# Supplementary material
Source: PubMed Central journal article supplement (PMC3591655)
Supplement: supp_M112.017962_mcp.M112.017962-23.pdf [file supp_M112.017962_mcp.M112.017962-23.pdf]

AAANLFAQTYGLTGSQDR, MH+ 1911.9564, m/z 637.9903  
 L OS G25 P150811 220811-s1.07081.07081.3.dta

scan 7081; 1.7e+000

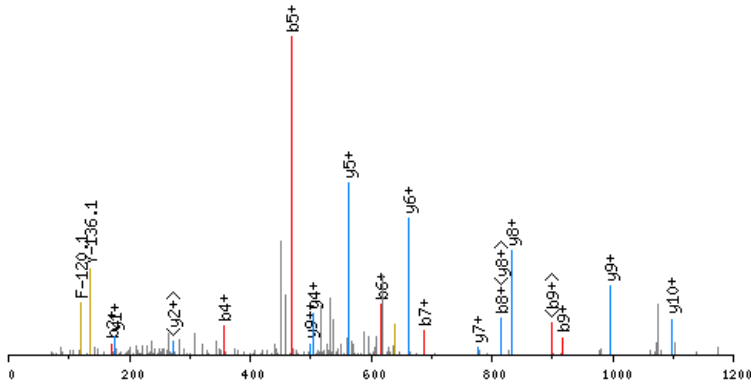

click image to zoom in; click top corners to zoom out [\[precursor±\]](#)

scan 7077; 638.0 m/z; 3.0e+001

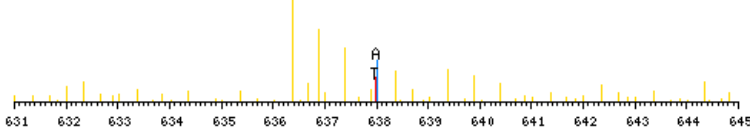

zoomed in precursor plot; T=theoretical m/z, A=acquired m/z

X-range:

-

MassTol: Y-zoom:

MassType:

AVG  MONO

Axis:

1  2

Label:

I  M  -

Ions:

a  +  2+  3+

b  +  2+  3+

c  +  2+  3+

x  +  2+  3+

y  +  2+  3+

z  +  2+  3+

hide H<sub>2</sub>O/NH<sub>3</sub>

zoom 112-122

GO

| b <sup>+</sup> | #  | AA | #  | y <sup>+</sup> | y <sup>2+</sup> |
|----------------|----|----|----|----------------|-----------------|
| 100.0762       | 1  | A  | 18 |                |                 |
| 171.1133       | 2  | A  | 17 | 1812.8881      | 906.9479        |
| 242.1504       | 3  | A  | 16 | 1741.8509      | 871.4294        |
| 356.1934       | 4  | N  | 15 | 1670.8138      | 835.9108        |
| 469.2774       | 5  | L  | 14 | 1556.7709      | 778.8894        |
| 616.3458       | 6  | F  | 13 | 1443.6868      | 722.3473        |
| 687.3830       | 7  | A  | 12 | 1296.6184      | 648.8131        |
| 815.4415       | 8  | Q  | 11 | 1225.5813      | 613.2946        |
| 916.4892       | 9  | T  | 10 | 1097.5227      | 549.2653        |
| 1079.5525      | 10 | Y  | 9  | 996.4750       | 498.7414        |
| 1136.5740      | 11 | G  | 8  | 833.4117       | 417.2098        |
| 1249.6581      | 12 | L  | 7  | 776.3903       | 388.6990        |
| 1350.7058      | 13 | T  | 6  | 663.3062       | 332.1570        |
| 1407.7272      | 14 | G  | 5  | 562.2585       | 281.6332        |
| 1494.7592      | 15 | S  | 4  | 505.2370       | 253.1224        |
| 1622.8178      | 16 | Q  | 3  | 418.2050       | 209.6064        |
| 1737.8448      | 17 | D  | 2  | 290.1464       | 145.5771        |
|                | 18 | R  | 1  | 175.1195       | 88.0637         |

N-term:+29.04

AAEEKLSVAVPQR, MH+ 1465.9015, m/z 489.3053  
 H OS G26 P150811 220811-s1.02967.02967.3.dta

scan 2967; 1.3e+001

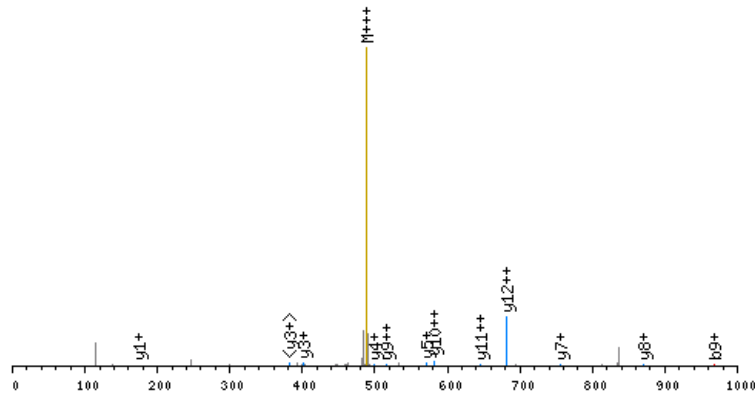

click image to zoom in; click top corners to zoom out [\[precursor±\]](#)

scan 2965; 489.3 m/z; 3.7e+000

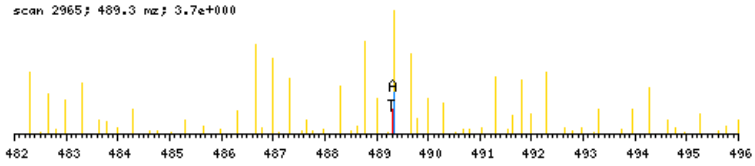

zoomed in precursor plot; T=theoretical m/z, A=acquired m/z

X-range:

-

MassTol: Y-zoom:

MassType:

AVG  MONO

Axis:

1  2

Label:

I  M  -

Ions:

a  +  2+  3+

b  +  2+  3+

c  +  2+  3+

x  +  2+  3+

y  +  2+  3+

z  +  2+  3+

hide H<sub>2</sub>O/NH<sub>3</sub>

zoom 112-122

GO

| b <sup>+</sup> | #  | AA # | y <sup>+</sup> | y <sup>2+</sup> |
|----------------|----|------|----------------|-----------------|
| 106.1080       | 1  | A 13 |                |                 |
| 177.1451       | 2  | A 12 | 1360.8013      | 680.9046        |
| 306.1877       | 3  | E 11 | 1289.7642      | 645.3860        |
| 435.2303       | 4  | E 10 | 1160.7216      | 580.8647        |
| 597.3884       | 5  | K 9  | 1031.6790      | 516.3434        |
| 710.4725       | 6  | L 8  | 869.5209       | 435.2644        |
| 797.5045       | 7  | S 7  | 756.4368       | 378.7223        |
| 896.5729       | 8  | V 6  | 669.4048       | 335.2063        |
| 967.6100       | 9  | A 5  | 570.3364       | 285.6721        |
| 1066.6784      | 10 | V 4  | 499.2993       | 250.1535        |
| 1163.7312      | 11 | P 3  | 400.2308       | 200.6193        |
| 1291.7898      | 12 | Q 2  | 303.1781       | 152.0930        |
|                | 13 | R 1  | 175.1195       | 88.0637         |

N-term:+35.07 K(5):+162.16



AALDQTSGLPGGAAQDPGGR, MH+ 1872.9628, m/z 624.9924  
 H OS G24 P150811 220811-s1.03101.03101.3.dta

scan 3101; 2.2e+000

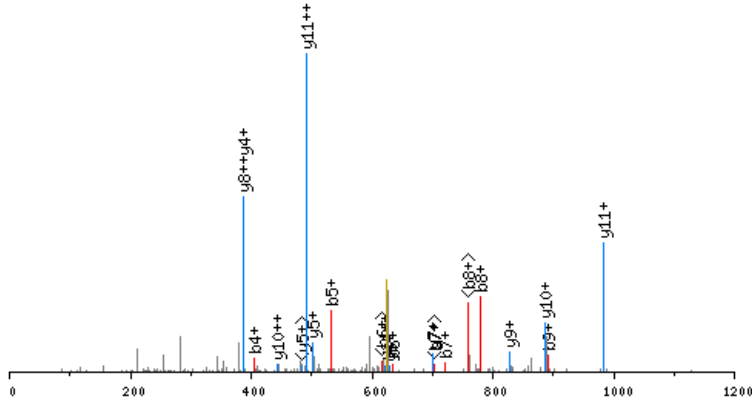

click image to zoom in; click top corners to zoom out [precursor±]

scan 3097; 625.0 m/z; 1.5e+000

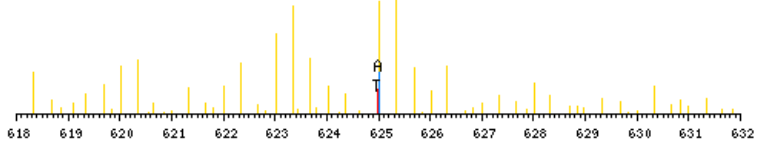

zoomed in precursor plot; T=theoretical m/z, A=acquired m/z

X-range:

-

MassTol: Y-zoom:

MassType:

AVG  MONO

Axis:

1  2

Label:

I  M  -

Ions:

a  +  2+  3+

b  +  2+  3+

c  +  2+  3+

x  +  2+  3+

y  +  2+  3+

z  +  2+  3+

hide H<sub>2</sub>O/NH<sub>3</sub>

zoom 112-122

GO

| b <sup>+</sup> | #  | AA # | y <sup>+</sup> | y <sup>2+</sup> |
|----------------|----|------|----------------|-----------------|
| 106.1080       | 1  | A 20 |                |                 |
| 177.1451       | 2  | A 19 | 1767.8626      | 884.4352        |
| 290.2292       | 3  | L 18 | 1696.8255      | 848.9166        |
| 405.2561       | 4  | D 17 | 1583.7414      | 792.3746        |
| 533.3147       | 5  | Q 16 | 1468.7144      | 734.8611        |
| 634.3624       | 6  | T 15 | 1340.6559      | 670.8318        |
| 721.3944       | 7  | S 14 | 1239.6082      | 620.3080        |
| 778.4159       | 8  | G 13 | 1152.5762      | 576.7920        |
| 891.4999       | 9  | L 12 | 1095.5547      | 548.2813        |
| 988.5527       | 10 | P 11 | 982.4706       | 491.7392        |
| 1045.5742      | 11 | G 10 | 885.4179       | 443.2128        |
| 1102.5956      | 12 | G 9  | 828.3964       | 414.7021        |
| 1173.6328      | 13 | A 8  | 771.3749       | 386.1914        |
| 1244.6699      | 14 | A 7  | 700.3378       | 350.6728        |
| 1372.7284      | 15 | Q 6  | 629.3007       | 315.1543        |
| 1487.7554      | 16 | D 5  | 501.2421       | 251.1250        |
| 1584.8082      | 17 | P 4  | 386.2152       | 193.6115        |
| 1641.8296      | 18 | G 3  | 289.1624       | 145.0851        |
| 1698.8511      | 19 | G 2  | 232.1410       | 116.5744        |
|                | 20 | R 1  | 175.1195       | 88.0637         |

N-term:+35.07

AALGGNSSPSAKDIKKILDSVGI EADDR, MH+ 3054.6324, m/z 764.4135  
 L OS G28 P150811 220811-s1.09089.09089.4.dta

scan 9089; 4.4e+000

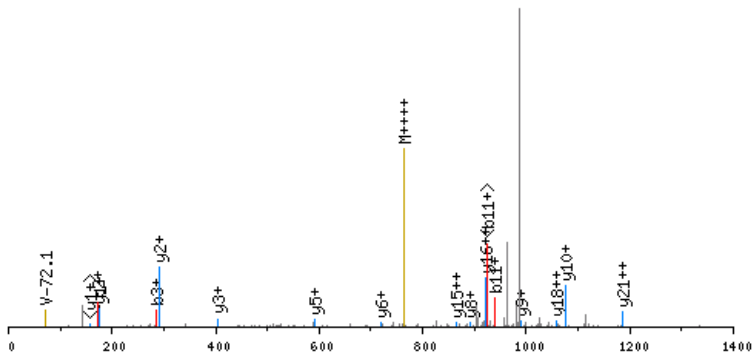

click image to zoom in; click top corners to zoom out [\[precursor±\]](#)

scan 9088; 764.4 m/z; 1.6e+001

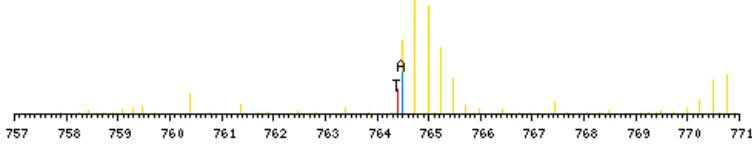

zoomed in precursor plot; T=theoretical m/z, A=acquired m/z

| b <sup>+</sup> | #  | AA # | y <sup>+</sup> | y <sup>2+</sup> |
|----------------|----|------|----------------|-----------------|
| 100.0762       | 1  | A 29 |                |                 |
| 171.1133       | 2  | A 28 | 2955.5640      | 1478.2859       |
| 284.1974       | 3  | L 27 | 2884.5269      | 1442.7673       |
| 341.2189       | 4  | G 26 | 2771.4428      | 1386.2253       |
| 398.2403       | 5  | G 25 | 2714.4213      | 1357.7146       |
| 512.2832       | 6  | N 24 | 2657.3999      | 1329.2039       |
| 599.3153       | 7  | S 23 | 2543.3569      | 1272.1824       |
| 686.3473       | 8  | S 22 | 2456.3249      | 1228.6664       |
| 783.4001       | 9  | P 21 | 2369.2929      | 1185.1504       |
| 870.4321       | 10 | S 20 | 2272.2401      | 1136.6240       |
| 941.4692       | 11 | A 19 | 2185.2081      | 1093.1080       |
| 1097.5955      | 12 | K 18 | 2114.1710      | 1057.5894       |
| 1212.6225      | 13 | D 17 | 1958.0447      | 979.5263        |
| 1325.7065      | 14 | I 16 | 1843.0177      | 922.0128        |
| 1481.8328      | 15 | K 15 | 1729.9337      | 865.4708        |
| 1637.9591      | 16 | K 14 | 1573.8074      | 787.4076        |
| 1751.0432      | 17 | I 13 | 1417.6811      | 709.3445        |
| 1864.1272      | 18 | L 12 | 1304.5970      | 652.8024        |
| 1979.1542      | 19 | D 11 | 1191.5130      | 596.2604        |
| 2066.1862      | 20 | S 10 | 1076.4860      | 538.7469        |
| 2165.2546      | 21 | V 9  | 989.4540       | 495.2309        |
| 2222.2761      | 22 | G 8  | 890.3856       | 445.6967        |
| 2335.3602      | 23 | I 7  | 833.3641       | 417.1860        |
| 2464.4028      | 24 | E 6  | 720.2800       | 360.6439        |
| 2535.4399      | 25 | A 5  | 591.2374       | 296.1226        |
| 2650.4668      | 26 | D 4  | 520.2003       | 260.6041        |
| 2765.4938      | 27 | D 3  | 405.1734       | 203.0906        |
| 2880.5207      | 28 | D 2  | 290.1464       | 145.5771        |
|                | 29 | R 1  | 175.1195       | 88.0637         |

N-term: +29.04 K(12): +156.13  
 K(15): +156.13 K(16): +156.13

X-range:

-

MassTol: Y-zoom:

MassType:

AVG  MONO

Axis:

1  2

Label:

I  M  -

Ions:

a  +  2+  3+

b  +  2+  3+

c  +  2+  3+

x  +  2+  3+

y  +  2+  3+

z  +  2+  3+

hide H<sub>2</sub>O/NH<sub>3</sub>

zoom 112-122

GO

AALPADPPASVVVGPVVVPR, MH+ 1939.1380, m/z 647.0509  
 L OS G24 P150811 220811-s1.04564.04564.3.dta

X-range:

-

MassTol: Y-zoom:

MassType:

AVG  MONO

Axis:

1  2

Label:

I  M  -

Ions:

a  +  2+  3+

b  +  2+  3+

c  +  2+  3+

x  +  2+  3+

y  +  2+  3+

z  +  2+  3+

hide H<sub>2</sub>O/NH<sub>3</sub>

zoom 112-122

GO

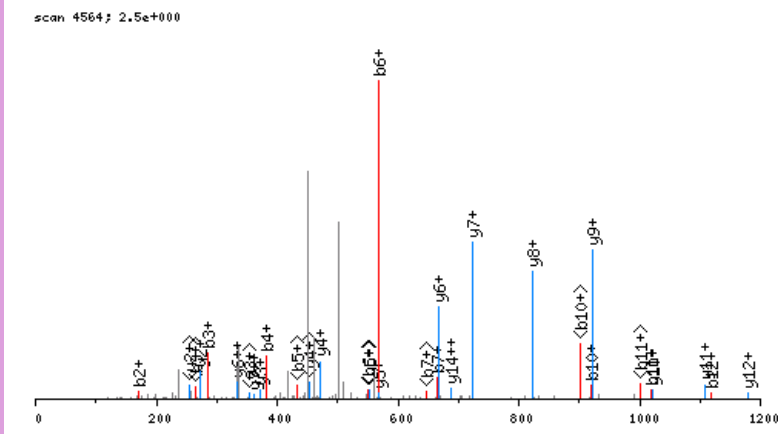

click image to zoom in; click top corners to zoom out [\[precursor±\]](#)

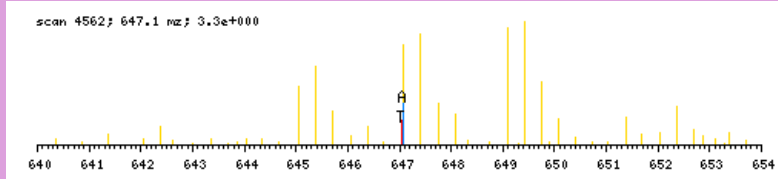

zoomed in precursor plot; T=theoretical m/z, A=acquired m/z

| b <sup>+</sup> | #  | AA # | y <sup>+</sup> | y <sup>2+</sup> |
|----------------|----|------|----------------|-----------------|
| 100.0762       | 1  | A 20 |                |                 |
| 171.1133       | 2  | A 19 | 1840.0696      | 920.5387        |
| 284.1974       | 3  | L 18 | 1769.0325      | 885.0202        |
| 381.2502       | 4  | P 17 | 1655.9485      | 828.4781        |
| 452.2873       | 5  | A 16 | 1558.8957      | 779.9518        |
| 567.3142       | 6  | D 15 | 1487.8586      | 744.4332        |
| 664.3670       | 7  | P 14 | 1372.8316      | 686.9197        |
| 761.4197       | 8  | P 13 | 1275.7789      | 638.3934        |
| 832.4569       | 9  | A 12 | 1178.7261      | 589.8670        |
| 919.4889       | 10 | S 11 | 1107.6890      | 554.3484        |
| 1018.5573      | 11 | V 10 | 1020.6570      | 510.8324        |
| 1117.6257      | 12 | V 9  | 921.5886       | 461.2982        |
| 1216.6941      | 13 | V 8  | 822.5201       | 411.7640        |
| 1273.7156      | 14 | G 7  | 723.4517       | 362.2298        |
| 1370.7684      | 15 | P 6  | 666.4303       | 333.7190        |
| 1469.8368      | 16 | V 5  | 569.3775       | 285.1927        |
| 1568.9052      | 17 | V 4  | 470.3091       | 235.6585        |
| 1667.9736      | 18 | V 3  | 371.2407       | 186.1243        |
| 1765.0264      | 19 | P 2  | 272.1723       | 136.5900        |
|                | 20 | R 1  | 175.1195       | 88.0637         |

N-term:+29.04

AANLFAQTYGLTGSQDR, MH+ 1840.9193, m/z 614.3113  
 L OS G25 P150811 220811-s1.06966.06966.3.dta

X-range:

-

MassTol: Y-zoom:

MassType:

AVG  MONO

Axis:

1  2

Label:

I  M  -

Ions:

a  +  2+  3+

b  +  2+  3+

c  +  2+  3+

x  +  2+  3+

y  +  2+  3+

z  +  2+  3+

hide H<sub>2</sub>O/NH<sub>3</sub>

zoom 112-122

GO

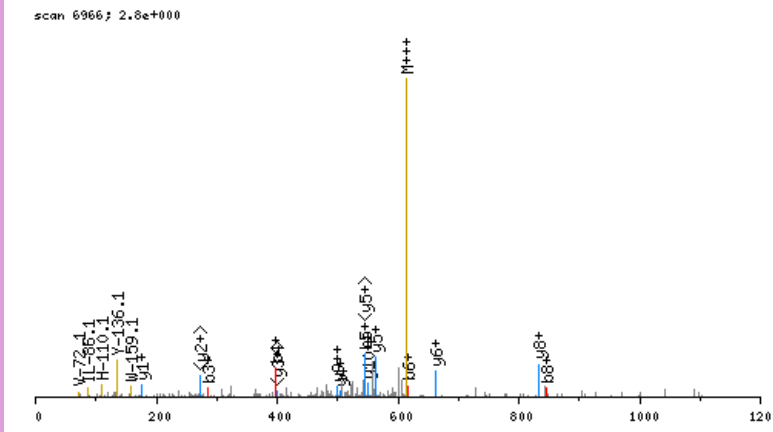

click image to zoom in; click top corners to zoom out [\[precursor±\]](#)

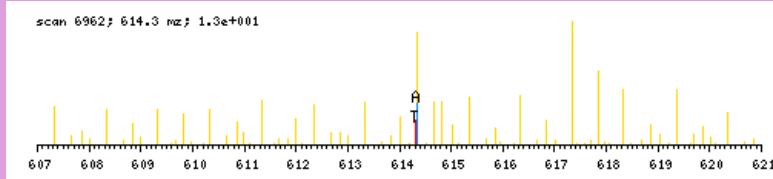

zoomed in precursor plot; T=theoretical m/z, A=acquired m/z

| b <sup>+</sup> | #  | AA # | y <sup>+</sup> | y <sup>2+</sup> |
|----------------|----|------|----------------|-----------------|
| 100.0762       | 1  | A 17 |                |                 |
| 171.1133       | 2  | A 16 | 1741.8509      | 871.4294        |
| 285.1563       | 3  | N 15 | 1670.8138      | 835.9108        |
| 398.2403       | 4  | L 14 | 1556.7709      | 778.8894        |
| 545.3087       | 5  | F 13 | 1443.6868      | 722.3473        |
| 616.3458       | 6  | A 12 | 1296.6184      | 648.8131        |
| 744.4044       | 7  | Q 11 | 1225.5813      | 613.2946        |
| 845.4521       | 8  | T 10 | 1097.5227      | 549.2653        |
| 1008.5154      | 9  | Y 9  | 996.4750       | 498.7414        |
| 1065.5369      | 10 | G 8  | 833.4117       | 417.2098        |
| 1178.6210      | 11 | L 7  | 776.3903       | 388.6990        |
| 1279.6686      | 12 | T 6  | 663.3062       | 332.1570        |
| 1336.6901      | 13 | G 5  | 562.2585       | 281.6332        |
| 1423.7221      | 14 | S 4  | 505.2370       | 253.1224        |
| 1551.7807      | 15 | Q 3  | 418.2050       | 209.6064        |
| 1666.8077      | 16 | D 2  | 290.1464       | 145.5771        |
|                | 17 | R 1  | 175.1195       | 88.0637         |

N-term:+29.04

AAPELPVPTGGPMAGAR, MH+ 1619.8579, m/z 540.6242  
 L OS G24 P150811 220811-s1.03920.03920.3.dta

X-range:

-

MassTol: Y-zoom:

MassType:

AVG  MONO

Axis:

1  2

Label:

I  M  -

Ions:

a  +  2+  3+

b  +  2+  3+

c  +  2+  3+

x  +  2+  3+

y  +  2+  3+

z  +  2+  3+

hide H<sub>2</sub>O/NH<sub>3</sub>

zoom 112-122

GO

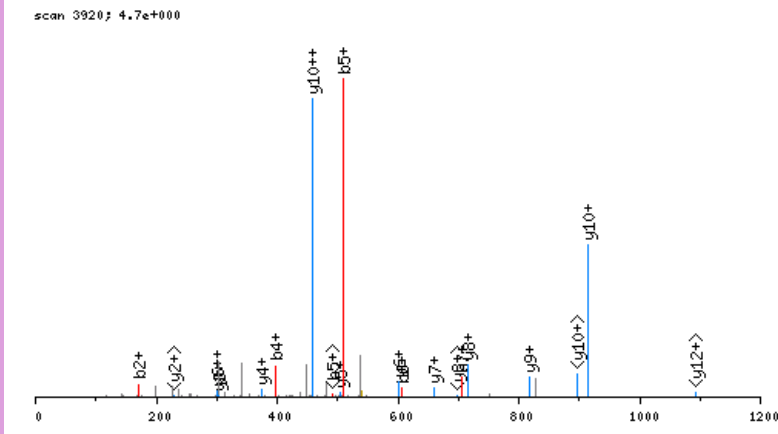

click image to zoom in; click top corners to zoom out [\[precursor±\]](#)

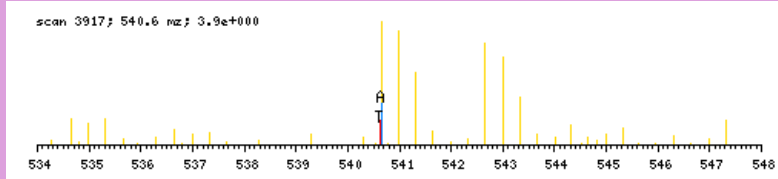

zoomed in precursor plot; T=theoretical m/z, A=acquired m/z

| b <sup>+</sup> | #  | AA # | y <sup>+</sup> | y <sup>2+</sup> |
|----------------|----|------|----------------|-----------------|
| 100.0762       | 1  | A 17 |                |                 |
| 171.1133       | 2  | A 16 | 1520.7895      | 760.8987        |
| 268.1661       | 3  | P 15 | 1449.7524      | 725.3801        |
| 397.2087       | 4  | E 14 | 1352.6996      | 676.8537        |
| 510.2927       | 5  | L 13 | 1223.6571      | 612.3324        |
| 607.3455       | 6  | P 12 | 1110.5730      | 555.7904        |
| 706.4139       | 7  | V 11 | 1013.5202      | 507.2640        |
| 803.4667       | 8  | P 10 | 914.4518       | 457.7298        |
| 904.5144       | 9  | T 9  | 817.3990       | 409.2034        |
| 961.5358       | 10 | G 8  | 716.3514       | 358.6796        |
| 1018.5573      | 11 | G 7  | 659.3299       | 330.1689        |
| 1115.6101      | 12 | P 6  | 602.3084       | 301.6581        |
| 1246.6505      | 13 | M 5  | 505.2557       | 253.1318        |
| 1317.6877      | 14 | A 4  | 374.2152       | 187.6115        |
| 1374.7091      | 15 | G 3  | 303.1781       | 152.0930        |
| 1445.7462      | 16 | A 2  | 246.1566       | 123.5822        |
|                | 17 | R 1  | 175.1195       | 88.0637         |

N-term:+29.04

AAPVPPAAAPLLDFSSDSVPPAPR, MH+ 2371.2661, m/z 593.5720  
 L OS G24 P150811 220811-s1.04874.04874.4.dta

scan 4874; 7.5e+000

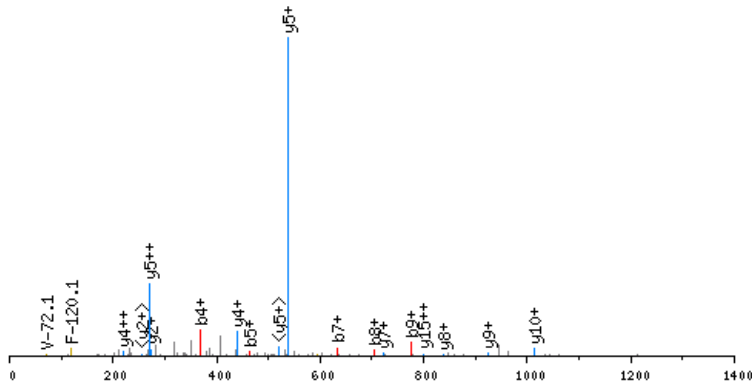

click image to zoom in; click top corners to zoom out [precursor±]

scan 4870; 593.6 mz; 1.1e+001

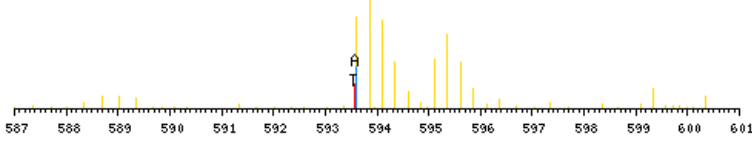

zoomed in precursor plot; T=theoretical m/z, A=acquired m/z

X-range:

-

MassTol: Y-zoom:

MassType:

AVG  MONO

Axis:

1  2

Label:

I  M  -

Ions:

a  +  2+  3+

b  +  2+  3+

c  +  2+  3+

x  +  2+  3+

y  +  2+  3+

z  +  2+  3+

hide H<sub>2</sub>O/NH<sub>3</sub>

zoom 112-122

GO

| b <sup>+</sup> | #  | AA # | y <sup>+</sup> | y <sup>2+</sup> |
|----------------|----|------|----------------|-----------------|
| 100.0762       | 1  | A 24 |                |                 |
| 171.1133       | 2  | A 23 | 2272.1978      | 1136.6028       |
| 268.1661       | 3  | P 22 | 2201.1606      | 1101.0842       |
| 367.2345       | 4  | V 21 | 2104.1079      | 1052.5579       |
| 464.2873       | 5  | P 20 | 2005.0395      | 1003.0236       |
| 561.3400       | 6  | P 19 | 1907.9867      | 954.4973        |
| 632.3771       | 7  | A 18 | 1810.9339      | 905.9709        |
| 703.4143       | 8  | A 17 | 1739.8968      | 870.4523        |
| 774.4514       | 9  | A 16 | 1668.8597      | 834.9338        |
| 871.5041       | 10 | P 15 | 1597.8226      | 799.4152        |
| 984.5882       | 11 | L 14 | 1500.7698      | 750.8888        |
| 1097.6723      | 12 | L 13 | 1387.6858      | 694.3468        |
| 1212.6992      | 13 | D 12 | 1274.6017      | 637.8048        |
| 1359.7676      | 14 | F 11 | 1159.5748      | 580.2913        |
| 1446.7997      | 15 | S 10 | 1012.5063      | 506.7571        |
| 1533.8317      | 16 | S 9  | 925.4743       | 463.2411        |
| 1648.8586      | 17 | D 8  | 838.4423       | 419.7251        |
| 1735.8907      | 18 | S 7  | 723.4153       | 362.2116        |
| 1834.9591      | 19 | V 6  | 636.3833       | 318.6956        |
| 1932.0118      | 20 | P 5  | 537.3149       | 269.1614        |
| 2029.0646      | 21 | P 4  | 440.2621       | 220.6350        |
| 2100.1017      | 22 | A 3  | 343.2094       | 172.1086        |
| 2197.1545      | 23 | P 2  | 272.1723       | 136.5900        |
|                | 24 | R 1  | 175.1195       | 88.0637         |

N-term:+29.04

AASIFGGAKPVDTAAR, MH+ 1599.9495, m/z 533.9880  
 H OS G26 P150811 220811-s1.03398.03398.3.dta

X-range:

-

MassTol: Y-zoom:

MassType:

AVG  MONO

Axis:

1  2

Label:

I  M  -

Ions:

a  +  2+  3+

b  +  2+  3+

c  +  2+  3+

x  +  2+  3+

y  +  2+  3+

z  +  2+  3+

hide H<sub>2</sub>O/NH<sub>3</sub>

zoom 112-122

GO

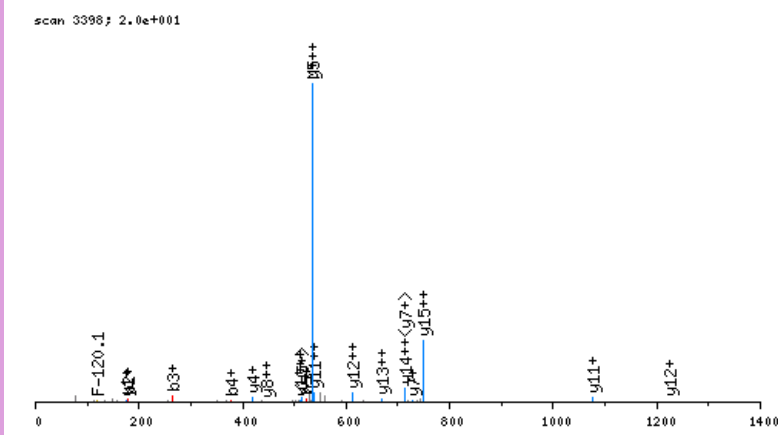

click image to zoom in; click top corners to zoom out [\[precursor±\]](#)

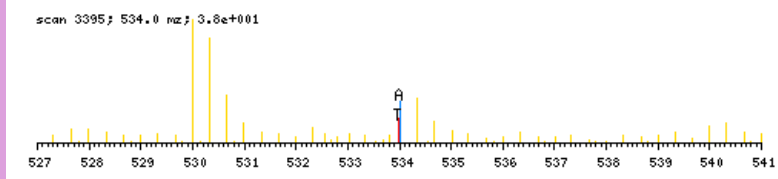

zoomed in precursor plot; T=theoretical m/z, A=acquired m/z

| b <sup>+</sup> | #  | AA # | y <sup>+</sup> | y <sup>2+</sup> |
|----------------|----|------|----------------|-----------------|
| 106.1080       | 1  | A 16 |                |                 |
| 177.1451       | 2  | A 15 | 1494.8493      | 747.9286        |
| 264.1772       | 3  | S 14 | 1423.8122      | 712.4100        |
| 377.2612       | 4  | I 13 | 1336.7801      | 668.8940        |
| 524.3296       | 5  | F 12 | 1223.6961      | 612.3520        |
| 581.3511       | 6  | G 11 | 1076.6277      | 538.8177        |
| 638.3726       | 7  | G 10 | 1019.6062      | 510.3070        |
| 709.4097       | 8  | A 9  | 962.5847       | 481.7963        |
| 871.5678       | 9  | K 8  | 891.5476       | 446.2777        |
| 968.6205       | 10 | P 7  | 729.3895       | 365.1987        |
| 1067.6890      | 11 | V 6  | 632.3368       | 316.6723        |
| 1182.7159      | 12 | D 5  | 533.2683       | 267.1381        |
| 1283.7636      | 13 | T 4  | 418.2414       | 209.6246        |
| 1354.8007      | 14 | A 3  | 317.1937       | 159.1008        |
| 1425.8378      | 15 | A 2  | 246.1566       | 123.5822        |
|                | 16 | R 1  | 175.1195       | 88.0637         |

N-term:+35.07 K(9):+162.16

AAVAGQDGGIDADELQR, MH+ 1784.8779, m/z 595.6308  
 L OS G25 P150811 220811-s1.04280.04280.3.dta

X-range:

-

MassTol: Y-zoom:

MassType:

AVG  MONO

Axis:

1  2

Label:

I  M  -

Ions:

a  +  2+  3+

b  +  2+  3+

c  +  2+  3+

x  +  2+  3+

y  +  2+  3+

z  +  2+  3+

hide H<sub>2</sub>O/NH<sub>3</sub>

zoom 112-122

GO

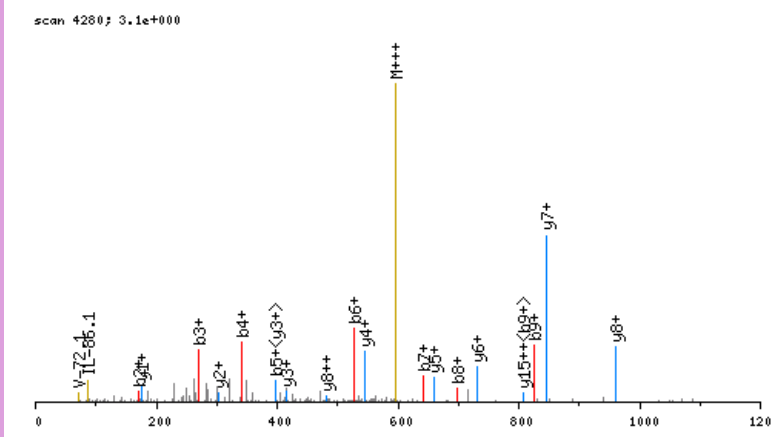

click image to zoom in; click top corners to zoom out [\[precursor±\]](#)

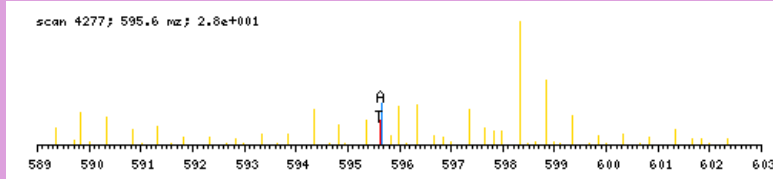

zoomed in precursor plot; T=theoretical m/z, A=acquired m/z

| b <sup>+</sup> | #  | AA # | y <sup>+</sup> | y <sup>2+</sup> |
|----------------|----|------|----------------|-----------------|
| 100.0762       | 1  | A 17 |                |                 |
| 171.1133       | 2  | A 16 | 1685.8095      | 843.4086        |
| 270.1817       | 3  | V 15 | 1614.7724      | 807.8901        |
| 341.2189       | 4  | A 14 | 1515.7039      | 758.3559        |
| 398.2403       | 5  | G 13 | 1444.6668      | 722.8373        |
| 526.2989       | 6  | Q 12 | 1387.6454      | 694.3266        |
| 641.3258       | 7  | D 11 | 1259.5868      | 630.2973        |
| 698.3473       | 8  | G 10 | 1144.5598      | 572.7838        |
| 826.4059       | 9  | Q 9  | 1087.5384      | 544.2731        |
| 939.4899       | 10 | I 8  | 959.4798       | 480.2438        |
| 1054.5169      | 11 | D 7  | 846.3957       | 423.7018        |
| 1125.5540      | 12 | A 6  | 731.3688       | 366.1883        |
| 1240.5809      | 13 | D 5  | 660.3317       | 330.6698        |
| 1369.6235      | 14 | E 4  | 545.3047       | 273.1563        |
| 1482.7076      | 15 | L 3  | 416.2621       | 208.6350        |
| 1610.7662      | 16 | Q 2  | 303.1781       | 152.0930        |
|                | 17 | R 1  | 175.1195       | 88.0637         |

N-term:+29.04



AAVASYNMGSDSLYYFR, MH+ 1942.9009, m/z 648.3052  
 L OS G25 P150811 220811-s1.07485.07485.3.dta

X-range:

-

MassTol: Y-zoom:

MassType:

AVG  MONO

Axis:

1  2

Label:

I  M  -

Ions:

a  +  2+  3+

b  +  2+  3+

c  +  2+  3+

x  +  2+  3+

y  +  2+  3+

z  +  2+  3+

hide H<sub>2</sub>O/NH<sub>3</sub>

zoom 112-122

GO

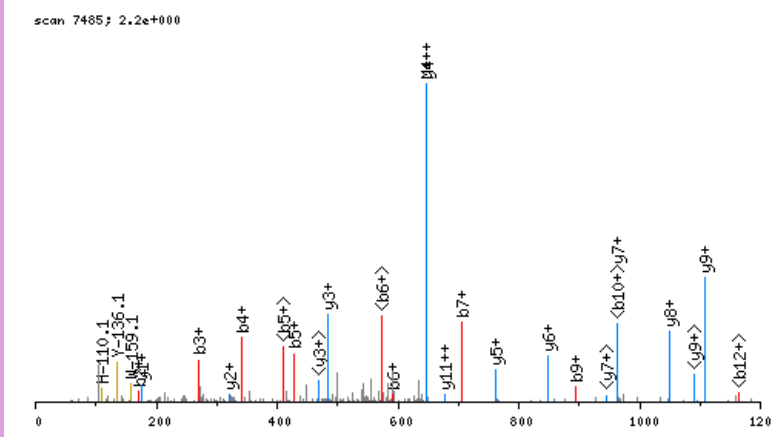

click image to zoom in; click top corners to zoom out [\[precursor±\]](#)

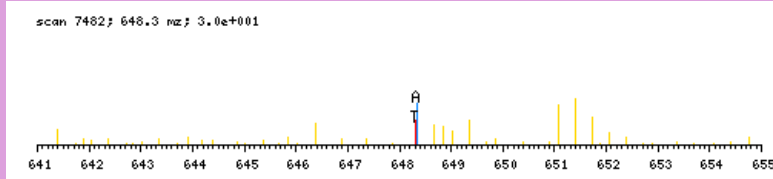

zoomed in precursor plot; T=theoretical m/z, A=acquired m/z

| b <sup>+</sup>  | #  | AA # | y <sup>+</sup>   | y <sup>2+</sup> |
|-----------------|----|------|------------------|-----------------|
| 100.0762        | 1  | A 17 |                  |                 |
| 171.1133        | 2  | A 16 | 1843.8325        | 922.4202        |
| 270.1817        | 3  | V 15 | 1772.7954        | 886.9016        |
| 341.2189        | 4  | A 14 | 1673.7270        | 837.3674        |
| 428.2509        | 5  | S 13 | 1602.6899        | 801.8488        |
| 591.3142        | 6  | Y 12 | 1515.6578        | 758.3328        |
| 705.3571        | 7  | N 11 | 1352.5945        | <b>676.8012</b> |
| 836.3976        | 8  | M 10 | 1238.5516        | 619.7797        |
| <b>893.4191</b> | 9  | G 9  | <b>1107.5111</b> | 554.2595        |
| 980.4511        | 10 | S 8  | <b>1050.4896</b> | 525.7487        |
| 1095.4781       | 11 | D 7  | <b>963.4576</b>  | 482.2327        |
| 1182.5101       | 12 | S 6  | <b>848.4307</b>  | 424.7192        |
| 1295.5942       | 13 | L 5  | <b>761.3986</b>  | 381.2032        |
| 1458.6575       | 14 | Y 4  | <b>648.3146</b>  | 324.6612        |
| 1621.7208       | 15 | Y 3  | <b>485.2512</b>  | 243.1295        |
| 1768.7892       | 16 | F 2  | <b>322.1879</b>  | 161.5979        |
|                 | 17 | R 1  | <b>175.1195</b>  | 88.0637         |

N-term:+29.04

AAVETPVPSDLQAQR, MH+ 1609.8549, m/z 537.2898  
 L OS G24 P150811 220811-s1.03261.03261.3.dta

X-range:

-

MassTol: Y-zoom:

MassType:

AVG  MONO

Axis:

1  2

Label:

I  M  -

Ions:

a  +  2+  3+

b  +  2+  3+

c  +  2+  3+

x  +  2+  3+

y  +  2+  3+

z  +  2+  3+

hide H<sub>2</sub>O/NH<sub>3</sub>

zoom 112-122

GO

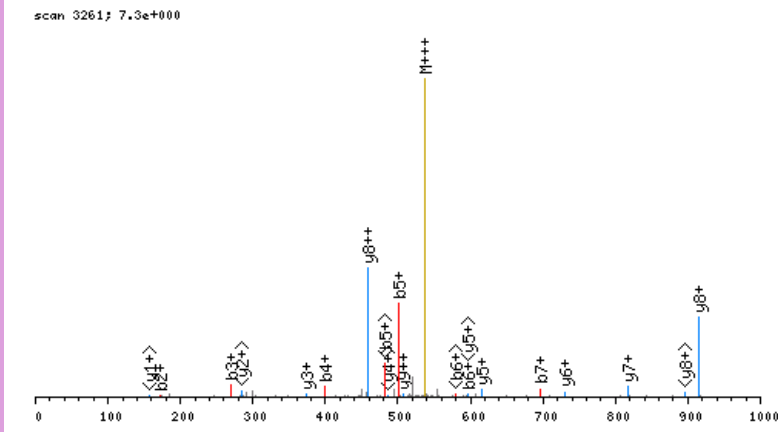

click image to zoom in; click top corners to zoom out [\[precursor±\]](#)

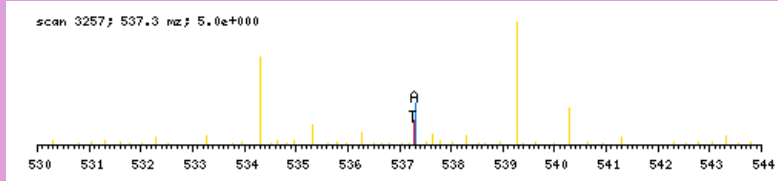

zoomed in precursor plot; T=theoretical m/z, A=acquired m/z

| b <sup>+</sup> | #  | AA # | y <sup>+</sup> | y <sup>2+</sup> |
|----------------|----|------|----------------|-----------------|
| 100.0762       | 1  | A 15 |                |                 |
| 171.1133       | 2  | A 14 | 1510.7865      | 755.8972        |
| 270.1817       | 3  | V 13 | 1439.7494      | 720.3786        |
| 399.2243       | 4  | E 12 | 1340.6810      | 670.8444        |
| 500.2720       | 5  | T 11 | 1211.6384      | 606.3231        |
| 597.3248       | 6  | P 10 | 1110.5907      | 555.7993        |
| 696.3932       | 7  | V 9  | 1013.5380      | 507.2729        |
| 793.4460       | 8  | P 8  | 914.4696       | 457.7387        |
| 880.4780       | 9  | S 7  | 817.4168       | 409.2123        |
| 995.5049       | 10 | D 6  | 730.3848       | 365.6963        |
| 1108.5890      | 11 | L 5  | 615.3578       | 308.1828        |
| 1236.6476      | 12 | Q 4  | 502.2738       | 251.6408        |
| 1307.6847      | 13 | A 3  | 374.2152       | 187.6115        |
| 1435.7433      | 14 | Q 2  | 303.1781       | 152.0930        |
|                | 15 | R 1  | 175.1195       | 88.0637         |

N-term:+29.04

AAVQQLQAEGLSPR, MH+ 1495.8232, m/z 499.2793  
 L OS G25 P150811 220811-s1.04595.04595.3.dta

X-range:

-

MassTol: Y-zoom:

MassType:

AVG  MONO

Axis:

1  2

Label:

I  M  -

Ions:

a  +  2+  3+

b  +  2+  3+

c  +  2+  3+

x  +  2+  3+

y  +  2+  3+

z  +  2+  3+

hide H<sub>2</sub>O/NH<sub>3</sub>

zoom 112-122

GO

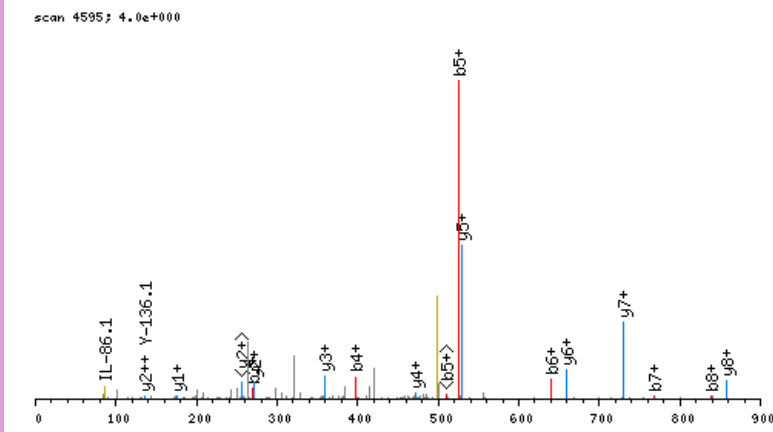

click image to zoom in; click top corners to zoom out [\[precursor±\]](#)

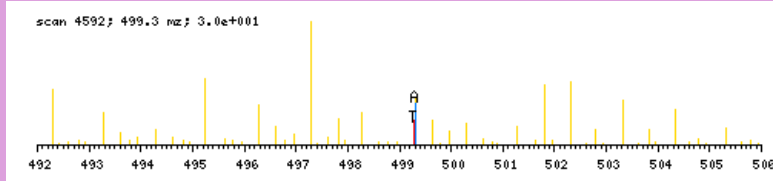

zoomed in precursor plot; T=theoretical m/z, A=acquired m/z

| b <sup>+</sup> | #  | AA # | y <sup>+</sup> | y <sup>2+</sup> |
|----------------|----|------|----------------|-----------------|
| 100.0762       | 1  | A 14 |                |                 |
| 171.1133       | 2  | A 13 | 1396.7549      | 698.8813        |
| 270.1817       | 3  | V 12 | 1325.7177      | 663.3628        |
| 398.2403       | 4  | Q 11 | 1226.6493      | 613.8286        |
| 526.2989       | 5  | Q 10 | 1098.5907      | 549.7993        |
| 639.3830       | 6  | L 9  | 970.5322       | 485.7700        |
| 767.4415       | 7  | Q 8  | 857.4481       | 429.2280        |
| 838.4787       | 8  | A 7  | 729.3895       | 365.1987        |
| 967.5212       | 9  | E 6  | 658.3524       | 329.6801        |
| 1024.5427      | 10 | G 5  | 529.3098       | 265.1588        |
| 1137.6268      | 11 | L 4  | 472.2884       | 236.6481        |
| 1224.6588      | 12 | S 3  | 359.2043       | 180.1061        |
| 1321.7116      | 13 | P 2  | 272.1723       | 136.5900        |
|                | 14 | R 1  | 175.1195       | 88.0637         |

N-term:+29.04

AAVSCLWGKVNSEVGGALGR, MH+ 2331.1767, m/z 583.5496  
 L OS G26 P150811 220811-s1.05539.05539.4.dta

X-range:

-

MassTol: Y-zoom:

MassType:

AVG  MONO

Axis:

1  2

Label:

I  M  -

Ions:

a  +  2+  3+

b  +  2+  3+

c  +  2+  3+

x  +  2+  3+

y  +  2+  3+

z  +  2+  3+

hide H<sub>2</sub>O/NH<sub>3</sub>

zoom 112-122

GO

scan 5539; 1.6e+000

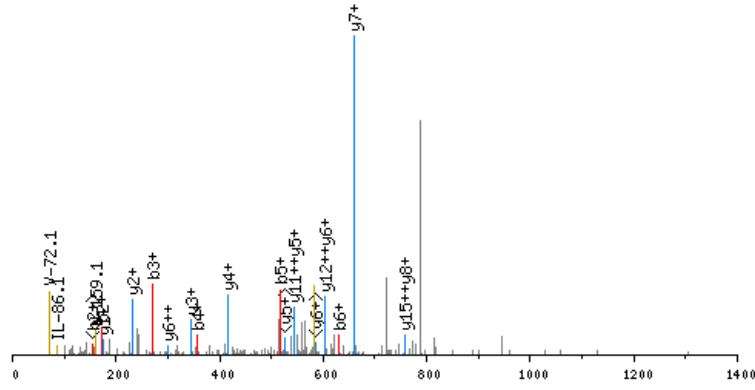

click image to zoom in; click top corners to zoom out [\[precursor±\]](#)

scan 5535; 583.6 m/z; 7.4e+001

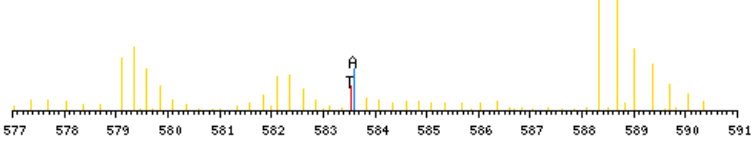

zoomed in precursor plot; T=theoretical m/z, A=acquired m/z

| b <sup>+</sup> | #  | AA # | y <sup>+</sup> | y <sup>2+</sup> |
|----------------|----|------|----------------|-----------------|
| 100.0762       | 1  | A 22 |                |                 |
| 171.1133       | 2  | A 21 | 2232.1083      | 1116.5581       |
| 270.1817       | 3  | V 20 | 2161.0712      | 1081.0395       |
| 357.2138       | 4  | S 19 | 2062.0028      | 1031.5053       |
| 517.2444       | 5  | C 18 | 1974.9707      | 987.9893        |
| 630.3284       | 6  | L 17 | 1814.9401      | 907.9740        |
| 816.4077       | 7  | W 16 | 1701.8561      | 851.4319        |
| 873.4292       | 8  | G 15 | 1515.7767      | 758.3923        |
| 1029.5555      | 9  | K 14 | 1458.7553      | 729.8816        |
| 1128.6239      | 10 | V 13 | 1302.6290      | 651.8184        |
| 1242.6669      | 11 | N 12 | 1203.5606      | 602.2842        |
| 1329.6989      | 12 | S 11 | 1089.5176      | 545.2627        |
| 1444.7258      | 13 | D 10 | 1002.4856      | 501.7467        |
| 1573.7684      | 14 | E 9  | 887.4587       | 444.2332        |
| 1672.8368      | 15 | V 8  | 758.4161       | 379.7120        |
| 1729.8583      | 16 | G 7  | 659.3477       | 330.1777        |
| 1786.8798      | 17 | G 6  | 602.3262       | 301.6670        |
| 1915.9224      | 18 | E 5  | 545.3047       | 273.1563        |
| 1986.9595      | 19 | A 4  | 416.2621       | 208.6350        |
| 2100.0435      | 20 | L 3  | 345.2250       | 173.1164        |
| 2157.0650      | 21 | G 2  | 232.1410       | 116.5744        |
|                | 22 | R 1  | 175.1195       | 88.0637         |

N-term:+29.04 C(5):+160.03  
 K(9):+156.13

AAVTEPADLEYTEVPR, MH+ 1788.9019, m/z 596.9722  
 L OS G24 P150811 220811-s1.03748.03748.3.dta

X-range:

-

MassTol: Y-zoom:

MassType:

AVG  MONO

Axis:

1  2

Label:

I  M  -

Ions:

a  +  2+  3+

b  +  2+  3+

c  +  2+  3+

x  +  2+  3+

y  +  2+  3+

z  +  2+  3+

hide H<sub>2</sub>O/NH<sub>3</sub>

zoom 112-122

GO

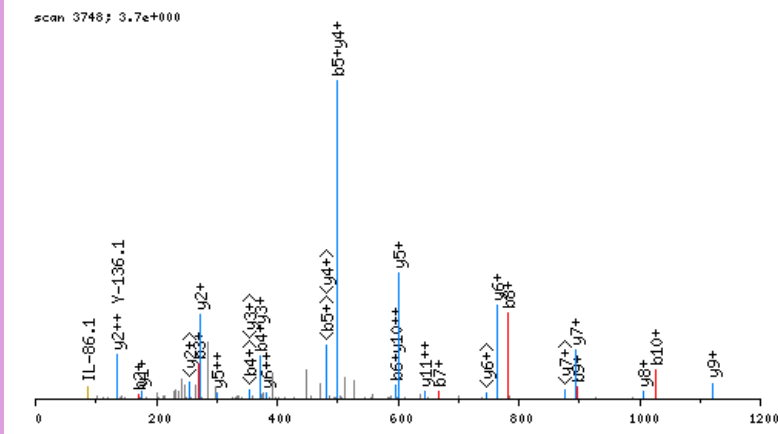

click image to zoom in; click top corners to zoom out [\[precursor±\]](#)

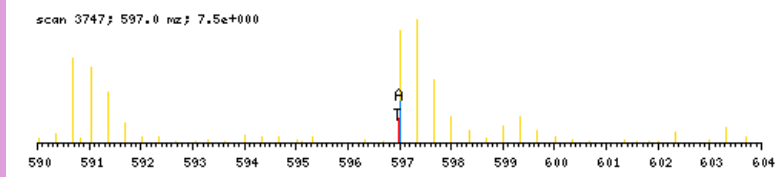

zoomed in precursor plot; T=theoretical m/z, A=acquired m/z

| b <sup>+</sup> | #  | AA # | y <sup>+</sup> | y <sup>2+</sup> |
|----------------|----|------|----------------|-----------------|
| 100.0762       | 1  | A 16 |                |                 |
| 171.1133       | 2  | A 15 | 1689.8336      | 845.4207        |
| 270.1817       | 3  | V 14 | 1618.7964      | 809.9021        |
| 371.2294       | 4  | T 13 | 1519.7280      | 760.3679        |
| 500.2720       | 5  | E 12 | 1418.6803      | 709.8441        |
| 597.3248       | 6  | P 11 | 1289.6378      | 645.3228        |
| 668.3619       | 7  | A 10 | 1192.5850      | 596.7964        |
| 783.3888       | 8  | D 9  | 1121.5479      | 561.2779        |
| 896.4729       | 9  | L 8  | 1006.5209      | 503.7644        |
| 1025.5155      | 10 | E 7  | 893.4369       | 447.2223        |
| 1188.5788      | 11 | Y 6  | 764.3943       | 382.7011        |
| 1289.6265      | 12 | T 5  | 601.3310       | 301.1694        |
| 1418.6691      | 13 | E 4  | 500.2833       | 250.6455        |
| 1517.7375      | 14 | V 3  | 371.2407       | 186.1243        |
| 1614.7903      | 15 | P 2  | 272.1723       | 136.5900        |
|                | 16 | R 1  | 175.1195       | 88.0637         |

N-term:+29.04

AAAYISNAVGAAAYSSAR, MH+ 1605.8449, m/z 535.9531  
 H OS G26 P150811 220811-s1.06607.06607.3.dta

X-range:

-

MassTol: Y-zoom:

MassType:

AVG  MONO

Axis:

1  2

Label:

I  M  -

Ions:

a  +  2+  3+

b  +  2+  3+

c  +  2+  3+

x  +  2+  3+

y  +  2+  3+

z  +  2+  3+

hide H<sub>2</sub>O/NH<sub>3</sub>

zoom 112-122

GO

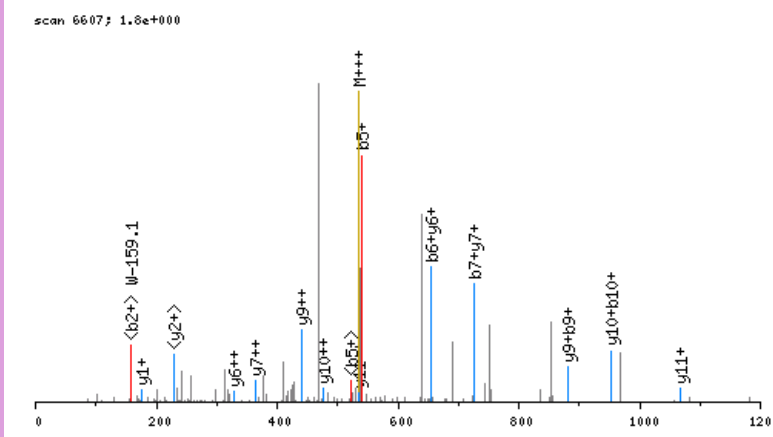

click image to zoom in; click top corners to zoom out [\[precursor±\]](#)

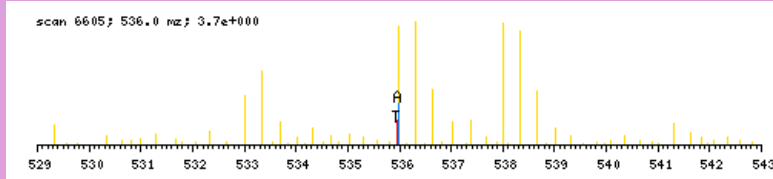

zoomed in precursor plot; T=theoretical m/z, A=acquired m/z

| b <sup>+</sup> | #  | AA # | y <sup>+</sup> | y <sup>2+</sup> |
|----------------|----|------|----------------|-----------------|
| 106.1080       | 1  | A 16 |                |                 |
| 177.1451       | 2  | A 15 | 1500.7447      | 750.8763        |
| 340.2085       | 3  | Y 14 | 1429.7076      | 715.3577        |
| 453.2925       | 4  | I 13 | 1266.6442      | 633.8260        |
| 540.3245       | 5  | S 12 | 1153.5602      | 577.2840        |
| 654.3675       | 6  | N 11 | 1066.5281      | 533.7680        |
| 725.4046       | 7  | A 10 | 952.4852       | 476.7465        |
| 824.4730       | 8  | V 9  | 881.4481       | 441.2280        |
| 881.4945       | 9  | G 8  | 782.3797       | 391.6938        |
| 952.5316       | 10 | A 7  | 725.3582       | 363.1830        |
| 1023.5687      | 11 | A 6  | 654.3211       | 327.6645        |
| 1186.6320      | 12 | Y 5  | 583.2840       | 292.1459        |
| 1273.6641      | 13 | S 4  | 420.2207       | 210.6142        |
| 1360.6961      | 14 | S 3  | 333.1886       | 167.0982        |
| 1431.7332      | 15 | A 2  | 246.1566       | 123.5822        |
|                | 16 | R 1  | 175.1195       | 88.0637         |

N-term:+35.07

ADASKGDDLLPAGTEDYIHIR, MH+ 2313.1727, m/z 579.0486  
 L OS G28 P150811 220811-s1.07665.07665.4.dta

X-range:

-

MassTol: Y-zoom:

MassType:

AVG  MONO

Axis:

1  2

Label:

I  M  -

Ions:

a  +  2+  3+

b  +  2+  3+

c  +  2+  3+

x  +  2+  3+

y  +  2+  3+

z  +  2+  3+

hide H<sub>2</sub>O/NH<sub>3</sub>

zoom 112-122

GO

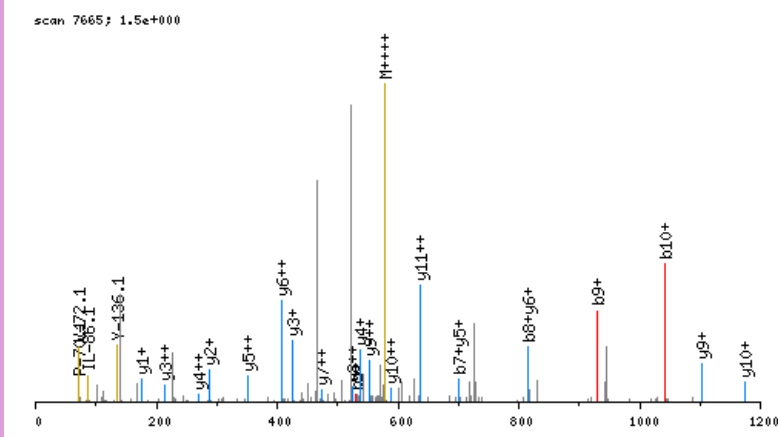

click image to zoom in; click top corners to zoom out [\[precursor±\]](#)

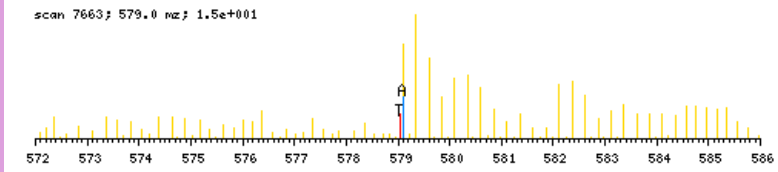

zoomed in precursor plot; T=theoretical m/z, A=acquired m/z

| b <sup>+</sup> | #  | AA | #  | y <sup>+</sup> | y <sup>2+</sup> |
|----------------|----|----|----|----------------|-----------------|
| 100.0762       | 1  | A  | 21 |                |                 |
| 215.1032       | 2  | D  | 20 | 2214.1043      | 1107.5561       |
| 286.1403       | 3  | A  | 19 | 2099.0773      | 1050.0426       |
| 373.1723       | 4  | S  | 18 | 2028.0402      | 1014.5240       |
| 529.2986       | 5  | K  | 17 | 1941.0082      | 971.0080        |
| 586.3201       | 6  | G  | 16 | 1784.8819      | 892.9449        |
| 701.3470       | 7  | D  | 15 | 1727.8604      | 864.4341        |
| 816.3739       | 8  | D  | 14 | 1612.8335      | 806.9207        |
| 929.4580       | 9  | L  | 13 | 1497.8066      | 749.4072        |
| 1042.5421      | 10 | L  | 12 | 1384.7225      | 692.8652        |
| 1139.5948      | 11 | P  | 11 | 1271.6384      | 636.3231        |
| 1210.6320      | 12 | A  | 10 | 1174.5857      | 587.7967        |
| 1267.6534      | 13 | G  | 9  | 1103.5485      | 552.2782        |
| 1368.7011      | 14 | T  | 8  | 1046.5271      | 523.7675        |
| 1497.7437      | 15 | E  | 7  | 945.4794       | 473.2436        |
| 1612.7706      | 16 | D  | 6  | 816.4368       | 408.7223        |
| 1775.8340      | 17 | Y  | 5  | 701.4099       | 351.2088        |
| 1888.9180      | 18 | I  | 4  | 538.3465       | 269.6772        |
| 2025.9769      | 19 | H  | 3  | 425.2625       | 213.1352        |
| 2139.0610      | 20 | I  | 2  | 288.2036       | 144.6057        |
|                | 21 | R  | 1  | 175.1195       | 88.0637         |

N-term:+29.04 K(5):+156.13

ADDDYDEPTDSDLAR, MH+ 1725.7091, m/z 575.9079  
 L OS G29 P150811 220811-s1.03274.03274.3.dta

X-range:

-

MassTol: Y-zoom:

MassType:

AVG  MONO

Axis:

1  2

Label:

I  M  -

Ions:

a  +  2+  3+

b  +  2+  3+

c  +  2+  3+

x  +  2+  3+

y  +  2+  3+

z  +  2+  3+

hide H<sub>2</sub>O/NH<sub>3</sub>

zoom 112-122

GO

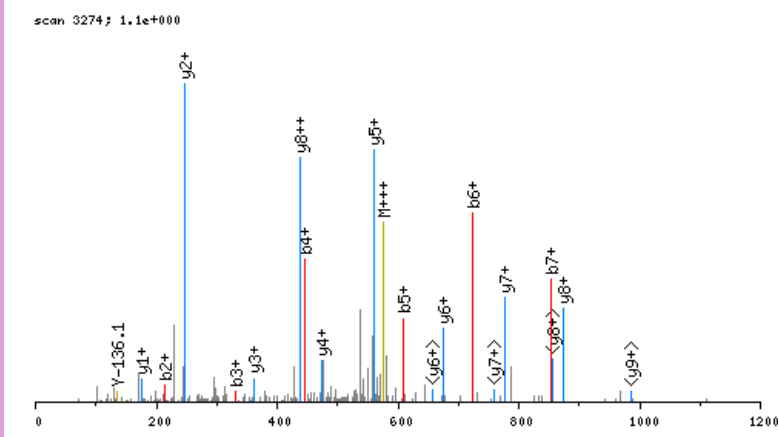

click image to zoom in; click top corners to zoom out [\[precursor±\]](#)

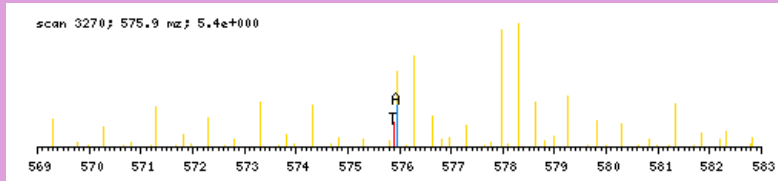

zoomed in precursor plot; T=theoretical m/z, A=acquired m/z

| b <sup>+</sup> | #  | AA # | y <sup>+</sup> | y <sup>2+</sup> |
|----------------|----|------|----------------|-----------------|
| 100.0762       | 1  | A 15 |                |                 |
| 215.1032       | 2  | D 14 | 1626.6407      | 813.8243        |
| 330.1301       | 3  | D 13 | 1511.6138      | 756.3108        |
| 445.1570       | 4  | D 12 | 1396.5868      | 698.7973        |
| 608.2204       | 5  | Y 11 | 1281.5599      | 641.2839        |
| 723.2473       | 6  | D 10 | 1118.4966      | 559.7522        |
| 852.2899       | 7  | E 9  | 1003.4696      | 502.2387        |
| 949.3427       | 8  | P 8  | 874.4270       | 437.7174        |
| 1050.3904      | 9  | T 7  | 777.3743       | 389.1910        |
| 1165.4173      | 10 | D 6  | 676.3266       | 338.6672        |
| 1252.4493      | 11 | S 5  | 561.2997       | 281.1537        |
| 1365.5334      | 12 | L 4  | 474.2676       | 237.6377        |
| 1480.5603      | 13 | D 3  | 361.1836       | 181.0957        |
| 1551.5974      | 14 | A 2  | 246.1566       | 123.5822        |
|                | 15 | R 1  | 175.1195       | 88.0637         |

N-term:+29.04



ADDLECTPGFQR, MH+ 1442.6797, m/z 481.5648  
 H OS G25 P150811 220811-s1.04298.04298.3.dta

X-range:

-

MassTol: Y-zoom:

MassType:

AVG  MONO

Axis:

1  2

Label:

I  M  -

Ions:

a  +  2+  3+

b  +  2+  3+

c  +  2+  3+

x  +  2+  3+

y  +  2+  3+

z  +  2+  3+

hide H<sub>2</sub>O/NH<sub>3</sub>

zoom 112-122

GO

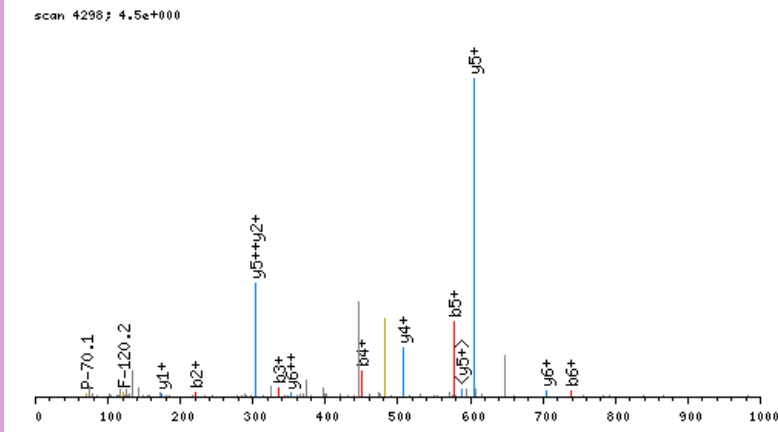

click image to zoom in; click top corners to zoom out [\[precursor±\]](#)

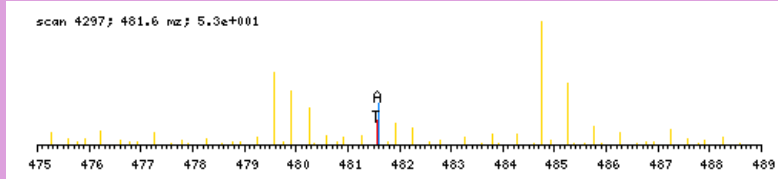

zoomed in precursor plot; T=theoretical m/z, A=acquired m/z

| b <sup>+</sup> | #  | AA # | y <sup>+</sup> | y <sup>2+</sup> |
|----------------|----|------|----------------|-----------------|
| 106.1080       | 1  | A 12 |                |                 |
| 221.1350       | 2  | D 11 | 1337.5795      | 669.2937        |
| 336.1619       | 3  | D 10 | 1222.5526      | 611.7802        |
| 449.2460       | 4  | L 9  | 1107.5257      | 554.2667        |
| 578.2886       | 5  | E 8  | 994.4416       | 497.7247        |
| 738.3192       | 6  | C 7  | 865.3990       | 433.2034        |
| 839.3668       | 7  | T 6  | 705.3684       | 353.1881        |
| 936.4196       | 8  | P 5  | 604.3207       | 302.6643        |
| 993.4411       | 9  | G 4  | 507.2680       | 254.1379        |
| 1140.5095      | 10 | F 3  | 450.2465       | 225.6272        |
| 1268.5681      | 11 | Q 2  | 303.1781       | 152.0930        |
|                | 12 | R 1  | 175.1195       | 88.0637         |

N-term:+35.07 C(6):+160.03

ADEFEDMVAEKR, MH+ 1507.7739, m/z 503.2628  
 H OS G27 P150811 220811-s1.04875.04875.3.dta

X-range:

-

MassTol: Y-zoom:

MassType:

AVG  MONO

Axis:

1  2

Label:

I  M  -

Ions:

a  +  2+  3+

b  +  2+  3+

c  +  2+  3+

x  +  2+  3+

y  +  2+  3+

z  +  2+  3+

hide H<sub>2</sub>O/NH<sub>3</sub>

zoom 112-122

GO

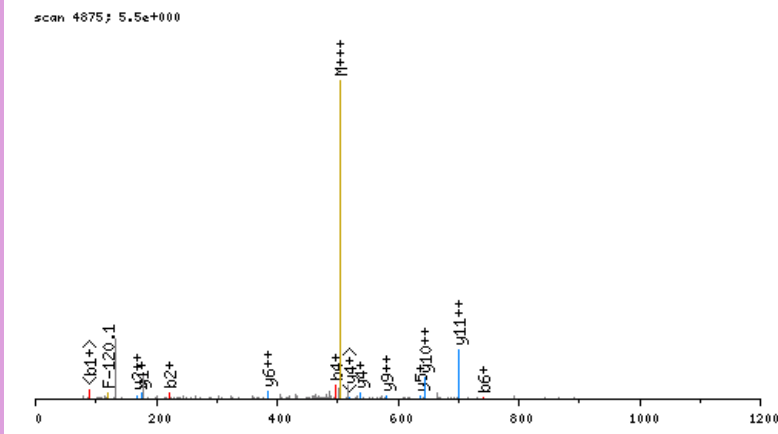

click image to zoom in; click top corners to zoom out [\[precursor±\]](#)

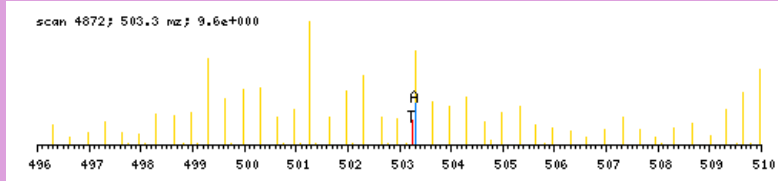

zoomed in precursor plot; T=theoretical m/z, A=acquired m/z

| b <sup>+</sup> | #  | AA # | y <sup>+</sup> | y <sup>2+</sup> |
|----------------|----|------|----------------|-----------------|
| 106.1080       | 1  | A 12 |                |                 |
| 221.1350       | 2  | D 11 | 1402.6737      | 701.8408        |
| 350.1776       | 3  | E 10 | 1287.6467      | 644.3273        |
| 497.2460       | 4  | F 9  | 1158.6042      | 579.8060        |
| 626.2886       | 5  | E 8  | 1011.5357      | 506.2718        |
| 741.3155       | 6  | D 7  | 882.4931       | 441.7505        |
| 872.3560       | 7  | M 6  | 767.4662       | 384.2370        |
| 971.4244       | 8  | V 5  | 636.4257       | 318.7168        |
| 1042.4615      | 9  | A 4  | 537.3573       | 269.1826        |
| 1171.5041      | 10 | E 3  | 466.3202       | 233.6640        |
| 1333.6622      | 11 | K 2  | 337.2776       | 169.1427        |
|                | 12 | R 1  | 175.1195       | 88.0637         |

N-term:+35.07 K(11):+162.16

ADEVESQLKSIR, MH+ 1442.8491, m/z 481.6212  
 H OS G27 P150811 220811-s1.04196.04196.3.dta

X-range:

-

MassTol: Y-zoom:

MassType:

AVG  MONO

Axis:

1  2

Label:

I  M  -

Ions:

a  +  2+  3+

b  +  2+  3+

c  +  2+  3+

x  +  2+  3+

y  +  2+  3+

z  +  2+  3+

hide H<sub>2</sub>O/NH<sub>3</sub>

zoom 112-122

GO

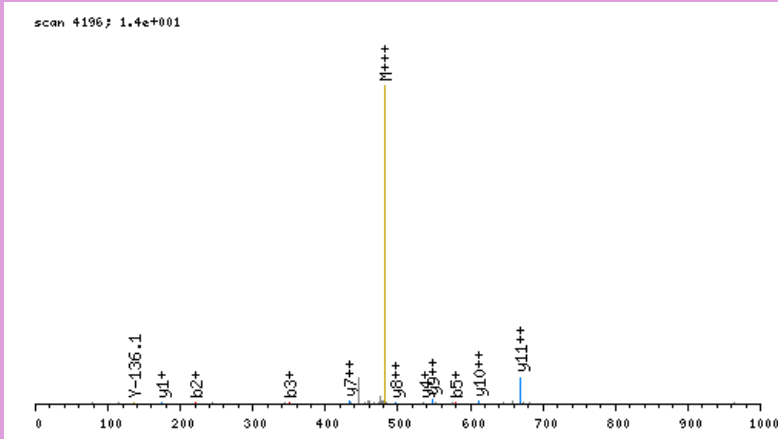

click image to zoom in; click top corners to zoom out [\[precursor±\]](#)

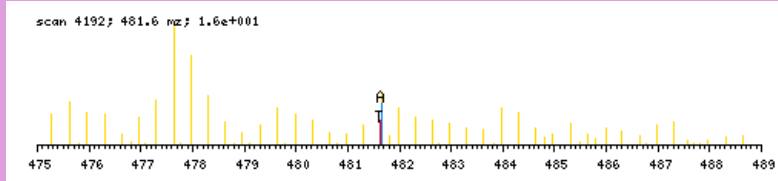

zoomed in precursor plot; T=theoretical m/z, A=acquired m/z

| b <sup>+</sup> | #  | AA # | y <sup>+</sup> | y <sup>2+</sup> |
|----------------|----|------|----------------|-----------------|
| 106.1080       | 1  | A 12 |                |                 |
| 221.1350       | 2  | D 11 | 1337.7489      | 669.3784        |
| 350.1776       | 3  | E 10 | 1222.7220      | 611.8649        |
| 449.2460       | 4  | V 9  | 1093.6794      | 547.3436        |
| 578.2886       | 5  | E 8  | 994.6110       | 497.8094        |
| 665.3206       | 6  | S 7  | 865.5684       | 433.2881        |
| 793.3792       | 7  | Q 6  | 778.5363       | 389.7721        |
| 906.4632       | 8  | L 5  | 650.4778       | 325.7428        |
| 1068.6213      | 9  | K 4  | 537.3937       | 269.2008        |
| 1155.6534      | 10 | S 3  | 375.2356       | 188.1217        |
| 1268.7374      | 11 | I 2  | 288.2036       | 144.6057        |
|                | 12 | R 1  | 175.1195       | 88.0637         |

N-term:+35.07 K(9):+162.16

ADLFDPVIKLR, MH+ 1354.8735, m/z 452.2960  
 H OS G26 P150811 220811-s1.06321.06321.3.dta

scan 6321; 1.3e+001

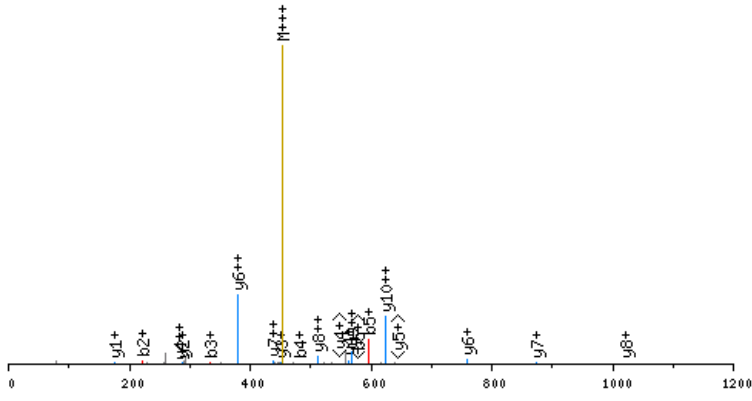

click image to zoom in; click top corners to zoom out [\[precursor±\]](#)

scan 6320; 452.3 m/z; 5.0e+000

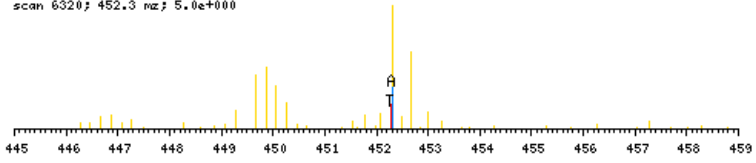

zoomed in precursor plot; T=theoretical m/z, A=acquired m/z

X-range:

-

MassTol: Y-zoom:

MassType:

AVG  MONO

Axis:

1  2

Label:

I  M  -

Ions:

a  +  2+  3+

b  +  2+  3+

c  +  2+  3+

x  +  2+  3+

y  +  2+  3+

z  +  2+  3+

hide H<sub>2</sub>O/NH<sub>3</sub>

zoom 112-122

GO

| b <sup>+</sup> | #  | AA # | y <sup>+</sup> | y <sup>2+</sup> |
|----------------|----|------|----------------|-----------------|
| 106.1080       | 1  | A 11 |                |                 |
| 221.1350       | 2  | D 10 | 1249.7733      | 625.3905        |
| 334.2190       | 3  | L 9  | 1134.7463      | 567.8771        |
| 481.2874       | 4  | F 8  | 1021.6623      | 511.3350        |
| 596.3144       | 5  | D 7  | 874.5938       | 437.8008        |
| 693.3671       | 6  | P 6  | 759.5669       | 380.2874        |
| 792.4356       | 7  | V 5  | 662.5141       | 331.7610        |
| 905.5196       | 8  | I 4  | 563.4457       | 282.2268        |
| 1067.6777      | 9  | K 3  | 450.3617       | 225.6847        |
| 1180.7618      | 10 | L 2  | 288.2036       | 144.6057        |
|                | 11 | R 1  | 175.1195       | 88.0637         |

N-term:+35.07 K(9):+162.16

ADLVQDLISICTR, MH+ 1511.7951, m/z 504.6032  
 H OS G25 P150811 220811-s1.06865.06865.3.dta

X-range:

-

MassTol: Y-zoom:

MassType:

AVG  MONO

Axis:

1  2

Label:

I  M  -

Ions:

a  +  2+  3+

b  +  2+  3+

c  +  2+  3+

x  +  2+  3+

y  +  2+  3+

z  +  2+  3+

hide H<sub>2</sub>O/NH<sub>3</sub>

zoom 112-122

GO

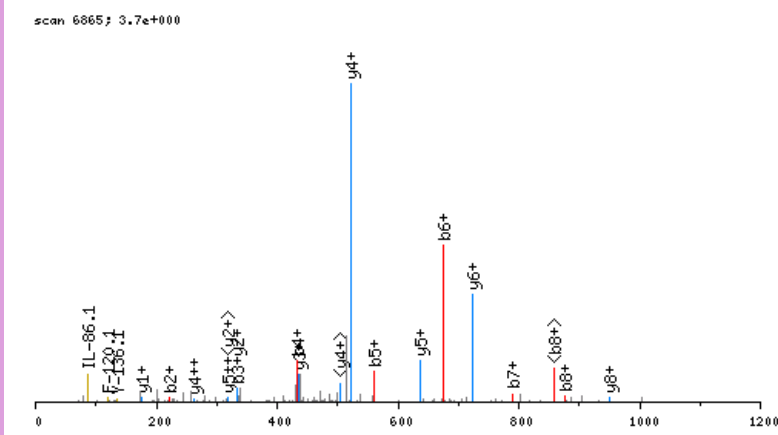

click image to zoom in; click top corners to zoom out [\[precursor±\]](#)

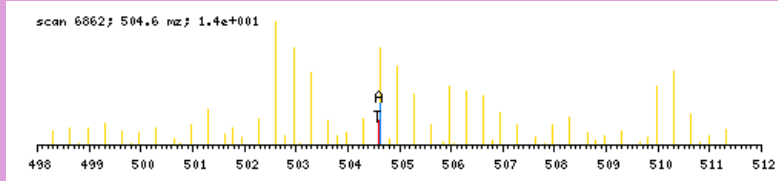

zoomed in precursor plot; T=theoretical m/z, A=acquired m/z

| b <sup>+</sup> | #  | AA # | y <sup>+</sup> | y <sup>2+</sup> |
|----------------|----|------|----------------|-----------------|
| 106.1080       | 1  | A 13 |                |                 |
| 221.1350       | 2  | D 12 | 1406.6949      | 703.8514        |
| 334.2190       | 3  | L 11 | 1291.6680      | 646.3379        |
| 433.2874       | 4  | V 10 | 1178.5839      | 589.7959        |
| 561.3460       | 5  | Q 9  | 1079.5155      | 540.2617        |
| 676.3730       | 6  | D 8  | 951.4569       | 476.2324        |
| 789.4570       | 7  | L 7  | 836.4300       | 418.7189        |
| 876.4890       | 8  | S 6  | 723.3459       | 362.1769        |
| 989.5731       | 9  | I 5  | 636.3139       | 318.6608        |
| 1076.6051      | 10 | S 4  | 523.2298       | 262.1188        |
| 1177.6528      | 11 | T 3  | 436.1978       | 218.6028        |
| 1337.6834      | 12 | C 2  | 335.1501       | 168.0790        |
|                | 13 | R 1  | 175.1195       | 88.0637         |

N-term:+35.07 C(12):+160.03

ADMGPPHHHPGHR, MH+ 1479.7240, m/z 493.9128  
 H OS G27 P150811 220811-s1.04499.04499.3.dta

X-range:

-

MassTol: Y-zoom:

MassType:

AVG  MONO

Axis:

1  2

Label:

I  M  -

Ions:

a  +  2+  3+

b  +  2+  3+

c  +  2+  3+

x  +  2+  3+

y  +  2+  3+

z  +  2+  3+

hide H<sub>2</sub>O/NH<sub>3</sub>

zoom 112-122

GO

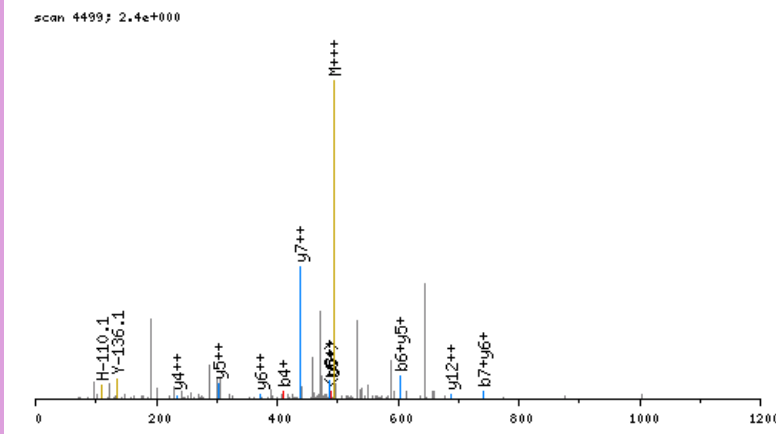

click image to zoom in; click top corners to zoom out [\[precursor±\]](#)

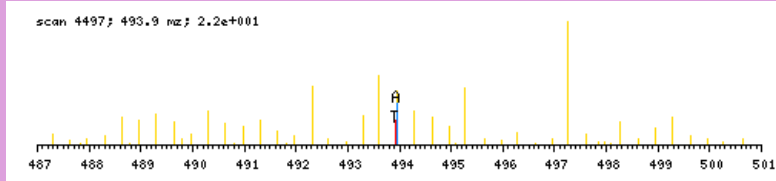

zoomed in precursor plot; T=theoretical m/z, A=acquired m/z

| b <sup>+</sup> | #  | AA # | y <sup>+</sup> | y <sup>2+</sup> |
|----------------|----|------|----------------|-----------------|
| 106.1080       | 1  | A 13 |                |                 |
| 221.1350       | 2  | D 12 | 1374.6238      | 687.8158        |
| 352.1754       | 3  | M 11 | 1259.5969      | 630.3023        |
| 409.1969       | 4  | G 10 | 1128.5564      | 564.7821        |
| 506.2497       | 5  | P 9  | 1071.5349      | 536.2714        |
| 603.3024       | 6  | P 8  | 974.4821       | 487.7450        |
| 740.3613       | 7  | H 7  | 877.4294       | 439.2186        |
| 877.4203       | 8  | H 6  | 740.3705       | 370.6891        |
| 1014.4792      | 9  | H 5  | 603.3116       | 302.1597        |
| 1111.5319      | 10 | P 4  | 466.2526       | 233.6302        |
| 1168.5534      | 11 | G 3  | 369.1999       | 185.1039        |
| 1305.6123      | 12 | H 2  | 312.1784       | 156.5931        |
|                | 13 | R 1  | 175.1195       | 88.0637         |

N-term:+35.07

ADTFLEHMCR, MH+ 1307.5876, m/z 436.5340  
 L OS G27 P150811 220811-s1.04778.04778.3.dta

X-range:

-

MassTol: Y-zoom:

MassType:

AVG  MONO

Axis:

1  2

Label:

I  M  -

Ions:

a  +  2+  3+

b  +  2+  3+

c  +  2+  3+

x  +  2+  3+

y  +  2+  3+

z  +  2+  3+

hide H<sub>2</sub>O/NH<sub>3</sub>

zoom 112-122

GO

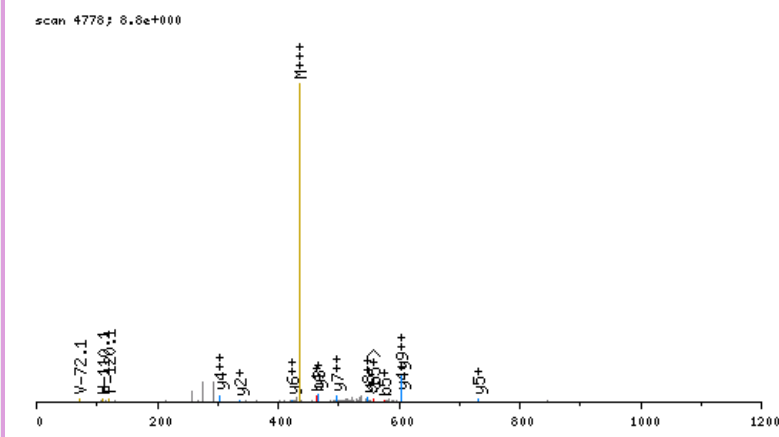

click image to zoom in; click top corners to zoom out [\[precursor±\]](#)

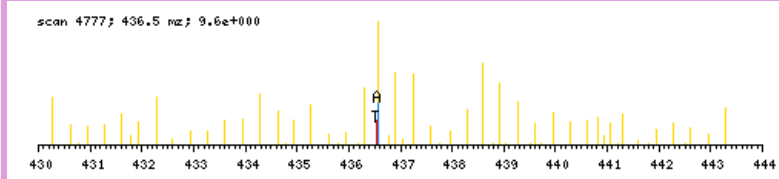

zoomed in precursor plot; T=theoretical m/z, A=acquired m/z

| b <sup>+</sup> | #  | AA # | y <sup>+</sup> | y <sup>2+</sup> |
|----------------|----|------|----------------|-----------------|
| 100.0762       | 1  | A 10 |                |                 |
| 215.1032       | 2  | D 9  | 1208.5192      | 604.7635        |
| 316.1508       | 3  | T 8  | 1093.4922      | 547.2500        |
| 463.2192       | 4  | F 7  | 992.4446       | 496.7262        |
| 576.3033       | 5  | L 6  | 845.3762       | 423.1920        |
| 705.3459       | 6  | E 5  | 732.2921       | 366.6500        |
| 842.4048       | 7  | H 4  | 603.2495       | 302.1287        |
| 973.4453       | 8  | M 3  | 466.1906       | 233.5992        |
| 1133.4759      | 9  | C 2  | 335.1501       | 168.0790        |
|                | 10 | R 1  | 175.1195       | 88.0637         |

N-term:+29.04 C(9):+160.03

ADTPGEATPPPR, MH+ 1236.6224, m/z 412.8790  
 L OS G25 P150811 220811-s1.02068.02068.3.dta

X-range:

-

MassTol: Y-zoom:

MassType:

AVG  MONO

Axis:

1  2

Label:

I  M  -

Ions:

a  +  2+  3+

b  +  2+  3+

c  +  2+  3+

x  +  2+  3+

y  +  2+  3+

z  +  2+  3+

hide H<sub>2</sub>O/NH<sub>3</sub>

zoom 112-122

GO

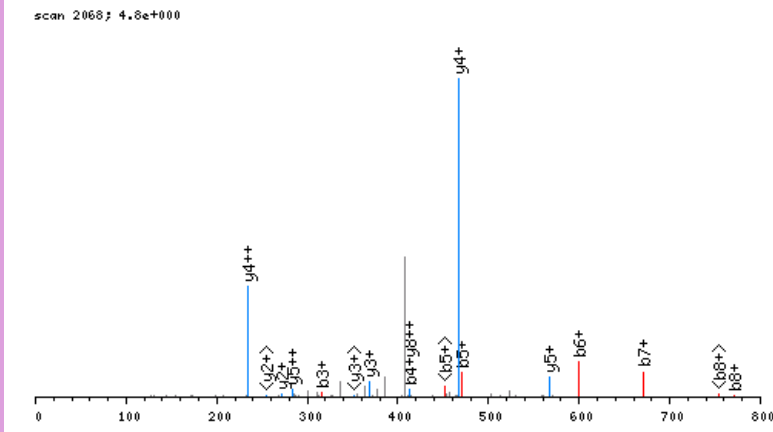

click image to zoom in; click top corners to zoom out [\[precursor±\]](#)

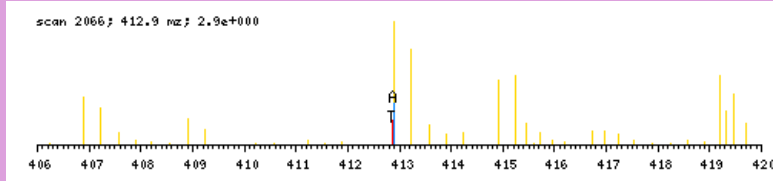

zoomed in precursor plot; T=theoretical m/z, A=acquired m/z

| b <sup>+</sup> | #  | AA # | y <sup>+</sup> | y <sup>2+</sup> |
|----------------|----|------|----------------|-----------------|
| 100.0762       | 1  | A 12 |                |                 |
| 215.1032       | 2  | D 11 | 1137.5540      | 569.2809        |
| 316.1508       | 3  | T 10 | 1022.5271      | 511.7675        |
| 413.2036       | 4  | P 9  | 921.4794       | 461.2436        |
| 470.2251       | 5  | G 8  | 824.4266       | 412.7172        |
| 599.2677       | 6  | E 7  | 767.4052       | 384.2065        |
| 670.3048       | 7  | A 6  | 638.3626       | 319.6852        |
| 771.3524       | 8  | T 5  | 567.3255       | 284.1666        |
| 868.4052       | 9  | P 4  | 466.2778       | 233.6428        |
| 965.4580       | 10 | P 3  | 369.2250       | 185.1164        |
| 1062.5107      | 11 | P 2  | 272.1723       | 136.5900        |
|                | 12 | R 1  | 175.1195       | 88.0637         |

N-term:+29.04



ADVVFETANDSGHR, MH+ 1416.6871, m/z 472.9006  
 L OS G27 P150811 220811-s1.03015.03015.3.dta

X-range:

-

MassTol: Y-zoom:

MassType:

AVG  MONO

Axis:

1  2

Label:

I  M  -

Ions:

a  +  2+  3+

b  +  2+  3+

c  +  2+  3+

x  +  2+  3+

y  +  2+  3+

z  +  2+  3+

hide H<sub>2</sub>O/NH<sub>3</sub>

zoom 112-122

GO

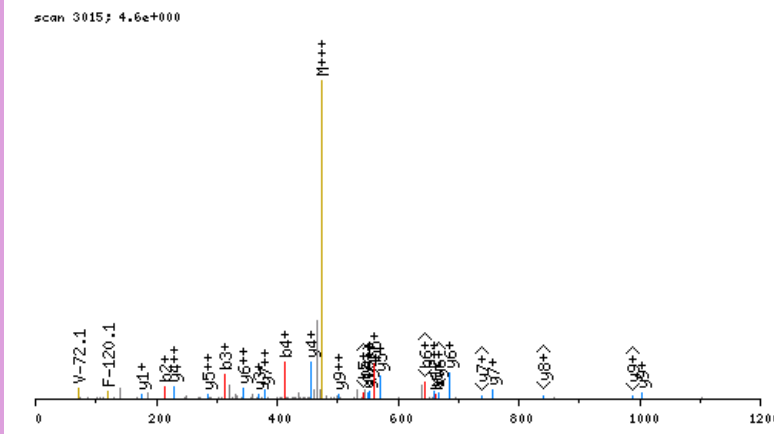

click image to zoom in; click top corners to zoom out [\[precursor±\]](#)

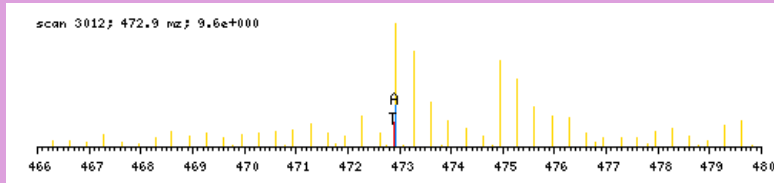

zoomed in precursor plot; T=theoretical m/z, A=acquired m/z

| b <sup>+</sup> | #  | AA # | y <sup>+</sup> | y <sup>2+</sup> |
|----------------|----|------|----------------|-----------------|
| 100.0762       | 1  | A 13 |                |                 |
| 215.1032       | 2  | D 12 | 1317.6188      | 659.3133        |
| 314.1716       | 3  | V 11 | 1202.5918      | 601.7998        |
| 413.2400       | 4  | V 10 | 1103.5234      | 552.2656        |
| 560.3084       | 5  | F 9  | 1004.4550      | 502.7314        |
| 661.3561       | 6  | T 8  | 857.3866       | 429.1972        |
| 732.3932       | 7  | A 7  | 756.3389       | 378.6734        |
| 846.4361       | 8  | N 6  | 685.3018       | 343.1548        |
| 961.4631       | 9  | D 5  | 571.2588       | 286.1333        |
| 1048.4951      | 10 | S 4  | 456.2319       | 228.6199        |
| 1105.5166      | 11 | G 3  | 369.1999       | 185.1039        |
| 1242.5755      | 12 | H 2  | 312.1784       | 156.5931        |
|                | 13 | R 1  | 175.1195       | 88.0637         |

N-term:+29.04

AEAPGVLDLILPEGR, MH+ 1521.8277, m/z 507.9474  
 L OS G24 P150811 220811-s1.04299.04299.3.dta

X-range:

-

MassTol: Y-zoom:

MassType:

AVG  MONO

Axis:

1  2

Label:

I  M  -

Ions:

a  +  2+  3+

b  +  2+  3+

c  +  2+  3+

x  +  2+  3+

y  +  2+  3+

z  +  2+  3+

hide H<sub>2</sub>O/NH<sub>3</sub>

zoom 112-122

GO

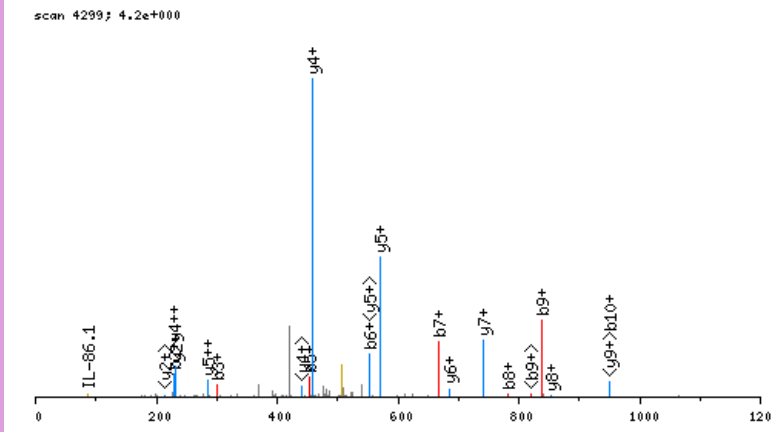

click image to zoom in; click top corners to zoom out [\[precursor±\]](#)

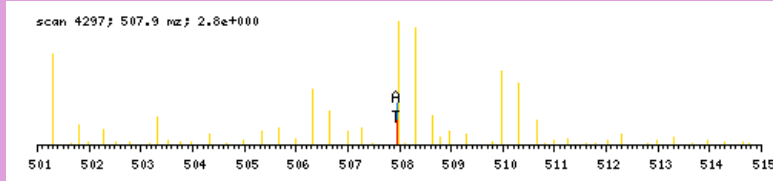

zoomed in precursor plot; T=theoretical m/z, A=acquired m/z

| b <sup>+</sup> | #  | AA # | y <sup>+</sup> | y <sup>2+</sup> |
|----------------|----|------|----------------|-----------------|
| 100.0762       | 1  | A 15 |                |                 |
| 229.1188       | 2  | E 14 | 1422.7593      | 711.8835        |
| 300.1559       | 3  | A 13 | 1293.7167      | 647.3623        |
| 397.2087       | 4  | P 12 | 1222.6796      | 611.8437        |
| 454.2301       | 5  | G 11 | 1125.6268      | 563.3173        |
| 553.2986       | 6  | V 10 | 1068.6053      | 534.8066        |
| 668.3255       | 7  | D 9  | 969.5369       | 485.2724        |
| 781.4096       | 8  | L 8  | 854.5100       | 427.7589        |
| 838.4310       | 9  | G 7  | 741.4259       | 371.2169        |
| 951.5151       | 10 | I 6  | 684.4044       | 342.7061        |
| 1064.5992      | 11 | L 5  | 571.3204       | 286.1641        |
| 1161.6519      | 12 | P 4  | 458.2363       | 229.6221        |
| 1290.6945      | 13 | E 3  | 361.1836       | 181.0957        |
| 1347.7160      | 14 | G 2  | 232.1410       | 116.5744        |
|                | 15 | R 1  | 175.1195       | 88.0637         |

N-term:+29.04

AEGQVLVLDGR, MH+ 1184.6639, m/z 592.8356  
 L OS G25 P150811 220811-s1.04765.04765.2.dta

X-range:

-

MassTol: Y-zoom:

MassType:

AVG  MONO

Axis:

1  2

Label:

I  M  -

Ions:

a  +  2+  3+

b  +  2+  3+

c  +  2+  3+

x  +  2+  3+

y  +  2+  3+

z  +  2+  3+

hide H<sub>2</sub>O/NH<sub>3</sub>

zoom 112-122

GO

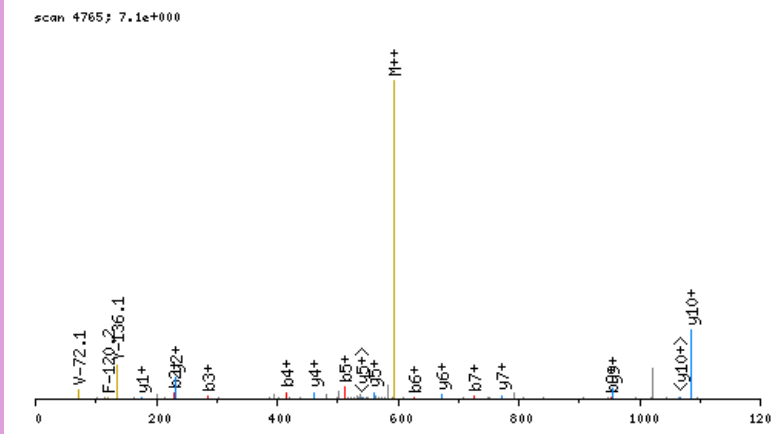

click image to zoom in; click top corners to zoom out [\[precursor±\]](#)

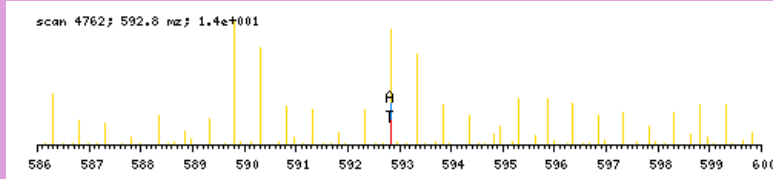

zoomed in precursor plot; T=theoretical m/z, A=acquired m/z

| b <sup>+</sup> | #  | AA # | y <sup>+</sup> | y <sup>2+</sup> |
|----------------|----|------|----------------|-----------------|
| 100.0762       | 1  | A 11 |                |                 |
| 229.1188       | 2  | E 10 | 1085.5955      | 543.3017        |
| 286.1403       | 3  | G 9  | 956.5529       | 478.7804        |
| 414.1988       | 4  | Q 8  | 899.5314       | 450.2696        |
| 513.2673       | 5  | V 7  | 771.4729       | 386.2403        |
| 626.3513       | 6  | L 6  | 672.4044       | 336.7061        |
| 725.4197       | 7  | V 5  | 559.3204       | 280.1641        |
| 838.5038       | 8  | L 4  | 460.2520       | 230.6299        |
| 953.5307       | 9  | D 3  | 347.1679       | 174.0879        |
| 1010.5522      | 10 | G 2  | 232.1410       | 116.5744        |
|                | 11 | R 1  | 175.1195       | 88.0637         |

N-term:+29.04

AEKELCKEFENQVR, MH+ 1863.9639, m/z 466.7464  
 L OS G28 P150811 220811-s1.04020.04020.4.dta

X-range:

-

MassTol: Y-zoom:

MassType:

AVG  MONO

Axis:

1  2

Label:

I  M  -

Ions:

a  +  2+  3+

b  +  2+  3+

c  +  2+  3+

x  +  2+  3+

y  +  2+  3+

z  +  2+  3+

hide H<sub>2</sub>O/NH<sub>3</sub>

zoom 112-122

GO

scan 4020; 6.0e+000

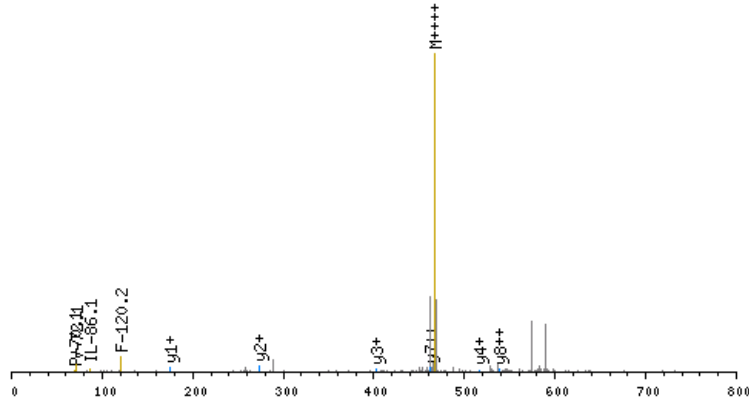

click image to zoom in; click top corners to zoom out [\[precursor±\]](#)

scan 4018; 466.7 m/z; 1.6e+001

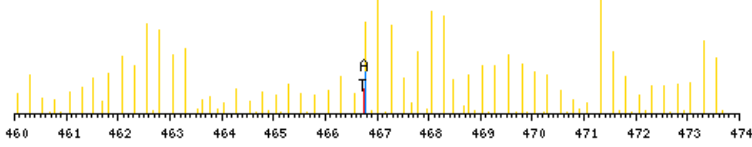

zoomed in precursor plot; T=theoretical m/z, A=acquired m/z

| b <sup>+</sup> | #  | AA # | y <sup>+</sup>  | y <sup>2+</sup> |
|----------------|----|------|-----------------|-----------------|
| 100.0762       | 1  | A 14 |                 |                 |
| 229.1188       | 2  | E 13 | 1764.8955       | 882.9516        |
| 385.2451       | 3  | K 12 | 1635.8529       | 818.4304        |
| 514.2877       | 4  | E 11 | 1479.7266       | 740.3672        |
| 627.3718       | 5  | L 10 | 1350.6840       | 675.8459        |
| 787.4024       | 6  | C 9  | 1237.5999       | 619.3039        |
| 943.5287       | 7  | K 8  | 1077.5693       | <b>539.2886</b> |
| 1072.5713      | 8  | E 7  | 921.4430        | <b>461.2254</b> |
| 1219.6397      | 9  | F 6  | 792.4004        | 396.7041        |
| 1348.6823      | 10 | E 5  | 645.3320        | 323.1699        |
| 1462.7252      | 11 | N 4  | <b>516.2894</b> | 258.6486        |
| 1590.7838      | 12 | Q 3  | <b>402.2465</b> | 201.6272        |
| 1689.8522      | 13 | V 2  | <b>274.1879</b> | 137.5979        |
|                | 14 | R 1  | <b>175.1195</b> | 88.0637         |

N-term:+29.04 K(3):+156.13  
 C(6):+160.03 K(7):+156.13

AELFDPVIQER, MH+ 1350.7481, m/z 450.9209  
 H OS G25 P150811 220811-s1.06774.06774.3.dta

scan 6774; 5.2e+000

X-range:

-

MassTol: Y-zoom:

MassType:

AVG  MONO

Axis:

1  2

Label:

I  M  -

Ions:

a  +  2+  3+

b  +  2+  3+

c  +  2+  3+

x  +  2+  3+

y  +  2+  3+

z  +  2+  3+

hide H<sub>2</sub>O/NH<sub>3</sub>

zoom 112-122

GO

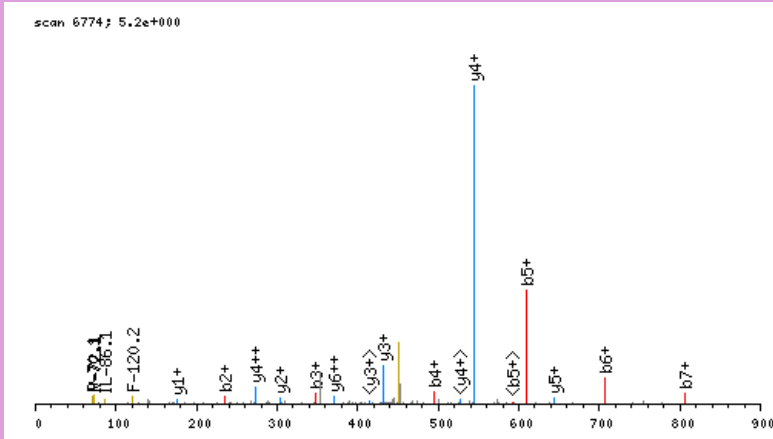

click image to zoom in; click top corners to zoom out [\[precursor±\]](#)

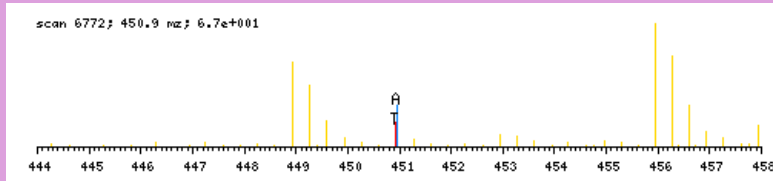

zoomed in precursor plot; T=theoretical m/z, A=acquired m/z

| b <sup>+</sup> | #  | AA # | y <sup>+</sup> | y <sup>2+</sup> |
|----------------|----|------|----------------|-----------------|
| 106.1080       | 1  | A 11 |                |                 |
| 235.1506       | 2  | E 10 | 1245.6479      | 623.3279        |
| 348.2347       | 3  | L 9  | 1116.6053      | 558.8066        |
| 495.3031       | 4  | F 8  | 1003.5213      | 502.2645        |
| 610.3300       | 5  | D 7  | 856.4529       | 428.7303        |
| 707.3828       | 6  | P 6  | 741.4259       | 371.2169        |
| 806.4512       | 7  | V 5  | 644.3731       | 322.6905        |
| 919.5353       | 8  | I 4  | 545.3047       | 273.1563        |
| 1047.5938      | 9  | Q 3  | 432.2207       | 216.6142        |
| 1176.6364      | 10 | E 2  | 304.1621       | 152.5850        |
|                | 11 | R 1  | 175.1195       | 88.0637         |

N-term:+35.07

AEPVDVLEAWGVHR, MH+ 1605.8389, m/z 535.9511  
 L OS G26 P150811 220811-s1.06607.06607.3.dta

X-range:

-

MassTol: Y-zoom:

MassType:

AVG  MONO

Axis:

1  2

Label:

I  M  -

Ions:

a  +  2+  3+

b  +  2+  3+

c  +  2+  3+

x  +  2+  3+

y  +  2+  3+

z  +  2+  3+

hide H<sub>2</sub>O/NH<sub>3</sub>

zoom 112-122

GO

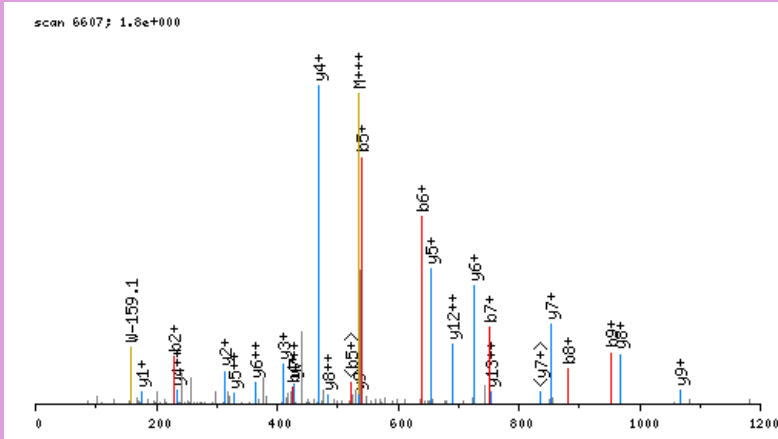

click image to zoom in; click top corners to zoom out [\[precursor±\]](#)

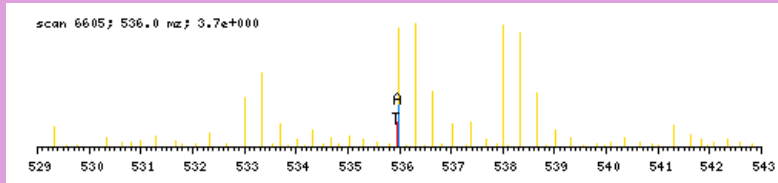

zoomed in precursor plot; T=theoretical m/z, A=acquired m/z

| b <sup>+</sup> | #  | AA # | y <sup>+</sup> | y <sup>2+</sup> |
|----------------|----|------|----------------|-----------------|
| 100.0762       | 1  | A 14 |                |                 |
| 229.1188       | 2  | E 13 | 1506.7705      | 753.8892        |
| 326.1716       | 3  | P 12 | 1377.7279      | 689.3679        |
| 425.2400       | 4  | V 11 | 1280.6751      | 640.8415        |
| 540.2669       | 5  | D 10 | 1181.6067      | 591.3073        |
| 639.3353       | 6  | V 9  | 1066.5798      | 533.7938        |
| 752.4194       | 7  | L 8  | 967.5114       | 484.2596        |
| 881.4620       | 8  | E 7  | 854.4273       | 427.7176        |
| 952.4991       | 9  | A 6  | 725.3847       | 363.1963        |
| 1138.5784      | 10 | W 5  | 654.3476       | 327.6777        |
| 1195.5999      | 11 | G 4  | 468.2683       | 234.6381        |
| 1294.6683      | 12 | V 3  | 411.2468       | 206.1273        |
| 1431.7272      | 13 | H 2  | 312.1784       | 156.5931        |
|                | 14 | R 1  | 175.1195       | 88.0637         |

N-term:+29.04

AEQPICKDVLVR, MH+ 1483.8306, m/z 495.2817  
 L OS G26 P150811 220811-s1.03187.03187.3.dta

X-range:

-

MassTol: Y-zoom:

MassType:

AVG  MONO

Axis:

1  2

Label:

I  M  -

Ions:

a  +  2+  3+

b  +  2+  3+

c  +  2+  3+

x  +  2+  3+

y  +  2+  3+

z  +  2+  3+

hide H<sub>2</sub>O/NH<sub>3</sub>

zoom 112-122

GO

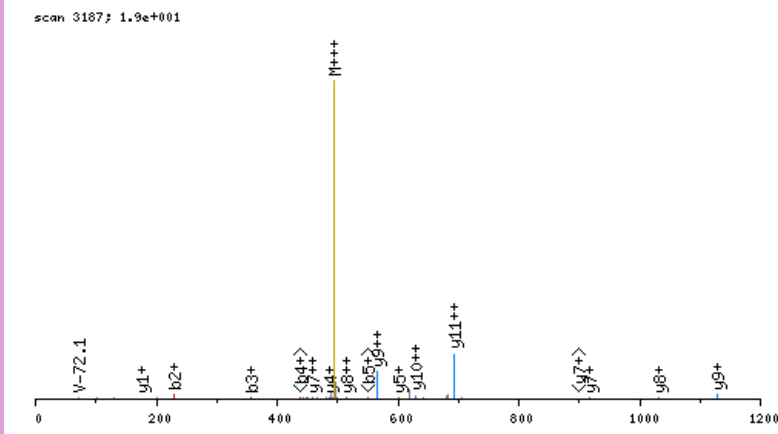

click image to zoom in; click top corners to zoom out [\[precursor±\]](#)

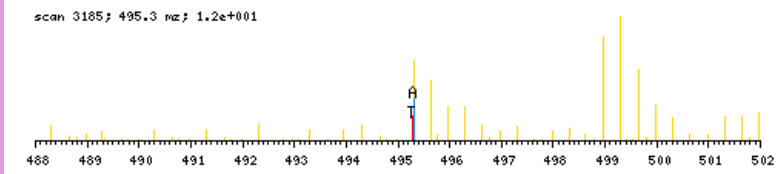

zoomed in precursor plot; T=theoretical m/z, A=acquired m/z

| b <sup>+</sup> | #  | AA # | y <sup>+</sup> | y <sup>2+</sup> |
|----------------|----|------|----------------|-----------------|
| 100.0762       | 1  | A 12 |                |                 |
| 229.1188       | 2  | E 11 | 1384.7622      | 692.8850        |
| 357.1774       | 3  | Q 10 | 1255.7196      | 628.3637        |
| 454.2301       | 4  | P 9  | 1127.6611      | 564.3344        |
| 567.3142       | 5  | I 8  | 1030.6083      | 515.8081        |
| 727.3448       | 6  | C 7  | 917.5242       | 459.2660        |
| 883.4711       | 7  | K 6  | 757.4936       | 379.2507        |
| 998.4981       | 8  | D 5  | 601.3673       | 301.1876        |
| 1097.5665      | 9  | V 4  | 486.3404       | 243.6741        |
| 1210.6505      | 10 | L 3  | 387.2720       | 194.1399        |
| 1309.7189      | 11 | V 2  | 274.1879       | 137.5979        |
|                | 12 | R 1  | 175.1195       | 88.0637         |

N-term:+29.04 C(6):+160.03  
 K(7):+156.13

AERPALLELER, MH+ 1330.7906, m/z 444.2684  
 H OS G27 P150811 220811-s1.04993.04993.3.dta

scan 4993; 1.9e+001

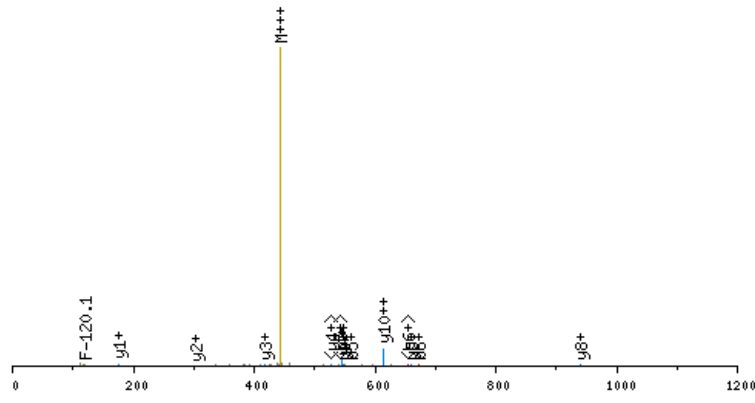

click image to zoom in; click top corners to zoom out [\[precursor±\]](#)

scan 4992; 444.3 m/z; 6.1e+001

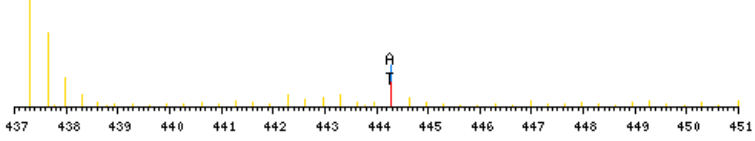

zoomed in precursor plot; T=theoretical m/z, A=acquired m/z

X-range:

-

MassTol: Y-zoom:

MassType:

AVG  MONO

Axis:

1  2

Label:

I  M  -

Ions:

a  +  2+  3+

b  +  2+  3+

c  +  2+  3+

x  +  2+  3+

y  +  2+  3+

z  +  2+  3+

hide H<sub>2</sub>O/NH<sub>3</sub>

zoom 112-122

GO

| b <sup>+</sup> | #  | AA # | y <sup>+</sup> | y <sup>2+</sup> |
|----------------|----|------|----------------|-----------------|
| 106.1080       | 1  | A 11 |                |                 |
| 235.1506       | 2  | E 10 | 1225.6905      | 613.3491        |
| 391.2517       | 3  | R 9  | 1096.6479      | 548.8278        |
| 488.3045       | 4  | P 8  | 940.5468       | 470.7773        |
| 559.3416       | 5  | A 7  | 843.4940       | 422.2509        |
| 672.4257       | 6  | L 6  | 772.4569       | 386.7324        |
| 785.5097       | 7  | L 5  | 659.3728       | 330.1903        |
| 914.5523       | 8  | E 4  | 546.2888       | 273.6483        |
| 1027.6364      | 9  | L 3  | 417.2462       | 209.1270        |
| 1156.6790      | 10 | E 2  | 304.1621       | 152.5850        |
|                | 11 | R 1  | 175.1195       | 88.0637         |

N-term:+35.07



AETFDQGAHHAFGQGR, MH+ 1819.8688, m/z 455.7227  
 H OS G28 P150811 220811-s1.02976.02976.4.dta

X-range:

-

MassTol: Y-zoom:

MassType:

AVG  MONO

Axis:

1  2

Label:

I  M  -

Ions:

a  +  2+  3+

b  +  2+  3+

c  +  2+  3+

x  +  2+  3+

y  +  2+  3+

z  +  2+  3+

hide H<sub>2</sub>O/NH<sub>3</sub>

zoom 112-122

GO

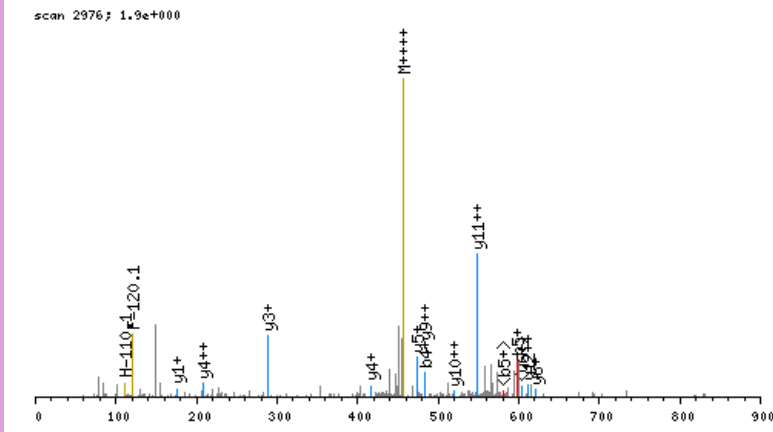

click image to zoom in; click top corners to zoom out [\[precursor±\]](#)

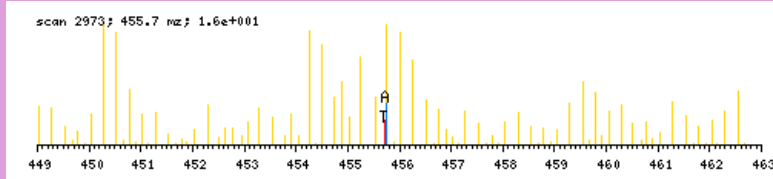

zoomed in precursor plot; T=theoretical m/z, A=acquired m/z

| b <sup>+</sup> | #  | AA # | y <sup>+</sup> | y <sup>2+</sup> |
|----------------|----|------|----------------|-----------------|
| 106.1080       | 1  | A 17 |                |                 |
| 235.1506       | 2  | E 16 | 1714.7686      | 857.8882        |
| 336.1983       | 3  | T 15 | 1585.7260      | 793.3669        |
| 483.2667       | 4  | F 14 | 1484.6783      | 742.8431        |
| 598.2936       | 5  | D 13 | 1337.6099      | 669.3089        |
| 726.3522       | 6  | Q 12 | 1222.5830      | 611.7954        |
| 783.3737       | 7  | G 11 | 1094.5244      | 547.7661        |
| 854.4108       | 8  | A 10 | 1037.5029      | 519.2554        |
| 991.4697       | 9  | H 9  | 966.4658       | 483.7368        |
| 1128.5286      | 10 | H 8  | 829.4069       | 415.2074        |
| 1199.5657      | 11 | A 7  | 692.3480       | 346.6779        |
| 1346.6341      | 12 | F 6  | 621.3109       | 311.1594        |
| 1403.6556      | 13 | G 5  | 474.2425       | 237.6251        |
| 1531.7142      | 14 | Q 4  | 417.2210       | 209.1144        |
| 1588.7357      | 15 | G 3  | 289.1624       | 145.0851        |
| 1645.7571      | 16 | G 2  | 232.1410       | 116.5744        |
|                | 17 | R 1  | 175.1195       | 88.0637         |

N-term:+35.07

AETPVVAALPEFPR, MH+ 1431.8060, m/z 477.9402  
 H OS G25 P150811 220811-s1.07006.07006.3.dta

X-range:

-

MassTol: Y-zoom:

MassType:

AVG  MONO

Axis:

1  2

Label:

I  M  -

Ions:

a  +  2+  3+

b  +  2+  3+

c  +  2+  3+

x  +  2+  3+

y  +  2+  3+

z  +  2+  3+

hide H<sub>2</sub>O/NH<sub>3</sub>

zoom 112-122

GO

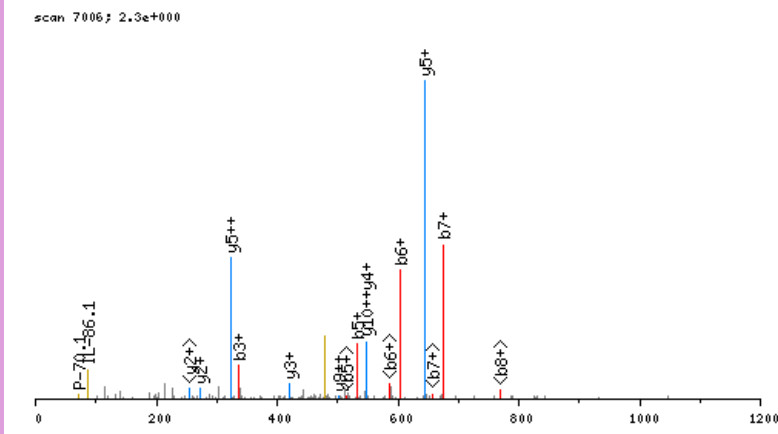

click image to zoom in; click top corners to zoom out [\[precursor±\]](#)

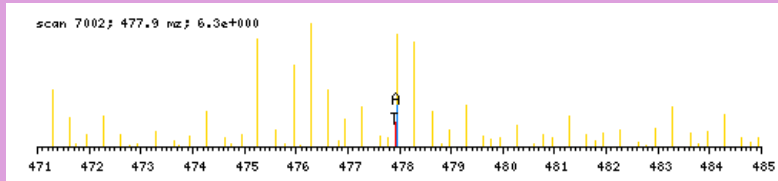

zoomed in precursor plot; T=theoretical m/z, A=acquired m/z

| b <sup>+</sup> | #  | AA # | y <sup>+</sup> | y <sup>2+</sup> |
|----------------|----|------|----------------|-----------------|
| 106.1080       | 1  | A 13 |                |                 |
| 235.1506       | 2  | E 12 | 1326.7058      | 663.8568        |
| 336.1983       | 3  | T 11 | 1197.6632      | 599.3355        |
| 433.2510       | 4  | P 10 | 1096.6155      | 548.8117        |
| 532.3195       | 5  | V 9  | 999.5627       | 500.2853        |
| 603.3566       | 6  | A 8  | 900.4943       | 450.7511        |
| 674.3937       | 7  | A 7  | 829.4572       | 415.2325        |
| 787.4778       | 8  | L 6  | 758.4201       | 379.7140        |
| 884.5305       | 9  | P 5  | 645.3360       | 323.1719        |
| 1013.5731      | 10 | E 4  | 548.2833       | 274.6455        |
| 1160.6415      | 11 | F 3  | 419.2407       | 210.1243        |
| 1257.6943      | 12 | P 2  | 272.1723       | 136.5900        |
|                | 13 | R 1  | 175.1195       | 88.0637         |

N-term:+35.07

AEVGVAGPGPQR, MH+ 1293.6915, m/z 431.9020  
 L OS G25 P150811 220811-s1.02425.02425.3.dta

X-range:

-

MassTol: Y-zoom:

MassType:

AVG  MONO

Axis:

1  2

Label:

I  M  -

Ions:

a  +  2+  3+

b  +  2+  3+

c  +  2+  3+

x  +  2+  3+

y  +  2+  3+

z  +  2+  3+

hide H<sub>2</sub>O/NH<sub>3</sub>

zoom 112-122

GO

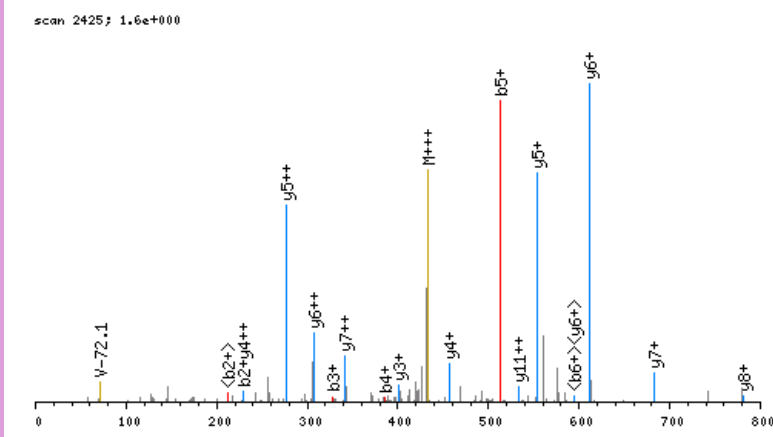

click image to zoom in; click top corners to zoom out [\[precursor±\]](#)

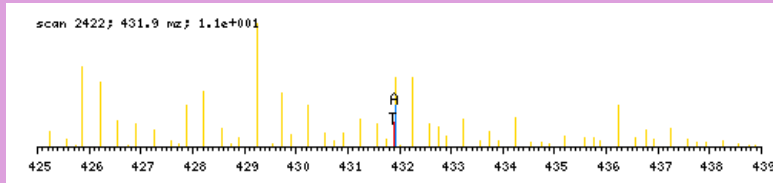

zoomed in precursor plot; T=theoretical m/z, A=acquired m/z

| b <sup>+</sup> | #  | AA # | y <sup>+</sup> | y <sup>2+</sup> |
|----------------|----|------|----------------|-----------------|
| 100.0762       | 1  | A 13 |                |                 |
| 229.1188       | 2  | E 12 | 1194.6231      | 597.8155        |
| 328.1872       | 3  | V 11 | 1065.5805      | 533.2942        |
| 385.2087       | 4  | G 10 | 966.5121       | 483.7600        |
| 513.2673       | 5  | Q 9  | 909.4906       | 455.2492        |
| 612.3357       | 6  | V 8  | 781.4321       | 391.2199        |
| 683.3728       | 7  | A 7  | 682.3636       | 341.6857        |
| 740.3943       | 8  | G 6  | 611.3265       | 306.1672        |
| 837.4470       | 9  | P 5  | 554.3051       | 277.6564        |
| 894.4685       | 10 | G 4  | 457.2523       | 229.1301        |
| 991.5212       | 11 | P 3  | 400.2308       | 200.6193        |
| 1119.5798      | 12 | Q 2  | 303.1781       | 152.0930        |
|                | 13 | R 1  | 175.1195       | 88.0637         |

N-term:+29.04

AEVLNDPESMEKR, MH+ 1585.8532, m/z 529.2892  
 H OS G26 P150811 220811-s1.02908.02908.3.dta

X-range:

-

MassTol: Y-zoom:

MassType:

AVG  MONO

Axis:

1  2

Label:

I  M  -

Ions:

a  +  2+  3+

b  +  2+  3+

c  +  2+  3+

x  +  2+  3+

y  +  2+  3+

z  +  2+  3+

hide H<sub>2</sub>O/NH<sub>3</sub>

zoom 112-122

GO

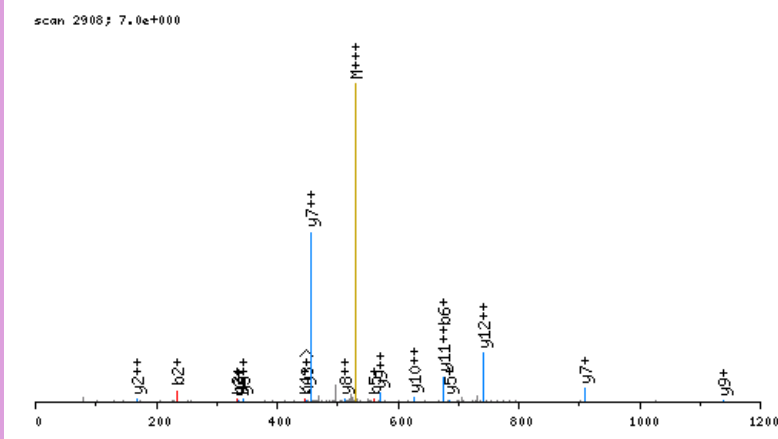

click image to zoom in; click top corners to zoom out [\[precursor±\]](#)

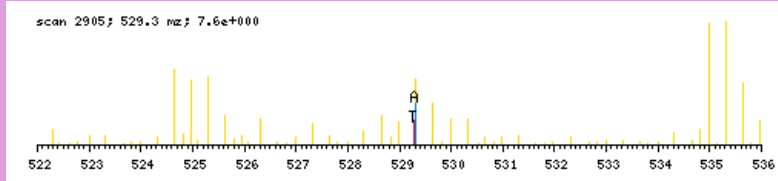

zoomed in precursor plot; T=theoretical m/z, A=acquired m/z

| b <sup>+</sup> | #  | AA # | y <sup>+</sup> | y <sup>2+</sup> |
|----------------|----|------|----------------|-----------------|
| 106.1080       | 1  | A 13 |                |                 |
| 235.1506       | 2  | E 12 | 1480.7530      | 740.8804        |
| 334.2190       | 3  | V 11 | 1351.7104      | 676.3591        |
| 447.3031       | 4  | L 10 | 1252.6420      | 626.8249        |
| 561.3460       | 5  | N 9  | 1139.5579      | 570.2829        |
| 676.3730       | 6  | D 8  | 1025.5150      | 513.2614        |
| 773.4257       | 7  | P 7  | 910.4881       | 455.7479        |
| 902.4683       | 8  | E 6  | 813.4353       | 407.2216        |
| 989.5003       | 9  | S 5  | 684.3927       | 342.7003        |
| 1120.5408      | 10 | M 4  | 597.3607       | 299.1843        |
| 1249.5834      | 11 | E 3  | 466.3202       | 233.6640        |
| 1411.7415      | 12 | K 2  | 337.2776       | 169.1427        |
|                | 13 | R 1  | 175.1195       | 88.0637         |

N-term:+35.07 K(12):+162.16

AEVSTIHLQSPGR, MH+ 1428.8023, m/z 476.9389  
 H OS G27 P150811 220811-s1.03614.03614.3.dta

X-range:

-

MassTol: Y-zoom:

MassType:

AVG  MONO

Axis:

1  2

Label:

I  M  -

Ions:

a  +  2+  3+

b  +  2+  3+

c  +  2+  3+

x  +  2+  3+

y  +  2+  3+

z  +  2+  3+

hide H<sub>2</sub>O/NH<sub>3</sub>

zoom 112-122

GO

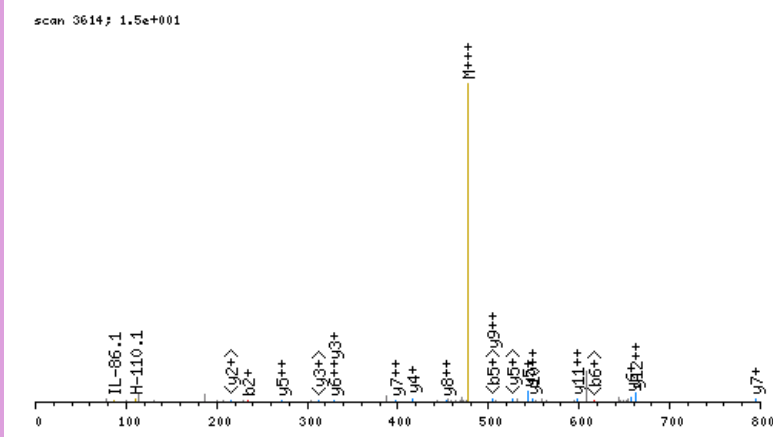

click image to zoom in; click top corners to zoom out [\[precursor±\]](#)

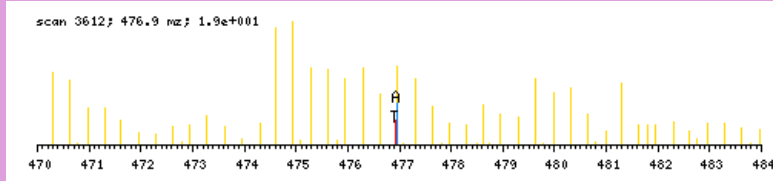

zoomed in precursor plot; T=theoretical m/z, A=acquired m/z

| b <sup>+</sup> | #  | AA # | y <sup>+</sup> | y <sup>2+</sup> |
|----------------|----|------|----------------|-----------------|
| 106.1080       | 1  | A 13 |                |                 |
| 235.1506       | 2  | E 12 | 1323.7021      | 662.3550        |
| 334.2190       | 3  | V 11 | 1194.6595      | 597.8337        |
| 421.2510       | 4  | S 10 | 1095.5911      | 548.2995        |
| 522.2987       | 5  | T 9  | 1008.5591      | 504.7834        |
| 635.3828       | 6  | I 8  | 907.5114       | 454.2596        |
| 772.4417       | 7  | H 7  | 794.4273       | 397.7176        |
| 885.5258       | 8  | L 6  | 657.3684       | 329.1881        |
| 1013.5843      | 9  | Q 5  | 544.2843       | 272.6461        |
| 1100.6164      | 10 | S 4  | 416.2258       | 208.6168        |
| 1197.6691      | 11 | P 3  | 329.1937       | 165.1008        |
| 1254.6906      | 12 | G 2  | 232.1410       | 116.5744        |
|                | 13 | R 1  | 175.1195       | 88.0637         |

N-term:+35.07

AFPQKVMPPPQAR, MH+ 1522.8568, m/z 508.2905  
 L OS G26 P150811 220811-s1.03079.03079.3.dta

scan 3079; 8.1e+000

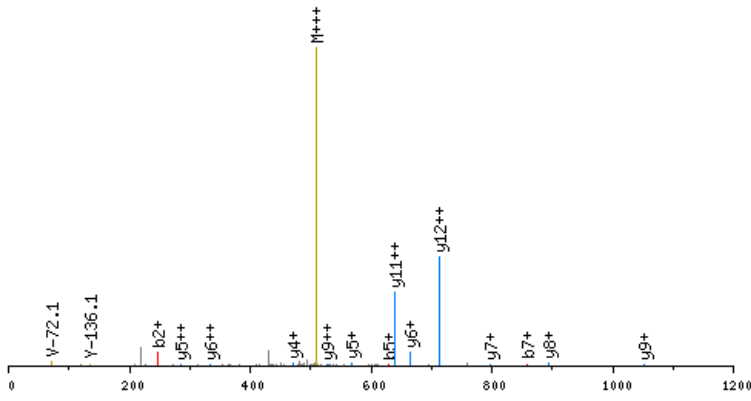

click image to zoom in; click top corners to zoom out [\[precursor±\]](#)

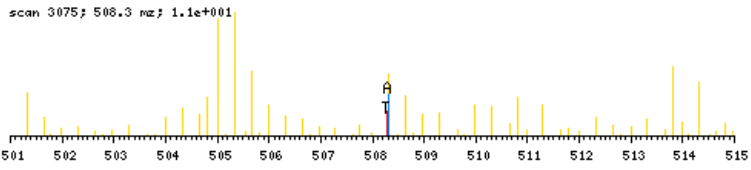

zoomed in precursor plot; T=theoretical m/z, A=acquired m/z

X-range:

-

MassTol: Y-zoom:

MassType:

AVG  MONO

Axis:

1  2

Label:

I  M  -

Ions:

a  +  2+  3+

b  +  2+  3+

c  +  2+  3+

x  +  2+  3+

y  +  2+  3+

z  +  2+  3+

hide H<sub>2</sub>O/NH<sub>3</sub>

zoom 112-122

GO

| b <sup>+</sup> | #  | AA # | y <sup>+</sup> | y <sup>2+</sup> |
|----------------|----|------|----------------|-----------------|
| 100.0762       | 1  | A 13 |                |                 |
| 247.1446       | 2  | F 12 | 1423.7884      | 712.3981        |
| 344.1974       | 3  | P 11 | 1276.7200      | 638.8639        |
| 472.2560       | 4  | Q 10 | 1179.6673      | 590.3375        |
| 628.3823       | 5  | K 9  | 1051.6087      | 526.3083        |
| 727.4507       | 6  | V 8  | 895.4824       | 448.2451        |
| 858.4912       | 7  | M 7  | 796.4140       | 398.7109        |
| 955.5439       | 8  | P 6  | 665.3735       | 333.1907        |
| 1052.5967      | 9  | P 5  | 568.3207       | 284.6643        |
| 1149.6495      | 10 | P 4  | 471.2680       | 236.1379        |
| 1277.7080      | 11 | Q 3  | 374.2152       | 187.6115        |
| 1348.7452      | 12 | A 2  | 246.1566       | 123.5822        |
|                | 13 | R 1  | 175.1195       | 88.0637         |

N-term:+29.04 K(5):+156.13

X-range:

-

MassTol: Y-zoom:

MassType:

AVG  MONO

Axis:

1  2

Label:

I  M  -

Ions:

a  +  2+  3+

b  +  2+  3+

c  +  2+  3+

x  +  2+  3+

y  +  2+  3+

z  +  2+  3+

hide H<sub>2</sub>O/NH<sub>3</sub>

zoom 112-122

GO

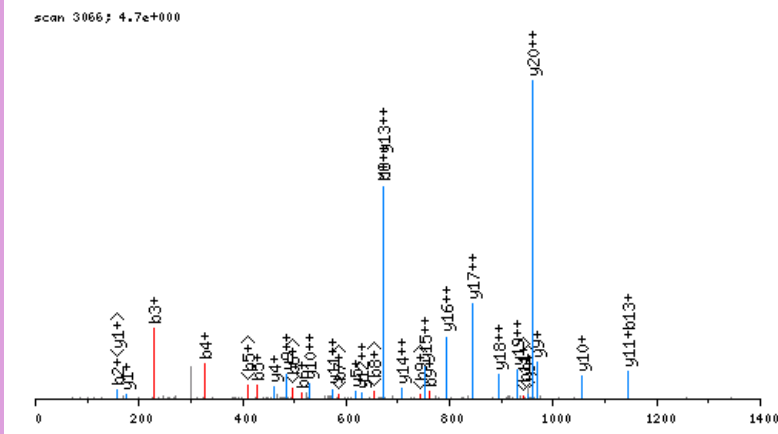

click image to zoom in; click top corners to zoom out [\[precursor±\]](#)

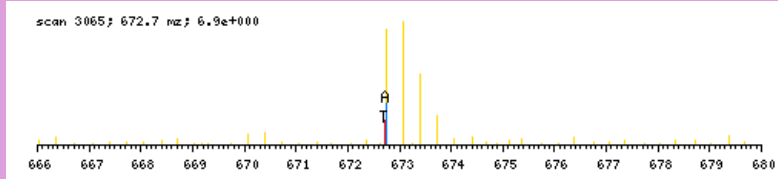

zoomed in precursor plot; T=theoretical m/z, A=acquired m/z

| b <sup>+</sup> | #  | AA # | y <sup>+</sup> | y <sup>2+</sup> |
|----------------|----|------|----------------|-----------------|
| 100.0762       | 1  | A 21 |                |                 |
| 157.0977       | 2  | G 20 | 1917.0406      | 959.0242        |
| 228.1348       | 3  | A 19 | 1860.0191      | 930.5135        |
| 327.2032       | 4  | V 18 | 1788.9820      | 894.9949        |
| 428.2509       | 5  | T 17 | 1689.9136      | 845.4607        |
| 515.2829       | 6  | S 16 | 1588.8659      | 794.9369        |
| 602.3149       | 7  | S 15 | 1501.8339      | 751.4208        |
| 673.3521       | 8  | A 14 | 1414.8018      | 707.9048        |
| 760.3841       | 9  | S 13 | 1343.7647      | 672.3863        |
| 873.4681       | 10 | L 12 | 1256.7327      | 628.8703        |
| 960.5002       | 11 | S 11 | 1143.6486      | 572.3282        |
| 1047.5322      | 12 | S 10 | 1056.6166      | 528.8122        |
| 1144.5850      | 13 | P 9  | 969.5846       | 485.2962        |
| 1215.6221      | 14 | A 8  | 872.5318       | 436.7698        |
| 1328.7061      | 15 | L 7  | 801.4947       | 401.2513        |
| 1399.7433      | 16 | A 6  | 688.4106       | 344.7092        |
| 1555.8696      | 17 | K 5  | 617.3735       | 309.1907        |
| 1612.8910      | 18 | G 4  | 461.2472       | 231.1275        |
| 1713.9387      | 19 | T 3  | 404.2258       | 202.6168        |
| 1841.9973      | 20 | Q 2  | 303.1781       | 152.0930        |
|                | 21 | R 1  | 175.1195       | 88.0637         |

N-term:+29.04 K(17):+156.13

AGDAFGDTSFLTSLTKAR, MH+ 1699.8655, m/z 567.2934  
 L OS G26 P150811 220811-s1.04784.04784.3.dta

X-range:

-

MassTol: Y-zoom:

MassType:

AVG  MONO

Axis:

1  2

Label:

I  M  -

Ions:

a  +  2+  3+

b  +  2+  3+

c  +  2+  3+

x  +  2+  3+

y  +  2+  3+

z  +  2+  3+

hide H<sub>2</sub>O/NH<sub>3</sub>

zoom 112-122

GO

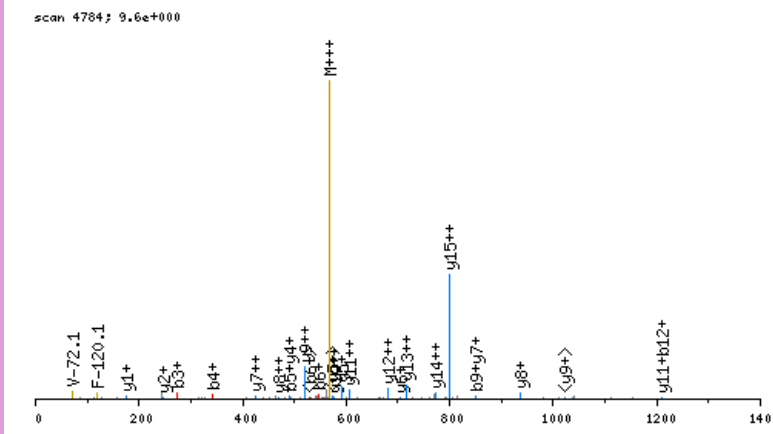

click image to zoom in; click top corners to zoom out [\[precursor±\]](#)

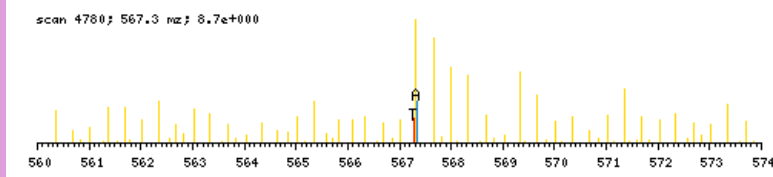

zoomed in precursor plot; T=theoretical m/z, A=acquired m/z

| b <sup>+</sup> | #  | AA # | y <sup>+</sup> | y <sup>2+</sup> |
|----------------|----|------|----------------|-----------------|
| 100.0762       | 1  | A 16 |                |                 |
| 157.0977       | 2  | G 15 | 1600.7971      | 800.9025        |
| 272.1246       | 3  | D 14 | 1543.7757      | 772.3918        |
| 343.1617       | 4  | A 13 | 1428.7487      | 714.8783        |
| 490.2301       | 5  | F 12 | 1357.7116      | 679.3597        |
| 547.2516       | 6  | G 11 | 1210.6432      | 605.8255        |
| 662.2786       | 7  | D 10 | 1153.6217      | 577.3148        |
| 763.3262       | 8  | T 9  | 1038.5948      | 519.8013        |
| 850.3583       | 9  | S 8  | 937.5471       | 469.2775        |
| 997.4267       | 10 | F 7  | 850.5151       | 425.7615        |
| 1110.5107      | 11 | L 6  | 703.4467       | 352.2273        |
| 1211.5584      | 12 | T 5  | 590.3626       | 295.6852        |
| 1298.5904      | 13 | S 4  | 489.3149       | 245.1614        |
| 1454.7167      | 14 | K 3  | 402.2829       | 201.6454        |
| 1525.7539      | 15 | A 2  | 246.1566       | 123.5822        |
|                | 16 | R 1  | 175.1195       | 88.0637         |

N-term:+29.04 K(14):+156.13



AGEEAAADSPPELPR, MH+ 1369.6599, m/z 685.3336  
 L OS G25 P150811 220811-s1.03226.03226.2.dta

X-range:

-

MassTol: Y-zoom:

MassType:

AVG  MONO

Axis:

1  2

Label:

I  M  -

Ions:

a  +  2+  3+

b  +  2+  3+

c  +  2+  3+

x  +  2+  3+

y  +  2+  3+

z  +  2+  3+

hide H<sub>2</sub>O/NH<sub>3</sub>

zoom 112-122

GO

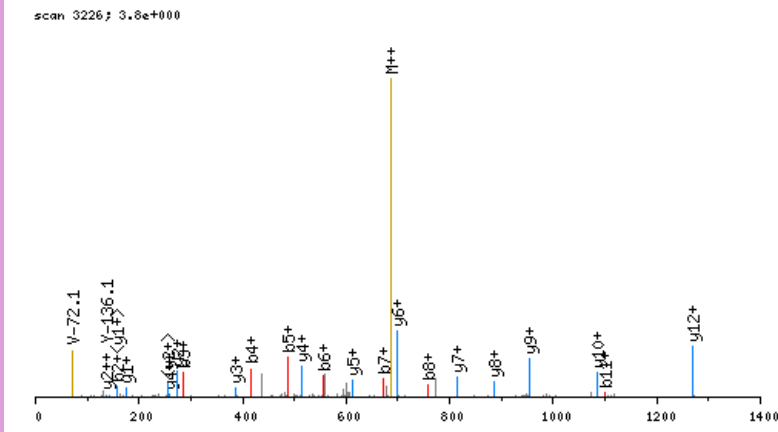

click image to zoom in; click top corners to zoom out [\[precursor±\]](#)

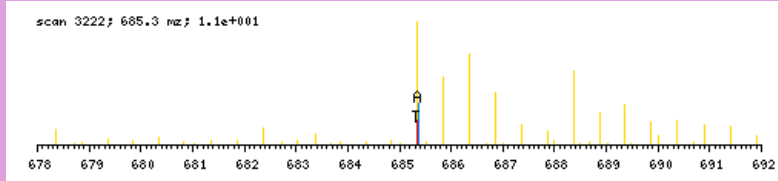

zoomed in precursor plot; T=theoretical m/z, A=acquired m/z

| b <sup>+</sup> | #  | AA # | y <sup>+</sup> | y <sup>2+</sup> |
|----------------|----|------|----------------|-----------------|
| 100.0762       | 1  | A 13 |                |                 |
| 157.0977       | 2  | G 12 | 1270.5915      | 635.7997        |
| 286.1403       | 3  | E 11 | 1213.5701      | 607.2889        |
| 415.1829       | 4  | E 10 | 1084.5275      | 542.7677        |
| 486.2200       | 5  | A 9  | 955.4849       | 478.2464        |
| 557.2571       | 6  | A 8  | 884.4478       | 442.7278        |
| 672.2840       | 7  | D 7  | 813.4107       | 407.2092        |
| 759.3161       | 8  | S 6  | 698.3837       | 349.6958        |
| 856.3688       | 9  | P 5  | 611.3517       | 306.1798        |
| 985.4114       | 10 | E 4  | 514.2989       | 257.6534        |
| 1098.4955      | 11 | L 3  | 385.2563       | 193.1321        |
| 1195.5482      | 12 | P 2  | 272.1723       | 136.5900        |
|                | 13 | R 1  | 175.1195       | 88.0637         |

N-term:+29.04

AGEEMEQFGQGV, MH+ 1465.6745, m/z 489.2297  
 L OS G25 P150811 220811-s1.04335.04335.3.dta

X-range:

-

MassTol: Y-zoom:

MassType:

AVG  MONO

Axis:

1  2

Label:

I  M  -

Ions:

a  +  2+  3+

b  +  2+  3+

c  +  2+  3+

x  +  2+  3+

y  +  2+  3+

z  +  2+  3+

hide H<sub>2</sub>O/NH<sub>3</sub>

zoom 112-122

GO

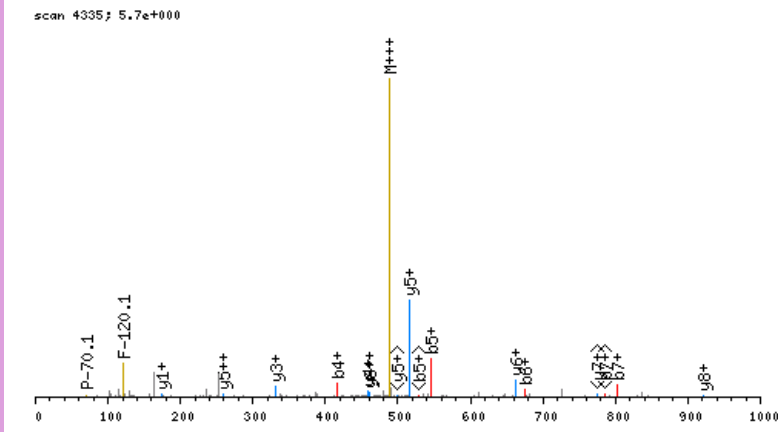

click image to zoom in; click top corners to zoom out [\[precursor±\]](#)

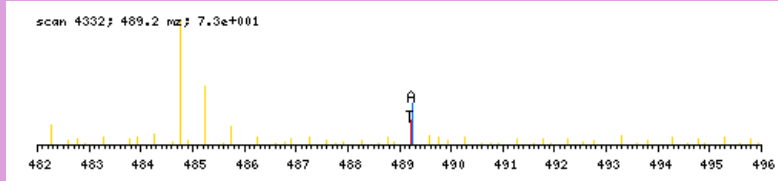

zoomed in precursor plot; T=theoretical m/z, A=acquired m/z

| b <sup>+</sup> | #  | AA # | y <sup>+</sup> | y <sup>2+</sup> |
|----------------|----|------|----------------|-----------------|
| 100.0762       | 1  | A 13 |                |                 |
| 157.0977       | 2  | G 12 | 1366.6061      | 683.8070        |
| 286.1403       | 3  | E 11 | 1309.5847      | 655.2963        |
| 415.1829       | 4  | E 10 | 1180.5421      | 590.7750        |
| 546.2233       | 5  | M 9  | 1051.4995      | 526.2537        |
| 675.2659       | 6  | E 8  | 920.4590       | 460.7334        |
| 803.3245       | 7  | Q 7  | 791.4164       | 396.2121        |
| 950.3929       | 8  | F 6  | 663.3578       | 332.1828        |
| 1007.4144      | 9  | G 5  | 516.2894       | 258.6486        |
| 1135.4730      | 10 | Q 4  | 459.2680       | 230.1379        |
| 1192.4944      | 11 | G 3  | 331.2094       | 166.1086        |
| 1291.5629      | 12 | V 2  | 274.1879       | 137.5979        |
|                | 13 | R 1  | 175.1195       | 88.0637         |

N-term:+29.04

AGFAGDDAPR, MH+ 1010.5119, m/z 505.7596  
 H OS G25 P150811 220811-s1.02334.02334.2.dta

X-range:

-

MassTol: Y-zoom:

MassType:

AVG  MONO

Axis:

1  2

Label:

I  M  -

Ions:

a  +  2+  3+

b  +  2+  3+

c  +  2+  3+

x  +  2+  3+

y  +  2+  3+

z  +  2+  3+

hide H<sub>2</sub>O/NH<sub>3</sub>

zoom 112-122

GO

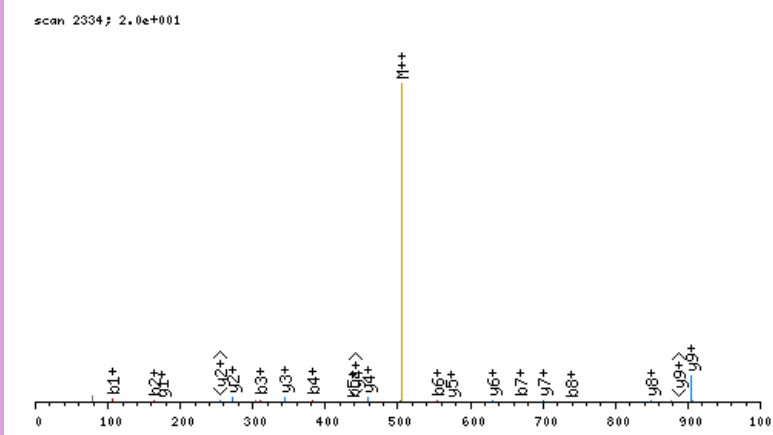

click image to zoom in; click top corners to zoom out [\[precursor±\]](#)

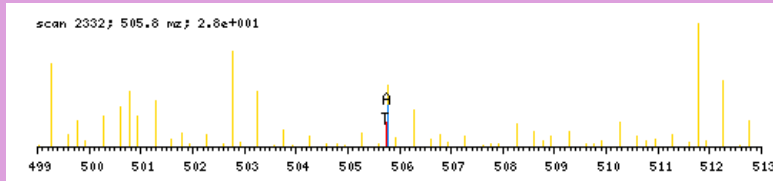

zoomed in precursor plot; T=theoretical m/z, A=acquired m/z

| b <sup>+</sup> | #  | AA | #  | y <sup>+</sup> | y <sup>2+</sup> |
|----------------|----|----|----|----------------|-----------------|
| 106.1080       | 1  | A  | 10 |                |                 |
| 163.1295       | 2  | G  | 9  | 905.4117       | 453.2098        |
| 310.1979       | 3  | F  | 8  | 848.3903       | 424.6990        |
| 381.2350       | 4  | A  | 7  | 701.3218       | 351.1648        |
| 438.2565       | 5  | G  | 6  | 630.2847       | 315.6463        |
| 553.2834       | 6  | D  | 5  | 573.2633       | 287.1355        |
| 668.3104       | 7  | D  | 4  | 458.2363       | 229.6221        |
| 739.3475       | 8  | A  | 3  | 343.2094       | 172.1086        |
| 836.4002       | 9  | P  | 2  | 272.1723       | 136.5900        |
|                | 10 | R  | 1  | 175.1195       | 88.0637         |

N-term: +35.07

AGGEAGVTLGQPHLSR, MH+ 1577.8400, m/z 526.6182  
 L OS G25 P150811 220811-s1.04778.04778.3.dta

X-range:

-

MassTol: Y-zoom:

MassType:

AVG  MONO

Axis:

1  2

Label:

I  M  -

Ions:

a  +  2+  3+

b  +  2+  3+

c  +  2+  3+

x  +  2+  3+

y  +  2+  3+

z  +  2+  3+

hide H<sub>2</sub>O/NH<sub>3</sub>

zoom 112-122

GO

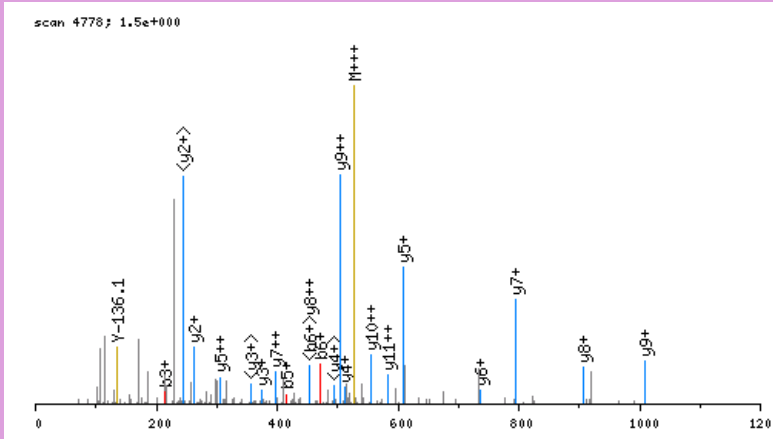

click image to zoom in; click top corners to zoom out [\[precursor±\]](#)

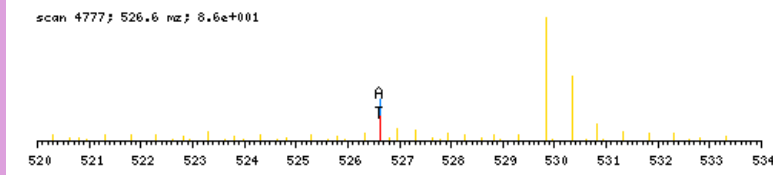

zoomed in precursor plot; T=theoretical m/z, A=acquired m/z

| b <sup>+</sup> | #  | AA | #  | y <sup>+</sup> | y <sup>2+</sup> |
|----------------|----|----|----|----------------|-----------------|
| 100.0762       | 1  | A  | 16 |                |                 |
| 157.0977       | 2  | G  | 15 | 1478.7716      | 739.8897        |
| 214.1191       | 3  | G  | 14 | 1421.7501      | 711.3790        |
| 343.1617       | 4  | E  | 13 | 1364.7286      | 682.8682        |
| 414.1988       | 5  | A  | 12 | 1235.6860      | 618.3469        |
| 471.2203       | 6  | G  | 11 | 1164.6489      | 582.8284        |
| 570.2887       | 7  | V  | 10 | 1107.6275      | 554.3176        |
| 671.3364       | 8  | T  | 9  | 1008.5591      | 504.7834        |
| 784.4205       | 9  | L  | 8  | 907.5114       | 454.2596        |
| 841.4419       | 10 | G  | 7  | 794.4273       | 397.7176        |
| 969.5005       | 11 | Q  | 6  | 737.4058       | 369.2068        |
| 1066.5533      | 12 | P  | 5  | 609.3473       | 305.1775        |
| 1203.6122      | 13 | H  | 4  | 512.2945       | 256.6512        |
| 1316.6962      | 14 | L  | 3  | 375.2356       | 188.1217        |
| 1403.7283      | 15 | S  | 2  | 262.1515       | 131.5797        |
|                | 16 | R  | 1  | 175.1195       | 88.0637         |

N-term:+29.04

AGKGGPTPQEAIQR, MH+ 1465.8127, m/z 489.2758  
 L OS G27 P150811 220811-s1.02215.02215.3.dta

scan 2215; 1.1e+001

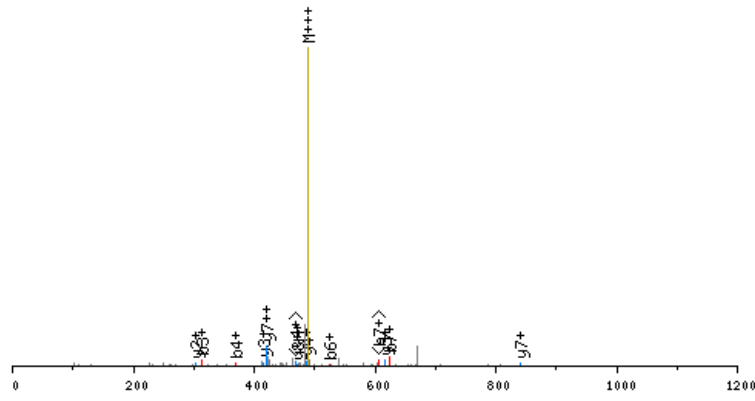

click image to zoom in; click top corners to zoom out [\[precursor±\]](#)

scan 2212; 489.3 m/z; 1.5e+001

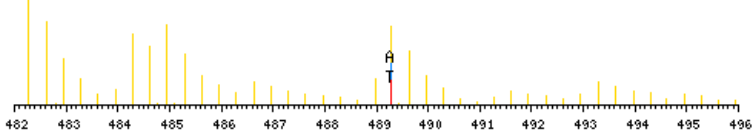

zoomed in precursor plot; T=theoretical m/z, A=acquired m/z

X-range:

-

MassTol: Y-zoom:

MassType:

AVG  MONO

Axis:

1  2

Label:

I  M  -

Ions:

a  +  2+  3+

b  +  2+  3+

c  +  2+  3+

x  +  2+  3+

y  +  2+  3+

z  +  2+  3+

hide H<sub>2</sub>O/NH<sub>3</sub>

zoom 112-122

GO

| b <sup>+</sup> | #  | AA # | y <sup>+</sup> | y <sup>2+</sup> |
|----------------|----|------|----------------|-----------------|
| 100.0762       | 1  | A 14 |                |                 |
| 157.0977       | 2  | G 13 | 1366.7443      | 683.8761        |
| 313.2240       | 3  | K 12 | 1309.7229      | 655.3653        |
| 370.2454       | 4  | G 11 | 1153.5966      | 577.3022        |
| 427.2669       | 5  | G 10 | 1096.5751      | 548.7915        |
| 524.3197       | 6  | P 9  | 1039.5536      | 520.2807        |
| 625.3673       | 7  | T 8  | 942.5009       | 471.7543        |
| 722.4201       | 8  | P 7  | 841.4532       | 421.2305        |
| 850.4787       | 9  | Q 6  | 744.4004       | 372.7041        |
| 979.5213       | 10 | E 5  | 616.3418       | 308.6748        |
| 1050.5584      | 11 | A 4  | 487.2993       | 244.1535        |
| 1163.6425      | 12 | I 3  | 416.2621       | 208.6350        |
| 1291.7010      | 13 | Q 2  | 303.1781       | 152.0930        |
|                | 14 | R 1  | 175.1195       | 88.0637         |

N-term:+29.04 K(3):+156.13

AGLHGDQGAPGVPVGPAGPR, MH+ 1744.9307, m/z 582.3151  
 H OS G27 P150811 220811-s1.02950.02950.3.dta

X-range:

-

MassTol: Y-zoom:

MassType:

AVG  MONO

Axis:

1  2

Label:

I  M  -

Ions:

a  +  2+  3+

b  +  2+  3+

c  +  2+  3+

x  +  2+  3+

y  +  2+  3+

z  +  2+  3+

hide H<sub>2</sub>O/NH<sub>3</sub>

zoom 112-122

GO

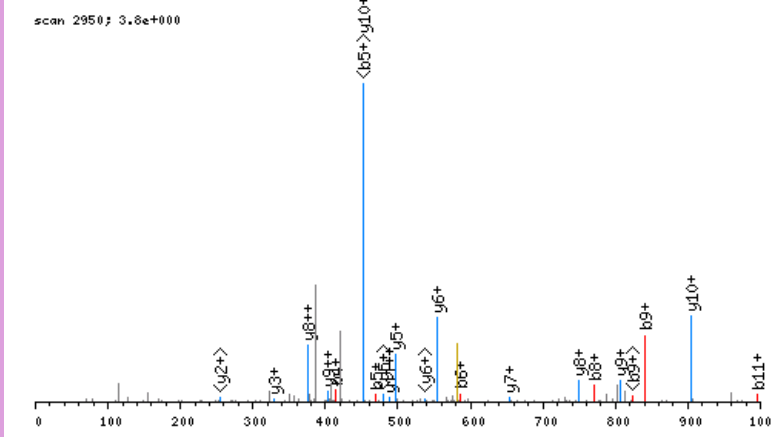

click image to zoom in; click top corners to zoom out [\[precursor±\]](#)

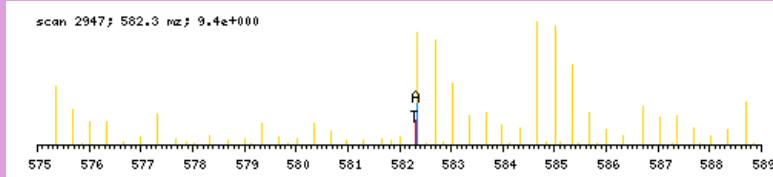

zoomed in precursor plot; T=theoretical m/z, A=acquired m/z

| b <sup>+</sup> | #  | AA # | y <sup>+</sup> | y <sup>2+</sup> |
|----------------|----|------|----------------|-----------------|
| 106.1080       | 1  | A 19 |                |                 |
| 163.1295       | 2  | G 18 | 1639.8305      | 820.4192        |
| 276.2135       | 3  | L 17 | 1582.8090      | 791.9084        |
| 413.2725       | 4  | H 16 | 1469.7249      | 735.3664        |
| 470.2939       | 5  | G 15 | 1332.6660      | 666.8369        |
| 585.3209       | 6  | D 14 | 1275.6446      | 638.3262        |
| 713.3794       | 7  | Q 13 | 1160.6176      | 580.8127        |
| 770.4009       | 8  | G 12 | 1032.5591      | 516.7834        |
| 841.4380       | 9  | A 11 | 975.5376       | 488.2727        |
| 938.4908       | 10 | P 10 | 904.5005       | 452.7542        |
| 995.5122       | 11 | G 9  | 807.4477       | 404.2278        |
| 1092.5650      | 12 | P 8  | 750.4262       | 375.7170        |
| 1191.6334      | 13 | V 7  | 653.3735       | 327.1907        |
| 1248.6549      | 14 | G 6  | 554.3051       | 277.6564        |
| 1345.7076      | 15 | P 5  | 497.2836       | 249.1457        |
| 1416.7448      | 16 | A 4  | 400.2308       | 200.6193        |
| 1473.7662      | 17 | G 3  | 329.1937       | 165.1008        |
| 1570.8190      | 18 | P 2  | 272.1723       | 136.5900        |
|                | 19 | R 1  | 175.1195       | 88.0637         |

N-term:+35.07

AGSSSGVQASAGGLAADASR, MH+ 1954.9642, m/z 652.3263  
 H OS G24 P150811 220811-s1.02798.02798.3.dta

scan 2798; 1.1e+000

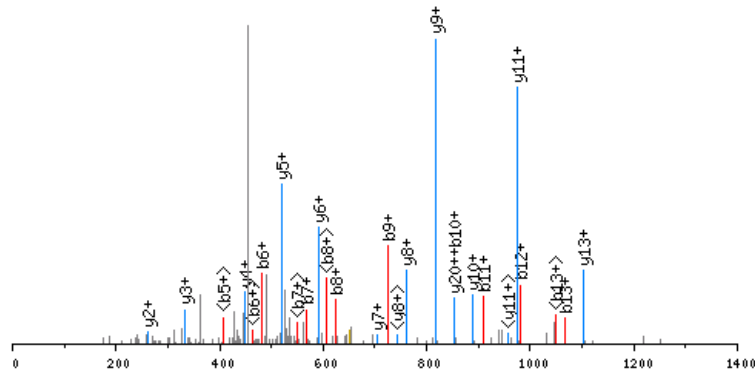

click image to zoom in; click top corners to zoom out [precursor±]

scan 2796; 652.3 m/z; 1.9e+000

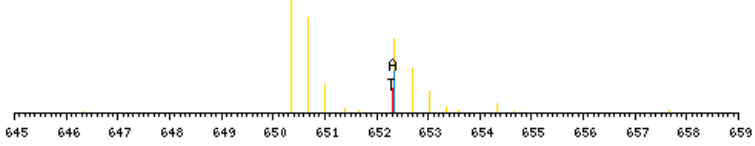

zoomed in precursor plot; T=theoretical m/z, A=acquired m/z

X-range:

0 - 0

MassTol: Y-zoom:

0. 1.

MassType:

AVG  MONO

Axis:

1  2

Label:

I  M  -

Ions:

a  +  2+  3+

b  +  2+  3+

c  +  2+  3+

x  +  2+  3+

y  +  2+  3+

z  +  2+  3+

hide H<sub>2</sub>O/NH<sub>3</sub>

zoom 112-122

GO

| b <sup>+</sup> | #  | AA # | y <sup>+</sup> | y <sup>2+</sup> |
|----------------|----|------|----------------|-----------------|
| 106.1080       | 1  | A 23 |                |                 |
| 163.1295       | 2  | G 22 | 1849.8640      | 925.4359        |
| 250.1615       | 3  | S 21 | 1792.8426      | 896.9252        |
| 337.1935       | 4  | S 20 | 1705.8105      | 853.4092        |
| 424.2256       | 5  | S 19 | 1618.7785      | 809.8932        |
| 481.2470       | 6  | G 18 | 1531.7465      | 766.3771        |
| 568.2791       | 7  | S 17 | 1474.7250      | 737.8664        |
| 625.3005       | 8  | G 16 | 1387.6930      | 694.3504        |
| 724.3689       | 9  | V 15 | 1330.6715      | 665.8397        |
| 852.4275       | 10 | Q 14 | 1231.6031      | 616.3055        |
| 909.4490       | 11 | G 13 | 1103.5445      | 552.2762        |
| 980.4861       | 12 | A 12 | 1046.5231      | 523.7654        |
| 1067.5181      | 13 | S 11 | 975.4859       | 488.2469        |
| 1138.5552      | 14 | A 10 | 888.4539       | 444.7309        |
| 1195.5767      | 15 | G 9  | 817.4168       | 409.2123        |
| 1252.5982      | 16 | G 8  | 760.3953       | 380.7016        |
| 1365.6822      | 17 | L 7  | 703.3739       | 352.1909        |
| 1436.7193      | 18 | A 6  | 590.2898       | 295.6488        |
| 1507.7564      | 19 | A 5  | 519.2527       | 260.1303        |
| 1622.7834      | 20 | D 4  | 448.2156       | 224.6117        |
| 1693.8205      | 21 | A 3  | 333.1886       | 167.0982        |
| 1780.8525      | 22 | S 2  | 262.1515       | 131.5797        |
|                | 23 | R 1  | 175.1195       | 88.0637         |

N-term:+35.07

AGVGEFEAGISKNGQTR, MH+ 1788.9880, m/z 597.0009  
 H OS G26 P150811 220811-s1.03312.03312.3.dta

X-range:

-

MassTol: Y-zoom:

MassType:

AVG  MONO

Axis:

1  2

Label:

I  M  -

Ions:

a  +  2+  3+

b  +  2+  3+

c  +  2+  3+

x  +  2+  3+

y  +  2+  3+

z  +  2+  3+

hide H<sub>2</sub>O/NH<sub>3</sub>

zoom 112-122

GO

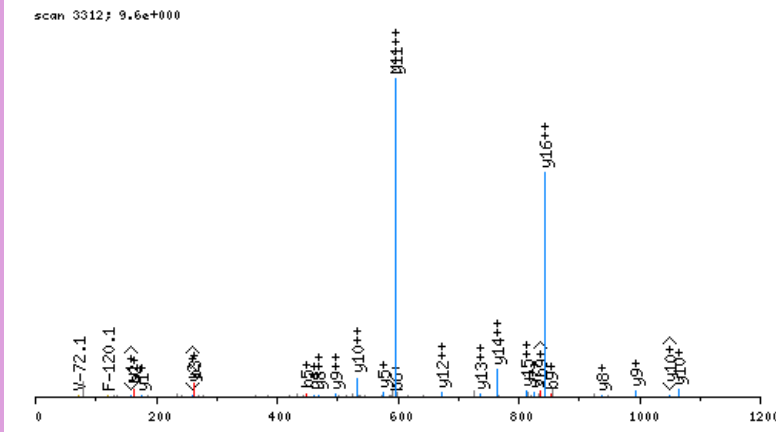

click image to zoom in; click top corners to zoom out [\[precursor±\]](#)

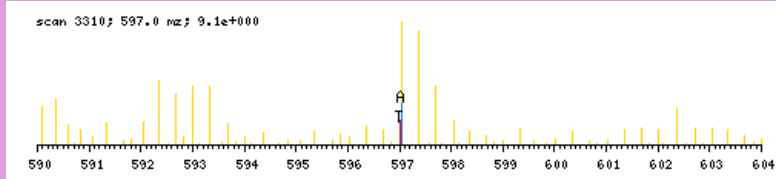

zoomed in precursor plot; T=theoretical m/z, A=acquired m/z

| b <sup>+</sup> | #  | AA | #  | y <sup>+</sup> | y <sup>2+</sup> |
|----------------|----|----|----|----------------|-----------------|
| 106.1080       | 1  | A  | 17 |                |                 |
| 163.1295       | 2  | G  | 16 | 1683.8879      | 842.4478        |
| 262.1979       | 3  | V  | 15 | 1626.8664      | 813.9371        |
| 319.2194       | 4  | G  | 14 | 1527.7980      | 764.4029        |
| 448.2619       | 5  | E  | 13 | 1470.7765      | 735.8922        |
| 595.3304       | 6  | F  | 12 | 1341.7339      | 671.3709        |
| 724.3730       | 7  | E  | 11 | 1194.6655      | 597.8367        |
| 795.4101       | 8  | A  | 10 | 1065.6229      | 533.3154        |
| 852.4315       | 9  | G  | 9  | 994.5858       | 497.7968        |
| 965.5156       | 10 | I  | 8  | 937.5643       | 469.2861        |
| 1052.5476      | 11 | S  | 7  | 824.4803       | 412.7441        |
| 1214.7057      | 12 | K  | 6  | 737.4482       | 369.2280        |
| 1328.7487      | 13 | N  | 5  | 575.2901       | 288.1490        |
| 1385.7701      | 14 | G  | 4  | 461.2472       | 231.1275        |
| 1513.8287      | 15 | Q  | 3  | 404.2258       | 202.6168        |
| 1614.8764      | 16 | T  | 2  | 276.1672       | 138.5875        |
|                | 17 | R  | 1  | 175.1195       | 88.0637         |

N-term:+35.07 K(12):+162.16



AGVLDKEGPGAEELR, MH+ 1596.8597, m/z 532.9581  
 L OS G26 P150811 220811-s1.03207.03207.3.dta

X-range:

-

MassTol: Y-zoom:

MassType:

AVG  MONO

Axis:

1  2

Label:

I  M  -

Ions:

a  +  2+  3+

b  +  2+  3+

c  +  2+  3+

x  +  2+  3+

y  +  2+  3+

z  +  2+  3+

hide H<sub>2</sub>O/NH<sub>3</sub>

zoom 112-122

GO

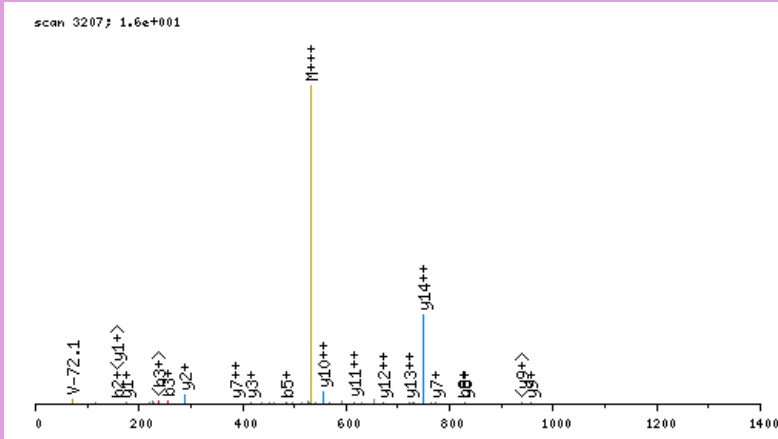

click image to zoom in; click top corners to zoom out [\[precursor±\]](#)

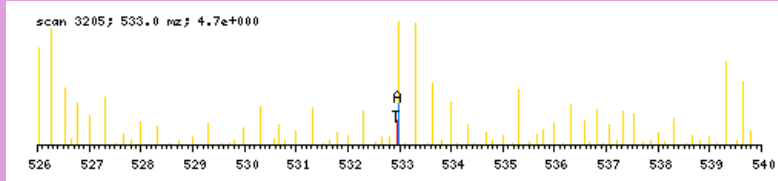

zoomed in precursor plot; T=theoretical m/z, A=acquired m/z

| b <sup>+</sup> | #  | AA # | y <sup>+</sup> | y <sup>2+</sup> |
|----------------|----|------|----------------|-----------------|
| 100.0762       | 1  | A 15 |                |                 |
| 157.0977       | 2  | G 14 | 1497.7913      | 749.3996        |
| 256.1661       | 3  | V 13 | 1440.7699      | 720.8888        |
| 369.2502       | 4  | L 12 | 1341.7015      | 671.3546        |
| 484.2771       | 5  | D 11 | 1228.6174      | 614.8126        |
| 640.4034       | 6  | K 10 | 1113.5904      | 557.2991        |
| 769.4460       | 7  | E 9  | 957.4641       | 479.2360        |
| 826.4675       | 8  | G 8  | 828.4216       | 414.7147        |
| 923.5202       | 9  | P 7  | 771.4001       | 386.2040        |
| 980.5417       | 10 | G 6  | 674.3473       | 337.6776        |
| 1051.5788      | 11 | A 5  | 617.3259       | 309.1668        |
| 1180.6214      | 12 | E 4  | 546.2888       | 273.6483        |
| 1309.6640      | 13 | E 3  | 417.2462       | 209.1270        |
| 1422.7480      | 14 | L 2  | 288.2036       | 144.6057        |
|                | 15 | R 1  | 175.1195       | 88.0637         |

N-term:+29.04 K(6):+156.13

AGVSDGSEVAKAQAAPGGASPTIFSR, MH+ 2643.4107, m/z 661.6081  
 L OS G27 P150811 220811-s1.04860.04860.4.dta

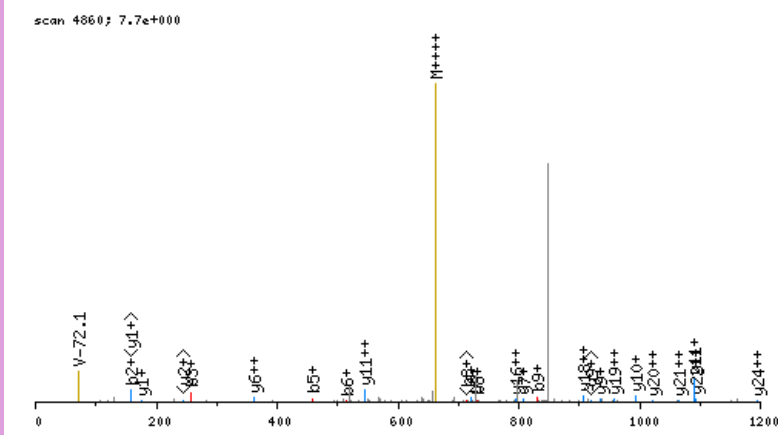

click image to zoom in; click top corners to zoom out [\[precursor±\]](#)

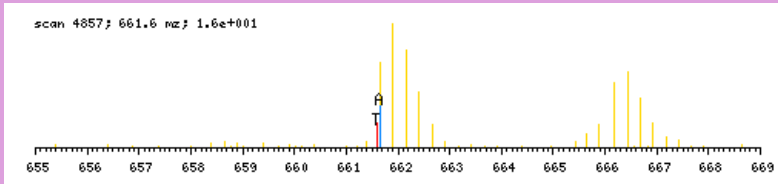

| b <sup>+</sup> | #  | AA | #  | y <sup>+</sup> | y <sup>2+</sup> |
|----------------|----|----|----|----------------|-----------------|
| 100.0762       | 1  | A  | 27 |                |                 |
| 157.0977       | 2  | G  | 26 | 2544.3423      | 1272.6750       |
| 256.1661       | 3  | V  | 25 | 2487.3208      | 1244.1643       |
| 343.1981       | 4  | S  | 24 | 2388.2524      | 1194.6301       |
| 458.2251       | 5  | D  | 23 | 2301.2204      | 1151.1141       |
| 515.2465       | 6  | G  | 22 | 2186.1934      | 1093.6006       |
| 602.2786       | 7  | S  | 21 | 2129.1720      | 1065.0899       |
| 731.3211       | 8  | E  | 20 | 2042.1399      | 1021.5739       |
| 830.3896       | 9  | V  | 19 | 1913.0973      | 957.0526        |
| 901.4267       | 10 | A  | 18 | 1814.0289      | 907.5184        |
| 1057.5530      | 11 | K  | 17 | 1742.9918      | 871.9998        |
| 1128.5901      | 12 | A  | 16 | 1586.8655      | 793.9367        |
| 1256.6487      | 13 | Q  | 15 | 1515.8284      | 758.4181        |
| 1412.7750      | 14 | K  | 14 | 1387.7698      | 694.3888        |
| 1483.8121      | 15 | A  | 13 | 1231.6435      | 616.3257        |
| 1554.8492      | 16 | A  | 12 | 1160.6064      | 580.8071        |
| 1651.9020      | 17 | P  | 11 | 1089.5693      | 545.2886        |
| 1708.9234      | 18 | G  | 10 | 992.5165       | 496.7622        |
| 1765.9449      | 19 | G  | 9  | 935.4951       | 468.2514        |
| 1836.9820      | 20 | A  | 8  | 878.4736       | 439.7407        |
| 1924.0140      | 21 | S  | 7  | 807.4365       | 404.2222        |
| 2021.0668      | 22 | P  | 6  | 720.4044       | 360.7061        |
| 2122.1145      | 23 | T  | 5  | 623.3517       | 312.1798        |
| 2235.1985      | 24 | I  | 4  | 522.3040       | 261.6559        |
| 2382.2669      | 25 | F  | 3  | 409.2199       | 205.1139        |
| 2469.2990      | 26 | S  | 2  | 262.1515       | 131.5797        |
|                | 27 | R  | 1  | 175.1195       | 88.0637         |

N-term: +29.04 K(11): +156.13  
 K(14): +156.13

X-range:

-

MassTol: Y-zoom:

MassType:

AVG  MONO

Axis:

1  2

Label:

I  M  -

Ions:

a  +  2+  3+

b  +  2+  3+

c  +  2+  3+

x  +  2+  3+

y  +  2+  3+

z  +  2+  3+

hide H<sub>2</sub>O/NH<sub>3</sub>

zoom 112-122

GO

X-range:

-

MassTol: Y-zoom:

MassType:

AVG  MONO

Axis:

1  2

Label:

I  M  -

Ions:

a  +  2+  3+

b  +  2+  3+

c  +  2+  3+

x  +  2+  3+

y  +  2+  3+

z  +  2+  3+

hide H<sub>2</sub>O/NH<sub>3</sub>

zoom 112-122

GO

scan 7974; 3.0e+001

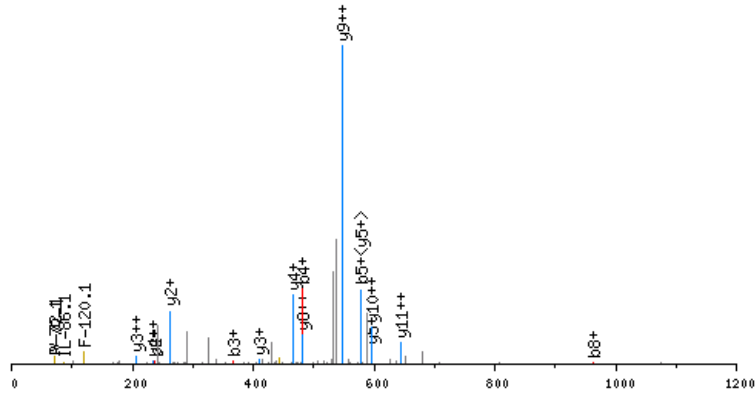

click image to zoom in; click top corners to zoom out [\[precursor±\]](#)

scan 7973; 443.0 m/z; 2.0e+002

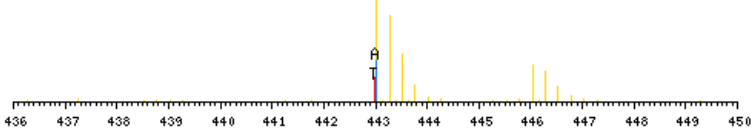

zoomed in precursor plot; T=theoretical m/z, A=acquired m/z

| b <sup>+</sup> | #  | AA # | y <sup>+</sup> | y <sup>2+</sup> |
|----------------|----|------|----------------|-----------------|
| 100.0762       | 1  | A 15 |                |                 |
| 237.1351       | 2  | H 14 | 1669.8550      | 835.4314        |
| 366.1777       | 3  | E 13 | 1532.7961      | 766.9020        |
| 481.2047       | 4  | D 12 | 1403.7535      | 702.3807        |
| 578.2574       | 5  | P 11 | 1288.7265      | 644.8672        |
| 677.3258       | 6  | V 10 | 1191.6738      | 596.3408        |
| 806.3684       | 7  | E 9  | 1092.6054      | 546.8066        |
| 962.4947       | 8  | K 8  | 963.5628       | 482.2853        |
| 1061.5631      | 9  | V 7  | 807.4365       | 404.2222        |
| 1174.6472      | 10 | I 6  | 708.3681       | 354.6879        |
| 1303.6898      | 11 | E 5  | 595.2840       | 298.1459        |
| 1360.7113      | 12 | G 4  | 466.2414       | 233.6246        |
| 1507.7797      | 13 | F 3  | 409.2199       | 205.1139        |
| 1594.8117      | 14 | S 2  | 262.1515       | 131.5797        |
|                | 15 | R 1  | 175.1195       | 88.0637         |

N-term:+29.04 K(8):+156.13

AHGSVVKSEDYAFPTYADR, MH+ 2169.0617, m/z 543.0209  
 L OS G28 P150811 220811-s1.04857.04857.4.dta

X-range:

-

MassTol: Y-zoom:

MassType:

AVG  MONO

Axis:

1  2

Label:

I  M  -

Ions:

a  +  2+  3+

b  +  2+  3+

c  +  2+  3+

x  +  2+  3+

y  +  2+  3+

z  +  2+  3+

hide H<sub>2</sub>O/NH<sub>3</sub>

zoom 112-122

GO

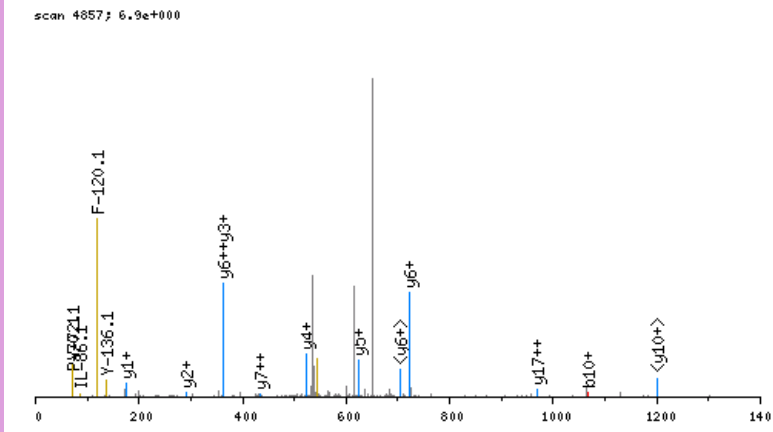

click image to zoom in; click top corners to zoom out [precursor±]

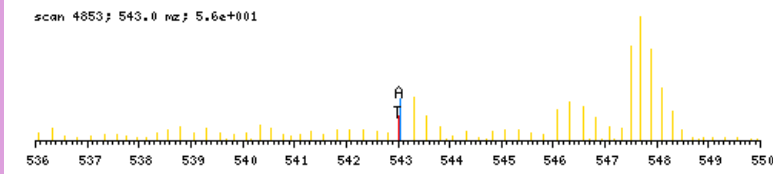

zoomed in precursor plot; T=theoretical m/z, A=acquired m/z

| b <sup>+</sup> | #  | AA | #  | y <sup>+</sup> | y <sup>2+</sup> |
|----------------|----|----|----|----------------|-----------------|
| 100.0762       | 1  | A  | 19 |                |                 |
| 237.1351       | 2  | H  | 18 | 2069.9933      | 1035.5006       |
| 294.1566       | 3  | G  | 17 | 1932.9344      | 966.9711        |
| 381.1886       | 4  | S  | 16 | 1875.9129      | 938.4604        |
| 480.2570       | 5  | V  | 15 | 1788.8809      | 894.9444        |
| 579.3254       | 6  | V  | 14 | 1689.8125      | 845.4101        |
| 735.4517       | 7  | K  | 13 | 1590.7440      | 795.8759        |
| 822.4838       | 8  | S  | 12 | 1434.6177      | 717.8128        |
| 951.5264       | 9  | E  | 11 | 1347.5857      | 674.2968        |
| 1066.5533      | 10 | D  | 10 | 1218.5431      | 609.7755        |
| 1229.6166      | 11 | Y  | 9  | 1103.5162      | 552.2620        |
| 1300.6538      | 12 | A  | 8  | 940.4529       | 470.7303        |
| 1447.7222      | 13 | F  | 7  | 869.4157       | 435.2118        |
| 1544.7749      | 14 | P  | 6  | 722.3473       | 361.6776        |
| 1645.8226      | 15 | T  | 5  | 625.2946       | 313.1512        |
| 1808.8859      | 16 | Y  | 4  | 524.2469       | 262.6274        |
| 1879.9231      | 17 | A  | 3  | 361.1836       | 181.0957        |
| 1994.9500      | 18 | D  | 2  | 290.1464       | 145.5771        |
|                | 19 | R  | 1  | 175.1195       | 88.0637         |

N-term:+29.04 K(7):+156.13

AHGSVVKSEDYAFPTYADRR, MH+ 2325.1628, m/z 582.0462  
 L OS G28 P150811 220811-s1.04341.04341.4.dta

X-range:

-

MassTol: Y-zoom:

MassType:

AVG  MONO

Axis:

1  2

Label:

I  M  -

Ions:

a  +  2+  3+

b  +  2+  3+

c  +  2+  3+

x  +  2+  3+

y  +  2+  3+

z  +  2+  3+

hide H<sub>2</sub>O/NH<sub>3</sub>

zoom 112-122

GO

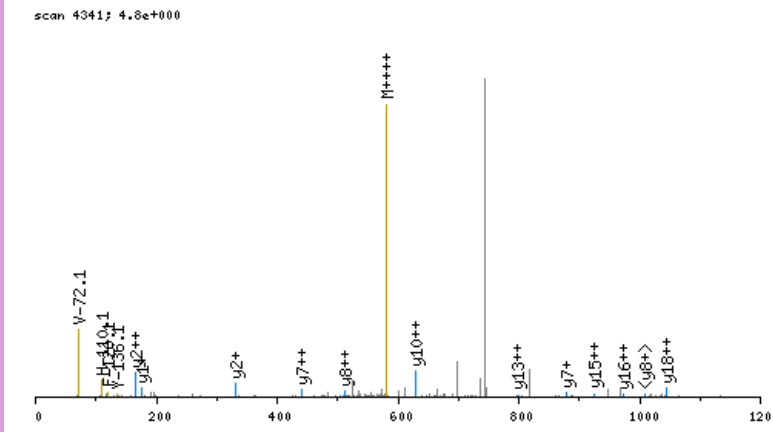

click image to zoom in; click top corners to zoom out [\[precursor±\]](#)

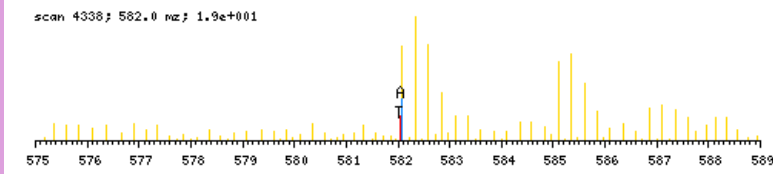

zoomed in precursor plot; T=theoretical m/z, A=acquired m/z

| b <sup>+</sup> | #  | AA | #  | y <sup>+</sup> | y <sup>2+</sup> |
|----------------|----|----|----|----------------|-----------------|
| 100.0762       | 1  | A  | 20 |                |                 |
| 237.1351       | 2  | H  | 19 | 2226.0944      | 1113.5511       |
| 294.1566       | 3  | G  | 18 | 2089.0355      | 1045.0217       |
| 381.1886       | 4  | S  | 17 | 2032.0140      | 1016.5109       |
| 480.2570       | 5  | V  | 16 | 1944.9820      | 972.9949        |
| 579.3254       | 6  | V  | 15 | 1845.9136      | 923.4607        |
| 735.4517       | 7  | K  | 14 | 1746.8452      | 873.9265        |
| 822.4838       | 8  | S  | 13 | 1590.7189      | 795.8633        |
| 951.5264       | 9  | E  | 12 | 1503.6868      | 752.3473        |
| 1066.5533      | 10 | D  | 11 | 1374.6442      | 687.8260        |
| 1229.6166      | 11 | Y  | 10 | 1259.6173      | 630.3126        |
| 1300.6538      | 12 | A  | 9  | 1096.5540      | 548.7809        |
| 1447.7222      | 13 | F  | 8  | 1025.5169      | 513.2623        |
| 1544.7749      | 14 | P  | 7  | 878.4484       | 439.7281        |
| 1645.8226      | 15 | T  | 6  | 781.3957       | 391.2018        |
| 1808.8859      | 16 | Y  | 5  | 680.3480       | 340.6779        |
| 1879.9231      | 17 | A  | 4  | 517.2847       | 259.1462        |
| 1994.9500      | 18 | D  | 3  | 446.2476       | 223.6277        |
| 2151.0511      | 19 | R  | 2  | 331.2206       | 166.1142        |
|                | 20 | R  | 1  | 175.1195       | 88.0637         |

N-term:+29.04 K(7):+156.13

AHLTGDTIIQGSATSLR, MH+ 1768.9557, m/z 590.3234  
 L OS G27 P150811 220811-s1.04980.04980.3.dta

scan 4980; 2.2e+000

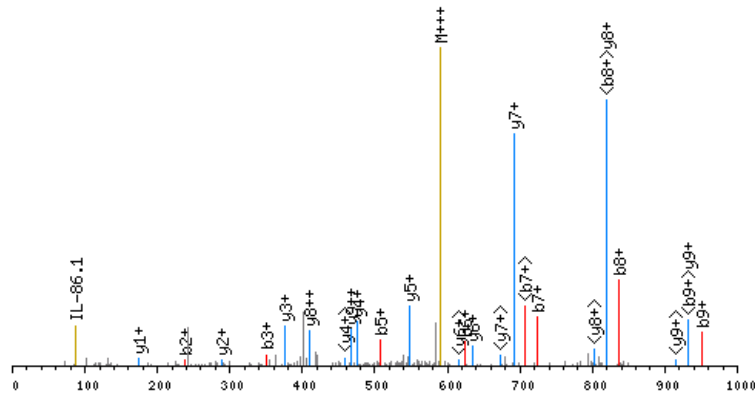

click image to zoom in; click top corners to zoom out [\[precursor±\]](#)

scan 4977; 590.3 m/z; 7.1e+000

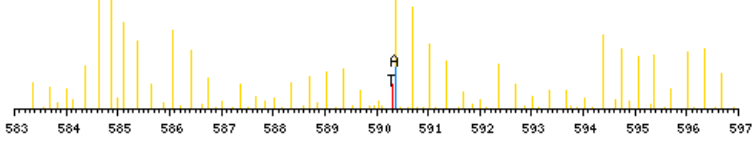

zoomed in precursor plot; T=theoretical m/z, A=acquired m/z

X-range:

-

MassTol: Y-zoom:

MassType:

AVG  MONO

Axis:

1  2

Label:

I  M  -

Ions:

a  +  2+  3+

b  +  2+  3+

c  +  2+  3+

x  +  2+  3+

y  +  2+  3+

z  +  2+  3+

hide H<sub>2</sub>O/NH<sub>3</sub>

zoom 112-122

GO

| b <sup>+</sup> | #  | AA # | y <sup>+</sup> | y <sup>2+</sup> |
|----------------|----|------|----------------|-----------------|
| 100.0762       | 1  | A 17 |                |                 |
| 237.1351       | 2  | H 16 | 1669.8873      | 835.4476        |
| 350.2192       | 3  | L 15 | 1532.8284      | 766.9181        |
| 451.2669       | 4  | T 14 | 1419.7443      | 710.3761        |
| 508.2883       | 5  | G 13 | 1318.6967      | 659.8522        |
| 623.3153       | 6  | D 12 | 1261.6752      | 631.3415        |
| 724.3630       | 7  | T 11 | 1146.6483      | 573.8280        |
| 837.4470       | 8  | I 10 | 1045.6006      | 523.3042        |
| 950.5311       | 9  | I 9  | 932.5165       | 466.7622        |
| 1078.5897      | 10 | Q 8  | 819.4325       | 410.2201        |
| 1135.6111      | 11 | G 7  | 691.3739       | 346.1909        |
| 1222.6432      | 12 | S 6  | 634.3524       | 317.6801        |
| 1293.6803      | 13 | A 5  | 547.3204       | 274.1641        |
| 1394.7279      | 14 | T 4  | 476.2833       | 238.6455        |
| 1481.7600      | 15 | S 3  | 375.2356       | 188.1217        |
| 1594.8440      | 16 | L 2  | 288.2036       | 144.6057        |
|                | 17 | R 1  | 175.1195       | 88.0637         |

N-term:+29.04

AILVDLEPGTMSVR, MH+ 1643.8678, m/z 548.6275  
 L OS G24 P150811 220811-s1.04576.04576.3.dta

X-range:

-

MassTol: Y-zoom:

MassType:

AVG  MONO

Axis:

1  2

Label:

I  M  -

Ions:

a  +  2+  3+

b  +  2+  3+

c  +  2+  3+

x  +  2+  3+

y  +  2+  3+

z  +  2+  3+

hide H<sub>2</sub>O/NH<sub>3</sub>

zoom 112-122

GO

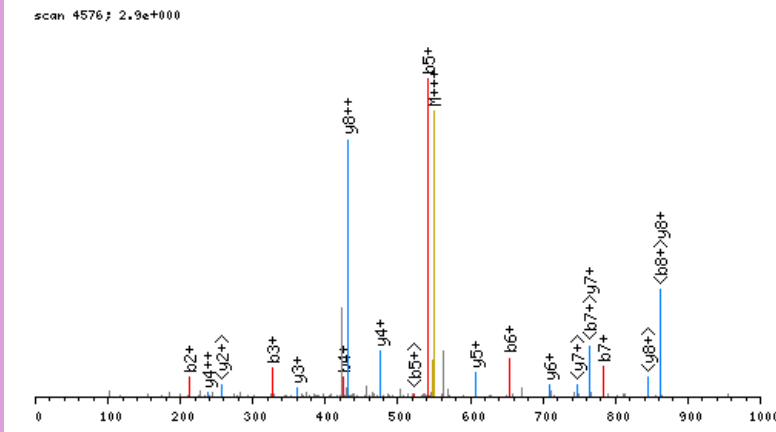

click image to zoom in; click top corners to zoom out [precursor±]

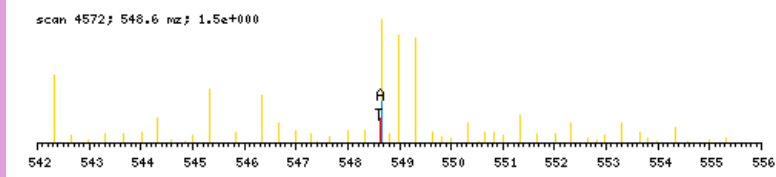

zoomed in precursor plot; T=theoretical m/z, A=acquired m/z

| b <sup>+</sup> | #  | AA # | y <sup>+</sup> | y <sup>2+</sup> |
|----------------|----|------|----------------|-----------------|
| 100.0762       | 1  | A 15 |                |                 |
| 213.1603       | 2  | I 14 | 1544.7994      | 772.9036        |
| 326.2443       | 3  | L 13 | 1431.7154      | 716.3616        |
| 425.3128       | 4  | V 12 | 1318.6313      | 659.8196        |
| 540.3397       | 5  | D 11 | 1219.5629      | 610.2854        |
| 653.4238       | 6  | L 10 | 1104.5359      | 552.7719        |
| 782.4664       | 7  | E 9  | 991.4519       | 496.2298        |
| 879.5191       | 8  | P 8  | 862.4093       | 431.7086        |
| 936.5406       | 9  | G 7  | 765.3565       | 383.1822        |
| 1037.5883      | 10 | T 6  | 708.3350       | 354.6714        |
| 1168.6287      | 11 | M 5  | 607.2874       | 304.1476        |
| 1283.6557      | 12 | D 4  | 476.2469       | 238.6274        |
| 1370.6877      | 13 | S 3  | 361.2199       | 181.1139        |
| 1469.7561      | 14 | V 2  | 274.1879       | 137.5979        |
|                | 15 | R 1  | 175.1195       | 88.0637         |

N-term:+29.04

X-range:

-

MassTol: Y-zoom:

MassType:

AVG  MONO

Axis:

1  2

Label:

I  M  -

Ions:

a  +  2+  3+

b  +  2+  3+

c  +  2+  3+

x  +  2+  3+

y  +  2+  3+

z  +  2+  3+

hide H<sub>2</sub>O/NH<sub>3</sub>

zoom 112-122

GO

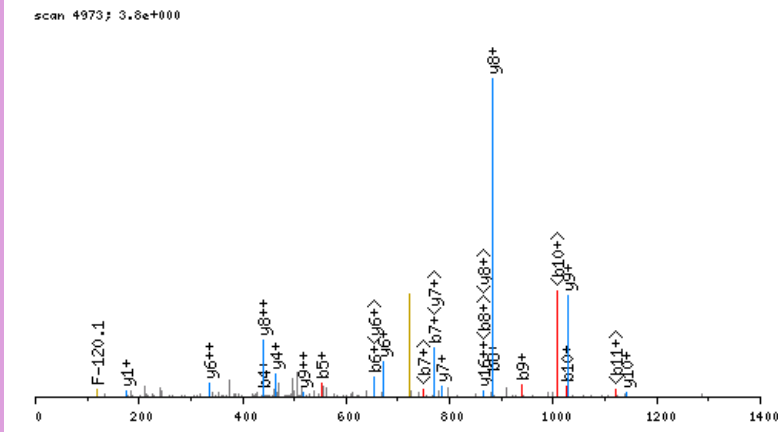

click image to zoom in; click top corners to zoom out [\[precursor±\]](#)

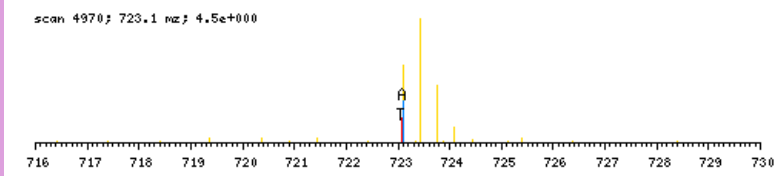

zoomed in precursor plot; T=theoretical m/z, A=acquired m/z

| b <sup>+</sup> | #  | AA | #  | y <sup>+</sup> | y <sup>2+</sup> |
|----------------|----|----|----|----------------|-----------------|
| 100.0762       | 1  | A  | 20 |                |                 |
| 213.1603       | 2  | I  | 19 | 2068.1079      | 1034.5579       |
| 310.2130       | 3  | P  | 18 | 1955.0238      | 978.0158        |
| 439.2556       | 4  | E  | 17 | 1857.9711      | 929.4894        |
| 553.2986       | 5  | N  | 16 | 1728.9285      | 864.9681        |
| 654.3462       | 6  | T  | 15 | 1614.8855      | 807.9467        |
| 768.3892       | 7  | N  | 14 | 1513.8379      | 757.4228        |
| 881.4732       | 8  | I  | 13 | 1399.7949      | 700.4014        |
| 938.4947       | 9  | G  | 12 | 1286.7109      | 643.8593        |
| 1025.5267      | 10 | S  | 11 | 1229.6894      | 615.3486        |
| 1138.6108      | 11 | L  | 10 | 1142.6574      | 571.8326        |
| 1285.6792      | 12 | F  | 9  | 1029.5733      | 515.2906        |
| 1382.7320      | 13 | P  | 8  | 882.5049       | 441.7564        |
| 1495.8160      | 14 | I  | 7  | 785.4521       | 393.2300        |
| 1592.8688      | 15 | P  | 6  | 672.3681       | 336.6879        |
| 1705.9529      | 16 | L  | 5  | 575.3153       | 288.1616        |
| 1776.9900      | 17 | A  | 4  | 462.2312       | 231.6195        |
| 1878.0377      | 18 | T  | 3  | 391.1941       | 196.1010        |
| 1993.0646      | 19 | D  | 2  | 290.1464       | 145.5771        |
|                | 20 | R  | 1  | 175.1195       | 88.0637         |

N-term:+29.04



AIPGLAGAGNSVLLVSNLNPGR, MH+ 2190.2246, m/z 730.7464  
 L OS G24 P150811 220811-s1.04898.04898.3.dta

scan 4898; 1.5e+000

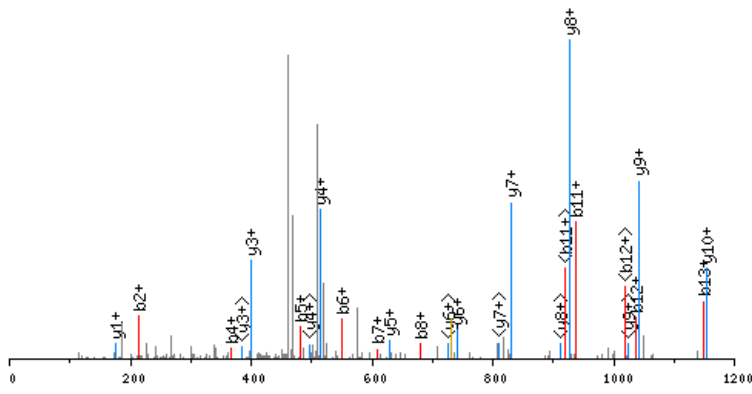

click image to zoom in; click top corners to zoom out [precursor±]

scan 4895; 730.7 m/z; 4.5e+000

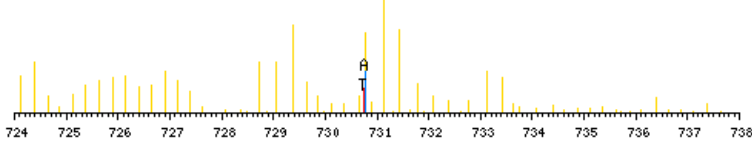

zoomed in precursor plot; T=theoretical m/z, A=acquired m/z

X-range:

-

MassTol: Y-zoom:

MassType:

AVG  MONO

Axis:

1  2

Label:

I  M  -

Ions:

a  +  2+  3+

b  +  2+  3+

c  +  2+  3+

x  +  2+  3+

y  +  2+  3+

z  +  2+  3+

hide H<sub>2</sub>O/NH<sub>3</sub>

zoom 112-122

GO

| b <sup>+</sup> | #  | AA # | y <sup>+</sup> | y <sup>2+</sup> |
|----------------|----|------|----------------|-----------------|
| 100.0762       | 1  | A 22 |                |                 |
| 213.1603       | 2  | I 21 | 2091.1562      | 1046.0820       |
| 310.2130       | 3  | P 20 | 1978.0722      | 989.5400        |
| 367.2345       | 4  | G 19 | 1881.0194      | 941.0136        |
| 480.3186       | 5  | L 18 | 1823.9979      | 912.5029        |
| 551.3557       | 6  | A 17 | 1710.9139      | 855.9608        |
| 608.3771       | 7  | G 16 | 1639.8768      | 820.4423        |
| 679.4143       | 8  | A 15 | 1582.8553      | 791.9316        |
| 736.4357       | 9  | G 14 | 1511.8182      | 756.4130        |
| 850.4787       | 10 | N 13 | 1454.7967      | 727.9023        |
| 937.5107       | 11 | S 12 | 1340.7538      | 670.8808        |
| 1036.5791      | 12 | V 11 | 1253.7218      | 627.3648        |
| 1149.6632      | 13 | L 10 | 1154.6533      | 577.8306        |
| 1262.7472      | 14 | L 9  | 1041.5693      | 521.2886        |
| 1361.8156      | 15 | V 8  | 928.4852       | 464.7465        |
| 1448.8477      | 16 | S 7  | 829.4168       | 415.2123        |
| 1562.8906      | 17 | N 6  | 742.3848       | 371.6963        |
| 1675.9747      | 18 | L 5  | 628.3418       | 314.6748        |
| 1790.0176      | 19 | N 4  | 515.2578       | 258.1328        |
| 1887.0703      | 20 | P 3  | 401.2149       | 201.1113        |
| 2016.1129      | 21 | E 2  | 304.1621       | 152.5850        |
|                | 22 | R 1  | 175.1195       | 88.0637         |

N-term:+29.04

AISEAAAQYNPEPPPPR, MH+ 1841.9610, m/z 614.6585  
 H OS G24 P150811 220811-s1.03095.03095.3.dta

X-range:

-

MassTol: Y-zoom:

MassType:

AVG  MONO

Axis:

1  2

Label:

I  M  -

Ions:

a  +  2+  3+

b  +  2+  3+

c  +  2+  3+

x  +  2+  3+

y  +  2+  3+

z  +  2+  3+

hide H<sub>2</sub>O/NH<sub>3</sub>

zoom 112-122

GO

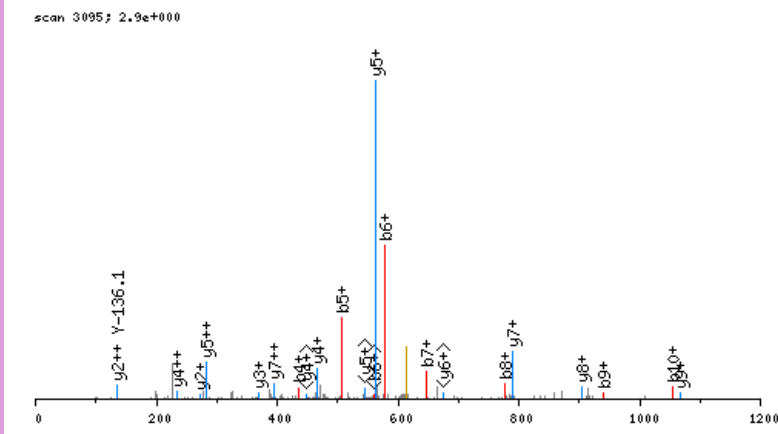

click image to zoom in; click top corners to zoom out [\[precursor±\]](#)

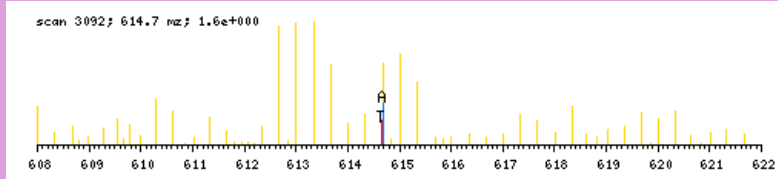

zoomed in precursor plot; T=theoretical m/z, A=acquired m/z

| b <sup>+</sup> | #  | AA # | y <sup>+</sup> | y <sup>2+</sup> |
|----------------|----|------|----------------|-----------------|
| 106.1080       | 1  | A 17 |                |                 |
| 219.1921       | 2  | I 16 | 1736.8608      | 868.9343        |
| 306.2241       | 3  | S 15 | 1623.7767      | 812.3923        |
| 435.2667       | 4  | E 14 | 1536.7447      | 768.8763        |
| 506.3038       | 5  | A 13 | 1407.7021      | 704.3550        |
| 577.3409       | 6  | A 12 | 1336.6650      | 668.8364        |
| 648.3780       | 7  | A 11 | 1265.6279      | 633.3178        |
| 776.4366       | 8  | Q 10 | 1194.5907      | 597.7993        |
| 939.4999       | 9  | Y 9  | 1066.5322      | 533.7700        |
| 1053.5429      | 10 | N 8  | 903.4688       | 452.2383        |
| 1150.5956      | 11 | P 7  | 789.4259       | 395.2169        |
| 1279.6382      | 12 | E 6  | 692.3731       | 346.6905        |
| 1376.6910      | 13 | P 5  | 563.3306       | 282.1692        |
| 1473.7438      | 14 | P 4  | 466.2778       | 233.6428        |
| 1570.7965      | 15 | P 3  | 369.2250       | 185.1164        |
| 1667.8493      | 16 | P 2  | 272.1723       | 136.5900        |
|                | 17 | R 1  | 175.1195       | 88.0637         |

N-term:+35.07

AISNNKDQGGYEDFVEGLR, MH+ 2180.1260, m/z 727.3802  
 H OS G26 P150811 220811-s1.05213.05213.3.dta

scan 5213; 7.2e+000

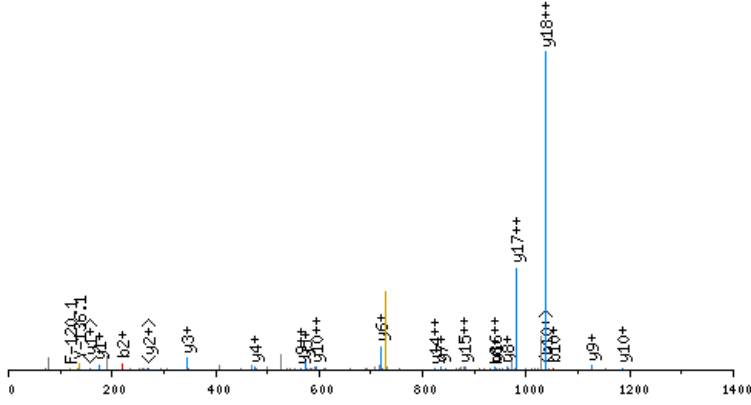

click image to zoom in; click top corners to zoom out [precursor±]

scan 5210; 727.4 m/z; 2.5e+001

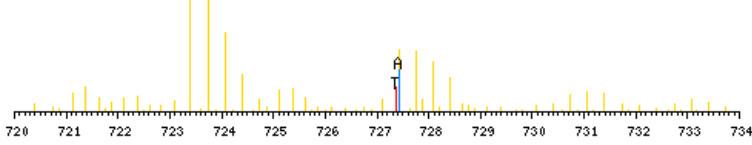

zoomed in precursor plot; T=theoretical m/z, A=acquired m/z

X-range:

-

MassTol: Y-zoom:

MassType:

AVG  MONO

Axis:

1  2

Label:

I  M  -

Ions:

a  +  2+  3+

b  +  2+  3+

c  +  2+  3+

x  +  2+  3+

y  +  2+  3+

z  +  2+  3+

hide H<sub>2</sub>O/NH<sub>3</sub>

zoom 112-122

GO

| b <sup>+</sup> | #  | AA | #  | y <sup>+</sup> | y <sup>2+</sup> |
|----------------|----|----|----|----------------|-----------------|
| 106.1080       | 1  | A  | 19 |                |                 |
| 219.1921       | 2  | I  | 18 | 2075.0258      | 1038.0168       |
| 306.2241       | 3  | S  | 17 | 1961.9417      | 981.4748        |
| 420.2670       | 4  | N  | 16 | 1874.9097      | 937.9588        |
| 534.3100       | 5  | N  | 15 | 1760.8668      | 880.9373        |
| 696.4681       | 6  | K  | 14 | 1646.8239      | 823.9158        |
| 811.4950       | 7  | D  | 13 | 1484.6658      | 742.8368        |
| 939.5536       | 8  | Q  | 12 | 1369.6388      | 685.3233        |
| 996.5750       | 9  | G  | 11 | 1241.5802      | 621.2940        |
| 1053.5965      | 10 | G  | 10 | 1184.5588      | 592.7833        |
| 1216.6598      | 11 | Y  | 9  | 1127.5373      | 564.2726        |
| 1345.7024      | 12 | E  | 8  | 964.4740       | 482.7409        |
| 1460.7294      | 13 | D  | 7  | 835.4314       | 418.2196        |
| 1607.7978      | 14 | F  | 6  | 720.4044       | 360.7061        |
| 1706.8662      | 15 | V  | 5  | 573.3360       | 287.1719        |
| 1835.9088      | 16 | E  | 4  | 474.2676       | 237.6377        |
| 1892.9303      | 17 | G  | 3  | 345.2250       | 173.1164        |
| 2006.0143      | 18 | L  | 2  | 288.2036       | 144.6057        |
|                | 19 | R  | 1  | 175.1195       | 88.0637         |

N-term:+35.07 K(6):+162.16

AITATQKTVDGPGSKLWR, MH+ 2013.1497, m/z 504.0429  
 L OS G28 P150811 220811-s1.04564.04564.4.dta

X-range:

-

MassTol: Y-zoom:

MassType:

AVG  MONO

Axis:

1  2

Label:

I  M  -

Ions:

a  +  2+  3+

b  +  2+  3+

c  +  2+  3+

x  +  2+  3+

y  +  2+  3+

z  +  2+  3+

hide H<sub>2</sub>O/NH<sub>3</sub>

zoom 112-122

GO

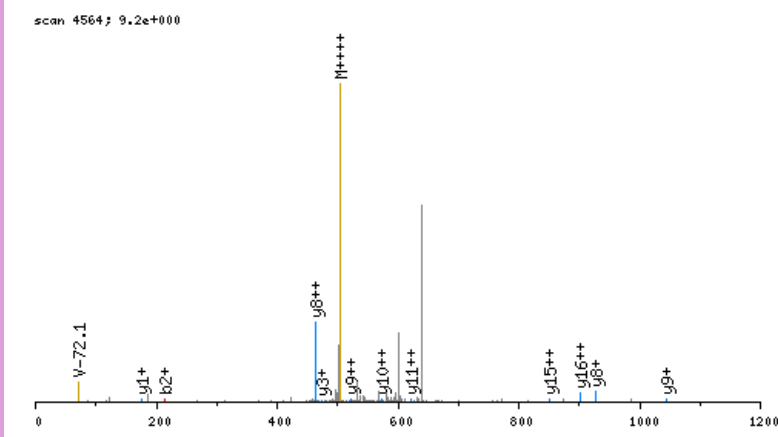

click image to zoom in; click top corners to zoom out [\[precursor±\]](#)

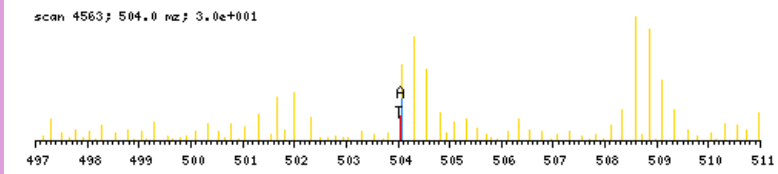

zoomed in precursor plot; T=theoretical m/z, A=acquired m/z

| b <sup>+</sup> | #  | AA | #  | y <sup>+</sup> | y <sup>2+</sup> |
|----------------|----|----|----|----------------|-----------------|
| 100.0762       | 1  | A  | 18 |                |                 |
| 213.1603       | 2  | I  | 17 | 1914.0813      | 957.5446        |
| 314.2080       | 3  | T  | 16 | 1800.9973      | 901.0026        |
| 385.2451       | 4  | A  | 15 | 1699.9496      | 850.4787        |
| 486.2927       | 5  | T  | 14 | 1628.9125      | 814.9602        |
| 614.3513       | 6  | Q  | 13 | 1527.8648      | 764.4363        |
| 770.4776       | 7  | K  | 12 | 1399.8062      | 700.4070        |
| 871.5253       | 8  | T  | 11 | 1243.6799      | 622.3439        |
| 970.5937       | 9  | V  | 10 | 1142.6323      | 571.8200        |
| 1085.6207      | 10 | D  | 9  | 1043.5638      | 522.2858        |
| 1142.6421      | 11 | G  | 8  | 928.5369       | 464.7724        |
| 1239.6949      | 12 | P  | 7  | 871.5154       | 436.2616        |
| 1326.7269      | 13 | S  | 6  | 774.4627       | 387.7352        |
| 1383.7484      | 14 | G  | 5  | 687.4306       | 344.2192        |
| 1539.8747      | 15 | K  | 4  | 630.4092       | 315.7085        |
| 1652.9587      | 16 | L  | 3  | 474.2829       | 237.6454        |
| 1839.0381      | 17 | W  | 2  | 361.1988       | 181.1033        |
|                | 18 | R  | 1  | 175.1195       | 88.0637         |

N-term:+29.04 K(7):+156.13  
 K(15):+156.13

AIVEFLEPLEAR, MH+ 1414.7946, m/z 472.2697  
 L OS G27 P150811 220811-s1.07053.07053.3.dta

X-range:

-

MassTol: Y-zoom:

MassType:

AVG  MONO

Axis:

1  2

Label:

I  M  -

Ions:

a  +  2+  3+

b  +  2+  3+

c  +  2+  3+

x  +  2+  3+

y  +  2+  3+

z  +  2+  3+

hide H<sub>2</sub>O/NH<sub>3</sub>

zoom 112-122

GO

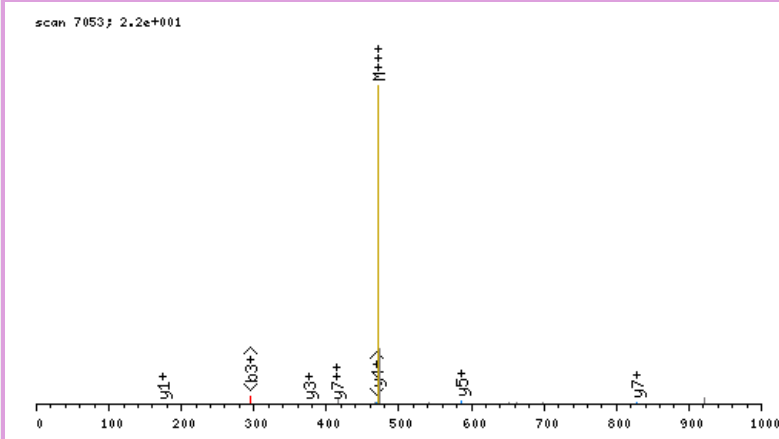

click image to zoom in; click top corners to zoom out [\[precursor±\]](#)

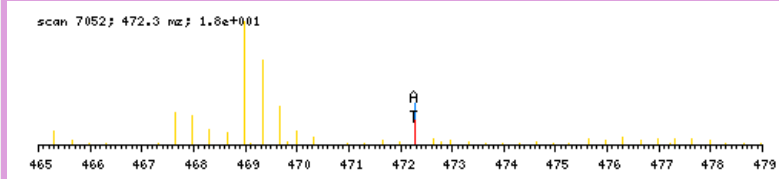

zoomed in precursor plot; T=theoretical m/z, A=acquired m/z

| b <sup>+</sup> | #  | AA # | y <sup>+</sup> | y <sup>2+</sup> |
|----------------|----|------|----------------|-----------------|
| 100.0762       | 1  | A 12 |                |                 |
| 213.1603       | 2  | I 11 | 1315.7262      | 658.3670        |
| 312.2287       | 3  | V 10 | 1202.6421      | 601.8250        |
| 441.2713       | 4  | E 9  | 1103.5737      | 552.2908        |
| 588.3397       | 5  | F 8  | 974.5311       | 487.7695        |
| 701.4238       | 6  | L 7  | 827.4627       | 414.2353        |
| 830.4664       | 7  | E 6  | 714.3786       | 357.6932        |
| 927.5191       | 8  | P 5  | 585.3360       | 293.1719        |
| 1040.6032      | 9  | L 4  | 488.2833       | 244.6455        |
| 1169.6458      | 10 | E 3  | 375.1992       | 188.1035        |
| 1240.6829      | 11 | A 2  | 246.1566       | 123.5822        |
|                | 12 | R 1  | 175.1195       | 88.0637         |

N-term:+29.04

AIVFIKEPSSQDALQGR, MH+ 1927.1289, m/z 643.0478  
 H OS G26 P150811 220811-s1.04753.04753.3.dta

X-range:

-

MassTol: Y-zoom:

MassType:

AVG  MONO

Axis:

1  2

Label:

I  M  -

Ions:

a  +  2+  3+

b  +  2+  3+

c  +  2+  3+

x  +  2+  3+

y  +  2+  3+

z  +  2+  3+

hide H<sub>2</sub>O/NH<sub>3</sub>

zoom 112-122

GO

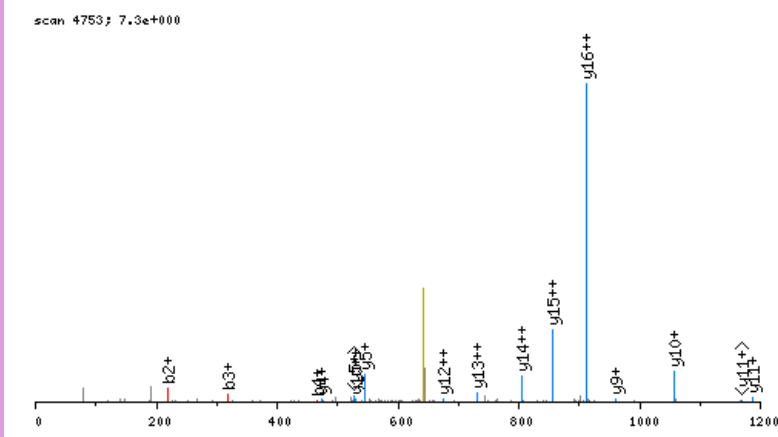

click image to zoom in; click top corners to zoom out [\[precursor±\]](#)

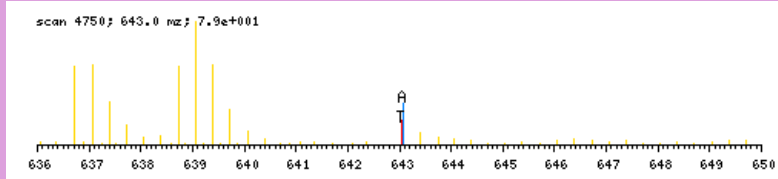

zoomed in precursor plot; T=theoretical m/z, A=acquired m/z

| b <sup>+</sup> | #  | AA | #  | y <sup>+</sup> | y <sup>2+</sup> |
|----------------|----|----|----|----------------|-----------------|
| 106.1080       | 1  | A  | 17 |                |                 |
| 219.1921       | 2  | I  | 16 | 1822.0287      | 911.5183        |
| 318.2605       | 3  | V  | 15 | 1708.9446      | 854.9762        |
| 465.3289       | 4  | F  | 14 | 1609.8762      | 805.4420        |
| 578.4130       | 5  | I  | 13 | 1462.8078      | 731.9078        |
| 740.5711       | 6  | K  | 12 | 1349.7238      | 675.3658        |
| 869.6137       | 7  | E  | 11 | 1187.5657      | 594.2867        |
| 966.6664       | 8  | P  | 10 | 1058.5231      | 529.7654        |
| 1053.6985      | 9  | S  | 9  | 961.4703       | 481.2391        |
| 1140.7305      | 10 | S  | 8  | 874.4383       | 437.7230        |
| 1268.7891      | 11 | Q  | 7  | 787.4062       | 394.2070        |
| 1383.8160      | 12 | D  | 6  | 659.3477       | 330.1777        |
| 1454.8531      | 13 | A  | 5  | 544.3207       | 272.6643        |
| 1567.9372      | 14 | L  | 4  | 473.2836       | 237.1457        |
| 1695.9958      | 15 | Q  | 3  | 360.1995       | 180.6037        |
| 1753.0172      | 16 | G  | 2  | 232.1410       | 116.5744        |
|                | 17 | R  | 1  | 175.1195       | 88.0637         |

N-term:+35.07 K(6):+162.16

AKVLTPDLYNKLR, MH+ 1633.0901, m/z 409.0280  
 H OS G28 P150811 220811-s1.05346.05346.4.dta

X-range:

-

MassTol: Y-zoom:

MassType:

AVG  MONO

Axis:

1  2

Label:

I  M  -

Ions:

a  +  2+  3+

b  +  2+  3+

c  +  2+  3+

x  +  2+  3+

y  +  2+  3+

z  +  2+  3+

hide H<sub>2</sub>O/NH<sub>3</sub>

zoom 112-122

GO

scan 5346; 1.1e+001

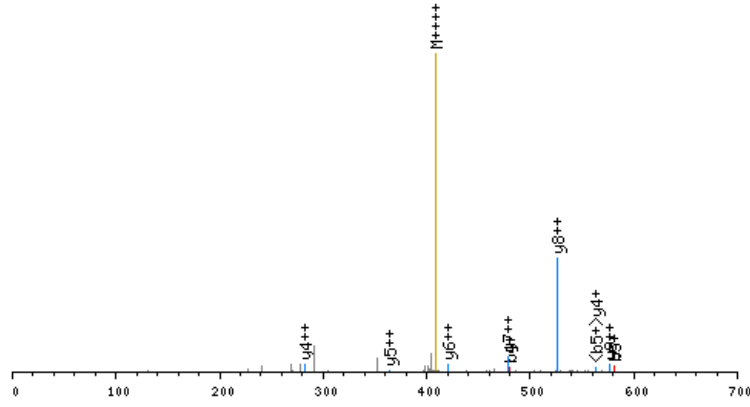

click image to zoom in; click top corners to zoom out [precursor±]

scan 5343; 409.0 mz; 1.5e+001

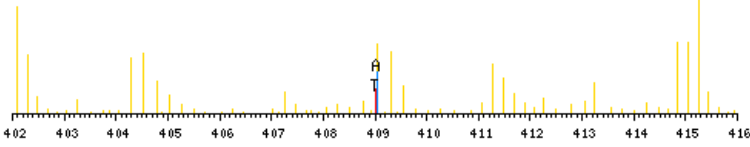

zoomed in precursor plot; T=theoretical m/z, A=acquired m/z

| b <sup>+</sup> | #  | AA # | y <sup>+</sup> | y <sup>2+</sup> |
|----------------|----|------|----------------|-----------------|
| 106.1080       | 1  | A 13 |                |                 |
| 268.2661       | 2  | K 12 | 1527.9899      | 764.4989        |
| 367.3345       | 3  | V 11 | 1365.8318      | 683.4198        |
| 480.4186       | 4  | L 10 | 1266.7634      | 633.8856        |
| 581.4663       | 5  | T 9  | 1153.6794      | 577.3436        |
| 678.5190       | 6  | P 8  | 1052.6317      | 526.8198        |
| 793.5460       | 7  | D 7  | 955.5789       | 478.2934        |
| 906.6300       | 8  | L 6  | 840.5520       | 420.7799        |
| 1069.6934      | 9  | Y 5  | 727.4679       | 364.2379        |
| 1183.7363      | 10 | N 4  | 564.4046       | 282.7062        |
| 1345.8944      | 11 | K 3  | 450.3617       | 225.6847        |
| 1458.9785      | 12 | L 2  | 288.2036       | 144.6057        |
|                | 13 | R 1  | 175.1195       | 88.0637         |

N-term:+35.07 K(2):+162.16  
 K(11):+162.16

AKVNPDEVGGEALGR, MH+ 1567.8444, m/z 523.2863  
 L OS G27 P150811 220811-s1.03441.03441.3.dta

X-range:

-

MassTol: Y-zoom:

MassType:

AVG  MONO

Axis:

1  2

Label:

I  M  -

Ions:

a  +  2+  3+

b  +  2+  3+

c  +  2+  3+

x  +  2+  3+

y  +  2+  3+

z  +  2+  3+

hide H<sub>2</sub>O/NH<sub>3</sub>

zoom 112-122

GO

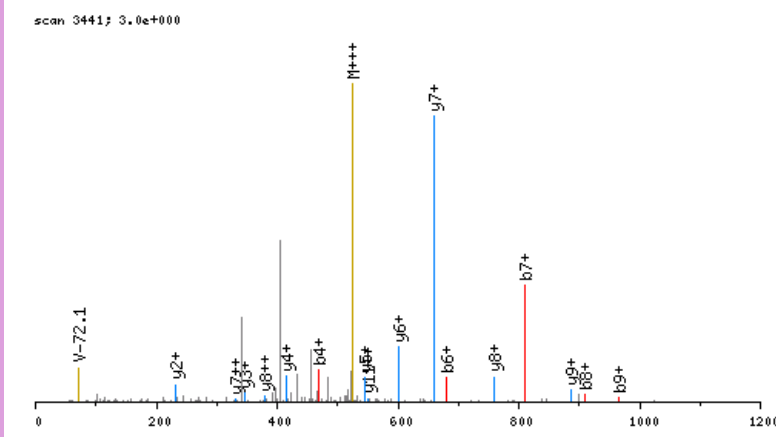

click image to zoom in; click top corners to zoom out [\[precursor±\]](#)

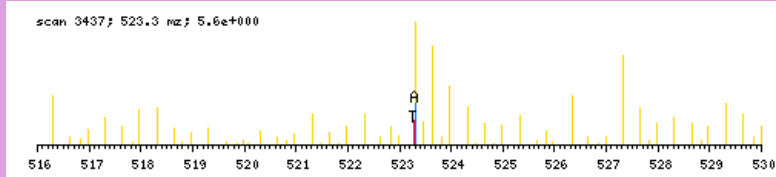

zoomed in precursor plot; T=theoretical m/z, A=acquired m/z

| b <sup>+</sup> | #  | AA # | y <sup>+</sup> | y <sup>2+</sup> |
|----------------|----|------|----------------|-----------------|
| 100.0762       | 1  | A 15 |                |                 |
| 256.2025       | 2  | K 14 | 1468.7760      | 734.8919        |
| 355.2709       | 3  | V 13 | 1312.6497      | 656.8288        |
| 469.3139       | 4  | N 12 | 1213.5813      | 607.2946        |
| 566.3666       | 5  | P 11 | 1099.5384      | 550.2731        |
| 681.3936       | 6  | D 10 | 1002.4856      | 501.7467        |
| 810.4362       | 7  | E 9  | 887.4587       | 444.2332        |
| 909.5046       | 8  | V 8  | 758.4161       | 379.7120        |
| 966.5260       | 9  | G 7  | 659.3477       | 330.1777        |
| 1023.5475      | 10 | G 6  | 602.3262       | 301.6670        |
| 1152.5901      | 11 | E 5  | 545.3047       | 273.1563        |
| 1223.6272      | 12 | A 4  | 416.2621       | 208.6350        |
| 1336.7113      | 13 | L 3  | 345.2250       | 173.1164        |
| 1393.7327      | 14 | G 2  | 232.1410       | 116.5744        |
|                | 15 | R 1  | 175.1195       | 88.0637         |

N-term:+29.04 K(2):+156.13



ALEGINNGITQAGR, MH+ 1441.7763, m/z 481.2636  
 L OS G25 P150811 220811-s1.04789.04789.3.dta

X-range:

-

MassTol: Y-zoom:

MassType:

AVG  MONO

Axis:

1  2

Label:

I  M  -

Ions:

a  +  2+  3+

b  +  2+  3+

c  +  2+  3+

x  +  2+  3+

y  +  2+  3+

z  +  2+  3+

hide H<sub>2</sub>O/NH<sub>3</sub>

zoom 112-122

GO

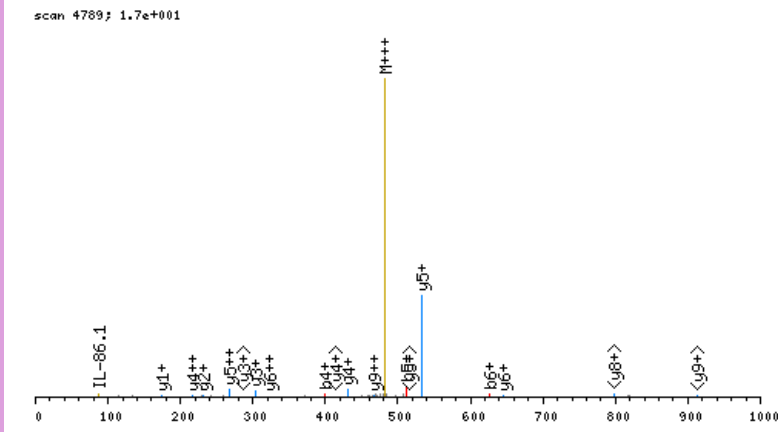

click image to zoom in; click top corners to zoom out [\[precursor±\]](#)

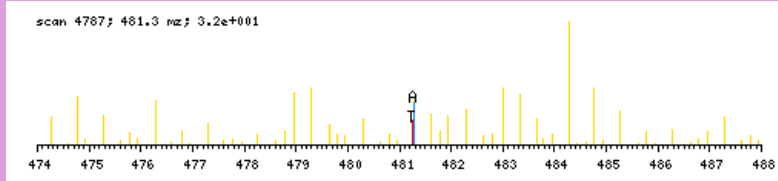

zoomed in precursor plot; T=theoretical m/z, A=acquired m/z

| b <sup>+</sup> | #  | AA # | y <sup>+</sup> | y <sup>2+</sup> |
|----------------|----|------|----------------|-----------------|
| 100.0762       | 1  | A 14 |                |                 |
| 213.1603       | 2  | L 13 | 1342.7079      | 671.8579        |
| 342.2029       | 3  | E 12 | 1229.6238      | 615.3158        |
| 399.2243       | 4  | G 11 | 1100.5812      | 550.7945        |
| 512.3084       | 5  | I 10 | 1043.5598      | 522.2838        |
| 626.3513       | 6  | N 9  | 930.4757       | 465.7418        |
| 740.3943       | 7  | N 8  | 816.4328       | 408.7203        |
| 797.4157       | 8  | G 7  | 702.3899       | 351.6988        |
| 910.4998       | 9  | I 6  | 645.3684       | 323.1881        |
| 1011.5475      | 10 | T 5  | 532.2843       | 266.6461        |
| 1139.6060      | 11 | Q 4  | 431.2367       | 216.1222        |
| 1210.6432      | 12 | A 3  | 303.1781       | 152.0930        |
| 1267.6646      | 13 | G 2  | 232.1410       | 116.5744        |
|                | 14 | R 1  | 175.1195       | 88.0637         |

N-term:+29.04

ALGGNSSPSAKDIKKILDSVIGIEADDR, MH+ 2983.5953, m/z 746.6543  
 L OS G28 P150811 220811-s1.09102.09102.4.dta

X-range:

-

MassTol: Y-zoom:

MassType:

AVG  MONO

Axis:

1  2

Label:

I  M  -

Ions:

a  +  2+  3+

b  +  2+  3+

c  +  2+  3+

x  +  2+  3+

y  +  2+  3+

z  +  2+  3+

hide H<sub>2</sub>O/NH<sub>3</sub>

zoom 112-122

GO

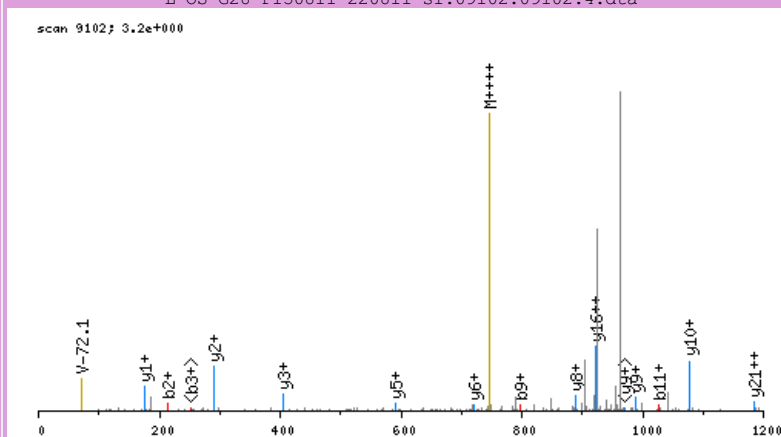

click image to zoom in; click top corners to zoom out [\[precursor±\]](#)

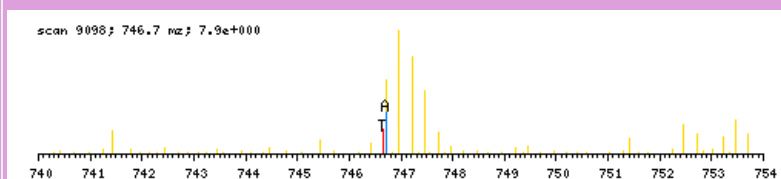

zoomed in precursor plot; T=theoretical m/z, A=acquired m/z

| b <sup>+</sup> | #  | AA # | y <sup>+</sup> | y <sup>2+</sup> |
|----------------|----|------|----------------|-----------------|
| 100.0762       | 1  | A 28 |                |                 |
| 213.1603       | 2  | L 27 | 2884.5269      | 1442.7673       |
| 270.1817       | 3  | G 26 | 2771.4428      | 1386.2253       |
| 327.2032       | 4  | G 25 | 2714.4213      | 1357.7146       |
| 441.2461       | 5  | N 24 | 2657.3999      | 1329.2039       |
| 528.2782       | 6  | S 23 | 2543.3569      | 1272.1824       |
| 615.3102       | 7  | S 22 | 2456.3249      | 1228.6664       |
| 712.3630       | 8  | P 21 | 2369.2929      | 1185.1504       |
| 799.3950       | 9  | S 20 | 2272.2401      | 1136.6240       |
| 870.4321       | 10 | A 19 | 2185.2081      | 1093.1080       |
| 1026.5584      | 11 | K 18 | 2114.1710      | 1057.5894       |
| 1141.5853      | 12 | D 17 | 1958.0447      | 979.5263        |
| 1254.6694      | 13 | I 16 | 1843.0177      | 922.0128        |
| 1410.7957      | 14 | K 15 | 1729.9337      | 865.4708        |
| 1566.9220      | 15 | K 14 | 1573.8074      | 787.4076        |
| 1680.0061      | 16 | I 13 | 1417.6811      | 709.3445        |
| 1793.0901      | 17 | L 12 | 1304.5970      | 652.8024        |
| 1908.1171      | 18 | D 11 | 1191.5130      | 596.2604        |
| 1995.1491      | 19 | S 10 | 1076.4860      | 538.7469        |
| 2094.2175      | 20 | V 9  | 989.4540       | 495.2309        |
| 2151.2390      | 21 | G 8  | 890.3856       | 445.6967        |
| 2264.3230      | 22 | I 7  | 833.3641       | 417.1860        |
| 2393.3656      | 23 | E 6  | 720.2800       | 360.6439        |
| 2464.4028      | 24 | A 5  | 591.2374       | 296.1226        |
| 2579.4297      | 25 | D 4  | 520.2003       | 260.6041        |
| 2694.4566      | 26 | D 3  | 405.1734       | 203.0906        |
| 2809.4836      | 27 | D 2  | 290.1464       | 145.5771        |
|                | 28 | R 1  | 175.1195       | 88.0637         |

N-term:+29.04 K(11):+156.13  
 K(14):+156.13 K(15):+156.13

ALIDSHFEAR, MH+ 1192.6538, m/z 398.2228  
 H OS G27 P150811 220811-s1.04165.04165.3.dta

X-range:

-

MassTol: Y-zoom:

MassType:

AVG  MONO

Axis:

1  2

Label:

I  M  -

Ions:

a  +  2+  3+

b  +  2+  3+

c  +  2+  3+

x  +  2+  3+

y  +  2+  3+

z  +  2+  3+

hide H<sub>2</sub>O/NH<sub>3</sub>

zoom 112-122

GO

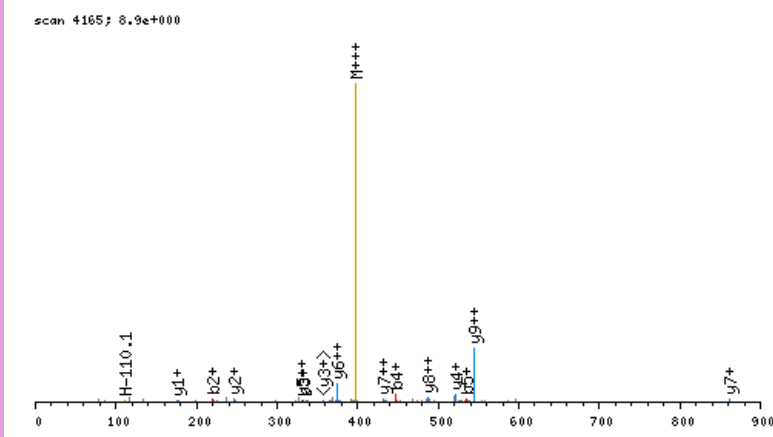

click image to zoom in; click top corners to zoom out [\[precursor±\]](#)

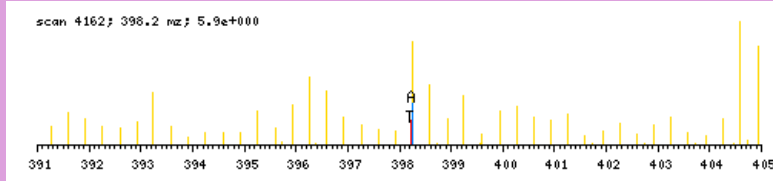

zoomed in precursor plot; T=theoretical m/z, A=acquired m/z

| b <sup>+</sup> | #  | AA # | y <sup>+</sup> | y <sup>2+</sup> |
|----------------|----|------|----------------|-----------------|
| 106.1080       | 1  | A 10 |                |                 |
| 219.1921       | 2  | L 9  | 1087.5536      | 544.2807        |
| 332.2761       | 3  | I 8  | 974.4696       | 487.7387        |
| 447.3031       | 4  | D 7  | 861.3855       | 431.1967        |
| 534.3351       | 5  | S 6  | 746.3586       | 373.6832        |
| 671.3940       | 6  | H 5  | 659.3265       | 330.1672        |
| 818.4624       | 7  | F 4  | 522.2676       | 261.6377        |
| 947.5050       | 8  | E 3  | 375.1992       | 188.1035        |
| 1018.5421      | 9  | A 2  | 246.1566       | 123.5822        |
|                | 10 | R 1  | 175.1195       | 88.0637         |

N-term:+35.07

ALIGTQANVTKELEK, MH+ 1698.9754, m/z 566.9967  
 L OS G26 P150811 220811-s1.04141.04141.3.dta

X-range:

-

MassTol: Y-zoom:

MassType:

AVG  MONO

Axis:

1  2

Label:

I  M  -

Ions:

a  +  2+  3+

b  +  2+  3+

c  +  2+  3+

x  +  2+  3+

y  +  2+  3+

z  +  2+  3+

hide H<sub>2</sub>O/NH<sub>3</sub>

zoom 112-122

GO

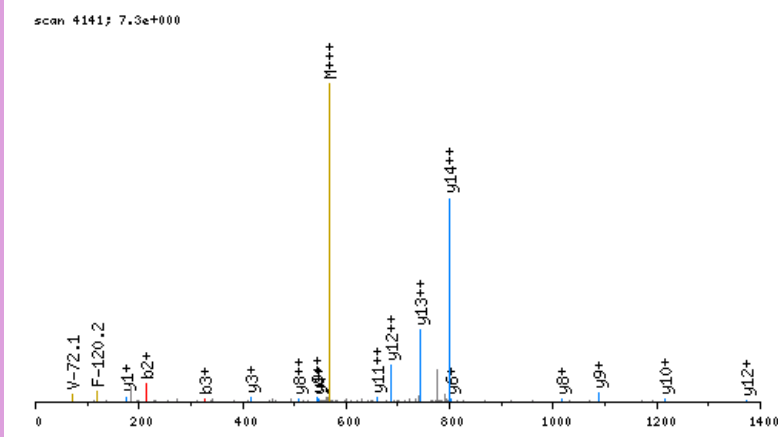

click image to zoom in; click top corners to zoom out [\[precursor±\]](#)

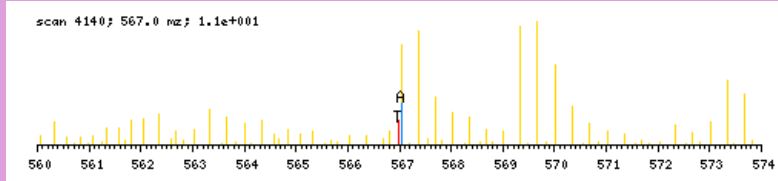

zoomed in precursor plot; T=theoretical m/z, A=acquired m/z

| b <sup>+</sup> | #  | AA # | y <sup>+</sup> | y <sup>2+</sup> |
|----------------|----|------|----------------|-----------------|
| 100.0762       | 1  | A 15 |                |                 |
| 213.1603       | 2  | L 14 | 1599.9070      | 800.4574        |
| 326.2443       | 3  | I 13 | 1486.8230      | 743.9154        |
| 383.2658       | 4  | G 12 | 1373.7389      | 687.3734        |
| 484.3135       | 5  | T 11 | 1316.7174      | 658.8626        |
| 612.3721       | 6  | Q 10 | 1215.6698      | 608.3388        |
| 683.4092       | 7  | A 9  | 1087.6112      | 544.3095        |
| 797.4521       | 8  | N 8  | 1016.5741      | 508.7909        |
| 896.5205       | 9  | V 7  | 902.5311       | 451.7695        |
| 997.5682       | 10 | T 6  | 803.4627       | 402.2353        |
| 1153.6945      | 11 | K 5  | 702.4151       | 351.7114        |
| 1282.7371      | 12 | E 4  | 546.2888       | 273.6483        |
| 1395.8212      | 13 | L 3  | 417.2462       | 209.1270        |
| 1524.8637      | 14 | E 2  | 304.1621       | 152.5850        |
|                | 15 | R 1  | 175.1195       | 88.0637         |

N-term:+29.04 K(11):+156.13

ALNEDTQDELGDPR, MH+ 1606.7772, m/z 536.2639  
 H OS G25 P150811 220811-s1.03784.03784.3.dta

X-range:

-

MassTol: Y-zoom:

MassType:

AVG  MONO

Axis:

1  2

Label:

I  M  -

Ions:

a  +  2+  3+

b  +  2+  3+

c  +  2+  3+

x  +  2+  3+

y  +  2+  3+

z  +  2+  3+

hide H<sub>2</sub>O/NH<sub>3</sub>

zoom 112-122

GO

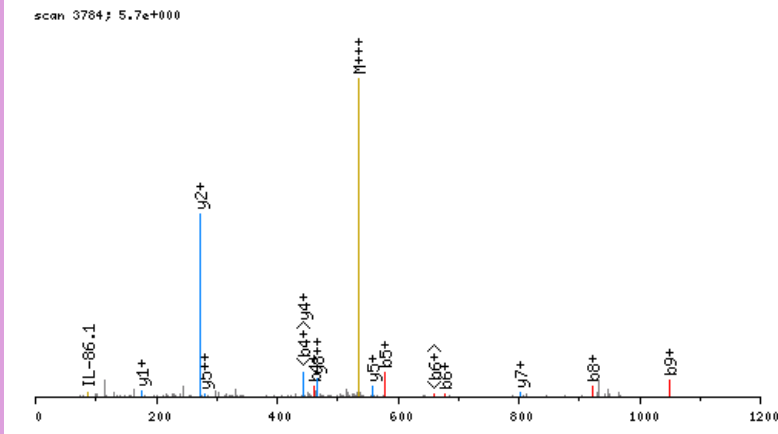

click image to zoom in; click top corners to zoom out [\[precursor±\]](#)

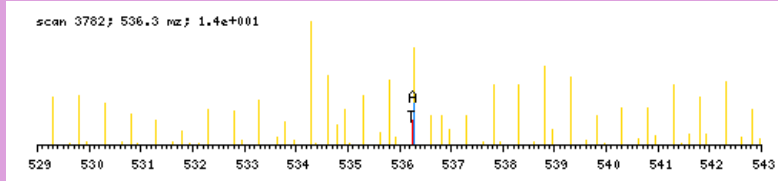

zoomed in precursor plot; T=theoretical m/z, A=acquired m/z

| b <sup>+</sup> | #  | AA # | y <sup>+</sup> | y <sup>2+</sup> |
|----------------|----|------|----------------|-----------------|
| 106.1080       | 1  | A 14 |                |                 |
| 219.1921       | 2  | L 13 | 1501.6771      | 751.3424        |
| 333.2350       | 3  | N 12 | 1388.5930      | 694.8004        |
| 462.2776       | 4  | E 11 | 1274.5501      | 637.7789        |
| 577.3045       | 5  | D 10 | 1145.5075      | 573.2576        |
| 678.3522       | 6  | T 9  | 1030.4805      | 515.7442        |
| 806.4108       | 7  | Q 8  | 929.4328       | 465.2203        |
| 921.4377       | 8  | D 7  | 801.3743       | 401.1910        |
| 1050.4803      | 9  | E 6  | 686.3473       | 343.6776        |
| 1163.5644      | 10 | L 5  | 557.3047       | 279.1563        |
| 1220.5859      | 11 | G 4  | 444.2207       | 222.6142        |
| 1335.6128      | 12 | D 3  | 387.1992       | 194.1035        |
| 1432.6656      | 13 | P 2  | 272.1723       | 136.5900        |
|                | 14 | R 1  | 175.1195       | 88.0637         |

N-term:+35.07

ALTSELANAR, MH+ 1073.5955, m/z 537.3014  
 L OS G25 P150811 220811-s1.03509.03509.2.dta

X-range:

-

MassTol: Y-zoom:

MassType:

AVG  MONO

Axis:

1  2

Label:

I  M  -

Ions:

a  +  2+  3+

b  +  2+  3+

c  +  2+  3+

x  +  2+  3+

y  +  2+  3+

z  +  2+  3+

hide H<sub>2</sub>O/NH<sub>3</sub>

zoom 112-122

GO

scan 3509; 1.4e+001

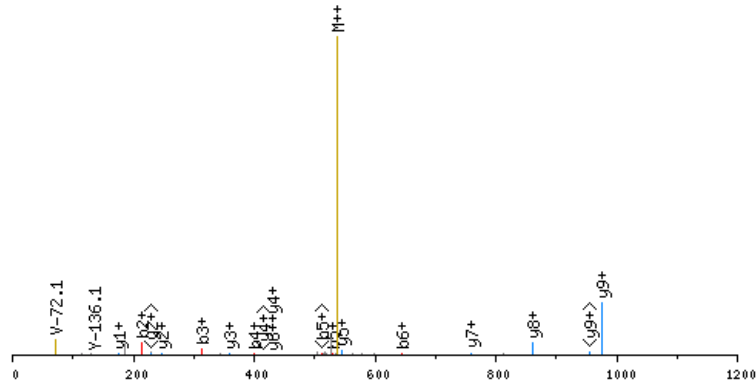

click image to zoom in; click top corners to zoom out [\[precursor±\]](#)

scan 3507; 537.3 m/z; 2.3e+001

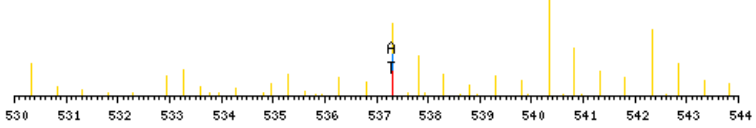

zoomed in precursor plot; T=theoretical m/z, A=acquired m/z

| b <sup>+</sup> | #  | AA | #  | y <sup>+</sup> | y <sup>2+</sup> |
|----------------|----|----|----|----------------|-----------------|
| 100.0762       | 1  | A  | 10 |                |                 |
| 213.1603       | 2  | L  | 9  | 974.5271       | 487.7675        |
| 314.2080       | 3  | T  | 8  | 861.4430       | 431.2254        |
| 401.2400       | 4  | S  | 7  | 760.3953       | 380.7016        |
| 530.2826       | 5  | E  | 6  | 673.3633       | 337.1856        |
| 643.3666       | 6  | L  | 5  | 544.3207       | 272.6643        |
| 714.4038       | 7  | A  | 4  | 431.2367       | 216.1222        |
| 828.4467       | 8  | N  | 3  | 360.1995       | 180.6037        |
| 899.4838       | 9  | A  | 2  | 246.1566       | 123.5822        |
|                | 10 | R  | 1  | 175.1195       | 88.0637         |

N-term: +29.04

ALVNDPQPEHPLR, MH+ 1513.8127, m/z 505.2757  
 L OS G26 P150811 220811-s1.02841.02841.3.dta

scan 2841; 3.9e+000

X-range:

-

MassTol: Y-zoom:

MassType:

AVG  MONO

Axis:

1  2

Label:

I  M  -

Ions:

a  +  2+  3+

b  +  2+  3+

c  +  2+  3+

x  +  2+  3+

y  +  2+  3+

z  +  2+  3+

hide H<sub>2</sub>O/NH<sub>3</sub>

zoom 112-122

GO

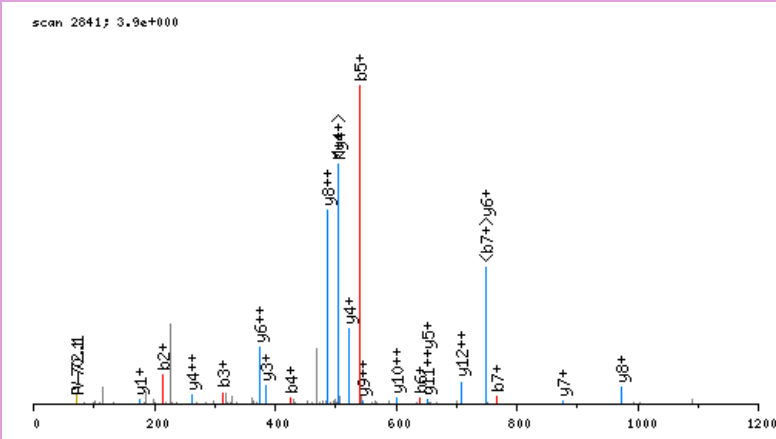

click image to zoom in; click top corners to zoom out [\[precursor±\]](#)

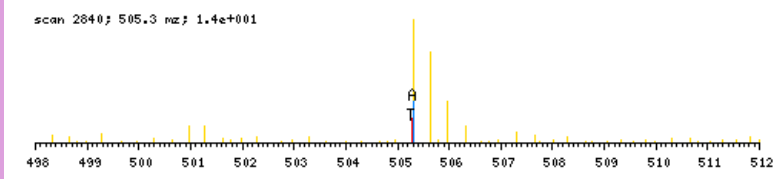

zoomed in precursor plot; T=theoretical m/z, A=acquired m/z

| b <sup>+</sup> | #  | AA # | y <sup>+</sup> | y <sup>2+</sup> |
|----------------|----|------|----------------|-----------------|
| 100.0762       | 1  | A 13 |                |                 |
| 213.1603       | 2  | L 12 | 1414.7443      | 707.8761        |
| 312.2287       | 3  | V 11 | 1301.6602      | 651.3340        |
| 426.2716       | 4  | N 10 | 1202.5918      | 601.7998        |
| 541.2986       | 5  | D 9  | 1088.5489      | 544.7784        |
| 638.3513       | 6  | P 8  | 973.5219       | 487.2649        |
| 766.4099       | 7  | Q 7  | 876.4692       | 438.7385        |
| 863.4627       | 8  | P 6  | 748.4106       | 374.7092        |
| 992.5053       | 9  | E 5  | 651.3578       | 326.1828        |
| 1129.5642      | 10 | H 4  | 522.3152       | 261.6615        |
| 1226.6169      | 11 | P 3  | 385.2563       | 193.1321        |
| 1339.7010      | 12 | L 2  | 288.2036       | 144.6057        |
|                | 13 | R 1  | 175.1195       | 88.0637         |

N-term:+29.04

AMDECADEGGRPQR, MH+ 1619.6905, m/z 540.5684  
 L OS G27 P150811 220811-s1.01928.01928.3.dta

scan 1928; 1.0e+000

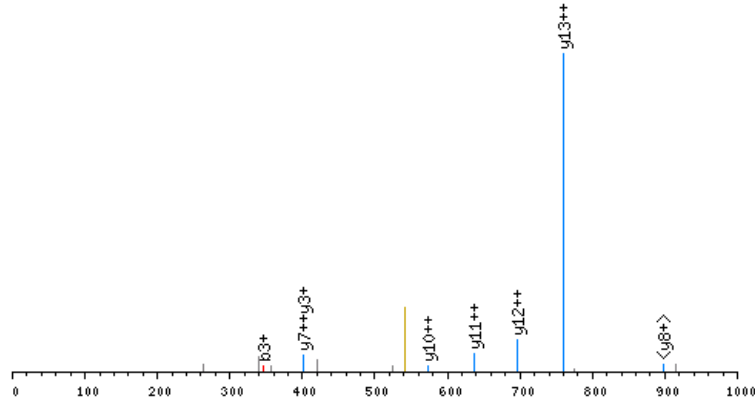

click image to zoom in; click top corners to zoom out [\[precursor±\]](#)

scan 1927; 540.6 m/z; 2.0e+000

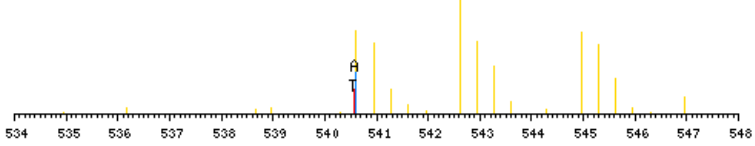

zoomed in precursor plot; T=theoretical m/z, A=acquired m/z

X-range:

-

MassTol: Y-zoom:

MassType:

AVG  MONO

Axis:

1  2

Label:

I  M  -

Ions:

a  +  2+  3+

b  +  2+  3+

c  +  2+  3+

x  +  2+  3+

y  +  2+  3+

z  +  2+  3+

hide H<sub>2</sub>O/NH<sub>3</sub>

zoom 112-122

GO

| b <sup>+</sup> | #  | AA # | y <sup>+</sup> | y <sup>2+</sup> |
|----------------|----|------|----------------|-----------------|
| 100.0762       | 1  | A 14 |                |                 |
| 231.1167       | 2  | M 13 | 1520.6222      | 760.8150        |
| 346.1436       | 3  | D 12 | 1389.5817      | 695.2947        |
| 475.1862       | 4  | E 11 | 1274.5547      | 637.7813        |
| 635.2168       | 5  | C 10 | 1145.5121      | 573.2600        |
| 706.2539       | 6  | A 9  | 985.4815       | 493.2447        |
| 821.2809       | 7  | D 8  | 914.4444       | 457.7261        |
| 950.3235       | 8  | E 7  | 799.4175       | 400.2126        |
| 1007.3449      | 9  | G 6  | 670.3749       | 335.6914        |
| 1064.3664      | 10 | G 5  | 613.3534       | 307.1806        |
| 1220.4675      | 11 | R 4  | 556.3320       | 278.6699        |
| 1317.5203      | 12 | P 3  | 400.2308       | 200.6193        |
| 1445.5789      | 13 | Q 2  | 303.1781       | 152.0930        |
|                | 14 | R 1  | 175.1195       | 88.0637         |

N-term:+29.04 C(5):+160.03



AMEGPWKTVAIAADR, MH+ 1671.8892, m/z 557.9679  
 L OS G27 P150811 220811-s1.05959.05959.3.dta

X-range:

-

MassTol: Y-zoom:

MassType:

AVG  MONO

Axis:

1  2

Label:

I  M  -

Ions:

a  +  2+  3+

b  +  2+  3+

c  +  2+  3+

x  +  2+  3+

y  +  2+  3+

z  +  2+  3+

hide H<sub>2</sub>O/NH<sub>3</sub>

zoom 112-122

GO

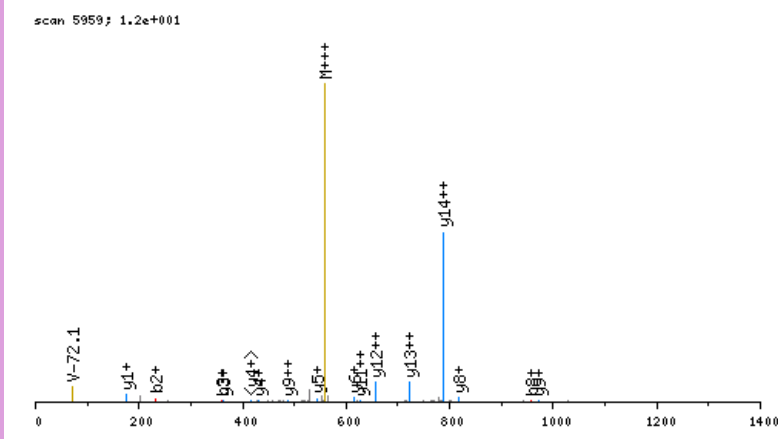

click image to zoom in; click top corners to zoom out [\[precursor±\]](#)

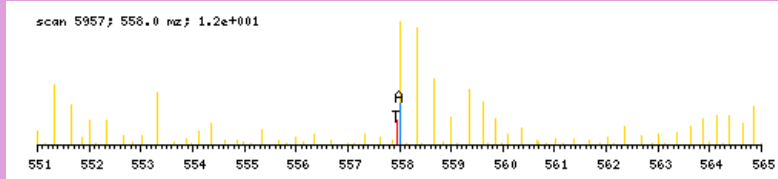

zoomed in precursor plot; T=theoretical m/z, A=acquired m/z

| b <sup>+</sup> | #  | AA # | y <sup>+</sup> | y <sup>2+</sup> |
|----------------|----|------|----------------|-----------------|
| 100.0762       | 1  | A 15 |                |                 |
| 231.1167       | 2  | M 14 | 1572.8209      | 786.9143        |
| 360.1593       | 3  | E 13 | 1441.7804      | 721.3941        |
| 417.1808       | 4  | G 12 | 1312.7378      | 656.8728        |
| 514.2335       | 5  | P 11 | 1255.7163      | 628.3621        |
| 700.3128       | 6  | W 10 | 1158.6636      | 579.8357        |
| 856.4391       | 7  | K 9  | 972.5842       | 486.7960        |
| 957.4868       | 8  | T 8  | 816.4579       | 408.7329        |
| 1056.5552      | 9  | V 7  | 715.4103       | 358.2090        |
| 1127.5923      | 10 | A 6  | 616.3418       | 308.6748        |
| 1240.6764      | 11 | I 5  | 545.3047       | 273.1563        |
| 1311.7135      | 12 | A 4  | 432.2207       | 216.6142        |
| 1382.7506      | 13 | A 3  | 361.1836       | 181.0957        |
| 1497.7776      | 14 | D 2  | 290.1464       | 145.5771        |
|                | 15 | R 1  | 175.1195       | 88.0637         |

N-term:+29.04 K(7):+156.13

AMPVFFTEPELKPKR, MH+ 1695.0032, m/z 424.5063  
 L OS G28 P150811 220811-s1.06111.06111.4.dta

X-range:

-

MassTol: Y-zoom:

MassType:

AVG  MONO

Axis:

1  2

Label:

I  M  -

Ions:

a  +  2+  3+

b  +  2+  3+

c  +  2+  3+

x  +  2+  3+

y  +  2+  3+

z  +  2+  3+

hide H<sub>2</sub>O/NH<sub>3</sub>

zoom 112-122

GO

scan 6111; 5.1e+000

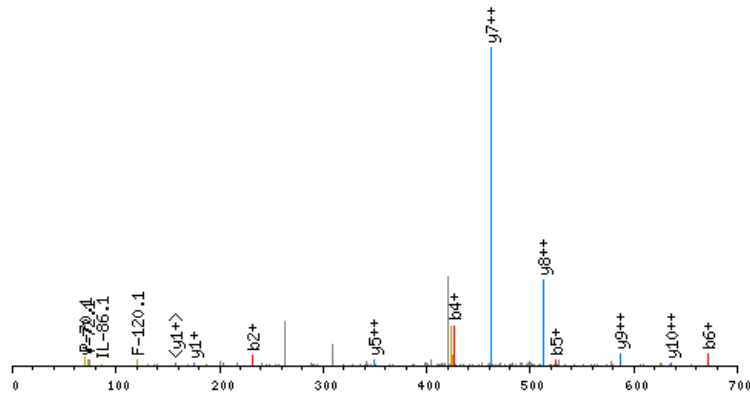

click image to zoom in; click top corners to zoom out [\[precursor±\]](#)

scan 6108; 424.5 mz; 4.9e+000

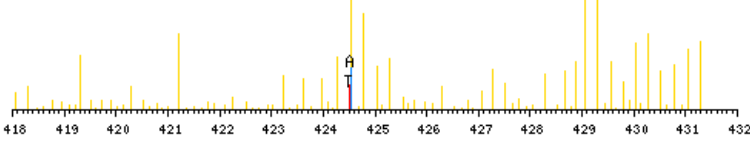

zoomed in precursor plot; T=theoretical m/z, A=acquired m/z

| b <sup>+</sup> | #  | AA | #  | y <sup>+</sup> | y <sup>2+</sup> |
|----------------|----|----|----|----------------|-----------------|
| 100.0762       | 1  | A  | 14 |                |                 |
| 231.1167       | 2  | M  | 13 | 1595.9348      | 798.4713        |
| 328.1695       | 3  | P  | 12 | 1464.8943      | 732.9511        |
| 427.2379       | 4  | V  | 11 | 1367.8416      | 684.4247        |
| 524.2906       | 5  | P  | 10 | 1268.7731      | 634.8905        |
| 671.3591       | 6  | F  | 9  | 1171.7204      | 586.3641        |
| 772.4067       | 7  | T  | 8  | 1024.6520      | 512.8299        |
| 869.4595       | 8  | P  | 7  | 923.6043       | 462.3061        |
| 998.5021       | 9  | E  | 6  | 826.5515       | 413.7797        |
| 1111.5862      | 10 | L  | 5  | 697.5089       | 349.2584        |
| 1267.7125      | 11 | K  | 4  | 584.4249       | 292.7163        |
| 1364.7652      | 12 | P  | 3  | 428.2986       | 214.6532        |
| 1520.8915      | 13 | K  | 2  | 331.2458       | 166.1268        |
|                | 14 | R  | 1  | 175.1195       | 88.0637         |

N-term:+29.04 K(11):+156.13  
 K(13):+156.13

AMQISEKEDDDNEKR, MH+ 1891.9072, m/z 473.7323  
 L OS G28 P150811 220811-s1.02015.02015.4.dta

X-range:

-

MassTol: Y-zoom:

MassType:

AVG  MONO

Axis:

1  2

Label:

I  M  -

Ions:

a  +  2+  3+

b  +  2+  3+

c  +  2+  3+

x  +  2+  3+

y  +  2+  3+

z  +  2+  3+

hide H<sub>2</sub>O/NH<sub>3</sub>

zoom 112-122

GO

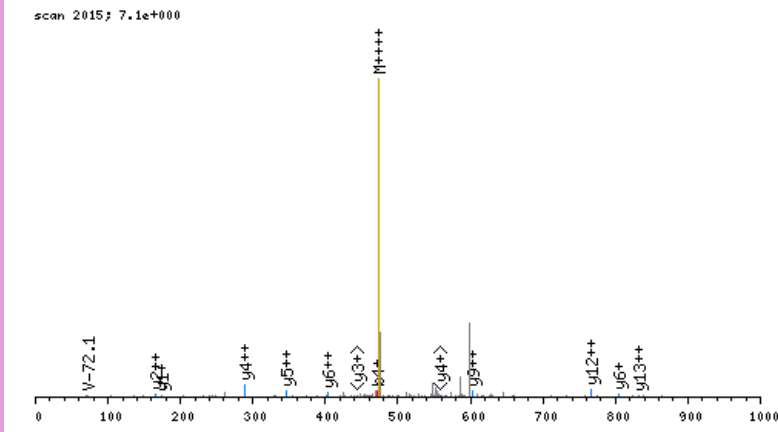

click image to zoom in; click top corners to zoom out [\[precursor±\]](#)

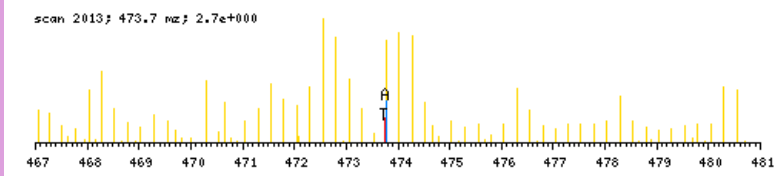

zoomed in precursor plot; T=theoretical m/z, A=acquired m/z

| b <sup>+</sup> | #  | AA # | y <sup>+</sup> | y <sup>2+</sup> |
|----------------|----|------|----------------|-----------------|
| 100.0762       | 1  | A 15 |                |                 |
| 231.1167       | 2  | M 14 | 1792.8388      | 896.9233        |
| 359.1753       | 3  | Q 13 | 1661.7983      | 831.4031        |
| 472.2593       | 4  | I 12 | 1533.7397      | 767.3738        |
| 559.2914       | 5  | S 11 | 1420.6557      | 710.8317        |
| 688.3340       | 6  | E 10 | 1333.6236      | 667.3157        |
| 844.4603       | 7  | K 9  | 1204.5810      | 602.7944        |
| 973.5029       | 8  | E 8  | 1048.4547      | 524.7313        |
| 1088.5298      | 9  | D 7  | 919.4122       | 460.2100        |
| 1203.5567      | 10 | D 6  | 804.3852       | 402.6965        |
| 1318.5837      | 11 | D 5  | 689.3583       | 345.1830        |
| 1432.6266      | 12 | N 4  | 574.3313       | 287.6696        |
| 1561.6692      | 13 | E 3  | 460.2884       | 230.6481        |
| 1717.7955      | 14 | K 2  | 331.2458       | 166.1268        |
|                | 15 | R 1  | 175.1195       | 88.0637         |

N-term:+29.04 K(7):+156.13  
 K(14):+156.13

AMSTTSVTSSQPGKLR, MH+ 1706.9111, m/z 569.6419  
 L OS G26 P150811 220811-s1.02556.02556.3.dta

X-range:

-

MassTol: Y-zoom:

MassType:

AVG  MONO

Axis:

1  2

Label:

I  M  -

Ions:

a  +  2+  3+

b  +  2+  3+

c  +  2+  3+

x  +  2+  3+

y  +  2+  3+

z  +  2+  3+

hide H<sub>2</sub>O/NH<sub>3</sub>

zoom 112-122

GO

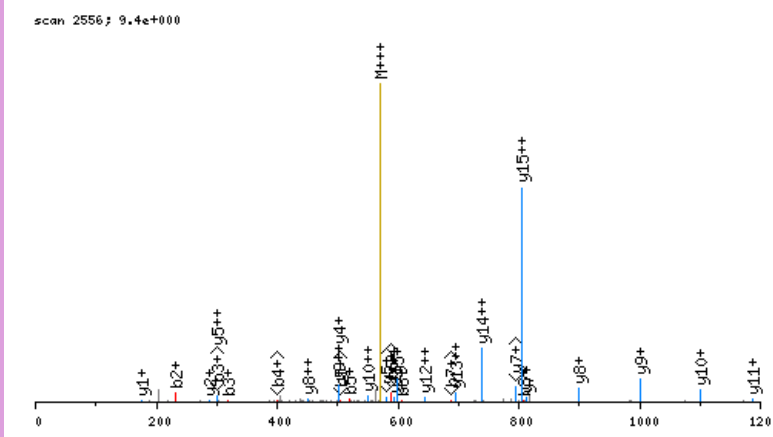

click image to zoom in; click top corners to zoom out [\[precursor±\]](#)

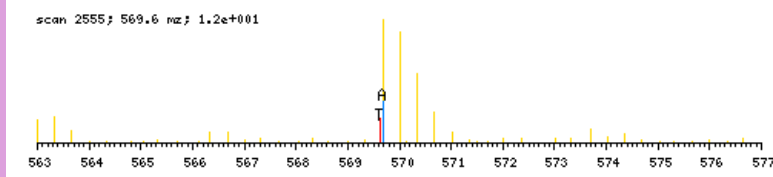

zoomed in precursor plot; T=theoretical m/z, A=acquired m/z

| b <sup>+</sup> | #  | AA # | y <sup>+</sup> | y <sup>2+</sup> |
|----------------|----|------|----------------|-----------------|
| 100.0762       | 1  | A 16 |                |                 |
| 231.1167       | 2  | M 15 | 1607.8427      | 804.4253        |
| 318.1487       | 3  | S 14 | 1476.8022      | 738.9050        |
| 419.1964       | 4  | T 13 | 1389.7702      | 695.3890        |
| 520.2441       | 5  | T 12 | 1288.7225      | 644.8652        |
| 607.2761       | 6  | S 11 | 1187.6748      | 594.3413        |
| 706.3445       | 7  | V 10 | 1100.6428      | 550.8253        |
| 807.3922       | 8  | T 9  | 1001.5744      | 501.2911        |
| 894.4242       | 9  | S 8  | 900.5267       | 450.7673        |
| 981.4563       | 10 | S 7  | 813.4947       | 407.2513        |
| 1109.5148      | 11 | Q 6  | 726.4627       | 363.7352        |
| 1206.5676      | 12 | P 5  | 598.4041       | 299.7060        |
| 1263.5891      | 13 | G 4  | 501.3513       | 251.1796        |
| 1419.7154      | 14 | K 3  | 444.3299       | 222.6688        |
| 1532.7994      | 15 | L 2  | 288.2036       | 144.6057        |
|                | 16 | R 1  | 175.1195       | 88.0637         |

N-term:+29.04 K(14):+156.13

ANDGSFLELFKR, MH+ 1464.8487, m/z 488.9544  
 H OS G27 P150811 220811-s1.07063.07063.3.dta

X-range:

-

MassTol: Y-zoom:

MassType:

AVG  MONO

Axis:

1  2

Label:

I  M  -

Ions:

a  +  2+  3+

b  +  2+  3+

c  +  2+  3+

x  +  2+  3+

y  +  2+  3+

z  +  2+  3+

hide H<sub>2</sub>O/NH<sub>3</sub>

zoom 112-122

GO

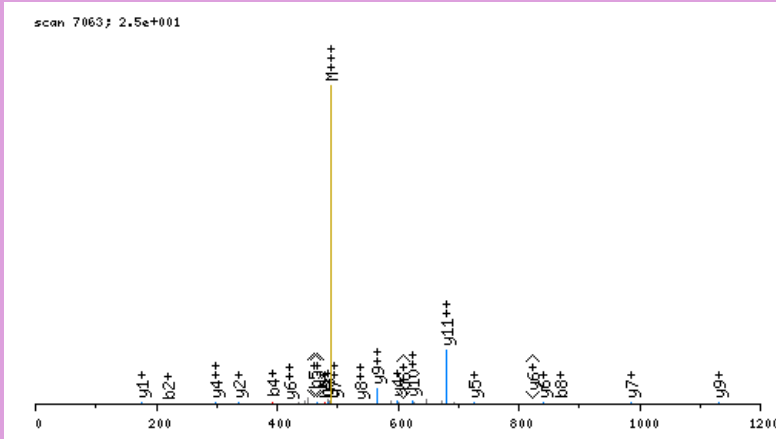

click image to zoom in; click top corners to zoom out [\[precursor±\]](#)

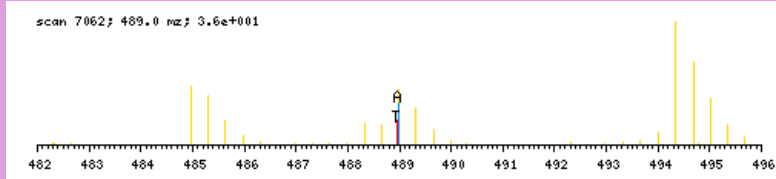

zoomed in precursor plot; T=theoretical m/z, A=acquired m/z

| b <sup>+</sup> | #  | AA # | y <sup>+</sup> | y <sup>2+</sup> |
|----------------|----|------|----------------|-----------------|
| 106.1080       | 1  | A 12 |                |                 |
| 220.1509       | 2  | N 11 | 1359.7485      | 680.3782        |
| 335.1779       | 3  | D 10 | 1245.7056      | 623.3567        |
| 392.1993       | 4  | G 9  | 1130.6786      | 565.8432        |
| 479.2314       | 5  | S 8  | 1073.6572      | 537.3325        |
| 626.2998       | 6  | F 7  | 986.6251       | 493.8165        |
| 739.3839       | 7  | L 6  | 839.5567       | 420.2823        |
| 868.4264       | 8  | E 5  | 726.4727       | 363.7402        |
| 981.5105       | 9  | L 4  | 597.4301       | 299.2190        |
| 1128.5789      | 10 | F 3  | 484.3460       | 242.6769        |
| 1290.7370      | 11 | K 2  | 337.2776       | 169.1427        |
|                | 12 | R 1  | 175.1195       | 88.0637         |

N-term:+35.07 K(11):+162.16

ANINIPMGAFRPGAGQPPR, MH+ 1992.0601, m/z 664.6916  
 L OS G26 P150811 220811-s1.05191.05191.3.dta

X-range:

-

MassTol: Y-zoom:

MassType:

AVG  MONO

Axis:

1  2

Label:

I  M  -

Ions:

a  +  2+  3+

b  +  2+  3+

c  +  2+  3+

x  +  2+  3+

y  +  2+  3+

z  +  2+  3+

hide H<sub>2</sub>O/NH<sub>3</sub>

zoom 112-122

GO

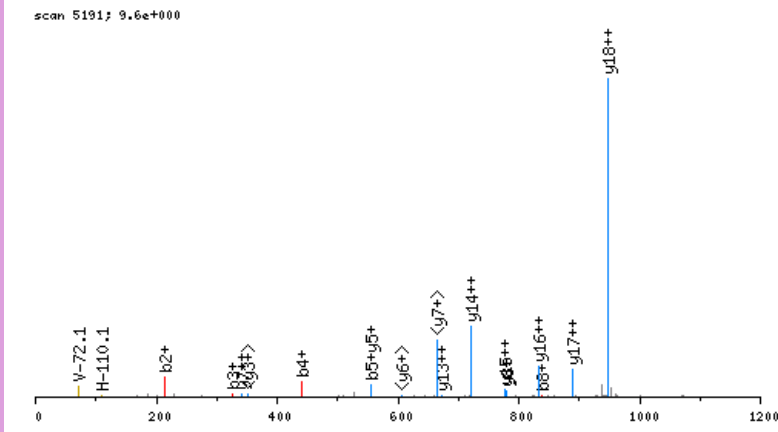

click image to zoom in; click top corners to zoom out [\[precursor±\]](#)

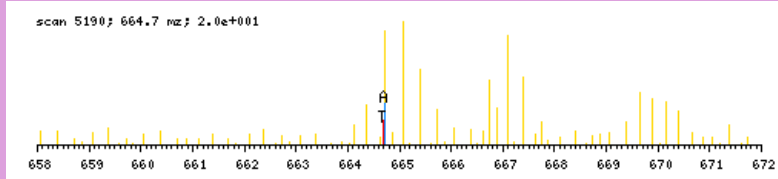

zoomed in precursor plot; T=theoretical m/z, A=acquired m/z

| b <sup>+</sup> | #  | AA # | y <sup>+</sup> | y <sup>2+</sup> |
|----------------|----|------|----------------|-----------------|
| 100.0762       | 1  | A 19 |                |                 |
| 214.1191       | 2  | N 18 | 1892.9917      | 946.9998        |
| 327.2032       | 3  | I 17 | 1778.9488      | 889.9783        |
| 441.2461       | 4  | N 16 | 1665.8648      | 833.4363        |
| 554.3302       | 5  | I 15 | 1551.8218      | 776.4148        |
| 651.3830       | 6  | P 14 | 1438.7378      | 719.8728        |
| 782.4234       | 7  | M 13 | 1341.6850      | 671.3464        |
| 839.4449       | 8  | G 12 | 1210.6445      | 605.8262        |
| 910.4820       | 9  | A 11 | 1153.6231      | 577.3154        |
| 1057.5504      | 10 | F 10 | 1082.5859      | 541.7969        |
| 1213.6515      | 11 | R 9  | 935.5175       | 468.2627        |
| 1310.7043      | 12 | P 8  | 779.4164       | 390.2121        |
| 1367.7258      | 13 | G 7  | 682.3636       | 341.6857        |
| 1438.7629      | 14 | A 6  | 625.3422       | 313.1750        |
| 1495.7844      | 15 | G 5  | 554.3051       | 277.6564        |
| 1623.8429      | 16 | Q 4  | 497.2836       | 249.1457        |
| 1720.8957      | 17 | P 3  | 369.2250       | 185.1164        |
| 1817.9485      | 18 | P 2  | 272.1723       | 136.5900        |
|                | 19 | R 1  | 175.1195       | 88.0637         |

N-term:+29.04

ANIPDLPSSYIPSR, MH+ 1563.8595, m/z 521.9580  
 H OS G25 P150811 220811-s1.06945.06945.3.dta

X-range:

-

MassTol: Y-zoom:

MassType:

AVG  MONO

Axis:

1  2

Label:

I  M  -

Ions:

a  +  2+  3+

b  +  2+  3+

c  +  2+  3+

x  +  2+  3+

y  +  2+  3+

z  +  2+  3+

hide H<sub>2</sub>O/NH<sub>3</sub>

zoom 112-122

GO

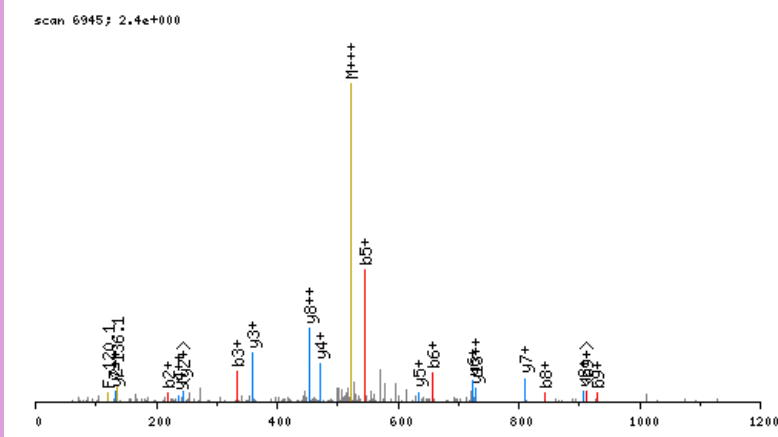

click image to zoom in; click top corners to zoom out [\[precursor±\]](#)

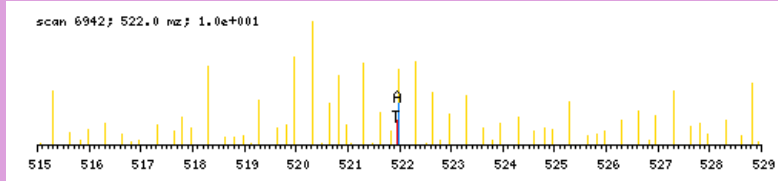

zoomed in precursor plot; T=theoretical m/z, A=acquired m/z

| b <sup>+</sup> | #  | AA # | y <sup>+</sup> | y <sup>2+</sup> |
|----------------|----|------|----------------|-----------------|
| 106.1080       | 1  | A 14 |                |                 |
| 220.1509       | 2  | N 13 | 1458.7593      | 729.8835        |
| 333.2350       | 3  | I 12 | 1344.7163      | 672.8621        |
| 430.2878       | 4  | P 11 | 1231.6323      | 616.3201        |
| 545.3147       | 5  | D 10 | 1134.5795      | 567.7937        |
| 658.3988       | 6  | L 9  | 1019.5526      | 510.2802        |
| 755.4515       | 7  | P 8  | 906.4685       | 453.7382        |
| 842.4836       | 8  | S 7  | 809.4157       | 405.2118        |
| 929.5156       | 9  | S 6  | 722.3837       | 361.6958        |
| 1092.5789      | 10 | Y 5  | 635.3517       | 318.1798        |
| 1205.6630      | 11 | I 4  | 472.2884       | 236.6481        |
| 1302.7158      | 12 | P 3  | 359.2043       | 180.1061        |
| 1389.7478      | 13 | S 2  | 262.1515       | 131.5797        |
|                | 14 | R 1  | 175.1195       | 88.0637         |

N-term:+35.07

ANNVMSGTTMYPGIADR, MH+ 1882.8791, m/z 628.2979  
 L OS G25 P150811 220811-s1.05615.05615.3.dta

X-range:

-

MassTol: Y-zoom:

MassType:

AVG  MONO

Axis:

1  2

Label:

I  M  -

Ions:

a  +  2+  3+

b  +  2+  3+

c  +  2+  3+

x  +  2+  3+

y  +  2+  3+

z  +  2+  3+

hide H<sub>2</sub>O/NH<sub>3</sub>

zoom 112-122

GO

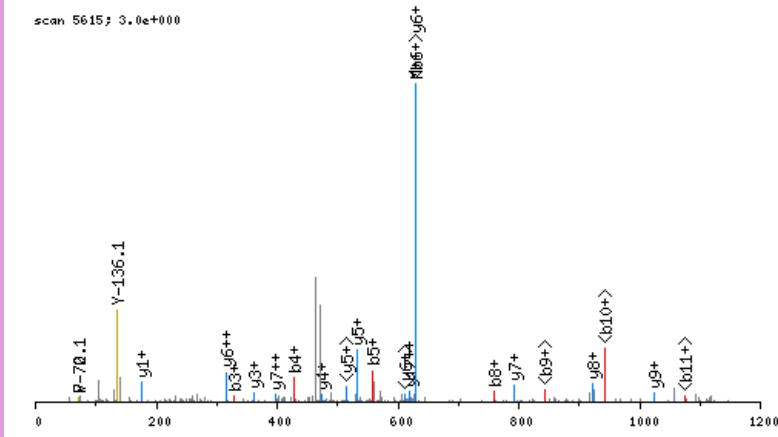

click image to zoom in; click top corners to zoom out [\[precursor±\]](#)

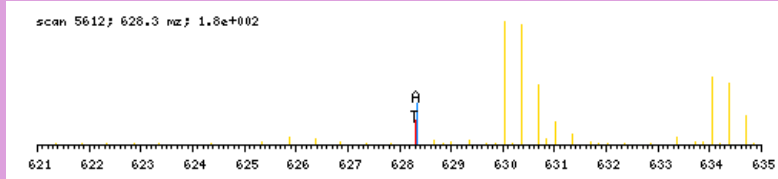

zoomed in precursor plot; T=theoretical m/z, A=acquired m/z

| b <sup>+</sup> | #  | AA # | y <sup>+</sup> | y <sup>2+</sup> |
|----------------|----|------|----------------|-----------------|
| 100.0762       | 1  | A 18 |                |                 |
| 214.1191       | 2  | N 17 | 1783.8107      | 892.4093        |
| 328.1621       | 3  | N 16 | 1669.7678      | 835.3878        |
| 427.2305       | 4  | V 15 | 1555.7249      | 778.3663        |
| 558.2710       | 5  | M 14 | 1456.6565      | 728.8321        |
| 645.3030       | 6  | S 13 | 1325.6160      | 663.3119        |
| 702.3245       | 7  | G 12 | 1238.5839      | 619.7959        |
| 759.3459       | 8  | G 11 | 1181.5625      | 591.2852        |
| 860.3936       | 9  | T 10 | 1124.5410      | 562.7744        |
| 961.4413       | 10 | T 9  | 1023.4933      | 512.2506        |
| 1092.4818      | 11 | M 8  | 922.4457       | 461.7267        |
| 1255.5451      | 12 | Y 7  | 791.4052       | 396.2065        |
| 1352.5979      | 13 | P 6  | 628.3418       | 314.6748        |
| 1409.6193      | 14 | G 5  | 531.2891       | 266.1485        |
| 1522.7034      | 15 | I 4  | 474.2676       | 237.6377        |
| 1593.7405      | 16 | A 3  | 361.1836       | 181.0957        |
| 1708.7674      | 17 | D 2  | 290.1464       | 145.5771        |
|                | 18 | R 1  | 175.1195       | 88.0637         |

N-term:+29.04



ANQDTIFEGIGGPR, MH+ 1508.7921, m/z 754.8997  
 H OS G25 P150811 220811-s1.06256.06256.2.dta

X-range:

-

MassTol: Y-zoom:

MassType:

AVG  MONO

Axis:

1  2

Label:

I  M  -

Ions:

a  +  2+  3+

b  +  2+  3+

c  +  2+  3+

x  +  2+  3+

y  +  2+  3+

z  +  2+  3+

hide H<sub>2</sub>O/NH<sub>3</sub>

zoom 112-122

GO

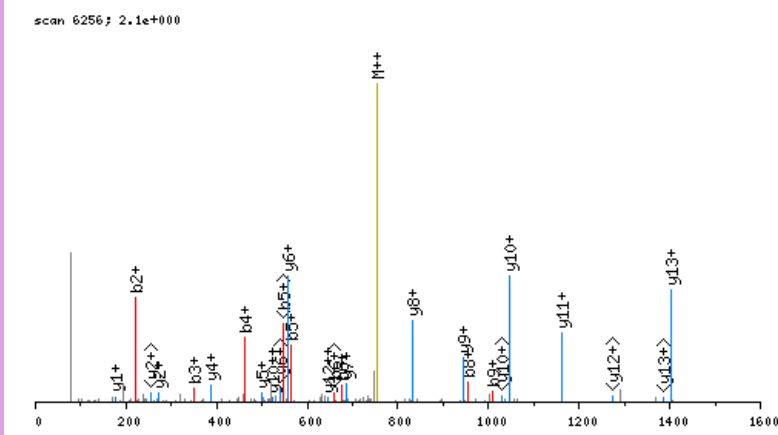

click image to zoom in; click top corners to zoom out [\[precursor±\]](#)

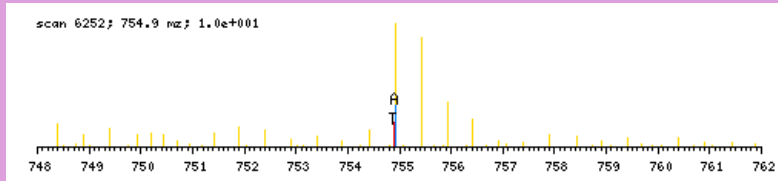

zoomed in precursor plot; T=theoretical m/z, A=acquired m/z

| b <sup>+</sup> | #  | AA # | y <sup>+</sup> | y <sup>2+</sup> |
|----------------|----|------|----------------|-----------------|
| 106.1080       | 1  | A 14 |                |                 |
| 220.1509       | 2  | N 13 | 1403.6919      | 702.3499        |
| 348.2095       | 3  | Q 12 | 1289.6490      | 645.3284        |
| 463.2365       | 4  | D 11 | 1161.5904      | 581.2991        |
| 564.2841       | 5  | T 10 | 1046.5635      | 523.7856        |
| 677.3682       | 6  | I 9  | 945.5158       | 473.2618        |
| 824.4366       | 7  | F 8  | 832.4317       | 416.7198        |
| 953.4792       | 8  | E 7  | 685.3633       | 343.1856        |
| 1010.5007      | 9  | G 6  | 556.3207       | 278.6643        |
| 1123.5847      | 10 | I 5  | 499.2993       | 250.1535        |
| 1180.6062      | 11 | G 4  | 386.2152       | 193.6115        |
| 1237.6277      | 12 | G 3  | 329.1937       | 165.1008        |
| 1334.6804      | 13 | P 2  | 272.1723       | 136.5900        |
|                | 14 | R 1  | 175.1195       | 88.0637         |

N-term:+35.07

ANVIDTIPEPLR, MH+ 1365.7742, m/z 683.3907  
 L OS G25 P150811 220811-s1.07074.07074.2.dta

X-range:

-

MassTol: Y-zoom:

MassType:

AVG  MONO

Axis:

1  2

Label:

I  M  -

Ions:

a  +  2+  3+

b  +  2+  3+

c  +  2+  3+

x  +  2+  3+

y  +  2+  3+

z  +  2+  3+

hide H<sub>2</sub>O/NH<sub>3</sub>

zoom 112-122

GO

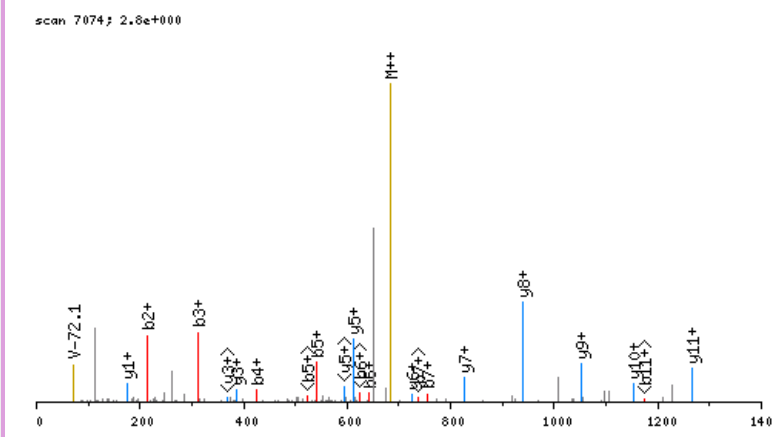

click image to zoom in; click top corners to zoom out [\[precursor±\]](#)

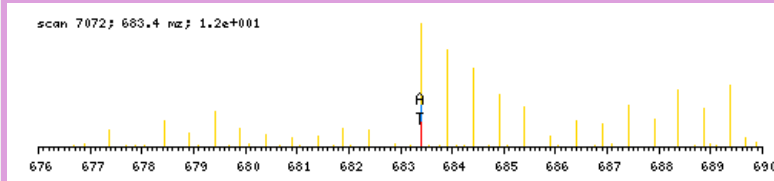

zoomed in precursor plot; T=theoretical m/z, A=acquired m/z

| b <sup>+</sup> | #  | AA # | y <sup>+</sup> | y <sup>2+</sup> |
|----------------|----|------|----------------|-----------------|
| 100.0762       | 1  | A 12 |                |                 |
| 214.1191       | 2  | N 11 | 1266.7058      | 633.8568        |
| 313.1876       | 3  | V 10 | 1152.6628      | 576.8353        |
| 426.2716       | 4  | I 9  | 1053.5944      | 527.3011        |
| 541.2986       | 5  | D 8  | 940.5104       | 470.7591        |
| 642.3462       | 6  | T 7  | 825.4834       | 413.2456        |
| 755.4303       | 7  | I 6  | 724.4357       | 362.7218        |
| 852.4831       | 8  | P 5  | 611.3517       | 306.1798        |
| 981.5257       | 9  | E 4  | 514.2989       | 257.6534        |
| 1078.5784      | 10 | P 3  | 385.2563       | 193.1321        |
| 1191.6625      | 11 | L 2  | 288.2036       | 144.6057        |
|                | 12 | R 1  | 175.1195       | 88.0637         |

N-term:+29.04

ANVYVDAVKDSGR, MH+ 1449.7702, m/z 483.9282  
 L OS G27 P150811 220811-s1.03525.03525.3.dta

X-range:

-

MassTol: Y-zoom:

MassType:

AVG  MONO

Axis:

1  2

Label:

I  M  -

Ions:

a  +  2+  3+

b  +  2+  3+

c  +  2+  3+

x  +  2+  3+

y  +  2+  3+

z  +  2+  3+

hide H<sub>2</sub>O/NH<sub>3</sub>

zoom 112-122

GO

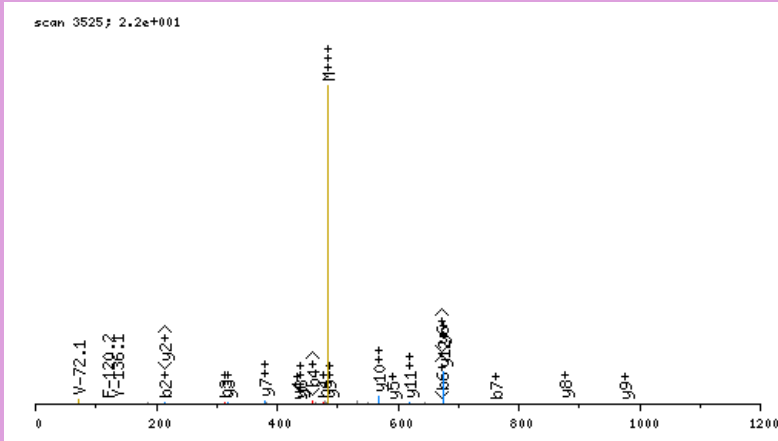

click image to zoom in; click top corners to zoom out [\[precursor±\]](#)

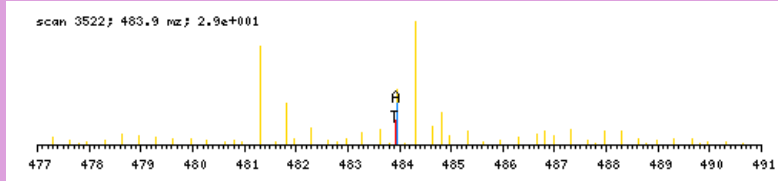

zoomed in precursor plot; T=theoretical m/z, A=acquired m/z

| b <sup>+</sup> | #  | AA # | y <sup>+</sup> | y <sup>2+</sup> |
|----------------|----|------|----------------|-----------------|
| 100.0762       | 1  | A 13 |                |                 |
| 214.1191       | 2  | N 12 | 1350.7018      | 675.8548        |
| 313.1876       | 3  | V 11 | 1236.6589      | 618.8333        |
| 476.2509       | 4  | Y 10 | 1137.5904      | 569.2991        |
| 575.3193       | 5  | V 9  | 974.5271       | 487.7675        |
| 690.3462       | 6  | D 8  | 875.4587       | 438.2333        |
| 761.3834       | 7  | A 7  | 760.4318       | 380.7198        |
| 860.4518       | 8  | V 6  | 689.3946       | 345.2012        |
| 1016.5781      | 9  | K 5  | 590.3262       | 295.6670        |
| 1131.6050      | 10 | D 4  | 434.1999       | 217.6039        |
| 1218.6370      | 11 | S 3  | 319.1730       | 160.0904        |
| 1275.6585      | 12 | G 2  | 232.1410       | 116.5744        |
|                | 13 | R 1  | 175.1195       | 88.0637         |

N-term:+29.04 K(9):+156.13

APAPPPAASFTPAEVQR, MH+ 1734.9179, m/z 578.9775  
 L OS G24 P150811 220811-s1.03421.03421.3.dta

X-range:

-

MassTol: Y-zoom:

MassType:

AVG  MONO

Axis:

1  2

Label:

I  M  -

Ions:

a  +  2+  3+

b  +  2+  3+

c  +  2+  3+

x  +  2+  3+

y  +  2+  3+

z  +  2+  3+

hide H<sub>2</sub>O/NH<sub>3</sub>

zoom 112-122

GO

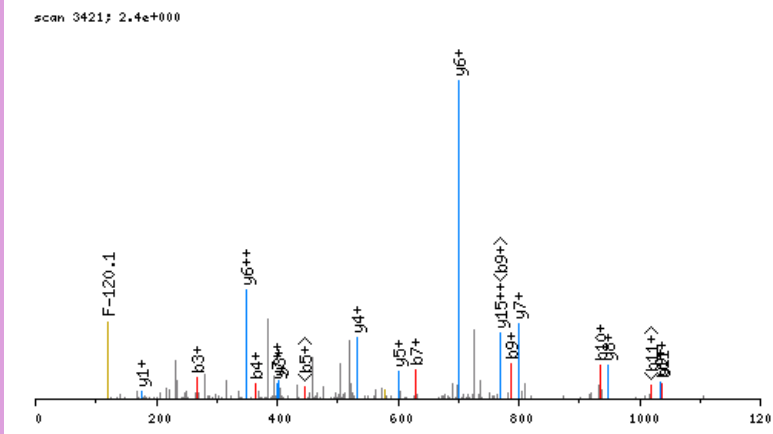

click image to zoom in; click top corners to zoom out [\[precursor±\]](#)

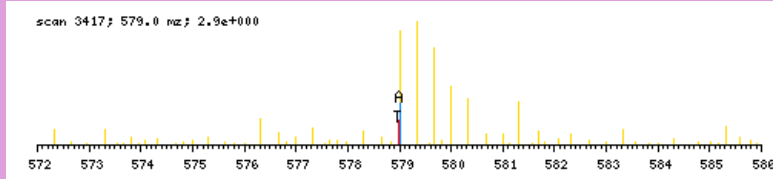

zoomed in precursor plot; T=theoretical m/z, A=acquired m/z

| b <sup>+</sup> | #  | AA # | y <sup>+</sup> | y <sup>2+</sup> |
|----------------|----|------|----------------|-----------------|
| 100.0762       | 1  | A 17 |                |                 |
| 197.1290       | 2  | P 16 | 1635.8495      | 818.4287        |
| 268.1661       | 3  | A 15 | 1538.7967      | 769.9023        |
| 365.2189       | 4  | P 14 | 1467.7596      | 734.3837        |
| 462.2716       | 5  | P 13 | 1370.7068      | 685.8573        |
| 559.3244       | 6  | P 12 | 1273.6541      | 637.3310        |
| 630.3615       | 7  | A 11 | 1176.6013      | 588.8046        |
| 701.3986       | 8  | A 10 | 1105.5642      | 553.2860        |
| 788.4306       | 9  | S 9  | 1034.5271      | 517.7675        |
| 935.4991       | 10 | F 8  | 947.4951       | 474.2514        |
| 1036.5467      | 11 | T 7  | 800.4266       | 400.7172        |
| 1133.5995      | 12 | P 6  | 699.3790       | 350.1934        |
| 1204.6366      | 13 | A 5  | 602.3262       | 301.6670        |
| 1333.6792      | 14 | E 4  | 531.2891       | 266.1485        |
| 1432.7476      | 15 | V 3  | 402.2465       | 201.6272        |
| 1560.8062      | 16 | Q 2  | 303.1781       | 152.0930        |
|                | 17 | R 1  | 175.1195       | 88.0637         |

N-term:+29.04

APDQDEIDCLPGLAKQPSFR, MH+ 2325.2185, m/z 582.0601  
H OS G26 P150811 220811-s1.05724.05724.4.dta

X-range:

-

MassTol: Y-zoom:

MassType:

AVG  MONO

Axis:

1  2

Label:

I  M  -

Ions:

a  +  2+  3+

b  +  2+  3+

c  +  2+  3+

x  +  2+  3+

y  +  2+  3+

z  +  2+  3+

hide H<sub>2</sub>O/NH<sub>3</sub>

zoom 112-122

GO

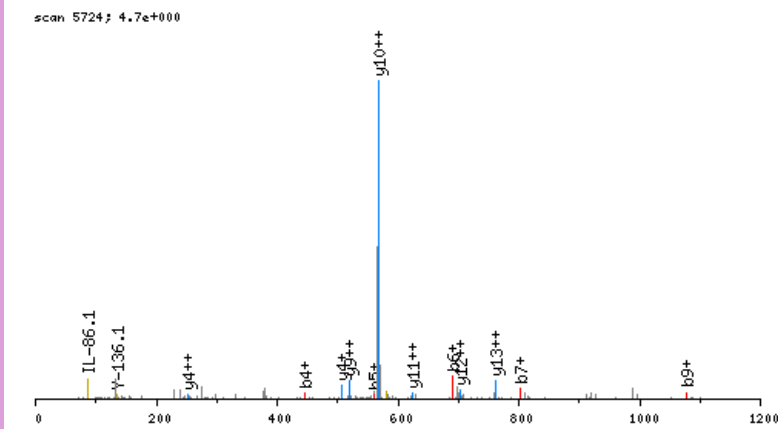

click image to zoom in; click top corners to zoom out [\[precursor±\]](#)

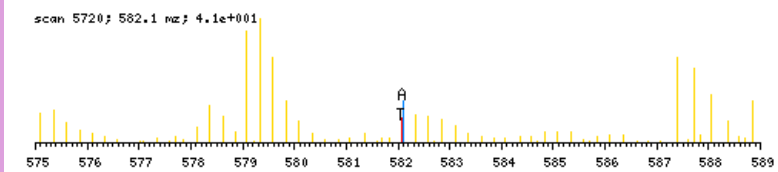

zoomed in precursor plot; T=theoretical m/z, A=acquired m/z

| b <sup>+</sup> | #  | AA | #  | y <sup>+</sup> | y <sup>2+</sup> |
|----------------|----|----|----|----------------|-----------------|
| 106.1080       | 1  | A  | 20 |                |                 |
| 203.1608       | 2  | P  | 19 | 2220.1183      | 1110.5631       |
| 318.1877       | 3  | D  | 18 | 2123.0655      | 1062.0367       |
| 446.2463       | 4  | Q  | 17 | 2008.0386      | 1004.5232       |
| 561.2732       | 5  | D  | 16 | 1879.9800      | 940.4939        |
| 690.3158       | 6  | E  | 15 | 1764.9531      | 882.9804        |
| 803.3999       | 7  | I  | 14 | 1635.9105      | 818.4591        |
| 918.4268       | 8  | D  | 13 | 1522.8264      | 761.9171        |
| 1078.4574      | 9  | C  | 12 | 1407.7995      | 704.4036        |
| 1191.5415      | 10 | L  | 11 | 1247.7689      | 624.3883        |
| 1288.5943      | 11 | P  | 10 | 1134.6848      | 567.8463        |
| 1345.6157      | 12 | G  | 9  | 1037.6320      | 519.3199        |
| 1458.6998      | 13 | L  | 8  | 980.6106       | 490.8092        |
| 1529.7369      | 14 | A  | 7  | 867.5265       | 434.2672        |
| 1691.8950      | 15 | K  | 6  | 796.4894       | 398.7486        |
| 1819.9536      | 16 | Q  | 5  | 634.3313       | 317.6696        |
| 1917.0064      | 17 | P  | 4  | 506.2727       | 253.6403        |
| 2004.0384      | 18 | S  | 3  | 409.2199       | 205.1139        |
| 2151.1068      | 19 | F  | 2  | 322.1879       | 161.5979        |
|                | 20 | R  | 1  | 175.1195       | 88.0637         |

N-term:+35.07 C(9):+160.03  
K(15):+162.16

APEEHPTLLTEAPLNPKANR, MH+ 2254.2196, m/z 564.3103  
 L OS G27 P150811 220811-s1.04890.04890.4.dta

X-range:

-

MassTol: Y-zoom:

MassType:

AVG  MONO

Axis:

1  2

Label:

I  M  -

Ions:

a  +  2+  3+

b  +  2+  3+

c  +  2+  3+

x  +  2+  3+

y  +  2+  3+

z  +  2+  3+

hide H<sub>2</sub>O/NH<sub>3</sub>

zoom 112-122

GO

scan 4890; 2.1e+000

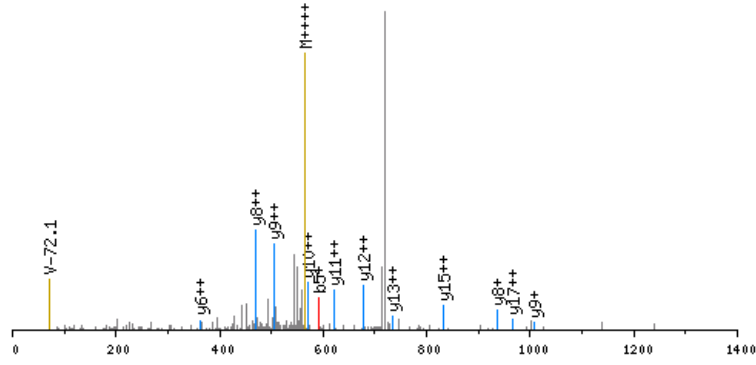

click image to zoom in; click top corners to zoom out [\[precursor±\]](#)

scan 4887; 564.3 mz; 2.2e+002

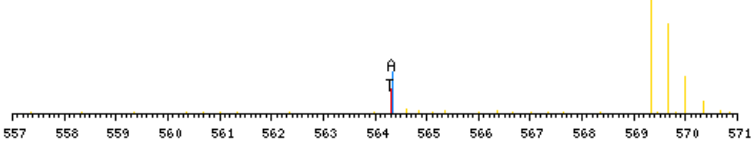

zoomed in precursor plot; T=theoretical m/z, A=acquired m/z

| b <sup>+</sup> | #  | AA # | y <sup>+</sup> | y <sup>2+</sup> |
|----------------|----|------|----------------|-----------------|
| 100.0762       | 1  | A 20 |                |                 |
| 197.1290       | 2  | P 19 | 2155.1512      | 1078.0795       |
| 326.1716       | 3  | E 18 | 2058.0984      | 1029.5531       |
| 455.2142       | 4  | E 17 | 1929.0558      | 965.0318        |
| 592.2731       | 5  | H 16 | 1800.0132      | 900.5105        |
| 689.3258       | 6  | P 15 | 1662.9543      | 831.9811        |
| 790.3735       | 7  | T 14 | 1565.9016      | 783.4547        |
| 903.4576       | 8  | L 13 | 1464.8539      | 732.9308        |
| 1016.5416      | 9  | L 12 | 1351.7698      | 676.3888        |
| 1117.5893      | 10 | T 11 | 1238.6857      | 619.8468        |
| 1246.6319      | 11 | E 10 | 1137.6381      | 569.3229        |
| 1317.6690      | 12 | A 9  | 1008.5955      | 504.8017        |
| 1414.7218      | 13 | P 8  | 937.5584       | 469.2831        |
| 1527.8059      | 14 | L 7  | 840.5056       | 420.7567        |
| 1641.8488      | 15 | N 6  | 727.4215       | 364.2147        |
| 1738.9016      | 16 | P 5  | 613.3786       | 307.1932        |
| 1895.0279      | 17 | K 4  | 516.3258       | 258.6668        |
| 1966.0650      | 18 | A 3  | 360.1995       | 180.6037        |
| 2080.1079      | 19 | N 2  | 289.1624       | 145.0851        |
|                | 20 | R 1  | 175.1195       | 88.0637         |

N-term:+29.04 K(17):+156.13

APEEHPVLLTEAPLNPKANR, MH+ 2252.2403, m/z 563.8155  
 L OS G27 P150811 220811-s1.05108.05108.4.dta

X-range:

-

MassTol: Y-zoom:

MassType:

AVG  MONO

Axis:

1  2

Label:

I  M  -

Ions:

a  +  2+  3+

b  +  2+  3+

c  +  2+  3+

x  +  2+  3+

y  +  2+  3+

z  +  2+  3+

hide H<sub>2</sub>O/NH<sub>3</sub>

zoom 112-122

GO

scan 5108; 1.5e+001

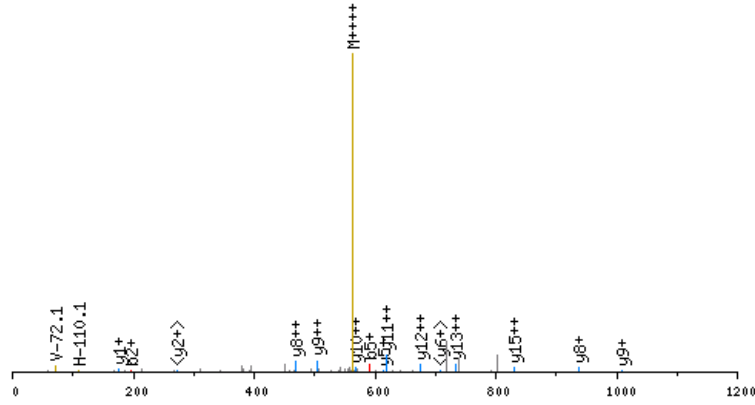

click image to zoom in; click top corners to zoom out [\[precursor±\]](#)

scan 5107; 563.8 mz; 1.5e+001

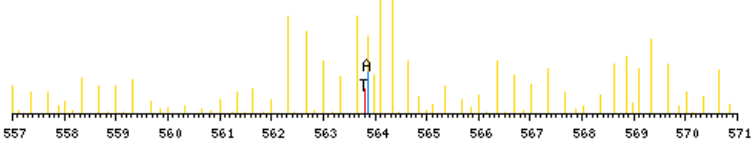

zoomed in precursor plot; T=theoretical m/z, A=acquired m/z

| b <sup>+</sup> | #  | AA | #  | y <sup>+</sup> | y <sup>2+</sup> |
|----------------|----|----|----|----------------|-----------------|
| 100.0762       | 1  | A  | 20 |                |                 |
| 197.1290       | 2  | P  | 19 | 2153.1719      | 1077.0899       |
| 326.1716       | 3  | E  | 18 | 2056.1192      | 1028.5635       |
| 455.2142       | 4  | E  | 17 | 1927.0766      | 964.0422        |
| 592.2731       | 5  | H  | 16 | 1798.0340      | 899.5209        |
| 689.3258       | 6  | P  | 15 | 1660.9751      | 830.9914        |
| 788.3943       | 7  | V  | 14 | 1563.9223      | 782.4651        |
| 901.4783       | 8  | L  | 13 | 1464.8539      | 732.9308        |
| 1014.5624      | 9  | L  | 12 | 1351.7698      | 676.3888        |
| 1115.6101      | 10 | T  | 11 | 1238.6857      | 619.8468        |
| 1244.6527      | 11 | E  | 10 | 1137.6381      | 569.3229        |
| 1315.6898      | 12 | A  | 9  | 1008.5955      | 504.8017        |
| 1412.7425      | 13 | P  | 8  | 937.5584       | 469.2831        |
| 1525.8266      | 14 | L  | 7  | 840.5056       | 420.7567        |
| 1639.8695      | 15 | N  | 6  | 727.4215       | 364.2147        |
| 1736.9223      | 16 | P  | 5  | 613.3786       | 307.1932        |
| 1893.0486      | 17 | K  | 4  | 516.3258       | 258.6668        |
| 1964.0857      | 18 | A  | 3  | 360.1995       | 180.6037        |
| 2078.1286      | 19 | N  | 2  | 289.1624       | 145.0851        |
|                | 20 | R  | 1  | 175.1195       | 88.0637         |

N-term:+29.04 K(17):+156.13

APLDLDKYVEIAR, MH+ 1570.9481, m/z 524.3209  
 H OS G26 P150811 220811-s1.06169.06169.3.dta

X-range:

-

MassTol: Y-zoom:

MassType:

AVG  MONO

Axis:

1  2

Label:

I  M  -

Ions:

a  +  2+  3+

b  +  2+  3+

c  +  2+  3+

x  +  2+  3+

y  +  2+  3+

z  +  2+  3+

hide H<sub>2</sub>O/NH<sub>3</sub>

zoom 112-122

GO

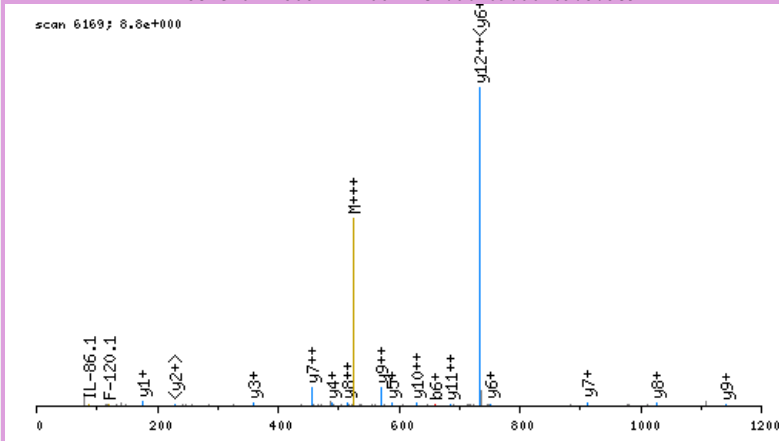

click image to zoom in; click top corners to zoom out [\[precursor±\]](#)

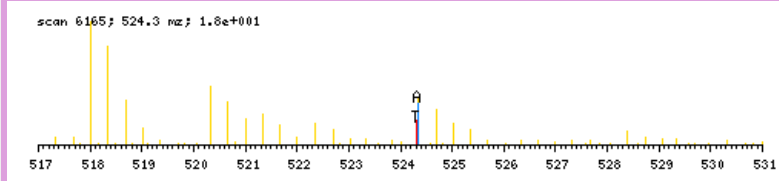

zoomed in precursor plot; T=theoretical m/z, A=acquired m/z

| b <sup>+</sup> | #  | AA # | y <sup>+</sup> | y <sup>2+</sup> |
|----------------|----|------|----------------|-----------------|
| 106.1080       | 1  | A 13 |                |                 |
| 203.1608       | 2  | P 12 | 1465.8479      | 733.4279        |
| 316.2448       | 3  | L 11 | 1368.7951      | 684.9015        |
| 431.2718       | 4  | D 10 | 1255.7111      | 628.3594        |
| 544.3558       | 5  | L 9  | 1140.6841      | 570.8460        |
| 659.3828       | 6  | D 8  | 1027.6001      | 514.3039        |
| 821.5409       | 7  | K 7  | 912.5731       | 456.7905        |
| 984.6042       | 8  | Y 6  | 750.4150       | 375.7114        |
| 1083.6726      | 9  | V 5  | 587.3517       | 294.1798        |
| 1212.7152      | 10 | E 4  | 488.2833       | 244.6455        |
| 1325.7993      | 11 | I 3  | 359.2407       | 180.1243        |
| 1396.8364      | 12 | A 2  | 246.1566       | 123.5822        |
|                | 13 | R 1  | 175.1195       | 88.0637         |

N-term:+35.07 K(7):+162.16



APLDTINVHLR, MH+ 1282.7695, m/z 428.2614  
 H OS G27 P150811 220811-s1.05351.05351.3.dta

X-range:

-

MassTol: Y-zoom:

MassType:

AVG  MONO

Axis:

1  2

Label:

I  M  -

Ions:

a  +  2+  3+

b  +  2+  3+

c  +  2+  3+

x  +  2+  3+

y  +  2+  3+

z  +  2+  3+

hide H<sub>2</sub>O/NH<sub>3</sub>

zoom 112-122

GO

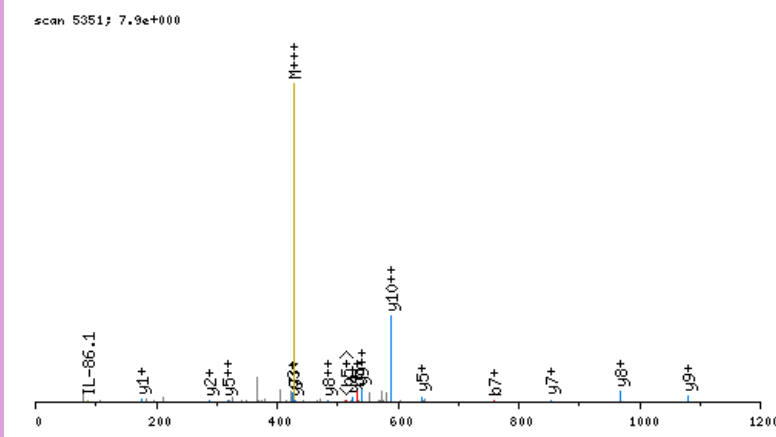

click image to zoom in; click top corners to zoom out [\[precursor±\]](#)

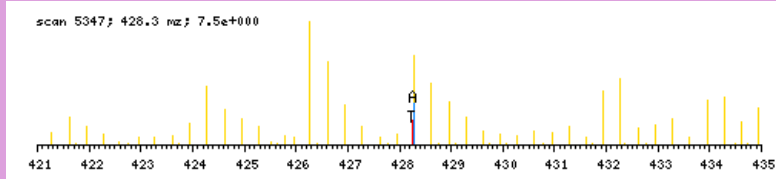

zoomed in precursor plot; T=theoretical m/z, A=acquired m/z

| b <sup>+</sup> | #  | AA # | y <sup>+</sup> | y <sup>2+</sup> |
|----------------|----|------|----------------|-----------------|
| 106.1080       | 1  | A 11 |                |                 |
| 203.1608       | 2  | P 10 | 1177.6693      | 589.3386        |
| 316.2448       | 3  | L 9  | 1080.6166      | 540.8122        |
| 431.2718       | 4  | D 8  | 967.5325       | 484.2702        |
| 532.3195       | 5  | T 7  | 852.5056       | 426.7567        |
| 645.4035       | 6  | I 6  | 751.4579       | 376.2329        |
| 759.4465       | 7  | N 5  | 638.3738       | 319.6908        |
| 858.5149       | 8  | V 4  | 524.3309       | 262.6694        |
| 995.5738       | 9  | H 3  | 425.2625       | 213.1352        |
| 1108.6578      | 10 | L 2  | 288.2036       | 144.6057        |
|                | 11 | R 1  | 175.1195       | 88.0637         |

N-term:+35.07

APNVLASEPEIIPKGIK, MH+ 1747.0118, m/z 583.0088  
 L OS G26 P150811 220811-s1.04678.04678.3.dta

X-range:

-

MassTol: Y-zoom:

MassType:

AVG  MONO

Axis:

1  2

Label:

I  M  -

Ions:

a  +  2+  3+

b  +  2+  3+

c  +  2+  3+

x  +  2+  3+

y  +  2+  3+

z  +  2+  3+

hide H<sub>2</sub>O/NH<sub>3</sub>

zoom 112-122

GO

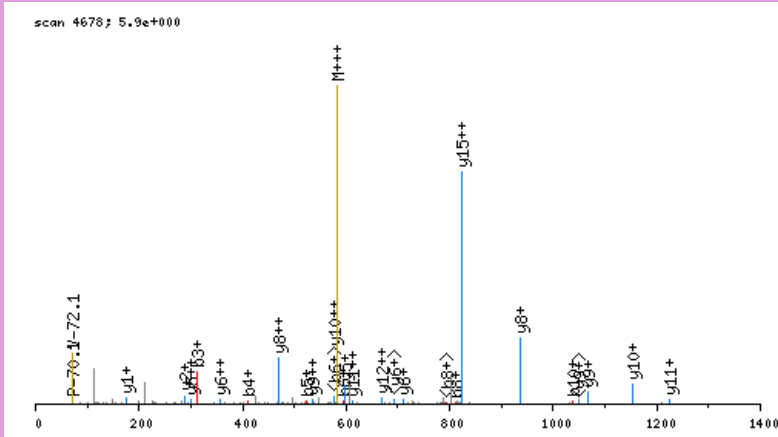

click image to zoom in; click top corners to zoom out [\[precursor±\]](#)

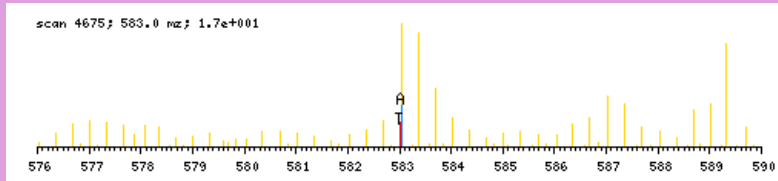

zoomed in precursor plot; T=theoretical m/z, A=acquired m/z

| b <sup>+</sup> | #  | AA # | y <sup>+</sup> | y <sup>2+</sup> |
|----------------|----|------|----------------|-----------------|
| 100.0762       | 1  | A 16 |                |                 |
| 197.1290       | 2  | P 15 | 1647.9434      | 824.4756        |
| 311.1719       | 3  | N 14 | 1550.8907      | 775.9492        |
| 410.2403       | 4  | V 13 | 1436.8477      | 718.9278        |
| 523.3244       | 5  | L 12 | 1337.7793      | 669.3936        |
| 594.3615       | 6  | A 11 | 1224.6952      | 612.8515        |
| 681.3935       | 7  | S 10 | 1153.6581      | 577.3330        |
| 810.4361       | 8  | E 9  | 1066.6261      | 533.8170        |
| 907.4889       | 9  | P 8  | 937.5835       | 469.2957        |
| 1036.5315      | 10 | E 7  | 840.5307       | 420.7693        |
| 1149.6155      | 11 | I 6  | 711.4882       | 356.2480        |
| 1246.6683      | 12 | P 5  | 598.4041       | 299.7060        |
| 1402.7946      | 13 | K 4  | 501.3513       | 251.1796        |
| 1459.8161      | 14 | G 3  | 345.2250       | 173.1164        |
| 1572.9001      | 15 | I 2  | 288.2036       | 144.6057        |
|                | 16 | R 1  | 175.1195       | 88.0637         |

N-term:+29.04 K(13):+156.13

APQGSLGEYLFR, MH+ 1500.7910, m/z 500.9352  
 H OS G25 P150811 220811-s1.07179.07179.3.dta

X-range:

-

MassTol: Y-zoom:

MassType:

AVG  MONO

Axis:

1  2

Label:

I  M  -

Ions:

a  +  2+  3+

b  +  2+  3+

c  +  2+  3+

x  +  2+  3+

y  +  2+  3+

z  +  2+  3+

hide H<sub>2</sub>O/NH<sub>3</sub>

zoom 112-122

GO

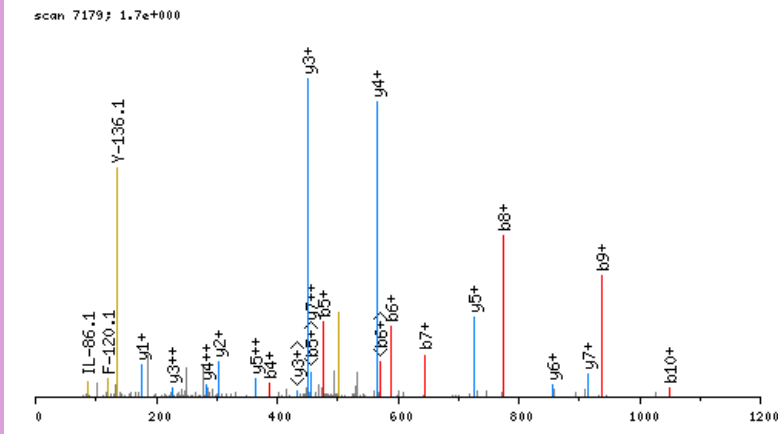

click image to zoom in; click top corners to zoom out [\[precursor±\]](#)

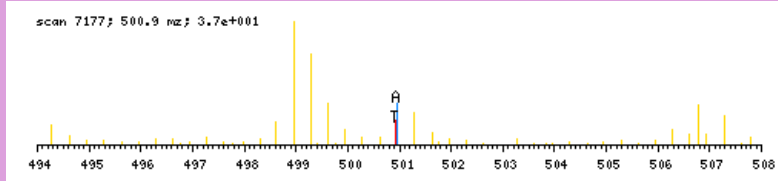

zoomed in precursor plot; T=theoretical m/z, A=acquired m/z

| b <sup>+</sup> | #  | AA # | y <sup>+</sup> | y <sup>2+</sup> |
|----------------|----|------|----------------|-----------------|
| 106.1080       | 1  | A 13 |                |                 |
| 203.1608       | 2  | P 12 | 1395.6909      | 698.3493        |
| 331.2194       | 3  | Q 11 | 1298.6381      | 649.8230        |
| 388.2408       | 4  | G 10 | 1170.5795      | 585.7937        |
| 475.2728       | 5  | S 9  | 1113.5580      | 557.2829        |
| 588.3569       | 6  | L 8  | 1026.5260      | 513.7669        |
| 645.3784       | 7  | G 7  | 913.4420       | 457.2249        |
| 774.4210       | 8  | E 6  | 856.4205       | 428.7142        |
| 937.4843       | 9  | Y 5  | 727.3779       | 364.1929        |
| 1050.5684      | 10 | L 4  | 564.3146       | 282.6612        |
| 1197.6368      | 11 | F 3  | 451.2305       | 226.1192        |
| 1326.6794      | 12 | E 2  | 304.1621       | 152.5850        |
|                | 13 | R 1  | 175.1195       | 88.0637         |

N-term:+35.07

APQVSTPTLVEAAR, MH+ 1467.8171, m/z 489.9439  
 L OS G24 P150811 220811-s1.03355.03355.3.dta

X-range:

-

MassTol: Y-zoom:

MassType:

AVG  MONO

Axis:

1  2

Label:

I  M  -

Ions:

a  +  2+  3+

b  +  2+  3+

c  +  2+  3+

x  +  2+  3+

y  +  2+  3+

z  +  2+  3+

hide H<sub>2</sub>O/NH<sub>3</sub>

zoom 112-122

GO

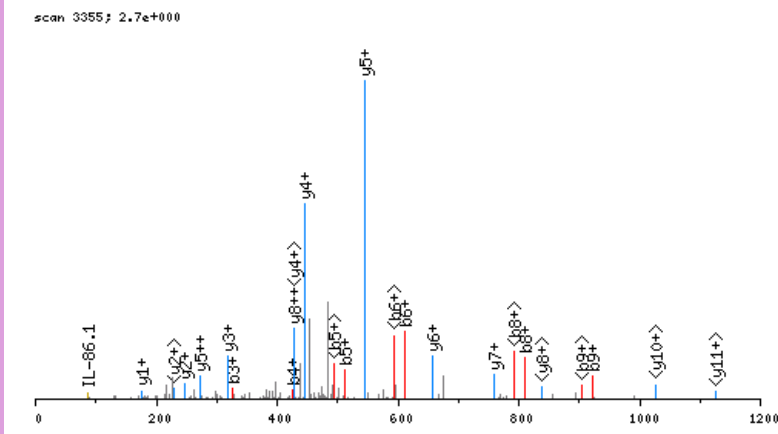

click image to zoom in; click top corners to zoom out [\[precursor±\]](#)

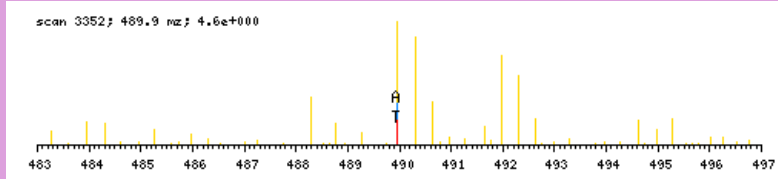

zoomed in precursor plot; T=theoretical m/z, A=acquired m/z

| b <sup>+</sup> | #  | AA # | y <sup>+</sup> | y <sup>2+</sup> |
|----------------|----|------|----------------|-----------------|
| 100.0762       | 1  | A 14 |                |                 |
| 197.1290       | 2  | P 13 | 1368.7487      | 684.8783        |
| 325.1876       | 3  | Q 12 | 1271.6959      | 636.3519        |
| 424.2560       | 4  | V 11 | 1143.6374      | 572.3226        |
| 511.2880       | 5  | S 10 | 1044.5689      | 522.7884        |
| 612.3357       | 6  | T 9  | 957.5369       | 479.2724        |
| 709.3884       | 7  | P 8  | 856.4892       | 428.7485        |
| 810.4361       | 8  | T 7  | 759.4365       | 380.2222        |
| 923.5202       | 9  | L 6  | 658.3888       | 329.6983        |
| 1022.5886      | 10 | V 5  | 545.3047       | 273.1563        |
| 1151.6312      | 11 | E 4  | 446.2363       | 223.6221        |
| 1222.6683      | 12 | A 3  | 317.1937       | 159.1008        |
| 1293.7054      | 13 | A 2  | 246.1566       | 123.5822        |
|                | 14 | R 1  | 175.1195       | 88.0637         |

N-term:+29.04

APSASPLAIHASR, MH+ 1305.7279, m/z 435.9141  
 L OS G27 P150811 220811-s1.03164.03164.3.dta

X-range:

-

MassTol: Y-zoom:

MassType:

AVG  MONO

Axis:

1  2

Label:

I  M  -

Ions:

a  +  2+  3+

b  +  2+  3+

c  +  2+  3+

x  +  2+  3+

y  +  2+  3+

z  +  2+  3+

hide H<sub>2</sub>O/NH<sub>3</sub>

zoom 112-122

GO

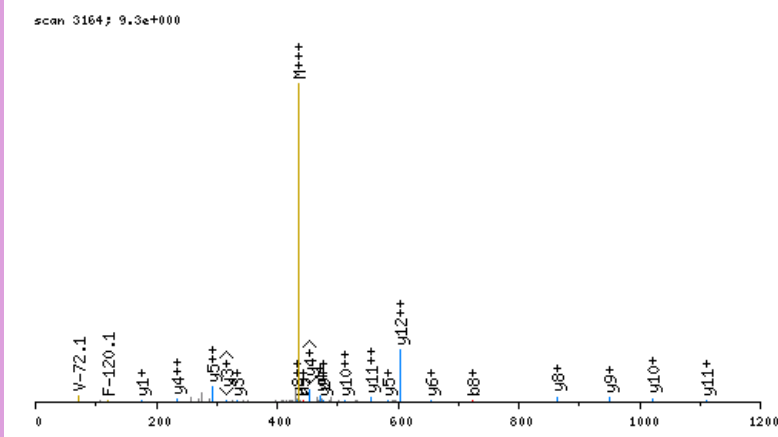

click image to zoom in; click top corners to zoom out [\[precursor±\]](#)

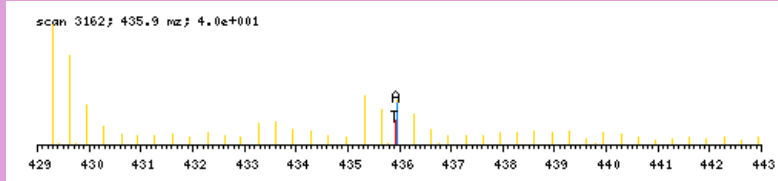

zoomed in precursor plot; T=theoretical m/z, A=acquired m/z

| b <sup>+</sup> | #  | AA # | y <sup>+</sup> | y <sup>2+</sup> |
|----------------|----|------|----------------|-----------------|
| 100.0762       | 1  | A 13 |                |                 |
| 197.1290       | 2  | P 12 | 1206.6595      | 603.8337        |
| 284.1610       | 3  | S 11 | 1109.6067      | 555.3073        |
| 355.1981       | 4  | A 10 | 1022.5747      | 511.7913        |
| 442.2301       | 5  | S 9  | 951.5376       | 476.2727        |
| 539.2829       | 6  | P 8  | 864.5056       | 432.7567        |
| 652.3670       | 7  | L 7  | 767.4528       | 384.2303        |
| 723.4041       | 8  | A 6  | 654.3687       | 327.6883        |
| 836.4882       | 9  | I 5  | 583.3316       | 292.1697        |
| 973.5471       | 10 | H 4  | 470.2476       | 235.6277        |
| 1044.5842      | 11 | A 3  | 333.1886       | 167.0982        |
| 1131.6162      | 12 | S 2  | 262.1515       | 131.5797        |
|                | 13 | R 1  | 175.1195       | 88.0637         |

N-term:+29.04

APVEHVADAGAFRLR, MH+ 1579.8596, m/z 527.2914  
 L OS G26 P150811 220811-s1.05413.05413.3.dta

scan 5413; 1.1e+000

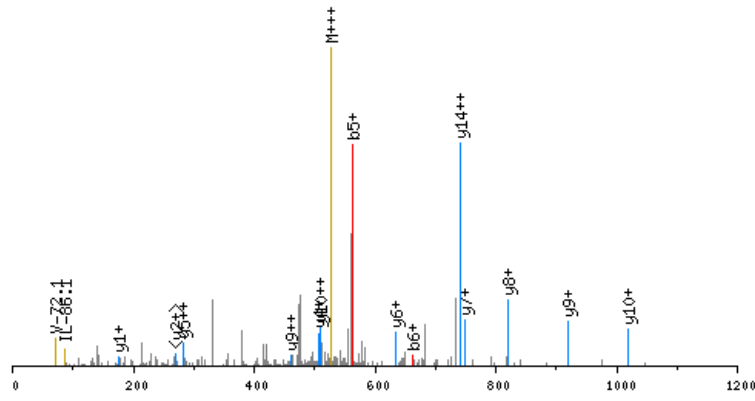

click image to zoom in; click top corners to zoom out [\[precursor±\]](#)

scan 5410; 527.3 m/z; 4.7e+000

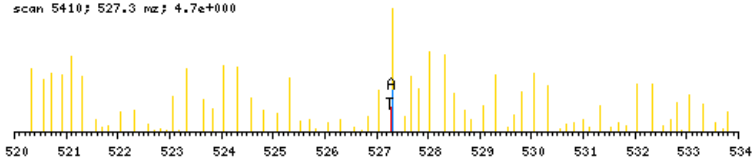

zoomed in precursor plot; T=theoretical m/z, A=acquired m/z

X-range:

-

MassTol: Y-zoom:

MassType:

AVG  MONO

Axis:

1  2

Label:

I  M  -

Ions:

a  +  2+  3+

b  +  2+  3+

c  +  2+  3+

x  +  2+  3+

y  +  2+  3+

z  +  2+  3+

hide H<sub>2</sub>O/NH<sub>3</sub>

zoom 112-122

GO

| b <sup>+</sup> | #  | AA # | y <sup>+</sup> | y <sup>2+</sup> |
|----------------|----|------|----------------|-----------------|
| 100.0762       | 1  | A 15 |                |                 |
| 197.1290       | 2  | P 14 | 1480.7912      | 740.8995        |
| 296.1974       | 3  | V 13 | 1383.7385      | 692.3731        |
| 425.2400       | 4  | E 12 | 1284.6701      | 642.8389        |
| 562.2989       | 5  | H 11 | 1155.6275      | 578.3176        |
| 661.3673       | 6  | V 10 | 1018.5686      | 509.7882        |
| 760.4357       | 7  | V 9  | 919.5001       | 460.2540        |
| 831.4728       | 8  | A 8  | 820.4317       | 410.7198        |
| 946.4998       | 9  | D 7  | 749.3946       | 375.2012        |
| 1017.5369      | 10 | A 6  | 634.3677       | 317.6877        |
| 1074.5584      | 11 | G 5  | 563.3306       | 282.1692        |
| 1145.5955      | 12 | A 4  | 506.3091       | 253.6585        |
| 1292.6639      | 13 | F 3  | 435.2720       | 218.1399        |
| 1405.7480      | 14 | L 2  | 288.2036       | 144.6057        |
|                | 15 | R 1  | 175.1195       | 88.0637         |

N-term:+29.04

APVIEPSGPELVVEPGETVTLR, MH+ 2317.2655, m/z 773.0933  
 L OS G24 P150811 220811-s1.04674.04674.3.dta

X-range:

-

MassTol: Y-zoom:

MassType:

AVG  MONO

Axis:

1  2

Label:

I  M  -

Ions:

a  +  2+  3+

b  +  2+  3+

c  +  2+  3+

x  +  2+  3+

y  +  2+  3+

z  +  2+  3+

hide H<sub>2</sub>O/NH<sub>3</sub>

zoom 112-122

GO

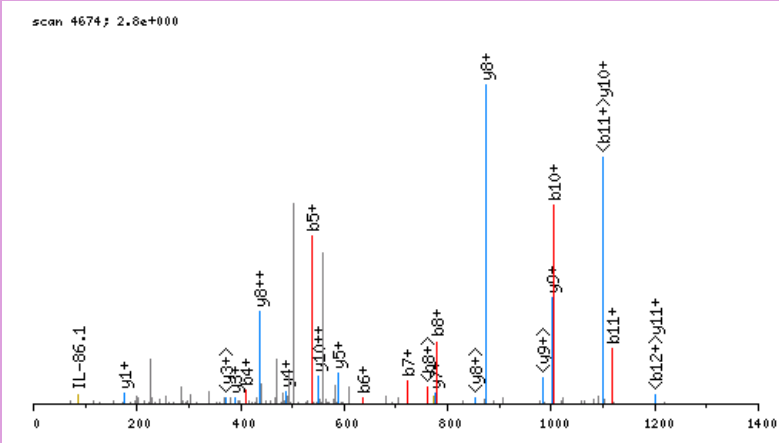

click image to zoom in; click top corners to zoom out [precursor±]

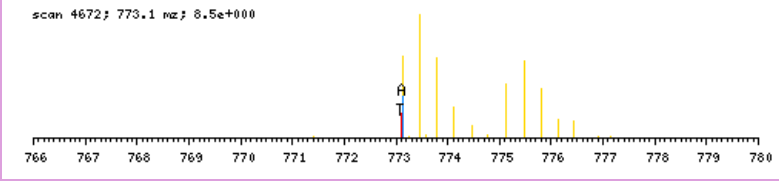

zoomed in precursor plot; T=theoretical m/z, A=acquired m/z

| b <sup>+</sup> | #  | AA # | y <sup>+</sup> | y <sup>2+</sup> |
|----------------|----|------|----------------|-----------------|
| 100.0762       | 1  | A 22 |                |                 |
| 197.1290       | 2  | P 21 | 2218.1971      | 1109.6025       |
| 296.1974       | 3  | V 20 | 2121.1443      | 1061.0761       |
| 409.2815       | 4  | I 19 | 2022.0759      | 1011.5419       |
| 538.3240       | 5  | E 18 | 1908.9918      | 954.9998        |
| 635.3768       | 6  | P 17 | 1779.9493      | 890.4785        |
| 722.4088       | 7  | S 16 | 1682.8965      | 841.9522        |
| 779.4303       | 8  | G 15 | 1595.8645      | 798.4361        |
| 876.4831       | 9  | P 14 | 1538.8430      | 769.9254        |
| 1005.5257      | 10 | E 13 | 1441.7902      | 721.3990        |
| 1118.6097      | 11 | L 12 | 1312.7476      | 656.8777        |
| 1217.6781      | 12 | V 11 | 1199.6636      | 600.3357        |
| 1316.7466      | 13 | V 10 | 1100.5952      | 550.8015        |
| 1445.7891      | 14 | E 9  | 1001.5267      | 501.2673        |
| 1542.8419      | 15 | P 8  | 872.4842       | 436.7460        |
| 1599.8634      | 16 | G 7  | 775.4314       | 388.2196        |
| 1728.9060      | 17 | E 6  | 718.4099       | 359.7089        |
| 1829.9536      | 18 | T 5  | 589.3673       | 295.1876        |
| 1929.0221      | 19 | V 4  | 488.3197       | 244.6637        |
| 2030.0697      | 20 | T 3  | 389.2512       | 195.1295        |
| 2143.1538      | 21 | L 2  | 288.2036       | 144.6057        |
|                | 22 | R 1  | 175.1195       | 88.0637         |

N-term:+29.04

AQDGVINEEALSVTELDLDR, MH+ 1986.9984, m/z 663.0043  
 L OS G24 P150811 220811-s1.04385.04385.3.dta

X-range:

-

MassTol: Y-zoom:

MassType:

AVG  MONO

Axis:

1  2

Label:

I  M  -

Ions:

a  +  2+  3+

b  +  2+  3+

c  +  2+  3+

x  +  2+  3+

y  +  2+  3+

z  +  2+  3+

hide H<sub>2</sub>O/NH<sub>3</sub>

zoom 112-122

GO

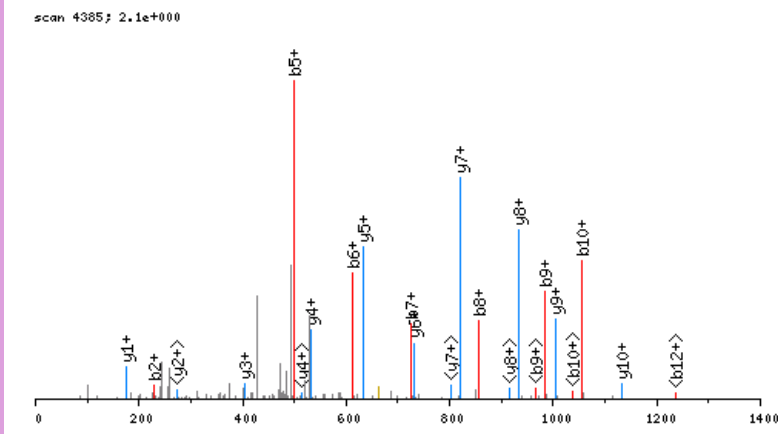

click image to zoom in; click top corners to zoom out [\[precursor±\]](#)

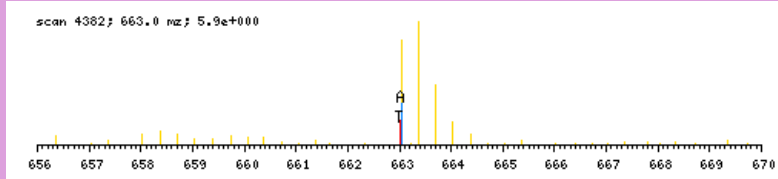

zoomed in precursor plot; T=theoretical m/z, A=acquired m/z

| b <sup>+</sup> | #  | AA # | y <sup>+</sup> | y <sup>2+</sup> |
|----------------|----|------|----------------|-----------------|
| 100.0762       | 1  | A 18 |                |                 |
| 228.1348       | 2  | Q 17 | 1887.9300      | 944.4689        |
| 343.1617       | 3  | D 16 | 1759.8714      | 880.4396        |
| 400.1832       | 4  | G 15 | 1644.8445      | 822.9261        |
| 499.2516       | 5  | V 14 | 1587.8230      | 794.4154        |
| 612.3357       | 6  | I 13 | 1488.7546      | 744.8812        |
| 726.3786       | 7  | N 12 | 1375.6705      | 688.3392        |
| 855.4212       | 8  | E 11 | 1261.6276      | 631.3177        |
| 984.4638       | 9  | E 10 | 1132.5850      | 566.7964        |
| 1055.5009      | 10 | A 9  | 1003.5424      | 502.2751        |
| 1168.5850      | 11 | L 8  | 932.5053       | 466.7566        |
| 1255.6170      | 12 | S 7  | 819.4212       | 410.2145        |
| 1354.6854      | 13 | V 6  | 732.3892       | 366.6985        |
| 1455.7331      | 14 | T 5  | 633.3208       | 317.1643        |
| 1584.7757      | 15 | E 4  | 532.2731       | 266.6405        |
| 1697.8597      | 16 | L 3  | 403.2305       | 202.1192        |
| 1812.8867      | 17 | D 2  | 290.1464       | 145.5771        |
|                | 18 | R 1  | 175.1195       | 88.0637         |

N-term:+29.04



AQFGSDLDAATQQLLSR, MH+ 1848.9455, m/z 616.9867  
 L OS G25 P150811 220811-s1.07991.07991.3.dta

scan 7991; 8.4e-001

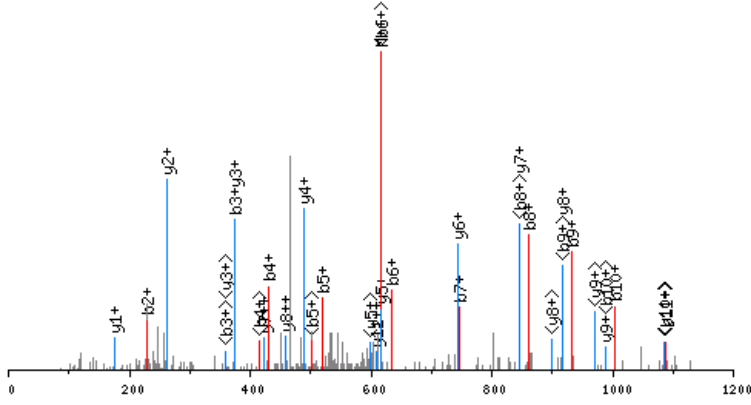

click image to zoom in; click top corners to zoom out [\[precursor±\]](#)

scan 7987; 617.0 m/z; 4.1e+000

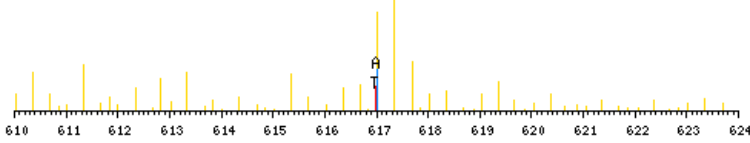

zoomed in precursor plot; T=theoretical m/z, A=acquired m/z

X-range:

-

MassTol: Y-zoom:

MassType:

AVG  MONO

Axis:

1  2

Label:

I  M  -

Ions:

a  +  2+  3+

b  +  2+  3+

c  +  2+  3+

x  +  2+  3+

y  +  2+  3+

z  +  2+  3+

hide H<sub>2</sub>O/NH<sub>3</sub>

zoom 112-122

GO

| b <sup>+</sup> | #  | AA # | y <sup>+</sup> | y <sup>2+</sup> |
|----------------|----|------|----------------|-----------------|
| 100.0762       | 1  | A 17 |                |                 |
| 228.1348       | 2  | Q 16 | 1749.8772      | 875.4425        |
| 375.2032       | 3  | F 15 | 1621.8186      | 811.4132        |
| 432.2247       | 4  | G 14 | 1474.7502      | 737.8790        |
| 519.2567       | 5  | S 13 | 1417.7287      | 709.3683        |
| 634.2836       | 6  | D 12 | 1330.6967      | 665.8522        |
| 747.3677       | 7  | L 11 | 1215.6697      | 608.3388        |
| 862.3946       | 8  | D 10 | 1102.5857      | 551.7967        |
| 933.4318       | 9  | A 9  | 987.5587       | 494.2833        |
| 1004.4689      | 10 | A 8  | 916.5216       | 458.7647        |
| 1105.5166      | 11 | T 7  | 845.4845       | 423.2462        |
| 1233.5751      | 12 | Q 6  | 744.4368       | 372.7223        |
| 1361.6337      | 13 | Q 5  | 616.3782       | 308.6930        |
| 1474.7178      | 14 | L 4  | 488.3197       | 244.6637        |
| 1587.8018      | 15 | L 3  | 375.2356       | 188.1217        |
| 1674.8339      | 16 | S 2  | 262.1515       | 131.5797        |
|                | 17 | R 1  | 175.1195       | 88.0637         |

N-term:+29.04

AQGDSASKGPTTHSLYPQFLR, MH+ 2317.1941, m/z 580.0540  
 L OS G28 P150811 220811-s1.05466.05466.4.dta

X-range:

-

MassTol: Y-zoom:

MassType:

AVG  MONO

Axis:

1  2

Label:

I  M  -

Ions:

a  +  2+  3+

b  +  2+  3+

c  +  2+  3+

x  +  2+  3+

y  +  2+  3+

z  +  2+  3+

hide H<sub>2</sub>O/NH<sub>3</sub>

zoom 112-122

GO

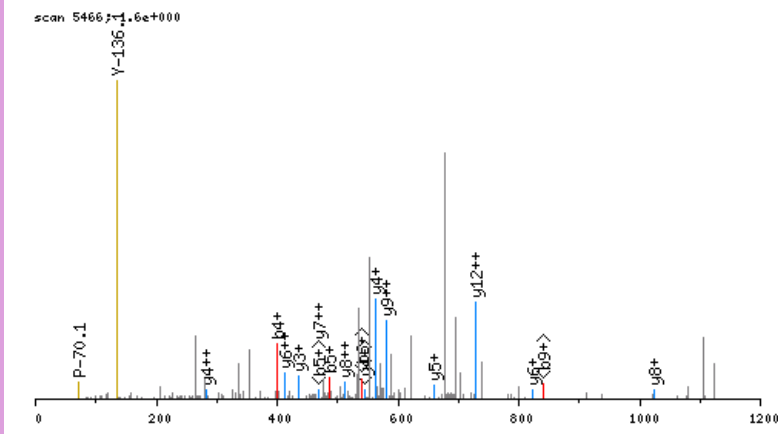

click image to zoom in; click top corners to zoom out [\[precursor±\]](#)

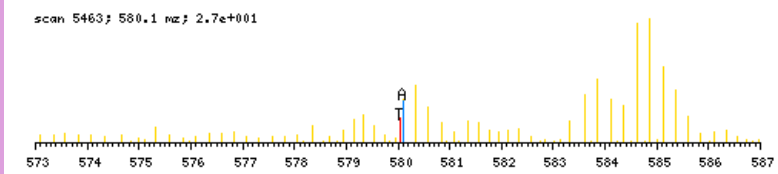

zoomed in precursor plot; T=theoretical m/z, A=acquired m/z

| b <sup>+</sup> | #  | AA # | y <sup>+</sup> | y <sup>2+</sup> |
|----------------|----|------|----------------|-----------------|
| 100.0762       | 1  | A 21 |                |                 |
| 228.1348       | 2  | Q 20 | 2218.1257      | 1109.5668       |
| 285.1563       | 3  | G 19 | 2090.0671      | 1045.5375       |
| 400.1832       | 4  | D 18 | 2033.0457      | 1017.0267       |
| 487.2152       | 5  | S 17 | 1918.0187      | 959.5133        |
| 558.2523       | 6  | A 16 | 1830.9867      | 915.9973        |
| 645.2844       | 7  | S 15 | 1759.9496      | 880.4787        |
| 801.4107       | 8  | K 14 | 1672.9175      | 836.9627        |
| 858.4321       | 9  | G 13 | 1516.7912      | 758.8995        |
| 955.4849       | 10 | P 12 | 1459.7698      | 730.3888        |
| 1056.5326      | 11 | T 11 | 1362.7170      | 681.8624        |
| 1157.5803      | 12 | T 10 | 1261.6693      | 631.3386        |
| 1294.6392      | 13 | H 9  | 1160.6217      | 580.8147        |
| 1381.6712      | 14 | S 8  | 1023.5627      | 512.2853        |
| 1494.7553      | 15 | L 7  | 936.5307       | 468.7693        |
| 1657.8186      | 16 | Y 6  | 823.4466       | 412.2272        |
| 1754.8714      | 17 | P 5  | 660.3833       | 330.6956        |
| 1882.9299      | 18 | Q 4  | 563.3306       | 282.1692        |
| 2029.9983      | 19 | F 3  | 435.2720       | 218.1399        |
| 2143.0824      | 20 | L 2  | 288.2036       | 144.6057        |
|                | 21 | R 1  | 175.1195       | 88.0637         |

N-term:+29.04 K(8):+156.13

AQGGTTSAITFPPEEQEDPR, MH+ 2165.0574, m/z 722.3573  
 H OS G24 P150811 220811-s1.03588.03588.3.dta

X-range:

-

MassTol: Y-zoom:

MassType:

AVG  MONO

Axis:

1  2

Label:

I  M  -

Ions:

a  +  2+  3+

b  +  2+  3+

c  +  2+  3+

x  +  2+  3+

y  +  2+  3+

z  +  2+  3+

hide H<sub>2</sub>O/NH<sub>3</sub>

zoom 112-122

GO

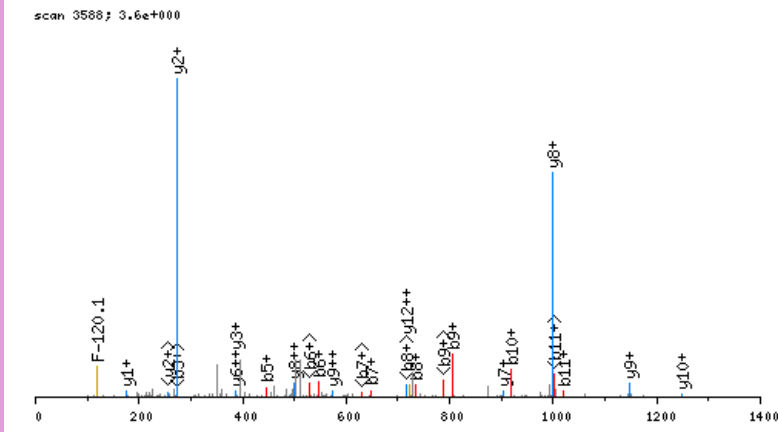

click image to zoom in; click top corners to zoom out [precursor±]

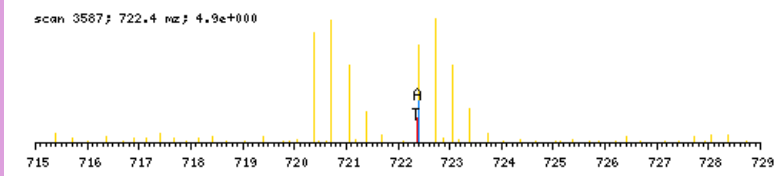

zoomed in precursor plot; T=theoretical m/z, A=acquired m/z

| b <sup>+</sup> | #  | AA | #  | y <sup>+</sup> | y <sup>2+</sup> |
|----------------|----|----|----|----------------|-----------------|
| 106.1080       | 1  | A  | 20 |                |                 |
| 234.1666       | 2  | Q  | 19 | 2059.9573      | 1030.4825       |
| 291.1881       | 3  | G  | 18 | 1931.8987      | 966.4533        |
| 388.2408       | 4  | P  | 17 | 1874.8772      | 937.9425        |
| 445.2623       | 5  | G  | 16 | 1777.8244      | 889.4161        |
| 546.3100       | 6  | T  | 15 | 1720.8030      | 860.9054        |
| 647.3576       | 7  | T  | 14 | 1619.7553      | 810.3816        |
| 734.3897       | 8  | S  | 13 | 1518.7076      | 759.8577        |
| 805.4268       | 9  | A  | 12 | 1431.6756      | 716.3417        |
| 918.5108       | 10 | I  | 11 | 1360.6385      | 680.8232        |
| 1019.5585      | 11 | T  | 10 | 1247.5544      | 624.2811        |
| 1166.6269      | 12 | F  | 9  | 1146.5067      | 573.7573        |
| 1263.6797      | 13 | P  | 8  | 999.4383       | 500.2231        |
| 1392.7223      | 14 | E  | 7  | 902.3856       | 451.6967        |
| 1521.7649      | 15 | E  | 6  | 773.3430       | 387.1754        |
| 1649.8235      | 16 | Q  | 5  | 644.3004       | 322.6541        |
| 1778.8661      | 17 | E  | 4  | 516.2418       | 258.6248        |
| 1893.8930      | 18 | D  | 3  | 387.1992       | 194.1035        |
| 1990.9458      | 19 | P  | 2  | 272.1723       | 136.5900        |
|                | 20 | R  | 1  | 175.1195       | 88.0637         |

N-term:+35.07

AQLKDECEVVR, MH+ 1400.7207, m/z 467.5784  
 L OS G27 P150811 220811-s1.02533.02533.3.dta

scan 2533; 1.8e+001

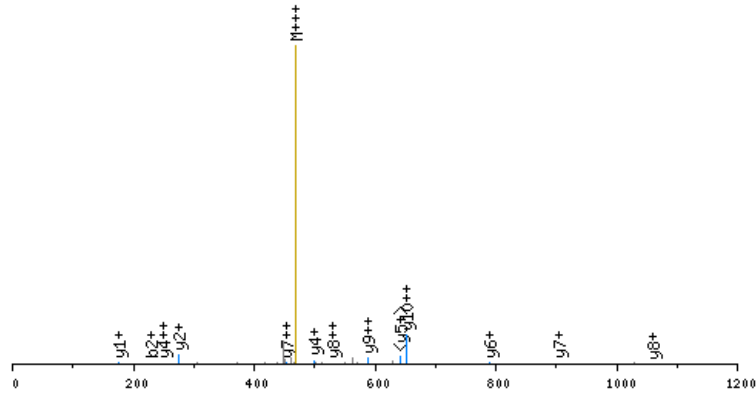

click image to zoom in; click top corners to zoom out [\[precursor±\]](#)

scan 2532; 467.6 mz; 1.9e+001

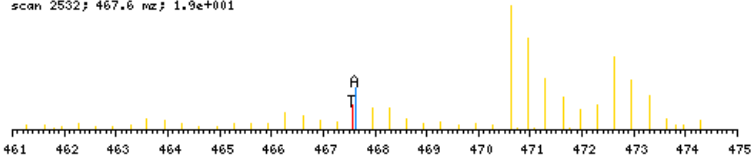

zoomed in precursor plot; T=theoretical m/z, A=acquired m/z

X-range:

-

MassTol: Y-zoom:

MassType:

AVG  MONO

Axis:

1  2

Label:

I  M  -

Ions:

a  +  2+  3+

b  +  2+  3+

c  +  2+  3+

x  +  2+  3+

y  +  2+  3+

z  +  2+  3+

hide H<sub>2</sub>O/NH<sub>3</sub>

zoom 112-122

GO

| b <sup>+</sup> | #  | AA # | y <sup>+</sup> | y <sup>2+</sup> |
|----------------|----|------|----------------|-----------------|
| 100.0762       | 1  | A    | 11             |                 |
| 228.1348       | 2  | Q    | 10             | 1301.6523       |
| 341.2189       | 3  | L    | 9              | 1173.5938       |
| 497.3452       | 4  | K    | 8              | 1060.5097       |
| 612.3721       | 5  | D    | 7              | 904.3834        |
| 741.4147       | 6  | E    | 6              | 789.3565        |
| 901.4453       | 7  | C    | 5              | 660.3139        |
| 998.4981       | 8  | P    | 4              | 500.2833        |
| 1127.5406      | 9  | E    | 3              | 403.2305        |
| 1226.6091      | 10 | V    | 2              | 274.1879        |
|                | 11 | R    | 1              | 175.1195        |

N-term:+29.04 K(4):+156.13  
 C(7):+160.03

AQMIGTEYMQDPDEEALR, MH+ 2118.9536, m/z 706.9894  
 H OS G24 P150811 220811-s1.03604.03604.3.dta

X-range:

-

MassTol: Y-zoom:

MassType:

AVG  MONO

Axis:

1  2

Label:

I  M  -

Ions:

a  +  2+  3+

b  +  2+  3+

c  +  2+  3+

x  +  2+  3+

y  +  2+  3+

z  +  2+  3+

hide H<sub>2</sub>O/NH<sub>3</sub>

zoom 112-122

GO

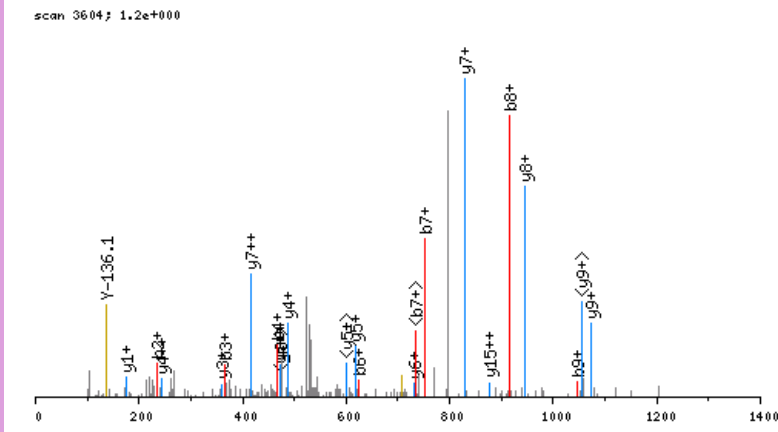

click image to zoom in; click top corners to zoom out [\[precursor±\]](#)

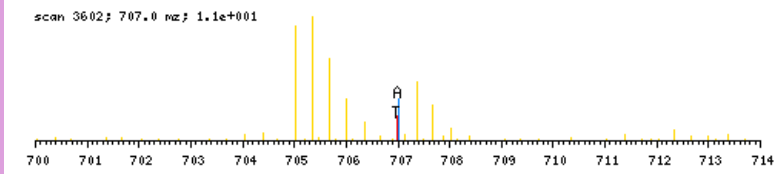

zoomed in precursor plot; T=theoretical m/z, A=acquired m/z

| b <sup>+</sup> | #  | AA # | y <sup>+</sup> | y <sup>2+</sup> |
|----------------|----|------|----------------|-----------------|
| 106.1080       | 1  | A 18 |                |                 |
| 234.1666       | 2  | Q 17 | 2013.8534      | 1007.4306       |
| 365.2071       | 3  | M 16 | 1885.7948      | 943.4013        |
| 466.2548       | 4  | T 15 | 1754.7543      | 877.8811        |
| 523.2762       | 5  | G 14 | 1653.7066      | 827.3572        |
| 624.3239       | 6  | T 13 | 1596.6852      | 798.8465        |
| 753.3665       | 7  | E 12 | 1495.6375      | 748.3227        |
| 916.4298       | 8  | Y 11 | 1366.5949      | 683.8014        |
| 1047.4703      | 9  | M 10 | 1203.5316      | 602.2697        |
| 1175.5289      | 10 | Q 9  | 1072.4911      | 536.7495        |
| 1290.5558      | 11 | D 8  | 944.4325       | 472.7202        |
| 1387.6086      | 12 | P 7  | 829.4056       | 415.2067        |
| 1502.6355      | 13 | D 6  | 732.3528       | 366.6803        |
| 1631.6781      | 14 | E 5  | 617.3259       | 309.1668        |
| 1760.7207      | 15 | E 4  | 488.2833       | 244.6455        |
| 1831.7578      | 16 | A 3  | 359.2407       | 180.1243        |
| 1944.8419      | 17 | L 2  | 288.2036       | 144.6057        |
|                | 18 | R 1  | 175.1195       | 88.0637         |

N-term:+35.07

AQNFGQLQHLSSGHLR, MH+ 1805.9775, m/z 452.2498  
 L OS G28 P150811 220811-s1.06056.06056.4.dta

X-range:

-

MassTol: Y-zoom:

MassType:

AVG  MONO

Axis:

1  2

Label:

I  M  -

Ions:

a  +  2+  3+

b  +  2+  3+

c  +  2+  3+

x  +  2+  3+

y  +  2+  3+

z  +  2+  3+

hide H<sub>2</sub>O/NH<sub>3</sub>

zoom 112-122

GO

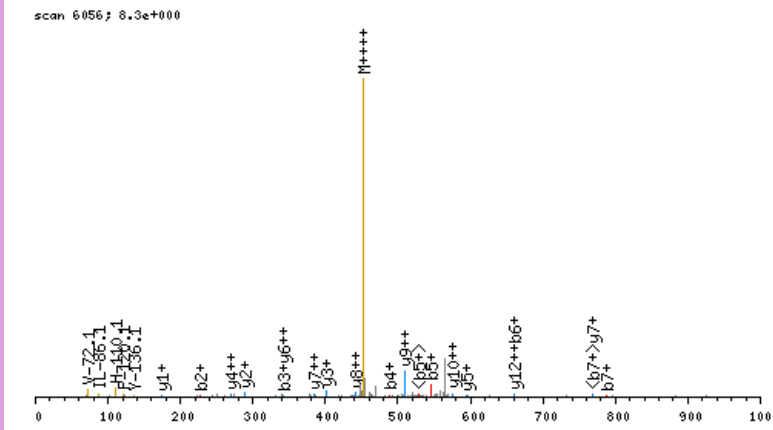

click image to zoom in; click top corners to zoom out [\[precursor±\]](#)

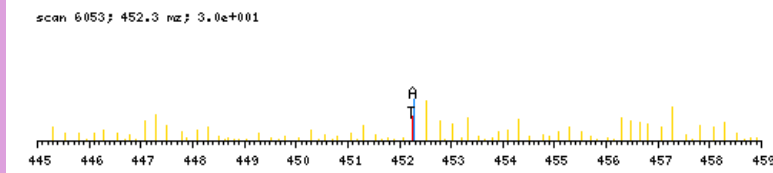

zoomed in precursor plot; T=theoretical m/z, A=acquired m/z

| b <sup>+</sup> | #  | AA # | y <sup>+</sup> | y <sup>2+</sup> |
|----------------|----|------|----------------|-----------------|
| 100.0762       | 1  | A 16 |                |                 |
| 228.1348       | 2  | Q 15 | 1706.9091      | 853.9584        |
| 342.1777       | 3  | N 14 | 1578.8505      | 789.9292        |
| 489.2461       | 4  | F 13 | 1464.8076      | 732.9077        |
| 546.2676       | 5  | G 12 | 1317.7391      | 659.3735        |
| 659.3517       | 6  | L 11 | 1260.7177      | 630.8628        |
| 787.4102       | 7  | Q 10 | 1147.6336      | 574.3207        |
| 924.4691       | 8  | H 9  | 1019.5750      | 510.2914        |
| 1037.5532      | 9  | L 8  | 882.5161       | 441.7620        |
| 1124.5852      | 10 | S 7  | 769.4321       | 385.2199        |
| 1211.6173      | 11 | S 6  | 682.4000       | 341.7039        |
| 1268.6387      | 12 | G 5  | 595.3680       | 298.1879        |
| 1405.6976      | 13 | H 4  | 538.3465       | 269.6772        |
| 1518.7817      | 14 | L 3  | 401.2876       | 201.1477        |
| 1631.8658      | 15 | L 2  | 288.2036       | 144.6057        |
|                | 16 | R 1  | 175.1195       | 88.0637         |

N-term:+29.04

AQPKNLEGVVGFFANLPNQVYR, MH+ 2434.2883, m/z 609.3275  
 L OS G26 P150811 220811-s1.06122.06122.4.dta

X-range:

-

MassTol: Y-zoom:

MassType:

AVG  MONO

Axis:

1  2

Label:

I  M  -

Ions:

a  +  2+  3+

b  +  2+  3+

c  +  2+  3+

x  +  2+  3+

y  +  2+  3+

z  +  2+  3+

hide H<sub>2</sub>O/NH<sub>3</sub>

zoom 112-122

GO

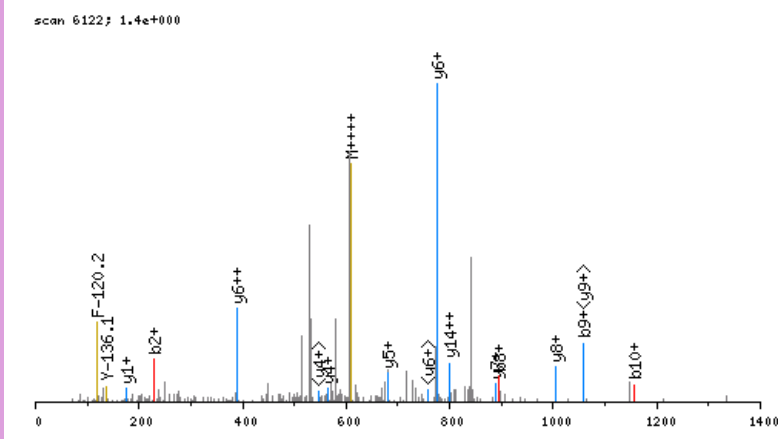

click image to zoom in; click top corners to zoom out [precursor±]

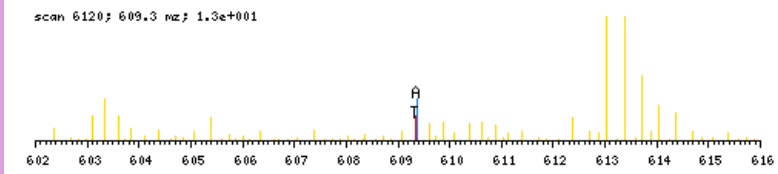

zoomed in precursor plot; T=theoretical m/z, A=acquired m/z

| b <sup>+</sup> | #  | AA | #  | y <sup>+</sup> | y <sup>2+</sup> |
|----------------|----|----|----|----------------|-----------------|
| 100.0762       | 1  | A  | 21 |                |                 |
| 228.1348       | 2  | Q  | 20 | 2335.2199      | 1168.1139       |
| 325.1876       | 3  | P  | 19 | 2207.1613      | 1104.0846       |
| 481.3139       | 4  | K  | 18 | 2110.1086      | 1055.5582       |
| 595.3568       | 5  | N  | 17 | 1953.9823      | 977.4951        |
| 708.4408       | 6  | L  | 16 | 1839.9394      | 920.4736        |
| 837.4834       | 7  | E  | 15 | 1726.8553      | 863.9316        |
| 894.5049       | 8  | G  | 14 | 1597.8127      | 799.4103        |
| 1057.5682      | 9  | Y  | 13 | 1540.7912      | 770.8995        |
| 1156.6366      | 10 | V  | 12 | 1377.7279      | 689.3679        |
| 1213.6581      | 11 | G  | 11 | 1278.6595      | 639.8337        |
| 1360.7265      | 12 | F  | 10 | 1221.6380      | 611.3229        |
| 1431.7636      | 13 | A  | 9  | 1074.5696      | 537.7887        |
| 1545.8066      | 14 | N  | 8  | 1003.5325      | 502.2702        |
| 1658.8906      | 15 | L  | 7  | 889.4896       | 445.2487        |
| 1755.9434      | 16 | P  | 6  | 776.4055       | 388.7067        |
| 1869.9863      | 17 | N  | 5  | 679.3527       | 340.1803        |
| 1998.0449      | 18 | Q  | 4  | 565.3098       | 283.1588        |
| 2097.1133      | 19 | V  | 3  | 437.2512       | 219.1295        |
| 2260.1766      | 20 | Y  | 2  | 338.1828       | 169.5953        |
|                | 21 | R  | 1  | 175.1195       | 88.0637         |

N-term:+29.04 K(4):+156.13

AQPPAAAAPSavgspaaapr, MH+ 1791.9929, m/z 598.0025  
 H OS G24 P150811 220811-s1.02896.02896.3.dta

X-range:

-

MassTol: Y-zoom:

MassType:

AVG  MONO

Axis:

1  2

Label:

I  M  -

Ions:

a  +  2+  3+

b  +  2+  3+

c  +  2+  3+

x  +  2+  3+

y  +  2+  3+

z  +  2+  3+

hide H<sub>2</sub>O/NH<sub>3</sub>

zoom 112-122

GO

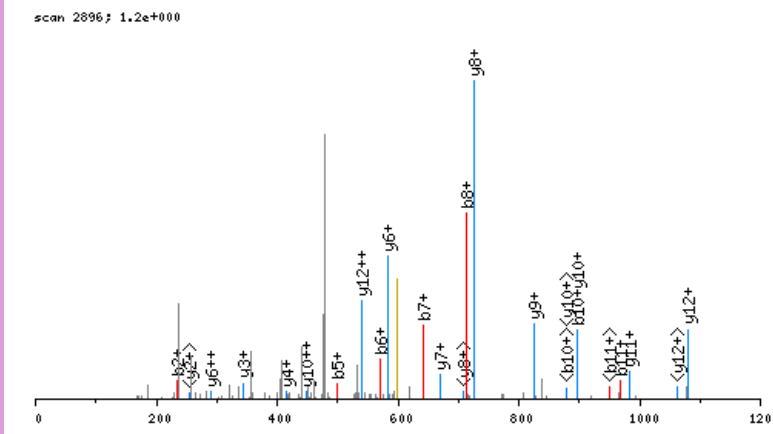

click image to zoom in; click top corners to zoom out [\[precursor±\]](#)

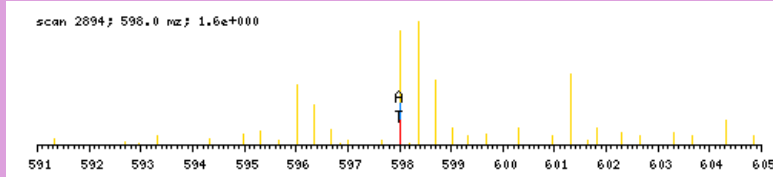

zoomed in precursor plot; T=theoretical m/z, A=acquired m/z

| b <sup>+</sup> | #  | AA # | y <sup>+</sup> | y <sup>2+</sup> |
|----------------|----|------|----------------|-----------------|
| 106.1080       | 1  | A 20 |                |                 |
| 234.1666       | 2  | Q 19 | 1686.8927      | 843.9503        |
| 331.2194       | 3  | P 18 | 1558.8342      | 779.9210        |
| 428.2721       | 4  | P 17 | 1461.7814      | 731.3946        |
| 499.3092       | 5  | A 16 | 1364.7286      | 682.8682        |
| 570.3463       | 6  | A 15 | 1293.6915      | 647.3497        |
| 641.3835       | 7  | A 14 | 1222.6544      | 611.8311        |
| 712.4206       | 8  | A 13 | 1151.6173      | 576.3126        |
| 809.4733       | 9  | P 12 | 1080.5802      | 540.7940        |
| 896.5054       | 10 | S 11 | 983.5274       | 492.2676        |
| 967.5425       | 11 | A 10 | 896.4954       | 448.7516        |
| 1066.6109      | 12 | V 9  | 825.4583       | 413.2331        |
| 1123.6324      | 13 | G 8  | 726.3899       | 363.6988        |
| 1210.6644      | 14 | S 7  | 669.3684       | 335.1881        |
| 1307.7172      | 15 | P 6  | 582.3364       | 291.6721        |
| 1378.7543      | 16 | A 5  | 485.2836       | 243.1457        |
| 1449.7914      | 17 | A 4  | 414.2465       | 207.6272        |
| 1520.8285      | 18 | A 3  | 343.2094       | 172.1086        |
| 1617.8813      | 19 | P 2  | 272.1723       | 136.5900        |
|                | 20 | R 1  | 175.1195       | 88.0637         |

N-term:+35.07



ARDDLITDLLNEAKQR, MH+ 1927.0613, m/z 482.5208  
 L OS G28 P150811 220811-s1.09041.09041.4.dta

X-range:

-

MassTol: Y-zoom:

MassType:

AVG  MONO

Axis:

1  2

Label:

I  M  -

Ions:

a  +  2+  3+

b  +  2+  3+

c  +  2+  3+

x  +  2+  3+

y  +  2+  3+

z  +  2+  3+

hide H<sub>2</sub>O/NH<sub>3</sub>

zoom 112-122

GO

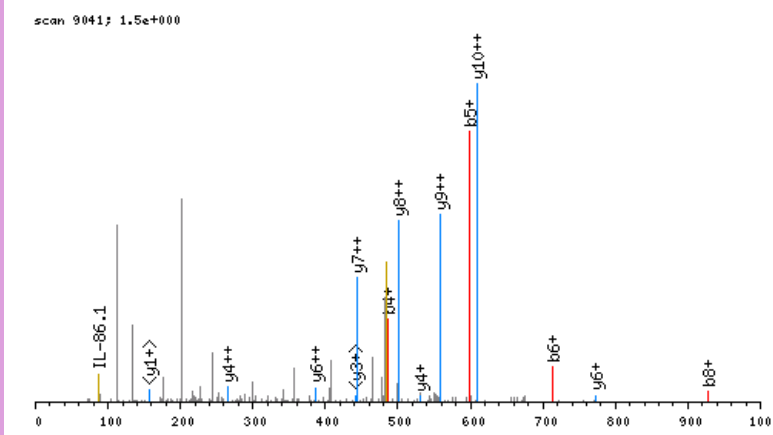

click image to zoom in; click top corners to zoom out [\[precursor±\]](#)

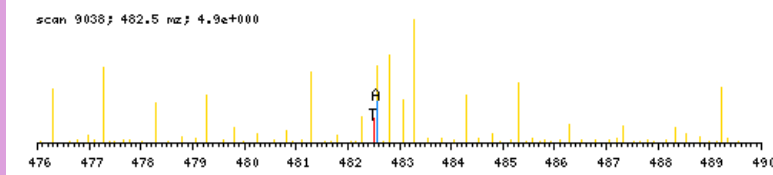

zoomed in precursor plot; T=theoretical m/z, A=acquired m/z

| b <sup>+</sup> | #  | AA # | y <sup>+</sup> | y <sup>2+</sup> |
|----------------|----|------|----------------|-----------------|
| 100.0762       | 1  | A 16 |                |                 |
| 256.1773       | 2  | R 15 | 1827.9929      | 914.5004        |
| 371.2043       | 3  | D 14 | 1671.8918      | 836.4498        |
| 486.2312       | 4  | D 13 | 1556.8648      | 778.9363        |
| 599.3153       | 5  | L 12 | 1441.8379      | 721.4229        |
| 712.3993       | 6  | I 11 | 1328.7538      | 664.8808        |
| 813.4470       | 7  | T 10 | 1215.6698      | 608.3388        |
| 928.4740       | 8  | D 9  | 1114.6221      | 557.8150        |
| 1041.5580      | 9  | L 8  | 999.5951       | 500.3015        |
| 1154.6421      | 10 | L 7  | 886.5111       | 443.7595        |
| 1268.6850      | 11 | N 6  | 773.4270       | 387.2174        |
| 1397.7276      | 12 | E 5  | 659.3841       | 330.1960        |
| 1468.7647      | 13 | A 4  | 530.3415       | 265.6747        |
| 1624.8910      | 14 | K 3  | 459.3044       | 230.1561        |
| 1752.9496      | 15 | Q 2  | 303.1781       | 152.0930        |
|                | 16 | R 1  | 175.1195       | 88.0637         |

N-term:+29.04 K(14):+156.13

ASAAAVDAGMAMAGQSPVLR, MH+ 1901.9577, m/z 634.6574  
 L OS G24 P150811 220811-s1.04161.04161.3.dta

scan 4161; 1.2e+000

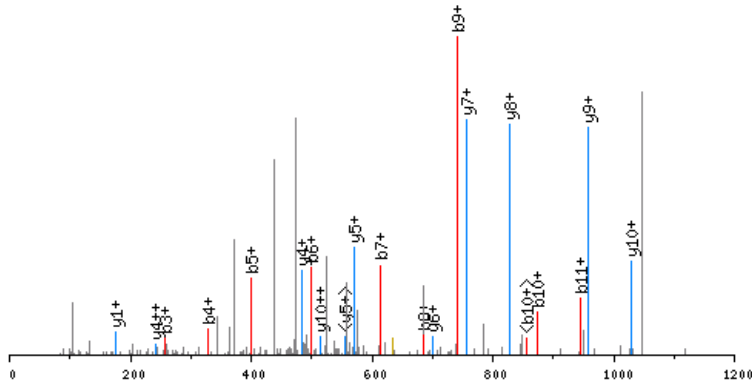

click image to zoom in; click top corners to zoom out [precursor±]

scan 4157; 634.7 m/z; 3.3e+000

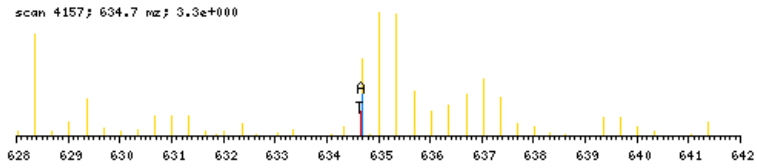

zoomed in precursor plot; T=theoretical m/z, A=acquired m/z

X-range:

-

MassTol: Y-zoom:

MassType:

AVG  MONO

Axis:

1  2

Label:

I  M  -

Ions:

a  +  2+  3+

b  +  2+  3+

c  +  2+  3+

x  +  2+  3+

y  +  2+  3+

z  +  2+  3+

hide H<sub>2</sub>O/NH<sub>3</sub>

zoom 112-122

GO

| b <sup>+</sup> | #  | AA | #  | y <sup>+</sup> | y <sup>2+</sup> |
|----------------|----|----|----|----------------|-----------------|
| 100.0762       | 1  | A  | 20 |                |                 |
| 187.1082       | 2  | S  | 19 | 1802.8893      | 901.9486        |
| 258.1454       | 3  | A  | 18 | 1715.8573      | 858.4326        |
| 329.1825       | 4  | A  | 17 | 1644.8202      | 822.9140        |
| 400.2196       | 5  | A  | 16 | 1573.7831      | 787.3954        |
| 499.2880       | 6  | V  | 15 | 1502.7459      | 751.8769        |
| 614.3149       | 7  | D  | 14 | 1403.6775      | 702.3427        |
| 685.3521       | 8  | A  | 13 | 1288.6506      | 644.8292        |
| 742.3735       | 9  | G  | 12 | 1217.6135      | 609.3106        |
| 873.4140       | 10 | M  | 11 | 1160.5920      | 580.7999        |
| 944.4511       | 11 | A  | 10 | 1029.5515      | 515.2797        |
| 1075.4916      | 12 | M  | 9  | 958.5144       | 479.7611        |
| 1146.5287      | 13 | A  | 8  | 827.4739       | 414.2409        |
| 1203.5502      | 14 | G  | 7  | 756.4368       | 378.7223        |
| 1331.6088      | 15 | Q  | 6  | 699.4153       | 350.2116        |
| 1418.6408      | 16 | S  | 5  | 571.3568       | 286.1823        |
| 1515.6935      | 17 | P  | 4  | 484.3247       | 242.6663        |
| 1614.7620      | 18 | V  | 3  | 387.2720       | 194.1399        |
| 1727.8460      | 19 | L  | 2  | 288.2036       | 144.6057        |
|                | 20 | R  | 1  | 175.1195       | 88.0637         |

N-term:+29.04

ASAESEDDVEEAALKLR, MH+ 1846.9034, m/z 616.3060  
 L OS G26 P150811 220811-s1.04182.04182.3.dta

X-range:

-

MassTol: Y-zoom:

MassType:

AVG  MONO

Axis:

1  2

Label:

I  M  -

Ions:

a  +  2+  3+

b  +  2+  3+

c  +  2+  3+

x  +  2+  3+

y  +  2+  3+

z  +  2+  3+

hide H<sub>2</sub>O/NH<sub>3</sub>

zoom 112-122

GO

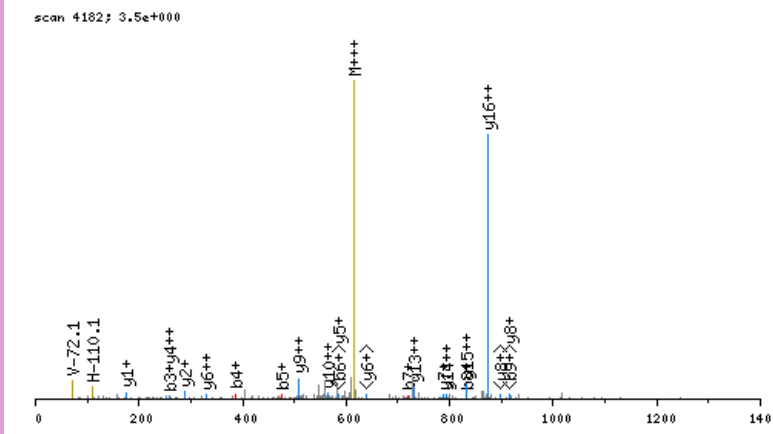

click image to zoom in; click top corners to zoom out [\[precursor±\]](#)

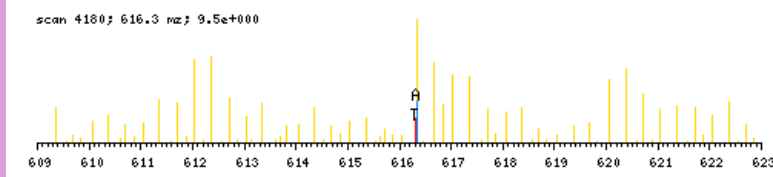

zoomed in precursor plot; T=theoretical m/z, A=acquired m/z

| b <sup>+</sup> | #  | AA # | y <sup>+</sup> | y <sup>2+</sup> |
|----------------|----|------|----------------|-----------------|
| 100.0762       | 1  | A 17 |                |                 |
| 187.1082       | 2  | S 16 | 1747.8350      | 874.4214        |
| 258.1454       | 3  | A 15 | 1660.8030      | 830.9054        |
| 387.1879       | 4  | E 14 | 1589.7659      | 795.3869        |
| 474.2200       | 5  | S 13 | 1460.7233      | 730.8656        |
| 603.2626       | 6  | E 12 | 1373.6913      | 687.3496        |
| 718.2895       | 7  | D 11 | 1244.6487      | 622.8283        |
| 833.3165       | 8  | D 10 | 1129.6217      | 565.3148        |
| 932.3849       | 9  | V 9  | 1014.5948      | 507.8013        |
| 1061.4275      | 10 | E 8  | 915.5264       | 458.2671        |
| 1190.4701      | 11 | E 7  | 786.4838       | 393.7458        |
| 1261.5072      | 12 | A 6  | 657.4412       | 329.2245        |
| 1332.5443      | 13 | A 5  | 586.4041       | 293.7060        |
| 1488.6706      | 14 | K 4  | 515.3670       | 258.1874        |
| 1559.7077      | 15 | A 3  | 359.2407       | 180.1243        |
| 1672.7918      | 16 | L 2  | 288.2036       | 144.6057        |
|                | 17 | R 1  | 175.1195       | 88.0637         |

N-term:+29.04 K(14):+156.13

ASAFGSSTESLVAR, MH+ 1410.7229, m/z 705.8651  
 L OS G25 P150811 220811-s1.04848.04848.2.dta

X-range:

-

MassTol: Y-zoom:

MassType:

AVG  MONO

Axis:

1  2

Label:

I  M  -

Ions:

a  +  2+  3+

b  +  2+  3+

c  +  2+  3+

x  +  2+  3+

y  +  2+  3+

z  +  2+  3+

hide H<sub>2</sub>O/NH<sub>3</sub>

zoom 112-122

GO

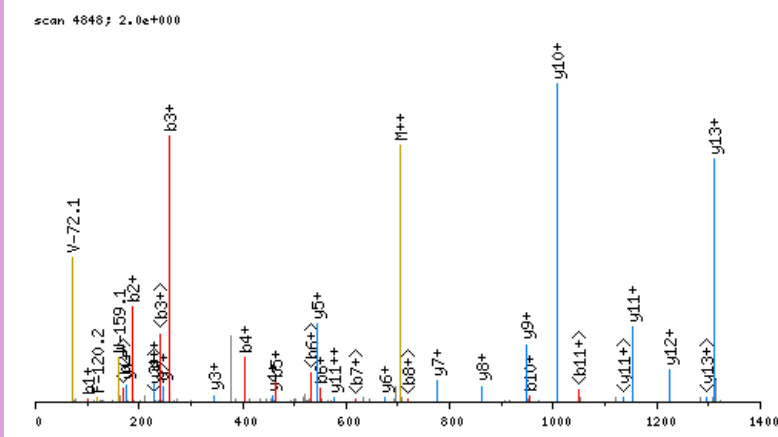

click image to zoom in; click top corners to zoom out [\[precursor±\]](#)

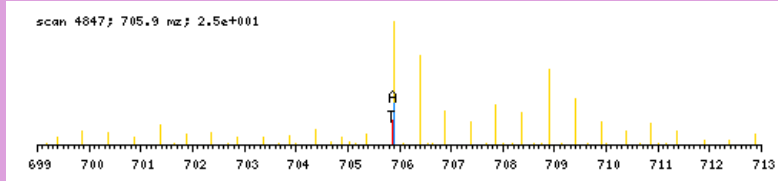

zoomed in precursor plot; T=theoretical m/z, A=acquired m/z

| b <sup>+</sup> | #  | AA # | y <sup>+</sup> | y <sup>2+</sup> |
|----------------|----|------|----------------|-----------------|
| 100.0762       | 1  | A 14 |                |                 |
| 187.1082       | 2  | S 13 | 1311.6545      | 656.3311        |
| 258.1454       | 3  | A 12 | 1224.6224      | 612.8151        |
| 405.2138       | 4  | F 11 | 1153.5853      | 577.2966        |
| 462.2352       | 5  | G 10 | 1006.5169      | 503.7624        |
| 549.2673       | 6  | S 9  | 949.4954       | 475.2516        |
| 636.2993       | 7  | S 8  | 862.4634       | 431.7356        |
| 737.3470       | 8  | T 7  | 775.4314       | 388.2196        |
| 866.3896       | 9  | E 6  | 674.3837       | 337.6958        |
| 953.4216       | 10 | S 5  | 545.3411       | 273.1745        |
| 1066.5057      | 11 | L 4  | 458.3091       | 229.6585        |
| 1165.5741      | 12 | V 3  | 345.2250       | 173.1164        |
| 1236.6112      | 13 | A 2  | 246.1566       | 123.5822        |
|                | 14 | R 1  | 175.1195       | 88.0637         |

N-term:+29.04

ASALWNDEVKAEQELR, MH+ 2030.0195, m/z 677.3447  
L OS G26 P150811 220811-s1.06174.06174.3.dta

X-range:

-

MassTol: Y-zoom:

MassType:

AVG  MONO

Axis:

1  2

Label:

I  M  -

Ions:

a  +  2+  3+

b  +  2+  3+

c  +  2+  3+

x  +  2+  3+

y  +  2+  3+

z  +  2+  3+

hide H<sub>2</sub>O/NH<sub>3</sub>

zoom 112-122

GO

scan 6174; 7.3e+000

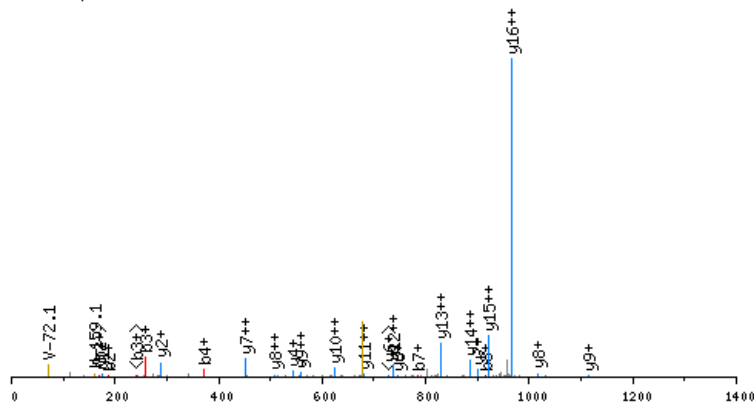

[click image to zoom in; click top corners to zoom out](#)      [\[precursor±\]](#)

scan 6170; 677.3 m/z; 8.4e+000

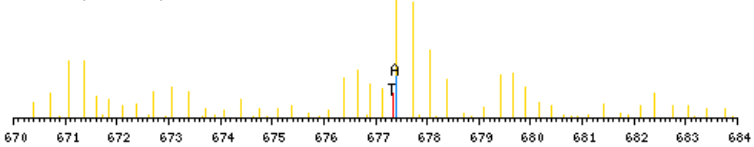

[zoomed in precursor plot; T=theoretical m/z, A=acquired m/z](#)

| b <sup>+</sup> | #  | AA # | y <sup>+</sup> | y <sup>2+</sup> |
|----------------|----|------|----------------|-----------------|
| 100.0762       | 1  | A 17 |                |                 |
| 187.1082       | 2  | S 16 | 1930.9511      | 965.9795        |
| 258.1454       | 3  | A 15 | 1843.9191      | 922.4634        |
| 371.2294       | 4  | L 14 | 1772.8819      | 886.9449        |
| 557.3087       | 5  | W 13 | 1659.7979      | 830.4029        |
| 671.3517       | 6  | N 12 | 1473.7186      | 737.3632        |
| 786.3786       | 7  | D 11 | 1359.6756      | 680.3417        |
| 915.4212       | 8  | E 10 | 1244.6487      | 622.8283        |
| 1014.4896      | 9  | V 9  | 1115.6061      | 558.3070        |
| 1129.5166      | 10 | D 8  | 1016.5377      | 508.7728        |
| 1285.6429      | 11 | K 7  | 901.5107       | 451.2593        |
| 1356.6800      | 12 | A 6  | 745.3844       | 373.1961        |
| 1485.7226      | 13 | E 5  | 674.3473       | 337.6776        |
| 1613.7811      | 14 | Q 4  | 545.3047       | 273.1563        |
| 1742.8237      | 15 | E 3  | 417.2462       | 209.1270        |
| 1855.9078      | 16 | L 2  | 288.2036       | 144.6057        |
|                | 17 | R 1  | 175.1195       | 88.0637         |

N-term:+29.04 K(11):+156.13

ASEPQEVLHIGSAHNR, MH+ 1772.9043, m/z 443.9815  
 L OS G28 P150811 220811-s1.03824.03824.4.dta

X-range:

-

MassTol: Y-zoom:

MassType:

AVG  MONO

Axis:

1  2

Label:

I  M  -

Ions:

a  +  2+  3+

b  +  2+  3+

c  +  2+  3+

x  +  2+  3+

y  +  2+  3+

z  +  2+  3+

hide H<sub>2</sub>O/NH<sub>3</sub>

zoom 112-122

GO

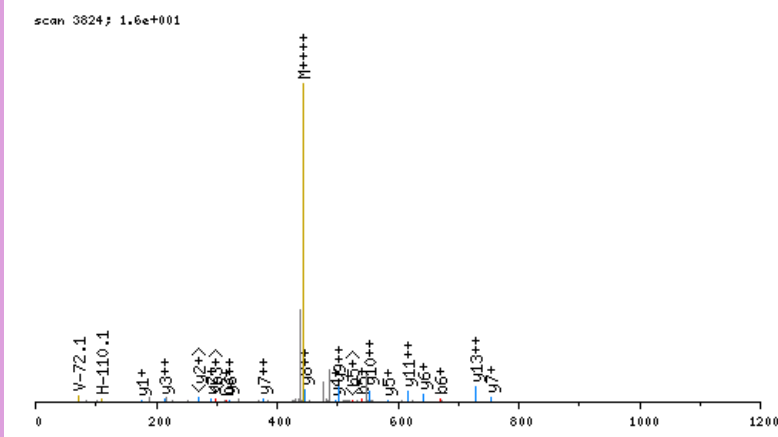

click image to zoom in; click top corners to zoom out [\[precursor±\]](#)

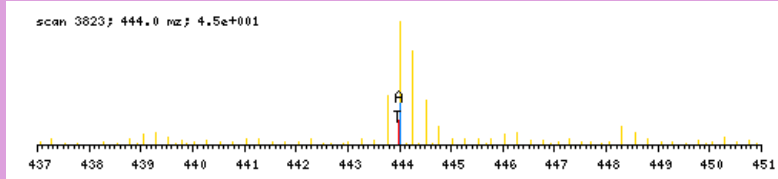

zoomed in precursor plot; T=theoretical m/z, A=acquired m/z

| b <sup>+</sup> | #  | AA # | y <sup>+</sup> | y <sup>2+</sup> |
|----------------|----|------|----------------|-----------------|
| 100.0762       | 1  | A 16 |                |                 |
| 187.1082       | 2  | S 15 | 1673.8360      | 837.4219        |
| 316.1508       | 3  | E 14 | 1586.8039      | 793.9059        |
| 413.2036       | 4  | P 13 | 1457.7613      | 729.3846        |
| 541.2622       | 5  | Q 12 | 1360.7086      | 680.8582        |
| 670.3048       | 6  | E 11 | 1232.6500      | 616.8289        |
| 769.3732       | 7  | V 10 | 1103.6074      | 552.3076        |
| 882.4572       | 8  | L 9  | 1004.5390      | 502.7734        |
| 1019.5162      | 9  | H 8  | 891.4549       | 446.2314        |
| 1132.6002      | 10 | I 7  | 754.3960       | 377.7019        |
| 1189.6217      | 11 | G 6  | 641.3119       | 321.1599        |
| 1276.6537      | 12 | S 5  | 584.2905       | 292.6492        |
| 1347.6908      | 13 | A 4  | 497.2585       | 249.1331        |
| 1484.7497      | 14 | H 3  | 426.2213       | 213.6146        |
| 1598.7927      | 15 | N 2  | 289.1624       | 145.0851        |
|                | 16 | R 1  | 175.1195       | 88.0637         |

N-term:+29.04

X-range:

-

MassTol: Y-zoom:

MassType:

AVG  MONO

Axis:

1  2

Label:

I  M  -

Ions:

a  +  2+  3+

b  +  2+  3+

c  +  2+  3+

x  +  2+  3+

y  +  2+  3+

z  +  2+  3+

hide H<sub>2</sub>O/NH<sub>3</sub>

zoom 112-122

GO

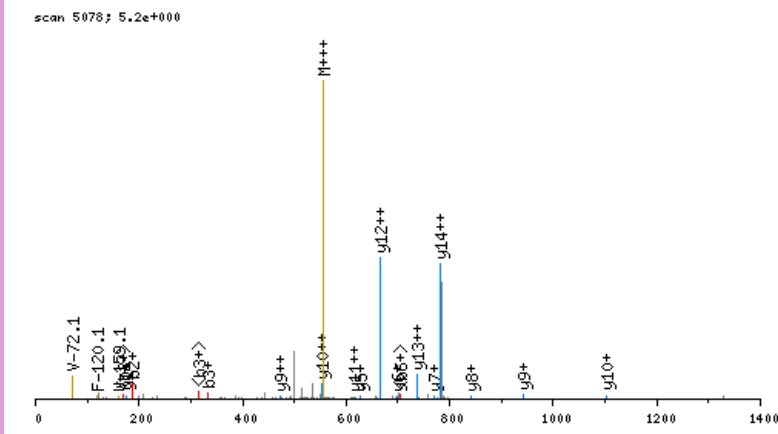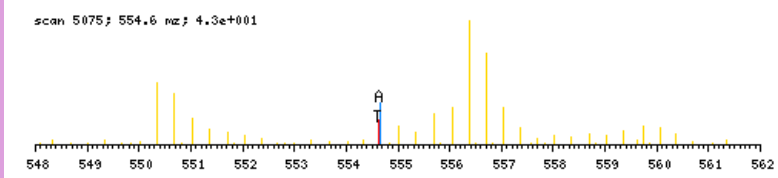

| b <sup>+</sup> | #  | AA | #  | y <sup>+</sup> | y <sup>2+</sup> |
|----------------|----|----|----|----------------|-----------------|
| 100.0762       | 1  | A  | 15 |                |                 |
| 187.1082       | 2  | S  | 14 | 1562.8365      | 781.9221        |
| 334.1767       | 3  | F  | 13 | 1475.8044      | 738.4061        |
| 431.2294       | 4  | P  | 12 | 1328.7360      | 664.8719        |
| 560.2720       | 5  | E  | 11 | 1231.6833      | 616.3455        |
| 720.3026       | 6  | C  | 10 | 1102.6407      | 551.8242        |
| 821.3503       | 7  | T  | 9  | 942.6101       | 471.8089        |
| 892.3874       | 8  | A  | 8  | 841.5624       | 421.2851        |
| 963.4245       | 9  | A  | 7  | 770.5253       | 385.7665        |
| 1034.4616      | 10 | A  | 6  | 699.4882       | 350.2480        |
| 1147.5457      | 11 | I  | 5  | 628.4510       | 314.7294        |
| 1303.6720      | 12 | K  | 4  | 515.3670       | 258.1874        |
| 1374.7091      | 13 | A  | 3  | 359.2407       | 180.1243        |
| 1487.7932      | 14 | I  | 2  | 288.2036       | 144.6057        |
|                | 15 | R  | 1  | 175.1195       | 88.0637         |

N-term:+29.04 C(6):+160.03  
 K(12):+156.13

ASGDKEAEGAPQVEAGKR, MH+ 1902.0781, m/z 476.2750  
 H OS G28 P150811 220811-s1.01895.01895.4.dta

X-range:

-

MassTol: Y-zoom:

MassType:

AVG  MONO

Axis:

1  2

Label:

I  M  -

Ions:

a  +  2+  3+

b  +  2+  3+

c  +  2+  3+

x  +  2+  3+

y  +  2+  3+

z  +  2+  3+

hide H<sub>2</sub>O/NH<sub>3</sub>

zoom 112-122

GO

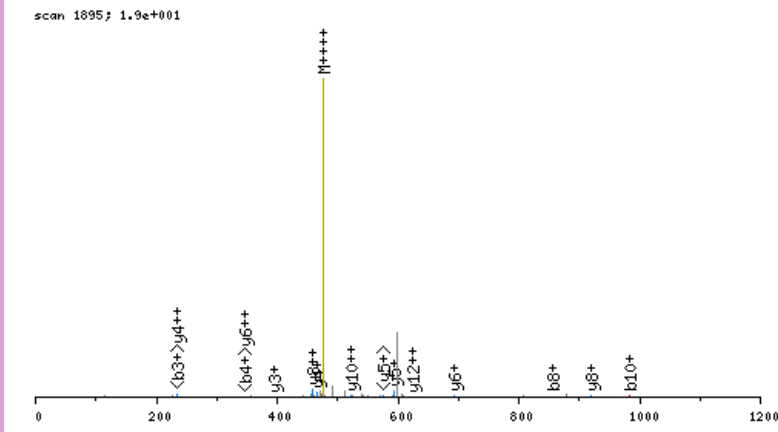

click image to zoom in; click top corners to zoom out [\[precursor±\]](#)

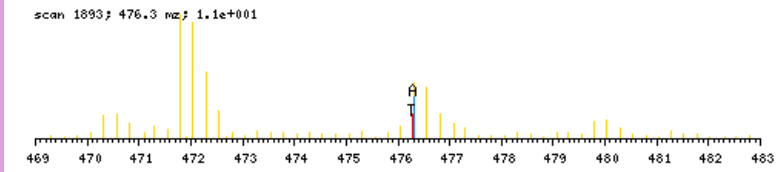

zoomed in precursor plot; T=theoretical m/z, A=acquired m/z

| b <sup>+</sup> | #  | AA # | y <sup>+</sup> | y <sup>2+</sup> |
|----------------|----|------|----------------|-----------------|
| 106.1080       | 1  | A 18 |                |                 |
| 193.1400       | 2  | S 17 | 1796.9779      | 898.9929        |
| 250.1615       | 3  | G 16 | 1709.9459      | 855.4769        |
| 365.1884       | 4  | D 15 | 1652.9244      | 826.9661        |
| 527.3465       | 5  | K 14 | 1537.8975      | 769.4527        |
| 656.3891       | 6  | E 13 | 1375.7394      | 688.3736        |
| 727.4263       | 7  | A 12 | 1246.6968      | 623.8523        |
| 856.4688       | 8  | E 11 | 1175.6597      | 588.3338        |
| 913.4903       | 9  | G 10 | 1046.6171      | 523.8125        |
| 984.5274       | 10 | A 9  | 989.5956       | 495.3017        |
| 1081.5802      | 11 | P 8  | 918.5585       | 459.7832        |
| 1209.6388      | 12 | Q 7  | 821.5058       | 411.2568        |
| 1308.7072      | 13 | V 6  | 693.4472       | 347.2275        |
| 1437.7498      | 14 | E 5  | 594.3788       | 297.6933        |
| 1508.7869      | 15 | A 4  | 465.3362       | 233.1720        |
| 1565.8084      | 16 | G 3  | 394.2991       | 197.6534        |
| 1727.9665      | 17 | K 2  | 337.2776       | 169.1427        |
|                | 18 | R 1  | 175.1195       | 88.0637         |

N-term:+35.07 K(5):+162.16  
 K(17):+162.16



ASGGVPTDEEQATGLER, MH+ 1801.8568, m/z 601.2904  
 L OS G25 P150811 220811-s1.03724.03724.3.dta

X-range:

-

MassTol: Y-zoom:

MassType:

AVG  MONO

Axis:

1  2

Label:

I  M  -

Ions:

a  +  2+  3+

b  +  2+  3+

c  +  2+  3+

x  +  2+  3+

y  +  2+  3+

z  +  2+  3+

hide H<sub>2</sub>O/NH<sub>3</sub>

zoom 112-122

GO

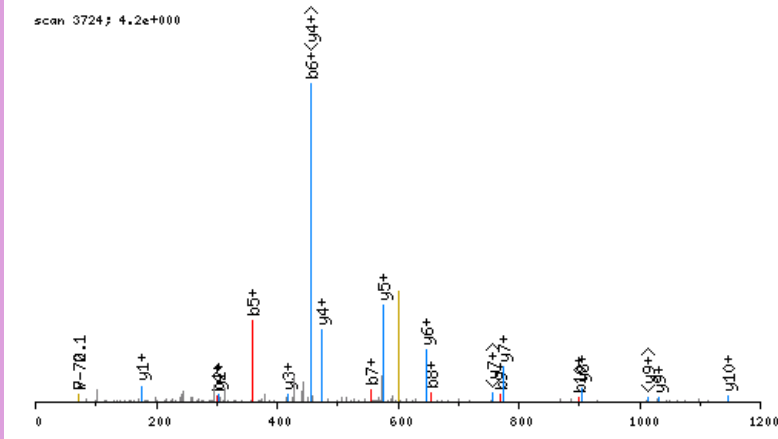

click image to zoom in; click top corners to zoom out [\[precursor±\]](#)

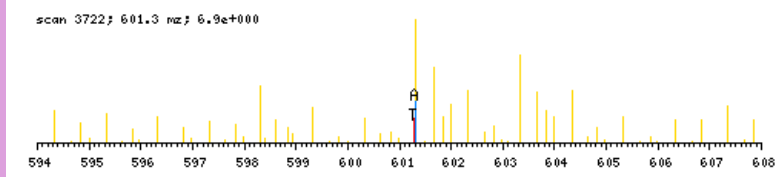

zoomed in precursor plot; T=theoretical m/z, A=acquired m/z

| b <sup>+</sup> | #  | AA # | y <sup>+</sup> | y <sup>2+</sup> |
|----------------|----|------|----------------|-----------------|
| 100.0762       | 1  | A 18 |                |                 |
| 187.1082       | 2  | S 17 | 1702.7884      | 851.8981        |
| 244.1297       | 3  | G 16 | 1615.7564      | 808.3821        |
| 301.1512       | 4  | G 15 | 1558.7349      | 779.8714        |
| 358.1726       | 5  | G 14 | 1501.7134      | 751.3606        |
| 457.2410       | 6  | V 13 | 1444.6920      | 722.8499        |
| 554.2938       | 7  | P 12 | 1345.6236      | 673.3157        |
| 655.3415       | 8  | T 11 | 1248.5708      | 624.7893        |
| 770.3684       | 9  | D 10 | 1147.5231      | 574.2655        |
| 899.4110       | 10 | E 9  | 1032.4962      | 516.7520        |
| 1028.4536      | 11 | E 8  | 903.4536       | 452.2307        |
| 1156.5122      | 12 | Q 7  | 774.4110       | 387.7094        |
| 1227.5493      | 13 | A 6  | 646.3524       | 323.6801        |
| 1328.5970      | 14 | T 5  | 575.3153       | 288.1616        |
| 1385.6185      | 15 | G 4  | 474.2676       | 237.6377        |
| 1498.7025      | 16 | L 3  | 417.2462       | 209.1270        |
| 1627.7451      | 17 | E 2  | 304.1621       | 152.5850        |
|                | 18 | R 1  | 175.1195       | 88.0637         |

N-term:+29.04

ASGPGGLHADLLR, MH+ 1291.7122, m/z 431.2423  
 L OS G27 P150811 220811-s1.04433.04433.3.dta

X-range:

-

MassTol: Y-zoom:

MassType:

AVG  MONO

Axis:

1  2

Label:

I  M  -

Ions:

a  +  2+  3+

b  +  2+  3+

c  +  2+  3+

x  +  2+  3+

y  +  2+  3+

z  +  2+  3+

hide H<sub>2</sub>O/NH<sub>3</sub>

zoom 112-122

GO

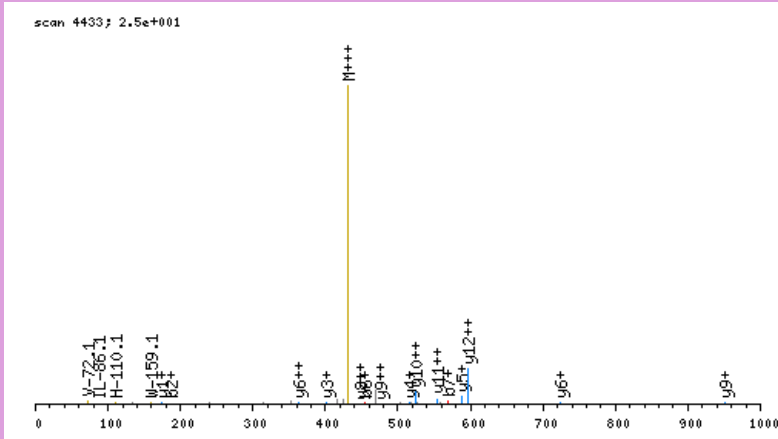

click image to zoom in; click top corners to zoom out [\[precursor±\]](#)

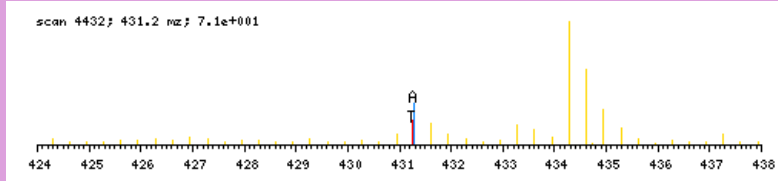

zoomed in precursor plot; T=theoretical m/z, A=acquired m/z

| b <sup>+</sup> | #  | AA # | y <sup>+</sup> | y <sup>2+</sup> |
|----------------|----|------|----------------|-----------------|
| 100.0762       | 1  | A 13 |                |                 |
| 187.1082       | 2  | S 12 | 1192.6438      | 596.8258        |
| 244.1297       | 3  | G 11 | 1105.6118      | 553.3098        |
| 341.1825       | 4  | P 10 | 1048.5904      | 524.7991        |
| 398.2039       | 5  | G 9  | 951.5376       | 476.2727        |
| 455.2254       | 6  | G 8  | 894.5161       | 447.7620        |
| 568.3095       | 7  | L 7  | 837.4947       | 419.2512        |
| 705.3684       | 8  | H 6  | 724.4106       | 362.7092        |
| 776.4055       | 9  | A 5  | 587.3517       | 294.1798        |
| 891.4324       | 10 | D 4  | 516.3146       | 258.6612        |
| 1004.5165      | 11 | L 3  | 401.2876       | 201.1477        |
| 1117.6006      | 12 | L 2  | 288.2036       | 144.6057        |
|                | 13 | R 1  | 175.1195       | 88.0637         |

N-term:+29.04

ASIFGGAKPVDTAAR, MH+ 1516.8488, m/z 506.2878  
 L OS G26 P150811 220811-s1.03316.03316.3.dta

X-range:

-

MassTol: Y-zoom:

MassType:

AVG  MONO

Axis:

1  2

Label:

I  M  -

Ions:

a  +  2+  3+

b  +  2+  3+

c  +  2+  3+

x  +  2+  3+

y  +  2+  3+

z  +  2+  3+

hide H<sub>2</sub>O/NH<sub>3</sub>

zoom 112-122

GO

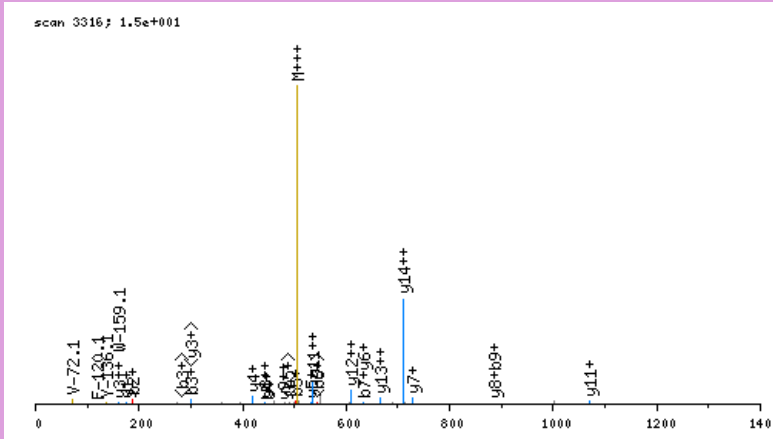

click image to zoom in; click top corners to zoom out [\[precursor±\]](#)

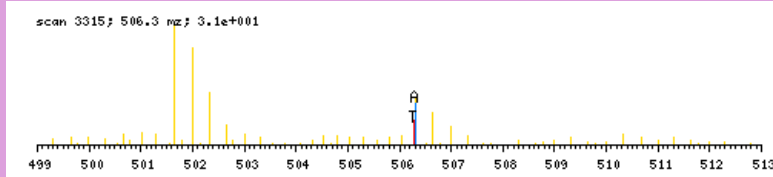

zoomed in precursor plot; T=theoretical m/z, A=acquired m/z

| b <sup>+</sup> | #  | AA # | y <sup>+</sup> | y <sup>2+</sup> |
|----------------|----|------|----------------|-----------------|
| 100.0762       | 1  | A 15 |                |                 |
| 187.1082       | 2  | S 14 | 1417.7804      | 709.3941        |
| 300.1923       | 3  | I 13 | 1330.7483      | 665.8781        |
| 447.2607       | 4  | F 12 | 1217.6643      | 609.3361        |
| 504.2822       | 5  | G 11 | 1070.5959      | 535.8018        |
| 561.3036       | 6  | G 10 | 1013.5744      | 507.2911        |
| 632.3408       | 7  | A 9  | 956.5529       | 478.7804        |
| 788.4671       | 8  | K 8  | 885.5158       | 443.2618        |
| 885.5198       | 9  | P 7  | 729.3895       | 365.1987        |
| 984.5882       | 10 | V 6  | 632.3368       | 316.6723        |
| 1099.6152      | 11 | D 5  | 533.2683       | 267.1381        |
| 1200.6629      | 12 | T 4  | 418.2414       | 209.6246        |
| 1271.7000      | 13 | A 3  | 317.1937       | 159.1008        |
| 1342.7371      | 14 | A 2  | 246.1566       | 123.5822        |
|                | 15 | R 1  | 175.1195       | 88.0637         |

N-term:+29.04 K(8):+156.13

ASKPTLNEVVIVSAIR, MH+ 1753.0588, m/z 585.0244  
 L OS G26 P150811 220811-s1.05436.05436.3.dta

X-range:

-

MassTol: Y-zoom:

MassType:

AVG  MONO

Axis:

1  2

Label:

I  M  -

Ions:

a  +  2+  3+

b  +  2+  3+

c  +  2+  3+

x  +  2+  3+

y  +  2+  3+

z  +  2+  3+

hide H<sub>2</sub>O/NH<sub>3</sub>

zoom 112-122

GO

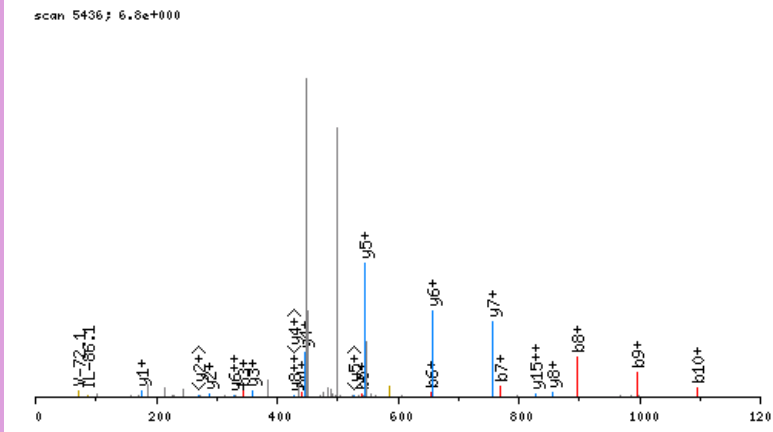

click image to zoom in; click top corners to zoom out [\[precursor±\]](#)

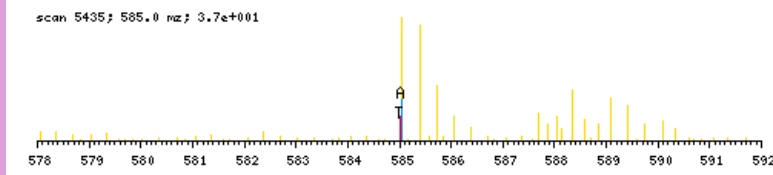

zoomed in precursor plot; T=theoretical m/z, A=acquired m/z

| b <sup>+</sup> | #  | AA # | y <sup>+</sup> | y <sup>2+</sup> |
|----------------|----|------|----------------|-----------------|
| 100.0762       | 1  | A 16 |                |                 |
| 187.1082       | 2  | S 15 | 1653.9904      | 827.4991        |
| 343.2345       | 3  | K 14 | 1566.9583      | 783.9831        |
| 440.2873       | 4  | P 13 | 1410.8320      | 705.9199        |
| 541.3350       | 5  | T 12 | 1313.7793      | 657.3936        |
| 654.4190       | 6  | L 11 | 1212.7316      | 606.8697        |
| 768.4620       | 7  | N 10 | 1099.6475      | 550.3277        |
| 897.5046       | 8  | E 9  | 985.6046       | 493.3062        |
| 996.5730       | 9  | V 8  | 856.5620       | 428.7849        |
| 1095.6414      | 10 | V 7  | 757.4936       | 379.2507        |
| 1208.7255      | 11 | I 6  | 658.4252       | 329.7165        |
| 1307.7939      | 12 | V 5  | 545.3411       | 273.1745        |
| 1394.8259      | 13 | S 4  | 446.2727       | 223.6403        |
| 1465.8630      | 14 | A 3  | 359.2407       | 180.1243        |
| 1578.9471      | 15 | I 2  | 288.2036       | 144.6057        |
|                | 16 | R 1  | 175.1195       | 88.0637         |

N-term:+29.04 K(3):+156.13

ASLSEKPPAIDWAYR, MH+ 1923.0016, m/z 641.6721  
 L OS G26 P150811 220811-s1.05537.05537.3.dta

X-range:

-

MassTol: Y-zoom:

MassType:

AVG  MONO

Axis:

1  2

Label:

I  M  -

Ions:

a  +  2+  3+

b  +  2+  3+

c  +  2+  3+

x  +  2+  3+

y  +  2+  3+

z  +  2+  3+

hide H<sub>2</sub>O/NH<sub>3</sub>

zoom 112-122

GO

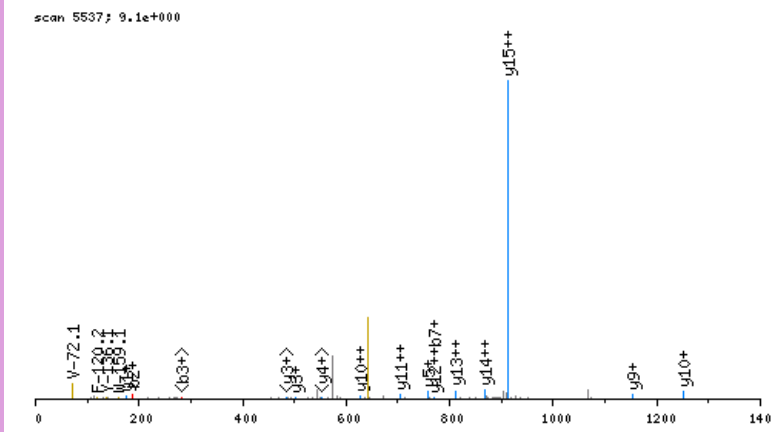

click image to zoom in; click top corners to zoom out [\[precursor±\]](#)

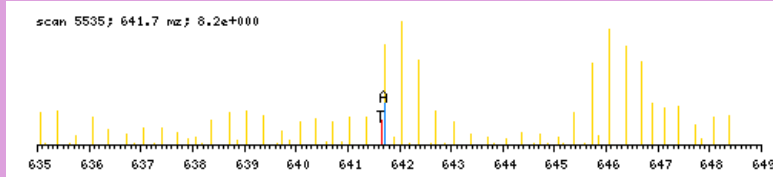

zoomed in precursor plot; T=theoretical m/z, A=acquired m/z

| b <sup>+</sup> | #  | AA # | y <sup>+</sup> | y <sup>2+</sup> |
|----------------|----|------|----------------|-----------------|
| 100.0762       | 1  | A 16 |                |                 |
| 187.1082       | 2  | S 15 | 1823.9332      | 912.4705        |
| 300.1923       | 3  | L 14 | 1736.9012      | 868.9545        |
| 387.2243       | 4  | S 13 | 1623.8172      | 812.4125        |
| 516.2669       | 5  | E 12 | 1536.7851      | 768.8965        |
| 672.3932       | 6  | K 11 | 1407.7425      | 704.3752        |
| 769.4460       | 7  | P 10 | 1251.6162      | 626.3120        |
| 866.4988       | 8  | P 9  | 1154.5635      | 577.7856        |
| 937.5359       | 9  | A 8  | 1057.5107      | 529.2593        |
| 1050.6199      | 10 | I 7  | 986.4736       | 493.7407        |
| 1165.6469      | 11 | D 6  | 873.3895       | 437.1987        |
| 1351.7262      | 12 | W 5  | 758.3626       | 379.6852        |
| 1422.7633      | 13 | A 4  | 572.2833       | 286.6455        |
| 1585.8266      | 14 | Y 3  | 501.2462       | 251.1270        |
| 1748.8900      | 15 | Y 2  | 338.1828       | 169.5953        |
|                | 16 | R 1  | 175.1195       | 88.0637         |

N-term:+29.04 K(6):+156.13

ASQMSYGYDEKSAGVSPGPMGPGSPGR, MH+ 2780.3660, m/z 695.8470  
 H OS G26 P150811 220811-s1.04617.04617.4.dta

scan 4617; 4.3e+000

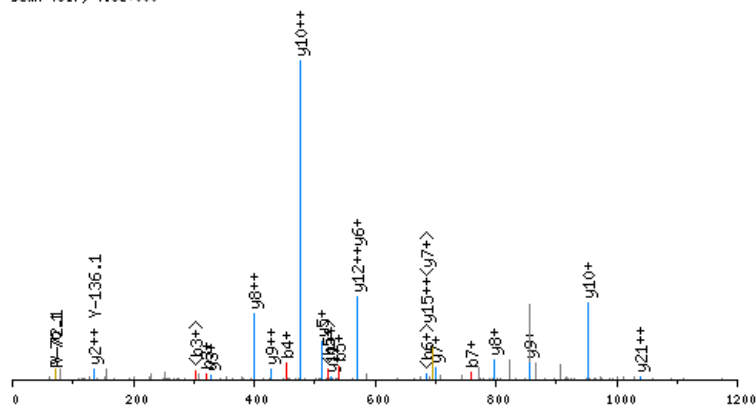

click image to zoom in; click top corners to zoom out [precursor±]

scan 4615; 695.8 m/z; 1.1e+001

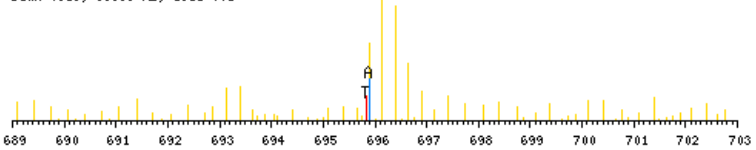

zoomed in precursor plot; T=theoretical m/z, A=acquired m/z

X-range:

-

MassTol: Y-zoom:

MassType:

AVG  MONO

Axis:

1  2

Label:

I  M  -

Ions:

a  +  2+  3+

b  +  2+  3+

c  +  2+  3+

x  +  2+  3+

y  +  2+  3+

z  +  2+  3+

hide H<sub>2</sub>O/NH<sub>3</sub>

zoom 112-122

GO

| b <sup>+</sup> | #  | AA | #  | y <sup>+</sup> | y <sup>2+</sup> |
|----------------|----|----|----|----------------|-----------------|
| 106.1080       | 1  | A  | 27 |                |                 |
| 193.1400       | 2  | S  | 26 | 2675.2658      | 1338.1368       |
| 321.1986       | 3  | Q  | 25 | 2588.2338      | 1294.6208       |
| 452.2391       | 4  | M  | 24 | 2460.1752      | 1230.5915       |
| 539.2711       | 5  | S  | 23 | 2329.1347      | 1165.0713       |
| 702.3345       | 6  | Y  | 22 | 2242.1027      | 1121.5553       |
| 759.3559       | 7  | G  | 21 | 2079.0394      | 1040.0236       |
| 922.4193       | 8  | Y  | 20 | 2022.0179      | 1011.5129       |
| 1037.4462      | 9  | D  | 19 | 1858.9546      | 929.9812        |
| 1166.4888      | 10 | E  | 18 | 1743.9276      | 872.4677        |
| 1328.6469      | 11 | K  | 17 | 1614.8850      | 807.9464        |
| 1415.6789      | 12 | S  | 16 | 1452.7269      | 726.8674        |
| 1486.7160      | 13 | A  | 15 | 1365.6949      | 683.3514        |
| 1543.7375      | 14 | G  | 14 | 1294.6578      | 647.8328        |
| 1642.8059      | 15 | V  | 13 | 1237.6363      | 619.3221        |
| 1729.8379      | 16 | S  | 12 | 1138.5679      | 569.7879        |
| 1828.9064      | 17 | V  | 11 | 1051.5359      | 526.2718        |
| 1925.9591      | 18 | P  | 10 | 952.4675       | 476.7376        |
| 1982.9806      | 19 | G  | 9  | 855.4147       | 428.2113        |
| 2080.0333      | 20 | P  | 8  | 798.3932       | 399.7005        |
| 2211.0738      | 21 | M  | 7  | 701.3405       | 351.1741        |
| 2268.0953      | 22 | G  | 6  | 570.3000       | 285.6539        |
| 2365.1481      | 23 | P  | 5  | 513.2785       | 257.1432        |
| 2452.1801      | 24 | S  | 4  | 416.2258       | 208.6168        |
| 2509.2015      | 25 | G  | 3  | 329.1937       | 165.1008        |
| 2606.2543      | 26 | P  | 2  | 272.1723       | 136.5900        |
|                | 27 | R  | 1  | 175.1195       | 88.0637         |

N-term:+35.07 K(11):+162.16

ASQTQGIQQLLQAEKR, MH+ 1855.0401, m/z 619.0182  
 L OS G25 P150811 220811-s1.06793.06793.3.dta

scan 6793; 1.2e+001

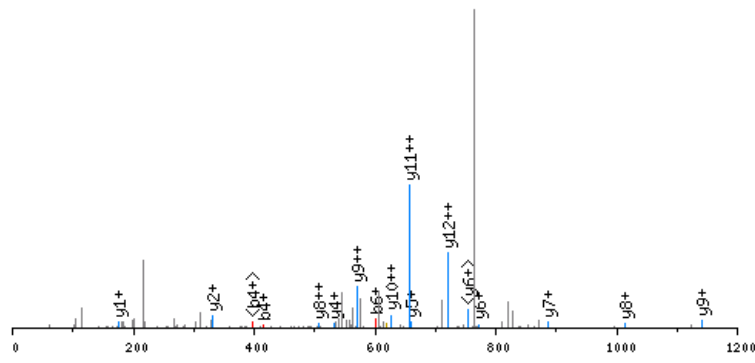

click image to zoom in; click top corners to zoom out [\[precursor±\]](#)

scan 6792; 619.0 m/z; 8.1e+001

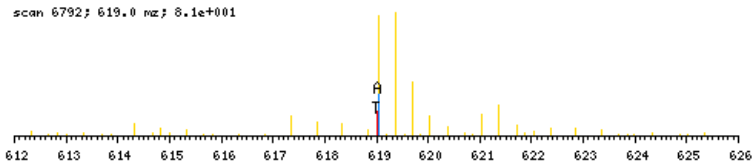

zoomed in precursor plot; T=theoretical m/z, A=acquired m/z

X-range:

-

MassTol: Y-zoom:

MassType:

AVG  MONO

Axis:

1  2

Label:

I  M  -

Ions:

a  +  2+  3+

b  +  2+  3+

c  +  2+  3+

x  +  2+  3+

y  +  2+  3+

z  +  2+  3+

hide H<sub>2</sub>O/NH<sub>3</sub>

zoom 112-122

GO

| b <sup>+</sup> | #  | AA # | y <sup>+</sup> | y <sup>2+</sup> |
|----------------|----|------|----------------|-----------------|
| 100.0762       | 1  | A 16 |                |                 |
| 187.1082       | 2  | S 15 | 1755.9718      | 878.4898        |
| 315.1668       | 3  | Q 14 | 1668.9397      | 834.9738        |
| 416.2145       | 4  | T 13 | 1540.8812      | 770.9445        |
| 544.2731       | 5  | Q 12 | 1439.8335      | 720.4206        |
| 601.2945       | 6  | G 11 | 1311.7749      | 656.3914        |
| 714.3786       | 7  | I 10 | 1254.7534      | 627.8806        |
| 842.4372       | 8  | Q 9  | 1141.6694      | 571.3386        |
| 970.4958       | 9  | Q 8  | 1013.6108      | 507.3093        |
| 1083.5798      | 10 | L 7  | 885.5522       | 443.2800        |
| 1196.6639      | 11 | L 6  | 772.4681       | 386.7380        |
| 1324.7225      | 12 | Q 5  | 659.3841       | 330.1960        |
| 1395.7596      | 13 | A 4  | 531.3255       | 266.1667        |
| 1524.8022      | 14 | E 3  | 460.2884       | 230.6481        |
| 1680.9285      | 15 | K 2  | 331.2458       | 166.1268        |
|                | 16 | R 1  | 175.1195       | 88.0637         |

N-term:+29.04 K(15):+156.13

ASSLSSASLVPR, MH+ 1202.6745, m/z 601.8409  
 L OS G25 P150811 220811-s1.04485.04485.2.dta

X-range:

-

MassTol: Y-zoom:

MassType:

AVG  MONO

Axis:

1  2

Label:

I  M  -

Ions:

a  +  2+  3+

b  +  2+  3+

c  +  2+  3+

x  +  2+  3+

y  +  2+  3+

z  +  2+  3+

hide H<sub>2</sub>O/NH<sub>3</sub>

zoom 112-122

GO

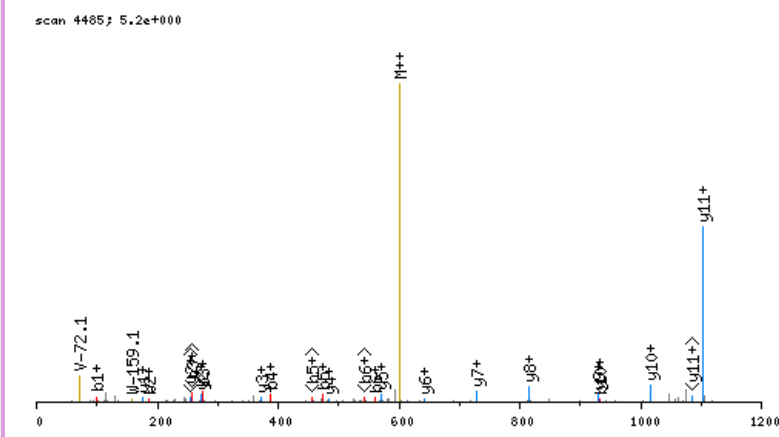

click image to zoom in; click top corners to zoom out [\[precursor±\]](#)

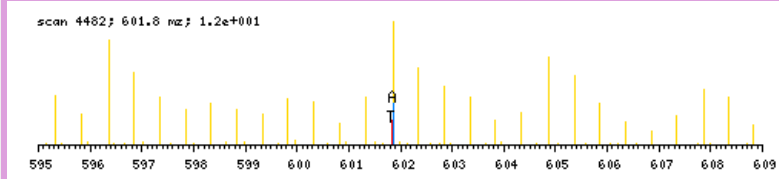

zoomed in precursor plot; T=theoretical m/z, A=acquired m/z

| b <sup>+</sup> | #  | AA # | y <sup>+</sup> | y <sup>2+</sup> |
|----------------|----|------|----------------|-----------------|
| 100.0762       | 1  | A 12 |                |                 |
| 187.1082       | 2  | S 11 | 1103.6061      | 552.3069        |
| 274.1403       | 3  | S 10 | 1016.5740      | 508.7909        |
| 387.2243       | 4  | L 9  | 929.5420       | 465.2749        |
| 474.2564       | 5  | S 8  | 816.4579       | 408.7329        |
| 561.2884       | 6  | S 7  | 729.4259       | 365.2169        |
| 632.3255       | 7  | A 6  | 642.3939       | 321.7009        |
| 719.3575       | 8  | S 5  | 571.3568       | 286.1823        |
| 832.4416       | 9  | L 4  | 484.3247       | 242.6663        |
| 931.5100       | 10 | V 3  | 371.2407       | 186.1243        |
| 1028.5628      | 11 | P 2  | 272.1723       | 136.5900        |
|                | 12 | R 1  | 175.1195       | 88.0637         |

N-term:+29.04



ASSTNLKDVLSNLPKEQAR, MH+ 2286.3882, m/z 572.3525  
 H OS G27 P150811 220811-s1.07257.07257.4.dta

X-range:

-

MassTol: Y-zoom:

MassType:

AVG  MONO

Axis:

1  2

Label:

I  M  -

Ions:

a  +  2+  3+

b  +  2+  3+

c  +  2+  3+

x  +  2+  3+

y  +  2+  3+

z  +  2+  3+

hide H<sub>2</sub>O/NH<sub>3</sub>

zoom 112-122

GO

scan 7257; 1.6e+001

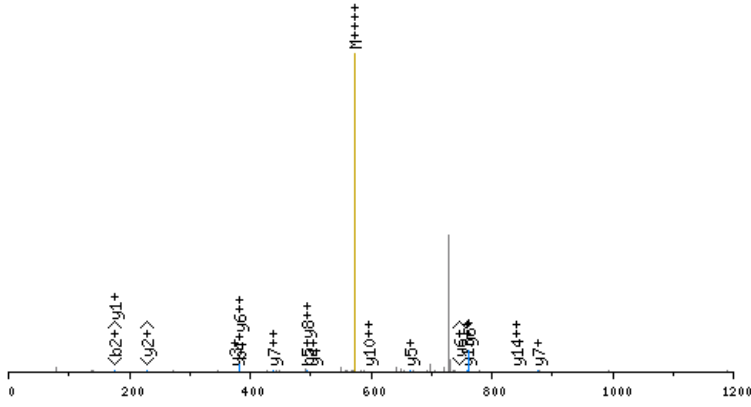

click image to zoom in; click top corners to zoom out [\[precursor±\]](#)

scan 7255; 572.4 m/z; 9.8e+000

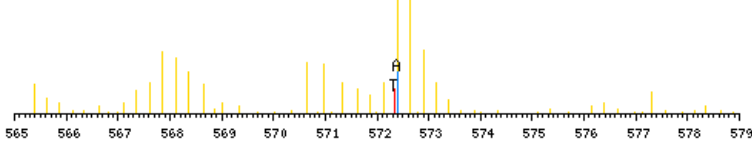

zoomed in precursor plot; T=theoretical m/z, A=acquired m/z

| b <sup>+</sup> | #  | AA | #  | y <sup>+</sup> | y <sup>2+</sup> |
|----------------|----|----|----|----------------|-----------------|
| 106.1080       | 1  | A  | 20 |                |                 |
| 193.1400       | 2  | S  | 19 | 2181.2880      | 1091.1479       |
| 280.1721       | 3  | S  | 18 | 2094.2560      | 1047.6319       |
| 381.2197       | 4  | T  | 17 | 2007.2239      | 1004.1159       |
| 495.2627       | 5  | N  | 16 | 1906.1762      | 953.5920        |
| 608.3467       | 6  | L  | 15 | 1792.1333      | 896.5706        |
| 770.5048       | 7  | K  | 14 | 1679.0493      | 840.0285        |
| 885.5318       | 8  | D  | 13 | 1516.8912      | 758.9495        |
| 984.6002       | 9  | V  | 12 | 1401.8642      | 701.4360        |
| 1097.6843      | 10 | L  | 11 | 1302.7958      | 651.9018        |
| 1184.7163      | 11 | S  | 10 | 1189.7117      | 595.3598        |
| 1298.7592      | 12 | N  | 9  | 1102.6797      | 551.8438        |
| 1411.8433      | 13 | L  | 8  | 988.6368       | 494.8223        |
| 1524.9273      | 14 | I  | 7  | 875.5527       | 438.2803        |
| 1621.9801      | 15 | P  | 6  | 762.4686       | 381.7382        |
| 1784.1382      | 16 | K  | 5  | 665.4159       | 333.2119        |
| 1913.1808      | 17 | E  | 4  | 503.2578       | 252.1328        |
| 2041.2394      | 18 | Q  | 3  | 374.2152       | 187.6115        |
| 2112.2765      | 19 | A  | 2  | 246.1566       | 123.5822        |
|                | 20 | R  | 1  | 175.1195       | 88.0637         |

N-term: +35.07 K(7): +162.16  
 K(16): +162.16

ATAASSSLEKSYELPDGQVITIGNER, MH+ 2879.4638, m/z 720.6214  
 L OS G26 P150811 220811-s1.06097.06097.4.dta

scan 6097; 7.7e+000

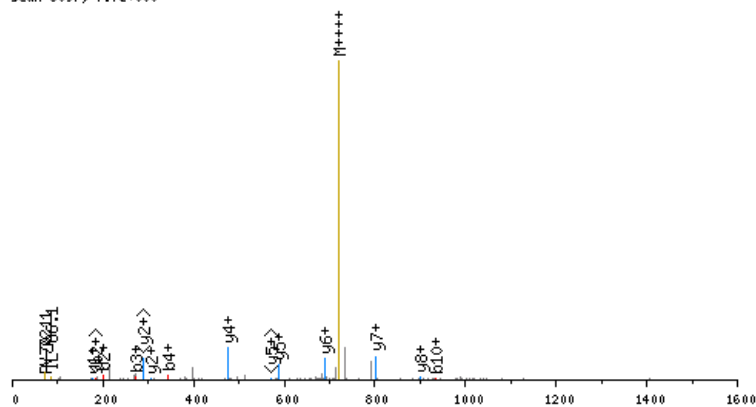

click image to zoom in; click top corners to zoom out [\[precursor±\]](#)

scan 6095; 720.6 m/z; 7.1e+001

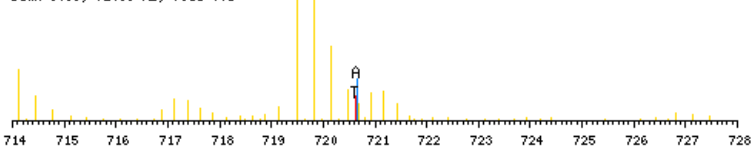

zoomed in precursor plot; T=theoretical m/z, A=acquired m/z

X-range:

-

MassTol: Y-zoom:

MassType:

AVG  MONO

Axis:

1  2

Label:

I  M  -

Ions:

a  +  2+  3+

b  +  2+  3+

c  +  2+  3+

x  +  2+  3+

y  +  2+  3+

z  +  2+  3+

hide H<sub>2</sub>O/NH<sub>3</sub>

zoom 112-122

GO

| b <sup>+</sup> | #  | AA | #  | y <sup>+</sup> | y <sup>2+</sup> |
|----------------|----|----|----|----------------|-----------------|
| 100.0762       | 1  | A  | 27 |                |                 |
| 201.1239       | 2  | T  | 26 | 2780.3954      | 1390.7016       |
| 272.1610       | 3  | A  | 25 | 2679.3478      | 1340.1778       |
| 343.1981       | 4  | A  | 24 | 2608.3107      | 1304.6592       |
| 430.2301       | 5  | S  | 23 | 2537.2735      | 1269.1407       |
| 517.2622       | 6  | S  | 22 | 2450.2415      | 1225.6247       |
| 604.2942       | 7  | S  | 21 | 2363.2095      | 1182.1087       |
| 691.3262       | 8  | S  | 20 | 2276.1775      | 1138.5926       |
| 804.4103       | 9  | L  | 19 | 2189.1454      | 1095.0766       |
| 933.4529       | 10 | E  | 18 | 2076.0614      | 1038.5346       |
| 1089.5792      | 11 | K  | 17 | 1947.0188      | 974.0133        |
| 1176.6112      | 12 | S  | 16 | 1790.8925      | 895.9501        |
| 1339.6745      | 13 | Y  | 15 | 1703.8604      | 852.4341        |
| 1468.7171      | 14 | E  | 14 | 1540.7971      | 770.9025        |
| 1581.8012      | 15 | L  | 13 | 1411.7545      | 706.3812        |
| 1678.8540      | 16 | P  | 12 | 1298.6705      | 649.8391        |
| 1793.8809      | 17 | D  | 11 | 1201.6177      | 601.3128        |
| 1850.9024      | 18 | G  | 10 | 1086.5907      | 543.7993        |
| 1978.9610      | 19 | Q  | 9  | 1029.5693      | 515.2886        |
| 2078.0294      | 20 | V  | 8  | 901.5107       | 451.2593        |
| 2191.1134      | 21 | I  | 7  | 802.4423       | 401.7251        |
| 2292.1611      | 22 | T  | 6  | 689.3582       | 345.1830        |
| 2405.2452      | 23 | I  | 5  | 588.3105       | 294.6592        |
| 2462.2666      | 24 | G  | 4  | 475.2265       | 238.1172        |
| 2576.3096      | 25 | N  | 3  | 418.2050       | 209.6064        |
| 2705.3522      | 26 | E  | 2  | 304.1621       | 152.5850        |
|                | 27 | R  | 1  | 175.1195       | 88.0637         |

N-term:+29.04 K(11):+156.13

AEMVEVGPEDDEVGAER, MH+ 1966.9128, m/z 656.3091  
 H OS G24 P150811 220811-s1.03381.03381.3.dta

X-range:

-

MassTol: Y-zoom:

MassType:

AVG  MONO

Axis:

1  2

Label:

I  M  -

Ions:

a  +  2+  3+

b  +  2+  3+

c  +  2+  3+

x  +  2+  3+

y  +  2+  3+

z  +  2+  3+

hide H<sub>2</sub>O/NH<sub>3</sub>

zoom 112-122

GO

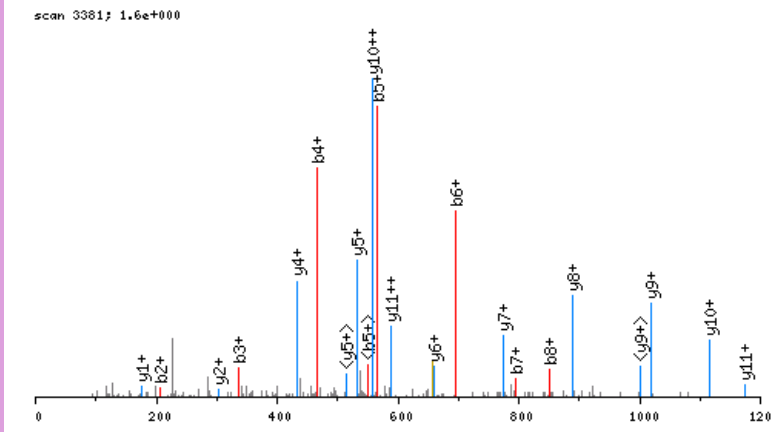

click image to zoom in; click top corners to zoom out [\[precursor±\]](#)

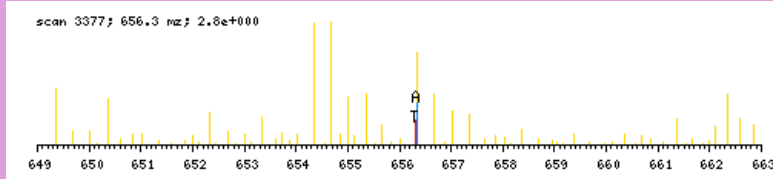

zoomed in precursor plot; T=theoretical m/z, A=acquired m/z

| b <sup>+</sup> | #  | AA # | y <sup>+</sup> | y <sup>2+</sup> |
|----------------|----|------|----------------|-----------------|
| 106.1080       | 1  | A 18 |                |                 |
| 207.1557       | 2  | T 17 | 1861.8126      | 931.4102        |
| 336.1983       | 3  | E 16 | 1760.7649      | 880.8864        |
| 467.2388       | 4  | M 15 | 1631.7223      | 816.3651        |
| 566.3072       | 5  | V 14 | 1500.6818      | 750.8448        |
| 695.3498       | 6  | E 13 | 1401.6134      | 701.3106        |
| 794.4182       | 7  | V 12 | 1272.5708      | 636.7893        |
| 851.4397       | 8  | G 11 | 1173.5024      | 587.2551        |
| 948.4924       | 9  | P 10 | 1116.4809      | 558.7444        |
| 1077.5350      | 10 | E 9  | 1019.4282      | 510.2180        |
| 1192.5620      | 11 | D 8  | 890.3856       | 445.6967        |
| 1307.5889      | 12 | D 7  | 775.3586       | 388.1832        |
| 1436.6315      | 13 | E 6  | 660.3317       | 330.6698        |
| 1535.6999      | 14 | V 5  | 531.2891       | 266.1485        |
| 1592.7214      | 15 | G 4  | 432.2207       | 216.6142        |
| 1663.7585      | 16 | A 3  | 375.1992       | 188.1035        |
| 1792.8011      | 17 | E 2  | 304.1621       | 152.5850        |
|                | 18 | R 1  | 175.1195       | 88.0637         |

N-term:+35.07

ATEPVISFYDKR, MH+ 1493.8640, m/z 498.6262  
 H OS G27 P150811 220811-s1.05158.05158.3.dta

X-range:

-

MassTol: Y-zoom:

MassType:

AVG  MONO

Axis:

1  2

Label:

I  M  -

Ions:

a  +  2+  3+

b  +  2+  3+

c  +  2+  3+

x  +  2+  3+

y  +  2+  3+

z  +  2+  3+

hide H<sub>2</sub>O/NH<sub>3</sub>

zoom 112-122

GO

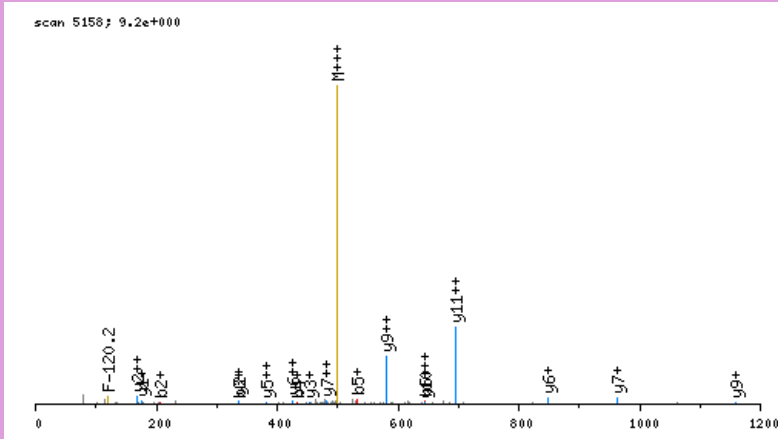

click image to zoom in; click top corners to zoom out [\[precursor±\]](#)

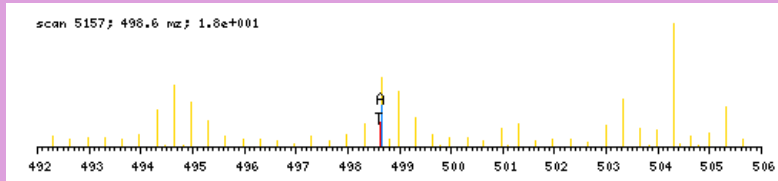

zoomed in precursor plot; T=theoretical m/z, A=acquired m/z

| b <sup>+</sup> | #  | AA # | y <sup>+</sup> | y <sup>2+</sup> |
|----------------|----|------|----------------|-----------------|
| 106.1080       | 1  | A 12 |                |                 |
| 207.1557       | 2  | T 11 | 1388.7638      | 694.8858        |
| 336.1983       | 3  | E 10 | 1287.7161      | 644.3620        |
| 433.2510       | 4  | P 9  | 1158.6736      | 579.8407        |
| 532.3195       | 5  | V 8  | 1061.6208      | 531.3143        |
| 645.4035       | 6  | I 7  | 962.5524       | 481.7801        |
| 732.4356       | 7  | S 6  | 849.4683       | 425.2381        |
| 879.5040       | 8  | F 5  | 762.4363       | 381.7221        |
| 1042.5673      | 9  | Y 4  | 615.3679       | 308.1878        |
| 1157.5942      | 10 | D 3  | 452.3045       | 226.6562        |
| 1319.7523      | 11 | K 2  | 337.2776       | 169.1427        |
|                | 12 | R 1  | 175.1195       | 88.0637         |

N-term:+35.07 K(11):+162.16

ATGSVFDISNLDR, MH+ 1422.7229, m/z 711.8651  
 L OS G25 P150811 220811-s1.07154.07154.2.dta

X-range:

-

MassTol: Y-zoom:

MassType:

AVG  MONO

Axis:

1  2

Label:

I  M  -

Ions:

a  +  2+  3+

b  +  2+  3+

c  +  2+  3+

x  +  2+  3+

y  +  2+  3+

z  +  2+  3+

hide H<sub>2</sub>O/NH<sub>3</sub>

zoom 112-122

GO

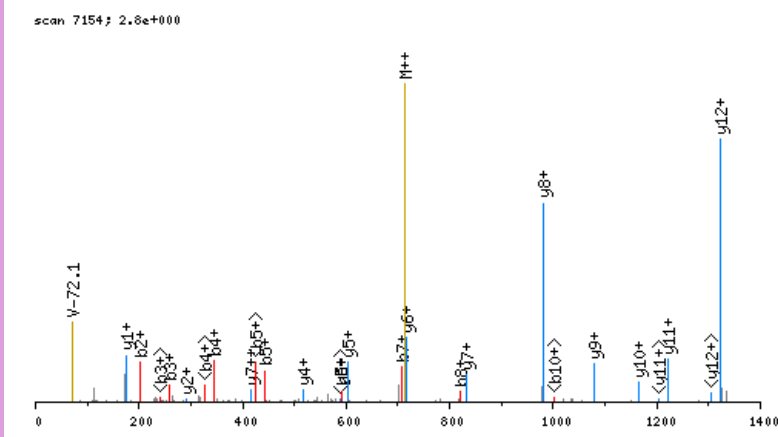

click image to zoom in; click top corners to zoom out [\[precursor±\]](#)

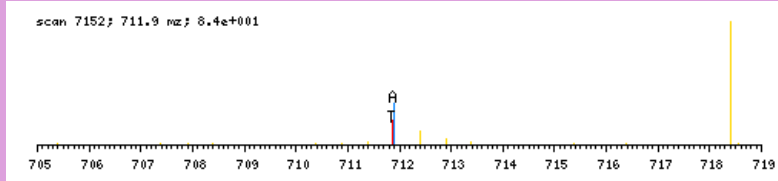

zoomed in precursor plot; T=theoretical m/z, A=acquired m/z

| b <sup>+</sup> | #  | AA # | y <sup>+</sup> | y <sup>2+</sup> |
|----------------|----|------|----------------|-----------------|
| 100.0762       | 1  | A 13 |                |                 |
| 201.1239       | 2  | T 12 | 1323.6545      | 662.3311        |
| 258.1454       | 3  | G 11 | 1222.6068      | 611.8073        |
| 345.1774       | 4  | S 10 | 1165.5853      | 583.2966        |
| 444.2458       | 5  | V 9  | 1078.5533      | 539.7806        |
| 591.3142       | 6  | F 8  | 979.4849       | 490.2464        |
| 706.3412       | 7  | D 7  | 832.4165       | 416.7121        |
| 819.4252       | 8  | I 6  | 717.3895       | 359.1987        |
| 906.4572       | 9  | S 5  | 604.3055       | 302.6566        |
| 1020.5002      | 10 | N 4  | 517.2734       | 259.1406        |
| 1133.5842      | 11 | L 3  | 403.2305       | 202.1192        |
| 1248.6112      | 12 | D 2  | 290.1464       | 145.5771        |
|                | 13 | R 1  | 175.1195       | 88.0637         |

N-term:+29.04

ATIEKIPFESAFR, MH+ 1564.8739, m/z 522.2962  
L OS G26 P150811 220811-s1.05526.05526.3.dta

scan 5526; 9.5e+000

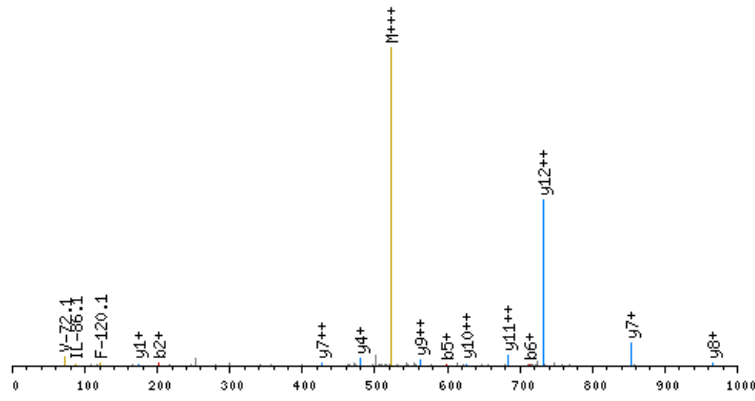

click image to zoom in; click top corners to zoom out [\[precursor±\]](#)

scan 5525; 522.3 m/z; 5.8e+000

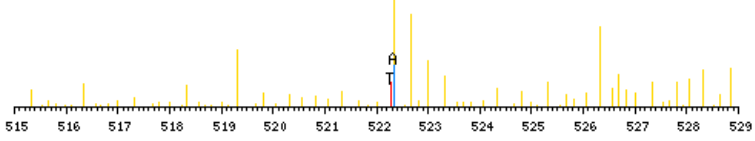

zoomed in precursor plot; T=theoretical m/z, A=acquired m/z

X-range:

-

MassTol: Y-zoom:

MassType:

AVG  MONO

Axis:

1  2

Label:

I  M  -

Ions:

a  +  2+  3+

b  +  2+  3+

c  +  2+  3+

x  +  2+  3+

y  +  2+  3+

z  +  2+  3+

hide H<sub>2</sub>O/NH<sub>3</sub>

zoom 112-122

GO

| b <sup>+</sup> | #  | AA # | y <sup>+</sup> | y <sup>2+</sup> |
|----------------|----|------|----------------|-----------------|
| 100.0762       | 1  | A 13 |                |                 |
| 201.1239       | 2  | T 12 | 1465.8055      | 733.4067        |
| 314.2080       | 3  | I 11 | 1364.7578      | 682.8828        |
| 443.2505       | 4  | E 10 | 1251.6738      | 626.3408        |
| 599.3768       | 5  | K 9  | 1122.6312      | 561.8195        |
| 712.4609       | 6  | I 8  | 966.5049       | 483.7564        |
| 809.5137       | 7  | P 7  | 853.4208       | 427.2143        |
| 956.5821       | 8  | F 6  | 756.3681       | 378.6879        |
| 1085.6247      | 9  | E 5  | 609.2997       | 305.1537        |
| 1172.6567      | 10 | S 4  | 480.2571       | 240.6324        |
| 1243.6938      | 11 | A 3  | 393.2250       | 197.1164        |
| 1390.7622      | 12 | F 2  | 322.1879       | 161.5979        |
|                | 13 | R 1  | 175.1195       | 88.0637         |

N-term:+29.04 K(5):+156.13

ATLDVYNPFENR, MH+ 1472.7597, m/z 491.5914  
 H OS G25 P150811 220811-s1.07475.07475.3.dta

X-range:

-

MassTol: Y-zoom:

MassType:

AVG  MONO

Axis:

1  2

Label:

I  M  -

Ions:

a  +  2+  3+

b  +  2+  3+

c  +  2+  3+

x  +  2+  3+

y  +  2+  3+

z  +  2+  3+

hide H<sub>2</sub>O/NH<sub>3</sub>

zoom 112-122

GO

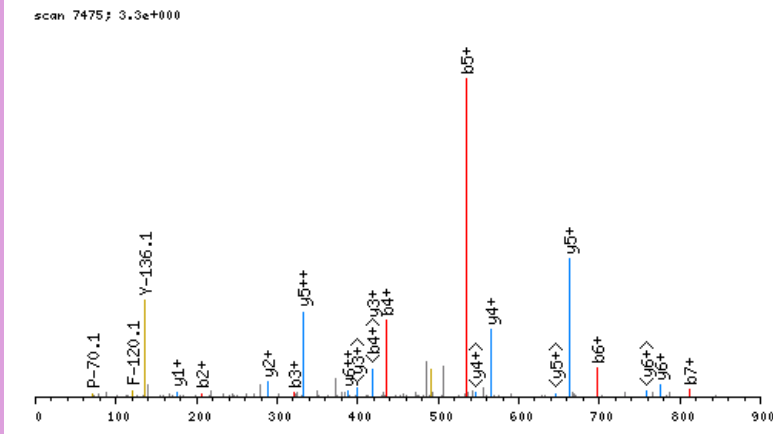

click image to zoom in; click top corners to zoom out [\[precursor±\]](#)

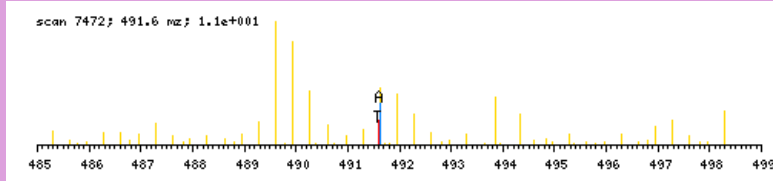

zoomed in precursor plot; T=theoretical m/z, A=acquired m/z

| b <sup>+</sup> | #  | AA # | y <sup>+</sup> | y <sup>2+</sup> |
|----------------|----|------|----------------|-----------------|
| 106.1080       | 1  | A 12 |                |                 |
| 207.1557       | 2  | T 11 | 1367.6596      | 684.3337        |
| 320.2398       | 3  | L 10 | 1266.6119      | 633.8099        |
| 435.2667       | 4  | D 9  | 1153.5278      | 577.2678        |
| 534.3351       | 5  | V 8  | 1038.5009      | 519.7543        |
| 697.3984       | 6  | Y 7  | 939.4325       | 470.2201        |
| 811.4414       | 7  | N 6  | 776.3691       | 388.6885        |
| 908.4941       | 8  | P 5  | 662.3262       | 331.6670        |
| 1055.5625      | 9  | F 4  | 565.2734       | 283.1406        |
| 1184.6051      | 10 | E 3  | 418.2050       | 209.6064        |
| 1298.6481      | 11 | N 2  | 289.1624       | 145.0851        |
|                | 12 | R 1  | 175.1195       | 88.0637         |

N-term:+35.07

ATPATAAPAASAAATTTSAQEPPAAPEPR, MH+ 2840.4490, m/z 710.8677  
 H OS G24 P150811 220811-s1.03440.03440.4.dta

scan 3440: 1.2e+000

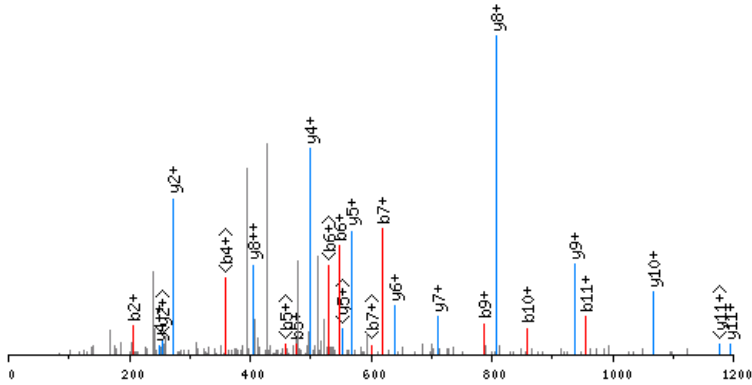

click image to zoom in; click top corners to zoom out [\[precursor±\]](#)

scan 3437: 710.9 m/z; 2.2e+000

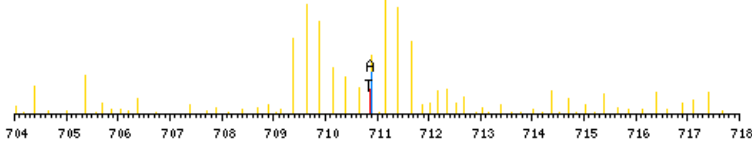

zoomed in precursor plot; T=theoretical m/z, A=acquired m/z

X-range:

-

MassTol: Y-zoom:

MassType:

AVG  MONO

Axis:

1  2

Label:

I  M  -

Ions:

a  +  2+  3+

b  +  2+  3+

c  +  2+  3+

x  +  2+  3+

y  +  2+  3+

z  +  2+  3+

hide H<sub>2</sub>O/NH<sub>3</sub>

zoom 112-122

GO

| b <sup>+</sup> | #  | AA # | y <sup>+</sup> | y <sup>2+</sup> |
|----------------|----|------|----------------|-----------------|
| 106.1080       | 1  | A 30 |                |                 |
| 207.1557       | 2  | T 29 | 2735.3488      | 1368.1783       |
| 304.2085       | 3  | P 28 | 2634.3011      | 1317.6545       |
| 375.2456       | 4  | A 27 | 2537.2483      | 1269.1281       |
| 476.2932       | 5  | T 26 | 2466.2112      | 1233.6095       |
| 547.3304       | 6  | A 25 | 2365.1636      | 1183.0857       |
| 618.3675       | 7  | A 24 | 2294.1264      | 1147.5671       |
| 715.4202       | 8  | P 23 | 2223.0893      | 1112.0486       |
| 786.4574       | 9  | A 22 | 2126.0366      | 1063.5222       |
| 857.4945       | 10 | A 21 | 2054.9995      | 1028.0036       |
| 956.5629       | 11 | V 20 | 1983.9623      | 992.4851        |
| 1043.5949      | 12 | S 19 | 1884.8939      | 942.9509        |
| 1114.6320      | 13 | A 18 | 1797.8619      | 899.4349        |
| 1185.6691      | 14 | A 17 | 1726.8248      | 863.9163        |
| 1286.7168      | 15 | T 16 | 1655.7877      | 828.3977        |
| 1387.7645      | 16 | T 15 | 1554.7400      | 777.8739        |
| 1488.8122      | 17 | T 14 | 1453.6923      | 727.3501        |
| 1575.8442      | 18 | S 13 | 1352.6446      | 676.8262        |
| 1646.8813      | 19 | A 12 | 1265.6126      | 633.3102        |
| 1774.9399      | 20 | Q 11 | 1194.5755      | 597.7917        |
| 1903.9825      | 21 | E 10 | 1066.5169      | 533.7624        |
| 2033.0251      | 22 | E 9  | 937.4743       | 469.2411        |
| 2130.0778      | 23 | P 8  | 808.4317       | 404.7198        |
| 2201.1150      | 24 | A 7  | 711.3790       | 356.1934        |
| 2272.1521      | 25 | A 6  | 640.3418       | 320.6748        |
| 2343.1892      | 26 | A 5  | 569.3047       | 285.1563        |
| 2440.2419      | 27 | P 4  | 498.2676       | 249.6377        |
| 2569.2845      | 28 | E 3  | 401.2149       | 201.1113        |
| 2666.3373      | 29 | P 2  | 272.1723       | 136.5900        |
|                | 30 | R 1  | 175.1195       | 88.0637         |

N-term:+35.07



ATPESLEVPEVTEDVDR, MH+ 1919.9662, m/z 640.6602  
 H OS G24 P150811 220811-s1.03990.03990.3.dta

X-range:

-

MassTol: Y-zoom:

MassType:

AVG  MONO

Axis:

1  2

Label:

I  M  -

Ions:

a  +  2+  3+

b  +  2+  3+

c  +  2+  3+

x  +  2+  3+

y  +  2+  3+

z  +  2+  3+

hide H<sub>2</sub>O/NH<sub>3</sub>

zoom 112-122

GO

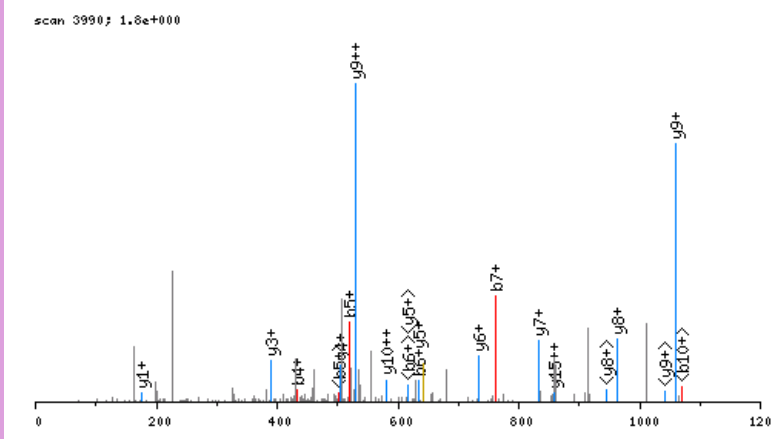

click image to zoom in; click top corners to zoom out [\[precursor±\]](#)

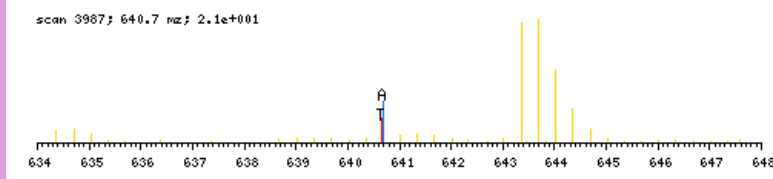

zoomed in precursor plot; T=theoretical m/z, A=acquired m/z

| b <sup>+</sup>  | #  | AA # | y <sup>+</sup>   | y <sup>2+</sup> |
|-----------------|----|------|------------------|-----------------|
| 106.1080        | 1  | A 17 |                  |                 |
| 207.1557        | 2  | T 16 | 1814.8660        | 907.9369        |
| 304.2085        | 3  | P 15 | 1713.8183        | <b>857.4131</b> |
| <b>433.2510</b> | 4  | E 14 | 1616.7655        | 808.8867        |
| <b>520.2831</b> | 5  | S 13 | 1487.7229        | 744.3654        |
| <b>633.3671</b> | 6  | L 12 | 1400.6909        | 700.8494        |
| <b>762.4097</b> | 7  | E 11 | 1287.6069        | 644.3073        |
| 861.4781        | 8  | V 10 | 1158.5643        | <b>579.7860</b> |
| 958.5309        | 9  | P 9  | <b>1059.4958</b> | <b>530.2518</b> |
| 1087.5735       | 10 | E 8  | <b>962.4431</b>  | 481.7255        |
| 1186.6419       | 11 | V 7  | <b>833.4005</b>  | 417.2042        |
| 1287.6896       | 12 | T 6  | <b>734.3321</b>  | 367.6699        |
| 1416.7322       | 13 | E 5  | <b>633.2844</b>  | 317.1461        |
| 1531.7591       | 14 | D 4  | <b>504.2418</b>  | 252.6248        |
| 1630.8275       | 15 | V 3  | <b>389.2149</b>  | 195.1113        |
| 1745.8545       | 16 | D 2  | 290.1464         | 145.5771        |
|                 | 17 | R 1  | <b>175.1195</b>  | 88.0637         |

N-term:+35.07

ATPLPAEGKKNTLR, MH+ 1598.0490, m/z 400.2677  
 H OS G28 P150811 220811-s1.02334.02334.4.dta

X-range:

-

MassTol: Y-zoom:

MassType:

AVG  MONO

Axis:

1  2

Label:

I  M  -

Ions:

a  +  2+  3+

b  +  2+  3+

c  +  2+  3+

x  +  2+  3+

y  +  2+  3+

z  +  2+  3+

hide H<sub>2</sub>O/NH<sub>3</sub>

zoom 112-122

GO

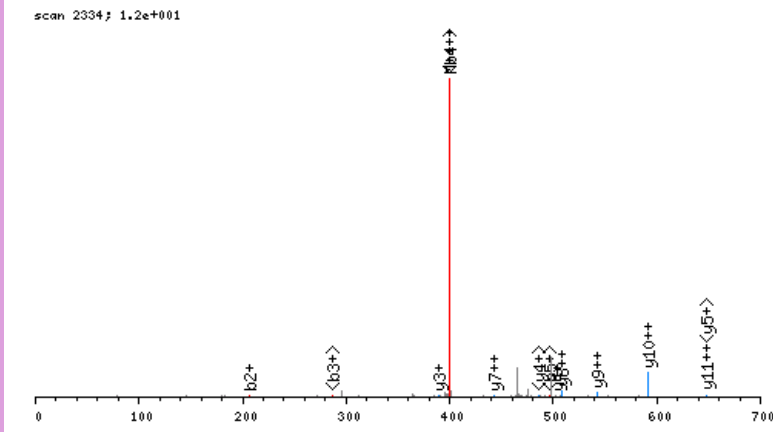

click image to zoom in; click top corners to zoom out [\[precursor±\]](#)

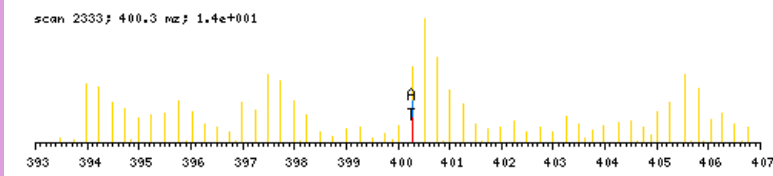

zoomed in precursor plot; T=theoretical m/z, A=acquired m/z

| b <sup>+</sup> | #  | AA # | y <sup>+</sup> | y <sup>2+</sup> |
|----------------|----|------|----------------|-----------------|
| 106.1080       | 1  | A 14 |                |                 |
| 207.1557       | 2  | T 13 | 1492.9488      | 746.9783        |
| 304.2085       | 3  | P 12 | 1391.9011      | 696.4545        |
| 417.2925       | 4  | L 11 | 1294.8484      | 647.9281        |
| 514.3453       | 5  | P 10 | 1181.7643      | 591.3861        |
| 585.3824       | 6  | A 9  | 1084.7115      | 542.8597        |
| 714.4250       | 7  | E 8  | 1013.6744      | 507.3411        |
| 771.4465       | 8  | G 7  | 884.6318       | 442.8198        |
| 933.6046       | 9  | K 6  | 827.6104       | 414.3091        |
| 1095.7627      | 10 | K 5  | 665.4523       | 333.2300        |
| 1209.8056      | 11 | N 4  | 503.2942       | 252.1510        |
| 1310.8533      | 12 | T 3  | 389.2512       | 195.1295        |
| 1423.9373      | 13 | L 2  | 288.2036       | 144.6057        |
|                | 14 | R 1  | 175.1195       | 88.0637         |

N-term:+35.07 K(9):+162.16  
 K(10):+162.16

ATPPEDSDMASLQQQR, MH+ 1801.8390, m/z 601.2845  
 L OS G24 P150811 220811-s1.03003.03003.3.dta

X-range:

-

MassTol: Y-zoom:

MassType:

AVG  MONO

Axis:

1  2

Label:

I  M  -

Ions:

a  +  2+  3+

b  +  2+  3+

c  +  2+  3+

x  +  2+  3+

y  +  2+  3+

z  +  2+  3+

hide H<sub>2</sub>O/NH<sub>3</sub>

zoom 112-122

GO

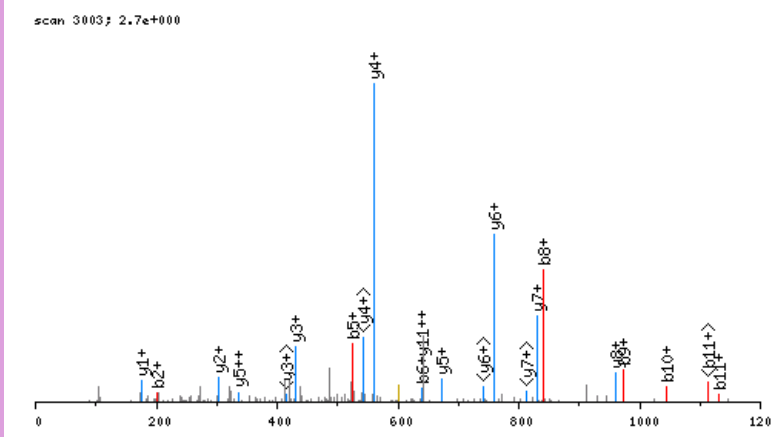

click image to zoom in; click top corners to zoom out [\[precursor±\]](#)

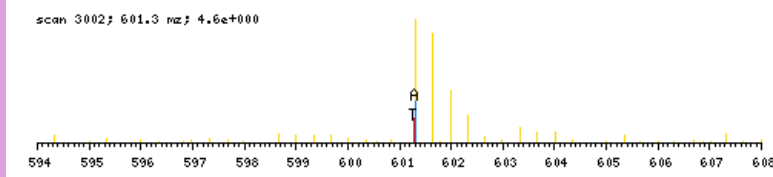

zoomed in precursor plot; T=theoretical m/z, A=acquired m/z

| b <sup>+</sup> | #  | AA # | y <sup>+</sup> | y <sup>2+</sup> |
|----------------|----|------|----------------|-----------------|
| 100.0762       | 1  | A 16 |                |                 |
| 201.1239       | 2  | T 15 | 1702.7706      | 851.8892        |
| 298.1767       | 3  | P 14 | 1601.7230      | 801.3654        |
| 395.2294       | 4  | P 13 | 1504.6702      | 752.8390        |
| 524.2720       | 5  | E 12 | 1407.6174      | 704.3126        |
| 639.2990       | 6  | D 11 | 1278.5748      | 639.7913        |
| 726.3310       | 7  | S 10 | 1163.5479      | 582.2779        |
| 841.3579       | 8  | D 9  | 1076.5159      | 538.7618        |
| 972.3984       | 9  | M 8  | 961.4889       | 481.2484        |
| 1043.4355      | 10 | A 7  | 830.4484       | 415.7281        |
| 1130.4676      | 11 | S 6  | 759.4113       | 380.2096        |
| 1243.5516      | 12 | L 5  | 672.3793       | 336.6936        |
| 1371.6102      | 13 | Q 4  | 559.2952       | 280.1515        |
| 1499.6688      | 14 | Q 3  | 431.2367       | 216.1222        |
| 1627.7274      | 15 | Q 2  | 303.1781       | 152.0930        |
|                | 16 | R 1  | 175.1195       | 88.0637         |

N-term:+29.04

ATVLEEMPPPPER, MH+ 1543.7830, m/z 515.2659  
 L OS G25 P150811 220811-s1.07389.07389.3.dta

X-range:

-

MassTol: Y-zoom:

MassType:

AVG  MONO

Axis:

1  2

Label:

I  M  -

Ions:

a  +  2+  3+

b  +  2+  3+

c  +  2+  3+

x  +  2+  3+

y  +  2+  3+

z  +  2+  3+

hide H<sub>2</sub>O/NH<sub>3</sub>

zoom 112-122

GO

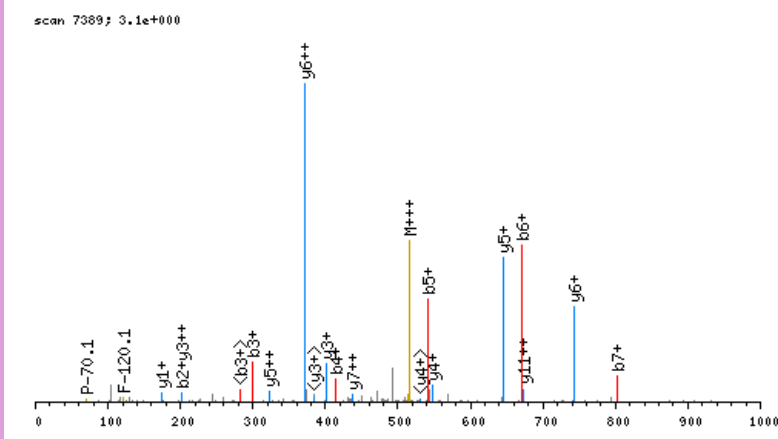

click image to zoom in; click top corners to zoom out [\[precursor±\]](#)

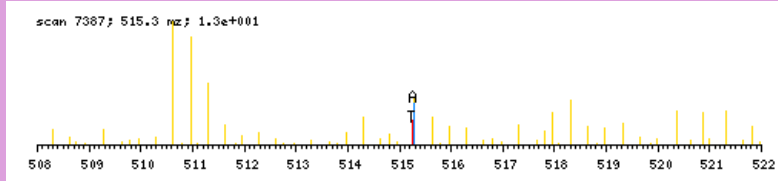

zoomed in precursor plot; T=theoretical m/z, A=acquired m/z

| b <sup>+</sup> | #  | AA # | y <sup>+</sup> | y <sup>2+</sup> |
|----------------|----|------|----------------|-----------------|
| 100.0762       | 1  | A 13 |                |                 |
| 201.1239       | 2  | T 12 | 1444.7146      | 722.8612        |
| 300.1923       | 3  | V 11 | 1343.6669      | 672.3374        |
| 413.2764       | 4  | L 10 | 1244.5985      | 622.8032        |
| 542.3190       | 5  | E 9  | 1131.5145      | 566.2611        |
| 671.3616       | 6  | E 8  | 1002.4719      | 501.7399        |
| 802.4020       | 7  | M 7  | 873.4293       | 437.2186        |
| 899.4548       | 8  | P 6  | 742.3888       | 371.6983        |
| 996.5076       | 9  | P 5  | 645.3360       | 323.1719        |
| 1143.5760      | 10 | F 4  | 548.2833       | 274.6455        |
| 1240.6287      | 11 | P 3  | 401.2149       | 201.1113        |
| 1369.6713      | 12 | E 2  | 304.1621       | 152.5850        |
|                | 13 | R 1  | 175.1195       | 88.0637         |

N-term:+29.04

AVAASGPGSSFR, MH+ 1134.5907, m/z 567.7990  
 L OS G25 P150811 220811-s1.02664.02664.2.dta

X-range:

-

MassTol: Y-zoom:

MassType:

AVG  MONO

Axis:

1  2

Label:

I  M  -

Ions:

a  +  2+  3+

b  +  2+  3+

c  +  2+  3+

x  +  2+  3+

y  +  2+  3+

z  +  2+  3+

hide H<sub>2</sub>O/NH<sub>3</sub>

zoom 112-122

GO

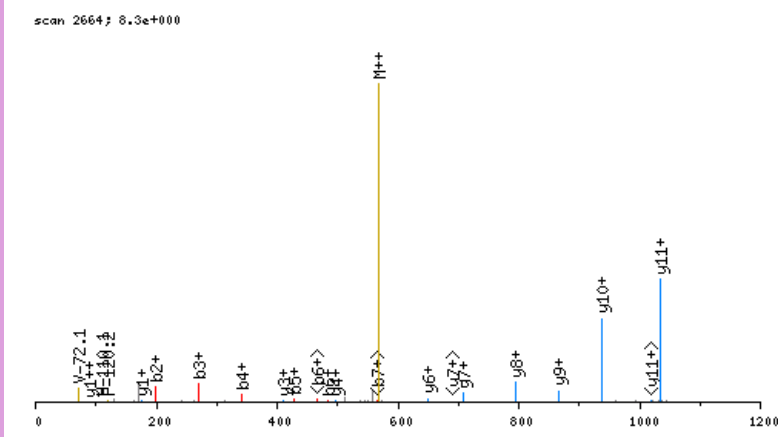

click image to zoom in; click top corners to zoom out [\[precursor±\]](#)

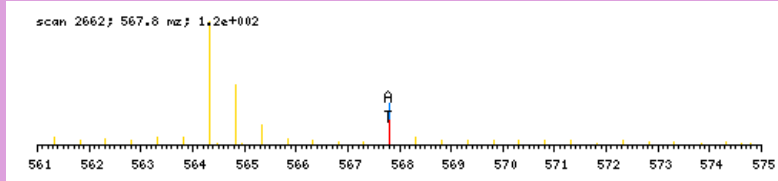

zoomed in precursor plot; T=theoretical m/z, A=acquired m/z

| b <sup>+</sup> | #  | AA | #  | y <sup>+</sup> | y <sup>2+</sup> |
|----------------|----|----|----|----------------|-----------------|
| 100.0762       | 1  | A  | 12 |                |                 |
| 199.1446       | 2  | V  | 11 | 1035.5223      | 518.2651        |
| 270.1817       | 3  | A  | 10 | 936.4539       | 468.7309        |
| 341.2189       | 4  | A  | 9  | 865.4168       | 433.2123        |
| 428.2509       | 5  | S  | 8  | 794.3797       | 397.6938        |
| 485.2723       | 6  | G  | 7  | 707.3477       | 354.1777        |
| 582.3251       | 7  | P  | 6  | 650.3262       | 325.6670        |
| 639.3466       | 8  | G  | 5  | 553.2734       | 277.1406        |
| 726.3786       | 9  | S  | 4  | 496.2520       | 248.6299        |
| 813.4106       | 10 | S  | 3  | 409.2199       | 205.1139        |
| 960.4790       | 11 | F  | 2  | 322.1879       | 161.5979        |
|                | 12 | R  | 1  | 175.1195       | 88.0637         |

N-term:+29.04

X-range:

-

MassTol: Y-zoom:

MassType:

AVG  MONO

Axis:

1  2

Label:

I  M  -

Ions:

a  +  2+  3+

b  +  2+  3+

c  +  2+  3+

x  +  2+  3+

y  +  2+  3+

z  +  2+  3+

hide H<sub>2</sub>O/NH<sub>3</sub>

zoom 112-122

GO

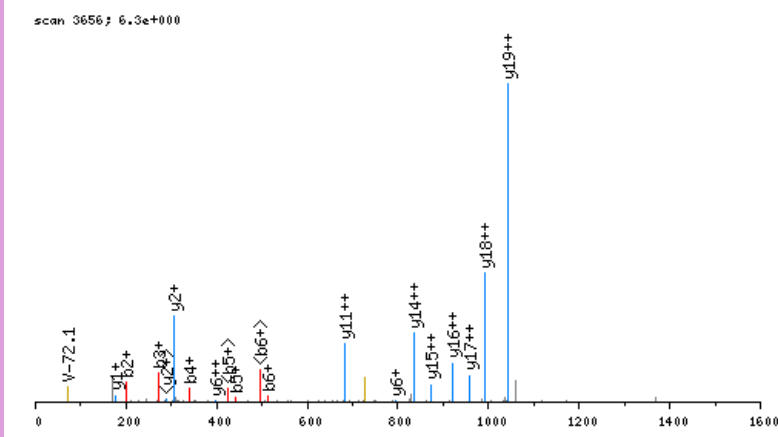

click image to zoom in; click top corners to zoom out [\[precursor±\]](#)

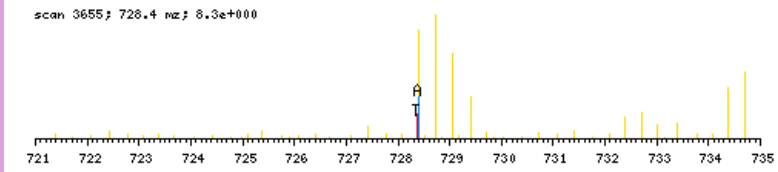

zoomed in precursor plot; T=theoretical m/z, A=acquired m/z

| b <sup>+</sup> | #  | AA | #  | y <sup>+</sup> | y <sup>2+</sup> |
|----------------|----|----|----|----------------|-----------------|
| 100.0762       | 1  | A  | 20 |                |                 |
| 199.1446       | 2  | V  | 19 | 2084.0049      | 1042.5063       |
| 270.1817       | 3  | A  | 18 | 1984.9365      | 992.9721        |
| 341.2189       | 4  | A  | 17 | 1913.8993      | 957.4536        |
| 442.2665       | 5  | T  | 16 | 1842.8622      | 921.9350        |
| 513.3036       | 6  | A  | 15 | 1741.8146      | 871.4112        |
| 610.3564       | 7  | P  | 14 | 1670.7774      | 835.8926        |
| 707.4092       | 8  | P  | 13 | 1573.7247      | 787.3662        |
| 822.4361       | 9  | D  | 12 | 1476.6719      | 738.8399        |
| 893.4732       | 10 | A  | 11 | 1361.6450      | 681.3264        |
| 990.5260       | 11 | P  | 10 | 1290.6079      | 645.8078        |
| 1104.5689      | 12 | N  | 9  | 1193.5551      | 597.2815        |
| 1260.6700      | 13 | R  | 8  | 1079.5122      | 540.2600        |
| 1389.7126      | 14 | E  | 7  | 923.4111       | 462.2094        |
| 1518.7552      | 15 | E  | 6  | 794.3685       | 397.6881        |
| 1617.8236      | 16 | V  | 5  | 665.3259       | 333.1668        |
| 1764.8920      | 17 | F  | 4  | 566.2575       | 283.6326        |
| 1879.9190      | 18 | D  | 3  | 419.1890       | 210.0984        |
| 2008.9616      | 19 | E  | 2  | 304.1621       | 152.5850        |
|                | 20 | R  | 1  | 175.1195       | 88.0637         |

N-term:+29.04

AVASAAAGQQVPGFPTAPTR, MH+ 1925.0245, m/z 642.3463  
 L OS G24 P150811 220811-s1.03590.03590.3.dta

X-range:

-

MassTol: Y-zoom:

MassType:

AVG  MONO

Axis:

1  2

Label:

I  M  -

Ions:

a  +  2+  3+

b  +  2+  3+

c  +  2+  3+

x  +  2+  3+

y  +  2+  3+

z  +  2+  3+

hide H<sub>2</sub>O/NH<sub>3</sub>

zoom 112-122

GO

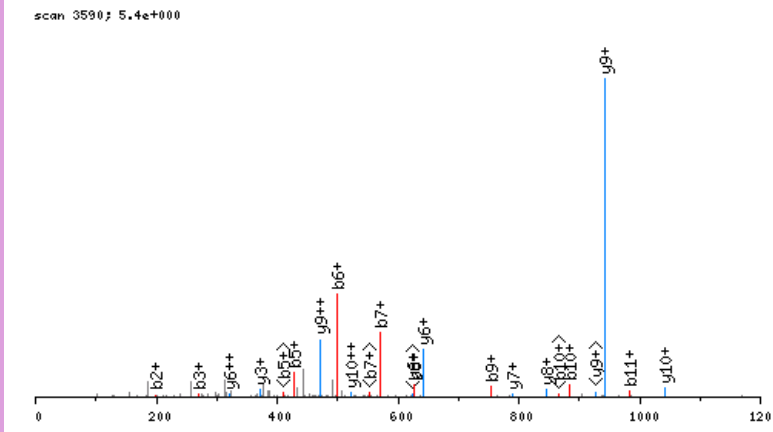

click image to zoom in; click top corners to zoom out [\[precursor±\]](#)

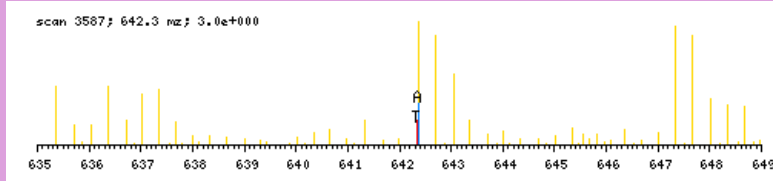

zoomed in precursor plot; T=theoretical m/z, A=acquired m/z

| b <sup>+</sup> | #  | AA # | y <sup>+</sup> | y <sup>2+</sup> |
|----------------|----|------|----------------|-----------------|
| 100.0762       | 1  | A 20 |                |                 |
| 199.1446       | 2  | V 19 | 1825.9561      | 913.4819        |
| 270.1817       | 3  | A 18 | 1726.8877      | 863.9477        |
| 357.2138       | 4  | S 17 | 1655.8505      | 828.4292        |
| 428.2509       | 5  | A 16 | 1568.8185      | 784.9132        |
| 499.2880       | 6  | A 15 | 1497.7814      | 749.3946        |
| 570.3251       | 7  | A 14 | 1426.7443      | 713.8761        |
| 627.3466       | 8  | G 13 | 1355.7072      | 678.3575        |
| 755.4052       | 9  | Q 12 | 1298.6857      | 649.8468        |
| 883.4637       | 10 | Q 11 | 1170.6271      | 585.8175        |
| 982.5321       | 11 | V 10 | 1042.5686      | 521.7882        |
| 1079.5849      | 12 | P 9  | 943.5001       | 472.2540        |
| 1136.6064      | 13 | G 8  | 846.4474       | 423.7276        |
| 1283.6748      | 14 | F 7  | 789.4259       | 395.2169        |
| 1380.7275      | 15 | P 6  | 642.3575       | 321.6827        |
| 1481.7752      | 16 | T 5  | 545.3047       | 273.1563        |
| 1552.8123      | 17 | A 4  | 444.2571       | 222.6324        |
| 1649.8651      | 18 | P 3  | 373.2199       | 187.1139        |
| 1750.9128      | 19 | T 2  | 276.1672       | 138.5875        |
|                | 20 | R 1  | 175.1195       | 88.0637         |

N-term:+29.04

AVEEQIEYLQKK, MH+ 1561.8842, m/z 521.2996  
 L OS G27 P150811 220811-s1.06769.06769.3.dta

scan 6769; 1.1e+001

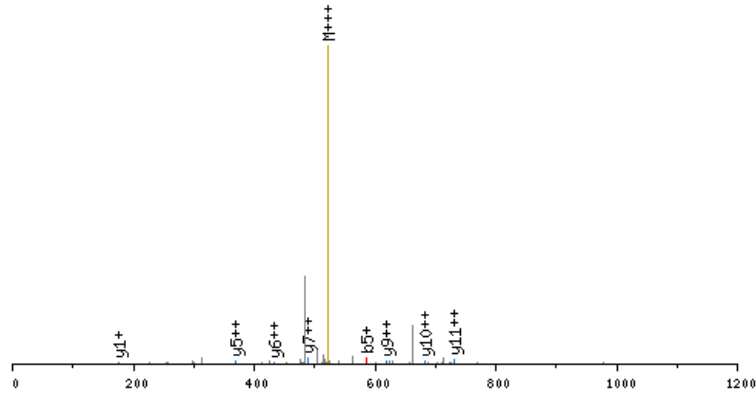

click image to zoom in; click top corners to zoom out [\[precursor±\]](#)

scan 6767; 521.3 mz; 4.0e+002

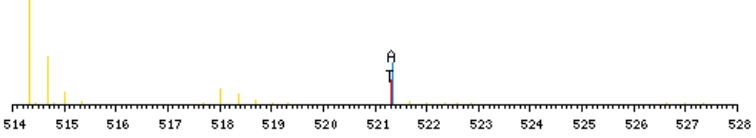

zoomed in precursor plot; T=theoretical m/z, A=acquired m/z

X-range:

-

MassTol: Y-zoom:

MassType:

AVG  MONO

Axis:

1  2

Label:

I  M  -

Ions:

a  +  2+  3+

b  +  2+  3+

c  +  2+  3+

x  +  2+  3+

y  +  2+  3+

z  +  2+  3+

hide H<sub>2</sub>O/NH<sub>3</sub>

zoom 112-122

GO

| b <sup>+</sup> | #  | AA | #  | y <sup>+</sup> | y <sup>2+</sup> |
|----------------|----|----|----|----------------|-----------------|
| 100.0762       | 1  | A  | 12 |                |                 |
| 199.1446       | 2  | V  | 11 | 1462.8158      | 731.9118        |
| 328.1872       | 3  | E  | 10 | 1363.7474      | 682.3776        |
| 457.2298       | 4  | E  | 9  | 1234.7048      | 617.8563        |
| 585.2884       | 5  | Q  | 8  | 1105.6622      | 553.3350        |
| 698.3725       | 6  | I  | 7  | 977.6036       | 489.3057        |
| 827.4150       | 7  | E  | 6  | 864.5196       | 432.7637        |
| 990.4784       | 8  | Y  | 5  | 735.4770       | 368.2424        |
| 1103.5624      | 9  | L  | 4  | 572.4136       | 286.7107        |
| 1231.6210      | 10 | Q  | 3  | 459.3296       | 230.1687        |
| 1387.7473      | 11 | K  | 2  | 331.2710       | 166.1394        |
|                | 12 | K  | 1  | 175.1447       | 88.0763         |

N-term:+29.04 K(11):+156.13  
 K(12):+156.13



AVEEQYSCEYGSGR, MH+ 1668.7387, m/z 556.9178  
 H OS G25 P150811 220811-s1.02939.02939.3.dta

X-range:

-

MassTol: Y-zoom:

MassType:

AVG  MONO

Axis:

1  2

Label:

I  M  -

Ions:

a  +  2+  3+

b  +  2+  3+

c  +  2+  3+

x  +  2+  3+

y  +  2+  3+

z  +  2+  3+

hide H<sub>2</sub>O/NH<sub>3</sub>

zoom 112-122

GO

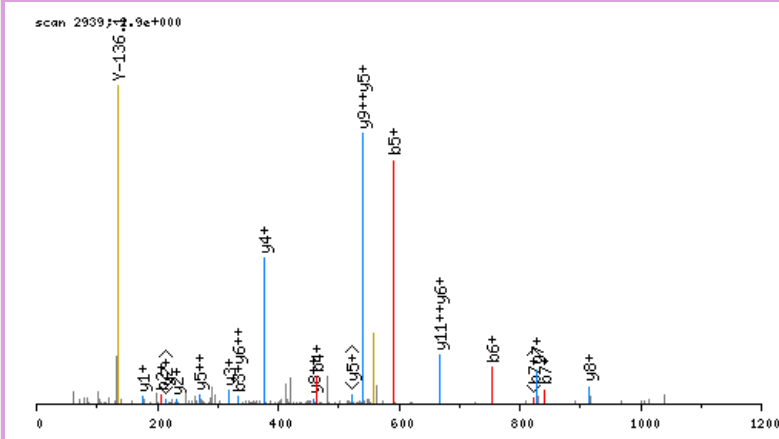

click image to zoom in; click top corners to zoom out [\[precursor±\]](#)

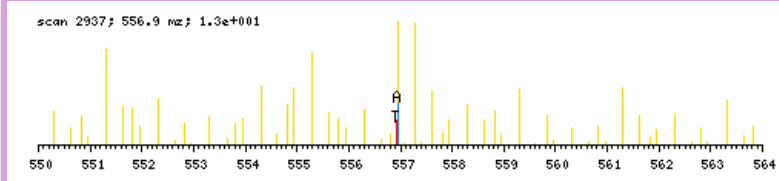

zoomed in precursor plot; T=theoretical m/z, A=acquired m/z

| b <sup>+</sup> | #  | AA # | y <sup>+</sup> | y <sup>2+</sup> |
|----------------|----|------|----------------|-----------------|
| 106.1080       | 1  | A 14 |                |                 |
| 205.1764       | 2  | V 13 | 1563.6385      | 782.3232        |
| 334.2190       | 3  | E 12 | 1464.5701      | 732.7890        |
| 463.2616       | 4  | E 11 | 1335.5275      | 668.2677        |
| 591.3202       | 5  | Q 10 | 1206.4849      | 603.7464        |
| 754.3835       | 6  | Y 9  | 1078.4263      | 539.7171        |
| 841.4155       | 7  | S 8  | 915.3630       | 458.1854        |
| 1001.4461      | 8  | C 7  | 828.3310       | 414.6694        |
| 1130.4887      | 9  | E 6  | 668.3004       | 334.6541        |
| 1293.5521      | 10 | Y 5  | 539.2578       | 270.1328        |
| 1350.5735      | 11 | G 4  | 376.1945       | 188.6011        |
| 1437.6056      | 12 | S 3  | 319.1730       | 160.0904        |
| 1494.6270      | 13 | G 2  | 232.1410       | 116.5744        |
|                | 14 | R 1  | 175.1195       | 88.0637         |

N-term:+35.07 C(8):+160.03

AVGKVIPELNGKLTGMAFR, MH+ 2085.2259, m/z 522.0619  
 L OS G27 P150811 220811-s1.06643.06643.4.dta

X-range:

-

MassTol: Y-zoom:

MassType:

AVG  MONO

Axis:

1  2

Label:

I  M  -

Ions:

a  +  2+  3+

b  +  2+  3+

c  +  2+  3+

x  +  2+  3+

y  +  2+  3+

z  +  2+  3+

hide H<sub>2</sub>O/NH<sub>3</sub>

zoom 112-122

GO

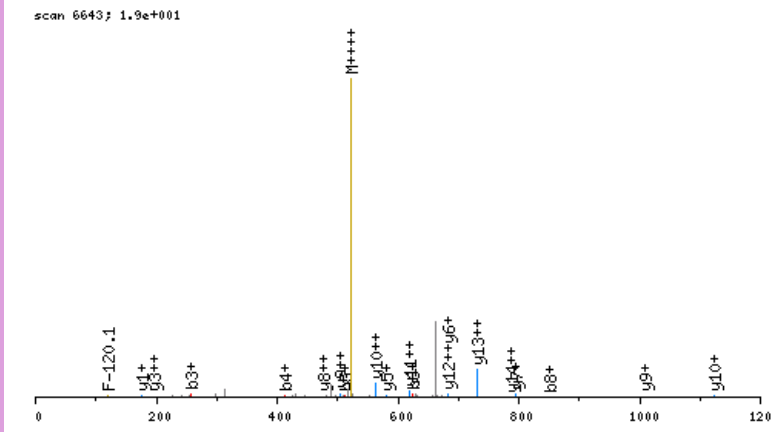

click image to zoom in; click top corners to zoom out [\[precursor±\]](#)

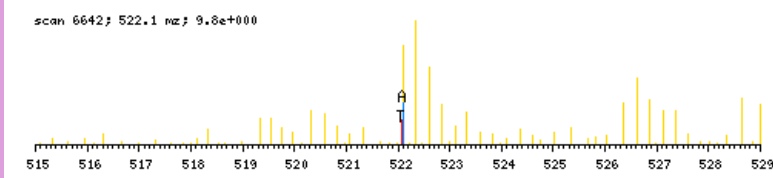

zoomed in precursor plot; T=theoretical m/z, A=acquired m/z

| b <sup>+</sup> | #  | AA | #  | y <sup>+</sup> | y <sup>2+</sup> |
|----------------|----|----|----|----------------|-----------------|
| 100.0762       | 1  | A  | 19 |                |                 |
| 199.1446       | 2  | V  | 18 | 1986.1575      | 993.5827        |
| 256.1661       | 3  | G  | 17 | 1887.0891      | 944.0484        |
| 412.2924       | 4  | K  | 16 | 1830.0676      | 915.5377        |
| 511.3608       | 5  | V  | 15 | 1673.9413      | 837.4746        |
| 624.4449       | 6  | I  | 14 | 1574.8729      | 787.9404        |
| 721.4976       | 7  | P  | 13 | 1461.7888      | 731.3983        |
| 850.5402       | 8  | E  | 12 | 1364.7361      | 682.8719        |
| 963.6243       | 9  | L  | 11 | 1235.6935      | 618.3506        |
| 1077.6672      | 10 | N  | 10 | 1122.6094      | 561.8086        |
| 1134.6887      | 11 | G  | 9  | 1008.5665      | 504.7872        |
| 1290.8150      | 12 | K  | 8  | 951.5450       | 476.2764        |
| 1403.8990      | 13 | L  | 7  | 795.4187       | 398.2133        |
| 1504.9467      | 14 | T  | 6  | 682.3347       | 341.6712        |
| 1561.9682      | 15 | G  | 5  | 581.2870       | 291.1474        |
| 1693.0087      | 16 | M  | 4  | 524.2655       | 262.6367        |
| 1764.0458      | 17 | A  | 3  | 393.2250       | 197.1164        |
| 1911.1142      | 18 | F  | 2  | 322.1879       | 161.5979        |
|                | 19 | R  | 1  | 175.1195       | 88.0637         |

N-term: +29.04 K(4): +156.13  
 K(12): +156.13

AVLDLPDLPEDELAR, MH+ 1693.9012, m/z 565.3053  
 L OS G24 P150811 220811-s1.04844.04844.3.dta

X-range:

-

MassTol: Y-zoom:

MassType:

AVG  MONO

Axis:

1  2

Label:

I  M  -

Ions:

a  +  2+  3+

b  +  2+  3+

c  +  2+  3+

x  +  2+  3+

y  +  2+  3+

z  +  2+  3+

hide H<sub>2</sub>O/NH<sub>3</sub>

zoom 112-122

GO

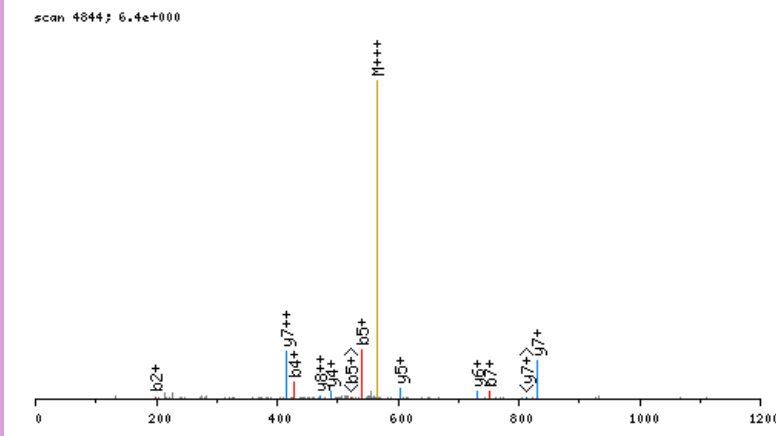

click image to zoom in; click top corners to zoom out [\[precursor±\]](#)

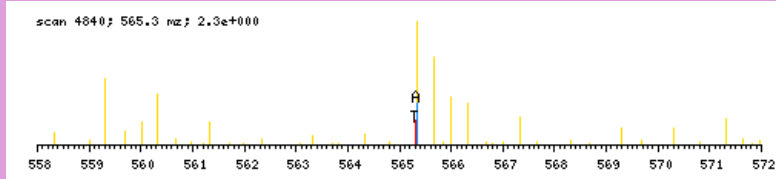

zoomed in precursor plot; T=theoretical m/z, A=acquired m/z

| b <sup>+</sup> | #  | AA # | y <sup>+</sup> | y <sup>2+</sup> |
|----------------|----|------|----------------|-----------------|
| 100.0762       | 1  | A 15 |                |                 |
| 199.1446       | 2  | V 14 | 1594.8328      | 797.9203        |
| 312.2287       | 3  | L 13 | 1495.7644      | 748.3861        |
| 427.2556       | 4  | D 12 | 1382.6803      | 691.8441        |
| 540.3397       | 5  | L 11 | 1267.6534      | 634.3306        |
| 637.3925       | 6  | P 10 | 1154.5693      | 577.7886        |
| 752.4194       | 7  | D 9  | 1057.5166      | 529.2622        |
| 865.5035       | 8  | L 8  | 942.4896       | 471.7487        |
| 962.5562       | 9  | P 7  | 829.4056       | 415.2067        |
| 1091.5988      | 10 | E 6  | 732.3528       | 366.6803        |
| 1206.6258      | 11 | D 5  | 603.3102       | 302.1590        |
| 1335.6684      | 12 | E 4  | 488.2833       | 244.6455        |
| 1448.7524      | 13 | L 3  | 359.2407       | 180.1243        |
| 1519.7895      | 14 | A 2  | 246.1566       | 123.5822        |
|                | 15 | R 1  | 175.1195       | 88.0637         |

N-term:+29.04

AVMHGETEGTVPGNALVVDPEKPF, MH+ 2706.3925, m/z 677.3536  
 L OS G27 P150811 220811-s1.06119.06119.4.dta

scan 6119; 2.6e+000

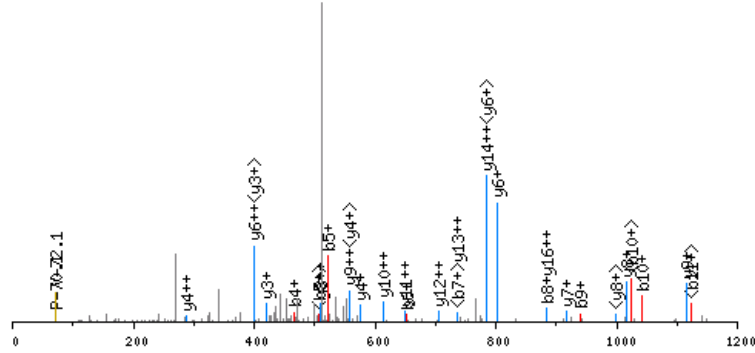

click image to zoom in; click top corners to zoom out [precursor±]

scan 6117; 677.4 mz; 6.7e+000

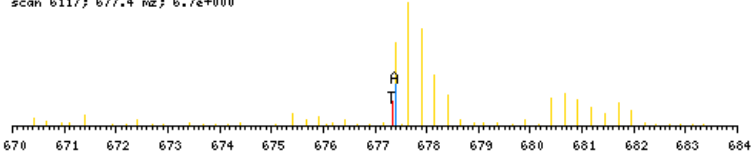

zoomed in precursor plot; T=theoretical m/z, A=acquired m/z

X-range:

0 - 0

MassTol: Y-zoom:

0. 1.

MassType:

AVG  MONO

Axis:

1  2

Label:

I  M  -

Ions:

a  +  2+  3+

b  +  2+  3+

c  +  2+  3+

x  +  2+  3+

y  +  2+  3+

z  +  2+  3+

hide H<sub>2</sub>O/NH<sub>3</sub>

zoom 112-122

GO

| b <sup>+</sup> | #  | AA # | y <sup>+</sup> | y <sup>2+</sup> |
|----------------|----|------|----------------|-----------------|
| 100.0762       | 1  | A 25 |                |                 |
| 199.1446       | 2  | V 24 | 2607.3241      | 1304.1660       |
| 330.1851       | 3  | M 23 | 2508.2557      | 1254.6318       |
| 467.2440       | 4  | H 22 | 2377.2152      | 1189.1115       |
| 524.2655       | 5  | G 21 | 2240.1563      | 1120.5821       |
| 653.3081       | 6  | E 20 | 2183.1349      | 1092.0713       |
| 754.3558       | 7  | T 19 | 2054.0923      | 1027.5500       |
| 883.3984       | 8  | E 18 | 1953.0446      | 977.0262        |
| 940.4198       | 9  | G 17 | 1824.0020      | 912.5049        |
| 1041.4675      | 10 | T 16 | 1766.9805      | 883.9942        |
| 1140.5359      | 11 | V 15 | 1665.9329      | 833.4703        |
| 1237.5887      | 12 | P 14 | 1566.8644      | 783.9361        |
| 1294.6101      | 13 | G 13 | 1469.8117      | 735.4098        |
| 1408.6531      | 14 | N 12 | 1412.7902      | 706.8990        |
| 1479.6902      | 15 | A 11 | 1298.7473      | 649.8776        |
| 1592.7742      | 16 | L 10 | 1227.7102      | 614.3590        |
| 1691.8427      | 17 | V 9  | 1114.6261      | 557.8170        |
| 1790.9111      | 18 | V 8  | 1015.5577      | 508.2828        |
| 1905.9380      | 19 | D 7  | 916.4893       | 458.7486        |
| 2002.9908      | 20 | P 6  | 801.4623       | 401.2351        |
| 2132.0334      | 21 | E 5  | 704.4096       | 352.7087        |
| 2288.1597      | 22 | K 4  | 575.3670       | 288.1874        |
| 2385.2124      | 23 | P 3  | 419.2407       | 210.1243        |
| 2532.2808      | 24 | F 2  | 322.1879       | 161.5979        |
|                | 25 | R 1  | 175.1195       | 88.0637         |

N-term:+29.04 K(22):+156.13

AVMKVIDPATATSVDLR, MH+ 1843.0363, m/z 615.0170  
 L OS G26 P150811 220811-s1.05136.05136.3.dta

scan 5136; 1.8e+000

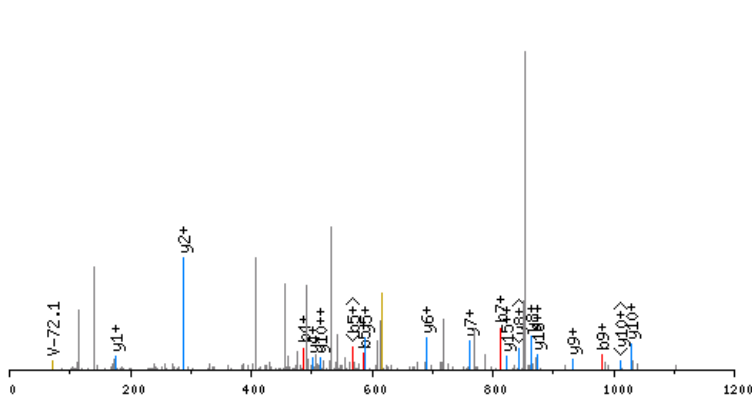

click image to zoom in; click top corners to zoom out [\[precursor±\]](#)

scan 5135; 615.0 m/z; 1.7e+001

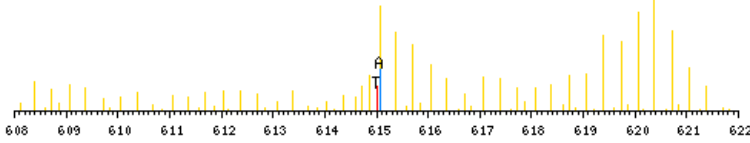

zoomed in precursor plot; T=theoretical m/z, A=acquired m/z

X-range:

-

MassTol: Y-zoom:

MassType:

AVG  MONO

Axis:

1  2

Label:

I  M  -

Ions:

a  +  2+  3+

b  +  2+  3+

c  +  2+  3+

x  +  2+  3+

y  +  2+  3+

z  +  2+  3+

hide H<sub>2</sub>O/NH<sub>3</sub>

zoom 112-122

GO

| b <sup>+</sup> | #  | AA # | y <sup>+</sup> | y <sup>2+</sup> |
|----------------|----|------|----------------|-----------------|
| 100.0762       | 1  | A 17 |                |                 |
| 199.1446       | 2  | V 16 | 1743.9679      | 872.4879        |
| 330.1851       | 3  | M 15 | 1644.8995      | 822.9537        |
| 486.3114       | 4  | K 14 | 1513.8590      | 757.4334        |
| 585.3798       | 5  | V 13 | 1357.7327      | 679.3703        |
| 698.4639       | 6  | I 12 | 1258.6643      | 629.8361        |
| 813.4908       | 7  | D 11 | 1145.5802      | 573.2940        |
| 910.5436       | 8  | P 10 | 1030.5533      | 515.7806        |
| 981.5807       | 9  | A 9  | 933.5005       | 467.2542        |
| 1082.6284      | 10 | T 8  | 862.4634       | 431.7356        |
| 1153.6655      | 11 | A 7  | 761.4157       | 381.2118        |
| 1254.7132      | 12 | T 6  | 690.3786       | 345.6932        |
| 1341.7452      | 13 | S 5  | 589.3310       | 295.1694        |
| 1440.8136      | 14 | V 4  | 502.2989       | 251.6534        |
| 1555.8406      | 15 | D 3  | 403.2305       | 202.1192        |
| 1668.9246      | 16 | L 2  | 288.2036       | 144.6057        |
|                | 17 | R 1  | 175.1195       | 88.0637         |

N-term:+29.04 K(4):+156.13

AVPIAQKSEPOLLSNEALMR, MH+ 2237.2600, m/z 560.0705  
 H OS G26 P150811 220811-s1.04252.04252.4.dta

X-range:

-

MassTol: Y-zoom:

MassType:

AVG  MONO

Axis:

1  2

Label:

I  M  -

Ions:

a  +  2+  3+

b  +  2+  3+

c  +  2+  3+

x  +  2+  3+

y  +  2+  3+

z  +  2+  3+

hide H<sub>2</sub>O/NH<sub>3</sub>

zoom 112-122

GO

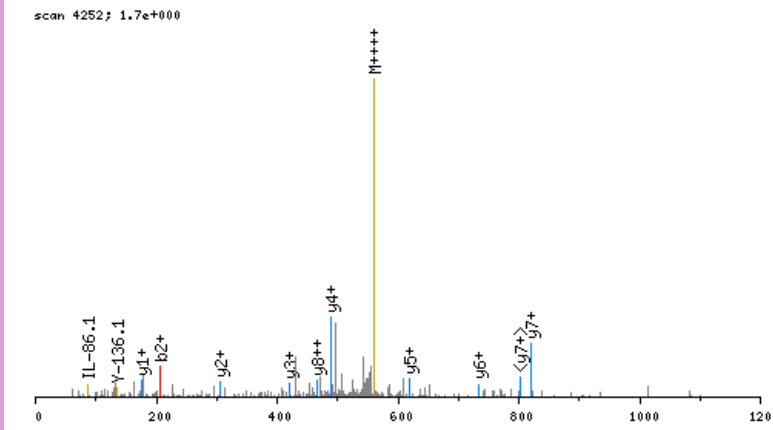

click image to zoom in; click top corners to zoom out [\[precursor±\]](#)

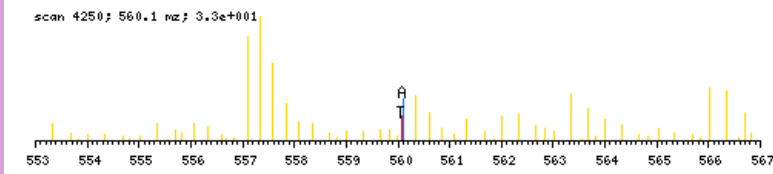

zoomed in precursor plot; T=theoretical m/z, A=acquired m/z

| b <sup>+</sup> | #  | AA | #  | y <sup>+</sup> | y <sup>2+</sup> |
|----------------|----|----|----|----------------|-----------------|
| 106.1080       | 1  | A  | 20 |                |                 |
| 205.1764       | 2  | V  | 19 | 2132.1598      | 1066.5838       |
| 302.2292       | 3  | P  | 18 | 2033.0914      | 1017.0496       |
| 415.3133       | 4  | I  | 17 | 1936.0386      | 968.5232        |
| 486.3504       | 5  | A  | 16 | 1822.9546      | 911.9812        |
| 614.4089       | 6  | Q  | 15 | 1751.9174      | 876.4626        |
| 776.5670       | 7  | K  | 14 | 1623.8589      | 812.4333        |
| 863.5991       | 8  | S  | 13 | 1461.7008      | 731.3543        |
| 992.6417       | 9  | E  | 12 | 1374.6687      | 687.8383        |
| 1089.6944      | 10 | P  | 11 | 1245.6261      | 623.3170        |
| 1217.7530      | 11 | Q  | 10 | 1148.5734      | 574.7906        |
| 1304.7850      | 12 | S  | 9  | 1020.5148      | 510.7613        |
| 1417.8691      | 13 | L  | 8  | 933.4828       | 467.2453        |
| 1504.9011      | 14 | S  | 7  | 820.3987       | 410.7033        |
| 1618.9441      | 15 | N  | 6  | 733.3667       | 367.1873        |
| 1747.9867      | 16 | E  | 5  | 619.3238       | 310.1658        |
| 1819.0238      | 17 | A  | 4  | 490.2812       | 245.6445        |
| 1932.1078      | 18 | L  | 3  | 419.2440       | 210.1259        |
| 2063.1483      | 19 | M  | 2  | 306.1600       | 153.5839        |
|                | 20 | R  | 1  | 175.1195       | 88.0637         |

N-term:+35.07 K(7):+162.16

AVQEEWLDIPSKLDNR, MH+ 1969.0395, m/z 657.0180  
 L OS G26 P150811 220811-s1.06213.06213.3.dta

X-range:

-

MassTol: Y-zoom:

MassType:

AVG  MONO

Axis:

1  2

Label:

I  M  -

Ions:

a  +  2+  3+

b  +  2+  3+

c  +  2+  3+

x  +  2+  3+

y  +  2+  3+

z  +  2+  3+

hide H<sub>2</sub>O/NH<sub>3</sub>

zoom 112-122

GO

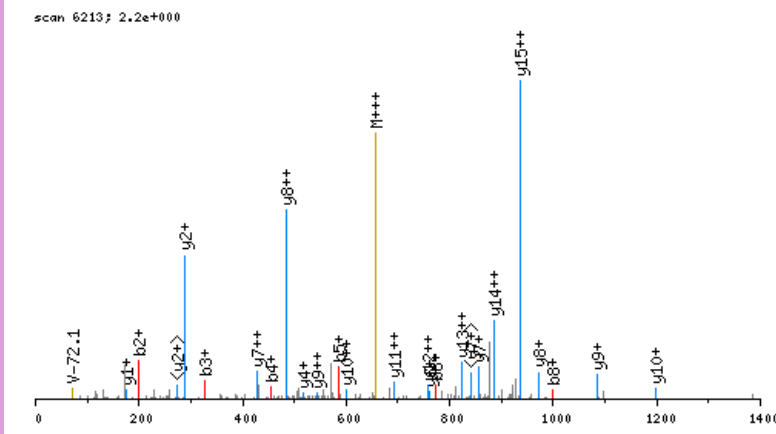

click image to zoom in; click top corners to zoom out [\[precursor±\]](#)

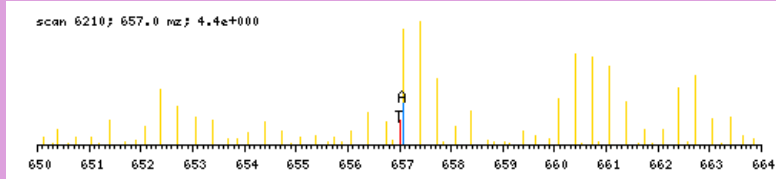

zoomed in precursor plot; T=theoretical m/z, A=acquired m/z

| b <sup>+</sup> | #  | AA # | y <sup>+</sup> | y <sup>2+</sup> |
|----------------|----|------|----------------|-----------------|
| 100.0762       | 1  | A 16 |                |                 |
| 199.1446       | 2  | V 15 | 1869.9711      | 935.4895        |
| 327.2032       | 3  | Q 14 | 1770.9027      | 885.9553        |
| 456.2458       | 4  | E 13 | 1642.8441      | 821.9260        |
| 585.2884       | 5  | E 12 | 1513.8015      | 757.4047        |
| 771.3677       | 6  | W 11 | 1384.7589      | 692.8834        |
| 884.4518       | 7  | L 10 | 1198.6796      | 599.8437        |
| 999.4787       | 8  | D 9  | 1085.5955      | 543.3017        |
| 1112.5628      | 9  | I 8  | 970.5686       | 485.7882        |
| 1209.6155      | 10 | P 7  | 857.4845       | 429.2462        |
| 1296.6476      | 11 | S 6  | 760.4318       | 380.7198        |
| 1452.7739      | 12 | K 5  | 673.3997       | 337.2038        |
| 1565.8579      | 13 | L 4  | 517.2734       | 259.1406        |
| 1680.8849      | 14 | D 3  | 404.1894       | 202.5986        |
| 1794.9278      | 15 | N 2  | 289.1624       | 145.0851        |
|                | 16 | R 1  | 175.1195       | 88.0637         |

N-term:+29.04 K(12):+156.13

AVRPLQLLGTCAEELCR, MH+ 1891.0469, m/z 631.0205  
 H OS G27 P150811 220811-s1.06581.06581.3.dta

X-range:

-

MassTol: Y-zoom:

MassType:

AVG  MONO

Axis:

1  2

Label:

I  M  -

Ions:

a  +  2+  3+

b  +  2+  3+

c  +  2+  3+

x  +  2+  3+

y  +  2+  3+

z  +  2+  3+

hide H<sub>2</sub>O/NH<sub>3</sub>

zoom 112-122

GO

scan 6581; 1.8e+000

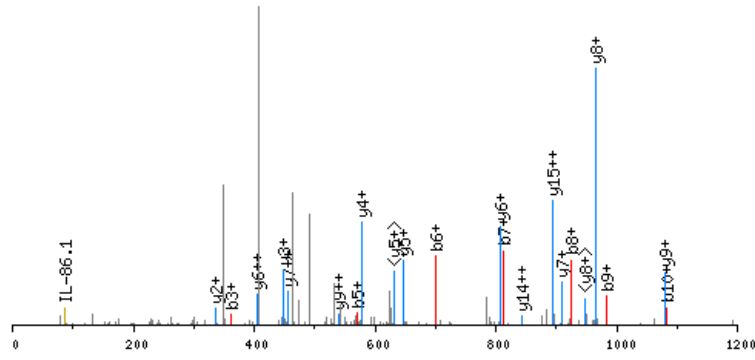

click image to zoom in; click top corners to zoom out [\[precursor±\]](#)

scan 6577; 631.0 mz; 2.8e+000

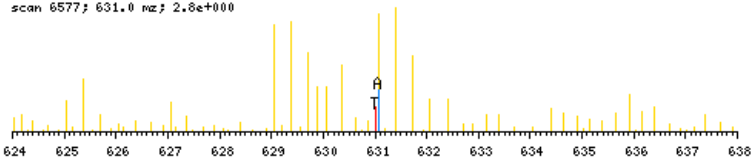

zoomed in precursor plot; T=theoretical m/z, A=acquired m/z

| b <sup>+</sup> | #  | AA # | y <sup>+</sup> | y <sup>2+</sup> |
|----------------|----|------|----------------|-----------------|
| 106.1080       | 1  | A 16 |                |                 |
| 205.1764       | 2  | V 15 | 1785.9467      | 893.4772        |
| 361.2775       | 3  | R 14 | 1686.8783      | 843.9430        |
| 458.3303       | 4  | P 13 | 1530.7771      | 765.8925        |
| 571.4144       | 5  | L 12 | 1433.7244      | 717.3661        |
| 699.4729       | 6  | Q 11 | 1320.6403      | 660.8241        |
| 812.5570       | 7  | L 10 | 1192.5817      | 596.7948        |
| 925.6411       | 8  | L 9  | 1079.4977      | 540.2528        |
| 982.6625       | 9  | G 8  | 966.4136       | 483.7107        |
| 1083.7102      | 10 | T 7  | 909.3922       | 455.2000        |
| 1243.7408      | 11 | C 6  | 808.3445       | 404.6761        |
| 1314.7779      | 12 | A 5  | 648.3139       | 324.6608        |
| 1443.8205      | 13 | E 4  | 577.2768       | 289.1423        |
| 1556.9046      | 14 | L 3  | 448.2342       | 224.6210        |
| 1716.9352      | 15 | C 2  | 335.1501       | 168.0790        |
|                | 16 | R 1  | 175.1195       | 88.0637         |

N-term:+35.07 C(11):+160.03  
 C(15):+160.03



AVSEQGVCTLEIR, MH+ 1489.7684, m/z 497.2610  
 L OS G25 P150811 220811-s1.05066.05066.3.dta

X-range:

-

MassTol: Y-zoom:

MassType:

AVG  MONO

Axis:

1  2

Label:

I  M  -

Ions:

a  +  2+  3+

b  +  2+  3+

c  +  2+  3+

x  +  2+  3+

y  +  2+  3+

z  +  2+  3+

hide H<sub>2</sub>O/NH<sub>3</sub>

zoom 112-122

GO

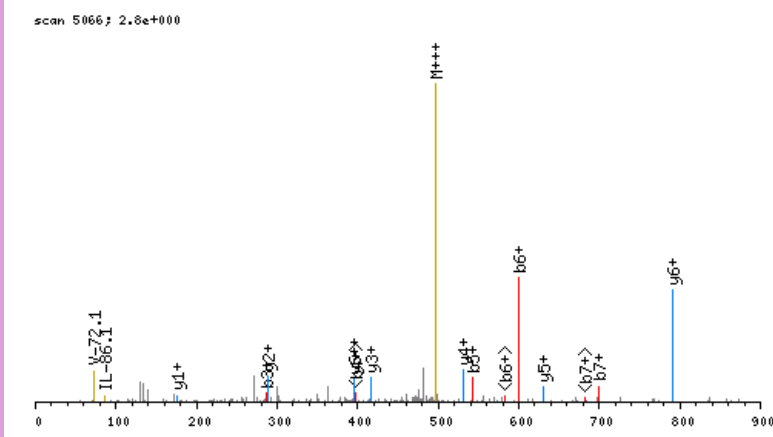

click image to zoom in; click top corners to zoom out [\[precursor±\]](#)

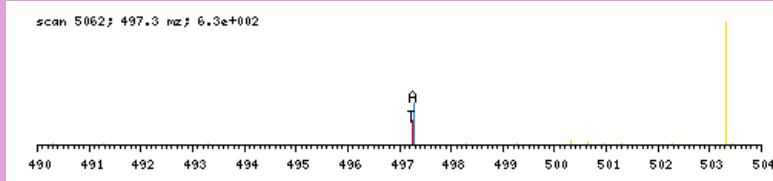

zoomed in precursor plot; T=theoretical m/z, A=acquired m/z

| b <sup>+</sup> | #  | AA # | y <sup>+</sup> | y <sup>2+</sup> |
|----------------|----|------|----------------|-----------------|
| 100.0762       | 1  | A 13 |                |                 |
| 199.1446       | 2  | V 12 | 1390.7000      | 695.8539        |
| 286.1767       | 3  | S 11 | 1291.6316      | 646.3197        |
| 415.2192       | 4  | E 10 | 1204.5995      | 602.8037        |
| 543.2778       | 5  | Q 9  | 1075.5570      | 538.2824        |
| 600.2993       | 6  | G 8  | 947.4984       | 474.2531        |
| 699.3677       | 7  | V 7  | 890.4769       | 445.7424        |
| 859.3983       | 8  | C 6  | 791.4085       | 396.2082        |
| 960.4460       | 9  | T 5  | 631.3779       | 316.1929        |
| 1073.5300      | 10 | L 4  | 530.3302       | 265.6690        |
| 1202.5726      | 11 | E 3  | 417.2462       | 209.1270        |
| 1315.6567      | 12 | I 2  | 288.2036       | 144.6057        |
|                | 13 | R 1  | 175.1195       | 88.0637         |

N-term:+29.04 C(8):+160.03

AVSKEKEEETSPTSIPR, MH+ 2216.1298, m/z 554.7879  
 L OS G28 P150811 220811-s1.02801.02801.4.dta

scan 2801; 8.6e+000

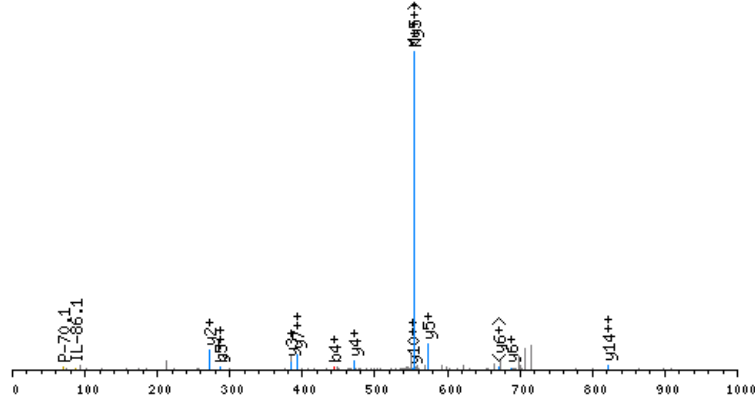

click image to zoom in; click top corners to zoom out [precursor±]

scan 2798; 554.8 m/z; 3.0e+001

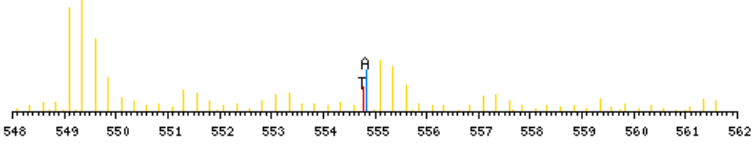

zoomed in precursor plot; T=theoretical m/z, A=acquired m/z

X-range:

-

MassTol: Y-zoom:

MassType:

AVG  MONO

Axis:

1  2

Label:

I  M  -

Ions:

a  +  2+  3+

b  +  2+  3+

c  +  2+  3+

x  +  2+  3+

y  +  2+  3+

z  +  2+  3+

hide H<sub>2</sub>O/NH<sub>3</sub>

zoom 112-122

GO

| b <sup>+</sup> | #  | AA | #  | y <sup>+</sup> | y <sup>2+</sup> |
|----------------|----|----|----|----------------|-----------------|
| 100.0762       | 1  | A  | 19 |                |                 |
| 199.1446       | 2  | V  | 18 | 2117.0615      | 1059.0346       |
| 286.1767       | 3  | S  | 17 | 2017.9930      | 1009.5004       |
| 442.3030       | 4  | K  | 16 | 1930.9610      | 965.9844        |
| 571.3455       | 5  | E  | 15 | 1774.8347      | 887.9213        |
| 727.4718       | 6  | K  | 14 | 1645.7921      | 823.4000        |
| 856.5144       | 7  | E  | 13 | 1489.6658      | 745.3368        |
| 985.5570       | 8  | E  | 12 | 1360.6232      | 680.8155        |
| 1114.5996      | 9  | E  | 11 | 1231.5806      | 616.2942        |
| 1243.6422      | 10 | E  | 10 | 1102.5380      | 551.7729        |
| 1344.6899      | 11 | T  | 9  | 973.4954       | 487.2516        |
| 1431.7219      | 12 | S  | 8  | 872.4478       | 436.7278        |
| 1528.7747      | 13 | P  | 7  | 785.4157       | 393.2118        |
| 1643.8016      | 14 | D  | 6  | 688.3630       | 344.6854        |
| 1744.8493      | 15 | T  | 5  | 573.3360       | 287.1719        |
| 1831.8813      | 16 | S  | 4  | 472.2884       | 236.6481        |
| 1944.9654      | 17 | I  | 3  | 385.2563       | 193.1321        |
| 2042.0182      | 18 | P  | 2  | 272.1723       | 136.5900        |
|                | 19 | R  | 1  | 175.1195       | 88.0637         |

N-term: +29.04 K(4): +156.13  
 K(6): +156.13

AVSSLASTGLSLTKVDER, MH+ 1902.1184, m/z 634.7110  
 H OS G26 P150811 220811-s1.05196.05196.3.dta

X-range:

-

MassTol: Y-zoom:

MassType:

AVG  MONO

Axis:

1  2

Label:

I  M  -

Ions:

a  +  2+  3+

b  +  2+  3+

c  +  2+  3+

x  +  2+  3+

y  +  2+  3+

z  +  2+  3+

hide H<sub>2</sub>O/NH<sub>3</sub>

zoom 112-122

GO

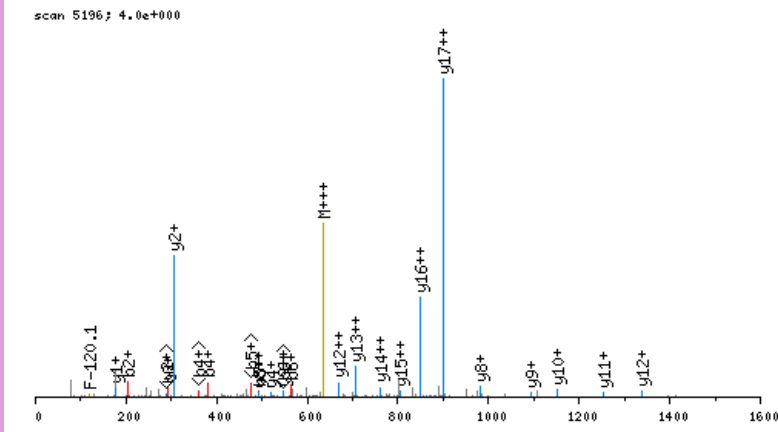

click image to zoom in; click top corners to zoom out [\[precursor±\]](#)

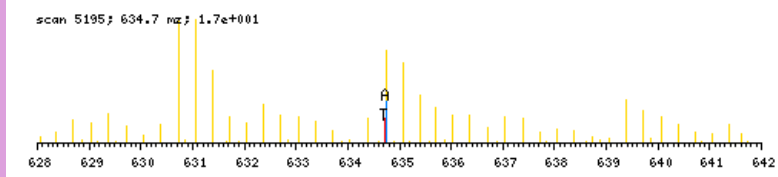

zoomed in precursor plot; T=theoretical m/z, A=acquired m/z

| b <sup>+</sup> | #  | AA # | y <sup>+</sup> | y <sup>2+</sup> |
|----------------|----|------|----------------|-----------------|
| 106.1080       | 1  | A 18 |                |                 |
| 205.1764       | 2  | V 17 | 1797.0182      | 899.0130        |
| 292.2085       | 3  | S 16 | 1697.9498      | 849.4788        |
| 379.2405       | 4  | S 15 | 1610.9178      | 805.9628        |
| 492.3245       | 5  | L 14 | 1523.8857      | 762.4468        |
| 563.3617       | 6  | A 13 | 1410.8017      | 705.9047        |
| 650.3937       | 7  | S 12 | 1339.7646      | 670.3862        |
| 751.4414       | 8  | T 11 | 1252.7325      | 626.8702        |
| 808.4628       | 9  | G 10 | 1151.6848      | 576.3463        |
| 921.5469       | 10 | L 9  | 1094.6634      | 547.8356        |
| 1008.5789      | 11 | S 8  | 981.5793       | 491.2936        |
| 1121.6630      | 12 | L 7  | 894.5473       | 447.7776        |
| 1222.7107      | 13 | T 6  | 781.4632       | 391.2355        |
| 1384.8688      | 14 | K 5  | 680.4156       | 340.7117        |
| 1483.9372      | 15 | V 4  | 518.2575       | 259.6326        |
| 1598.9641      | 16 | D 3  | 419.1890       | 210.0984        |
| 1728.0067      | 17 | E 2  | 304.1621       | 152.5850        |
|                | 18 | R 1  | 175.1195       | 88.0637         |

N-term:+35.07 K(14):+162.16

AVSSLATAKGGPSEVR, MH+ 1585.8914, m/z 529.3020  
 L OS G26 P150811 220811-s1.02516.02516.3.dta

X-range:

-

MassTol: Y-zoom:

MassType:

AVG  MONO

Axis:

1  2

Label:

I  M  -

Ions:

a  +  2+  3+

b  +  2+  3+

c  +  2+  3+

x  +  2+  3+

y  +  2+  3+

z  +  2+  3+

hide H<sub>2</sub>O/NH<sub>3</sub>

zoom 112-122

GO

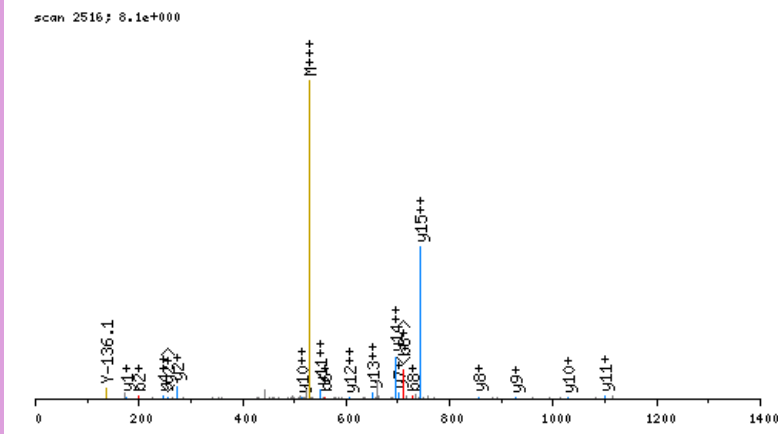

click image to zoom in; click top corners to zoom out [\[precursor±\]](#)

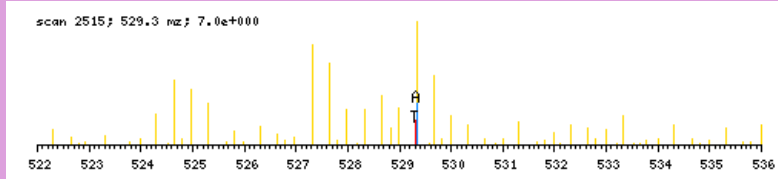

zoomed in precursor plot; T=theoretical m/z, A=acquired m/z

| b <sup>+</sup> | #  | AA # | y <sup>+</sup> | y <sup>2+</sup> |
|----------------|----|------|----------------|-----------------|
| 100.0762       | 1  | A 16 |                |                 |
| 199.1446       | 2  | V 15 | 1486.8230      | 743.9154        |
| 286.1767       | 3  | S 14 | 1387.7546      | 694.3812        |
| 373.2087       | 4  | S 13 | 1300.7225      | 650.8652        |
| 486.2927       | 5  | L 12 | 1213.6905      | 607.3492        |
| 557.3299       | 6  | A 11 | 1100.6064      | 550.8071        |
| 658.3775       | 7  | T 10 | 1029.5693      | 515.2886        |
| 729.4147       | 8  | A 9  | 928.5216       | 464.7647        |
| 885.5410       | 9  | K 8  | 857.4845       | 429.2462        |
| 942.5624       | 10 | G 7  | 701.3582       | 351.1830        |
| 999.5839       | 11 | G 6  | 644.3368       | 322.6723        |
| 1096.6366      | 12 | P 5  | 587.3153       | 294.1616        |
| 1183.6687      | 13 | S 4  | 490.2625       | 245.6352        |
| 1312.7113      | 14 | E 3  | 403.2305       | 202.1192        |
| 1411.7797      | 15 | V 2  | 274.1879       | 137.5979        |
|                | 16 | R 1  | 175.1195       | 88.0637         |

N-term:+29.04 K(9):+156.13

X-range:

-

MassTol: Y-zoom:

MassType:

AVG  MONO

Axis:

1  2

Label:

I  M  -

Ions:

a  +  2+  3+

b  +  2+  3+

c  +  2+  3+

x  +  2+  3+

y  +  2+  3+

z  +  2+  3+

hide H<sub>2</sub>O/NH<sub>3</sub>

zoom 112-122

GO

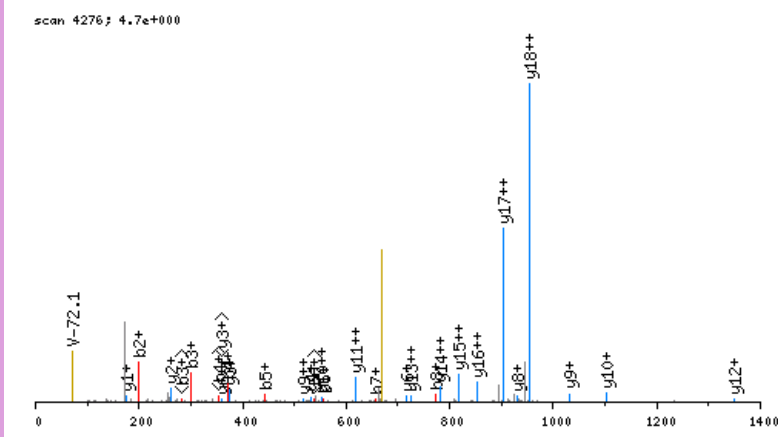

click image to zoom in; click top corners to zoom out [\[precursor±\]](#)

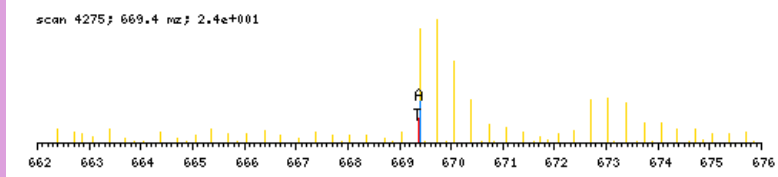

zoomed in precursor plot; T=theoretical m/z, A=acquired m/z

| b <sup>+</sup> | #  | AA | #  | y <sup>+</sup> | y <sup>2+</sup> |
|----------------|----|----|----|----------------|-----------------|
| 100.0762       | 1  | A  | 19 |                |                 |
| 199.1446       | 2  | V  | 18 | 1906.9908      | 953.9993        |
| 300.1923       | 3  | T  | 17 | 1807.9224      | 904.4651        |
| 371.2294       | 4  | A  | 16 | 1706.8747      | 853.9413        |
| 442.2665       | 5  | A  | 15 | 1635.8376      | 818.4227        |
| 556.3095       | 6  | N  | 14 | 1564.8005      | 782.9042        |
| 657.3571       | 7  | T  | 13 | 1450.7576      | 725.8827        |
| 772.3841       | 8  | D  | 12 | 1349.7099      | 675.3589        |
| 903.4246       | 9  | M  | 11 | 1234.6830      | 617.8454        |
| 974.4617       | 10 | A  | 10 | 1103.6425      | 552.3252        |
| 1075.5094      | 11 | T  | 9  | 1032.6054      | 516.8066        |
| 1162.5414      | 12 | S  | 8  | 931.5577       | 466.2828        |
| 1291.5840      | 13 | E  | 7  | 844.5257       | 422.7667        |
| 1362.6211      | 14 | A  | 6  | 715.4831       | 358.2454        |
| 1475.7052      | 15 | L  | 5  | 644.4460       | 322.7269        |
| 1631.8315      | 16 | K  | 4  | 531.3619       | 266.1849        |
| 1744.9155      | 17 | I  | 3  | 375.2356       | 188.1217        |
| 1831.9476      | 18 | S  | 2  | 262.1515       | 131.5797        |
|                | 19 | R  | 1  | 175.1195       | 88.0637         |

N-term:+29.04 K(16):+156.13

AVVTCGSVVKLLNTR, MH+ 1672.9784, m/z 558.3310  
 L OS G26 P150811 220811-s1.05252.05252.3.dta

X-range:

-

MassTol: Y-zoom:

MassType:

AVG  MONO

Axis:

1  2

Label:

I  M  -

Ions:

a  +  2+  3+

b  +  2+  3+

c  +  2+  3+

x  +  2+  3+

y  +  2+  3+

z  +  2+  3+

hide H<sub>2</sub>O/NH<sub>3</sub>

zoom 112-122

GO

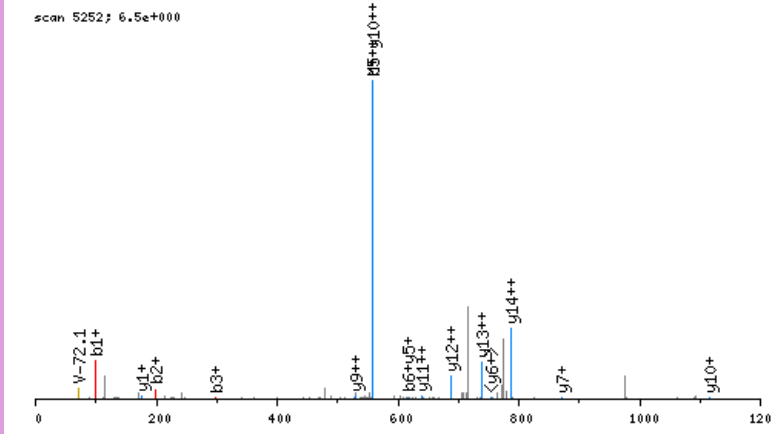

click image to zoom in; click top corners to zoom out [\[precursor±\]](#)

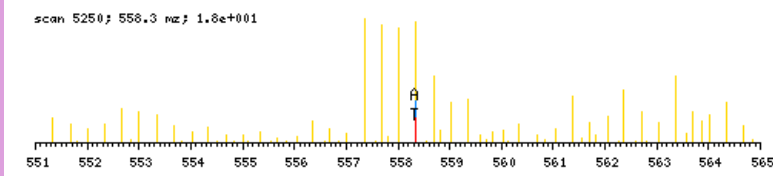

zoomed in precursor plot; T=theoretical m/z, A=acquired m/z

| b <sup>+</sup> | #  | AA | #  | y <sup>+</sup> | y <sup>2+</sup> |
|----------------|----|----|----|----------------|-----------------|
| 100.0762       | 1  | A  | 15 |                |                 |
| 199.1446       | 2  | V  | 14 | 1573.9100      | 787.4589        |
| 298.2130       | 3  | V  | 13 | 1474.8415      | 737.9247        |
| 399.2607       | 4  | T  | 12 | 1375.7731      | 688.3905        |
| 559.2913       | 5  | C  | 11 | 1274.7255      | 637.8666        |
| 616.3128       | 6  | G  | 10 | 1114.6949      | 557.8513        |
| 703.3448       | 7  | S  | 9  | 1057.6734      | 529.3406        |
| 802.4132       | 8  | V  | 8  | 970.6414       | 485.8246        |
| 901.4816       | 9  | V  | 7  | 871.5729       | 436.2904        |
| 1057.6079      | 10 | K  | 6  | 772.5045       | 386.7562        |
| 1170.6920      | 11 | L  | 5  | 616.3782       | 308.6930        |
| 1283.7761      | 12 | L  | 4  | 503.2942       | 252.1510        |
| 1397.8190      | 13 | N  | 3  | 390.2101       | 195.6090        |
| 1498.8667      | 14 | T  | 2  | 276.1672       | 138.5875        |
|                | 15 | R  | 1  | 175.1195       | 88.0637         |

N-term:+29.04 C(5):+160.03  
 K(10):+156.13

AYLTIEQLLEKR, MH+ 1532.9052, m/z 511.6399  
 L OS G26 P150811 220811-s1.06668.06668.3.dta

X-range:

-

MassTol: Y-zoom:

MassType:

AVG  MONO

Axis:

1  2

Label:

I  M  -

Ions:

a  +  2+  3+

b  +  2+  3+

c  +  2+  3+

x  +  2+  3+

y  +  2+  3+

z  +  2+  3+

hide H<sub>2</sub>O/NH<sub>3</sub>

zoom 112-122

GO

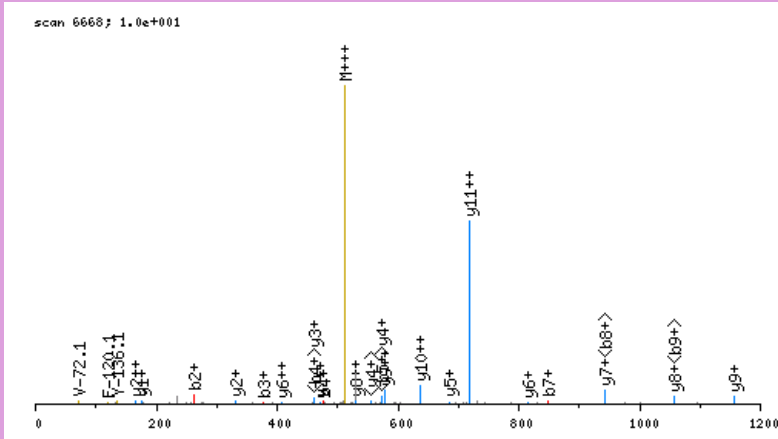

click image to zoom in; click top corners to zoom out [\[precursor±\]](#)

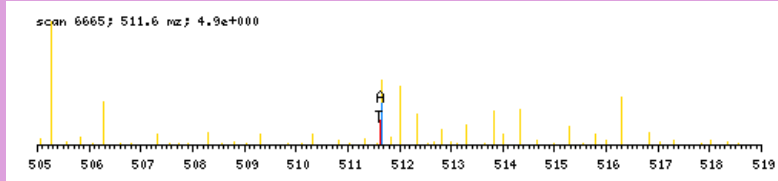

zoomed in precursor plot; T=theoretical m/z, A=acquired m/z

| b <sup>+</sup> | #  | AA # | y <sup>+</sup> | y <sup>2+</sup> |
|----------------|----|------|----------------|-----------------|
| 100.0762       | 1  | A 12 |                |                 |
| 263.1395       | 2  | Y 11 | 1433.8368      | 717.4223        |
| 376.2236       | 3  | L 10 | 1270.7735      | 635.8907        |
| 477.2713       | 4  | T 9  | 1157.6894      | 579.3486        |
| 590.3553       | 5  | I 8  | 1056.6418      | 528.8248        |
| 719.3979       | 6  | E 7  | 943.5577       | 472.2828        |
| 847.4565       | 7  | Q 6  | 814.5151       | 407.7615        |
| 960.5406       | 8  | L 5  | 686.4565       | 343.7322        |
| 1073.6246      | 9  | L 4  | 573.3725       | 287.1901        |
| 1202.6672      | 10 | E 3  | 460.2884       | 230.6481        |
| 1358.7935      | 11 | K 2  | 331.2458       | 166.1268        |
|                | 12 | R 1  | 175.1195       | 88.0637         |

N-term:+29.04 K(11):+156.13

CCTLPEDQR, MH+ 1206.5246, m/z 603.7659  
 L OS G25 P150811 220811-s1.02178.02178.2.dta

scan 2178; 3.9e+000

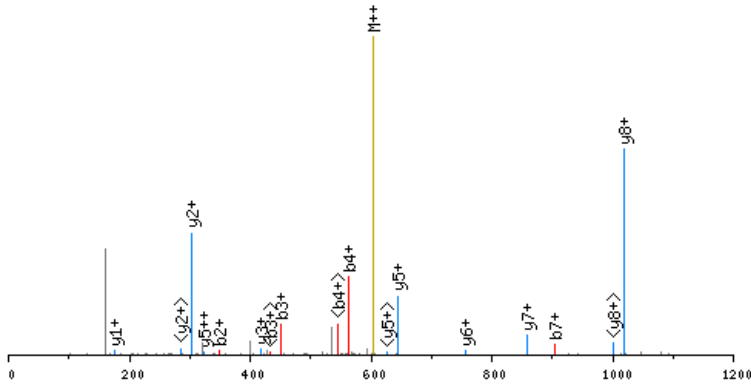

click image to zoom in; click top corners to zoom out [precursor±]

scan 2177; 603.8 m/z; 1.3e+001

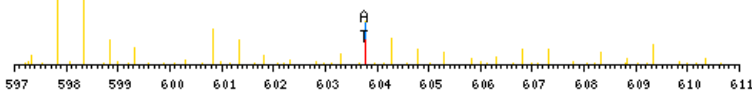

zoomed in precursor plot; T=theoretical m/z, A=acquired m/z

X-range:

0 - 0

MassTol: Y-zoom:

0. 1.

MassType:

AVG  MONO

Axis:

1  2

Label:

I  M  -

Ions:

a  +  2+  3+

b  +  2+  3+

c  +  2+  3+

x  +  2+  3+

y  +  2+  3+

z  +  2+  3+

hide H<sub>2</sub>O/NH<sub>3</sub>

zoom 112-122

GO

| b <sup>+</sup> | # | AA # | y <sup>+</sup> | y <sup>2+</sup>    |
|----------------|---|------|----------------|--------------------|
| 189.0697       | 1 | C    | 9              |                    |
| 349.1003       | 2 | C    | 8              | 1018.4627 509.7353 |
| 450.1480       | 3 | T    | 7              | 858.4321 429.7200  |
| 563.2320       | 4 | L    | 6              | 757.3844 379.1961  |
| 660.2848       | 5 | P    | 5              | 644.3004 322.6541  |
| 789.3274       | 6 | E    | 4              | 547.2476 274.1277  |
| 904.3543       | 7 | D    | 3              | 418.2050 209.6064  |
| 1032.4129      | 8 | Q    | 2              | 303.1781 152.0930  |
|                | 9 | R    | 1              | 175.1195 88.0637   |

N-term:+29.04 C(1):+160.03  
 C(2):+160.03



CDTFVALPPATVGNR, MH+ 1651.8689, m/z 551.2945  
 H OS G25 P150811 220811-s1.06486.06486.3.dta

scan 6486; 6.1e+000

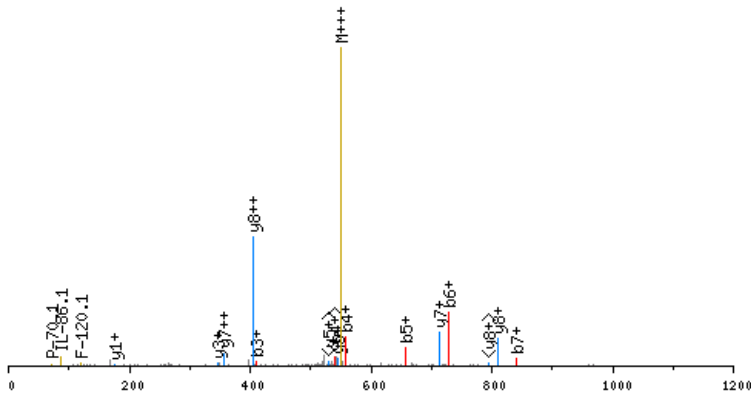

click image to zoom in; click top corners to zoom out [precursor±]

scan 6482; 551.3 m/z; 4.5e+001

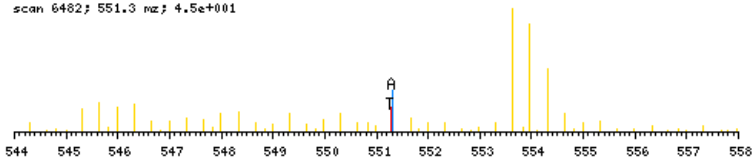

zoomed in precursor plot; T=theoretical m/z, A=acquired m/z

X-range:

-

MassTol: Y-zoom:

MassType:

AVG  MONO

Axis:

1  2

Label:

I  M  -

Ions:

a  +  2+  3+

b  +  2+  3+

c  +  2+  3+

x  +  2+  3+

y  +  2+  3+

z  +  2+  3+

hide H<sub>2</sub>O/NH<sub>3</sub>

zoom 112-122

GO

| b <sup>+</sup> | #  | AA # | y <sup>+</sup> | y <sup>2+</sup> |
|----------------|----|------|----------------|-----------------|
| 195.1015       | 1  | C 15 |                |                 |
| 310.1284       | 2  | D 14 | 1457.7753      | 729.3915        |
| 411.1761       | 3  | T 13 | 1342.7483      | 671.8781        |
| 558.2445       | 4  | F 12 | 1241.7006      | 621.3542        |
| 657.3129       | 5  | V 11 | 1094.6322      | 547.8200        |
| 728.3501       | 6  | A 10 | 995.5638       | 498.2858        |
| 841.4341       | 7  | L 9  | 924.5267       | 462.7673        |
| 938.4869       | 8  | P 8  | 811.4426       | 406.2252        |
| 1035.5397      | 9  | P 7  | 714.3899       | 357.6988        |
| 1106.5768      | 10 | A 6  | 617.3371       | 309.1725        |
| 1207.6244      | 11 | T 5  | 546.3000       | 273.6539        |
| 1306.6929      | 12 | V 4  | 445.2523       | 223.1301        |
| 1363.7143      | 13 | G 3  | 346.1839       | 173.5959        |
| 1477.7573      | 14 | N 2  | 289.1624       | 145.0851        |
|                | 15 | R 1  | 175.1195       | 88.0637         |

N-term:+35.07 C(1):+160.03

CGEEQGADAALHFNPR, MH+ 1799.8134, m/z 600.6093  
 L OS G27 P150811 220811-s1.04394.04394.3.dta

scan 4394; 4.0e+000

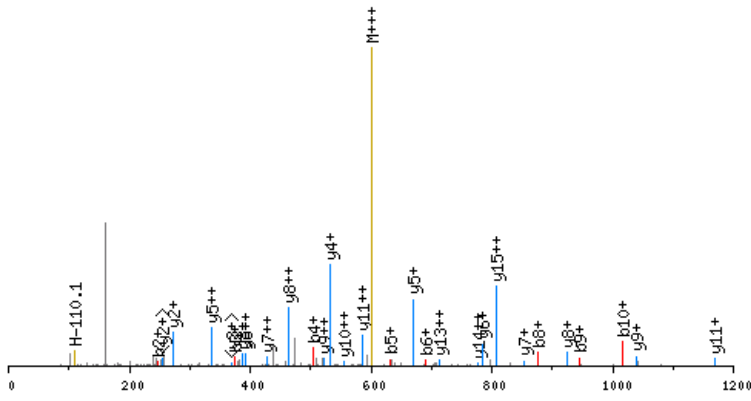

click image to zoom in; click top corners to zoom out [\[precursor±\]](#)

scan 4392; 600.6 m/z; 1.6e+001

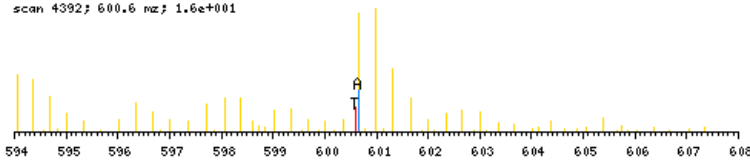

zoomed in precursor plot; T=theoretical m/z, A=acquired m/z

X-range:

-

MassTol: Y-zoom:

MassType:

AVG  MONO

Axis:

1  2

Label:

I  M  -

Ions:

a  +  2+  3+

b  +  2+  3+

c  +  2+  3+

x  +  2+  3+

y  +  2+  3+

z  +  2+  3+

hide H<sub>2</sub>O/NH<sub>3</sub>

zoom 112-122

GO

| b <sup>+</sup> | #  | AA # | y <sup>+</sup> | y <sup>2+</sup> |
|----------------|----|------|----------------|-----------------|
| 189.0697       | 1  | C 16 |                |                 |
| 246.0912       | 2  | G 15 | 1611.7516      | 806.3797        |
| 375.1338       | 3  | E 14 | 1554.7301      | 777.8690        |
| 504.1764       | 4  | E 13 | 1425.6875      | 713.3477        |
| 632.2349       | 5  | Q 12 | 1296.6449      | 648.8264        |
| 689.2564       | 6  | G 11 | 1168.5863      | 584.7971        |
| 760.2935       | 7  | A 10 | 1111.5649      | 556.2863        |
| 875.3204       | 8  | D 9  | 1040.5278      | 520.7678        |
| 946.3576       | 9  | A 8  | 925.5008       | 463.2543        |
| 1017.3947      | 10 | A 7  | 854.4637       | 427.7358        |
| 1130.4787      | 11 | L 6  | 783.4266       | 392.2172        |
| 1267.5377      | 12 | H 5  | 670.3425       | 335.6752        |
| 1414.6061      | 13 | F 4  | 533.2836       | 267.1457        |
| 1528.6490      | 14 | N 3  | 386.2152       | 193.6115        |
| 1625.7018      | 15 | P 2  | 272.1723       | 136.5900        |
|                | 16 | R 1  | 175.1195       | 88.0637         |

N-term:+29.04 C(1):+160.03

CKAADKDTCFSTEGPNLVTR, MH+ 2354.1484, m/z 589.2926  
 L OS G28 P150811 220811-s1.04446.04446.4.dta

X-range:

-

MassTol: Y-zoom:

MassType:

AVG  MONO

Axis:

1  2

Label:

I  M  -

Ions:

a  +  2+  3+

b  +  2+  3+

c  +  2+  3+

x  +  2+  3+

y  +  2+  3+

z  +  2+  3+

hide H<sub>2</sub>O/NH<sub>3</sub>

zoom 112-122

GO

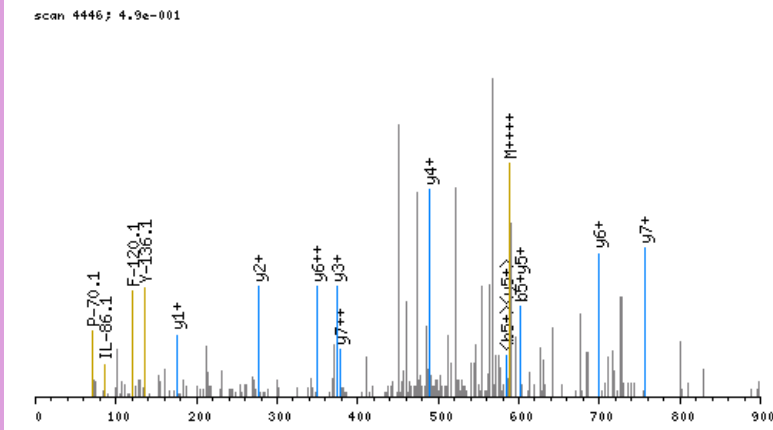

click image to zoom in; click top corners to zoom out [precursor±]

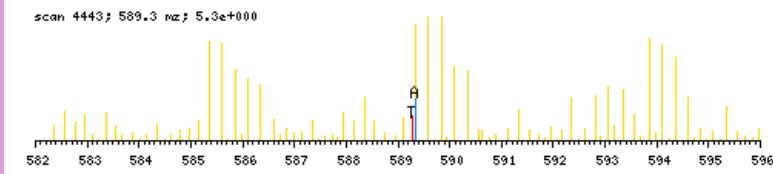

zoomed in precursor plot; T=theoretical m/z, A=acquired m/z

| b <sup>+</sup> | #  | AA | #  | y <sup>+</sup> | y <sup>2+</sup> |
|----------------|----|----|----|----------------|-----------------|
| 189.0697       | 1  | C  | 20 |                |                 |
| 345.1960       | 2  | K  | 19 | 2166.0865      | 1083.5472       |
| 416.2331       | 3  | A  | 18 | 2009.9602      | 1005.4840       |
| 487.2702       | 4  | A  | 17 | 1938.9231      | 969.9655        |
| 602.2972       | 5  | D  | 16 | 1867.8860      | 934.4469        |
| 758.4235       | 6  | K  | 15 | 1752.8590      | 876.9334        |
| 873.4504       | 7  | D  | 14 | 1596.7327      | 798.8703        |
| 974.4981       | 8  | T  | 13 | 1481.7058      | 741.3568        |
| 1134.5287      | 9  | C  | 12 | 1380.6581      | 690.8330        |
| 1281.5971      | 10 | F  | 11 | 1220.6275      | 610.8177        |
| 1368.6291      | 11 | S  | 10 | 1073.5591      | 537.2835        |
| 1469.6768      | 12 | T  | 9  | 986.5271       | 493.7675        |
| 1598.7194      | 13 | E  | 8  | 885.4794       | 443.2436        |
| 1655.7409      | 14 | G  | 7  | 756.4368       | 378.7223        |
| 1752.7936      | 15 | P  | 6  | 699.4153       | 350.2116        |
| 1866.8366      | 16 | N  | 5  | 602.3626       | 301.6852        |
| 1979.9206      | 17 | L  | 4  | 488.3197       | 244.6637        |
| 2078.9890      | 18 | V  | 3  | 375.2356       | 188.1217        |
| 2180.0367      | 19 | T  | 2  | 276.1672       | 138.5875        |
|                | 20 | R  | 1  | 175.1195       | 88.0637         |

N-term:+29.04 C(1):+160.03  
 K(2):+156.13 K(6):+156.13 C(9):+160.03

CSPDPGLTALLSDHR, MH+ 1666.8222, m/z 556.2789  
 L OS G26 P150811 220811-s1.05449.05449.3.dta

X-range:

-

MassTol: Y-zoom:

MassType:

AVG  MONO

Axis:

1  2

Label:

I  M  -

Ions:

a  +  2+  3+

b  +  2+  3+

c  +  2+  3+

x  +  2+  3+

y  +  2+  3+

z  +  2+  3+

hide H<sub>2</sub>O/NH<sub>3</sub>

zoom 112-122

GO

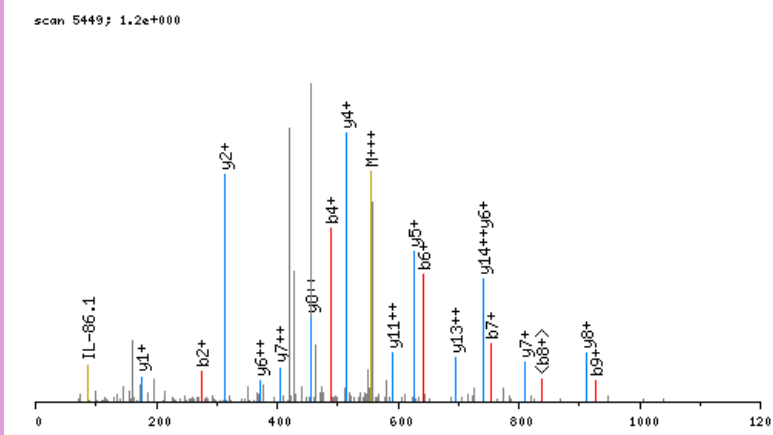

click image to zoom in; click top corners to zoom out [\[precursor±\]](#)

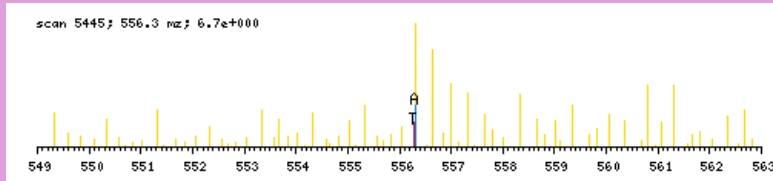

zoomed in precursor plot; T=theoretical m/z, A=acquired m/z

| b <sup>+</sup> | #  | AA # | y <sup>+</sup> | y <sup>2+</sup> |
|----------------|----|------|----------------|-----------------|
| 189.0697       | 1  | C 15 |                |                 |
| 276.1017       | 2  | S 14 | 1478.7603      | 739.8841        |
| 373.1545       | 3  | P 13 | 1391.7283      | 696.3681        |
| 488.1814       | 4  | D 12 | 1294.6755      | 647.8417        |
| 585.2342       | 5  | P 11 | 1179.6486      | 590.3282        |
| 642.2557       | 6  | G 10 | 1082.5958      | 541.8018        |
| 755.3397       | 7  | L 9  | 1025.5744      | 513.2911        |
| 856.3874       | 8  | T 8  | 912.4903       | 456.7491        |
| 927.4245       | 9  | A 7  | 811.4426       | 406.2252        |
| 1040.5086      | 10 | L 6  | 740.4055       | 370.7067        |
| 1153.5926      | 11 | L 5  | 627.3214       | 314.1646        |
| 1240.6247      | 12 | S 4  | 514.2374       | 257.6226        |
| 1355.6516      | 13 | D 3  | 427.2054       | 214.1066        |
| 1492.7105      | 14 | H 2  | 312.1784       | 156.5931        |
|                | 15 | R 1  | 175.1195       | 88.0637         |

N-term:+29.04 C(1):+160.03

CVTDISHLVR, MH+ 1227.6519, m/z 409.8888  
 L OS G27 P150811 220811-s1.05140.05140.3.dta

X-range:

-

MassTol: Y-zoom:

MassType:

AVG  MONO

Axis:

1  2

Label:

I  M  -

Ions:

a  +  2+  3+

b  +  2+  3+

c  +  2+  3+

x  +  2+  3+

y  +  2+  3+

z  +  2+  3+

hide H<sub>2</sub>O/NH<sub>3</sub>

zoom 112-122

GO

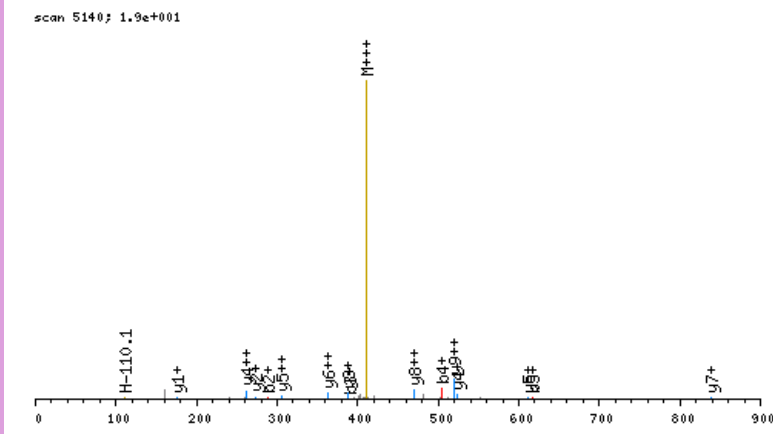

click image to zoom in; click top corners to zoom out [\[precursor±\]](#)

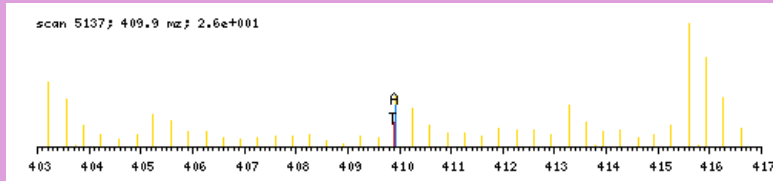

zoomed in precursor plot; T=theoretical m/z, A=acquired m/z

| b <sup>+</sup> | #  | AA # | y <sup>+</sup> | y <sup>2+</sup> |
|----------------|----|------|----------------|-----------------|
| 189.0697       | 1  | C 10 |                |                 |
| 288.1381       | 2  | V 9  | 1039.5900      | 520.2989        |
| 389.1858       | 3  | T 8  | 940.5216       | 470.7647        |
| 504.2127       | 4  | D 7  | 839.4739       | 420.2409        |
| 617.2968       | 5  | I 6  | 724.4470       | 362.7274        |
| 704.3288       | 6  | S 5  | 611.3629       | 306.1854        |
| 841.3877       | 7  | H 4  | 524.3309       | 262.6694        |
| 954.4718       | 8  | L 3  | 387.2720       | 194.1399        |
| 1053.5402      | 9  | V 2  | 274.1879       | 137.5979        |
|                | 10 | R 1  | 175.1195       | 88.0637         |

N-term:+29.04 C(1):+160.03

DADGGDISVKELGTVMR, MH+ 1888.0122, m/z 630.0089  
 H OS G26 P150811 220811-s1.05334.05334.3.dta

X-range:

-

MassTol: Y-zoom:

MassType:

AVG  MONO

Axis:

1  2

Label:

I  M  -

Ions:

a  +  2+  3+

b  +  2+  3+

c  +  2+  3+

x  +  2+  3+

y  +  2+  3+

z  +  2+  3+

hide H<sub>2</sub>O/NH<sub>3</sub>

zoom 112-122

GO

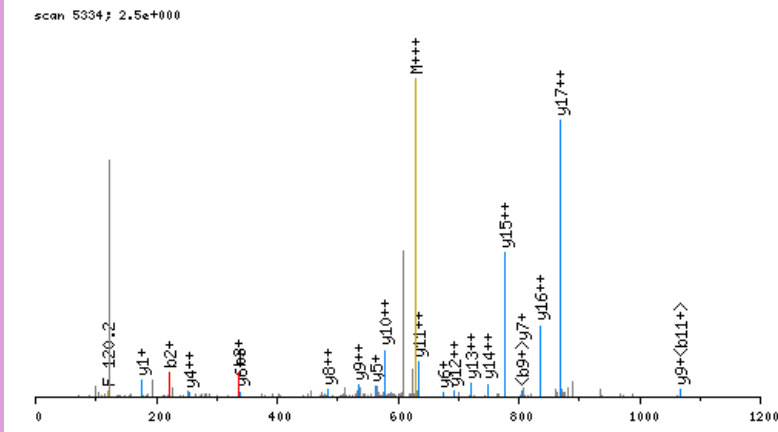

click image to zoom in; click top corners to zoom out [\[precursor±\]](#)

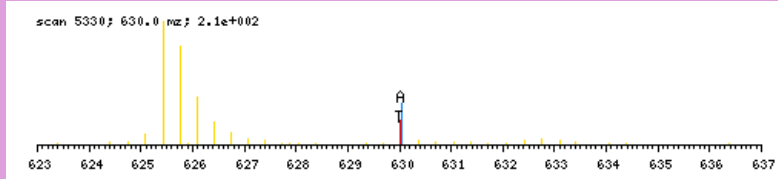

zoomed in precursor plot; T=theoretical m/z, A=acquired m/z

| b <sup>+</sup> | #  | AA # | y <sup>+</sup> | y <sup>2+</sup> |
|----------------|----|------|----------------|-----------------|
| 150.0978       | 1  | D 18 |                |                 |
| 221.1350       | 2  | A 17 | 1738.9222      | 869.9650        |
| 336.1619       | 3  | D 16 | 1667.8851      | 834.4465        |
| 393.1834       | 4  | G 15 | 1552.8581      | 776.9330        |
| 450.2048       | 5  | G 14 | 1495.8367      | 748.4223        |
| 507.2263       | 6  | G 13 | 1438.8152      | 719.9115        |
| 622.2532       | 7  | D 12 | 1381.7937      | 691.4008        |
| 735.3373       | 8  | I 11 | 1266.7668      | 633.8873        |
| 822.3693       | 9  | S 10 | 1153.6827      | 577.3453        |
| 921.4377       | 10 | V 9  | 1066.6507      | 533.8293        |
| 1083.5958      | 11 | K 8  | 967.5823       | 484.2951        |
| 1212.6384      | 12 | E 7  | 805.4242       | 403.2160        |
| 1325.7225      | 13 | L 6  | 676.3816       | 338.6947        |
| 1382.7440      | 14 | G 5  | 563.2975       | 282.1527        |
| 1483.7916      | 15 | T 4  | 506.2761       | 253.6420        |
| 1582.8601      | 16 | V 3  | 405.2284       | 203.1181        |
| 1713.9005      | 17 | M 2  | 306.1600       | 153.5839        |
|                | 18 | R 1  | 175.1195       | 88.0637         |

N-term:+35.07 K(11):+162.16

DALYKLGMTDAFGGR, MH+ 1682.9212, m/z 561.6453  
 H OS G26 P150811 220811-s1.05919.05919.3.dta

X-range:

-

MassTol: Y-zoom:

MassType:

AVG  MONO

Axis:

1  2

Label:

I  M  -

Ions:

a  +  2+  3+

b  +  2+  3+

c  +  2+  3+

x  +  2+  3+

y  +  2+  3+

z  +  2+  3+

hide H<sub>2</sub>O/NH<sub>3</sub>

zoom 112-122

GO

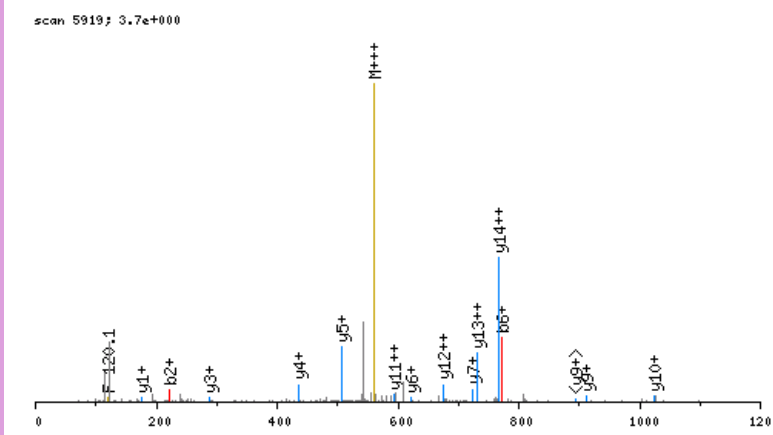

click image to zoom in; click top corners to zoom out [\[precursor±\]](#)

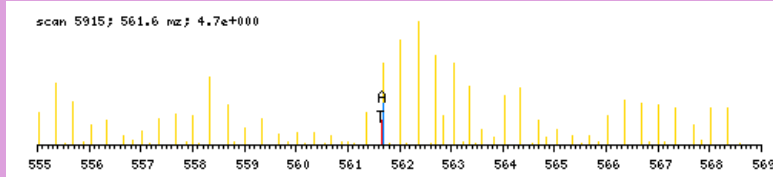

zoomed in precursor plot; T=theoretical m/z, A=acquired m/z

| b <sup>+</sup> | #  | AA # | y <sup>+</sup> | y <sup>2+</sup> |
|----------------|----|------|----------------|-----------------|
| 150.0978       | 1  | D 15 |                |                 |
| 221.1350       | 2  | A 14 | 1533.8312      | 767.4195        |
| 334.2190       | 3  | L 13 | 1462.7941      | 731.9010        |
| 497.2823       | 4  | Y 12 | 1349.7100      | 675.3589        |
| 659.4404       | 5  | K 11 | 1186.6467      | 593.8273        |
| 772.5245       | 6  | L 10 | 1024.4886      | 512.7482        |
| 829.5460       | 7  | G 9  | 911.4045       | 456.2062        |
| 960.5865       | 8  | M 8  | 854.3831       | 427.6954        |
| 1061.6341      | 9  | T 7  | 723.3426       | 362.1752        |
| 1176.6611      | 10 | D 6  | 622.2949       | 311.6514        |
| 1247.6982      | 11 | A 5  | 507.2680       | 254.1379        |
| 1394.7666      | 12 | F 4  | 436.2308       | 218.6193        |
| 1451.7881      | 13 | G 3  | 289.1624       | 145.0851        |
| 1508.8095      | 14 | G 2  | 232.1410       | 116.5744        |
|                | 15 | R 1  | 175.1195       | 88.0637         |

N-term:+35.07 K(5):+162.16

DAVDTYIPVPTK, MH+ 1380.7587, m/z 460.9244  
 H OS G24 P150811 220811-s1.03948.03948.3.dta

scan 3948; 4.8e+000

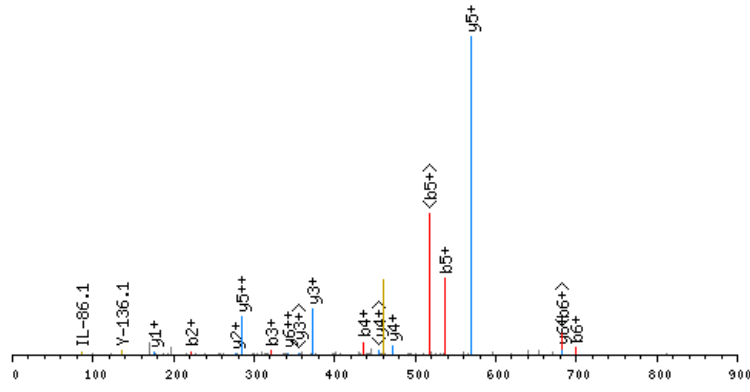

click image to zoom in; click top corners to zoom out [\[precursor±\]](#)

scan 3947; 460.9 m/z; 7.7e+000

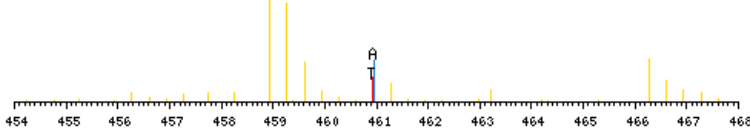

zoomed in precursor plot; T=theoretical m/z, A=acquired m/z

X-range:

-

MassTol: Y-zoom:

MassType:

AVG  MONO

Axis:

1  2

Label:

I  M  -

Ions:

a  +  2+  3+

b  +  2+  3+

c  +  2+  3+

x  +  2+  3+

y  +  2+  3+

z  +  2+  3+

hide H<sub>2</sub>O/NH<sub>3</sub>

zoom 112-122

GO

| b <sup>+</sup> | #  | AA # | y <sup>+</sup> | y <sup>2+</sup> |
|----------------|----|------|----------------|-----------------|
| 150.0978       | 1  | D 12 |                |                 |
| 221.1350       | 2  | A 11 | 1231.6687      | 616.3382        |
| 320.2034       | 3  | V 10 | 1160.6315      | 580.8197        |
| 435.2303       | 4  | D 9  | 1061.5631      | 531.2855        |
| 536.2780       | 5  | T 8  | 946.5362       | 473.7720        |
| 699.3413       | 6  | Y 7  | 845.4885       | 423.2482        |
| 812.4254       | 7  | I 6  | 682.4252       | 341.7165        |
| 909.4781       | 8  | P 5  | 569.3411       | 285.1745        |
| 1008.5466      | 9  | V 4  | 472.2884       | 236.6481        |
| 1105.5993      | 10 | P 3  | 373.2199       | 187.1139        |
| 1206.6470      | 11 | T 2  | 276.1672       | 138.5875        |
|                | 12 | R 1  | 175.1195       | 88.0637         |

N-term:+35.07



DCILPPTRPDKPLR, MH+ 1835.0213, m/z 459.5108  
 L OS G28 P150811 220811-s1.04547.04547.4.dta

X-range:

-

MassTol: Y-zoom:

MassType:

AVG  MONO

Axis:

1  2

Label:

I  M  -

Ions:

a  +  2+  3+

b  +  2+  3+

c  +  2+  3+

x  +  2+  3+

y  +  2+  3+

z  +  2+  3+

hide H<sub>2</sub>O/NH<sub>3</sub>

zoom 112-122

GO

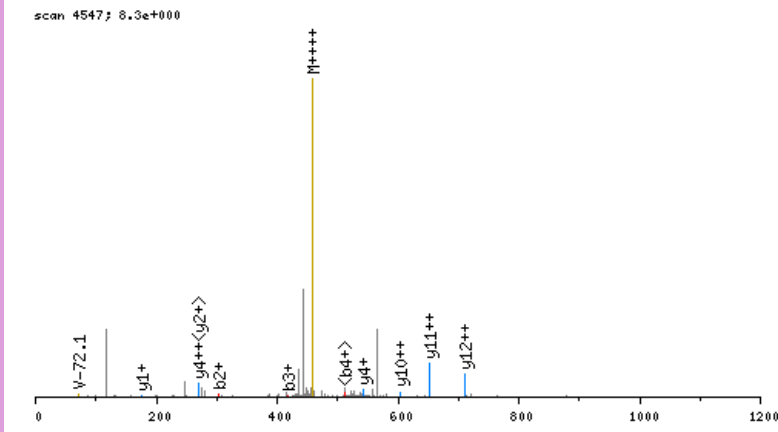

click image to zoom in; click top corners to zoom out [\[precursor±\]](#)

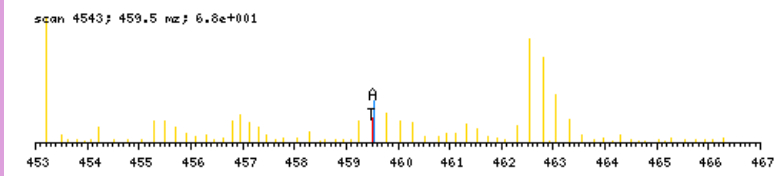

zoomed in precursor plot; T=theoretical m/z, A=acquired m/z

| b <sup>+</sup> | #  | AA # | y <sup>+</sup> | y <sup>2+</sup>    |
|----------------|----|------|----------------|--------------------|
| 144.0660       | 1  | D    | 15             |                    |
| 304.0966       | 2  | C    | 14             | 1691.9631 846.4854 |
| 417.1807       | 3  | I    | 13             | 1531.9325 766.4701 |
| 530.2648       | 4  | L    | 12             | 1418.8484 709.9281 |
| 627.3175       | 5  | P    | 11             | 1305.7643 653.3861 |
| 724.3703       | 6  | P    | 10             | 1208.7116 604.8597 |
| 825.4180       | 7  | T    | 9              | 1111.6588 556.3333 |
| 981.5191       | 8  | R    | 8              | 1010.6111 505.8095 |
| 1078.5719      | 9  | P    | 7              | 854.5100 427.7589  |
| 1179.6195      | 10 | T    | 6              | 757.4573 379.2325  |
| 1294.6465      | 11 | D    | 5              | 656.4096 328.7087  |
| 1450.7728      | 12 | K    | 4              | 541.3826 271.1952  |
| 1547.8255      | 13 | P    | 3              | 385.2563 193.1321  |
| 1660.9096      | 14 | L    | 2              | 288.2036 144.6057  |
|                | 15 | R    | 1              | 175.1195 88.0637   |

N-term:+29.04 C(2):+160.03  
 K(12):+156.13

X-range:

-

MassTol: Y-zoom:

MassType:

AVG  MONO

Axis:

1  2

Label:

I  M  -

Ions:

a  +  2+  3+

b  +  2+  3+

c  +  2+  3+

x  +  2+  3+

y  +  2+  3+

z  +  2+  3+

hide H<sub>2</sub>O/NH<sub>3</sub>

zoom 112-122

GO

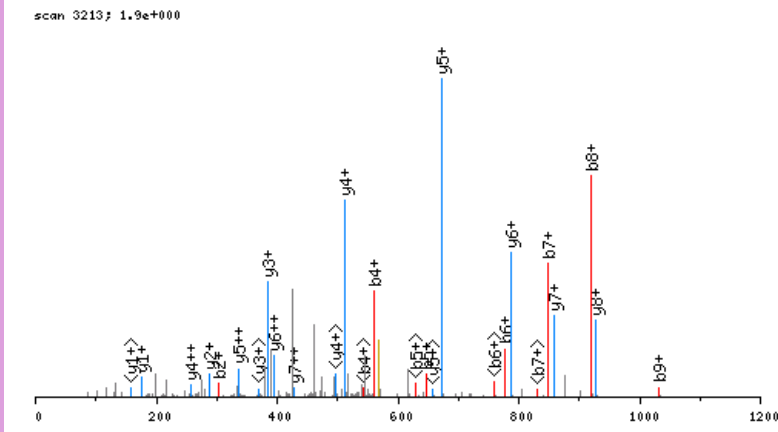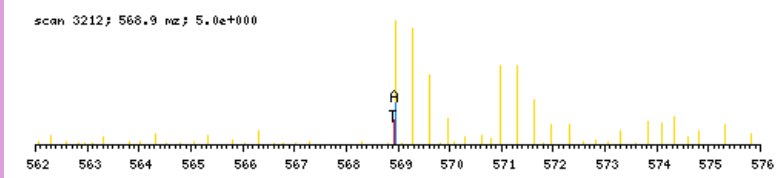

| b <sup>+</sup> | #  | AA # | y <sup>+</sup> | y <sup>2+</sup>    |
|----------------|----|------|----------------|--------------------|
| 144.0660       | 1  | D    | 14             |                    |
| 304.0966       | 2  | C    | 13             | 1561.6924 781.3501 |
| 401.1494       | 3  | P    | 12             | 1401.6618 701.3348 |
| 561.1800       | 4  | C    | 11             | 1304.6090 652.8084 |
| 648.2120       | 5  | S    | 10             | 1144.5784 572.7931 |
| 777.2546       | 6  | E    | 9              | 1057.5464 529.2771 |
| 848.2917       | 7  | A    | 8              | 928.5038 464.7558  |
| 919.3289       | 8  | A    | 7              | 857.4667 429.2373  |
| 1032.4129      | 9  | L    | 6              | 786.4296 393.7187  |
| 1192.4435      | 10 | C    | 5              | 673.3455 337.1767  |
| 1320.5021      | 11 | Q    | 4              | 513.3149 257.1614  |
| 1417.5549      | 12 | P    | 3              | 385.2563 193.1321  |
| 1530.6389      | 13 | I    | 2              | 288.2036 144.6057  |
|                | 14 | R    | 1              | 175.1195 88.0637   |

N-term:+29.04 C(2):+160.03  
 C(4):+160.03 C(10):+160.03

DDEVAPDAAAENCLAER, MH+ 1873.8237, m/z 625.2794  
 L OS G24 P150811 220811-s1.03316.03316.3.dta

X-range:

-

MassTol: Y-zoom:

MassType:

AVG  MONO

Axis:

1  2

Label:

I  M  -

Ions:

a  +  2+  3+

b  +  2+  3+

c  +  2+  3+

x  +  2+  3+

y  +  2+  3+

z  +  2+  3+

hide H<sub>2</sub>O/NH<sub>3</sub>

zoom 112-122

GO

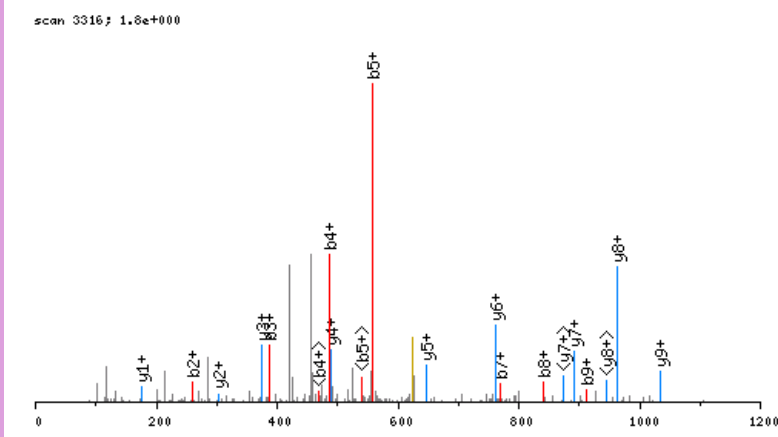

click image to zoom in; click top corners to zoom out [\[precursor±\]](#)

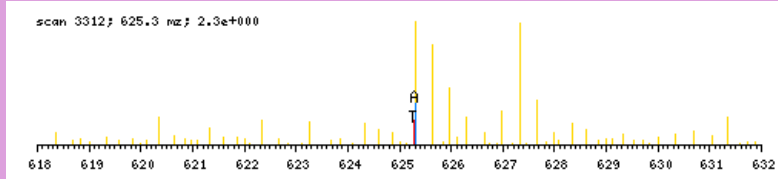

zoomed in precursor plot; T=theoretical m/z, A=acquired m/z

| b <sup>+</sup> | #  | AA # | y <sup>+</sup> | y <sup>2+</sup> |
|----------------|----|------|----------------|-----------------|
| 144.0660       | 1  | D 17 |                |                 |
| 259.0930       | 2  | D 16 | 1730.7655      | 865.8867        |
| 388.1356       | 3  | E 15 | 1615.7386      | 808.3732        |
| 487.2040       | 4  | V 14 | 1486.6960      | 743.8519        |
| 558.2411       | 5  | A 13 | 1387.6276      | 694.3177        |
| 655.2939       | 6  | P 12 | 1316.5904      | 658.7991        |
| 770.3208       | 7  | D 11 | 1219.5377      | 610.2728        |
| 841.3579       | 8  | A 10 | 1104.5107      | 552.7593        |
| 912.3950       | 9  | A 9  | 1033.4736      | 517.2407        |
| 983.4322       | 10 | A 8  | 962.4365       | 481.7222        |
| 1112.4747      | 11 | E 7  | 891.3994       | 446.2036        |
| 1226.5177      | 12 | N 6  | 762.3568       | 381.6823        |
| 1386.5483      | 13 | C 5  | 648.3139       | 324.6608        |
| 1499.6323      | 14 | L 4  | 488.2833       | 244.6455        |
| 1570.6695      | 15 | A 3  | 375.1992       | 188.1035        |
| 1699.7120      | 16 | E 2  | 304.1621       | 152.5850        |
|                | 17 | R 1  | 175.1195       | 88.0637         |

N-term:+29.04 C(13):+160.03

DDEVVDVDTVEEDLGKSR, MH+ 2046.0151, m/z 682.6766  
 H OS G26 P150811 220811-s1.04768.04768.3.dta

X-range:

-

MassTol: Y-zoom:

MassType:

AVG  MONO

Axis:

1  2

Label:

I  M  -

Ions:

a  +  2+  3+

b  +  2+  3+

c  +  2+  3+

x  +  2+  3+

y  +  2+  3+

z  +  2+  3+

hide H<sub>2</sub>O/NH<sub>3</sub>

zoom 112-122

GO

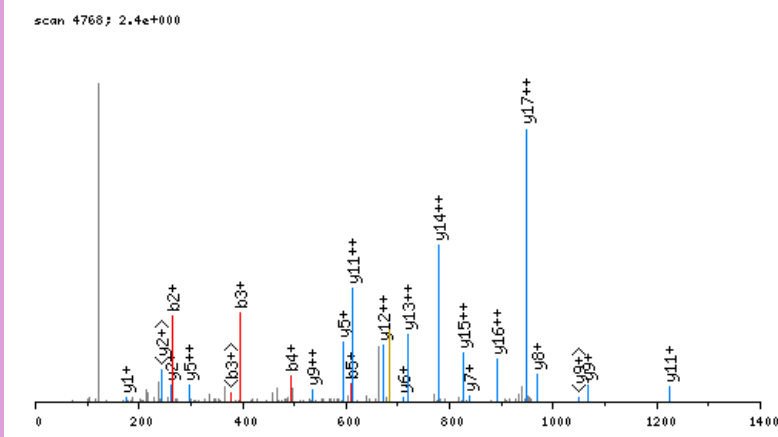

click image to zoom in; click top corners to zoom out [\[precursor±\]](#)

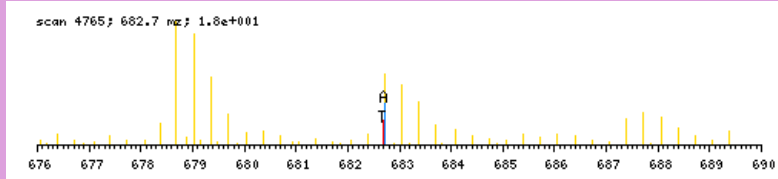

zoomed in precursor plot; T=theoretical m/z, A=acquired m/z

| b <sup>+</sup> | #  | AA # | y <sup>+</sup> | y <sup>2+</sup> |
|----------------|----|------|----------------|-----------------|
| 150.0978       | 1  | D 18 |                |                 |
| 265.1248       | 2  | D 17 | 1896.9251      | 948.9665        |
| 394.1674       | 3  | E 16 | 1781.8981      | 891.4530        |
| 493.2358       | 4  | V 15 | 1652.8556      | 826.9317        |
| 608.2627       | 5  | D 14 | 1553.7871      | 777.3975        |
| 707.3312       | 6  | V 13 | 1438.7602      | 719.8840        |
| 822.3581       | 7  | D 12 | 1339.6918      | 670.3498        |
| 879.3796       | 8  | G 11 | 1224.6648      | 612.8363        |
| 980.4272       | 9  | T 10 | 1167.6434      | 584.3256        |
| 1079.4956      | 10 | V 9  | 1066.5957      | 533.8018        |
| 1208.5382      | 11 | E 8  | 967.5273       | 484.2676        |
| 1337.5808      | 12 | E 7  | 838.4847       | 419.7463        |
| 1452.6078      | 13 | D 6  | 709.4421       | 355.2250        |
| 1565.6918      | 14 | L 5  | 594.4152       | 297.7115        |
| 1622.7133      | 15 | G 4  | 481.3311       | 241.1695        |
| 1784.8714      | 16 | K 3  | 424.3096       | 212.6587        |
| 1871.9034      | 17 | S 2  | 262.1515       | 131.5797        |
|                | 18 | R 1  | 175.1195       | 88.0637         |

N-term:+35.07 K(16):+162.16

DDLITDLLNEAKQR, MH+ 1699.9231, m/z 567.3125  
 L OS G26 P150811 220811-s1.06962.06962.3.dta

scan 6962; 1.9e+000

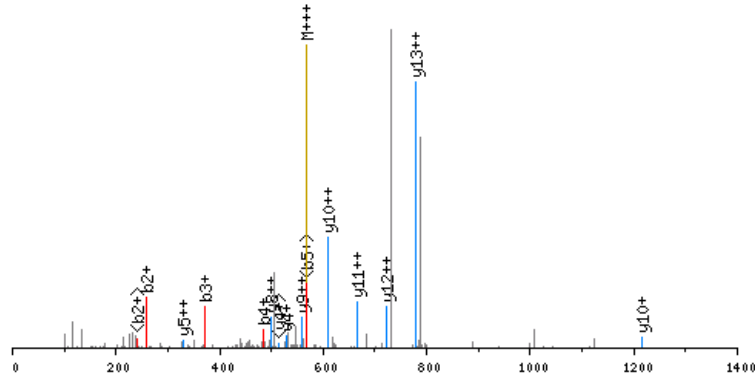

click image to zoom in; click top corners to zoom out [\[precursor±\]](#)

scan 6960; 567.3 m/z; 3.6e+000

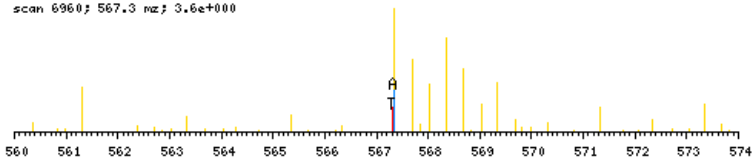

zoomed in precursor plot; T=theoretical m/z, A=acquired m/z

X-range:

-

MassTol: Y-zoom:

MassType:

AVG  MONO

Axis:

1  2

Label:

I  M  -

Ions:

a  +  2+  3+

b  +  2+  3+

c  +  2+  3+

x  +  2+  3+

y  +  2+  3+

z  +  2+  3+

hide H<sub>2</sub>O/NH<sub>3</sub>

zoom 112-122

GO

| b <sup>+</sup> | #  | AA # | y <sup>+</sup> | y <sup>2+</sup> |
|----------------|----|------|----------------|-----------------|
| 144.0660       | 1  | D    | 14             |                 |
| 259.0930       | 2  | D    | 13             | 1556.8648       |
| 372.1771       | 3  | L    | 12             | 1441.8379       |
| 485.2611       | 4  | I    | 11             | 1328.7538       |
| 586.3088       | 5  | T    | 10             | 1215.6698       |
| 701.3357       | 6  | D    | 9              | 1114.6221       |
| 814.4198       | 7  | L    | 8              | 999.5951        |
| 927.5039       | 8  | L    | 7              | 886.5111        |
| 1041.5468      | 9  | N    | 6              | 773.4270        |
| 1170.5894      | 10 | E    | 5              | 659.3841        |
| 1241.6265      | 11 | A    | 4              | 530.3415        |
| 1397.7528      | 12 | K    | 3              | 459.3044        |
| 1525.8114      | 13 | Q    | 2              | 303.1781        |
|                | 14 | R    | 1              | 175.1195        |

N-term:+29.04 K(12):+156.13

DDPHKTPASPVVHIR, MH+ 1737.0084, m/z 435.0076  
 H OS G28 P150811 220811-s1.02889.02889.4.dta

X-range:

-

MassTol: Y-zoom:

MassType:

AVG  MONO

Axis:

1  2

Label:

I  M  -

Ions:

a  +  2+  3+

b  +  2+  3+

c  +  2+  3+

x  +  2+  3+

y  +  2+  3+

z  +  2+  3+

hide H<sub>2</sub>O/NH<sub>3</sub>

zoom 112-122

GO

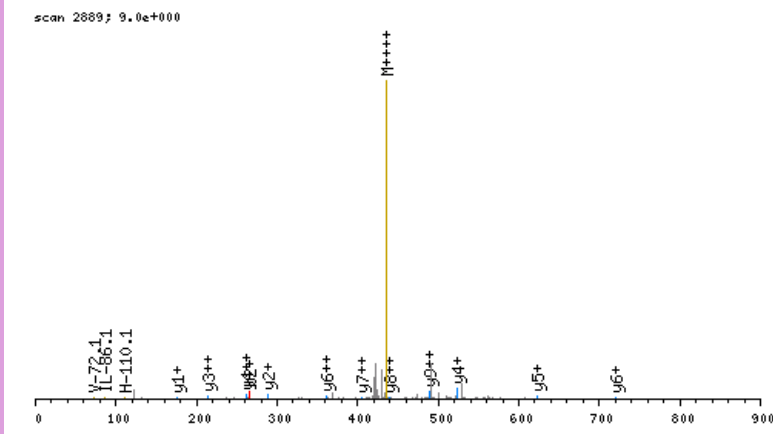

click image to zoom in; click top corners to zoom out [\[precursor±\]](#)

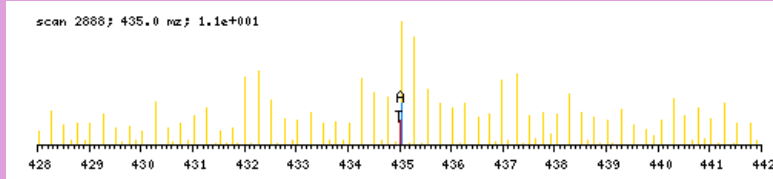

zoomed in precursor plot; T=theoretical m/z, A=acquired m/z

| b <sup>+</sup>  | #  | AA # | y <sup>+</sup> | y <sup>2+</sup>                 |
|-----------------|----|------|----------------|---------------------------------|
| 150.0978        | 1  | D    | 15             |                                 |
| <b>265.1248</b> | 2  | D    | 14             | 1587.9184 794.4631              |
| 362.1776        | 3  | P    | 13             | 1472.8914 736.9496              |
| 499.2365        | 4  | H    | 12             | 1375.8387 688.4232              |
| 661.3946        | 5  | K    | 11             | 1238.7798 619.8938              |
| 762.4422        | 6  | T    | 10             | 1076.6217 538.8147              |
| 859.4950        | 7  | P    | 9              | 975.5740 <b>488.2909</b>        |
| 930.5321        | 8  | A    | 8              | 878.5212 <b>439.7645</b>        |
| 1017.5641       | 9  | S    | 7              | 807.4841 <b>404.2460</b>        |
| 1114.6169       | 10 | P    | 6              | <b>720.4521</b> <b>360.7299</b> |
| 1213.6853       | 11 | V    | 5              | <b>623.3993</b> 312.2036        |
| 1312.7537       | 12 | V    | 4              | <b>524.3309</b> <b>262.6694</b> |
| 1449.8127       | 13 | H    | 3              | 425.2625 <b>213.1352</b>        |
| 1562.8967       | 14 | I    | 2              | <b>288.2036</b> 144.6057        |
|                 | 15 | R    | 1              | <b>175.1195</b> 88.0637         |

N-term:+35.07 K(5):+162.16

DDPSYVNIQNLDKAR, MH+ 1803.9241, m/z 601.9796  
 L OS G26 P150811 220811-s1.04612.04612.3.dta

X-range:

-

MassTol: Y-zoom:

MassType:

AVG  MONO

Axis:

1  2

Label:

I  M  -

Ions:

a  +  2+  3+

b  +  2+  3+

c  +  2+  3+

x  +  2+  3+

y  +  2+  3+

z  +  2+  3+

hide H<sub>2</sub>O/NH<sub>3</sub>

zoom 112-122

GO

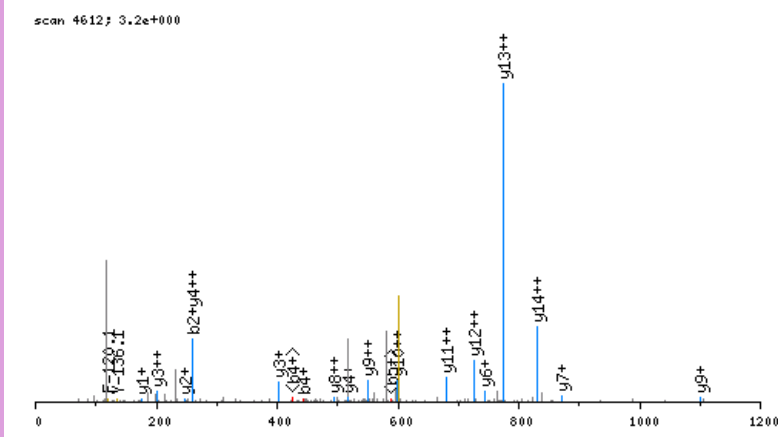

click image to zoom in; click top corners to zoom out [\[precursor±\]](#)

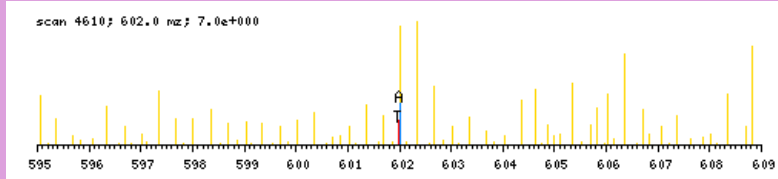

zoomed in precursor plot; T=theoretical m/z, A=acquired m/z

| b <sup>+</sup> | #  | AA # | y <sup>+</sup> | y <sup>2+</sup> |
|----------------|----|------|----------------|-----------------|
| 144.0660       | 1  | D 15 |                |                 |
| 259.0930       | 2  | D 14 | 1660.8659      | 830.9369        |
| 356.1458       | 3  | P 13 | 1545.8390      | 773.4234        |
| 443.1778       | 4  | S 12 | 1448.7862      | 724.8970        |
| 606.2411       | 5  | Y 11 | 1361.7542      | 681.3810        |
| 705.3095       | 6  | V 10 | 1198.6908      | 599.8493        |
| 819.3524       | 7  | N 9  | 1099.6224      | 550.3151        |
| 932.4365       | 8  | I 8  | 985.5795       | 493.2937        |
| 1060.4951      | 9  | Q 7  | 872.4954       | 436.7516        |
| 1174.5380      | 10 | N 6  | 744.4368       | 372.7223        |
| 1287.6221      | 11 | L 5  | 630.3939       | 315.7009        |
| 1402.6490      | 12 | D 4  | 517.3099       | 259.1588        |
| 1558.7753      | 13 | K 3  | 402.2829       | 201.6454        |
| 1629.8124      | 14 | A 2  | 246.1566       | 123.5822        |
|                | 15 | R 1  | 175.1195       | 88.0637         |

N-term:+29.04 K(13):+156.13

DDVDHPAAVSSPQR, MH+ 1521.7297, m/z 507.9148  
 L OS G26 P150811 220811-s1.02154.02154.3.dta

scan 2154; 1.4e+000

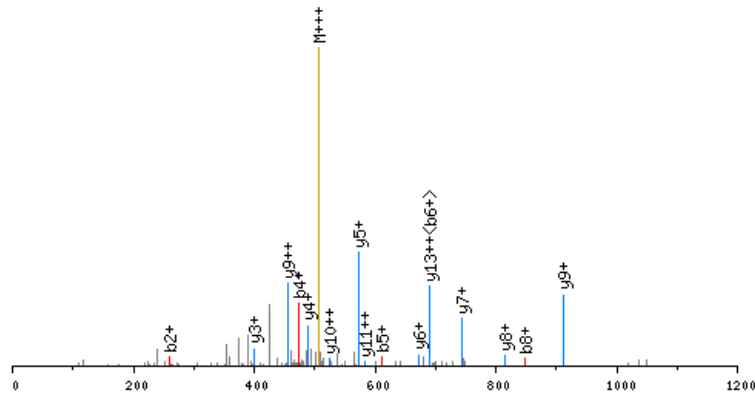

click image to zoom in; click top corners to zoom out [\[precursor±\]](#)

scan 2151; 507.9 m/z; 1.3e+000

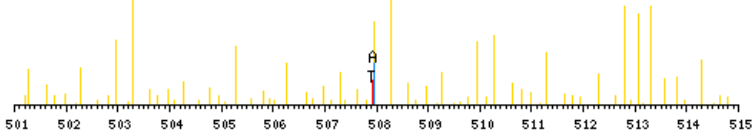

zoomed in precursor plot; T=theoretical m/z, A=acquired m/z

X-range:

-

MassTol: Y-zoom:

MassType:

AVG  MONO

Axis:

1  2

Label:

I  M  -

Ions:

a  +  2+  3+

b  +  2+  3+

c  +  2+  3+

x  +  2+  3+

y  +  2+  3+

z  +  2+  3+

hide H<sub>2</sub>O/NH<sub>3</sub>

zoom 112-122

GO

| b <sup>+</sup> | #  | AA # | y <sup>+</sup> | y <sup>2+</sup> |
|----------------|----|------|----------------|-----------------|
| 144.0660       | 1  | D 14 |                |                 |
| 259.0930       | 2  | D 13 | 1378.6715      | 689.8397        |
| 358.1614       | 3  | V 12 | 1263.6446      | 632.3262        |
| 473.1883       | 4  | D 11 | 1164.5762      | 582.7920        |
| 610.2473       | 5  | H 10 | 1049.5492      | 525.2785        |
| 707.3000       | 6  | P 9  | 912.4903       | 456.7491        |
| 778.3371       | 7  | A 8  | 815.4375       | 408.2227        |
| 849.3742       | 8  | A 7  | 744.4004       | 372.7041        |
| 948.4427       | 9  | V 6  | 673.3633       | 337.1856        |
| 1035.4747      | 10 | S 5  | 574.2949       | 287.6514        |
| 1122.5067      | 11 | S 4  | 487.2629       | 244.1353        |
| 1219.5595      | 12 | P 3  | 400.2308       | 200.6193        |
| 1347.6181      | 13 | Q 2  | 303.1781       | 152.0930        |
|                | 14 | R 1  | 175.1195       | 88.0637         |

N-term:+29.04



DEEAIGTIQEDYLR, MH+ 1679.8128, m/z 560.6091  
 L OS G24 P150811 220811-s1.04285.04285.3.dta

X-range:

-

MassTol: Y-zoom:

MassType:

AVG  MONO

Axis:

1  2

Label:

I  M  -

Ions:

a  +  2+  3+

b  +  2+  3+

c  +  2+  3+

x  +  2+  3+

y  +  2+  3+

z  +  2+  3+

hide H<sub>2</sub>O/NH<sub>3</sub>

zoom 112-122

GO

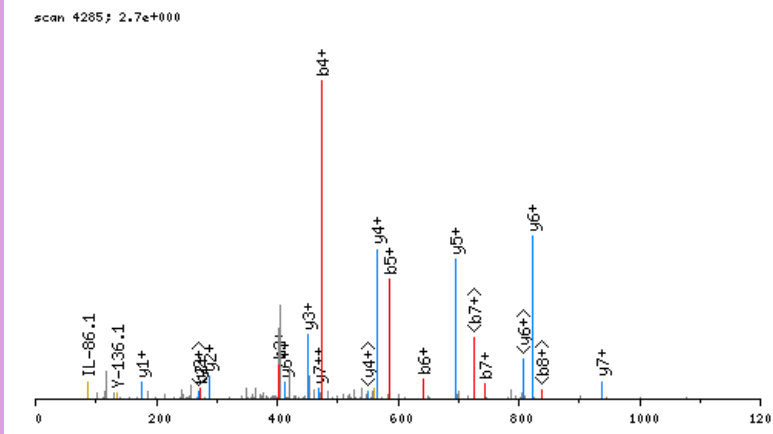

click image to zoom in; click top corners to zoom out [\[precursor±\]](#)

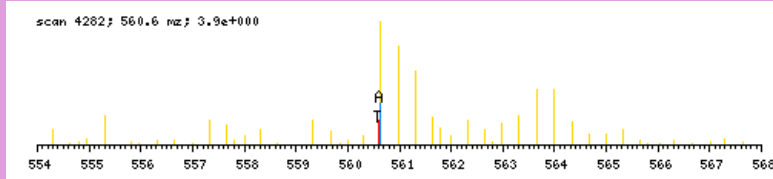

zoomed in precursor plot; T=theoretical m/z, A=acquired m/z

| b <sup>+</sup> | #  | AA # | y <sup>+</sup> | y <sup>2+</sup> |
|----------------|----|------|----------------|-----------------|
| 144.0660       | 1  | D 14 |                |                 |
| 273.1086       | 2  | E 13 | 1536.7546      | 768.8812        |
| 402.1512       | 3  | E 12 | 1407.7120      | 704.3599        |
| 473.1883       | 4  | A 11 | 1278.6694      | 639.8386        |
| 586.2724       | 5  | I 10 | 1207.6323      | 604.3201        |
| 643.2939       | 6  | G 9  | 1094.5482      | 547.7780        |
| 744.3415       | 7  | T 8  | 1037.5267      | 519.2673        |
| 857.4256       | 8  | I 7  | 936.4791       | 468.7434        |
| 985.4842       | 9  | Q 6  | 823.3950       | 412.2014        |
| 1114.5268      | 10 | E 5  | 695.3364       | 348.1721        |
| 1229.5537      | 11 | D 4  | 566.2938       | 283.6508        |
| 1392.6171      | 12 | Y 3  | 451.2669       | 226.1374        |
| 1505.7011      | 13 | L 2  | 288.2036       | 144.6057        |
|                | 14 | R 1  | 175.1195       | 88.0637         |

N-term:+29.04

DEEATGTTIQEDYLR, MH+ 1667.7764, m/z 556.5970  
 L OS G24 P150811 220811-s1.03558.03558.3.dta

scan 3558; 1.5e+000

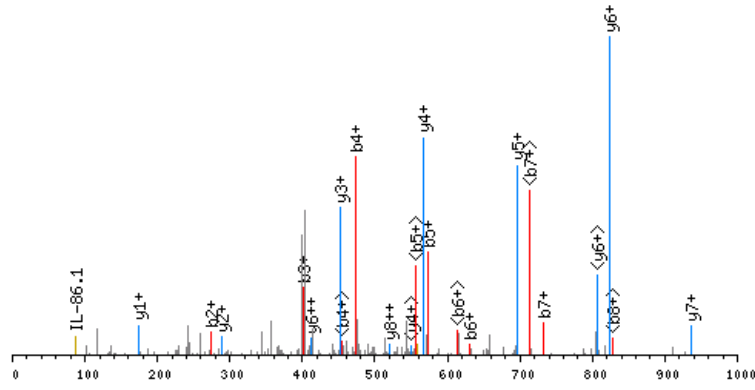

click image to zoom in; click top corners to zoom out [precursor±]

scan 3557; 556.6 m/z; 5.9e+000

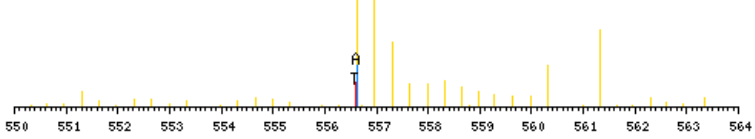

zoomed in precursor plot; T=theoretical m/z, A=acquired m/z

X-range:

-

MassTol: Y-zoom:

MassType:

AVG  MONO

Axis:

1  2

Label:

I  M  -

Ions:

a  +  2+  3+

b  +  2+  3+

c  +  2+  3+

x  +  2+  3+

y  +  2+  3+

z  +  2+  3+

hide H<sub>2</sub>O/NH<sub>3</sub>

zoom 112-122

GO

| b <sup>+</sup> | #  | AA # | y <sup>+</sup> | y <sup>2+</sup> |
|----------------|----|------|----------------|-----------------|
| 144.0660       | 1  | D 14 |                |                 |
| 273.1086       | 2  | E 13 | 1524.7182      | 762.8630        |
| 402.1512       | 3  | E 12 | 1395.6756      | 698.3417        |
| 473.1883       | 4  | A 11 | 1266.6330      | 633.8204        |
| 574.2360       | 5  | T 10 | 1195.5959      | 598.3019        |
| 631.2575       | 6  | G 9  | 1094.5482      | 547.7780        |
| 732.3052       | 7  | T 8  | 1037.5267      | 519.2673        |
| 845.3892       | 8  | I 7  | 936.4791       | 468.7434        |
| 973.4478       | 9  | Q 6  | 823.3950       | 412.2014        |
| 1102.4904      | 10 | E 5  | 695.3364       | 348.1721        |
| 1217.5173      | 11 | D 4  | 566.2938       | 283.6508        |
| 1380.5807      | 12 | Y 3  | 451.2669       | 226.1374        |
| 1493.6647      | 13 | L 2  | 288.2036       | 144.6057        |
|                | 14 | R 1  | 175.1195       | 88.0637         |

N-term:+29.04

DEEVHTGLGELLR, MH+ 1495.7756, m/z 499.2634  
 L OS G26 P150811 220811-s1.05259.05259.3.dta

scan 5259; 1.4e+001

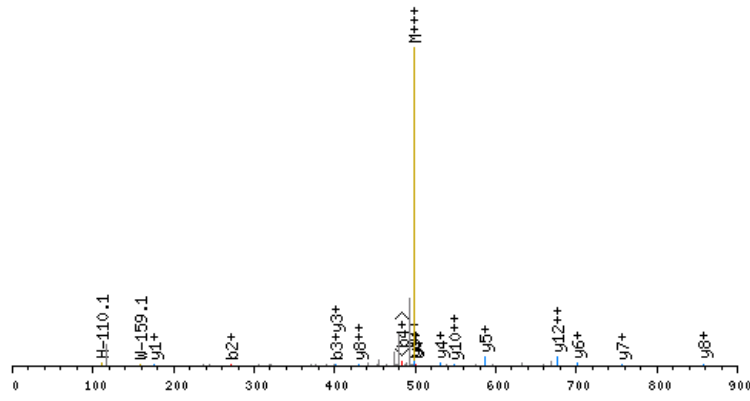

click image to zoom in; click top corners to zoom out [\[precursor±\]](#)

scan 5255; 499.3 m/z; 1.7e+001

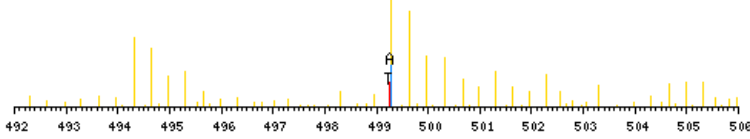

zoomed in precursor plot; T=theoretical m/z, A=acquired m/z

X-range:

-

MassTol: Y-zoom:

MassType:

AVG  MONO

Axis:

1  2

Label:

I  M  -

Ions:

a  +  2+  3+

b  +  2+  3+

c  +  2+  3+

x  +  2+  3+

y  +  2+  3+

z  +  2+  3+

hide H<sub>2</sub>O/NH<sub>3</sub>

zoom 112-122

GO

| b <sup>+</sup> | #  | AA # | y <sup>+</sup> | y <sup>2+</sup> |
|----------------|----|------|----------------|-----------------|
| 144.0660       | 1  | D 13 |                |                 |
| 273.1086       | 2  | E 12 | 1352.7174      | 676.8626        |
| 402.1512       | 3  | E 11 | 1223.6748      | 612.3413        |
| 501.2196       | 4  | V 10 | 1094.6322      | 547.8200        |
| 638.2786       | 5  | H 9  | 995.5638       | 498.2858        |
| 739.3262       | 6  | T 8  | 858.5049       | 429.7564        |
| 796.3477       | 7  | G 7  | 757.4572       | 379.2325        |
| 909.4318       | 8  | L 6  | 700.4357       | 350.7218        |
| 966.4532       | 9  | G 5  | 587.3517       | 294.1798        |
| 1095.4958      | 10 | E 4  | 530.3302       | 265.6690        |
| 1208.5799      | 11 | L 3  | 401.2876       | 201.1477        |
| 1321.6639      | 12 | L 2  | 288.2036       | 144.6057        |
|                | 13 | R 1  | 175.1195       | 88.0637         |

N-term:+29.04

DEKLDITLTLGVPEEHIKTR, MH+ 2397.4090, m/z 600.1077  
 H OS G28 P150811 220811-s1.07397.07397.4.dta

X-range:

-

MassTol: Y-zoom:

MassType:

AVG  MONO

Axis:

1  2

Label:

I  M  -

Ions:

a  +  2+  3+

b  +  2+  3+

c  +  2+  3+

x  +  2+  3+

y  +  2+  3+

z  +  2+  3+

hide H<sub>2</sub>O/NH<sub>3</sub>

zoom 112-122

GO

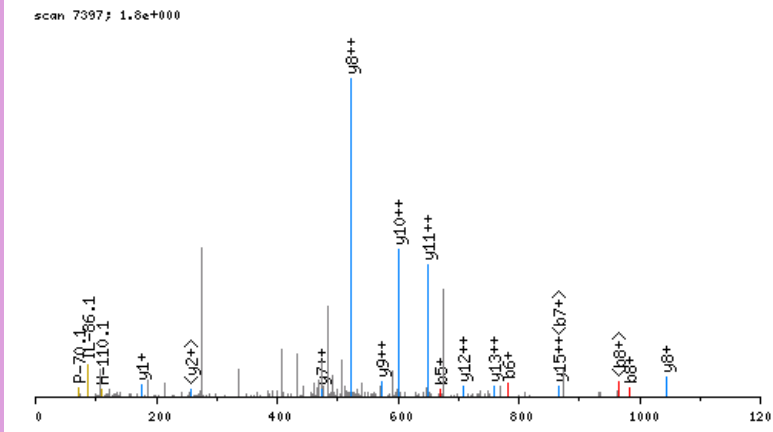

click image to zoom in; click top corners to zoom out [precursor±]

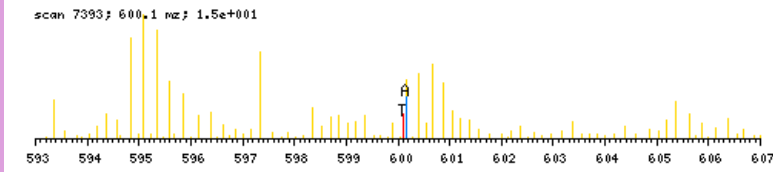

zoomed in precursor plot; T=theoretical m/z, A=acquired m/z

| b <sup>+</sup> | #  | AA | #  | y <sup>+</sup> | y <sup>2+</sup> |
|----------------|----|----|----|----------------|-----------------|
| 150.0978       | 1  | D  | 20 |                |                 |
| 279.1404       | 2  | E  | 19 | 2248.3189      | 1124.6634       |
| 441.2985       | 3  | K  | 18 | 2119.2764      | 1060.1421       |
| 554.3826       | 4  | L  | 17 | 1957.1183      | 979.0630        |
| 669.4095       | 5  | D  | 16 | 1844.0342      | 922.5210        |
| 782.4936       | 6  | I  | 15 | 1729.0072      | 865.0075        |
| 883.5413       | 7  | T  | 14 | 1615.9232      | 808.4655        |
| 984.5890       | 8  | T  | 13 | 1514.8755      | 757.9417        |
| 1097.6730      | 9  | L  | 12 | 1413.8278      | 707.4178        |
| 1198.7207      | 10 | T  | 11 | 1300.7438      | 650.8758        |
| 1255.7422      | 11 | G  | 10 | 1199.6961      | 600.3520        |
| 1354.8106      | 12 | V  | 9  | 1142.6746      | 571.8412        |
| 1451.8633      | 13 | P  | 8  | 1043.6062      | 522.3070        |
| 1580.9059      | 14 | E  | 7  | 946.5534       | 473.7806        |
| 1709.9485      | 15 | E  | 6  | 817.5108       | 409.2593        |
| 1847.0074      | 16 | H  | 5  | 688.4683       | 344.7380        |
| 1960.0915      | 17 | I  | 4  | 551.4093       | 276.2086        |
| 2122.2496      | 18 | K  | 3  | 438.3253       | 219.6666        |
| 2223.2973      | 19 | T  | 2  | 276.1672       | 138.5875        |
|                | 20 | R  | 1  | 175.1195       | 88.0637         |

N-term:+35.07 K(3):+162.16  
 K(18):+162.16

DEKSAGVSVPGMGPSPGR, MH+ 1893.0176, m/z 631.6774  
 H OS G26 P150811 220811-s1.03627.03627.3.dta

X-range:

-

MassTol: Y-zoom:

MassType:

AVG  MONO

Axis:

1  2

Label:

I  M  -

Ions:

a  +  2+  3+

b  +  2+  3+

c  +  2+  3+

x  +  2+  3+

y  +  2+  3+

z  +  2+  3+

hide H<sub>2</sub>O/NH<sub>3</sub>

zoom 112-122

GO

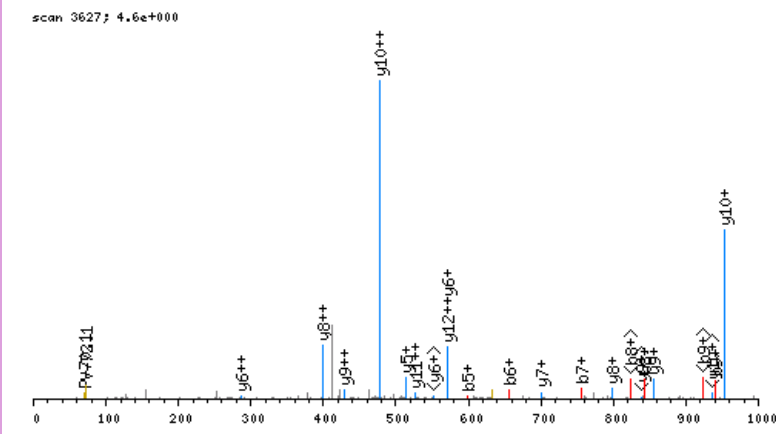

click image to zoom in; click top corners to zoom out [\[precursor±\]](#)

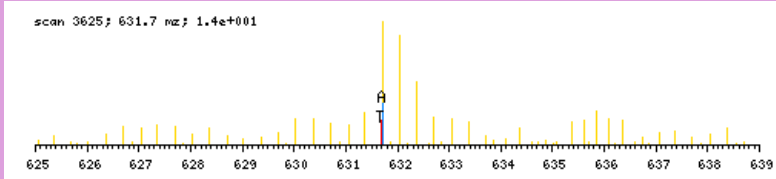

zoomed in precursor plot; T=theoretical m/z, A=acquired m/z

| b <sup>+</sup> | #  | AA # | y <sup>+</sup> | y <sup>2+</sup> |
|----------------|----|------|----------------|-----------------|
| 150.0978       | 1  | D 19 |                |                 |
| 279.1404       | 2  | E 18 | 1743.9276      | 872.4677        |
| 441.2985       | 3  | K 17 | 1614.8850      | 807.9464        |
| 528.3306       | 4  | S 16 | 1452.7269      | 726.8674        |
| 599.3677       | 5  | A 15 | 1365.6949      | 683.3514        |
| 656.3891       | 6  | G 14 | 1294.6578      | 647.8328        |
| 755.4576       | 7  | V 13 | 1237.6363      | 619.3221        |
| 842.4896       | 8  | S 12 | 1138.5679      | 569.7879        |
| 941.5580       | 9  | V 11 | 1051.5359      | 526.2718        |
| 1038.6108      | 10 | P 10 | 952.4675       | 476.7376        |
| 1095.6322      | 11 | G 9  | 855.4147       | 428.2113        |
| 1192.6850      | 12 | P 8  | 798.3932       | 399.7005        |
| 1323.7255      | 13 | M 7  | 701.3405       | 351.1741        |
| 1380.7469      | 14 | G 6  | 570.3000       | 285.6539        |
| 1477.7997      | 15 | P 5  | 513.2785       | 257.1432        |
| 1564.8317      | 16 | S 4  | 416.2258       | 208.6168        |
| 1621.8532      | 17 | G 3  | 329.1937       | 165.1008        |
| 1718.9060      | 18 | P 2  | 272.1723       | 136.5900        |
|                | 19 | R 1  | 175.1195       | 88.0637         |

N-term:+35.07 K(3):+162.16

DEPQSQWDKVKDFANVYVDAVKDSGR, MH+ 3132.6915, m/z 783.9283  
 H OS G28\_P150811\_220811-s1.09150.09150.4.dta

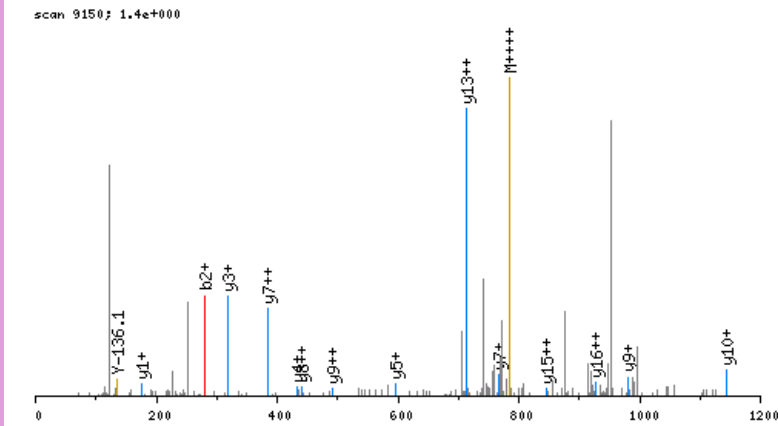

click image to zoom in; click top corners to zoom out [\[precursor±\]](#)

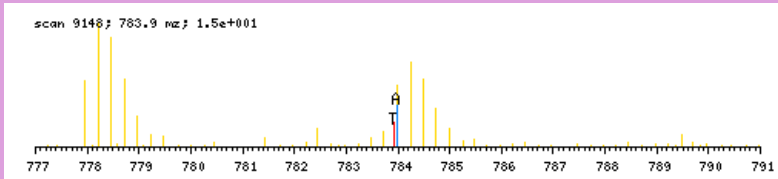

zoomed in precursor plot; T=theoretical m/z, A=acquired m/z

X-range:

-

MassTol: Y-zoom:

MassType:

AVG  MONO

Axis:

1  2

Label:

I  M  -

Ions:

a  +  2+  3+

b  +  2+  3+

c  +  2+  3+

x  +  2+  3+

y  +  2+  3+

z  +  2+  3+

hide H<sub>2</sub>O/NH<sub>3</sub>

zoom 112-122

GO

| b <sup>+</sup>  | #        | AA #        | y <sup>+</sup>   | y <sup>2+</sup> |
|-----------------|----------|-------------|------------------|-----------------|
| 150.0978        | 1        | D 26        |                  |                 |
| <b>279.1404</b> | <b>2</b> | <b>E 25</b> | 2983.6015        | 1492.3046       |
| 376.1932        | 3        | P 24        | 2854.5589        | 1427.7834       |
| 504.2518        | 4        | Q 23        | 2757.5061        | 1379.2570       |
| 591.2838        | 5        | S 22        | 2629.4475        | 1315.2277       |
| 719.3424        | 6        | Q 21        | 2542.4155        | 1271.7117       |
| 905.4217        | 7        | W 20        | 2414.3569        | 1207.6824       |
| 1020.4486       | 8        | D 19        | 2228.2776        | 1114.6427       |
| 1182.6067       | 9        | K 18        | 2113.2507        | 1057.1293       |
| 1281.6752       | 10       | V 17        | 1951.0926        | 976.0502        |
| 1443.8333       | 11       | K 16        | 1852.0242        | <b>926.5160</b> |
| 1558.8602       | 12       | D 15        | 1689.8661        | <b>845.4369</b> |
| 1705.9286       | 13       | F 14        | 1574.8391        | 787.9235        |
| 1776.9657       | 14       | A 13        | 1427.7707        | <b>714.3893</b> |
| 1891.0087       | 15       | N 12        | 1356.7336        | 678.8707        |
| 1990.0771       | 16       | V 11        | 1242.6907        | 621.8492        |
| 2153.1404       | 17       | Y 10        | <b>1143.6222</b> | 572.3150        |
| 2252.2088       | 18       | V 9         | <b>980.5589</b>  | <b>490.7834</b> |
| 2367.2358       | 19       | D 8         | 881.4905         | <b>441.2492</b> |
| 2438.2729       | 20       | A 7         | <b>766.4636</b>  | <b>383.7357</b> |
| 2537.3413       | 21       | V 6         | 695.4264         | 348.2171        |
| 2699.4994       | 22       | K 5         | <b>596.3580</b>  | 298.6829        |
| 2814.5263       | 23       | D 4         | <b>434.1999</b>  | 217.6039        |
| 2901.5584       | 24       | S 3         | <b>319.1730</b>  | 160.0904        |
| 2958.5798       | 25       | G 2         | 232.1410         | 116.5744        |
|                 | 26       | R 1         | <b>175.1195</b>  | 88.0637         |

N-term:+35.07 K(9):+162.16  
 K(11):+162.16 K(22):+162.16

DETEQALANER, MH+ 1303.6130, m/z 652.3101  
 L OS G25 P150811 220811-s1.02898.02898.2.dta

X-range:

-

MassTol: Y-zoom:

MassType:

AVG  MONO

Axis:

1  2

Label:

I  M  -

Ions:

a  +  2+  3+

b  +  2+  3+

c  +  2+  3+

x  +  2+  3+

y  +  2+  3+

z  +  2+  3+

hide H<sub>2</sub>O/NH<sub>3</sub>

zoom 112-122

GO

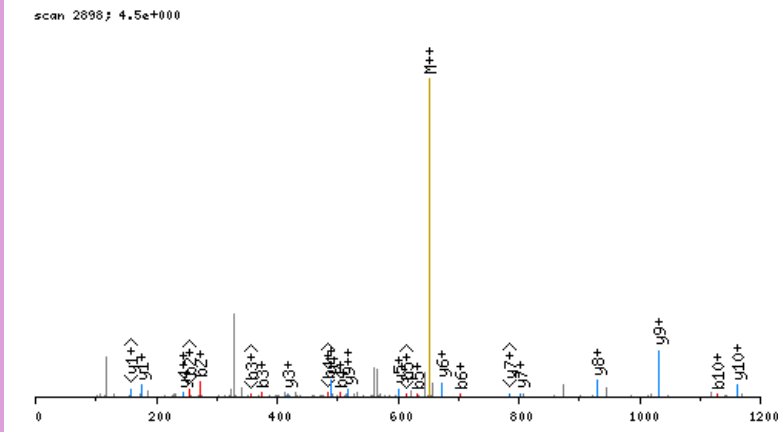

click image to zoom in; click top corners to zoom out [\[precursor±\]](#)

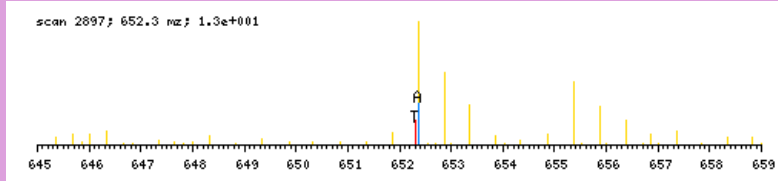

zoomed in precursor plot; T=theoretical m/z, A=acquired m/z

| b <sup>+</sup> | #  | AA # | y <sup>+</sup> | y <sup>2+</sup>    |
|----------------|----|------|----------------|--------------------|
| 144.0660       | 1  | D    | 11             |                    |
| 273.1086       | 2  | E    | 10             | 1160.5548 580.7813 |
| 374.1563       | 3  | T    | 9              | 1031.5122 516.2600 |
| 503.1989       | 4  | E    | 8              | 930.4645 465.7362  |
| 631.2575       | 5  | Q    | 7              | 801.4219 401.2149  |
| 702.2946       | 6  | A    | 6              | 673.3633 337.1856  |
| 815.3787       | 7  | L    | 5              | 602.3262 301.6670  |
| 886.4158       | 8  | A    | 4              | 489.2421 245.1250  |
| 1000.4587      | 9  | N    | 3              | 418.2050 209.6064  |
| 1129.5013      | 10 | E    | 2              | 304.1621 152.5850  |
|                | 11 | R    | 1              | 175.1195 88.0637   |

N-term:+29.04

DEVAPFLTAQATHLR, MH+ 1702.9340, m/z 426.4890  
 H OS G28 P150811 220811-s1.02669.02669.4.dta

X-range:

-

MassTol: Y-zoom:

MassType:

AVG  MONO

Axis:

1  2

Label:

I  M  -

Ions:

a  +  2+  3+

b  +  2+  3+

c  +  2+  3+

x  +  2+  3+

y  +  2+  3+

z  +  2+  3+

hide H<sub>2</sub>O/NH<sub>3</sub>

zoom 112-122

GO

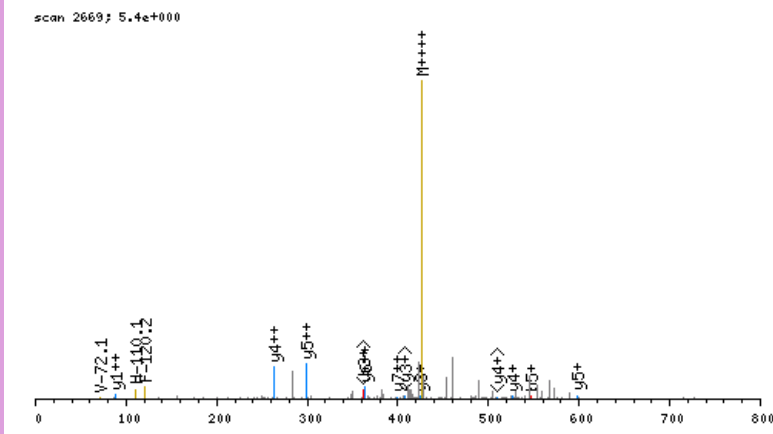

click image to zoom in; click top corners to zoom out [\[precursor±\]](#)

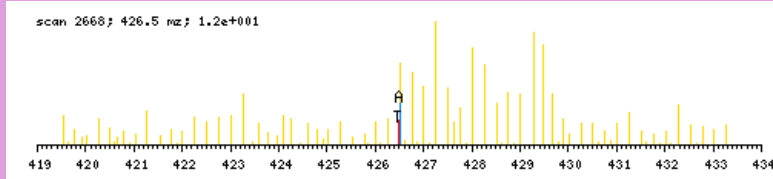

zoomed in precursor plot; T=theoretical m/z, A=acquired m/z

| b <sup>+</sup> | #  | AA # | y <sup>+</sup> | y <sup>2+</sup> |
|----------------|----|------|----------------|-----------------|
| 150.0978       | 1  | D 15 |                |                 |
| 279.1404       | 2  | E 14 | 1553.8440      | 777.4259        |
| 378.2089       | 3  | V 13 | 1424.8014      | 712.9046        |
| 449.2460       | 4  | A 12 | 1325.7330      | 663.3704        |
| 546.2987       | 5  | P 11 | 1254.6959      | 627.8519        |
| 693.3671       | 6  | F 10 | 1157.6431      | 579.3255        |
| 806.4512       | 7  | L 9  | 1010.5747      | 505.7913        |
| 907.4989       | 8  | T 8  | 897.4906       | 449.2492        |
| 978.5360       | 9  | A 7  | 796.4430       | 398.7254        |
| 1106.5946      | 10 | Q 6  | 725.4058       | 363.2068        |
| 1177.6317      | 11 | A 5  | 597.3473       | 299.1775        |
| 1278.6794      | 12 | T 4  | 526.3102       | 263.6590        |
| 1415.7383      | 13 | H 3  | 425.2625       | 213.1352        |
| 1528.8223      | 14 | L 2  | 288.2036       | 144.6057        |
|                | 15 | R 1  | 175.1195       | 88.0637         |

N-term:+35.07



DFCPMGLLAGDVAFPRR, MH+ 2013.0262, m/z 671.6802  
 H OS G24 P150811 220811-s1.03844.03844.3.dta

X-range:

-

MassTol: Y-zoom:

MassType:

AVG  MONO

Axis:

1  2

Label:

I  M  -

Ions:

a  +  2+  3+

b  +  2+  3+

c  +  2+  3+

x  +  2+  3+

y  +  2+  3+

z  +  2+  3+

hide H<sub>2</sub>O/NH<sub>3</sub>

zoom 112-122

GO

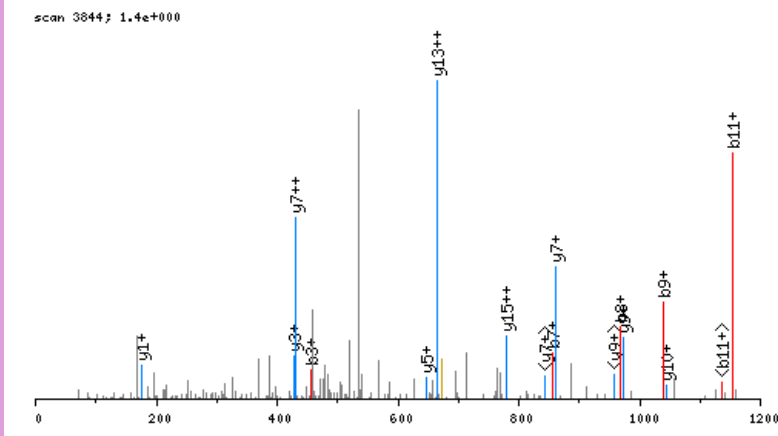

click image to zoom in; click top corners to zoom out [\[precursor±\]](#)

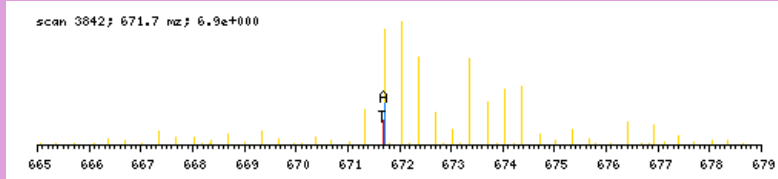

zoomed in precursor plot; T=theoretical m/z, A=acquired m/z

| b <sup>+</sup> | #  | AA # | y <sup>+</sup> | y <sup>2+</sup> |
|----------------|----|------|----------------|-----------------|
| 150.0978       | 1  | D 18 |                |                 |
| 297.1663       | 2  | F 17 | 1863.9362      | 932.4720        |
| 457.1969       | 3  | C 16 | 1716.8677      | 858.9378        |
| 554.2496       | 4  | P 15 | 1556.8371      | 778.9225        |
| 685.2901       | 5  | M 14 | 1459.7844      | 730.3961        |
| 742.3116       | 6  | G 13 | 1328.7439      | 664.8759        |
| 855.3956       | 7  | L 12 | 1271.7224      | 636.3651        |
| 968.4797       | 8  | L 11 | 1158.6384      | 579.8231        |
| 1039.5168      | 9  | A 10 | 1045.5543      | 523.2811        |
| 1096.5383      | 10 | G 9  | 974.5172       | 487.7625        |
| 1153.5597      | 11 | G 8  | 917.4957       | 459.2518        |
| 1268.5867      | 12 | D 7  | 860.4743       | 430.7410        |
| 1367.6551      | 13 | V 6  | 745.4473       | 373.2276        |
| 1438.6922      | 14 | A 5  | 646.3789       | 323.6934        |
| 1585.7606      | 15 | F 4  | 575.3418       | 288.1748        |
| 1682.8134      | 16 | P 3  | 428.2734       | 214.6406        |
| 1838.9145      | 17 | R 2  | 331.2206       | 166.1142        |
|                | 18 | R 1  | 175.1195       | 88.0637         |

N-term:+35.07 C(3):+160.03

DFNPDADAKALR, MH+ 1388.7174, m/z 463.5773  
 L OS G27 P150811 220811-s1.04555.04555.3.dta

X-range:

-

MassTol: Y-zoom:

MassType:

AVG  MONO

Axis:

1  2

Label:

I  M  -

Ions:

a  +  2+  3+

b  +  2+  3+

c  +  2+  3+

x  +  2+  3+

y  +  2+  3+

z  +  2+  3+

hide H<sub>2</sub>O/NH<sub>3</sub>

zoom 112-122

GO

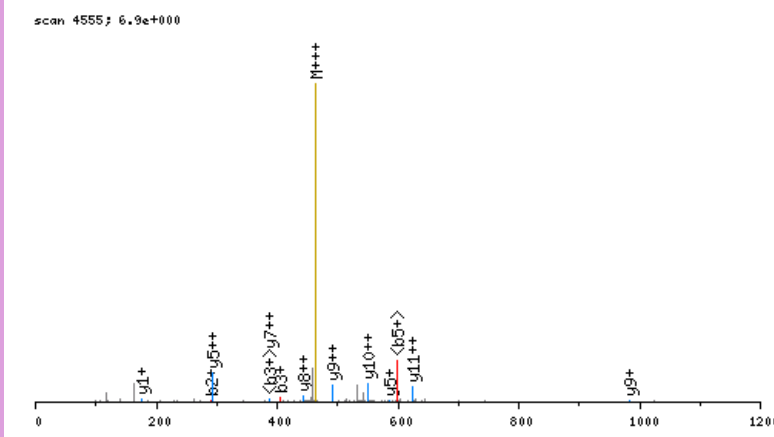

click image to zoom in; click top corners to zoom out [\[precursor±\]](#)

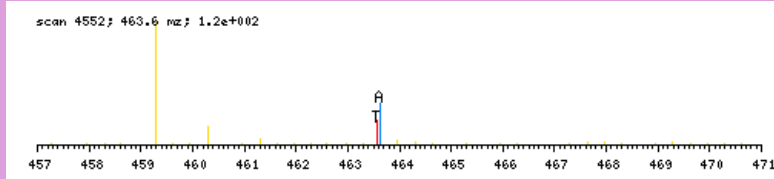

zoomed in precursor plot; T=theoretical m/z, A=acquired m/z

| b <sup>+</sup> | #  | AA # | y <sup>+</sup> | y <sup>2+</sup> |
|----------------|----|------|----------------|-----------------|
| 144.0660       | 1  | D 12 |                |                 |
| 291.1345       | 2  | F 11 | 1245.6592      | 623.3335        |
| 405.1774       | 3  | N 10 | 1098.5908      | 549.7993        |
| 502.2301       | 4  | P 9  | 984.5479       | 492.7778        |
| 617.2571       | 5  | D 8  | 887.4951       | 444.2515        |
| 688.2942       | 6  | A 7  | 772.4681       | 386.7380        |
| 803.3211       | 7  | D 6  | 701.4310       | 351.2194        |
| 874.3583       | 8  | A 5  | 586.4041       | 293.7060        |
| 1030.4846      | 9  | K 4  | 515.3670       | 258.1874        |
| 1101.5217      | 10 | A 3  | 359.2407       | 180.1243        |
| 1214.6057      | 11 | L 2  | 288.2036       | 144.6057        |
|                | 12 | R 1  | 175.1195       | 88.0637         |

N-term:+29.04 K(9):+156.13

DFSEGGQAVGAHR, MH+ 1301.6238, m/z 434.5461  
 L OS G27 P150811 220811-s1.02895.02895.3.dta

X-range:

-

MassTol: Y-zoom:

MassType:

AVG  MONO

Axis:

1  2

Label:

I  M  -

Ions:

a  +  2+  3+

b  +  2+  3+

c  +  2+  3+

x  +  2+  3+

y  +  2+  3+

z  +  2+  3+

hide H<sub>2</sub>O/NH<sub>3</sub>

zoom 112-122

GO

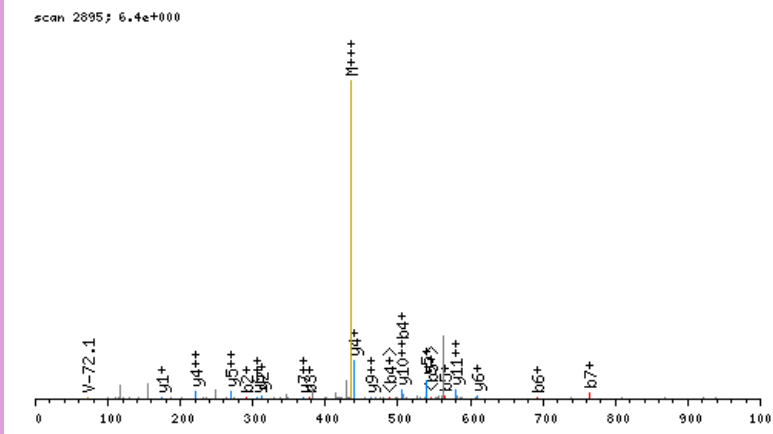

click image to zoom in; click top corners to zoom out [\[precursor±\]](#)

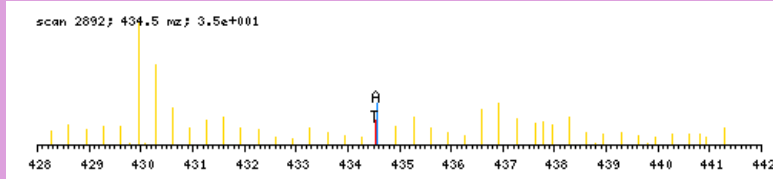

zoomed in precursor plot; T=theoretical m/z, A=acquired m/z

| b <sup>+</sup> | #  | AA # | y <sup>+</sup> | y <sup>2+</sup> |
|----------------|----|------|----------------|-----------------|
| 144.0660       | 1  | D 12 |                |                 |
| 291.1345       | 2  | F 11 | 1158.5656      | 579.7867        |
| 378.1665       | 3  | S 10 | 1011.4972      | 506.2525        |
| 507.2091       | 4  | E 9  | 924.4652       | 462.7365        |
| 564.2305       | 5  | G 8  | 795.4226       | 398.2152        |
| 692.2891       | 6  | Q 7  | 738.4011       | 369.7045        |
| 763.3262       | 7  | A 6  | 610.3425       | 305.6752        |
| 862.3946       | 8  | V 5  | 539.3054       | 270.1566        |
| 919.4161       | 9  | G 4  | 440.2370       | 220.6224        |
| 990.4532       | 10 | A 3  | 383.2155       | 192.1117        |
| 1127.5121      | 11 | H 2  | 312.1784       | 156.5931        |
|                | 12 | R 1  | 175.1195       | 88.0637         |

N-term:+29.04

DGDKLVVECVMKGVSTTR, MH+ 2078.0990, m/z 520.2802  
 L OS G27 P150811 220811-s1.06603.06603.4.dta

X-range:

-

MassTol: Y-zoom:

MassType:

AVG  MONO

Axis:

1  2

Label:

I  M  -

Ions:

a  +  2+  3+

b  +  2+  3+

c  +  2+  3+

x  +  2+  3+

y  +  2+  3+

z  +  2+  3+

hide H<sub>2</sub>O/NH<sub>3</sub>

zoom 112-122

GO

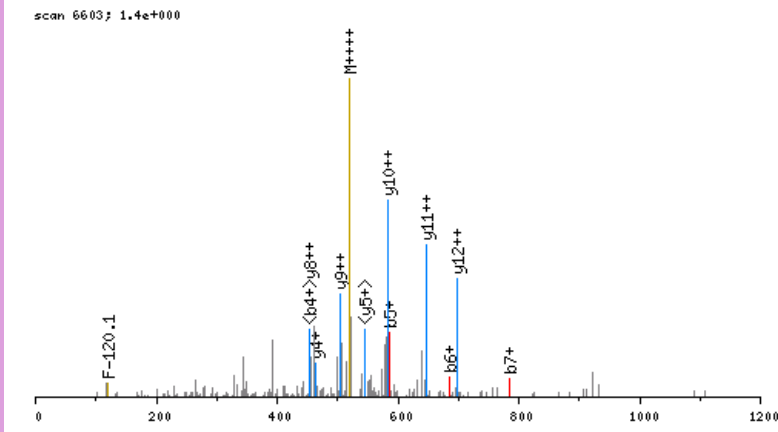

click image to zoom in; click top corners to zoom out [\[precursor±\]](#)

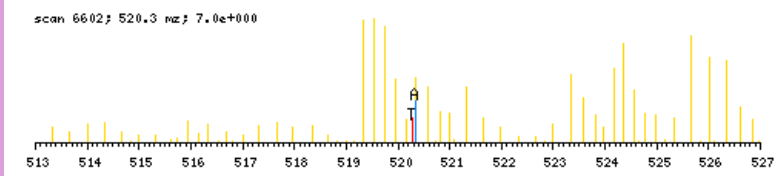

zoomed in precursor plot; T=theoretical m/z, A=acquired m/z

| b <sup>+</sup> | #  | AA | #  | y <sup>+</sup> | y <sup>2+</sup> |
|----------------|----|----|----|----------------|-----------------|
| 144.0660       | 1  | D  | 18 |                |                 |
| 201.0875       | 2  | G  | 17 | 1935.0408      | 968.0243        |
| 316.1144       | 3  | D  | 16 | 1878.0193      | 939.5136        |
| 472.2407       | 4  | K  | 15 | 1762.9923      | 882.0001        |
| 585.3248       | 5  | L  | 14 | 1606.8660      | 803.9369        |
| 684.3932       | 6  | V  | 13 | 1493.7820      | 747.3949        |
| 783.4616       | 7  | V  | 12 | 1394.7136      | 697.8607        |
| 912.5042       | 8  | E  | 11 | 1295.6452      | 648.3265        |
| 1072.5348      | 9  | C  | 10 | 1166.6026      | 583.8052        |
| 1171.6032      | 10 | V  | 9  | 1006.5720      | 503.7899        |
| 1302.6437      | 11 | M  | 8  | 907.5035       | 454.2557        |
| 1458.7700      | 12 | K  | 7  | 776.4631       | 388.7354        |
| 1515.7915      | 13 | G  | 6  | 620.3368       | 310.6723        |
| 1614.8599      | 14 | V  | 5  | 563.3153       | 282.1616        |
| 1715.9076      | 15 | T  | 4  | 464.2469       | 232.6274        |
| 1802.9396      | 16 | S  | 3  | 363.1992       | 182.1035        |
| 1903.9873      | 17 | T  | 2  | 276.1672       | 138.5875        |
|                | 18 | R  | 1  | 175.1195       | 88.0637         |

N-term: +29.04 K(4): +156.13  
 C(9): +160.03 K(12): +156.13

DGGGAGGGGAGGAGAAGAAGGPDFR, MH+ 1978.9179, m/z 660.3108  
 H OS G24 P150811 220811-s1.02813.02813.3.dta

scan 2813; 5.0e-001

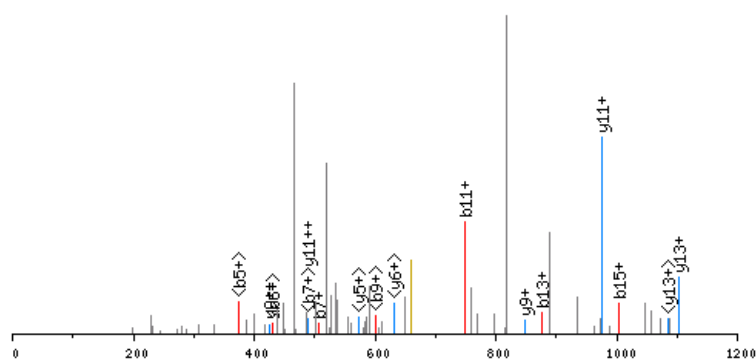

click image to zoom in; click top corners to zoom out [precursor±]

scan 2812; 660.3 m/z; 8.8e-001

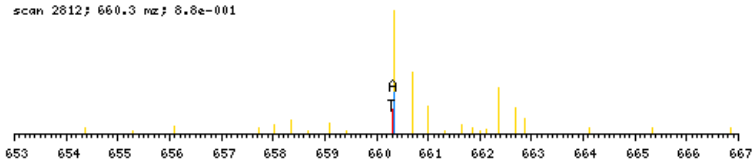

zoomed in precursor plot; T=theoretical m/z, A=acquired m/z

X-range:

-

MassTol: Y-zoom:

MassType:

AVG  MONO

Axis:

1  2

Label:

I  M  -

Ions:

a  +  2+  3+

b  +  2+  3+

c  +  2+  3+

x  +  2+  3+

y  +  2+  3+

z  +  2+  3+

hide H<sub>2</sub>O/NH<sub>3</sub>

zoom 112-122

GO

| b <sup>+</sup> | #  | AA # | y <sup>+</sup> | y <sup>2+</sup> |
|----------------|----|------|----------------|-----------------|
| 150.0978       | 1  | D 26 |                |                 |
| 207.1193       | 2  | G 25 | 1829.8279      | 915.4179        |
| 264.1408       | 3  | G 24 | 1772.8064      | 886.9071        |
| 321.1622       | 4  | G 23 | 1715.7850      | 858.3964        |
| 392.1993       | 5  | A 22 | 1658.7635      | 829.8857        |
| 449.2208       | 6  | G 21 | 1587.7264      | 794.3671        |
| 506.2423       | 7  | G 20 | 1530.7049      | 765.8564        |
| 563.2637       | 8  | G 19 | 1473.6835      | 737.3457        |
| 620.2852       | 9  | G 18 | 1416.6620      | 708.8349        |
| 691.3223       | 10 | A 17 | 1359.6406      | 680.3242        |
| 748.3438       | 11 | G 16 | 1288.6034      | 644.8056        |
| 805.3652       | 12 | G 15 | 1231.5820      | 616.2949        |
| 876.4024       | 13 | A 14 | 1174.5605      | 587.7842        |
| 933.4238       | 14 | G 13 | 1103.5234      | 552.2656        |
| 1004.4609      | 15 | A 12 | 1046.5019      | 523.7549        |
| 1075.4980      | 16 | A 11 | 975.4648       | 488.2363        |
| 1132.5195      | 17 | G 10 | 904.4277       | 452.7178        |
| 1203.5566      | 18 | A 9  | 847.4062       | 424.2070        |
| 1274.5937      | 19 | A 8  | 776.3691       | 388.6885        |
| 1331.6152      | 20 | G 7  | 705.3320       | 353.1699        |
| 1388.6367      | 21 | G 6  | 648.3105       | 324.6592        |
| 1445.6581      | 22 | G 5  | 591.2891       | 296.1485        |
| 1542.7109      | 23 | P 4  | 534.2676       | 267.6377        |
| 1657.7378      | 24 | D 3  | 437.2149       | 219.1113        |
| 1804.8063      | 25 | F 2  | 322.1879       | 161.5979        |
|                | 26 | R 1  | 175.1195       | 88.0637         |

N-term:+35.07

DGSFLELFKR, MH+ 1267.7051, m/z 423.2399  
 L OS G27 P150811 220811-s1.07244.07244.3.dta

X-range:

-

MassTol: Y-zoom:

MassType:

AVG  MONO

Axis:

1  2

Label:

I  M  -

Ions:

a  +  2+  3+

b  +  2+  3+

c  +  2+  3+

x  +  2+  3+

y  +  2+  3+

z  +  2+  3+

hide H<sub>2</sub>O/NH<sub>3</sub>

zoom 112-122

GO

scan 7244; 8.5e+000

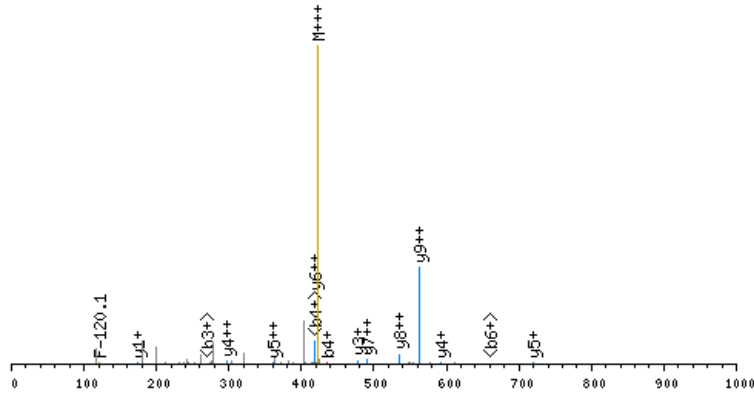

click image to zoom in; click top corners to zoom out [\[precursor±\]](#)

scan 7240; 423.2 m/z; 2.5e+000

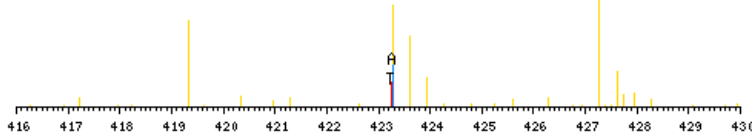

zoomed in precursor plot; T=theoretical m/z, A=acquired m/z

| b <sup>+</sup> | #  | AA # | y <sup>+</sup> | y <sup>2+</sup> |
|----------------|----|------|----------------|-----------------|
| 144.0660       | 1  | D 10 |                |                 |
| 201.0875       | 2  | G 9  | 1124.6468      | 562.8273        |
| 288.1195       | 3  | S 8  | 1067.6254      | 534.3166        |
| 435.1879       | 4  | F 7  | 980.5933       | 490.8006        |
| 548.2720       | 5  | L 6  | 833.5249       | 417.2664        |
| 677.3146       | 6  | E 5  | 720.4409       | 360.7243        |
| 790.3987       | 7  | L 4  | 591.3983       | 296.2031        |
| 937.4671       | 8  | F 3  | 478.3142       | 239.6610        |
| 1093.5934      | 9  | K 2  | 331.2458       | 166.1268        |
|                | 10 | R 1  | 175.1195       | 88.0637         |

N-term:+29.04 K(9):+156.13

DGTEASCGAVIQPR, MH+ 1488.7116, m/z 496.9087  
 L OS G24 P150811 220811-s1.02730.02730.3.dta

scan 2730; 1.0e+000

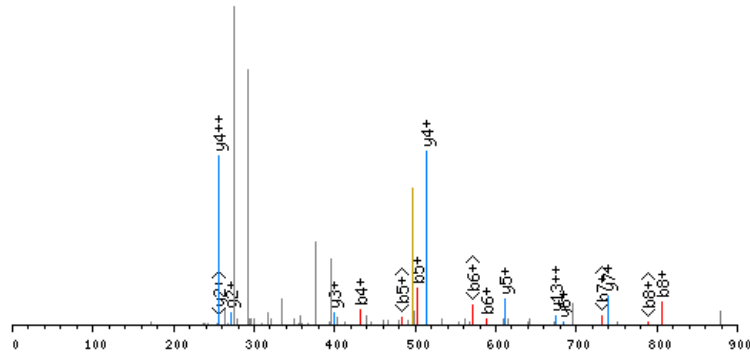

click image to zoom in; click top corners to zoom out [\[precursor±\]](#)

scan 2729; 496.9 m/z; 2.0e+000

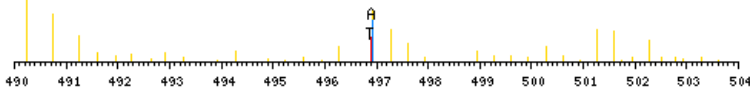

zoomed in precursor plot; T=theoretical m/z, A=acquired m/z

X-range:

-

MassTol: Y-zoom:

MassType:

AVG  MONO

Axis:

1  2

Label:

I  M  -

Ions:

a  +  2+  3+

b  +  2+  3+

c  +  2+  3+

x  +  2+  3+

y  +  2+  3+

z  +  2+  3+

hide H<sub>2</sub>O/NH<sub>3</sub>

zoom 112-122

GO

| b <sup>+</sup> | #  | AA # | y <sup>+</sup> | y <sup>2+</sup> |
|----------------|----|------|----------------|-----------------|
| 144.0660       | 1  | D 14 |                |                 |
| 201.0875       | 2  | G 13 | 1345.6534      | 673.3306        |
| 302.1352       | 3  | T 12 | 1288.6319      | 644.8199        |
| 431.1778       | 4  | E 11 | 1187.5842      | 594.2960        |
| 502.2149       | 5  | A 10 | 1058.5416      | 529.7747        |
| 589.2469       | 6  | S 9  | 987.5045       | 494.2562        |
| 749.2775       | 7  | C 8  | 900.4725       | 450.7402        |
| 806.2990       | 8  | G 7  | 740.4419       | 370.7249        |
| 877.3361       | 9  | A 6  | 683.4204       | 342.2141        |
| 976.4045       | 10 | V 5  | 612.3833       | 306.6956        |
| 1089.4886      | 11 | I 4  | 513.3149       | 257.1614        |
| 1217.5472      | 12 | Q 3  | 400.2308       | 200.6193        |
| 1314.5999      | 13 | P 2  | 272.1723       | 136.5900        |
|                | 14 | R 1  | 175.1195       | 88.0637         |

N-term:+29.04 C(7):+160.03

DHASIQMNVAEVDR, MH+ 1612.7753, m/z 538.2633  
 L OS G27 P150811 220811-s1.04506.04506.3.dta

scan 4506; 2.2e+000

X-range:

-

MassTol: Y-zoom:

MassType:

AVG  MONO

Axis:

1  2

Label:

I  M  -

Ions:

a  +  2+  3+

b  +  2+  3+

c  +  2+  3+

x  +  2+  3+

y  +  2+  3+

z  +  2+  3+

hide H<sub>2</sub>O/NH<sub>3</sub>

zoom 112-122

GO

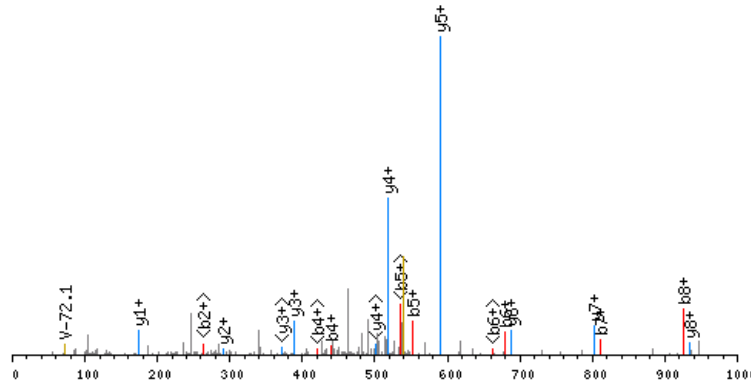

click image to zoom in; click top corners to zoom out [\[precursor±\]](#)

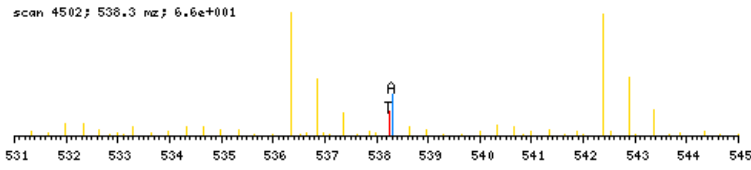

zoomed in precursor plot; T=theoretical m/z, A=acquired m/z

| b <sup>+</sup> | #  | AA # | y <sup>+</sup> | y <sup>2+</sup> |
|----------------|----|------|----------------|-----------------|
| 144.0660       | 1  | D 14 |                |                 |
| 281.1250       | 2  | H 13 | 1469.7171      | 735.3625        |
| 352.1621       | 3  | A 12 | 1332.6582      | 666.8330        |
| 439.1941       | 4  | S 11 | 1261.6211      | 631.3144        |
| 552.2782       | 5  | I 10 | 1174.5890      | 587.7984        |
| 680.3367       | 6  | Q 9  | 1061.5050      | 531.2564        |
| 811.3772       | 7  | M 8  | 933.4464       | 467.2271        |
| 925.4202       | 8  | N 7  | 802.4059       | 401.7069        |
| 1024.4886      | 9  | V 6  | 688.3630       | 344.6854        |
| 1095.5257      | 10 | A 5  | 589.2946       | 295.1512        |
| 1224.5683      | 11 | E 4  | 518.2575       | 259.6326        |
| 1323.6367      | 12 | V 3  | 389.2149       | 195.1113        |
| 1438.6636      | 13 | D 2  | 290.1464       | 145.5771        |
|                | 14 | R 1  | 175.1195       | 88.0637         |

N-term:+29.04



DIALAPMEAAKVR, MH+ 1440.8249, m/z 480.9465  
 L OS G26 P150811 220811-s1.04803.04803.3.dta

X-range:

-

MassTol: Y-zoom:

MassType:

AVG  MONO

Axis:

1  2

Label:

I  M  -

Ions:

a  +  2+  3+

b  +  2+  3+

c  +  2+  3+

x  +  2+  3+

y  +  2+  3+

z  +  2+  3+

hide H<sub>2</sub>O/NH<sub>3</sub>

zoom 112-122

GO

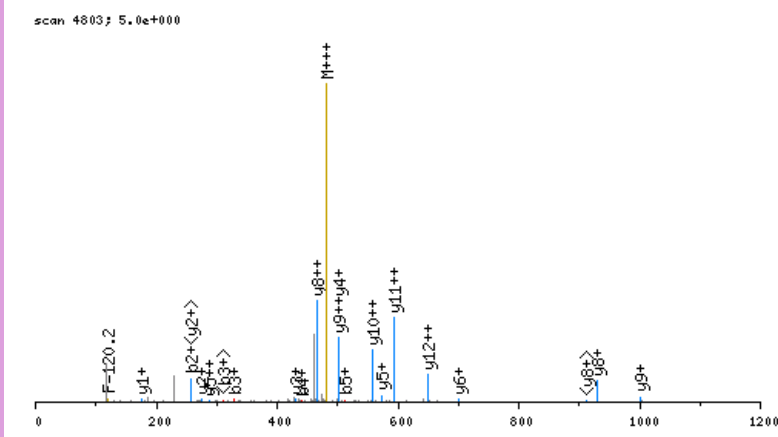

click image to zoom in; click top corners to zoom out [\[precursor±\]](#)

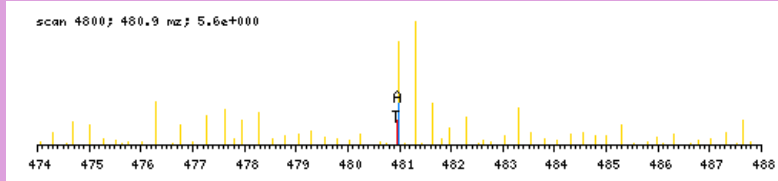

zoomed in precursor plot; T=theoretical m/z, A=acquired m/z

| b <sup>+</sup> | #  | AA # | y <sup>+</sup> | y <sup>2+</sup>    |
|----------------|----|------|----------------|--------------------|
| 144.0660       | 1  | D    | 13             |                    |
| 257.1501       | 2  | I    | 12             | 1297.7666 649.3872 |
| 328.1872       | 3  | A    | 11             | 1184.6826 592.8452 |
| 441.2713       | 4  | L    | 10             | 1113.6455 557.3266 |
| 512.3084       | 5  | A    | 9              | 1000.5614 500.7846 |
| 609.3612       | 6  | P    | 8              | 929.5243 465.2661  |
| 740.4016       | 7  | M    | 7              | 832.4715 416.7397  |
| 869.4442       | 8  | E    | 6              | 701.4310 351.2194  |
| 940.4814       | 9  | A    | 5              | 572.3884 286.6981  |
| 1011.5185      | 10 | A    | 4              | 501.3513 251.1796  |
| 1167.6448      | 11 | K    | 3              | 430.3142 215.6610  |
| 1266.7132      | 12 | V    | 2              | 274.1879 137.5979  |
|                | 13 | R    | 1              | 175.1195 88.0637   |

N-term:+29.04 K(11):+156.13

DIDLPEFDAR, MH+ 1319.6483, m/z 660.3278  
 L OS G24 P150811 220811-s1.04306.04306.2.dta

X-range:

-

MassTol: Y-zoom:

MassType:

AVG  MONO

Axis:

1  2

Label:

I  M  -

Ions:

a  +  2+  3+

b  +  2+  3+

c  +  2+  3+

x  +  2+  3+

y  +  2+  3+

z  +  2+  3+

hide H<sub>2</sub>O/NH<sub>3</sub>

zoom 112-122

GO

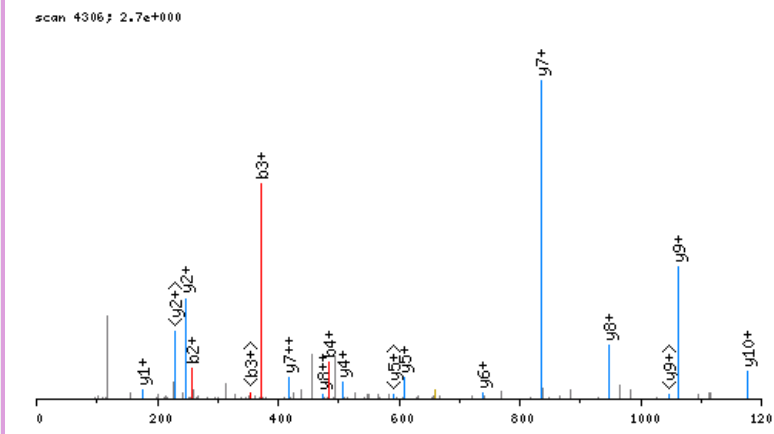

click image to zoom in; click top corners to zoom out [\[precursor±\]](#)

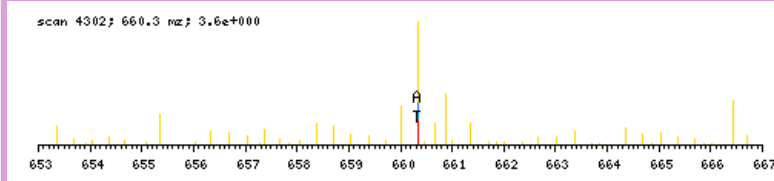

zoomed in precursor plot; T=theoretical m/z, A=acquired m/z

| b <sup>+</sup> | #  | AA # | y <sup>+</sup> | y <sup>2+</sup> |
|----------------|----|------|----------------|-----------------|
| 144.0660       | 1  | D 11 |                |                 |
| 257.1501       | 2  | I 10 | 1176.5901      | 588.7990        |
| 372.1771       | 3  | D 9  | 1063.5060      | 532.2569        |
| 485.2611       | 4  | L 8  | 948.4791       | 474.7434        |
| 582.3139       | 5  | P 7  | 835.3950       | 418.2014        |
| 711.3565       | 6  | E 6  | 738.3422       | 369.6750        |
| 812.4041       | 7  | T 5  | 609.2997       | 305.1537        |
| 959.4726       | 8  | F 4  | 508.2520       | 254.6299        |
| 1074.4995      | 9  | D 3  | 361.1836       | 181.0957        |
| 1145.5366      | 10 | A 2  | 246.1566       | 123.5822        |
|                | 11 | R 1  | 175.1195       | 88.0637         |

N-term:+29.04

DIKMTQSPSSMYASLGER, MH+ 2057.0047, m/z 686.3398  
 L OS G26 P150811 220811-s1.05172.05172.3.dta

X-range:

-

MassTol: Y-zoom:

MassType:

AVG  MONO

Axis:

1  2

Label:

I  M  -

Ions:

a  +  2+  3+

b  +  2+  3+

c  +  2+  3+

x  +  2+  3+

y  +  2+  3+

z  +  2+  3+

hide H<sub>2</sub>O/NH<sub>3</sub>

zoom 112-122

GO

scan 5172; 1.5e+000

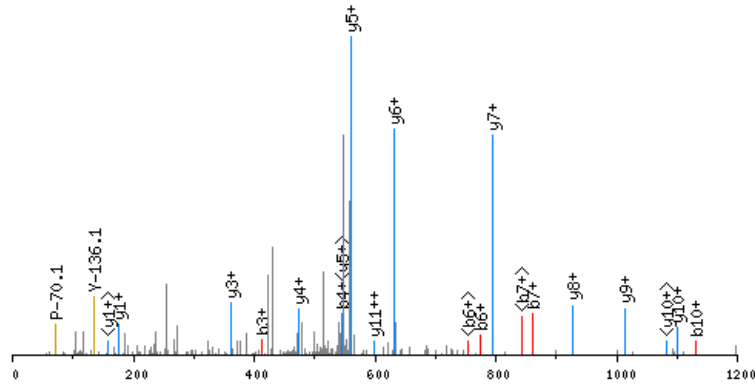

click image to zoom in; click top corners to zoom out [\[precursor±\]](#)

scan 5170; 686.3 m/z; 2.3e+001

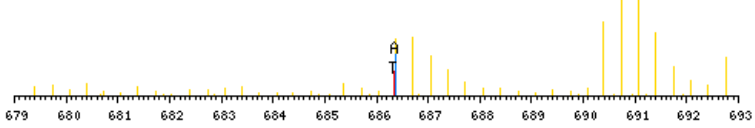

zoomed in precursor plot; T=theoretical m/z, A=acquired m/z

| b <sup>+</sup> | #  | AA # | y <sup>+</sup> | y <sup>2+</sup> |
|----------------|----|------|----------------|-----------------|
| 144.0660       | 1  | D 18 |                |                 |
| 257.1501       | 2  | I 17 | 1913.9465      | 957.4772        |
| 413.2764       | 3  | K 16 | 1800.8625      | 900.9351        |
| 544.3169       | 4  | M 15 | 1644.7362      | 822.8720        |
| 645.3646       | 5  | T 14 | 1513.6957      | 757.3518        |
| 773.4231       | 6  | Q 13 | 1412.6480      | 706.8279        |
| 860.4552       | 7  | S 12 | 1284.5894      | 642.7986        |
| 957.5079       | 8  | P 11 | 1197.5574      | 599.2826        |
| 1044.5400      | 9  | S 10 | 1100.5046      | 550.7562        |
| 1131.5720      | 10 | S 9  | 1013.4726      | 507.2402        |
| 1262.6125      | 11 | M 8  | 926.4406       | 463.7242        |
| 1425.6758      | 12 | Y 7  | 795.4001       | 398.2040        |
| 1496.7129      | 13 | A 6  | 632.3368       | 316.6723        |
| 1583.7450      | 14 | S 5  | 561.2997       | 281.1537        |
| 1696.8290      | 15 | L 4  | 474.2676       | 237.6377        |
| 1753.8505      | 16 | G 3  | 361.1836       | 181.0957        |
| 1882.8931      | 17 | E 2  | 304.1621       | 152.5850        |
|                | 18 | R 1  | 175.1195       | 88.0637         |

N-term:+29.04 K(3):+156.13

DILLTQSPAILSVSPGER, MH+ 1924.0755, m/z 642.0300  
 L OS G24 P150811 220811-s1.04826.04826.3.dta

X-range:

-

MassTol: Y-zoom:

MassType:

AVG  MONO

Axis:

1  2

Label:

I  M  -

Ions:

a  +  2+  3+

b  +  2+  3+

c  +  2+  3+

x  +  2+  3+

y  +  2+  3+

z  +  2+  3+

hide H<sub>2</sub>O/NH<sub>3</sub>

zoom 112-122

GO

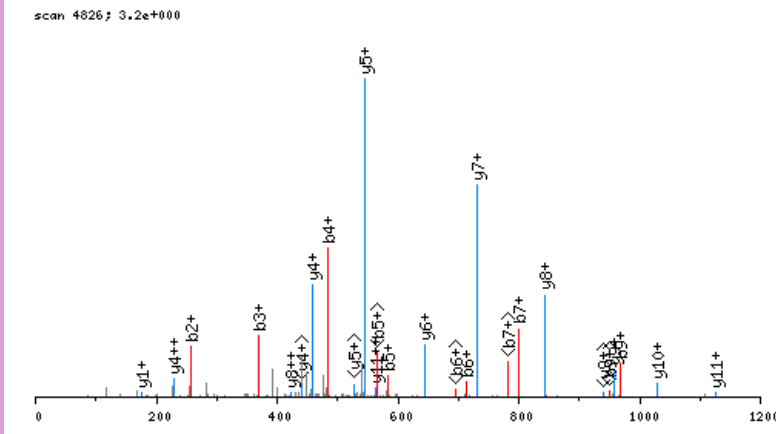

click image to zoom in; click top corners to zoom out [\[precursor±\]](#)

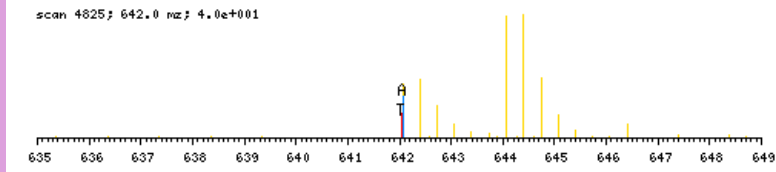

zoomed in precursor plot; T=theoretical m/z, A=acquired m/z

| b <sup>+</sup> | #  | AA # | y <sup>+</sup> | y <sup>2+</sup> |
|----------------|----|------|----------------|-----------------|
| 144.0660       | 1  | D 18 |                |                 |
| 257.1501       | 2  | I 17 | 1781.0173      | 891.0125        |
| 370.2342       | 3  | L 16 | 1667.9332      | 834.4705        |
| 483.3182       | 4  | L 15 | 1554.8491      | 777.9285        |
| 584.3659       | 5  | T 14 | 1441.7651      | 721.3865        |
| 712.4245       | 6  | Q 13 | 1340.7174      | 670.8626        |
| 799.4565       | 7  | S 12 | 1212.6588      | 606.8333        |
| 896.5093       | 8  | P 11 | 1125.6268      | 563.3173        |
| 967.5464       | 9  | A 10 | 1028.5740      | 514.7909        |
| 1080.6305      | 10 | I 9  | 957.5369       | 479.2724        |
| 1193.7145      | 11 | L 8  | 844.4529       | 422.7303        |
| 1280.7466      | 12 | S 7  | 731.3688       | 366.1883        |
| 1379.8150      | 13 | V 6  | 644.3368       | 322.6723        |
| 1466.8470      | 14 | S 5  | 545.2683       | 273.1381        |
| 1563.8998      | 15 | P 4  | 458.2363       | 229.6221        |
| 1620.9212      | 16 | G 3  | 361.1836       | 181.0957        |
| 1749.9638      | 17 | E 2  | 304.1621       | 152.5850        |
|                | 18 | R 1  | 175.1195       | 88.0637         |

N-term:+29.04

DIQEGADMLMVKPGLPYLDMVR, MH+ 2547.3025, m/z 637.5811  
 L OS G26 P150811 220811-s1.02086.02086.4.dta

scan 2086; 1.8e+000

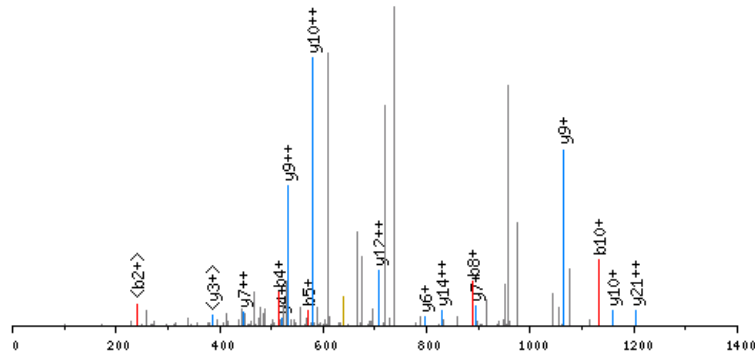

click image to zoom in; click top corners to zoom out [precursor±]

scan 2084; 637.6 mz; 3.2e+000

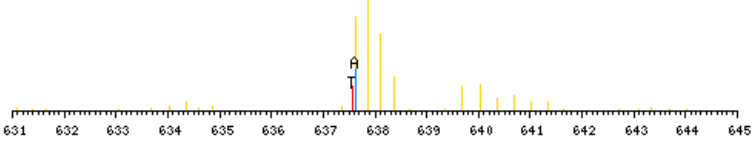

zoomed in precursor plot; T=theoretical m/z, A=acquired m/z

X-range:

-

MassTol: Y-zoom:

MassType:

AVG  MONO

Axis:

1  2

Label:

I  M  -

Ions:

a  +  2+  3+

b  +  2+  3+

c  +  2+  3+

x  +  2+  3+

y  +  2+  3+

z  +  2+  3+

hide H<sub>2</sub>O/NH<sub>3</sub>

zoom 112-122

GO

| b <sup>+</sup> | #  | AA # | y <sup>+</sup> | y <sup>2+</sup> |
|----------------|----|------|----------------|-----------------|
| 144.0660       | 1  | D 22 |                |                 |
| 257.1501       | 2  | I 21 | 2404.2443      | 1202.6261       |
| 385.2087       | 3  | Q 20 | 2291.1602      | 1146.0840       |
| 514.2513       | 4  | E 19 | 2163.1017      | 1082.0547       |
| 571.2727       | 5  | G 18 | 2034.0591      | 1017.5334       |
| 642.3099       | 6  | A 17 | 1977.0376      | 989.0227        |
| 757.3368       | 7  | D 16 | 1906.0005      | 953.5042        |
| 888.3773       | 8  | M 15 | 1790.9735      | 895.9907        |
| 1001.4613      | 9  | L 14 | 1659.9331      | 830.4704        |
| 1132.5018      | 10 | M 13 | 1546.8490      | 773.9284        |
| 1231.5702      | 11 | V 12 | 1415.8085      | 708.4082        |
| 1387.6965      | 12 | K 11 | 1316.7401      | 658.8740        |
| 1484.7493      | 13 | P 10 | 1160.6138      | 580.8108        |
| 1541.7708      | 14 | G 9  | 1063.5610      | 532.2844        |
| 1654.8548      | 15 | L 8  | 1006.5396      | 503.7737        |
| 1751.9076      | 16 | P 7  | 893.4555       | 447.2317        |
| 1914.9709      | 17 | Y 6  | 796.4027       | 398.7053        |
| 2028.0550      | 18 | L 5  | 633.3394       | 317.1736        |
| 2143.0819      | 19 | D 4  | 520.2553       | 260.6316        |
| 2274.1224      | 20 | M 3  | 405.2284       | 203.1181        |
| 2373.1908      | 21 | V 2  | 274.1879       | 137.5979        |
|                | 22 | R 1  | 175.1195       | 88.0637         |

N-term:+29.04 K(12):+156.13

DIQMTQSPSSLSASLGER, MH+ 1934.9493, m/z 645.6546  
 L OS G24 P150811 220811-s1.04033.04033.3.dta

X-range:

-

MassTol: Y-zoom:

MassType:

AVG  MONO

Axis:

1  2

Label:

I  M  -

Ions:

a  +  2+  3+

b  +  2+  3+

c  +  2+  3+

x  +  2+  3+

y  +  2+  3+

z  +  2+  3+

hide H<sub>2</sub>O/NH<sub>3</sub>

zoom 112-122

GO

scan 4033; 1.6e+000

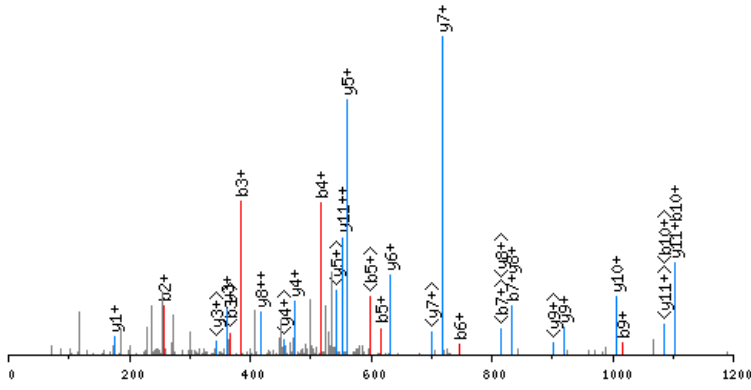

click image to zoom in; click top corners to zoom out [\[precursor±\]](#)

scan 4032; 645.7 m/z; 2.1e+001

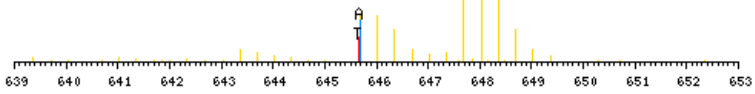

zoomed in precursor plot; T=theoretical m/z, A=acquired m/z

| b <sup>+</sup> | #  | AA # | y <sup>+</sup> | y <sup>2+</sup> |
|----------------|----|------|----------------|-----------------|
| 144.0660       | 1  | D 18 |                |                 |
| 257.1501       | 2  | I 17 | 1791.8911      | 896.4495        |
| 385.2087       | 3  | Q 16 | 1678.8070      | 839.9074        |
| 516.2492       | 4  | M 15 | 1550.7484      | 775.8781        |
| 617.2968       | 5  | T 14 | 1419.7080      | 710.3579        |
| 745.3554       | 6  | Q 13 | 1318.6603      | 659.8341        |
| 832.3875       | 7  | S 12 | 1190.6017      | 595.8048        |
| 929.4402       | 8  | P 11 | 1103.5697      | 552.2888        |
| 1016.4722      | 9  | S 10 | 1006.5169      | 503.7624        |
| 1103.5043      | 10 | S 9  | 919.4849       | 460.2464        |
| 1216.5883      | 11 | L 8  | 832.4529       | 416.7303        |
| 1303.6204      | 12 | S 7  | 719.3688       | 360.1883        |
| 1374.6575      | 13 | A 6  | 632.3368       | 316.6723        |
| 1461.6895      | 14 | S 5  | 561.2997       | 281.1537        |
| 1574.7736      | 15 | L 4  | 474.2676       | 237.6377        |
| 1631.7950      | 16 | G 3  | 361.1836       | 181.0957        |
| 1760.8376      | 17 | E 2  | 304.1621       | 152.5850        |
|                | 18 | R 1  | 175.1195       | 88.0637         |

N-term:+29.04

DISMEACCTDGNQMANQHR, MH+ 2265.9108, m/z 567.2332  
 L OS G26 P150811 220811-s1.03123.03123.4.dta

X-range:

-

MassTol: Y-zoom:

MassType:

AVG  MONO

Axis:

1  2

Label:

I  M  -

Ions:

a  +  2+  3+

b  +  2+  3+

c  +  2+  3+

x  +  2+  3+

y  +  2+  3+

z  +  2+  3+

hide H<sub>2</sub>O/NH<sub>3</sub>

zoom 112-122

GO

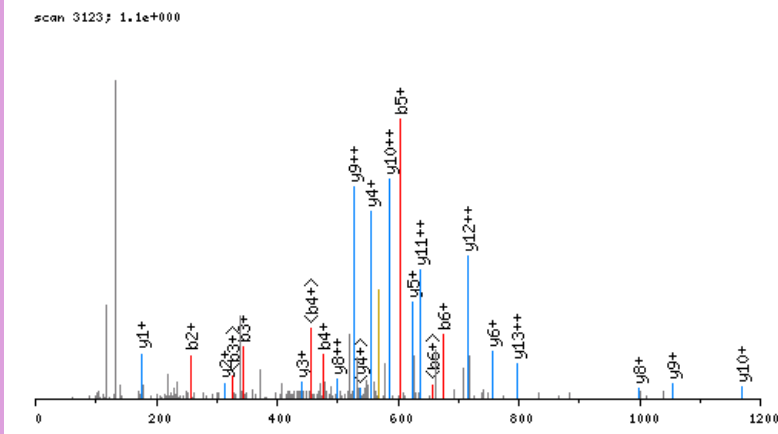

click image to zoom in; click top corners to zoom out [\[precursor±\]](#)

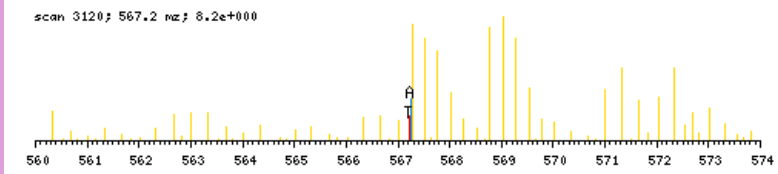

zoomed in precursor plot; T=theoretical m/z, A=acquired m/z

| b <sup>+</sup> | #  | AA | #  | y <sup>+</sup> | y <sup>2+</sup> |
|----------------|----|----|----|----------------|-----------------|
| 144.0660       | 1  | D  | 19 |                |                 |
| 257.1501       | 2  | I  | 18 | 2122.8526      | 1061.9302       |
| 344.1821       | 3  | S  | 17 | 2009.7685      | 1005.3882       |
| 475.2226       | 4  | M  | 16 | 1922.7365      | 961.8722        |
| 604.2652       | 5  | E  | 15 | 1791.6960      | 896.3519        |
| 675.3023       | 6  | A  | 14 | 1662.6534      | 831.8306        |
| 835.3329       | 7  | C  | 13 | 1591.6163      | 796.3121        |
| 995.3635       | 8  | C  | 12 | 1431.5857      | 716.2968        |
| 1096.4112      | 9  | T  | 11 | 1271.5551      | 636.2815        |
| 1211.4381      | 10 | D  | 10 | 1170.5074      | 585.7576        |
| 1268.4596      | 11 | G  | 9  | 1055.4805      | 528.2442        |
| 1382.5025      | 12 | N  | 8  | 998.4590       | 499.7334        |
| 1510.5611      | 13 | Q  | 7  | 884.4161       | 442.7120        |
| 1641.6016      | 14 | M  | 6  | 756.3575       | 378.6827        |
| 1712.6387      | 15 | A  | 5  | 625.3170       | 313.1624        |
| 1826.6816      | 16 | N  | 4  | 554.2799       | 277.6439        |
| 1954.7402      | 17 | Q  | 3  | 440.2370       | 220.6224        |
| 2091.7991      | 18 | H  | 2  | 312.1784       | 156.5931        |
|                | 19 | R  | 1  | 175.1195       | 88.0637         |

N-term:+29.04 C(7):+160.03  
 C(8):+160.03

DITDGNSEHLKR, MH+ 1440.7447, m/z 480.9197  
 L OS G28 P150811 220811-s1.02272.02272.3.dta

scan 2272; 6.6e+000

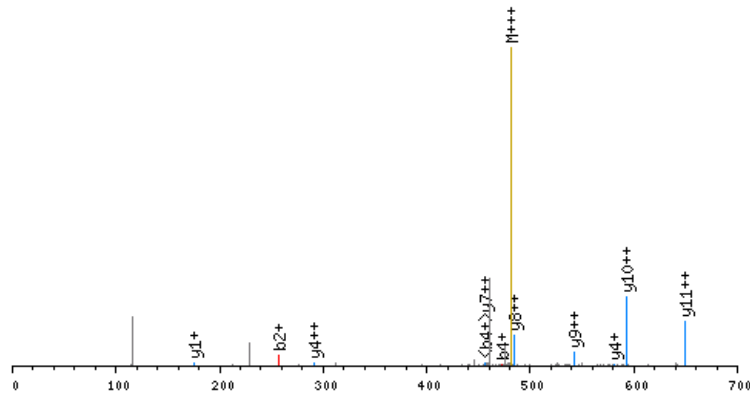

click image to zoom in; click top corners to zoom out [\[precursor±\]](#)

scan 2268; 480.9 m/z; 9.8e+000

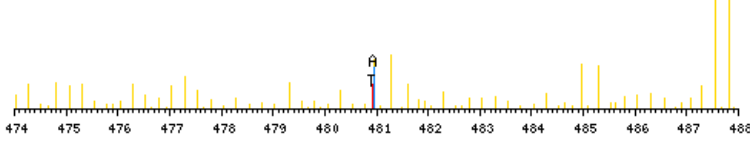

zoomed in precursor plot; T=theoretical m/z, A=acquired m/z

X-range:

-

MassTol: Y-zoom:

MassType:

AVG  MONO

Axis:

1  2

Label:

I  M  -

Ions:

a  +  2+  3+

b  +  2+  3+

c  +  2+  3+

x  +  2+  3+

y  +  2+  3+

z  +  2+  3+

hide H<sub>2</sub>O/NH<sub>3</sub>

zoom 112-122

GO

| b <sup>+</sup> | #  | AA | #  | y <sup>+</sup> | y <sup>2+</sup> |
|----------------|----|----|----|----------------|-----------------|
| 144.0660       | 1  | D  | 12 |                |                 |
| 257.1501       | 2  | I  | 11 | 1297.6865      | 649.3472        |
| 358.1978       | 3  | T  | 10 | 1184.6024      | 592.8051        |
| 473.2247       | 4  | D  | 9  | 1083.5547      | 542.2813        |
| 530.2462       | 5  | G  | 8  | 968.5278       | 484.7678        |
| 644.2891       | 6  | N  | 7  | 911.5063       | 456.2571        |
| 731.3211       | 7  | S  | 6  | 797.4634       | 399.2356        |
| 860.3637       | 8  | E  | 5  | 710.4314       | 355.7196        |
| 997.4227       | 9  | H  | 4  | 581.3888       | 291.1983        |
| 1110.5067      | 10 | L  | 3  | 444.3299       | 222.6688        |
| 1266.6330      | 11 | K  | 2  | 331.2458       | 166.1268        |
|                | 12 | R  | 1  | 175.1195       | 88.0637         |

N-term:+29.04 K(11):+156.13



DIVMTQSHKFMSTSVGDR, MH+ 2095.0316, m/z 524.5134  
 L OS G28 P150811 220811-s1.05974.05974.4.dta

X-range:

-

MassTol: Y-zoom:

MassType:

AVG  MONO

Axis:

1  2

Label:

I  M  -

Ions:

a  +  2+  3+

b  +  2+  3+

c  +  2+  3+

x  +  2+  3+

y  +  2+  3+

z  +  2+  3+

hide H<sub>2</sub>O/NH<sub>3</sub>

zoom 112-122

GO

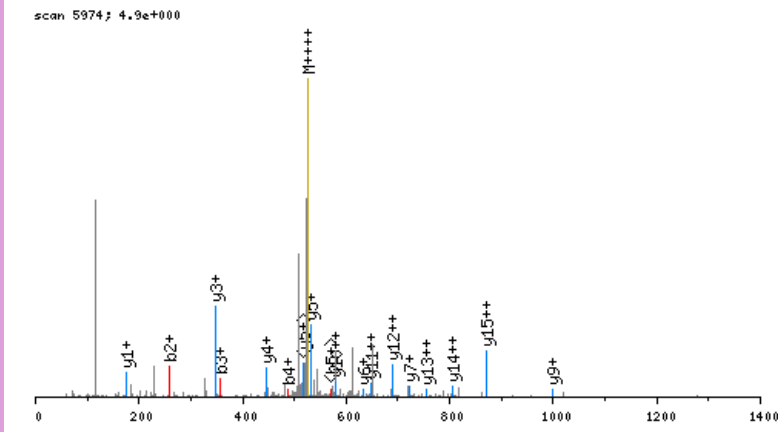

click image to zoom in; click top corners to zoom out [\[precursor±\]](#)

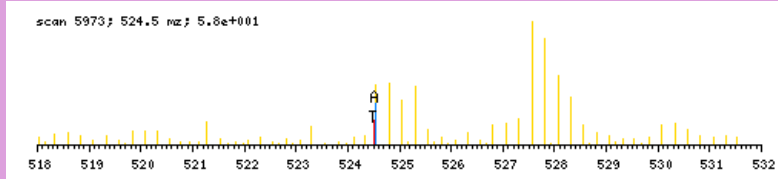

zoomed in precursor plot; T=theoretical m/z, A=acquired m/z

| b <sup>+</sup> | #  | AA # | y <sup>+</sup> | y <sup>2+</sup> |
|----------------|----|------|----------------|-----------------|
| 144.0660       | 1  | D 18 |                |                 |
| 257.1501       | 2  | I 17 | 1951.9734      | 976.4906        |
| 356.2185       | 3  | V 16 | 1838.8894      | 919.9486        |
| 487.2590       | 4  | M 15 | 1739.8209      | 870.4144        |
| 588.3067       | 5  | T 14 | 1608.7805      | 804.8941        |
| 716.3653       | 6  | Q 13 | 1507.7328      | 754.3703        |
| 803.3973       | 7  | S 12 | 1379.6742      | 690.3410        |
| 940.4562       | 8  | H 11 | 1292.6422      | 646.8250        |
| 1096.5825      | 9  | K 10 | 1155.5833      | 578.2955        |
| 1243.6509      | 10 | F 9  | 999.4570       | 500.2324        |
| 1374.6914      | 11 | M 8  | 852.3885       | 426.6982        |
| 1461.7234      | 12 | S 7  | 721.3481       | 361.1779        |
| 1562.7711      | 13 | T 6  | 634.3160       | 317.6619        |
| 1649.8031      | 14 | S 5  | 533.2683       | 267.1381        |
| 1748.8715      | 15 | V 4  | 446.2363       | 223.6221        |
| 1805.8930      | 16 | G 3  | 347.1679       | 174.0879        |
| 1920.9200      | 17 | D 2  | 290.1464       | 145.5771        |
|                | 18 | R 1  | 175.1195       | 88.0637         |

N-term:+29.04 K(9):+156.13

DKDTCFSTEGPNLVTR, MH+ 1895.9173, m/z 632.6439  
 L OS G26 P150811 220811-s1.03846.03846.3.dta

X-range:

-

MassTol: Y-zoom:

MassType:

AVG  MONO

Axis:

1  2

Label:

I  M  -

Ions:

a  +  2+  3+

b  +  2+  3+

c  +  2+  3+

x  +  2+  3+

y  +  2+  3+

z  +  2+  3+

hide H<sub>2</sub>O/NH<sub>3</sub>

zoom 112-122

GO

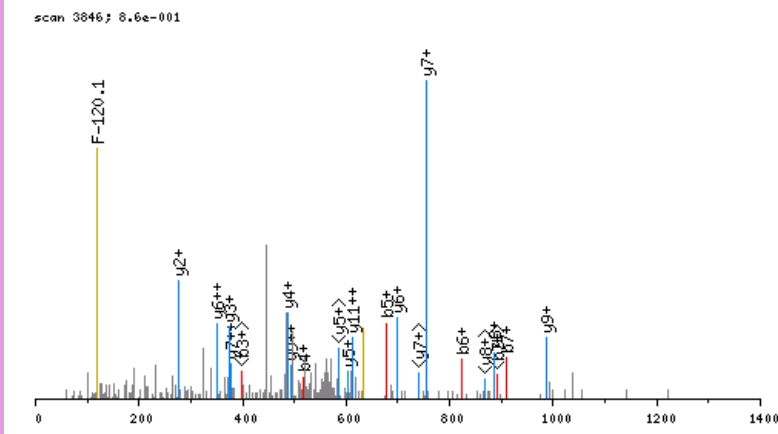

click image to zoom in; click top corners to zoom out [precursor±]

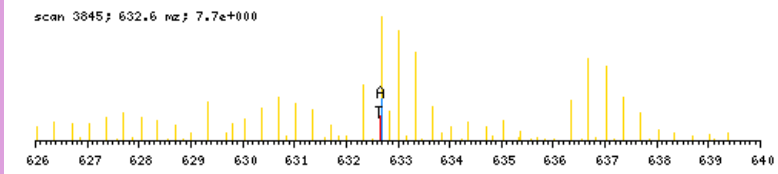

zoomed in precursor plot; T=theoretical m/z, A=acquired m/z

| b <sup>+</sup> | #  | AA | #  | y <sup>+</sup> | y <sup>2+</sup> |
|----------------|----|----|----|----------------|-----------------|
| 144.0660       | 1  | D  | 16 |                |                 |
| 300.1923       | 2  | K  | 15 | 1752.8590      | 876.9334        |
| 415.2193       | 3  | D  | 14 | 1596.7327      | 798.8703        |
| 516.2670       | 4  | T  | 13 | 1481.7058      | 741.3568        |
| 676.2976       | 5  | C  | 12 | 1380.6581      | 690.8330        |
| 823.3660       | 6  | F  | 11 | 1220.6275      | 610.8177        |
| 910.3980       | 7  | S  | 10 | 1073.5591      | 537.2835        |
| 1011.4457      | 8  | T  | 9  | 986.5271       | 493.7675        |
| 1140.4883      | 9  | E  | 8  | 885.4794       | 443.2436        |
| 1197.5097      | 10 | G  | 7  | 756.4368       | 378.7223        |
| 1294.5625      | 11 | P  | 6  | 699.4153       | 350.2116        |
| 1408.6054      | 12 | N  | 5  | 602.3626       | 301.6852        |
| 1521.6895      | 13 | L  | 4  | 488.3197       | 244.6637        |
| 1620.7579      | 14 | V  | 3  | 375.2356       | 188.1217        |
| 1721.8056      | 15 | T  | 2  | 276.1672       | 138.5875        |
|                | 16 | R  | 1  | 175.1195       | 88.0637         |

N-term:+29.04 K(2):+156.13  
 C(5):+160.03

DKPVSPLLTAAGMAR, MH+ 1582.8991, m/z 528.3045  
 L OS G26 P150811 220811-s1.05114.05114.3.dta

X-range:

-

MassTol: Y-zoom:

MassType:

AVG  MONO

Axis:

1  2

Label:

I  M  -

Ions:

a  +  2+  3+

b  +  2+  3+

c  +  2+  3+

x  +  2+  3+

y  +  2+  3+

z  +  2+  3+

hide H<sub>2</sub>O/NH<sub>3</sub>

zoom 112-122

GO

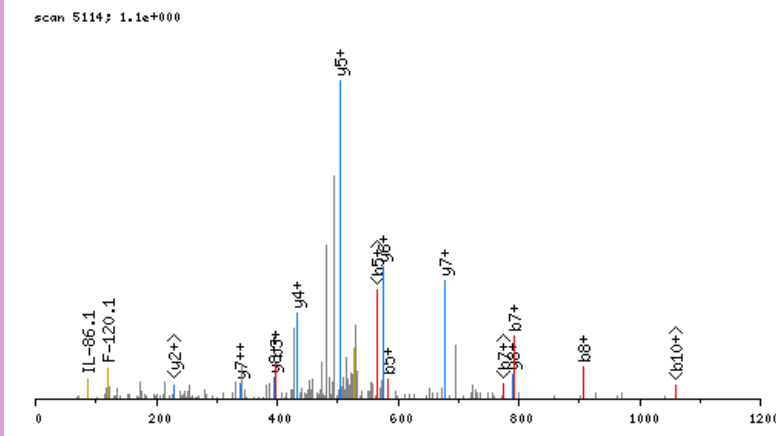

click image to zoom in; click top corners to zoom out [\[precursor±\]](#)

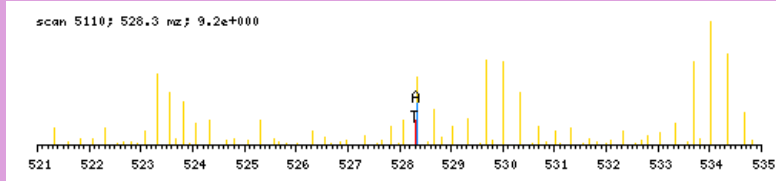

zoomed in precursor plot; T=theoretical m/z, A=acquired m/z

| b <sup>+</sup> | #  | AA # | y <sup>+</sup> | y <sup>2+</sup> |
|----------------|----|------|----------------|-----------------|
| 144.0660       | 1  | D 15 |                |                 |
| 300.1923       | 2  | K 14 | 1439.8409      | 720.4243        |
| 397.2451       | 3  | P 13 | 1283.7146      | 642.3612        |
| 496.3135       | 4  | V 12 | 1186.6618      | 593.8348        |
| 583.3455       | 5  | S 11 | 1087.5934      | 544.3006        |
| 680.3983       | 6  | P 10 | 1000.5614      | 500.7846        |
| 793.4824       | 7  | L 9  | 903.5086       | 452.2582        |
| 906.5664       | 8  | L 8  | 790.4245       | 395.7162        |
| 1007.6141      | 9  | T 7  | 677.3405       | 339.1741        |
| 1078.6512      | 10 | A 6  | 576.2928       | 288.6503        |
| 1149.6883      | 11 | A 5  | 505.2557       | 253.1318        |
| 1206.7098      | 12 | G 4  | 434.2186       | 217.6132        |
| 1337.7503      | 13 | M 3  | 377.1971       | 189.1025        |
| 1408.7874      | 14 | A 2  | 246.1566       | 123.5822        |
|                | 15 | R 1  | 175.1195       | 88.0637         |

N-term:+29.04 K(2):+156.13

DLAKDITSDTSGDFR, MH+ 1696.8394, m/z 566.2846  
 L OS G26 P150811 220811-s1.04909.04909.3.dta

X-range:

-

MassTol: Y-zoom:

MassType:

AVG  MONO

Axis:

1  2

Label:

I  M  -

Ions:

a  +  2+  3+

b  +  2+  3+

c  +  2+  3+

x  +  2+  3+

y  +  2+  3+

z  +  2+  3+

hide H<sub>2</sub>O/NH<sub>3</sub>

zoom 112-122

GO

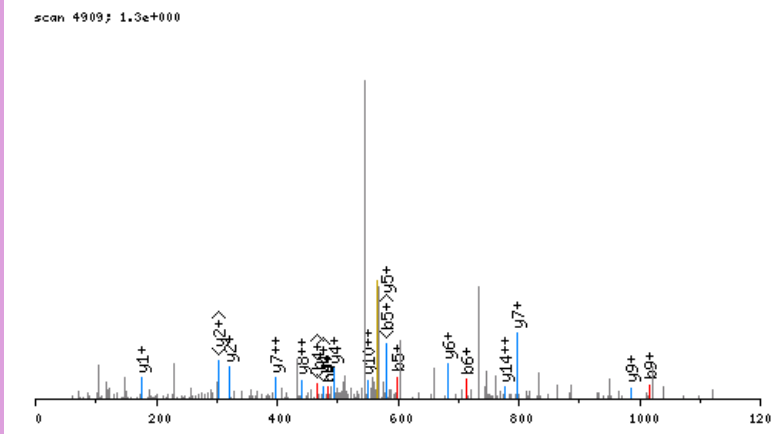

click image to zoom in; click top corners to zoom out [\[precursor±\]](#)

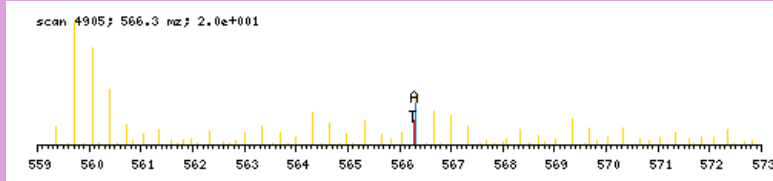

zoomed in precursor plot; T=theoretical m/z, A=acquired m/z

| b <sup>+</sup> | #  | AA # | y <sup>+</sup> | y <sup>2+</sup> |
|----------------|----|------|----------------|-----------------|
| 144.0660       | 1  | D 15 |                |                 |
| 257.1501       | 2  | L 14 | 1553.7812      | 777.3945        |
| 328.1872       | 3  | A 13 | 1440.6971      | 720.8525        |
| 484.3135       | 4  | K 12 | 1369.6600      | 685.3339        |
| 599.3405       | 5  | D 11 | 1213.5337      | 607.2708        |
| 712.4245       | 6  | I 10 | 1098.5067      | 549.7573        |
| 813.4722       | 7  | T 9  | 985.4227       | 493.2153        |
| 900.5042       | 8  | S 8  | 884.3750       | 442.6914        |
| 1015.5312      | 9  | D 7  | 797.3430       | 399.1754        |
| 1116.5789      | 10 | T 6  | 682.3160       | 341.6619        |
| 1203.6109      | 11 | S 5  | 581.2683       | 291.1381        |
| 1260.6323      | 12 | G 4  | 494.2363       | 247.6221        |
| 1375.6593      | 13 | D 3  | 437.2149       | 219.1113        |
| 1522.7277      | 14 | F 2  | 322.1879       | 161.5979        |
|                | 15 | R 1  | 175.1195       | 88.0637         |

N-term:+29.04 K(4):+156.13

DLEPTVIDEVR, MH+ 1313.6952, m/z 657.3513  
 L OS G24 P150811 220811-s1.03998.03998.2.dta

X-range:

-

MassTol: Y-zoom:

MassType:

AVG  MONO

Axis:

1  2

Label:

I  M  -

Ions:

a  +  2+  3+

b  +  2+  3+

c  +  2+  3+

x  +  2+  3+

y  +  2+  3+

z  +  2+  3+

hide H<sub>2</sub>O/NH<sub>3</sub>

zoom 112-122

GO

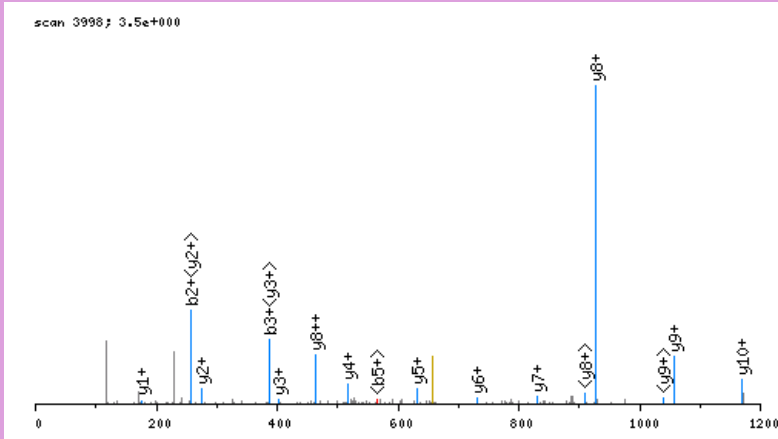

click image to zoom in; click top corners to zoom out [\[precursor±\]](#)

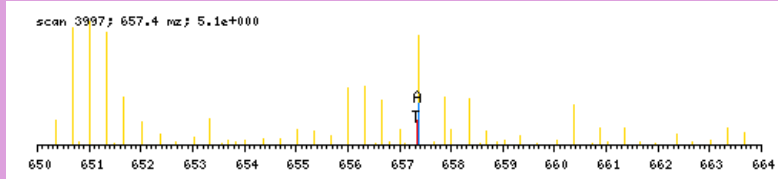

zoomed in precursor plot; T=theoretical m/z, A=acquired m/z

| b <sup>+</sup> | #  | AA # | y <sup>+</sup> | y <sup>2+</sup> |
|----------------|----|------|----------------|-----------------|
| 144.0660       | 1  | D 11 |                |                 |
| 257.1501       | 2  | L 10 | 1170.6370      | 585.8224        |
| 386.1927       | 3  | E 9  | 1057.5530      | 529.2804        |
| 483.2455       | 4  | P 8  | 928.5104       | 464.7591        |
| 584.2931       | 5  | T 7  | 831.4576       | 416.2327        |
| 683.3616       | 6  | V 6  | 730.4099       | 365.7089        |
| 796.4456       | 7  | I 5  | 631.3415       | 316.1747        |
| 911.4726       | 8  | D 4  | 518.2575       | 259.6326        |
| 1040.5152      | 9  | E 3  | 403.2305       | 202.1192        |
| 1139.5836      | 10 | V 2  | 274.1879       | 137.5979        |
|                | 11 | R 1  | 175.1195       | 88.0637         |

N-term:+29.04

DLNLDLSKFR, MH+ 1288.7901, m/z 430.2682  
 H OS G27 P150811 220811-s1.06739.06739.3.dta

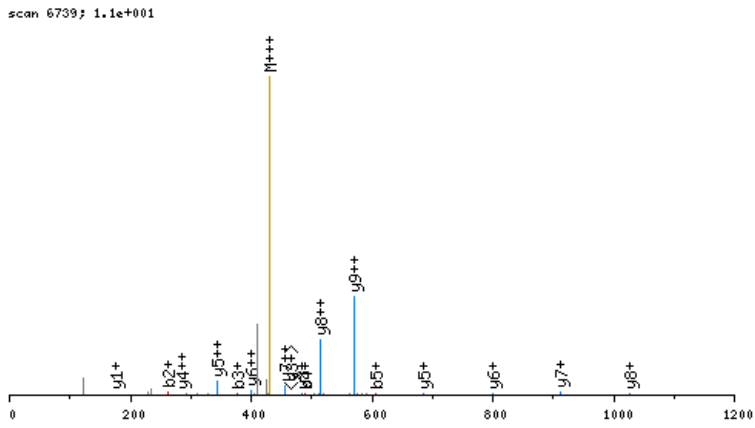

click image to zoom in; click top corners to zoom out [\[precursor±\]](#)

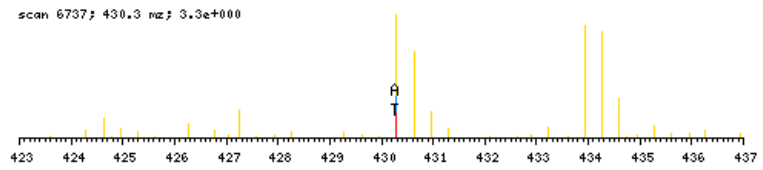

zoomed in precursor plot; T=theoretical m/z, A=acquired m/z

X-range:

-

MassTol: Y-zoom:

MassType:

AVG  MONO

Axis:

1  2

Label:

I  M  -

Ions:

a  +  2+  3+

b  +  2+  3+

c  +  2+  3+

x  +  2+  3+

y  +  2+  3+

z  +  2+  3+

hide H<sub>2</sub>O/NH<sub>3</sub>

zoom 112-122

GO

| b <sup>+</sup> | #  | AA # | y <sup>+</sup> | y <sup>2+</sup>    |
|----------------|----|------|----------------|--------------------|
| 150.0978       | 1  | D    | 10             |                    |
| 263.1819       | 2  | L    | 9              | 1139.7001 570.3540 |
| 377.2248       | 3  | N    | 8              | 1026.6160 513.8119 |
| 490.3089       | 4  | L    | 7              | 912.5731 456.7905  |
| 605.3358       | 5  | D    | 6              | 799.4891 400.2484  |
| 718.4199       | 6  | L    | 5              | 684.4621 342.7350  |
| 805.4519       | 7  | S    | 4              | 571.3780 286.1929  |
| 967.6100       | 8  | K    | 3              | 484.3460 242.6769  |
| 1114.6784      | 9  | F    | 2              | 322.1879 161.5979  |
|                | 10 | R    | 1              | 175.1195 88.0637   |

N-term:+35.07 K(8):+162.16

DLPCTPPPPAPIPSVR, MH+ 1741.9310, m/z 581.3152  
 L OS G24 P150811 220811-s1.04114.04114.3.dta

X-range:

-

MassTol: Y-zoom:

MassType:

AVG  MONO

Axis:

1  2

Label:

I  M  -

Ions:

a  +  2+  3+

b  +  2+  3+

c  +  2+  3+

x  +  2+  3+

y  +  2+  3+

z  +  2+  3+

hide H<sub>2</sub>O/NH<sub>3</sub>

zoom 112-122

GO

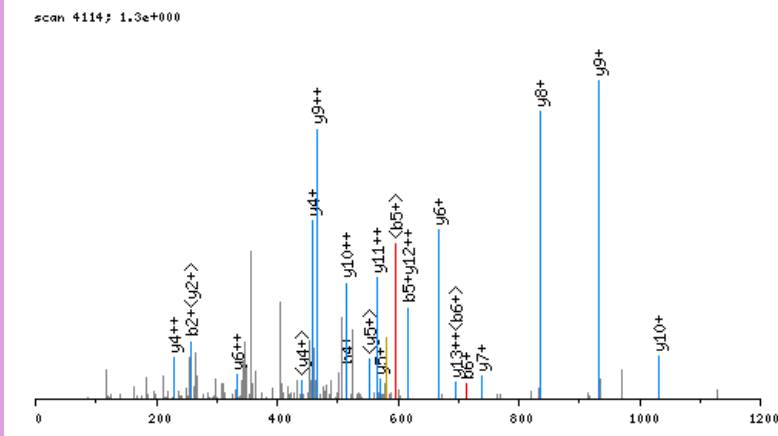

click image to zoom in; click top corners to zoom out [\[precursor±\]](#)

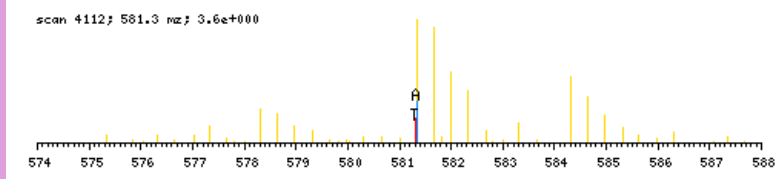

zoomed in precursor plot; T=theoretical m/z, A=acquired m/z

| b <sup>+</sup> | #  | AA # | y <sup>+</sup> | y <sup>2+</sup> |
|----------------|----|------|----------------|-----------------|
| 144.0660       | 1  | D 16 |                |                 |
| 257.1501       | 2  | L 15 | 1598.8728      | 799.9403        |
| 354.2029       | 3  | P 14 | 1485.7887      | 743.3983        |
| 514.2335       | 4  | C 13 | 1388.7360      | 694.8719        |
| 615.2811       | 5  | T 12 | 1228.7054      | 614.8566        |
| 712.3339       | 6  | P 11 | 1127.6577      | 564.3328        |
| 809.3867       | 7  | P 10 | 1030.6049      | 515.8064        |
| 906.4394       | 8  | P 9  | 933.5522       | 467.2800        |
| 1003.4922      | 9  | P 8  | 836.4994       | 418.7536        |
| 1074.5293      | 10 | A 7  | 739.4466       | 370.2272        |
| 1171.5821      | 11 | P 6  | 668.4095       | 334.7087        |
| 1284.6661      | 12 | I 5  | 571.3568       | 286.1823        |
| 1381.7189      | 13 | P 4  | 458.2727       | 229.6403        |
| 1468.7509      | 14 | S 3  | 361.2199       | 181.1139        |
| 1567.8194      | 15 | V 2  | 274.1879       | 137.5979        |
|                | 16 | R 1  | 175.1195       | 88.0637         |

N-term:+29.04 C(4):+160.03

DLPGALSALSDLHAKLR, MH+ 1970.1187, m/z 493.2851  
 L OS G28 P150811 220811-s1.08374.08374.4.dta

scan 8374; 5.3e+000

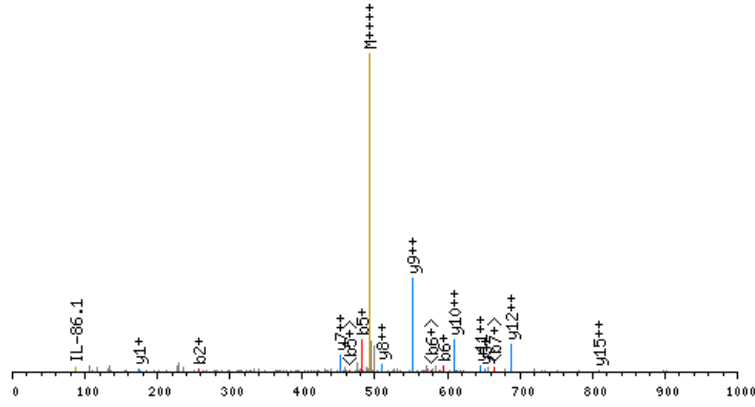

click image to zoom in; click top corners to zoom out [\[precursor±\]](#)

scan 8373; 493.3 m/z; 5.4e+000

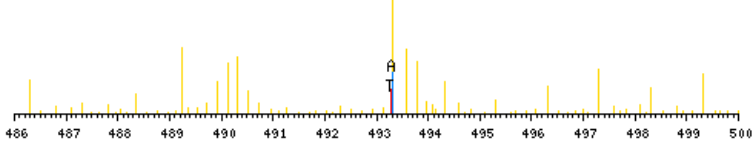

zoomed in precursor plot; T=theoretical m/z, A=acquired m/z

X-range:

-

MassTol: Y-zoom:

MassType:

AVG  MONO

Axis:

1  2

Label:

I  M  -

Ions:

a  +  2+  3+

b  +  2+  3+

c  +  2+  3+

x  +  2+  3+

y  +  2+  3+

z  +  2+  3+

hide H<sub>2</sub>O/NH<sub>3</sub>

zoom 112-122

GO

| b <sup>+</sup> | #  | AA # | y <sup>+</sup> | y <sup>2+</sup> |
|----------------|----|------|----------------|-----------------|
| 144.0660       | 1  | D 18 |                |                 |
| 257.1501       | 2  | L 17 | 1827.0605      | 914.0342        |
| 354.2029       | 3  | P 16 | 1713.9764      | 857.4921        |
| 411.2243       | 4  | G 15 | 1616.9237      | 808.9658        |
| 482.2614       | 5  | A 14 | 1559.9022      | 780.4550        |
| 595.3455       | 6  | L 13 | 1488.8651      | 744.9365        |
| 682.3775       | 7  | S 12 | 1375.7810      | 688.3944        |
| 753.4147       | 8  | A 11 | 1288.7490      | 644.8784        |
| 866.4987       | 9  | L 10 | 1217.7119      | 609.3599        |
| 953.5307       | 10 | S 9  | 1104.6278      | 552.8178        |
| 1068.5577      | 11 | D 8  | 1017.5958      | 509.3018        |
| 1181.6418      | 12 | L 7  | 902.5689       | 451.7883        |
| 1318.7007      | 13 | H 6  | 789.4848       | 395.2463        |
| 1389.7378      | 14 | A 5  | 652.4259       | 326.7169        |
| 1526.7967      | 15 | H 4  | 581.3888       | 291.1983        |
| 1682.9230      | 16 | K 3  | 444.3299       | 222.6688        |
| 1796.0071      | 17 | L 2  | 288.2036       | 144.6057        |
|                | 18 | R 1  | 175.1195       | 88.0637         |

N-term:+29.04 K(16):+156.13



DLSLEEIQKKLEAAEER, MH+ 2103.2398, m/z 526.5654  
 H OS G28 P150811 220811-s1.08884.08884.4.dta

X-range:

-

MassTol: Y-zoom:

MassType:

AVG  MONO

Axis:

1  2

Label:

I  M  -

Ions:

a  +  2+  3+

b  +  2+  3+

c  +  2+  3+

x  +  2+  3+

y  +  2+  3+

z  +  2+  3+

hide H<sub>2</sub>O/NH<sub>3</sub>

zoom 112-122

GO

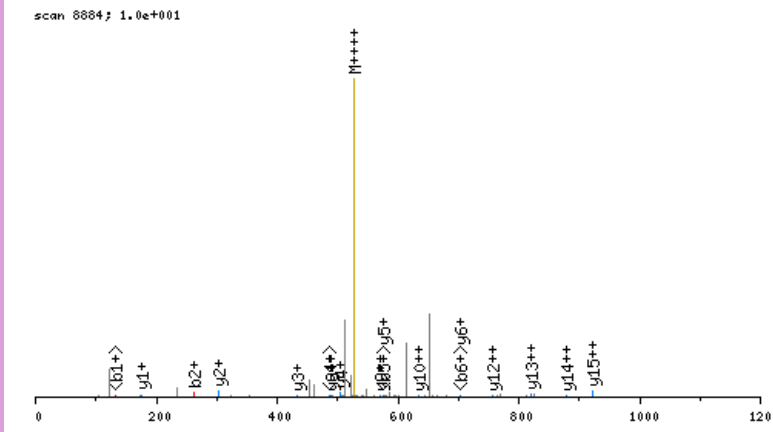

click image to zoom in; click top corners to zoom out [\[precursor±\]](#)

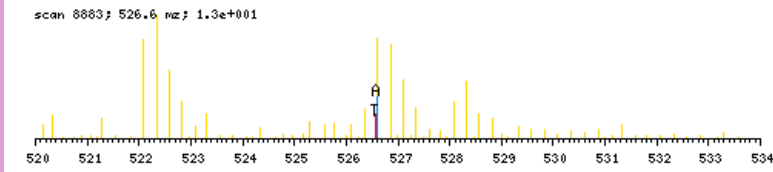

zoomed in precursor plot; T=theoretical m/z, A=acquired m/z

| b <sup>+</sup> | #  | AA | #  | y <sup>+</sup> | y <sup>2+</sup> |
|----------------|----|----|----|----------------|-----------------|
| 150.0978       | 1  | D  | 17 |                |                 |
| 263.1819       | 2  | L  | 16 | 1954.1498      | 977.5788        |
| 350.2139       | 3  | S  | 15 | 1841.0657      | 921.0368        |
| 463.2980       | 4  | L  | 14 | 1754.0337      | 877.5207        |
| 592.3406       | 5  | E  | 13 | 1640.9496      | 820.9787        |
| 721.3832       | 6  | E  | 12 | 1511.9070      | 756.4574        |
| 834.4672       | 7  | I  | 11 | 1382.8644      | 691.9361        |
| 962.5258       | 8  | Q  | 10 | 1269.7803      | 635.3941        |
| 1124.6839      | 9  | K  | 9  | 1141.7218      | 571.3648        |
| 1286.8420      | 10 | K  | 8  | 979.5637       | 490.2857        |
| 1399.9261      | 11 | L  | 7  | 817.4056       | 409.2067        |
| 1528.9687      | 12 | E  | 6  | 704.3215       | 352.6647        |
| 1600.0058      | 13 | A  | 5  | 575.2789       | 288.1434        |
| 1671.0429      | 14 | A  | 4  | 504.2418       | 252.6248        |
| 1800.0855      | 15 | E  | 3  | 433.2047       | 217.1063        |
| 1929.1281      | 16 | E  | 2  | 304.1621       | 152.5850        |
|                | 17 | R  | 1  | 175.1195       | 88.0637         |

N-term:+35.07 K(9):+162.16  
 K(10):+162.16

DLSSSDLSTASK, MH+ 1266.6429, m/z 633.8251  
 L OS G24 P150811 220811-s1.02858.02858.2.dta

X-range:

-

MassTol: Y-zoom:

MassType:

AVG  MONO

Axis:

1  2

Label:

I  M  -

Ions:

a  +  2+  3+

b  +  2+  3+

c  +  2+  3+

x  +  2+  3+

y  +  2+  3+

z  +  2+  3+

hide H<sub>2</sub>O/NH<sub>3</sub>

zoom 112-122

GO

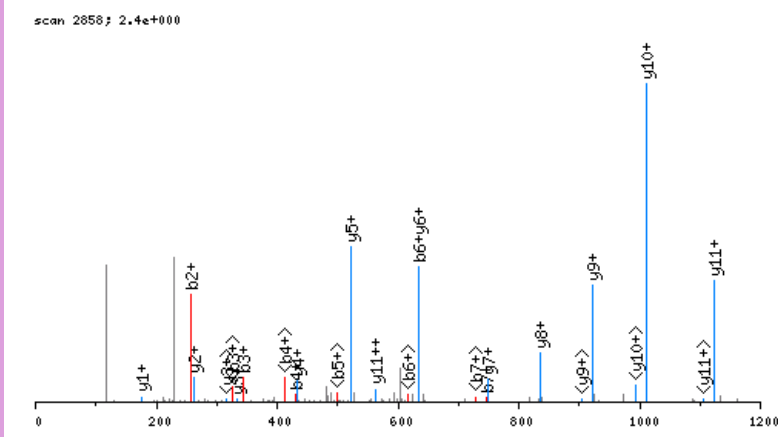

click image to zoom in; click top corners to zoom out [\[precursor±\]](#)

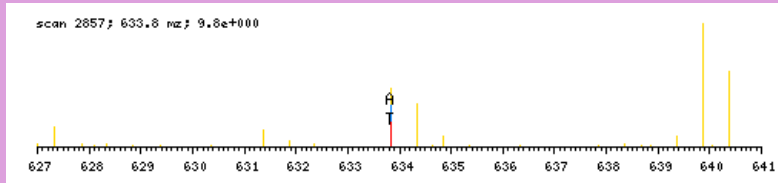

zoomed in precursor plot; T=theoretical m/z, A=acquired m/z

| b <sup>+</sup> | #  | AA # | y <sup>+</sup> | y <sup>2+</sup> |
|----------------|----|------|----------------|-----------------|
| 144.0660       | 1  | D 12 |                |                 |
| 257.1501       | 2  | L 11 | 1123.5847      | 562.2963        |
| 344.1821       | 3  | S 10 | 1010.5006      | 505.7542        |
| 431.2142       | 4  | S 9  | 923.4686       | 462.2382        |
| 518.2462       | 5  | S 8  | 836.4366       | 418.7222        |
| 633.2731       | 6  | D 7  | 749.4045       | 375.2062        |
| 746.3572       | 7  | L 6  | 634.3776       | 317.6927        |
| 833.3892       | 8  | S 5  | 521.2935       | 261.1507        |
| 934.4369       | 9  | T 4  | 434.2615       | 217.6347        |
| 1005.4740      | 10 | A 3  | 333.2138       | 167.1108        |
| 1092.5060      | 11 | S 2  | 262.1767       | 131.5923        |
|                | 12 | K 1  | 175.1447       | 88.0763         |

N-term:+29.04 K(12):+156.13

X-range:

-

MassTol: Y-zoom:

MassType:

AVG  MONO

Axis:

1  2

Label:

I  M  -

Ions:

a  +  2+  3+

b  +  2+  3+

c  +  2+  3+

x  +  2+  3+

y  +  2+  3+

z  +  2+  3+

hide H<sub>2</sub>O/NH<sub>3</sub>

zoom 112-122

GO

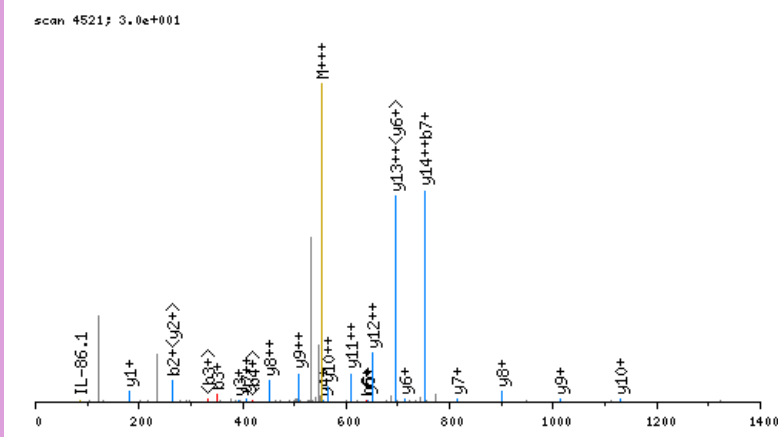

click image to zoom in; click top corners to zoom out [\[precursor±\]](#)

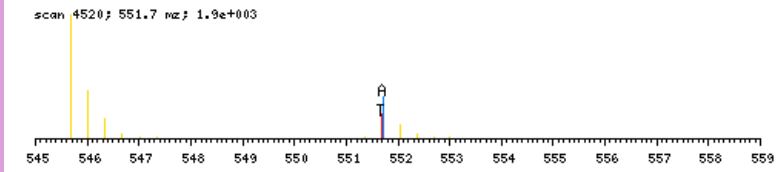

zoomed in precursor plot; T=theoretical m/z, A=acquired m/z

| b <sup>+</sup> | #  | AA | #  | y <sup>+</sup> | y <sup>2+</sup> |
|----------------|----|----|----|----------------|-----------------|
| 150.0978       | 1  | D  | 15 |                |                 |
| 263.1819       | 2  | L  | 14 | 1503.9271      | 752.4674        |
| 350.2139       | 3  | S  | 13 | 1390.8430      | 695.9254        |
| 437.2460       | 4  | S  | 12 | 1303.8110      | 652.4094        |
| 524.2780       | 5  | S  | 11 | 1216.7790      | 608.8934        |
| 639.3049       | 6  | D  | 10 | 1129.7469      | 565.3774        |
| 752.3890       | 7  | L  | 9  | 1014.7200      | 507.8639        |
| 839.4210       | 8  | S  | 8  | 901.6359       | 451.3219        |
| 940.4687       | 9  | T  | 7  | 814.6039       | 407.8059        |
| 1011.5058      | 10 | A  | 6  | 713.5562       | 357.2820        |
| 1098.5378      | 11 | S  | 5  | 642.5191       | 321.7635        |
| 1260.6959      | 12 | K  | 4  | 555.4871       | 278.2474        |
| 1373.7800      | 13 | I  | 3  | 393.3290       | 197.1684        |
| 1472.8484      | 14 | V  | 2  | 280.2449       | 140.6264        |
|                | 15 | K  | 1  | 181.1765       | 91.0922         |

N-term:+35.07 K(12):+162.16  
 K(15):+162.16

DLTTCPPLAAGGQEKLR, MH+ 1914.0118, m/z 479.2584  
 L OS G26 P150811 220811-s1.04053.04053.4.dta

scan 4053; 5.7e+000

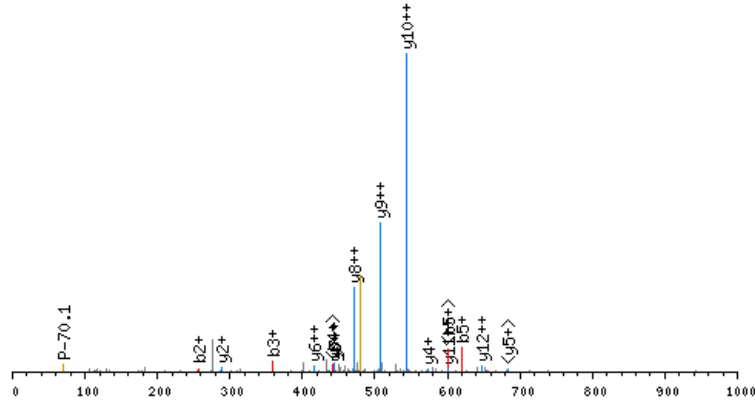

click image to zoom in; click top corners to zoom out [\[precursor±\]](#)

scan 4050; 479.3 m/z; 9.0e+000

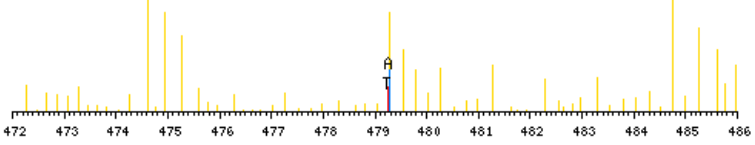

zoomed in precursor plot; T=theoretical m/z, A=acquired m/z

X-range:

-

MassTol: Y-zoom:

MassType:

AVG  MONO

Axis:

1  2

Label:

I  M  -

Ions:

a  +  2+  3+

b  +  2+  3+

c  +  2+  3+

x  +  2+  3+

y  +  2+  3+

z  +  2+  3+

hide H<sub>2</sub>O/NH<sub>3</sub>

zoom 112-122

GO

| b <sup>+</sup> | #  | AA | #  | y <sup>+</sup> | y <sup>2+</sup> |
|----------------|----|----|----|----------------|-----------------|
| 144.0660       | 1  | D  | 17 |                |                 |
| 257.1501       | 2  | L  | 16 | 1770.9536      | 885.9807        |
| 358.1978       | 3  | T  | 15 | 1657.8696      | 829.4387        |
| 459.2455       | 4  | T  | 14 | 1556.8219      | 778.9148        |
| 619.2761       | 5  | C  | 13 | 1455.7742      | 728.3910        |
| 716.3288       | 6  | P  | 12 | 1295.7436      | 648.3757        |
| 829.4129       | 7  | L  | 11 | 1198.6908      | 599.8493        |
| 900.4500       | 8  | A  | 10 | 1085.6068      | 543.3073        |
| 971.4871       | 9  | A  | 9  | 1014.5697      | 507.7887        |
| 1028.5086      | 10 | G  | 8  | 943.5325       | 472.2702        |
| 1085.5300      | 11 | G  | 7  | 886.5111       | 443.7595        |
| 1213.5886      | 12 | Q  | 6  | 829.4896       | 415.2487        |
| 1341.6472      | 13 | Q  | 5  | 701.4310       | 351.2194        |
| 1470.6898      | 14 | E  | 4  | 573.3725       | 287.1901        |
| 1626.8161      | 15 | K  | 3  | 444.3299       | 222.6688        |
| 1739.9002      | 16 | L  | 2  | 288.2036       | 144.6057        |
|                | 17 | R  | 1  | 175.1195       | 88.0637         |

N-term: +29.04 C(5): +160.03  
 K(15): +156.13

DLVSSKMFEELKNR, MH+ 1779.9679, m/z 445.7474  
 L OS G28 P150811 220811-s1.07659.07659.4.dta

X-range:

-

MassTol: Y-zoom:

MassType:

AVG  MONO

Axis:

1  2

Label:

I  M  -

Ions:

a  +  2+  3+

b  +  2+  3+

c  +  2+  3+

x  +  2+  3+

y  +  2+  3+

z  +  2+  3+

hide H<sub>2</sub>O/NH<sub>3</sub>

zoom 112-122

GO

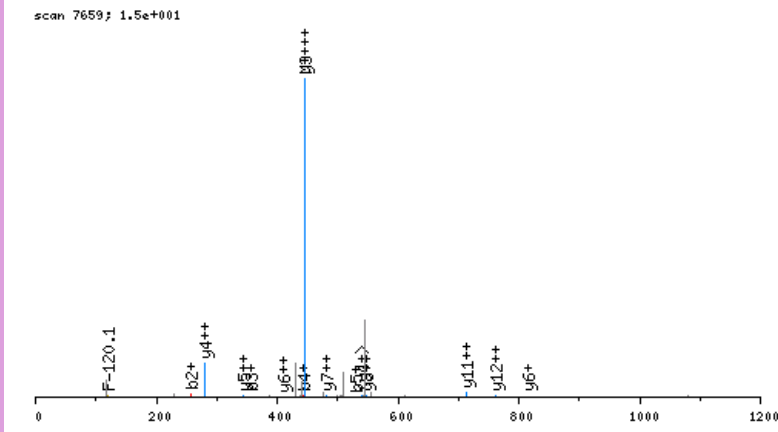

click image to zoom in; click top corners to zoom out [\[precursor±\]](#)

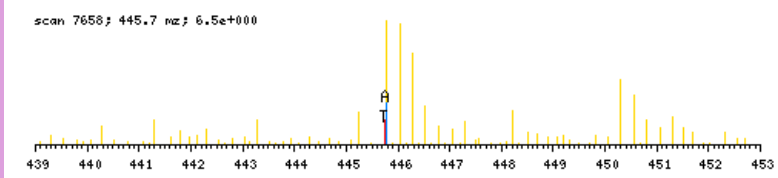

zoomed in precursor plot; T=theoretical m/z, A=acquired m/z

| b <sup>+</sup> | #  | AA # | y <sup>+</sup> | y <sup>2+</sup>                 |
|----------------|----|------|----------------|---------------------------------|
| 144.0660       | 1  | D    | 14             |                                 |
| 257.1501       | 2  | L    | 13             | 1636.9097 818.9588              |
| 356.2185       | 3  | V    | 12             | 1523.8256 <b>762.4167</b>       |
| 443.2505       | 4  | S    | 11             | 1424.7572 <b>712.8825</b>       |
| 530.2826       | 5  | S    | 10             | 1337.7252 669.3665              |
| 686.4089       | 6  | K    | 9              | 1250.6932 625.8505              |
| 817.4494       | 7  | M    | 8              | 1094.5669 <b>547.7874</b>       |
| 964.5178       | 8  | F    | 7              | 963.5264 <b>482.2671</b>        |
| 1093.5604      | 9  | E    | 6              | <b>816.4580</b> <b>408.7329</b> |
| 1222.6030      | 10 | E    | 5              | 687.4154 <b>344.2116</b>        |
| 1335.6870      | 11 | L    | 4              | 558.3728 <b>279.6903</b>        |
| 1491.8133      | 12 | K    | 3              | <b>445.2887</b> 223.1483        |
| 1605.8563      | 13 | N    | 2              | 289.1624 145.0851               |
|                | 14 | R    | 1              | 175.1195 88.0637                |

N-term:+29.04 K(6):+156.13  
 K(12):+156.13

DLYANNMSGGTTMYPGIADR, MH+ 2274.0535, m/z 758.6893  
 L OS G24 P150811 220811-s1.04528.04528.3.dta

X-range:

-

MassTol: Y-zoom:

MassType:

AVG  MONO

Axis:

1  2

Label:

I  M  -

Ions:

a  +  2+  3+

b  +  2+  3+

c  +  2+  3+

x  +  2+  3+

y  +  2+  3+

z  +  2+  3+

hide H<sub>2</sub>O/NH<sub>3</sub>

zoom 112-122

GO

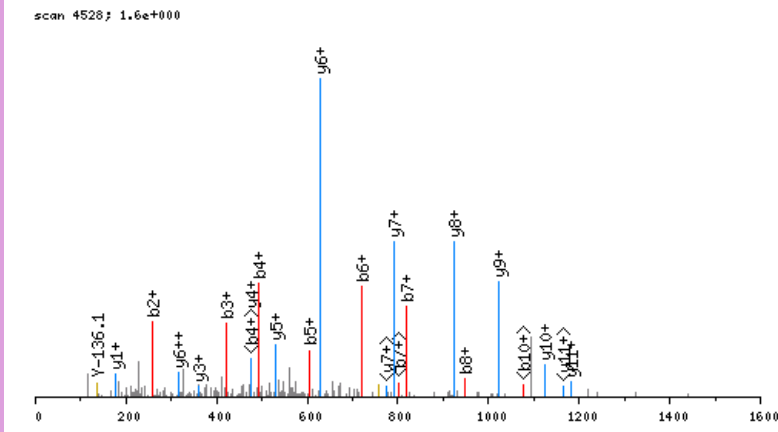

click image to zoom in; click top corners to zoom out [precursor±]

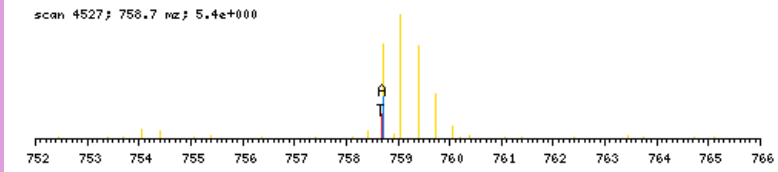

zoomed in precursor plot; T=theoretical m/z, A=acquired m/z

| b <sup>+</sup> | #  | AA # | y <sup>+</sup> | y <sup>2+</sup> |
|----------------|----|------|----------------|-----------------|
| 144.0660       | 1  | D 21 |                |                 |
| 257.1501       | 2  | L 20 | 2130.9952      | 1066.0015       |
| 420.2134       | 3  | Y 19 | 2017.9112      | 1009.4595       |
| 491.2505       | 4  | A 18 | 1854.8478      | 927.9278        |
| 605.2935       | 5  | N 17 | 1783.8107      | 892.4093        |
| 719.3364       | 6  | N 16 | 1669.7678      | 835.3878        |
| 818.4048       | 7  | V 15 | 1555.7249      | 778.3663        |
| 949.4453       | 8  | M 14 | 1456.6565      | 728.8321        |
| 1036.4773      | 9  | S 13 | 1325.6160      | 663.3119        |
| 1093.4988      | 10 | G 12 | 1238.5839      | 619.7959        |
| 1150.5203      | 11 | G 11 | 1181.5625      | 591.2852        |
| 1251.5679      | 12 | T 10 | 1124.5410      | 562.7744        |
| 1352.6156      | 13 | T 9  | 1023.4933      | 512.2506        |
| 1483.6561      | 14 | M 8  | 922.4457       | 461.7267        |
| 1646.7194      | 15 | Y 7  | 791.4052       | 396.2065        |
| 1743.7722      | 16 | P 6  | 628.3418       | 314.6748        |
| 1800.7937      | 17 | G 5  | 531.2891       | 266.1485        |
| 1913.8777      | 18 | I 4  | 474.2676       | 237.6377        |
| 1984.9148      | 19 | A 3  | 361.1836       | 181.0957        |
| 2099.9418      | 20 | D 2  | 290.1464       | 145.5771        |
|                | 21 | R 1  | 175.1195       | 88.0637         |

N-term:+29.04

DMAETFDQGAHHAFGQGGGR, MH+ 2065.9362, m/z 517.2395  
 H OS G28 P150811 220811-s1.05964.05964.4.dta

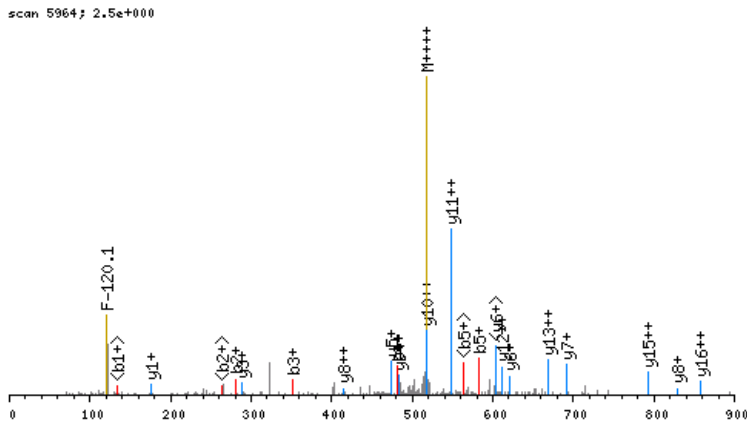

click image to zoom in; click top corners to zoom out [\[precursor±\]](#)

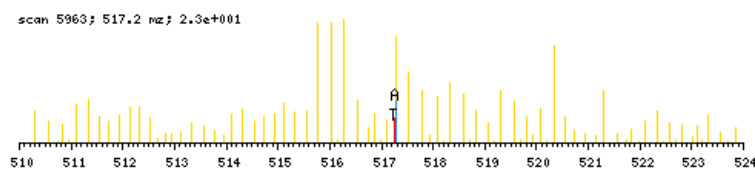

zoomed in precursor plot; T=theoretical m/z, A=acquired m/z

X-range:  -

MassTol: Y-zoom:

MassType:  AVG  MONO

Axis:  1  2

Label:  I  M  -

Ions:

a  +  2+  3+

b  +  2+  3+

c  +  2+  3+

x  +  2+  3+

y  +  2+  3+

z  +  2+  3+

hide H<sub>2</sub>O/NH<sub>3</sub>

zoom 112-122

| b <sup>+</sup> | #  | AA # | y <sup>+</sup> | y <sup>2+</sup> |
|----------------|----|------|----------------|-----------------|
| 150.0978       | 1  | D 19 |                |                 |
| 281.1383       | 2  | M 18 | 1916.8462      | 958.9270        |
| 352.1754       | 3  | A 17 | 1785.8057      | 893.4068        |
| 481.2180       | 4  | E 16 | 1714.7686      | 857.8882        |
| 582.2657       | 5  | T 15 | 1585.7260      | 793.3669        |
| 729.3341       | 6  | F 14 | 1484.6783      | 742.8431        |
| 844.3611       | 7  | D 13 | 1337.6099      | 669.3089        |
| 972.4196       | 8  | Q 12 | 1222.5830      | 611.7954        |
| 1029.4411      | 9  | G 11 | 1094.5244      | 547.7661        |
| 1100.4782      | 10 | A 10 | 1037.5029      | 519.2554        |
| 1237.5371      | 11 | H 9  | 966.4658       | 483.7368        |
| 1374.5960      | 12 | H 8  | 829.4069       | 415.2074        |
| 1445.6332      | 13 | A 7  | 692.3480       | 346.6779        |
| 1592.7016      | 14 | F 6  | 621.3109       | 311.1594        |
| 1649.7230      | 15 | G 5  | 474.2425       | 237.6251        |
| 1777.7816      | 16 | Q 4  | 417.2210       | 209.1144        |
| 1834.8031      | 17 | G 3  | 289.1624       | 145.0851        |
| 1891.8245      | 18 | G 2  | 232.1410       | 116.5744        |
|                | 19 | R 1  | 175.1195       | 88.0637         |

N-term:+35.07

DMVTDCSYTVAQVR, MH+ 1678.7992, m/z 560.2712  
 H OS G24 P150811 220811-s1.03615.03615.3.dta

X-range:

-

MassTol: Y-zoom:

MassType:

AVG  MONO

Axis:

1  2

Label:

I  M  -

Ions:

a  +  2+  3+

b  +  2+  3+

c  +  2+  3+

x  +  2+  3+

y  +  2+  3+

z  +  2+  3+

hide H<sub>2</sub>O/NH<sub>3</sub>

zoom 112-122

GO

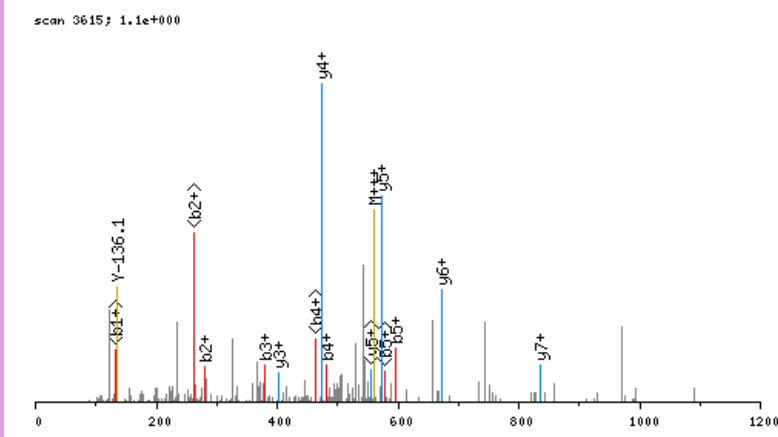

click image to zoom in; click top corners to zoom out [\[precursor±\]](#)

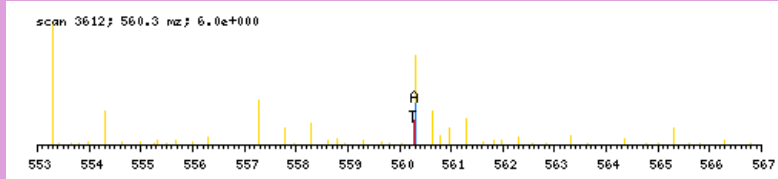

zoomed in precursor plot; T=theoretical m/z, A=acquired m/z

| b <sup>+</sup> | #  | AA # | y <sup>+</sup> | y <sup>2+</sup> |
|----------------|----|------|----------------|-----------------|
| 150.0978       | 1  | D 14 |                |                 |
| 281.1383       | 2  | M 13 | 1529.7092      | 765.3585        |
| 380.2067       | 3  | V 12 | 1398.6687      | 699.8383        |
| 481.2544       | 4  | T 11 | 1299.6003      | 650.3041        |
| 596.2814       | 5  | D 10 | 1198.5526      | 599.7802        |
| 756.3120       | 6  | C 9  | 1083.5257      | 542.2667        |
| 843.3440       | 7  | S 8  | 923.4951       | 462.2514        |
| 1006.4073      | 8  | Y 7  | 836.4630       | 418.7354        |
| 1107.4550      | 9  | T 6  | 673.3997       | 337.2038        |
| 1206.5234      | 10 | V 5  | 572.3520       | 286.6799        |
| 1277.5605      | 11 | A 4  | 473.2836       | 237.1457        |
| 1405.6191      | 12 | Q 3  | 402.2465       | 201.6272        |
| 1504.6875      | 13 | V 2  | 274.1879       | 137.5979        |
|                | 14 | R 1  | 175.1195       | 88.0637         |

N-term:+35.07 C(6):+160.03



DNGSGLVKAGFAGDDAPR, MH+ 1802.9037, m/z 601.6394  
 L OS G26 P150811 220811-s1.03732.03732.3.dta

X-range:

-

MassTol: Y-zoom:

MassType:

AVG  MONO

Axis:

1  2

Label:

I  M  -

Ions:

a  +  2+  3+

b  +  2+  3+

c  +  2+  3+

x  +  2+  3+

y  +  2+  3+

z  +  2+  3+

hide H<sub>2</sub>O/NH<sub>3</sub>

zoom 112-122

GO

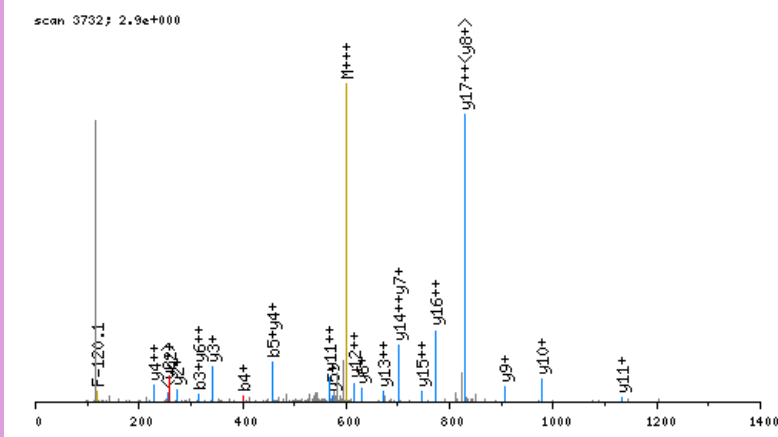

click image to zoom in; click top corners to zoom out [\[precursor±\]](#)

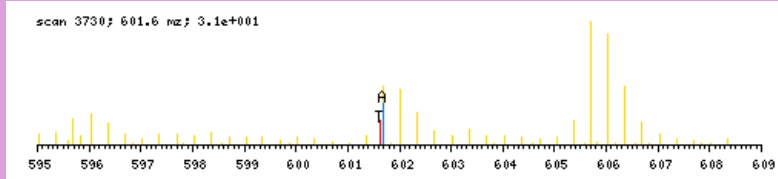

zoomed in precursor plot; T=theoretical m/z, A=acquired m/z

| b <sup>+</sup> | #  | AA | #  | y <sup>+</sup> | y <sup>2+</sup> |
|----------------|----|----|----|----------------|-----------------|
| 144.0660       | 1  | D  | 18 |                |                 |
| 258.1090       | 2  | N  | 17 | 1659.8455      | 830.4267        |
| 315.1304       | 3  | G  | 16 | 1545.8026      | 773.4052        |
| 402.1625       | 4  | S  | 15 | 1488.7811      | 744.8945        |
| 459.1839       | 5  | G  | 14 | 1401.7491      | 701.3785        |
| 572.2680       | 6  | L  | 13 | 1344.7276      | 672.8677        |
| 671.3364       | 7  | V  | 12 | 1231.6435      | 616.3257        |
| 827.4627       | 8  | K  | 11 | 1132.5751      | 566.7915        |
| 898.4998       | 9  | A  | 10 | 976.4488       | 488.7283        |
| 955.5213       | 10 | G  | 9  | 905.4117       | 453.2098        |
| 1102.5897      | 11 | F  | 8  | 848.3903       | 424.6990        |
| 1173.6268      | 12 | A  | 7  | 701.3218       | 351.1648        |
| 1230.6483      | 13 | G  | 6  | 630.2847       | 315.6463        |
| 1345.6752      | 14 | D  | 5  | 573.2633       | 287.1355        |
| 1460.7022      | 15 | D  | 4  | 458.2363       | 229.6221        |
| 1531.7393      | 16 | A  | 3  | 343.2094       | 172.1086        |
| 1628.7920      | 17 | P  | 2  | 272.1723       | 136.5900        |
|                | 18 | R  | 1  | 175.1195       | 88.0637         |

N-term:+29.04 K(8):+156.13

DNGSGMCKAGFAGDDAPR, MH+ 1881.8223, m/z 627.9456  
 L OS G26 P150811 220811-s1.02758.02758.3.dta

scan 2758; 1.7e+000

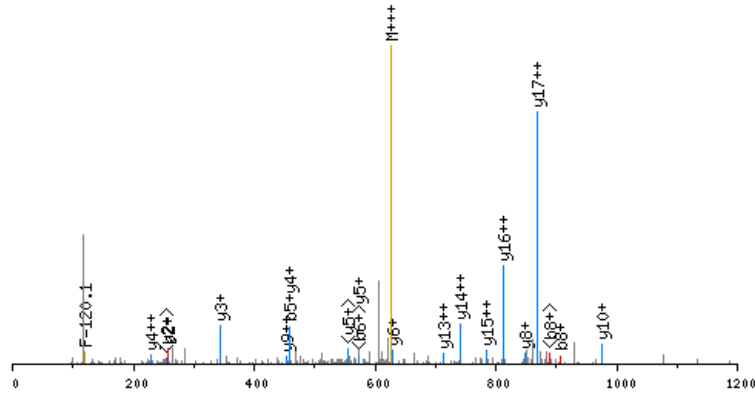

click image to zoom in; click top corners to zoom out [\[precursor±\]](#)

scan 2755; 627.9 m/z; 2.9e+001

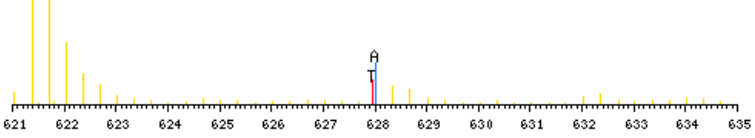

zoomed in precursor plot; T=theoretical m/z, A=acquired m/z

X-range:

-

MassTol: Y-zoom:

MassType:

AVG  MONO

Axis:

1  2

Label:

I  M  -

Ions:

a  +  2+  3+

b  +  2+  3+

c  +  2+  3+

x  +  2+  3+

y  +  2+  3+

z  +  2+  3+

hide H<sub>2</sub>O/NH<sub>3</sub>

zoom 112-122

GO

| b <sup>+</sup> | #  | AA | #  | y <sup>+</sup> | y <sup>2+</sup> |
|----------------|----|----|----|----------------|-----------------|
| 144.0660       | 1  | D  | 18 |                |                 |
| 258.1090       | 2  | N  | 17 | 1738.7641      | 869.8860        |
| 315.1304       | 3  | G  | 16 | 1624.7212      | 812.8645        |
| 402.1625       | 4  | S  | 15 | 1567.6997      | 784.3538        |
| 459.1839       | 5  | G  | 14 | 1480.6677      | 740.8378        |
| 590.2244       | 6  | M  | 13 | 1423.6462      | 712.3270        |
| 750.2550       | 7  | C  | 12 | 1292.6057      | 646.8068        |
| 906.3813       | 8  | K  | 11 | 1132.5751      | 566.7915        |
| 977.4184       | 9  | A  | 10 | 976.4488       | 488.7283        |
| 1034.4399      | 10 | G  | 9  | 905.4117       | 453.2098        |
| 1181.5083      | 11 | F  | 8  | 848.3903       | 424.6990        |
| 1252.5454      | 12 | A  | 7  | 701.3218       | 351.1648        |
| 1309.5669      | 13 | G  | 6  | 630.2847       | 315.6463        |
| 1424.5938      | 14 | D  | 5  | 573.2633       | 287.1355        |
| 1539.6208      | 15 | D  | 4  | 458.2363       | 229.6221        |
| 1610.6579      | 16 | A  | 3  | 343.2094       | 172.1086        |
| 1707.7106      | 17 | P  | 2  | 272.1723       | 136.5900        |
|                | 18 | R  | 1  | 175.1195       | 88.0637         |

N-term:+29.04 C(7):+160.03  
 K(8):+156.13

DNKSFLLVWVNEEDHLR, MH+ 2069.1092, m/z 518.0328  
 H OS G28 P150811 220811-s1.08649.08649.4.dta

X-range:

-

MassTol: Y-zoom:

MassType:

AVG  MONO

Axis:

1  2

Label:

I  M  -

Ions:

a  +  2+  3+

b  +  2+  3+

c  +  2+  3+

x  +  2+  3+

y  +  2+  3+

z  +  2+  3+

hide H<sub>2</sub>O/NH<sub>3</sub>

zoom 112-122

GO

scan 8649; 9.5e-001

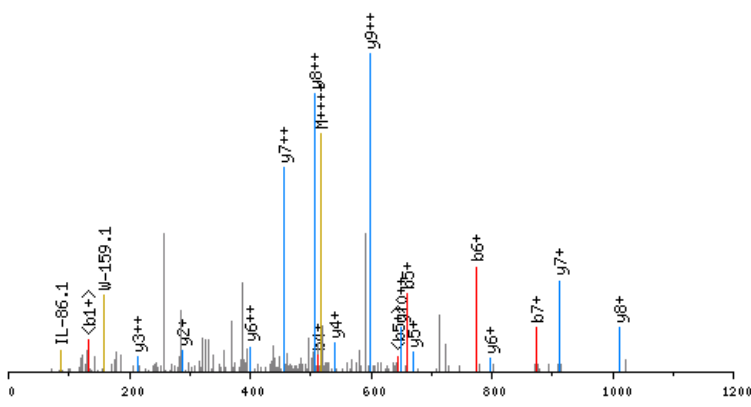

click image to zoom in; click top corners to zoom out [\[precursor±\]](#)

scan 8648; 518.0 m/z; 6.5e+000

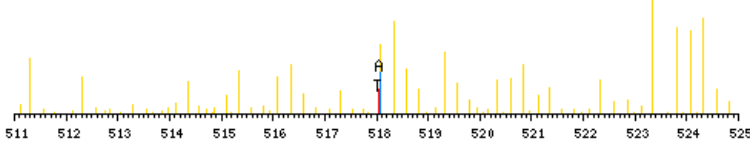

zoomed in precursor plot; T=theoretical m/z, A=acquired m/z

| b <sup>+</sup> | #  | AA # | y <sup>+</sup> | y <sup>2+</sup> |
|----------------|----|------|----------------|-----------------|
| 150.0978       | 1  | D 16 |                |                 |
| 264.1408       | 2  | N 15 | 1920.0192      | 960.5135        |
| 426.2989       | 3  | K 14 | 1805.9763      | 903.4921        |
| 513.3309       | 4  | S 13 | 1643.8182      | 822.4130        |
| 660.3993       | 5  | F 12 | 1556.7862      | 778.8970        |
| 773.4834       | 6  | L 11 | 1409.7177      | 705.3628        |
| 872.5518       | 7  | V 10 | 1296.6337      | 648.8207        |
| 1058.6311      | 8  | W 9  | 1197.5653      | 599.2865        |
| 1157.6995      | 9  | V 8  | 1011.4859      | 506.2469        |
| 1271.7424      | 10 | N 7  | 912.4175       | 456.7127        |
| 1400.7850      | 11 | E 6  | 798.3746       | 399.6912        |
| 1529.8276      | 12 | E 5  | 669.3320       | 335.1699        |
| 1644.8546      | 13 | D 4  | 540.2894       | 270.6486        |
| 1781.9135      | 14 | H 3  | 425.2625       | 213.1352        |
| 1894.9976      | 15 | L 2  | 288.2036       | 144.6057        |
|                | 16 | R 1  | 175.1195       | 88.0637         |

N-term:+35.07 K(3):+162.16

DNNKISNIPDEYFKR, MH+ 1955.1087, m/z 489.5326  
 H OS G28 P150811 220811-s1.06177.06177.4.dta

X-range:

-

MassTol: Y-zoom:

MassType:

AVG  MONO

Axis:

1  2

Label:

I  M  -

Ions:

a  +  2+  3+

b  +  2+  3+

c  +  2+  3+

x  +  2+  3+

y  +  2+  3+

z  +  2+  3+

hide H<sub>2</sub>O/NH<sub>3</sub>

zoom 112-122

GO

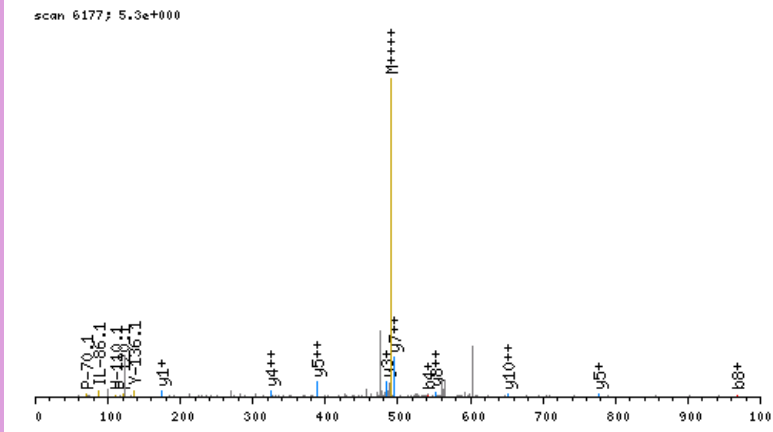

click image to zoom in; click top corners to zoom out [\[precursor±\]](#)

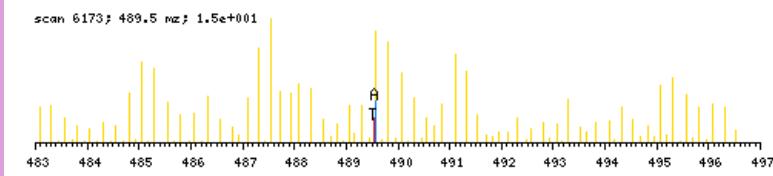

zoomed in precursor plot; T=theoretical m/z, A=acquired m/z

| b <sup>+</sup> | #  | AA | #  | y <sup>+</sup> | y <sup>2+</sup> |
|----------------|----|----|----|----------------|-----------------|
| 150.0978       | 1  | D  | 15 |                |                 |
| 264.1408       | 2  | N  | 14 | 1806.0187      | 903.5133        |
| 378.1837       | 3  | N  | 13 | 1691.9758      | 846.4918        |
| 540.3418       | 4  | K  | 12 | 1577.9328      | 789.4703        |
| 653.4259       | 5  | I  | 11 | 1415.7747      | 708.3913        |
| 740.4579       | 6  | S  | 10 | 1302.6907      | 651.8492        |
| 854.5008       | 7  | N  | 9  | 1215.6586      | 608.3332        |
| 967.5849       | 8  | I  | 8  | 1101.6157      | 551.3118        |
| 1064.6376      | 9  | P  | 7  | 988.5316       | 494.7697        |
| 1179.6646      | 10 | D  | 6  | 891.4789       | 446.2434        |
| 1308.7072      | 11 | E  | 5  | 776.4519       | 388.7299        |
| 1471.7705      | 12 | Y  | 4  | 647.4093       | 324.2086        |
| 1618.8389      | 13 | F  | 3  | 484.3460       | 242.6769        |
| 1780.9970      | 14 | K  | 2  | 337.2776       | 169.1427        |
|                | 15 | R  | 1  | 175.1195       | 88.0637         |

N-term:+35.07 K(4):+162.16  
 K(14):+162.16

DNVETIPNSGHMEEPR, MH+ 1858.8817, m/z 620.2988  
 H OS G24 P150811 220811-s1.02740.02740.3.dta

X-range:

-

MassTol: Y-zoom:

MassType:

AVG  MONO

Axis:

1  2

Label:

I  M  -

Ions:

a  +  2+  3+

b  +  2+  3+

c  +  2+  3+

x  +  2+  3+

y  +  2+  3+

z  +  2+  3+

hide H<sub>2</sub>O/NH<sub>3</sub>

zoom 112-122

GO

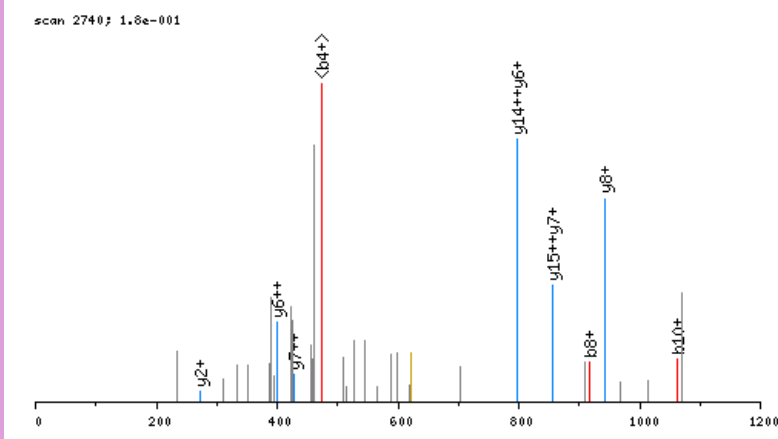

click image to zoom in; click top corners to zoom out [\[precursor±\]](#)

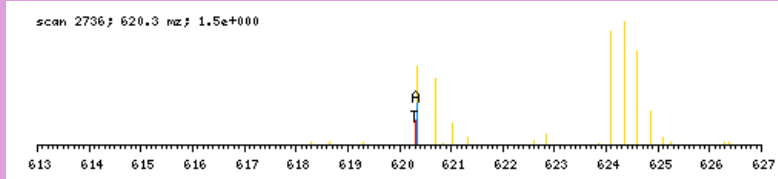

zoomed in precursor plot; T=theoretical m/z, A=acquired m/z

| b <sup>+</sup> | #  | AA # | y <sup>+</sup> | y <sup>2+</sup> |
|----------------|----|------|----------------|-----------------|
| 150.0978       | 1  | D 16 |                |                 |
| 264.1408       | 2  | N 15 | 1709.7917      | 855.3998        |
| 363.2092       | 3  | V 14 | 1595.7488      | 798.3783        |
| 492.2518       | 4  | E 13 | 1496.6804      | 748.8441        |
| 593.2995       | 5  | T 12 | 1367.6378      | 684.3228        |
| 706.3835       | 6  | I 11 | 1266.5901      | 633.7990        |
| 803.4363       | 7  | P 10 | 1153.5060      | 577.2569        |
| 917.4792       | 8  | N 9  | 1056.4533      | 528.7305        |
| 1004.5112      | 9  | S 8  | 942.4103       | 471.7091        |
| 1061.5327      | 10 | G 7  | 855.3783       | 428.1931        |
| 1198.5916      | 11 | H 6  | 798.3568       | 399.6823        |
| 1329.6321      | 12 | M 5  | 661.2979       | 331.1529        |
| 1458.6747      | 13 | E 4  | 530.2575       | 265.6326        |
| 1587.7173      | 14 | E 3  | 401.2149       | 201.1113        |
| 1684.7701      | 15 | P 2  | 272.1723       | 136.5900        |
|                | 16 | R 1  | 175.1195       | 88.0637         |

N-term:+35.07

DPAKHSLLSAR, MH+ 1250.7221, m/z 417.5789  
 L OS G27 P150811 220811-s1.02883.02883.3.dta

scan 2883; 6.3e+000

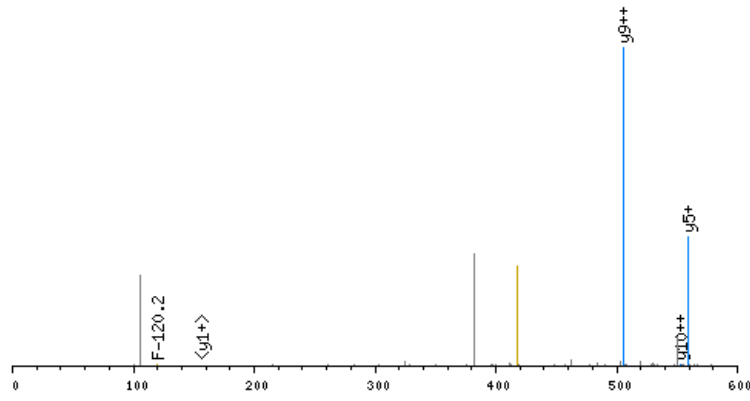

click image to zoom in; click top corners to zoom out [\[precursor±\]](#)

scan 2882; 417.6 m/z; 2.0e+001

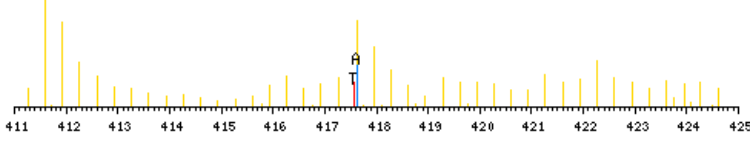

zoomed in precursor plot; T=theoretical m/z, A=acquired m/z

X-range:

-

MassTol: Y-zoom:

MassType:

AVG  MONO

Axis:

1  2

Label:

I  M  -

Ions:

a  +  2+  3+

b  +  2+  3+

c  +  2+  3+

x  +  2+  3+

y  +  2+  3+

z  +  2+  3+

hide H<sub>2</sub>O/NH<sub>3</sub>

zoom 112-122

GO

| b <sup>+</sup> | #  | AA # | y <sup>+</sup> | y <sup>2+</sup> |
|----------------|----|------|----------------|-----------------|
| 144.0660       | 1  | D 11 |                |                 |
| 241.1188       | 2  | P 10 | 1107.6639      | 554.3359        |
| 312.1559       | 3  | A 9  | 1010.6111      | 505.8095        |
| 468.2822       | 4  | K 8  | 939.5740       | 470.2909        |
| 605.3411       | 5  | H 7  | 783.4477       | 392.2278        |
| 692.3732       | 6  | S 6  | 646.3888       | 323.6983        |
| 805.4572       | 7  | L 5  | 559.3568       | 280.1823        |
| 918.5413       | 8  | L 4  | 446.2727       | 223.6403        |
| 1005.5733      | 9  | S 3  | 333.1886       | 167.0982        |
| 1076.6104      | 10 | A 2  | 246.1566       | 123.5822        |
|                | 11 | R 1  | 175.1195       | 88.0637         |

N-term:+29.04 K(4):+156.13

DPEATSHSTQDPLEAQAKSR, MH+ 2224.0846, m/z 556.7766  
 L OS G27 P150811 220811-s1.02810.02810.4.dta

X-range:

-

MassTol: Y-zoom:

MassType:

AVG  MONO

Axis:

1  2

Label:

I  M  -

Ions:

a  +  2+  3+

b  +  2+  3+

c  +  2+  3+

x  +  2+  3+

y  +  2+  3+

z  +  2+  3+

hide H<sub>2</sub>O/NH<sub>3</sub>

zoom 112-122

GO

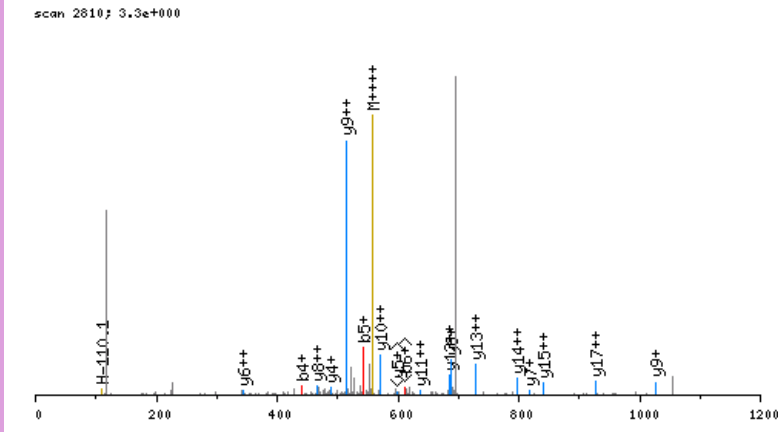

click image to zoom in; click top corners to zoom out [\[precursor±\]](#)

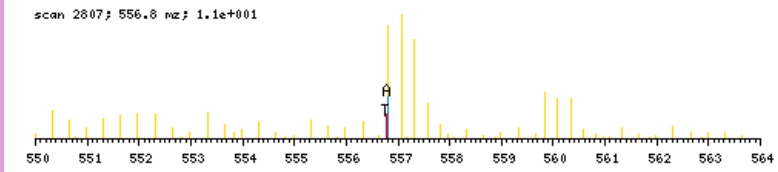

zoomed in precursor plot; T=theoretical m/z, A=acquired m/z

| b <sup>+</sup> | #  | AA # | y <sup>+</sup> | y <sup>2+</sup> |
|----------------|----|------|----------------|-----------------|
| 144.0660       | 1  | D    | 20             |                 |
| 241.1188       | 2  | P    | 19             | 2081.0264       |
| 370.1614       | 3  | E    | 18             | 1983.9736       |
| 441.1985       | 4  | A    | 17             | 1854.9310       |
| 542.2462       | 5  | T    | 16             | 1783.8939       |
| 629.2782       | 6  | S    | 15             | 1682.8462       |
| 766.3371       | 7  | H    | 14             | 1595.8142       |
| 853.3692       | 8  | S    | 13             | 1458.7553       |
| 954.4168       | 9  | T    | 12             | 1371.7233       |
| 1082.4754      | 10 | Q    | 11             | 1270.6756       |
| 1197.5024      | 11 | D    | 10             | 1142.6170       |
| 1294.5551      | 12 | P    | 9              | 1027.5901       |
| 1407.6392      | 13 | L    | 8              | 930.5373        |
| 1536.6818      | 14 | E    | 7              | 817.4532        |
| 1607.7189      | 15 | A    | 6              | 688.4106        |
| 1735.7775      | 16 | Q    | 5              | 617.3735        |
| 1806.8146      | 17 | A    | 4              | 489.3149        |
| 1962.9409      | 18 | K    | 3              | 418.2778        |
| 2049.9729      | 19 | S    | 2              | 262.1515        |
|                | 20 | R    | 1              | 175.1195        |

N-term:+29.04 K(18):+156.13

DPPASVVVGPVVVPR, MH+ 1515.8899, m/z 505.9681  
 L OS G24 P150811 220811-s1.04249.04249.3.dta

X-range:

-

MassTol: Y-zoom:

MassType:

AVG  MONO

Axis:

1  2

Label:

I  M  -

Ions:

a  +  2+  3+

b  +  2+  3+

c  +  2+  3+

x  +  2+  3+

y  +  2+  3+

z  +  2+  3+

hide H<sub>2</sub>O/NH<sub>3</sub>

zoom 112-122

GO

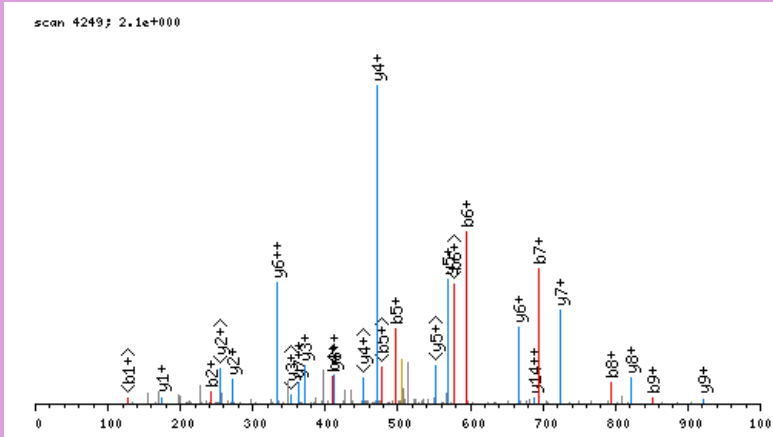

click image to zoom in; click top corners to zoom out [\[precursor±\]](#)

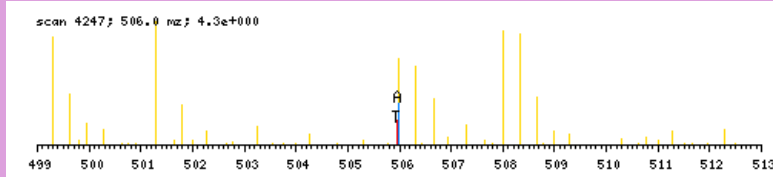

zoomed in precursor plot; T=theoretical m/z, A=acquired m/z

| b <sup>+</sup>  | #  | AA # | y <sup>+</sup>  | y <sup>2+</sup> |
|-----------------|----|------|-----------------|-----------------|
| 144.0660        | 1  | D 15 |                 |                 |
| <b>241.1188</b> | 2  | P 14 | 1372.8316       | <b>686.9197</b> |
| 338.1716        | 3  | P 13 | 1275.7789       | 638.3934        |
| <b>409.2087</b> | 4  | A 12 | 1178.7261       | 589.8670        |
| <b>496.2407</b> | 5  | S 11 | 1107.6890       | 554.3484        |
| <b>595.3091</b> | 6  | V 10 | 1020.6570       | 510.8324        |
| <b>694.3775</b> | 7  | V 9  | <b>921.5886</b> | 461.2982        |
| <b>793.4460</b> | 8  | V 8  | <b>822.5201</b> | <b>411.7640</b> |
| <b>850.4674</b> | 9  | G 7  | <b>723.4517</b> | <b>362.2298</b> |
| 947.5202        | 10 | P 6  | <b>666.4303</b> | <b>333.7190</b> |
| 1046.5886       | 11 | V 5  | <b>569.3775</b> | 285.1927        |
| 1145.6570       | 12 | V 4  | <b>470.3091</b> | 235.6585        |
| 1244.7254       | 13 | V 3  | <b>371.2407</b> | 186.1243        |
| 1341.7782       | 14 | P 2  | <b>272.1723</b> | 136.5900        |
|                 | 15 | R 1  | <b>175.1195</b> | 88.0637         |

N-term:+29.04



DPTSVTLKPMIEIR, MH+ 1554.9202, m/z 518.9782  
 H OS G26 P150811 220811-s1.04577.04577.3.dta

X-range:

-

MassTol: Y-zoom:

MassType:

AVG  MONO

Axis:

1  2

Label:

I  M  -

Ions:

a  +  2+  3+

b  +  2+  3+

c  +  2+  3+

x  +  2+  3+

y  +  2+  3+

z  +  2+  3+

hide H<sub>2</sub>O/NH<sub>3</sub>

zoom 112-122

GO

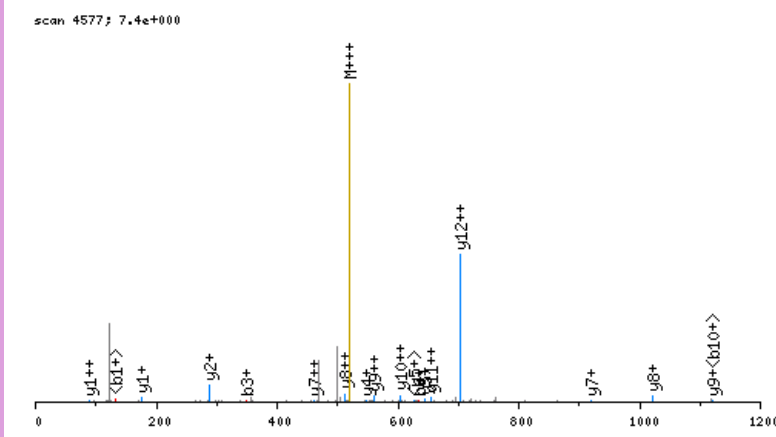

click image to zoom in; click top corners to zoom out [\[precursor±\]](#)

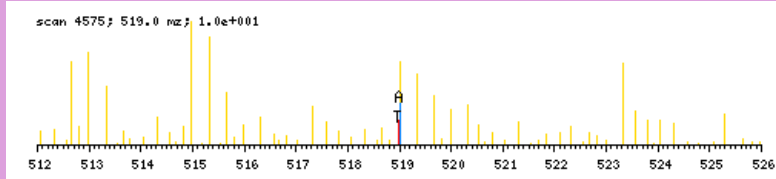

zoomed in precursor plot; T=theoretical m/z, A=acquired m/z

| b <sup>+</sup> | #  | AA # | y <sup>+</sup> | y <sup>2+</sup> |
|----------------|----|------|----------------|-----------------|
| 150.0978       | 1  | D 13 |                |                 |
| 247.1506       | 2  | P 12 | 1405.8301      | 703.4190        |
| 348.1983       | 3  | T 11 | 1308.7774      | 654.8926        |
| 435.2303       | 4  | S 10 | 1207.7297      | 604.3688        |
| 534.2987       | 5  | V 9  | 1120.6977      | 560.8527        |
| 635.3464       | 6  | T 8  | 1021.6292      | 511.3185        |
| 748.4305       | 7  | L 7  | 920.5816       | 460.7947        |
| 910.5886       | 8  | K 6  | 807.4975       | 404.2527        |
| 1007.6413      | 9  | P 5  | 645.3394       | 323.1736        |
| 1138.6818      | 10 | M 4  | 548.2866       | 274.6472        |
| 1267.7244      | 11 | E 3  | 417.2462       | 209.1270        |
| 1380.8085      | 12 | I 2  | 288.2036       | 144.6057        |
|                | 13 | R 1  | 175.1195       | 88.0637         |

N-term:+35.07 K(8):+162.16

DPVLCFTQYEESSGR, MH+ 1815.8223, m/z 605.9456  
 L OS G24 P150811 220811-s1.04379.04379.3.dta

X-range:

-

MassTol: Y-zoom:

MassType:

AVG  MONO

Axis:

1  2

Label:

I  M  -

Ions:

a  +  2+  3+

b  +  2+  3+

c  +  2+  3+

x  +  2+  3+

y  +  2+  3+

z  +  2+  3+

hide H<sub>2</sub>O/NH<sub>3</sub>

zoom 112-122

GO

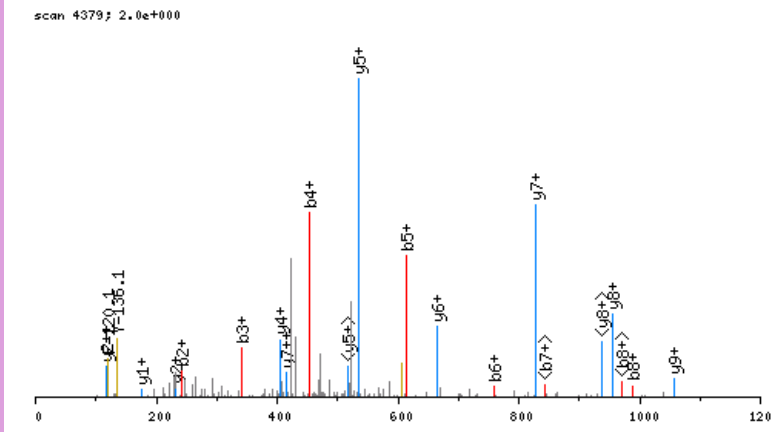

click image to zoom in; click top corners to zoom out [\[precursor±\]](#)

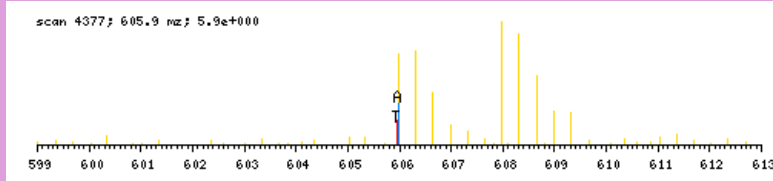

zoomed in precursor plot; T=theoretical m/z, A=acquired m/z

| b <sup>+</sup> | #  | AA # | y <sup>+</sup> | y <sup>2+</sup> |
|----------------|----|------|----------------|-----------------|
| 144.0660       | 1  | D 15 |                |                 |
| 241.1188       | 2  | P 14 | 1672.7640      | 836.8859        |
| 340.1872       | 3  | V 13 | 1575.7113      | 788.3596        |
| 453.2713       | 4  | L 12 | 1476.6429      | 738.8253        |
| 613.3019       | 5  | C 11 | 1363.5588      | 682.2833        |
| 760.3703       | 6  | F 10 | 1203.5282      | 602.2680        |
| 861.4180       | 7  | T 9  | 1056.4598      | 528.7338        |
| 989.4766       | 8  | Q 8  | 955.4121       | 478.2100        |
| 1152.5399      | 9  | Y 7  | 827.3535       | 414.1807        |
| 1281.5825      | 10 | E 6  | 664.2902       | 332.6490        |
| 1410.6251      | 11 | E 5  | 535.2476       | 268.1277        |
| 1497.6571      | 12 | S 4  | 406.2050       | 203.6064        |
| 1584.6891      | 13 | S 3  | 319.1730       | 160.0904        |
| 1641.7106      | 14 | G 2  | 232.1410       | 116.5744        |
|                | 15 | R 1  | 175.1195       | 88.0637         |

N-term:+29.04 C(5):+160.03

DQDEIDCLPGLAKQPSFR, MH+ 2145.0650, m/z 715.6932  
 L OS G26 P150811 220811-s1.05792.05792.3.dta

X-range:

-

MassTol: Y-zoom:

MassType:

AVG  MONO

Axis:

1  2

Label:

I  M  -

Ions:

a  +  2+  3+

b  +  2+  3+

c  +  2+  3+

x  +  2+  3+

y  +  2+  3+

z  +  2+  3+

hide H<sub>2</sub>O/NH<sub>3</sub>

zoom 112-122

GO

scan 5792; 2.2e+000

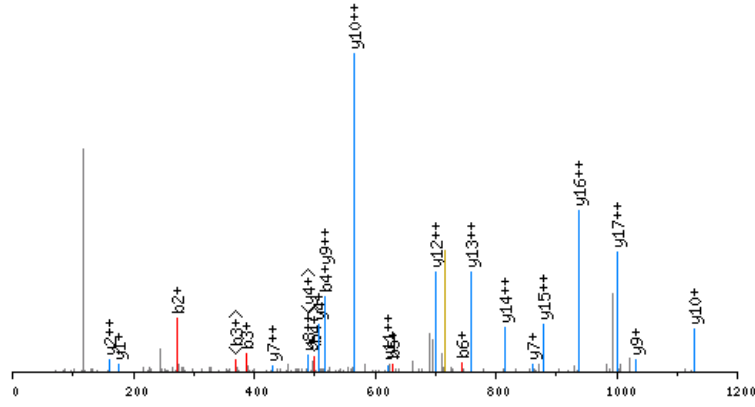

click image to zoom in; click top corners to zoom out [\[precursor±\]](#)

scan 5790; 715.7 nz; 8.2e+000

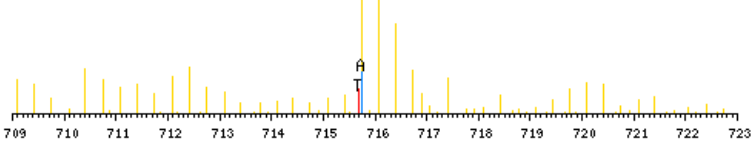

zoomed in precursor plot; T=theoretical m/z, A=acquired m/z

| b <sup>+</sup> | #  | AA # | y <sup>+</sup> | y <sup>2+</sup> |
|----------------|----|------|----------------|-----------------|
| 144.0660       | 1  | D    | 18             |                 |
| 272.1246       | 2  | Q    | 17             | 2002.0068       |
| 387.1516       | 3  | D    | 16             | 1873.9482       |
| 516.1942       | 4  | E    | 15             | 1758.9213       |
| 629.2782       | 5  | I    | 14             | 1629.8787       |
| 744.3052       | 6  | D    | 13             | 1516.7946       |
| 904.3358       | 7  | C    | 12             | 1401.7677       |
| 1017.4198      | 8  | L    | 11             | 1241.7371       |
| 1114.4726      | 9  | P    | 10             | 1128.6530       |
| 1171.4941      | 10 | G    | 9              | 1031.6002       |
| 1284.5781      | 11 | L    | 8              | 974.5788        |
| 1355.6152      | 12 | A    | 7              | 861.4947        |
| 1511.7415      | 13 | K    | 6              | 790.4576        |
| 1639.8001      | 14 | Q    | 5              | 634.3313        |
| 1736.8529      | 15 | P    | 4              | 506.2727        |
| 1823.8849      | 16 | S    | 3              | 409.2199        |
| 1970.9533      | 17 | F    | 2              | 322.1879        |
|                | 18 | R    | 1              | 175.1195        |

N-term: +29.04 C(7): +160.03  
 K(13): +156.13

DQGAPGVPVGPAGPR, MH+ 1309.7076, m/z 437.2407  
 H OS G27 P150811 220811-s1.02961.02961.3.dta

X-range:

-

MassTol: Y-zoom:

MassType:

AVG  MONO

Axis:

1  2

Label:

I  M  -

Ions:

a  +  2+  3+

b  +  2+  3+

c  +  2+  3+

x  +  2+  3+

y  +  2+  3+

z  +  2+  3+

hide H<sub>2</sub>O/NH<sub>3</sub>

zoom 112-122

GO

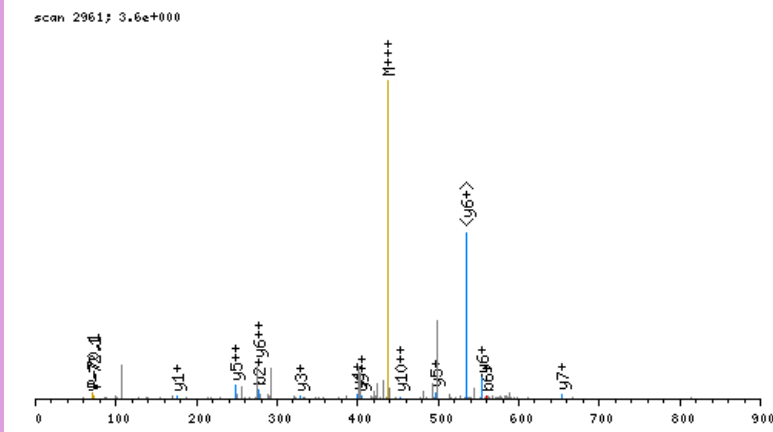

click image to zoom in; click top corners to zoom out [\[precursor±\]](#)

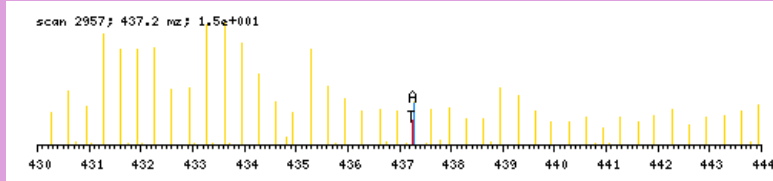

zoomed in precursor plot; T=theoretical m/z, A=acquired m/z

| b <sup>+</sup> | #  | AA # | y <sup>+</sup> | y <sup>2+</sup> |
|----------------|----|------|----------------|-----------------|
| 150.0978       | 1  | D 14 |                |                 |
| 278.1564       | 2  | Q 13 | 1160.6176      | 580.8127        |
| 335.1779       | 3  | G 12 | 1032.5591      | 516.7834        |
| 406.2150       | 4  | A 11 | 975.5376       | 488.2727        |
| 503.2678       | 5  | P 10 | 904.5005       | 452.7542        |
| 560.2892       | 6  | G 9  | 807.4477       | 404.2278        |
| 657.3420       | 7  | P 8  | 750.4262       | 375.7170        |
| 756.4104       | 8  | V 7  | 653.3735       | 327.1907        |
| 813.4319       | 9  | G 6  | 554.3051       | 277.6564        |
| 910.4846       | 10 | P 5  | 497.2836       | 249.1457        |
| 981.5217       | 11 | A 4  | 400.2308       | 200.6193        |
| 1038.5432      | 12 | G 3  | 329.1937       | 165.1008        |
| 1135.5960      | 13 | P 2  | 272.1723       | 136.5900        |
|                | 14 | R 1  | 175.1195       | 88.0637         |

N-term:+35.07

DQGKLIPDDVMTR, MH+ 1543.8154, m/z 515.2767  
 L OS G26 P150811 220811-s1.04343.04343.3.dta

scan 4343; 4.6e+000

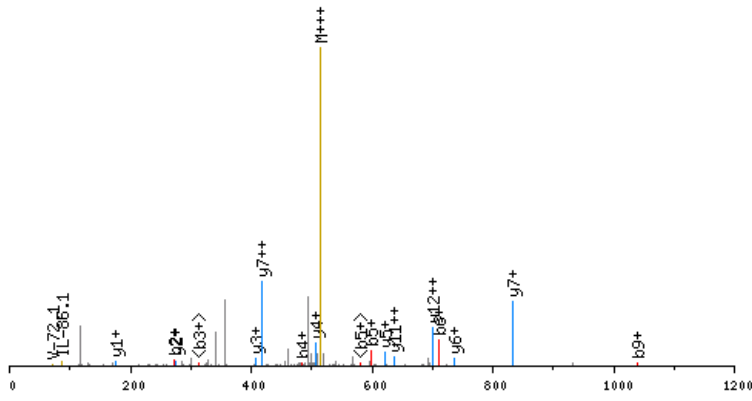

click image to zoom in; click top corners to zoom out [\[precursor±\]](#)

scan 4340; 515.3 m/z; 4.6e+000

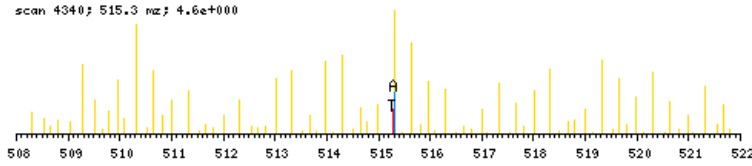

zoomed in precursor plot; T=theoretical m/z, A=acquired m/z

X-range:

-

MassTol: Y-zoom:

MassType:

AVG  MONO

Axis:

1  2

Label:

I  M  -

Ions:

a  +  2+  3+

b  +  2+  3+

c  +  2+  3+

x  +  2+  3+

y  +  2+  3+

z  +  2+  3+

hide H<sub>2</sub>O/NH<sub>3</sub>

zoom 112-122

GO

| b <sup>+</sup> | #  | AA # | y <sup>+</sup> | y <sup>2+</sup> |
|----------------|----|------|----------------|-----------------|
| 144.0660       | 1  | D 13 |                |                 |
| 272.1246       | 2  | Q 12 | 1400.7572      | 700.8825        |
| 329.1461       | 3  | G 11 | 1272.6986      | 636.8532        |
| 485.2724       | 4  | K 10 | 1215.6772      | 608.3425        |
| 598.3564       | 5  | L 9  | 1059.5509      | 530.2793        |
| 711.4405       | 6  | I 8  | 946.4668       | 473.7373        |
| 808.4933       | 7  | P 7  | 833.3827       | 417.1953        |
| 923.5202       | 8  | D 6  | 736.3300       | 368.6689        |
| 1038.5472      | 9  | D 5  | 621.3030       | 311.1554        |
| 1137.6156      | 10 | V 4  | 506.2761       | 253.6420        |
| 1268.6561      | 11 | M 3  | 407.2077       | 204.1077        |
| 1369.7037      | 12 | T 2  | 276.1672       | 138.5875        |
|                | 13 | R 1  | 175.1195       | 88.0637         |

N-term:+29.04 K(4):+156.13

DQSHSNLTPEER, MH+ 1496.7306, m/z 499.5817  
 H OS G27 P150811 220811-s1.03576.03576.3.dta

X-range:

-

MassTol: Y-zoom:

MassType:

AVG  MONO

Axis:

1  2

Label:

I  M  -

Ions:

a  +  2+  3+

b  +  2+  3+

c  +  2+  3+

x  +  2+  3+

y  +  2+  3+

z  +  2+  3+

hide H<sub>2</sub>O/NH<sub>3</sub>

zoom 112-122

GO

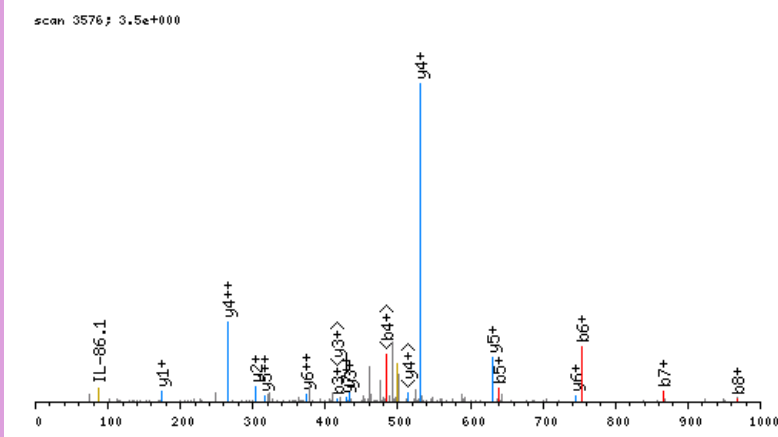

click image to zoom in; click top corners to zoom out [\[precursor±\]](#)

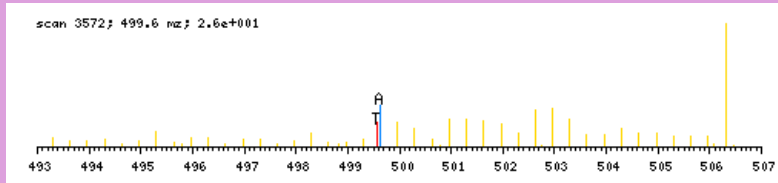

zoomed in precursor plot; T=theoretical m/z, A=acquired m/z

| b <sup>+</sup> | #  | AA # | y <sup>+</sup> | y <sup>2+</sup> |
|----------------|----|------|----------------|-----------------|
| 150.0978       | 1  | D 12 |                |                 |
| 278.1564       | 2  | Q 11 | 1347.6406      | 674.3242        |
| 415.2153       | 3  | H 10 | 1219.5820      | 610.2949        |
| 502.2474       | 4  | S 9  | 1082.5231      | 541.7654        |
| 639.3063       | 5  | H 8  | 995.4910       | 498.2494        |
| 753.3492       | 6  | N 7  | 858.4321       | 429.7200        |
| 866.4333       | 7  | L 6  | 744.3892       | 372.6985        |
| 967.4809       | 8  | T 5  | 631.3051       | 316.1565        |
| 1064.5337      | 9  | P 4  | 530.2575       | 265.6326        |
| 1193.5763      | 10 | E 3  | 433.2047       | 217.1063        |
| 1322.6189      | 11 | E 2  | 304.1621       | 152.5850        |
|                | 12 | R 1  | 175.1195       | 88.0637         |

N-term:+35.07

DQQLQGDGKLIDR, MH+ 1553.8924, m/z 518.6356  
 H OS G26 P150811 220811-s1.02909.02909.3.dta

X-range:

-

MassTol: Y-zoom:

MassType:

AVG  MONO

Axis:

1  2

Label:

I  M  -

Ions:

a  +  2+  3+

b  +  2+  3+

c  +  2+  3+

x  +  2+  3+

y  +  2+  3+

z  +  2+  3+

hide H<sub>2</sub>O/NH<sub>3</sub>

zoom 112-122

GO

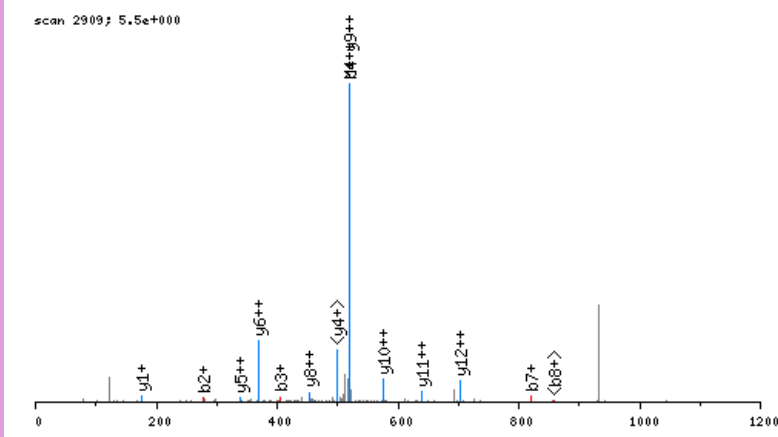

click image to zoom in; click top corners to zoom out [\[precursor±\]](#)

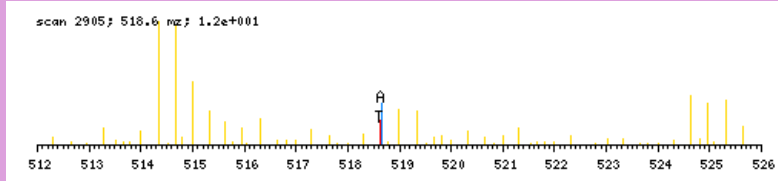

zoomed in precursor plot; T=theoretical m/z, A=acquired m/z

| b <sup>+</sup> | #  | AA # | y <sup>+</sup> | y <sup>2+</sup> |
|----------------|----|------|----------------|-----------------|
| 150.0978       | 1  | D    | 13             |                 |
| 278.1564       | 2  | Q    | 12             | 1404.8023       |
| 406.2150       | 3  | Q    | 11             | 1276.7438       |
| 519.2991       | 4  | L    | 10             | 1148.6852       |
| 647.3576       | 5  | Q    | 9              | 1035.6011       |
| 704.3791       | 6  | G    | 8              | 907.5425        |
| 819.4060       | 7  | D    | 7              | 850.5211        |
| 876.4275       | 8  | G    | 6              | 735.4941        |
| 1038.5856      | 9  | K    | 5              | 678.4727        |
| 1151.6697      | 10 | L    | 4              | 516.3146        |
| 1264.7537      | 11 | I    | 3              | 403.2305        |
| 1379.7807      | 12 | D    | 2              | 290.1464        |
|                | 13 | R    | 1              | 175.1195        |

N-term:+35.07 K(9):+162.16

DQSPASHEIATNLGDFALR, MH+ 2070.0256, m/z 690.6800  
 L OS G26 P150811 220811-s1.06004.06004.3.dta

X-range:

-

MassTol: Y-zoom:

MassType:

AVG  MONO

Axis:

1  2

Label:

I  M  -

Ions:

a  +  2+  3+

b  +  2+  3+

c  +  2+  3+

x  +  2+  3+

y  +  2+  3+

z  +  2+  3+

hide H<sub>2</sub>O/NH<sub>3</sub>

zoom 112-122

GO

scan 6004; 1.5e+000

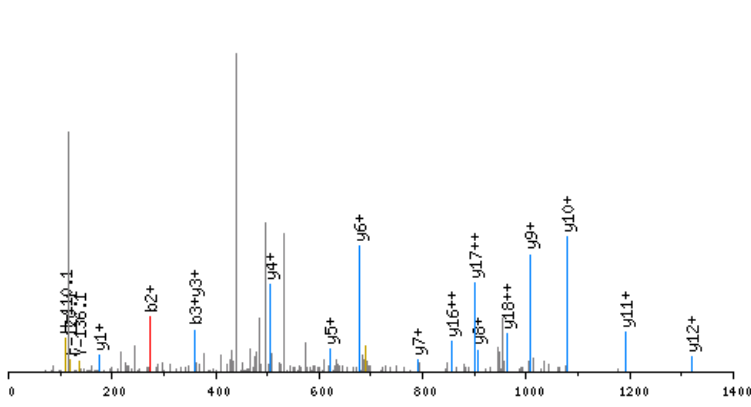

click image to zoom in; click top corners to zoom out [\[precursor±\]](#)

scan 6000; 690.7 m/z; 2.2e+001

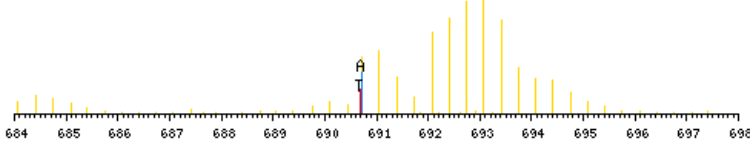

zoomed in precursor plot; T=theoretical m/z, A=acquired m/z

| b <sup>+</sup> | #  | AA # | y <sup>+</sup> | y <sup>2+</sup> |
|----------------|----|------|----------------|-----------------|
| 144.0660       | 1  | D 19 |                |                 |
| 272.1246       | 2  | Q 18 | 1926.9674      | 963.9876        |
| 359.1566       | 3  | S 17 | 1798.9088      | 899.9583        |
| 456.2094       | 4  | P 16 | 1711.8768      | 856.4423        |
| 527.2465       | 5  | A 15 | 1614.8240      | 807.9159        |
| 614.2786       | 6  | S 14 | 1543.7869      | 772.3974        |
| 751.3375       | 7  | H 13 | 1456.7549      | 728.8813        |
| 880.3801       | 8  | E 12 | 1319.6959      | 660.3519        |
| 993.4641       | 9  | I 11 | 1190.6533      | 595.8306        |
| 1064.5012      | 10 | A 10 | 1077.5693      | 539.2886        |
| 1165.5489      | 11 | T 9  | 1006.5322      | 503.7700        |
| 1279.5918      | 12 | N 8  | 905.4845       | 453.2462        |
| 1392.6759      | 13 | L 7  | 791.4416       | 396.2247        |
| 1449.6974      | 14 | G 6  | 678.3575       | 339.6827        |
| 1564.7243      | 15 | D 5  | 621.3360       | 311.1719        |
| 1711.7927      | 16 | F 4  | 506.3091       | 253.6585        |
| 1782.8298      | 17 | A 3  | 359.2407       | 180.1243        |
| 1895.9139      | 18 | L 2  | 288.2036       | 144.6057        |
|                | 19 | R 1  | 175.1195       | 88.0637         |

N-term:+29.04



DQTQIQEFKEAFTVIDQNR, MH+ 2366.1992, m/z 789.4046  
 L OS G26 P150811 220811-s1.06833.06833.3.dta

X-range:

-

MassTol: Y-zoom:

MassType:

AVG  MONO

Axis:

1  2

Label:

I  M  -

Ions:

a  +  2+  3+

b  +  2+  3+

c  +  2+  3+

x  +  2+  3+

y  +  2+  3+

z  +  2+  3+

hide H<sub>2</sub>O/NH<sub>3</sub>

zoom 112-122

GO

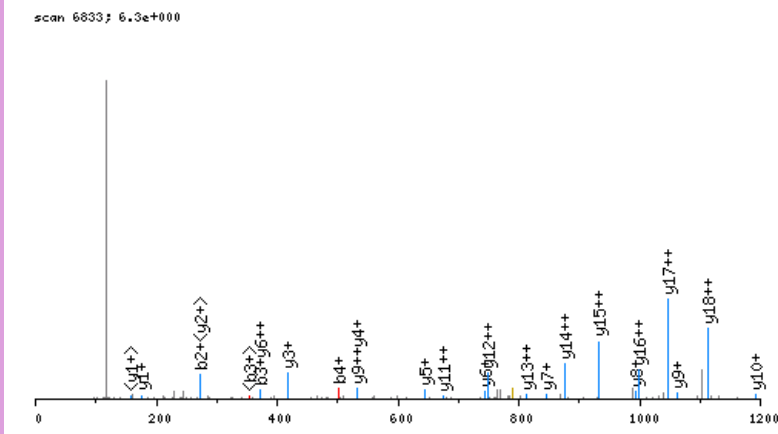

click image to zoom in; click top corners to zoom out [precursor±]

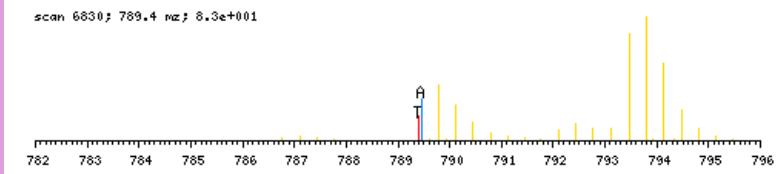

zoomed in precursor plot; T=theoretical m/z, A=acquired m/z

| b <sup>+</sup> | #  | AA | #  | y <sup>+</sup> | y <sup>2+</sup> |
|----------------|----|----|----|----------------|-----------------|
| 144.0660       | 1  | D  | 19 |                |                 |
| 272.1246       | 2  | Q  | 18 | 2223.1410      | 1112.0744       |
| 373.1723       | 3  | T  | 17 | 2095.0824      | 1048.0451       |
| 501.2309       | 4  | Q  | 16 | 1994.0348      | 997.5213        |
| 614.3149       | 5  | I  | 15 | 1865.9762      | 933.4920        |
| 742.3735       | 6  | Q  | 14 | 1752.8921      | 876.9500        |
| 871.4161       | 7  | E  | 13 | 1624.8335      | 812.9207        |
| 1018.4845      | 8  | F  | 12 | 1495.7909      | 748.3994        |
| 1174.6108      | 9  | K  | 11 | 1348.7225      | 674.8652        |
| 1303.6534      | 10 | E  | 10 | 1192.5962      | 596.8020        |
| 1374.6905      | 11 | A  | 9  | 1063.5536      | 532.2807        |
| 1521.7589      | 12 | F  | 8  | 992.5165       | 496.7622        |
| 1622.8066      | 13 | T  | 7  | 845.4481       | 423.2280        |
| 1721.8750      | 14 | V  | 6  | 744.4004       | 372.7041        |
| 1834.9591      | 15 | I  | 5  | 645.3320       | 323.1699        |
| 1949.9860      | 16 | D  | 4  | 532.2479       | 266.6279        |
| 2078.0446      | 17 | Q  | 3  | 417.2210       | 209.1144        |
| 2192.0876      | 18 | N  | 2  | 289.1624       | 145.0851        |
|                | 19 | R  | 1  | 175.1195       | 88.0637         |

N-term:+29.04 K(9):+156.13

DQYELLCLDNTR, MH+ 1567.7426, m/z 523.2524  
 L OS G25 P150811 220811-s1.07020.07020.3.dta

scan 7020; 2.3e+000

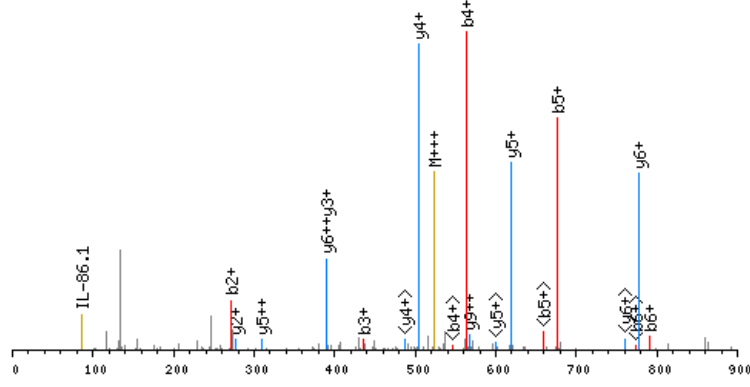

click image to zoom in; click top corners to zoom out [precursor±]

scan 7017; 523.3 m/z; 6.1e+001

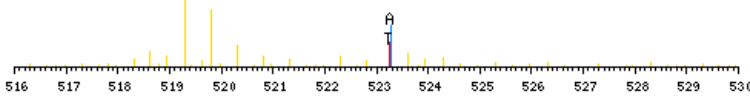

zoomed in precursor plot; T=theoretical m/z, A=acquired m/z

X-range:

0 - 0

MassTol: Y-zoom:

0. 1.

MassType:

AVG  MONO

Axis:

1  2

Label:

I  M  -

Ions:

a  +  2+  3+

b  +  2+  3+

c  +  2+  3+

x  +  2+  3+

y  +  2+  3+

z  +  2+  3+

hide H<sub>2</sub>O/NH<sub>3</sub>

zoom 112-122

GO

| b <sup>+</sup> | #  | AA # | y <sup>+</sup> | y <sup>2+</sup> |
|----------------|----|------|----------------|-----------------|
| 144.0660       | 1  | D 12 |                |                 |
| 272.1246       | 2  | Q 11 | 1424.6843      | 712.8461        |
| 435.1879       | 3  | Y 10 | 1296.6258      | 648.8168        |
| 564.2305       | 4  | E 9  | 1133.5624      | 567.2851        |
| 677.3146       | 5  | L 8  | 1004.5198      | 502.7638        |
| 790.3987       | 6  | L 7  | 891.4358       | 446.2218        |
| 950.4293       | 7  | C 6  | 778.3517       | 389.6798        |
| 1063.5133      | 8  | L 5  | 618.3211       | 309.6645        |
| 1178.5403      | 9  | D 4  | 505.2370       | 253.1224        |
| 1292.5832      | 10 | N 3  | 390.2101       | 195.6090        |
| 1393.6309      | 11 | T 2  | 276.1672       | 138.5875        |
|                | 12 | R 1  | 175.1195       | 88.0637         |

N-term:+29.04 C(7):+160.03

DRGEAGAAGPSGPAGPR, MH+ 1556.7993, m/z 519.6046  
 H OS G27 P150811 220811-s1.01985.01985.3.dta

X-range:

-

MassTol: Y-zoom:

MassType:

AVG  MONO

Axis:

1  2

Label:

I  M  -

Ions:

a  +  2+  3+

b  +  2+  3+

c  +  2+  3+

x  +  2+  3+

y  +  2+  3+

z  +  2+  3+

hide H<sub>2</sub>O/NH<sub>3</sub>

zoom 112-122

GO

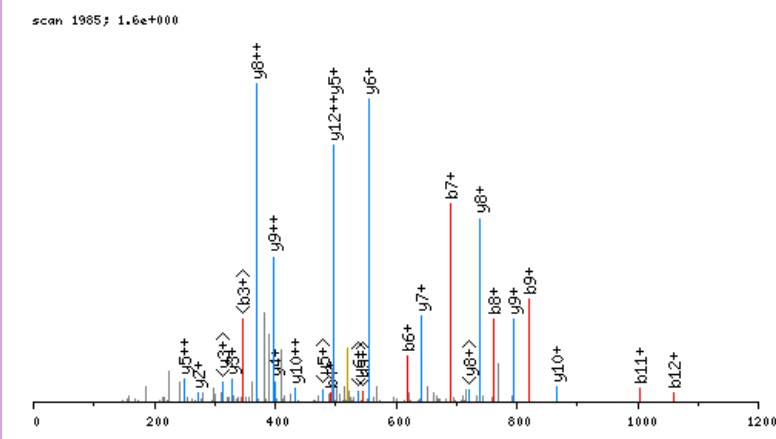

click image to zoom in; click top corners to zoom out [\[precursor±\]](#)

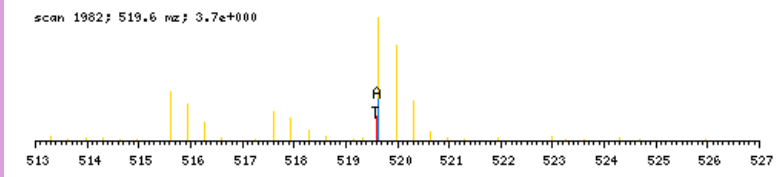

zoomed in precursor plot; T=theoretical m/z, A=acquired m/z

| b <sup>+</sup> | #  | AA # | y <sup>+</sup> | y <sup>2+</sup> |
|----------------|----|------|----------------|-----------------|
| 150.0978       | 1  | D 17 |                |                 |
| 306.1990       | 2  | R 16 | 1407.7093      | 704.3586        |
| 363.2204       | 3  | G 15 | 1251.6082      | 626.3080        |
| 492.2630       | 4  | E 14 | 1194.5867      | 597.7973        |
| 563.3001       | 5  | A 13 | 1065.5441      | 533.2760        |
| 620.3216       | 6  | G 12 | 994.5070       | 497.7574        |
| 691.3587       | 7  | A 11 | 937.4856       | 469.2467        |
| 762.3958       | 8  | A 10 | 866.4484       | 433.7281        |
| 819.4173       | 9  | G 9  | 795.4113       | 398.2096        |
| 916.4700       | 10 | P 8  | 738.3899       | 369.6988        |
| 1003.5021      | 11 | S 7  | 641.3371       | 321.1725        |
| 1060.5235      | 12 | G 6  | 554.3051       | 277.6564        |
| 1157.5763      | 13 | P 5  | 497.2836       | 249.1457        |
| 1228.6134      | 14 | A 4  | 400.2308       | 200.6193        |
| 1285.6349      | 15 | G 3  | 329.1937       | 165.1008        |
| 1382.6876      | 16 | P 2  | 272.1723       | 136.5900        |
|                | 17 | R 1  | 175.1195       | 88.0637         |

N-term:+35.07

DRGETGPAGPAGPIGPAGAR, MH+ 1837.9733, m/z 613.3293  
 H OS G26 P150811 220811-s1.02772.02772.3.dta

scan 2772; 1.4e+000

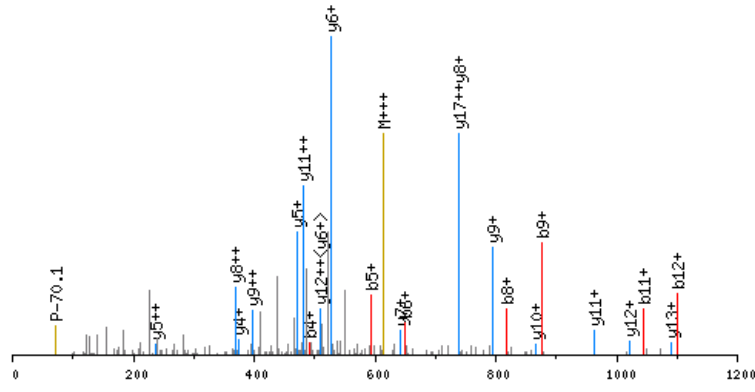

click image to zoom in; click top corners to zoom out [\[precursor±\]](#)

scan 2770; 613.3 m/z; 8.6e+001

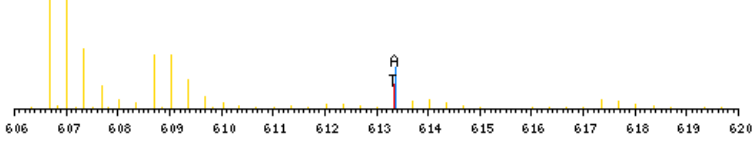

zoomed in precursor plot; T=theoretical m/z, A=acquired m/z

X-range:

-

MassTol: Y-zoom:

MassType:

AVG  MONO

Axis:

1  2

Label:

I  M  -

Ions:

a  +  2+  3+

b  +  2+  3+

c  +  2+  3+

x  +  2+  3+

y  +  2+  3+

z  +  2+  3+

hide H<sub>2</sub>O/NH<sub>3</sub>

zoom 112-122

GO

| b <sup>+</sup> | #  | AA # | y <sup>+</sup> | y <sup>2+</sup> |
|----------------|----|------|----------------|-----------------|
| 150.0978       | 1  | D 20 |                |                 |
| 306.1990       | 2  | R 19 | 1688.8832      | 844.9455        |
| 363.2204       | 3  | G 18 | 1532.7821      | 766.8950        |
| 492.2630       | 4  | E 17 | 1475.7607      | 738.3842        |
| 593.3107       | 5  | T 16 | 1346.7181      | 673.8629        |
| 650.3322       | 6  | G 15 | 1245.6704      | 623.3391        |
| 747.3849       | 7  | P 14 | 1188.6489      | 594.8284        |
| 818.4220       | 8  | A 13 | 1091.5962      | 546.3020        |
| 875.4435       | 9  | G 12 | 1020.5591      | 510.7834        |
| 972.4963       | 10 | P 11 | 963.5376       | 482.2727        |
| 1043.5334      | 11 | A 10 | 866.4848       | 433.7463        |
| 1100.5548      | 12 | G 9  | 795.4477       | 398.2278        |
| 1197.6076      | 13 | P 8  | 738.4262       | 369.7170        |
| 1310.6917      | 14 | I 7  | 641.3735       | 321.1907        |
| 1367.7131      | 15 | G 6  | 528.2894       | 264.6486        |
| 1464.7659      | 16 | P 5  | 471.2680       | 236.1379        |
| 1535.8030      | 17 | A 4  | 374.2152       | 187.6115        |
| 1592.8245      | 18 | G 3  | 303.1781       | 152.0930        |
| 1663.8616      | 19 | A 2  | 246.1566       | 123.5822        |
|                | 20 | R 1  | 175.1195       | 88.0637         |

N-term:+35.07

DSFRDQAVAIMR, MH+ 1436.7320, m/z 479.5822  
 L OS G27 P150811 220811-s1.05665.05665.3.dta

X-range:

-

MassTol: Y-zoom:

MassType:

AVG  MONO

Axis:

1  2

Label:

I  M  -

Ions:

a  +  2+  3+

b  +  2+  3+

c  +  2+  3+

x  +  2+  3+

y  +  2+  3+

z  +  2+  3+

hide H<sub>2</sub>O/NH<sub>3</sub>

zoom 112-122

GO

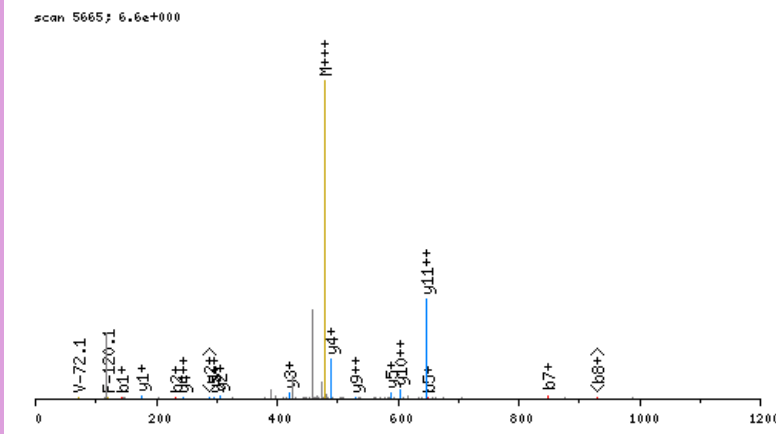

click image to zoom in; click top corners to zoom out [\[precursor±\]](#)

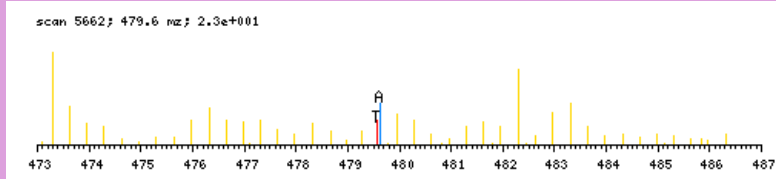

zoomed in precursor plot; T=theoretical m/z, A=acquired m/z

| b <sup>+</sup> | #  | AA # | y <sup>+</sup> | y <sup>2+</sup> |
|----------------|----|------|----------------|-----------------|
| 144.0660       | 1  | D 12 |                |                 |
| 231.0981       | 2  | S 11 | 1293.6738      | 647.3408        |
| 378.1665       | 3  | F 10 | 1206.6417      | 603.8248        |
| 534.2676       | 4  | R 9  | 1059.5733      | 530.2906        |
| 649.2945       | 5  | D 8  | 903.4722       | 452.2400        |
| 777.3531       | 6  | Q 7  | 788.4453       | 394.7265        |
| 848.3902       | 7  | A 6  | 660.3867       | 330.6973        |
| 947.4586       | 8  | V 5  | 589.3496       | 295.1787        |
| 1018.4958      | 9  | A 4  | 490.2812       | 245.6445        |
| 1131.5798      | 10 | I 3  | 419.2440       | 210.1259        |
| 1262.6203      | 11 | M 2  | 306.1600       | 153.5839        |
|                | 12 | R 1  | 175.1195       | 88.0637         |

N-term:+29.04

DSMDTGAGSIR, MH+ 1143.5528, m/z 572.2800  
 H OS G25 P150811 220811-s1.02536.02536.2.dta

scan 2536; 2.8e+001

X-range:

-

MassTol: Y-zoom:

MassType:

AVG  MONO

Axis:

1  2

Label:

I  M  -

Ions:

a  +  2+  3+

b  +  2+  3+

c  +  2+  3+

x  +  2+  3+

y  +  2+  3+

z  +  2+  3+

hide H<sub>2</sub>O/NH<sub>3</sub>

zoom 112-122

GO

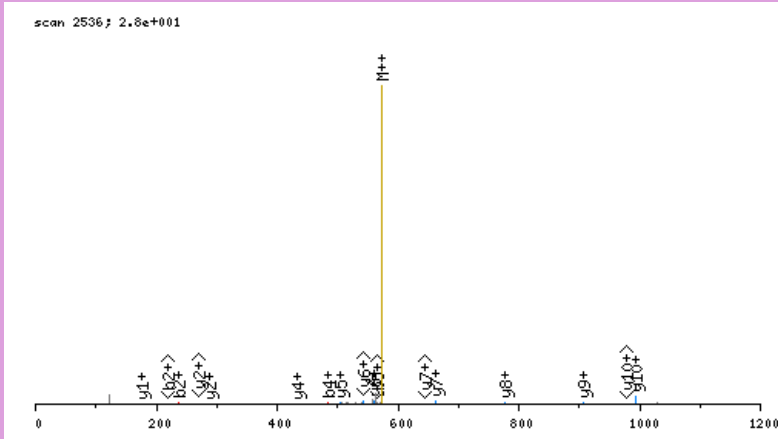

click image to zoom in; click top corners to zoom out [\[precursor±\]](#)

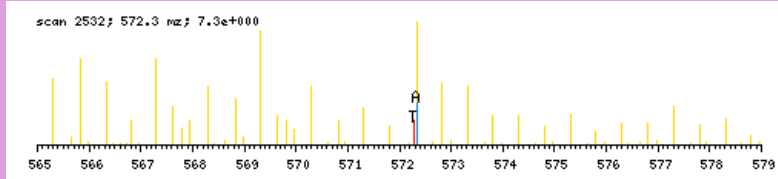

zoomed in precursor plot; T=theoretical m/z, A=acquired m/z

| b <sup>+</sup> | #  | AA # | y <sup>+</sup> | y <sup>2+</sup>   |
|----------------|----|------|----------------|-------------------|
| 150.0978       | 1  | D    | 11             |                   |
| 237.1299       | 2  | S    | 10             | 994.4628 497.7353 |
| 368.1704       | 3  | M    | 9              | 907.4307 454.2193 |
| 483.1973       | 4  | D    | 8              | 776.3903 388.6990 |
| 584.2450       | 5  | T    | 7              | 661.3633 331.1856 |
| 641.2664       | 6  | G    | 6              | 560.3156 280.6617 |
| 712.3036       | 7  | A    | 5              | 503.2942 252.1510 |
| 769.3250       | 8  | G    | 4              | 432.2571 216.6324 |
| 856.3570       | 9  | S    | 3              | 375.2356 188.1217 |
| 969.4411       | 10 | I    | 2              | 288.2036 144.6057 |
|                | 11 | R    | 1              | 175.1195 88.0637  |

N-term: +35.07

DSQVHSGVQVEGR, MH+ 1425.7086, m/z 475.9077  
 L OS G27 P150811 220811-s1.02105.02105.3.dta

X-range:

-

MassTol: Y-zoom:

MassType:

AVG  MONO

Axis:

1  2

Label:

I  M  -

Ions:

a  +  2+  3+

b  +  2+  3+

c  +  2+  3+

x  +  2+  3+

y  +  2+  3+

z  +  2+  3+

hide H<sub>2</sub>O/NH<sub>3</sub>

zoom 112-122

GO

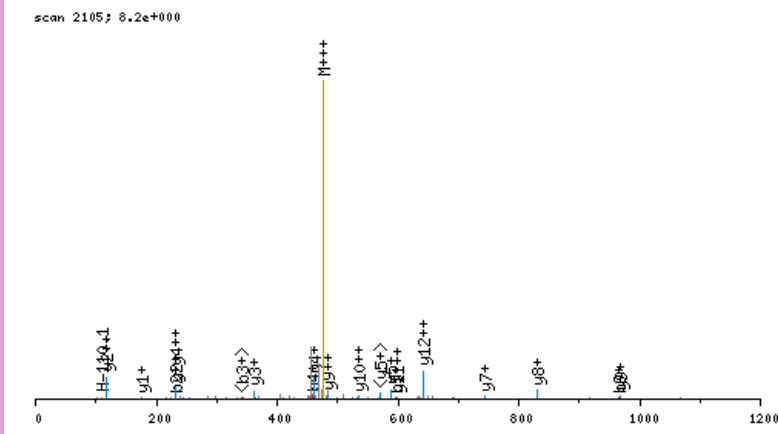

click image to zoom in; click top corners to zoom out [\[precursor±\]](#)

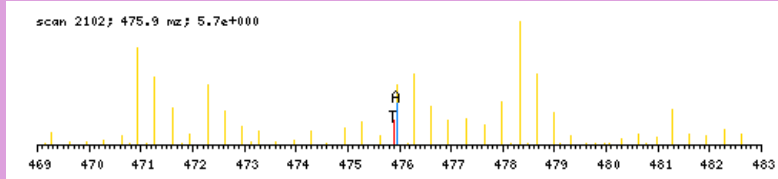

zoomed in precursor plot; T=theoretical m/z, A=acquired m/z

| b <sup>+</sup> | #  | AA # | y <sup>+</sup> | y <sup>2+</sup> |
|----------------|----|------|----------------|-----------------|
| 144.0660       | 1  | D 13 |                |                 |
| 231.0981       | 2  | S 12 | 1282.6504      | 641.8291        |
| 359.1566       | 3  | Q 11 | 1195.6184      | 598.3131        |
| 458.2251       | 4  | V 10 | 1067.5598      | 534.2838        |
| 595.2840       | 5  | H 9  | 968.4914       | 484.7496        |
| 682.3160       | 6  | S 8  | 831.4325       | 416.2201        |
| 739.3375       | 7  | G 7  | 744.4004       | 372.7041        |
| 838.4059       | 8  | V 6  | 687.3790       | 344.1934        |
| 966.4645       | 9  | Q 5  | 588.3105       | 294.6592        |
| 1065.5329      | 10 | V 4  | 460.2520       | 230.6299        |
| 1194.5755      | 11 | E 3  | 361.1836       | 181.0957        |
| 1251.5969      | 12 | G 2  | 232.1410       | 116.5744        |
|                | 13 | R 1  | 175.1195       | 88.0637         |

N-term:+29.04

DSSDSMDTGAGSIR, MH+ 1426.6120, m/z 713.8096  
 L OS G25 P150811 220811-s1.02826.02826.2.dta

X-range:

-

MassTol: Y-zoom:

MassType:

AVG  MONO

Axis:

1  2

Label:

I  M  -

Ions:

a  +  2+  3+

b  +  2+  3+

c  +  2+  3+

x  +  2+  3+

y  +  2+  3+

z  +  2+  3+

hide H<sub>2</sub>O/NH<sub>3</sub>

zoom 112-122

GO

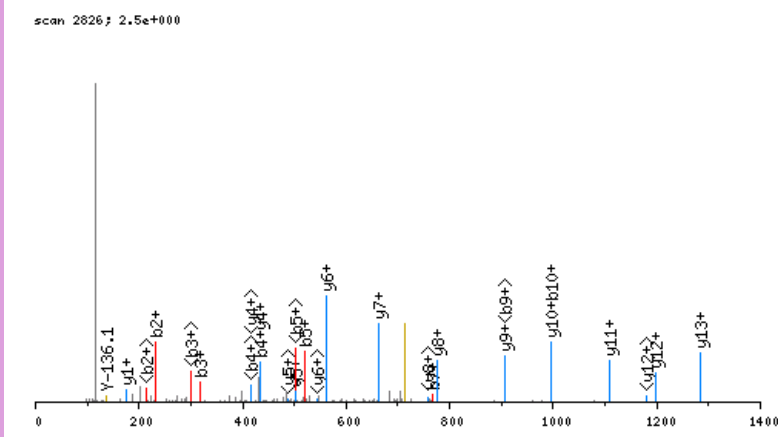

click image to zoom in; click top corners to zoom out [\[precursor±\]](#)

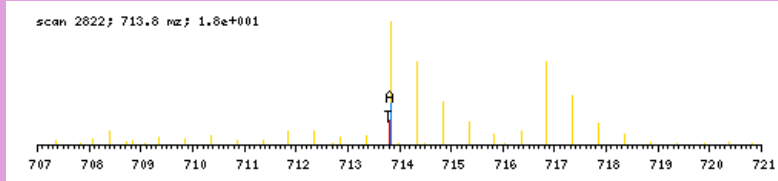

zoomed in precursor plot; T=theoretical m/z, A=acquired m/z

| b <sup>+</sup> | #  | AA # | y <sup>+</sup> | y <sup>2+</sup> |
|----------------|----|------|----------------|-----------------|
| 144.0660       | 1  | D 14 |                |                 |
| 231.0981       | 2  | S 13 | 1283.5538      | 642.2808        |
| 318.1301       | 3  | S 12 | 1196.5217      | 598.7648        |
| 433.1570       | 4  | D 11 | 1109.4897      | 555.2488        |
| 520.1891       | 5  | S 10 | 994.4628       | 497.7353        |
| 651.2296       | 6  | M 9  | 907.4307       | 454.2193        |
| 766.2565       | 7  | D 8  | 776.3903       | 388.6990        |
| 867.3042       | 8  | T 7  | 661.3633       | 331.1856        |
| 924.3256       | 9  | G 6  | 560.3156       | 280.6617        |
| 995.3628       | 10 | A 5  | 503.2942       | 252.1510        |
| 1052.3842      | 11 | G 4  | 432.2571       | 216.6324        |
| 1139.4162      | 12 | S 3  | 375.2356       | 188.1217        |
| 1252.5003      | 13 | I 2  | 288.2036       | 144.6057        |
|                | 14 | R 1  | 175.1195       | 88.0637         |

N-term:+29.04



DSVASTVSGVVDKTKGAVTGSVER, MH+ 2433.3201, m/z 609.0855  
 I OS G27 P150811 220811-s1.07125.07125.4.dta

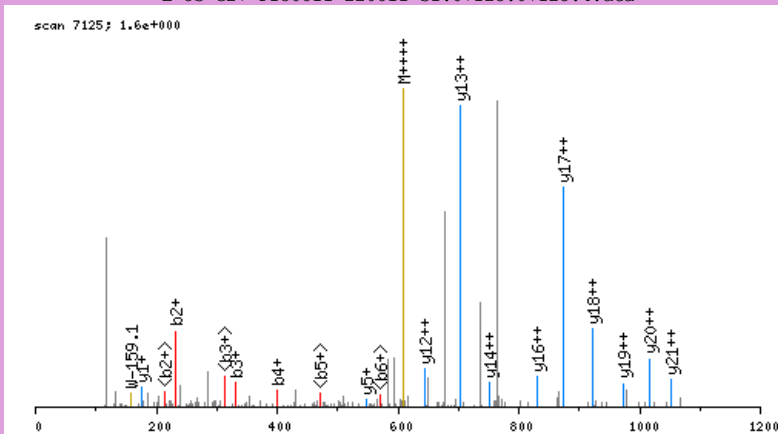

click image to zoom in; click top corners to zoom out [\[precursor±\]](#)

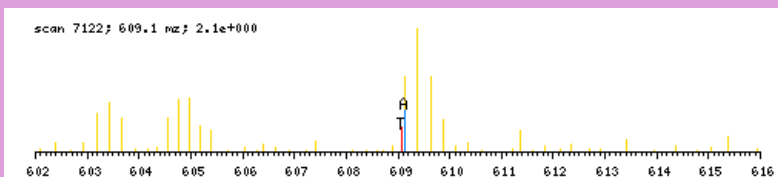

zoomed in precursor plot; T=theoretical m/z, A=acquired m/z

X-range:

-

MassTol: Y-zoom:

MassType:

AVG  MONO

Axis:

1  2

Label:

I  M  -

Ions:

a  +  2+  3+

b  +  2+  3+

c  +  2+  3+

x  +  2+  3+

y  +  2+  3+

z  +  2+  3+

hide H<sub>2</sub>O/NH<sub>3</sub>

zoom 112-122

GO

| b <sup>+</sup> | #  | AA | #  | y <sup>+</sup> | y <sup>2+</sup> |
|----------------|----|----|----|----------------|-----------------|
| 144.0660       | 1  | D  | 24 |                |                 |
| 231.0981       | 2  | S  | 23 | 2290.2619      | 1145.6349       |
| 330.1665       | 3  | V  | 22 | 2203.2299      | 1102.1188       |
| 401.2036       | 4  | A  | 21 | 2104.1614      | 1052.5846       |
| 488.2356       | 5  | S  | 20 | 2033.1243      | 1017.0661       |
| 589.2833       | 6  | T  | 19 | 1946.0923      | 973.5501        |
| 688.3517       | 7  | V  | 18 | 1845.0446      | 923.0262        |
| 775.3837       | 8  | S  | 17 | 1745.9762      | 873.4920        |
| 832.4052       | 9  | G  | 16 | 1658.9442      | 829.9760        |
| 931.4736       | 10 | V  | 15 | 1601.9227      | 801.4653        |
| 1030.5420      | 11 | V  | 14 | 1502.8543      | 751.9311        |
| 1145.5690      | 12 | D  | 13 | 1403.7859      | 702.3969        |
| 1301.6953      | 13 | K  | 12 | 1288.7589      | 644.8834        |
| 1402.7430      | 14 | T  | 11 | 1132.6326      | 566.8202        |
| 1558.8693      | 15 | K  | 10 | 1031.5850      | 516.2964        |
| 1615.8907      | 16 | G  | 9  | 875.4587       | 438.2332        |
| 1686.9278      | 17 | A  | 8  | 818.4372       | 409.7225        |
| 1785.9963      | 18 | V  | 7  | 747.4001       | 374.2040        |
| 1887.0439      | 19 | T  | 6  | 648.3317       | 324.6698        |
| 1944.0654      | 20 | G  | 5  | 547.2840       | 274.1459        |
| 2031.0974      | 21 | S  | 4  | 490.2625       | 245.6352        |
| 2130.1658      | 22 | V  | 3  | 403.2305       | 202.1192        |
| 2259.2084      | 23 | E  | 2  | 304.1621       | 152.5850        |
|                | 24 | R  | 1  | 175.1195       | 88.0637         |

N-term: +29.04 K(13) : +156.13  
 K(15) : +156.13

DSVSVFNGAVSDDSKR, MH+ 1750.9248, m/z 584.3131  
 H OS G26 P150811 220811-s1.03681.03681.3.dta

X-range:

-

MassTol: Y-zoom:

MassType:

AVG  MONO

Axis:

1  2

Label:

I  M  -

Ions:

a  +  2+  3+

b  +  2+  3+

c  +  2+  3+

x  +  2+  3+

y  +  2+  3+

z  +  2+  3+

hide H<sub>2</sub>O/NH<sub>3</sub>

zoom 112-122

GO

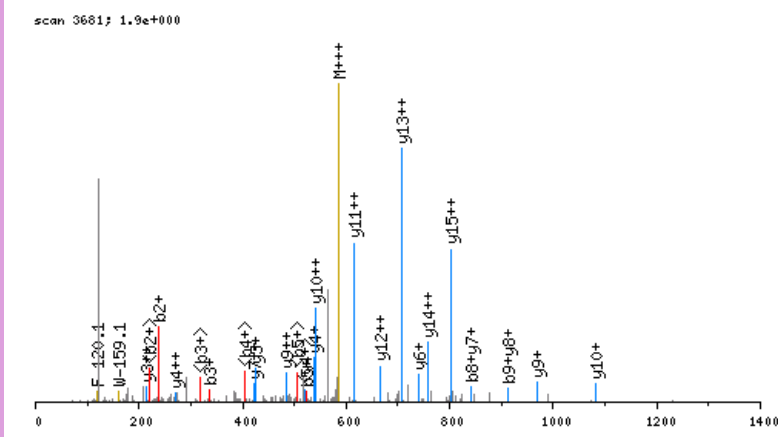

click image to zoom in; click top corners to zoom out [\[precursor±\]](#)

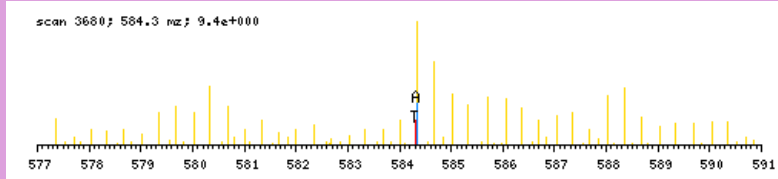

zoomed in precursor plot; T=theoretical m/z, A=acquired m/z

| b <sup>+</sup> | #  | AA # | y <sup>+</sup> | y <sup>2+</sup> |
|----------------|----|------|----------------|-----------------|
| 150.0978       | 1  | D 16 |                |                 |
| 237.1299       | 2  | S 15 | 1601.8348      | 801.4213        |
| 336.1983       | 3  | V 14 | 1514.8027      | 757.9053        |
| 423.2303       | 4  | S 13 | 1415.7343      | 708.3711        |
| 522.2987       | 5  | V 12 | 1328.7023      | 664.8551        |
| 669.3671       | 6  | F 11 | 1229.6339      | 615.3209        |
| 783.4101       | 7  | N 10 | 1082.5655      | 541.7866        |
| 840.4315       | 8  | G 9  | 968.5225       | 484.7652        |
| 911.4686       | 9  | A 8  | 911.5011       | 456.2544        |
| 1010.5371      | 10 | V 7  | 840.4640       | 420.7359        |
| 1097.5691      | 11 | S 6  | 741.3955       | 371.2017        |
| 1212.5960      | 12 | D 5  | 654.3635       | 327.6857        |
| 1327.6230      | 13 | D 4  | 539.3366       | 270.1722        |
| 1414.6550      | 14 | S 3  | 424.3096       | 212.6587        |
| 1576.8131      | 15 | K 2  | 337.2776       | 169.1427        |
|                | 16 | R 1  | 175.1195       | 88.0637         |

N-term:+35.07 K(15):+162.16

DSYVGVDEAQSQR, MH+ 1410.6865, m/z 470.9004  
 L OS G27 P150811 220811-s1.02063.02063.3.dta

scan 2063; 1.2e+001

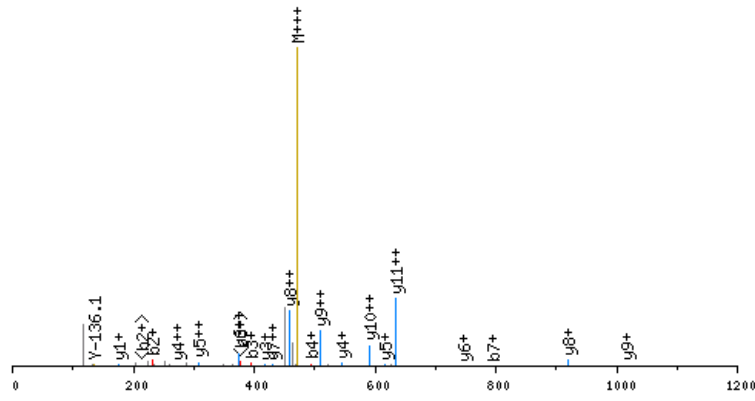

click image to zoom in; click top corners to zoom out [\[precursor±\]](#)

scan 2062; 470.9 m/z; 1.8e+001

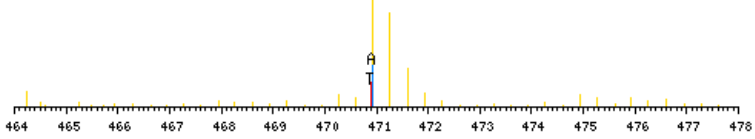

zoomed in precursor plot; T=theoretical m/z, A=acquired m/z

X-range:

-

MassTol: Y-zoom:

MassType:

AVG  MONO

Axis:

1  2

Label:

I  M  -

Ions:

a  +  2+  3+

b  +  2+  3+

c  +  2+  3+

x  +  2+  3+

y  +  2+  3+

z  +  2+  3+

hide H<sub>2</sub>O/NH<sub>3</sub>

zoom 112-122

GO

| b <sup>+</sup> | #  | AA # | y <sup>+</sup> | y <sup>2+</sup> |
|----------------|----|------|----------------|-----------------|
| 144.0660       | 1  | D 12 |                |                 |
| 231.0981       | 2  | S 11 | 1267.6283      | 634.3181        |
| 394.1614       | 3  | Y 10 | 1180.5963      | 590.8020        |
| 493.2298       | 4  | V 9  | 1017.5329      | 509.2704        |
| 550.2513       | 5  | G 8  | 918.4645       | 459.7362        |
| 665.2782       | 6  | D 7  | 861.4431       | 431.2254        |
| 794.3208       | 7  | E 6  | 746.4161       | 373.7120        |
| 865.3579       | 8  | A 5  | 617.3735       | 309.1907        |
| 993.4165       | 9  | Q 4  | 546.3364       | 273.6721        |
| 1080.4485      | 10 | S 3  | 418.2778       | 209.6428        |
| 1236.5748      | 11 | K 2  | 331.2458       | 166.1268        |
|                | 12 | R 1  | 175.1195       | 88.0637         |

N-term:+29.04 K(11):+156.13

DTKNEIAELTR, MH+ 1345.7327, m/z 449.2491  
 L OS G27 P150811 220811-s1.04463.04463.3.dta

X-range:

-

MassTol: Y-zoom:

MassType:

AVG  MONO

Axis:

1  2

Label:

I  M  -

Ions:

a  +  2+  3+

b  +  2+  3+

c  +  2+  3+

x  +  2+  3+

y  +  2+  3+

z  +  2+  3+

hide H<sub>2</sub>O/NH<sub>3</sub>

zoom 112-122

GO

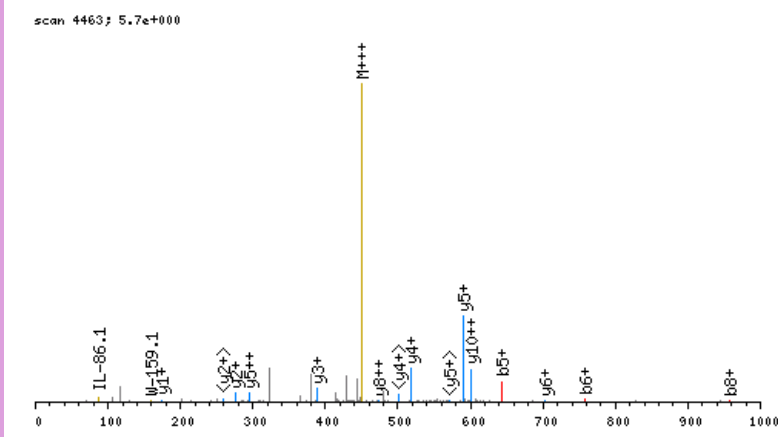

click image to zoom in; click top corners to zoom out [\[precursor±\]](#)

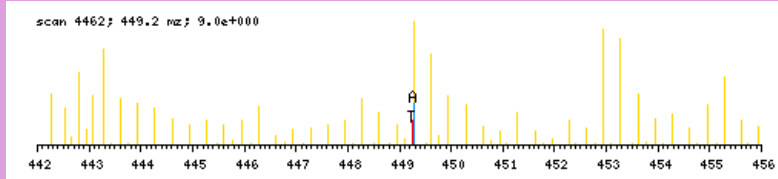

zoomed in precursor plot; T=theoretical m/z, A=acquired m/z

| b <sup>+</sup> | #  | AA # | y <sup>+</sup> | y <sup>2+</sup> |
|----------------|----|------|----------------|-----------------|
| 144.0660       | 1  | D 11 |                |                 |
| 245.1137       | 2  | T 10 | 1202.6745      | 601.8412        |
| 401.2400       | 3  | K 9  | 1101.6268      | 551.3173        |
| 515.2829       | 4  | N 8  | 945.5005       | 473.2542        |
| 644.3255       | 5  | E 7  | 831.4576       | 416.2327        |
| 757.4096       | 6  | I 6  | 702.4150       | 351.7114        |
| 828.4467       | 7  | A 5  | 589.3310       | 295.1694        |
| 957.4893       | 8  | E 4  | 518.2938       | 259.6508        |
| 1070.5734      | 9  | L 3  | 389.2512       | 195.1295        |
| 1171.6211      | 10 | T 2  | 276.1672       | 138.5875        |
|                | 11 | R 1  | 175.1195       | 88.0637         |

N-term:+29.04 K(3):+156.13

X-range:

-

MassTol: Y-zoom:

MassType:

AVG  MONO

Axis:

1  2

Label:

I  M  -

Ions:

a  +  2+  3+

b  +  2+  3+

c  +  2+  3+

x  +  2+  3+

y  +  2+  3+

z  +  2+  3+

hide H<sub>2</sub>O/NH<sub>3</sub>

zoom 112-122

GO

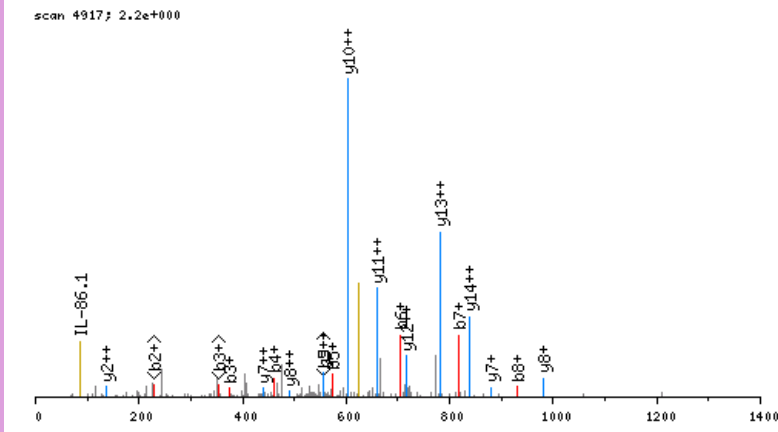

click image to zoom in; click top corners to zoom out [precursor±]

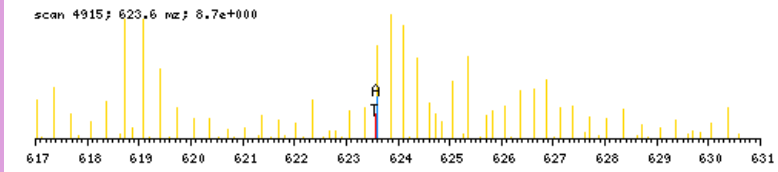

zoomed in precursor plot; T=theoretical m/z, A=acquired m/z

| b <sup>+</sup> | #  | AA # | y <sup>+</sup> | y <sup>2+</sup> |
|----------------|----|------|----------------|-----------------|
| 144.0660       | 1  | D 21 |                |                 |
| 245.1137       | 2  | T 20 | 2348.2098      | 1174.6088       |
| 373.1723       | 3  | Q 19 | 2247.1621      | 1124.0850       |
| 460.2043       | 4  | S 18 | 2119.1036      | 1060.0557       |
| 574.2473       | 5  | N 17 | 2032.0715      | 1016.5397       |
| 703.2898       | 6  | E 16 | 1918.0286      | 959.5182        |
| 816.3739       | 7  | L 15 | 1788.9860      | 894.9969        |
| 929.4580       | 8  | I 14 | 1675.9019      | 838.4549        |
| 1058.5006      | 9  | E 13 | 1562.8179      | 781.9129        |
| 1171.5846      | 10 | I 12 | 1433.7753      | 717.3916        |
| 1285.6276      | 11 | N 11 | 1320.6912      | 660.8495        |
| 1382.6803      | 12 | P 10 | 1206.6483      | 603.8281        |
| 1510.7389      | 13 | Q 9  | 1109.5955      | 555.3017        |
| 1611.7866      | 14 | T 8  | 981.5370       | 491.2724        |
| 1740.8292      | 15 | E 7  | 880.4893       | 440.7486        |
| 1797.8506      | 16 | G 6  | 751.4467       | 376.2273        |
| 1953.9769      | 17 | K 5  | 694.4252       | 347.7165        |
| 2053.0454      | 18 | V 4  | 538.2989       | 269.6534        |
| 2216.1087      | 19 | Y 3  | 439.2305       | 220.1192        |
| 2317.1564      | 20 | T 2  | 276.1672       | 138.5875        |
|                | 21 | R 1  | 175.1195       | 88.0637         |

N-term:+29.04 K(17):+156.13

DVALEGVGHFFR, MH+ 1374.7170, m/z 458.9105  
 L OS G27 P150811 220811-s1.06876.06876.3.dta

X-range:

-

MassTol: Y-zoom:

MassType:

AVG  MONO

Axis:

1  2

Label:

I  M  -

Ions:

a  +  2+  3+

b  +  2+  3+

c  +  2+  3+

x  +  2+  3+

y  +  2+  3+

z  +  2+  3+

hide H<sub>2</sub>O/NH<sub>3</sub>

zoom 112-122

GO

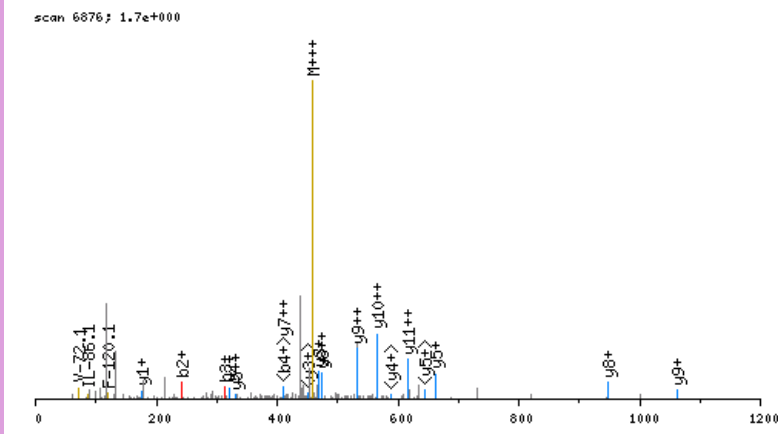

click image to zoom in; click top corners to zoom out [\[precursor±\]](#)

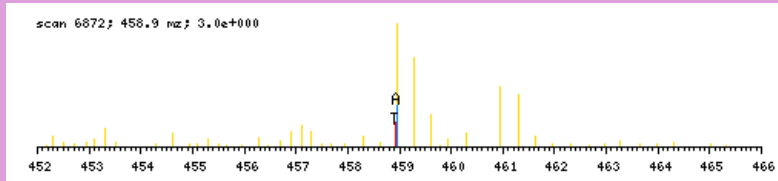

zoomed in precursor plot; T=theoretical m/z, A=acquired m/z

| b <sup>+</sup> | #  | AA # | y <sup>+</sup> | y <sup>2+</sup> |
|----------------|----|------|----------------|-----------------|
| 144.0660       | 1  | D 12 |                |                 |
| 243.1345       | 2  | V 11 | 1231.6588      | 616.3333        |
| 314.1716       | 3  | A 10 | 1132.5904      | 566.7991        |
| 427.2556       | 4  | L 9  | 1061.5532      | 531.2805        |
| 556.2982       | 5  | E 8  | 948.4692       | 474.7385        |
| 613.3197       | 6  | G 7  | 819.4266       | 410.2172        |
| 712.3881       | 7  | V 6  | 762.4051       | 381.7065        |
| 769.4096       | 8  | G 5  | 663.3367       | 332.1723        |
| 906.4685       | 9  | H 4  | 606.3152       | 303.6615        |
| 1053.5369      | 10 | F 3  | 469.2563       | 235.1321        |
| 1200.6053      | 11 | F 2  | 322.1879       | 161.5979        |
|                | 12 | R 1  | 175.1195       | 88.0637         |

N-term:+29.04

DVGVEGPKGDGPGQGR, MH+ 1729.9509, m/z 577.3218  
 H OS G26 P150811 220811-s1.02532.02532.3.dta

scan 2532; 3.0e+000

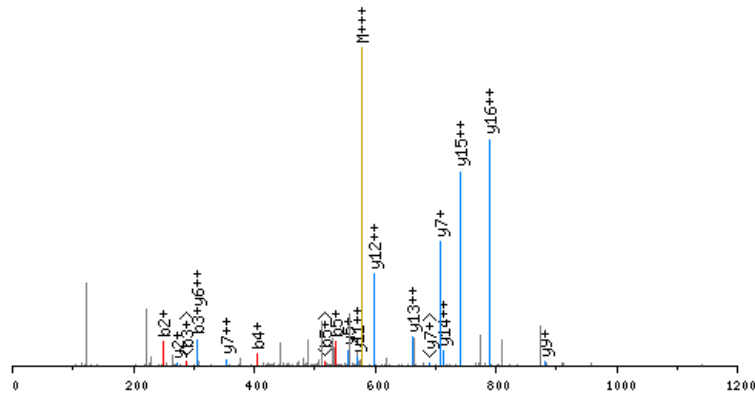

click image to zoom in; click top corners to zoom out [\[precursor±\]](#)

scan 2530; 577.3 m/z; 6.4e+000

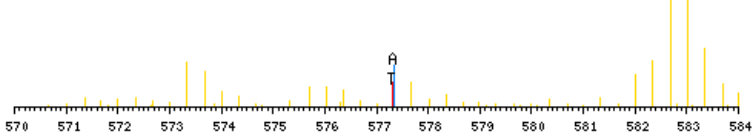

zoomed in precursor plot; T=theoretical m/z, A=acquired m/z

X-range:

-

MassTol: Y-zoom:

MassType:

AVG  MONO

Axis:

1  2

Label:

I  M  -

Ions:

a  +  2+  3+

b  +  2+  3+

c  +  2+  3+

x  +  2+  3+

y  +  2+  3+

z  +  2+  3+

hide H<sub>2</sub>O/NH<sub>3</sub>

zoom 112-122

GO

| b <sup>+</sup> | #  | AA | #  | y <sup>+</sup> | y <sup>2+</sup> |
|----------------|----|----|----|----------------|-----------------|
| 150.0978       | 1  | D  | 17 |                |                 |
| 249.1663       | 2  | V  | 16 | 1580.8609      | 790.9344        |
| 306.1877       | 3  | G  | 15 | 1481.7925      | 741.4002        |
| 405.2561       | 4  | V  | 14 | 1424.7710      | 712.8894        |
| 534.2987       | 5  | E  | 13 | 1325.7026      | 663.3552        |
| 591.3202       | 6  | G  | 12 | 1196.6600      | 598.8339        |
| 688.3730       | 7  | P  | 11 | 1139.6386      | 570.3232        |
| 850.5311       | 8  | K  | 10 | 1042.5858      | 521.7968        |
| 907.5525       | 9  | G  | 9  | 880.4277       | 440.7178        |
| 1022.5795      | 10 | D  | 8  | 823.4062       | 412.2070        |
| 1119.6322      | 11 | P  | 7  | 708.3793       | 354.6936        |
| 1176.6537      | 12 | G  | 6  | 611.3265       | 306.1672        |
| 1273.7065      | 13 | P  | 5  | 554.3051       | 277.6564        |
| 1401.7650      | 14 | Q  | 4  | 457.2523       | 229.1301        |
| 1458.7865      | 15 | G  | 3  | 329.1937       | 165.1008        |
| 1555.8393      | 16 | P  | 2  | 272.1723       | 136.5900        |
|                | 17 | R  | 1  | 175.1195       | 88.0637         |

N-term:+35.07 K(8):+162.16

DVPVVADPTVPNVTVTR, MH+ 1806.9965, m/z 603.0037  
 L OS G24 P150811 220811-s1.04183.04183.3.dta

X-range:

-

MassTol: Y-zoom:

MassType:

AVG  MONO

Axis:

1  2

Label:

I  M  -

Ions:

a  +  2+  3+

b  +  2+  3+

c  +  2+  3+

x  +  2+  3+

y  +  2+  3+

z  +  2+  3+

hide H<sub>2</sub>O/NH<sub>3</sub>

zoom 112-122

GO

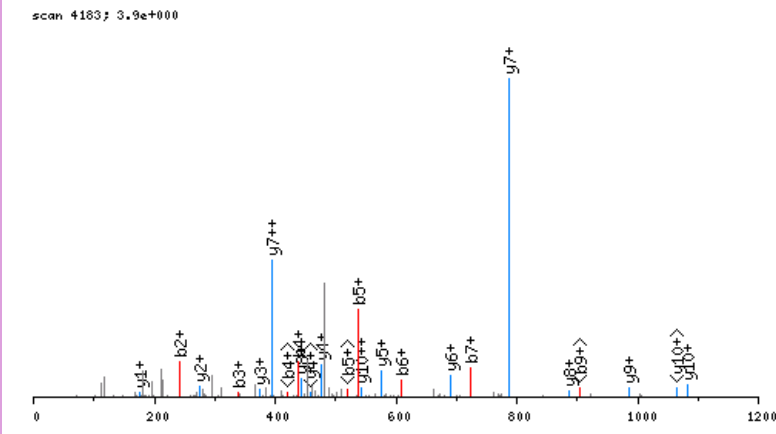

click image to zoom in; click top corners to zoom out [\[precursor±\]](#)

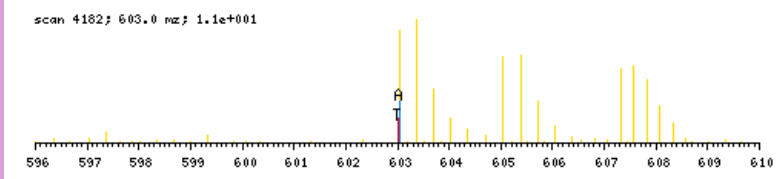

zoomed in precursor plot; T=theoretical m/z, A=acquired m/z

| b <sup>+</sup> | #  | AA # | y <sup>+</sup> | y <sup>2+</sup> |
|----------------|----|------|----------------|-----------------|
| 144.0660       | 1  | D 17 |                |                 |
| 243.1345       | 2  | V 16 | 1663.9383      | 832.4731        |
| 340.1872       | 3  | P 15 | 1564.8699      | 782.9389        |
| 439.2556       | 4  | V 14 | 1467.8171      | 734.4125        |
| 538.3240       | 5  | V 13 | 1368.7487      | 684.8783        |
| 609.3612       | 6  | A 12 | 1269.6803      | 635.3441        |
| 724.3881       | 7  | D 11 | 1198.6432      | 599.8255        |
| 821.4409       | 8  | P 10 | 1083.6162      | 542.3120        |
| 922.4885       | 9  | T 9  | 986.5635       | 493.7856        |
| 1021.5570      | 10 | V 8  | 885.5158       | 443.2618        |
| 1118.6097      | 11 | P 7  | 786.4474       | 393.7276        |
| 1232.6527      | 12 | N 6  | 689.3946       | 345.2012        |
| 1331.7211      | 13 | V 5  | 575.3517       | 288.1798        |
| 1432.7687      | 14 | T 4  | 476.2833       | 238.6455        |
| 1531.8372      | 15 | V 3  | 375.2356       | 188.1217        |
| 1632.8848      | 16 | T 2  | 276.1672       | 138.5875        |
|                | 17 | R 1  | 175.1195       | 88.0637         |

N-term:+29.04



DVQLVESGGGLVQPGGSR, MH+ 1782.9350, m/z 594.9832  
 L OS G24 P150811 220811-s1.03894.03894.3.dta

X-range:

-

MassTol: Y-zoom:

MassType:

AVG  MONO

Axis:

1  2

Label:

I  M  -

Ions:

a  +  2+  3+

b  +  2+  3+

c  +  2+  3+

x  +  2+  3+

y  +  2+  3+

z  +  2+  3+

hide H<sub>2</sub>O/NH<sub>3</sub>

zoom 112-122

GO

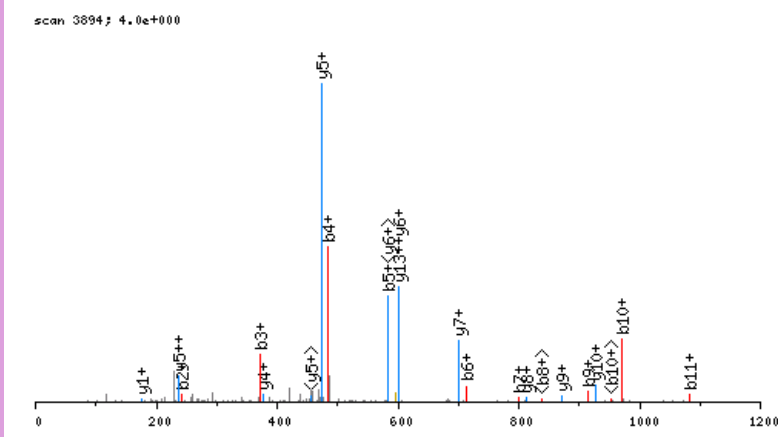

click image to zoom in; click top corners to zoom out [\[precursor±\]](#)

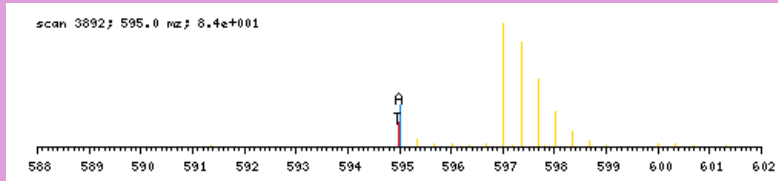

zoomed in precursor plot; T=theoretical m/z, A=acquired m/z

| b <sup>+</sup> | #  | AA | #  | y <sup>+</sup> | y <sup>2+</sup> |
|----------------|----|----|----|----------------|-----------------|
| 144.0660       | 1  | D  | 18 |                |                 |
| 243.1345       | 2  | V  | 17 | 1639.8768      | 820.4423        |
| 371.1930       | 3  | Q  | 16 | 1540.8083      | 770.9081        |
| 484.2771       | 4  | L  | 15 | 1412.7498      | 706.8788        |
| 583.3455       | 5  | V  | 14 | 1299.6657      | 650.3368        |
| 712.3881       | 6  | E  | 13 | 1200.5973      | 600.8026        |
| 799.4201       | 7  | S  | 12 | 1071.5547      | 536.2813        |
| 856.4416       | 8  | G  | 11 | 984.5227       | 492.7652        |
| 913.4631       | 9  | G  | 10 | 927.5012       | 464.2545        |
| 970.4845       | 10 | G  | 9  | 870.4797       | 435.7438        |
| 1083.5686      | 11 | L  | 8  | 813.4583       | 407.2331        |
| 1182.6370      | 12 | V  | 7  | 700.3742       | 350.6910        |
| 1310.6956      | 13 | Q  | 6  | 601.3058       | 301.1568        |
| 1407.7483      | 14 | P  | 5  | 473.2472       | 237.1275        |
| 1464.7698      | 15 | G  | 4  | 376.1945       | 188.6011        |
| 1521.7913      | 16 | G  | 3  | 319.1730       | 160.0904        |
| 1608.8233      | 17 | S  | 2  | 262.1515       | 131.5797        |
|                | 18 | R  | 1  | 175.1195       | 88.0637         |

N-term:+29.04

DVVEGEGKAEAAANVTGPDGVPVEGSR, MH+ 2607.3538, m/z 652.5939  
 H OS G26 P150811 220811-s1.03953.03953.4.dta

scan 3953; 1.7e+000

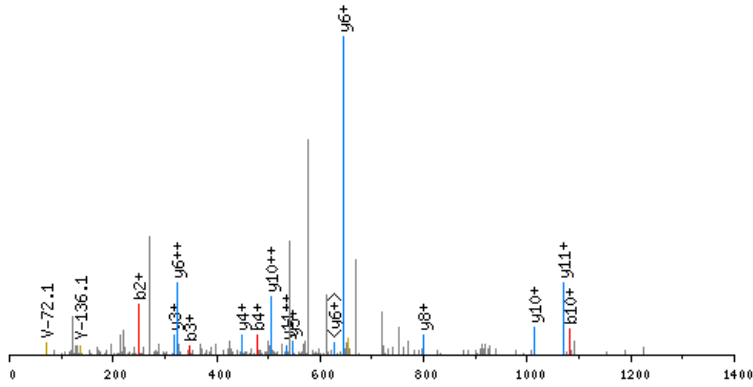

click image to zoom in; click top corners to zoom out [precursor±]

scan 3950; 652.6 m/z; 8.6e+000

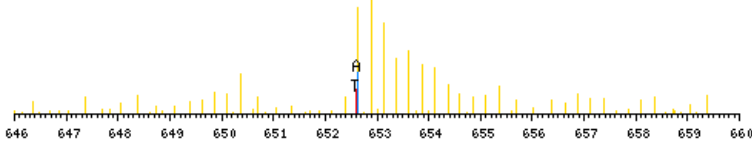

zoomed in precursor plot; T=theoretical m/z, A=acquired m/z

X-range:

-

MassTol: Y-zoom:

MassType:

AVG  MONO

Axis:

1  2

Label:

I  M  -

Ions:

a  +  2+  3+

b  +  2+  3+

c  +  2+  3+

x  +  2+  3+

y  +  2+  3+

z  +  2+  3+

hide H<sub>2</sub>O/NH<sub>3</sub>

zoom 112-122

GO

| b <sup>+</sup> | #  | AA | #  | y <sup>+</sup> | y <sup>2+</sup> |
|----------------|----|----|----|----------------|-----------------|
| 150.0978       | 1  | D  | 26 |                |                 |
| 249.1663       | 2  | V  | 25 | 2458.2638      | 1229.6358       |
| 348.2347       | 3  | V  | 24 | 2359.1954      | 1180.1016       |
| 477.2773       | 4  | E  | 23 | 2260.1270      | 1130.5674       |
| 534.2987       | 5  | G  | 22 | 2131.0844      | 1066.0461       |
| 663.3413       | 6  | E  | 21 | 2074.0629      | 1037.5354       |
| 825.4994       | 7  | K  | 20 | 1945.0203      | 973.0141        |
| 882.5209       | 8  | G  | 19 | 1782.8622      | 891.9350        |
| 953.5580       | 9  | A  | 18 | 1725.8408      | 863.4243        |
| 1082.6006      | 10 | E  | 17 | 1654.8037      | 827.9057        |
| 1153.6377      | 11 | A  | 16 | 1525.7611      | 763.3844        |
| 1224.6748      | 12 | A  | 15 | 1454.7239      | 727.8659        |
| 1338.7177      | 13 | N  | 14 | 1383.6868      | 692.3473        |
| 1437.7862      | 14 | V  | 13 | 1269.6439      | 635.3259        |
| 1538.8338      | 15 | T  | 12 | 1170.5755      | 585.7917        |
| 1595.8553      | 16 | G  | 11 | 1069.5278      | 535.2678        |
| 1692.9081      | 17 | P  | 10 | 1012.5063      | 506.7571        |
| 1807.9350      | 18 | D  | 9  | 915.4536       | 458.2307        |
| 1864.9565      | 19 | G  | 8  | 800.4266       | 400.7172        |
| 1964.0249      | 20 | V  | 7  | 743.4052       | 372.2065        |
| 2061.0777      | 21 | P  | 6  | 644.3368       | 322.6723        |
| 2160.1461      | 22 | V  | 5  | 547.2840       | 274.1459        |
| 2289.1887      | 23 | E  | 4  | 448.2156       | 224.6117        |
| 2346.2101      | 24 | G  | 3  | 319.1730       | 160.0904        |
| 2433.2422      | 25 | S  | 2  | 262.1515       | 131.5797        |
|                | 26 | R  | 1  | 175.1195       | 88.0637         |

N-term:+35.07 K(7):+162.16

DVYKIGGIGTVPVGR, MH+ 1586.9270, m/z 529.6472  
 L OS G26 P150811 220811-s1.05107.05107.3.dta

X-range:

-

MassTol: Y-zoom:

MassType:

AVG  MONO

Axis:

1  2

Label:

I  M  -

Ions:

a  +  2+  3+

b  +  2+  3+

c  +  2+  3+

x  +  2+  3+

y  +  2+  3+

z  +  2+  3+

hide H<sub>2</sub>O/NH<sub>3</sub>

zoom 112-122

GO

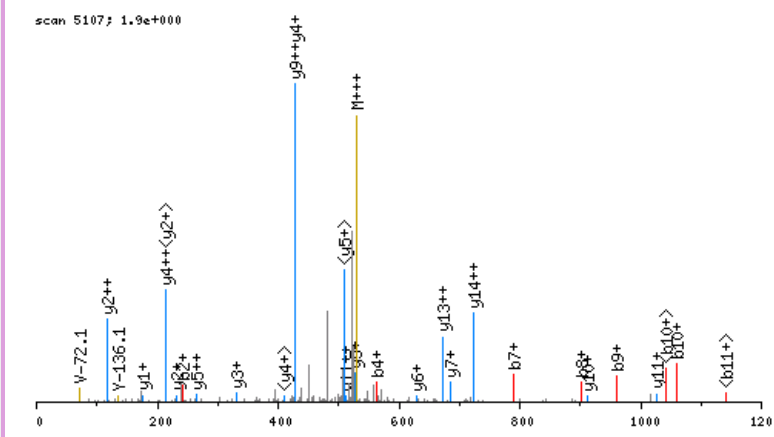

click image to zoom in; click top corners to zoom out [\[precursor±\]](#)

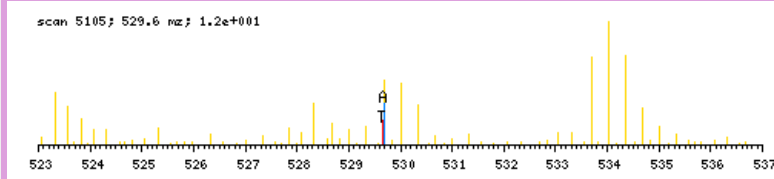

zoomed in precursor plot; T=theoretical m/z, A=acquired m/z

| b <sup>+</sup> | #  | AA # | y <sup>+</sup> | y <sup>2+</sup> |
|----------------|----|------|----------------|-----------------|
| 144.0660       | 1  | D 15 |                |                 |
| 243.1345       | 2  | V 14 | 1443.8688      | 722.4383        |
| 406.1978       | 3  | Y 13 | 1344.8004      | 672.9041        |
| 562.3241       | 4  | K 12 | 1181.7371      | 591.3724        |
| 675.4081       | 5  | I 11 | 1025.6108      | 513.3093        |
| 732.4296       | 6  | G 10 | 912.5267       | 456.7673        |
| 789.4511       | 7  | G 9  | 855.5052       | 428.2565        |
| 902.5351       | 8  | I 8  | 798.4838       | 399.7458        |
| 959.5566       | 9  | G 7  | 685.3997       | 343.2038        |
| 1060.6043      | 10 | T 6  | 628.3782       | 314.6930        |
| 1159.6727      | 11 | V 5  | 527.3306       | 264.1692        |
| 1256.7255      | 12 | P 4  | 428.2621       | 214.6350        |
| 1355.7939      | 13 | V 3  | 331.2094       | 166.1086        |
| 1412.8153      | 14 | G 2  | 232.1410       | 116.5744        |
|                | 15 | R 1  | 175.1195       | 88.0637         |

N-term:+29.04 K(4):+156.13

DWLSISLPHR, MH+ 1251.6850, m/z 417.8998  
 L OS G27 P150811 220811-s1.07005.07005.3.dta

X-range:

-

MassTol: Y-zoom:

MassType:

AVG  MONO

Axis:

1  2

Label:

I  M  -

Ions:

a  +  2+  3+

b  +  2+  3+

c  +  2+  3+

x  +  2+  3+

y  +  2+  3+

z  +  2+  3+

hide H<sub>2</sub>O/NH<sub>3</sub>

zoom 112-122

GO

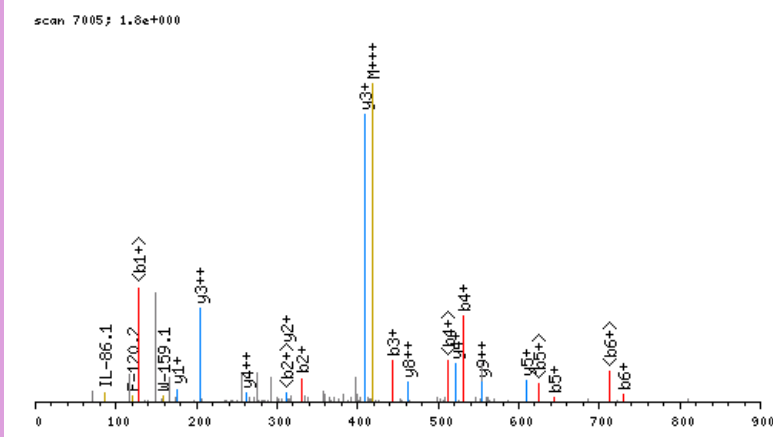

click image to zoom in; click top corners to zoom out [\[precursor±\]](#)

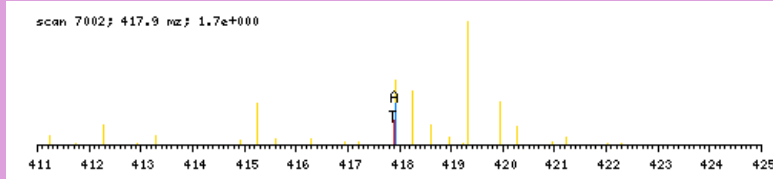

zoomed in precursor plot; T=theoretical m/z, A=acquired m/z

| b <sup>+</sup> | #  | AA # | y <sup>+</sup> | y <sup>2+</sup> |
|----------------|----|------|----------------|-----------------|
| 144.0660       | 1  | D    | 10             |                 |
| 330.1454       | 2  | W    | 9              | 1108.6267       |
| 443.2294       | 3  | L    | 8              | 922.5474        |
| 530.2614       | 4  | S    | 7              | 809.4634        |
| 643.3455       | 5  | I    | 6              | 722.4313        |
| 730.3775       | 6  | S    | 5              | 609.3473        |
| 843.4616       | 7  | L    | 4              | 522.3152        |
| 940.5144       | 8  | P    | 3              | 409.2312        |
| 1077.5733      | 9  | H    | 2              | 312.1784        |
|                | 10 | R    | 1              | 175.1195        |

N-term:+29.04

DYMKEVGVGFATR, MH+ 1528.7834, m/z 510.2660  
 L OS G26 P150811 220811-s1.05096.05096.3.dta

X-range:

-

MassTol: Y-zoom:

MassType:

AVG  MONO

Axis:

1  2

Label:

I  M  -

Ions:

a  +  2+  3+

b  +  2+  3+

c  +  2+  3+

x  +  2+  3+

y  +  2+  3+

z  +  2+  3+

hide H<sub>2</sub>O/NH<sub>3</sub>

zoom 112-122

GO

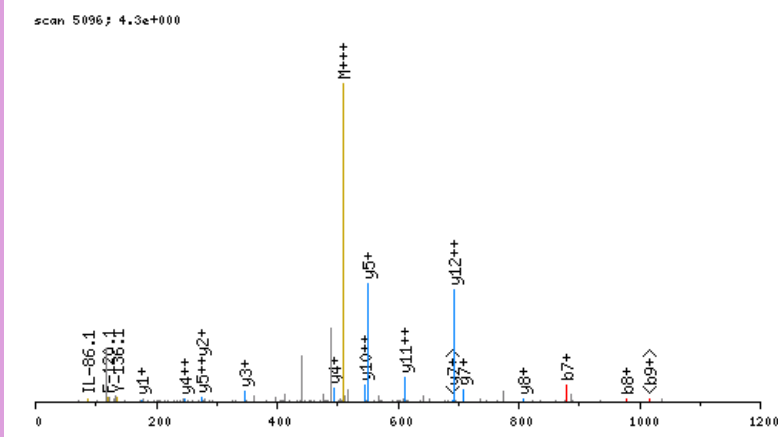

click image to zoom in; click top corners to zoom out [\[precursor±\]](#)

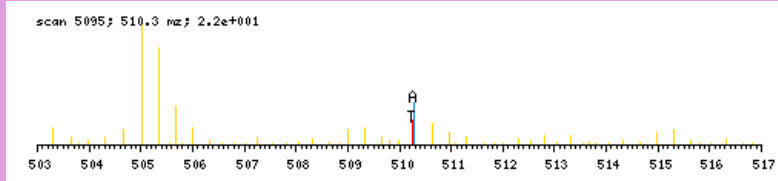

zoomed in precursor plot; T=theoretical m/z, A=acquired m/z

| b <sup>+</sup> | #  | AA # | y <sup>+</sup> | y <sup>2+</sup> |
|----------------|----|------|----------------|-----------------|
| 144.0660       | 1  | D 13 |                |                 |
| 307.1294       | 2  | Y 12 | 1385.7252      | 693.3665        |
| 438.1699       | 3  | M 11 | 1222.6618      | 611.8348        |
| 594.2962       | 4  | K 10 | 1091.6214      | 546.3146        |
| 723.3387       | 5  | E 9  | 935.4951       | 468.2514        |
| 822.4072       | 6  | V 8  | 806.4525       | 403.7301        |
| 879.4286       | 7  | G 7  | 707.3840       | 354.1959        |
| 978.4970       | 8  | V 6  | 650.3626       | 325.6852        |
| 1035.5185      | 9  | G 5  | 551.2942       | 276.1510        |
| 1182.5869      | 10 | F 4  | 494.2727       | 247.6403        |
| 1253.6240      | 11 | A 3  | 347.2043       | 174.1061        |
| 1354.6717      | 12 | T 2  | 276.1672       | 138.5875        |
|                | 13 | R 1  | 175.1195       | 88.0637         |

N-term:+29.04 K(4):+156.13

EACCVLLLLWLALFLSIQPR, MH+ 2429.3452, m/z 608.0917  
 L OS G28 P150811 220811-s1.08070.08070.4.dta

X-range:

-

MassTol: Y-zoom:

MassType:

AVG  MONO

Axis:

1  2

Label:

I  M  -

Ions:

a  +  2+  3+

b  +  2+  3+

c  +  2+  3+

x  +  2+  3+

y  +  2+  3+

z  +  2+  3+

hide H<sub>2</sub>O/NH<sub>3</sub>

zoom 112-122

GO

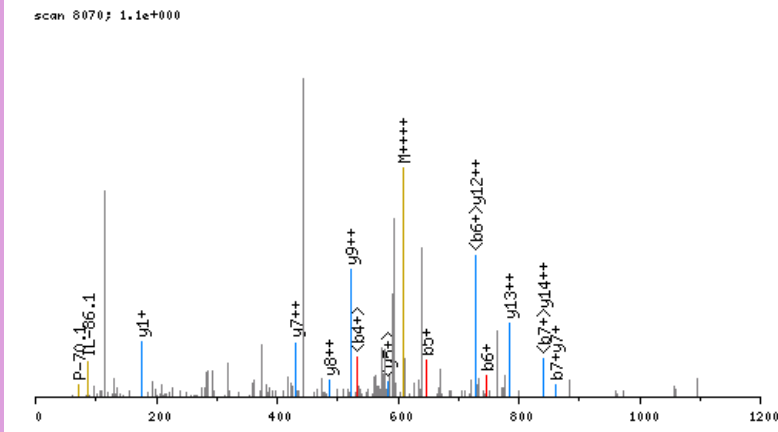

click image to zoom in; click top corners to zoom out [\[precursor±\]](#)

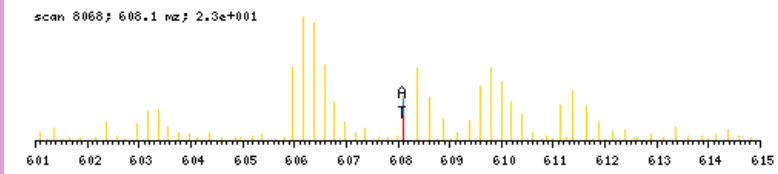

zoomed in precursor plot; T=theoretical m/z, A=acquired m/z

| b <sup>+</sup> | #  | AA | #  | y <sup>+</sup> | y <sup>2+</sup> |
|----------------|----|----|----|----------------|-----------------|
| 158.0817       | 1  | E  | 20 |                |                 |
| 229.1188       | 2  | A  | 19 | 2272.2713      | 1136.6396       |
| 389.1494       | 3  | C  | 18 | 2201.2342      | 1101.1210       |
| 549.1800       | 4  | C  | 17 | 2041.2036      | 1021.1057       |
| 648.2484       | 5  | V  | 16 | 1881.1730      | 941.0904        |
| 747.3168       | 6  | V  | 15 | 1782.1046      | 891.5562        |
| 860.4009       | 7  | L  | 14 | 1683.0362      | 842.0220        |
| 973.4850       | 8  | L  | 13 | 1569.9521      | 785.4800        |
| 1086.5690      | 9  | L  | 12 | 1456.8680      | 728.9379        |
| 1272.6483      | 10 | W  | 11 | 1343.7840      | 672.3959        |
| 1385.7324      | 11 | L  | 10 | 1157.7047      | 579.3562        |
| 1456.7695      | 12 | A  | 9  | 1044.6206      | 522.8142        |
| 1569.8536      | 13 | L  | 8  | 973.5835       | 487.2957        |
| 1716.9220      | 14 | F  | 7  | 860.4994       | 430.7536        |
| 1830.0061      | 15 | L  | 6  | 713.4310       | 357.2194        |
| 1917.0381      | 16 | S  | 5  | 600.3469       | 300.6774        |
| 2030.1222      | 17 | I  | 4  | 513.3149       | 257.1614        |
| 2158.1807      | 18 | Q  | 3  | 400.2308       | 200.6193        |
| 2255.2335      | 19 | P  | 2  | 272.1723       | 136.5900        |
|                | 20 | R  | 1  | 175.1195       | 88.0637         |

N-term:+29.04 C(3):+160.03  
 C(4):+160.03

EADENENITVVKGIR, MH+ 1742.9289, m/z 581.6478  
 L OS G26 P150811 220811-s1.03407.03407.3.dta

X-range:

-

MassTol: Y-zoom:

MassType:

AVG  MONO

Axis:

1  2

Label:

I  M  -

Ions:

a  +  2+  3+

b  +  2+  3+

c  +  2+  3+

x  +  2+  3+

y  +  2+  3+

z  +  2+  3+

hide H<sub>2</sub>O/NH<sub>3</sub>

zoom 112-122

GO

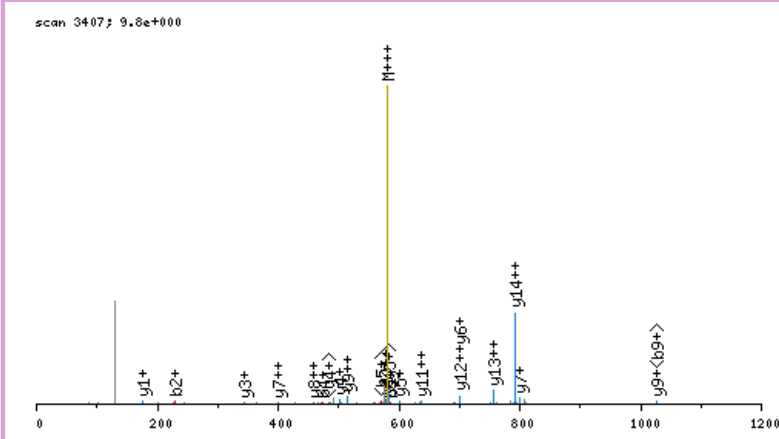

click image to zoom in; click top corners to zoom out [\[precursor±\]](#)

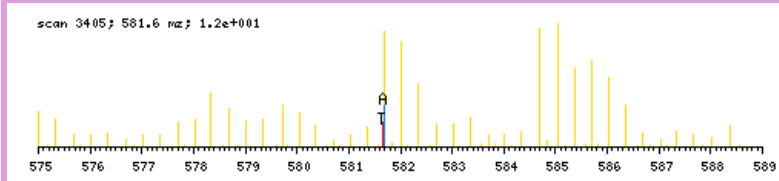

zoomed in precursor plot; T=theoretical m/z, A=acquired m/z

| b <sup>+</sup> | #  | AA # | y <sup>+</sup> | y <sup>2+</sup> |
|----------------|----|------|----------------|-----------------|
| 158.0817       | 1  | E 15 |                |                 |
| 229.1188       | 2  | A 14 | 1585.8550      | 793.4314        |
| 344.1458       | 3  | D 13 | 1514.8179      | 757.9129        |
| 473.1883       | 4  | E 12 | 1399.7909      | 700.3994        |
| 587.2313       | 5  | N 11 | 1270.7483      | 635.8781        |
| 716.2739       | 6  | E 10 | 1156.7054      | 578.8566        |
| 830.3168       | 7  | N 9  | 1027.6628      | 514.3353        |
| 943.4009       | 8  | I 8  | 913.6199       | 457.3139        |
| 1044.4485      | 9  | T 7  | 800.5358       | 400.7718        |
| 1143.5169      | 10 | V 6  | 699.4882       | 350.2480        |
| 1242.5854      | 11 | V 5  | 600.4197       | 300.7138        |
| 1398.7117      | 12 | K 4  | 501.3513       | 251.1796        |
| 1455.7331      | 13 | G 3  | 345.2250       | 173.1164        |
| 1568.8172      | 14 | I 2  | 288.2036       | 144.6057        |
|                | 15 | R 1  | 175.1195       | 88.0637         |

N-term:+29.04 K(12):+156.13

EALDCILPPTRPDKPLR, MH+ 2160.2486, m/z 540.8176  
 H OS G28 P150811 220811-s1.06386.06386.4.dta

X-range:

-

MassTol: Y-zoom:

MassType:

AVG  MONO

Axis:

1  2

Label:

I  M  -

Ions:

a  +  2+  3+

b  +  2+  3+

c  +  2+  3+

x  +  2+  3+

y  +  2+  3+

z  +  2+  3+

hide H<sub>2</sub>O/NH<sub>3</sub>

zoom 112-122

GO

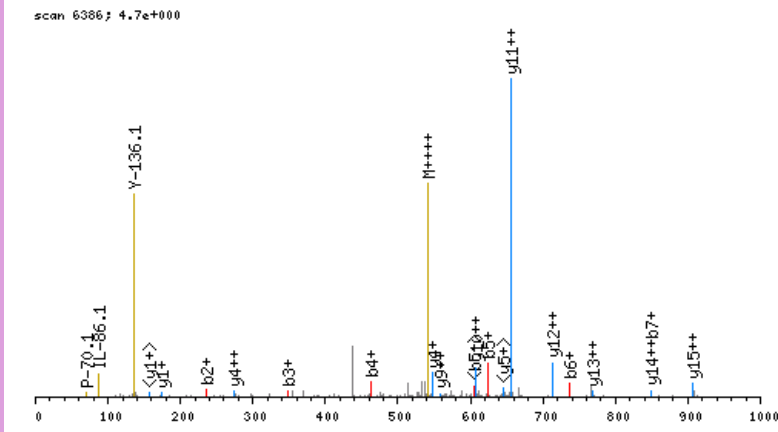

click image to zoom in; click top corners to zoom out [precursor±]

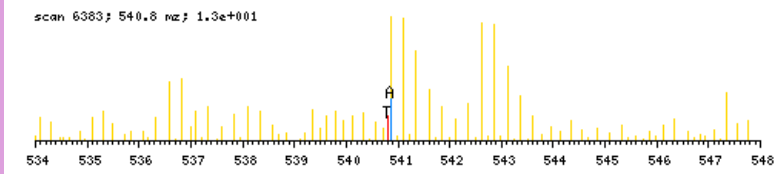

zoomed in precursor plot; T=theoretical m/z, A=acquired m/z

| b <sup>+</sup> | #  | AA # | y <sup>+</sup> | y <sup>2+</sup> |
|----------------|----|------|----------------|-----------------|
| 164.1135       | 1  | E 18 |                |                 |
| 235.1506       | 2  | A 17 | 1997.1430      | 999.0754        |
| 348.2347       | 3  | L 16 | 1926.1059      | 963.5568        |
| 463.2616       | 4  | D 15 | 1813.0218      | 907.0148        |
| 623.2922       | 5  | C 14 | 1697.9949      | 849.5013        |
| 736.3763       | 6  | I 13 | 1537.9643      | 769.4860        |
| 849.4603       | 7  | L 12 | 1424.8802      | 712.9440        |
| 946.5131       | 8  | P 11 | 1311.7961      | 656.4020        |
| 1043.5659      | 9  | P 10 | 1214.7434      | 607.8756        |
| 1144.6135      | 10 | T 9  | 1117.6906      | 559.3492        |
| 1300.7147      | 11 | R 8  | 1016.6429      | 508.8254        |
| 1397.7674      | 12 | P 7  | 860.5418       | 430.7748        |
| 1498.8151      | 13 | T 6  | 763.4891       | 382.2484        |
| 1613.8420      | 14 | D 5  | 662.4414       | 331.7246        |
| 1776.0001      | 15 | K 4  | 547.4144       | 274.2111        |
| 1873.0529      | 16 | P 3  | 385.2563       | 193.1321        |
| 1986.1370      | 17 | L 2  | 288.2036       | 144.6057        |
|                | 18 | R 1  | 175.1195       | 88.0637         |

N-term:+35.07 C(5):+160.03  
 K(15):+162.16



EALDTILPPTRPDKPLR, MH+ 2101.2657, m/z 526.0719  
 H OS G27 P150811 220811-s1.05561.05561.4.dta

X-range:

-

MassTol: Y-zoom:

MassType:

AVG  MONO

Axis:

1  2

Label:

I  M  -

Ions:

a  +  2+  3+

b  +  2+  3+

c  +  2+  3+

x  +  2+  3+

y  +  2+  3+

z  +  2+  3+

hide H<sub>2</sub>O/NH<sub>3</sub>

zoom 112-122

GO

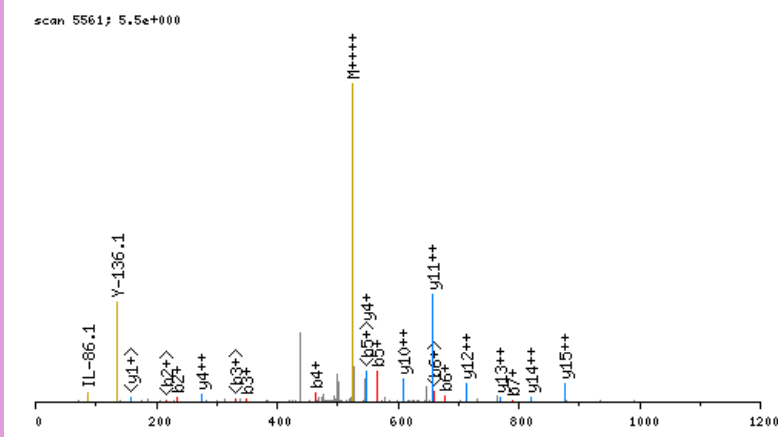

click image to zoom in; click top corners to zoom out [\[precursor±\]](#)

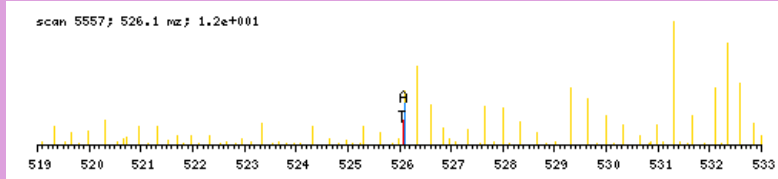

zoomed in precursor plot; T=theoretical m/z, A=acquired m/z

| b <sup>+</sup> | #  | AA # | y <sup>+</sup> | y <sup>2+</sup> |
|----------------|----|------|----------------|-----------------|
| 164.1135       | 1  | E 18 |                |                 |
| 235.1506       | 2  | A 17 | 1938.1601      | 969.5839        |
| 348.2347       | 3  | L 16 | 1867.1229      | 934.0654        |
| 463.2616       | 4  | D 15 | 1754.0389      | 877.5234        |
| 564.3093       | 5  | T 14 | 1639.0119      | 820.0099        |
| 677.3934       | 6  | I 13 | 1537.9643      | 769.4860        |
| 790.4774       | 7  | L 12 | 1424.8802      | 712.9440        |
| 887.5302       | 8  | P 11 | 1311.7961      | 656.4020        |
| 984.5829       | 9  | P 10 | 1214.7434      | 607.8756        |
| 1085.6306      | 10 | T 9  | 1117.6906      | 559.3492        |
| 1241.7317      | 11 | R 8  | 1016.6429      | 508.8254        |
| 1338.7845      | 12 | P 7  | 860.5418       | 430.7748        |
| 1439.8322      | 13 | T 6  | 763.4891       | 382.2484        |
| 1554.8591      | 14 | D 5  | 662.4414       | 331.7246        |
| 1717.0172      | 15 | K 4  | 547.4144       | 274.2111        |
| 1814.0700      | 16 | P 3  | 385.2563       | 193.1321        |
| 1927.1541      | 17 | L 2  | 288.2036       | 144.6057        |
|                | 18 | R 1  | 175.1195       | 88.0637         |

N-term:+35.07 K(15):+162.16

EALGIKEGTIPPEYR, MH+ 1728.9536, m/z 576.9894  
 L OS G26 P150811 220811-s1.04234.04234.3.dta

X-range:

-

MassTol: Y-zoom:

MassType:

AVG  MONO

Axis:

1  2

Label:

I  M  -

Ions:

a  +  2+  3+

b  +  2+  3+

c  +  2+  3+

x  +  2+  3+

y  +  2+  3+

z  +  2+  3+

hide H<sub>2</sub>O/NH<sub>3</sub>

zoom 112-122

GO

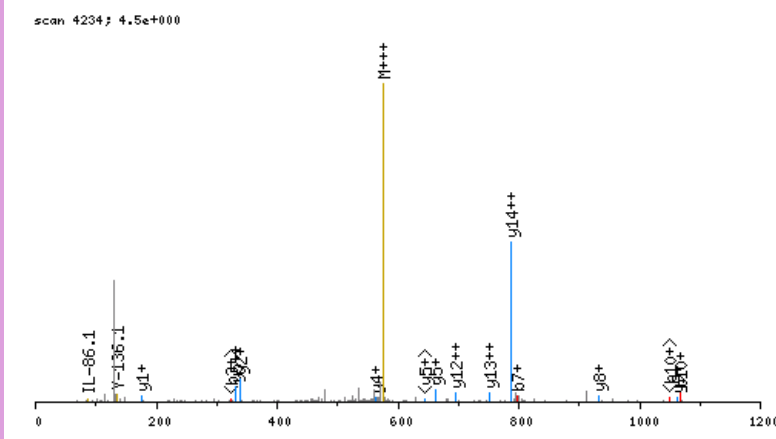

click image to zoom in; click top corners to zoom out [\[precursor±\]](#)

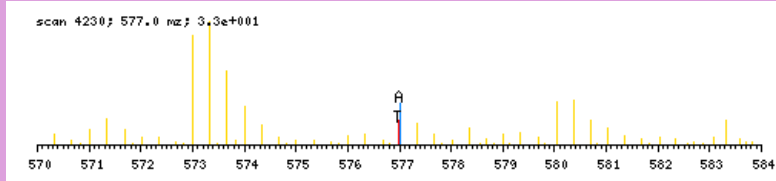

zoomed in precursor plot; T=theoretical m/z, A=acquired m/z

| b <sup>+</sup> | #  | AA # | y <sup>+</sup> | y <sup>2+</sup> |
|----------------|----|------|----------------|-----------------|
| 158.0817       | 1  | E 15 |                |                 |
| 229.1188       | 2  | A 14 | 1571.8798      | 786.4438        |
| 342.2029       | 3  | L 13 | 1500.8426      | 750.9252        |
| 399.2243       | 4  | G 12 | 1387.7586      | 694.3832        |
| 512.3084       | 5  | I 11 | 1330.7371      | 665.8725        |
| 668.4347       | 6  | K 10 | 1217.6530      | 609.3304        |
| 797.4773       | 7  | E 9  | 1061.5267      | 531.2673        |
| 854.4988       | 8  | G 8  | 932.4842       | 466.7460        |
| 955.5464       | 9  | T 7  | 875.4627       | 438.2353        |
| 1068.6305      | 10 | I 6  | 774.4150       | 387.7114        |
| 1165.6833      | 11 | P 5  | 661.3310       | 331.1694        |
| 1262.7360      | 12 | P 4  | 564.2782       | 282.6430        |
| 1391.7786      | 13 | E 3  | 467.2254       | 234.1166        |
| 1554.8419      | 14 | Y 2  | 338.1828       | 169.5953        |
|                | 15 | R 1  | 175.1195       | 88.0637         |

N-term:+29.04 K(6):+156.13

EAPKVVVEEQESR, MH+ 1456.7648, m/z 486.2598  
 L OS G27 P150811 220811-s1.02290.02290.3.dta

X-range:

-

MassTol: Y-zoom:

MassType:

AVG  MONO

Axis:

1  2

Label:

I  M  -

Ions:

a  +  2+  3+

b  +  2+  3+

c  +  2+  3+

x  +  2+  3+

y  +  2+  3+

z  +  2+  3+

hide H<sub>2</sub>O/NH<sub>3</sub>

zoom 112-122

GO

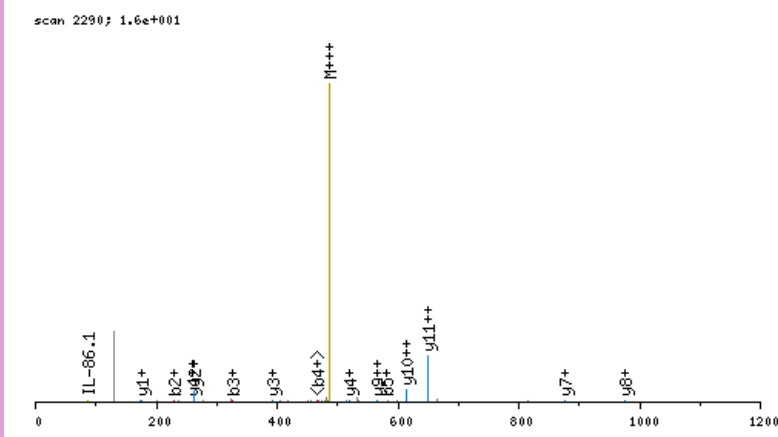

click image to zoom in; click top corners to zoom out [\[precursor±\]](#)

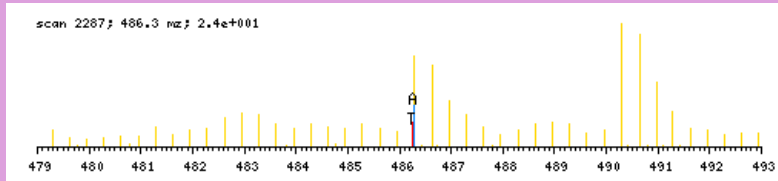

zoomed in precursor plot; T=theoretical m/z, A=acquired m/z

| b <sup>+</sup> | #  | AA # | y <sup>+</sup> | y <sup>2+</sup> |
|----------------|----|------|----------------|-----------------|
| 158.0817       | 1  | E 12 |                |                 |
| 229.1188       | 2  | A 11 | 1299.6909      | 650.3494        |
| 326.1716       | 3  | P 10 | 1228.6538      | 614.8308        |
| 482.2979       | 4  | K 9  | 1131.6010      | 566.3044        |
| 581.3663       | 5  | V 8  | 975.4747       | 488.2413        |
| 680.4347       | 6  | V 7  | 876.4063       | 438.7071        |
| 809.4773       | 7  | E 6  | 777.3379       | 389.1729        |
| 938.5199       | 8  | E 5  | 648.2953       | 324.6516        |
| 1066.5785      | 9  | Q 4  | 519.2527       | 260.1303        |
| 1195.6211      | 10 | E 3  | 391.1941       | 196.1010        |
| 1282.6531      | 11 | S 2  | 262.1515       | 131.5797        |
|                | 12 | R 1  | 175.1195       | 88.0637         |

N-term:+29.04 K(4):+156.13

ECIGSGVKPPDALQATAR, MH+ 1926.0118, m/z 642.6755  
 L OS G26 P150811 220811-s1.03776.03776.3.dta

X-range:

-

MassTol: Y-zoom:

MassType:

AVG  MONO

Axis:

1  2

Label:

I  M  -

Ions:

a  +  2+  3+

b  +  2+  3+

c  +  2+  3+

x  +  2+  3+

y  +  2+  3+

z  +  2+  3+

hide H<sub>2</sub>O/NH<sub>3</sub>

zoom 112-122

GO

scan 3776; 6.7e+000

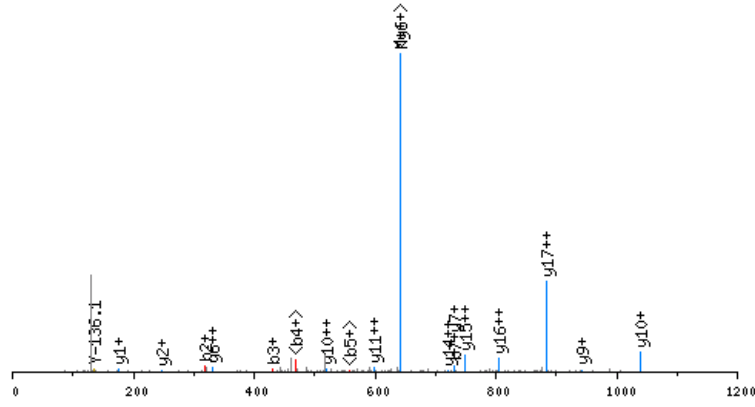

click image to zoom in; click top corners to zoom out [\[precursor±\]](#)

scan 3775; 642.7 m/z; 1.4e+001

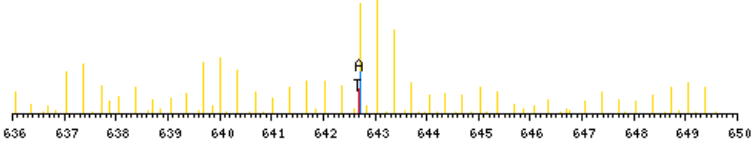

zoomed in precursor plot; T=theoretical m/z, A=acquired m/z

| b <sup>+</sup> | #  | AA | #  | y <sup>+</sup> | y <sup>2+</sup> |
|----------------|----|----|----|----------------|-----------------|
| 158.0817       | 1  | E  | 18 |                |                 |
| 318.1123       | 2  | C  | 17 | 1768.9380      | 884.9729        |
| 431.1964       | 3  | I  | 16 | 1608.9074      | 804.9576        |
| 488.2178       | 4  | G  | 15 | 1495.8233      | 748.4156        |
| 575.2498       | 5  | S  | 14 | 1438.8018      | 719.9048        |
| 632.2713       | 6  | G  | 13 | 1351.7698      | 676.3888        |
| 731.3397       | 7  | V  | 12 | 1294.7483      | 647.8781        |
| 887.4660       | 8  | K  | 11 | 1195.6799      | 598.3439        |
| 984.5188       | 9  | P  | 10 | 1039.5536      | 520.2807        |
| 1081.5716      | 10 | P  | 9  | 942.5009       | 471.7543        |
| 1196.5985      | 11 | D  | 8  | 845.4481       | 423.2280        |
| 1267.6356      | 12 | A  | 7  | 730.4212       | 365.7145        |
| 1380.7197      | 13 | L  | 6  | 659.3840       | 330.1959        |
| 1508.7783      | 14 | Q  | 5  | 546.3000       | 273.6539        |
| 1579.8154      | 15 | A  | 4  | 418.2414       | 209.6246        |
| 1680.8630      | 16 | T  | 3  | 347.2043       | 174.1061        |
| 1751.9002      | 17 | A  | 2  | 246.1566       | 123.5822        |
|                | 18 | R  | 1  | 175.1195       | 88.0637         |

N-term:+29.04 C(2):+160.03  
 K(8):+156.13

EDEEHSVIPQR, MH+ 1366.6603, m/z 456.2249  
 L OS G27 P150811 220811-s1.02616.02616.3.dta

X-range:

-

MassTol: Y-zoom:

MassType:

AVG  MONO

Axis:

1  2

Label:

I  M  -

Ions:

a  +  2+  3+

b  +  2+  3+

c  +  2+  3+

x  +  2+  3+

y  +  2+  3+

z  +  2+  3+

hide H<sub>2</sub>O/NH<sub>3</sub>

zoom 112-122

GO

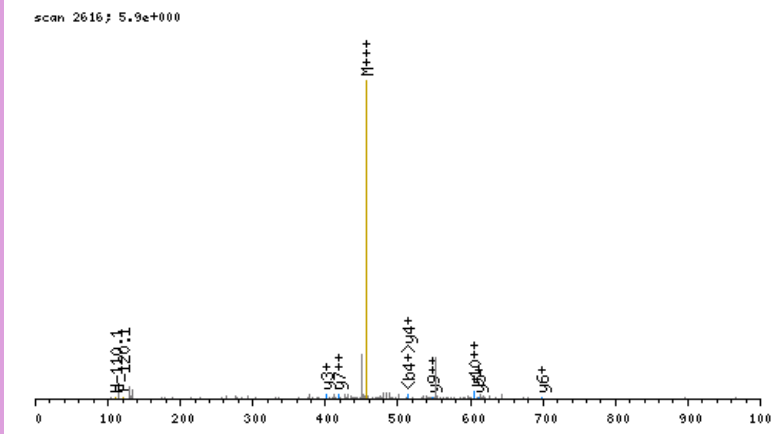

click image to zoom in; click top corners to zoom out [\[precursor±\]](#)

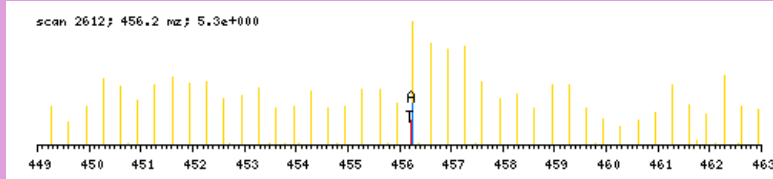

zoomed in precursor plot; T=theoretical m/z, A=acquired m/z

| b <sup>+</sup> | #  | AA # | y <sup>+</sup> | y <sup>2+</sup> |
|----------------|----|------|----------------|-----------------|
| 158.0817       | 1  | E 11 |                |                 |
| 273.1086       | 2  | D 10 | 1209.5864      | 605.2971        |
| 402.1512       | 3  | E 9  | 1094.5594      | 547.7836        |
| 531.1938       | 4  | E 8  | 965.5169       | 483.2623        |
| 668.2527       | 5  | H 7  | 836.4743       | 418.7410        |
| 755.2848       | 6  | S 6  | 699.4153       | 350.2116        |
| 854.3532       | 7  | V 5  | 612.3833       | 306.6956        |
| 967.4372       | 8  | I 4  | 513.3149       | 257.1614        |
| 1064.4900      | 9  | P 3  | 400.2308       | 200.6193        |
| 1192.5486      | 10 | Q 2  | 303.1781       | 152.0930        |
|                | 11 | R 1  | 175.1195       | 88.0637         |

N-term:+29.04

EDGLDFPEYDGVDR, MH+ 1660.7554, m/z 554.2567  
 H OS G25 P150811 220811-s1.06763.06763.3.dta

scan 6763; 3.0e+000

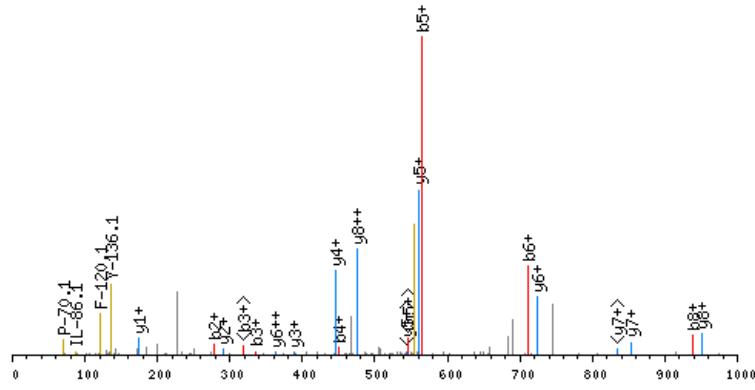

click image to zoom in; click top corners to zoom out [\[precursor±\]](#)

scan 6762; 554.3 m/z; 1.0e+001

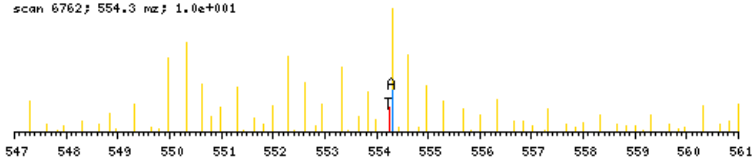

zoomed in precursor plot; T=theoretical m/z, A=acquired m/z

X-range:

-

MassTol: Y-zoom:

MassType:

AVG  MONO

Axis:

1  2

Label:

I  M  -

Ions:

a  +  2+  3+

b  +  2+  3+

c  +  2+  3+

x  +  2+  3+

y  +  2+  3+

z  +  2+  3+

hide H<sub>2</sub>O/NH<sub>3</sub>

zoom 112-122

GO

| b <sup>+</sup> | #  | AA # | y <sup>+</sup> | y <sup>2+</sup> |
|----------------|----|------|----------------|-----------------|
| 164.1135       | 1  | E 14 |                |                 |
| 279.1404       | 2  | D 13 | 1497.6498      | 749.3288        |
| 336.1619       | 3  | G 12 | 1382.6228      | 691.8153        |
| 449.2460       | 4  | L 11 | 1325.6014      | 663.3046        |
| 564.2729       | 5  | D 10 | 1212.5173      | 606.7626        |
| 711.3413       | 6  | F 9  | 1097.4904      | 549.2491        |
| 808.3941       | 7  | P 8  | 950.4220       | 475.7149        |
| 937.4367       | 8  | E 7  | 853.3692       | 427.1885        |
| 1100.5000      | 9  | Y 6  | 724.3266       | 362.6672        |
| 1215.5269      | 10 | D 5  | 561.2633       | 281.1355        |
| 1272.5484      | 11 | G 4  | 446.2363       | 223.6221        |
| 1371.6168      | 12 | V 3  | 389.2149       | 195.1113        |
| 1486.6438      | 13 | D 2  | 290.1464       | 145.5771        |
|                | 14 | R 1  | 175.1195       | 88.0637         |

N-term:+35.07

EDICPSTHNMDVPNIKR, MH+ 2082.0112, m/z 521.2583  
 L OS G28 P150811 220811-s1.04831.04831.4.dta

X-range:

-

MassTol: Y-zoom:

MassType:

AVG  MONO

Axis:

1  2

Label:

I  M  -

Ions:

a  2+  3+

b  2+  3+

c  2+  3+

x  2+  3+

y  2+  3+

z  2+  3+

hide H<sub>2</sub>O/NH<sub>3</sub>

zoom 112-122

GO

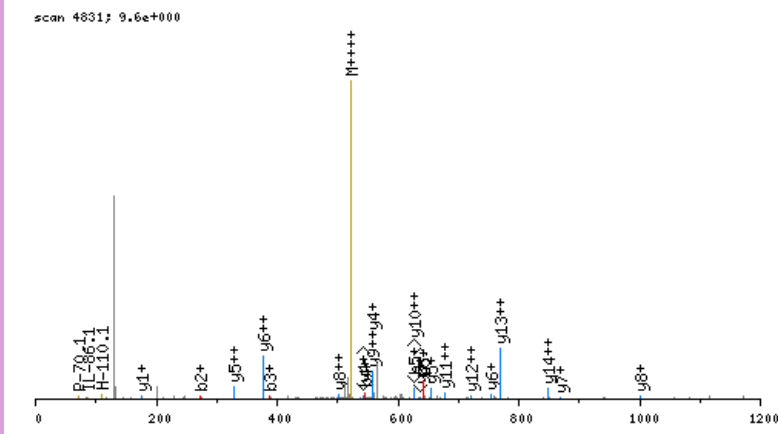

click image to zoom in; click top corners to zoom out [\[precursor±\]](#)

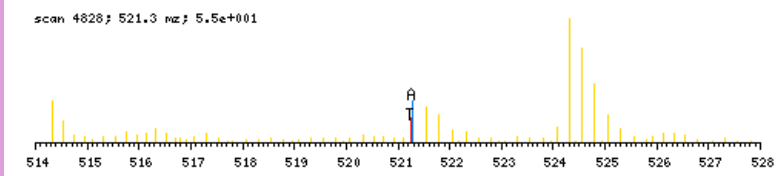

zoomed in precursor plot; T=theoretical m/z, A=acquired m/z

| b <sup>+</sup> | #  | AA | #  | y <sup>+</sup> | y <sup>2+</sup> |
|----------------|----|----|----|----------------|-----------------|
| 158.0817       | 1  | E  | 17 |                |                 |
| 273.1086       | 2  | D  | 16 | 1924.9373      | 962.9726        |
| 386.1927       | 3  | I  | 15 | 1809.9104      | 905.4591        |
| 546.2233       | 4  | C  | 14 | 1696.8263      | 848.9171        |
| 643.2761       | 5  | P  | 13 | 1536.7957      | 768.9018        |
| 730.3081       | 6  | S  | 12 | 1439.7429      | 720.3754        |
| 831.3558       | 7  | T  | 11 | 1352.7109      | 676.8594        |
| 968.4147       | 8  | H  | 10 | 1251.6632      | 626.3355        |
| 1082.4576      | 9  | N  | 9  | 1114.6043      | 557.8061        |
| 1213.4981      | 10 | M  | 8  | 1000.5614      | 500.7846        |
| 1328.5250      | 11 | D  | 7  | 869.5209       | 435.2644        |
| 1427.5935      | 12 | V  | 6  | 754.4940       | 377.7509        |
| 1524.6462      | 13 | P  | 5  | 655.4256       | 328.2167        |
| 1638.6891      | 14 | N  | 4  | 558.3728       | 279.6903        |
| 1751.7732      | 15 | I  | 3  | 444.3299       | 222.6688        |
| 1907.8995      | 16 | K  | 2  | 331.2458       | 166.1268        |
|                | 17 | R  | 1  | 175.1195       | 88.0637         |

N-term: +29.04 C(4): +160.03  
 K(16): +156.13

EDIDLPEPFDAR, MH+ 1448.6909, m/z 483.5685  
 L OS G25 P150811 220811-s1.06785.06785.3.dta

X-range:

-

MassTol: Y-zoom:

MassType:

AVG  MONO

Axis:

1  2

Label:

I  M  -

Ions:

a  +  2+  3+

b  +  2+  3+

c  +  2+  3+

x  +  2+  3+

y  +  2+  3+

z  +  2+  3+

hide H<sub>2</sub>O/NH<sub>3</sub>

zoom 112-122

GO

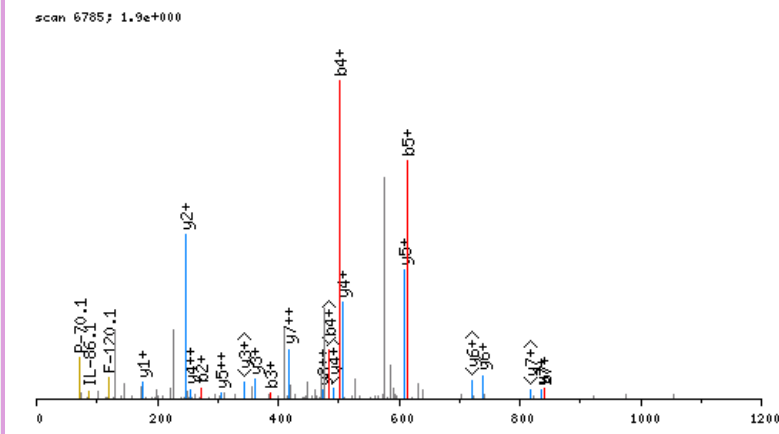

click image to zoom in; click top corners to zoom out [\[precursor±\]](#)

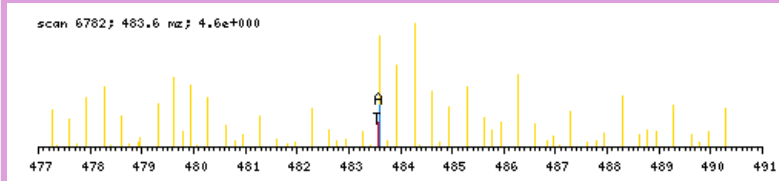

zoomed in precursor plot; T=theoretical m/z, A=acquired m/z

| b <sup>+</sup> | #  | AA # | y <sup>+</sup> | y <sup>2+</sup> |
|----------------|----|------|----------------|-----------------|
| 158.0817       | 1  | E 12 |                |                 |
| 273.1086       | 2  | D 11 | 1291.6170      | 646.3124        |
| 386.1927       | 3  | I 10 | 1176.5901      | 588.7990        |
| 501.2196       | 4  | D 9  | 1063.5060      | 532.2569        |
| 614.3037       | 5  | L 8  | 948.4791       | 474.7434        |
| 711.3565       | 6  | P 7  | 835.3950       | 418.2014        |
| 840.3991       | 7  | E 6  | 738.3422       | 369.6750        |
| 941.4467       | 8  | T 5  | 609.2997       | 305.1537        |
| 1088.5152      | 9  | F 4  | 508.2520       | 254.6299        |
| 1203.5421      | 10 | D 3  | 361.1836       | 181.0957        |
| 1274.5792      | 11 | A 2  | 246.1566       | 123.5822        |
|                | 12 | R 1  | 175.1195       | 88.0637         |

N-term:+29.04



EDIPEVSCIHNGLR, MH+ 1666.8222, m/z 556.2789  
 L OS G27 P150811 220811-s1.05294.05294.3.dta

X-range:

-

MassTol: Y-zoom:

MassType:

AVG  MONO

Axis:

1  2

Label:

I  M  -

Ions:

a  +  2+  3+

b  +  2+  3+

c  +  2+  3+

x  +  2+  3+

y  +  2+  3+

z  +  2+  3+

hide H<sub>2</sub>O/NH<sub>3</sub>

zoom 112-122

GO

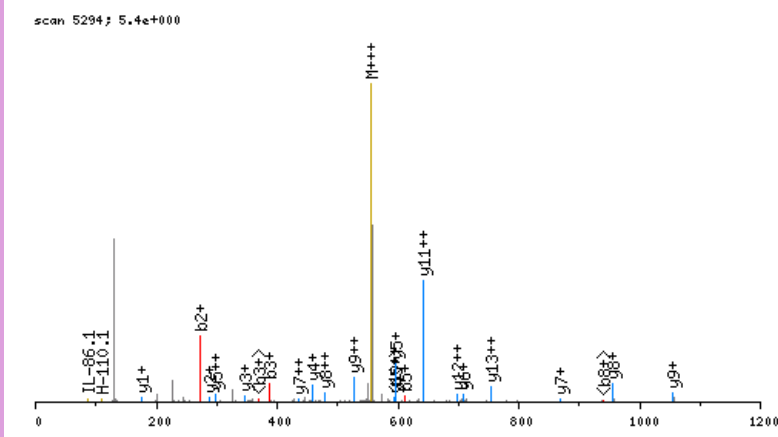

click image to zoom in; click top corners to zoom out [\[precursor±\]](#)

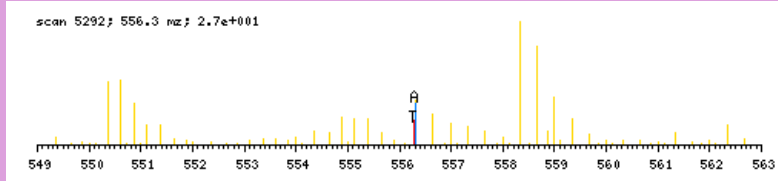

zoomed in precursor plot; T=theoretical m/z, A=acquired m/z

| b <sup>+</sup> | #  | AA # | y <sup>+</sup> | y <sup>2+</sup> |
|----------------|----|------|----------------|-----------------|
| 158.0817       | 1  | E 14 |                |                 |
| 273.1086       | 2  | D 13 | 1509.7483      | 755.3781        |
| 386.1927       | 3  | I 12 | 1394.7214      | 697.8646        |
| 483.2455       | 4  | P 11 | 1281.6373      | 641.3226        |
| 612.2881       | 5  | E 10 | 1184.5846      | 592.7962        |
| 711.3565       | 6  | V 9  | 1055.5420      | 528.2749        |
| 798.3885       | 7  | S 8  | 956.4736       | 478.7407        |
| 958.4191       | 8  | C 7  | 869.4415       | 435.2247        |
| 1071.5032      | 9  | I 6  | 709.4109       | 355.2094        |
| 1208.5621      | 10 | H 5  | 596.3269       | 298.6673        |
| 1322.6050      | 11 | N 4  | 459.2680       | 230.1379        |
| 1379.6265      | 12 | G 3  | 345.2250       | 173.1164        |
| 1492.7105      | 13 | L 2  | 288.2036       | 144.6057        |
|                | 14 | R 1  | 175.1195       | 88.0637         |

N-term:+29.04 C(8):+160.03

EDLVFPSEIVGKR, MH+ 1556.9324, m/z 519.6490  
 H OS G26 P150811 220811-s1.05561.05561.3.dta

scan 5561: 1.2e+001

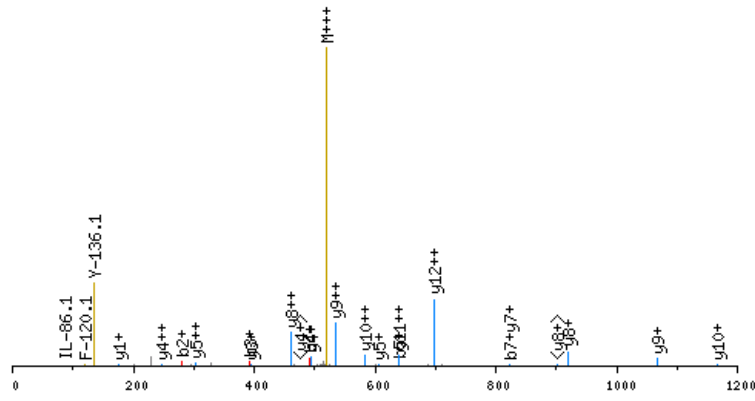

click image to zoom in; click top corners to zoom out [\[precursor±\]](#)

scan 5560: 519.6 m/z; 5.6e+001

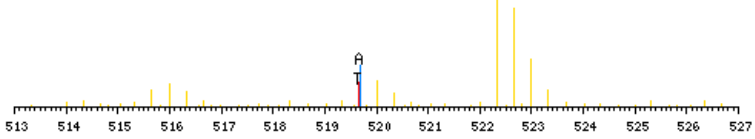

zoomed in precursor plot; T=theoretical m/z, A=acquired m/z

X-range:

-

MassTol: Y-zoom:

MassType:

AVG  MONO

Axis:

1  2

Label:

I  M  -

Ions:

a  +  2+  3+

b  +  2+  3+

c  +  2+  3+

x  +  2+  3+

y  +  2+  3+

z  +  2+  3+

hide H<sub>2</sub>O/NH<sub>3</sub>

zoom 112-122

GO

| b <sup>+</sup> | #  | AA # | y <sup>+</sup> | y <sup>2+</sup> |
|----------------|----|------|----------------|-----------------|
| 164.1135       | 1  | E 13 |                |                 |
| 279.1404       | 2  | D 12 | 1393.8268      | 697.4173        |
| 392.2245       | 3  | L 11 | 1278.7998      | 639.9038        |
| 491.2929       | 4  | V 10 | 1165.7158      | 583.3618        |
| 638.3613       | 5  | F 9  | 1066.6473      | 533.8276        |
| 735.4141       | 6  | P 8  | 919.5789       | 460.2934        |
| 822.4461       | 7  | S 7  | 822.5262       | 411.7670        |
| 951.4887       | 8  | E 6  | 735.4941       | 368.2510        |
| 1064.5728      | 9  | I 5  | 606.4515       | 303.7297        |
| 1163.6412      | 10 | V 4  | 493.3675       | 247.1877        |
| 1220.6627      | 11 | G 3  | 394.2991       | 197.6534        |
| 1382.8208      | 12 | K 2  | 337.2776       | 169.1427        |
|                | 13 | R 1  | 175.1195       | 88.0637         |

N-term:+35.07 K(12):+162.16

EDPVKVIIEGFSR, MH+ 1572.8910, m/z 524.9685  
 H OS G26 P150811 220811-s1.06566.06566.3.dta

X-range:

-

MassTol: Y-zoom:

MassType:

AVG  MONO

Axis:

1  2

Label:

I  M  -

Ions:

a  +  2+  3+

b  +  2+  3+

c  +  2+  3+

x  +  2+  3+

y  +  2+  3+

z  +  2+  3+

hide H<sub>2</sub>O/NH<sub>3</sub>

zoom 112-122

GO

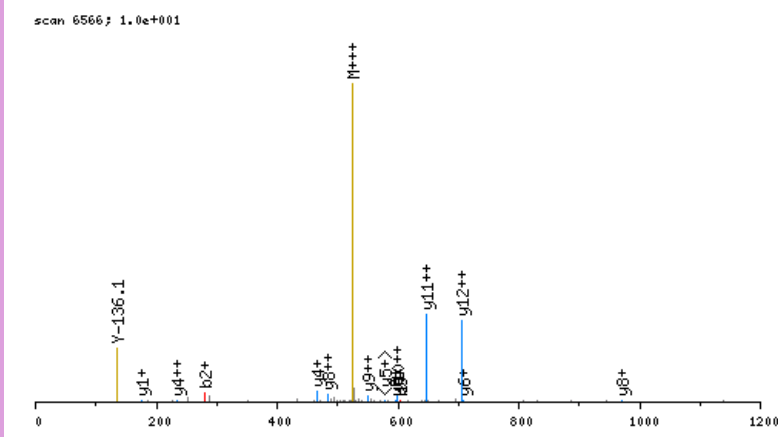

click image to zoom in; click top corners to zoom out [\[precursor±\]](#)

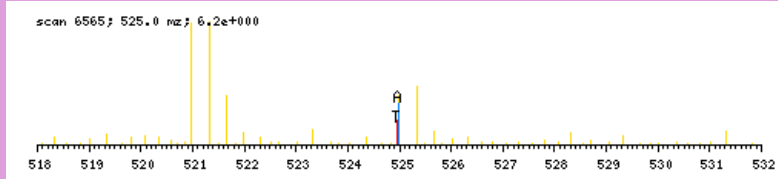

zoomed in precursor plot; T=theoretical m/z, A=acquired m/z

| b <sup>+</sup> | #  | AA | #  | y <sup>+</sup> | y <sup>2+</sup> |
|----------------|----|----|----|----------------|-----------------|
| 164.1135       | 1  | E  | 13 |                |                 |
| 279.1404       | 2  | D  | 12 | 1409.7853      | 705.3966        |
| 376.1932       | 3  | P  | 11 | 1294.7583      | 647.8831        |
| 475.2616       | 4  | V  | 10 | 1197.7056      | 599.3567        |
| 604.3042       | 5  | E  | 9  | 1098.6372      | 549.8225        |
| 766.4623       | 6  | K  | 8  | 969.5946       | 485.3012        |
| 865.5307       | 7  | V  | 7  | 807.4365       | 404.2222        |
| 978.6148       | 8  | I  | 6  | 708.3681       | 354.6879        |
| 1107.6574      | 9  | E  | 5  | 595.2840       | 298.1459        |
| 1164.6788      | 10 | G  | 4  | 466.2414       | 233.6246        |
| 1311.7473      | 11 | F  | 3  | 409.2199       | 205.1139        |
| 1398.7793      | 12 | S  | 2  | 262.1515       | 131.5797        |
|                | 13 | R  | 1  | 175.1195       | 88.0637         |

N-term:+35.07 K(6):+162.16

EDTEDWRPR, MH+ 1237.6025, m/z 413.2057  
 H OS G28 P150811 220811-s1.02940.02940.3.dta

X-range:

-

MassTol: Y-zoom:

MassType:

AVG  MONO

Axis:

1  2

Label:

I  M  -

Ions:

a  +  2+  3+

b  +  2+  3+

c  +  2+  3+

x  +  2+  3+

y  +  2+  3+

z  +  2+  3+

hide H<sub>2</sub>O/NH<sub>3</sub>

zoom 112-122

GO

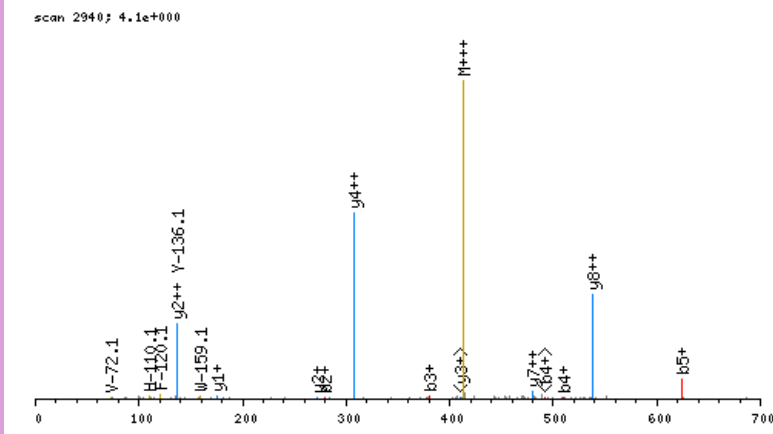

click image to zoom in; click top corners to zoom out [\[precursor±\]](#)

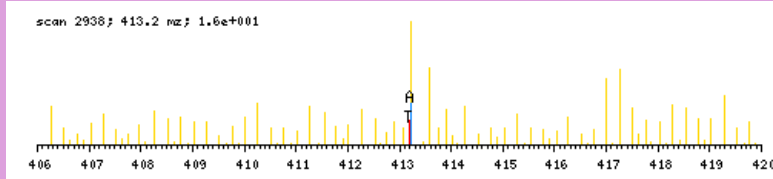

zoomed in precursor plot; T=theoretical m/z, A=acquired m/z

| b <sup>+</sup> | # | AA # | y <sup>+</sup> | y <sup>2+</sup> |
|----------------|---|------|----------------|-----------------|
| 164.1135       | 1 | E    | 9              |                 |
| 279.1404       | 2 | D    | 8              | 1074.4968       |
| 380.1881       | 3 | T    | 7              | 959.4699        |
| 509.2307       | 4 | E    | 6              | 858.4222        |
| 624.2577       | 5 | D    | 5              | 729.3796        |
| 810.3370       | 6 | W    | 4              | 614.3527        |
| 966.4381       | 7 | R    | 3              | 428.2734        |
| 1063.4908      | 8 | P    | 2              | 272.1723        |
|                | 9 | R    | 1              | 175.1195        |

N-term: +35.07

EDYQIVERPQR, MH+ 1460.7497, m/z 487.5881  
 L OS G27 P150811 220811-s1.03130.03130.3.dta

scan 3130; 1.2e+001

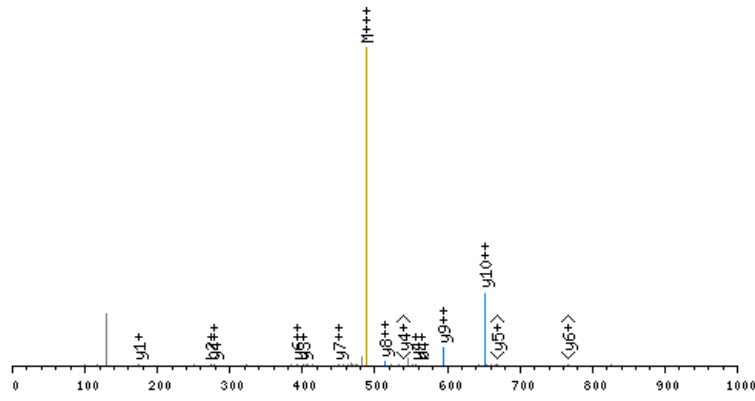

click image to zoom in; click top corners to zoom out [\[precursor±\]](#)

scan 3127; 487.6 m/z; 5.5e+000

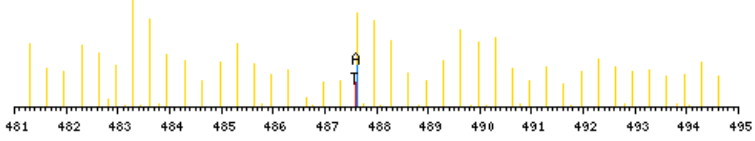

zoomed in precursor plot; T=theoretical m/z, A=acquired m/z

X-range:

-

MassTol: Y-zoom:

MassType:

AVG  MONO

Axis:

1  2

Label:

I  M  -

Ions:

a  +  2+  3+

b  +  2+  3+

c  +  2+  3+

x  +  2+  3+

y  +  2+  3+

z  +  2+  3+

hide H<sub>2</sub>O/NH<sub>3</sub>

zoom 112-122

GO

| b <sup>+</sup> | #  | AA # | y <sup>+</sup> | y <sup>2+</sup> |
|----------------|----|------|----------------|-----------------|
| 158.0817       | 1  | E    | 11             |                 |
| 273.1086       | 2  | D    | 10             | 1303.6759       |
| 436.1720       | 3  | Y    | 9              | 1188.6489       |
| 564.2305       | 4  | Q    | 8              | 1025.5856       |
| 677.3146       | 5  | I    | 7              | 897.5270        |
| 776.3830       | 6  | V    | 6              | 784.4430        |
| 905.4256       | 7  | E    | 5              | 685.3745        |
| 1061.5267      | 8  | R    | 4              | 556.3320        |
| 1158.5795      | 9  | P    | 3              | 400.2308        |
| 1286.6381      | 10 | Q    | 2              | 303.1781        |
|                | 11 | R    | 1              | 175.1195        |

N-term:+29.04

EDYYYYHPPPR, MH+ 1370.6593, m/z 457.5580  
 H OS G27 P150811 220811-s1.03081.03081.3.dta

X-range:

-

MassTol: Y-zoom:

MassType:

AVG  MONO

Axis:

1  2

Label:

I  M  -

Ions:

a  +  2+  3+

b  +  2+  3+

c  +  2+  3+

x  +  2+  3+

y  +  2+  3+

z  +  2+  3+

hide H<sub>2</sub>O/NH<sub>3</sub>

zoom 112-122

GO

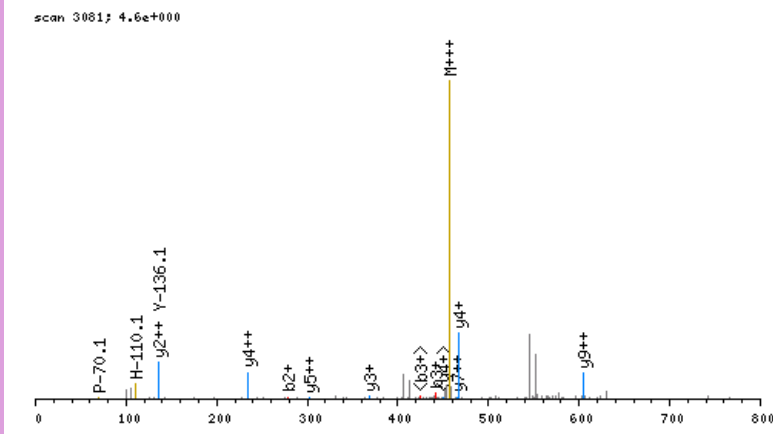

click image to zoom in; click top corners to zoom out [\[precursor±\]](#)

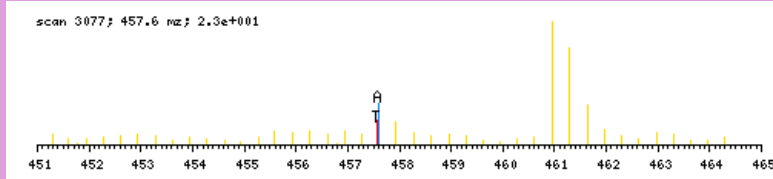

zoomed in precursor plot; T=theoretical m/z, A=acquired m/z

| b <sup>+</sup> | #  | AA # | y <sup>+</sup> | y <sup>2+</sup> |
|----------------|----|------|----------------|-----------------|
| 164.1135       | 1  | E 10 |                |                 |
| 279.1404       | 2  | D 9  | 1207.5536      | 604.2807        |
| 442.2038       | 3  | Y 8  | 1092.5267      | 546.7673        |
| 605.2671       | 4  | Y 7  | 929.4634       | 465.2356        |
| 768.3304       | 5  | Y 6  | 766.4000       | 383.7039        |
| 905.3893       | 6  | H 5  | 603.3367       | 302.1723        |
| 1002.4421      | 7  | P 4  | 466.2778       | 233.6428        |
| 1099.4949      | 8  | P 3  | 369.2250       | 185.1164        |
| 1196.5476      | 9  | P 2  | 272.1723       | 136.5900        |
|                | 10 | R 1  | 175.1195       | 88.0637         |

N-term:+35.07

EEALGDKAVFAGR, MH+ 1430.8280, m/z 477.6142  
 H OS G27 P150811 220811-s1.04126.04126.3.dta

X-range:

-

MassTol: Y-zoom:

MassType:

AVG  MONO

Axis:

1  2

Label:

I  M  -

Ions:

a  +  2+  3+

b  +  2+  3+

c  +  2+  3+

x  +  2+  3+

y  +  2+  3+

z  +  2+  3+

hide H<sub>2</sub>O/NH<sub>3</sub>

zoom 112-122

GO

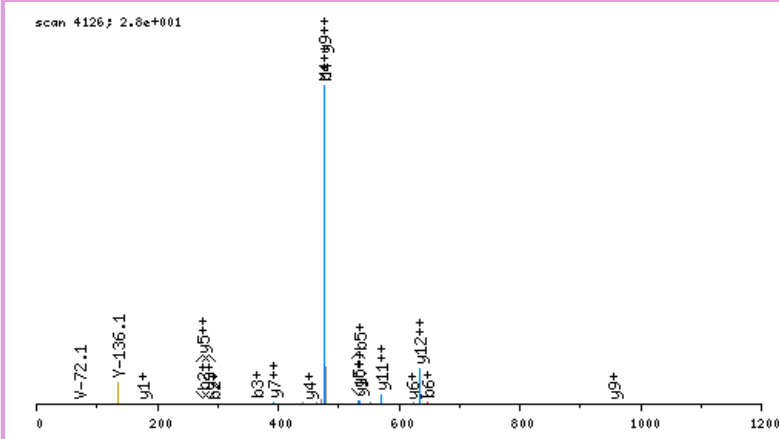

click image to zoom in; click top corners to zoom out [\[precursor±\]](#)

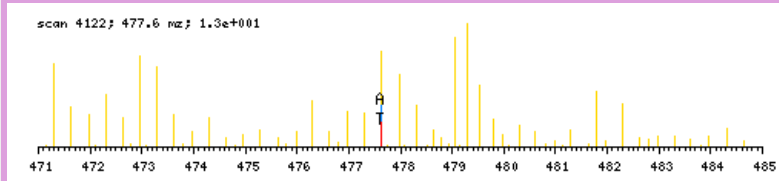

zoomed in precursor plot; T=theoretical m/z, A=acquired m/z

| b <sup>+</sup> | #  | AA # | y <sup>+</sup> | y <sup>2+</sup> |
|----------------|----|------|----------------|-----------------|
| 164.1135       | 1  | E 13 |                |                 |
| 293.1561       | 2  | E 12 | 1267.7223      | 634.3651        |
| 364.1932       | 3  | A 11 | 1138.6797      | 569.8438        |
| 477.2773       | 4  | L 10 | 1067.6426      | 534.3252        |
| 534.2987       | 5  | G 9  | 954.5585       | 477.7832        |
| 649.3257       | 6  | D 8  | 897.5371       | 449.2724        |
| 811.4838       | 7  | K 7  | 782.5101       | 391.7590        |
| 882.5209       | 8  | A 6  | 620.3520       | 310.6799        |
| 981.5893       | 9  | V 5  | 549.3149       | 275.1614        |
| 1128.6577      | 10 | F 4  | 450.2465       | 225.6272        |
| 1199.6948      | 11 | A 3  | 303.1781       | 152.0930        |
| 1256.7163      | 12 | G 2  | 232.1410       | 116.5744        |
|                | 13 | R 1  | 175.1195       | 88.0637         |

N-term:+35.07 K(7):+162.16

EEIAMATVTALR, MH+ 1338.7515, m/z 669.8794  
 H OS G25 P150811 220811-s1.06498.06498.2.dta

X-range:

-

MassTol: Y-zoom:

MassType:

AVG  MONO

Axis:

1  2

Label:

I  M  -

Ions:

a  +  2+  3+

b  +  2+  3+

c  +  2+  3+

x  +  2+  3+

y  +  2+  3+

z  +  2+  3+

hide H<sub>2</sub>O/NH<sub>3</sub>

zoom 112-122

GO

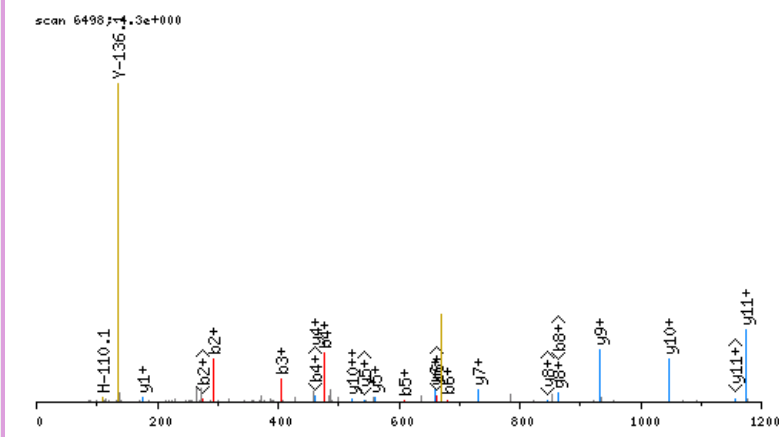

click image to zoom in; click top corners to zoom out [\[precursor±\]](#)

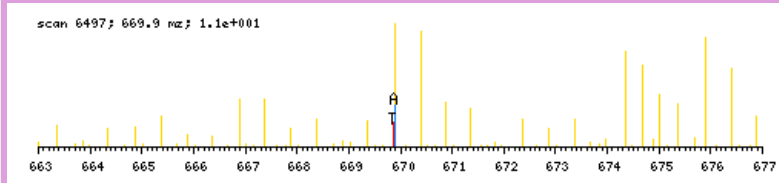

zoomed in precursor plot; T=theoretical m/z, A=acquired m/z

| b <sup>+</sup> | #  | AA # | y <sup>+</sup> | y <sup>2+</sup> |
|----------------|----|------|----------------|-----------------|
| 164.1135       | 1  | E 12 |                |                 |
| 293.1561       | 2  | E 11 | 1175.6458      | 588.3268        |
| 406.2402       | 3  | I 10 | 1046.6032      | 523.8055        |
| 477.2773       | 4  | A 9  | 933.5192       | 467.2635        |
| 608.3177       | 5  | M 8  | 862.4820       | 431.7449        |
| 679.3549       | 6  | A 7  | 731.4416       | 366.2247        |
| 780.4025       | 7  | T 6  | 660.4044       | 330.7061        |
| 879.4710       | 8  | V 5  | 559.3568       | 280.1823        |
| 980.5186       | 9  | T 4  | 460.2884       | 230.6481        |
| 1051.5557      | 10 | A 3  | 359.2407       | 180.1243        |
| 1164.6398      | 11 | L 2  | 288.2036       | 144.6057        |
|                | 12 | R 1  | 175.1195       | 88.0637         |

N-term:+35.07



EEIDNAPEER, MH+ 1229.5650, m/z 615.2861  
 L OS G25 P150811 220811-s1.02160.02160.2.dta

X-range:

-

MassTol: Y-zoom:

MassType:

AVG  MONO

Axis:

1  2

Label:

I  M  -

Ions:

a  +  2+  3+

b  +  2+  3+

c  +  2+  3+

x  +  2+  3+

y  +  2+  3+

z  +  2+  3+

hide H<sub>2</sub>O/NH<sub>3</sub>

zoom 112-122

GO

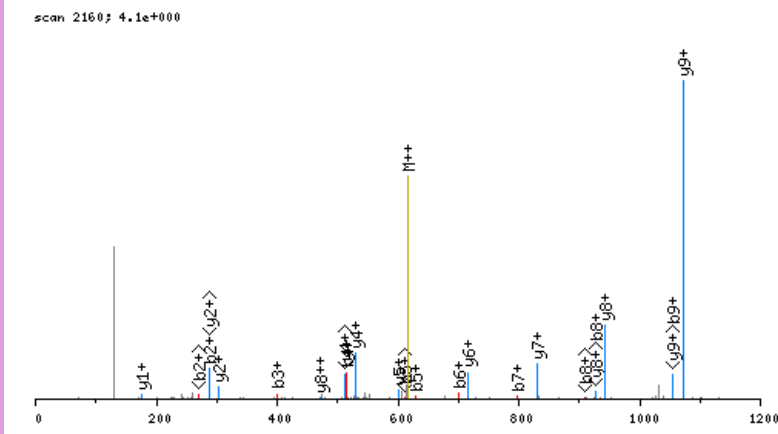

click image to zoom in; click top corners to zoom out [\[precursor±\]](#)

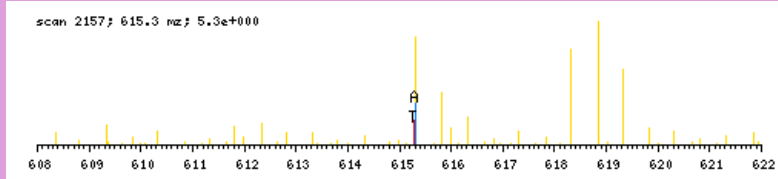

zoomed in precursor plot; T=theoretical m/z, A=acquired m/z

| b <sup>+</sup> | #  | AA # | y <sup>+</sup> | y <sup>2+</sup> |
|----------------|----|------|----------------|-----------------|
| 158.0817       | 1  | E 10 |                |                 |
| 287.1243       | 2  | E 9  | 1072.4911      | 536.7495        |
| 400.2084       | 3  | I 8  | 943.4485       | 472.2282        |
| 515.2353       | 4  | D 7  | 830.3644       | 415.6861        |
| 629.2782       | 5  | N 6  | 715.3375       | 358.1727        |
| 700.3153       | 6  | A 5  | 601.2946       | 301.1512        |
| 797.3681       | 7  | P 4  | 530.2575       | 265.6326        |
| 926.4107       | 8  | E 3  | 433.2047       | 217.1063        |
| 1055.4533      | 9  | E 2  | 304.1621       | 152.5850        |
|                | 10 | R 1  | 175.1195       | 88.0637         |

N-term:+29.04

EEIKDFLLTAR, MH+ 1390.7946, m/z 464.2697  
 L OS G27 P150811 220811-s1.06604.06604.3.dta

X-range:

-

MassTol: Y-zoom:

MassType:

AVG  MONO

Axis:

1  2

Label:

I  M  -

Ions:

a  +  2+  3+

b  +  2+  3+

c  +  2+  3+

x  +  2+  3+

y  +  2+  3+

z  +  2+  3+

hide H<sub>2</sub>O/NH<sub>3</sub>

zoom 112-122

GO

scan 6604; 1.0e+001

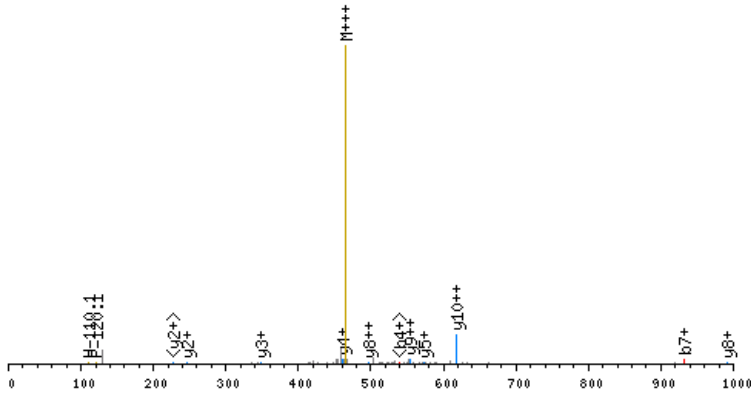

click image to zoom in; click top corners to zoom out [\[precursor±\]](#)

scan 6602; 464.3 m/z; 2.0e+001

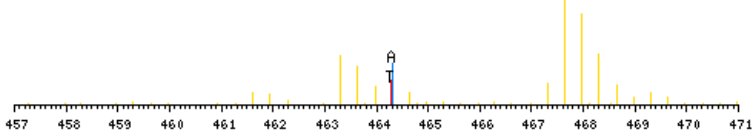

zoomed in precursor plot; T=theoretical m/z, A=acquired m/z

| b <sup>+</sup> | #  | AA # | y <sup>+</sup> | y <sup>2+</sup> |
|----------------|----|------|----------------|-----------------|
| 158.0817       | 1  | E 11 |                |                 |
| 287.1243       | 2  | E 10 | 1233.7207      | 617.3643        |
| 400.2084       | 3  | I 9  | 1104.6781      | 552.8430        |
| 556.3347       | 4  | K 8  | 991.5941       | 496.3010        |
| 671.3616       | 5  | D 7  | 835.4678       | 418.2378        |
| 818.4300       | 6  | F 6  | 720.4408       | 360.7243        |
| 931.5141       | 7  | L 5  | 573.3724       | 287.1901        |
| 1044.5981      | 8  | L 4  | 460.2884       | 230.6481        |
| 1145.6458      | 9  | T 3  | 347.2043       | 174.1061        |
| 1216.6829      | 10 | A 2  | 246.1566       | 123.5822        |
|                | 11 | R 1  | 175.1195       | 88.0637         |

N-term:+29.04 K(4):+156.13

EKQCDFPTVENGR, MH+ 1764.8226, m/z 588.9457  
 L OS G27 P150811 220811-s1.03236.03236.3.dta

X-range:

-

MassTol: Y-zoom:

MassType:

AVG  MONO

Axis:

1  2

Label:

I  M  -

Ions:

a  +  2+  3+

b  +  2+  3+

c  +  2+  3+

x  +  2+  3+

y  +  2+  3+

z  +  2+  3+

hide H<sub>2</sub>O/NH<sub>3</sub>

zoom 112-122

GO

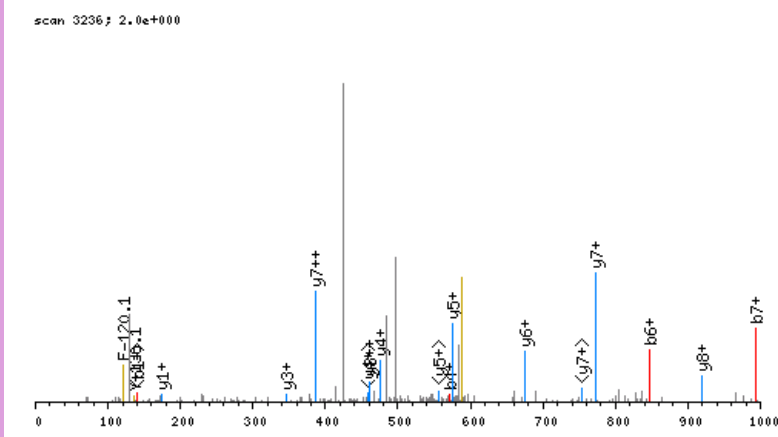

click image to zoom in; click top corners to zoom out [\[precursor±\]](#)

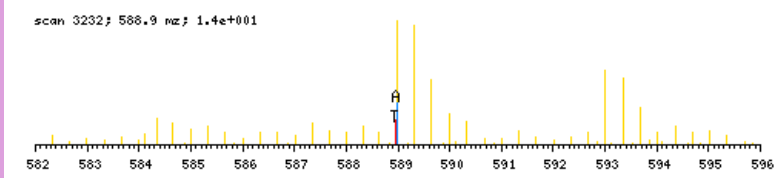

zoomed in precursor plot; T=theoretical m/z, A=acquired m/z

| b <sup>+</sup> | #  | AA # | y <sup>+</sup> | y <sup>2+</sup> |
|----------------|----|------|----------------|-----------------|
| 158.0817       | 1  | E 14 |                |                 |
| 287.1243       | 2  | E 13 | 1607.7488      | 804.3783        |
| 443.2506       | 3  | K 12 | 1478.7062      | 739.8570        |
| 571.3092       | 4  | Q 11 | 1322.5799      | 661.7939        |
| 731.3398       | 5  | C 10 | 1194.5213      | 597.7646        |
| 846.3667       | 6  | D 9  | 1034.4907      | 517.7493        |
| 993.4351       | 7  | F 8  | 919.4638       | 460.2358        |
| 1090.4879      | 8  | P 7  | 772.3953       | 386.7016        |
| 1191.5356      | 9  | T 6  | 675.3426       | 338.1752        |
| 1290.6040      | 10 | V 5  | 574.2949       | 287.6514        |
| 1419.6466      | 11 | E 4  | 475.2265       | 238.1172        |
| 1533.6895      | 12 | N 3  | 346.1839       | 173.5959        |
| 1590.7110      | 13 | G 2  | 232.1410       | 116.5744        |
|                | 14 | R 1  | 175.1195       | 88.0637         |

N-term:+29.04 K(3):+156.13  
 C(5):+160.03

EEQGADAALHFNPR, MH+ 1582.7614, m/z 528.2586  
 L OS G27 P150811 220811-s1.04214.04214.3.dta

X-range:

-

MassTol: Y-zoom:

MassType:

AVG  MONO

Axis:

1  2

Label:

I  M  -

Ions:

a  +  2+  3+

b  +  2+  3+

c  +  2+  3+

x  +  2+  3+

y  +  2+  3+

z  +  2+  3+

hide H<sub>2</sub>O/NH<sub>3</sub>

zoom 112-122

GO

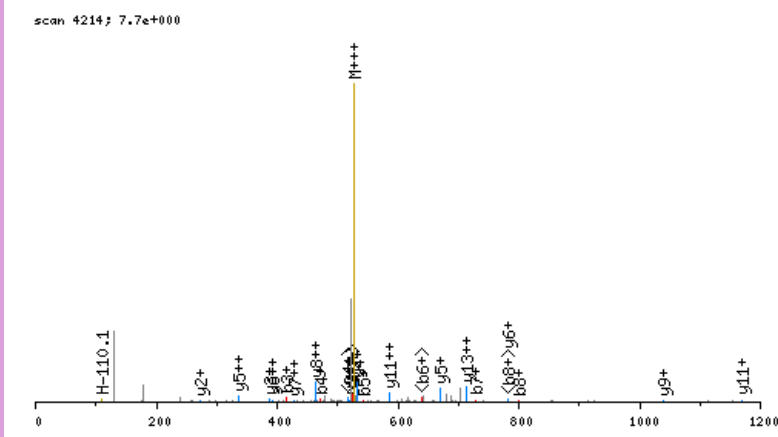

click image to zoom in; click top corners to zoom out [\[precursor±\]](#)

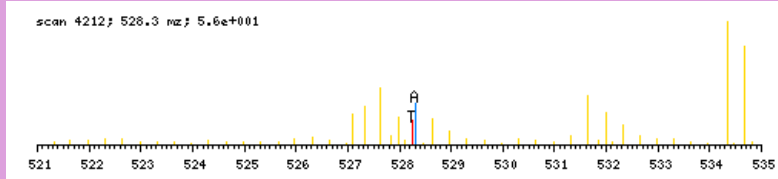

zoomed in precursor plot; T=theoretical m/z, A=acquired m/z

| b <sup>+</sup> | #  | AA # | y <sup>+</sup> | y <sup>2+</sup> |
|----------------|----|------|----------------|-----------------|
| 158.0817       | 1  | E 14 |                |                 |
| 287.1243       | 2  | E 13 | 1425.6875      | 713.3477        |
| 415.1829       | 3  | Q 12 | 1296.6449      | 648.8264        |
| 472.2043       | 4  | G 11 | 1168.5863      | 584.7971        |
| 543.2414       | 5  | A 10 | 1111.5649      | 556.2863        |
| 658.2684       | 6  | D 9  | 1040.5278      | 520.7678        |
| 729.3055       | 7  | A 8  | 925.5008       | 463.2543        |
| 800.3426       | 8  | A 7  | 854.4637       | 427.7358        |
| 913.4267       | 9  | L 6  | 783.4266       | 392.2172        |
| 1050.4856      | 10 | H 5  | 670.3425       | 335.6752        |
| 1197.5540      | 11 | F 4  | 533.2836       | 267.1457        |
| 1311.5969      | 12 | N 3  | 386.2152       | 193.6115        |
| 1408.6497      | 13 | P 2  | 272.1723       | 136.5900        |
|                | 14 | R 1  | 175.1195       | 88.0637         |

N-term:+29.04

EEQLDEEHLESHR, MH+ 1678.7672, m/z 420.4473  
 L OS G28 P150811 220811-s1.02754.02754.4.dta

X-range:

-

MassTol: Y-zoom:

MassType:

AVG  MONO

Axis:

1  2

Label:

I  M  -

Ions:

a  +  2+  3+

b  +  2+  3+

c  +  2+  3+

x  +  2+  3+

y  +  2+  3+

z  +  2+  3+

hide H<sub>2</sub>O/NH<sub>3</sub>

zoom 112-122

GO

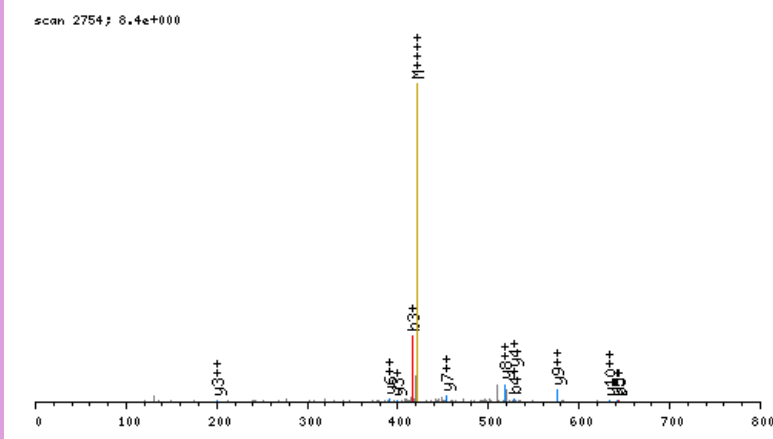

click image to zoom in; click top corners to zoom out [\[precursor±\]](#)

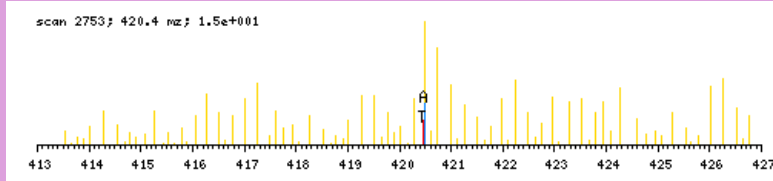

zoomed in precursor plot; T=theoretical m/z, A=acquired m/z

| b <sup>+</sup> | #  | AA # | y <sup>+</sup> | y <sup>2+</sup> |
|----------------|----|------|----------------|-----------------|
| 158.0817       | 1  | E 13 |                |                 |
| 287.1243       | 2  | E 12 | 1521.6934      | 761.3506        |
| 415.1829       | 3  | Q 11 | 1392.6508      | 696.8293        |
| 528.2669       | 4  | L 10 | 1264.5922      | 632.8000        |
| 643.2939       | 5  | D 9  | 1151.5081      | 576.2580        |
| 772.3365       | 6  | E 8  | 1036.4812      | 518.7445        |
| 901.3791       | 7  | E 7  | 907.4386       | 454.2232        |
| 1038.4380      | 8  | H 6  | 778.3960       | 389.7019        |
| 1151.5220      | 9  | L 5  | 641.3371       | 321.1725        |
| 1280.5646      | 10 | E 4  | 528.2530       | 264.6304        |
| 1367.5967      | 11 | S 3  | 399.2104       | 200.1091        |
| 1504.6556      | 12 | H 2  | 312.1784       | 156.5931        |
|                | 13 | R 1  | 175.1195       | 88.0637         |

N-term:+29.04

EEVEDASEEAPLR, MH+ 1507.7340, m/z 754.3706  
 H OS G25 P150811 220811-s1.03646.03646.2.dta

X-range:

-

MassTol: Y-zoom:

MassType:

AVG  MONO

Axis:

1  2

Label:

I  M  -

Ions:

a  +  2+  3+

b  +  2+  3+

c  +  2+  3+

x  +  2+  3+

y  +  2+  3+

z  +  2+  3+

hide H<sub>2</sub>O/NH<sub>3</sub>

zoom 112-122

GO

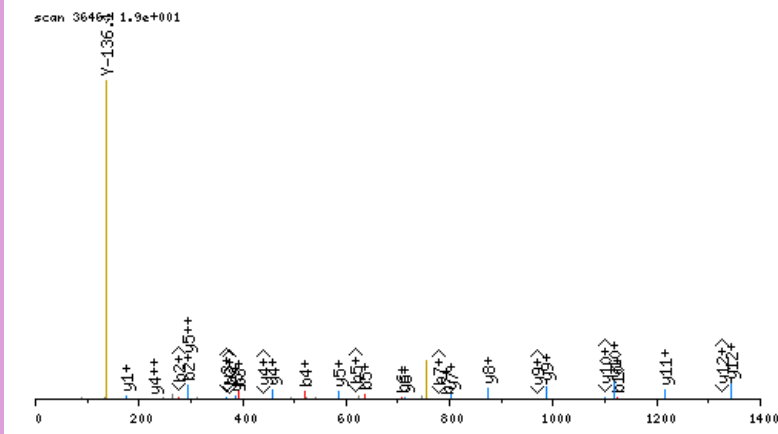

click image to zoom in; click top corners to zoom out [\[precursor±\]](#)

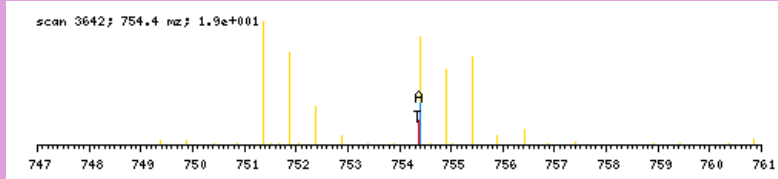

zoomed in precursor plot; T=theoretical m/z, A=acquired m/z

| b <sup>+</sup> | #  | AA # | y <sup>+</sup> | y <sup>2+</sup> |
|----------------|----|------|----------------|-----------------|
| 164.1135       | 1  | E 13 |                |                 |
| 293.1561       | 2  | E 12 | 1344.6283      | 672.8181        |
| 392.2245       | 3  | V 11 | 1215.5857      | 608.2968        |
| 521.2671       | 4  | E 10 | 1116.5173      | 558.7626        |
| 636.2940       | 5  | D 9  | 987.4747       | 494.2413        |
| 707.3312       | 6  | A 8  | 872.4478       | 436.7278        |
| 794.3632       | 7  | S 7  | 801.4107       | 401.2092        |
| 923.4058       | 8  | E 6  | 714.3786       | 357.6932        |
| 1052.4484      | 9  | E 5  | 585.3360       | 293.1719        |
| 1123.4855      | 10 | A 4  | 456.2934       | 228.6506        |
| 1220.5382      | 11 | P 3  | 385.2563       | 193.1321        |
| 1333.6223      | 12 | L 2  | 288.2036       | 144.6057        |
|                | 13 | R 1  | 175.1195       | 88.0637         |

N-term:+35.07

EEVHVSSNADEEDIR, MH+ 1756.7989, m/z 586.2712  
 L OS G27 P150811 220811-s1.03043.03043.3.dta

X-range:

-

MassTol: Y-zoom:

MassType:

AVG  MONO

Axis:

1  2

Label:

I  M  -

Ions:

a  +  2+  3+

b  +  2+  3+

c  +  2+  3+

x  +  2+  3+

y  +  2+  3+

z  +  2+  3+

hide H<sub>2</sub>O/NH<sub>3</sub>

zoom 112-122

GO

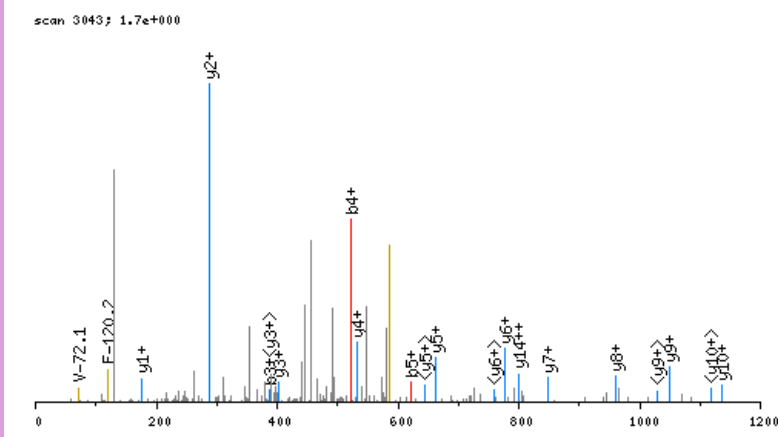

click image to zoom in; click top corners to zoom out [\[precursor±\]](#)

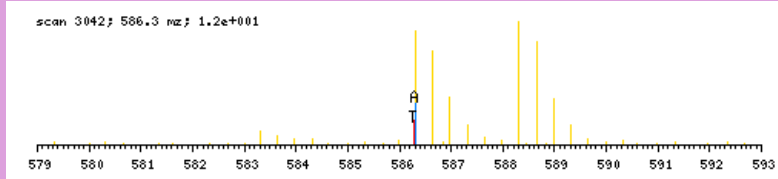

zoomed in precursor plot; T=theoretical m/z, A=acquired m/z

| b <sup>+</sup> | #  | AA # | y <sup>+</sup> | y <sup>2+</sup> |
|----------------|----|------|----------------|-----------------|
| 158.0817       | 1  | E 15 |                |                 |
| 287.1243       | 2  | E 14 | 1599.7251      | 800.3664        |
| 386.1927       | 3  | V 13 | 1470.6825      | 735.8452        |
| 523.2516       | 4  | H 12 | 1371.6141      | 686.3109        |
| 622.3200       | 5  | V 11 | 1234.5551      | 617.7815        |
| 709.3521       | 6  | S 10 | 1135.4867      | 568.2473        |
| 796.3841       | 7  | S 9  | 1048.4547      | 524.7313        |
| 910.4270       | 8  | N 8  | 961.4227       | 481.2153        |
| 981.4641       | 9  | A 7  | 847.3798       | 424.1938        |
| 1096.4911      | 10 | D 6  | 776.3426       | 388.6752        |
| 1225.5337      | 11 | E 5  | 661.3157       | 331.1618        |
| 1354.5763      | 12 | E 4  | 532.2731       | 266.6405        |
| 1469.6032      | 13 | D 3  | 403.2305       | 202.1192        |
| 1582.6873      | 14 | I 2  | 288.2036       | 144.6057        |
|                | 15 | R 1  | 175.1195       | 88.0637         |

N-term:+29.04

EEVTLEPLPETLQAKNR, MH+ 2035.1712, m/z 679.0619  
 H OS G26 P150811 220811-s1.05074.05074.3.dta

X-range:

-

MassTol: Y-zoom:

MassType:

AVG  MONO

Axis:

1  2

Label:

I  M  -

Ions:

a  +  2+  3+

b  +  2+  3+

c  +  2+  3+

x  +  2+  3+

y  +  2+  3+

z  +  2+  3+

hide H<sub>2</sub>O/NH<sub>3</sub>

zoom 112-122

GO

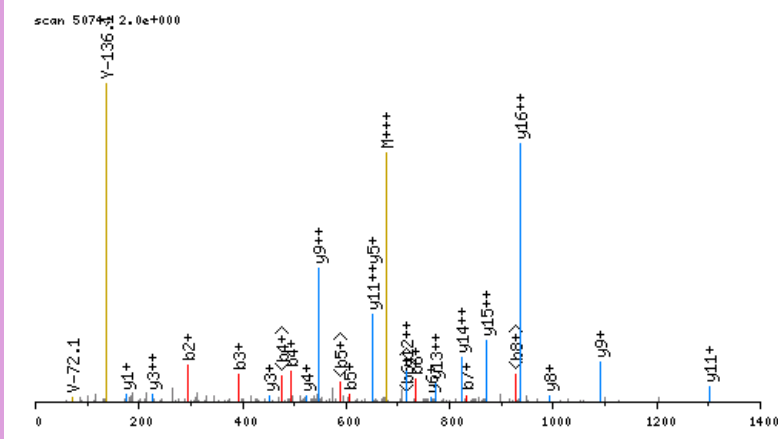

click image to zoom in; click top corners to zoom out [\[precursor±\]](#)

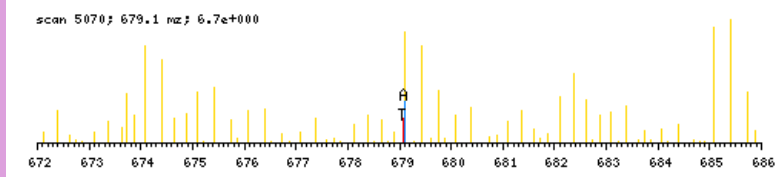

zoomed in precursor plot; T=theoretical m/z, A=acquired m/z

| b <sup>+</sup> | #  | AA | #  | y <sup>+</sup> | y <sup>2+</sup> |
|----------------|----|----|----|----------------|-----------------|
| 164.1135       | 1  | E  | 17 |                |                 |
| 293.1561       | 2  | E  | 16 | 1872.0655      | 936.5367        |
| 392.2245       | 3  | V  | 15 | 1743.0229      | 872.0154        |
| 493.2722       | 4  | T  | 14 | 1643.9545      | 822.4812        |
| 606.3562       | 5  | L  | 13 | 1542.9068      | 771.9573        |
| 735.3988       | 6  | E  | 12 | 1429.8227      | 715.4153        |
| 832.4516       | 7  | P  | 11 | 1300.7801      | 650.8940        |
| 945.5357       | 8  | L  | 10 | 1203.7274      | 602.3676        |
| 1042.5884      | 9  | P  | 9  | 1090.6433      | 545.8256        |
| 1171.6310      | 10 | E  | 8  | 993.5906       | 497.2992        |
| 1272.6787      | 11 | T  | 7  | 864.5480       | 432.7779        |
| 1385.7628      | 12 | L  | 6  | 763.5003       | 382.2541        |
| 1513.8213      | 13 | Q  | 5  | 650.4162       | 325.7120        |
| 1584.8585      | 14 | A  | 4  | 522.3576       | 261.6827        |
| 1747.0166      | 15 | K  | 3  | 451.3205       | 226.1642        |
| 1861.0595      | 16 | N  | 2  | 289.1624       | 145.0851        |
|                | 17 | R  | 1  | 175.1195       | 88.0637         |

N-term:+35.07 K(15):+162.16



EEYGKIDTIEIITDR, MH+ 1863.0387, m/z 621.6844  
 H OS G26 P150811 220811-s1.05552.05552.3.dta

X-range:

-

MassTol: Y-zoom:

MassType:

AVG  MONO

Axis:

1  2

Label:

I  M  -

Ions:

a  +  2+  3+

b  +  2+  3+

c  +  2+  3+

x  +  2+  3+

y  +  2+  3+

z  +  2+  3+

hide H<sub>2</sub>O/NH<sub>3</sub>

zoom 112-122

GO

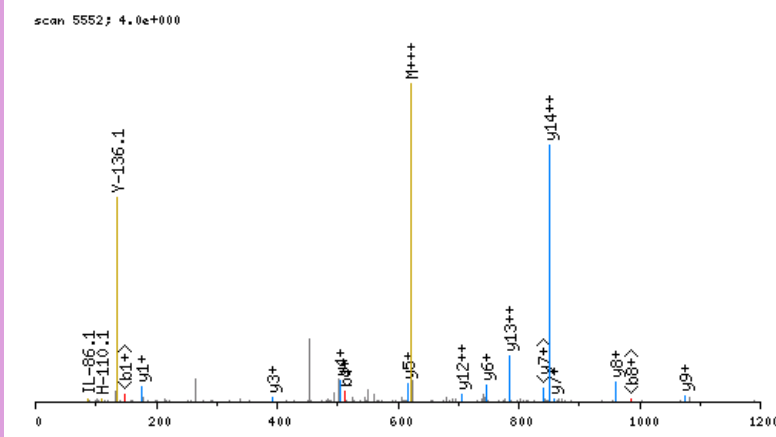

click image to zoom in; click top corners to zoom out [\[precursor±\]](#)

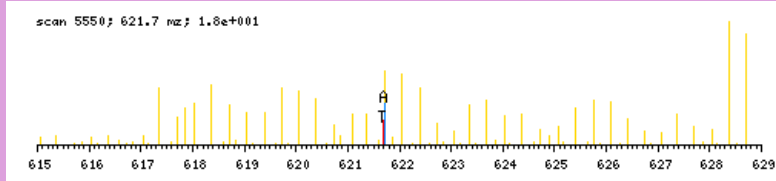

zoomed in precursor plot; T=theoretical m/z, A=acquired m/z

| b <sup>+</sup> | #  | AA # | y <sup>+</sup> | y <sup>2+</sup> |
|----------------|----|------|----------------|-----------------|
| 164.1135       | 1  | E 15 |                |                 |
| 293.1561       | 2  | E 14 | 1699.9331      | 850.4705        |
| 456.2194       | 3  | Y 13 | 1570.8905      | 785.9492        |
| 513.2409       | 4  | G 12 | 1407.8272      | 704.4175        |
| 675.3990       | 5  | K 11 | 1350.8057      | 675.9068        |
| 788.4830       | 6  | I 10 | 1188.6476      | 594.8277        |
| 903.5100       | 7  | D 9  | 1075.5635      | 538.2857        |
| 1004.5577      | 8  | T 8  | 960.5366       | 480.7722        |
| 1117.6417      | 9  | I 7  | 859.4889       | 430.2484        |
| 1246.6843      | 10 | E 6  | 746.4048       | 373.7063        |
| 1359.7684      | 11 | I 5  | 617.3623       | 309.1850        |
| 1472.8524      | 12 | I 4  | 504.2782       | 252.6430        |
| 1573.9001      | 13 | T 3  | 391.1941       | 196.1010        |
| 1688.9271      | 14 | D 2  | 290.1464       | 145.5771        |
|                | 15 | R 1  | 175.1195       | 88.0637         |

N-term:+35.07 K(5):+162.16

EFKEAFTVIDQNR, MH+ 1664.9284, m/z 555.6477  
H OS G27 P150811 220811-s1.05878.05878.3.dta

X-range:

-

MassTol: Y-zoom:

MassType:

AVG  MONO

Axis:

1  2

Label:

I  M  -

Ions:

a  +  2+  3+

b  +  2+  3+

c  +  2+  3+

x  +  2+  3+

y  +  2+  3+

z  +  2+  3+

hide H<sub>2</sub>O/NH<sub>3</sub>

zoom 112-122

GO

scan 5878; 2.2e+000

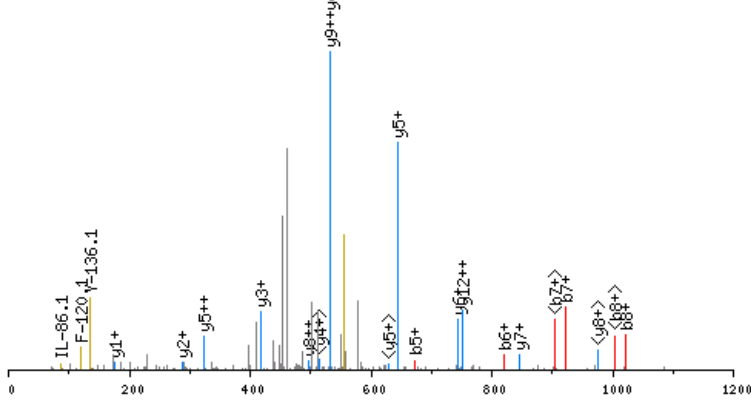

click image to zoom in; click top corners to zoom out [\[precursor±\]](#)

scan 5877; 555.6 m/z; 1.5e+001

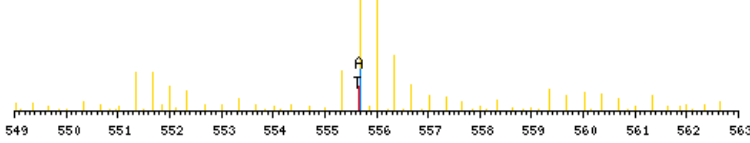

zoomed in precursor plot; T=theoretical m/z, A=acquired m/z

| b <sup>+</sup> | #  | AA # | y <sup>+</sup> | y <sup>2+</sup> |
|----------------|----|------|----------------|-----------------|
| 164.1135       | 1  | E 13 |                |                 |
| 311.1819       | 2  | F 12 | 1501.8227      | 751.4153        |
| 473.3400       | 3  | K 11 | 1354.7543      | 677.8811        |
| 602.3826       | 4  | E 10 | 1192.5962      | 596.8020        |
| 673.4197       | 5  | A 9  | 1063.5536      | 532.2807        |
| 820.4881       | 6  | F 8  | 992.5165       | 496.7622        |
| 921.5358       | 7  | T 7  | 845.4481       | 423.2280        |
| 1020.6042      | 8  | V 6  | 744.4004       | 372.7041        |
| 1133.6883      | 9  | I 5  | 645.3320       | 323.1699        |
| 1248.7152      | 10 | D 4  | 532.2479       | 266.6279        |
| 1376.7738      | 11 | Q 3  | 417.2210       | 209.1144        |
| 1490.8167      | 12 | N 2  | 289.1624       | 145.0851        |
|                | 13 | R 1  | 175.1195       | 88.0637         |

N-term:+35.07 K(3):+162.16

EGATAAPELSALEEAFRR, MH+ 1945.9983, m/z 649.3376  
 L OS G26 P150811 220811-s1.06748.06748.3.dta

X-range:

-

MassTol: Y-zoom:

MassType:

AVG  MONO

Axis:

1  2

Label:

I  M  -

Ions:

a  +  2+  3+

b  +  2+  3+

c  +  2+  3+

x  +  2+  3+

y  +  2+  3+

z  +  2+  3+

hide H<sub>2</sub>O/NH<sub>3</sub>

zoom 112-122

GO

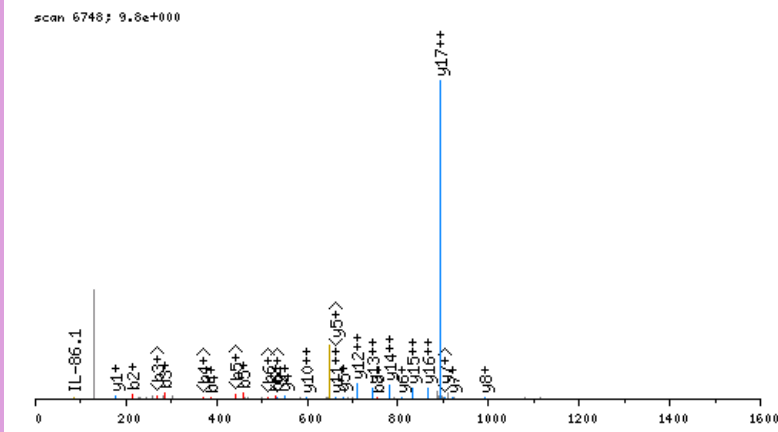

click image to zoom in; click top corners to zoom out [\[precursor±\]](#)

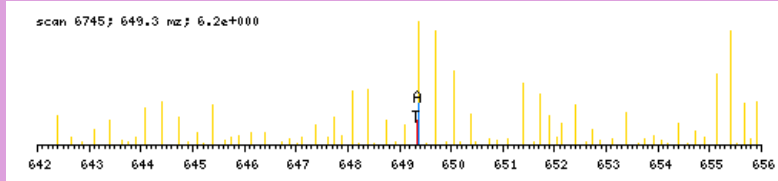

zoomed in precursor plot; T=theoretical m/z, A=acquired m/z

| b <sup>+</sup> | #  | AA # | y <sup>+</sup> | y <sup>2+</sup> |
|----------------|----|------|----------------|-----------------|
| 158.0817       | 1  | E 18 |                |                 |
| 215.1032       | 2  | G 17 | 1788.9244      | 894.9661        |
| 286.1403       | 3  | A 16 | 1731.9030      | 866.4554        |
| 387.1879       | 4  | T 15 | 1660.8659      | 830.9368        |
| 458.2251       | 5  | A 14 | 1559.8182      | 780.4130        |
| 529.2622       | 6  | A 13 | 1488.7811      | 744.8944        |
| 626.3149       | 7  | P 12 | 1417.7440      | 709.3759        |
| 755.3575       | 8  | E 11 | 1320.6912      | 660.8495        |
| 868.4416       | 9  | L 10 | 1191.6486      | 596.3282        |
| 955.4736       | 10 | S 9  | 1078.5645      | 539.7862        |
| 1026.5107      | 11 | A 8  | 991.5325       | 496.2702        |
| 1139.5948      | 12 | L 7  | 920.4954       | 460.7516        |
| 1268.6374      | 13 | E 6  | 807.4113       | 404.2096        |
| 1397.6800      | 14 | E 5  | 678.3687       | 339.6883        |
| 1468.7171      | 15 | A 4  | 549.3261       | 275.1670        |
| 1615.7855      | 16 | F 3  | 478.2890       | 239.6484        |
| 1771.8866      | 17 | R 2  | 331.2206       | 166.1142        |
|                | 18 | R 1  | 175.1195       | 88.0637         |

N-term:+29.04

EGDFDFESANAQFNRR, MH+ 1780.7990, m/z 594.2712  
 H OS G25 P150811 220811-s1.06425.06425.3.dta

X-range:

-

MassTol: Y-zoom:

MassType:

AVG  MONO

Axis:

1  2

Label:

I  M  -

Ions:

a  +  2+  3+

b  +  2+  3+

c  +  2+  3+

x  +  2+  3+

y  +  2+  3+

z  +  2+  3+

hide H<sub>2</sub>O/NH<sub>3</sub>

zoom 112-122

GO

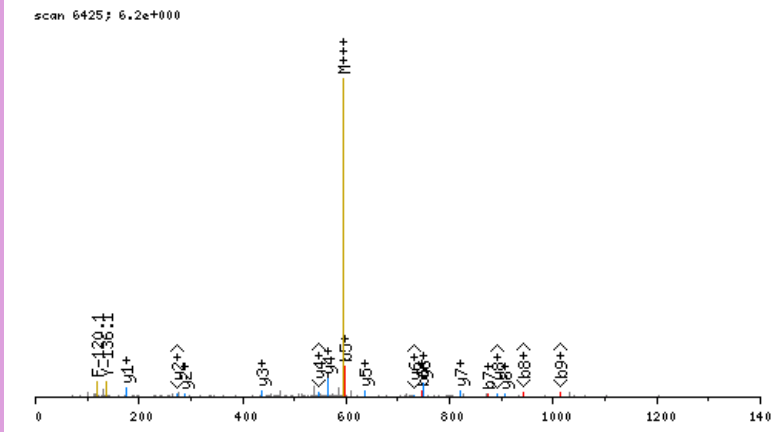

click image to zoom in; click top corners to zoom out [\[precursor±\]](#)

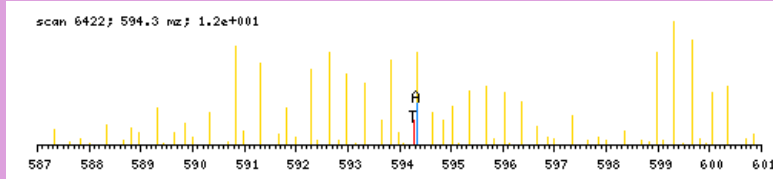

zoomed in precursor plot; T=theoretical m/z, A=acquired m/z

| b <sup>+</sup> | #  | AA # | y <sup>+</sup> | y <sup>2+</sup> |
|----------------|----|------|----------------|-----------------|
| 164.1135       | 1  | E 15 |                |                 |
| 221.1350       | 2  | G 14 | 1617.6934      | 809.3506        |
| 336.1619       | 3  | D 13 | 1560.6719      | 780.8399        |
| 483.2303       | 4  | F 12 | 1445.6450      | 723.3264        |
| 598.2573       | 5  | D 11 | 1298.5766      | 649.7922        |
| 745.3257       | 6  | F 10 | 1183.5496      | 592.2787        |
| 874.3683       | 7  | E 9  | 1036.4812      | 518.7445        |
| 961.4003       | 8  | S 8  | 907.4386       | 454.2232        |
| 1032.4374      | 9  | A 7  | 820.4066       | 410.7072        |
| 1146.4803      | 10 | N 6  | 749.3695       | 375.1886        |
| 1217.5174      | 11 | A 5  | 635.3265       | 318.1672        |
| 1345.5760      | 12 | Q 4  | 564.2894       | 282.6486        |
| 1492.6444      | 13 | F 3  | 436.2308       | 218.6193        |
| 1606.6874      | 14 | N 2  | 289.1624       | 145.0851        |
|                | 15 | R 1  | 175.1195       | 88.0637         |

N-term:+35.07

EGHSDFSEGOAVGAHR, MH+ 1711.7788, m/z 428.7002  
 L OS G28 P150811 220811-s1.02240.02240.4.dta

X-range:

-

MassTol: Y-zoom:

MassType:

AVG  MONO

Axis:

1  2

Label:

I  M  -

Ions:

a  +  2+  3+

b  +  2+  3+

c  +  2+  3+

x  +  2+  3+

y  +  2+  3+

z  +  2+  3+

hide H<sub>2</sub>O/NH<sub>3</sub>

zoom 112-122

GO

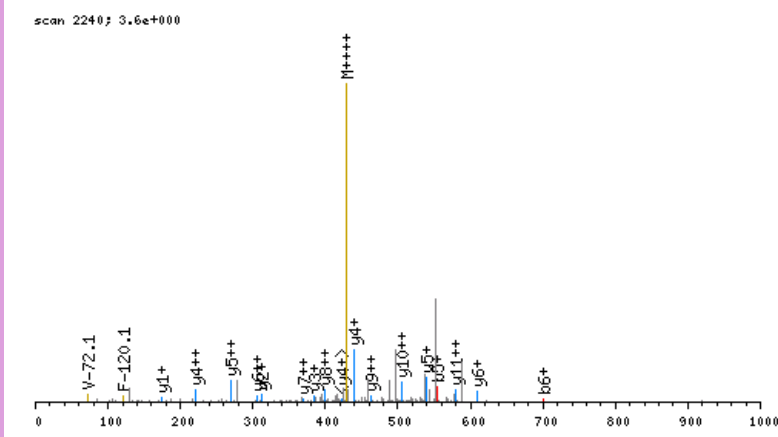

click image to zoom in; click top corners to zoom out [\[precursor±\]](#)

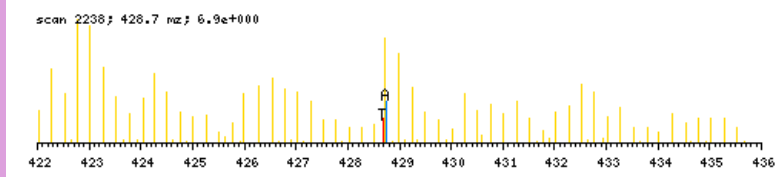

zoomed in precursor plot; T=theoretical m/z, A=acquired m/z

| b <sup>+</sup> | #  | AA # | y <sup>+</sup> | y <sup>2+</sup> |
|----------------|----|------|----------------|-----------------|
| 158.0817       | 1  | E 16 |                |                 |
| 215.1032       | 2  | G 15 | 1554.7049      | 777.8564        |
| 352.1621       | 3  | H 14 | 1497.6835      | 749.3457        |
| 439.1941       | 4  | S 13 | 1360.6246      | 680.8162        |
| 554.2210       | 5  | D 12 | 1273.5925      | 637.3002        |
| 701.2895       | 6  | F 11 | 1158.5656      | 579.7867        |
| 788.3215       | 7  | S 10 | 1011.4972      | 506.2525        |
| 917.3641       | 8  | E 9  | 924.4652       | 462.7365        |
| 974.3855       | 9  | G 8  | 795.4226       | 398.2152        |
| 1102.4441      | 10 | Q 7  | 738.4011       | 369.7045        |
| 1173.4812      | 11 | A 6  | 610.3425       | 305.6752        |
| 1272.5496      | 12 | V 5  | 539.3054       | 270.1566        |
| 1329.5711      | 13 | G 4  | 440.2370       | 220.6224        |
| 1400.6082      | 14 | A 3  | 383.2155       | 192.1117        |
| 1537.6671      | 15 | H 2  | 312.1784       | 156.5931        |
|                | 16 | R 1  | 175.1195       | 88.0637         |

N-term:+29.04

EHLGYVLTCPNLTGLR, MH+ 2015.0383, m/z 672.3510  
 L OS G27 P150811 220811-s1.06384.06384.3.dta

X-range:

-

MassTol: Y-zoom:

MassType:

AVG  MONO

Axis:

1  2

Label:

I  M  -

Ions:

a  +  2+  3+

b  +  2+  3+

c  +  2+  3+

x  +  2+  3+

y  +  2+  3+

z  +  2+  3+

hide H<sub>2</sub>O/NH<sub>3</sub>

zoom 112-122

GO

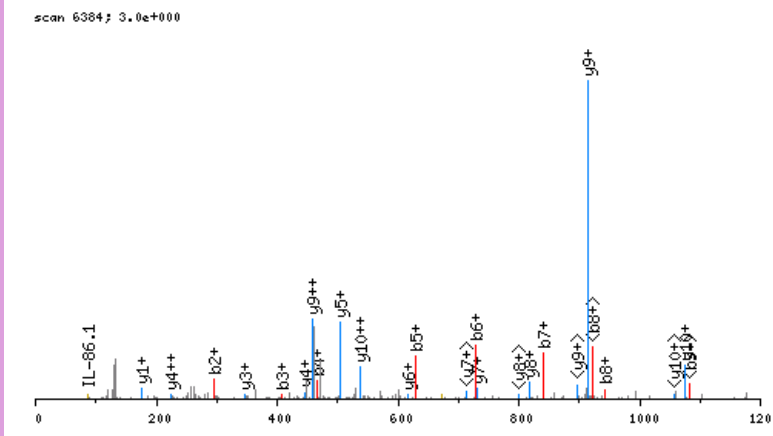

click image to zoom in; click top corners to zoom out [\[precursor±\]](#)

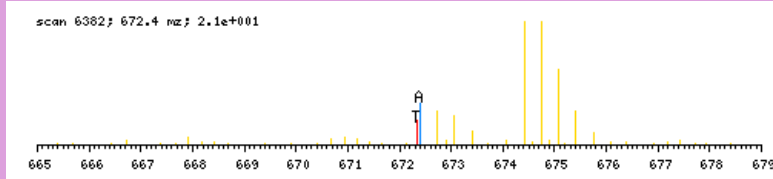

zoomed in precursor plot; T=theoretical m/z, A=acquired m/z

| b <sup>+</sup> | #  | AA | #  | y <sup>+</sup> | y <sup>2+</sup> |
|----------------|----|----|----|----------------|-----------------|
| 158.0817       | 1  | E  | 18 |                |                 |
| 295.1406       | 2  | H  | 17 | 1857.9645      | 929.4862        |
| 408.2247       | 3  | L  | 16 | 1720.9056      | 860.9567        |
| 465.2461       | 4  | G  | 15 | 1607.8215      | 804.4147        |
| 628.3095       | 5  | Y  | 14 | 1550.8000      | 775.9039        |
| 727.3779       | 6  | V  | 13 | 1387.7367      | 694.3723        |
| 840.4619       | 7  | L  | 12 | 1288.6683      | 644.8381        |
| 941.5096       | 8  | T  | 11 | 1175.5842      | 588.2960        |
| 1101.5402      | 9  | C  | 10 | 1074.5366      | 537.7722        |
| 1198.5930      | 10 | P  | 9  | 914.5060       | 457.7569        |
| 1285.6250      | 11 | S  | 8  | 817.4532       | 409.2305        |
| 1399.6679      | 12 | N  | 7  | 730.4212       | 365.7145        |
| 1512.7520      | 13 | L  | 6  | 616.3782       | 308.6930        |
| 1569.7735      | 14 | G  | 5  | 503.2942       | 252.1510        |
| 1670.8211      | 15 | T  | 4  | 446.2727       | 223.6403        |
| 1727.8426      | 16 | G  | 3  | 345.2250       | 173.1164        |
| 1840.9267      | 17 | L  | 2  | 288.2036       | 144.6057        |
|                | 18 | R  | 1  | 175.1195       | 88.0637         |

N-term:+29.04 C(9):+160.03

EHLNHQNPNTFESR, MH+ 1750.8261, m/z 438.4620  
 L OS G28 P150811 220811-s1.02034.02034.4.dta

X-range:

-

MassTol: Y-zoom:

MassType:

AVG  MONO

Axis:

1  2

Label:

I  M  -

Ions:

a  +  2+  3+

b  +  2+  3+

c  +  2+  3+

x  +  2+  3+

y  +  2+  3+

z  +  2+  3+

hide H<sub>2</sub>O/NH<sub>3</sub>

zoom 112-122

GO

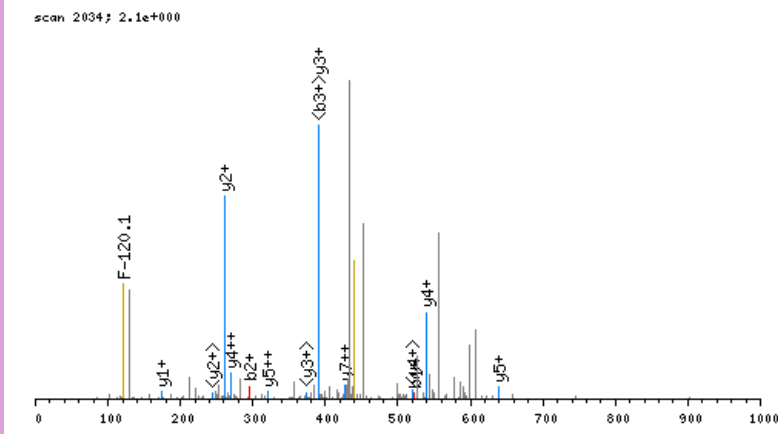

click image to zoom in; click top corners to zoom out [\[precursor±\]](#)

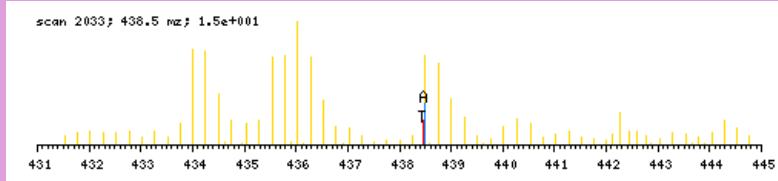

zoomed in precursor plot; T=theoretical m/z, A=acquired m/z

| b <sup>+</sup> | #  | AA # | y <sup>+</sup> | y <sup>2+</sup> |
|----------------|----|------|----------------|-----------------|
| 158.0817       | 1  | E 14 |                |                 |
| 295.1406       | 2  | H 13 | 1593.7522      | 797.3800        |
| 408.2247       | 3  | L 12 | 1456.6933      | 728.8506        |
| 522.2676       | 4  | N 11 | 1343.6093      | 672.3085        |
| 659.3265       | 5  | H 10 | 1229.5663      | 615.2871        |
| 787.3851       | 6  | Q 9  | 1092.5074      | 546.7576        |
| 901.4280       | 7  | N 8  | 964.4488       | 482.7283        |
| 998.4808       | 8  | P 7  | 850.4059       | 425.7069        |
| 1112.5237      | 9  | N 6  | 753.3531       | 377.1805        |
| 1213.5714      | 10 | T 5  | 639.3102       | 320.1590        |
| 1360.6398      | 11 | F 4  | 538.2625       | 269.6352        |
| 1489.6824      | 12 | E 3  | 391.1941       | 196.1010        |
| 1576.7144      | 13 | S 2  | 262.1515       | 131.5797        |
|                | 14 | R 1  | 175.1195       | 88.0637         |

N-term:+29.04

EINPDHPIVETLR, MH+ 1560.8386, m/z 520.9510  
 L OS G27 P150811 220811-s1.05010.05010.3.dta

scan 5010; 5.3e+000

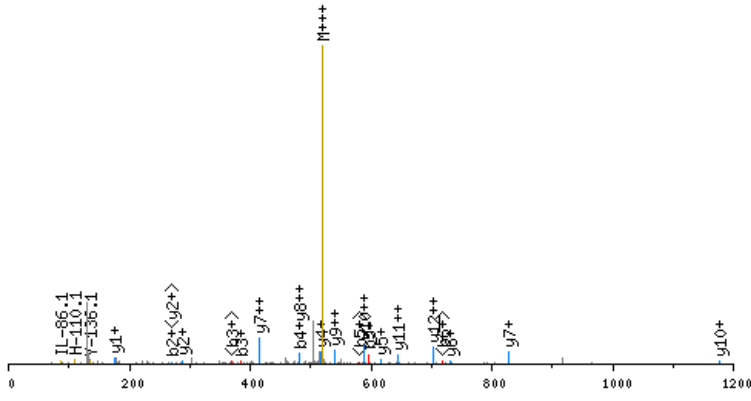

click image to zoom in; click top corners to zoom out [\[precursor±\]](#)

scan 5007; 521.0 m/z; 2.1e+001

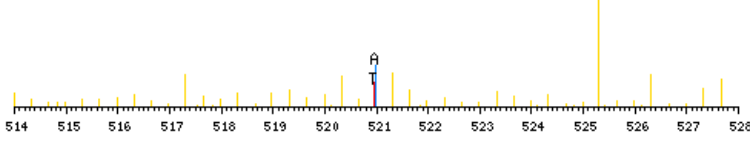

zoomed in precursor plot; T=theoretical m/z, A=acquired m/z

X-range:

-

MassTol: Y-zoom:

MassType:

AVG  MONO

Axis:

1  2

Label:

I  M  -

Ions:

a  +  2+  3+

b  +  2+  3+

c  +  2+  3+

x  +  2+  3+

y  +  2+  3+

z  +  2+  3+

hide H<sub>2</sub>O/NH<sub>3</sub>

zoom 112-122

GO

| b <sup>+</sup> | #  | AA # | y <sup>+</sup> | y <sup>2+</sup> |
|----------------|----|------|----------------|-----------------|
| 158.0817       | 1  | E 13 |                |                 |
| 271.1658       | 2  | I 12 | 1403.7647      | 702.3863        |
| 385.2087       | 3  | N 11 | 1290.6806      | 645.8442        |
| 482.2614       | 4  | P 10 | 1176.6377      | 588.8228        |
| 597.2884       | 5  | D 9  | 1079.5849      | 540.2964        |
| 734.3473       | 6  | H 8  | 964.5580       | 482.7829        |
| 831.4001       | 7  | P 7  | 827.4991       | 414.2535        |
| 944.4841       | 8  | I 6  | 730.4463       | 365.7271        |
| 1043.5525      | 9  | V 5  | 617.3623       | 309.1850        |
| 1172.5951      | 10 | E 4  | 518.2938       | 259.6508        |
| 1273.6428      | 11 | T 3  | 389.2512       | 195.1295        |
| 1386.7269      | 12 | L 2  | 288.2036       | 144.6057        |
|                | 13 | R 1  | 175.1195       | 88.0637         |

N-term:+29.04



EIPGSSDPNIVPDGDFSSSLVR, MH+ 2235.1357, m/z 745.7167  
 H OS G24 P150811 220811-s1.04784.04784.3.dta

scan 4784; 3.6e+000

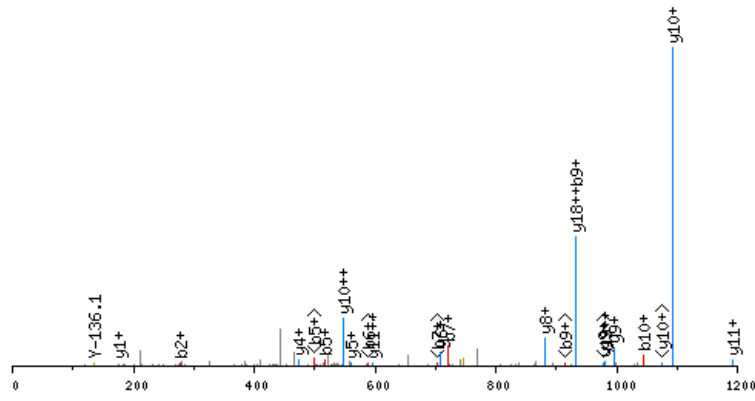

click image to zoom in; click top corners to zoom out [precursor±]

scan 4780; 745.7 mz; 1.7e+000

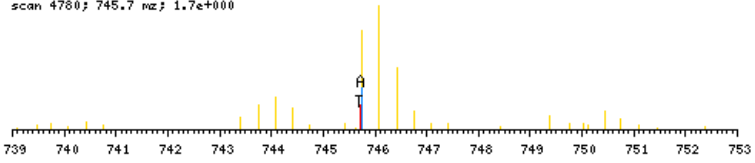

zoomed in precursor plot; T=theoretical m/z, A=acquired m/z

| b <sup>+</sup> | #  | AA # | y <sup>+</sup> | y <sup>2+</sup> |
|----------------|----|------|----------------|-----------------|
| 164.1135       | 1  | E 21 |                |                 |
| 277.1976       | 2  | I 20 | 2072.0300      | 1036.5189       |
| 374.2503       | 3  | P 19 | 1958.9460      | 979.9769        |
| 431.2718       | 4  | G 18 | 1861.8932      | 931.4505        |
| 518.3038       | 5  | S 17 | 1804.8717      | 902.9398        |
| 605.3358       | 6  | S 16 | 1717.8397      | 859.4238        |
| 720.3628       | 7  | D 15 | 1630.8077      | 815.9078        |
| 817.4155       | 8  | P 14 | 1515.7807      | 758.3943        |
| 931.4585       | 9  | N 13 | 1418.7280      | 709.8679        |
| 1044.5425      | 10 | I 12 | 1304.6850      | 652.8464        |
| 1143.6110      | 11 | V 11 | 1191.6010      | 596.3044        |
| 1240.6637      | 12 | P 10 | 1092.5326      | 546.7702        |
| 1355.6907      | 13 | D 9  | 995.4798       | 498.2438        |
| 1412.7121      | 14 | G 8  | 880.4529       | 440.7303        |
| 1527.7391      | 15 | D 7  | 823.4314       | 412.2196        |
| 1674.8075      | 16 | F 6  | 708.4044       | 354.7061        |
| 1761.8395      | 17 | S 5  | 561.3360       | 281.1719        |
| 1848.8715      | 18 | S 4  | 474.3040       | 237.6559        |
| 1961.9556      | 19 | L 3  | 387.2720       | 194.1399        |
| 2061.0240      | 20 | V 2  | 274.1879       | 137.5979        |
|                | 21 | R 1  | 175.1195       | 88.0637         |

N-term:+35.07

X-range:

-

MassTol: Y-zoom:

MassType:

AVG  MONO

Axis:

1  2

Label:

I  M  -

Ions:

a  +  2+  3+

b  +  2+  3+

c  +  2+  3+

x  +  2+  3+

y  +  2+  3+

z  +  2+  3+

hide H<sub>2</sub>O/NH<sub>3</sub>

zoom 112-122

GO

EISDEFSEAIGALR, MH+ 1564.7859, m/z 522.2668  
 L OS G25 P150811 220811-s1.08045.08045.3.dta

X-range:

-

MassTol: Y-zoom:

MassType:

AVG  MONO

Axis:

1  2

Label:

I  M  -

Ions:

a  +  2+  3+

b  +  2+  3+

c  +  2+  3+

x  +  2+  3+

y  +  2+  3+

z  +  2+  3+

hide H<sub>2</sub>O/NH<sub>3</sub>

zoom 112-122

GO

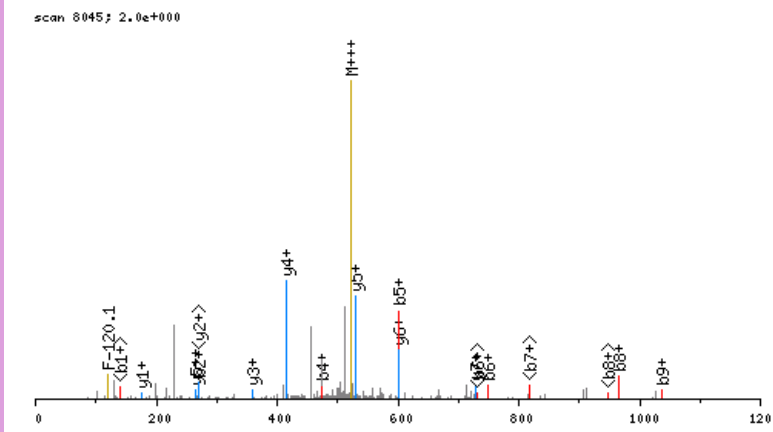

click image to zoom in; click top corners to zoom out [\[precursor±\]](#)

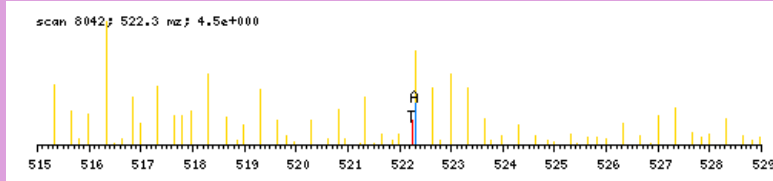

zoomed in precursor plot; T=theoretical m/z, A=acquired m/z

| b <sup>+</sup> | #  | AA # | y <sup>+</sup> | y <sup>2+</sup> |
|----------------|----|------|----------------|-----------------|
| 158.0817       | 1  | E 14 |                |                 |
| 271.1658       | 2  | I 13 | 1407.7120      | 704.3599        |
| 358.1978       | 3  | S 12 | 1294.6279      | 647.8179        |
| 473.2247       | 4  | D 11 | 1207.5959      | 604.3019        |
| 602.2673       | 5  | E 10 | 1092.5689      | 546.7884        |
| 749.3357       | 6  | F 9  | 963.5264       | 482.2671        |
| 836.3678       | 7  | S 8  | 816.4579       | 408.7329        |
| 965.4104       | 8  | E 7  | 729.4259       | 365.2169        |
| 1036.4475      | 9  | A 6  | 600.3833       | 300.6956        |
| 1149.5315      | 10 | I 5  | 529.3462       | 265.1770        |
| 1206.5530      | 11 | G 4  | 416.2621       | 208.6350        |
| 1277.5901      | 12 | A 3  | 359.2407       | 180.1243        |
| 1390.6742      | 13 | L 2  | 288.2036       | 144.6057        |
|                | 14 | R 1  | 175.1195       | 88.0637         |

N-term:+29.04

X-range:

-

MassTol: Y-zoom:

MassType:

AVG  MONO

Axis:

1  2

Label:

I  M  -

Ions:

a  +  2+  3+

b  +  2+  3+

c  +  2+  3+

x  +  2+  3+

y  +  2+  3+

z  +  2+  3+

hide H<sub>2</sub>O/NH<sub>3</sub>

zoom 112-122

GO

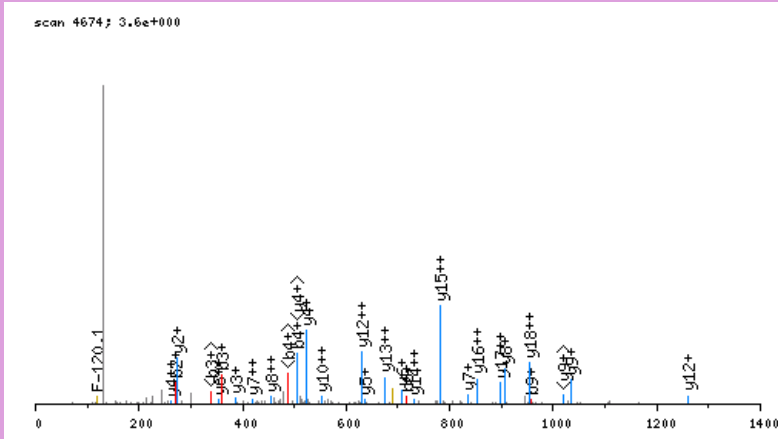

click image to zoom in; click top corners to zoom out [precursor±]

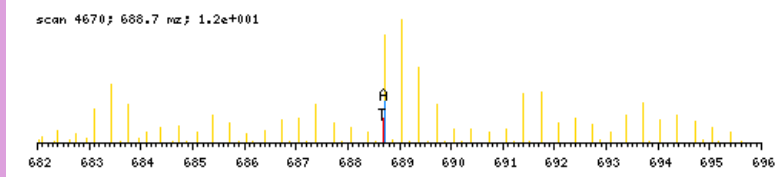

zoomed in precursor plot; T=theoretical m/z, A=acquired m/z

| b <sup>+</sup> | #  | AA # | y <sup>+</sup> | y <sup>2+</sup> |
|----------------|----|------|----------------|-----------------|
| 158.0817       | 1  | E 19 |                |                 |
| 271.1658       | 2  | I 18 | 1906.9411      | 953.9745        |
| 358.1978       | 3  | S 17 | 1793.8571      | 897.4325        |
| 505.2662       | 4  | F 16 | 1706.8251      | 853.9164        |
| 602.3190       | 5  | P 15 | 1559.7566      | 780.3822        |
| 717.3459       | 6  | D 14 | 1462.7039      | 731.8559        |
| 804.3779       | 7  | S 13 | 1347.6769      | 674.3424        |
| 901.4307       | 8  | P 12 | 1260.6449      | 630.8264        |
| 958.4522       | 9  | G 11 | 1163.5921      | 582.3000        |
| 1029.4893      | 10 | A 10 | 1106.5707      | 553.7893        |
| 1157.5479      | 11 | Q 9  | 1035.5336      | 518.2707        |
| 1228.5850      | 12 | A 8  | 907.4750       | 454.2414        |
| 1356.6435      | 13 | Q 7  | 836.4379       | 418.7228        |
| 1427.6807      | 14 | A 6  | 708.3793       | 354.6936        |
| 1542.7076      | 15 | D 5  | 637.3422       | 319.1750        |
| 1679.7665      | 16 | H 4  | 522.3152       | 261.6615        |
| 1792.8506      | 17 | L 3  | 385.2563       | 193.1321        |
| 1889.9033      | 18 | P 2  | 272.1723       | 136.5900        |
|                | 19 | R 1  | 175.1195       | 88.0637         |

N-term:+29.04

EITALAPSTMKIKIAPPER, MH+ 2263.3464, m/z 566.5921  
 L OS G27 P150811 220811-s1.06628.06628.4.dta

X-range:

-

MassTol: Y-zoom:

MassType:

AVG  MONO

Axis:

1  2

Label:

I  M  -

Ions:

a  +  2+  3+

b  +  2+  3+

c  +  2+  3+

x  +  2+  3+

y  +  2+  3+

z  +  2+  3+

hide H<sub>2</sub>O/NH<sub>3</sub>

zoom 112-122

GO

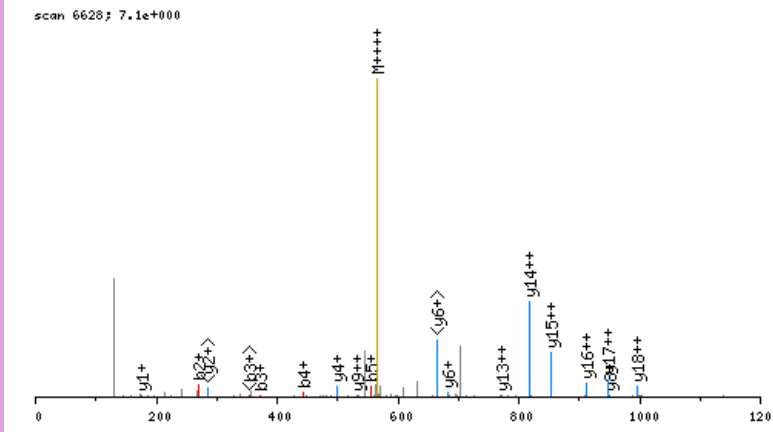

click image to zoom in; click top corners to zoom out [precursor±]

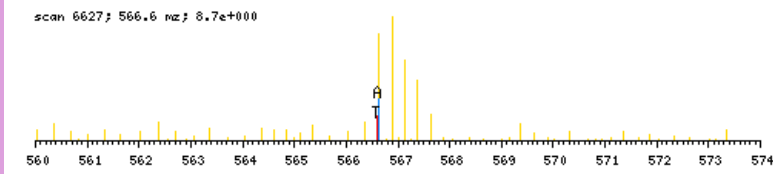

zoomed in precursor plot; T=theoretical m/z, A=acquired m/z

| b <sup>+</sup> | #  | AA | #  | y <sup>+</sup> | y <sup>2+</sup> |
|----------------|----|----|----|----------------|-----------------|
| 158.0817       | 1  | E  | 20 |                |                 |
| 271.1658       | 2  | I  | 19 | 2106.2725      | 1053.6402       |
| 372.2134       | 3  | T  | 18 | 1993.1885      | 997.0981        |
| 443.2505       | 4  | A  | 17 | 1892.1408      | 946.5743        |
| 556.3346       | 5  | L  | 16 | 1821.1037      | 911.0557        |
| 627.3717       | 6  | A  | 15 | 1708.0196      | 854.5137        |
| 724.4245       | 7  | P  | 14 | 1636.9825      | 818.9952        |
| 811.4565       | 8  | S  | 13 | 1539.9297      | 770.4688        |
| 912.5042       | 9  | T  | 12 | 1452.8977      | 726.9528        |
| 1043.5447      | 10 | M  | 11 | 1351.8500      | 676.4289        |
| 1199.6710      | 11 | K  | 10 | 1220.8095      | 610.9087        |
| 1312.7550      | 12 | I  | 9  | 1064.6832      | 532.8455        |
| 1468.8813      | 13 | K  | 8  | 951.5992       | 476.3035        |
| 1581.9654      | 14 | I  | 7  | 795.4729       | 398.2403        |
| 1695.0495      | 15 | I  | 6  | 682.3888       | 341.6983        |
| 1766.0866      | 16 | A  | 5  | 569.3047       | 285.1563        |
| 1863.1394      | 17 | P  | 4  | 498.2676       | 249.6377        |
| 1960.1921      | 18 | P  | 3  | 401.2149       | 201.1113        |
| 2089.2347      | 19 | E  | 2  | 304.1621       | 152.5850        |
|                | 20 | R  | 1  | 175.1195       | 88.0637         |

N-term: +29.04 K(11): +156.13  
 K(13): +156.13

EKFVEGVYR, MH+ 1182.6523, m/z 394.8889  
 L OS G27 P150811 220811-s1.03299.03299.3.dta

X-range:

-

MassTol: Y-zoom:

MassType:

AVG  MONO

Axis:

1  2

Label:

I  M  -

Ions:

a  +  2+  3+

b  +  2+  3+

c  +  2+  3+

x  +  2+  3+

y  +  2+  3+

z  +  2+  3+

hide H<sub>2</sub>O/NH<sub>3</sub>

zoom 112-122

GO

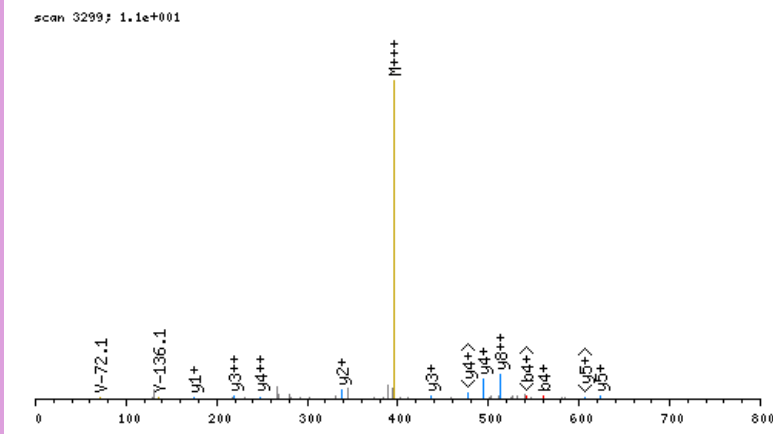

click image to zoom in; click top corners to zoom out [\[precursor±\]](#)

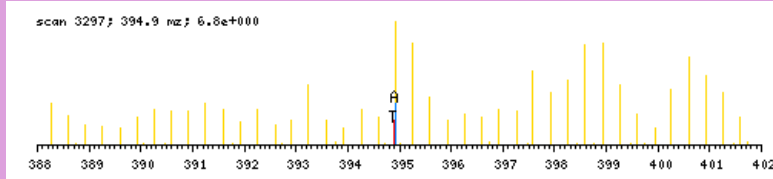

zoomed in precursor plot; T=theoretical m/z, A=acquired m/z

| b <sup>+</sup> | # | AA | # | y <sup>+</sup> | y <sup>2+</sup> |
|----------------|---|----|---|----------------|-----------------|
| 158.0817       | 1 | E  | 9 |                |                 |
| 314.2080       | 2 | K  | 8 | 1025.5784      | 513.2931        |
| 461.2764       | 3 | F  | 7 | 869.4521       | 435.2300        |
| 560.3448       | 4 | V  | 6 | 722.3837       | 361.6958        |
| 689.3874       | 5 | E  | 5 | 623.3153       | 312.1616        |
| 746.4089       | 6 | G  | 4 | 494.2727       | 247.6403        |
| 845.4773       | 7 | V  | 3 | 437.2512       | 219.1295        |
| 1008.5406      | 8 | Y  | 2 | 338.1828       | 169.5953        |
|                | 9 | R  | 1 | 175.1195       | 88.0637         |

N-term:+29.04 K(2):+156.13

EKIPFESAFR, MH+ 1279.7051, m/z 427.2399  
 L OS G27 P150811 220811-s1.05634.05634.3.dta

X-range:

-

MassTol: Y-zoom:

MassType:

AVG  MONO

Axis:

1  2

Label:

I  M  -

Ions:

a  +  2+  3+

b  +  2+  3+

c  +  2+  3+

x  +  2+  3+

y  +  2+  3+

z  +  2+  3+

hide H<sub>2</sub>O/NH<sub>3</sub>

zoom 112-122

GO

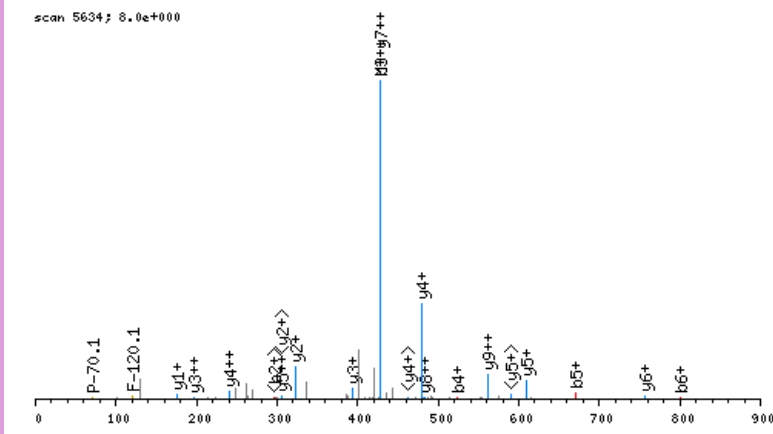

click image to zoom in; click top corners to zoom out [\[precursor±\]](#)

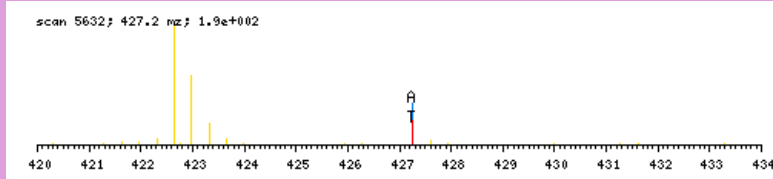

zoomed in precursor plot; T=theoretical m/z, A=acquired m/z

| b <sup>+</sup> | #  | AA # | y <sup>+</sup> | y <sup>2+</sup> |
|----------------|----|------|----------------|-----------------|
| 158.0817       | 1  | E 10 |                |                 |
| 314.2080       | 2  | K 9  | 1122.6312      | 561.8195        |
| 427.2921       | 3  | I 8  | 966.5049       | 483.7564        |
| 524.3448       | 4  | P 7  | 853.4208       | 427.2143        |
| 671.4132       | 5  | F 6  | 756.3681       | 378.6879        |
| 800.4558       | 6  | E 5  | 609.2997       | 305.1537        |
| 887.4879       | 7  | S 4  | 480.2571       | 240.6324        |
| 958.5250       | 8  | A 3  | 393.2250       | 197.1164        |
| 1105.5934      | 9  | F 2  | 322.1879       | 161.5979        |
|                | 10 | R 1  | 175.1195       | 88.0637         |

N-term:+29.04 K(2):+156.13

EKNGIDIYSLTVDSR, MH+ 1765.9336, m/z 589.3161  
 L OS G27 P150811 220811-s1.06164.06164.3.dta

X-range:

-

MassTol: Y-zoom:

MassType:

AVG  MONO

Axis:

1  2

Label:

I  M  -

Ions:

a  +  2+  3+

b  +  2+  3+

c  +  2+  3+

x  +  2+  3+

y  +  2+  3+

z  +  2+  3+

hide H<sub>2</sub>O/NH<sub>3</sub>

zoom 112-122

GO

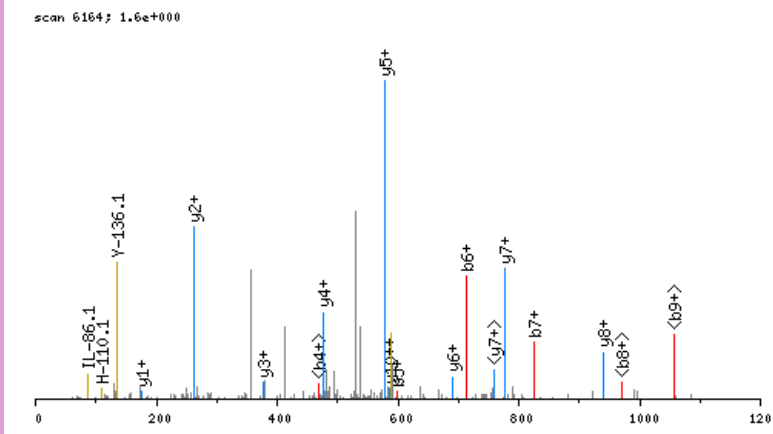

click image to zoom in; click top corners to zoom out [\[precursor±\]](#)

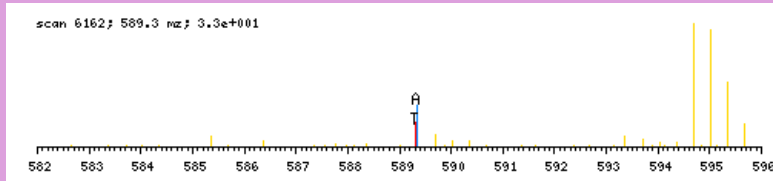

zoomed in precursor plot; T=theoretical m/z, A=acquired m/z

| b <sup>+</sup> | #  | AA # | y <sup>+</sup> | y <sup>2+</sup> |
|----------------|----|------|----------------|-----------------|
| 158.0817       | 1  | E 15 |                |                 |
| 314.2080       | 2  | K 14 | 1608.8597      | 804.9338        |
| 428.2509       | 3  | N 13 | 1452.7334      | 726.8706        |
| 485.2724       | 4  | G 12 | 1338.6905      | 669.8492        |
| 598.3564       | 5  | I 11 | 1281.6691      | 641.3384        |
| 713.3834       | 6  | D 10 | 1168.5850      | 584.7964        |
| 826.4675       | 7  | I 9  | 1053.5580      | 527.2829        |
| 989.5308       | 8  | Y 8  | 940.4740       | 470.7409        |
| 1076.5628      | 9  | S 7  | 777.4107       | 389.2092        |
| 1189.6469      | 10 | L 6  | 690.3786       | 345.6932        |
| 1290.6946      | 11 | T 5  | 577.2946       | 289.1512        |
| 1389.7630      | 12 | V 4  | 476.2469       | 238.6274        |
| 1504.7899      | 13 | D 3  | 377.1785       | 189.0931        |
| 1591.8219      | 14 | S 2  | 262.1515       | 131.5797        |
|                | 15 | R 1  | 175.1195       | 88.0637         |

N-term:+29.04 K(2):+156.13

EKNQLEEVPSALPR, MH+ 1677.9812, m/z 559.9986  
 H OS G27 P150811 220811-s1.04865.04865.3.dta

X-range:

-

MassTol: Y-zoom:

MassType:

AVG  MONO

Axis:

1  2

Label:

I  M  -

Ions:

a  +  2+  3+

b  +  2+  3+

c  +  2+  3+

x  +  2+  3+

y  +  2+  3+

z  +  2+  3+

hide H<sub>2</sub>O/NH<sub>3</sub>

zoom 112-122

GO

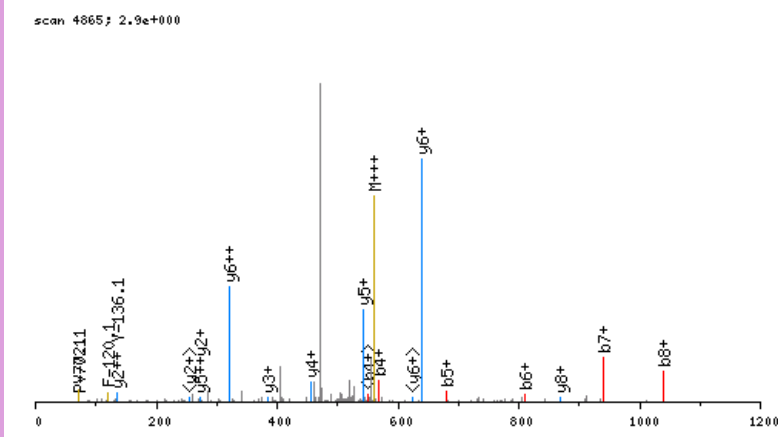

click image to zoom in; click top corners to zoom out [\[precursor±\]](#)

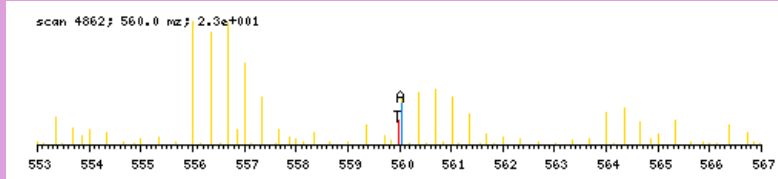

zoomed in precursor plot; T=theoretical m/z, A=acquired m/z

| b <sup>+</sup> | #  | AA # | y <sup>+</sup> | y <sup>2+</sup> |
|----------------|----|------|----------------|-----------------|
| 164.1135       | 1  | E 14 |                |                 |
| 326.2716       | 2  | K 13 | 1514.8755      | 757.9417        |
| 440.3145       | 3  | N 12 | 1352.7174      | 676.8626        |
| 568.3731       | 4  | Q 11 | 1238.6745      | 619.8412        |
| 681.4572       | 5  | L 10 | 1110.6159      | 555.8119        |
| 810.4998       | 6  | E 9  | 997.5318       | 499.2698        |
| 939.5423       | 7  | E 8  | 868.4892       | 434.7485        |
| 1038.6108      | 8  | V 7  | 739.4466       | 370.2272        |
| 1135.6635      | 9  | P 6  | 640.3782       | 320.6930        |
| 1222.6956      | 10 | S 5  | 543.3255       | 272.1666        |
| 1293.7327      | 11 | A 4  | 456.2934       | 228.6506        |
| 1406.8167      | 12 | L 3  | 385.2563       | 193.1321        |
| 1503.8695      | 13 | P 2  | 272.1723       | 136.5900        |
|                | 14 | R 1  | 175.1195       | 88.0637         |

N-term:+35.07 K(2):+162.16



EKQLDQLEEEIR, MH+ 1584.8597, m/z 396.9704  
 L OS G28 P150811 220811-s1.03185.03185.4.dta

X-range:

-

MassTol: Y-zoom:

MassType:

AVG  MONO

Axis:

1  2

Label:

I  M  -

Ions:

a  +  2+  3+

b  +  2+  3+

c  +  2+  3+

x  +  2+  3+

y  +  2+  3+

z  +  2+  3+

hide H<sub>2</sub>O/NH<sub>3</sub>

zoom 112-122

GO

scan 3185; 7.9e+000

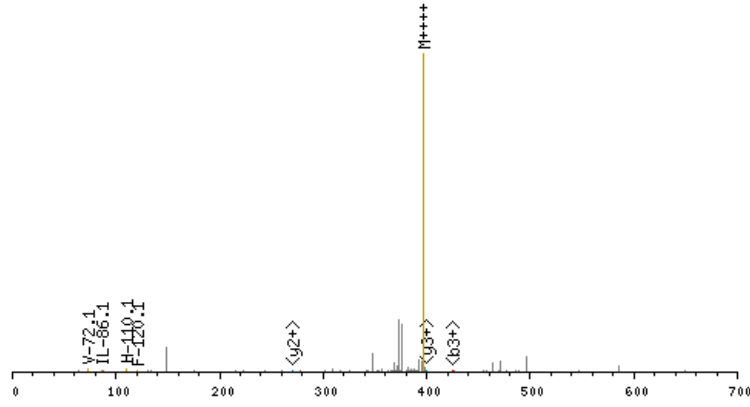

click image to zoom in; click top corners to zoom out

[precursor±]

scan 3183; 397.0 m/z; 1.7e+001

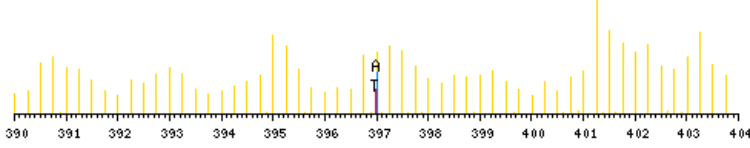

zoomed in precursor plot; T=theoretical m/z, A=acquired m/z

| b <sup>+</sup> | #  | AA # | y <sup>+</sup> | y <sup>2+</sup> |
|----------------|----|------|----------------|-----------------|
| 158.0817       | 1  | E 12 |                |                 |
| 314.2080       | 2  | K 11 | 1427.7859      | 714.3968        |
| 442.2666       | 3  | Q 10 | 1271.6596      | 636.3337        |
| 555.3506       | 4  | L 9  | 1143.6010      | 572.3044        |
| 683.4092       | 5  | Q 8  | 1030.5169      | 515.7624        |
| 798.4362       | 6  | D 7  | 902.4583       | 451.7331        |
| 926.4947       | 7  | Q 6  | 787.4314       | 394.2196        |
| 1039.5788      | 8  | L 5  | 659.3728       | 330.1903        |
| 1168.6214      | 9  | E 4  | 546.2888       | 273.6483        |
| 1297.6640      | 10 | E 3  | 417.2462       | 209.1270        |
| 1410.7480      | 11 | I 2  | 288.2036       | 144.6057        |
|                | 12 | R 1  | 175.1195       | 88.0637         |

N-term:+29.04 K(2):+156.13

EKSAGVSVPGMGPSPGPR, MH+ 1777.9907, m/z 593.3351  
 H OS G26 P150811 220811-s1.03179.03179.3.dta

X-range:

-

MassTol: Y-zoom:

MassType:

AVG  MONO

Axis:

1  2

Label:

I  M  -

Ions:

a  +  2+  3+

b  +  2+  3+

c  +  2+  3+

x  +  2+  3+

y  +  2+  3+

z  +  2+  3+

hide H<sub>2</sub>O/NH<sub>3</sub>

zoom 112-122

GO

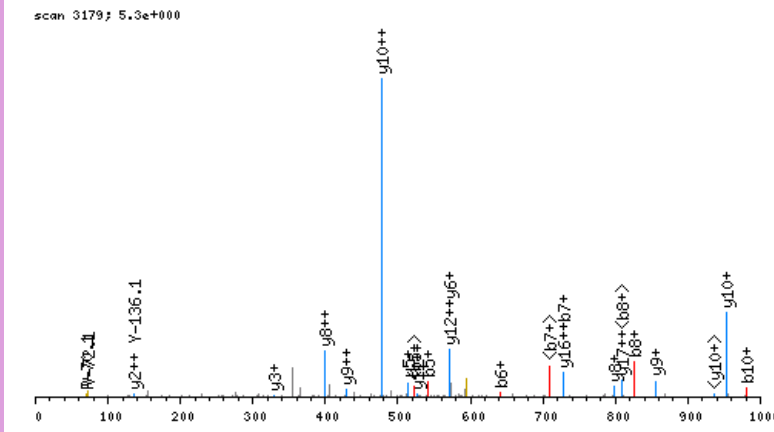

click image to zoom in; click top corners to zoom out [\[precursor±\]](#)

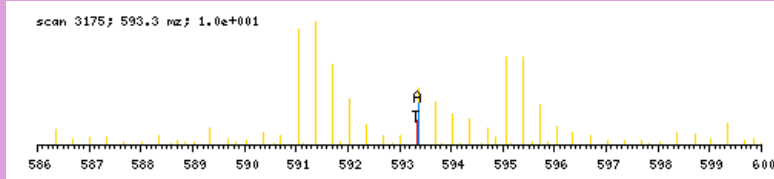

zoomed in precursor plot; T=theoretical m/z, A=acquired m/z

| b <sup>+</sup> | #  | AA # | y <sup>+</sup> | y <sup>2+</sup> |
|----------------|----|------|----------------|-----------------|
| 164.1135       | 1  | E 18 |                |                 |
| 326.2716       | 2  | K 17 | 1614.8850      | 807.9464        |
| 413.3036       | 3  | S 16 | 1452.7269      | 726.8674        |
| 484.3407       | 4  | A 15 | 1365.6949      | 683.3514        |
| 541.3622       | 5  | G 14 | 1294.6578      | 647.8328        |
| 640.4306       | 6  | V 13 | 1237.6363      | 619.3221        |
| 727.4626       | 7  | S 12 | 1138.5679      | 569.7879        |
| 826.5311       | 8  | V 11 | 1051.5359      | 526.2718        |
| 923.5838       | 9  | P 10 | 952.4675       | 476.7376        |
| 980.6053       | 10 | G 9  | 855.4147       | 428.2113        |
| 1077.6580      | 11 | P 8  | 798.3932       | 399.7005        |
| 1208.6985      | 12 | M 7  | 701.3405       | 351.1741        |
| 1265.7200      | 13 | G 6  | 570.3000       | 285.6539        |
| 1362.7728      | 14 | P 5  | 513.2785       | 257.1432        |
| 1449.8048      | 15 | S 4  | 416.2258       | 208.6168        |
| 1506.8263      | 16 | G 3  | 329.1937       | 165.1008        |
| 1603.8790      | 17 | P 2  | 272.1723       | 136.5900        |
|                | 18 | R 1  | 175.1195       | 88.0637         |

N-term:+35.07 K(2):+162.16

ELADCCTKQEPER, MH+ 1691.7732, m/z 564.5959  
 L OS G27 P150811 220811-s1.02049.02049.3.dta

X-range:

-

MassTol: Y-zoom:

MassType:

AVG  MONO

Axis:

1  2

Label:

I  M  -

Ions:

a  +  2+  3+

b  +  2+  3+

c  +  2+  3+

x  +  2+  3+

y  +  2+  3+

z  +  2+  3+

hide H<sub>2</sub>O/NH<sub>3</sub>

zoom 112-122

GO

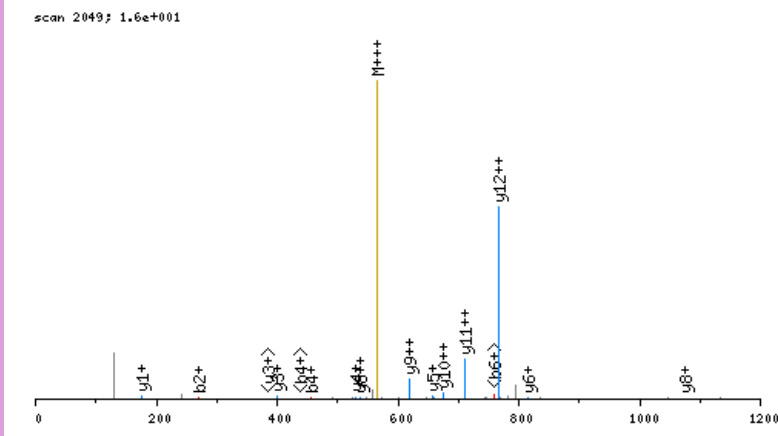

click image to zoom in; click top corners to zoom out [\[precursor±\]](#)

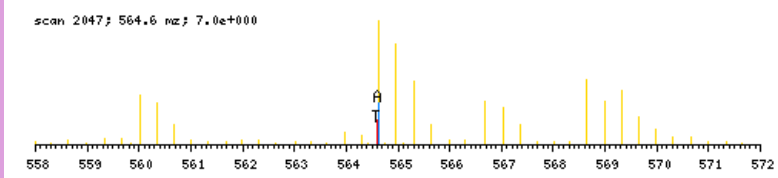

zoomed in precursor plot; T=theoretical m/z, A=acquired m/z

| b <sup>+</sup> | #  | AA # | y <sup>+</sup> | y <sup>2+</sup> |
|----------------|----|------|----------------|-----------------|
| 158.0817       | 1  | E 13 |                |                 |
| 271.1658       | 2  | L 12 | 1534.6993      | 767.8536        |
| 342.2029       | 3  | A 11 | 1421.6153      | 711.3115        |
| 457.2298       | 4  | D 10 | 1350.5782      | 675.7930        |
| 617.2604       | 5  | C 9  | 1235.5512      | 618.2795        |
| 777.2910       | 6  | C 8  | 1075.5206      | 538.2642        |
| 878.3387       | 7  | T 7  | 915.4900       | 458.2489        |
| 1034.4650      | 8  | K 6  | 814.4423       | 407.7251        |
| 1162.5236      | 9  | Q 5  | 658.3160       | 329.6619        |
| 1291.5662      | 10 | E 4  | 530.2575       | 265.6326        |
| 1388.6189      | 11 | P 3  | 401.2149       | 201.1113        |
| 1517.6615      | 12 | E 2  | 304.1621       | 152.5850        |
|                | 13 | R 1  | 175.1195       | 88.0637         |

N-term:+29.04 C(5):+160.03  
 C(6):+160.03 K(8):+156.13

ELISNASDALDKIR, MH+ 1600.8910, m/z 534.3019  
 L OS G26 P150811 220811-s1.05068.05068.3.dta

X-range:

-

MassTol: Y-zoom:

MassType:

AVG  MONO

Axis:

1  2

Label:

I  M  -

Ions:

a  +  2+  3+

b  +  2+  3+

c  +  2+  3+

x  +  2+  3+

y  +  2+  3+

z  +  2+  3+

hide H<sub>2</sub>O/NH<sub>3</sub>

zoom 112-122

GO

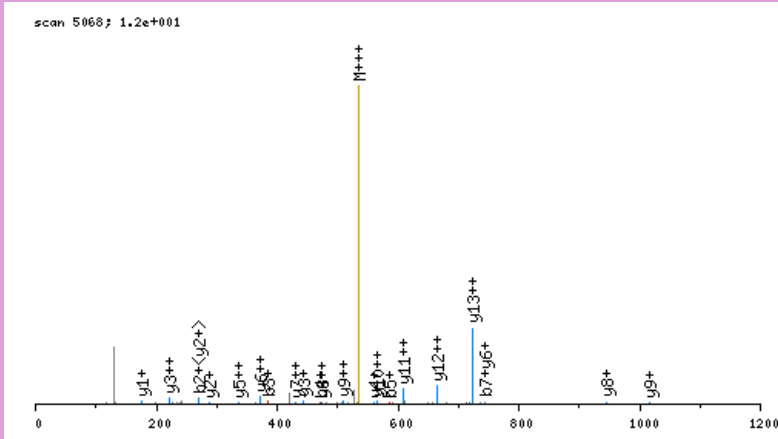

click image to zoom in; click top corners to zoom out [\[precursor±\]](#)

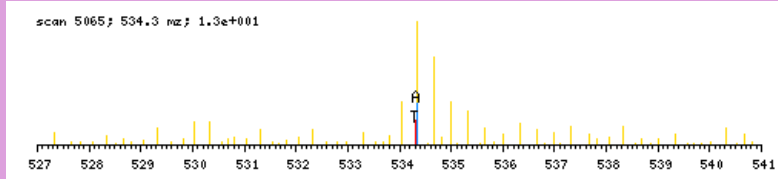

zoomed in precursor plot; T=theoretical m/z, A=acquired m/z

| b <sup>+</sup> | #  | AA # | y <sup>+</sup> | y <sup>2+</sup> |
|----------------|----|------|----------------|-----------------|
| 158.0817       | 1  | E 14 |                |                 |
| 271.1658       | 2  | L 13 | 1443.8172      | 722.4125        |
| 384.2498       | 3  | I 12 | 1330.7331      | 665.8705        |
| 471.2818       | 4  | S 11 | 1217.6490      | 609.3284        |
| 585.3248       | 5  | N 10 | 1130.6170      | 565.8124        |
| 656.3619       | 6  | A 9  | 1016.5741      | 508.7909        |
| 743.3939       | 7  | S 8  | 945.5370       | 473.2724        |
| 858.4209       | 8  | D 7  | 858.5049       | 429.7564        |
| 929.4580       | 9  | A 6  | 743.4780       | 372.2429        |
| 1042.5420      | 10 | L 5  | 672.4409       | 336.7243        |
| 1157.5690      | 11 | D 4  | 559.3568       | 280.1823        |
| 1313.6953      | 12 | K 3  | 444.3299       | 222.6688        |
| 1426.7793      | 13 | I 2  | 288.2036       | 144.6057        |
|                | 14 | R 1  | 175.1195       | 88.0637         |

N-term:+29.04 K(12):+156.13

ELMELEIFLSQR, MH+ 1535.8143, m/z 512.6096  
 L OS G27 P150811 220811-s1.06559.06559.3.dta

X-range:

-

MassTol: Y-zoom:

MassType:

AVG  MONO

Axis:

1  2

Label:

I  M  -

Ions:

a  +  2+  3+

b  +  2+  3+

c  +  2+  3+

x  +  2+  3+

y  +  2+  3+

z  +  2+  3+

hide H<sub>2</sub>O/NH<sub>3</sub>

zoom 112-122

GO

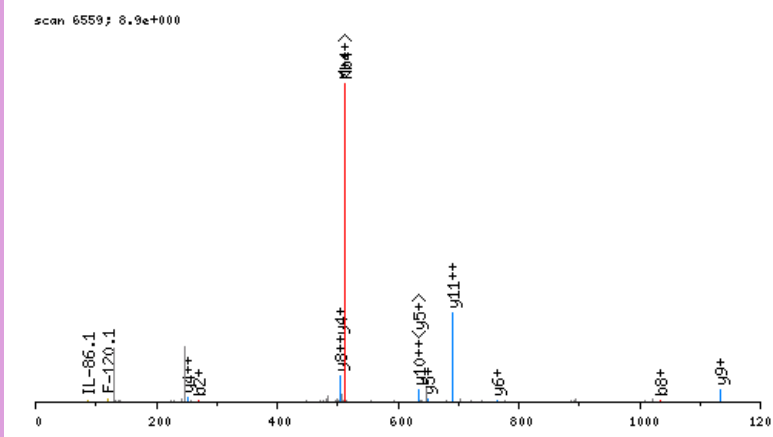

click image to zoom in; click top corners to zoom out [\[precursor±\]](#)

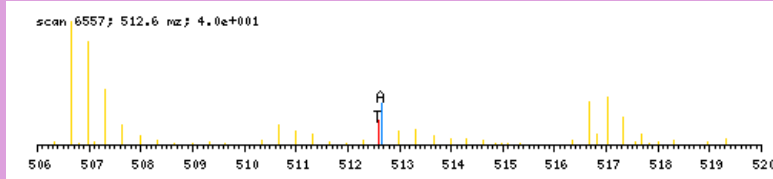

zoomed in precursor plot; T=theoretical m/z, A=acquired m/z

| b <sup>+</sup> | #  | AA # | y <sup>+</sup> | y <sup>2+</sup> |
|----------------|----|------|----------------|-----------------|
| 158.0817       | 1  | E 12 |                |                 |
| 271.1658       | 2  | L 11 | 1378.7404      | 689.8741        |
| 402.2062       | 3  | M 10 | 1265.6564      | 633.3321        |
| 531.2488       | 4  | E 9  | 1134.6159      | 567.8119        |
| 644.3329       | 5  | L 8  | 1005.5733      | 503.2906        |
| 773.3755       | 6  | E 7  | 892.4892       | 446.7485        |
| 886.4596       | 7  | I 6  | 763.4466       | 382.2272        |
| 1033.5280      | 8  | F 5  | 650.3626       | 325.6852        |
| 1146.6120      | 9  | L 4  | 503.2942       | 252.1510        |
| 1233.6441      | 10 | S 3  | 390.2101       | 195.6090        |
| 1361.7026      | 11 | Q 2  | 303.1781       | 152.0930        |
|                | 12 | R 1  | 175.1195       | 88.0637         |

N-term:+29.04

ELPDGQVITIGNER, MH+ 1568.8284, m/z 523.6143  
 L OS G25 P150811 220811-s1.06185.06185.3.dta

X-range:

-

MassTol: Y-zoom:

MassType:

AVG  MONO

Axis:

1  2

Label:

I  M  -

Ions:

a  +  2+  3+

b  +  2+  3+

c  +  2+  3+

x  +  2+  3+

y  +  2+  3+

z  +  2+  3+

hide H<sub>2</sub>O/NH<sub>3</sub>

zoom 112-122

GO

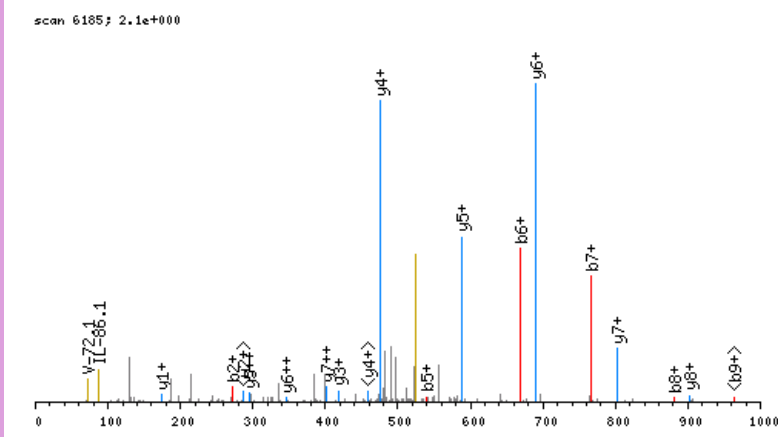

click image to zoom in; click top corners to zoom out [\[precursor±\]](#)

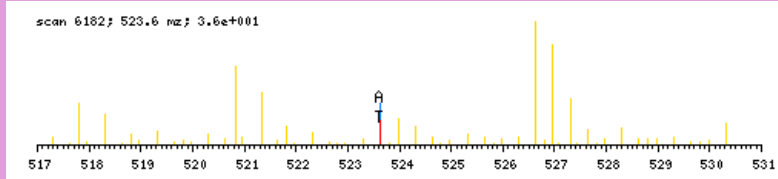

zoomed in precursor plot; T=theoretical m/z, A=acquired m/z

| b <sup>+</sup> | #  | AA # | y <sup>+</sup> | y <sup>2+</sup> |
|----------------|----|------|----------------|-----------------|
| 158.0817       | 1  | E 14 |                |                 |
| 271.1658       | 2  | L 13 | 1411.7545      | 706.3812        |
| 368.2185       | 3  | P 12 | 1298.6705      | 649.8391        |
| 483.2455       | 4  | D 11 | 1201.6177      | 601.3128        |
| 540.2669       | 5  | G 10 | 1086.5907      | 543.7993        |
| 668.3255       | 6  | Q 9  | 1029.5693      | 515.2886        |
| 767.3939       | 7  | V 8  | 901.5107       | 451.2593        |
| 880.4780       | 8  | I 7  | 802.4423       | 401.7251        |
| 981.5257       | 9  | T 6  | 689.3582       | 345.1830        |
| 1094.6097      | 10 | I 5  | 588.3105       | 294.6592        |
| 1151.6312      | 11 | G 4  | 475.2265       | 238.1172        |
| 1265.6741      | 12 | N 3  | 418.2050       | 209.6064        |
| 1394.7167      | 13 | E 2  | 304.1621       | 152.5850        |
|                | 14 | R 1  | 175.1195       | 88.0637         |

N-term:+29.04

ELQALIDSHFEAR, MH+ 1562.8391, m/z 521.6179  
 H OS G27 P150811 220811-s1.06321.06321.3.dta

X-range:

-

MassTol: Y-zoom:

MassType:

AVG  MONO

Axis:

1  2

Label:

I  M  -

Ions:

a  +  2+  3+

b  +  2+  3+

c  +  2+  3+

x  +  2+  3+

y  +  2+  3+

z  +  2+  3+

hide H<sub>2</sub>O/NH<sub>3</sub>

zoom 112-122

GO

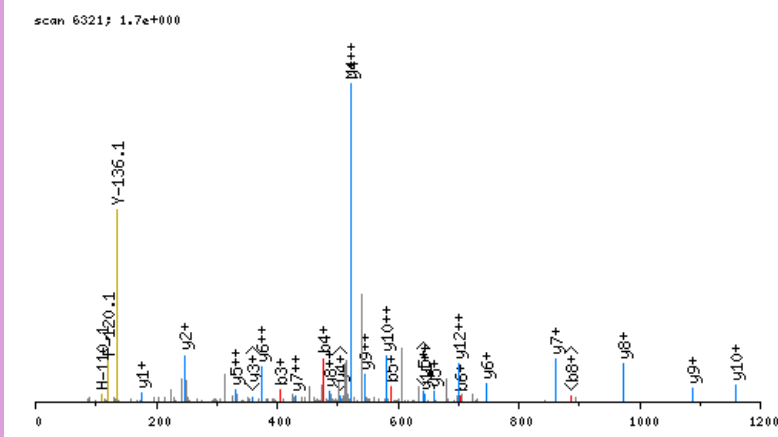

click image to zoom in; click top corners to zoom out [\[precursor±\]](#)

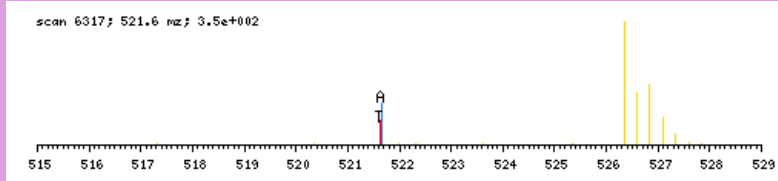

zoomed in precursor plot; T=theoretical m/z, A=acquired m/z

| b <sup>+</sup> | #  | AA # | y <sup>+</sup> | y <sup>2+</sup> |
|----------------|----|------|----------------|-----------------|
| 164.1135       | 1  | E 13 |                |                 |
| 277.1976       | 2  | L 12 | 1399.7334      | 700.3706        |
| 405.2561       | 3  | Q 11 | 1286.6493      | 643.8286        |
| 476.2932       | 4  | A 10 | 1158.5907      | 579.7993        |
| 589.3773       | 5  | L 9  | 1087.5536      | 544.2807        |
| 702.4614       | 6  | I 8  | 974.4696       | 487.7387        |
| 817.4883       | 7  | D 7  | 861.3855       | 431.1967        |
| 904.5203       | 8  | S 6  | 746.3586       | 373.6832        |
| 1041.5793      | 9  | H 5  | 659.3265       | 330.1672        |
| 1188.6477      | 10 | F 4  | 522.2676       | 261.6377        |
| 1317.6903      | 11 | E 3  | 375.1992       | 188.1035        |
| 1388.7274      | 12 | A 2  | 246.1566       | 123.5822        |
|                | 13 | R 1  | 175.1195       | 88.0637         |

N-term:+35.07

ELVQSGKSEISELR, MH+ 1630.9016, m/z 544.3054  
 L OS G26 P150811 220811-s1.03482.03482.3.dta

X-range:

-

MassTol: Y-zoom:

MassType:

AVG  MONO

Axis:

1  2

Label:

I  M  -

Ions:

a  +  2+  3+

b  +  2+  3+

c  +  2+  3+

x  +  2+  3+

y  +  2+  3+

z  +  2+  3+

hide H<sub>2</sub>O/NH<sub>3</sub>

zoom 112-122

GO

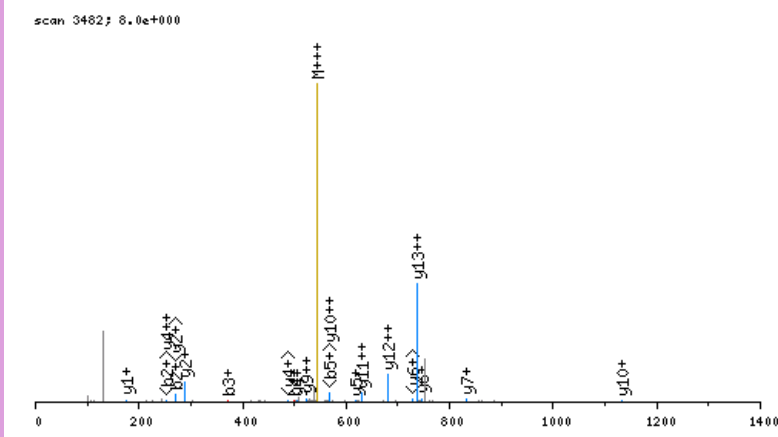

click image to zoom in; click top corners to zoom out [\[precursor±\]](#)

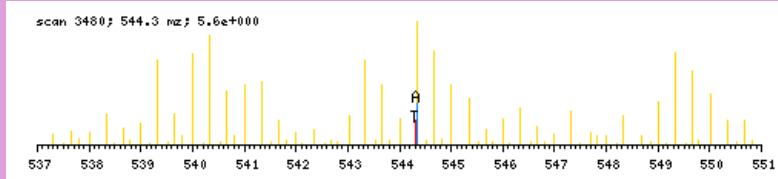

zoomed in precursor plot; T=theoretical m/z, A=acquired m/z

| b <sup>+</sup> | #  | AA # | y <sup>+</sup> | y <sup>2+</sup> |
|----------------|----|------|----------------|-----------------|
| 158.0817       | 1  | E 14 |                |                 |
| 271.1658       | 2  | L 13 | 1473.8277      | 737.4178        |
| 370.2342       | 3  | V 12 | 1360.7437      | 680.8757        |
| 498.2927       | 4  | Q 11 | 1261.6752      | 631.3415        |
| 585.3248       | 5  | S 10 | 1133.6167      | 567.3122        |
| 642.3462       | 6  | G 9  | 1046.5846      | 523.7962        |
| 798.4725       | 7  | K 8  | 989.5632       | 495.2855        |
| 885.5046       | 8  | S 7  | 833.4369       | 417.2223        |
| 1014.5472      | 9  | E 6  | 746.4048       | 373.7063        |
| 1127.6312      | 10 | I 5  | 617.3623       | 309.1850        |
| 1214.6633      | 11 | S 4  | 504.2782       | 252.6430        |
| 1343.7058      | 12 | E 3  | 417.2462       | 209.1270        |
| 1456.7899      | 13 | L 2  | 288.2036       | 144.6057        |
|                | 14 | R 1  | 175.1195       | 88.0637         |

N-term:+29.04 K(7):+156.13



ENWDTLGSTVSQLQER, MH+ 1890.9197, m/z 630.9781  
 L OS G25 P150811 220811-s1.07344.07344.3.dta

X-range:

-

MassTol: Y-zoom:

MassType:

AVG  MONO

Axis:

1  2

Label:

I  M  -

Ions:

a  +  2+  3+

b  +  2+  3+

c  +  2+  3+

x  +  2+  3+

y  +  2+  3+

z  +  2+  3+

hide H<sub>2</sub>O/NH<sub>3</sub>

zoom 112-122

GO

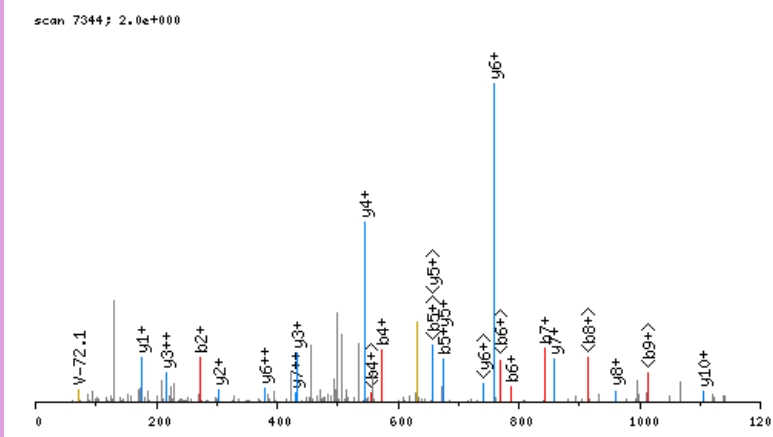

click image to zoom in; click top corners to zoom out [\[precursor±\]](#)

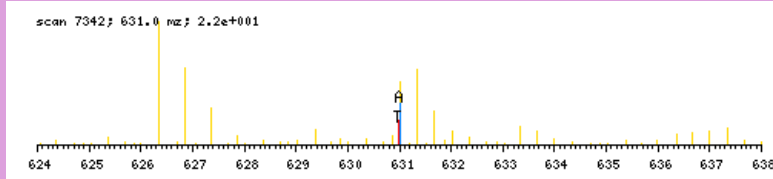

zoomed in precursor plot; T=theoretical m/z, A=acquired m/z

| b <sup>+</sup> | #  | AA | #  | y <sup>+</sup> | y <sup>2+</sup> |
|----------------|----|----|----|----------------|-----------------|
| 158.0817       | 1  | E  | 16 |                |                 |
| 272.1246       | 2  | N  | 15 | 1733.8459      | 867.4268        |
| 458.2039       | 3  | W  | 14 | 1619.8029      | 810.4054        |
| 573.2309       | 4  | D  | 13 | 1433.7236      | 717.3657        |
| 674.2786       | 5  | T  | 12 | 1318.6967      | 659.8522        |
| 787.3626       | 6  | L  | 11 | 1217.6490      | 609.3284        |
| 844.3841       | 7  | G  | 10 | 1104.5649      | 552.7864        |
| 931.4161       | 8  | S  | 9  | 1047.5435      | 524.2756        |
| 1032.4638      | 9  | T  | 8  | 960.5114       | 480.7596        |
| 1131.5322      | 10 | V  | 7  | 859.4638       | 430.2358        |
| 1218.5642      | 11 | S  | 6  | 760.3953       | 380.7016        |
| 1346.6228      | 12 | Q  | 5  | 673.3633       | 337.1856        |
| 1459.7069      | 13 | L  | 4  | 545.3047       | 273.1563        |
| 1587.7655      | 14 | Q  | 3  | 432.2207       | 216.6142        |
| 1716.8080      | 15 | E  | 2  | 304.1621       | 152.5850        |
|                | 16 | R  | 1  | 175.1195       | 88.0637         |

N-term:+29.04

ENYGLADCCTKQEPER, MH+ 2154.9435, m/z 718.9860  
 L OS G26 P150811 220811-s1.02853.02853.3.dta

X-range:

-

MassTol: Y-zoom:

MassType:

AVG  MONO

Axis:

1  2

Label:

I  M  -

Ions:

a  +  2+  3+

b  +  2+  3+

c  +  2+  3+

x  +  2+  3+

y  +  2+  3+

z  +  2+  3+

hide H<sub>2</sub>O/NH<sub>3</sub>

zoom 112-122

GO

scan 2853; 1.5e+000

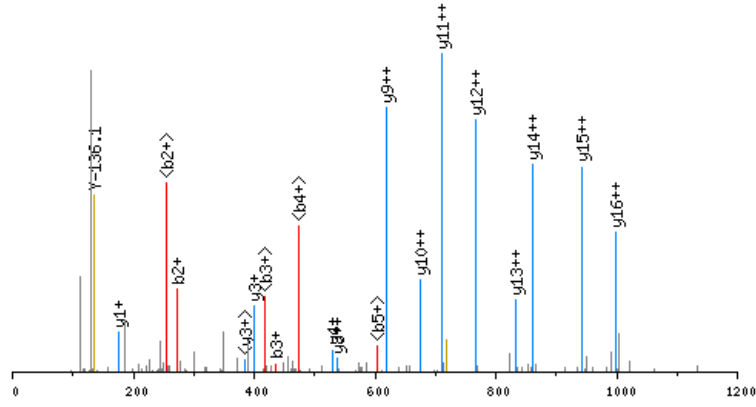

click image to zoom in; click top corners to zoom out [\[precursor±\]](#)

scan 2850; 718.0 Hz; 1.3e+001

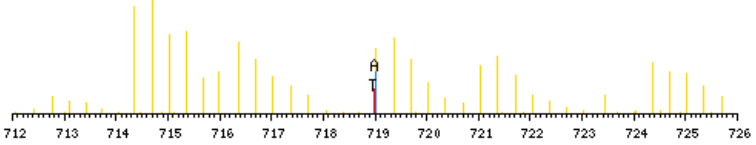

zoomed in precursor plot; T=theoretical m/z, A=acquired m/z

| b <sup>+</sup> | #  | AA | #  | y <sup>+</sup> | y <sup>2+</sup> |
|----------------|----|----|----|----------------|-----------------|
| 158.0817       | 1  | E  | 17 |                |                 |
| 272.1246       | 2  | N  | 16 | 1997.8696      | 999.4387        |
| 435.1879       | 3  | Y  | 15 | 1883.8267      | 942.4173        |
| 492.2094       | 4  | G  | 14 | 1720.7634      | 860.8856        |
| 621.2520       | 5  | E  | 13 | 1663.7419      | 832.3749        |
| 734.3361       | 6  | L  | 12 | 1534.6993      | 767.8536        |
| 805.3732       | 7  | A  | 11 | 1421.6153      | 711.3115        |
| 920.4001       | 8  | D  | 10 | 1350.5782      | 675.7930        |
| 1080.4307      | 9  | C  | 9  | 1235.5512      | 618.2795        |
| 1240.4613      | 10 | C  | 8  | 1075.5206      | 538.2642        |
| 1341.5090      | 11 | T  | 7  | 915.4900       | 458.2489        |
| 1497.6353      | 12 | K  | 6  | 814.4423       | 407.7251        |
| 1625.6939      | 13 | Q  | 5  | 658.3160       | 329.6619        |
| 1754.7365      | 14 | E  | 4  | 530.2575       | 265.6326        |
| 1851.7892      | 15 | P  | 3  | 401.2149       | 201.1113        |
| 1980.8318      | 16 | E  | 2  | 304.1621       | 152.5850        |
|                | 17 | R  | 1  | 175.1195       | 88.0637         |

N-term:+29.04 C(9):+160.03  
 C(10):+160.03 K(12):+156.13

EPDIQDSSGSEAQSVKPTRR, MH+ 2342.2224, m/z 586.3111  
 H OS G28 P150811 220811-s1.01778.01778.4.dta

scan 1778; 3.8e-001

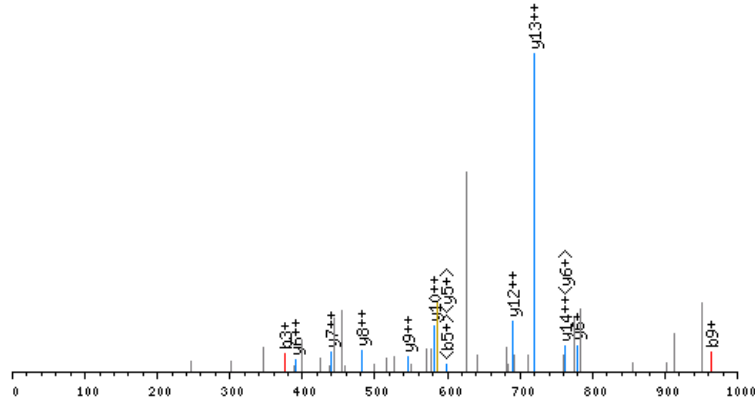

click image to zoom in; click top corners to zoom out [precursor±]

scan 1777; 586.3 nz; 4.9e+000

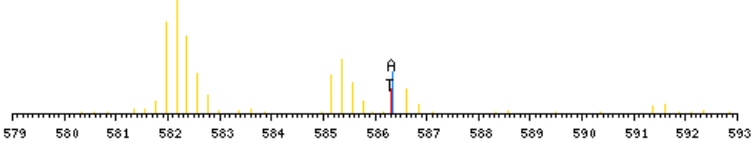

zoomed in precursor plot; T=theoretical m/z, A=acquired m/z

| b <sup>+</sup> | #  | AA # | y <sup>+</sup> | y <sup>2+</sup> |
|----------------|----|------|----------------|-----------------|
| 164.1135       | 1  | E 21 |                |                 |
| 261.1663       | 2  | P 20 | 2179.1168      | 1090.0623       |
| 376.1932       | 3  | D 19 | 2082.0640      | 1041.5359       |
| 489.2773       | 4  | I 18 | 1967.0370      | 984.0224        |
| 617.3358       | 5  | Q 17 | 1853.9530      | 927.4804        |
| 732.3628       | 6  | D 16 | 1725.8944      | 863.4511        |
| 819.3948       | 7  | S 15 | 1610.8675      | 805.9376        |
| 906.4268       | 8  | S 14 | 1523.8354      | 762.4216        |
| 963.4483       | 9  | G 13 | 1436.8034      | 718.9056        |
| 1050.4803      | 10 | S 12 | 1379.7819      | 690.3949        |
| 1179.5229      | 11 | E 11 | 1292.7499      | 646.8789        |
| 1250.5600      | 12 | A 10 | 1163.7073      | 582.3576        |
| 1378.6186      | 13 | Q 9  | 1092.6702      | 546.8390        |
| 1465.6506      | 14 | S 8  | 964.6116       | 482.8097        |
| 1564.7191      | 15 | V 7  | 877.5796       | 439.2937        |
| 1726.8772      | 16 | K 6  | 778.5112       | 389.7595        |
| 1823.9299      | 17 | P 5  | 616.3531       | 308.6805        |
| 1910.9620      | 18 | S 4  | 519.3003       | 260.1541        |
| 2012.0096      | 19 | T 3  | 432.2683       | 216.6381        |
| 2168.1107      | 20 | R 2  | 331.2206       | 166.1142        |
|                | 21 | R 1  | 175.1195       | 88.0637         |

N-term:+35.07 K(16):+162.16

X-range:

-

MassTol: Y-zoom:

MassType:

AVG  MONO

Axis:

1  2

Label:

I  M  -

Ions:

a  +  2+  3+

b  +  2+  3+

c  +  2+  3+

x  +  2+  3+

y  +  2+  3+

z  +  2+  3+

hide H<sub>2</sub>O/NH<sub>3</sub>

zoom 112-122

GO

EQQCYNCGKPGHLAR, MH+ 1905.8521, m/z 477.2185  
 L OS G28 P150811 220811-s1.01984.01984.4.dta

X-range:

-

MassTol: Y-zoom:

MassType:

AVG  MONO

Axis:

1  2

Label:

I  M  -

Ions:

a  +  2+  3+

b  +  2+  3+

c  +  2+  3+

x  +  2+  3+

y  +  2+  3+

z  +  2+  3+

hide H<sub>2</sub>O/NH<sub>3</sub>

zoom 112-122

GO

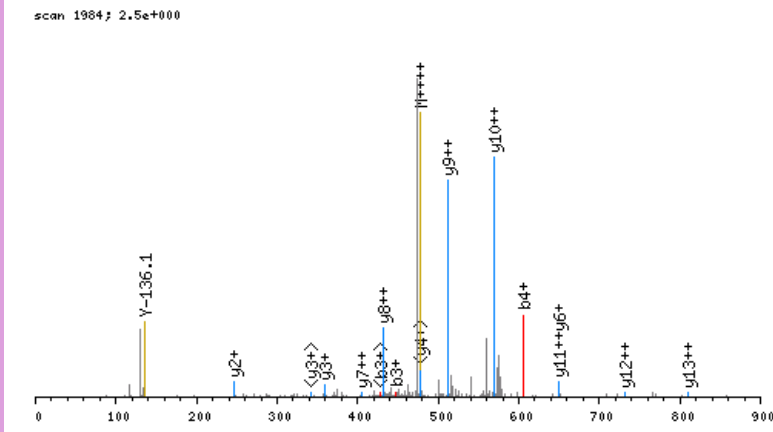

click image to zoom in; click top corners to zoom out [\[precursor±\]](#)

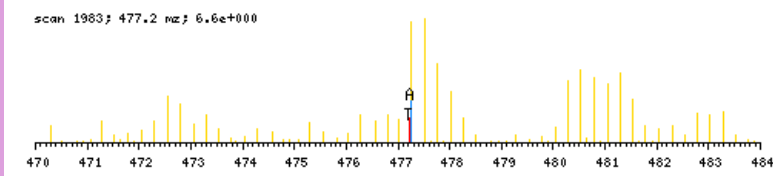

zoomed in precursor plot; T=theoretical m/z, A=acquired m/z

| b <sup>+</sup> | #  | AA | #  | y <sup>+</sup> | y <sup>2+</sup> |
|----------------|----|----|----|----------------|-----------------|
| 158.0817       | 1  | E  | 15 |                |                 |
| 286.1403       | 2  | Q  | 14 | 1748.7782      | 874.8930        |
| 446.1709       | 3  | C  | 13 | 1620.7196      | 810.8637        |
| 606.2015       | 4  | C  | 12 | 1460.6890      | 730.8484        |
| 769.2648       | 5  | Y  | 11 | 1300.6584      | 650.8331        |
| 883.3077       | 6  | N  | 10 | 1137.5951      | 569.3015        |
| 1043.3383      | 7  | C  | 9  | 1023.5522      | 512.2800        |
| 1100.3598      | 8  | G  | 8  | 863.5216       | 432.2647        |
| 1256.4861      | 9  | K  | 7  | 806.5001       | 403.7540        |
| 1353.5389      | 10 | P  | 6  | 650.3738       | 325.6908        |
| 1410.5603      | 11 | G  | 5  | 553.3211       | 277.1644        |
| 1547.6192      | 12 | H  | 4  | 496.2996       | 248.6537        |
| 1660.7033      | 13 | L  | 3  | 359.2407       | 180.1243        |
| 1731.7404      | 14 | A  | 2  | 246.1566       | 123.5822        |
|                | 15 | R  | 1  | 175.1195       | 88.0637         |

N-term:+29.04 C(3):+160.03  
 C(4):+160.03 C(7):+160.03 K(9):+156.13

EQDFYDFKAVNIR, MH+ 1700.8648, m/z 567.6265  
 L OS G27 P150811 220811-s1.06370.06370.3.dta

X-range:

-

MassTol: Y-zoom:

MassType:

AVG  MONO

Axis:

1  2

Label:

I  M  -

Ions:

a  +  2+  3+

b  +  2+  3+

c  +  2+  3+

x  +  2+  3+

y  +  2+  3+

z  +  2+  3+

hide H<sub>2</sub>O/NH<sub>3</sub>

zoom 112-122

GO

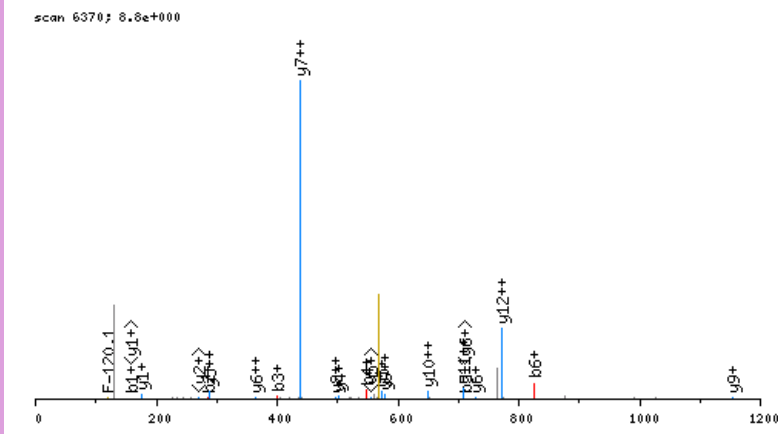

click image to zoom in; click top corners to zoom out [\[precursor±\]](#)

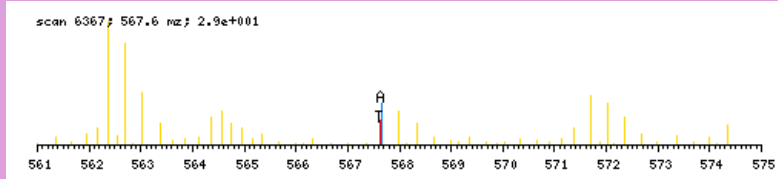

zoomed in precursor plot; T=theoretical m/z, A=acquired m/z

| b <sup>+</sup> | #  | AA # | y <sup>+</sup> | y <sup>2+</sup> |
|----------------|----|------|----------------|-----------------|
| 158.0817       | 1  | E 13 |                |                 |
| 286.1403       | 2  | Q 12 | 1543.7909      | 772.3994        |
| 401.1672       | 3  | D 11 | 1415.7324      | 708.3701        |
| 548.2356       | 4  | F 10 | 1300.7054      | 650.8566        |
| 711.2990       | 5  | Y 9  | 1153.6370      | 577.3224        |
| 826.3259       | 6  | D 8  | 990.5737       | 495.7908        |
| 973.3943       | 7  | F 7  | 875.5467       | 438.2773        |
| 1129.5206      | 8  | K 6  | 728.4783       | 364.7431        |
| 1200.5577      | 9  | A 5  | 572.3520       | 286.6799        |
| 1299.6261      | 10 | V 4  | 501.3149       | 251.1614        |
| 1413.6691      | 11 | N 3  | 402.2465       | 201.6272        |
| 1526.7531      | 12 | I 2  | 288.2036       | 144.6057        |
|                | 13 | R 1  | 175.1195       | 88.0637         |

N-term:+29.04 K(8):+156.13

EQEVSVDNELQELSTQGSR, MH+ 2076.9685, m/z 692.9944  
 L OS G25 P150811 220811-s1.05375.05375.3.dta

scan 5375; 1.7e+000

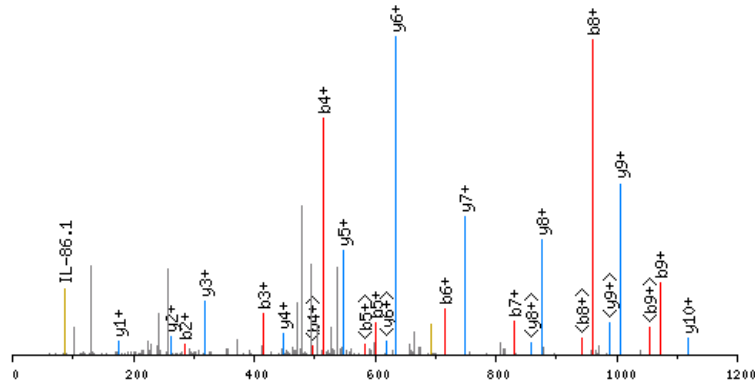

click image to zoom in; click top corners to zoom out [\[precursor±\]](#)

scan 5372; 693.0 m/z; 2.1e+001

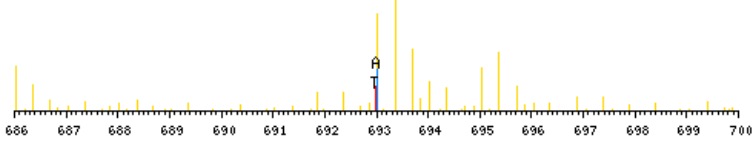

zoomed in precursor plot; T=theoretical m/z, A=acquired m/z

X-range:

-

MassTol: Y-zoom:

MassType:

AVG  MONO

Axis:

1  2

Label:

I  M  -

Ions:

a  +  2+  3+

b  +  2+  3+

c  +  2+  3+

x  +  2+  3+

y  +  2+  3+

z  +  2+  3+

hide H<sub>2</sub>O/NH<sub>3</sub>

zoom 112-122

GO

| b <sup>+</sup> | #  | AA | #  | y <sup>+</sup> | y <sup>2+</sup> |
|----------------|----|----|----|----------------|-----------------|
| 158.0817       | 1  | E  | 18 |                |                 |
| 286.1403       | 2  | Q  | 17 | 1919.8947      | 960.4512        |
| 415.1829       | 3  | E  | 16 | 1791.8361      | 896.4220        |
| 514.2513       | 4  | V  | 15 | 1662.7935      | 831.9007        |
| 601.2833       | 5  | S  | 14 | 1563.7251      | 782.3664        |
| 716.3102       | 6  | D  | 13 | 1476.6930      | 738.8504        |
| 830.3532       | 7  | N  | 12 | 1361.6661      | 681.3370        |
| 959.3958       | 8  | E  | 11 | 1247.6232      | 624.3155        |
| 1072.4798      | 9  | L  | 10 | 1118.5806      | 559.7942        |
| 1200.5384      | 10 | Q  | 9  | 1005.4965      | 503.2522        |
| 1329.5810      | 11 | E  | 8  | 877.4379       | 439.2229        |
| 1442.6651      | 12 | L  | 7  | 748.3953       | 374.7016        |
| 1529.6971      | 13 | S  | 6  | 635.3113       | 318.1596        |
| 1630.7448      | 14 | T  | 5  | 548.2792       | 274.6435        |
| 1758.8034      | 15 | Q  | 4  | 447.2316       | 224.1197        |
| 1815.8248      | 16 | G  | 3  | 319.1730       | 160.0904        |
| 1902.8568      | 17 | S  | 2  | 262.1515       | 131.5797        |
|                | 18 | R  | 1  | 175.1195       | 88.0637         |

N-term:+29.04

EQFQEALAEELAKKR, MH+ 1821.0971, m/z 456.0297  
 H OS G28 P150811 220811-s1.07852.07852.4.dta

X-range:

-

MassTol: Y-zoom:

MassType:

AVG  MONO

Axis:

1  2

Label:

I  M  -

Ions:

a  +  2+  3+

b  +  2+  3+

c  +  2+  3+

x  +  2+  3+

y  +  2+  3+

z  +  2+  3+

hide H<sub>2</sub>O/NH<sub>3</sub>

zoom 112-122

GO

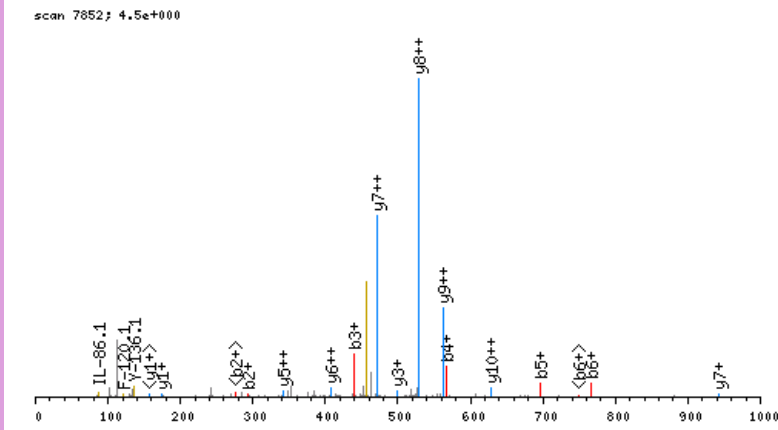

click image to zoom in; click top corners to zoom out [\[precursor±\]](#)

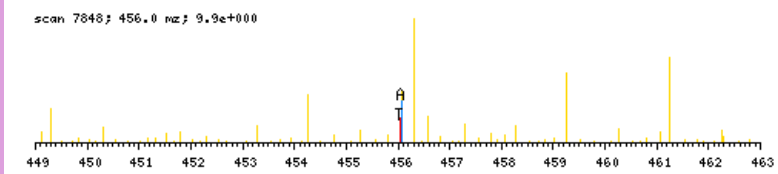

zoomed in precursor plot; T=theoretical m/z, A=acquired m/z

| b <sup>+</sup> | #  | AA | #  | y <sup>+</sup> | y <sup>2+</sup> |
|----------------|----|----|----|----------------|-----------------|
| 164.1135       | 1  | E  | 14 |                |                 |
| 292.1721       | 2  | Q  | 13 | 1657.9914      | 829.4996        |
| 439.2405       | 3  | F  | 12 | 1529.9328      | 765.4703        |
| 567.2991       | 4  | Q  | 11 | 1382.8644      | 691.9361        |
| 696.3417       | 5  | E  | 10 | 1254.8058      | 627.9068        |
| 767.3788       | 6  | A  | 9  | 1125.7632      | 563.3855        |
| 880.4628       | 7  | L  | 8  | 1054.7261      | 527.8670        |
| 1009.5054      | 8  | E  | 7  | 941.6421       | 471.3249        |
| 1138.5480      | 9  | E  | 6  | 812.5995       | 406.8036        |
| 1251.6321      | 10 | L  | 5  | 683.5569       | 342.2824        |
| 1322.6692      | 11 | A  | 4  | 570.4728       | 285.7403        |
| 1484.8273      | 12 | K  | 3  | 499.4357       | 250.2218        |
| 1646.9854      | 13 | K  | 2  | 337.2776       | 169.1427        |
|                | 14 | R  | 1  | 175.1195       | 88.0637         |

N-term:+35.07 K(12):+162.16  
 K(13):+162.16

EQKTVIPGMPTVIPPLTR, MH+ 2090.2048, m/z 697.4064  
 L OS G26 P150811 220811-s1.06448.06448.3.dta

X-range:

-

MassTol: Y-zoom:

MassType:

AVG  MONO

Axis:

1  2

Label:

I  M  -

Ions:

a  +  2+  3+

b  +  2+  3+

c  +  2+  3+

x  +  2+  3+

y  +  2+  3+

z  +  2+  3+

hide H<sub>2</sub>O/NH<sub>3</sub>

zoom 112-122

GO

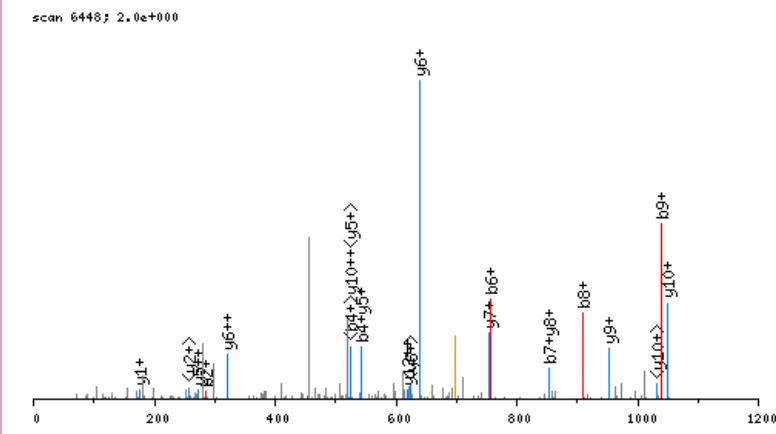

click image to zoom in; click top corners to zoom out [\[precursor±\]](#)

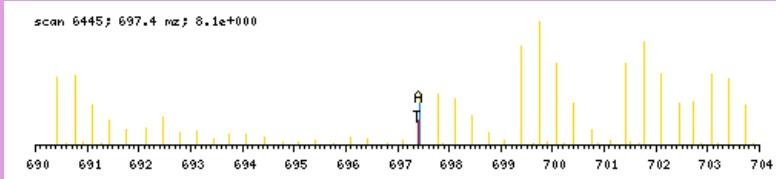

zoomed in precursor plot; T=theoretical m/z, A=acquired m/z

| b <sup>+</sup> | #  | AA # | y <sup>+</sup> | y <sup>2+</sup> |
|----------------|----|------|----------------|-----------------|
| 158.0817       | 1  | E 19 |                |                 |
| 286.1403       | 2  | Q 18 | 1933.1309      | 967.0694        |
| 442.2666       | 3  | K 17 | 1805.0723      | 903.0401        |
| 543.3142       | 4  | T 16 | 1648.9460      | 824.9769        |
| 642.3827       | 5  | V 15 | 1547.8983      | 774.4531        |
| 755.4667       | 6  | I 14 | 1448.8299      | 724.9189        |
| 852.5195       | 7  | P 13 | 1335.7459      | 668.3768        |
| 909.5410       | 8  | G 12 | 1238.6931      | 619.8505        |
| 1040.5814      | 9  | M 11 | 1181.6716      | 591.3397        |
| 1137.6342      | 10 | P 10 | 1050.6312      | 525.8195        |
| 1238.6819      | 11 | T 9  | 953.5784       | 477.2931        |
| 1337.7503      | 12 | V 8  | 852.5307       | 426.7693        |
| 1450.8344      | 13 | I 7  | 753.4623       | 377.2351        |
| 1547.8871      | 14 | P 6  | 640.3782       | 320.6930        |
| 1644.9399      | 15 | P 5  | 543.3255       | 272.1666        |
| 1701.9614      | 16 | G 4  | 446.2727       | 223.6403        |
| 1815.0454      | 17 | L 3  | 389.2512       | 195.1295        |
| 1916.0931      | 18 | T 2  | 276.1672       | 138.5875        |
|                | 19 | R 1  | 175.1195       | 88.0637         |

N-term:+29.04 K(3):+156.13



ESEVASSLVLER, MH+ 1346.7167, m/z 673.8620  
 L OS G25 P150811 220811-s1.05193.05193.2.dta

X-range:

-

MassTol: Y-zoom:

MassType:

AVG  MONO

Axis:

1  2

Label:

I  M  -

Ions:

a  +  2+  3+

b  +  2+  3+

c  +  2+  3+

x  +  2+  3+

y  +  2+  3+

z  +  2+  3+

hide H<sub>2</sub>O/NH<sub>3</sub>

zoom 112-122

GO

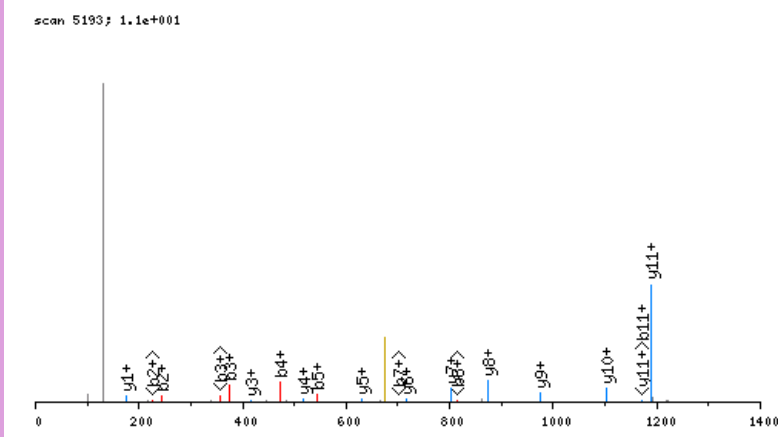

click image to zoom in; click top corners to zoom out [\[precursor±\]](#)

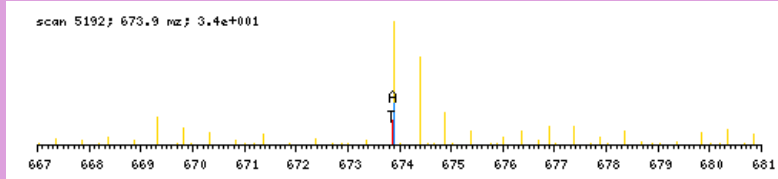

zoomed in precursor plot; T=theoretical m/z, A=acquired m/z

| b <sup>+</sup> | #  | AA # | y <sup>+</sup> | y <sup>2+</sup> |
|----------------|----|------|----------------|-----------------|
| 158.0817       | 1  | E 12 |                |                 |
| 245.1137       | 2  | S 11 | 1189.6428      | 595.3253        |
| 374.1563       | 3  | E 10 | 1102.6108      | 551.8093        |
| 473.2247       | 4  | V 9  | 973.5682       | 487.2880        |
| 544.2618       | 5  | A 8  | 874.4998       | 437.7538        |
| 631.2939       | 6  | S 7  | 803.4627       | 402.2353        |
| 718.3259       | 7  | S 6  | 716.4307       | 358.7192        |
| 831.4100       | 8  | L 5  | 629.3986       | 315.2032        |
| 930.4784       | 9  | V 4  | 516.3146       | 258.6612        |
| 1043.5624      | 10 | L 3  | 417.2462       | 209.1270        |
| 1172.6050      | 11 | E 2  | 304.1621       | 152.5850        |
|                | 12 | R 1  | 175.1195       | 88.0637         |

N-term:+29.04

ESISIIDTPGILSGAKQR, MH+ 1941.1021, m/z 647.7055  
 L OS G26 P150811 220811-s1.05903.05903.3.dta

X-range:

-

MassTol: Y-zoom:

MassType:

AVG  MONO

Axis:

1  2

Label:

I  M  -

Ions:

a  +  2+  3+

b  +  2+  3+

c  +  2+  3+

x  +  2+  3+

y  +  2+  3+

z  +  2+  3+

hide H<sub>2</sub>O/NH<sub>3</sub>

zoom 112-122

GO

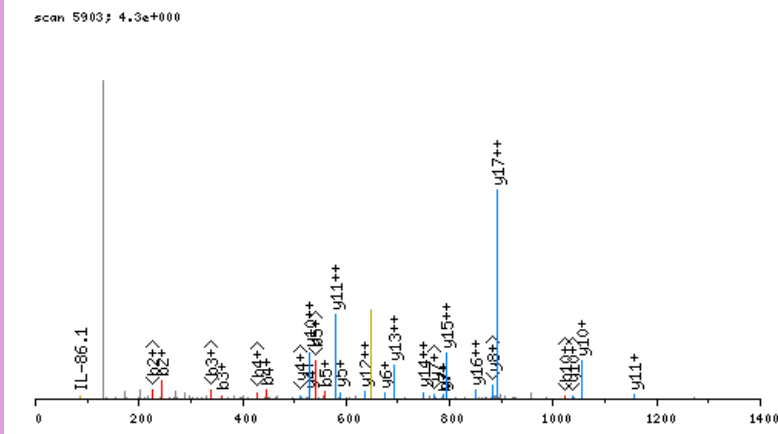

click image to zoom in; click top corners to zoom out [\[precursor±\]](#)

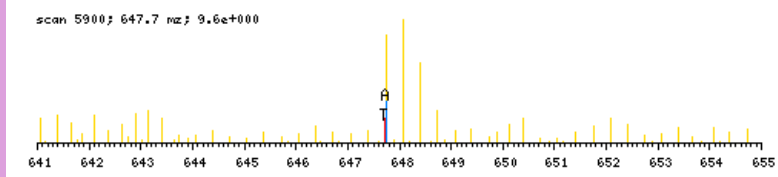

zoomed in precursor plot; T=theoretical m/z, A=acquired m/z

| b <sup>+</sup> | #  | AA # | y <sup>+</sup> | y <sup>2+</sup> |
|----------------|----|------|----------------|-----------------|
| 158.0817       | 1  | E 18 |                |                 |
| 245.1137       | 2  | S 17 | 1784.0282      | 892.5180        |
| 358.1978       | 3  | I 16 | 1696.9962      | 849.0020        |
| 445.2298       | 4  | S 15 | 1583.9121      | 792.4600        |
| 558.3139       | 5  | I 14 | 1496.8801      | 748.9440        |
| 671.3979       | 6  | I 13 | 1383.7960      | 692.4019        |
| 786.4249       | 7  | D 12 | 1270.7120      | 635.8599        |
| 887.4726       | 8  | T 11 | 1155.6850      | 578.3464        |
| 984.5253       | 9  | P 10 | 1054.6373      | 527.8226        |
| 1041.5468      | 10 | G 9  | 957.5846       | 479.2962        |
| 1154.6309      | 11 | I 8  | 900.5631       | 450.7855        |
| 1267.7149      | 12 | L 7  | 787.4790       | 394.2434        |
| 1354.7469      | 13 | S 6  | 674.3950       | 337.7014        |
| 1411.7684      | 14 | G 5  | 587.3630       | 294.1854        |
| 1482.8055      | 15 | A 4  | 530.3415       | 265.6747        |
| 1638.9318      | 16 | K 3  | 459.3044       | 230.1561        |
| 1766.9904      | 17 | Q 2  | 303.1781       | 152.0930        |
|                | 18 | R 1  | 175.1195       | 88.0637         |

N-term:+29.04 K(16):+156.13

ESKCLPMVKVLDVAVR, MH+ 1829.0393, m/z 458.0153  
 L OS G28 P150811 220811-s1.08216.08216.4.dta

X-range:

-

MassTol: Y-zoom:

MassType:

AVG  MONO

Axis:

1  2

Label:

I  M  -

Ions:

a  +  2+  3+

b  +  2+  3+

c  +  2+  3+

x  +  2+  3+

y  +  2+  3+

z  +  2+  3+

hide H<sub>2</sub>O/NH<sub>3</sub>

zoom 112-122

GO

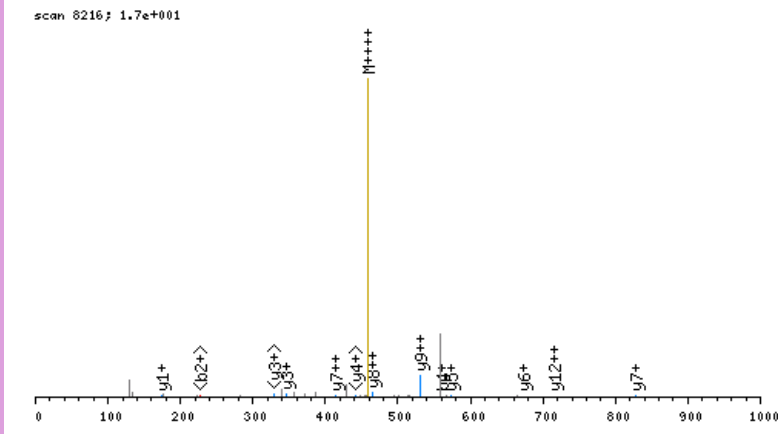

click image to zoom in; click top corners to zoom out [\[precursor±\]](#)

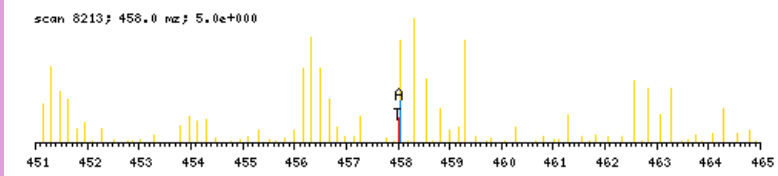

zoomed in precursor plot; T=theoretical m/z, A=acquired m/z

| b <sup>+</sup> | #  | AA | #  | y <sup>+</sup> | y <sup>2+</sup> |
|----------------|----|----|----|----------------|-----------------|
| 158.0817       | 1  | E  | 15 |                |                 |
| 245.1137       | 2  | S  | 14 | 1671.9654      | 836.4866        |
| 401.2400       | 3  | K  | 13 | 1584.9334      | 792.9706        |
| 561.2706       | 4  | C  | 12 | 1428.8071      | 714.9075        |
| 658.3234       | 5  | P  | 11 | 1268.7765      | 634.8922        |
| 771.4074       | 6  | L  | 10 | 1171.7237      | 586.3658        |
| 902.4479       | 7  | M  | 9  | 1058.6396      | 529.8237        |
| 1001.5163      | 8  | V  | 8  | 927.5992       | 464.3035        |
| 1157.6426      | 9  | K  | 7  | 828.5307       | 414.7693        |
| 1256.7111      | 10 | V  | 6  | 672.4044       | 336.7061        |
| 1369.7951      | 11 | L  | 5  | 573.3360       | 287.1719        |
| 1484.8221      | 12 | D  | 4  | 460.2520       | 230.6299        |
| 1555.8592      | 13 | A  | 3  | 345.2250       | 173.1164        |
| 1654.9276      | 14 | V  | 2  | 274.1879       | 137.5979        |
|                | 15 | R  | 1  | 175.1195       | 88.0637         |

N-term:+29.04 K(3):+156.13  
 C(4):+160.03 K(9):+156.13

ESPTKVQLVGGAGR, MH+ 1546.9342, m/z 387.4890  
 H OS G28 P150811 220811-s1.02634.02634.4.dta

scan 2634; 2.3e+001

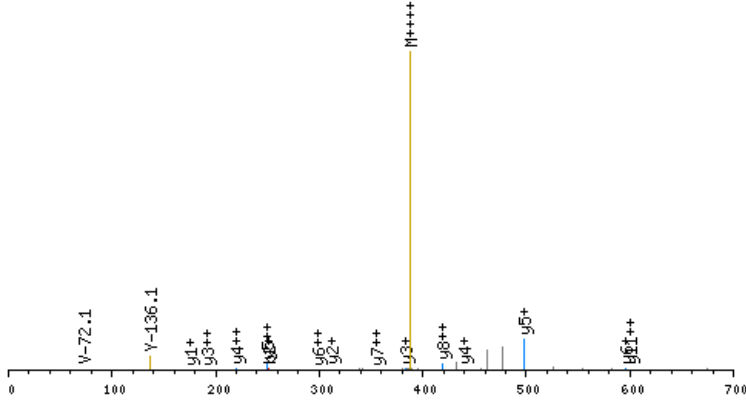

click image to zoom in; click top corners to zoom out [\[precursor±\]](#)

scan 2633; 387.5 m/z; 1.2e+001

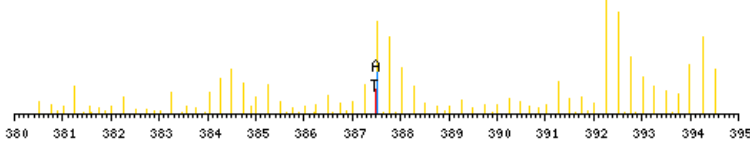

zoomed in precursor plot; T=theoretical m/z, A=acquired m/z

X-range:

-

MassTol: Y-zoom:

MassType:

AVG  MONO

Axis:

1  2

Label:

I  M  -

Ions:

a  +  2+  3+

b  +  2+  3+

c  +  2+  3+

x  +  2+  3+

y  +  2+  3+

z  +  2+  3+

hide H<sub>2</sub>O/NH<sub>3</sub>

zoom 112-122

GO

| b <sup>+</sup> | #  | AA | #  | y <sup>+</sup> | y <sup>2+</sup> |
|----------------|----|----|----|----------------|-----------------|
| 164.1135       | 1  | E  | 14 |                |                 |
| 251.1455       | 2  | S  | 13 | 1383.8285      | 692.4182        |
| 348.1983       | 3  | P  | 12 | 1296.7965      | 648.9021        |
| 449.2460       | 4  | T  | 11 | 1199.7437      | 600.3758        |
| 611.4041       | 5  | K  | 10 | 1098.6960      | 549.8519        |
| 710.4725       | 6  | V  | 9  | 936.5379       | 468.7729        |
| 838.5311       | 7  | Q  | 8  | 837.4695       | 419.2387        |
| 951.6151       | 8  | L  | 7  | 709.4109       | 355.2094        |
| 1050.6835      | 9  | V  | 6  | 596.3269       | 298.6673        |
| 1107.7050      | 10 | G  | 5  | 497.2585       | 249.1331        |
| 1164.7265      | 11 | G  | 4  | 440.2370       | 220.6224        |
| 1235.7636      | 12 | A  | 3  | 383.2155       | 192.1117        |
| 1372.8225      | 13 | H  | 2  | 312.1784       | 156.5931        |
|                | 14 | R  | 1  | 175.1195       | 88.0637         |

N-term:+35.07 K(5):+162.16

ESVMKTEPSVAEYTVR, MH+ 1881.9632, m/z 627.9926  
 L OS G26 P150811 220811-s1.03762.03762.3.dta

X-range:

-

MassTol: Y-zoom:

MassType:

AVG  MONO

Axis:

1  2

Label:

I  M  -

Ions:

a  +  2+  3+

b  +  2+  3+

c  +  2+  3+

x  +  2+  3+

y  +  2+  3+

z  +  2+  3+

hide H<sub>2</sub>O/NH<sub>3</sub>

zoom 112-122

GO

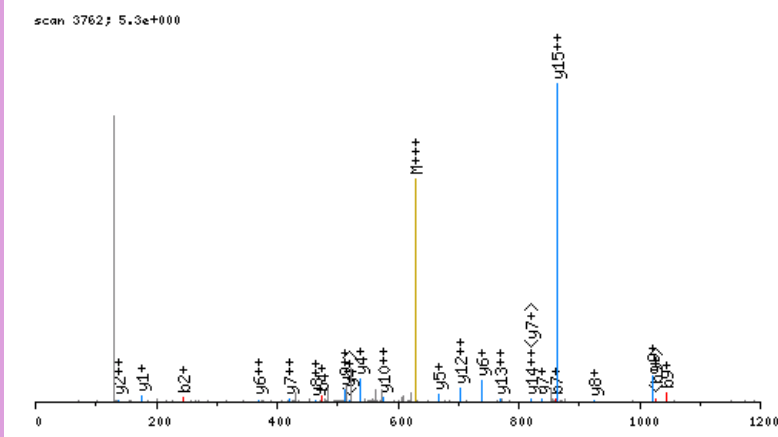

click image to zoom in; click top corners to zoom out [\[precursor±\]](#)

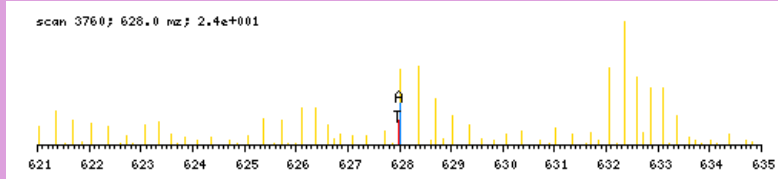

zoomed in precursor plot; T=theoretical m/z, A=acquired m/z

| b <sup>+</sup> | #  | AA | #  | y <sup>+</sup> | y <sup>2+</sup> |
|----------------|----|----|----|----------------|-----------------|
| 158.0817       | 1  | E  | 16 |                |                 |
| 245.1137       | 2  | S  | 15 | 1724.8893      | 862.9486        |
| 344.1821       | 3  | V  | 14 | 1637.8573      | 819.4326        |
| 475.2226       | 4  | M  | 13 | 1538.7889      | 769.8984        |
| 631.3489       | 5  | K  | 12 | 1407.7484      | 704.3781        |
| 732.3966       | 6  | T  | 11 | 1251.6221      | 626.3150        |
| 861.4392       | 7  | E  | 10 | 1150.5744      | 575.7911        |
| 958.4920       | 8  | P  | 9  | 1021.5318      | 511.2698        |
| 1045.5240      | 9  | S  | 8  | 924.4791       | 462.7434        |
| 1144.5924      | 10 | V  | 7  | 837.4470       | 419.2274        |
| 1215.6295      | 11 | A  | 6  | 738.3786       | 369.6932        |
| 1344.6721      | 12 | E  | 5  | 667.3415       | 334.1747        |
| 1507.7354      | 13 | Y  | 4  | 538.2989       | 269.6534        |
| 1608.7831      | 14 | T  | 3  | 375.2356       | 188.1217        |
| 1707.8515      | 15 | V  | 2  | 274.1879       | 137.5979        |
|                | 16 | R  | 1  | 175.1195       | 88.0637         |

N-term:+29.04 K(5):+156.13

ETFDQGAHHAFGQGGGR, MH+ 1742.7999, m/z 436.4554  
 L OS G28 P150811 220811-s1.03007.03007.4.dta

X-range:

-

MassTol: Y-zoom:

MassType:

AVG  MONO

Axis:

1  2

Label:

I  M  -

Ions:

a  +  2+  3+

b  +  2+  3+

c  +  2+  3+

x  +  2+  3+

y  +  2+  3+

z  +  2+  3+

hide H<sub>2</sub>O/NH<sub>3</sub>

zoom 112-122

GO

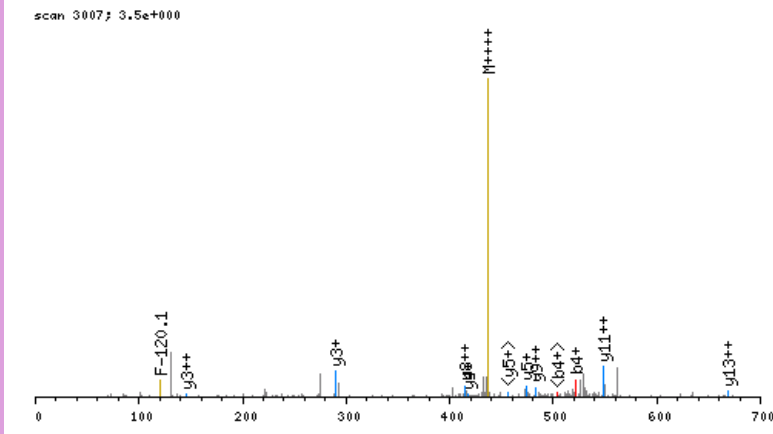

click image to zoom in; click top corners to zoom out [\[precursor±\]](#)

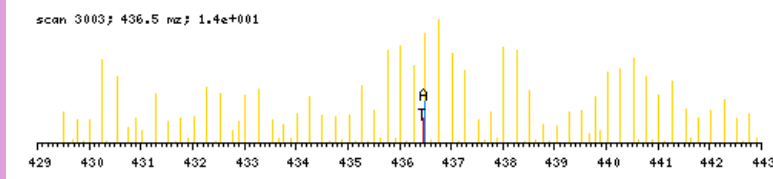

zoomed in precursor plot; T=theoretical m/z, A=acquired m/z

| b <sup>+</sup> | #  | AA # | y <sup>+</sup> | y <sup>2+</sup> |
|----------------|----|------|----------------|-----------------|
| 158.0817       | 1  | E 16 |                |                 |
| 259.1294       | 2  | T 15 | 1585.7260      | 793.3669        |
| 406.1978       | 3  | F 14 | 1484.6783      | 742.8431        |
| 521.2247       | 4  | D 13 | 1337.6099      | 669.3089        |
| 649.2833       | 5  | Q 12 | 1222.5830      | 611.7954        |
| 706.3048       | 6  | G 11 | 1094.5244      | 547.7661        |
| 777.3419       | 7  | A 10 | 1037.5029      | 519.2554        |
| 914.4008       | 8  | H 9  | 966.4658       | 483.7368        |
| 1051.4597      | 9  | H 8  | 829.4069       | 415.2074        |
| 1122.4968      | 10 | A 7  | 692.3480       | 346.6779        |
| 1269.5652      | 11 | F 6  | 621.3109       | 311.1594        |
| 1326.5867      | 12 | G 5  | 474.2425       | 237.6251        |
| 1454.6453      | 13 | Q 4  | 417.2210       | 209.1144        |
| 1511.6667      | 14 | G 3  | 289.1624       | 145.0851        |
| 1568.6882      | 15 | G 2  | 232.1410       | 116.5744        |
|                | 16 | R 1  | 175.1195       | 88.0637         |

N-term:+29.04

ETGPAGPAGPIGPAGAR, MH+ 1509.8237, m/z 503.9461  
 H OS G25 P150811 220811-s1.03510.03510.3.dta

scan 3510; 2.0e+000

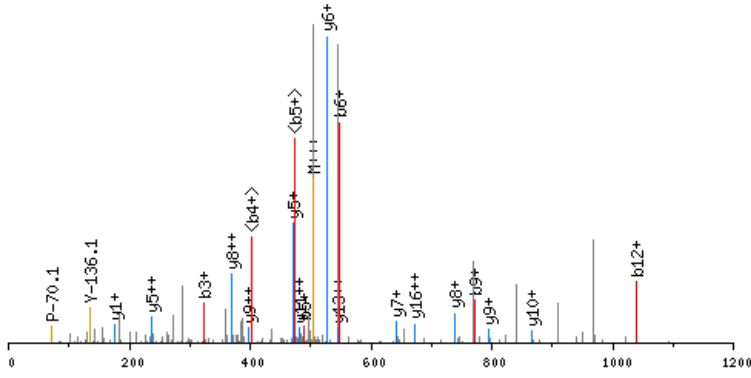

click image to zoom in; click top corners to zoom out [\[precursor±\]](#)

scan 3507; 503.9 m/z; 4.8e+001

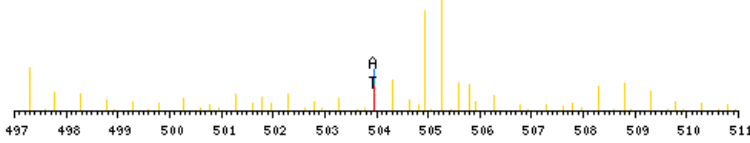

zoomed in precursor plot; T=theoretical m/z, A=acquired m/z

X-range:

-

MassTol: Y-zoom:

MassType:

AVG  MONO

Axis:

1  2

Label:

I  M  -

Ions:

a  +  2+  3+

b  +  2+  3+

c  +  2+  3+

x  +  2+  3+

y  +  2+  3+

z  +  2+  3+

hide H<sub>2</sub>O/NH<sub>3</sub>

zoom 112-122

GO

| b <sup>+</sup> | #  | AA # | y <sup>+</sup> | y <sup>2+</sup> |
|----------------|----|------|----------------|-----------------|
| 164.1135       | 1  | E 17 |                |                 |
| 265.1612       | 2  | T 16 | 1346.7181      | 673.8629        |
| 322.1826       | 3  | G 15 | 1245.6704      | 623.3391        |
| 419.2354       | 4  | P 14 | 1188.6489      | 594.8284        |
| 490.2725       | 5  | A 13 | 1091.5962      | 546.3020        |
| 547.2940       | 6  | G 12 | 1020.5591      | 510.7834        |
| 644.3467       | 7  | P 11 | 963.5376       | 482.2727        |
| 715.3839       | 8  | A 10 | 866.4848       | 433.7463        |
| 772.4053       | 9  | G 9  | 795.4477       | 398.2278        |
| 869.4581       | 10 | P 8  | 738.4262       | 369.7170        |
| 982.5421       | 11 | I 7  | 641.3735       | 321.1907        |
| 1039.5636      | 12 | G 6  | 528.2894       | 264.6486        |
| 1136.6164      | 13 | P 5  | 471.2680       | 236.1379        |
| 1207.6535      | 14 | A 4  | 374.2152       | 187.6115        |
| 1264.6750      | 15 | G 3  | 303.1781       | 152.0930        |
| 1335.7121      | 16 | A 2  | 246.1566       | 123.5822        |
|                | 17 | R 1  | 175.1195       | 88.0637         |

N-term:+35.07

ETTSSIPEAGEGQIR, MH+ 1602.7975, m/z 534.9373  
 L OS G25 P150811 220811-s1.03673.03673.3.dta

X-range:

-

MassTol: Y-zoom:

MassType:

AVG  MONO

Axis:

1  2

Label:

I  M  -

Ions:

a  +  2+  3+

b  +  2+  3+

c  +  2+  3+

x  +  2+  3+

y  +  2+  3+

z  +  2+  3+

hide H<sub>2</sub>O/NH<sub>3</sub>

zoom 112-122

GO

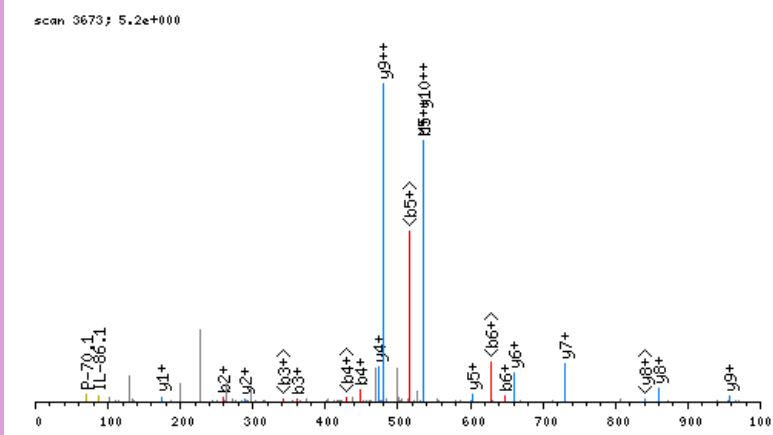

click image to zoom in; click top corners to zoom out [\[precursor±\]](#)

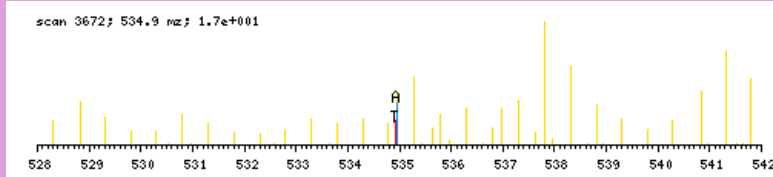

zoomed in precursor plot; T=theoretical m/z, A=acquired m/z

| b <sup>+</sup> | #  | AA # | y <sup>+</sup> | y <sup>2+</sup> |
|----------------|----|------|----------------|-----------------|
| 158.0817       | 1  | E 15 |                |                 |
| 259.1294       | 2  | T 14 | 1445.7236      | 723.3657        |
| 360.1771       | 3  | T 13 | 1344.6759      | 672.8419        |
| 447.2091       | 4  | S 12 | 1243.6283      | 622.3180        |
| 534.2411       | 5  | S 11 | 1156.5962      | 578.8020        |
| 647.3252       | 6  | I 10 | 1069.5642      | 535.2860        |
| 744.3779       | 7  | P 9  | 956.4801       | 478.7440        |
| 873.4205       | 8  | E 8  | 859.4274       | 430.2176        |
| 944.4576       | 9  | A 7  | 730.3848       | 365.6963        |
| 1001.4791      | 10 | G 6  | 659.3477       | 330.1777        |
| 1130.5217      | 11 | E 5  | 602.3262       | 301.6670        |
| 1187.5432      | 12 | G 4  | 473.2836       | 237.1457        |
| 1315.6017      | 13 | Q 3  | 416.2621       | 208.6350        |
| 1428.6858      | 14 | I 2  | 288.2036       | 144.6057        |
|                | 15 | R 1  | 175.1195       | 88.0637         |

N-term:+29.04



EVAQHLGESTVR, MH+ 1353.7126, m/z 451.9091  
 L OS G27 P150811 220811-s1.02423.02423.3.dta

scan 2423; 1.1e+001

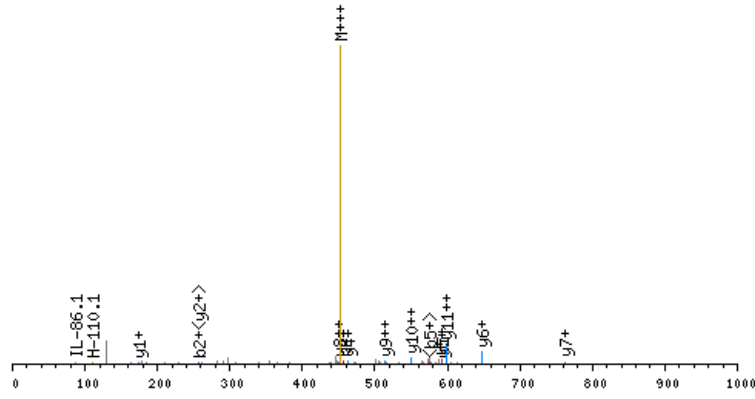

click image to zoom in; click top corners to zoom out [\[precursor±\]](#)

scan 2422; 451.9 m/z; 3.1e+001

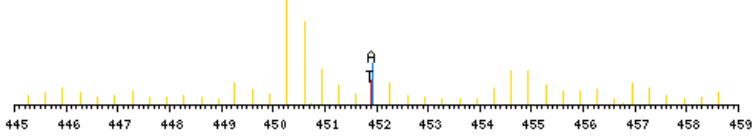

zoomed in precursor plot; T=theoretical m/z, A=acquired m/z

X-range:

-

MassTol: Y-zoom:

MassType:

AVG  MONO

Axis:

1  2

Label:

I  M  -

Ions:

a  +  2+  3+

b  +  2+  3+

c  +  2+  3+

x  +  2+  3+

y  +  2+  3+

z  +  2+  3+

hide H<sub>2</sub>O/NH<sub>3</sub>

zoom 112-122

GO

| b <sup>+</sup> | #  | AA # | y <sup>+</sup> | y <sup>2+</sup> |
|----------------|----|------|----------------|-----------------|
| 158.0817       | 1  | E 12 |                |                 |
| 257.1501       | 2  | V 11 | 1196.6388      | 598.8233        |
| 328.1872       | 3  | A 10 | 1097.5703      | 549.2891        |
| 456.2458       | 4  | Q 9  | 1026.5332      | 513.7705        |
| 593.3047       | 5  | H 8  | 898.4747       | 449.7412        |
| 706.3888       | 6  | L 7  | 761.4157       | 381.2118        |
| 763.4102       | 7  | G 6  | 648.3317       | 324.6698        |
| 892.4528       | 8  | E 5  | 591.3102       | 296.1590        |
| 979.4849       | 9  | S 4  | 462.2676       | 231.6377        |
| 1080.5325      | 10 | T 3  | 375.2356       | 188.1217        |
| 1179.6010      | 11 | V 2  | 274.1879       | 137.5979        |
|                | 12 | R 1  | 175.1195       | 88.0637         |

N-term:+29.04

EVEDASEEAPLR, MH+ 1372.6596, m/z 458.2247  
 L OS G25 P150811 220811-s1.03165.03165.3.dta

X-range:

-

MassTol: Y-zoom:

MassType:

AVG  MONO

Axis:

1  2

Label:

I  M  -

Ions:

a  +  2+  3+

b  +  2+  3+

c  +  2+  3+

x  +  2+  3+

y  +  2+  3+

z  +  2+  3+

hide H<sub>2</sub>O/NH<sub>3</sub>

zoom 112-122

GO

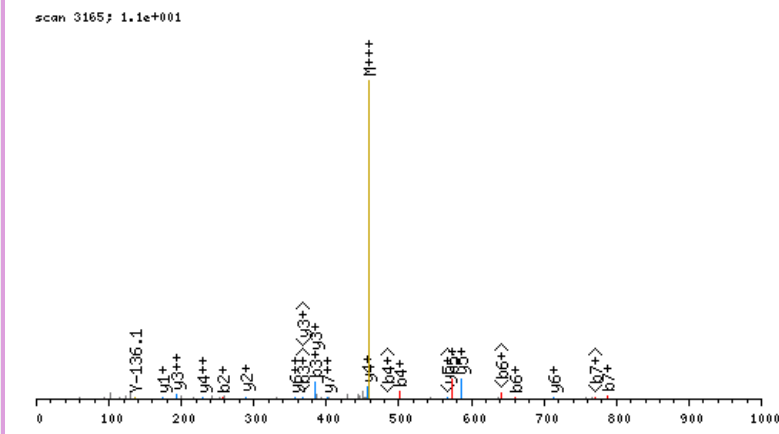

click image to zoom in; click top corners to zoom out [\[precursor±\]](#)

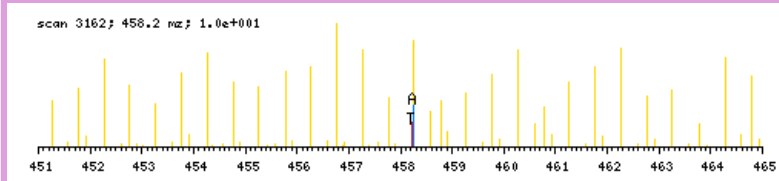

zoomed in precursor plot; T=theoretical m/z, A=acquired m/z

| b <sup>+</sup> | #  | AA # | y <sup>+</sup> | y <sup>2+</sup> |
|----------------|----|------|----------------|-----------------|
| 158.0817       | 1  | E 12 |                |                 |
| 257.1501       | 2  | V 11 | 1215.5857      | 608.2968        |
| 386.1927       | 3  | E 10 | 1116.5173      | 558.7626        |
| 501.2196       | 4  | D 9  | 987.4747       | 494.2413        |
| 572.2568       | 5  | A 8  | 872.4478       | 436.7278        |
| 659.2888       | 6  | S 7  | 801.4107       | 401.2092        |
| 788.3314       | 7  | E 6  | 714.3786       | 357.6932        |
| 917.3740       | 8  | E 5  | 585.3360       | 293.1719        |
| 988.4111       | 9  | A 4  | 456.2934       | 228.6506        |
| 1085.4638      | 10 | P 3  | 385.2563       | 193.1321        |
| 1198.5479      | 11 | L 2  | 288.2036       | 144.6057        |
|                | 12 | R 1  | 175.1195       | 88.0637         |

N-term:+29.04

X-range:

-

MassTol: Y-zoom:

MassType:

AVG  MONO

Axis:

1  2

Label:

I  M  -

Ions:

a  +  2+  3+

b  +  2+  3+

c  +  2+  3+

x  +  2+  3+

y  +  2+  3+

z  +  2+  3+

hide H<sub>2</sub>O/NH<sub>3</sub>

zoom 112-122

GO

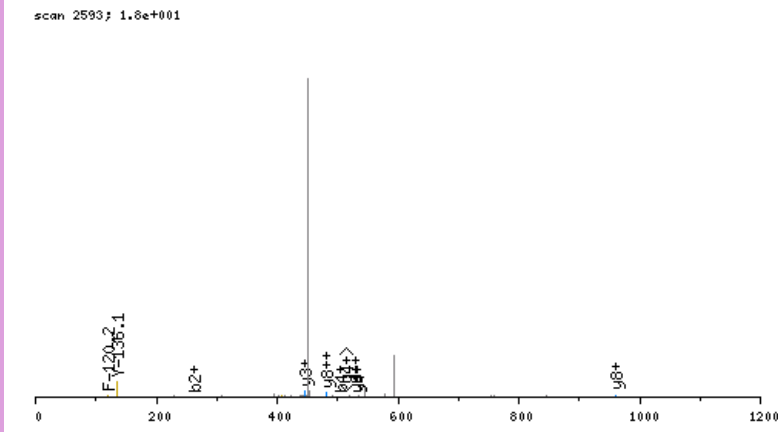

click image to zoom in; click top corners to zoom out [\[precursor±\]](#)

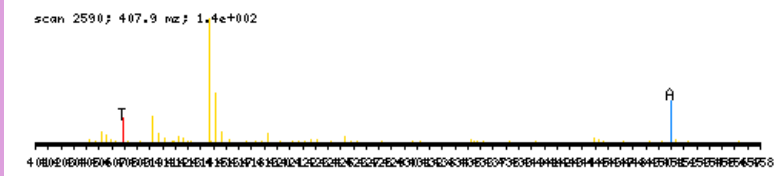

zoomed in precursor plot; T=theoretical m/z, A=acquired m/z

| b <sup>+</sup> | #  | AA # | y <sup>+</sup> | y <sup>2+</sup> |
|----------------|----|------|----------------|-----------------|
| 164.1135       | 1  | E 10 |                |                 |
| 263.1819       | 2  | V 9  | 1058.7098      | 529.8588        |
| 392.2245       | 3  | E 8  | 959.6414       | 480.3246        |
| 505.3086       | 4  | L 7  | 830.5988       | 415.8033        |
| 592.3406       | 5  | S 6  | 717.5147       | 359.2613        |
| 691.4090       | 6  | V 5  | 630.4827       | 315.7453        |
| 778.4410       | 7  | S 4  | 531.4143       | 266.2111        |
| 879.4887       | 8  | T 3  | 444.3823       | 222.6950        |
| 1041.6468      | 9  | K 2  | 343.3346       | 172.1712        |
|                | 10 | K 1  | 181.1765       | 91.0922         |

N-term:+35.07 K(9):+162.16  
 K(10):+162.16

EVGKALEGINNGITQAGR, MH+ 1883.0351, m/z 628.3499  
L OS G26 P150811 220811-s1.04163.04163.3.dta

scan 4163; 1.4e+000

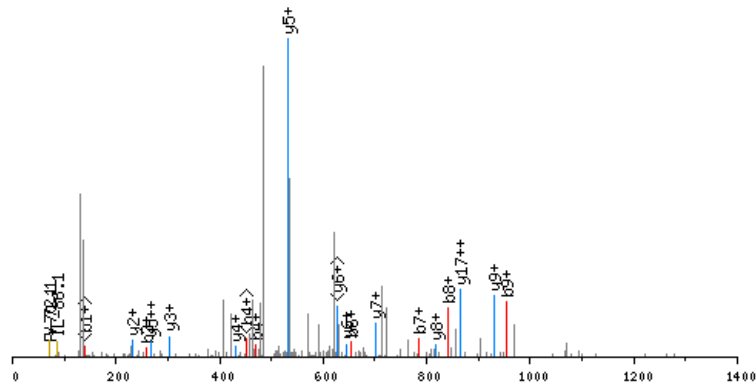

click image to zoom in; click top corners to zoom out [\[precursor±\]](#)

scan 4160; 628.4 m/z; 1.1e+001

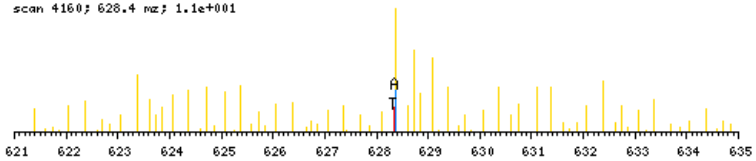

zoomed in precursor plot; T=theoretical m/z, A=acquired m/z

X-range:

-

MassTol: Y-zoom:

MassType:

AVG  MONO

Axis:

1  2

Label:

I  M  -

Ions:

a  +  2+  3+

b  +  2+  3+

c  +  2+  3+

x  +  2+  3+

y  +  2+  3+

z  +  2+  3+

hide H<sub>2</sub>O/NH<sub>3</sub>

zoom 112-122

GO

| b <sup>+</sup> | #  | AA # | y <sup>+</sup> | y <sup>2+</sup> |
|----------------|----|------|----------------|-----------------|
| 158.0817       | 1  | E 18 |                |                 |
| 257.1501       | 2  | V 17 | 1725.9612      | 863.4845        |
| 314.1716       | 3  | G 16 | 1626.8928      | 813.9503        |
| 470.2979       | 4  | K 15 | 1569.8713      | 785.4396        |
| 541.3350       | 5  | A 14 | 1413.7450      | 707.3764        |
| 654.4190       | 6  | L 13 | 1342.7079      | 671.8579        |
| 783.4616       | 7  | E 12 | 1229.6238      | 615.3158        |
| 840.4831       | 8  | G 11 | 1100.5812      | 550.7945        |
| 953.5672       | 9  | I 10 | 1043.5598      | 522.2838        |
| 1067.6101      | 10 | N 9  | 930.4757       | 465.7418        |
| 1181.6530      | 11 | N 8  | 816.4328       | 408.7203        |
| 1238.6745      | 12 | G 7  | 702.3899       | 351.6988        |
| 1351.7586      | 13 | I 6  | 645.3684       | 323.1881        |
| 1452.8062      | 14 | T 5  | 532.2843       | 266.6461        |
| 1580.8648      | 15 | Q 4  | 431.2367       | 216.1222        |
| 1651.9019      | 16 | A 3  | 303.1781       | 152.0930        |
| 1708.9234      | 17 | G 2  | 232.1410       | 116.5744        |
|                | 18 | R 1  | 175.1195       | 88.0637         |

N-term:+29.04 K(4):+156.13

EVHTGLGELLR, MH+ 1251.7061, m/z 417.9069  
 L OS G27 P150811 220811-s1.05594.05594.3.dta

X-range:

-

MassTol: Y-zoom:

MassType:

AVG  MONO

Axis:

1  2

Label:

I  M  -

Ions:

a  +  2+  3+

b  +  2+  3+

c  +  2+  3+

x  +  2+  3+

y  +  2+  3+

z  +  2+  3+

hide H<sub>2</sub>O/NH<sub>3</sub>

zoom 112-122

GO

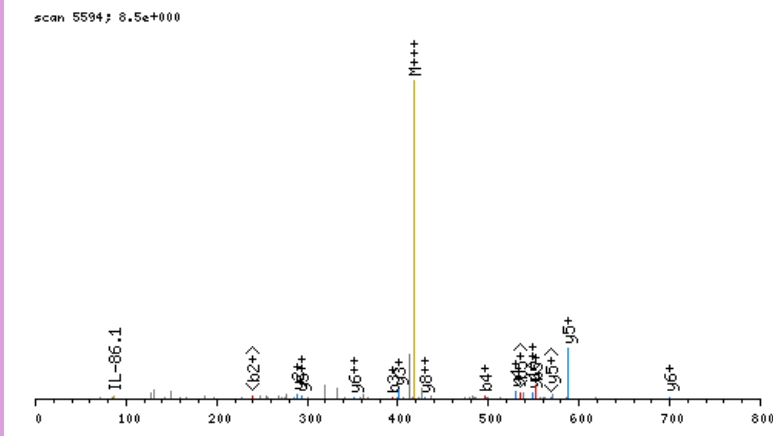

click image to zoom in; click top corners to zoom out [\[precursor±\]](#)

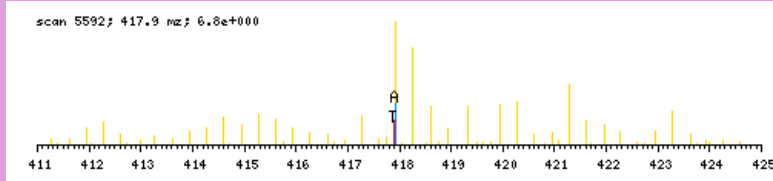

zoomed in precursor plot; T=theoretical m/z, A=acquired m/z

| b <sup>+</sup> | #  | AA # | y <sup>+</sup> | y <sup>2+</sup> |
|----------------|----|------|----------------|-----------------|
| 158.0817       | 1  | E 11 |                |                 |
| 257.1501       | 2  | V 10 | 1094.6322      | 547.8200        |
| 394.2090       | 3  | H 9  | 995.5638       | 498.2858        |
| 495.2567       | 4  | T 8  | 858.5049       | 429.7564        |
| 552.2782       | 5  | G 7  | 757.4572       | 379.2325        |
| 665.3622       | 6  | L 6  | 700.4357       | 350.7218        |
| 722.3837       | 7  | G 5  | 587.3517       | 294.1798        |
| 851.4263       | 8  | E 4  | 530.3302       | 265.6690        |
| 964.5103       | 9  | L 3  | 401.2876       | 201.1477        |
| 1077.5944      | 10 | L 2  | 288.2036       | 144.6057        |
|                | 11 | R 1  | 175.1195       | 88.0637         |

N-term:+29.04

EVIETHITLVTEHQK, MH+ 1818.9714, m/z 606.9953  
 L OS G26 P150811 220811-s1.05152.05152.3.dta

X-range:

-

MassTol: Y-zoom:

MassType:

AVG  MONO

Axis:

1  2

Label:

I  M  -

Ions:

a  +  2+  3+

b  +  2+  3+

c  +  2+  3+

x  +  2+  3+

y  +  2+  3+

z  +  2+  3+

hide H<sub>2</sub>O/NH<sub>3</sub>

zoom 112-122

GO

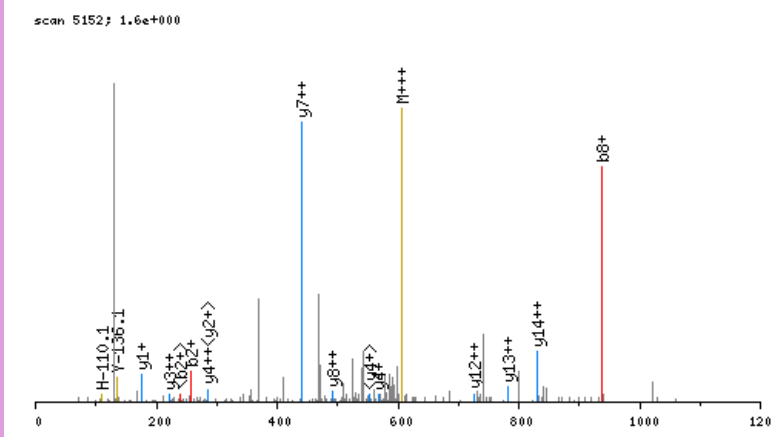

click image to zoom in; click top corners to zoom out [\[precursor±\]](#)

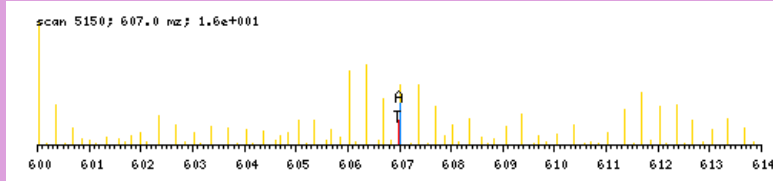

zoomed in precursor plot; T=theoretical m/z, A=acquired m/z

| b <sup>+</sup> | #  | AA # | y <sup>+</sup> | y <sup>2+</sup> |
|----------------|----|------|----------------|-----------------|
| 158.0817       | 1  | E 15 |                |                 |
| 257.1501       | 2  | V 14 | 1661.8975      | 831.4527        |
| 370.2342       | 3  | I 13 | 1562.8291      | 781.9185        |
| 499.2768       | 4  | E 12 | 1449.7450      | 725.3764        |
| 600.3244       | 5  | T 11 | 1320.7024      | 660.8551        |
| 737.3834       | 6  | H 10 | 1219.6547      | 610.3313        |
| 838.4310       | 7  | T 9  | 1082.5958      | 541.8018        |
| 937.4994       | 8  | V 8  | 981.5482       | 491.2780        |
| 1050.5835      | 9  | L 7  | 882.4797       | 441.7438        |
| 1149.6519      | 10 | V 6  | 769.3957       | 385.2018        |
| 1250.6996      | 11 | T 5  | 670.3273       | 335.6675        |
| 1379.7422      | 12 | E 4  | 569.2796       | 285.1437        |
| 1516.8011      | 13 | H 3  | 440.2370       | 220.6224        |
| 1644.8597      | 14 | Q 2  | 303.1781       | 152.0930        |
|                | 15 | R 1  | 175.1195       | 88.0637         |

N-term:+29.04

EVKCDMEVSCPEGYTCCR, MH+ 2335.9488, m/z 779.3211  
 L OS G26 P150811 220811-s1.03341.03341.3.dta

X-range:

-

MassTol: Y-zoom:

MassType:

AVG  MONO

Axis:

1  2

Label:

I  M  -

Ions:

a  +  2+  3+

b  +  2+  3+

c  +  2+  3+

x  +  2+  3+

y  +  2+  3+

z  +  2+  3+

hide H<sub>2</sub>O/NH<sub>3</sub>

zoom 112-122

GO

scan 3341; 5.0e+000

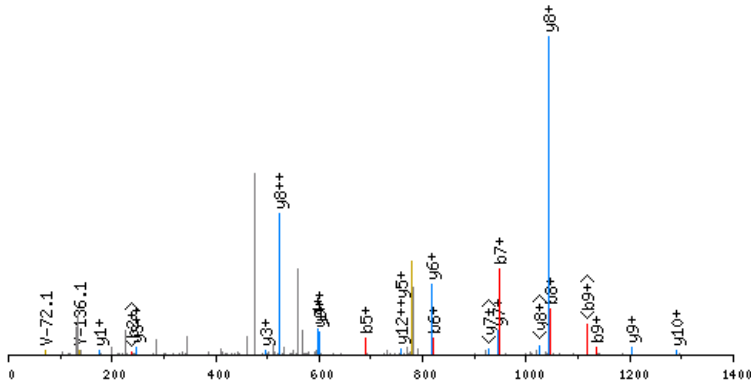

click image to zoom in; click top corners to zoom out [precursor±]

scan 3340; 779.3 mz; 3.2e+001

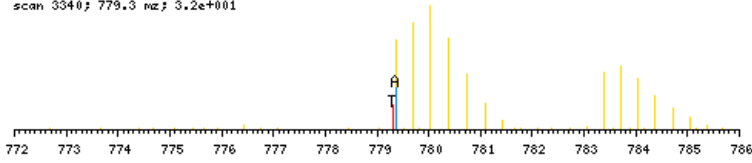

zoomed in precursor plot; T=theoretical m/z, A=acquired m/z

| b <sup>+</sup> | #  | AA | #  | y <sup>+</sup> | y <sup>2+</sup> |
|----------------|----|----|----|----------------|-----------------|
| 158.0817       | 1  | E  | 18 |                |                 |
| 257.1501       | 2  | V  | 17 | 2178.8749      | 1089.9414       |
| 413.2764       | 3  | K  | 16 | 2079.8065      | 1040.4072       |
| 573.3070       | 4  | C  | 15 | 1923.6802      | 962.3440        |
| 688.3340       | 5  | D  | 14 | 1763.6496      | 882.3287        |
| 819.3744       | 6  | M  | 13 | 1648.6226      | 824.8152        |
| 948.4170       | 7  | E  | 12 | 1517.5822      | 759.2950        |
| 1047.4854      | 8  | V  | 11 | 1388.5396      | 694.7737        |
| 1134.5175      | 9  | S  | 10 | 1289.4712      | 645.2395        |
| 1294.5481      | 10 | C  | 9  | 1202.4391      | 601.7235        |
| 1391.6008      | 11 | P  | 8  | 1042.4085      | 521.7082        |
| 1520.6434      | 12 | E  | 7  | 945.3558       | 473.1818        |
| 1577.6649      | 13 | G  | 6  | 816.3132       | 408.6605        |
| 1740.7282      | 14 | Y  | 5  | 759.2917       | 380.1498        |
| 1841.7759      | 15 | T  | 4  | 596.2284       | 298.6181        |
| 2001.8065      | 16 | C  | 3  | 495.1807       | 248.0943        |
| 2161.8371      | 17 | C  | 2  | 335.1501       | 168.0790        |
|                | 18 | R  | 1  | 175.1195       | 88.0637         |

N-term:+29.04 K(3):+156.13  
 C(4):+160.03 C(10):+160.03  
 C(16):+160.03 C(17):+160.03

EVKVDCSEYLALSKR, MH+ 1881.0156, m/z 471.0093  
 L OS G28 P150811 220811-s1.05627.05627.4.dta

X-range:

-

MassTol: Y-zoom:

MassType:

AVG  MONO

Axis:

1  2

Label:

I  M  -

Ions:

a  +  2+  3+

b  +  2+  3+

c  +  2+  3+

x  +  2+  3+

y  +  2+  3+

z  +  2+  3+

hide H<sub>2</sub>O/NH<sub>3</sub>

zoom 112-122

GO

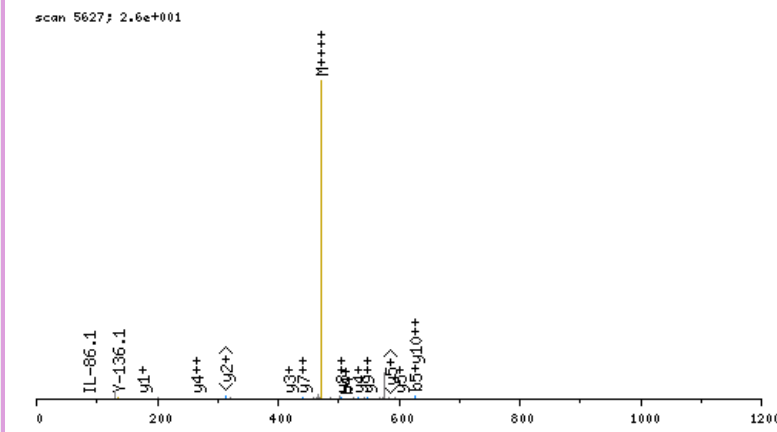

click image to zoom in; click top corners to zoom out [precursor±]

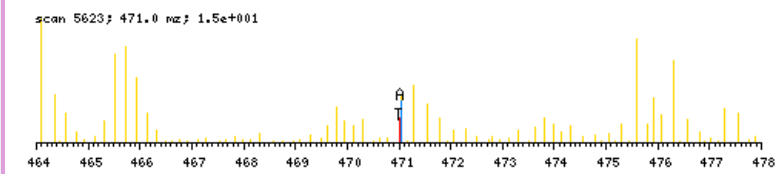

zoomed in precursor plot; T=theoretical m/z, A=acquired m/z

| b <sup>+</sup> | #  | AA | #  | y <sup>+</sup> | y <sup>2+</sup> |
|----------------|----|----|----|----------------|-----------------|
| 158.0817       | 1  | E  | 15 |                |                 |
| 257.1501       | 2  | V  | 14 | 1723.9417      | 862.4748        |
| 413.2764       | 3  | K  | 13 | 1624.8733      | 812.9406        |
| 512.3448       | 4  | V  | 12 | 1468.7470      | 734.8774        |
| 627.3718       | 5  | D  | 11 | 1369.6786      | 685.3432        |
| 787.4024       | 6  | C  | 10 | 1254.6516      | 627.8297        |
| 874.4344       | 7  | S  | 9  | 1094.6210      | 547.8144        |
| 1003.4770      | 8  | E  | 8  | 1007.5890      | 504.2984        |
| 1166.5403      | 9  | Y  | 7  | 878.5464       | 439.7771        |
| 1279.6244      | 10 | L  | 6  | 715.4831       | 358.2454        |
| 1350.6615      | 11 | A  | 5  | 602.3990       | 301.7034        |
| 1463.7456      | 12 | L  | 4  | 531.3619       | 266.1849        |
| 1550.7776      | 13 | S  | 3  | 418.2778       | 209.6428        |
| 1706.9039      | 14 | K  | 2  | 331.2458       | 166.1268        |
|                | 15 | R  | 1  | 175.1195       | 88.0637         |

N-term:+29.04 K(3):+156.13  
 C(6):+160.03 K(14):+156.13



EVLDMAENAFDDEYLKCKSR, MH+ 2535.2959, m/z 634.5794  
 H OS G28 P150811 220811-s1.08311.08311.4.dta

X-range:

-

MassTol: Y-zoom:

MassType:

AVG  MONO

Axis:

1  2

Label:

I  M  -

Ions:

a  +  2+  3+

b  +  2+  3+

c  +  2+  3+

x  +  2+  3+

y  +  2+  3+

z  +  2+  3+

hide H<sub>2</sub>O/NH<sub>3</sub>

zoom 112-122

GO

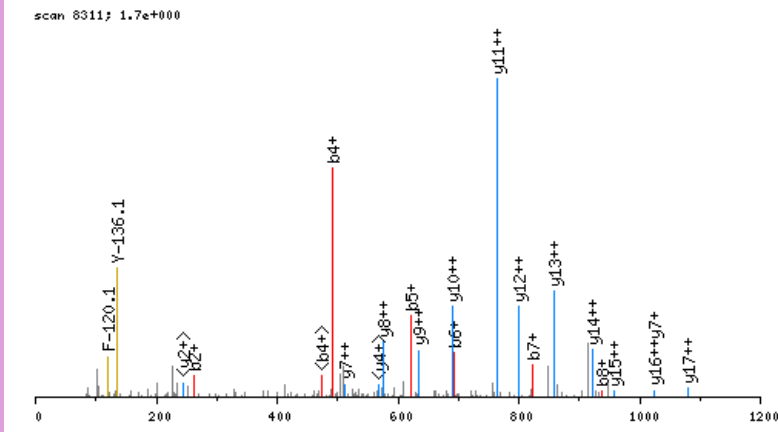

click image to zoom in; click top corners to zoom out [\[precursor±\]](#)

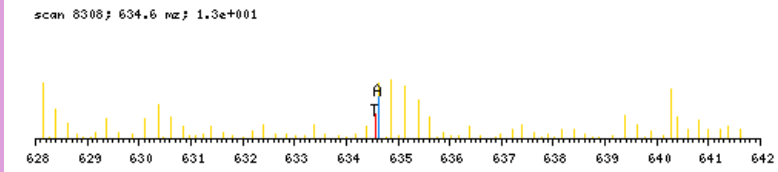

zoomed in precursor plot; T=theoretical m/z, A=acquired m/z

| b <sup>+</sup> | #  | AA | #  | y <sup>+</sup> | y <sup>2+</sup> |
|----------------|----|----|----|----------------|-----------------|
| 164.1135       | 1  | E  | 20 |                |                 |
| 263.1819       | 2  | V  | 19 | 2372.1903      | 1186.5990       |
| 376.2660       | 3  | L  | 18 | 2273.1219      | 1137.0648       |
| 491.2929       | 4  | D  | 17 | 2160.0378      | 1080.5228       |
| 622.3334       | 5  | M  | 16 | 2045.0108      | 1023.0093       |
| 693.3705       | 6  | A  | 15 | 1913.9704      | 957.4891        |
| 822.4131       | 7  | E  | 14 | 1842.9332      | 921.9705        |
| 936.4560       | 8  | N  | 13 | 1713.8907      | 857.4492        |
| 1007.4931      | 9  | A  | 12 | 1599.8477      | 800.4278        |
| 1154.5616      | 10 | F  | 11 | 1528.8106      | 764.9092        |
| 1269.5885      | 11 | D  | 10 | 1381.7422      | 691.3750        |
| 1384.6154      | 12 | D  | 9  | 1266.7153      | 633.8615        |
| 1513.6580      | 13 | E  | 8  | 1151.6883      | 576.3481        |
| 1676.7214      | 14 | Y  | 7  | 1022.6457      | 511.8268        |
| 1789.8054      | 15 | L  | 6  | 859.5824       | 430.2951        |
| 1951.9635      | 16 | K  | 5  | 746.4983       | 373.7531        |
| 2111.9941      | 17 | C  | 4  | 584.3402       | 292.6740        |
| 2274.1522      | 18 | K  | 3  | 424.3096       | 212.6587        |
| 2361.1843      | 19 | S  | 2  | 262.1515       | 131.5797        |
|                | 20 | R  | 1  | 175.1195       | 88.0637         |

N-term:+35.07 K(16):+162.16  
 C(17):+160.03 K(18):+162.16

EVQLQQSGAELVR, MH+ 1490.8391, m/z 497.6179  
 H OS G25 P150811 220811-s1.04844.04844.3.dta

X-range:

-

MassTol: Y-zoom:

MassType:

AVG  MONO

Axis:

1  2

Label:

I  M  -

Ions:

a  +  2+  3+

b  +  2+  3+

c  +  2+  3+

x  +  2+  3+

y  +  2+  3+

z  +  2+  3+

hide H<sub>2</sub>O/NH<sub>3</sub>

zoom 112-122

GO

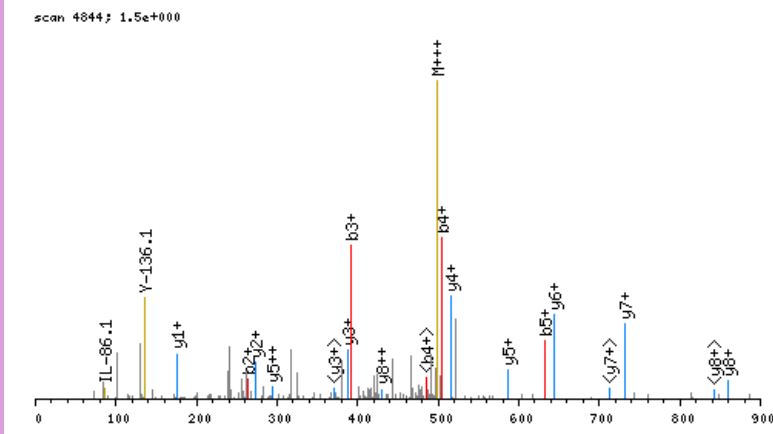

click image to zoom in; click top corners to zoom out [\[precursor±\]](#)

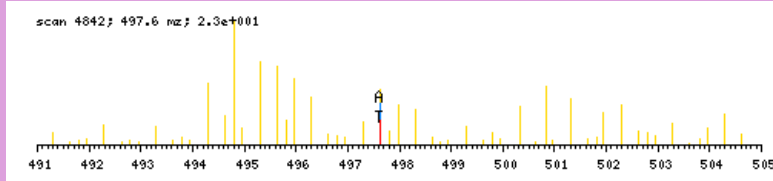

zoomed in precursor plot; T=theoretical m/z, A=acquired m/z

| b <sup>+</sup> | #  | AA | #  | y <sup>+</sup> | y <sup>2+</sup> |
|----------------|----|----|----|----------------|-----------------|
| 164.1135       | 1  | E  | 13 |                |                 |
| 263.1819       | 2  | V  | 12 | 1327.7334      | 664.3706        |
| 391.2405       | 3  | Q  | 11 | 1228.6650      | 614.8364        |
| 504.3245       | 4  | L  | 10 | 1100.6064      | 550.8071        |
| 632.3831       | 5  | Q  | 9  | 987.5223       | 494.2651        |
| 760.4417       | 6  | Q  | 8  | 859.4638       | 430.2358        |
| 847.4737       | 7  | S  | 7  | 731.4052       | 366.2065        |
| 904.4952       | 8  | G  | 6  | 644.3731       | 322.6905        |
| 975.5323       | 9  | A  | 5  | 587.3517       | 294.1798        |
| 1104.5749      | 10 | E  | 4  | 516.3146       | 258.6612        |
| 1217.6590      | 11 | L  | 3  | 387.2720       | 194.1399        |
| 1316.7274      | 12 | V  | 2  | 274.1879       | 137.5979        |
|                | 13 | R  | 1  | 175.1195       | 88.0637         |

N-term:+35.07

EYGFQNAILVR, MH+ 1337.7217, m/z 669.3645  
 L OS G25 P150811 220811-s1.06900.06900.2.dta

X-range:

-

MassTol: Y-zoom:

MassType:

AVG  MONO

Axis:

1  2

Label:

I  M  -

Ions:

a  +  2+  3+

b  +  2+  3+

c  +  2+  3+

x  +  2+  3+

y  +  2+  3+

z  +  2+  3+

hide H<sub>2</sub>O/NH<sub>3</sub>

zoom 112-122

GO

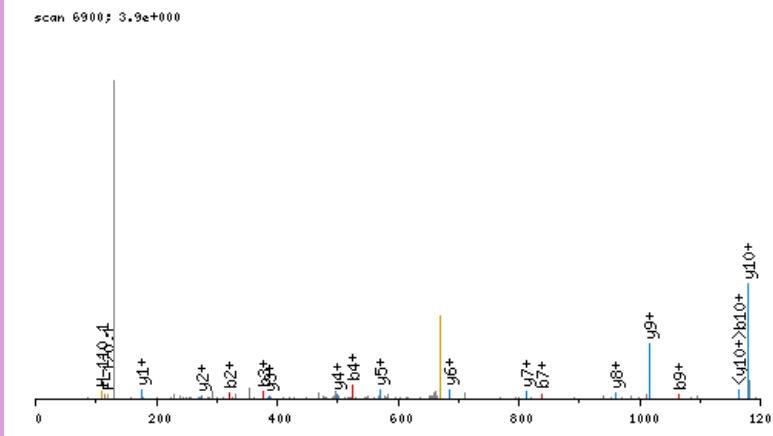

click image to zoom in; click top corners to zoom out [\[precursor±\]](#)

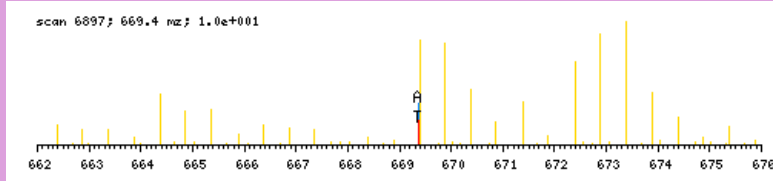

zoomed in precursor plot; T=theoretical m/z, A=acquired m/z

| b <sup>+</sup> | #  | AA # | y <sup>+</sup> | y <sup>2+</sup> |
|----------------|----|------|----------------|-----------------|
| 158.0817       | 1  | E 11 |                |                 |
| 321.1450       | 2  | Y 10 | 1180.6479      | 590.8278        |
| 378.1665       | 3  | G 9  | 1017.5845      | 509.2962        |
| 525.2349       | 4  | F 8  | 960.5631       | 480.7855        |
| 653.2935       | 5  | Q 7  | 813.4947       | 407.2512        |
| 767.3364       | 6  | N 6  | 685.4361       | 343.2220        |
| 838.3735       | 7  | A 5  | 571.3932       | 286.2005        |
| 951.4576       | 8  | I 4  | 500.3560       | 250.6819        |
| 1064.5416      | 9  | L 3  | 387.2720       | 194.1399        |
| 1163.6101      | 10 | V 2  | 274.1879       | 137.5979        |
|                | 11 | R 1  | 175.1195       | 88.0637         |

N-term:+29.04

FAKLVRRPPVQVYGIAGR, MH+ 1997.2336, m/z 500.0639  
 H OS G28 P150811 220811-s1.06569.06569.4.dta

X-range:

0 - 0

MassTol: Y-zoom:

0. 1.

MassType:

AVG  MONO

Axis:

1  2

Label:

I  M  -

Ions:

a  +  2+  3+

b  +  2+  3+

c  +  2+  3+

x  +  2+  3+

y  +  2+  3+

z  +  2+  3+

hide H<sub>2</sub>O/NH<sub>3</sub>

zoom 112-122

GO

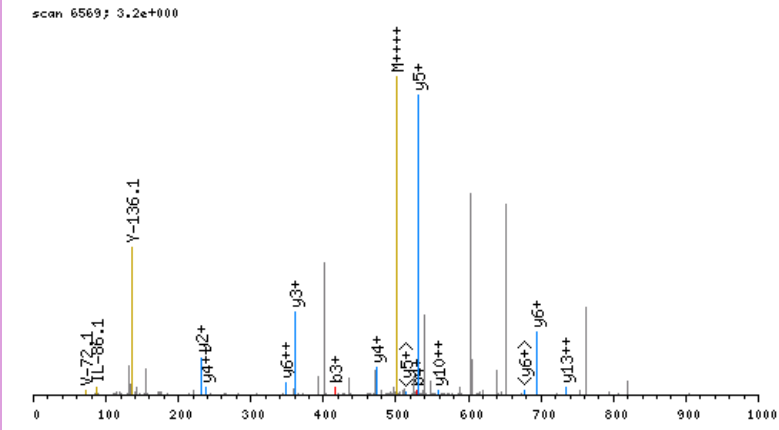

click image to zoom in; click top corners to zoom out [precursor±]

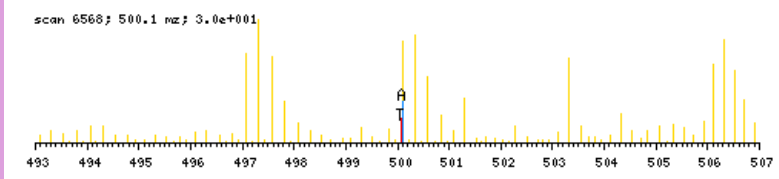

zoomed in precursor plot; T=theoretical m/z, A=acquired m/z

| b <sup>+</sup> | #  | AA # | y <sup>+</sup> | y <sup>2+</sup> |
|----------------|----|------|----------------|-----------------|
| 182.1393       | 1  | F 17 |                |                 |
| 253.1764       | 2  | A 16 | 1816.1021      | 908.5550        |
| 415.3345       | 3  | K 15 | 1745.0650      | 873.0364        |
| 528.4186       | 4  | L 14 | 1582.9069      | 791.9574        |
| 627.4870       | 5  | V 13 | 1469.8229      | 735.4153        |
| 783.5881       | 6  | R 12 | 1370.7545      | 685.8811        |
| 880.6409       | 7  | P 11 | 1214.6533      | 607.8306        |
| 977.6936       | 8  | P 10 | 1117.6006      | 559.3042        |
| 1076.7621      | 9  | V 9  | 1020.5478      | 510.7778        |
| 1204.8206      | 10 | Q 8  | 921.4794       | 461.2436        |
| 1303.8890      | 11 | V 7  | 793.4208       | 397.2143        |
| 1466.9524      | 12 | Y 6  | 694.3524       | 347.6801        |
| 1523.9738      | 13 | G 5  | 531.2891       | 266.1485        |
| 1637.0579      | 14 | I 4  | 474.2676       | 237.6377        |
| 1766.1005      | 15 | E 3  | 361.1836       | 181.0957        |
| 1823.1220      | 16 | G 2  | 232.1410       | 116.5744        |
|                | 17 | R 1  | 175.1195       | 88.0637         |

N-term:+35.07 K(3):+162.16

X-range:

-

MassTol: Y-zoom:

MassType:

AVG  MONO

Axis:

1  2

Label:

I  M  -

Ions:

a  +  2+  3+

b  +  2+  3+

c  +  2+  3+

x  +  2+  3+

y  +  2+  3+

z  +  2+  3+

hide H<sub>2</sub>O/NH<sub>3</sub>

zoom 112-122

GO

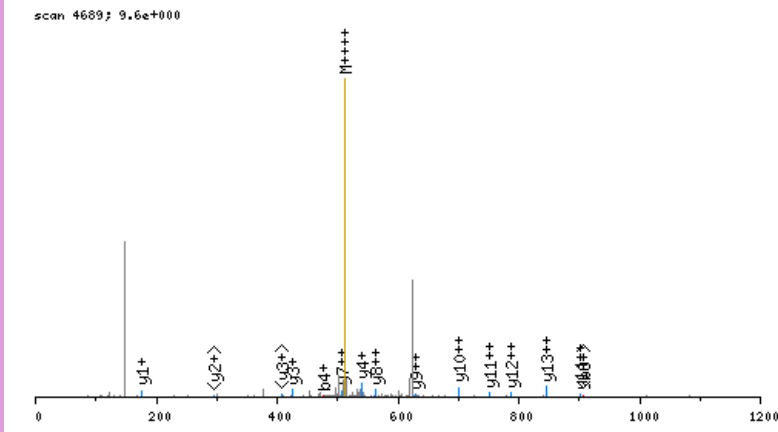

click image to zoom in; click top corners to zoom out [\[precursor±\]](#)

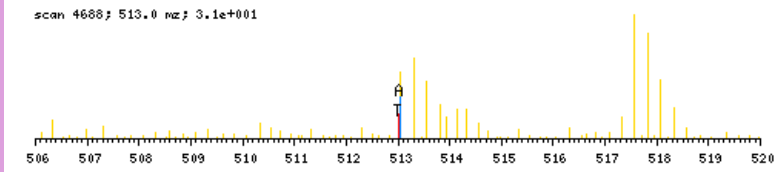

zoomed in precursor plot; T=theoretical m/z, A=acquired m/z

| b <sup>+</sup> | #  | AA # | y <sup>+</sup> | y <sup>2+</sup> |
|----------------|----|------|----------------|-----------------|
| 176.1075       | 1  | F 16 |                |                 |
| 247.1446       | 2  | A 15 | 1873.9595      | 937.4836        |
| 361.1876       | 3  | N 14 | 1802.9224      | 901.9651        |
| 476.2145       | 4  | D 13 | 1688.8794      | 844.9436        |
| 547.2516       | 5  | A 12 | 1573.8525      | 787.4302        |
| 648.2993       | 6  | T 11 | 1502.8154      | 751.9116        |
| 795.3677       | 7  | F 10 | 1401.7677      | 701.3878        |
| 924.4103       | 8  | E 9  | 1254.6993      | 627.8536        |
| 1037.4944      | 9  | I 8  | 1125.6567      | 563.3323        |
| 1193.6207      | 10 | K 7  | 1012.5726      | 506.7902        |
| 1349.7470      | 11 | K 6  | 856.4463       | 428.7271        |
| 1509.7776      | 12 | C 5  | 700.3200       | 350.6639        |
| 1624.8045      | 13 | D 4  | 540.2894       | 270.6486        |
| 1737.8886      | 14 | L 3  | 425.2625       | 213.1352        |
| 1874.9475      | 15 | H 2  | 312.1784       | 156.5931        |
|                | 16 | R 1  | 175.1195       | 88.0637         |

N-term:+29.04 K(10):+156.13  
 K(11):+156.13 C(12):+160.03

FDAPVTAECGHSFCR, MH+ 1781.7738, m/z 594.5961  
 L OS G27 P150811 220811-s1.04550.04550.3.dta

X-range:

-

MassTol: Y-zoom:

MassType:

AVG  MONO

Axis:

1  2

Label:

I  M  -

Ions:

a  +  2+  3+

b  +  2+  3+

c  +  2+  3+

x  +  2+  3+

y  +  2+  3+

z  +  2+  3+

hide H<sub>2</sub>O/NH<sub>3</sub>

zoom 112-122

GO

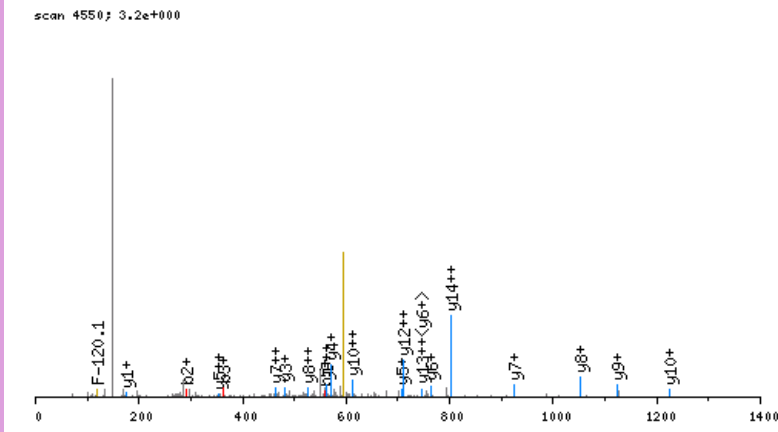

click image to zoom in; click top corners to zoom out [\[precursor±\]](#)

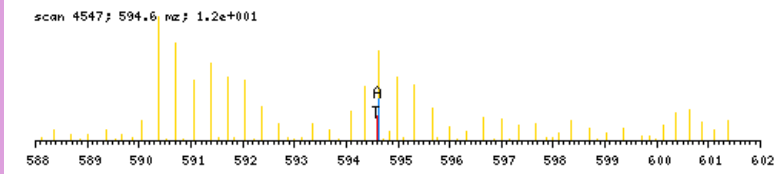

zoomed in precursor plot; T=theoretical m/z, A=acquired m/z

| b <sup>+</sup> | #  | AA | #  | y <sup>+</sup> | y <sup>2+</sup> |
|----------------|----|----|----|----------------|-----------------|
| 176.1075       | 1  | F  | 15 |                |                 |
| 291.1345       | 2  | D  | 14 | 1606.6741      | 803.8410        |
| 362.1716       | 3  | A  | 13 | 1491.6472      | 746.3275        |
| 459.2243       | 4  | P  | 12 | 1420.6101      | 710.8090        |
| 558.2927       | 5  | V  | 11 | 1323.5573      | 662.2826        |
| 659.3404       | 6  | T  | 10 | 1224.4889      | 612.7484        |
| 730.3775       | 7  | A  | 9  | 1123.4412      | 562.2245        |
| 859.4201       | 8  | E  | 8  | 1052.4041      | 526.7060        |
| 1019.4507      | 9  | C  | 7  | 923.3615       | 462.1847        |
| 1076.4722      | 10 | G  | 6  | 763.3309       | 382.1694        |
| 1213.5311      | 11 | H  | 5  | 706.3095       | 353.6586        |
| 1300.5631      | 12 | S  | 4  | 569.2505       | 285.1292        |
| 1447.6316      | 13 | F  | 3  | 482.2185       | 241.6132        |
| 1607.6622      | 14 | C  | 2  | 335.1501       | 168.0790        |
|                | 15 | R  | 1  | 175.1195       | 88.0637         |

N-term:+29.04 C(9):+160.03  
 C(14):+160.03

FDITADDEPLGR, MH+ 1376.6698, m/z 688.8385  
 L OS G25 P150811 220811-s1.06389.06389.2.dta

X-range:

-

MassTol: Y-zoom:

MassType:

AVG  MONO

Axis:

1  2

Label:

I  M  -

Ions:

a  +  2+  3+

b  +  2+  3+

c  +  2+  3+

x  +  2+  3+

y  +  2+  3+

z  +  2+  3+

hide H<sub>2</sub>O/NH<sub>3</sub>

zoom 112-122

GO

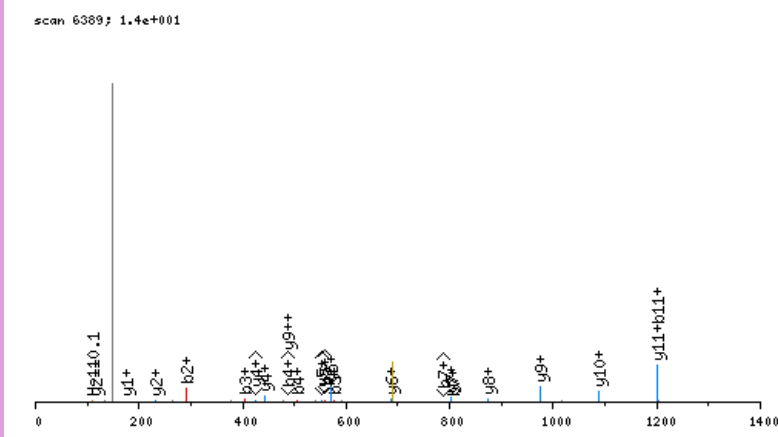

click image to zoom in; click top corners to zoom out [\[precursor±\]](#)

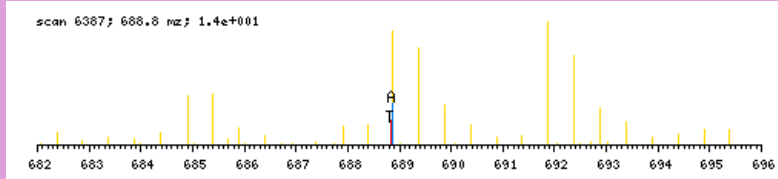

zoomed in precursor plot; T=theoretical m/z, A=acquired m/z

| b <sup>+</sup> | #  | AA # | y <sup>+</sup> | y <sup>2+</sup> |
|----------------|----|------|----------------|-----------------|
| 176.1075       | 1  | F 12 |                |                 |
| 291.1345       | 2  | D 11 | 1201.5701      | 601.2889        |
| 404.2185       | 3  | I 10 | 1086.5431      | 543.7755        |
| 505.2662       | 4  | T 9  | 973.4591       | 487.2334        |
| 576.3033       | 5  | A 8  | 872.4114       | 436.7096        |
| 691.3303       | 6  | D 7  | 801.3743       | 401.1910        |
| 806.3572       | 7  | D 6  | 686.3473       | 343.6776        |
| 935.3998       | 8  | E 5  | 571.3204       | 286.1641        |
| 1032.4526      | 9  | P 4  | 442.2778       | 221.6428        |
| 1145.5366      | 10 | L 3  | 345.2250       | 173.1164        |
| 1202.5581      | 11 | G 2  | 232.1410       | 116.5744        |
|                | 12 | R 1  | 175.1195       | 88.0637         |

N-term:+29.04

FDKEGNGTVMGAELR, MH+ 1691.9063, m/z 564.6403  
 H OS G27 P150811 220811-s1.04245.04245.3.dta

X-range:

-

MassTol: Y-zoom:

MassType:

AVG  MONO

Axis:

1  2

Label:

I  M  -

Ions:

a  +  2+  3+

b  +  2+  3+

c  +  2+  3+

x  +  2+  3+

y  +  2+  3+

z  +  2+  3+

hide H<sub>2</sub>O/NH<sub>3</sub>

zoom 112-122

GO

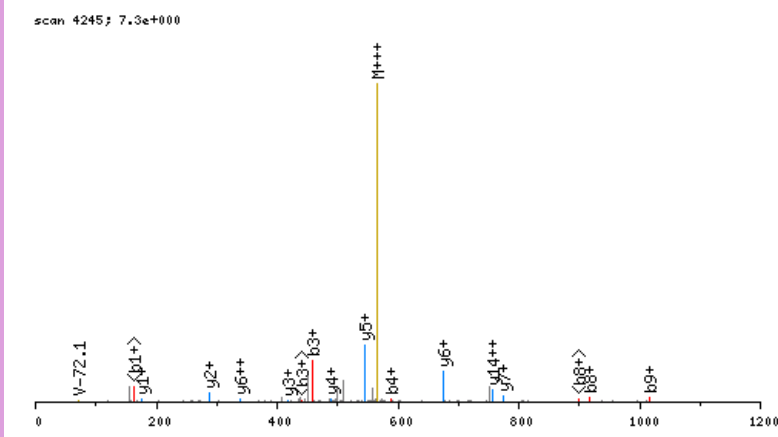

click image to zoom in; click top corners to zoom out [\[precursor±\]](#)

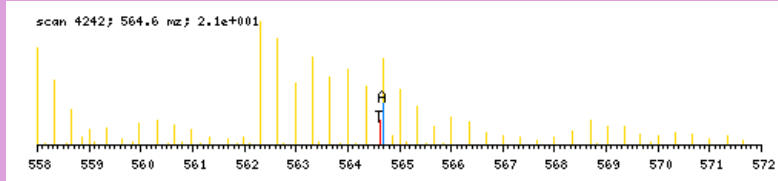

zoomed in precursor plot; T=theoretical m/z, A=acquired m/z

| b <sup>+</sup> | #  | AA # | y <sup>+</sup> | y <sup>2+</sup> |
|----------------|----|------|----------------|-----------------|
| 182.1393       | 1  | F 15 |                |                 |
| 297.1663       | 2  | D 14 | 1510.7748      | 755.8913        |
| 459.3244       | 3  | K 13 | 1395.7479      | 698.3778        |
| 588.3670       | 4  | E 12 | 1233.5898      | 617.2988        |
| 645.3884       | 5  | G 11 | 1104.5472      | 552.7775        |
| 759.4313       | 6  | N 10 | 1047.5257      | 524.2668        |
| 816.4528       | 7  | G 9  | 933.4828       | 467.2453        |
| 917.5005       | 8  | T 8  | 876.4613       | 438.7346        |
| 1016.5689      | 9  | V 7  | 775.4136       | 388.2107        |
| 1147.6094      | 10 | M 6  | 676.3452       | 338.6765        |
| 1204.6308      | 11 | G 5  | 545.3047       | 273.1563        |
| 1275.6680      | 12 | A 4  | 488.2833       | 244.6455        |
| 1404.7106      | 13 | E 3  | 417.2462       | 209.1270        |
| 1517.7946      | 14 | L 2  | 288.2036       | 144.6057        |
|                | 15 | R 1  | 175.1195       | 88.0637         |

N-term:+35.07 K(3):+162.16



FDKPVSPDLLASGMAR, MH+ 1770.0624, m/z 590.6923  
 H OS G26 P150811 220811-s1.06158.06158.3.dta

scan 6158; 2.1e+000

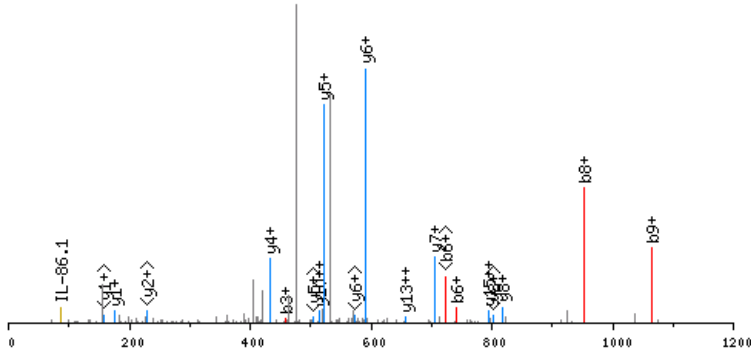

click image to zoom in; click top corners to zoom out [\[precursor±\]](#)

scan 6155; 590.7 m/z; 4.2e+000

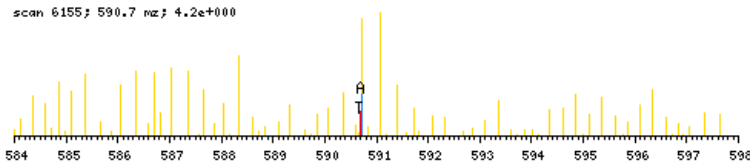

zoomed in precursor plot; T=theoretical m/z, A=acquired m/z

X-range:

-

MassTol: Y-zoom:

MassType:

AVG  MONO

Axis:

1  2

Label:

I  M  -

Ions:

a  +  2+  3+

b  +  2+  3+

c  +  2+  3+

x  +  2+  3+

y  +  2+  3+

z  +  2+  3+

hide H<sub>2</sub>O/NH<sub>3</sub>

zoom 112-122

GO

| b <sup>+</sup> | #  | AA | #  | y <sup>+</sup> | y <sup>2+</sup> |
|----------------|----|----|----|----------------|-----------------|
| 182.1393       | 1  | F  | 16 |                |                 |
| 297.1663       | 2  | D  | 15 | 1588.9309      | 794.9694        |
| 459.3244       | 3  | K  | 14 | 1473.9040      | 737.4559        |
| 556.3771       | 4  | P  | 13 | 1311.7459      | 656.3768        |
| 655.4455       | 5  | V  | 12 | 1214.6931      | 607.8505        |
| 742.4776       | 6  | S  | 11 | 1115.6247      | 558.3163        |
| 839.5303       | 7  | P  | 10 | 1028.5927      | 514.8002        |
| 952.6144       | 8  | L  | 9  | 931.5399       | 466.2739        |
| 1065.6985      | 9  | L  | 8  | 818.4558       | 409.7318        |
| 1178.7825      | 10 | L  | 7  | 705.3718       | 353.1898        |
| 1249.8196      | 11 | A  | 6  | 592.2877       | 296.6478        |
| 1336.8517      | 12 | S  | 5  | 521.2506       | 261.1292        |
| 1393.8731      | 13 | G  | 4  | 434.2186       | 217.6132        |
| 1524.9136      | 14 | M  | 3  | 377.1971       | 189.1025        |
| 1595.9507      | 15 | A  | 2  | 246.1566       | 123.5822        |
|                | 16 | R  | 1  | 175.1195       | 88.0637         |

N-term:+35.07 K(3):+162.16

FDNEQSDLVHR, MH+ 1387.6606, m/z 463.2250  
 L OS G27 P150811 220811-s1.02955.02955.3.dta

X-range:

-

MassTol: Y-zoom:

MassType:

AVG  MONO

Axis:

1  2

Label:

I  M  -

Ions:

a  +  2+  3+

b  +  2+  3+

c  +  2+  3+

x  +  2+  3+

y  +  2+  3+

z  +  2+  3+

hide H<sub>2</sub>O/NH<sub>3</sub>

zoom 112-122

GO

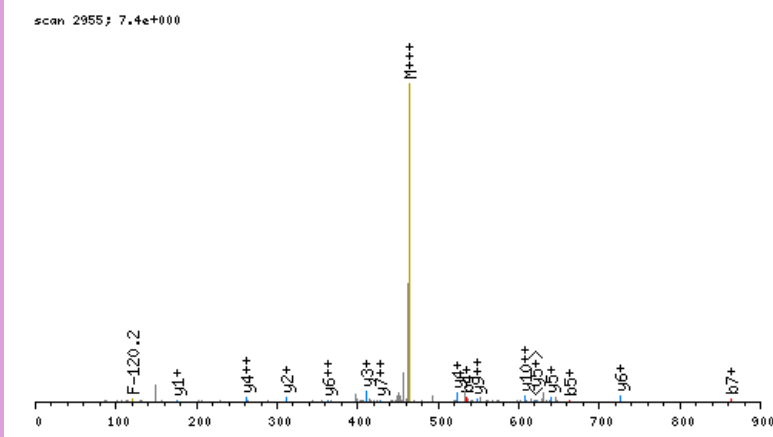

click image to zoom in; click top corners to zoom out [\[precursor±\]](#)

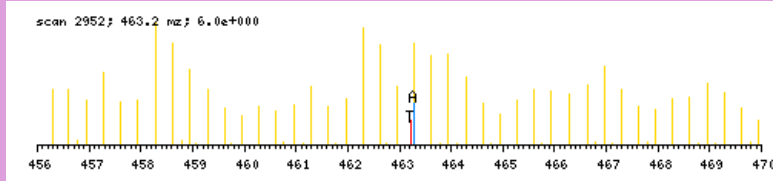

zoomed in precursor plot; T=theoretical m/z, A=acquired m/z

| b <sup>+</sup> | #  | AA # | y <sup>+</sup> | y <sup>2+</sup> |
|----------------|----|------|----------------|-----------------|
| 176.1075       | 1  | F 11 |                |                 |
| 291.1345       | 2  | D 10 | 1212.5609      | 606.7844        |
| 405.1774       | 3  | N 9  | 1097.5340      | 549.2709        |
| 534.2200       | 4  | E 8  | 983.4910       | 492.2494        |
| 662.2786       | 5  | Q 7  | 854.4484       | 427.7281        |
| 749.3106       | 6  | S 6  | 726.3899       | 363.6988        |
| 864.3375       | 7  | D 5  | 639.3578       | 320.1828        |
| 977.4216       | 8  | L 4  | 524.3309       | 262.6694        |
| 1076.4900      | 9  | V 3  | 411.2468       | 206.1273        |
| 1213.5489      | 10 | H 2  | 312.1784       | 156.5931        |
|                | 11 | R 1  | 175.1195       | 88.0637         |

N-term:+29.04

FDQTQIQEFKEAFTVIDQNR, MH+ 2525.3312, m/z 632.0883  
 H OS G26 P150811 220811-s1.06907.06907.4.dta

X-range:

-

MassTol: Y-zoom:

MassType:

AVG  MONO

Axis:

1  2

Label:

I  M  -

Ions:

a  +  2+  3+

b  +  2+  3+

c  +  2+  3+

x  +  2+  3+

y  +  2+  3+

z  +  2+  3+

hide H<sub>2</sub>O/NH<sub>3</sub>

zoom 112-122

GO

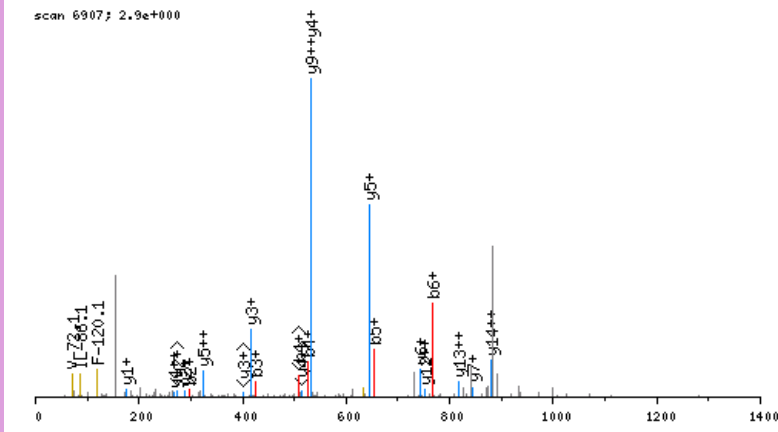

click image to zoom in; click top corners to zoom out [\[precursor±\]](#)

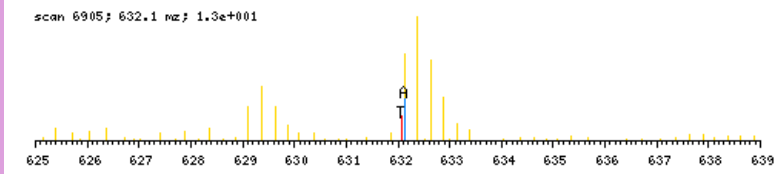

zoomed in precursor plot; T=theoretical m/z, A=acquired m/z

| b <sup>+</sup> | #  | AA # | y <sup>+</sup> | y <sup>2+</sup> |
|----------------|----|------|----------------|-----------------|
| 182.1393       | 1  | F 20 |                |                 |
| 297.1663       | 2  | D 19 | 2344.1998      | 1172.6038       |
| 425.2248       | 3  | Q 18 | 2229.1728      | 1115.0903       |
| 526.2725       | 4  | T 17 | 2101.1142      | 1051.0610       |
| 654.3311       | 5  | Q 16 | 2000.0666      | 1000.5372       |
| 767.4152       | 6  | I 15 | 1872.0080      | 936.5079        |
| 895.4737       | 7  | Q 14 | 1758.9239      | 879.9659        |
| 1024.5163      | 8  | E 13 | 1630.8653      | 815.9366        |
| 1171.5847      | 9  | F 12 | 1501.8227      | 751.4153        |
| 1333.7428      | 10 | K 11 | 1354.7543      | 677.8811        |
| 1462.7854      | 11 | E 10 | 1192.5962      | 596.8020        |
| 1533.8225      | 12 | A 9  | 1063.5536      | 532.2807        |
| 1680.8910      | 13 | F 8  | 992.5165       | 496.7622        |
| 1781.9386      | 14 | T 7  | 845.4481       | 423.2280        |
| 1881.0071      | 15 | V 6  | 744.4004       | 372.7041        |
| 1994.0911      | 16 | I 5  | 645.3320       | 323.1699        |
| 2109.1181      | 17 | D 4  | 532.2479       | 266.6279        |
| 2237.1766      | 18 | Q 3  | 417.2210       | 209.1144        |
| 2351.2196      | 19 | N 2  | 289.1624       | 145.0851        |
|                | 20 | R 1  | 175.1195       | 88.0637         |

N-term:+35.07 K(10):+162.16

FDTPQESPVKSPVPR, MH+ 1739.9332, m/z 580.6493  
 L OS G26 P150811 220811-s1.03259.03259.3.dta

X-range:

-

MassTol: Y-zoom:

MassType:

AVG  MONO

Axis:

1  2

Label:

I  M  -

Ions:

a  +  2+  3+

b  +  2+  3+

c  +  2+  3+

x  +  2+  3+

y  +  2+  3+

z  +  2+  3+

hide H<sub>2</sub>O/NH<sub>3</sub>

zoom 112-122

GO

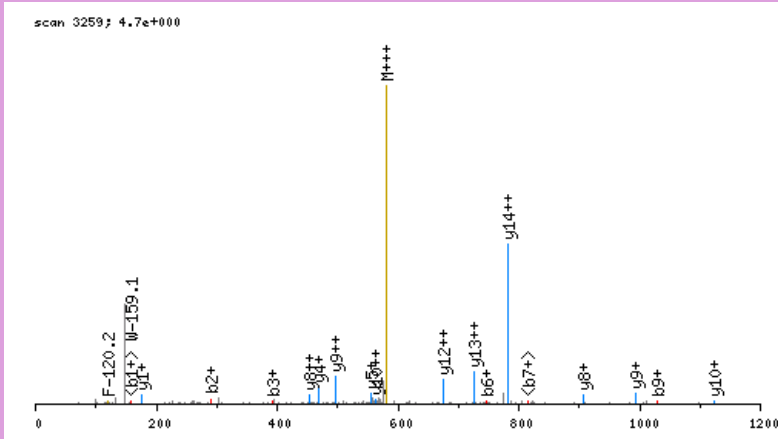

click image to zoom in; click top corners to zoom out [\[precursor±\]](#)

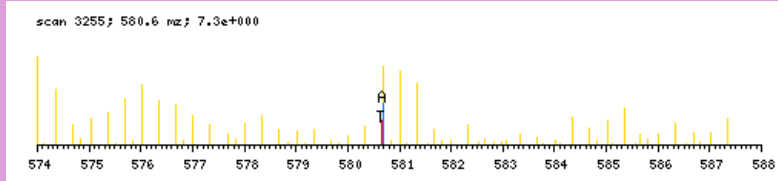

zoomed in precursor plot; T=theoretical m/z, A=acquired m/z

| b <sup>+</sup> | #  | AA # | y <sup>+</sup> | y <sup>2+</sup> |
|----------------|----|------|----------------|-----------------|
| 176.1075       | 1  | F 15 |                |                 |
| 291.1345       | 2  | D 14 | 1564.8335      | 782.9207        |
| 392.1821       | 3  | T 13 | 1449.8066      | 725.4072        |
| 489.2349       | 4  | P 12 | 1348.7589      | 674.8834        |
| 617.2935       | 5  | Q 11 | 1251.7061      | 626.3570        |
| 746.3361       | 6  | E 10 | 1123.6476      | 562.3277        |
| 833.3681       | 7  | S 9  | 994.6050       | 497.8064        |
| 930.4209       | 8  | P 8  | 907.5729       | 454.2904        |
| 1029.4893      | 9  | V 7  | 810.5202       | 405.7640        |
| 1185.6156      | 10 | K 6  | 711.4518       | 356.2298        |
| 1272.6476      | 11 | S 5  | 555.3255       | 278.1666        |
| 1369.7004      | 12 | P 4  | 468.2934       | 234.6506        |
| 1466.7531      | 13 | P 3  | 371.2407       | 186.1243        |
| 1565.8215      | 14 | V 2  | 274.1879       | 137.5979        |
|                | 15 | R 1  | 175.1195       | 88.0637         |

N-term:+29.04 K(10):+156.13

FQAKVQAINVSSR, MH+ 1516.9124, m/z 506.3090  
 H OS G27 P150811 220811-s1.04291.04291.3.dta

scan 4291; 2.5e+001

X-range:

-

MassTol: Y-zoom:

MassType:

AVG  MONO

Axis:

1  2

Label:

I  M  -

Ions:

a  +  2+  3+

b  +  2+  3+

c  +  2+  3+

x  +  2+  3+

y  +  2+  3+

z  +  2+  3+

hide H<sub>2</sub>O/NH<sub>3</sub>

zoom 112-122

GO

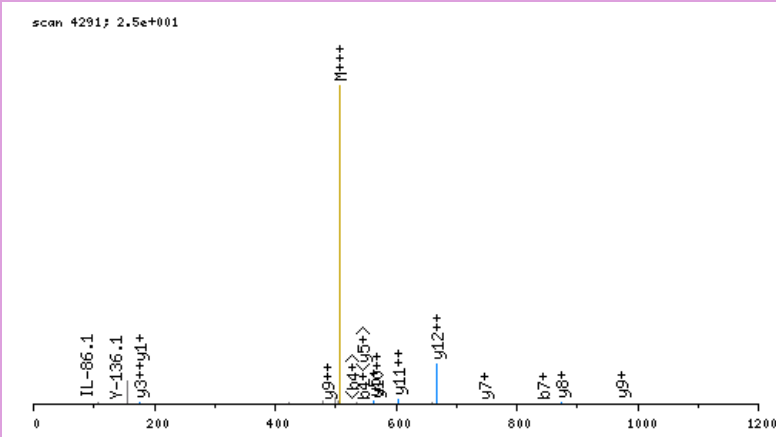

click image to zoom in; click top corners to zoom out [\[precursor±\]](#)

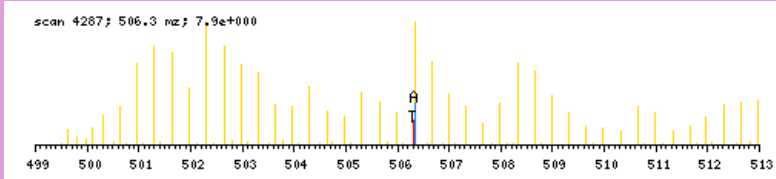

zoomed in precursor plot; T=theoretical m/z, A=acquired m/z

| b <sup>+</sup> | #  | AA # | y <sup>+</sup> | y <sup>2+</sup> |
|----------------|----|------|----------------|-----------------|
| 182.1393       | 1  | F 13 |                |                 |
| 311.1819       | 2  | E 12 | 1335.7809      | 668.3944        |
| 382.2190       | 3  | A 11 | 1206.7383      | 603.8731        |
| 544.3771       | 4  | K 10 | 1135.7012      | 568.3545        |
| 643.4455       | 5  | V 9  | 973.5431       | 487.2754        |
| 771.5041       | 6  | Q 8  | 874.4747       | 437.7412        |
| 842.5412       | 7  | A 7  | 746.4161       | 373.7120        |
| 955.6253       | 8  | I 6  | 675.3790       | 338.1934        |
| 1069.6682      | 9  | N 5  | 562.2949       | 281.6514        |
| 1168.7366      | 10 | V 4  | 448.2520       | 224.6299        |
| 1255.7687      | 11 | S 3  | 349.1836       | 175.0957        |
| 1342.8007      | 12 | S 2  | 262.1515       | 131.5797        |
|                | 13 | R 1  | 175.1195       | 88.0637         |

N-term:+35.07 K(4):+162.16

FEKYGKIEITIEVMEDR, MH+ 2089.1740, m/z 523.0490  
 H OS G28 P150811 220811-s1.06167.06167.4.dta

X-range:

-

MassTol: Y-zoom:

MassType:

AVG  MONO

Axis:

1  2

Label:

I  M  -

Ions:

a  +  2+  3+

b  +  2+  3+

c  +  2+  3+

x  +  2+  3+

y  +  2+  3+

z  +  2+  3+

hide H<sub>2</sub>O/NH<sub>3</sub>

zoom 112-122

GO

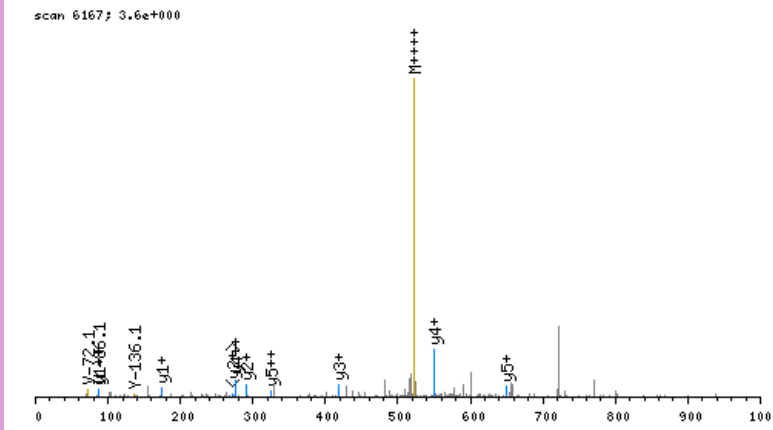

click image to zoom in; click top corners to zoom out [\[precursor±\]](#)

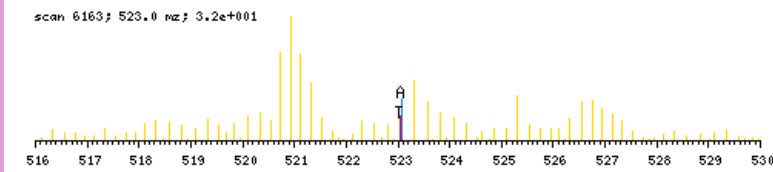

zoomed in precursor plot; T=theoretical m/z, A=acquired m/z

| b <sup>+</sup> | #  | AA | #  | y <sup>+</sup> | y <sup>2+</sup> |
|----------------|----|----|----|----------------|-----------------|
| 182.1393       | 1  | F  | 16 |                |                 |
| 311.1819       | 2  | E  | 15 | 1908.0425      | 954.5252        |
| 473.3400       | 3  | K  | 14 | 1778.9999      | 890.0039        |
| 636.4033       | 4  | Y  | 13 | 1616.8418      | 808.9248        |
| 693.4248       | 5  | G  | 12 | 1453.7785      | 727.3932        |
| 855.5829       | 6  | K  | 11 | 1396.7570      | 698.8824        |
| 968.6670       | 7  | I  | 10 | 1234.5989      | 617.8034        |
| 1097.7096      | 8  | E  | 9  | 1121.5149      | 561.2613        |
| 1198.7572      | 9  | T  | 8  | 992.4723       | 496.7400        |
| 1311.8413      | 10 | I  | 7  | 891.4246       | 446.2162        |
| 1440.8839      | 11 | E  | 6  | 778.3405       | 389.6742        |
| 1539.9523      | 12 | V  | 5  | 649.2979       | 325.1529        |
| 1670.9928      | 13 | M  | 4  | 550.2295       | 275.6187        |
| 1800.0354      | 14 | E  | 3  | 419.1890       | 210.0984        |
| 1915.0623      | 15 | D  | 2  | 290.1464       | 145.5771        |
|                | 16 | R  | 1  | 175.1195       | 88.0637         |

N-term:+35.07 K(3):+162.16  
 K(6):+162.16

FETALLSSGFSLQTHSNR, MH+ 2364.1472, m/z 591.7922  
 L OS G26 P150811 220811-s1.06439.06439.4.dta

X-range:

-

MassTol: Y-zoom:

MassType:

AVG  MONO

Axis:

1  2

Label:

I  M  -

Ions:

a  +  2+  3+

b  +  2+  3+

c  +  2+  3+

x  +  2+  3+

y  +  2+  3+

z  +  2+  3+

hide H<sub>2</sub>O/NH<sub>3</sub>

zoom 112-122

GO

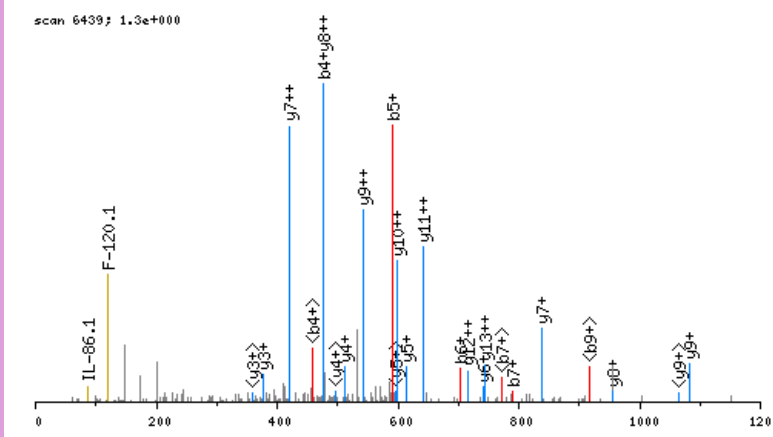

click image to zoom in; click top corners to zoom out [precursor±]

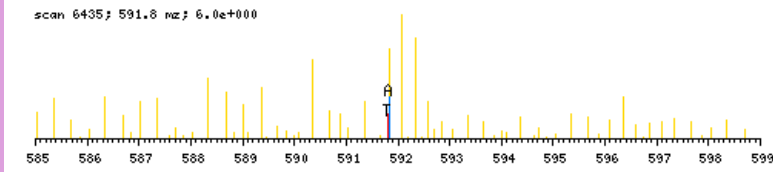

zoomed in precursor plot; T=theoretical m/z, A=acquired m/z

| b <sup>+</sup> | #  | AA # | y <sup>+</sup> | y <sup>2+</sup> |
|----------------|----|------|----------------|-----------------|
| 176.1075       | 1  | F 21 |                |                 |
| 305.1501       | 2  | E 20 | 2189.0475      | 1095.0276       |
| 406.1978       | 3  | T 19 | 2060.0049      | 1030.5063       |
| 477.2349       | 4  | A 18 | 1958.9572      | 979.9825        |
| 590.3190       | 5  | L 17 | 1887.9201      | 944.4640        |
| 703.4030       | 6  | L 16 | 1774.8360      | 887.9219        |
| 790.4351       | 7  | S 15 | 1661.7520      | 831.3799        |
| 877.4671       | 8  | S 14 | 1574.7199      | 787.8639        |
| 934.4885       | 9  | G 13 | 1487.6879      | 744.3479        |
| 1081.5570      | 10 | F 12 | 1430.6664      | 715.8371        |
| 1168.5890      | 11 | S 11 | 1283.5980      | 642.3029        |
| 1281.6731      | 12 | L 10 | 1196.5660      | 598.7869        |
| 1410.7156      | 13 | E 9  | 1083.4819      | 542.2449        |
| 1525.7426      | 14 | D 8  | 954.4393       | 477.7236        |
| 1622.7954      | 15 | P 7  | 839.4124       | 420.2101        |
| 1750.8539      | 16 | Q 6  | 742.3596       | 371.6837        |
| 1851.9016      | 17 | T 5  | 614.3010       | 307.6544        |
| 1988.9605      | 18 | H 4  | 513.2534       | 257.1306        |
| 2075.9926      | 19 | S 3  | 376.1945       | 188.6011        |
| 2190.0355      | 20 | N 2  | 289.1624       | 145.0851        |
|                | 21 | R 1  | 175.1195       | 88.0637         |

N-term:+29.04

FFEGCPDKEPR, MH+ 1437.6836, m/z 479.8994  
 L OS G27 P150811 220811-s1.02809.02809.3.dta

X-range:

-

MassTol: Y-zoom:

MassType:

AVG  MONO

Axis:

1  2

Label:

I  M  -

Ions:

a  +  2+  3+

b  +  2+  3+

c  +  2+  3+

x  +  2+  3+

y  +  2+  3+

z  +  2+  3+

hide H<sub>2</sub>O/NH<sub>3</sub>

zoom 112-122

GO

scan 2809; 2.0e+001

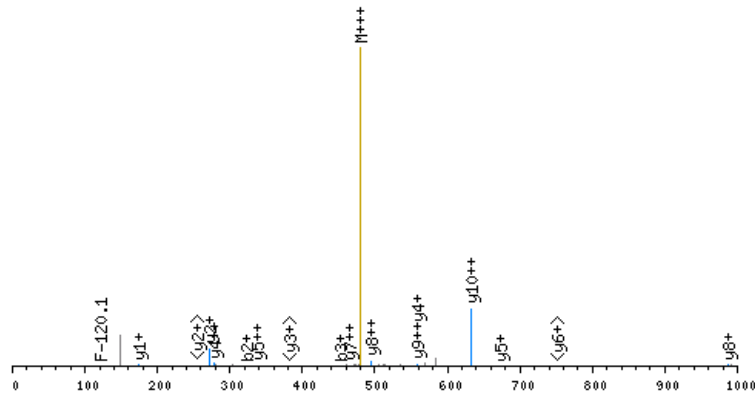

click image to zoom in; click top corners to zoom out [\[precursor±\]](#)

scan 2807; 479.9 mz; 5.2e+001

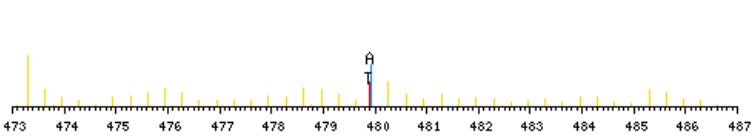

zoomed in precursor plot; T=theoretical m/z, A=acquired m/z

| b <sup>+</sup> | #  | AA | #  | y <sup>+</sup> | y <sup>2+</sup> |
|----------------|----|----|----|----------------|-----------------|
| 176.1075       | 1  | F  | 11 |                |                 |
| 323.1759       | 2  | F  | 10 | 1262.5839      | 631.7959        |
| 452.2185       | 3  | E  | 9  | 1115.5155      | 558.2617        |
| 509.2400       | 4  | G  | 8  | 986.4729       | 493.7404        |
| 669.2706       | 5  | C  | 7  | 929.4515       | 465.2296        |
| 766.3233       | 6  | P  | 6  | 769.4209       | 385.2143        |
| 881.3503       | 7  | D  | 5  | 672.3681       | 336.6880        |
| 1037.4766      | 8  | K  | 4  | 557.3412       | 279.1745        |
| 1166.5192      | 9  | E  | 3  | 401.2149       | 201.1113        |
| 1263.5719      | 10 | P  | 2  | 272.1723       | 136.5900        |
|                | 11 | R  | 1  | 175.1195       | 88.0637         |

N-term: +29.04 C(5): +160.03  
 K(8): +156.13



FGAPSASVAAAPAPAR, MH+ 1468.7912, m/z 490.2686  
 L OS G24 P150811 220811-s1.03106.03106.3.dta

X-range:

-

MassTol: Y-zoom:

MassType:

AVG  MONO

Axis:

1  2

Label:

I  M  -

Ions:

a  +  2+  3+

b  +  2+  3+

c  +  2+  3+

x  +  2+  3+

y  +  2+  3+

z  +  2+  3+

hide H<sub>2</sub>O/NH<sub>3</sub>

zoom 112-122

GO

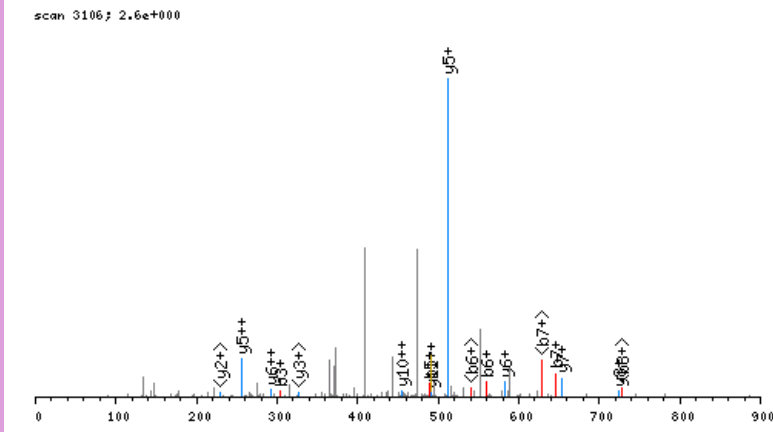

click image to zoom in; click top corners to zoom out [\[precursor±\]](#)

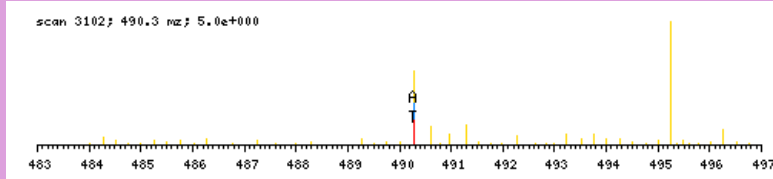

zoomed in precursor plot; T=theoretical m/z, A=acquired m/z

| b <sup>+</sup> | #  | AA # | y <sup>+</sup> | y <sup>2+</sup> |
|----------------|----|------|----------------|-----------------|
| 176.1075       | 1  | F 16 |                |                 |
| 233.1290       | 2  | G 15 | 1293.6915      | 647.3497        |
| 304.1661       | 3  | A 14 | 1236.6701      | 618.8389        |
| 401.2189       | 4  | P 13 | 1165.6329      | 583.3204        |
| 488.2509       | 5  | S 12 | 1068.5802      | 534.7940        |
| 559.2880       | 6  | A 11 | 981.5482       | 491.2780        |
| 646.3200       | 7  | S 10 | 910.5110       | 455.7594        |
| 745.3884       | 8  | V 9  | 823.4790       | 412.2434        |
| 816.4256       | 9  | A 8  | 724.4106       | 362.7092        |
| 887.4627       | 10 | A 7  | 653.3735       | 327.1907        |
| 958.4998       | 11 | A 6  | 582.3364       | 291.6721        |
| 1055.5525      | 12 | P 5  | 511.2993       | 256.1535        |
| 1126.5897      | 13 | A 4  | 414.2465       | 207.6272        |
| 1223.6424      | 14 | P 3  | 343.2094       | 172.1086        |
| 1294.6795      | 15 | A 2  | 246.1566       | 123.5822        |
|                | 16 | R 1  | 175.1195       | 88.0637         |

N-term:+29.04

FGEDIDLPEFDAR, MH+ 1652.7808, m/z 551.5984  
 L OS G25 P150811 220811-s1.07703.07703.3.dta

X-range:

-

MassTol: Y-zoom:

MassType:

AVG  MONO

Axis:

1  2

Label:

I  M  -

Ions:

a  +  2+  3+

b  +  2+  3+

c  +  2+  3+

x  +  2+  3+

y  +  2+  3+

z  +  2+  3+

hide H<sub>2</sub>O/NH<sub>3</sub>

zoom 112-122

GO

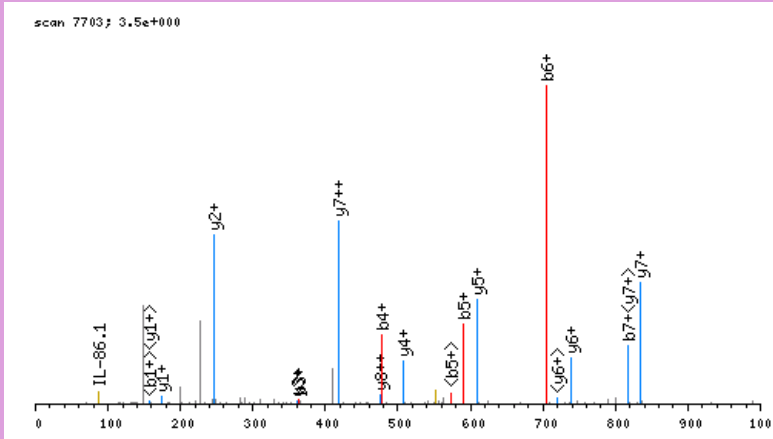

click image to zoom in; click top corners to zoom out [\[precursor±\]](#)

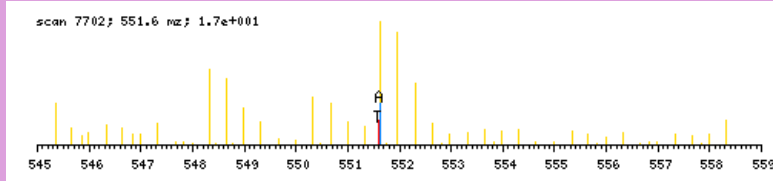

zoomed in precursor plot; T=theoretical m/z, A=acquired m/z

| b <sup>+</sup> | #  | AA # | y <sup>+</sup> | y <sup>2+</sup> |
|----------------|----|------|----------------|-----------------|
| 176.1075       | 1  | F 14 |                |                 |
| 233.1290       | 2  | G 13 | 1477.6811      | 739.3445        |
| 362.1716       | 3  | E 12 | 1420.6596      | 710.8337        |
| 477.1985       | 4  | D 11 | 1291.6170      | 646.3124        |
| 590.2826       | 5  | I 10 | 1176.5901      | 588.7990        |
| 705.3095       | 6  | D 9  | 1063.5060      | 532.2569        |
| 818.3936       | 7  | L 8  | 948.4791       | 474.7434        |
| 915.4463       | 8  | P 7  | 835.3950       | 418.2014        |
| 1044.4889      | 9  | E 6  | 738.3422       | 369.6750        |
| 1145.5366      | 10 | T 5  | 609.2997       | 305.1537        |
| 1292.6050      | 11 | F 4  | 508.2520       | 254.6299        |
| 1407.6320      | 12 | D 3  | 361.1836       | 181.0957        |
| 1478.6691      | 13 | A 2  | 246.1566       | 123.5822        |
|                | 14 | R 1  | 175.1195       | 88.0637         |

N-term:+29.04

FGIVTSSAGTGTTEDETEAKKR, MH+ 2240.1775, m/z 560.7998  
 L OS G28 P150811 220811-s1.03766.03766.4.dta

X-range:

0 - 0

MassTol: Y-zoom:

0. 1.

MassType:

AVG  MONO

Axis:

1  2

Label:

I  M  -

Ions:

a  +  2+  3+

b  +  2+  3+

c  +  2+  3+

x  +  2+  3+

y  +  2+  3+

z  +  2+  3+

hide H<sub>2</sub>O/NH<sub>3</sub>

zoom 112-122

GO

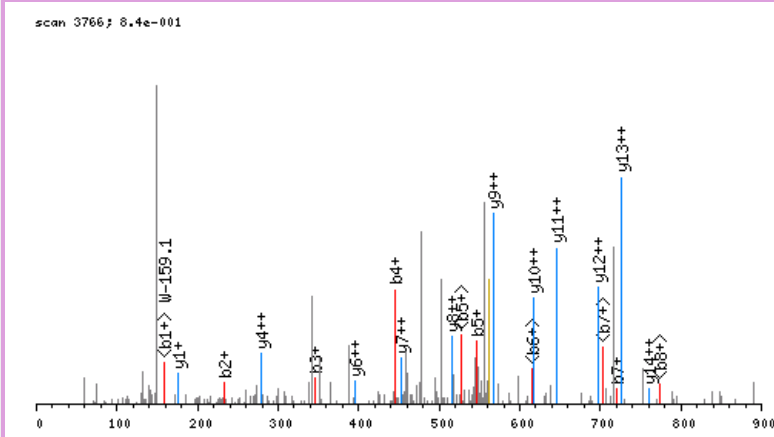

click image to zoom in; click top corners to zoom out [precursor±]

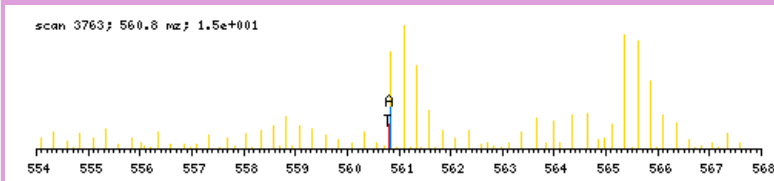

zoomed in precursor plot; T=theoretical m/z, A=acquired m/z

| b <sup>+</sup> | #  | AA | #  | y <sup>+</sup> | y <sup>2+</sup> |
|----------------|----|----|----|----------------|-----------------|
| 176.1075       | 1  | F  | 21 |                |                 |
| 233.1290       | 2  | G  | 20 | 2065.0778      | 1033.0428       |
| 346.2130       | 3  | I  | 19 | 2008.0563      | 1004.5321       |
| 445.2815       | 4  | V  | 18 | 1894.9722      | 947.9900        |
| 546.3291       | 5  | T  | 17 | 1795.9038      | 898.4558        |
| 633.3612       | 6  | S  | 16 | 1694.8562      | 847.9320        |
| 720.3932       | 7  | S  | 15 | 1607.8241      | 804.4160        |
| 791.4303       | 8  | A  | 14 | 1520.7921      | 760.9000        |
| 848.4518       | 9  | G  | 13 | 1449.7550      | 725.3814        |
| 949.4994       | 10 | T  | 12 | 1392.7335      | 696.8707        |
| 1006.5209      | 11 | G  | 11 | 1291.6858      | 646.3468        |
| 1107.5686      | 12 | T  | 10 | 1234.6644      | 617.8361        |
| 1208.6163      | 13 | T  | 9  | 1133.6167      | 567.3123        |
| 1337.6589      | 14 | E  | 8  | 1032.5690      | 516.7884        |
| 1452.6858      | 15 | D  | 7  | 903.5264       | 452.2671        |
| 1553.7335      | 16 | T  | 6  | 788.4995       | 394.7537        |
| 1682.7761      | 17 | E  | 5  | 687.4518       | 344.2298        |
| 1753.8132      | 18 | A  | 4  | 558.4092       | 279.7085        |
| 1909.9395      | 19 | K  | 3  | 487.3721       | 244.1900        |
| 2066.0658      | 20 | K  | 2  | 331.2458       | 166.1268        |
|                | 21 | R  | 1  | 175.1195       | 88.0637         |

N-term:+29.04 K(19):+156.13  
 K(20):+156.13

FGPISEVVVVKDR, MH+ 1512.9426, m/z 504.9857  
 H OS G26 P150811 220811-s1.05071.05071.3.dta

scan 5071; 1.4e+001

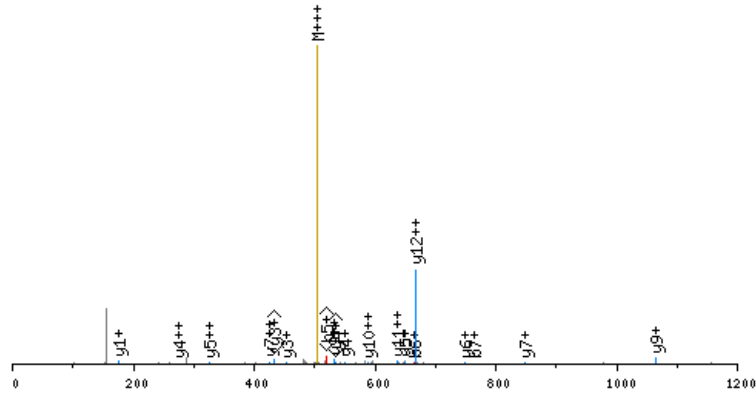

click image to zoom in; click top corners to zoom out [\[precursor±\]](#)

scan 5070; 505.0 m/z; 1.0e+001

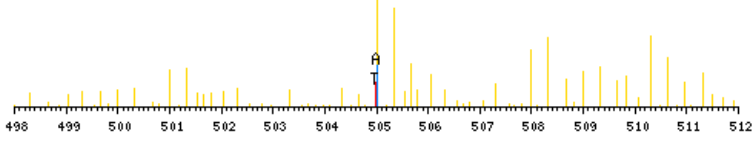

zoomed in precursor plot; T=theoretical m/z, A=acquired m/z

X-range:

-

MassTol: Y-zoom:

MassType:

AVG  MONO

Axis:

1  2

Label:

I  M  -

Ions:

a  +  2+  3+

b  +  2+  3+

c  +  2+  3+

x  +  2+  3+

y  +  2+  3+

z  +  2+  3+

hide H<sub>2</sub>O/NH<sub>3</sub>

zoom 112-122

GO

| b <sup>+</sup> | #  | AA # | y <sup>+</sup> | y <sup>2+</sup> |
|----------------|----|------|----------------|-----------------|
| 182.1393       | 1  | F    | 13             |                 |
| 239.1608       | 2  | G    | 12             | 1331.8111       |
| 336.2135       | 3  | P    | 11             | 1274.7896       |
| 449.2976       | 4  | I    | 10             | 1177.7369       |
| 536.3296       | 5  | S    | 9              | 1064.6528       |
| 665.3722       | 6  | E    | 8              | 977.6208        |
| 764.4406       | 7  | V    | 7              | 848.5782        |
| 863.5091       | 8  | V    | 6              | 749.5098        |
| 962.5775       | 9  | V    | 5              | 650.4414        |
| 1061.6459      | 10 | V    | 4              | 551.3730        |
| 1223.8040      | 11 | K    | 3              | 452.3045        |
| 1338.8309      | 12 | D    | 2              | 290.1464        |
|                | 13 | R    | 1              | 175.1195        |

N-term:+35.07 K(11):+162.16

FGPTGIGFGLTQQVEKK, MH+ 1948.0908, m/z 650.0351  
 L OS G26 P150811 220811-s1.05973.05973.3.dta

X-range:

-

MassTol: Y-zoom:

MassType:

AVG  MONO

Axis:

1  2

Label:

I  M  -

Ions:

a  +  2+  3+

b  +  2+  3+

c  +  2+  3+

x  +  2+  3+

y  +  2+  3+

z  +  2+  3+

hide H<sub>2</sub>O/NH<sub>3</sub>

zoom 112-122

GO

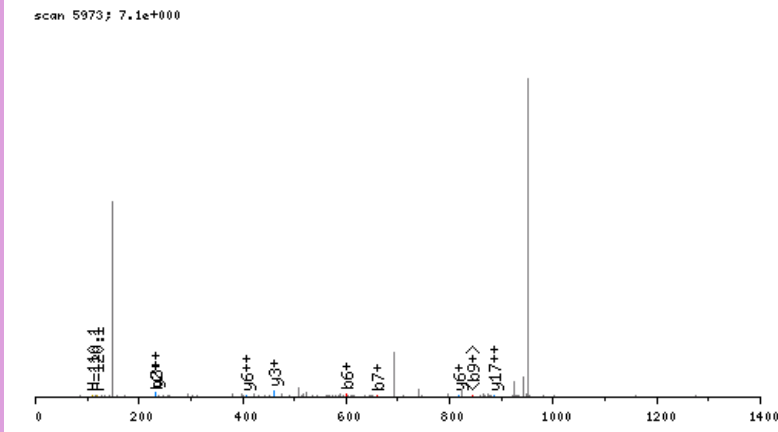

click image to zoom in; click top corners to zoom out [\[precursor±\]](#)

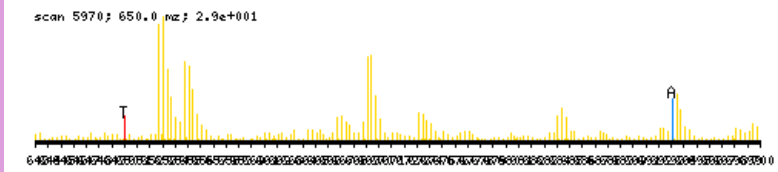

zoomed in precursor plot; T=theoretical m/z, A=acquired m/z

| b <sup>+</sup> | #  | AA | #  | y <sup>+</sup> | y <sup>2+</sup> |
|----------------|----|----|----|----------------|-----------------|
| 176.1075       | 1  | F  | 18 |                |                 |
| 233.1290       | 2  | G  | 17 | 1772.9911      | 886.9995        |
| 330.1817       | 3  | P  | 16 | 1715.9697      | 858.4887        |
| 431.2294       | 4  | T  | 15 | 1618.9169      | 809.9624        |
| 488.2509       | 5  | G  | 14 | 1517.8692      | 759.4385        |
| 601.3349       | 6  | I  | 13 | 1460.8478      | 730.9278        |
| 658.3564       | 7  | G  | 12 | 1347.7637      | 674.3858        |
| 805.4248       | 8  | F  | 11 | 1290.7422      | 645.8750        |
| 862.4463       | 9  | G  | 10 | 1143.6738      | 572.3408        |
| 919.4678       | 10 | G  | 9  | 1086.6524      | 543.8301        |
| 1032.5518      | 11 | L  | 8  | 1029.6309      | 515.3194        |
| 1133.5995      | 12 | T  | 7  | 916.5468       | 458.7773        |
| 1261.6581      | 13 | Q  | 6  | 815.4992       | 408.2535        |
| 1389.7167      | 14 | Q  | 5  | 687.4406       | 344.2242        |
| 1488.7851      | 15 | V  | 4  | 559.3820       | 280.1949        |
| 1617.8277      | 16 | E  | 3  | 460.3136       | 230.6607        |
| 1773.9540      | 17 | K  | 2  | 331.2710       | 166.1394        |
|                | 18 | K  | 1  | 175.1447       | 88.0763         |

N-term:+29.04 K(17):+156.13  
 K(18):+156.13

FGSLLDAATQQLLSR, MH+ 1649.8498, m/z 550.6215  
 L OS G25 P150811 220811-s1.07628.07628.3.dta

scan 7628; 8.6e-001

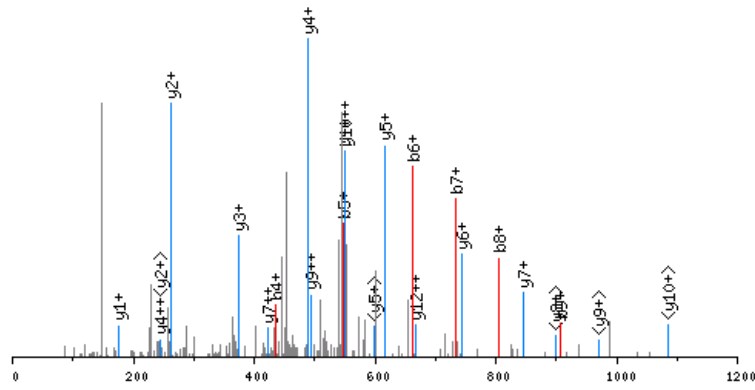

click image to zoom in; click top corners to zoom out [precursor±]

scan 7627; 550.6 m/z; 1.4e+001

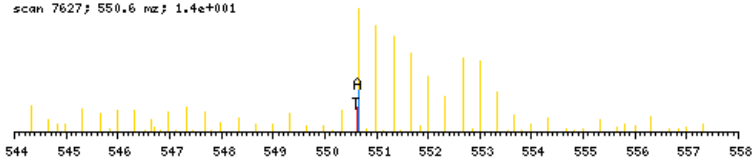

zoomed in precursor plot; T=theoretical m/z, A=acquired m/z

X-range:

-

MassTol: Y-zoom:

MassType:

AVG  MONO

Axis:

1  2

Label:

I  M  -

Ions:

a  +  2+  3+

b  +  2+  3+

c  +  2+  3+

x  +  2+  3+

y  +  2+  3+

z  +  2+  3+

hide H<sub>2</sub>O/NH<sub>3</sub>

zoom 112-122

GO

| b <sup>+</sup> | #  | AA # | y <sup>+</sup> | y <sup>2+</sup> |
|----------------|----|------|----------------|-----------------|
| 176.1075       | 1  | F 15 |                |                 |
| 233.1290       | 2  | G 14 | 1474.7502      | 737.8790        |
| 320.1610       | 3  | S 13 | 1417.7287      | 709.3683        |
| 435.1879       | 4  | D 12 | 1330.6967      | 665.8522        |
| 548.2720       | 5  | L 11 | 1215.6697      | 608.3388        |
| 663.2990       | 6  | D 10 | 1102.5857      | 551.7967        |
| 734.3361       | 7  | A 9  | 987.5587       | 494.2833        |
| 805.3732       | 8  | A 8  | 916.5216       | 458.7647        |
| 906.4209       | 9  | T 7  | 845.4845       | 423.2462        |
| 1034.4794      | 10 | Q 6  | 744.4368       | 372.7223        |
| 1162.5380      | 11 | Q 5  | 616.3782       | 308.6930        |
| 1275.6221      | 12 | L 4  | 488.3197       | 244.6637        |
| 1388.7061      | 13 | L 3  | 375.2356       | 188.1217        |
| 1475.7382      | 14 | S 2  | 262.1515       | 131.5797        |
|                | 15 | R 1  | 175.1195       | 88.0637         |

N-term:+29.04

FHDFSSDLENVPHLR, MH+ 1840.8982, m/z 460.9800  
 L OS G28 P150811 220811-s1.07385.07385.4.dta

X-range:

-

MassTol: Y-zoom:

MassType:

AVG  MONO

Axis:

1  2

Label:

I  M  -

Ions:

a  +  2+  3+

b  +  2+  3+

c  +  2+  3+

x  +  2+  3+

y  +  2+  3+

z  +  2+  3+

hide H<sub>2</sub>O/NH<sub>3</sub>

zoom 112-122

GO

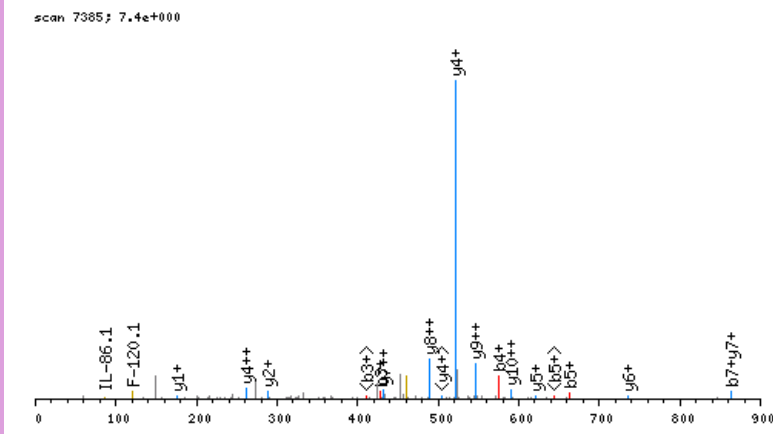

click image to zoom in; click top corners to zoom out [\[precursor±\]](#)

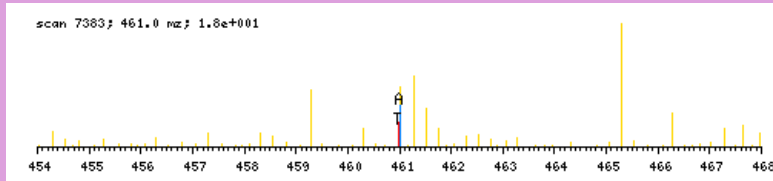

zoomed in precursor plot; T=theoretical m/z, A=acquired m/z

| b <sup>+</sup> | #  | AA # | y <sup>+</sup> | y <sup>2+</sup> |
|----------------|----|------|----------------|-----------------|
| 176.1075       | 1  | F 15 |                |                 |
| 313.1664       | 2  | H 14 | 1665.7985      | 833.4032        |
| 428.1934       | 3  | D 13 | 1528.7396      | 764.8737        |
| 575.2618       | 4  | F 12 | 1413.7127      | 707.3602        |
| 662.2938       | 5  | S 11 | 1266.6442      | 633.8260        |
| 749.3258       | 6  | S 10 | 1179.6122      | 590.3100        |
| 864.3528       | 7  | D 9  | 1092.5802      | 546.7940        |
| 977.4368       | 8  | L 8  | 977.5532       | 489.2805        |
| 1106.4794      | 9  | E 7  | 864.4692       | 432.7385        |
| 1220.5224      | 10 | N 6  | 735.4266       | 368.2172        |
| 1319.5908      | 11 | V 5  | 621.3837       | 311.1957        |
| 1416.6435      | 12 | P 4  | 522.3152       | 261.6615        |
| 1553.7025      | 13 | H 3  | 425.2625       | 213.1352        |
| 1666.7865      | 14 | L 2  | 288.2036       | 144.6057        |
|                | 15 | R 1  | 175.1195       | 88.0637         |

N-term:+29.04

FHMTKDMLPGSYPR, MH+ 1735.8664, m/z 434.7221  
 L OS G28 P150811 220811-s1.05797.05797.4.dta

X-range:

-

MassTol: Y-zoom:

MassType:

AVG  MONO

Axis:

1  2

Label:

I  M  -

Ions:

a  +  2+  3+

b  +  2+  3+

c  +  2+  3+

x  +  2+  3+

y  +  2+  3+

z  +  2+  3+

hide H<sub>2</sub>O/NH<sub>3</sub>

zoom 112-122

GO

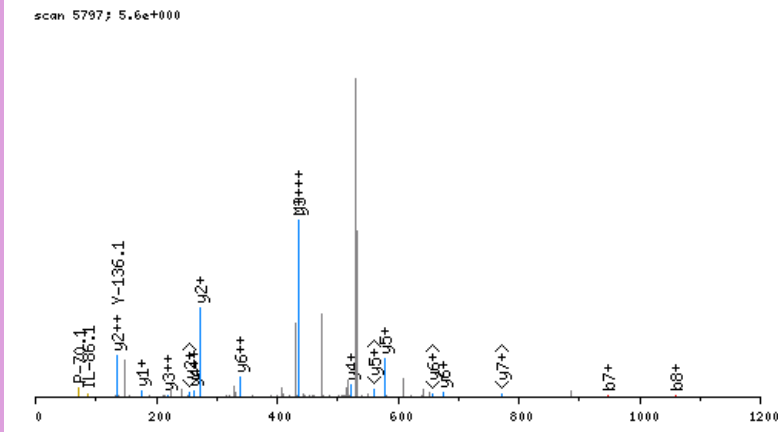

click image to zoom in; click top corners to zoom out [\[precursor±\]](#)

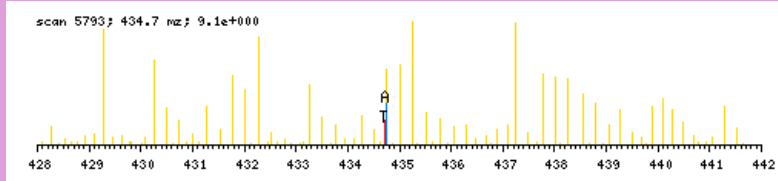

zoomed in precursor plot; T=theoretical m/z, A=acquired m/z

| b <sup>+</sup> | #  | AA # | y <sup>+</sup> | y <sup>2+</sup> |
|----------------|----|------|----------------|-----------------|
| 176.1075       | 1  | F 14 |                |                 |
| 313.1664       | 2  | H 13 | 1560.7667      | 780.8873        |
| 444.2069       | 3  | M 12 | 1423.7078      | 712.3578        |
| 545.2546       | 4  | T 11 | 1292.6673      | 646.8376        |
| 701.3809       | 5  | K 10 | 1191.6196      | 596.3137        |
| 816.4078       | 6  | D 9  | 1035.4933      | 518.2506        |
| 947.4483       | 7  | M 8  | 920.4664       | 460.7371        |
| 1060.5324      | 8  | L 7  | 789.4259       | 395.2169        |
| 1157.5851      | 9  | P 6  | 676.3418       | 338.6748        |
| 1214.6066      | 10 | G 5  | 579.2891       | 290.1485        |
| 1301.6386      | 11 | S 4  | 522.2676       | 261.6377        |
| 1464.7020      | 12 | Y 3  | 435.2356       | 218.1217        |
| 1561.7547      | 13 | P 2  | 272.1723       | 136.5900        |
|                | 14 | R 1  | 175.1195       | 88.0637         |

N-term:+29.04 K(5):+156.13



FHPEQLITGKEDAANNYAR, MH+ 2230.1257, m/z 558.2869  
 L OS G28 P150811 220811-s1.05947.05947.4.dta

X-range:

-

MassTol: Y-zoom:

MassType:

AVG  MONO

Axis:

1  2

Label:

I  M  -

Ions:

a  +  2+  3+

b  +  2+  3+

c  +  2+  3+

x  +  2+  3+

y  +  2+  3+

z  +  2+  3+

hide H<sub>2</sub>O/NH<sub>3</sub>

zoom 112-122

GO

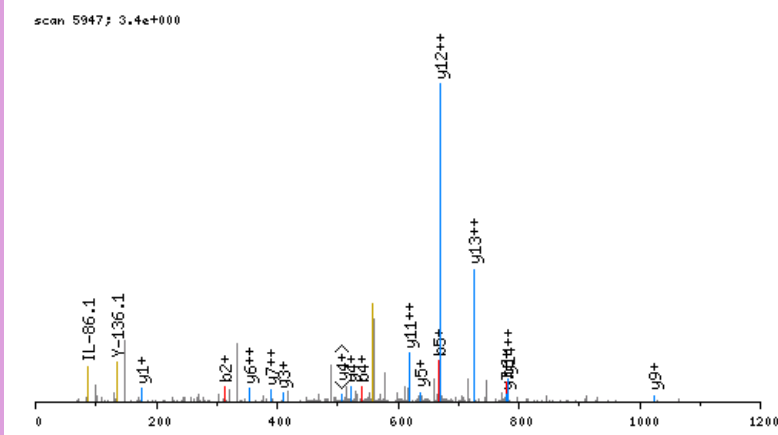

click image to zoom in; click top corners to zoom out [\[precursor±\]](#)

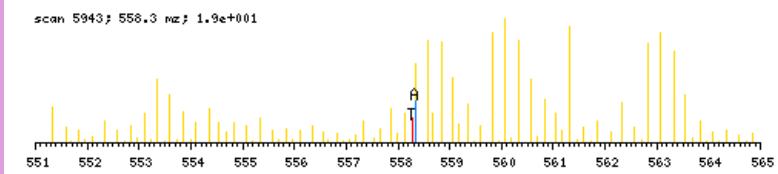

zoomed in precursor plot; T=theoretical m/z, A=acquired m/z

| b <sup>+</sup> | #  | AA # | y <sup>+</sup> | y <sup>2+</sup> |
|----------------|----|------|----------------|-----------------|
| 176.1075       | 1  | F 19 |                |                 |
| 313.1664       | 2  | H 18 | 2055.0260      | 1028.0169       |
| 410.2192       | 3  | P 17 | 1917.9671      | 959.4874        |
| 539.2618       | 4  | E 16 | 1820.9143      | 910.9611        |
| 667.3204       | 5  | Q 15 | 1691.8717      | 846.4398        |
| 780.4044       | 6  | L 14 | 1563.8131      | 782.4105        |
| 893.4885       | 7  | I 13 | 1450.7291      | 725.8684        |
| 994.5362       | 8  | T 12 | 1337.6450      | 669.3264        |
| 1051.5576      | 9  | G 11 | 1236.5973      | 618.8026        |
| 1207.6839      | 10 | K 10 | 1179.5759      | 590.2918        |
| 1336.7265      | 11 | E 9  | 1023.4496      | 512.2287        |
| 1451.7535      | 12 | D 8  | 894.4070       | 447.7074        |
| 1522.7906      | 13 | A 7  | 779.3800       | 390.1939        |
| 1593.8277      | 14 | A 6  | 708.3429       | 354.6754        |
| 1707.8706      | 15 | N 5  | 637.3058       | 319.1568        |
| 1821.9135      | 16 | N 4  | 523.2629       | 262.1353        |
| 1984.9769      | 17 | Y 3  | 409.2199       | 205.1139        |
| 2056.0140      | 18 | A 2  | 246.1566       | 123.5822        |
|                | 19 | R 1  | 175.1195       | 88.0637         |

N-term:+29.04 K(10):+156.13

FKEAFTVIDQNR, MH+ 1523.8222, m/z 508.6123  
 L OS G27 P150811 220811-s1.05020.05020.3.dta

X-range:

-

MassTol: Y-zoom:

MassType:

AVG  MONO

Axis:

1  2

Label:

I  M  -

Ions:

a  +  2+  3+

b  +  2+  3+

c  +  2+  3+

x  +  2+  3+

y  +  2+  3+

z  +  2+  3+

hide H<sub>2</sub>O/NH<sub>3</sub>

zoom 112-122

GO

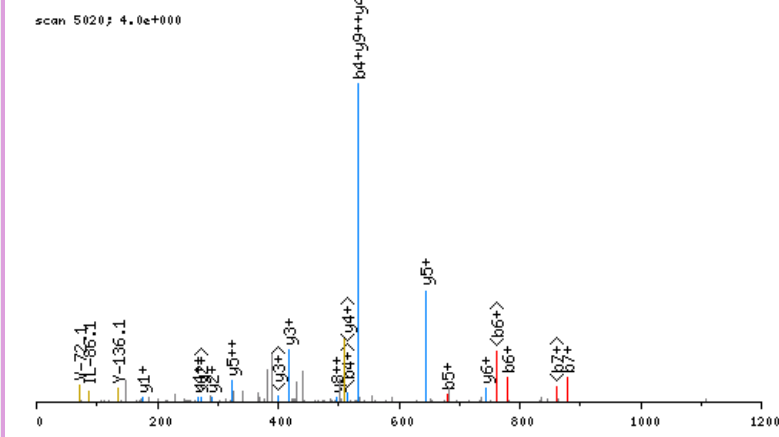

click image to zoom in; click top corners to zoom out [\[precursor±\]](#)

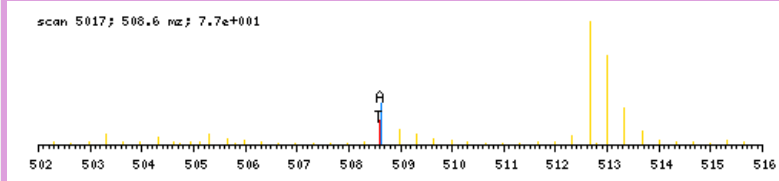

zoomed in precursor plot; T=theoretical m/z, A=acquired m/z

| b <sup>+</sup> | #  | AA # | y <sup>+</sup> | y <sup>2+</sup> |
|----------------|----|------|----------------|-----------------|
| 176.1075       | 1  | F 12 |                |                 |
| 332.2338       | 2  | K 11 | 1348.7225      | 674.8652        |
| 461.2764       | 3  | E 10 | 1192.5962      | 596.8020        |
| 532.3135       | 4  | A 9  | 1063.5536      | 532.2807        |
| 679.3819       | 5  | F 8  | 992.5165       | 496.7622        |
| 780.4296       | 6  | T 7  | 845.4481       | 423.2280        |
| 879.4980       | 7  | V 6  | 744.4004       | 372.7041        |
| 992.5821       | 8  | I 5  | 645.3320       | 323.1699        |
| 1107.6090      | 9  | D 4  | 532.2479       | 266.6279        |
| 1235.6676      | 10 | Q 3  | 417.2210       | 209.1144        |
| 1349.7105      | 11 | N 2  | 289.1624       | 145.0851        |
|                | 12 | R 1  | 175.1195       | 88.0637         |

N-term:+29.04 K(2):+156.13

FKGFDLPEQEQLKDYR, MH+ 2257.1327, m/z 565.0386  
 L OS G28 P150811 220811-s1.07150.07150.4.dta

X-range:

-

MassTol: Y-zoom:

MassType:

AVG  MONO

Axis:

1  2

Label:

I  M  -

Ions:

a  +  2+  3+

b  +  2+  3+

c  +  2+  3+

x  +  2+  3+

y  +  2+  3+

z  +  2+  3+

hide H<sub>2</sub>O/NH<sub>3</sub>

zoom 112-122

GO

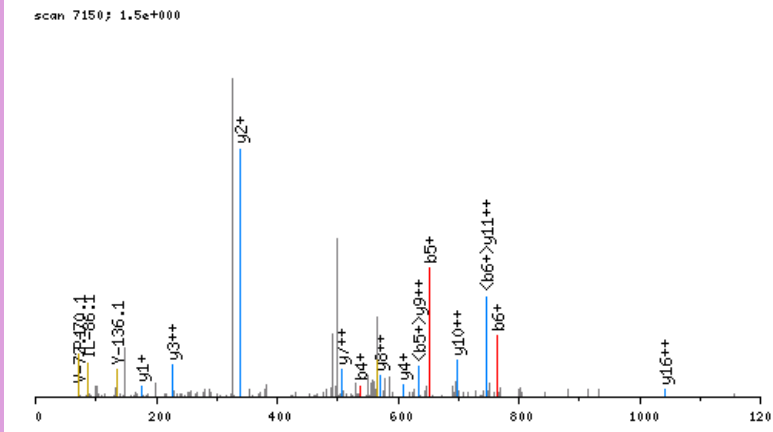

click image to zoom in; click top corners to zoom out [\[precursor±\]](#)

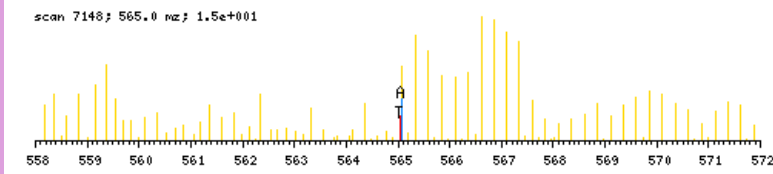

zoomed in precursor plot; T=theoretical m/z, A=acquired m/z

| b <sup>+</sup> | #  | AA | #  | y <sup>+</sup> | y <sup>2+</sup> |
|----------------|----|----|----|----------------|-----------------|
| 176.1075       | 1  | F  | 17 |                |                 |
| 332.2338       | 2  | K  | 16 | 2082.0330      | 1041.5204       |
| 389.2553       | 3  | G  | 15 | 1925.9067      | 963.4573        |
| 536.3237       | 4  | F  | 14 | 1868.8853      | 934.9465        |
| 651.3506       | 5  | D  | 13 | 1721.8168      | 861.4123        |
| 764.4347       | 6  | L  | 12 | 1606.7899      | 803.8989        |
| 861.4875       | 7  | P  | 11 | 1493.7058      | 747.3568        |
| 990.5301       | 8  | E  | 10 | 1396.6531      | 698.8305        |
| 1118.5886      | 9  | Q  | 9  | 1267.6105      | 634.3092        |
| 1247.6312      | 10 | E  | 8  | 1139.5519      | 570.2799        |
| 1375.6898      | 11 | Q  | 7  | 1010.5093      | 505.7586        |
| 1535.7204      | 12 | C  | 6  | 882.4507       | 441.7293        |
| 1648.8045      | 13 | L  | 5  | 722.4201       | 361.7140        |
| 1804.9308      | 14 | K  | 4  | 609.3361       | 305.1719        |
| 1919.9577      | 15 | D  | 3  | 453.2098       | 227.1088        |
| 2083.0210      | 16 | Y  | 2  | 338.1828       | 169.5953        |
|                | 17 | R  | 1  | 175.1195       | 88.0637         |

N-term:+29.04 K(2):+156.13  
 C(12):+160.03 K(14):+156.13

FLEELLTQCDR, MH+ 1558.7998, m/z 520.2715  
 H OS G25 P150811 220811-s1.07111.07111.3.dta

scan 7111; 6.9e+000

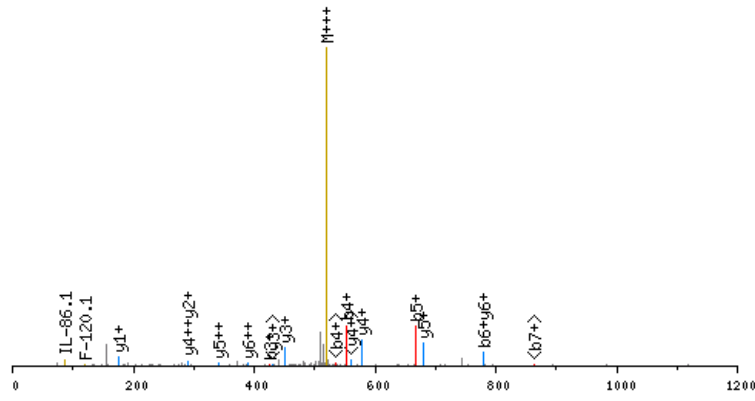

click image to zoom in; click top corners to zoom out [\[precursor±\]](#)

scan 7107; 520.3 m/z; 6.0e+000

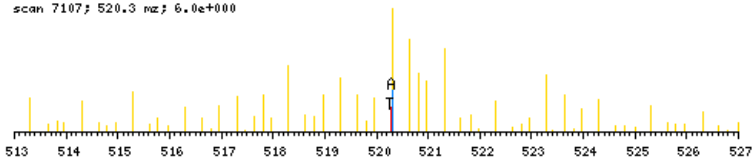

zoomed in precursor plot; T=theoretical m/z, A=acquired m/z

X-range:

-

MassTol: Y-zoom:

MassType:

AVG  MONO

Axis:

1  2

Label:

I  M  -

Ions:

a  +  2+  3+

b  +  2+  3+

c  +  2+  3+

x  +  2+  3+

y  +  2+  3+

z  +  2+  3+

hide H<sub>2</sub>O/NH<sub>3</sub>

zoom 112-122

GO

| b <sup>+</sup> | #  | AA # | y <sup>+</sup> | y <sup>2+</sup> |
|----------------|----|------|----------------|-----------------|
| 182.1393       | 1  | F 12 |                |                 |
| 295.2234       | 2  | L 11 | 1377.6684      | 689.3381        |
| 424.2660       | 3  | E 10 | 1264.5843      | 632.7961        |
| 553.3086       | 4  | E 9  | 1135.5417      | 568.2748        |
| 666.3926       | 5  | L 8  | 1006.4991      | 503.7535        |
| 779.4767       | 6  | L 7  | 893.4150       | 447.2114        |
| 880.5244       | 7  | T 6  | 780.3310       | 390.6694        |
| 981.5720       | 8  | T 5  | 679.2833       | 340.1456        |
| 1109.6306      | 9  | Q 4  | 578.2356       | 289.6217        |
| 1269.6612      | 10 | C 3  | 450.1770       | 225.5924        |
| 1384.6882      | 11 | D 2  | 290.1464       | 145.5771        |
|                | 12 | R 1  | 175.1195       | 88.0637         |

N-term:+35.07 C(10):+160.03

FLLEPGAETGLVSR, MH+ 1516.8375, m/z 506.2840  
 L OS G25 P150811 220811-s1.07318.07318.3.dta

X-range:

-

MassTol: Y-zoom:

MassType:

AVG  MONO

Axis:

1  2

Label:

I  M  -

Ions:

a  +  2+  3+

b  +  2+  3+

c  +  2+  3+

x  +  2+  3+

y  +  2+  3+

z  +  2+  3+

hide H<sub>2</sub>O/NH<sub>3</sub>

zoom 112-122

GO

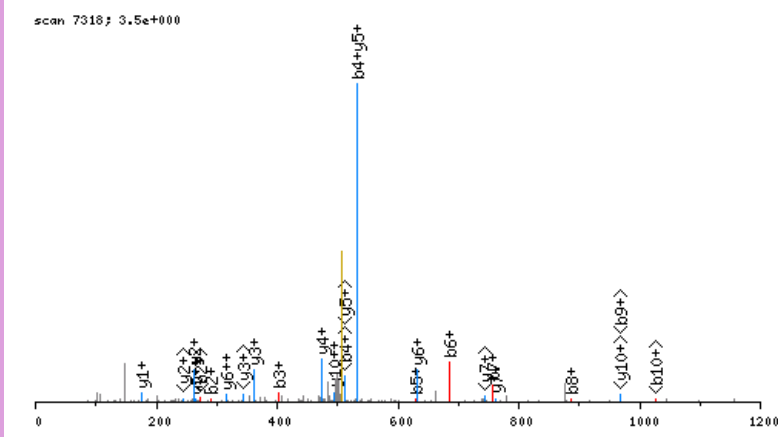

click image to zoom in; click top corners to zoom out [\[precursor±\]](#)

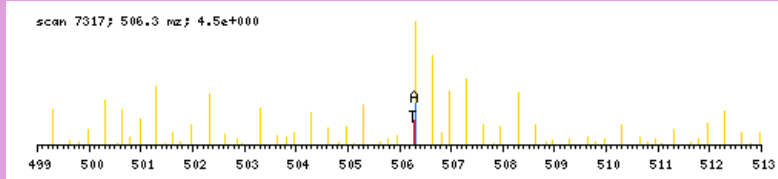

zoomed in precursor plot; T=theoretical m/z, A=acquired m/z

| b <sup>+</sup> | #  | AA # | y <sup>+</sup> | y <sup>2+</sup> |
|----------------|----|------|----------------|-----------------|
| 176.1075       | 1  | F 14 |                |                 |
| 289.1916       | 2  | L 13 | 1341.7378      | 671.3728        |
| 402.2756       | 3  | L 12 | 1228.6537      | 614.8308        |
| 531.3182       | 4  | E 11 | 1115.5697      | 558.2888        |
| 628.3710       | 5  | P 10 | 986.5271       | 493.7675        |
| 685.3925       | 6  | G 9  | 889.4743       | 445.2411        |
| 756.4296       | 7  | A 8  | 832.4529       | 416.7303        |
| 885.4722       | 8  | E 7  | 761.4157       | 381.2118        |
| 986.5198       | 9  | T 6  | 632.3731       | 316.6905        |
| 1043.5413      | 10 | G 5  | 531.3255       | 266.1666        |
| 1156.6254      | 11 | L 4  | 474.3040       | 237.6559        |
| 1255.6938      | 12 | V 3  | 361.2199       | 181.1139        |
| 1342.7258      | 13 | S 2  | 262.1515       | 131.5797        |
|                | 14 | R 1  | 175.1195       | 88.0637         |

N-term:+29.04

FNKPDIDAWELR, MH+ 1571.8858, m/z 524.6335  
 H OS G27 P150811 220811-s1.06444.06444.3.dta

X-range:

-

MassTol: Y-zoom:

MassType:

AVG  MONO

Axis:

1  2

Label:

I  M  -

Ions:

a  +  2+  3+

b  +  2+  3+

c  +  2+  3+

x  +  2+  3+

y  +  2+  3+

z  +  2+  3+

hide H<sub>2</sub>O/NH<sub>3</sub>

zoom 112-122

GO

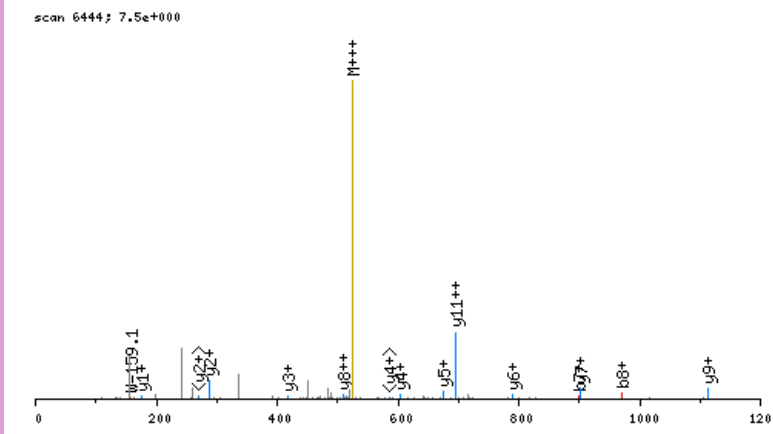

click image to zoom in; click top corners to zoom out [\[precursor±\]](#)

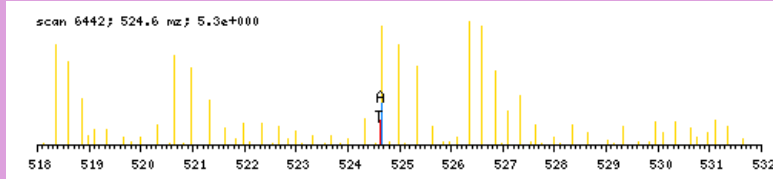

zoomed in precursor plot; T=theoretical m/z, A=acquired m/z

| b <sup>+</sup> | #  | AA # | y <sup>+</sup> | y <sup>2+</sup> |
|----------------|----|------|----------------|-----------------|
| 182.1393       | 1  | F 12 |                |                 |
| 296.1822       | 2  | N 11 | 1390.7543      | 695.8811        |
| 458.3403       | 3  | K 10 | 1276.7114      | 638.8596        |
| 555.3931       | 4  | P 9  | 1114.5533      | 557.7806        |
| 670.4200       | 5  | D 8  | 1017.5005      | 509.2542        |
| 783.5041       | 6  | I 7  | 902.4736       | 451.7407        |
| 898.5311       | 7  | D 6  | 789.3895       | 395.1987        |
| 969.5682       | 8  | A 5  | 674.3626       | 337.6852        |
| 1155.6475      | 9  | W 4  | 603.3255       | 302.1666        |
| 1284.6901      | 10 | E 3  | 417.2462       | 209.1270        |
| 1397.7741      | 11 | L 2  | 288.2036       | 144.6057        |
|                | 12 | R 1  | 175.1195       | 88.0637         |

N-term:+35.07 K(3):+162.16

FPGSPGEKGEKGSAGTPGMPSGPR, MH+ 2523.2666, m/z 631.5721  
 I\_OS\_G26\_P150811\_220811-s1.04227.04227.4.dta

X-range:

-

MassTol: Y-zoom:

MassType:

AVG  MONO

Axis:

1  2

Label:

I  M  -

Ions:

a  +  2+  3+

b  +  2+  3+

c  +  2+  3+

x  +  2+  3+

y  +  2+  3+

z  +  2+  3+

hide H<sub>2</sub>O/NH<sub>3</sub>

zoom 112-122

GO

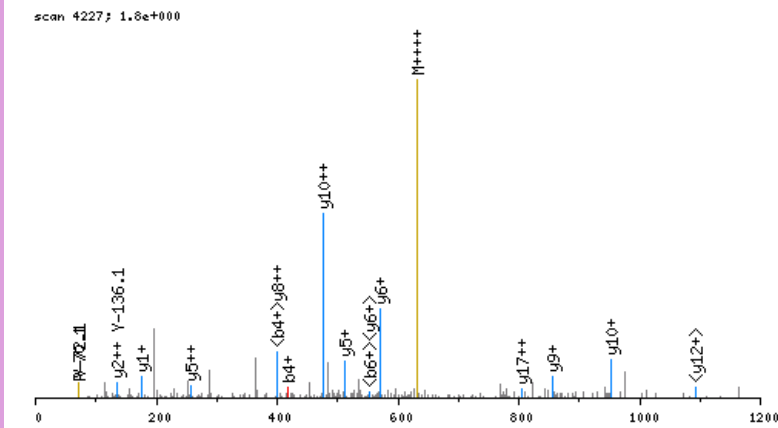

click image to zoom in; click top corners to zoom out [\[precursor±\]](#)

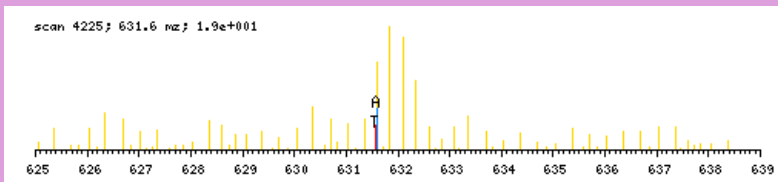

zoomed in precursor plot; T=theoretical m/z, A=acquired m/z

| b <sup>+</sup>  | #        | AA #        | y <sup>+</sup>  | y <sup>2+</sup> |
|-----------------|----------|-------------|-----------------|-----------------|
| 176.1075        | 1        | F 26        |                 |                 |
| 273.1603        | 2        | P 25        | 2348.1669       | 1174.5874       |
| 330.1817        | 3        | G 24        | 2251.1142       | 1126.0610       |
| <b>417.2138</b> | <b>4</b> | <b>S 23</b> | 2194.0927       | 1097.5503       |
| 514.2665        | 5        | P 22        | 2107.0607       | 1054.0343       |
| 571.2880        | 6        | G 21        | 2010.0079       | 1005.5079       |
| 700.3306        | 7        | E 20        | 1952.9865       | 976.9971        |
| 856.4569        | 8        | K 19        | 1823.9439       | 912.4758        |
| 913.4784        | 9        | G 18        | 1667.8176       | 834.4127        |
| 1042.5209       | 10       | E 17        | 1610.7961       | <b>805.9020</b> |
| 1198.6472       | 11       | K 16        | 1481.7535       | 741.3807        |
| 1255.6687       | 12       | G 15        | 1325.6272       | 663.3175        |
| 1342.7007       | 13       | S 14        | 1268.6057       | 634.8068        |
| 1413.7379       | 14       | A 13        | 1181.5737       | 591.2908        |
| 1470.7593       | 15       | G 12        | 1110.5366       | 555.7722        |
| 1571.8070       | 16       | T 11        | 1053.5151       | 527.2615        |
| 1668.8598       | 17       | P 10        | <b>952.4675</b> | <b>476.7376</b> |
| 1725.8812       | 18       | G 9         | <b>855.4147</b> | 428.2113        |
| 1856.9217       | 19       | M 8         | 798.3932        | <b>399.7005</b> |
| 1953.9745       | 20       | P 7         | 667.3527        | 334.1803        |
| 2010.9959       | 21       | G 6         | <b>570.3000</b> | 285.6539        |
| 2098.0280       | 22       | S 5         | <b>513.2785</b> | <b>257.1432</b> |
| 2195.0807       | 23       | P 4         | 426.2465        | 213.6272        |
| 2252.1022       | 24       | G 3         | 329.1937        | 165.1008        |
| 2349.1550       | 25       | P 2         | 272.1723        | <b>136.5900</b> |
|                 | 26       | R 1         | <b>175.1195</b> | 88.0637         |

N-term:+29.04 K(8):+156.13  
 K(11):+156.13

FQGEETENEENLSSEKAGLDKR, MH+ 2594.2586, m/z 649.3201  
 L OS G28 P150811 220811-s1.04122.04122.4.dta

X-range:

-

MassTol: Y-zoom:

MassType:

AVG  MONO

Axis:

1  2

Label:

I  M  -

Ions:

a  +  2+  3+

b  +  2+  3+

c  +  2+  3+

x  +  2+  3+

y  +  2+  3+

z  +  2+  3+

hide H<sub>2</sub>O/NH<sub>3</sub>

zoom 112-122

GO

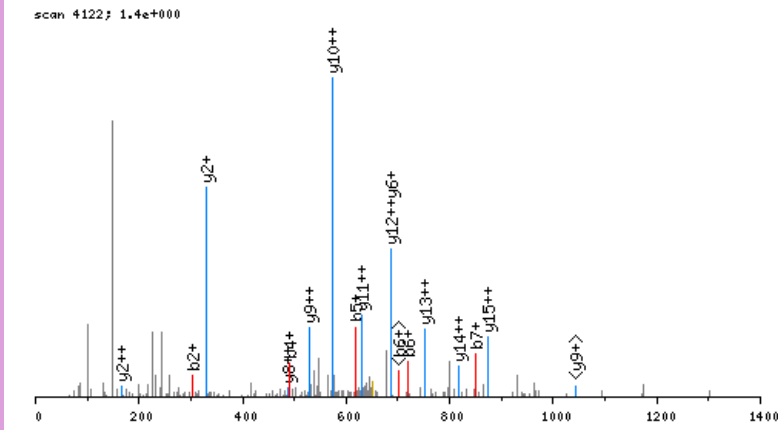

click image to zoom in; click top corners to zoom out [\[precursor±\]](#)

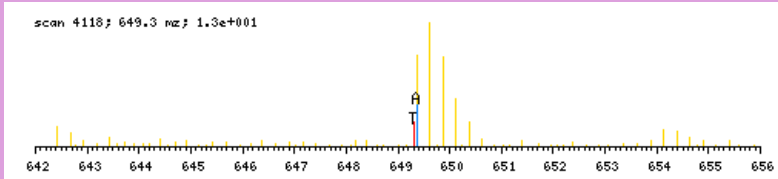

zoomed in precursor plot; T=theoretical m/z, A=acquired m/z

| b <sup>+</sup> | #  | AA | #  | y <sup>+</sup> | y <sup>2+</sup> |
|----------------|----|----|----|----------------|-----------------|
| 176.1075       | 1  | F  | 22 |                |                 |
| 304.1661       | 2  | Q  | 21 | 2419.1589      | 1210.0834       |
| 361.1876       | 3  | G  | 20 | 2291.1004      | 1146.0541       |
| 490.2301       | 4  | E  | 19 | 2234.0789      | 1117.5434       |
| 619.2727       | 5  | E  | 18 | 2105.0363      | 1053.0221       |
| 720.3204       | 6  | T  | 17 | 1975.9937      | 988.5008        |
| 849.3630       | 7  | E  | 16 | 1874.9460      | 937.9769        |
| 963.4059       | 8  | N  | 15 | 1745.9034      | 873.4556        |
| 1092.4485      | 9  | E  | 14 | 1631.8605      | 816.4342        |
| 1221.4911      | 10 | E  | 13 | 1502.8179      | 751.9129        |
| 1335.5341      | 11 | N  | 12 | 1373.7753      | 687.3916        |
| 1448.6181      | 12 | L  | 11 | 1259.7324      | 630.3701        |
| 1535.6501      | 13 | S  | 10 | 1146.6483      | 573.8281        |
| 1622.6822      | 14 | S  | 9  | 1059.6163      | 530.3121        |
| 1751.7248      | 15 | E  | 8  | 972.5843       | 486.7961        |
| 1907.8511      | 16 | K  | 7  | 843.5417       | 422.2748        |
| 1978.8882      | 17 | A  | 6  | 687.4154       | 344.2116        |
| 2035.9096      | 18 | G  | 5  | 616.3783       | 308.6930        |
| 2148.9937      | 19 | L  | 4  | 559.3568       | 280.1823        |
| 2264.0207      | 20 | D  | 3  | 446.2727       | 223.6403        |
| 2420.1470      | 21 | K  | 2  | 331.2458       | 166.1268        |
|                | 22 | R  | 1  | 175.1195       | 88.0637         |

N-term: +29.04 K(16): +156.13  
 K(21): +156.13



FSEGGAVGAHR, MH+ 1186.5969, m/z 396.2038  
 L OS G27 P150811 220811-s1.02130.02130.3.dta

X-range:

-

MassTol: Y-zoom:

MassType:

AVG  MONO

Axis:

1  2

Label:

I  M  -

Ions:

a  +  2+  3+

b  +  2+  3+

c  +  2+  3+

x  +  2+  3+

y  +  2+  3+

z  +  2+  3+

hide H<sub>2</sub>O/NH<sub>3</sub>

zoom 112-122

GO

scan 2130; 7.1e+000

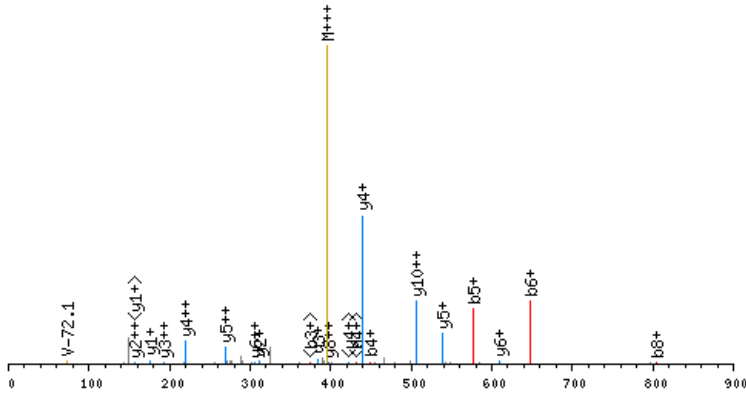

click image to zoom in; click top corners to zoom out [\[precursor±\]](#)

scan 2127; 396.2 m/z; 2.6e+001

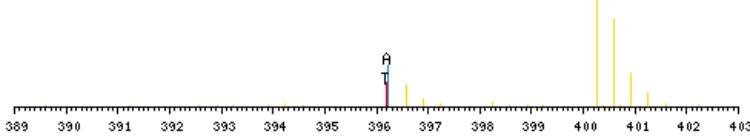

zoomed in precursor plot; T=theoretical m/z, A=acquired m/z

| b <sup>+</sup> | #  | AA # | y <sup>+</sup> | y <sup>2+</sup> |
|----------------|----|------|----------------|-----------------|
| 176.1075       | 1  | F 11 |                |                 |
| 263.1395       | 2  | S 10 | 1011.4972      | 506.2525        |
| 392.1821       | 3  | E 9  | 924.4652       | 462.7365        |
| 449.2036       | 4  | G 8  | 795.4226       | 398.2152        |
| 577.2622       | 5  | Q 7  | 738.4011       | 369.7045        |
| 648.2993       | 6  | A 6  | 610.3425       | 305.6752        |
| 747.3677       | 7  | V 5  | 539.3054       | 270.1566        |
| 804.3892       | 8  | G 4  | 440.2370       | 220.6224        |
| 875.4263       | 9  | A 3  | 383.2155       | 192.1117        |
| 1012.4852      | 10 | H 2  | 312.1784       | 156.5931        |
|                | 11 | R 1  | 175.1195       | 88.0637         |

N-term:+29.04

FSLGFDEPAEQPVR, MH+ 1619.8069, m/z 540.6072  
 L OS G25 P150811 220811-s1.07165.07165.3.dta

X-range:

-

MassTol: Y-zoom:

MassType:

AVG  MONO

Axis:

1  2

Label:

I  M  -

Ions:

a  +  2+  3+

b  +  2+  3+

c  +  2+  3+

x  +  2+  3+

y  +  2+  3+

z  +  2+  3+

hide H<sub>2</sub>O/NH<sub>3</sub>

zoom 112-122

GO

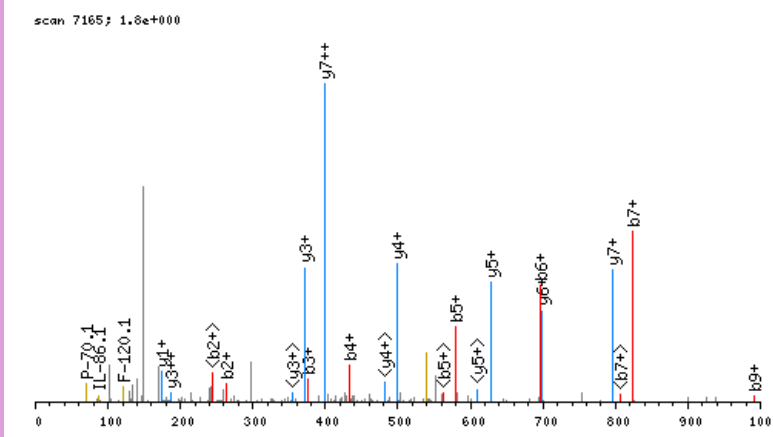

click image to zoom in; click top corners to zoom out [\[precursor±\]](#)

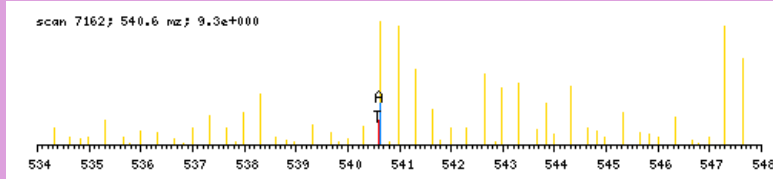

zoomed in precursor plot; T=theoretical m/z, A=acquired m/z

| b <sup>+</sup> | #  | AA # | y <sup>+</sup> | y <sup>2+</sup> |
|----------------|----|------|----------------|-----------------|
| 176.1075       | 1  | F 14 |                |                 |
| 263.1395       | 2  | S 13 | 1444.7072      | 722.8575        |
| 376.2236       | 3  | L 12 | 1357.6752      | 679.3415        |
| 433.2451       | 4  | G 11 | 1244.5911      | 622.7995        |
| 580.3135       | 5  | F 10 | 1187.5697      | 594.2888        |
| 695.3404       | 6  | D 9  | 1040.5013      | 520.7545        |
| 824.3830       | 7  | E 8  | 925.4743       | 463.2411        |
| 921.4358       | 8  | P 7  | 796.4317       | 398.7198        |
| 992.4729       | 9  | A 6  | 699.3790       | 350.1934        |
| 1121.5155      | 10 | E 5  | 628.3418       | 314.6748        |
| 1249.5741      | 11 | Q 4  | 499.2993       | 250.1535        |
| 1346.6268      | 12 | P 3  | 371.2407       | 186.1243        |
| 1445.6952      | 13 | V 2  | 274.1879       | 137.5979        |
|                | 14 | R 1  | 175.1195       | 88.0637         |

N-term:+29.04

FSPEKSQLPGIVAGGR, MH+ 1698.9543, m/z 566.9896  
 L OS G26 P150811 220811-s1.04297.04297.3.dta

X-range:

-

MassTol: Y-zoom:

MassType:

AVG  MONO

Axis:

1  2

Label:

I  M  -

Ions:

a  +  2+  3+

b  +  2+  3+

c  +  2+  3+

x  +  2+  3+

y  +  2+  3+

z  +  2+  3+

hide H<sub>2</sub>O/NH<sub>3</sub>

zoom 112-122

GO

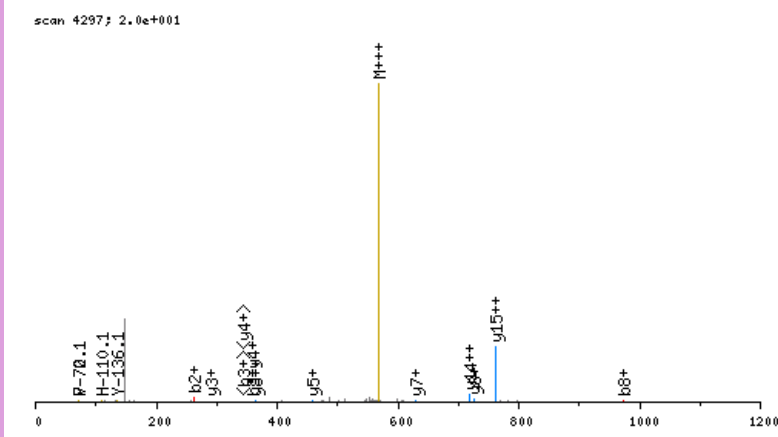

click image to zoom in; click top corners to zoom out [\[precursor±\]](#)

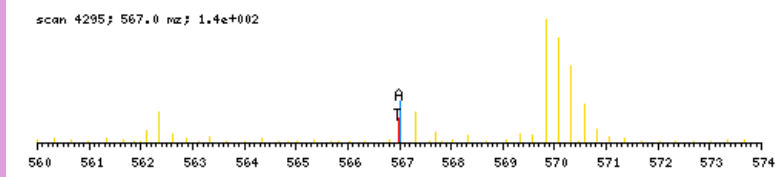

zoomed in precursor plot; T=theoretical m/z, A=acquired m/z

| b <sup>+</sup> | #  | AA # | y <sup>+</sup> | y <sup>2+</sup> |
|----------------|----|------|----------------|-----------------|
| 176.1075       | 1  | F 16 |                |                 |
| 263.1395       | 2  | S 15 | 1523.8546      | 762.4312        |
| 360.1923       | 3  | P 14 | 1436.8226      | 718.9152        |
| 489.2349       | 4  | E 13 | 1339.7698      | 670.3888        |
| 645.3612       | 5  | K 12 | 1210.7272      | 605.8675        |
| 732.3932       | 6  | S 11 | 1054.6009      | 527.8044        |
| 860.4518       | 7  | Q 10 | 967.5689       | 484.2884        |
| 973.5359       | 8  | L 9  | 839.5103       | 420.2591        |
| 1070.5886      | 9  | P 8  | 726.4262       | 363.7170        |
| 1127.6101      | 10 | G 7  | 629.3735       | 315.1907        |
| 1240.6942      | 11 | I 6  | 572.3520       | 286.6799        |
| 1339.7626      | 12 | V 5  | 459.2680       | 230.1379        |
| 1410.7997      | 13 | A 4  | 360.1995       | 180.6037        |
| 1467.8212      | 14 | G 3  | 289.1624       | 145.0851        |
| 1524.8426      | 15 | G 2  | 232.1410       | 116.5744        |
|                | 16 | R 1  | 175.1195       | 88.0637         |

N-term:+29.04 K(5):+156.13

FTELNQNQVQKVDQYLYHMR, MH+ 2610.3139, m/z 653.3339  
 L OS G28 P150811 220811-s1.08109.08109.4.dta

X-range:

-

MassTol: Y-zoom:

MassType:

AVG  MONO

Axis:

1  2

Label:

I  M  -

Ions:

a  +  2+  3+

b  +  2+  3+

c  +  2+  3+

x  +  2+  3+

y  +  2+  3+

z  +  2+  3+

hide H<sub>2</sub>O/NH<sub>3</sub>

zoom 112-122

GO

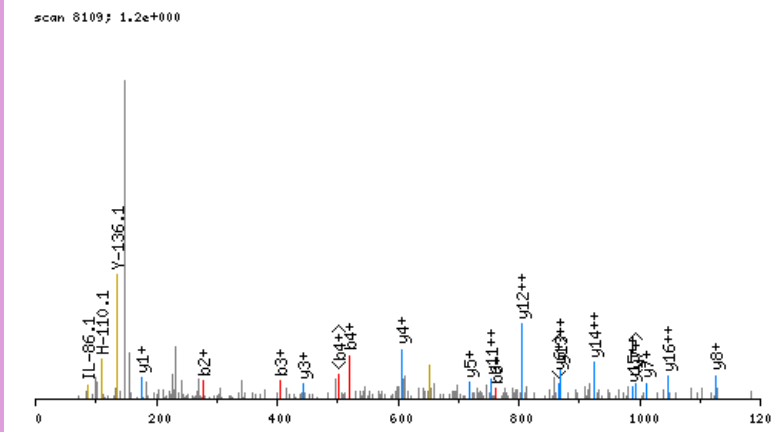

click image to zoom in; click top corners to zoom out [\[precursor±\]](#)

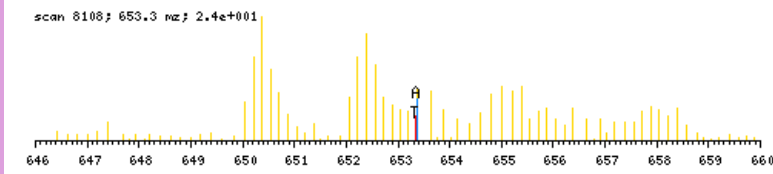

zoomed in precursor plot; T=theoretical m/z, A=acquired m/z

| b <sup>+</sup> | #  | AA | #  | y <sup>+</sup> | y <sup>2+</sup> |
|----------------|----|----|----|----------------|-----------------|
| 176.1075       | 1  | F  | 20 |                |                 |
| 277.1552       | 2  | T  | 19 | 2435.2142      | 1218.1110       |
| 406.1978       | 3  | E  | 18 | 2334.1665      | 1167.5872       |
| 519.2818       | 4  | L  | 17 | 2205.1239      | 1103.0659       |
| 633.3248       | 5  | N  | 16 | 2092.0399      | 1046.5238       |
| 761.3834       | 6  | Q  | 15 | 1977.9969      | 989.5024        |
| 875.4263       | 7  | N  | 14 | 1849.9383      | 925.4731        |
| 1003.4849      | 8  | Q  | 13 | 1735.8954      | 868.4516        |
| 1102.5533      | 9  | V  | 12 | 1607.8368      | 804.4223        |
| 1230.6119      | 10 | Q  | 11 | 1508.7684      | 754.8881        |
| 1386.7382      | 11 | K  | 10 | 1380.7099      | 690.8588        |
| 1485.8066      | 12 | V  | 9  | 1224.5836      | 612.7957        |
| 1600.8335      | 13 | D  | 8  | 1125.5151      | 563.2615        |
| 1728.8921      | 14 | Q  | 7  | 1010.4882      | 505.7480        |
| 1891.9554      | 15 | Y  | 6  | 882.4296       | 441.7187        |
| 2005.0395      | 16 | L  | 5  | 719.3663       | 360.1871        |
| 2168.1028      | 17 | Y  | 4  | 606.2822       | 303.6450        |
| 2305.1617      | 18 | H  | 3  | 443.2189       | 222.1134        |
| 2436.2022      | 19 | M  | 2  | 306.1600       | 153.5839        |
|                | 20 | R  | 1  | 175.1195       | 88.0637         |

N-term:+29.04 K(11):+156.13

FTKNQKDPGVLDLR, MH+ 1619.9970, m/z 405.7547  
 H OS G28 P150811 220811-s1.02469.02469.4.dta

X-range:

-

MassTol: Y-zoom:

MassType:

AVG  MONO

Axis:

1  2

Label:

I  M  -

Ions:

a  +  2+  3+

b  +  2+  3+

c  +  2+  3+

x  +  2+  3+

y  +  2+  3+

z  +  2+  3+

hide H<sub>2</sub>O/NH<sub>3</sub>

zoom 112-122

GO

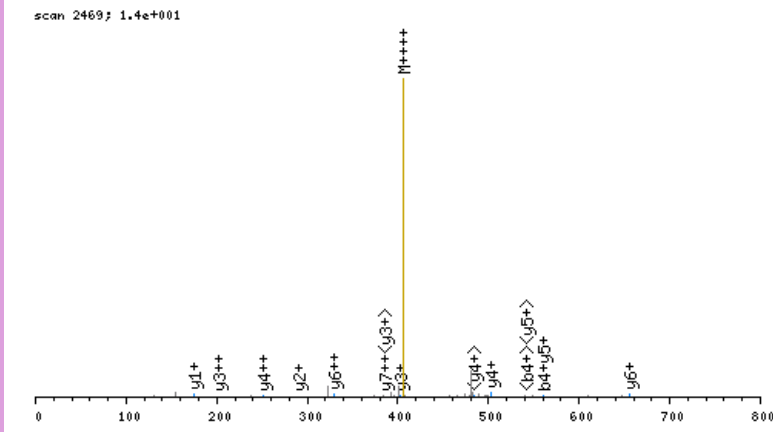

click image to zoom in; click top corners to zoom out [\[precursor±\]](#)

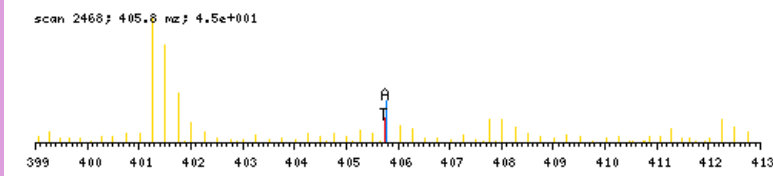

zoomed in precursor plot; T=theoretical m/z, A=acquired m/z

| b <sup>+</sup> | #  | AA | #  | y <sup>+</sup> | y <sup>2+</sup> |
|----------------|----|----|----|----------------|-----------------|
| 182.1393       | 1  | F  | 13 |                |                 |
| 283.1870       | 2  | T  | 12 | 1438.8655      | 719.9367        |
| 445.3451       | 3  | K  | 11 | 1337.8178      | 669.4128        |
| 559.3880       | 4  | N  | 10 | 1175.6597      | 588.3338        |
| 687.4466       | 5  | Q  | 9  | 1061.6168      | 531.3123        |
| 849.6047       | 6  | K  | 8  | 933.5582       | 467.2830        |
| 964.6316       | 7  | D  | 7  | 771.4001       | 386.2040        |
| 1061.6844      | 8  | P  | 6  | 656.3731       | 328.6905        |
| 1118.7059      | 9  | G  | 5  | 559.3204       | 280.1641        |
| 1217.7743      | 10 | V  | 4  | 502.2989       | 251.6534        |
| 1330.8583      | 11 | L  | 3  | 403.2305       | 202.1192        |
| 1445.8853      | 12 | D  | 2  | 290.1464       | 145.5771        |
|                | 13 | R  | 1  | 175.1195       | 88.0637         |

N-term:+35.07 K(3):+162.16  
 K(6):+162.16

FVAPEVLKR, MH+ 1114.6989, m/z 372.2378  
 L OS G27 P150811 220811-s1.04381.04381.3.dta

X-range:

-

MassTol: Y-zoom:

MassType:

AVG  MONO

Axis:

1  2

Label:

I  M  -

Ions:

a  +  2+  3+

b  +  2+  3+

c  +  2+  3+

x  +  2+  3+

y  +  2+  3+

z  +  2+  3+

hide H<sub>2</sub>O/NH<sub>3</sub>

zoom 112-122

GO

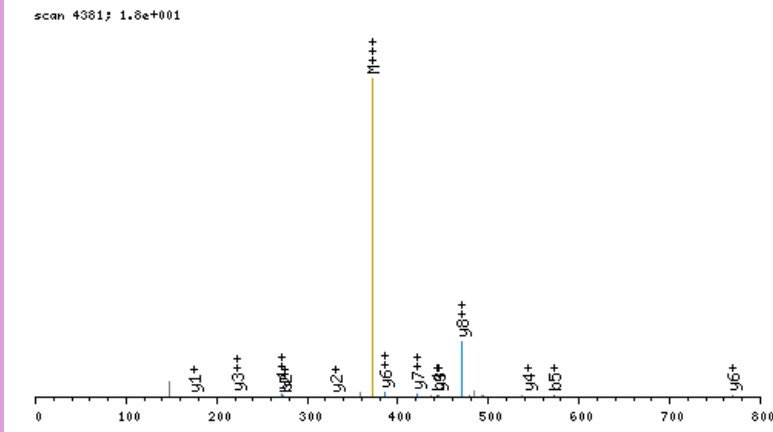

click image to zoom in; click top corners to zoom out [\[precursor±\]](#)

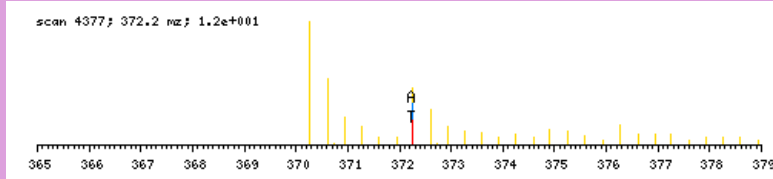

zoomed in precursor plot; T=theoretical m/z, A=acquired m/z

| b <sup>+</sup> | # | AA # | y <sup>+</sup> | y <sup>2+</sup> |
|----------------|---|------|----------------|-----------------|
| 176.1075       | 1 | F    | 9              |                 |
| 275.1759       | 2 | V    | 8              | 939.5992        |
| 346.2130       | 3 | A    | 7              | 840.5307        |
| 443.2658       | 4 | P    | 6              | 769.4936        |
| 572.3084       | 5 | E    | 5              | 672.4409        |
| 671.3768       | 6 | V    | 4              | 543.3983        |
| 784.4609       | 7 | L    | 3              | 444.3299        |
| 940.5872       | 8 | K    | 2              | 331.2458        |
|                | 9 | R    | 1              | 175.1195        |

N-term: +29.04 K(8): +156.13

FVEDLNESFKDNR, MH+ 1668.8233, m/z 556.9460  
 L OS G27 P150811 220811-s1.04723.04723.3.dta

X-range:

-

MassTol: Y-zoom:

MassType:

AVG  MONO

Axis:

1  2

Label:

I  M  -

Ions:

a  +  2+  3+

b  +  2+  3+

c  +  2+  3+

x  +  2+  3+

y  +  2+  3+

z  +  2+  3+

hide H<sub>2</sub>O/NH<sub>3</sub>

zoom 112-122

GO

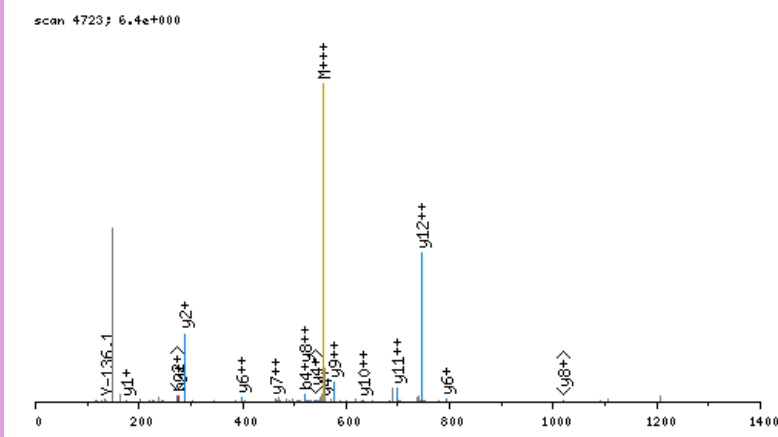

click image to zoom in; click top corners to zoom out [\[precursor±\]](#)

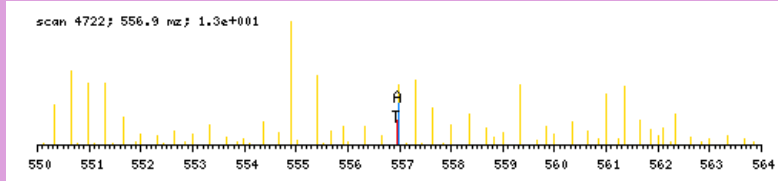

zoomed in precursor plot; T=theoretical m/z, A=acquired m/z

| b <sup>+</sup> | #  | AA # | y <sup>+</sup> | y <sup>2+</sup> |
|----------------|----|------|----------------|-----------------|
| 176.1075       | 1  | F 13 |                |                 |
| 275.1759       | 2  | V 12 | 1493.7236      | 747.3657        |
| 404.2185       | 3  | E 11 | 1394.6552      | 697.8315        |
| 519.2455       | 4  | D 10 | 1265.6126      | 633.3102        |
| 632.3295       | 5  | L 9  | 1150.5857      | 575.7968        |
| 746.3725       | 6  | N 8  | 1037.5016      | 519.2547        |
| 875.4150       | 7  | E 7  | 923.4587       | 462.2333        |
| 962.4471       | 8  | S 6  | 794.4161       | 397.7120        |
| 1109.5155      | 9  | F 5  | 707.3841       | 354.1960        |
| 1265.6418      | 10 | K 4  | 560.3157       | 280.6617        |
| 1380.6687      | 11 | D 3  | 404.1894       | 202.5986        |
| 1494.7117      | 12 | N 2  | 289.1624       | 145.0851        |
|                | 13 | R 1  | 175.1195       | 88.0637         |

N-term:+29.04 K(10):+156.13

FVEWIPNNVKTAVCDIPPR, MH+ 2311.2272, m/z 578.5623  
 L OS G26 P150811 220811-s1.06594.06594.4.dta

X-range:

-

MassTol: Y-zoom:

MassType:

AVG  MONO

Axis:

1  2

Label:

I  M  -

Ions:

a  +  2+  3+

b  +  2+  3+

c  +  2+  3+

x  +  2+  3+

y  +  2+  3+

z  +  2+  3+

hide H<sub>2</sub>O/NH<sub>3</sub>

zoom 112-122

GO

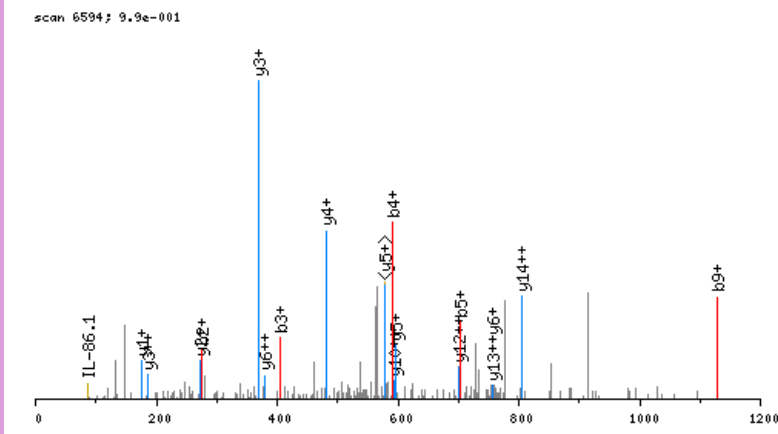

click image to zoom in; click top corners to zoom out [precursor±]

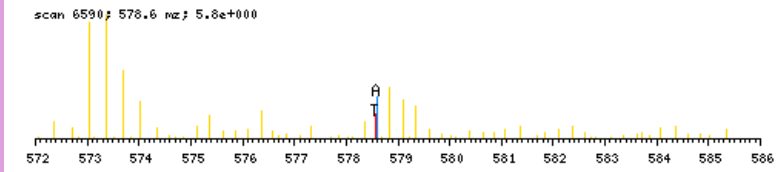

zoomed in precursor plot; T=theoretical m/z, A=acquired m/z

| b <sup>+</sup> | #  | AA # | y <sup>+</sup> | y <sup>2+</sup> |
|----------------|----|------|----------------|-----------------|
| 176.1075       | 1  | F 19 |                |                 |
| 275.1759       | 2  | V 18 | 2136.1276      | 1068.5677       |
| 404.2185       | 3  | E 17 | 2037.0591      | 1019.0335       |
| 590.2978       | 4  | W 16 | 1908.0166      | 954.5122        |
| 703.3819       | 5  | I 15 | 1721.9372      | 861.4725        |
| 800.4347       | 6  | P 14 | 1608.8532      | 804.9305        |
| 914.4776       | 7  | N 13 | 1511.8004      | 756.4041        |
| 1028.5205      | 8  | N 12 | 1397.7575      | 699.3827        |
| 1127.5889      | 9  | V 11 | 1283.7146      | 642.3612        |
| 1283.7152      | 10 | K 10 | 1184.6461      | 592.8270        |
| 1384.7629      | 11 | T 9  | 1028.5198      | 514.7638        |
| 1455.8000      | 12 | A 8  | 927.4722       | 464.2400        |
| 1554.8684      | 13 | V 7  | 856.4350       | 428.7214        |
| 1714.8990      | 14 | C 6  | 757.3666       | 379.1872        |
| 1829.9260      | 15 | D 5  | 597.3360       | 299.1719        |
| 1943.0100      | 16 | I 4  | 482.3091       | 241.6585        |
| 2040.0628      | 17 | P 3  | 369.2250       | 185.1164        |
| 2137.1156      | 18 | P 2  | 272.1723       | 136.5900        |
|                | 19 | R 1  | 175.1195       | 88.0637         |

N-term: +29.04 K(10): +156.13  
 C(14): +160.03



FVLDEADEMLSR, MH+ 1452.7044, m/z 726.8559  
 L OS G25 P150811 220811-s1.07533.07533.2.dta

X-range:

-

MassTol: Y-zoom:

MassType:

AVG  MONO

Axis:

1  2

Label:

I  M  -

Ions:

a  +  2+  3+

b  +  2+  3+

c  +  2+  3+

x  +  2+  3+

y  +  2+  3+

z  +  2+  3+

hide H<sub>2</sub>O/NH<sub>3</sub>

zoom 112-122

GO

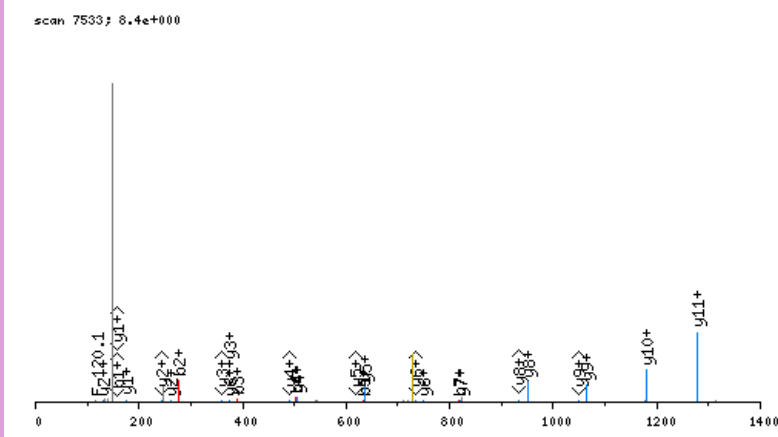

click image to zoom in; click top corners to zoom out [\[precursor±\]](#)

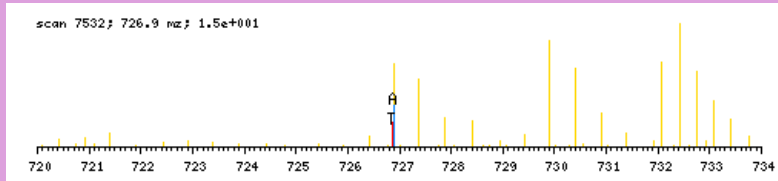

zoomed in precursor plot; T=theoretical m/z, A=acquired m/z

| b <sup>+</sup> | #  | AA # | y <sup>+</sup> | y <sup>2+</sup> |
|----------------|----|------|----------------|-----------------|
| 176.1075       | 1  | F 12 |                |                 |
| 275.1759       | 2  | V 11 | 1277.6047      | 639.3063        |
| 388.2600       | 3  | L 10 | 1178.5363      | 589.7721        |
| 503.2869       | 4  | D 9  | 1065.4523      | 533.2300        |
| 632.3295       | 5  | E 8  | 950.4253       | 475.7166        |
| 703.3666       | 6  | A 7  | 821.3827       | 411.1953        |
| 818.3936       | 7  | D 6  | 750.3456       | 375.6767        |
| 947.4362       | 8  | E 5  | 635.3187       | 318.1632        |
| 1078.4767      | 9  | M 4  | 506.2761       | 253.6420        |
| 1191.5607      | 10 | L 3  | 375.2356       | 188.1217        |
| 1278.5928      | 11 | S 2  | 262.1515       | 131.5797        |
|                | 12 | R 1  | 175.1195       | 88.0637         |

N-term:+29.04

FVPLNTNPKEVQEMR, MH+ 1870.0533, m/z 624.0226  
 H OS G26 P150811 220811-s1.04116.04116.3.dta

X-range:

-

MassTol: Y-zoom:

MassType:

AVG  MONO

Axis:

1  2

Label:

I  M  -

Ions:

a  +  2+  3+

b  +  2+  3+

c  +  2+  3+

x  +  2+  3+

y  +  2+  3+

z  +  2+  3+

hide H<sub>2</sub>O/NH<sub>3</sub>

zoom 112-122

GO

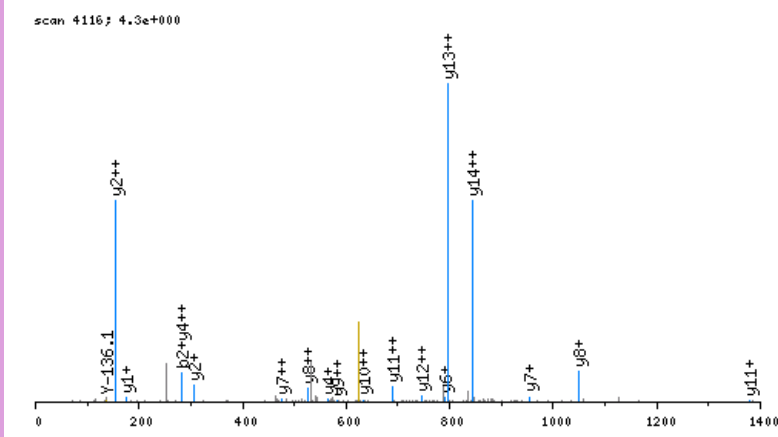

click image to zoom in; click top corners to zoom out [\[precursor±\]](#)

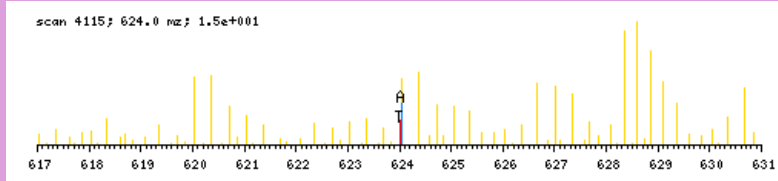

zoomed in precursor plot; T=theoretical m/z, A=acquired m/z

| b <sup>+</sup>  | #  | AA #       | y <sup>+</sup>   | y <sup>2+</sup> |
|-----------------|----|------------|------------------|-----------------|
| 182.1393        | 1  | F 15       |                  |                 |
| <b>281.2077</b> | 2  | V 14       | 1688.9218        | <b>844.9648</b> |
| 378.2605        | 3  | P 13       | 1589.8534        | <b>795.4306</b> |
| 491.3446        | 4  | L 12       | 1492.8006        | <b>746.9042</b> |
| 605.3875        | 5  | N 11       | <b>1379.7166</b> | <b>690.3622</b> |
| 706.4352        | 6  | T 10       | 1265.6736        | <b>633.3407</b> |
| 820.4781        | 7  | N 9        | 1164.6260        | <b>582.8169</b> |
| 917.5309        | 8  | P 8        | <b>1050.5830</b> | <b>525.7954</b> |
| 1079.6890       | 9  | <b>K 7</b> | <b>953.5303</b>  | <b>477.2690</b> |
| 1208.7315       | 10 | E 6        | <b>791.3722</b>  | 396.1900        |
| 1307.8000       | 11 | V 5        | 662.3296         | 331.6687        |
| 1435.8585       | 12 | Q 4        | <b>563.2612</b>  | <b>282.1345</b> |
| 1564.9011       | 13 | E 3        | 435.2026         | 218.1052        |
| 1695.9416       | 14 | M 2        | <b>306.1600</b>  | <b>153.5839</b> |
|                 | 15 | R 1        | <b>175.1195</b>  | 88.0637         |

N-term:+35.07 K(9):+162.16

FVQPPSLDVLEQR, MH+ 1555.8484, m/z 519.2876  
 L OS G25 P150811 220811-s1.07325.07325.3.dta

scan 7325; 7.7e+000

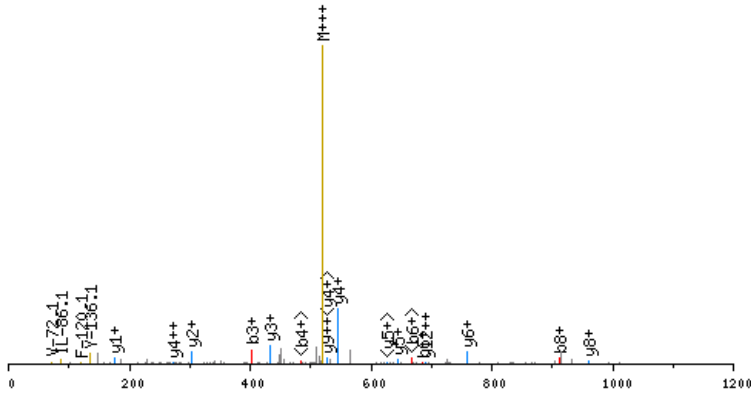

click image to zoom in; click top corners to zoom out [\[precursor±\]](#)

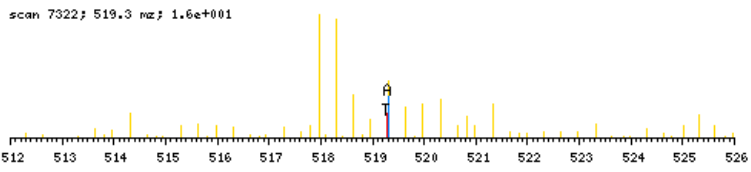

zoomed in precursor plot; T=theoretical m/z, A=acquired m/z

X-range:

-

MassTol: Y-zoom:

MassType:

AVG  MONO

Axis:

1  2

Label:

I  M  -

Ions:

a  +  2+  3+

b  +  2+  3+

c  +  2+  3+

x  +  2+  3+

y  +  2+  3+

z  +  2+  3+

hide H<sub>2</sub>O/NH<sub>3</sub>

zoom 112-122

GO

| b <sup>+</sup> | #  | AA # | y <sup>+</sup> | y <sup>2+</sup> |
|----------------|----|------|----------------|-----------------|
| 176.1075       | 1  | F 13 |                |                 |
| 275.1759       | 2  | V 12 | 1380.7487      | 690.8783        |
| 403.2345       | 3  | Q 11 | 1281.6803      | 641.3441        |
| 500.2873       | 4  | P 10 | 1153.6217      | 577.3148        |
| 597.3400       | 5  | P 9  | 1056.5689      | 528.7884        |
| 684.3721       | 6  | S 8  | 959.5162       | 480.2620        |
| 797.4561       | 7  | L 7  | 872.4842       | 436.7460        |
| 912.4831       | 8  | D 6  | 759.4001       | 380.2040        |
| 1011.5515      | 9  | V 5  | 644.3731       | 322.6905        |
| 1124.6355      | 10 | L 4  | 545.3047       | 273.1563        |
| 1253.6781      | 11 | E 3  | 432.2207       | 216.6142        |
| 1381.7367      | 12 | Q 2  | 303.1781       | 152.0930        |
|                | 13 | R 1  | 175.1195       | 88.0637         |

N-term:+29.04

GAAQNIIPASTGAAKAVGK, MH+ 1809.0599, m/z 603.6915  
 L OS G26 P150811 220811-s1.03404.03404.3.dta

X-range:

-

MassTol: Y-zoom:

MassType:

AVG  MONO

Axis:

1  2

Label:

I  M  -

Ions:

a  +  2+  3+

b  +  2+  3+

c  +  2+  3+

x  +  2+  3+

y  +  2+  3+

z  +  2+  3+

hide H<sub>2</sub>O/NH<sub>3</sub>

zoom 112-122

GO

scan 3404; 4.6e+000

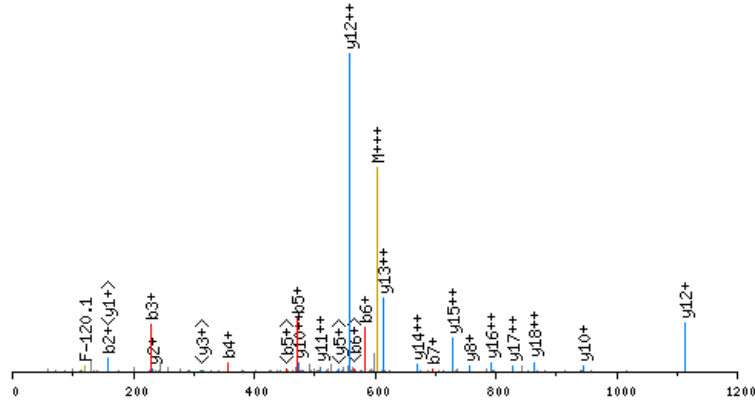

click image to zoom in; click top corners to zoom out [\[precursor±\]](#)

scan 3400; 603.7 mz; 2.0e+001

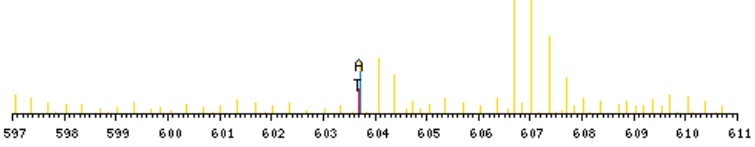

zoomed in precursor plot; T=theoretical m/z, A=acquired m/z

| b <sup>+</sup> | #  | AA # | y <sup>+</sup> | y <sup>2+</sup> |
|----------------|----|------|----------------|-----------------|
| 86.0606        | 1  | G 19 |                |                 |
| 157.0977       | 2  | A 18 | 1724.0071      | 862.5075        |
| 228.1348       | 3  | A 17 | 1652.9700      | 826.9889        |
| 356.1934       | 4  | Q 16 | 1581.9329      | 791.4704        |
| 470.2363       | 5  | N 15 | 1453.8743      | 727.4411        |
| 583.3204       | 6  | I 14 | 1339.8314      | 670.4196        |
| 696.4044       | 7  | I 13 | 1226.7473      | 613.8776        |
| 793.4572       | 8  | P 12 | 1113.6633      | 557.3355        |
| 864.4943       | 9  | A 11 | 1016.6105      | 508.8092        |
| 951.5263       | 10 | S 10 | 945.5734       | 473.2906        |
| 1052.5740      | 11 | T 9  | 858.5414       | 429.7746        |
| 1109.5955      | 12 | G 8  | 757.4937       | 379.2507        |
| 1180.6326      | 13 | A 7  | 700.4722       | 350.7400        |
| 1251.6697      | 14 | A 6  | 629.4351       | 315.2215        |
| 1407.7960      | 15 | K 5  | 558.3980       | 279.7029        |
| 1478.8331      | 16 | A 4  | 402.2717       | 201.6398        |
| 1577.9015      | 17 | V 3  | 331.2346       | 166.1212        |
| 1634.9230      | 18 | G 2  | 232.1662       | 116.5870        |
|                | 19 | K 1  | 175.1447       | 88.0763         |

N-term:+29.04 K(15):+156.13  
 K(19):+156.13

GAGAVGAGPVVR, MH+ 1044.6378, m/z 522.8225  
 H OS G25 P150811 220811-s1.02533.02533.2.dta

scan 2533; 1.4e+001

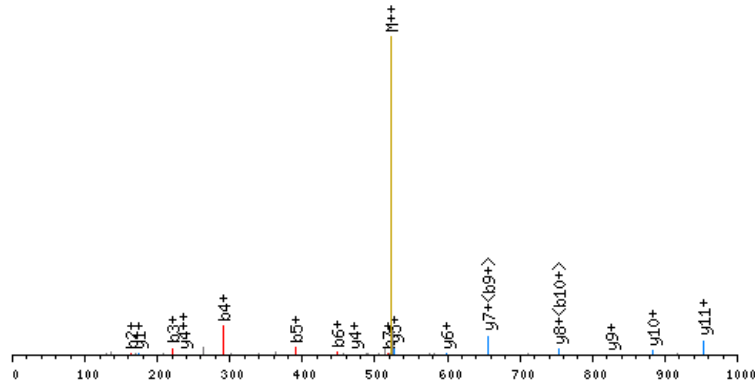

click image to zoom in; click top corners to zoom out [\[precursor±\]](#)

scan 2532; 522.8 m/z; 2.1e+001

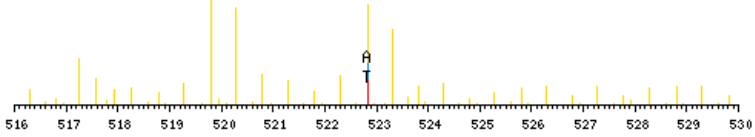

zoomed in precursor plot; T=theoretical m/z, A=acquired m/z

X-range:

-

MassTol: Y-zoom:

MassType:

AVG  MONO

Axis:

1  2

Label:

I  M  -

Ions:

a  +  2+  3+

b  +  2+  3+

c  +  2+  3+

x  +  2+  3+

y  +  2+  3+

z  +  2+  3+

hide H<sub>2</sub>O/NH<sub>3</sub>

zoom 112-122

GO

| b <sup>+</sup> | #  | AA | #  | y <sup>+</sup> | y <sup>2+</sup> |
|----------------|----|----|----|----------------|-----------------|
| 92.0924        | 1  | G  | 12 |                |                 |
| 163.1295       | 2  | A  | 11 | 953.5532       | 477.2805        |
| 220.1509       | 3  | G  | 10 | 882.5161       | 441.7620        |
| 291.1881       | 4  | A  | 9  | 825.4947       | 413.2512        |
| 390.2565       | 5  | V  | 8  | 754.4575       | 377.7327        |
| 447.2779       | 6  | G  | 7  | 655.3891       | 328.1985        |
| 518.3150       | 7  | A  | 6  | 598.3677       | 299.6877        |
| 575.3365       | 8  | G  | 5  | 527.3306       | 264.1692        |
| 672.3893       | 9  | P  | 4  | 470.3091       | 235.6585        |
| 771.4577       | 10 | V  | 3  | 373.2563       | 187.1321        |
| 870.5261       | 11 | V  | 2  | 274.1879       | 137.5979        |
|                | 12 | R  | 1  | 175.1195       | 88.0637         |

N-term: +35.07

GAGGKAGKGGPTPQEAIQR, MH+ 1921.0620, m/z 481.0210  
 L OS G28 P150811 220811-s1.01970.01970.4.dta

X-range:

-

MassTol: Y-zoom:

MassType:

AVG  MONO

Axis:

1  2

Label:

I  M  -

Ions:

a  +  2+  3+

b  +  2+  3+

c  +  2+  3+

x  +  2+  3+

y  +  2+  3+

z  +  2+  3+

hide H<sub>2</sub>O/NH<sub>3</sub>

zoom 112-122

GO

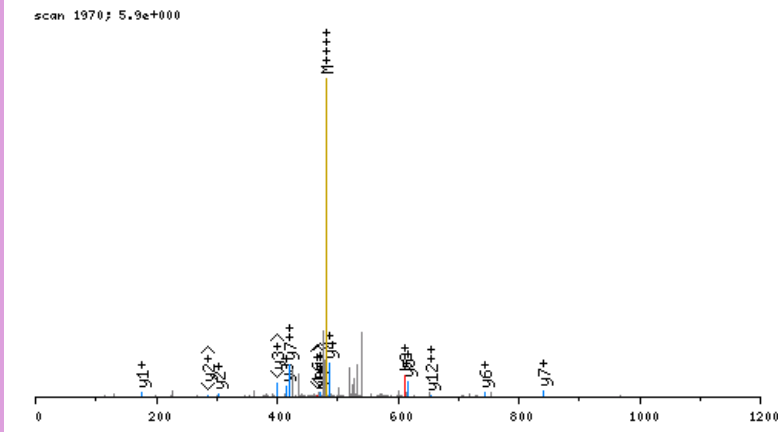

click image to zoom in; click top corners to zoom out [precursor±]

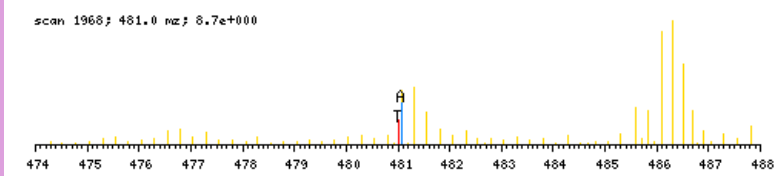

zoomed in precursor plot; T=theoretical m/z, A=acquired m/z

| b <sup>+</sup> | #  | AA | #  | y <sup>+</sup> | y <sup>2+</sup> |
|----------------|----|----|----|----------------|-----------------|
| 86.0606        | 1  | G  | 20 |                |                 |
| 157.0977       | 2  | A  | 19 | 1836.0092      | 918.5085        |
| 214.1191       | 3  | G  | 18 | 1764.9721      | 882.9900        |
| 271.1406       | 4  | G  | 17 | 1707.9507      | 854.4792        |
| 328.1621       | 5  | G  | 16 | 1650.9292      | 825.9685        |
| 484.2884       | 6  | K  | 15 | 1593.9077      | 797.4578        |
| 555.3255       | 7  | A  | 14 | 1437.7814      | 719.3946        |
| 612.3469       | 8  | G  | 13 | 1366.7443      | 683.8761        |
| 768.4732       | 9  | K  | 12 | 1309.7229      | 655.3653        |
| 825.4947       | 10 | G  | 11 | 1153.5966      | 577.3022        |
| 882.5162       | 11 | G  | 10 | 1096.5751      | 548.7915        |
| 979.5689       | 12 | P  | 9  | 1039.5536      | 520.2807        |
| 1080.6166      | 13 | T  | 8  | 942.5009       | 471.7543        |
| 1177.6694      | 14 | P  | 7  | 841.4532       | 421.2305        |
| 1305.7280      | 15 | Q  | 6  | 744.4004       | 372.7041        |
| 1434.7706      | 16 | E  | 5  | 616.3418       | 308.6748        |
| 1505.8077      | 17 | A  | 4  | 487.2993       | 244.1535        |
| 1618.8917      | 18 | I  | 3  | 416.2621       | 208.6350        |
| 1746.9503      | 19 | Q  | 2  | 303.1781       | 152.0930        |
|                | 20 | R  | 1  | 175.1195       | 88.0637         |

N-term:+29.04 K(6):+156.13  
 K(9):+156.13

X-range:

-

MassTol: Y-zoom:

MassType:

AVG  MONO

Axis:

1  2

Label:

I  M  -

Ions:

a  +  2+  3+

b  +  2+  3+

c  +  2+  3+

x  +  2+  3+

y  +  2+  3+

z  +  2+  3+

hide H<sub>2</sub>O/NH<sub>3</sub>

zoom 112-122

GO

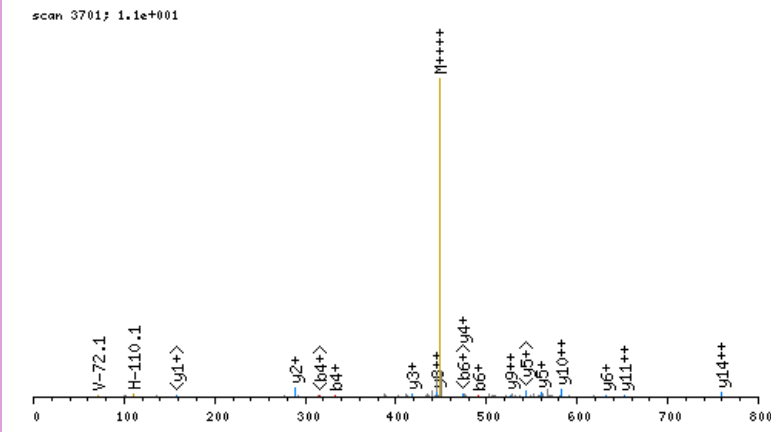

click image to zoom in; click top corners to zoom out [\[precursor±\]](#)

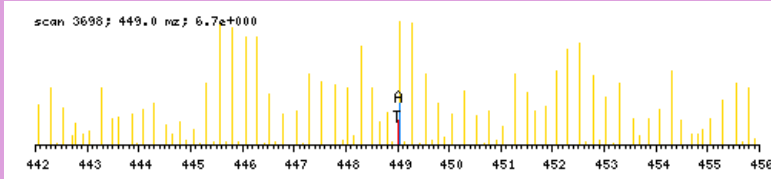

zoomed in precursor plot; T=theoretical m/z, A=acquired m/z

| b <sup>+</sup> | #  | AA # | y <sup>+</sup> | y <sup>2+</sup> |
|----------------|----|------|----------------|-----------------|
| 92.0924        | 1  | G 17 |                |                 |
| 163.1295       | 2  | A 16 | 1701.9348      | 851.4713        |
| 276.2135       | 3  | I 15 | 1630.8977      | 815.9528        |
| 333.2350       | 4  | G 14 | 1517.8136      | 759.4107        |
| 420.2670       | 5  | S 13 | 1460.7922      | 730.9000        |
| 491.3041       | 6  | A 12 | 1373.7601      | 687.3840        |
| 628.3631       | 7  | H 11 | 1302.7230      | 651.8654        |
| 741.4471       | 8  | L 10 | 1165.6641      | 583.3360        |
| 903.6052       | 9  | K 9  | 1052.5801      | 526.7939        |
| 1032.6478      | 10 | E 8  | 890.4220       | 445.7149        |
| 1161.6904      | 11 | E 7  | 761.3794       | 381.1936        |
| 1232.7275      | 12 | A 6  | 632.3368       | 316.6723        |
| 1319.7596      | 13 | S 5  | 561.2997       | 281.1537        |
| 1376.7810      | 14 | G 4  | 474.2676       | 237.6377        |
| 1505.8236      | 15 | E 3  | 417.2462       | 209.1270        |
| 1618.9077      | 16 | L 2  | 288.2036       | 144.6057        |
|                | 17 | R 1  | 175.1195       | 88.0637         |

N-term:+35.07 K(9):+162.16

GALTKAPVPGAQNSSQSR, MH+ 1824.9932, m/z 609.0026  
 L OS G26 P150811 220811-s1.02334.02334.3.dta

scan 2334; 1.8e+000

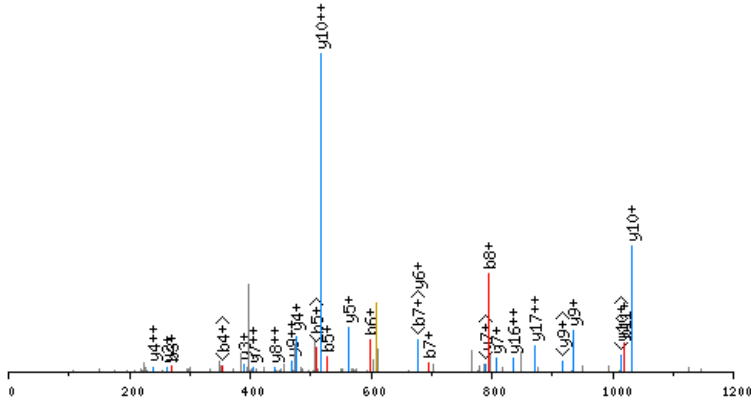

click image to zoom in; click top corners to zoom out [precursor±]

scan 2330; 609.0 m/z; 1.2e+000

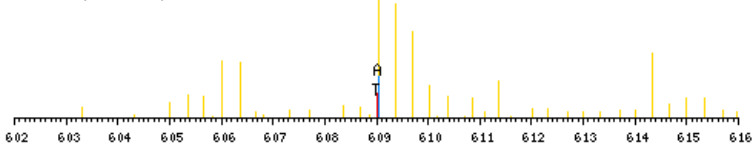

zoomed in precursor plot; T=theoretical m/z, A=acquired m/z

X-range:

-

MassTol: Y-zoom:

MassType:

AVG  MONO

Axis:

1  2

Label:

I  M  -

Ions:

a  +  2+  3+

b  +  2+  3+

c  +  2+  3+

x  +  2+  3+

y  +  2+  3+

z  +  2+  3+

hide H<sub>2</sub>O/NH<sub>3</sub>

zoom 112-122

GO

| b <sup>+</sup> | #  | AA | #  | y <sup>+</sup> | y <sup>2+</sup> |
|----------------|----|----|----|----------------|-----------------|
| 86.0606        | 1  | G  | 18 |                |                 |
| 157.0977       | 2  | A  | 17 | 1739.9405      | 870.4741        |
| 270.1817       | 3  | L  | 16 | 1668.9033      | 834.9556        |
| 371.2294       | 4  | T  | 15 | 1555.8193      | 778.4136        |
| 527.3557       | 5  | K  | 14 | 1454.7716      | 727.8897        |
| 598.3928       | 6  | A  | 13 | 1298.6453      | 649.8266        |
| 695.4456       | 7  | P  | 12 | 1227.6082      | 614.3080        |
| 794.5140       | 8  | V  | 11 | 1130.5554      | 565.7816        |
| 891.5668       | 9  | P  | 10 | 1031.4870      | 516.2474        |
| 948.5882       | 10 | G  | 9  | 934.4342       | 467.7210        |
| 1019.6254      | 11 | A  | 8  | 877.4128       | 439.2103        |
| 1147.6839      | 12 | Q  | 7  | 806.3757       | 403.6917        |
| 1261.7269      | 13 | N  | 6  | 678.3171       | 339.6625        |
| 1348.7589      | 14 | S  | 5  | 564.2742       | 282.6410        |
| 1435.7909      | 15 | S  | 4  | 477.2421       | 239.1250        |
| 1563.8495      | 16 | Q  | 3  | 390.2101       | 195.6090        |
| 1650.8815      | 17 | S  | 2  | 262.1515       | 131.5797        |
|                | 18 | R  | 1  | 175.1195       | 88.0637         |

N-term:+29.04 K(5):+156.13



GANLPCPGKVGSAALR, MH+ 1623.9004, m/z 541.9717  
 L OS G26 P150811 220811-s1.03373.03373.3.dta

X-range:

-

MassTol: Y-zoom:

MassType:

AVG  MONO

Axis:

1  2

Label:

I  M  -

Ions:

a  +  2+  3+

b  +  2+  3+

c  +  2+  3+

x  +  2+  3+

y  +  2+  3+

z  +  2+  3+

hide H<sub>2</sub>O/NH<sub>3</sub>

zoom 112-122

GO

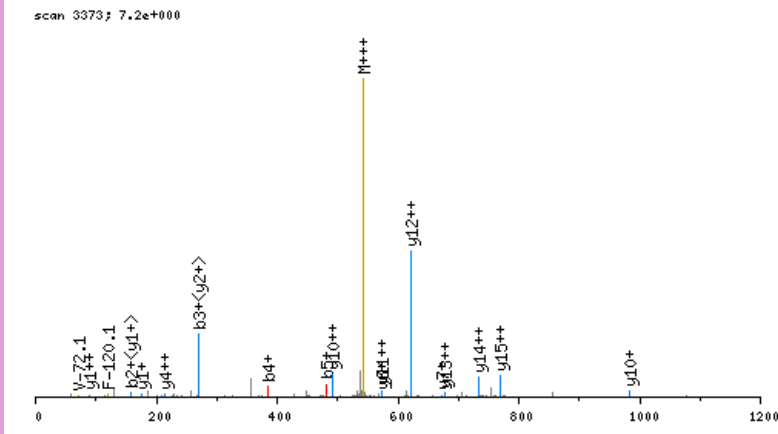

click image to zoom in; click top corners to zoom out [\[precursor±\]](#)

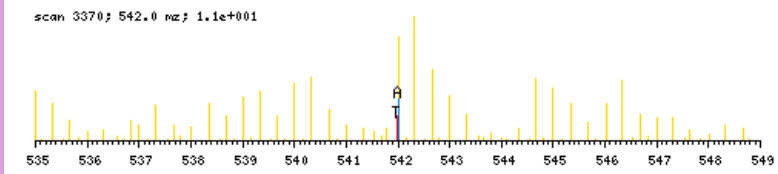

zoomed in precursor plot; T=theoretical m/z, A=acquired m/z

| b <sup>+</sup> | #  | AA # | y <sup>+</sup> | y <sup>2+</sup> |
|----------------|----|------|----------------|-----------------|
| 86.0606        | 1  | G    | 16             |                 |
| 157.0977       | 2  | A    | 15             | 1538.8477       |
| 271.1406       | 3  | N    | 14             | 1467.8106       |
| 384.2247       | 4  | L    | 13             | 1353.7677       |
| 481.2774       | 5  | P    | 12             | 1240.6836       |
| 641.3080       | 6  | C    | 11             | 1143.6308       |
| 738.3608       | 7  | P    | 10             | 983.6002        |
| 795.3823       | 8  | G    | 9              | 886.5475        |
| 951.5086       | 9  | K    | 8              | 829.5260        |
| 1050.5770      | 10 | V    | 7              | 673.3997        |
| 1107.5984      | 11 | G    | 6              | 574.3313        |
| 1194.6305      | 12 | S    | 5              | 517.3098        |
| 1265.6676      | 13 | A    | 4              | 430.2778        |
| 1336.7047      | 14 | A    | 3              | 359.2407        |
| 1449.7888      | 15 | L    | 2              | 288.2036        |
|                | 16 | R    | 1              | 175.1195        |

N-term:+29.04 C(6):+160.03  
 K(9):+156.13

GAPQGS LG EYL FER, MH+ 1557.8125, m/z 519.9424  
 H OS G25 P150811 220811-s1.07276.07276.3.dta

X-range:

-

MassTol: Y-zoom:

MassType:

AVG  MONO

Axis:

1  2

Label:

I  M  -

Ions:

a  +  2+  3+

b  +  2+  3+

c  +  2+  3+

x  +  2+  3+

y  +  2+  3+

z  +  2+  3+

hide H<sub>2</sub>O/NH<sub>3</sub>

zoom 112-122

GO

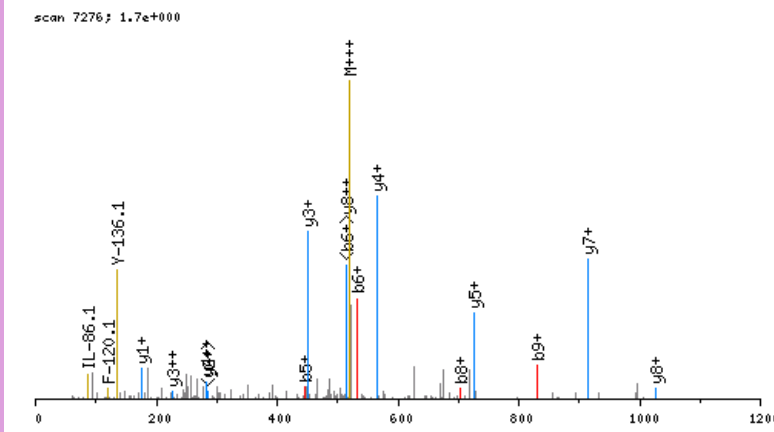

click image to zoom in; click top corners to zoom out [\[precursor±\]](#)

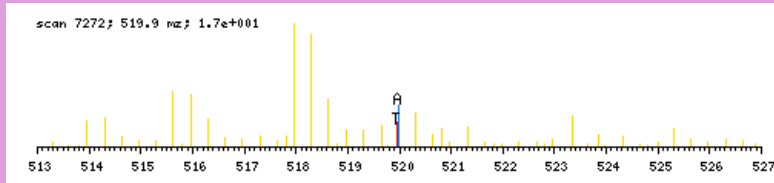

zoomed in precursor plot; T=theoretical m/z, A=acquired m/z

| b <sup>+</sup> | #  | AA # | y <sup>+</sup> | y <sup>2+</sup> |
|----------------|----|------|----------------|-----------------|
| 92.0924        | 1  | G 14 |                |                 |
| 163.1295       | 2  | A 13 | 1466.7280      | 733.8679        |
| 260.1822       | 3  | P 12 | 1395.6909      | 698.3493        |
| 388.2408       | 4  | Q 11 | 1298.6381      | 649.8230        |
| 445.2623       | 5  | G 10 | 1170.5795      | 585.7937        |
| 532.2943       | 6  | S 9  | 1113.5580      | 557.2829        |
| 645.3784       | 7  | L 8  | 1026.5260      | 513.7669        |
| 702.3998       | 8  | G 7  | 913.4420       | 457.2249        |
| 831.4424       | 9  | E 6  | 856.4205       | 428.7142        |
| 994.5058       | 10 | Y 5  | 727.3779       | 364.1929        |
| 1107.5898      | 11 | L 4  | 564.3146       | 282.6612        |
| 1254.6582      | 12 | F 3  | 451.2305       | 226.1192        |
| 1383.7008      | 13 | E 2  | 304.1621       | 152.5850        |
|                | 14 | R 1  | 175.1195       | 88.0637         |

N-term:+35.07

GAPSASVAAAPAPAR, MH+ 1321.7228, m/z 441.2458  
 L OS G24 P150811 220811-s1.02579.02579.3.dta

X-range:

-

MassTol: Y-zoom:

MassType:

AVG  MONO

Axis:

1  2

Label:

I  M  -

Ions:

a  +  2+  3+

b  +  2+  3+

c  +  2+  3+

x  +  2+  3+

y  +  2+  3+

z  +  2+  3+

hide H<sub>2</sub>O/NH<sub>3</sub>

zoom 112-122

GO

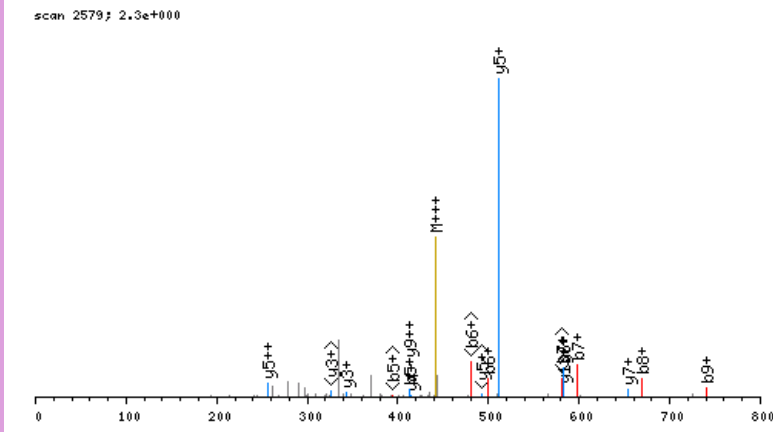

click image to zoom in; click top corners to zoom out [\[precursor±\]](#)

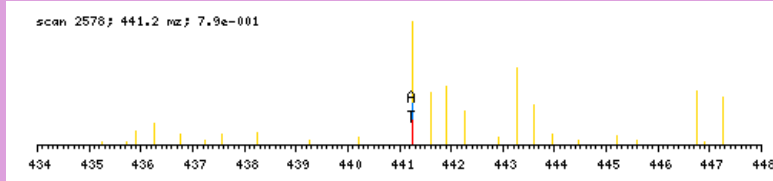

zoomed in precursor plot; T=theoretical m/z, A=acquired m/z

| b <sup>+</sup>  | #  | AA # | y <sup>+</sup>  | y <sup>2+</sup> |
|-----------------|----|------|-----------------|-----------------|
| 86.0606         | 1  | G 15 |                 |                 |
| 157.0977        | 2  | A 14 | 1236.6701       | 618.8389        |
| 254.1504        | 3  | P 13 | 1165.6329       | <b>583.3204</b> |
| 341.1825        | 4  | S 12 | 1068.5802       | 534.7940        |
| <b>412.2196</b> | 5  | A 11 | 981.5482        | 491.2780        |
| <b>499.2516</b> | 6  | S 10 | 910.5110        | 455.7594        |
| <b>598.3200</b> | 7  | V 9  | 823.4790        | <b>412.2434</b> |
| <b>669.3571</b> | 8  | A 8  | 724.4106        | 362.7092        |
| <b>740.3943</b> | 9  | A 7  | <b>653.3735</b> | 327.1907        |
| 811.4314        | 10 | A 6  | <b>582.3364</b> | 291.6721        |
| 908.4841        | 11 | P 5  | <b>511.2993</b> | <b>256.1535</b> |
| 979.5212        | 12 | A 4  | <b>414.2465</b> | 207.6272        |
| 1076.5740       | 13 | P 3  | <b>343.2094</b> | 172.1086        |
| 1147.6111       | 14 | A 2  | 246.1566        | 123.5822        |
|                 | 15 | R 1  | 175.1195        | 88.0637         |

N-term:+29.04

GASQAGMLAPGTR, MH+ 1244.6421, m/z 622.8247  
 L OS G25 P150811 220811-s1.02838.02838.2.dta

scan 2838; 1.1e+000

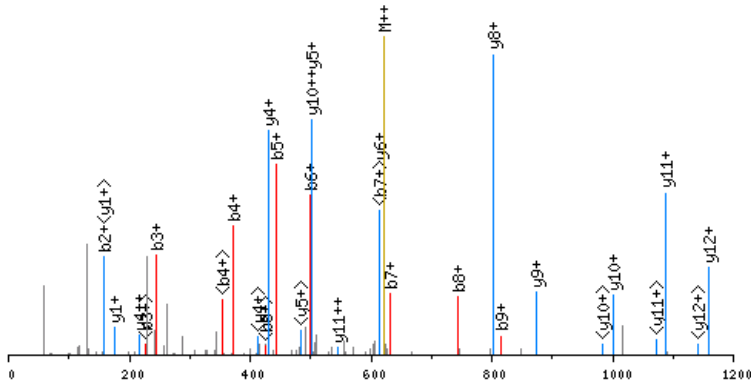

click image to zoom in; click top corners to zoom out [\[precursor±\]](#)

scan 2837; 622.8 m/z; 3.2e+001

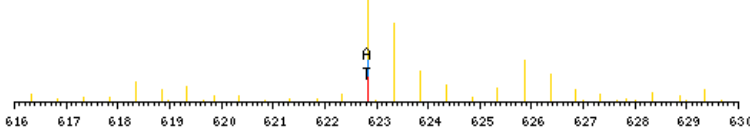

zoomed in precursor plot; T=theoretical m/z, A=acquired m/z

X-range:

-

MassTol: Y-zoom:

MassType:

AVG  MONO

Axis:

1  2

Label:

I  M  -

Ions:

a  +  2+  3+

b  +  2+  3+

c  +  2+  3+

x  +  2+  3+

y  +  2+  3+

z  +  2+  3+

hide H<sub>2</sub>O/NH<sub>3</sub>

zoom 112-122

GO

| b <sup>+</sup> | #  | AA # | y <sup>+</sup> | y <sup>2+</sup> |
|----------------|----|------|----------------|-----------------|
| 86.0606        | 1  | G 13 |                |                 |
| 157.0977       | 2  | A 12 | 1159.5894      | 580.2986        |
| 244.1297       | 3  | S 11 | 1088.5523      | 544.7800        |
| 372.1883       | 4  | Q 10 | 1001.5202      | 501.2640        |
| 443.2254       | 5  | A 9  | 873.4616       | 437.2347        |
| 500.2469       | 6  | G 8  | 802.4245       | 401.7162        |
| 631.2873       | 7  | M 7  | 745.4031       | 373.2054        |
| 744.3714       | 8  | L 6  | 614.3626       | 307.6852        |
| 815.4085       | 9  | A 5  | 501.2785       | 251.1432        |
| 912.4613       | 10 | P 4  | 430.2414       | 215.6246        |
| 969.4828       | 11 | G 3  | 333.1886       | 167.0982        |
| 1070.5304      | 12 | T 2  | 276.1672       | 138.5875        |
|                | 13 | R 1  | 175.1195       | 88.0637         |

N-term:+29.04

GAVSAEQVIAGFNR, MH+ 1446.7705, m/z 482.9283  
 L OS G25 P150811 220811-s1.06889.06889.3.dta

scan 6889; 7.8e+000

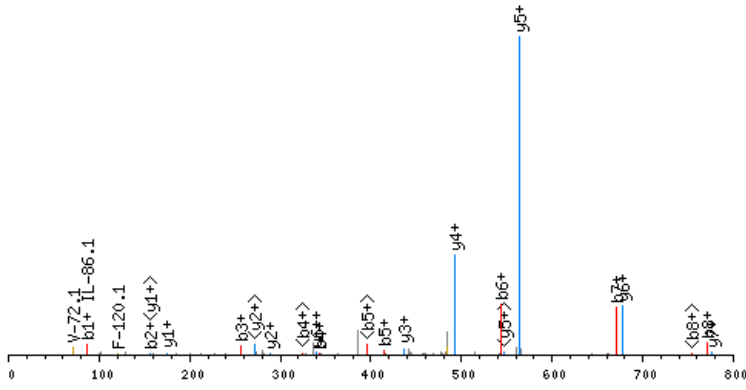

click image to zoom in; click top corners to zoom out [\[precursor±\]](#)

scan 6887; 482.9 m/z; 9.9e+000

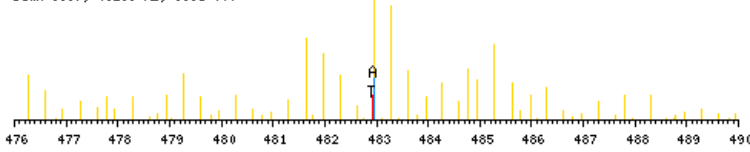

zoomed in precursor plot; T=theoretical m/z, A=acquired m/z

X-range:

-

MassTol: Y-zoom:

MassType:

AVG  MONO

Axis:

1  2

Label:

I  M  -

Ions:

a  +  2+  3+

b  +  2+  3+

c  +  2+  3+

x  +  2+  3+

y  +  2+  3+

z  +  2+  3+

hide H<sub>2</sub>O/NH<sub>3</sub>

zoom 112-122

GO

| b <sup>+</sup> | #  | AA # | y <sup>+</sup> | y <sup>2+</sup> |
|----------------|----|------|----------------|-----------------|
| 86.0606        | 1  | G 14 |                |                 |
| 157.0977       | 2  | A 13 | 1361.7177      | 681.3628        |
| 256.1661       | 3  | V 12 | 1290.6806      | 645.8442        |
| 343.1981       | 4  | S 11 | 1191.6122      | 596.3100        |
| 414.2352       | 5  | A 10 | 1104.5802      | 552.7940        |
| 543.2778       | 6  | E 9  | 1033.5431      | 517.2754        |
| 671.3364       | 7  | Q 8  | 904.5005       | 452.7542        |
| 770.4048       | 8  | V 7  | 776.4419       | 388.7249        |
| 883.4889       | 9  | I 6  | 677.3735       | 339.1907        |
| 954.5260       | 10 | A 5  | 564.2894       | 282.6486        |
| 1011.5475      | 11 | G 4  | 493.2523       | 247.1301        |
| 1158.6159      | 12 | F 3  | 436.2308       | 218.6193        |
| 1272.6588      | 13 | N 2  | 289.1624       | 145.0851        |
|                | 14 | R 1  | 175.1195       | 88.0637         |

N-term:+29.04

GAYDAQGTLTKIFKLGGR, MH+ 1984.2080, m/z 496.8075  
 H OS G28 P150811 220811-s1.08696.08696.4.dta

X-range:

-

MassTol: Y-zoom:

MassType:

AVG  MONO

Axis:

1  2

Label:

I  M  -

Ions:

a  +  2+  3+

b  +  2+  3+

c  +  2+  3+

x  +  2+  3+

y  +  2+  3+

z  +  2+  3+

hide H<sub>2</sub>O/NH<sub>3</sub>

zoom 112-122

GO

scan 8696; 9.6e+000

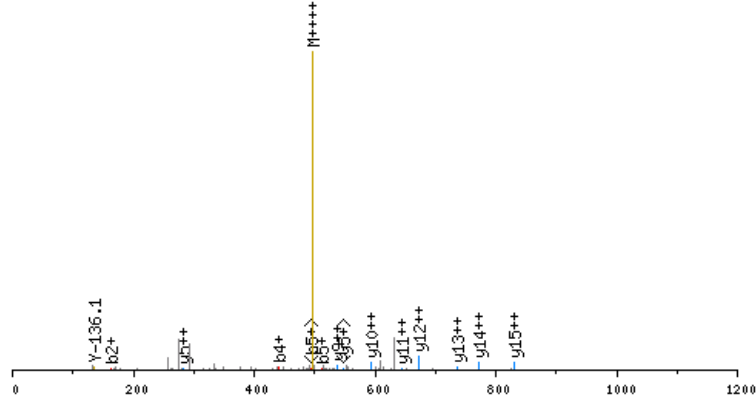

click image to zoom in; click top corners to zoom out [\[precursor±\]](#)

scan 8693; 496.8 mz; 1.2e+001

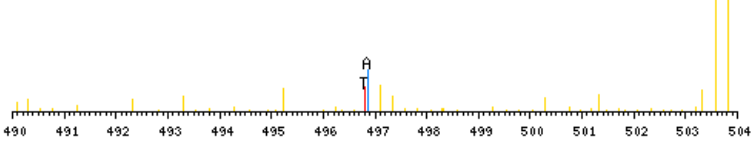

zoomed in precursor plot; T=theoretical m/z, A=acquired m/z

| b <sup>+</sup> | #  | AA | #  | y <sup>+</sup> | y <sup>2+</sup> |
|----------------|----|----|----|----------------|-----------------|
| 92.0924        | 1  | G  | 18 |                |                 |
| 163.1295       | 2  | A  | 17 | 1893.1235      | 947.0657        |
| 326.1928       | 3  | Y  | 16 | 1822.0864      | 911.5471        |
| 441.2197       | 4  | D  | 15 | 1659.0230      | 830.0154        |
| 512.2569       | 5  | A  | 14 | 1543.9961      | 772.5020        |
| 640.3154       | 6  | Q  | 13 | 1472.9590      | 736.9834        |
| 697.3369       | 7  | G  | 12 | 1344.9004      | 672.9541        |
| 798.3846       | 8  | T  | 11 | 1287.8789      | 644.4434        |
| 911.4686       | 9  | L  | 10 | 1186.8313      | 593.9195        |
| 998.5007       | 10 | S  | 9  | 1073.7472      | 537.3775        |
| 1160.6588      | 11 | K  | 8  | 986.7152       | 493.8615        |
| 1273.7428      | 12 | I  | 7  | 824.5571       | 412.7824        |
| 1420.8113      | 13 | F  | 6  | 711.4730       | 356.2404        |
| 1582.9694      | 14 | K  | 5  | 564.4046       | 282.7062        |
| 1696.0534      | 15 | L  | 4  | 402.2465       | 201.6272        |
| 1753.0749      | 16 | G  | 3  | 289.1624       | 145.0851        |
| 1810.0963      | 17 | G  | 2  | 232.1410       | 116.5744        |
|                | 18 | R  | 1  | 175.1195       | 88.0637         |

N-term:+35.07 K(11):+162.16  
 K(14):+162.16

GDDLDPNYVLSSR, MH+ 1484.7445, m/z 495.5863  
 H OS G25 P150811 220811-s1.05990.05990.3.dta

X-range:

-

MassTol: Y-zoom:

MassType:

AVG  MONO

Axis:

1  2

Label:

I  M  -

Ions:

a  +  2+  3+

b  +  2+  3+

c  +  2+  3+

x  +  2+  3+

y  +  2+  3+

z  +  2+  3+

hide H<sub>2</sub>O/NH<sub>3</sub>

zoom 112-122

GO

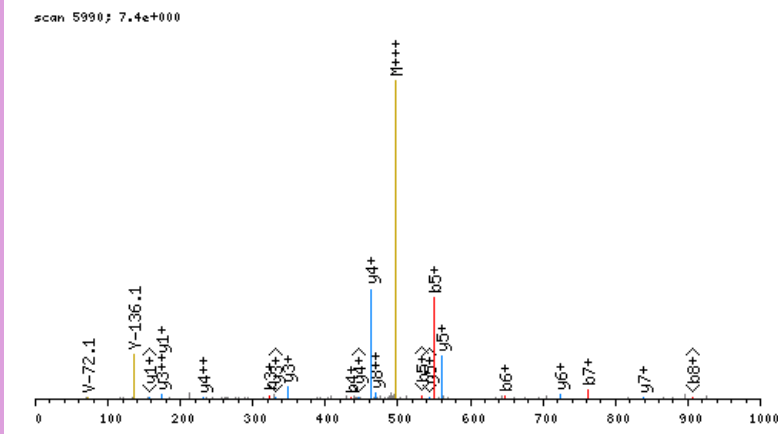

click image to zoom in; click top corners to zoom out [\[precursor±\]](#)

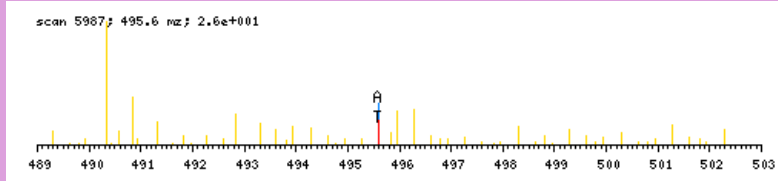

zoomed in precursor plot; T=theoretical m/z, A=acquired m/z

| b <sup>+</sup> | #  | AA # | y <sup>+</sup> | y <sup>2+</sup> |
|----------------|----|------|----------------|-----------------|
| 92.0924        | 1  | G 13 |                |                 |
| 207.1193       | 2  | D 12 | 1393.6599      | 697.3339        |
| 322.1462       | 3  | D 11 | 1278.6330      | 639.8204        |
| 435.2303       | 4  | L 10 | 1163.6061      | 582.3069        |
| 550.2573       | 5  | D 9  | 1050.5220      | 525.7649        |
| 647.3100       | 6  | P 8  | 935.4951       | 468.2514        |
| 761.3529       | 7  | N 7  | 838.4423       | 419.7251        |
| 924.4163       | 8  | Y 6  | 724.3994       | 362.7036        |
| 1023.4847      | 9  | V 5  | 561.3360       | 281.1719        |
| 1136.5688      | 10 | L 4  | 462.2676       | 231.6377        |
| 1223.6008      | 11 | S 3  | 349.1836       | 175.0957        |
| 1310.6328      | 12 | S 2  | 262.1515       | 131.5797        |
|                | 13 | R 1  | 175.1195       | 88.0637         |

N-term:+35.07

GDDLIVTNPQR, MH+ 1283.7596, m/z 428.5914  
 H OS G27 P150811 220811-s1.02289.02289.3.dta

scan 2289; 2.2e+001

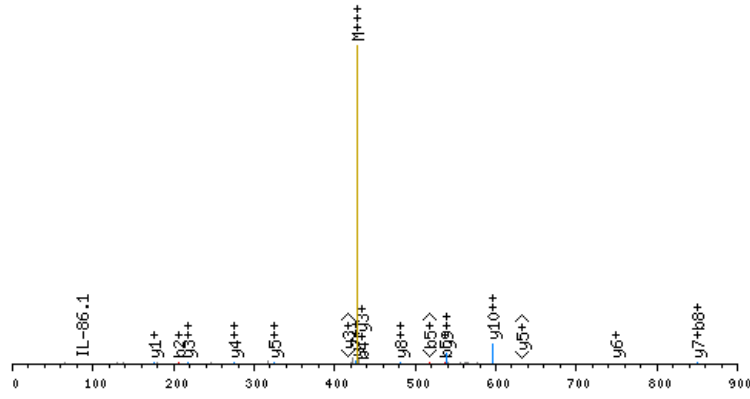

click image to zoom in; click top corners to zoom out [\[precursor±\]](#)

scan 2287; 428.6 m/z; 1.8e+001

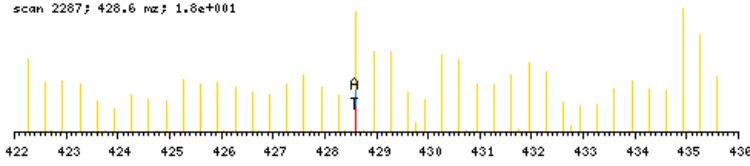

zoomed in precursor plot; T=theoretical m/z, A=acquired m/z

X-range:

-

MassTol: Y-zoom:

MassType:

AVG  MONO

Axis:

1  2

Label:

I  M  -

Ions:

a  +  2+  3+

b  +  2+  3+

c  +  2+  3+

x  +  2+  3+

y  +  2+  3+

z  +  2+  3+

hide H<sub>2</sub>O/NH<sub>3</sub>

zoom 112-122

GO

| b <sup>+</sup> | #  | AA # | y <sup>+</sup> | y <sup>2+</sup> |
|----------------|----|------|----------------|-----------------|
| 92.0924        | 1  | G 11 |                |                 |
| 207.1193       | 2  | D 10 | 1192.6750      | 596.8414        |
| 322.1462       | 3  | D 9  | 1077.6481      | 539.3279        |
| 435.2303       | 4  | L 8  | 962.6211       | 481.8145        |
| 536.2780       | 5  | T 7  | 849.5371       | 425.2724        |
| 635.3464       | 6  | V 6  | 748.4894       | 374.7486        |
| 736.3941       | 7  | T 5  | 649.4210       | 325.2144        |
| 850.4370       | 8  | N 4  | 548.3733       | 274.6906        |
| 947.4898       | 9  | P 3  | 434.3304       | 217.6691        |
| 1109.6479      | 10 | K 2  | 337.2776       | 169.1427        |
|                | 11 | R 1  | 175.1195       | 88.0637         |

N-term:+35.07 K(10):+162.16



GDFPDTIQCADVHLVPR, MH+ 1967.9648, m/z 656.6598  
 L OS G26 P150811 220811-s1.05627.05627.3.dta

X-range:

-

MassTol: Y-zoom:

MassType:

AVG  MONO

Axis:

1  2

Label:

I  M  -

Ions:

a  +  2+  3+

b  +  2+  3+

c  +  2+  3+

x  +  2+  3+

y  +  2+  3+

z  +  2+  3+

hide H<sub>2</sub>O/NH<sub>3</sub>

zoom 112-122

GO

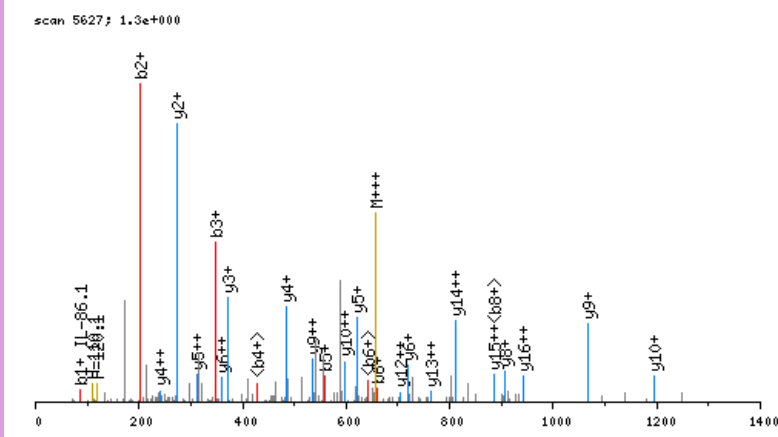

click image to zoom in; click top corners to zoom out [\[precursor±\]](#)

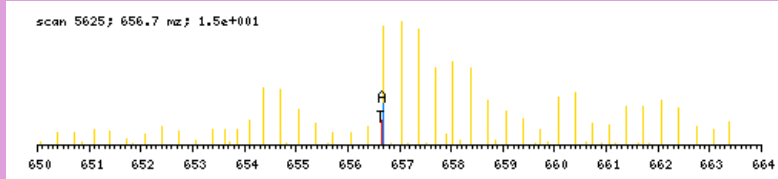

zoomed in precursor plot; T=theoretical m/z, A=acquired m/z

| b <sup>+</sup> | #  | AA # | y <sup>+</sup> | y <sup>2+</sup> |
|----------------|----|------|----------------|-----------------|
| 86.0606        | 1  | G 17 |                |                 |
| 201.0875       | 2  | D 16 | 1882.9121      | 941.9600        |
| 348.1559       | 3  | F 15 | 1767.8852      | 884.4465        |
| 445.2087       | 4  | P 14 | 1620.8168      | 810.9123        |
| 560.2356       | 5  | D 13 | 1523.7640      | 762.3859        |
| 661.2833       | 6  | T 12 | 1408.7370      | 704.8724        |
| 774.3674       | 7  | I 11 | 1307.6894      | 654.3486        |
| 902.4259       | 8  | Q 10 | 1194.6053      | 597.8066        |
| 1062.4565      | 9  | C 9  | 1066.5467      | 533.7773        |
| 1133.4937      | 10 | A 8  | 906.5161       | 453.7620        |
| 1248.5206      | 11 | D 7  | 835.4790       | 418.2434        |
| 1347.5890      | 12 | V 6  | 720.4521       | 360.7299        |
| 1484.6479      | 13 | H 5  | 621.3837       | 311.1957        |
| 1597.7320      | 14 | L 4  | 484.3247       | 242.6663        |
| 1696.8004      | 15 | V 3  | 371.2407       | 186.1243        |
| 1793.8532      | 16 | P 2  | 272.1723       | 136.5900        |
|                | 17 | R 1  | 175.1195       | 88.0637         |

N-term:+29.04 C(9):+160.03

GDPKEEEEEELVDPLTTVR, MH+ 2253.1774, m/z 751.7307  
 H OS G26 P150811 220811-s1.05711.05711.3.dta

scan 5711; 3.5e+000

X-range:

-

MassTol: Y-zoom:

MassType:

AVG  MONO

Axis:

1  2

Label:

I  M  -

Ions:

a  +  2+  3+

b  +  2+  3+

c  +  2+  3+

x  +  2+  3+

y  +  2+  3+

z  +  2+  3+

hide H<sub>2</sub>O/NH<sub>3</sub>

zoom 112-122

GO

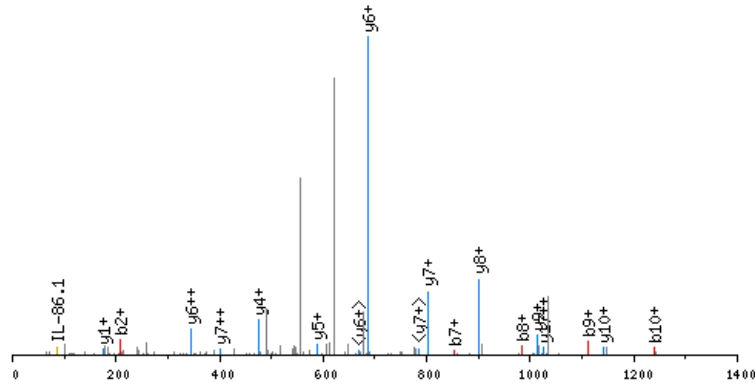

click image to zoom in; click top corners to zoom out [\[precursor±\]](#)

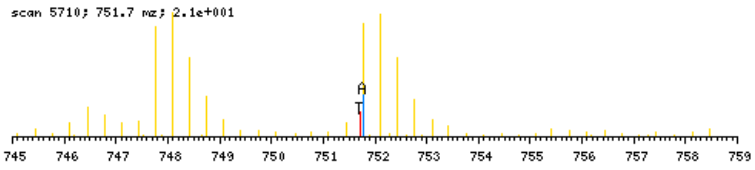

zoomed in precursor plot; T=theoretical m/z, A=acquired m/z

| b <sup>+</sup> | #  | AA | #  | y <sup>+</sup> | y <sup>2+</sup> |
|----------------|----|----|----|----------------|-----------------|
| 92.0924        | 1  | G  | 19 |                |                 |
| 207.1193       | 2  | D  | 18 | 2162.0929      | 1081.5504       |
| 304.1721       | 3  | P  | 17 | 2047.0659      | 1024.0369       |
| 466.3302       | 4  | K  | 16 | 1950.0132      | 975.5105        |
| 595.3728       | 5  | E  | 15 | 1787.8551      | 894.4315        |
| 724.4154       | 6  | E  | 14 | 1658.8125      | 829.9102        |
| 853.4580       | 7  | E  | 13 | 1529.7699      | 765.3889        |
| 982.5005       | 8  | E  | 12 | 1400.7273      | 700.8676        |
| 1111.5431      | 9  | E  | 11 | 1271.6847      | 636.3463        |
| 1240.5857      | 10 | E  | 10 | 1142.6421      | 571.8250        |
| 1353.6698      | 11 | L  | 9  | 1013.5995      | 507.3037        |
| 1452.7382      | 12 | V  | 8  | 900.5155       | 450.7616        |
| 1567.7652      | 13 | D  | 7  | 801.4470       | 401.2274        |
| 1664.8179      | 14 | P  | 6  | 686.4201       | 343.7140        |
| 1777.9020      | 15 | L  | 5  | 589.3673       | 295.1876        |
| 1878.9497      | 16 | T  | 4  | 476.2833       | 238.6455        |
| 1979.9973      | 17 | T  | 3  | 375.2356       | 188.1217        |
| 2079.0657      | 18 | V  | 2  | 274.1879       | 137.5979        |
|                | 19 | R  | 1  | 175.1195       | 88.0637         |

N-term:+35.07 K(4):+162.16

GDRGEAGAAGPSGPAGPR, MH+ 1613.8208, m/z 538.6118  
 H OS G27 P150811 220811-s1.01940.01940.3.dta

scan 1940; 1.0e-001

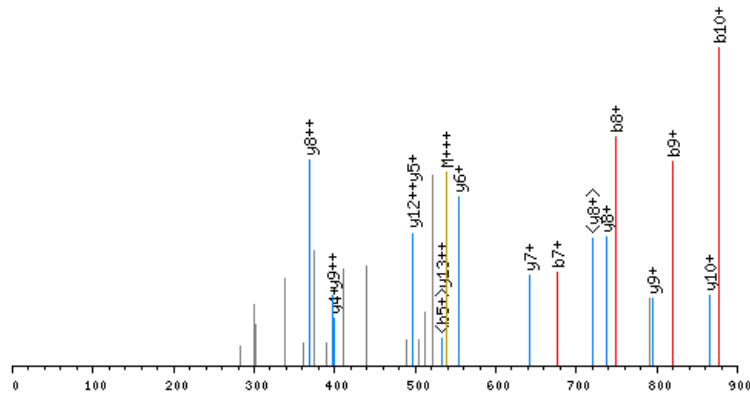

click image to zoom in; click top corners to zoom out [\[precursor±\]](#)

scan 1939; 538.6 m/z; 1.8e+000

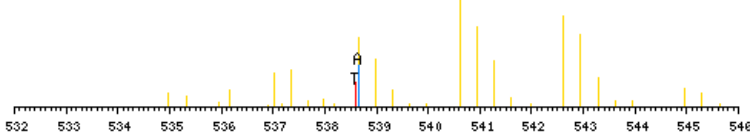

zoomed in precursor plot; T=theoretical m/z, A=acquired m/z

X-range:

-

MassTol: Y-zoom:

MassType:

AVG  MONO

Axis:

1  2

Label:

I  M  -

Ions:

a  +  2+  3+

b  +  2+  3+

c  +  2+  3+

x  +  2+  3+

y  +  2+  3+

z  +  2+  3+

hide H<sub>2</sub>O/NH<sub>3</sub>

zoom 112-122

GO

| b <sup>+</sup> | #  | AA # | y <sup>+</sup> | y <sup>2+</sup> |
|----------------|----|------|----------------|-----------------|
| 92.0924        | 1  | G 18 |                |                 |
| 207.1193       | 2  | D 17 | 1522.7362      | 761.8720        |
| 363.2204       | 3  | R 16 | 1407.7093      | 704.3586        |
| 420.2419       | 4  | G 15 | 1251.6082      | 626.3080        |
| 549.2845       | 5  | E 14 | 1194.5867      | 597.7973        |
| 620.3216       | 6  | A 13 | 1065.5441      | 533.2760        |
| 677.3431       | 7  | G 12 | 994.5070       | 497.7574        |
| 748.3802       | 8  | A 11 | 937.4856       | 469.2467        |
| 819.4173       | 9  | A 10 | 866.4484       | 433.7281        |
| 876.4387       | 10 | G 9  | 795.4113       | 398.2096        |
| 973.4915       | 11 | P 8  | 738.3899       | 369.6988        |
| 1060.5235      | 12 | S 7  | 641.3371       | 321.1725        |
| 1117.5450      | 13 | G 6  | 554.3051       | 277.6564        |
| 1214.5978      | 14 | P 5  | 497.2836       | 249.1457        |
| 1285.6349      | 15 | A 4  | 400.2308       | 200.6193        |
| 1342.6563      | 16 | G 3  | 329.1937       | 165.1008        |
| 1439.7091      | 17 | P 2  | 272.1723       | 136.5900        |
|                | 18 | R 1  | 175.1195       | 88.0637         |

N-term:+35.07

X-range:

-

MassTol: Y-zoom:

MassType:

AVG  MONO

Axis:

1  2

Label:

I  M  -

Ions:

a  +  2+  3+

b  +  2+  3+

c  +  2+  3+

x  +  2+  3+

y  +  2+  3+

z  +  2+  3+

hide H<sub>2</sub>O/NH<sub>3</sub>

zoom 112-122

GO

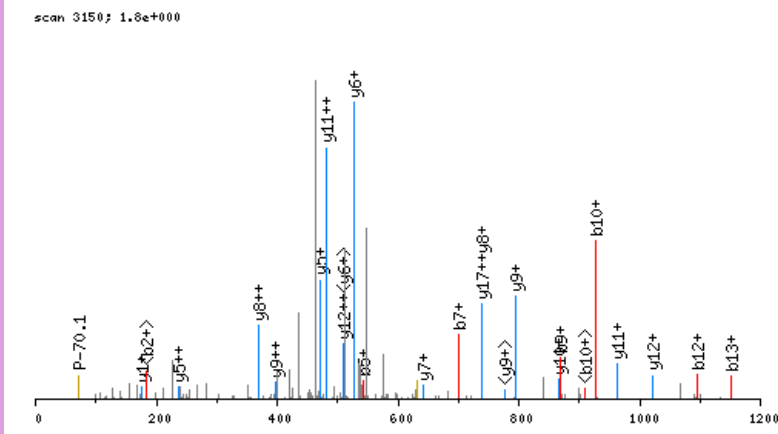

click image to zoom in; click top corners to zoom out [\[precursor±\]](#)

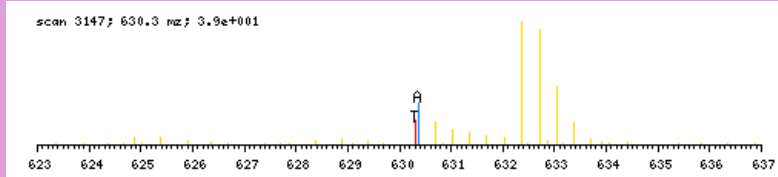

zoomed in precursor plot; T=theoretical m/z, A=acquired m/z

| b <sup>+</sup> | #  | AA # | y <sup>+</sup> | y <sup>2+</sup> |
|----------------|----|------|----------------|-----------------|
| 86.0606        | 1  | G 21 |                |                 |
| 201.0875       | 2  | D 20 | 1803.9102      | 902.4590        |
| 357.1886       | 3  | R 19 | 1688.8832      | 844.9455        |
| 414.2101       | 4  | G 18 | 1532.7821      | 766.8950        |
| 543.2527       | 5  | E 17 | 1475.7607      | 738.3842        |
| 644.3004       | 6  | T 16 | 1346.7181      | 673.8629        |
| 701.3218       | 7  | G 15 | 1245.6704      | 623.3391        |
| 798.3746       | 8  | P 14 | 1188.6489      | 594.8284        |
| 869.4117       | 9  | A 13 | 1091.5962      | 546.3020        |
| 926.4332       | 10 | G 12 | 1020.5591      | 510.7834        |
| 1023.4859      | 11 | P 11 | 963.5376       | 482.2727        |
| 1094.5230      | 12 | A 10 | 866.4848       | 433.7463        |
| 1151.5445      | 13 | G 9  | 795.4477       | 398.2278        |
| 1248.5973      | 14 | P 8  | 738.4262       | 369.7170        |
| 1361.6813      | 15 | I 7  | 641.3735       | 321.1907        |
| 1418.7028      | 16 | G 6  | 528.2894       | 264.6486        |
| 1515.7556      | 17 | P 5  | 471.2680       | 236.1379        |
| 1586.7927      | 18 | A 4  | 374.2152       | 187.6115        |
| 1643.8141      | 19 | G 3  | 303.1781       | 152.0930        |
| 1714.8512      | 20 | A 2  | 246.1566       | 123.5822        |
|                | 21 | R 1  | 175.1195       | 88.0637         |

N-term:+29.04

GDSGDSGGGDSGGSPCSEAAATLTEKR, MH+ 2608.1433, m/z 652.7913  
 I OS G26 P150811 220811-s1.02912.02912.4.dta

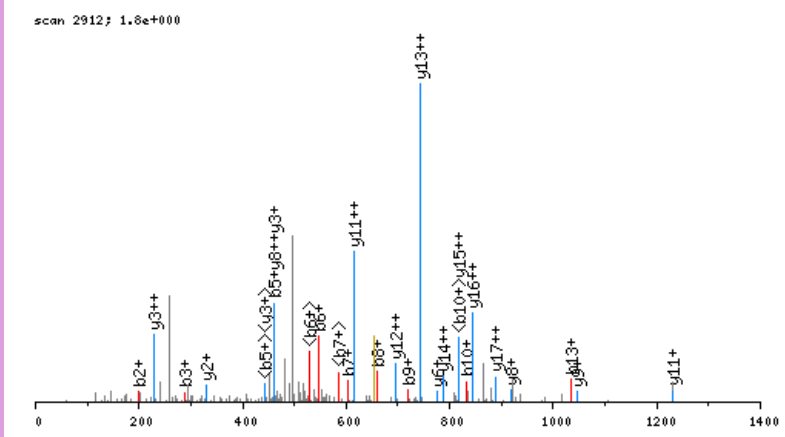

click image to zoom in; click top corners to zoom out [\[precursor±\]](#)

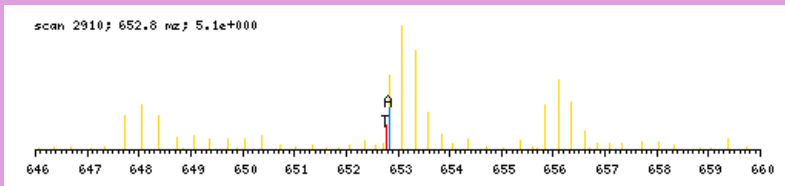

zoomed in precursor plot; T=theoretical m/z, A=acquired m/z

| b <sup>+</sup> | #  | AA | #  | y <sup>+</sup> | y <sup>2+</sup> |
|----------------|----|----|----|----------------|-----------------|
| 86.0606        | 1  | G  | 27 |                |                 |
| 201.0875       | 2  | D  | 26 | 2523.0905      | 1262.0492       |
| 288.1195       | 3  | S  | 25 | 2408.0636      | 1204.5357       |
| 345.1410       | 4  | G  | 24 | 2321.0315      | 1161.0197       |
| 460.1679       | 5  | D  | 23 | 2264.0101      | 1132.5090       |
| 547.2000       | 6  | S  | 22 | 2148.9831      | 1074.9955       |
| 604.2214       | 7  | G  | 21 | 2061.9511      | 1031.4795       |
| 661.2429       | 8  | G  | 20 | 2004.9296      | 1002.9687       |
| 718.2644       | 9  | G  | 19 | 1947.9082      | 974.4580        |
| 833.2913       | 10 | D  | 18 | 1890.8867      | 945.9473        |
| 920.3233       | 11 | S  | 17 | 1775.8598      | 888.4338        |
| 977.3448       | 12 | G  | 16 | 1688.8277      | 844.9178        |
| 1034.3663      | 13 | G  | 15 | 1631.8063      | 816.4071        |
| 1121.3983      | 14 | S  | 14 | 1574.7848      | 787.8963        |
| 1218.4511      | 15 | P  | 13 | 1487.7528      | 744.3803        |
| 1378.4817      | 16 | C  | 12 | 1390.7000      | 695.8539        |
| 1475.5344      | 17 | P  | 11 | 1230.6694      | 615.8386        |
| 1562.5664      | 18 | S  | 10 | 1133.6167      | 567.3122        |
| 1691.6090      | 19 | E  | 9  | 1046.5846      | 523.7962        |
| 1762.6462      | 20 | A  | 8  | 917.5420       | 459.2749        |
| 1833.6833      | 21 | A  | 7  | 846.5049       | 423.7564        |
| 1934.7309      | 22 | T  | 6  | 775.4678       | 388.2378        |
| 2047.8150      | 23 | L  | 5  | 674.4201       | 337.7140        |
| 2148.8627      | 24 | T  | 4  | 561.3361       | 281.1719        |
| 2277.9053      | 25 | E  | 3  | 460.2884       | 230.6481        |
| 2434.0316      | 26 | K  | 2  | 331.2458       | 166.1268        |
|                | 27 | R  | 1  | 175.1195       | 88.0637         |

N-term: +29.04 C(16) : +160.03  
 K(26) : +156.13

X-range:

-

MassTol: Y-zoom:

MassType:

AVG  MONO

Axis:

1  2

Label:

I  M  -

Ions:

a  +  2+  3+

b  +  2+  3+

c  +  2+  3+

x  +  2+  3+

y  +  2+  3+

z  +  2+  3+

hide H<sub>2</sub>O/NH<sub>3</sub>

zoom 112-122

GO

GDVDISGPKLEGDIKVPR, MH+ 1997.2132, m/z 500.0587  
 H OS G28 P150811 220811-s1.06437.06437.4.dta

X-range:

-

MassTol: Y-zoom:

MassType:

AVG  MONO

Axis:

1  2

Label:

I  M  -

Ions:

a  +  2+  3+

b  +  2+  3+

c  +  2+  3+

x  +  2+  3+

y  +  2+  3+

z  +  2+  3+

hide H<sub>2</sub>O/NH<sub>3</sub>

zoom 112-122

GO

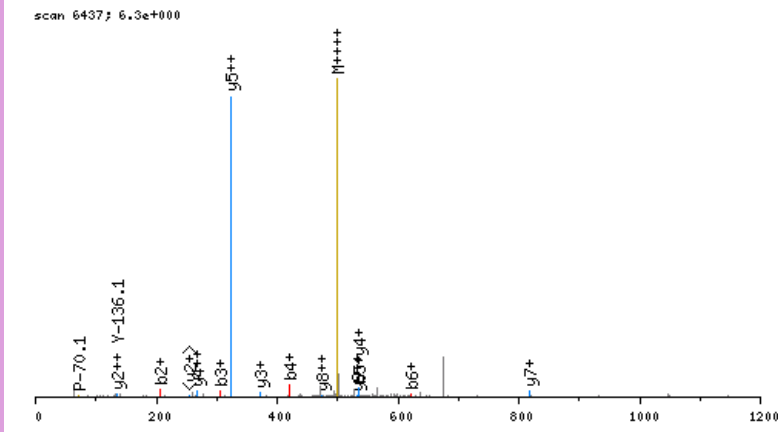

click image to zoom in; click top corners to zoom out [\[precursor±\]](#)

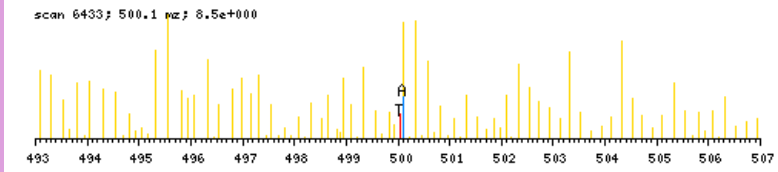

zoomed in precursor plot; T=theoretical m/z, A=acquired m/z

| b <sup>+</sup> | #  | AA | #  | y <sup>+</sup> | y <sup>2+</sup> |
|----------------|----|----|----|----------------|-----------------|
| 92.0924        | 1  | G  | 18 |                |                 |
| 207.1193       | 2  | D  | 17 | 1906.1286      | 953.5682        |
| 306.1877       | 3  | V  | 16 | 1791.1017      | 896.0548        |
| 421.2147       | 4  | D  | 15 | 1692.0333      | 846.5205        |
| 534.2987       | 5  | I  | 14 | 1577.0063      | 789.0071        |
| 621.3308       | 6  | S  | 13 | 1463.9223      | 732.4650        |
| 678.3522       | 7  | G  | 12 | 1376.8902      | 688.9490        |
| 775.4050       | 8  | P  | 11 | 1319.8688      | 660.4383        |
| 937.5631       | 9  | K  | 10 | 1222.8160      | 611.9119        |
| 1050.6471      | 10 | L  | 9  | 1060.6579      | 530.8329        |
| 1179.6897      | 11 | E  | 8  | 947.5738       | 474.2908        |
| 1236.7112      | 12 | G  | 7  | 818.5312       | 409.7695        |
| 1351.7381      | 13 | D  | 6  | 761.5098       | 381.2588        |
| 1464.8222      | 14 | I  | 5  | 646.4828       | 323.7453        |
| 1626.9803      | 15 | K  | 4  | 533.3988       | 267.2033        |
| 1726.0487      | 16 | V  | 3  | 371.2407       | 186.1243        |
| 1823.1015      | 17 | P  | 2  | 272.1723       | 136.5900        |
|                | 18 | R  | 1  | 175.1195       | 88.0637         |

N-term:+35.07 K(9):+162.16  
 K(15):+162.16

GDVLTLESER, MH+ 1259.6847, m/z 630.3460  
 L OS G25 P150811 220811-s1.07876.07876.2.dta

X-range:

-

MassTol: Y-zoom:

MassType:

AVG  MONO

Axis:

1  2

Label:

I  M  -

Ions:

a  +  2+  3+

b  +  2+  3+

c  +  2+  3+

x  +  2+  3+

y  +  2+  3+

z  +  2+  3+

hide H<sub>2</sub>O/NH<sub>3</sub>

zoom 112-122

GO

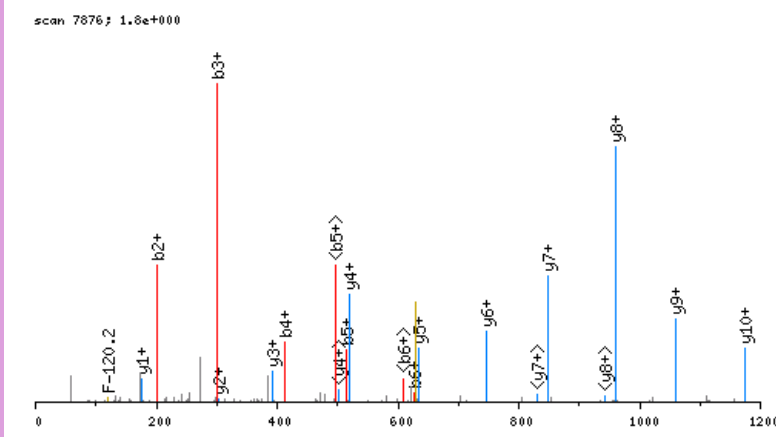

click image to zoom in; click top corners to zoom out [\[precursor±\]](#)

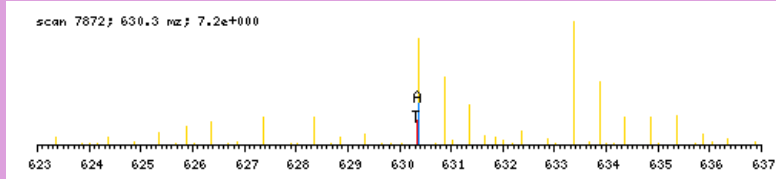

zoomed in precursor plot; T=theoretical m/z, A=acquired m/z

| b <sup>+</sup> | #  | AA # | y <sup>+</sup> | y <sup>2+</sup> |
|----------------|----|------|----------------|-----------------|
| 86.0606        | 1  | G 11 |                |                 |
| 201.0875       | 2  | D 10 | 1174.6319      | 587.8199        |
| 300.1559       | 3  | V 9  | 1059.6050      | 530.3064        |
| 413.2400       | 4  | L 8  | 960.5366       | 480.7722        |
| 514.2877       | 5  | T 7  | 847.4525       | 424.2302        |
| 627.3717       | 6  | L 6  | 746.4048       | 373.7063        |
| 740.4558       | 7  | L 5  | 633.3208       | 317.1643        |
| 869.4984       | 8  | E 4  | 520.2367       | 260.6223        |
| 956.5304       | 9  | S 3  | 391.1941       | 196.1010        |
| 1085.5730      | 10 | E 2  | 304.1621       | 152.5850        |
|                | 11 | R 1  | 175.1195       | 88.0637         |

N-term:+29.04

GDVFPVVADPTVPNVTVTR, MH+ 1864.0180, m/z 622.0108  
 L OS G24 P150811 220811-s1.03993.03993.3.dta

X-range:

-

MassTol: Y-zoom:

MassType:

AVG  MONO

Axis:

1  2

Label:

I  M  -

Ions:

a  +  2+  3+

b  +  2+  3+

c  +  2+  3+

x  +  2+  3+

y  +  2+  3+

z  +  2+  3+

hide H<sub>2</sub>O/NH<sub>3</sub>

zoom 112-122

GO

scan 3993; 4.3e+000

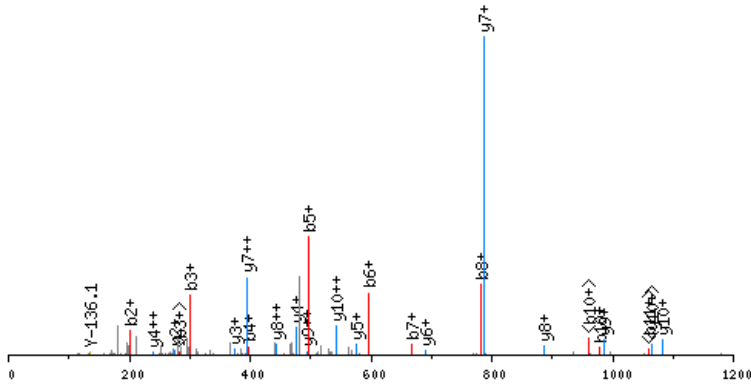

click image to zoom in; click top corners to zoom out [\[precursor±\]](#)

scan 3992; 622.0 m/z; 1.4e+001

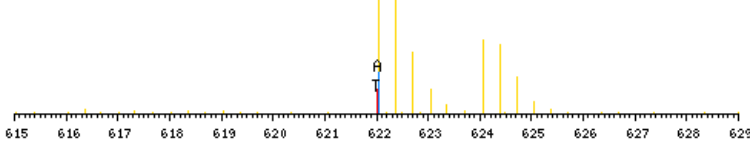

zoomed in precursor plot; T=theoretical m/z, A=acquired m/z

| b <sup>+</sup> | #  | AA # | y <sup>+</sup> | y <sup>2+</sup> |
|----------------|----|------|----------------|-----------------|
| 86.0606        | 1  | G 18 |                |                 |
| 201.0875       | 2  | D 17 | 1778.9652      | 889.9865        |
| 300.1559       | 3  | V 16 | 1663.9383      | 832.4731        |
| 397.2087       | 4  | P 15 | 1564.8699      | 782.9389        |
| 496.2771       | 5  | V 14 | 1467.8171      | 734.4125        |
| 595.3455       | 6  | V 13 | 1368.7487      | 684.8783        |
| 666.3826       | 7  | A 12 | 1269.6803      | 635.3441        |
| 781.4096       | 8  | D 11 | 1198.6432      | 599.8255        |
| 878.4623       | 9  | P 10 | 1083.6162      | 542.3120        |
| 979.5100       | 10 | T 9  | 986.5635       | 493.7856        |
| 1078.5784      | 11 | V 8  | 885.5158       | 443.2618        |
| 1175.6312      | 12 | P 7  | 786.4474       | 393.7276        |
| 1289.6741      | 13 | N 6  | 689.3946       | 345.2012        |
| 1388.7425      | 14 | V 5  | 575.3517       | 288.1798        |
| 1489.7902      | 15 | T 4  | 476.2833       | 238.6455        |
| 1588.8586      | 16 | V 3  | 375.2356       | 188.1217        |
| 1689.9063      | 17 | T 2  | 276.1672       | 138.5875        |
|                | 18 | R 1  | 175.1195       | 88.0637         |

N-term:+29.04



GDVSSCDNPSGTEPSGTNR, MH+ 1970.8573, m/z 657.6240  
 H OS G25 P150811 220811-s1.02091.02091.3.dta

scan 2091; 2.3e+000

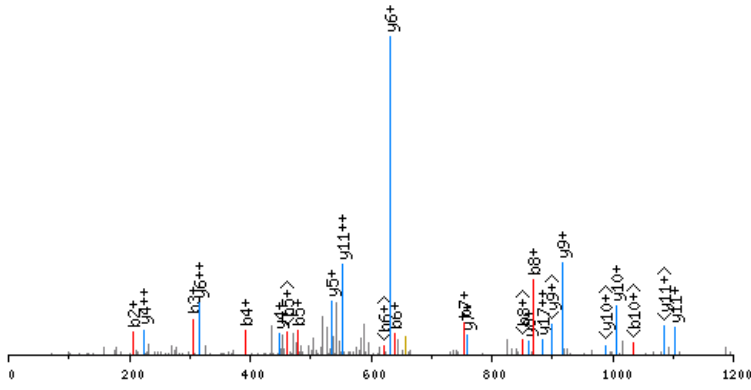

click image to zoom in; click top corners to zoom out [\[precursor±\]](#)

scan 2087; 657.6 m/z; 7.6e+000

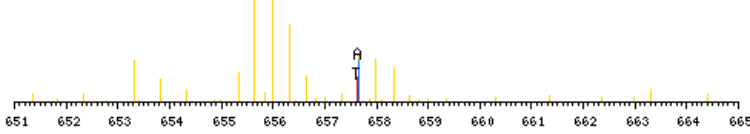

zoomed in precursor plot; T=theoretical m/z, A=acquired m/z

X-range:

-

MassTol: Y-zoom:

MassType:

AVG  MONO

Axis:

1  2

Label:

I  M  -

Ions:

a  +  2+  3+

b  +  2+  3+

c  +  2+  3+

x  +  2+  3+

y  +  2+  3+

z  +  2+  3+

hide H<sub>2</sub>O/NH<sub>3</sub>

zoom 112-122

GO

| b <sup>+</sup> | #  | AA # | y <sup>+</sup> | y <sup>2+</sup> |
|----------------|----|------|----------------|-----------------|
| 92.0924        | 1  | G 19 |                |                 |
| 207.1193       | 2  | D 18 | 1879.7728      | 940.3903        |
| 306.1877       | 3  | V 17 | 1764.7458      | 882.8768        |
| 393.2197       | 4  | S 16 | 1665.6774      | 833.3426        |
| 480.2518       | 5  | S 15 | 1578.6454      | 789.8266        |
| 640.2824       | 6  | C 14 | 1491.6134      | 746.3106        |
| 755.3093       | 7  | D 13 | 1331.5828      | 666.2953        |
| 869.3522       | 8  | N 12 | 1216.5558      | 608.7818        |
| 966.4050       | 9  | P 11 | 1102.5129      | 551.7604        |
| 1053.4370      | 10 | S 10 | 1005.4601      | 503.2340        |
| 1110.4585      | 11 | G 9  | 918.4281       | 459.7180        |
| 1211.5062      | 12 | T 8  | 861.4066       | 431.2072        |
| 1340.5488      | 13 | E 7  | 760.3590       | 380.6834        |
| 1437.6015      | 14 | P 6  | 631.3164       | 316.1621        |
| 1524.6336      | 15 | S 5  | 534.2636       | 267.6357        |
| 1581.6550      | 16 | G 4  | 447.2316       | 224.1197        |
| 1682.7027      | 17 | T 3  | 390.2101       | 195.6090        |
| 1796.7456      | 18 | N 2  | 289.1624       | 145.0851        |
|                | 19 | R 1  | 175.1195       | 88.0637         |

N-term:+35.07 C(6):+160.03

GEAGPEIVAPSAEGTAGSR, MH+ 1789.9144, m/z 597.3097  
 H OS G24 P150811 220811-s1.03040.03040.3.dta

X-range:

-

MassTol: Y-zoom:

MassType:

AVG  MONO

Axis:

1  2

Label:

I  M  -

Ions:

a  +  2+  3+

b  +  2+  3+

c  +  2+  3+

x  +  2+  3+

y  +  2+  3+

z  +  2+  3+

hide H<sub>2</sub>O/NH<sub>3</sub>

zoom 112-122

GO

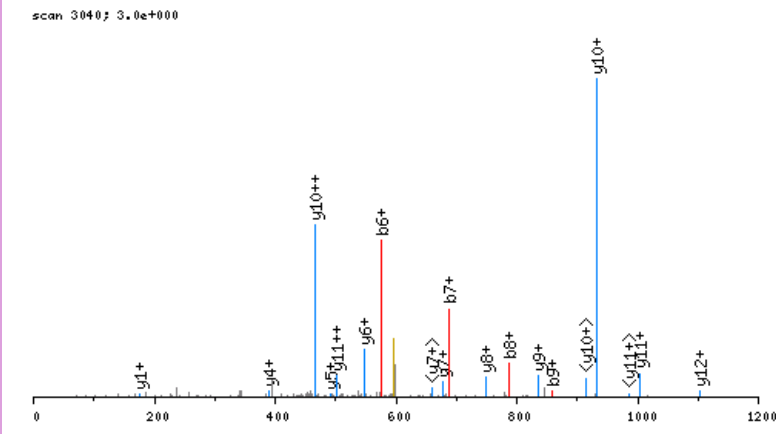

click image to zoom in; click top corners to zoom out [\[precursor±\]](#)

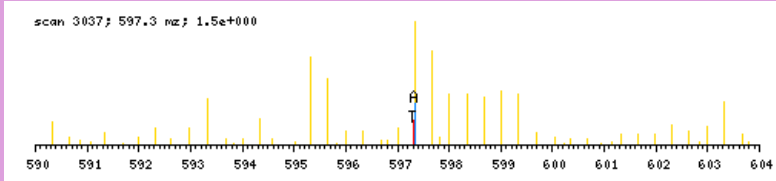

zoomed in precursor plot; T=theoretical m/z, A=acquired m/z

| b <sup>+</sup> | #  | AA # | y <sup>+</sup> | y <sup>2+</sup> |
|----------------|----|------|----------------|-----------------|
| 92.0924        | 1  | G 19 |                |                 |
| 221.1350       | 2  | E 18 | 1698.8299      | 849.9188        |
| 292.1721       | 3  | A 17 | 1569.7873      | 785.3975        |
| 349.1935       | 4  | G 16 | 1498.7502      | 749.8790        |
| 446.2463       | 5  | P 15 | 1441.7287      | 721.3683        |
| 575.2889       | 6  | E 14 | 1344.6759      | 672.8419        |
| 688.3730       | 7  | I 13 | 1215.6333      | 608.3206        |
| 787.4414       | 8  | V 12 | 1102.5493      | 551.7786        |
| 858.4785       | 9  | A 11 | 1003.4809      | 502.2443        |
| 955.5312       | 10 | P 10 | 932.4437       | 466.7258        |
| 1042.5633      | 11 | S 9  | 835.3910       | 418.1994        |
| 1113.6004      | 12 | A 8  | 748.3590       | 374.6834        |
| 1242.6430      | 13 | E 7  | 677.3218       | 339.1648        |
| 1299.6644      | 14 | G 6  | 548.2792       | 274.6435        |
| 1400.7121      | 15 | T 5  | 491.2578       | 246.1328        |
| 1471.7492      | 16 | A 4  | 390.2101       | 195.6090        |
| 1528.7707      | 17 | G 3  | 319.1730       | 160.0904        |
| 1615.8027      | 18 | S 2  | 262.1515       | 131.5797        |
|                | 19 | R 1  | 175.1195       | 88.0637         |

N-term:+35.07

GEDIDLPEPFDAR, MH+ 1505.7124, m/z 753.3598  
 L OS G25 P150811 220811-s1.06639.06639.2.dta

X-range:

-

MassTol: Y-zoom:

MassType:

AVG  MONO

Axis:

1  2

Label:

I  M  -

Ions:

a  +  2+  3+

b  +  2+  3+

c  +  2+  3+

x  +  2+  3+

y  +  2+  3+

z  +  2+  3+

hide H<sub>2</sub>O/NH<sub>3</sub>

zoom 112-122

GO

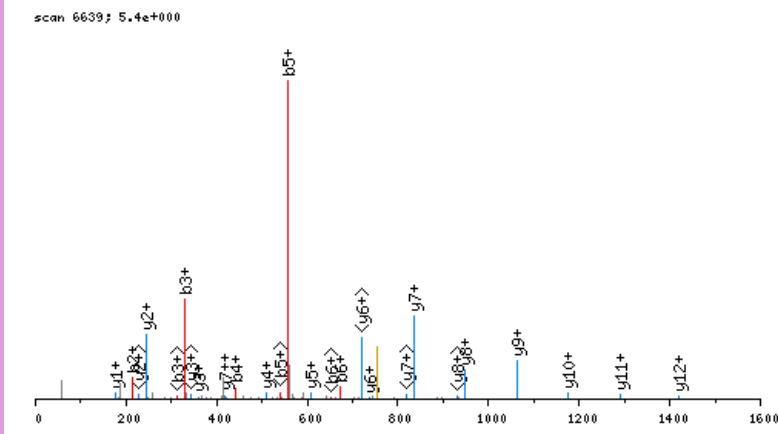

click image to zoom in; click top corners to zoom out [\[precursor±\]](#)

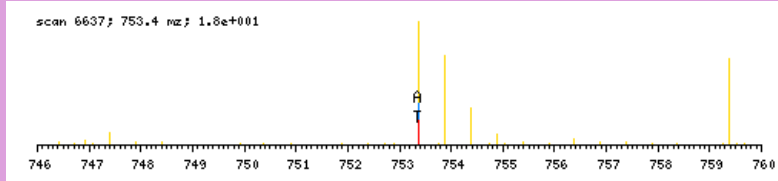

zoomed in precursor plot; T=theoretical m/z, A=acquired m/z

| b <sup>+</sup> | #  | AA # | y <sup>+</sup> | y <sup>2+</sup> |
|----------------|----|------|----------------|-----------------|
| 86.0606        | 1  | G 13 |                |                 |
| 215.1032       | 2  | E 12 | 1420.6596      | 710.8337        |
| 330.1301       | 3  | D 11 | 1291.6170      | 646.3124        |
| 443.2142       | 4  | I 10 | 1176.5901      | 588.7990        |
| 558.2411       | 5  | D 9  | 1063.5060      | 532.2569        |
| 671.3252       | 6  | L 8  | 948.4791       | 474.7434        |
| 768.3779       | 7  | P 7  | 835.3950       | 418.2014        |
| 897.4205       | 8  | E 6  | 738.3422       | 369.6750        |
| 998.4682       | 9  | T 5  | 609.2997       | 305.1537        |
| 1145.5366      | 10 | F 4  | 508.2520       | 254.6299        |
| 1260.5636      | 11 | D 3  | 361.1836       | 181.0957        |
| 1331.6007      | 12 | A 2  | 246.1566       | 123.5822        |
|                | 13 | R 1  | 175.1195       | 88.0637         |

N-term:+29.04

GEEQGADAALHFNPR, MH+ 1639.7828, m/z 547.2658  
 L OS G27 P150811 220811-s1.04215.04215.3.dta

X-range:

-

MassTol: Y-zoom:

MassType:

AVG  MONO

Axis:

1  2

Label:

I  M  -

Ions:

a  +  2+  3+

b  +  2+  3+

c  +  2+  3+

x  +  2+  3+

y  +  2+  3+

z  +  2+  3+

hide H<sub>2</sub>O/NH<sub>3</sub>

zoom 112-122

GO

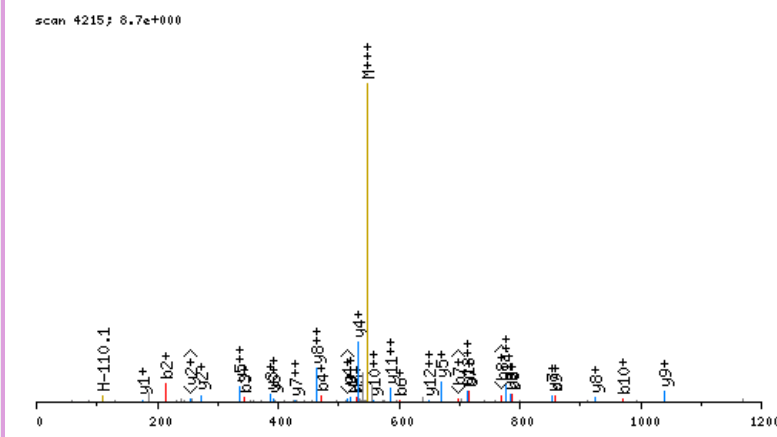

click image to zoom in; click top corners to zoom out [\[precursor±\]](#)

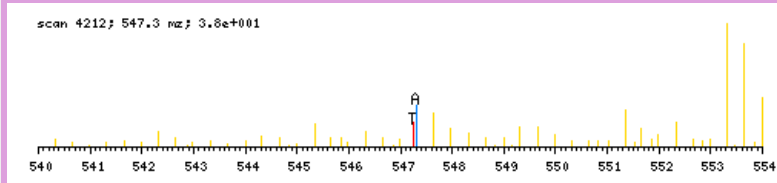

zoomed in precursor plot; T=theoretical m/z, A=acquired m/z

| b <sup>+</sup> | #  | AA # | y <sup>+</sup> | y <sup>2+</sup> |
|----------------|----|------|----------------|-----------------|
| 86.0606        | 1  | G 15 |                |                 |
| 215.1032       | 2  | E 14 | 1554.7301      | 777.8690        |
| 344.1458       | 3  | E 13 | 1425.6875      | 713.3477        |
| 472.2043       | 4  | Q 12 | 1296.6449      | 648.8264        |
| 529.2258       | 5  | G 11 | 1168.5863      | 584.7971        |
| 600.2629       | 6  | A 10 | 1111.5649      | 556.2863        |
| 715.2898       | 7  | D 9  | 1040.5278      | 520.7678        |
| 786.3270       | 8  | A 8  | 925.5008       | 463.2543        |
| 857.3641       | 9  | A 7  | 854.4637       | 427.7358        |
| 970.4481       | 10 | L 6  | 783.4266       | 392.2172        |
| 1107.5071      | 11 | H 5  | 670.3425       | 335.6752        |
| 1254.5755      | 12 | F 4  | 533.2836       | 267.1457        |
| 1368.6184      | 13 | N 3  | 386.2152       | 193.6115        |
| 1465.6712      | 14 | P 2  | 272.1723       | 136.5900        |
|                | 15 | R 1  | 175.1195       | 88.0637         |

N-term:+29.04

GEIDASVPEMEADLR, MH+ 1665.8218, m/z 555.9454  
 H OS G24 P150811 220811-s1.04191.04191.3.dta

X-range:

-

MassTol: Y-zoom:

MassType:

AVG  MONO

Axis:

1  2

Label:

I  M  -

Ions:

a  +  2+  3+

b  +  2+  3+

c  +  2+  3+

x  +  2+  3+

y  +  2+  3+

z  +  2+  3+

hide H<sub>2</sub>O/NH<sub>3</sub>

zoom 112-122

GO

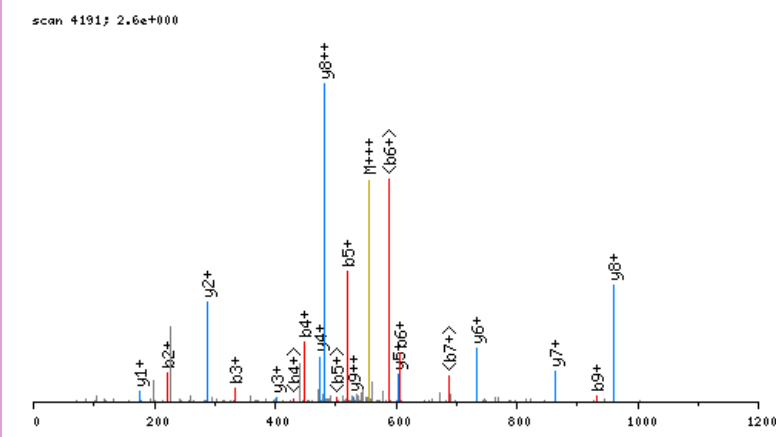

click image to zoom in; click top corners to zoom out [\[precursor±\]](#)

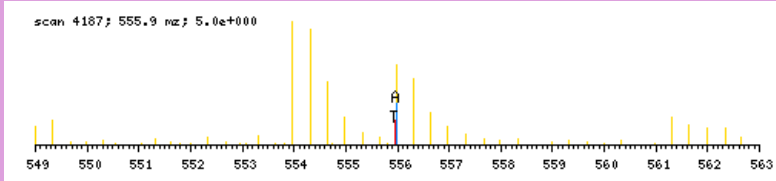

zoomed in precursor plot; T=theoretical m/z, A=acquired m/z

| b <sup>+</sup> | #  | AA # | y <sup>+</sup> | y <sup>2+</sup> |
|----------------|----|------|----------------|-----------------|
| 92.0924        | 1  | G 15 |                |                 |
| 221.1350       | 2  | E 14 | 1574.7372      | 787.8725        |
| 334.2190       | 3  | I 13 | 1445.6946      | 723.3512        |
| 449.2460       | 4  | D 12 | 1332.6106      | 666.8092        |
| 520.2831       | 5  | A 11 | 1217.5836      | 609.2957        |
| 607.3151       | 6  | S 10 | 1146.5465      | 573.7772        |
| 706.3835       | 7  | V 9  | 1059.5145      | 530.2611        |
| 803.4363       | 8  | P 8  | 960.4461       | 480.7269        |
| 932.4789       | 9  | E 7  | 863.3933       | 432.2006        |
| 1063.5194      | 10 | M 6  | 734.3507       | 367.6793        |
| 1192.5620      | 11 | E 5  | 603.3102       | 302.1590        |
| 1263.5991      | 12 | A 4  | 474.2676       | 237.6377        |
| 1378.6260      | 13 | D 3  | 403.2305       | 202.1192        |
| 1491.7101      | 14 | L 2  | 288.2036       | 144.6057        |
|                | 15 | R 1  | 175.1195       | 88.0637         |

N-term:+35.07

GELEDKPPAPPVR, MH+ 1460.8113, m/z 487.6086  
 L OS G26 P150811 220811-s1.02788.02788.3.dta

scan 2788; 1.1e+001

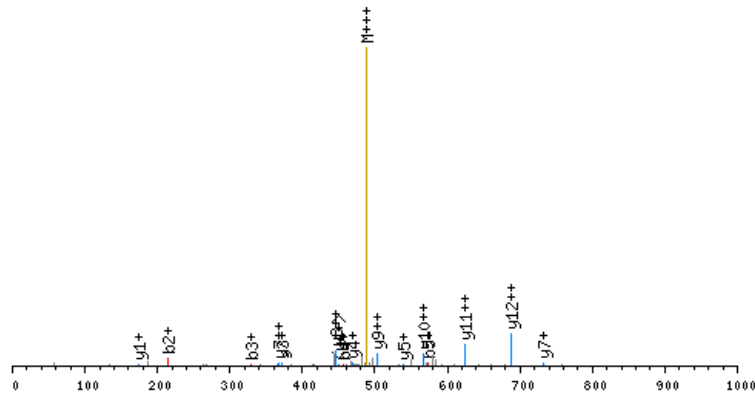

click image to zoom in; click top corners to zoom out [\[precursor±\]](#)

scan 2785; 487.6 m/z; 1.2e+001

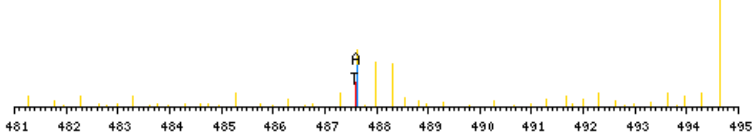

zoomed in precursor plot; T=theoretical m/z, A=acquired m/z

X-range:

-

MassTol: Y-zoom:

MassType:

AVG  MONO

Axis:

1  2

Label:

I  M  -

Ions:

a  +  2+  3+

b  +  2+  3+

c  +  2+  3+

x  +  2+  3+

y  +  2+  3+

z  +  2+  3+

hide H<sub>2</sub>O/NH<sub>3</sub>

zoom 112-122

GO

| b <sup>+</sup> | #  | AA | #  | y <sup>+</sup> | y <sup>2+</sup> |
|----------------|----|----|----|----------------|-----------------|
| 86.0606        | 1  | G  | 13 |                |                 |
| 215.1032       | 2  | E  | 12 | 1375.7586      | 688.3832        |
| 328.1872       | 3  | L  | 11 | 1246.7160      | 623.8619        |
| 457.2298       | 4  | E  | 10 | 1133.6319      | 567.3199        |
| 572.2568       | 5  | D  | 9  | 1004.5893      | 502.7986        |
| 728.3831       | 6  | K  | 8  | 889.5624       | 445.2851        |
| 825.4358       | 7  | P  | 7  | 733.4361       | 367.2220        |
| 922.4886       | 8  | P  | 6  | 636.3833       | 318.6956        |
| 993.5257       | 9  | A  | 5  | 539.3306       | 270.1692        |
| 1090.5785      | 10 | P  | 4  | 468.2934       | 234.6506        |
| 1187.6312      | 11 | P  | 3  | 371.2407       | 186.1243        |
| 1286.6996      | 12 | V  | 2  | 274.1879       | 137.5979        |
|                | 13 | R  | 1  | 175.1195       | 88.0637         |

N-term:+29.04 K(6):+156.13

GESGHLAKDCDLQEDACYNCGR, MH+ 2623.1610, m/z 656.5457  
 H OS G28 P150811 220811-s1.03496.03496.4.dta

X-range:

-

MassTol: Y-zoom:

MassType:

AVG  MONO

Axis:

1  2

Label:

I  M  -

Ions:

a  +  2+  3+

b  +  2+  3+

c  +  2+  3+

x  +  2+  3+

y  +  2+  3+

z  +  2+  3+

hide H<sub>2</sub>O/NH<sub>3</sub>

zoom 112-122

GO

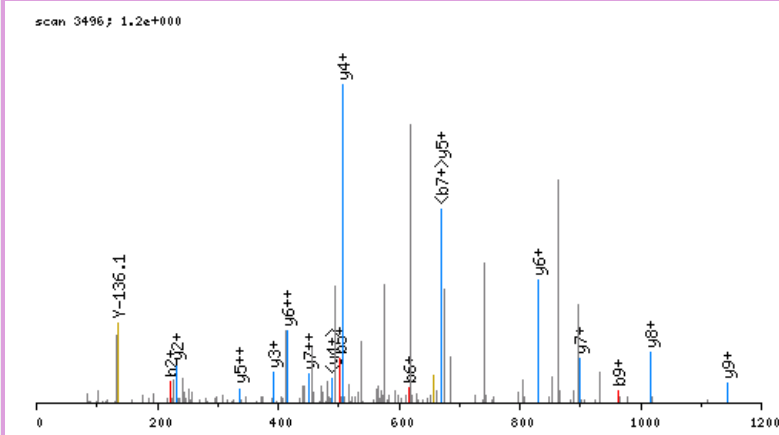

click image to zoom in; click top corners to zoom out [\[precursor±\]](#)

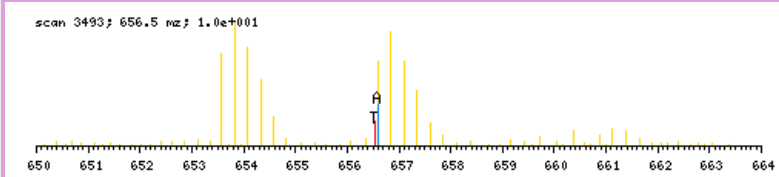

zoomed in precursor plot; T=theoretical m/z, A=acquired m/z

| b <sup>+</sup> | #  | AA | #  | y <sup>+</sup> | y <sup>2+</sup> |
|----------------|----|----|----|----------------|-----------------|
| 92.0924        | 1  | G  | 22 |                |                 |
| 221.1350       | 2  | E  | 21 | 2532.0765      | 1266.5421       |
| 308.1670       | 3  | S  | 20 | 2403.0339      | 1202.0209       |
| 365.1884       | 4  | G  | 19 | 2316.0019      | 1158.5048       |
| 502.2474       | 5  | H  | 18 | 2258.9804      | 1129.9941       |
| 615.3314       | 6  | L  | 17 | 2121.9215      | 1061.4647       |
| 686.3685       | 7  | A  | 16 | 2008.8374      | 1004.9226       |
| 848.5266       | 8  | K  | 15 | 1937.8003      | 969.4041        |
| 963.5536       | 9  | D  | 14 | 1775.6422      | 888.3250        |
| 1123.5842      | 10 | C  | 13 | 1660.6153      | 830.8115        |
| 1238.6111      | 11 | D  | 12 | 1500.5847      | 750.7962        |
| 1351.6952      | 12 | L  | 11 | 1385.5577      | 693.2828        |
| 1479.7538      | 13 | Q  | 10 | 1272.4736      | 636.7407        |
| 1608.7964      | 14 | E  | 9  | 1144.4151      | 572.7114        |
| 1723.8233      | 15 | D  | 8  | 1015.3725      | 508.1902        |
| 1794.8604      | 16 | A  | 7  | 900.3455       | 450.6767        |
| 1954.8910      | 17 | C  | 6  | 829.3084       | 415.1581        |
| 2117.9543      | 18 | Y  | 5  | 669.2778       | 335.1428        |
| 2231.9973      | 19 | N  | 4  | 506.2145       | 253.6112        |
| 2392.0279      | 20 | C  | 3  | 392.1716       | 196.5897        |
| 2449.0493      | 21 | G  | 2  | 232.1410       | 116.5744        |
|                | 22 | R  | 1  | 175.1195       | 88.0637         |

N-term:+35.07 K(8):+162.16  
 C(10):+160.03 C(17):+160.03  
 C(20):+160.03

GESKCPMLVKVLDVAVR, MH+ 1886.0607, m/z 472.2706  
 L OS G28 P150811 220811-s1.08150.08150.4.dta

X-range:

-

MassTol: Y-zoom:

MassType:

AVG  MONO

Axis:

1  2

Label:

I  M  -

Ions:

a  +  2+  3+

b  +  2+  3+

c  +  2+  3+

x  +  2+  3+

y  +  2+  3+

z  +  2+  3+

hide H<sub>2</sub>O/NH<sub>3</sub>

zoom 112-122

GO

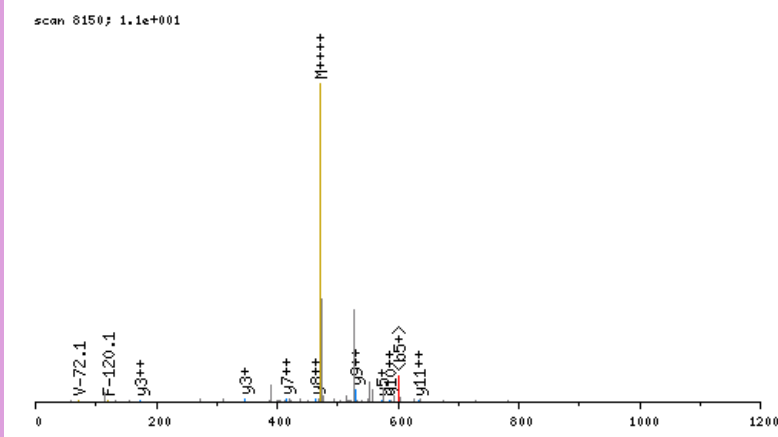

click image to zoom in; click top corners to zoom out [\[precursor±\]](#)

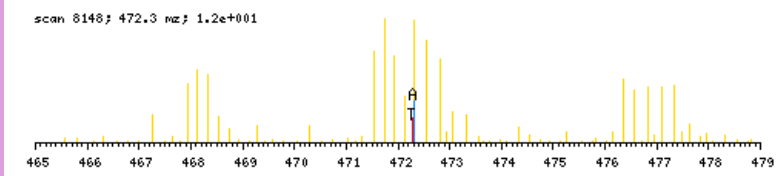

zoomed in precursor plot; T=theoretical m/z, A=acquired m/z

| b <sup>+</sup> | #  | AA # | y <sup>+</sup> | y <sup>2+</sup> |
|----------------|----|------|----------------|-----------------|
| 86.0606        | 1  | G 16 |                |                 |
| 215.1032       | 2  | E 15 | 1801.0080      | 901.0079        |
| 302.1352       | 3  | S 14 | 1671.9654      | 836.4866        |
| 458.2615       | 4  | K 13 | 1584.9334      | 792.9706        |
| 618.2921       | 5  | C 12 | 1428.8071      | 714.9075        |
| 715.3448       | 6  | P 11 | 1268.7765      | 634.8922        |
| 828.4289       | 7  | L 10 | 1171.7237      | 586.3658        |
| 959.4694       | 8  | M 9  | 1058.6396      | 529.8237        |
| 1058.5378      | 9  | V 8  | 927.5992       | 464.3035        |
| 1214.6641      | 10 | K 7  | 828.5307       | 414.7693        |
| 1313.7325      | 11 | V 6  | 672.4044       | 336.7061        |
| 1426.8166      | 12 | L 5  | 573.3360       | 287.1719        |
| 1541.8435      | 13 | D 4  | 460.2520       | 230.6299        |
| 1612.8806      | 14 | A 3  | 345.2250       | 173.1164        |
| 1711.9491      | 15 | V 2  | 274.1879       | 137.5979        |
|                | 16 | R 1  | 175.1195       | 88.0637         |

N-term:+29.04 K(4):+156.13  
 C(5):+160.03 K(10):+156.13



GESSFDLADR, MH+ 1124.5224, m/z 562.7648  
 L OS G25 P150811 220811-s1.03995.03995.2.dta

scan 3995; 1.3e+001

X-range:

-

MassTol: Y-zoom:

MassType:

AVG  MONO

Axis:

1  2

Label:

I  M  -

Ions:

a  +  2+  3+

b  +  2+  3+

c  +  2+  3+

x  +  2+  3+

y  +  2+  3+

z  +  2+  3+

hide H<sub>2</sub>O/NH<sub>3</sub>

zoom 112-122

GO

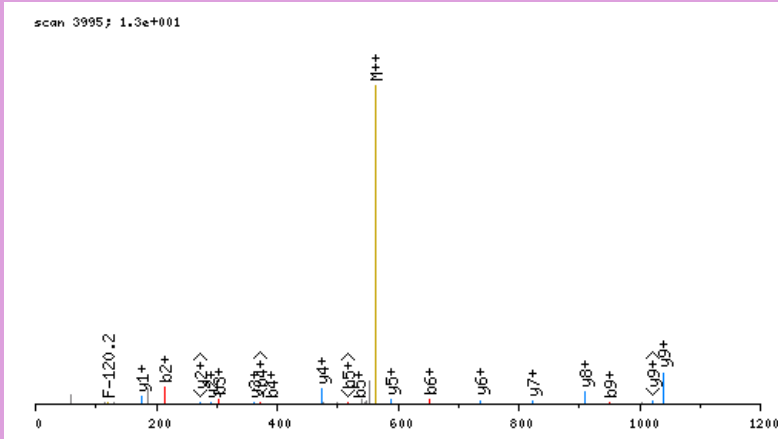

click image to zoom in; click top corners to zoom out [\[precursor±\]](#)

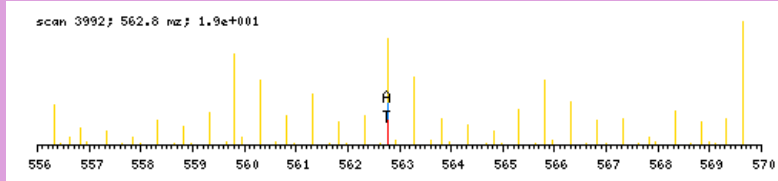

zoomed in precursor plot; T=theoretical m/z, A=acquired m/z

| b <sup>+</sup> | #  | AA | #  | y <sup>+</sup> | y <sup>2+</sup> |
|----------------|----|----|----|----------------|-----------------|
| 86.0606        | 1  | G  | 10 |                |                 |
| 215.1032       | 2  | E  | 9  | 1039.4696      | 520.2387        |
| 302.1352       | 3  | S  | 8  | 910.4270       | 455.7174        |
| 389.1672       | 4  | S  | 7  | 823.3950       | 412.2014        |
| 536.2356       | 5  | F  | 6  | 736.3630       | 368.6854        |
| 651.2626       | 6  | D  | 5  | 589.2946       | 295.1512        |
| 764.3466       | 7  | L  | 4  | 474.2676       | 237.6377        |
| 835.3837       | 8  | A  | 3  | 361.1836       | 181.0957        |
| 950.4107       | 9  | D  | 2  | 290.1464       | 145.5771        |
|                | 10 | R  | 1  | 175.1195       | 88.0637         |

N-term:+29.04

GETGPAGPAGPIGPAGAR, MH+ 1566.8452, m/z 522.9533  
 H OS G24 P150811 220811-s1.02899.02899.3.dta

scan 2899; 9.3e-001

X-range:

-

MassTol: Y-zoom:

MassType:

AVG  MONO

Axis:

1  2

Label:

I  M  -

Ions:

a  +  2+  3+

b  +  2+  3+

c  +  2+  3+

x  +  2+  3+

y  +  2+  3+

z  +  2+  3+

hide H<sub>2</sub>O/NH<sub>3</sub>

zoom 112-122

GO

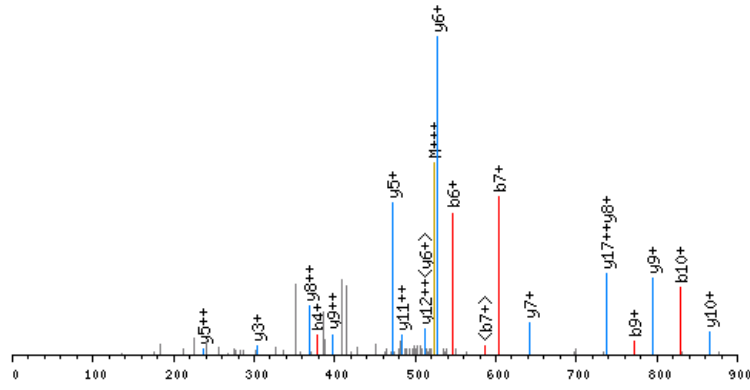

click image to zoom in; click top corners to zoom out [\[precursor±\]](#)

scan 2898; 523.0 m/z; 1.2e+000

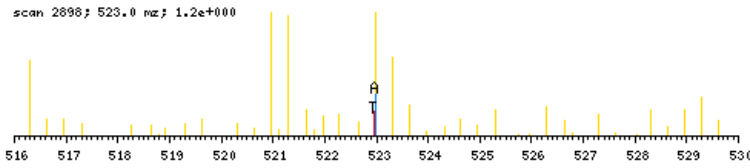

zoomed in precursor plot; T=theoretical m/z, A=acquired m/z

| b <sup>+</sup> | #  | AA # | y <sup>+</sup> | y <sup>2+</sup> |
|----------------|----|------|----------------|-----------------|
| 92.0924        | 1  | G 18 |                |                 |
| 221.1350       | 2  | E 17 | 1475.7607      | 738.3842        |
| 322.1826       | 3  | T 16 | 1346.7181      | 673.8629        |
| 379.2041       | 4  | G 15 | 1245.6704      | 623.3391        |
| 476.2569       | 5  | P 14 | 1188.6489      | 594.8284        |
| 547.2940       | 6  | A 13 | 1091.5962      | 546.3020        |
| 604.3154       | 7  | G 12 | 1020.5591      | 510.7834        |
| 701.3682       | 8  | P 11 | 963.5376       | 482.2727        |
| 772.4053       | 9  | A 10 | 866.4848       | 433.7463        |
| 829.4268       | 10 | G 9  | 795.4477       | 398.2278        |
| 926.4795       | 11 | P 8  | 738.4262       | 369.7170        |
| 1039.5636      | 12 | I 7  | 641.3735       | 321.1907        |
| 1096.5851      | 13 | G 6  | 528.2894       | 264.6486        |
| 1193.6378      | 14 | P 5  | 471.2680       | 236.1379        |
| 1264.6750      | 15 | A 4  | 374.2152       | 187.6115        |
| 1321.6964      | 16 | G 3  | 303.1781       | 152.0930        |
| 1392.7335      | 17 | A 2  | 246.1566       | 123.5822        |
|                | 18 | R 1  | 175.1195       | 88.0637         |

N-term:+35.07

GETNPADSKPGTIR, MH+ 1498.7866, m/z 500.2670  
 L OS G27 P150811 220811-s1.02116.02116.3.dta

X-range:

-

MassTol: Y-zoom:

MassType:

AVG  MONO

Axis:

1  2

Label:

I  M  -

Ions:

a  +  2+  3+

b  +  2+  3+

c  +  2+  3+

x  +  2+  3+

y  +  2+  3+

z  +  2+  3+

hide H<sub>2</sub>O/NH<sub>3</sub>

zoom 112-122

GO

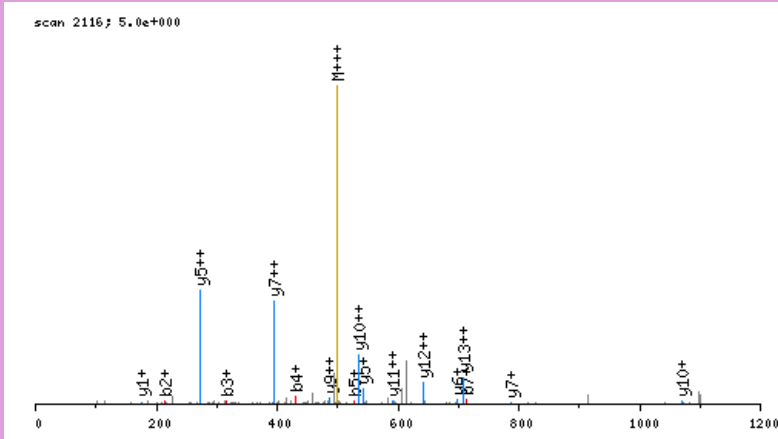

click image to zoom in; click top corners to zoom out [\[precursor±\]](#)

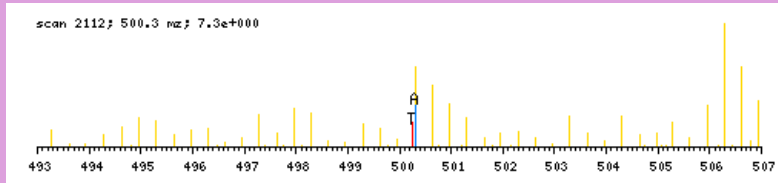

zoomed in precursor plot; T=theoretical m/z, A=acquired m/z

| b <sup>+</sup> | #  | AA # | y <sup>+</sup> | y <sup>2+</sup> |
|----------------|----|------|----------------|-----------------|
| 86.0606        | 1  | G 14 |                |                 |
| 215.1032       | 2  | E 13 | 1413.7338      | 707.3708        |
| 316.1508       | 3  | T 12 | 1284.6912      | 642.8495        |
| 430.1938       | 4  | N 11 | 1183.6435      | 592.3257        |
| 527.2465       | 5  | P 10 | 1069.6006      | 535.3042        |
| 598.2836       | 6  | A 9  | 972.5479       | 486.7778        |
| 713.3106       | 7  | D 8  | 901.5107       | 451.2593        |
| 800.3426       | 8  | S 7  | 786.4838       | 393.7458        |
| 956.4689       | 9  | K 6  | 699.4518       | 350.2298        |
| 1053.5217      | 10 | P 5  | 543.3255       | 272.1666        |
| 1110.5431      | 11 | G 4  | 446.2727       | 223.6403        |
| 1211.5908      | 12 | T 3  | 389.2512       | 195.1295        |
| 1324.6749      | 13 | I 2  | 288.2036       | 144.6057        |
|                | 14 | R 1  | 175.1195       | 88.0637         |

N-term:+29.04 K(9):+156.13

GETTTQGLDGLSER, MH+ 1491.7291, m/z 497.9145  
 L OS G25 P150811 220811-s1.03864.03864.3.dta

scan 3864; 3.3e+000

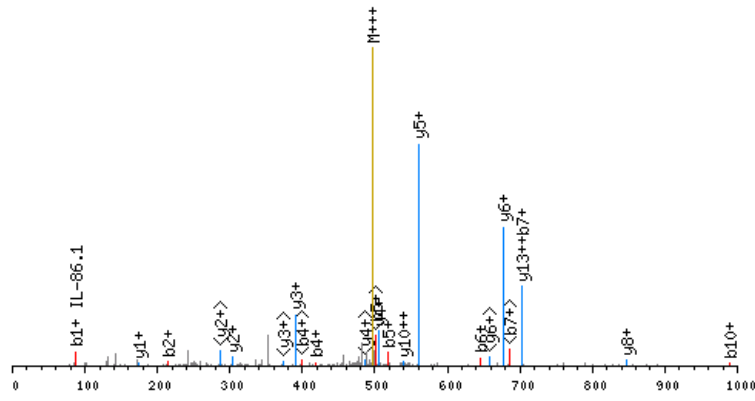

click image to zoom in; click top corners to zoom out [\[precursor±\]](#)

scan 3862; 497.9 m/z; 1.9e+001

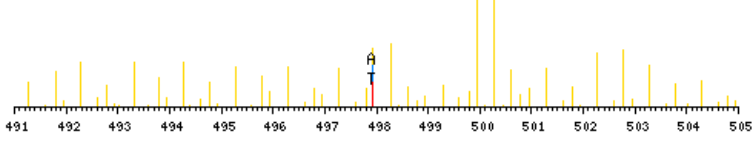

zoomed in precursor plot; T=theoretical m/z, A=acquired m/z

X-range:

-

MassTol: Y-zoom:

MassType:

AVG  MONO

Axis:

1  2

Label:

I  M  -

Ions:

a  +  2+  3+

b  +  2+  3+

c  +  2+  3+

x  +  2+  3+

y  +  2+  3+

z  +  2+  3+

hide H<sub>2</sub>O/NH<sub>3</sub>

zoom 112-122

GO

| b <sup>+</sup> | #  | AA # | y <sup>+</sup> | y <sup>2+</sup> |
|----------------|----|------|----------------|-----------------|
| 86.0606        | 1  | G 14 |                |                 |
| 215.1032       | 2  | E 13 | 1406.6763      | 703.8421        |
| 316.1508       | 3  | T 12 | 1277.6337      | 639.3208        |
| 417.1985       | 4  | T 11 | 1176.5861      | 588.7969        |
| 518.2462       | 5  | T 10 | 1075.5384      | 538.2731        |
| 646.3048       | 6  | Q 9  | 974.4907       | 487.7493        |
| 703.3262       | 7  | G 8  | 846.4321       | 423.7200        |
| 816.4103       | 8  | L 7  | 789.4107       | 395.2092        |
| 931.4372       | 9  | D 6  | 676.3266       | 338.6672        |
| 988.4587       | 10 | G 5  | 561.2997       | 281.1537        |
| 1101.5428      | 11 | L 4  | 504.2782       | 252.6430        |
| 1188.5748      | 12 | S 3  | 391.1941       | 196.1010        |
| 1317.6174      | 13 | E 2  | 304.1621       | 152.5850        |
|                | 14 | R 1  | 175.1195       | 88.0637         |

N-term:+29.04

GEVVDCTIKMDPNTGR, MH+ 1859.9631, m/z 620.6592  
 H OS G26 P150811 220811-s1.03388.03388.3.dta

X-range:

-

MassTol: Y-zoom:

MassType:

AVG  MONO

Axis:

1  2

Label:

I  M  -

Ions:

a  +  2+  3+

b  +  2+  3+

c  +  2+  3+

x  +  2+  3+

y  +  2+  3+

z  +  2+  3+

hide H<sub>2</sub>O/NH<sub>3</sub>

zoom 112-122

GO

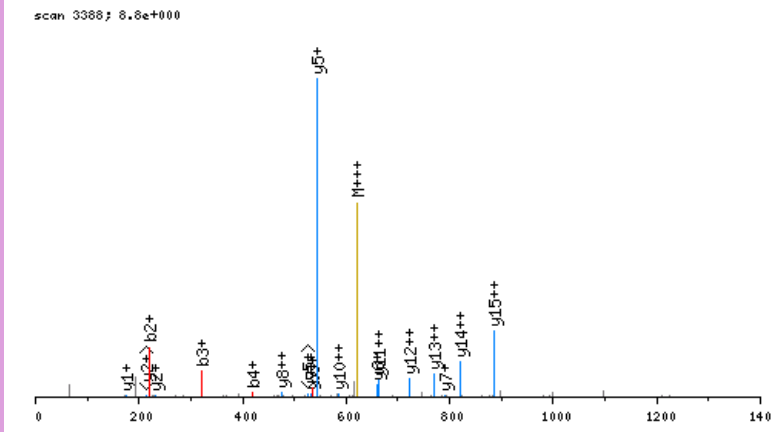

click image to zoom in; click top corners to zoom out [\[precursor±\]](#)

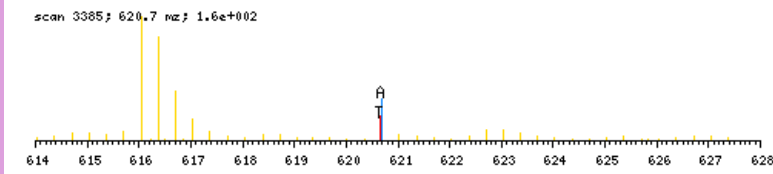

zoomed in precursor plot; T=theoretical m/z, A=acquired m/z

| b <sup>+</sup> | #  | AA # | y <sup>+</sup> | y <sup>2+</sup> |
|----------------|----|------|----------------|-----------------|
| 92.0924        | 1  | G 16 |                |                 |
| 221.1350       | 2  | E 15 | 1768.8786      | 884.9432        |
| 320.2034       | 3  | V 14 | 1639.8360      | 820.4219        |
| 419.2718       | 4  | V 13 | 1540.7676      | 770.8877        |
| 534.2987       | 5  | D 12 | 1441.6991      | 721.3535        |
| 694.3293       | 6  | C 11 | 1326.6722      | 663.8400        |
| 795.3770       | 7  | T 10 | 1166.6416      | 583.8247        |
| 908.4611       | 8  | I 9  | 1065.5939      | 533.3009        |
| 1070.6192      | 9  | K 8  | 952.5099       | 476.7588        |
| 1201.6597      | 10 | M 7  | 790.3518       | 395.6798        |
| 1316.6866      | 11 | D 6  | 659.3113       | 330.1596        |
| 1413.7394      | 12 | P 5  | 544.2843       | 272.6461        |
| 1527.7823      | 13 | N 4  | 447.2316       | 224.1197        |
| 1628.8300      | 14 | T 3  | 333.1886       | 167.0982        |
| 1685.8514      | 15 | G 2  | 232.1410       | 116.5744        |
|                | 16 | R 1  | 175.1195       | 88.0637         |

N-term:+35.07 C(6):+160.03  
 K(9):+162.16

GEVVDCTIKTDPVTGR, MH+ 1814.9958, m/z 605.6701  
 H OS G26 P150811 220811-s1.03286.03286.3.dta

X-range:

-

MassTol: Y-zoom:

MassType:

AVG  MONO

Axis:

1  2

Label:

I  M  -

Ions:

a  +  2+  3+

b  +  2+  3+

c  +  2+  3+

x  +  2+  3+

y  +  2+  3+

z  +  2+  3+

hide H<sub>2</sub>O/NH<sub>3</sub>

zoom 112-122

GO

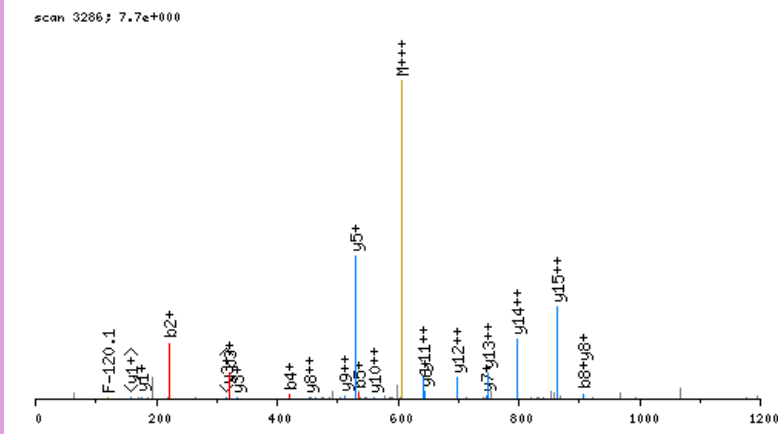

click image to zoom in; click top corners to zoom out [\[precursor±\]](#)

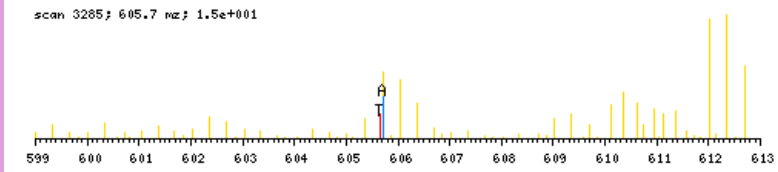

zoomed in precursor plot; T=theoretical m/z, A=acquired m/z

| b <sup>+</sup> | #  | AA # | y <sup>+</sup> | y <sup>2+</sup> |
|----------------|----|------|----------------|-----------------|
| 92.0924        | 1  | G    | 16             |                 |
| 221.1350       | 2  | E    | 15             | 1723.9112       |
| 320.2034       | 3  | V    | 14             | 1594.8687       |
| 419.2718       | 4  | V    | 13             | 1495.8002       |
| 534.2987       | 5  | D    | 12             | 1396.7318       |
| 694.3293       | 6  | C    | 11             | 1281.7049       |
| 795.3770       | 7  | T    | 10             | 1121.6743       |
| 908.4611       | 8  | I    | 9              | 1020.6266       |
| 1070.6192      | 9  | K    | 8              | 907.5425        |
| 1171.6668      | 10 | T    | 7              | 745.3844        |
| 1286.6938      | 11 | D    | 6              | 644.3368        |
| 1383.7466      | 12 | P    | 5              | 529.3098        |
| 1482.8150      | 13 | V    | 4              | 432.2571        |
| 1583.8626      | 14 | T    | 3              | 333.1886        |
| 1640.8841      | 15 | G    | 2              | 232.1410        |
|                | 16 | R    | 1              | 175.1195        |

N-term:+35.07 C(6):+160.03  
 K(9):+162.16

GEVVDCTKLDPITGR, MH+ 1841.0478, m/z 614.3541  
 H OS G26 P150811 220811-s1.05229.05229.3.dta

X-range:

-

MassTol: Y-zoom:

MassType:

AVG  MONO

Axis:

1  2

Label:

I  M  -

Ions:

a  +  2+  3+

b  +  2+  3+

c  +  2+  3+

x  +  2+  3+

y  +  2+  3+

z  +  2+  3+

hide H<sub>2</sub>O/NH<sub>3</sub>

zoom 112-122

GO

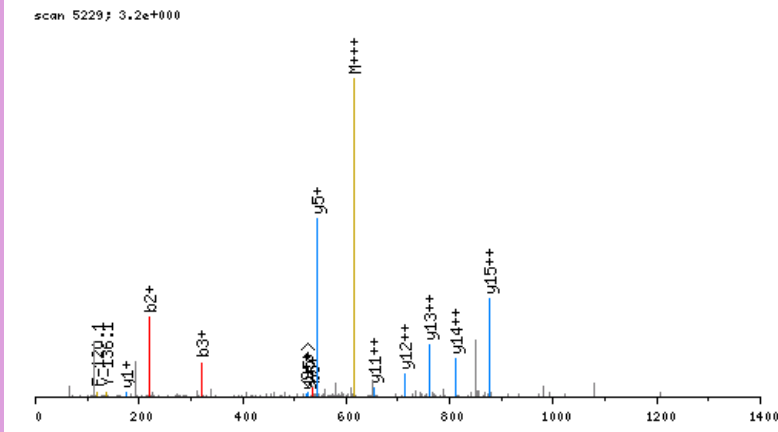

click image to zoom in; click top corners to zoom out [\[precursor±\]](#)

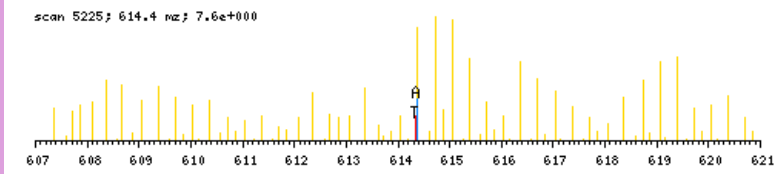

zoomed in precursor plot; T=theoretical m/z, A=acquired m/z

| b <sup>+</sup> | #  | AA | #  | y <sup>+</sup> | y <sup>2+</sup> |
|----------------|----|----|----|----------------|-----------------|
| 92.0924        | 1  | G  | 16 |                |                 |
| 221.1350       | 2  | E  | 15 | 1749.9633      | 875.4856        |
| 320.2034       | 3  | V  | 14 | 1620.9207      | 810.9643        |
| 419.2718       | 4  | V  | 13 | 1521.8523      | 761.4301        |
| 534.2987       | 5  | D  | 12 | 1422.7839      | 711.8958        |
| 694.3293       | 6  | C  | 11 | 1307.7569      | 654.3824        |
| 795.3770       | 7  | T  | 10 | 1147.7263      | 574.3671        |
| 908.4611       | 8  | L  | 9  | 1046.6786      | 523.8432        |
| 1070.6192      | 9  | K  | 8  | 933.5946       | 467.3012        |
| 1183.7032      | 10 | L  | 7  | 771.4365       | 386.2222        |
| 1298.7302      | 11 | D  | 6  | 658.3524       | 329.6801        |
| 1395.7829      | 12 | P  | 5  | 543.3255       | 272.1666        |
| 1508.8670      | 13 | I  | 4  | 446.2727       | 223.6403        |
| 1609.9147      | 14 | T  | 3  | 333.1886       | 167.0982        |
| 1666.9361      | 15 | G  | 2  | 232.1410       | 116.5744        |
|                | 16 | R  | 1  | 175.1195       | 88.0637         |

N-term:+35.07 C(6):+160.03  
 K(9):+162.16

X-range:

-

MassTol: Y-zoom:

MassType:

AVG  MONO

Axis:

1  2

Label:

I  M  -

Ions:

a  +  2+  3+

b  +  2+  3+

c  +  2+  3+

x  +  2+  3+

y  +  2+  3+

z  +  2+  3+

hide H<sub>2</sub>O/NH<sub>3</sub>

zoom 112-122

GO

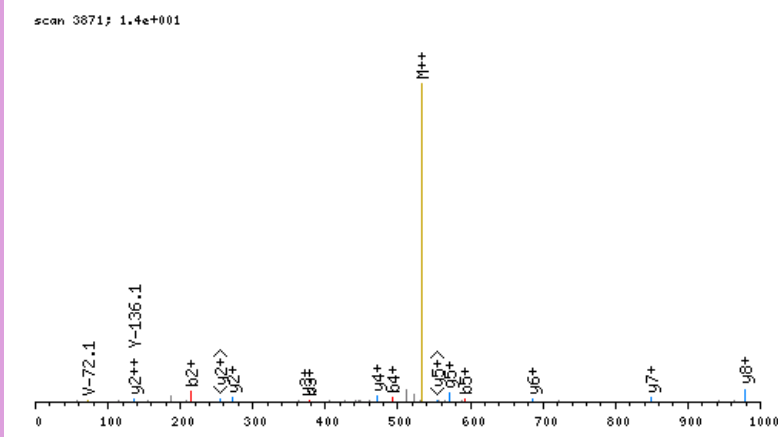

click image to zoom in; click top corners to zoom out [\[precursor±\]](#)

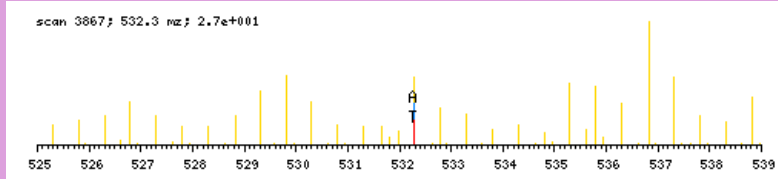

zoomed in precursor plot; T=theoretical m/z, A=acquired m/z

| b <sup>+</sup> | # | AA # | y <sup>+</sup> | y <sup>2+</sup> |
|----------------|---|------|----------------|-----------------|
| 86.0606        | 1 | G    | 9              |                 |
| 215.1032       | 2 | E    | 8              | 489.7487        |
| 378.1665       | 3 | Y    | 7              | 425.2274        |
| 493.1934       | 4 | D    | 6              | 343.6958        |
| 592.2618       | 5 | V    | 5              | 286.1823        |
| 693.3095       | 6 | T    | 4              | 236.6481        |
| 792.3779       | 7 | V    | 3              | 186.1243        |
| 889.4307       | 8 | P    | 2              | 136.5900        |
|                | 9 | R    | 1              | 88.0637         |

N-term:+29.04



GFQNAILVR, MH+ 1045.6158, m/z 523.3115  
 L OS G25 P150811 220811-s1.05225.05225.2.dta

scan 5225; 1.2e+001

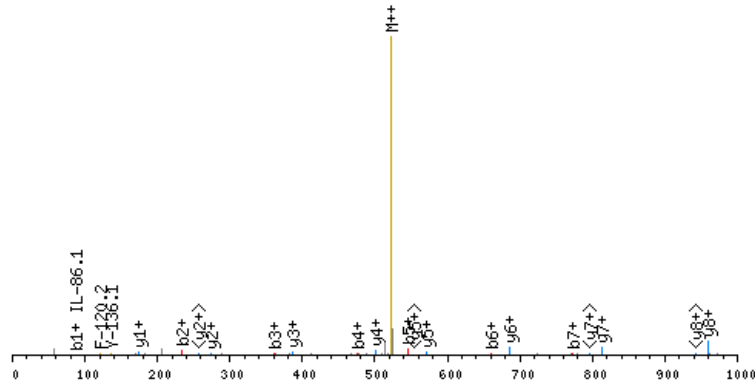

click image to zoom in; click top corners to zoom out [\[precursor±\]](#)

scan 5222; 523.3 m/z; 2.0e+001

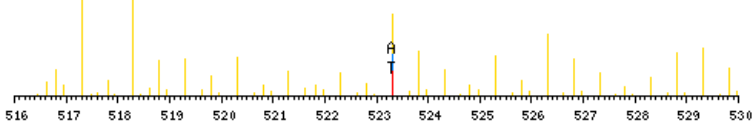

zoomed in precursor plot; T=theoretical m/z, A=acquired m/z

X-range:

-

MassTol: Y-zoom:

MassType:

AVG  MONO

Axis:

1  2

Label:

I  M  -

Ions:

a  +  2+  3+

b  +  2+  3+

c  +  2+  3+

x  +  2+  3+

y  +  2+  3+

z  +  2+  3+

hide H<sub>2</sub>O/NH<sub>3</sub>

zoom 112-122

GO

| b <sup>+</sup> | # | AA # | y <sup>+</sup> | y <sup>2+</sup> |
|----------------|---|------|----------------|-----------------|
| 86.0606        | 1 | G    | 9              |                 |
| 233.1290       | 2 | F    | 8              | 960.5631        |
| 361.1876       | 3 | Q    | 7              | 813.4947        |
| 475.2305       | 4 | N    | 6              | 685.4361        |
| 546.2676       | 5 | A    | 5              | 571.3932        |
| 659.3517       | 6 | I    | 4              | 500.3560        |
| 772.4357       | 7 | L    | 3              | 387.2720        |
| 871.5041       | 8 | V    | 2              | 274.1879        |
|                | 9 | R    | 1              | 175.1195        |

N-term:+29.04

GGEASAAVEKLVSGVR, MH+ 1585.8914, m/z 529.3020  
 L OS G26 P150811 220811-s1.05221.05221.3.dta

X-range:

-

MassTol: Y-zoom:

MassType:

AVG  MONO

Axis:

1  2

Label:

I  M  -

Ions:

a  +  2+  3+

b  +  2+  3+

c  +  2+  3+

x  +  2+  3+

y  +  2+  3+

z  +  2+  3+

hide H<sub>2</sub>O/NH<sub>3</sub>

zoom 112-122

GO

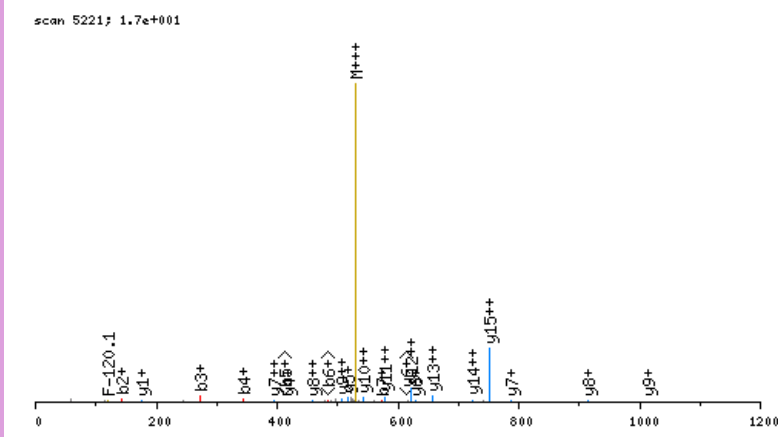

click image to zoom in; click top corners to zoom out [\[precursor±\]](#)

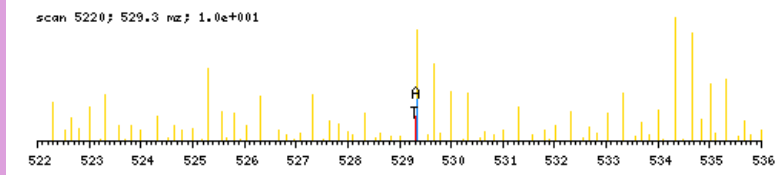

zoomed in precursor plot; T=theoretical m/z, A=acquired m/z

| b <sup>+</sup> | #  | AA # | y <sup>+</sup> | y <sup>2+</sup> |
|----------------|----|------|----------------|-----------------|
| 86.0606        | 1  | G 16 |                |                 |
| 143.0820       | 2  | G 15 | 1500.8386      | 750.9232        |
| 272.1246       | 3  | E 14 | 1443.8172      | 722.4125        |
| 343.1617       | 4  | A 13 | 1314.7746      | 657.8912        |
| 430.1938       | 5  | S 12 | 1243.7374      | 622.3726        |
| 501.2309       | 6  | A 11 | 1156.7054      | 578.8566        |
| 572.2680       | 7  | A 10 | 1085.6683      | 543.3381        |
| 671.3364       | 8  | V 9  | 1014.6312      | 507.8195        |
| 800.3790       | 9  | E 8  | 915.5628       | 458.2853        |
| 956.5053       | 10 | K 7  | 786.5202       | 393.7640        |
| 1069.5894      | 11 | L 6  | 630.3939       | 315.7009        |
| 1168.6578      | 12 | V 5  | 517.3098       | 259.1588        |
| 1255.6898      | 13 | S 4  | 418.2414       | 209.6246        |
| 1312.7113      | 14 | G 3  | 331.2094       | 166.1086        |
| 1411.7797      | 15 | V 2  | 274.1879       | 137.5979        |
|                | 16 | R 1  | 175.1195       | 88.0637         |

N-term:+29.04 K(10):+156.13

GGDISVKELGTVMR, MH+ 1586.9212, m/z 529.6453  
 H OS G26 P150811 220811-s1.04728.04728.3.dta

scan 4728; 1.3e+001

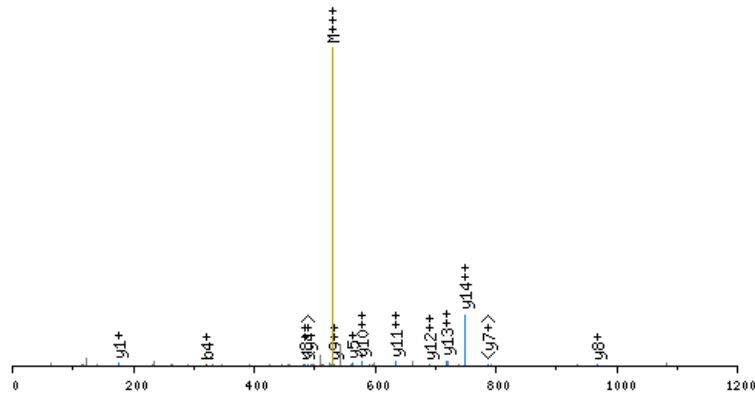

click image to zoom in; click top corners to zoom out [precursor±]

scan 4725; 529.6 m/z; 1.2e+001

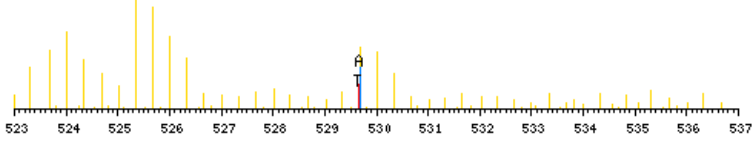

zoomed in precursor plot; T=theoretical m/z, A=acquired m/z

X-range:

-

MassTol: Y-zoom:

MassType:

AVG  MONO

Axis:

1  2

Label:

I  M  -

Ions:

a  +  2+  3+

b  +  2+  3+

c  +  2+  3+

x  +  2+  3+

y  +  2+  3+

z  +  2+  3+

hide H<sub>2</sub>O/NH<sub>3</sub>

zoom 112-122

GO

| b <sup>+</sup> | #  | AA # | y <sup>+</sup> | y <sup>2+</sup> |
|----------------|----|------|----------------|-----------------|
| 92.0924        | 1  | G 15 |                |                 |
| 149.1138       | 2  | G 14 | 1495.8367      | 748.4223        |
| 206.1353       | 3  | G 13 | 1438.8152      | 719.9115        |
| 321.1622       | 4  | D 12 | 1381.7937      | 691.4008        |
| 434.2463       | 5  | I 11 | 1266.7668      | 633.8873        |
| 521.2783       | 6  | S 10 | 1153.6827      | 577.3453        |
| 620.3467       | 7  | V 9  | 1066.6507      | 533.8293        |
| 782.5048       | 8  | K 8  | 967.5823       | 484.2951        |
| 911.5474       | 9  | E 7  | 805.4242       | 403.2160        |
| 1024.6315      | 10 | L 6  | 676.3816       | 338.6947        |
| 1081.6530      | 11 | G 5  | 563.2975       | 282.1527        |
| 1182.7006      | 12 | T 4  | 506.2761       | 253.6420        |
| 1281.7691      | 13 | V 3  | 405.2284       | 203.1181        |
| 1412.8095      | 14 | M 2  | 306.1600       | 153.5839        |
|                | 15 | R 1  | 175.1195       | 88.0637         |

N-term:+35.07 K(8):+162.16

GGGGHDALKGPNVCGSR, MH+ 1706.9032, m/z 427.4813  
 H OS G28 P150811 220811-s1.02106.02106.4.dta

X-range:

-

MassTol: Y-zoom:

MassType:

AVG  MONO

Axis:

1  2

Label:

I  M  -

Ions:

a  +  2+  3+

b  +  2+  3+

c  +  2+  3+

x  +  2+  3+

y  +  2+  3+

z  +  2+  3+

hide H<sub>2</sub>O/NH<sub>3</sub>

zoom 112-122

GO

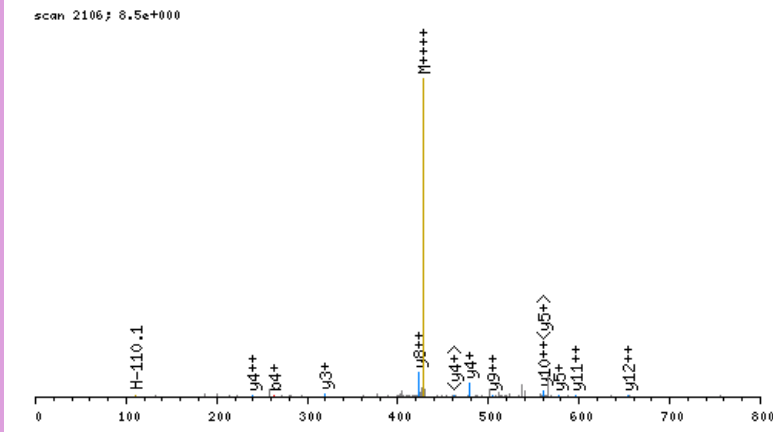

click image to zoom in; click top corners to zoom out [\[precursor±\]](#)

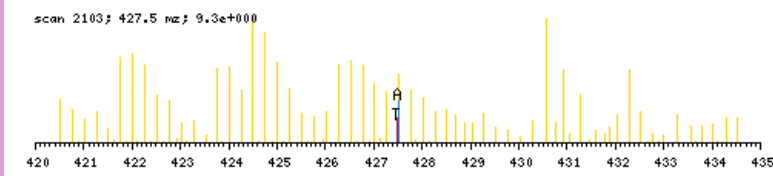

zoomed in precursor plot; T=theoretical m/z, A=acquired m/z

| b <sup>+</sup>  | #        | AA       | #         | y <sup>+</sup>  | y <sup>2+</sup> |
|-----------------|----------|----------|-----------|-----------------|-----------------|
| 92.0924         | 1        | G        | 17        |                 |                 |
| 149.1138        | 2        | G        | 16        | 1615.8187       | 808.4133        |
| 206.1353        | 3        | G        | 15        | 1558.7972       | 779.9025        |
| <b>263.1568</b> | <b>4</b> | <b>G</b> | <b>14</b> | 1501.7758       | 751.3918        |
| 400.2157        | 5        | H        | 13        | 1444.7543       | 722.8811        |
| 515.2426        | 6        | D        | 12        | 1307.6954       | <b>654.3516</b> |
| 586.2797        | 7        | A        | 11        | 1192.6684       | <b>596.8381</b> |
| 699.3638        | 8        | L        | 10        | 1121.6313       | <b>561.3196</b> |
| 861.5219        | 9        | K        | 9         | 1008.5473       | <b>504.7775</b> |
| 918.5434        | 10       | G        | 8         | 846.3892        | <b>423.6985</b> |
| 1015.5961       | 11       | P        | 7         | 789.3677        | 395.1878        |
| 1129.6390       | 12       | N        | 6         | 692.3149        | 346.6614        |
| 1228.7075       | 13       | V        | 5         | <b>578.2720</b> | 289.6399        |
| 1388.7381       | 14       | C        | 4         | <b>479.2036</b> | <b>240.1057</b> |
| 1445.7595       | 15       | G        | 3         | <b>319.1730</b> | 160.0904        |
| 1532.7915       | 16       | S        | 2         | 262.1515        | 131.5797        |
|                 | 17       | R        | 1         | 175.1195        | 88.0637         |

N-term:+35.07 K(9):+162.16  
 C(14):+160.03

GGGNFGPGGSNFR, MH+ 1405.6613, m/z 469.2253  
 L OS G25 P150811 220811-s1.03813.03813.3.dta

X-range:

-

MassTol: Y-zoom:

MassType:

AVG  MONO

Axis:

1  2

Label:

I  M  -

Ions:

a  +  2+  3+

b  +  2+  3+

c  +  2+  3+

x  +  2+  3+

y  +  2+  3+

z  +  2+  3+

hide H<sub>2</sub>O/NH<sub>3</sub>

zoom 112-122

GO

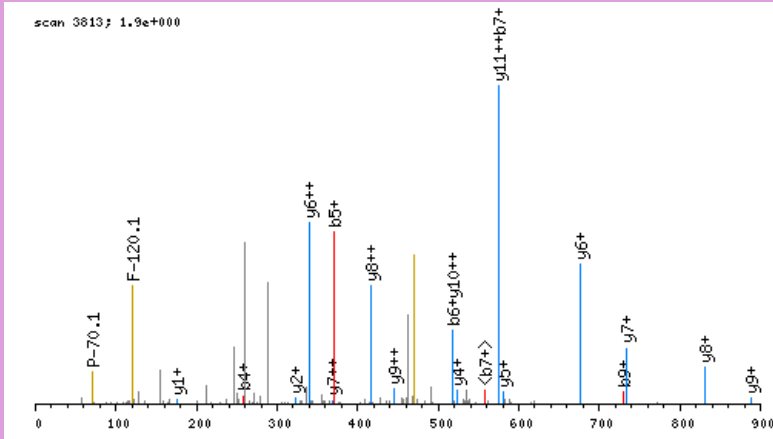

click image to zoom in; click top corners to zoom out [\[precursor±\]](#)

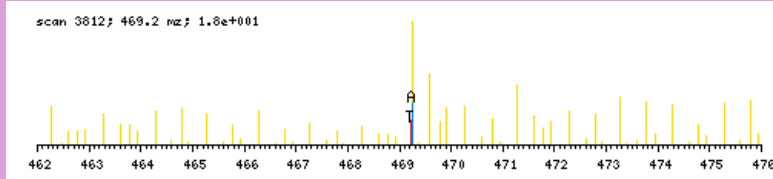

zoomed in precursor plot; T=theoretical m/z, A=acquired m/z

| b <sup>+</sup> | #  | AA # | y <sup>+</sup> | y <sup>2+</sup> |
|----------------|----|------|----------------|-----------------|
| 86.0606        | 1  | G 15 |                |                 |
| 143.0820       | 2  | G 14 | 1320.6085      | 660.8082        |
| 200.1035       | 3  | G 13 | 1263.5871      | 632.2974        |
| 257.1250       | 4  | G 12 | 1206.5656      | 603.7867        |
| 371.1679       | 5  | N 11 | 1149.5441      | 575.2760        |
| 518.2363       | 6  | F 10 | 1035.5012      | 518.2545        |
| 575.2578       | 7  | G 9  | 888.4328       | 444.7203        |
| 672.3105       | 8  | P 8  | 831.4113       | 416.2096        |
| 729.3320       | 9  | G 7  | 734.3586       | 367.6832        |
| 826.3848       | 10 | P 6  | 677.3371       | 339.1725        |
| 883.4062       | 11 | G 5  | 580.2843       | 290.6461        |
| 970.4382       | 12 | S 4  | 523.2629       | 262.1353        |
| 1084.4812      | 13 | N 3  | 436.2308       | 218.6193        |
| 1231.5496      | 14 | F 2  | 322.1879       | 161.5979        |
|                | 15 | R 1  | 175.1195       | 88.0637         |

N-term:+29.04

GGGGGGGLENANPLIYER, MH+ 1958.9936, m/z 653.6694  
 L OS G25 P150811 220811-s1.07334.07334.3.dta

scan 7334; 1.8e+000

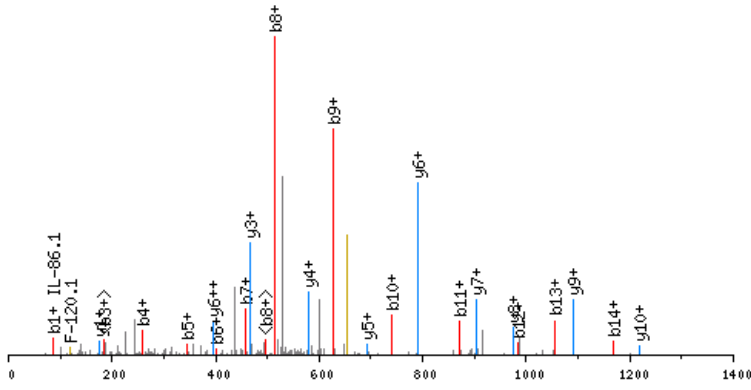

click image to zoom in; click top corners to zoom out [precursor±]

scan 7332; 653.7 m/z; 6.3e+000

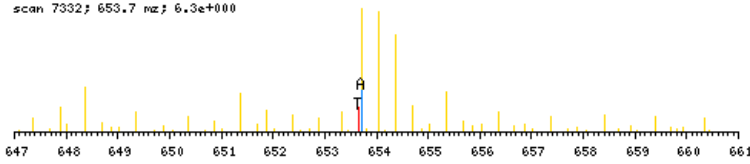

zoomed in precursor plot; T=theoretical m/z, A=acquired m/z

X-range:

-

MassTol: Y-zoom:

MassType:

AVG  MONO

Axis:

1  2

Label:

I  M  -

Ions:

a  +  2+  3+

b  +  2+  3+

c  +  2+  3+

x  +  2+  3+

y  +  2+  3+

z  +  2+  3+

hide H<sub>2</sub>O/NH<sub>3</sub>

zoom 112-122

GO

| b <sup>+</sup> | #  | AA | #  | y <sup>+</sup> | y <sup>2+</sup> |
|----------------|----|----|----|----------------|-----------------|
| 86.0606        | 1  | G  | 20 |                |                 |
| 143.0820       | 2  | G  | 19 | 1873.9408      | 937.4743        |
| 200.1035       | 3  | G  | 18 | 1816.9194      | 908.9636        |
| 257.1250       | 4  | G  | 17 | 1759.8979      | 880.4529        |
| 344.1570       | 5  | S  | 16 | 1702.8764      | 851.9421        |
| 401.1784       | 6  | G  | 15 | 1615.8444      | 808.4261        |
| 458.1999       | 7  | G  | 14 | 1558.8229      | 779.9154        |
| 515.2214       | 8  | G  | 13 | 1501.8015      | 751.4046        |
| 628.3054       | 9  | L  | 12 | 1444.7800      | 722.8939        |
| 741.3895       | 10 | L  | 11 | 1331.6959      | 666.3519        |
| 870.4321       | 11 | E  | 10 | 1218.6119      | 609.8099        |
| 984.4750       | 12 | N  | 9  | 1089.5693      | 545.2886        |
| 1055.5121      | 13 | A  | 8  | 975.5264       | 488.2671        |
| 1169.5551      | 14 | N  | 7  | 904.4892       | 452.7485        |
| 1266.6078      | 15 | P  | 6  | 790.4463       | 395.7271        |
| 1379.6919      | 16 | L  | 5  | 693.3936       | 347.2007        |
| 1492.7760      | 17 | I  | 4  | 580.3095       | 290.6587        |
| 1655.8393      | 18 | Y  | 3  | 467.2254       | 234.1166        |
| 1784.8819      | 19 | E  | 2  | 304.1621       | 152.5850        |
|                | 20 | R  | 1  | 175.1195       | 88.0637         |

N-term:+29.04

GGGTGSGMGTLLISKIR, MH+ 1660.9420, m/z 554.3189  
 L OS G26 P150811 220811-s1.05222.05222.3.dta

X-range:

-

MassTol: Y-zoom:

MassType:

AVG  MONO

Axis:

1  2

Label:

I  M  -

Ions:

a  +  2+  3+

b  +  2+  3+

c  +  2+  3+

x  +  2+  3+

y  +  2+  3+

z  +  2+  3+

hide H<sub>2</sub>O/NH<sub>3</sub>

zoom 112-122

GO

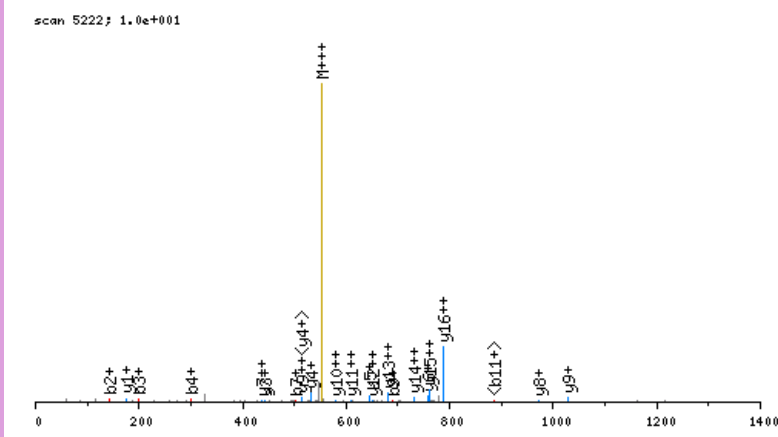

click image to zoom in; click top corners to zoom out [\[precursor±\]](#)

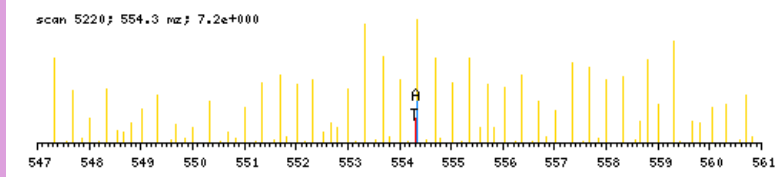

zoomed in precursor plot; T=theoretical m/z, A=acquired m/z

| b <sup>+</sup> | #  | AA # | y <sup>+</sup> | y <sup>2+</sup> |
|----------------|----|------|----------------|-----------------|
| 86.0606        | 1  | G 17 |                |                 |
| 143.0820       | 2  | G 16 | 1575.8893      | 788.4485        |
| 200.1035       | 3  | G 15 | 1518.8678      | 759.9378        |
| 301.1512       | 4  | T 14 | 1461.8463      | 731.4271        |
| 358.1726       | 5  | G 13 | 1360.7987      | 680.9032        |
| 445.2047       | 6  | S 12 | 1303.7772      | 652.3925        |
| 502.2261       | 7  | G 11 | 1216.7452      | 608.8765        |
| 633.2666       | 8  | M 10 | 1159.7237      | 580.3658        |
| 690.2881       | 9  | G 9  | 1028.6832      | 514.8455        |
| 791.3358       | 10 | T 8  | 971.6618       | 486.3348        |
| 904.4198       | 11 | L 7  | 870.6141       | 435.8110        |
| 1017.5039      | 12 | L 6  | 757.5300       | 379.2689        |
| 1130.5879      | 13 | I 5  | 644.4460       | 322.7269        |
| 1217.6200      | 14 | S 4  | 531.3619       | 266.1849        |
| 1373.7463      | 15 | K 3  | 444.3299       | 222.6688        |
| 1486.8303      | 16 | I 2  | 288.2036       | 144.6057        |
|                | 17 | R 1  | 175.1195       | 88.0637         |

N-term:+29.04 K(15):+156.13

GGHGAEYGAELER, MH+ 1444.6821, m/z 482.2322  
 L OS G27 P150811 220811-s1.02885.02885.3.dta

X-range:

-

MassTol: Y-zoom:

MassType:

AVG  MONO

Axis:

1  2

Label:

I  M  -

Ions:

a  +  2+  3+

b  +  2+  3+

c  +  2+  3+

x  +  2+  3+

y  +  2+  3+

z  +  2+  3+

hide H<sub>2</sub>O/NH<sub>3</sub>

zoom 112-122

GO

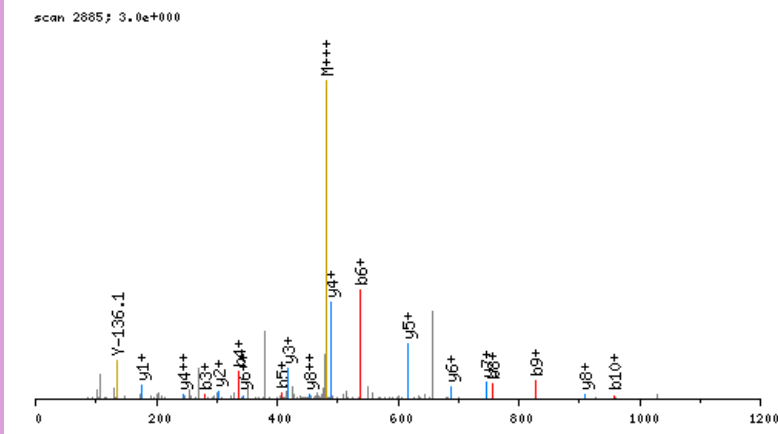

click image to zoom in; click top corners to zoom out [\[precursor±\]](#)

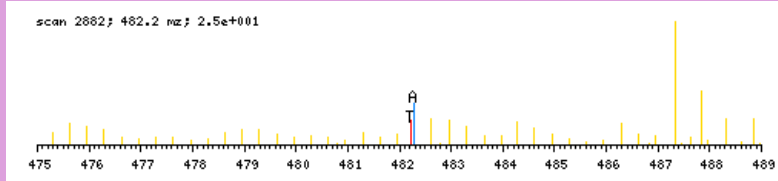

zoomed in precursor plot; T=theoretical m/z, A=acquired m/z

| b <sup>+</sup> | #  | AA # | y <sup>+</sup> | y <sup>2+</sup> |
|----------------|----|------|----------------|-----------------|
| 86.0606        | 1  | G 14 |                |                 |
| 143.0820       | 2  | G 13 | 1359.6293      | 680.3186        |
| 280.1409       | 3  | H 12 | 1302.6079      | 651.8078        |
| 337.1624       | 4  | G 11 | 1165.5489      | 583.2784        |
| 408.1995       | 5  | A 10 | 1108.5275      | 554.7677        |
| 537.2421       | 6  | E 9  | 1037.4904      | 519.2491        |
| 700.3054       | 7  | Y 8  | 908.4478       | 454.7278        |
| 757.3269       | 8  | G 7  | 745.3844       | 373.1961        |
| 828.3640       | 9  | A 6  | 688.3630       | 344.6854        |
| 957.4066       | 10 | E 5  | 617.3259       | 309.1668        |
| 1028.4437      | 11 | A 4  | 488.2833       | 244.6455        |
| 1141.5278      | 12 | L 3  | 417.2462       | 209.1270        |
| 1270.5704      | 13 | E 2  | 304.1621       | 152.5850        |
|                | 14 | R 1  | 175.1195       | 88.0637         |

N-term:+29.04



GGNSSPSAKDIKKILDSVGI EADDR, MH+ 2799.4741, m/z 700.6240  
 I\_OS\_G28\_P150811\_220811-s1.08842.08842.4.dta

X-range:

-

MassTol: Y-zoom:

MassType:

AVG  MONO

Axis:

1  2

Label:

I  M  -

Ions:

a  +  2+  3+

b  +  2+  3+

c  +  2+  3+

x  +  2+  3+

y  +  2+  3+

z  +  2+  3+

hide H<sub>2</sub>O/NH<sub>3</sub>

zoom 112-122

GO

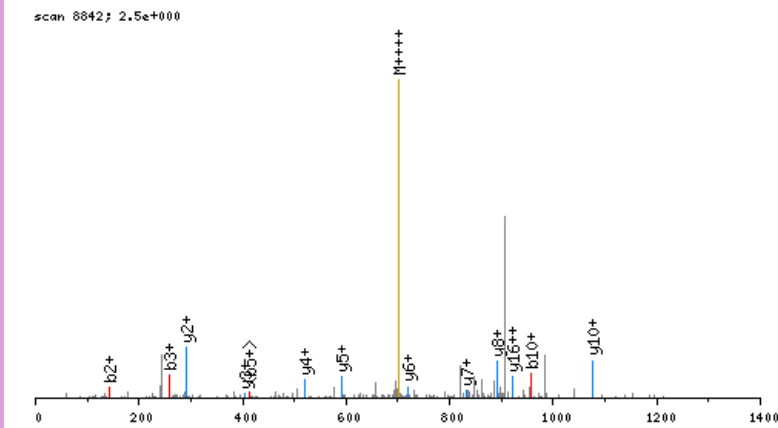

click image to zoom in; click top corners to zoom out [\[precursor±\]](#)

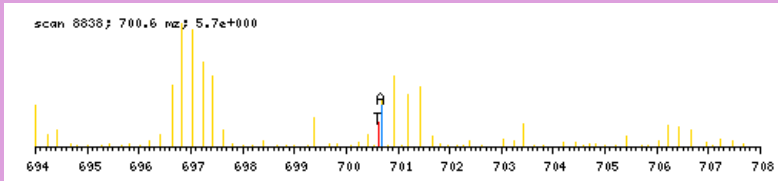

zoomed in precursor plot; T=theoretical m/z, A=acquired m/z

| b <sup>+</sup> | #  | AA # | y <sup>+</sup> | y <sup>2+</sup> |
|----------------|----|------|----------------|-----------------|
| 86.0606        | 1  | G 26 |                |                 |
| 143.0820       | 2  | G 25 | 2714.4213      | 1357.7146       |
| 257.1250       | 3  | N 24 | 2657.3999      | 1329.2039       |
| 344.1570       | 4  | S 23 | 2543.3569      | 1272.1824       |
| 431.1890       | 5  | S 22 | 2456.3249      | 1228.6664       |
| 528.2418       | 6  | P 21 | 2369.2929      | 1185.1504       |
| 615.2738       | 7  | S 20 | 2272.2401      | 1136.6240       |
| 686.3109       | 8  | A 19 | 2185.2081      | 1093.1080       |
| 842.4372       | 9  | K 18 | 2114.1710      | 1057.5894       |
| 957.4642       | 10 | D 17 | 1958.0447      | 979.5263        |
| 1070.5482      | 11 | I 16 | 1843.0177      | 922.0128        |
| 1226.6745      | 12 | K 15 | 1729.9337      | 865.4708        |
| 1382.8008      | 13 | K 14 | 1573.8074      | 787.4076        |
| 1495.8849      | 14 | I 13 | 1417.6811      | 709.3445        |
| 1608.9690      | 15 | L 12 | 1304.5970      | 652.8024        |
| 1723.9959      | 16 | D 11 | 1191.5130      | 596.2604        |
| 1811.0279      | 17 | S 10 | 1076.4860      | 538.7469        |
| 1910.0963      | 18 | V 9  | 989.4540       | 495.2309        |
| 1967.1178      | 19 | G 8  | 890.3856       | 445.6967        |
| 2080.2019      | 20 | I 7  | 833.3641       | 417.1860        |
| 2209.2445      | 21 | E 6  | 720.2800       | 360.6439        |
| 2280.2816      | 22 | A 5  | 591.2374       | 296.1226        |
| 2395.3085      | 23 | D 4  | 520.2003       | 260.6041        |
| 2510.3355      | 24 | D 3  | 405.1734       | 203.0906        |
| 2625.3624      | 25 | D 2  | 290.1464       | 145.5771        |
|                | 26 | R 1  | 175.1195       | 88.0637         |

N-term:+29.04 K(9):+156.13  
 K(12):+156.13 K(13):+156.13

GGSFAGSFGGAGGHAPGVAR, MH+ 1744.8519, m/z 582.2888  
 L OS G27 P150811 220811-s1.04275.04275.3.dta

X-range:

-

MassTol: Y-zoom:

MassType:

AVG  MONO

Axis:

1  2

Label:

I  M  -

Ions:

a  +  2+  3+

b  +  2+  3+

c  +  2+  3+

x  +  2+  3+

y  +  2+  3+

z  +  2+  3+

hide H<sub>2</sub>O/NH<sub>3</sub>

zoom 112-122

GO

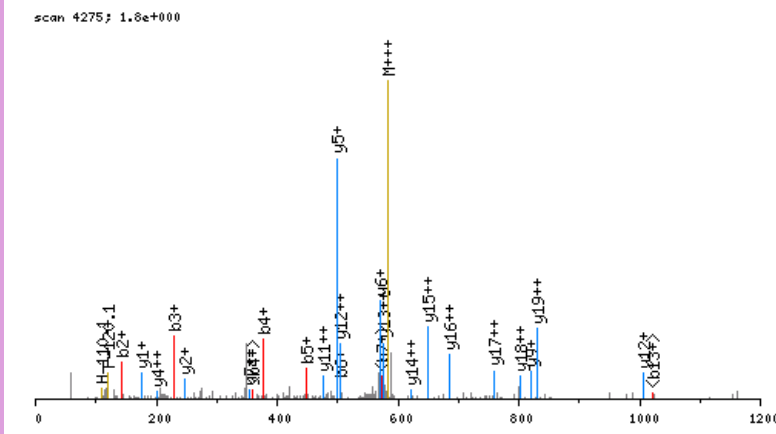

click image to zoom in; click top corners to zoom out [\[precursor±\]](#)

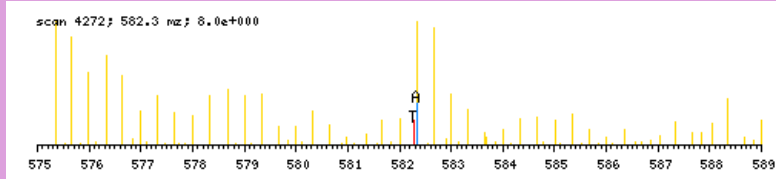

zoomed in precursor plot; T=theoretical m/z, A=acquired m/z

| b <sup>+</sup> | #  | AA | #  | y <sup>+</sup> | y <sup>2+</sup> |
|----------------|----|----|----|----------------|-----------------|
| 86.0606        | 1  | G  | 20 |                |                 |
| 143.0820       | 2  | G  | 19 | 1659.7992      | 830.4035        |
| 230.1141       | 3  | S  | 18 | 1602.7777      | 801.8928        |
| 377.1825       | 4  | F  | 17 | 1515.7457      | 758.3768        |
| 448.2196       | 5  | A  | 16 | 1368.6773      | 684.8425        |
| 505.2410       | 6  | G  | 15 | 1297.6402      | 649.3240        |
| 592.2731       | 7  | S  | 14 | 1240.6187      | 620.8133        |
| 739.3415       | 8  | F  | 13 | 1153.5867      | 577.2972        |
| 796.3630       | 9  | G  | 12 | 1006.5183      | 503.7630        |
| 853.3844       | 10 | G  | 11 | 949.4968       | 475.2523        |
| 924.4215       | 11 | A  | 10 | 892.4753       | 446.7416        |
| 981.4430       | 12 | G  | 9  | 821.4382       | 411.2230        |
| 1038.4645      | 13 | G  | 8  | 764.4167       | 382.7123        |
| 1175.5234      | 14 | H  | 7  | 707.3953       | 354.2016        |
| 1246.5605      | 15 | A  | 6  | 570.3364       | 285.6721        |
| 1343.6132      | 16 | P  | 5  | 499.2993       | 250.1535        |
| 1400.6347      | 17 | G  | 4  | 402.2465       | 201.6272        |
| 1499.7031      | 18 | V  | 3  | 345.2250       | 173.1164        |
| 1570.7402      | 19 | A  | 2  | 246.1566       | 123.5822        |
|                | 20 | R  | 1  | 175.1195       | 88.0637         |

N-term:+29.04

GGSKSIFGNLVGR, MH+ 1347.7749, m/z 449.9298  
 L OS G27 P150811 220811-s1.05565.05565.3.dta

scan 5565; 1.5e+001

X-range:

-

MassTol: Y-zoom:

MassType:

AVG  MONO

Axis:

1  2

Label:

I  M  -

Ions:

a  +  2+  3+

b  +  2+  3+

c  +  2+  3+

x  +  2+  3+

y  +  2+  3+

z  +  2+  3+

hide H<sub>2</sub>O/NH<sub>3</sub>

zoom 112-122

GO

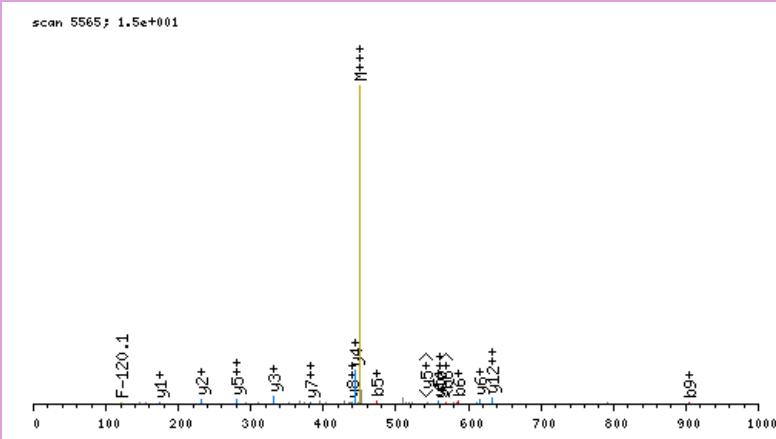

click image to zoom in; click top corners to zoom out [\[precursor±\]](#)

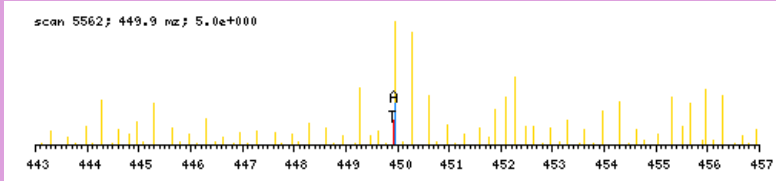

zoomed in precursor plot; T=theoretical m/z, A=acquired m/z

| b <sup>+</sup> | #  | AA # | y <sup>+</sup> | y <sup>2+</sup> |
|----------------|----|------|----------------|-----------------|
| 86.0606        | 1  | G 13 |                |                 |
| 143.0820       | 2  | G 12 | 1262.7221      | 631.8650        |
| 230.1141       | 3  | S 11 | 1205.7007      | 603.3542        |
| 386.2404       | 4  | K 10 | 1118.6686      | 559.8382        |
| 473.2724       | 5  | S 9  | 962.5423       | 481.7751        |
| 586.3564       | 6  | I 8  | 875.5103       | 438.2591        |
| 733.4249       | 7  | F 7  | 762.4262       | 381.7170        |
| 790.4463       | 8  | G 6  | 615.3578       | 308.1828        |
| 904.4893       | 9  | N 5  | 558.3364       | 279.6721        |
| 1017.5733      | 10 | L 4  | 444.2934       | 222.6506        |
| 1116.6417      | 11 | V 3  | 331.2094       | 166.1086        |
| 1173.6632      | 12 | G 2  | 232.1410       | 116.5744        |
|                | 13 | R 1  | 175.1195       | 88.0637         |

N-term:+29.04 K(4):+156.13

GGVISAISEAAAQYNPEPPPR, MH+ 2249.1566, m/z 563.0446  
 L OS G24 P150811 220811-s1.04774.04774.4.dta

scan 4774; 2.5e+000

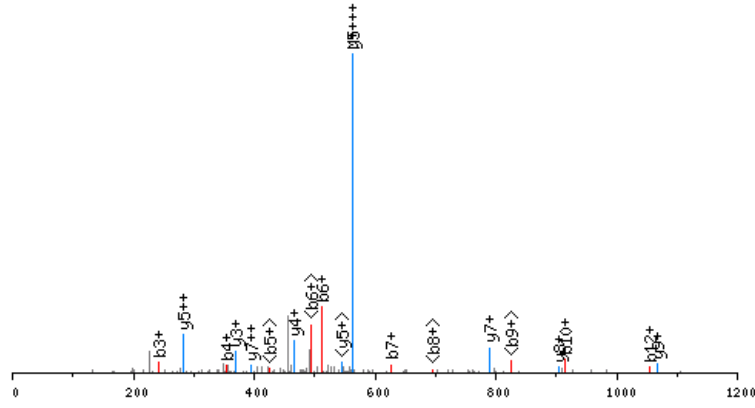

click image to zoom in; click top corners to zoom out [precursor±]

scan 4770; 563.0 nz; 1.5e+000

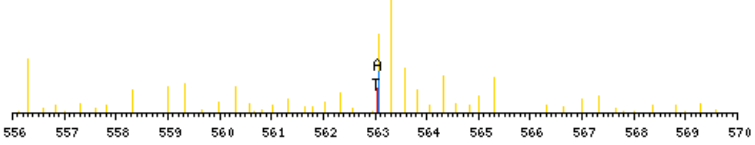

zoomed in precursor plot; T=theoretical m/z, A=acquired m/z

X-range:

-

MassTol: Y-zoom:

MassType:

AVG  MONO

Axis:

1  2

Label:

I  M  -

Ions:

a  +  2+  3+

b  +  2+  3+

c  +  2+  3+

x  +  2+  3+

y  +  2+  3+

z  +  2+  3+

hide H<sub>2</sub>O/NH<sub>3</sub>

zoom 112-122

GO

| b <sup>+</sup> | #  | AA # | y <sup>+</sup> | y <sup>2+</sup> |
|----------------|----|------|----------------|-----------------|
| 86.0606        | 1  | G 22 |                |                 |
| 143.0820       | 2  | G 21 | 2164.1039      | 1082.5558       |
| 242.1504       | 3  | V 20 | 2107.0824      | 1054.0451       |
| 355.2345       | 4  | I 19 | 2008.0140      | 1004.5109       |
| 442.2665       | 5  | S 18 | 1894.9299      | 947.9689        |
| 513.3036       | 6  | A 17 | 1807.8979      | 904.4529        |
| 626.3877       | 7  | I 16 | 1736.8608      | 868.9343        |
| 713.4197       | 8  | S 15 | 1623.7767      | 812.3923        |
| 842.4623       | 9  | E 14 | 1536.7447      | 768.8763        |
| 913.4994       | 10 | A 13 | 1407.7021      | 704.3550        |
| 984.5366       | 11 | A 12 | 1336.6650      | 668.8364        |
| 1055.5737      | 12 | A 11 | 1265.6279      | 633.3178        |
| 1183.6323      | 13 | Q 10 | 1194.5907      | 597.7993        |
| 1346.6956      | 14 | Y 9  | 1066.5322      | 533.7700        |
| 1460.7385      | 15 | N 8  | 903.4688       | 452.2383        |
| 1557.7913      | 16 | P 7  | 789.4259       | 395.2169        |
| 1686.8339      | 17 | E 6  | 692.3731       | 346.6905        |
| 1783.8866      | 18 | P 5  | 563.3306       | 282.1692        |
| 1880.9394      | 19 | P 4  | 466.2778       | 233.6428        |
| 1977.9922      | 20 | P 3  | 369.2250       | 185.1164        |
| 2075.0449      | 21 | P 2  | 272.1723       | 136.5900        |
|                | 22 | R 1  | 175.1195       | 88.0637         |

N-term:+29.04

GGYKEPAAPVSIQR, MH+ 1528.8488, m/z 510.2878  
 L OS G26 P150811 220811-s1.02906.02906.3.dta

X-range:

-

MassTol: Y-zoom:

MassType:

AVG  MONO

Axis:

1  2

Label:

I  M  -

Ions:

a  +  2+  3+

b  +  2+  3+

c  +  2+  3+

x  +  2+  3+

y  +  2+  3+

z  +  2+  3+

hide H<sub>2</sub>O/NH<sub>3</sub>

zoom 112-122

GO

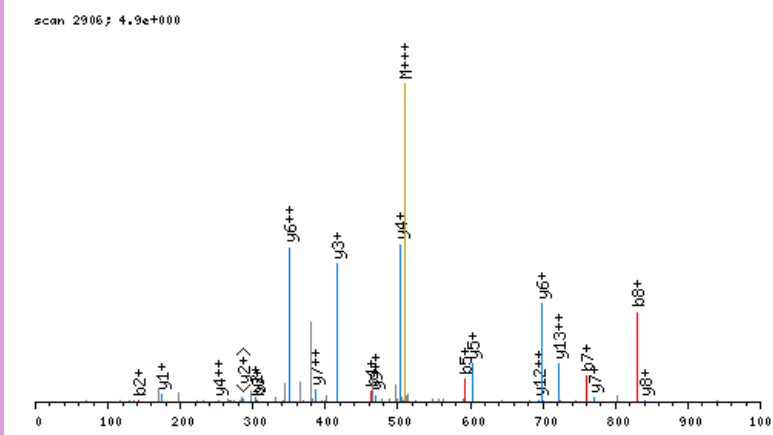

click image to zoom in; click top corners to zoom out [\[precursor±\]](#)

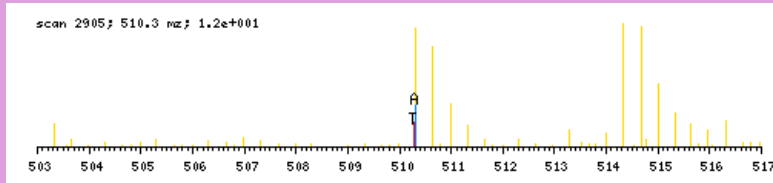

zoomed in precursor plot; T=theoretical m/z, A=acquired m/z

| b <sup>+</sup> | #  | AA # | y <sup>+</sup> | y <sup>2+</sup> |
|----------------|----|------|----------------|-----------------|
| 86.0606        | 1  | G 14 |                |                 |
| 143.0820       | 2  | G 13 | 1443.7960      | 722.4019        |
| 306.1454       | 3  | Y 12 | 1386.7746      | 693.8912        |
| 462.2717       | 4  | K 11 | 1223.7112      | 612.3595        |
| 591.3142       | 5  | E 10 | 1067.5849      | 534.2964        |
| 688.3670       | 6  | P 9  | 938.5423       | 469.7751        |
| 759.4041       | 7  | A 8  | 841.4896       | 421.2487        |
| 830.4412       | 8  | A 7  | 770.4525       | 385.7301        |
| 927.4940       | 9  | P 6  | 699.4153       | 350.2116        |
| 1026.5624      | 10 | V 5  | 602.3626       | 301.6852        |
| 1113.5944      | 11 | S 4  | 503.2942       | 252.1510        |
| 1226.6785      | 12 | I 3  | 416.2621       | 208.6350        |
| 1354.7371      | 13 | Q 2  | 303.1781       | 152.0930        |
|                | 14 | R 1  | 175.1195       | 88.0637         |

N-term:+29.04 K(4):+156.13

GILAADESTGSIAKR, MH+ 1544.8648, m/z 515.6265  
 L OS G26 P150811 220811-s1.03049.03049.3.dta

X-range:

-

MassTol: Y-zoom:

MassType:

AVG  MONO

Axis:

1  2

Label:

I  M  -

Ions:

a  +  2+  3+

b  +  2+  3+

c  +  2+  3+

x  +  2+  3+

y  +  2+  3+

z  +  2+  3+

hide H<sub>2</sub>O/NH<sub>3</sub>

zoom 112-122

GO

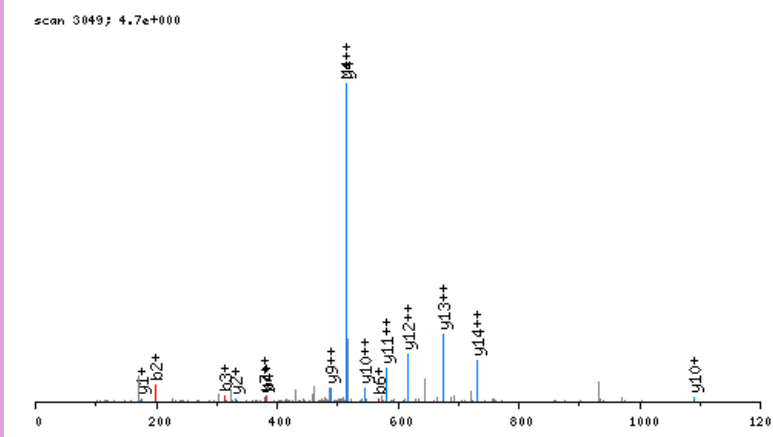

click image to zoom in; click top corners to zoom out [\[precursor±\]](#)

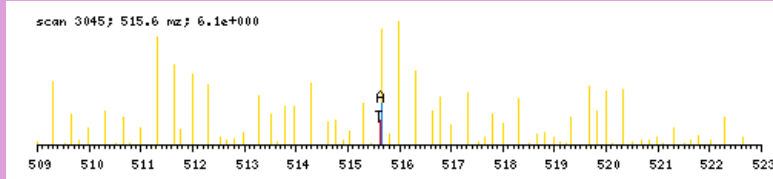

zoomed in precursor plot; T=theoretical m/z, A=acquired m/z

| b <sup>+</sup> | #  | AA # | y <sup>+</sup> | y <sup>2+</sup> |
|----------------|----|------|----------------|-----------------|
| 86.0606        | 1  | G    | 15             |                 |
| 199.1446       | 2  | I    | 14             | 1459.8121       |
| 312.2287       | 3  | L    | 13             | 1346.7280       |
| 383.2658       | 4  | A    | 12             | 1233.6439       |
| 454.3029       | 5  | A    | 11             | 1162.6068       |
| 569.3299       | 6  | D    | 10             | 1091.5697       |
| 698.3725       | 7  | E    | 9              | 976.5428        |
| 785.4045       | 8  | S    | 8              | 847.5002        |
| 886.4522       | 9  | T    | 7              | 760.4681        |
| 943.4736       | 10 | G    | 6              | 659.4205        |
| 1030.5057      | 11 | S    | 5              | 602.3990        |
| 1143.5897      | 12 | I    | 4              | 515.3670        |
| 1214.6268      | 13 | A    | 3              | 402.2829        |
| 1370.7531      | 14 | K    | 2              | 331.2458        |
|                | 15 | R    | 1              | 175.1195        |

N-term:+29.04 K(14):+156.13

GIPGYGQTGR, MH+ 1033.5430, m/z 517.2752  
 L OS G25 P150811 220811-s1.06131.06131.2.dta

X-range:

-

MassTol: Y-zoom:

MassType:

AVG  MONO

Axis:

1  2

Label:

I  M  -

Ions:

a  +  2+  3+

b  +  2+  3+

c  +  2+  3+

x  +  2+  3+

y  +  2+  3+

z  +  2+  3+

hide H<sub>2</sub>O/NH<sub>3</sub>

zoom 112-122

GO

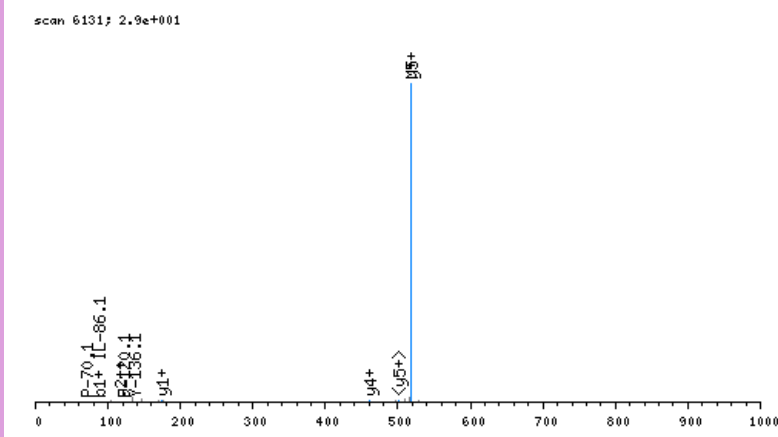

click image to zoom in; click top corners to zoom out [\[precursor±\]](#)

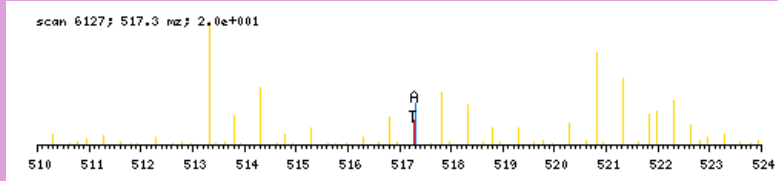

zoomed in precursor plot; T=theoretical m/z, A=acquired m/z

| b <sup>+</sup> | #  | AA | #  | y <sup>+</sup> | y <sup>2+</sup> |
|----------------|----|----|----|----------------|-----------------|
| 86.0606        | 1  | G  | 10 |                |                 |
| 199.1446       | 2  | I  | 9  | 948.4903       | 474.7491        |
| 296.1974       | 3  | P  | 8  | 835.4062       | 418.2070        |
| 353.2189       | 4  | G  | 7  | 738.3535       | 369.6807        |
| 516.2822       | 5  | Y  | 6  | 681.3320       | 341.1699        |
| 573.3036       | 6  | G  | 5  | 518.2687       | 259.6383        |
| 701.3622       | 7  | Q  | 4  | 461.2472       | 231.1275        |
| 802.4099       | 8  | T  | 3  | 333.1886       | 167.0982        |
| 859.4314       | 9  | G  | 2  | 232.1410       | 116.5744        |
|                | 10 | R  | 1  | 175.1195       | 88.0637         |

N-term: +29.04

GIQDGYLSLLQDSGEVR, MH+ 1877.9609, m/z 626.6585  
 L OS G25 P150811 220811-s1.08079.08079.3.dta

X-range:

-

MassTol: Y-zoom:

MassType:

AVG  MONO

Axis:

1  2

Label:

I  M  -

Ions:

a  +  2+  3+

b  +  2+  3+

c  +  2+  3+

x  +  2+  3+

y  +  2+  3+

z  +  2+  3+

hide H<sub>2</sub>O/NH<sub>3</sub>

zoom 112-122

GO

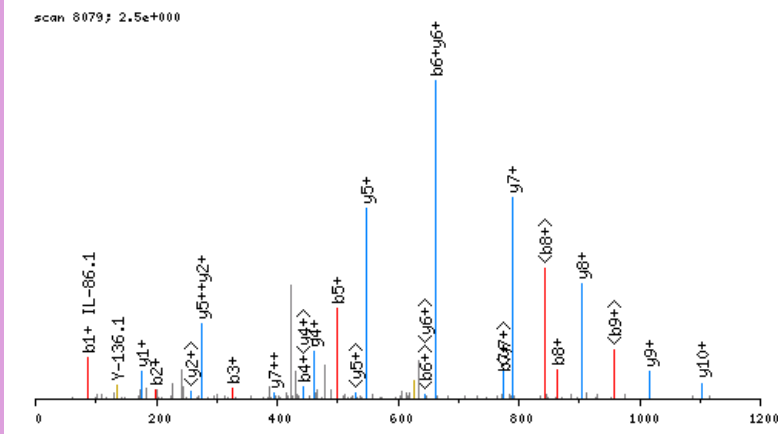

click image to zoom in; click top corners to zoom out [\[precursor±\]](#)

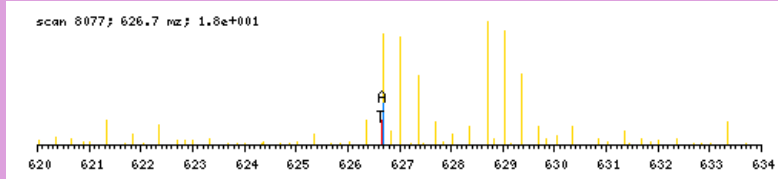

zoomed in precursor plot; T=theoretical m/z, A=acquired m/z

| b <sup>+</sup> | #  | AA # | y <sup>+</sup> | y <sup>2+</sup> |
|----------------|----|------|----------------|-----------------|
| 86.0606        | 1  | G 17 |                |                 |
| 199.1446       | 2  | I 16 | 1792.9081      | 896.9580        |
| 327.2032       | 3  | Q 15 | 1679.8241      | 840.4159        |
| 442.2301       | 4  | D 14 | 1551.7655      | 776.3867        |
| 499.2516       | 5  | G 13 | 1436.7385      | 718.8732        |
| 662.3149       | 6  | Y 12 | 1379.7171      | 690.3624        |
| 775.3990       | 7  | L 11 | 1216.6537      | 608.8308        |
| 862.4310       | 8  | S 10 | 1103.5697      | 552.2888        |
| 975.5151       | 9  | L 9  | 1016.5376      | 508.7727        |
| 1088.5992      | 10 | L 8  | 903.4536       | 452.2307        |
| 1216.6577      | 11 | Q 7  | 790.3695       | 395.6887        |
| 1331.6847      | 12 | D 6  | 662.3109       | 331.6594        |
| 1418.7167      | 13 | S 5  | 547.2840       | 274.1459        |
| 1475.7382      | 14 | G 4  | 460.2520       | 230.6299        |
| 1604.7808      | 15 | E 3  | 403.2305       | 202.1192        |
| 1703.8492      | 16 | V 2  | 274.1879       | 137.5979        |
|                | 17 | R 1  | 175.1195       | 88.0637         |

N-term:+29.04



GISDVVKVTLTPPEEAR, MH+ 1911.1075, m/z 637.7073  
 H OS G26 P150811 220811-s1.05752.05752.3.dta

X-range:

-

MassTol: Y-zoom:

MassType:

AVG  MONO

Axis:

1  2

Label:

I  M  -

Ions:

a  +  2+  3+

b  +  2+  3+

c  +  2+  3+

x  +  2+  3+

y  +  2+  3+

z  +  2+  3+

hide H<sub>2</sub>O/NH<sub>3</sub>

zoom 112-122

GO

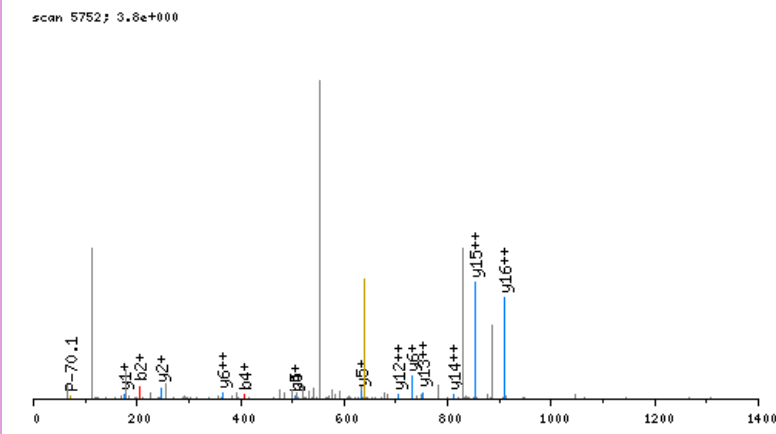

click image to zoom in; click top corners to zoom out [\[precursor±\]](#)

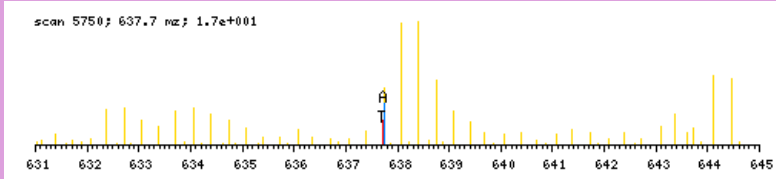

zoomed in precursor plot; T=theoretical m/z, A=acquired m/z

| b <sup>+</sup> | #  | AA # | y <sup>+</sup> | y <sup>2+</sup> |
|----------------|----|------|----------------|-----------------|
| 92.0924        | 1  | G 17 |                |                 |
| 205.1764       | 2  | I 16 | 1820.0230      | 910.5154        |
| 292.2085       | 3  | S 15 | 1706.9389      | 853.9734        |
| 407.2354       | 4  | D 14 | 1619.9069      | 810.4573        |
| 506.3038       | 5  | V 13 | 1504.8799      | 752.9439        |
| 605.3722       | 6  | V 12 | 1405.8115      | 703.4097        |
| 767.5303       | 7  | K 11 | 1306.7431      | 653.8755        |
| 866.5987       | 8  | V 10 | 1144.5850      | 572.7964        |
| 967.6464       | 9  | T 9  | 1045.5166      | 523.2622        |
| 1080.7305      | 10 | L 8  | 944.4689       | 472.7384        |
| 1181.7782      | 11 | T 7  | 831.3848       | 416.1963        |
| 1278.8309      | 12 | P 6  | 730.3372       | 365.6725        |
| 1407.8735      | 13 | E 5  | 633.2844       | 317.1461        |
| 1536.9161      | 14 | E 4  | 504.2418       | 252.6248        |
| 1665.9587      | 15 | E 3  | 375.1992       | 188.1035        |
| 1736.9958      | 16 | A 2  | 246.1566       | 123.5822        |
|                | 17 | R 1  | 175.1195       | 88.0637         |

N-term:+35.07 K(7):+162.16

GIVPDIAVGTRK, MH+ 1281.7895, m/z 427.9347  
 L OS G26 P150811 220811-s1.04044.04044.3.dta

X-range:

-

MassTol: Y-zoom:

MassType:

AVG  MONO

Axis:

1  2

Label:

I  M  -

Ions:

a  +  2+  3+

b  +  2+  3+

c  +  2+  3+

x  +  2+  3+

y  +  2+  3+

z  +  2+  3+

hide H<sub>2</sub>O/NH<sub>3</sub>

zoom 112-122

GO

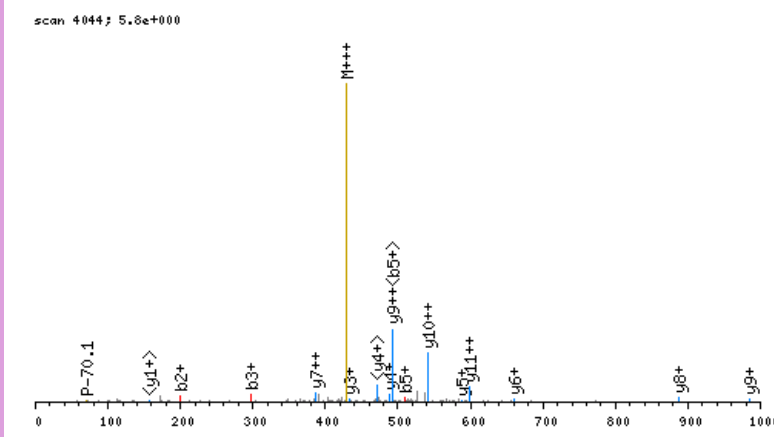

click image to zoom in; click top corners to zoom out [\[precursor±\]](#)

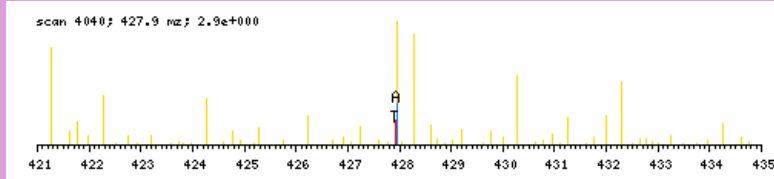

zoomed in precursor plot; T=theoretical m/z, A=acquired m/z

| b <sup>+</sup> | #  | AA # | y <sup>+</sup> | y <sup>2+</sup> |
|----------------|----|------|----------------|-----------------|
| 86.0606        | 1  | G 12 |                |                 |
| 199.1446       | 2  | I 11 | 1196.7367      | 598.8723        |
| 298.2130       | 3  | V 10 | 1083.6527      | 542.3302        |
| 395.2658       | 4  | P 9  | 984.5842       | 492.7960        |
| 510.2927       | 5  | D 8  | 887.5315       | 444.2697        |
| 623.3768       | 6  | I 7  | 772.5045       | 386.7562        |
| 694.4139       | 7  | A 6  | 659.4205       | 330.2141        |
| 793.4823       | 8  | V 5  | 588.3834       | 294.6956        |
| 850.5038       | 9  | G 4  | 489.3149       | 245.1614        |
| 951.5515       | 10 | T 3  | 432.2935       | 216.6507        |
| 1107.6778      | 11 | K 2  | 331.2458       | 166.1268        |
|                | 12 | R 1  | 175.1195       | 88.0637         |

N-term:+29.04 K(11):+156.13

GIVTSSAGTGTTEDETEAKKR, MH+ 2093.1091, m/z 524.0327  
 L OS G28 P150811 220811-s1.02139.02139.4.dta

X-range:

-

MassTol: Y-zoom:

MassType:

AVG  MONO

Axis:

1  2

Label:

I  M  -

Ions:

a  +  2+  3+

b  +  2+  3+

c  +  2+  3+

x  +  2+  3+

y  +  2+  3+

z  +  2+  3+

hide H<sub>2</sub>O/NH<sub>3</sub>

zoom 112-122

GO

scan 2139; 1.5e+000

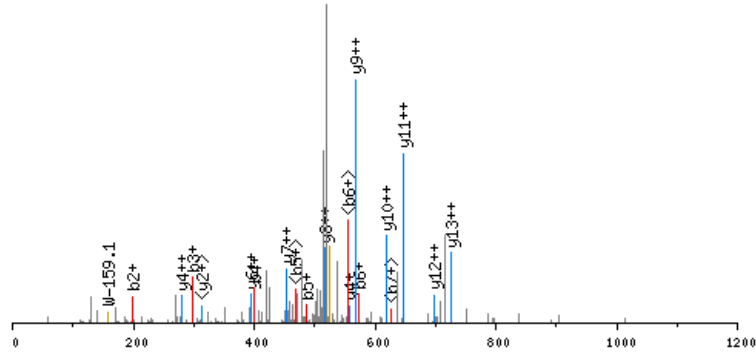

click image to zoom in; click top corners to zoom out [\[precursor±\]](#)

scan 2138; 524.0 nz; 2.2e+001

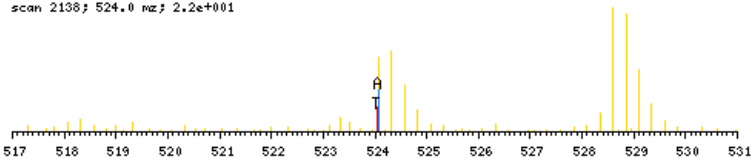

zoomed in precursor plot; T=theoretical m/z, A=acquired m/z

| b <sup>+</sup> | #  | AA | #  | y <sup>+</sup> | y <sup>2+</sup> |
|----------------|----|----|----|----------------|-----------------|
| 86.0606        | 1  | G  | 20 |                |                 |
| 199.1446       | 2  | I  | 19 | 2008.0563      | 1004.5321       |
| 298.2130       | 3  | V  | 18 | 1894.9722      | 947.9900        |
| 399.2607       | 4  | T  | 17 | 1795.9038      | 898.4558        |
| 486.2927       | 5  | S  | 16 | 1694.8562      | 847.9320        |
| 573.3248       | 6  | S  | 15 | 1607.8241      | 804.4160        |
| 644.3619       | 7  | A  | 14 | 1520.7921      | 760.9000        |
| 701.3834       | 8  | G  | 13 | 1449.7550      | 725.3814        |
| 802.4310       | 9  | T  | 12 | 1392.7335      | 696.8707        |
| 859.4525       | 10 | G  | 11 | 1291.6858      | 646.3468        |
| 960.5002       | 11 | T  | 10 | 1234.6644      | 617.8361        |
| 1061.5479      | 12 | T  | 9  | 1133.6167      | 567.3123        |
| 1190.5904      | 13 | E  | 8  | 1032.5690      | 516.7884        |
| 1305.6174      | 14 | D  | 7  | 903.5264       | 452.2671        |
| 1406.6651      | 15 | T  | 6  | 788.4995       | 394.7537        |
| 1535.7077      | 16 | E  | 5  | 687.4518       | 344.2298        |
| 1606.7448      | 17 | A  | 4  | 558.4092       | 279.7085        |
| 1762.8711      | 18 | K  | 3  | 487.3721       | 244.1900        |
| 1918.9974      | 19 | K  | 2  | 331.2458       | 166.1268        |
|                | 20 | R  | 1  | 175.1195       | 88.0637         |

N-term: +29.04 K(18): +156.13  
 K(19): +156.13

GIYPAVDPLDSTSR, MH+ 1518.7804, m/z 506.9316  
 L OS G24 P150811 220811-s1.03979.03979.3.dta

X-range:

-

MassTol: Y-zoom:

MassType:

AVG  MONO

Axis:

1  2

Label:

I  M  -

Ions:

a  +  2+  3+

b  +  2+  3+

c  +  2+  3+

x  +  2+  3+

y  +  2+  3+

z  +  2+  3+

hide H<sub>2</sub>O/NH<sub>3</sub>

zoom 112-122

GO

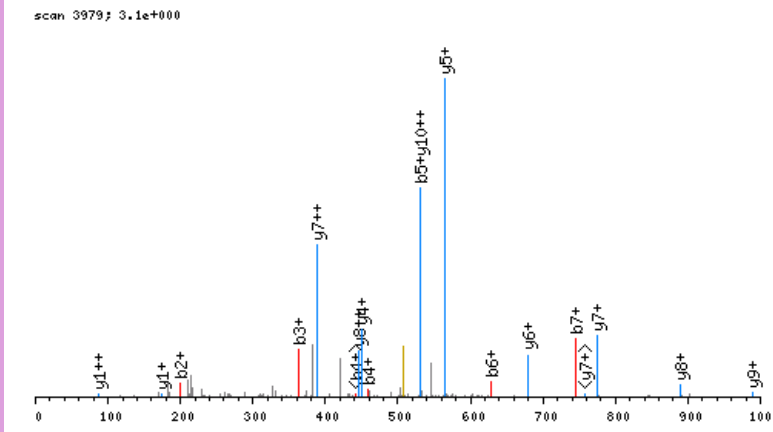

click image to zoom in; click top corners to zoom out [\[precursor±\]](#)

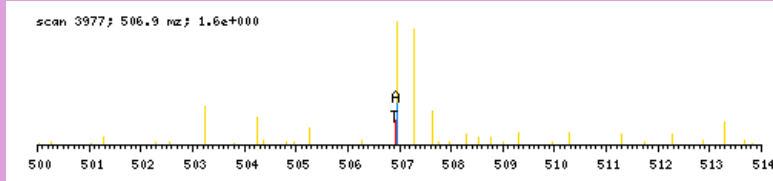

zoomed in precursor plot; T=theoretical m/z, A=acquired m/z

| b <sup>+</sup> | #  | AA # | y <sup>+</sup> | y <sup>2+</sup> |
|----------------|----|------|----------------|-----------------|
| 86.0606        | 1  | G 14 |                |                 |
| 199.1446       | 2  | I 13 | 1433.7276      | 717.3677        |
| 362.2080       | 3  | Y 12 | 1320.6436      | 660.8257        |
| 459.2607       | 4  | P 11 | 1157.5802      | 579.2940        |
| 530.2978       | 5  | A 10 | 1060.5275      | 530.7677        |
| 629.3662       | 6  | V 9  | 989.4904       | 495.2491        |
| 744.3932       | 7  | D 8  | 890.4220       | 445.7149        |
| 841.4460       | 8  | P 7  | 775.3950       | 388.2014        |
| 954.5300       | 9  | L 6  | 678.3422       | 339.6750        |
| 1069.5570      | 10 | D 5  | 565.2582       | 283.1330        |
| 1156.5890      | 11 | S 4  | 450.2312       | 225.6195        |
| 1257.6367      | 12 | T 3  | 363.1992       | 182.1035        |
| 1344.6687      | 13 | S 2  | 262.1515       | 131.5797        |
|                | 14 | R 1  | 175.1195       | 88.0637         |

N-term:+29.04

GKDYQTGLAR, MH+ 1452.8487, m/z 484.9544  
 H OS G27 P150811 220811-s1.04866.04866.3.dta

X-range:

-

MassTol: Y-zoom:

MassType:

AVG  MONO

Axis:

1  2

Label:

I  M  -

Ions:

a  +  2+  3+

b  +  2+  3+

c  +  2+  3+

x  +  2+  3+

y  +  2+  3+

z  +  2+  3+

hide H<sub>2</sub>O/NH<sub>3</sub>

zoom 112-122

GO

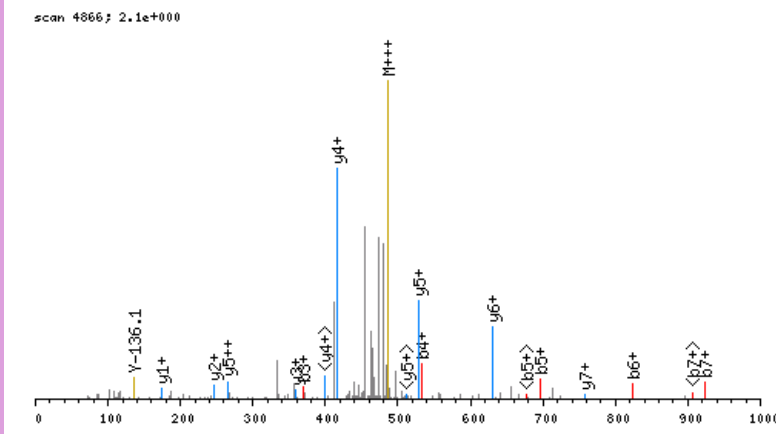

click image to zoom in; click top corners to zoom out [\[precursor±\]](#)

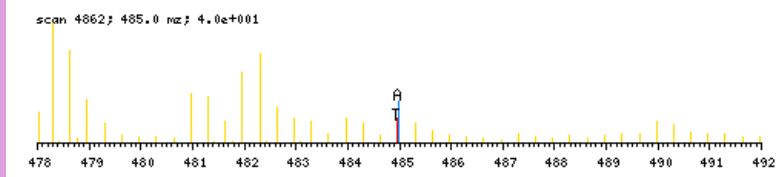

zoomed in precursor plot; T=theoretical m/z, A=acquired m/z

| b <sup>+</sup> | #  | AA # | y <sup>+</sup> | y <sup>2+</sup> |
|----------------|----|------|----------------|-----------------|
| 92.0924        | 1  | G 12 |                |                 |
| 254.2505       | 2  | K 11 | 1361.7642      | 681.3860        |
| 369.2774       | 3  | D 10 | 1199.6061      | 600.3069        |
| 532.3407       | 4  | Y 9  | 1084.5791      | 542.7935        |
| 695.4041       | 5  | Y 8  | 921.5158       | 461.2618        |
| 823.4626       | 6  | Q 7  | 758.4525       | 379.7301        |
| 924.5103       | 7  | T 6  | 630.3939       | 315.7009        |
| 1037.5944      | 8  | L 5  | 529.3462       | 265.1770        |
| 1094.6158      | 9  | G 4  | 416.2621       | 208.6350        |
| 1207.6999      | 10 | L 3  | 359.2407       | 180.1243        |
| 1278.7370      | 11 | A 2  | 246.1566       | 123.5822        |
|                | 12 | R 1  | 175.1195       | 88.0637         |

N-term:+35.07 K(2):+162.16

GKIETIEVMEDR, MH+ 1487.8416, m/z 496.6187  
 H OS G27 P150811 220811-s1.04583.04583.3.dta

X-range:

-

MassTol: Y-zoom:

MassType:

AVG  MONO

Axis:

1  2

Label:

I  M  -

Ions:

a  +  2+  3+

b  +  2+  3+

c  +  2+  3+

x  +  2+  3+

y  +  2+  3+

z  +  2+  3+

hide H<sub>2</sub>O/NH<sub>3</sub>

zoom 112-122

GO

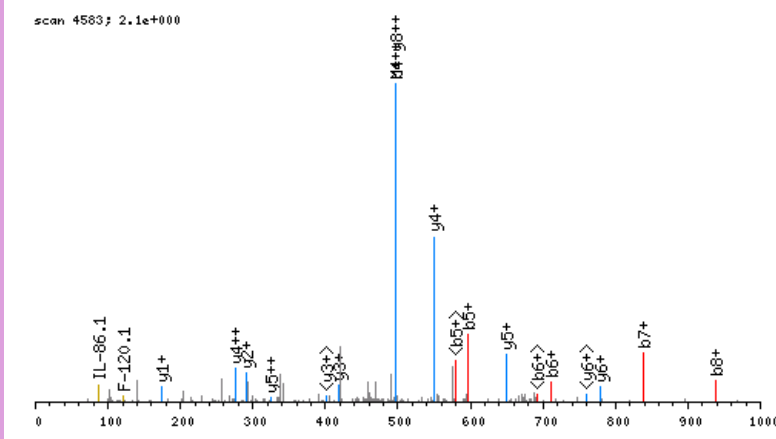

click image to zoom in; click top corners to zoom out [\[precursor±\]](#)

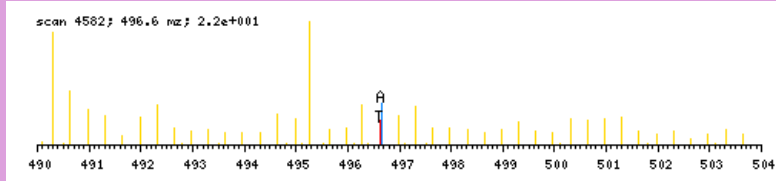

zoomed in precursor plot; T=theoretical m/z, A=acquired m/z

| b <sup>+</sup> | #  | AA # | y <sup>+</sup> | y <sup>2+</sup> |
|----------------|----|------|----------------|-----------------|
| 92.0924        | 1  | G 12 |                |                 |
| 254.2505       | 2  | K 11 | 1396.7570      | 698.8824        |
| 367.3345       | 3  | I 10 | 1234.5989      | 617.8034        |
| 496.3771       | 4  | E 9  | 1121.5149      | 561.2613        |
| 597.4248       | 5  | T 8  | 992.4723       | 496.7400        |
| 710.5089       | 6  | I 7  | 891.4246       | 446.2162        |
| 839.5515       | 7  | E 6  | 778.3405       | 389.6742        |
| 938.6199       | 8  | V 5  | 649.2979       | 325.1529        |
| 1069.6604      | 9  | M 4  | 550.2295       | 275.6187        |
| 1198.7029      | 10 | E 3  | 419.1890       | 210.0984        |
| 1313.7299      | 11 | D 2  | 290.1464       | 145.5771        |
|                | 12 | R 1  | 175.1195       | 88.0637         |

N-term:+35.07 K(2):+162.16

GKVNSDEVGGEALGR, MH+ 1543.8080, m/z 515.2742  
 L OS G27 P150811 220811-s1.02733.02733.3.dta

X-range:

-

MassTol: Y-zoom:

MassType:

AVG  MONO

Axis:

1  2

Label:

I  M  -

Ions:

a  +  2+  3+

b  +  2+  3+

c  +  2+  3+

x  +  2+  3+

y  +  2+  3+

z  +  2+  3+

hide H<sub>2</sub>O/NH<sub>3</sub>

zoom 112-122

GO

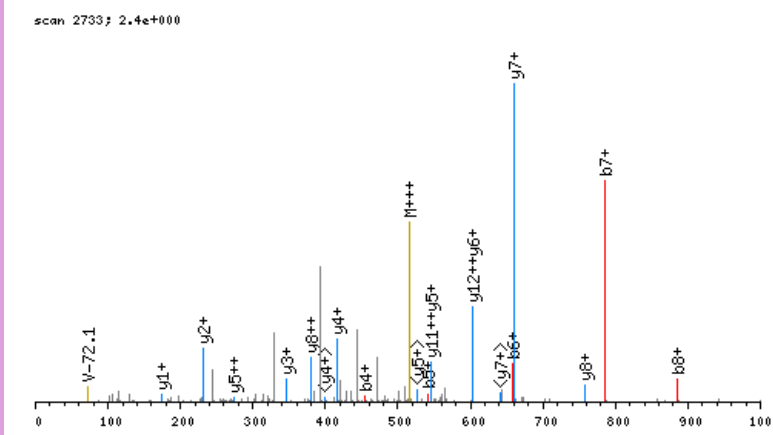

click image to zoom in; click top corners to zoom out [\[precursor±\]](#)

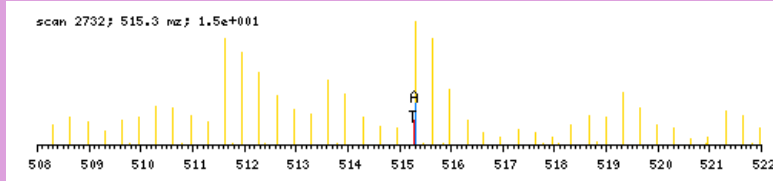

zoomed in precursor plot; T=theoretical m/z, A=acquired m/z

| b <sup>+</sup> | #  | AA # | y <sup>+</sup> | y <sup>2+</sup> |
|----------------|----|------|----------------|-----------------|
| 86.0606        | 1  | G 15 |                |                 |
| 242.1869       | 2  | K 14 | 1458.7553      | 729.8816        |
| 341.2553       | 3  | V 13 | 1302.6290      | 651.8184        |
| 455.2982       | 4  | N 12 | 1203.5606      | 602.2842        |
| 542.3302       | 5  | S 11 | 1089.5176      | 545.2627        |
| 657.3572       | 6  | D 10 | 1002.4856      | 501.7467        |
| 786.3998       | 7  | E 9  | 887.4587       | 444.2332        |
| 885.4682       | 8  | V 8  | 758.4161       | 379.7120        |
| 942.4896       | 9  | G 7  | 659.3477       | 330.1777        |
| 999.5111       | 10 | G 6  | 602.3262       | 301.6670        |
| 1128.5537      | 11 | E 5  | 545.3047       | 273.1563        |
| 1199.5908      | 12 | A 4  | 416.2621       | 208.6350        |
| 1312.6749      | 13 | L 3  | 345.2250       | 173.1164        |
| 1369.6963      | 14 | G 2  | 232.1410       | 116.5744        |
|                | 15 | R 1  | 175.1195       | 88.0637         |

N-term:+29.04 K(2):+156.13

GKVVSTHEQVLR, MH+ 1408.8276, m/z 470.2807  
 L OS G28 P150811 220811-s1.02012.02012.3.dta

scan 2012; 6.5e+000

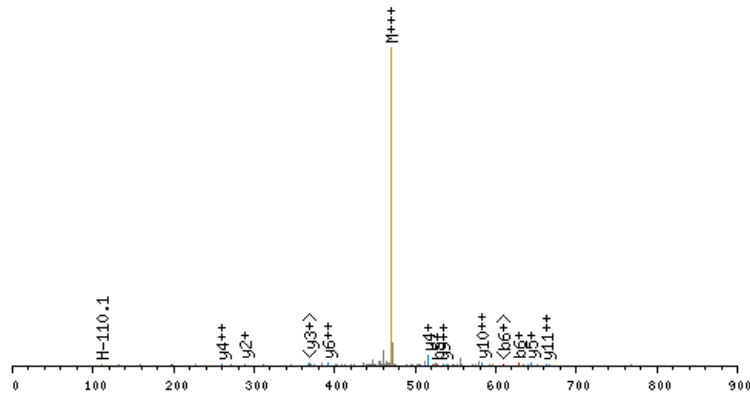

click image to zoom in; click top corners to zoom out [\[precursor±\]](#)

scan 2008; 470.3 m/z; 2.5e+000

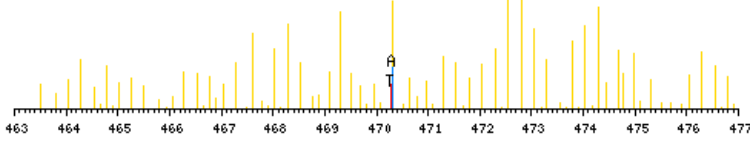

zoomed in precursor plot; T=theoretical m/z, A=acquired m/z

X-range:

-

MassTol: Y-zoom:

MassType:

AVG  MONO

Axis:

1  2

Label:

I  M  -

Ions:

a  +  2+  3+

b  +  2+  3+

c  +  2+  3+

x  +  2+  3+

y  +  2+  3+

z  +  2+  3+

hide H<sub>2</sub>O/NH<sub>3</sub>

zoom 112-122

GO

| b <sup>+</sup> | #  | AA | #  | y <sup>+</sup> | y <sup>2+</sup> |
|----------------|----|----|----|----------------|-----------------|
| 86.0606        | 1  | G  | 12 |                |                 |
| 242.1869       | 2  | K  | 11 | 1323.7749      | 662.3914        |
| 341.2553       | 3  | V  | 10 | 1167.6486      | 584.3282        |
| 440.3237       | 4  | V  | 9  | 1068.5802      | 534.7940        |
| 527.3557       | 5  | S  | 8  | 969.5118       | 485.2598        |
| 628.4034       | 6  | T  | 7  | 882.4797       | 441.7438        |
| 765.4623       | 7  | H  | 6  | 781.4321       | 391.2199        |
| 894.5049       | 8  | E  | 5  | 644.3731       | 322.6905        |
| 1022.5635      | 9  | Q  | 4  | 515.3306       | 258.1692        |
| 1121.6319      | 10 | V  | 3  | 387.2720       | 194.1399        |
| 1234.7160      | 11 | L  | 2  | 288.2036       | 144.6057        |
|                | 12 | R  | 1  | 175.1195       | 88.0637         |

N-term:+29.04 K(2):+156.13



GLDPCSVAAAILQQR, MH+ 1555.8266, m/z 519.2804  
 L OS G25 P150811 220811-s1.08021.08021.3.dta

scan 8021; 1.6e+000

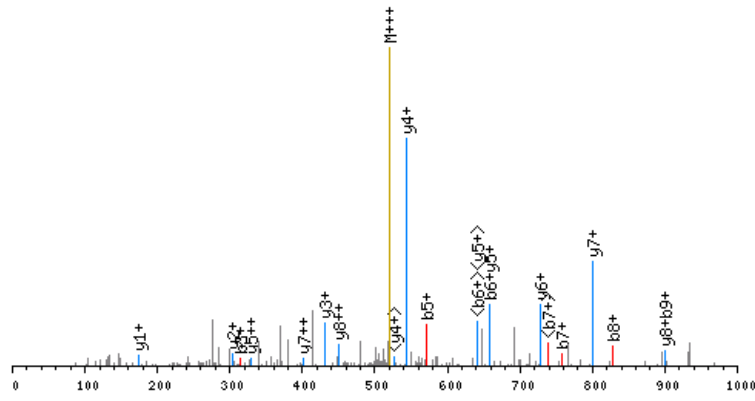

click image to zoom in; click top corners to zoom out [\[precursor±\]](#)

scan 8017; 519.3 m/z; 2.9e+000

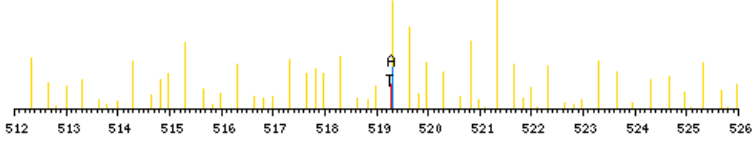

zoomed in precursor plot; T=theoretical m/z, A=acquired m/z

X-range:

-

MassTol: Y-zoom:

MassType:

AVG  MONO

Axis:

1  2

Label:

I  M  -

Ions:

a  +  2+  3+

b  +  2+  3+

c  +  2+  3+

x  +  2+  3+

y  +  2+  3+

z  +  2+  3+

hide H<sub>2</sub>O/NH<sub>3</sub>

zoom 112-122

GO

| b <sup>+</sup> | #  | AA # | y <sup>+</sup> | y <sup>2+</sup> |
|----------------|----|------|----------------|-----------------|
| 86.0606        | 1  | G 14 |                |                 |
| 199.1446       | 2  | L 13 | 1470.7738      | 735.8908        |
| 314.1716       | 3  | D 12 | 1357.6898      | 679.3488        |
| 411.2243       | 4  | P 11 | 1242.6628      | 621.8353        |
| 571.2549       | 5  | C 10 | 1145.6101      | 573.3089        |
| 658.2870       | 6  | S 9  | 985.5795       | 493.2936        |
| 757.3554       | 7  | V 8  | 898.5474       | 449.7776        |
| 828.3925       | 8  | A 7  | 799.4790       | 400.2434        |
| 899.4296       | 9  | A 6  | 728.4419       | 364.7249        |
| 1012.5137      | 10 | I 5  | 657.4048       | 329.2063        |
| 1125.5977      | 11 | L 4  | 544.3207       | 272.6643        |
| 1253.6563      | 12 | Q 3  | 431.2367       | 216.1222        |
| 1381.7149      | 13 | Q 2  | 303.1781       | 152.0930        |
|                | 14 | R 1  | 175.1195       | 88.0637         |

N-term:+29.04 C(5):+160.03

GLGPMNIPLISDPKR, MH+ 1663.9569, m/z 555.3238  
 L OS G26 P150811 220811-s1.06226.06226.3.dta

X-range:

-

MassTol: Y-zoom:

MassType:

AVG  MONO

Axis:

1  2

Label:

I  M  -

Ions:

a  +  2+  3+

b  +  2+  3+

c  +  2+  3+

x  +  2+  3+

y  +  2+  3+

z  +  2+  3+

hide H<sub>2</sub>O/NH<sub>3</sub>

zoom 112-122

GO

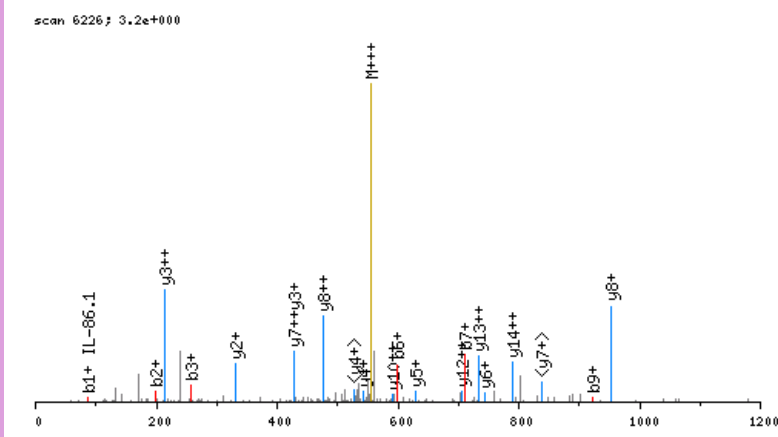

click image to zoom in; click top corners to zoom out [\[precursor±\]](#)

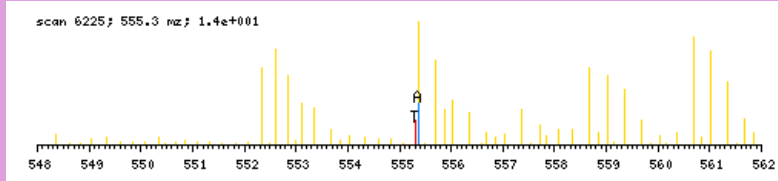

zoomed in precursor plot; T=theoretical m/z, A=acquired m/z

| b <sup>+</sup> | #  | AA # | y <sup>+</sup> | y <sup>2+</sup> |
|----------------|----|------|----------------|-----------------|
| 86.0606        | 1  | G 15 |                |                 |
| 199.1446       | 2  | L 14 | 1578.9042      | 789.9560        |
| 256.1661       | 3  | G 13 | 1465.8201      | 733.4140        |
| 353.2189       | 4  | P 12 | 1408.7987      | 704.9032        |
| 484.2593       | 5  | M 11 | 1311.7459      | 656.3769        |
| 598.3023       | 6  | N 10 | 1180.7054      | 590.8566        |
| 711.3863       | 7  | I 9  | 1066.6625      | 533.8352        |
| 808.4391       | 8  | P 8  | 953.5784       | 477.2931        |
| 921.5232       | 9  | L 7  | 856.5257       | 428.7667        |
| 1034.6072      | 10 | I 6  | 743.4416       | 372.2247        |
| 1121.6393      | 11 | S 5  | 630.3575       | 315.6827        |
| 1236.6662      | 12 | D 4  | 543.3255       | 272.1667        |
| 1333.7190      | 13 | P 3  | 428.2986       | 214.6532        |
| 1489.8453      | 14 | K 2  | 331.2458       | 166.1268        |
|                | 15 | R 1  | 175.1195       | 88.0637         |

N-term:+29.04 K(14):+156.13

GLKPPEGAAAEGEPPSR, MH+ 1847.9503, m/z 616.6550  
 L OS G26 P150811 220811-s1.02541.02541.3.dta

X-range:

-

MassTol: Y-zoom:

MassType:

AVG  MONO

Axis:

1  2

Label:

I  M  -

Ions:

a  +  2+  3+

b  +  2+  3+

c  +  2+  3+

x  +  2+  3+

y  +  2+  3+

z  +  2+  3+

hide H<sub>2</sub>O/NH<sub>3</sub>

zoom 112-122

GO

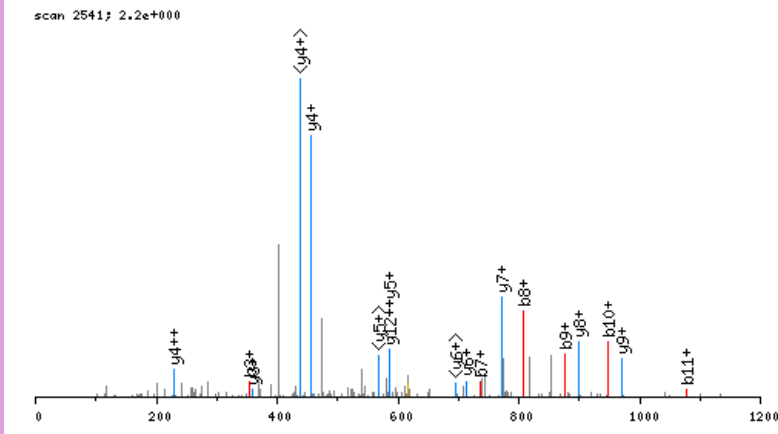

click image to zoom in; click top corners to zoom out [\[precursor±\]](#)

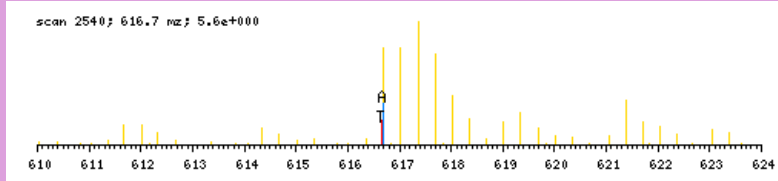

zoomed in precursor plot; T=theoretical m/z, A=acquired m/z

| b <sup>+</sup> | #  | AA # | y <sup>+</sup> | y <sup>2+</sup> |
|----------------|----|------|----------------|-----------------|
| 86.0606        | 1  | G 18 |                |                 |
| 199.1446       | 2  | L 17 | 1762.8976      | 881.9527        |
| 355.2709       | 3  | K 16 | 1649.8135      | 825.4107        |
| 452.3237       | 4  | P 15 | 1493.6872      | 747.3475        |
| 549.3765       | 5  | P 14 | 1396.6345      | 698.8211        |
| 678.4190       | 6  | E 13 | 1299.5817      | 650.2948        |
| 735.4405       | 7  | G 12 | 1170.5391      | 585.7735        |
| 806.4776       | 8  | A 11 | 1113.5176      | 557.2627        |
| 877.5147       | 9  | A 10 | 1042.4805      | 521.7442        |
| 948.5519       | 10 | A 9  | 971.4434       | 486.2256        |
| 1077.5944      | 11 | E 8  | 900.4063       | 450.7071        |
| 1134.6159      | 12 | G 7  | 771.3637       | 386.1858        |
| 1263.6585      | 13 | E 6  | 714.3422       | 357.6750        |
| 1392.7011      | 14 | E 5  | 585.2997       | 293.1537        |
| 1489.7539      | 15 | P 4  | 456.2571       | 228.6324        |
| 1586.8066      | 16 | P 3  | 359.2043       | 180.1061        |
| 1673.8387      | 17 | S 2  | 262.1515       | 131.5797        |
|                | 18 | R 1  | 175.1195       | 88.0637         |

N-term:+29.04 K(3):+156.13

GLLSQGSPLSWEETQR, MH+ 1815.9241, m/z 605.9795  
 L OS G25 P150811 220811-s1.07178.07178.3.dta

X-range:

-

MassTol: Y-zoom:

MassType:

AVG  MONO

Axis:

1  2

Label:

I  M  -

Ions:

a  +  2+  3+

b  +  2+  3+

c  +  2+  3+

x  +  2+  3+

y  +  2+  3+

z  +  2+  3+

hide H<sub>2</sub>O/NH<sub>3</sub>

zoom 112-122

GO

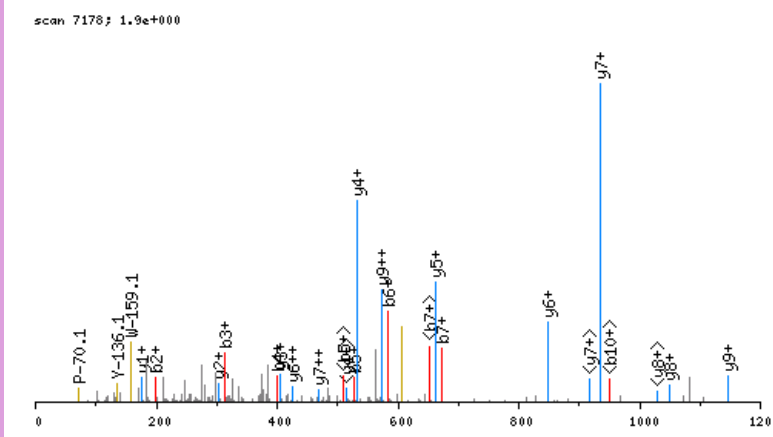

click image to zoom in; click top corners to zoom out [\[precursor±\]](#)

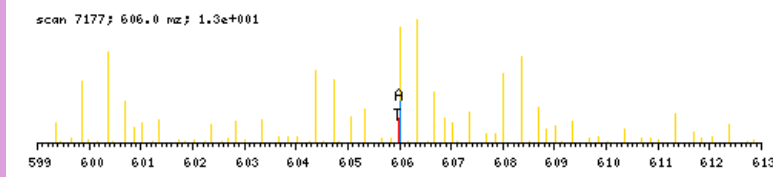

zoomed in precursor plot; T=theoretical m/z, A=acquired m/z

| b <sup>+</sup> | #  | AA # | y <sup>+</sup> | y <sup>2+</sup> |
|----------------|----|------|----------------|-----------------|
| 86.0606        | 1  | G 16 |                |                 |
| 199.1446       | 2  | L 15 | 1730.8713      | 865.9396        |
| 312.2287       | 3  | L 14 | 1617.7873      | 809.3975        |
| 399.2607       | 4  | S 13 | 1504.7032      | 752.8555        |
| 527.3193       | 5  | Q 12 | 1417.6712      | 709.3395        |
| 584.3408       | 6  | G 11 | 1289.6126      | 645.3102        |
| 671.3728       | 7  | S 10 | 1232.5911      | 616.7995        |
| 768.4256       | 8  | P 9  | 1145.5591      | 573.2835        |
| 881.5096       | 9  | L 8  | 1048.5063      | 524.7571        |
| 968.5416       | 10 | S 7  | 935.4223       | 468.2151        |
| 1154.6210      | 11 | W 6  | 848.3903       | 424.6990        |
| 1283.6636      | 12 | E 5  | 662.3109       | 331.6594        |
| 1412.7061      | 13 | E 4  | 533.2683       | 267.1381        |
| 1513.7538      | 14 | T 3  | 404.2258       | 202.6168        |
| 1641.8124      | 15 | Q 2  | 303.1781       | 152.0930        |
|                | 16 | R 1  | 175.1195       | 88.0637         |

N-term:+29.04

GLPKGPEGQGLPEVETR, MH+ 1819.9918, m/z 607.3355  
 L OS G26 P150811 220811-s1.03919.03919.3.dta

X-range:

-

MassTol: Y-zoom:

MassType:

AVG  MONO

Axis:

1  2

Label:

I  M  -

Ions:

a  +  2+  3+

b  +  2+  3+

c  +  2+  3+

x  +  2+  3+

y  +  2+  3+

z  +  2+  3+

hide H<sub>2</sub>O/NH<sub>3</sub>

zoom 112-122

GO

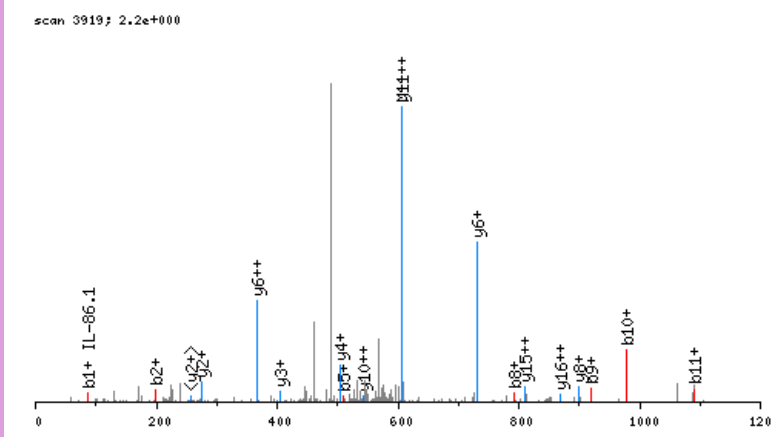

click image to zoom in; click top corners to zoom out [\[precursor±\]](#)

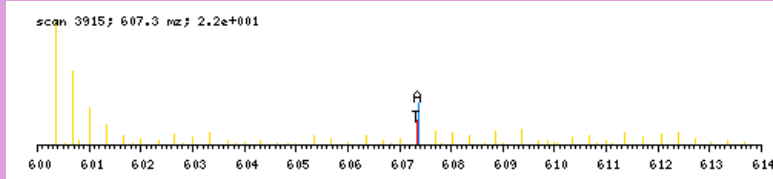

zoomed in precursor plot; T=theoretical m/z, A=acquired m/z

| b <sup>+</sup> | #  | AA | #  | y <sup>+</sup> | y <sup>2+</sup> |
|----------------|----|----|----|----------------|-----------------|
| 86.0606        | 1  | G  | 17 |                |                 |
| 199.1446       | 2  | L  | 16 | 1734.9391      | 867.9734        |
| 296.1974       | 3  | P  | 15 | 1621.8550      | 811.4314        |
| 452.3237       | 4  | K  | 14 | 1524.8022      | 762.9050        |
| 509.3452       | 5  | G  | 13 | 1368.6759      | 684.8419        |
| 606.3979       | 6  | P  | 12 | 1311.6545      | 656.3311        |
| 735.4405       | 7  | E  | 11 | 1214.6017      | 607.8048        |
| 792.4620       | 8  | G  | 10 | 1085.5591      | 543.2835        |
| 920.5206       | 9  | Q  | 9  | 1028.5376      | 514.7727        |
| 977.5420       | 10 | G  | 8  | 900.4791       | 450.7434        |
| 1090.6261      | 11 | L  | 7  | 843.4576       | 422.2327        |
| 1187.6788      | 12 | P  | 6  | 730.3735       | 365.6907        |
| 1316.7214      | 13 | E  | 5  | 633.3208       | 317.1643        |
| 1415.7899      | 14 | V  | 4  | 504.2782       | 252.6430        |
| 1544.8324      | 15 | E  | 3  | 405.2098       | 203.1088        |
| 1645.8801      | 16 | T  | 2  | 276.1672       | 138.5875        |
|                | 17 | R  | 1  | 175.1195       | 88.0637         |

N-term:+29.04 K(4):+156.13

X-range:

-

MassTol: Y-zoom:

MassType:

AVG  MONO

Axis:

1  2

Label:

I  M  -

Ions:

a  +  2+  3+

b  +  2+  3+

c  +  2+  3+

x  +  2+  3+

y  +  2+  3+

z  +  2+  3+

hide H<sub>2</sub>O/NH<sub>3</sub>

zoom 112-122

GO

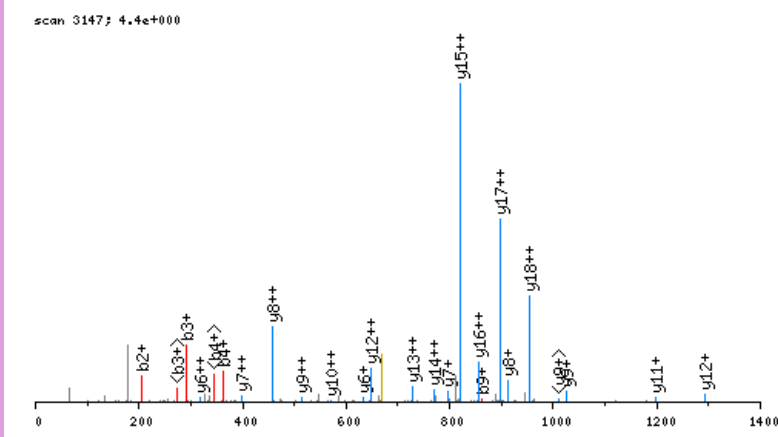

click image to zoom in; click top corners to zoom out [\[precursor±\]](#)

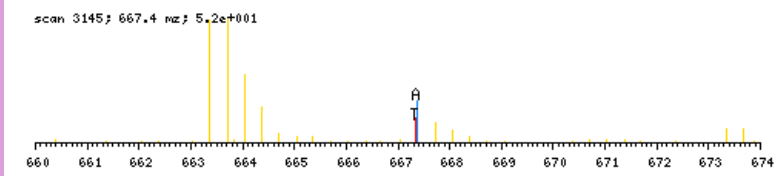

zoomed in precursor plot; T=theoretical m/z, A=acquired m/z

| b <sup>+</sup> | #  | AA | #  | y <sup>+</sup> | y <sup>2+</sup> |
|----------------|----|----|----|----------------|-----------------|
| 92.0924        | 1  | G  | 19 |                |                 |
| 205.1764       | 2  | L  | 18 | 1908.9549      | 954.9814        |
| 292.2085       | 3  | S  | 17 | 1795.8708      | 898.4393        |
| 363.2456       | 4  | A  | 16 | 1708.8388      | 854.9233        |
| 460.2983       | 5  | P  | 15 | 1637.8017      | 819.4048        |
| 547.3304       | 6  | S  | 14 | 1540.7489      | 770.8784        |
| 707.3610       | 7  | C  | 13 | 1453.7169      | 727.3624        |
| 804.4137       | 8  | P  | 12 | 1293.6863      | 647.3471        |
| 861.4352       | 9  | G  | 11 | 1196.6335      | 598.8207        |
| 974.5193       | 10 | L  | 10 | 1139.6121      | 570.3100        |
| 1089.5462      | 11 | D  | 9  | 1026.5280      | 513.7679        |
| 1204.5731      | 12 | D  | 8  | 911.5011       | 456.2544        |
| 1366.7312      | 13 | K  | 7  | 796.4741       | 398.7410        |
| 1467.7789      | 14 | T  | 6  | 634.3160       | 317.6619        |
| 1596.8215      | 15 | E  | 5  | 533.2683       | 267.1381        |
| 1667.8586      | 16 | A  | 4  | 404.2258       | 202.6168        |
| 1754.8907      | 17 | S  | 3  | 333.1886       | 167.0982        |
| 1825.9278      | 18 | A  | 2  | 246.1566       | 123.5822        |
|                | 19 | R  | 1  | 175.1195       | 88.0637         |

N-term:+35.07 C(7):+160.03  
K(13):+162.16

GLTLDPEADSEYLSR, MH+ 1699.8602, m/z 567.2916  
 H OS G24 P150811 220811-s1.04321.04321.3.dta

X-range:

-

MassTol: Y-zoom:

MassType:

AVG  MONO

Axis:

1  2

Label:

I  M  -

Ions:

a  +  2+  3+

b  +  2+  3+

c  +  2+  3+

x  +  2+  3+

y  +  2+  3+

z  +  2+  3+

hide H<sub>2</sub>O/NH<sub>3</sub>

zoom 112-122

GO

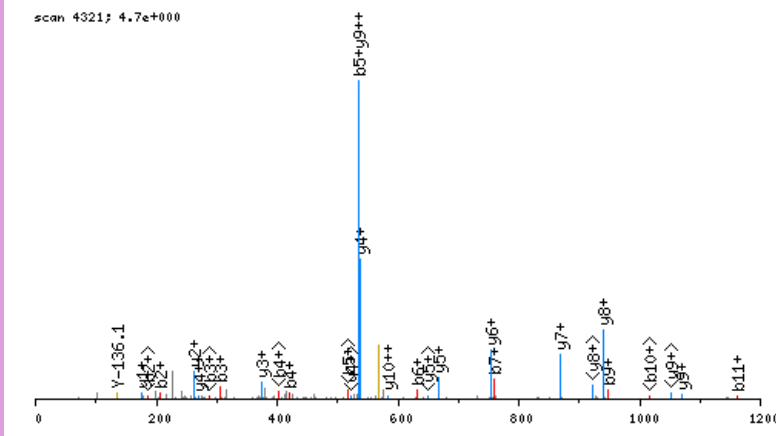

click image to zoom in; click top corners to zoom out [\[precursor±\]](#)

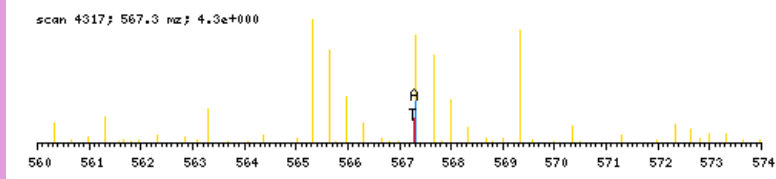

zoomed in precursor plot; T=theoretical m/z, A=acquired m/z

| b <sup>+</sup> | #  | AA # | y <sup>+</sup> | y <sup>2+</sup> |
|----------------|----|------|----------------|-----------------|
| 92.0924        | 1  | G 15 |                |                 |
| 205.1764       | 2  | L 14 | 1608.7757      | 804.8918        |
| 306.2241       | 3  | T 13 | 1495.6916      | 748.3497        |
| 419.3082       | 4  | L 12 | 1394.6440      | 697.8259        |
| 534.3351       | 5  | D 11 | 1281.5599      | 641.2839        |
| 631.3879       | 6  | P 10 | 1166.5330      | 583.7704        |
| 760.4305       | 7  | E 9  | 1069.4802      | 535.2440        |
| 831.4676       | 8  | A 8  | 940.4376       | 470.7227        |
| 946.4945       | 9  | D 7  | 869.4005       | 435.2042        |
| 1033.5266      | 10 | S 6  | 754.3735       | 377.6907        |
| 1162.5691      | 11 | E 5  | 667.3415       | 334.1747        |
| 1325.6325      | 12 | Y 4  | 538.2989       | 269.6534        |
| 1438.7165      | 13 | L 3  | 375.2356       | 188.1217        |
| 1525.7486      | 14 | S 2  | 262.1515       | 131.5797        |
|                | 15 | R 1  | 175.1195       | 88.0637         |

N-term:+35.07

GLTPDLPKSASQER, MH+ 1566.9128, m/z 522.9758  
 H OS G26 P150811 220811-s1.02984.02984.3.dta

X-range:

-

MassTol: Y-zoom:

MassType:

AVG  MONO

Axis:

1  2

Label:

I  M  -

Ions:

a  +  2+  3+

b  +  2+  3+

c  +  2+  3+

x  +  2+  3+

y  +  2+  3+

z  +  2+  3+

hide H<sub>2</sub>O/NH<sub>3</sub>

zoom 112-122

GO

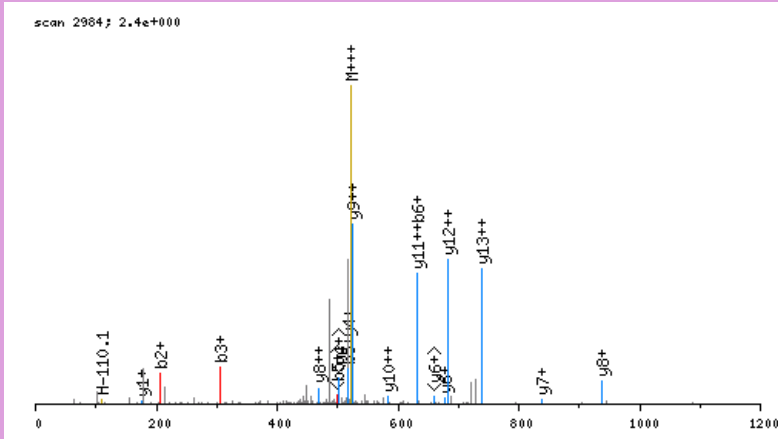

click image to zoom in; click top corners to zoom out [\[precursor±\]](#)

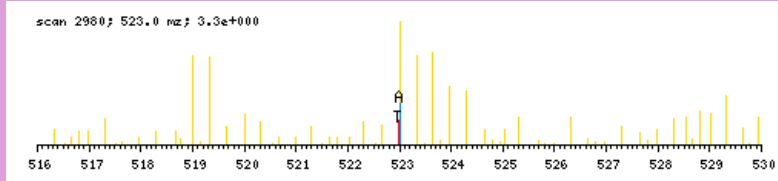

zoomed in precursor plot; T=theoretical m/z, A=acquired m/z

| b <sup>+</sup> | #  | AA # | y <sup>+</sup> | y <sup>2+</sup> |
|----------------|----|------|----------------|-----------------|
| 92.0924        | 1  | G 14 |                |                 |
| 205.1764       | 2  | L 13 | 1475.8282      | 738.4180        |
| 306.2241       | 3  | T 12 | 1362.7442      | 681.8760        |
| 403.2769       | 4  | P 11 | 1261.6965      | 631.3522        |
| 518.3038       | 5  | D 10 | 1164.6437      | 582.8258        |
| 631.3879       | 6  | L 9  | 1049.6168      | 525.3123        |
| 728.4406       | 7  | P 8  | 936.5327       | 468.7703        |
| 890.5987       | 8  | K 7  | 839.4799       | 420.2439        |
| 977.6308       | 9  | S 6  | 677.3218       | 339.1648        |
| 1048.6679      | 10 | A 5  | 590.2898       | 295.6488        |
| 1135.6999      | 11 | S 4  | 519.2527       | 260.1303        |
| 1263.7585      | 12 | Q 3  | 432.2207       | 216.6142        |
| 1392.8011      | 13 | E 2  | 304.1621       | 152.5850        |
|                | 14 | R 1  | 175.1195       | 88.0637         |

N-term:+35.07 K(8):+162.16



GMEEGEFSEAR, MH+ 1269.5421, m/z 635.2747  
 L OS G25 P150811 220811-s1.03270.03270.2.dta

scan 3270; 2.5e+000

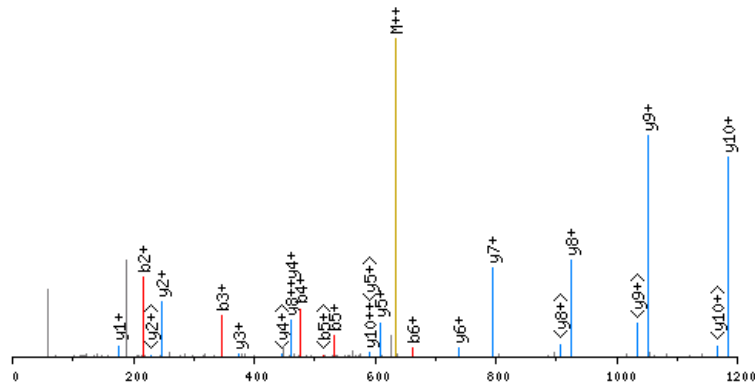

click image to zoom in; click top corners to zoom out [precursor±]

scan 3267; 635.3 m/z; 1.6e+001

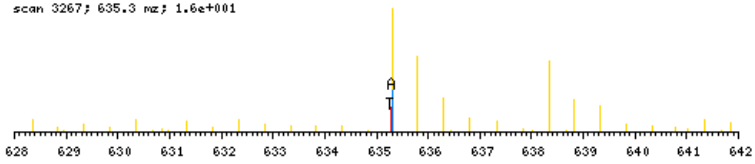

zoomed in precursor plot; T=theoretical m/z, A=acquired m/z

X-range:

-

MassTol: Y-zoom:

MassType:

AVG  MONO

Axis:

1  2

Label:

I  M  -

Ions:

a  +  2+  3+

b  +  2+  3+

c  +  2+  3+

x  +  2+  3+

y  +  2+  3+

z  +  2+  3+

hide H<sub>2</sub>O/NH<sub>3</sub>

zoom 112-122

GO

| b <sup>+</sup> | #  | AA # | y <sup>+</sup> | y <sup>2+</sup>    |
|----------------|----|------|----------------|--------------------|
| 86.0606        | 1  | G    | 11             |                    |
| 217.1010       | 2  | M    | 10             | 1184.4894 592.7486 |
| 346.1436       | 3  | E    | 9              | 1053.4489 527.2284 |
| 475.1862       | 4  | E    | 8              | 924.4063 462.7071  |
| 532.2077       | 5  | G    | 7              | 795.3637 398.1858  |
| 661.2503       | 6  | E    | 6              | 738.3422 369.6750  |
| 808.3187       | 7  | F    | 5              | 609.2997 305.1537  |
| 895.3507       | 8  | S    | 4              | 462.2312 231.6195  |
| 1024.3933      | 9  | E    | 3              | 375.1992 188.1035  |
| 1095.4304      | 10 | A    | 2              | 246.1566 123.5822  |
|                | 11 | R    | 1              | 175.1195 88.0637   |

N-term:+29.04

GMESAGIHETTYNSIMKCDIDIR, MH+ 2697.2686, m/z 675.0726  
 L OS G27 P150811 220811-s1.06226.06226.4.dta

X-range:

-

MassTol: Y-zoom:

MassType:

AVG  MONO

Axis:

1  2

Label:

I  M  -

Ions:

a  +  2+  3+

b  +  2+  3+

c  +  2+  3+

x  +  2+  3+

y  +  2+  3+

z  +  2+  3+

hide H<sub>2</sub>O/NH<sub>3</sub>

zoom 112-122

GO

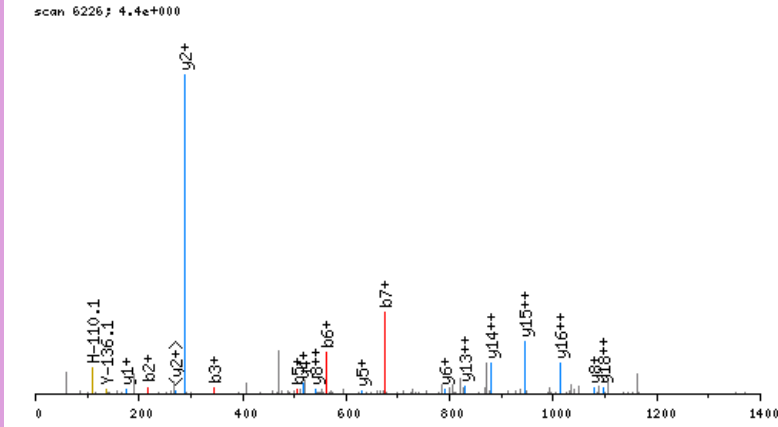

click image to zoom in; click top corners to zoom out [\[precursor±\]](#)

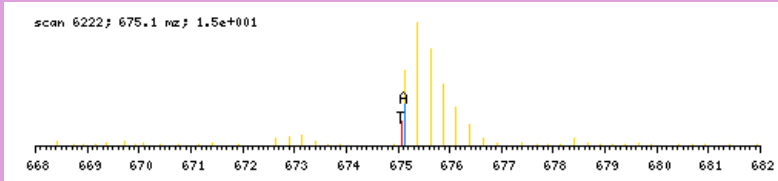

zoomed in precursor plot; T=theoretical m/z, A=acquired m/z

| b <sup>+</sup> | #  | AA # | y <sup>+</sup> | y <sup>2+</sup> |
|----------------|----|------|----------------|-----------------|
| 86.0606        | 1  | G 23 |                |                 |
| 217.1010       | 2  | M 22 | 2612.2159      | 1306.6118       |
| 346.1436       | 3  | E 21 | 2481.1754      | 1241.0916       |
| 433.1757       | 4  | S 20 | 2352.1328      | 1176.5703       |
| 504.2128       | 5  | A 19 | 2265.1008      | 1133.0543       |
| 561.2342       | 6  | G 18 | 2194.0636      | 1097.5357       |
| 674.3183       | 7  | I 17 | 2137.0422      | 1069.0250       |
| 811.3772       | 8  | H 16 | 2023.9581      | 1012.4830       |
| 940.4198       | 9  | E 15 | 1886.8992      | 943.9535        |
| 1041.4675      | 10 | T 14 | 1757.8566      | 879.4322        |
| 1142.5152      | 11 | T 13 | 1656.8089      | 828.9084        |
| 1305.5785      | 12 | Y 12 | 1555.7612      | 778.3845        |
| 1419.6214      | 13 | N 11 | 1392.6979      | 696.8529        |
| 1506.6535      | 14 | S 10 | 1278.6550      | 639.8314        |
| 1619.7375      | 15 | I 9  | 1191.6230      | 596.3154        |
| 1750.7780      | 16 | M 8  | 1078.5389      | 539.7734        |
| 1906.9043      | 17 | K 7  | 947.4984       | 474.2531        |
| 2066.9349      | 18 | C 6  | 791.3721       | 396.1900        |
| 2181.9618      | 19 | D 5  | 631.3415       | 316.1747        |
| 2295.0459      | 20 | I 4  | 516.3146       | 258.6612        |
| 2410.0729      | 21 | D 3  | 403.2305       | 202.1192        |
| 2523.1569      | 22 | I 2  | 288.2036       | 144.6057        |
|                | 23 | R 1  | 175.1195       | 88.0637         |

N-term:+29.04 K(17):+156.13  
 C(18):+160.03

GMGQKDSYVGDEAQSQR, MH+ 1958.0502, m/z 490.2680  
 H OS G28 P150811 220811-s1.02154.02154.4.dta

X-range:

-

MassTol: Y-zoom:

MassType:

AVG  MONO

Axis:

1  2

Label:

I  M  -

Ions:

a  +  2+  3+

b  +  2+  3+

c  +  2+  3+

x  +  2+  3+

y  +  2+  3+

z  +  2+  3+

hide H<sub>2</sub>O/NH<sub>3</sub>

zoom 112-122

GO

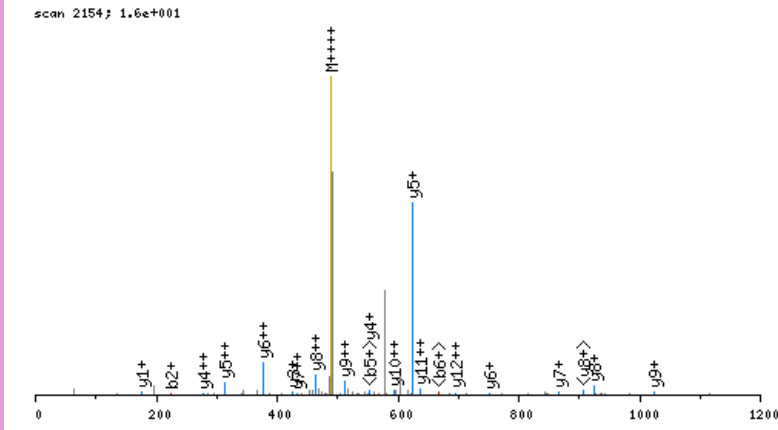

click image to zoom in; click top corners to zoom out [\[precursor±\]](#)

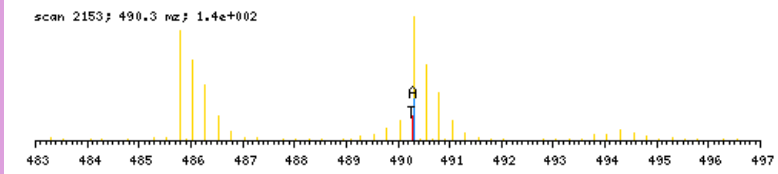

zoomed in precursor plot; T=theoretical m/z, A=acquired m/z

| b <sup>+</sup>  | #  | AA # | y <sup>+</sup> | y <sup>2+</sup> |
|-----------------|----|------|----------------|-----------------|
| 92.0924         | 1  | G    | 17             |                 |
| <b>223.1328</b> | 2  | M    | 16             | 1866.9657       |
| 280.1543        | 3  | G    | 15             | 1735.9252       |
| 408.2129        | 4  | Q    | 14             | 1678.9037       |
| 570.3710        | 5  | K    | 13             | 1550.8451       |
| 685.3979        | 6  | D    | 12             | 1388.6870       |
| 772.4300        | 7  | S    | 11             | 1273.6601       |
| 935.4933        | 8  | Y    | 10             | 1186.6281       |
| 1034.5617       | 9  | V    | 9              | 1023.5647       |
| 1091.5832       | 10 | G    | 8              | 924.4963        |
| 1206.6101       | 11 | D    | 7              | 867.4749        |
| 1335.6527       | 12 | E    | 6              | 752.4479        |
| 1406.6898       | 13 | A    | 5              | 623.4053        |
| 1534.7484       | 14 | Q    | 4              | 552.3682        |
| 1621.7804       | 15 | S    | 3              | 424.3096        |
| 1783.9385       | 16 | K    | 2              | 337.2776        |
|                 | 17 | R    | 1              | 175.1195        |

N-term:+35.07 K(5):+162.16  
 K(16):+162.16

GPAGAGESKCLPMVKVLDVR, MH+ 2239.2307, m/z 560.5631  
 L OS G27 P150811 220811-s1.07089.07089.4.dta

X-range:

-

MassTol: Y-zoom:

MassType:

AVG  MONO

Axis:

1  2

Label:

I  M  -

Ions:

a  +  2+  3+

b  +  2+  3+

c  +  2+  3+

x  +  2+  3+

y  +  2+  3+

z  +  2+  3+

hide H<sub>2</sub>O/NH<sub>3</sub>

zoom 112-122

GO

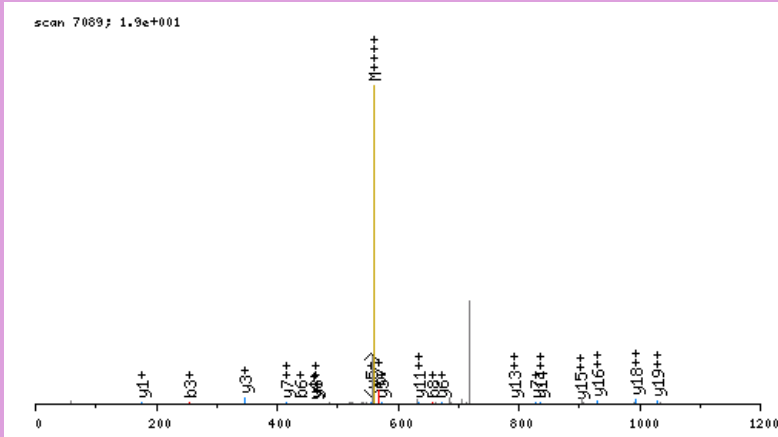

click image to zoom in; click top corners to zoom out [precursor±]

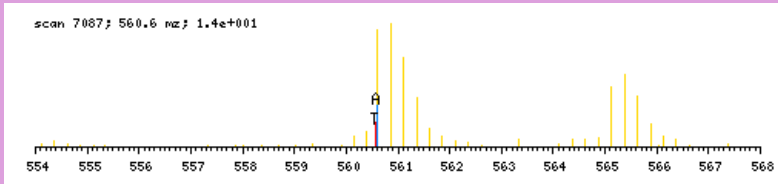

zoomed in precursor plot; T=theoretical m/z, A=acquired m/z

| b <sup>+</sup> | #  | AA | #  | y <sup>+</sup> | y <sup>2+</sup> |
|----------------|----|----|----|----------------|-----------------|
| 86.0606        | 1  | G  | 21 |                |                 |
| 183.1133       | 2  | P  | 20 | 2154.1779      | 1077.5929       |
| 254.1504       | 3  | A  | 19 | 2057.1252      | 1029.0665       |
| 311.1719       | 4  | G  | 18 | 1986.0880      | 993.5479        |
| 382.2090       | 5  | A  | 17 | 1929.0666      | 965.0372        |
| 439.2305       | 6  | G  | 16 | 1858.0295      | 929.5186        |
| 568.2731       | 7  | E  | 15 | 1801.0080      | 901.0079        |
| 655.3051       | 8  | S  | 14 | 1671.9654      | 836.4866        |
| 811.4314       | 9  | K  | 13 | 1584.9334      | 792.9706        |
| 971.4620       | 10 | C  | 12 | 1428.8071      | 714.9075        |
| 1068.5148      | 11 | P  | 11 | 1268.7765      | 634.8922        |
| 1181.5988      | 12 | L  | 10 | 1171.7237      | 586.3658        |
| 1312.6393      | 13 | M  | 9  | 1058.6396      | 529.8237        |
| 1411.7077      | 14 | V  | 8  | 927.5992       | 464.3035        |
| 1567.8340      | 15 | K  | 7  | 828.5307       | 414.7693        |
| 1666.9024      | 16 | V  | 6  | 672.4044       | 336.7061        |
| 1779.9865      | 17 | L  | 5  | 573.3360       | 287.1719        |
| 1895.0135      | 18 | D  | 4  | 460.2520       | 230.6299        |
| 1966.0506      | 19 | A  | 3  | 345.2250       | 173.1164        |
| 2065.1190      | 20 | V  | 2  | 274.1879       | 137.5979        |
|                | 21 | R  | 1  | 175.1195       | 88.0637         |

N-term:+29.04 K(9):+156.13  
 C(10):+160.03 K(15):+156.13

GPAGSVGPVGVAVGPR, MH+ 1305.7279, m/z 653.3676  
 L OS G29 P150811 220811-s1.03828.03828.2.dta

X-range:

-

MassTol: Y-zoom:

MassType:

AVG  MONO

Axis:

1  2

Label:

I  M  -

Ions:

a  +  2+  3+

b  +  2+  3+

c  +  2+  3+

x  +  2+  3+

y  +  2+  3+

z  +  2+  3+

hide H<sub>2</sub>O/NH<sub>3</sub>

zoom 112-122

GO

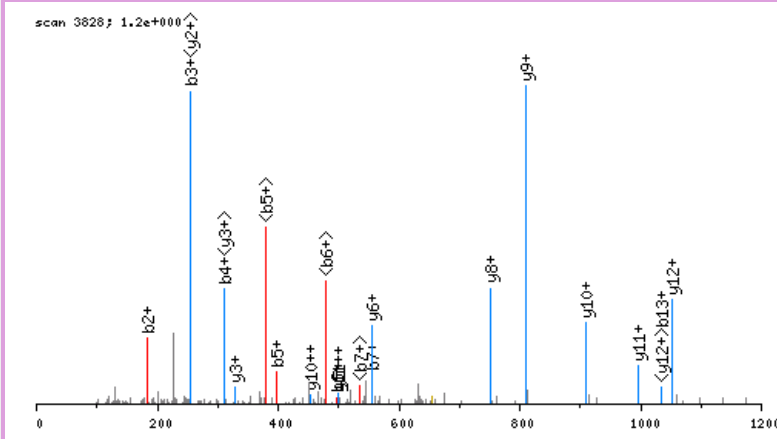

click image to zoom in; click top corners to zoom out [\[precursor±\]](#)

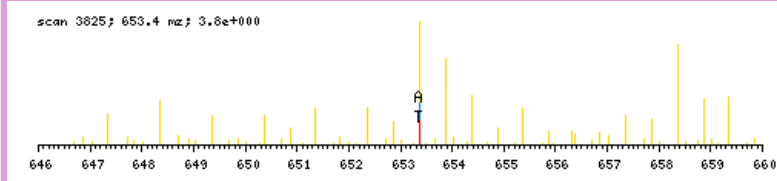

zoomed in precursor plot; T=theoretical m/z, A=acquired m/z

| b <sup>+</sup> | #  | AA # | y <sup>+</sup> | y <sup>2+</sup> |
|----------------|----|------|----------------|-----------------|
| 86.0606        | 1  | G 15 |                |                 |
| 183.1133       | 2  | P 14 | 1220.6751      | 610.8415        |
| 254.1504       | 3  | A 13 | 1123.6224      | 562.3151        |
| 311.1719       | 4  | G 12 | 1052.5853      | 526.7965        |
| 398.2039       | 5  | S 11 | 995.5638       | 498.2858        |
| 497.2723       | 6  | V 10 | 908.5318       | 454.7698        |
| 554.2938       | 7  | G 9  | 809.4634       | 405.2356        |
| 651.3466       | 8  | P 8  | 752.4419       | 376.7249        |
| 750.4150       | 9  | V 7  | 655.3891       | 328.1985        |
| 807.4365       | 10 | G 6  | 556.3207       | 278.6643        |
| 878.4736       | 11 | A 5  | 499.2993       | 250.1535        |
| 977.5420       | 12 | V 4  | 428.2621       | 214.6350        |
| 1034.5634      | 13 | G 3  | 329.1937       | 165.1008        |
| 1131.6162      | 14 | P 2  | 272.1723       | 136.5900        |
|                | 15 | R 1  | 175.1195       | 88.0637         |

N-term:+29.04

GPIGPPGIGLPGPPGPR, MH+ 1569.9329, m/z 523.9825  
 H OS G24 P150811 220811-s1.04029.04029.3.dta

X-range:

-

MassTol: Y-zoom:

MassType:

AVG  MONO

Axis:

1  2

Label:

I  M  -

Ions:

a  +  2+  3+

b  +  2+  3+

c  +  2+  3+

x  +  2+  3+

y  +  2+  3+

z  +  2+  3+

hide H<sub>2</sub>O/NH<sub>3</sub>

zoom 112-122

GO

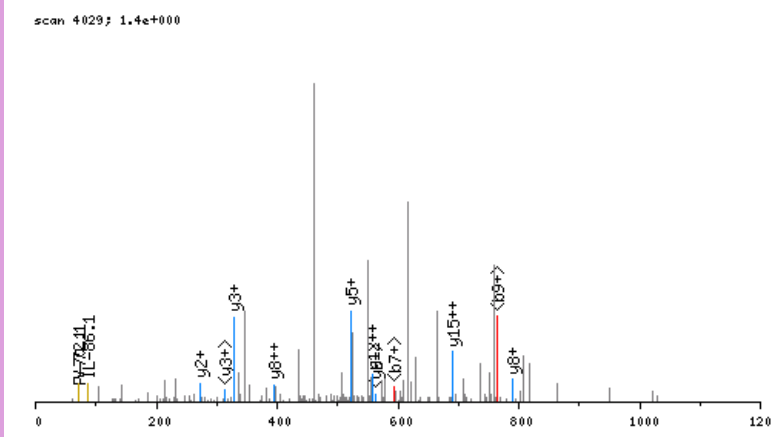

click image to zoom in; click top corners to zoom out [\[precursor±\]](#)

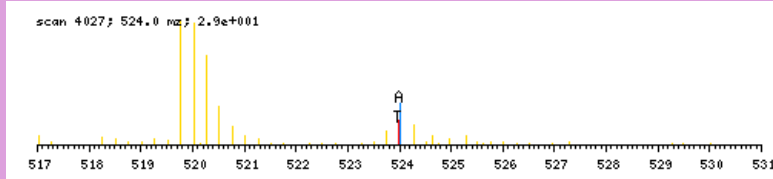

zoomed in precursor plot; T=theoretical m/z, A=acquired m/z

| b <sup>+</sup> | #  | AA # | y <sup>+</sup>  | y <sup>2+</sup> |
|----------------|----|------|-----------------|-----------------|
| 92.0924        | 1  | G 17 |                 |                 |
| 189.1451       | 2  | P 16 | 1478.8484       | 739.9281        |
| 302.2292       | 3  | I 15 | 1381.7956       | <b>691.4017</b> |
| 359.2507       | 4  | G 14 | 1268.7115       | 634.8597        |
| 456.3034       | 5  | P 13 | 1211.6901       | 606.3489        |
| 553.3562       | 6  | P 12 | 1114.6373       | <b>557.8226</b> |
| 610.3776       | 7  | G 11 | 1017.5845       | 509.2962        |
| 723.4617       | 8  | I 10 | 960.5631        | 480.7855        |
| 780.4832       | 9  | G 9  | 847.4790        | 424.2434        |
| 893.5672       | 10 | L 8  | <b>790.4575</b> | <b>395.7327</b> |
| 990.6200       | 11 | P 7  | 677.3735        | 339.1907        |
| 1047.6415      | 12 | G 6  | 580.3207        | 290.6643        |
| 1144.6942      | 13 | P 5  | <b>523.2993</b> | 262.1535        |
| 1241.7470      | 14 | P 4  | 426.2465        | 213.6272        |
| 1298.7685      | 15 | G 3  | <b>329.1937</b> | 165.1008        |
| 1395.8212      | 16 | P 2  | <b>272.1723</b> | 136.5900        |
|                | 17 | R 1  | 175.1195        | 88.0637         |

N-term:+35.07

GPNVKGEYDVTVPR, MH+ 1598.9178, m/z 533.6441  
 H OS G27 P150811 220811-s1.03840.03840.3.dta

X-range:

-

MassTol: Y-zoom:

MassType:

AVG  MONO

Axis:

1  2

Label:

I  M  -

Ions:

a  +  2+  3+

b  +  2+  3+

c  +  2+  3+

x  +  2+  3+

y  +  2+  3+

z  +  2+  3+

hide H<sub>2</sub>O/NH<sub>3</sub>

zoom 112-122

GO

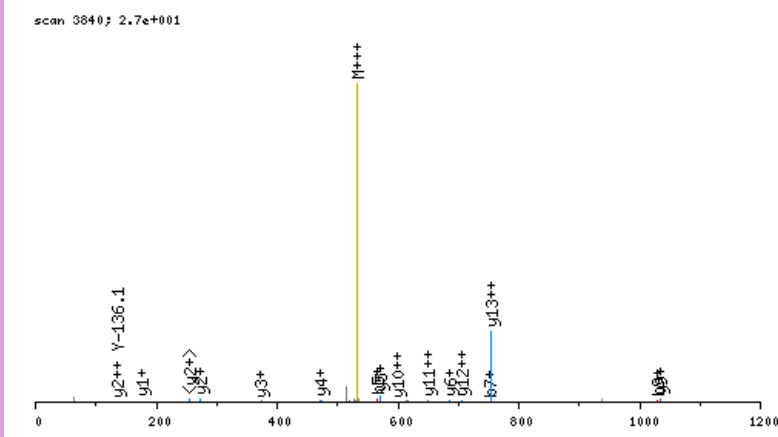

click image to zoom in; click top corners to zoom out [\[precursor±\]](#)

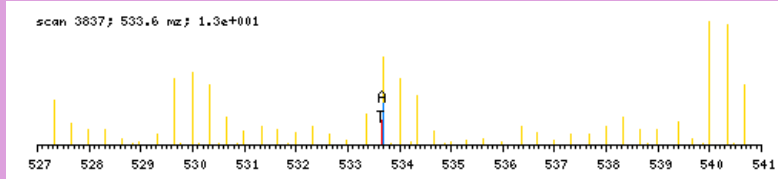

zoomed in precursor plot; T=theoretical m/z, A=acquired m/z

| b <sup>+</sup> | #  | AA # | y <sup>+</sup> | y <sup>2+</sup> |
|----------------|----|------|----------------|-----------------|
| 92.0924        | 1  | G 14 |                |                 |
| 189.1451       | 2  | P 13 | 1507.8333      | 754.4206        |
| 303.1881       | 3  | N 12 | 1410.7805      | 705.8942        |
| 402.2565       | 4  | V 11 | 1296.7376      | 648.8727        |
| 564.4146       | 5  | K 10 | 1197.6692      | 599.3385        |
| 621.4360       | 6  | G 9  | 1035.5111      | 518.2595        |
| 750.4786       | 7  | E 8  | 978.4896       | 489.7487        |
| 913.5420       | 8  | Y 7  | 849.4470       | 425.2274        |
| 1028.5689      | 9  | D 6  | 686.3837       | 343.6958        |
| 1127.6373      | 10 | V 5  | 571.3568       | 286.1823        |
| 1228.6850      | 11 | T 4  | 472.2884       | 236.6481        |
| 1327.7534      | 12 | V 3  | 371.2407       | 186.1243        |
| 1424.8062      | 13 | P 2  | 272.1723       | 136.5900        |
|                | 14 | R 1  | 175.1195       | 88.0637         |

N-term:+35.07 K(5):+162.16

GQISEVVVVKDR, MH+ 1396.8800, m/z 466.2982  
 H OS G26 P150811 220811-s1.03114.03114.3.dta

scan 3114; 1.0e+001

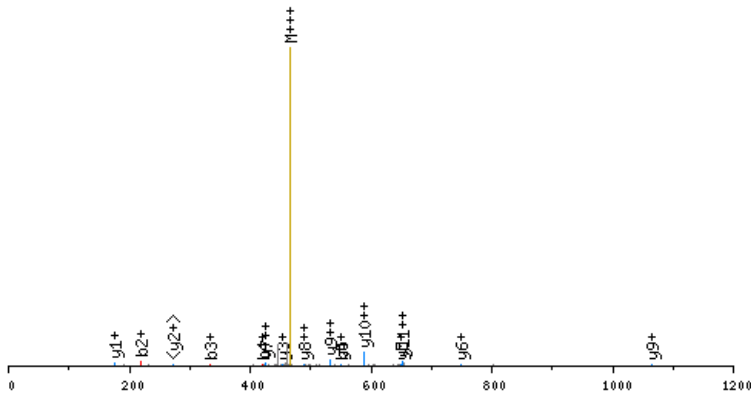

click image to zoom in; click top corners to zoom out [\[precursor±\]](#)

scan 3110; 466.3 m/z; 1.2e+001

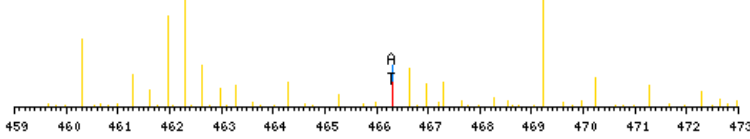

zoomed in precursor plot; T=theoretical m/z, A=acquired m/z

X-range:

-

MassTol: Y-zoom:

MassType:

AVG  MONO

Axis:

1  2

Label:

I  M  -

Ions:

a  +  2+  3+

b  +  2+  3+

c  +  2+  3+

x  +  2+  3+

y  +  2+  3+

z  +  2+  3+

hide H<sub>2</sub>O/NH<sub>3</sub>

zoom 112-122

GO

| b <sup>+</sup> | #  | AA # | y <sup>+</sup> | y <sup>2+</sup> |
|----------------|----|------|----------------|-----------------|
| 92.0924        | 1  | G 12 |                |                 |
| 220.1509       | 2  | Q 11 | 1305.7955      | 653.4016        |
| 333.2350       | 3  | I 10 | 1177.7369      | 589.3724        |
| 420.2670       | 4  | S 9  | 1064.6528      | 532.8303        |
| 549.3096       | 5  | E 8  | 977.6208       | 489.3143        |
| 648.3780       | 6  | V 7  | 848.5782       | 424.7930        |
| 747.4465       | 7  | V 6  | 749.5098       | 375.2588        |
| 846.5149       | 8  | V 5  | 650.4414       | 325.7246        |
| 945.5833       | 9  | V 4  | 551.3730       | 276.1904        |
| 1107.7414      | 10 | K 3  | 452.3045       | 226.6562        |
| 1222.7683      | 11 | D 2  | 290.1464       | 145.5771        |
|                | 12 | R 1  | 175.1195       | 88.0637         |

N-term:+35.07 K(10):+162.16



GQLDQHPIDGYLSHTEPLR, MH+ 2394.2630, m/z 599.3212  
 H OS G28 P150811 220811-s1.07736.07736.4.dta

scan 7736; 6.6e-001

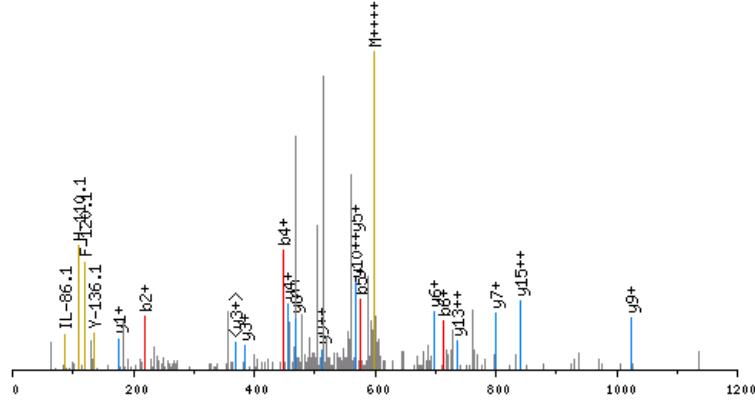

click image to zoom in; click top corners to zoom out [precursor±]

scan 7733; 599.3 mz; 1.4e+001

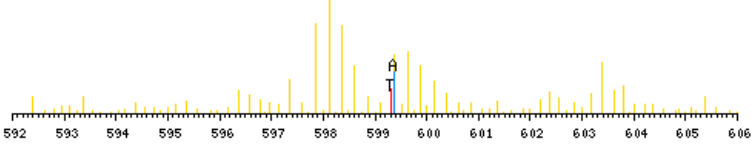

zoomed in precursor plot; T=theoretical m/z, A=acquired m/z

| b <sup>+</sup> | #  | AA # | y <sup>+</sup> | y <sup>2+</sup> |
|----------------|----|------|----------------|-----------------|
| 92.0924        | 1  | G 21 |                |                 |
| 220.1509       | 2  | Q 20 | 2303.1784      | 1152.0931       |
| 333.2350       | 3  | L 19 | 2175.1198      | 1088.0638       |
| 448.2619       | 4  | D 18 | 2062.0358      | 1031.5218       |
| 576.3205       | 5  | Q 17 | 1947.0088      | 974.0083        |
| 713.3794       | 6  | H 16 | 1818.9503      | 909.9790        |
| 810.4322       | 7  | P 15 | 1681.8913      | 841.4496        |
| 923.5163       | 8  | I 14 | 1584.8386      | 792.9232        |
| 1038.5432      | 9  | D 13 | 1471.7545      | 736.3812        |
| 1095.5647      | 10 | G 12 | 1356.7276      | 678.8677        |
| 1258.6280      | 11 | Y 11 | 1299.7061      | 650.3570        |
| 1371.7121      | 12 | L 10 | 1136.6428      | 568.8253        |
| 1458.7441      | 13 | S 9  | 1023.5587      | 512.2833        |
| 1595.8030      | 14 | H 8  | 936.5267       | 468.7673        |
| 1696.8507      | 15 | T 7  | 799.4678       | 400.2378        |
| 1825.8933      | 16 | E 6  | 698.4201       | 349.7140        |
| 1938.9773      | 17 | L 5  | 569.3775       | 285.1927        |
| 2010.0145      | 18 | A 4  | 456.2934       | 228.6506        |
| 2107.0672      | 19 | P 3  | 385.2563       | 193.1321        |
| 2220.1513      | 20 | L 2  | 288.2036       | 144.6057        |
|                | 21 | R 1  | 175.1195       | 88.0637         |

N-term:+35.07

X-range:

-

MassTol: Y-zoom:

MassType:

AVG  MONO

Axis:

1  2

Label:

I  M  -

Ions:

a  +  2+  3+

b  +  2+  3+

c  +  2+  3+

x  +  2+  3+

y  +  2+  3+

z  +  2+  3+

hide H<sub>2</sub>O/NH<sub>3</sub>

zoom 112-122

GO

GQPEPLAPGTTLPAPDR, MH+ 1744.9233, m/z 582.3126  
 L OS G24 P150811 220811-s1.03471.03471.3.dta

X-range:

-

MassTol: Y-zoom:

MassType:

AVG  MONO

Axis:

1  2

Label:

I  M  -

Ions:

a  +  2+  3+

b  +  2+  3+

c  +  2+  3+

x  +  2+  3+

y  +  2+  3+

z  +  2+  3+

hide H<sub>2</sub>O/NH<sub>3</sub>

zoom 112-122

GO

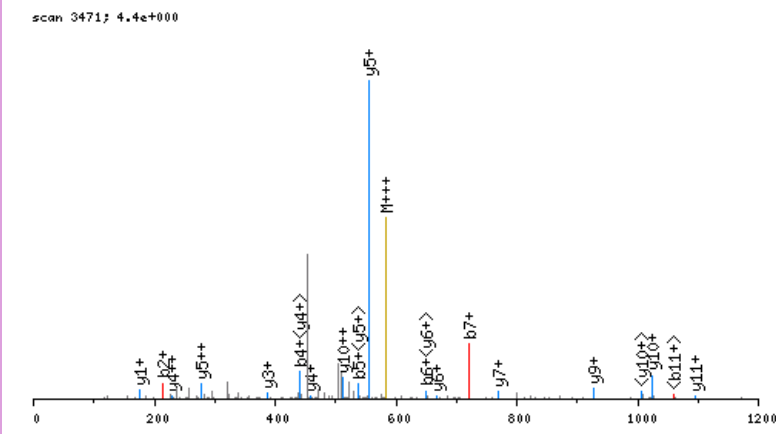

click image to zoom in; click top corners to zoom out [\[precursor±\]](#)

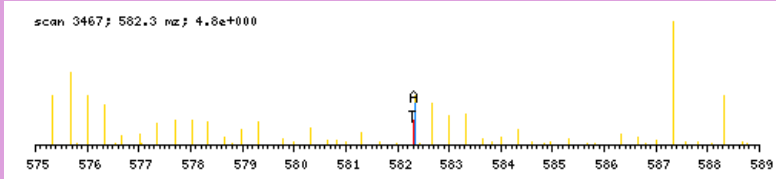

zoomed in precursor plot; T=theoretical m/z, A=acquired m/z

| b <sup>+</sup> | #  | AA # | y <sup>+</sup> | y <sup>2+</sup> |
|----------------|----|------|----------------|-----------------|
| 86.0606        | 1  | G 17 |                |                 |
| 214.1191       | 2  | Q 16 | 1659.8706      | 830.4392        |
| 311.1719       | 3  | P 15 | 1531.8120      | 766.4099        |
| 440.2145       | 4  | E 14 | 1434.7593      | 717.8835        |
| 537.2673       | 5  | P 13 | 1305.7167      | 653.3623        |
| 650.3513       | 6  | L 12 | 1208.6639      | 604.8359        |
| 721.3884       | 7  | A 11 | 1095.5798      | 548.2938        |
| 818.4412       | 8  | P 10 | 1024.5427      | 512.7753        |
| 875.4627       | 9  | G 9  | 927.4900       | 464.2489        |
| 976.5103       | 10 | T 8  | 870.4685       | 435.7382        |
| 1077.5580      | 11 | T 7  | 769.4208       | 385.2143        |
| 1190.6421      | 12 | L 6  | 668.3731       | 334.6905        |
| 1287.6949      | 13 | P 5  | 555.2891       | 278.1485        |
| 1358.7320      | 14 | A 4  | 458.2363       | 229.6221        |
| 1455.7847      | 15 | P 3  | 387.1992       | 194.1035        |
| 1570.8117      | 16 | D 2  | 290.1464       | 145.5771        |
|                | 17 | R 1  | 175.1195       | 88.0637         |

N-term:+29.04

GQPQQTTGAASGGYIKR, MH+ 1775.9404, m/z 592.6517  
 L OS G26 P150811 220811-s1.02200.02200.3.dta

X-range:

-

MassTol: Y-zoom:

MassType:

AVG  MONO

Axis:

1  2

Label:

I  M  -

Ions:

a  +  2+  3+

b  +  2+  3+

c  +  2+  3+

x  +  2+  3+

y  +  2+  3+

z  +  2+  3+

hide H<sub>2</sub>O/NH<sub>3</sub>

zoom 112-122

GO

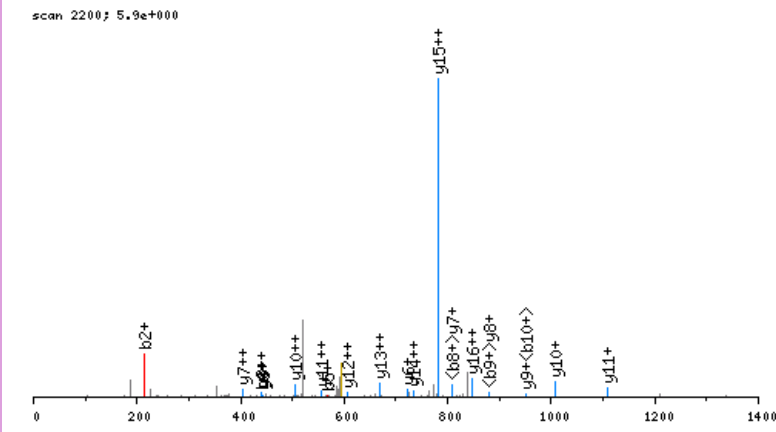

click image to zoom in; click top corners to zoom out [\[precursor±\]](#)

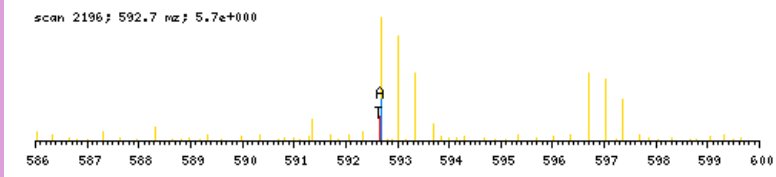

zoomed in precursor plot; T=theoretical m/z, A=acquired m/z

| b <sup>+</sup> | #  | AA | #  | y <sup>+</sup> | y <sup>2+</sup> |
|----------------|----|----|----|----------------|-----------------|
| 86.0606        | 1  | G  | 17 |                |                 |
| 214.1191       | 2  | Q  | 16 | 1690.8877      | 845.9478        |
| 311.1719       | 3  | P  | 15 | 1562.8291      | 781.9185        |
| 439.2305       | 4  | Q  | 14 | 1465.7764      | 733.3921        |
| 567.2891       | 5  | Q  | 13 | 1337.7178      | 669.3628        |
| 668.3367       | 6  | T  | 12 | 1209.6592      | 605.3335        |
| 769.3844       | 7  | T  | 11 | 1108.6115      | 554.8097        |
| 826.4059       | 8  | G  | 10 | 1007.5638      | 504.2858        |
| 897.4430       | 9  | A  | 9  | 950.5424       | 475.7751        |
| 968.4801       | 10 | A  | 8  | 879.5053       | 440.2565        |
| 1055.5121      | 11 | S  | 7  | 808.4681       | 404.7380        |
| 1112.5336      | 12 | G  | 6  | 721.4361       | 361.2220        |
| 1169.5551      | 13 | G  | 5  | 664.4147       | 332.7112        |
| 1332.6184      | 14 | Y  | 4  | 607.3932       | 304.2005        |
| 1445.7025      | 15 | I  | 3  | 444.3299       | 222.6688        |
| 1601.8288      | 16 | K  | 2  | 331.2458       | 166.1268        |
|                | 17 | R  | 1  | 175.1195       | 88.0637         |

N-term:+29.04 K(16):+156.13

GQVVQFKLSDIGEGIR, MH+ 1814.0812, m/z 605.3653  
 H OS G26 P150811 220811-s1.05912.05912.3.dta

X-range:

-

MassTol: Y-zoom:

MassType:

AVG  MONO

Axis:

1  2

Label:

I  M  -

Ions:

a  +  2+  3+

b  +  2+  3+

c  +  2+  3+

x  +  2+  3+

y  +  2+  3+

z  +  2+  3+

hide H<sub>2</sub>O/NH<sub>3</sub>

zoom 112-122

GO

scan 5912; 5.1e+000

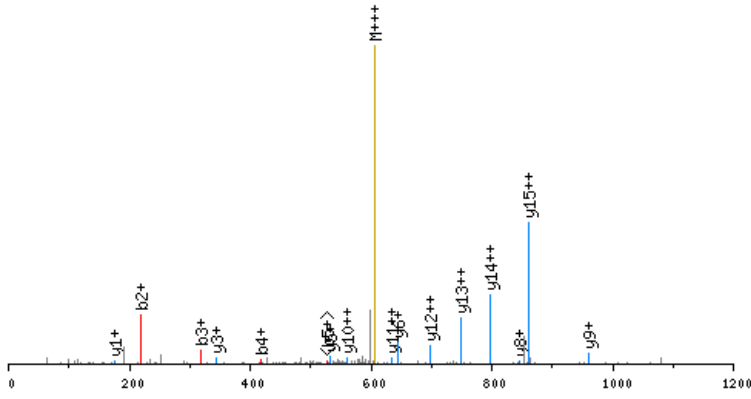

click image to zoom in; click top corners to zoom out [\[precursor±\]](#)

scan 5910; 605.4 m/z; 1.2e+001

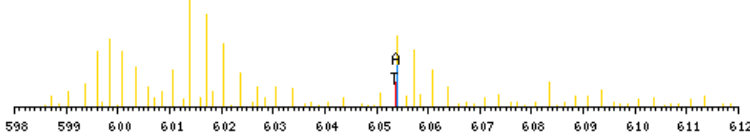

zoomed in precursor plot; T=theoretical m/z, A=acquired m/z

| b <sup>+</sup> | #  | AA # | y <sup>+</sup> | y <sup>2+</sup> |
|----------------|----|------|----------------|-----------------|
| 92.0924        | 1  | G 16 |                |                 |
| 220.1509       | 2  | Q 15 | 1722.9967      | 862.0023        |
| 319.2194       | 3  | V 14 | 1594.9381      | 797.9730        |
| 418.2878       | 4  | V 13 | 1495.8697      | 748.4388        |
| 546.3463       | 5  | Q 12 | 1396.8013      | 698.9046        |
| 693.4148       | 6  | F 11 | 1268.7427      | 634.8753        |
| 855.5729       | 7  | K 10 | 1121.6743      | 561.3411        |
| 968.6569       | 8  | L 9  | 959.5162       | 480.2620        |
| 1055.6890      | 9  | S 8  | 846.4321       | 423.7200        |
| 1170.7159      | 10 | D 7  | 759.4001       | 380.2040        |
| 1283.8000      | 11 | I 6  | 644.3731       | 322.6905        |
| 1340.8214      | 12 | G 5  | 531.2891       | 266.1485        |
| 1469.8640      | 13 | E 4  | 474.2676       | 237.6377        |
| 1526.8855      | 14 | G 3  | 345.2250       | 173.1164        |
| 1639.9695      | 15 | I 2  | 288.2036       | 144.6057        |
|                | 16 | R 1  | 175.1195       | 88.0637         |

N-term:+35.07 K(7):+162.16

GRPGPIGPAGPR, MH+ 1165.7018, m/z 389.2388  
 H OS G27 P150811 220811-s1.02183.02183.3.dta

X-range:

-

MassTol: Y-zoom:

MassType:

AVG  MONO

Axis:

1  2

Label:

I  M  -

Ions:

a  +  2+  3+

b  +  2+  3+

c  +  2+  3+

x  +  2+  3+

y  +  2+  3+

z  +  2+  3+

hide H<sub>2</sub>O/NH<sub>3</sub>

zoom 112-122

GO

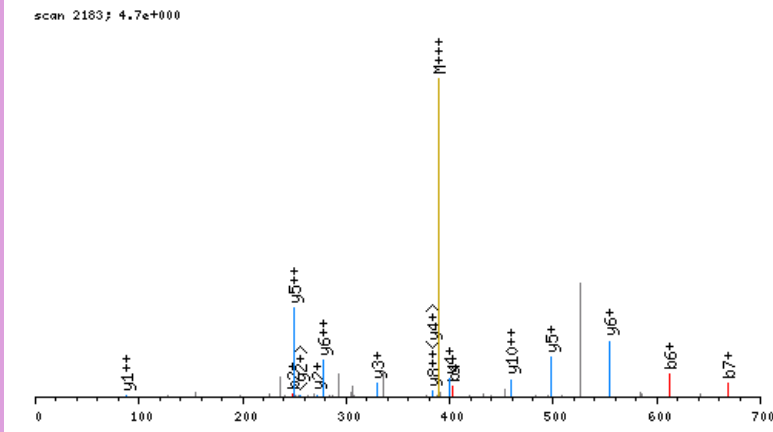

click image to zoom in; click top corners to zoom out [\[precursor±\]](#)

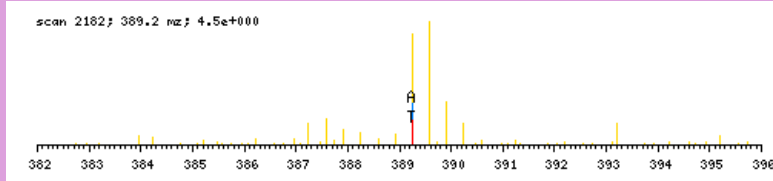

zoomed in precursor plot; T=theoretical m/z, A=acquired m/z

| b <sup>+</sup> | #  | AA | #  | y <sup>+</sup> | y <sup>2+</sup> |
|----------------|----|----|----|----------------|-----------------|
| 92.0924        | 1  | G  | 12 |                |                 |
| 248.1935       | 2  | R  | 11 | 1074.6172      | 537.8125        |
| 345.2462       | 3  | P  | 10 | 918.5161       | 459.7620        |
| 402.2677       | 4  | G  | 9  | 821.4634       | 411.2356        |
| 499.3205       | 5  | P  | 8  | 764.4419       | 382.7249        |
| 612.4045       | 6  | I  | 7  | 667.3891       | 334.1985        |
| 669.4260       | 7  | G  | 6  | 554.3051       | 277.6564        |
| 766.4788       | 8  | P  | 5  | 497.2836       | 249.1457        |
| 837.5159       | 9  | A  | 4  | 400.2308       | 200.6193        |
| 894.5373       | 10 | G  | 3  | 329.1937       | 165.1008        |
| 991.5901       | 11 | P  | 2  | 272.1723       | 136.5900        |
|                | 12 | R  | 1  | 175.1195       | 88.0637         |

N-term:+35.07

GSDLDAATQQLLSR, MH+ 1502.7814, m/z 501.5987  
 L OS G25 P150811 220811-s1.06711.06711.3.dta

scan 6711; 9.2e-001

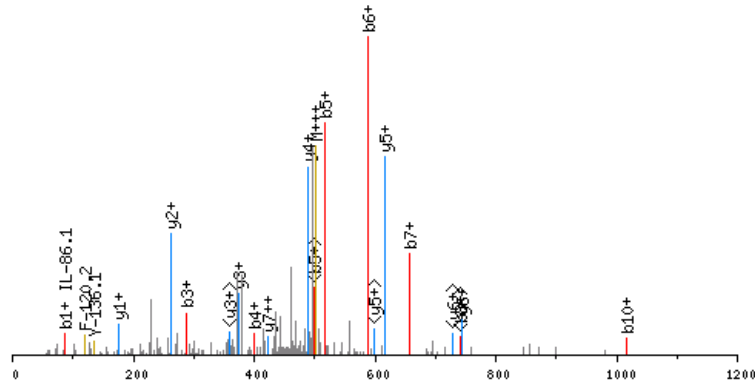

click image to zoom in; click top corners to zoom out [\[precursor±\]](#)

scan 6707; 501.6 m/z; 1.3e+001

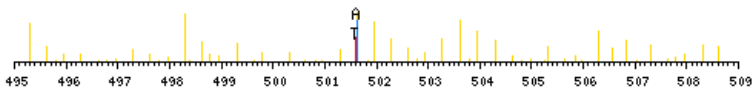

zoomed in precursor plot; T=theoretical m/z, A=acquired m/z

X-range:

-

MassTol: Y-zoom:

MassType:

AVG  MONO

Axis:

1  2

Label:

I  M  -

Ions:

a  +  2+  3+

b  +  2+  3+

c  +  2+  3+

x  +  2+  3+

y  +  2+  3+

z  +  2+  3+

hide H<sub>2</sub>O/NH<sub>3</sub>

zoom 112-122

GO

| b <sup>+</sup> | #  | AA # | y <sup>+</sup> | y <sup>2+</sup> |
|----------------|----|------|----------------|-----------------|
| 86.0606        | 1  | G 14 |                |                 |
| 173.0926       | 2  | S 13 | 1417.7287      | 709.3683        |
| 288.1195       | 3  | D 12 | 1330.6967      | 665.8522        |
| 401.2036       | 4  | L 11 | 1215.6697      | 608.3388        |
| 516.2305       | 5  | D 10 | 1102.5857      | 551.7967        |
| 587.2677       | 6  | A 9  | 987.5587       | 494.2833        |
| 658.3048       | 7  | A 8  | 916.5216       | 458.7647        |
| 759.3524       | 8  | T 7  | 845.4845       | 423.2462        |
| 887.4110       | 9  | Q 6  | 744.4368       | 372.7223        |
| 1015.4696      | 10 | Q 5  | 616.3782       | 308.6930        |
| 1128.5537      | 11 | L 4  | 488.3197       | 244.6637        |
| 1241.6377      | 12 | L 3  | 375.2356       | 188.1217        |
| 1328.6698      | 13 | S 2  | 262.1515       | 131.5797        |
|                | 14 | R 1  | 175.1195       | 88.0637         |

N-term:+29.04

GSEVTQCCQTDLCNER, MH+ 1984.8161, m/z 662.2769  
 L OS G25 P150811 220811-s1.02868.02868.3.dta

X-range:

-

MassTol: Y-zoom:

MassType:

AVG  MONO

Axis:

1  2

Label:

I  M  -

Ions:

a  +  2+  3+

b  +  2+  3+

c  +  2+  3+

x  +  2+  3+

y  +  2+  3+

z  +  2+  3+

hide H<sub>2</sub>O/NH<sub>3</sub>

zoom 112-122

GO

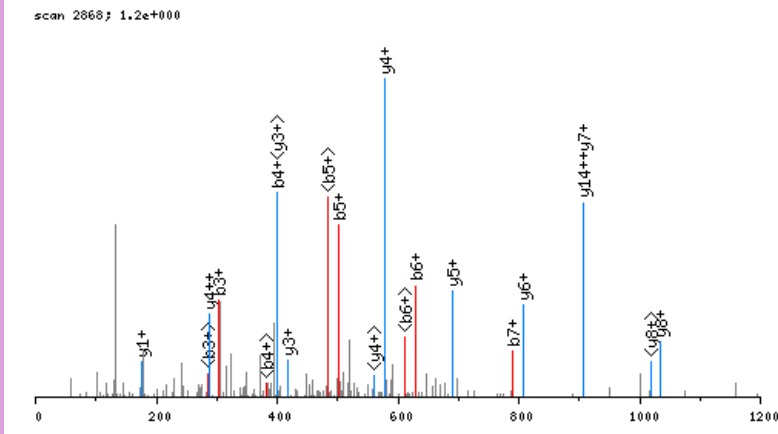

click image to zoom in; click top corners to zoom out [\[precursor±\]](#)

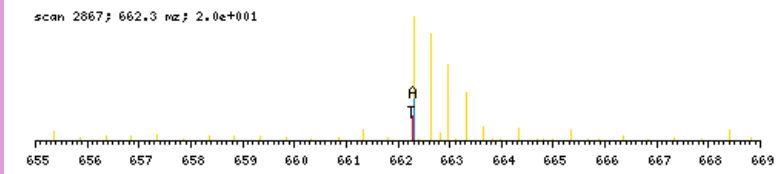

zoomed in precursor plot; T=theoretical m/z, A=acquired m/z

| b <sup>+</sup> | #  | AA # | y <sup>+</sup> | y <sup>2+</sup> |
|----------------|----|------|----------------|-----------------|
| 86.0606        | 1  | G 16 |                |                 |
| 173.0926       | 2  | S 15 | 1899.7634      | 950.3856        |
| 302.1352       | 3  | E 14 | 1812.7313      | 906.8696        |
| 401.2036       | 4  | V 13 | 1683.6888      | 842.3483        |
| 502.2513       | 5  | T 12 | 1584.6203      | 792.8141        |
| 630.3099       | 6  | Q 11 | 1483.5727      | 742.2902        |
| 790.3405       | 7  | C 10 | 1355.5141      | 678.2610        |
| 950.3711       | 8  | C 9  | 1195.4835      | 598.2457        |
| 1078.4296      | 9  | Q 8  | 1035.4529      | 518.2304        |
| 1179.4773      | 10 | T 7  | 907.3943       | 454.2011        |
| 1294.5043      | 11 | D 6  | 806.3466       | 403.6772        |
| 1407.5883      | 12 | L 5  | 691.3197       | 346.1638        |
| 1567.6189      | 13 | C 4  | 578.2356       | 289.6217        |
| 1681.6618      | 14 | N 3  | 418.2050       | 209.6064        |
| 1810.7044      | 15 | E 2  | 304.1621       | 152.5850        |
|                | 16 | R 1  | 175.1195       | 88.0637         |

N-term:+29.04 C(7):+160.03  
 C(8):+160.03 C(13):+160.03

X-range:

-

MassTol: Y-zoom:

MassType:

AVG  MONO

Axis:

1  2

Label:

I  M  -

Ions:

a  +  2+  3+

b  +  2+  3+

c  +  2+  3+

x  +  2+  3+

y  +  2+  3+

z  +  2+  3+

hide H<sub>2</sub>O/NH<sub>3</sub>

zoom 112-122

GO

scan 3022; 1.5e+001

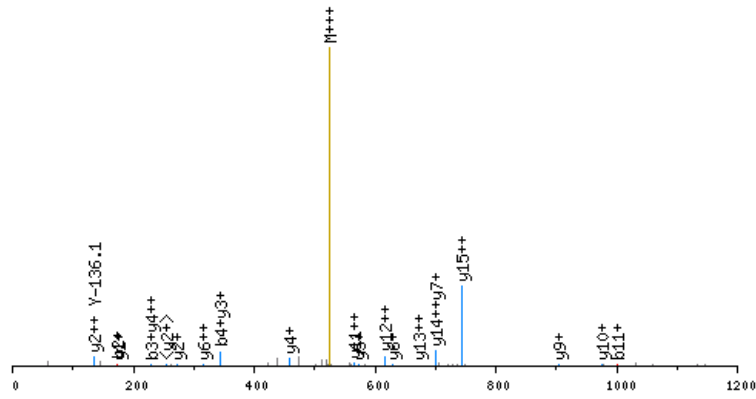

[click image to zoom in; click top corners to zoom out](#) [[precursor±](#)]

scan 3020; 525.3 m/z; 1.6e+001

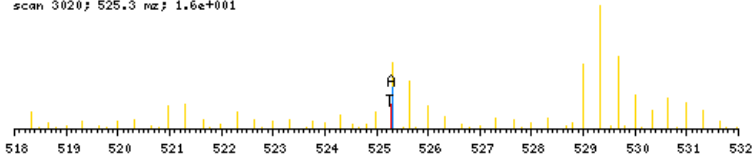

[zoomed in precursor plot; T=theoretical m/z, A=acquired m/z](#)

| b <sup>+</sup> | #  | AA # | y <sup>+</sup> | y <sup>2+</sup> |
|----------------|----|------|----------------|-----------------|
| 86.0606        | 1  | G 16 |                |                 |
| 173.0926       | 2  | S 15 | 1488.7811      | 744.8945        |
| 230.1141       | 3  | G 14 | 1401.7491      | 701.3785        |
| 343.1981       | 4  | L 13 | 1344.7276      | 672.8677        |
| 442.2665       | 5  | V 12 | 1231.6435      | 616.3257        |
| 598.3928       | 6  | K 11 | 1132.5751      | 566.7915        |
| 669.4299       | 7  | A 10 | 976.4488       | 488.7283        |
| 726.4514       | 8  | G 9  | 905.4117       | 453.2098        |
| 873.5198       | 9  | F 8  | 848.3903       | 424.6990        |
| 944.5569       | 10 | A 7  | 701.3218       | 351.1648        |
| 1001.5784      | 11 | G 6  | 630.2847       | 315.6463        |
| 1116.6053      | 12 | D 5  | 573.2633       | 287.1355        |
| 1231.6323      | 13 | D 4  | 458.2363       | 229.6221        |
| 1302.6694      | 14 | A 3  | 343.2094       | 172.1086        |
| 1399.7222      | 15 | P 2  | 272.1723       | 136.5900        |
|                | 16 | R 1  | 175.1195       | 88.0637         |

N-term:+29.04 K(6):+156.13



GSIIITVYPKEIR, MH+ 1431.8575, m/z 477.9574  
 L OS G26 P150811 220811-s1.04109.04109.3.dta

scan 4109; 1.2e+001

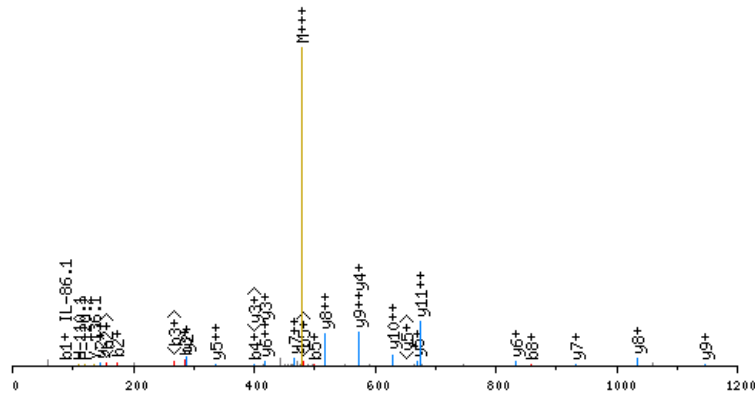

click image to zoom in; click top corners to zoom out [\[precursor±\]](#)

scan 4105; 478.0 m/z; 7.2e+000

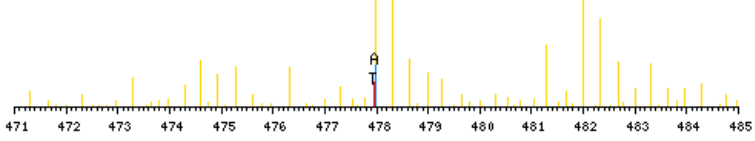

zoomed in precursor plot; T=theoretical m/z, A=acquired m/z

X-range:

-

MassTol: Y-zoom:

MassType:

AVG  MONO

Axis:

1  2

Label:

I  M  -

Ions:

a  +  2+  3+

b  +  2+  3+

c  +  2+  3+

x  +  2+  3+

y  +  2+  3+

z  +  2+  3+

hide H<sub>2</sub>O/NH<sub>3</sub>

zoom 112-122

GO

| b <sup>+</sup> | #  | AA | #  | y <sup>+</sup> | y <sup>2+</sup> |
|----------------|----|----|----|----------------|-----------------|
| 86.0606        | 1  | G  | 12 |                |                 |
| 173.0926       | 2  | S  | 11 | 1346.8048      | 673.9063        |
| 286.1767       | 3  | I  | 10 | 1259.7728      | 630.3903        |
| 399.2607       | 4  | I  | 9  | 1146.6887      | 573.8483        |
| 500.3084       | 5  | T  | 8  | 1033.6046      | 517.3062        |
| 599.3768       | 6  | V  | 7  | 932.5570       | 466.7824        |
| 762.4401       | 7  | Y  | 6  | 833.4886       | 417.2482        |
| 859.4929       | 8  | P  | 5  | 670.4252       | 335.7165        |
| 1015.6192      | 9  | K  | 4  | 573.3725       | 287.1901        |
| 1144.6618      | 10 | E  | 3  | 417.2462       | 209.1270        |
| 1257.7459      | 11 | I  | 2  | 288.2036       | 144.6057        |
|                | 12 | R  | 1  | 175.1195       | 88.0637         |

N-term:+29.04 K(9):+156.13

GSLDLGGDAAGR, MH+ 1122.5967, m/z 561.8020  
 H OS G25 P150811 220811-s1.03418.03418.2.dta

scan 3418; 8.0e+000

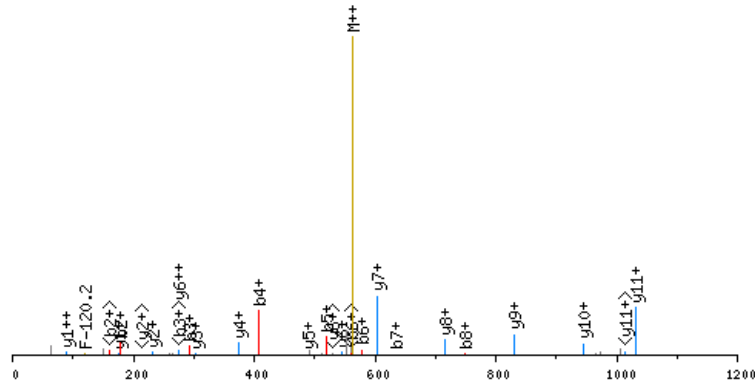

click image to zoom in; click top corners to zoom out [\[precursor±\]](#)

scan 3417; 561.8 m/z; 1.5e+002

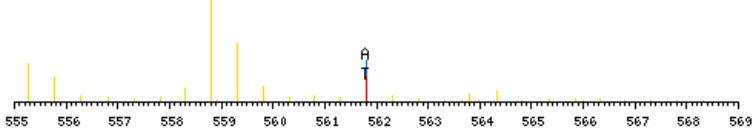

zoomed in precursor plot; T=theoretical m/z, A=acquired m/z

X-range:

-

MassTol: Y-zoom:

MassType:

AVG  MONO

Axis:

1  2

Label:

I  M  -

Ions:

a  +  2+  3+

b  +  2+  3+

c  +  2+  3+

x  +  2+  3+

y  +  2+  3+

z  +  2+  3+

hide H<sub>2</sub>O/NH<sub>3</sub>

zoom 112-122

GO

| b <sup>+</sup> | #  | AA | #  | y <sup>+</sup> | y <sup>2+</sup> |
|----------------|----|----|----|----------------|-----------------|
| 92.0924        | 1  | G  | 12 |                |                 |
| 179.1244       | 2  | S  | 11 | 1031.5122      | 516.2600        |
| 292.2085       | 3  | L  | 10 | 944.4801       | 472.7440        |
| 407.2354       | 4  | D  | 9  | 831.3961       | 416.2019        |
| 520.3195       | 5  | L  | 8  | 716.3691       | 358.6885        |
| 577.3409       | 6  | G  | 7  | 603.2851       | 302.1464        |
| 634.3624       | 7  | G  | 6  | 546.2636       | 273.6357        |
| 749.3893       | 8  | D  | 5  | 489.2421       | 245.1250        |
| 820.4264       | 9  | A  | 4  | 374.2152       | 187.6115        |
| 891.4636       | 10 | A  | 3  | 303.1781       | 152.0930        |
| 948.4850       | 11 | G  | 2  | 232.1410       | 116.5744        |
|                | 12 | R  | 1  | 175.1195       | 88.0637         |

N-term:+35.07

GSSQSVEIPGGTEGYHVLK, MH+ 2058.0256, m/z 686.6800  
 L OS G26 P150811 220811-s1.04219.04219.3.dta

X-range:

-

MassTol: Y-zoom:

MassType:

AVG  MONO

Axis:

1  2

Label:

I  M  -

Ions:

a  +  2+  3+

b  +  2+  3+

c  +  2+  3+

x  +  2+  3+

y  +  2+  3+

z  +  2+  3+

hide H<sub>2</sub>O/NH<sub>3</sub>

zoom 112-122

GO

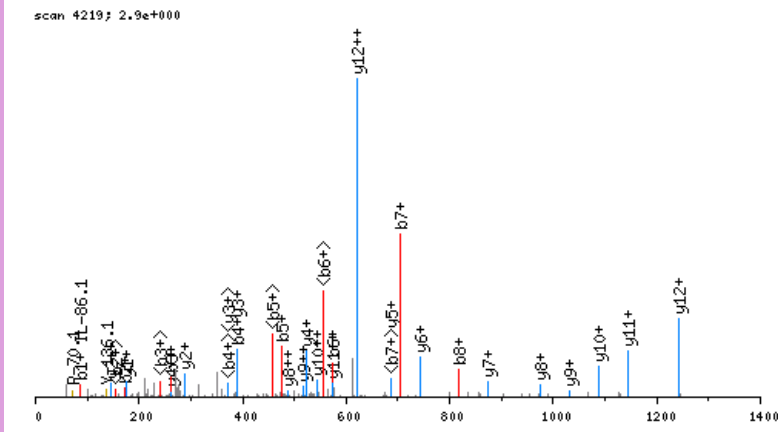

click image to zoom in; click top corners to zoom out [\[precursor±\]](#)

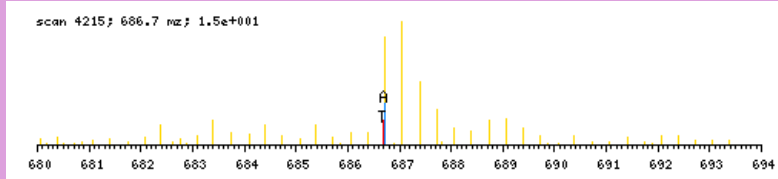

zoomed in precursor plot; T=theoretical m/z, A=acquired m/z

| b <sup>+</sup> | #  | AA # | y <sup>+</sup> | y <sup>2+</sup> |
|----------------|----|------|----------------|-----------------|
| 86.0606        | 1  | G 20 |                |                 |
| 173.0926       | 2  | S 19 | 1972.9728      | 986.9903        |
| 260.1246       | 3  | S 18 | 1885.9408      | 943.4743        |
| 388.1832       | 4  | Q 17 | 1798.9088      | 899.9583        |
| 475.2152       | 5  | S 16 | 1670.8502      | 835.9290        |
| 574.2836       | 6  | V 15 | 1583.8182      | 792.4130        |
| 703.3262       | 7  | E 14 | 1484.7498      | 742.8788        |
| 816.4103       | 8  | I 13 | 1355.7072      | 678.3575        |
| 913.4631       | 9  | P 12 | 1242.6231      | 621.8155        |
| 970.4845       | 10 | G 11 | 1145.5703      | 573.2891        |
| 1027.5060      | 11 | G 10 | 1088.5489      | 544.7784        |
| 1084.5275      | 12 | G 9  | 1031.5274      | 516.2676        |
| 1185.5751      | 13 | T 8  | 974.5060       | 487.7569        |
| 1314.6177      | 14 | E 7  | 873.4583       | 437.2331        |
| 1371.6392      | 15 | G 6  | 744.4157       | 372.7118        |
| 1534.7025      | 16 | Y 5  | 687.3942       | 344.2010        |
| 1671.7614      | 17 | H 4  | 524.3309       | 262.6694        |
| 1770.8298      | 18 | V 3  | 387.2720       | 194.1399        |
| 1883.9139      | 19 | L 2  | 288.2036       | 144.6057        |
|                | 20 | R 1  | 175.1195       | 88.0637         |

N-term:+29.04

GSTTEFEEPR, MH+ 1186.5804, m/z 593.7938  
 H OS G25 P150811 220811-s1.02676.02676.2.dta

X-range:

-

MassTol: Y-zoom:

MassType:

AVG  MONO

Axis:

1  2

Label:

I  M  -

Ions:

a  +  2+  3+

b  +  2+  3+

c  +  2+  3+

x  +  2+  3+

y  +  2+  3+

z  +  2+  3+

hide H<sub>2</sub>O/NH<sub>3</sub>

zoom 112-122

GO

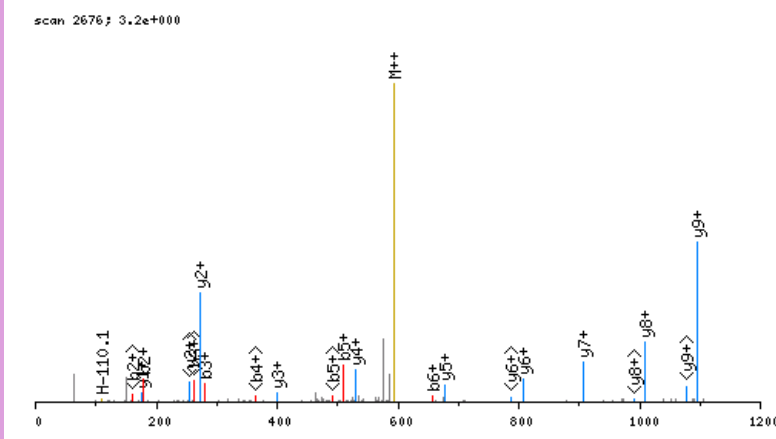

click image to zoom in; click top corners to zoom out [\[precursor±\]](#)

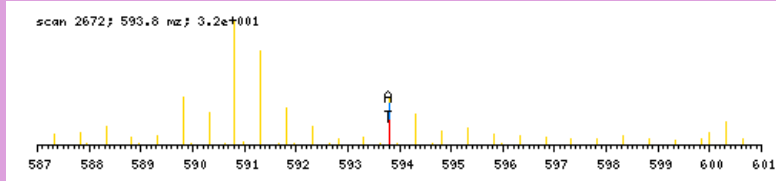

zoomed in precursor plot; T=theoretical m/z, A=acquired m/z

| b <sup>+</sup> | #  | AA # | y <sup>+</sup> | y <sup>2+</sup> |
|----------------|----|------|----------------|-----------------|
| 92.0924        | 1  | G    | 10             |                 |
| 179.1244       | 2  | S    | 9              | 1095.4958       |
| 280.1721       | 3  | T    | 8              | 1008.4638       |
| 381.2197       | 4  | T    | 7              | 907.4161        |
| 510.2623       | 5  | E    | 6              | 806.3685        |
| 657.3308       | 6  | F    | 5              | 677.3259        |
| 786.3733       | 7  | E    | 4              | 530.2575        |
| 915.4159       | 8  | E    | 3              | 401.2149        |
| 1012.4687      | 9  | P    | 2              | 272.1723        |
|                | 10 | R    | 1              | 175.1195        |

N-term:+35.07

GSVKPYTNFDAER, MH+ 1539.7807, m/z 513.9318  
 L OS G27 P150811 220811-s1.03318.03318.3.dta

X-range:

-

MassTol: Y-zoom:

MassType:

AVG  MONO

Axis:

1  2

Label:

I  M  -

Ions:

a  +  2+  3+

b  +  2+  3+

c  +  2+  3+

x  +  2+  3+

y  +  2+  3+

z  +  2+  3+

hide H<sub>2</sub>O/NH<sub>3</sub>

zoom 112-122

GO

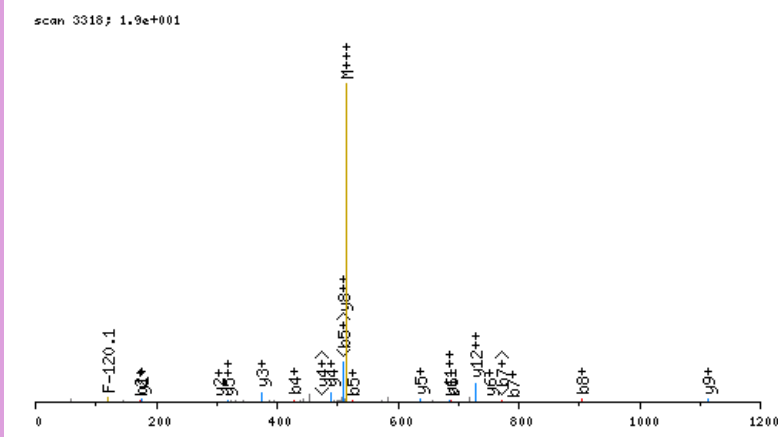

click image to zoom in; click top corners to zoom out [\[precursor±\]](#)

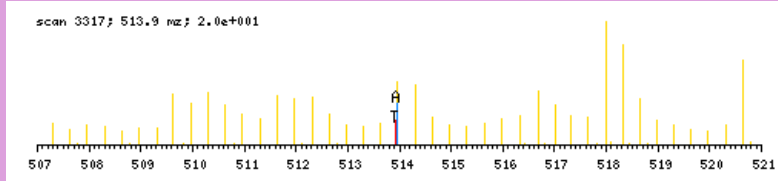

zoomed in precursor plot; T=theoretical m/z, A=acquired m/z

| b <sup>+</sup> | #  | AA # | y <sup>+</sup> | y <sup>2+</sup> |
|----------------|----|------|----------------|-----------------|
| 86.0606        | 1  | G 13 |                |                 |
| 173.0926       | 2  | S 12 | 1454.7280      | 727.8679        |
| 272.1610       | 3  | V 11 | 1367.6960      | 684.3519        |
| 428.2873       | 4  | K 10 | 1268.6276      | 634.8177        |
| 525.3401       | 5  | P 9  | 1112.5013      | 556.7545        |
| 688.4034       | 6  | Y 8  | 1015.4485      | 508.2282        |
| 789.4511       | 7  | T 7  | 852.3852       | 426.6965        |
| 903.4940       | 8  | N 6  | 751.3375       | 376.1727        |
| 1050.5624      | 9  | F 5  | 637.2946       | 319.1512        |
| 1165.5894      | 10 | D 4  | 490.2262       | 245.6170        |
| 1236.6265      | 11 | A 3  | 375.1992       | 188.1035        |
| 1365.6691      | 12 | E 2  | 304.1621       | 152.5850        |
|                | 13 | R 1  | 175.1195       | 88.0637         |

N-term:+29.04 K(4):+156.13

GTITTKELGTVMR, MH+ 1462.8303, m/z 488.2816  
 L OS G26 P150811 220811-s1.03702.03702.3.dta

scan 3702; 1.3e+001

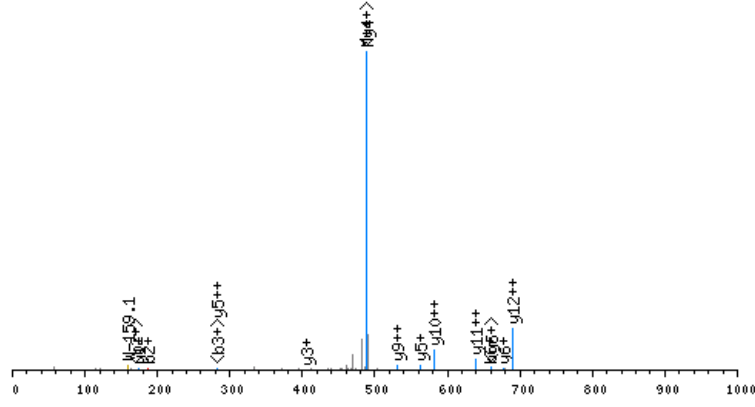

click image to zoom in; click top corners to zoom out [\[precursor±\]](#)

scan 3700; 488.3 m/z; 5.6e+001

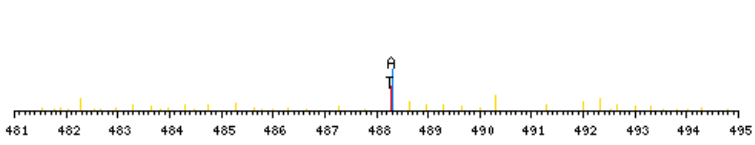

zoomed in precursor plot; T=theoretical m/z, A=acquired m/z

X-range:

-

MassTol: Y-zoom:

MassType:

AVG  MONO

Axis:

1  2

Label:

I  M  -

Ions:

a  +  2+  3+

b  +  2+  3+

c  +  2+  3+

x  +  2+  3+

y  +  2+  3+

z  +  2+  3+

hide H<sub>2</sub>O/NH<sub>3</sub>

zoom 112-122

GO

| b <sup>+</sup> | #  | AA # | y <sup>+</sup> | y <sup>2+</sup> |
|----------------|----|------|----------------|-----------------|
| 86.0606        | 1  | G 13 |                |                 |
| 187.1082       | 2  | T 12 | 1377.7776      | 689.3927        |
| 300.1923       | 3  | I 11 | 1276.7299      | 638.8689        |
| 401.2400       | 4  | T 10 | 1163.6459      | 582.3268        |
| 502.2877       | 5  | T 9  | 1062.5982      | 531.8030        |
| 658.4140       | 6  | K 8  | 961.5505       | 481.2792        |
| 787.4566       | 7  | E 7  | 805.4242       | 403.2160        |
| 900.5406       | 8  | L 6  | 676.3816       | 338.6947        |
| 957.5621       | 9  | G 5  | 563.2975       | 282.1527        |
| 1058.6098      | 10 | T 4  | 506.2761       | 253.6420        |
| 1157.6782      | 11 | V 3  | 405.2284       | 203.1181        |
| 1288.7187      | 12 | M 2  | 306.1600       | 153.5839        |
|                | 13 | R 1  | 175.1195       | 88.0637         |

N-term:+29.04 K(6):+156.13

GTLDPSSLDETAYER, MH+ 1801.8668, m/z 601.2938  
 H OS G25 P150811 220811-s1.05010.05010.3.dta

X-range:

-

MassTol: Y-zoom:

MassType:

AVG  MONO

Axis:

1  2

Label:

I  M  -

Ions:

a  +  2+  3+

b  +  2+  3+

c  +  2+  3+

x  +  2+  3+

y  +  2+  3+

z  +  2+  3+

hide H<sub>2</sub>O/NH<sub>3</sub>

zoom 112-122

GO

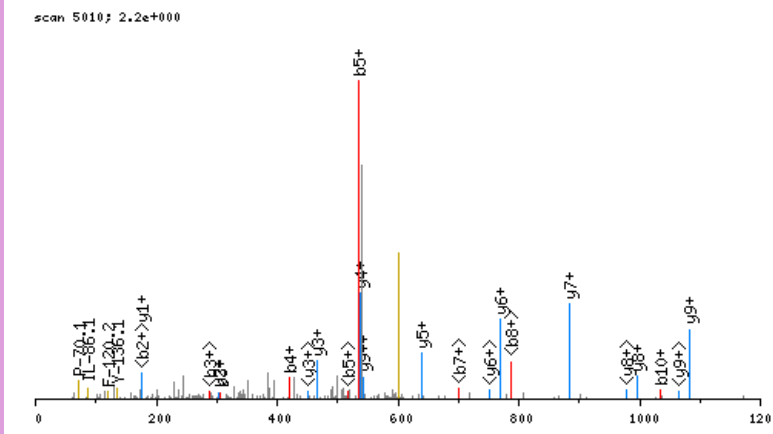

click image to zoom in; click top corners to zoom out [\[precursor±\]](#)

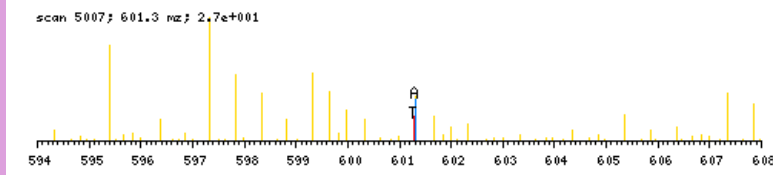

zoomed in precursor plot; T=theoretical m/z, A=acquired m/z

| b <sup>+</sup> | #  | AA # | y <sup>+</sup> | y <sup>2+</sup> |
|----------------|----|------|----------------|-----------------|
| 92.0924        | 1  | G 16 |                |                 |
| 193.1400       | 2  | T 15 | 1710.7822      | 855.8950        |
| 306.2241       | 3  | L 14 | 1609.7346      | 805.3712        |
| 421.2510       | 4  | D 13 | 1496.6505      | 748.8292        |
| 535.2940       | 5  | N 12 | 1381.6236      | 691.3157        |
| 632.3467       | 6  | P 11 | 1267.5806      | 634.2942        |
| 719.3788       | 7  | S 10 | 1170.5279      | 585.7678        |
| 806.4108       | 8  | S 9  | 1083.4958      | 542.2518        |
| 919.4949       | 9  | L 8  | 996.4638       | 498.7358        |
| 1034.5218      | 10 | D 7  | 883.3798       | 442.1938        |
| 1163.5644      | 11 | E 6  | 768.3528       | 384.6803        |
| 1264.6121      | 12 | T 5  | 639.3102       | 320.1590        |
| 1335.6492      | 13 | A 4  | 538.2625       | 269.6352        |
| 1498.7125      | 14 | Y 3  | 467.2254       | 234.1166        |
| 1627.7551      | 15 | E 2  | 304.1621       | 152.5850        |
|                | 16 | R 1  | 175.1195       | 88.0637         |

N-term:+35.07

GTPEENPPSWAKSAGSKSSGGR, MH+ 2271.1370, m/z 568.5397  
 L OS G28 P150811 220811-s1.03052.03052.4.dta

X-range:

0 - 0

MassTol: Y-zoom:

0. 1.

MassType:

AVG  MONO

Axis:

1  2

Label:

I  M  -

Ions:

a  +  2+  3+

b  +  2+  3+

c  +  2+  3+

x  +  2+  3+

y  +  2+  3+

z  +  2+  3+

hide H<sub>2</sub>O/NH<sub>3</sub>

zoom 112-122

GO

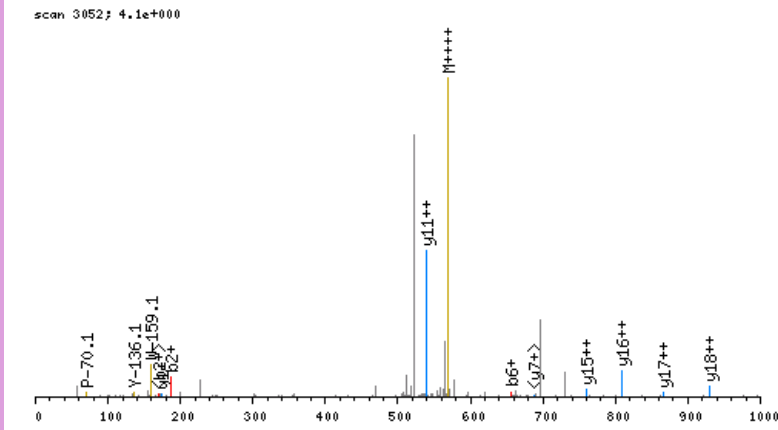

click image to zoom in; click top corners to zoom out [precursor±]

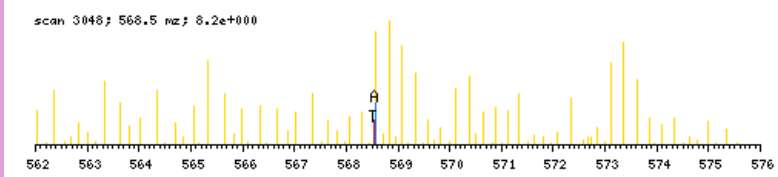

zoomed in precursor plot; T=theoretical m/z, A=acquired m/z

| b <sup>+</sup> | #  | AA # | y <sup>+</sup> | y <sup>2+</sup> |
|----------------|----|------|----------------|-----------------|
| 86.0606        | 1  | G 22 |                |                 |
| 187.1082       | 2  | T 21 | 2186.0843      | 1093.5460       |
| 284.1610       | 3  | P 20 | 2085.0366      | 1043.0222       |
| 413.2036       | 4  | E 19 | 1987.9838      | 994.4958        |
| 542.2462       | 5  | E 18 | 1858.9412      | 929.9745        |
| 656.2891       | 6  | N 17 | 1729.8986      | 865.4532        |
| 753.3419       | 7  | P 16 | 1615.8557      | 808.4318        |
| 850.3946       | 8  | P 15 | 1518.8029      | 759.9054        |
| 937.4267       | 9  | S 14 | 1421.7502      | 711.3790        |
| 1123.5060      | 10 | W 13 | 1334.7181      | 667.8630        |
| 1194.5431      | 11 | A 12 | 1148.6388      | 574.8233        |
| 1350.6694      | 12 | K 11 | 1077.6017      | 539.3048        |
| 1437.7014      | 13 | S 10 | 921.4754       | 461.2416        |
| 1508.7385      | 14 | A 9  | 834.4434       | 417.7256        |
| 1565.7600      | 15 | G 8  | 763.4063       | 382.2071        |
| 1652.7920      | 16 | S 7  | 706.3848       | 353.6963        |
| 1808.9183      | 17 | K 6  | 619.3528       | 310.1803        |
| 1895.9504      | 18 | S 5  | 463.2265       | 232.1172        |
| 1982.9824      | 19 | S 4  | 376.1945       | 188.6011        |
| 2040.0039      | 20 | G 3  | 289.1624       | 145.0851        |
| 2097.0253      | 21 | G 2  | 232.1410       | 116.5744        |
|                | 22 | R 1  | 175.1195       | 88.0637         |

N-term: +29.04 K(12): +156.13  
 K(17): +156.13



GTPSGTAEPYDGTKAR, MH+ 1663.8292, m/z 555.2812  
 L OS G27 P150811 220811-s1.02126.02126.3.dta

X-range:

-

MassTol: Y-zoom:

MassType:

AVG  MONO

Axis:

1  2

Label:

I  M  -

Ions:

a  +  2+  3+

b  +  2+  3+

c  +  2+  3+

x  +  2+  3+

y  +  2+  3+

z  +  2+  3+

hide H<sub>2</sub>O/NH<sub>3</sub>

zoom 112-122

GO

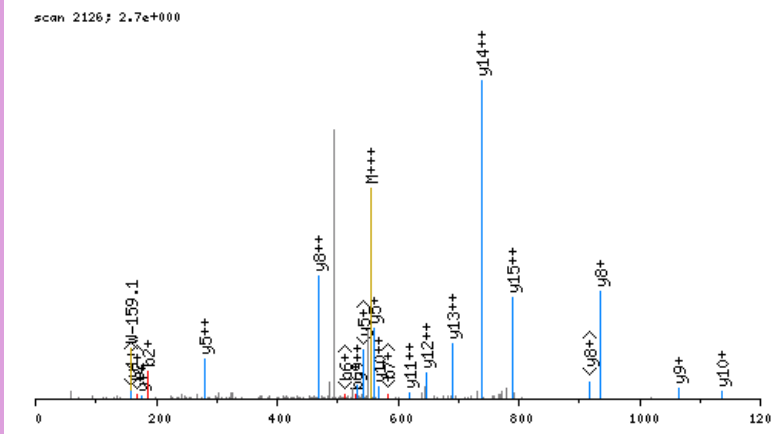

click image to zoom in; click top corners to zoom out [\[precursor±\]](#)

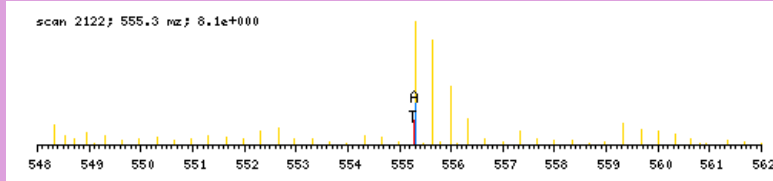

zoomed in precursor plot; T=theoretical m/z, A=acquired m/z

| b <sup>+</sup> | #  | AA # | y <sup>+</sup> | y <sup>2+</sup> |
|----------------|----|------|----------------|-----------------|
| 86.0606        | 1  | G 16 |                |                 |
| 187.1082       | 2  | T 15 | 1578.7764      | 789.8921        |
| 284.1610       | 3  | P 14 | 1477.7287      | 739.3683        |
| 371.1930       | 4  | S 13 | 1380.6760      | 690.8419        |
| 428.2145       | 5  | G 12 | 1293.6439      | 647.3259        |
| 529.2622       | 6  | T 11 | 1236.6225      | 618.8152        |
| 600.2993       | 7  | A 10 | 1135.5748      | 568.2913        |
| 729.3419       | 8  | E 9  | 1064.5377      | 532.7728        |
| 826.3946       | 9  | P 8  | 935.4951       | 468.2515        |
| 989.4580       | 10 | Y 7  | 838.4423       | 419.7251        |
| 1104.4849      | 11 | D 6  | 675.3790       | 338.1934        |
| 1161.5064      | 12 | G 5  | 560.3521       | 280.6799        |
| 1262.5541      | 13 | T 4  | 503.3306       | 252.1692        |
| 1418.6804      | 14 | K 3  | 402.2829       | 201.6454        |
| 1489.7175      | 15 | A 2  | 246.1566       | 123.5822        |
|                | 16 | R 1  | 175.1195       | 88.0637         |

N-term:+29.04 K(14):+156.13

GVAPQALAVAASGPGSSFR, MH+ 1776.9820, m/z 592.9989  
 H OS G24 P150811 220811-s1.03988.03988.3.dta

scan 3988; 1.8e+000

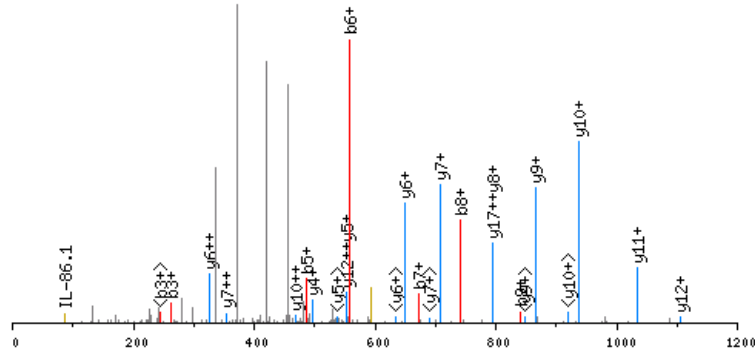

click image to zoom in; click top corners to zoom out [\[precursor±\]](#)

scan 3987; 593.0 m/z; 3.4e+000

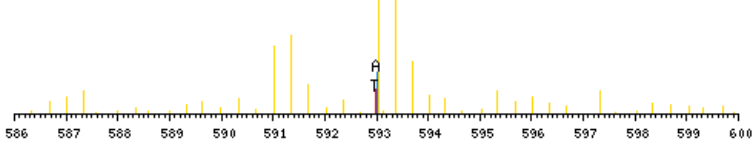

zoomed in precursor plot; T=theoretical m/z, A=acquired m/z

X-range:

-

MassTol: Y-zoom:

MassType:

AVG  MONO

Axis:

1  2

Label:

I  M  -

Ions:

a  +  2+  3+

b  +  2+  3+

c  +  2+  3+

x  +  2+  3+

y  +  2+  3+

z  +  2+  3+

hide H<sub>2</sub>O/NH<sub>3</sub>

zoom 112-122

GO

| b <sup>+</sup> | #  | AA # | y <sup>+</sup> | y <sup>2+</sup> |
|----------------|----|------|----------------|-----------------|
| 92.0924        | 1  | G 19 |                |                 |
| 191.1608       | 2  | V 18 | 1685.8975      | 843.4527        |
| 262.1979       | 3  | A 17 | 1586.8291      | 793.9185        |
| 359.2507       | 4  | P 16 | 1515.7920      | 758.3999        |
| 487.3092       | 5  | Q 15 | 1418.7392      | 709.8735        |
| 558.3463       | 6  | A 14 | 1290.6806      | 645.8442        |
| 671.4304       | 7  | L 13 | 1219.6435      | 610.3257        |
| 742.4675       | 8  | A 12 | 1106.5594      | 553.7836        |
| 841.5359       | 9  | V 11 | 1035.5223      | 518.2651        |
| 912.5731       | 10 | A 10 | 936.4539       | 468.7309        |
| 983.6102       | 11 | A 9  | 865.4168       | 433.2123        |
| 1070.6422      | 12 | S 8  | 794.3797       | 397.6938        |
| 1127.6637      | 13 | G 7  | 707.3477       | 354.1777        |
| 1224.7164      | 14 | P 6  | 650.3262       | 325.6670        |
| 1281.7379      | 15 | G 5  | 553.2734       | 277.1406        |
| 1368.7699      | 16 | S 4  | 496.2520       | 248.6299        |
| 1455.8019      | 17 | S 3  | 409.2199       | 205.1139        |
| 1602.8704      | 18 | F 2  | 322.1879       | 161.5979        |
|                | 19 | R 1  | 175.1195       | 88.0637         |

N-term:+35.07

GVDALGLNIYEQNDR, MH+ 1710.8875, m/z 570.9673  
 H OS G25 P150811 220811-s1.06980.06980.3.dta

scan 6980; 1.2e+000

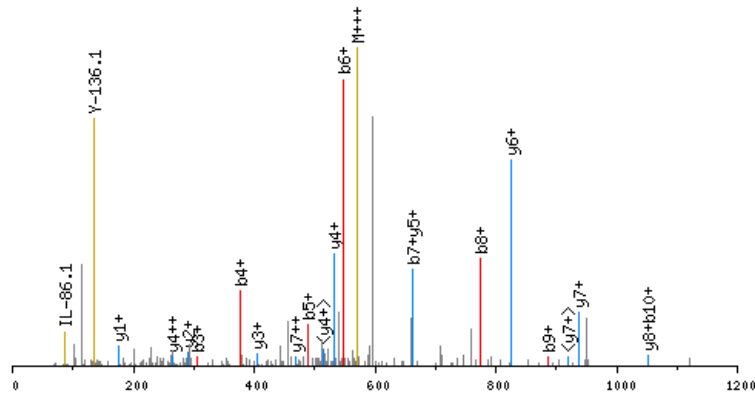

click image to zoom in; click top corners to zoom out [\[precursor±\]](#)

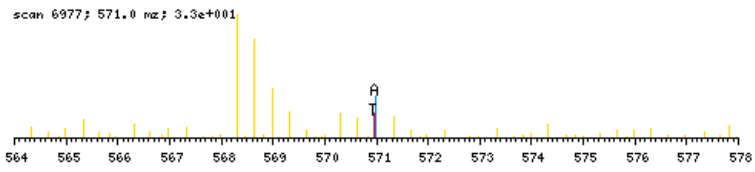

zoomed in precursor plot; T=theoretical m/z, A=acquired m/z

X-range:

-

MassTol: Y-zoom:

MassType:

AVG  MONO

Axis:

1  2

Label:

I  M  -

Ions:

a  +  2+  3+

b  +  2+  3+

c  +  2+  3+

x  +  2+  3+

y  +  2+  3+

z  +  2+  3+

hide H<sub>2</sub>O/NH<sub>3</sub>

zoom 112-122

GO

| b <sup>+</sup> | #  | AA | #  | y <sup>+</sup> | y <sup>2+</sup> |
|----------------|----|----|----|----------------|-----------------|
| 92.0924        | 1  | G  | 15 |                |                 |
| 191.1608       | 2  | V  | 14 | 1619.8029      | 810.4054        |
| 306.1877       | 3  | D  | 13 | 1520.7345      | 760.8712        |
| 377.2248       | 4  | A  | 12 | 1405.7076      | 703.3577        |
| 490.3089       | 5  | L  | 11 | 1334.6705      | 667.8391        |
| 547.3304       | 6  | G  | 10 | 1221.5864      | 611.2971        |
| 660.4144       | 7  | L  | 9  | 1164.5649      | 582.7864        |
| 774.4574       | 8  | N  | 8  | 1051.4809      | 526.2443        |
| 887.5414       | 9  | I  | 7  | 937.4379       | 469.2229        |
| 1050.6047      | 10 | Y  | 6  | 824.3539       | 412.6808        |
| 1179.6473      | 11 | E  | 5  | 661.2905       | 331.1492        |
| 1307.7059      | 12 | Q  | 4  | 532.2479       | 266.6279        |
| 1421.7488      | 13 | N  | 3  | 404.1894       | 202.5986        |
| 1536.7758      | 14 | D  | 2  | 290.1464       | 145.5771        |
|                | 15 | R  | 1  | 175.1195       | 88.0637         |

N-term:+35.07

GVDEATIIDILTKR, MH+ 1599.9322, m/z 533.9822  
 L OS G26 P150811 220811-s1.06901.06901.3.dta

X-range:

-

MassTol: Y-zoom:

MassType:

AVG  MONO

Axis:

1  2

Label:

I  M  -

Ions:

a  +  2+  3+

b  +  2+  3+

c  +  2+  3+

x  +  2+  3+

y  +  2+  3+

z  +  2+  3+

hide H<sub>2</sub>O/NH<sub>3</sub>

zoom 112-122

GO

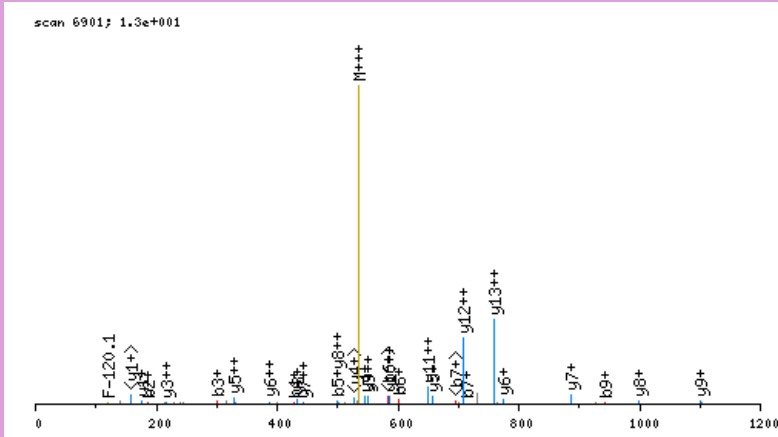

click image to zoom in; click top corners to zoom out [\[precursor±\]](#)

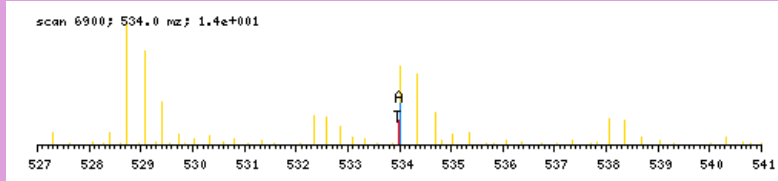

zoomed in precursor plot; T=theoretical m/z, A=acquired m/z

| b <sup>+</sup> | #  | AA # | y <sup>+</sup> | y <sup>2+</sup> |
|----------------|----|------|----------------|-----------------|
| 86.0606        | 1  | G 14 |                |                 |
| 185.1290       | 2  | V 13 | 1514.8794      | 757.9436        |
| 300.1559       | 3  | D 12 | 1415.8110      | 708.4094        |
| 429.1985       | 4  | E 11 | 1300.7841      | 650.8959        |
| 500.2356       | 5  | A 10 | 1171.7415      | 586.3746        |
| 601.2833       | 6  | T 9  | 1100.7044      | 550.8561        |
| 714.3674       | 7  | I 8  | 999.6567       | 500.3323        |
| 827.4514       | 8  | I 7  | 886.5726       | 443.7902        |
| 942.4784       | 9  | D 6  | 773.4886       | 387.2482        |
| 1055.5624      | 10 | I 5  | 658.4616       | 329.7347        |
| 1168.6465      | 11 | L 4  | 545.3775       | 273.1927        |
| 1269.6942      | 12 | T 3  | 432.2935       | 216.6507        |
| 1425.8205      | 13 | K 2  | 331.2458       | 166.1268        |
|                | 14 | R 1  | 175.1195       | 88.0637         |

N-term:+29.04 K(13):+156.13

GVEEHETLLLR, MH+ 1329.7590, m/z 443.9245  
 H OS G27 P150811 220811-s1.04405.04405.3.dta

scan 4405; 1.1e+001

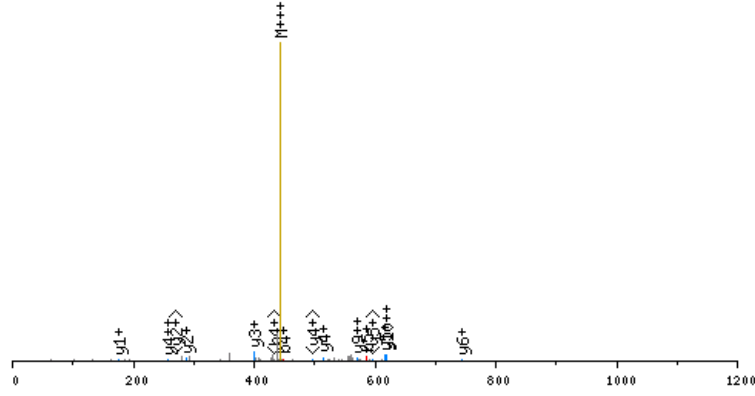

click image to zoom in; click top corners to zoom out [\[precursor±\]](#)

scan 4402; 443.9 m/z; 1.0e+001

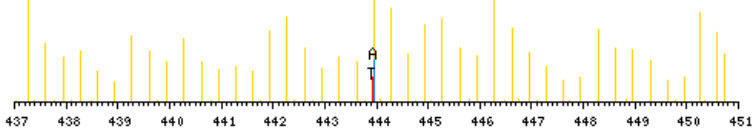

zoomed in precursor plot; T=theoretical m/z, A=acquired m/z

X-range:

-

MassTol: Y-zoom:

MassType:

AVG  MONO

Axis:

1  2

Label:

I  M  -

Ions:

a  +  2+  3+

b  +  2+  3+

c  +  2+  3+

x  +  2+  3+

y  +  2+  3+

z  +  2+  3+

hide H<sub>2</sub>O/NH<sub>3</sub>

zoom 112-122

GO

| b <sup>+</sup> | #  | AA # | y <sup>+</sup> | y <sup>2+</sup> |
|----------------|----|------|----------------|-----------------|
| 92.0924        | 1  | G 11 |                |                 |
| 191.1608       | 2  | V 10 | 1238.6745      | 619.8412        |
| 320.2034       | 3  | E 9  | 1139.6061      | 570.3069        |
| 449.2460       | 4  | E 8  | 1010.5635      | 505.7856        |
| 586.3049       | 5  | H 7  | 881.5209       | 441.2644        |
| 715.3475       | 6  | E 6  | 744.4620       | 372.7349        |
| 816.3951       | 7  | T 5  | 615.4194       | 308.2136        |
| 929.4792       | 8  | L 4  | 514.3717       | 257.6898        |
| 1042.5633      | 9  | L 3  | 401.2876       | 201.1477        |
| 1155.6473      | 10 | L 2  | 288.2036       | 144.6057        |
|                | 11 | R 1  | 175.1195       | 88.0637         |

N-term:+35.07

GVEIETISPGDGR, MH+ 1357.6963, m/z 453.2370  
 L OS G25 P150811 220811-s1.04691.04691.3.dta

X-range:

-

MassTol: Y-zoom:

MassType:

AVG  MONO

Axis:

1  2

Label:

I  M  -

Ions:

a  +  2+  3+

b  +  2+  3+

c  +  2+  3+

x  +  2+  3+

y  +  2+  3+

z  +  2+  3+

hide H<sub>2</sub>O/NH<sub>3</sub>

zoom 112-122

GO

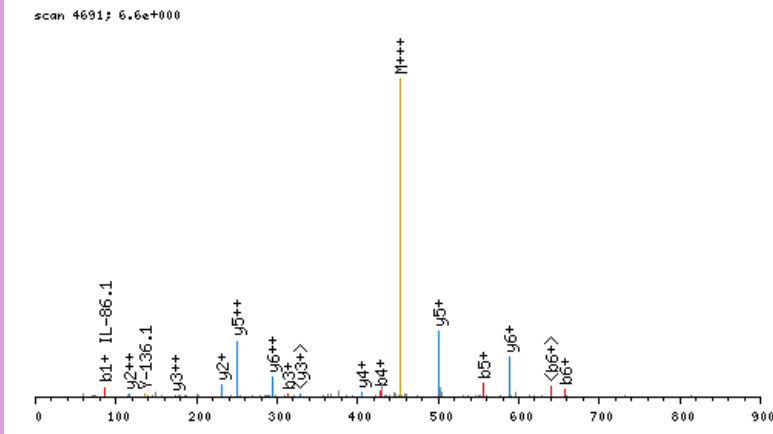

click image to zoom in; click top corners to zoom out [\[precursor±\]](#)

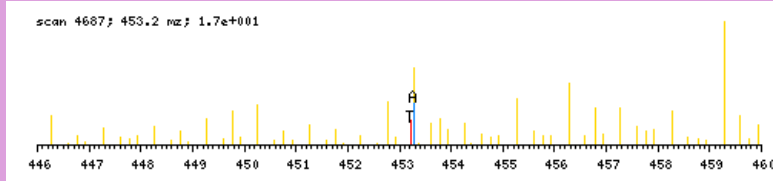

zoomed in precursor plot; T=theoretical m/z, A=acquired m/z

| b <sup>+</sup> | #  | AA # | y <sup>+</sup> | y <sup>2+</sup> |
|----------------|----|------|----------------|-----------------|
| 86.0606        | 1  | G 13 |                |                 |
| 185.1290       | 2  | V 12 | 1272.6436      | 636.8257        |
| 314.1716       | 3  | E 11 | 1173.5752      | 587.2915        |
| 427.2556       | 4  | I 10 | 1044.5326      | 522.7702        |
| 556.2982       | 5  | E 9  | 931.4485       | 466.2282        |
| 657.3459       | 6  | T 8  | 802.4059       | 401.7069        |
| 770.4300       | 7  | I 7  | 701.3582       | 351.1830        |
| 857.4620       | 8  | S 6  | 588.2742       | 294.6410        |
| 954.5148       | 9  | P 5  | 501.2421       | 251.1250        |
| 1011.5362      | 10 | G 4  | 404.1894       | 202.5986        |
| 1126.5632      | 11 | D 3  | 347.1679       | 174.0879        |
| 1183.5846      | 12 | G 2  | 232.1410       | 116.5744        |
|                | 13 | R 1  | 175.1195       | 88.0637         |

N-term:+29.04

GVEPSPSPIKPGDIKR, MH+ 1761.0275, m/z 441.0123  
 L OS G28 P150811 220811-s1.03695.03695.4.dta

X-range:

-

MassTol: Y-zoom:

MassType:

AVG  MONO

Axis:

1  2

Label:

I  M  -

Ions:

a  +  2+  3+

b  +  2+  3+

c  +  2+  3+

x  +  2+  3+

y  +  2+  3+

z  +  2+  3+

hide H<sub>2</sub>O/NH<sub>3</sub>

zoom 112-122

GO

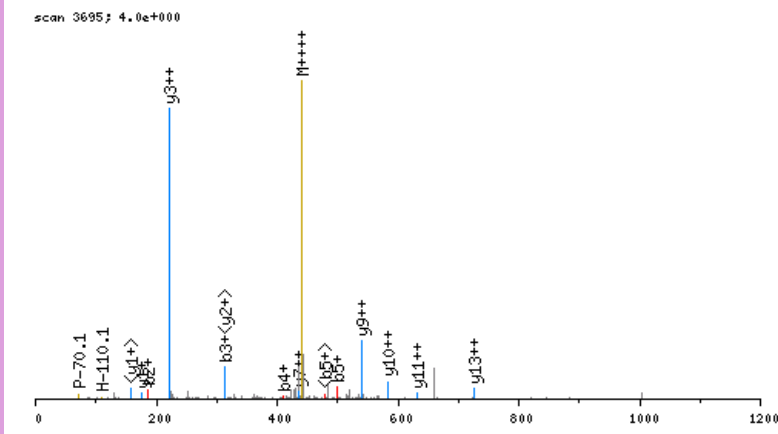

click image to zoom in; click top corners to zoom out [\[precursor±\]](#)

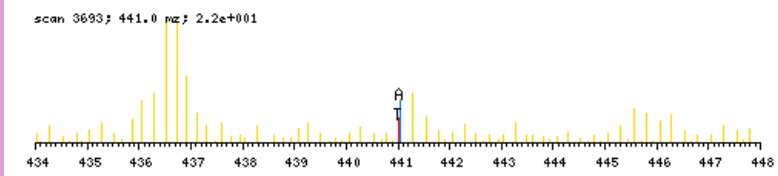

zoomed in precursor plot; T=theoretical m/z, A=acquired m/z

| b <sup>+</sup> | #  | AA # | y <sup>+</sup> | y <sup>2+</sup> |
|----------------|----|------|----------------|-----------------|
| 86.0606        | 1  | G 16 |                |                 |
| 185.1290       | 2  | V 15 | 1675.9748      | 838.4913        |
| 314.1716       | 3  | E 14 | 1576.9063      | 788.9571        |
| 411.2243       | 4  | P 13 | 1447.8637      | 724.4358        |
| 498.2564       | 5  | S 12 | 1350.8110      | 675.9094        |
| 595.3091       | 6  | P 11 | 1263.7790      | 632.3934        |
| 682.3412       | 7  | S 10 | 1166.7262      | 583.8670        |
| 779.3939       | 8  | P 9  | 1079.6942      | 540.3510        |
| 892.4780       | 9  | I 8  | 982.6414       | 491.8246        |
| 1048.6043      | 10 | K 7  | 869.5573       | 435.2826        |
| 1145.6570      | 11 | P 6  | 713.4310       | 357.2194        |
| 1202.6785      | 12 | G 5  | 616.3783       | 308.6930        |
| 1317.7055      | 13 | D 4  | 559.3568       | 280.1823        |
| 1430.7895      | 14 | I 3  | 444.3299       | 222.6688        |
| 1586.9158      | 15 | K 2  | 331.2458       | 166.1268        |
|                | 16 | R 1  | 175.1195       | 88.0637         |

N-term:+29.04 K(10):+156.13  
 K(15):+156.13

GVGFEAGISKNGQTR, MH+ 1717.9509, m/z 573.3218  
 H OS G27 P150811 220811-s1.03810.03810.3.dta

X-range:

-

MassTol: Y-zoom:

MassType:

AVG  MONO

Axis:

1  2

Label:

I  M  -

Ions:

a  +  2+  3+

b  +  2+  3+

c  +  2+  3+

x  +  2+  3+

y  +  2+  3+

z  +  2+  3+

hide H<sub>2</sub>O/NH<sub>3</sub>

zoom 112-122

GO

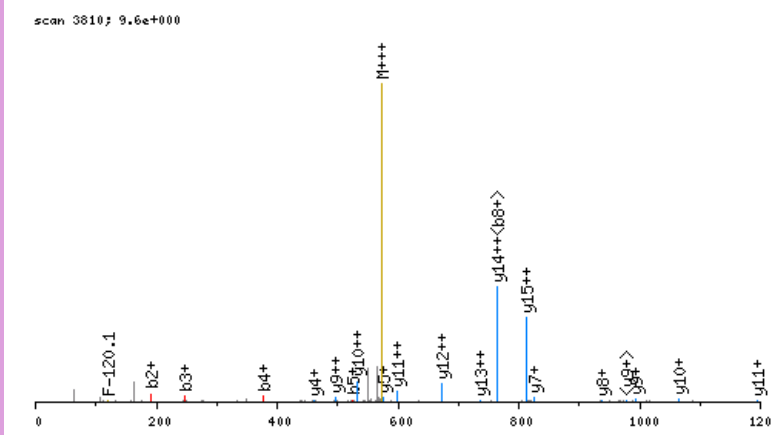

click image to zoom in; click top corners to zoom out [\[precursor±\]](#)

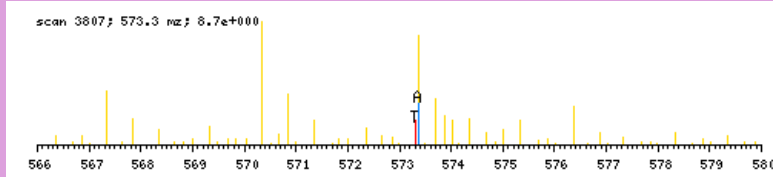

zoomed in precursor plot; T=theoretical m/z, A=acquired m/z

| b <sup>+</sup> | #  | AA # | y <sup>+</sup> | y <sup>2+</sup> |
|----------------|----|------|----------------|-----------------|
| 92.0924        | 1  | G 16 |                |                 |
| 191.1608       | 2  | V 15 | 1626.8664      | 813.9371        |
| 248.1822       | 3  | G 14 | 1527.7980      | 764.4029        |
| 377.2248       | 4  | E 13 | 1470.7765      | 735.8922        |
| 524.2932       | 5  | F 12 | 1341.7339      | 671.3709        |
| 653.3358       | 6  | E 11 | 1194.6655      | 597.8367        |
| 724.3730       | 7  | A 10 | 1065.6229      | 533.3154        |
| 781.3944       | 8  | G 9  | 994.5858       | 497.7968        |
| 894.4785       | 9  | I 8  | 937.5643       | 469.2861        |
| 981.5105       | 10 | S 7  | 824.4803       | 412.7441        |
| 1143.6686      | 11 | K 6  | 737.4482       | 369.2280        |
| 1257.7115      | 12 | N 5  | 575.2901       | 288.1490        |
| 1314.7330      | 13 | G 4  | 461.2472       | 231.1275        |
| 1442.7916      | 14 | Q 3  | 404.2258       | 202.6168        |
| 1543.8393      | 15 | T 2  | 276.1672       | 138.5875        |
|                | 16 | R 1  | 175.1195       | 88.0637         |

N-term:+35.07 K(11):+162.16



GVGPDGHTCSLFPDHPDLLQER, MH+ 2360.1457, m/z 590.7919  
 L OS G28 P150811 220811-s1.07222.07222.4.dta

scan 7222; 1.2e+000

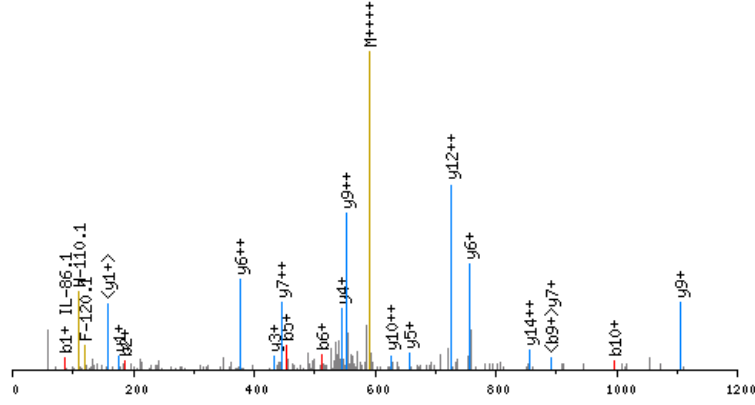

click image to zoom in; click top corners to zoom out [precursor±]

scan 7218; 590.8 mz; 6.3e+000

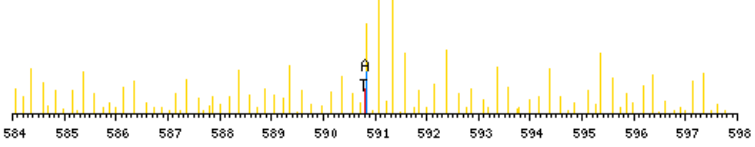

zoomed in precursor plot; T=theoretical m/z, A=acquired m/z

| b <sup>+</sup> | #  | AA | #  | y <sup>+</sup> | y <sup>2+</sup> |
|----------------|----|----|----|----------------|-----------------|
| 86.0606        | 1  | G  | 21 |                |                 |
| 185.1290       | 2  | V  | 20 | 2275.0929      | 1138.0504       |
| 242.1504       | 3  | G  | 19 | 2176.0245      | 1088.5162       |
| 339.2032       | 4  | P  | 18 | 2119.0030      | 1060.0054       |
| 454.2301       | 5  | D  | 17 | 2021.9503      | 1011.4791       |
| 511.2516       | 6  | G  | 16 | 1906.9233      | 953.9656        |
| 648.3105       | 7  | H  | 15 | 1849.9019      | 925.4549        |
| 749.3582       | 8  | T  | 14 | 1712.8430      | 856.9254        |
| 909.3888       | 9  | C  | 13 | 1611.7953      | 806.4016        |
| 996.4208       | 10 | S  | 12 | 1451.7647      | 726.3863        |
| 1109.5049      | 11 | L  | 11 | 1364.7327      | 682.8702        |
| 1256.5733      | 12 | F  | 10 | 1251.6486      | 626.3282        |
| 1353.6261      | 13 | P  | 9  | 1104.5802      | 552.7940        |
| 1468.6530      | 14 | D  | 8  | 1007.5274      | 504.2676        |
| 1605.7119      | 15 | H  | 7  | 892.5005       | 446.7542        |
| 1702.7647      | 16 | P  | 6  | 755.4416       | 378.2247        |
| 1815.8488      | 17 | L  | 5  | 658.3888       | 329.6983        |
| 1928.9328      | 18 | L  | 4  | 545.3047       | 273.1563        |
| 2056.9914      | 19 | Q  | 3  | 432.2207       | 216.6142        |
| 2186.0340      | 20 | E  | 2  | 304.1621       | 152.5850        |
|                | 21 | R  | 1  | 175.1195       | 88.0637         |

N-term:+29.04 C(9):+160.03

X-range:

-

MassTol: Y-zoom:

MassType:

AVG  MONO

Axis:

1  2

Label:

I  M  -

Ions:

a  +  2+  3+

b  +  2+  3+

c  +  2+  3+

x  +  2+  3+

y  +  2+  3+

z  +  2+  3+

hide H<sub>2</sub>O/NH<sub>3</sub>

zoom 112-122

GO

GVMVGMGQKDSYVGDEAQSQR, MH+ 2326.1536, m/z 582.2939  
 L OS G28 P150811 220811-s1.04225.04225.4.dta

X-range:

-

MassTol: Y-zoom:

MassType:

AVG  MONO

Axis:

1  2

Label:

I  M  -

Ions:

a  +  2+  3+

b  +  2+  3+

c  +  2+  3+

x  +  2+  3+

y  +  2+  3+

z  +  2+  3+

hide H<sub>2</sub>O/NH<sub>3</sub>

zoom 112-122

GO

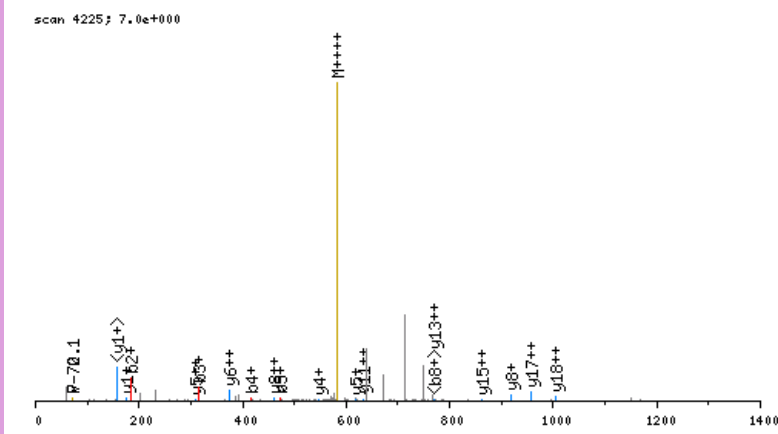

click image to zoom in; click top corners to zoom out [precursor±]

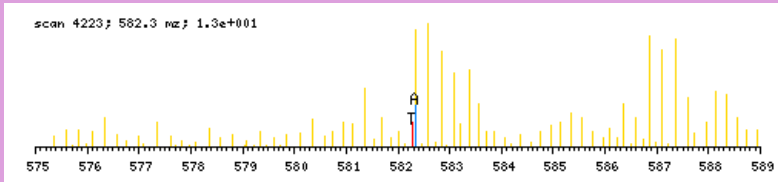

zoomed in precursor plot; T=theoretical m/z, A=acquired m/z

| b <sup>+</sup> | #  | AA | #  | y <sup>+</sup> | y <sup>2+</sup> |
|----------------|----|----|----|----------------|-----------------|
| 86.0606        | 1  | G  | 21 |                |                 |
| 185.1290       | 2  | V  | 20 | 2241.1008      | 1121.0543       |
| 316.1695       | 3  | M  | 19 | 2142.0324      | 1071.5201       |
| 415.2379       | 4  | V  | 18 | 2010.9919      | 1005.9999       |
| 472.2593       | 5  | G  | 17 | 1911.9235      | 956.4657        |
| 603.2998       | 6  | M  | 16 | 1854.9021      | 927.9549        |
| 660.3213       | 7  | G  | 15 | 1723.8616      | 862.4347        |
| 788.3799       | 8  | Q  | 14 | 1666.8401      | 833.9240        |
| 944.5062       | 9  | K  | 13 | 1538.7815      | 769.8947        |
| 1059.5331      | 10 | D  | 12 | 1382.6552      | 691.8315        |
| 1146.5651      | 11 | S  | 11 | 1267.6283      | 634.3181        |
| 1309.6285      | 12 | Y  | 10 | 1180.5963      | 590.8020        |
| 1408.6969      | 13 | V  | 9  | 1017.5329      | 509.2704        |
| 1465.7183      | 14 | G  | 8  | 918.4645       | 459.7362        |
| 1580.7453      | 15 | D  | 7  | 861.4431       | 431.2254        |
| 1709.7879      | 16 | E  | 6  | 746.4161       | 373.7120        |
| 1780.8250      | 17 | A  | 5  | 617.3735       | 309.1907        |
| 1908.8836      | 18 | Q  | 4  | 546.3364       | 273.6721        |
| 1995.9156      | 19 | S  | 3  | 418.2778       | 209.6428        |
| 2152.0419      | 20 | K  | 2  | 331.2458       | 166.1268        |
|                | 21 | R  | 1  | 175.1195       | 88.0637         |

N-term:+29.04 K(9):+156.13  
 K(20):+156.13

GVPVEITEKQTR, MH+ 1412.8113, m/z 471.6086  
 L OS G26 P150811 220811-s1.02708.02708.3.dta

X-range:

-

MassTol: Y-zoom:

MassType:

AVG  MONO

Axis:

1  2

Label:

I  M  -

Ions:

a  +  2+  3+

b  +  2+  3+

c  +  2+  3+

x  +  2+  3+

y  +  2+  3+

z  +  2+  3+

hide H<sub>2</sub>O/NH<sub>3</sub>

zoom 112-122

GO

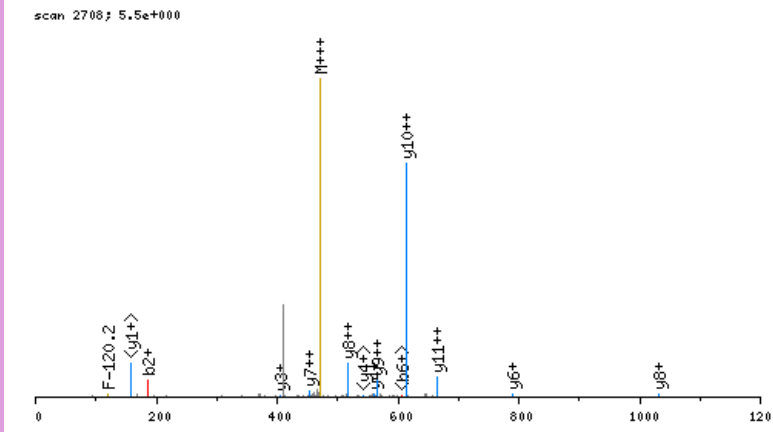

click image to zoom in; click top corners to zoom out [\[precursor±\]](#)

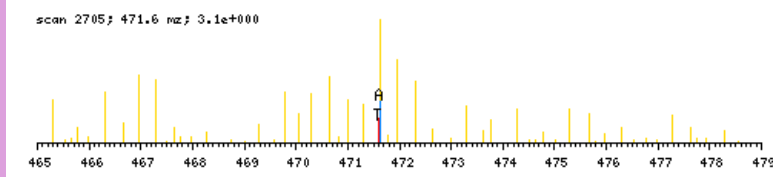

zoomed in precursor plot; T=theoretical m/z, A=acquired m/z

| b <sup>+</sup> | #  | AA # | y <sup>+</sup> | y <sup>2+</sup> |
|----------------|----|------|----------------|-----------------|
| 86.0606        | 1  | G 12 |                |                 |
| 185.1290       | 2  | V 11 | 1327.7586      | 664.3832        |
| 282.1817       | 3  | P 10 | 1228.6902      | 614.8490        |
| 381.2502       | 4  | V 9  | 1131.6374      | 566.3226        |
| 510.2927       | 5  | E 8  | 1032.5690      | 516.7884        |
| 623.3768       | 6  | I 7  | 903.5264       | 452.2671        |
| 724.4245       | 7  | T 6  | 790.4423       | 395.7251        |
| 853.4671       | 8  | E 5  | 689.3946       | 345.2012        |
| 1009.5934      | 9  | K 4  | 560.3521       | 280.6799        |
| 1137.6520      | 10 | Q 3  | 404.2258       | 202.6168        |
| 1238.6996      | 11 | T 2  | 276.1672       | 138.5875        |
|                | 12 | R 1  | 175.1195       | 88.0637         |

N-term:+29.04 K(9):+156.13

GVQPPNFSWVLPGR, MH+ 1587.8859, m/z 529.9668  
 H OS G25 P150811 220811-s1.08116.08116.3.dta

X-range:

-

MassTol: Y-zoom:

MassType:

AVG  MONO

Axis:

1  2

Label:

I  M  -

Ions:

a  +  2+  3+

b  +  2+  3+

c  +  2+  3+

x  +  2+  3+

y  +  2+  3+

z  +  2+  3+

hide H<sub>2</sub>O/NH<sub>3</sub>

zoom 112-122

GO

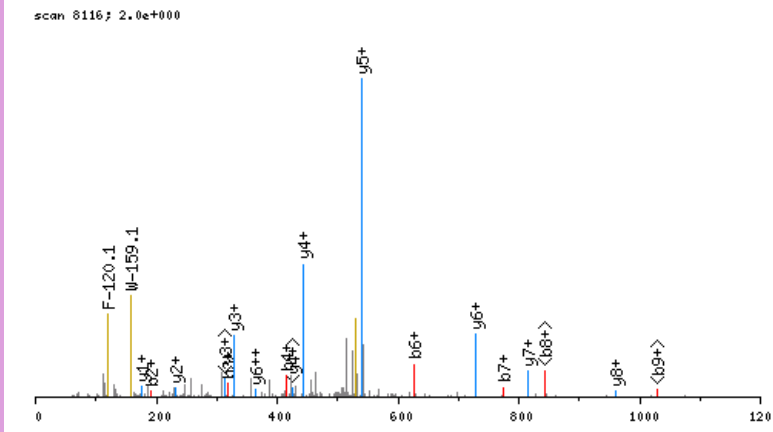

click image to zoom in; click top corners to zoom out [\[precursor±\]](#)

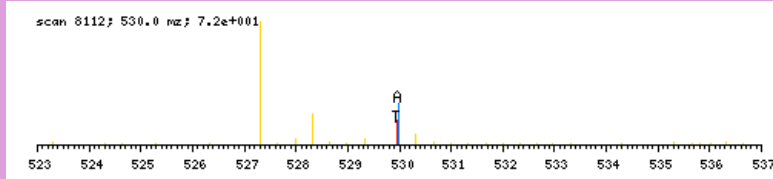

zoomed in precursor plot; T=theoretical m/z, A=acquired m/z

| b <sup>+</sup> | #  | AA | #  | y <sup>+</sup> | y <sup>2+</sup> |
|----------------|----|----|----|----------------|-----------------|
| 92.0924        | 1  | G  | 14 |                |                 |
| 191.1608       | 2  | V  | 13 | 1496.8014      | 748.9046        |
| 319.2194       | 3  | Q  | 12 | 1397.7330      | 699.3704        |
| 416.2721       | 4  | P  | 11 | 1269.6744      | 635.3411        |
| 513.3249       | 5  | P  | 10 | 1172.6217      | 586.8147        |
| 627.3678       | 6  | N  | 9  | 1075.5689      | 538.2884        |
| 774.4362       | 7  | F  | 8  | 961.5260       | 481.2669        |
| 861.4683       | 8  | S  | 7  | 814.4575       | 407.7327        |
| 1047.5476      | 9  | W  | 6  | 727.4255       | 364.2167        |
| 1146.6160      | 10 | V  | 5  | 541.3462       | 271.1770        |
| 1259.7000      | 11 | L  | 4  | 442.2778       | 221.6428        |
| 1356.7528      | 12 | P  | 3  | 329.1937       | 165.1008        |
| 1413.7743      | 13 | G  | 2  | 232.1410       | 116.5744        |
|                | 14 | R  | 1  | 175.1195       | 88.0637         |

N-term:+35.07

GVQIGVNVQAGKETQR, MH+ 1640.9356, m/z 547.6501  
 H OS G27 P150811 220811-s1.01953.01953.3.dta

X-range:

-

MassTol: Y-zoom:

MassType:

AVG  MONO

Axis:

1  2

Label:

I  M  -

Ions:

a  +  2+  3+

b  +  2+  3+

c  +  2+  3+

x  +  2+  3+

y  +  2+  3+

z  +  2+  3+

hide H<sub>2</sub>O/NH<sub>3</sub>

zoom 112-122

GO

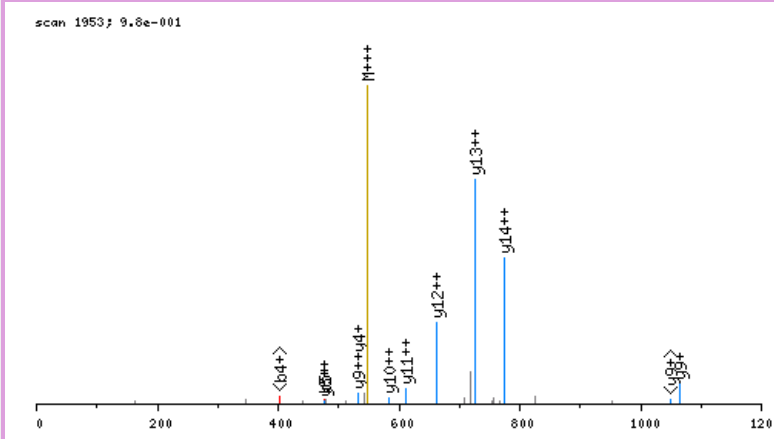

click image to zoom in; click top corners to zoom out [\[precursor±\]](#)

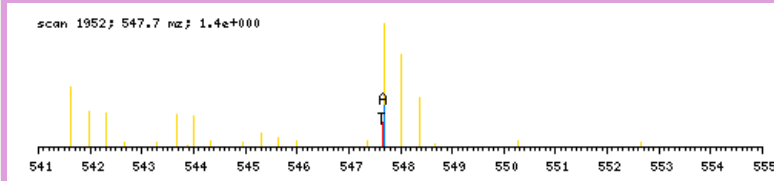

zoomed in precursor plot; T=theoretical m/z, A=acquired m/z

| b <sup>+</sup> | #  | AA # | y <sup>+</sup> | y <sup>2+</sup> |
|----------------|----|------|----------------|-----------------|
| 92.0924        | 1  | G 15 |                |                 |
| 191.1608       | 2  | V 14 | 1549.8511      | 775.4295        |
| 319.2194       | 3  | Q 13 | 1450.7827      | 725.8952        |
| 420.2670       | 4  | T 12 | 1322.7241      | 661.8660        |
| 477.2885       | 5  | G 11 | 1221.6764      | 611.3421        |
| 576.3569       | 6  | V 10 | 1164.6549      | 582.8314        |
| 690.3998       | 7  | N 9  | 1065.5865      | 533.2972        |
| 818.4584       | 8  | Q 8  | 951.5436       | 476.2757        |
| 889.4955       | 9  | A 7  | 823.4850       | 412.2464        |
| 946.5170       | 10 | G 6  | 752.4479       | 376.7279        |
| 1108.6751      | 11 | K 5  | 695.4264       | 348.2171        |
| 1237.7177      | 12 | E 4  | 533.2683       | 267.1381        |
| 1338.7654      | 13 | T 3  | 404.2258       | 202.6168        |
| 1466.8239      | 14 | Q 2  | 303.1781       | 152.0930        |
|                | 15 | R 1  | 175.1195       | 88.0637         |

N-term:+35.07 K(11):+162.16

GVQVETISPGDGR, MH+ 1348.7284, m/z 674.8679  
 H OS G25 P150811 220811-s1.03729.03729.2.dta

scan 3729; 6.5e+000

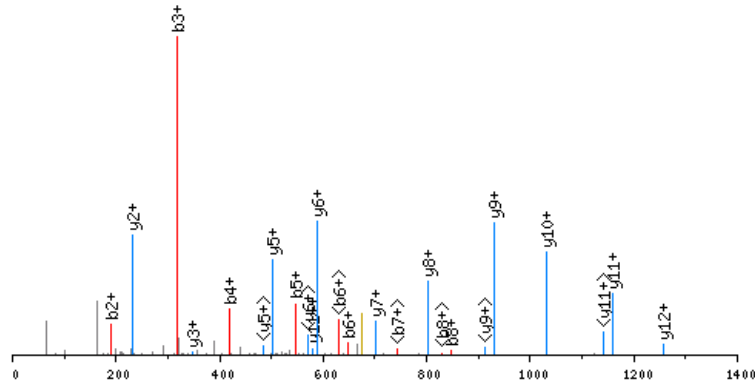

click image to zoom in; click top corners to zoom out [precursor±]

scan 3727; 674.9 m/z; 4.1e+002

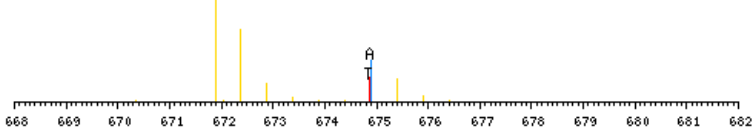

zoomed in precursor plot; T=theoretical m/z, A=acquired m/z

X-range:

-

MassTol: Y-zoom:

MassType:

AVG  MONO

Axis:

1  2

Label:

I  M  -

Ions:

a  +  2+  3+

b  +  2+  3+

c  +  2+  3+

x  +  2+  3+

y  +  2+  3+

z  +  2+  3+

hide H<sub>2</sub>O/NH<sub>3</sub>

zoom 112-122

GO

| b <sup>+</sup> | #  | AA # | y <sup>+</sup> | y <sup>2+</sup> |
|----------------|----|------|----------------|-----------------|
| 92.0924        | 1  | G 13 |                |                 |
| 191.1608       | 2  | V 12 | 1257.6439      | 629.3259        |
| 319.2194       | 3  | Q 11 | 1158.5755      | 579.7917        |
| 418.2878       | 4  | V 10 | 1030.5169      | 515.7624        |
| 547.3304       | 5  | E 9  | 931.4485       | 466.2282        |
| 648.3780       | 6  | T 8  | 802.4059       | 401.7069        |
| 761.4621       | 7  | I 7  | 701.3582       | 351.1830        |
| 848.4941       | 8  | S 6  | 588.2742       | 294.6410        |
| 945.5469       | 9  | P 5  | 501.2421       | 251.1250        |
| 1002.5684      | 10 | G 4  | 404.1894       | 202.5986        |
| 1117.5953      | 11 | D 3  | 347.1679       | 174.0879        |
| 1174.6168      | 12 | G 2  | 232.1410       | 116.5744        |
|                | 13 | R 1  | 175.1195       | 88.0637         |

N-term:+35.07

GVSDGSEVAKAQAAPGGASPTIFSR, MH+ 2590.4689, m/z 648.3727  
 H\_OS\_G27\_P150811\_220811-s1.04795.04795.4.dta

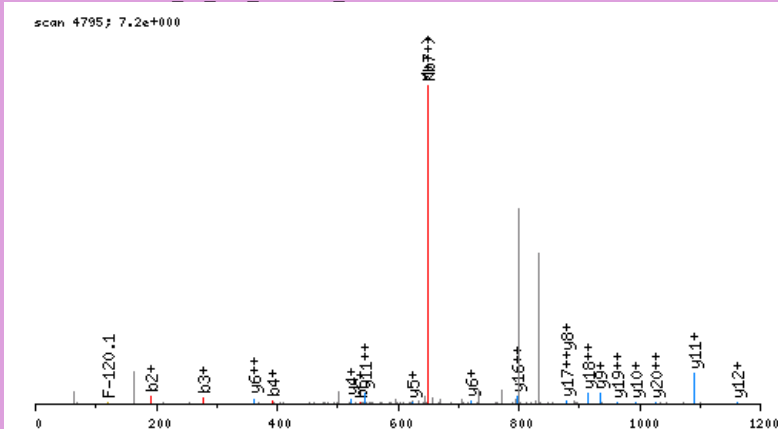

click image to zoom in; click top corners to zoom out [\[precursor±\]](#)

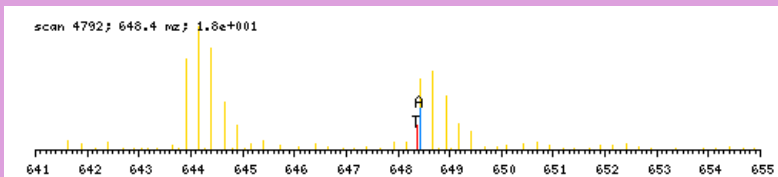

zoomed in precursor plot; T=theoretical m/z, A=acquired m/z

X-range:

-

MassTol: Y-zoom:

MassType:

AVG  MONO

Axis:

1  2

Label:

I  M  -

Ions:

a  +  2+  3+

b  +  2+  3+

c  +  2+  3+

x  +  2+  3+

y  +  2+  3+

z  +  2+  3+

hide H<sub>2</sub>O/NH<sub>3</sub>

zoom 112-122

GO

| b <sup>+</sup> | #  | AA | #  | y <sup>+</sup> | y <sup>2+</sup> |
|----------------|----|----|----|----------------|-----------------|
| 92.0924        | 1  | G  | 26 |                |                 |
| 191.1608       | 2  | V  | 25 | 2499.3844      | 1250.1961       |
| 278.1928       | 3  | S  | 24 | 2400.3160      | 1200.6619       |
| 393.2197       | 4  | D  | 23 | 2313.2840      | 1157.1459       |
| 450.2412       | 5  | G  | 22 | 2198.2570      | 1099.6324       |
| 537.2732       | 6  | S  | 21 | 2141.2356      | 1071.1217       |
| 666.3158       | 7  | E  | 20 | 2054.2035      | 1027.6057       |
| 765.3842       | 8  | V  | 19 | 1925.1609      | 963.0844        |
| 836.4214       | 9  | A  | 18 | 1826.0925      | 913.5502        |
| 998.5795       | 10 | K  | 17 | 1755.0554      | 878.0316        |
| 1069.6166      | 11 | A  | 16 | 1592.8973      | 796.9526        |
| 1197.6752      | 12 | Q  | 15 | 1521.8602      | 761.4340        |
| 1359.8333      | 13 | K  | 14 | 1393.8016      | 697.4047        |
| 1430.8704      | 14 | A  | 13 | 1231.6435      | 616.3257        |
| 1501.9075      | 15 | A  | 12 | 1160.6064      | 580.8071        |
| 1598.9602      | 16 | P  | 11 | 1089.5693      | 545.2886        |
| 1655.9817      | 17 | G  | 10 | 992.5165       | 496.7622        |
| 1713.0032      | 18 | G  | 9  | 935.4951       | 468.2514        |
| 1784.0403      | 19 | A  | 8  | 878.4736       | 439.7407        |
| 1871.0723      | 20 | S  | 7  | 807.4365       | 404.2222        |
| 1968.1251      | 21 | P  | 6  | 720.4044       | 360.7061        |
| 2069.1728      | 22 | T  | 5  | 623.3517       | 312.1798        |
| 2182.2568      | 23 | I  | 4  | 522.3040       | 261.6559        |
| 2329.3252      | 24 | F  | 3  | 409.2199       | 205.1139        |
| 2416.3573      | 25 | S  | 2  | 262.1515       | 131.5797        |
|                | 26 | R  | 1  | 175.1195       | 88.0637         |

N-term: +35.07 K(10): +162.16  
 K(13): +162.16

GVSQAGEEME QFGQGV R, MH+ 1836.8550, m/z 612.9565  
 L OS G25 P150811 220811-s1.05764.05764.3.dta

X-range:

-

MassTol: Y-zoom:

MassType:

AVG  MONO

Axis:

1  2

Label:

I  M  -

Ions:

a  +  2+  3+

b  +  2+  3+

c  +  2+  3+

x  +  2+  3+

y  +  2+  3+

z  +  2+  3+

hide H<sub>2</sub>O/NH<sub>3</sub>

zoom 112-122

GO

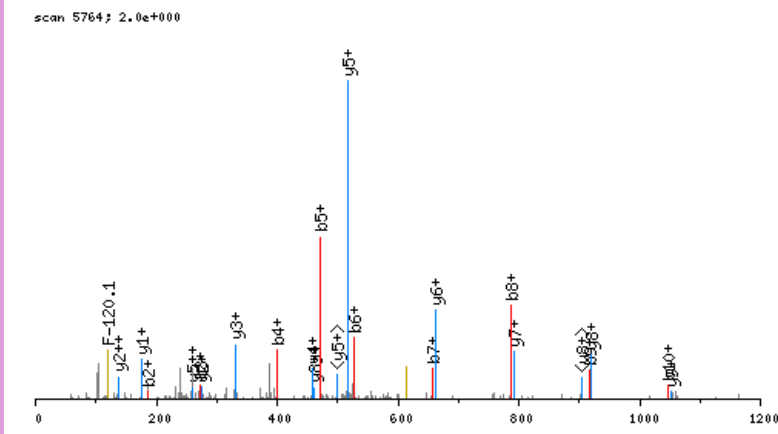

click image to zoom in; click top corners to zoom out [\[precursor±\]](#)

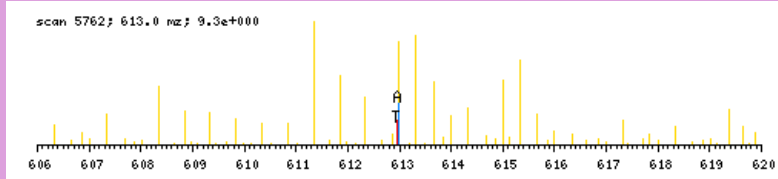

zoomed in precursor plot; T=theoretical m/z, A=acquired m/z

| b <sup>+</sup> | #  | AA # | y <sup>+</sup> | y <sup>2+</sup> |
|----------------|----|------|----------------|-----------------|
| 86.0606        | 1  | G 17 |                |                 |
| 185.1290       | 2  | V 16 | 1751.8023      | 876.4050        |
| 272.1610       | 3  | S 15 | 1652.7339      | 826.8708        |
| 400.2196       | 4  | Q 14 | 1565.7018      | 783.3548        |
| 471.2567       | 5  | A 13 | 1437.6433      | 719.3255        |
| 528.2782       | 6  | G 12 | 1366.6061      | 683.8070        |
| 657.3208       | 7  | E 11 | 1309.5847      | 655.2963        |
| 786.3633       | 8  | E 10 | 1180.5421      | 590.7750        |
| 917.4038       | 9  | M 9  | 1051.4995      | 526.2537        |
| 1046.4464      | 10 | E 8  | 920.4590       | 460.7334        |
| 1174.5050      | 11 | Q 7  | 791.4164       | 396.2121        |
| 1321.5734      | 12 | F 6  | 663.3578       | 332.1828        |
| 1378.5949      | 13 | G 5  | 516.2894       | 258.6486        |
| 1506.6535      | 14 | Q 4  | 459.2680       | 230.1379        |
| 1563.6749      | 15 | G 3  | 331.2094       | 166.1086        |
| 1662.7433      | 16 | V 2  | 274.1879       | 137.5979        |
|                | 17 | R 1  | 175.1195       | 88.0637         |

N-term:+29.04



GVSSGPGMGLMGP, MH+ 1433.7457, m/z 717.3765  
 H OS G25 P150811 220811-s1.05649.05649.2.dta

X-range:

-

MassTol: Y-zoom:

MassType:

AVG  MONO

Axis:

1  2

Label:

I  M  -

Ions:

a  +  2+  3+

b  +  2+  3+

c  +  2+  3+

x  +  2+  3+

y  +  2+  3+

z  +  2+  3+

hide H<sub>2</sub>O/NH<sub>3</sub>

zoom 112-122

GO

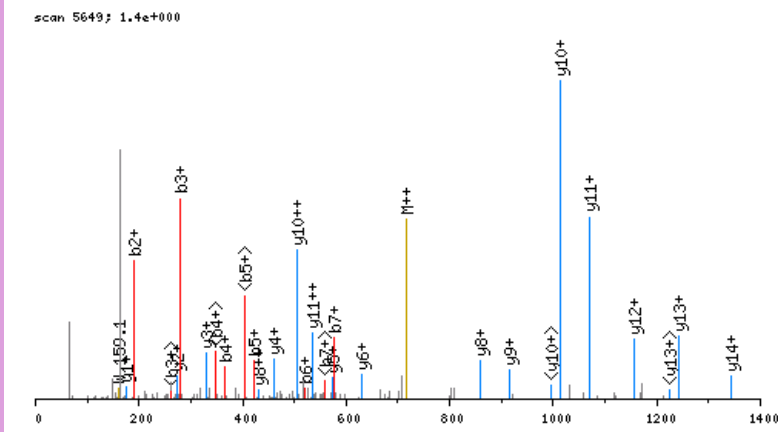

click image to zoom in; click top corners to zoom out [\[precursor±\]](#)

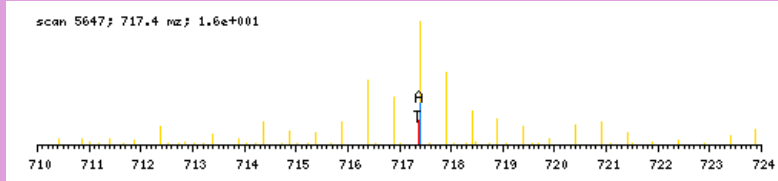

zoomed in precursor plot; T=theoretical m/z, A=acquired m/z

| b <sup>+</sup> | #  | AA # | y <sup>+</sup> | y <sup>2+</sup> |
|----------------|----|------|----------------|-----------------|
| 92.0924        | 1  | G    | 15             |                 |
| 191.1608       | 2  | V    | 14             | 671.8345        |
| 278.1928       | 3  | S    | 13             | 622.3003        |
| 365.2248       | 4  | S    | 12             | 578.7843        |
| 422.2463       | 5  | G    | 11             | 535.2683        |
| 519.2991       | 6  | P    | 10             | 506.7575        |
| 576.3205       | 7  | G    | 9              | 458.2311        |
| 673.3733       | 8  | P    | 8              | 429.7204        |
| 804.4138       | 9  | M    | 7              | 381.1940        |
| 861.4352       | 10 | G    | 6              | 315.6738        |
| 974.5193       | 11 | L    | 5              | 287.1631        |
| 1105.5598      | 12 | M    | 4              | 230.6210        |
| 1162.5813      | 13 | G    | 3              | 165.1008        |
| 1259.6340      | 14 | P    | 2              | 136.5900        |
|                | 15 | R    | 1              | 88.0637         |

N-term:+35.07

GYDEKSAGVSVPGPMGPGSPR, MH+ 2113.1024, m/z 705.0390  
 H OS G26 P150811 220811-s1.03779.03779.3.dta

X-range:

-

MassTol: Y-zoom:

MassType:

AVG  MONO

Axis:

1  2

Label:

I  M  -

Ions:

a  +  2+  3+

b  +  2+  3+

c  +  2+  3+

x  +  2+  3+

y  +  2+  3+

z  +  2+  3+

hide H<sub>2</sub>O/NH<sub>3</sub>

zoom 112-122

GO

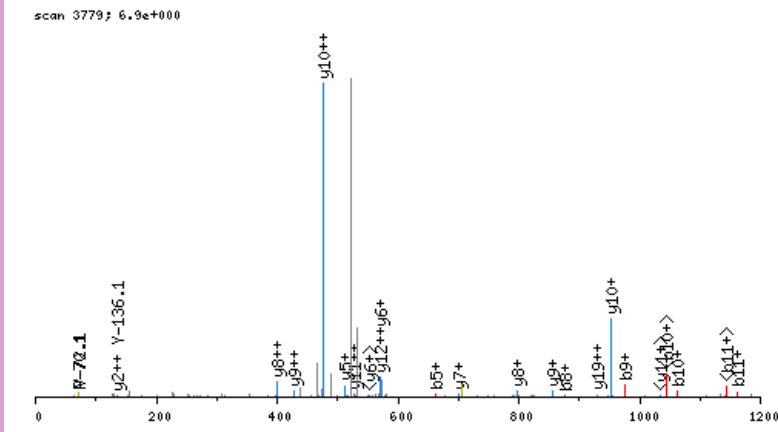

click image to zoom in; click top corners to zoom out [\[precursor±\]](#)

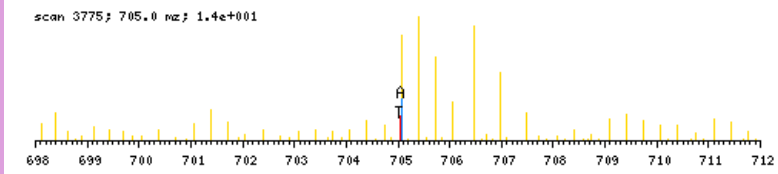

zoomed in precursor plot; T=theoretical m/z, A=acquired m/z

| b <sup>+</sup> | #  | AA # | y <sup>+</sup> | y <sup>2+</sup> |
|----------------|----|------|----------------|-----------------|
| 92.0924        | 1  | G 21 |                |                 |
| 255.1557       | 2  | Y 20 | 2022.0179      | 1011.5129       |
| 370.1826       | 3  | D 19 | 1858.9546      | 929.9812        |
| 499.2252       | 4  | E 18 | 1743.9276      | 872.4677        |
| 661.3833       | 5  | K 17 | 1614.8850      | 807.9464        |
| 748.4154       | 6  | S 16 | 1452.7269      | 726.8674        |
| 819.4525       | 7  | A 15 | 1365.6949      | 683.3514        |
| 876.4739       | 8  | G 14 | 1294.6578      | 647.8328        |
| 975.5423       | 9  | V 13 | 1237.6363      | 619.3221        |
| 1062.5744      | 10 | S 12 | 1138.5679      | 569.7879        |
| 1161.6428      | 11 | V 11 | 1051.5359      | 526.2718        |
| 1258.6956      | 12 | P 10 | 952.4675       | 476.7376        |
| 1315.7170      | 13 | G 9  | 855.4147       | 428.2113        |
| 1412.7698      | 14 | P 8  | 798.3932       | 399.7005        |
| 1543.8103      | 15 | M 7  | 701.3405       | 351.1741        |
| 1600.8317      | 16 | G 6  | 570.3000       | 285.6539        |
| 1697.8845      | 17 | P 5  | 513.2785       | 257.1432        |
| 1784.9165      | 18 | S 4  | 416.2258       | 208.6168        |
| 1841.9380      | 19 | G 3  | 329.1937       | 165.1008        |
| 1938.9908      | 20 | P 2  | 272.1723       | 136.5900        |
|                | 21 | R 1  | 175.1195       | 88.0637         |

N-term:+35.07 K(5):+162.16

GYEDFVEGLR, MH+ 1218.6219, m/z 609.8146  
 H OS G25 P150811 220811-s1.06946.06946.2.dta

X-range:

-

MassTol: Y-zoom:

MassType:

AVG  MONO

Axis:

1  2

Label:

I  M  -

Ions:

a  +  2+  3+

b  +  2+  3+

c  +  2+  3+

x  +  2+  3+

y  +  2+  3+

z  +  2+  3+

hide H<sub>2</sub>O/NH<sub>3</sub>

zoom 112-122

GO

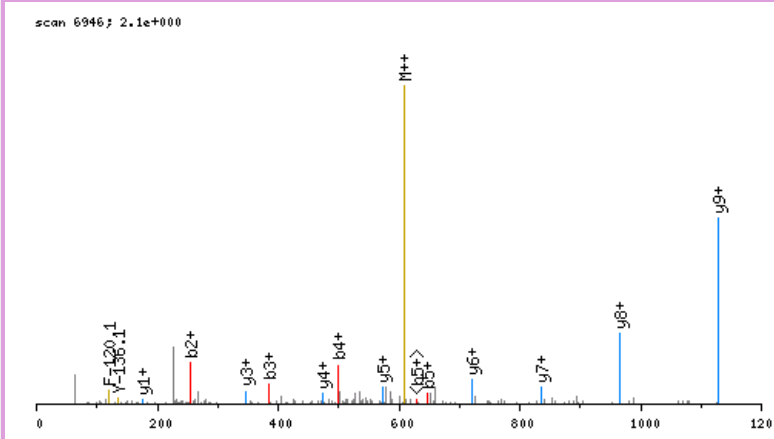

click image to zoom in; click top corners to zoom out [\[precursor±\]](#)

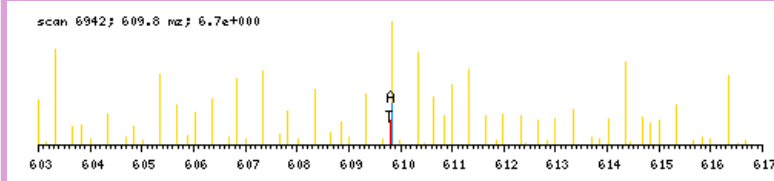

zoomed in precursor plot; T=theoretical m/z, A=acquired m/z

| b <sup>+</sup> | #  | AA # | y <sup>+</sup> | y <sup>2+</sup> |
|----------------|----|------|----------------|-----------------|
| 92.0924        | 1  | G    | 10             |                 |
| 255.1557       | 2  | Y    | 9              | 1127.5373       |
| 384.1983       | 3  | E    | 8              | 964.4740        |
| 499.2252       | 4  | D    | 7              | 835.4314        |
| 646.2936       | 5  | F    | 6              | 720.4044        |
| 745.3621       | 6  | V    | 5              | 573.3360        |
| 874.4046       | 7  | E    | 4              | 474.2676        |
| 931.4261       | 8  | G    | 3              | 345.2250        |
| 1044.5102      | 9  | L    | 2              | 288.2036        |
|                | 10 | R    | 1              | 175.1195        |

N-term:+35.07

GYISAAELR, MH+ 1007.5525, m/z 504.2799  
 L OS G25 P150811 220811-s1.04359.04359.2.dta

scan 4359; 1.6e+001

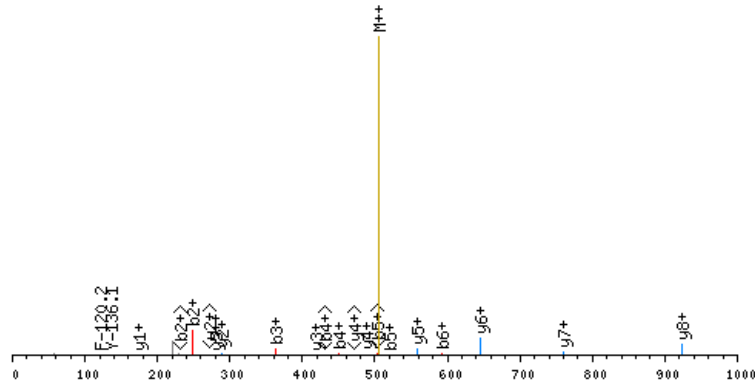

click image to zoom in; click top corners to zoom out [\[precursor±\]](#)

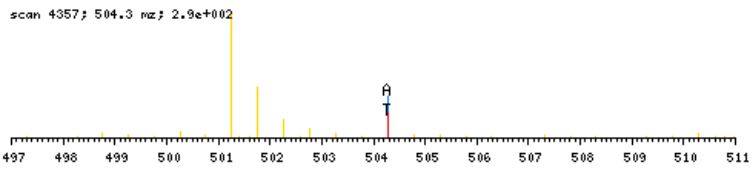

zoomed in precursor plot; T=theoretical m/z, A=acquired m/z

X-range:

-

MassTol: Y-zoom:

MassType:

AVG  MONO

Axis:

1  2

Label:

I  M  -

Ions:

a  +  2+  3+

b  +  2+  3+

c  +  2+  3+

x  +  2+  3+

y  +  2+  3+

z  +  2+  3+

hide H<sub>2</sub>O/NH<sub>3</sub>

zoom 112-122

GO

| b <sup>+</sup> | # | AA # | y <sup>+</sup> | y <sup>2+</sup> |
|----------------|---|------|----------------|-----------------|
| 86.0606        | 1 | G    | 9              |                 |
| 249.1239       | 2 | Y    | 8              | 922.4998        |
| 362.2080       | 3 | I    | 7              | 759.4365        |
| 449.2400       | 4 | S    | 6              | 646.3524        |
| 520.2771       | 5 | A    | 5              | 559.3204        |
| 591.3142       | 6 | A    | 4              | 488.2833        |
| 720.3568       | 7 | E    | 3              | 417.2462        |
| 833.4409       | 8 | L    | 2              | 288.2036        |
|                | 9 | R    | 1              | 175.1195        |

N-term:+29.04

GYKEPAAPVSIQR, MH+ 1471.8273, m/z 491.2806  
 L OS G26 P150811 220811-s1.02923.02923.3.dta

scan 2923; 2.5e+000

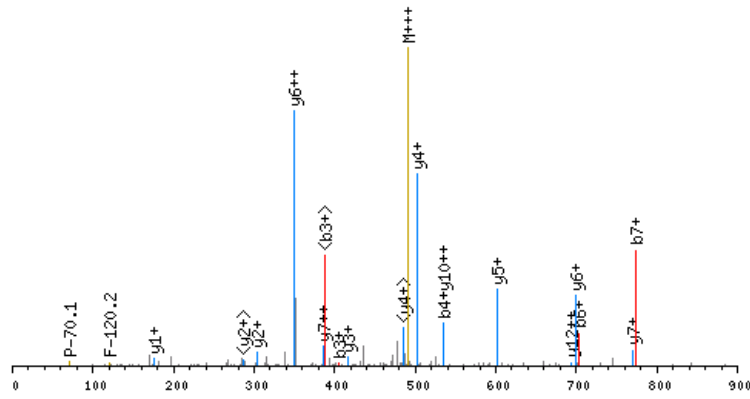

click image to zoom in; click top corners to zoom out [\[precursor±\]](#)

scan 2920; 491.3 m/z; 3.4e+000

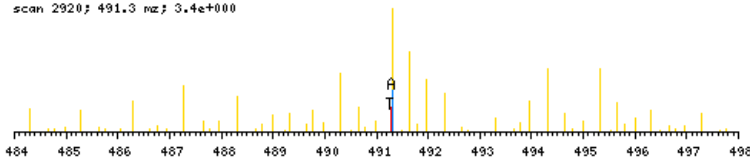

zoomed in precursor plot; T=theoretical m/z, A=acquired m/z

X-range:

-

MassTol: Y-zoom:

MassType:

AVG  MONO

Axis:

1  2

Label:

I  M  -

Ions:

a  +  2+  3+

b  +  2+  3+

c  +  2+  3+

x  +  2+  3+

y  +  2+  3+

z  +  2+  3+

hide H<sub>2</sub>O/NH<sub>3</sub>

zoom 112-122

GO

| b <sup>+</sup> | #  | AA # | y <sup>+</sup> | y <sup>2+</sup> |
|----------------|----|------|----------------|-----------------|
| 86.0606        | 1  | G 13 |                |                 |
| 249.1239       | 2  | Y 12 | 1386.7746      | 693.8912        |
| 405.2502       | 3  | K 11 | 1223.7112      | 612.3595        |
| 534.2928       | 4  | E 10 | 1067.5849      | 534.2964        |
| 631.3455       | 5  | P 9  | 938.5423       | 469.7751        |
| 702.3827       | 6  | A 8  | 841.4896       | 421.2487        |
| 773.4198       | 7  | A 7  | 770.4525       | 385.7301        |
| 870.4725       | 8  | P 6  | 699.4153       | 350.2116        |
| 969.5410       | 9  | V 5  | 602.3626       | 301.6852        |
| 1056.5730      | 10 | S 4  | 503.2942       | 252.1510        |
| 1169.6570      | 11 | I 3  | 416.2621       | 208.6350        |
| 1297.7156      | 12 | Q 2  | 303.1781       | 152.0930        |
|                | 13 | R 1  | 175.1195       | 88.0637         |

N-term:+29.04 K(3):+156.13

GYTHLSTGDLRL, MH+ 1366.7543, m/z 456.2563  
 H OS G27 P150811 220811-s1.04948.04948.3.dta

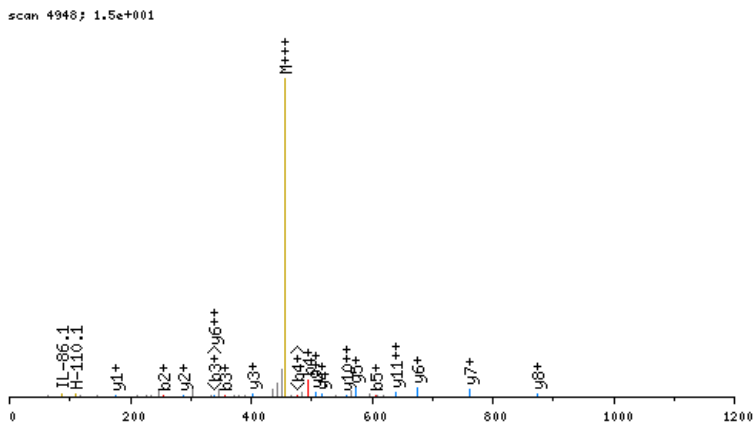

click image to zoom in; click top corners to zoom out [\[precursor±\]](#)

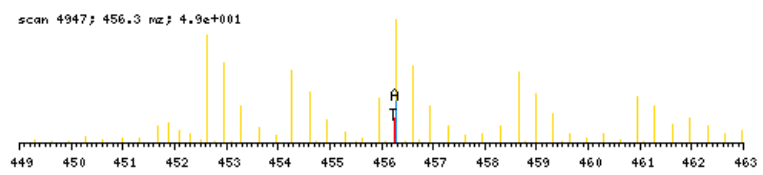

zoomed in precursor plot; T=theoretical m/z, A=acquired m/z

X-range:

-

MassTol: Y-zoom:

MassType:

AVG  MONO

Axis:

1  2

Label:

I  M  -

Ions:

a  +  2+  3+

b  +  2+  3+

c  +  2+  3+

x  +  2+  3+

y  +  2+  3+

z  +  2+  3+

hide H<sub>2</sub>O/NH<sub>3</sub>

zoom 112-122

GO

| b <sup>+</sup> | #  | AA # | y <sup>+</sup> | y <sup>2+</sup> |
|----------------|----|------|----------------|-----------------|
| 92.0924        | 1  | G 12 |                |                 |
| 255.1557       | 2  | Y 11 | 1275.6697      | 638.3388        |
| 356.2034       | 3  | T 10 | 1112.6064      | 556.8071        |
| 493.2623       | 4  | H 9  | 1011.5587      | 506.2833        |
| 606.3463       | 5  | L 8  | 874.4998       | 437.7538        |
| 693.3784       | 6  | S 7  | 761.4157       | 381.2118        |
| 794.4261       | 7  | T 6  | 674.3837       | 337.6958        |
| 851.4475       | 8  | G 5  | 573.3360       | 287.1719        |
| 966.4745       | 9  | D 4  | 516.3146       | 258.6612        |
| 1079.5585      | 10 | L 3  | 401.2876       | 201.1477        |
| 1192.6426      | 11 | L 2  | 288.2036       | 144.6057        |
|                | 12 | R 1  | 175.1195       | 88.0637         |

N-term:+35.07

X-range:

-

MassTol: Y-zoom:

MassType:

AVG  MONO

Axis:

1  2

Label:

I  M  -

Ions:

a  +  2+  3+

b  +  2+  3+

c  +  2+  3+

x  +  2+  3+

y  +  2+  3+

z  +  2+  3+

hide H<sub>2</sub>O/NH<sub>3</sub>

zoom 112-122

GO

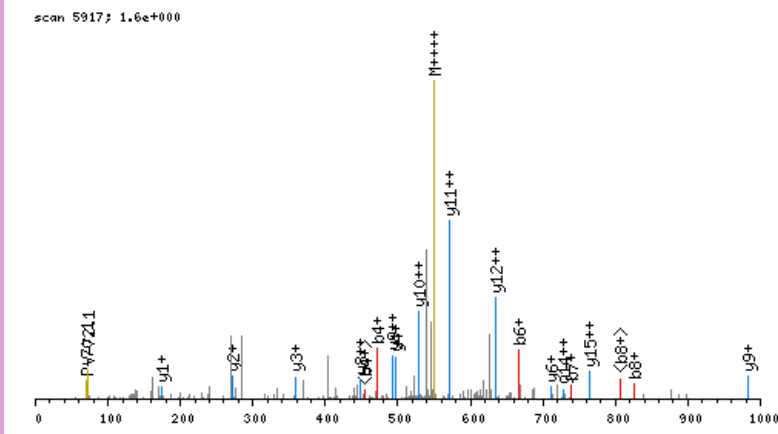

click image to zoom in; click top corners to zoom out [\[precursor±\]](#)

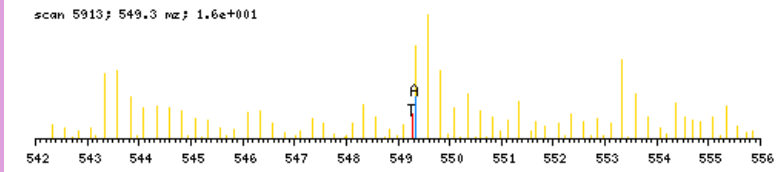

zoomed in precursor plot; T=theoretical m/z, A=acquired m/z

| b <sup>+</sup> | #  | AA | #  | y <sup>+</sup> | y <sup>2+</sup> |
|----------------|----|----|----|----------------|-----------------|
| 166.0980       | 1  | H  | 21 |                |                 |
| 237.1351       | 2  | A  | 20 | 2029.0242      | 1015.0160       |
| 384.2035       | 3  | F  | 19 | 1957.9871      | 979.4975        |
| 471.2356       | 4  | S  | 18 | 1810.9187      | 905.9633        |
| 568.2883       | 5  | P  | 17 | 1723.8867      | 862.4473        |
| 667.3567       | 6  | V  | 16 | 1626.8339      | 813.9209        |
| 738.3939       | 7  | A  | 15 | 1527.7655      | 764.3867        |
| 825.4259       | 8  | S  | 14 | 1456.7284      | 728.8681        |
| 924.4943       | 9  | V  | 13 | 1369.6964      | 685.3521        |
| 1053.5369      | 10 | E  | 12 | 1270.6280      | 635.8179        |
| 1140.5689      | 11 | S  | 11 | 1141.5854      | 571.2966        |
| 1211.6060      | 12 | A  | 10 | 1054.5533      | 527.7806        |
| 1298.6381      | 13 | S  | 9  | 983.5162       | 492.2620        |
| 1355.6595      | 14 | G  | 8  | 896.4842       | 448.7460        |
| 1484.7021      | 15 | E  | 7  | 839.4627       | 420.2353        |
| 1585.7498      | 16 | T  | 6  | 710.4201       | 355.7140        |
| 1698.8339      | 17 | L  | 5  | 609.3725       | 305.1901        |
| 1835.8928      | 18 | H  | 4  | 496.2884       | 248.6481        |
| 1922.9248      | 19 | S  | 3  | 359.2295       | 180.1187        |
| 2019.9776      | 20 | P  | 2  | 272.1975       | 136.6026        |
|                | 21 | K  | 1  | 175.1447       | 88.0763         |

N-term:+29.04 K(21):+156.13

HSSISEEVAELGR, MH+ 1685.7982, m/z 562.6043  
 L OS G26 P150811 220811-s1.03184.03184.3.dta

X-range:

-

MassTol: Y-zoom:

MassType:

AVG  MONO

Axis:

1  2

Label:

I  M  -

Ions:

a  +  2+  3+

b  +  2+  3+

c  +  2+  3+

x  +  2+  3+

y  +  2+  3+

z  +  2+  3+

hide H<sub>2</sub>O/NH<sub>3</sub>

zoom 112-122

GO

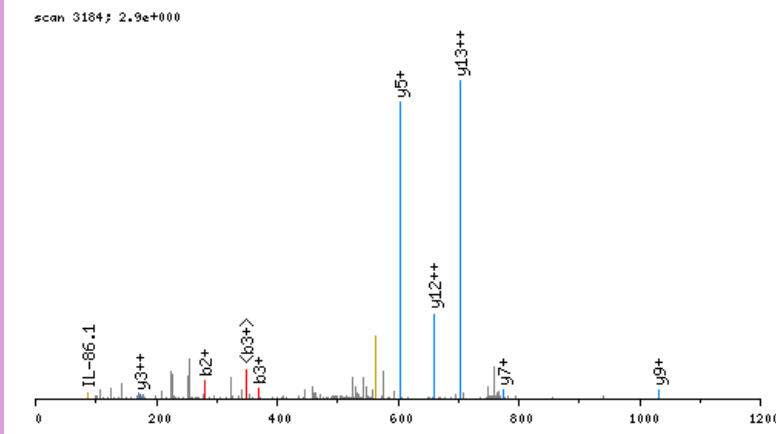

click image to zoom in; click top corners to zoom out [\[precursor±\]](#)

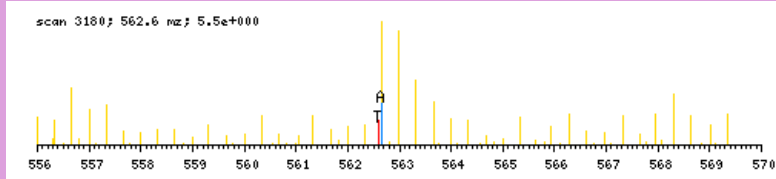

zoomed in precursor plot; T=theoretical m/z, A=acquired m/z

| b <sup>+</sup> | #  | AA # | y <sup>+</sup> | y <sup>2+</sup> |
|----------------|----|------|----------------|-----------------|
| 166.0980       | 1  | H 15 |                |                 |
| 281.1250       | 2  | D 14 | 1520.7080      | 760.8579        |
| 368.1570       | 3  | S 13 | 1405.6811      | 703.3445        |
| 455.1890       | 4  | S 12 | 1318.6490      | 659.8284        |
| 568.2731       | 5  | I 11 | 1231.6170      | 616.3124        |
| 655.3051       | 6  | S 10 | 1118.5330      | 559.7704        |
| 784.3477       | 7  | E 9  | 1031.5009      | 516.2544        |
| 913.3903       | 8  | E 8  | 902.4583       | 451.7331        |
| 1012.4587      | 9  | V 7  | 773.4157       | 387.2118        |
| 1083.4958      | 10 | A 6  | 674.3473       | 337.6776        |
| 1212.5384      | 11 | E 5  | 603.3102       | 302.1590        |
| 1341.5810      | 12 | E 4  | 474.2676       | 237.6377        |
| 1454.6651      | 13 | L 3  | 345.2250       | 173.1164        |
| 1511.6865      | 14 | G 2  | 232.1410       | 116.5744        |
|                | 15 | R 1  | 175.1195       | 88.0637         |

N-term:+29.04



HEDPVEKVIIEGFSR, MH+ 1709.9499, m/z 428.2429  
 H OS G28 P150811 220811-s1.07851.07851.4.dta

scan 7851; 3.1e+000

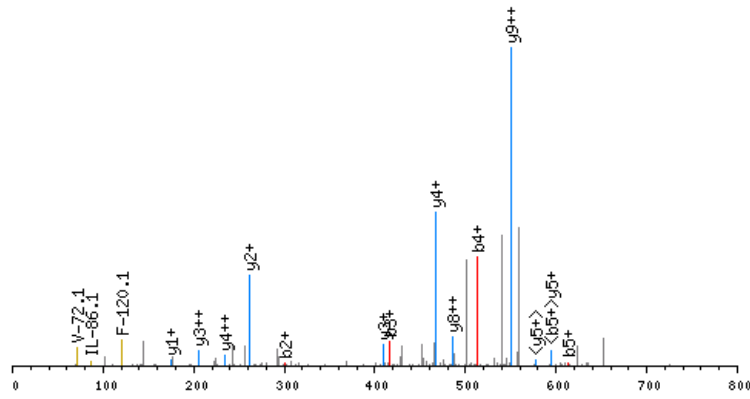

click image to zoom in; click top corners to zoom out [\[precursor±\]](#)

scan 7848; 428.2 m/z; 1.9e+001

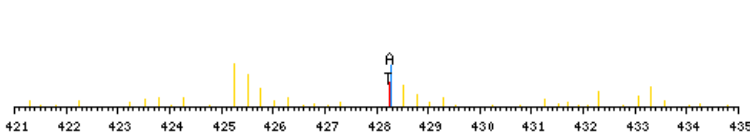

zoomed in precursor plot; T=theoretical m/z, A=acquired m/z

X-range:

-

MassTol: Y-zoom:

MassType:

AVG  MONO

Axis:

1  2

Label:

I  M  -

Ions:

a  +  2+  3+

b  +  2+  3+

c  +  2+  3+

x  +  2+  3+

y  +  2+  3+

z  +  2+  3+

hide H<sub>2</sub>O/NH<sub>3</sub>

zoom 112-122

GO

| b <sup>+</sup> | #  | AA # | y <sup>+</sup> | y <sup>2+</sup> |
|----------------|----|------|----------------|-----------------|
| 172.1298       | 1  | H 14 |                |                 |
| 301.1724       | 2  | E 13 | 1538.8279      | 769.9179        |
| 416.1993       | 3  | D 12 | 1409.7853      | 705.3966        |
| 513.2521       | 4  | P 11 | 1294.7583      | 647.8831        |
| 612.3205       | 5  | V 10 | 1197.7056      | 599.3567        |
| 741.3631       | 6  | E 9  | 1098.6372      | 549.8225        |
| 903.5212       | 7  | K 8  | 969.5946       | 485.3012        |
| 1002.5896      | 8  | V 7  | 807.4365       | 404.2222        |
| 1115.6737      | 9  | I 6  | 708.3681       | 354.6879        |
| 1244.7163      | 10 | E 5  | 595.2840       | 298.1459        |
| 1301.7378      | 11 | G 4  | 466.2414       | 233.6246        |
| 1448.8062      | 12 | F 3  | 409.2199       | 205.1139        |
| 1535.8382      | 13 | S 2  | 262.1515       | 131.5797        |
|                | 14 | R 1  | 175.1195       | 88.0637         |

N-term:+35.07 K(7):+162.16

HENLKGDDLDPNYVLSSR, MH+ 2197.1525, m/z 550.0436  
 H OS G28 P150811 220811-s1.05556.05556.4.dta

scan 5556; 1.1e+001

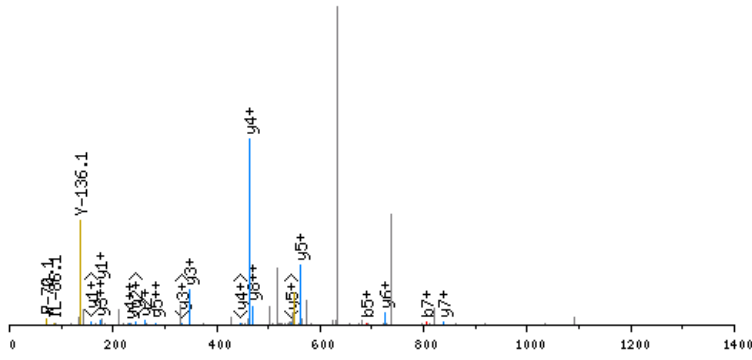

click image to zoom in; click top corners to zoom out [precursor±]

scan 5553; 550.0 mz; 1.8e+001

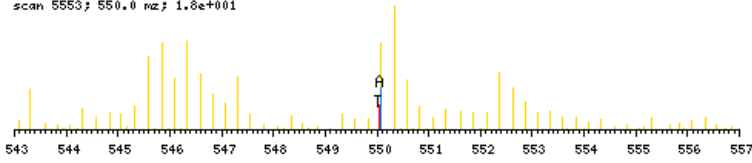

zoomed in precursor plot; T=theoretical m/z, A=acquired m/z

X-range:

-

MassTol: Y-zoom:

MassType:

AVG  MONO

Axis:

1  2

Label:

I  M  -

Ions:

a  +  2+  3+

b  +  2+  3+

c  +  2+  3+

x  +  2+  3+

y  +  2+  3+

z  +  2+  3+

hide H<sub>2</sub>O/NH<sub>3</sub>

zoom 112-122

GO

| b <sup>+</sup> | #  | AA | #  | y <sup>+</sup> | y <sup>2+</sup> |
|----------------|----|----|----|----------------|-----------------|
| 172.1298       | 1  | H  | 19 |                |                 |
| 301.1724       | 2  | E  | 18 | 2026.0306      | 1013.5192       |
| 415.2153       | 3  | N  | 17 | 1896.9880      | 948.9979        |
| 528.2994       | 4  | L  | 16 | 1782.9450      | 891.9764        |
| 690.4575       | 5  | K  | 15 | 1669.8610      | 835.4344        |
| 747.4790       | 6  | G  | 14 | 1507.7029      | 754.3554        |
| 804.5004       | 7  | G  | 13 | 1450.6814      | 725.8446        |
| 919.5274       | 8  | D  | 12 | 1393.6599      | 697.3339        |
| 1034.5543      | 9  | D  | 11 | 1278.6330      | 639.8204        |
| 1147.6384      | 10 | L  | 10 | 1163.6061      | 582.3069        |
| 1262.6653      | 11 | D  | 9  | 1050.5220      | 525.7649        |
| 1359.7181      | 12 | P  | 8  | 935.4951       | 468.2514        |
| 1473.7610      | 13 | N  | 7  | 838.4423       | 419.7251        |
| 1636.8243      | 14 | Y  | 6  | 724.3994       | 362.7036        |
| 1735.8928      | 15 | V  | 5  | 561.3360       | 281.1719        |
| 1848.9768      | 16 | L  | 4  | 462.2676       | 231.6377        |
| 1936.0088      | 17 | S  | 3  | 349.1836       | 175.0957        |
| 2023.0409      | 18 | S  | 2  | 262.1515       | 131.5797        |
|                | 19 | R  | 1  | 175.1195       | 88.0637         |

N-term:+35.07 K(5):+162.16

HHPEFTPDPQTER, MH+ 1624.7932, m/z 542.2692  
 H OS G28 P150811 220811-s1.02429.02429.3.dta

X-range:

-

MassTol: Y-zoom:

MassType:

AVG  MONO

Axis:

1  2

Label:

I  M  -

Ions:

a  +  2+  3+

b  +  2+  3+

c  +  2+  3+

x  +  2+  3+

y  +  2+  3+

z  +  2+  3+

hide H<sub>2</sub>O/NH<sub>3</sub>

zoom 112-122

GO

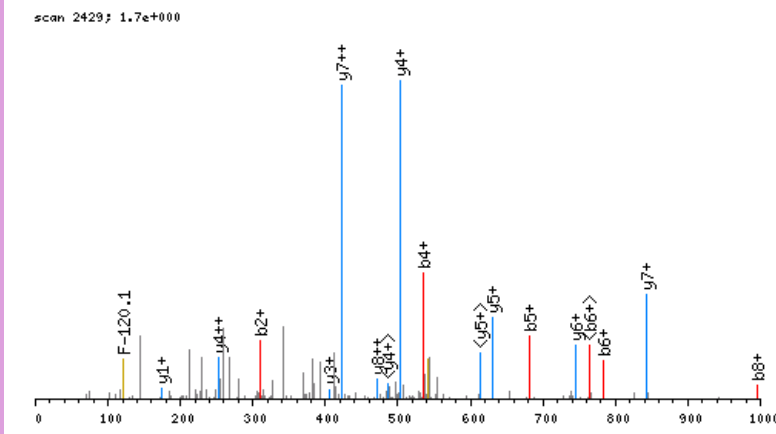

click image to zoom in; click top corners to zoom out [\[precursor±\]](#)

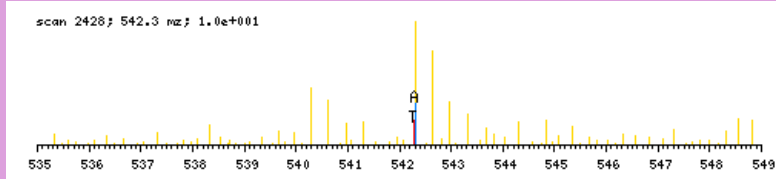

zoomed in precursor plot; T=theoretical m/z, A=acquired m/z

| b <sup>+</sup> | #  | AA # | y <sup>+</sup> | y <sup>2+</sup> |
|----------------|----|------|----------------|-----------------|
| 172.1298       | 1  | H 13 |                |                 |
| 309.1887       | 2  | H 12 | 1453.6712      | 727.3395        |
| 406.2415       | 3  | P 11 | 1316.6123      | 658.8100        |
| 535.2841       | 4  | E 10 | 1219.5595      | 610.2837        |
| 682.3525       | 5  | F 9  | 1090.5169      | 545.7624        |
| 783.4002       | 6  | T 8  | 943.4485       | 472.2282        |
| 880.4529       | 7  | P 7  | 842.4008       | 421.7043        |
| 995.4799       | 8  | D 6  | 745.3481       | 373.1779        |
| 1123.5385      | 9  | Q 5  | 630.3211       | 315.6645        |
| 1220.5912      | 10 | P 4  | 502.2625       | 251.6352        |
| 1321.6389      | 11 | T 3  | 405.2098       | 203.1088        |
| 1450.6815      | 12 | E 2  | 304.1621       | 152.5850        |
|                | 13 | R 1  | 175.1195       | 88.0637         |

N-term:+35.07

HIVERPYSGFDPDASSEGPEPTQGEAR, MH+ 2841.3444, m/z 711.0915  
 L OS G28 P150811 220811-s1.04927.04927.4.dta

scan 4927; 2.3e+000

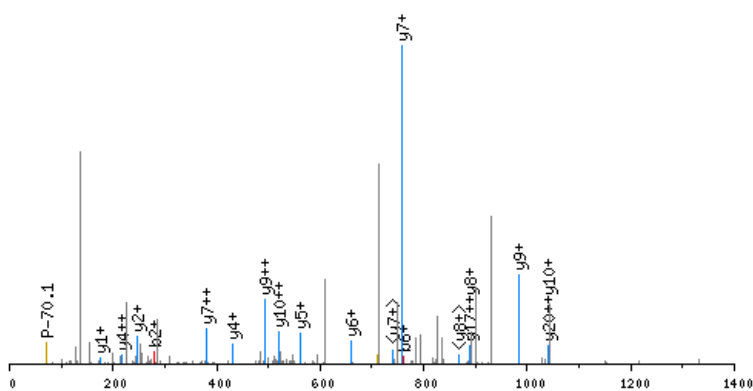

click image to zoom in; click top corners to zoom out [precursor±]

scan 4928; 711.1 m/z; 1.8e+001

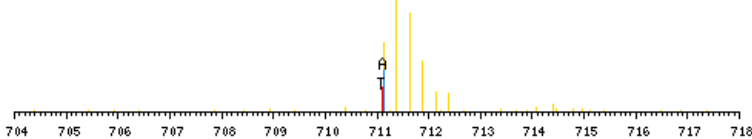

zoomed in precursor plot; T=theoretical m/z, A=acquired m/z

X-range:

-

MassTol: Y-zoom:

MassType:

AVG  MONO

Axis:

1  2

Label:

I  M  -

Ions:

a  +  2+  3+

b  +  2+  3+

c  +  2+  3+

x  +  2+  3+

y  +  2+  3+

z  +  2+  3+

hide H<sub>2</sub>O/NH<sub>3</sub>

zoom 112-122

GO

| b <sup>+</sup> | #  | AA # | y <sup>+</sup> | y <sup>2+</sup> |
|----------------|----|------|----------------|-----------------|
| 166.0980       | 1  | H 26 |                |                 |
| 279.1821       | 2  | I 25 | 2676.2542      | 1338.6310       |
| 378.2505       | 3  | V 24 | 2563.1701      | 1282.0890       |
| 507.2931       | 4  | E 23 | 2464.1017      | 1232.5548       |
| 663.3942       | 5  | R 22 | 2335.0591      | 1168.0335       |
| 760.4470       | 6  | P 21 | 2178.9580      | 1089.9829       |
| 923.5103       | 7  | Y 20 | 2081.9052      | 1041.4565       |
| 1010.5423      | 8  | S 19 | 1918.8419      | 959.9249        |
| 1067.5638      | 9  | G 18 | 1831.8099      | 916.4088        |
| 1214.6322      | 10 | F 17 | 1774.7884      | 887.8981        |
| 1311.6850      | 11 | P 16 | 1627.7200      | 814.3639        |
| 1426.7119      | 12 | D 15 | 1530.6672      | 765.8375        |
| 1497.7490      | 13 | A 14 | 1415.6403      | 708.3241        |
| 1584.7810      | 14 | S 13 | 1344.6032      | 672.8055        |
| 1671.8131      | 15 | S 12 | 1257.5711      | 629.2895        |
| 1800.8557      | 16 | E 11 | 1170.5391      | 585.7735        |
| 1857.8771      | 17 | G 10 | 1041.4965      | 521.2522        |
| 1954.9299      | 18 | P 9  | 984.4750       | 492.7414        |
| 2083.9725      | 19 | E 8  | 887.4223       | 444.2151        |
| 2181.0252      | 20 | P 7  | 758.3797       | 379.6938        |
| 2282.0729      | 21 | T 6  | 661.3269       | 331.1674        |
| 2410.1315      | 22 | Q 5  | 560.2792       | 280.6435        |
| 2467.1530      | 23 | G 4  | 432.2207       | 216.6142        |
| 2596.1956      | 24 | E 3  | 375.1992       | 188.1035        |
| 2667.2327      | 25 | A 2  | 246.1566       | 123.5822        |
|                | 26 | R 1  | 175.1195       | 88.0637         |

N-term:+29.04

HLKGNVKG EYDVTVPR, MH+ 1993.1235, m/z 499.0363  
 L OS G28 P150811 220811-s1.04056.04056.4.dta

X-range:

-

MassTol: Y-zoom:

MassType:

AVG  MONO

Axis:

1  2

Label:

I  M  -

Ions:

a  +  2+  3+

b  +  2+  3+

c  +  2+  3+

x  +  2+  3+

y  +  2+  3+

z  +  2+  3+

hide H<sub>2</sub>O/NH<sub>3</sub>

zoom 112-122

GO

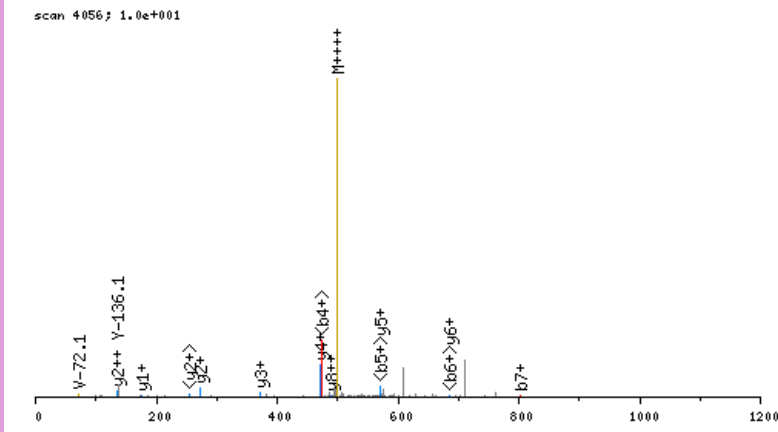

click image to zoom in; click top corners to zoom out [\[precursor±\]](#)

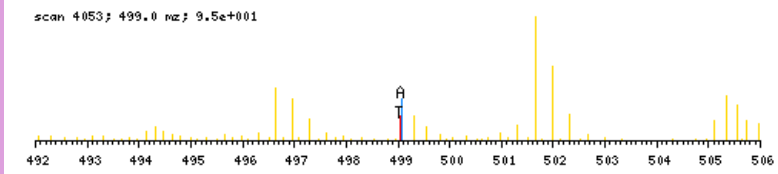

zoomed in precursor plot; T=theoretical m/z, A=acquired m/z

| b <sup>+</sup> | #  | AA | #  | y <sup>+</sup> | y <sup>2+</sup> |
|----------------|----|----|----|----------------|-----------------|
| 166.0980       | 1  | H  | 17 |                |                 |
| 279.1821       | 2  | L  | 16 | 1828.0333      | 914.5206        |
| 435.3084       | 3  | K  | 15 | 1714.9493      | 857.9785        |
| 492.3298       | 4  | G  | 14 | 1558.8230      | 779.9154        |
| 589.3826       | 5  | P  | 13 | 1501.8015      | 751.4047        |
| 703.4255       | 6  | N  | 12 | 1404.7487      | 702.8783        |
| 802.4939       | 7  | V  | 11 | 1290.7058      | 645.8568        |
| 958.6202       | 8  | K  | 10 | 1191.6374      | 596.3226        |
| 1015.6417      | 9  | G  | 9  | 1035.5111      | 518.2595        |
| 1144.6843      | 10 | E  | 8  | 978.4896       | 489.7487        |
| 1307.7476      | 11 | Y  | 7  | 849.4470       | 425.2274        |
| 1422.7746      | 12 | D  | 6  | 686.3837       | 343.6958        |
| 1521.8430      | 13 | V  | 5  | 571.3568       | 286.1823        |
| 1622.8907      | 14 | T  | 4  | 472.2884       | 236.6481        |
| 1721.9591      | 15 | V  | 3  | 371.2407       | 186.1243        |
| 1819.0118      | 16 | P  | 2  | 272.1723       | 136.5900        |
|                | 17 | R  | 1  | 175.1195       | 88.0637         |

N-term:+29.04 K(3):+156.13  
 K(8):+156.13

HLPAPQAVSSTKGR, MH+ 1508.8549, m/z 503.6232  
 L OS G28 P150811 220811-s1.02140.02140.3.dta

X-range:

-

MassTol: Y-zoom:

MassType:

AVG  MONO

Axis:

1  2

Label:

I  M  -

Ions:

a  +  2+  3+

b  +  2+  3+

c  +  2+  3+

x  +  2+  3+

y  +  2+  3+

z  +  2+  3+

hide H<sub>2</sub>O/NH<sub>3</sub>

zoom 112-122

GO

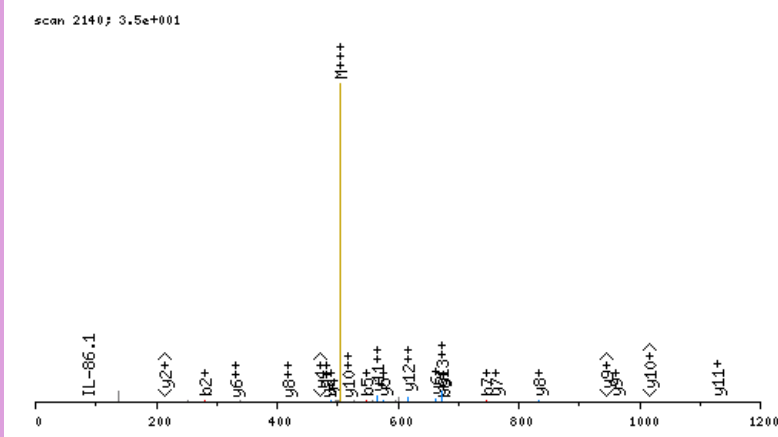

click image to zoom in; click top corners to zoom out [\[precursor±\]](#)

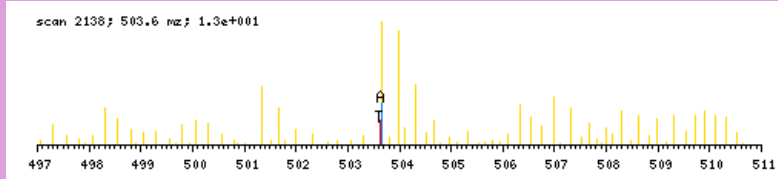

zoomed in precursor plot; T=theoretical m/z, A=acquired m/z

| b <sup>+</sup> | #  | AA # | y <sup>+</sup> | y <sup>2+</sup> |
|----------------|----|------|----------------|-----------------|
| 166.0980       | 1  | H 14 |                |                 |
| 279.1821       | 2  | L 13 | 1343.7647      | 672.3863        |
| 380.2298       | 3  | T 12 | 1230.6807      | 615.8442        |
| 477.2825       | 4  | P 11 | 1129.6330      | 565.3204        |
| 548.3196       | 5  | A 10 | 1032.5802      | 516.7940        |
| 676.3782       | 6  | Q 9  | 961.5431       | 481.2755        |
| 747.4153       | 7  | A 8  | 833.4845       | 417.2462        |
| 846.4837       | 8  | V 7  | 762.4474       | 381.7276        |
| 933.5158       | 9  | S 6  | 663.3790       | 332.1934        |
| 1020.5478      | 10 | S 5  | 576.3470       | 288.6774        |
| 1121.5955      | 11 | T 4  | 489.3149       | 245.1614        |
| 1277.7218      | 12 | K 3  | 388.2673       | 194.6375        |
| 1334.7432      | 13 | G 2  | 232.1410       | 116.5744        |
|                | 14 | R 1  | 175.1195       | 88.0637         |

N-term:+29.04 K(12):+156.13

HLVTKSQPVAPR, MH+ 1388.8378, m/z 463.6175  
 L OS G28 P150811 220811-s1.01925.01925.3.dta

scan 1925; 2.9e+001

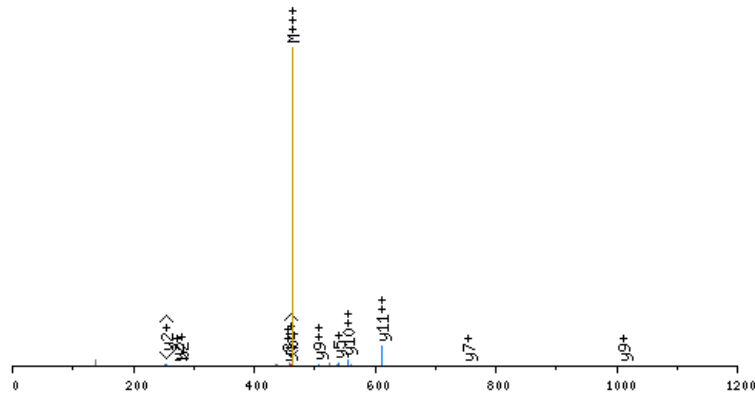

click image to zoom in; click top corners to zoom out [\[precursor±\]](#)

scan 1923; 463.6 m/z; 1.1e+001

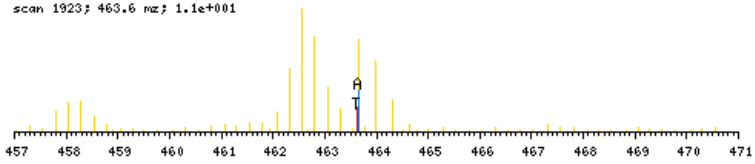

zoomed in precursor plot; T=theoretical m/z, A=acquired m/z

X-range:

-

MassTol: Y-zoom:

MassType:

AVG  MONO

Axis:

1  2

Label:

I  M  -

Ions:

a  +  2+  3+

b  +  2+  3+

c  +  2+  3+

x  +  2+  3+

y  +  2+  3+

z  +  2+  3+

hide H<sub>2</sub>O/NH<sub>3</sub>

zoom 112-122

GO

| b <sup>+</sup> | #  | AA # | y <sup>+</sup> | y <sup>2+</sup> |
|----------------|----|------|----------------|-----------------|
| 166.0980       | 1  | H 12 |                |                 |
| 279.1821       | 2  | L 11 | 1223.7476      | 612.3777        |
| 378.2505       | 3  | V 10 | 1110.6636      | 555.8357        |
| 479.2982       | 4  | T 9  | 1011.5951      | 506.3015        |
| 635.4245       | 5  | K 8  | 910.5475       | 455.7776        |
| 722.4565       | 6  | S 7  | 754.4212       | 377.7145        |
| 850.5151       | 7  | Q 6  | 667.3891       | 334.1985        |
| 947.5678       | 8  | P 5  | 539.3306       | 270.1692        |
| 1046.6363      | 9  | V 4  | 442.2778       | 221.6428        |
| 1117.6734      | 10 | A 3  | 343.2094       | 172.1086        |
| 1214.7261      | 11 | P 2  | 272.1723       | 136.5900        |
|                | 12 | R 1  | 175.1195       | 88.0637         |

N-term:+29.04 K(5):+156.13

HQGVVMGMGQKDSYVGDEAQS, MH+ 2435.1700, m/z 609.5479  
 L OS G28 P150811 220811-s1.04050.04050.4.dta

scan 4050; 3.9e+000

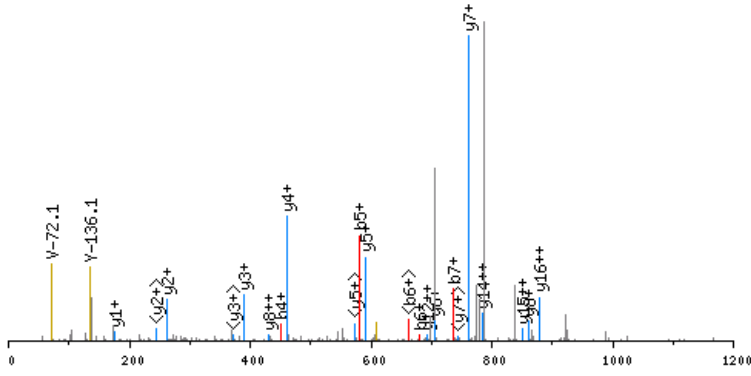

click image to zoom in; click top corners to zoom out [precursor±]

scan 4048; 609.5 m/z; 3.1e+001

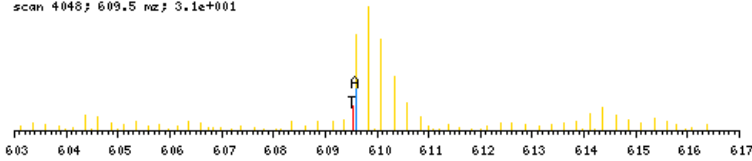

zoomed in precursor plot; T=theoretical m/z, A=acquired m/z

X-range:

0 - 0

MassTol: Y-zoom:

0. 1.

MassType:

AVG  MONO

Axis:

1  2

Label:

I  M  -

Ions:

a  +  2+  3+

b  +  2+  3+

c  +  2+  3+

x  +  2+  3+

y  +  2+  3+

z  +  2+  3+

hide H<sub>2</sub>O/NH<sub>3</sub>

zoom 112-122

GO

| b <sup>+</sup> | #  | AA # | y <sup>+</sup> | y <sup>2+</sup> |
|----------------|----|------|----------------|-----------------|
| 166.0980       | 1  | H 22 |                |                 |
| 294.1566       | 2  | Q 21 | 2270.0798      | 1135.5438       |
| 351.1781       | 3  | G 20 | 2142.0212      | 1071.5145       |
| 450.2465       | 4  | V 19 | 2084.9997      | 1043.0038       |
| 581.2870       | 5  | M 18 | 1985.9313      | 993.4696        |
| 680.3554       | 6  | V 17 | 1854.8908      | 927.9493        |
| 737.3768       | 7  | G 16 | 1755.8224      | 878.4151        |
| 868.4173       | 8  | M 15 | 1698.8009      | 849.9044        |
| 925.4388       | 9  | G 14 | 1567.7605      | 784.3841        |
| 1053.4974      | 10 | Q 13 | 1510.7390      | 755.8734        |
| 1209.6237      | 11 | K 12 | 1382.6804      | 691.8441        |
| 1324.6506      | 12 | D 11 | 1226.5541      | 613.7810        |
| 1411.6826      | 13 | S 10 | 1111.5272      | 556.2675        |
| 1574.7460      | 14 | Y 9  | 1024.4952      | 512.7515        |
| 1673.8144      | 15 | V 8  | 861.4318       | 431.2198        |
| 1730.8358      | 16 | G 7  | 762.3634       | 381.6856        |
| 1845.8628      | 17 | D 6  | 705.3419       | 353.1749        |
| 1974.9054      | 18 | E 5  | 590.3150       | 295.6614        |
| 2045.9425      | 19 | A 4  | 461.2724       | 231.1401        |
| 2174.0011      | 20 | Q 3  | 390.2353       | 195.6216        |
| 2261.0331      | 21 | S 2  | 262.1767       | 131.5923        |
|                | 22 | K 1  | 175.1447       | 88.0763         |

N-term: +29.04 K(11): +156.13  
 K(22): +156.13



HQGVVMVGMGQKDSYVGDEAQSQR, MH+ 2591.2711, m/z 648.5732  
 L OS G28 P150811 220811-s1.03594.03594.4.dta

X-range:

-

MassTol: Y-zoom:

MassType:

AVG  MONO

Axis:

1  2

Label:

I  M  -

Ions:

a  +  2+  3+

b  +  2+  3+

c  +  2+  3+

x  +  2+  3+

y  +  2+  3+

z  +  2+  3+

hide H<sub>2</sub>O/NH<sub>3</sub>

zoom 112-122

GO

scan 3594; 1.9e+001

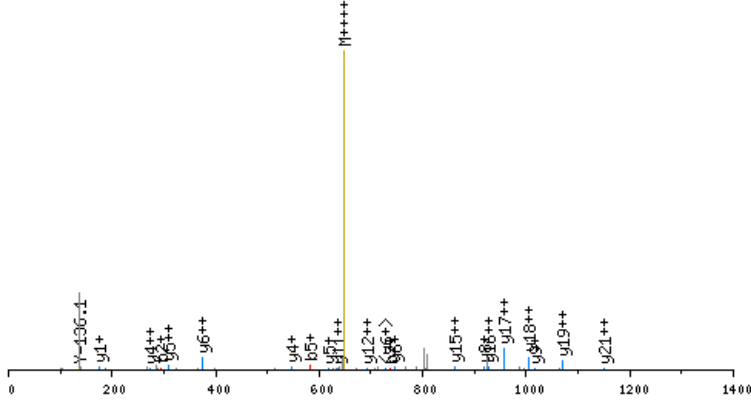

click image to zoom in; click top corners to zoom out

[\[precursor±\]](#)

scan 3593; 648.6 m/z; 4.5e+001

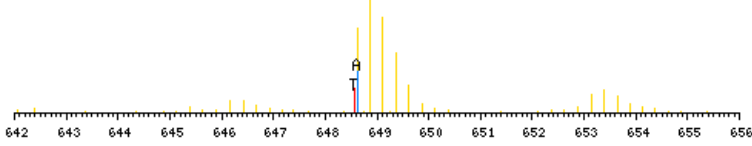

zoomed in precursor plot; T=theoretical m/z, A=acquired m/z

| b <sup>+</sup> | #  | AA | #  | y <sup>+</sup> | y <sup>2+</sup> |
|----------------|----|----|----|----------------|-----------------|
| 166.0980       | 1  | H  | 23 |                |                 |
| 294.1566       | 2  | Q  | 22 | 2426.1809      | 1213.5944       |
| 351.1781       | 3  | G  | 21 | 2298.1223      | 1149.5651       |
| 450.2465       | 4  | V  | 20 | 2241.1008      | 1121.0543       |
| 581.2870       | 5  | M  | 19 | 2142.0324      | 1071.5201       |
| 680.3554       | 6  | V  | 18 | 2010.9919      | 1005.9999       |
| 737.3768       | 7  | G  | 17 | 1911.9235      | 956.4657        |
| 868.4173       | 8  | M  | 16 | 1854.9021      | 927.9549        |
| 925.4388       | 9  | G  | 15 | 1723.8616      | 862.4347        |
| 1053.4974      | 10 | Q  | 14 | 1666.8401      | 833.9240        |
| 1209.6237      | 11 | K  | 13 | 1538.7815      | 769.8947        |
| 1324.6506      | 12 | D  | 12 | 1382.6552      | 691.8315        |
| 1411.6826      | 13 | S  | 11 | 1267.6283      | 634.3181        |
| 1574.7460      | 14 | Y  | 10 | 1180.5963      | 590.8020        |
| 1673.8144      | 15 | V  | 9  | 1017.5329      | 509.2704        |
| 1730.8358      | 16 | G  | 8  | 918.4645       | 459.7362        |
| 1845.8628      | 17 | D  | 7  | 861.4431       | 431.2254        |
| 1974.9054      | 18 | E  | 6  | 746.4161       | 373.7120        |
| 2045.9425      | 19 | A  | 5  | 617.3735       | 309.1907        |
| 2174.0011      | 20 | Q  | 4  | 546.3364       | 273.6721        |
| 2261.0331      | 21 | S  | 3  | 418.2778       | 209.6428        |
| 2417.1594      | 22 | K  | 2  | 331.2458       | 166.1268        |
|                | 23 | R  | 1  | 175.1195       | 88.0637         |

N-term: +29.04 K(11): +156.13  
 K(22): +156.13

HSILPVDDDDINGLNEEQKQLR, MH+ 2489.3000, m/z 623.0805  
 L OS G28 P150811 220811-s1.07239.07239.4.dta

X-range:

-

MassTol: Y-zoom:

MassType:

AVG  MONO

Axis:

1  2

Label:

I  M  -

Ions:

a  +  2+  3+

b  +  2+  3+

c  +  2+  3+

x  +  2+  3+

y  +  2+  3+

z  +  2+  3+

hide H<sub>2</sub>O/NH<sub>3</sub>

zoom 112-122

GO

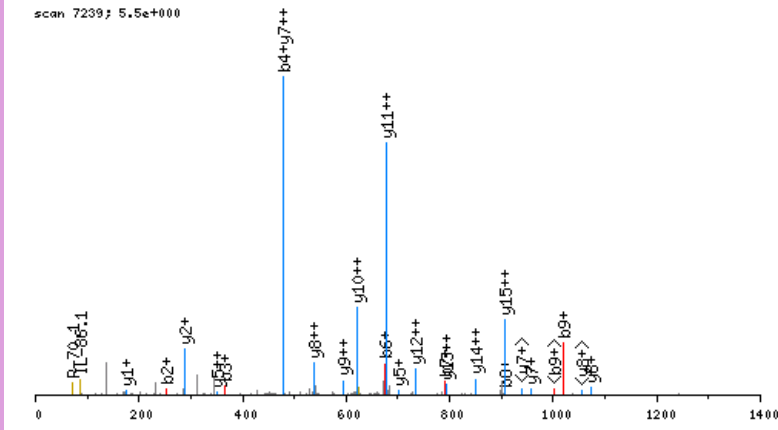

click image to zoom in; click top corners to zoom out [\[precursor±\]](#)

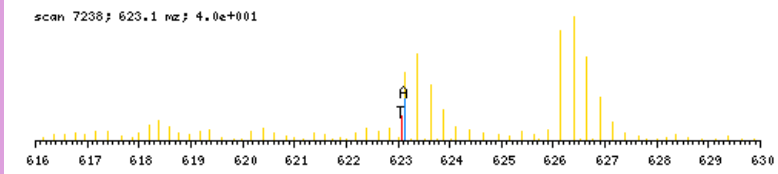

zoomed in precursor plot; T=theoretical m/z, A=acquired m/z

| b <sup>+</sup> | #  | AA # | y <sup>+</sup> | y <sup>2+</sup> |
|----------------|----|------|----------------|-----------------|
| 166.0980       | 1  | H 21 |                |                 |
| 253.1300       | 2  | S 20 | 2324.2098      | 1162.6088       |
| 366.2141       | 3  | I 19 | 2237.1778      | 1119.0928       |
| 479.2982       | 4  | L 18 | 2124.0937      | 1062.5508       |
| 576.3509       | 5  | P 17 | 2011.0097      | 1006.0087       |
| 675.4193       | 6  | V 16 | 1913.9569      | 957.4824        |
| 790.4463       | 7  | D 15 | 1814.8885      | 907.9482        |
| 905.4732       | 8  | D 14 | 1699.8615      | 850.4347        |
| 1020.5002      | 9  | D 13 | 1584.8346      | 792.9212        |
| 1133.5842      | 10 | I 12 | 1469.8077      | 735.4077        |
| 1247.6272      | 11 | N 11 | 1356.7236      | 678.8657        |
| 1304.6486      | 12 | G 10 | 1242.6807      | 621.8442        |
| 1417.7327      | 13 | L 9  | 1185.6592      | 593.3335        |
| 1531.7756      | 14 | N 8  | 1072.5751      | 536.7915        |
| 1660.8182      | 15 | E 7  | 958.5322       | 479.7700        |
| 1789.8608      | 16 | E 6  | 829.4896       | 415.2487        |
| 1917.9194      | 17 | Q 5  | 700.4470       | 350.7274        |
| 2074.0457      | 18 | K 4  | 572.3884       | 286.6981        |
| 2202.1043      | 19 | Q 3  | 416.2621       | 208.6350        |
| 2315.1883      | 20 | L 2  | 288.2036       | 144.6057        |
|                | 21 | R 1  | 175.1195       | 88.0637         |

N-term:+29.04 K(18):+156.13

HSNALNEDTQDELGDPR, MH+ 1938.8793, m/z 646.9646  
 L OS G27 P150811 220811-s1.03301.03301.3.dta

X-range:

-

MassTol: Y-zoom:

MassType:

AVG  MONO

Axis:

1  2

Label:

I  M  -

Ions:

a  +  2+  3+

b  +  2+  3+

c  +  2+  3+

x  +  2+  3+

y  +  2+  3+

z  +  2+  3+

hide H<sub>2</sub>O/NH<sub>3</sub>

zoom 112-122

GO

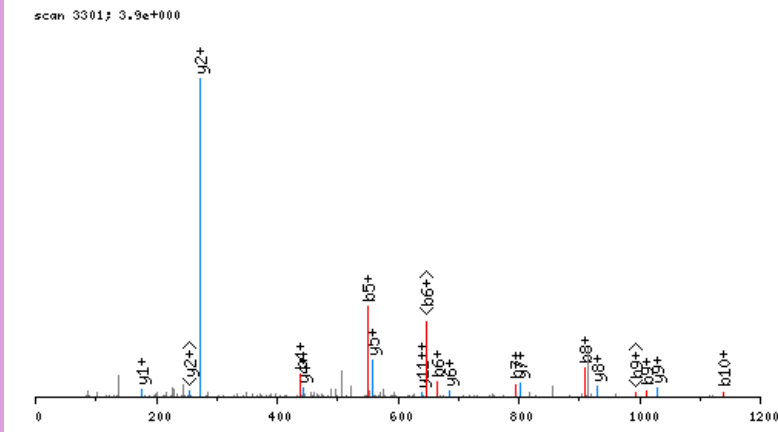

click image to zoom in; click top corners to zoom out [\[precursor±\]](#)

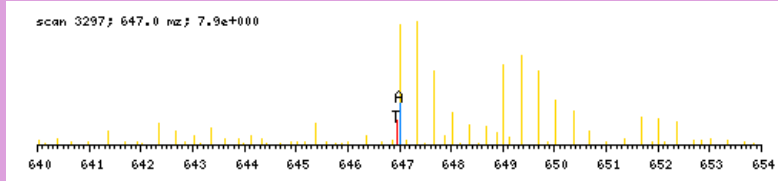

zoomed in precursor plot; T=theoretical m/z, A=acquired m/z

| b <sup>+</sup> | #  | AA # | y <sup>+</sup> | y <sup>2+</sup> |
|----------------|----|------|----------------|-----------------|
| 166.0980       | 1  | H 17 |                |                 |
| 253.1300       | 2  | S 16 | 1773.7891      | 887.3985        |
| 367.1730       | 3  | N 15 | 1686.7571      | 843.8825        |
| 438.2101       | 4  | A 14 | 1572.7142      | 786.8610        |
| 551.2941       | 5  | L 13 | 1501.6771      | 751.3424        |
| 665.3371       | 6  | N 12 | 1388.5930      | 694.8004        |
| 794.3797       | 7  | E 11 | 1274.5501      | 637.7789        |
| 909.4066       | 8  | D 10 | 1145.5075      | 573.2576        |
| 1010.4543      | 9  | T 9  | 1030.4805      | 515.7442        |
| 1138.5129      | 10 | Q 8  | 929.4328       | 465.2203        |
| 1253.5398      | 11 | D 7  | 801.3743       | 401.1910        |
| 1382.5824      | 12 | E 6  | 686.3473       | 343.6776        |
| 1495.6665      | 13 | L 5  | 557.3047       | 279.1563        |
| 1552.6879      | 14 | G 4  | 444.2207       | 222.6142        |
| 1667.7149      | 15 | D 3  | 387.1992       | 194.1035        |
| 1764.7676      | 16 | P 2  | 272.1723       | 136.5900        |
|                | 17 | R 1  | 175.1195       | 88.0637         |

N-term:+29.04

HTEAAEVLLER, MH+ 1301.7277, m/z 434.5808  
 H OS G27 P150811 220811-s1.04246.04246.3.dta

X-range:

-

MassTol: Y-zoom:

MassType:

AVG  MONO

Axis:

1  2

Label:

I  M  -

Ions:

a  +  2+  3+

b  +  2+  3+

c  +  2+  3+

x  +  2+  3+

y  +  2+  3+

z  +  2+  3+

hide H<sub>2</sub>O/NH<sub>3</sub>

zoom 112-122

GO

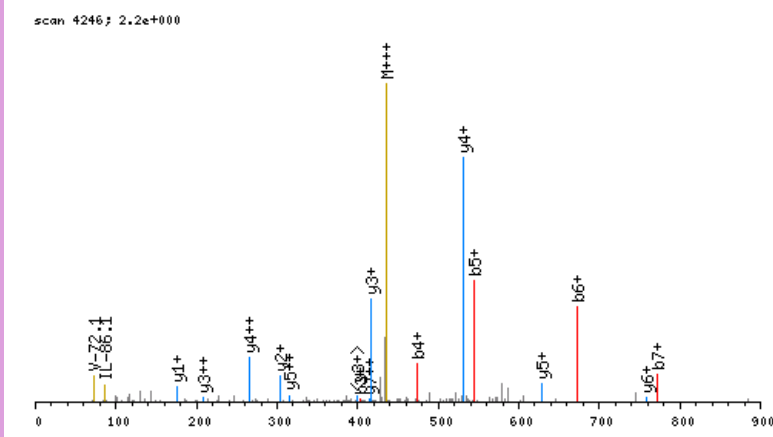

click image to zoom in; click top corners to zoom out [\[precursor±\]](#)

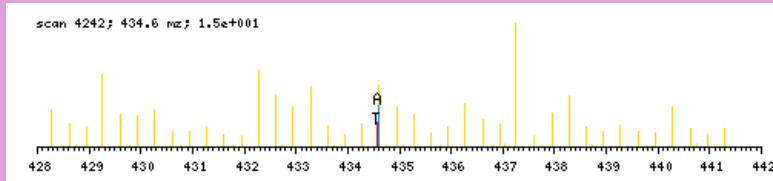

zoomed in precursor plot; T=theoretical m/z, A=acquired m/z

| b <sup>+</sup> | #  | AA # | y <sup>+</sup> | y <sup>2+</sup> |
|----------------|----|------|----------------|-----------------|
| 172.1298       | 1  | H 11 |                |                 |
| 273.1775       | 2  | T 10 | 1130.6057      | 565.8068        |
| 402.2201       | 3  | E 9  | 1029.5580      | 515.2829        |
| 473.2572       | 4  | A 8  | 900.5155       | 450.7616        |
| 544.2943       | 5  | A 7  | 829.4783       | 415.2431        |
| 673.3369       | 6  | E 6  | 758.4412       | 379.7245        |
| 772.4053       | 7  | V 5  | 629.3986       | 315.2032        |
| 885.4894       | 8  | L 4  | 530.3302       | 265.6690        |
| 998.5734       | 9  | L 3  | 417.2462       | 209.1270        |
| 1127.6160      | 10 | E 2  | 304.1621       | 152.5850        |
|                | 11 | R 1  | 175.1195       | 88.0637         |

N-term:+35.07

HVAVDTEKIIR, MH+ 1324.7589, m/z 442.2578  
 L OS G28 P150811 220811-s1.02292.02292.3.dta

X-range:

-

MassTol: Y-zoom:

MassType:

AVG  MONO

Axis:

1  2

Label:

I  M  -

Ions:

a  +  2+  3+

b  +  2+  3+

c  +  2+  3+

x  +  2+  3+

y  +  2+  3+

z  +  2+  3+

hide H<sub>2</sub>O/NH<sub>3</sub>

zoom 112-122

GO

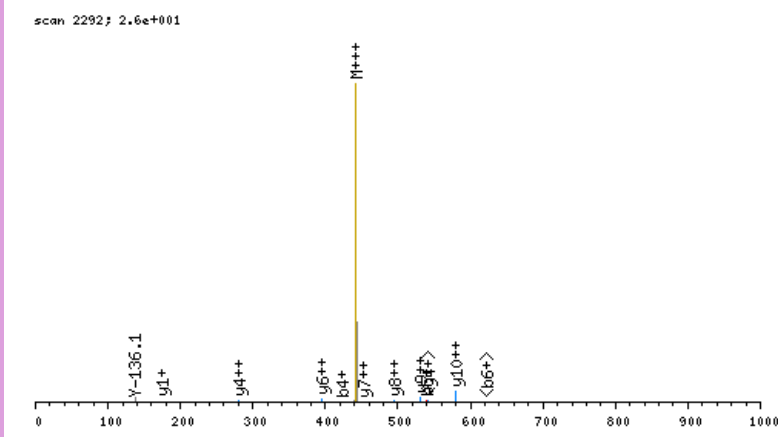

click image to zoom in; click top corners to zoom out [\[precursor±\]](#)

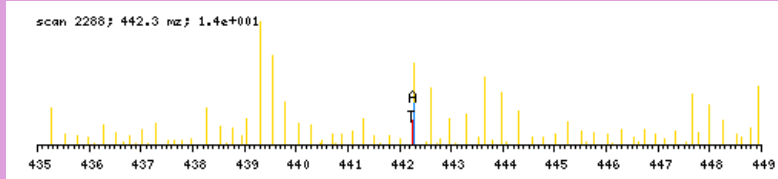

zoomed in precursor plot; T=theoretical m/z, A=acquired m/z

| b <sup>+</sup> | #  | AA # | y <sup>+</sup> | y <sup>2+</sup> |
|----------------|----|------|----------------|-----------------|
| 166.0980       | 1  | H 11 |                |                 |
| 265.1664       | 2  | V 10 | 1159.6687      | 580.3383        |
| 336.2035       | 3  | A 9  | 1060.6003      | 530.8041        |
| 423.2356       | 4  | S 8  | 989.5632       | 495.2855        |
| 538.2625       | 5  | D 7  | 902.5311       | 451.7695        |
| 639.3102       | 6  | T 6  | 787.5042       | 394.2560        |
| 768.3528       | 7  | E 5  | 686.4565       | 343.7322        |
| 924.4791       | 8  | K 4  | 557.4139       | 279.2109        |
| 1037.5631      | 9  | I 3  | 401.2876       | 201.1477        |
| 1150.6472      | 10 | I 2  | 288.2036       | 144.6057        |
|                | 11 | R 1  | 175.1195       | 88.0637         |

N-term:+29.04 K(8):+156.13

X-range:

-

MassTol: Y-zoom:

MassType:

AVG  MONO

Axis:

1  2

Label:

I  M  -

Ions:

a  +  2+  3+

b  +  2+  3+

c  +  2+  3+

x  +  2+  3+

y  +  2+  3+

z  +  2+  3+

hide H<sub>2</sub>O/NH<sub>3</sub>

zoom 112-122

GO

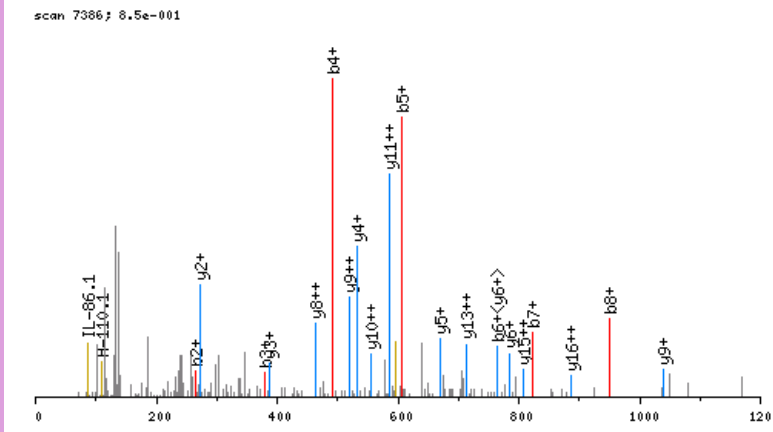

click image to zoom in; click top corners to zoom out [\[precursor±\]](#)

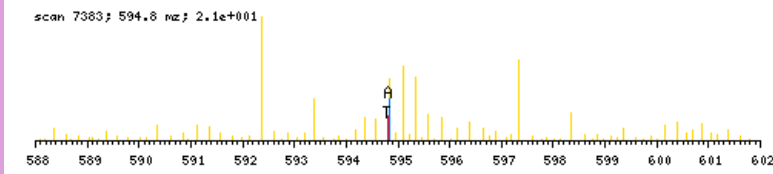

zoomed in precursor plot; T=theoretical m/z, A=acquired m/z

| b <sup>+</sup> | #  | AA | #  | y <sup>+</sup> | y <sup>2+</sup> |
|----------------|----|----|----|----------------|-----------------|
| 166.0980       | 1  | H  | 21 |                |                 |
| 265.1664       | 2  | V  | 20 | 2211.0616      | 1106.0347       |
| 379.2094       | 3  | N  | 19 | 2111.9932      | 1056.5005       |
| 492.2934       | 4  | L  | 18 | 1997.9503      | 999.4791        |
| 605.3775       | 5  | L  | 17 | 1884.8662      | 942.9370        |
| 765.4081       | 6  | C  | 16 | 1771.7822      | 886.3950        |
| 822.4295       | 7  | G  | 15 | 1611.7516      | 806.3797        |
| 951.4721       | 8  | E  | 14 | 1554.7301      | 777.8690        |
| 1080.5147      | 9  | E  | 13 | 1425.6875      | 713.3477        |
| 1208.5733      | 10 | Q  | 12 | 1296.6449      | 648.8264        |
| 1265.5948      | 11 | G  | 11 | 1168.5863      | 584.7971        |
| 1336.6319      | 12 | A  | 10 | 1111.5649      | 556.2863        |
| 1451.6588      | 13 | D  | 9  | 1040.5278      | 520.7678        |
| 1522.6959      | 14 | A  | 8  | 925.5008       | 463.2543        |
| 1593.7331      | 15 | A  | 7  | 854.4637       | 427.7358        |
| 1706.8171      | 16 | L  | 6  | 783.4266       | 392.2172        |
| 1843.8760      | 17 | H  | 5  | 670.3425       | 335.6752        |
| 1990.9444      | 18 | F  | 4  | 533.2836       | 267.1457        |
| 2104.9874      | 19 | N  | 3  | 386.2152       | 193.6115        |
| 2202.0401      | 20 | P  | 2  | 272.1723       | 136.5900        |
|                | 21 | R  | 1  | 175.1195       | 88.0637         |

N-term:+29.04 C(6):+160.03

HVTNEVAQLIQGGR, MH+ 1549.8450, m/z 517.2865  
 L OS G27 P150811 220811-s1.05518.05518.3.dta

X-range:

-

MassTol: Y-zoom:

MassType:

AVG  MONO

Axis:

1  2

Label:

I  M  -

Ions:

a  +  2+  3+

b  +  2+  3+

c  +  2+  3+

x  +  2+  3+

y  +  2+  3+

z  +  2+  3+

hide H<sub>2</sub>O/NH<sub>3</sub>

zoom 112-122

GO

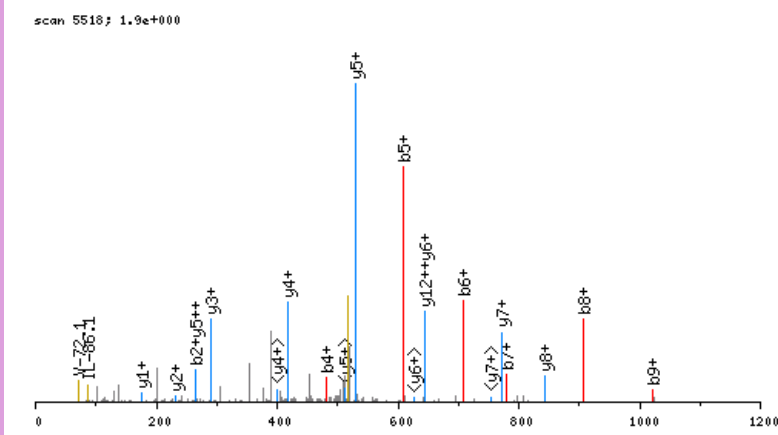

click image to zoom in; click top corners to zoom out [\[precursor±\]](#)

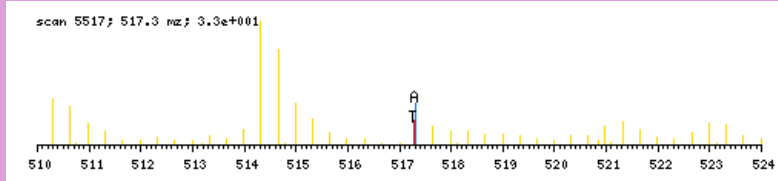

zoomed in precursor plot; T=theoretical m/z, A=acquired m/z

| b <sup>+</sup> | #  | AA # | y <sup>+</sup> | y <sup>2+</sup> |
|----------------|----|------|----------------|-----------------|
| 166.0980       | 1  | H 14 |                |                 |
| 265.1664       | 2  | V 13 | 1384.7549      | 692.8813        |
| 366.2141       | 3  | T 12 | 1285.6864      | 643.3471        |
| 480.2570       | 4  | N 11 | 1184.6388      | 592.8233        |
| 609.2996       | 5  | E 10 | 1070.5958      | 535.8018        |
| 708.3680       | 6  | V 9  | 941.5532       | 471.2805        |
| 779.4052       | 7  | A 8  | 842.4848       | 421.7463        |
| 907.4637       | 8  | Q 7  | 771.4477       | 386.2278        |
| 1020.5478      | 9  | L 6  | 643.3891       | 322.1985        |
| 1133.6319      | 10 | I 5  | 530.3051       | 265.6564        |
| 1261.6904      | 11 | Q 4  | 417.2210       | 209.1144        |
| 1318.7119      | 12 | G 3  | 289.1624       | 145.0851        |
| 1375.7334      | 13 | G 2  | 232.1410       | 116.5744        |
|                | 14 | R 1  | 175.1195       | 88.0637         |

N-term:+29.04

IADLVVGLCTGQIKTGAPCR, MH+ 2197.2472, m/z 550.0673  
 H OS G26 P150811 220811-s1.05499.05499.4.dta

X-range:

-

MassTol: Y-zoom:

MassType:

AVG  MONO

Axis:

1  2

Label:

I  M  -

Ions:

a  +  2+  3+

b  +  2+  3+

c  +  2+  3+

x  +  2+  3+

y  +  2+  3+

z  +  2+  3+

hide H<sub>2</sub>O/NH<sub>3</sub>

zoom 112-122

GO

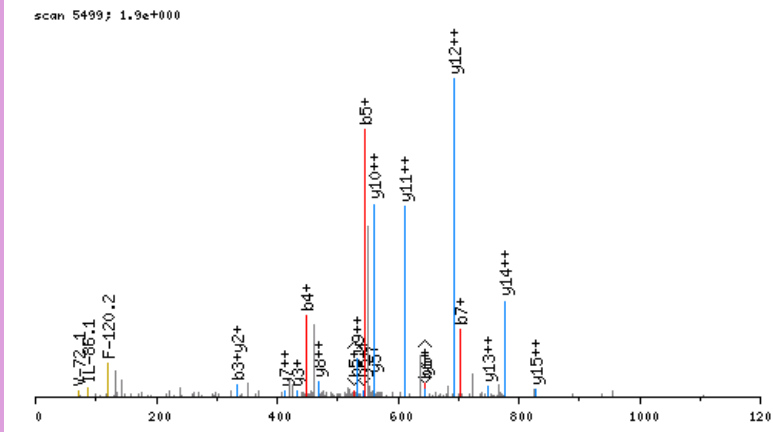

click image to zoom in; click top corners to zoom out [precursor±]

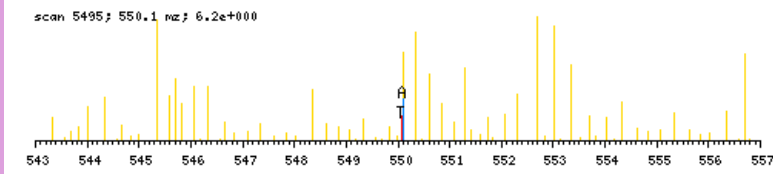

zoomed in precursor plot; T=theoretical m/z, A=acquired m/z

| b <sup>+</sup> | #  | AA | #  | y <sup>+</sup> | y <sup>2+</sup> |
|----------------|----|----|----|----------------|-----------------|
| 148.1550       | 1  | I  | 20 |                |                 |
| 219.1921       | 2  | A  | 19 | 2050.1001      | 1025.5540       |
| 334.2190       | 3  | D  | 18 | 1979.0630      | 990.0354        |
| 447.3031       | 4  | L  | 17 | 1864.0360      | 932.5219        |
| 546.3715       | 5  | V  | 16 | 1750.9520      | 875.9799        |
| 645.4399       | 6  | V  | 15 | 1651.8835      | 826.4457        |
| 702.4614       | 7  | G  | 14 | 1552.8151      | 776.9115        |
| 815.5454       | 8  | L  | 13 | 1495.7937      | 748.4007        |
| 975.5760       | 9  | C  | 12 | 1382.7096      | 691.8587        |
| 1076.6237      | 10 | T  | 11 | 1222.6790      | 611.8434        |
| 1133.6452      | 11 | G  | 10 | 1121.6313      | 561.3196        |
| 1261.7038      | 12 | Q  | 9  | 1064.6099      | 532.8088        |
| 1374.7878      | 13 | I  | 8  | 936.5513       | 468.7796        |
| 1536.9459      | 14 | K  | 7  | 823.4672       | 412.2375        |
| 1637.9936      | 15 | T  | 6  | 661.3091       | 331.1585        |
| 1695.0151      | 16 | G  | 5  | 560.2614       | 280.6346        |
| 1766.0522      | 17 | A  | 4  | 503.2400       | 252.1239        |
| 1863.1049      | 18 | P  | 3  | 432.2029       | 216.6053        |
| 2023.1355      | 19 | C  | 2  | 335.1501       | 168.0790        |
|                | 20 | R  | 1  | 175.1195       | 88.0637         |

N-term:+35.07 C(9):+160.03  
 K(14):+162.16 C(19):+160.03



IDELDAIAPKR, MH+ 1296.7527, m/z 432.9224  
 L OS G27 P150811 220811-s1.04658.04658.3.dta

scan 4658; 1.3e+001

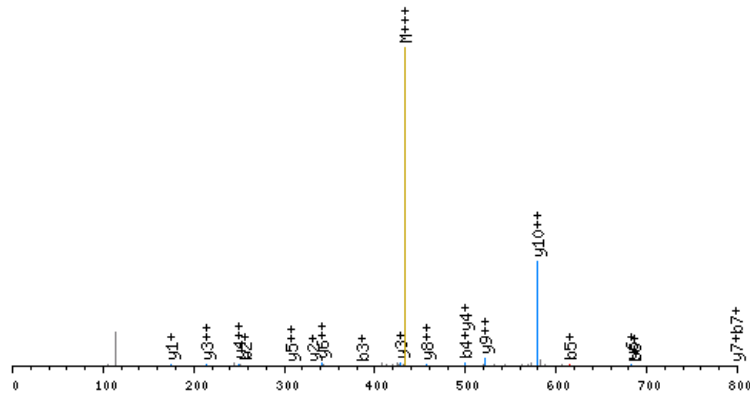

click image to zoom in; click top corners to zoom out [\[precursor±\]](#)

scan 4657; 432.9 m/z; 1.2e+001

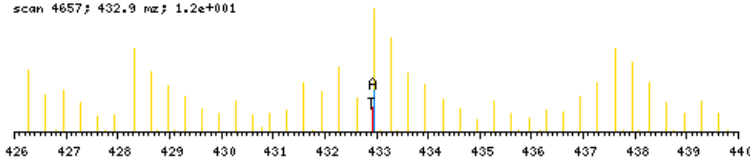

zoomed in precursor plot; T=theoretical m/z, A=acquired m/z

X-range:

-

MassTol: Y-zoom:

MassType:

AVG  MONO

Axis:

1  2

Label:

I  M  -

Ions:

a  +  2+  3+

b  +  2+  3+

c  +  2+  3+

x  +  2+  3+

y  +  2+  3+

z  +  2+  3+

hide H<sub>2</sub>O/NH<sub>3</sub>

zoom 112-122

GO

| b <sup>+</sup> | #  | AA # | y <sup>+</sup> | y <sup>2+</sup> |
|----------------|----|------|----------------|-----------------|
| 142.1232       | 1  | I 11 |                |                 |
| 257.1501       | 2  | D 10 | 1155.6374      | 578.3226        |
| 386.1927       | 3  | E 9  | 1040.6105      | 520.8091        |
| 499.2768       | 4  | L 8  | 911.5679       | 456.2878        |
| 614.3037       | 5  | D 7  | 798.4838       | 399.7458        |
| 685.3408       | 6  | A 6  | 683.4569       | 342.2323        |
| 798.4249       | 7  | I 5  | 612.4197       | 306.7138        |
| 869.4620       | 8  | A 4  | 499.3357       | 250.1718        |
| 966.5148       | 9  | P 3  | 428.2986       | 214.6532        |
| 1122.6411      | 10 | K 2  | 331.2458       | 166.1268        |
|                | 11 | R 1  | 175.1195       | 88.0637         |

N-term:+29.04 K(10):+156.13

IDETSSEVLDELYR, MH+ 1696.8281, m/z 566.2809  
 L OS G25 P150811 220811-s1.07458.07458.3.dta

X-range:

-

MassTol: Y-zoom:

MassType:

AVG  MONO

Axis:

1  2

Label:

I  M  -

Ions:

a  +  2+  3+

b  +  2+  3+

c  +  2+  3+

x  +  2+  3+

y  +  2+  3+

z  +  2+  3+

hide H<sub>2</sub>O/NH<sub>3</sub>

zoom 112-122

GO

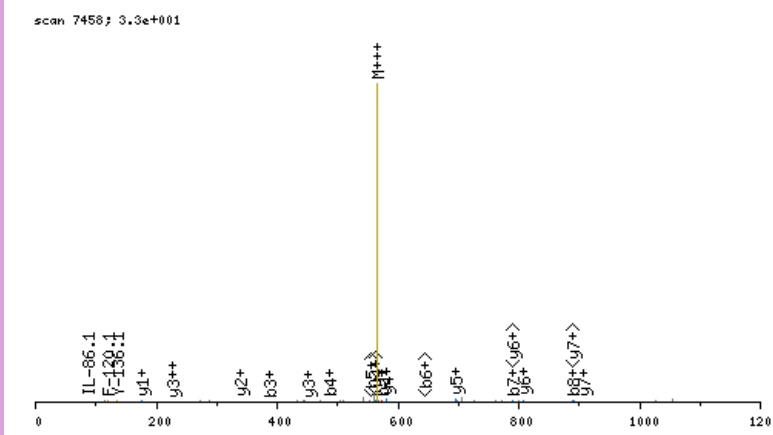

click image to zoom in; click top corners to zoom out [\[precursor±\]](#)

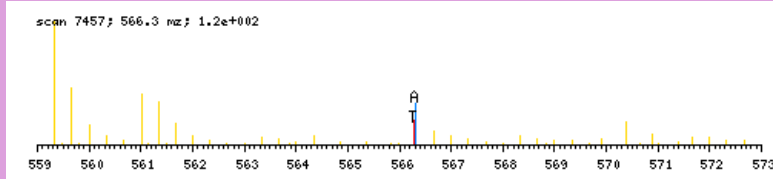

zoomed in precursor plot; T=theoretical m/z, A=acquired m/z

| b <sup>+</sup> | #  | AA # | y <sup>+</sup> | y <sup>2+</sup> |
|----------------|----|------|----------------|-----------------|
| 142.1232       | 1  | I 14 |                |                 |
| 257.1501       | 2  | D 13 | 1555.7128      | 778.3603        |
| 386.1927       | 3  | E 12 | 1440.6858      | 720.8468        |
| 487.2404       | 4  | T 11 | 1311.6432      | 656.3255        |
| 574.2724       | 5  | S 10 | 1210.5956      | 605.8017        |
| 661.3044       | 6  | S 9  | 1123.5635      | 562.2857        |
| 790.3470       | 7  | E 8  | 1036.5315      | 518.7697        |
| 889.4154       | 8  | V 7  | 907.4889       | 454.2484        |
| 1002.4995      | 9  | L 6  | 808.4205       | 404.7142        |
| 1117.5264      | 10 | D 5  | 695.3364       | 348.1721        |
| 1246.5690      | 11 | E 4  | 580.3095       | 290.6587        |
| 1359.6531      | 12 | L 3  | 451.2669       | 226.1374        |
| 1522.7164      | 13 | Y 2  | 338.1828       | 169.5953        |
|                | 14 | R 1  | 175.1195       | 88.0637         |

N-term:+29.04

IDGVTMEETVSGILGKR, MH+ 1944.1112, m/z 648.7086  
 H OS G26 P150811 220811-s1.06697.06697.3.dta

X-range:

-

MassTol: Y-zoom:

MassType:

AVG  MONO

Axis:

1  2

Label:

I  M  -

Ions:

a  +  2+  3+

b  +  2+  3+

c  +  2+  3+

x  +  2+  3+

y  +  2+  3+

z  +  2+  3+

hide H<sub>2</sub>O/NH<sub>3</sub>

zoom 112-122

GO

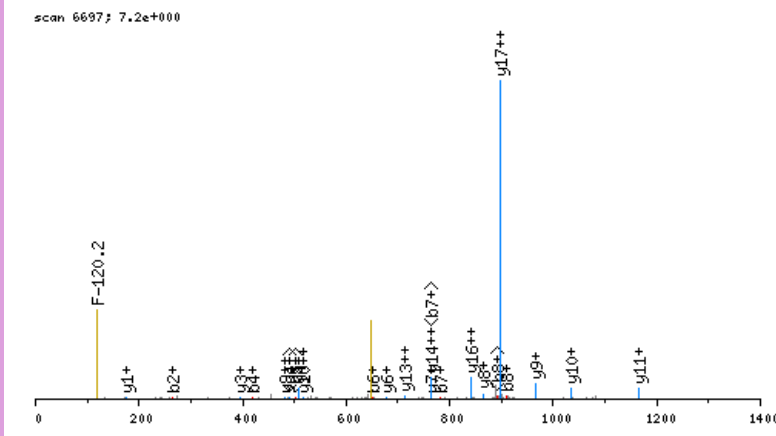

click image to zoom in; click top corners to zoom out [\[precursor±\]](#)

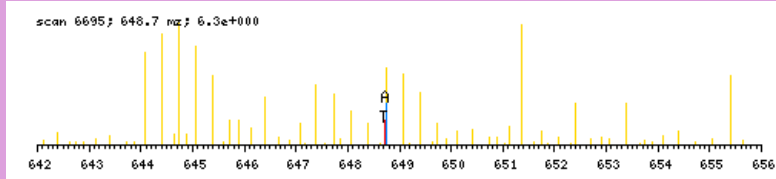

zoomed in precursor plot; T=theoretical m/z, A=acquired m/z

| b <sup>+</sup> | #  | AA # | y <sup>+</sup> | y <sup>2+</sup> |
|----------------|----|------|----------------|-----------------|
| 148.1550       | 1  | I 18 |                |                 |
| 263.1819       | 2  | D 17 | 1796.9641      | 898.9859        |
| 320.2034       | 3  | G 16 | 1681.9371      | 841.4725        |
| 419.2718       | 4  | V 15 | 1624.9157      | 812.9617        |
| 520.3195       | 5  | T 14 | 1525.8472      | 763.4275        |
| 651.3599       | 6  | M 13 | 1424.7996      | 712.9037        |
| 780.4025       | 7  | E 12 | 1293.7591      | 647.3835        |
| 909.4451       | 8  | E 11 | 1164.7165      | 582.8622        |
| 980.4822       | 9  | A 10 | 1035.6739      | 518.3409        |
| 1081.5299      | 10 | T 9  | 964.6368       | 482.8223        |
| 1180.5983      | 11 | V 8  | 863.5891       | 432.2985        |
| 1267.6304      | 12 | S 7  | 764.5207       | 382.7643        |
| 1324.6518      | 13 | G 6  | 677.4887       | 339.2482        |
| 1437.7359      | 14 | I 5  | 620.4672       | 310.7375        |
| 1550.8200      | 15 | L 4  | 507.3831       | 254.1955        |
| 1607.8414      | 16 | G 3  | 394.2991       | 197.6534        |
| 1769.9995      | 17 | K 2  | 337.2776       | 169.1427        |
|                | 18 | R 1  | 175.1195       | 88.0637         |

N-term:+35.07 K(17):+162.16

IDSMSDSEVQAKEER, MH+ 1779.8435, m/z 593.9527  
 L OS G26 P150811 220811-s1.02462.02462.3.dta

X-range:

-

MassTol: Y-zoom:

MassType:

AVG  MONO

Axis:

1  2

Label:

I  M  -

Ions:

a  +  2+  3+

b  +  2+  3+

c  +  2+  3+

x  +  2+  3+

y  +  2+  3+

z  +  2+  3+

hide H<sub>2</sub>O/NH<sub>3</sub>

zoom 112-122

GO

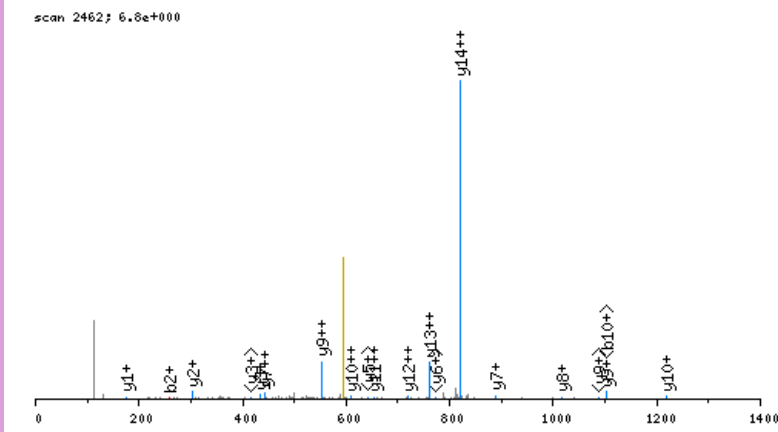

click image to zoom in; click top corners to zoom out [\[precursor±\]](#)

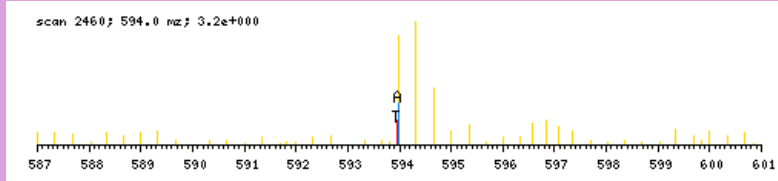

zoomed in precursor plot; T=theoretical m/z, A=acquired m/z

| b <sup>+</sup> | #  | AA # | y <sup>+</sup> | y <sup>2+</sup> |
|----------------|----|------|----------------|-----------------|
| 142.1232       | 1  | I    | 15             |                 |
| 257.1501       | 2  | D    | 14             | 1638.7281       |
| 344.1821       | 3  | S    | 13             | 1523.7012       |
| 475.2226       | 4  | M    | 12             | 1436.6692       |
| 562.2546       | 5  | S    | 11             | 1305.6287       |
| 677.2816       | 6  | D    | 10             | 1218.5967       |
| 764.3136       | 7  | S    | 9              | 1103.5697       |
| 893.3562       | 8  | E    | 8              | 1016.5377       |
| 992.4246       | 9  | V    | 7              | 887.4951        |
| 1120.4832      | 10 | Q    | 6              | 788.4267        |
| 1191.5203      | 11 | A    | 5              | 660.3681        |
| 1347.6466      | 12 | K    | 4              | 589.3310        |
| 1476.6892      | 13 | E    | 3              | 433.2047        |
| 1605.7318      | 14 | E    | 2              | 304.1621        |
|                | 15 | R    | 1              | 175.1195        |

N-term:+29.04 K(12):+156.13

IDVDKTKVHNTEPVENAR, MH+ 2149.1618, m/z 538.0459  
 L OS G28 P150811 220811-s1.02797.02797.4.dta

X-range:

-

MassTol: Y-zoom:

MassType:

AVG  MONO

Axis:

1  2

Label:

I  M  -

Ions:

a  +  2+  3+

b  +  2+  3+

c  +  2+  3+

x  +  2+  3+

y  +  2+  3+

z  +  2+  3+

hide H<sub>2</sub>O/NH<sub>3</sub>

zoom 112-122

GO

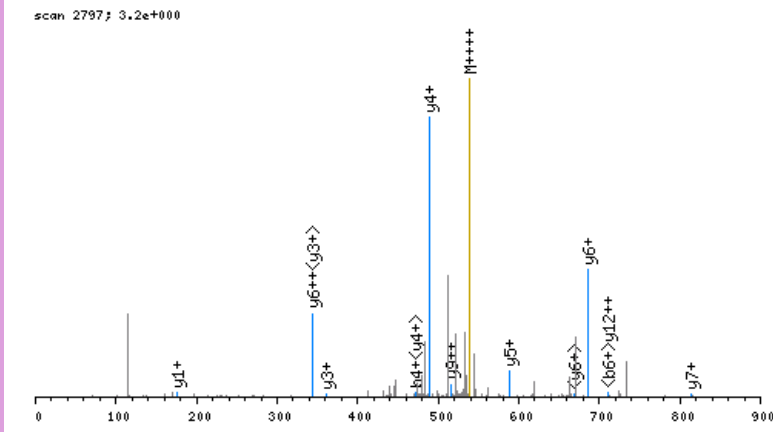

click image to zoom in; click top corners to zoom out [\[precursor±\]](#)

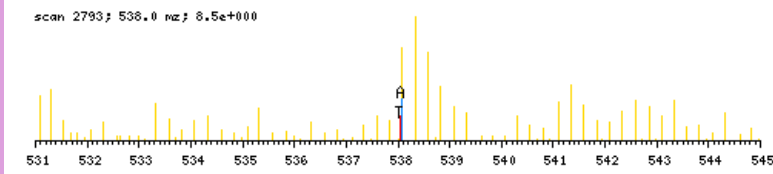

zoomed in precursor plot; T=theoretical m/z, A=acquired m/z

| b <sup>+</sup> | #  | AA | #  | y <sup>+</sup> | y <sup>2+</sup> |
|----------------|----|----|----|----------------|-----------------|
| 142.1232       | 1  | I  | 18 |                |                 |
| 257.1501       | 2  | D  | 17 | 2008.0464      | 1004.5271       |
| 356.2185       | 3  | V  | 16 | 1893.0195      | 947.0136        |
| 471.2455       | 4  | D  | 15 | 1793.9511      | 897.4794        |
| 627.3718       | 5  | K  | 14 | 1678.9241      | 839.9660        |
| 728.4194       | 6  | T  | 13 | 1522.7978      | 761.9028        |
| 884.5457       | 7  | K  | 12 | 1421.7501      | 711.3790        |
| 983.6142       | 8  | V  | 11 | 1265.6238      | 633.3158        |
| 1120.6731      | 9  | H  | 10 | 1166.5554      | 583.7816        |
| 1234.7160      | 10 | N  | 9  | 1029.4965      | 515.2522        |
| 1335.7637      | 11 | T  | 8  | 915.4536       | 458.2307        |
| 1464.8063      | 12 | E  | 7  | 814.4059       | 407.7069        |
| 1561.8590      | 13 | P  | 6  | 685.3633       | 343.1856        |
| 1660.9274      | 14 | V  | 5  | 588.3105       | 294.6592        |
| 1789.9700      | 15 | E  | 4  | 489.2421       | 245.1250        |
| 1904.0130      | 16 | N  | 3  | 360.1995       | 180.6037        |
| 1975.0501      | 17 | A  | 2  | 246.1566       | 123.5822        |
|                | 18 | R  | 1  | 175.1195       | 88.0637         |

N-term:+29.04 K(5):+156.13  
 K(7):+156.13

IEEALGDKAVFAGR, MH+ 1531.8484, m/z 511.2877  
 L OS G26 P150811 220811-s1.03837.03837.3.dta

scan 3837; 1.9e+001

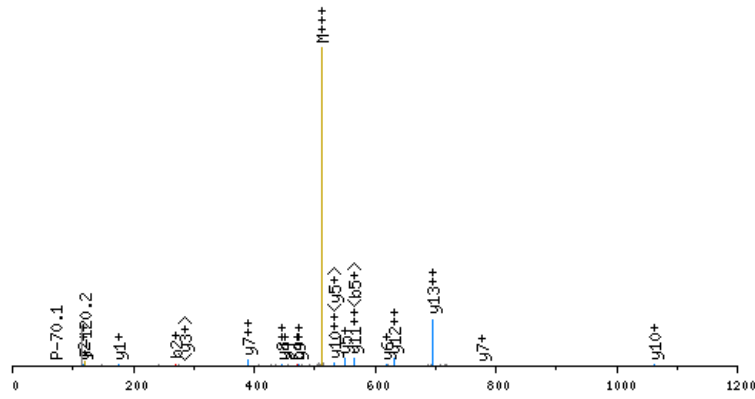

click image to zoom in; click top corners to zoom out [\[precursor±\]](#)

scan 3835; 511.3 m/z; 1.6e+001

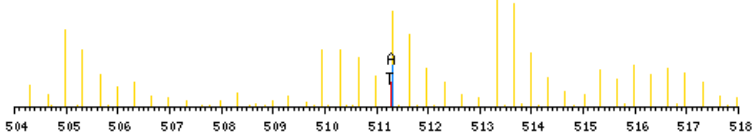

zoomed in precursor plot; T=theoretical m/z, A=acquired m/z

X-range:

-

MassTol: Y-zoom:

MassType:

AVG  MONO

Axis:

1  2

Label:

I  M  -

Ions:

a  +  2+  3+

b  +  2+  3+

c  +  2+  3+

x  +  2+  3+

y  +  2+  3+

z  +  2+  3+

hide H<sub>2</sub>O/NH<sub>3</sub>

zoom 112-122

GO

| b <sup>+</sup> | #  | AA # | y <sup>+</sup> | y <sup>2+</sup> |
|----------------|----|------|----------------|-----------------|
| 142.1232       | 1  | I 14 |                |                 |
| 271.1658       | 2  | E 13 | 1390.7331      | 695.8705        |
| 400.2084       | 3  | E 12 | 1261.6905      | 631.3492        |
| 471.2455       | 4  | A 11 | 1132.6479      | 566.8279        |
| 584.3295       | 5  | L 10 | 1061.6108      | 531.3093        |
| 641.3510       | 6  | G 9  | 948.5267       | 474.7673        |
| 756.3779       | 7  | D 8  | 891.5053       | 446.2565        |
| 912.5042       | 8  | K 7  | 776.4783       | 388.7431        |
| 983.5413       | 9  | A 6  | 620.3520       | 310.6799        |
| 1082.6098      | 10 | V 5  | 549.3149       | 275.1614        |
| 1229.6782      | 11 | F 4  | 450.2465       | 225.6272        |
| 1300.7153      | 12 | A 3  | 303.1781       | 152.0930        |
| 1357.7368      | 13 | G 2  | 232.1410       | 116.5744        |
|                | 14 | R 1  | 175.1195       | 88.0637         |

N-term:+29.04 K(8):+156.13

IEENDEVLVAGFGR, MH+ 1575.8018, m/z 525.9388  
 L OS G25 P150811 220811-s1.06779.06779.3.dta

scan 6779; 2.8e+000

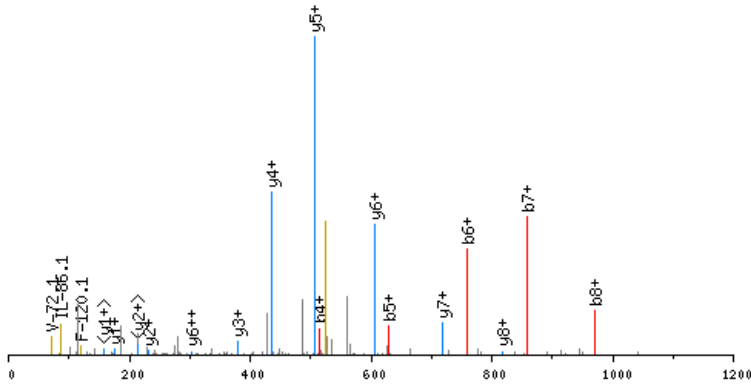

click image to zoom in; click top corners to zoom out [\[precursor±\]](#)

scan 6777; 525.9 m/z; 8.9e+000

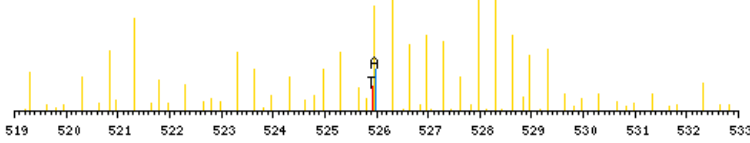

zoomed in precursor plot; T=theoretical m/z, A=acquired m/z

X-range:

-

MassTol: Y-zoom:

MassType:

AVG  MONO

Axis:

1  2

Label:

I  M  -

Ions:

a  +  2+  3+

b  +  2+  3+

c  +  2+  3+

x  +  2+  3+

y  +  2+  3+

z  +  2+  3+

hide H<sub>2</sub>O/NH<sub>3</sub>

zoom 112-122

GO

| b <sup>+</sup> | #  | AA # | y <sup>+</sup> | y <sup>2+</sup> |
|----------------|----|------|----------------|-----------------|
| 142.1232       | 1  | I 14 |                |                 |
| 271.1658       | 2  | E 13 | 1434.6865      | 717.8472        |
| 400.2084       | 3  | E 12 | 1305.6439      | 653.3259        |
| 514.2513       | 4  | N 11 | 1176.6013      | 588.8046        |
| 629.2782       | 5  | D 10 | 1062.5584      | 531.7831        |
| 758.3208       | 6  | E 9  | 947.5314       | 474.2696        |
| 857.3892       | 7  | V 8  | 818.4888       | 409.7483        |
| 970.4733       | 8  | L 7  | 719.4204       | 360.2141        |
| 1069.5417      | 9  | V 6  | 606.3364       | 303.6721        |
| 1140.5788      | 10 | A 5  | 507.2680       | 254.1379        |
| 1197.6003      | 11 | G 4  | 436.2308       | 218.6193        |
| 1344.6687      | 12 | F 3  | 379.2094       | 190.1086        |
| 1401.6902      | 13 | G 2  | 232.1410       | 116.5744        |
|                | 14 | R 1  | 175.1195       | 88.0637         |

N-term:+29.04

IEEVDLANLAPR, MH+ 1373.7852, m/z 458.5999  
 H OS G25 P150811 220811-s1.07068.07068.3.dta

scan 7068; 6.8e+000

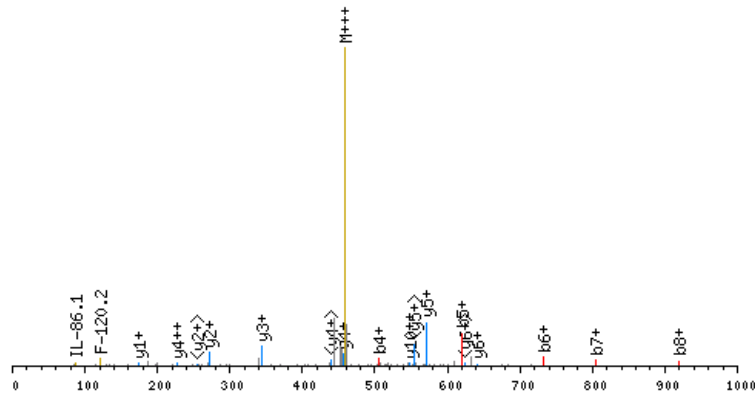

click image to zoom in; click top corners to zoom out [\[precursor±\]](#)

scan 7067; 458.6 m/z; 1.3e+001

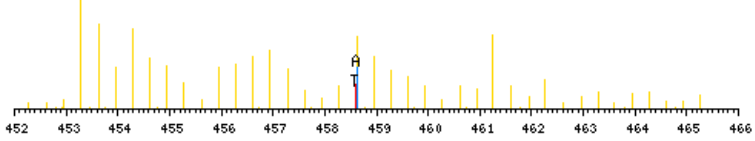

zoomed in precursor plot; T=theoretical m/z, A=acquired m/z

X-range:

-

MassTol: Y-zoom:

MassType:

AVG  MONO

Axis:

1  2

Label:

I  M  -

Ions:

a  +  2+  3+

b  +  2+  3+

c  +  2+  3+

x  +  2+  3+

y  +  2+  3+

z  +  2+  3+

hide H<sub>2</sub>O/NH<sub>3</sub>

zoom 112-122

GO

| b <sup>+</sup> | #  | AA # | y <sup>+</sup> | y <sup>2+</sup> |
|----------------|----|------|----------------|-----------------|
| 148.1550       | 1  | I 12 |                |                 |
| 277.1976       | 2  | E 11 | 1226.6381      | 613.8230        |
| 406.2402       | 3  | E 10 | 1097.5955      | 549.3017        |
| 505.3086       | 4  | V 9  | 968.5529       | 484.7804        |
| 620.3355       | 5  | D 8  | 869.4845       | 435.2462        |
| 733.4196       | 6  | L 7  | 754.4575       | 377.7327        |
| 804.4567       | 7  | A 6  | 641.3735       | 321.1907        |
| 918.4996       | 8  | N 5  | 570.3364       | 285.6721        |
| 1031.5837      | 9  | L 4  | 456.2934       | 228.6506        |
| 1102.6208      | 10 | A 3  | 343.2094       | 172.1086        |
| 1199.6736      | 11 | P 2  | 272.1723       | 136.5900        |
|                | 12 | R 1  | 175.1195       | 88.0637         |

N-term:+35.07



IEKLEKEGSAGGPGTPR, MH+ 1810.0075, m/z 453.2573  
 L OS G28 P150811 220811-s1.02211.02211.4.dta

X-range:

-

MassTol: Y-zoom:

MassType:

AVG  MONO

Axis:

1  2

Label:

I  M  -

Ions:

a  +  2+  3+

b  +  2+  3+

c  +  2+  3+

x  +  2+  3+

y  +  2+  3+

z  +  2+  3+

hide H<sub>2</sub>O/NH<sub>3</sub>

zoom 112-122

GO

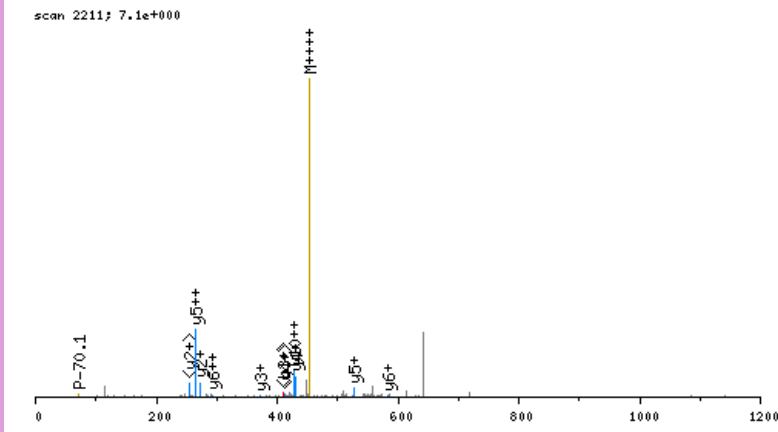

click image to zoom in; click top corners to zoom out [\[precursor±\]](#)

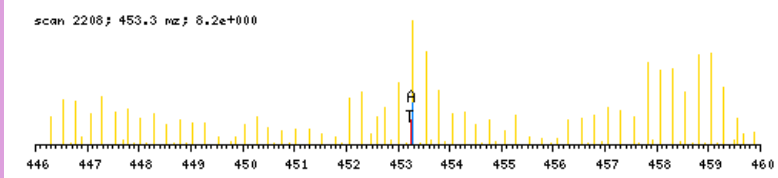

zoomed in precursor plot; T=theoretical m/z, A=acquired m/z

| b <sup>+</sup> | #  | AA | #  | y <sup>+</sup>  | y <sup>2+</sup> |
|----------------|----|----|----|-----------------|-----------------|
| 142.1232       | 1  | I  | 17 |                 |                 |
| 271.1658       | 2  | E  | 16 | 1668.8921       | 834.9500        |
| 427.2921       | 3  | K  | 15 | 1539.8496       | 770.4287        |
| 540.3761       | 4  | L  | 14 | 1383.7233       | 692.3655        |
| 669.4187       | 5  | E  | 13 | 1270.6392       | 635.8235        |
| 825.5450       | 6  | K  | 12 | 1141.5966       | 571.3022        |
| 954.5876       | 7  | E  | 11 | 985.4703        | 493.2391        |
| 1011.6091      | 8  | G  | 10 | 856.4277        | <b>428.7178</b> |
| 1098.6411      | 9  | S  | 9  | 799.4062        | 400.2070        |
| 1169.6782      | 10 | A  | 8  | 712.3742        | 356.6910        |
| 1226.6997      | 11 | G  | 7  | 641.3371        | 321.1725        |
| 1283.7211      | 12 | G  | 6  | <b>584.3156</b> | <b>292.6617</b> |
| 1380.7739      | 13 | P  | 5  | <b>527.2942</b> | <b>264.1510</b> |
| 1437.7954      | 14 | G  | 4  | <b>430.2414</b> | 215.6246        |
| 1538.8430      | 15 | T  | 3  | <b>373.2199</b> | 187.1139        |
| 1635.8958      | 16 | P  | 2  | <b>272.1723</b> | 136.5900        |
|                | 17 | R  | 1  | 175.1195        | 88.0637         |

N-term:+29.04 K(3):+156.13  
 K(6):+156.13

IFQTTTTERPFIQKLFER, MH+ 2093.2548, m/z 524.0691  
 H OS G28 P150811 220811-s1.08259.08259.4.dta

X-range:

-

MassTol: Y-zoom:

MassType:

AVG  MONO

Axis:

1  2

Label:

I  M  -

Ions:

a  +  2+  3+

b  +  2+  3+

c  +  2+  3+

x  +  2+  3+

y  +  2+  3+

z  +  2+  3+

hide H<sub>2</sub>O/NH<sub>3</sub>

zoom 112-122

GO

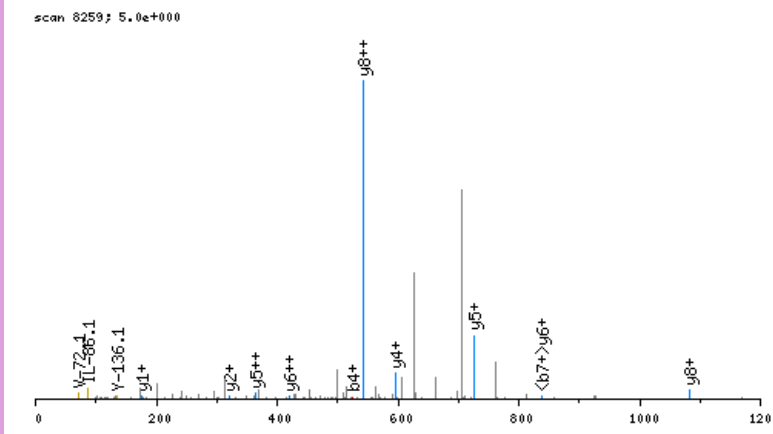

click image to zoom in; click top corners to zoom out [\[precursor±\]](#)

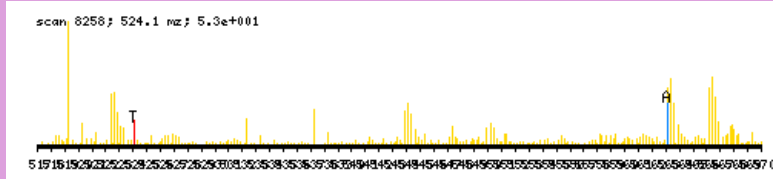

zoomed in precursor plot; T=theoretical m/z, A=acquired m/z

| b <sup>+</sup> | #  | AA # | y <sup>+</sup> | y <sup>2+</sup> |
|----------------|----|------|----------------|-----------------|
| 148.1550       | 1  | I 16 |                |                 |
| 295.2234       | 2  | F 15 | 1946.1076      | 973.5577        |
| 423.2820       | 3  | Q 14 | 1799.0392      | 900.0235        |
| 524.3296       | 4  | T 13 | 1670.9806      | 835.9942        |
| 625.3773       | 5  | T 12 | 1569.9330      | 785.4704        |
| 726.4250       | 6  | T 11 | 1468.8853      | 734.9466        |
| 855.4676       | 7  | E 10 | 1367.8376      | 684.4227        |
| 1011.5687      | 8  | R 9  | 1238.7950      | 619.9014        |
| 1108.6215      | 9  | P 8  | 1082.6939      | 541.8509        |
| 1255.6899      | 10 | F 7  | 985.6411       | 493.3245        |
| 1368.7739      | 11 | I 6  | 838.5727       | 419.7903        |
| 1496.8325      | 12 | Q 5  | 725.4887       | 363.2482        |
| 1658.9906      | 13 | K 4  | 597.4301       | 299.2190        |
| 1772.0747      | 14 | L 3  | 435.2720       | 218.1399        |
| 1919.1431      | 15 | F 2  | 322.1879       | 161.5979        |
|                | 16 | R 1  | 175.1195       | 88.0637         |

N-term:+35.07 K(13):+162.16

IGGHGAEYGAELER, MH+ 1557.7661, m/z 519.9269  
 L OS G27 P150811 220811-s1.03475.03475.3.dta

X-range:

-

MassTol: Y-zoom:

MassType:

AVG  MONO

Axis:

1  2

Label:

I  M  -

Ions:

a  +  2+  3+

b  +  2+  3+

c  +  2+  3+

x  +  2+  3+

y  +  2+  3+

z  +  2+  3+

hide H<sub>2</sub>O/NH<sub>3</sub>

zoom 112-122

GO

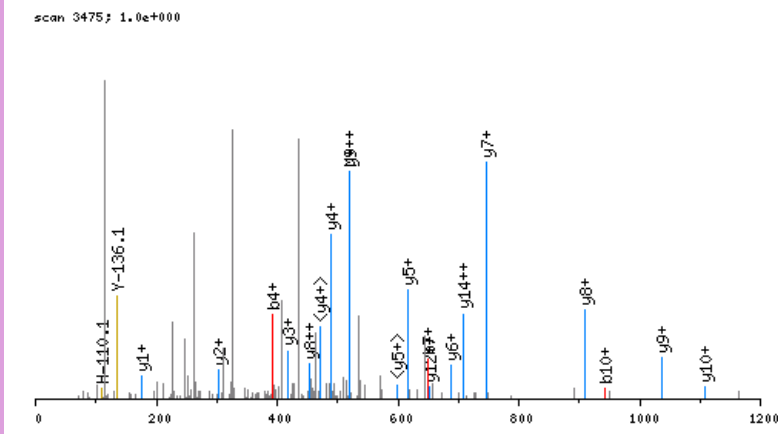

click image to zoom in; click top corners to zoom out [\[precursor±\]](#)

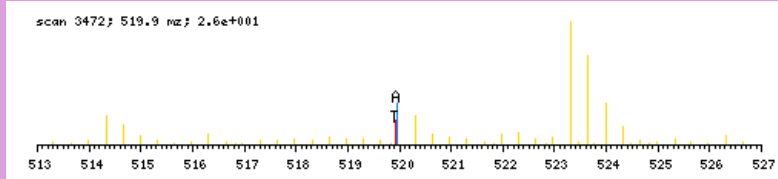

zoomed in precursor plot; T=theoretical m/z, A=acquired m/z

| b <sup>+</sup> | #  | AA # | y <sup>+</sup> | y <sup>2+</sup> |
|----------------|----|------|----------------|-----------------|
| 142.1232       | 1  | I 15 |                |                 |
| 199.1446       | 2  | G 14 | 1416.6508      | 708.8293        |
| 256.1661       | 3  | G 13 | 1359.6293      | 680.3186        |
| 393.2250       | 4  | H 12 | 1302.6079      | 651.8078        |
| 450.2465       | 5  | G 11 | 1165.5489      | 583.2784        |
| 521.2836       | 6  | A 10 | 1108.5275      | 554.7677        |
| 650.3262       | 7  | E 9  | 1037.4904      | 519.2491        |
| 813.3895       | 8  | Y 8  | 908.4478       | 454.7278        |
| 870.4110       | 9  | G 7  | 745.3844       | 373.1961        |
| 941.4481       | 10 | A 6  | 688.3630       | 344.6854        |
| 1070.4907      | 11 | E 5  | 617.3259       | 309.1668        |
| 1141.5278      | 12 | A 4  | 488.2833       | 244.6455        |
| 1254.6119      | 13 | L 3  | 417.2462       | 209.1270        |
| 1383.6544      | 14 | E 2  | 304.1621       | 152.5850        |
|                | 15 | R 1  | 175.1195       | 88.0637         |

N-term:+29.04

IGNSTAIQELFKR, MH+ 1532.8801, m/z 511.6315  
 L OS G27 P150811 220811-s1.06425.06425.3.dta

scan 6425; 5.3e+000

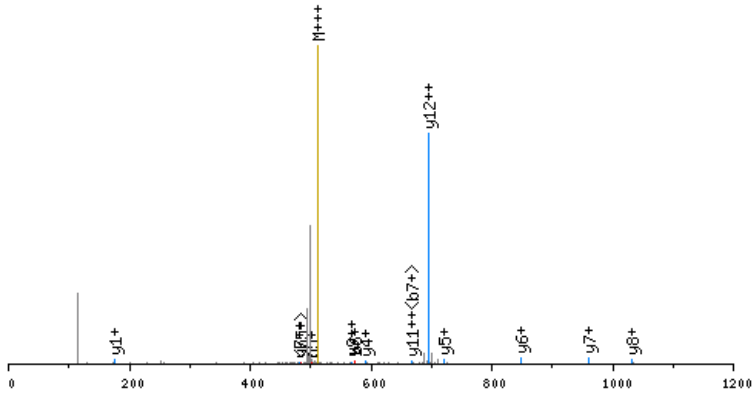

scan 6422; 511.6 m/z; 4.9e+000

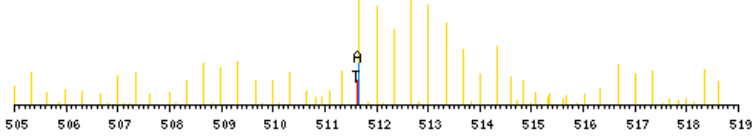

X-range:

-

MassTol: Y-zoom:

MassType:

AVG  MONO

Axis:

1  2

Label:

I  M  -

Ions:

a  +  2+  3+

b  +  2+  3+

c  +  2+  3+

x  +  2+  3+

y  +  2+  3+

z  +  2+  3+

hide H<sub>2</sub>O/NH<sub>3</sub>

zoom 112-122

GO

| b <sup>+</sup> | #  | AA # | y <sup>+</sup> | y <sup>2+</sup> |
|----------------|----|------|----------------|-----------------|
| 142.1232       | 1  | I    | 13             |                 |
| 199.1446       | 2  | G    | 12             | 1391.7647       |
| 313.1876       | 3  | N    | 11             | 1334.7433       |
| 400.2196       | 4  | S    | 10             | 1220.7003       |
| 501.2673       | 5  | T    | 9              | 1133.6683       |
| 572.3044       | 6  | A    | 8              | 1032.6206       |
| 685.3884       | 7  | I    | 7              | 961.5835        |
| 813.4470       | 8  | Q    | 6              | 848.4994        |
| 942.4896       | 9  | E    | 5              | 720.4409        |
| 1055.5737      | 10 | L    | 4              | 591.3983        |
| 1202.6421      | 11 | F    | 3              | 478.3142        |
| 1358.7684      | 12 | K    | 2              | 331.2458        |
|                | 13 | R    | 1              | 175.1195        |

N-term:+29.04 K(12):+156.13



IKELISELDER, MH+ 1400.8001, m/z 467.6049  
 L OS G27 P150811 220811-s1.05340.05340.3.dta

X-range:

-

MassTol: Y-zoom:

MassType:

AVG  MONO

Axis:

1  2

Label:

I  M  -

Ions:

a  +  2+  3+

b  +  2+  3+

c  +  2+  3+

x  +  2+  3+

y  +  2+  3+

z  +  2+  3+

hide H<sub>2</sub>O/NH<sub>3</sub>

zoom 112-122

GO

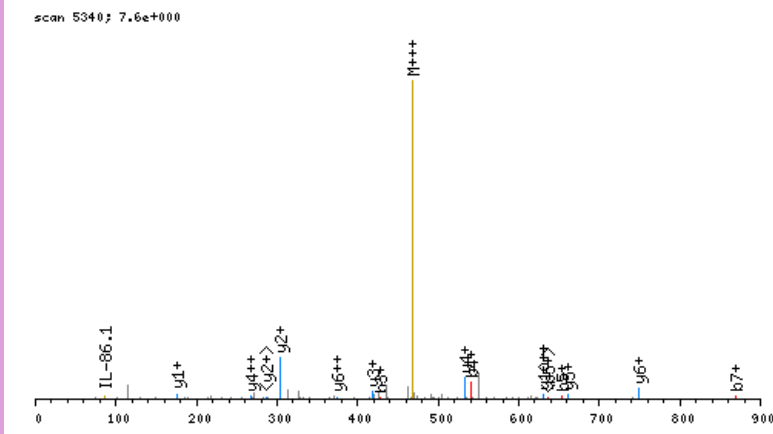

click image to zoom in; click top corners to zoom out [\[precursor±\]](#)

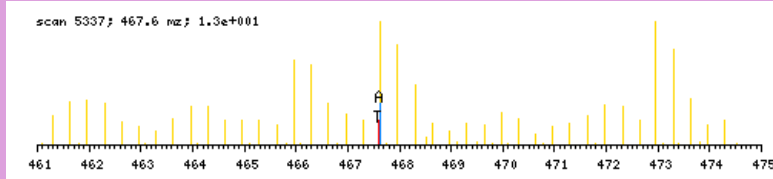

zoomed in precursor plot; T=theoretical m/z, A=acquired m/z

| b <sup>+</sup> | #  | AA # | y <sup>+</sup> | y <sup>2+</sup> |
|----------------|----|------|----------------|-----------------|
| 142.1232       | 1  | I 11 |                |                 |
| 298.2495       | 2  | K 10 | 1259.6847      | 630.3463        |
| 427.2921       | 3  | E 9  | 1103.5584      | 552.2831        |
| 540.3761       | 4  | L 8  | 974.5159       | 487.7618        |
| 653.4602       | 5  | I 7  | 861.4318       | 431.2198        |
| 740.4922       | 6  | S 6  | 748.3477       | 374.6778        |
| 869.5348       | 7  | E 5  | 661.3157       | 331.1618        |
| 982.6189       | 8  | L 4  | 532.2731       | 266.6405        |
| 1097.6458      | 9  | D 3  | 419.1890       | 210.0984        |
| 1226.6884      | 10 | E 2  | 304.1621       | 152.5850        |
|                | 11 | R 1  | 175.1195       | 88.0637         |

N-term:+29.04 K(2):+156.13

ILGGQEAHAHAR, MH+ 1221.6704, m/z 407.8950  
 L OS G27 P150811 220811-s1.02074.02074.3.dta

scan 2074; 2.9e+001

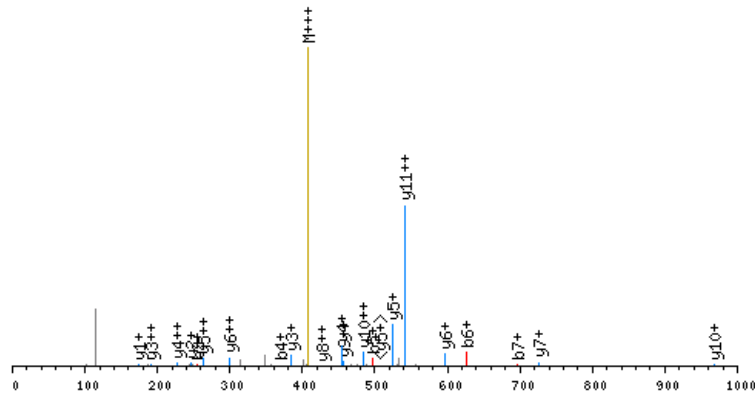

click image to zoom in; click top corners to zoom out [\[precursor±\]](#)

scan 2072; 407.9 m/z; 9.1e+001

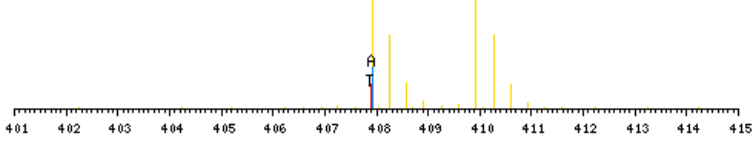

zoomed in precursor plot; T=theoretical m/z, A=acquired m/z

X-range:

-

MassTol: Y-zoom:

MassType:

AVG  MONO

Axis:

1  2

Label:

I  M  -

Ions:

a  +  2+  3+

b  +  2+  3+

c  +  2+  3+

x  +  2+  3+

y  +  2+  3+

z  +  2+  3+

hide H<sub>2</sub>O/NH<sub>3</sub>

zoom 112-122

GO

| b <sup>+</sup> | #  | AA # | y <sup>+</sup> | y <sup>2+</sup> |
|----------------|----|------|----------------|-----------------|
| 142.1232       | 1  | I 12 |                |                 |
| 255.2072       | 2  | L 11 | 1080.5550      | 540.7814        |
| 312.2287       | 3  | G 10 | 967.4710       | 484.2394        |
| 369.2502       | 4  | G 9  | 910.4495       | 455.7287        |
| 497.3087       | 5  | Q 8  | 853.4280       | 427.2179        |
| 626.3513       | 6  | E 7  | 725.3695       | 363.1886        |
| 697.3884       | 7  | A 6  | 596.3269       | 298.6673        |
| 768.4256       | 8  | A 5  | 525.2898       | 263.1488        |
| 839.4627       | 9  | A 4  | 454.2526       | 227.6302        |
| 976.5216       | 10 | H 3  | 383.2155       | 192.1117        |
| 1047.5587      | 11 | A 2  | 246.1566       | 123.5822        |
|                | 12 | R 1  | 175.1195       | 88.0637         |

N-term:+29.04

ILNLPE\$WDWR, MH+ 1456.7588, m/z 486.2578  
 L OS G25 P150811 220811-s1.08148.08148.3.dta

X-range:

-

MassTol: Y-zoom:

MassType:

AVG  MONO

Axis:

1  2

Label:

I  M  -

Ions:

a  +  2+  3+

b  +  2+  3+

c  +  2+  3+

x  +  2+  3+

y  +  2+  3+

z  +  2+  3+

hide H<sub>2</sub>O/NH<sub>3</sub>

zoom 112-122

GO

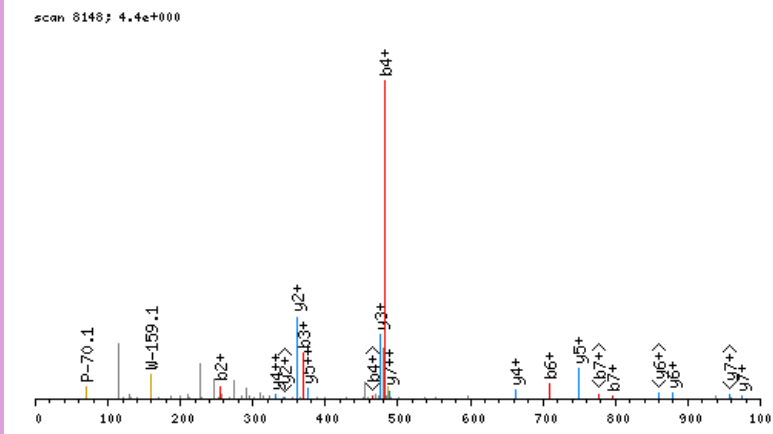

click image to zoom in; click top corners to zoom out [\[precursor±\]](#)

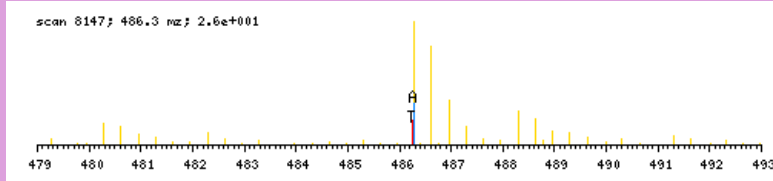

zoomed in precursor plot; T=theoretical m/z, A=acquired m/z

| b <sup>+</sup> | #  | AA # | y <sup>+</sup> | y <sup>2+</sup> |
|----------------|----|------|----------------|-----------------|
| 142.1232       | 1  | I 11 |                |                 |
| 255.2072       | 2  | L 10 | 1315.6435      | 658.3257        |
| 369.2502       | 3  | N 9  | 1202.5594      | 601.7836        |
| 482.3342       | 4  | L 8  | 1088.5165      | 544.7622        |
| 579.3870       | 5  | P 7  | 975.4325       | 488.2201        |
| 708.4296       | 6  | E 6  | 878.3797       | 439.6938        |
| 795.4616       | 7  | S 5  | 749.3371       | 375.1725        |
| 981.5409       | 8  | W 4  | 662.3051       | 331.6564        |
| 1096.5679      | 9  | D 3  | 476.2258       | 238.6168        |
| 1282.6472      | 10 | W 2  | 361.1988       | 181.1033        |
|                | 11 | R 1  | 175.1195       | 88.0637         |

N-term:+29.04



INPETPGYVGFANLPNQVHR, MH+ 2257.1942, m/z 565.0540  
 H OS G26 P150811 220811-s1.05469.05469.4.dta

X-range:

-

MassTol: Y-zoom:

MassType:

AVG  MONO

Axis:

1  2

Label:

I  M  -

Ions:

a  +  2+  3+

b  +  2+  3+

c  +  2+  3+

x  +  2+  3+

y  +  2+  3+

z  +  2+  3+

hide H<sub>2</sub>O/NH<sub>3</sub>

zoom 112-122

GO

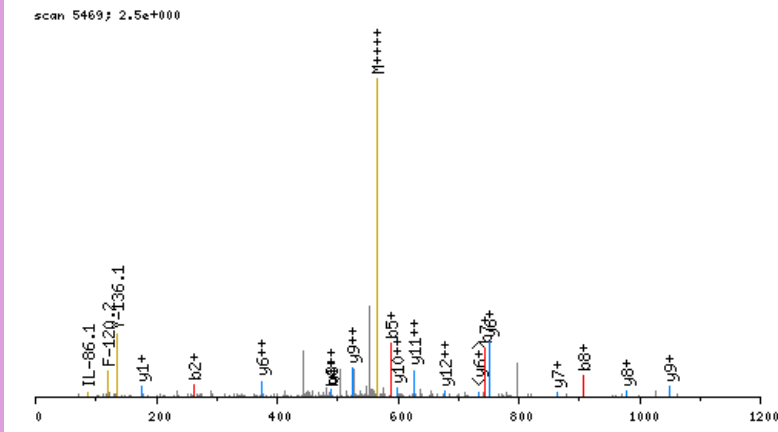

click image to zoom in; click top corners to zoom out [\[precursor±\]](#)

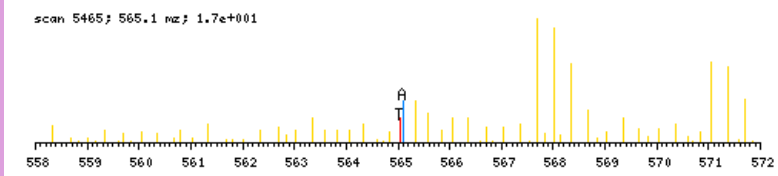

zoomed in precursor plot; T=theoretical m/z, A=acquired m/z

| b <sup>+</sup> | #  | AA | #  | y <sup>+</sup> | y <sup>2+</sup> |
|----------------|----|----|----|----------------|-----------------|
| 148.1550       | 1  | I  | 20 |                |                 |
| 262.1979       | 2  | N  | 19 | 2110.0470      | 1055.5274       |
| 359.2507       | 3  | P  | 18 | 1996.0041      | 998.5060        |
| 488.2932       | 4  | E  | 17 | 1898.9513      | 949.9796        |
| 589.3409       | 5  | T  | 16 | 1769.9087      | 885.4583        |
| 686.3937       | 6  | P  | 15 | 1668.8610      | 834.9344        |
| 743.4152       | 7  | G  | 14 | 1571.8083      | 786.4081        |
| 906.4785       | 8  | Y  | 13 | 1514.7868      | 757.8973        |
| 1005.5469      | 9  | V  | 12 | 1351.7235      | 676.3657        |
| 1062.5684      | 10 | G  | 11 | 1252.6551      | 626.8315        |
| 1209.6368      | 11 | F  | 10 | 1195.6336      | 598.3207        |
| 1280.6739      | 12 | A  | 9  | 1048.5652      | 524.7865        |
| 1394.7168      | 13 | N  | 8  | 977.5281       | 489.2680        |
| 1507.8009      | 14 | L  | 7  | 863.4852       | 432.2465        |
| 1604.8536      | 15 | P  | 6  | 750.4011       | 375.7045        |
| 1718.8966      | 16 | N  | 5  | 653.3483       | 327.1781        |
| 1846.9551      | 17 | Q  | 4  | 539.3054       | 270.1566        |
| 1946.0236      | 18 | V  | 3  | 411.2468       | 206.1273        |
| 2083.0825      | 19 | H  | 2  | 312.1784       | 156.5931        |
|                | 20 | R  | 1  | 175.1195       | 88.0637         |

N-term:+35.07

INYQDDAELATR, MH+ 1436.7021, m/z 479.5722  
 L OS G25 P150811 220811-s1.04290.04290.3.dta

X-range:

-

MassTol: Y-zoom:

MassType:

AVG  MONO

Axis:

1  2

Label:

I  M  -

Ions:

a  +  2+  3+

b  +  2+  3+

c  +  2+  3+

x  +  2+  3+

y  +  2+  3+

z  +  2+  3+

hide H<sub>2</sub>O/NH<sub>3</sub>

zoom 112-122

GO

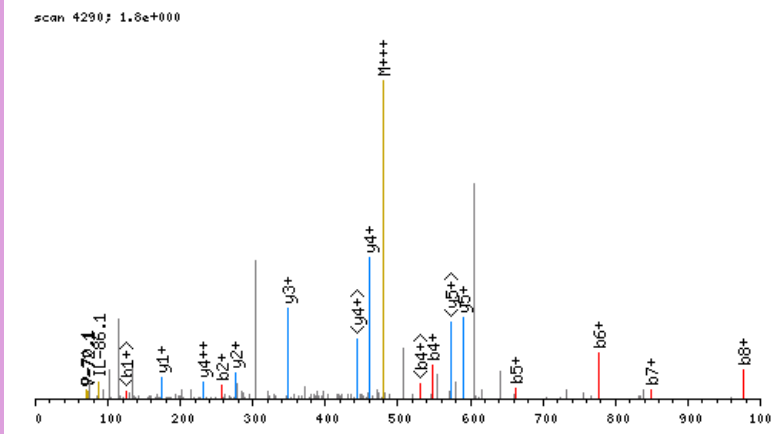

click image to zoom in; click top corners to zoom out [\[precursor±\]](#)

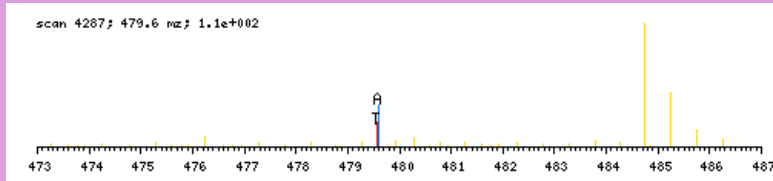

zoomed in precursor plot; T=theoretical m/z, A=acquired m/z

| b <sup>+</sup> | #  | AA # | y <sup>+</sup> | y <sup>2+</sup> |
|----------------|----|------|----------------|-----------------|
| 142.1232       | 1  | I 12 |                |                 |
| 256.1661       | 2  | N 11 | 1295.5868      | 648.2973        |
| 419.2294       | 3  | Y 10 | 1181.5439      | 591.2758        |
| 547.2880       | 4  | Q 9  | 1018.4805      | 509.7442        |
| 662.3149       | 5  | D 8  | 890.4220       | 445.7149        |
| 777.3419       | 6  | D 7  | 775.3950       | 388.2014        |
| 848.3790       | 7  | A 6  | 660.3681       | 330.6879        |
| 977.4216       | 8  | E 5  | 589.3310       | 295.1694        |
| 1090.5057      | 9  | L 4  | 460.2884       | 230.6481        |
| 1161.5428      | 10 | A 3  | 347.2043       | 174.1061        |
| 1262.5904      | 11 | T 2  | 276.1672       | 138.5875        |
|                | 12 | R 1  | 175.1195       | 88.0637         |

N-term:+29.04

IPIKSDPVVSYR, MH+ 1604.0636, m/z 401.7714  
 H OS G28 P150811 220811-s1.03335.03335.4.dta

X-range:

-

MassTol: Y-zoom:

MassType:

AVG  MONO

Axis:

1  2

Label:

I  M  -

Ions:

a  +  2+  3+

b  +  2+  3+

c  +  2+  3+

x  +  2+  3+

y  +  2+  3+

z  +  2+  3+

hide H<sub>2</sub>O/NH<sub>3</sub>

zoom 112-122

GO

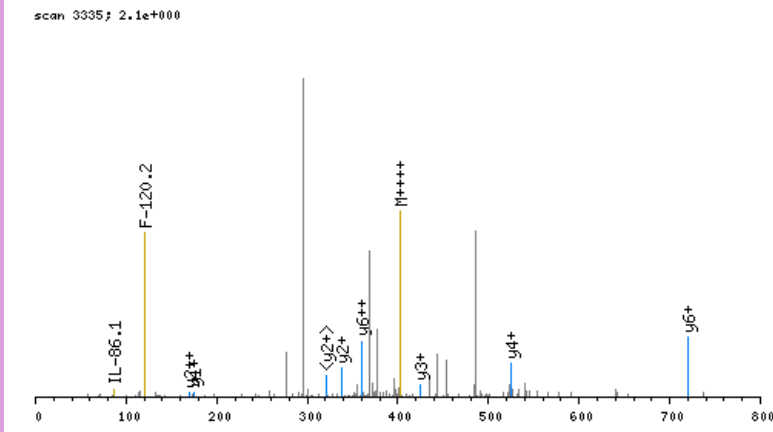

click image to zoom in; click top corners to zoom out [\[precursor±\]](#)

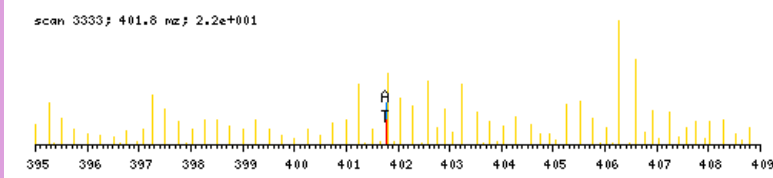

zoomed in precursor plot; T=theoretical m/z, A=acquired m/z

| b <sup>+</sup> | #  | AA # | y <sup>+</sup> | y <sup>2+</sup> |
|----------------|----|------|----------------|-----------------|
| 148.1550       | 1  | I 13 |                |                 |
| 245.2077       | 2  | P 12 | 1456.9164      | 728.9621        |
| 358.2918       | 3  | I 11 | 1359.8637      | 680.4358        |
| 520.4499       | 4  | K 10 | 1246.7796      | 623.8937        |
| 682.6080       | 5  | K 9  | 1084.6215      | 542.8147        |
| 769.6400       | 6  | S 8  | 922.4634       | 461.7356        |
| 884.6670       | 7  | D 7  | 835.4314       | 418.2196        |
| 981.7197       | 8  | P 6  | 720.4044       | 360.7061        |
| 1080.7881      | 9  | V 5  | 623.3517       | 312.1798        |
| 1179.8566      | 10 | V 4  | 524.2833       | 262.6455        |
| 1266.8886      | 11 | S 3  | 425.2149       | 213.1113        |
| 1429.9519      | 12 | Y 2  | 338.1828       | 169.5953        |
|                | 13 | R 1  | 175.1195       | 88.0637         |

N-term:+35.07 K(4):+162.16  
 K(5):+162.16

IQMTQTTSSLSASLGDR, MH+ 1829.9491, m/z 610.6545  
 H OS G24 P150811 220811-s1.04073.04073.3.dta

X-range:

-

MassTol: Y-zoom:

MassType:

AVG  MONO

Axis:

1  2

Label:

I  M  -

Ions:

a  +  2+  3+

b  +  2+  3+

c  +  2+  3+

x  +  2+  3+

y  +  2+  3+

z  +  2+  3+

hide H<sub>2</sub>O/NH<sub>3</sub>

zoom 112-122

GO

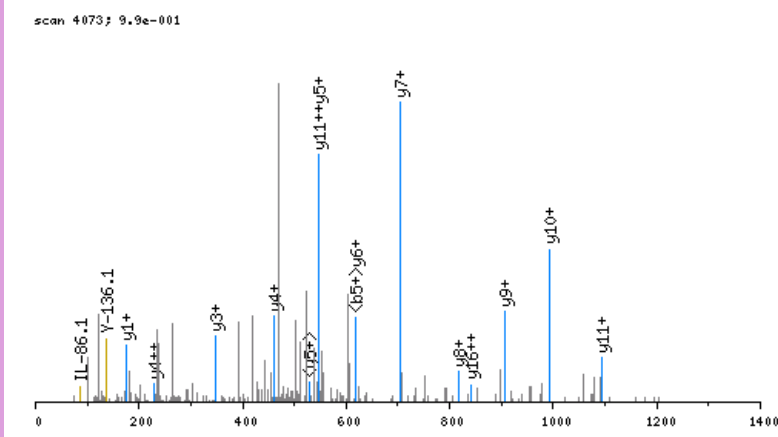

click image to zoom in; click top corners to zoom out [\[precursor±\]](#)

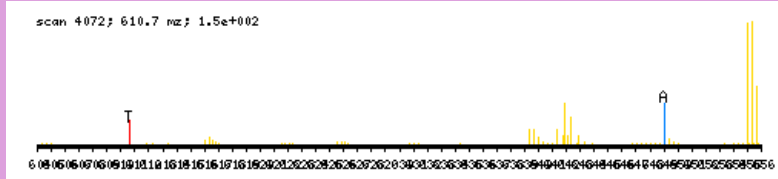

zoomed in precursor plot; T=theoretical m/z, A=acquired m/z

| b <sup>+</sup> | #  | AA # | y <sup>+</sup> | y <sup>2+</sup> |
|----------------|----|------|----------------|-----------------|
| 148.1550       | 1  | I 17 |                |                 |
| 276.2135       | 2  | Q 16 | 1682.8019      | 841.9049        |
| 407.2540       | 3  | M 15 | 1554.7434      | 777.8756        |
| 508.3017       | 4  | T 14 | 1423.7029      | 712.3554        |
| 636.3603       | 5  | Q 13 | 1322.6552      | 661.8315        |
| 737.4080       | 6  | T 12 | 1194.5966      | 597.8022        |
| 838.4556       | 7  | T 11 | 1093.5489      | 547.2784        |
| 925.4877       | 8  | S 10 | 992.5013       | 496.7545        |
| 1012.5197      | 9  | S 9  | 905.4692       | 453.2385        |
| 1125.6038      | 10 | L 8  | 818.4372       | 409.7225        |
| 1212.6358      | 11 | S 7  | 705.3531       | 353.1805        |
| 1283.6729      | 12 | A 6  | 618.3211       | 309.6645        |
| 1370.7049      | 13 | S 5  | 547.2840       | 274.1459        |
| 1483.7890      | 14 | L 4  | 460.2520       | 230.6299        |
| 1540.8105      | 15 | G 3  | 347.1679       | 174.0879        |
| 1655.8374      | 16 | D 2  | 290.1464       | 145.5771        |
|                | 17 | R 1  | 175.1195       | 88.0637         |

N-term:+35.07

IQTQQLHAAMADTFLEHMCR, MH+ 2435.1845, m/z 609.5516  
 H OS G28 P150811 220811-s1.08334.08334.4.dta

X-range:

-

MassTol: Y-zoom:

MassType:

AVG  MONO

Axis:

1  2

Label:

I  M  -

Ions:

a  +  2+  3+

b  +  2+  3+

c  +  2+  3+

x  +  2+  3+

y  +  2+  3+

z  +  2+  3+

hide H<sub>2</sub>O/NH<sub>3</sub>

zoom 112-122

GO

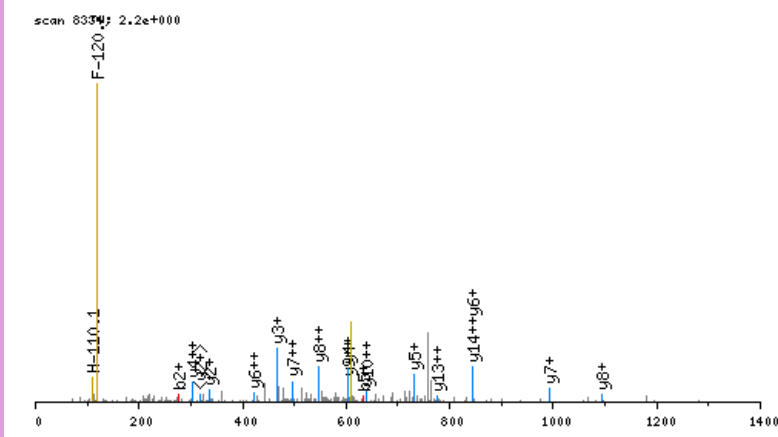

click image to zoom in; click top corners to zoom out [\[precursor±\]](#)

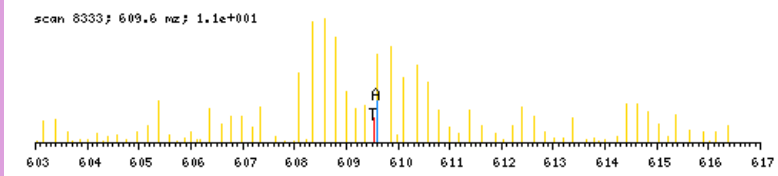

zoomed in precursor plot; T=theoretical m/z, A=acquired m/z

| b <sup>+</sup> | #  | AA | #  | y <sup>+</sup> | y <sup>2+</sup> |
|----------------|----|----|----|----------------|-----------------|
| 148.1550       | 1  | I  | 20 |                |                 |
| 276.2135       | 2  | Q  | 19 | 2288.0374      | 1144.5226       |
| 377.2612       | 3  | T  | 18 | 2159.9788      | 1080.4933       |
| 505.3198       | 4  | Q  | 17 | 2058.9311      | 1029.9695       |
| 633.3784       | 5  | Q  | 16 | 1930.8726      | 965.9402        |
| 746.4624       | 6  | L  | 15 | 1802.8140      | 901.9109        |
| 883.5214       | 7  | H  | 14 | 1689.7299      | 845.3689        |
| 954.5585       | 8  | A  | 13 | 1552.6710      | 776.8394        |
| 1025.5956      | 9  | A  | 12 | 1481.6339      | 741.3209        |
| 1156.6361      | 10 | M  | 11 | 1410.5968      | 705.8023        |
| 1227.6732      | 11 | A  | 10 | 1279.5563      | 640.2821        |
| 1342.7001      | 12 | D  | 9  | 1208.5192      | 604.7635        |
| 1443.7478      | 13 | T  | 8  | 1093.4922      | 547.2500        |
| 1590.8162      | 14 | F  | 7  | 992.4446       | 496.7262        |
| 1703.9003      | 15 | L  | 6  | 845.3762       | 423.1920        |
| 1832.9429      | 16 | E  | 5  | 732.2921       | 366.6500        |
| 1970.0018      | 17 | H  | 4  | 603.2495       | 302.1287        |
| 2101.0423      | 18 | M  | 3  | 466.1906       | 233.5992        |
| 2261.0729      | 19 | C  | 2  | 335.1501       | 168.0790        |
|                | 20 | R  | 1  | 175.1195       | 88.0637         |

N-term:+35.07 C(19):+160.03

IRGMVPDQAGR, MH+ 1227.6632, m/z 409.8926  
 L OS G27 P150811 220811-s1.02681.02681.3.dta

scan 2681; 6.5e+000

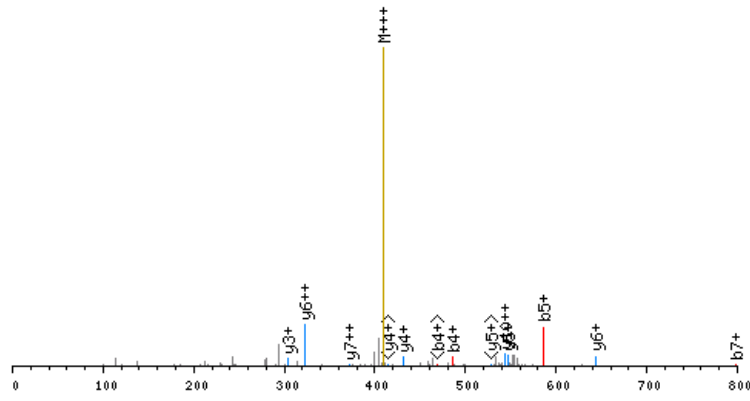

click image to zoom in; click top corners to zoom out [\[precursor±\]](#)

scan 2677; 409.9 m/z; 2.1e+001

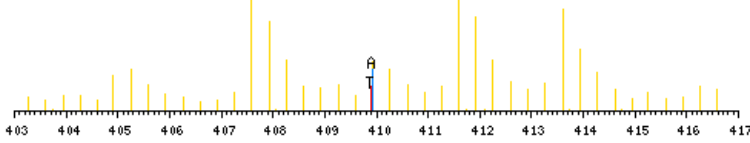

zoomed in precursor plot; T=theoretical m/z, A=acquired m/z

X-range:

-

MassTol: Y-zoom:

MassType:

AVG  MONO

Axis:

1  2

Label:

I  M  -

Ions:

a  +  2+  3+

b  +  2+  3+

c  +  2+  3+

x  +  2+  3+

y  +  2+  3+

z  +  2+  3+

hide H<sub>2</sub>O/NH<sub>3</sub>

zoom 112-122

GO

| b <sup>+</sup> | #  | AA # | y <sup>+</sup> | y <sup>2+</sup> |
|----------------|----|------|----------------|-----------------|
| 142.1232       | 1  | I 11 |                |                 |
| 298.2243       | 2  | R 10 | 1086.5478      | 543.7778        |
| 355.2457       | 3  | G 9  | 930.4467       | 465.7273        |
| 486.2862       | 4  | M 8  | 873.4253       | 437.2165        |
| 585.3546       | 5  | V 7  | 742.3848       | 371.6963        |
| 682.4074       | 6  | P 6  | 643.3164       | 322.1621        |
| 797.4343       | 7  | D 5  | 546.2636       | 273.6357        |
| 925.4929       | 8  | Q 4  | 431.2367       | 216.1222        |
| 996.5300       | 9  | A 3  | 303.1781       | 152.0930        |
| 1053.5515      | 10 | G 2  | 232.1410       | 116.5744        |
|                | 11 | R 1  | 175.1195       | 88.0637         |

N-term:+29.04

ISEAAAQYNEPPPPR, MH+ 1764.8920, m/z 588.9689  
 L OS G24 P150811 220811-s1.02969.02969.3.dta

X-range:

-

MassTol: Y-zoom:

MassType:

AVG  MONO

Axis:

1  2

Label:

I  M  -

Ions:

a  +  2+  3+

b  +  2+  3+

c  +  2+  3+

x  +  2+  3+

y  +  2+  3+

z  +  2+  3+

hide H<sub>2</sub>O/NH<sub>3</sub>

zoom 112-122

GO

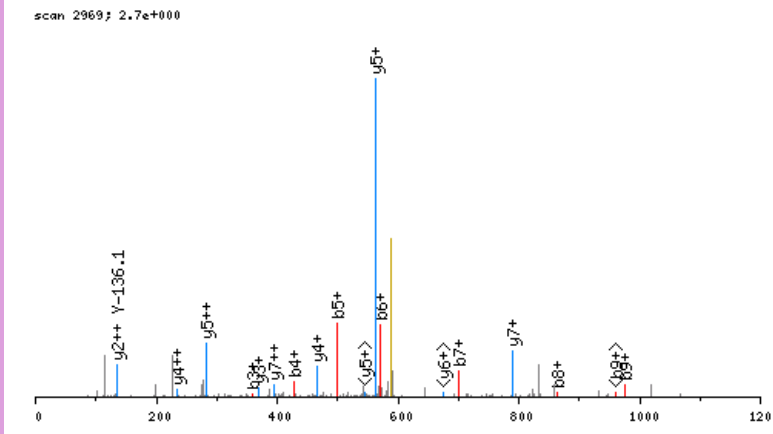

click image to zoom in; click top corners to zoom out [\[precursor±\]](#)

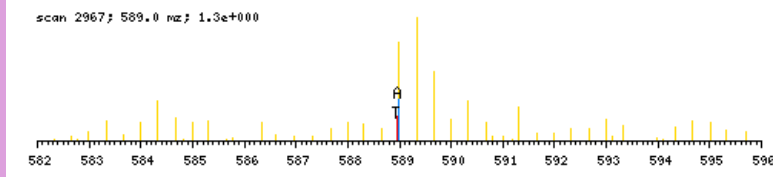

zoomed in precursor plot; T=theoretical m/z, A=acquired m/z

| b <sup>+</sup> | #  | AA # | y <sup>+</sup> | y <sup>2+</sup> |
|----------------|----|------|----------------|-----------------|
| 142.1232       | 1  | I 16 |                |                 |
| 229.1552       | 2  | S 15 | 1623.7767      | 812.3923        |
| 358.1978       | 3  | E 14 | 1536.7447      | 768.8763        |
| 429.2349       | 4  | A 13 | 1407.7021      | 704.3550        |
| 500.2720       | 5  | A 12 | 1336.6650      | 668.8364        |
| 571.3091       | 6  | A 11 | 1265.6279      | 633.3178        |
| 699.3677       | 7  | Q 10 | 1194.5907      | 597.7993        |
| 862.4310       | 8  | Y 9  | 1066.5322      | 533.7700        |
| 976.4740       | 9  | N 8  | 903.4688       | 452.2383        |
| 1073.5267      | 10 | P 7  | 789.4259       | 395.2169        |
| 1202.5693      | 11 | E 6  | 692.3731       | 346.6905        |
| 1299.6221      | 12 | P 5  | 563.3306       | 282.1692        |
| 1396.6748      | 13 | P 4  | 466.2778       | 233.6428        |
| 1493.7276      | 14 | P 3  | 369.2250       | 185.1164        |
| 1590.7804      | 15 | P 2  | 272.1723       | 136.5900        |
|                | 16 | R 1  | 175.1195       | 88.0637         |

N-term:+29.04

ISEKEAMSTIEPHR, MH+ 1695.9376, m/z 565.9840  
 H OS G26 P150811 220811-s1.05943.05943.3.dta

X-range:

-

MassTol: Y-zoom:

MassType:

AVG  MONO

Axis:

1  2

Label:

I  M  -

Ions:

a  +  2+  3+

b  +  2+  3+

c  +  2+  3+

x  +  2+  3+

y  +  2+  3+

z  +  2+  3+

hide H<sub>2</sub>O/NH<sub>3</sub>

zoom 112-122

GO

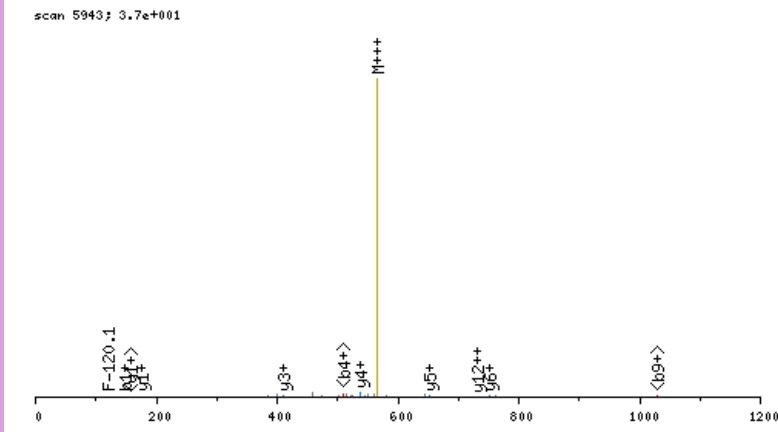

click image to zoom in; click top corners to zoom out [\[precursor±\]](#)

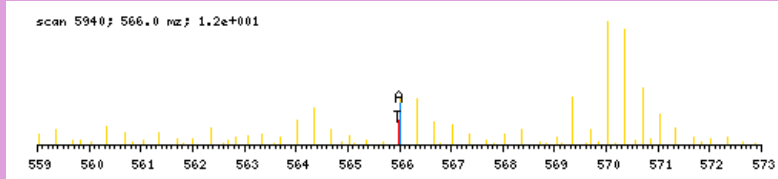

zoomed in precursor plot; T=theoretical m/z, A=acquired m/z

| b <sup>+</sup> | #  | AA # | y <sup>+</sup> | y <sup>2+</sup> |
|----------------|----|------|----------------|-----------------|
| 148.1550       | 1  | I 14 |                |                 |
| 235.1870       | 2  | S 13 | 1548.7905      | 774.8991        |
| 364.2296       | 3  | E 12 | 1461.7584      | 731.3831        |
| 526.3877       | 4  | K 11 | 1332.7158      | 666.8618        |
| 655.4303       | 5  | E 10 | 1170.5577      | 585.7828        |
| 726.4674       | 6  | A 9  | 1041.5151      | 521.2615        |
| 857.5079       | 7  | M 8  | 970.4780       | 485.7429        |
| 944.5399       | 8  | S 7  | 839.4375       | 420.2227        |
| 1045.5876      | 9  | T 6  | 752.4055       | 376.7067        |
| 1158.6716      | 10 | I 5  | 651.3578       | 326.1828        |
| 1287.7142      | 11 | E 4  | 538.2738       | 269.6408        |
| 1384.7670      | 12 | P 3  | 409.2312       | 205.1195        |
| 1521.8259      | 13 | H 2  | 312.1784       | 156.5931        |
|                | 14 | R 1  | 175.1195       | 88.0637         |

N-term:+35.07 K(4):+162.16



X-range:

-

MassTol: Y-zoom:

MassType:

AVG  MONO

Axis:

1  2

Label:

I  M  -

Ions:

a  +  2+  3+

b  +  2+  3+

c  +  2+  3+

x  +  2+  3+

y  +  2+  3+

z  +  2+  3+

hide H<sub>2</sub>O/NH<sub>3</sub>

zoom 112-122

GO

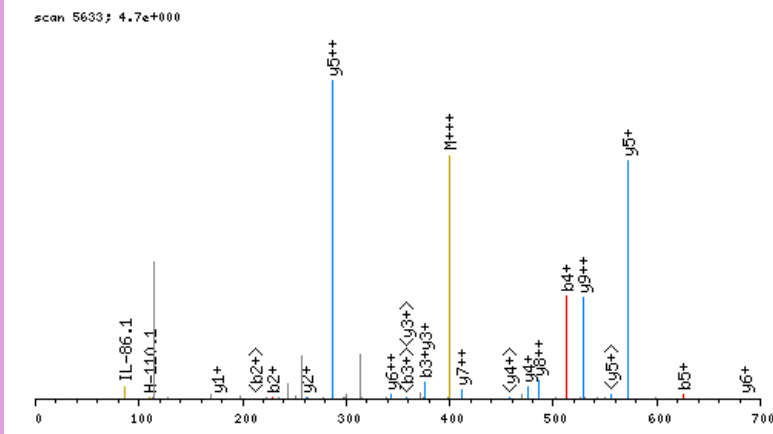

click image to zoom in; click top corners to zoom out [\[precursor±\]](#)

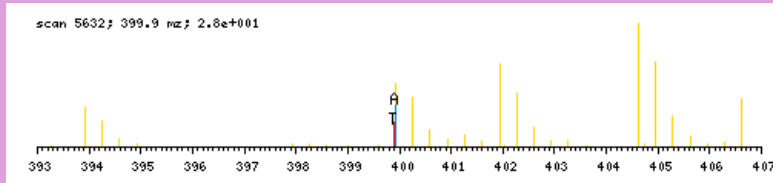

zoomed in precursor plot; T=theoretical m/z, A=acquired m/z

| b <sup>+</sup> | #  | AA # | y <sup>+</sup> | y <sup>2+</sup> |
|----------------|----|------|----------------|-----------------|
| 142.1232       | 1  | I 10 |                |                 |
| 229.1552       | 2  | S 9  | 1056.5591      | 528.7834        |
| 376.2236       | 3  | F 8  | 969.5270       | 485.2674        |
| 513.2825       | 4  | H 7  | 822.4586       | 411.7332        |
| 626.3666       | 5  | L 6  | 685.3997       | 343.2038        |
| 723.4193       | 6  | P 5  | 572.3156       | 286.6617        |
| 822.4878       | 7  | V 4  | 475.2629       | 238.1353        |
| 936.5307       | 8  | N 3  | 376.1945       | 188.6011        |
| 1023.5627      | 9  | S 2  | 262.1515       | 131.5797        |
|                | 10 | R 1  | 175.1195       | 88.0637         |

N-term:+29.04

ISNASDALDKIR, MH+ 1358.7644, m/z 453.5930  
 L OS G27 P150811 220811-s1.04343.04343.3.dta

X-range:

-

MassTol: Y-zoom:

MassType:

AVG  MONO

Axis:

1  2

Label:

I  M  -

Ions:

a  +  2+  3+

b  +  2+  3+

c  +  2+  3+

x  +  2+  3+

y  +  2+  3+

z  +  2+  3+

hide H<sub>2</sub>O/NH<sub>3</sub>

zoom 112-122

GO

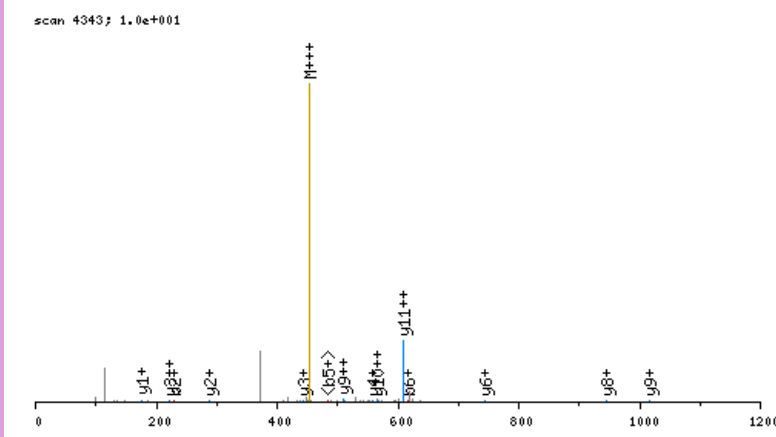

click image to zoom in; click top corners to zoom out [\[precursor±\]](#)

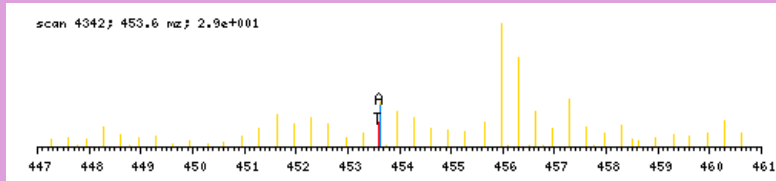

zoomed in precursor plot; T=theoretical m/z, A=acquired m/z

| b <sup>+</sup> | #  | AA # | y <sup>+</sup> | y <sup>2+</sup> |
|----------------|----|------|----------------|-----------------|
| 142.1232       | 1  | I 12 |                |                 |
| 229.1552       | 2  | S 11 | 1217.6490      | 609.3284        |
| 343.1981       | 3  | N 10 | 1130.6170      | 565.8124        |
| 414.2352       | 4  | A 9  | 1016.5741      | 508.7909        |
| 501.2673       | 5  | S 8  | 945.5370       | 473.2724        |
| 616.2942       | 6  | D 7  | 858.5049       | 429.7564        |
| 687.3313       | 7  | A 6  | 743.4780       | 372.2429        |
| 800.4154       | 8  | L 5  | 672.4409       | 336.7243        |
| 915.4423       | 9  | D 4  | 559.3568       | 280.1823        |
| 1071.5686      | 10 | K 3  | 444.3299       | 222.6688        |
| 1184.6527      | 11 | I 2  | 288.2036       | 144.6057        |
|                | 12 | R 1  | 175.1195       | 88.0637         |

N-term:+29.04 K(10):+156.13

ISSQQTIPPSAKYGGK, MH+ 1758.0186, m/z 586.6777  
 H OS G26 P150811 220811-s1.02513.02513.3.dta

X-range:

-

MassTol: Y-zoom:

MassType:

AVG  MONO

Axis:

1  2

Label:

I  M  -

Ions:

a  +  2+  3+

b  +  2+  3+

c  +  2+  3+

x  +  2+  3+

y  +  2+  3+

z  +  2+  3+

hide H<sub>2</sub>O/NH<sub>3</sub>

zoom 112-122

GO

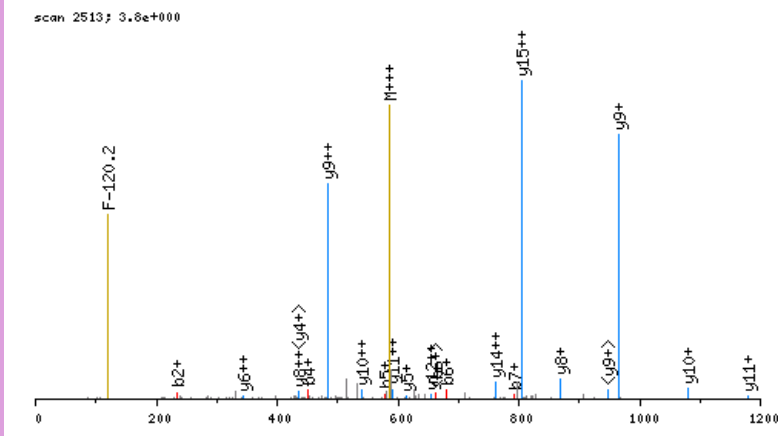

click image to zoom in; click top corners to zoom out [\[precursor±\]](#)

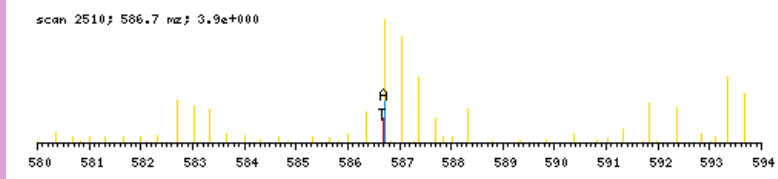

zoomed in precursor plot; T=theoretical m/z, A=acquired m/z

| b <sup>+</sup> | #  | AA # | y <sup>+</sup> | y <sup>2+</sup> |
|----------------|----|------|----------------|-----------------|
| 148.1550       | 1  | I 16 |                |                 |
| 235.1870       | 2  | S 15 | 1610.8715      | 805.9397        |
| 322.2190       | 3  | S 14 | 1523.8395      | 762.4236        |
| 450.2776       | 4  | Q 13 | 1436.8074      | 718.9076        |
| 578.3362       | 5  | Q 12 | 1308.7488      | 654.8783        |
| 679.3839       | 6  | T 11 | 1180.6903      | 590.8490        |
| 792.4679       | 7  | I 10 | 1079.6426      | 540.3252        |
| 889.5207       | 8  | P 9  | 966.5585       | 483.7832        |
| 986.5734       | 9  | P 8  | 869.5058       | 435.2568        |
| 1073.6055      | 10 | S 7  | 772.4530       | 386.7304        |
| 1144.6426      | 11 | A 6  | 685.4210       | 343.2144        |
| 1306.8007      | 12 | K 5  | 614.3839       | 307.6958        |
| 1469.8640      | 13 | Y 4  | 452.2258       | 226.6168        |
| 1526.8855      | 14 | G 3  | 289.1624       | 145.0851        |
| 1583.9069      | 15 | G 2  | 232.1410       | 116.5744        |
|                | 16 | R 1  | 175.1195       | 88.0637         |

N-term:+35.07 K(12):+162.16

ISWYDNEYGYSNR, MH+ 1694.7451, m/z 565.5865  
 L OS G25 P150811 220811-s1.06028.06028.3.dta

scan 6028; 1.4e+001

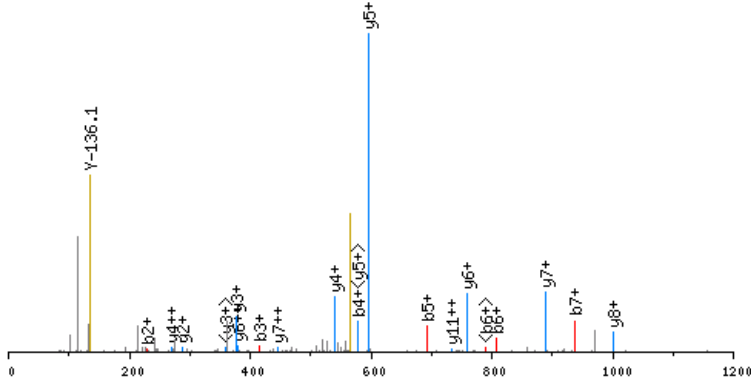

click image to zoom in; click top corners to zoom out [\[precursor±\]](#)

scan 6027; 565.6 m/z; 5.7e+001

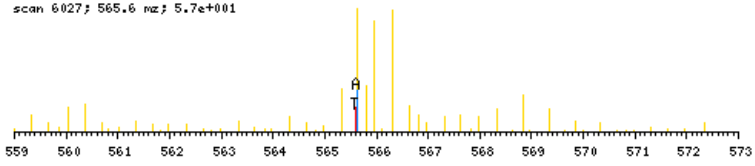

zoomed in precursor plot; T=theoretical m/z, A=acquired m/z

X-range:

-

MassTol: Y-zoom:

MassType:

AVG  MONO

Axis:

1  2

Label:

I  M  -

Ions:

a  +  2+  3+

b  +  2+  3+

c  +  2+  3+

x  +  2+  3+

y  +  2+  3+

z  +  2+  3+

hide H<sub>2</sub>O/NH<sub>3</sub>

zoom 112-122

GO

| b <sup>+</sup> | #  | AA # | y <sup>+</sup> | y <sup>2+</sup> |
|----------------|----|------|----------------|-----------------|
| 142.1232       | 1  | I 13 |                |                 |
| 229.1552       | 2  | S 12 | 1553.6297      | 777.3188        |
| 415.2345       | 3  | W 11 | 1466.5977      | 733.8028        |
| 578.2978       | 4  | Y 10 | 1280.5184      | 640.7631        |
| 693.3248       | 5  | D 9  | 1117.4550      | 559.2314        |
| 807.3677       | 6  | N 8  | 1002.4281      | 501.7180        |
| 936.4103       | 7  | E 7  | 888.3852       | 444.6965        |
| 1099.4736      | 8  | Y 6  | 759.3426       | 380.1752        |
| 1156.4951      | 9  | G 5  | 596.2792       | 298.6435        |
| 1319.5584      | 10 | Y 4  | 539.2578       | 270.1328        |
| 1406.5904      | 11 | S 3  | 376.1945       | 188.6011        |
| 1520.6334      | 12 | N 2  | 289.1624       | 145.0851        |
|                | 13 | R 1  | 175.1195       | 88.0637         |

N-term:+29.04

X-range:

-

MassTol: Y-zoom:

MassType:

AVG  MONO

Axis:

1  2

Label:

I  M  -

Ions:

a  +  2+  3+

b  +  2+  3+

c  +  2+  3+

x  +  2+  3+

y  +  2+  3+

z  +  2+  3+

hide H<sub>2</sub>O/NH<sub>3</sub>

zoom 112-122

GO

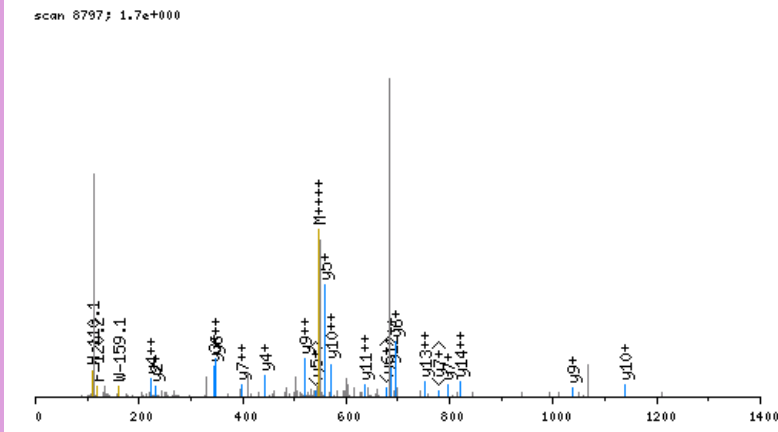

click image to zoom in; click top corners to zoom out [\[precursor±\]](#)

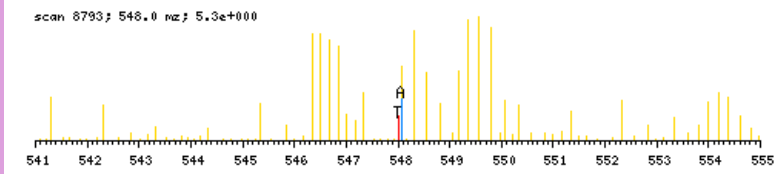

zoomed in precursor plot; T=theoretical m/z, A=acquired m/z

| b <sup>+</sup> | #  | AA # | y <sup>+</sup> | y <sup>2+</sup> |
|----------------|----|------|----------------|-----------------|
| 142.1232       | 1  | I 18 |                |                 |
| 229.1552       | 2  | S 17 | 2047.9118      | 1024.4598       |
| 392.2185       | 3  | Y 16 | 1960.8798      | 980.9438        |
| 552.2491       | 4  | C 15 | 1797.8164      | 899.4121        |
| 689.3080       | 5  | H 14 | 1637.7858      | 819.3968        |
| 818.3506       | 6  | E 13 | 1500.7269      | 750.8674        |
| 919.3983       | 7  | T 12 | 1371.6843      | 686.3461        |
| 1050.4388      | 8  | M 11 | 1270.6367      | 635.8222        |
| 1151.4865      | 9  | T 10 | 1139.5962      | 570.3020        |
| 1208.5079      | 10 | G 9  | 1038.5485      | 519.7782        |
| 1394.5872      | 11 | W 8  | 981.5270       | 491.2674        |
| 1493.6557      | 12 | V 7  | 795.4477       | 398.2278        |
| 1630.7146      | 13 | H 6  | 696.3793       | 348.6936        |
| 1745.7415      | 14 | D 5  | 559.3204       | 280.1641        |
| 1844.8099      | 15 | V 4  | 444.2934       | 222.6506        |
| 1957.8940      | 16 | L 3  | 345.2250       | 173.1164        |
| 2014.9155      | 17 | G 2  | 232.1410       | 116.5744        |
|                | 18 | R 1  | 175.1195       | 88.0637         |

N-term:+29.04 C(4):+160.03

ITSGESSGGNPKAKDECAQYR, MH+ 2426.1622, m/z 607.2960  
 L OS G28 P150811 220811-s1.01920.01920.4.dta

X-range:

-

MassTol: Y-zoom:

MassType:

AVG  MONO

Axis:

1  2

Label:

I  M  -

Ions:

a  +  2+  3+

b  +  2+  3+

c  +  2+  3+

x  +  2+  3+

y  +  2+  3+

z  +  2+  3+

hide H<sub>2</sub>O/NH<sub>3</sub>

zoom 112-122

GO

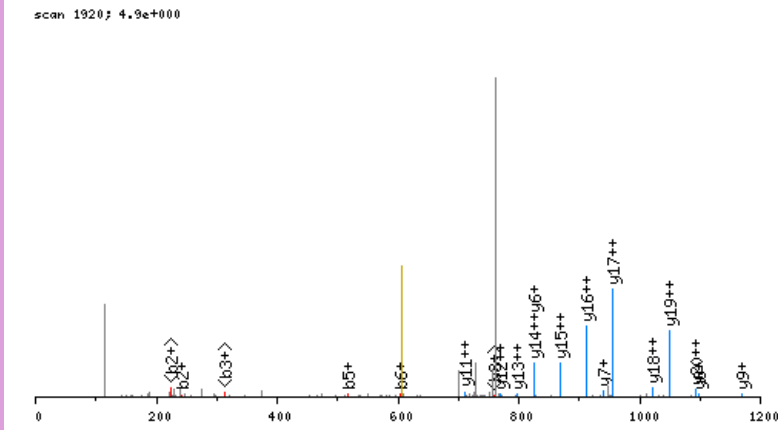

click image to zoom in; click top corners to zoom out [\[precursor±\]](#)

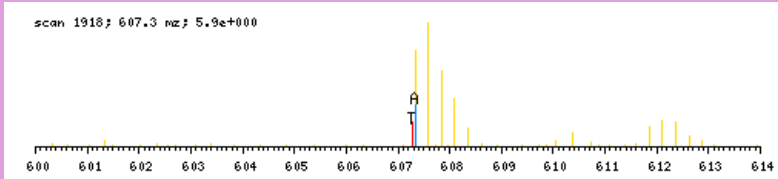

zoomed in precursor plot; T=theoretical m/z, A=acquired m/z

| b <sup>+</sup> | #  | AA | #  | y <sup>+</sup> | y <sup>2+</sup> |
|----------------|----|----|----|----------------|-----------------|
| 142.1232       | 1  | I  | 22 |                |                 |
| 243.1708       | 2  | T  | 21 | 2285.0468      | 1143.0273       |
| 330.2029       | 3  | S  | 20 | 2183.9992      | 1092.5035       |
| 387.2243       | 4  | G  | 19 | 2096.9671      | 1048.9875       |
| 516.2669       | 5  | E  | 18 | 2039.9457      | 1020.4767       |
| 603.2990       | 6  | S  | 17 | 1910.9031      | 955.9554        |
| 690.3310       | 7  | S  | 16 | 1823.8710      | 912.4394        |
| 777.3630       | 8  | S  | 15 | 1736.8390      | 868.9234        |
| 834.3845       | 9  | G  | 14 | 1649.8070      | 825.4074        |
| 891.4059       | 10 | G  | 13 | 1592.7855      | 796.8967        |
| 1005.4489      | 11 | N  | 12 | 1535.7641      | 768.3859        |
| 1102.5016      | 12 | P  | 11 | 1421.7211      | 711.3645        |
| 1258.6279      | 13 | K  | 10 | 1324.6684      | 662.8381        |
| 1329.6650      | 14 | A  | 9  | 1168.5421      | 584.7749        |
| 1485.7913      | 15 | K  | 8  | 1097.5050      | 549.2564        |
| 1600.8183      | 16 | D  | 7  | 941.3787       | 471.1932        |
| 1729.8609      | 17 | E  | 6  | 826.3517       | 413.6798        |
| 1889.8915      | 18 | C  | 5  | 697.3091       | 349.1585        |
| 1960.9286      | 19 | A  | 4  | 537.2785       | 269.1432        |
| 2088.9872      | 20 | Q  | 3  | 466.2414       | 233.6246        |
| 2252.0505      | 21 | Y  | 2  | 338.1828       | 169.5953        |
|                | 22 | R  | 1  | 175.1195       | 88.0637         |

N-term:+29.04 K(13):+156.13  
 K(15):+156.13 C(18):+160.03

IVAPGKILAADESTGSIAKR, MH+ 2138.2549, m/z 535.3192  
 L OS G27 P150811 220811-s1.04891.04891.4.dta

X-range:

-

MassTol: Y-zoom:

MassType:

AVG  MONO

Axis:

1  2

Label:

I  M  -

Ions:

a  +  2+  3+

b  +  2+  3+

c  +  2+  3+

x  +  2+  3+

y  +  2+  3+

z  +  2+  3+

hide H<sub>2</sub>O/NH<sub>3</sub>

zoom 112-122

GO

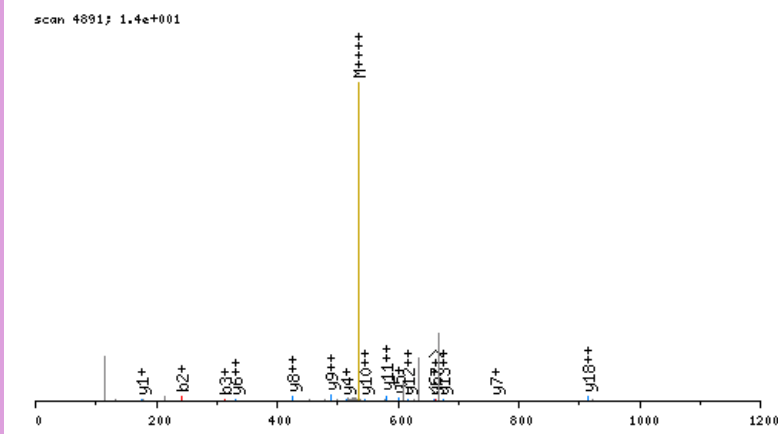

click image to zoom in; click top corners to zoom out [precursor±]

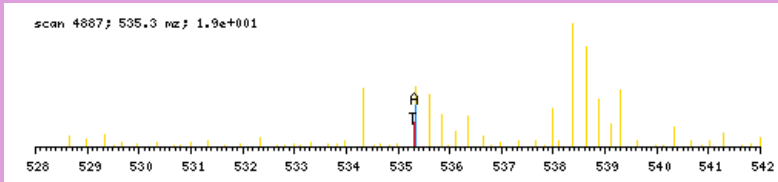

zoomed in precursor plot; T=theoretical m/z, A=acquired m/z

| b <sup>+</sup> | #  | AA # | y <sup>+</sup> | y <sup>2+</sup> |
|----------------|----|------|----------------|-----------------|
| 142.1232       | 1  | I 21 |                |                 |
| 241.1916       | 2  | V 20 | 1997.1396      | 999.0737        |
| 312.2287       | 3  | A 19 | 1898.0712      | 949.5395        |
| 409.2815       | 4  | P 18 | 1827.0341      | 914.0209        |
| 466.3029       | 5  | G 17 | 1729.9813      | 865.4946        |
| 622.4292       | 6  | K 16 | 1672.9598      | 836.9838        |
| 679.4507       | 7  | G 15 | 1516.8335      | 758.9207        |
| 792.5347       | 8  | I 14 | 1459.8121      | 730.4099        |
| 905.6188       | 9  | L 13 | 1346.7280      | 673.8679        |
| 976.6559       | 10 | A 12 | 1233.6439      | 617.3259        |
| 1047.6930      | 11 | A 11 | 1162.6068      | 581.8073        |
| 1162.7200      | 12 | D 10 | 1091.5697      | 546.2888        |
| 1291.7626      | 13 | E 9  | 976.5428       | 488.7753        |
| 1378.7946      | 14 | S 8  | 847.5002       | 424.2540        |
| 1479.8423      | 15 | T 7  | 760.4681       | 380.7380        |
| 1536.8637      | 16 | G 6  | 659.4205       | 330.2141        |
| 1623.8958      | 17 | S 5  | 602.3990       | 301.7034        |
| 1736.9798      | 18 | I 4  | 515.3670       | 258.1874        |
| 1808.0170      | 19 | A 3  | 402.2829       | 201.6454        |
| 1964.1433      | 20 | K 2  | 331.2458       | 166.1268        |
|                | 21 | R 1  | 175.1195       | 88.0637         |

N-term:+29.04 K(6):+156.13  
 K(20):+156.13

IVEEVQDGKVISSR, MH+ 1614.9067, m/z 538.9737  
 L OS G26 P150811 220811-s1.02761.02761.3.dta

scan 2761; 1.2e+001

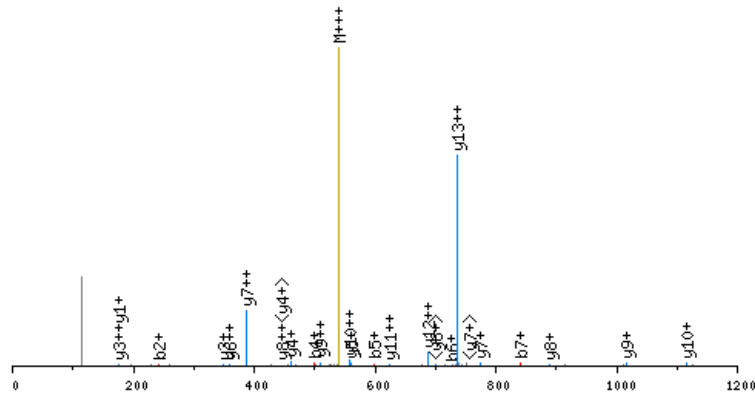

click image to zoom in; click top corners to zoom out [\[precursor±\]](#)

scan 2760; 539.0 m/z; 4.5e+001

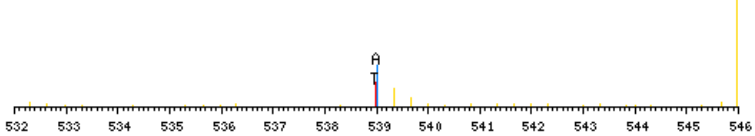

zoomed in precursor plot; T=theoretical m/z, A=acquired m/z

X-range:

-

MassTol: Y-zoom:

MassType:

AVG  MONO

Axis:

1  2

Label:

I  M  -

Ions:

a  +  2+  3+

b  +  2+  3+

c  +  2+  3+

x  +  2+  3+

y  +  2+  3+

z  +  2+  3+

hide H<sub>2</sub>O/NH<sub>3</sub>

zoom 112-122

GO

| b <sup>+</sup> | #  | AA # | y <sup>+</sup> | y <sup>2+</sup> |
|----------------|----|------|----------------|-----------------|
| 142.1232       | 1  | I 14 |                |                 |
| 241.1916       | 2  | V 13 | 1473.7913      | 737.3996        |
| 370.2342       | 3  | E 12 | 1374.7229      | 687.8654        |
| 499.2768       | 4  | E 11 | 1245.6803      | 623.3441        |
| 598.3452       | 5  | V 10 | 1116.6377      | 558.8228        |
| 726.4038       | 6  | Q 9  | 1017.5693      | 509.2886        |
| 841.4307       | 7  | D 8  | 889.5107       | 445.2593        |
| 898.4522       | 8  | G 7  | 774.4838       | 387.7458        |
| 1054.5785      | 9  | K 6  | 717.4623       | 359.2351        |
| 1153.6469      | 10 | V 5  | 561.3360       | 281.1719        |
| 1266.7309      | 11 | I 4  | 462.2676       | 231.6377        |
| 1353.7630      | 12 | S 3  | 349.1836       | 175.0957        |
| 1440.7950      | 13 | S 2  | 262.1515       | 131.5797        |
|                | 14 | R 1  | 175.1195       | 88.0637         |

N-term:+29.04 K(9):+156.13



IVLTQSPASLAVSLGQR, MH+ 1774.0650, m/z 592.0265  
 H OS G24 P150811 220811-s1.04837.04837.3.dta

X-range:

-

MassTol: Y-zoom:

MassType:

AVG  MONO

Axis:

1  2

Label:

I  M  -

Ions:

a  +  2+  3+

b  +  2+  3+

c  +  2+  3+

x  +  2+  3+

y  +  2+  3+

z  +  2+  3+

hide H<sub>2</sub>O/NH<sub>3</sub>

zoom 112-122

GO

scan 4837; 1.8e+000

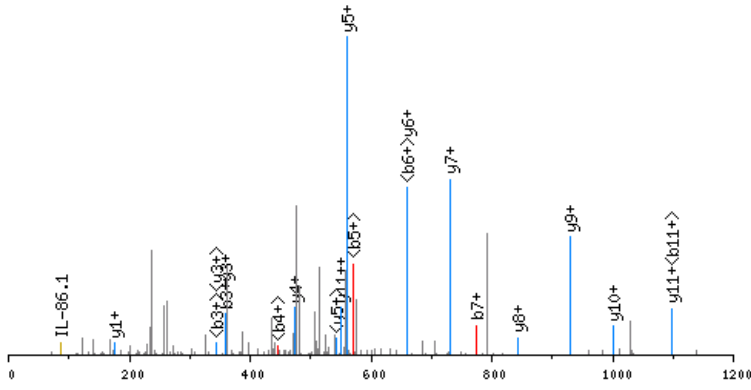

click image to zoom in; click top corners to zoom out [\[precursor±\]](#)

scan 4835; 592.0 m/z; 5.4e+000

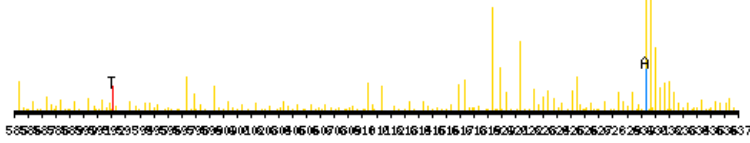

zoomed in precursor plot; T=theoretical m/z, A=acquired m/z

| b <sup>+</sup> | #  | AA | #  | y <sup>+</sup> | y <sup>2+</sup> |
|----------------|----|----|----|----------------|-----------------|
| 148.1550       | 1  | I  | 17 |                |                 |
| 247.2234       | 2  | V  | 16 | 1626.9179      | 813.9629        |
| 360.3074       | 3  | L  | 15 | 1527.8495      | 764.4287        |
| 461.3551       | 4  | T  | 14 | 1414.7654      | 707.8866        |
| 589.4137       | 5  | Q  | 13 | 1313.7177      | 657.3628        |
| 676.4457       | 6  | S  | 12 | 1185.6592      | 593.3335        |
| 773.4985       | 7  | P  | 11 | 1098.6271      | 549.8175        |
| 844.5356       | 8  | A  | 10 | 1001.5744      | 501.2911        |
| 931.5676       | 9  | S  | 9  | 930.5373       | 465.7725        |
| 1044.6517      | 10 | L  | 8  | 843.5052       | 422.2565        |
| 1115.6888      | 11 | A  | 7  | 730.4212       | 365.7145        |
| 1214.7572      | 12 | V  | 6  | 659.3840       | 330.1959        |
| 1301.7893      | 13 | S  | 5  | 560.3156       | 280.6617        |
| 1414.8733      | 14 | L  | 4  | 473.2836       | 237.1457        |
| 1471.8948      | 15 | G  | 3  | 360.1995       | 180.6037        |
| 1599.9534      | 16 | Q  | 2  | 303.1781       | 152.0930        |
|                | 17 | R  | 1  | 175.1195       | 88.0637         |

N-term:+35.07

IVPDNPPYDKGAFR, MH+ 1644.8750, m/z 548.9632  
 L OS G26 P150811 220811-s1.03634.03634.3.dta

X-range:

-

MassTol: Y-zoom:

MassType:

AVG  MONO

Axis:

1  2

Label:

I  M  -

Ions:

a  +  2+  3+

b  +  2+  3+

c  +  2+  3+

x  +  2+  3+

y  +  2+  3+

z  +  2+  3+

hide H<sub>2</sub>O/NH<sub>3</sub>

zoom 112-122

GO

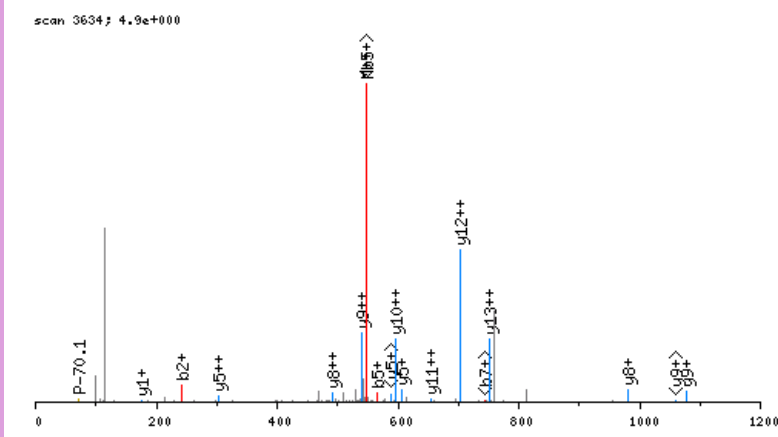

click image to zoom in; click top corners to zoom out [\[precursor±\]](#)

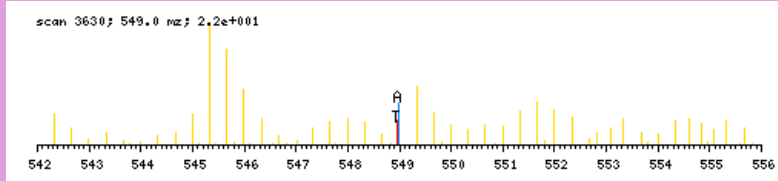

zoomed in precursor plot; T=theoretical m/z, A=acquired m/z

| b <sup>+</sup> | #  | AA # | y <sup>+</sup> | y <sup>2+</sup> |
|----------------|----|------|----------------|-----------------|
| 142.1232       | 1  | I 14 |                |                 |
| 241.1916       | 2  | V 13 | 1503.7596      | 752.3837        |
| 338.2443       | 3  | P 12 | 1404.6912      | 702.8495        |
| 453.2713       | 4  | D 11 | 1307.6385      | 654.3231        |
| 567.3142       | 5  | N 10 | 1192.6115      | 596.8097        |
| 664.3670       | 6  | P 9  | 1078.5686      | 539.7882        |
| 761.4197       | 7  | P 8  | 981.5158       | 491.2618        |
| 924.4831       | 8  | Y 7  | 884.4631       | 442.7354        |
| 1039.5100      | 9  | D 6  | 721.3997       | 361.2038        |
| 1195.6363      | 10 | K 5  | 606.3728       | 303.6903        |
| 1252.6578      | 11 | G 4  | 450.2465       | 225.6272        |
| 1323.6949      | 12 | A 3  | 393.2250       | 197.1164        |
| 1470.7633      | 13 | F 2  | 322.1879       | 161.5979        |
|                | 14 | R 1  | 175.1195       | 88.0637         |

N-term:+29.04 K(10):+156.13

IVQKYGYTHLSTGDLRL, MH+ 2020.1231, m/z 505.7862  
 L OS G28 P150811 220811-s1.06031.06031.4.dta

X-range:

-

MassTol: Y-zoom:

MassType:

AVG  MONO

Axis:

1  2

Label:

I  M  -

Ions:

a  +  2+  3+

b  +  2+  3+

c  +  2+  3+

x  +  2+  3+

y  +  2+  3+

z  +  2+  3+

hide H<sub>2</sub>O/NH<sub>3</sub>

zoom 112-122

GO

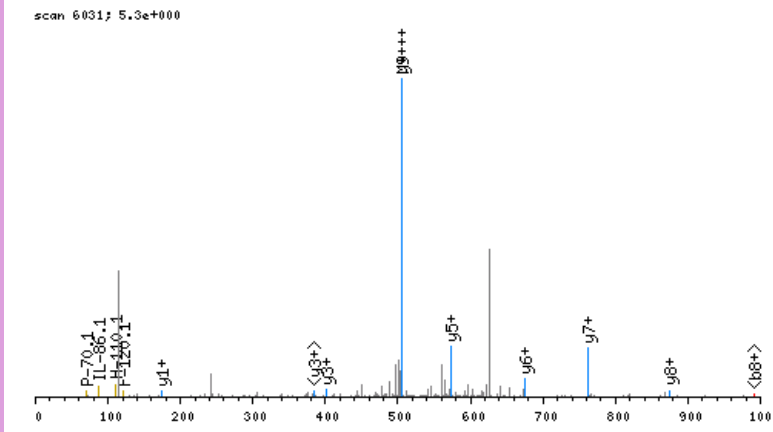

click image to zoom in; click top corners to zoom out [\[precursor±\]](#)

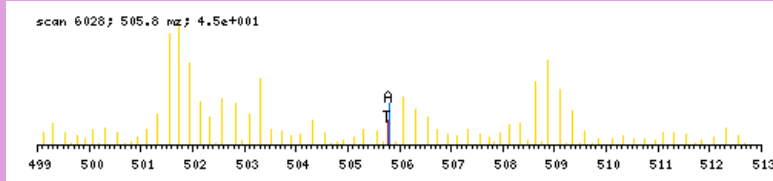

zoomed in precursor plot; T=theoretical m/z, A=acquired m/z

| b <sup>+</sup> | #  | AA # | y <sup>+</sup>  | y <sup>2+</sup> |
|----------------|----|------|-----------------|-----------------|
| 142.1232       | 1  | I 17 |                 |                 |
| 241.1916       | 2  | V 16 | 1879.0078       | 940.0078        |
| 369.2502       | 3  | Q 15 | 1779.9394       | 890.4736        |
| 525.3765       | 4  | K 14 | 1651.8808       | 826.4443        |
| 688.4398       | 5  | Y 13 | 1495.7545       | 748.3812        |
| 745.4612       | 6  | G 12 | 1332.6912       | 666.8495        |
| 908.5246       | 7  | Y 11 | 1275.6697       | 638.3388        |
| 1009.5723      | 8  | T 10 | 1112.6064       | 556.8071        |
| 1146.6312      | 9  | H 9  | 1011.5587       | <b>506.2833</b> |
| 1259.7152      | 10 | L 8  | <b>874.4998</b> | 437.7538        |
| 1346.7473      | 11 | S 7  | <b>761.4157</b> | 381.2118        |
| 1447.7949      | 12 | T 6  | <b>674.3837</b> | 337.6958        |
| 1504.8164      | 13 | G 5  | <b>573.3360</b> | 287.1719        |
| 1619.8433      | 14 | D 4  | 516.3146        | 258.6612        |
| 1732.9274      | 15 | L 3  | <b>401.2876</b> | 201.1477        |
| 1846.0115      | 16 | L 2  | 288.2036        | 144.6057        |
|                | 17 | R 1  | <b>175.1195</b> | 88.0637         |

N-term:+29.04 K(4):+156.13

IYEKPQTEAPQVTGPIEVPVVR, MH+ 2506.3921, m/z 627.3535  
 L OS G26 P150811 220811-s1.05281.05281.4.dta

scan 5281; 7.8e+000

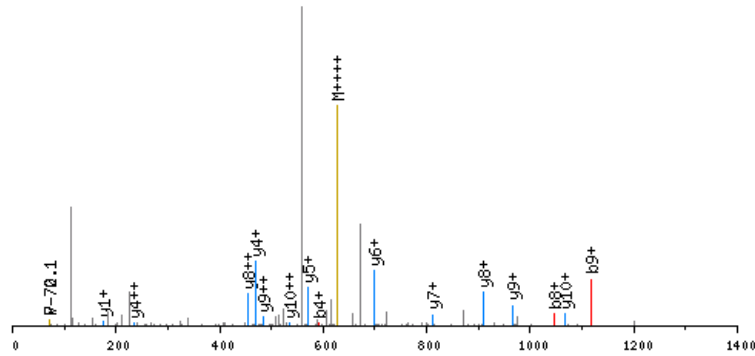

click image to zoom in; click top corners to zoom out [precursor±]

scan 5280; 627.4 mz; 9.9e+002

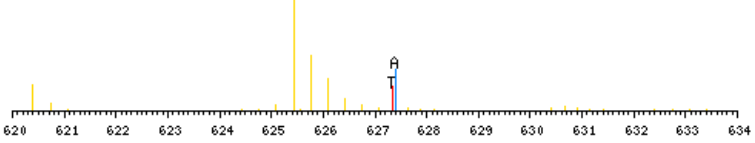

zoomed in precursor plot; T=theoretical m/z, A=acquired m/z

X-range:

-

MassTol: Y-zoom:

MassType:

AVG  MONO

Axis:

1  2

Label:

I  M  -

Ions:

a  +  2+  3+

b  +  2+  3+

c  +  2+  3+

x  +  2+  3+

y  +  2+  3+

z  +  2+  3+

hide H<sub>2</sub>O/NH<sub>3</sub>

zoom 112-122

GO

| b <sup>+</sup> | #  | AA # | y <sup>+</sup> | y <sup>2+</sup> |
|----------------|----|------|----------------|-----------------|
| 142.1232       | 1  | I 22 |                |                 |
| 305.1865       | 2  | Y 21 | 2365.2768      | 1183.1423       |
| 434.2291       | 3  | E 20 | 2202.2134      | 1101.6106       |
| 590.3554       | 4  | K 19 | 2073.1709      | 1037.0893       |
| 687.4081       | 5  | P 18 | 1917.0446      | 959.0262        |
| 815.4667       | 6  | Q 17 | 1819.9918      | 910.4998        |
| 916.5144       | 7  | T 16 | 1691.9332      | 846.4705        |
| 1045.5570      | 8  | E 15 | 1590.8855      | 795.9467        |
| 1116.5941      | 9  | A 14 | 1461.8429      | 731.4254        |
| 1213.6469      | 10 | P 13 | 1390.8058      | 695.9068        |
| 1341.7055      | 11 | Q 12 | 1293.7531      | 647.3804        |
| 1440.7739      | 12 | V 11 | 1165.6945      | 583.3512        |
| 1541.8215      | 13 | T 10 | 1066.6261      | 533.8169        |
| 1598.8430      | 14 | G 9  | 965.5784       | 483.2931        |
| 1695.8958      | 15 | P 8  | 908.5569       | 454.7824        |
| 1808.9798      | 16 | I 7  | 811.5042       | 406.2560        |
| 1938.0224      | 17 | E 6  | 698.4201       | 349.7140        |
| 2037.0908      | 18 | V 5  | 569.3775       | 285.1927        |
| 2134.1436      | 19 | P 4  | 470.3091       | 235.6585        |
| 2233.2120      | 20 | V 3  | 373.2563       | 187.1321        |
| 2332.2804      | 21 | V 2  | 274.1879       | 137.5979        |
|                | 22 | R 1  | 175.1195       | 88.0637         |

N-term:+29.04 K(4):+156.13

X-range:

-

MassTol: Y-zoom:

MassType:

AVG  MONO

Axis:

1  2

Label:

I  M  -

Ions:

a  +  2+  3+

b  +  2+  3+

c  +  2+  3+

x  +  2+  3+

y  +  2+  3+

z  +  2+  3+

hide H<sub>2</sub>O/NH<sub>3</sub>

zoom 112-122

GO

scan 2625; 2.2e+000

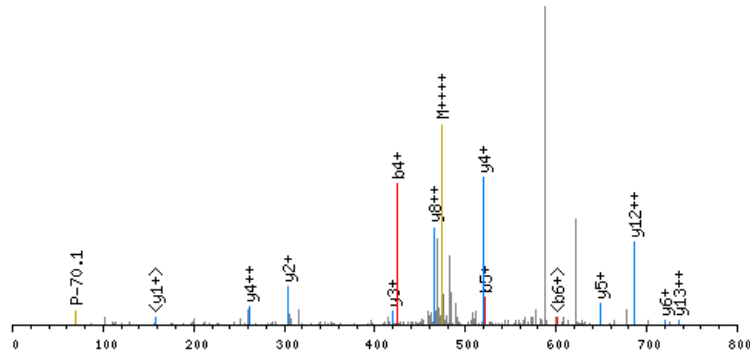

click image to zoom in; click top corners to zoom out [\[precursor±\]](#)

scan 2623; 473.5 mz; 2.9e+001

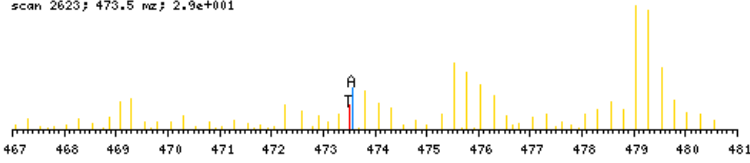

zoomed in precursor plot; T=theoretical m/z, A=acquired m/z

| b <sup>+</sup> | #  | AA | #  | y <sup>+</sup> | y <sup>2+</sup> |
|----------------|----|----|----|----------------|-----------------|
| 185.1654       | 1  | K  | 17 |                |                 |
| 256.2025       | 2  | A  | 16 | 1706.9078      | 853.9578        |
| 353.2553       | 3  | P  | 15 | 1635.8706      | 818.4392        |
| 424.2924       | 4  | A  | 14 | 1538.8179      | 769.9129        |
| 521.3452       | 5  | P  | 13 | 1467.7808      | 734.3943        |
| 618.3979       | 6  | P  | 12 | 1370.7280      | 685.8679        |
| 705.4299       | 7  | S  | 11 | 1273.6752      | 637.3415        |
| 861.5562       | 8  | K  | 10 | 1186.6432      | 593.8255        |
| 962.6039       | 9  | T  | 9  | 1030.5169      | 515.7624        |
| 1059.6567      | 10 | P  | 8  | 929.4692       | 465.2385        |
| 1172.7408      | 11 | L  | 7  | 832.4165       | 416.7121        |
| 1243.7779      | 12 | A  | 6  | 719.3324       | 360.1701        |
| 1371.8364      | 13 | Q  | 5  | 648.2953       | 324.6516        |
| 1472.8841      | 14 | T  | 4  | 520.2367       | 260.6223        |
| 1587.9111      | 15 | D  | 3  | 419.1890       | 210.0984        |
| 1716.9537      | 16 | E  | 2  | 304.1621       | 152.5850        |
|                | 17 | R  | 1  | 175.1195       | 88.0637         |

N-term:+29.04 K(1):+156.13  
 K(8):+156.13

KAPQVSTPTLVEAAR, MH+ 1636.0070, m/z 546.0072  
 H OS G26 P150811 220811-s1.03392.03392.3.dta

X-range:

-

MassTol: Y-zoom:

MassType:

AVG  MONO

Axis:

1  2

Label:

I  M  -

Ions:

a  +  2+  3+

b  +  2+  3+

c  +  2+  3+

x  +  2+  3+

y  +  2+  3+

z  +  2+  3+

hide H<sub>2</sub>O/NH<sub>3</sub>

zoom 112-122

GO

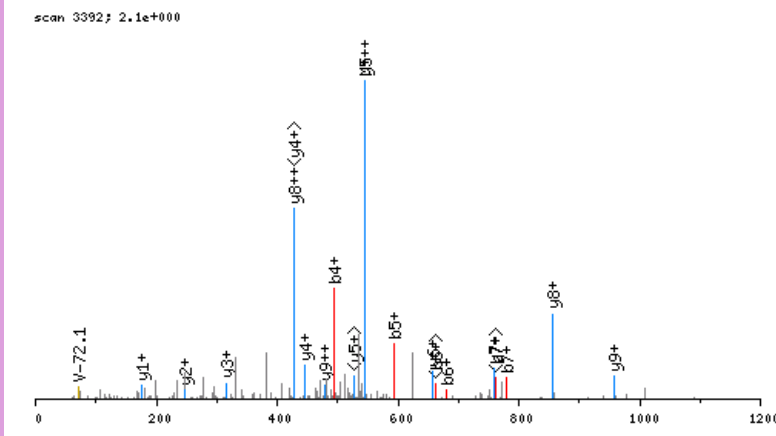

click image to zoom in; click top corners to zoom out [\[precursor±\]](#)

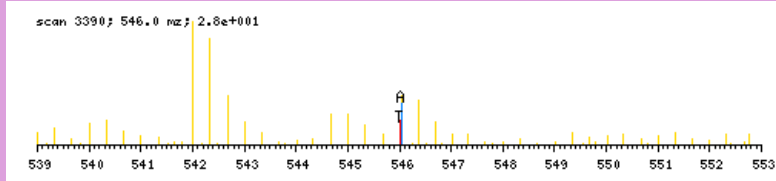

zoomed in precursor plot; T=theoretical m/z, A=acquired m/z

| b <sup>+</sup> | #  | AA # | y <sup>+</sup> | y <sup>2+</sup> |
|----------------|----|------|----------------|-----------------|
| 197.2290       | 1  | K 15 |                |                 |
| 268.2661       | 2  | A 14 | 1439.7858      | 720.3968        |
| 365.3189       | 3  | P 13 | 1368.7487      | 684.8783        |
| 493.3775       | 4  | Q 12 | 1271.6959      | 636.3519        |
| 592.4459       | 5  | V 11 | 1143.6374      | 572.3226        |
| 679.4779       | 6  | S 10 | 1044.5689      | 522.7884        |
| 780.5256       | 7  | T 9  | 957.5369       | 479.2724        |
| 877.5783       | 8  | P 8  | 856.4892       | 428.7485        |
| 978.6260       | 9  | T 7  | 759.4365       | 380.2222        |
| 1091.7101      | 10 | L 6  | 658.3888       | 329.6983        |
| 1190.7785      | 11 | V 5  | 545.3047       | 273.1563        |
| 1319.8211      | 12 | E 4  | 446.2363       | 223.6221        |
| 1390.8582      | 13 | A 3  | 317.1937       | 159.1008        |
| 1461.8953      | 14 | A 2  | 246.1566       | 123.5822        |
|                | 15 | R 1  | 175.1195       | 88.0637         |

N-term:+35.07 K(1):+162.16

KATEMVEVGPEDDEVGAER, MH+ 2117.0073, m/z 706.3406  
 L OS G26 P150811 220811-s1.03424.03424.3.dta

X-range:

-

MassTol: Y-zoom:

MassType:

AVG  MONO

Axis:

1  2

Label:

I  M  -

Ions:

a  +  2+  3+

b  +  2+  3+

c  +  2+  3+

x  +  2+  3+

y  +  2+  3+

z  +  2+  3+

hide H<sub>2</sub>O/NH<sub>3</sub>

zoom 112-122

GO

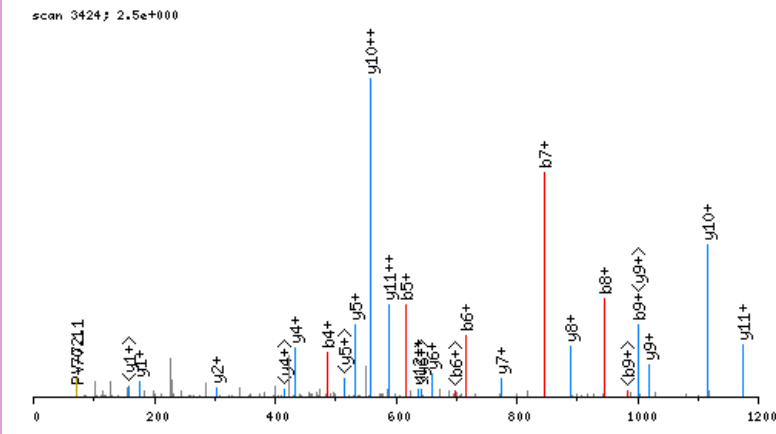

click image to zoom in; click top corners to zoom out [\[precursor±\]](#)

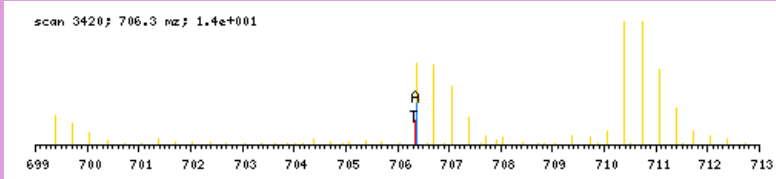

zoomed in precursor plot; T=theoretical m/z, A=acquired m/z

| b <sup>+</sup> | #  | AA # | y <sup>+</sup> | y <sup>2+</sup> |
|----------------|----|------|----------------|-----------------|
| 185.1654       | 1  | K 19 |                |                 |
| 256.2025       | 2  | A 18 | 1932.8497      | 966.9288        |
| 357.2502       | 3  | T 17 | 1861.8126      | 931.4102        |
| 486.2928       | 4  | E 16 | 1760.7649      | 880.8864        |
| 617.3333       | 5  | M 15 | 1631.7223      | 816.3651        |
| 716.4017       | 6  | V 14 | 1500.6818      | 750.8448        |
| 845.4443       | 7  | E 13 | 1401.6134      | 701.3106        |
| 944.5127       | 8  | V 12 | 1272.5708      | 636.7893        |
| 1001.5342      | 9  | G 11 | 1173.5024      | 587.2551        |
| 1098.5869      | 10 | P 10 | 1116.4809      | 558.7444        |
| 1227.6295      | 11 | E 9  | 1019.4282      | 510.2180        |
| 1342.6565      | 12 | D 8  | 890.3856       | 445.6967        |
| 1457.6834      | 13 | D 7  | 775.3586       | 388.1832        |
| 1586.7260      | 14 | E 6  | 660.3317       | 330.6698        |
| 1685.7944      | 15 | V 5  | 531.2891       | 266.1485        |
| 1742.8159      | 16 | G 4  | 432.2207       | 216.6142        |
| 1813.8530      | 17 | A 3  | 375.1992       | 188.1035        |
| 1942.8956      | 18 | E 2  | 304.1621       | 152.5850        |
|                | 19 | R 1  | 175.1195       | 88.0637         |

N-term:+29.04 K(1):+156.13

KDAPDGPVVLTVDGR, MH+ 1695.9281, m/z 565.9809  
 L OS G26 P150811 220811-s1.03902.03902.3.dta

X-range:

-

MassTol: Y-zoom:

MassType:

AVG  MONO

Axis:

1  2

Label:

I  M  -

Ions:

a  +  2+  3+

b  +  2+  3+

c  +  2+  3+

x  +  2+  3+

y  +  2+  3+

z  +  2+  3+

hide H<sub>2</sub>O/NH<sub>3</sub>

zoom 112-122

GO

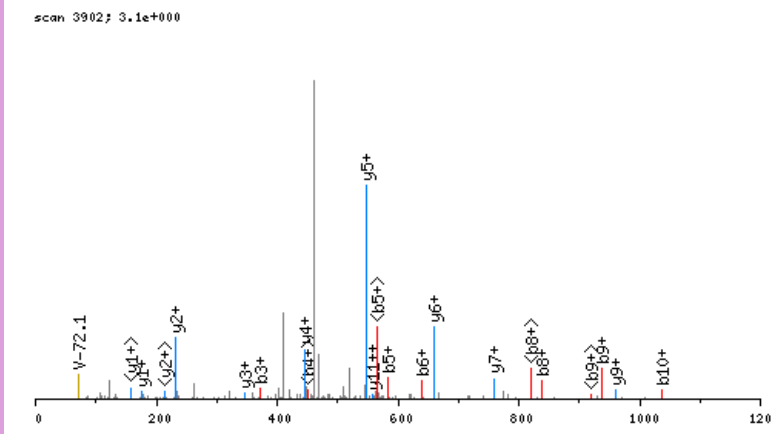

click image to zoom in; click top corners to zoom out [\[precursor±\]](#)

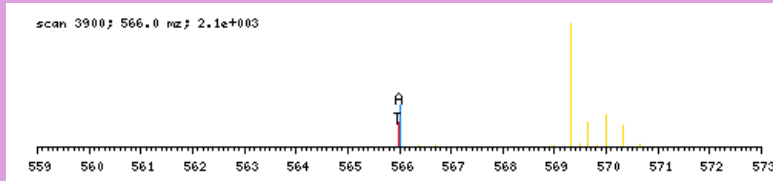

zoomed in precursor plot; T=theoretical m/z, A=acquired m/z

| b <sup>+</sup> | #  | AA # | y <sup>+</sup> | y <sup>2+</sup> |
|----------------|----|------|----------------|-----------------|
| 185.1654       | 1  | K 16 |                |                 |
| 300.1923       | 2  | D 15 | 1511.7706      | 756.3892        |
| 371.2295       | 3  | A 14 | 1396.7436      | 698.8757        |
| 468.2822       | 4  | P 13 | 1325.7065      | 663.3572        |
| 583.3092       | 5  | D 12 | 1228.6537      | 614.8308        |
| 640.3306       | 6  | G 11 | 1113.6268      | 557.3173        |
| 737.3834       | 7  | P 10 | 1056.6053      | 528.8066        |
| 838.4311       | 8  | T 9  | 959.5526       | 480.2802        |
| 937.4995       | 9  | V 8  | 858.5049       | 429.7564        |
| 1036.5679      | 10 | V 7  | 759.4365       | 380.2222        |
| 1149.6520      | 11 | L 6  | 660.3681       | 330.6879        |
| 1250.6996      | 12 | T 5  | 547.2840       | 274.1459        |
| 1349.7681      | 13 | V 4  | 446.2363       | 223.6221        |
| 1464.7950      | 14 | D 3  | 347.1679       | 174.0879        |
| 1521.8165      | 15 | G 2  | 232.1410       | 116.5744        |
|                | 16 | R 1  | 175.1195       | 88.0637         |

N-term:+29.04 K(1):+156.13



KDFMIQGGDFTR, MH+ 1482.8051, m/z 494.9399  
 H OS G27 P150811 220811-s1.05225.05225.3.dta

X-range:

-

MassTol: Y-zoom:

MassType:

AVG  MONO

Axis:

1  2

Label:

I  M  -

Ions:

a  +  2+  3+

b  +  2+  3+

c  +  2+  3+

x  +  2+  3+

y  +  2+  3+

z  +  2+  3+

hide H<sub>2</sub>O/NH<sub>3</sub>

zoom 112-122

GO

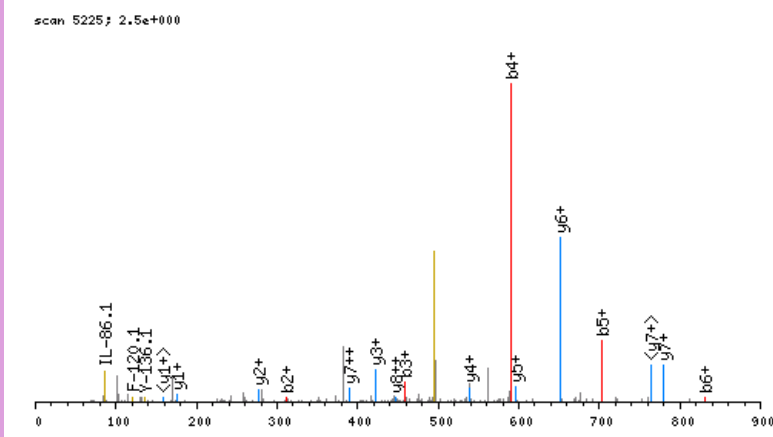

click image to zoom in; click top corners to zoom out [\[precursor±\]](#)

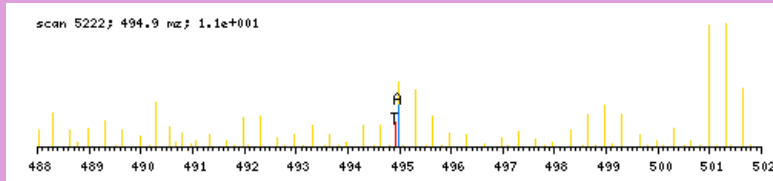

zoomed in precursor plot; T=theoretical m/z, A=acquired m/z

| b <sup>+</sup> | #  | AA # | y <sup>+</sup> | y <sup>2+</sup> |
|----------------|----|------|----------------|-----------------|
| 197.2290       | 1  | K 12 |                |                 |
| 312.2559       | 2  | D 11 | 1286.5839      | 643.7959        |
| 459.3244       | 3  | F 10 | 1171.5570      | 586.2824        |
| 590.3648       | 4  | M 9  | 1024.4886      | 512.7482        |
| 703.4489       | 5  | I 8  | 893.4481       | 447.2280        |
| 831.5075       | 6  | Q 7  | 780.3640       | 390.6859        |
| 888.5289       | 7  | G 6  | 652.3055       | 326.6566        |
| 945.5504       | 8  | G 5  | 595.2840       | 298.1459        |
| 1060.5774      | 9  | D 4  | 538.2625       | 269.6352        |
| 1207.6458      | 10 | F 3  | 423.2356       | 212.1217        |
| 1308.6934      | 11 | T 2  | 276.1672       | 138.5875        |
|                | 12 | R 1  | 175.1195       | 88.0637         |

N-term:+35.07 K(1):+162.16

KDGLKMNAAIKMLKEYASENDR, MH+ 2832.6601, m/z 708.9205  
 H OS G26 P150811 220811-s1.06693.06693.4.dta

scan 6693; 8.4e-001

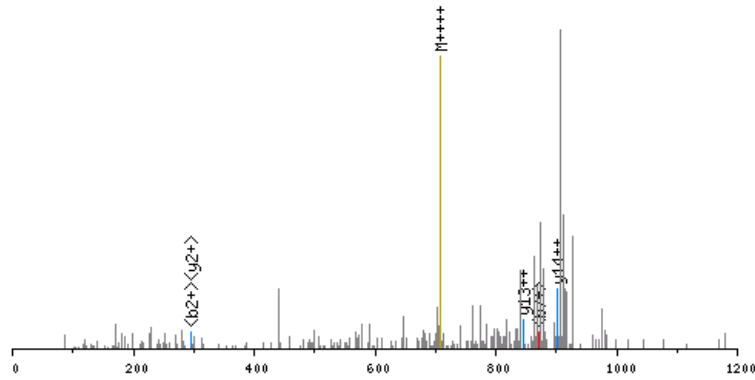

click image to zoom in; click top corners to zoom out [\[precursor±\]](#)

scan 6690; 708.9 m/z; 8.1e+000

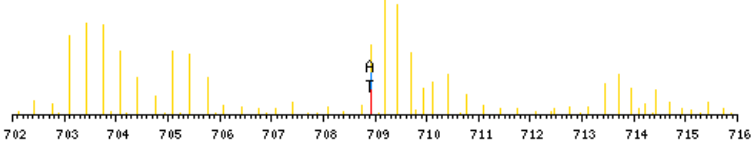

zoomed in precursor plot; T=theoretical m/z, A=acquired m/z

X-range:

-

MassTol: Y-zoom:

MassType:

AVG  MONO

Axis:

1  2

Label:

I  M  -

Ions:

a  +  2+  3+

b  +  2+  3+

c  +  2+  3+

x  +  2+  3+

y  +  2+  3+

z  +  2+  3+

hide H<sub>2</sub>O/NH<sub>3</sub>

zoom 112-122

GO

| b <sup>+</sup> | #  | AA | #  | y <sup>+</sup> | y <sup>2+</sup> |
|----------------|----|----|----|----------------|-----------------|
| 197.2290       | 1  | K  | 23 |                |                 |
| 312.2559       | 2  | D  | 22 | 2636.4390      | 1318.7234       |
| 369.2774       | 3  | G  | 21 | 2521.4120      | 1261.2099       |
| 482.3615       | 4  | L  | 20 | 2464.3906      | 1232.6992       |
| 644.5196       | 5  | K  | 19 | 2351.3065      | 1176.1572       |
| 775.5601       | 6  | M  | 18 | 2189.1484      | 1095.0781       |
| 889.6030       | 7  | N  | 17 | 2058.1079      | 1029.5579       |
| 960.6401       | 8  | A  | 16 | 1944.0650      | 972.5364        |
| 1031.6772      | 9  | A  | 15 | 1873.0279      | 937.0178        |
| 1144.7613      | 10 | I  | 14 | 1801.9908      | 901.4993        |
| 1306.9194      | 11 | K  | 13 | 1688.9067      | 844.9573        |
| 1437.9599      | 12 | M  | 12 | 1526.7486      | 763.8782        |
| 1551.0439      | 13 | L  | 11 | 1395.7081      | 698.3580        |
| 1713.2020      | 14 | K  | 10 | 1282.6240      | 641.8159        |
| 1842.2446      | 15 | E  | 9  | 1120.4659      | 560.7369        |
| 2005.3079      | 16 | Y  | 8  | 991.4233       | 496.2156        |
| 2076.3451      | 17 | A  | 7  | 828.3600       | 414.6839        |
| 2163.3771      | 18 | S  | 6  | 757.3229       | 379.1654        |
| 2292.4197      | 19 | E  | 5  | 670.2909       | 335.6494        |
| 2406.4626      | 20 | N  | 4  | 541.2483       | 271.1281        |
| 2521.4896      | 21 | D  | 3  | 427.2054       | 214.1066        |
| 2658.5485      | 22 | H  | 2  | 312.1784       | 156.5931        |
|                | 23 | R  | 1  | 175.1195       | 88.0637         |

N-term:+35.07 K(1):+162.16  
 K(5):+162.16 K(11):+162.16  
 K(14):+162.16

KDLEEDHACIPIKKSDPVVSYR, MH+ 2711.4443, m/z 678.6165  
 L OS G28 P150811 220811-s1.04582.04582.4.dta

X-range:

-

MassTol: Y-zoom:

MassType:

AVG  MONO

Axis:

1  2

Label:

I  M  -

Ions:

a  +  2+  3+

b  +  2+  3+

c  +  2+  3+

x  +  2+  3+

y  +  2+  3+

z  +  2+  3+

hide H<sub>2</sub>O/NH<sub>3</sub>

zoom 112-122

GO

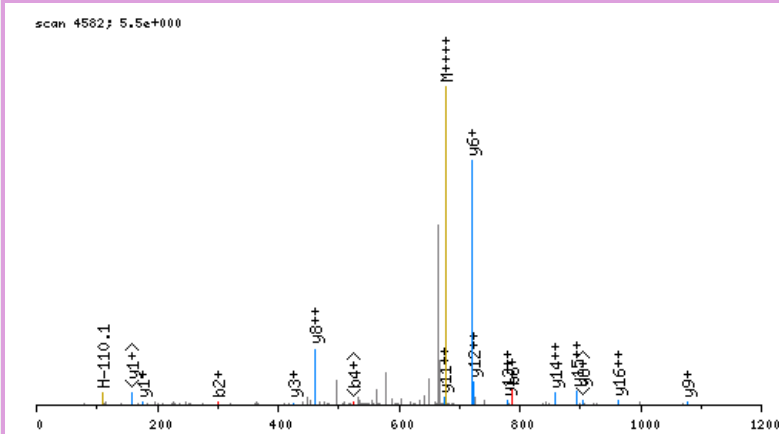

click image to zoom in; click top corners to zoom out [\[precursor±\]](#)

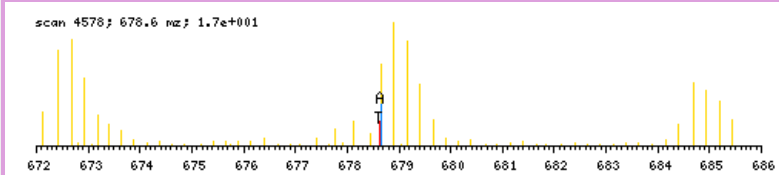

zoomed in precursor plot; T=theoretical m/z, A=acquired m/z

| b <sup>+</sup> | #  | AA | #  | y <sup>+</sup> | y <sup>2+</sup> |
|----------------|----|----|----|----------------|-----------------|
| 185.1654       | 1  | K  | 22 |                |                 |
| 300.1923       | 2  | D  | 21 | 2527.2867      | 1264.1473       |
| 413.2764       | 3  | L  | 20 | 2412.2597      | 1206.6338       |
| 542.3190       | 4  | E  | 19 | 2299.1757      | 1150.0917       |
| 671.3616       | 5  | E  | 18 | 2170.1331      | 1085.5704       |
| 786.3885       | 6  | D  | 17 | 2041.0905      | 1021.0492       |
| 923.4474       | 7  | H  | 16 | 1926.0635      | 963.5357        |
| 994.4846       | 8  | A  | 15 | 1789.0046      | 895.0062        |
| 1154.5152      | 9  | C  | 14 | 1717.9675      | 859.4877        |
| 1267.5992      | 10 | I  | 13 | 1557.9369      | 779.4724        |
| 1364.6520      | 11 | P  | 12 | 1444.8528      | 722.9303        |
| 1477.7361      | 12 | I  | 11 | 1347.8001      | 674.4040        |
| 1633.8624      | 13 | K  | 10 | 1234.7160      | 617.8619        |
| 1789.9887      | 14 | K  | 9  | 1078.5897      | 539.7988        |
| 1877.0207      | 15 | S  | 8  | 922.4634       | 461.7356        |
| 1992.0476      | 16 | D  | 7  | 835.4314       | 418.2196        |
| 2089.1004      | 17 | P  | 6  | 720.4044       | 360.7061        |
| 2188.1688      | 18 | V  | 5  | 623.3517       | 312.1798        |
| 2287.2372      | 19 | V  | 4  | 524.2833       | 262.6455        |
| 2374.2692      | 20 | S  | 3  | 425.2149       | 213.1113        |
| 2537.3326      | 21 | Y  | 2  | 338.1828       | 169.5953        |
|                | 22 | R  | 1  | 175.1195       | 88.0637         |

N-term:+29.04 K(1):+156.13  
 C(9):+160.03 K(13):+156.13  
 K(14):+156.13

KDLFDPIIEER, MH+ 1442.8531, m/z 481.6226  
 H OS G27 P150811 220811-s1.06411.06411.3.dta

X-range:

-

MassTol: Y-zoom:

MassType:

AVG  MONO

Axis:

1  2

Label:

I  M  -

Ions:

a  +  2+  3+

b  +  2+  3+

c  +  2+  3+

x  +  2+  3+

y  +  2+  3+

z  +  2+  3+

hide H<sub>2</sub>O/NH<sub>3</sub>

zoom 112-122

GO

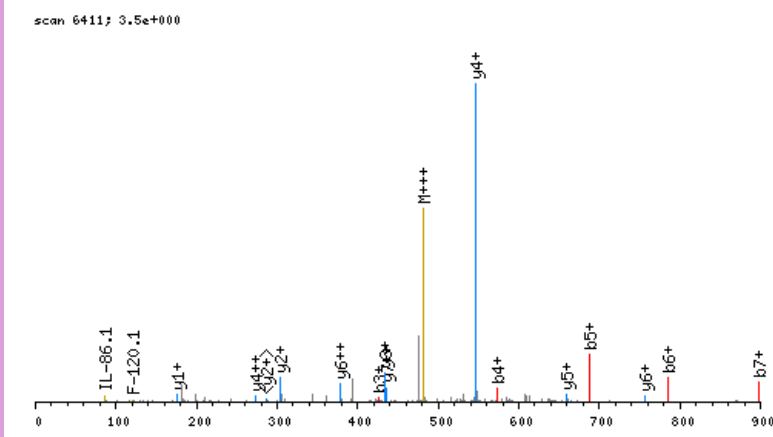

click image to zoom in; click top corners to zoom out [\[precursor±\]](#)

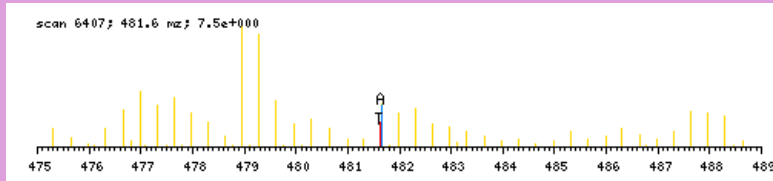

zoomed in precursor plot; T=theoretical m/z, A=acquired m/z

| b <sup>+</sup> | #  | AA # | y <sup>+</sup> | y <sup>2+</sup> |
|----------------|----|------|----------------|-----------------|
| 197.2290       | 1  | K 11 |                |                 |
| 312.2559       | 2  | D 10 | 1246.6319      | 623.8199        |
| 425.3400       | 3  | L 9  | 1131.6050      | 566.3064        |
| 572.4084       | 4  | F 8  | 1018.5209      | 509.7644        |
| 687.4354       | 5  | D 7  | 871.4525       | 436.2302        |
| 784.4881       | 6  | P 6  | 756.4256       | 378.7167        |
| 897.5722       | 7  | I 5  | 659.3728       | 330.1903        |
| 1010.6563      | 8  | I 4  | 546.2888       | 273.6483        |
| 1139.6988      | 9  | E 3  | 433.2047       | 217.1063        |
| 1268.7414      | 10 | E 2  | 304.1621       | 152.5850        |
|                | 11 | R 1  | 175.1195       | 88.0637         |

N-term:+35.07 K(1):+162.16

KDLFDPIIQDR, MH+ 1427.8535, m/z 476.6227  
 H OS G27 P150811 220811-s1.06248.06248.3.dta

scan 6248; 2.2e+001

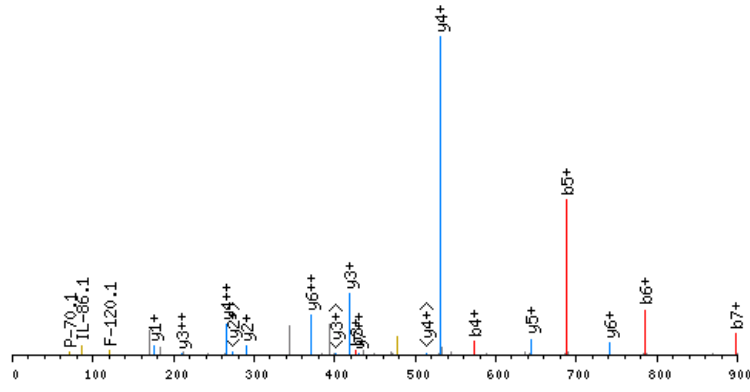

click image to zoom in; click top corners to zoom out [\[precursor±\]](#)

scan 6247; 476.6 m/z; 1.6e+002

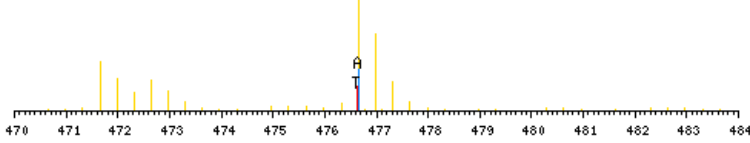

zoomed in precursor plot; T=theoretical m/z, A=acquired m/z

X-range:

-

MassTol: Y-zoom:

MassType:

AVG  MONO

Axis:

1  2

Label:

I  M  -

Ions:

a  +  2+  3+

b  +  2+  3+

c  +  2+  3+

x  +  2+  3+

y  +  2+  3+

z  +  2+  3+

hide H<sub>2</sub>O/NH<sub>3</sub>

zoom 112-122

GO

| b <sup>+</sup> | #  | AA # | y <sup>+</sup> | y <sup>2+</sup> |
|----------------|----|------|----------------|-----------------|
| 197.2290       | 1  | K 11 |                |                 |
| 312.2559       | 2  | D 10 | 1231.6323      | 616.3201        |
| 425.3400       | 3  | L 9  | 1116.6053      | 558.8066        |
| 572.4084       | 4  | F 8  | 1003.5213      | 502.2645        |
| 687.4354       | 5  | D 7  | 856.4529       | 428.7303        |
| 784.4881       | 6  | P 6  | 741.4259       | 371.2169        |
| 897.5722       | 7  | I 5  | 644.3731       | 322.6905        |
| 1010.6563      | 8  | I 4  | 531.2891       | 266.1485        |
| 1138.7148      | 9  | Q 3  | 418.2050       | 209.6064        |
| 1253.7418      | 10 | D 2  | 290.1464       | 145.5771        |
|                | 11 | R 1  | 175.1195       | 88.0637         |

N-term:+35.07 K(1):+162.16

KDQGGYEDFVEGLR, MH+ 1680.8869, m/z 560.9672  
 H OS G27 P150811 220811-s1.06024.06024.3.dta

X-range:

-

MassTol: Y-zoom:

MassType:

AVG  MONO

Axis:

1  2

Label:

I  M  -

Ions:

a  +  2+  3+

b  +  2+  3+

c  +  2+  3+

x  +  2+  3+

y  +  2+  3+

z  +  2+  3+

hide H<sub>2</sub>O/NH<sub>3</sub>

zoom 112-122

GO

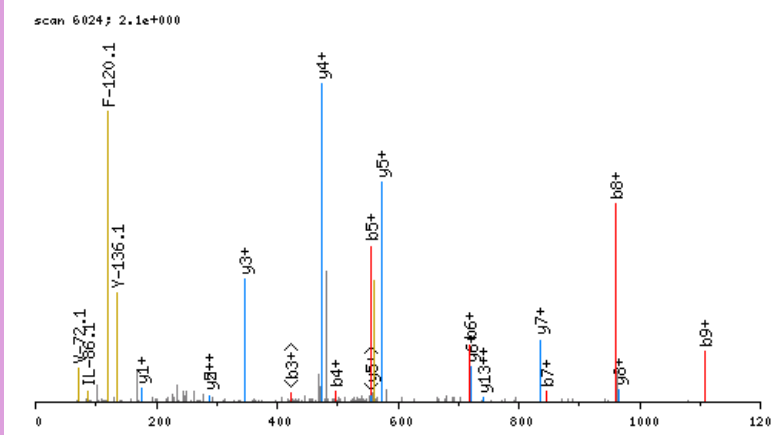

click image to zoom in; click top corners to zoom out [\[precursor±\]](#)

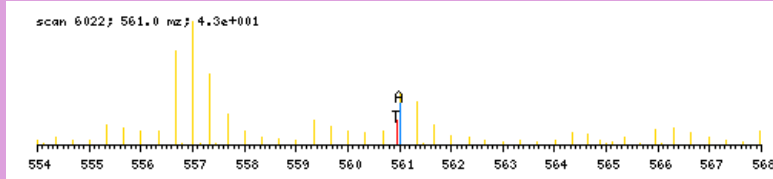

zoomed in precursor plot; T=theoretical m/z, A=acquired m/z

| b <sup>+</sup> | #  | AA | #  | y <sup>+</sup> | y <sup>2+</sup> |
|----------------|----|----|----|----------------|-----------------|
| 197.2290       | 1  | K  | 14 |                |                 |
| 312.2559       | 2  | D  | 13 | 1484.6658      | 742.8368        |
| 440.3145       | 3  | Q  | 12 | 1369.6388      | 685.3233        |
| 497.3360       | 4  | G  | 11 | 1241.5802      | 621.2940        |
| 554.3574       | 5  | G  | 10 | 1184.5588      | 592.7833        |
| 717.4208       | 6  | Y  | 9  | 1127.5373      | 564.2726        |
| 846.4634       | 7  | E  | 8  | 964.4740       | 482.7409        |
| 961.4903       | 8  | D  | 7  | 835.4314       | 418.2196        |
| 1108.5587      | 9  | F  | 6  | 720.4044       | 360.7061        |
| 1207.6271      | 10 | V  | 5  | 573.3360       | 287.1719        |
| 1336.6697      | 11 | E  | 4  | 474.2676       | 237.6377        |
| 1393.6912      | 12 | G  | 3  | 345.2250       | 173.1164        |
| 1506.7753      | 13 | L  | 2  | 288.2036       | 144.6057        |
|                | 14 | R  | 1  | 175.1195       | 88.0637         |

N-term:+35.07 K(1):+162.16

KDTCFSTEGPNLVTR, MH+ 1780.8903, m/z 594.3016  
 L OS G27 P150811 220811-s1.04353.04353.3.dta

X-range:

-

MassTol: Y-zoom:

MassType:

AVG  MONO

Axis:

1  2

Label:

I  M  -

Ions:

a  +  2+  3+

b  +  2+  3+

c  +  2+  3+

x  +  2+  3+

y  +  2+  3+

z  +  2+  3+

hide H<sub>2</sub>O/NH<sub>3</sub>

zoom 112-122

GO

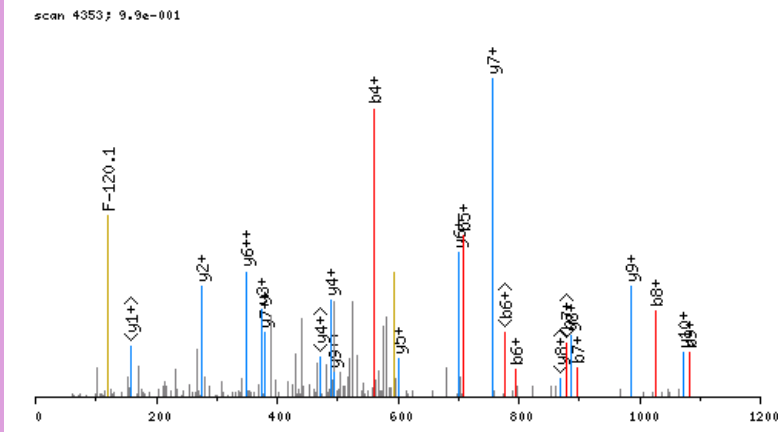

click image to zoom in; click top corners to zoom out [\[precursor±\]](#)

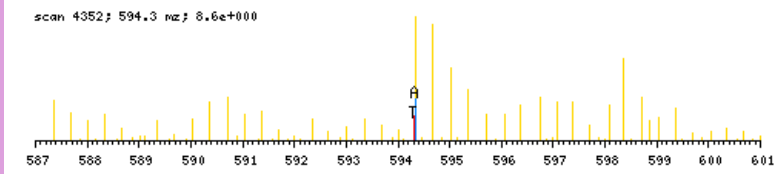

zoomed in precursor plot; T=theoretical m/z, A=acquired m/z

| b <sup>+</sup> | #  | AA # | y <sup>+</sup> | y <sup>2+</sup> |
|----------------|----|------|----------------|-----------------|
| 185.1654       | 1  | K 15 |                |                 |
| 300.1923       | 2  | D 14 | 1596.7327      | 798.8703        |
| 401.2400       | 3  | T 13 | 1481.7058      | 741.3568        |
| 561.2706       | 4  | C 12 | 1380.6581      | 690.8330        |
| 708.3390       | 5  | F 11 | 1220.6275      | 610.8177        |
| 795.3711       | 6  | S 10 | 1073.5591      | 537.2835        |
| 896.4187       | 7  | T 9  | 986.5271       | 493.7675        |
| 1025.4613      | 8  | E 8  | 885.4794       | 443.2436        |
| 1082.4828      | 9  | G 7  | 756.4368       | 378.7223        |
| 1179.5356      | 10 | P 6  | 699.4153       | 350.2116        |
| 1293.5785      | 11 | N 5  | 602.3626       | 301.6852        |
| 1406.6626      | 12 | L 4  | 488.3197       | 244.6637        |
| 1505.7310      | 13 | V 3  | 375.2356       | 188.1217        |
| 1606.7786      | 14 | T 2  | 276.1672       | 138.5875        |
|                | 15 | R 1  | 175.1195       | 88.0637         |

N-term:+29.04 K(1):+156.13  
 C(4):+160.03

KDTGKTPVEPEVAIHR, MH+ 1861.0548, m/z 466.0191  
 L OS G28 P150811 220811-s1.02882.02882.4.dta

scan 2882; 1.1e+001

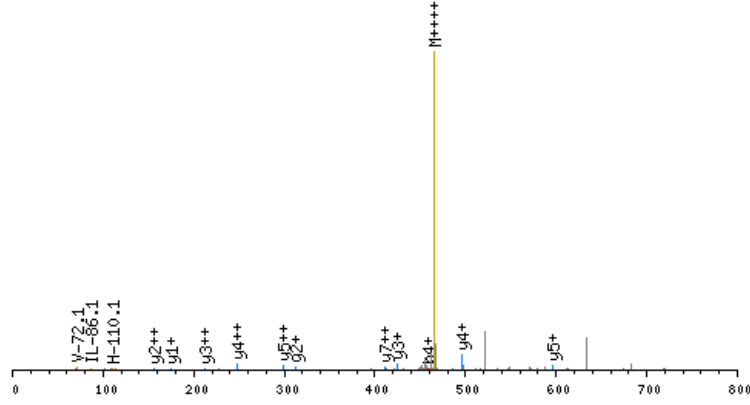

click image to zoom in; click top corners to zoom out [\[precursor±\]](#)

scan 2878; 466.0 mz; 2.1e+001

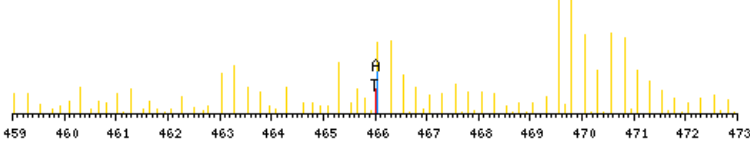

zoomed in precursor plot; T=theoretical m/z, A=acquired m/z

X-range:

-

MassTol: Y-zoom:

MassType:

AVG  MONO

Axis:

1  2

Label:

I  M  -

Ions:

a  +  2+  3+

b  +  2+  3+

c  +  2+  3+

x  +  2+  3+

y  +  2+  3+

z  +  2+  3+

hide H<sub>2</sub>O/NH<sub>3</sub>

zoom 112-122

GO

| b <sup>+</sup> | #  | AA # | y <sup>+</sup> | y <sup>2+</sup> |
|----------------|----|------|----------------|-----------------|
| 185.1654       | 1  | K 16 |                |                 |
| 300.1923       | 2  | D 15 | 1676.8972      | 838.9525        |
| 401.2400       | 3  | T 14 | 1561.8703      | 781.4390        |
| 458.2615       | 4  | G 13 | 1460.8226      | 730.9152        |
| 614.3878       | 5  | K 12 | 1403.8011      | 702.4045        |
| 715.4355       | 6  | T 11 | 1247.6748      | 624.3413        |
| 812.4882       | 7  | P 10 | 1146.6271      | 573.8175        |
| 911.5566       | 8  | V 9  | 1049.5744      | 525.2911        |
| 1040.5992      | 9  | E 8  | 950.5060       | 475.7569        |
| 1137.6520      | 10 | P 7  | 821.4634       | 411.2356        |
| 1266.6946      | 11 | E 6  | 724.4106       | 362.7092        |
| 1365.7630      | 12 | V 5  | 595.3680       | 298.1879        |
| 1436.8001      | 13 | A 4  | 496.2996       | 248.6537        |
| 1549.8842      | 14 | I 3  | 425.2625       | 213.1352        |
| 1686.9431      | 15 | H 2  | 312.1784       | 156.5931        |
|                | 16 | R 1  | 175.1195       | 88.0637         |

N-term:+29.04 K(1):+156.13  
 K(5):+156.13



KDWSALSSLIAR, MH+ 1289.7218, m/z 430.5788  
 L OS G27 P150811 220811-s1.05483.05483.3.dta

X-range:

-

MassTol: Y-zoom:

MassType:

AVG  MONO

Axis:

1  2

Label:

I  M  -

Ions:

a  +  2+  3+

b  +  2+  3+

c  +  2+  3+

x  +  2+  3+

y  +  2+  3+

z  +  2+  3+

hide H<sub>2</sub>O/NH<sub>3</sub>

zoom 112-122

GO

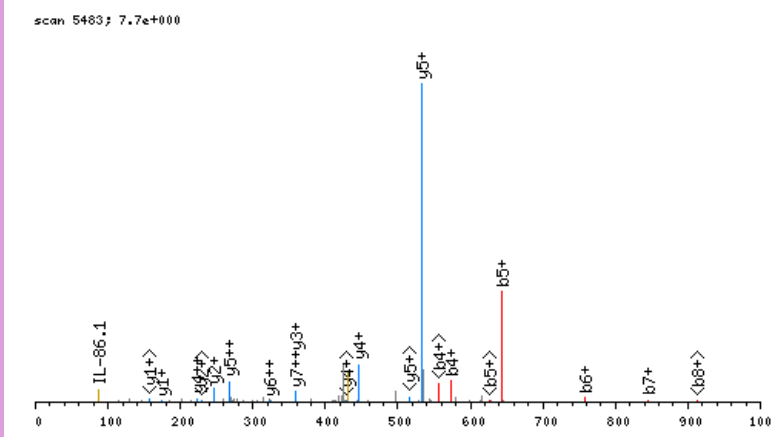

click image to zoom in; click top corners to zoom out [\[precursor±\]](#)

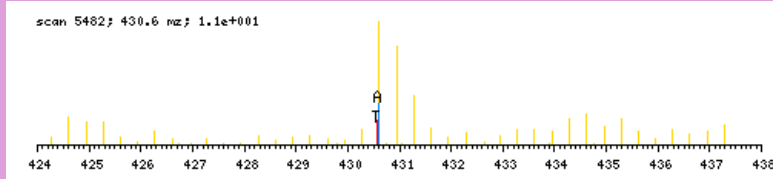

zoomed in precursor plot; T=theoretical m/z, A=acquired m/z

| b <sup>+</sup> | #  | AA # | y <sup>+</sup> | y <sup>2+</sup> |
|----------------|----|------|----------------|-----------------|
| 185.1654       | 1  | K 11 |                |                 |
| 300.1923       | 2  | D 10 | 1105.5642      | 553.2860        |
| 486.2717       | 3  | W 9  | 990.5373       | 495.7725        |
| 573.3037       | 4  | S 8  | 804.4579       | 402.7329        |
| 644.3408       | 5  | A 7  | 717.4259       | 359.2169        |
| 757.4249       | 6  | L 6  | 646.3888       | 323.6983        |
| 844.4569       | 7  | S 5  | 533.3047       | 267.1563        |
| 931.4889       | 8  | S 4  | 446.2727       | 223.6403        |
| 1044.5730      | 9  | L 3  | 359.2407       | 180.1243        |
| 1115.6101      | 10 | A 2  | 246.1566       | 123.5822        |
|                | 11 | R 1  | 175.1195       | 88.0637         |

N-term:+29.04 K(1):+156.13

KEAFTVIDQNR, MH+ 1376.7538, m/z 459.5895  
 L OS G27 P150811 220811-s1.03383.03383.3.dta

X-range:

-

MassTol: Y-zoom:

MassType:

AVG  MONO

Axis:

1  2

Label:

I  M  -

Ions:

a  +  2+  3+

b  +  2+  3+

c  +  2+  3+

x  +  2+  3+

y  +  2+  3+

z  +  2+  3+

hide H<sub>2</sub>O/NH<sub>3</sub>

zoom 112-122

GO

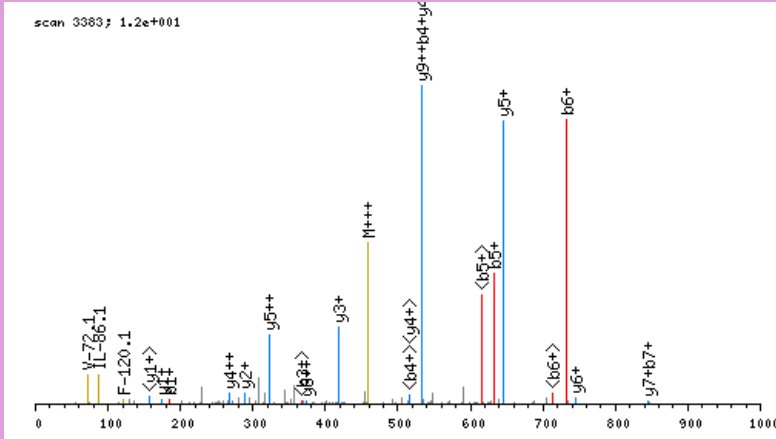

click image to zoom in; click top corners to zoom out [\[precursor±\]](#)

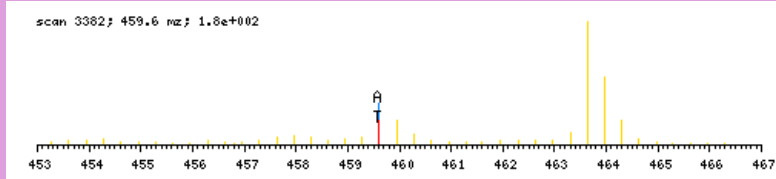

zoomed in precursor plot; T=theoretical m/z, A=acquired m/z

| b <sup>+</sup> | #  | AA # | y <sup>+</sup> | y <sup>2+</sup> |
|----------------|----|------|----------------|-----------------|
| 185.1654       | 1  | K 11 |                |                 |
| 314.2080       | 2  | E 10 | 1192.5962      | 596.8020        |
| 385.2451       | 3  | A 9  | 1063.5536      | 532.2807        |
| 532.3135       | 4  | F 8  | 992.5165       | 496.7622        |
| 633.3612       | 5  | T 7  | 845.4481       | 423.2280        |
| 732.4296       | 6  | V 6  | 744.4004       | 372.7041        |
| 845.5137       | 7  | I 5  | 645.3320       | 323.1699        |
| 960.5406       | 8  | D 4  | 532.2479       | 266.6279        |
| 1088.5992      | 9  | Q 3  | 417.2210       | 209.1144        |
| 1202.6421      | 10 | N 2  | 289.1624       | 145.0851        |
|                | 11 | R 1  | 175.1195       | 88.0637         |

N-term:+29.04 K(1):+156.13

KECCHGDLLECADDR, MH+ 1933.8205, m/z 484.2106  
 L OS G28 P150811 220811-s1.03025.03025.4.dta

X-range:

-

MassTol: Y-zoom:

MassType:

AVG  MONO

Axis:

1  2

Label:

I  M  -

Ions:

a  +  2+  3+

b  +  2+  3+

c  +  2+  3+

x  +  2+  3+

y  +  2+  3+

z  +  2+  3+

hide H<sub>2</sub>O/NH<sub>3</sub>

zoom 112-122

GO

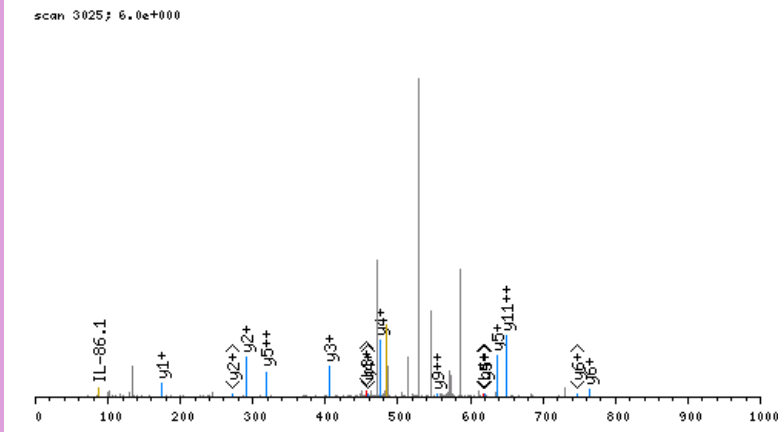

click image to zoom in; click top corners to zoom out [precursor±]

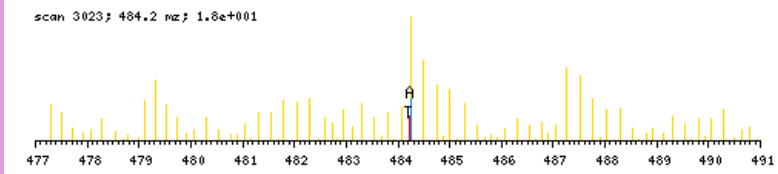

zoomed in precursor plot; T=theoretical m/z, A=acquired m/z

| b <sup>+</sup> | #  | AA # | y <sup>+</sup> | y <sup>2+</sup>    |
|----------------|----|------|----------------|--------------------|
| 185.1654       | 1  | K    | 15             |                    |
| 314.2080       | 2  | E    | 14             | 1749.6629 875.3354 |
| 474.2386       | 3  | C    | 13             | 1620.6203 810.8141 |
| 634.2692       | 4  | C    | 12             | 1460.5897 730.7988 |
| 771.3281       | 5  | H    | 11             | 1300.5591 650.7835 |
| 828.3496       | 6  | G    | 10             | 1163.5002 582.2540 |
| 943.3765       | 7  | D    | 9              | 1106.4788 553.7433 |
| 1056.4606      | 8  | L    | 8              | 991.4518 496.2298  |
| 1169.5446      | 9  | L    | 7              | 878.3678 439.6878  |
| 1298.5872      | 10 | E    | 6              | 765.2837 383.1458  |
| 1458.6178      | 11 | C    | 5              | 636.2411 318.6245  |
| 1529.6549      | 12 | A    | 4              | 476.2105 238.6092  |
| 1644.6819      | 13 | D    | 3              | 405.1734 203.0906  |
| 1759.7088      | 14 | D    | 2              | 290.1464 145.5771  |
|                | 15 | R    | 1              | 175.1195 88.0637   |

N-term:+29.04 K(1):+156.13  
 C(3):+160.03 C(4):+160.03  
 C(11):+160.03

KEEDIVEDGWTIVR, MH+ 1756.9758, m/z 586.3301  
 H OS G27 P150811 220811-s1.06530.06530.3.dta

X-range:

-

MassTol: Y-zoom:

MassType:

AVG  MONO

Axis:

1  2

Label:

I  M  -

Ions:

a  +  2+  3+

b  +  2+  3+

c  +  2+  3+

x  +  2+  3+

y  +  2+  3+

z  +  2+  3+

hide H<sub>2</sub>O/NH<sub>3</sub>

zoom 112-122

GO

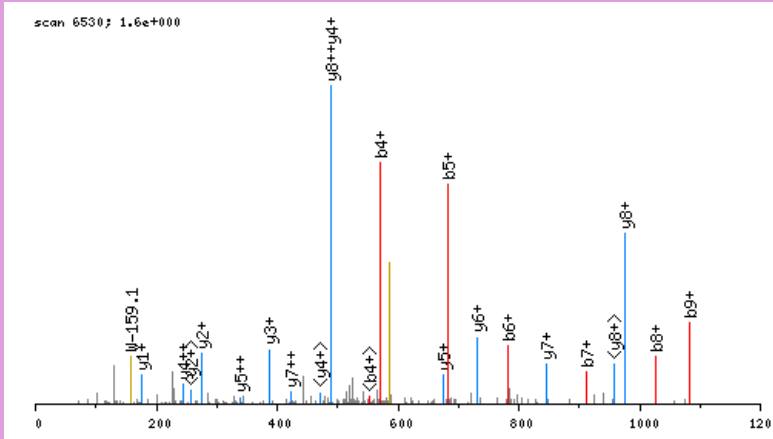

click image to zoom in; click top corners to zoom out [\[precursor±\]](#)

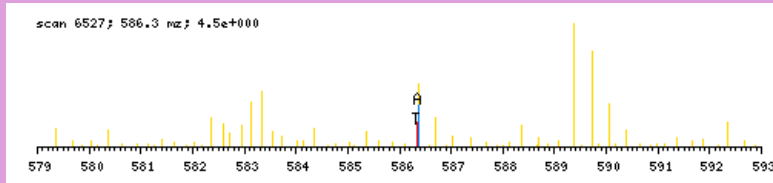

zoomed in precursor plot; T=theoretical m/z, A=acquired m/z

| b <sup>+</sup> | #  | AA # | y <sup>+</sup> | y <sup>2+</sup> |
|----------------|----|------|----------------|-----------------|
| 197.2290       | 1  | K 14 |                |                 |
| 326.2716       | 2  | E 13 | 1560.7546      | 780.8812        |
| 455.3142       | 3  | E 12 | 1431.7120      | 716.3599        |
| 570.3411       | 4  | D 11 | 1302.6694      | 651.8386        |
| 683.4252       | 5  | I 10 | 1187.6424      | 594.3251        |
| 782.4936       | 6  | V 9  | 1074.5584      | 537.7831        |
| 911.5362       | 7  | E 8  | 975.4900       | 488.2489        |
| 1026.5631      | 8  | D 7  | 846.4474       | 423.7276        |
| 1083.5846      | 9  | G 6  | 731.4204       | 366.2141        |
| 1269.6639      | 10 | W 5  | 674.3990       | 337.7034        |
| 1370.7116      | 11 | T 4  | 488.3197       | 244.6637        |
| 1483.7957      | 12 | I 3  | 387.2720       | 194.1399        |
| 1582.8641      | 13 | V 2  | 274.1879       | 137.5979        |
|                | 14 | R 1  | 175.1195       | 88.0637         |

N-term:+35.07 K(1):+162.16

KEEEGIGEELAIHNR, MH+ 1779.9241, m/z 445.7365  
 L OS G28 P150811 220811-s1.04111.04111.4.dta

X-range:

-

MassTol: Y-zoom:

MassType:

AVG  MONO

Axis:

1  2

Label:

I  M  -

Ions:

a  +  2+  3+

b  +  2+  3+

c  +  2+  3+

x  +  2+  3+

y  +  2+  3+

z  +  2+  3+

hide H<sub>2</sub>O/NH<sub>3</sub>

zoom 112-122

GO

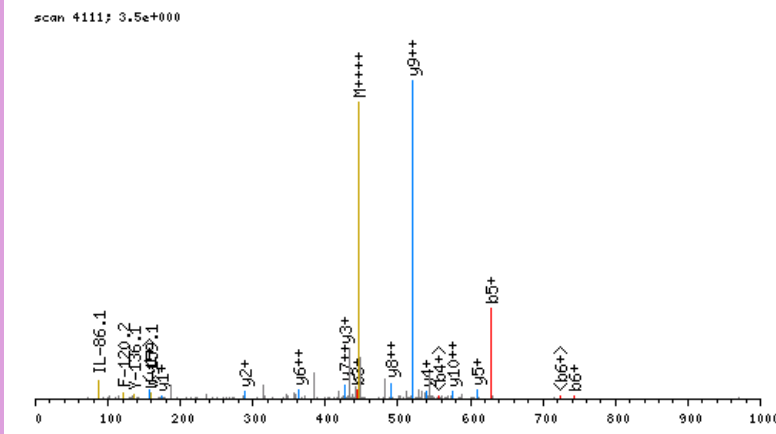

click image to zoom in; click top corners to zoom out [\[precursor±\]](#)

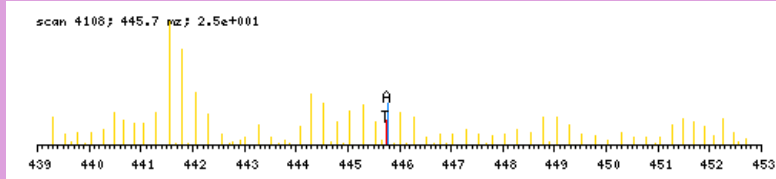

zoomed in precursor plot; T=theoretical m/z, A=acquired m/z

| b <sup>+</sup> | #  | AA # | y <sup>+</sup> | y <sup>2+</sup> |
|----------------|----|------|----------------|-----------------|
| 185.1654       | 1  | K 15 |                |                 |
| 314.2080       | 2  | E 14 | 1595.7665      | 798.3872        |
| 443.2506       | 3  | E 13 | 1466.7239      | 733.8659        |
| 572.2932       | 4  | E 12 | 1337.6814      | 669.3446        |
| 629.3146       | 5  | G 11 | 1208.6388      | 604.8233        |
| 742.3987       | 6  | I 10 | 1151.6173      | 576.3126        |
| 799.4202       | 7  | G 9  | 1038.5332      | 519.7705        |
| 928.4628       | 8  | E 8  | 981.5118       | 491.2598        |
| 1057.5054      | 9  | E 7  | 852.4692       | 426.7385        |
| 1170.5894      | 10 | L 6  | 723.4266       | 362.2172        |
| 1241.6265      | 11 | A 5  | 610.3425       | 305.6752        |
| 1354.7106      | 12 | I 4  | 539.3054       | 270.1566        |
| 1491.7695      | 13 | H 3  | 426.2213       | 213.6146        |
| 1605.8124      | 14 | N 2  | 289.1624       | 145.0851        |
|                | 15 | R 1  | 175.1195       | 88.0637         |

N-term:+29.04 K(1):+156.13

KEHISTTKVPEQPR, MH+ 1752.0868, m/z 438.7772  
 H OS G28 P150811 220811-s1.01904.01904.4.dta

X-range:

-

MassTol: Y-zoom:

MassType:

AVG  MONO

Axis:

1  2

Label:

I  M  -

Ions:

a  +  2+  3+

b  +  2+  3+

c  +  2+  3+

x  +  2+  3+

y  +  2+  3+

z  +  2+  3+

hide H<sub>2</sub>O/NH<sub>3</sub>

zoom 112-122

GO

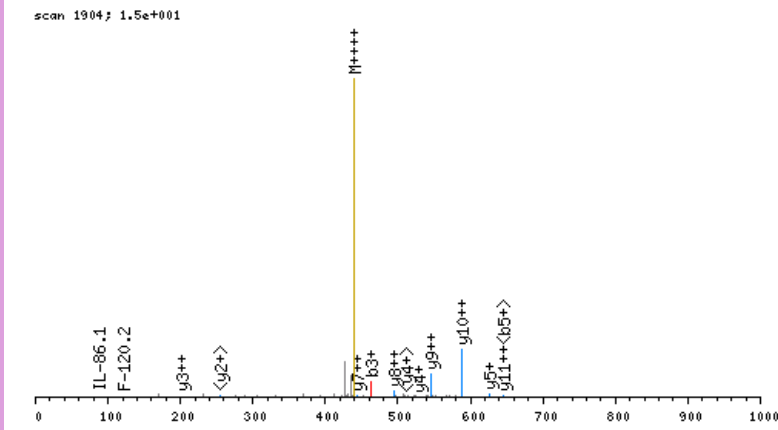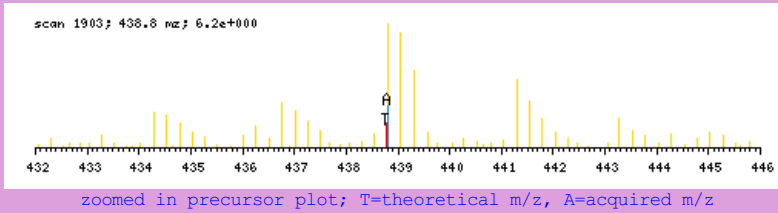

| b <sup>+</sup> | #  | AA # | y <sup>+</sup> | y <sup>2+</sup> |
|----------------|----|------|----------------|-----------------|
| 197.2290       | 1  | K 14 |                |                 |
| 326.2716       | 2  | E 13 | 1555.8657      | 778.4367        |
| 463.3305       | 3  | H 12 | 1426.8231      | 713.9154        |
| 576.4146       | 4  | I 11 | 1289.7642      | 645.3860        |
| 663.4466       | 5  | S 10 | 1176.6801      | 588.8440        |
| 764.4943       | 6  | T 9  | 1089.6481      | 545.3279        |
| 865.5420       | 7  | P 8  | 988.6004       | 494.8041        |
| 1027.7001      | 8  | K 7  | 887.5527       | 444.2803        |
| 1126.7685      | 9  | V 6  | 725.3946       | 363.2012        |
| 1223.8212      | 10 | P 5  | 626.3262       | 313.6670        |
| 1352.8638      | 11 | E 4  | 529.2734       | 265.1406        |
| 1480.9224      | 12 | Q 3  | 400.2308       | 200.6193        |
| 1577.9752      | 13 | P 2  | 272.1723       | 136.5900        |
|                | 14 | R 1  | 175.1195       | 88.0637         |

N-term:+35.07 K(1):+162.16  
 K(8):+162.16

KEILGTAQSVGCNVDGR, MH+ 1859.9649, m/z 620.6598  
 L OS G27 P150811 220811-s1.03828.03828.3.dta

X-range:

-

MassTol: Y-zoom:

MassType:

AVG  MONO

Axis:

1  2

Label:

I  M  -

Ions:

a  +  2+  3+

b  +  2+  3+

c  +  2+  3+

x  +  2+  3+

y  +  2+  3+

z  +  2+  3+

hide H<sub>2</sub>O/NH<sub>3</sub>

zoom 112-122

GO

scan 3828; 2.1e+000

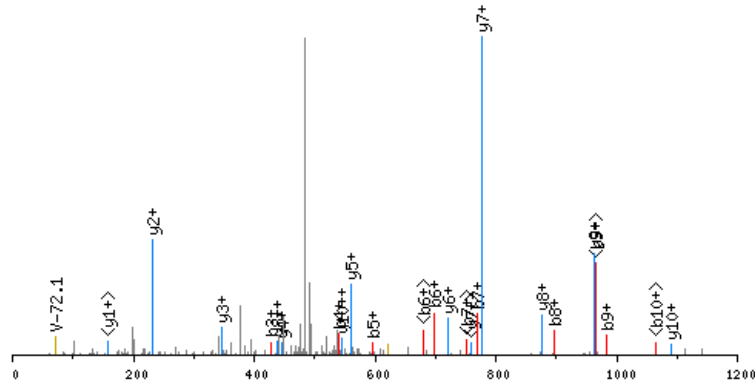

click image to zoom in; click top corners to zoom out [\[precursor±\]](#)

scan 3827; 620.7 mz; 2.5e+001

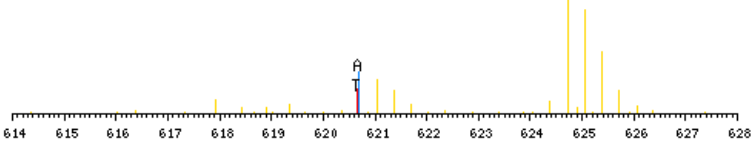

zoomed in precursor plot; T=theoretical m/z, A=acquired m/z

| b <sup>+</sup> | #  | AA # | y <sup>+</sup> | y <sup>2+</sup> |
|----------------|----|------|----------------|-----------------|
| 185.1654       | 1  | K 17 |                |                 |
| 314.2080       | 2  | E 16 | 1675.8073      | 838.4076        |
| 427.2921       | 3  | I 15 | 1546.7647      | 773.8863        |
| 540.3761       | 4  | L 14 | 1433.6807      | 717.3442        |
| 597.3976       | 5  | G 13 | 1320.5966      | 660.8022        |
| 698.4453       | 6  | T 12 | 1263.5751      | 632.2915        |
| 769.4824       | 7  | A 11 | 1162.5274      | 581.7676        |
| 897.5410       | 8  | Q 10 | 1091.4903      | 546.2491        |
| 984.5730       | 9  | S 9  | 963.4318       | 482.2198        |
| 1083.6414      | 10 | V 8  | 876.3997       | 438.7038        |
| 1140.6629      | 11 | G 7  | 777.3313       | 389.1696        |
| 1300.6935      | 12 | C 6  | 720.3098       | 360.6588        |
| 1414.7364      | 13 | N 5  | 560.2792       | 280.6435        |
| 1513.8048      | 14 | V 4  | 446.2363       | 223.6221        |
| 1628.8317      | 15 | D 3  | 347.1679       | 174.0879        |
| 1685.8532      | 16 | G 2  | 232.1410       | 116.5744        |
|                | 17 | R 1  | 175.1195       | 88.0637         |

N-term:+29.04 K(1):+156.13  
 C(12):+160.03

KELEDMNQKLFDLR, MH+ 1881.1004, m/z 471.0306  
 H OS G28 P150811 220811-s1.06892.06892.4.dta

X-range:

-

MassTol: Y-zoom:

MassType:

AVG  MONO

Axis:

1  2

Label:

I  M  -

Ions:

a  +  2+  3+

b  +  2+  3+

c  +  2+  3+

x  +  2+  3+

y  +  2+  3+

z  +  2+  3+

hide H<sub>2</sub>O/NH<sub>3</sub>

zoom 112-122

GO

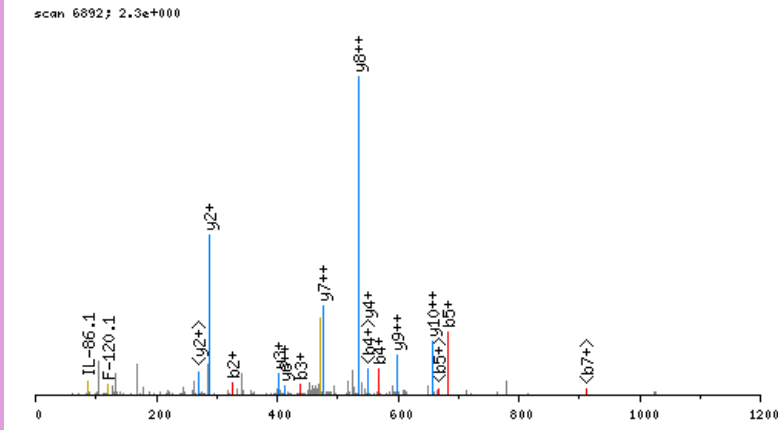

click image to zoom in; click top corners to zoom out [\[precursor±\]](#)

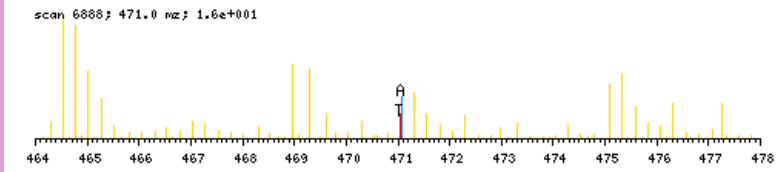

zoomed in precursor plot; T=theoretical m/z, A=acquired m/z

| b <sup>+</sup> | #  | AA # | y <sup>+</sup> | y <sup>2+</sup> |
|----------------|----|------|----------------|-----------------|
| 197.2290       | 1  | K 14 |                |                 |
| 326.2716       | 2  | E 13 | 1684.8793      | 842.9435        |
| 439.3557       | 3  | L 12 | 1555.8367      | 778.4223        |
| 568.3983       | 4  | E 11 | 1442.7526      | 721.8802        |
| 683.4252       | 5  | D 10 | 1313.7100      | 657.3589        |
| 814.4657       | 6  | M 9  | 1198.6831      | 599.8455        |
| 928.5086       | 7  | N 8  | 1067.6426      | 534.3252        |
| 1056.5672      | 8  | Q 7  | 953.5997       | 477.3037        |
| 1218.7253      | 9  | K 6  | 825.5411       | 413.2745        |
| 1331.8093      | 10 | L 5  | 663.3830       | 332.1954        |
| 1478.8778      | 11 | F 4  | 550.2989       | 275.6534        |
| 1593.9047      | 12 | D 3  | 403.2305       | 202.1192        |
| 1706.9888      | 13 | L 2  | 288.2036       | 144.6057        |
|                | 14 | R 1  | 175.1195       | 88.0637         |

N-term:+35.07 K(1):+162.16  
 K(9):+162.16



KEPAAPVSIQR, MH+ 1251.7425, m/z 417.9190  
 L OS G27 P150811 220811-s1.02738.02738.3.dta

scan 2738; 4.4e+000

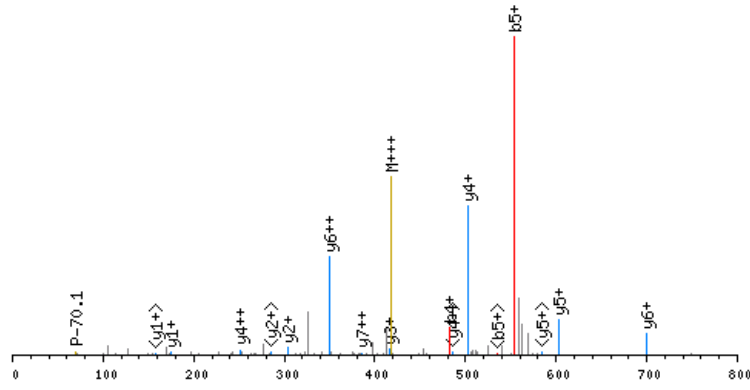

click image to zoom in; click top corners to zoom out [\[precursor±\]](#)

scan 2737; 417.9 m/z; 2.3e+001

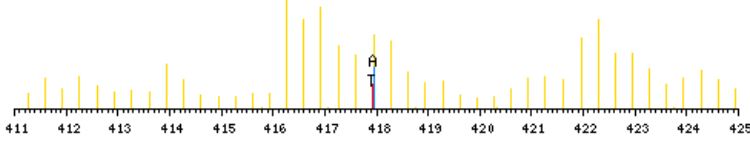

zoomed in precursor plot; T=theoretical m/z, A=acquired m/z

X-range:

-

MassTol: Y-zoom:

MassType:

AVG  MONO

Axis:

1  2

Label:

I  M  -

Ions:

a  +  2+  3+

b  +  2+  3+

c  +  2+  3+

x  +  2+  3+

y  +  2+  3+

z  +  2+  3+

hide H<sub>2</sub>O/NH<sub>3</sub>

zoom 112-122

GO

| b <sup>+</sup> | #  | AA # | y <sup>+</sup> | y <sup>2+</sup> |
|----------------|----|------|----------------|-----------------|
| 185.1654       | 1  | K 11 |                |                 |
| 314.2080       | 2  | E 10 | 1067.5849      | 534.2964        |
| 411.2608       | 3  | P 9  | 938.5423       | 469.7751        |
| 482.2979       | 4  | A 8  | 841.4896       | 421.2487        |
| 553.3350       | 5  | A 7  | 770.4525       | 385.7301        |
| 650.3877       | 6  | P 6  | 699.4153       | 350.2116        |
| 749.4562       | 7  | V 5  | 602.3626       | 301.6852        |
| 836.4882       | 8  | S 4  | 503.2942       | 252.1510        |
| 949.5723       | 9  | I 3  | 416.2621       | 208.6350        |
| 1077.6308      | 10 | Q 2  | 303.1781       | 152.0930        |
|                | 11 | R 1  | 175.1195       | 88.0637         |

N-term:+29.04 K(1):+156.13

KEVGVGFATR, MH+ 1119.6526, m/z 373.8891  
 L OS G27 P150811 220811-s1.02905.02905.3.dta

X-range:

-

MassTol: Y-zoom:

MassType:

AVG  MONO

Axis:

1  2

Label:

I  M  -

Ions:

a  +  2+  3+

b  +  2+  3+

c  +  2+  3+

x  +  2+  3+

y  +  2+  3+

z  +  2+  3+

hide H<sub>2</sub>O/NH<sub>3</sub>

zoom 112-122

GO

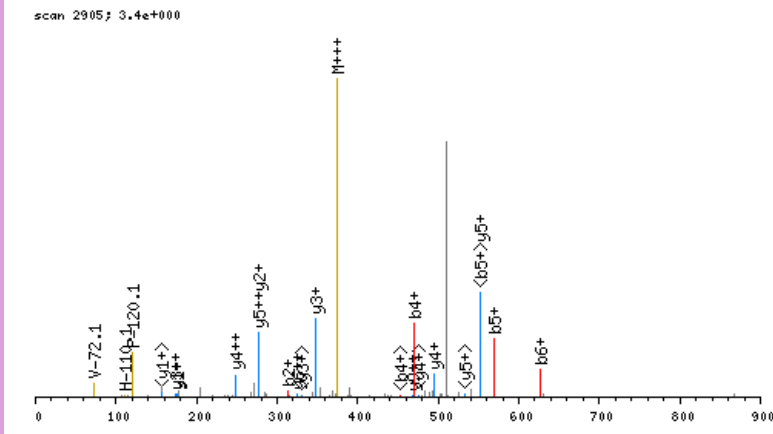

click image to zoom in; click top corners to zoom out [\[precursor±\]](#)

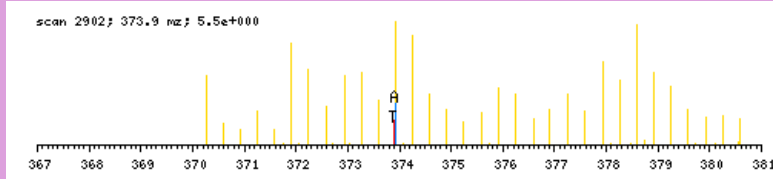

zoomed in precursor plot; T=theoretical m/z, A=acquired m/z

| b <sup>+</sup> | #  | AA | #  | y <sup>+</sup> | y <sup>2+</sup> |
|----------------|----|----|----|----------------|-----------------|
| 185.1654       | 1  | K  | 10 |                |                 |
| 314.2080       | 2  | E  | 9  | 935.4951       | 468.2514        |
| 413.2764       | 3  | V  | 8  | 806.4525       | 403.7301        |
| 470.2979       | 4  | G  | 7  | 707.3840       | 354.1959        |
| 569.3663       | 5  | V  | 6  | 650.3626       | 325.6852        |
| 626.3877       | 6  | G  | 5  | 551.2942       | 276.1510        |
| 773.4562       | 7  | F  | 4  | 494.2727       | 247.6403        |
| 844.4933       | 8  | A  | 3  | 347.2043       | 174.1061        |
| 945.5410       | 9  | T  | 2  | 276.1672       | 138.5875        |
|                | 10 | R  | 1  | 175.1195       | 88.0637         |

N-term:+29.04 K(1):+156.13

KEVKCDMEVSCPEGYTCCR, MH+ 2492.0751, m/z 623.7742  
 L\_OS\_G28\_P150811\_220811-s1.03835.03835.4.dta

X-range:

-

MassTol: Y-zoom:

MassType:

AVG  MONO

Axis:

1  2

Label:

I  M  -

Ions:

a  +  2+  3+

b  +  2+  3+

c  +  2+  3+

x  +  2+  3+

y  +  2+  3+

z  +  2+  3+

hide H<sub>2</sub>O/NH<sub>3</sub>

zoom 112-122

GO

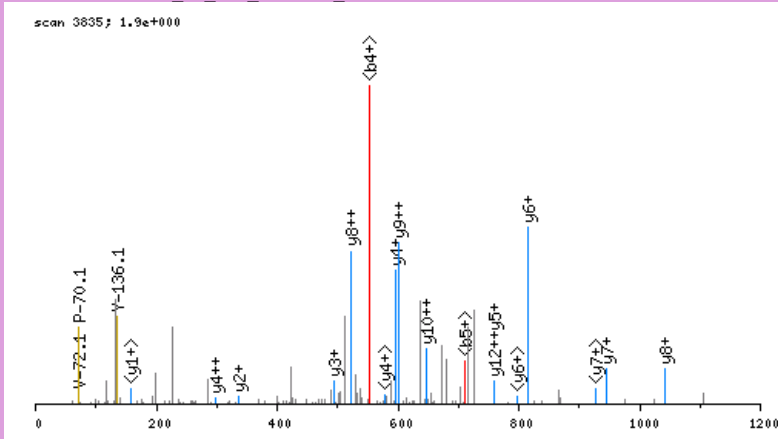

click image to zoom in; click top corners to zoom out [\[precursor±\]](#)

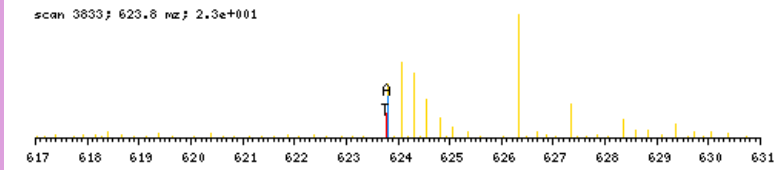

zoomed in precursor plot; T=theoretical m/z, A=acquired m/z

| b <sup>+</sup> | #  | AA | #  | y <sup>+</sup> | y <sup>2+</sup> |
|----------------|----|----|----|----------------|-----------------|
| 185.1654       | 1  | K  | 19 |                |                 |
| 314.2080       | 2  | E  | 18 | 2307.9175      | 1154.4627       |
| 413.2764       | 3  | V  | 17 | 2178.8749      | 1089.9414       |
| 569.4027       | 4  | K  | 16 | 2079.8065      | 1040.4072       |
| 729.4333       | 5  | C  | 15 | 1923.6802      | 962.3440        |
| 844.4603       | 6  | D  | 14 | 1763.6496      | 882.3287        |
| 975.5007       | 7  | M  | 13 | 1648.6226      | 824.8152        |
| 1104.5433      | 8  | E  | 12 | 1517.5822      | 759.2950        |
| 1203.6117      | 9  | V  | 11 | 1388.5396      | 694.7737        |
| 1290.6438      | 10 | S  | 10 | 1289.4712      | 645.2395        |
| 1450.6744      | 11 | C  | 9  | 1202.4391      | 601.7235        |
| 1547.7271      | 12 | P  | 8  | 1042.4085      | 521.7082        |
| 1676.7697      | 13 | E  | 7  | 945.3558       | 473.1818        |
| 1733.7912      | 14 | G  | 6  | 816.3132       | 408.6605        |
| 1896.8545      | 15 | Y  | 5  | 759.2917       | 380.1498        |
| 1997.9022      | 16 | T  | 4  | 596.2284       | 298.6181        |
| 2157.9328      | 17 | C  | 3  | 495.1807       | 248.0943        |
| 2317.9634      | 18 | C  | 2  | 335.1501       | 168.0790        |
|                | 19 | R  | 1  | 175.1195       | 88.0637         |

N-term:+29.04 K(1):+156.13  
 K(4):+156.13 C(5):+160.03  
 C(11):+160.03 C(17):+160.03  
 C(18):+160.03

KEVYENYPAYDLTER, MH+ 1958.0183, m/z 653.3443  
 H OS G27 P150811 220811-s1.05208.05208.3.dta

X-range:

-

MassTol: Y-zoom:

MassType:

AVG  MONO

Axis:

1  2

Label:

I  M  -

Ions:

a  +  2+  3+

b  +  2+  3+

c  +  2+  3+

x  +  2+  3+

y  +  2+  3+

z  +  2+  3+

hide H<sub>2</sub>O/NH<sub>3</sub>

zoom 112-122

GO

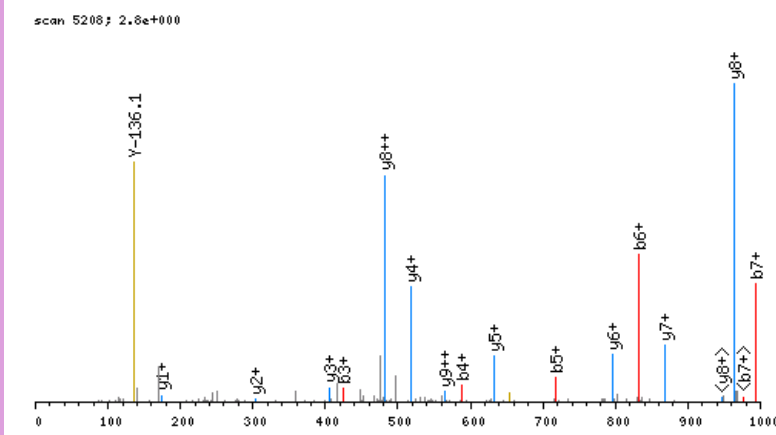

click image to zoom in; click top corners to zoom out [\[precursor±\]](#)

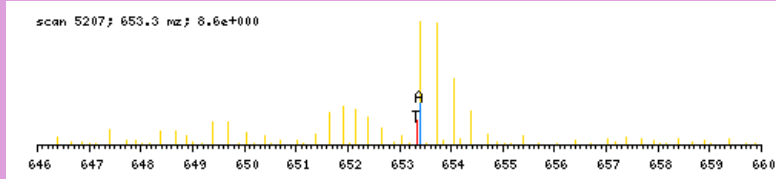

zoomed in precursor plot; T=theoretical m/z, A=acquired m/z

| b <sup>+</sup> | #  | AA # | y <sup>+</sup> | y <sup>2+</sup> |
|----------------|----|------|----------------|-----------------|
| 197.2290       | 1  | K 15 |                |                 |
| 326.2716       | 2  | E 14 | 1761.7972      | 881.4025        |
| 425.3400       | 3  | V 13 | 1632.7546      | 816.8812        |
| 588.4033       | 4  | Y 12 | 1533.6862      | 767.3470        |
| 717.4459       | 5  | E 11 | 1370.6228      | 685.8153        |
| 831.4889       | 6  | N 10 | 1241.5802      | 621.2940        |
| 994.5522       | 7  | Y 9  | 1127.5373      | 564.2726        |
| 1091.6049      | 8  | P 8  | 964.4740       | 482.7409        |
| 1162.6421      | 9  | A 7  | 867.4212       | 434.2145        |
| 1325.7054      | 10 | Y 6  | 796.3841       | 398.6960        |
| 1440.7323      | 11 | D 5  | 633.3208       | 317.1643        |
| 1553.8164      | 12 | L 4  | 518.2938       | 259.6508        |
| 1654.8641      | 13 | T 3  | 405.2098       | 203.1088        |
| 1783.9067      | 14 | E 2  | 304.1621       | 152.5850        |
|                | 15 | R 1  | 175.1195       | 88.0637         |

N-term:+35.07 K(1):+162.16

KFNPFVTSR, MH+ 1278.7483, m/z 426.9209  
 H OS G27 P150811 220811-s1.05609.05609.3.dta

scan 5609; 4.2e+000

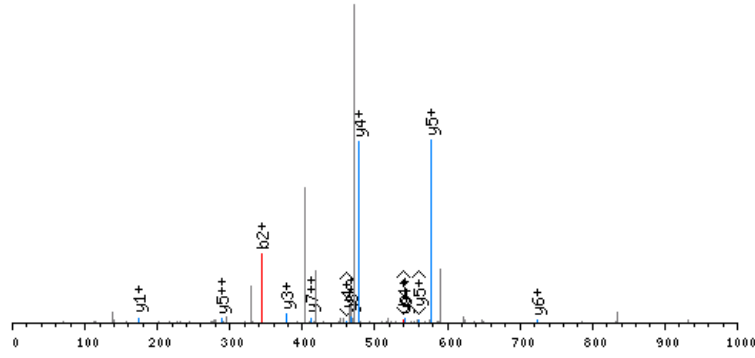

click image to zoom in; click top corners to zoom out [precursor±]

scan 5607; 426.9 m/z; 7.0e+001

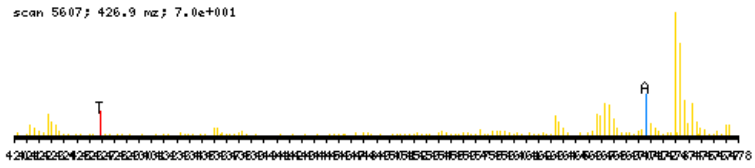

zoomed in precursor plot; T=theoretical m/z, A=acquired m/z

X-range:

-

MassTol: Y-zoom:

MassType:

AVG  MONO

Axis:

1  2

Label:

I  M  -

Ions:

a  +  2+  3+

b  +  2+  3+

c  +  2+  3+

x  +  2+  3+

y  +  2+  3+

z  +  2+  3+

hide H<sub>2</sub>O/NH<sub>3</sub>

zoom 112-122

GO

| b <sup>+</sup> | #  | AA # | y <sup>+</sup> | y <sup>2+</sup> |
|----------------|----|------|----------------|-----------------|
| 197.2290       | 1  | K 10 |                |                 |
| 344.2974       | 2  | F 9  | 1082.5271      | 541.7675        |
| 458.3403       | 3  | N 8  | 935.4587       | 468.2332        |
| 555.3931       | 4  | P 7  | 821.4157       | 411.2118        |
| 702.4615       | 5  | F 6  | 724.3630       | 362.6854        |
| 801.5299       | 6  | V 5  | 577.2946       | 289.1512        |
| 902.5776       | 7  | T 4  | 478.2262       | 239.6170        |
| 989.6096       | 8  | S 3  | 377.1785       | 189.0931        |
| 1104.6366      | 9  | D 2  | 290.1464       | 145.5771        |
|                | 10 | R 1  | 175.1195       | 88.0637         |

N-term:+35.07 K(1):+162.16

KGLEEEGEEGNKQNLK, MH+ 1913.9933, m/z 479.2538  
 L OS G28 P150811 220811-s1.02111.02111.4.dta

X-range:

-

MassTol: Y-zoom:

MassType:

AVG  MONO

Axis:

1  2

Label:

I  M  -

Ions:

a  +  2+  3+

b  +  2+  3+

c  +  2+  3+

x  +  2+  3+

y  +  2+  3+

z  +  2+  3+

hide H<sub>2</sub>O/NH<sub>3</sub>

zoom 112-122

GO

scan 2111; 1.5e+000

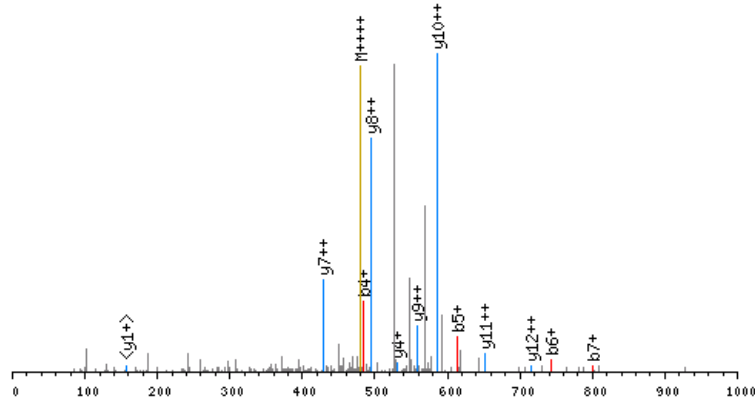

click image to zoom in; click top corners to zoom out [\[precursor±\]](#)

scan 2108; 479.3 mz; 5.1e+000

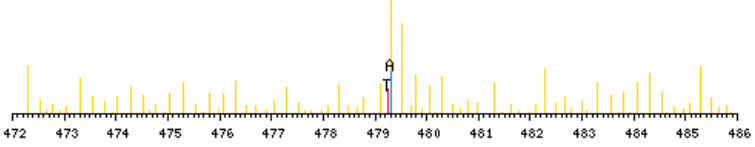

zoomed in precursor plot; T=theoretical m/z, A=acquired m/z

| b <sup>+</sup> | #  | AA # | y <sup>+</sup> | y <sup>2+</sup> |
|----------------|----|------|----------------|-----------------|
| 185.1654       | 1  | K 16 |                |                 |
| 242.1869       | 2  | G 15 | 1729.8357      | 865.4218        |
| 355.2709       | 3  | L 14 | 1672.8143      | 836.9110        |
| 484.3135       | 4  | E 13 | 1559.7302      | 780.3690        |
| 613.3561       | 5  | E 12 | 1430.6876      | 715.8477        |
| 742.3987       | 6  | E 11 | 1301.6450      | 651.3264        |
| 799.4202       | 7  | G 10 | 1172.6024      | 586.8051        |
| 928.4628       | 8  | E 9  | 1115.5809      | 558.2944        |
| 1057.5054      | 9  | E 8  | 986.5384       | 493.7731        |
| 1114.5268      | 10 | G 7  | 857.4958       | 429.2518        |
| 1228.5697      | 11 | N 6  | 800.4743       | 400.7411        |
| 1384.6960      | 12 | K 5  | 686.4314       | 343.7196        |
| 1512.7546      | 13 | Q 4  | 530.3051       | 265.6564        |
| 1626.7976      | 14 | N 3  | 402.2465       | 201.6272        |
| 1739.8816      | 15 | L 2  | 288.2036       | 144.6057        |
|                | 16 | R 1  | 175.1195       | 88.0637         |

N-term:+29.04 K(1):+156.13  
 K(12):+156.13

KGPTLLDGDLPQENVLQR, MH+ 2178.1770, m/z 545.2997  
 L OS G26 P150811 220811-s1.05501.05501.4.dta

X-range:

-

MassTol: Y-zoom:

MassType:

AVG  MONO

Axis:

1  2

Label:

I  M  -

Ions:

a  +  2+  3+

b  +  2+  3+

c  +  2+  3+

x  +  2+  3+

y  +  2+  3+

z  +  2+  3+

hide H<sub>2</sub>O/NH<sub>3</sub>

zoom 112-122

GO

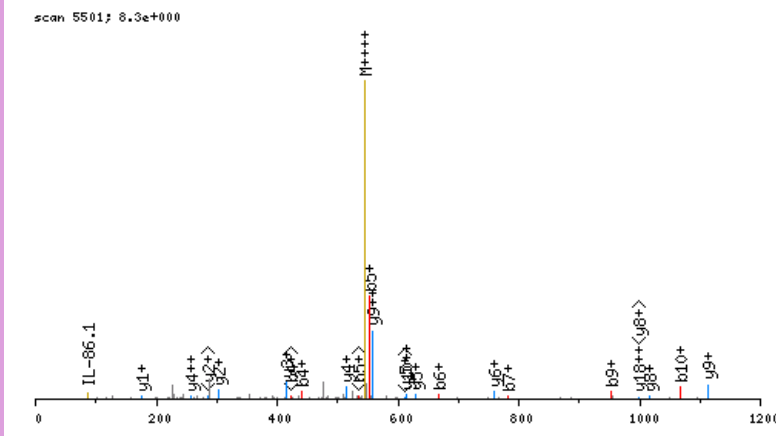

click image to zoom in; click top corners to zoom out [\[precursor±\]](#)

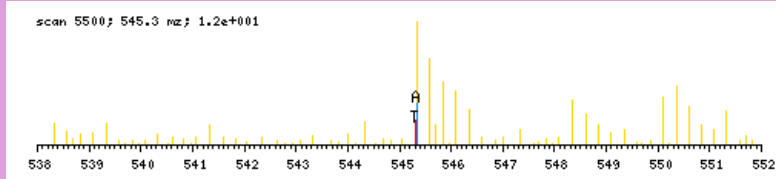

zoomed in precursor plot; T=theoretical m/z, A=acquired m/z

| b <sup>+</sup> | #  | AA # | y <sup>+</sup> | y <sup>2+</sup> |
|----------------|----|------|----------------|-----------------|
| 185.1654       | 1  | K 19 |                |                 |
| 242.1869       | 2  | G 18 | 1994.0195      | 997.5136        |
| 339.2396       | 3  | P 17 | 1936.9980      | 969.0029        |
| 440.2873       | 4  | T 16 | 1839.9452      | 920.4765        |
| 553.3714       | 5  | L 15 | 1738.8976      | 869.9527        |
| 666.4554       | 6  | L 14 | 1625.8135      | 813.4107        |
| 781.4824       | 7  | D 13 | 1512.7294      | 756.8686        |
| 838.5038       | 8  | G 12 | 1397.7025      | 699.3552        |
| 953.5308       | 9  | D 11 | 1340.6810      | 670.8444        |
| 1066.6148      | 10 | L 10 | 1225.6541      | 613.3310        |
| 1163.6676      | 11 | P 9  | 1112.5700      | 556.7889        |
| 1292.7102      | 12 | E 8  | 1015.5172      | 508.2625        |
| 1420.7688      | 13 | Q 7  | 886.4747       | 443.7412        |
| 1549.8114      | 14 | E 6  | 758.4161       | 379.7120        |
| 1663.8543      | 15 | N 5  | 629.3735       | 315.1907        |
| 1762.9227      | 16 | V 4  | 515.3306       | 258.1692        |
| 1876.0068      | 17 | L 3  | 416.2621       | 208.6350        |
| 2004.0654      | 18 | Q 2  | 303.1781       | 152.0930        |
|                | 19 | R 1  | 175.1195       | 88.0637         |

N-term:+29.04 K(1):+156.13

KGSDFDCELR, MH+ 1282.6101, m/z 428.2082  
 L OS G27 P150811 220811-s1.02920.02920.3.dta

X-range:

-

MassTol: Y-zoom:

MassType:

AVG  MONO

Axis:

1  2

Label:

I  M  -

Ions:

a  +  2+  3+

b  +  2+  3+

c  +  2+  3+

x  +  2+  3+

y  +  2+  3+

z  +  2+  3+

hide H<sub>2</sub>O/NH<sub>3</sub>

zoom 112-122

GO

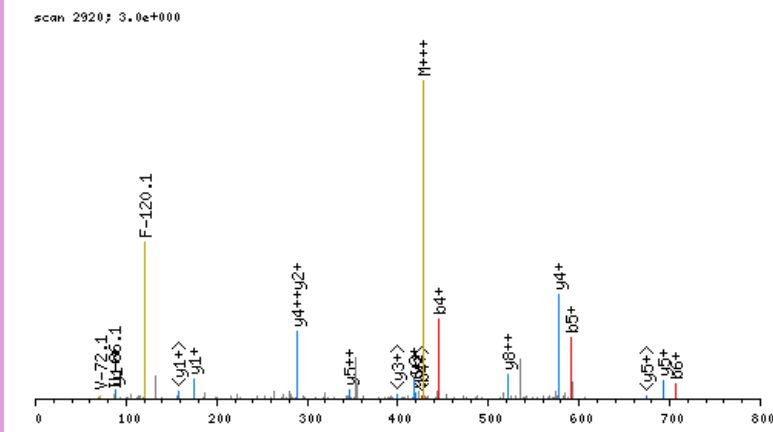

click image to zoom in; click top corners to zoom out [precursor±]

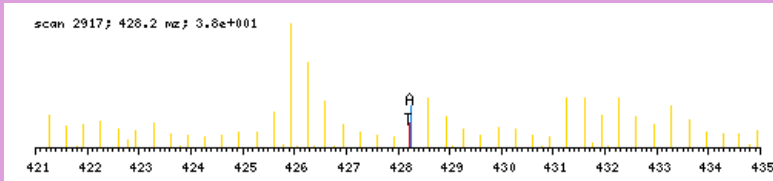

zoomed in precursor plot; T=theoretical m/z, A=acquired m/z

| b <sup>+</sup> | #  | AA # | y <sup>+</sup> | y <sup>2+</sup> |
|----------------|----|------|----------------|-----------------|
| 185.1654       | 1  | K 10 |                |                 |
| 242.1869       | 2  | G 9  | 1098.4526      | 549.7302        |
| 329.2189       | 3  | S 8  | 1041.4311      | 521.2195        |
| 444.2458       | 4  | D 7  | 954.3991       | 477.7034        |
| 591.3142       | 5  | F 6  | 839.3721       | 420.1900        |
| 706.3412       | 6  | D 5  | 692.3037       | 346.6558        |
| 866.3718       | 7  | C 4  | 577.2768       | 289.1423        |
| 995.4144       | 8  | E 3  | 417.2462       | 209.1270        |
| 1108.4984      | 9  | L 2  | 288.2036       | 144.6057        |
|                | 10 | R 1  | 175.1195       | 88.0637         |

N-term:+29.04 K(1):+156.13  
 C(7):+160.03



KGVPEDAVETLAGSLGTR, MH+ 1955.0813, m/z 652.3653  
 L OS G26 P150811 220811-s1.06479.06479.3.dta

X-range:

-

MassTol: Y-zoom:

MassType:

AVG  MONO

Axis:

1  2

Label:

I  M  -

Ions:

a  +  2+  3+

b  +  2+  3+

c  +  2+  3+

x  +  2+  3+

y  +  2+  3+

z  +  2+  3+

hide H<sub>2</sub>O/NH<sub>3</sub>

zoom 112-122

GO

scan 6479; 1.1e+000

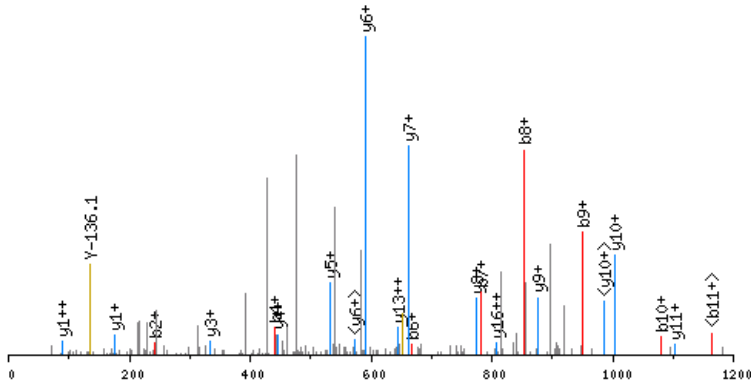

click image to zoom in; click top corners to zoom out [\[precursor±\]](#)

scan 6475; 652.4 m/z; 4.4e+000

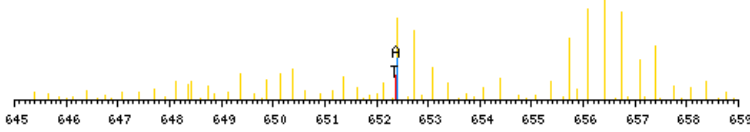

zoomed in precursor plot; T=theoretical m/z, A=acquired m/z

| b <sup>+</sup> | #  | AA | #  | y <sup>+</sup> | y <sup>2+</sup> |
|----------------|----|----|----|----------------|-----------------|
| 185.1654       | 1  | K  | 19 |                |                 |
| 242.1869       | 2  | G  | 18 | 1770.9238      | 885.9658        |
| 341.2553       | 3  | V  | 17 | 1713.9023      | 857.4551        |
| 440.3237       | 4  | V  | 16 | 1614.8339      | 807.9209        |
| 537.3765       | 5  | P  | 15 | 1515.7655      | 758.3867        |
| 666.4190       | 6  | E  | 14 | 1418.7127      | 709.8603        |
| 781.4460       | 7  | D  | 13 | 1289.6701      | 645.3390        |
| 852.4831       | 8  | A  | 12 | 1174.6432      | 587.8255        |
| 951.5515       | 9  | V  | 11 | 1103.6061      | 552.3069        |
| 1080.5941      | 10 | E  | 10 | 1004.5376      | 502.7727        |
| 1181.6418      | 11 | T  | 9  | 875.4951       | 438.2514        |
| 1294.7259      | 12 | L  | 8  | 774.4474       | 387.7276        |
| 1365.7630      | 13 | A  | 7  | 661.3633       | 331.1856        |
| 1422.7844      | 14 | G  | 6  | 590.3262       | 295.6670        |
| 1509.8165      | 15 | S  | 5  | 533.3047       | 267.1563        |
| 1622.9005      | 16 | L  | 4  | 446.2727       | 223.6403        |
| 1679.9220      | 17 | G  | 3  | 333.1886       | 167.0982        |
| 1780.9697      | 18 | T  | 2  | 276.1672       | 138.5875        |
|                | 19 | R  | 1  | 175.1195       | 88.0637         |

N-term:+29.04 K(1):+156.13

KIGGIGTVPVGR, MH+ 1221.8319, m/z 407.9488  
 H OS G27 P150811 220811-s1.03650.03650.3.dta

X-range:

-

MassTol: Y-zoom:

MassType:

AVG  MONO

Axis:

1  2

Label:

I  M  -

Ions:

a  +  2+  3+

b  +  2+  3+

c  +  2+  3+

x  +  2+  3+

y  +  2+  3+

z  +  2+  3+

hide H<sub>2</sub>O/NH<sub>3</sub>

zoom 112-122

GO

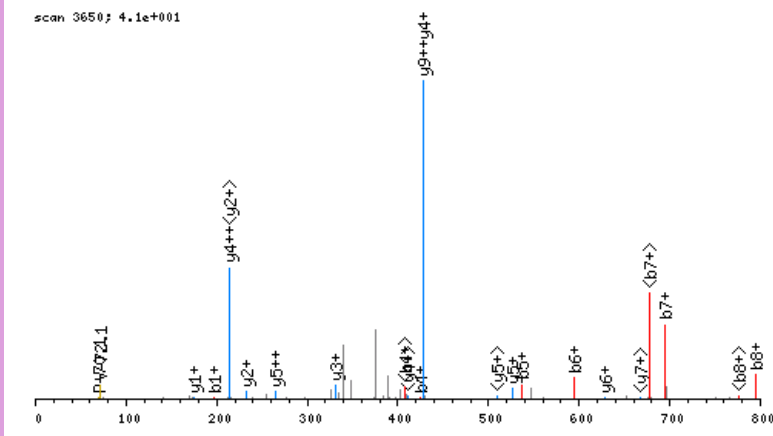

click image to zoom in; click top corners to zoom out [\[precursor±\]](#)

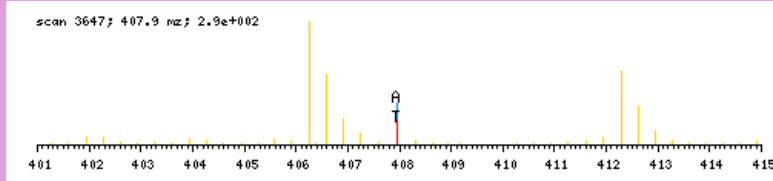

zoomed in precursor plot; T=theoretical m/z, A=acquired m/z

| b <sup>+</sup> | #  | AA # | y <sup>+</sup> | y <sup>2+</sup> |
|----------------|----|------|----------------|-----------------|
| 197.2290       | 1  | K 12 |                |                 |
| 310.3131       | 2  | I 11 | 1025.6108      | 513.3093        |
| 367.3345       | 3  | G 10 | 912.5267       | 456.7673        |
| 424.3560       | 4  | G 9  | 855.5052       | 428.2565        |
| 537.4401       | 5  | I 8  | 798.4838       | 399.7458        |
| 594.4615       | 6  | G 7  | 685.3997       | 343.2038        |
| 695.5092       | 7  | T 6  | 628.3782       | 314.6930        |
| 794.5776       | 8  | V 5  | 527.3306       | 264.1692        |
| 891.6304       | 9  | P 4  | 428.2621       | 214.6350        |
| 990.6988       | 10 | V 3  | 331.2094       | 166.1086        |
| 1047.7203      | 11 | G 2  | 232.1410       | 116.5744        |
|                | 12 | R 1  | 175.1195       | 88.0637         |

N-term:+35.07 K(1):+162.16

KLEVNEAELLR, MH+ 1369.8055, m/z 457.2734  
 L OS G27 P150811 220811-s1.05290.05290.3.dta

X-range:

-

MassTol: Y-zoom:

MassType:

AVG  MONO

Axis:

1  2

Label:

I  M  -

Ions:

a  +  2+  3+

b  +  2+  3+

c  +  2+  3+

x  +  2+  3+

y  +  2+  3+

z  +  2+  3+

hide H<sub>2</sub>O/NH<sub>3</sub>

zoom 112-122

GO

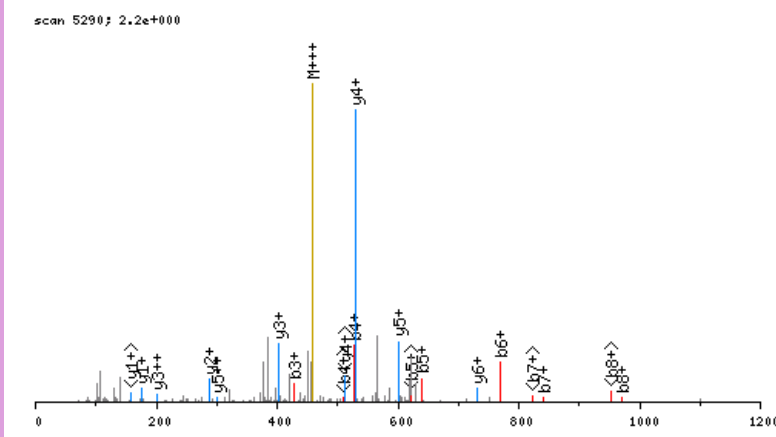

click image to zoom in; click top corners to zoom out [\[precursor±\]](#)

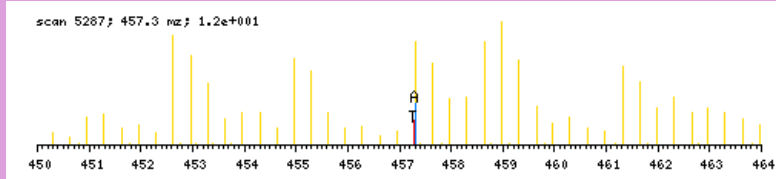

zoomed in precursor plot; T=theoretical m/z, A=acquired m/z

| b <sup>+</sup> | #  | AA # | y <sup>+</sup> | y <sup>2+</sup> |
|----------------|----|------|----------------|-----------------|
| 185.1654       | 1  | K 11 |                |                 |
| 298.2495       | 2  | L 10 | 1185.6479      | 593.3279        |
| 427.2921       | 3  | E 9  | 1072.5639      | 536.7858        |
| 526.3605       | 4  | V 8  | 943.5213       | 472.2645        |
| 640.4034       | 5  | N 7  | 844.4529       | 422.7303        |
| 769.4460       | 6  | E 6  | 730.4099       | 365.7089        |
| 840.4831       | 7  | A 5  | 601.3673       | 301.1876        |
| 969.5257       | 8  | E 4  | 530.3302       | 265.6690        |
| 1082.6098      | 9  | L 3  | 401.2876       | 201.1477        |
| 1195.6938      | 10 | L 2  | 288.2036       | 144.6057        |
|                | 11 | R 1  | 175.1195       | 88.0637         |

N-term:+29.04 K(1):+156.13

KLHVDPENFR, MH+ 1310.7221, m/z 437.5789  
 L OS G28 P150811 220811-s1.03562.03562.3.dta

X-range:

-

MassTol: Y-zoom:

MassType:

AVG  MONO

Axis:

1  2

Label:

I  M  -

Ions:

a  +  2+  3+

b  +  2+  3+

c  +  2+  3+

x  +  2+  3+

y  +  2+  3+

z  +  2+  3+

hide H<sub>2</sub>O/NH<sub>3</sub>

zoom 112-122

GO

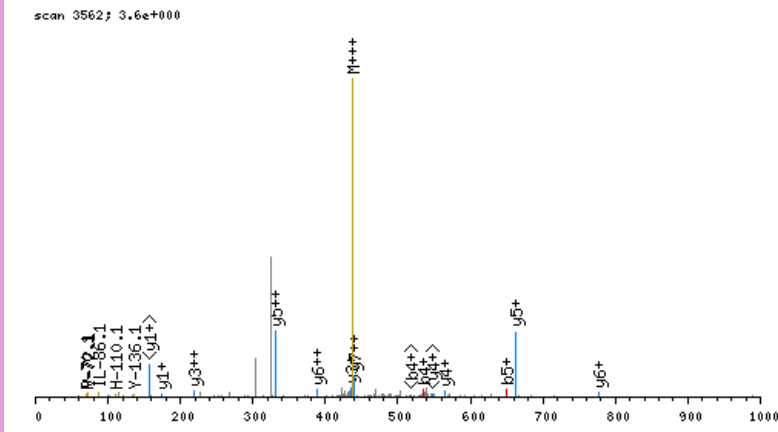

click image to zoom in; click top corners to zoom out [\[precursor±\]](#)

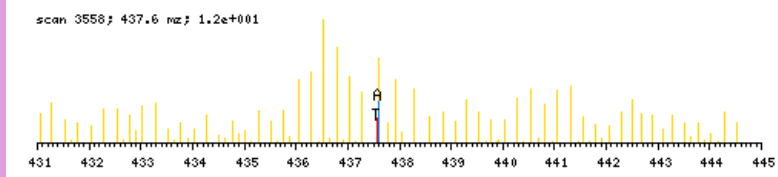

zoomed in precursor plot; T=theoretical m/z, A=acquired m/z

| b <sup>+</sup> | #  | AA # | y <sup>+</sup> | y <sup>2+</sup> |
|----------------|----|------|----------------|-----------------|
| 185.1654       | 1  | K 10 |                |                 |
| 298.2495       | 2  | L 9  | 1126.5645      | 563.7862        |
| 435.3084       | 3  | H 8  | 1013.4805      | 507.2441        |
| 534.3768       | 4  | V 7  | 876.4216       | 438.7147        |
| 649.4037       | 5  | D 6  | 777.3531       | 389.1805        |
| 746.4565       | 6  | P 5  | 662.3262       | 331.6670        |
| 875.4991       | 7  | E 4  | 565.2734       | 283.1406        |
| 989.5420       | 8  | N 3  | 436.2308       | 218.6193        |
| 1136.6104      | 9  | F 2  | 322.1879       | 161.5979        |
|                | 10 | R 1  | 175.1195       | 88.0637         |

N-term:+29.04 K(1):+156.13

X-range:

-

MassTol: Y-zoom:

MassType:

AVG  MONO

Axis:

1  2

Label:

I  M  -

Ions:

a  +  2+  3+

b  +  2+  3+

c  +  2+  3+

x  +  2+  3+

y  +  2+  3+

z  +  2+  3+

hide H<sub>2</sub>O/NH<sub>3</sub>

zoom 112-122

GO

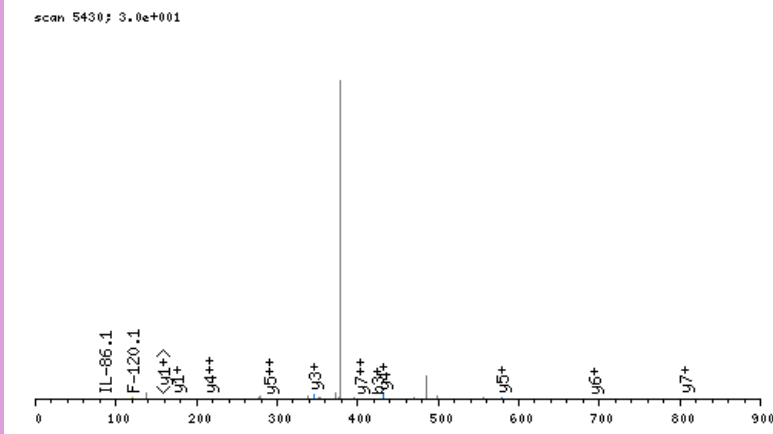

click image to zoom in; click top corners to zoom out [\[precursor±\]](#)

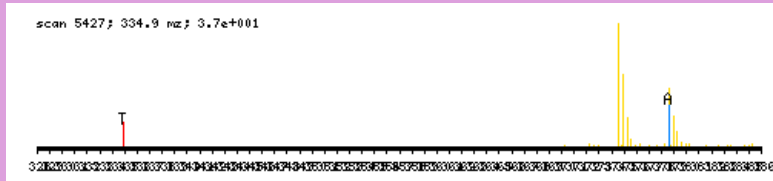

zoomed in precursor plot; T=theoretical m/z, A=acquired m/z

| b <sup>+</sup> | # | AA # | y <sup>+</sup> | y <sup>2+</sup>   |
|----------------|---|------|----------------|-------------------|
| 197.2290       | 1 | K    | 8              |                   |
| 310.3131       | 2 | L    | 7              | 806.4525 403.7301 |
| 424.3560       | 3 | N    | 6              | 693.3684 347.1881 |
| 571.4244       | 4 | F    | 5              | 579.3255 290.1666 |
| 658.4564       | 5 | S    | 4              | 432.2571 216.6324 |
| 715.4779       | 6 | G    | 3              | 345.2250 173.1164 |
| 828.5620       | 7 | L    | 2              | 288.2036 144.6057 |
|                | 8 | R    | 1              | 175.1195 88.0637  |

N-term:+35.07 K(1):+162.16

KLQPLSPVPSDIEISR, MH+ 1835.0642, m/z 612.3596  
 L OS G26 P150811 220811-s1.05093.05093.3.dta

X-range:

-

MassTol: Y-zoom:

MassType:

AVG  MONO

Axis:

1  2

Label:

I  M  -

Ions:

a  +  2+  3+

b  +  2+  3+

c  +  2+  3+

x  +  2+  3+

y  +  2+  3+

z  +  2+  3+

hide H<sub>2</sub>O/NH<sub>3</sub>

zoom 112-122

GO

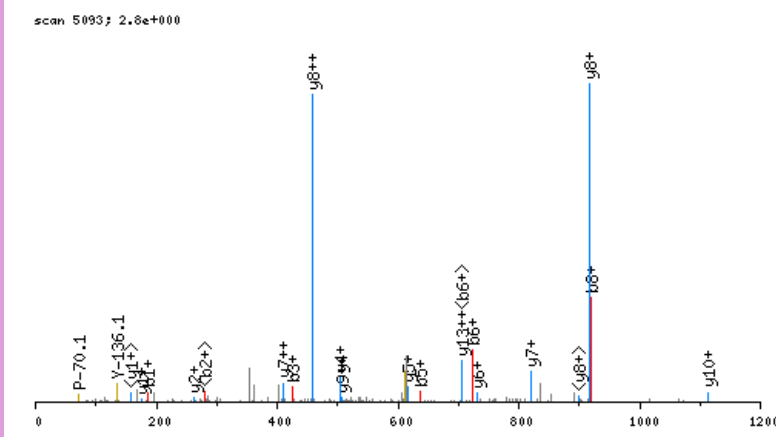

click image to zoom in; click top corners to zoom out [\[precursor±\]](#)

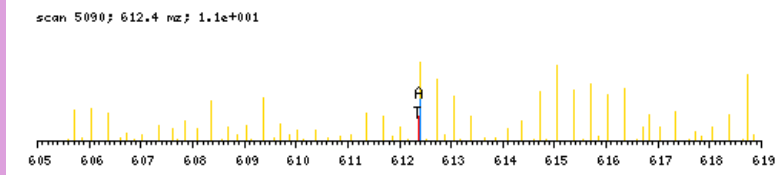

zoomed in precursor plot; T=theoretical m/z, A=acquired m/z

| b <sup>+</sup> | #  | AA # | y <sup>+</sup> | y <sup>2+</sup> |
|----------------|----|------|----------------|-----------------|
| 185.1654       | 1  | K 16 |                |                 |
| 298.2495       | 2  | L 15 | 1650.9067      | 825.9572        |
| 426.3080       | 3  | Q 14 | 1537.8226      | 769.4152        |
| 523.3608       | 4  | P 13 | 1409.7640      | 705.3859        |
| 636.4449       | 5  | L 12 | 1312.7113      | 656.8595        |
| 723.4769       | 6  | S 11 | 1199.6272      | 600.3175        |
| 820.5297       | 7  | P 10 | 1112.5952      | 556.8015        |
| 919.5981       | 8  | V 9  | 1015.5424      | 508.2751        |
| 1016.6508      | 9  | P 8  | 916.4740       | 458.7409        |
| 1103.6829      | 10 | S 7  | 819.4212       | 410.2145        |
| 1218.7098      | 11 | D 6  | 732.3892       | 366.6985        |
| 1331.7939      | 12 | I 5  | 617.3623       | 309.1850        |
| 1460.8365      | 13 | E 4  | 504.2782       | 252.6430        |
| 1573.9205      | 14 | I 3  | 375.2356       | 188.1217        |
| 1660.9526      | 15 | S 2  | 262.1515       | 131.5797        |
|                | 16 | R 1  | 175.1195       | 88.0637         |

N-term:+29.04 K(1):+156.13

KLSLEGDHSTPPSAYGSVKPYTNFQDAER, MH+ 3150.5748, m/z 788.3992  
 L OS G28 P150811 220811-s1.06307.06307.4.dta

scan 6307; 3.1e+000

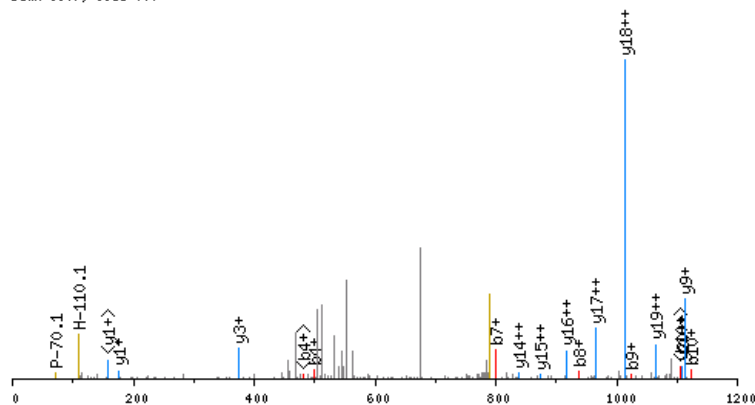

click image to zoom in; click top corners to zoom out [precursor±]

scan 6303; 788.4 m/z; 3.0e+001

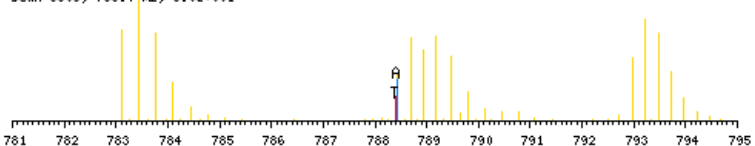

zoomed in precursor plot; T=theoretical m/z, A=acquired m/z

| b <sup>+</sup> | #  | AA # | y <sup>+</sup> | y <sup>2+</sup> |
|----------------|----|------|----------------|-----------------|
| 185.1654       | 1  | K 28 |                |                 |
| 298.2495       | 2  | L 27 | 2966.4172      | 1483.7125       |
| 385.2815       | 3  | S 26 | 2853.3332      | 1427.1705       |
| 498.3656       | 4  | L 25 | 2766.3012      | 1383.6545       |
| 627.4081       | 5  | E 24 | 2653.2171      | 1327.1125       |
| 684.4296       | 6  | G 23 | 2524.1745      | 1262.5912       |
| 799.4566       | 7  | D 22 | 2467.1530      | 1234.0804       |
| 936.5155       | 8  | H 21 | 2352.1261      | 1176.5670       |
| 1023.5475      | 9  | S 20 | 2215.0672      | 1108.0375       |
| 1124.5952      | 10 | T 19 | 2128.0351      | 1064.5215       |
| 1221.6479      | 11 | P 18 | 2026.9875      | 1013.9976       |
| 1318.7007      | 12 | P 17 | 1929.9347      | 965.4713        |
| 1405.7327      | 13 | S 16 | 1832.8819      | 916.9449        |
| 1476.7698      | 14 | A 15 | 1745.8499      | 873.4289        |
| 1639.8332      | 15 | Y 14 | 1674.8128      | 837.9103        |
| 1696.8546      | 16 | G 13 | 1511.7495      | 756.3786        |
| 1783.8867      | 17 | S 12 | 1454.7280      | 727.8679        |
| 1882.9551      | 18 | V 11 | 1367.6960      | 684.3519        |
| 2039.0814      | 19 | K 10 | 1268.6276      | 634.8177        |
| 2136.1341      | 20 | P 9  | 1112.5013      | 556.7545        |
| 2299.1975      | 21 | Y 8  | 1015.4485      | 508.2282        |
| 2400.2452      | 22 | T 7  | 852.3852       | 426.6965        |
| 2514.2881      | 23 | N 6  | 751.3375       | 376.1727        |
| 2661.3565      | 24 | F 5  | 637.2946       | 319.1512        |
| 2776.3834      | 25 | D 4  | 490.2262       | 245.6170        |
| 2847.4205      | 26 | A 3  | 375.1992       | 188.1035        |
| 2976.4631      | 27 | E 2  | 304.1621       | 152.5850        |
|                | 28 | R 1  | 175.1195       | 88.0637         |

N-term:+29.04 K(1):+156.13  
 K(19):+156.13

X-range:

-

MassTol: Y-zoom:

MassType:

AVG  MONO

Axis:

1  2

Label:

I  M  -

Ions:

a  +  2+  3+

b  +  2+  3+

c  +  2+  3+

x  +  2+  3+

y  +  2+  3+

z  +  2+  3+

hide H<sub>2</sub>O/NH<sub>3</sub>

zoom 112-122

GO

KLTDVLR, MH+ 987.6203, m/z 329.8783  
 L OS G27 P150811 220811-s1.04469.04469.3.dta

scan 4469; 2.5e+001

X-range:

-

MassTol: Y-zoom:

MassType:

AVG  MONO

Axis:

1  2

Label:

I  M  -

Ions:

a  +  2+  3+

b  +  2+  3+

c  +  2+  3+

x  +  2+  3+

y  +  2+  3+

z  +  2+  3+

hide H<sub>2</sub>O/NH<sub>3</sub>

zoom 112-122

GO

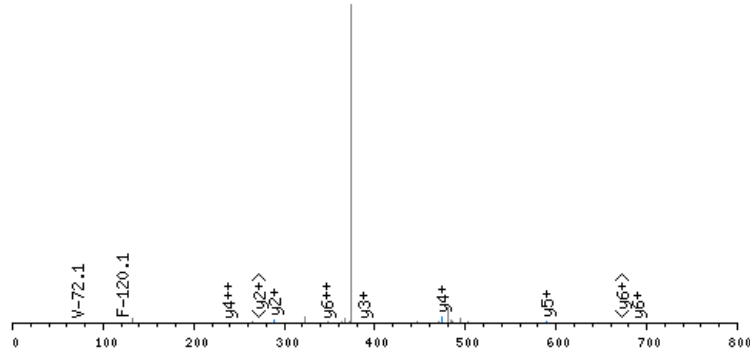

click image to zoom in; click top corners to zoom out [\[precursor±\]](#)

scan 4467; 329.9 m/z; 5.8e+000

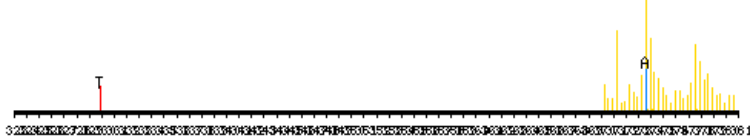

zoomed in precursor plot; T=theoretical m/z, A=acquired m/z

| b <sup>+</sup> | # | AA # | y <sup>+</sup> | y <sup>2+</sup>   |
|----------------|---|------|----------------|-------------------|
| 185.1654       | 1 | K    | 8              |                   |
| 298.2495       | 2 | L    | 7              | 803.4627 402.2353 |
| 399.2971       | 3 | T    | 6              | 690.3786 345.6932 |
| 514.3241       | 4 | D    | 5              | 589.3310 295.1694 |
| 601.3561       | 5 | S    | 4              | 474.3040 237.6559 |
| 700.4245       | 6 | V    | 3              | 387.2720 194.1399 |
| 813.5086       | 7 | L    | 2              | 288.2036 144.6057 |
|                | 8 | R    | 1              | 175.1195 88.0637  |

N-term:+29.04 K(1):+156.13



KNAIANASTLAEVER, MH+ 1654.9764, m/z 552.3303  
 H OS G27 P150811 220811-s1.04159.04159.3.dta

X-range:

-

MassTol: Y-zoom:

MassType:

AVG  MONO

Axis:

1  2

Label:

I  M  -

Ions:

a  +  2+  3+

b  +  2+  3+

c  +  2+  3+

x  +  2+  3+

y  +  2+  3+

z  +  2+  3+

hide H<sub>2</sub>O/NH<sub>3</sub>

zoom 112-122

GO

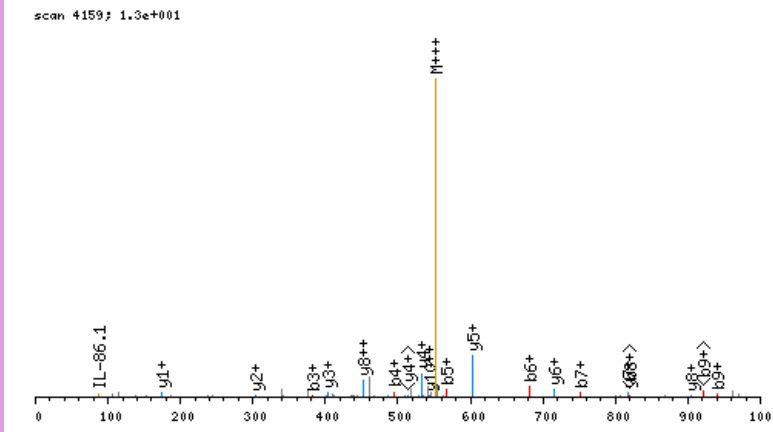

click image to zoom in; click top corners to zoom out [\[precursor±\]](#)

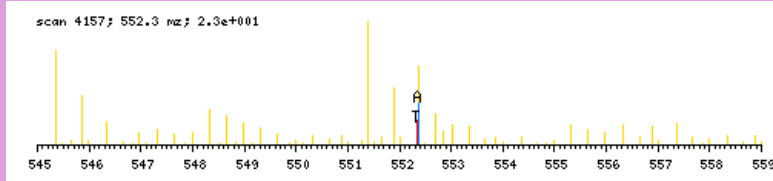

zoomed in precursor plot; T=theoretical m/z, A=acquired m/z

| b <sup>+</sup> | #  | AA # | y <sup>+</sup> | y <sup>2+</sup> |
|----------------|----|------|----------------|-----------------|
| 197.2290       | 1  | K 15 |                |                 |
| 311.2719       | 2  | N 14 | 1458.7552      | 729.8815        |
| 382.3090       | 3  | A 13 | 1344.7123      | 672.8601        |
| 495.3931       | 4  | I 12 | 1273.6752      | 637.3415        |
| 566.4302       | 5  | A 11 | 1160.5911      | 580.7995        |
| 680.4731       | 6  | N 10 | 1089.5540      | 545.2809        |
| 751.5103       | 7  | A 9  | 975.5111       | 488.2595        |
| 838.5423       | 8  | S 8  | 904.4740       | 452.7409        |
| 939.5900       | 9  | T 7  | 817.4420       | 409.2249        |
| 1052.6740      | 10 | L 6  | 716.3943       | 358.7011        |
| 1123.7111      | 11 | A 5  | 603.3102       | 302.1590        |
| 1252.7537      | 12 | E 4  | 532.2731       | 266.6405        |
| 1351.8222      | 13 | V 3  | 403.2305       | 202.1192        |
| 1480.8647      | 14 | E 2  | 304.1621       | 152.5850        |
|                | 15 | R 1  | 175.1195       | 88.0637         |

N-term:+35.07 K(1):+162.16

KNDPSSLPEPACVKISALEGYR, MH+ 2446.3864, m/z 612.3521  
 H OS G27 P150811 220811-s1.06375.06375.4.dta

X-range:

-

MassTol: Y-zoom:

MassType:

AVG  MONO

Axis:

1  2

Label:

I  M  -

Ions:

a  +  2+  3+

b  +  2+  3+

c  +  2+  3+

x  +  2+  3+

y  +  2+  3+

z  +  2+  3+

hide H<sub>2</sub>O/NH<sub>3</sub>

zoom 112-122

GO

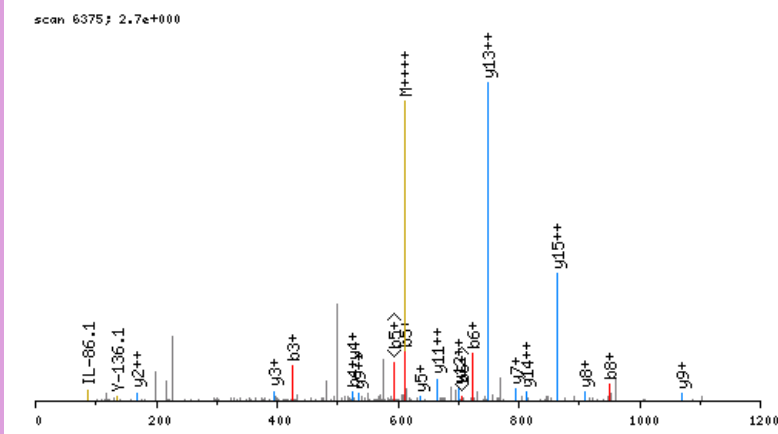

click image to zoom in; click top corners to zoom out [precursor±]

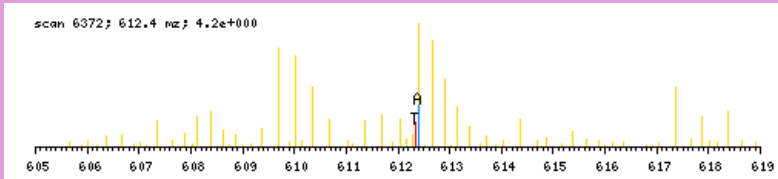

zoomed in precursor plot; T=theoretical m/z, A=acquired m/z

| b <sup>+</sup> | #  | AA # | y <sup>+</sup> | y <sup>2+</sup> |
|----------------|----|------|----------------|-----------------|
| 197.2290       | 1  | K 21 |                |                 |
| 311.2719       | 2  | N 20 | 2250.1652      | 1125.5865       |
| 426.2989       | 3  | D 19 | 2136.1223      | 1068.5651       |
| 523.3516       | 4  | P 18 | 2021.0954      | 1011.0516       |
| 610.3837       | 5  | S 17 | 1924.0426      | 962.5252        |
| 723.4677       | 6  | L 16 | 1837.0106      | 919.0092        |
| 820.5205       | 7  | P 15 | 1723.9265      | 862.4672        |
| 949.5631       | 8  | E 14 | 1626.8737      | 813.9408        |
| 1046.6158      | 9  | P 13 | 1497.8311      | 749.4195        |
| 1117.6530      | 10 | A 12 | 1400.7784      | 700.8931        |
| 1277.6836      | 11 | C 11 | 1329.7413      | 665.3745        |
| 1376.7520      | 12 | V 10 | 1169.7107      | 585.3592        |
| 1538.9101      | 13 | K 9  | 1070.6423      | 535.8250        |
| 1651.9941      | 14 | I 8  | 908.4842       | 454.7460        |
| 1739.0262      | 15 | S 7  | 795.4001       | 398.2040        |
| 1810.0633      | 16 | A 6  | 708.3681       | 354.6879        |
| 1923.1473      | 17 | L 5  | 637.3310       | 319.1694        |
| 2052.1899      | 18 | E 4  | 524.2469       | 262.6274        |
| 2109.2114      | 19 | G 3  | 395.2043       | 198.1061        |
| 2272.2747      | 20 | Y 2  | 338.1828       | 169.5953        |
|                | 21 | R 1  | 175.1195       | 88.0637         |

N-term:+35.07 K(1):+162.16  
 C(11):+160.03 K(13):+162.16

KPPAACAGDVVDAASPASTVNHRLR, MH+ 2460.2669, m/z 615.8222  
 L OS G28 P150811 220811-s1.05475.05475.4.dta

scan 5475; 2.1e+000

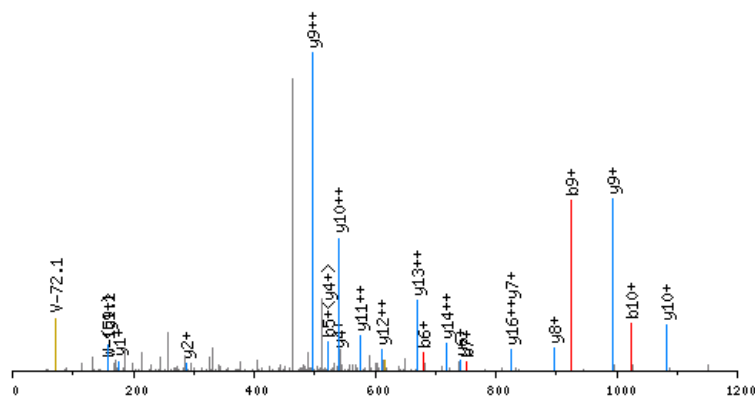

click image to zoom in; click top corners to zoom out [\[precursor±\]](#)

scan 5473; 615.8 mz; 1.7e+001

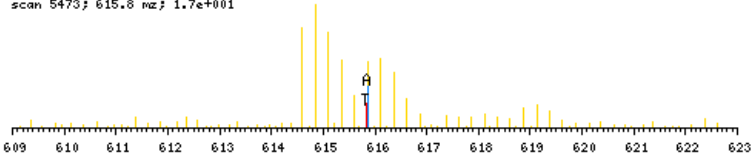

zoomed in precursor plot; T=theoretical m/z, A=acquired m/z

X-range:

-

MassTol: Y-zoom:

MassType:

AVG  MONO

Axis:

1  2

Label:

I  M  -

Ions:

a  +  2+  3+

b  +  2+  3+

c  +  2+  3+

x  +  2+  3+

y  +  2+  3+

z  +  2+  3+

hide H<sub>2</sub>O/NH<sub>3</sub>

zoom 112-122

GO

| b <sup>+</sup> | #  | AA # | y <sup>+</sup> | y <sup>2+</sup> |
|----------------|----|------|----------------|-----------------|
| 185.1654       | 1  | K 24 |                |                 |
| 282.2182       | 2  | P 23 | 2276.1093      | 1138.5586       |
| 379.2709       | 3  | P 22 | 2179.0565      | 1090.0322       |
| 450.3080       | 4  | A 21 | 2082.0038      | 1041.5058       |
| 521.3452       | 5  | A 20 | 2010.9667      | 1005.9872       |
| 681.3758       | 6  | C 19 | 1939.9296      | 970.4687        |
| 752.4129       | 7  | A 18 | 1779.8990      | 890.4534        |
| 809.4343       | 8  | G 17 | 1708.8618      | 854.9348        |
| 924.4613       | 9  | D 16 | 1651.8404      | 826.4241        |
| 1023.5297      | 10 | V 15 | 1536.8134      | 768.9106        |
| 1122.5981      | 11 | V 14 | 1437.7450      | 719.3764        |
| 1237.6250      | 12 | D 13 | 1338.6766      | 669.8422        |
| 1308.6622      | 13 | A 12 | 1223.6497      | 612.3287        |
| 1379.6993      | 14 | A 11 | 1152.6125      | 576.8102        |
| 1466.7313      | 15 | S 10 | 1081.5754      | 541.2916        |
| 1563.7841      | 16 | P 9  | 994.5434       | 497.7756        |
| 1634.8212      | 17 | A 8  | 897.4906       | 449.2492        |
| 1721.8532      | 18 | S 7  | 826.4535       | 413.7307        |
| 1822.9009      | 19 | T 6  | 739.4215       | 370.2147        |
| 1921.9693      | 20 | V 5  | 638.3738       | 319.6908        |
| 2036.0122      | 21 | N 4  | 539.3054       | 270.1566        |
| 2173.0711      | 22 | H 3  | 425.2625       | 213.1352        |
| 2286.1552      | 23 | L 2  | 288.2036       | 144.6057        |
|                | 24 | R 1  | 175.1195       | 88.0637         |

N-term:+29.04 K(1):+156.13  
 C(6):+160.03

KPVDQYEDCYLAR, MH+ 1712.8317, m/z 571.6154  
 L OS G27 P150811 220811-s1.03996.03996.3.dta

X-range:

-

MassTol: Y-zoom:

MassType:

AVG  MONO

Axis:

1  2

Label:

I  M  -

Ions:

a  +  2+  3+

b  +  2+  3+

c  +  2+  3+

x  +  2+  3+

y  +  2+  3+

z  +  2+  3+

hide H<sub>2</sub>O/NH<sub>3</sub>

zoom 112-122

GO

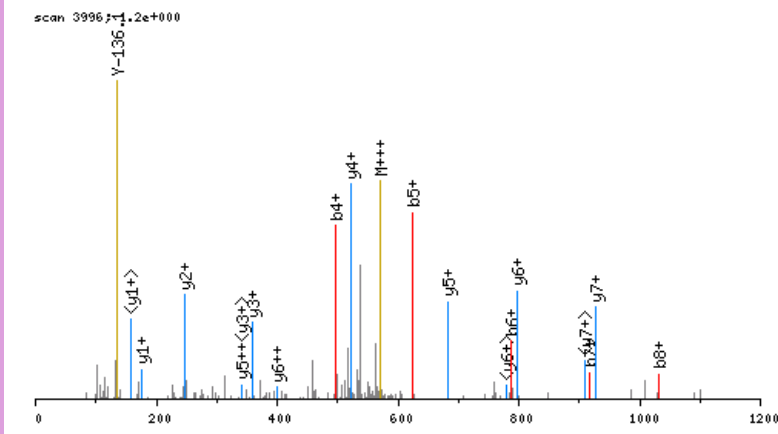

click image to zoom in; click top corners to zoom out [\[precursor±\]](#)

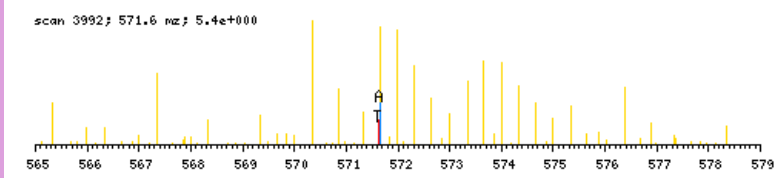

zoomed in precursor plot; T=theoretical m/z, A=acquired m/z

| b <sup>+</sup> | #  | AA | #  | y <sup>+</sup> | y <sup>2+</sup> |
|----------------|----|----|----|----------------|-----------------|
| 185.1654       | 1  | K  | 13 |                |                 |
| 282.2182       | 2  | P  | 12 | 1528.6742      | 764.8410        |
| 381.2866       | 3  | V  | 11 | 1431.6214      | 716.3146        |
| 496.3135       | 4  | D  | 10 | 1332.5530      | 666.7804        |
| 624.3721       | 5  | Q  | 9  | 1217.5260      | 609.2669        |
| 787.4354       | 6  | Y  | 8  | 1089.4675      | 545.2376        |
| 916.4780       | 7  | E  | 7  | 926.4041       | 463.7060        |
| 1031.5050      | 8  | D  | 6  | 797.3616       | 399.1847        |
| 1191.5356      | 9  | C  | 5  | 682.3346       | 341.6712        |
| 1354.5989      | 10 | Y  | 4  | 522.3040       | 261.6559        |
| 1467.6830      | 11 | L  | 3  | 359.2407       | 180.1243        |
| 1538.7201      | 12 | A  | 2  | 246.1566       | 123.5822        |
|                | 13 | R  | 1  | 175.1195       | 88.0637         |

N-term:+29.04 K(1):+156.13  
 C(9):+160.03

KPVSPLLLASGMAR, MH+ 1507.9670, m/z 503.3272  
 H OS G27 P150811 220811-s1.06036.06036.3.dta

X-range:

-

MassTol: Y-zoom:

MassType:

AVG  MONO

Axis:

1  2

Label:

I  M  -

Ions:

a  +  2+  3+

b  +  2+  3+

c  +  2+  3+

x  +  2+  3+

y  +  2+  3+

z  +  2+  3+

hide H<sub>2</sub>O/NH<sub>3</sub>

zoom 112-122

GO

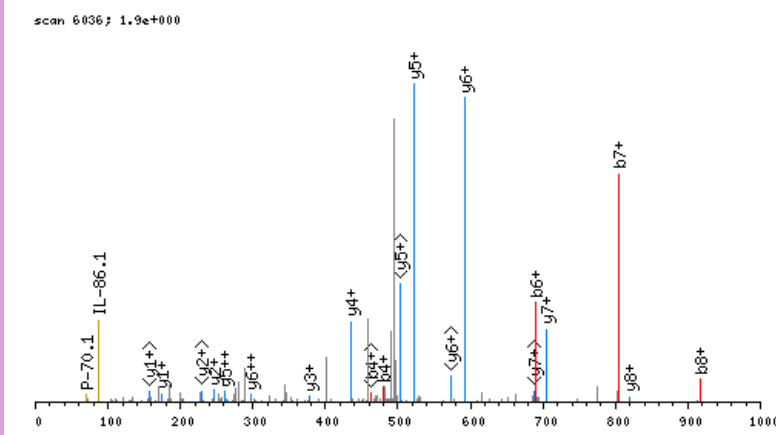

click image to zoom in; click top corners to zoom out [\[precursor±\]](#)

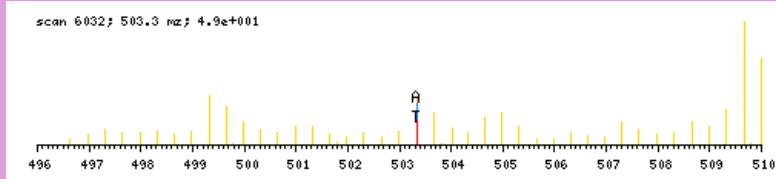

zoomed in precursor plot; T=theoretical m/z, A=acquired m/z

| b <sup>+</sup> | #  | AA # | y <sup>+</sup> | y <sup>2+</sup> |
|----------------|----|------|----------------|-----------------|
| 197.2290       | 1  | K 14 |                |                 |
| 294.2818       | 2  | P 13 | 1311.7459      | 656.3768        |
| 393.3502       | 3  | V 12 | 1214.6931      | 607.8505        |
| 480.3822       | 4  | S 11 | 1115.6247      | 558.3163        |
| 577.4350       | 5  | P 10 | 1028.5927      | 514.8002        |
| 690.5190       | 6  | L 9  | 931.5399       | 466.2739        |
| 803.6031       | 7  | L 8  | 818.4558       | 409.7318        |
| 916.6872       | 8  | L 7  | 705.3718       | 353.1898        |
| 987.7243       | 9  | A 6  | 592.2877       | 296.6478        |
| 1074.7563      | 10 | S 5  | 521.2506       | 261.1292        |
| 1131.7778      | 11 | G 4  | 434.2186       | 217.6132        |
| 1262.8183      | 12 | M 3  | 377.1971       | 189.1025        |
| 1333.8554      | 13 | A 2  | 246.1566       | 123.5822        |
|                | 14 | R 1  | 175.1195       | 88.0637         |

N-term:+35.07 K(1):+162.16

KQEYDEAGPSIVHR, MH+ 1684.8659, m/z 421.9719  
 L OS G28 P150811 220811-s1.02897.02897.4.dta

X-range:

-

MassTol: Y-zoom:

MassType:

AVG  MONO

Axis:

1  2

Label:

I  M  -

Ions:

a  +  2+  3+

b  +  2+  3+

c  +  2+  3+

x  +  2+  3+

y  +  2+  3+

z  +  2+  3+

hide H<sub>2</sub>O/NH<sub>3</sub>

zoom 112-122

GO

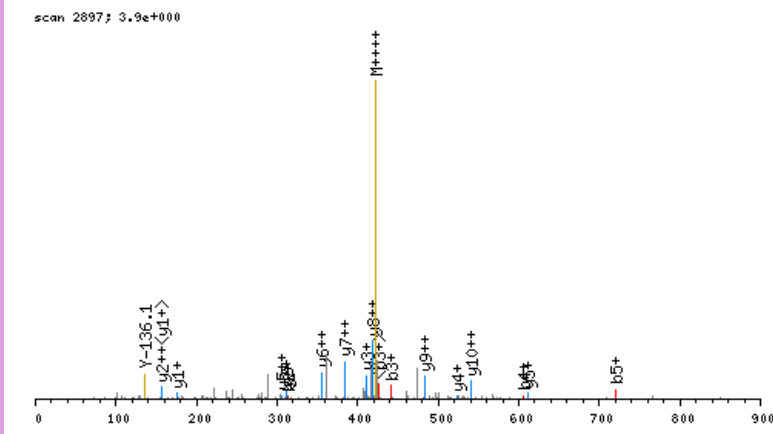

click image to zoom in; click top corners to zoom out [\[precursor±\]](#)

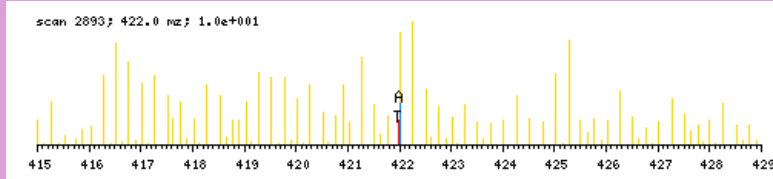

zoomed in precursor plot; T=theoretical m/z, A=acquired m/z

| b <sup>+</sup> | #  | AA # | y <sup>+</sup> | y <sup>2+</sup> |
|----------------|----|------|----------------|-----------------|
| 185.1654       | 1  | K 14 |                |                 |
| 313.2240       | 2  | Q 13 | 1500.7083      | 750.8581        |
| 442.2666       | 3  | E 12 | 1372.6497      | 686.8288        |
| 605.3299       | 4  | Y 11 | 1243.6071      | 622.3075        |
| 720.3568       | 5  | D 10 | 1080.5438      | 540.7758        |
| 849.3994       | 6  | E 9  | 965.5169       | 483.2623        |
| 920.4365       | 7  | A 8  | 836.4743       | 418.7410        |
| 977.4580       | 8  | G 7  | 765.4371       | 383.2225        |
| 1074.5108      | 9  | P 6  | 708.4157       | 354.7118        |
| 1161.5428      | 10 | S 5  | 611.3629       | 306.1854        |
| 1274.6269      | 11 | I 4  | 524.3309       | 262.6694        |
| 1373.6953      | 12 | V 3  | 411.2468       | 206.1273        |
| 1510.7542      | 13 | H 2  | 312.1784       | 156.5931        |
|                | 14 | R 1  | 175.1195       | 88.0637         |

N-term:+29.04 K(1):+156.13

KQFLEELLTQCDR, MH+ 1836.9529, m/z 612.9892  
 L OS G27 P150811 220811-s1.06726.06726.3.dta

X-range:

-

MassTol: Y-zoom:

MassType:

AVG  MONO

Axis:

1  2

Label:

I  M  -

Ions:

a  +  2+  3+

b  +  2+  3+

c  +  2+  3+

x  +  2+  3+

y  +  2+  3+

z  +  2+  3+

hide H<sub>2</sub>O/NH<sub>3</sub>

zoom 112-122

GO

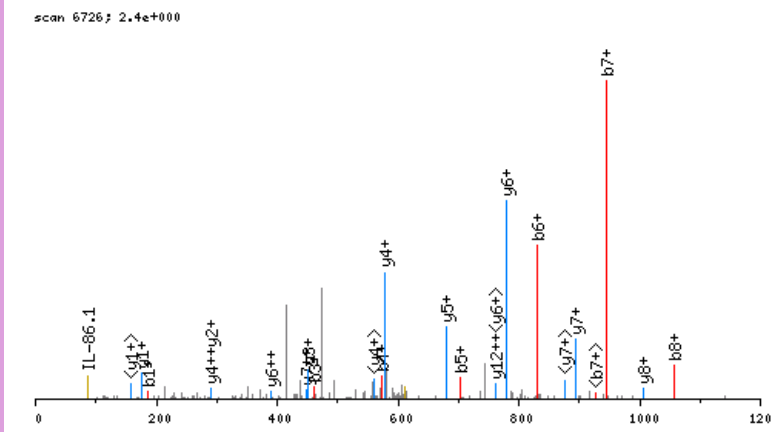

click image to zoom in; click top corners to zoom out [\[precursor±\]](#)

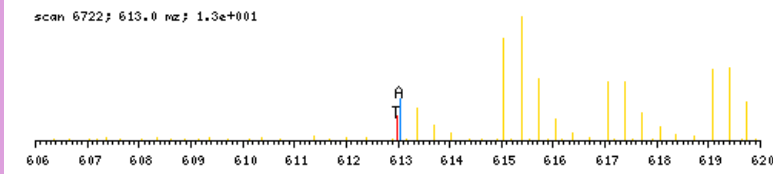

zoomed in precursor plot; T=theoretical m/z, A=acquired m/z

| b <sup>+</sup> | #  | AA # | y <sup>+</sup> | y <sup>2+</sup> |
|----------------|----|------|----------------|-----------------|
| 185.1654       | 1  | K 14 |                |                 |
| 313.2240       | 2  | Q 13 | 1652.7953      | 826.9016        |
| 460.2924       | 3  | F 12 | 1524.7368      | 762.8723        |
| 573.3765       | 4  | L 11 | 1377.6684      | 689.3381        |
| 702.4190       | 5  | E 10 | 1264.5843      | 632.7961        |
| 831.4616       | 6  | E 9  | 1135.5417      | 568.2748        |
| 944.5457       | 7  | L 8  | 1006.4991      | 503.7535        |
| 1057.6298      | 8  | L 7  | 893.4150       | 447.2114        |
| 1158.6774      | 9  | T 6  | 780.3310       | 390.6694        |
| 1259.7251      | 10 | T 5  | 679.2833       | 340.1456        |
| 1387.7837      | 11 | Q 4  | 578.2356       | 289.6217        |
| 1547.8143      | 12 | C 3  | 450.1770       | 225.5924        |
| 1662.8412      | 13 | D 2  | 290.1464       | 145.5771        |
|                | 14 | R 1  | 175.1195       | 88.0637         |

N-term:+29.04 K(1):+156.13  
 C(12):+160.03

KQLEDMNAYCGER, MH+ 1681.8314, m/z 561.2820  
 H OS G27 P150811 220811-s1.03168.03168.3.dta

X-range:

-

MassTol: Y-zoom:

MassType:

AVG  MONO

Axis:

1  2

Label:

I  M  -

Ions:

a  +  2+  3+

b  +  2+  3+

c  +  2+  3+

x  +  2+  3+

y  +  2+  3+

z  +  2+  3+

hide H<sub>2</sub>O/NH<sub>3</sub>

zoom 112-122

GO

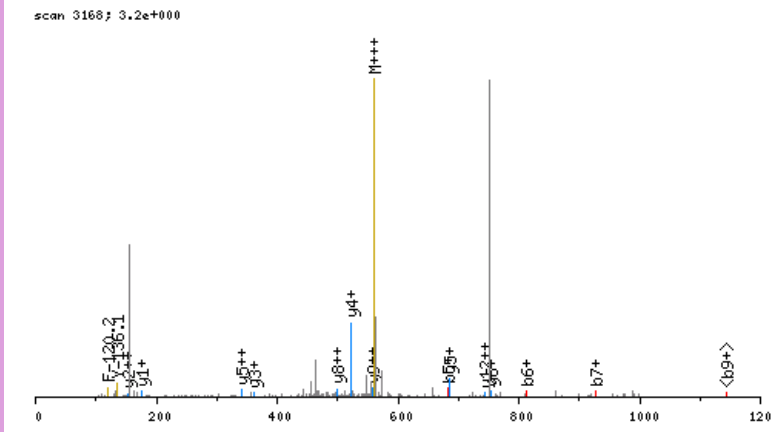

click image to zoom in; click top corners to zoom out [\[precursor±\]](#)

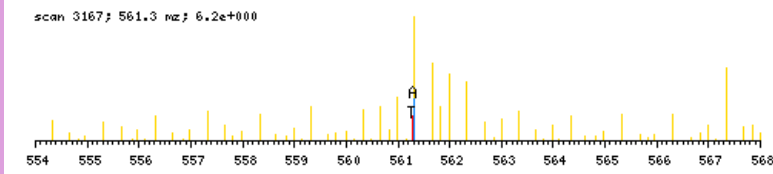

zoomed in precursor plot; T=theoretical m/z, A=acquired m/z

| b <sup>+</sup> | #  | AA # | y <sup>+</sup> | y <sup>2+</sup> |
|----------------|----|------|----------------|-----------------|
| 197.2290       | 1  | K    | 13             |                 |
| 325.2876       | 2  | Q    | 12             | 1485.6102       |
| 438.3716       | 3  | L    | 11             | 1357.5516       |
| 567.4142       | 4  | E    | 10             | 1244.4675       |
| 682.4412       | 5  | D    | 9              | 1115.4250       |
| 813.4817       | 6  | M    | 8              | 1000.3980       |
| 927.5246       | 7  | N    | 7              | 869.3575        |
| 998.5617       | 8  | A    | 6              | 755.3146        |
| 1161.6250      | 9  | Y    | 5              | 684.2775        |
| 1321.6556      | 10 | C    | 4              | 521.2142        |
| 1378.6771      | 11 | G    | 3              | 361.1836        |
| 1507.7197      | 12 | E    | 2              | 304.1621        |
|                | 13 | R    | 1              | 175.1195        |

N-term:+35.07 K(1):+162.16  
 C(10):+160.03



KTDPGIILKTENR, MH+ 1568.9376, m/z 392.9899  
 L OS G28 P150811 220811-s1.03360.03360.4.dta

X-range:

-

MassTol: Y-zoom:

MassType:

AVG  MONO

Axis:

1  2

Label:

I  M  -

Ions:

a  +  2+  3+

b  +  2+  3+

c  +  2+  3+

x  +  2+  3+

y  +  2+  3+

z  +  2+  3+

hide H<sub>2</sub>O/NH<sub>3</sub>

zoom 112-122

GO

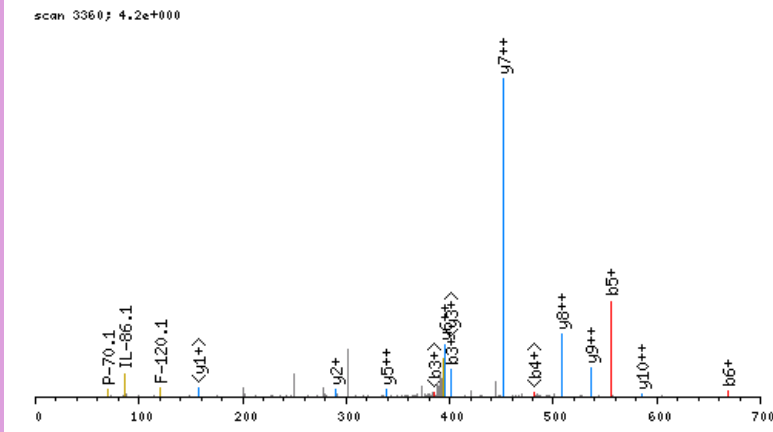

click image to zoom in; click top corners to zoom out [\[precursor±\]](#)

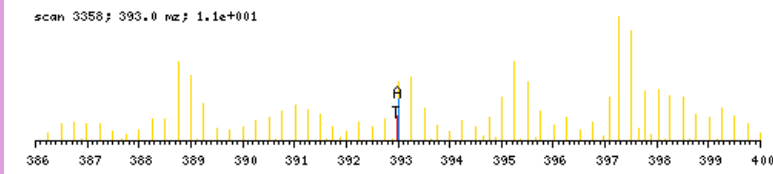

zoomed in precursor plot; T=theoretical m/z, A=acquired m/z

| b <sup>+</sup> | #  | AA # | y <sup>+</sup> | y <sup>2+</sup> |
|----------------|----|------|----------------|-----------------|
| 185.1654       | 1  | K 13 |                |                 |
| 286.2131       | 2  | T 12 | 1384.7800      | 692.8939        |
| 401.2400       | 3  | D 11 | 1283.7324      | 642.3701        |
| 498.2928       | 4  | P 10 | 1168.7054      | 584.8566        |
| 555.3142       | 5  | G 9  | 1071.6527      | 536.3302        |
| 668.3983       | 6  | I 8  | 1014.6312      | 507.8195        |
| 781.4824       | 7  | I 7  | 901.5471       | 451.2775        |
| 894.5664       | 8  | L 6  | 788.4631       | 394.7354        |
| 1050.6927      | 9  | K 5  | 675.3790       | 338.1934        |
| 1151.7404      | 10 | T 4  | 519.2527       | 260.1303        |
| 1280.7830      | 11 | E 3  | 418.2050       | 209.6064        |
| 1394.8259      | 12 | N 2  | 289.1624       | 145.0851        |
|                | 13 | R 1  | 175.1195       | 88.0637         |

N-term:+29.04 K(1):+156.13  
 K(9):+156.13

KTGTAEMSSILEER, MH+ 1619.8951, m/z 540.6365  
 H OS G27 P150811 220811-s1.04688.04688.3.dta

X-range:

-

MassTol: Y-zoom:

MassType:

AVG  MONO

Axis:

1  2

Label:

I  M  -

Ions:

a  +  2+  3+

b  +  2+  3+

c  +  2+  3+

x  +  2+  3+

y  +  2+  3+

z  +  2+  3+

hide H<sub>2</sub>O/NH<sub>3</sub>

zoom 112-122

GO

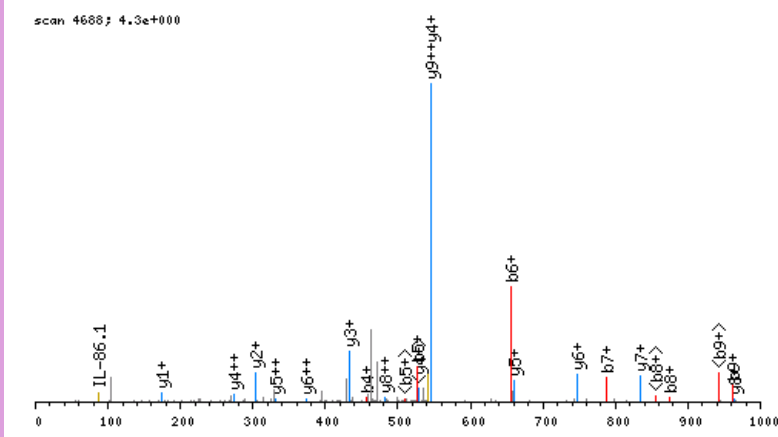

click image to zoom in; click top corners to zoom out [\[precursor±\]](#)

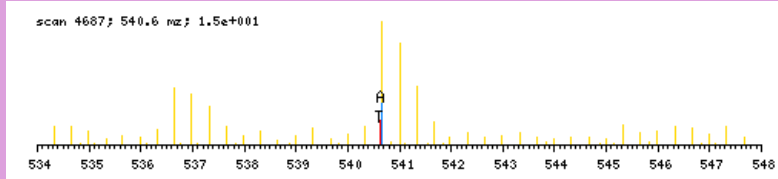

zoomed in precursor plot; T=theoretical m/z, A=acquired m/z

| b <sup>+</sup> | #  | AA # | y <sup>+</sup> | y <sup>2+</sup> |
|----------------|----|------|----------------|-----------------|
| 197.2290       | 1  | K 14 |                |                 |
| 298.2767       | 2  | T 13 | 1423.6739      | 712.3409        |
| 355.2981       | 3  | G 12 | 1322.6262      | 661.8170        |
| 456.3458       | 4  | T 11 | 1265.6047      | 633.3063        |
| 527.3829       | 5  | A 10 | 1164.5571      | 582.7824        |
| 656.4255       | 6  | E 9  | 1093.5199      | 547.2639        |
| 787.4660       | 7  | M 8  | 964.4774       | 482.7426        |
| 874.4980       | 8  | S 7  | 833.4369       | 417.2223        |
| 961.5301       | 9  | S 6  | 746.4048       | 373.7063        |
| 1074.6141      | 10 | I 5  | 659.3728       | 330.1903        |
| 1187.6982      | 11 | L 4  | 546.2888       | 273.6483        |
| 1316.7408      | 12 | E 3  | 433.2047       | 217.1063        |
| 1445.7834      | 13 | E 2  | 304.1621       | 152.5850        |
|                | 14 | R 1  | 175.1195       | 88.0637         |

N-term:+35.07 K(1):+162.16

KTPAQFDADELK, MH+ 1446.7593, m/z 482.9246  
 L OS G27 P150811 220811-s1.03885.03885.3.dta

X-range:

-

MassTol: Y-zoom:

MassType:

AVG  MONO

Axis:

1  2

Label:

I  M  -

Ions:

a  +  2+  3+

b  +  2+  3+

c  +  2+  3+

x  +  2+  3+

y  +  2+  3+

z  +  2+  3+

hide H<sub>2</sub>O/NH<sub>3</sub>

zoom 112-122

GO

scan 3885; 2.9e+000

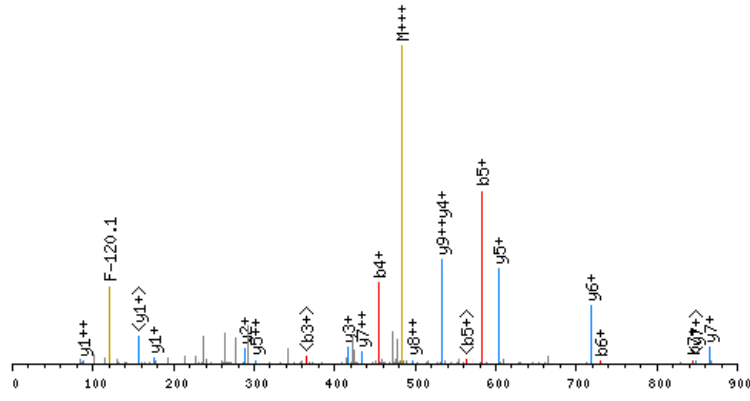

click image to zoom in; click top corners to zoom out [\[precursor±\]](#)

scan 3882; 482.9 m/z; 1.6e+001

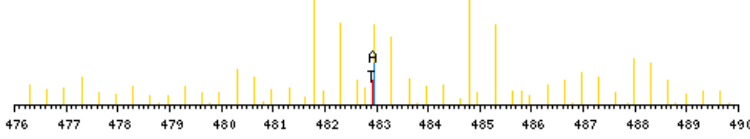

zoomed in precursor plot; T=theoretical m/z, A=acquired m/z

| b <sup>+</sup> | #  | AA # | y <sup>+</sup> | y <sup>2+</sup> |
|----------------|----|------|----------------|-----------------|
| 185.1654       | 1  | K 12 |                |                 |
| 286.2131       | 2  | T 11 | 1262.6017      | 631.8048        |
| 383.2658       | 3  | P 10 | 1161.5540      | 581.2809        |
| 454.3030       | 4  | A 9  | 1064.5013      | 532.7545        |
| 582.3615       | 5  | Q 8  | 993.4641       | 497.2360        |
| 729.4299       | 6  | F 7  | 865.4056       | 433.2067        |
| 844.4569       | 7  | D 6  | 718.3372       | 359.6725        |
| 915.4940       | 8  | A 5  | 603.3102       | 302.1590        |
| 1030.5209      | 9  | D 4  | 532.2731       | 266.6405        |
| 1159.5635      | 10 | E 3  | 417.2462       | 209.1270        |
| 1272.6476      | 11 | L 2  | 288.2036       | 144.6057        |
|                | 12 | R 1  | 175.1195       | 88.0637         |

N-term:+29.04 K(1):+156.13

KTQSKPEDEADWAR, MH+ 1892.0250, m/z 473.7617  
 H OS G28 P150811 220811-s1.02812.02812.4.dta

X-range:

-

MassTol: Y-zoom:

MassType:

AVG  MONO

Axis:

1  2

Label:

I  M  -

Ions:

a  +  2+  3+

b  +  2+  3+

c  +  2+  3+

x  +  2+  3+

y  +  2+  3+

z  +  2+  3+

hide H<sub>2</sub>O/NH<sub>3</sub>

zoom 112-122

GO

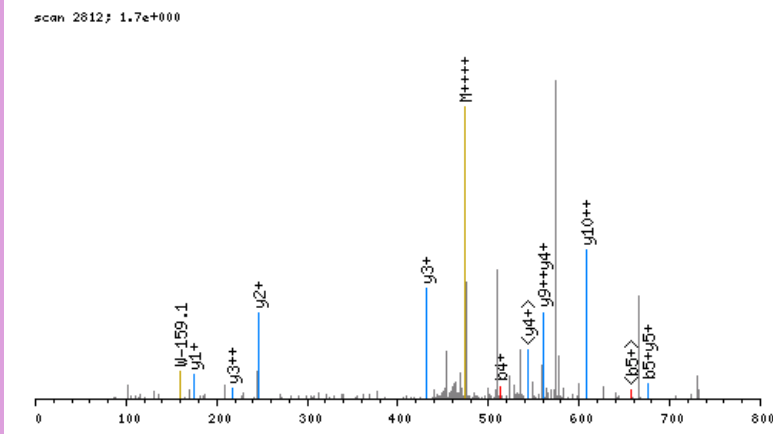

click image to zoom in; click top corners to zoom out [precursor±]

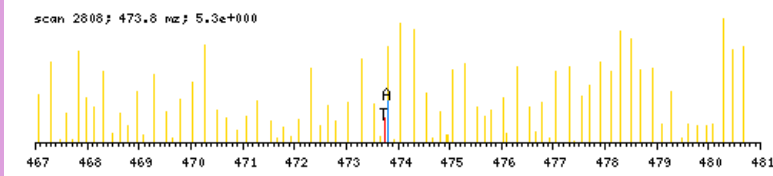

zoomed in precursor plot; T=theoretical m/z, A=acquired m/z

| b <sup>+</sup> | #  | AA | #  | y <sup>+</sup> | y <sup>2+</sup> |
|----------------|----|----|----|----------------|-----------------|
| 197.2290       | 1  | K  | 15 |                |                 |
| 298.2767       | 2  | T  | 14 | 1695.8039      | 848.4058        |
| 426.3353       | 3  | Q  | 13 | 1594.7562      | 797.8820        |
| 513.3673       | 4  | S  | 12 | 1466.6976      | 733.8527        |
| 675.5254       | 5  | K  | 11 | 1379.6656      | 690.3367        |
| 772.5781       | 6  | P  | 10 | 1217.5075      | 609.2576        |
| 901.6207       | 7  | E  | 9  | 1120.4547      | 560.7313        |
| 1016.6477      | 8  | D  | 8  | 991.4121       | 496.2100        |
| 1145.6903      | 9  | E  | 7  | 876.3852       | 438.6965        |
| 1216.7274      | 10 | A  | 6  | 747.3426       | 374.1752        |
| 1331.7543      | 11 | D  | 5  | 676.3055       | 338.6566        |
| 1460.7969      | 12 | E  | 4  | 561.2785       | 281.1432        |
| 1646.8762      | 13 | W  | 3  | 432.2359       | 216.6219        |
| 1717.9134      | 14 | A  | 2  | 246.1566       | 123.5822        |
|                | 15 | R  | 1  | 175.1195       | 88.0637         |

N-term:+35.07 K(1):+162.16  
 K(5):+162.16

KIVVEAENIVVTIGVVR, MH+ 1912.1391, m/z 638.0512  
 H OS G26 P150811 220811-s1.04468.04468.3.dta

X-range:

-

MassTol: Y-zoom:

MassType:

AVG  MONO

Axis:

1  2

Label:

I  M  -

Ions:

a  +  2+  3+

b  +  2+  3+

c  +  2+  3+

x  +  2+  3+

y  +  2+  3+

z  +  2+  3+

hide H<sub>2</sub>O/NH<sub>3</sub>

zoom 112-122

GO

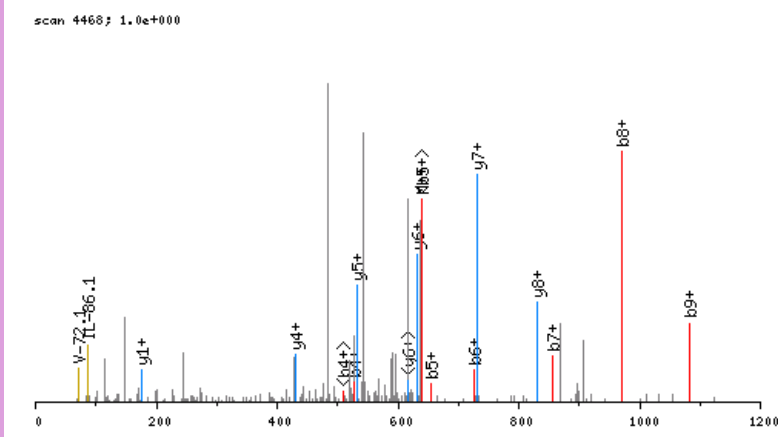

click image to zoom in; click top corners to zoom out [\[precursor±\]](#)

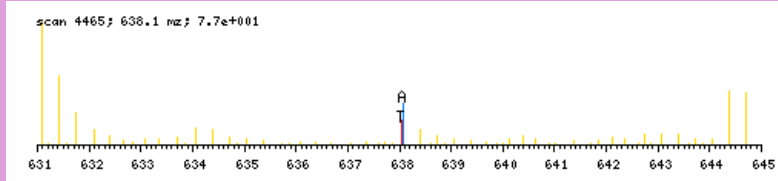

zoomed in precursor plot; T=theoretical m/z, A=acquired m/z

| b <sup>+</sup> | #  | AA # | y <sup>+</sup> | y <sup>2+</sup> |
|----------------|----|------|----------------|-----------------|
| 197.2290       | 1  | K 17 |                |                 |
| 298.2767       | 2  | T 16 | 1715.9180      | 858.4629        |
| 397.3451       | 3  | V 15 | 1614.8703      | 807.9391        |
| 526.3877       | 4  | E 14 | 1515.8019      | 758.4048        |
| 655.4303       | 5  | E 13 | 1386.7593      | 693.8835        |
| 726.4674       | 6  | A 12 | 1257.7167      | 629.3623        |
| 855.5100       | 7  | E 11 | 1186.6796      | 593.8437        |
| 969.5529       | 8  | N 10 | 1057.6370      | 529.3224        |
| 1082.6370      | 9  | I 9  | 943.5940       | 472.3009        |
| 1181.7054      | 10 | V 8  | 830.5100       | 415.7589        |
| 1280.7738      | 11 | V 7  | 731.4416       | 366.2247        |
| 1381.8215      | 12 | T 6  | 632.3731       | 316.6905        |
| 1482.8692      | 13 | T 5  | 531.3255       | 266.1666        |
| 1539.8906      | 14 | G 4  | 430.2778       | 215.6428        |
| 1638.9590      | 15 | V 3  | 373.2563       | 187.1321        |
| 1738.0275      | 16 | V 2  | 274.1879       | 137.5979        |
|                | 17 | R 1  | 175.1195       | 88.0637         |

N-term:+35.07 K(1):+162.16

KVDVVGATQQAGSCSR, MH+ 1775.9074, m/z 592.6406  
 L OS G27 P150811 220811-s1.02569.02569.3.dta

X-range:

-

MassTol: Y-zoom:

MassType:

AVG  MONO

Axis:

1  2

Label:

I  M  -

Ions:

a  +  2+  3+

b  +  2+  3+

c  +  2+  3+

x  +  2+  3+

y  +  2+  3+

z  +  2+  3+

hide H<sub>2</sub>O/NH<sub>3</sub>

zoom 112-122

GO

scan 2569; 2.4e+000

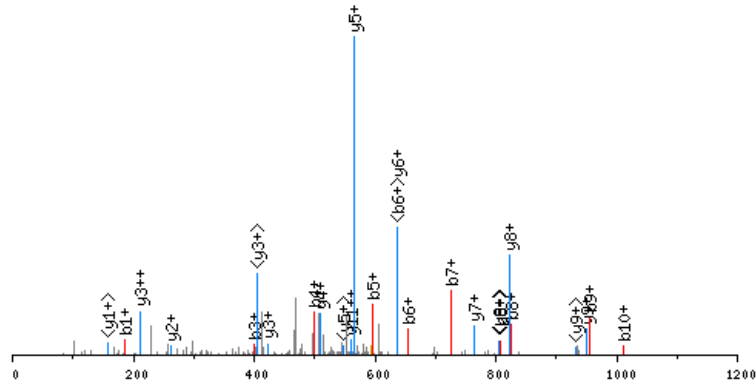

click image to zoom in; click top corners to zoom out [\[precursor±\]](#)

scan 2567; 592.6 m/z; 6.6e+000

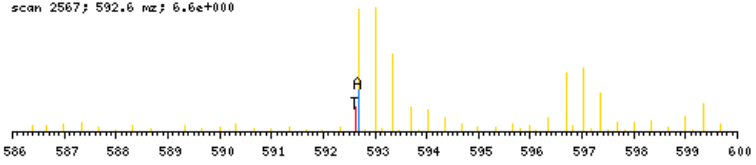

zoomed in precursor plot; T=theoretical m/z, A=acquired m/z

| b <sup>+</sup> | #  | AA | #  | y <sup>+</sup> | y <sup>2+</sup> |
|----------------|----|----|----|----------------|-----------------|
| 185.1654       | 1  | K  | 17 |                |                 |
| 284.2338       | 2  | V  | 16 | 1591.7498      | 796.3788        |
| 399.2608       | 3  | D  | 15 | 1492.6814      | 746.8446        |
| 498.3292       | 4  | V  | 14 | 1377.6544      | 689.3311        |
| 597.3976       | 5  | V  | 13 | 1278.5860      | 639.7969        |
| 654.4190       | 6  | G  | 12 | 1179.5176      | 590.2627        |
| 725.4562       | 7  | A  | 11 | 1122.4961      | 561.7520        |
| 826.5038       | 8  | T  | 10 | 1051.4590      | 526.2334        |
| 954.5624       | 9  | Q  | 9  | 950.4114       | 475.7096        |
| 1011.5839      | 10 | G  | 8  | 822.3528       | 411.6803        |
| 1139.6425      | 11 | Q  | 7  | 765.3313       | 383.1696        |
| 1210.6796      | 12 | A  | 6  | 637.2727       | 319.1403        |
| 1267.7010      | 13 | G  | 5  | 566.2356       | 283.6217        |
| 1354.7331      | 14 | S  | 4  | 509.2142       | 255.1110        |
| 1514.7637      | 15 | C  | 3  | 422.1821       | 211.5950        |
| 1601.7957      | 16 | S  | 2  | 262.1515       | 131.5797        |
|                | 17 | R  | 1  | 175.1195       | 88.0637         |

N-term:+29.04 K(1):+156.13  
 C(15):+160.03

KVEDNFEDIITKPPVR, MH+ 1984.1120, m/z 496.7834  
 L OS G28 P150811 220811-s1.06959.06959.4.dta

X-range:

-

MassTol: Y-zoom:

MassType:

AVG  MONO

Axis:

1  2

Label:

I  M  -

Ions:

a  +  2+  3+

b  +  2+  3+

c  +  2+  3+

x  +  2+  3+

y  +  2+  3+

z  +  2+  3+

hide H<sub>2</sub>O/NH<sub>3</sub>

zoom 112-122

GO

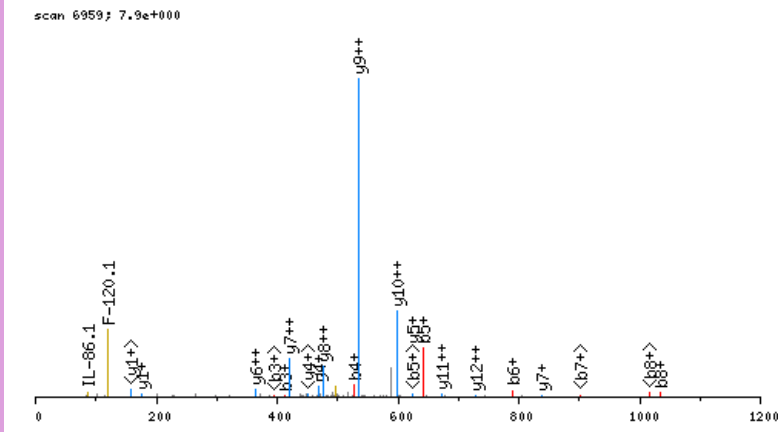

click image to zoom in; click top corners to zoom out [\[precursor±\]](#)

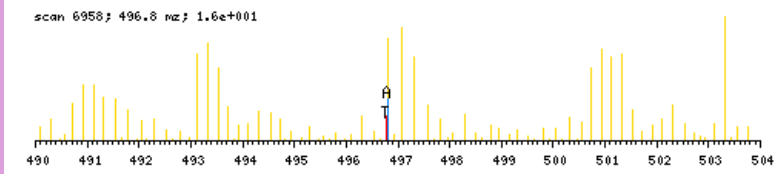

zoomed in precursor plot; T=theoretical m/z, A=acquired m/z

| b <sup>+</sup> | #  | AA # | y <sup>+</sup> | y <sup>2+</sup> |
|----------------|----|------|----------------|-----------------|
| 185.1654       | 1  | K 16 |                |                 |
| 284.2338       | 2  | V 15 | 1799.9544      | 900.4811        |
| 413.2764       | 3  | E 14 | 1700.8860      | 850.9469        |
| 528.3034       | 4  | D 13 | 1571.8434      | 786.4256        |
| 642.3463       | 5  | N 12 | 1456.8164      | 728.9121        |
| 789.4147       | 6  | F 11 | 1342.7735      | 671.8907        |
| 918.4573       | 7  | E 10 | 1195.7051      | 598.3565        |
| 1033.4842      | 8  | D 9  | 1066.6625      | 533.8352        |
| 1146.5683      | 9  | I 8  | 951.6355       | 476.3217        |
| 1259.6524      | 10 | I 7  | 838.5515       | 419.7797        |
| 1360.7000      | 11 | T 6  | 725.4674       | 363.2376        |
| 1516.8263      | 12 | K 5  | 624.4197       | 312.7138        |
| 1613.8791      | 13 | P 4  | 468.2934       | 234.6506        |
| 1710.9319      | 14 | P 3  | 371.2407       | 186.1243        |
| 1810.0003      | 15 | V 2  | 274.1879       | 137.5979        |
|                | 16 | R 1  | 175.1195       | 88.0637         |

N-term:+29.04 K(1):+156.13  
 K(12):+156.13

KVGINYQPPTVPPGGDLAKVQR, MH+ 2420.4030, m/z 605.8562  
 L OS G27 P150811 220811-s1.05796.05796.4.dta

X-range:

-

MassTol: Y-zoom:

MassType:

AVG  MONO

Axis:

1  2

Label:

I  M  -

Ions:

a  +  2+  3+

b  +  2+  3+

c  +  2+  3+

x  +  2+  3+

y  +  2+  3+

z  +  2+  3+

hide H<sub>2</sub>O/NH<sub>3</sub>

zoom 112-122

GO

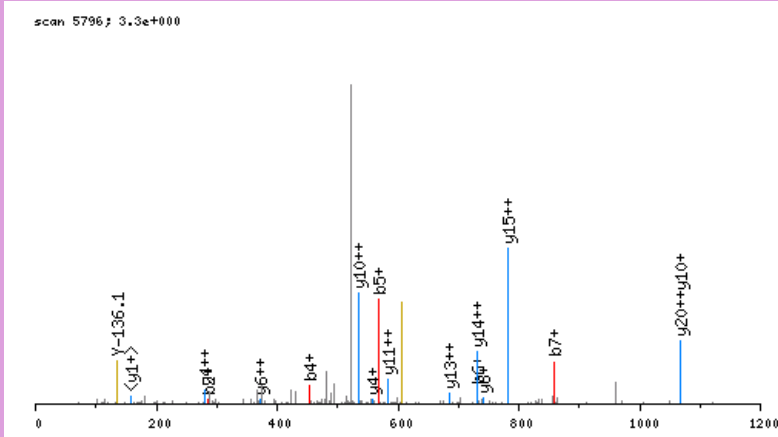

click image to zoom in; click top corners to zoom out [\[precursor±\]](#)

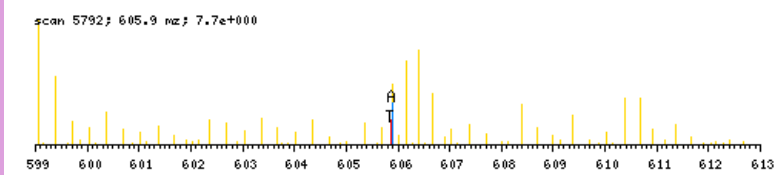

zoomed in precursor plot; T=theoretical m/z, A=acquired m/z

| b <sup>+</sup> | #  | AA # | y <sup>+</sup> | y <sup>2+</sup> |
|----------------|----|------|----------------|-----------------|
| 185.1654       | 1  | K 22 |                |                 |
| 284.2338       | 2  | V 21 | 2236.2454      | 1118.6266       |
| 341.2553       | 3  | G 20 | 2137.1770      | 1069.0924       |
| 454.3393       | 4  | I 19 | 2080.1555      | 1040.5817       |
| 568.3823       | 5  | N 18 | 1967.0715      | 984.0396        |
| 731.4456       | 6  | Y 17 | 1853.0285      | 927.0182        |
| 859.5042       | 7  | Q 16 | 1689.9652      | 845.4865        |
| 956.5569       | 8  | P 15 | 1561.9066      | 781.4572        |
| 1053.6097      | 9  | P 14 | 1464.8539      | 732.9308        |
| 1154.6574      | 10 | T 13 | 1367.8011      | 684.4045        |
| 1253.7258      | 11 | V 12 | 1266.7534      | 633.8806        |
| 1352.7942      | 12 | V 11 | 1167.6850      | 584.3464        |
| 1449.8470      | 13 | P 10 | 1068.6166      | 534.8122        |
| 1506.8684      | 14 | G 9  | 971.5638       | 486.2858        |
| 1563.8899      | 15 | G 8  | 914.5424       | 457.7751        |
| 1678.9168      | 16 | D 7  | 857.5209       | 429.2644        |
| 1792.0009      | 17 | L 6  | 742.4940       | 371.7509        |
| 1863.0380      | 18 | A 5  | 629.4099       | 315.2089        |
| 2019.1643      | 19 | K 4  | 558.3728       | 279.6903        |
| 2118.2327      | 20 | V 3  | 402.2465       | 201.6272        |
| 2246.2913      | 21 | Q 2  | 303.1781       | 152.0930        |
|                | 22 | R 1  | 175.1195       | 88.0637         |

N-term:+29.04 K(1):+156.13  
 K(19):+156.13



KVIDPATATSVDLR, MH+ 1541.8903, m/z 514.6349  
 L OS G26 P150811 220811-s1.03777.03777.3.dta

X-range:

-

MassTol: Y-zoom:

MassType:

AVG  MONO

Axis:

1  2

Label:

I  M  -

Ions:

a  +  2+  3+

b  +  2+  3+

c  +  2+  3+

x  +  2+  3+

y  +  2+  3+

z  +  2+  3+

hide H<sub>2</sub>O/NH<sub>3</sub>

zoom 112-122

GO

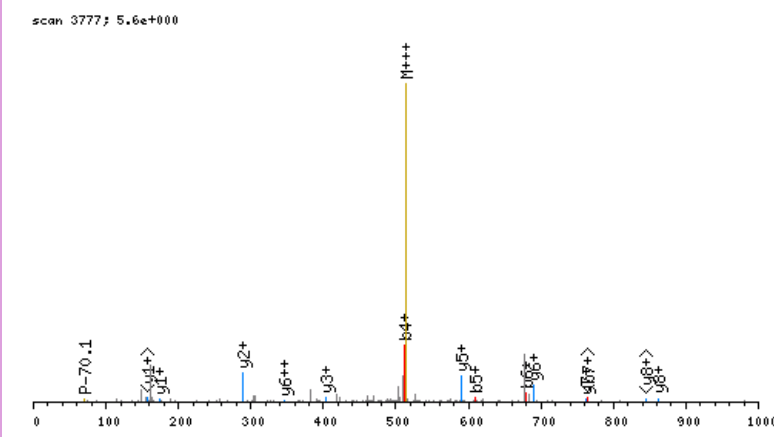

click image to zoom in; click top corners to zoom out [\[precursor±\]](#)

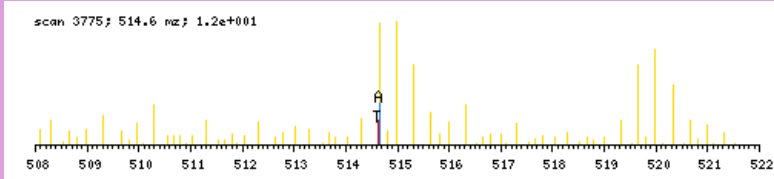

zoomed in precursor plot; T=theoretical m/z, A=acquired m/z

| b <sup>+</sup> | #  | AA # | y <sup>+</sup> | y <sup>2+</sup> |
|----------------|----|------|----------------|-----------------|
| 185.1654       | 1  | K 14 |                |                 |
| 284.2338       | 2  | V 13 | 1357.7327      | 679.3703        |
| 397.3179       | 3  | I 12 | 1258.6643      | 629.8361        |
| 512.3448       | 4  | D 11 | 1145.5802      | 573.2940        |
| 609.3976       | 5  | P 10 | 1030.5533      | 515.7806        |
| 680.4347       | 6  | A 9  | 933.5005       | 467.2542        |
| 781.4824       | 7  | T 8  | 862.4634       | 431.7356        |
| 852.5195       | 8  | A 7  | 761.4157       | 381.2118        |
| 953.5672       | 9  | T 6  | 690.3786       | 345.6932        |
| 1040.5992      | 10 | S 5  | 589.3310       | 295.1694        |
| 1139.6676      | 11 | V 4  | 502.2989       | 251.6534        |
| 1254.6946      | 12 | D 3  | 403.2305       | 202.1192        |
| 1367.7786      | 13 | L 2  | 288.2036       | 144.6057        |
|                | 14 | R 1  | 175.1195       | 88.0637         |

N-term:+29.04 K(1):+156.13

KVTQLDLLDGPKELSR, MH+ 1783.0330, m/z 446.5137  
 L OS G28 P150811 220811-s1.04824.04824.4.dta

X-range:

-

MassTol: Y-zoom:

MassType:

AVG  MONO

Axis:

1  2

Label:

I  M  -

Ions:

a  +  2+  3+

b  +  2+  3+

c  +  2+  3+

x  +  2+  3+

y  +  2+  3+

z  +  2+  3+

hide H<sub>2</sub>O/NH<sub>3</sub>

zoom 112-122

GO

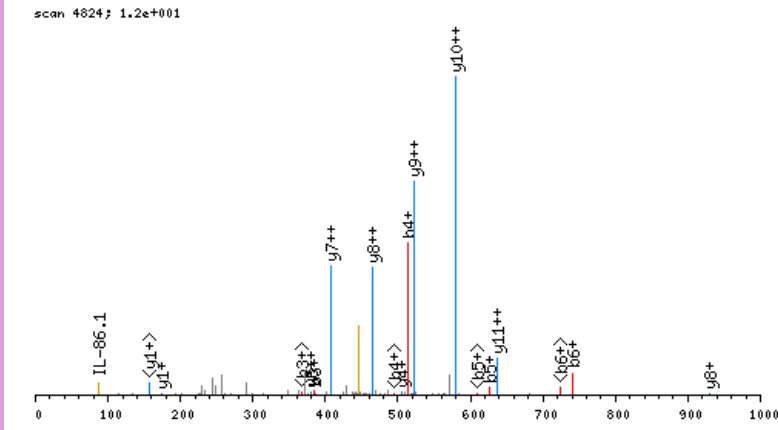

click image to zoom in; click top corners to zoom out [\[precursor±\]](#)

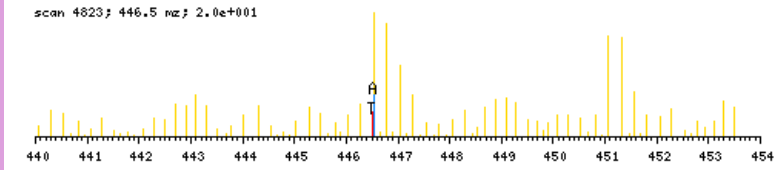

zoomed in precursor plot; T=theoretical m/z, A=acquired m/z

| b <sup>+</sup> | #  | AA | #  | y <sup>+</sup> | y <sup>2+</sup> |
|----------------|----|----|----|----------------|-----------------|
| 185.1654       | 1  | K  | 15 |                |                 |
| 284.2338       | 2  | V  | 14 | 1598.8754      | 799.9416        |
| 385.2815       | 3  | T  | 13 | 1499.8070      | 750.4074        |
| 513.3401       | 4  | Q  | 12 | 1398.7593      | 699.8836        |
| 626.4241       | 5  | L  | 11 | 1270.7007      | 635.8543        |
| 741.4511       | 6  | D  | 10 | 1157.6167      | 579.3122        |
| 854.5351       | 7  | L  | 9  | 1042.5897      | 521.7988        |
| 969.5621       | 8  | D  | 8  | 929.5057       | 465.2567        |
| 1026.5835      | 9  | G  | 7  | 814.4787       | 407.7433        |
| 1123.6363      | 10 | P  | 6  | 757.4573       | 379.2325        |
| 1279.7626      | 11 | K  | 5  | 660.4045       | 330.7062        |
| 1408.8052      | 12 | E  | 4  | 504.2782       | 252.6430        |
| 1521.8893      | 13 | L  | 3  | 375.2356       | 188.1217        |
| 1608.9213      | 14 | S  | 2  | 262.1515       | 131.5797        |
|                | 15 | R  | 1  | 175.1195       | 88.0637         |

N-term:+29.04 K(1):+156.13  
 K(11):+156.13

LASEPEIPKGIK, MH+ 1365.8106, m/z 455.9417  
 L OS G26 P150811 220811-s1.03444.03444.3.dta

X-range:

-

MassTol: Y-zoom:

MassType:

AVG  MONO

Axis:

1  2

Label:

I  M  -

Ions:

a  +  2+  3+

b  +  2+  3+

c  +  2+  3+

x  +  2+  3+

y  +  2+  3+

z  +  2+  3+

hide H<sub>2</sub>O/NH<sub>3</sub>

zoom 112-122

GO

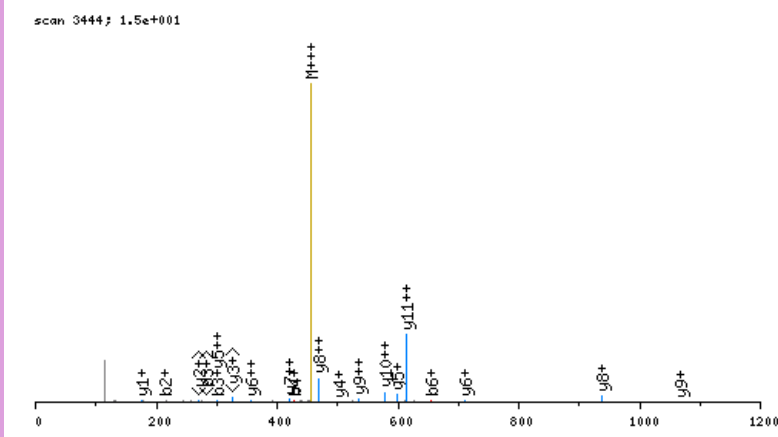

click image to zoom in; click top corners to zoom out [\[precursor±\]](#)

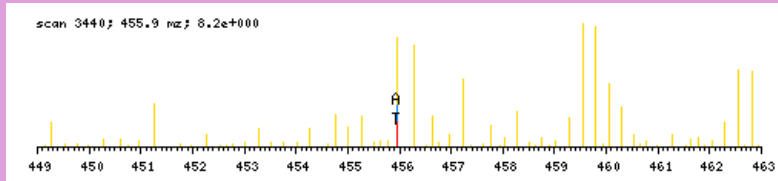

zoomed in precursor plot; T=theoretical m/z, A=acquired m/z

| b <sup>+</sup> | #  | AA # | y <sup>+</sup> | y <sup>2+</sup> |
|----------------|----|------|----------------|-----------------|
| 142.1232       | 1  | L 12 |                |                 |
| 213.1603       | 2  | A 11 | 1224.6952      | 612.8515        |
| 300.1923       | 3  | S 10 | 1153.6581      | 577.3330        |
| 429.2349       | 4  | E 9  | 1066.6261      | 533.8170        |
| 526.2877       | 5  | P 8  | 937.5835       | 469.2957        |
| 655.3303       | 6  | E 7  | 840.5307       | 420.7693        |
| 768.4143       | 7  | I 6  | 711.4882       | 356.2480        |
| 865.4671       | 8  | P 5  | 598.4041       | 299.7060        |
| 1021.5934      | 9  | K 4  | 501.3513       | 251.1796        |
| 1078.6148      | 10 | G 3  | 345.2250       | 173.1164        |
| 1191.6989      | 11 | I 2  | 288.2036       | 144.6057        |
|                | 12 | R 1  | 175.1195       | 88.0637         |

N-term:+29.04 K(9):+156.13

LCEQQAELDYLCGR, MH+ 1788.8472, m/z 596.9539  
 H OS G24 P150811 220811-s1.03748.03748.3.dta

X-range:

-

MassTol: Y-zoom:

MassType:

AVG  MONO

Axis:

1  2

Label:

I  M  -

Ions:

a  +  2+  3+

b  +  2+  3+

c  +  2+  3+

x  +  2+  3+

y  +  2+  3+

z  +  2+  3+

hide H<sub>2</sub>O/NH<sub>3</sub>

zoom 112-122

GO

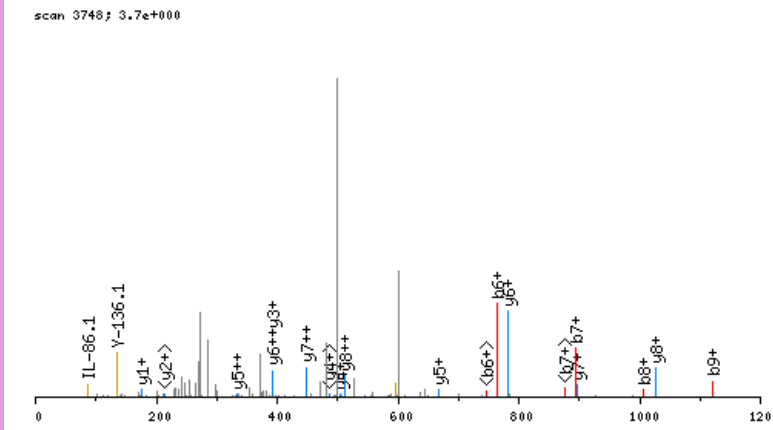

click image to zoom in; click top corners to zoom out [\[precursor±\]](#)

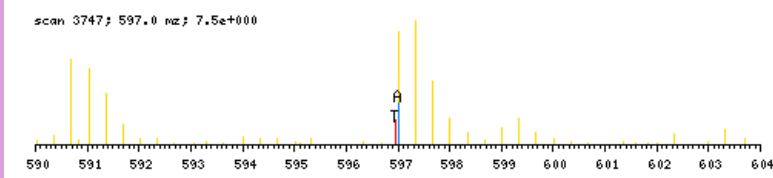

zoomed in precursor plot; T=theoretical m/z, A=acquired m/z

| b <sup>+</sup> | #  | AA | #  | y <sup>+</sup> | y <sup>2+</sup> |
|----------------|----|----|----|----------------|-----------------|
| 148.1550       | 1  | L  | 14 |                |                 |
| 308.1856       | 2  | C  | 13 | 1641.7000      | 821.3539        |
| 437.2282       | 3  | E  | 12 | 1481.6694      | 741.3386        |
| 565.2867       | 4  | Q  | 11 | 1352.6268      | 676.8173        |
| 693.3453       | 5  | Q  | 10 | 1224.5682      | 612.7880        |
| 764.3824       | 6  | A  | 9  | 1096.5097      | 548.7587        |
| 893.4250       | 7  | E  | 8  | 1025.4726      | 513.2402        |
| 1006.5091      | 8  | L  | 7  | 896.4300       | 448.7189        |
| 1121.5360      | 9  | D  | 6  | 783.3459       | 392.1769        |
| 1284.5994      | 10 | Y  | 5  | 668.3190       | 334.6634        |
| 1397.6834      | 11 | L  | 4  | 505.2556       | 253.1317        |
| 1557.7140      | 12 | C  | 3  | 392.1716       | 196.5897        |
| 1614.7355      | 13 | G  | 2  | 232.1410       | 116.5744        |
|                | 14 | R  | 1  | 175.1195       | 88.0637         |

N-term:+35.07 C(2):+160.03  
 C(12):+160.03

LCGEEQGADAALHFNPR, MH+ 1912.8975, m/z 638.3040  
 L OS G27 P150811 220811-s1.05024.05024.3.dta

X-range:

-

MassTol: Y-zoom:

MassType:

AVG  MONO

Axis:

1  2

Label:

I  M  -

Ions:

a  +  2+  3+

b  +  2+  3+

c  +  2+  3+

x  +  2+  3+

y  +  2+  3+

z  +  2+  3+

hide H<sub>2</sub>O/NH<sub>3</sub>

zoom 112-122

GO

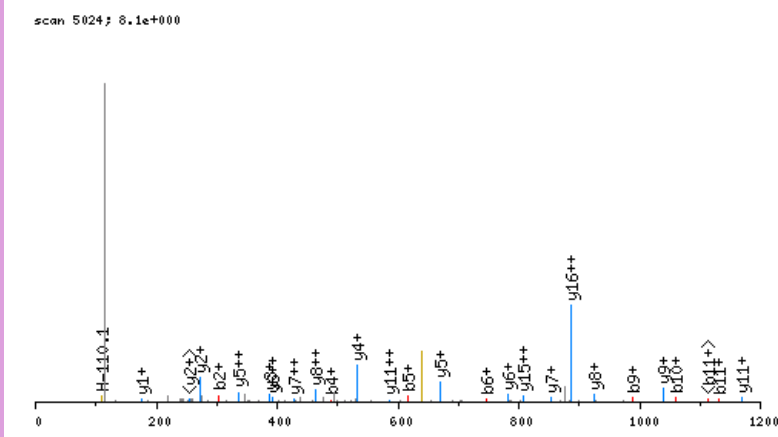

click image to zoom in; click top corners to zoom out [\[precursor±\]](#)

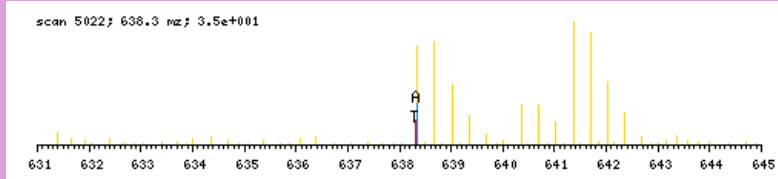

zoomed in precursor plot; T=theoretical m/z, A=acquired m/z

| b <sup>+</sup> | #  | AA # | y <sup>+</sup> | y <sup>2+</sup> |
|----------------|----|------|----------------|-----------------|
| 142.1232       | 1  | L 17 |                |                 |
| 302.1538       | 2  | C 16 | 1771.7822      | 886.3950        |
| 359.1752       | 3  | G 15 | 1611.7516      | 806.3797        |
| 488.2178       | 4  | E 14 | 1554.7301      | 777.8690        |
| 617.2604       | 5  | E 13 | 1425.6875      | 713.3477        |
| 745.3190       | 6  | Q 12 | 1296.6449      | 648.8264        |
| 802.3405       | 7  | G 11 | 1168.5863      | 584.7971        |
| 873.3776       | 8  | A 10 | 1111.5649      | 556.2863        |
| 988.4045       | 9  | D 9  | 1040.5278      | 520.7678        |
| 1059.4416      | 10 | A 8  | 925.5008       | 463.2543        |
| 1130.4787      | 11 | A 7  | 854.4637       | 427.7358        |
| 1243.5628      | 12 | L 6  | 783.4266       | 392.2172        |
| 1380.6217      | 13 | H 5  | 670.3425       | 335.6752        |
| 1527.6901      | 14 | F 4  | 533.2836       | 267.1457        |
| 1641.7331      | 15 | N 3  | 386.2152       | 193.6115        |
| 1738.7858      | 16 | P 2  | 272.1723       | 136.5900        |
|                | 17 | R 1  | 175.1195       | 88.0637         |

N-term:+29.04 C(2):+160.03

LCSCPHPLVLGLDGR, MH+ 1727.9148, m/z 576.6431  
 H OS G27 P150811 220811-s1.03603.03603.3.dta

X-range:

-

MassTol: Y-zoom:

MassType:

AVG  MONO

Axis:

1  2

Label:

I  M  -

Ions:

a  +  2+  3+

b  +  2+  3+

c  +  2+  3+

x  +  2+  3+

y  +  2+  3+

z  +  2+  3+

hide H<sub>2</sub>O/NH<sub>3</sub>

zoom 112-122

GO

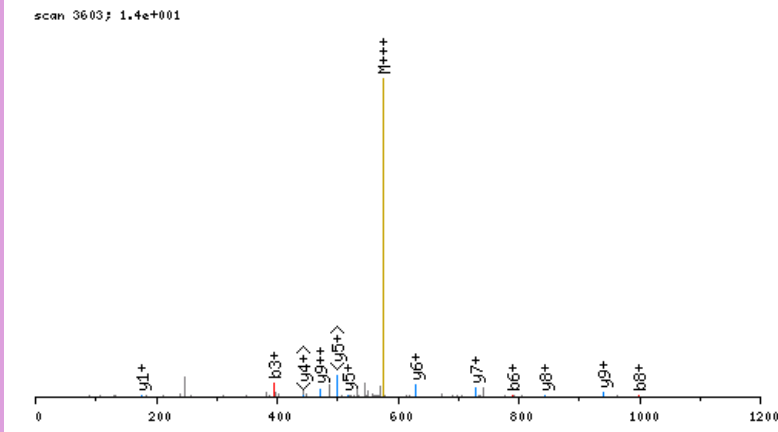

click image to zoom in; click top corners to zoom out [\[precursor±\]](#)

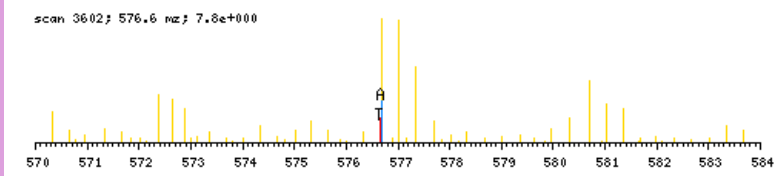

zoomed in precursor plot; T=theoretical m/z, A=acquired m/z

| b <sup>+</sup> | #  | AA # | y <sup>+</sup> | y <sup>2+</sup> |
|----------------|----|------|----------------|-----------------|
| 148.1550       | 1  | L 15 |                |                 |
| 308.1856       | 2  | C 14 | 1580.7676      | 790.8877        |
| 395.2176       | 3  | S 13 | 1420.7370      | 710.8724        |
| 555.2482       | 4  | C 12 | 1333.7050      | 667.3564        |
| 652.3010       | 5  | P 11 | 1173.6744      | 587.3411        |
| 789.3599       | 6  | H 10 | 1076.6217      | 538.8147        |
| 886.4126       | 7  | P 9  | 939.5627       | 470.2853        |
| 999.4967       | 8  | L 8  | 842.5100       | 421.7589        |
| 1098.5651      | 9  | V 7  | 729.4259       | 365.2169        |
| 1211.6492      | 10 | L 6  | 630.3575       | 315.6827        |
| 1268.6706      | 11 | G 5  | 517.2734       | 259.1406        |
| 1381.7547      | 12 | L 4  | 460.2520       | 230.6299        |
| 1496.7816      | 13 | D 3  | 347.1679       | 174.0879        |
| 1553.8031      | 14 | G 2  | 232.1410       | 116.5744        |
|                | 15 | R 1  | 175.1195       | 88.0637         |

N-term:+35.07 C(2):+160.03  
 C(4):+160.03

LDAVDTYIPVPTTR, MH+ 1487.8109, m/z 496.6085  
 L OS G24 P150811 220811-s1.04304.04304.3.dta

X-range:

-

MassTol: Y-zoom:

MassType:

AVG  MONO

Axis:

1  2

Label:

I  M  -

Ions:

a  +  2+  3+

b  +  2+  3+

c  +  2+  3+

x  +  2+  3+

y  +  2+  3+

z  +  2+  3+

hide H<sub>2</sub>O/NH<sub>3</sub>

zoom 112-122

GO

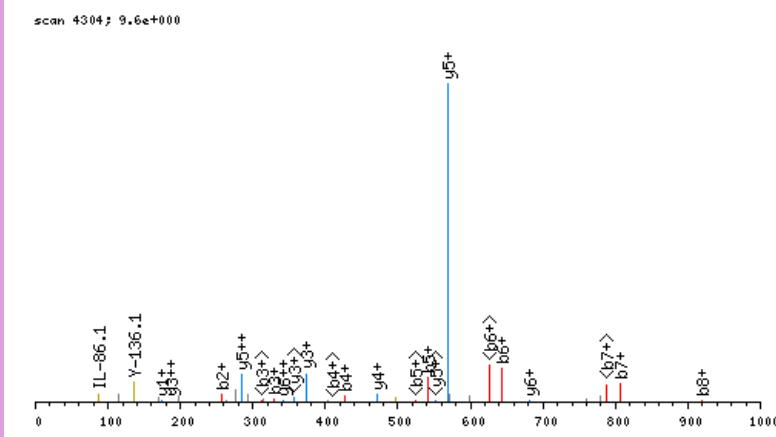

click image to zoom in; click top corners to zoom out [\[precursor±\]](#)

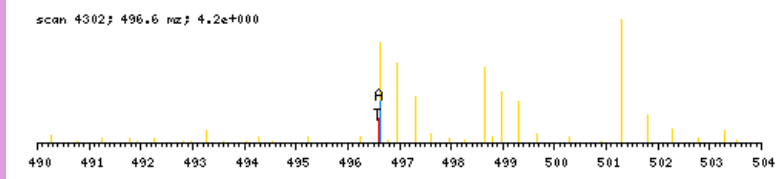

zoomed in precursor plot; T=theoretical m/z, A=acquired m/z

| b <sup>+</sup> | #  | AA # | y <sup>+</sup> | y <sup>2+</sup> |
|----------------|----|------|----------------|-----------------|
| 142.1232       | 1  | L 13 |                |                 |
| 257.1501       | 2  | D 12 | 1346.6956      | 673.8517        |
| 328.1872       | 3  | A 11 | 1231.6687      | 616.3382        |
| 427.2556       | 4  | V 10 | 1160.6315      | 580.8197        |
| 542.2826       | 5  | D 9  | 1061.5631      | 531.2855        |
| 643.3303       | 6  | T 8  | 946.5362       | 473.7720        |
| 806.3936       | 7  | Y 7  | 845.4885       | 423.2482        |
| 919.4776       | 8  | I 6  | 682.4252       | 341.7165        |
| 1016.5304      | 9  | P 5  | 569.3411       | 285.1745        |
| 1115.5988      | 10 | V 4  | 472.2884       | 236.6481        |
| 1212.6516      | 11 | P 3  | 373.2199       | 187.1139        |
| 1313.6993      | 12 | T 2  | 276.1672       | 138.5875        |
|                | 13 | R 1  | 175.1195       | 88.0637         |

N-term:+29.04

LDIAPLDIGGADQEFR, MH+ 1763.9392, m/z 588.6512  
 H OS G24 P150811 220811-s1.04881.04881.3.dta

scan 4881; 2.9e+000

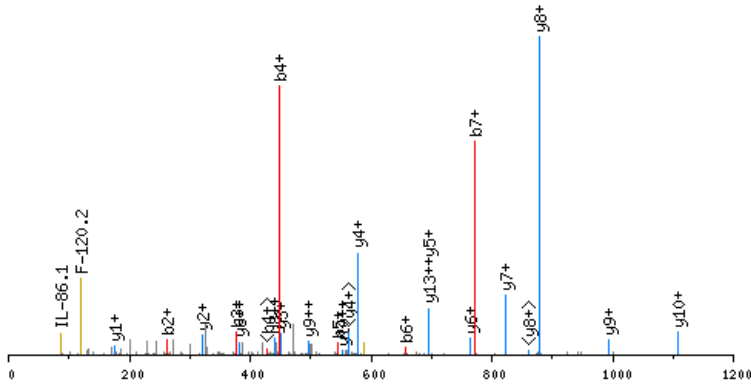

click image to zoom in; click top corners to zoom out [\[precursor±\]](#)

scan 4880; 588.7 m/z; 8.5e+000

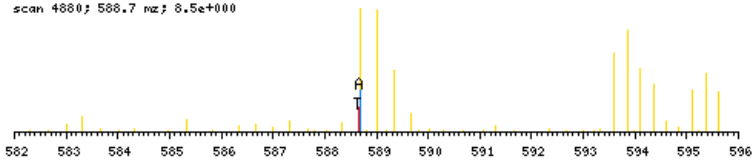

zoomed in precursor plot; T=theoretical m/z, A=acquired m/z

X-range:

-

MassTol: Y-zoom:

MassType:

AVG  MONO

Axis:

1  2

Label:

I  M  -

Ions:

a  +  2+  3+

b  +  2+  3+

c  +  2+  3+

x  +  2+  3+

y  +  2+  3+

z  +  2+  3+

hide H<sub>2</sub>O/NH<sub>3</sub>

zoom 112-122

GO

| b <sup>+</sup> | #  | AA # | y <sup>+</sup> | y <sup>2+</sup> |
|----------------|----|------|----------------|-----------------|
| 148.1550       | 1  | L 16 |                |                 |
| 263.1819       | 2  | D 15 | 1616.7920      | 808.8999        |
| 376.2660       | 3  | I 14 | 1501.7651      | 751.3865        |
| 447.3031       | 4  | A 13 | 1388.6810      | 694.8444        |
| 544.3558       | 5  | P 12 | 1317.6439      | 659.3259        |
| 657.4399       | 6  | L 11 | 1220.5911      | 610.7995        |
| 772.4669       | 7  | D 10 | 1107.5071      | 554.2575        |
| 885.5509       | 8  | I 9  | 992.4801       | 496.7440        |
| 942.5724       | 9  | G 8  | 879.3961       | 440.2019        |
| 999.5938       | 10 | G 7  | 822.3746       | 411.6912        |
| 1070.6310      | 11 | A 6  | 765.3531       | 383.1805        |
| 1185.6579      | 12 | D 5  | 694.3160       | 347.6619        |
| 1313.7165      | 13 | Q 4  | 579.2891       | 290.1485        |
| 1442.7591      | 14 | E 3  | 451.2305       | 226.1192        |
| 1589.8275      | 15 | F 2  | 322.1879       | 161.5979        |
|                | 16 | R 1  | 175.1195       | 88.0637         |

N-term:+35.07



LDLPCTPPPPAPIPSVR, MH+ 1855.0151, m/z 619.0099  
 L OS G24 P150811 220811-s1.04465.04465.3.dta

X-range:

-

MassTol: Y-zoom:

MassType:

AVG  MONO

Axis:

1  2

Label:

I  M  -

Ions:

a  +  2+  3+

b  +  2+  3+

c  +  2+  3+

x  +  2+  3+

y  +  2+  3+

z  +  2+  3+

hide H<sub>2</sub>O/NH<sub>3</sub>

zoom 112-122

GO

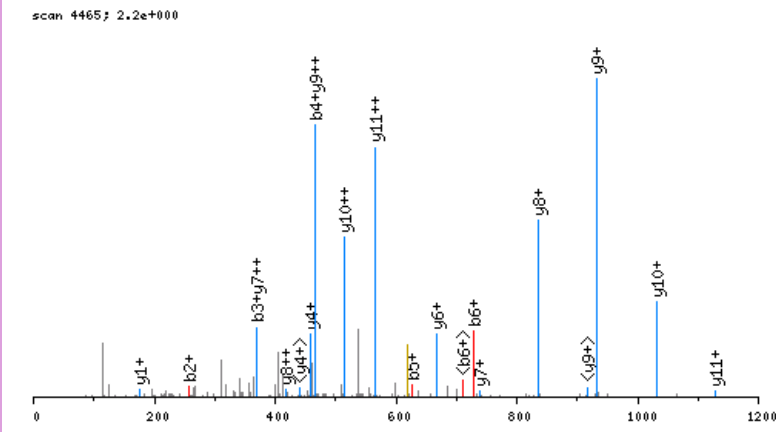

click image to zoom in; click top corners to zoom out [\[precursor±\]](#)

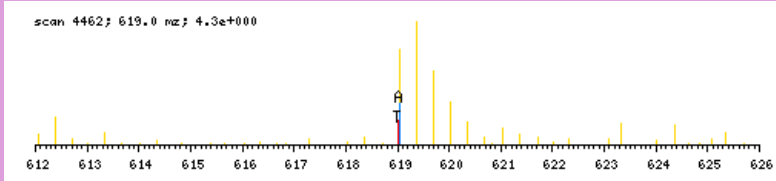

zoomed in precursor plot; T=theoretical m/z, A=acquired m/z

| b <sup>+</sup> | #  | AA # | y <sup>+</sup> | y <sup>2+</sup> |
|----------------|----|------|----------------|-----------------|
| 142.1232       | 1  | L 17 |                |                 |
| 257.1501       | 2  | D 16 | 1713.8998      | 857.4538        |
| 370.2342       | 3  | L 15 | 1598.8728      | 799.9403        |
| 467.2869       | 4  | P 14 | 1485.7887      | 743.3983        |
| 627.3175       | 5  | C 13 | 1388.7360      | 694.8719        |
| 728.3652       | 6  | T 12 | 1228.7054      | 614.8566        |
| 825.4180       | 7  | P 11 | 1127.6577      | 564.3328        |
| 922.4707       | 8  | P 10 | 1030.6049      | 515.8064        |
| 1019.5235      | 9  | P 9  | 933.5522       | 467.2800        |
| 1116.5763      | 10 | P 8  | 836.4994       | 418.7536        |
| 1187.6134      | 11 | A 7  | 739.4466       | 370.2272        |
| 1284.6661      | 12 | P 6  | 668.4095       | 334.7087        |
| 1397.7502      | 13 | I 5  | 571.3568       | 286.1823        |
| 1494.8030      | 14 | P 4  | 458.2727       | 229.6403        |
| 1581.8350      | 15 | S 3  | 361.2199       | 181.1139        |
| 1680.9034      | 16 | V 2  | 274.1879       | 137.5979        |
|                | 17 | R 1  | 175.1195       | 88.0637         |

N-term:+29.04 C(5):+160.03

LDPTSVTLPMEIR, MH+ 1655.9406, m/z 552.6517  
 L OS G26 P150811 220811-s1.05496.05496.3.dta

scan 5496; 5.9e+000

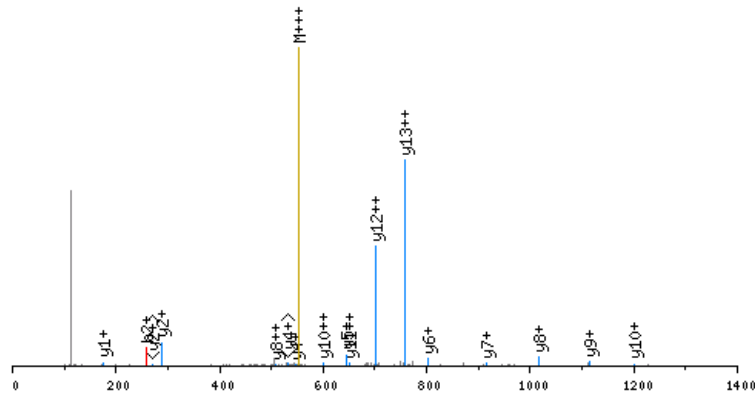

click image to zoom in; click top corners to zoom out [precursor±]

scan 5495; 552.7 m/z; 6.2e+000

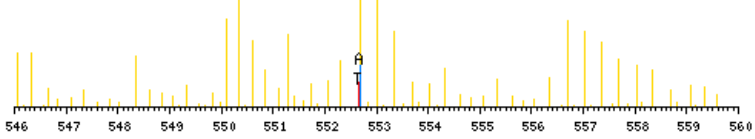

zoomed in precursor plot; T=theoretical m/z, A=acquired m/z

X-range:

-

MassTol: Y-zoom:

MassType:

AVG  MONO

Axis:

1  2

Label:

I  M  -

Ions:

a  +  2+  3+

b  +  2+  3+

c  +  2+  3+

x  +  2+  3+

y  +  2+  3+

z  +  2+  3+

hide H<sub>2</sub>O/NH<sub>3</sub>

zoom 112-122

GO

| b <sup>+</sup> | #  | AA # | y <sup>+</sup> | y <sup>2+</sup> |
|----------------|----|------|----------------|-----------------|
| 142.1232       | 1  | L 14 |                |                 |
| 257.1501       | 2  | D 13 | 1514.8253      | 757.9166        |
| 354.2029       | 3  | P 12 | 1399.7983      | 700.4031        |
| 455.2505       | 4  | T 11 | 1302.7456      | 651.8767        |
| 542.2826       | 5  | S 10 | 1201.6979      | 601.3529        |
| 641.3510       | 6  | V 9  | 1114.6659      | 557.8368        |
| 742.3987       | 7  | T 8  | 1015.5974      | 508.3026        |
| 855.4827       | 8  | L 7  | 914.5498       | 457.7788        |
| 1011.6090      | 9  | K 6  | 801.4657       | 401.2368        |
| 1108.6618      | 10 | P 5  | 645.3394       | 323.1736        |
| 1239.7023      | 11 | M 4  | 548.2866       | 274.6472        |
| 1368.7449      | 12 | E 3  | 417.2462       | 209.1270        |
| 1481.8289      | 13 | I 2  | 288.2036       | 144.6057        |
|                | 14 | R 1  | 175.1195       | 88.0637         |

N-term:+29.04 K(9):+156.13

LDSLTTIPELKDHLR, MH+ 1819.0965, m/z 455.5296  
 H OS G28 P150811 220811-s1.07419.07419.4.dta

X-range:

-

MassTol: Y-zoom:

MassType:

AVG  MONO

Axis:

1  2

Label:

I  M  -

Ions:

a  +  2+  3+

b  +  2+  3+

c  +  2+  3+

x  +  2+  3+

y  +  2+  3+

z  +  2+  3+

hide H<sub>2</sub>O/NH<sub>3</sub>

zoom 112-122

GO

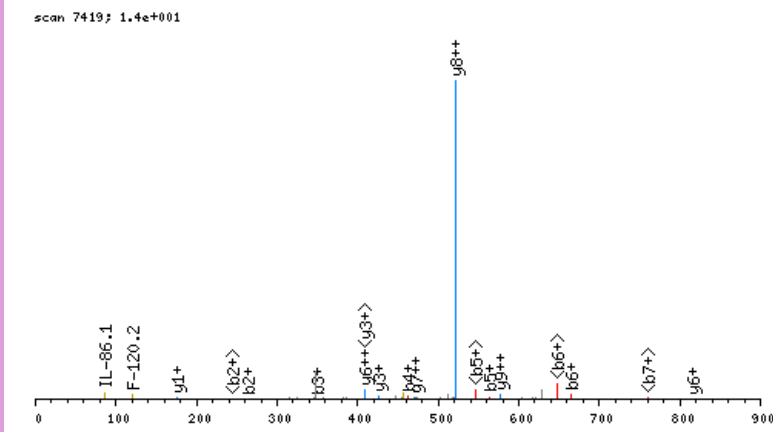

click image to zoom in; click top corners to zoom out [\[precursor±\]](#)

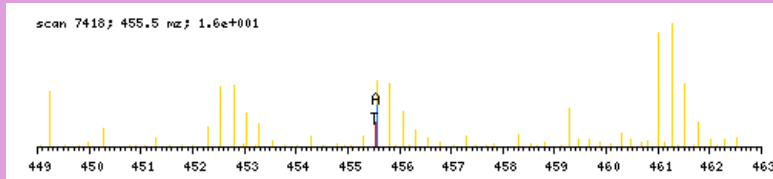

zoomed in precursor plot; T=theoretical m/z, A=acquired m/z

| b <sup>+</sup> | #  | AA # | y <sup>+</sup> | y <sup>2+</sup> |
|----------------|----|------|----------------|-----------------|
| 148.1550       | 1  | L 15 |                |                 |
| 263.1819       | 2  | D 14 | 1671.9494      | 836.4786        |
| 350.2139       | 3  | S 13 | 1556.9225      | 778.9651        |
| 463.2980       | 4  | L 12 | 1469.8904      | 735.4491        |
| 564.3457       | 5  | T 11 | 1356.8064      | 678.9071        |
| 665.3934       | 6  | T 10 | 1255.7587      | 628.3833        |
| 778.4774       | 7  | I 9  | 1154.7110      | 577.8594        |
| 875.5302       | 8  | P 8  | 1041.6269      | 521.3174        |
| 1004.5728      | 9  | E 7  | 944.5742       | 472.7910        |
| 1117.6568      | 10 | L 6  | 815.5316       | 408.2697        |
| 1279.8149      | 11 | K 5  | 702.4475       | 351.7277        |
| 1394.8419      | 12 | D 4  | 540.2894       | 270.6486        |
| 1531.9008      | 13 | H 3  | 425.2625       | 213.1352        |
| 1644.9849      | 14 | L 2  | 288.2036       | 144.6057        |
|                | 15 | R 1  | 175.1195       | 88.0637         |

N-term:+35.07 K(11):+162.16

LDSVGIEADDDR, MH+ 1332.6283, m/z 666.8178  
 L OS G25 P150811 220811-s1.03884.03884.2.dta

X-range:

-

MassTol: Y-zoom:

MassType:

AVG  MONO

Axis:

1  2

Label:

I  M  -

Ions:

a  +  2+  3+

b  +  2+  3+

c  +  2+  3+

x  +  2+  3+

y  +  2+  3+

z  +  2+  3+

hide H<sub>2</sub>O/NH<sub>3</sub>

zoom 112-122

GO

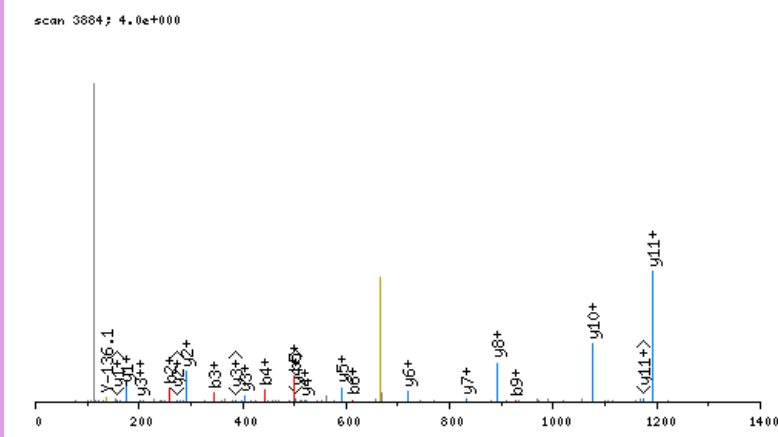

click image to zoom in; click top corners to zoom out [\[precursor±\]](#)

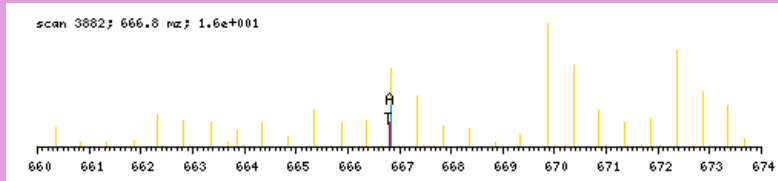

zoomed in precursor plot; T=theoretical m/z, A=acquired m/z

| b <sup>+</sup> | #  | AA # | y <sup>+</sup> | y <sup>2+</sup> |
|----------------|----|------|----------------|-----------------|
| 142.1232       | 1  | L 12 |                |                 |
| 257.1501       | 2  | D 11 | 1191.5130      | 596.2604        |
| 344.1821       | 3  | S 10 | 1076.4860      | 538.7469        |
| 443.2505       | 4  | V 9  | 989.4540       | 495.2309        |
| 500.2720       | 5  | G 8  | 890.3856       | 445.6967        |
| 613.3561       | 6  | I 7  | 833.3641       | 417.1860        |
| 742.3987       | 7  | E 6  | 720.2800       | 360.6439        |
| 813.4358       | 8  | A 5  | 591.2374       | 296.1226        |
| 928.4627       | 9  | D 4  | 520.2003       | 260.6041        |
| 1043.4897      | 10 | D 3  | 405.1734       | 203.0906        |
| 1158.5166      | 11 | D 2  | 290.1464       | 145.5771        |
|                | 12 | R 1  | 175.1195       | 88.0637         |

N-term:+29.04

LDVNDNAPIPEPR, MH+ 1477.7651, m/z 493.2599  
 L OS G25 P150811 220811-s1.05203.05203.3.dta

X-range:

-

MassTol: Y-zoom:

MassType:

AVG  MONO

Axis:

1  2

Label:

I  M  -

Ions:

a  +  2+  3+

b  +  2+  3+

c  +  2+  3+

x  +  2+  3+

y  +  2+  3+

z  +  2+  3+

hide H<sub>2</sub>O/NH<sub>3</sub>

zoom 112-122

GO

scan 5203; 3.3e+000

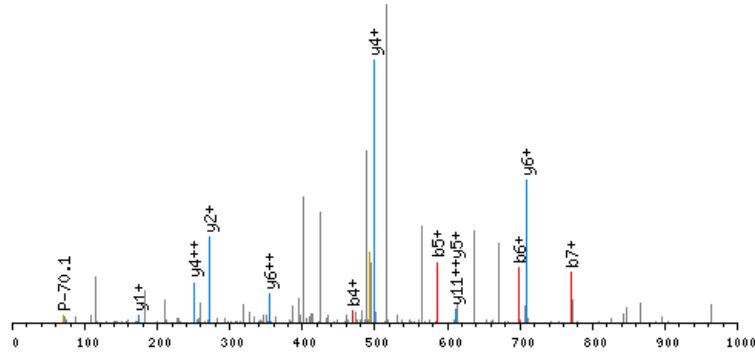

click image to zoom in; click top corners to zoom out [\[precursor±\]](#)

scan 5202; 493.3 m/z; 3.5e+001

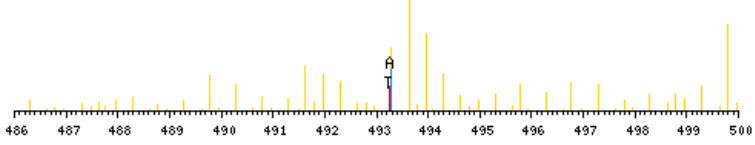

zoomed in precursor plot; T=theoretical m/z, A=acquired m/z

| b <sup>+</sup>  | #  | AA # | y <sup>+</sup>  | y <sup>2+</sup> |
|-----------------|----|------|-----------------|-----------------|
| 142.1232        | 1  | L 13 |                 |                 |
| 257.1501        | 2  | D 12 | 1336.6497       | 668.8288        |
| 356.2185        | 3  | V 11 | 1221.6228       | <b>611.3153</b> |
| <b>470.2614</b> | 4  | N 10 | 1122.5544       | 561.7811        |
| <b>585.2884</b> | 5  | D 9  | 1008.5114       | 504.7596        |
| <b>699.3313</b> | 6  | N 8  | 893.4845        | 447.2462        |
| <b>770.3684</b> | 7  | A 7  | 779.4416        | 390.2247        |
| 867.4212        | 8  | P 6  | <b>708.4044</b> | <b>354.7061</b> |
| 980.5053        | 9  | I 5  | <b>611.3517</b> | 306.1798        |
| 1077.5580       | 10 | P 4  | <b>498.2676</b> | <b>249.6377</b> |
| 1206.6006       | 11 | E 3  | 401.2149        | 201.1113        |
| 1303.6534       | 12 | P 2  | <b>272.1723</b> | 136.5900        |
|                 | 13 | R 1  | <b>175.1195</b> | 88.0637         |

N-term:+29.04

LDWLVEGEATTR, MH+ 1551.8231, m/z 517.9459  
 H OS G25 P150811 220811-s1.06971.06971.3.dta

X-range:

-

MassTol: Y-zoom:

MassType:

AVG  MONO

Axis:

1  2

Label:

I  M  -

Ions:

a  +  2+  3+

b  +  2+  3+

c  +  2+  3+

x  +  2+  3+

y  +  2+  3+

z  +  2+  3+

hide H<sub>2</sub>O/NH<sub>3</sub>

zoom 112-122

GO

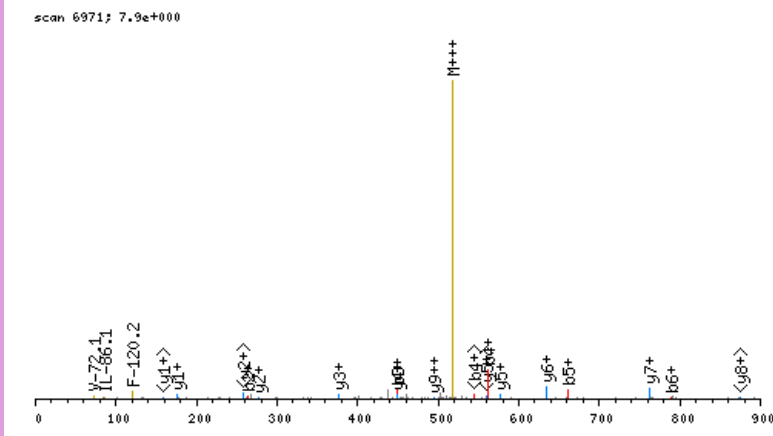

click image to zoom in; click top corners to zoom out [\[precursor±\]](#)

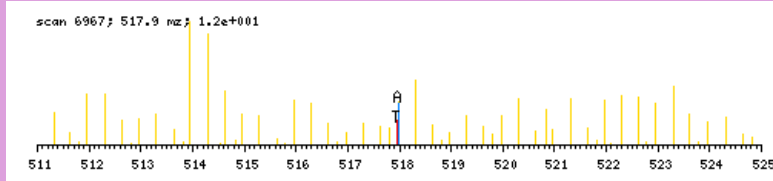

zoomed in precursor plot; T=theoretical m/z, A=acquired m/z

| b <sup>+</sup> | #  | AA # | y <sup>+</sup> | y <sup>2+</sup> |
|----------------|----|------|----------------|-----------------|
| 148.1550       | 1  | L 13 |                |                 |
| 263.1819       | 2  | D 12 | 1404.6759      | 702.8419        |
| 449.2612       | 3  | W 11 | 1289.6490      | 645.3284        |
| 562.3453       | 4  | L 10 | 1103.5697      | 552.2888        |
| 661.4137       | 5  | V 9  | 990.4856       | 495.7467        |
| 789.4723       | 6  | Q 8  | 891.4172       | 446.2125        |
| 918.5149       | 7  | E 7  | 763.3586       | 382.1832        |
| 975.5363       | 8  | G 6  | 634.3160       | 317.6619        |
| 1104.5789      | 9  | E 5  | 577.2946       | 289.1512        |
| 1175.6160      | 10 | A 4  | 448.2520       | 224.6299        |
| 1276.6637      | 11 | T 3  | 377.2149       | 189.1113        |
| 1377.7114      | 12 | T 2  | 276.1672       | 138.5875        |
|                | 13 | R 1  | 175.1195       | 88.0637         |

N-term:+35.07

LEALDCILPPTTRPTDKPLR, MH+ 2261.2691, m/z 566.0727  
 L OS G27 P150811 220811-s1.06508.06508.4.dta

scan 6508; 3.3e+000

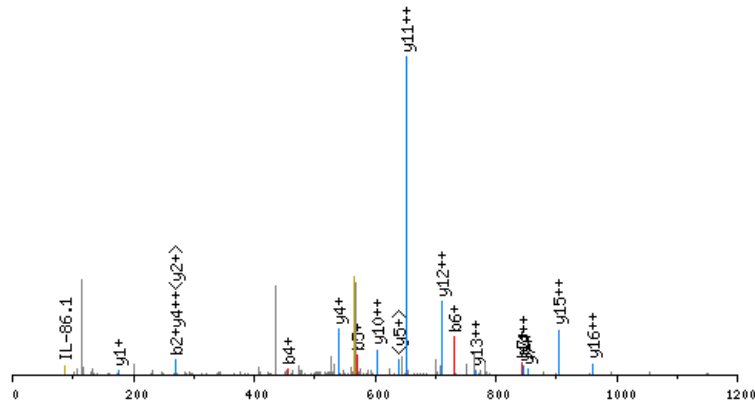

click image to zoom in; click top corners to zoom out [precursor±]

scan 6507; 566.1 m/z; 2.9e+001

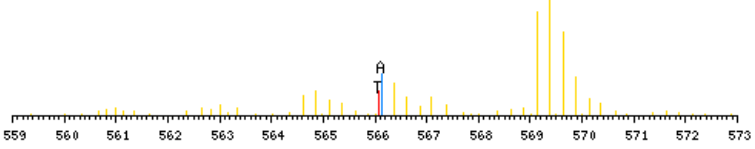

zoomed in precursor plot; T=theoretical m/z, A=acquired m/z

X-range:

-

MassTol: Y-zoom:

MassType:

AVG  MONO

Axis:

1  2

Label:

I  M  -

Ions:

a  +  2+  3+

b  +  2+  3+

c  +  2+  3+

x  +  2+  3+

y  +  2+  3+

z  +  2+  3+

hide H<sub>2</sub>O/NH<sub>3</sub>

zoom 112-122

GO

| b <sup>+</sup> | #  | AA | #  | y <sup>+</sup> | y <sup>2+</sup> |
|----------------|----|----|----|----------------|-----------------|
| 142.1232       | 1  | L  | 19 |                |                 |
| 271.1658       | 2  | E  | 18 | 2120.1538      | 1060.5808       |
| 342.2029       | 3  | A  | 17 | 1991.1112      | 996.0595        |
| 455.2869       | 4  | L  | 16 | 1920.0741      | 960.5409        |
| 570.3139       | 5  | D  | 15 | 1806.9900      | 903.9989        |
| 730.3445       | 6  | C  | 14 | 1691.9631      | 846.4854        |
| 843.4285       | 7  | I  | 13 | 1531.9325      | 766.4701        |
| 956.5126       | 8  | L  | 12 | 1418.8484      | 709.9281        |
| 1053.5654      | 9  | P  | 11 | 1305.7643      | 653.3861        |
| 1150.6181      | 10 | P  | 10 | 1208.7116      | 604.8597        |
| 1251.6658      | 11 | T  | 9  | 1111.6588      | 556.3333        |
| 1407.7669      | 12 | R  | 8  | 1010.6111      | 505.8095        |
| 1504.8197      | 13 | P  | 7  | 854.5100       | 427.7589        |
| 1605.8674      | 14 | T  | 6  | 757.4573       | 379.2325        |
| 1720.8943      | 15 | D  | 5  | 656.4096       | 328.7087        |
| 1877.0206      | 16 | K  | 4  | 541.3826       | 271.1952        |
| 1974.0734      | 17 | P  | 3  | 385.2563       | 193.1321        |
| 2087.1574      | 18 | L  | 2  | 288.2036       | 144.6057        |
|                | 19 | R  | 1  | 175.1195       | 88.0637         |

N-term:+29.04 C(6):+160.03  
 K(16):+156.13

LEALDTILPPTTRPTDKPLR, MH+ 2214.3498, m/z 554.3429  
 H OS G27 P150811 220811-s1.06541.06541.4.dta

X-range:

-

MassTol: Y-zoom:

MassType:

AVG  MONO

Axis:

1  2

Label:

I  M  -

Ions:

a  +  2+  3+

b  +  2+  3+

c  +  2+  3+

x  +  2+  3+

y  +  2+  3+

z  +  2+  3+

hide H<sub>2</sub>O/NH<sub>3</sub>

zoom 112-122

GO

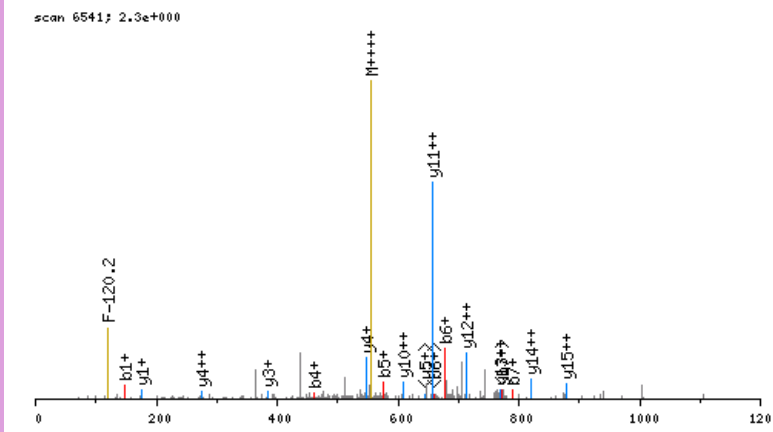

click image to zoom in; click top corners to zoom out [\[precursor±\]](#)

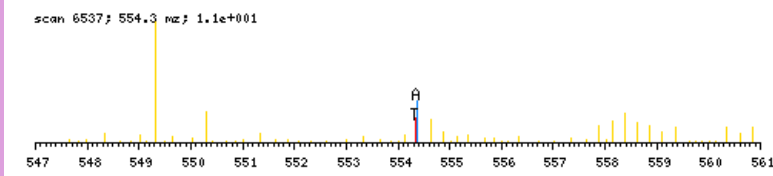

zoomed in precursor plot; T=theoretical m/z, A=acquired m/z

| b <sup>+</sup> | #  | AA | #  | y <sup>+</sup> | y <sup>2+</sup> |
|----------------|----|----|----|----------------|-----------------|
| 148.1550       | 1  | L  | 19 |                |                 |
| 277.1976       | 2  | E  | 18 | 2067.2027      | 1034.1052       |
| 348.2347       | 3  | A  | 17 | 1938.1601      | 969.5839        |
| 461.3187       | 4  | L  | 16 | 1867.1229      | 934.0654        |
| 576.3457       | 5  | D  | 15 | 1754.0389      | 877.5234        |
| 677.3934       | 6  | T  | 14 | 1639.0119      | 820.0099        |
| 790.4774       | 7  | I  | 13 | 1537.9643      | 769.4860        |
| 903.5615       | 8  | L  | 12 | 1424.8802      | 712.9440        |
| 1000.6142      | 9  | P  | 11 | 1311.7961      | 656.4020        |
| 1097.6670      | 10 | P  | 10 | 1214.7434      | 607.8756        |
| 1198.7147      | 11 | T  | 9  | 1117.6906      | 559.3492        |
| 1354.8158      | 12 | R  | 8  | 1016.6429      | 508.8254        |
| 1451.8686      | 13 | P  | 7  | 860.5418       | 430.7748        |
| 1552.9162      | 14 | T  | 6  | 763.4891       | 382.2484        |
| 1667.9432      | 15 | D  | 5  | 662.4414       | 331.7246        |
| 1830.1013      | 16 | K  | 4  | 547.4144       | 274.2111        |
| 1927.1541      | 17 | P  | 3  | 385.2563       | 193.1321        |
| 2040.2381      | 18 | L  | 2  | 288.2036       | 144.6057        |
|                | 19 | R  | 1  | 175.1195       | 88.0637         |

N-term: +35.07 K(16) : +162.16



LEALGIKEGTIPPEYR, MH+ 1842.0377, m/z 614.6841  
 L OS G26 P150811 220811-s1.04893.04893.3.dta

X-range:

-

MassTol: Y-zoom:

MassType:

AVG  MONO

Axis:

1  2

Label:

I  M  -

Ions:

a  +  2+  3+

b  +  2+  3+

c  +  2+  3+

x  +  2+  3+

y  +  2+  3+

z  +  2+  3+

hide H<sub>2</sub>O/NH<sub>3</sub>

zoom 112-122

GO

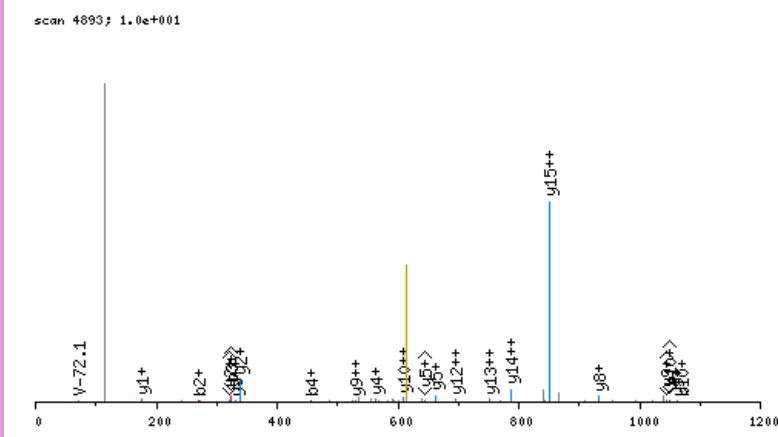

click image to zoom in; click top corners to zoom out [\[precursor±\]](#)

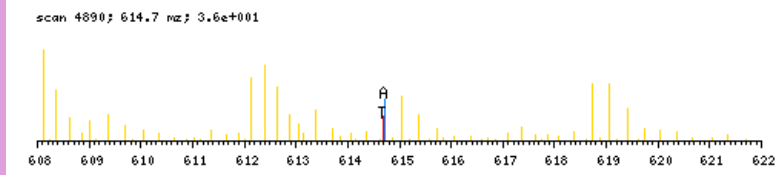

zoomed in precursor plot; T=theoretical m/z, A=acquired m/z

| b <sup>+</sup> | #  | AA # | y <sup>+</sup> | y <sup>2+</sup> |
|----------------|----|------|----------------|-----------------|
| 142.1232       | 1  | L 16 |                |                 |
| 271.1658       | 2  | E 15 | 1700.9223      | 850.9651        |
| 342.2029       | 3  | A 14 | 1571.8798      | 786.4438        |
| 455.2869       | 4  | L 13 | 1500.8426      | 750.9252        |
| 512.3084       | 5  | G 12 | 1387.7586      | 694.3832        |
| 625.3925       | 6  | I 11 | 1330.7371      | 665.8725        |
| 781.5188       | 7  | K 10 | 1217.6530      | 609.3304        |
| 910.5614       | 8  | E 9  | 1061.5267      | 531.2673        |
| 967.5828       | 9  | G 8  | 932.4842       | 466.7460        |
| 1068.6305      | 10 | T 7  | 875.4627       | 438.2353        |
| 1181.7146      | 11 | I 6  | 774.4150       | 387.7114        |
| 1278.7673      | 12 | P 5  | 661.3310       | 331.1694        |
| 1375.8201      | 13 | P 4  | 564.2782       | 282.6430        |
| 1504.8627      | 14 | E 3  | 467.2254       | 234.1166        |
| 1667.9260      | 15 | Y 2  | 338.1828       | 169.5953        |
|                | 16 | R 1  | 175.1195       | 88.0637         |

N-term:+29.04 K(7):+156.13

LECYSCVQKADDGCSPHR, MH+ 2237.9740, m/z 560.2490  
 L OS G28 P150811 220811-s1.02849.02849.4.dta

X-range:

-

MassTol: Y-zoom:

MassType:

AVG  MONO

Axis:

1  2

Label:

I  M  -

Ions:

a  +  2+  3+

b  +  2+  3+

c  +  2+  3+

x  +  2+  3+

y  +  2+  3+

z  +  2+  3+

hide H<sub>2</sub>O/NH<sub>3</sub>

zoom 112-122

GO

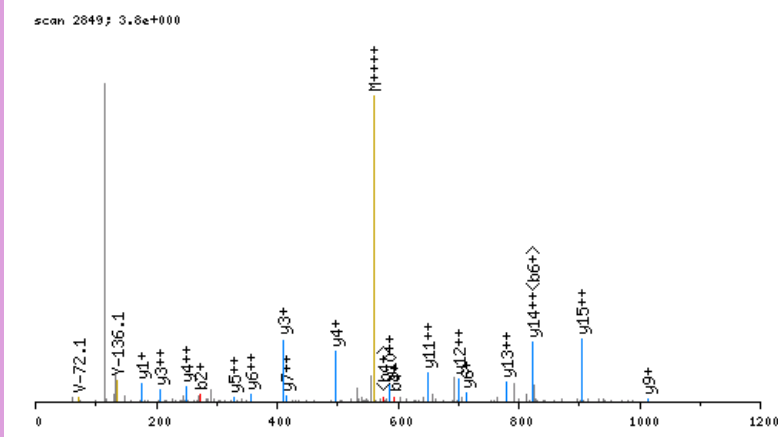

click image to zoom in; click top corners to zoom out [\[precursor±\]](#)

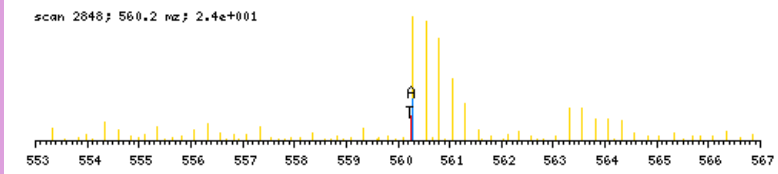

zoomed in precursor plot; T=theoretical m/z, A=acquired m/z

| b <sup>+</sup> | #  | AA # | y <sup>+</sup> | y <sup>2+</sup> |
|----------------|----|------|----------------|-----------------|
| 142.1232       | 1  | L 18 |                |                 |
| 271.1658       | 2  | E 17 | 2096.8587      | 1048.9333       |
| 431.1964       | 3  | C 16 | 1967.8161      | 984.4120        |
| 594.2597       | 4  | Y 15 | 1807.7855      | 904.3967        |
| 681.2917       | 5  | S 14 | 1644.7222      | 822.8650        |
| 841.3223       | 6  | C 13 | 1557.6902      | 779.3490        |
| 940.3907       | 7  | V 12 | 1397.6596      | 699.3337        |
| 1068.4493      | 8  | Q 11 | 1298.5911      | 649.7995        |
| 1224.5756      | 9  | K 10 | 1170.5326      | 585.7702        |
| 1295.6127      | 10 | A 9  | 1014.4063      | 507.7070        |
| 1410.6397      | 11 | D 8  | 943.3692       | 472.1885        |
| 1525.6666      | 12 | D 7  | 828.3422       | 414.6750        |
| 1582.6881      | 13 | G 6  | 713.3153       | 357.1615        |
| 1742.7187      | 14 | C 5  | 656.2938       | 328.6508        |
| 1829.7507      | 15 | S 4  | 496.2632       | 248.6355        |
| 1926.8035      | 16 | P 3  | 409.2312       | 205.1195        |
| 2063.8624      | 17 | H 2  | 312.1784       | 156.5931        |
|                | 18 | R 1  | 175.1195       | 88.0637         |

N-term: +29.04 C(3): +160.03  
 C(6): +160.03 K(9): +156.13  
 C(14): +160.03

LEDLVFPSEIVGKR, MH+ 1657.9529, m/z 553.3225  
 L OS G26 P150811 220811-s1.06151.06151.3.dta

X-range:

-

MassTol: Y-zoom:

MassType:

AVG  MONO

Axis:

1  2

Label:

I  M  -

Ions:

a  +  2+  3+

b  +  2+  3+

c  +  2+  3+

x  +  2+  3+

y  +  2+  3+

z  +  2+  3+

hide H<sub>2</sub>O/NH<sub>3</sub>

zoom 112-122

GO

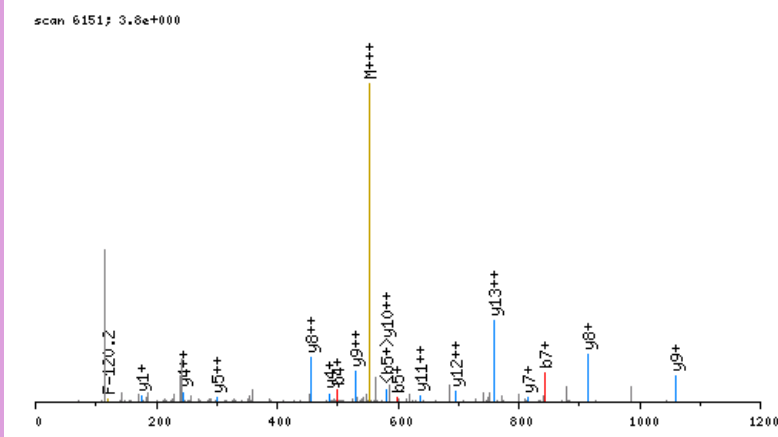

click image to zoom in; click top corners to zoom out [\[precursor±\]](#)

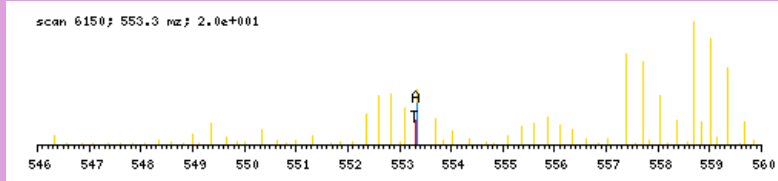

zoomed in precursor plot; T=theoretical m/z, A=acquired m/z

| b <sup>+</sup> | #  | AA # | y <sup>+</sup> | y <sup>2+</sup> |
|----------------|----|------|----------------|-----------------|
| 142.1232       | 1  | L 14 |                |                 |
| 271.1658       | 2  | E 13 | 1516.8376      | 758.9227        |
| 386.1927       | 3  | D 12 | 1387.7950      | 694.4014        |
| 499.2768       | 4  | L 11 | 1272.7680      | 636.8879        |
| 598.3452       | 5  | V 10 | 1159.6840      | 580.3459        |
| 745.4136       | 6  | F 9  | 1060.6155      | 530.8117        |
| 842.4664       | 7  | P 8  | 913.5471       | 457.2775        |
| 929.4984       | 8  | S 7  | 816.4944       | 408.7511        |
| 1058.5410      | 9  | E 6  | 729.4623       | 365.2351        |
| 1171.6250      | 10 | I 5  | 600.4197       | 300.7138        |
| 1270.6935      | 11 | V 4  | 487.3357       | 244.1718        |
| 1327.7149      | 12 | G 3  | 388.2673       | 194.6375        |
| 1483.8412      | 13 | K 2  | 331.2458       | 166.1268        |
|                | 14 | R 1  | 175.1195       | 88.0637         |

N-term:+29.04 K(13):+156.13

LEELLTQCDR, MH+ 1411.7314, m/z 706.3694  
 H OS G25 P150811 220811-s1.04645.04645.2.dta

X-range:

-

MassTol: Y-zoom:

MassType:

AVG  MONO

Axis:

1  2

Label:

I  M  -

Ions:

a  +  2+  3+

b  +  2+  3+

c  +  2+  3+

x  +  2+  3+

y  +  2+  3+

z  +  2+  3+

hide H<sub>2</sub>O/NH<sub>3</sub>

zoom 112-122

GO

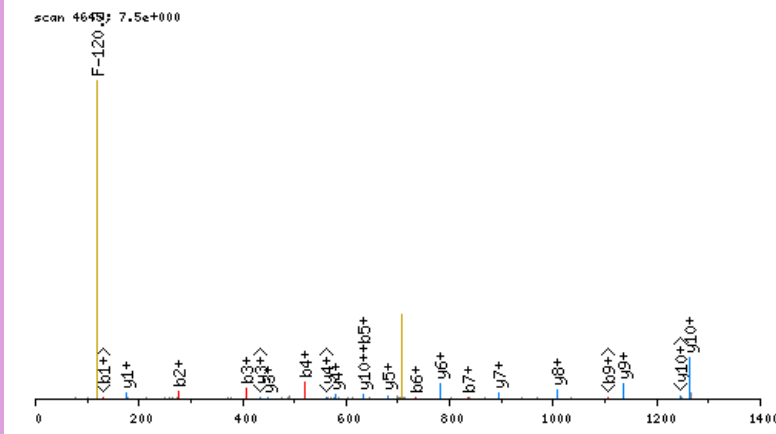

click image to zoom in; click top corners to zoom out [\[precursor±\]](#)

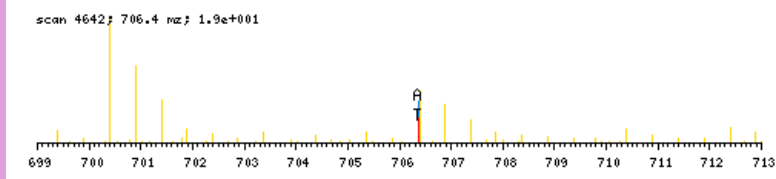

zoomed in precursor plot; T=theoretical m/z, A=acquired m/z

| b <sup>+</sup> | #  | AA # | y <sup>+</sup> | y <sup>2+</sup> |
|----------------|----|------|----------------|-----------------|
| 148.1550       | 1  | L 11 |                |                 |
| 277.1976       | 2  | E 10 | 1264.5843      | 632.7961        |
| 406.2402       | 3  | E 9  | 1135.5417      | 568.2748        |
| 519.3242       | 4  | L 8  | 1006.4991      | 503.7535        |
| 632.4083       | 5  | L 7  | 893.4150       | 447.2114        |
| 733.4560       | 6  | T 6  | 780.3310       | 390.6694        |
| 834.5036       | 7  | T 5  | 679.2833       | 340.1456        |
| 962.5622       | 8  | Q 4  | 578.2356       | 289.6217        |
| 1122.5928      | 9  | C 3  | 450.1770       | 225.5924        |
| 1237.6198      | 10 | D 2  | 290.1464       | 145.5771        |
|                | 11 | R 1  | 175.1195       | 88.0637         |

N-term:+35.07 C(9):+160.03

LEEVAVNFAKGLADR, MH+ 1700.0019, m/z 567.3388  
 H OS G26 P150811 220811-s1.05691.05691.3.dta

X-range:

-

MassTol: Y-zoom:

MassType:

AVG  MONO

Axis:

1  2

Label:

I  M  -

Ions:

a  +  2+  3+

b  +  2+  3+

c  +  2+  3+

x  +  2+  3+

y  +  2+  3+

z  +  2+  3+

hide H<sub>2</sub>O/NH<sub>3</sub>

zoom 112-122

GO

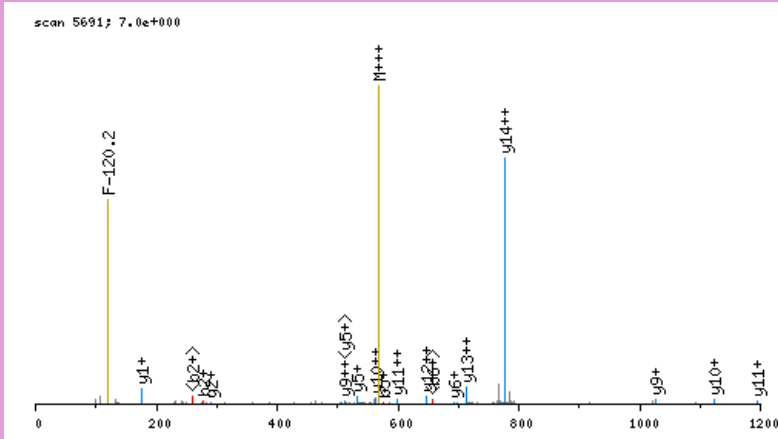

click image to zoom in; click top corners to zoom out [\[precursor±\]](#)

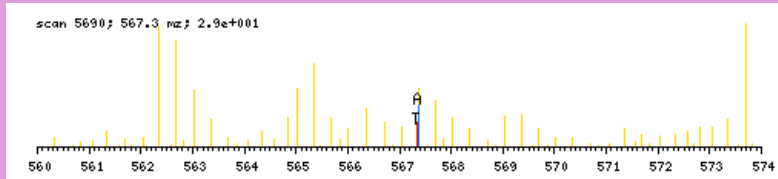

zoomed in precursor plot; T=theoretical m/z, A=acquired m/z

| b <sup>+</sup> | #  | AA # | y <sup>+</sup> | y <sup>2+</sup> |
|----------------|----|------|----------------|-----------------|
| 148.1550       | 1  | L 15 |                |                 |
| 277.1976       | 2  | E 14 | 1552.8548      | 776.9313        |
| 406.2402       | 3  | E 13 | 1423.8122      | 712.4100        |
| 505.3086       | 4  | V 12 | 1294.7696      | 647.8887        |
| 576.3457       | 5  | A 11 | 1195.7012      | 598.3545        |
| 675.4141       | 6  | V 10 | 1124.6641      | 562.8359        |
| 789.4570       | 7  | N 9  | 1025.5956      | 513.3017        |
| 936.5254       | 8  | F 8  | 911.5527       | 456.2803        |
| 1007.5625      | 9  | A 7  | 764.4843       | 382.7461        |
| 1169.7206      | 10 | K 6  | 693.4472       | 347.2275        |
| 1226.7421      | 11 | G 5  | 531.2891       | 266.1485        |
| 1339.8262      | 12 | L 4  | 474.2676       | 237.6377        |
| 1410.8633      | 13 | A 3  | 361.1836       | 181.0957        |
| 1525.8902      | 14 | D 2  | 290.1464       | 145.5771        |
|                | 15 | R 1  | 175.1195       | 88.0637         |

N-term:+35.07 K(10):+162.16

LEIDVSNPQTVGVGR, MH+ 1617.9024, m/z 539.9723  
 H OS G24 P150811 220811-s1.03866.03866.3.dta

scan 3866; 6.4e-001

X-range:

-

MassTol: Y-zoom:

MassType:

AVG  MONO

Axis:

1  2

Label:

I  M  -

Ions:

a  +  2+  3+

b  +  2+  3+

c  +  2+  3+

x  +  2+  3+

y  +  2+  3+

z  +  2+  3+

hide H<sub>2</sub>O/NH<sub>3</sub>

zoom 112-122

GO

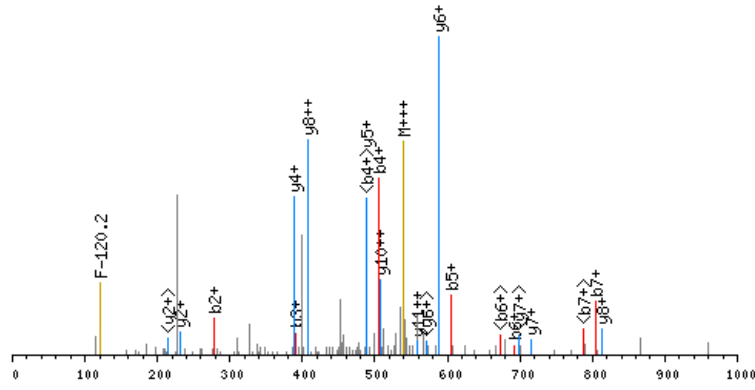

click image to zoom in; click top corners to zoom out [\[precursor±\]](#)

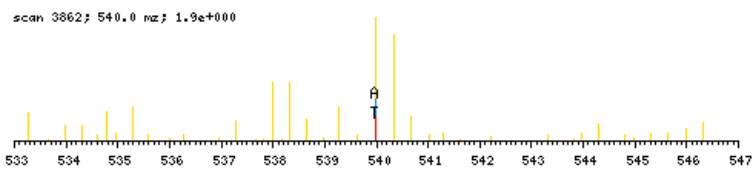

zoomed in precursor plot; T=theoretical m/z, A=acquired m/z

| b <sup>+</sup> | #  | AA # | y <sup>+</sup> | y <sup>2+</sup> |
|----------------|----|------|----------------|-----------------|
| 148.1550       | 1  | L 15 |                |                 |
| 277.1976       | 2  | E 14 | 1470.7552      | 735.8815        |
| 390.2816       | 3  | I 13 | 1341.7127      | 671.3602        |
| 505.3086       | 4  | D 12 | 1228.6286      | 614.8182        |
| 604.3770       | 5  | V 11 | 1113.6016      | 557.3047        |
| 691.4090       | 6  | S 10 | 1014.5332      | 507.7705        |
| 805.4519       | 7  | N 9  | 927.5012       | 464.2545        |
| 902.5047       | 8  | P 8  | 813.4583       | 407.2331        |
| 1030.5633      | 9  | Q 7  | 716.4055       | 358.7067        |
| 1131.6110      | 10 | T 6  | 588.3469       | 294.6774        |
| 1230.6794      | 11 | V 5  | 487.2993       | 244.1535        |
| 1287.7008      | 12 | G 4  | 388.2308       | 194.6193        |
| 1386.7692      | 13 | V 3  | 331.2094       | 166.1086        |
| 1443.7907      | 14 | G 2  | 232.1410       | 116.5744        |
|                | 15 | R 1  | 175.1195       | 88.0637         |

N-term:+35.07

LEINPETGAIFTR, MH+ 1488.8062, m/z 496.9402  
 L OS G25 P150811 220811-s1.07203.07203.3.dta

scan 7203; 2.7e+000

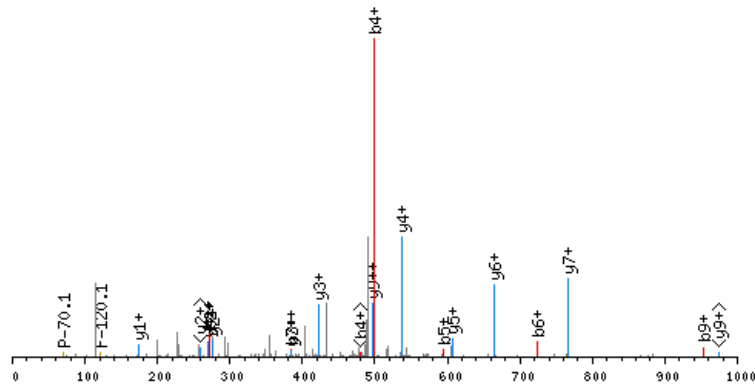

click image to zoom in; click top corners to zoom out [\[precursor±\]](#)

scan 7202; 496.9 m/z; 7.3e+001

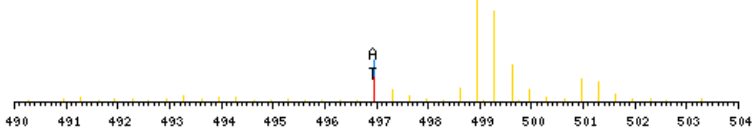

zoomed in precursor plot; T=theoretical m/z, A=acquired m/z

X-range:

-

MassTol: Y-zoom:

MassType:

AVG  MONO

Axis:

1  2

Label:

I  M  -

Ions:

a  +  2+  3+

b  +  2+  3+

c  +  2+  3+

x  +  2+  3+

y  +  2+  3+

z  +  2+  3+

hide H<sub>2</sub>O/NH<sub>3</sub>

zoom 112-122

GO

| b <sup>+</sup> | #  | AA | #  | y <sup>+</sup> | y <sup>2+</sup> |
|----------------|----|----|----|----------------|-----------------|
| 142.1232       | 1  | L  | 13 |                |                 |
| 271.1658       | 2  | E  | 12 | 1347.6909      | 674.3493        |
| 384.2498       | 3  | I  | 11 | 1218.6483      | 609.8280        |
| 498.2927       | 4  | N  | 10 | 1105.5642      | 553.2860        |
| 595.3455       | 5  | P  | 9  | 991.5213       | 496.2645        |
| 724.3881       | 6  | E  | 8  | 894.4685       | 447.7382        |
| 825.4358       | 7  | T  | 7  | 765.4259       | 383.2169        |
| 882.4572       | 8  | G  | 6  | 664.3782       | 332.6930        |
| 953.4944       | 9  | A  | 5  | 607.3568       | 304.1823        |
| 1066.5784      | 10 | I  | 4  | 536.3197       | 268.6637        |
| 1213.6468      | 11 | F  | 3  | 423.2356       | 212.1217        |
| 1314.6945      | 12 | T  | 2  | 276.1672       | 138.5875        |
|                | 13 | R  | 1  | 175.1195       | 88.0637         |

N-term:+29.04

LEPHLDPEAAEQIR, MH+ 1651.8867, m/z 551.3004  
 H OS G26 P150811 220811-s1.04273.04273.3.dta

X-range:

-

MassTol: Y-zoom:

MassType:

AVG  MONO

Axis:

1  2

Label:

I  M  -

Ions:

a  +  2+  3+

b  +  2+  3+

c  +  2+  3+

x  +  2+  3+

y  +  2+  3+

z  +  2+  3+

hide H<sub>2</sub>O/NH<sub>3</sub>

zoom 112-122

GO

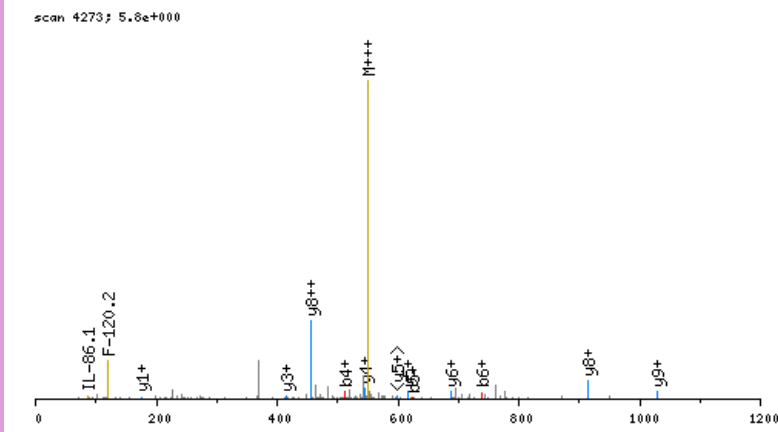

click image to zoom in; click top corners to zoom out [\[precursor±\]](#)

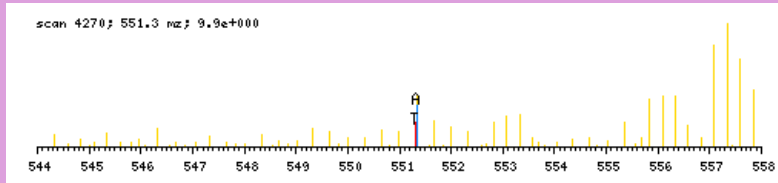

zoomed in precursor plot; T=theoretical m/z, A=acquired m/z

| b <sup>+</sup> | #  | AA # | y <sup>+</sup> | y <sup>2+</sup> |
|----------------|----|------|----------------|-----------------|
| 148.1550       | 1  | L 14 |                |                 |
| 277.1976       | 2  | E 13 | 1504.7396      | 752.8737        |
| 374.2503       | 3  | P 12 | 1375.6970      | 688.3524        |
| 511.3092       | 4  | H 11 | 1278.6442      | 639.8260        |
| 624.3933       | 5  | L 10 | 1141.5853      | 571.2966        |
| 739.4202       | 6  | D 9  | 1028.5013      | 514.7545        |
| 836.4730       | 7  | P 8  | 913.4743       | 457.2411        |
| 965.5156       | 8  | E 7  | 816.4216       | 408.7147        |
| 1036.5527      | 9  | A 6  | 687.3790       | 344.1934        |
| 1107.5898      | 10 | A 5  | 616.3418       | 308.6748        |
| 1236.6324      | 11 | E 4  | 545.3047       | 273.1563        |
| 1364.6910      | 12 | Q 3  | 416.2621       | 208.6350        |
| 1477.7751      | 13 | I 2  | 288.2036       | 144.6057        |
|                | 14 | R 1  | 175.1195       | 88.0637         |

N-term:+35.07



LETSSSPAEPAPGACR, MH+ 1878.9079, m/z 626.9741  
 H OS G24 P150811 220811-s1.02547.02547.3.dta

scan 2547; 6.1e-001

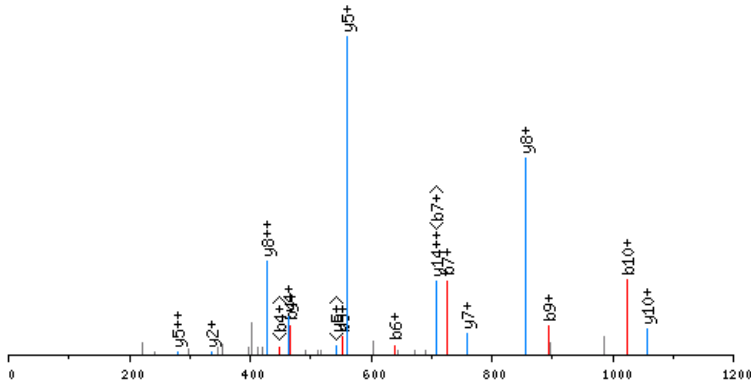

click image to zoom in; click top corners to zoom out [\[precursor±\]](#)

scan 2546; 627.0 m/z; 8.6e-001

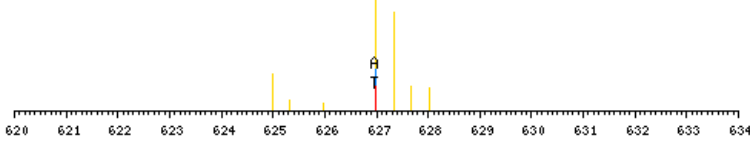

zoomed in precursor plot; T=theoretical m/z, A=acquired m/z

X-range:

-

MassTol: Y-zoom:

MassType:

AVG  MONO

Axis:

1  2

Label:

I  M  -

Ions:

a  +  2+  3+

b  +  2+  3+

c  +  2+  3+

x  +  2+  3+

y  +  2+  3+

z  +  2+  3+

hide H<sub>2</sub>O/NH<sub>3</sub>

zoom 112-122

GO

| b <sup>+</sup> | #  | AA # | y <sup>+</sup> | y <sup>2+</sup> |
|----------------|----|------|----------------|-----------------|
| 148.1550       | 1  | L 18 |                |                 |
| 277.1976       | 2  | E 17 | 1731.7608      | 866.3843        |
| 378.2452       | 3  | T 16 | 1602.7182      | 801.8630        |
| 465.2773       | 4  | S 15 | 1501.6705      | 751.3392        |
| 552.3093       | 5  | S 14 | 1414.6385      | 707.8231        |
| 639.3413       | 6  | S 13 | 1327.6064      | 664.3071        |
| 726.3733       | 7  | S 12 | 1240.5744      | 620.7911        |
| 823.4261       | 8  | P 11 | 1153.5424      | 577.2751        |
| 894.4632       | 9  | A 10 | 1056.4896      | 528.7487        |
| 1023.5058      | 10 | E 9  | 985.4525       | 493.2302        |
| 1120.5586      | 11 | P 8  | 856.4099       | 428.7089        |
| 1191.5957      | 12 | A 7  | 759.3571       | 380.1825        |
| 1319.6543      | 13 | Q 6  | 688.3200       | 344.6639        |
| 1416.7070      | 14 | P 5  | 560.2614       | 280.6346        |
| 1473.7285      | 15 | G 4  | 463.2087       | 232.1083        |
| 1544.7656      | 16 | A 3  | 406.1872       | 203.5975        |
| 1704.7962      | 17 | C 2  | 335.1501       | 168.0790        |
|                | 18 | R 1  | 175.1195       | 88.0637         |

N-term:+35.07 C(17):+160.03

LFGDKLCAIPNLR, MH+ 1572.8936, m/z 524.9694  
 L OS G27 P150811 220811-s1.06496.06496.3.dta

scan 6496; 6.9e+000

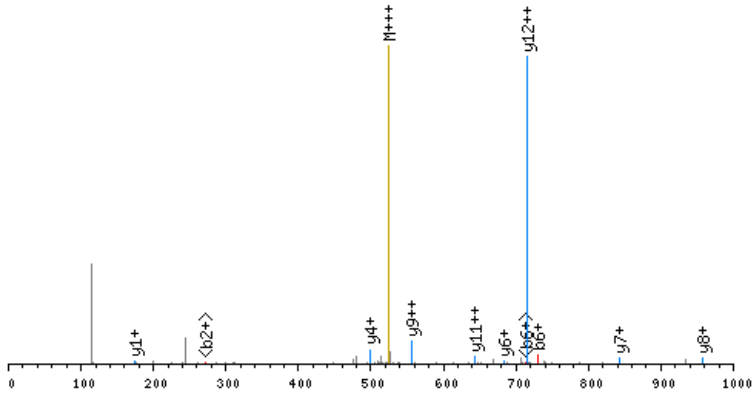

click image to zoom in; click top corners to zoom out [\[precursor±\]](#)

scan 6492; 525.0 Hz; 9.5e+000

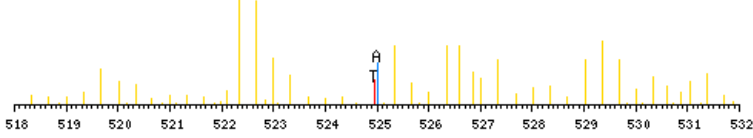

zoomed in precursor plot; T=theoretical m/z, A=acquired m/z

X-range:

-

MassTol: Y-zoom:

MassType:

AVG  MONO

Axis:

1  2

Label:

I  M  -

Ions:

a  +  2+  3+

b  +  2+  3+

c  +  2+  3+

x  +  2+  3+

y  +  2+  3+

z  +  2+  3+

hide H<sub>2</sub>O/NH<sub>3</sub>

zoom 112-122

GO

| b <sup>+</sup> | #  | AA # | y <sup>+</sup> | y <sup>2+</sup> |
|----------------|----|------|----------------|-----------------|
| 142.1232       | 1  | L    | 13             |                 |
| 289.1916       | 2  | F    | 12             | 1431.7782       |
| 346.2130       | 3  | G    | 11             | 1284.7098       |
| 461.2400       | 4  | D    | 10             | 1227.6883       |
| 617.3663       | 5  | K    | 9              | 1112.6614       |
| 730.4503       | 6  | L    | 8              | 956.5351        |
| 890.4809       | 7  | C    | 7              | 843.4510        |
| 961.5181       | 8  | A    | 6              | 683.4204        |
| 1074.6021      | 9  | I    | 5              | 612.3833        |
| 1171.6549      | 10 | P    | 4              | 499.2993        |
| 1285.6978      | 11 | N    | 3              | 402.2465        |
| 1398.7819      | 12 | L    | 2              | 288.2036        |
|                | 13 | R    | 1              | 175.1195        |

N-term:+29.04 K(5):+156.13  
 C(7):+160.03

LGDFAIISLYR, MH+ 1188.6841, m/z 594.8457  
 H OS G25 P150811 220811-s1.07649.07649.2.dta

X-range:

-

MassTol: Y-zoom:

MassType:

AVG  MONO

Axis:

1  2

Label:

I  M  -

Ions:

a  +  2+  3+

b  +  2+  3+

c  +  2+  3+

x  +  2+  3+

y  +  2+  3+

z  +  2+  3+

hide H<sub>2</sub>O/NH<sub>3</sub>

zoom 112-122

GO

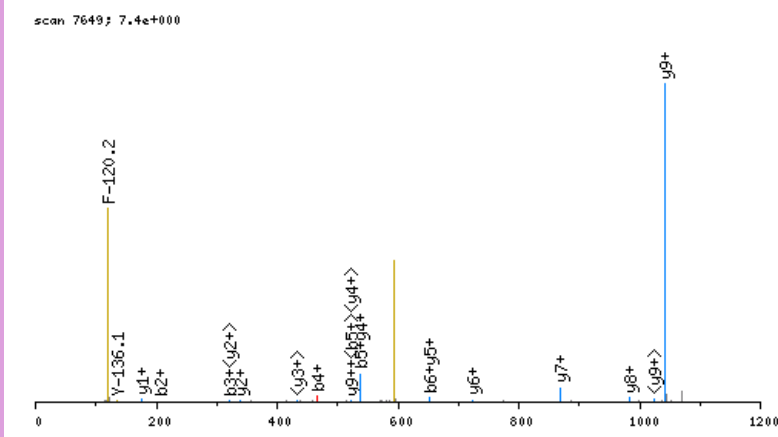

click image to zoom in; click top corners to zoom out [\[precursor±\]](#)

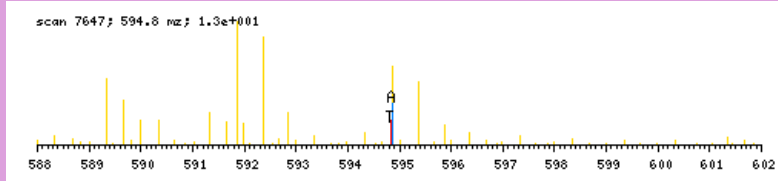

zoomed in precursor plot; T=theoretical m/z, A=acquired m/z

| b <sup>+</sup> | #  | AA # | y <sup>+</sup> | y <sup>2+</sup>    |
|----------------|----|------|----------------|--------------------|
| 148.1550       | 1  | L    | 10             |                    |
| 205.1764       | 2  | G    | 9              | 1041.5369 521.2724 |
| 320.2034       | 3  | D    | 8              | 984.5155 492.7616  |
| 467.2718       | 4  | F    | 7              | 869.4885 435.2482  |
| 538.3089       | 5  | A    | 6              | 722.4201 361.7140  |
| 651.3930       | 6  | I    | 5              | 651.3830 326.1954  |
| 738.4250       | 7  | S    | 4              | 538.2989 269.6534  |
| 851.5091       | 8  | L    | 3              | 451.2669 226.1374  |
| 1014.5724      | 9  | Y    | 2              | 338.1828 169.5953  |
|                | 10 | R    | 1              | 175.1195 88.0637   |

N-term:+35.07

LGEKFDETTADGR, MH+ 1494.7440, m/z 498.9195  
 L OS G27 P150811 220811-s1.03138.03138.3.dta

X-range:

-

MassTol: Y-zoom:

MassType:

AVG  MONO

Axis:

1  2

Label:

I  M  -

Ions:

a  +  2+  3+

b  +  2+  3+

c  +  2+  3+

x  +  2+  3+

y  +  2+  3+

z  +  2+  3+

hide H<sub>2</sub>O/NH<sub>3</sub>

zoom 112-122

GO

scan 3138; 1.2e+001

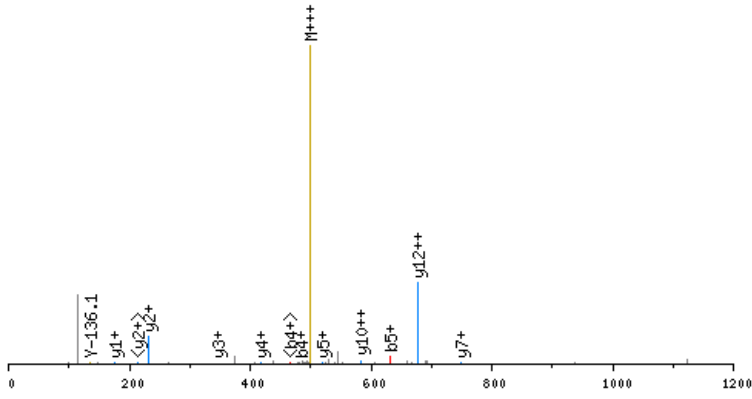

click image to zoom in; click top corners to zoom out [\[precursor±\]](#)

scan 3137; 498.9 m/z; 5.4e+001

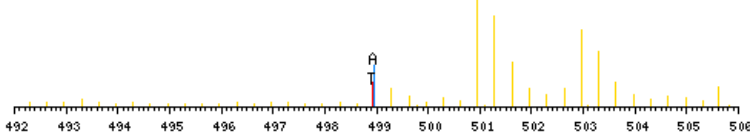

zoomed in precursor plot; T=theoretical m/z, A=acquired m/z

| b <sup>+</sup> | #  | AA # | y <sup>+</sup> | y <sup>2+</sup> |
|----------------|----|------|----------------|-----------------|
| 142.1232       | 1  | L 13 |                |                 |
| 199.1446       | 2  | G 12 | 1353.6287      | 677.3183        |
| 328.1872       | 3  | E 11 | 1296.6072      | 648.8075        |
| 484.3135       | 4  | K 10 | 1167.5646      | 584.2862        |
| 631.3819       | 5  | F 9  | 1011.4383      | 506.2231        |
| 746.4089       | 6  | D 8  | 864.3699       | 432.6889        |
| 875.4515       | 7  | E 7  | 749.3430       | 375.1754        |
| 976.4991       | 8  | T 6  | 620.3004       | 310.6541        |
| 1077.5468      | 9  | T 5  | 519.2527       | 260.1303        |
| 1148.5839      | 10 | A 4  | 418.2050       | 209.6064        |
| 1263.6109      | 11 | D 3  | 347.1679       | 174.0879        |
| 1320.6323      | 12 | G 2  | 232.1410       | 116.5744        |
|                | 13 | R 1  | 175.1195       | 88.0637         |

N-term:+29.04 K(4):+156.13

LGTLDNPSSSLDETAYER, MH+ 1914.9509, m/z 638.9885  
 H OS G24 P150811 220811-s1.03786.03786.3.dta

X-range:

-

MassTol: Y-zoom:

MassType:

AVG  MONO

Axis:

1  2

Label:

I  M  -

Ions:

a  +  2+  3+

b  +  2+  3+

c  +  2+  3+

x  +  2+  3+

y  +  2+  3+

z  +  2+  3+

hide H<sub>2</sub>O/NH<sub>3</sub>

zoom 112-122

GO

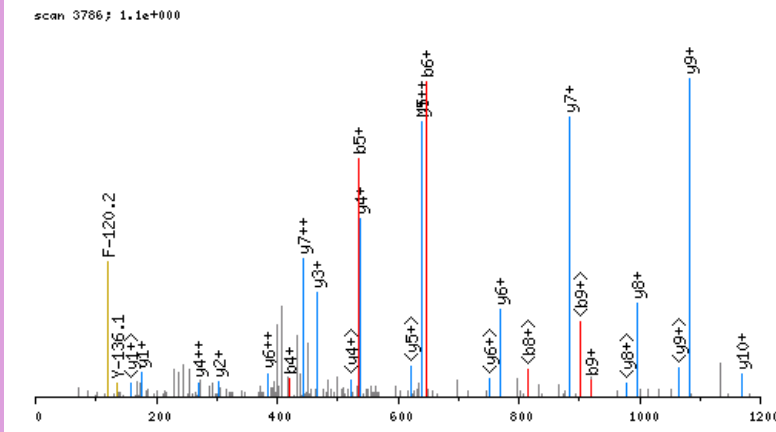

click image to zoom in; click top corners to zoom out [\[precursor±\]](#)

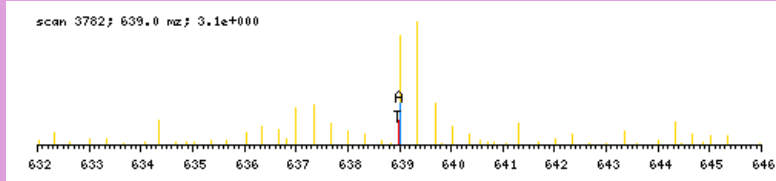

zoomed in precursor plot; T=theoretical m/z, A=acquired m/z

| b <sup>+</sup> | #  | AA | #  | y <sup>+</sup> | y <sup>2+</sup> |
|----------------|----|----|----|----------------|-----------------|
| 148.1550       | 1  | L  | 17 |                |                 |
| 205.1764       | 2  | G  | 16 | 1767.8037      | 884.4058        |
| 306.2241       | 3  | T  | 15 | 1710.7822      | 855.8950        |
| 419.3082       | 4  | L  | 14 | 1609.7346      | 805.3712        |
| 534.3351       | 5  | D  | 13 | 1496.6505      | 748.8292        |
| 648.3780       | 6  | N  | 12 | 1381.6236      | 691.3157        |
| 745.4308       | 7  | P  | 11 | 1267.5806      | 634.2942        |
| 832.4628       | 8  | S  | 10 | 1170.5279      | 585.7678        |
| 919.4949       | 9  | S  | 9  | 1083.4958      | 542.2518        |
| 1032.5789      | 10 | L  | 8  | 996.4638       | 498.7358        |
| 1147.6059      | 11 | D  | 7  | 883.3798       | 442.1938        |
| 1276.6485      | 12 | E  | 6  | 768.3528       | 384.6803        |
| 1377.6961      | 13 | T  | 5  | 639.3102       | 320.1590        |
| 1448.7333      | 14 | A  | 4  | 538.2625       | 269.6352        |
| 1611.7966      | 15 | Y  | 3  | 467.2254       | 234.1166        |
| 1740.8392      | 16 | E  | 2  | 304.1621       | 152.5850        |
|                | 17 | R  | 1  | 175.1195       | 88.0637         |

N-term:+35.07

LGVPKTHLELKRLIR, MH+ 1875.3120, m/z 469.5835  
 H OS G28 P150811 220811-s1.05495.05495.4.dta

X-range:

-

MassTol: Y-zoom:

MassType:

AVG  MONO

Axis:

1  2

Label:

I  M  -

Ions:

a  +  2+  3+

b  +  2+  3+

c  +  2+  3+

x  +  2+  3+

y  +  2+  3+

z  +  2+  3+

hide H<sub>2</sub>O/NH<sub>3</sub>

zoom 112-122

GO

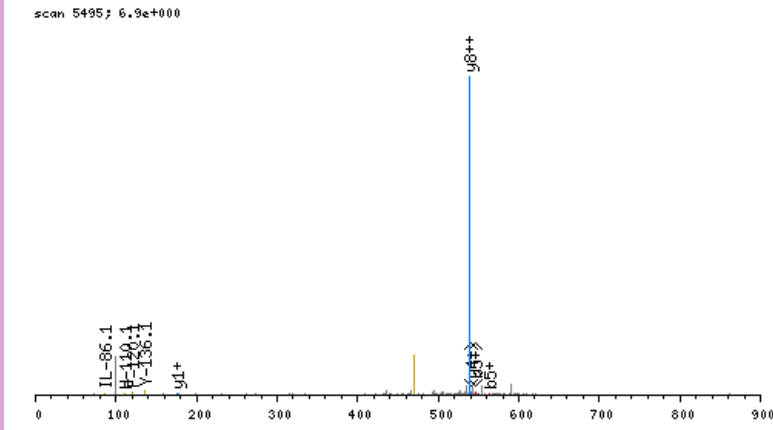

click image to zoom in; click top corners to zoom out [precursor±]

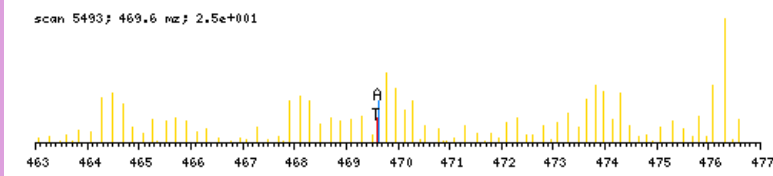

zoomed in precursor plot; T=theoretical m/z, A=acquired m/z

| b <sup>+</sup> | #  | AA | #  | y <sup>+</sup> | y <sup>2+</sup> |
|----------------|----|----|----|----------------|-----------------|
| 148.1550       | 1  | L  | 15 |                |                 |
| 205.1764       | 2  | G  | 14 | 1728.1649      | 864.5864        |
| 304.2448       | 3  | V  | 13 | 1671.1434      | 836.0756        |
| 401.2976       | 4  | P  | 12 | 1572.0750      | 786.5414        |
| 563.4557       | 5  | K  | 11 | 1475.0223      | 738.0150        |
| 664.5034       | 6  | T  | 10 | 1312.8642      | 656.9360        |
| 801.5623       | 7  | H  | 9  | 1211.8165      | 606.4121        |
| 914.6464       | 8  | L  | 8  | 1074.7576      | 537.8827        |
| 1043.6890      | 9  | E  | 7  | 961.6735       | 481.3407        |
| 1156.7730      | 10 | L  | 6  | 832.6309       | 416.8194        |
| 1318.9311      | 11 | K  | 5  | 719.5468       | 360.2773        |
| 1475.0322      | 12 | R  | 4  | 557.3887       | 279.1983        |
| 1588.1163      | 13 | L  | 3  | 401.2876       | 201.1477        |
| 1701.2004      | 14 | I  | 2  | 288.2036       | 144.6057        |
|                | 15 | R  | 1  | 175.1195       | 88.0637         |

N-term:+35.07 K(5):+162.16  
 K(11):+162.16

LHLGVTPSVLR, MH+ 1219.7526, m/z 407.2557  
 L OS G27 P150811 220811-s1.05553.05553.3.dta

X-range:

-

MassTol: Y-zoom:

MassType:

AVG  MONO

Axis:

1  2

Label:

I  M  -

Ions:

a  +  2+  3+

b  +  2+  3+

c  +  2+  3+

x  +  2+  3+

y  +  2+  3+

z  +  2+  3+

hide H<sub>2</sub>O/NH<sub>3</sub>

zoom 112-122

GO

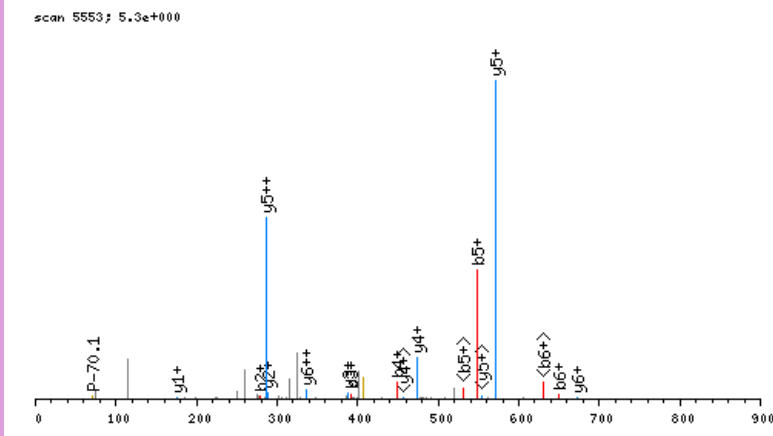

click image to zoom in; click top corners to zoom out [\[precursor±\]](#)

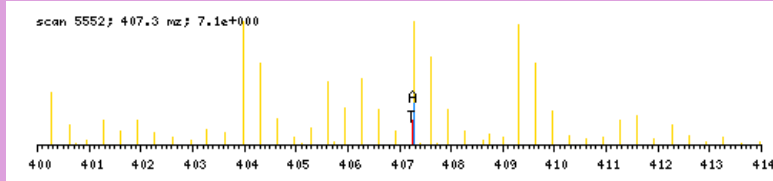

zoomed in precursor plot; T=theoretical m/z, A=acquired m/z

| b <sup>+</sup> | #  | AA # | y <sup>+</sup> | y <sup>2+</sup> |
|----------------|----|------|----------------|-----------------|
| 142.1232       | 1  | L 11 |                |                 |
| 279.1821       | 2  | H 10 | 1078.6373      | 539.8226        |
| 392.2661       | 3  | L 9  | 941.5784       | 471.2931        |
| 449.2876       | 4  | G 8  | 828.4943       | 414.7511        |
| 548.3560       | 5  | V 7  | 771.4729       | 386.2403        |
| 649.4037       | 6  | T 6  | 672.4044       | 336.7061        |
| 746.4565       | 7  | P 5  | 571.3568       | 286.1823        |
| 833.4885       | 8  | S 4  | 474.3040       | 237.6559        |
| 932.5569       | 9  | V 3  | 387.2720       | 194.1399        |
| 1045.6410      | 10 | L 2  | 288.2036       | 144.6057        |
|                | 11 | R 1  | 175.1195       | 88.0637         |

N-term:+29.04

LHTLFGDKLCAIPNLR, MH+ 1924.0842, m/z 481.7765  
 L OS G28 P150811 220811-s1.08544.08544.4.dta

X-range:

-

MassTol: Y-zoom:

MassType:

AVG  MONO

Axis:

1  2

Label:

I  M  -

Ions:

a  +  2+  3+

b  +  2+  3+

c  +  2+  3+

x  +  2+  3+

y  +  2+  3+

z  +  2+  3+

hide H<sub>2</sub>O/NH<sub>3</sub>

zoom 112-122

GO

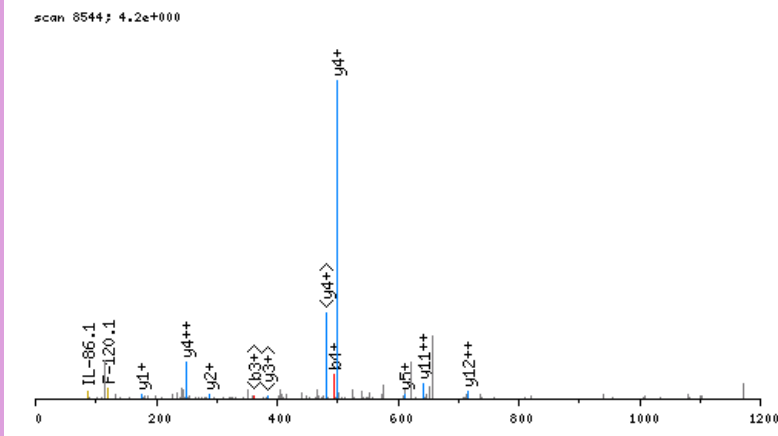

click image to zoom in; click top corners to zoom out [\[precursor±\]](#)

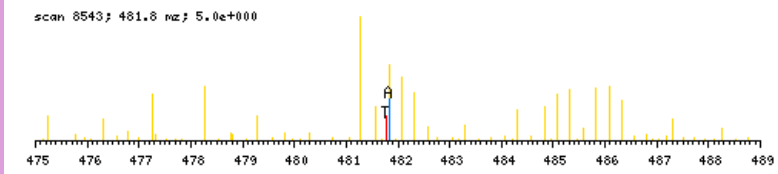

zoomed in precursor plot; T=theoretical m/z, A=acquired m/z

| b <sup>+</sup> | #  | AA | #  | y <sup>+</sup> | y <sup>2+</sup> |
|----------------|----|----|----|----------------|-----------------|
| 142.1232       | 1  | L  | 16 |                |                 |
| 279.1821       | 2  | H  | 15 | 1782.9689      | 891.9883        |
| 380.2298       | 3  | T  | 14 | 1645.9100      | 823.4589        |
| 493.3138       | 4  | L  | 13 | 1544.8623      | 772.9351        |
| 640.3822       | 5  | F  | 12 | 1431.7782      | 716.3930        |
| 697.4037       | 6  | G  | 11 | 1284.7098      | 642.8588        |
| 812.4306       | 7  | D  | 10 | 1227.6883      | 614.3481        |
| 968.5569       | 8  | K  | 9  | 1112.6614      | 556.8346        |
| 1081.6410      | 9  | L  | 8  | 956.5351       | 478.7715        |
| 1241.6716      | 10 | C  | 7  | 843.4510       | 422.2294        |
| 1312.7087      | 11 | A  | 6  | 683.4204       | 342.2141        |
| 1425.7928      | 12 | I  | 5  | 612.3833       | 306.6956        |
| 1522.8455      | 13 | P  | 4  | 499.2993       | 250.1535        |
| 1636.8885      | 14 | N  | 3  | 402.2465       | 201.6272        |
| 1749.9725      | 15 | L  | 2  | 288.2036       | 144.6057        |
|                | 16 | R  | 1  | 175.1195       | 88.0637         |

N-term:+29.04 K(8):+156.13  
 C(10):+160.03



LHTVYQSVELPETHQLR, MH+ 2215.1757, m/z 554.5494  
 H OS G28 P150811 220811-s1.06574.06574.4.dta

X-range:

-

MassTol: Y-zoom:

MassType:

AVG  MONO

Axis:

1  2

Label:

I  M  -

Ions:

a  +  2+  3+

b  +  2+  3+

c  +  2+  3+

x  +  2+  3+

y  +  2+  3+

z  +  2+  3+

hide H<sub>2</sub>O/NH<sub>3</sub>

zoom 112-122

GO

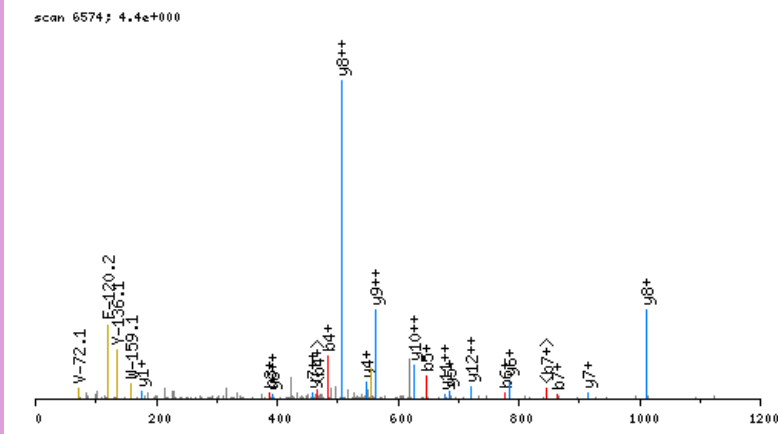

click image to zoom in; click top corners to zoom out [\[precursor±\]](#)

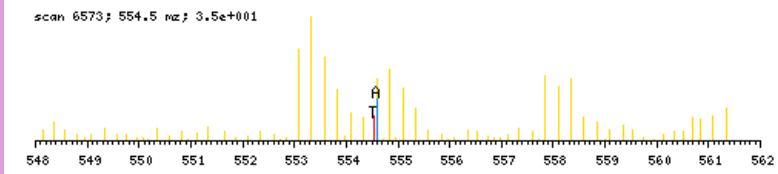

zoomed in precursor plot; T=theoretical m/z, A=acquired m/z

| b <sup>+</sup> | #  | AA | #  | y <sup>+</sup> | y <sup>2+</sup> |
|----------------|----|----|----|----------------|-----------------|
| 148.1550       | 1  | L  | 18 |                |                 |
| 285.2139       | 2  | H  | 17 | 2068.0286      | 1034.5182       |
| 386.2616       | 3  | T  | 16 | 1930.9697      | 965.9887        |
| 485.3300       | 4  | V  | 15 | 1829.9220      | 915.4649        |
| 648.3933       | 5  | Y  | 14 | 1730.8536      | 865.9307        |
| 776.4519       | 6  | Q  | 13 | 1567.7903      | 784.3990        |
| 863.4839       | 7  | S  | 12 | 1439.7317      | 720.3697        |
| 962.5523       | 8  | V  | 11 | 1352.6996      | 676.8537        |
| 1091.5949      | 9  | E  | 10 | 1253.6312      | 627.3195        |
| 1204.6790      | 10 | L  | 9  | 1124.5886      | 562.7982        |
| 1301.7317      | 11 | P  | 8  | 1011.5046      | 506.2562        |
| 1430.7743      | 12 | E  | 7  | 914.4518       | 457.7298        |
| 1531.8220      | 13 | T  | 6  | 785.4092       | 393.2085        |
| 1668.8809      | 14 | H  | 5  | 684.3615       | 342.6847        |
| 1796.9395      | 15 | Q  | 4  | 547.3026       | 274.1552        |
| 1927.9800      | 16 | M  | 3  | 419.2440       | 210.1259        |
| 2041.0640      | 17 | L  | 2  | 288.2036       | 144.6057        |
|                | 18 | R  | 1  | 175.1195       | 88.0637         |

N-term:+35.07

LKGGDDLDPNYVLSSR, MH+ 1817.0081, m/z 606.3409  
 H OS G27 P150811 220811-s1.05536.05536.3.dta

X-range:

-

MassTol: Y-zoom:

MassType:

AVG  MONO

Axis:

1  2

Label:

I  M  -

Ions:

a  +  2+  3+

b  +  2+  3+

c  +  2+  3+

x  +  2+  3+

y  +  2+  3+

z  +  2+  3+

hide H<sub>2</sub>O/NH<sub>3</sub>

zoom 112-122

GO

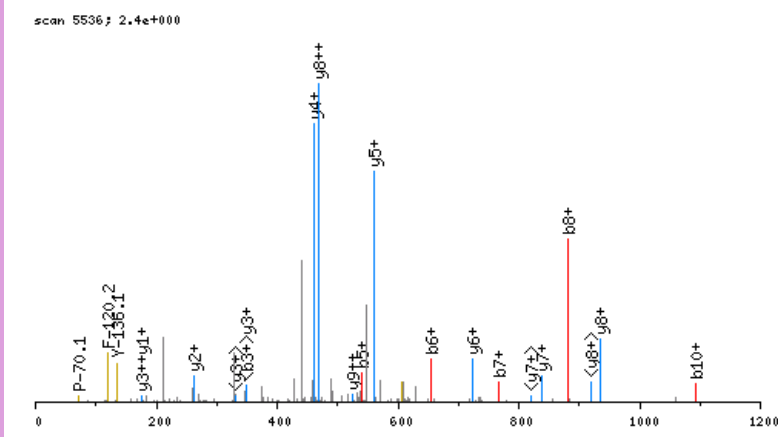

click image to zoom in; click top corners to zoom out [\[precursor±\]](#)

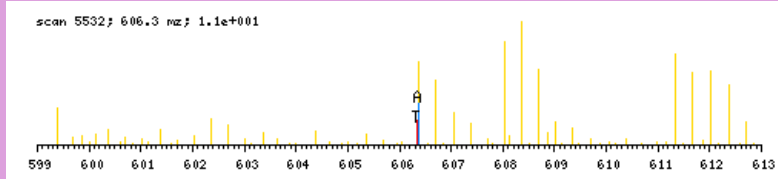

zoomed in precursor plot; T=theoretical m/z, A=acquired m/z

| b <sup>+</sup> | #  | AA # | y <sup>+</sup> | y <sup>2+</sup> |
|----------------|----|------|----------------|-----------------|
| 148.1550       | 1  | L 16 |                |                 |
| 310.3131       | 2  | K 15 | 1669.8610      | 835.4344        |
| 367.3345       | 3  | G 14 | 1507.7029      | 754.3554        |
| 424.3560       | 4  | G 13 | 1450.6814      | 725.8446        |
| 539.3829       | 5  | D 12 | 1393.6599      | 697.3339        |
| 654.4099       | 6  | D 11 | 1278.6330      | 639.8204        |
| 767.4939       | 7  | L 10 | 1163.6061      | 582.3069        |
| 882.5209       | 8  | D 9  | 1050.5220      | 525.7649        |
| 979.5736       | 9  | P 8  | 935.4951       | 468.2514        |
| 1093.6166      | 10 | N 7  | 838.4423       | 419.7251        |
| 1256.6799      | 11 | Y 6  | 724.3994       | 362.7036        |
| 1355.7483      | 12 | V 5  | 561.3360       | 281.1719        |
| 1468.8324      | 13 | L 4  | 462.2676       | 231.6377        |
| 1555.8644      | 14 | S 3  | 349.1836       | 175.0957        |
| 1642.8964      | 15 | S 2  | 262.1515       | 131.5797        |
|                | 16 | R 1  | 175.1195       | 88.0637         |

N-term:+35.07 K(2):+162.16

LKGPKEISGFEGDTVSLR, MH+ 2017.1334, m/z 505.0388  
 L OS G28 P150811 220811-s1.06072.06072.4.dta

X-range:

-

MassTol: Y-zoom:

MassType:

AVG  MONO

Axis:

1  2

Label:

I  M  -

Ions:

a  +  2+  3+

b  +  2+  3+

c  +  2+  3+

x  +  2+  3+

y  +  2+  3+

z  +  2+  3+

hide H<sub>2</sub>O/NH<sub>3</sub>

zoom 112-122

GO

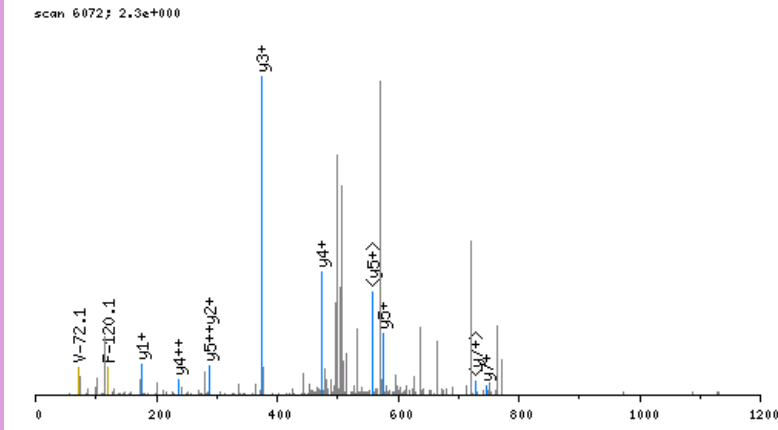

click image to zoom in; click top corners to zoom out [\[precursor±\]](#)

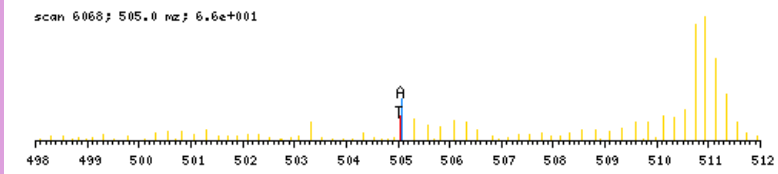

zoomed in precursor plot; T=theoretical m/z, A=acquired m/z

| b <sup>+</sup> | #  | AA # | y <sup>+</sup> | y <sup>2+</sup> |
|----------------|----|------|----------------|-----------------|
| 142.1232       | 1  | L 18 |                |                 |
| 298.2495       | 2  | K 17 | 1876.0181      | 938.5130        |
| 355.2709       | 3  | G 16 | 1719.8918      | 860.4498        |
| 452.3237       | 4  | P 15 | 1662.8703      | 831.9391        |
| 608.4500       | 5  | K 14 | 1565.8175      | 783.4127        |
| 737.4926       | 6  | E 13 | 1409.6912      | 705.3495        |
| 850.5766       | 7  | I 12 | 1280.6487      | 640.8282        |
| 937.6087       | 8  | S 11 | 1167.5646      | 584.2862        |
| 994.6301       | 9  | G 10 | 1080.5326      | 540.7702        |
| 1141.6986      | 10 | F 9  | 1023.5111      | 512.2595        |
| 1270.7411      | 11 | E 8  | 876.4427       | 438.7253        |
| 1327.7626      | 12 | G 7  | 747.4001       | 374.2040        |
| 1442.7896      | 13 | D 6  | 690.3786       | 345.6932        |
| 1543.8372      | 14 | T 5  | 575.3517       | 288.1798        |
| 1642.9056      | 15 | V 4  | 474.3040       | 237.6559        |
| 1729.9377      | 16 | S 3  | 375.2356       | 188.1217        |
| 1843.0217      | 17 | L 2  | 288.2036       | 144.6057        |
|                | 18 | R 1  | 175.1195       | 88.0637         |

N-term:+29.04 K(2):+156.13  
 K(5):+156.13

LKTLMSPLGTR, MH+ 1385.8554, m/z 462.6233  
 L OS G27 P150811 220811-s1.05970.05970.3.dta

scan 5970; 5.4e+000

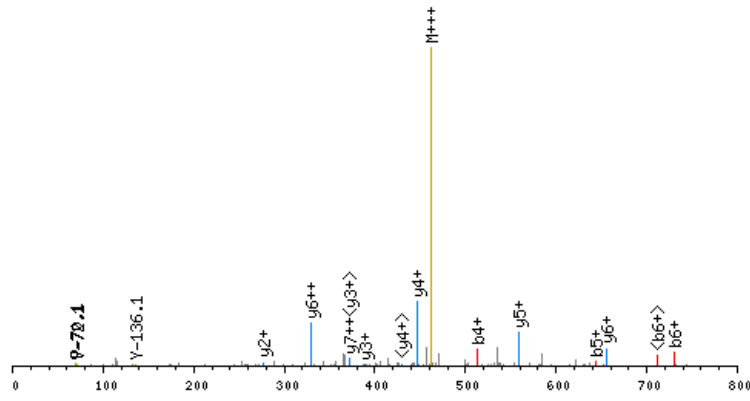

click image to zoom in; click top corners to zoom out [\[precursor±\]](#)

scan 5967; 462.6 m/z; 1.8e+003

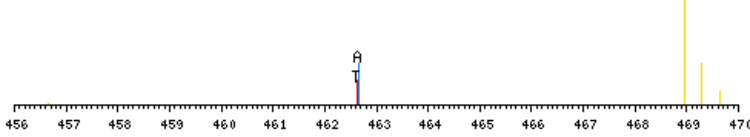

zoomed in precursor plot; T=theoretical m/z, A=acquired m/z

X-range:

-

MassTol: Y-zoom:

MassType:

AVG  MONO

Axis:

1  2

Label:

I  M  -

Ions:

a  +  2+  3+

b  +  2+  3+

c  +  2+  3+

x  +  2+  3+

y  +  2+  3+

z  +  2+  3+

hide H<sub>2</sub>O/NH<sub>3</sub>

zoom 112-122

GO

| b <sup>+</sup> | #  | AA # | y <sup>+</sup> | y <sup>2+</sup> |
|----------------|----|------|----------------|-----------------|
| 142.1232       | 1  | L 12 |                |                 |
| 298.2495       | 2  | K 11 | 1244.7401      | 622.8740        |
| 399.2971       | 3  | T 10 | 1088.6138      | 544.8108        |
| 512.3812       | 4  | L 9  | 987.5661       | 494.2870        |
| 643.4217       | 5  | M 8  | 874.4820       | 437.7449        |
| 730.4537       | 6  | S 7  | 743.4416       | 372.2247        |
| 827.5065       | 7  | P 6  | 656.4095       | 328.7087        |
| 940.5905       | 8  | L 5  | 559.3568       | 280.1823        |
| 997.6120       | 9  | G 4  | 446.2727       | 223.6403        |
| 1110.6961      | 10 | I 3  | 389.2512       | 195.1295        |
| 1211.7438      | 11 | T 2  | 276.1672       | 138.5875        |
|                | 12 | R 1  | 175.1195       | 88.0637         |

N-term:+29.04 K(2):+156.13

LLCGEEQGADAALHFNPR, MH+ 2025.9816, m/z 675.9987  
 L OS G26 P150811 220811-s1.04673.04673.3.dta

X-range:

-

MassTol: Y-zoom:

MassType:

AVG  MONO

Axis:

1  2

Label:

I  M  -

Ions:

a  +  2+  3+

b  +  2+  3+

c  +  2+  3+

x  +  2+  3+

y  +  2+  3+

z  +  2+  3+

hide H<sub>2</sub>O/NH<sub>3</sub>

zoom 112-122

GO

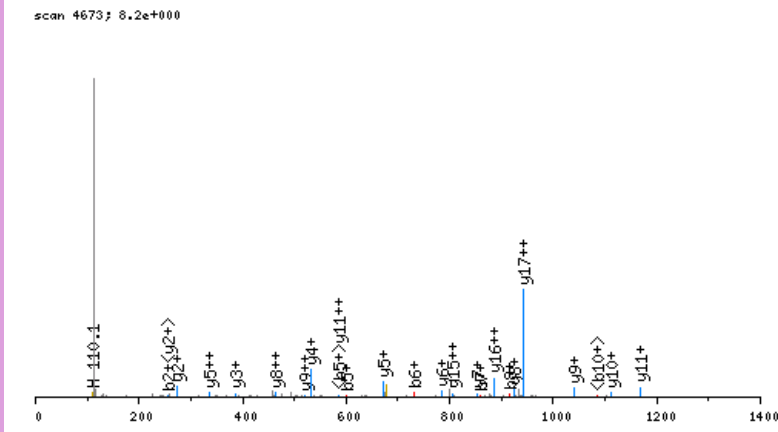

click image to zoom in; click top corners to zoom out [\[precursor±\]](#)

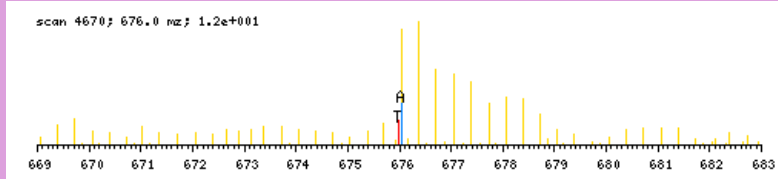

zoomed in precursor plot; T=theoretical m/z, A=acquired m/z

| b <sup>+</sup> | #  | AA # | y <sup>+</sup> | y <sup>2+</sup> |
|----------------|----|------|----------------|-----------------|
| 142.1232       | 1  | L 18 |                |                 |
| 255.2072       | 2  | L 17 | 1884.8662      | 942.9370        |
| 415.2378       | 3  | C 16 | 1771.7822      | 886.3950        |
| 472.2593       | 4  | G 15 | 1611.7516      | 806.3797        |
| 601.3019       | 5  | E 14 | 1554.7301      | 777.8690        |
| 730.3445       | 6  | E 13 | 1425.6875      | 713.3477        |
| 858.4031       | 7  | Q 12 | 1296.6449      | 648.8264        |
| 915.4245       | 8  | G 11 | 1168.5863      | 584.7971        |
| 986.4616       | 9  | A 10 | 1111.5649      | 556.2863        |
| 1101.4886      | 10 | D 9  | 1040.5278      | 520.7678        |
| 1172.5257      | 11 | A 8  | 925.5008       | 463.2543        |
| 1243.5628      | 12 | A 7  | 854.4637       | 427.7358        |
| 1356.6469      | 13 | L 6  | 783.4266       | 392.2172        |
| 1493.7058      | 14 | H 5  | 670.3425       | 335.6752        |
| 1640.7742      | 15 | F 4  | 533.2836       | 267.1457        |
| 1754.8171      | 16 | N 3  | 386.2152       | 193.6115        |
| 1851.8699      | 17 | P 2  | 272.1723       | 136.5900        |
|                | 18 | R 1  | 175.1195       | 88.0637         |

N-term:+29.04 C(3):+160.03

LMEQDPDVAVTVR, MH+ 1500.7732, m/z 375.9488  
 L OS G28 P150811 220811-s1.03580.03580.4.dta

X-range:

-

MassTol: Y-zoom:

MassType:

AVG  MONO

Axis:

1  2

Label:

I  M  -

Ions:

a  +  2+  3+

b  +  2+  3+

c  +  2+  3+

x  +  2+  3+

y  +  2+  3+

z  +  2+  3+

hide H<sub>2</sub>O/NH<sub>3</sub>

zoom 112-122

GO

scan 3580; 4.9e+001

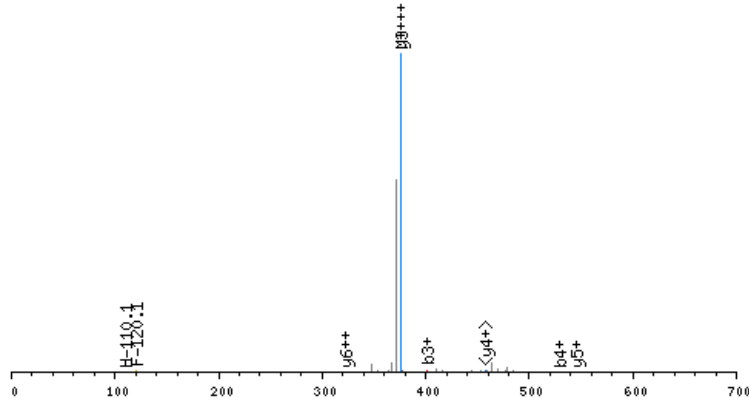

click image to zoom in; click top corners to zoom out [\[precursor±\]](#)

scan 3578; 375.9 m/z; 7.6e+001

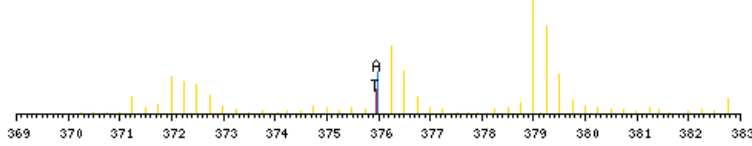

zoomed in precursor plot; T=theoretical m/z, A=acquired m/z

| b <sup>+</sup> | #  | AA # | y <sup>+</sup> | y <sup>2+</sup> |
|----------------|----|------|----------------|-----------------|
| 142.1232       | 1  | L 13 |                |                 |
| 273.1636       | 2  | M 12 | 1359.6578      | 680.3328        |
| 402.2062       | 3  | E 11 | 1228.6174      | 614.8126        |
| 530.2648       | 4  | Q 10 | 1099.5748      | 550.2913        |
| 645.2918       | 5  | D 9  | 971.5162       | 486.2620        |
| 742.3445       | 6  | P 8  | 856.4892       | 428.7485        |
| 857.3715       | 7  | D 7  | 759.4365       | 380.2222        |
| 956.4399       | 8  | V 6  | 644.4095       | 322.7087        |
| 1027.4770      | 9  | A 5  | 545.3411       | 273.1745        |
| 1126.5454      | 10 | V 4  | 474.3040       | 237.6559        |
| 1227.5931      | 11 | T 3  | 375.2356       | 188.1217        |
| 1326.6615      | 12 | V 2  | 274.1879       | 137.5979        |
|                | 13 | R 1  | 175.1195       | 88.0637         |

N-term:+29.04

LNIDHLSDDKLR, MH+ 1506.8916, m/z 377.4784  
 H OS G28 P150811 220811-s1.05039.05039.4.dta

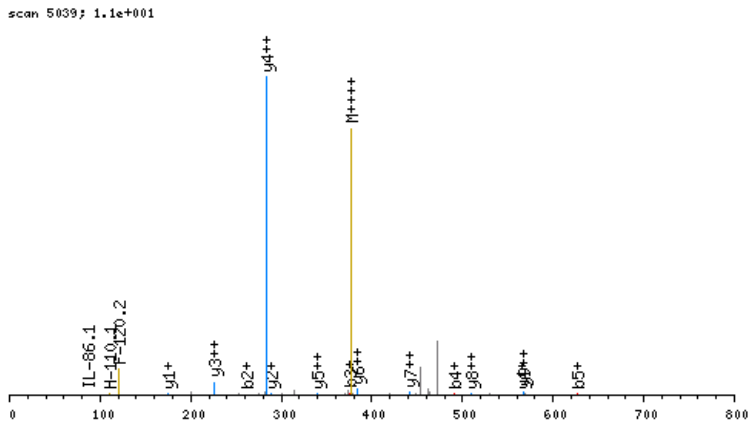

click image to zoom in; click top corners to zoom out [\[precursor±\]](#)

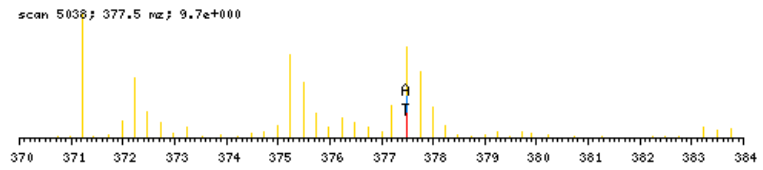

zoomed in precursor plot; T=theoretical m/z, A=acquired m/z

X-range:  -   
 MassTol: Y-zoom:    
 MassType:  AVG  MONO  
 Axis:  1  2  
 Label:  I  M  -  
 Ions:  
 a  +  2+  3+  
 b  +  2+  3+  
 c  +  2+  3+  
 x  +  2+  3+  
 y  +  2+  3+  
 z  +  2+  3+  
 hide H<sub>2</sub>O/NH<sub>3</sub>   
 zoom 112-122

| b <sup>+</sup> | #  | AA # | y <sup>+</sup> | y <sup>2+</sup> |
|----------------|----|------|----------------|-----------------|
| 148.1550       | 1  | L 12 |                |                 |
| 262.1979       | 2  | N 11 | 1359.7445      | 680.3762        |
| 375.2820       | 3  | I 10 | 1245.7016      | 623.3547        |
| 490.3089       | 4  | D 9  | 1132.6175      | 566.8127        |
| 627.3678       | 5  | H 8  | 1017.5906      | 509.2992        |
| 740.4519       | 6  | L 7  | 880.5316       | 440.7697        |
| 827.4839       | 7  | S 6  | 767.4476       | 384.2277        |
| 942.5108       | 8  | D 5  | 680.4156       | 340.7117        |
| 1057.5378      | 9  | D 4  | 565.3886       | 283.1982        |
| 1219.6959      | 10 | K 3  | 450.3617       | 225.6847        |
| 1332.7800      | 11 | L 2  | 288.2036       | 144.6057        |
|                | 12 | R 1  | 175.1195       | 88.0637         |

N-term:+35.07 K(10):+162.16

LPDTSIPGGSTPTVQVTPQLETR, MH+ 2422.2829, m/z 606.3262  
 L OS G24 P150811 220811-s1.04145.04145.4.dta

scan 4145; 7.4e-001

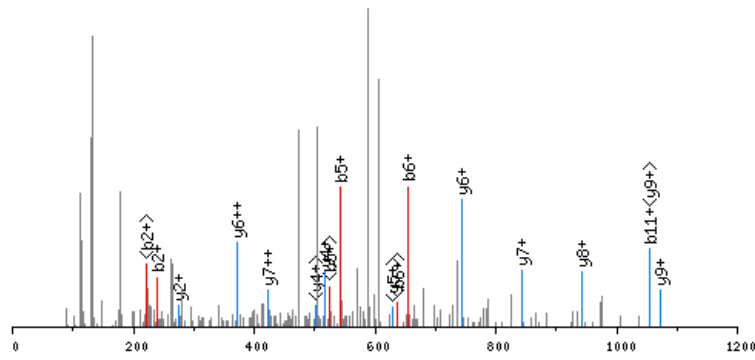

click image to zoom in; click top corners to zoom out [precursor±]

scan 4142; 606.3 m/z; 3.7e+000

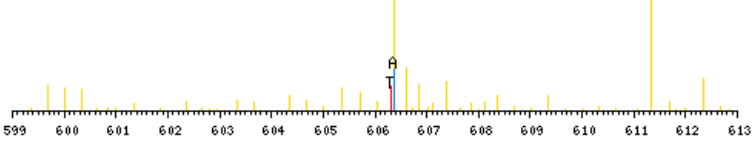

zoomed in precursor plot; T=theoretical m/z, A=acquired m/z

X-range:

-

MassTol: Y-zoom:

MassType:

AVG  MONO

Axis:

1  2

Label:

I  M  -

Ions:

a  +  2+  3+

b  +  2+  3+

c  +  2+  3+

x  +  2+  3+

y  +  2+  3+

z  +  2+  3+

hide H<sub>2</sub>O/NH<sub>3</sub>

zoom 112-122

GO

| b <sup>+</sup> | #  | AA # | y <sup>+</sup> | y <sup>2+</sup> |
|----------------|----|------|----------------|-----------------|
| 142.1232       | 1  | L 23 |                |                 |
| 239.1759       | 2  | P 22 | 2281.1676      | 1141.0877       |
| 354.2029       | 3  | D 21 | 2184.1148      | 1092.5613       |
| 455.2505       | 4  | T 20 | 2069.0879      | 1035.0478       |
| 542.2826       | 5  | S 19 | 1968.0402      | 984.5240        |
| 655.3666       | 6  | I 18 | 1881.0082      | 941.0080        |
| 752.4194       | 7  | P 17 | 1767.9241      | 884.4660        |
| 809.4409       | 8  | G 16 | 1670.8713      | 835.9396        |
| 866.4623       | 9  | G 15 | 1613.8499      | 807.4288        |
| 953.4944       | 10 | S 14 | 1556.8284      | 778.9181        |
| 1054.5420      | 11 | T 13 | 1469.7964      | 735.4021        |
| 1151.5948      | 12 | P 12 | 1368.7487      | 684.8783        |
| 1252.6425      | 13 | T 11 | 1271.6959      | 636.3519        |
| 1351.7109      | 14 | V 10 | 1170.6483      | 585.8280        |
| 1479.7695      | 15 | Q 9  | 1071.5798      | 536.2938        |
| 1578.8379      | 16 | V 8  | 943.5213       | 472.2645        |
| 1679.8856      | 17 | T 7  | 844.4529       | 422.7303        |
| 1776.9383      | 18 | P 6  | 743.4052       | 372.2065        |
| 1904.9969      | 19 | Q 5  | 646.3524       | 323.6801        |
| 2018.0810      | 20 | L 4  | 518.2938       | 259.6508        |
| 2147.1236      | 21 | E 3  | 405.2098       | 203.1088        |
| 2248.1712      | 22 | T 2  | 276.1672       | 138.5875        |
|                | 23 | R 1  | 175.1195       | 88.0637         |

N-term:+29.04



LQEDSLNVADLSSLR, MH+ 1687.8866, m/z 563.3004  
 L OS G25 P150811 220811-s1.07433.07433.3.dta

X-range:

-

MassTol: Y-zoom:

MassType:

AVG  MONO

Axis:

1  2

Label:

I  M  -

Ions:

a  +  2+  3+

b  +  2+  3+

c  +  2+  3+

x  +  2+  3+

y  +  2+  3+

z  +  2+  3+

hide H<sub>2</sub>O/NH<sub>3</sub>

zoom 112-122

GO

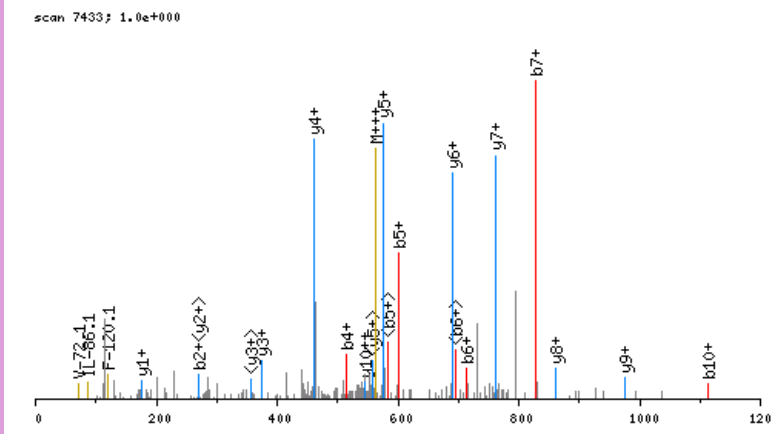

click image to zoom in; click top corners to zoom out [\[precursor±\]](#)

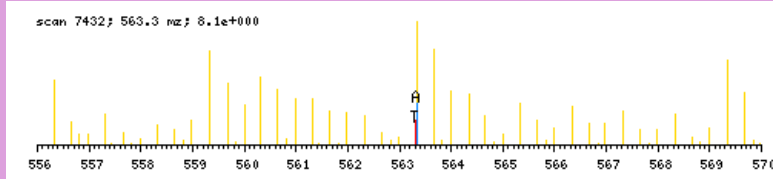

zoomed in precursor plot; T=theoretical m/z, A=acquired m/z

| b <sup>+</sup> | #  | AA # | y <sup>+</sup> | y <sup>2+</sup> |
|----------------|----|------|----------------|-----------------|
| 142.1232       | 1  | L 15 |                |                 |
| 270.1817       | 2  | Q 14 | 1546.7713      | 773.8896        |
| 399.2243       | 3  | E 13 | 1418.7127      | 709.8603        |
| 514.2513       | 4  | D 12 | 1289.6701      | 645.3390        |
| 601.2833       | 5  | S 11 | 1174.6432      | 587.8255        |
| 714.3674       | 6  | L 10 | 1087.6111      | 544.3095        |
| 828.4103       | 7  | N 9  | 974.5271       | 487.7675        |
| 927.4787       | 8  | V 8  | 860.4842       | 430.7460        |
| 998.5158       | 9  | A 7  | 761.4157       | 381.2118        |
| 1113.5428      | 10 | D 6  | 690.3786       | 345.6932        |
| 1226.6268      | 11 | L 5  | 575.3517       | 288.1798        |
| 1313.6589      | 12 | S 4  | 462.2676       | 231.6377        |
| 1400.6909      | 13 | S 3  | 375.2356       | 188.1217        |
| 1513.7750      | 14 | L 2  | 288.2036       | 144.6057        |
|                | 15 | R 1  | 175.1195       | 88.0637         |

N-term:+29.04

LQEYFDGNLKR, MH+ 1450.8331, m/z 484.2825  
 H OS G27 P150811 220811-s1.04378.04378.3.dta

scan 4378; 1.6e+001

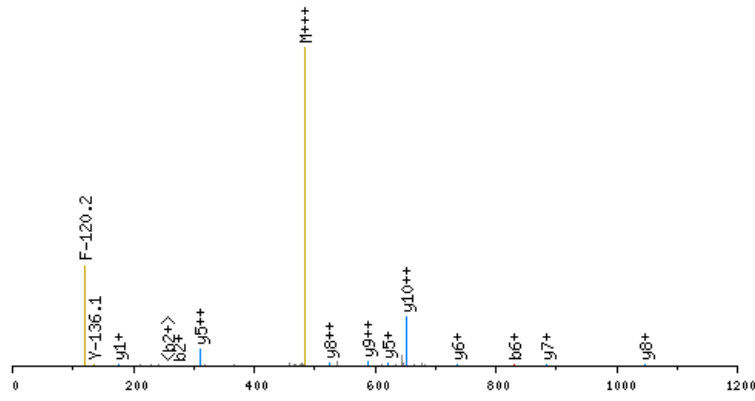

click image to zoom in; click top corners to zoom out [\[precursor±\]](#)

scan 4377; 484.3 m/z; 2.3e+001

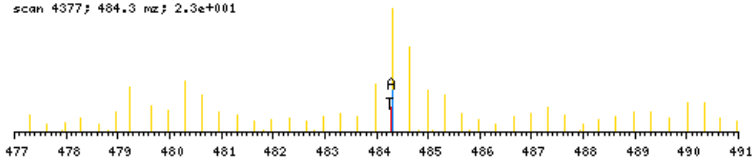

zoomed in precursor plot; T=theoretical m/z, A=acquired m/z

X-range:  
 -

MassTol: Y-zoom:

MassType:  
 AVG  MONO

Axis:  
 1  2

Label:  
 I  M  -

Ions:  
 a  +  2+  3+  
 b  +  2+  3+  
 c  +  2+  3+  
 x  +  2+  3+  
 y  +  2+  3+  
 z  +  2+  3+

hide H<sub>2</sub>O/NH<sub>3</sub>

zoom 112-122

GO

| b <sup>+</sup> | #  | AA # | y <sup>+</sup> | y <sup>2+</sup> |
|----------------|----|------|----------------|-----------------|
| 148.1550       | 1  | L 11 |                |                 |
| 276.2135       | 2  | Q 10 | 1303.6859      | 652.3469        |
| 405.2561       | 3  | E 9  | 1175.6273      | 588.3176        |
| 568.3195       | 4  | Y 8  | 1046.5847      | 523.7963        |
| 715.3879       | 5  | F 7  | 883.5214       | 442.2646        |
| 830.4148       | 6  | D 6  | 736.4530       | 368.7304        |
| 887.4363       | 7  | G 5  | 621.4261       | 311.2169        |
| 1001.4792      | 8  | N 4  | 564.4046       | 282.7062        |
| 1114.5633      | 9  | L 3  | 450.3617       | 225.6847        |
| 1276.7214      | 10 | K 2  | 337.2776       | 169.1427        |
|                | 11 | R 1  | 175.1195       | 88.0637         |

N-term:+35.07 K(10):+162.16

LQIAATELEKEESR, MH+ 1672.9122, m/z 558.3089  
 L OS G26 P150811 220811-s1.03921.03921.3.dta

X-range:

-

MassTol: Y-zoom:

MassType:

AVG  MONO

Axis:

1  2

Label:

I  M  -

Ions:

a  +  2+  3+

b  +  2+  3+

c  +  2+  3+

x  +  2+  3+

y  +  2+  3+

z  +  2+  3+

hide H<sub>2</sub>O/NH<sub>3</sub>

zoom 112-122

GO

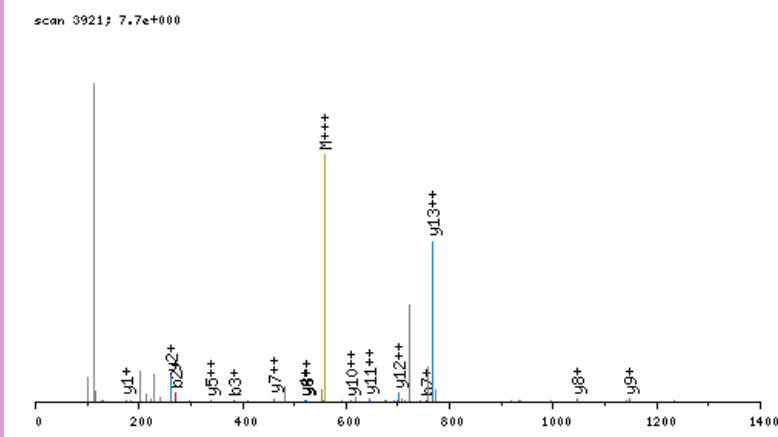

click image to zoom in; click top corners to zoom out [\[precursor±\]](#)

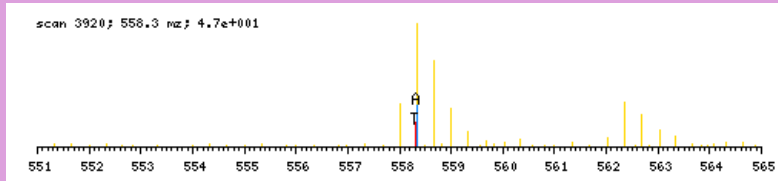

zoomed in precursor plot; T=theoretical m/z, A=acquired m/z

| b <sup>+</sup> | #  | AA # | y <sup>+</sup> | y <sup>2+</sup> |
|----------------|----|------|----------------|-----------------|
| 142.1232       | 1  | L 14 |                |                 |
| 270.1817       | 2  | Q 13 | 1531.7968      | 766.4023        |
| 383.2658       | 3  | I 12 | 1403.7382      | 702.3730        |
| 454.3029       | 4  | A 11 | 1290.6542      | 645.8310        |
| 525.3400       | 5  | A 10 | 1219.6171      | 610.3124        |
| 626.3877       | 6  | T 9  | 1148.5799      | 574.7939        |
| 755.4303       | 7  | E 8  | 1047.5323      | 524.2700        |
| 868.5144       | 8  | L 7  | 918.4897       | 459.7487        |
| 997.5570       | 9  | E 6  | 805.4056       | 403.2067        |
| 1153.6833      | 10 | K 5  | 676.3630       | 338.6854        |
| 1282.7259      | 11 | E 4  | 520.2367       | 260.6223        |
| 1411.7684      | 12 | E 3  | 391.1941       | 196.1010        |
| 1498.8005      | 13 | S 2  | 262.1515       | 131.5797        |
|                | 14 | R 1  | 175.1195       | 88.0637         |

N-term:+29.04 K(10):+156.13

LQSIGTENTEENRR, MH+ 1674.8411, m/z 558.9519  
 L OS G27 P150811 220811-s1.02248.02248.3.dta

scan 2248; 1.2e+001

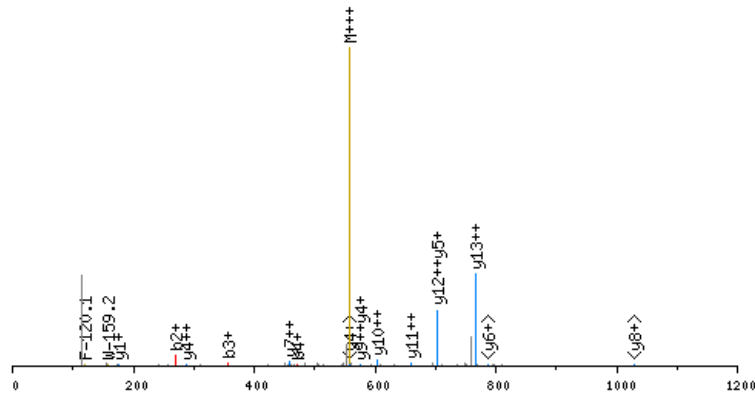

click image to zoom in; click top corners to zoom out [precursor±]

scan 2247; 559.0 m/z; 1.9e+001

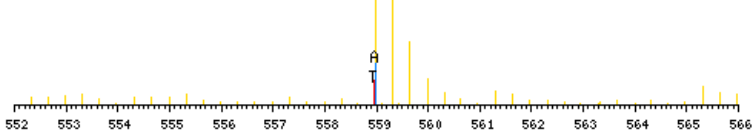

zoomed in precursor plot; T=theoretical m/z, A=acquired m/z

X-range:

-

MassTol: Y-zoom:

MassType:

AVG  MONO

Axis:

1  2

Label:

I  M  -

Ions:

a  +  2+  3+

b  +  2+  3+

c  +  2+  3+

x  +  2+  3+

y  +  2+  3+

z  +  2+  3+

hide H<sub>2</sub>O/NH<sub>3</sub>

zoom 112-122

GO

| b <sup>+</sup> | #  | AA # | y <sup>+</sup> | y <sup>2+</sup> |
|----------------|----|------|----------------|-----------------|
| 142.1232       | 1  | L 14 |                |                 |
| 270.1817       | 2  | Q 13 | 1533.7257      | 767.3668        |
| 357.2138       | 3  | S 12 | 1405.6672      | 703.3375        |
| 470.2978       | 4  | I 11 | 1318.6351      | 659.8215        |
| 527.3193       | 5  | G 10 | 1205.5511      | 603.2794        |
| 628.3670       | 6  | T 9  | 1148.5296      | 574.7687        |
| 757.4096       | 7  | E 8  | 1047.4819      | 524.2449        |
| 871.4525       | 8  | N 7  | 918.4393       | 459.7236        |
| 972.5002       | 9  | T 6  | 804.3964       | 402.7021        |
| 1101.5428      | 10 | E 5  | 703.3487       | 352.1783        |
| 1230.5854      | 11 | E 4  | 574.3061       | 287.6570        |
| 1344.6283      | 12 | N 3  | 445.2635       | 223.1357        |
| 1500.7294      | 13 | R 2  | 331.2206       | 166.1142        |
|                | 14 | R 1  | 175.1195       | 88.0637         |

N-term:+29.04

LRELISNASDALDKIR, MH+ 1870.0762, m/z 468.2745  
 L OS G28 P150811 220811-s1.07209.07209.4.dta

X-range:

-

MassTol: Y-zoom:

MassType:

AVG  MONO

Axis:

1  2

Label:

I  M  -

Ions:

a  +  2+  3+

b  +  2+  3+

c  +  2+  3+

x  +  2+  3+

y  +  2+  3+

z  +  2+  3+

hide H<sub>2</sub>O/NH<sub>3</sub>

zoom 112-122

GO

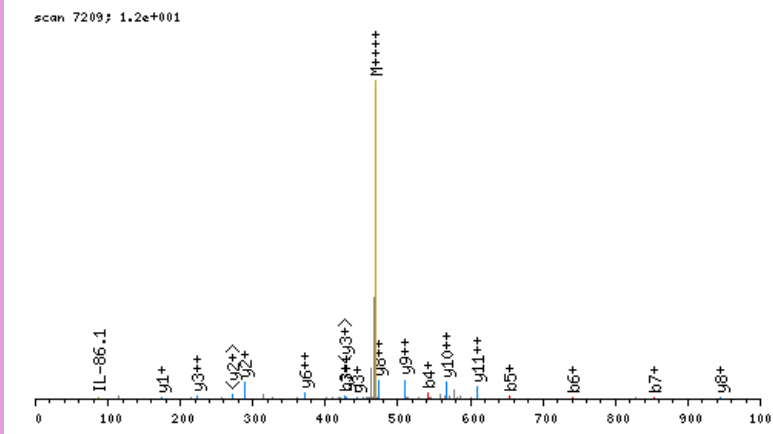

click image to zoom in; click top corners to zoom out [\[precursor±\]](#)

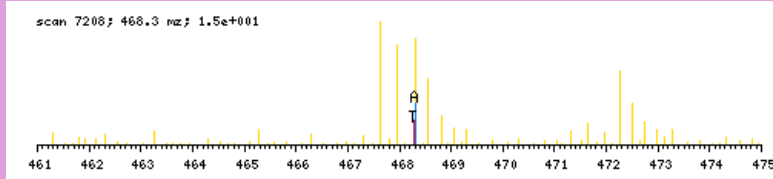

zoomed in precursor plot; T=theoretical m/z, A=acquired m/z

| b <sup>+</sup> | #  | AA # | y <sup>+</sup> | y <sup>2+</sup> |
|----------------|----|------|----------------|-----------------|
| 142.1232       | 1  | L 16 |                |                 |
| 298.2243       | 2  | R 15 | 1728.9609      | 864.9843        |
| 427.2669       | 3  | E 14 | 1572.8597      | 786.9338        |
| 540.3509       | 4  | L 13 | 1443.8172      | 722.4125        |
| 653.4350       | 5  | I 12 | 1330.7331      | 665.8705        |
| 740.4670       | 6  | S 11 | 1217.6490      | 609.3284        |
| 854.5100       | 7  | N 10 | 1130.6170      | 565.8124        |
| 925.5471       | 8  | A 9  | 1016.5741      | 508.7909        |
| 1012.5791      | 9  | S 8  | 945.5370       | 473.2724        |
| 1127.6060      | 10 | D 7  | 858.5049       | 429.7564        |
| 1198.6432      | 11 | A 6  | 743.4780       | 372.2429        |
| 1311.7272      | 12 | L 5  | 672.4409       | 336.7243        |
| 1426.7542      | 13 | D 4  | 559.3568       | 280.1823        |
| 1582.8805      | 14 | K 3  | 444.3299       | 222.6688        |
| 1695.9645      | 15 | I 2  | 288.2036       | 144.6057        |
|                | 16 | R 1  | 175.1195       | 88.0637         |

N-term:+29.04 K(14):+156.13

LRENYGELADCCTKQEPER, MH+ 2436.1923, m/z 609.8035  
 H OS G28 P150811 220811-s1.03771.03771.4.dta

scan 3771; 1.8e+000

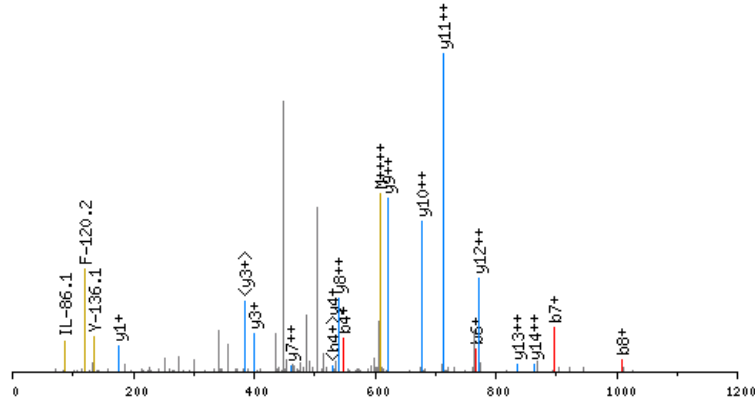

click image to zoom in; click top corners to zoom out [precursor±]

scan 3768; 609.8 m/z; 1.4e+001

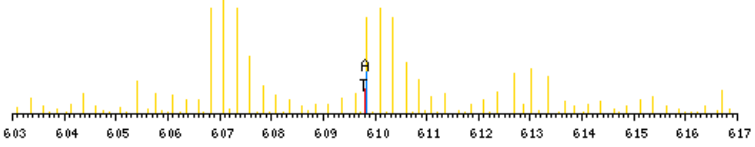

zoomed in precursor plot; T=theoretical m/z, A=acquired m/z

X-range:

-

MassTol: Y-zoom:

MassType:

AVG  MONO

Axis:

1  2

Label:

I  M  -

Ions:

a  +  2+  3+

b  +  2+  3+

c  +  2+  3+

x  +  2+  3+

y  +  2+  3+

z  +  2+  3+

hide H<sub>2</sub>O/NH<sub>3</sub>

zoom 112-122

GO

| b <sup>+</sup> | #  | AA | #  | y <sup>+</sup> | y <sup>2+</sup> |
|----------------|----|----|----|----------------|-----------------|
| 148.1550       | 1  | L  | 19 |                |                 |
| 304.2561       | 2  | R  | 18 | 2289.0451      | 1145.0265       |
| 433.2987       | 3  | E  | 17 | 2132.9440      | 1066.9759       |
| 547.3416       | 4  | N  | 16 | 2003.9014      | 1002.4546       |
| 710.4049       | 5  | Y  | 15 | 1889.8585      | 945.4332        |
| 767.4264       | 6  | G  | 14 | 1726.7952      | 863.9015        |
| 896.4690       | 7  | E  | 13 | 1669.7737      | 835.3908        |
| 1009.5530      | 8  | L  | 12 | 1540.7311      | 770.8695        |
| 1080.5902      | 9  | A  | 11 | 1427.6471      | 714.3274        |
| 1195.6171      | 10 | D  | 10 | 1356.6100      | 678.8089        |
| 1355.6477      | 11 | C  | 9  | 1241.5830      | 621.2954        |
| 1515.6783      | 12 | C  | 8  | 1081.5524      | 541.2801        |
| 1616.7260      | 13 | T  | 7  | 921.5218       | 461.2648        |
| 1778.8841      | 14 | K  | 6  | 820.4741       | 410.7410        |
| 1906.9427      | 15 | Q  | 5  | 658.3160       | 329.6619        |
| 2035.9853      | 16 | E  | 4  | 530.2575       | 265.6326        |
| 2133.0380      | 17 | P  | 3  | 401.2149       | 201.1113        |
| 2262.0806      | 18 | E  | 2  | 304.1621       | 152.5850        |
|                | 19 | R  | 1  | 175.1195       | 88.0637         |

N-term: +35.07 C(11): +160.03  
 C(12): +160.03 K(14): +162.16

LRGGPLSGPYR, MH+ 1200.6853, m/z 400.8999  
 L OS G28 P150811 220811-s1.03406.03406.3.dta

scan 3406; 3.1e+000

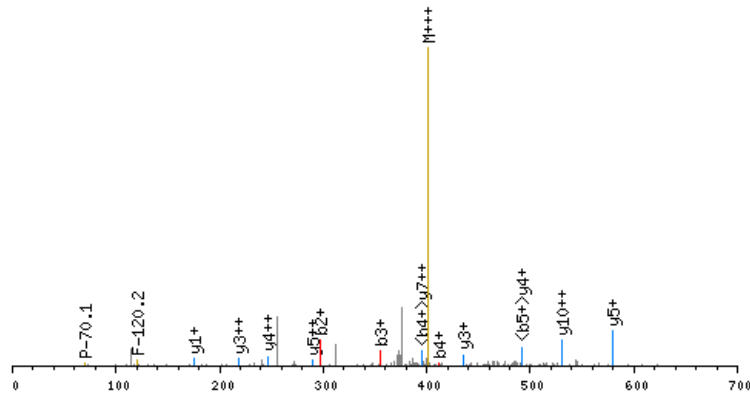

click image to zoom in; click top corners to zoom out [\[precursor±\]](#)

scan 3403; 400.9 m/z; 2.0e+001

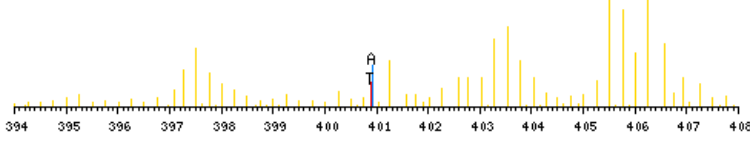

zoomed in precursor plot; T=theoretical m/z, A=acquired m/z

X-range:

-

MassTol: Y-zoom:

MassType:

AVG  MONO

Axis:

1  2

Label:

I  M  -

Ions:

a  +  2+  3+

b  +  2+  3+

c  +  2+  3+

x  +  2+  3+

y  +  2+  3+

z  +  2+  3+

hide H<sub>2</sub>O/NH<sub>3</sub>

zoom 112-122

GO

| b <sup>+</sup> | #  | AA # | y <sup>+</sup> | y <sup>2+</sup> |
|----------------|----|------|----------------|-----------------|
| 142.1232       | 1  | L 11 |                |                 |
| 298.2243       | 2  | R 10 | 1059.5700      | 530.2889        |
| 355.2457       | 3  | G 9  | 903.4688       | 452.2383        |
| 412.2672       | 4  | G 8  | 846.4474       | 423.7276        |
| 509.3200       | 5  | P 7  | 789.4259       | 395.2169        |
| 622.4040       | 6  | L 6  | 692.3731       | 346.6905        |
| 709.4361       | 7  | S 5  | 579.2891       | 290.1485        |
| 766.4575       | 8  | G 4  | 492.2571       | 246.6324        |
| 863.5103       | 9  | P 3  | 435.2356       | 218.1217        |
| 1026.5736      | 10 | Y 2  | 338.1828       | 169.5953        |
|                | 11 | R 1  | 175.1195       | 88.0637         |

N-term:+29.04

LRPGDCEVCISYLGR, MH+ 1822.8943, m/z 608.3029  
 L OS G27 P150811 220811-s1.05820.05820.3.dta

X-range:

-

MassTol: Y-zoom:

MassType:

AVG  MONO

Axis:

1  2

Label:

I  M  -

Ions:

a  +  2+  3+

b  +  2+  3+

c  +  2+  3+

x  +  2+  3+

y  +  2+  3+

z  +  2+  3+

hide H<sub>2</sub>O/NH<sub>3</sub>

zoom 112-122

GO

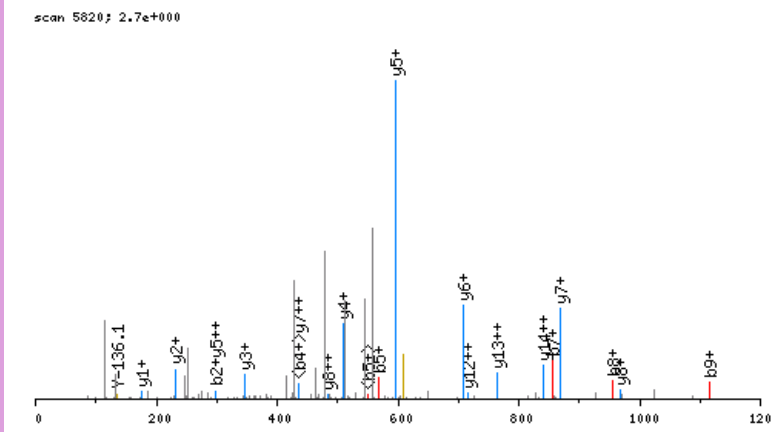

click image to zoom in; click top corners to zoom out [precursor±]

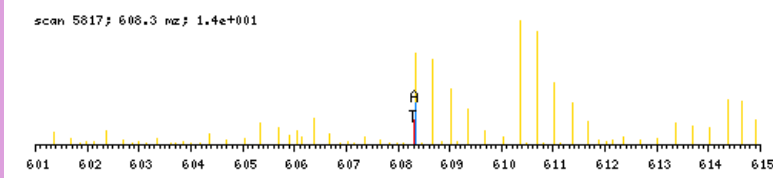

zoomed in precursor plot; T=theoretical m/z, A=acquired m/z

| b <sup>+</sup> | #  | AA | #  | y <sup>+</sup> | y <sup>2+</sup> |
|----------------|----|----|----|----------------|-----------------|
| 142.1232       | 1  | L  | 15 |                |                 |
| 298.2243       | 2  | R  | 14 | 1681.7789      | 841.3934        |
| 395.2770       | 3  | P  | 13 | 1525.6778      | 763.3428        |
| 452.2985       | 4  | G  | 12 | 1428.6251      | 714.8164        |
| 567.3254       | 5  | D  | 11 | 1371.6036      | 686.3057        |
| 727.3560       | 6  | C  | 10 | 1256.5767      | 628.7922        |
| 856.3986       | 7  | E  | 9  | 1096.5461      | 548.7769        |
| 955.4671       | 8  | V  | 8  | 967.5035       | 484.2556        |
| 1115.4977      | 9  | C  | 7  | 868.4350       | 434.7214        |
| 1228.5817      | 10 | I  | 6  | 708.4044       | 354.7061        |
| 1315.6137      | 11 | S  | 5  | 595.3204       | 298.1641        |
| 1478.6771      | 12 | Y  | 4  | 508.2884       | 254.6481        |
| 1591.7611      | 13 | L  | 3  | 345.2250       | 173.1164        |
| 1648.7826      | 14 | G  | 2  | 232.1410       | 116.5744        |
|                | 15 | R  | 1  | 175.1195       | 88.0637         |

N-term:+29.04 C(6):+160.03  
 C(9):+160.03



LRPQTSEEVSQLR, MH+ 1689.9711, m/z 563.9952  
 H OS G24 P150811 220811-s1.04863.04863.3.dta

X-range:

-

MassTol: Y-zoom:

MassType:

AVG  MONO

Axis:

1  2

Label:

I  M  -

Ions:

a  +  2+  3+

b  +  2+  3+

c  +  2+  3+

x  +  2+  3+

y  +  2+  3+

z  +  2+  3+

hide H<sub>2</sub>O/NH<sub>3</sub>

zoom 112-122

GO

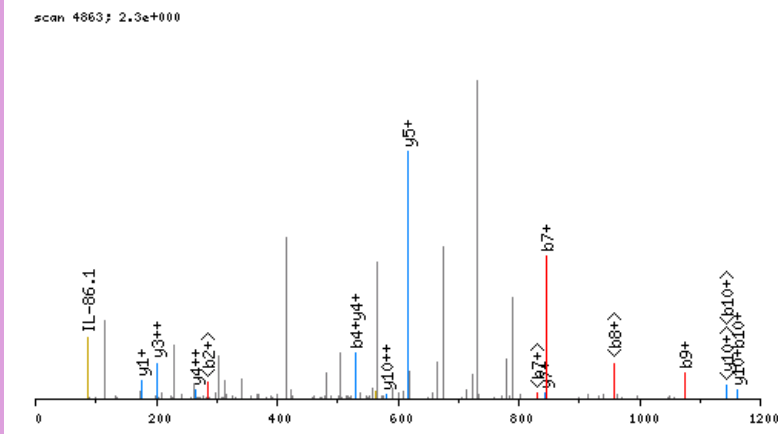

click image to zoom in; click top corners to zoom out [\[precursor±\]](#)

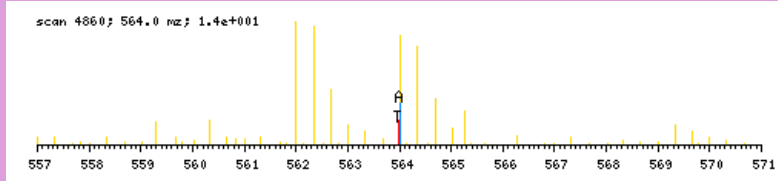

zoomed in precursor plot; T=theoretical m/z, A=acquired m/z

| b <sup>+</sup> | #  | AA # | y <sup>+</sup> | y <sup>2+</sup> |
|----------------|----|------|----------------|-----------------|
| 148.1550       | 1  | L 14 |                |                 |
| 304.2561       | 2  | R 13 | 1542.8240      | 771.9159        |
| 401.3088       | 3  | P 12 | 1386.7229      | 693.8654        |
| 529.3674       | 4  | Q 11 | 1289.6701      | 645.3390        |
| 630.4151       | 5  | T 10 | 1161.6115      | 581.3097        |
| 717.4471       | 6  | S 9  | 1060.5639      | 530.7858        |
| 846.4897       | 7  | E 8  | 973.5318       | 487.2698        |
| 975.5323       | 8  | E 7  | 844.4892       | 422.7485        |
| 1074.6007      | 9  | V 6  | 715.4466       | 358.2272        |
| 1161.6328      | 10 | S 5  | 616.3782       | 308.6930        |
| 1289.6913      | 11 | Q 4  | 529.3462       | 265.1770        |
| 1402.7754      | 12 | I 3  | 401.2876       | 201.1477        |
| 1515.8595      | 13 | L 2  | 288.2036       | 144.6057        |
|                | 14 | R 1  | 175.1195       | 88.0637         |

N-term:+35.07

LSEPQEAALYR, MH+ 1375.7221, m/z 459.2456  
 L OS G25 P150811 220811-s1.05050.05050.3.dta

scan 5050; 6.5e+000

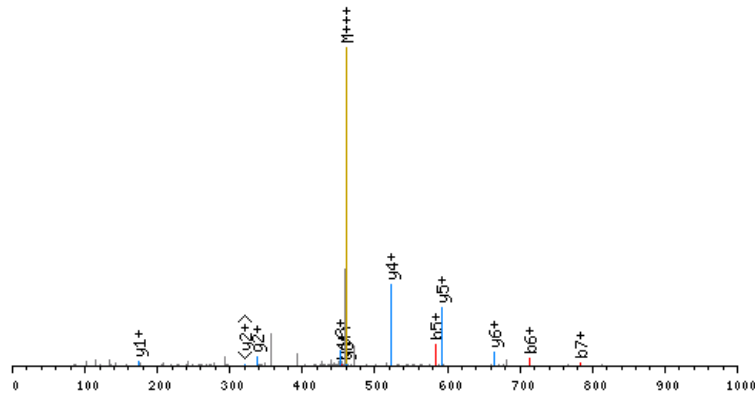

click image to zoom in; click top corners to zoom out [precursor±]

scan 5047; 459.2 m/z; 2.2e+001

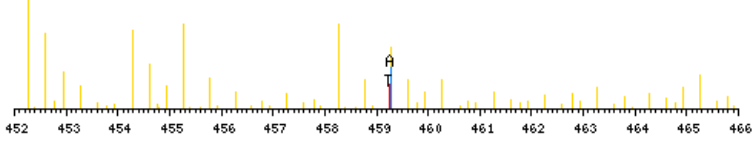

zoomed in precursor plot; T=theoretical m/z, A=acquired m/z

X-range:

-

MassTol: Y-zoom:

MassType:

AVG  MONO

Axis:

1  2

Label:

I  M  -

Ions:

a  +  2+  3+

b  +  2+  3+

c  +  2+  3+

x  +  2+  3+

y  +  2+  3+

z  +  2+  3+

hide H<sub>2</sub>O/NH<sub>3</sub>

zoom 112-122

GO

| b <sup>+</sup> | #  | AA # | y <sup>+</sup> | y <sup>2+</sup> |
|----------------|----|------|----------------|-----------------|
| 142.1232       | 1  | L 12 |                |                 |
| 229.1552       | 2  | S 11 | 1234.6068      | 617.8073        |
| 358.1978       | 3  | E 10 | 1147.5748      | 574.2913        |
| 455.2505       | 4  | P 9  | 1018.5322      | 509.7700        |
| 583.3091       | 5  | Q 8  | 921.4794       | 461.2436        |
| 712.3517       | 6  | E 7  | 793.4208       | 397.2143        |
| 783.3888       | 7  | A 6  | 664.3782       | 332.6930        |
| 854.4259       | 8  | A 5  | 593.3411       | 297.1745        |
| 925.4631       | 9  | A 4  | 522.3040       | 261.6559        |
| 1038.5471      | 10 | L 3  | 451.2669       | 226.1374        |
| 1201.6105      | 11 | Y 2  | 338.1828       | 169.5953        |
|                | 12 | R 1  | 175.1195       | 88.0637         |

N-term:+29.04

LSGTLSEIPDKLKEFGNTLEDKAR, MH+ 2773.5352, m/z 694.1393  
 L OS G28 P150811 220811-s1.09194.09194.4.dta

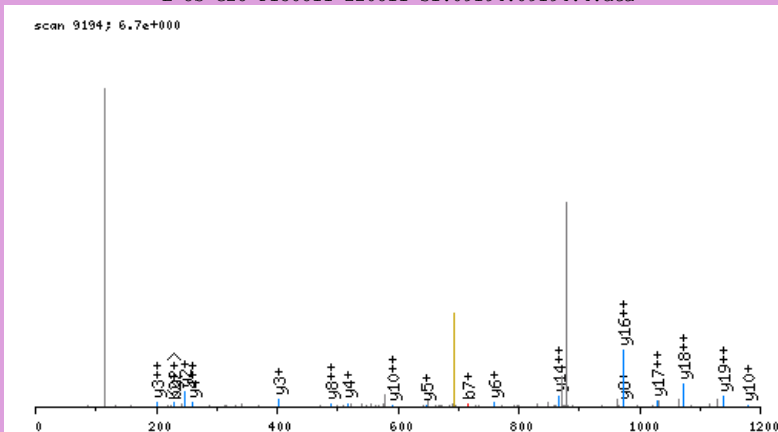

click image to zoom in; click top corners to zoom out [\[precursor±\]](#)

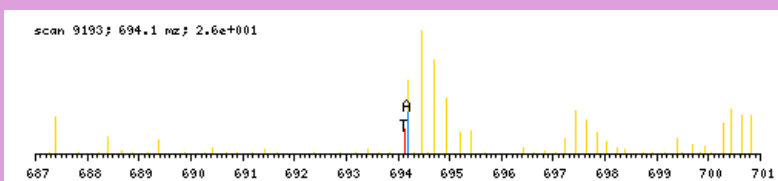

zoomed in precursor plot; T=theoretical m/z, A=acquired m/z

X-range:

-

MassTol: Y-zoom:

MassType:

AVG  MONO

Axis:

1  2

Label:

I  M  -

Ions:

a  +  2+  3+

b  +  2+  3+

c  +  2+  3+

x  +  2+  3+

y  +  2+  3+

z  +  2+  3+

hide H<sub>2</sub>O/NH<sub>3</sub>

zoom 112-122

GO

| b <sup>+</sup> | #  | AA # | y <sup>+</sup> | y <sup>2+</sup> |
|----------------|----|------|----------------|-----------------|
| 142.1232       | 1  | L 24 |                |                 |
| 229.1552       | 2  | S 23 | 2632.4199      | 1316.7139       |
| 286.1767       | 3  | G 22 | 2545.3879      | 1273.1978       |
| 387.2243       | 4  | T 21 | 2488.3664      | 1244.6871       |
| 500.3084       | 5  | L 20 | 2387.3187      | 1194.1633       |
| 629.3510       | 6  | E 19 | 2274.2346      | 1137.6212       |
| 716.3830       | 7  | S 18 | 2145.1921      | 1073.0999       |
| 829.4671       | 8  | I 17 | 2058.1600      | 1029.5839       |
| 926.5198       | 9  | P 16 | 1945.0760      | 973.0419        |
| 1041.5468      | 10 | D 15 | 1848.0232      | 924.5155        |
| 1197.6731      | 11 | K 14 | 1732.9963      | 867.0020        |
| 1310.7572      | 12 | L 13 | 1576.8700      | 788.9389        |
| 1466.8835      | 13 | K 12 | 1463.7859      | 732.3969        |
| 1595.9260      | 14 | E 11 | 1307.6596      | 654.3337        |
| 1742.9945      | 15 | F 10 | 1178.6170      | 589.8124        |
| 1800.0159      | 16 | G 9  | 1031.5486      | 516.2782        |
| 1914.0589      | 17 | N 8  | 974.5271       | 487.7675        |
| 2015.1065      | 18 | T 7  | 860.4842       | 430.7460        |
| 2128.1906      | 19 | L 6  | 759.4365       | 380.2222        |
| 2257.2332      | 20 | E 5  | 646.3525       | 323.6801        |
| 2372.2601      | 21 | D 4  | 517.3099       | 259.1588        |
| 2528.3864      | 22 | K 3  | 402.2829       | 201.6454        |
| 2599.4235      | 23 | A 2  | 246.1566       | 123.5822        |
|                | 24 | R 1  | 175.1195       | 88.0637         |

N-term:+29.04 K(11):+156.13  
 K(13):+156.13 K(22):+156.13

LSLLQDSGEVR, MH+ 1250.7168, m/z 625.8620  
 H OS G25 P150811 220811-s1.05584.05584.2.dta

X-range:

-

MassTol: Y-zoom:

MassType:

AVG  MONO

Axis:

1  2

Label:

I  M  -

Ions:

a  +  2+  3+

b  +  2+  3+

c  +  2+  3+

x  +  2+  3+

y  +  2+  3+

z  +  2+  3+

hide H<sub>2</sub>O/NH<sub>3</sub>

zoom 112-122

GO

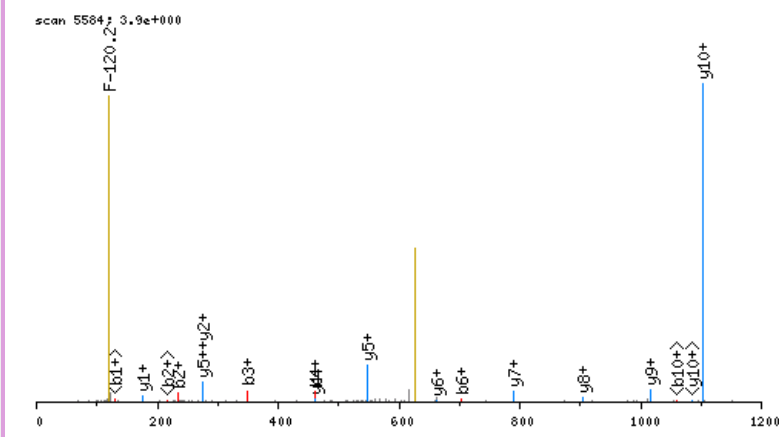

click image to zoom in; click top corners to zoom out [\[precursor±\]](#)

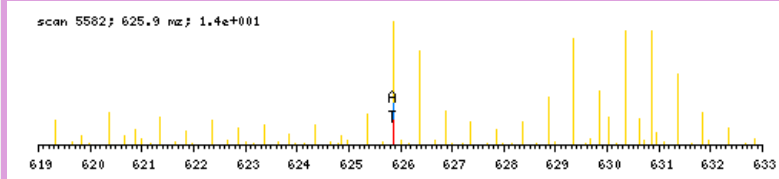

zoomed in precursor plot; T=theoretical m/z, A=acquired m/z

| b <sup>+</sup> | #  | AA # | y <sup>+</sup> | y <sup>2+</sup> |
|----------------|----|------|----------------|-----------------|
| 148.1550       | 1  | L 11 |                |                 |
| 235.1870       | 2  | S 10 | 1103.5697      | 552.2888        |
| 348.2711       | 3  | L 9  | 1016.5376      | 508.7727        |
| 461.3551       | 4  | L 8  | 903.4536       | 452.2307        |
| 589.4137       | 5  | Q 7  | 790.3695       | 395.6887        |
| 704.4406       | 6  | D 6  | 662.3109       | 331.6594        |
| 791.4727       | 7  | S 5  | 547.2840       | 274.1459        |
| 848.4941       | 8  | G 4  | 460.2520       | 230.6299        |
| 977.5367       | 9  | E 3  | 403.2305       | 202.1192        |
| 1076.6051      | 10 | V 2  | 274.1879       | 137.5979        |
|                | 11 | R 1  | 175.1195       | 88.0637         |

N-term:+35.07

LSTEEDSGAGPPR, MH+ 1343.6443, m/z 448.5529  
 L OS G25 P150811 220811-s1.02285.02285.3.dta

X-range:

-

MassTol: Y-zoom:

MassType:

AVG  MONO

Axis:

1  2

Label:

I  M  -

Ions:

a  +  2+  3+

b  +  2+  3+

c  +  2+  3+

x  +  2+  3+

y  +  2+  3+

z  +  2+  3+

hide H<sub>2</sub>O/NH<sub>3</sub>

zoom 112-122

GO

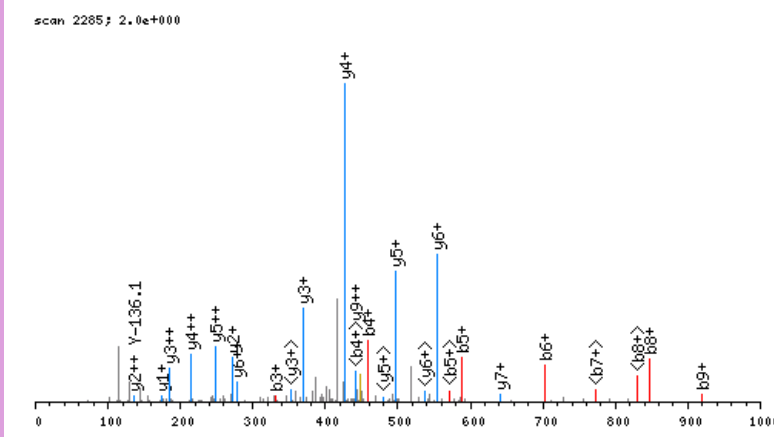

click image to zoom in; click top corners to zoom out [\[precursor±\]](#)

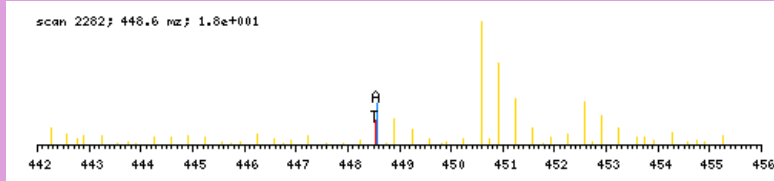

zoomed in precursor plot; T=theoretical m/z, A=acquired m/z

| b <sup>+</sup> | #  | AA # | y <sup>+</sup> | y <sup>2+</sup> |
|----------------|----|------|----------------|-----------------|
| 142.1232       | 1  | L 13 |                |                 |
| 229.1552       | 2  | S 12 | 1202.5289      | 601.7684        |
| 330.2029       | 3  | T 11 | 1115.4969      | 558.2524        |
| 459.2455       | 4  | E 10 | 1014.4492      | 507.7285        |
| 588.2881       | 5  | E 9  | 885.4066       | 443.2072        |
| 703.3150       | 6  | D 8  | 756.3640       | 378.6859        |
| 790.3470       | 7  | S 7  | 641.3371       | 321.1725        |
| 847.3685       | 8  | G 6  | 554.3051       | 277.6564        |
| 918.4056       | 9  | A 5  | 497.2836       | 249.1457        |
| 975.4271       | 10 | G 4  | 426.2465       | 213.6272        |
| 1072.4798      | 11 | P 3  | 369.2250       | 185.1164        |
| 1169.5326      | 12 | P 2  | 272.1723       | 136.5900        |
|                | 13 | R 1  | 175.1195       | 88.0637         |

N-term:+29.04

LTDGDANTGESRPEKIQENVR, MH+ 2385.2010, m/z 597.0557  
 L OS G28 P150811 220811-s1.02941.02941.4.dta

X-range:

-

MassTol: Y-zoom:

MassType:

AVG  MONO

Axis:

1  2

Label:

I  M  -

Ions:

a  +  2+  3+

b  +  2+  3+

c  +  2+  3+

x  +  2+  3+

y  +  2+  3+

z  +  2+  3+

hide H<sub>2</sub>O/NH<sub>3</sub>

zoom 112-122

GO

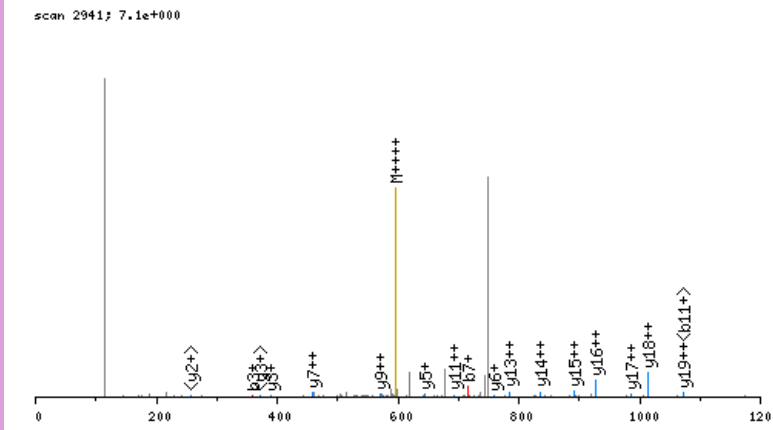

click image to zoom in; click top corners to zoom out [precursor±]

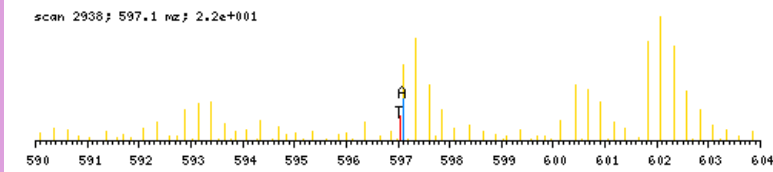

zoomed in precursor plot; T=theoretical m/z, A=acquired m/z

| b <sup>+</sup> | #  | AA # | y <sup>+</sup> | y <sup>2+</sup> |
|----------------|----|------|----------------|-----------------|
| 142.1232       | 1  | L 21 |                |                 |
| 243.1708       | 2  | T 20 | 2244.0857      | 1122.5468       |
| 358.1978       | 3  | D 19 | 2143.0380      | 1072.0229       |
| 415.2192       | 4  | G 18 | 2028.0111      | 1014.5094       |
| 530.2462       | 5  | D 17 | 1970.9896      | 985.9987        |
| 601.2833       | 6  | A 16 | 1855.9627      | 928.4852        |
| 715.3262       | 7  | N 15 | 1784.9255      | 892.9667        |
| 816.3739       | 8  | T 14 | 1670.8826      | 835.9452        |
| 873.3954       | 9  | G 13 | 1569.8349      | 785.4214        |
| 1002.4380      | 10 | E 12 | 1512.8135      | 756.9106        |
| 1089.4700      | 11 | S 11 | 1383.7709      | 692.3893        |
| 1245.5711      | 12 | R 10 | 1296.7388      | 648.8733        |
| 1342.6239      | 13 | P 9  | 1140.6377      | 570.8228        |
| 1471.6665      | 14 | E 8  | 1043.5850      | 522.2964        |
| 1627.7928      | 15 | K 7  | 914.5424       | 457.7751        |
| 1740.8768      | 16 | I 6  | 758.4161       | 379.7120        |
| 1868.9354      | 17 | Q 5  | 645.3320       | 323.1699        |
| 1997.9780      | 18 | E 4  | 517.2734       | 259.1406        |
| 2112.0209      | 19 | N 3  | 388.2308       | 194.6193        |
| 2211.0893      | 20 | V 2  | 274.1879       | 137.5979        |
|                | 21 | R 1  | 175.1195       | 88.0637         |

N-term:+29.04 K(15):+156.13

LTEDEKQTMVDLHNQYR, MH+ 2176.0709, m/z 544.7732  
 L OS G28 P150811 220811-s1.04784.04784.4.dta

X-range:

-

MassTol: Y-zoom:

MassType:

AVG  MONO

Axis:

1  2

Label:

I  M  -

Ions:

a  +  2+  3+

b  +  2+  3+

c  +  2+  3+

x  +  2+  3+

y  +  2+  3+

z  +  2+  3+

hide H<sub>2</sub>O/NH<sub>3</sub>

zoom 112-122

GO

scan 4784; 6.2e+000

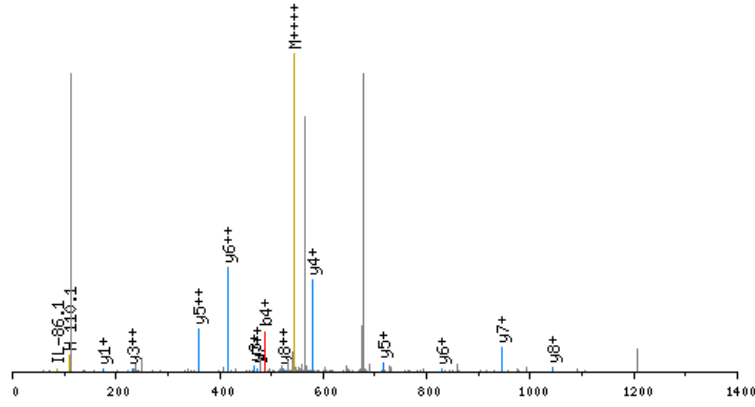

click image to zoom in; click top corners to zoom out [\[precursor±\]](#)

scan 4783; 544.8 mz; 2.9e+001

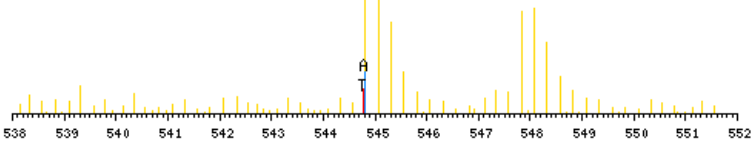

zoomed in precursor plot; T=theoretical m/z, A=acquired m/z

| b <sup>+</sup> | #  | AA | #  | y <sup>+</sup> | y <sup>2+</sup> |
|----------------|----|----|----|----------------|-----------------|
| 142.1232       | 1  | L  | 17 |                |                 |
| 243.1708       | 2  | T  | 16 | 2034.9555      | 1017.9817       |
| 372.2134       | 3  | E  | 15 | 1933.9078      | 967.4578        |
| 487.2404       | 4  | D  | 14 | 1804.8652      | 902.9365        |
| 616.2830       | 5  | E  | 13 | 1689.8383      | 845.4231        |
| 772.4093       | 6  | K  | 12 | 1560.7957      | 780.9018        |
| 900.4678       | 7  | Q  | 11 | 1404.6694      | 702.8386        |
| 1001.5155      | 8  | T  | 10 | 1276.6108      | 638.8093        |
| 1132.5560      | 9  | M  | 9  | 1175.5632      | 588.2855        |
| 1231.6244      | 10 | V  | 8  | 1044.5227      | 522.7652        |
| 1346.6514      | 11 | D  | 7  | 945.4543       | 473.2310        |
| 1459.7354      | 12 | L  | 6  | 830.4273       | 415.7176        |
| 1596.7943      | 13 | H  | 5  | 717.3432       | 359.1755        |
| 1710.8373      | 14 | N  | 4  | 580.2843       | 290.6461        |
| 1838.8959      | 15 | Q  | 3  | 466.2414       | 233.6246        |
| 2001.9592      | 16 | Y  | 2  | 338.1828       | 169.5953        |
|                | 17 | R  | 1  | 175.1195       | 88.0637         |

N-term:+29.04 K(6):+156.13

LTIEQLLEKR, MH+ 1298.8048, m/z 433.6064  
 L OS G27 P150811 220811-s1.07114.07114.3.dta

X-range:

-

MassTol: Y-zoom:

MassType:

AVG  MONO

Axis:

1  2

Label:

I  M  -

Ions:

a  +  2+  3+

b  +  2+  3+

c  +  2+  3+

x  +  2+  3+

y  +  2+  3+

z  +  2+  3+

hide H<sub>2</sub>O/NH<sub>3</sub>

zoom 112-122

GO

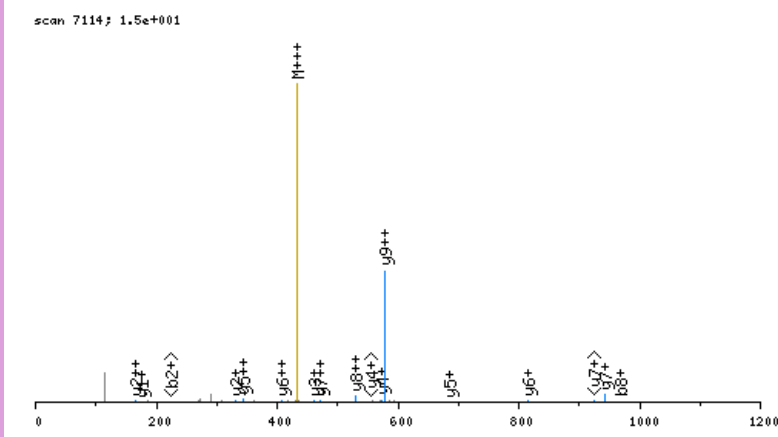

click image to zoom in; click top corners to zoom out [\[precursor±\]](#)

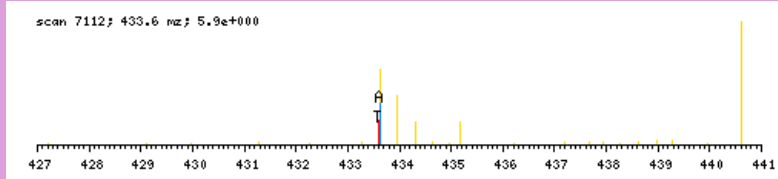

zoomed in precursor plot; T=theoretical m/z, A=acquired m/z

| b <sup>+</sup> | #  | AA # | y <sup>+</sup> | y <sup>2+</sup>    |
|----------------|----|------|----------------|--------------------|
| 142.1232       | 1  | L    | 10             |                    |
| 243.1708       | 2  | T    | 9              | 1157.6894 579.3486 |
| 356.2549       | 3  | I    | 8              | 1056.6418 528.8248 |
| 485.2975       | 4  | E    | 7              | 943.5577 472.2828  |
| 613.3561       | 5  | Q    | 6              | 814.5151 407.7615  |
| 726.4401       | 6  | L    | 5              | 686.4565 343.7322  |
| 839.5242       | 7  | L    | 4              | 573.3725 287.1901  |
| 968.5668       | 8  | E    | 3              | 460.2884 230.6481  |
| 1124.6931      | 9  | K    | 2              | 331.2458 166.1268  |
|                | 10 | R    | 1              | 175.1195 88.0637   |

N-term:+29.04 K(9):+156.13



LVDGSSSLGPSNFNAIR, MH+ 1761.9135, m/z 587.9760  
 L OS G25 P150811 220811-s1.06201.06201.3.dta

X-range:

-

MassTol: Y-zoom:

MassType:

AVG  MONO

Axis:

1  2

Label:

I  M  -

Ions:

a  +  2+  3+

b  +  2+  3+

c  +  2+  3+

x  +  2+  3+

y  +  2+  3+

z  +  2+  3+

hide H<sub>2</sub>O/NH<sub>3</sub>

zoom 112-122

GO

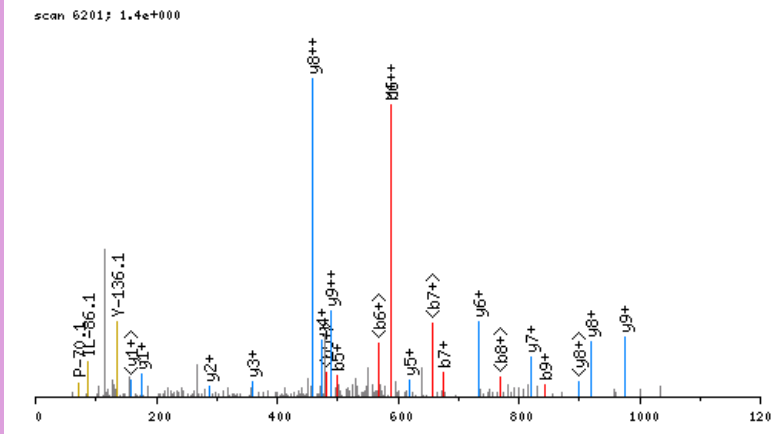

click image to zoom in; click top corners to zoom out [\[precursor±\]](#)

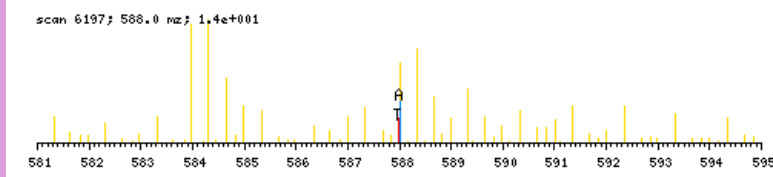

zoomed in precursor plot; T=theoretical m/z, A=acquired m/z

| b <sup>+</sup> | #  | AA # | y <sup>+</sup> | y <sup>2+</sup> |
|----------------|----|------|----------------|-----------------|
| 142.1232       | 1  | L 17 |                |                 |
| 241.1916       | 2  | V 16 | 1620.7982      | 810.9030        |
| 356.2185       | 3  | D 15 | 1521.7298      | 761.3688        |
| 413.2400       | 4  | G 14 | 1406.7028      | 703.8553        |
| 500.2720       | 5  | S 13 | 1349.6814      | 675.3446        |
| 587.3040       | 6  | S 12 | 1262.6493      | 631.8286        |
| 674.3361       | 7  | S 11 | 1175.6173      | 588.3126        |
| 787.4201       | 8  | L 10 | 1088.5853      | 544.7965        |
| 844.4416       | 9  | G 9  | 975.5012       | 488.2545        |
| 941.4944       | 10 | P 8  | 918.4797       | 459.7438        |
| 1028.5264      | 11 | S 7  | 821.4270       | 411.2174        |
| 1142.5693      | 12 | N 6  | 734.3949       | 367.7014        |
| 1289.6377      | 13 | F 5  | 620.3520       | 310.6799        |
| 1403.6807      | 14 | N 4  | 473.2836       | 237.1457        |
| 1474.7178      | 15 | A 3  | 359.2407       | 180.1243        |
| 1587.8018      | 16 | I 2  | 288.2036       | 144.6057        |
|                | 17 | R 1  | 175.1195       | 88.0637         |

N-term:+29.04

LVKAGFAGDDAPR, MH+ 1384.8225, m/z 462.2790  
 H OS G27 P150811 220811-s1.02944.02944.3.dta

X-range:

-

MassTol: Y-zoom:

MassType:

AVG  MONO

Axis:

1  2

Label:

I  M  -

Ions:

a  +  2+  3+

b  +  2+  3+

c  +  2+  3+

x  +  2+  3+

y  +  2+  3+

z  +  2+  3+

hide H<sub>2</sub>O/NH<sub>3</sub>

zoom 112-122

GO

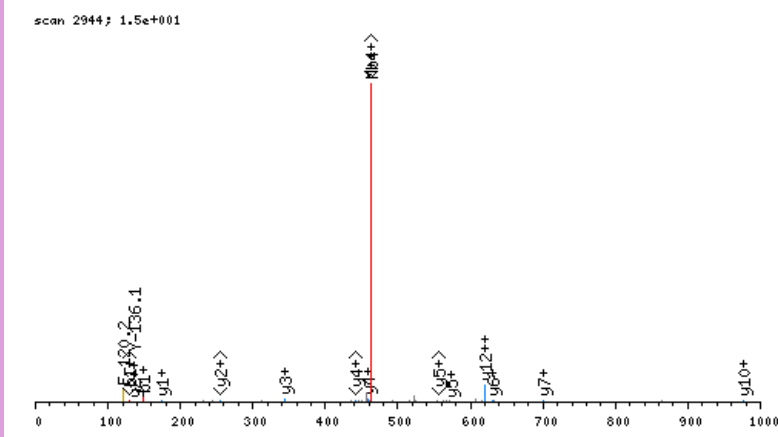

click image to zoom in; click top corners to zoom out [\[precursor±\]](#)

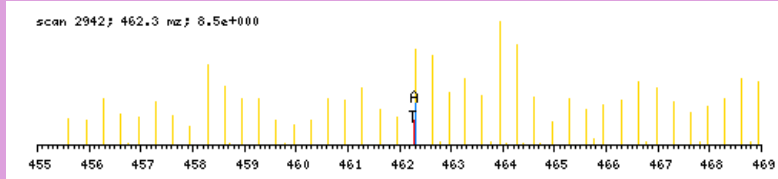

zoomed in precursor plot; T=theoretical m/z, A=acquired m/z

| b <sup>+</sup> | #  | AA # | y <sup>+</sup> | y <sup>2+</sup> |
|----------------|----|------|----------------|-----------------|
| 148.1550       | 1  | L 13 |                |                 |
| 247.2234       | 2  | V 12 | 1237.6753      | 619.3416        |
| 409.3815       | 3  | K 11 | 1138.6069      | 569.8074        |
| 480.4186       | 4  | A 10 | 976.4488       | 488.7283        |
| 537.4401       | 5  | G 9  | 905.4117       | 453.2098        |
| 684.5085       | 6  | F 8  | 848.3903       | 424.6990        |
| 755.5456       | 7  | A 7  | 701.3218       | 351.1648        |
| 812.5670       | 8  | G 6  | 630.2847       | 315.6463        |
| 927.5940       | 9  | D 5  | 573.2633       | 287.1355        |
| 1042.6209      | 10 | D 4  | 458.2363       | 229.6221        |
| 1113.6580      | 11 | A 3  | 343.2094       | 172.1086        |
| 1210.7108      | 12 | P 2  | 272.1723       | 136.5900        |
|                | 13 | R 1  | 175.1195       | 88.0637         |

N-term:+35.07 K(3):+162.16

LVKIPSEQEQLR, MH+ 1495.8848, m/z 499.2998  
 L OS G27 P150811 220811-s1.04039.04039.3.dta

X-range:

-

MassTol: Y-zoom:

MassType:

AVG  MONO

Axis:

1  2

Label:

I  M  -

Ions:

a  +  2+  3+

b  +  2+  3+

c  +  2+  3+

x  +  2+  3+

y  +  2+  3+

z  +  2+  3+

hide H<sub>2</sub>O/NH<sub>3</sub>

zoom 112-122

GO

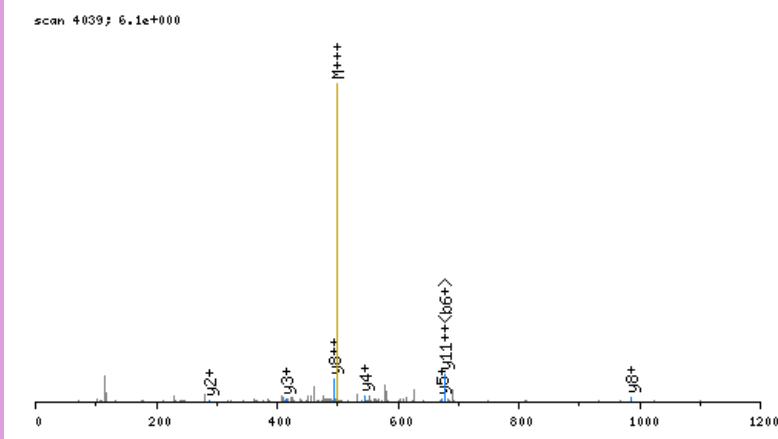

click image to zoom in; click top corners to zoom out [\[precursor±\]](#)

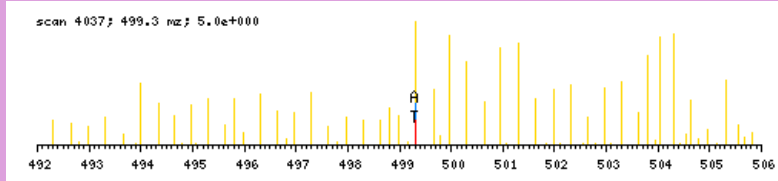

zoomed in precursor plot; T=theoretical m/z, A=acquired m/z

| b <sup>+</sup> | #  | AA # | y <sup>+</sup> | y <sup>2+</sup> |
|----------------|----|------|----------------|-----------------|
| 142.1232       | 1  | L 12 |                |                 |
| 241.1916       | 2  | V 11 | 1354.7695      | 677.8887        |
| 397.3179       | 3  | K 10 | 1255.7011      | 628.3544        |
| 510.4019       | 4  | I 9  | 1099.5748      | 550.2913        |
| 607.4547       | 5  | P 8  | 986.4907       | 493.7493        |
| 694.4867       | 6  | S 7  | 889.4379       | 445.2229        |
| 823.5293       | 7  | E 6  | 802.4059       | 401.7069        |
| 951.5879       | 8  | Q 5  | 673.3633       | 337.1856        |
| 1080.6305      | 9  | E 4  | 545.3047       | 273.1563        |
| 1208.6891      | 10 | Q 3  | 416.2621       | 208.6350        |
| 1321.7731      | 11 | L 2  | 288.2036       | 144.6057        |
|                | 12 | R 1  | 175.1195       | 88.0637         |

N-term:+29.04 K(3):+156.13

LVVWNEEDHLR, MH+ 1437.7490, m/z 479.9212  
 L OS G27 P150811 220811-s1.05304.05304.3.dta

scan 5304; 6.5e+000

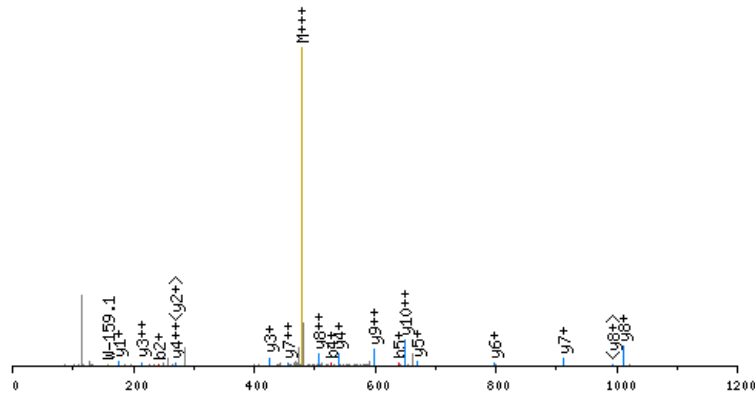

click image to zoom in; click top corners to zoom out [\[precursor±\]](#)

scan 5302; 479.9 m/z; 2.8e+001

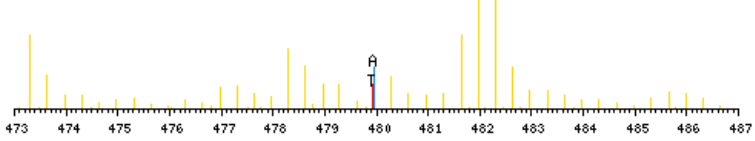

zoomed in precursor plot; T=theoretical m/z, A=acquired m/z

X-range:

-

MassTol: Y-zoom:

MassType:

AVG  MONO

Axis:

1  2

Label:

I  M  -

Ions:

a  +  2+  3+

b  +  2+  3+

c  +  2+  3+

x  +  2+  3+

y  +  2+  3+

z  +  2+  3+

hide H<sub>2</sub>O/NH<sub>3</sub>

zoom 112-122

GO

| b <sup>+</sup> | #  | AA # | y <sup>+</sup> | y <sup>2+</sup> |
|----------------|----|------|----------------|-----------------|
| 142.1232       | 1  | L 11 |                |                 |
| 241.1916       | 2  | V 10 | 1296.6337      | 648.8207        |
| 427.2709       | 3  | W 9  | 1197.5653      | 599.2865        |
| 526.3393       | 4  | V 8  | 1011.4859      | 506.2469        |
| 640.3822       | 5  | N 7  | 912.4175       | 456.7127        |
| 769.4248       | 6  | E 6  | 798.3746       | 399.6912        |
| 898.4674       | 7  | E 5  | 669.3320       | 335.1699        |
| 1013.4944      | 8  | D 4  | 540.2894       | 270.6486        |
| 1150.5533      | 9  | H 3  | 425.2625       | 213.1352        |
| 1263.6373      | 10 | L 2  | 288.2036       | 144.6057        |
|                | 11 | R 1  | 175.1195       | 88.0637         |

N-term:+29.04

LVYDQELLGPSDKSEALR, MH+ 2172.2188, m/z 724.7445  
 H OS G26 P150811 220811-s1.05162.05162.3.dta

X-range:

-

MassTol: Y-zoom:

MassType:

AVG  MONO

Axis:

1  2

Label:

I  M  -

Ions:

a  +  2+  3+

b  +  2+  3+

c  +  2+  3+

x  +  2+  3+

y  +  2+  3+

z  +  2+  3+

hide H<sub>2</sub>O/NH<sub>3</sub>

zoom 112-122

GO

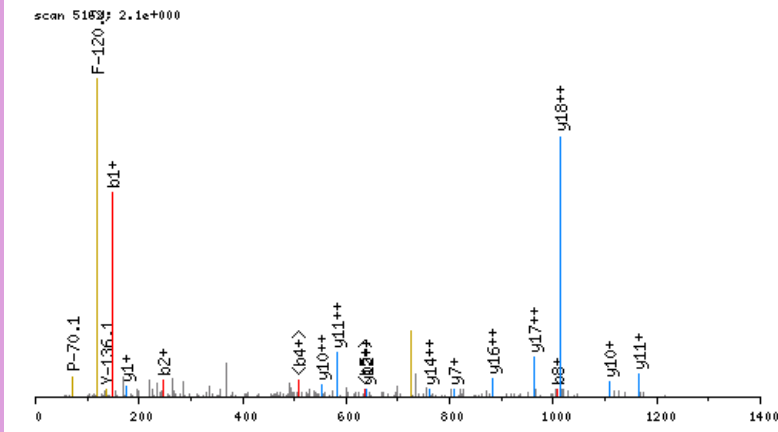

click image to zoom in; click top corners to zoom out [\[precursor±\]](#)

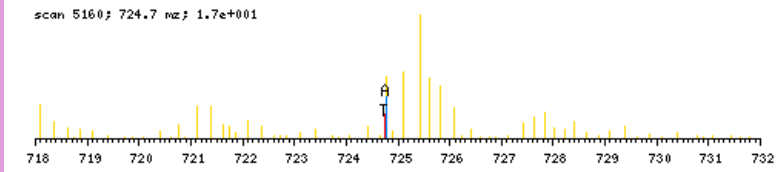

zoomed in precursor plot; T=theoretical m/z, A=acquired m/z

| b <sup>+</sup> | #  | AA | #  | y <sup>+</sup> | y <sup>2+</sup> |
|----------------|----|----|----|----------------|-----------------|
| 148.1550       | 1  | L  | 19 |                |                 |
| 247.2234       | 2  | V  | 18 | 2025.0717      | 1013.0398       |
| 410.2867       | 3  | Y  | 17 | 1926.0033      | 963.5056        |
| 525.3136       | 4  | D  | 16 | 1762.9400      | 881.9739        |
| 653.3722       | 5  | Q  | 15 | 1647.9130      | 824.4604        |
| 782.4148       | 6  | E  | 14 | 1519.8544      | 760.4311        |
| 895.4989       | 7  | L  | 13 | 1390.8118      | 695.9098        |
| 1008.5829      | 8  | L  | 12 | 1277.7278      | 639.3678        |
| 1065.6044      | 9  | G  | 11 | 1164.6437      | 582.8258        |
| 1162.6572      | 10 | P  | 10 | 1107.6222      | 554.3150        |
| 1249.6892      | 11 | S  | 9  | 1010.5695      | 505.7887        |
| 1364.7161      | 12 | D  | 8  | 923.5375       | 462.2726        |
| 1526.8742      | 13 | K  | 7  | 808.5105       | 404.7592        |
| 1613.9063      | 14 | S  | 6  | 646.3524       | 323.6801        |
| 1742.9489      | 15 | E  | 5  | 559.3204       | 280.1641        |
| 1813.9860      | 16 | A  | 4  | 430.2778       | 215.6428        |
| 1885.0231      | 17 | A  | 3  | 359.2407       | 180.1243        |
| 1998.1072      | 18 | L  | 2  | 288.2036       | 144.6057        |
|                | 19 | R  | 1  | 175.1195       | 88.0637         |

N-term:+35.07 K(13):+162.16

LYMEKNQLEEVPSALPR, MH+ 2073.1054, m/z 691.7067  
 L OS G26 P150811 220811-s1.05244.05244.3.dta

X-range:

-

MassTol: Y-zoom:

MassType:

AVG  MONO

Axis:

1  2

Label:

I  M  -

Ions:

a  +  2+  3+

b  +  2+  3+

c  +  2+  3+

x  +  2+  3+

y  +  2+  3+

z  +  2+  3+

hide H<sub>2</sub>O/NH<sub>3</sub>

zoom 112-122

GO

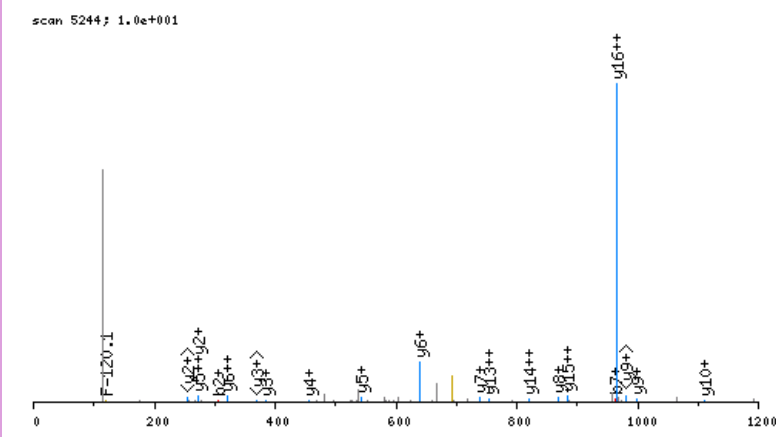

click image to zoom in; click top corners to zoom out [\[precursor±\]](#)

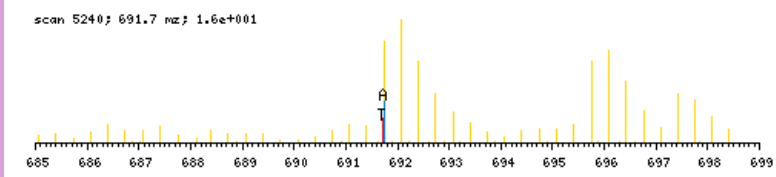

zoomed in precursor plot; T=theoretical m/z, A=acquired m/z

| b <sup>+</sup> | #  | AA # | y <sup>+</sup> | y <sup>2+</sup> |
|----------------|----|------|----------------|-----------------|
| 142.1232       | 1  | L 17 |                |                 |
| 305.1865       | 2  | Y 16 | 1931.9901      | 966.4990        |
| 436.2270       | 3  | M 15 | 1768.9268      | 884.9673        |
| 565.2696       | 4  | E 14 | 1637.8863      | 819.4471        |
| 721.3959       | 5  | K 13 | 1508.8437      | 754.9258        |
| 835.4388       | 6  | N 12 | 1352.7174      | 676.8626        |
| 963.4974       | 7  | Q 11 | 1238.6745      | 619.8412        |
| 1076.5814      | 8  | L 10 | 1110.6159      | 555.8119        |
| 1205.6240      | 9  | E 9  | 997.5318       | 499.2698        |
| 1334.6666      | 10 | E 8  | 868.4892       | 434.7485        |
| 1433.7350      | 11 | V 7  | 739.4466       | 370.2272        |
| 1530.7878      | 12 | P 6  | 640.3782       | 320.6930        |
| 1617.8198      | 13 | S 5  | 543.3255       | 272.1666        |
| 1688.8569      | 14 | A 4  | 456.2934       | 228.6506        |
| 1801.9410      | 15 | L 3  | 385.2563       | 193.1321        |
| 1898.9938      | 16 | P 2  | 272.1723       | 136.5900        |
|                | 17 | R 1  | 175.1195       | 88.0637         |

N-term:+29.04 K(5):+156.13

X-range:

-

MassTol: Y-zoom:

MassType:

AVG  MONO

Axis:

1  2

Label:

I  M  -

Ions:

a  +  2+  3+

b  +  2+  3+

c  +  2+  3+

x  +  2+  3+

y  +  2+  3+

z  +  2+  3+

hide H<sub>2</sub>O/NH<sub>3</sub>

zoom 112-122

GO

scan 4368; 2.9e+000

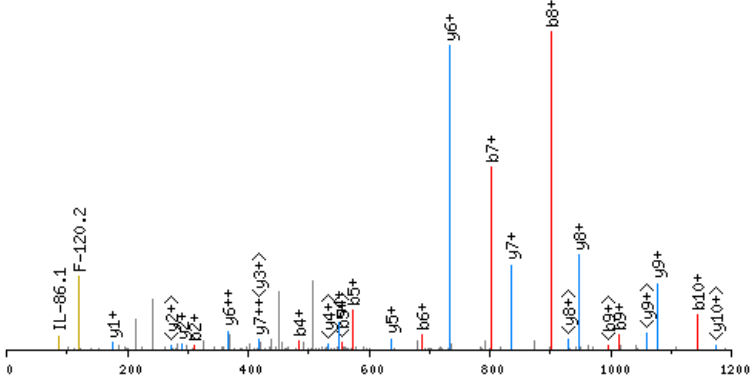

click image to zoom in; click top corners to zoom out [\[precursor±\]](#)

scan 4367; 697.7 m/z; 1.3e+001

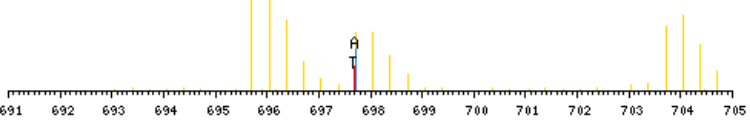

zoomed in precursor plot; T=theoretical m/z, A=acquired m/z

| b <sup>+</sup>   | #  | AA | #  | y <sup>+</sup>   | y <sup>2+</sup> |
|------------------|----|----|----|------------------|-----------------|
| 148.1550         | 1  | L  | 18 |                  |                 |
| <b>311.2183</b>  | 2  | Y  | 17 | 1943.8987        | 972.4533        |
| 398.2503         | 3  | S  | 16 | 1780.8353        | 890.9216        |
| <b>485.2823</b>  | 4  | S  | 15 | 1693.8033        | 847.4056        |
| <b>572.3144</b>  | 5  | S  | 14 | 1606.7713        | 803.8896        |
| <b>687.3413</b>  | 6  | D  | 13 | 1519.7393        | 760.3735        |
| <b>802.3683</b>  | 7  | D  | 12 | 1404.7123        | 702.8601        |
| <b>901.4367</b>  | 8  | V  | 11 | 1289.6854        | 645.3466        |
| <b>1014.5207</b> | 9  | I  | 10 | 1190.6170        | 595.8124        |
| <b>1143.5633</b> | 10 | E  | 9  | <b>1077.5329</b> | 539.2704        |
| 1256.6474        | 11 | L  | 8  | <b>948.4903</b>  | 474.7491        |
| 1357.6951        | 12 | T  | 7  | <b>835.4062</b>  | <b>418.2070</b> |
| 1454.7478        | 13 | P  | 6  | <b>734.3586</b>  | <b>367.6832</b> |
| 1541.7799        | 14 | S  | 5  | <b>637.3058</b>  | 319.1568        |
| 1655.8228        | 15 | N  | 4  | <b>550.2738</b>  | 275.6408        |
| 1802.8912        | 16 | F  | 3  | 436.2308         | 218.6193        |
| 1916.9341        | 17 | N  | 2  | <b>289.1624</b>  | 145.0851        |
|                  | 18 | R  | 1  | <b>175.1195</b>  | 88.0637         |

N-term:+35.07

MASGGVPTDEEQATGLER, MH+ 1932.8973, m/z 644.9706  
 L OS G24 P150811 220811-s1.03098.03098.3.dta

scan 3098; 3.1e+000

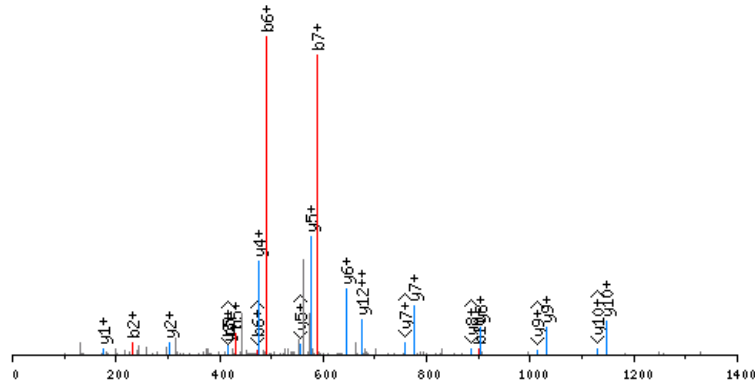

click image to zoom in; click top corners to zoom out [precursor±]

scan 3097; 645.0 m/z; 4.2e+000

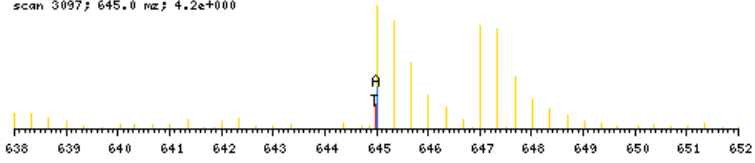

zoomed in precursor plot; T=theoretical m/z, A=acquired m/z

X-range:

-

MassTol: Y-zoom:

MassType:

AVG  MONO

Axis:

1  2

Label:

I  M  -

Ions:

a  +  2+  3+

b  +  2+  3+

c  +  2+  3+

x  +  2+  3+

y  +  2+  3+

z  +  2+  3+

hide H<sub>2</sub>O/NH<sub>3</sub>

zoom 112-122

GO

| b <sup>+</sup> | #  | AA # | y <sup>+</sup> | y <sup>2+</sup> |
|----------------|----|------|----------------|-----------------|
| 160.0796       | 1  | M 19 |                |                 |
| 231.1167       | 2  | A 18 | 1773.8255      | 887.4167        |
| 318.1487       | 3  | S 17 | 1702.7884      | 851.8981        |
| 375.1702       | 4  | G 16 | 1615.7564      | 808.3821        |
| 432.1917       | 5  | G 15 | 1558.7349      | 779.8714        |
| 489.2131       | 6  | G 14 | 1501.7134      | 751.3606        |
| 588.2815       | 7  | V 13 | 1444.6920      | 722.8499        |
| 685.3343       | 8  | P 12 | 1345.6236      | 673.3157        |
| 786.3820       | 9  | T 11 | 1248.5708      | 624.7893        |
| 901.4089       | 10 | D 10 | 1147.5231      | 574.2655        |
| 1030.4515      | 11 | E 9  | 1032.4962      | 516.7520        |
| 1159.4941      | 12 | E 8  | 903.4536       | 452.2307        |
| 1287.5527      | 13 | Q 7  | 774.4110       | 387.7094        |
| 1358.5898      | 14 | A 6  | 646.3524       | 323.6801        |
| 1459.6375      | 15 | T 5  | 575.3153       | 288.1616        |
| 1516.6589      | 16 | G 4  | 474.2676       | 237.6377        |
| 1629.7430      | 17 | L 3  | 417.2462       | 209.1270        |
| 1758.7856      | 18 | E 2  | 304.1621       | 152.5850        |
|                | 19 | R 1  | 175.1195       | 88.0637         |

N-term:+29.04



MDESNVLDSGFLEK, MH+ 1639.7637, m/z 547.2594  
 L OS G25 P150811 220811-s1.07481.07481.3.dta

X-range:

-

MassTol: Y-zoom:

MassType:

AVG  MONO

Axis:

1  2

Label:

I  M  -

Ions:

a  +  2+  3+

b  +  2+  3+

c  +  2+  3+

x  +  2+  3+

y  +  2+  3+

z  +  2+  3+

hide H<sub>2</sub>O/NH<sub>3</sub>

zoom 112-122

GO

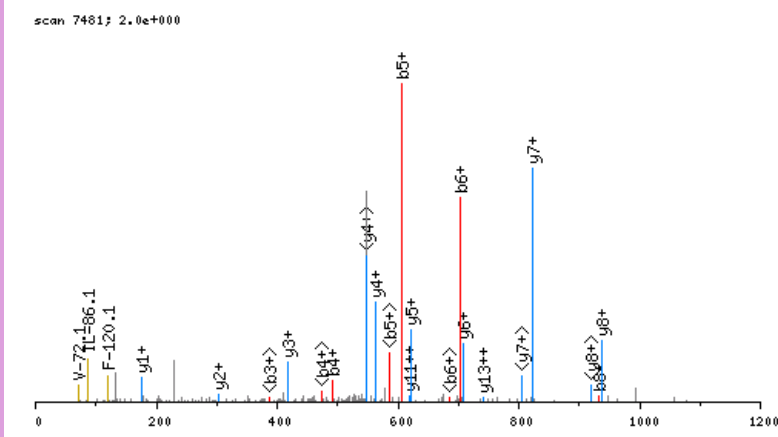

click image to zoom in; click top corners to zoom out [\[precursor±\]](#)

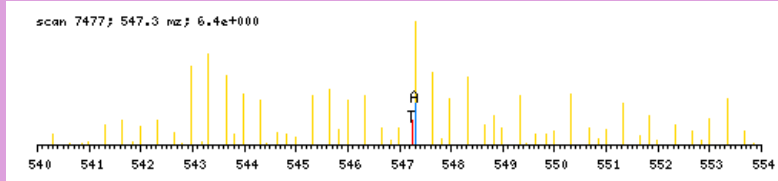

zoomed in precursor plot; T=theoretical m/z, A=acquired m/z

| b <sup>+</sup> | #  | AA # | y <sup>+</sup> | y <sup>2+</sup> |
|----------------|----|------|----------------|-----------------|
| 160.0796       | 1  | M 14 |                |                 |
| 275.1065       | 2  | D 13 | 1480.6920      | 740.8499        |
| 404.1491       | 3  | E 12 | 1365.6650      | 683.3364        |
| 491.1811       | 4  | S 11 | 1236.6224      | 618.8151        |
| 605.2241       | 5  | N 10 | 1149.5904      | 575.2991        |
| 704.2925       | 6  | V 9  | 1035.5475      | 518.2777        |
| 817.3766       | 7  | L 8  | 936.4791       | 468.7434        |
| 932.4035       | 8  | D 7  | 823.3950       | 412.2014        |
| 1019.4355      | 9  | S 6  | 708.3681       | 354.6879        |
| 1076.4570      | 10 | G 5  | 621.3360       | 311.1719        |
| 1223.5254      | 11 | F 4  | 564.3146       | 282.6612        |
| 1336.6095      | 12 | L 3  | 417.2462       | 209.1270        |
| 1465.6521      | 13 | E 2  | 304.1621       | 152.5850        |
|                | 14 | R 1  | 175.1195       | 88.0637         |

N-term:+29.04

MDVLAQEVALLEK, MH+ 1670.9767, m/z 557.6638  
 L OS G26 P150811 220811-s1.06644.06644.3.dta

X-range:

-

MassTol: Y-zoom:

MassType:

AVG  MONO

Axis:

1  2

Label:

I  M  -

Ions:

a  +  2+  3+

b  +  2+  3+

c  +  2+  3+

x  +  2+  3+

y  +  2+  3+

z  +  2+  3+

hide H<sub>2</sub>O/NH<sub>3</sub>

zoom 112-122

GO

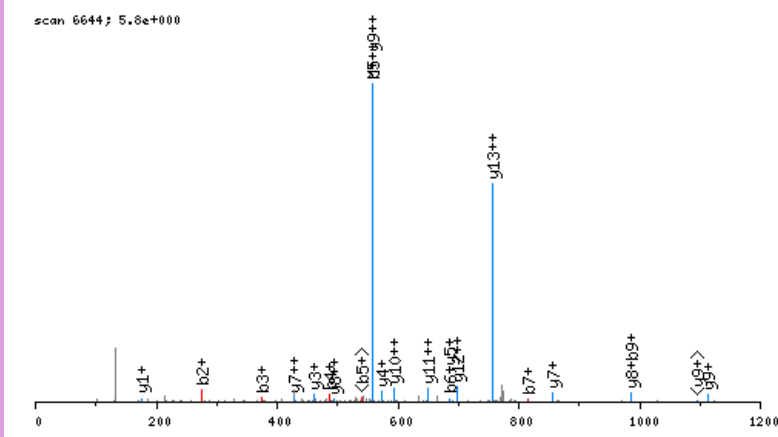

click image to zoom in; click top corners to zoom out [\[precursor±\]](#)

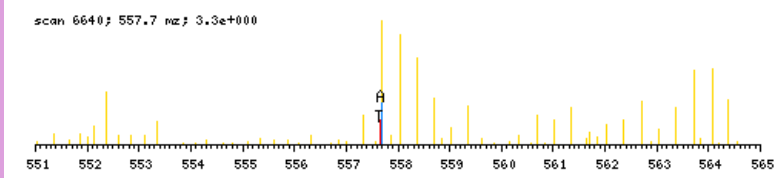

zoomed in precursor plot; T=theoretical m/z, A=acquired m/z

| b <sup>+</sup> | #  | AA | #  | y <sup>+</sup> | y <sup>2+</sup> |
|----------------|----|----|----|----------------|-----------------|
| 160.0796       | 1  | M  | 14 |                |                 |
| 275.1065       | 2  | D  | 13 | 1511.9049      | 756.4564        |
| 374.1749       | 3  | V  | 12 | 1396.8780      | 698.9429        |
| 487.2590       | 4  | L  | 11 | 1297.8096      | 649.4087        |
| 558.2961       | 5  | A  | 10 | 1184.7255      | 592.8667        |
| 686.3547       | 6  | Q  | 9  | 1113.6884      | 557.3481        |
| 815.3973       | 7  | E  | 8  | 985.6298       | 493.3188        |
| 914.4657       | 8  | V  | 7  | 856.5872       | 428.7975        |
| 985.5028       | 9  | A  | 6  | 757.5188       | 379.2633        |
| 1098.5869      | 10 | L  | 5  | 686.4817       | 343.7448        |
| 1211.6709      | 11 | L  | 4  | 573.3976       | 287.2027        |
| 1367.7972      | 12 | K  | 3  | 460.3136       | 230.6607        |
| 1496.8398      | 13 | E  | 2  | 304.1873       | 152.5976        |
|                | 14 | K  | 1  | 175.1447       | 88.0763         |

N-term:+29.04 K(12):+156.13  
 K(14):+156.13

MEKNQLEEVPSALPR, MH+ 1809.0217, m/z 603.6787  
 H OS G26 P150811 220811-s1.04244.04244.3.dta

X-range:

-

MassTol: Y-zoom:

MassType:

AVG  MONO

Axis:

1  2

Label:

I  M  -

Ions:

a  +  2+  3+

b  +  2+  3+

c  +  2+  3+

x  +  2+  3+

y  +  2+  3+

z  +  2+  3+

hide H<sub>2</sub>O/NH<sub>3</sub>

zoom 112-122

GO

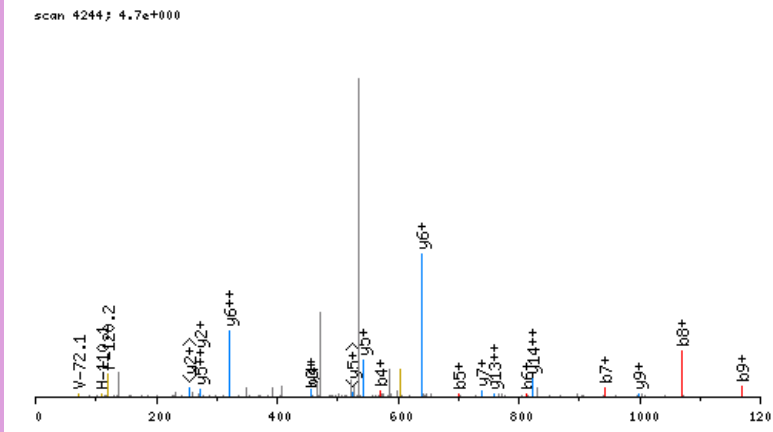

click image to zoom in; click top corners to zoom out [\[precursor±\]](#)

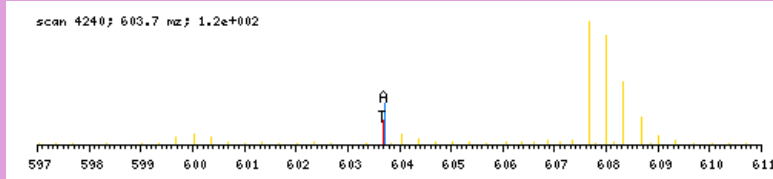

zoomed in precursor plot; T=theoretical m/z, A=acquired m/z

| b <sup>+</sup> | #  | AA # | y <sup>+</sup> | y <sup>2+</sup> |
|----------------|----|------|----------------|-----------------|
| 166.1114       | 1  | M 15 |                |                 |
| 295.1540       | 2  | E 14 | 1643.9181      | 822.4630        |
| 457.3121       | 3  | K 13 | 1514.8755      | 757.9417        |
| 571.3550       | 4  | N 12 | 1352.7174      | 676.8626        |
| 699.4136       | 5  | Q 11 | 1238.6745      | 619.8412        |
| 812.4976       | 6  | L 10 | 1110.6159      | 555.8119        |
| 941.5402       | 7  | E 9  | 997.5318       | 499.2698        |
| 1070.5828      | 8  | E 8  | 868.4892       | 434.7485        |
| 1169.6512      | 9  | V 7  | 739.4466       | 370.2272        |
| 1266.7040      | 10 | P 6  | 640.3782       | 320.6930        |
| 1353.7360      | 11 | S 5  | 543.3255       | 272.1666        |
| 1424.7732      | 12 | A 4  | 456.2934       | 228.6506        |
| 1537.8572      | 13 | L 3  | 385.2563       | 193.1321        |
| 1634.9100      | 14 | P 2  | 272.1723       | 136.5900        |
|                | 15 | R 1  | 175.1195       | 88.0637         |

N-term:+35.07 K(3):+162.16

MFDTPEQESPVKSPVVR, MH+ 1870.9737, m/z 624.3294  
 L OS G26 P150811 220811-s1.03593.03593.3.dta

X-range:

-

MassTol: Y-zoom:

MassType:

AVG  MONO

Axis:

1  2

Label:

I  M  -

Ions:

a  +  2+  3+

b  +  2+  3+

c  +  2+  3+

x  +  2+  3+

y  +  2+  3+

z  +  2+  3+

hide H<sub>2</sub>O/NH<sub>3</sub>

zoom 112-122

GO

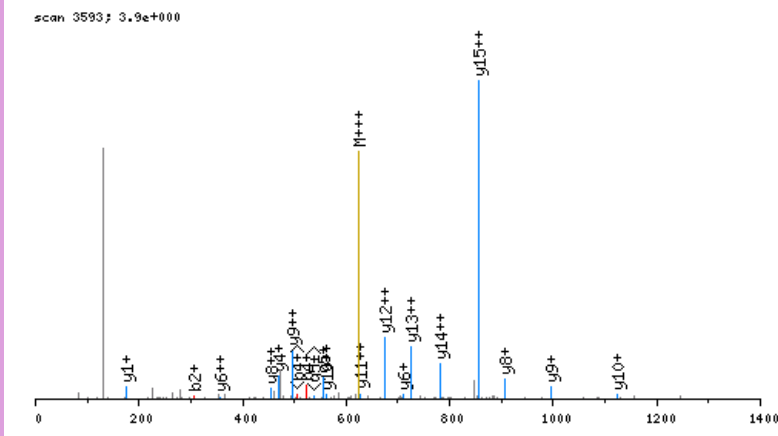

click image to zoom in; click top corners to zoom out [\[precursor±\]](#)

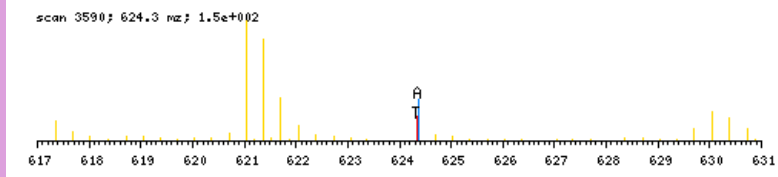

zoomed in precursor plot; T=theoretical m/z, A=acquired m/z

| b <sup>+</sup> | #  | AA # | y <sup>+</sup> | y <sup>2+</sup> |
|----------------|----|------|----------------|-----------------|
| 160.0796       | 1  | M 16 |                |                 |
| 307.1480       | 2  | F 15 | 1711.9019      | 856.4549        |
| 422.1749       | 3  | D 14 | 1564.8335      | 782.9207        |
| 523.2226       | 4  | T 13 | 1449.8066      | 725.4072        |
| 620.2754       | 5  | P 12 | 1348.7589      | 674.8834        |
| 748.3340       | 6  | Q 11 | 1251.7061      | 626.3570        |
| 877.3766       | 7  | E 10 | 1123.6476      | 562.3277        |
| 964.4086       | 8  | S 9  | 994.6050       | 497.8064        |
| 1061.4613      | 9  | P 8  | 907.5729       | 454.2904        |
| 1160.5298      | 10 | V 7  | 810.5202       | 405.7640        |
| 1316.6561      | 11 | K 6  | 711.4518       | 356.2298        |
| 1403.6881      | 12 | S 5  | 555.3255       | 278.1666        |
| 1500.7409      | 13 | P 4  | 468.2934       | 234.6506        |
| 1597.7936      | 14 | P 3  | 371.2407       | 186.1243        |
| 1696.8620      | 15 | V 2  | 274.1879       | 137.5979        |
|                | 16 | R 1  | 175.1195       | 88.0637         |

N-term:+29.04 K(11):+156.13

MFSNQGVCTLEIR, MH+ 1582.7721, m/z 528.2622  
 L OS G25 P150811 220811-s1.06046.06046.3.dta

X-range:

-

MassTol: Y-zoom:

MassType:

AVG  MONO

Axis:

1  2

Label:

I  M  -

Ions:

a  +  2+  3+

b  +  2+  3+

c  +  2+  3+

x  +  2+  3+

y  +  2+  3+

z  +  2+  3+

hide H<sub>2</sub>O/NH<sub>3</sub>

zoom 112-122

GO

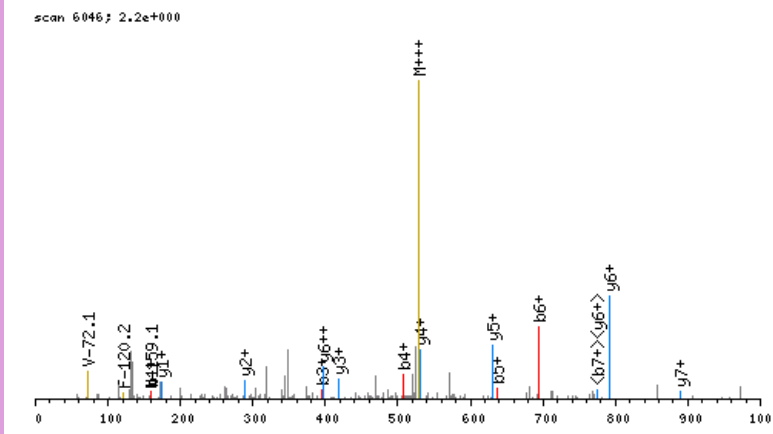

click image to zoom in; click top corners to zoom out [\[precursor±\]](#)

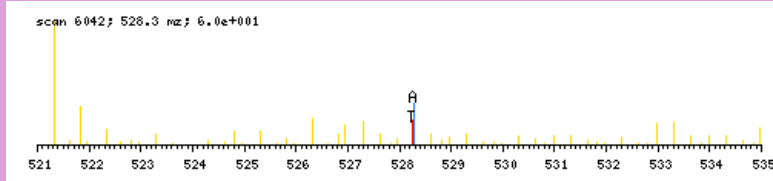

zoomed in precursor plot; T=theoretical m/z, A=acquired m/z

| b <sup>+</sup> | #  | AA # | y <sup>+</sup> | y <sup>2+</sup> |
|----------------|----|------|----------------|-----------------|
| 160.0796       | 1  | M 13 |                |                 |
| 307.1480       | 2  | F 12 | 1423.7003      | 712.3541        |
| 394.1800       | 3  | S 11 | 1276.6319      | 638.8199        |
| 508.2230       | 4  | N 10 | 1189.5999      | 595.3039        |
| 636.2815       | 5  | Q 9  | 1075.5570      | 538.2824        |
| 693.3030       | 6  | G 8  | 947.4984       | 474.2531        |
| 792.3714       | 7  | V 7  | 890.4769       | 445.7424        |
| 952.4020       | 8  | C 6  | 791.4085       | 396.2082        |
| 1053.4497      | 9  | T 5  | 631.3779       | 316.1929        |
| 1166.5338      | 10 | L 4  | 530.3302       | 265.6690        |
| 1295.5763      | 11 | E 3  | 417.2462       | 209.1270        |
| 1408.6604      | 12 | I 2  | 288.2036       | 144.6057        |
|                | 13 | R 1  | 175.1195       | 88.0637         |

N-term:+29.04 C(8):+160.03

MGQKDCYVGDEAQSQR, MH+ 1974.0273, m/z 494.2623  
 H OS G28 P150811 220811-s1.01829.01829.4.dta

X-range:

-

MassTol: Y-zoom:

MassType:

AVG  MONO

Axis:

1  2

Label:

I  M  -

Ions:

a  +  2+  3+

b  +  2+  3+

c  +  2+  3+

x  +  2+  3+

y  +  2+  3+

z  +  2+  3+

hide H<sub>2</sub>O/NH<sub>3</sub>

zoom 112-122

GO

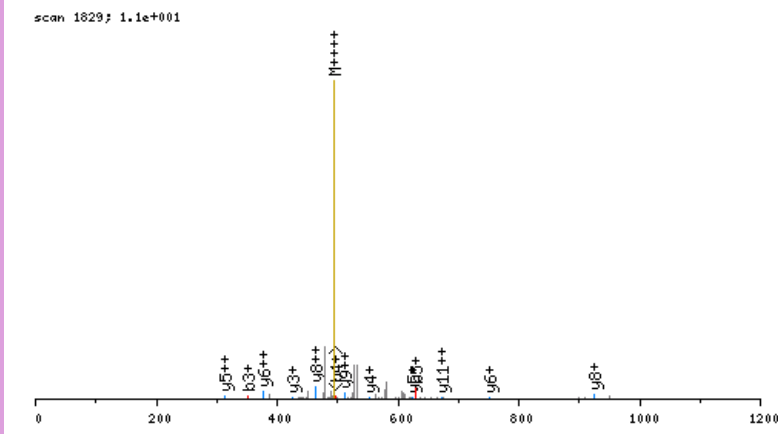

click image to zoom in; click top corners to zoom out [\[precursor±\]](#)

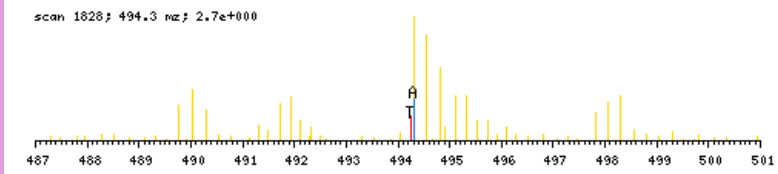

zoomed in precursor plot; T=theoretical m/z, A=acquired m/z

| b <sup>+</sup> | #  | AA | #  | y <sup>+</sup> | y <sup>2+</sup> |
|----------------|----|----|----|----------------|-----------------|
| 166.1114       | 1  | M  | 16 |                |                 |
| 223.1328       | 2  | G  | 15 | 1808.9237      | 904.9658        |
| 351.1914       | 3  | Q  | 14 | 1751.9023      | 876.4551        |
| 513.3495       | 4  | K  | 13 | 1623.8437      | 812.4258        |
| 628.3765       | 5  | D  | 12 | 1461.6856      | 731.3467        |
| 788.4071       | 6  | C  | 11 | 1346.6587      | 673.8332        |
| 951.4704       | 7  | Y  | 10 | 1186.6281      | 593.8179        |
| 1050.5388      | 8  | V  | 9  | 1023.5647      | 512.2863        |
| 1107.5603      | 9  | G  | 8  | 924.4963       | 462.7521        |
| 1222.5872      | 10 | D  | 7  | 867.4749       | 434.2413        |
| 1351.6298      | 11 | E  | 6  | 752.4479       | 376.7279        |
| 1422.6669      | 12 | A  | 5  | 623.4053       | 312.2066        |
| 1550.7255      | 13 | Q  | 4  | 552.3682       | 276.6880        |
| 1637.7575      | 14 | S  | 3  | 424.3096       | 212.6587        |
| 1799.9156      | 15 | K  | 2  | 337.2776       | 169.1427        |
|                | 16 | R  | 1  | 175.1195       | 88.0637         |

N-term:+35.07 K(4):+162.16  
 C(6):+160.03 K(15):+162.16

MGQKDSYVGDEAQSQR, MH+ 1882.9333, m/z 471.4888  
 L OS G28 P150811 220811-s1.02045.02045.4.dta

X-range:

-

MassTol: Y-zoom:

MassType:

AVG  MONO

Axis:

1  2

Label:

I  M  -

Ions:

a  +  2+  3+

b  +  2+  3+

c  +  2+  3+

x  +  2+  3+

y  +  2+  3+

z  +  2+  3+

hide H<sub>2</sub>O/NH<sub>3</sub>

zoom 112-122

GO

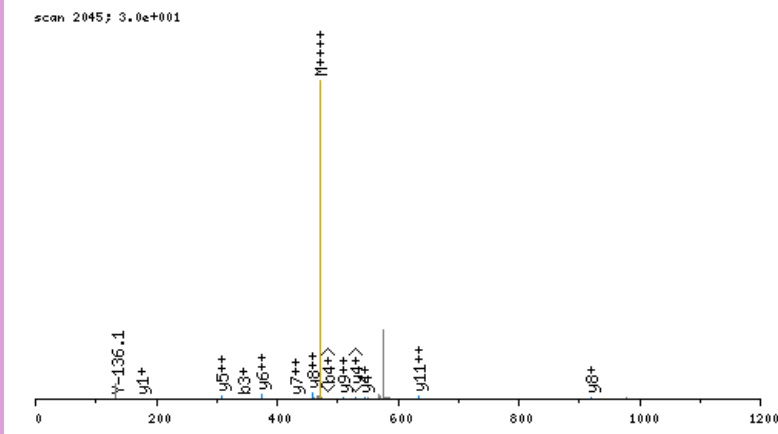

click image to zoom in; click top corners to zoom out [\[precursor±\]](#)

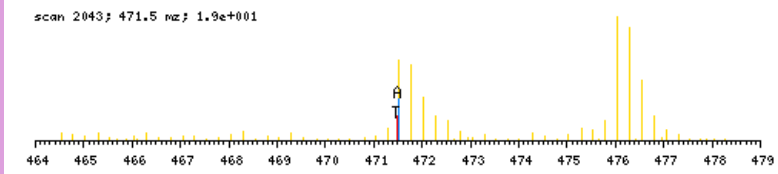

zoomed in precursor plot; T=theoretical m/z, A=acquired m/z

| b <sup>+</sup> | #  | AA | #  | y <sup>+</sup> | y <sup>2+</sup> |
|----------------|----|----|----|----------------|-----------------|
| 160.0796       | 1  | M  | 16 |                |                 |
| 217.1010       | 2  | G  | 15 | 1723.8616      | 862.4347        |
| 345.1596       | 3  | Q  | 14 | 1666.8401      | 833.9240        |
| 501.2859       | 4  | K  | 13 | 1538.7815      | 769.8947        |
| 616.3129       | 5  | D  | 12 | 1382.6552      | 691.8315        |
| 703.3449       | 6  | S  | 11 | 1267.6283      | 634.3181        |
| 866.4082       | 7  | Y  | 10 | 1180.5963      | 590.8020        |
| 965.4766       | 8  | V  | 9  | 1017.5329      | 509.2704        |
| 1022.4981      | 9  | G  | 8  | 918.4645       | 459.7362        |
| 1137.5250      | 10 | D  | 7  | 861.4431       | 431.2254        |
| 1266.5676      | 11 | E  | 6  | 746.4161       | 373.7120        |
| 1337.6048      | 12 | A  | 5  | 617.3735       | 309.1907        |
| 1465.6633      | 13 | Q  | 4  | 546.3364       | 273.6721        |
| 1552.6954      | 14 | S  | 3  | 418.2778       | 209.6428        |
| 1708.8217      | 15 | K  | 2  | 331.2458       | 166.1268        |
|                | 16 | R  | 1  | 175.1195       | 88.0637         |

N-term:+29.04 K(4):+156.13  
 K(15):+156.13

MIECVLLGVMAAYDR, MH+ 1703.8746, m/z 568.6297  
 H OS G27 P150811 220811-s1.01986.01986.3.dta

X-range:

-

MassTol: Y-zoom:

MassType:

AVG  MONO

Axis:

1  2

Label:

I  M  -

Ions:

a  +  2+  3+

b  +  2+  3+

c  +  2+  3+

x  +  2+  3+

y  +  2+  3+

z  +  2+  3+

hide H<sub>2</sub>O/NH<sub>3</sub>

zoom 112-122

GO

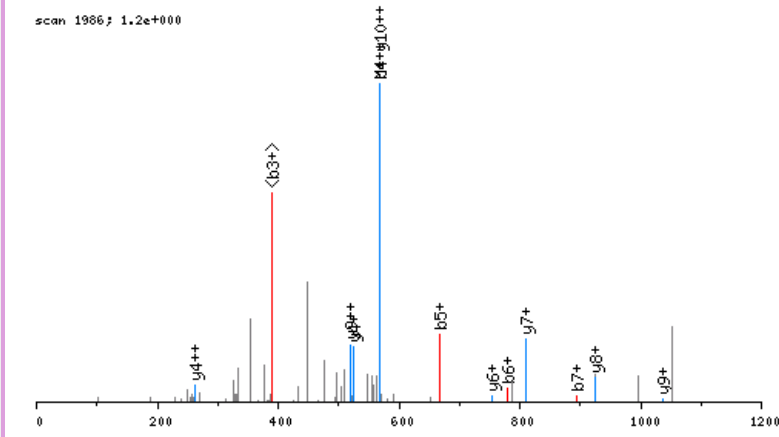

click image to zoom in; click top corners to zoom out [\[precursor±\]](#)

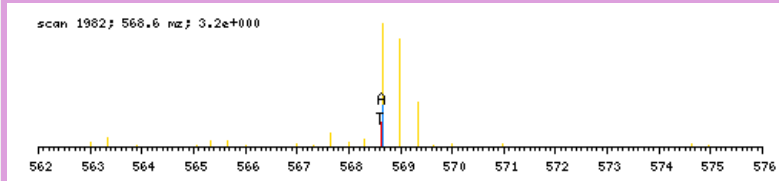

| b <sup>+</sup> | #  | AA # | y <sup>+</sup> | y <sup>2+</sup>    |
|----------------|----|------|----------------|--------------------|
| 166.1114       | 1  | M    | 14             |                    |
| 279.1954       | 2  | I    | 13             | 1538.7710 769.8894 |
| 408.2380       | 3  | E    | 12             | 1425.6870 713.3474 |
| 568.2686       | 4  | C    | 11             | 1296.6444 648.8261 |
| 667.3371       | 5  | V    | 10             | 1136.6138 568.8108 |
| 780.4211       | 6  | L    | 9              | 1037.5454 519.2766 |
| 893.5052       | 7  | L    | 8              | 924.4613 462.7346  |
| 950.5266       | 8  | G    | 7              | 811.3772 406.1925  |
| 1049.5951      | 9  | V    | 6              | 754.3558 377.6818  |
| 1180.6355      | 10 | M    | 5              | 655.2874 328.1476  |
| 1251.6727      | 11 | A    | 4              | 524.2469 262.6274  |
| 1414.7360      | 12 | Y    | 3              | 453.2098 227.1088  |
| 1529.7629      | 13 | D    | 2              | 290.1464 145.5771  |
|                | 14 | R    | 1              | 175.1195 88.0637   |

N-term:+35.07 C(4):+160.03



MKCSSMQKFGER, MH+ 1572.7701, m/z 393.9480  
 L OS G28 P150811 220811-s1.02259.02259.4.dta

X-range:

-

MassTol: Y-zoom:

MassType:

AVG  MONO

Axis:

1  2

Label:

I  M  -

Ions:

a  +  2+  3+

b  +  2+  3+

c  +  2+  3+

x  +  2+  3+

y  +  2+  3+

z  +  2+  3+

hide H<sub>2</sub>O/NH<sub>3</sub>

zoom 112-122

GO

scan 2259; 2.2e+001

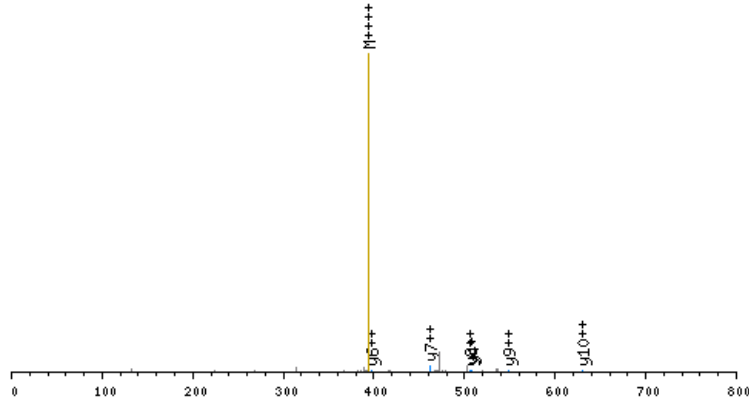

click image to zoom in; click top corners to zoom out [\[precursor±\]](#)

scan 2258; 393.9 mz; 7.5e+000

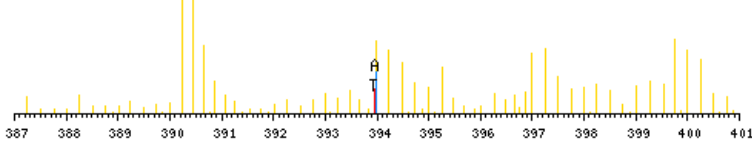

zoomed in precursor plot; T=theoretical m/z, A=acquired m/z

| b <sup>+</sup> | #  | AA | #  | y <sup>+</sup> | y <sup>2+</sup> |
|----------------|----|----|----|----------------|-----------------|
| 160.0796       | 1  | M  | 12 |                |                 |
| 316.2059       | 2  | K  | 11 | 1413.6983      | 707.3531        |
| 476.2365       | 3  | C  | 10 | 1257.5720      | 629.2899        |
| 563.2685       | 4  | S  | 9  | 1097.5414      | 549.2746        |
| 650.3005       | 5  | S  | 8  | 1010.5094      | 505.7586        |
| 781.3410       | 6  | M  | 7  | 923.4773       | 462.2426        |
| 909.3996       | 7  | Q  | 6  | 792.4368       | 396.7223        |
| 1065.5259      | 8  | K  | 5  | 664.3783       | 332.6930        |
| 1212.5943      | 9  | F  | 4  | 508.2520       | 254.6299        |
| 1269.6158      | 10 | G  | 3  | 361.1836       | 181.0957        |
| 1398.6584      | 11 | E  | 2  | 304.1621       | 152.5850        |
|                | 12 | R  | 1  | 175.1195       | 88.0637         |

N-term:+29.04 K(2):+156.13  
 C(3):+160.03 K(8):+156.13

MKVFVTGPLPAEGR, MH+ 1569.9463, m/z 523.9870  
 H OS G27 P150811 220811-s1.05643.05643.3.dta

X-range:

-

MassTol: Y-zoom:

MassType:

AVG  MONO

Axis:

1  2

Label:

I  M  -

Ions:

a  +  2+  3+

b  +  2+  3+

c  +  2+  3+

x  +  2+  3+

y  +  2+  3+

z  +  2+  3+

hide H<sub>2</sub>O/NH<sub>3</sub>

zoom 112-122

GO

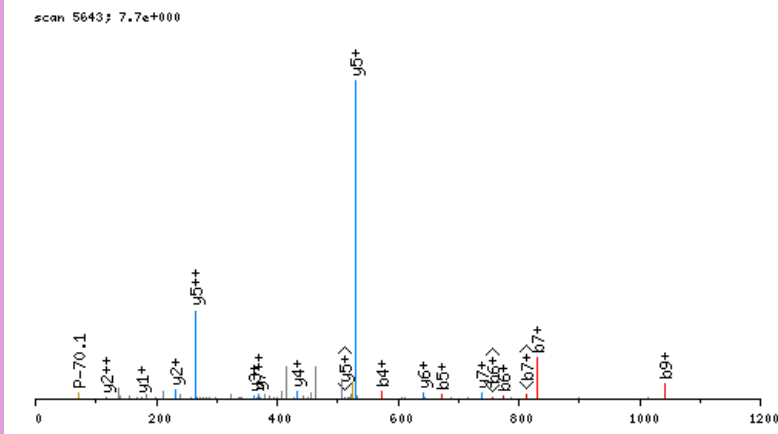

click image to zoom in; click top corners to zoom out [\[precursor±\]](#)

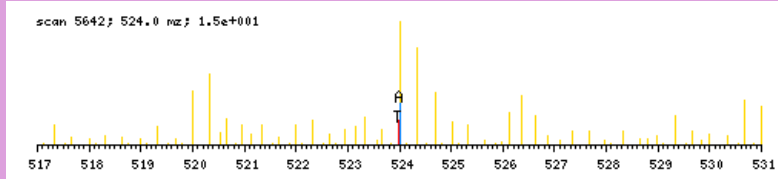

zoomed in precursor plot; T=theoretical m/z, A=acquired m/z

| b <sup>+</sup> | #  | AA # | y <sup>+</sup> | y <sup>2+</sup> |
|----------------|----|------|----------------|-----------------|
| 166.1114       | 1  | M 14 |                |                 |
| 328.2695       | 2  | K 13 | 1404.8427      | 702.9253        |
| 427.3379       | 3  | V 12 | 1242.6846      | 621.8462        |
| 574.4063       | 4  | F 11 | 1143.6162      | 572.3120        |
| 673.4747       | 5  | V 10 | 996.5478       | 498.7778        |
| 774.5224       | 6  | T 9  | 897.4794       | 449.2436        |
| 831.5439       | 7  | G 8  | 796.4317       | 398.7198        |
| 928.5966       | 8  | P 7  | 739.4103       | 370.2090        |
| 1041.6807      | 9  | L 6  | 642.3575       | 321.6827        |
| 1138.7335      | 10 | P 5  | 529.2734       | 265.1406        |
| 1209.7706      | 11 | A 4  | 432.2207       | 216.6142        |
| 1338.8132      | 12 | E 3  | 361.1836       | 181.0957        |
| 1395.8346      | 13 | G 2  | 232.1410       | 116.5744        |
|                | 14 | R 1  | 175.1195       | 88.0637         |

N-term:+35.07 K(2):+162.16

MLQQEGKHPAQLR, MH+ 1591.8743, m/z 398.7240  
 L OS G28 P150811 220811-s1.02027.02027.4.dta

scan 2027; 1.2e+001

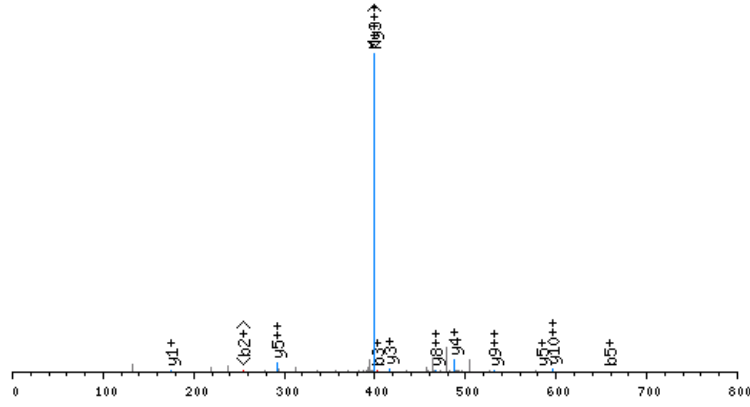

click image to zoom in; click top corners to zoom out [\[precursor±\]](#)

scan 2023; 398.7 m/z; 7.2e+000

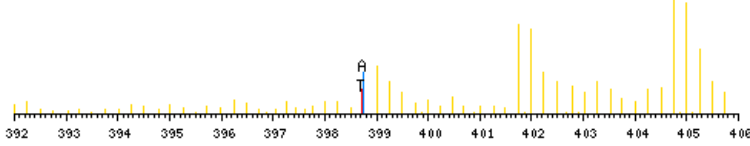

zoomed in precursor plot; T=theoretical m/z, A=acquired m/z

X-range:

-

MassTol: Y-zoom:

MassType:

AVG  MONO

Axis:

1  2

Label:

I  M  -

Ions:

a  +  2+  3+

b  +  2+  3+

c  +  2+  3+

x  +  2+  3+

y  +  2+  3+

z  +  2+  3+

hide H<sub>2</sub>O/NH<sub>3</sub>

zoom 112-122

GO

| b <sup>+</sup> | #  | AA # | y <sup>+</sup> | y <sup>2+</sup> |
|----------------|----|------|----------------|-----------------|
| 160.0796       | 1  | M 13 |                |                 |
| 273.1636       | 2  | L 12 | 1432.8025      | 716.9052        |
| 401.2222       | 3  | Q 11 | 1319.7184      | 660.3631        |
| 529.2808       | 4  | Q 10 | 1191.6599      | 596.3338        |
| 658.3234       | 5  | E 9  | 1063.6013      | 532.3046        |
| 715.3449       | 6  | G 8  | 934.5587       | 467.7833        |
| 871.4712       | 7  | K 7  | 877.5372       | 439.2725        |
| 1008.5301      | 8  | H 6  | 721.4109       | 361.2094        |
| 1105.5828      | 9  | P 5  | 584.3520       | 292.6799        |
| 1176.6200      | 10 | A 4  | 487.2993       | 244.1535        |
| 1304.6785      | 11 | Q 3  | 416.2621       | 208.6350        |
| 1417.7626      | 12 | L 2  | 288.2036       | 144.6057        |
|                | 13 | R 1  | 175.1195       | 88.0637         |

N-term:+29.04 K(7):+156.13

MNTELAAFTKNQKDPGVLDLDR, MH+ 2350.3289, m/z 588.3377  
H OS G28 P150811 220811-s1.06441.06441.4.dta

scan 6441; 5.4e+000

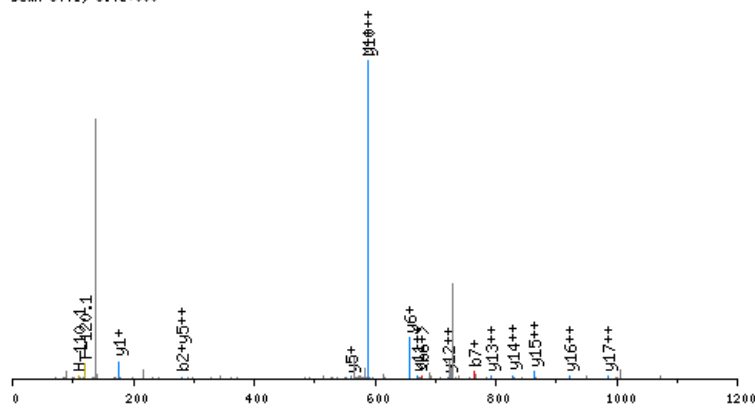

click image to zoom in; click top corners to zoom out [precursor±]

scan 6438; 588.3 m/z; 1.3e+001

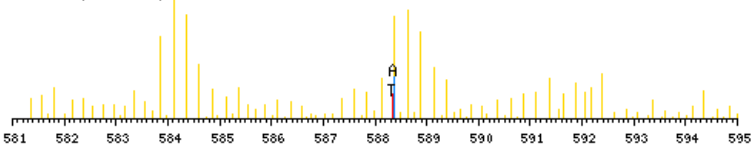

zoomed in precursor plot; T=theoretical m/z, A=acquired m/z

X-range:

-

MassTol: Y-zoom:

MassType:

AVG  MONO

Axis:

1  2

Label:

I  M  -

Ions:

a  +  2+  3+

b  +  2+  3+

c  +  2+  3+

x  +  2+  3+

y  +  2+  3+

z  +  2+  3+

hide H<sub>2</sub>O/NH<sub>3</sub>

zoom 112-122

GO

| b <sup>+</sup> | #  | AA | #  | y <sup>+</sup> | y <sup>2+</sup> |
|----------------|----|----|----|----------------|-----------------|
| 166.1114       | 1  | M  | 20 |                |                 |
| 280.1543       | 2  | N  | 19 | 2185.2254      | 1093.1166       |
| 381.2020       | 3  | T  | 18 | 2071.1825      | 1036.0951       |
| 510.2446       | 4  | E  | 17 | 1970.1348      | 985.5713        |
| 623.3286       | 5  | L  | 16 | 1841.0922      | 921.0500        |
| 694.3658       | 6  | A  | 15 | 1728.0081      | 864.5080        |
| 765.4029       | 7  | A  | 14 | 1656.9710      | 828.9894        |
| 912.4713       | 8  | F  | 13 | 1585.9339      | 793.4709        |
| 1013.5190      | 9  | T  | 12 | 1438.8655      | 719.9367        |
| 1175.6771      | 10 | K  | 11 | 1337.8178      | 669.4128        |
| 1289.7200      | 11 | N  | 10 | 1175.6597      | 588.3338        |
| 1417.7786      | 12 | Q  | 9  | 1061.6168      | 531.3123        |
| 1579.9367      | 13 | K  | 8  | 933.5582       | 467.2830        |
| 1694.9636      | 14 | D  | 7  | 771.4001       | 386.2040        |
| 1792.0164      | 15 | P  | 6  | 656.3731       | 328.6905        |
| 1849.0378      | 16 | G  | 5  | 559.3204       | 280.1641        |
| 1948.1063      | 17 | V  | 4  | 502.2989       | 251.6534        |
| 2061.1903      | 18 | L  | 3  | 403.2305       | 202.1192        |
| 2176.2173      | 19 | D  | 2  | 290.1464       | 145.5771        |
|                | 20 | R  | 1  | 175.1195       | 88.0637         |

N-term:+35.07 K(10):+162.16  
K(13):+162.16

MQDPDEEALRR, MH+ 1393.6958, m/z 465.2368  
 H OS G27 P150811 220811-s1.02793.02793.3.dta

scan 2793; 1.8e+001

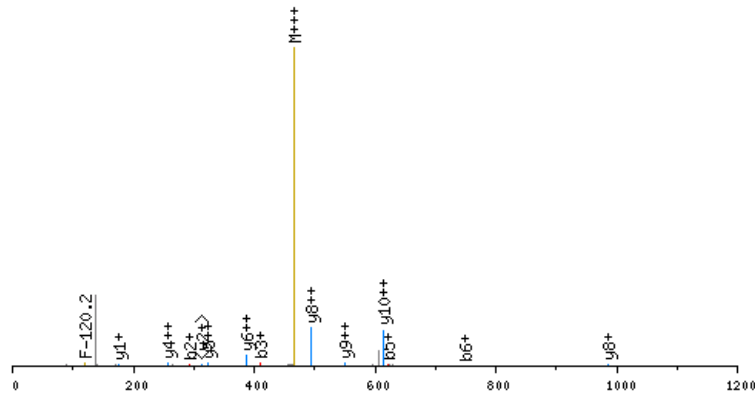

click image to zoom in; click top corners to zoom out [\[precursor±\]](#)

scan 2792; 465.2 m/z; 2.5e+001

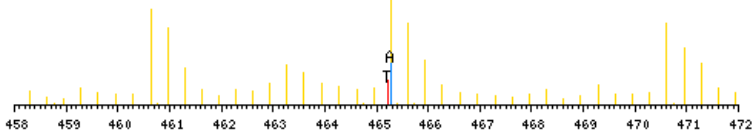

zoomed in precursor plot; T=theoretical m/z, A=acquired m/z

X-range:

-

MassTol: Y-zoom:

MassType:

AVG  MONO

Axis:

1  2

Label:

I  M  -

Ions:

a  +  2+  3+

b  +  2+  3+

c  +  2+  3+

x  +  2+  3+

y  +  2+  3+

z  +  2+  3+

hide H<sub>2</sub>O/NH<sub>3</sub>

zoom 112-122

GO

| b <sup>+</sup> | #  | AA # | y <sup>+</sup> | y <sup>2+</sup> |
|----------------|----|------|----------------|-----------------|
| 166.1114       | 1  | M    | 11             |                 |
| 294.1700       | 2  | Q    | 10             | 1228.5922       |
| 409.1969       | 3  | D    | 9              | 1100.5336       |
| 506.2497       | 4  | P    | 8              | 985.5067        |
| 621.2766       | 5  | D    | 7              | 888.4539        |
| 750.3192       | 6  | E    | 6              | 773.4270        |
| 879.3618       | 7  | E    | 5              | 644.3844        |
| 950.3989       | 8  | A    | 4              | 515.3418        |
| 1063.4830      | 9  | L    | 3              | 444.3047        |
| 1219.5841      | 10 | R    | 2              | 331.2206        |
|                | 11 | R    | 1              | 175.1195        |

N-term:+35.07

MQDPDEEFMKSR, MH+ 1742.9306, m/z 436.4881  
 H OS G28 P150811 220811-s1.03894.03894.4.dta

X-range:

-

MassTol: Y-zoom:

MassType:

AVG  MONO

Axis:

1  2

Label:

I  M  -

Ions:

a  +  2+  3+

b  +  2+  3+

c  +  2+  3+

x  +  2+  3+

y  +  2+  3+

z  +  2+  3+

hide H<sub>2</sub>O/NH<sub>3</sub>

zoom 112-122

GO

scan 3894; 1.0e+001

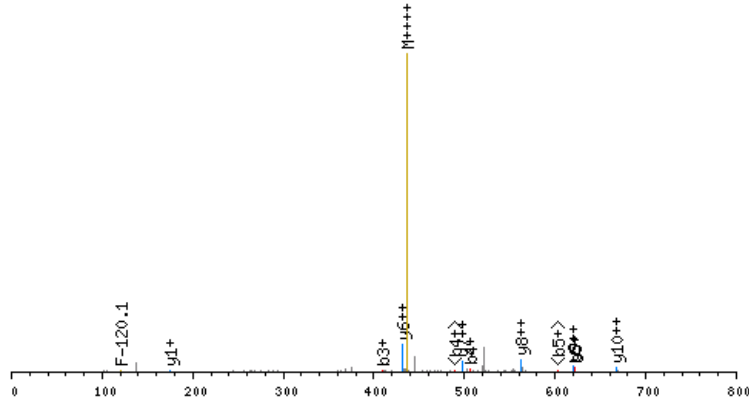

click image to zoom in; click top corners to zoom out [\[precursor±\]](#)

scan 3893; 436.5 m/z; 1.4e+001

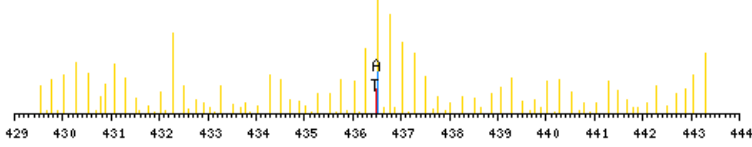

zoomed in precursor plot; T=theoretical m/z, A=acquired m/z

| b <sup>+</sup> | #  | AA # | y <sup>+</sup> | y <sup>2+</sup> |
|----------------|----|------|----------------|-----------------|
| 166.1114       | 1  | M 13 |                |                 |
| 294.1700       | 2  | Q 12 | 1577.8270      | 789.4174        |
| 409.1969       | 3  | D 11 | 1449.7685      | 725.3881        |
| 506.2497       | 4  | P 10 | 1334.7415      | 667.8747        |
| 621.2766       | 5  | D 9  | 1237.6888      | 619.3483        |
| 750.3192       | 6  | E 8  | 1122.6618      | 561.8348        |
| 879.3618       | 7  | E 7  | 993.6192       | 497.3135        |
| 1026.4302      | 8  | F 6  | 864.5766       | 432.7922        |
| 1157.4707      | 9  | M 5  | 717.5082       | 359.2580        |
| 1319.6288      | 10 | K 4  | 586.4677       | 293.7378        |
| 1481.7869      | 11 | K 3  | 424.3096       | 212.6587        |
| 1568.8189      | 12 | S 2  | 262.1515       | 131.5797        |
|                | 13 | R 1  | 175.1195       | 88.0637         |

N-term:+35.07 K(10):+162.16  
 K(11):+162.16

MQKEITALAPSTMK, MH+ 1632.9069, m/z 544.9738  
 L OS G26 P150811 220811-s1.03639.03639.3.dta

X-range:

-

MassTol: Y-zoom:

MassType:

AVG  MONO

Axis:

1  2

Label:

I  M  -

Ions:

a  +  2+  3+

b  +  2+  3+

c  +  2+  3+

x  +  2+  3+

y  +  2+  3+

z  +  2+  3+

hide H<sub>2</sub>O/NH<sub>3</sub>

zoom 112-122

GO

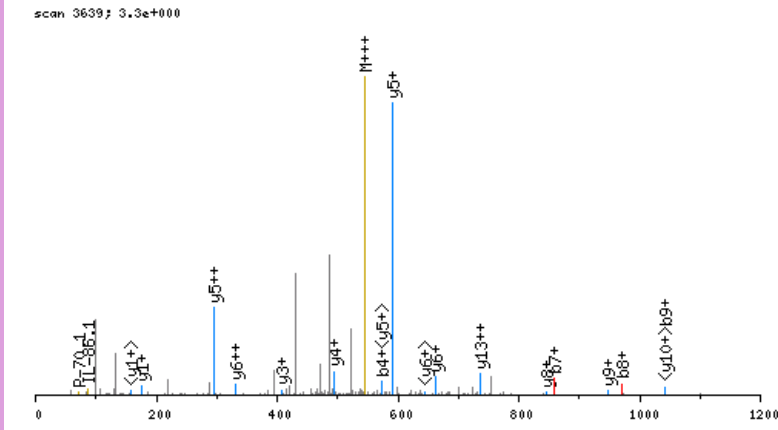

click image to zoom in; click top corners to zoom out [\[precursor±\]](#)

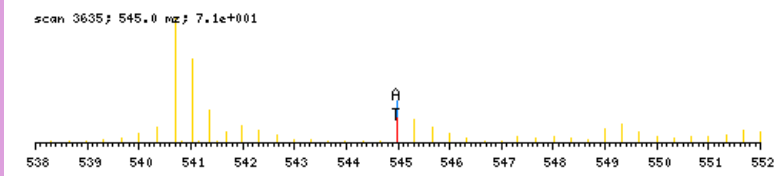

zoomed in precursor plot; T=theoretical m/z, A=acquired m/z

| b <sup>+</sup> | #  | AA # | y <sup>+</sup> | y <sup>2+</sup> |
|----------------|----|------|----------------|-----------------|
| 160.0796       | 1  | M 14 |                |                 |
| 288.1382       | 2  | Q 13 | 1473.8352      | 737.4215        |
| 444.2645       | 3  | K 12 | 1345.7766      | 673.3922        |
| 573.3071       | 4  | E 11 | 1189.6503      | 595.3290        |
| 686.3911       | 5  | I 10 | 1060.6077      | 530.8078        |
| 787.4388       | 6  | T 9  | 947.5236       | 474.2657        |
| 858.4759       | 7  | A 8  | 846.4759       | 423.7419        |
| 971.5600       | 8  | L 7  | 775.4388       | 388.2233        |
| 1042.5971      | 9  | A 6  | 662.3548       | 331.6813        |
| 1139.6499      | 10 | P 5  | 591.3176       | 296.1627        |
| 1226.6819      | 11 | S 4  | 494.2649       | 247.6364        |
| 1327.7296      | 12 | T 3  | 407.2329       | 204.1203        |
| 1458.7700      | 13 | M 2  | 306.1852       | 153.5965        |
|                | 14 | K 1  | 175.1447       | 88.0763         |

N-term:+29.04 K(3):+156.13  
 K(14):+156.13

X-range:

-

MassTol: Y-zoom:

MassType:

AVG  MONO

Axis:

1  2

Label:

I  M  -

Ions:

a  +  2+  3+

b  +  2+  3+

c  +  2+  3+

x  +  2+  3+

y  +  2+  3+

z  +  2+  3+

hide H<sub>2</sub>O/NH<sub>3</sub>

zoom 112-122

GO

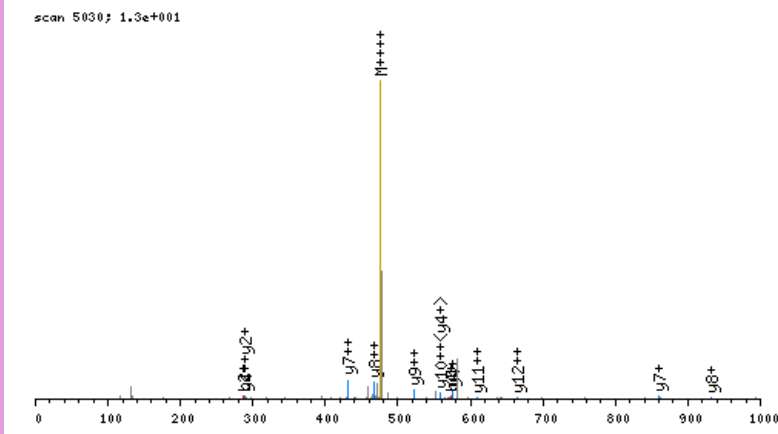

click image to zoom in; click top corners to zoom out [\[precursor±\]](#)

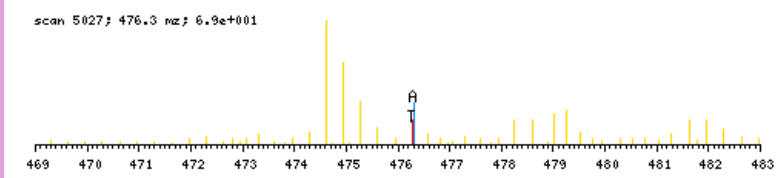

zoomed in precursor plot; T=theoretical m/z, A=acquired m/z

| b <sup>+</sup> | #  | AA # | y <sup>+</sup> | y <sup>2+</sup>    |
|----------------|----|------|----------------|--------------------|
| 160.0796       | 1  | M    | 16             |                    |
| 288.1382       | 2  | Q    | 15             | 1743.0455 872.0267 |
| 444.2645       | 3  | K    | 14             | 1614.9869 807.9974 |
| 573.3071       | 4  | E    | 13             | 1458.8606 729.9342 |
| 686.3911       | 5  | I    | 12             | 1329.8180 665.4129 |
| 787.4388       | 6  | T    | 11             | 1216.7340 608.8709 |
| 858.4759       | 7  | A    | 10             | 1115.6863 558.3471 |
| 971.5600       | 8  | L    | 9              | 1044.6492 522.8285 |
| 1042.5971      | 9  | A    | 8              | 931.5651 466.2865  |
| 1139.6499      | 10 | P    | 7              | 860.5280 430.7679  |
| 1226.6819      | 11 | S    | 6              | 763.4752 382.2415  |
| 1327.7296      | 12 | T    | 5              | 676.4432 338.7255  |
| 1458.7700      | 13 | M    | 4              | 575.3955 288.2017  |
| 1614.8963      | 14 | K    | 3              | 444.3551 222.6814  |
| 1727.9804      | 15 | I    | 2              | 288.2288 144.6183  |
|                | 16 | K    | 1              | 175.1447 88.0763   |

N-term:+29.04 K(3):+156.13  
 K(14):+156.13 K(16):+156.13



MQKEITALAPSTMKIKIIPPER, MH+ 2678.5717, m/z 670.3984  
 L OS G28 P150811 220811-s1.07416.07416.4.dta

X-range:

-

MassTol: Y-zoom:

MassType:

AVG  MONO

Axis:

1  2

Label:

I  M  -

Ions:

a  +  2+  3+

b  +  2+  3+

c  +  2+  3+

x  +  2+  3+

y  +  2+  3+

z  +  2+  3+

hide H<sub>2</sub>O/NH<sub>3</sub>

zoom 112-122

GO

scan 7416; 2.2e+000

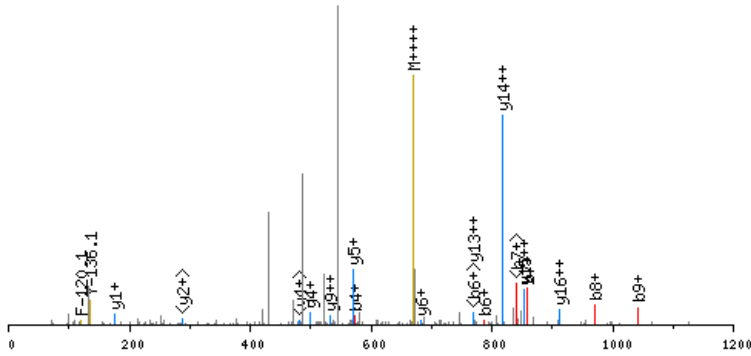

click image to zoom in; click top corners to zoom out

[\[precursor±\]](#)

scan 7413; 670.4 m/z; 9.5e+000

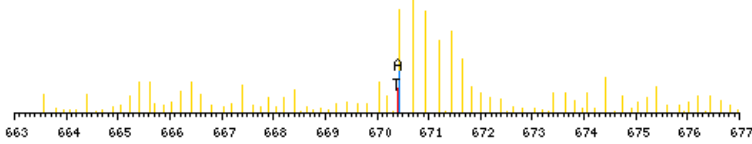

zoomed in precursor plot; T=theoretical m/z, A=acquired m/z

| b <sup>+</sup> | #  | AA # | y <sup>+</sup> | y <sup>2+</sup> |
|----------------|----|------|----------------|-----------------|
| 160.0796       | 1  | M 23 |                |                 |
| 288.1382       | 2  | Q 22 | 2519.5000      | 1260.2539       |
| 444.2645       | 3  | K 21 | 2391.4414      | 1196.2246       |
| 573.3071       | 4  | E 20 | 2235.3151      | 1118.1615       |
| 686.3911       | 5  | I 19 | 2106.2725      | 1053.6402       |
| 787.4388       | 6  | T 18 | 1993.1885      | 997.0981        |
| 858.4759       | 7  | A 17 | 1892.1408      | 946.5743        |
| 971.5600       | 8  | L 16 | 1821.1037      | 911.0557        |
| 1042.5971      | 9  | A 15 | 1708.0196      | 854.5137        |
| 1139.6499      | 10 | P 14 | 1636.9825      | 818.9952        |
| 1226.6819      | 11 | S 13 | 1539.9297      | 770.4688        |
| 1327.7296      | 12 | T 12 | 1452.8977      | 726.9528        |
| 1458.7700      | 13 | M 11 | 1351.8500      | 676.4289        |
| 1614.8963      | 14 | K 10 | 1220.8095      | 610.9087        |
| 1727.9804      | 15 | I 9  | 1064.6832      | 532.8455        |
| 1884.1067      | 16 | K 8  | 951.5992       | 476.3035        |
| 1997.1908      | 17 | I 7  | 795.4729       | 398.2403        |
| 2110.2748      | 18 | I 6  | 682.3888       | 341.6983        |
| 2181.3120      | 19 | A 5  | 569.3047       | 285.1563        |
| 2278.3647      | 20 | P 4  | 498.2676       | 249.6377        |
| 2375.4175      | 21 | P 3  | 401.2149       | 201.1113        |
| 2504.4601      | 22 | E 2  | 304.1621       | 152.5850        |
|                | 23 | R 1  | 175.1195       | 88.0637         |

N-term:+29.04 K(3):+156.13  
 K(14):+156.13 K(16):+156.13

MQQVEASLQPETLR, MH+ 1657.8583, m/z 553.2910  
 L OS G25 P150811 220811-s1.05240.05240.3.dta

scan 5240; 1.2e+001

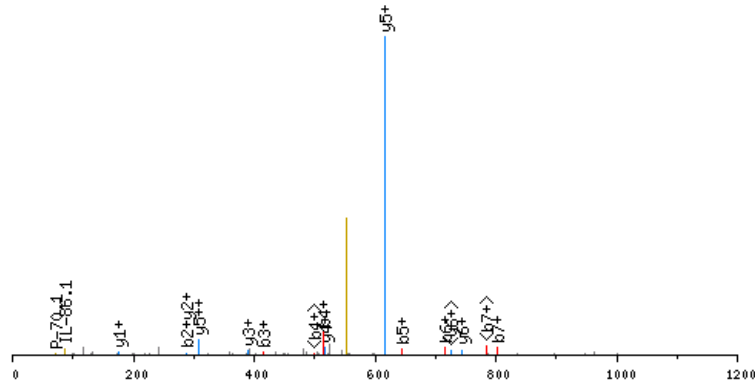

click image to zoom in; click top corners to zoom out [\[precursor±\]](#)

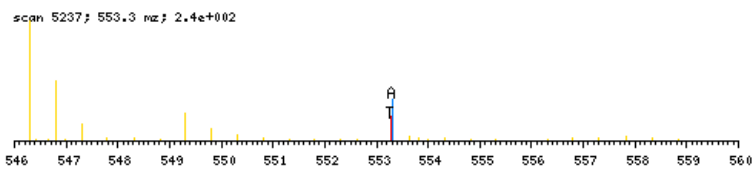

zoomed in precursor plot; T=theoretical m/z, A=acquired m/z

X-range:

-

MassTol: Y-zoom:

MassType:

AVG  MONO

Axis:

1  2

Label:

I  M  -

Ions:

a  +  2+  3+

b  +  2+  3+

c  +  2+  3+

x  +  2+  3+

y  +  2+  3+

z  +  2+  3+

hide H<sub>2</sub>O/NH<sub>3</sub>

zoom 112-122

GO

| b <sup>+</sup> | #  | AA # | y <sup>+</sup> | y <sup>2+</sup> |
|----------------|----|------|----------------|-----------------|
| 160.0796       | 1  | M 14 |                |                 |
| 288.1382       | 2  | Q 13 | 1498.7865      | 749.8972        |
| 416.1967       | 3  | Q 12 | 1370.7280      | 685.8679        |
| 515.2652       | 4  | V 11 | 1242.6694      | 621.8386        |
| 644.3077       | 5  | E 10 | 1143.6010      | 572.3044        |
| 715.3449       | 6  | A 9  | 1014.5584      | 507.7831        |
| 802.3769       | 7  | S 8  | 943.5213       | 472.2645        |
| 915.4610       | 8  | L 7  | 856.4892       | 428.7485        |
| 1043.5195      | 9  | Q 6  | 743.4052       | 372.2065        |
| 1140.5723      | 10 | P 5  | 615.3466       | 308.1772        |
| 1269.6149      | 11 | E 4  | 518.2938       | 259.6508        |
| 1370.6626      | 12 | T 3  | 389.2512       | 195.1295        |
| 1483.7466      | 13 | L 2  | 288.2036       | 144.6057        |
|                | 14 | R 1  | 175.1195       | 88.0637         |

N-term:+29.04

MSYGYDEKSAGVSVPGPMGPGSGPR, MH+ 2494.2383, m/z 832.0843  
H OS G26 P150811 220811-s1.04597.04597.3.dta

X-range:

-

MassTol: Y-zoom:

MassType:

AVG  MONO

Axis:

1  2

Label:

I  M  -

Ions:

a  +  2+  3+

b  +  2+  3+

c  +  2+  3+

x  +  2+  3+

y  +  2+  3+

z  +  2+  3+

hide H<sub>2</sub>O/NH<sub>3</sub>

zoom 112-122

GO

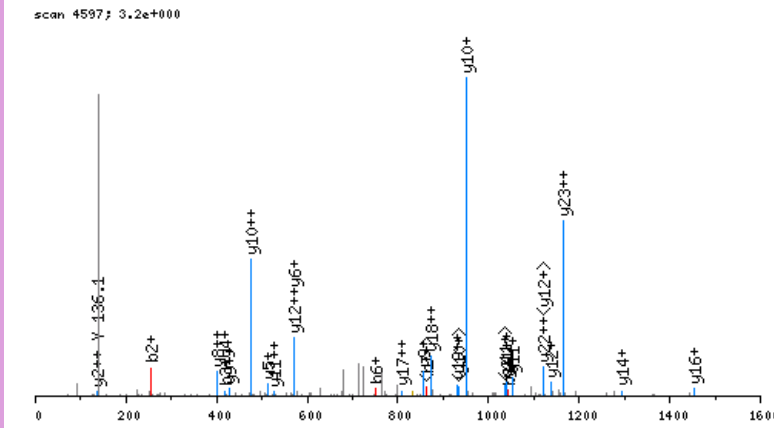

click image to zoom in; click top corners to zoom out [\[precursor±\]](#)

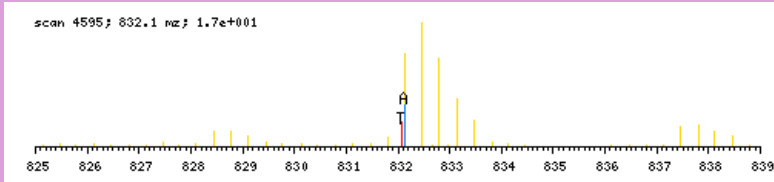

zoomed in precursor plot; T=theoretical m/z, A=acquired m/z

| b <sup>+</sup> | #  | AA # | y <sup>+</sup> | y <sup>2+</sup> |
|----------------|----|------|----------------|-----------------|
| 166.1114       | 1  | M    | 24             |                 |
| 253.1434       | 2  | S    | 23             | 2329.1347       |
| 416.2067       | 3  | Y    | 22             | 2242.1027       |
| 473.2282       | 4  | G    | 21             | 2079.0394       |
| 636.2915       | 5  | Y    | 20             | 2022.0179       |
| 751.3185       | 6  | D    | 19             | 1858.9546       |
| 880.3611       | 7  | E    | 18             | 1743.9276       |
| 1042.5192      | 8  | K    | 17             | 1614.8850       |
| 1129.5512      | 9  | S    | 16             | 1452.7269       |
| 1200.5883      | 10 | A    | 15             | 1365.6949       |
| 1257.6098      | 11 | G    | 14             | 1294.6578       |
| 1356.6782      | 12 | V    | 13             | 1237.6363       |
| 1443.7102      | 13 | S    | 12             | 1138.5679       |
| 1542.7786      | 14 | V    | 11             | 1051.5359       |
| 1639.8314      | 15 | P    | 10             | 952.4675        |
| 1696.8529      | 16 | G    | 9              | 855.4147        |
| 1793.9056      | 17 | P    | 8              | 798.3932        |
| 1924.9461      | 18 | M    | 7              | 701.3405        |
| 1981.9676      | 19 | G    | 6              | 570.3000        |
| 2079.0203      | 20 | P    | 5              | 513.2785        |
| 2166.0524      | 21 | S    | 4              | 416.2258        |
| 2223.0738      | 22 | G    | 3              | 329.1937        |
| 2320.1266      | 23 | P    | 2              | 272.1723        |
|                | 24 | R    | 1              | 175.1195        |

N-term:+35.07 K(8):+162.16

MTDVPVDPGVVHR, MH+ 1449.7524, m/z 483.9223  
 L OS G26 P150811 220811-s1.03586.03586.3.dta

scan 3586; 5.4e+000

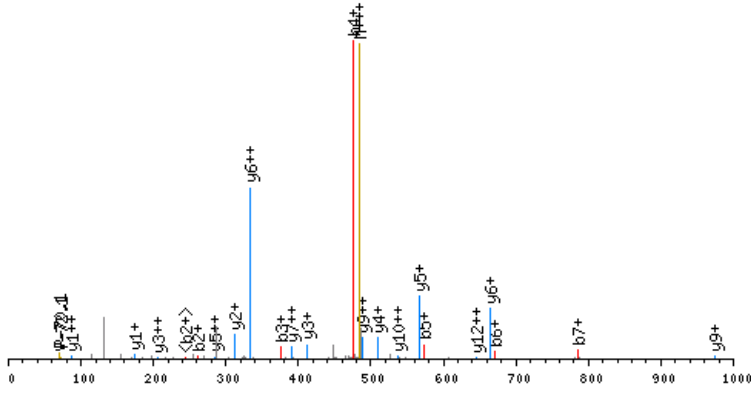

click image to zoom in; click top corners to zoom out [\[precursor±\]](#)

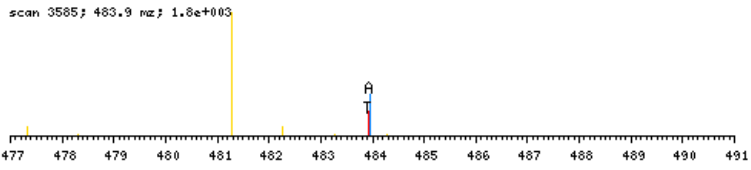

zoomed in precursor plot; T=theoretical m/z, A=acquired m/z

X-range:

-

MassTol: Y-zoom:

MassType:

AVG  MONO

Axis:

1  2

Label:

I  M  -

Ions:

a  +  2+  3+

b  +  2+  3+

c  +  2+  3+

x  +  2+  3+

y  +  2+  3+

z  +  2+  3+

hide H<sub>2</sub>O/NH<sub>3</sub>

zoom 112-122

GO

| b <sup>+</sup> | #  | AA # | y <sup>+</sup> | y <sup>2+</sup> |
|----------------|----|------|----------------|-----------------|
| 160.0796       | 1  | M 13 |                |                 |
| 261.1273       | 2  | T 12 | 1290.6806      | 645.8442        |
| 376.1542       | 3  | D 11 | 1189.6329      | 595.3204        |
| 475.2226       | 4  | V 10 | 1074.6060      | 537.8069        |
| 572.2754       | 5  | P 9  | 975.5376       | 488.2727        |
| 671.3438       | 6  | V 8  | 878.4848       | 439.7463        |
| 786.3707       | 7  | D 7  | 779.4164       | 390.2121        |
| 883.4235       | 8  | P 6  | 664.3895       | 332.6986        |
| 940.4450       | 9  | G 5  | 567.3367       | 284.1723        |
| 1039.5134      | 10 | V 4  | 510.3152       | 255.6615        |
| 1138.5818      | 11 | V 3  | 411.2468       | 206.1273        |
| 1275.6407      | 12 | H 2  | 312.1784       | 156.5931        |
|                | 13 | R 1  | 175.1195       | 88.0637         |

N-term:+29.04

MTGTEYMQDPDEEALRR, MH+ 2075.9590, m/z 692.6578  
 H OS G26 P150811 220811-s1.03913.03913.3.dta

X-range:

-

MassTol: Y-zoom:

MassType:

AVG  MONO

Axis:

1  2

Label:

I  M  -

Ions:

a  +  2+  3+

b  +  2+  3+

c  +  2+  3+

x  +  2+  3+

y  +  2+  3+

z  +  2+  3+

hide H<sub>2</sub>O/NH<sub>3</sub>

zoom 112-122

GO

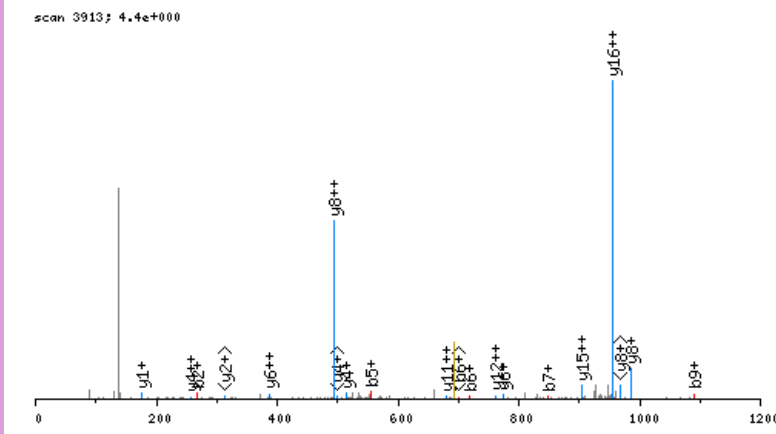

click image to zoom in; click top corners to zoom out [\[precursor±\]](#)

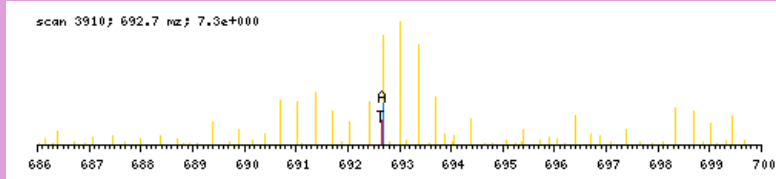

zoomed in precursor plot; T=theoretical m/z, A=acquired m/z

| b <sup>+</sup> | #  | AA | #  | y <sup>+</sup> | y <sup>2+</sup> |
|----------------|----|----|----|----------------|-----------------|
| 166.1114       | 1  | M  | 17 |                |                 |
| 267.1591       | 2  | T  | 16 | 1910.8554      | 955.9316        |
| 324.1805       | 3  | G  | 15 | 1809.8078      | 905.4078        |
| 425.2282       | 4  | T  | 14 | 1752.7863      | 876.8971        |
| 554.2708       | 5  | E  | 13 | 1651.7386      | 826.3732        |
| 717.3341       | 6  | Y  | 12 | 1522.6960      | 761.8519        |
| 848.3746       | 7  | M  | 11 | 1359.6327      | 680.3203        |
| 976.4332       | 8  | Q  | 10 | 1228.5922      | 614.8000        |
| 1091.4601      | 9  | D  | 9  | 1100.5336      | 550.7707        |
| 1188.5129      | 10 | P  | 8  | 985.5067       | 493.2573        |
| 1303.5398      | 11 | D  | 7  | 888.4539       | 444.7309        |
| 1432.5824      | 12 | E  | 6  | 773.4270       | 387.2174        |
| 1561.6250      | 13 | E  | 5  | 644.3844       | 322.6961        |
| 1632.6621      | 14 | A  | 4  | 515.3418       | 258.1748        |
| 1745.7462      | 15 | L  | 3  | 444.3047       | 222.6563        |
| 1901.8473      | 16 | R  | 2  | 331.2206       | 166.1142        |
|                | 17 | R  | 1  | 175.1195       | 88.0637         |

N-term:+35.07

NADEFEDMVAEKR, MH+ 1621.8168, m/z 541.2771  
 H OS G27 P150811 220811-s1.05303.05303.3.dta

X-range:

-

MassTol: Y-zoom:

MassType:

AVG  MONO

Axis:

1  2

Label:

I  M  -

Ions:

a  +  2+  3+

b  +  2+  3+

c  +  2+  3+

x  +  2+  3+

y  +  2+  3+

z  +  2+  3+

hide H<sub>2</sub>O/NH<sub>3</sub>

zoom 112-122

GO

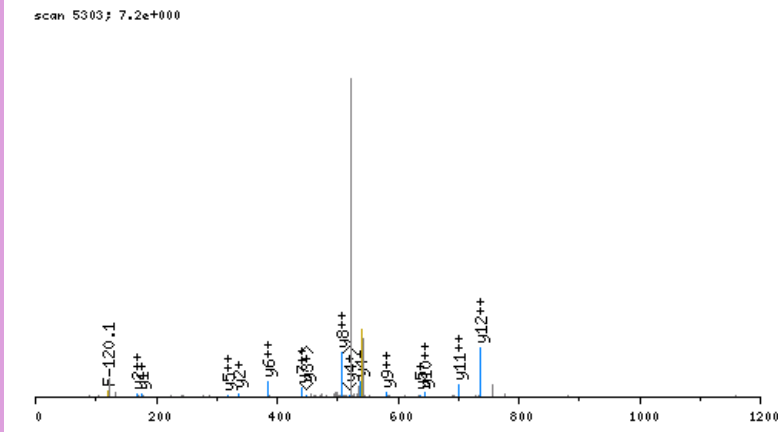

click image to zoom in; click top corners to zoom out [\[precursor±\]](#)

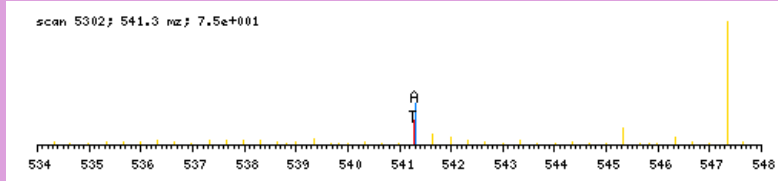

zoomed in precursor plot; T=theoretical m/z, A=acquired m/z

| b <sup>+</sup> | #  | AA # | y <sup>+</sup> | y <sup>2+</sup> |
|----------------|----|------|----------------|-----------------|
| 149.1138       | 1  | N 13 |                |                 |
| 220.1509       | 2  | A 12 | 1473.7108      | 737.3593        |
| 335.1779       | 3  | D 11 | 1402.6737      | 701.8408        |
| 464.2205       | 4  | E 10 | 1287.6467      | 644.3273        |
| 611.2889       | 5  | F 9  | 1158.6042      | 579.8060        |
| 740.3315       | 6  | E 8  | 1011.5357      | 506.2718        |
| 855.3584       | 7  | D 7  | 882.4931       | 441.7505        |
| 986.3989       | 8  | M 6  | 767.4662       | 384.2370        |
| 1085.4673      | 9  | V 5  | 636.4257       | 318.7168        |
| 1156.5044      | 10 | A 4  | 537.3573       | 269.1826        |
| 1285.5470      | 11 | E 3  | 466.3202       | 233.6640        |
| 1447.7051      | 12 | K 2  | 337.2776       | 169.1427        |
|                | 13 | R 1  | 175.1195       | 88.0637         |

N-term:+35.07 K(12):+162.16

NATEPVISFYDKR, MH+ 1607.9069, m/z 536.6405  
 H OS G27 P150811 220811-s1.05350.05350.3.dta

X-range:

-

MassTol: Y-zoom:

MassType:

AVG  MONO

Axis:

1  2

Label:

I  M  -

Ions:

a  +  2+  3+

b  +  2+  3+

c  +  2+  3+

x  +  2+  3+

y  +  2+  3+

z  +  2+  3+

hide H<sub>2</sub>O/NH<sub>3</sub>

zoom 112-122

GO

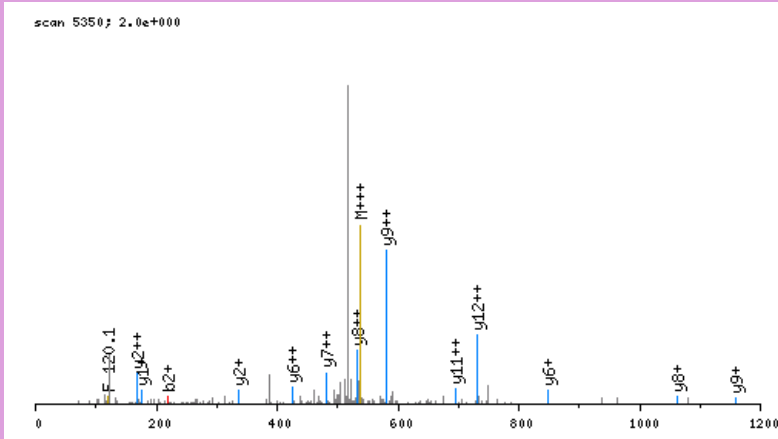

click image to zoom in; click top corners to zoom out [\[precursor±\]](#)

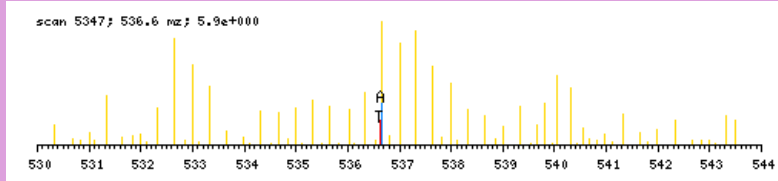

zoomed in precursor plot; T=theoretical m/z, A=acquired m/z

| b <sup>+</sup> | #  | AA # | y <sup>+</sup> | y <sup>2+</sup> |
|----------------|----|------|----------------|-----------------|
| 149.1138       | 1  | N 13 |                |                 |
| 220.1509       | 2  | A 12 | 1459.8009      | 730.4044        |
| 321.1986       | 3  | T 11 | 1388.7638      | 694.8858        |
| 450.2412       | 4  | E 10 | 1287.7161      | 644.3620        |
| 547.2940       | 5  | P 9  | 1158.6736      | 579.8407        |
| 646.3624       | 6  | V 8  | 1061.6208      | 531.3143        |
| 759.4465       | 7  | I 7  | 962.5524       | 481.7801        |
| 846.4785       | 8  | S 6  | 849.4683       | 425.2381        |
| 993.5469       | 9  | F 5  | 762.4363       | 381.7221        |
| 1156.6102      | 10 | Y 4  | 615.3679       | 308.1878        |
| 1271.6372      | 11 | D 3  | 452.3045       | 226.6562        |
| 1433.7953      | 12 | K 2  | 337.2776       | 169.1427        |
|                | 13 | R 1  | 175.1195       | 88.0637         |

N-term:+35.07 K(12):+162.16

NATLSVEPEGR, MH+ 1200.6224, m/z 600.8148  
 L OS G25 P150811 220811-s1.03083.03083.2.dta

X-range:

-

MassTol: Y-zoom:

MassType:

AVG  MONO

Axis:

1  2

Label:

I  M  -

Ions:

a  +  2+  3+

b  +  2+  3+

c  +  2+  3+

x  +  2+  3+

y  +  2+  3+

z  +  2+  3+

hide H<sub>2</sub>O/NH<sub>3</sub>

zoom 112-122

GO

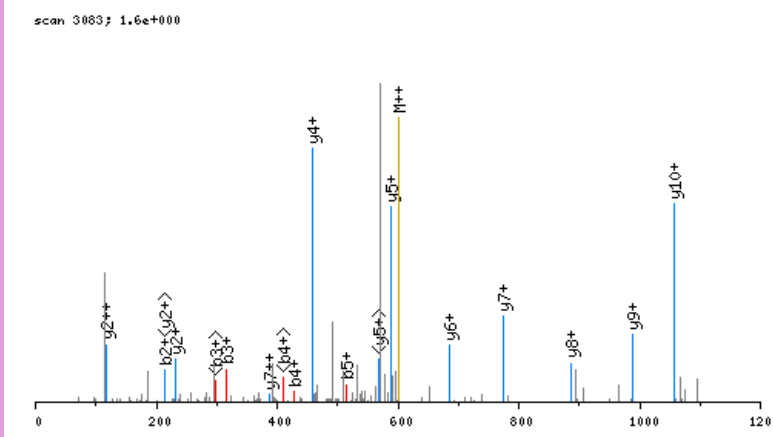

click image to zoom in; click top corners to zoom out [\[precursor±\]](#)

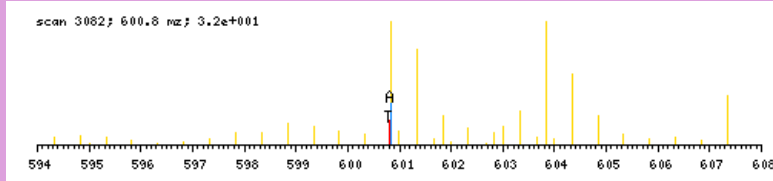

zoomed in precursor plot; T=theoretical m/z, A=acquired m/z

| b <sup>+</sup> | #  | AA # | y <sup>+</sup> | y <sup>2+</sup> |
|----------------|----|------|----------------|-----------------|
| 143.0820       | 1  | N 11 |                |                 |
| 214.1191       | 2  | A 10 | 1058.5482      | 529.7780        |
| 315.1668       | 3  | T 9  | 987.5111       | 494.2595        |
| 428.2509       | 4  | L 8  | 886.4634       | 443.7356        |
| 515.2829       | 5  | S 7  | 773.3794       | 387.1936        |
| 614.3513       | 6  | V 6  | 686.3473       | 343.6776        |
| 743.3939       | 7  | E 5  | 587.2789       | 294.1434        |
| 840.4467       | 8  | P 4  | 458.2363       | 229.6221        |
| 969.4893       | 9  | E 3  | 361.1836       | 181.0957        |
| 1026.5107      | 10 | G 2  | 232.1410       | 116.5744        |
|                | 11 | R 1  | 175.1195       | 88.0637         |

N-term:+29.04



NFGPTGIGFGLTQQVEKK, MH+ 2080.2291, m/z 694.0812  
 H OS G26 P150811 220811-s1.05939.05939.3.dta

scan 5939; 1.7e+000

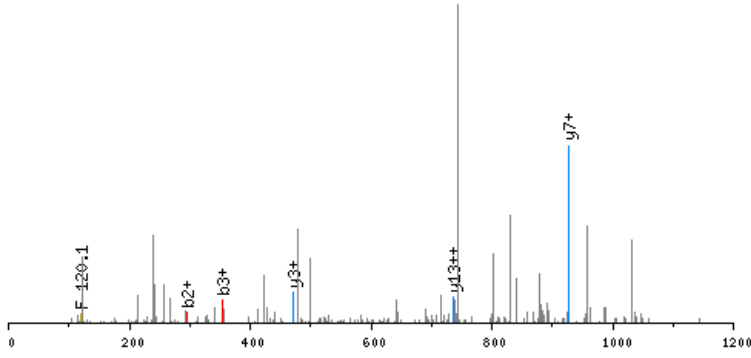

click image to zoom in; click top corners to zoom out [precursor±]

scan 5935; 694.1 m/z; 7.6e+000

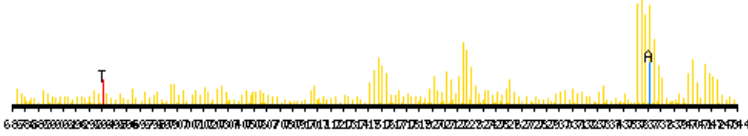

zoomed in precursor plot; T=theoretical m/z, A=acquired m/z

X-range:

-

MassTol: Y-zoom:

MassType:

AVG  MONO

Axis:

1  2

Label:

I  M  -

Ions:

a  +  2+  3+

b  +  2+  3+

c  +  2+  3+

x  +  2+  3+

y  +  2+  3+

z  +  2+  3+

hide H<sub>2</sub>O/NH<sub>3</sub>

zoom 112-122

GO

| b <sup>+</sup> | #  | AA | #  | y <sup>+</sup> | y <sup>2+</sup> |
|----------------|----|----|----|----------------|-----------------|
| 149.1138       | 1  | N  | 19 |                |                 |
| 296.1822       | 2  | F  | 18 | 1932.1231      | 966.5655        |
| 353.2037       | 3  | G  | 17 | 1785.0547      | 893.0313        |
| 450.2565       | 4  | P  | 16 | 1728.0333      | 864.5205        |
| 551.3041       | 5  | T  | 15 | 1630.9805      | 815.9942        |
| 608.3256       | 6  | G  | 14 | 1529.9328      | 765.4703        |
| 721.4097       | 7  | I  | 13 | 1472.9114      | 736.9596        |
| 778.4311       | 8  | G  | 12 | 1359.8273      | 680.4176        |
| 925.4996       | 9  | F  | 11 | 1302.8058      | 651.9068        |
| 982.5210       | 10 | G  | 10 | 1155.7374      | 578.3726        |
| 1039.5425      | 11 | G  | 9  | 1098.7160      | 549.8619        |
| 1152.6265      | 12 | L  | 8  | 1041.6945      | 521.3512        |
| 1253.6742      | 13 | T  | 7  | 928.6104       | 464.8091        |
| 1381.7328      | 14 | Q  | 6  | 827.5628       | 414.2853        |
| 1509.7914      | 15 | Q  | 5  | 699.5042       | 350.2560        |
| 1608.8598      | 16 | V  | 4  | 571.4456       | 286.2267        |
| 1737.9024      | 17 | E  | 3  | 472.3772       | 236.6925        |
| 1900.0605      | 18 | K  | 2  | 343.3346       | 172.1712        |
|                | 19 | K  | 1  | 181.1765       | 91.0922         |

N-term:+35.07 K(18):+162.16  
 K(19):+162.16

NGLKADQAEPEKLR, MH+ 1652.9336, m/z 551.6494  
 L OS G26 P150811 220811-s1.02413.02413.3.dta

X-range:

-

MassTol: Y-zoom:

MassType:

AVG  MONO

Axis:

1  2

Label:

I  M  -

Ions:

a  +  2+  3+

b  +  2+  3+

c  +  2+  3+

x  +  2+  3+

y  +  2+  3+

z  +  2+  3+

hide H<sub>2</sub>O/NH<sub>3</sub>

zoom 112-122

GO

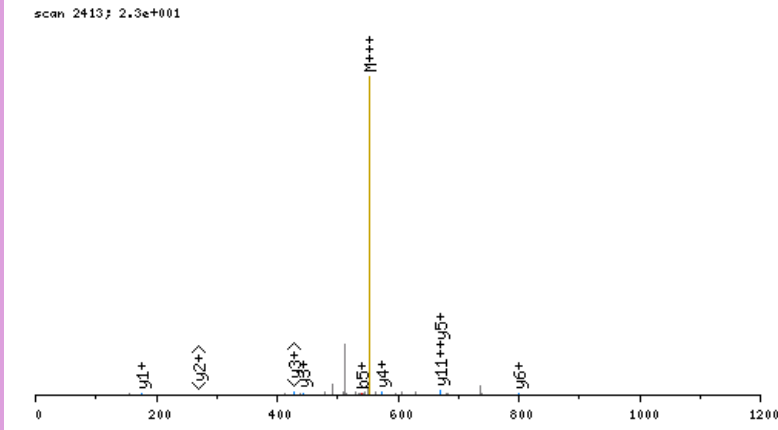

click image to zoom in; click top corners to zoom out [\[precursor±\]](#)

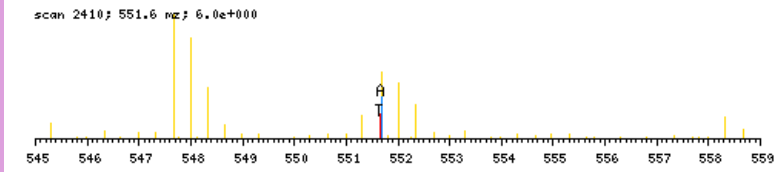

zoomed in precursor plot; T=theoretical m/z, A=acquired m/z

| b <sup>+</sup> | #  | AA # | y <sup>+</sup> | y <sup>2+</sup> |
|----------------|----|------|----------------|-----------------|
| 143.0820       | 1  | N 14 |                |                 |
| 200.1035       | 2  | G 13 | 1510.8594      | 755.9336        |
| 313.1876       | 3  | L 12 | 1453.8379      | 727.4229        |
| 469.3139       | 4  | K 11 | 1340.7539      | 670.8808        |
| 540.3510       | 5  | A 10 | 1184.6276      | 592.8177        |
| 655.3779       | 6  | D 9  | 1113.5904      | 557.2991        |
| 783.4365       | 7  | Q 8  | 998.5635       | 499.7857        |
| 854.4736       | 8  | A 7  | 870.5049       | 435.7564        |
| 983.5162       | 9  | E 6  | 799.4678       | 400.2378        |
| 1080.5690      | 10 | P 5  | 670.4252       | 335.7165        |
| 1209.6116      | 11 | E 4  | 573.3725       | 287.1901        |
| 1365.7379      | 12 | K 3  | 444.3299       | 222.6688        |
| 1478.8219      | 13 | L 2  | 288.2036       | 144.6057        |
|                | 14 | R 1  | 175.1195       | 88.0637         |

N-term:+29.04 K(4):+156.13  
 K(12):+156.13

NIVMTQSPKSMMSVGER, MH+ 2050.0771, m/z 684.0306  
 H OS G26 P150811 220811-s1.04129.04129.3.dta

X-range:

-

MassTol: Y-zoom:

MassType:

AVG  MONO

Axis:

1  2

Label:

I  M  -

Ions:

a  +  2+  3+

b  +  2+  3+

c  +  2+  3+

x  +  2+  3+

y  +  2+  3+

z  +  2+  3+

hide H<sub>2</sub>O/NH<sub>3</sub>

zoom 112-122

GO

scan 4129; 2.4e+000

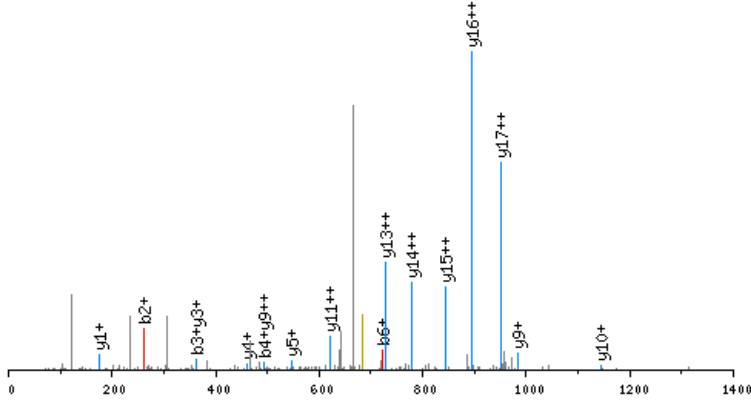

click image to zoom in; click top corners to zoom out

[precursor±]

scan 4125; 684.0 m/z; 6.5e+000

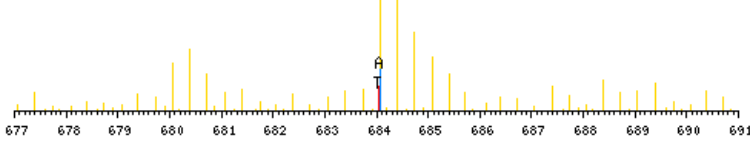

zoomed in precursor plot; T=theoretical m/z, A=acquired m/z

| b <sup>+</sup> | #  | AA | #  | y <sup>+</sup> | y <sup>2+</sup> |
|----------------|----|----|----|----------------|-----------------|
| 149.1138       | 1  | N  | 18 |                |                 |
| 262.1979       | 2  | I  | 17 | 1901.9711      | 951.4895        |
| 361.2663       | 3  | V  | 16 | 1788.8871      | 894.9474        |
| 492.3068       | 4  | M  | 15 | 1689.8187      | 845.4132        |
| 593.3545       | 5  | T  | 14 | 1558.7782      | 779.8930        |
| 721.4130       | 6  | Q  | 13 | 1457.7305      | 729.3692        |
| 808.4451       | 7  | S  | 12 | 1329.6719      | 665.3399        |
| 905.4978       | 8  | P  | 11 | 1242.6399      | 621.8239        |
| 1067.6559      | 9  | K  | 10 | 1145.5871      | 573.2975        |
| 1154.6880      | 10 | S  | 9  | 983.4290       | 492.2184        |
| 1285.7285      | 11 | M  | 8  | 896.3970       | 448.7024        |
| 1372.7605      | 12 | S  | 7  | 765.3565       | 383.1822        |
| 1503.8010      | 13 | M  | 6  | 678.3245       | 339.6662        |
| 1590.8330      | 14 | S  | 5  | 547.2840       | 274.1459        |
| 1689.9014      | 15 | V  | 4  | 460.2520       | 230.6299        |
| 1746.9229      | 16 | G  | 3  | 361.1836       | 181.0957        |
| 1875.9655      | 17 | E  | 2  | 304.1621       | 152.5850        |
|                | 18 | R  | 1  | 175.1195       | 88.0637         |

N-term:+35.07 K(9):+162.16

NKDQGGYEDFVEGLR, MH+ 1782.8663, m/z 594.9603  
 L OS G27 P150811 220811-s1.06009.06009.3.dta

X-range:

-

MassTol: Y-zoom:

MassType:

AVG  MONO

Axis:

1  2

Label:

I  M  -

Ions:

a  +  2+  3+

b  +  2+  3+

c  +  2+  3+

x  +  2+  3+

y  +  2+  3+

z  +  2+  3+

hide H<sub>2</sub>O/NH<sub>3</sub>

zoom 112-122

GO

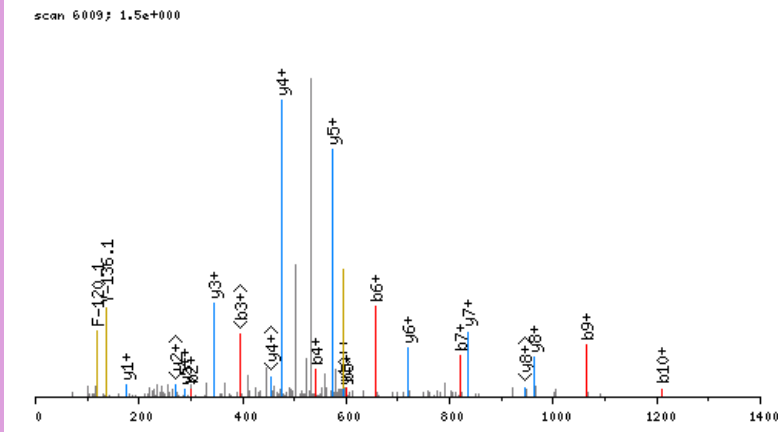

click image to zoom in; click top corners to zoom out [\[precursor±\]](#)

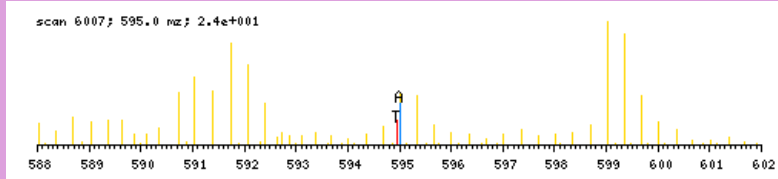

zoomed in precursor plot; T=theoretical m/z, A=acquired m/z

| b <sup>+</sup> | #  | AA # | y <sup>+</sup> | y <sup>2+</sup> |
|----------------|----|------|----------------|-----------------|
| 143.0820       | 1  | N 15 |                |                 |
| 299.2083       | 2  | K 14 | 1640.7921      | 820.8999        |
| 414.2353       | 3  | D 13 | 1484.6658      | 742.8368        |
| 542.2938       | 4  | Q 12 | 1369.6388      | 685.3233        |
| 599.3153       | 5  | G 11 | 1241.5802      | 621.2940        |
| 656.3368       | 6  | G 10 | 1184.5588      | 592.7833        |
| 819.4001       | 7  | Y 9  | 1127.5373      | 564.2726        |
| 948.4427       | 8  | E 8  | 964.4740       | 482.7409        |
| 1063.4696      | 9  | D 7  | 835.4314       | 418.2196        |
| 1210.5381      | 10 | F 6  | 720.4044       | 360.7061        |
| 1309.6065      | 11 | V 5  | 573.3360       | 287.1719        |
| 1438.6491      | 12 | E 4  | 474.2676       | 237.6377        |
| 1495.6705      | 13 | G 3  | 345.2250       | 173.1164        |
| 1608.7546      | 14 | L 2  | 288.2036       | 144.6057        |
|                | 15 | R 1  | 175.1195       | 88.0637         |

N-term:+29.04 K(2):+156.13

NKEEYNGYTGAFR, MH+ 1604.7709, m/z 535.5952  
 L OS G27 P150811 220811-s1.03516.03516.3.dta

X-range:

-

MassTol: Y-zoom:

MassType:

AVG  MONO

Axis:

1  2

Label:

I  M  -

Ions:

a  +  2+  3+

b  +  2+  3+

c  +  2+  3+

x  +  2+  3+

y  +  2+  3+

z  +  2+  3+

hide H<sub>2</sub>O/NH<sub>3</sub>

zoom 112-122

GO

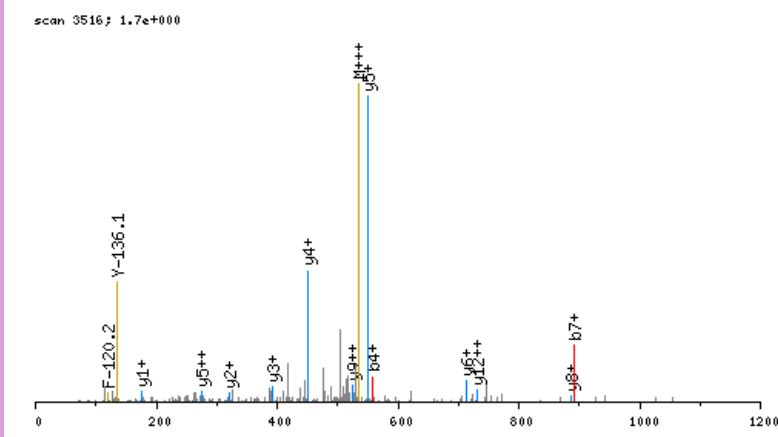

click image to zoom in; click top corners to zoom out [\[precursor±\]](#)

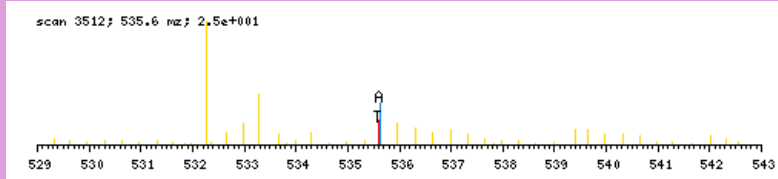

zoomed in precursor plot; T=theoretical m/z, A=acquired m/z

| b <sup>+</sup> | #  | AA # | y <sup>+</sup> | y <sup>2+</sup> |
|----------------|----|------|----------------|-----------------|
| 143.0820       | 1  | N 13 |                |                 |
| 299.2083       | 2  | K 12 | 1462.6967      | 731.8523        |
| 428.2509       | 3  | E 11 | 1306.5704      | 653.7891        |
| 557.2935       | 4  | E 10 | 1177.5278      | 589.2678        |
| 720.3568       | 5  | Y 9  | 1048.4852      | 524.7465        |
| 834.3998       | 6  | N 8  | 885.4219       | 443.2149        |
| 891.4212       | 7  | G 7  | 771.3790       | 386.1934        |
| 1054.4846      | 8  | Y 6  | 714.3575       | 357.6827        |
| 1155.5322      | 9  | T 5  | 551.2942       | 276.1510        |
| 1212.5537      | 10 | G 4  | 450.2465       | 225.6272        |
| 1283.5908      | 11 | A 3  | 393.2250       | 197.1164        |
| 1430.6592      | 12 | F 2  | 322.1879       | 161.5979        |
|                | 13 | R 1  | 175.1195       | 88.0637         |

N-term:+29.04 K(2):+156.13

NKWDYVAALTPR, MH+ 1590.8644, m/z 530.9597  
 L OS G25 P150811 220811-s1.06710.06710.3.dta

X-range:

-

MassTol: Y-zoom:

MassType:

AVG  MONO

Axis:

1  2

Label:

I  M  -

Ions:

a  +  2+  3+

b  +  2+  3+

c  +  2+  3+

x  +  2+  3+

y  +  2+  3+

z  +  2+  3+

hide H<sub>2</sub>O/NH<sub>3</sub>

zoom 112-122

GO

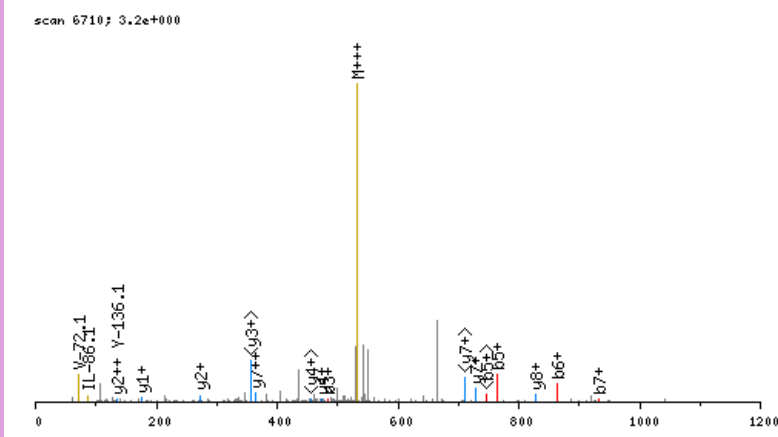

click image to zoom in; click top corners to zoom out [\[precursor±\]](#)

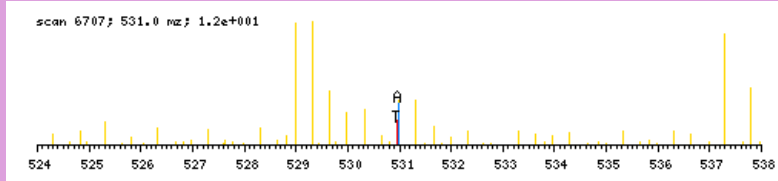

zoomed in precursor plot; T=theoretical m/z, A=acquired m/z

| b <sup>+</sup> | #  | AA # | y <sup>+</sup> | y <sup>2+</sup> |
|----------------|----|------|----------------|-----------------|
| 143.0820       | 1  | N 13 |                |                 |
| 299.2083       | 2  | K 12 | 1448.7902      | 724.8990        |
| 485.2876       | 3  | W 11 | 1292.6639      | 646.8359        |
| 600.3146       | 4  | D 10 | 1106.5846      | 553.7962        |
| 763.3779       | 5  | Y 9  | 991.5577       | 496.2827        |
| 862.4463       | 6  | V 8  | 828.4943       | 414.7511        |
| 933.4834       | 7  | A 7  | 729.4259       | 365.2169        |
| 1004.5206      | 8  | A 6  | 658.3888       | 329.6983        |
| 1117.6046      | 9  | L 5  | 587.3517       | 294.1798        |
| 1218.6523      | 10 | T 4  | 474.2676       | 237.6377        |
| 1319.7000      | 11 | T 3  | 373.2199       | 187.1139        |
| 1416.7527      | 12 | P 2  | 272.1723       | 136.5900        |
|                | 13 | R 1  | 175.1195       | 88.0637         |

N-term:+29.04 K(2):+156.13

NPDGMVALLDYR, MH+ 1391.6993, m/z 464.5713  
 L OS G25 P150811 220811-s1.07714.07714.3.dta

X-range:

-

MassTol: Y-zoom:

MassType:

AVG  MONO

Axis:

1  2

Label:

I  M  -

Ions:

a  +  2+  3+

b  +  2+  3+

c  +  2+  3+

x  +  2+  3+

y  +  2+  3+

z  +  2+  3+

hide H<sub>2</sub>O/NH<sub>3</sub>

zoom 112-122

GO

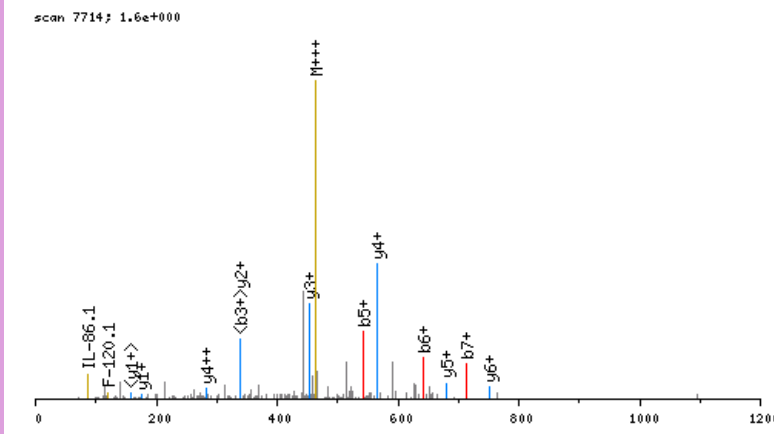

click image to zoom in; click top corners to zoom out [\[precursor±\]](#)

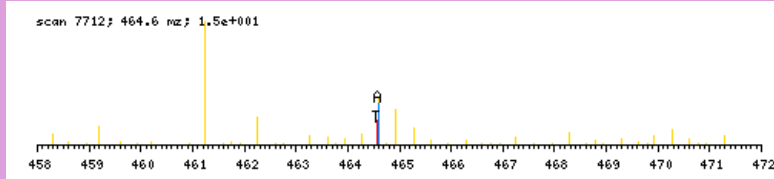

zoomed in precursor plot; T=theoretical m/z, A=acquired m/z

| b <sup>+</sup> | #  | AA # | y <sup>+</sup> | y <sup>2+</sup> |
|----------------|----|------|----------------|-----------------|
| 143.0820       | 1  | N 12 |                |                 |
| 240.1348       | 2  | P 11 | 1249.6251      | 625.3165        |
| 355.1617       | 3  | D 10 | 1152.5723      | 576.7901        |
| 412.1832       | 4  | G 9  | 1037.5454      | 519.2766        |
| 543.2237       | 5  | M 8  | 980.5239       | 490.7659        |
| 642.2921       | 6  | V 7  | 849.4834       | 425.2456        |
| 713.3292       | 7  | A 6  | 750.4150       | 375.7114        |
| 826.4133       | 8  | L 5  | 679.3779       | 340.1929        |
| 939.4973       | 9  | L 4  | 566.2938       | 283.6508        |
| 1054.5243      | 10 | D 3  | 453.2098       | 227.1088        |
| 1217.5876      | 11 | Y 2  | 338.1828       | 169.5953        |
|                | 12 | R 1  | 175.1195       | 88.0637         |

N-term:+29.04

NPGESSFDLADR, MH+ 1335.6181, m/z 668.3127  
 L OS G25 P150811 220811-s1.04383.04383.2.dta

X-range:

-

MassTol: Y-zoom:

MassType:

AVG  MONO

Axis:

1  2

Label:

I  M  -

Ions:

a  +  2+  3+

b  +  2+  3+

c  +  2+  3+

x  +  2+  3+

y  +  2+  3+

z  +  2+  3+

hide H<sub>2</sub>O/NH<sub>3</sub>

zoom 112-122

GO

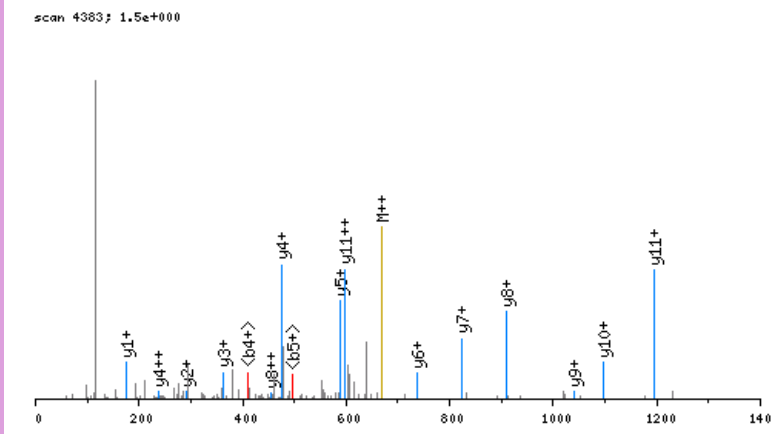

click image to zoom in; click top corners to zoom out [\[precursor±\]](#)

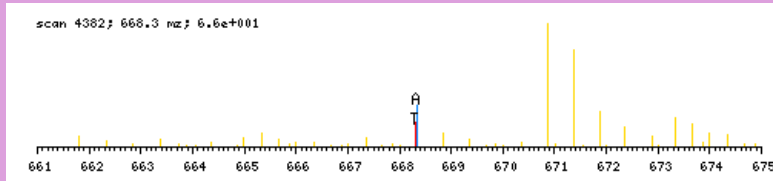

zoomed in precursor plot; T=theoretical m/z, A=acquired m/z

| b <sup>+</sup> | #  | AA # | y <sup>+</sup> | y <sup>2+</sup> |
|----------------|----|------|----------------|-----------------|
| 143.0820       | 1  | N 12 |                |                 |
| 240.1348       | 2  | P 11 | 1193.5439      | 597.2758        |
| 297.1563       | 3  | G 10 | 1096.4911      | 548.7495        |
| 426.1988       | 4  | E 9  | 1039.4696      | 520.2387        |
| 513.2309       | 5  | S 8  | 910.4270       | 455.7174        |
| 600.2629       | 6  | S 7  | 823.3950       | 412.2014        |
| 747.3313       | 7  | F 6  | 736.3630       | 368.6854        |
| 862.3583       | 8  | D 5  | 589.2946       | 295.1512        |
| 975.4423       | 9  | L 4  | 474.2676       | 237.6377        |
| 1046.4794      | 10 | A 3  | 361.1836       | 181.0957        |
| 1161.5064      | 11 | D 2  | 290.1464       | 145.5771        |
|                | 12 | R 1  | 175.1195       | 88.0637         |

N-term:+29.04



NPNVSIVDLTCR, MH+ 1415.7316, m/z 472.5821  
 L OS G27 P150811 220811-s1.06934.06934.3.dta

X-range:

-

MassTol: Y-zoom:

MassType:

AVG  MONO

Axis:

1  2

Label:

I  M  -

Ions:

a  +  2+  3+

b  +  2+  3+

c  +  2+  3+

x  +  2+  3+

y  +  2+  3+

z  +  2+  3+

hide H<sub>2</sub>O/NH<sub>3</sub>

zoom 112-122

GO

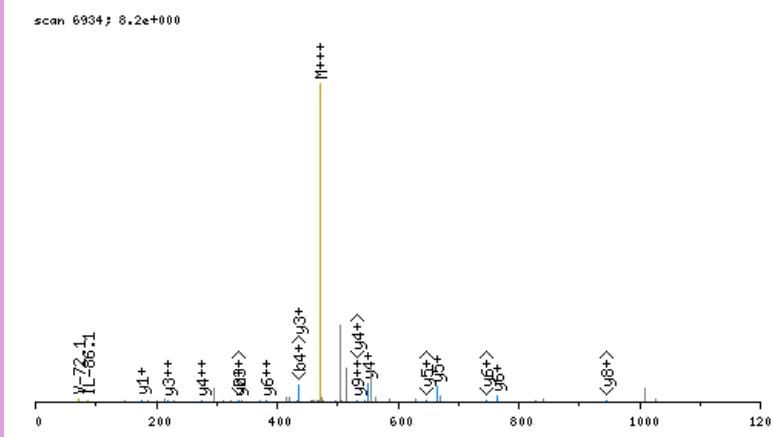

click image to zoom in; click top corners to zoom out [\[precursor±\]](#)

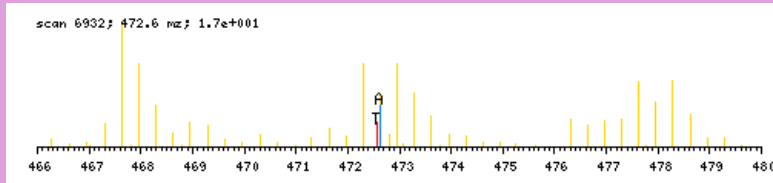

zoomed in precursor plot; T=theoretical m/z, A=acquired m/z

| b <sup>+</sup> | #  | AA # | y <sup>+</sup> | y <sup>2+</sup> |
|----------------|----|------|----------------|-----------------|
| 143.0820       | 1  | N 12 |                |                 |
| 240.1348       | 2  | P 11 | 1273.6574      | 637.3326        |
| 354.1777       | 3  | N 10 | 1176.6046      | 588.8062        |
| 453.2461       | 4  | V 9  | 1062.5617      | 531.7848        |
| 540.2782       | 5  | S 8  | 963.4933       | 482.2506        |
| 653.3622       | 6  | I 7  | 876.4613       | 438.7345        |
| 752.4306       | 7  | V 6  | 763.3772       | 382.1925        |
| 867.4576       | 8  | D 5  | 664.3088       | 332.6583        |
| 980.5416       | 9  | L 4  | 549.2818       | 275.1448        |
| 1081.5893      | 10 | T 3  | 436.1978       | 218.6028        |
| 1241.6199      | 11 | C 2  | 335.1501       | 168.0790        |
|                | 12 | R 1  | 175.1195       | 88.0637         |

N-term:+29.04 C(11):+160.03

NPVDDICIAPR, MH+ 1453.7837, m/z 485.2661  
 L OS G27 P150811 220811-s1.04678.04678.3.dta

X-range:

-

MassTol: Y-zoom:

MassType:

AVG  MONO

Axis:

1  2

Label:

I  M  -

Ions:

a  2+  3+

b  2+  3+

c  2+  3+

x  2+  3+

y  2+  3+

z  2+  3+

hide H<sub>2</sub>O/NH<sub>3</sub>

zoom 112-122

GO

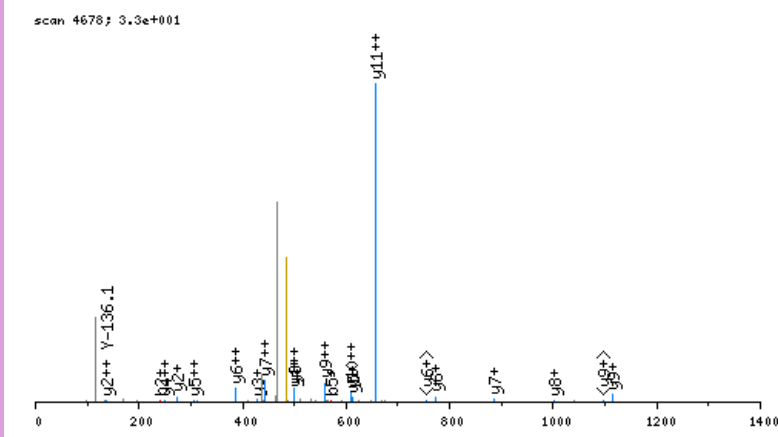

click image to zoom in; click top corners to zoom out [\[precursor±\]](#)

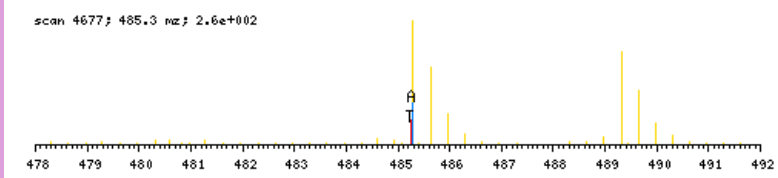

zoomed in precursor plot; T=theoretical m/z, A=acquired m/z

| b <sup>+</sup> | #  | AA # | y <sup>+</sup> | y <sup>2+</sup> |
|----------------|----|------|----------------|-----------------|
| 143.0820       | 1  | N 12 |                |                 |
| 240.1348       | 2  | P 11 | 1311.7095      | 656.3586        |
| 339.2032       | 3  | V 10 | 1214.6567      | 607.8323        |
| 454.2301       | 4  | D 9  | 1115.5883      | 558.2981        |
| 569.2571       | 5  | D 8  | 1000.5613      | 500.7846        |
| 682.3412       | 6  | I 7  | 885.5344       | 443.2711        |
| 842.3718       | 7  | C 6  | 772.4503       | 386.7291        |
| 955.4558       | 8  | I 5  | 612.4197       | 306.7138        |
| 1026.4929      | 9  | A 4  | 499.3357       | 250.1718        |
| 1182.6192      | 10 | K 3  | 428.2986       | 214.6532        |
| 1279.6720      | 11 | P 2  | 272.1723       | 136.5900        |
|                | 12 | R 1  | 175.1195       | 88.0637         |

N-term:+29.04 C(7):+160.03  
 K(10):+156.13

NQSSYEESPVRR, MH+ 1485.7510, m/z 495.9218  
 H OS G29 P150811 220811-s1.04739.04739.3.dta

X-range:

-

MassTol: Y-zoom:

MassType:

AVG  MONO

Axis:

1  2

Label:

I  M  -

Ions:

a  +  2+  3+

b  +  2+  3+

c  +  2+  3+

x  +  2+  3+

y  +  2+  3+

z  +  2+  3+

hide H<sub>2</sub>O/NH<sub>3</sub>

zoom 112-122

GO

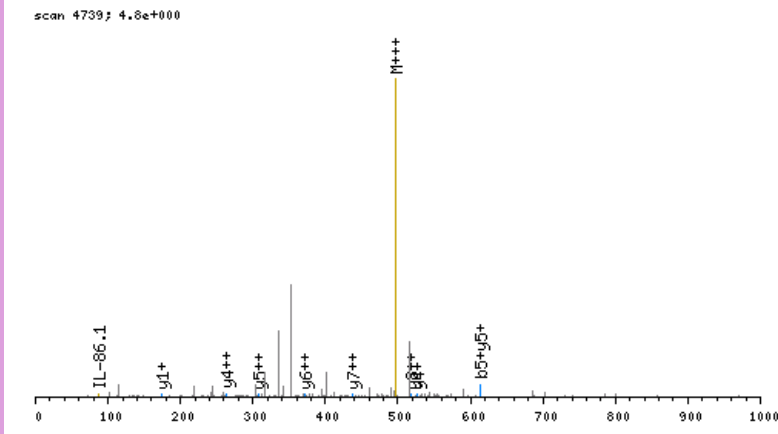

click image to zoom in; click top corners to zoom out [\[precursor±\]](#)

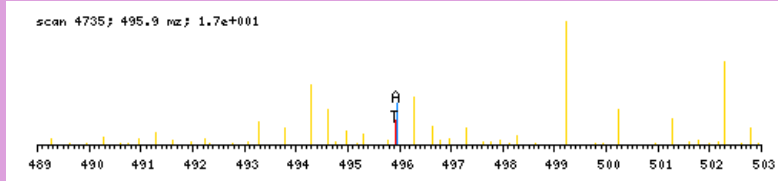

zoomed in precursor plot; T=theoretical m/z, A=acquired m/z

| b <sup>+</sup> | #  | AA # | y <sup>+</sup> | y <sup>2+</sup> |
|----------------|----|------|----------------|-----------------|
| 149.1138       | 1  | N 12 |                |                 |
| 277.1724       | 2  | Q 11 | 1337.6450      | 669.3264        |
| 364.2044       | 3  | S 10 | 1209.5864      | 605.2971        |
| 451.2365       | 4  | S 9  | 1122.5544      | 561.7811        |
| 614.2998       | 5  | Y 8  | 1035.5223      | 518.2651        |
| 743.3424       | 6  | E 7  | 872.4590       | 436.7334        |
| 872.3850       | 7  | E 6  | 743.4164       | 372.2121        |
| 959.4170       | 8  | S 5  | 614.3738       | 307.6908        |
| 1056.4698      | 9  | P 4  | 527.3418       | 264.1748        |
| 1155.5382      | 10 | V 3  | 430.2890       | 215.6484        |
| 1311.6393      | 11 | R 2  | 331.2206       | 166.1142        |
|                | 12 | R 1  | 175.1195       | 88.0637         |

N-term:+35.07

NTDVETQPGKTVIR, MH+ 1613.8863, m/z 538.6336  
 L OS G26 P150811 220811-s1.02447.02447.3.dta

scan 2447; 4.1e+000

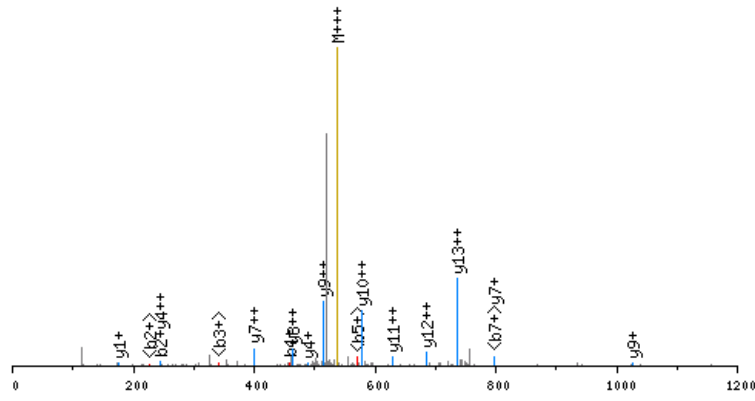

click image to zoom in; click top corners to zoom out [\[precursor±\]](#)

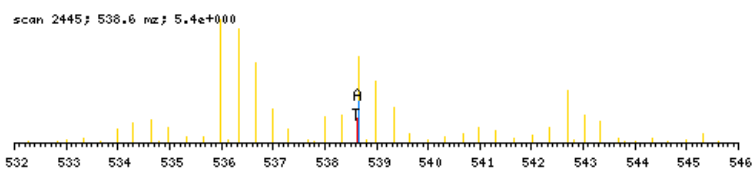

zoomed in precursor plot; T=theoretical m/z, A=acquired m/z

X-range:

-

MassTol: Y-zoom:

MassType:

AVG  MONO

Axis:

1  2

Label:

I  M  -

Ions:

a  +  2+  3+

b  +  2+  3+

c  +  2+  3+

x  +  2+  3+

y  +  2+  3+

z  +  2+  3+

hide H<sub>2</sub>O/NH<sub>3</sub>

zoom 112-122

GO

| b <sup>+</sup> | #  | AA # | y <sup>+</sup> | y <sup>2+</sup> |
|----------------|----|------|----------------|-----------------|
| 143.0820       | 1  | N 14 |                |                 |
| 244.1297       | 2  | T 13 | 1471.8121      | 736.4099        |
| 359.1566       | 3  | D 12 | 1370.7644      | 685.8861        |
| 458.2251       | 4  | V 11 | 1255.7374      | 628.3726        |
| 587.2677       | 5  | E 10 | 1156.6690      | 578.8384        |
| 688.3153       | 6  | T 9  | 1027.6264      | 514.3171        |
| 816.3739       | 7  | Q 8  | 926.5788       | 463.7933        |
| 913.4267       | 8  | P 7  | 798.5202       | 399.7640        |
| 970.4481       | 9  | G 6  | 701.4674       | 351.2376        |
| 1126.5744      | 10 | K 5  | 644.4460       | 322.7269        |
| 1227.6221      | 11 | T 4  | 488.3197       | 244.6637        |
| 1326.6905      | 12 | V 3  | 387.2720       | 194.1399        |
| 1439.7746      | 13 | I 2  | 288.2036       | 144.6057        |
|                | 14 | R 1  | 175.1195       | 88.0637         |

N-term:+29.04 K(10):+156.13

NTEITAEHLTINLKESVTTDAGR, MH+ 2558.3950, m/z 640.3542  
 H OS G27 P150811 220811-s1.05726.05726.4.dta

X-range:

-

MassTol: Y-zoom:

MassType:

AVG  MONO

Axis:

1  2

Label:

I  M  -

Ions:

a  +  2+  3+

b  +  2+  3+

c  +  2+  3+

x  +  2+  3+

y  +  2+  3+

z  +  2+  3+

hide H<sub>2</sub>O/NH<sub>3</sub>

zoom 112-122

GO

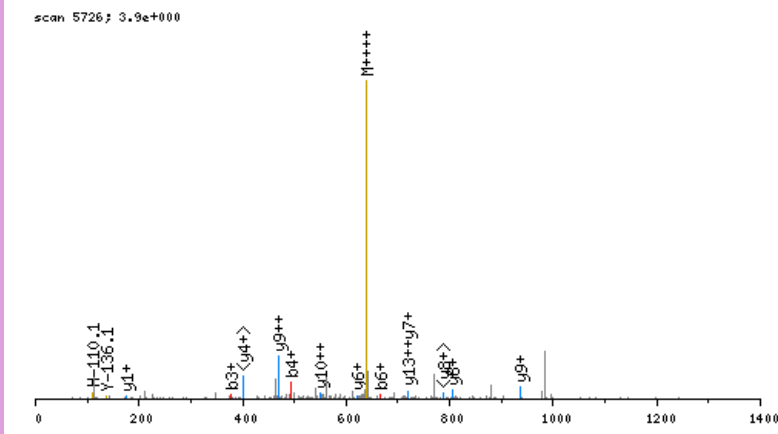

click image to zoom in; click top corners to zoom out [precursor±]

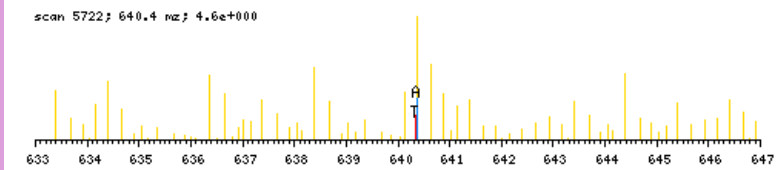

zoomed in precursor plot; T=theoretical m/z, A=acquired m/z

| b <sup>+</sup> | #  | AA # | y <sup>+</sup> | y <sup>2+</sup> |
|----------------|----|------|----------------|-----------------|
| 149.1138       | 1  | N 23 |                |                 |
| 250.1615       | 2  | T 22 | 2410.2890      | 1205.6484       |
| 379.2041       | 3  | E 21 | 2309.2413      | 1155.1246       |
| 492.2882       | 4  | I 20 | 2180.1987      | 1090.6033       |
| 593.3358       | 5  | T 19 | 2067.1146      | 1034.0612       |
| 664.3730       | 6  | A 18 | 1966.0669      | 983.5374        |
| 793.4155       | 7  | E 17 | 1895.0298      | 948.0188        |
| 907.4585       | 8  | N 16 | 1765.9872      | 883.4975        |
| 1020.5425      | 9  | L 15 | 1651.9443      | 826.4761        |
| 1121.5902      | 10 | T 14 | 1538.8602      | 769.9340        |
| 1234.6743      | 11 | I 13 | 1437.8126      | 719.4102        |
| 1348.7172      | 12 | N 12 | 1324.7285      | 662.8682        |
| 1461.8013      | 13 | L 11 | 1210.6856      | 605.8467        |
| 1623.9594      | 14 | K 10 | 1097.6015      | 549.3047        |
| 1753.0020      | 15 | E 9  | 935.4434       | 468.2256        |
| 1840.0340      | 16 | S 8  | 806.4008       | 403.7043        |
| 1939.1024      | 17 | V 7  | 719.3688       | 360.1883        |
| 2040.1501      | 18 | T 6  | 620.3004       | 310.6541        |
| 2141.1978      | 19 | T 5  | 519.2527       | 260.1303        |
| 2256.2247      | 20 | D 4  | 418.2050       | 209.6064        |
| 2327.2618      | 21 | A 3  | 303.1781       | 152.0930        |
| 2384.2833      | 22 | G 2  | 232.1410       | 116.5744        |
|                | 23 | R 1  | 175.1195       | 88.0637         |

N-term:+35.07 K(14):+162.16

QASGGPVDIGPEYQQDLDR, MH+ 2079.0207, m/z 693.6784  
 H OS G24 P150811 220811-s1.03704.03704.3.dta

X-range:

-

MassTol: Y-zoom:

MassType:

AVG  MONO

Axis:

1  2

Label:

I  M  -

Ions:

a  +  2+  3+

b  +  2+  3+

c  +  2+  3+

x  +  2+  3+

y  +  2+  3+

z  +  2+  3+

hide H<sub>2</sub>O/NH<sub>3</sub>

zoom 112-122

GO

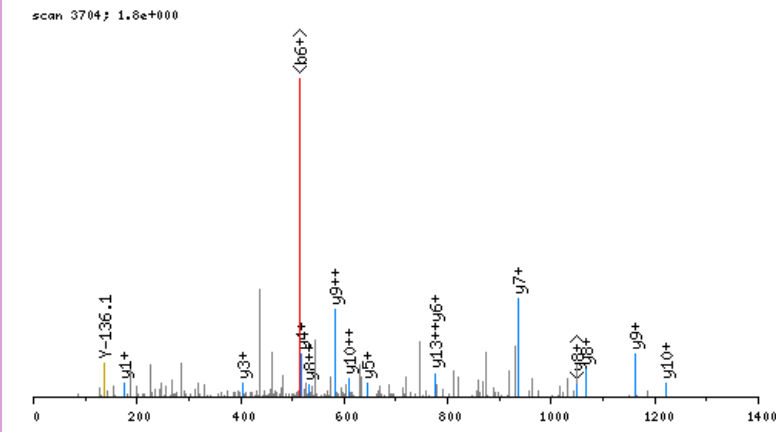

click image to zoom in; click top corners to zoom out [\[precursor±\]](#)

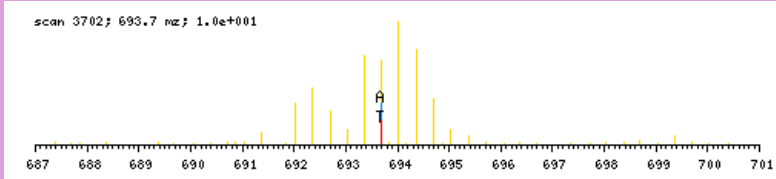

zoomed in precursor plot; T=theoretical m/z, A=acquired m/z

| b <sup>+</sup> | #  | AA # | y <sup>+</sup>   | y <sup>2+</sup> |
|----------------|----|------|------------------|-----------------|
| 163.1295       | 1  | Q 19 |                  |                 |
| 234.1666       | 2  | A 18 | 1916.8990        | 958.9534        |
| 321.1986       | 3  | S 17 | 1845.8619        | 923.4349        |
| 378.2201       | 4  | G 16 | 1758.8299        | 879.9188        |
| 435.2415       | 5  | G 15 | 1701.8084        | 851.4081        |
| 532.2943       | 6  | P 14 | 1644.7869        | 822.8974        |
| 631.3627       | 7  | V 13 | 1547.7342        | <b>774.3710</b> |
| 746.3897       | 8  | D 12 | 1448.6658        | 724.8368        |
| 859.4737       | 9  | I 11 | 1333.6388        | 667.3233        |
| 916.4952       | 10 | G 10 | <b>1220.5548</b> | <b>610.7813</b> |
| 1013.5480      | 11 | P 9  | <b>1163.5333</b> | <b>582.2706</b> |
| 1142.5906      | 12 | E 8  | <b>1066.4805</b> | <b>533.7442</b> |
| 1305.6539      | 13 | Y 7  | <b>937.4379</b>  | 469.2229        |
| 1433.7125      | 14 | Q 6  | <b>774.3746</b>  | 387.6912        |
| 1561.7710      | 15 | Q 5  | <b>646.3160</b>  | 323.6619        |
| 1676.7980      | 16 | D 4  | <b>518.2575</b>  | 259.6326        |
| 1789.8820      | 17 | L 3  | <b>403.2305</b>  | 202.1192        |
| 1904.9090      | 18 | D 2  | 290.1464         | 145.5771        |
|                | 19 | R 1  | <b>175.1195</b>  | 88.0637         |

N-term:+35.07

QDGALVQHQQWDGKESTITR, MH+ 2353.1901, m/z 589.0530  
 L OS G28 P150811 220811-s1.04259.04259.4.dta

X-range:

-

MassTol: Y-zoom:

MassType:

AVG  MONO

Axis:

1  2

Label:

I  M  -

Ions:

a  +  2+  3+

b  +  2+  3+

c  +  2+  3+

x  +  2+  3+

y  +  2+  3+

z  +  2+  3+

hide H<sub>2</sub>O/NH<sub>3</sub>

zoom 112-122

GO

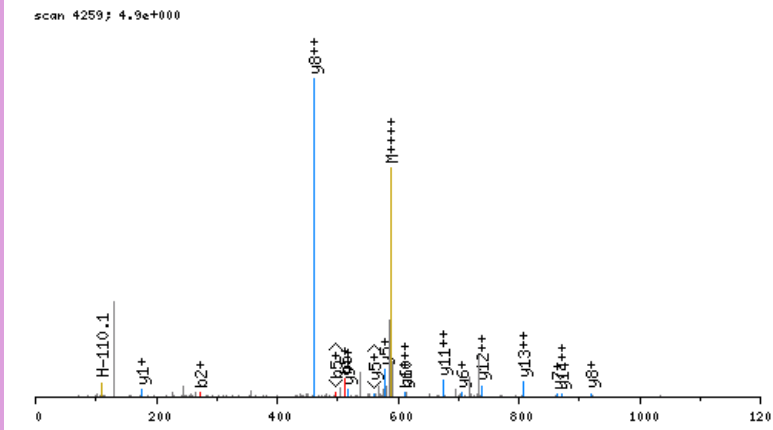

click image to zoom in; click top corners to zoom out [\[precursor±\]](#)

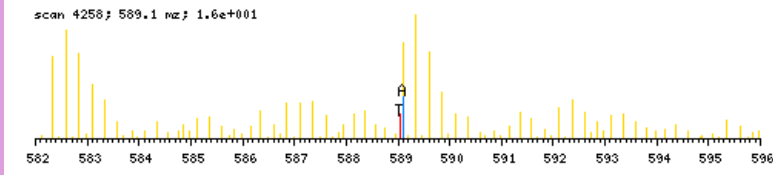

zoomed in precursor plot; T=theoretical m/z, A=acquired m/z

| b <sup>+</sup> | #  | AA # | y <sup>+</sup> | y <sup>2+</sup> |
|----------------|----|------|----------------|-----------------|
| 157.0977       | 1  | Q 20 |                |                 |
| 272.1246       | 2  | D 19 | 2197.1002      | 1099.0540       |
| 329.1461       | 3  | G 18 | 2082.0733      | 1041.5405       |
| 400.1832       | 4  | A 17 | 2025.0518      | 1013.0298       |
| 513.2673       | 5  | L 16 | 1954.0147      | 977.5113        |
| 612.3357       | 6  | V 15 | 1840.9306      | 920.9692        |
| 740.3943       | 7  | Q 14 | 1741.8622      | 871.4350        |
| 877.4532       | 8  | H 13 | 1613.8036      | 807.4057        |
| 1005.5117      | 9  | Q 12 | 1476.7447      | 738.8763        |
| 1133.5703      | 10 | Q 11 | 1348.6861      | 674.8470        |
| 1319.6496      | 11 | W 10 | 1220.6276      | 610.8177        |
| 1434.6766      | 12 | D 9  | 1034.5483      | 517.7780        |
| 1491.6980      | 13 | G 8  | 919.5213       | 460.2646        |
| 1647.8243      | 14 | K 7  | 862.4998       | 431.7538        |
| 1776.8669      | 15 | E 6  | 706.3735       | 353.6907        |
| 1863.8990      | 16 | S 5  | 577.3310       | 289.1694        |
| 1964.9466      | 17 | T 4  | 490.2989       | 245.6534        |
| 2078.0307      | 18 | I 3  | 389.2512       | 195.1295        |
| 2179.0784      | 19 | T 2  | 276.1672       | 138.5875        |
|                | 20 | R 1  | 175.1195       | 88.0637         |

N-term:+29.04 K(14):+156.13

QDPDEEALRR, MH+ 1262.6553, m/z 421.5566  
 H OS G27 P150811 220811-s1.02188.02188.3.dta

scan 2188; 1.3e+001

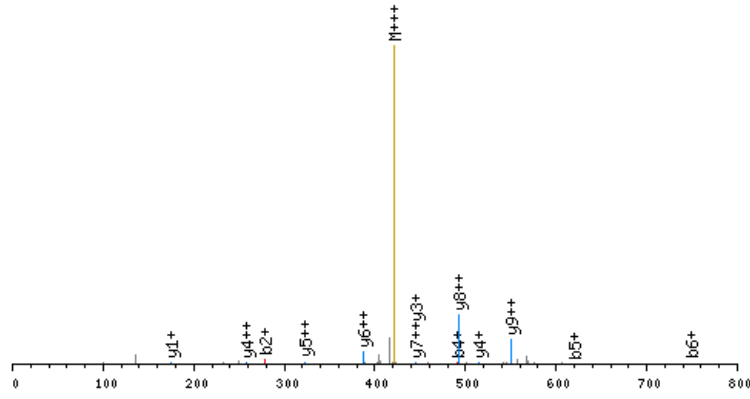

click image to zoom in; click top corners to zoom out [\[precursor±\]](#)

scan 2187; 421.6 m/z; 5.7e+000

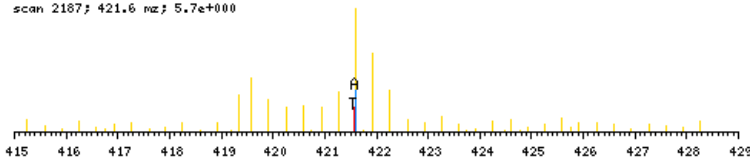

zoomed in precursor plot; T=theoretical m/z, A=acquired m/z

X-range:

-

MassTol: Y-zoom:

MassType:

AVG  MONO

Axis:

1  2

Label:

I  M  -

Ions:

a  +  2+  3+

b  +  2+  3+

c  +  2+  3+

x  +  2+  3+

y  +  2+  3+

z  +  2+  3+

hide H<sub>2</sub>O/NH<sub>3</sub>

zoom 112-122

GO

| b <sup>+</sup> | #  | AA # | y <sup>+</sup> | y <sup>2+</sup> |
|----------------|----|------|----------------|-----------------|
| 163.1295       | 1  | Q    | 10             |                 |
| 278.1564       | 2  | D    | 9              | 1100.5336       |
| 375.2092       | 3  | P    | 8              | 985.5067        |
| 490.2361       | 4  | D    | 7              | 888.4539        |
| 619.2787       | 5  | E    | 6              | 773.4270        |
| 748.3213       | 6  | E    | 5              | 644.3844        |
| 819.3584       | 7  | A    | 4              | 515.3418        |
| 932.4425       | 8  | L    | 3              | 444.3047        |
| 1088.5436      | 9  | R    | 2              | 331.2206        |
|                | 10 | R    | 1              | 175.1195        |

N-term:+35.07



QEFKEAFTVIDQNR, MH+ 1780.9234, m/z 594.3126  
 L OS G27 P150811 220811-s1.05815.05815.3.dta

X-range:

-

MassTol: Y-zoom:

MassType:

AVG  MONO

Axis:

1  2

Label:

I  M  -

Ions:

a  +  2+  3+

b  +  2+  3+

c  +  2+  3+

x  +  2+  3+

y  +  2+  3+

z  +  2+  3+

hide H<sub>2</sub>O/NH<sub>3</sub>

zoom 112-122

GO

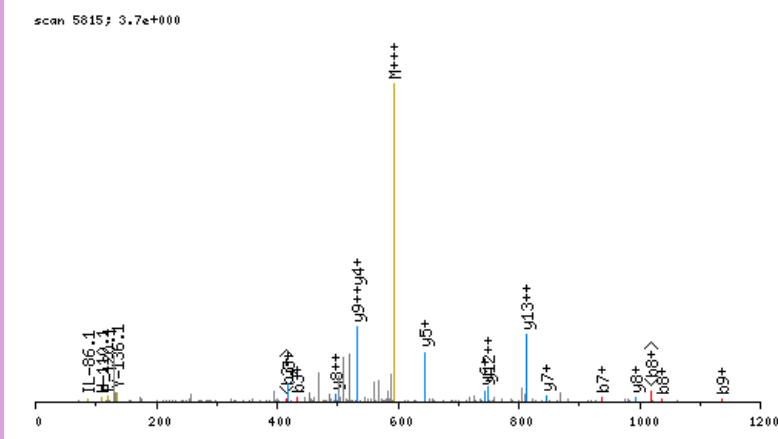

click image to zoom in; click top corners to zoom out [\[precursor±\]](#)

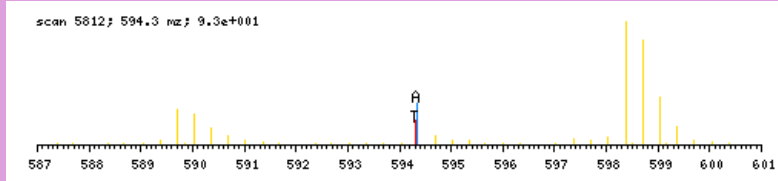

zoomed in precursor plot; T=theoretical m/z, A=acquired m/z

| b <sup>+</sup> | #  | AA # | y <sup>+</sup> | y <sup>2+</sup> |
|----------------|----|------|----------------|-----------------|
| 157.0977       | 1  | Q 14 |                |                 |
| 286.1403       | 2  | E 13 | 1624.8335      | 812.9207        |
| 433.2087       | 3  | F 12 | 1495.7909      | 748.3994        |
| 589.3350       | 4  | K 11 | 1348.7225      | 674.8652        |
| 718.3776       | 5  | E 10 | 1192.5962      | 596.8020        |
| 789.4147       | 6  | A 9  | 1063.5536      | 532.2807        |
| 936.4831       | 7  | F 8  | 992.5165       | 496.7622        |
| 1037.5308      | 8  | T 7  | 845.4481       | 423.2280        |
| 1136.5992      | 9  | V 6  | 744.4004       | 372.7041        |
| 1249.6833      | 10 | I 5  | 645.3320       | 323.1699        |
| 1364.7102      | 11 | D 4  | 532.2479       | 266.6279        |
| 1492.7688      | 12 | Q 3  | 417.2210       | 209.1144        |
| 1606.8117      | 13 | N 2  | 289.1624       | 145.0851        |
|                | 14 | R 1  | 175.1195       | 88.0637         |

N-term:+29.04 K(4):+156.13

QELDLAALNSKLSGCPVQKPGGR, MH+ 2522.3765, m/z 631.3496  
 L OS G26 P150811 220811-s1.06753.06753.4.dta

scan 6753; 9.8e-001

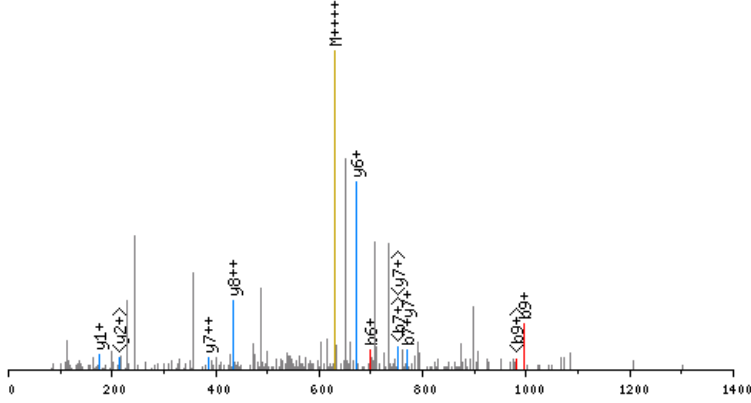

click image to zoom in; click top corners to zoom out [\[precursor±\]](#)

scan 6750; 631.3 m/z; 1.3e+001

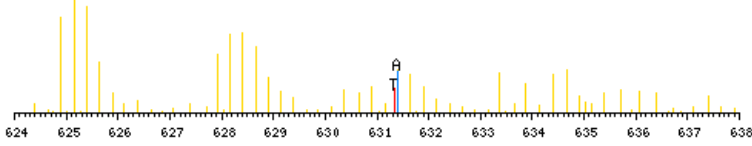

zoomed in precursor plot; T=theoretical m/z, A=acquired m/z

X-range:

-

MassTol: Y-zoom:

MassType:

AVG  MONO

Axis:

1  2

Label:

I  M  -

Ions:

a  +  2+  3+

b  +  2+  3+

c  +  2+  3+

x  +  2+  3+

y  +  2+  3+

z  +  2+  3+

hide H<sub>2</sub>O/NH<sub>3</sub>

zoom 112-122

GO

| b <sup>+</sup> | #  | AA # | y <sup>+</sup> | y <sup>2+</sup> |
|----------------|----|------|----------------|-----------------|
| 157.0977       | 1  | Q    | 23             |                 |
| 286.1403       | 2  | E    | 22             | 2366.2866       |
| 399.2243       | 3  | L    | 21             | 2237.2440       |
| 514.2513       | 4  | D    | 20             | 2124.1600       |
| 627.3353       | 5  | L    | 19             | 2009.1330       |
| 698.3725       | 6  | A    | 18             | 1896.0490       |
| 769.4096       | 7  | A    | 17             | 1825.0118       |
| 882.4936       | 8  | L    | 16             | 1753.9747       |
| 996.5366       | 9  | N    | 15             | 1640.8907       |
| 1083.5686      | 10 | S    | 14             | 1526.8477       |
| 1239.6949      | 11 | K    | 13             | 1439.8157       |
| 1352.7790      | 12 | L    | 12             | 1283.6894       |
| 1439.8110      | 13 | S    | 11             | 1170.6053       |
| 1496.8324      | 14 | G    | 10             | 1083.5733       |
| 1656.8630      | 15 | C    | 9              | 1026.5518       |
| 1753.9158      | 16 | P    | 8              | 866.5212        |
| 1852.9842      | 17 | V    | 7              | 769.4685        |
| 1981.0428      | 18 | Q    | 6              | 670.4001        |
| 2137.1691      | 19 | K    | 5              | 542.3415        |
| 2234.2219      | 20 | P    | 4              | 386.2152        |
| 2291.2433      | 21 | G    | 3              | 289.1624        |
| 2348.2648      | 22 | G    | 2              | 232.1410        |
|                | 23 | R    | 1              | 175.1195        |

N-term:+29.04 K(11):+156.13  
 C(15):+160.03 K(19):+156.13

QEYDEAGPSIVHR, MH+ 1534.7714, m/z 512.2620  
 H OS G27 P150811 220811-s1.03295.03295.3.dta

X-range:

-

MassTol: Y-zoom:

MassType:

AVG  MONO

Axis:

1  2

Label:

I  M  -

Ions:

a  +  2+  3+

b  +  2+  3+

c  +  2+  3+

x  +  2+  3+

y  +  2+  3+

z  +  2+  3+

hide H<sub>2</sub>O/NH<sub>3</sub>

zoom 112-122

GO

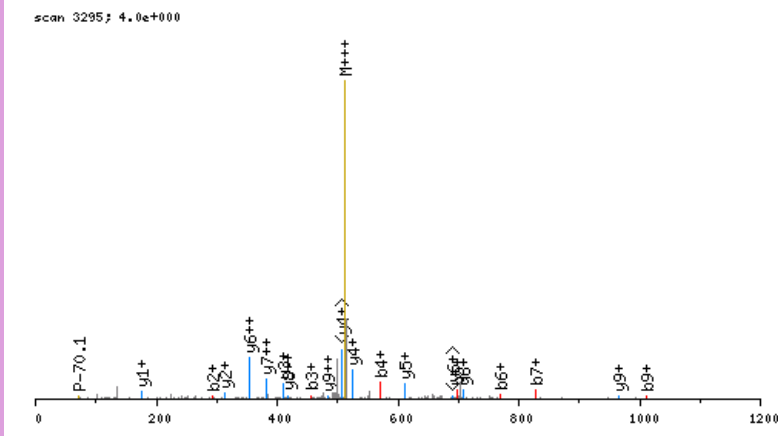

click image to zoom in; click top corners to zoom out [\[precursor±\]](#)

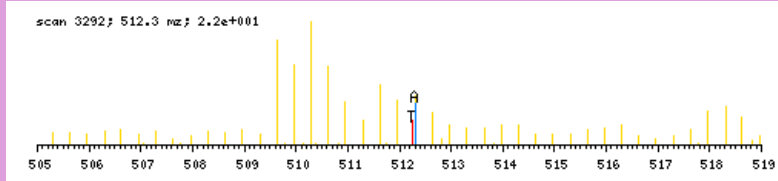

zoomed in precursor plot; T=theoretical m/z, A=acquired m/z

| b <sup>+</sup> | #  | AA # | y <sup>+</sup> | y <sup>2+</sup>    |
|----------------|----|------|----------------|--------------------|
| 163.1295       | 1  | Q    | 13             |                    |
| 292.1721       | 2  | E    | 12             | 1372.6497 686.8288 |
| 455.2354       | 3  | Y    | 11             | 1243.6071 622.3075 |
| 570.2623       | 4  | D    | 10             | 1080.5438 540.7758 |
| 699.3049       | 5  | E    | 9              | 965.5169 483.2623  |
| 770.3420       | 6  | A    | 8              | 836.4743 418.7410  |
| 827.3635       | 7  | G    | 7              | 765.4371 383.2225  |
| 924.4163       | 8  | P    | 6              | 708.4157 354.7118  |
| 1011.4483      | 9  | S    | 5              | 611.3629 306.1854  |
| 1124.5324      | 10 | I    | 4              | 524.3309 262.6694  |
| 1223.6008      | 11 | V    | 3              | 411.2468 206.1273  |
| 1360.6597      | 12 | H    | 2              | 312.1784 156.5931  |
|                | 13 | R    | 1              | 175.1195 88.0637   |

N-term:+35.07

QEYIYSIHTR, MH+ 1337.6854, m/z 446.5666  
 L OS G27 P150811 220811-s1.03829.03829.3.dta

X-range:

-

MassTol: Y-zoom:

MassType:

AVG  MONO

Axis:

1  2

Label:

I  M  -

Ions:

a  +  2+  3+

b  +  2+  3+

c  +  2+  3+

x  +  2+  3+

y  +  2+  3+

z  +  2+  3+

hide H<sub>2</sub>O/NH<sub>3</sub>

zoom 112-122

GO

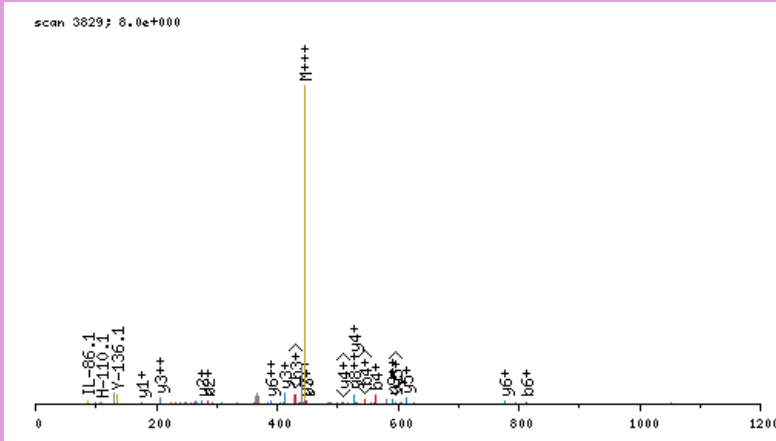

click image to zoom in; click top corners to zoom out [\[precursor±\]](#)

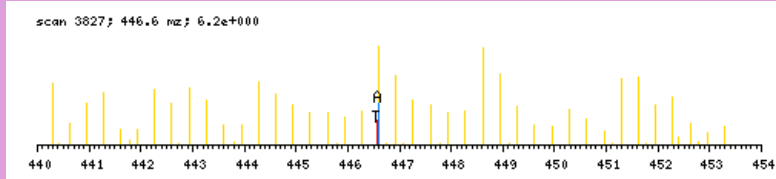

zoomed in precursor plot; T=theoretical m/z, A=acquired m/z

| b <sup>+</sup> | #  | AA # | y <sup>+</sup> | y <sup>2+</sup> |
|----------------|----|------|----------------|-----------------|
| 157.0977       | 1  | Q    | 10             |                 |
| 286.1403       | 2  | E    | 9              | 1181.5955       |
| 449.2036       | 3  | Y    | 8              | 1052.5529       |
| 562.2877       | 4  | I    | 7              | 889.4896        |
| 725.3510       | 5  | Y    | 6              | 776.4055        |
| 812.3830       | 6  | S    | 5              | 613.3422        |
| 925.4671       | 7  | I    | 4              | 526.3102        |
| 1062.5260      | 8  | H    | 3              | 413.2261        |
| 1163.5737      | 9  | T    | 2              | 276.1672        |
|                | 10 | R    | 1              | 175.1195        |

N-term:+29.04

QIAATELEKEESR, MH+ 1559.8281, m/z 520.6142  
 L OS G27 P150811 220811-s1.03309.03309.3.dta

X-range:

-

MassTol: Y-zoom:

MassType:

AVG  MONO

Axis:

1  2

Label:

I  M  -

Ions:

a  +  2+  3+

b  +  2+  3+

c  +  2+  3+

x  +  2+  3+

y  +  2+  3+

z  +  2+  3+

hide H<sub>2</sub>O/NH<sub>3</sub>

zoom 112-122

GO

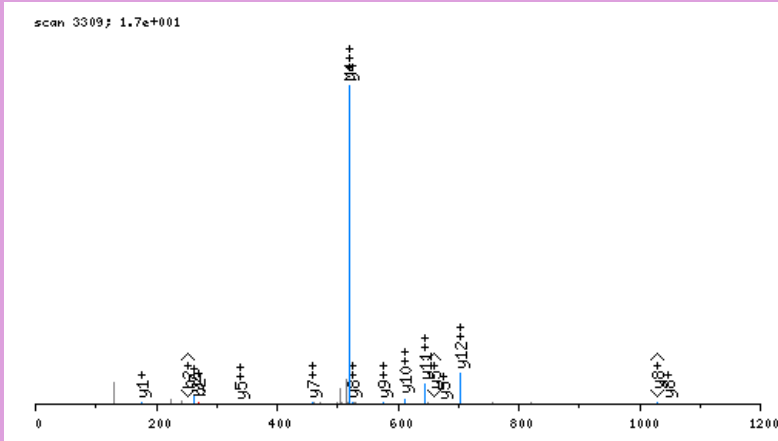

click image to zoom in; click top corners to zoom out [\[precursor±\]](#)

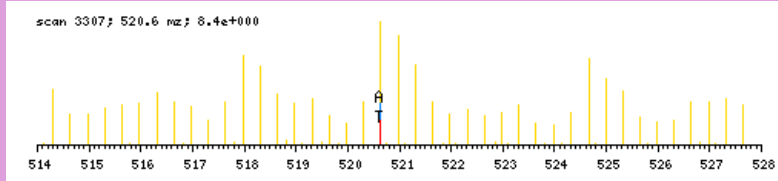

zoomed in precursor plot; T=theoretical m/z, A=acquired m/z

| b <sup>+</sup> | #  | AA # | y <sup>+</sup> | y <sup>2+</sup> |
|----------------|----|------|----------------|-----------------|
| 157.0977       | 1  | Q    | 13             |                 |
| 270.1817       | 2  | I    | 12             | 1403.7382       |
| 341.2189       | 3  | A    | 11             | 1290.6542       |
| 412.2560       | 4  | A    | 10             | 1219.6171       |
| 513.3036       | 5  | T    | 9              | 1148.5799       |
| 642.3462       | 6  | E    | 8              | 1047.5323       |
| 755.4303       | 7  | L    | 7              | 918.4897        |
| 884.4729       | 8  | E    | 6              | 805.4056        |
| 1040.5992      | 9  | K    | 5              | 676.3630        |
| 1169.6418      | 10 | E    | 4              | 520.2367        |
| 1298.6844      | 11 | E    | 3              | 391.1941        |
| 1385.7164      | 12 | S    | 2              | 262.1515        |
|                | 13 | R    | 1              | 175.1195        |

N-term:+29.04 K(9):+156.13

QKAPQVSTPTLVAAAR, MH+ 1752.0020, m/z 584.6722  
 L OS G26 P150811 220811-s1.03393.03393.3.dta

X-range:

-

MassTol: Y-zoom:

MassType:

AVG  MONO

Axis:

1  2

Label:

I  M  -

Ions:

a  +  2+  3+

b  +  2+  3+

c  +  2+  3+

x  +  2+  3+

y  +  2+  3+

z  +  2+  3+

hide H<sub>2</sub>O/NH<sub>3</sub>

zoom 112-122

GO

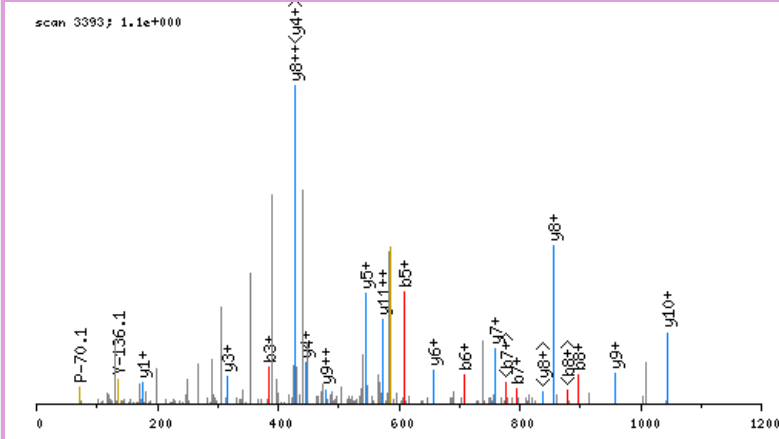

click image to zoom in; click top corners to zoom out [\[precursor±\]](#)

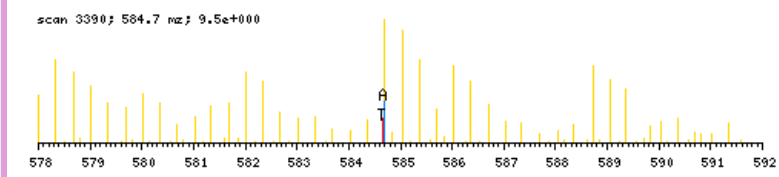

zoomed in precursor plot; T=theoretical m/z, A=acquired m/z

| b <sup>+</sup> | #  | AA # | y <sup>+</sup> | y <sup>2+</sup> |
|----------------|----|------|----------------|-----------------|
| 157.0977       | 1  | Q 16 |                |                 |
| 313.2240       | 2  | K 15 | 1595.9121      | 798.4600        |
| 384.2611       | 3  | A 14 | 1439.7858      | 720.3968        |
| 481.3139       | 4  | P 13 | 1368.7487      | 684.8783        |
| 609.3724       | 5  | Q 12 | 1271.6959      | 636.3519        |
| 708.4408       | 6  | V 11 | 1143.6374      | 572.3226        |
| 795.4729       | 7  | S 10 | 1044.5689      | 522.7884        |
| 896.5206       | 8  | T 9  | 957.5369       | 479.2724        |
| 993.5733       | 9  | P 8  | 856.4892       | 428.7485        |
| 1094.6210      | 10 | T 7  | 759.4365       | 380.2222        |
| 1207.7051      | 11 | L 6  | 658.3888       | 329.6983        |
| 1306.7735      | 12 | V 5  | 545.3047       | 273.1563        |
| 1435.8161      | 13 | E 4  | 446.2363       | 223.6221        |
| 1506.8532      | 14 | A 3  | 317.1937       | 159.1008        |
| 1577.8903      | 15 | A 2  | 246.1566       | 123.5822        |
|                | 16 | R 1  | 175.1195       | 88.0637         |

N-term:+29.04 K(2):+156.13

QLVDSGKVDDEAR, MH+ 1372.7436, m/z 458.2527  
 L OS G27 P150811 220811-s1.02690.02690.3.dta

X-range:

-

MassTol: Y-zoom:

MassType:

AVG  MONO

Axis:

1  2

Label:

I  M  -

Ions:

a  +  2+  3+

b  +  2+  3+

c  +  2+  3+

x  +  2+  3+

y  +  2+  3+

z  +  2+  3+

hide H<sub>2</sub>O/NH<sub>3</sub>

zoom 112-122

GO

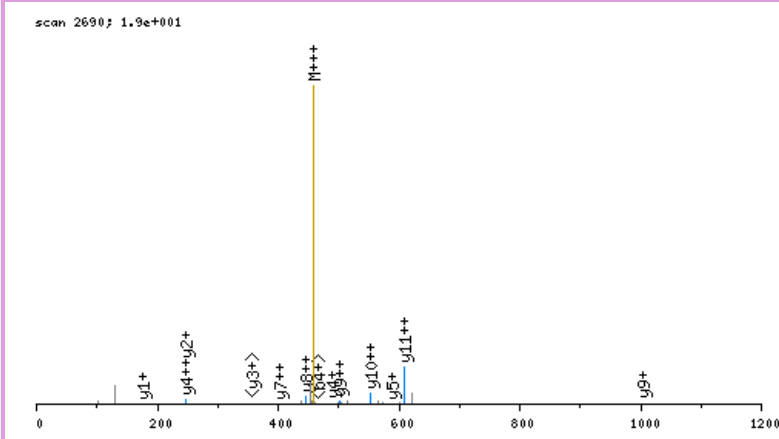

click image to zoom in; click top corners to zoom out [\[precursor±\]](#)

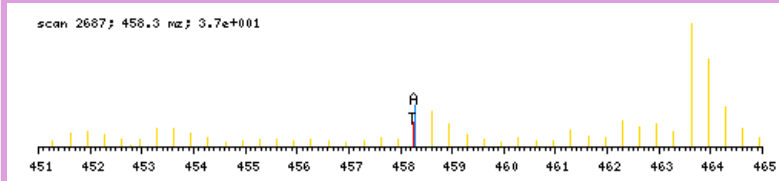

zoomed in precursor plot; T=theoretical m/z, A=acquired m/z

| b <sup>+</sup> | #  | AA # | y <sup>+</sup> | y <sup>2+</sup> |
|----------------|----|------|----------------|-----------------|
| 157.0977       | 1  | Q    | 12             |                 |
| 270.1817       | 2  | L    | 11             | 1216.6538       |
| 369.2502       | 3  | V    | 10             | 1103.5697       |
| 484.2771       | 4  | D    | 9              | 1004.5013       |
| 571.3091       | 5  | S    | 8              | 889.4744        |
| 628.3306       | 6  | G    | 7              | 802.4423        |
| 784.4569       | 7  | K    | 6              | 745.4209        |
| 883.5253       | 8  | V    | 5              | 589.2946        |
| 998.5522       | 9  | D    | 4              | 490.2262        |
| 1127.5948      | 10 | E    | 3              | 375.1992        |
| 1198.6320      | 11 | A    | 2              | 246.1566        |
|                | 12 | R    | 1              | 175.1195        |

N-term:+29.04 K(7):+156.13

QMMNPGLPESVLDINECLR, MH+ 2244.0826, m/z 561.7761  
 L OS G26 P150811 220811-s1.06344.06344.4.dta

X-range:

-

MassTol: Y-zoom:

MassType:

AVG  MONO

Axis:

1  2

Label:

I  M  -

Ions:

a  +  2+  3+

b  +  2+  3+

c  +  2+  3+

x  +  2+  3+

y  +  2+  3+

z  +  2+  3+

hide H<sub>2</sub>O/NH<sub>3</sub>

zoom 112-122

GO

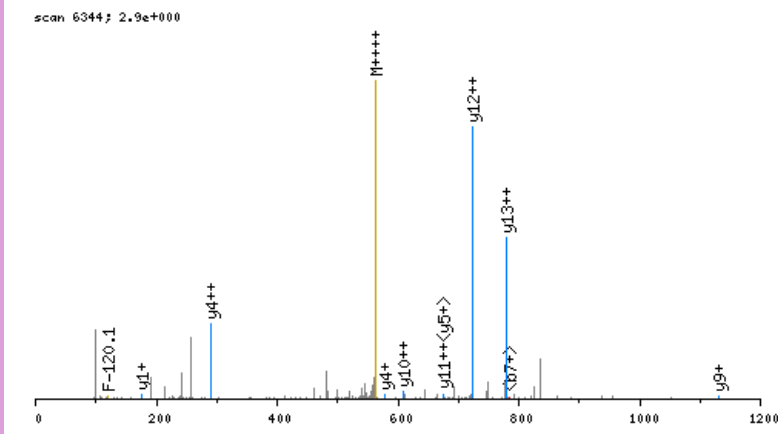

click image to zoom in; click top corners to zoom out [\[precursor±\]](#)

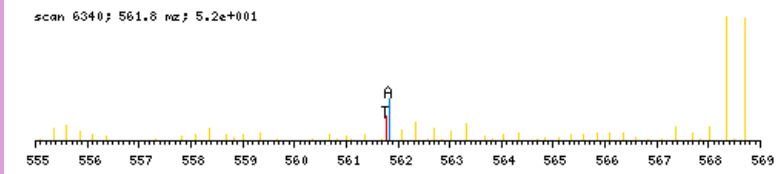

zoomed in precursor plot; T=theoretical m/z, A=acquired m/z

| b <sup>+</sup> | #  | AA # | y <sup>+</sup> | y <sup>2+</sup> |
|----------------|----|------|----------------|-----------------|
| 157.0977       | 1  | Q    | 19             |                 |
| 288.1382       | 2  | M    | 18             | 2087.9927       |
| 419.1786       | 3  | M    | 17             | 1956.9523       |
| 533.2216       | 4  | N    | 16             | 1825.9118       |
| 630.2743       | 5  | P    | 15             | 1711.8688       |
| 687.2958       | 6  | G    | 14             | 1614.8161       |
| 800.3799       | 7  | L    | 13             | 1557.7946       |
| 897.4326       | 8  | P    | 12             | 1444.7106       |
| 1026.4752      | 9  | E    | 11             | 1347.6578       |
| 1113.5073      | 10 | S    | 10             | 1218.6152       |
| 1212.5757      | 11 | V    | 9              | 1131.5832       |
| 1325.6597      | 12 | L    | 8              | 1032.5148       |
| 1440.6867      | 13 | D    | 7              | 919.4307        |
| 1553.7707      | 14 | I    | 6              | 804.4037        |
| 1667.8137      | 15 | N    | 5              | 691.3197        |
| 1796.8563      | 16 | E    | 4              | 577.2768        |
| 1956.8869      | 17 | C    | 3              | 448.2342        |
| 2069.9709      | 18 | L    | 2              | 288.2036        |
|                | 19 | R    | 1              | 175.1195        |

N-term:+29.04 C(17):+160.03



QPGLPAVLSSPSPPLSPR, MH+ 1828.0332, m/z 457.7638  
 L OS G28 P150811 220811-s1.01896.01896.4.dta

X-range:

-

MassTol: Y-zoom:

MassType:

AVG  MONO

Axis:

1  2

Label:

I  M  -

Ions:

a  +  2+  3+

b  +  2+  3+

c  +  2+  3+

x  +  2+  3+

y  +  2+  3+

z  +  2+  3+

hide H<sub>2</sub>O/NH<sub>3</sub>

zoom 112-122

GO

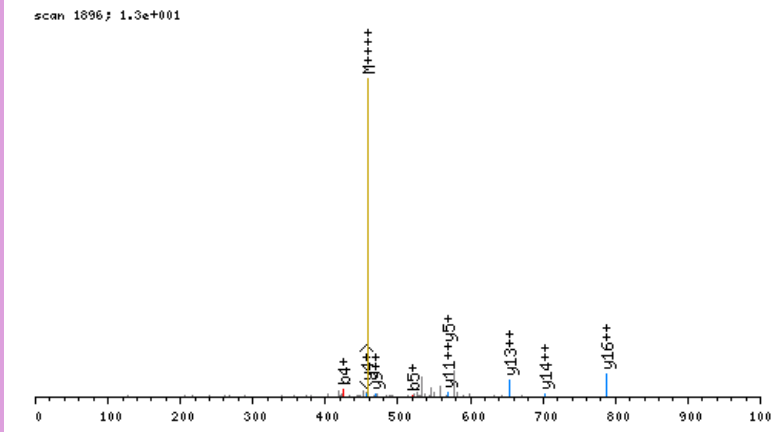

click image to zoom in; click top corners to zoom out [\[precursor±\]](#)

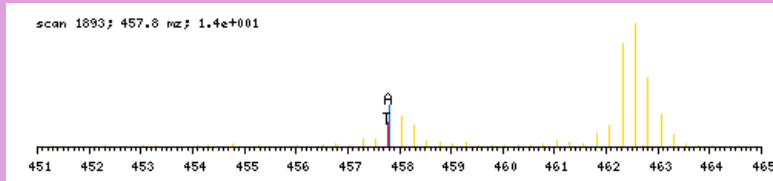

zoomed in precursor plot; T=theoretical m/z, A=acquired m/z

| b <sup>+</sup>  | #  | AA # | y <sup>+</sup>  | y <sup>2+</sup> |
|-----------------|----|------|-----------------|-----------------|
| 157.0977        | 1  | Q 18 |                 |                 |
| 254.1504        | 2  | P 17 | 1671.9434       | 836.4756        |
| 311.1719        | 3  | G 16 | 1574.8906       | <b>787.9492</b> |
| <b>424.2560</b> | 4  | L 15 | 1517.8692       | 759.4385        |
| <b>521.3087</b> | 5  | P 14 | 1404.7851       | <b>702.8965</b> |
| 592.3458        | 6  | A 13 | 1307.7323       | <b>654.3701</b> |
| 691.4143        | 7  | V 12 | 1236.6952       | 618.8515        |
| 804.4983        | 8  | L 11 | 1137.6268       | <b>569.3173</b> |
| 891.5304        | 9  | S 10 | 1024.5427       | 512.7753        |
| 978.5624        | 10 | S 9  | 937.5107        | <b>469.2593</b> |
| 1075.6151       | 11 | P 8  | 850.4787        | 425.7433        |
| 1162.6472       | 12 | S 7  | 753.4259        | 377.2169        |
| 1259.6999       | 13 | P 6  | 666.3939        | 333.7009        |
| 1356.7527       | 14 | P 5  | <b>569.3411</b> | 285.1745        |
| 1469.8368       | 15 | L 4  | 472.2884        | 236.6481        |
| 1556.8688       | 16 | S 3  | 359.2043        | 180.1061        |
| 1653.9216       | 17 | P 2  | 272.1723        | 136.5900        |
|                 | 18 | R 1  | 175.1195        | 88.0637         |

N-term:+29.04

QPHLSVSSAANGHLGR, MH+ 1664.9045, m/z 555.6397  
 H OS G24 P150811 220811-s1.04903.04903.3.dta

X-range:

-

MassTol: Y-zoom:

MassType:

AVG  MONO

Axis:

1  2

Label:

I  M  -

Ions:

a  +  2+  3+

b  +  2+  3+

c  +  2+  3+

x  +  2+  3+

y  +  2+  3+

z  +  2+  3+

hide H<sub>2</sub>O/NH<sub>3</sub>

zoom 112-122

GO

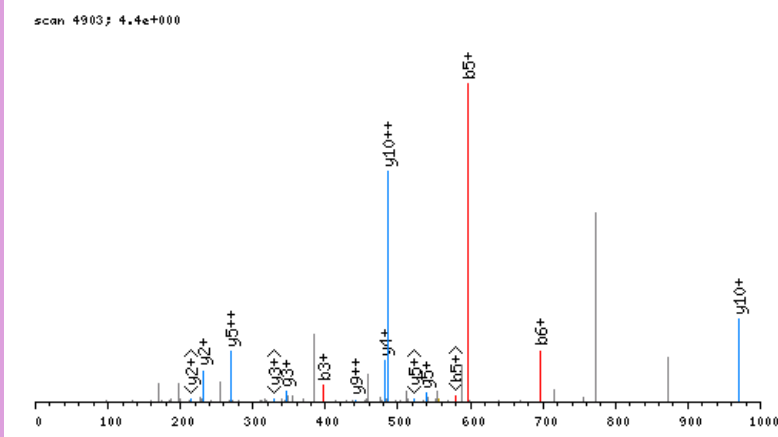

click image to zoom in; click top corners to zoom out [\[precursor±\]](#)

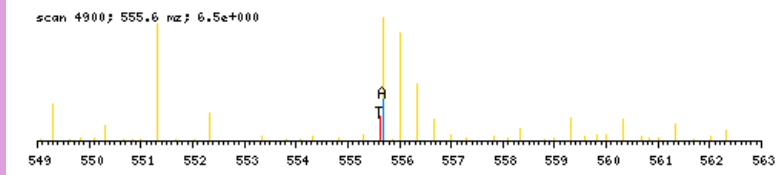

zoomed in precursor plot; T=theoretical m/z, A=acquired m/z

| b <sup>+</sup> | #  | AA # | y <sup>+</sup> | y <sup>2+</sup> |
|----------------|----|------|----------------|-----------------|
| 163.1295       | 1  | Q 16 |                |                 |
| 260.1822       | 2  | P 15 | 1502.7828      | 751.8953        |
| 397.2412       | 3  | H 14 | 1405.7300      | 703.3689        |
| 510.3252       | 4  | L 13 | 1268.6711      | 634.8395        |
| 597.3572       | 5  | S 12 | 1155.5871      | 578.2974        |
| 696.4257       | 6  | V 11 | 1068.5550      | 534.7814        |
| 783.4577       | 7  | S 10 | 969.4866       | 485.2472        |
| 870.4897       | 8  | S 9  | 882.4546       | 441.7312        |
| 941.5268       | 9  | A 8  | 795.4226       | 398.2152        |
| 1012.5639      | 10 | A 7  | 724.3854       | 362.6966        |
| 1126.6069      | 11 | N 6  | 653.3483       | 327.1781        |
| 1183.6283      | 12 | G 5  | 539.3054       | 270.1566        |
| 1320.6872      | 13 | H 4  | 482.2839       | 241.6459        |
| 1433.7713      | 14 | L 3  | 345.2250       | 173.1164        |
| 1490.7928      | 15 | G 2  | 232.1410       | 116.5744        |
|                | 16 | R 1  | 175.1195       | 88.0637         |

N-term:+35.07

QPSALALEPEALR, MH+ 1428.8274, m/z 476.9473  
 H OS G27 P150811 220811-s1.06668.06668.3.dta

X-range:

-

MassTol: Y-zoom:

MassType:

AVG  MONO

Axis:

1  2

Label:

I  M  -

Ions:

a  +  2+  3+

b  +  2+  3+

c  +  2+  3+

x  +  2+  3+

y  +  2+  3+

z  +  2+  3+

hide H<sub>2</sub>O/NH<sub>3</sub>

zoom 112-122

GO

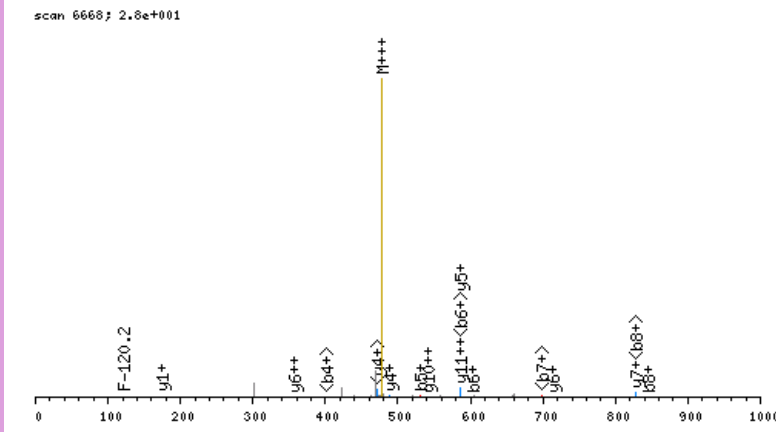

click image to zoom in; click top corners to zoom out [\[precursor±\]](#)

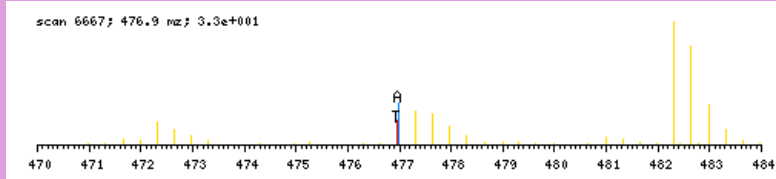

zoomed in precursor plot; T=theoretical m/z, A=acquired m/z

| b <sup>+</sup> | #  | AA # | y <sup>+</sup> | y <sup>2+</sup> |
|----------------|----|------|----------------|-----------------|
| 163.1295       | 1  | Q 13 |                |                 |
| 260.1822       | 2  | P 12 | 1266.7058      | 633.8568        |
| 347.2143       | 3  | S 11 | 1169.6530      | 585.3304        |
| 418.2514       | 4  | A 10 | 1082.6210      | 541.8144        |
| 531.3354       | 5  | L 9  | 1011.5839      | 506.2958        |
| 602.3726       | 6  | A 8  | 898.4998       | 449.7538        |
| 715.4566       | 7  | L 7  | 827.4627       | 414.2353        |
| 844.4992       | 8  | E 6  | 714.3786       | 357.6932        |
| 941.5520       | 9  | P 5  | 585.3360       | 293.1719        |
| 1070.5946      | 10 | E 4  | 488.2833       | 244.6455        |
| 1141.6317      | 11 | A 3  | 359.2407       | 180.1243        |
| 1254.7158      | 12 | L 2  | 288.2036       | 144.6057        |
|                | 13 | R 1  | 175.1195       | 88.0637         |

N-term:+35.07

QSNVDELGCShLQSYESR, MH+ 2200.0152, m/z 734.0099  
 H OS G27 P150811 220811-s1.04219.04219.3.dta

X-range:

-

MassTol: Y-zoom:

MassType:

AVG  MONO

Axis:

1  2

Label:

I  M  -

Ions:

a  +  2+  3+

b  +  2+  3+

c  +  2+  3+

x  +  2+  3+

y  +  2+  3+

z  +  2+  3+

hide H<sub>2</sub>O/NH<sub>3</sub>

zoom 112-122

GO

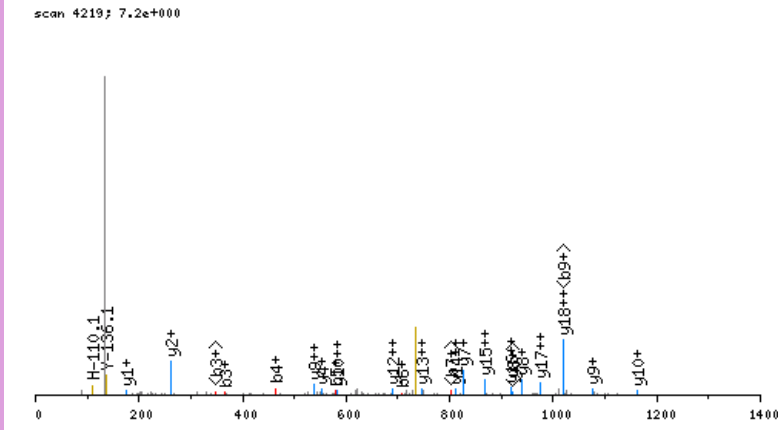

click image to zoom in; click top corners to zoom out [\[precursor±\]](#)

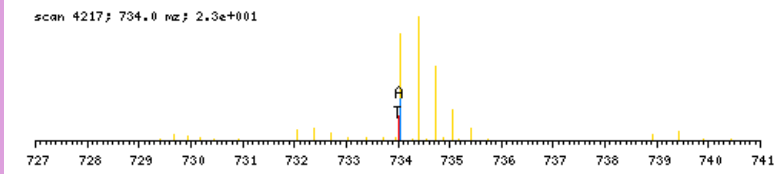

zoomed in precursor plot; T=theoretical m/z, A=acquired m/z

| b <sup>+</sup> | #  | AA | #  | y <sup>+</sup> | y <sup>2+</sup> |
|----------------|----|----|----|----------------|-----------------|
| 163.1295       | 1  | Q  | 19 |                |                 |
| 250.1615       | 2  | S  | 18 | 2037.8936      | 1019.4507       |
| 364.2044       | 3  | N  | 17 | 1950.8615      | 975.9347        |
| 463.2728       | 4  | V  | 16 | 1836.8186      | 918.9132        |
| 578.2998       | 5  | D  | 15 | 1737.7502      | 869.3790        |
| 707.3424       | 6  | E  | 14 | 1622.7232      | 811.8655        |
| 820.4264       | 7  | L  | 13 | 1493.6807      | 747.3442        |
| 877.4479       | 8  | G  | 12 | 1380.5966      | 690.8022        |
| 1037.4785      | 9  | C  | 11 | 1323.5751      | 662.2915        |
| 1124.5105      | 10 | S  | 10 | 1163.5445      | 582.2762        |
| 1261.5695      | 11 | H  | 9  | 1076.5125      | 538.7602        |
| 1374.6535      | 12 | L  | 8  | 939.4536       | 470.2307        |
| 1431.6750      | 13 | G  | 7  | 826.3695       | 413.6887        |
| 1559.7336      | 14 | Q  | 6  | 769.3481       | 385.1779        |
| 1646.7656      | 15 | S  | 5  | 641.2895       | 321.1487        |
| 1809.8289      | 16 | Y  | 4  | 554.2575       | 277.6326        |
| 1938.8715      | 17 | E  | 3  | 391.1941       | 196.1010        |
| 2025.9035      | 18 | S  | 2  | 262.1515       | 131.5797        |
|                | 19 | R  | 1  | 175.1195       | 88.0637         |

N-term:+35.07 C(9):+160.03

QTVAVGVIKAVDK, MH+ 1429.9843, m/z 477.3329  
 H OS G26 P150811 220811-s1.03756.03756.3.dta

scan 3756; 2.2e+001

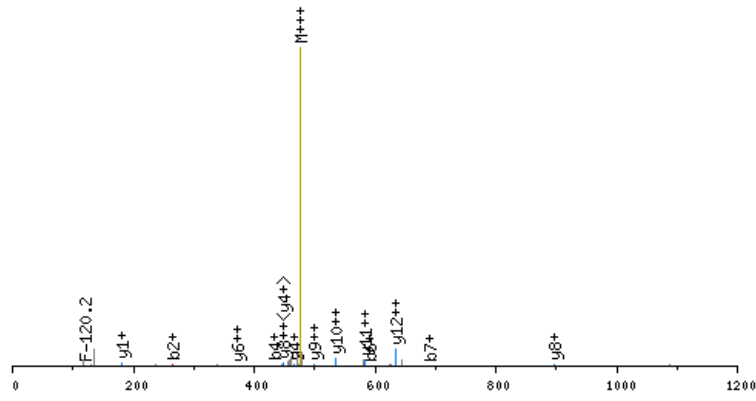

click image to zoom in; click top corners to zoom out [\[precursor±\]](#)

scan 3755; 477.3 m/z; 3.6e+001

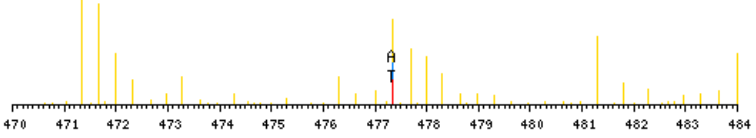

zoomed in precursor plot; T=theoretical m/z, A=acquired m/z

X-range:

-

MassTol: Y-zoom:

MassType:

AVG  MONO

Axis:

1  2

Label:

I  M  -

Ions:

a  +  2+  3+

b  +  2+  3+

c  +  2+  3+

x  +  2+  3+

y  +  2+  3+

z  +  2+  3+

hide H<sub>2</sub>O/NH<sub>3</sub>

zoom 112-122

GO

| b <sup>+</sup> | #  | AA | #  | y <sup>+</sup> | y <sup>2+</sup> |
|----------------|----|----|----|----------------|-----------------|
| 163.1295       | 1  | Q  | 13 |                |                 |
| 264.1772       | 2  | T  | 12 | 1267.8626      | 634.4352        |
| 363.2456       | 3  | V  | 11 | 1166.8149      | 583.9114        |
| 434.2827       | 4  | A  | 10 | 1067.7465      | 534.3772        |
| 533.3511       | 5  | V  | 9  | 996.7094       | 498.8586        |
| 590.3726       | 6  | G  | 8  | 897.6410       | 449.3244        |
| 689.4410       | 7  | V  | 7  | 840.6195       | 420.8137        |
| 802.5250       | 8  | I  | 6  | 741.5511       | 371.2795        |
| 964.6831       | 9  | K  | 5  | 628.4671       | 314.7374        |
| 1035.7203      | 10 | A  | 4  | 466.3090       | 233.6584        |
| 1134.7887      | 11 | V  | 3  | 395.2718       | 198.1398        |
| 1249.8156      | 12 | D  | 2  | 296.2034       | 148.6056        |
|                | 13 | K  | 1  | 181.1765       | 91.0922         |

N-term:+35.07 K(9):+162.16  
 K(13):+162.16

QTVAVGVKAVDKK, MH+ 1568.0152, m/z 392.7593  
 L OS G28 P150811 220811-s1.04409.04409.4.dta

X-range:

-

MassTol: Y-zoom:

MassType:

AVG  MONO

Axis:

1  2

Label:

I  M  -

Ions:

a  +  2+  3+

b  +  2+  3+

c  +  2+  3+

x  +  2+  3+

y  +  2+  3+

z  +  2+  3+

hide H<sub>2</sub>O/NH<sub>3</sub>

zoom 112-122

GO

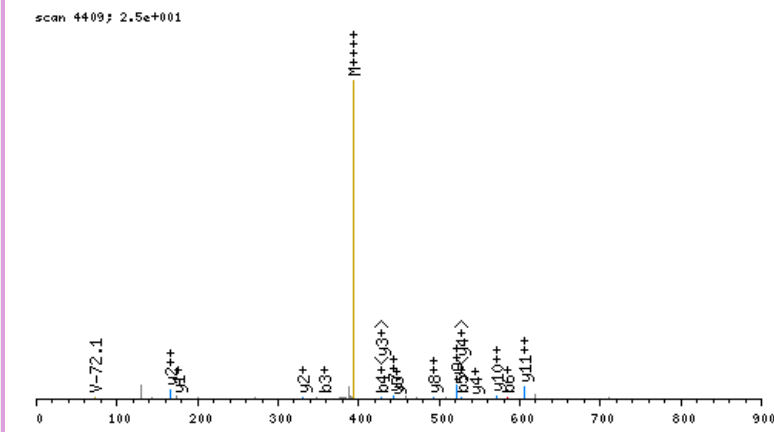

click image to zoom in; click top corners to zoom out [\[precursor±\]](#)

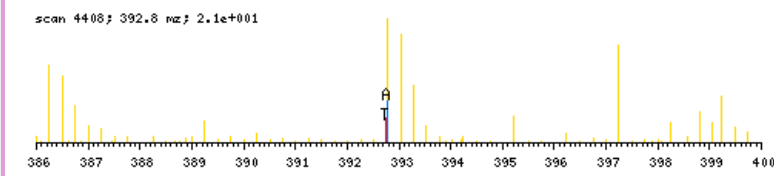

zoomed in precursor plot; T=theoretical m/z, A=acquired m/z

| b <sup>+</sup> | #  | AA # | y <sup>+</sup> | y <sup>2+</sup> |
|----------------|----|------|----------------|-----------------|
| 157.0977       | 1  | Q    | 14             |                 |
| 258.1454       | 2  | T    | 13             | 1411.9253       |
| 357.2138       | 3  | V    | 12             | 1310.8776       |
| 428.2509       | 4  | A    | 11             | 1211.8092       |
| 527.3193       | 5  | V    | 10             | 1140.7721       |
| 584.3408       | 6  | G    | 9              | 1041.7037       |
| 683.4092       | 7  | V    | 8              | 984.6822        |
| 796.4932       | 8  | I    | 7              | 885.6138        |
| 952.6195       | 9  | K    | 6              | 772.5298        |
| 1023.6567      | 10 | A    | 5              | 616.4035        |
| 1122.7251      | 11 | V    | 4              | 545.3663        |
| 1237.7520      | 12 | D    | 3              | 446.2979        |
| 1393.8783      | 13 | K    | 2              | 331.2710        |
|                | 14 | K    | 1              | 175.1447        |

N-term:+29.04 K(9):+156.13  
 K(13):+156.13 K(14):+156.13

QYSDKGVSSGPGPMGLMGP, MH+ 2089.0847, m/z 697.0331  
 H OS G26 P150811 220811-s1.04544.04544.3.dta

X-range:

-

MassTol: Y-zoom:

MassType:

AVG  MONO

Axis:

1  2

Label:

I  M  -

Ions:

a  +  2+  3+

b  +  2+  3+

c  +  2+  3+

x  +  2+  3+

y  +  2+  3+

z  +  2+  3+

hide H<sub>2</sub>O/NH<sub>3</sub>

zoom 112-122

GO

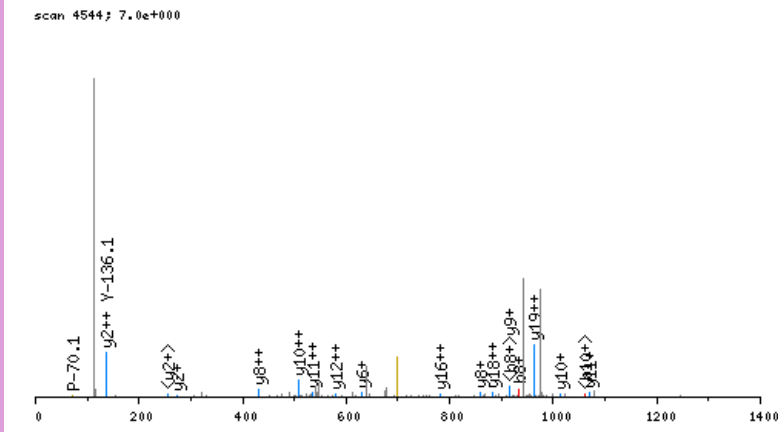

click image to zoom in; click top corners to zoom out [\[precursor±\]](#)

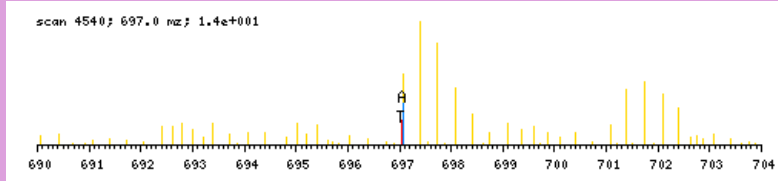

zoomed in precursor plot; T=theoretical m/z, A=acquired m/z

| b <sup>+</sup> | #  | AA # | y <sup>+</sup> | y <sup>2+</sup> |
|----------------|----|------|----------------|-----------------|
| 163.1295       | 1  | Q 20 |                |                 |
| 326.1928       | 2  | Y 19 | 1926.9630      | 963.9854        |
| 413.2248       | 3  | S 18 | 1763.8997      | 882.4538        |
| 528.2518       | 4  | D 17 | 1676.8677      | 838.9377        |
| 690.4099       | 5  | K 16 | 1561.8407      | 781.4243        |
| 747.4313       | 6  | G 15 | 1399.6826      | 700.3452        |
| 846.4998       | 7  | V 14 | 1342.6612      | 671.8345        |
| 933.5318       | 8  | S 13 | 1243.5927      | 622.3003        |
| 1020.5638      | 9  | S 12 | 1156.5607      | 578.7843        |
| 1077.5853      | 10 | G 11 | 1069.5287      | 535.2683        |
| 1174.6380      | 11 | P 10 | 1012.5072      | 506.7575        |
| 1231.6595      | 12 | G 9  | 915.4545       | 458.2311        |
| 1328.7123      | 13 | P 8  | 858.4330       | 429.7204        |
| 1459.7528      | 14 | M 7  | 761.3802       | 381.1940        |
| 1516.7742      | 15 | G 6  | 630.3397       | 315.6738        |
| 1629.8583      | 16 | L 5  | 573.3183       | 287.1631        |
| 1760.8988      | 17 | M 4  | 460.2342       | 230.6210        |
| 1817.9202      | 18 | G 3  | 329.1937       | 165.1008        |
| 1914.9730      | 19 | P 2  | 272.1723       | 136.5900        |
|                | 20 | R 1  | 175.1195       | 88.0637         |

N-term:+35.07 K(5):+162.16

RAADEEAFEDNSEEYIR, MH+ 2071.9208, m/z 691.3118  
 L OS G27 P150811 220811-s1.04806.04806.3.dta

X-range:

-

MassTol: Y-zoom:

MassType:

AVG  MONO

Axis:

1  2

Label:

I  M  -

Ions:

a  +  2+  3+

b  +  2+  3+

c  +  2+  3+

x  +  2+  3+

y  +  2+  3+

z  +  2+  3+

hide H<sub>2</sub>O/NH<sub>3</sub>

zoom 112-122

GO

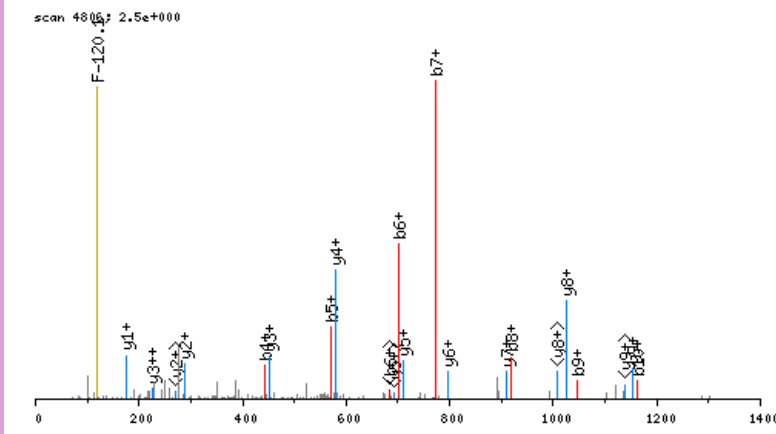

click image to zoom in; click top corners to zoom out [\[precursor±\]](#)

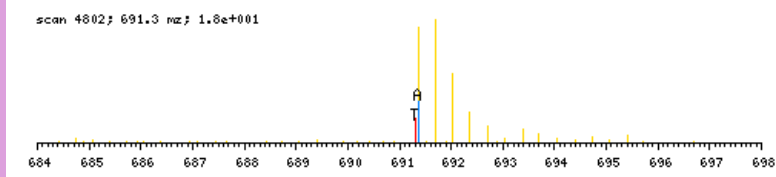

zoomed in precursor plot; T=theoretical m/z, A=acquired m/z

| b <sup>+</sup> | #  | AA # | y <sup>+</sup> | y <sup>2+</sup> |
|----------------|----|------|----------------|-----------------|
| 185.1402       | 1  | R 17 |                |                 |
| 256.1773       | 2  | A 16 | 1887.7885      | 944.3981        |
| 327.2144       | 3  | A 15 | 1816.7513      | 908.8796        |
| 442.2414       | 4  | D 14 | 1745.7142      | 873.3610        |
| 571.2840       | 5  | E 13 | 1630.6873      | 815.8476        |
| 700.3266       | 6  | E 12 | 1501.6447      | 751.3263        |
| 771.3637       | 7  | A 11 | 1372.6021      | 686.8050        |
| 918.4321       | 8  | F 10 | 1301.5650      | 651.2864        |
| 1047.4747      | 9  | E 9  | 1154.4966      | 577.7522        |
| 1162.5016      | 10 | D 8  | 1025.4540      | 513.2309        |
| 1276.5446      | 11 | N 7  | 910.4270       | 455.7174        |
| 1363.5766      | 12 | S 6  | 796.3841       | 398.6960        |
| 1492.6192      | 13 | E 5  | 709.3521       | 355.1800        |
| 1621.6618      | 14 | E 4  | 580.3095       | 290.6587        |
| 1784.7251      | 15 | Y 3  | 451.2669       | 226.1374        |
| 1897.8092      | 16 | I 2  | 288.2036       | 144.6057        |
|                | 17 | R 1  | 175.1195       | 88.0637         |

N-term:+29.04



RAGSSSGVQASAGGLAADASR, MH+ 2105.0335, m/z 702.3494  
 L OS G27 P150811 220811-s1.02745.02745.3.dta

scan 2745; 4.6e+000

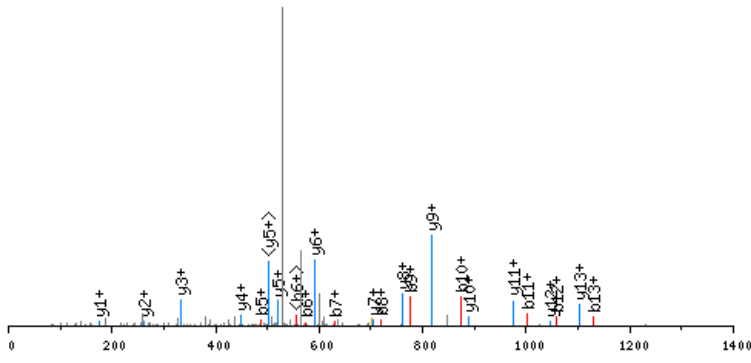

click image to zoom in; click top corners to zoom out [precursor±]

scan 2742; 702.3 m/z; 1.3e+001

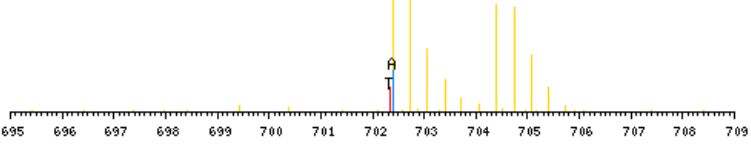

zoomed in precursor plot; T=theoretical m/z, A=acquired m/z

| b <sup>+</sup> | #  | AA # | y <sup>+</sup> | y <sup>2+</sup> |
|----------------|----|------|----------------|-----------------|
| 185.1402       | 1  | R 24 |                |                 |
| 256.1773       | 2  | A 23 | 1920.9011      | 960.9545        |
| 313.1988       | 3  | G 22 | 1849.8640      | 925.4359        |
| 400.2308       | 4  | S 21 | 1792.8426      | 896.9252        |
| 487.2628       | 5  | S 20 | 1705.8105      | 853.4092        |
| 574.2949       | 6  | S 19 | 1618.7785      | 809.8932        |
| 631.3163       | 7  | G 18 | 1531.7465      | 766.3771        |
| 718.3484       | 8  | S 17 | 1474.7250      | 737.8664        |
| 775.3698       | 9  | G 16 | 1387.6930      | 694.3504        |
| 874.4382       | 10 | V 15 | 1330.6715      | 665.8397        |
| 1002.4968      | 11 | Q 14 | 1231.6031      | 616.3055        |
| 1059.5183      | 12 | G 13 | 1103.5445      | 552.2762        |
| 1130.5554      | 13 | A 12 | 1046.5231      | 523.7654        |
| 1217.5874      | 14 | S 11 | 975.4859       | 488.2469        |
| 1288.6245      | 15 | A 10 | 888.4539       | 444.7309        |
| 1345.6460      | 16 | G 9  | 817.4168       | 409.2123        |
| 1402.6675      | 17 | G 8  | 760.3953       | 380.7016        |
| 1515.7515      | 18 | L 7  | 703.3739       | 352.1909        |
| 1586.7886      | 19 | A 6  | 590.2898       | 295.6488        |
| 1657.8258      | 20 | A 5  | 519.2527       | 260.1303        |
| 1772.8527      | 21 | D 4  | 448.2156       | 224.6117        |
| 1843.8898      | 22 | A 3  | 333.1886       | 167.0982        |
| 1930.9218      | 23 | S 2  | 262.1515       | 131.5797        |
|                | 24 | R 1  | 175.1195       | 88.0637         |

N-term:+29.04

X-range:

-

MassTol: Y-zoom:

MassType:

AVG  MONO

Axis:

1  2

Label:

I  M  -

Ions:

a  +  2+  3+

b  +  2+  3+

c  +  2+  3+

x  +  2+  3+

y  +  2+  3+

z  +  2+  3+

hide H<sub>2</sub>O/NH<sub>3</sub>

zoom 112-122

GO

RAPAAQPPAAAAPSAVGSPAAAAPR, MH+ 2181.1892, m/z 546.0528  
 L OS G26 P150811 220811-s1.02821.02821.4.dta

scan 2821; 1.9e+000

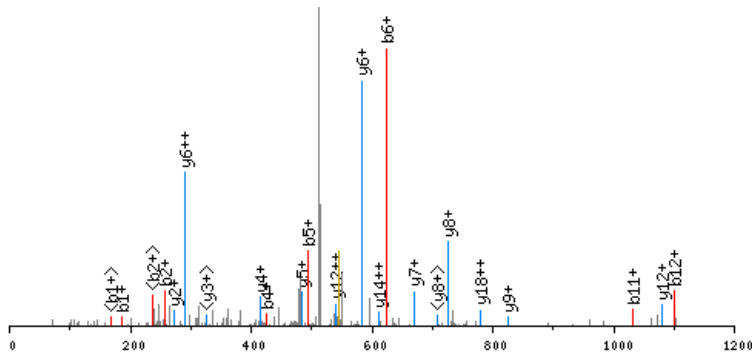

click image to zoom in; click top corners to zoom out [precursor±]

scan 2820; 546.1 m/z; 9.5e+000

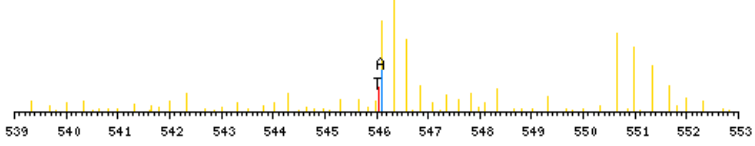

zoomed in precursor plot; T=theoretical m/z, A=acquired m/z

X-range:

-

MassTol: Y-zoom:

MassType:

AVG  MONO

Axis:

1  2

Label:

I  M  -

Ions:

a  +  2+  3+

b  +  2+  3+

c  +  2+  3+

x  +  2+  3+

y  +  2+  3+

z  +  2+  3+

hide H<sub>2</sub>O/NH<sub>3</sub>

zoom 112-122

GO

| b <sup>+</sup> | #  | AA # | y <sup>+</sup> | y <sup>2+</sup> |
|----------------|----|------|----------------|-----------------|
| 185.1402       | 1  | R 24 |                |                 |
| 256.1773       | 2  | A 23 | 1997.0568      | 999.0323        |
| 353.2301       | 3  | P 22 | 1926.0197      | 963.5138        |
| 424.2672       | 4  | A 21 | 1828.9670      | 914.9874        |
| 495.3043       | 5  | A 20 | 1757.9299      | 879.4688        |
| 623.3629       | 6  | Q 19 | 1686.8927      | 843.9503        |
| 720.4157       | 7  | P 18 | 1558.8342      | 779.9210        |
| 817.4684       | 8  | P 17 | 1461.7814      | 731.3946        |
| 888.5055       | 9  | A 16 | 1364.7286      | 682.8682        |
| 959.5426       | 10 | A 15 | 1293.6915      | 647.3497        |
| 1030.5798      | 11 | A 14 | 1222.6544      | 611.8311        |
| 1101.6169      | 12 | A 13 | 1151.6173      | 576.3126        |
| 1198.6696      | 13 | P 12 | 1080.5802      | 540.7940        |
| 1285.7017      | 14 | S 11 | 983.5274       | 492.2676        |
| 1356.7388      | 15 | A 10 | 896.4954       | 448.7516        |
| 1455.8072      | 16 | V 9  | 825.4583       | 413.2331        |
| 1512.8287      | 17 | G 8  | 726.3899       | 363.6988        |
| 1599.8607      | 18 | S 7  | 669.3684       | 335.1881        |
| 1696.9135      | 19 | P 6  | 582.3364       | 291.6721        |
| 1767.9506      | 20 | A 5  | 485.2836       | 243.1457        |
| 1838.9877      | 21 | A 4  | 414.2465       | 207.6272        |
| 1910.0248      | 22 | A 3  | 343.2094       | 172.1086        |
| 2007.0776      | 23 | P 2  | 272.1723       | 136.5900        |
|                | 24 | R 1  | 175.1195       | 88.0637         |

N-term:+29.04

RATEQEKDVMSAR, MH+ 1691.8387, m/z 423.7151  
 L OS G28 P150811 220811-s1.02096.02096.4.dta

scan 2096; 4.5e+000

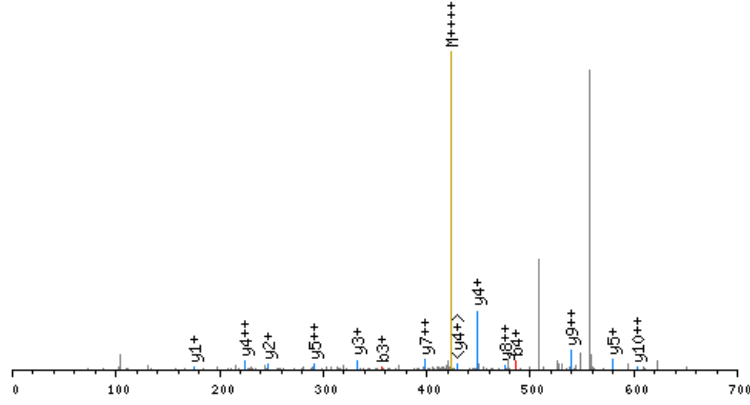

click image to zoom in; click top corners to zoom out [\[precursor±\]](#)

scan 2093; 423.7 m/z; 4.0e+001

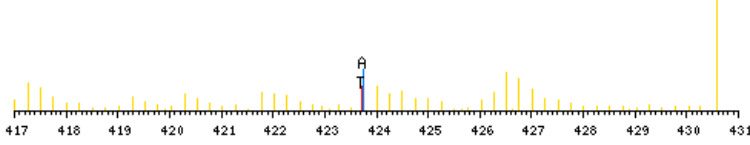

zoomed in precursor plot; T=theoretical m/z, A=acquired m/z

X-range:

-

MassTol: Y-zoom:

MassType:

AVG  MONO

Axis:

1  2

Label:

I  M  -

Ions:

a  +  2+  3+

b  +  2+  3+

c  +  2+  3+

x  +  2+  3+

y  +  2+  3+

z  +  2+  3+

hide H<sub>2</sub>O/NH<sub>3</sub>

zoom 112-122

GO

| b <sup>+</sup> | #  | AA # | y <sup>+</sup> | y <sup>2+</sup> |
|----------------|----|------|----------------|-----------------|
| 185.1402       | 1  | R 14 |                |                 |
| 256.1773       | 2  | A 13 | 1507.7063      | 754.3571        |
| 357.2250       | 3  | T 12 | 1436.6692      | 718.8385        |
| 486.2676       | 4  | E 11 | 1335.6215      | 668.3147        |
| 614.3262       | 5  | Q 10 | 1206.5789      | 603.7934        |
| 743.3688       | 6  | E 9  | 1078.5203      | 539.7641        |
| 899.4951       | 7  | K 8  | 949.4777       | 475.2428        |
| 1014.5220      | 8  | D 7  | 793.3514       | 397.1796        |
| 1113.5904      | 9  | V 6  | 678.3245       | 339.6662        |
| 1244.6309      | 10 | M 5  | 579.2561       | 290.1319        |
| 1359.6579      | 11 | D 4  | 448.2156       | 224.6117        |
| 1446.6899      | 12 | S 3  | 333.1886       | 167.0982        |
| 1517.7270      | 13 | A 2  | 246.1566       | 123.5822        |
|                | 14 | R 1  | 175.1195       | 88.0637         |

N-term:+29.04 K(7):+156.13

RCILDSELEGIR, MH+ 1488.7844, m/z 496.9330  
 L OS G27 P150811 220811-s1.05705.05705.3.dta

X-range:

-

MassTol: Y-zoom:

MassType:

AVG  MONO

Axis:

1  2

Label:

I  M  -

Ions:

a  +  2+  3+

b  +  2+  3+

c  +  2+  3+

x  +  2+  3+

y  +  2+  3+

z  +  2+  3+

hide H<sub>2</sub>O/NH<sub>3</sub>

zoom 112-122

GO

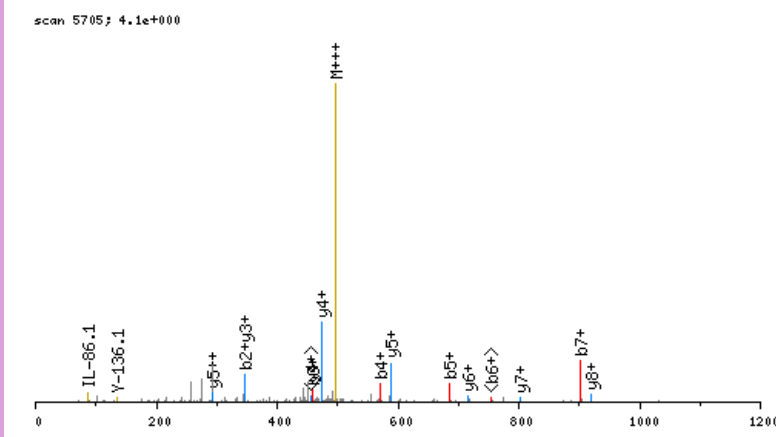

click image to zoom in; click top corners to zoom out [\[precursor±\]](#)

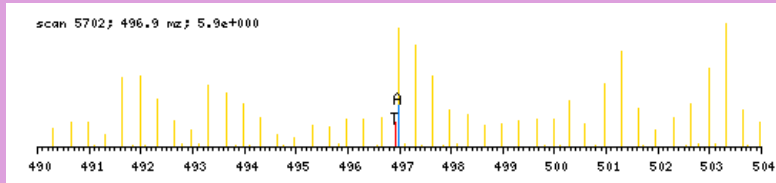

zoomed in precursor plot; T=theoretical m/z, A=acquired m/z

| b <sup>+</sup> | #  | AA # | y <sup>+</sup> | y <sup>2+</sup> |
|----------------|----|------|----------------|-----------------|
| 185.1402       | 1  | R 12 |                |                 |
| 345.1708       | 2  | C 11 | 1304.6520      | 652.8299        |
| 458.2549       | 3  | I 10 | 1144.6214      | 572.8146        |
| 571.3389       | 4  | L 9  | 1031.5373      | 516.2726        |
| 686.3659       | 5  | D 8  | 918.4533       | 459.7305        |
| 773.3979       | 6  | S 7  | 803.4263       | 402.2171        |
| 902.4405       | 7  | E 6  | 716.3943       | 358.7011        |
| 1015.5246      | 8  | L 5  | 587.3517       | 294.1798        |
| 1144.5672      | 9  | E 4  | 474.2676       | 237.6377        |
| 1201.5886      | 10 | G 3  | 345.2250       | 173.1164        |
| 1314.6727      | 11 | I 2  | 288.2036       | 144.6057        |
|                | 12 | R 1  | 175.1195       | 88.0637         |

N-term:+29.04 C(2):+160.03

RDEEVHTGLGELLR, MH+ 1657.9085, m/z 553.3077  
 H OS G28 P150811 220811-s1.05671.05671.3.dta

X-range:

-

MassTol: Y-zoom:

MassType:

AVG  MONO

Axis:

1  2

Label:

I  M  -

Ions:

a  +  2+  3+

b  +  2+  3+

c  +  2+  3+

x  +  2+  3+

y  +  2+  3+

z  +  2+  3+

hide H<sub>2</sub>O/NH<sub>3</sub>

zoom 112-122

GO

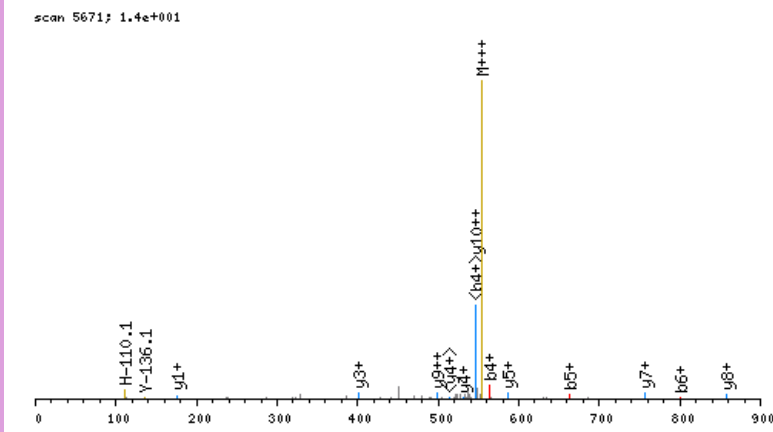

click image to zoom in; click top corners to zoom out [\[precursor±\]](#)

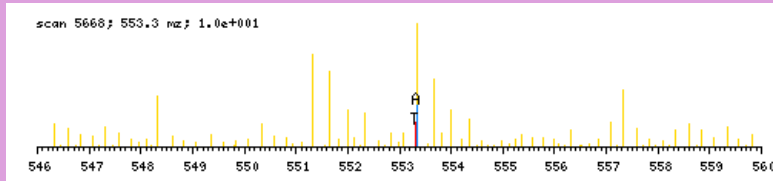

zoomed in precursor plot; T=theoretical m/z, A=acquired m/z

| b <sup>+</sup> | #  | AA # | y <sup>+</sup> | y <sup>2+</sup> |
|----------------|----|------|----------------|-----------------|
| 191.1720       | 1  | R 14 |                |                 |
| 306.1990       | 2  | D 13 | 1467.7443      | 734.3761        |
| 435.2415       | 3  | E 12 | 1352.7174      | 676.8626        |
| 564.2841       | 4  | E 11 | 1223.6748      | 612.3413        |
| 663.3526       | 5  | V 10 | 1094.6322      | 547.8200        |
| 800.4115       | 6  | H 9  | 995.5638       | 498.2858        |
| 901.4591       | 7  | T 8  | 858.5049       | 429.7564        |
| 958.4806       | 8  | G 7  | 757.4572       | 379.2325        |
| 1071.5647      | 9  | L 6  | 700.4357       | 350.7218        |
| 1128.5861      | 10 | G 5  | 587.3517       | 294.1798        |
| 1257.6287      | 11 | E 4  | 530.3302       | 265.6690        |
| 1370.7128      | 12 | L 3  | 401.2876       | 201.1477        |
| 1483.7969      | 13 | L 2  | 288.2036       | 144.6057        |
|                | 14 | R 1  | 175.1195       | 88.0637         |

N-term:+35.07

RDIDNPSAEAEER, MH+ 1400.6770, m/z 467.5638  
 L OS G27 P150811 220811-s1.02040.02040.3.dta

X-range:

-

MassTol: Y-zoom:

MassType:

AVG  MONO

Axis:

1  2

Label:

I  M  -

Ions:

a  +  2+  3+

b  +  2+  3+

c  +  2+  3+

x  +  2+  3+

y  +  2+  3+

z  +  2+  3+

hide H<sub>2</sub>O/NH<sub>3</sub>

zoom 112-122

GO

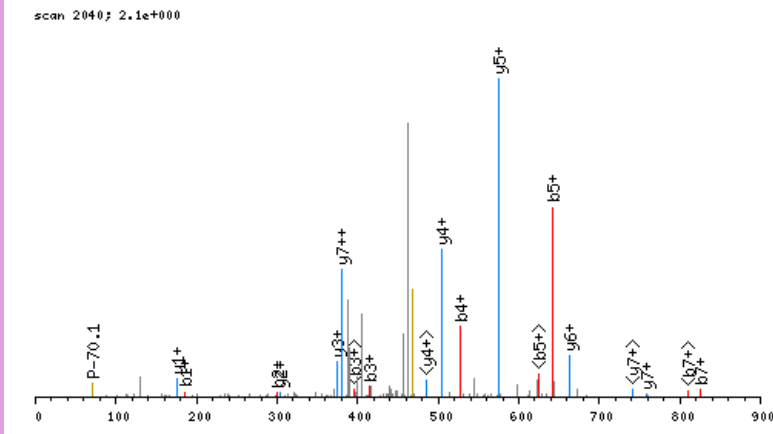

click image to zoom in; click top corners to zoom out [\[precursor±\]](#)

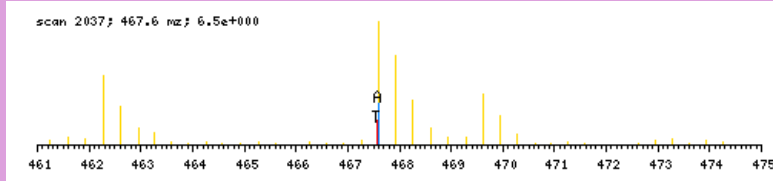

zoomed in precursor plot; T=theoretical m/z, A=acquired m/z

| b <sup>+</sup> | #  | AA # | y <sup>+</sup> | y <sup>2+</sup> |
|----------------|----|------|----------------|-----------------|
| 185.1402       | 1  | R 12 |                |                 |
| 300.1672       | 2  | D 11 | 1216.5446      | 608.7762        |
| 413.2512       | 3  | I 10 | 1101.5176      | 551.2627        |
| 528.2782       | 4  | D 9  | 988.4336       | 494.7207        |
| 642.3211       | 5  | N 8  | 873.4066       | 437.2072        |
| 739.3739       | 6  | P 7  | 759.3637       | 380.1858        |
| 826.4059       | 7  | S 6  | 662.3109       | 331.6594        |
| 897.4430       | 8  | A 5  | 575.2789       | 288.1434        |
| 1026.4856      | 9  | E 4  | 504.2418       | 252.6248        |
| 1097.5227      | 10 | A 3  | 375.1992       | 188.1035        |
| 1226.5653      | 11 | E 2  | 304.1621       | 152.5850        |
|                | 12 | R 1  | 175.1195       | 88.0637         |

N-term:+29.04

RDYEQAGSAAPSVFSR, MH+ 1774.8936, m/z 592.3027  
 H OS G27 P150811 220811-s1.04094.04094.3.dta

X-range:

-

MassTol: Y-zoom:

MassType:

AVG  MONO

Axis:

1  2

Label:

I  M  -

Ions:

a  +  2+  3+

b  +  2+  3+

c  +  2+  3+

x  +  2+  3+

y  +  2+  3+

z  +  2+  3+

hide H<sub>2</sub>O/NH<sub>3</sub>

zoom 112-122

GO

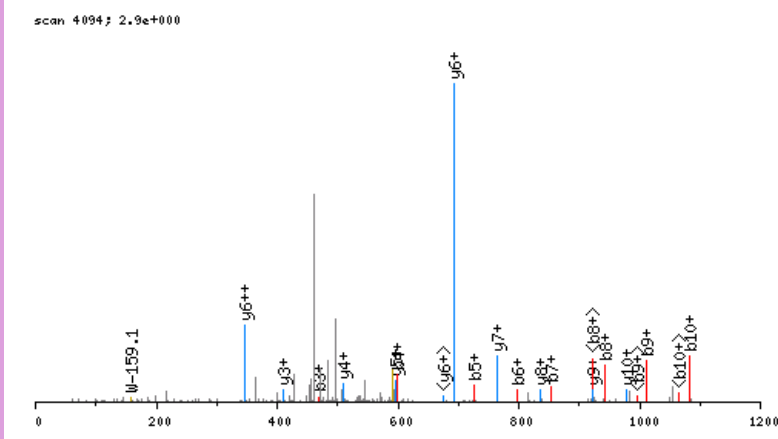

click image to zoom in; click top corners to zoom out [\[precursor±\]](#)

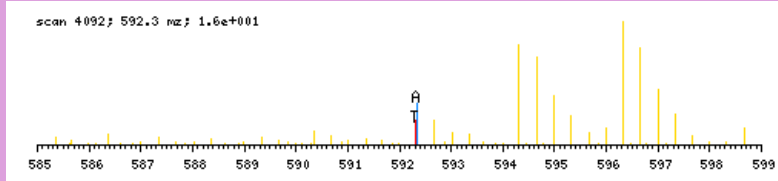

zoomed in precursor plot; T=theoretical m/z, A=acquired m/z

| b <sup>+</sup> | #  | AA | #  | y <sup>+</sup> | y <sup>2+</sup> |
|----------------|----|----|----|----------------|-----------------|
| 191.1720       | 1  | R  | 16 |                |                 |
| 306.1990       | 2  | D  | 15 | 1584.7294      | 792.8686        |
| 469.2623       | 3  | Y  | 14 | 1469.7025      | 735.3552        |
| 598.3049       | 4  | E  | 13 | 1306.6392      | 653.8235        |
| 726.3635       | 5  | Q  | 12 | 1177.5966      | 589.3022        |
| 797.4006       | 6  | A  | 11 | 1049.5380      | 525.2729        |
| 854.4220       | 7  | G  | 10 | 978.5009       | 489.7543        |
| 941.4541       | 8  | S  | 9  | 921.4794       | 461.2436        |
| 1012.4912      | 9  | A  | 8  | 834.4474       | 417.7276        |
| 1083.5283      | 10 | A  | 7  | 763.4103       | 382.2090        |
| 1180.5811      | 11 | P  | 6  | 692.3731       | 346.6905        |
| 1267.6131      | 12 | S  | 5  | 595.3204       | 298.1641        |
| 1366.6815      | 13 | V  | 4  | 508.2884       | 254.6481        |
| 1513.7499      | 14 | F  | 3  | 409.2199       | 205.1139        |
| 1600.7819      | 15 | S  | 2  | 262.1515       | 131.5797        |
|                | 16 | R  | 1  | 175.1195       | 88.0637         |

N-term:+35.07

REGDVLTLLESER, MH+ 1550.8602, m/z 517.6249  
 H OS G27 P150811 220811-s1.06729.06729.3.dta

scan 6729; 2.3e+000

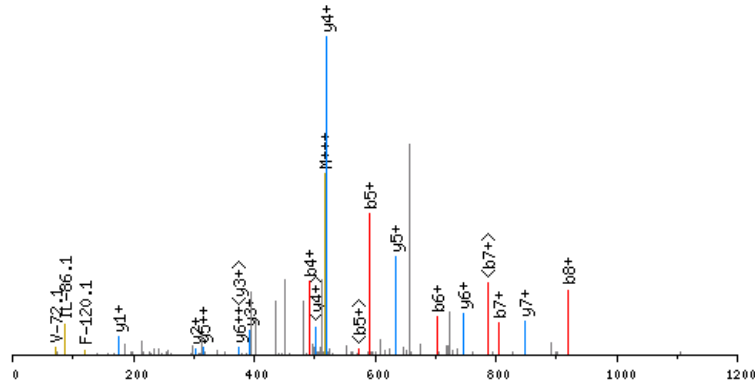

click image to zoom in; click top corners to zoom out [\[precursor±\]](#)

scan 6727; 517.6 m/z; 1.0e+001

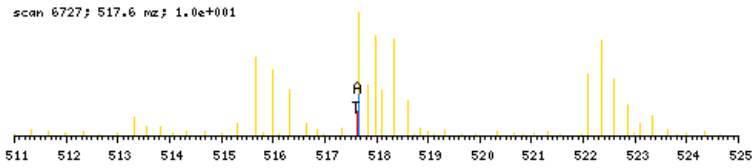

zoomed in precursor plot; T=theoretical m/z, A=acquired m/z

X-range:

-

MassTol: Y-zoom:

MassType:

AVG  MONO

Axis:

1  2

Label:

I  M  -

Ions:

a  +  2+  3+

b  +  2+  3+

c  +  2+  3+

x  +  2+  3+

y  +  2+  3+

z  +  2+  3+

hide H<sub>2</sub>O/NH<sub>3</sub>

zoom 112-122

GO

| b <sup>+</sup> | #  | AA # | y <sup>+</sup> | y <sup>2+</sup> |
|----------------|----|------|----------------|-----------------|
| 191.1720       | 1  | R 13 |                |                 |
| 320.2146       | 2  | E 12 | 1360.6960      | 680.8519        |
| 377.2361       | 3  | G 11 | 1231.6534      | 616.3306        |
| 492.2630       | 4  | D 10 | 1174.6319      | 587.8199        |
| 591.3314       | 5  | V 9  | 1059.6050      | 530.3064        |
| 704.4155       | 6  | L 8  | 960.5366       | 480.7722        |
| 805.4632       | 7  | T 7  | 847.4525       | 424.2302        |
| 918.5472       | 8  | L 6  | 746.4048       | 373.7063        |
| 1031.6313      | 9  | L 5  | 633.3208       | 317.1643        |
| 1160.6739      | 10 | E 4  | 520.2367       | 260.6223        |
| 1247.7059      | 11 | S 3  | 391.1941       | 196.1010        |
| 1376.7485      | 12 | E 2  | 304.1621       | 152.5850        |
|                | 13 | R 1  | 175.1195       | 88.0637         |

N-term:+35.07



REGPCAVNLVLR, MH+ 1411.7843, m/z 471.2663  
 L OS G27 P150811 220811-s1.04836.04836.3.dta

X-range:

-

MassTol: Y-zoom:

MassType:

AVG  MONO

Axis:

1  2

Label:

I  M  -

Ions:

a  +  2+  3+

b  +  2+  3+

c  +  2+  3+

x  +  2+  3+

y  +  2+  3+

z  +  2+  3+

hide H<sub>2</sub>O/NH<sub>3</sub>

zoom 112-122

GO

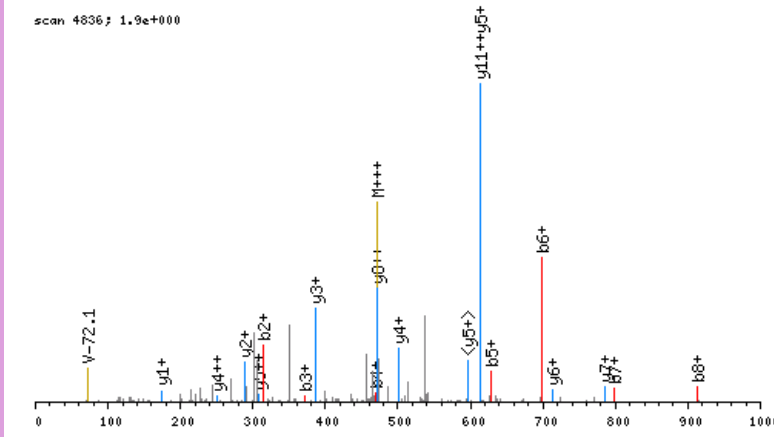

click image to zoom in; click top corners to zoom out [\[precursor±\]](#)

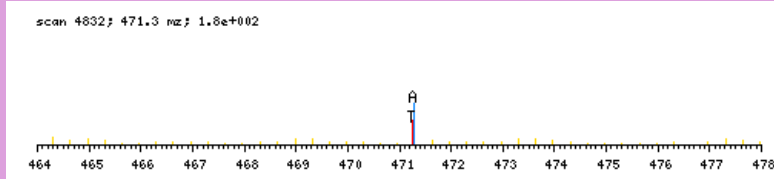

zoomed in precursor plot; T=theoretical m/z, A=acquired m/z

| b <sup>+</sup> | #  | AA | #  | y <sup>+</sup> | y <sup>2+</sup> |
|----------------|----|----|----|----------------|-----------------|
| 185.1402       | 1  | R  | 12 |                |                 |
| 314.1828       | 2  | E  | 11 | 1227.6519      | 614.3299        |
| 371.2043       | 3  | G  | 10 | 1098.6093      | 549.8086        |
| 468.2570       | 4  | P  | 9  | 1041.5879      | 521.2978        |
| 628.2876       | 5  | C  | 8  | 944.5351       | 472.7715        |
| 699.3247       | 6  | A  | 7  | 784.5045       | 392.7562        |
| 798.3932       | 7  | V  | 6  | 713.4674       | 357.2376        |
| 912.4361       | 8  | N  | 5  | 614.3990       | 307.7034        |
| 1025.5202      | 9  | L  | 4  | 500.3560       | 250.6819        |
| 1124.5886      | 10 | V  | 3  | 387.2720       | 194.1399        |
| 1237.6726      | 11 | L  | 2  | 288.2036       | 144.6057        |
|                | 12 | R  | 1  | 175.1195       | 88.0637         |

N-term:+29.04 C(5):+160.03

RELEGEVENEQKR, MH+ 1683.9302, m/z 421.7380  
 H OS G28 P150811 220811-s1.01940.01940.4.dta

X-range:

-

MassTol: Y-zoom:

MassType:

AVG  MONO

Axis:

1  2

Label:

I  M  -

Ions:

a  +  2+  3+

b  +  2+  3+

c  +  2+  3+

x  +  2+  3+

y  +  2+  3+

z  +  2+  3+

hide H<sub>2</sub>O/NH<sub>3</sub>

zoom 112-122

GO

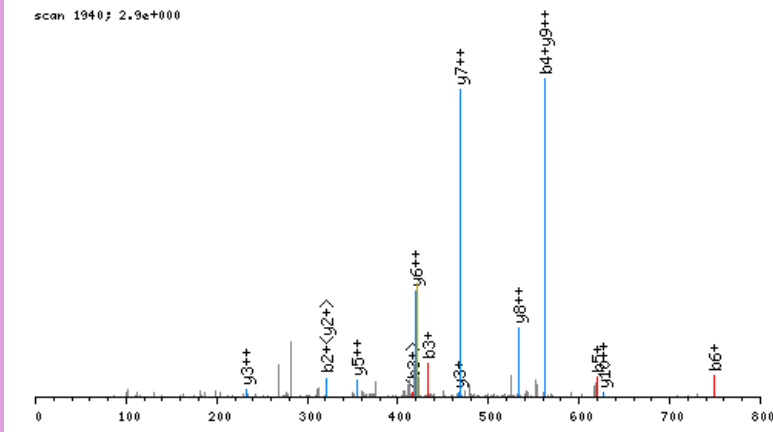

click image to zoom in; click top corners to zoom out [\[precursor±\]](#)

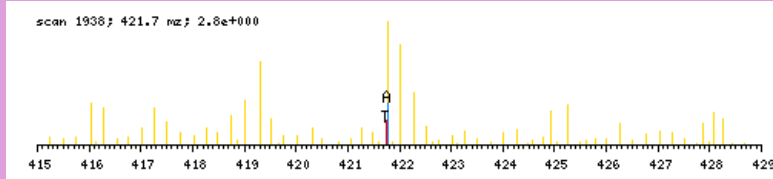

zoomed in precursor plot; T=theoretical m/z, A=acquired m/z

| b <sup>+</sup> | #  | AA # | y <sup>+</sup> | y <sup>2+</sup> |
|----------------|----|------|----------------|-----------------|
| 191.1720       | 1  | R 13 |                |                 |
| 320.2146       | 2  | E 12 | 1493.7660      | 747.3869        |
| 433.2987       | 3  | L 11 | 1364.7234      | 682.8656        |
| 562.3413       | 4  | E 10 | 1251.6394      | 626.3236        |
| 619.3627       | 5  | G 9  | 1122.5968      | 561.8023        |
| 748.4053       | 6  | E 8  | 1065.5753      | 533.2916        |
| 847.4737       | 7  | V 7  | 936.5327       | 468.7703        |
| 976.5163       | 8  | E 6  | 837.4643       | 419.2361        |
| 1090.5593      | 9  | N 5  | 708.4217       | 354.7148        |
| 1219.6018      | 10 | E 4  | 594.3788       | 297.6933        |
| 1347.6604      | 11 | Q 3  | 465.3362       | 233.1720        |
| 1509.8185      | 12 | K 2  | 337.2776       | 169.1427        |
|                | 13 | R 1  | 175.1195       | 88.0637         |

N-term:+35.07 K(12):+162.16

RELENEVENEQKR, MH+ 1740.9517, m/z 435.9934  
 H OS G28 P150811 220811-s1.02039.02039.4.dta

scan 2039; 2.5e+000

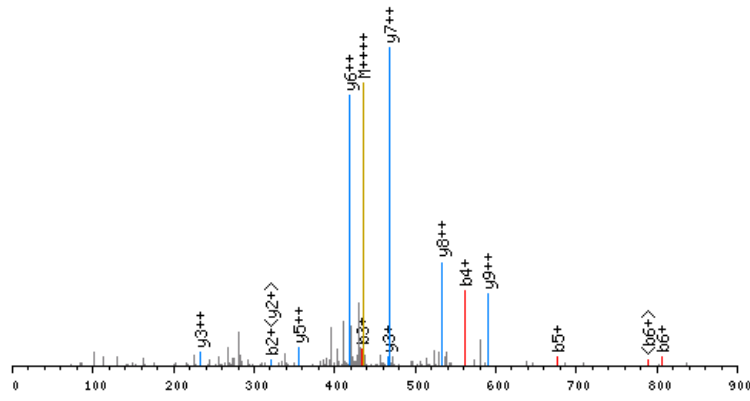

click image to zoom in; click top corners to zoom out [\[precursor±\]](#)

scan 2038; 436.0 m/z; 2.2e+001

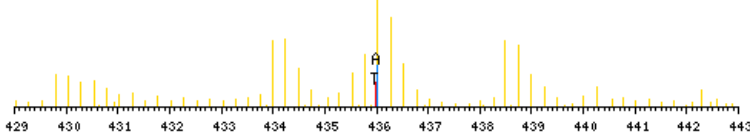

zoomed in precursor plot; T=theoretical m/z, A=acquired m/z

X-range:

-

MassTol: Y-zoom:

MassType:

AVG  MONO

Axis:

1  2

Label:

I  M  -

Ions:

a  +  2+  3+

b  +  2+  3+

c  +  2+  3+

x  +  2+  3+

y  +  2+  3+

z  +  2+  3+

hide H<sub>2</sub>O/NH<sub>3</sub>

zoom 112-122

GO

| b <sup>+</sup> | #  | AA # | y <sup>+</sup> | y <sup>2+</sup> |
|----------------|----|------|----------------|-----------------|
| 191.1720       | 1  | R 13 |                |                 |
| 320.2146       | 2  | E 12 | 1550.7875      | 775.8977        |
| 433.2987       | 3  | L 11 | 1421.7449      | 711.3764        |
| 562.3413       | 4  | E 10 | 1308.6608      | 654.8343        |
| 676.3842       | 5  | N 9  | 1179.6182      | 590.3130        |
| 805.4268       | 6  | E 8  | 1065.5753      | 533.2916        |
| 904.4952       | 7  | V 7  | 936.5327       | 468.7703        |
| 1033.5378      | 8  | E 6  | 837.4643       | 419.2361        |
| 1147.5807      | 9  | N 5  | 708.4217       | 354.7148        |
| 1276.6233      | 10 | E 4  | 594.3788       | 297.6933        |
| 1404.6819      | 11 | Q 3  | 465.3362       | 233.1720        |
| 1566.8400      | 12 | K 2  | 337.2776       | 169.1427        |
|                | 13 | R 1  | 175.1195       | 88.0637         |

N-term:+35.07 K(12):+162.16

X-range:

-

MassTol: Y-zoom:

MassType:

AVG  MONO

Axis:

1  2

Label:

I  M  -

Ions:

a  +  2+  3+

b  +  2+  3+

c  +  2+  3+

x  +  2+  3+

y  +  2+  3+

z  +  2+  3+

hide H<sub>2</sub>O/NH<sub>3</sub>

zoom 112-122

GO

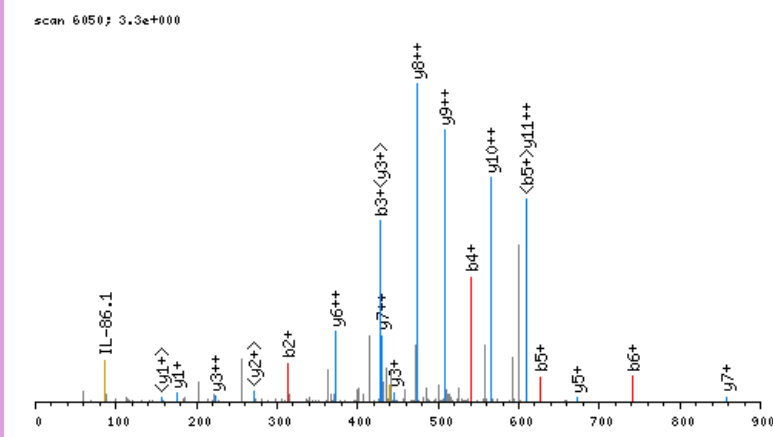

click image to zoom in; click top corners to zoom out [\[precursor±\]](#)

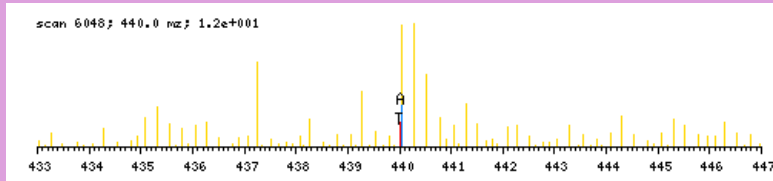

zoomed in precursor plot; T=theoretical m/z, A=acquired m/z

| b <sup>+</sup> | #  | AA # | y <sup>+</sup> | y <sup>2+</sup> |
|----------------|----|------|----------------|-----------------|
| 185.1402       | 1  | R 15 |                |                 |
| 314.1828       | 2  | E 14 | 1572.8597      | 786.9338        |
| 427.2669       | 3  | L 13 | 1443.8172      | 722.4125        |
| 540.3509       | 4  | I 12 | 1330.7331      | 665.8705        |
| 627.3830       | 5  | S 11 | 1217.6490      | 609.3284        |
| 741.4259       | 6  | N 10 | 1130.6170      | 565.8124        |
| 812.4630       | 7  | A 9  | 1016.5741      | 508.7909        |
| 899.4950       | 8  | S 8  | 945.5370       | 473.2724        |
| 1014.5220      | 9  | D 7  | 858.5049       | 429.7564        |
| 1085.5591      | 10 | A 6  | 743.4780       | 372.2429        |
| 1198.6432      | 11 | L 5  | 672.4409       | 336.7243        |
| 1313.6701      | 12 | D 4  | 559.3568       | 280.1823        |
| 1469.7964      | 13 | K 3  | 444.3299       | 222.6688        |
| 1582.8805      | 14 | I 2  | 288.2036       | 144.6057        |
|                | 15 | R 1  | 175.1195       | 88.0637         |

N-term:+29.04 K(13):+156.13

REPIDNLTPEER, MH+ 1496.7709, m/z 499.5951  
 L OS G27 P150811 220811-s1.03576.03576.3.dta

X-range:

-

MassTol: Y-zoom:

MassType:

AVG  MONO

Axis:

1  2

Label:

I  M  -

Ions:

a  +  2+  3+

b  +  2+  3+

c  +  2+  3+

x  +  2+  3+

y  +  2+  3+

z  +  2+  3+

hide H<sub>2</sub>O/NH<sub>3</sub>

zoom 112-122

GO

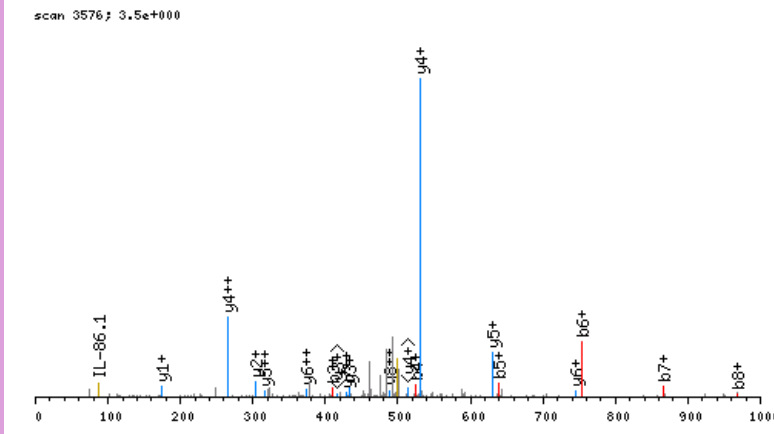

click image to zoom in; click top corners to zoom out [\[precursor±\]](#)

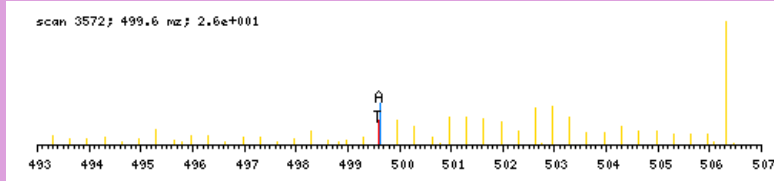

zoomed in precursor plot; T=theoretical m/z, A=acquired m/z

| b <sup>+</sup> | #  | AA # | y <sup>+</sup> | y <sup>2+</sup> |
|----------------|----|------|----------------|-----------------|
| 185.1402       | 1  | R 12 |                |                 |
| 314.1828       | 2  | E 11 | 1312.6385      | 656.8232        |
| 411.2356       | 3  | P 10 | 1183.5959      | 592.3019        |
| 524.3196       | 4  | I 9  | 1086.5431      | 543.7755        |
| 639.3466       | 5  | D 8  | 973.4591       | 487.2334        |
| 753.3895       | 6  | N 7  | 858.4321       | 429.7200        |
| 866.4736       | 7  | L 6  | 744.3892       | 372.6985        |
| 967.5212       | 8  | T 5  | 631.3051       | 316.1565        |
| 1064.5740      | 9  | P 4  | 530.2575       | 265.6326        |
| 1193.6166      | 10 | E 3  | 433.2047       | 217.1063        |
| 1322.6592      | 11 | E 2  | 304.1621       | 152.5850        |
|                | 12 | R 1  | 175.1195       | 88.0637         |

N-term:+29.04

RETNLESPLVDTHSKR, MH+ 2051.1249, m/z 513.5367  
 L OS G28 P150811 220811-s1.04584.04584.4.dta

X-range:

-

MassTol: Y-zoom:

MassType:

AVG  MONO

Axis:

1  2

Label:

I  M  -

Ions:

a  +  2+  3+

b  +  2+  3+

c  +  2+  3+

x  +  2+  3+

y  +  2+  3+

z  +  2+  3+

hide H<sub>2</sub>O/NH<sub>3</sub>

zoom 112-122

GO

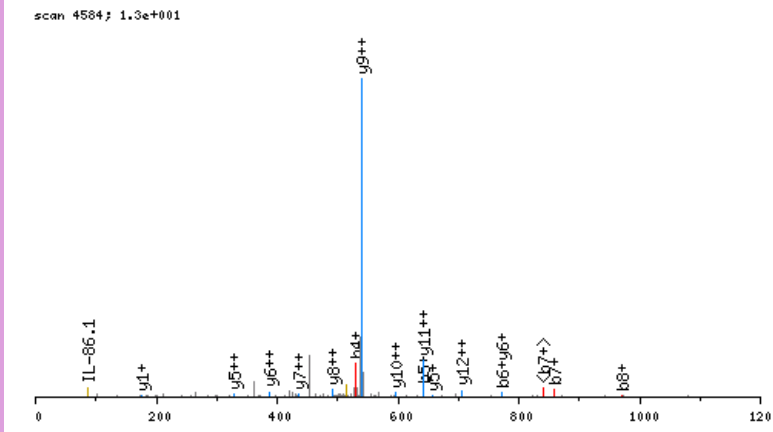

click image to zoom in; click top corners to zoom out [\[precursor±\]](#)

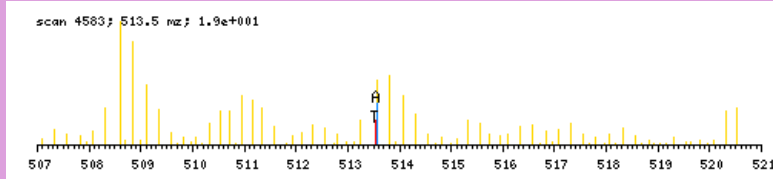

zoomed in precursor plot; T=theoretical m/z, A=acquired m/z

| b <sup>+</sup> | #  | AA | #  | y <sup>+</sup> | y <sup>2+</sup> |
|----------------|----|----|----|----------------|-----------------|
| 185.1402       | 1  | R  | 17 |                |                 |
| 314.1828       | 2  | E  | 16 | 1866.9926      | 934.0002        |
| 415.2305       | 3  | T  | 15 | 1737.9500      | 869.4789        |
| 529.2734       | 4  | N  | 14 | 1636.9023      | 818.9551        |
| 642.3575       | 5  | L  | 13 | 1522.8594      | 761.9336        |
| 771.4001       | 6  | E  | 12 | 1409.7753      | 705.3916        |
| 858.4321       | 7  | S  | 11 | 1280.7327      | 640.8703        |
| 971.5162       | 8  | L  | 10 | 1193.7007      | 597.3542        |
| 1068.5689      | 9  | P  | 9  | 1080.6166      | 540.8122        |
| 1181.6530      | 10 | L  | 8  | 983.5638       | 492.2858        |
| 1280.7214      | 11 | V  | 7  | 870.4798       | 435.7438        |
| 1395.7483      | 12 | D  | 6  | 771.4114       | 386.2096        |
| 1496.7960      | 13 | T  | 5  | 656.3844       | 328.6961        |
| 1633.8549      | 14 | H  | 4  | 555.3367       | 278.1723        |
| 1720.8870      | 15 | S  | 3  | 418.2778       | 209.6428        |
| 1877.0133      | 16 | K  | 2  | 331.2458       | 166.1268        |
|                | 17 | R  | 1  | 175.1195       | 88.0637         |

N-term:+29.04 K(16):+156.13

RGDDGIFDDNFIEER, MH+ 1831.8675, m/z 611.2940  
 H OS G27 P150811 220811-s1.06554.06554.3.dta

X-range:

-

MassTol: Y-zoom:

MassType:

AVG  MONO

Axis:

1  2

Label:

I  M  -

Ions:

a  +  2+  3+

b  +  2+  3+

c  +  2+  3+

x  +  2+  3+

y  +  2+  3+

z  +  2+  3+

hide H<sub>2</sub>O/NH<sub>3</sub>

zoom 112-122

GO

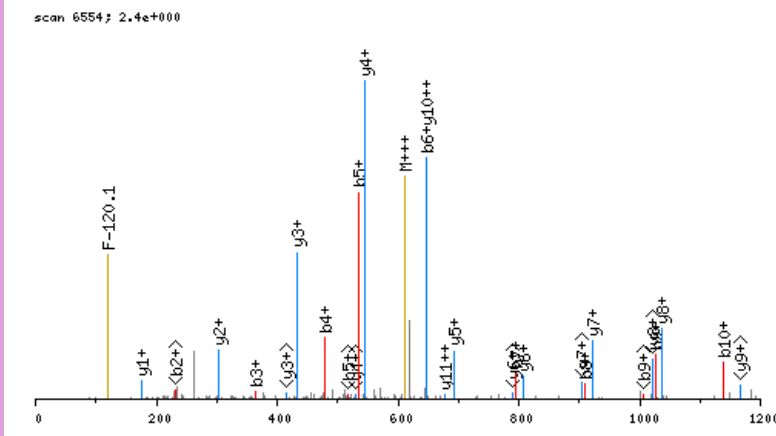

click image to zoom in; click top corners to zoom out [\[precursor±\]](#)

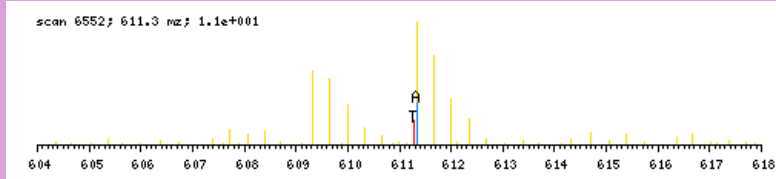

zoomed in precursor plot; T=theoretical m/z, A=acquired m/z

| b <sup>+</sup> | #  | AA # | y <sup>+</sup> | y <sup>2+</sup> |
|----------------|----|------|----------------|-----------------|
| 191.1720       | 1  | R 15 |                |                 |
| 248.1935       | 2  | G 14 | 1641.7033      | 821.3555        |
| 363.2204       | 3  | D 13 | 1584.6818      | 792.8448        |
| 478.2474       | 4  | D 12 | 1469.6549      | 735.3313        |
| 535.2688       | 5  | G 11 | 1354.6279      | 677.8179        |
| 648.3529       | 6  | I 10 | 1297.6065      | 649.3071        |
| 795.4213       | 7  | F 9  | 1184.5224      | 592.7651        |
| 910.4482       | 8  | D 8  | 1037.4540      | 519.2309        |
| 1025.4752      | 9  | D 7  | 922.4270       | 461.7174        |
| 1139.5181      | 10 | N 6  | 807.4001       | 404.2040        |
| 1286.5865      | 11 | F 5  | 693.3572       | 347.1825        |
| 1399.6706      | 12 | I 4  | 546.2888       | 273.6483        |
| 1528.7132      | 13 | E 3  | 433.2047       | 217.1063        |
| 1657.7558      | 14 | E 2  | 304.1621       | 152.5850        |
|                | 15 | R 1  | 175.1195       | 88.0637         |

N-term:+35.07

RGDEGIFEESFIEER, MH+ 1846.9035, m/z 616.3060  
 H OS G27 P150811 220811-s1.06526.06526.3.dta

X-range:

-

MassTol: Y-zoom:

MassType:

AVG  MONO

Axis:

1  2

Label:

I  M  -

Ions:

a  +  2+  3+

b  +  2+  3+

c  +  2+  3+

x  +  2+  3+

y  +  2+  3+

z  +  2+  3+

hide H<sub>2</sub>O/NH<sub>3</sub>

zoom 112-122

GO

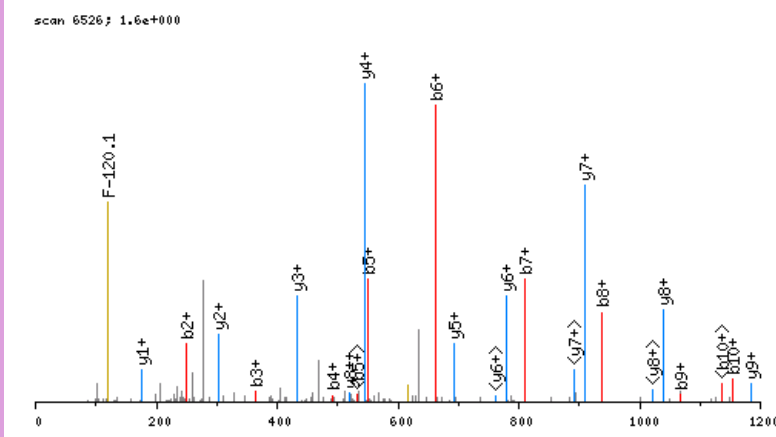

click image to zoom in; click top corners to zoom out [\[precursor±\]](#)

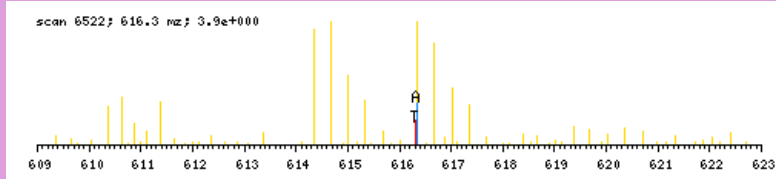

zoomed in precursor plot; T=theoretical m/z, A=acquired m/z

| b <sup>+</sup> | #  | AA # | y <sup>+</sup> | y <sup>2+</sup> |
|----------------|----|------|----------------|-----------------|
| 191.1720       | 1  | R 15 |                |                 |
| 248.1935       | 2  | G 14 | 1656.7393      | 828.8736        |
| 363.2204       | 3  | D 13 | 1599.7179      | 800.3628        |
| 492.2630       | 4  | E 12 | 1484.6909      | 742.8494        |
| 549.2845       | 5  | G 11 | 1355.6483      | 678.3281        |
| 662.3685       | 6  | I 10 | 1298.6269      | 649.8173        |
| 809.4370       | 7  | F 9  | 1185.5428      | 593.2753        |
| 938.4795       | 8  | E 8  | 1038.4744      | 519.7411        |
| 1067.5221      | 9  | E 7  | 909.4318       | 455.2198        |
| 1154.5542      | 10 | S 6  | 780.3892       | 390.6985        |
| 1301.6226      | 11 | F 5  | 693.3572       | 347.1825        |
| 1414.7066      | 12 | I 4  | 546.2888       | 273.6483        |
| 1543.7492      | 13 | E 3  | 433.2047       | 217.1063        |
| 1672.7918      | 14 | E 2  | 304.1621       | 152.5850        |
|                | 15 | R 1  | 175.1195       | 88.0637         |

N-term:+35.07



RGETGPAGPAGPIGPAGAR, MH+ 1722.9463, m/z 574.9870  
 H OS G27 P150811 220811-s1.02921.02921.3.dta

X-range:

-

MassTol: Y-zoom:

MassType:

AVG  MONO

Axis:

1  2

Label:

I  M  -

Ions:

a  +  2+  3+

b  +  2+  3+

c  +  2+  3+

x  +  2+  3+

y  +  2+  3+

z  +  2+  3+

hide H<sub>2</sub>O/NH<sub>3</sub>

zoom 112-122

GO

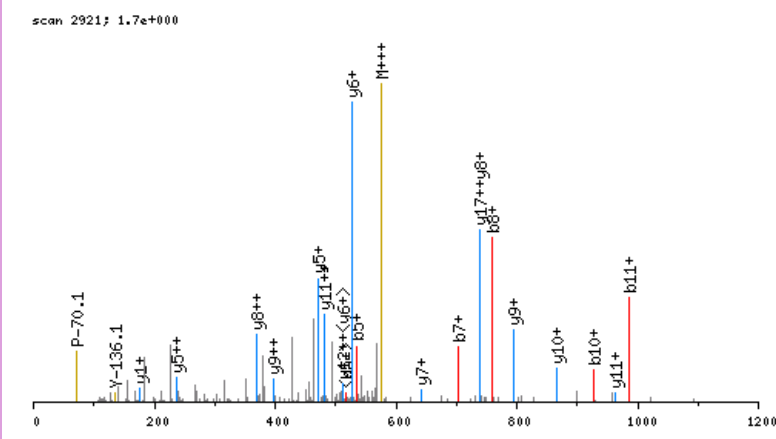

click image to zoom in; click top corners to zoom out [\[precursor±\]](#)

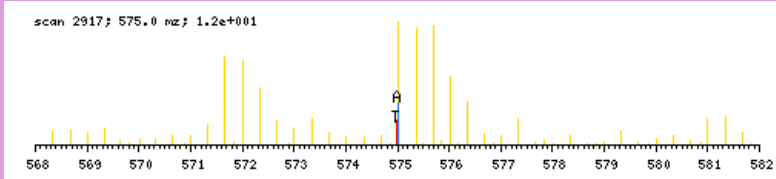

zoomed in precursor plot; T=theoretical m/z, A=acquired m/z

| b <sup>+</sup>  | #  | AA # | y <sup>+</sup>  | y <sup>2+</sup> |
|-----------------|----|------|-----------------|-----------------|
| 191.1720        | 1  | R 19 |                 |                 |
| 248.1935        | 2  | G 18 | 1532.7821       | 766.8950        |
| 377.2361        | 3  | E 17 | 1475.7607       | <b>738.3842</b> |
| 478.2837        | 4  | T 16 | 1346.7181       | 673.8629        |
| <b>535.3052</b> | 5  | G 15 | 1245.6704       | 623.3391        |
| 632.3580        | 6  | P 14 | 1188.6489       | 594.8284        |
| <b>703.3951</b> | 7  | A 13 | 1091.5962       | 546.3020        |
| <b>760.4166</b> | 8  | G 12 | 1020.5591       | <b>510.7834</b> |
| 857.4693        | 9  | P 11 | <b>963.5376</b> | <b>482.2727</b> |
| <b>928.5064</b> | 10 | A 10 | <b>866.4848</b> | 433.7463        |
| <b>985.5279</b> | 11 | G 9  | <b>795.4477</b> | <b>398.2278</b> |
| 1082.5807       | 12 | P 8  | <b>738.4262</b> | <b>369.7170</b> |
| 1195.6647       | 13 | I 7  | <b>641.3735</b> | 321.1907        |
| 1252.6862       | 14 | G 6  | <b>528.2894</b> | 264.6486        |
| 1349.7389       | 15 | P 5  | <b>471.2680</b> | <b>236.1379</b> |
| 1420.7761       | 16 | A 4  | 374.2152        | 187.6115        |
| 1477.7975       | 17 | G 3  | 303.1781        | 152.0930        |
| 1548.8346       | 18 | A 2  | 246.1566        | 123.5822        |
|                 | 19 | R 1  | <b>175.1195</b> | 88.0637         |

N-term:+35.07

RGGKNVGGPGLSKSR, MH+ 1553.9240, m/z 518.6462  
 L OS G27 P150811 220811-s1.02691.02691.3.dta

X-range:

-

MassTol: Y-zoom:

MassType:

AVG  MONO

Axis:

1  2

Label:

I  M  -

Ions:

a  +  2+  3+

b  +  2+  3+

c  +  2+  3+

x  +  2+  3+

y  +  2+  3+

z  +  2+  3+

hide H<sub>2</sub>O/NH<sub>3</sub>

zoom 112-122

GO

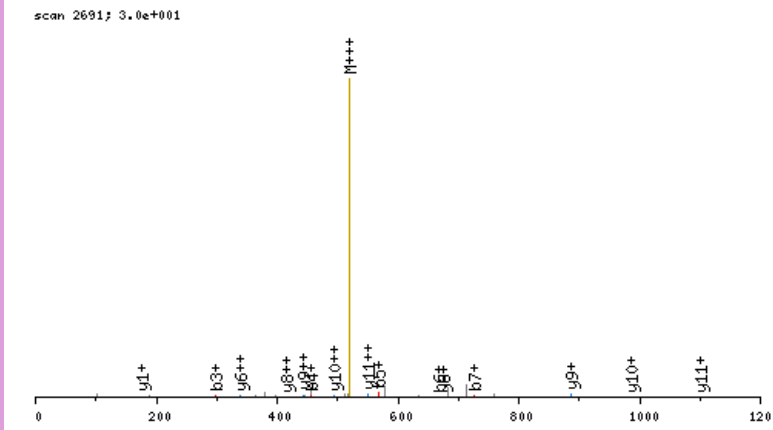

click image to zoom in; click top corners to zoom out [\[precursor±\]](#)

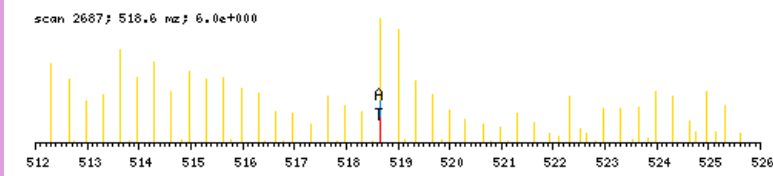

zoomed in precursor plot; T=theoretical m/z, A=acquired m/z

| b <sup>+</sup> | #  | AA # | y <sup>+</sup> | y <sup>2+</sup> |
|----------------|----|------|----------------|-----------------|
| 185.1402       | 1  | R    | 15             |                 |
| 242.1617       | 2  | G    | 14             | 1369.7916       |
| 299.1831       | 3  | G    | 13             | 1312.7702       |
| 455.3094       | 4  | K    | 12             | 1255.7487       |
| 569.3524       | 5  | N    | 11             | 1099.6224       |
| 668.4208       | 6  | V    | 10             | 985.5795        |
| 725.4422       | 7  | G    | 9              | 886.5111        |
| 782.4637       | 8  | G    | 8              | 829.4896        |
| 879.5165       | 9  | P    | 7              | 772.4681        |
| 936.5379       | 10 | G    | 6              | 675.4154        |
| 1049.6220      | 11 | L    | 5              | 618.3939        |
| 1136.6540      | 12 | S    | 4              | 505.3099        |
| 1292.7803      | 13 | K    | 3              | 418.2778        |
| 1379.8124      | 14 | S    | 2              | 262.1515        |
|                | 15 | R    | 1              | 175.1195        |

N-term:+29.04 K(4):+156.13  
 K(13):+156.13

RGQVGDLSPQQQEALAR, MH+ 1887.0260, m/z 629.6802  
 H OS G27 P150811 220811-s1.04054.04054.3.dta

X-range:

-

MassTol: Y-zoom:

MassType:

AVG  MONO

Axis:

1  2

Label:

I  M  -

Ions:

a  +  2+  3+

b  +  2+  3+

c  +  2+  3+

x  +  2+  3+

y  +  2+  3+

z  +  2+  3+

hide H<sub>2</sub>O/NH<sub>3</sub>

zoom 112-122

GO

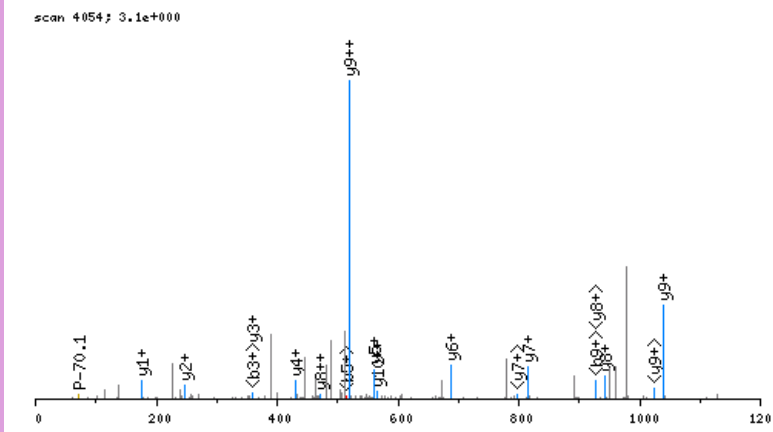

click image to zoom in; click top corners to zoom out [\[precursor±\]](#)

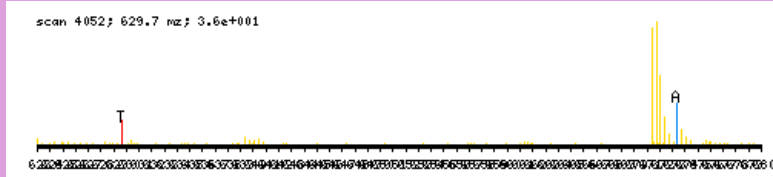

zoomed in precursor plot; T=theoretical m/z, A=acquired m/z

| b <sup>+</sup> | #  | AA # | y <sup>+</sup>   | y <sup>2+</sup> |
|----------------|----|------|------------------|-----------------|
| 191.1720       | 1  | R 17 |                  |                 |
| 248.1935       | 2  | G 16 | 1696.8618        | 848.9348        |
| 376.2521       | 3  | Q 15 | 1639.8404        | 820.4241        |
| 475.3205       | 4  | V 14 | 1511.7818        | 756.3948        |
| 532.3419       | 5  | G 13 | 1412.7134        | 706.8606        |
| 647.3689       | 6  | D 12 | 1355.6919        | 678.3499        |
| 760.4529       | 7  | L 11 | 1240.6650        | 620.8364        |
| 847.4850       | 8  | S 10 | 1127.5809        | <b>564.2944</b> |
| 944.5377       | 9  | P 9  | <b>1040.5489</b> | <b>520.7784</b> |
| 1072.5963      | 10 | Q 8  | <b>943.4961</b>  | <b>472.2520</b> |
| 1200.6549      | 11 | Q 7  | <b>815.4375</b>  | 408.2227        |
| 1328.7135      | 12 | Q 6  | <b>687.3790</b>  | 344.1934        |
| 1457.7561      | 13 | E 5  | <b>559.3204</b>  | 280.1641        |
| 1528.7932      | 14 | A 4  | <b>430.2778</b>  | 215.6428        |
| 1641.8772      | 15 | L 3  | <b>359.2407</b>  | 180.1243        |
| 1712.9143      | 16 | A 2  | <b>246.1566</b>  | 123.5822        |
|                | 17 | R 1  | <b>175.1195</b>  | 88.0637         |

N-term:+35.07

RIRPQFIGDIHGR, MH+ 1592.9137, m/z 398.9839  
 L OS G28 P150811 220811-s1.02124.02124.4.dta

X-range:

-

MassTol: Y-zoom:

MassType:

AVG  MONO

Axis:

1  2

Label:

I  M  -

Ions:

a  +  2+  3+

b  +  2+  3+

c  +  2+  3+

x  +  2+  3+

y  +  2+  3+

z  +  2+  3+

hide H<sub>2</sub>O/NH<sub>3</sub>

zoom 112-122

GO

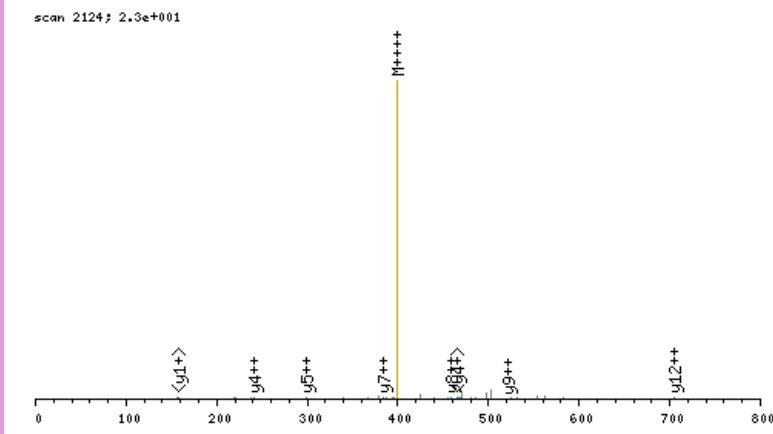

click image to zoom in; click top corners to zoom out [\[precursor±\]](#)

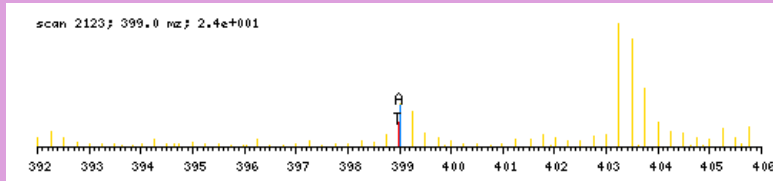

zoomed in precursor plot; T=theoretical m/z, A=acquired m/z

| b <sup>+</sup> | #  | AA # | y <sup>+</sup> | y <sup>2+</sup> |
|----------------|----|------|----------------|-----------------|
| 185.1402       | 1  | R 13 |                |                 |
| 298.2243       | 2  | I 12 | 1408.7813      | 704.8946        |
| 454.3254       | 3  | R 11 | 1295.6973      | 648.3526        |
| 551.3781       | 4  | P 10 | 1139.5962      | 570.3020        |
| 679.4367       | 5  | Q 9  | 1042.5434      | 521.7756        |
| 826.5051       | 6  | F 8  | 914.4848       | 457.7463        |
| 939.5892       | 7  | I 7  | 767.4164       | 384.2121        |
| 996.6107       | 8  | G 6  | 654.3323       | 327.6701        |
| 1111.6376      | 9  | D 5  | 597.3109       | 299.1594        |
| 1224.7217      | 10 | I 4  | 482.2839       | 241.6459        |
| 1361.7806      | 11 | H 3  | 369.1999       | 185.1039        |
| 1418.8021      | 12 | G 2  | 232.1410       | 116.5744        |
|                | 13 | R 1  | 175.1195       | 88.0637         |

N-term:+29.04

RIVEDEPNKICEADR, MH+ 1899.9598, m/z 475.7454  
 L OS G28 P150811 220811-s1.02901.02901.4.dta

X-range:

-

MassTol: Y-zoom:

MassType:

AVG  MONO

Axis:

1  2

Label:

I  M  -

Ions:

a  +  2+  3+

b  +  2+  3+

c  +  2+  3+

x  +  2+  3+

y  +  2+  3+

z  +  2+  3+

hide H<sub>2</sub>O/NH<sub>3</sub>

zoom 112-122

GO

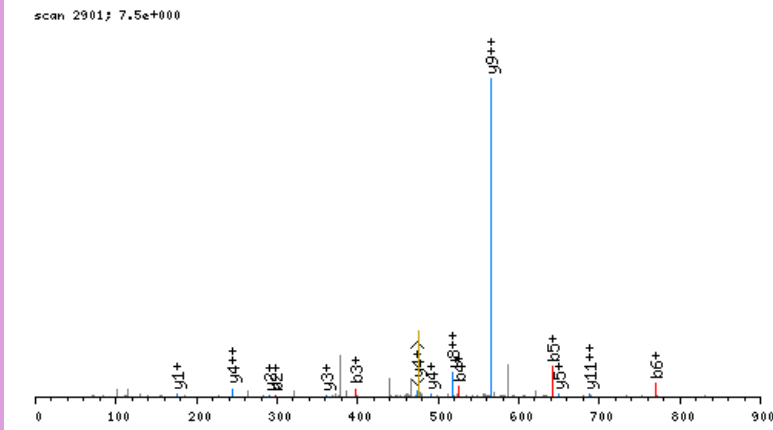

click image to zoom in; click top corners to zoom out [\[precursor±\]](#)

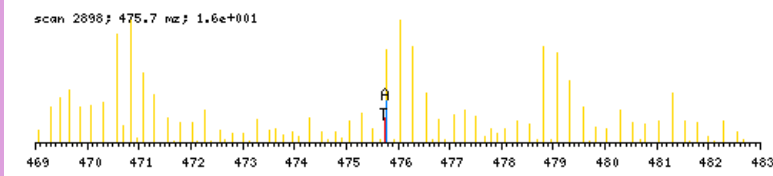

zoomed in precursor plot; T=theoretical m/z, A=acquired m/z

| b <sup>+</sup> | #  | AA | #  | y <sup>+</sup> | y <sup>2+</sup> |
|----------------|----|----|----|----------------|-----------------|
| 185.1402       | 1  | R  | 15 |                |                 |
| 298.2243       | 2  | I  | 14 | 1715.8274      | 858.4176        |
| 397.2927       | 3  | V  | 13 | 1602.7433      | 801.8756        |
| 526.3353       | 4  | E  | 12 | 1503.6749      | 752.3414        |
| 641.3622       | 5  | D  | 11 | 1374.6323      | 687.8201        |
| 770.4048       | 6  | E  | 10 | 1259.6054      | 630.3066        |
| 867.4576       | 7  | P  | 9  | 1130.5628      | 565.7853        |
| 981.5005       | 8  | N  | 8  | 1033.5100      | 517.2589        |
| 1137.6268      | 9  | K  | 7  | 919.4671       | 460.2375        |
| 1250.7109      | 10 | I  | 6  | 763.3408       | 382.1743        |
| 1410.7415      | 11 | C  | 5  | 650.2568       | 325.6323        |
| 1539.7841      | 12 | E  | 4  | 490.2262       | 245.6170        |
| 1610.8212      | 13 | A  | 3  | 361.1836       | 181.0957        |
| 1725.8481      | 14 | D  | 2  | 290.1464       | 145.5771        |
|                | 15 | R  | 1  | 175.1195       | 88.0637         |

N-term:+29.04 K(9):+156.13  
 C(11):+160.03

X-range:

-

MassTol: Y-zoom:

MassType:

AVG  MONO

Axis:

1  2

Label:

I  M  -

Ions:

a  +  2+  3+

b  +  2+  3+

c  +  2+  3+

x  +  2+  3+

y  +  2+  3+

z  +  2+  3+

hide H<sub>2</sub>O/NH<sub>3</sub>

zoom 112-122

GO

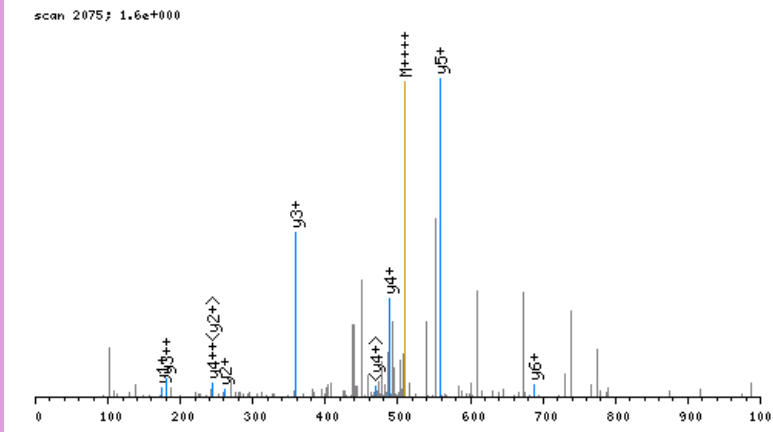

click image to zoom in; click top corners to zoom out [precursor±]

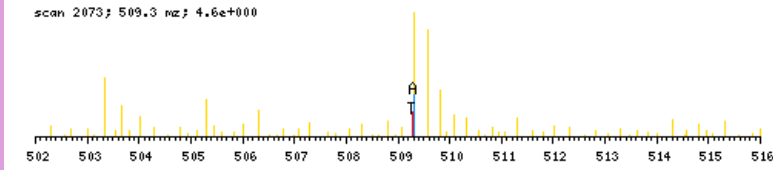

zoomed in precursor plot; T=theoretical m/z, A=acquired m/z

| b <sup>+</sup> | #  | AA | #  | y <sup>+</sup> | y <sup>2+</sup> |
|----------------|----|----|----|----------------|-----------------|
| 185.1402       | 1  | R  | 17 |                |                 |
| 341.2665       | 2  | K  | 16 | 1850.0024      | 925.5051        |
| 497.3928       | 3  | K  | 15 | 1693.8761      | 847.4420        |
| 568.4299       | 4  | A  | 14 | 1537.7498      | 769.3788        |
| 665.4827       | 5  | P  | 13 | 1466.7127      | 733.8603        |
| 762.5355       | 6  | P  | 12 | 1369.6599      | 685.3339        |
| 875.6195       | 7  | L  | 11 | 1272.6072      | 636.8075        |
| 974.6879       | 8  | V  | 10 | 1159.5231      | 580.2655        |
| 1103.7305      | 9  | E  | 9  | 1060.4547      | 530.7313        |
| 1217.7735      | 10 | N  | 8  | 931.4121       | 466.2100        |
| 1346.8160      | 11 | E  | 7  | 817.3692       | 409.1885        |
| 1475.8586      | 12 | E  | 6  | 688.3266       | 344.6672        |
| 1546.8958      | 13 | A  | 5  | 559.2840       | 280.1459        |
| 1675.9383      | 14 | E  | 4  | 488.2469       | 244.6274        |
| 1772.9911      | 15 | P  | 3  | 359.2043       | 180.1061        |
| 1860.0231      | 16 | S  | 2  | 262.1515       | 131.5797        |
|                | 17 | R  | 1  | 175.1195       | 88.0637         |

N-term: +29.04 K(2): +156.13  
 K(3): +156.13

RKVMAAIKQR, MH+ 1302.9257, m/z 434.9801  
H OS G27 P150811 220811-s1.04354.04354.3.dta

scan 4354; 7.0e+000

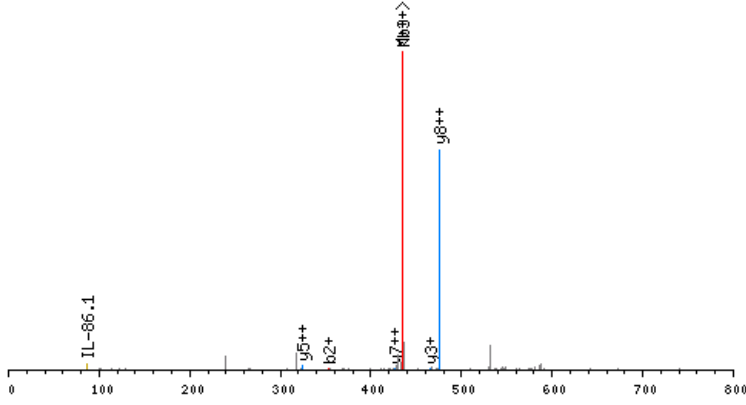

[click image to zoom in; click top corners to zoom out](#) [\[precursor±\]](#)

scan 4352; 435.0 m/z; 1.2e+001

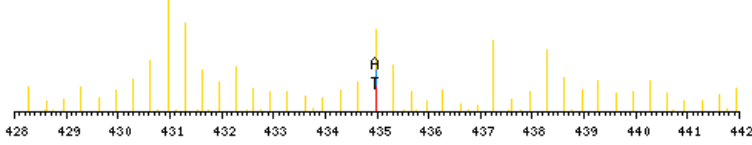

zoomed in precursor plot; T=theoretical m/z, A=acquired m/z

X-range:

-

MassTol: Y-zoom:

MassType:

AVG  MONO

Axis:

1  2

Label:

I  M  -

Ions:

a   2+  3+

b   2+  3+

c   2+  3+

x   2+  3+

y   2+  3+

z   2+  3+

hide H<sub>2</sub>O/NH<sub>3</sub>

zoom 112-122

| b <sup>+</sup>  | #        | AA       | #        | y <sup>+</sup>  | y <sup>2+</sup> |
|-----------------|----------|----------|----------|-----------------|-----------------|
| 191.1720        | 1        | R        | 10       |                 |                 |
| <b>353.3301</b> | <b>2</b> | <b>K</b> | <b>9</b> | 1112.7615       | 556.8846        |
| 452.3985        | 3        | V        | 8        | 950.6034        | <b>475.8056</b> |
| 583.4390        | 4        | M        | 7        | 851.5350        | <b>426.2714</b> |
| 654.4761        | 5        | A        | 6        | 720.4945        | 360.7511        |
| 725.5132        | 6        | A        | 5        | 649.4574        | <b>325.2326</b> |
| 838.5973        | 7        | I        | 4        | 578.4202        | 289.7140        |
| 1000.7554       | 8        | <b>K</b> | <b>3</b> | <b>465.3362</b> | 233.1720        |
| 1128.8140       | 9        | Q        | 2        | 303.1781        | 152.0930        |
|                 | 10       | R        | 1        | 175.1195        | 88.0637         |

N-term:+35.07 K(2):+162.16  
K(8):+162.16

RLASTSDIEEKENR, MH+ 1703.8928, m/z 426.7287  
 L OS G28 P150811 220811-s1.02419.02419.4.dta

X-range:

-

MassTol: Y-zoom:

MassType:

AVG  MONO

Axis:

1  2

Label:

I  M  -

Ions:

a  +  2+  3+

b  +  2+  3+

c  +  2+  3+

x  +  2+  3+

y  +  2+  3+

z  +  2+  3+

hide H<sub>2</sub>O/NH<sub>3</sub>

zoom 112-122

GO

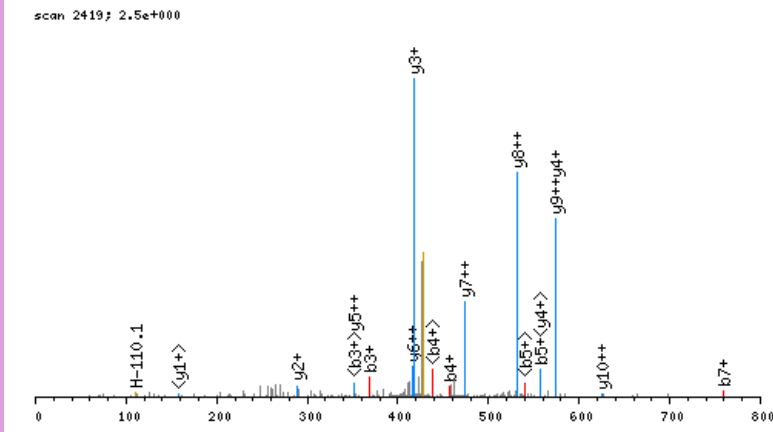

click image to zoom in; click top corners to zoom out [\[precursor±\]](#)

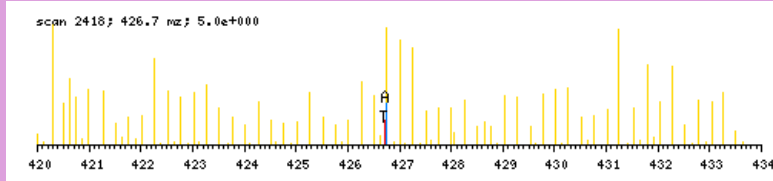

zoomed in precursor plot; T=theoretical m/z, A=acquired m/z

| b <sup>+</sup> | #  | AA # | y <sup>+</sup> | y <sup>2+</sup> |
|----------------|----|------|----------------|-----------------|
| 185.1402       | 1  | R 14 |                |                 |
| 298.2243       | 2  | L 13 | 1519.7604      | 760.3841        |
| 369.2614       | 3  | A 12 | 1406.6764      | 703.8421        |
| 456.2934       | 4  | S 11 | 1335.6393      | 668.3235        |
| 557.3411       | 5  | T 10 | 1248.6072      | 624.8075        |
| 644.3731       | 6  | S 9  | 1147.5595      | 574.2837        |
| 759.4001       | 7  | D 8  | 1060.5275      | 530.7677        |
| 872.4841       | 8  | I 7  | 945.5006       | 473.2542        |
| 1001.5267      | 9  | E 6  | 832.4165       | 416.7122        |
| 1130.5693      | 10 | E 5  | 703.3739       | 352.1909        |
| 1286.6956      | 11 | K 4  | 574.3313       | 287.6696        |
| 1415.7382      | 12 | E 3  | 418.2050       | 209.6064        |
| 1529.7811      | 13 | N 2  | 289.1624       | 145.0851        |
|                | 14 | R 1  | 175.1195       | 88.0637         |

N-term:+29.04 K(11):+156.13



RLLLPQQAGFGECDR, MH+ 1787.9226, m/z 596.6457  
 L OS G27 P150811 220811-s1.05624.05624.3.dta

X-range:

-

MassTol: Y-zoom:

MassType:

AVG  MONO

Axis:

1  2

Label:

I  M  -

Ions:

a  +  2+  3+

b  +  2+  3+

c  +  2+  3+

x  +  2+  3+

y  +  2+  3+

z  +  2+  3+

hide H<sub>2</sub>O/NH<sub>3</sub>

zoom 112-122

GO

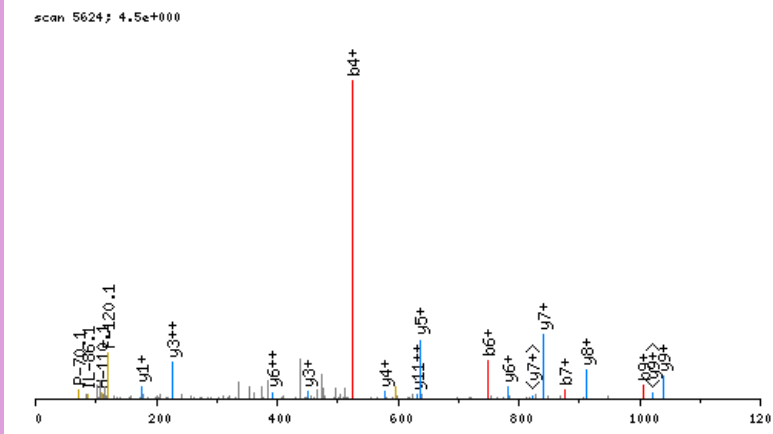

click image to zoom in; click top corners to zoom out [\[precursor±\]](#)

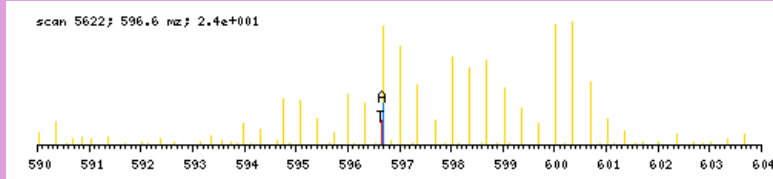

zoomed in precursor plot; T=theoretical m/z, A=acquired m/z

| b <sup>+</sup> | #  | AA | #  | y <sup>+</sup> | y <sup>2+</sup> |
|----------------|----|----|----|----------------|-----------------|
| 185.1402       | 1  | R  | 15 |                |                 |
| 298.2243       | 2  | L  | 14 | 1603.7902      | 802.3990        |
| 411.3083       | 3  | L  | 13 | 1490.7061      | 745.8570        |
| 524.3924       | 4  | L  | 12 | 1377.6221      | 689.3150        |
| 621.4452       | 5  | P  | 11 | 1264.5380      | 632.7729        |
| 749.5037       | 6  | Q  | 10 | 1167.4852      | 584.2465        |
| 877.5623       | 7  | Q  | 9  | 1039.4267      | 520.2172        |
| 948.5994       | 8  | A  | 8  | 911.3681       | 456.1880        |
| 1005.6209      | 9  | G  | 7  | 840.3310       | 420.6694        |
| 1152.6893      | 10 | F  | 6  | 783.3095       | 392.1587        |
| 1209.7108      | 11 | G  | 5  | 636.2411       | 318.6245        |
| 1338.7534      | 12 | E  | 4  | 579.2196       | 290.1137        |
| 1498.7840      | 13 | C  | 3  | 450.1770       | 225.5924        |
| 1613.8109      | 14 | D  | 2  | 290.1464       | 145.5771        |
|                | 15 | R  | 1  | 175.1195       | 88.0637         |

N-term:+29.04 C(13):+160.03

X-range:

-

MassTol: Y-zoom:

MassType:

AVG  MONO

Axis:

1  2

Label:

I  M  -

Ions:

a  +  2+  3+

b  +  2+  3+

c  +  2+  3+

x  +  2+  3+

y  +  2+  3+

z  +  2+  3+

hide H<sub>2</sub>O/NH<sub>3</sub>

zoom 112-122

GO

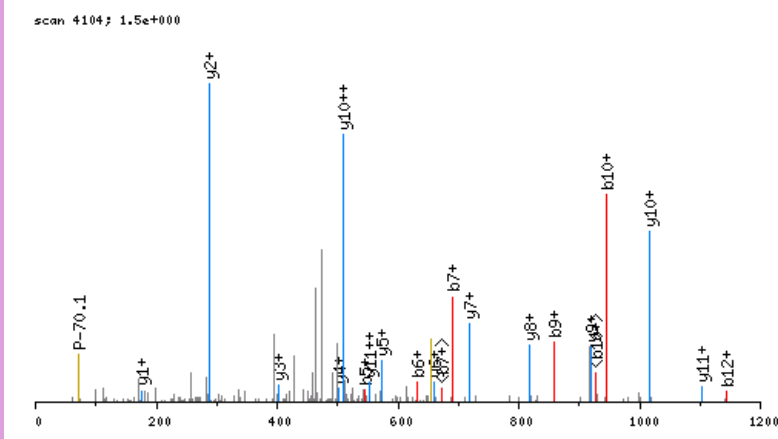

click image to zoom in; click top corners to zoom out [\[precursor±\]](#)

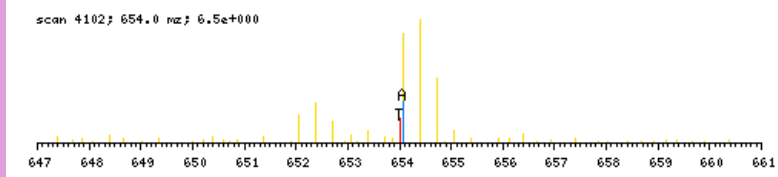

zoomed in precursor plot; T=theoretical m/z, A=acquired m/z

| b <sup>+</sup> | #  | AA # | y <sup>+</sup> | y <sup>2+</sup> |
|----------------|----|------|----------------|-----------------|
| 191.1720       | 1  | R 20 |                |                 |
| 304.2561       | 2  | L 19 | 1769.9034      | 885.4556        |
| 401.3088       | 3  | P 18 | 1656.8193      | 828.9136        |
| 488.3409       | 4  | S 17 | 1559.7665      | 780.3872        |
| 545.3623       | 5  | G 16 | 1472.7345      | 736.8712        |
| 632.3944       | 6  | S 15 | 1415.7130      | 708.3604        |
| 689.4158       | 7  | G 14 | 1328.6810      | 664.8444        |
| 786.4686       | 8  | P 13 | 1271.6596      | 636.3337        |
| 857.5057       | 9  | A 12 | 1174.6068      | 587.8073        |
| 944.5377       | 10 | S 11 | 1103.5697      | 552.2888        |
| 1041.5905      | 11 | P 10 | 1016.5376      | 508.7727        |
| 1142.6382      | 12 | T 9  | 919.4849       | 460.2464        |
| 1243.6859      | 13 | T 8  | 818.4372       | 409.7225        |
| 1300.7073      | 14 | G 7  | 717.3895       | 359.1987        |
| 1387.7393      | 15 | S 6  | 660.3681       | 330.6879        |
| 1458.7765      | 16 | A 5  | 573.3360       | 287.1719        |
| 1557.8449      | 17 | V 4  | 502.2989       | 251.6534        |
| 1672.8718      | 18 | D 3  | 403.2305       | 202.1192        |
| 1785.9559      | 19 | I 2  | 288.2036       | 144.6057        |
|                | 20 | R 1  | 175.1195       | 88.0637         |

N-term:+35.07

RPAPPPIISGGGYR, MH+ 1352.7439, m/z 451.5861  
 L OS G27 P150811 220811-s1.02710.02710.3.dta

X-range:

-

MassTol: Y-zoom:

MassType:

AVG  MONO

Axis:

1  2

Label:

I  M  -

Ions:

a  +  2+  3+

b  +  2+  3+

c  +  2+  3+

x  +  2+  3+

y  +  2+  3+

z  +  2+  3+

hide H<sub>2</sub>O/NH<sub>3</sub>

zoom 112-122

GO

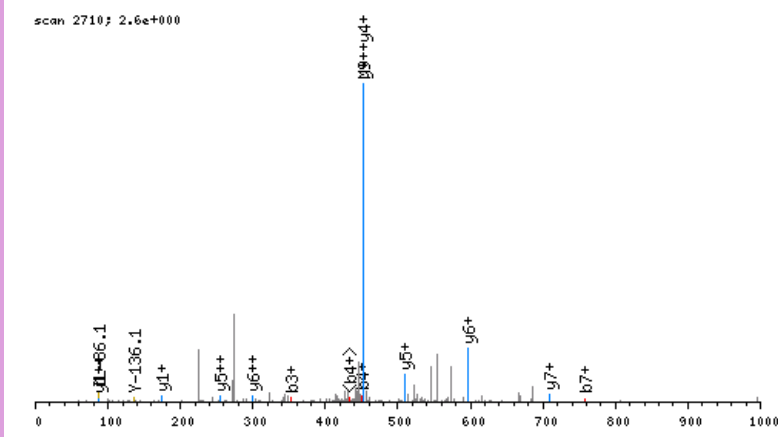

click image to zoom in; click top corners to zoom out [\[precursor±\]](#)

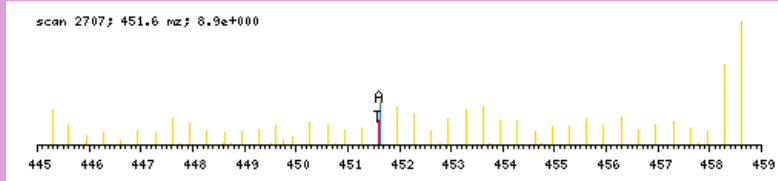

zoomed in precursor plot; T=theoretical m/z, A=acquired m/z

| b <sup>+</sup> | #  | AA # | y <sup>+</sup> | y <sup>2+</sup> |
|----------------|----|------|----------------|-----------------|
| 185.1402       | 1  | R 13 |                |                 |
| 282.1930       | 2  | P 12 | 1168.6115      | 584.8097        |
| 353.2301       | 3  | A 11 | 1071.5587      | 536.2833        |
| 450.2829       | 4  | P 10 | 1000.5216      | 500.7647        |
| 547.3356       | 5  | P 9  | 903.4688       | 452.2383        |
| 644.3884       | 6  | P 8  | 806.4161       | 403.7120        |
| 757.4724       | 7  | I 7  | 709.3633       | 355.1856        |
| 844.5045       | 8  | S 6  | 596.2792       | 298.6435        |
| 901.5259       | 9  | G 5  | 509.2472       | 255.1275        |
| 958.5474       | 10 | G 4  | 452.2258       | 226.6168        |
| 1015.5689      | 11 | G 3  | 395.2043       | 198.1061        |
| 1178.6322      | 12 | Y 2  | 338.1828       | 169.5953        |
|                | 13 | R 1  | 175.1195       | 88.0637         |

N-term:+29.04

RPAPVEISYENMR, MH+ 1589.8110, m/z 530.6085  
 L OS G27 P150811 220811-s1.04310.04310.3.dta

X-range:

-

MassTol: Y-zoom:

MassType:

AVG  MONO

Axis:

1  2

Label:

I  M  -

Ions:

a  +  2+  3+

b  +  2+  3+

c  +  2+  3+

x  +  2+  3+

y  +  2+  3+

z  +  2+  3+

hide H<sub>2</sub>O/NH<sub>3</sub>

zoom 112-122

GO

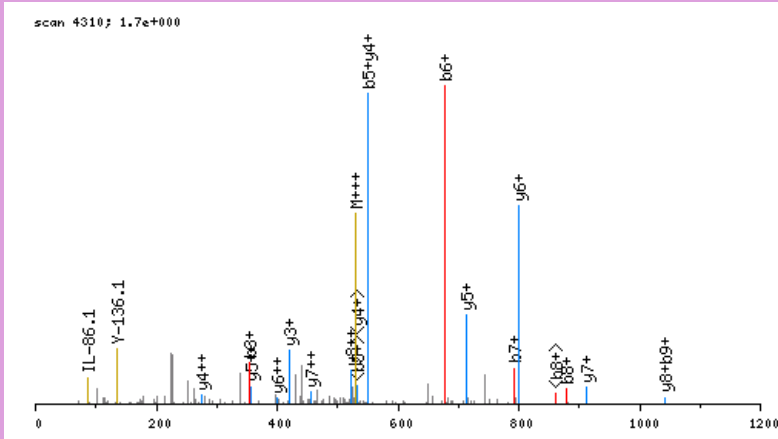

click image to zoom in; click top corners to zoom out [\[precursor±\]](#)

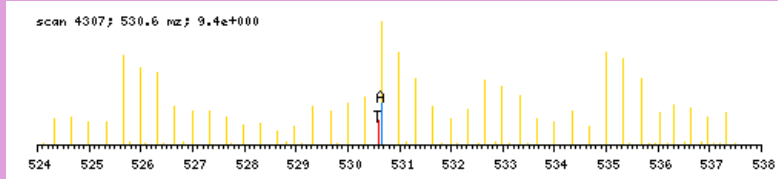

zoomed in precursor plot; T=theoretical m/z, A=acquired m/z

| b <sup>+</sup> | #  | AA # | y <sup>+</sup> | y <sup>2+</sup> |
|----------------|----|------|----------------|-----------------|
| 185.1402       | 1  | R 13 |                |                 |
| 282.1930       | 2  | P 12 | 1405.6786      | 703.3432        |
| 353.2301       | 3  | A 11 | 1308.6258      | 654.8168        |
| 450.2829       | 4  | P 10 | 1237.5887      | 619.2983        |
| 549.3513       | 5  | V 9  | 1140.5359      | 570.7719        |
| 678.3939       | 6  | E 8  | 1041.4675      | 521.2377        |
| 791.4779       | 7  | I 7  | 912.4249       | 456.7164        |
| 878.5100       | 8  | S 6  | 799.3409       | 400.1743        |
| 1041.5733      | 9  | Y 5  | 712.3088       | 356.6583        |
| 1170.6159      | 10 | E 4  | 549.2455       | 275.1267        |
| 1284.6588      | 11 | N 3  | 420.2029       | 210.6054        |
| 1415.6993      | 12 | M 2  | 306.1600       | 153.5839        |
|                | 13 | R 1  | 175.1195       | 88.0637         |

N-term:+29.04

X-range:

-

MassTol: Y-zoom:

MassType:

AVG  MONO

Axis:

1  2

Label:

I  M  -

Ions:

a  +  2+  3+

b  +  2+  3+

c  +  2+  3+

x  +  2+  3+

y  +  2+  3+

z  +  2+  3+

hide H<sub>2</sub>O/NH<sub>3</sub>

zoom 112-122

GO

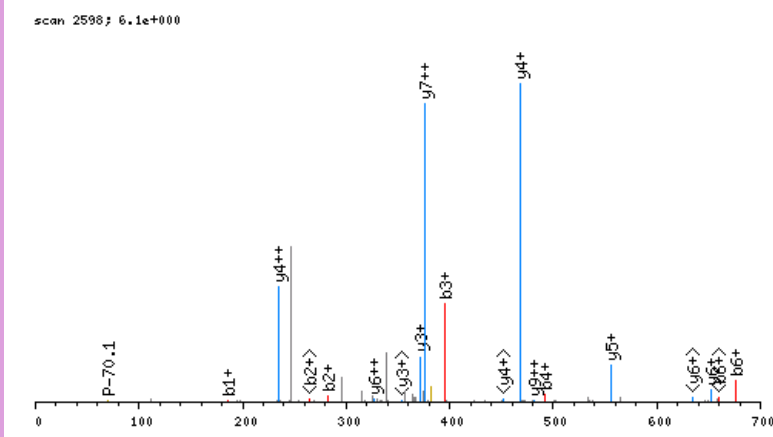

click image to zoom in; click top corners to zoom out [\[precursor±\]](#)

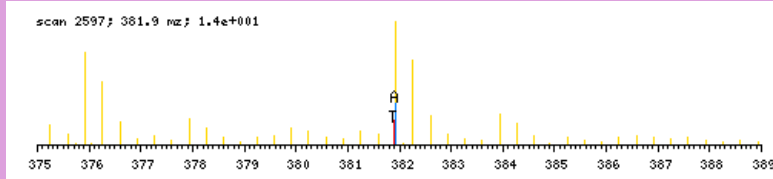

zoomed in precursor plot; T=theoretical m/z, A=acquired m/z

| b <sup>+</sup> | #  | AA | #  | y <sup>+</sup> | y <sup>2+</sup> |
|----------------|----|----|----|----------------|-----------------|
| 185.1402       | 1  | R  | 10 |                |                 |
| 282.1930       | 2  | P  | 9  | 959.5678       | 480.2878        |
| 395.2770       | 3  | L  | 8  | 862.5151       | 431.7614        |
| 492.3298       | 4  | P  | 7  | 749.4310       | 375.2194        |
| 589.3826       | 5  | P  | 6  | 652.3782       | 326.6930        |
| 676.4146       | 6  | S  | 5  | 555.3255       | 278.1666        |
| 773.4674       | 7  | P  | 4  | 468.2934       | 234.6506        |
| 870.5201       | 8  | P  | 3  | 371.2407       | 186.1243        |
| 969.5885       | 9  | V  | 2  | 274.1879       | 137.5979        |
|                | 10 | R  | 1  | 175.1195       | 88.0637         |

N-term: +29.04

RPPGGGSNFSLGFDEPAEQPVR, MH+ 2342.1529, m/z 586.2937  
 L OS G27 P150811 220811-s1.05865.05865.4.dta

scan 5865; 7.1e-001

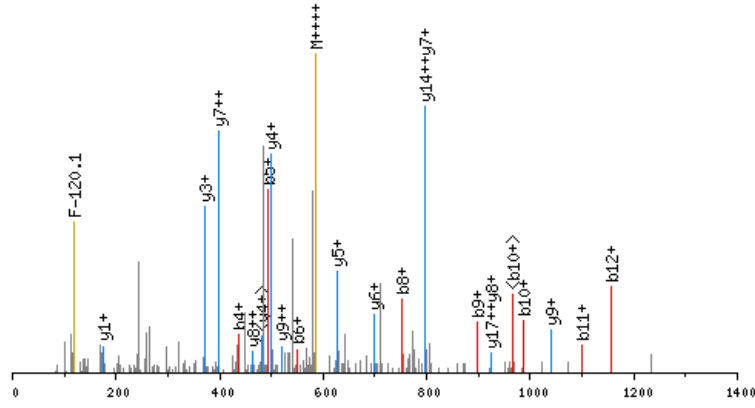

click image to zoom in; click top corners to zoom out [precursor±]

scan 5862; 586.3 m/z; 1.8e+001

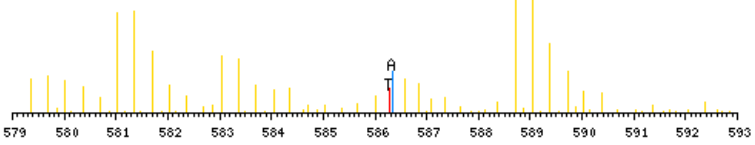

zoomed in precursor plot; T=theoretical m/z, A=acquired m/z

X-range:

-

MassTol: Y-zoom:

MassType:

AVG  MONO

Axis:

1  2

Label:

I  M  -

Ions:

a  +  2+  3+

b  +  2+  3+

c  +  2+  3+

x  +  2+  3+

y  +  2+  3+

z  +  2+  3+

hide H<sub>2</sub>O/NH<sub>3</sub>

zoom 112-122

GO

| b <sup>+</sup> | #  | AA # | y <sup>+</sup> | y <sup>2+</sup> |
|----------------|----|------|----------------|-----------------|
| 185.1402       | 1  | R 22 |                |                 |
| 282.1930       | 2  | P 21 | 2158.0205      | 1079.5142       |
| 379.2457       | 3  | P 20 | 2060.9678      | 1030.9878       |
| 436.2672       | 4  | G 19 | 1963.9150      | 982.4614        |
| 493.2887       | 5  | G 18 | 1906.8935      | 953.9507        |
| 550.3101       | 6  | G 17 | 1849.8721      | 925.4399        |
| 637.3422       | 7  | S 16 | 1792.8506      | 896.9292        |
| 751.3851       | 8  | N 15 | 1705.8186      | 853.4132        |
| 898.4535       | 9  | F 14 | 1591.7756      | 796.3917        |
| 985.4855       | 10 | S 13 | 1444.7072      | 722.8575        |
| 1098.5696      | 11 | L 12 | 1357.6752      | 679.3415        |
| 1155.5911      | 12 | G 11 | 1244.5911      | 622.7995        |
| 1302.6595      | 13 | F 10 | 1187.5697      | 594.2888        |
| 1417.6864      | 14 | D 9  | 1040.5013      | 520.7545        |
| 1546.7290      | 15 | E 8  | 925.4743       | 463.2411        |
| 1643.7818      | 16 | P 7  | 796.4317       | 398.7198        |
| 1714.8189      | 17 | A 6  | 699.3790       | 350.1934        |
| 1843.8615      | 18 | E 5  | 628.3418       | 314.6748        |
| 1971.9201      | 19 | Q 4  | 499.2993       | 250.1535        |
| 2068.9728      | 20 | P 3  | 371.2407       | 186.1243        |
| 2168.0412      | 21 | V 2  | 274.1879       | 137.5979        |
|                | 22 | R 1  | 175.1195       | 88.0637         |

N-term:+29.04

RPPLGFLNPR, MH+ 1194.7111, m/z 398.9086  
 L OS G28 P150811 220811-s1.05500.05500.3.dta

scan 5500; 8.3e-001

X-range:

-

MassTol: Y-zoom:

MassType:

AVG  MONO

Axis:

1  2

Label:

I  M  -

Ions:

a  +  2+  3+

b  +  2+  3+

c  +  2+  3+

x  +  2+  3+

y  +  2+  3+

z  +  2+  3+

hide H<sub>2</sub>O/NH<sub>3</sub>

zoom 112-122

GO

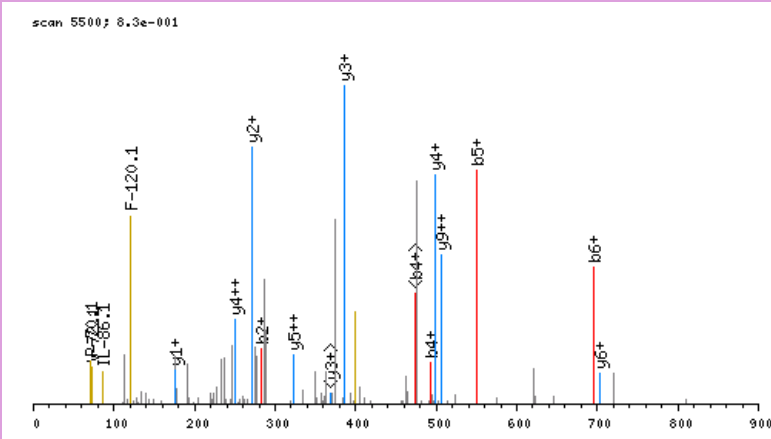

click image to zoom in; click top corners to zoom out [\[precursor±\]](#)

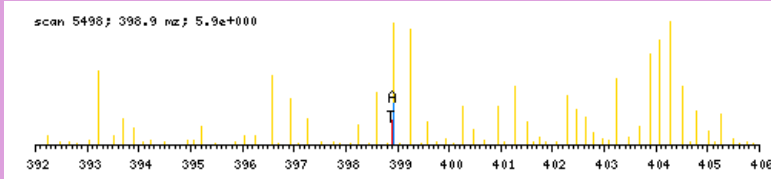

zoomed in precursor plot; T=theoretical m/z, A=acquired m/z

| b <sup>+</sup> | #  | AA # | y <sup>+</sup> | y <sup>2+</sup> |
|----------------|----|------|----------------|-----------------|
| 185.1402       | 1  | R 10 |                |                 |
| 282.1930       | 2  | P 9  | 1010.5787      | 505.7933        |
| 379.2457       | 3  | P 8  | 913.5260       | 457.2669        |
| 492.3298       | 4  | L 7  | 816.4732       | 408.7405        |
| 549.3513       | 5  | G 6  | 703.3891       | 352.1985        |
| 696.4197       | 6  | F 5  | 646.3677       | 323.6877        |
| 809.5037       | 7  | L 4  | 499.2993       | 250.1535        |
| 923.5467       | 8  | N 3  | 386.2152       | 193.6115        |
| 1020.5994      | 9  | P 2  | 272.1723       | 136.5900        |
|                | 10 | R 1  | 175.1195       | 88.0637         |

N-term:+29.04

RPPSPPPPPR, MH+ 1222.7060, m/z 408.2402  
 L OS G25 P150811 220811-s1.05401.05401.3.dta

X-range:

-

MassTol: Y-zoom:

MassType:

AVG  MONO

Axis:

1  2

Label:

I  M  -

Ions:

a  +  2+  3+

b  +  2+  3+

c  +  2+  3+

x  +  2+  3+

y  +  2+  3+

z  +  2+  3+

hide H<sub>2</sub>O/NH<sub>3</sub>

zoom 112-122

GO

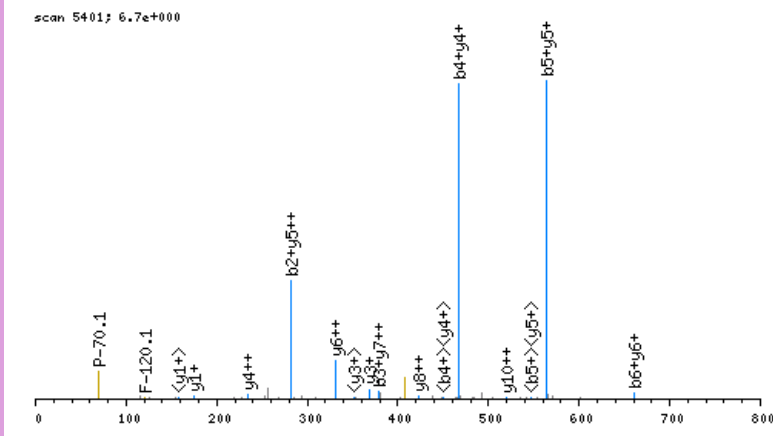

click image to zoom in; click top corners to zoom out [\[precursor±\]](#)

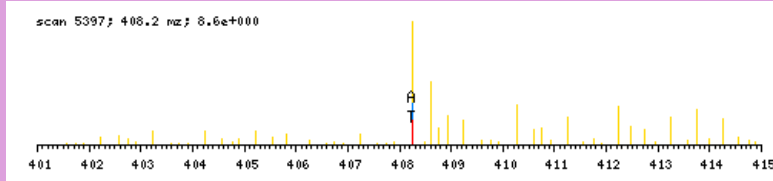

zoomed in precursor plot; T=theoretical m/z, A=acquired m/z

| b <sup>+</sup> | #  | AA # | y <sup>+</sup> | y <sup>2+</sup> |
|----------------|----|------|----------------|-----------------|
| 185.1402       | 1  | R 11 |                |                 |
| 282.1930       | 2  | P 10 | 1038.5736      | 519.7907        |
| 379.2457       | 3  | P 9  | 941.5209       | 471.2644        |
| 466.2778       | 4  | S 8  | 844.4681       | 422.7380        |
| 563.3305       | 5  | P 7  | 757.4361       | 379.2220        |
| 660.3833       | 6  | P 6  | 660.3833       | 330.6956        |
| 757.4361       | 7  | P 5  | 563.3306       | 282.1692        |
| 854.4888       | 8  | P 4  | 466.2778       | 233.6428        |
| 951.5416       | 9  | P 3  | 369.2250       | 185.1164        |
| 1048.5944      | 10 | P 2  | 272.1723       | 136.5900        |
|                | 11 | R 1  | 175.1195       | 88.0637         |

N-term:+29.04



RQEELESVEAGVQGGAFEGTR, MH+ 2277.1111, m/z 759.7086  
 L OS G27 P150811 220811-s1.05570.05570.3.dta

scan 5570; 1.7e+000

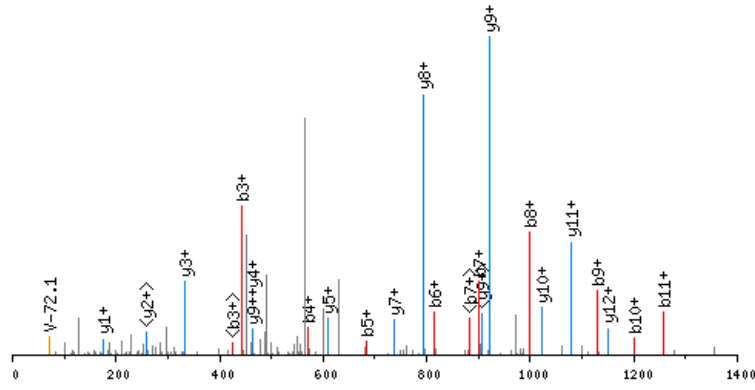

click image to zoom in; click top corners to zoom out [precursor±]

scan 5567; 759.7 m/z; 2.1e+001

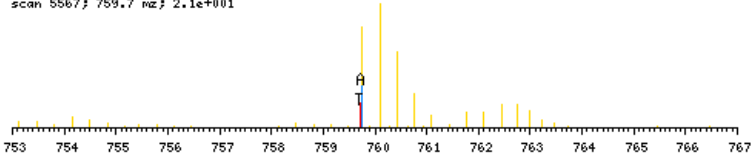

zoomed in precursor plot; T=theoretical m/z, A=acquired m/z

| b <sup>+</sup> | #  | AA # | y <sup>+</sup> | y <sup>2+</sup> |
|----------------|----|------|----------------|-----------------|
| 185.1402       | 1  | R 21 |                |                 |
| 313.1988       | 2  | Q 20 | 2092.9787      | 1046.9933       |
| 442.2414       | 3  | E 19 | 1964.9201      | 982.9640        |
| 571.2840       | 4  | E 18 | 1835.8775      | 918.4427        |
| 684.3680       | 5  | L 17 | 1706.8350      | 853.9214        |
| 813.4106       | 6  | E 16 | 1593.7509      | 797.3794        |
| 900.4427       | 7  | S 15 | 1464.7083      | 732.8581        |
| 999.5111       | 8  | V 14 | 1377.6763      | 689.3420        |
| 1128.5537      | 9  | E 13 | 1278.6079      | 639.8078        |
| 1199.5908      | 10 | A 12 | 1149.5653      | 575.2865        |
| 1256.6122      | 11 | G 11 | 1078.5281      | 539.7680        |
| 1355.6807      | 12 | V 10 | 1021.5067      | 511.2573        |
| 1483.7392      | 13 | Q 9  | 922.4383       | 461.7230        |
| 1540.7607      | 14 | G 8  | 794.3797       | 397.6938        |
| 1597.7822      | 15 | G 7  | 737.3582       | 369.1830        |
| 1668.8193      | 16 | A 6  | 680.3368       | 340.6723        |
| 1815.8877      | 17 | F 5  | 609.2997       | 305.1537        |
| 1944.9303      | 18 | E 4  | 462.2312       | 231.6195        |
| 2001.9517      | 19 | G 3  | 333.1886       | 167.0982        |
| 2102.9994      | 20 | T 2  | 276.1672       | 138.5875        |
|                | 21 | R 1  | 175.1195       | 88.0637         |

N-term:+29.04

X-range:

-

MassTol: Y-zoom:

MassType:

AVG  MONO

Axis:

1  2

Label:

I  M  -

Ions:

a  +  2+  3+

b  +  2+  3+

c  +  2+  3+

x  +  2+  3+

y  +  2+  3+

z  +  2+  3+

hide H<sub>2</sub>O/NH<sub>3</sub>

zoom 112-122

GO

RQISEDVDGPDNR, MH+ 1534.7673, m/z 512.2606  
 H OS G28 P150811 220811-s1.02201.02201.3.dta

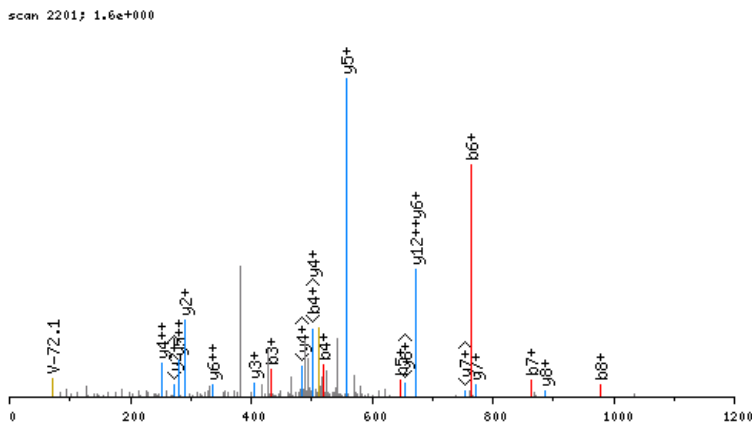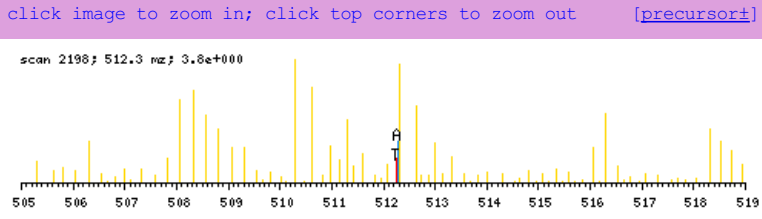

zoomed in precursor plot; T=theoretical m/z, A=acquired m/z

X-range:

-

MassTol: Y-zoom:

MassType:

AVG  MONO

Axis:

1  2

Label:

I  M  -

Ions:

a  +  2+  3+

b  +  2+  3+

c  +  2+  3+

x  +  2+  3+

y  +  2+  3+

z  +  2+  3+

hide H<sub>2</sub>O/NH<sub>3</sub>

zoom 112-122

GO

| b <sup>+</sup> | #  | AA # | y <sup>+</sup> | y <sup>2+</sup> |
|----------------|----|------|----------------|-----------------|
| 191.1720       | 1  | R 13 |                |                 |
| 319.2306       | 2  | Q 12 | 1344.6032      | 672.8055        |
| 432.3147       | 3  | I 11 | 1216.5446      | 608.7762        |
| 519.3467       | 4  | S 10 | 1103.4605      | 552.2342        |
| 648.3893       | 5  | E 9  | 1016.4285      | 508.7182        |
| 763.4162       | 6  | D 8  | 887.3859       | 444.1969        |
| 862.4846       | 7  | V 7  | 772.3590       | 386.6834        |
| 977.5116       | 8  | D 6  | 673.2905       | 337.1492        |
| 1034.5330      | 9  | G 5  | 558.2636       | 279.6357        |
| 1131.5858      | 10 | P 4  | 501.2421       | 251.1250        |
| 1246.6127      | 11 | D 3  | 404.1894       | 202.5986        |
| 1360.6557      | 12 | N 2  | 289.1624       | 145.0851        |
|                | 13 | R 1  | 175.1195       | 88.0637         |

N-term:+35.07

RQLSSGVSEIR, MH+ 1259.7071, m/z 420.5739  
 L OS G28 P150811 220811-s1.02575.02575.3.dta

X-range:

-

MassTol: Y-zoom:

MassType:

AVG  MONO

Axis:

1  2

Label:

I  M  -

Ions:

a  +  2+  3+

b  +  2+  3+

c  +  2+  3+

x  +  2+  3+

y  +  2+  3+

z  +  2+  3+

hide H<sub>2</sub>O/NH<sub>3</sub>

zoom 112-122

GO

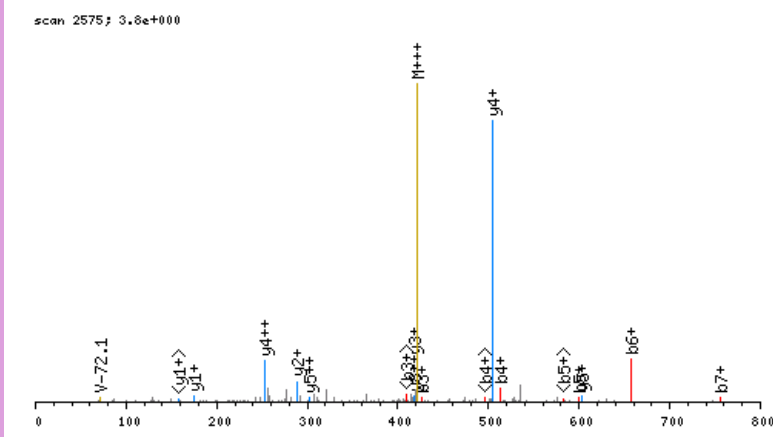

click image to zoom in; click top corners to zoom out [\[precursor±\]](#)

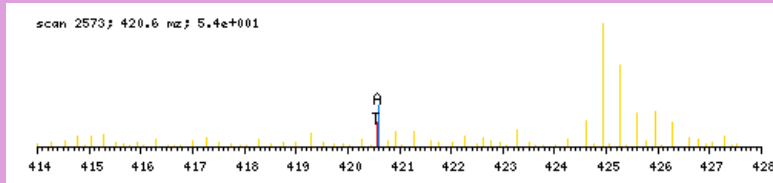

zoomed in precursor plot; T=theoretical m/z, A=acquired m/z

| b <sup>+</sup> | #  | AA # | y <sup>+</sup> | y <sup>2+</sup> |
|----------------|----|------|----------------|-----------------|
| 185.1402       | 1  | R 11 |                |                 |
| 313.1988       | 2  | Q 10 | 1075.5748      | 538.2913        |
| 426.2829       | 3  | L 9  | 947.5162       | 474.2620        |
| 513.3149       | 4  | S 8  | 834.4321       | 417.7200        |
| 600.3469       | 5  | S 7  | 747.4001       | 374.2040        |
| 657.3684       | 6  | G 6  | 660.3681       | 330.6879        |
| 756.4368       | 7  | V 5  | 603.3466       | 302.1772        |
| 843.4688       | 8  | S 4  | 504.2782       | 252.6430        |
| 972.5114       | 9  | E 3  | 417.2462       | 209.1270        |
| 1085.5955      | 10 | I 2  | 288.2036       | 144.6057        |
|                | 11 | R 1  | 175.1195       | 88.0637         |

N-term:+29.04

RQPSPSQSSDSQVHSGVQVEGR, MH+ 2380.1605, m/z 595.7956  
 L OS G28 P150811 220811-s1.02181.02181.4.dta

X-range:

-

MassTol: Y-zoom:

MassType:

AVG  MONO

Axis:

1  2

Label:

I  M  -

Ions:

a  +  2+  3+

b  +  2+  3+

c  +  2+  3+

x  +  2+  3+

y  +  2+  3+

z  +  2+  3+

hide H<sub>2</sub>O/NH<sub>3</sub>

zoom 112-122

GO

scan 2181; 1.0e+000

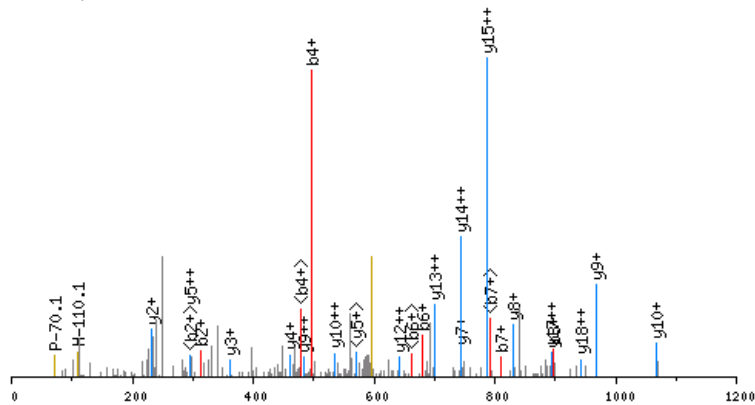

click image to zoom in; click top corners to zoom out [precursor±]

scan 2178; 595.8 mz; 9.4e+000

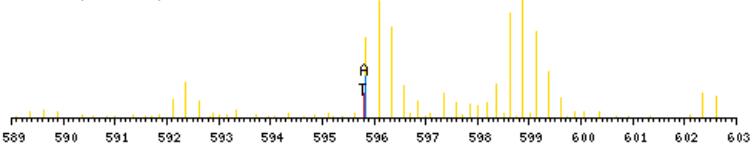

zoomed in precursor plot; T=theoretical m/z, A=acquired m/z

| b <sup>+</sup> | #  | AA # | y <sup>+</sup> | y <sup>2+</sup> |
|----------------|----|------|----------------|-----------------|
| 185.1402       | 1  | R 22 |                |                 |
| 313.1988       | 2  | Q 21 | 2196.0281      | 1098.5180       |
| 410.2516       | 3  | P 20 | 2067.9695      | 1034.4887       |
| 497.2836       | 4  | S 19 | 1970.9168      | 985.9623        |
| 594.3363       | 5  | P 18 | 1883.8848      | 942.4463        |
| 681.3684       | 6  | S 17 | 1786.8320      | 893.9199        |
| 809.4270       | 7  | Q 16 | 1699.8000      | 850.4039        |
| 896.4590       | 8  | S 15 | 1571.7414      | 786.3746        |
| 983.4910       | 9  | S 14 | 1484.7094      | 742.8586        |
| 1098.5180      | 10 | D 13 | 1397.6773      | 699.3426        |
| 1185.5500      | 11 | S 12 | 1282.6504      | 641.8291        |
| 1313.6086      | 12 | Q 11 | 1195.6184      | 598.3131        |
| 1412.6770      | 13 | V 10 | 1067.5598      | 534.2838        |
| 1549.7359      | 14 | H 9  | 968.4914       | 484.7496        |
| 1636.7679      | 15 | S 8  | 831.4325       | 416.2201        |
| 1693.7894      | 16 | G 7  | 744.4004       | 372.7041        |
| 1792.8578      | 17 | V 6  | 687.3790       | 344.1934        |
| 1920.9164      | 18 | Q 5  | 588.3105       | 294.6592        |
| 2019.9848      | 19 | V 4  | 460.2520       | 230.6299        |
| 2149.0274      | 20 | E 3  | 361.1836       | 181.0957        |
| 2206.0488      | 21 | G 2  | 232.1410       | 116.5744        |
|                | 22 | R 1  | 175.1195       | 88.0637         |

N-term:+29.04

RSPVHPESSEGEHSVVPQR, MH+ 2277.1436, m/z 570.0413  
 H OS G28 P150811 220811-s1.02336.02336.4.dta

scan 2336; 7.3e+000

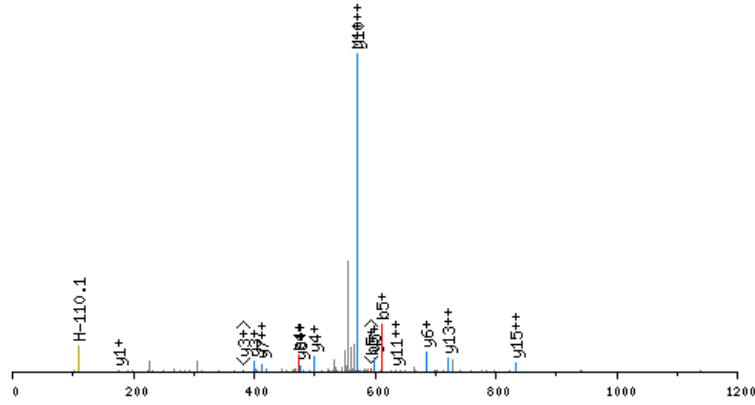

click image to zoom in; click top corners to zoom out [\[precursor±\]](#)

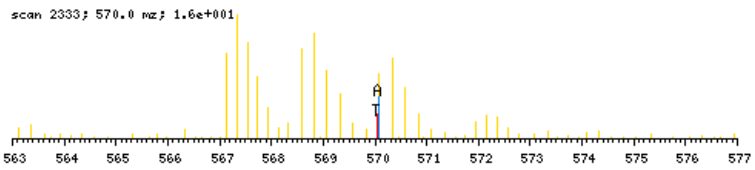

zoomed in precursor plot; T=theoretical m/z, A=acquired m/z

X-range:

-

MassTol: Y-zoom:

MassType:

AVG  MONO

Axis:

1  2

Label:

I  M  -

Ions:

a  +  2+  3+

b  +  2+  3+

c  +  2+  3+

x  +  2+  3+

y  +  2+  3+

z  +  2+  3+

hide H<sub>2</sub>O/NH<sub>3</sub>

zoom 112-122

| b <sup>+</sup> | #  | AA # | y <sup>+</sup> | y <sup>2+</sup> |
|----------------|----|------|----------------|-----------------|
| 191.1720       | 1  | R 20 |                |                 |
| 278.2040       | 2  | S 19 | 2086.9794      | 1043.9936       |
| 375.2568       | 3  | P 18 | 1999.9474      | 1000.4776       |
| 474.3252       | 4  | V 17 | 1902.8946      | 951.9512        |
| 611.3841       | 5  | H 16 | 1803.8262      | 902.4170        |
| 708.4369       | 6  | P 15 | 1666.7673      | 833.8875        |
| 837.4795       | 7  | E 14 | 1569.7145      | 785.3612        |
| 924.5115       | 8  | S 13 | 1440.6719      | 720.8399        |
| 1011.5435      | 9  | S 12 | 1353.6399      | 677.3239        |
| 1140.5861      | 10 | E 11 | 1266.6079      | 633.8078        |
| 1197.6076      | 11 | G 10 | 1137.5653      | 569.2865        |
| 1326.6502      | 12 | E 9  | 1080.5438      | 540.7758        |
| 1455.6928      | 13 | E 8  | 951.5012       | 476.2545        |
| 1592.7517      | 14 | H 7  | 822.4586       | 411.7332        |
| 1679.7837      | 15 | S 6  | 685.3997       | 343.2038        |
| 1778.8521      | 16 | V 5  | 598.3677       | 299.6877        |
| 1877.9206      | 17 | V 4  | 499.2993       | 250.1535        |
| 1974.9733      | 18 | P 3  | 400.2308       | 200.6193        |
| 2103.0319      | 19 | Q 2  | 303.1781       | 152.0930        |
|                | 20 | R 1  | 175.1195       | 88.0637         |

N-term:+35.07

RSTPAITLENPDIKYPLR, MH+ 2140.2130, m/z 535.8087  
 L OS G28 P150811 220811-s1.06775.06775.4.dta

scan 6775; 1.8e+000

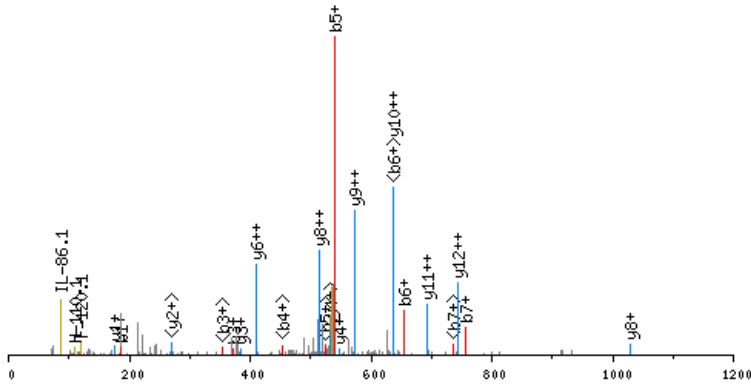

click image to zoom in; click top corners to zoom out [\[precursor±\]](#)

scan 6773; 535.8 m/z; 9.8e+000

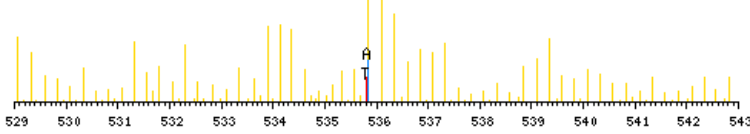

zoomed in precursor plot; T=theoretical m/z, A=acquired m/z

X-range:

-

MassTol: Y-zoom:

MassType:

AVG  MONO

Axis:

1  2

Label:

I  M  -

Ions:

a  +  2+  3+

b  +  2+  3+

c  +  2+  3+

x  +  2+  3+

y  +  2+  3+

z  +  2+  3+

hide H<sub>2</sub>O/NH<sub>3</sub>

zoom 112-122

GO

| b <sup>+</sup> | #  | AA | #  | y <sup>+</sup> | y <sup>2+</sup> |
|----------------|----|----|----|----------------|-----------------|
| 185.1402       | 1  | R  | 18 |                |                 |
| 272.1722       | 2  | S  | 17 | 1956.0806      | 978.5442        |
| 373.2199       | 3  | T  | 16 | 1869.0486      | 935.0282        |
| 470.2727       | 4  | P  | 15 | 1768.0009      | 884.5044        |
| 541.3098       | 5  | A  | 14 | 1670.9482      | 835.9780        |
| 654.3939       | 6  | I  | 13 | 1599.9111      | 800.4594        |
| 755.4415       | 7  | T  | 12 | 1486.8270      | 743.9174        |
| 868.5256       | 8  | L  | 11 | 1385.7793      | 693.3936        |
| 997.5682       | 9  | E  | 10 | 1272.6952      | 636.8515        |
| 1111.6111      | 10 | N  | 9  | 1143.6527      | 572.3302        |
| 1208.6639      | 11 | P  | 8  | 1029.6097      | 515.3088        |
| 1323.6908      | 12 | D  | 7  | 932.5570       | 466.7824        |
| 1436.7749      | 13 | I  | 6  | 817.5300       | 409.2689        |
| 1592.9012      | 14 | K  | 5  | 704.4460       | 352.7269        |
| 1755.9645      | 15 | Y  | 4  | 548.3197       | 274.6637        |
| 1853.0173      | 16 | P  | 3  | 385.2563       | 193.1321        |
| 1966.1014      | 17 | L  | 2  | 288.2036       | 144.6057        |
|                | 18 | R  | 1  | 175.1195       | 88.0637         |

N-term:+29.04 K(14):+156.13

RTEITIVKPKQESVLR, MH+ 1825.0911, m/z 457.0282  
 L OS G28 P150811 220811-s1.04950.04950.4.dta

X-range:

-

MassTol: Y-zoom:

MassType:

AVG  MONO

Axis:

1  2

Label:

I  M  -

Ions:

a  +  2+  3+

b  +  2+  3+

c  +  2+  3+

x  +  2+  3+

y  +  2+  3+

z  +  2+  3+

hide H<sub>2</sub>O/NH<sub>3</sub>

zoom 112-122

GO

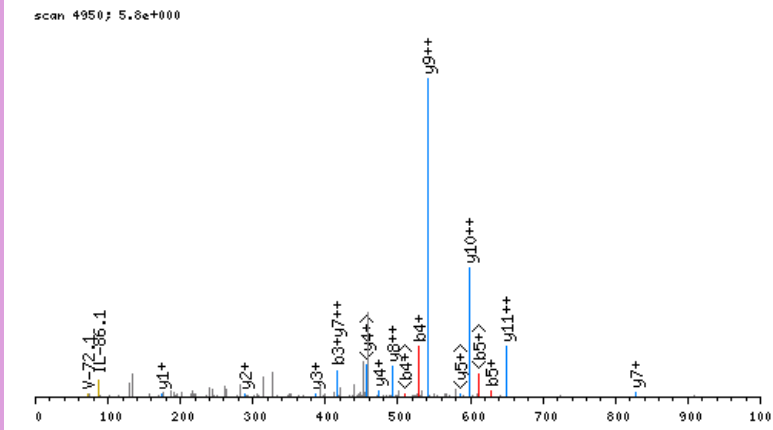

click image to zoom in; click top corners to zoom out [\[precursor±\]](#)

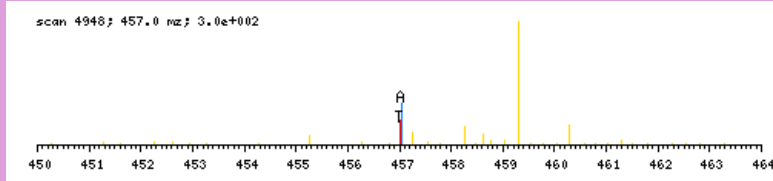

zoomed in precursor plot; T=theoretical m/z, A=acquired m/z

| b <sup>+</sup> | #  | AA | #  | y <sup>+</sup> | y <sup>2+</sup> |
|----------------|----|----|----|----------------|-----------------|
| 185.1402       | 1  | R  | 15 |                |                 |
| 286.1879       | 2  | T  | 14 | 1640.9587      | 820.9833        |
| 415.2305       | 3  | E  | 13 | 1539.9111      | 770.4594        |
| 528.3145       | 4  | I  | 12 | 1410.8685      | 705.9381        |
| 629.3622       | 5  | T  | 11 | 1297.7844      | 649.3961        |
| 742.4463       | 6  | I  | 10 | 1196.7367      | 598.8723        |
| 841.5147       | 7  | V  | 9  | 1083.6527      | 542.3302        |
| 997.6410       | 8  | K  | 8  | 984.5842       | 492.7960        |
| 1094.6938      | 9  | P  | 7  | 828.4579       | 414.7329        |
| 1222.7523      | 10 | Q  | 6  | 731.4052       | 366.2065        |
| 1351.7949      | 11 | E  | 5  | 603.3466       | 302.1772        |
| 1438.8270      | 12 | S  | 4  | 474.3040       | 237.6559        |
| 1537.8954      | 13 | V  | 3  | 387.2720       | 194.1399        |
| 1650.9794      | 14 | L  | 2  | 288.2036       | 144.6057        |
|                | 15 | R  | 1  | 175.1195       | 88.0637         |

N-term:+29.04 K(8):+156.13

RTLETPAAQMEGFLNR, MH+ 1861.9594, m/z 621.3247  
 L OS G27 P150811 220811-s1.06561.06561.3.dta

scan 6561; 1.2e+000

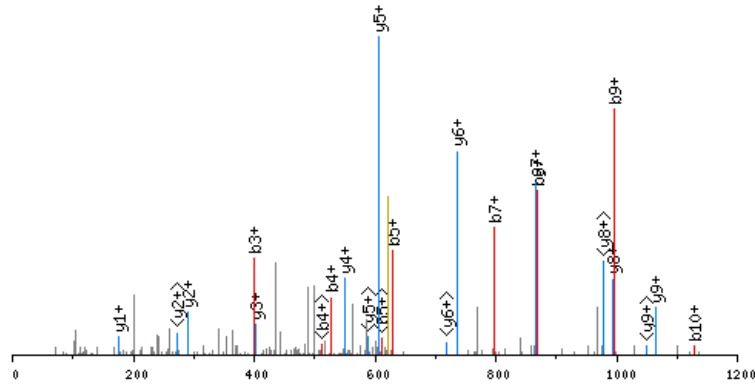

click image to zoom in; click top corners to zoom out [\[precursor±\]](#)

scan 6557; 621.3 m/z; 5.6e+000

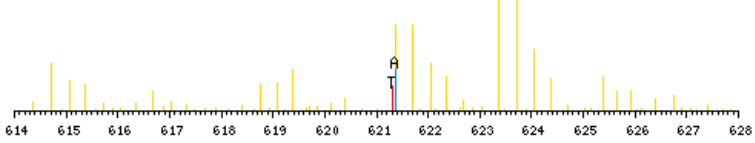

zoomed in precursor plot; T=theoretical m/z, A=acquired m/z

X-range:

-

MassTol: Y-zoom:

MassType:

AVG  MONO

Axis:

1  2

Label:

I  M  -

Ions:

a  +  2+  3+

b  +  2+  3+

c  +  2+  3+

x  +  2+  3+

y  +  2+  3+

z  +  2+  3+

hide H<sub>2</sub>O/NH<sub>3</sub>

zoom 112-122

GO

| b <sup>+</sup> | #  | AA | #  | y <sup>+</sup> | y <sup>2+</sup> |
|----------------|----|----|----|----------------|-----------------|
| 185.1402       | 1  | R  | 16 |                |                 |
| 286.1879       | 2  | T  | 15 | 1677.8270      | 839.4174        |
| 399.2720       | 3  | L  | 14 | 1576.7794      | 788.8936        |
| 528.3145       | 4  | E  | 13 | 1463.6953      | 732.3516        |
| 629.3622       | 5  | T  | 12 | 1334.6527      | 667.8303        |
| 726.4150       | 6  | P  | 11 | 1233.6050      | 617.3064        |
| 797.4521       | 7  | A  | 10 | 1136.5523      | 568.7800        |
| 868.4892       | 8  | A  | 9  | 1065.5151      | 533.2615        |
| 996.5478       | 9  | Q  | 8  | 994.4780       | 497.7429        |
| 1127.5883      | 10 | M  | 7  | 866.4194       | 433.7136        |
| 1256.6309      | 11 | E  | 6  | 735.3790       | 368.1934        |
| 1313.6523      | 12 | G  | 5  | 606.3364       | 303.6721        |
| 1460.7207      | 13 | F  | 4  | 549.3149       | 275.1614        |
| 1573.8048      | 14 | L  | 3  | 402.2465       | 201.6272        |
| 1687.8477      | 15 | N  | 2  | 289.1624       | 145.0851        |
|                | 16 | R  | 1  | 175.1195       | 88.0637         |

N-term:+29.04



RVAPEEHPILLTEAPLNPKANR, MH+ 2509.3891, m/z 628.1027  
 L OS G28 P150811 220811-s1.05029.05029.4.dta

scan 5029; 1.2e+001

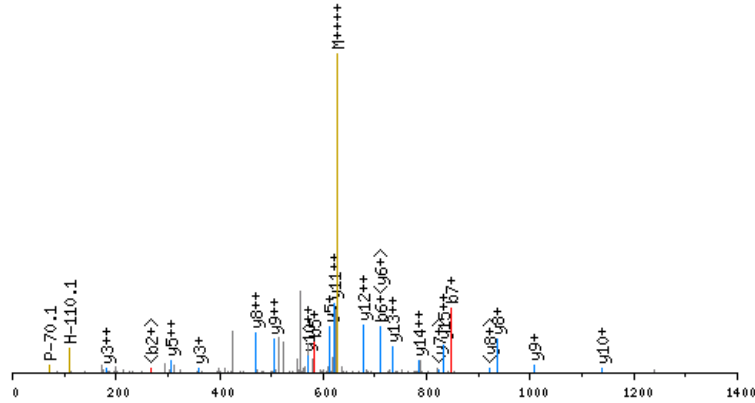

click image to zoom in; click top corners to zoom out [precursor±]

scan 5028; 628.1 mz; 1.1e+002

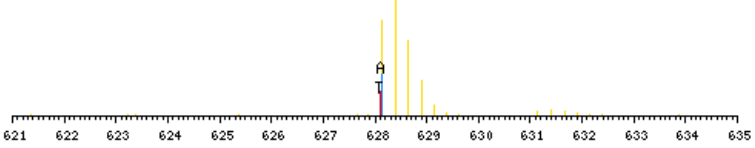

zoomed in precursor plot; T=theoretical m/z, A=acquired m/z

X-range:

-

MassTol: Y-zoom:

MassType:

AVG  MONO

Axis:

1  2

Label:

I  M  -

Ions:

a  +  2+  3+

b  +  2+  3+

c  +  2+  3+

x  +  2+  3+

y  +  2+  3+

z  +  2+  3+

hide H<sub>2</sub>O/NH<sub>3</sub>

zoom 112-122

GO

| b <sup>+</sup> | #  | AA # | y <sup>+</sup> | y <sup>2+</sup> |
|----------------|----|------|----------------|-----------------|
| 185.1402       | 1  | R 22 |                |                 |
| 284.2086       | 2  | V 21 | 2325.2567      | 1163.1323       |
| 355.2457       | 3  | A 20 | 2226.1883      | 1113.5981       |
| 452.2985       | 4  | P 19 | 2155.1512      | 1078.0795       |
| 581.3411       | 5  | E 18 | 2058.0984      | 1029.5531       |
| 710.3837       | 6  | E 17 | 1929.0558      | 965.0318        |
| 847.4426       | 7  | H 16 | 1800.0132      | 900.5105        |
| 944.4954       | 8  | P 15 | 1662.9543      | 831.9811        |
| 1045.5430      | 9  | T 14 | 1565.9016      | 783.4547        |
| 1158.6271      | 10 | L 13 | 1464.8539      | 732.9308        |
| 1271.7112      | 11 | L 12 | 1351.7698      | 676.3888        |
| 1372.7588      | 12 | T 11 | 1238.6857      | 619.8468        |
| 1501.8014      | 13 | E 10 | 1137.6381      | 569.3229        |
| 1572.8386      | 14 | A 9  | 1008.5955      | 504.8017        |
| 1669.8913      | 15 | P 8  | 937.5584       | 469.2831        |
| 1782.9754      | 16 | L 7  | 840.5056       | 420.7567        |
| 1897.0183      | 17 | N 6  | 727.4215       | 364.2147        |
| 1994.0711      | 18 | P 5  | 613.3786       | 307.1932        |
| 2150.1974      | 19 | K 4  | 516.3258       | 258.6668        |
| 2221.2345      | 20 | A 3  | 360.1995       | 180.6037        |
| 2335.2774      | 21 | N 2  | 289.1624       | 145.0851        |
|                | 22 | R 1  | 175.1195       | 88.0637         |

N-term:+29.04 K(19):+156.13

RVAPEEHPVLLTEAPLNPKANR, MH+ 2507.4098, m/z 627.6079  
 L OS G28 P150811 220811-s1.05164.05164.4.dta

scan 5164; 1.0e+001

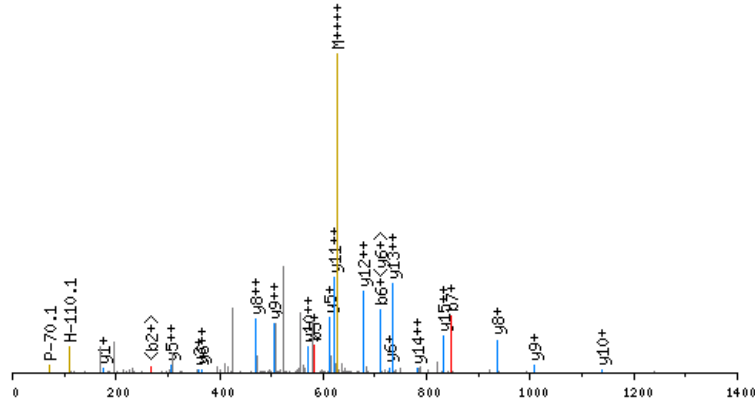

click image to zoom in; click top corners to zoom out [precursor±]

scan 5163; 627.6 mz; 4.8e+001

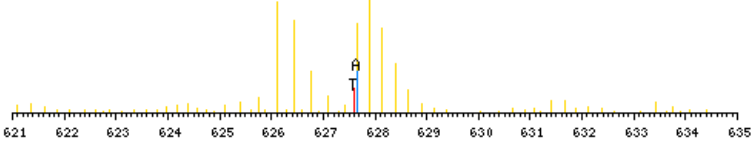

zoomed in precursor plot; T=theoretical m/z, A=acquired m/z

X-range:

-

MassTol: Y-zoom:

MassType:

AVG  MONO

Axis:

1  2

Label:

I  M  -

Ions:

a  +  2+  3+

b  +  2+  3+

c  +  2+  3+

x  +  2+  3+

y  +  2+  3+

z  +  2+  3+

hide H<sub>2</sub>O/NH<sub>3</sub>

zoom 112-122

GO

| b <sup>+</sup> | #  | AA # | y <sup>+</sup> | y <sup>2+</sup> |
|----------------|----|------|----------------|-----------------|
| 185.1402       | 1  | R 22 |                |                 |
| 284.2086       | 2  | V 21 | 2323.2774      | 1162.1426       |
| 355.2457       | 3  | A 20 | 2224.2090      | 1112.6084       |
| 452.2985       | 4  | P 19 | 2153.1719      | 1077.0899       |
| 581.3411       | 5  | E 18 | 2056.1192      | 1028.5635       |
| 710.3837       | 6  | E 17 | 1927.0766      | 964.0422        |
| 847.4426       | 7  | H 16 | 1798.0340      | 899.5209        |
| 944.4954       | 8  | P 15 | 1660.9751      | 830.9914        |
| 1043.5638      | 9  | V 14 | 1563.9223      | 782.4651        |
| 1156.6478      | 10 | L 13 | 1464.8539      | 732.9308        |
| 1269.7319      | 11 | L 12 | 1351.7698      | 676.3888        |
| 1370.7796      | 12 | T 11 | 1238.6857      | 619.8468        |
| 1499.8222      | 13 | E 10 | 1137.6381      | 569.3229        |
| 1570.8593      | 14 | A 9  | 1008.5955      | 504.8017        |
| 1667.9121      | 15 | P 8  | 937.5584       | 469.2831        |
| 1780.9961      | 16 | L 7  | 840.5056       | 420.7567        |
| 1895.0390      | 17 | N 6  | 727.4215       | 364.2147        |
| 1992.0918      | 18 | P 5  | 613.3786       | 307.1932        |
| 2148.2181      | 19 | K 4  | 516.3258       | 258.6668        |
| 2219.2552      | 20 | A 3  | 360.1995       | 180.6037        |
| 2333.2982      | 21 | N 2  | 289.1624       | 145.0851        |
|                | 22 | R 1  | 175.1195       | 88.0637         |

N-term:+29.04 K(19):+156.13

RVIGSGCNLDSAR, MH+ 1438.7648, m/z 480.2598  
 H OS G28 P150811 220811-s1.02514.02514.3.dta

scan 2514; 9.8e-001

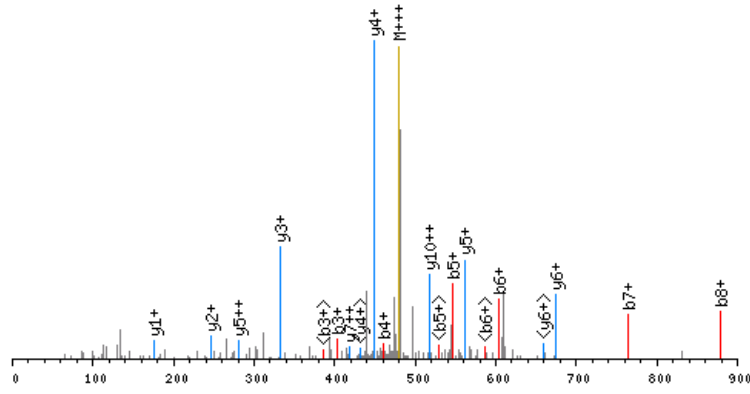

click image to zoom in; click top corners to zoom out [\[precursor±\]](#)

scan 2513; 480.3 m/z; 7.5e+000

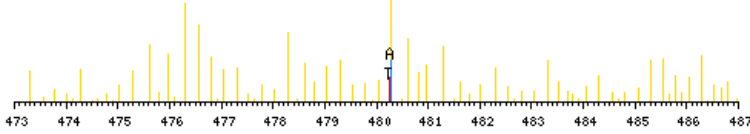

zoomed in precursor plot; T=theoretical m/z, A=acquired m/z

X-range:

-

MassTol: Y-zoom:

MassType:

AVG  MONO

Axis:

1  2

Label:

I  M  -

Ions:

a  +  2+  3+

b  +  2+  3+

c  +  2+  3+

x  +  2+  3+

y  +  2+  3+

z  +  2+  3+

hide H<sub>2</sub>O/NH<sub>3</sub>

zoom 112-122

GO

| b <sup>+</sup> | #  | AA # | y <sup>+</sup> | y <sup>2+</sup> |
|----------------|----|------|----------------|-----------------|
| 191.1720       | 1  | R 13 |                |                 |
| 290.2404       | 2  | V 12 | 1248.6006      | 624.8042        |
| 403.3245       | 3  | I 11 | 1149.5322      | 575.2700        |
| 460.3460       | 4  | G 10 | 1036.4481      | 518.7280        |
| 547.3780       | 5  | S 9  | 979.4267       | 490.2172        |
| 604.3994       | 6  | G 8  | 892.3946       | 446.7012        |
| 764.4300       | 7  | C 7  | 835.3732       | 418.1905        |
| 878.4730       | 8  | N 6  | 675.3426       | 338.1752        |
| 991.5570       | 9  | L 5  | 561.2997       | 281.1537        |
| 1106.5840      | 10 | D 4  | 448.2156       | 224.6117        |
| 1193.6160      | 11 | S 3  | 333.1886       | 167.0982        |
| 1264.6531      | 12 | A 2  | 246.1566       | 123.5822        |
|                | 13 | R 1  | 175.1195       | 88.0637         |

N-term:+35.07 C(7):+160.03

RVISSIEQKTER, MH+ 1513.9338, m/z 379.2389  
 H OS G28 P150811 220811-s1.02105.02105.4.dta

X-range:

-

MassTol: Y-zoom:

MassType:

AVG  MONO

Axis:

1  2

Label:

I  M  -

Ions:

a  +  2+  3+

b  +  2+  3+

c  +  2+  3+

x  +  2+  3+

y  +  2+  3+

z  +  2+  3+

hide H<sub>2</sub>O/NH<sub>3</sub>

zoom 112-122

GO

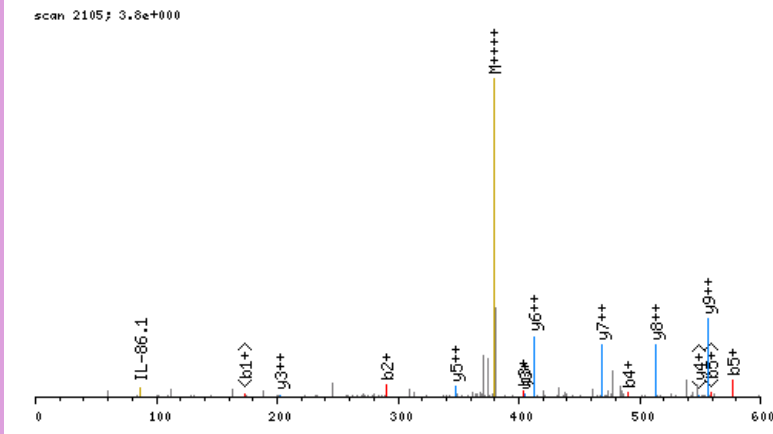

click image to zoom in; click top corners to zoom out [\[precursor±\]](#)

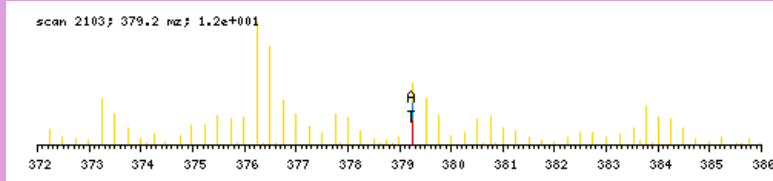

zoomed in precursor plot; T=theoretical m/z, A=acquired m/z

| b <sup>+</sup> | #  | AA # | y <sup>+</sup> | y <sup>2+</sup> |
|----------------|----|------|----------------|-----------------|
| 191.1720       | 1  | R 12 |                |                 |
| 290.2404       | 2  | V 11 | 1323.7696      | 662.3887        |
| 403.3245       | 3  | I 10 | 1224.7012      | 612.8545        |
| 490.3565       | 4  | S 9  | 1111.6172      | 556.3125        |
| 577.3885       | 5  | S 8  | 1024.5851      | 512.7965        |
| 690.4726       | 6  | I 7  | 937.5531       | 469.2805        |
| 819.5152       | 7  | E 6  | 824.4690       | 412.7384        |
| 947.5738       | 8  | Q 5  | 695.4264       | 348.2171        |
| 1109.7319      | 9  | K 4  | 567.3679       | 284.1878        |
| 1210.7796      | 10 | T 3  | 405.2098       | 203.1088        |
| 1339.8222      | 11 | E 2  | 304.1621       | 152.5850        |
|                | 12 | R 1  | 175.1195       | 88.0637         |

N-term:+35.07 K(9):+162.16

RVPTPNVSVVDLTCR, MH+ 1746.9748, m/z 582.9964  
 H OS G27 P150811 220811-s1.05859.05859.3.dta

X-range:

-

MassTol: Y-zoom:

MassType:

AVG  MONO

Axis:

1  2

Label:

I  M  -

Ions:

a  +  2+  3+

b  +  2+  3+

c  +  2+  3+

x  +  2+  3+

y  +  2+  3+

z  +  2+  3+

hide H<sub>2</sub>O/NH<sub>3</sub>

zoom 112-122

GO

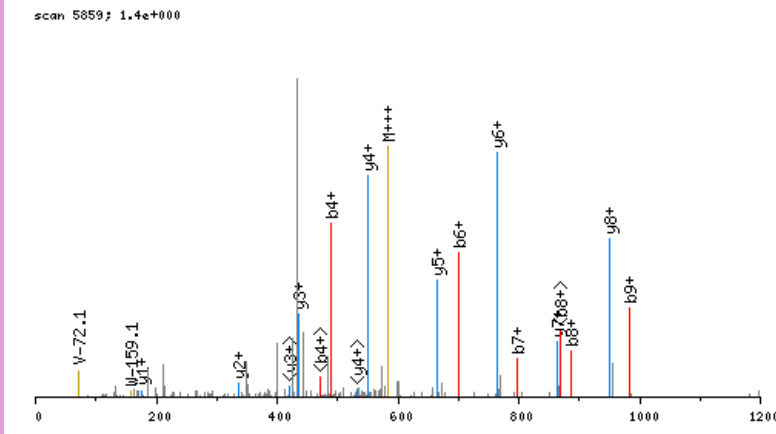

click image to zoom in; click top corners to zoom out [\[precursor±\]](#)

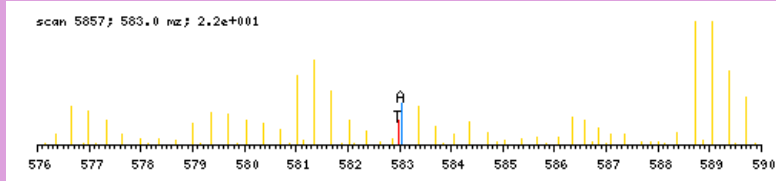

zoomed in precursor plot; T=theoretical m/z, A=acquired m/z

| b <sup>+</sup> | #  | AA # | y <sup>+</sup> | y <sup>2+</sup> |
|----------------|----|------|----------------|-----------------|
| 191.1720       | 1  | R 15 |                |                 |
| 290.2404       | 2  | V 14 | 1556.8106      | 778.9092        |
| 387.2932       | 3  | P 13 | 1457.7422      | 729.3750        |
| 488.3409       | 4  | T 12 | 1360.6894      | 680.8486        |
| 585.3936       | 5  | P 11 | 1259.6417      | 630.3248        |
| 699.4366       | 6  | N 10 | 1162.5890      | 581.7984        |
| 798.5050       | 7  | V 9  | 1048.5461      | 524.7769        |
| 885.5370       | 8  | S 8  | 949.4776       | 475.2427        |
| 984.6054       | 9  | V 7  | 862.4456       | 431.7267        |
| 1083.6738      | 10 | V 6  | 763.3772       | 382.1925        |
| 1198.7008      | 11 | D 5  | 664.3088       | 332.6583        |
| 1311.7848      | 12 | L 4  | 549.2818       | 275.1448        |
| 1412.8325      | 13 | T 3  | 436.1978       | 218.6028        |
| 1572.8631      | 14 | C 2  | 335.1501       | 168.0790        |
|                | 15 | R 1  | 175.1195       | 88.0637         |

N-term:+35.07 C(14):+160.03

SADPNVNPVIVTR, MH+ 1415.8070, m/z 472.6072  
 H OS G25 P150811 220811-s1.04990.04990.3.dta

scan 4990; 2.3e+000

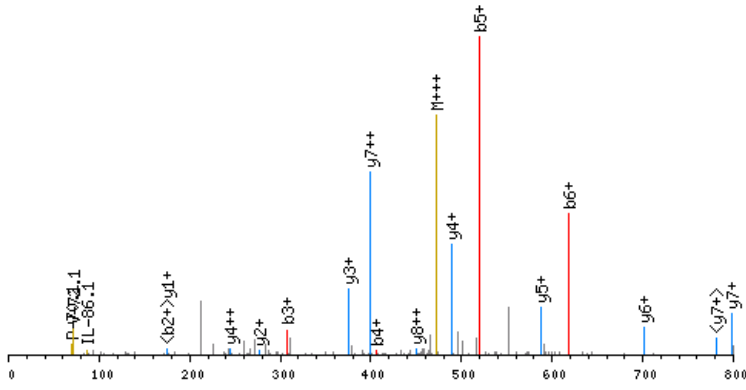

click image to zoom in; click top corners to zoom out [\[precursor±\]](#)

scan 4987; 472.6 m/z; 1.2e+001

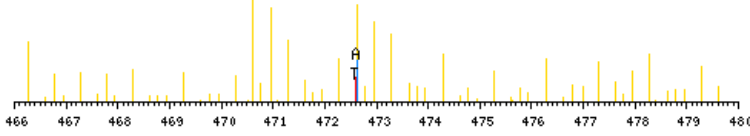

zoomed in precursor plot; T=theoretical m/z, A=acquired m/z

X-range:

-

MassTol: Y-zoom:

MassType:

AVG  MONO

Axis:

1  2

Label:

I  M  -

Ions:

a  +  2+  3+

b  +  2+  3+

c  +  2+  3+

x  +  2+  3+

y  +  2+  3+

z  +  2+  3+

hide H<sub>2</sub>O/NH<sub>3</sub>

zoom 112-122

GO

| b <sup>+</sup> | #  | AA # | y <sup>+</sup> | y <sup>2+</sup> |
|----------------|----|------|----------------|-----------------|
| 122.1029       | 1  | S 13 |                |                 |
| 193.1400       | 2  | A 12 | 1294.7119      | 647.8599        |
| 308.1670       | 3  | D 11 | 1223.6748      | 612.3413        |
| 405.2197       | 4  | P 10 | 1108.6479      | 554.8278        |
| 519.2627       | 5  | N 9  | 1011.5951      | 506.3015        |
| 618.3311       | 6  | V 8  | 897.5522       | 449.2800        |
| 715.3839       | 7  | P 7  | 798.4838       | 399.7458        |
| 829.4268       | 8  | N 6  | 701.4310       | 351.2194        |
| 928.4952       | 9  | V 5  | 587.3881       | 294.1979        |
| 1041.5793      | 10 | I 4  | 488.3197       | 244.6637        |
| 1140.6477      | 11 | V 3  | 375.2356       | 188.1217        |
| 1241.6954      | 12 | T 2  | 276.1672       | 138.5875        |
|                | 13 | R 1  | 175.1195       | 88.0637         |

N-term:+35.07

SAEEGEVTEKSSQKESVQR, MH+ 2366.1688, m/z 592.2976  
 L OS G28 P150811 220811-s1.01855.01855.4.dta

X-range:

-

MassTol: Y-zoom:

MassType:

AVG  MONO

Axis:

1  2

Label:

I  M  -

Ions:

a  +  2+  3+

b  +  2+  3+

c  +  2+  3+

x  +  2+  3+

y  +  2+  3+

z  +  2+  3+

hide H<sub>2</sub>O/NH<sub>3</sub>

zoom 112-122

GO

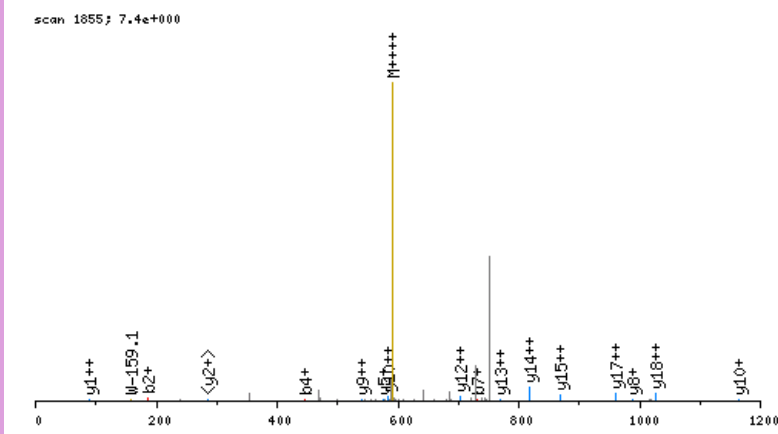

click image to zoom in; click top corners to zoom out [precursor±]

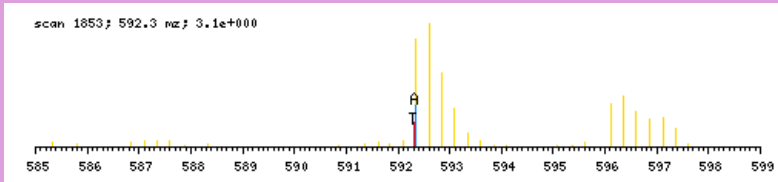

zoomed in precursor plot; T=theoretical m/z, A=acquired m/z

| b <sup>+</sup> | #  | AA | #  | y <sup>+</sup> | y <sup>2+</sup> |
|----------------|----|----|----|----------------|-----------------|
| 116.0711       | 1  | S  | 21 |                |                 |
| 187.1082       | 2  | A  | 20 | 2251.1054      | 1126.0566       |
| 316.1508       | 3  | E  | 19 | 2180.0683      | 1090.5381       |
| 445.1934       | 4  | E  | 18 | 2051.0257      | 1026.0168       |
| 502.2149       | 5  | G  | 17 | 1921.9831      | 961.4955        |
| 631.2575       | 6  | E  | 16 | 1864.9617      | 932.9848        |
| 730.3259       | 7  | V  | 15 | 1735.9191      | 868.4635        |
| 831.3736       | 8  | T  | 14 | 1636.8507      | 818.9293        |
| 960.4162       | 9  | E  | 13 | 1535.8030      | 768.4054        |
| 1047.4482      | 10 | S  | 12 | 1406.7604      | 703.8841        |
| 1203.5745      | 11 | K  | 11 | 1319.7284      | 660.3681        |
| 1290.6065      | 12 | S  | 10 | 1163.6021      | 582.3050        |
| 1377.6386      | 13 | S  | 9  | 1076.5700      | 538.7889        |
| 1505.6971      | 14 | Q  | 8  | 989.5380       | 495.2729        |
| 1661.8234      | 15 | K  | 7  | 861.4794       | 431.2436        |
| 1790.8660      | 16 | E  | 6  | 705.3531       | 353.1805        |
| 1877.8981      | 17 | S  | 5  | 576.3105       | 288.6592        |
| 1964.9301      | 18 | S  | 4  | 489.2785       | 245.1432        |
| 2063.9985      | 19 | V  | 3  | 402.2465       | 201.6272        |
| 2192.0571      | 20 | Q  | 2  | 303.1781       | 152.0930        |
|                | 21 | R  | 1  | 175.1195       | 88.0637         |

N-term: +29.04 K(11): +156.13  
 K(15): +156.13

SAELSSSEGILDDR, MH+ 1419.6967, m/z 710.3520  
 L OS G25 P150811 220811-s1.05251.05251.2.dta

X-range:

-

MassTol: Y-zoom:

MassType:

AVG  MONO

Axis:

1  2

Label:

I  M  -

Ions:

a  +  2+  3+

b  +  2+  3+

c  +  2+  3+

x  +  2+  3+

y  +  2+  3+

z  +  2+  3+

hide H<sub>2</sub>O/NH<sub>3</sub>

zoom 112-122

GO

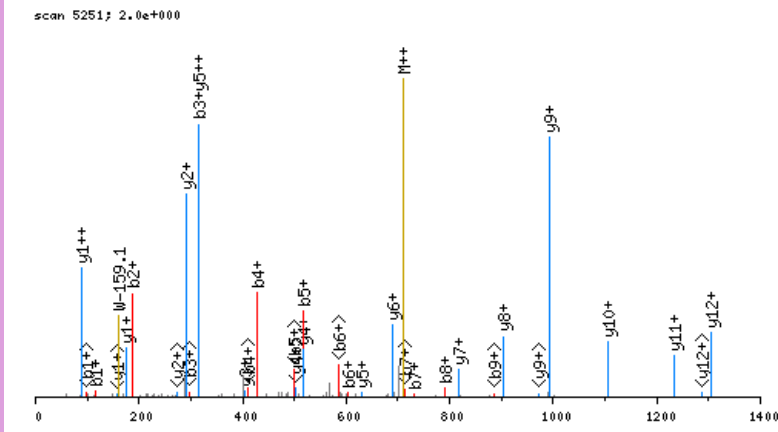

click image to zoom in; click top corners to zoom out [\[precursor±\]](#)

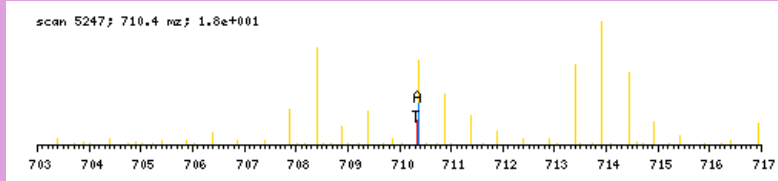

zoomed in precursor plot; T=theoretical m/z, A=acquired m/z

| b <sup>+</sup> | #  | AA # | y <sup>+</sup> | y <sup>2+</sup> |
|----------------|----|------|----------------|-----------------|
| 116.0711       | 1  | S 13 |                |                 |
| 187.1082       | 2  | A 12 | 1304.6334      | 652.8206        |
| 316.1508       | 3  | E 11 | 1233.5963      | 617.3021        |
| 429.2349       | 4  | L 10 | 1104.5537      | 552.7808        |
| 516.2669       | 5  | S 9  | 991.4696       | 496.2387        |
| 603.2990       | 6  | S 8  | 904.4376       | 452.7227        |
| 732.3415       | 7  | E 7  | 817.4056       | 409.2067        |
| 789.3630       | 8  | G 6  | 688.3630       | 344.6854        |
| 902.4471       | 9  | I 5  | 631.3415       | 316.1747        |
| 1015.5311      | 10 | L 4  | 518.2575       | 259.6326        |
| 1130.5581      | 11 | D 3  | 405.1734       | 203.0906        |
| 1245.5850      | 12 | D 2  | 290.1464       | 145.5771        |
|                | 13 | R 1  | 175.1195       | 88.0637         |

N-term:+29.04



SAELSSGILDDRNEEKR, MH+ 2104.0522, m/z 526.7685  
 L OS G28 P150811 220811-s1.04351.04351.4.dta

X-range:

-

MassTol: Y-zoom:

MassType:

AVG  MONO

Axis:

1  2

Label:

I  M  -

Ions:

a  +  2+  3+

b  +  2+  3+

c  +  2+  3+

x  +  2+  3+

y  +  2+  3+

z  +  2+  3+

hide H<sub>2</sub>O/NH<sub>3</sub>

zoom 112-122

GO

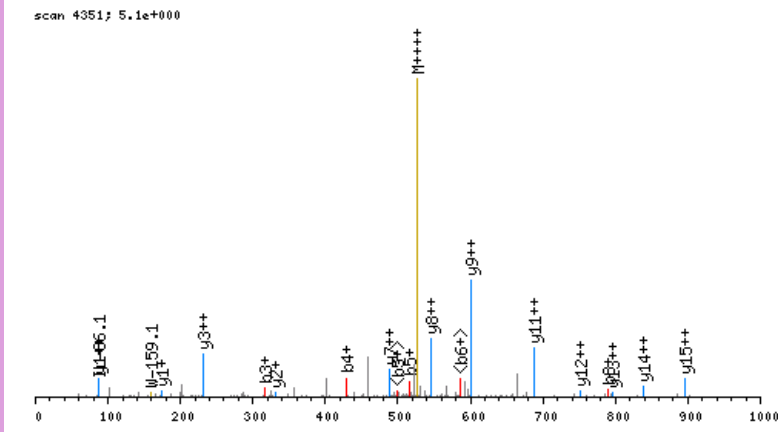

click image to zoom in; click top corners to zoom out [\[precursor±\]](#)

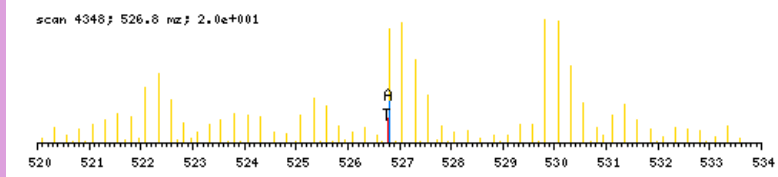

zoomed in precursor plot; T=theoretical m/z, A=acquired m/z

| b <sup>+</sup> | #  | AA # | y <sup>+</sup> | y <sup>2+</sup> |
|----------------|----|------|----------------|-----------------|
| 116.0711       | 1  | S 18 |                |                 |
| 187.1082       | 2  | A 17 | 1988.9889      | 994.9984        |
| 316.1508       | 3  | E 16 | 1917.9518      | 959.4798        |
| 429.2349       | 4  | L 15 | 1788.9092      | 894.9585        |
| 516.2669       | 5  | S 14 | 1675.8252      | 838.4165        |
| 603.2990       | 6  | S 13 | 1588.7931      | 794.9005        |
| 732.3415       | 7  | E 12 | 1501.7611      | 751.3845        |
| 789.3630       | 8  | G 11 | 1372.7185      | 686.8632        |
| 902.4471       | 9  | I 10 | 1315.6970      | 658.3524        |
| 1015.5311      | 10 | L 9  | 1202.6130      | 601.8104        |
| 1130.5581      | 11 | D 8  | 1089.5289      | 545.2684        |
| 1245.5850      | 12 | D 7  | 974.5020       | 487.7549        |
| 1401.6861      | 13 | R 6  | 859.4750       | 430.2414        |
| 1515.7291      | 14 | N 5  | 703.3739       | 352.1909        |
| 1644.7717      | 15 | E 4  | 589.3310       | 295.1694        |
| 1773.8143      | 16 | E 3  | 460.2884       | 230.6481        |
| 1929.9406      | 17 | K 2  | 331.2458       | 166.1268        |
|                | 18 | R 1  | 175.1195       | 88.0637         |

N-term:+29.04 K(17):+156.13

SAGPQVQPSTASSANLDAAR, MH+ 2049.0425, m/z 683.6857  
 H OS G24 P150811 220811-s1.02911.02911.3.dta

scan 2911; 6.3e-001

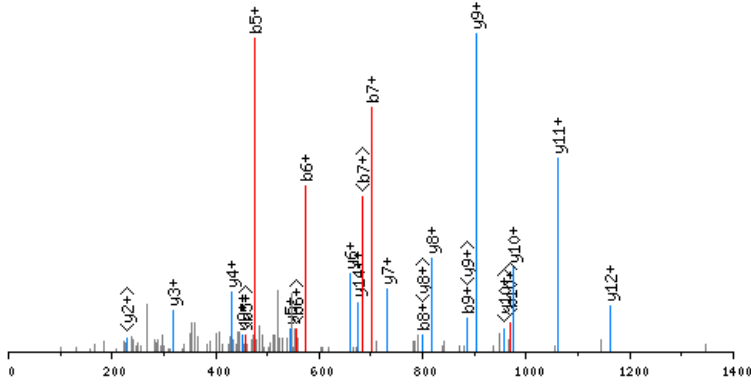

click image to zoom in; click top corners to zoom out [precursor±]

scan 2909; 683.7 m/z; 1.5e+000

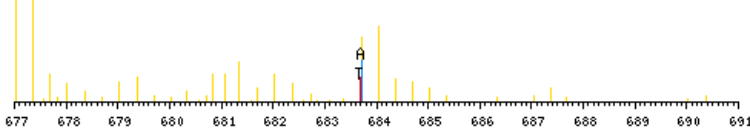

zoomed in precursor plot; T=theoretical m/z, A=acquired m/z

X-range:

-

MassTol: Y-zoom:

MassType:

AVG  MONO

Axis:

1  2

Label:

I  M  -

Ions:

a  +  2+  3+

b  +  2+  3+

c  +  2+  3+

x  +  2+  3+

y  +  2+  3+

z  +  2+  3+

hide H<sub>2</sub>O/NH<sub>3</sub>

zoom 112-122

GO

| b <sup>+</sup> | #  | AA # | y <sup>+</sup> | y <sup>2+</sup> |
|----------------|----|------|----------------|-----------------|
| 122.1029       | 1  | S 21 |                |                 |
| 193.1400       | 2  | A 20 | 1927.9474      | 964.4776        |
| 250.1615       | 3  | G 19 | 1856.9102      | 928.9590        |
| 347.2143       | 4  | P 18 | 1799.8888      | 900.4483        |
| 475.2728       | 5  | Q 17 | 1702.8360      | 851.9219        |
| 574.3413       | 6  | V 16 | 1574.7774      | 787.8926        |
| 702.3998       | 7  | Q 15 | 1475.7090      | 738.3584        |
| 799.4526       | 8  | P 14 | 1347.6504      | 674.3291        |
| 886.4846       | 9  | S 13 | 1250.5977      | 625.8028        |
| 987.5323       | 10 | T 12 | 1163.5657      | 582.2867        |
| 1074.5643      | 11 | S 11 | 1062.5180      | 531.7629        |
| 1145.6015      | 12 | A 10 | 975.4859       | 488.2469        |
| 1232.6335      | 13 | S 9  | 904.4488       | 452.7283        |
| 1319.6655      | 14 | S 8  | 817.4168       | 409.2123        |
| 1390.7026      | 15 | A 7  | 730.3848       | 365.6963        |
| 1504.7456      | 16 | N 6  | 659.3477       | 330.1777        |
| 1617.8296      | 17 | L 5  | 545.3047       | 273.1563        |
| 1732.8566      | 18 | D 4  | 432.2207       | 216.6142        |
| 1803.8937      | 19 | A 3  | 317.1937       | 159.1008        |
| 1874.9308      | 20 | A 2  | 246.1566       | 123.5822        |
|                | 21 | R 1  | 175.1195       | 88.0637         |

N-term:+35.07

SAGSAAAAGPVEAAIR, MH+ 1355.7283, m/z 678.3678  
 L OS G25 P150811 220811-s1.04120.04120.2.dta

X-range:

-

MassTol: Y-zoom:

MassType:

AVG  MONO

Axis:

1  2

Label:

I  M  -

Ions:

a  +  2+  3+

b  +  2+  3+

c  +  2+  3+

x  +  2+  3+

y  +  2+  3+

z  +  2+  3+

hide H<sub>2</sub>O/NH<sub>3</sub>

zoom 112-122

GO

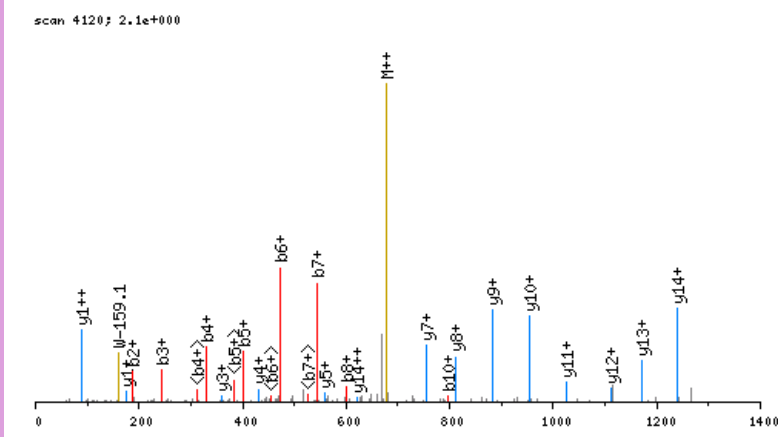

click image to zoom in; click top corners to zoom out [\[precursor±\]](#)

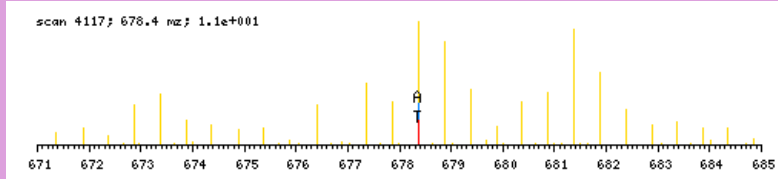

zoomed in precursor plot; T=theoretical m/z, A=acquired m/z

| b <sup>+</sup> | #  | AA | #  | y <sup>+</sup> | y <sup>2+</sup> |
|----------------|----|----|----|----------------|-----------------|
| 116.0711       | 1  | S  | 15 |                |                 |
| 187.1082       | 2  | A  | 14 | 1240.6650      | 620.8364        |
| 244.1297       | 3  | G  | 13 | 1169.6279      | 585.3178        |
| 331.1617       | 4  | S  | 12 | 1112.6064      | 556.8071        |
| 402.1988       | 5  | A  | 11 | 1025.5744      | 513.2911        |
| 473.2360       | 6  | A  | 10 | 954.5373       | 477.7725        |
| 544.2731       | 7  | A  | 9  | 883.5001       | 442.2540        |
| 601.2945       | 8  | G  | 8  | 812.4630       | 406.7354        |
| 698.3473       | 9  | P  | 7  | 755.4416       | 378.2247        |
| 797.4157       | 10 | V  | 6  | 658.3888       | 329.6983        |
| 926.4583       | 11 | E  | 5  | 559.3204       | 280.1641        |
| 997.4954       | 12 | A  | 4  | 430.2778       | 215.6428        |
| 1068.5325      | 13 | A  | 3  | 359.2407       | 180.1243        |
| 1181.6166      | 14 | I  | 2  | 288.2036       | 144.6057        |
|                | 15 | R  | 1  | 175.1195       | 88.0637         |

N-term:+29.04

SAGVSVPGPMGPGSPR, MH+ 1486.7900, m/z 496.2682  
 H OS G25 P150811 220811-s1.04600.04600.3.dta

X-range:

-

MassTol: Y-zoom:

MassType:

AVG  MONO

Axis:

1  2

Label:

I  M  -

Ions:

a  +  2+  3+

b  +  2+  3+

c  +  2+  3+

x  +  2+  3+

y  +  2+  3+

z  +  2+  3+

hide H<sub>2</sub>O/NH<sub>3</sub>

zoom 112-122

GO

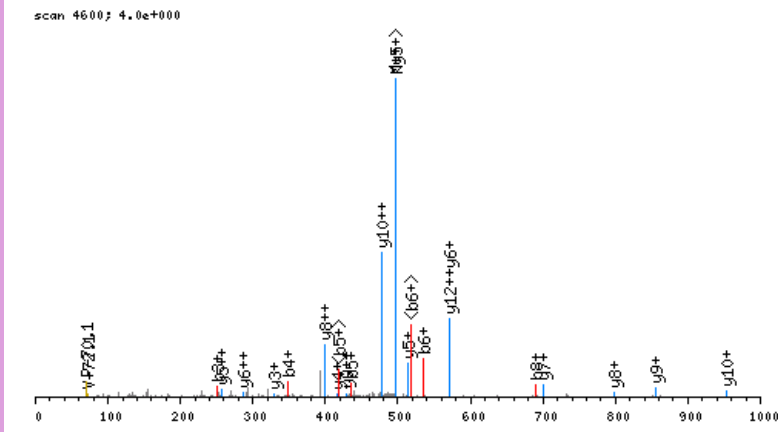

click image to zoom in; click top corners to zoom out [\[precursor±\]](#)

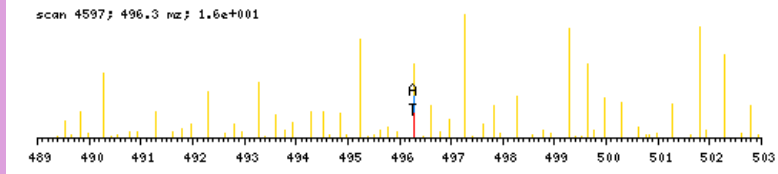

zoomed in precursor plot; T=theoretical m/z, A=acquired m/z

| b <sup>+</sup> | #  | AA # | y <sup>+</sup> | y <sup>2+</sup> |
|----------------|----|------|----------------|-----------------|
| 122.1029       | 1  | S 16 |                |                 |
| 193.1400       | 2  | A 15 | 1365.6949      | 683.3514        |
| 250.1615       | 3  | G 14 | 1294.6578      | 647.8328        |
| 349.2299       | 4  | V 13 | 1237.6363      | 619.3221        |
| 436.2619       | 5  | S 12 | 1138.5679      | 569.7879        |
| 535.3304       | 6  | V 11 | 1051.5359      | 526.2718        |
| 632.3831       | 7  | P 10 | 952.4675       | 476.7376        |
| 689.4046       | 8  | G 9  | 855.4147       | 428.2113        |
| 786.4574       | 9  | P 8  | 798.3932       | 399.7005        |
| 917.4978       | 10 | M 7  | 701.3405       | 351.1741        |
| 974.5193       | 11 | G 6  | 570.3000       | 285.6539        |
| 1071.5721      | 12 | P 5  | 513.2785       | 257.1432        |
| 1158.6041      | 13 | S 4  | 416.2258       | 208.6168        |
| 1215.6256      | 14 | G 3  | 329.1937       | 165.1008        |
| 1312.6783      | 15 | P 2  | 272.1723       | 136.5900        |
|                | 16 | R 1  | 175.1195       | 88.0637         |

N-term:+35.07

SALPAQSAATLPAR, MH+ 1381.7803, m/z 461.2650  
 L OS G24 P150811 220811-s1.03074.03074.3.dta

X-range:

-

MassTol: Y-zoom:

MassType:

AVG  MONO

Axis:

1  2

Label:

I  M  -

Ions:

a  +  2+  3+

b  +  2+  3+

c  +  2+  3+

x  +  2+  3+

y  +  2+  3+

z  +  2+  3+

hide H<sub>2</sub>O/NH<sub>3</sub>

zoom 112-122

GO

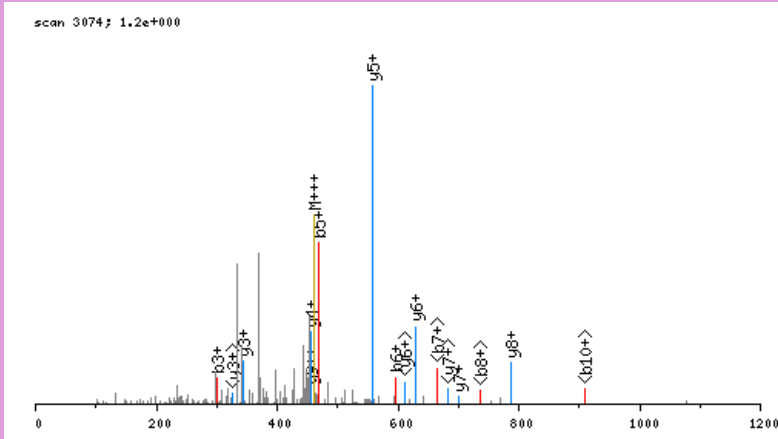

click image to zoom in; click top corners to zoom out [\[precursor±\]](#)

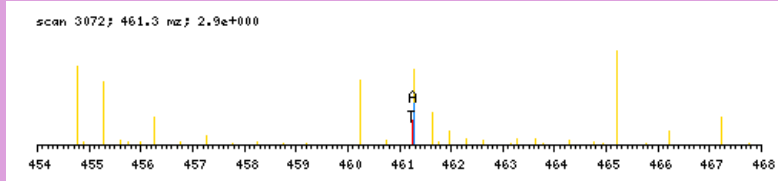

zoomed in precursor plot; T=theoretical m/z, A=acquired m/z

| b <sup>+</sup> | #  | AA # | y <sup>+</sup> | y <sup>2+</sup> |
|----------------|----|------|----------------|-----------------|
| 116.0711       | 1  | S 14 |                |                 |
| 187.1082       | 2  | A 13 | 1266.7170      | 633.8624        |
| 300.1923       | 3  | L 12 | 1195.6799      | 598.3439        |
| 397.2451       | 4  | P 11 | 1082.5958      | 541.8018        |
| 468.2822       | 5  | A 10 | 985.5431       | 493.2754        |
| 596.3408       | 6  | Q 9  | 914.5060       | 457.7569        |
| 683.3728       | 7  | S 8  | 786.4474       | 393.7276        |
| 754.4099       | 8  | A 7  | 699.4153       | 350.2116        |
| 825.4470       | 9  | A 6  | 628.3782       | 314.6930        |
| 926.4947       | 10 | T 5  | 557.3411       | 279.1745        |
| 1039.5788      | 11 | L 4  | 456.2934       | 228.6506        |
| 1136.6315      | 12 | P 3  | 343.2094       | 172.1086        |
| 1207.6686      | 13 | A 2  | 246.1566       | 123.5822        |
|                | 14 | R 1  | 175.1195       | 88.0637         |

N-term:+29.04

SAMPFTASPAPSTR, MH+ 1448.7207, m/z 724.8640  
 L OS G25 P150811 220811-s1.04670.04670.2.dta

X-range:

-

MassTol: Y-zoom:

MassType:

AVG  MONO

Axis:

1  2

Label:

I  M  -

Ions:

a  +  2+  3+

b  +  2+  3+

c  +  2+  3+

x  +  2+  3+

y  +  2+  3+

z  +  2+  3+

hide H<sub>2</sub>O/NH<sub>3</sub>

zoom 112-122

GO

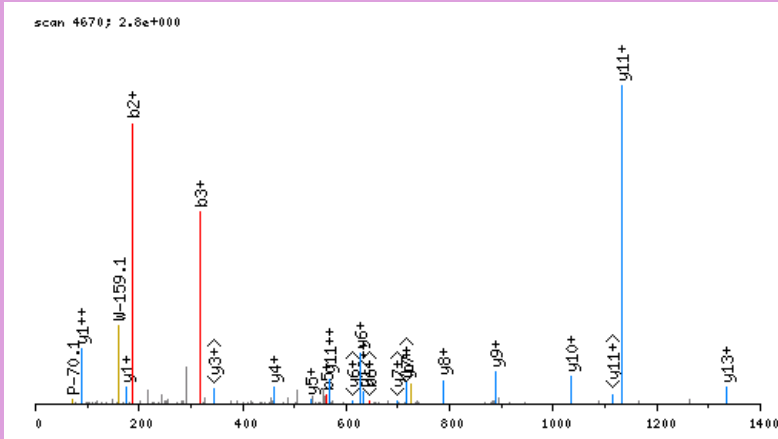

click image to zoom in; click top corners to zoom out [\[precursor±\]](#)

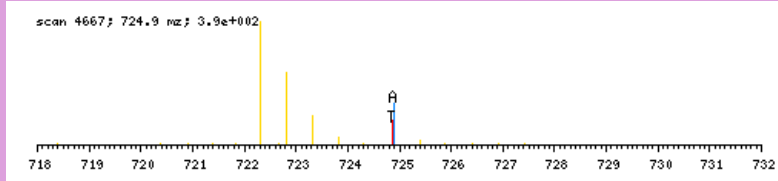

zoomed in precursor plot; T=theoretical m/z, A=acquired m/z

| b <sup>+</sup> | #  | AA # | y <sup>+</sup> | y <sup>2+</sup> |
|----------------|----|------|----------------|-----------------|
| 116.0711       | 1  | S 14 |                |                 |
| 187.1082       | 2  | A 13 | 1333.6574      | 667.3326        |
| 318.1487       | 3  | M 12 | 1262.6203      | 631.8141        |
| 415.2015       | 4  | P 11 | 1131.5798      | 566.2938        |
| 562.2699       | 5  | F 10 | 1034.5271      | 517.7675        |
| 663.3176       | 6  | T 9  | 887.4587       | 444.2332        |
| 734.3547       | 7  | A 8  | 786.4110       | 393.7094        |
| 821.3867       | 8  | S 7  | 715.3739       | 358.1909        |
| 918.4395       | 9  | P 6  | 628.3418       | 314.6748        |
| 989.4766       | 10 | A 5  | 531.2891       | 266.1485        |
| 1086.5294      | 11 | P 4  | 460.2520       | 230.6299        |
| 1173.5614      | 12 | S 3  | 363.1992       | 182.1035        |
| 1274.6091      | 13 | T 2  | 276.1672       | 138.5875        |
|                | 14 | R 1  | 175.1195       | 88.0637         |

N-term:+29.04

SAMPVPFTPELKPKR, MH+ 1782.0352, m/z 446.2643  
L OS G28 P150811 220811-s1.06087.06087.4.dta

X-range:

-

MassTol: Y-zoom:

MassType:

AVG  MONO

Axis:

1  2

Label:

I  M  -

Ions:

a  +  2+  3+

b  +  2+  3+

c  +  2+  3+

x  +  2+  3+

y  +  2+  3+

z  +  2+  3+

hide H<sub>2</sub>O/NH<sub>3</sub>

zoom 112-122

GO

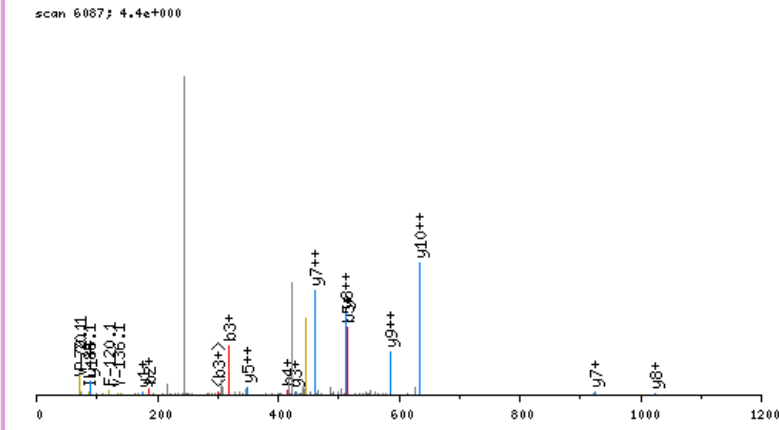

click image to zoom in; click top corners to zoom out [\[precursor±\]](#)

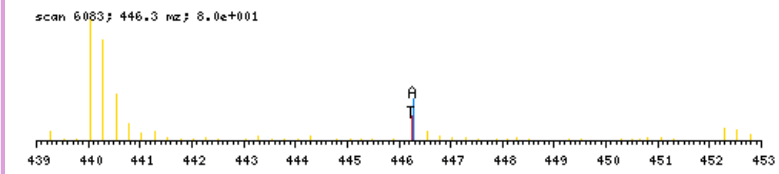

zoomed in precursor plot; T=theoretical m/z, A=acquired m/z

| b <sup>+</sup> | #  | AA | #  | y <sup>+</sup> | y <sup>2+</sup> |
|----------------|----|----|----|----------------|-----------------|
| 116.0711       | 1  | S  | 15 |                |                 |
| 187.1082       | 2  | A  | 14 | 1666.9719      | 833.9899        |
| 318.1487       | 3  | M  | 13 | 1595.9348      | 798.4713        |
| 415.2015       | 4  | P  | 12 | 1464.8943      | 732.9511        |
| 514.2699       | 5  | V  | 11 | 1367.8416      | 684.4247        |
| 611.3227       | 6  | P  | 10 | 1268.7731      | 634.8905        |
| 758.3911       | 7  | F  | 9  | 1171.7204      | 586.3641        |
| 859.4388       | 8  | T  | 8  | 1024.6520      | 512.8299        |
| 956.4915       | 9  | P  | 7  | 923.6043       | 462.3061        |
| 1085.5341      | 10 | E  | 6  | 826.5515       | 413.7797        |
| 1198.6182      | 11 | L  | 5  | 697.5089       | 349.2584        |
| 1354.7445      | 12 | K  | 4  | 584.4249       | 292.7163        |
| 1451.7972      | 13 | P  | 3  | 428.2986       | 214.6532        |
| 1607.9235      | 14 | K  | 2  | 331.2458       | 166.1268        |
|                | 15 | R  | 1  | 175.1195       | 88.0637         |

N-term:+29.04 K(12):+156.13  
K(14):+156.13

SAPASSPQLSHDDTHSR, MH+ 1820.8527, m/z 455.9686  
 L OS G28 P150811 220811-s1.01866.01866.4.dta

X-range:

-

MassTol: Y-zoom:

MassType:

AVG  MONO

Axis:

1  2

Label:

I  M  -

Ions:

a  +  2+  3+

b  +  2+  3+

c  +  2+  3+

x  +  2+  3+

y  +  2+  3+

z  +  2+  3+

hide H<sub>2</sub>O/NH<sub>3</sub>

zoom 112-122

GO

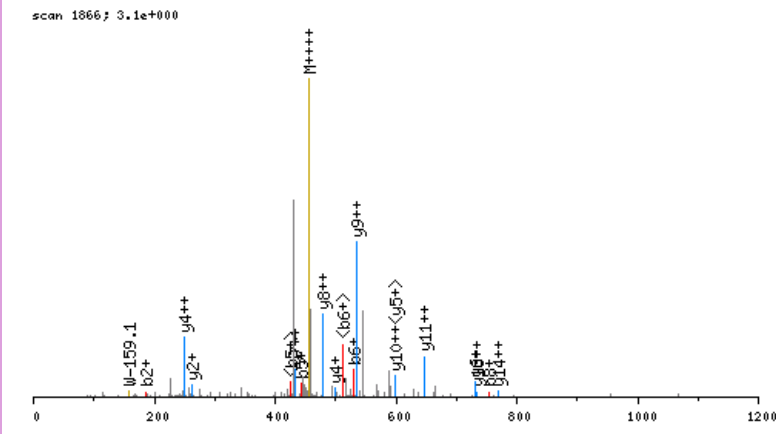

click image to zoom in; click top corners to zoom out [\[precursor±\]](#)

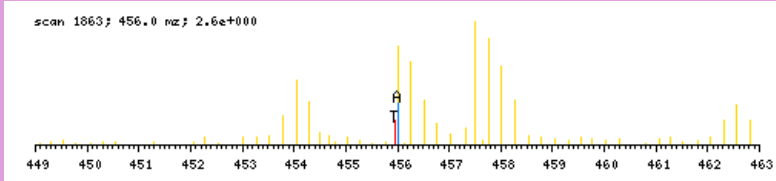

zoomed in precursor plot; T=theoretical m/z, A=acquired m/z

| b <sup>+</sup> | #  | AA # | y <sup>+</sup> | y <sup>2+</sup> |
|----------------|----|------|----------------|-----------------|
| 116.0711       | 1  | S 17 |                |                 |
| 187.1082       | 2  | A 16 | 1705.7894      | 853.3986        |
| 284.1610       | 3  | P 15 | 1634.7523      | 817.8801        |
| 355.1981       | 4  | A 14 | 1537.6995      | 769.3537        |
| 442.2301       | 5  | S 13 | 1466.6624      | 733.8351        |
| 529.2622       | 6  | S 12 | 1379.6304      | 690.3191        |
| 626.3149       | 7  | P 11 | 1292.5984      | 646.8031        |
| 754.3735       | 8  | Q 10 | 1195.5456      | 598.2767        |
| 867.4576       | 9  | L 9  | 1067.4870      | 534.2474        |
| 954.4896       | 10 | S 8  | 954.4029       | 477.7054        |
| 1091.5485      | 11 | H 7  | 867.3709       | 434.1894        |
| 1206.5755      | 12 | D 6  | 730.3120       | 365.6599        |
| 1321.6024      | 13 | D 5  | 615.2851       | 308.1464        |
| 1422.6501      | 14 | T 4  | 500.2581       | 250.6330        |
| 1559.7090      | 15 | H 3  | 399.2104       | 200.1091        |
| 1646.7410      | 16 | S 2  | 262.1515       | 131.5797        |
|                | 17 | R 1  | 175.1195       | 88.0637         |

N-term:+29.04



SAPSASGTPNKETAGLVGVSSR, MH+ 2303.3419, m/z 576.5909  
 H OS G27 P150811 220811-s1.03141.03141.4.dta

X-range:

-

MassTol: Y-zoom:

MassType:

AVG  MONO

Axis:

1  2

Label:

I  M  -

Ions:

a  +  2+  3+

b  +  2+  3+

c  +  2+  3+

x  +  2+  3+

y  +  2+  3+

z  +  2+  3+

hide H<sub>2</sub>O/NH<sub>3</sub>

zoom 112-122

GO

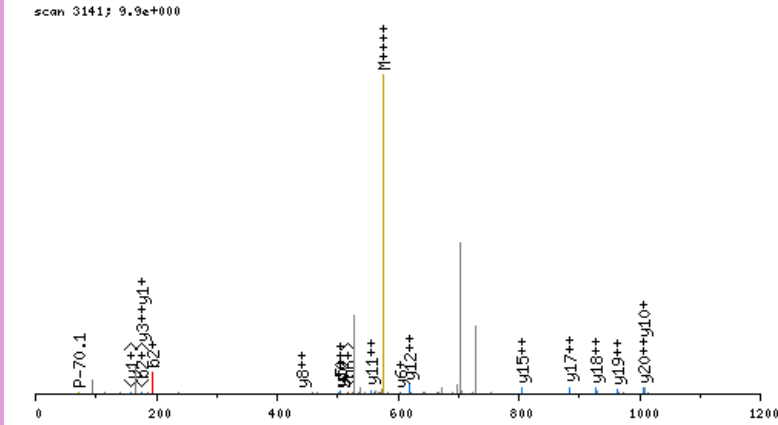

click image to zoom in; click top corners to zoom out [\[precursor±\]](#)

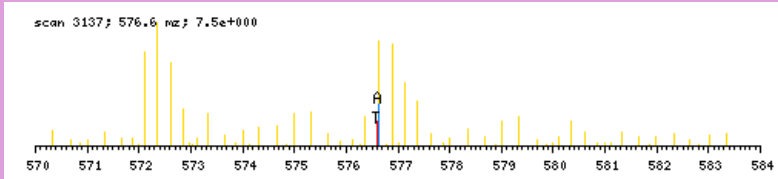

zoomed in precursor plot; T=theoretical m/z, A=acquired m/z

| b <sup>+</sup> | #  | AA | #  | y <sup>+</sup> | y <sup>2+</sup> |
|----------------|----|----|----|----------------|-----------------|
| 122.1029       | 1  | S  | 23 |                |                 |
| 193.1400       | 2  | A  | 22 | 2182.2468      | 1091.6273       |
| 290.1928       | 3  | P  | 21 | 2111.2097      | 1056.1088       |
| 377.2248       | 4  | S  | 20 | 2014.1570      | 1007.5824       |
| 448.2619       | 5  | A  | 19 | 1927.1249      | 964.0664        |
| 535.2940       | 6  | S  | 18 | 1856.0878      | 928.5478        |
| 592.3154       | 7  | G  | 17 | 1769.0558      | 885.0318        |
| 693.3631       | 8  | T  | 16 | 1712.0343      | 856.5211        |
| 790.4159       | 9  | P  | 15 | 1610.9867      | 805.9972        |
| 904.4588       | 10 | N  | 14 | 1513.9339      | 757.4709        |
| 1066.6169      | 11 | K  | 13 | 1399.8910      | 700.4494        |
| 1195.6595      | 12 | E  | 12 | 1237.7329      | 619.3703        |
| 1296.7072      | 13 | T  | 11 | 1108.6903      | 554.8490        |
| 1367.7443      | 14 | A  | 10 | 1007.6426      | 504.3252        |
| 1424.7658      | 15 | G  | 9  | 936.6055       | 468.8067        |
| 1537.8498      | 16 | L  | 8  | 879.5840       | 440.2959        |
| 1700.0079      | 17 | K  | 7  | 766.4999       | 383.7539        |
| 1799.0763      | 18 | V  | 6  | 604.3418       | 302.6748        |
| 1856.0978      | 19 | G  | 5  | 505.2734       | 253.1406        |
| 1955.1662      | 20 | V  | 4  | 448.2520       | 224.6299        |
| 2042.1982      | 21 | S  | 3  | 349.1836       | 175.0957        |
| 2129.2303      | 22 | S  | 2  | 262.1515       | 131.5797        |
|                | 23 | R  | 1  | 175.1195       | 88.0637         |

N-term:+35.07 K(11):+162.16  
 K(17):+162.16

SAQQQEDIKDEDER, MH+ 1746.8146, m/z 582.9431  
 L OS G27 P150811 220811-s1.01962.01962.3.dta

scan 1962; 8.1e-001

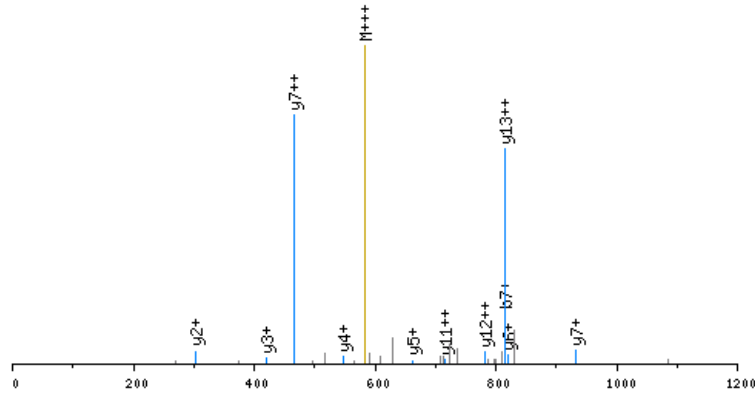

click image to zoom in; click top corners to zoom out [\[precursor±\]](#)

scan 1960; 582.9 m/z; 7.6e-001

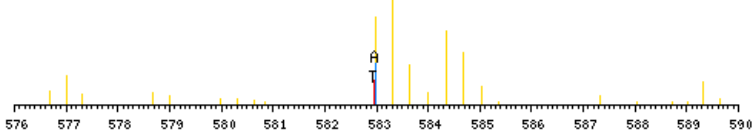

zoomed in precursor plot; T=theoretical m/z, A=acquired m/z

X-range:

-

MassTol: Y-zoom:

MassType:

AVG  MONO

Axis:

1  2

Label:

I  M  -

Ions:

a  +  2+  3+

b  +  2+  3+

c  +  2+  3+

x  +  2+  3+

y  +  2+  3+

z  +  2+  3+

hide H<sub>2</sub>O/NH<sub>3</sub>

zoom 112-122

GO

| b <sup>+</sup> | #  | AA # | y <sup>+</sup> | y <sup>2+</sup> |
|----------------|----|------|----------------|-----------------|
| 116.0711       | 1  | S 14 |                |                 |
| 187.1082       | 2  | A 13 | 1631.7513      | 816.3796        |
| 315.1668       | 3  | Q 12 | 1560.7142      | 780.8610        |
| 443.2254       | 4  | Q 11 | 1432.6556      | 716.8317        |
| 571.2840       | 5  | Q 10 | 1304.5971      | 652.8024        |
| 700.3266       | 6  | E 9  | 1176.5385      | 588.7731        |
| 815.3535       | 7  | D 8  | 1047.4959      | 524.2519        |
| 928.4376       | 8  | I 7  | 932.4689       | 466.7384        |
| 1084.5639      | 9  | K 6  | 819.3849       | 410.1963        |
| 1199.5908      | 10 | D 5  | 663.2586       | 332.1332        |
| 1328.6334      | 11 | E 4  | 548.2316       | 274.6197        |
| 1443.6604      | 12 | D 3  | 419.1890       | 210.0984        |
| 1572.7029      | 13 | E 2  | 304.1621       | 152.5850        |
|                | 14 | R 1  | 175.1195       | 88.0637         |

N-term:+29.04 K(9):+156.13

SASPLAIHASR, MH+ 1137.6380, m/z 379.8842  
 L OS G27 P150811 220811-s1.02780.02780.3.dta

scan 2780; 1.4e+001

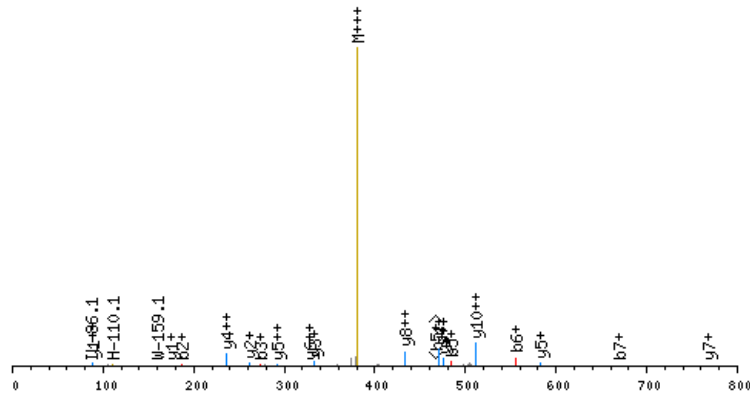

click image to zoom in; click top corners to zoom out [\[precursor±\]](#)

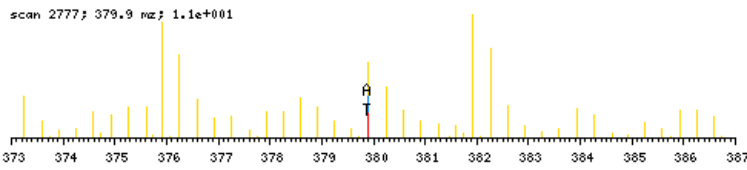

zoomed in precursor plot; T=theoretical m/z, A=acquired m/z

X-range:

-

MassTol: Y-zoom:

MassType:

AVG  MONO

Axis:

1  2

Label:

I  M  -

Ions:

a  +  2+  3+

b  +  2+  3+

c  +  2+  3+

x  +  2+  3+

y  +  2+  3+

z  +  2+  3+

hide H<sub>2</sub>O/NH<sub>3</sub>

zoom 112-122

GO

| b <sup>+</sup> | #  | AA | #  | y <sup>+</sup> | y <sup>2+</sup> |
|----------------|----|----|----|----------------|-----------------|
| 116.0711       | 1  | S  | 11 |                |                 |
| 187.1082       | 2  | A  | 10 | 1022.5747      | 511.7913        |
| 274.1403       | 3  | S  | 9  | 951.5376       | 476.2727        |
| 371.1930       | 4  | P  | 8  | 864.5056       | 432.7567        |
| 484.2771       | 5  | L  | 7  | 767.4528       | 384.2303        |
| 555.3142       | 6  | A  | 6  | 654.3687       | 327.6883        |
| 668.3983       | 7  | I  | 5  | 583.3316       | 292.1697        |
| 805.4572       | 8  | H  | 4  | 470.2476       | 235.6277        |
| 876.4943       | 9  | A  | 3  | 333.1886       | 167.0982        |
| 963.5263       | 10 | S  | 2  | 262.1515       | 131.5797        |
|                | 11 | R  | 1  | 175.1195       | 88.0637         |

N-term:+29.04

SASSTNLKDVLSNLIPEQAR, MH+ 2355.3248, m/z 589.5867  
 L OS G27 P150811 220811-s1.07254.07254.4.dta

X-range:

-

MassTol: Y-zoom:

MassType:

AVG  MONO

Axis:

1  2

Label:

I  M  -

Ions:

a  +  2+  3+

b  +  2+  3+

c  +  2+  3+

x  +  2+  3+

y  +  2+  3+

z  +  2+  3+

hide H<sub>2</sub>O/NH<sub>3</sub>

zoom 112-122

GO

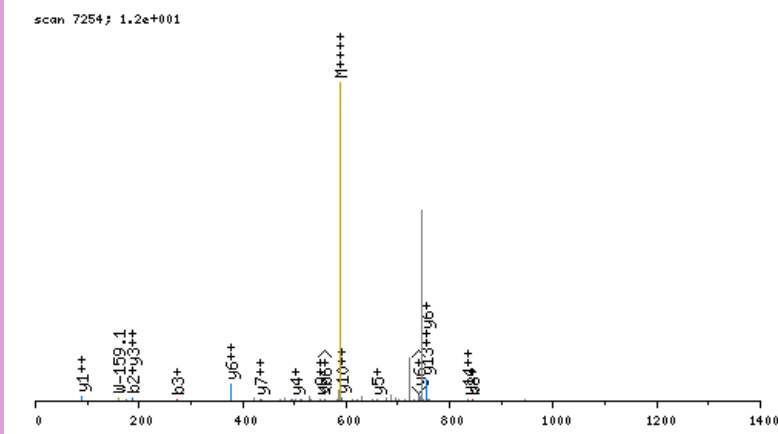

click image to zoom in; click top corners to zoom out [\[precursor±\]](#)

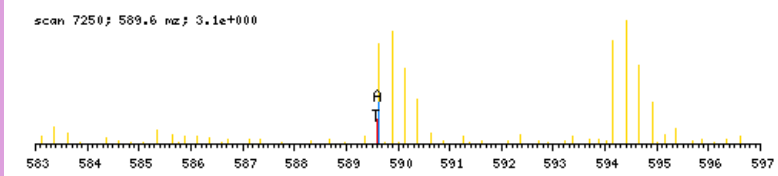

zoomed in precursor plot; T=theoretical m/z, A=acquired m/z

| b <sup>+</sup> | #  | AA | #  | y <sup>+</sup> | y <sup>2+</sup> |
|----------------|----|----|----|----------------|-----------------|
| 116.0711       | 1  | S  | 21 |                |                 |
| 187.1082       | 2  | A  | 20 | 2240.2615      | 1120.6347       |
| 274.1403       | 3  | S  | 19 | 2169.2244      | 1085.1161       |
| 361.1723       | 4  | S  | 18 | 2082.1924      | 1041.6001       |
| 462.2200       | 5  | T  | 17 | 1995.1603      | 998.0841        |
| 576.2629       | 6  | N  | 16 | 1894.1126      | 947.5602        |
| 689.3470       | 7  | L  | 15 | 1780.0697      | 890.5388        |
| 845.4733       | 8  | K  | 14 | 1666.9857      | 833.9967        |
| 960.5002       | 9  | D  | 13 | 1510.8594      | 755.9336        |
| 1059.5686      | 10 | V  | 12 | 1395.8324      | 698.4201        |
| 1172.6527      | 11 | L  | 11 | 1296.7640      | 648.8859        |
| 1259.6847      | 12 | S  | 10 | 1183.6799      | 592.3439        |
| 1373.7276      | 13 | N  | 9  | 1096.6479      | 548.8279        |
| 1486.8117      | 14 | L  | 8  | 982.6050       | 491.8064        |
| 1599.8958      | 15 | I  | 7  | 869.5209       | 435.2644        |
| 1696.9485      | 16 | P  | 6  | 756.4368       | 378.7223        |
| 1853.0748      | 17 | K  | 5  | 659.3841       | 330.1960        |
| 1982.1174      | 18 | E  | 4  | 503.2578       | 252.1328        |
| 2110.1760      | 19 | Q  | 3  | 374.2152       | 187.6115        |
| 2181.2131      | 20 | A  | 2  | 246.1566       | 123.5822        |
|                | 21 | R  | 1  | 175.1195       | 88.0637         |

N-term: +29.04 K(8): +156.13  
 K(17): +156.13

SASYDPGSAKTILNNGKTCR, MH+ 2224.1396, m/z 556.7904  
 L OS G28 P150811 220811-s1.04267.04267.4.dta

X-range:

-

MassTol: Y-zoom:

MassType:

AVG  MONO

Axis:

1  2

Label:

I  M  -

Ions:

a  +  2+  3+

b  +  2+  3+

c  +  2+  3+

x  +  2+  3+

y  +  2+  3+

z  +  2+  3+

hide H<sub>2</sub>O/NH<sub>3</sub>

zoom 112-122

GO

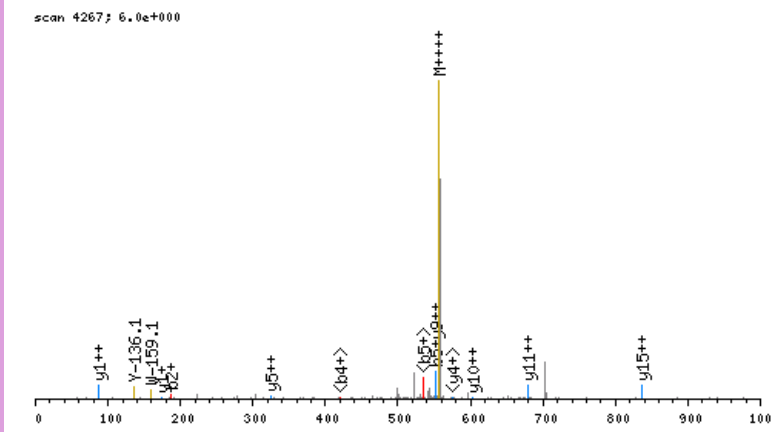

click image to zoom in; click top corners to zoom out [\[precursor±\]](#)

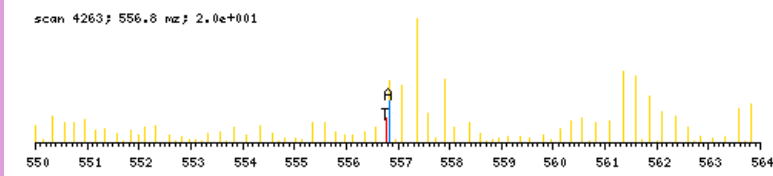

zoomed in precursor plot; T=theoretical m/z, A=acquired m/z

| b <sup>+</sup> | #  | AA | #  | y <sup>+</sup> | y <sup>2+</sup> |
|----------------|----|----|----|----------------|-----------------|
| 116.0711       | 1  | S  | 20 |                |                 |
| 187.1082       | 2  | A  | 19 | 2109.0763      | 1055.0421       |
| 274.1403       | 3  | S  | 18 | 2038.0392      | 1019.5235       |
| 437.2036       | 4  | Y  | 17 | 1951.0071      | 976.0075        |
| 552.2305       | 5  | D  | 16 | 1787.9438      | 894.4758        |
| 649.2833       | 6  | P  | 15 | 1672.9169      | 836.9623        |
| 706.3048       | 7  | G  | 14 | 1575.8641      | 788.4360        |
| 793.3368       | 8  | S  | 13 | 1518.8426      | 759.9252        |
| 864.3739       | 9  | A  | 12 | 1431.8106      | 716.4092        |
| 1020.5002      | 10 | K  | 11 | 1360.7735      | 680.8907        |
| 1121.5479      | 11 | T  | 10 | 1204.6472      | 602.8275        |
| 1234.6320      | 12 | I  | 9  | 1103.5995      | 552.3037        |
| 1347.7160      | 13 | L  | 8  | 990.5155       | 495.7616        |
| 1461.7589      | 14 | N  | 7  | 877.4314       | 439.2196        |
| 1575.8019      | 15 | N  | 6  | 763.3885       | 382.1981        |
| 1632.8233      | 16 | G  | 5  | 649.3455       | 325.1767        |
| 1788.9496      | 17 | K  | 4  | 592.3241       | 296.6660        |
| 1889.9973      | 18 | T  | 3  | 436.1978       | 218.6028        |
| 2050.0279      | 19 | C  | 2  | 335.1501       | 168.0790        |
|                | 20 | R  | 1  | 175.1195       | 88.0637         |

N-term: +29.04 K(10): +156.13  
 K(17): +156.13 C(19): +160.03

SATHHKTSLPQGVK, MH+ 1586.9403, m/z 529.6516  
 H OS G27 P150811 220811-s1.02624.02624.3.dta

X-range:

-

MassTol: Y-zoom:

MassType:

AVG  MONO

Axis:

1  2

Label:

I  M  -

Ions:

a  +  2+  3+

b  +  2+  3+

c  +  2+  3+

x  +  2+  3+

y  +  2+  3+

z  +  2+  3+

hide H<sub>2</sub>O/NH<sub>3</sub>

zoom 112-122

GO

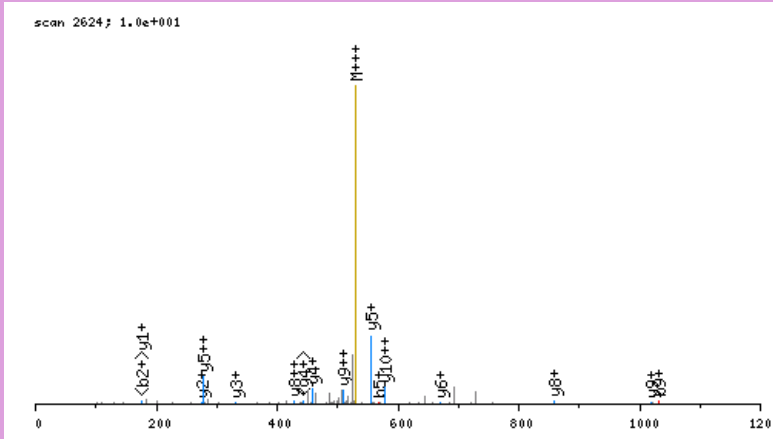

click image to zoom in; click top corners to zoom out [\[precursor±\]](#)

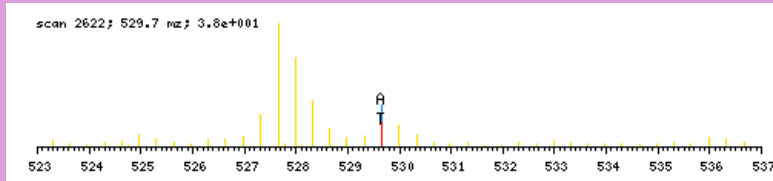

zoomed in precursor plot; T=theoretical m/z, A=acquired m/z

| b <sup>+</sup> | #  | AA # | y <sup>+</sup> | y <sup>2+</sup> |
|----------------|----|------|----------------|-----------------|
| 122.1029       | 1  | S 14 |                |                 |
| 193.1400       | 2  | A 13 | 1465.8452      | 733.4265        |
| 294.1877       | 3  | T 12 | 1394.8081      | 697.9080        |
| 431.2466       | 4  | H 11 | 1293.7604      | 647.3841        |
| 568.3055       | 5  | H 10 | 1156.7015      | 578.8547        |
| 730.4636       | 6  | K 9  | 1019.6426      | 510.3252        |
| 831.5113       | 7  | T 8  | 857.4845       | 429.2462        |
| 918.5434       | 8  | S 7  | 756.4368       | 378.7223        |
| 1031.6274      | 9  | L 6  | 669.4048       | 335.2063        |
| 1128.6802      | 10 | P 5  | 556.3207       | 278.6643        |
| 1256.7388      | 11 | Q 4  | 459.2680       | 230.1379        |
| 1313.7602      | 12 | G 3  | 331.2094       | 166.1086        |
| 1412.8286      | 13 | V 2  | 274.1879       | 137.5979        |
|                | 14 | R 1  | 175.1195       | 88.0637         |

N-term:+35.07 K(6):+162.16

SATVNGAVEGSAGTGR, MH+ 1467.7615, m/z 489.9254  
 H OS G25 P150811 220811-s1.02265.02265.3.dta

scan 2265; 1.7e+000

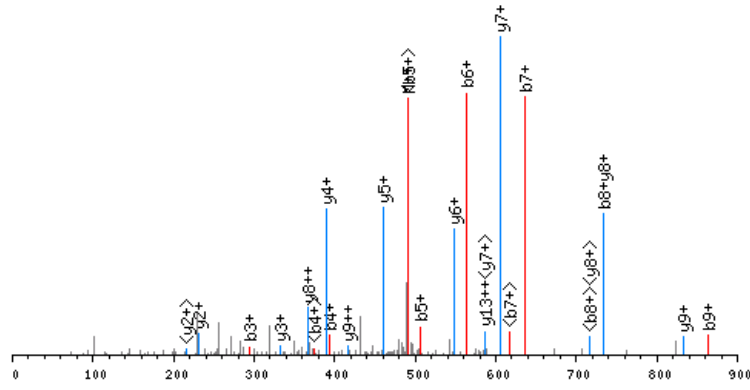

click image to zoom in; click top corners to zoom out [\[precursor±\]](#)

scan 2262; 489.9 m/z; 1.1e+001

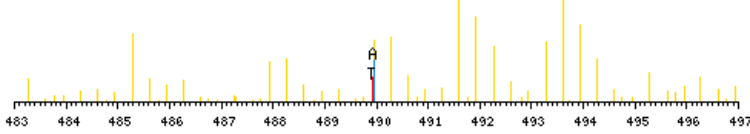

zoomed in precursor plot; T=theoretical m/z, A=acquired m/z

X-range:

-

MassTol: Y-zoom:

MassType:

AVG  MONO

Axis:

1  2

Label:

I  M  -

Ions:

a  +  2+  3+

b  +  2+  3+

c  +  2+  3+

x  +  2+  3+

y  +  2+  3+

z  +  2+  3+

hide H<sub>2</sub>O/NH<sub>3</sub>

zoom 112-122

GO

| b <sup>+</sup> | #  | AA # | y <sup>+</sup> | y <sup>2+</sup> |
|----------------|----|------|----------------|-----------------|
| 122.1029       | 1  | S 16 |                |                 |
| 193.1400       | 2  | A 15 | 1346.6664      | 673.8371        |
| 294.1877       | 3  | T 14 | 1275.6293      | 638.3186        |
| 393.2561       | 4  | V 13 | 1174.5816      | 587.7947        |
| 507.2991       | 5  | N 12 | 1075.5132      | 538.2605        |
| 564.3205       | 6  | G 11 | 961.4703       | 481.2391        |
| 635.3576       | 7  | A 10 | 904.4488       | 452.7283        |
| 734.4261       | 8  | V 9  | 833.4117       | 417.2098        |
| 863.4686       | 9  | E 8  | 734.3433       | 367.6756        |
| 920.4901       | 10 | G 7  | 605.3007       | 303.1543        |
| 1007.5221      | 11 | S 6  | 548.2792       | 274.6435        |
| 1078.5593      | 12 | A 5  | 461.2472       | 231.1275        |
| 1135.5807      | 13 | G 4  | 390.2101       | 195.6090        |
| 1236.6284      | 14 | T 3  | 333.1886       | 167.0982        |
| 1293.6499      | 15 | G 2  | 232.1410       | 116.5744        |
|                | 16 | R 1  | 175.1195       | 88.0637         |

N-term:+35.07

SAVEKGEELSCEER, MH+ 1678.7958, m/z 560.2701  
 L OS G27 P150811 220811-s1.02571.02571.3.dta

X-range:

-

MassTol: Y-zoom:

MassType:

AVG  MONO

Axis:

1  2

Label:

I  M  -

Ions:

a  +  2+  3+

b  +  2+  3+

c  +  2+  3+

x  +  2+  3+

y  +  2+  3+

z  +  2+  3+

hide H<sub>2</sub>O/NH<sub>3</sub>

zoom 112-122

GO

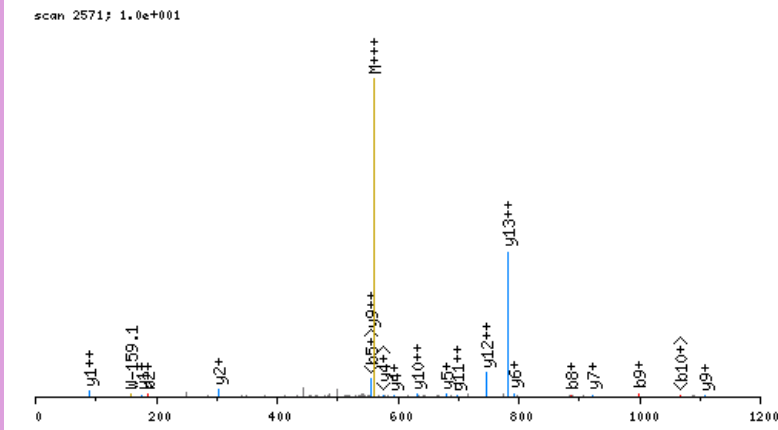

click image to zoom in; click top corners to zoom out [\[precursor±\]](#)

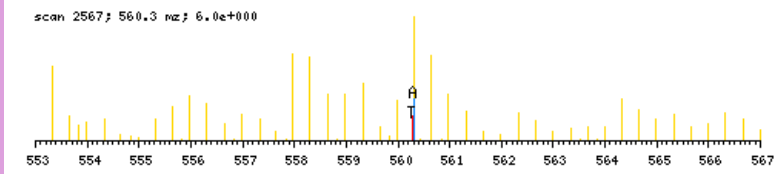

zoomed in precursor plot; T=theoretical m/z, A=acquired m/z

| b <sup>+</sup> | #  | AA # | y <sup>+</sup> | y <sup>2+</sup> |
|----------------|----|------|----------------|-----------------|
| 116.0711       | 1  | S    | 14             |                 |
| 187.1082       | 2  | A    | 13             | 1563.7325       |
| 286.1767       | 3  | V    | 12             | 1492.6953       |
| 415.2192       | 4  | E    | 11             | 1393.6269       |
| 571.3455       | 5  | K    | 10             | 1264.5843       |
| 628.3670       | 6  | G    | 9              | 1108.4580       |
| 757.4096       | 7  | E    | 8              | 1051.4366       |
| 886.4522       | 8  | E    | 7              | 922.3940        |
| 999.5363       | 9  | L    | 6              | 793.3514        |
| 1086.5683      | 10 | S    | 5              | 680.2673        |
| 1246.5989      | 11 | C    | 4              | 593.2353        |
| 1375.6415      | 12 | E    | 3              | 433.2047        |
| 1504.6841      | 13 | E    | 2              | 304.1621        |
|                | 14 | R    | 1              | 175.1195        |

N-term:+29.04 K(5):+156.13  
 C(11):+160.03



SAVPPGADKKAEAGAGSATEFQFR, MH+ 2476.2837, m/z 619.8264  
 L OS G27 P150811 220811-s1.04601.04601.4.dta

scan 4601; 1.2e+000

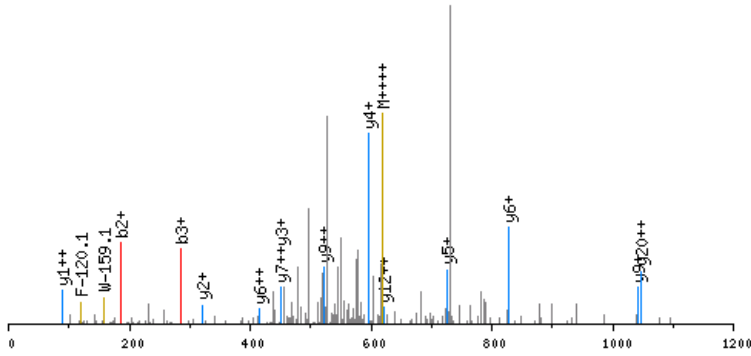

click image to zoom in; click top corners to zoom out [\[precursor±\]](#)

scan 4597; 619.8 mz; 1.4e+001

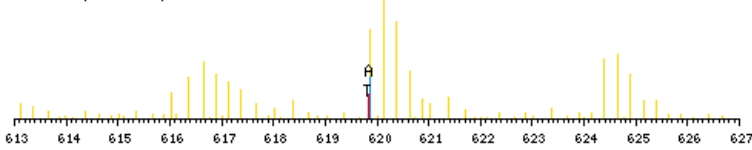

zoomed in precursor plot; T=theoretical m/z, A=acquired m/z

X-range:

-

MassTol: Y-zoom:

MassType:

AVG  MONO

Axis:

1  2

Label:

I  M  -

Ions:

a  +  2+  3+

b  +  2+  3+

c  +  2+  3+

x  +  2+  3+

y  +  2+  3+

z  +  2+  3+

hide H<sub>2</sub>O/NH<sub>3</sub>

zoom 112-122

GO

| b <sup>+</sup> | #  | AA | #  | y <sup>+</sup> | y <sup>2+</sup> |
|----------------|----|----|----|----------------|-----------------|
| 116.0711       | 1  | S  | 24 |                |                 |
| 187.1082       | 2  | A  | 23 | 2361.2204      | 1181.1141       |
| 286.1767       | 3  | V  | 22 | 2290.1832      | 1145.5955       |
| 383.2294       | 4  | P  | 21 | 2191.1148      | 1096.0613       |
| 480.2822       | 5  | P  | 20 | 2094.0621      | 1047.5349       |
| 537.3036       | 6  | G  | 19 | 1997.0093      | 999.0086        |
| 608.3408       | 7  | A  | 18 | 1939.9878      | 970.4978        |
| 723.3677       | 8  | D  | 17 | 1868.9507      | 934.9793        |
| 879.4940       | 9  | K  | 16 | 1753.9238      | 877.4658        |
| 1035.6203      | 10 | K  | 15 | 1597.7975      | 799.4027        |
| 1106.6574      | 11 | A  | 14 | 1441.6712      | 721.3395        |
| 1235.7000      | 12 | E  | 13 | 1370.6341      | 685.8209        |
| 1306.7371      | 13 | A  | 12 | 1241.5915      | 621.2997        |
| 1363.7586      | 14 | G  | 11 | 1170.5544      | 585.7811        |
| 1434.7957      | 15 | A  | 10 | 1113.5329      | 557.2704        |
| 1491.8172      | 16 | G  | 9  | 1042.4958      | 521.7518        |
| 1578.8492      | 17 | S  | 8  | 985.4743       | 493.2411        |
| 1649.8863      | 18 | A  | 7  | 898.4423       | 449.7251        |
| 1750.9340      | 19 | T  | 6  | 827.4052       | 414.2065        |
| 1879.9766      | 20 | E  | 5  | 726.3575       | 363.6827        |
| 2027.0450      | 21 | F  | 4  | 597.3149       | 299.1614        |
| 2155.1036      | 22 | Q  | 3  | 450.2465       | 225.6272        |
| 2302.1720      | 23 | F  | 2  | 322.1879       | 161.5979        |
|                | 24 | R  | 1  | 175.1195       | 88.0637         |

N-term:+29.04 K(9):+156.13  
 K(10):+156.13

SAYPSEEDMIEWAKR, MH+ 1867.8900, m/z 623.3015  
 L OS G26 P150811 220811-s1.05584.05584.3.dta

X-range:

-

MassTol: Y-zoom:

MassType:

AVG  MONO

Axis:

1  2

Label:

I  M  -

Ions:

a  +  2+  3+

b  +  2+  3+

c  +  2+  3+

x  +  2+  3+

y  +  2+  3+

z  +  2+  3+

hide H<sub>2</sub>O/NH<sub>3</sub>

zoom 112-122

GO

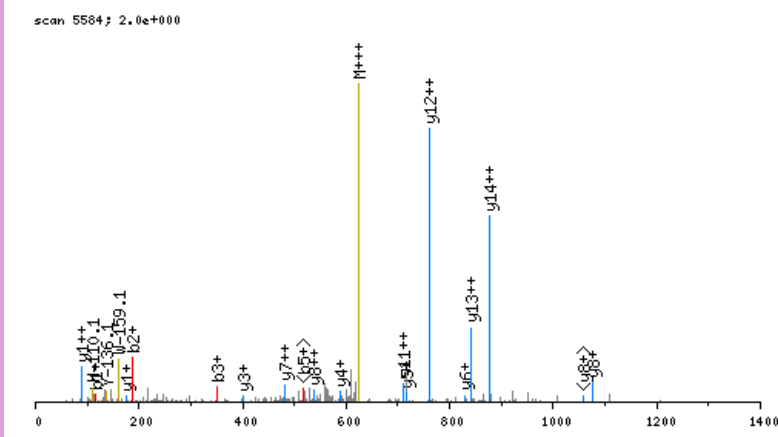

click image to zoom in; click top corners to zoom out [\[precursor±\]](#)

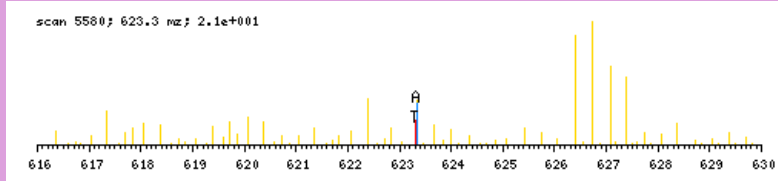

zoomed in precursor plot; T=theoretical m/z, A=acquired m/z

| b <sup>+</sup> | #  | AA | #  | y <sup>+</sup> | y <sup>2+</sup> |
|----------------|----|----|----|----------------|-----------------|
| 116.0711       | 1  | S  | 15 |                |                 |
| 187.1082       | 2  | A  | 14 | 1752.8267      | 876.9173        |
| 350.1716       | 3  | Y  | 13 | 1681.7896      | 841.3987        |
| 447.2243       | 4  | P  | 12 | 1518.7263      | 759.8671        |
| 534.2564       | 5  | S  | 11 | 1421.6735      | 711.3407        |
| 663.2990       | 6  | E  | 10 | 1334.6415      | 667.8247        |
| 792.3415       | 7  | E  | 9  | 1205.5989      | 603.3034        |
| 907.3685       | 8  | D  | 8  | 1076.5563      | 538.7821        |
| 1038.4090      | 9  | M  | 7  | 961.5294       | 481.2686        |
| 1151.4930      | 10 | I  | 6  | 830.4889       | 415.7484        |
| 1280.5356      | 11 | E  | 5  | 717.4048       | 359.2063        |
| 1466.6149      | 12 | W  | 4  | 588.3622       | 294.6850        |
| 1537.6521      | 13 | A  | 3  | 402.2829       | 201.6454        |
| 1693.7784      | 14 | K  | 2  | 331.2458       | 166.1268        |
|                | 15 | R  | 1  | 175.1195       | 88.0637         |

N-term:+29.04 K(14):+156.13

SCHLAQAPNHVVVSR, MH+ 1702.8811, m/z 426.4757  
 L OS G28 P150811 220811-s1.02669.02669.4.dta

X-range:

-

MassTol: Y-zoom:

MassType:

AVG  MONO

Axis:

1  2

Label:

I  M  -

Ions:

a  +  2+  3+

b  +  2+  3+

c  +  2+  3+

x  +  2+  3+

y  +  2+  3+

z  +  2+  3+

hide H<sub>2</sub>O/NH<sub>3</sub>

zoom 112-122

GO

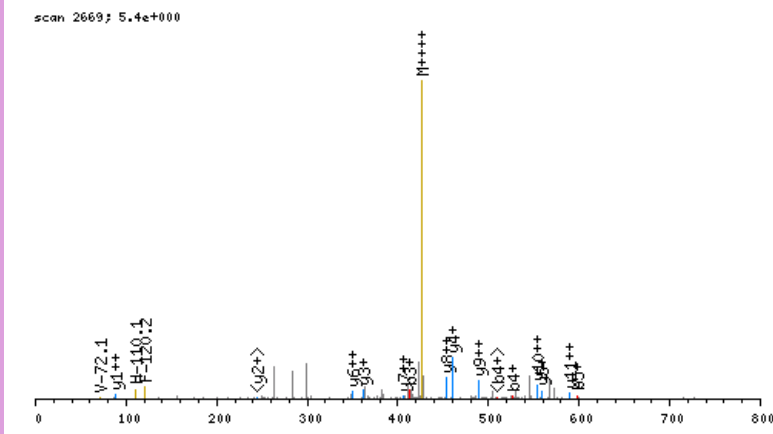

click image to zoom in; click top corners to zoom out [\[precursor±\]](#)

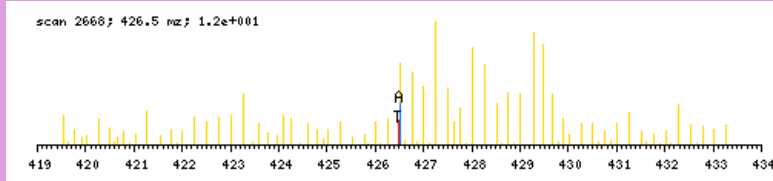

zoomed in precursor plot; T=theoretical m/z, A=acquired m/z

| b <sup>+</sup> | #  | AA # | y <sup>+</sup> | y <sup>2+</sup> |
|----------------|----|------|----------------|-----------------|
| 116.0711       | 1  | S 15 |                |                 |
| 276.1017       | 2  | C 14 | 1587.8178      | 794.4128        |
| 413.1606       | 3  | H 13 | 1427.7872      | 714.3975        |
| 526.2447       | 4  | L 12 | 1290.7282      | 645.8680        |
| 597.2818       | 5  | A 11 | 1177.6442      | 589.3260        |
| 725.3404       | 6  | Q 10 | 1106.6071      | 553.8074        |
| 796.3775       | 7  | A 9  | 978.5485       | 489.7782        |
| 893.4303       | 8  | P 8  | 907.5114       | 454.2596        |
| 1007.4732      | 9  | N 7  | 810.4586       | 405.7332        |
| 1144.5321      | 10 | H 6  | 696.4157       | 348.7118        |
| 1243.6005      | 11 | V 5  | 559.3568       | 280.1823        |
| 1342.6689      | 12 | V 4  | 460.2884       | 230.6481        |
| 1441.7374      | 13 | V 3  | 361.2199       | 181.1139        |
| 1528.7694      | 14 | S 2  | 262.1515       | 131.5797        |
|                | 15 | R 1  | 175.1195       | 88.0637         |

N-term:+29.04 C(2):+160.03

SCLTPKLDGVKEKALVSSVR, MH+ 2299.3424, m/z 575.5910  
 L OS G28 P150811 220811-s1.05676.05676.4.dta

X-range:

-

MassTol: Y-zoom:

MassType:

AVG  MONO

Axis:

1  2

Label:

I  M  -

Ions:

a  +  2+  3+

b  +  2+  3+

c  +  2+  3+

x  +  2+  3+

y  +  2+  3+

z  +  2+  3+

hide H<sub>2</sub>O/NH<sub>3</sub>

zoom 112-122

GO

scan 5676; 1.4e+001

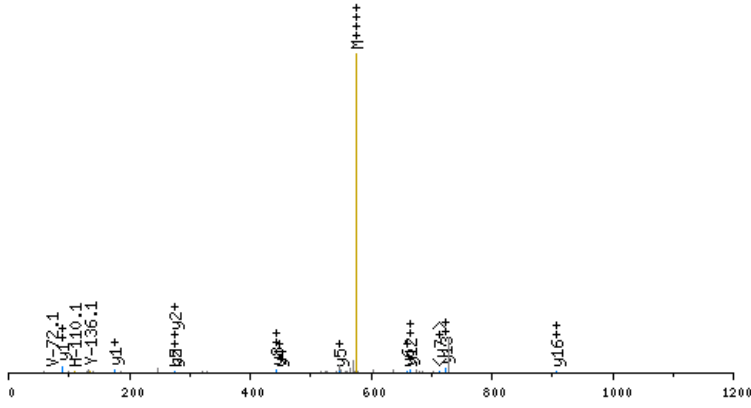

click image to zoom in; click top corners to zoom out [\[precursor±\]](#)

scan 5673; 575.6 nz; 5.0e+000

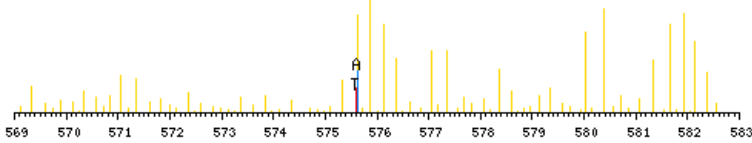

zoomed in precursor plot; T=theoretical m/z, A=acquired m/z

| b <sup>+</sup> | #  | AA | #  | y <sup>+</sup> | y <sup>2+</sup> |
|----------------|----|----|----|----------------|-----------------|
| 116.0711       | 1  | S  | 20 |                |                 |
| 276.1017       | 2  | C  | 19 | 2184.2790      | 1092.6434       |
| 389.1858       | 3  | L  | 18 | 2024.2484      | 1012.6281       |
| 490.2335       | 4  | T  | 17 | 1911.1644      | 956.0861        |
| 587.2862       | 5  | P  | 16 | 1810.1167      | 905.5623        |
| 743.4125       | 6  | K  | 15 | 1713.0639      | 857.0359        |
| 856.4966       | 7  | L  | 14 | 1556.9376      | 778.9727        |
| 971.5235       | 8  | D  | 13 | 1443.8536      | 722.4307        |
| 1028.5450      | 9  | G  | 12 | 1328.8266      | 664.9172        |
| 1127.6134      | 10 | V  | 11 | 1271.8052      | 636.4065        |
| 1283.7397      | 11 | K  | 10 | 1172.7368      | 586.8723        |
| 1412.7823      | 12 | E  | 9  | 1016.6105      | 508.8091        |
| 1568.9086      | 13 | K  | 8  | 887.5679       | 444.2878        |
| 1639.9457      | 14 | A  | 7  | 731.4416       | 366.2247        |
| 1753.0298      | 15 | L  | 6  | 660.4044       | 330.7061        |
| 1852.0982      | 16 | V  | 5  | 547.3204       | 274.1641        |
| 1939.1302      | 17 | S  | 4  | 448.2520       | 224.6299        |
| 2026.1623      | 18 | S  | 3  | 361.2199       | 181.1139        |
| 2125.2307      | 19 | V  | 2  | 274.1879       | 137.5979        |
|                | 20 | R  | 1  | 175.1195       | 88.0637         |

N-term:+29.04 C(2):+160.03  
 K(6):+156.13 K(11):+156.13  
 K(13):+156.13

SCNLGKFKFDETTADGR, MH+ 1855.8496, m/z 619.2880  
 L OS G27 P150811 220811-s1.03664.03664.3.dta

X-range:

-

MassTol: Y-zoom:

MassType:

AVG  MONO

Axis:

1  2

Label:

I  M  -

Ions:

a  +  2+  3+

b  +  2+  3+

c  +  2+  3+

x  +  2+  3+

y  +  2+  3+

z  +  2+  3+

hide H<sub>2</sub>O/NH<sub>3</sub>

zoom 112-122

GO

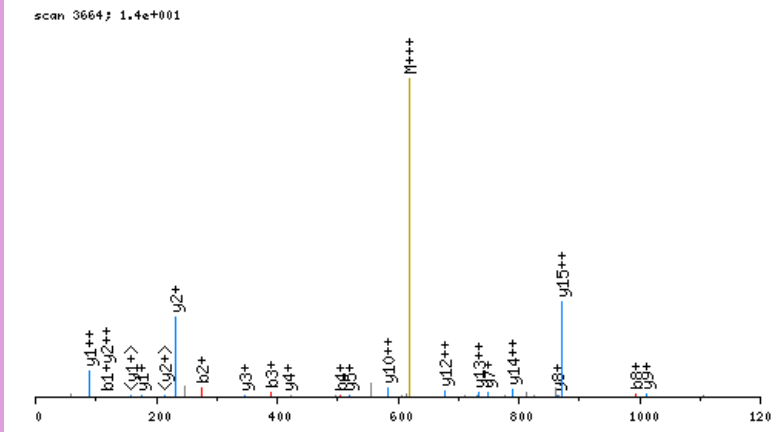

click image to zoom in; click top corners to zoom out [\[precursor±\]](#)

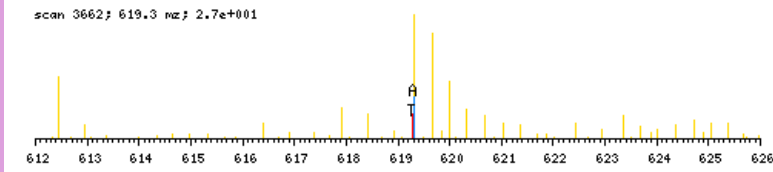

zoomed in precursor plot; T=theoretical m/z, A=acquired m/z

| b <sup>+</sup> | #  | AA # | y <sup>+</sup> | y <sup>2+</sup> |
|----------------|----|------|----------------|-----------------|
| 116.0711       | 1  | S 16 |                |                 |
| 276.1017       | 2  | C 15 | 1740.7863      | 870.8971        |
| 390.1447       | 3  | N 14 | 1580.7557      | 790.8818        |
| 503.2287       | 4  | L 13 | 1466.7127      | 733.8603        |
| 560.2502       | 5  | G 12 | 1353.6287      | 677.3183        |
| 689.2928       | 6  | E 11 | 1296.6072      | 648.8075        |
| 845.4191       | 7  | K 10 | 1167.5646      | 584.2862        |
| 992.4875       | 8  | F 9  | 1011.4383      | 506.2231        |
| 1107.5144      | 9  | D 8  | 864.3699       | 432.6889        |
| 1236.5570      | 10 | E 7  | 749.3430       | 375.1754        |
| 1337.6047      | 11 | T 6  | 620.3004       | 310.6541        |
| 1438.6524      | 12 | T 5  | 519.2527       | 260.1303        |
| 1509.6895      | 13 | A 4  | 418.2050       | 209.6064        |
| 1624.7164      | 14 | D 3  | 347.1679       | 174.0879        |
| 1681.7379      | 15 | G 2  | 232.1410       | 116.5744        |
|                | 16 | R 1  | 175.1195       | 88.0637         |

N-term:+29.04 C(2):+160.03  
 K(7):+156.13

SCQGIQCAPGQR, MH+ 1389.6366, m/z 463.8837  
 L OS G25 P150811 220811-s1.02108.02108.3.dta

X-range:

-

MassTol: Y-zoom:

MassType:

AVG  MONO

Axis:

1  2

Label:

I  M  -

Ions:

a  +  2+  3+

b  +  2+  3+

c  +  2+  3+

x  +  2+  3+

y  +  2+  3+

z  +  2+  3+

hide H<sub>2</sub>O/NH<sub>3</sub>

zoom 112-122

GO

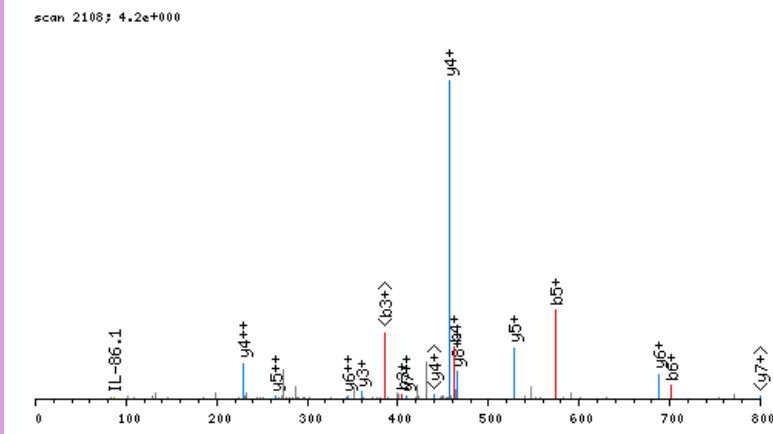

click image to zoom in; click top corners to zoom out [precursor±]

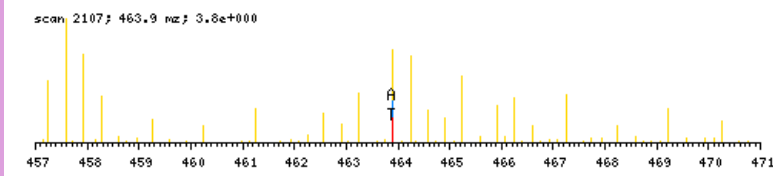

zoomed in precursor plot; T=theoretical m/z, A=acquired m/z

| b <sup>+</sup> | #  | AA # | y <sup>+</sup> | y <sup>2+</sup> |
|----------------|----|------|----------------|-----------------|
| 116.0711       | 1  | S 12 |                |                 |
| 276.1017       | 2  | C 11 | 1274.5733      | 637.7906        |
| 404.1603       | 3  | Q 10 | 1114.5427      | 557.7753        |
| 461.1818       | 4  | G 9  | 986.4841       | 493.7460        |
| 574.2658       | 5  | I 8  | 929.4627       | 465.2352        |
| 702.3244       | 6  | Q 7  | 816.3786       | 408.6932        |
| 862.3550       | 7  | C 6  | 688.3200       | 344.6639        |
| 933.3921       | 8  | A 5  | 528.2894       | 264.6486        |
| 1030.4449      | 9  | P 4  | 457.2523       | 229.1301        |
| 1087.4664      | 10 | G 3  | 360.1995       | 180.6037        |
| 1215.5249      | 11 | Q 2  | 303.1781       | 152.0930        |
|                | 12 | R 1  | 175.1195       | 88.0637         |

N-term:+29.04 C(2):+160.03  
 C(7):+160.03

SDAPPLTLTDGIKDR, MH+ 1553.8539, m/z 518.6228  
 L OS G26 P150811 220811-s1.03956.03956.3.dta

X-range:

-

MassTol: Y-zoom:

MassType:

AVG  MONO

Axis:

1  2

Label:

I  M  -

Ions:

a  +  2+  3+

b  +  2+  3+

c  +  2+  3+

x  +  2+  3+

y  +  2+  3+

z  +  2+  3+

hide H<sub>2</sub>O/NH<sub>3</sub>

zoom 112-122

GO

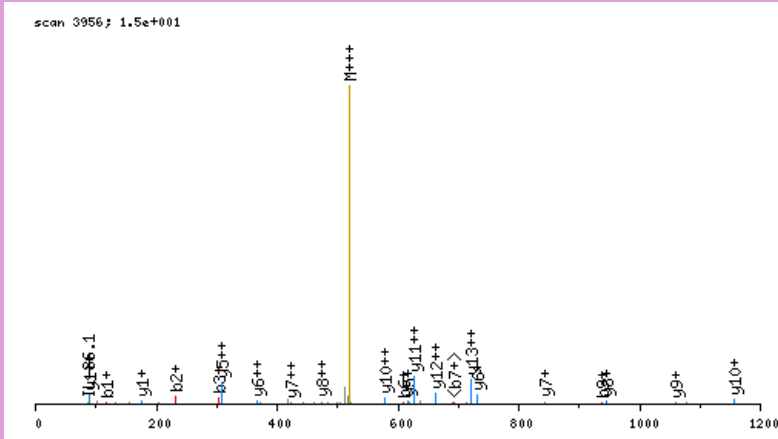

click image to zoom in; click top corners to zoom out [\[precursor±\]](#)

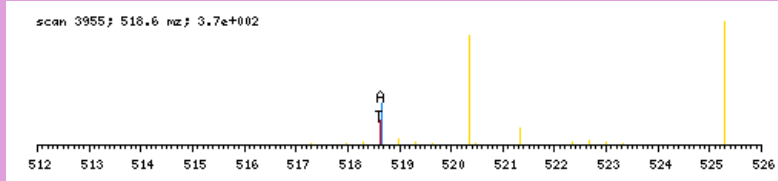

zoomed in precursor plot; T=theoretical m/z, A=acquired m/z

| b <sup>+</sup> | #  | AA # | y <sup>+</sup> | y <sup>2+</sup> |
|----------------|----|------|----------------|-----------------|
| 116.0711       | 1  | S 14 |                |                 |
| 231.0981       | 2  | D 13 | 1438.7906      | 719.8992        |
| 302.1352       | 3  | A 12 | 1323.7637      | 662.3857        |
| 399.1879       | 4  | P 11 | 1252.7265      | 626.8672        |
| 496.2407       | 5  | P 10 | 1155.6738      | 578.3408        |
| 609.3248       | 6  | L 9  | 1058.6210      | 529.8144        |
| 710.3725       | 7  | T 8  | 945.5370       | 473.2724        |
| 823.4565       | 8  | L 7  | 844.4893       | 422.7486        |
| 938.4835       | 9  | D 6  | 731.4052       | 366.2065        |
| 995.5049       | 10 | G 5  | 616.3783       | 308.6930        |
| 1108.5890      | 11 | I 4  | 559.3568       | 280.1823        |
| 1264.7153      | 12 | K 3  | 446.2727       | 223.6403        |
| 1379.7422      | 13 | D 2  | 290.1464       | 145.5771        |
|                | 14 | R 1  | 175.1195       | 88.0637         |

N-term:+29.04 K(12):+156.13

SDEHGIDPTGYHGDSDLQLDR, MH+ 2456.0966, m/z 614.7796  
 L OS G28 P150811 220811-s1.05519.05519.4.dta

scan 5519; 5.1e-001

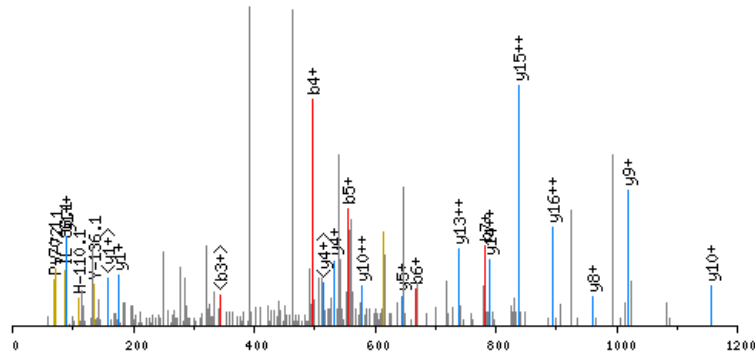

click image to zoom in; click top corners to zoom out [precursor±]

scan 5518; 614.8 m/z; 1.4e+001

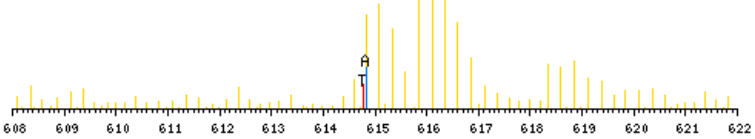

zoomed in precursor plot; T=theoretical m/z, A=acquired m/z

X-range:

-

MassTol: Y-zoom:

MassType:

AVG  MONO

Axis:

1  2

Label:

I  M  -

Ions:

a  +  2+  3+

b  +  2+  3+

c  +  2+  3+

x  +  2+  3+

y  +  2+  3+

z  +  2+  3+

hide H<sub>2</sub>O/NH<sub>3</sub>

zoom 112-122

GO

| b <sup>+</sup> | #  | AA # | y <sup>+</sup> | y <sup>2+</sup> |
|----------------|----|------|----------------|-----------------|
| 116.0711       | 1  | S 22 |                |                 |
| 231.0981       | 2  | D 21 | 2341.0333      | 1171.0205       |
| 360.1407       | 3  | E 20 | 2226.0063      | 1113.5071       |
| 497.1996       | 4  | H 19 | 2096.9637      | 1048.9858       |
| 554.2210       | 5  | G 18 | 1959.9048      | 980.4563        |
| 667.3051       | 6  | I 17 | 1902.8834      | 951.9456        |
| 782.3320       | 7  | D 16 | 1789.7993      | 895.4036        |
| 879.3848       | 8  | P 15 | 1674.7724      | 837.8901        |
| 980.4325       | 9  | T 14 | 1577.7196      | 789.3637        |
| 1037.4540      | 10 | G 13 | 1476.6719      | 738.8399        |
| 1138.5016      | 11 | T 12 | 1419.6504      | 710.3291        |
| 1301.5650      | 12 | Y 11 | 1318.6028      | 659.8053        |
| 1438.6239      | 13 | H 10 | 1155.5394      | 578.2736        |
| 1495.6453      | 14 | G 9  | 1018.4805      | 509.7442        |
| 1610.6723      | 15 | D 8  | 961.4591       | 481.2334        |
| 1697.7043      | 16 | S 7  | 846.4321       | 423.7200        |
| 1812.7313      | 17 | D 6  | 759.4001       | 380.2040        |
| 1925.8153      | 18 | L 5  | 644.3731       | 322.6905        |
| 2053.8739      | 19 | Q 4  | 531.2891       | 266.1485        |
| 2166.9580      | 20 | L 3  | 403.2305       | 202.1192        |
| 2281.9849      | 21 | D 2  | 290.1464       | 145.5771        |
|                | 22 | R 1  | 175.1195       | 88.0637         |

N-term:+29.04



SDFSEGOAVGAHR, MH+ 1388.6558, m/z 463.5568  
 L OS G27 P150811 220811-s1.02466.02466.3.dta

X-range:

-

MassTol: Y-zoom:

MassType:

AVG  MONO

Axis:

1  2

Label:

I  M  -

Ions:

a  +  2+  3+

b  +  2+  3+

c  +  2+  3+

x  +  2+  3+

y  +  2+  3+

z  +  2+  3+

hide H<sub>2</sub>O/NH<sub>3</sub>

zoom 112-122

GO

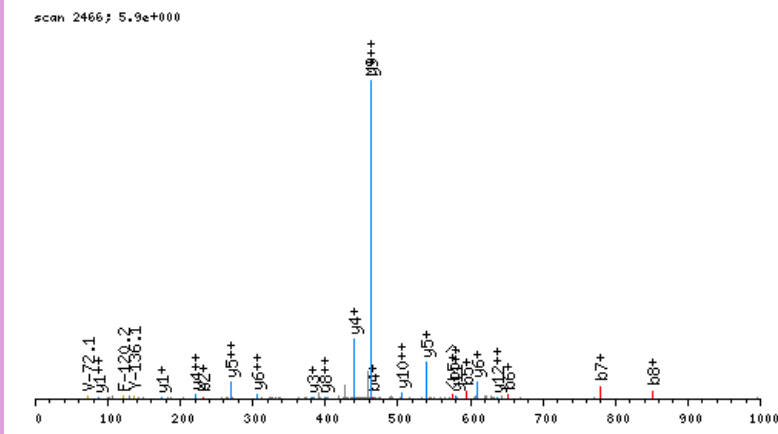

click image to zoom in; click top corners to zoom out [\[precursor±\]](#)

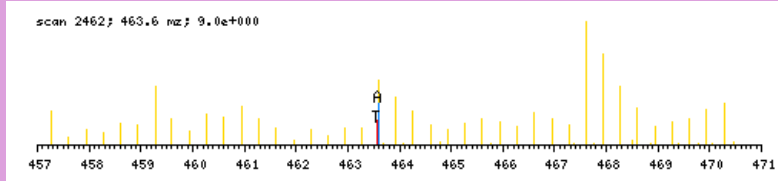

zoomed in precursor plot; T=theoretical m/z, A=acquired m/z

| b <sup>+</sup> | #  | AA # | y <sup>+</sup> | y <sup>2+</sup> |
|----------------|----|------|----------------|-----------------|
| 116.0711       | 1  | S 13 |                |                 |
| 231.0981       | 2  | D 12 | 1273.5925      | 637.3002        |
| 378.1665       | 3  | F 11 | 1158.5656      | 579.7867        |
| 465.1985       | 4  | S 10 | 1011.4972      | 506.2525        |
| 594.2411       | 5  | E 9  | 924.4652       | 462.7365        |
| 651.2626       | 6  | G 8  | 795.4226       | 398.2152        |
| 779.3211       | 7  | Q 7  | 738.4011       | 369.7045        |
| 850.3583       | 8  | A 6  | 610.3425       | 305.6752        |
| 949.4267       | 9  | V 5  | 539.3054       | 270.1566        |
| 1006.4481      | 10 | G 4  | 440.2370       | 220.6224        |
| 1077.4853      | 11 | A 3  | 383.2155       | 192.1117        |
| 1214.5442      | 12 | H 2  | 312.1784       | 156.5931        |
|                | 13 | R 1  | 175.1195       | 88.0637         |

N-term:+29.04

SDISEDQPQEPFR, MH+ 1525.7134, m/z 509.2427  
 L OS G25 P150811 220811-s1.02544.02544.3.dta

X-range:

-

MassTol: Y-zoom:

MassType:

AVG  MONO

Axis:

1  2

Label:

I  M  -

Ions:

a  +  2+  3+

b  +  2+  3+

c  +  2+  3+

x  +  2+  3+

y  +  2+  3+

z  +  2+  3+

hide H<sub>2</sub>O/NH<sub>3</sub>

zoom 112-122

GO

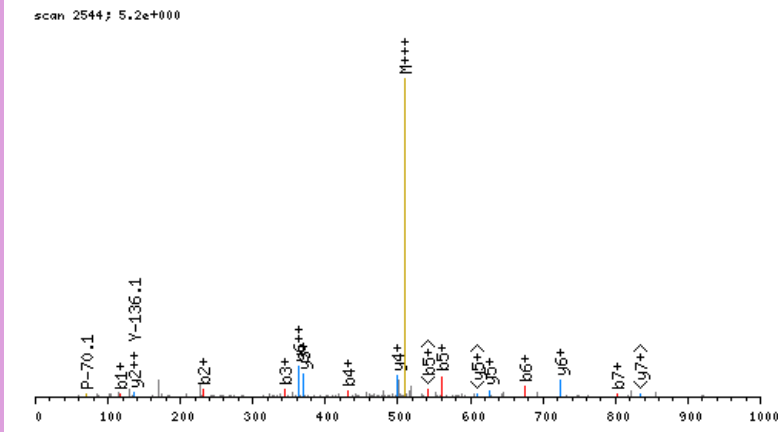

click image to zoom in; click top corners to zoom out [\[precursor±\]](#)

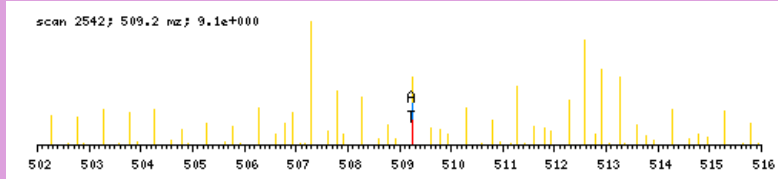

zoomed in precursor plot; T=theoretical m/z, A=acquired m/z

| b <sup>+</sup> | #  | AA # | y <sup>+</sup> | y <sup>2+</sup> |
|----------------|----|------|----------------|-----------------|
| 116.0711       | 1  | S 13 |                |                 |
| 231.0981       | 2  | D 12 | 1410.6501      | 705.8290        |
| 344.1821       | 3  | I 11 | 1295.6232      | 648.3155        |
| 431.2142       | 4  | S 10 | 1182.5391      | 591.7735        |
| 560.2568       | 5  | E 9  | 1095.5071      | 548.2575        |
| 675.2837       | 6  | D 8  | 966.4645       | 483.7362        |
| 803.3423       | 7  | Q 7  | 851.4375       | 426.2227        |
| 900.3950       | 8  | P 6  | 723.3790       | 362.1934        |
| 1028.4536      | 9  | Q 5  | 626.3262       | 313.6670        |
| 1157.4962      | 10 | E 4  | 498.2676       | 249.6377        |
| 1254.5490      | 11 | P 3  | 369.2250       | 185.1164        |
| 1351.6017      | 12 | P 2  | 272.1723       | 136.5900        |
|                | 13 | R 1  | 175.1195       | 88.0637         |

N-term:+29.04

SDKGVSSGPGMGLMGP, MH+ 1785.8992, m/z 595.9712  
 L OS G26 P150811 220811-s1.03928.03928.3.dta

scan 3928; 9.2e-001

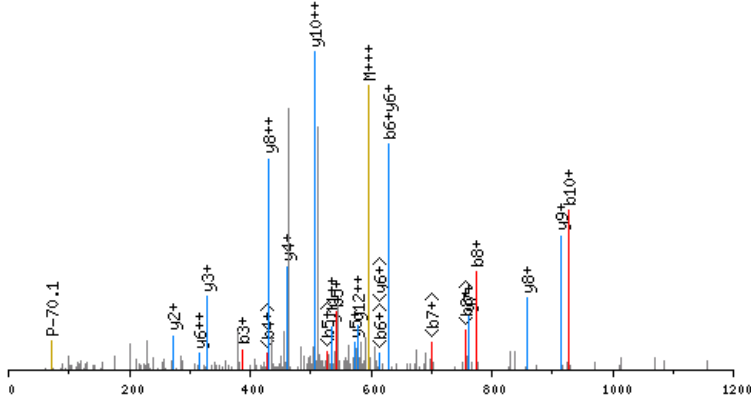

click image to zoom in; click top corners to zoom out [precursor±]

scan 3925; 596.0 m/z; 4.8e+001

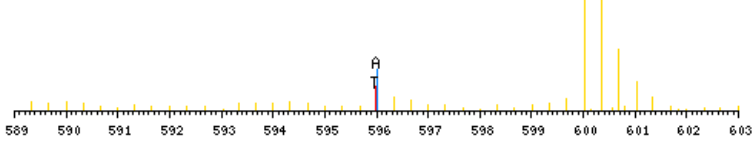

zoomed in precursor plot; T=theoretical m/z, A=acquired m/z

X-range:

-

MassTol: Y-zoom:

MassType:

AVG  MONO

Axis:

1  2

Label:

I  M  -

Ions:

a  +  2+  3+

b  +  2+  3+

c  +  2+  3+

x  +  2+  3+

y  +  2+  3+

z  +  2+  3+

hide H<sub>2</sub>O/NH<sub>3</sub>

zoom 112-122

GO

| b <sup>+</sup> | #  | AA # | y <sup>+</sup> | y <sup>2+</sup> |
|----------------|----|------|----------------|-----------------|
| 116.0711       | 1  | S 18 |                |                 |
| 231.0981       | 2  | D 17 | 1670.8359      | 835.9218        |
| 387.2244       | 3  | K 16 | 1555.8089      | 778.4084        |
| 444.2458       | 4  | G 15 | 1399.6826      | 700.3452        |
| 543.3142       | 5  | V 14 | 1342.6612      | 671.8345        |
| 630.3463       | 6  | S 13 | 1243.5927      | 622.3003        |
| 717.3783       | 7  | S 12 | 1156.5607      | 578.7843        |
| 774.3998       | 8  | G 11 | 1069.5287      | 535.2683        |
| 871.4525       | 9  | P 10 | 1012.5072      | 506.7575        |
| 928.4740       | 10 | G 9  | 915.4545       | 458.2311        |
| 1025.5268      | 11 | P 8  | 858.4330       | 429.7204        |
| 1156.5672      | 12 | M 7  | 761.3802       | 381.1940        |
| 1213.5887      | 13 | G 6  | 630.3397       | 315.6738        |
| 1326.6728      | 14 | L 5  | 573.3183       | 287.1631        |
| 1457.7133      | 15 | M 4  | 460.2342       | 230.6210        |
| 1514.7347      | 16 | G 3  | 329.1937       | 165.1008        |
| 1611.7875      | 17 | P 2  | 272.1723       | 136.5900        |
|                | 18 | R 1  | 175.1195       | 88.0637         |

N-term:+29.04 K(3):+156.13

SDLEIELLKR, MH+ 1271.7575, m/z 424.5907  
 L OS G27 P150811 220811-s1.06031.06031.3.dta

X-range:

-

MassTol: Y-zoom:

MassType:

AVG  MONO

Axis:

1  2

Label:

I  M  -

Ions:

a  +  2+  3+

b  +  2+  3+

c  +  2+  3+

x  +  2+  3+

y  +  2+  3+

z  +  2+  3+

hide H<sub>2</sub>O/NH<sub>3</sub>

zoom 112-122

GO

scan 6031; 1.8e+001

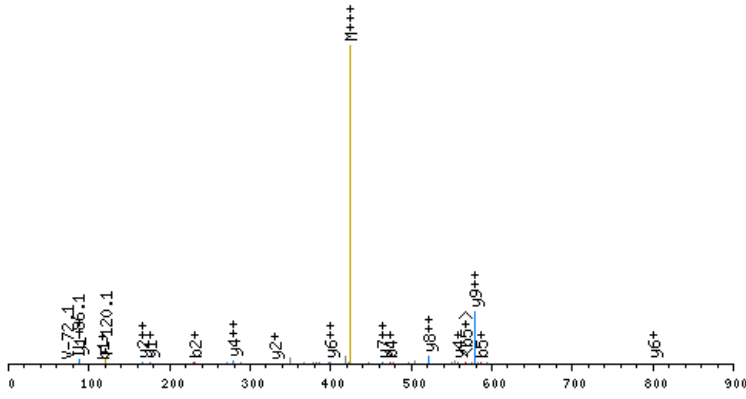

click image to zoom in; click top corners to zoom out [\[precursor±\]](#)

scan 6027; 424.6 m/z; 1.3e+001

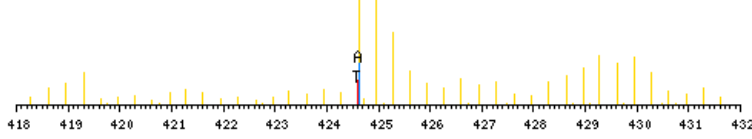

zoomed in precursor plot; T=theoretical m/z, A=acquired m/z

| b <sup>+</sup> | #  | AA # | y <sup>+</sup> | y <sup>2+</sup> |
|----------------|----|------|----------------|-----------------|
| 116.0711       | 1  | S    | 10             |                 |
| 231.0981       | 2  | D    | 9              | 1156.6942       |
| 344.1821       | 3  | L    | 8              | 1041.6672       |
| 473.2247       | 4  | E    | 7              | 928.5832        |
| 586.3088       | 5  | I    | 6              | 799.5406        |
| 715.3514       | 6  | E    | 5              | 686.4565        |
| 828.4354       | 7  | L    | 4              | 557.4139        |
| 941.5195       | 8  | L    | 3              | 444.3299        |
| 1097.6458      | 9  | K    | 2              | 331.2458        |
|                | 10 | R    | 1              | 175.1195        |

N-term:+29.04 K(9):+156.13

SDLELHPPSYWWSHR, MH+ 1848.9033, m/z 462.9813  
 L OS G28 P150811 220811-s1.06857.06857.4.dta

X-range:

-

MassTol: Y-zoom:

MassType:

AVG  MONO

Axis:

1  2

Label:

I  M  -

Ions:

a  +  2+  3+

b  +  2+  3+

c  +  2+  3+

x  +  2+  3+

y  +  2+  3+

z  +  2+  3+

hide H<sub>2</sub>O/NH<sub>3</sub>

zoom 112-122

GO

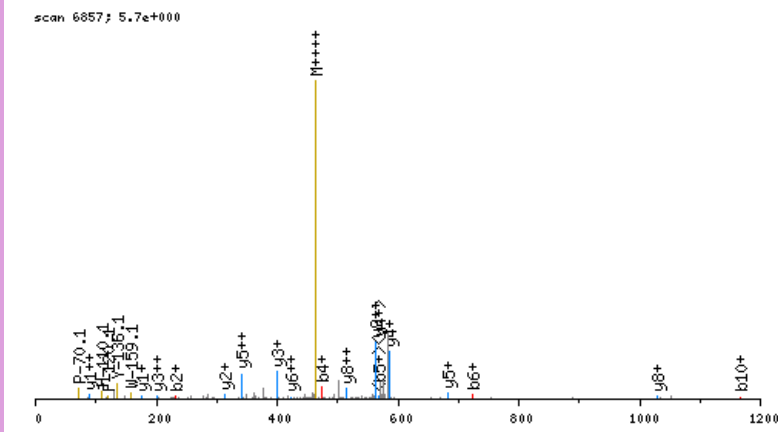

click image to zoom in; click top corners to zoom out [\[precursor±\]](#)

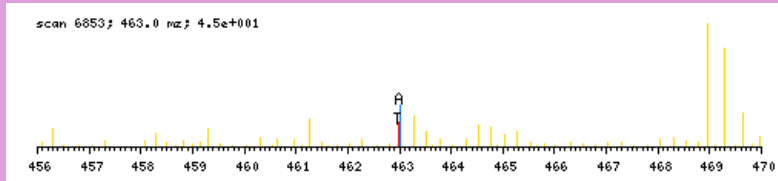

zoomed in precursor plot; T=theoretical m/z, A=acquired m/z

| b <sup>+</sup> | #  | AA # | y <sup>+</sup> | y <sup>2+</sup> |
|----------------|----|------|----------------|-----------------|
| 116.0711       | 1  | S 15 |                |                 |
| 231.0981       | 2  | D 14 | 1733.8400      | 867.4239        |
| 344.1821       | 3  | L 13 | 1618.8130      | 809.9104        |
| 473.2247       | 4  | E 12 | 1505.7290      | 753.3684        |
| 586.3088       | 5  | L 11 | 1376.6864      | 688.8471        |
| 723.3677       | 6  | H 10 | 1263.6023      | 632.3051        |
| 820.4205       | 7  | P 9  | 1126.5434      | 563.7756        |
| 917.4732       | 8  | P 8  | 1029.4906      | 515.2492        |
| 1004.5053      | 9  | S 7  | 932.4379       | 466.7228        |
| 1167.5686      | 10 | Y 6  | 845.4058       | 423.2068        |
| 1264.6214      | 11 | P 5  | 682.3425       | 341.6752        |
| 1450.7007      | 12 | W 4  | 585.2898       | 293.1488        |
| 1537.7327      | 13 | S 3  | 399.2104       | 200.1091        |
| 1674.7916      | 14 | H 2  | 312.1784       | 156.5931        |
|                | 15 | R 1  | 175.1195       | 88.0637         |

N-term:+29.04

SDNQLQEGKNVIGLQMGTR, MH+ 2270.2199, m/z 568.3104  
 H OS G26 P150811 220811-s1.04528.04528.4.dta

X-range:

-

MassTol: Y-zoom:

MassType:

AVG  MONO

Axis:

1  2

Label:

I  M  -

Ions:

a  +  2+  3+

b  +  2+  3+

c  +  2+  3+

x  +  2+  3+

y  +  2+  3+

z  +  2+  3+

hide H<sub>2</sub>O/NH<sub>3</sub>

zoom 112-122

GO

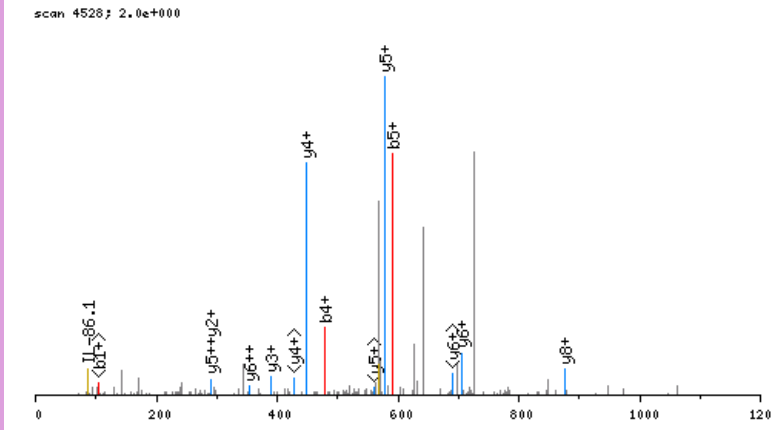

click image to zoom in; click top corners to zoom out [\[precursor±\]](#)

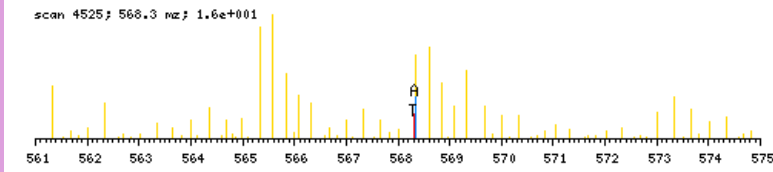

zoomed in precursor plot; T=theoretical m/z, A=acquired m/z

| b <sup>+</sup> | #  | AA # | y <sup>+</sup> | y <sup>2+</sup> |
|----------------|----|------|----------------|-----------------|
| 122.1029       | 1  | S    | 20             |                 |
| 237.1299       | 2  | D    | 19             | 2149.1248       |
| 351.1728       | 3  | N    | 18             | 2034.0979       |
| 479.2314       | 4  | Q    | 17             | 1920.0549       |
| 592.3154       | 5  | L    | 16             | 1791.9964       |
| 720.3740       | 6  | Q    | 15             | 1678.9123       |
| 849.4166       | 7  | E    | 14             | 1550.8537       |
| 906.4381       | 8  | G    | 13             | 1421.8111       |
| 1068.5962      | 9  | K    | 12             | 1364.7897       |
| 1182.6391      | 10 | N    | 11             | 1202.6316       |
| 1281.7075      | 11 | V    | 10             | 1088.5886       |
| 1394.7916      | 12 | I    | 9              | 989.5202        |
| 1451.8130      | 13 | G    | 8              | 876.4362        |
| 1564.8971      | 14 | L    | 7              | 819.4147        |
| 1692.9557      | 15 | Q    | 6              | 706.3306        |
| 1823.9962      | 16 | M    | 5              | 578.2721        |
| 1881.0176      | 17 | G    | 4              | 447.2316        |
| 1982.0653      | 18 | T    | 3              | 390.2101        |
| 2096.1082      | 19 | N    | 2              | 289.1624        |
|                | 20 | R    | 1              | 175.1195        |

N-term:+35.07 K(9):+162.16

SDNQPGVLIQVYEGER, MH+ 1831.9190, m/z 611.3112  
 L OS G25 P150811 220811-s1.06826.06826.3.dta

X-range:

-

MassTol: Y-zoom:

MassType:

AVG  MONO

Axis:

1  2

Label:

I  M  -

Ions:

a  +  2+  3+

b  +  2+  3+

c  +  2+  3+

x  +  2+  3+

y  +  2+  3+

z  +  2+  3+

hide H<sub>2</sub>O/NH<sub>3</sub>

zoom 112-122

GO

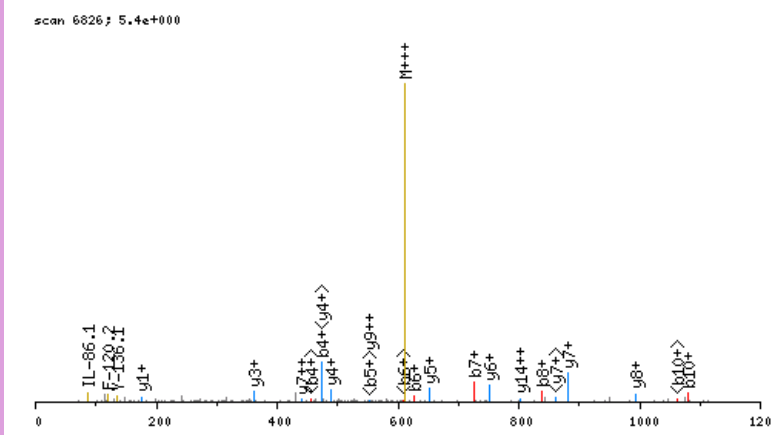

click image to zoom in; click top corners to zoom out [\[precursor±\]](#)

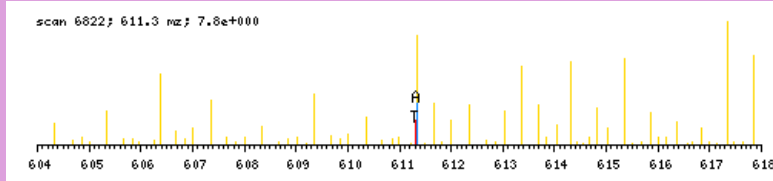

zoomed in precursor plot; T=theoretical m/z, A=acquired m/z

| b <sup>+</sup>   | #  | AA # | y <sup>+</sup>  | y <sup>2+</sup> |
|------------------|----|------|-----------------|-----------------|
| 116.0711         | 1  | S 16 |                 |                 |
| 231.0981         | 2  | D 15 | 1716.8557       | 858.9318        |
| 345.1410         | 3  | N 14 | 1601.8287       | <b>801.4183</b> |
| <b>473.1996</b>  | 4  | Q 13 | 1487.7858       | 744.3968        |
| 570.2523         | 5  | P 12 | 1359.7272       | 680.3675        |
| <b>627.2738</b>  | 6  | G 11 | 1262.6745       | 631.8412        |
| <b>726.3422</b>  | 7  | V 10 | 1205.6530       | 603.3304        |
| <b>839.4263</b>  | 8  | L 9  | 1106.5846       | <b>553.7962</b> |
| 952.5103         | 9  | I 8  | <b>993.5005</b> | 497.2542        |
| <b>1080.5689</b> | 10 | Q 7  | <b>880.4165</b> | <b>440.7121</b> |
| 1179.6373        | 11 | V 6  | <b>752.3579</b> | 376.6829        |
| 1342.7007        | 12 | Y 5  | <b>653.2895</b> | 327.1487        |
| 1471.7433        | 13 | E 4  | <b>490.2262</b> | 245.6170        |
| 1528.7647        | 14 | G 3  | <b>361.1836</b> | 181.0957        |
| 1657.8073        | 15 | E 2  | 304.1621        | 152.5850        |
|                  | 16 | R 1  | <b>175.1195</b> | 88.0637         |

N-term:+29.04

SDPQQPPAPEASASAPPLR, MH+ 2077.0778, m/z 693.0308  
 H OS G24 P150811 220811-s1.03181.03181.3.dta

X-range:

-

MassTol: Y-zoom:

MassType:

AVG  MONO

Axis:

1  2

Label:

I  M  -

Ions:

a  +  2+  3+

b  +  2+  3+

c  +  2+  3+

x  +  2+  3+

y  +  2+  3+

z  +  2+  3+

hide H<sub>2</sub>O/NH<sub>3</sub>

zoom 112-122

GO

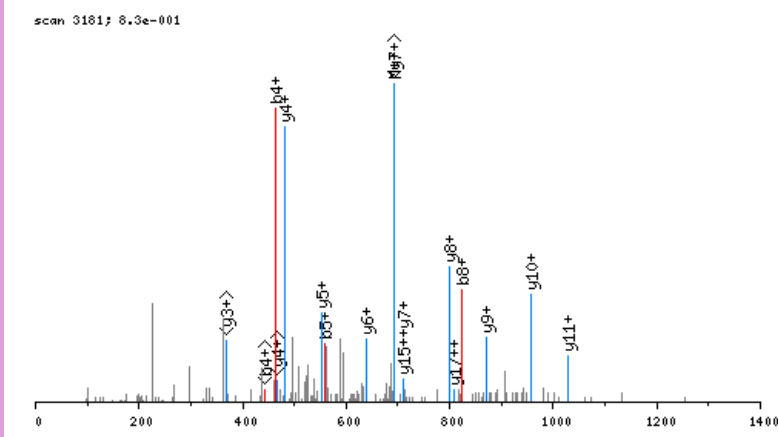

click image to zoom in; click top corners to zoom out [\[precursor±\]](#)

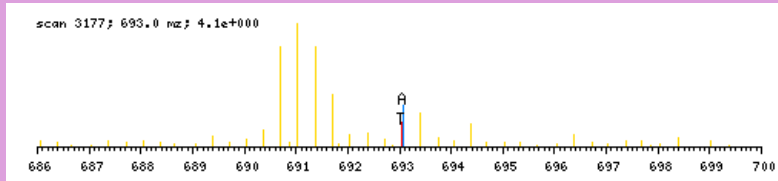

zoomed in precursor plot; T=theoretical m/z, A=acquired m/z

| b <sup>+</sup> | #  | AA # | y <sup>+</sup> | y <sup>2+</sup> |
|----------------|----|------|----------------|-----------------|
| 122.1029       | 1  | S 21 |                |                 |
| 237.1299       | 2  | D 20 | 1955.9827      | 978.4953        |
| 334.1826       | 3  | P 19 | 1840.9557      | 920.9818        |
| 462.2412       | 4  | Q 18 | 1743.9030      | 872.4554        |
| 559.2940       | 5  | P 17 | 1615.8444      | 808.4261        |
| 656.3467       | 6  | P 16 | 1518.7916      | 759.8997        |
| 753.3995       | 7  | P 15 | 1421.7389      | 711.3733        |
| 824.4366       | 8  | A 14 | 1324.6861      | 662.8470        |
| 921.4894       | 9  | P 13 | 1253.6490      | 627.3284        |
| 1050.5320      | 10 | E 12 | 1156.5962      | 578.8020        |
| 1121.5691      | 11 | A 11 | 1027.5536      | 514.2807        |
| 1208.6011      | 12 | S 10 | 956.5165       | 478.7622        |
| 1279.6382      | 13 | A 9  | 869.4845       | 435.2462        |
| 1366.6703      | 14 | S 8  | 798.4474       | 399.7276        |
| 1437.7074      | 15 | A 7  | 711.4153       | 356.2116        |
| 1524.7394      | 16 | S 6  | 640.3782       | 320.6930        |
| 1595.7765      | 17 | A 5  | 553.3462       | 277.1770        |
| 1692.8293      | 18 | P 4  | 482.3091       | 241.6585        |
| 1789.8820      | 19 | P 3  | 385.2563       | 193.1321        |
| 1902.9661      | 20 | L 2  | 288.2036       | 144.6057        |
|                | 21 | R 1  | 175.1195       | 88.0637         |

N-term:+35.07



SDSASAVAPLAPGSEDNFAR, MH+ 1995.9835, m/z 665.9994  
 H OS G24 P150811 220811-s1.03618.03618.3.dta

scan 3618; 3.2e+000

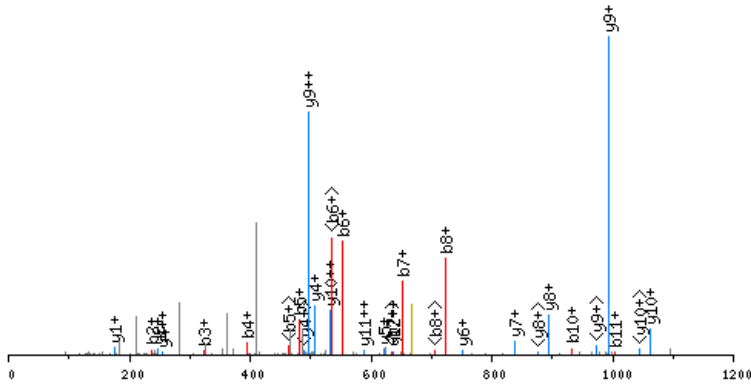

click image to zoom in; click top corners to zoom out [precursor±]

scan 3617; 666.0 m/z; 7.0e+000

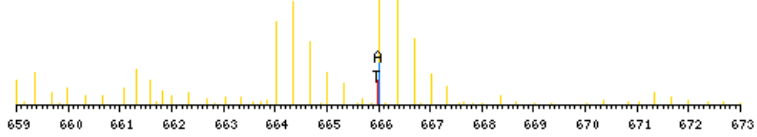

zoomed in precursor plot; T=theoretical m/z, A=acquired m/z

X-range:

-

MassTol: Y-zoom:

MassType:

AVG  MONO

Axis:

1  2

Label:

I  M  -

Ions:

a  +  2+  3+

b  +  2+  3+

c  +  2+  3+

x  +  2+  3+

y  +  2+  3+

z  +  2+  3+

hide H<sub>2</sub>O/NH<sub>3</sub>

zoom 112-122

GO

| b <sup>+</sup> | #  | AA | #  | y <sup>+</sup> | y <sup>2+</sup> |
|----------------|----|----|----|----------------|-----------------|
| 122.1029       | 1  | S  | 20 |                |                 |
| 237.1299       | 2  | D  | 19 | 1874.8884      | 937.9481        |
| 324.1619       | 3  | S  | 18 | 1759.8615      | 880.4347        |
| 395.1990       | 4  | A  | 17 | 1672.8295      | 836.9186        |
| 482.2310       | 5  | S  | 16 | 1601.7924      | 801.4001        |
| 553.2682       | 6  | A  | 15 | 1514.7603      | 757.8841        |
| 652.3366       | 7  | V  | 14 | 1443.7232      | 722.3655        |
| 723.3737       | 8  | A  | 13 | 1344.6548      | 672.8313        |
| 820.4264       | 9  | P  | 12 | 1273.6177      | 637.3128        |
| 933.5105       | 10 | L  | 11 | 1176.5649      | 588.7864        |
| 1004.5476      | 11 | A  | 10 | 1063.4809      | 532.2443        |
| 1101.6004      | 12 | P  | 9  | 992.4437       | 496.7258        |
| 1158.6219      | 13 | G  | 8  | 895.3910       | 448.1994        |
| 1245.6539      | 14 | S  | 7  | 838.3695       | 419.6887        |
| 1374.6965      | 15 | E  | 6  | 751.3375       | 376.1727        |
| 1489.7234      | 16 | D  | 5  | 622.2949       | 311.6514        |
| 1603.7663      | 17 | N  | 4  | 507.2680       | 254.1379        |
| 1750.8348      | 18 | F  | 3  | 393.2250       | 197.1164        |
| 1821.8719      | 19 | A  | 2  | 246.1566       | 123.5822        |
|                | 20 | R  | 1  | 175.1195       | 88.0637         |

N-term:+35.07

SDSEGFKANLSLLR, MH+ 1604.9284, m/z 535.6477  
 H OS G27 P150811 220811-s1.06026.06026.3.dta

scan 6026; 2.8e+001

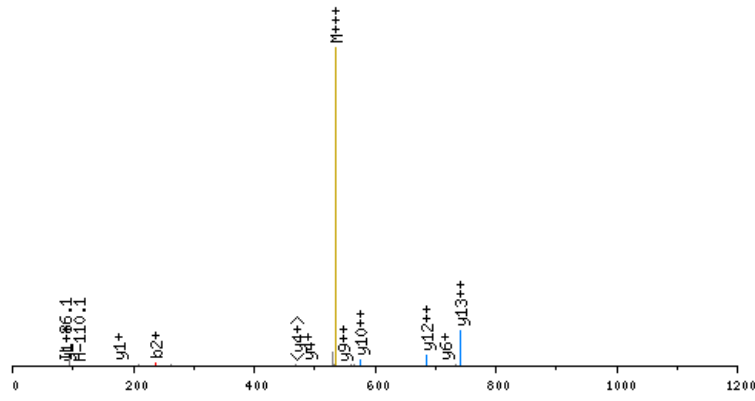

click image to zoom in; click top corners to zoom out [\[precursor±\]](#)

scan 6022; 535.6 m/z; 1.3e+001

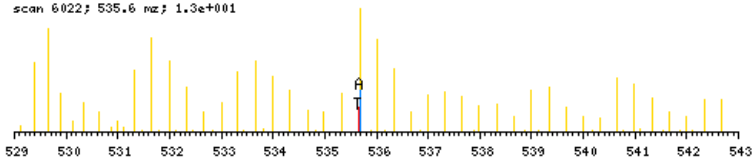

zoomed in precursor plot; T=theoretical m/z, A=acquired m/z

X-range:

-

MassTol: Y-zoom:

MassType:

AVG  MONO

Axis:

1  2

Label:

I  M  -

Ions:

a  +  2+  3+

b  +  2+  3+

c  +  2+  3+

x  +  2+  3+

y  +  2+  3+

z  +  2+  3+

hide H<sub>2</sub>O/NH<sub>3</sub>

zoom 112-122

GO

| b <sup>+</sup> | #  | AA # | y <sup>+</sup> | y <sup>2+</sup> |
|----------------|----|------|----------------|-----------------|
| 122.1029       | 1  | S 14 |                |                 |
| 237.1299       | 2  | D 13 | 1483.8333      | 742.4206        |
| 324.1619       | 3  | S 12 | 1368.8064      | 684.9071        |
| 453.2045       | 4  | E 11 | 1281.7743      | 641.3911        |
| 510.2260       | 5  | G 10 | 1152.7317      | 576.8698        |
| 657.2944       | 6  | F 9  | 1095.7103      | 548.3591        |
| 819.4525       | 7  | K 8  | 948.6419       | 474.8248        |
| 890.4896       | 8  | A 7  | 786.4838       | 393.7458        |
| 1004.5325      | 9  | N 6  | 715.4466       | 358.2272        |
| 1117.6166      | 10 | L 5  | 601.4037       | 301.2058        |
| 1204.6486      | 11 | S 4  | 488.3197       | 244.6637        |
| 1317.7327      | 12 | L 3  | 401.2876       | 201.1477        |
| 1430.8167      | 13 | L 2  | 288.2036       | 144.6057        |
|                | 14 | R 1  | 175.1195       | 88.0637         |

N-term:+35.07 K(7):+162.16

SDSMDTGAGSIR, MH+ 1224.5530, m/z 612.7801  
 L OS G25 P150811 220811-s1.02465.02465.2.dta

X-range:

-

MassTol: Y-zoom:

MassType:

AVG  MONO

Axis:

1  2

Label:

I  M  -

Ions:

a  +  2+  3+

b  +  2+  3+

c  +  2+  3+

x  +  2+  3+

y  +  2+  3+

z  +  2+  3+

hide H<sub>2</sub>O/NH<sub>3</sub>

zoom 112-122

GO

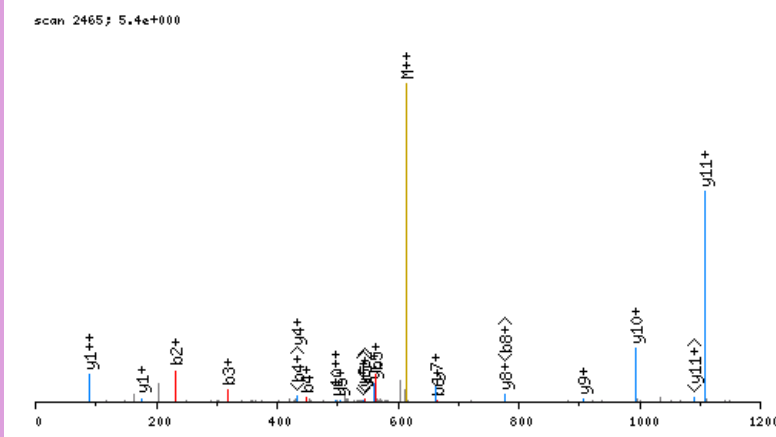

click image to zoom in; click top corners to zoom out [\[precursor±\]](#)

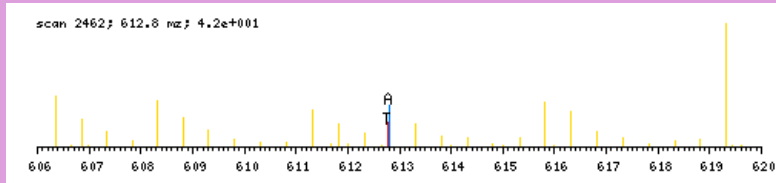

zoomed in precursor plot; T=theoretical m/z, A=acquired m/z

| b <sup>+</sup> | #  | AA # | y <sup>+</sup> | y <sup>2+</sup> |
|----------------|----|------|----------------|-----------------|
| 116.0711       | 1  | S 12 |                |                 |
| 231.0981       | 2  | D 11 | 1109.4897      | 555.2488        |
| 318.1301       | 3  | S 10 | 994.4628       | 497.7353        |
| 449.1706       | 4  | M 9  | 907.4307       | 454.2193        |
| 564.1975       | 5  | D 8  | 776.3903       | 388.6990        |
| 665.2452       | 6  | T 7  | 661.3633       | 331.1856        |
| 722.2667       | 7  | G 6  | 560.3156       | 280.6617        |
| 793.3038       | 8  | A 5  | 503.2942       | 252.1510        |
| 850.3252       | 9  | G 4  | 432.2571       | 216.6324        |
| 937.3573       | 10 | S 3  | 375.2356       | 188.1217        |
| 1050.4413      | 11 | I 2  | 288.2036       | 144.6057        |
|                | 12 | R 1  | 175.1195       | 88.0637         |

N-term:+29.04

SDSQVHSGVQVEAQR, MH+ 1654.8149, m/z 552.2765  
 L OS G27 P150811 220811-s1.02135.02135.3.dta

X-range:

-

MassTol: Y-zoom:

MassType:

AVG  MONO

Axis:

1  2

Label:

I  M  -

Ions:

a  +  2+  3+

b  +  2+  3+

c  +  2+  3+

x  +  2+  3+

y  +  2+  3+

z  +  2+  3+

hide H<sub>2</sub>O/NH<sub>3</sub>

zoom 112-122

GO

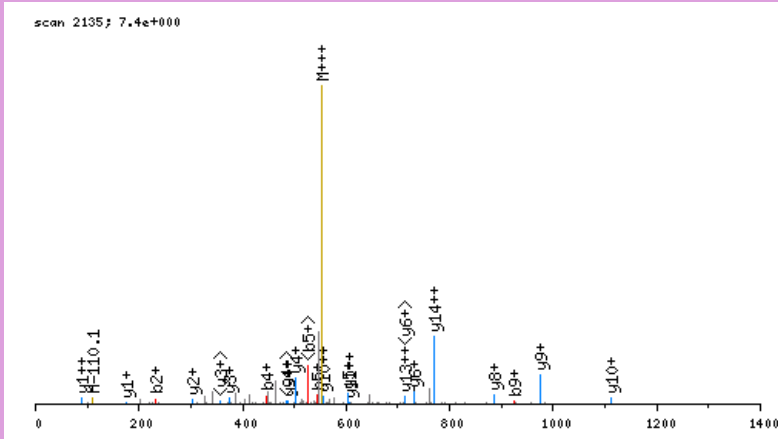

click image to zoom in; click top corners to zoom out [\[precursor±\]](#)

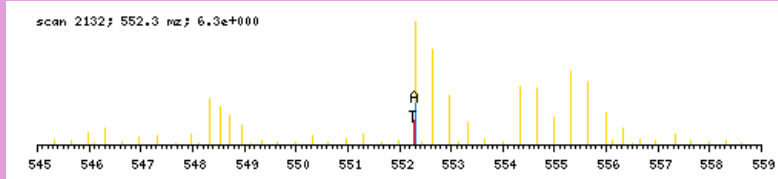

zoomed in precursor plot; T=theoretical m/z, A=acquired m/z

| b <sup>+</sup> | #  | AA # | y <sup>+</sup> | y <sup>2+</sup> |
|----------------|----|------|----------------|-----------------|
| 116.0711       | 1  | S 15 |                |                 |
| 231.0981       | 2  | D 14 | 1539.7516      | 770.3797        |
| 318.1301       | 3  | S 13 | 1424.7246      | 712.8662        |
| 446.1887       | 4  | Q 12 | 1337.6926      | 669.3502        |
| 545.2571       | 5  | V 11 | 1209.6340      | 605.3209        |
| 682.3160       | 6  | H 10 | 1110.5656      | 555.7867        |
| 769.3480       | 7  | S 9  | 973.5067       | 487.2573        |
| 826.3695       | 8  | G 8  | 886.4747       | 443.7412        |
| 925.4379       | 9  | V 7  | 829.4532       | 415.2305        |
| 1053.4965      | 10 | Q 6  | 730.3848       | 365.6963        |
| 1152.5649      | 11 | V 5  | 602.3262       | 301.6670        |
| 1281.6075      | 12 | E 4  | 503.2578       | 252.1328        |
| 1352.6446      | 13 | A 3  | 374.2152       | 187.6115        |
| 1480.7032      | 14 | Q 2  | 303.1781       | 152.0930        |
|                | 15 | R 1  | 175.1195       | 88.0637         |

N-term:+29.04

SDSQVHSGVQVEGR, MH+ 1512.7406, m/z 504.9184  
 L OS G27 P150811 220811-s1.02025.02025.3.dta

scan 2025; 2.8e+001

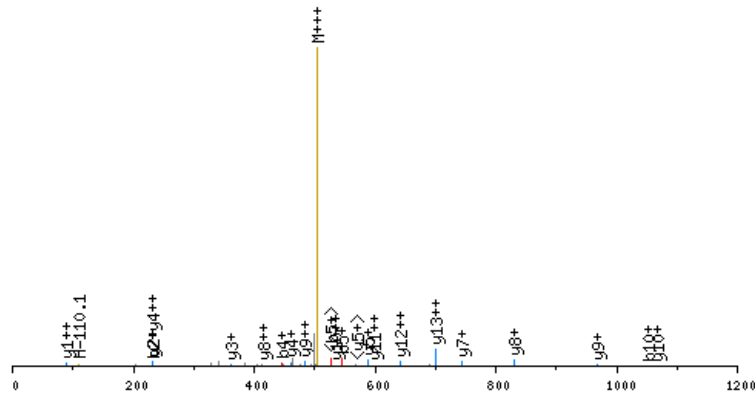

click image to zoom in; click top corners to zoom out [\[precursor±\]](#)

scan 2022; 504.9 m/z; 1.7e+001

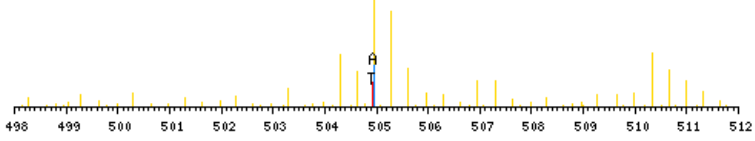

zoomed in precursor plot; T=theoretical m/z, A=acquired m/z

X-range:

-

MassTol: Y-zoom:

MassType:

AVG  MONO

Axis:

1  2

Label:

I  M  -

Ions:

a  +  2+  3+

b  +  2+  3+

c  +  2+  3+

x  +  2+  3+

y  +  2+  3+

z  +  2+  3+

hide H<sub>2</sub>O/NH<sub>3</sub>

zoom 112-122

GO

| b <sup>+</sup> | #  | AA # | y <sup>+</sup> | y <sup>2+</sup> |
|----------------|----|------|----------------|-----------------|
| 116.0711       | 1  | S 14 |                |                 |
| 231.0981       | 2  | D 13 | 1397.6773      | 699.3426        |
| 318.1301       | 3  | S 12 | 1282.6504      | 641.8291        |
| 446.1887       | 4  | Q 11 | 1195.6184      | 598.3131        |
| 545.2571       | 5  | V 10 | 1067.5598      | 534.2838        |
| 682.3160       | 6  | H 9  | 968.4914       | 484.7496        |
| 769.3480       | 7  | S 8  | 831.4325       | 416.2201        |
| 826.3695       | 8  | G 7  | 744.4004       | 372.7041        |
| 925.4379       | 9  | V 6  | 687.3790       | 344.1934        |
| 1053.4965      | 10 | Q 5  | 588.3105       | 294.6592        |
| 1152.5649      | 11 | V 4  | 460.2520       | 230.6299        |
| 1281.6075      | 12 | E 3  | 361.1836       | 181.0957        |
| 1338.6290      | 13 | G 2  | 232.1410       | 116.5744        |
|                | 14 | R 1  | 175.1195       | 88.0637         |

N-term:+29.04

SDSSDSMDTGAGSIR, MH+ 1513.6440, m/z 505.2195  
 L OS G25 P150811 220811-s1.02641.02641.3.dta

X-range:

-

MassTol: Y-zoom:

MassType:

AVG  MONO

Axis:

1  2

Label:

I  M  -

Ions:

a  +  2+  3+

b  +  2+  3+

c  +  2+  3+

x  +  2+  3+

y  +  2+  3+

z  +  2+  3+

hide H<sub>2</sub>O/NH<sub>3</sub>

zoom 112-122

GO

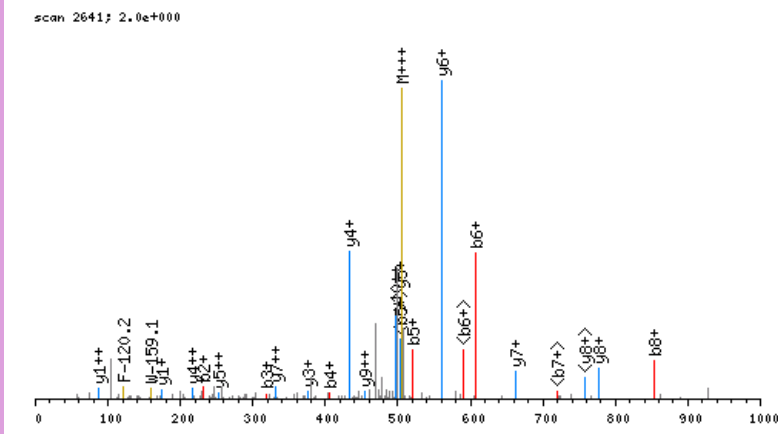

click image to zoom in; click top corners to zoom out [\[precursor±\]](#)

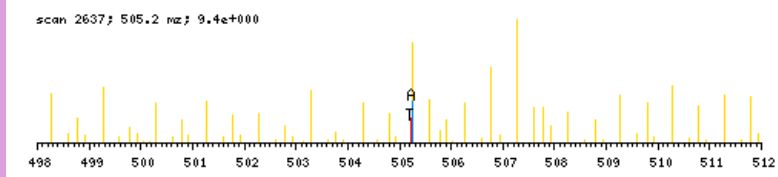

zoomed in precursor plot; T=theoretical m/z, A=acquired m/z

| b <sup>+</sup> | #  | AA # | y <sup>+</sup> | y <sup>2+</sup> |
|----------------|----|------|----------------|-----------------|
| 116.0711       | 1  | S    | 15             |                 |
| 231.0981       | 2  | D    | 14             | 1398.5807       |
| 318.1301       | 3  | S    | 13             | 1283.5538       |
| 405.1621       | 4  | S    | 12             | 1196.5217       |
| 520.1891       | 5  | D    | 11             | 1109.4897       |
| 607.2211       | 6  | S    | 10             | 994.4628        |
| 738.2616       | 7  | M    | 9              | 907.4307        |
| 853.2885       | 8  | D    | 8              | 776.3903        |
| 954.3362       | 9  | T    | 7              | 661.3633        |
| 1011.3577      | 10 | G    | 6              | 560.3156        |
| 1082.3948      | 11 | A    | 5              | 503.2942        |
| 1139.4162      | 12 | G    | 4              | 432.2571        |
| 1226.4483      | 13 | S    | 3              | 375.2356        |
| 1339.5323      | 14 | I    | 2              | 288.2036        |
|                | 15 | R    | 1              | 175.1195        |

N-term:+29.04

SDTAITKDMFEEALR, MH+ 1782.8948, m/z 594.9698  
 L OS G26 P150811 220811-s1.07505.07505.3.dta

X-range:

-

MassTol: Y-zoom:

MassType:

AVG  MONO

Axis:

1  2

Label:

I  M  -

Ions:

a  +  2+  3+

b  +  2+  3+

c  +  2+  3+

x  +  2+  3+

y  +  2+  3+

z  +  2+  3+

hide H<sub>2</sub>O/NH<sub>3</sub>

zoom 112-122

GO

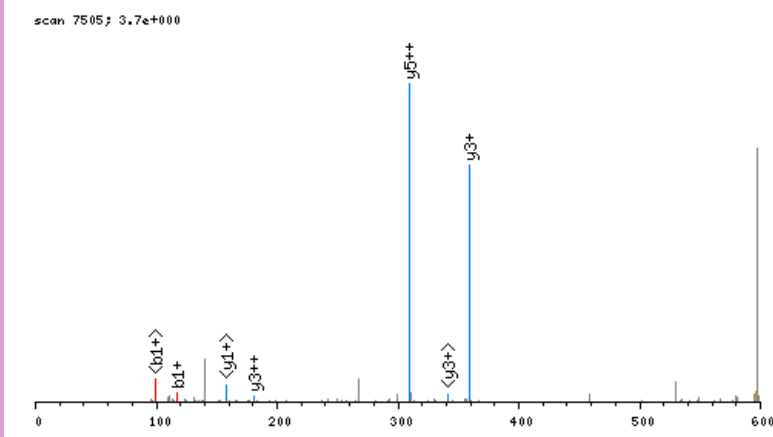

click image to zoom in; click top corners to zoom out [\[precursor±\]](#)

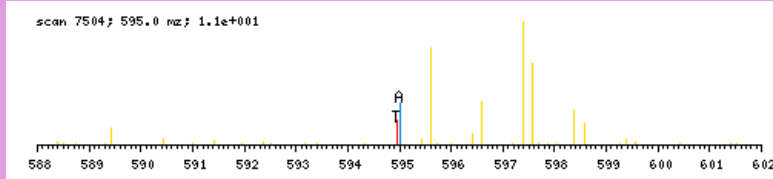

zoomed in precursor plot; T=theoretical m/z, A=acquired m/z

| b <sup>+</sup> | #  | AA # | y <sup>+</sup> | y <sup>2+</sup> |
|----------------|----|------|----------------|-----------------|
| 116.0711       | 1  | S 15 |                |                 |
| 231.0981       | 2  | D 14 | 1667.8315      | 834.4197        |
| 332.1458       | 3  | T 13 | 1552.8045      | 776.9062        |
| 403.1829       | 4  | A 12 | 1451.7569      | 726.3823        |
| 516.2669       | 5  | I 11 | 1380.7197      | 690.8638        |
| 617.3146       | 6  | T 10 | 1267.6357      | 634.3218        |
| 773.4409       | 7  | K 9  | 1166.5880      | 583.7979        |
| 888.4678       | 8  | D 8  | 1010.4617      | 505.7348        |
| 1019.5083      | 9  | M 7  | 895.4348       | 448.2213        |
| 1166.5767      | 10 | F 6  | 764.3943       | 382.7011        |
| 1295.6193      | 11 | E 5  | 617.3259       | 309.1668        |
| 1424.6619      | 12 | E 4  | 488.2833       | 244.6455        |
| 1495.6990      | 13 | A 3  | 359.2407       | 180.1243        |
| 1608.7831      | 14 | L 2  | 288.2036       | 144.6057        |
|                | 15 | R 1  | 175.1195       | 88.0637         |

N-term:+29.04 K(7):+156.13

SDVLELTDENFESR, MH+ 1681.7921, m/z 841.3997  
 L OS G25 P150811 220811-s1.07023.07023.2.dta

X-range:

-

MassTol: Y-zoom:

MassType:

AVG  MONO

Axis:

1  2

Label:

I  M  -

Ions:

a  +  2+  3+

b  +  2+  3+

c  +  2+  3+

x  +  2+  3+

y  +  2+  3+

z  +  2+  3+

hide H<sub>2</sub>O/NH<sub>3</sub>

zoom 112-122

GO

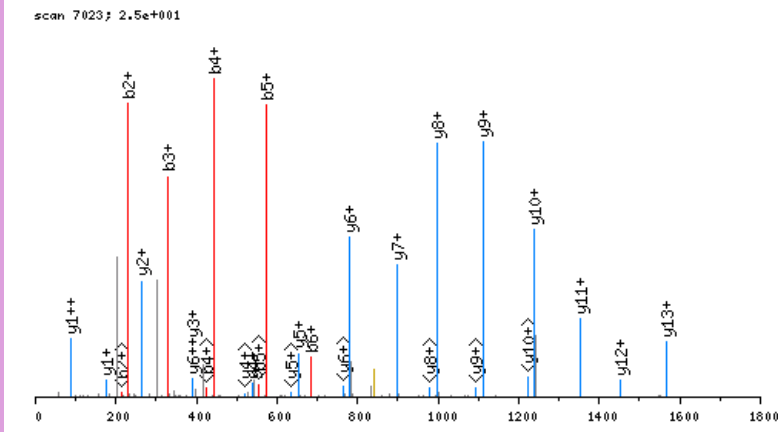

click image to zoom in; click top corners to zoom out [\[precursor±\]](#)

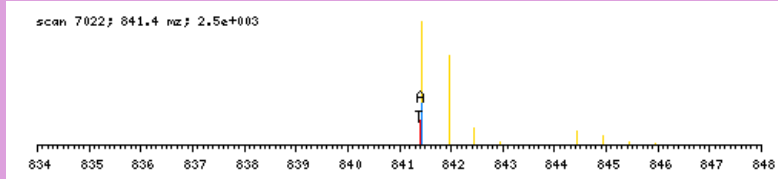

zoomed in precursor plot; T=theoretical m/z, A=acquired m/z

| b <sup>+</sup> | #  | AA # | y <sup>+</sup> | y <sup>2+</sup> |
|----------------|----|------|----------------|-----------------|
| 116.0711       | 1  | S 14 |                |                 |
| 231.0981       | 2  | D 13 | 1566.7288      | 783.8683        |
| 330.1665       | 3  | V 12 | 1451.7018      | 726.3548        |
| 443.2505       | 4  | L 11 | 1352.6334      | 676.8206        |
| 572.2931       | 5  | E 10 | 1239.5493      | 620.2786        |
| 685.3772       | 6  | L 9  | 1110.5067      | 555.7573        |
| 786.4249       | 7  | T 8  | 997.4227       | 499.2153        |
| 901.4518       | 8  | D 7  | 896.3750       | 448.6914        |
| 1030.4944      | 9  | E 6  | 781.3481       | 391.1779        |
| 1144.5373      | 10 | N 5  | 652.3055       | 326.6566        |
| 1291.6058      | 11 | F 4  | 538.2625       | 269.6352        |
| 1420.6484      | 12 | E 3  | 391.1941       | 196.1010        |
| 1507.6804      | 13 | S 2  | 262.1515       | 131.5797        |
|                | 14 | R 1  | 175.1195       | 88.0637         |

N-term:+29.04



SEAAQYNPEPPPPR, MH+ 1651.8080, m/z 551.2742  
 L OS G25 P150811 220811-s1.02926.02926.3.dta

X-range:

-

MassTol: Y-zoom:

MassType:

AVG  MONO

Axis:

1  2

Label:

I  M  -

Ions:

a  +  2+  3+

b  +  2+  3+

c  +  2+  3+

x  +  2+  3+

y  +  2+  3+

z  +  2+  3+

hide H<sub>2</sub>O/NH<sub>3</sub>

zoom 112-122

GO

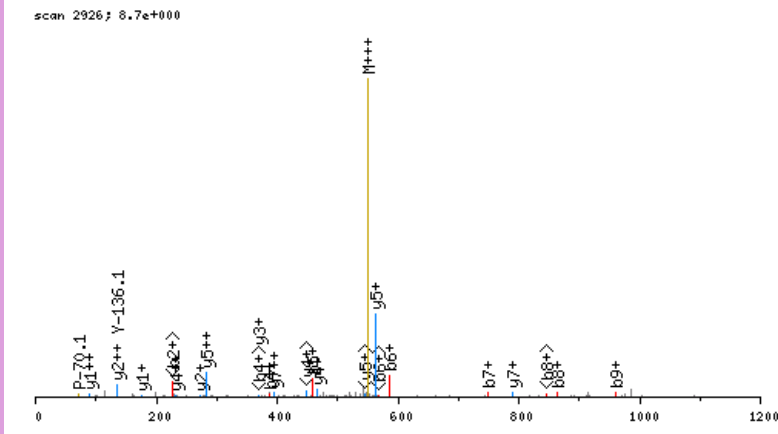

click image to zoom in; click top corners to zoom out [\[precursor±\]](#)

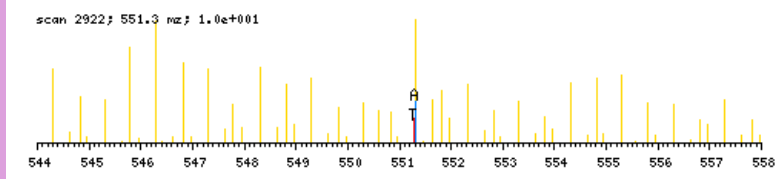

zoomed in precursor plot; T=theoretical m/z, A=acquired m/z

| b <sup>+</sup> | #  | AA # | y <sup>+</sup> | y <sup>2+</sup> |
|----------------|----|------|----------------|-----------------|
| 116.0711       | 1  | S 15 |                |                 |
| 245.1137       | 2  | E 14 | 1536.7447      | 768.8763        |
| 316.1508       | 3  | A 13 | 1407.7021      | 704.3550        |
| 387.1879       | 4  | A 12 | 1336.6650      | 668.8364        |
| 458.2251       | 5  | A 11 | 1265.6279      | 633.3178        |
| 586.2836       | 6  | Q 10 | 1194.5907      | 597.7993        |
| 749.3470       | 7  | Y 9  | 1066.5322      | 533.7700        |
| 863.3899       | 8  | N 8  | 903.4688       | 452.2383        |
| 960.4427       | 9  | P 7  | 789.4259       | 395.2169        |
| 1089.4853      | 10 | E 6  | 692.3731       | 346.6905        |
| 1186.5380      | 11 | P 5  | 563.3306       | 282.1692        |
| 1283.5908      | 12 | P 4  | 466.2778       | 233.6428        |
| 1380.6435      | 13 | P 3  | 369.2250       | 185.1164        |
| 1477.6963      | 14 | P 2  | 272.1723       | 136.5900        |
|                | 15 | R 1  | 175.1195       | 88.0637         |

N-term:+29.04

SEDEVGVEGPKGDGPGQGR, MH+ 1946.0256, m/z 649.3467  
 H OS G26 P150811 220811-s1.02498.02498.3.dta

X-range:

-

MassTol: Y-zoom:

MassType:

AVG  MONO

Axis:

1  2

Label:

I  M  -

Ions:

a  +  2+  3+

b  +  2+  3+

c  +  2+  3+

x  +  2+  3+

y  +  2+  3+

z  +  2+  3+

hide H<sub>2</sub>O/NH<sub>3</sub>

zoom 112-122

GO

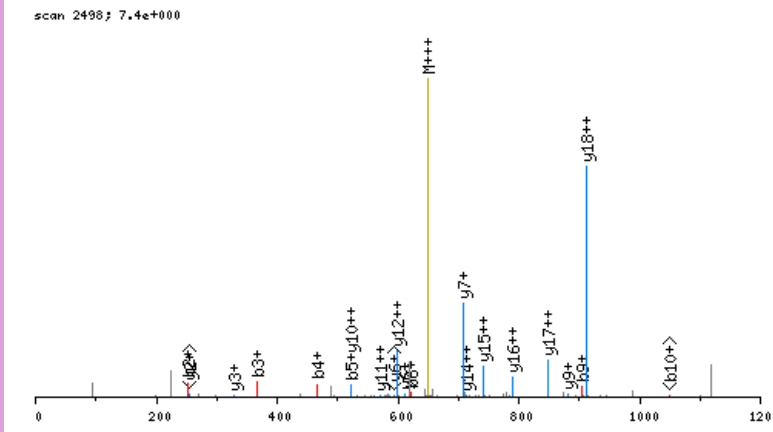

click image to zoom in; click top corners to zoom out [\[precursor±\]](#)

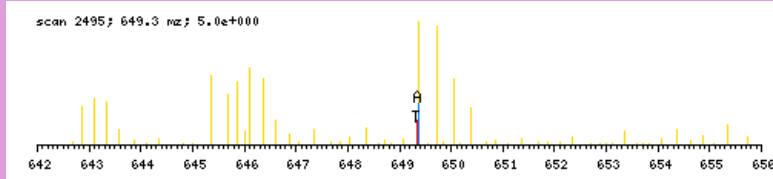

zoomed in precursor plot; T=theoretical m/z, A=acquired m/z

| b <sup>+</sup> | #  | AA # | y <sup>+</sup> | y <sup>2+</sup> |
|----------------|----|------|----------------|-----------------|
| 122.1029       | 1  | S    | 19             |                 |
| 251.1455       | 2  | E    | 18             | 1824.9305       |
| 366.1725       | 3  | D    | 17             | 1695.8879       |
| 465.2409       | 4  | V    | 16             | 1580.8609       |
| 522.2623       | 5  | G    | 15             | 1481.7925       |
| 621.3308       | 6  | V    | 14             | 1424.7710       |
| 750.3733       | 7  | E    | 13             | 1325.7026       |
| 807.3948       | 8  | G    | 12             | 1196.6600       |
| 904.4476       | 9  | P    | 11             | 1139.6386       |
| 1066.6057      | 10 | K    | 10             | 1042.5858       |
| 1123.6271      | 11 | G    | 9              | 880.4277        |
| 1238.6541      | 12 | D    | 8              | 823.4062        |
| 1335.7068      | 13 | P    | 7              | 708.3793        |
| 1392.7283      | 14 | G    | 6              | 611.3265        |
| 1489.7811      | 15 | P    | 5              | 554.3051        |
| 1617.8397      | 16 | Q    | 4              | 457.2523        |
| 1674.8611      | 17 | G    | 3              | 329.1937        |
| 1771.9139      | 18 | P    | 2              | 272.1723        |
|                | 19 | R    | 1              | 175.1195        |

N-term:+35.07 K(10):+162.16

SEETKQNEAFSLTAKGKR, MH+ 2217.3152, m/z 555.0843  
 H OS G28 P150811 220811-s1.02774.02774.4.dta

scan 2774; 1.6e+001

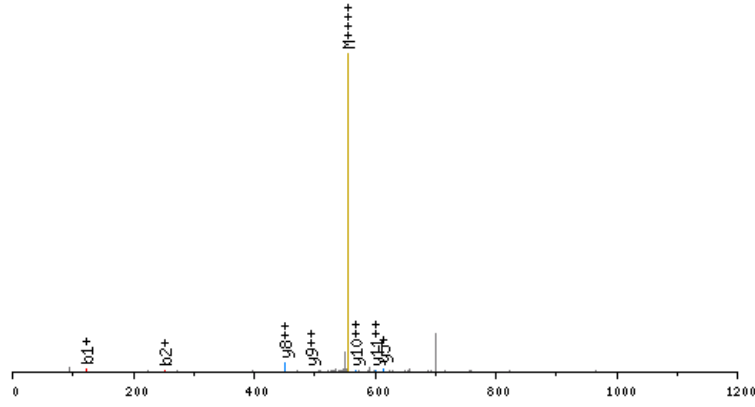

click image to zoom in; click top corners to zoom out [precursor±]

scan 2773; 555.1 m/z; 3.5e+001

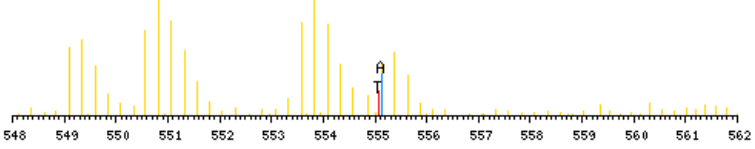

zoomed in precursor plot; T=theoretical m/z, A=acquired m/z

X-range:

-

MassTol: Y-zoom:

MassType:

AVG  MONO

Axis:

1  2

Label:

I  M  -

Ions:

a  +  2+  3+

b  +  2+  3+

c  +  2+  3+

x  +  2+  3+

y  +  2+  3+

z  +  2+  3+

hide H<sub>2</sub>O/NH<sub>3</sub>

zoom 112-122

GO

| b <sup>+</sup> | #  | AA | #  | y <sup>+</sup> | y <sup>2+</sup> |
|----------------|----|----|----|----------------|-----------------|
| 122.1029       | 1  | S  | 19 |                |                 |
| 251.1455       | 2  | E  | 18 | 2096.2201      | 1048.6140       |
| 380.1881       | 3  | E  | 17 | 1967.1775      | 984.0927        |
| 481.2358       | 4  | T  | 16 | 1838.1349      | 919.5714        |
| 643.3939       | 5  | K  | 15 | 1737.0872      | 869.0475        |
| 771.4525       | 6  | Q  | 14 | 1574.9291      | 787.9685        |
| 885.4954       | 7  | N  | 13 | 1446.8706      | 723.9392        |
| 1014.5380      | 8  | E  | 12 | 1332.8276      | 666.9177        |
| 1085.5751      | 9  | A  | 11 | 1203.7850      | 602.3964        |
| 1232.6435      | 10 | F  | 10 | 1132.7479      | 566.8779        |
| 1319.6755      | 11 | S  | 9  | 985.6795       | 493.3437        |
| 1432.7596      | 12 | L  | 8  | 898.6475       | 449.8277        |
| 1533.8073      | 13 | T  | 7  | 785.5634       | 393.2856        |
| 1604.8444      | 14 | A  | 6  | 684.5157       | 342.7618        |
| 1767.0025      | 15 | K  | 5  | 613.4786       | 307.2432        |
| 1824.0240      | 16 | G  | 4  | 451.3205       | 226.1642        |
| 1986.1821      | 17 | K  | 3  | 394.2991       | 197.6534        |
| 2043.2035      | 18 | G  | 2  | 232.1410       | 116.5744        |
|                | 19 | R  | 1  | 175.1195       | 88.0637         |

N-term:+35.07 K(5):+162.16  
 K(15):+162.16 K(17):+162.16

SEFGDSSSPATR, MH+ 1268.5759, m/z 634.7916  
 L OS G25 P150811 220811-s1.02260.02260.2.dta

scan 2260; 4.8e+000

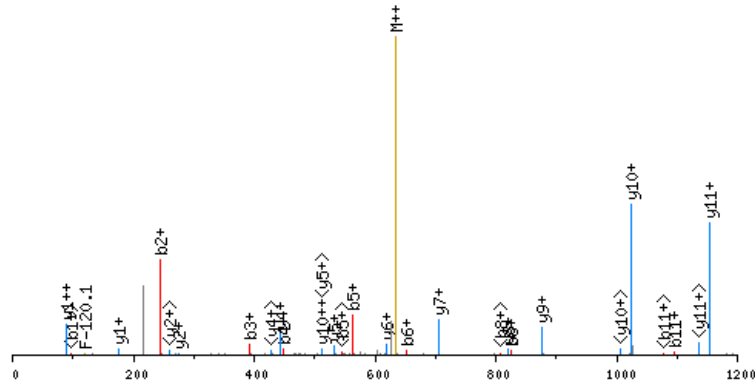

click image to zoom in; click top corners to zoom out [\[precursor±\]](#)

scan 2257; 634.8 m/z; 2.0e+001

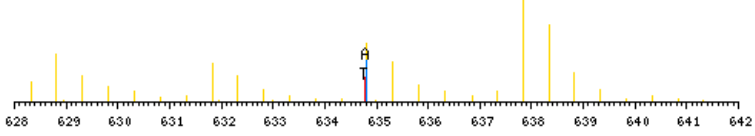

zoomed in precursor plot; T=theoretical m/z, A=acquired m/z

X-range:

-

MassTol: Y-zoom:

MassType:

AVG  MONO

Axis:

1  2

Label:

I  M  -

Ions:

a  +  2+  3+

b  +  2+  3+

c  +  2+  3+

x  +  2+  3+

y  +  2+  3+

z  +  2+  3+

hide H<sub>2</sub>O/NH<sub>3</sub>

zoom 112-122

GO

| b <sup>+</sup> | #  | AA | #  | y <sup>+</sup> | y <sup>2+</sup> |
|----------------|----|----|----|----------------|-----------------|
| 116.0711       | 1  | S  | 12 |                |                 |
| 245.1137       | 2  | E  | 11 | 1153.5126      | 577.2602        |
| 392.1821       | 3  | F  | 10 | 1024.4700      | 512.7389        |
| 449.2036       | 4  | G  | 9  | 877.4015       | 439.2047        |
| 564.2305       | 5  | D  | 8  | 820.3801       | 410.6940        |
| 651.2626       | 6  | S  | 7  | 705.3531       | 353.1805        |
| 738.2946       | 7  | S  | 6  | 618.3211       | 309.6645        |
| 825.3266       | 8  | S  | 5  | 531.2891       | 266.1485        |
| 922.3794       | 9  | P  | 4  | 444.2571       | 222.6324        |
| 993.4165       | 10 | A  | 3  | 347.2043       | 174.1061        |
| 1094.4642      | 11 | T  | 2  | 276.1672       | 138.5875        |
|                | 12 | R  | 1  | 175.1195       | 88.0637         |

N-term:+29.04

SEGHSDFSEGGAVGAHR, MH+ 1798.8108, m/z 450.4582  
 L OS G28 P150811 220811-s1.02224.02224.4.dta

X-range:

-

MassTol: Y-zoom:

MassType:

AVG  MONO

Axis:

1  2

Label:

I  M  -

Ions:

a  +  2+  3+

b  +  2+  3+

c  +  2+  3+

x  +  2+  3+

y  +  2+  3+

z  +  2+  3+

hide H<sub>2</sub>O/NH<sub>3</sub>

zoom 112-122

GO

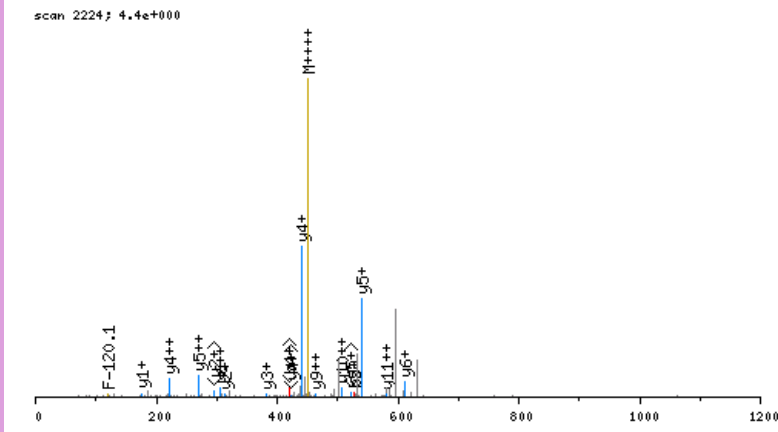

click image to zoom in; click top corners to zoom out [\[precursor±\]](#)

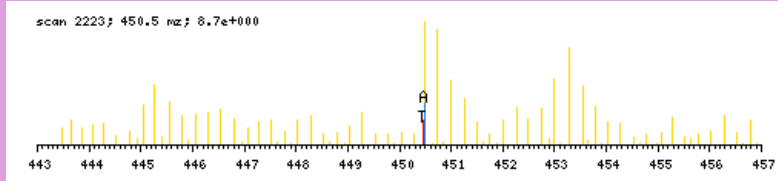

zoomed in precursor plot; T=theoretical m/z, A=acquired m/z

| b <sup>+</sup> | #  | AA # | y <sup>+</sup> | y <sup>2+</sup> |
|----------------|----|------|----------------|-----------------|
| 116.0711       | 1  | S 17 |                |                 |
| 245.1137       | 2  | E 16 | 1683.7475      | 842.3777        |
| 302.1352       | 3  | G 15 | 1554.7049      | 777.8564        |
| 439.1941       | 4  | H 14 | 1497.6835      | 749.3457        |
| 526.2261       | 5  | S 13 | 1360.6246      | 680.8162        |
| 641.2531       | 6  | D 12 | 1273.5925      | 637.3002        |
| 788.3215       | 7  | F 11 | 1158.5656      | 579.7867        |
| 875.3535       | 8  | S 10 | 1011.4972      | 506.2525        |
| 1004.3961      | 9  | E 9  | 924.4652       | 462.7365        |
| 1061.4176      | 10 | G 8  | 795.4226       | 398.2152        |
| 1189.4761      | 11 | Q 7  | 738.4011       | 369.7045        |
| 1260.5133      | 12 | A 6  | 610.3425       | 305.6752        |
| 1359.5817      | 13 | V 5  | 539.3054       | 270.1566        |
| 1416.6031      | 14 | G 4  | 440.2370       | 220.6224        |
| 1487.6403      | 15 | A 3  | 383.2155       | 192.1117        |
| 1624.6992      | 16 | H 2  | 312.1784       | 156.5931        |
|                | 17 | R 1  | 175.1195       | 88.0637         |

N-term:+29.04

SEHVTKCCSGSLVER, MH+ 1816.9321, m/z 454.9885  
 H OS G28 P150811 220811-s1.02004.02004.4.dta

X-range:

-

MassTol: Y-zoom:

MassType:

AVG  MONO

Axis:

1  2

Label:

I  M  -

Ions:

a  +  2+  3+

b  +  2+  3+

c  +  2+  3+

x  +  2+  3+

y  +  2+  3+

z  +  2+  3+

hide H<sub>2</sub>O/NH<sub>3</sub>

zoom 112-122

GO

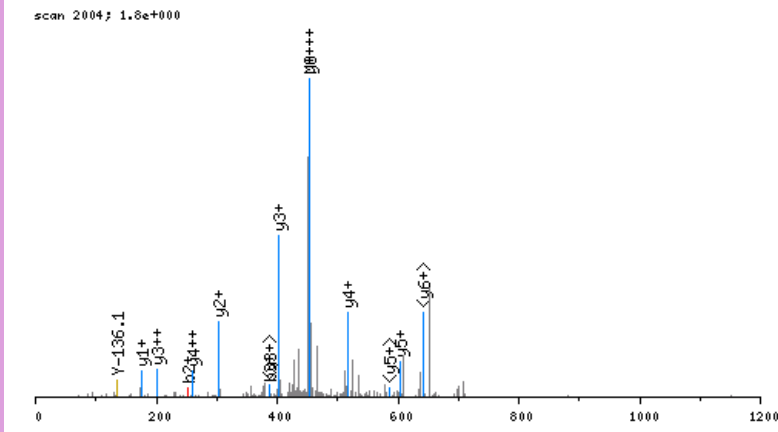

click image to zoom in; click top corners to zoom out [\[precursor±\]](#)

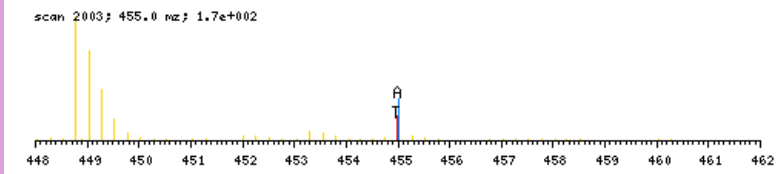

zoomed in precursor plot; T=theoretical m/z, A=acquired m/z

| b <sup>+</sup> | #  | AA | #  | y <sup>+</sup> | y <sup>2+</sup> |
|----------------|----|----|----|----------------|-----------------|
| 122.1029       | 1  | S  | 15 |                |                 |
| 251.1455       | 2  | E  | 14 | 1695.8370      | 848.4224        |
| 388.2044       | 3  | H  | 13 | 1566.7944      | 783.9011        |
| 487.2728       | 4  | V  | 12 | 1429.7355      | 715.3717        |
| 588.3205       | 5  | T  | 11 | 1330.6671      | 665.8374        |
| 750.4786       | 6  | K  | 10 | 1229.6194      | 615.3136        |
| 910.5092       | 7  | C  | 9  | 1067.4613      | 534.2346        |
| 1070.5398      | 8  | C  | 8  | 907.4307       | 454.2193        |
| 1157.5719      | 9  | S  | 7  | 747.4001       | 374.2040        |
| 1214.5933      | 10 | G  | 6  | 660.3681       | 330.6879        |
| 1301.6253      | 11 | S  | 5  | 603.3466       | 302.1772        |
| 1414.7094      | 12 | L  | 4  | 516.3146       | 258.6612        |
| 1513.7778      | 13 | V  | 3  | 403.2305       | 202.1192        |
| 1642.8204      | 14 | E  | 2  | 304.1621       | 152.5850        |
|                | 15 | R  | 1  | 175.1195       | 88.0637         |

N-term:+35.07 K(6):+162.16  
 C(7):+160.03 C(8):+160.03

X-range:

0  -  0

MassTol: Y-zoom:

0.  1.

MassType:

AVG  MONO

Axis:

1  2

Label:

I  M  -

Ions:

a  +  2+  3+

b  +  2+  3+

c  +  2+  3+

x  +  2+  3+

y  +  2+  3+

z  +  2+  3+

hide H<sub>2</sub>O/NH<sub>3</sub>

zoom 112-122

GO

scan 6265; 4.1e+000

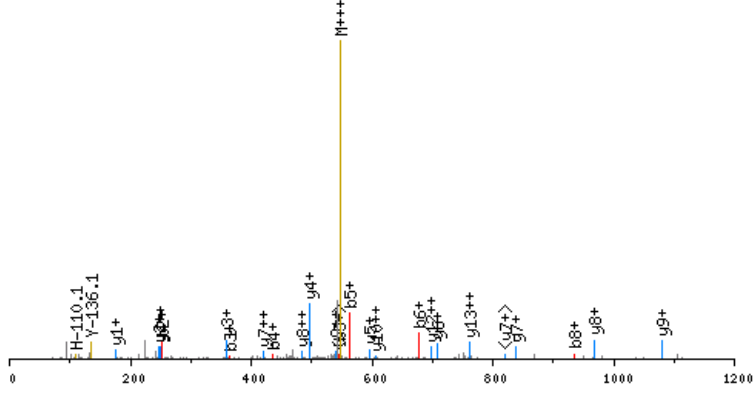

click image to zoom in; click top corners to zoom out

[precursor±]

scan 6262; 548.3 m/z; 7.7e+000

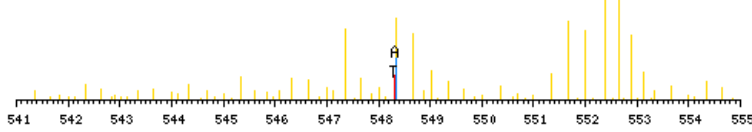

zoomed in precursor plot; T=theoretical m/z, A=acquired m/z

| b <sup>+</sup> | #  | AA # | y <sup>+</sup> | y <sup>2+</sup> |
|----------------|----|------|----------------|-----------------|
| 122.1029       | 1  | S 14 |                |                 |
| 251.1455       | 2  | E 13 | 1521.8025      | 761.4052        |
| 364.2296       | 3  | L 12 | 1392.7599      | 696.8839        |
| 435.2667       | 4  | A 11 | 1279.6759      | 640.3418        |
| 563.3253       | 5  | Q 10 | 1208.6388      | 604.8233        |
| 676.4093       | 6  | L 9  | 1080.5802      | 540.7940        |
| 805.4519       | 7  | E 8  | 967.4961       | 484.2520        |
| 934.4945       | 8  | E 7  | 838.4535       | 419.7307        |
| 1048.5375      | 9  | N 6  | 709.4109       | 355.2094        |
| 1147.6059      | 10 | V 5  | 595.3680       | 298.1879        |
| 1284.6648      | 11 | H 4  | 496.2996       | 248.6537        |
| 1397.7488      | 12 | L 3  | 359.2407       | 180.1243        |
| 1468.7860      | 13 | A 2  | 246.1566       | 123.5822        |
|                | 14 | R 1  | 175.1195       | 88.0637         |

N-term:+35.07

X-range:

-

MassTol: Y-zoom:

MassType:

AVG  MONO

Axis:

1  2

Label:

I  M  -

Ions:

a  +  2+  3+

b  +  2+  3+

c  +  2+  3+

x  +  2+  3+

y  +  2+  3+

z  +  2+  3+

hide H<sub>2</sub>O/NH<sub>3</sub>

zoom 112-122

GO

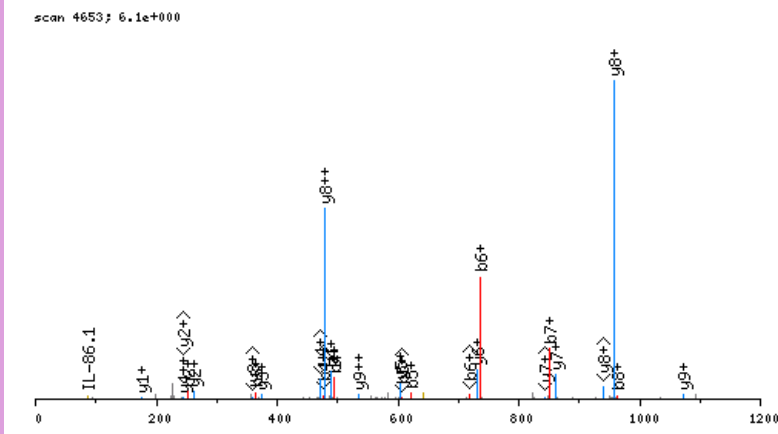

click image to zoom in; click top corners to zoom out [\[precursor±\]](#)

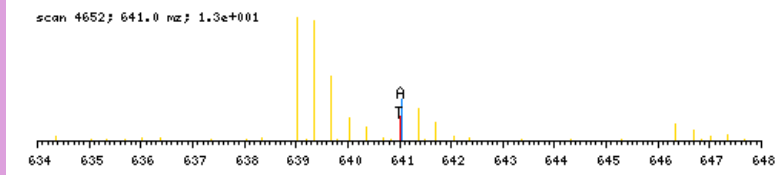

zoomed in precursor plot; T=theoretical m/z, A=acquired m/z

| b <sup>+</sup> | #  | AA # | y <sup>+</sup> | y <sup>2+</sup> |
|----------------|----|------|----------------|-----------------|
| 122.1029       | 1  | S 16 |                |                 |
| 251.1455       | 2  | E 15 | 1799.8915      | 900.4496        |
| 364.2296       | 3  | L 14 | 1670.8489      | 835.9283        |
| 493.2722       | 4  | E 13 | 1557.7648      | 779.3863        |
| 622.3148       | 5  | E 12 | 1428.7222      | 714.8650        |
| 737.3417       | 6  | D 11 | 1299.6796      | 650.3437        |
| 850.4258       | 7  | I 10 | 1184.6527      | 592.8303        |
| 963.5098       | 8  | I 9  | 1071.5686      | 536.2882        |
| 1060.5626      | 9  | P 8  | 958.4846       | 479.7462        |
| 1189.6052      | 10 | E 7  | 861.4318       | 431.2198        |
| 1318.6478      | 11 | E 6  | 732.3892       | 366.6985        |
| 1433.6747      | 12 | D 5  | 603.3466       | 302.1772        |
| 1546.7588      | 13 | I 4  | 488.3197       | 244.6637        |
| 1659.8429      | 14 | I 3  | 375.2356       | 188.1217        |
| 1746.8749      | 15 | S 2  | 262.1515       | 131.5797        |
|                | 16 | R 1  | 175.1195       | 88.0637         |

N-term:+35.07



SENFDDYMKEVGVGFATR, MH+ 2120.9963, m/z 707.6703  
 L OS G26 P150811 220811-s1.06738.06738.3.dta

scan 6738; 2.9e+000

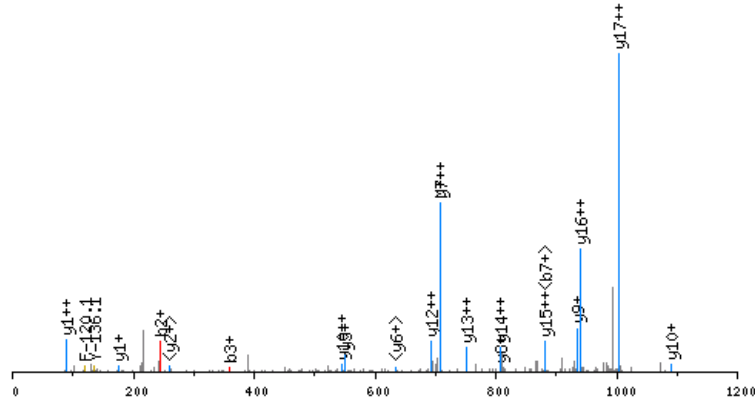

click image to zoom in; click top corners to zoom out [\[precursor±\]](#)

scan 6735; 707.7 mz; 6.5e+000

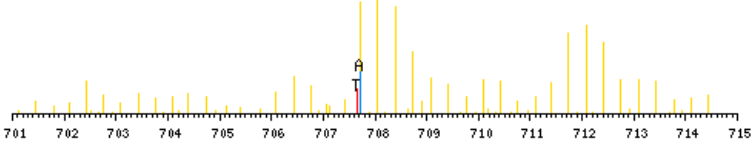

zoomed in precursor plot; T=theoretical m/z, A=acquired m/z

X-range:

-

MassTol: Y-zoom:

MassType:

AVG  MONO

Axis:

1  2

Label:

I  M  -

Ions:

a  +  2+  3+

b  +  2+  3+

c  +  2+  3+

x  +  2+  3+

y  +  2+  3+

z  +  2+  3+

hide H<sub>2</sub>O/NH<sub>3</sub>

zoom 112-122

GO

| b <sup>+</sup> | #  | AA # | y <sup>+</sup> | y <sup>2+</sup> |
|----------------|----|------|----------------|-----------------|
| 116.0711       | 1  | S 18 |                |                 |
| 245.1137       | 2  | E 17 | 2005.9330      | 1003.4704       |
| 359.1566       | 3  | N 16 | 1876.8904      | 938.9491        |
| 506.2251       | 4  | F 15 | 1762.8475      | 881.9276        |
| 621.2520       | 5  | D 14 | 1615.7791      | 808.3934        |
| 736.2789       | 6  | D 13 | 1500.7521      | 750.8800        |
| 899.3423       | 7  | Y 12 | 1385.7252      | 693.3665        |
| 1030.3828      | 8  | M 11 | 1222.6618      | 611.8348        |
| 1186.5091      | 9  | K 10 | 1091.6214      | 546.3146        |
| 1315.5517      | 10 | E 9  | 935.4951       | 468.2514        |
| 1414.6201      | 11 | V 8  | 806.4525       | 403.7301        |
| 1471.6415      | 12 | G 7  | 707.3840       | 354.1959        |
| 1570.7099      | 13 | V 6  | 650.3626       | 325.6852        |
| 1627.7314      | 14 | G 5  | 551.2942       | 276.1510        |
| 1774.7998      | 15 | F 4  | 494.2727       | 247.6403        |
| 1845.8369      | 16 | A 3  | 347.2043       | 174.1061        |
| 1946.8846      | 17 | T 2  | 276.1672       | 138.5875        |
|                | 18 | R 1  | 175.1195       | 88.0637         |

N-term:+29.04 K(9):+156.13

SEPEIPIKGIK, MH+ 1193.7530, m/z 398.5892  
 H OS G27 P150811 220811-s1.03539.03539.3.dta

scan 3539; 2.1e+001

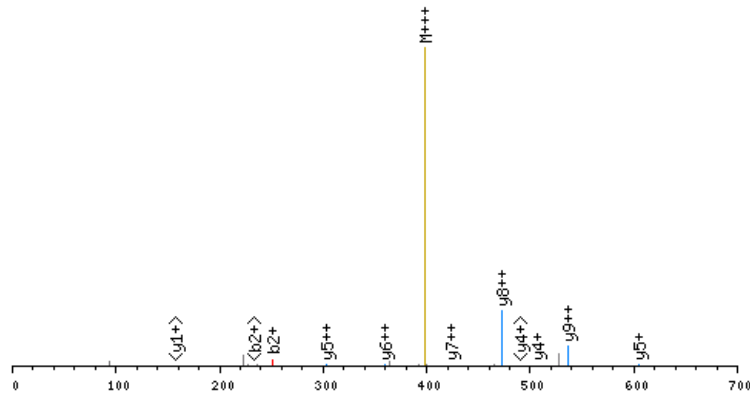

click image to zoom in; click top corners to zoom out [precursor±]

scan 3537; 398.6 m/z; 1.7e+002

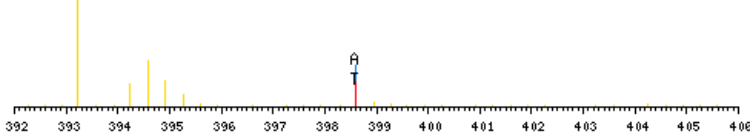

zoomed in precursor plot; T=theoretical m/z, A=acquired m/z

X-range:

-

MassTol: Y-zoom:

MassType:

AVG  MONO

Axis:

1  2

Label:

I  M  -

Ions:

a  +  2+  3+

b  +  2+  3+

c  +  2+  3+

x  +  2+  3+

y  +  2+  3+

z  +  2+  3+

hide H<sub>2</sub>O/NH<sub>3</sub>

zoom 112-122

GO

| b <sup>+</sup> | #  | AA # | y <sup>+</sup> | y <sup>2+</sup> |
|----------------|----|------|----------------|-----------------|
| 122.1029       | 1  | S 10 |                |                 |
| 251.1455       | 2  | E 9  | 1072.6579      | 536.8329        |
| 348.1983       | 3  | P 8  | 943.6153       | 472.3116        |
| 477.2409       | 4  | E 7  | 846.5625       | 423.7852        |
| 590.3249       | 5  | I 6  | 717.5200       | 359.2639        |
| 687.3777       | 6  | P 5  | 604.4359       | 302.7219        |
| 849.5358       | 7  | K 4  | 507.3831       | 254.1955        |
| 906.5573       | 8  | G 3  | 345.2250       | 173.1164        |
| 1019.6413      | 9  | I 2  | 288.2036       | 144.6057        |
|                | 10 | R 1  | 175.1195       | 88.0637         |

N-term:+35.07 K(7):+162.16

SEPIMPEPGRDETVR, MH+ 1740.8590, m/z 580.9579  
 L OS G26 P150811 220811-s1.03137.03137.3.dta

X-range:

-

MassTol: Y-zoom:

MassType:

AVG  MONO

Axis:

1  2

Label:

I  M  -

Ions:

a  +  2+  3+

b  +  2+  3+

c  +  2+  3+

x  +  2+  3+

y  +  2+  3+

z  +  2+  3+

hide H<sub>2</sub>O/NH<sub>3</sub>

zoom 112-122

GO

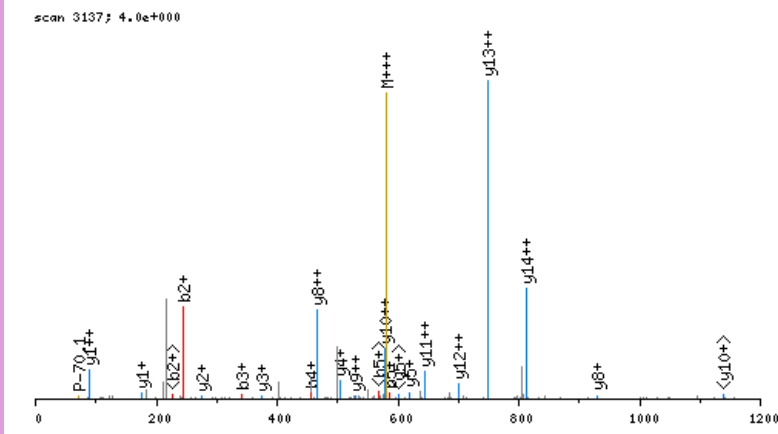

click image to zoom in; click top corners to zoom out [\[precursor±\]](#)

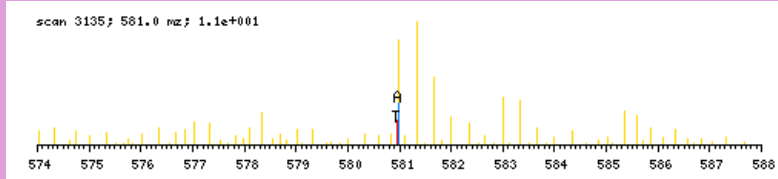

zoomed in precursor plot; T=theoretical m/z, A=acquired m/z

| b <sup>+</sup> | #  | AA # | y <sup>+</sup> | y <sup>2+</sup> |
|----------------|----|------|----------------|-----------------|
| 116.0711       | 1  | S 15 |                |                 |
| 245.1137       | 2  | E 14 | 1625.7957      | 813.4018        |
| 342.1665       | 3  | P 13 | 1496.7531      | 748.8805        |
| 455.2505       | 4  | I 12 | 1399.7004      | 700.3541        |
| 586.2910       | 5  | M 11 | 1286.6163      | 643.8121        |
| 683.3438       | 6  | P 10 | 1155.5758      | 578.2918        |
| 812.3864       | 7  | E 9  | 1058.5231      | 529.7654        |
| 909.4392       | 8  | P 8  | 929.4805       | 465.2441        |
| 966.4606       | 9  | G 7  | 832.4277       | 416.7178        |
| 1122.5617      | 10 | R 6  | 775.4062       | 388.2070        |
| 1237.5887      | 11 | D 5  | 619.3051       | 310.1565        |
| 1366.6313      | 12 | E 4  | 504.2782       | 252.6430        |
| 1467.6789      | 13 | T 3  | 375.2356       | 188.1217        |
| 1566.7474      | 14 | V 2  | 274.1879       | 137.5979        |
|                | 15 | R 1  | 175.1195       | 88.0637         |

N-term:+29.04

SEPQEVHLHIGSAHNR, MH+ 1701.8672, m/z 426.2223  
 L OS G28 P150811 220811-s1.03737.03737.4.dta

X-range:

-

MassTol: Y-zoom:

MassType:

AVG  MONO

Axis:

1  2

Label:

I  M  -

Ions:

a  +  2+  3+

b  +  2+  3+

c  +  2+  3+

x  +  2+  3+

y  +  2+  3+

z  +  2+  3+

hide H<sub>2</sub>O/NH<sub>3</sub>

zoom 112-122

GO

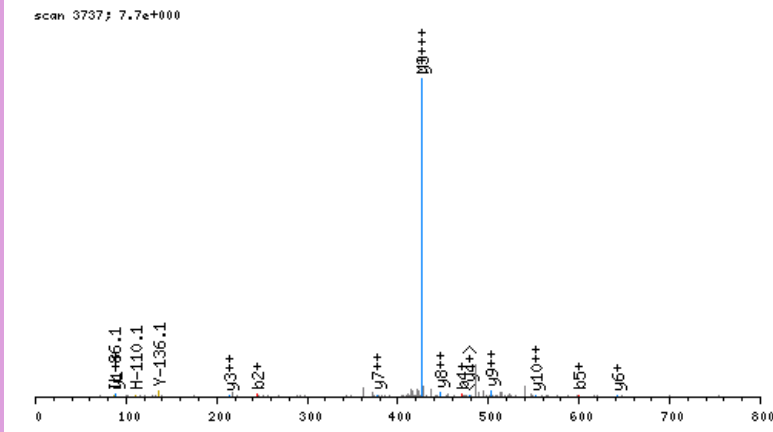

click image to zoom in; click top corners to zoom out [\[precursor±\]](#)

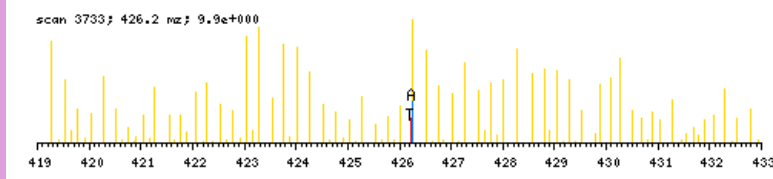

zoomed in precursor plot; T=theoretical m/z, A=acquired m/z

| b <sup>+</sup> | #  | AA # | y <sup>+</sup> | y <sup>2+</sup> |
|----------------|----|------|----------------|-----------------|
| 116.0711       | 1  | S 15 |                |                 |
| 245.1137       | 2  | E 14 | 1586.8039      | 793.9059        |
| 342.1665       | 3  | P 13 | 1457.7613      | 729.3846        |
| 470.2251       | 4  | Q 12 | 1360.7086      | 680.8582        |
| 599.2677       | 5  | E 11 | 1232.6500      | 616.8289        |
| 698.3361       | 6  | V 10 | 1103.6074      | 552.3076        |
| 811.4201       | 7  | L 9  | 1004.5390      | 502.7734        |
| 948.4790       | 8  | H 8  | 891.4549       | 446.2314        |
| 1061.5631      | 9  | I 7  | 754.3960       | 377.7019        |
| 1118.5846      | 10 | G 6  | 641.3119       | 321.1599        |
| 1205.6166      | 11 | S 5  | 584.2905       | 292.6492        |
| 1276.6537      | 12 | A 4  | 497.2585       | 249.1331        |
| 1413.7126      | 13 | H 3  | 426.2213       | 213.6146        |
| 1527.7556      | 14 | N 2  | 289.1624       | 145.0851        |
|                | 15 | R 1  | 175.1195       | 88.0637         |

N-term:+29.04

SEPSAVTPTVPTTLLIAPR, MH+ 1962.0911, m/z 654.7019  
 L OS G24 P150811 220811-s1.04219.04219.3.dta

X-range:

-

MassTol: Y-zoom:

MassType:

AVG  MONO

Axis:

1  2

Label:

I  M  -

Ions:

a  +  2+  3+

b  +  2+  3+

c  +  2+  3+

x  +  2+  3+

y  +  2+  3+

z  +  2+  3+

hide H<sub>2</sub>O/NH<sub>3</sub>

zoom 112-122

GO

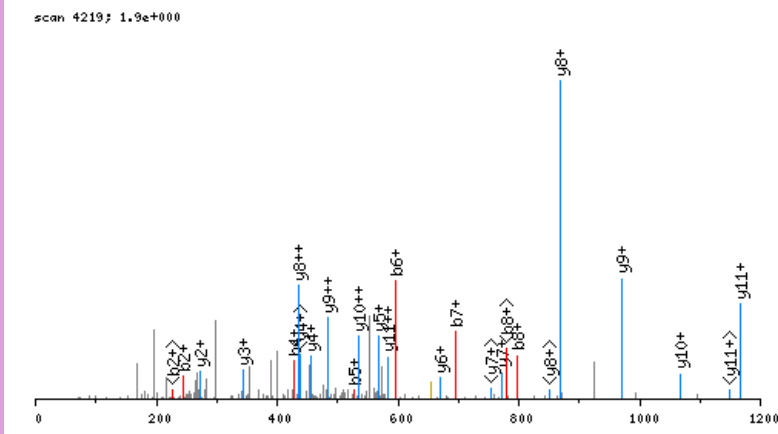

click image to zoom in; click top corners to zoom out [\[precursor±\]](#)

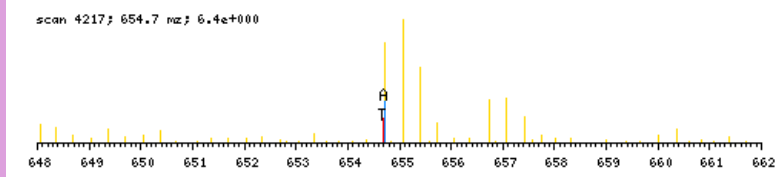

zoomed in precursor plot; T=theoretical m/z, A=acquired m/z

| b <sup>+</sup> | #  | AA # | y <sup>+</sup> | y <sup>2+</sup> |
|----------------|----|------|----------------|-----------------|
| 116.0711       | 1  | S 19 |                |                 |
| 245.1137       | 2  | E 18 | 1847.0278      | 924.0178        |
| 342.1665       | 3  | P 17 | 1717.9852      | 859.4965        |
| 429.1985       | 4  | S 16 | 1620.9325      | 810.9702        |
| 526.2513       | 5  | P 15 | 1533.9005      | 767.4541        |
| 597.2884       | 6  | A 14 | 1436.8477      | 718.9278        |
| 696.3568       | 7  | V 13 | 1365.8106      | 683.4092        |
| 797.4045       | 8  | T 12 | 1266.7422      | 633.8750        |
| 894.4572       | 9  | P 11 | 1165.6945      | 583.3512        |
| 993.5257       | 10 | V 10 | 1068.6417      | 534.8248        |
| 1094.5733      | 11 | T 9  | 969.5733       | 485.2906        |
| 1191.6261      | 12 | P 8  | 868.5256       | 434.7667        |
| 1292.6738      | 13 | T 7  | 771.4729       | 386.2403        |
| 1393.7215      | 14 | T 6  | 670.4252       | 335.7165        |
| 1506.8055      | 15 | L 5  | 569.3775       | 285.1927        |
| 1619.8896      | 16 | I 4  | 456.2934       | 228.6506        |
| 1690.9267      | 17 | A 3  | 343.2094       | 172.1086        |
| 1787.9795      | 18 | P 2  | 272.1723       | 136.5900        |
|                | 19 | R 1  | 175.1195       | 88.0637         |

N-term:+29.04

SEQEYKAGGSPASYHGSTSPR, MH+ 2309.0798, m/z 578.0254  
 L OS G28 P150811 220811-s1.02244.02244.4.dta

scan 2244; 1.1e+001

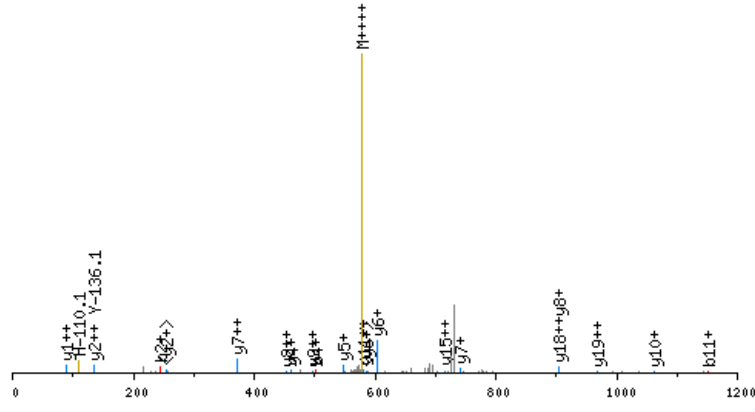

click image to zoom in; click top corners to zoom out [precursor±]

scan 2243; 578.0 mz; 1.5e+001

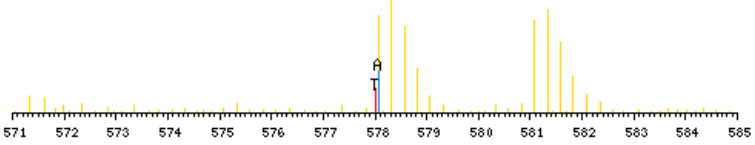

zoomed in precursor plot; T=theoretical m/z, A=acquired m/z

| b <sup>+</sup> | #  | AA | #  | y <sup>+</sup> | y <sup>2+</sup> |
|----------------|----|----|----|----------------|-----------------|
| 116.0711       | 1  | S  | 22 |                |                 |
| 245.1137       | 2  | E  | 21 | 2194.0165      | 1097.5122       |
| 373.1723       | 3  | Q  | 20 | 2064.9739      | 1032.9909       |
| 502.2149       | 4  | E  | 19 | 1936.9154      | 968.9616        |
| 665.2782       | 5  | Y  | 18 | 1807.8728      | 904.4403        |
| 722.2997       | 6  | G  | 17 | 1644.8094      | 822.9086        |
| 878.4260       | 7  | K  | 16 | 1587.7880      | 794.3979        |
| 949.4631       | 8  | A  | 15 | 1431.6617      | 716.3348        |
| 1006.4846      | 9  | G  | 14 | 1360.6246      | 680.8162        |
| 1063.5060      | 10 | G  | 13 | 1303.6031      | 652.3055        |
| 1150.5381      | 11 | S  | 12 | 1246.5816      | 623.7947        |
| 1247.5908      | 12 | P  | 11 | 1159.5496      | 580.2787        |
| 1318.6279      | 13 | A  | 10 | 1062.4968      | 531.7523        |
| 1405.6600      | 14 | S  | 9  | 991.4597       | 496.2338        |
| 1568.7233      | 15 | Y  | 8  | 904.4277       | 452.7178        |
| 1705.7822      | 16 | H  | 7  | 741.3644       | 371.1861        |
| 1762.8037      | 17 | G  | 6  | 604.3055       | 302.6566        |
| 1849.8357      | 18 | S  | 5  | 547.2840       | 274.1459        |
| 1950.8834      | 19 | T  | 4  | 460.2520       | 230.6299        |
| 2037.9154      | 20 | S  | 3  | 359.2043       | 180.1061        |
| 2134.9682      | 21 | P  | 2  | 272.1723       | 136.5900        |
|                | 22 | R  | 1  | 175.1195       | 88.0637         |

N-term:+29.04 K(7):+156.13

X-range:

-

MassTol: Y-zoom:

MassType:

AVG  MONO

Axis:

1  2

Label:

I  M  -

Ions:

a  +  2+  3+

b  +  2+  3+

c  +  2+  3+

x  +  2+  3+

y  +  2+  3+

z  +  2+  3+

hide H<sub>2</sub>O/NH<sub>3</sub>

zoom 112-122

GO

SESAQELAEGQR, MH+ 1332.6395, m/z 444.8847  
 L OS G25 P150811 220811-s1.02479.02479.3.dta

scan 2479; 3.1e+000

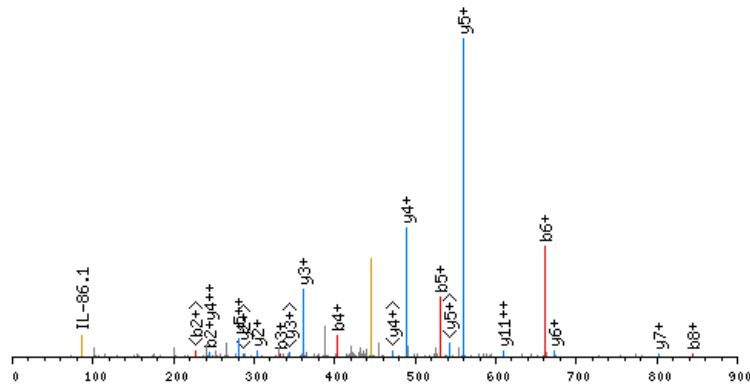

click image to zoom in; click top corners to zoom out [\[precursor±\]](#)

scan 2477; 444.9 m/z; 2.4e+001

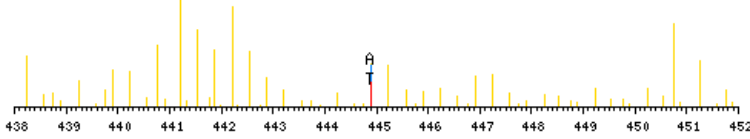

zoomed in precursor plot; T=theoretical m/z, A=acquired m/z

X-range:

-

MassTol: Y-zoom:

MassType:

AVG  MONO

Axis:

1  2

Label:

I  M  -

Ions:

a  +  2+  3+

b  +  2+  3+

c  +  2+  3+

x  +  2+  3+

y  +  2+  3+

z  +  2+  3+

hide H<sub>2</sub>O/NH<sub>3</sub>

zoom 112-122

GO

| b <sup>+</sup> | #  | AA # | y <sup>+</sup> | y <sup>2+</sup> |
|----------------|----|------|----------------|-----------------|
| 116.0711       | 1  | S 12 |                |                 |
| 245.1137       | 2  | E 11 | 1217.5762      | 609.2920        |
| 332.1458       | 3  | S 10 | 1088.5336      | 544.7707        |
| 403.1829       | 4  | A 9  | 1001.5016      | 501.2547        |
| 531.2414       | 5  | Q 8  | 930.4645       | 465.7362        |
| 660.2840       | 6  | E 7  | 802.4059       | 401.7069        |
| 773.3681       | 7  | L 6  | 673.3633       | 337.1856        |
| 844.4052       | 8  | A 5  | 560.2792       | 280.6435        |
| 973.4478       | 9  | E 4  | 489.2421       | 245.1250        |
| 1030.4693      | 10 | G 3  | 360.1995       | 180.6037        |
| 1158.5278      | 11 | Q 2  | 303.1781       | 152.0930        |
|                | 12 | R 1  | 175.1195       | 88.0637         |

N-term:+29.04

SESPYEDFLSADSKVLGR, MH+ 2056.0239, m/z 686.0128  
 L OS G26 P150811 220811-s1.06527.06527.3.dta

X-range:

-

MassTol: Y-zoom:

MassType:

AVG  MONO

Axis:

1  2

Label:

I  M  -

Ions:

a  +  2+  3+

b  +  2+  3+

c  +  2+  3+

x  +  2+  3+

y  +  2+  3+

z  +  2+  3+

hide H<sub>2</sub>O/NH<sub>3</sub>

zoom 112-122

GO

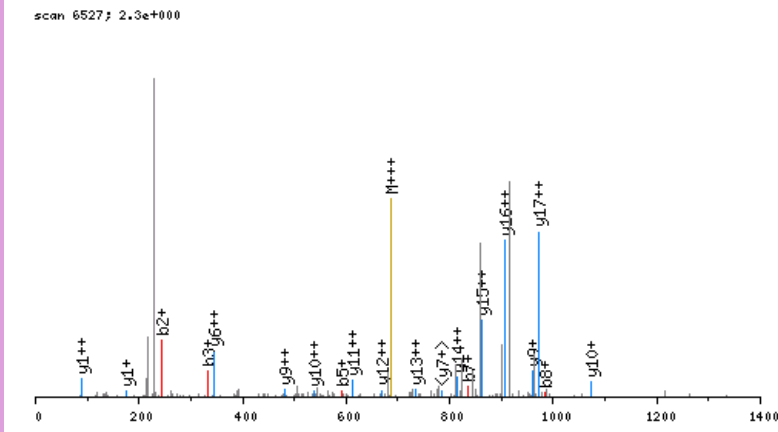

click image to zoom in; click top corners to zoom out [\[precursor±\]](#)

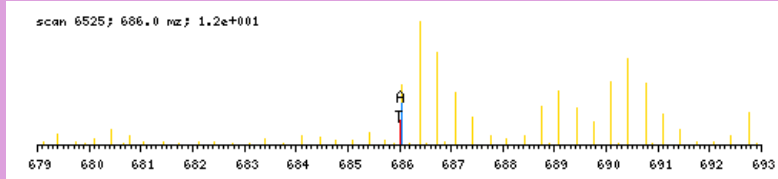

zoomed in precursor plot; T=theoretical m/z, A=acquired m/z

| b <sup>+</sup> | #  | AA # | y <sup>+</sup> | y <sup>2+</sup> |
|----------------|----|------|----------------|-----------------|
| 116.0711       | 1  | S 18 |                |                 |
| 245.1137       | 2  | E 17 | 1940.9606      | 970.9842        |
| 332.1458       | 3  | S 16 | 1811.9180      | 906.4629        |
| 429.1985       | 4  | P 15 | 1724.8860      | 862.9469        |
| 592.2618       | 5  | Y 14 | 1627.8332      | 814.4205        |
| 721.3044       | 6  | E 13 | 1464.7699      | 732.8888        |
| 836.3314       | 7  | D 12 | 1335.7273      | 668.3676        |
| 983.3998       | 8  | F 11 | 1220.7003      | 610.8541        |
| 1096.4839      | 9  | L 10 | 1073.6319      | 537.3199        |
| 1183.5159      | 10 | S 9  | 960.5479       | 480.7778        |
| 1254.5530      | 11 | A 8  | 873.5158       | 437.2618        |
| 1369.5799      | 12 | D 7  | 802.4787       | 401.7433        |
| 1456.6120      | 13 | S 6  | 687.4518       | 344.2298        |
| 1612.7383      | 14 | K 5  | 600.4197       | 300.7138        |
| 1711.8067      | 15 | V 4  | 444.2934       | 222.6506        |
| 1824.8907      | 16 | L 3  | 345.2250       | 173.1164        |
| 1881.9122      | 17 | G 2  | 232.1410       | 116.5744        |
|                | 18 | R 1  | 175.1195       | 88.0637         |

N-term:+29.04 K(14):+156.13



SEQASDSEGHSDSFSEGGAVGAHR, MH+ 2503.0722, m/z 626.5235  
 L OS G28 P150811 220811-s1.02646.02646.4.dta

scan 2646; 1.7e+000

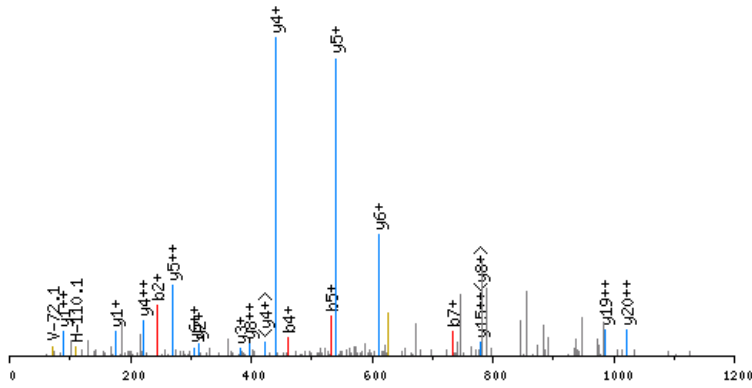

click image to zoom in; click top corners to zoom out [precursor±]

scan 2643; 626.5 mz; 1.9e+001

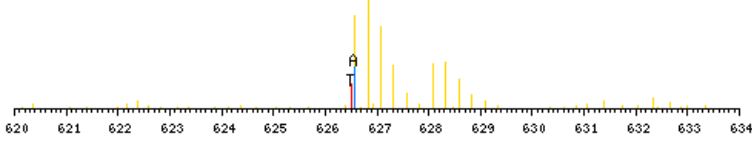

zoomed in precursor plot; T=theoretical m/z, A=acquired m/z

X-range:

-

MassTol: Y-zoom:

MassType:

AVG  MONO

Axis:

1  2

Label:

I  M  -

Ions:

a  +  2+  3+

b  +  2+  3+

c  +  2+  3+

x  +  2+  3+

y  +  2+  3+

z  +  2+  3+

hide H<sub>2</sub>O/NH<sub>3</sub>

zoom 112-122

GO

| b <sup>+</sup> | #  | AA # | y <sup>+</sup> | y <sup>2+</sup> |
|----------------|----|------|----------------|-----------------|
| 116.0711       | 1  | S 24 |                |                 |
| 245.1137       | 2  | E 23 | 2388.0088      | 1194.5083       |
| 332.1458       | 3  | S 22 | 2258.9663      | 1129.9870       |
| 460.2043       | 4  | Q 21 | 2171.9342      | 1086.4710       |
| 531.2414       | 5  | A 20 | 2043.8756      | 1022.4417       |
| 618.2735       | 6  | S 19 | 1972.8385      | 986.9232        |
| 733.3004       | 7  | D 18 | 1885.8065      | 943.4072        |
| 820.3324       | 8  | S 17 | 1770.7796      | 885.8937        |
| 949.3750       | 9  | E 16 | 1683.7475      | 842.3777        |
| 1006.3965      | 10 | G 15 | 1554.7049      | 777.8564        |
| 1143.4554      | 11 | H 14 | 1497.6835      | 749.3457        |
| 1230.4874      | 12 | S 13 | 1360.6246      | 680.8162        |
| 1345.5144      | 13 | D 12 | 1273.5925      | 637.3002        |
| 1492.5828      | 14 | F 11 | 1158.5656      | 579.7867        |
| 1579.6148      | 15 | S 10 | 1011.4972      | 506.2525        |
| 1708.6574      | 16 | E 9  | 924.4652       | 462.7365        |
| 1765.6789      | 17 | G 8  | 795.4226       | 398.2152        |
| 1893.7375      | 18 | Q 7  | 738.4011       | 369.7045        |
| 1964.7746      | 19 | A 6  | 610.3425       | 305.6752        |
| 2063.8430      | 20 | V 5  | 539.3054       | 270.1566        |
| 2120.8644      | 21 | G 4  | 440.2370       | 220.6224        |
| 2191.9016      | 22 | A 3  | 383.2155       | 192.1117        |
| 2328.9605      | 23 | H 2  | 312.1784       | 156.5931        |
|                | 24 | R 1  | 175.1195       | 88.0637         |

N-term:+29.04

SEVCGQDITTKHMLPTVLR, MH+ 2241.1735, m/z 561.0488  
 L OS G28 P150811 220811-s1.06535.06535.4.dta

scan 6535; 6.6e+000

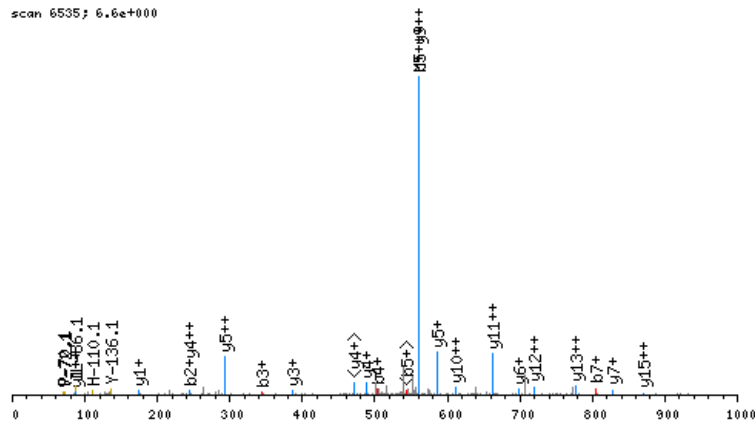

click image to zoom in; click top corners to zoom out [precursor±]

scan 6533; 561.0 m/z; 2.0e+001

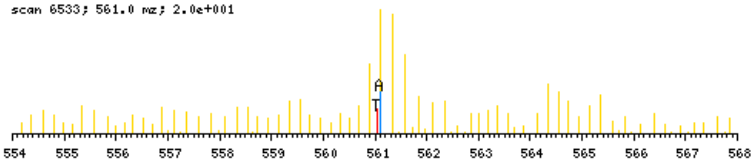

zoomed in precursor plot; T=theoretical m/z, A=acquired m/z

X-range:

-

MassTol: Y-zoom:

MassType:

AVG  MONO

Axis:

1  2

Label:

I  M  -

Ions:

a  +  2+  3+

b  +  2+  3+

c  +  2+  3+

x  +  2+  3+

y  +  2+  3+

z  +  2+  3+

hide H<sub>2</sub>O/NH<sub>3</sub>

zoom 112-122

GO

| b <sup>+</sup> | #  | AA | #  | y <sup>+</sup> | y <sup>2+</sup> |
|----------------|----|----|----|----------------|-----------------|
| 116.0711       | 1  | S  | 19 |                |                 |
| 245.1137       | 2  | E  | 18 | 2126.1102      | 1063.5590       |
| 344.1821       | 3  | V  | 17 | 1997.0676      | 999.0377        |
| 504.2127       | 4  | C  | 16 | 1897.9992      | 949.5035        |
| 561.2342       | 5  | G  | 15 | 1737.9686      | 869.4882        |
| 689.2928       | 6  | Q  | 14 | 1680.9471      | 840.9775        |
| 804.3197       | 7  | D  | 13 | 1552.8885      | 776.9482        |
| 917.4038       | 8  | I  | 12 | 1437.8616      | 719.4347        |
| 1018.4515      | 9  | T  | 11 | 1324.7775      | 662.8927        |
| 1119.4991      | 10 | T  | 10 | 1223.7299      | 612.3688        |
| 1275.6254      | 11 | K  | 9  | 1122.6822      | 561.8450        |
| 1412.6844      | 12 | H  | 8  | 966.5559       | 483.7819        |
| 1543.7248      | 13 | M  | 7  | 829.4970       | 415.2524        |
| 1656.8089      | 14 | L  | 6  | 698.4565       | 349.7322        |
| 1753.8617      | 15 | P  | 5  | 585.3724       | 293.1901        |
| 1854.9093      | 16 | T  | 4  | 488.3197       | 244.6637        |
| 1953.9778      | 17 | V  | 3  | 387.2720       | 194.1399        |
| 2067.0618      | 18 | L  | 2  | 288.2036       | 144.6057        |
|                | 19 | R  | 1  | 175.1195       | 88.0637         |

N-term:+29.04 C(4):+160.03  
 K(11):+156.13

SEVVLSGDDEDYQR, MH+ 1639.7451, m/z 547.2532  
 L OS G25 P150811 220811-s1.03991.03991.3.dta

scan 3991; 2.2e+000

X-range:

-

MassTol: Y-zoom:

MassType:

AVG  MONO

Axis:

1  2

Label:

I  M  -

Ions:

a  +  2+  3+

b  +  2+  3+

c  +  2+  3+

x  +  2+  3+

y  +  2+  3+

z  +  2+  3+

hide H<sub>2</sub>O/NH<sub>3</sub>

zoom 112-122

GO

click image to zoom in; click top corners to zoom out [\[precursor±\]](#)

scan 3987; 547.3 m/z; 6.4e+000

zoomed in precursor plot; T=theoretical m/z, A=acquired m/z

| b <sup>+</sup> | #  | AA | #  | y <sup>+</sup> | y <sup>2+</sup> |
|----------------|----|----|----|----------------|-----------------|
| 116.0711       | 1  | S  | 14 |                |                 |
| 245.1137       | 2  | E  | 13 | 1524.6818      | 762.8448        |
| 344.1821       | 3  | V  | 12 | 1395.6392      | 698.3235        |
| 443.2505       | 4  | V  | 11 | 1296.5708      | 648.7893        |
| 556.3346       | 5  | L  | 10 | 1197.5024      | 599.2551        |
| 643.3666       | 6  | S  | 9  | 1084.4183      | 542.7131        |
| 700.3881       | 7  | G  | 8  | 997.3863       | 499.1971        |
| 815.4150       | 8  | D  | 7  | 940.3648       | 470.6863        |
| 930.4420       | 9  | D  | 6  | 825.3379       | 413.1729        |
| 1059.4846      | 10 | E  | 5  | 710.3109       | 355.6594        |
| 1174.5115      | 11 | D  | 4  | 581.2683       | 291.1381        |
| 1337.5749      | 12 | Y  | 3  | 466.2414       | 233.6246        |
| 1465.6334      | 13 | Q  | 2  | 303.1781       | 152.0930        |
|                | 14 | R  | 1  | 175.1195       | 88.0637         |

N-term:+29.04

SFEDDSAPLSPLKFMQR, MH+ 2107.1170, m/z 703.0439  
 H OS G26 P150811 220811-s1.06667.06667.3.dta

X-range:

-

MassTol: Y-zoom:

MassType:

AVG  MONO

Axis:

1  2

Label:

I  M  -

Ions:

a  +  2+  3+

b  +  2+  3+

c  +  2+  3+

x  +  2+  3+

y  +  2+  3+

z  +  2+  3+

hide H<sub>2</sub>O/NH<sub>3</sub>

zoom 112-122

GO

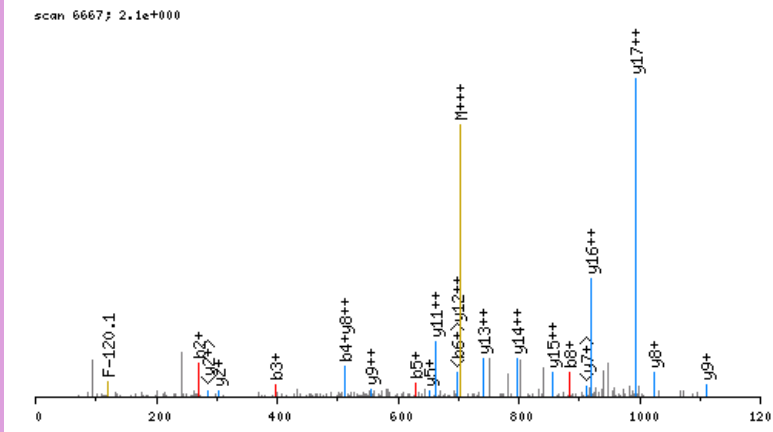

click image to zoom in; click top corners to zoom out [\[precursor±\]](#)

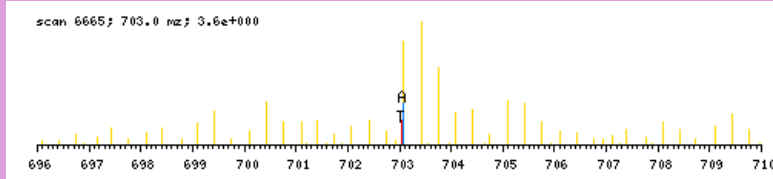

zoomed in precursor plot; T=theoretical m/z, A=acquired m/z

| b <sup>+</sup> | #  | AA # | y <sup>+</sup> | y <sup>2+</sup> |
|----------------|----|------|----------------|-----------------|
| 122.1029       | 1  | S 18 |                |                 |
| 269.1713       | 2  | F 17 | 1986.0219      | 993.5149        |
| 398.2139       | 3  | E 16 | 1838.9535      | 919.9807        |
| 513.2409       | 4  | D 15 | 1709.9109      | 855.4594        |
| 628.2678       | 5  | D 14 | 1594.8840      | 797.9459        |
| 715.2999       | 6  | S 13 | 1479.8570      | 740.4324        |
| 786.3370       | 7  | A 12 | 1392.8250      | 696.9164        |
| 883.3897       | 8  | P 11 | 1321.7879      | 661.3978        |
| 996.4738       | 9  | L 10 | 1224.7351      | 612.8715        |
| 1083.5058      | 10 | S 9  | 1111.6510      | 556.3294        |
| 1180.5586      | 11 | P 8  | 1024.6190      | 512.8134        |
| 1293.6426      | 12 | L 7  | 927.5663       | 464.2870        |
| 1455.8007      | 13 | K 6  | 814.4822       | 407.7450        |
| 1602.8692      | 14 | F 5  | 652.3241       | 326.6660        |
| 1733.9096      | 15 | M 4  | 505.2557       | 253.1318        |
| 1804.9468      | 16 | A 3  | 374.2152       | 187.6115        |
| 1933.0053      | 17 | Q 2  | 303.1781       | 152.0930        |
|                | 18 | R 1  | 175.1195       | 88.0637         |

N-term:+35.07 K(13):+162.16

SFEVEEIEPPNSTPPR, MH+ 1855.9078, m/z 619.3074  
 L OS G24 P150811 220811-s1.03899.03899.3.dta

X-range:

-

MassTol: Y-zoom:

MassType:

AVG  MONO

Axis:

1  2

Label:

I  M  -

Ions:

a  +  2+  3+

b  +  2+  3+

c  +  2+  3+

x  +  2+  3+

y  +  2+  3+

z  +  2+  3+

hide H<sub>2</sub>O/NH<sub>3</sub>

zoom 112-122

GO

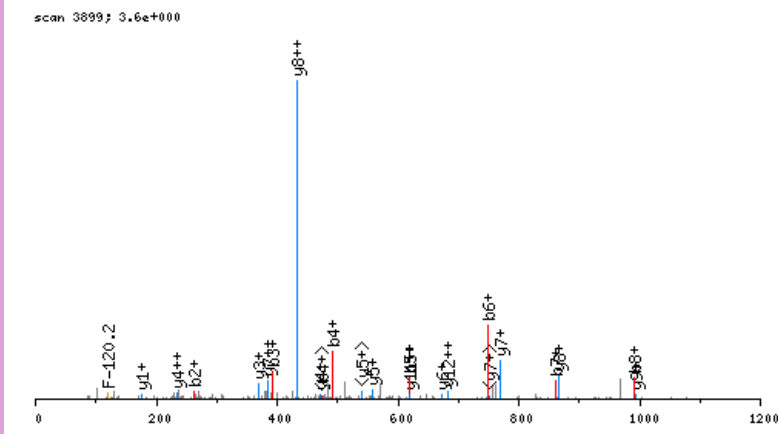

click image to zoom in; click top corners to zoom out [\[precursor±\]](#)

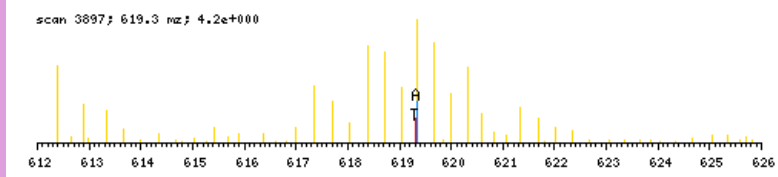

zoomed in precursor plot; T=theoretical m/z, A=acquired m/z

| b <sup>+</sup> | #  | AA # | y <sup>+</sup> | y <sup>2+</sup> |
|----------------|----|------|----------------|-----------------|
| 116.0711       | 1  | S 16 |                |                 |
| 263.1395       | 2  | F 15 | 1740.8445      | 870.9261        |
| 392.1821       | 3  | E 14 | 1593.7760      | 797.3919        |
| 491.2505       | 4  | V 13 | 1464.7334      | 732.8706        |
| 620.2931       | 5  | E 12 | 1365.6650      | 683.3364        |
| 749.3357       | 6  | E 11 | 1236.6224      | 618.8151        |
| 862.4198       | 7  | I 10 | 1107.5798      | 554.2938        |
| 991.4624       | 8  | E 9  | 994.4958       | 497.7518        |
| 1088.5152      | 9  | P 8  | 865.4532       | 433.2305        |
| 1185.5679      | 10 | P 7  | 768.4004       | 384.7041        |
| 1299.6108      | 11 | N 6  | 671.3477       | 336.1777        |
| 1386.6429      | 12 | S 5  | 557.3047       | 279.1563        |
| 1487.6906      | 13 | T 4  | 470.2727       | 235.6403        |
| 1584.7433      | 14 | P 3  | 369.2250       | 185.1164        |
| 1681.7961      | 15 | P 2  | 272.1723       | 136.5900        |
|                | 16 | R 1  | 175.1195       | 88.0637         |

N-term:+29.04

SFGPISEVVVVKDR, MH+ 1587.9110, m/z 529.9752  
 L OS G26 P150811 220811-s1.05312.05312.3.dta

X-range:

-

MassTol: Y-zoom:

MassType:

AVG  MONO

Axis:

1  2

Label:

I  M  -

Ions:

a  +  2+  3+

b  +  2+  3+

c  +  2+  3+

x  +  2+  3+

y  +  2+  3+

z  +  2+  3+

hide H<sub>2</sub>O/NH<sub>3</sub>

zoom 112-122

GO

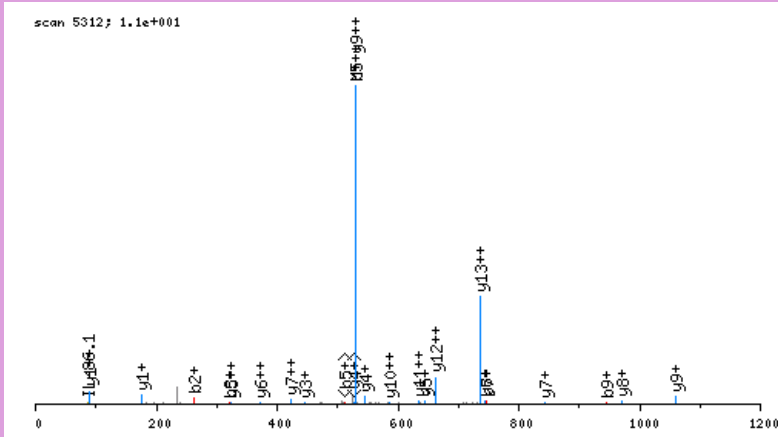

click image to zoom in; click top corners to zoom out [\[precursor±\]](#)

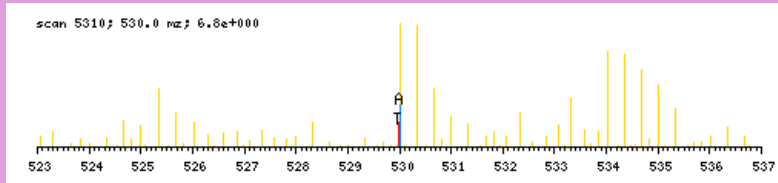

zoomed in precursor plot; T=theoretical m/z, A=acquired m/z

| b <sup>+</sup> | #  | AA # | y <sup>+</sup> | y <sup>2+</sup> |
|----------------|----|------|----------------|-----------------|
| 116.0711       | 1  | S 14 |                |                 |
| 263.1395       | 2  | F 13 | 1472.8477      | 736.9278        |
| 320.1610       | 3  | G 12 | 1325.7793      | 663.3936        |
| 417.2138       | 4  | P 11 | 1268.7578      | 634.8828        |
| 530.2978       | 5  | I 10 | 1171.7051      | 586.3565        |
| 617.3299       | 6  | S 9  | 1058.6210      | 529.8144        |
| 746.3725       | 7  | E 8  | 971.5890       | 486.2984        |
| 845.4409       | 8  | V 7  | 842.5464       | 421.7771        |
| 944.5093       | 9  | V 6  | 743.4780       | 372.2429        |
| 1043.5777      | 10 | V 5  | 644.4096       | 322.7087        |
| 1142.6461      | 11 | V 4  | 545.3412       | 273.1745        |
| 1298.7724      | 12 | K 3  | 446.2727       | 223.6403        |
| 1413.7994      | 13 | D 2  | 290.1464       | 145.5771        |
|                | 14 | R 1  | 175.1195       | 88.0637         |

N-term:+29.04 K(12):+156.13

SFPTLKFFPASADR, MH+ 1639.8848, m/z 547.2998  
 L OS G26 P150811 220811-s1.06278.06278.3.dta

X-range:

-

MassTol: Y-zoom:

MassType:

AVG  MONO

Axis:

1  2

Label:

I  M  -

Ions:

a  +  2+  3+

b  +  2+  3+

c  +  2+  3+

x  +  2+  3+

y  +  2+  3+

z  +  2+  3+

hide H<sub>2</sub>O/NH<sub>3</sub>

zoom 112-122

GO

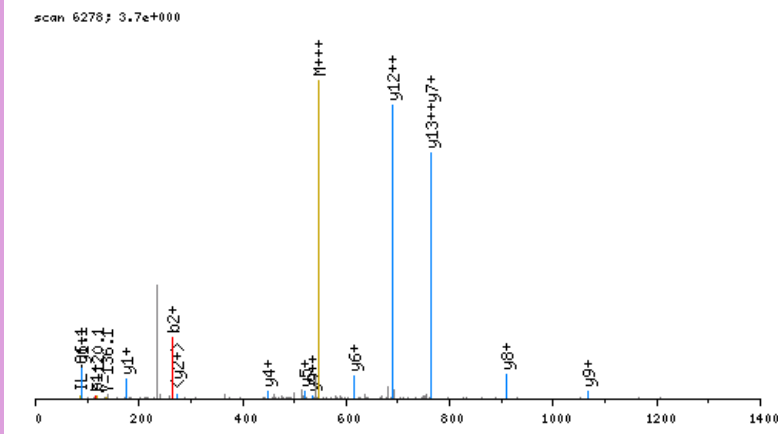

click image to zoom in; click top corners to zoom out [\[precursor±\]](#)

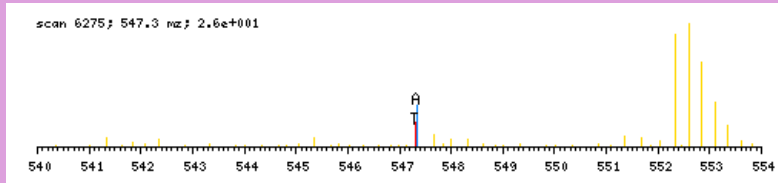

zoomed in precursor plot; T=theoretical m/z, A=acquired m/z

| b <sup>+</sup> | #  | AA # | y <sup>+</sup> | y <sup>2+</sup> |
|----------------|----|------|----------------|-----------------|
| 116.0711       | 1  | S 14 |                |                 |
| 263.1395       | 2  | F 13 | 1524.8215      | 762.9147        |
| 360.1923       | 3  | P 12 | 1377.7531      | 689.3805        |
| 461.2400       | 4  | T 11 | 1280.7003      | 640.8541        |
| 574.3240       | 5  | L 10 | 1179.6527      | 590.3302        |
| 730.4503       | 6  | K 9  | 1066.5686      | 533.7882        |
| 877.5188       | 7  | F 8  | 910.4423       | 455.7251        |
| 1024.5872      | 8  | F 7  | 763.3739       | 382.1909        |
| 1121.6399      | 9  | P 6  | 616.3055       | 308.6566        |
| 1192.6771      | 10 | A 5  | 519.2527       | 260.1303        |
| 1279.7091      | 11 | S 4  | 448.2156       | 224.6117        |
| 1350.7462      | 12 | A 3  | 361.1836       | 181.0957        |
| 1465.7731      | 13 | D 2  | 290.1464       | 145.5771        |
|                | 14 | R 1  | 175.1195       | 88.0637         |

N-term:+29.04 K(6):+156.13

SGAQASSTPLSPTR, MH+ 1387.7181, m/z 694.3627  
 L OS G25 P150811 220811-s1.02370.02370.2.dta

scan 2370; 2.6e+000

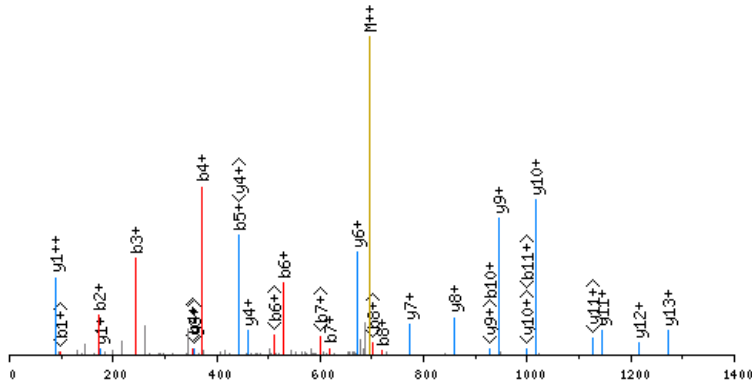

click image to zoom in; click top corners to zoom out [\[precursor±\]](#)

scan 2367; 694.4 m/z; 1.9e+001

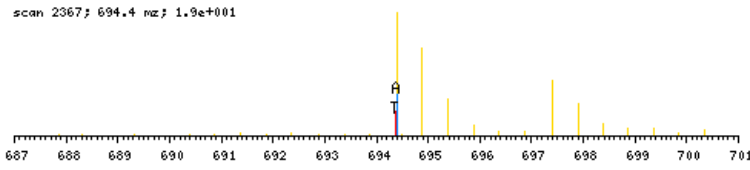

zoomed in precursor plot; T=theoretical m/z, A=acquired m/z

X-range:

-

MassTol: Y-zoom:

MassType:

AVG  MONO

Axis:

1  2

Label:

I  M  -

Ions:

a  +  2+  3+

b  +  2+  3+

c  +  2+  3+

x  +  2+  3+

y  +  2+  3+

z  +  2+  3+

hide H<sub>2</sub>O/NH<sub>3</sub>

zoom 112-122

GO

| b <sup>+</sup> | #  | AA # | y <sup>+</sup> | y <sup>2+</sup> |
|----------------|----|------|----------------|-----------------|
| 116.0711       | 1  | S 14 |                |                 |
| 173.0926       | 2  | G 13 | 1272.6548      | 636.8313        |
| 244.1297       | 3  | A 12 | 1215.6333      | 608.3206        |
| 372.1883       | 4  | Q 11 | 1144.5962      | 572.8020        |
| 443.2254       | 5  | A 10 | 1016.5376      | 508.7727        |
| 530.2574       | 6  | S 9  | 945.5005       | 473.2542        |
| 617.2895       | 7  | S 8  | 858.4685       | 429.7382        |
| 718.3371       | 8  | T 7  | 771.4365       | 386.2222        |
| 815.3899       | 9  | P 6  | 670.3888       | 335.6983        |
| 928.4740       | 10 | L 5  | 573.3360       | 287.1719        |
| 1015.5060      | 11 | S 4  | 460.2520       | 230.6299        |
| 1112.5588      | 12 | P 3  | 373.2199       | 187.1139        |
| 1213.6064      | 13 | T 2  | 276.1672       | 138.5875        |
|                | 14 | R 1  | 175.1195       | 88.0637         |

N-term:+29.04



SGDSAPLQEAMAVLQHHDAVSGTAR, MH+ 2582.2845, m/z 646.3266  
 H OS G27 P150811 220811-s1.07201.07201.4.dta

scan 7201; 8.5e-001

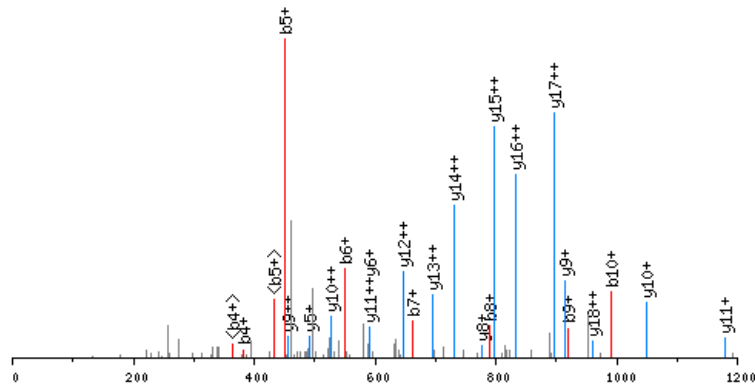

click image to zoom in; click top corners to zoom out [\[precursor±\]](#)

scan 7200; 646.3 m/z; 1.4e+000

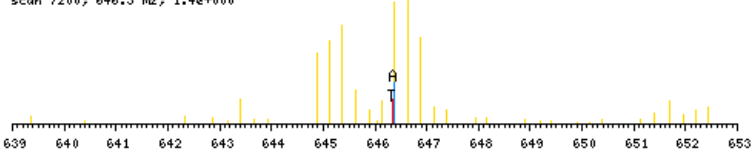

zoomed in precursor plot; T=theoretical m/z, A=acquired m/z

X-range:

-

MassTol: Y-zoom:

MassType:

AVG  MONO

Axis:

1  2

Label:

I  M  -

Ions:

a  +  2+  3+

b  +  2+  3+

c  +  2+  3+

x  +  2+  3+

y  +  2+  3+

z  +  2+  3+

hide H<sub>2</sub>O/NH<sub>3</sub>

zoom 112-122

GO

| b <sup>+</sup> | #  | AA # | y <sup>+</sup> | y <sup>2+</sup> |
|----------------|----|------|----------------|-----------------|
| 122.1029       | 1  | S 25 |                |                 |
| 179.1244       | 2  | G 24 | 2461.1894      | 1231.0986       |
| 294.1513       | 3  | D 23 | 2404.1679      | 1202.5879       |
| 381.1834       | 4  | S 22 | 2289.1410      | 1145.0744       |
| 452.2205       | 5  | A 21 | 2202.1090      | 1101.5584       |
| 549.2732       | 6  | P 20 | 2131.0718      | 1066.0398       |
| 662.3573       | 7  | L 19 | 2034.0191      | 1017.5135       |
| 790.4159       | 8  | Q 18 | 1920.9350      | 960.9714        |
| 919.4585       | 9  | E 17 | 1792.8764      | 896.9421        |
| 990.4956       | 10 | A 16 | 1663.8338      | 832.4208        |
| 1121.5361      | 11 | M 15 | 1592.7967      | 796.9023        |
| 1192.5732      | 12 | A 14 | 1461.7562      | 731.3820        |
| 1291.6416      | 13 | V 13 | 1390.7191      | 695.8635        |
| 1404.7257      | 14 | L 12 | 1291.6507      | 646.3293        |
| 1532.7842      | 15 | Q 11 | 1178.5667      | 589.7872        |
| 1669.8432      | 16 | H 10 | 1050.5081      | 525.7580        |
| 1806.9021      | 17 | H 9  | 913.4492       | 457.2285        |
| 1921.9290      | 18 | D 8  | 776.3903       | 388.6990        |
| 1992.9661      | 19 | A 7  | 661.3633       | 331.1856        |
| 2092.0345      | 20 | V 6  | 590.3262       | 295.6670        |
| 2179.0666      | 21 | S 5  | 491.2578       | 246.1328        |
| 2236.0880      | 22 | G 4  | 404.2258       | 202.6168        |
| 2337.1357      | 23 | T 3  | 347.2043       | 174.1061        |
| 2408.1728      | 24 | A 2  | 246.1566       | 123.5822        |
|                | 25 | R 1  | 175.1195       | 88.0637         |

N-term:+35.07

SGEGQEDAGELDFSGLLKR, MH+ 2076.0886, m/z 692.7010  
 H OS G26 P150811 220811-s1.06121.06121.3.dta

scan 6121; 3.9e+000

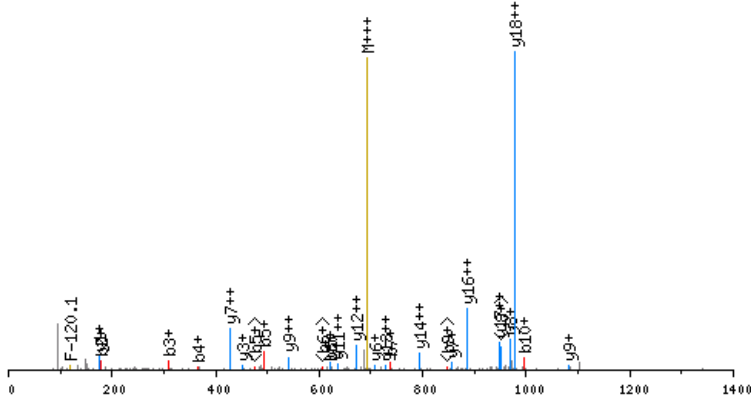

click image to zoom in; click top corners to zoom out [\[precursor±\]](#)

scan 6120; 692.7 m/z; 3.4e+001

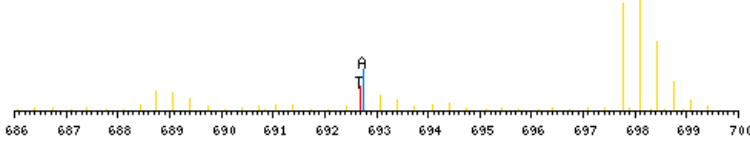

zoomed in precursor plot; T=theoretical m/z, A=acquired m/z

X-range:

-

MassTol: Y-zoom:

MassType:

AVG  MONO

Axis:

1  2

Label:

I  M  -

Ions:

a  +  2+  3+

b  +  2+  3+

c  +  2+  3+

x  +  2+  3+

y  +  2+  3+

z  +  2+  3+

hide H<sub>2</sub>O/NH<sub>3</sub>

zoom 112-122

GO

| b <sup>+</sup> | #  | AA | #  | y <sup>+</sup> | y <sup>2+</sup> |
|----------------|----|----|----|----------------|-----------------|
| 122.1029       | 1  | S  | 19 |                |                 |
| 179.1244       | 2  | G  | 18 | 1954.9934      | 978.0006        |
| 308.1670       | 3  | E  | 17 | 1897.9720      | 949.4899        |
| 365.1884       | 4  | G  | 16 | 1768.9294      | 884.9686        |
| 493.2470       | 5  | Q  | 15 | 1711.9079      | 856.4579        |
| 622.2896       | 6  | E  | 14 | 1583.8493      | 792.4286        |
| 737.3166       | 7  | D  | 13 | 1454.8068      | 727.9073        |
| 808.3537       | 8  | A  | 12 | 1339.7798      | 670.3938        |
| 865.3751       | 9  | G  | 11 | 1268.7427      | 634.8753        |
| 994.4177       | 10 | E  | 10 | 1211.7212      | 606.3645        |
| 1107.5018      | 11 | L  | 9  | 1082.6786      | 541.8432        |
| 1222.5287      | 12 | D  | 8  | 969.5946       | 485.3012        |
| 1369.5972      | 13 | F  | 7  | 854.5676       | 427.7877        |
| 1456.6292      | 14 | S  | 6  | 707.4992       | 354.2535        |
| 1513.6506      | 15 | G  | 5  | 620.4672       | 310.7375        |
| 1626.7347      | 16 | L  | 4  | 563.4457       | 282.2268        |
| 1739.8188      | 17 | L  | 3  | 450.3617       | 225.6847        |
| 1901.9769      | 18 | K  | 2  | 337.2776       | 169.1427        |
|                | 19 | R  | 1  | 175.1195       | 88.0637         |

N-term:+35.07 K(18);+162.16

SGEHMDLTTTCPLAAGGQEKLR, MH+ 2455.2073, m/z 614.5573  
 L OS G28 P150811 220811-s1.05465.05465.4.dta

X-range:

0 - 0

MassTol: Y-zoom:

0. 1.

MassType:

AVG  MONO

Axis:

1  2

Label:

I  M  -

Ions:

a  +  2+  3+

b  +  2+  3+

c  +  2+  3+

x  +  2+  3+

y  +  2+  3+

z  +  2+  3+

hide H<sub>2</sub>O/NH<sub>3</sub>

zoom 112-122

GO

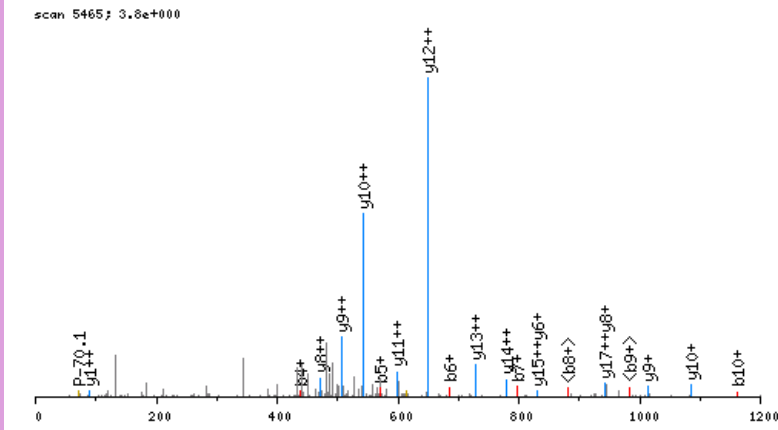

click image to zoom in; click top corners to zoom out [precursor±]

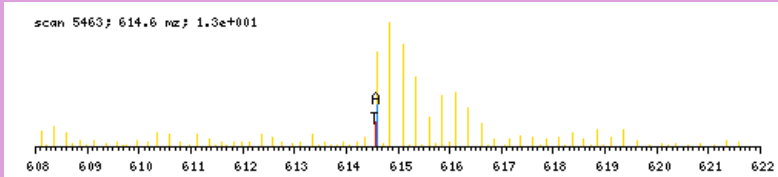

zoomed in precursor plot; T=theoretical m/z, A=acquired m/z

| b <sup>+</sup> | #  | AA | #  | y <sup>+</sup> | y <sup>2+</sup> |
|----------------|----|----|----|----------------|-----------------|
| 116.0711       | 1  | S  | 22 |                |                 |
| 173.0926       | 2  | G  | 21 | 2340.1440      | 1170.5759       |
| 302.1352       | 3  | E  | 20 | 2283.1225      | 1142.0652       |
| 439.1941       | 4  | H  | 19 | 2154.0800      | 1077.5439       |
| 570.2346       | 5  | M  | 18 | 2017.0210      | 1009.0144       |
| 685.2615       | 6  | D  | 17 | 1885.9806      | 943.4942        |
| 798.3456       | 7  | L  | 16 | 1770.9536      | 885.9807        |
| 899.3933       | 8  | T  | 15 | 1657.8696      | 829.4387        |
| 1000.4409      | 9  | T  | 14 | 1556.8219      | 778.9148        |
| 1160.4715      | 10 | C  | 13 | 1455.7742      | 728.3910        |
| 1257.5243      | 11 | P  | 12 | 1295.7436      | 648.3757        |
| 1370.6084      | 12 | L  | 11 | 1198.6908      | 599.8493        |
| 1441.6455      | 13 | A  | 10 | 1085.6068      | 543.3073        |
| 1512.6826      | 14 | A  | 9  | 1014.5697      | 507.7887        |
| 1569.7041      | 15 | G  | 8  | 943.5325       | 472.2702        |
| 1626.7255      | 16 | G  | 7  | 886.5111       | 443.7595        |
| 1754.7841      | 17 | Q  | 6  | 829.4896       | 415.2487        |
| 1882.8427      | 18 | Q  | 5  | 701.4310       | 351.2194        |
| 2011.8853      | 19 | E  | 4  | 573.3725       | 287.1901        |
| 2168.0116      | 20 | K  | 3  | 444.3299       | 222.6688        |
| 2281.0956      | 21 | L  | 2  | 288.2036       | 144.6057        |
|                | 22 | R  | 1  | 175.1195       | 88.0637         |

N-term: +29.04 C(10): +160.03  
 K(20): +156.13

SGFEPGAFDGLKLNLYR, MH+ 1940.0282, m/z 647.3476  
 L OS G26 P150811 220811-s1.06698.06698.3.dta

X-range:

-

MassTol: Y-zoom:

MassType:

AVG  MONO

Axis:

1  2

Label:

I  M  -

Ions:

a  +  2+  3+

b  +  2+  3+

c  +  2+  3+

x  +  2+  3+

y  +  2+  3+

z  +  2+  3+

hide H<sub>2</sub>O/NH<sub>3</sub>

zoom 112-122

GO

scan 6698; 1.5e+000

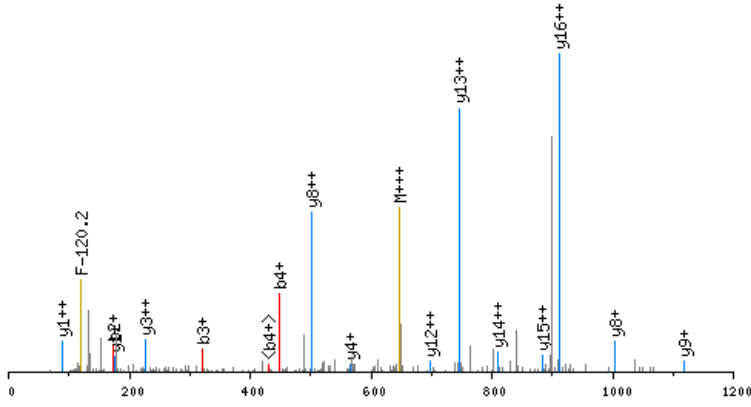

click image to zoom in; click top corners to zoom out [\[precursor±\]](#)

scan 6695; 647.3 m/z; 6.3e+000

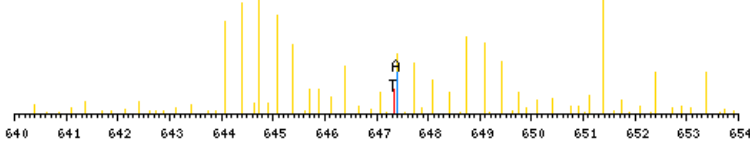

zoomed in precursor plot; T=theoretical m/z, A=acquired m/z

| b <sup>+</sup> | #  | AA | #  | y <sup>+</sup> | y <sup>2+</sup> |
|----------------|----|----|----|----------------|-----------------|
| 116.0711       | 1  | S  | 17 |                |                 |
| 173.0926       | 2  | G  | 16 | 1824.9649      | 912.9864        |
| 320.1610       | 3  | F  | 15 | 1767.9434      | 884.4756        |
| 449.2036       | 4  | E  | 14 | 1620.8750      | 810.9414        |
| 546.2564       | 5  | P  | 13 | 1491.8324      | 746.4201        |
| 603.2778       | 6  | G  | 12 | 1394.7796      | 697.8937        |
| 674.3149       | 7  | A  | 11 | 1337.7582      | 669.3830        |
| 821.3834       | 8  | F  | 10 | 1266.7211      | 633.8644        |
| 936.4103       | 9  | D  | 9  | 1119.6527      | 560.3302        |
| 993.4318       | 10 | G  | 8  | 1004.6257      | 502.8168        |
| 1106.5158      | 11 | L  | 7  | 947.6042       | 474.3060        |
| 1262.6421      | 12 | K  | 6  | 834.5202       | 417.7640        |
| 1375.7262      | 13 | L  | 5  | 678.3939       | 339.7009        |
| 1489.7691      | 14 | N  | 4  | 565.3098       | 283.1588        |
| 1652.8324      | 15 | Y  | 3  | 451.2669       | 226.1374        |
| 1765.9165      | 16 | L  | 2  | 288.2036       | 144.6057        |
|                | 17 | R  | 1  | 175.1195       | 88.0637         |

N-term:+29.04 K(12):+156.13

SGFPDASSEGPEPTQGEAR, MH+ 1952.9050, m/z 651.6398  
 H OS G24 P150811 220811-s1.02965.02965.3.dta

X-range:

-

MassTol: Y-zoom:

MassType:

AVG  MONO

Axis:

1  2

Label:

I  M  -

Ions:

a  +  2+  3+

b  +  2+  3+

c  +  2+  3+

x  +  2+  3+

y  +  2+  3+

z  +  2+  3+

hide H<sub>2</sub>O/NH<sub>3</sub>

zoom 112-122

GO

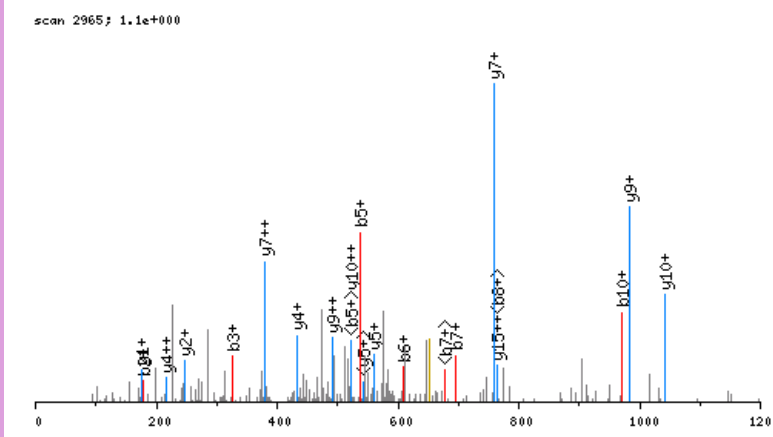

click image to zoom in; click top corners to zoom out [\[precursor±\]](#)

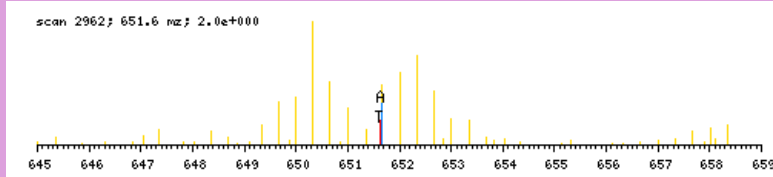

zoomed in precursor plot; T=theoretical m/z, A=acquired m/z

| b <sup>+</sup> | #  | AA | #  | y <sup>+</sup> | y <sup>2+</sup> |
|----------------|----|----|----|----------------|-----------------|
| 122.1029       | 1  | S  | 19 |                |                 |
| 179.1244       | 2  | G  | 18 | 1831.8099      | 916.4088        |
| 326.1928       | 3  | F  | 17 | 1774.7884      | 887.8981        |
| 423.2456       | 4  | P  | 16 | 1627.7200      | 814.3639        |
| 538.2725       | 5  | D  | 15 | 1530.6672      | 765.8375        |
| 609.3096       | 6  | A  | 14 | 1415.6403      | 708.3241        |
| 696.3417       | 7  | S  | 13 | 1344.6032      | 672.8055        |
| 783.3737       | 8  | S  | 12 | 1257.5711      | 629.2895        |
| 912.4163       | 9  | E  | 11 | 1170.5391      | 585.7735        |
| 969.4377       | 10 | G  | 10 | 1041.4965      | 521.2522        |
| 1066.4905      | 11 | P  | 9  | 984.4750       | 492.7414        |
| 1195.5331      | 12 | E  | 8  | 887.4223       | 444.2151        |
| 1292.5859      | 13 | P  | 7  | 758.3797       | 379.6938        |
| 1393.6335      | 14 | T  | 6  | 661.3269       | 331.1674        |
| 1521.6921      | 15 | Q  | 5  | 560.2792       | 280.6435        |
| 1578.7136      | 16 | G  | 4  | 432.2207       | 216.6142        |
| 1707.7562      | 17 | E  | 3  | 375.1992       | 188.1035        |
| 1778.7933      | 18 | A  | 2  | 246.1566       | 123.5822        |
|                | 19 | R  | 1  | 175.1195       | 88.0637         |

N-term:+35.07

SGGSKDNLSPPLGQCLTER, MH+ 2084.1082, m/z 695.3742  
 H OS G26 P150811 220811-s1.03844.03844.3.dta

X-range:

-

MassTol: Y-zoom:

MassType:

AVG  MONO

Axis:

1  2

Label:

I  M  -

Ions:

a  +  2+  3+

b  +  2+  3+

c  +  2+  3+

x  +  2+  3+

y  +  2+  3+

z  +  2+  3+

hide H<sub>2</sub>O/NH<sub>3</sub>

zoom 112-122

GO

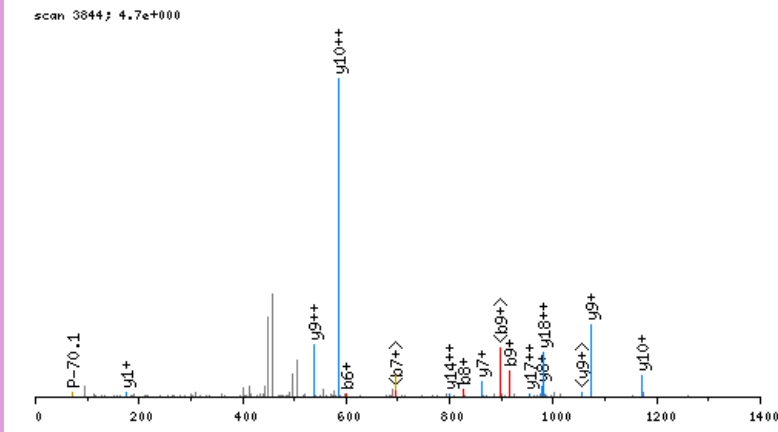

click image to zoom in; click top corners to zoom out [precursor±]

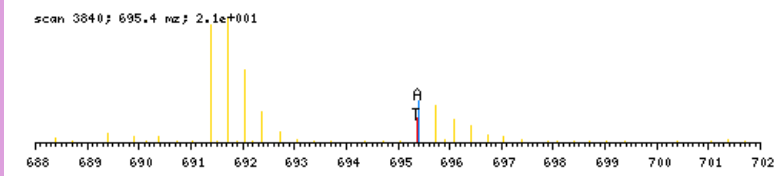

zoomed in precursor plot; T=theoretical m/z, A=acquired m/z

| b <sup>+</sup> | #  | AA | #  | y <sup>+</sup> | y <sup>2+</sup> |
|----------------|----|----|----|----------------|-----------------|
| 122.1029       | 1  | S  | 19 |                |                 |
| 179.1244       | 2  | G  | 18 | 1963.0131      | 982.0105        |
| 236.1459       | 3  | G  | 17 | 1905.9916      | 953.4997        |
| 323.1779       | 4  | S  | 16 | 1848.9702      | 924.9890        |
| 485.3360       | 5  | K  | 15 | 1761.9381      | 881.4730        |
| 600.3629       | 6  | D  | 14 | 1599.7800      | 800.3939        |
| 714.4059       | 7  | N  | 13 | 1484.7531      | 742.8805        |
| 827.4899       | 8  | L  | 12 | 1370.7102      | 685.8590        |
| 914.5219       | 9  | S  | 11 | 1257.6261      | 629.3170        |
| 1011.5747      | 10 | P  | 10 | 1170.5941      | 585.8009        |
| 1108.6275      | 11 | P  | 9  | 1073.5413      | 537.2746        |
| 1221.7115      | 12 | L  | 8  | 976.4885       | 488.7482        |
| 1278.7330      | 13 | G  | 7  | 863.4045       | 432.2062        |
| 1406.7916      | 14 | Q  | 6  | 806.3830       | 403.6954        |
| 1566.8222      | 15 | C  | 5  | 678.3244       | 339.6661        |
| 1679.9062      | 16 | L  | 4  | 518.2938       | 259.6508        |
| 1780.9539      | 17 | T  | 3  | 405.2098       | 203.1088        |
| 1909.9965      | 18 | E  | 2  | 304.1621       | 152.5850        |
|                | 19 | R  | 1  | 175.1195       | 88.0637         |

N-term:+35.07 K(5):+162.16  
 C(15):+160.03

SGGTTMYPGIADR, MH+ 1359.6791, m/z 680.3432  
 H OS G25 P150811 220811-s1.04066.04066.2.dta

X-range:

-

MassTol: Y-zoom:

MassType:

AVG  MONO

Axis:

1  2

Label:

I  M  -

Ions:

a  +  2+  3+

b  +  2+  3+

c  +  2+  3+

x  +  2+  3+

y  +  2+  3+

z  +  2+  3+

hide H<sub>2</sub>O/NH<sub>3</sub>

zoom 112-122

GO

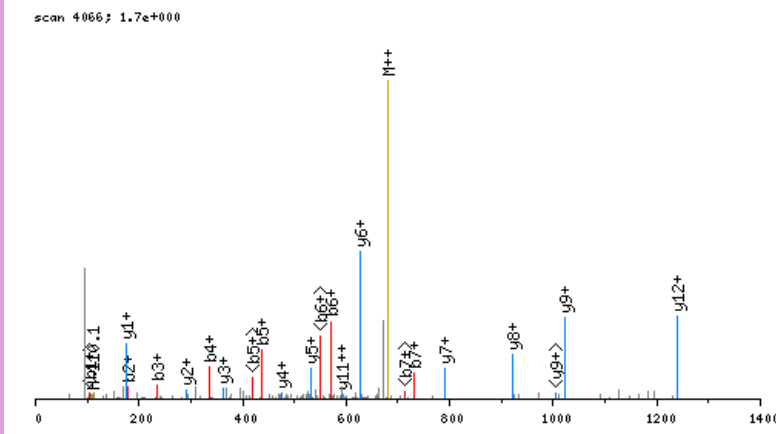

click image to zoom in; click top corners to zoom out [\[precursor±\]](#)

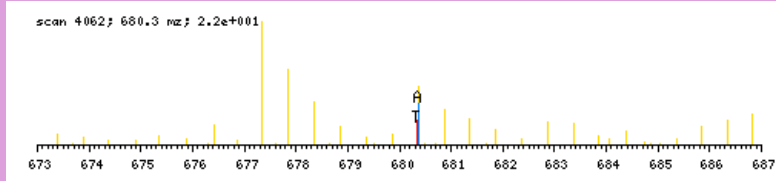

zoomed in precursor plot; T=theoretical m/z, A=acquired m/z

| b <sup>+</sup> | #  | AA # | y <sup>+</sup> | y <sup>2+</sup> |
|----------------|----|------|----------------|-----------------|
| 122.1029       | 1  | S 13 |                |                 |
| 179.1244       | 2  | G 12 | 1238.5839      | 619.7959        |
| 236.1459       | 3  | G 11 | 1181.5625      | 591.2852        |
| 337.1935       | 4  | T 10 | 1124.5410      | 562.7744        |
| 438.2412       | 5  | T 9  | 1023.4933      | 512.2506        |
| 569.2817       | 6  | M 8  | 922.4457       | 461.7267        |
| 732.3450       | 7  | Y 7  | 791.4052       | 396.2065        |
| 829.3978       | 8  | P 6  | 628.3418       | 314.6748        |
| 886.4193       | 9  | G 5  | 531.2891       | 266.1485        |
| 999.5033       | 10 | I 4  | 474.2676       | 237.6377        |
| 1070.5404      | 11 | A 3  | 361.1836       | 181.0957        |
| 1185.5674      | 12 | D 2  | 290.1464       | 145.5771        |
|                | 13 | R 1  | 175.1195       | 88.0637         |

N-term:+35.07

SGIPETVPLSTVNR, MH+ 1497.8277, m/z 499.9474  
 L OS G25 P150811 220811-s1.05644.05644.3.dta

scan 5644; 6.8e+000

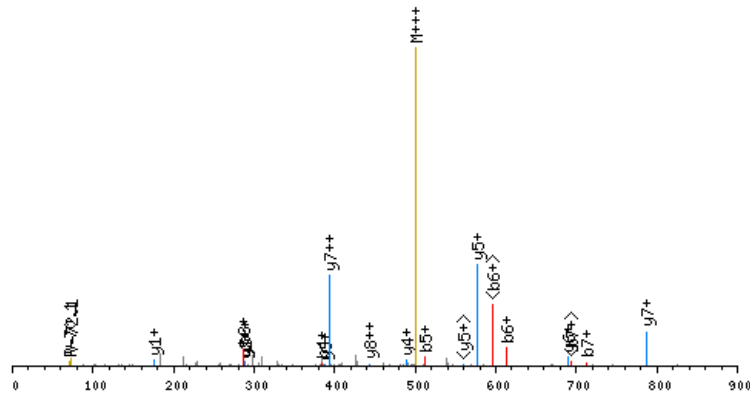

click image to zoom in; click top corners to zoom out [\[precursor±\]](#)

scan 5642; 499.9 m/z; 1.2e+001

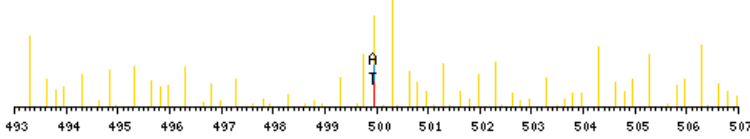

zoomed in precursor plot; T=theoretical m/z, A=acquired m/z

X-range:

-

MassTol: Y-zoom:

MassType:

AVG  MONO

Axis:

1  2

Label:

I  M  -

Ions:

a  +  2+  3+

b  +  2+  3+

c  +  2+  3+

x  +  2+  3+

y  +  2+  3+

z  +  2+  3+

hide H<sub>2</sub>O/NH<sub>3</sub>

zoom 112-122

GO

| b <sup>+</sup> | #  | AA # | y <sup>+</sup> | y <sup>2+</sup> |
|----------------|----|------|----------------|-----------------|
| 116.0711       | 1  | S 14 |                |                 |
| 173.0926       | 2  | G 13 | 1382.7644      | 691.8861        |
| 286.1767       | 3  | I 12 | 1325.7429      | 663.3754        |
| 383.2294       | 4  | P 11 | 1212.6588      | 606.8333        |
| 512.2720       | 5  | E 10 | 1115.6061      | 558.3069        |
| 613.3197       | 6  | T 9  | 986.5635       | 493.7856        |
| 712.3881       | 7  | V 8  | 885.5158       | 443.2618        |
| 809.4409       | 8  | P 7  | 786.4474       | 393.7276        |
| 922.5249       | 9  | L 6  | 689.3946       | 345.2012        |
| 1009.5570      | 10 | S 5  | 576.3105       | 288.6592        |
| 1110.6046      | 11 | T 4  | 489.2785       | 245.1432        |
| 1209.6731      | 12 | V 3  | 388.2308       | 194.6193        |
| 1323.7160      | 13 | N 2  | 289.1624       | 145.0851        |
|                | 14 | R 1  | 175.1195       | 88.0637         |

N-term:+29.04



SGKDGQCPLVVEQVR, MH+ 1727.9114, m/z 576.6420  
 L OS G27 P150811 220811-s1.03603.03603.3.dta

X-range:

-

MassTol: Y-zoom:

MassType:

AVG  MONO

Axis:

1  2

Label:

I  M  -

Ions:

a  +  2+  3+

b  +  2+  3+

c  +  2+  3+

x  +  2+  3+

y  +  2+  3+

z  +  2+  3+

hide H<sub>2</sub>O/NH<sub>3</sub>

zoom 112-122

GO

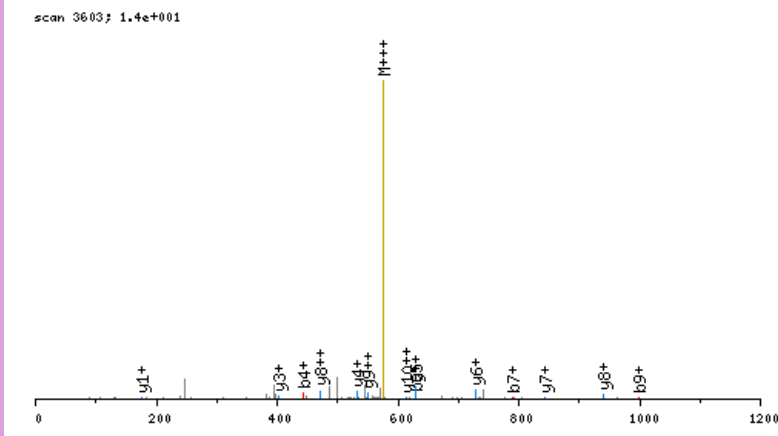

click image to zoom in; click top corners to zoom out [\[precursor±\]](#)

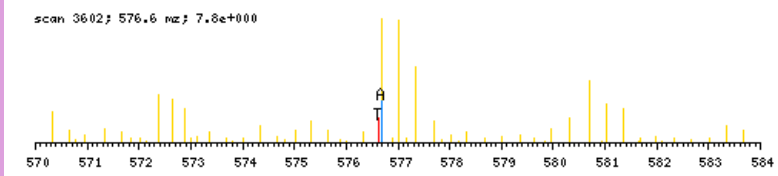

zoomed in precursor plot; T=theoretical m/z, A=acquired m/z

| b <sup>+</sup> | #  | AA | #  | y <sup>+</sup> | y <sup>2+</sup> |
|----------------|----|----|----|----------------|-----------------|
| 116.0711       | 1  | S  | 15 |                |                 |
| 173.0926       | 2  | G  | 14 | 1612.8481      | 806.9280        |
| 329.2189       | 3  | K  | 13 | 1555.8266      | 778.4172        |
| 444.2458       | 4  | D  | 12 | 1399.7003      | 700.3541        |
| 501.2673       | 5  | G  | 11 | 1284.6734      | 642.8406        |
| 629.3259       | 6  | Q  | 10 | 1227.6519      | 614.3299        |
| 789.3565       | 7  | C  | 9  | 1099.5933      | 550.3006        |
| 886.4092       | 8  | P  | 8  | 939.5627       | 470.2853        |
| 999.4933       | 9  | L  | 7  | 842.5100       | 421.7589        |
| 1098.5617      | 10 | V  | 6  | 729.4259       | 365.2169        |
| 1197.6301      | 11 | V  | 5  | 630.3575       | 315.6827        |
| 1326.6727      | 12 | E  | 4  | 531.2891       | 266.1485        |
| 1454.7313      | 13 | Q  | 3  | 402.2465       | 201.6272        |
| 1553.7997      | 14 | V  | 2  | 274.1879       | 137.5979        |
|                | 15 | R  | 1  | 175.1195       | 88.0637         |

N-term:+29.04 K(3):+156.13  
 C(7):+160.03

SGLDTYSLSGGGVPVLVR, MH+ 1862.0023, m/z 621.3390  
 L OS G24 P150811 220811-s1.04575.04575.3.dta

scan 4575; 2.5e+000

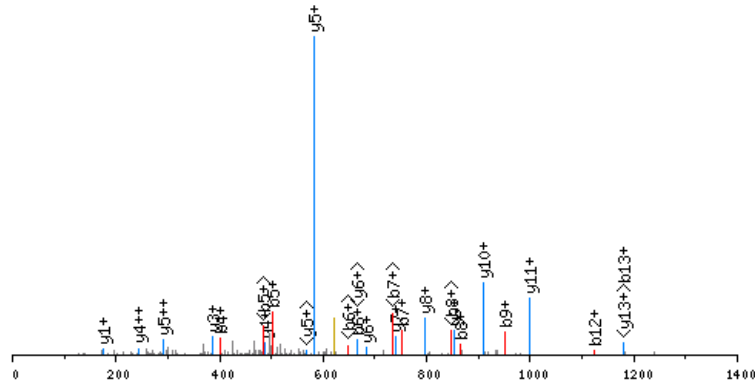

click image to zoom in; click top corners to zoom out [precursor±]

scan 4572; 621.3 m/z; 1.5e+000

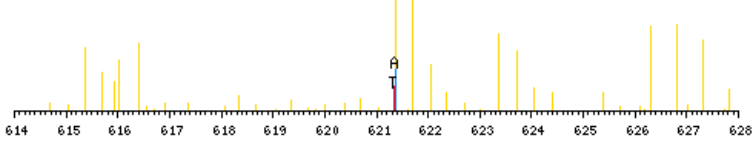

zoomed in precursor plot; T=theoretical m/z, A=acquired m/z

X-range:

-

MassTol: Y-zoom:

MassType:

AVG  MONO

Axis:

1  2

Label:

I  M  -

Ions:

a  +  2+  3+

b  +  2+  3+

c  +  2+  3+

x  +  2+  3+

y  +  2+  3+

z  +  2+  3+

hide H<sub>2</sub>O/NH<sub>3</sub>

zoom 112-122

GO

| b <sup>+</sup> | #  | AA # | y <sup>+</sup> | y <sup>2+</sup> |
|----------------|----|------|----------------|-----------------|
| 116.0711       | 1  | S 19 |                |                 |
| 173.0926       | 2  | G 18 | 1746.9390      | 873.9734        |
| 286.1767       | 3  | L 17 | 1689.9176      | 845.4627        |
| 401.2036       | 4  | D 16 | 1576.8335      | 788.9207        |
| 502.2513       | 5  | T 15 | 1461.8066      | 731.4072        |
| 665.3146       | 6  | Y 14 | 1360.7589      | 680.8833        |
| 752.3466       | 7  | S 13 | 1197.6955      | 599.3517        |
| 865.4307       | 8  | L 12 | 1110.6635      | 555.8357        |
| 952.4627       | 9  | S 11 | 997.5795       | 499.2936        |
| 1009.4842      | 10 | G 10 | 910.5474       | 455.7776        |
| 1066.5057      | 11 | G 9  | 853.5260       | 427.2669        |
| 1123.5271      | 12 | G 8  | 796.5045       | 398.7562        |
| 1180.5486      | 13 | G 7  | 739.4830       | 370.2454        |
| 1279.6170      | 14 | V 6  | 682.4616       | 341.7347        |
| 1376.6698      | 15 | P 5  | 583.3932       | 292.2005        |
| 1475.7382      | 16 | V 4  | 486.3404       | 243.6741        |
| 1588.8222      | 17 | L 3  | 387.2720       | 194.1399        |
| 1687.8907      | 18 | V 2  | 274.1879       | 137.5979        |
|                | 19 | R 1  | 175.1195       | 88.0637         |

N-term:+29.04

SGLVKAGFAGDDAPR, MH+ 1528.8760, m/z 510.2968  
 H OS G27 P150811 220811-s1.03565.03565.3.dta

scan 3565; 1.3e+001

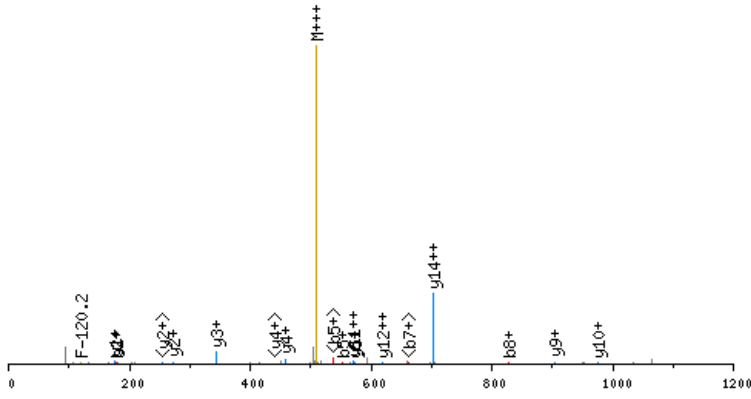

click image to zoom in; click top corners to zoom out [\[precursor±\]](#)

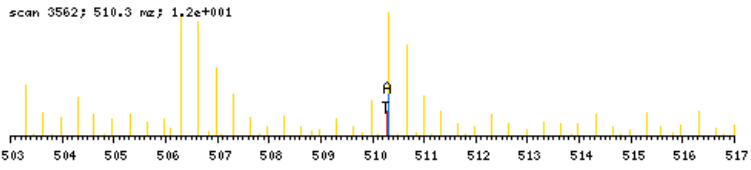

zoomed in precursor plot; T=theoretical m/z, A=acquired m/z

X-range:

-

MassTol: Y-zoom:

MassType:

AVG  MONO

Axis:

1  2

Label:

I  M  -

Ions:

a  +  2+  3+

b  +  2+  3+

c  +  2+  3+

x  +  2+  3+

y  +  2+  3+

z  +  2+  3+

hide H<sub>2</sub>O/NH<sub>3</sub>

zoom 112-122

GO

| b <sup>+</sup> | #  | AA | #  | y <sup>+</sup> | y <sup>2+</sup> |
|----------------|----|----|----|----------------|-----------------|
| 122.1029       | 1  | S  | 15 |                |                 |
| 179.1244       | 2  | G  | 14 | 1407.7809      | 704.3944        |
| 292.2085       | 3  | L  | 13 | 1350.7594      | 675.8836        |
| 391.2769       | 4  | V  | 12 | 1237.6753      | 619.3416        |
| 553.4350       | 5  | K  | 11 | 1138.6069      | 569.8074        |
| 624.4721       | 6  | A  | 10 | 976.4488       | 488.7283        |
| 681.4935       | 7  | G  | 9  | 905.4117       | 453.2098        |
| 828.5620       | 8  | F  | 8  | 848.3903       | 424.6990        |
| 899.5991       | 9  | A  | 7  | 701.3218       | 351.1648        |
| 956.6205       | 10 | G  | 6  | 630.2847       | 315.6463        |
| 1071.6475      | 11 | D  | 5  | 573.2633       | 287.1355        |
| 1186.6744      | 12 | D  | 4  | 458.2363       | 229.6221        |
| 1257.7115      | 13 | A  | 3  | 343.2094       | 172.1086        |
| 1354.7643      | 14 | P  | 2  | 272.1723       | 136.5900        |
|                | 15 | R  | 1  | 175.1195       | 88.0637         |

N-term:+35.07 K(5):+162.16

SGNPPLALPGVPGKPIR, MH+ 1823.0907, m/z 608.3684  
 L OS G26 P150811 220811-s1.05124.05124.3.dta

scan 5124; 9.7e-001

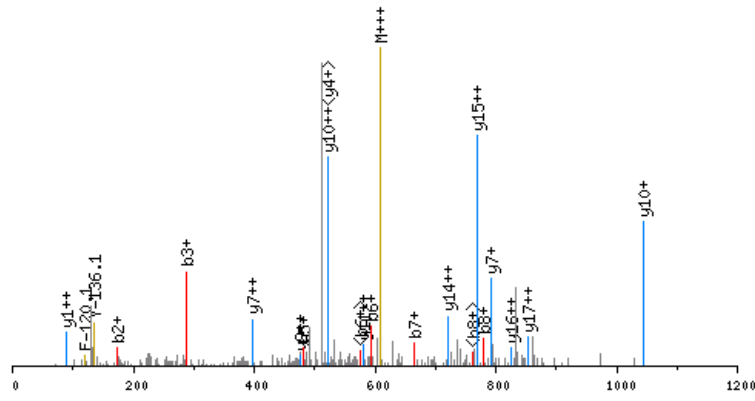

click image to zoom in; click top corners to zoom out [\[precursor±\]](#)

scan 5120; 608.4 m/z; 6.6e+000

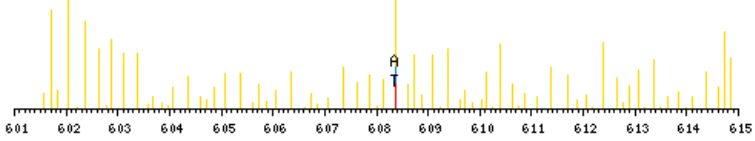

zoomed in precursor plot; T=theoretical m/z, A=acquired m/z

X-range:

-

MassTol: Y-zoom:

MassType:

AVG  MONO

Axis:

1  2

Label:

I  M  -

Ions:

a  +  2+  3+

b  +  2+  3+

c  +  2+  3+

x  +  2+  3+

y  +  2+  3+

z  +  2+  3+

hide H<sub>2</sub>O/NH<sub>3</sub>

zoom 112-122

GO

| b <sup>+</sup> | #  | AA # | y <sup>+</sup> | y <sup>2+</sup> |
|----------------|----|------|----------------|-----------------|
| 116.0711       | 1  | S 18 |                |                 |
| 173.0926       | 2  | G 17 | 1708.0274      | 854.5176        |
| 287.1355       | 3  | N 16 | 1651.0060      | 826.0069        |
| 384.1883       | 4  | P 15 | 1536.9630      | 768.9854        |
| 481.2410       | 5  | P 14 | 1439.9103      | 720.4590        |
| 594.3251       | 6  | L 13 | 1342.8575      | 671.9327        |
| 665.3622       | 7  | A 12 | 1229.7734      | 615.3906        |
| 778.4463       | 8  | L 11 | 1158.7363      | 579.8721        |
| 875.4991       | 9  | P 10 | 1045.6523      | 523.3300        |
| 932.5205       | 10 | G 9  | 948.5995       | 474.8037        |
| 1031.5889      | 11 | V 8  | 891.5780       | 446.2929        |
| 1128.6417      | 12 | P 7  | 792.5096       | 396.7587        |
| 1185.6632      | 13 | G 6  | 695.4569       | 348.2323        |
| 1282.7159      | 14 | P 5  | 638.4354       | 319.7216        |
| 1438.8422      | 15 | K 4  | 541.3826       | 271.1952        |
| 1535.8950      | 16 | P 3  | 385.2563       | 193.1321        |
| 1648.9791      | 17 | I 2  | 288.2036       | 144.6057        |
|                | 18 | R 1  | 175.1195       | 88.0637         |

N-term:+29.04 K(15):+156.13

SGPFAPVLSATSR, MH+ 1323.7485, m/z 662.3779  
 H OS G25 P150811 220811-s1.06025.06025.2.dta

X-range:

-

MassTol: Y-zoom:

MassType:

AVG  MONO

Axis:

1  2

Label:

I  M  -

Ions:

a  +  2+  3+

b  +  2+  3+

c  +  2+  3+

x  +  2+  3+

y  +  2+  3+

z  +  2+  3+

hide H<sub>2</sub>O/NH<sub>3</sub>

zoom 112-122

GO

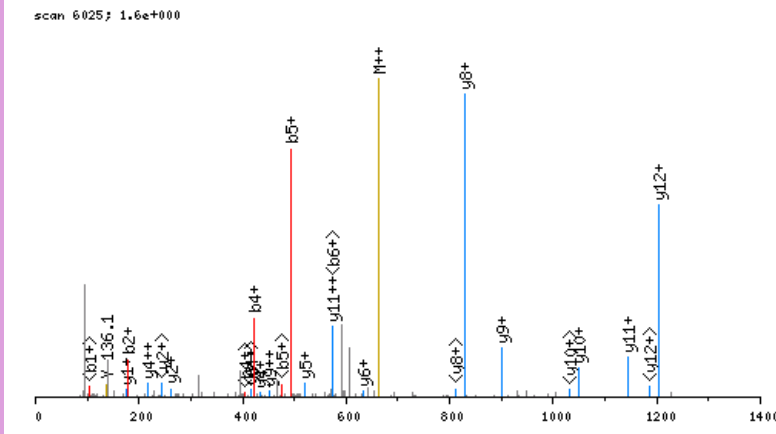

click image to zoom in; click top corners to zoom out [\[precursor±\]](#)

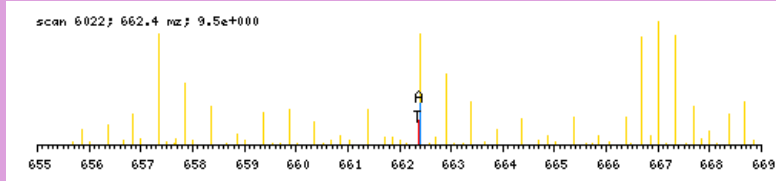

zoomed in precursor plot; T=theoretical m/z, A=acquired m/z

| b <sup>+</sup> | #  | AA # | y <sup>+</sup> | y <sup>2+</sup> |
|----------------|----|------|----------------|-----------------|
| 122.1029       | 1  | S 13 |                |                 |
| 179.1244       | 2  | G 12 | 1202.6533      | 601.8306        |
| 276.1772       | 3  | P 11 | 1145.6319      | 573.3199        |
| 423.2456       | 4  | F 10 | 1048.5791      | 524.7935        |
| 494.2827       | 5  | A 9  | 901.5107       | 451.2593        |
| 591.3354       | 6  | P 8  | 830.4736       | 415.7407        |
| 690.4039       | 7  | V 7  | 733.4208       | 367.2143        |
| 803.4879       | 8  | L 6  | 634.3524       | 317.6801        |
| 890.5200       | 9  | S 5  | 521.2683       | 261.1381        |
| 961.5571       | 10 | A 4  | 434.2363       | 217.6221        |
| 1062.6047      | 11 | T 3  | 363.1992       | 182.1035        |
| 1149.6368      | 12 | S 2  | 262.1515       | 131.5797        |
|                | 13 | R 1  | 175.1195       | 88.0637         |

N-term:+35.07

SGPGPMGLMGPR, MH+ 1190.6238, m/z 595.8155  
 H OS G25 P150811 220811-s1.05208.05208.2.dta

scan 5208; 1.2e+001

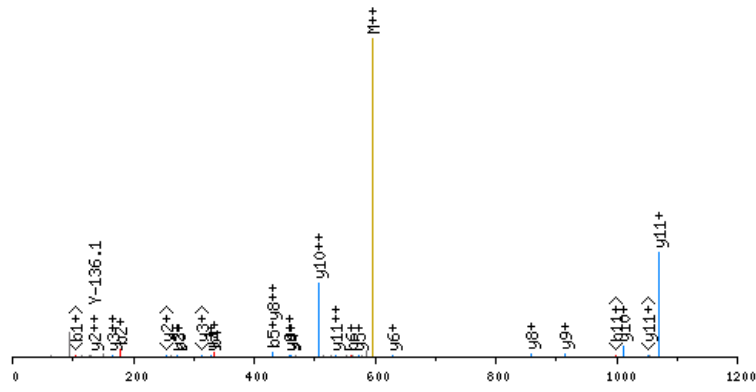

click image to zoom in; click top corners to zoom out [\[precursor±\]](#)

scan 5207; 595.8 m/z; 1.7e+001

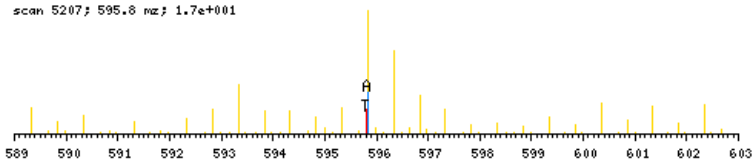

zoomed in precursor plot; T=theoretical m/z, A=acquired m/z

X-range:

-

MassTol: Y-zoom:

MassType:

AVG  MONO

Axis:

1  2

Label:

I  M  -

Ions:

a  +  2+  3+

b  +  2+  3+

c  +  2+  3+

x  +  2+  3+

y  +  2+  3+

z  +  2+  3+

hide H<sub>2</sub>O/NH<sub>3</sub>

zoom 112-122

GO

| b <sup>+</sup> | #  | AA # | y <sup>+</sup> | y <sup>2+</sup> |
|----------------|----|------|----------------|-----------------|
| 122.1029       | 1  | S 12 |                |                 |
| 179.1244       | 2  | G 11 | 1069.5287      | 535.2683        |
| 276.1772       | 3  | P 10 | 1012.5072      | 506.7575        |
| 333.1986       | 4  | G 9  | 915.4545       | 458.2311        |
| 430.2514       | 5  | P 8  | 858.4330       | 429.7204        |
| 561.2919       | 6  | M 7  | 761.3802       | 381.1940        |
| 618.3133       | 7  | G 6  | 630.3397       | 315.6738        |
| 731.3974       | 8  | L 5  | 573.3183       | 287.1631        |
| 862.4379       | 9  | M 4  | 460.2342       | 230.6210        |
| 919.4593       | 10 | G 3  | 329.1937       | 165.1008        |
| 1016.5121      | 11 | P 2  | 272.1723       | 136.5900        |
|                | 12 | R 1  | 175.1195       | 88.0637         |

N-term:+35.07

SGQPGVGPAGVR, MH+ 1212.6913, m/z 606.8493  
 H OS G25 P150811 220811-s1.02598.02598.2.dta

scan 2598; 3.6e+000

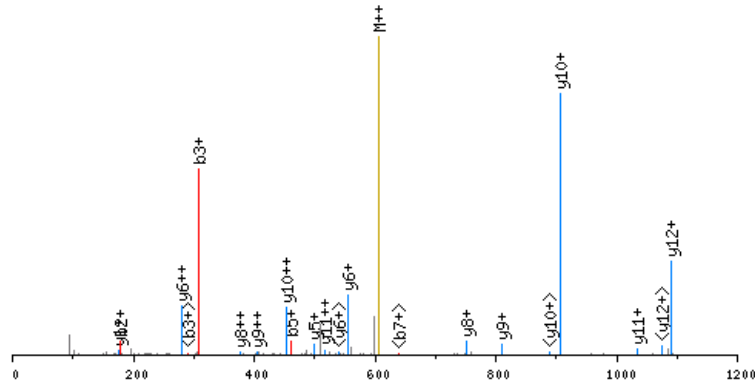

click image to zoom in; click top corners to zoom out [\[precursor±\]](#)

scan 2597; 606.8 m/z; 1.8e+001

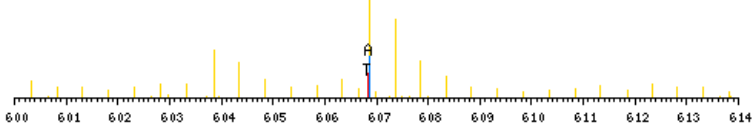

zoomed in precursor plot; T=theoretical m/z, A=acquired m/z

X-range:

-

MassTol: Y-zoom:

MassType:

AVG  MONO

Axis:

1  2

Label:

I  M  -

Ions:

a  +  2+  3+

b  +  2+  3+

c  +  2+  3+

x  +  2+  3+

y  +  2+  3+

z  +  2+  3+

hide H<sub>2</sub>O/NH<sub>3</sub>

zoom 112-122

GO

| b <sup>+</sup> | #  | AA # | y <sup>+</sup> | y <sup>2+</sup> |
|----------------|----|------|----------------|-----------------|
| 122.1029       | 1  | S 13 |                |                 |
| 179.1244       | 2  | G 12 | 1091.5962      | 546.3020        |
| 307.1830       | 3  | Q 11 | 1034.5747      | 517.7913        |
| 404.2357       | 4  | P 10 | 906.5161       | 453.7620        |
| 461.2572       | 5  | G 9  | 809.4634       | 405.2356        |
| 558.3100       | 6  | P 8  | 752.4419       | 376.7249        |
| 657.3784       | 7  | V 7  | 655.3891       | 328.1985        |
| 714.3998       | 8  | G 6  | 556.3207       | 278.6643        |
| 811.4526       | 9  | P 5  | 499.2993       | 250.1535        |
| 882.4897       | 10 | A 4  | 402.2465       | 201.6272        |
| 939.5112       | 11 | G 3  | 331.2094       | 166.1086        |
| 1038.5796      | 12 | V 2  | 274.1879       | 137.5979        |
|                | 13 | R 1  | 175.1195       | 88.0637         |

N-term:+35.07

SGSEVTQCCQTDLNCR, MH+ 2071.8481, m/z 691.2876  
 L OS G25 P150811 220811-s1.02913.02913.3.dta

X-range:

-

MassTol: Y-zoom:

MassType:

AVG  MONO

Axis:

1  2

Label:

I  M  -

Ions:

a  +  2+  3+

b  +  2+  3+

c  +  2+  3+

x  +  2+  3+

y  +  2+  3+

z  +  2+  3+

hide H<sub>2</sub>O/NH<sub>3</sub>

zoom 112-122

GO

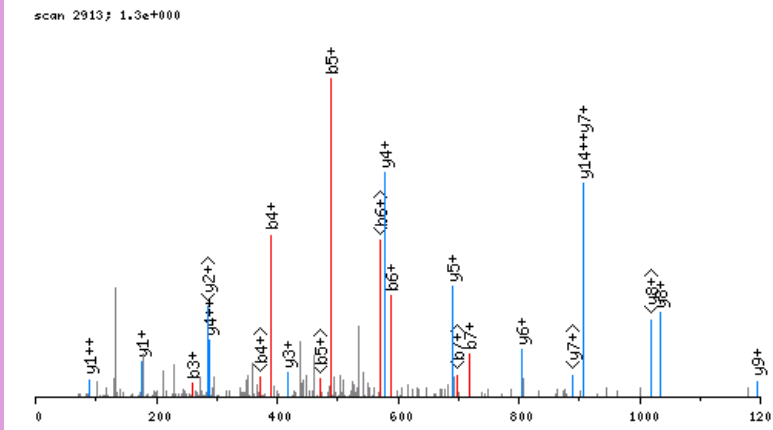

click image to zoom in; click top corners to zoom out [\[precursor±\]](#)

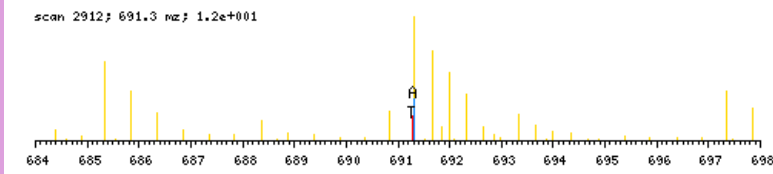

zoomed in precursor plot; T=theoretical m/z, A=acquired m/z

| b <sup>+</sup> | #  | AA | #  | y <sup>+</sup> | y <sup>2+</sup> |
|----------------|----|----|----|----------------|-----------------|
| 116.0711       | 1  | S  | 17 |                |                 |
| 173.0926       | 2  | G  | 16 | 1956.7848      | 978.8963        |
| 260.1246       | 3  | S  | 15 | 1899.7634      | 950.3856        |
| 389.1672       | 4  | E  | 14 | 1812.7313      | 906.8696        |
| 488.2356       | 5  | V  | 13 | 1683.6888      | 842.3483        |
| 589.2833       | 6  | T  | 12 | 1584.6203      | 792.8141        |
| 717.3419       | 7  | Q  | 11 | 1483.5727      | 742.2902        |
| 877.3725       | 8  | C  | 10 | 1355.5141      | 678.2610        |
| 1037.4031      | 9  | C  | 9  | 1195.4835      | 598.2457        |
| 1165.4617      | 10 | Q  | 8  | 1035.4529      | 518.2304        |
| 1266.5093      | 11 | T  | 7  | 907.3943       | 454.2011        |
| 1381.5363      | 12 | D  | 6  | 806.3466       | 403.6772        |
| 1494.6203      | 13 | L  | 5  | 691.3197       | 346.1638        |
| 1654.6509      | 14 | C  | 4  | 578.2356       | 289.6217        |
| 1768.6939      | 15 | N  | 3  | 418.2050       | 209.6064        |
| 1897.7365      | 16 | E  | 2  | 304.1621       | 152.5850        |
|                | 17 | R  | 1  | 175.1195       | 88.0637         |

N-term:+29.04 C(8):+160.03  
 C(9):+160.03 C(14):+160.03



SGTPVHCPSPiR, MH+ 1335.6843, m/z 445.8996  
 L OS G27 P150811 220811-s1.02531.02531.3.dta

scan 2531; 1.1e+001

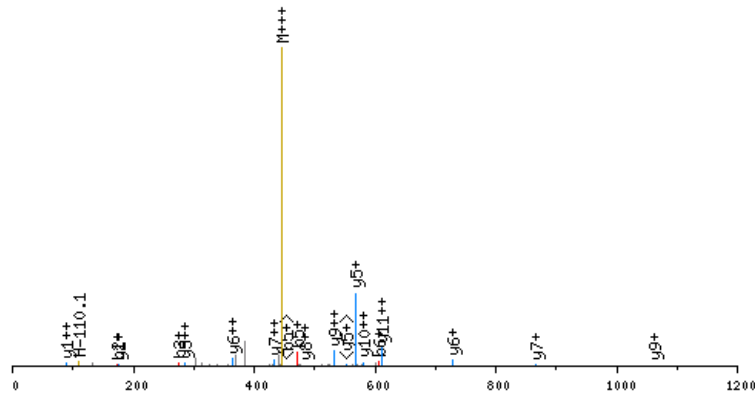

click image to zoom in; click top corners to zoom out [\[precursor±\]](#)

scan 2527; 445.9 m/z; 9.7e+000

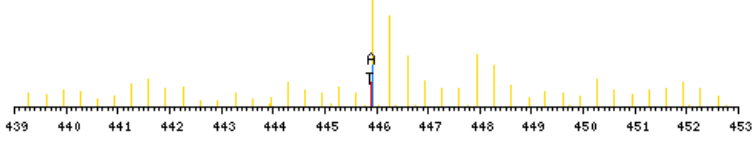

zoomed in precursor plot; T=theoretical m/z, A=acquired m/z

X-range:

-

MassTol: Y-zoom:

MassType:

AVG  MONO

Axis:

1  2

Label:

I  M  -

Ions:

a  +  2+  3+

b  +  2+  3+

c  +  2+  3+

x  +  2+  3+

y  +  2+  3+

z  +  2+  3+

hide H<sub>2</sub>O/NH<sub>3</sub>

zoom 112-122

GO

| b <sup>+</sup> | #  | AA # | y <sup>+</sup> | y <sup>2+</sup> |
|----------------|----|------|----------------|-----------------|
| 116.0711       | 1  | S 12 |                |                 |
| 173.0926       | 2  | G 11 | 1220.6210      | 610.8144        |
| 274.1403       | 3  | T 10 | 1163.5995      | 582.3037        |
| 371.1930       | 4  | P 9  | 1062.5518      | 531.7798        |
| 470.2614       | 5  | V 8  | 965.4990       | 483.2534        |
| 607.3204       | 6  | H 7  | 866.4306       | 433.7192        |
| 767.3510       | 7  | C 6  | 729.3717       | 365.1898        |
| 864.4037       | 8  | P 5  | 569.3411       | 285.1745        |
| 951.4358       | 9  | S 4  | 472.2884       | 236.6481        |
| 1048.4885      | 10 | P 3  | 385.2563       | 193.1321        |
| 1161.5726      | 11 | I 2  | 288.2036       | 144.6057        |
|                | 12 | R 1  | 175.1195       | 88.0637         |

N-term:+29.04 C(7):+160.03

SGVGPSQPTTVGTECGFVSR, MH+ 2050.9867, m/z 684.3338  
 L OS G24 P150811 220811-s1.03306.03306.3.dta

scan 3306; 9.2e-001

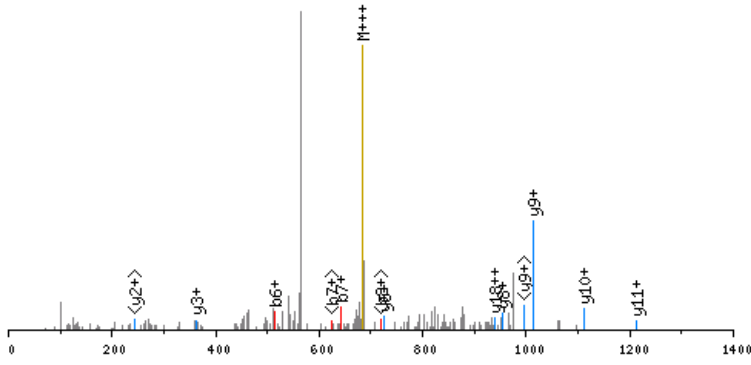

click image to zoom in; click top corners to zoom out [precursor±]

scan 3302; 684.3 m/z; 1.7e+000

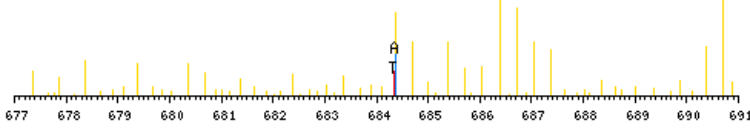

zoomed in precursor plot; T=theoretical m/z, A=acquired m/z

X-range:

-

MassTol: Y-zoom:

MassType:

AVG  MONO

Axis:

1  2

Label:

I  M  -

Ions:

a  +  2+  3+

b  +  2+  3+

c  +  2+  3+

x  +  2+  3+

y  +  2+  3+

z  +  2+  3+

hide H<sub>2</sub>O/NH<sub>3</sub>

zoom 112-122

GO

| b <sup>+</sup> | #  | AA | #  | y <sup>+</sup> | y <sup>2+</sup> |
|----------------|----|----|----|----------------|-----------------|
| 116.0711       | 1  | S  | 20 |                |                 |
| 173.0926       | 2  | G  | 19 | 1935.9234      | 968.4656        |
| 272.1610       | 3  | V  | 18 | 1878.9019      | 939.9549        |
| 329.1825       | 4  | G  | 17 | 1779.8335      | 890.4207        |
| 426.2352       | 5  | P  | 16 | 1722.8121      | 861.9099        |
| 513.2673       | 6  | S  | 15 | 1625.7593      | 813.3836        |
| 641.3258       | 7  | Q  | 14 | 1538.7273      | 769.8675        |
| 738.3786       | 8  | P  | 13 | 1410.6687      | 705.8383        |
| 839.4263       | 9  | T  | 12 | 1313.6159      | 657.3119        |
| 940.4740       | 10 | T  | 11 | 1212.5682      | 606.7880        |
| 1039.5424      | 11 | V  | 10 | 1111.5206      | 556.2642        |
| 1096.5638      | 12 | G  | 9  | 1012.4522      | 506.7300        |
| 1197.6115      | 13 | T  | 8  | 955.4307       | 478.2193        |
| 1326.6541      | 14 | E  | 7  | 854.3830       | 427.6954        |
| 1486.6847      | 15 | C  | 6  | 725.3404       | 363.1741        |
| 1543.7062      | 16 | G  | 5  | 565.3098       | 283.1588        |
| 1690.7746      | 17 | F  | 4  | 508.2884       | 254.6481        |
| 1789.8430      | 18 | V  | 3  | 361.2199       | 181.1139        |
| 1876.8750      | 19 | S  | 2  | 262.1515       | 131.5797        |
|                | 20 | R  | 1  | 175.1195       | 88.0637         |

N-term:+29.04 C(15);+160.03

SHTDVKVPDFSDYR, MH+ 1733.9135, m/z 434.2338  
 H OS G28 P150811 220811-s1.05367.05367.4.dta

X-range:

-

MassTol: Y-zoom:

MassType:

AVG  MONO

Axis:

1  2

Label:

I  M  -

Ions:

a  +  2+  3+

b  +  2+  3+

c  +  2+  3+

x  +  2+  3+

y  +  2+  3+

z  +  2+  3+

hide H<sub>2</sub>O/NH<sub>3</sub>

zoom 112-122

GO

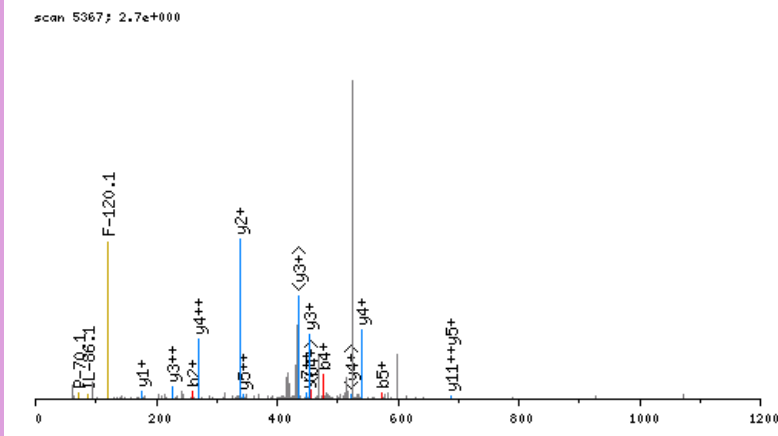

click image to zoom in; click top corners to zoom out [\[precursor±\]](#)

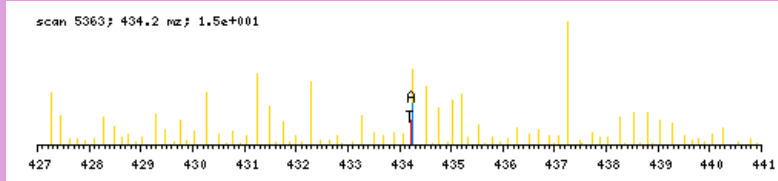

zoomed in precursor plot; T=theoretical m/z, A=acquired m/z

| b <sup>+</sup> | #  | AA # | y <sup>+</sup> | y <sup>2+</sup> |
|----------------|----|------|----------------|-----------------|
| 122.1029       | 1  | S 14 |                |                 |
| 259.1618       | 2  | H 13 | 1612.8184      | 806.9131        |
| 360.2095       | 3  | T 12 | 1475.7595      | 738.3836        |
| 475.2365       | 4  | D 11 | 1374.7118      | 687.8598        |
| 574.3049       | 5  | V 10 | 1259.6848      | 630.3463        |
| 736.4630       | 6  | K 9  | 1160.6164      | 580.8121        |
| 835.5314       | 7  | V 8  | 998.4583       | 499.7331        |
| 932.5842       | 8  | P 7  | 899.3899       | 450.1989        |
| 1047.6111      | 9  | D 6  | 802.3372       | 401.6725        |
| 1194.6795      | 10 | F 5  | 687.3102       | 344.1590        |
| 1281.7115      | 11 | S 4  | 540.2418       | 270.6248        |
| 1396.7385      | 12 | D 3  | 453.2098       | 227.1088        |
| 1559.8018      | 13 | Y 2  | 338.1828       | 169.5953        |
|                | 14 | R 1  | 175.1195       | 88.0637         |

N-term:+35.07 K(6):+162.16

SHVISQHQSLGNIK, MH+ 1716.9509, m/z 429.9932  
 L OS G28 P150811 220811-s1.04071.04071.4.dta

X-range:

-

MassTol: Y-zoom:

MassType:

AVG  MONO

Axis:

1  2

Label:

I  M  -

Ions:

a  +  2+  3+

b  +  2+  3+

c  +  2+  3+

x  +  2+  3+

y  +  2+  3+

z  +  2+  3+

hide H<sub>2</sub>O/NH<sub>3</sub>

zoom 112-122

GO

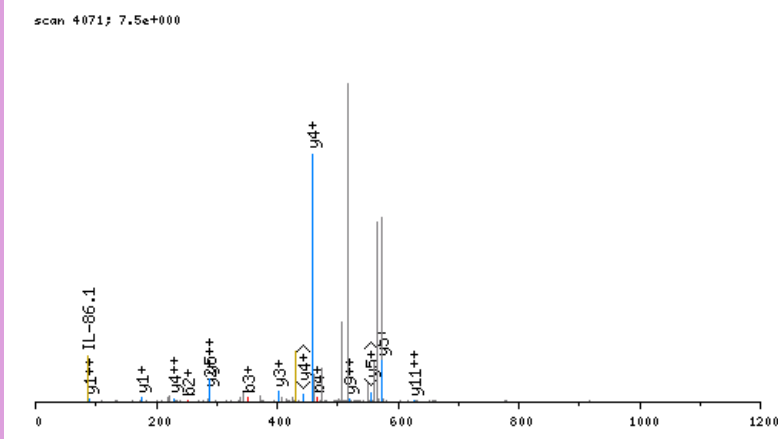

click image to zoom in; click top corners to zoom out [\[precursor±\]](#)

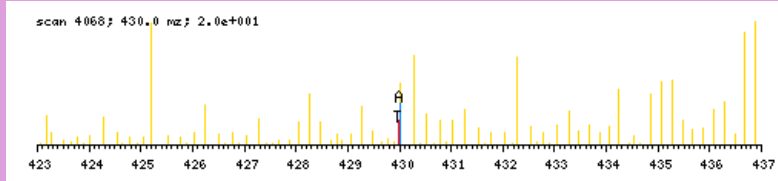

zoomed in precursor plot; T=theoretical m/z, A=acquired m/z

| b <sup>+</sup> | #  | AA | #  | y <sup>+</sup> | y <sup>2+</sup> |
|----------------|----|----|----|----------------|-----------------|
| 116.0711       | 1  | S  | 15 |                |                 |
| 253.1300       | 2  | H  | 14 | 1601.8876      | 801.4477        |
| 352.1985       | 3  | V  | 13 | 1464.8287      | 732.9183        |
| 465.2825       | 4  | I  | 12 | 1365.7603      | 683.3840        |
| 552.3145       | 5  | S  | 11 | 1252.6762      | 626.8420        |
| 680.3731       | 6  | Q  | 10 | 1165.6442      | 583.3260        |
| 817.4320       | 7  | H  | 9  | 1037.5856      | 519.2967        |
| 945.4906       | 8  | Q  | 8  | 900.5267       | 450.7673        |
| 1032.5226      | 9  | S  | 7  | 772.4681       | 386.7380        |
| 1145.6067      | 10 | L  | 6  | 685.4361       | 343.2220        |
| 1258.6908      | 11 | L  | 5  | 572.3520       | 286.6799        |
| 1315.7122      | 12 | G  | 4  | 459.2680       | 230.1379        |
| 1429.7552      | 13 | N  | 3  | 402.2465       | 201.6272        |
| 1542.8392      | 14 | I  | 2  | 288.2036       | 144.6057        |
|                | 15 | R  | 1  | 175.1195       | 88.0637         |

N-term:+29.04

SICEEFSQQADDKGCFR, MH+ 2132.9380, m/z 711.6509  
 L OS G27 P150811 220811-s1.05175.05175.3.dta

X-range:

-

MassTol: Y-zoom:

MassType:

AVG  MONO

Axis:

1  2

Label:

I  M  -

Ions:

a  +  2+  3+

b  +  2+  3+

c  +  2+  3+

x  +  2+  3+

y  +  2+  3+

z  +  2+  3+

hide H<sub>2</sub>O/NH<sub>3</sub>

zoom 112-122

GO

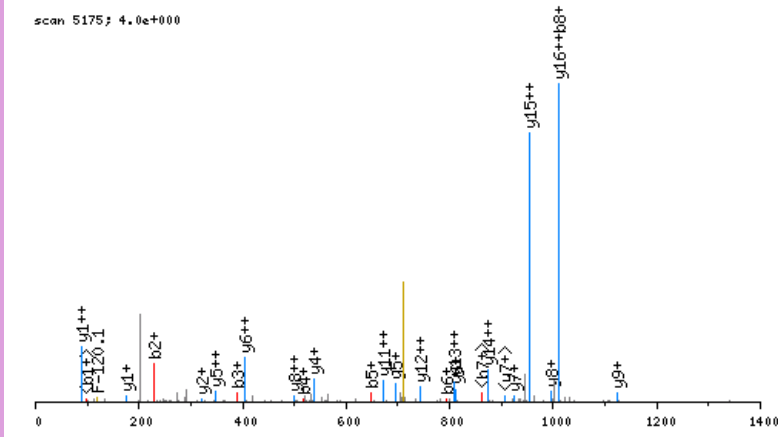

click image to zoom in; click top corners to zoom out [\[precursor±\]](#)

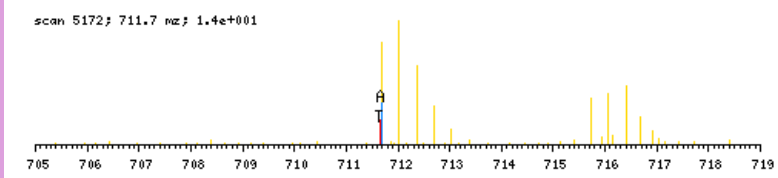

zoomed in precursor plot; T=theoretical m/z, A=acquired m/z

| b <sup>+</sup> | #  | AA | #  | y <sup>+</sup> | y <sup>2+</sup> |
|----------------|----|----|----|----------------|-----------------|
| 116.0711       | 1  | S  | 17 |                |                 |
| 229.1552       | 2  | I  | 16 | 2017.8747      | 1009.4413       |
| 389.1858       | 3  | C  | 15 | 1904.7907      | 952.8992        |
| 518.2284       | 4  | E  | 14 | 1744.7601      | 872.8839        |
| 647.2710       | 5  | E  | 13 | 1615.7175      | 808.3626        |
| 794.3394       | 6  | F  | 12 | 1486.6749      | 743.8414        |
| 881.3714       | 7  | S  | 11 | 1339.6065      | 670.3071        |
| 1009.4300      | 8  | Q  | 10 | 1252.5744      | 626.7911        |
| 1137.4886      | 9  | Q  | 9  | 1124.5159      | 562.7618        |
| 1208.5257      | 10 | A  | 8  | 996.4573       | 498.7326        |
| 1323.5526      | 11 | D  | 7  | 925.4202       | 463.2140        |
| 1438.5796      | 12 | D  | 6  | 810.3932       | 405.7005        |
| 1594.7059      | 13 | K  | 5  | 695.3663       | 348.1871        |
| 1651.7273      | 14 | G  | 4  | 539.2400       | 270.1239        |
| 1811.7579      | 15 | C  | 3  | 482.2185       | 241.6132        |
| 1958.8264      | 16 | F  | 2  | 322.1879       | 161.5979        |
|                | 17 | R  | 1  | 175.1195       | 88.0637         |

N-term:+29.04 C(3):+160.03  
 K(13):+156.13 C(15):+160.03

SIDNSPVKWCALSHLER, MH+ 2080.1285, m/z 520.7876  
 H OS G28 P150811 220811-s1.06987.06987.4.dta

scan 6987; 6.7e+000

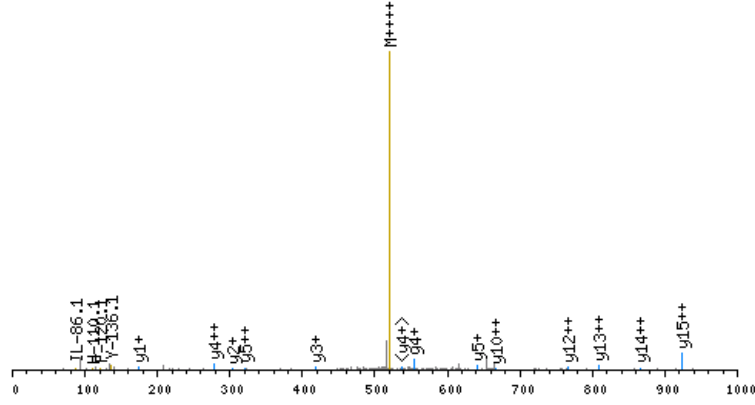

click image to zoom in; click top corners to zoom out [\[precursor±\]](#)

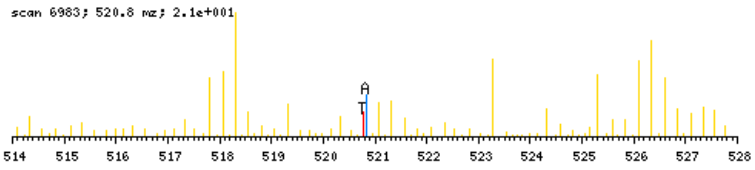

zoomed in precursor plot; T=theoretical m/z, A=acquired m/z

X-range:

-

MassTol: Y-zoom:

MassType:

AVG  MONO

Axis:

1  2

Label:

I  M  -

Ions:

a  +  2+  3+

b  +  2+  3+

c  +  2+  3+

x  +  2+  3+

y  +  2+  3+

z  +  2+  3+

hide H<sub>2</sub>O/NH<sub>3</sub>

zoom 112-122

GO

| b <sup>+</sup> | #  | AA | #  | y <sup>+</sup> | y <sup>2+</sup> |
|----------------|----|----|----|----------------|-----------------|
| 122.1029       | 1  | S  | 17 |                |                 |
| 235.1870       | 2  | I  | 16 | 1959.0334      | 980.0206        |
| 350.2139       | 3  | D  | 15 | 1845.9494      | 923.4786        |
| 464.2569       | 4  | N  | 14 | 1730.9224      | 865.9651        |
| 551.2889       | 5  | S  | 13 | 1616.8795      | 808.9437        |
| 648.3417       | 6  | P  | 12 | 1529.8475      | 765.4276        |
| 747.4101       | 7  | V  | 11 | 1432.7947      | 716.9013        |
| 909.5682       | 8  | K  | 10 | 1333.7263      | 667.3671        |
| 1095.6475      | 9  | W  | 9  | 1171.5682      | 586.2880        |
| 1255.6781      | 10 | C  | 8  | 985.4889       | 493.2484        |
| 1326.7152      | 11 | A  | 7  | 825.4583       | 413.2331        |
| 1439.7993      | 12 | L  | 6  | 754.4212       | 377.7145        |
| 1526.8313      | 13 | S  | 5  | 641.3371       | 321.1725        |
| 1663.8902      | 14 | H  | 4  | 554.3051       | 277.6564        |
| 1776.9743      | 15 | L  | 3  | 417.2462       | 209.1270        |
| 1906.0169      | 16 | E  | 2  | 304.1621       | 152.5850        |
|                | 17 | R  | 1  | 175.1195       | 88.0637         |

N-term:+35.07 K(8):+162.16  
 C(10):+160.03

SIFGGAKPVDTAAR, MH+ 1457.8753, m/z 486.6299  
 H OS G26 P150811 220811-s1.02972.02972.3.dta

scan 2972; 1.5e+001

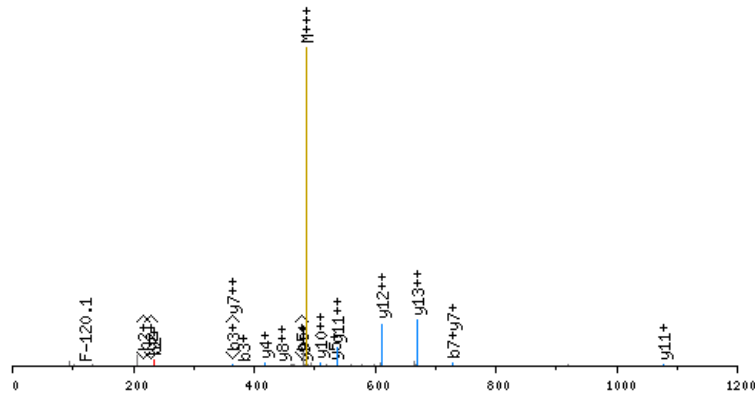

click image to zoom in; click top corners to zoom out [\[precursor±\]](#)

scan 2970; 486.6 m/z; 1.2e+001

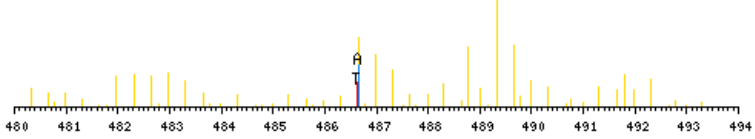

zoomed in precursor plot; T=theoretical m/z, A=acquired m/z

X-range:

-

MassTol: Y-zoom:

MassType:

AVG  MONO

Axis:

1  2

Label:

I  M  -

Ions:

a  +  2+  3+

b  +  2+  3+

c  +  2+  3+

x  +  2+  3+

y  +  2+  3+

z  +  2+  3+

hide H<sub>2</sub>O/NH<sub>3</sub>

zoom 112-122

GO

| b <sup>+</sup> | #  | AA # | y <sup>+</sup> | y <sup>2+</sup> |
|----------------|----|------|----------------|-----------------|
| 122.1029       | 1  | S 14 |                |                 |
| 235.1870       | 2  | I 13 | 1336.7801      | 668.8940        |
| 382.2554       | 3  | F 12 | 1223.6961      | 612.3520        |
| 439.2769       | 4  | G 11 | 1076.6277      | 538.8177        |
| 496.2983       | 5  | G 10 | 1019.6062      | 510.3070        |
| 567.3354       | 6  | A 9  | 962.5847       | 481.7963        |
| 729.4935       | 7  | K 8  | 891.5476       | 446.2777        |
| 826.5463       | 8  | P 7  | 729.3895       | 365.1987        |
| 925.6147       | 9  | V 6  | 632.3368       | 316.6723        |
| 1040.6417      | 10 | D 5  | 533.2683       | 267.1381        |
| 1141.6893      | 11 | T 4  | 418.2414       | 209.6246        |
| 1212.7265      | 12 | A 3  | 317.1937       | 159.1008        |
| 1283.7636      | 13 | A 2  | 246.1566       | 123.5822        |
|                | 14 | R 1  | 175.1195       | 88.0637         |

N-term:+35.07 K(7):+162.16

X-range:

-

MassTol: Y-zoom:

MassType:

AVG  MONO

Axis:

1  2

Label:

I  M  -

Ions:

a  +  2+  3+

b  +  2+  3+

c  +  2+  3+

x  +  2+  3+

y  +  2+  3+

z  +  2+  3+

hide H<sub>2</sub>O/NH<sub>3</sub>

zoom 112-122

GO

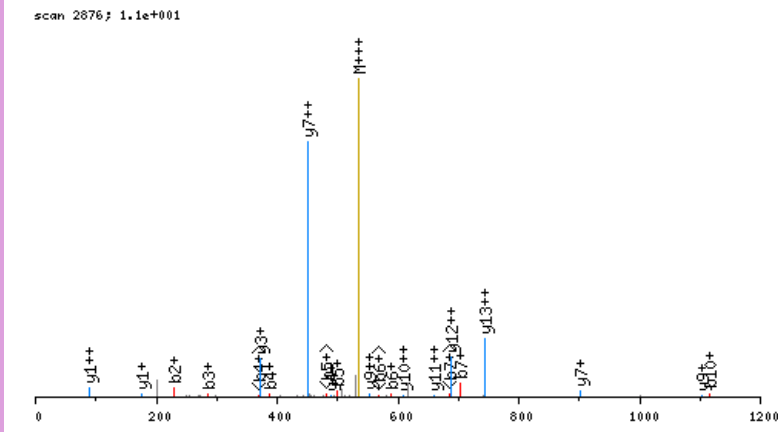

click image to zoom in; click top corners to zoom out [\[precursor±\]](#)

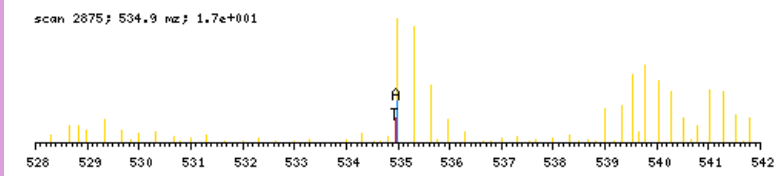

zoomed in precursor plot; T=theoretical m/z, A=acquired m/z

| b <sup>+</sup> | #  | AA # | y <sup>+</sup> | y <sup>2+</sup> |
|----------------|----|------|----------------|-----------------|
| 116.0711       | 1  | S    | 14             |                 |
| 229.1552       | 2  | I    | 13             | 1487.7528       |
| 286.1767       | 3  | G    | 12             | 1374.6687       |
| 387.2243       | 4  | T    | 11             | 1317.6473       |
| 500.3084       | 5  | L    | 10             | 1216.5996       |
| 587.3404       | 6  | S    | 9              | 1103.5155       |
| 702.3674       | 7  | D    | 8              | 1016.4835       |
| 799.4201       | 8  | P    | 7              | 901.4566        |
| 959.4507       | 9  | C    | 6              | 804.4038        |
| 1115.5770      | 10 | K    | 5              | 644.3732        |
| 1230.6040      | 11 | D    | 4              | 488.2469        |
| 1327.6567      | 12 | P    | 3              | 373.2199        |
| 1428.7044      | 13 | T    | 2              | 276.1672        |
|                | 14 | R    | 1              | 175.1195        |

N-term:+29.04 C(9):+160.03  
 K(10):+156.13



SIIDTPGILSGAKQR, MH+ 1611.9434, m/z 537.9860  
 L OS G26 P150811 220811-s1.04759.04759.3.dta

X-range:

-

MassTol: Y-zoom:

MassType:

AVG  MONO

Axis:

1  2

Label:

I  M  -

Ions:

a  +  2+  3+

b  +  2+  3+

c  +  2+  3+

x  +  2+  3+

y  +  2+  3+

z  +  2+  3+

hide H<sub>2</sub>O/NH<sub>3</sub>

zoom 112-122

GO

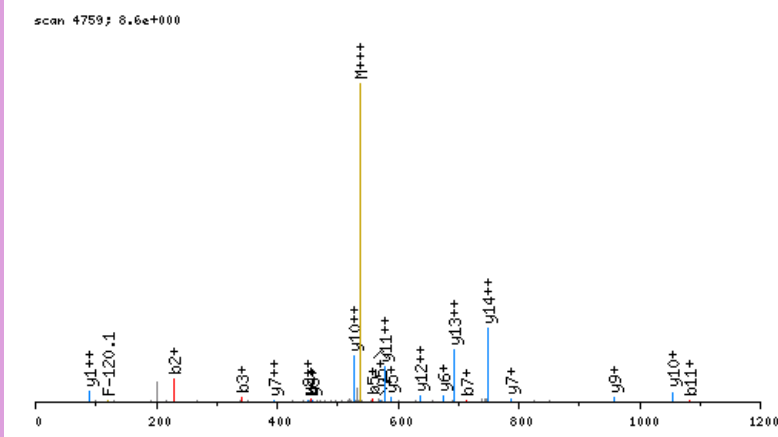

click image to zoom in; click top corners to zoom out [\[precursor±\]](#)

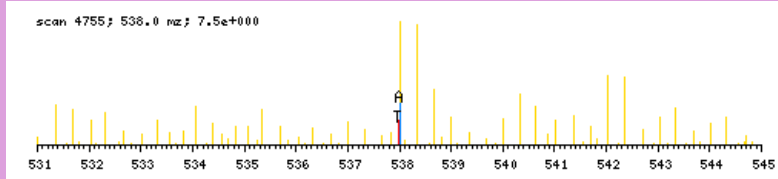

zoomed in precursor plot; T=theoretical m/z, A=acquired m/z

| b <sup>+</sup> | #  | AA # | y <sup>+</sup> | y <sup>2+</sup> |
|----------------|----|------|----------------|-----------------|
| 116.0711       | 1  | S 15 |                |                 |
| 229.1552       | 2  | I 14 | 1496.8801      | 748.9440        |
| 342.2393       | 3  | I 13 | 1383.7960      | 692.4019        |
| 457.2662       | 4  | D 12 | 1270.7120      | 635.8599        |
| 558.3139       | 5  | T 11 | 1155.6850      | 578.3464        |
| 655.3666       | 6  | P 10 | 1054.6373      | 527.8226        |
| 712.3881       | 7  | G 9  | 957.5846       | 479.2962        |
| 825.4722       | 8  | I 8  | 900.5631       | 450.7855        |
| 938.5562       | 9  | L 7  | 787.4790       | 394.2434        |
| 1025.5883      | 10 | S 6  | 674.3950       | 337.7014        |
| 1082.6097      | 11 | G 5  | 587.3630       | 294.1854        |
| 1153.6468      | 12 | A 4  | 530.3415       | 265.6747        |
| 1309.7731      | 13 | K 3  | 459.3044       | 230.1561        |
| 1437.8317      | 14 | Q 2  | 303.1781       | 152.0930        |
|                | 15 | R 1  | 175.1195       | 88.0637         |

N-term:+29.04 K(13):+156.13

SIMKCDIDIR, MH+ 1306.6863, m/z 436.2336  
 L OS G27 P150811 220811-s1.04369.04369.3.dta

X-range:

-

MassTol: Y-zoom:

MassType:

AVG  MONO

Axis:

1  2

Label:

I  M  -

Ions:

a  +  2+  3+

b  +  2+  3+

c  +  2+  3+

x  +  2+  3+

y  +  2+  3+

z  +  2+  3+

hide H<sub>2</sub>O/NH<sub>3</sub>

zoom 112-122

GO

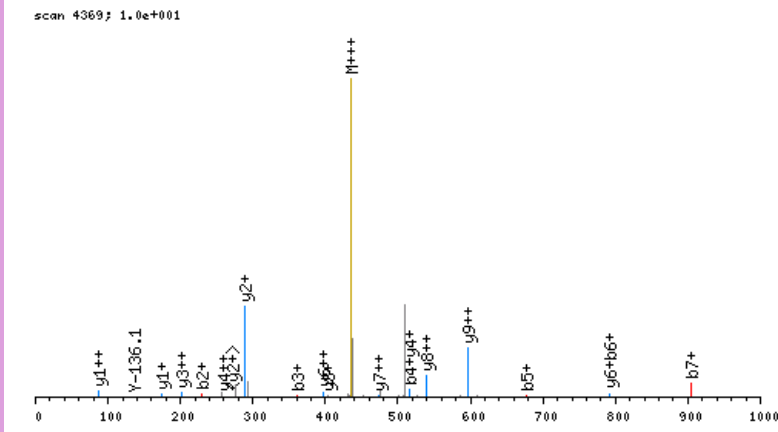

click image to zoom in; click top corners to zoom out [\[precursor±\]](#)

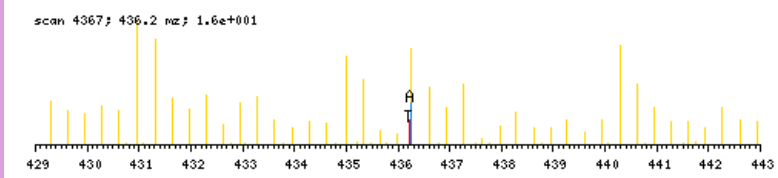

zoomed in precursor plot; T=theoretical m/z, A=acquired m/z

| b <sup>+</sup> | #  | AA # | y <sup>+</sup> | y <sup>2+</sup> |
|----------------|----|------|----------------|-----------------|
| 116.0711       | 1  | S    | 10             |                 |
| 229.1552       | 2  | I    | 9              | 1191.6230       |
| 360.1957       | 3  | M    | 8              | 1078.5389       |
| 516.3220       | 4  | K    | 7              | 947.4984        |
| 676.3526       | 5  | C    | 6              | 791.3721        |
| 791.3795       | 6  | D    | 5              | 631.3415        |
| 904.4636       | 7  | I    | 4              | 516.3146        |
| 1019.4905      | 8  | D    | 3              | 403.2305        |
| 1132.5746      | 9  | I    | 2              | 288.2036        |
|                | 10 | R    | 1              | 175.1195        |

N-term:+29.04 K(4):+156.13  
 C(5):+160.03

SIVPALEIANAHR, MH+ 1418.8119, m/z 473.6088  
 L OS G27 P150811 220811-s1.05870.05870.3.dta

X-range:

-

MassTol: Y-zoom:

MassType:

AVG  MONO

Axis:

1  2

Label:

I  M  -

Ions:

a  +  2+  3+

b  +  2+  3+

c  +  2+  3+

x  +  2+  3+

y  +  2+  3+

z  +  2+  3+

hide H<sub>2</sub>O/NH<sub>3</sub>

zoom 112-122

GO

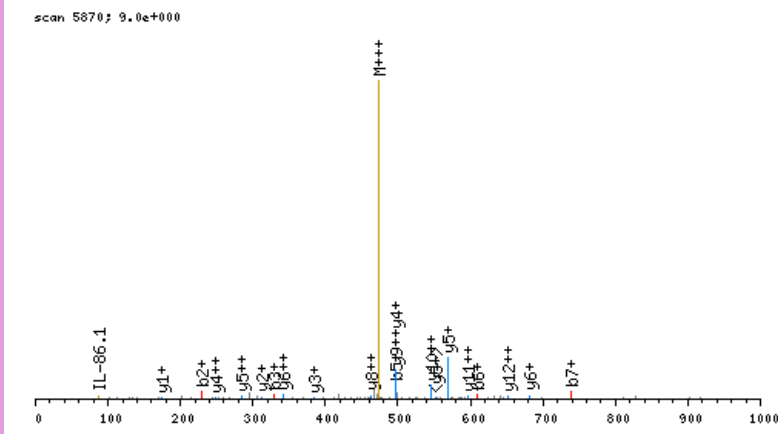

click image to zoom in; click top corners to zoom out [\[precursor±\]](#)

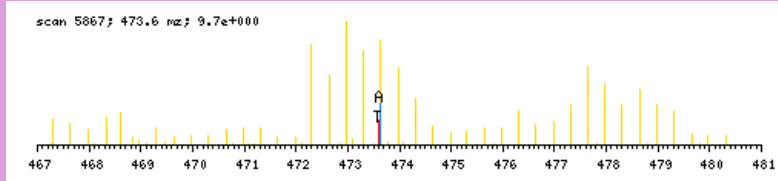

zoomed in precursor plot; T=theoretical m/z, A=acquired m/z

| b <sup>+</sup> | #  | AA # | y <sup>+</sup> | y <sup>2+</sup> |
|----------------|----|------|----------------|-----------------|
| 116.0711       | 1  | S 13 |                |                 |
| 229.1552       | 2  | I 12 | 1303.7486      | 652.3782        |
| 328.2236       | 3  | V 11 | 1190.6646      | 595.8362        |
| 425.2764       | 4  | P 10 | 1091.5962      | 546.3020        |
| 496.3135       | 5  | A 9  | 994.5434       | 497.7756        |
| 609.3975       | 6  | L 8  | 923.5063       | 462.2571        |
| 738.4401       | 7  | E 7  | 810.4222       | 405.7150        |
| 851.5242       | 8  | I 6  | 681.3796       | 341.1937        |
| 922.5613       | 9  | A 5  | 568.2956       | 284.6517        |
| 1036.6042      | 10 | N 4  | 497.2585       | 249.1331        |
| 1107.6414      | 11 | A 3  | 383.2155       | 192.1117        |
| 1244.7003      | 12 | H 2  | 312.1784       | 156.5931        |
|                | 13 | R 1  | 175.1195       | 88.0637         |

N-term:+29.04

SIVVSPILIPENQR, MH+ 1592.9375, m/z 531.6507  
 L OS G25 P150811 220811-s1.07460.07460.3.dta

X-range:

-

MassTol: Y-zoom:

MassType:

AVG  MONO

Axis:

1  2

Label:

I  M  -

Ions:

a  +  2+  3+

b  +  2+  3+

c  +  2+  3+

x  +  2+  3+

y  +  2+  3+

z  +  2+  3+

hide H<sub>2</sub>O/NH<sub>3</sub>

zoom 112-122

GO

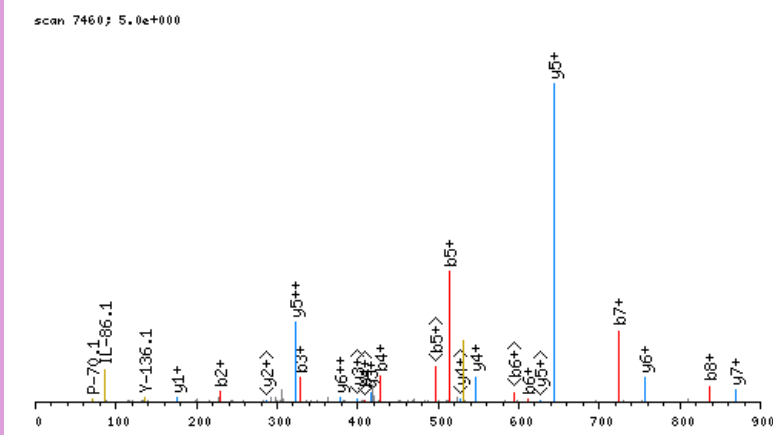

click image to zoom in; click top corners to zoom out [\[precursor±\]](#)

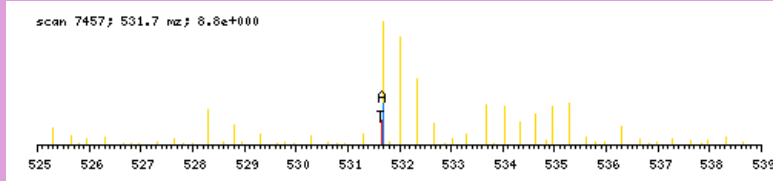

zoomed in precursor plot; T=theoretical m/z, A=acquired m/z

| b <sup>+</sup> | #  | AA # | y <sup>+</sup> | y <sup>2+</sup> |
|----------------|----|------|----------------|-----------------|
| 116.0711       | 1  | S 14 |                |                 |
| 229.1552       | 2  | I 13 | 1477.8742      | 739.4410        |
| 328.2236       | 3  | V 12 | 1364.7902      | 682.8990        |
| 427.2920       | 4  | V 11 | 1265.7218      | 633.3648        |
| 514.3240       | 5  | S 10 | 1166.6533      | 583.8306        |
| 611.3768       | 6  | P 9  | 1079.6213      | 540.3146        |
| 724.4609       | 7  | I 8  | 982.5686       | 491.7882        |
| 837.5449       | 8  | L 7  | 869.4845       | 435.2462        |
| 950.6290       | 9  | I 6  | 756.4004       | 378.7041        |
| 1047.6818      | 10 | P 5  | 643.3164       | 322.1621        |
| 1176.7244      | 11 | E 4  | 546.2636       | 273.6357        |
| 1290.7673      | 12 | N 3  | 417.2210       | 209.1144        |
| 1418.8259      | 13 | Q 2  | 303.1781       | 152.0930        |
|                | 14 | R 1  | 175.1195       | 88.0637         |

N-term:+29.04

SKADLDLLKSSGVIQR, MH+ 1929.1021, m/z 483.0310  
 L OS G28 P150811 220811-s1.06502.06502.4.dta

X-range:

-

MassTol: Y-zoom:

MassType:

AVG  MONO

Axis:

1  2

Label:

I  M  -

Ions:

a  +  2+  3+

b  +  2+  3+

c  +  2+  3+

x  +  2+  3+

y  +  2+  3+

z  +  2+  3+

hide H<sub>2</sub>O/NH<sub>3</sub>

zoom 112-122

GO

scan 6502; 3.1e+000

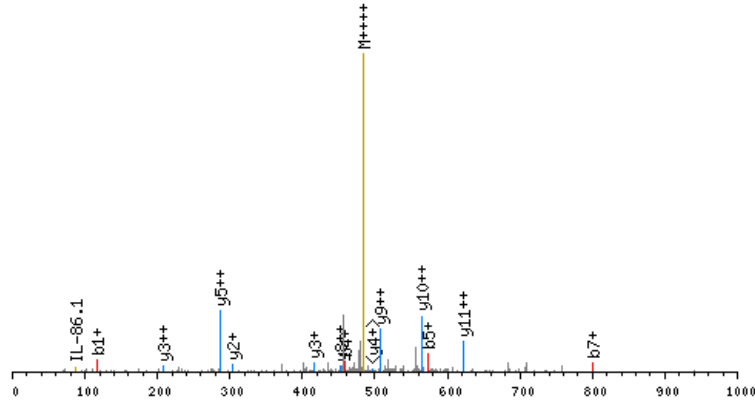

click image to zoom in; click top corners to zoom out [\[precursor±\]](#)

scan 6498; 483.0 m/z; 2.4e+001

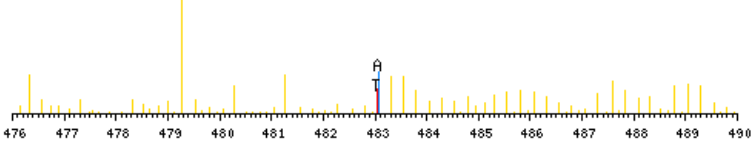

zoomed in precursor plot; T=theoretical m/z, A=acquired m/z

| b <sup>+</sup> | #  | AA | #  | y <sup>+</sup> | y <sup>2+</sup> |
|----------------|----|----|----|----------------|-----------------|
| 116.0711       | 1  | S  | 17 |                |                 |
| 272.1974       | 2  | K  | 16 | 1814.0388      | 907.5233        |
| 343.2345       | 3  | A  | 15 | 1657.9125      | 829.4602        |
| 458.2615       | 4  | D  | 14 | 1586.8754      | 793.9416        |
| 573.2884       | 5  | D  | 13 | 1471.8485      | 736.4281        |
| 686.3725       | 6  | L  | 12 | 1356.8215      | 678.9147        |
| 801.3994       | 7  | D  | 11 | 1243.7374      | 622.3726        |
| 914.4835       | 8  | L  | 10 | 1128.7105      | 564.8592        |
| 1027.5676      | 9  | L  | 9  | 1015.6264      | 508.3171        |
| 1183.6939      | 10 | K  | 8  | 902.5424       | 451.7751        |
| 1270.7259      | 11 | S  | 7  | 746.4161       | 373.7120        |
| 1357.7579      | 12 | S  | 6  | 659.3840       | 330.1959        |
| 1414.7794      | 13 | G  | 5  | 572.3520       | 286.6799        |
| 1513.8478      | 14 | V  | 4  | 515.3306       | 258.1692        |
| 1626.9319      | 15 | I  | 3  | 416.2621       | 208.6350        |
| 1754.9904      | 16 | Q  | 2  | 303.1781       | 152.0930        |
|                | 17 | R  | 1  | 175.1195       | 88.0637         |

N-term: +29.04 K(2): +156.13  
 K(10): +156.13

SKLEPQIATASEYADR, MH+ 1856.9870, m/z 465.0022  
 L OS G28 P150811 220811-s1.04261.04261.4.dta

X-range:

-

MassTol: Y-zoom:

MassType:

AVG  MONO

Axis:

1  2

Label:

I  M  -

Ions:

a  +  2+  3+

b  +  2+  3+

c  +  2+  3+

x  +  2+  3+

y  +  2+  3+

z  +  2+  3+

hide H<sub>2</sub>O/NH<sub>3</sub>

zoom 112-122

GO

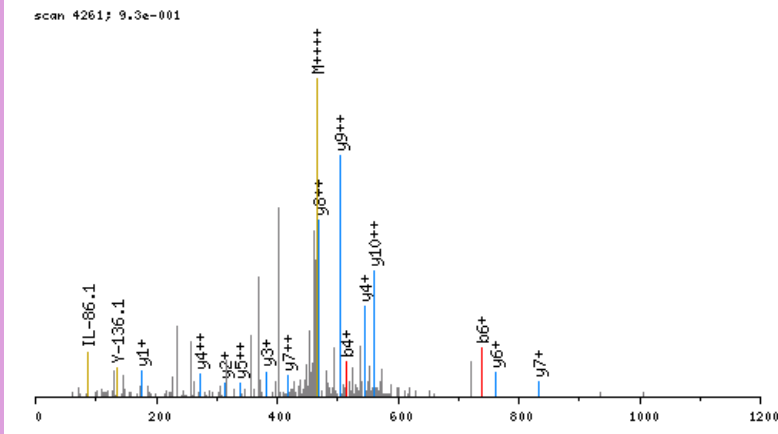

click image to zoom in; click top corners to zoom out [\[precursor±\]](#)

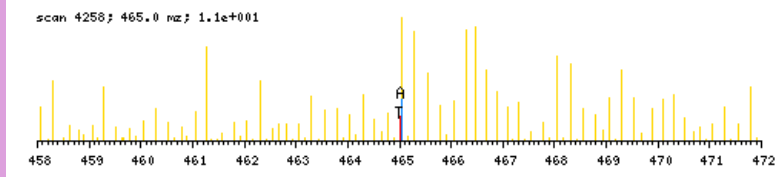

zoomed in precursor plot; T=theoretical m/z, A=acquired m/z

| b <sup>+</sup> | #  | AA # | y <sup>+</sup> | y <sup>2+</sup> |
|----------------|----|------|----------------|-----------------|
| 116.0711       | 1  | S 16 |                |                 |
| 272.1974       | 2  | K 15 | 1741.9237      | 871.4658        |
| 385.2815       | 3  | L 14 | 1585.7974      | 793.4026        |
| 514.3241       | 4  | E 13 | 1472.7134      | 736.8606        |
| 611.3768       | 5  | P 12 | 1343.6708      | 672.3393        |
| 739.4354       | 6  | Q 11 | 1246.6180      | 623.8129        |
| 852.5195       | 7  | I 10 | 1118.5594      | 559.7836        |
| 923.5566       | 8  | A 9  | 1005.4754      | 503.2416        |
| 1024.6043      | 9  | T 8  | 934.4383       | 467.7230        |
| 1095.6414      | 10 | A 7  | 833.3906       | 417.1992        |
| 1182.6734      | 11 | S 6  | 762.3535       | 381.6807        |
| 1311.7160      | 12 | E 5  | 675.3214       | 338.1646        |
| 1474.7793      | 13 | Y 4  | 546.2789       | 273.6433        |
| 1545.8165      | 14 | A 3  | 383.2155       | 192.1117        |
| 1682.8754      | 15 | H 2  | 312.1784       | 156.5931        |
|                | 16 | R 1  | 175.1195       | 88.0637         |

N-term:+29.04 K(2):+156.13

SKLQDMLANLR, MH+ 1344.7673, m/z 448.9273  
 L OS G27 P150811 220811-s1.06689.06689.3.dta

scan 6689; 1.4e+001

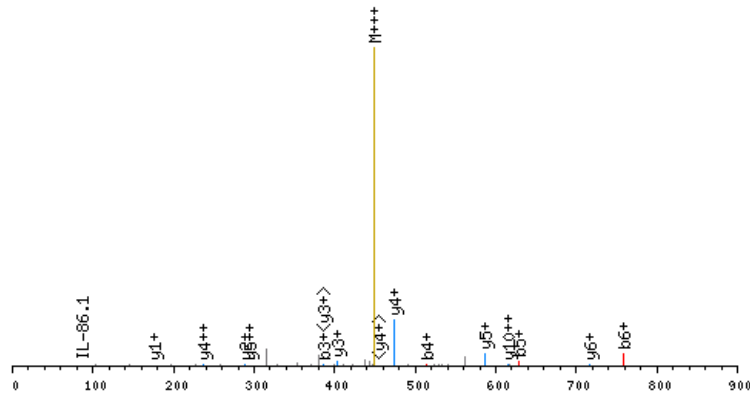

click image to zoom in; click top corners to zoom out [\[precursor±\]](#)

scan 6687; 448.9 m/z; 4.5e+000

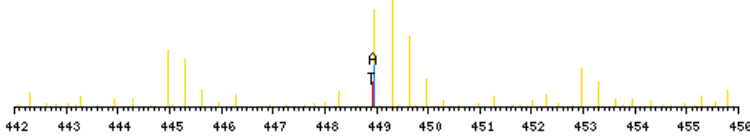

zoomed in precursor plot; T=theoretical m/z, A=acquired m/z

X-range:

-

MassTol: Y-zoom:

MassType:

AVG  MONO

Axis:

1  2

Label:

I  M  -

Ions:

a  +  2+  3+

b  +  2+  3+

c  +  2+  3+

x  +  2+  3+

y  +  2+  3+

z  +  2+  3+

hide H<sub>2</sub>O/NH<sub>3</sub>

zoom 112-122

GO

| b <sup>+</sup> | #  | AA # | y <sup>+</sup> | y <sup>2+</sup> |
|----------------|----|------|----------------|-----------------|
| 116.0711       | 1  | S 11 |                |                 |
| 272.1974       | 2  | K 10 | 1229.7040      | 615.3559        |
| 385.2815       | 3  | L 9  | 1073.5777      | 537.2928        |
| 513.3401       | 4  | Q 8  | 960.4937       | 480.7508        |
| 628.3670       | 5  | D 7  | 832.4351       | 416.7215        |
| 759.4075       | 6  | M 6  | 717.4082       | 359.2080        |
| 872.4916       | 7  | L 5  | 586.3677       | 293.6877        |
| 943.5287       | 8  | A 4  | 473.2836       | 237.1457        |
| 1057.5716      | 9  | N 3  | 402.2465       | 201.6272        |
| 1170.6557      | 10 | L 2  | 288.2036       | 144.6057        |
|                | 11 | R 1  | 175.1195       | 88.0637         |

N-term:+29.04 K(2):+156.13

SKWPEPVFGR, MH+ 1258.6948, m/z 420.2365  
 L OS G27 P150811 220811-s1.05345.05345.3.dta

X-range:

-

MassTol: Y-zoom:

MassType:

AVG  MONO

Axis:

1  2

Label:

I  M  -

Ions:

a  +  2+  3+

b  +  2+  3+

c  +  2+  3+

x  +  2+  3+

y  +  2+  3+

z  +  2+  3+

hide H<sub>2</sub>O/NH<sub>3</sub>

zoom 112-122

GO

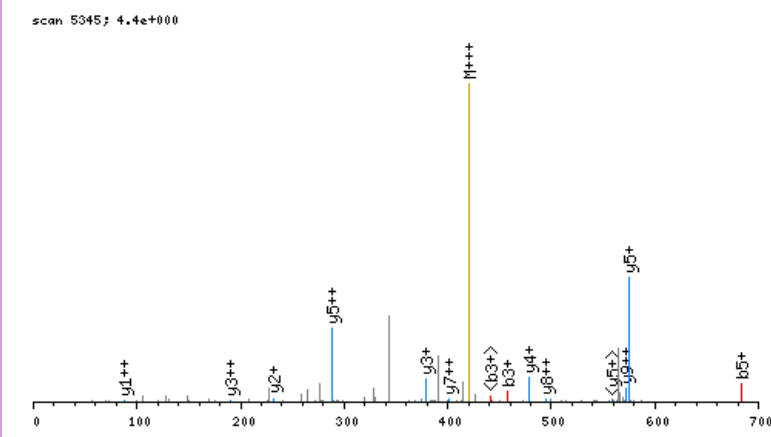

click image to zoom in; click top corners to zoom out [\[precursor±\]](#)

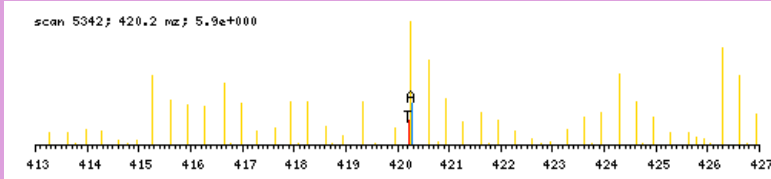

zoomed in precursor plot; T=theoretical m/z, A=acquired m/z

| b <sup>+</sup> | #  | AA # | y <sup>+</sup> | y <sup>2+</sup> |
|----------------|----|------|----------------|-----------------|
| 116.0711       | 1  | S 10 |                |                 |
| 272.1974       | 2  | K 9  | 1143.6315      | 572.3197        |
| 458.2767       | 3  | W 8  | 987.5052       | 494.2565        |
| 555.3295       | 4  | P 7  | 801.4259       | 401.2169        |
| 684.3721       | 5  | E 6  | 704.3731       | 352.6905        |
| 781.4249       | 6  | P 5  | 575.3306       | 288.1692        |
| 880.4933       | 7  | V 4  | 478.2778       | 239.6428        |
| 1027.5617      | 8  | F 3  | 379.2094       | 190.1086        |
| 1084.5832      | 9  | G 2  | 232.1410       | 116.5744        |
|                | 10 | R 1  | 175.1195       | 88.0637         |

N-term:+29.04 K(2):+156.13



SLADAINTEFKNTR, MH+ 1635.8706, m/z 545.9617  
 L OS G27 P150811 220811-s1.06010.06010.3.dta

X-range:

-

MassTol: Y-zoom:

MassType:

AVG  MONO

Axis:

1  2

Label:

I  M  -

Ions:

a  +  2+  3+

b  +  2+  3+

c  +  2+  3+

x  +  2+  3+

y  +  2+  3+

z  +  2+  3+

hide H<sub>2</sub>O/NH<sub>3</sub>

zoom 112-122

GO

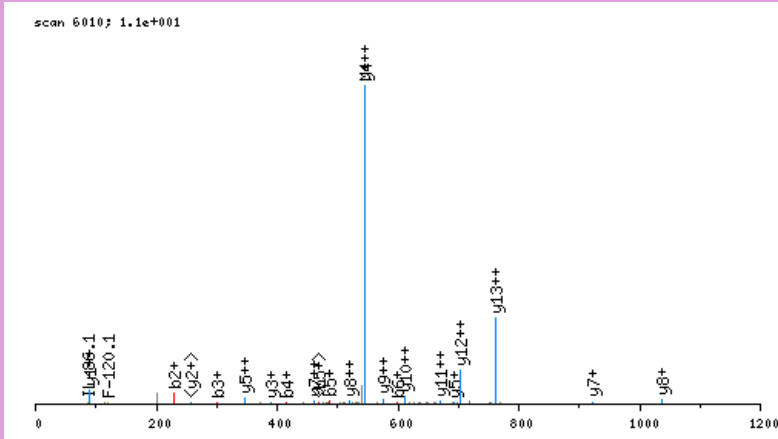

click image to zoom in; click top corners to zoom out [\[precursor±\]](#)

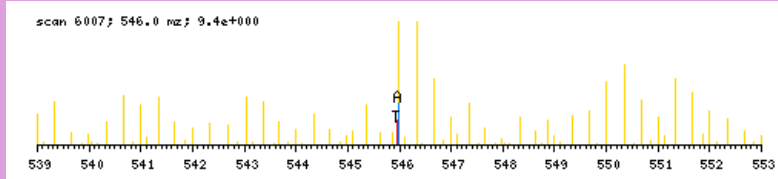

zoomed in precursor plot; T=theoretical m/z, A=acquired m/z

| b <sup>+</sup> | #  | AA # | y <sup>+</sup> | y <sup>2+</sup> |
|----------------|----|------|----------------|-----------------|
| 116.0711       | 1  | S 14 |                |                 |
| 229.1552       | 2  | L 13 | 1520.8073      | 760.9076        |
| 300.1923       | 3  | A 12 | 1407.7233      | 704.3655        |
| 415.2192       | 4  | D 11 | 1336.6861      | 668.8470        |
| 486.2564       | 5  | A 10 | 1221.6592      | 611.3335        |
| 599.3404       | 6  | I 9  | 1150.6221      | 575.8150        |
| 713.3834       | 7  | N 8  | 1037.5380      | 519.2729        |
| 814.4310       | 8  | T 7  | 923.4951       | 462.2515        |
| 943.4736       | 9  | E 6  | 822.4474       | 411.7276        |
| 1090.5420      | 10 | F 5  | 693.4048       | 347.2063        |
| 1246.6683      | 11 | K 4  | 546.3364       | 273.6721        |
| 1360.7113      | 12 | N 3  | 390.2101       | 195.6090        |
| 1461.7589      | 13 | T 2  | 276.1672       | 138.5875        |
|                | 14 | R 1  | 175.1195       | 88.0637         |

N-term:+29.04 K(11):+156.13

SLAEPKPEAPKVGILGSGDFAR, MH+ 2343.4137, m/z 586.6089  
 H OS G27 P150811 220811-s1.06389.06389.4.dta

X-range:

-

MassTol: Y-zoom:

MassType:

AVG  MONO

Axis:

1  2

Label:

I  M  -

Ions:

a  +  2+  3+

b  +  2+  3+

c  +  2+  3+

x  +  2+  3+

y  +  2+  3+

z  +  2+  3+

hide H<sub>2</sub>O/NH<sub>3</sub>

zoom 112-122

GO

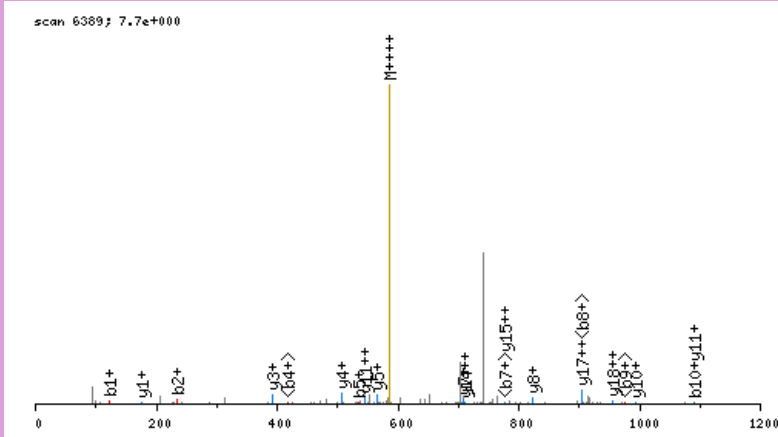

click image to zoom in; click top corners to zoom out [\[precursor±\]](#)

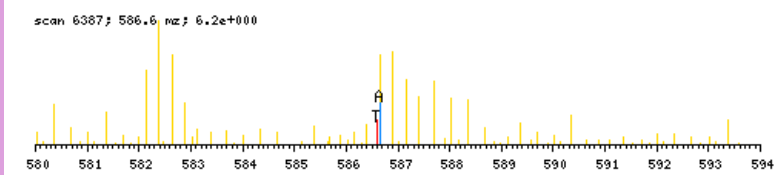

zoomed in precursor plot; T=theoretical m/z, A=acquired m/z

| b <sup>+</sup> | #  | AA | #  | y <sup>+</sup> | y <sup>2+</sup> |
|----------------|----|----|----|----------------|-----------------|
| 122.1029       | 1  | S  | 22 |                |                 |
| 235.1870       | 2  | L  | 21 | 2222.3186      | 1111.6632       |
| 306.2241       | 3  | A  | 20 | 2109.2345      | 1055.1212       |
| 435.2667       | 4  | E  | 19 | 2038.1974      | 1019.6026       |
| 534.3351       | 5  | V  | 18 | 1909.1548      | 955.0813        |
| 631.3879       | 6  | P  | 17 | 1810.0864      | 905.5471        |
| 793.5460       | 7  | K  | 16 | 1713.0336      | 857.0207        |
| 922.5886       | 8  | E  | 15 | 1550.8755      | 775.9417        |
| 993.6257       | 9  | A  | 14 | 1421.8329      | 711.4204        |
| 1090.6784      | 10 | P  | 13 | 1350.7958      | 675.9018        |
| 1252.8365      | 11 | K  | 12 | 1253.7430      | 627.3754        |
| 1351.9050      | 12 | V  | 11 | 1091.5849      | 546.2964        |
| 1408.9264      | 13 | G  | 10 | 992.5165       | 496.7622        |
| 1522.0105      | 14 | I  | 9  | 935.4951       | 468.2514        |
| 1635.0946      | 15 | L  | 8  | 822.4110       | 411.7094        |
| 1692.1160      | 16 | G  | 7  | 709.3269       | 355.1674        |
| 1779.1480      | 17 | S  | 6  | 652.3055       | 326.6566        |
| 1836.1695      | 18 | G  | 5  | 565.2734       | 283.1406        |
| 1951.1965      | 19 | D  | 4  | 508.2520       | 254.6299        |
| 2098.2649      | 20 | F  | 3  | 393.2250       | 197.1164        |
| 2169.3020      | 21 | A  | 2  | 246.1566       | 123.5822        |
|                | 22 | R  | 1  | 175.1195       | 88.0637         |

N-term:+35.07 K(7):+162.16  
 K(11):+162.16

SLEGDHSTPPSAYGSVKPYTNFDAER, MH+ 2893.4281, m/z 724.1125  
 H OS G27 P150811 220811-s1.05333.05333.4.dta

scan 5333; 2.8e+000

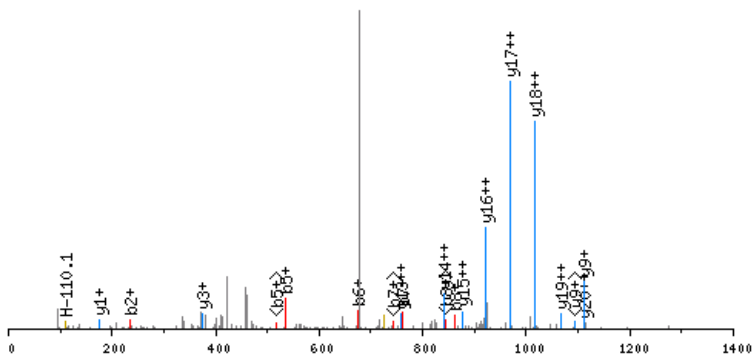

click image to zoom in; click top corners to zoom out [precursor±]

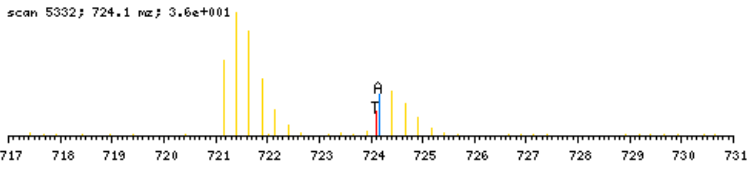

zoomed in precursor plot; T=theoretical m/z, A=acquired m/z

| b <sup>+</sup>  | #        | AA #        | y <sup>+</sup>   | y <sup>2+</sup>  |
|-----------------|----------|-------------|------------------|------------------|
| 122.1029        | 1        | S 26        |                  |                  |
| <b>235.1870</b> | <b>2</b> | <b>L 25</b> | 2772.3330        | 1386.6704        |
| 364.2296        | 3        | E 24        | 2659.2489        | 1330.1284        |
| 421.2510        | 4        | G 23        | 2530.2063        | 1265.6071        |
| <b>536.2780</b> | <b>5</b> | <b>D 22</b> | 2473.1848        | 1237.0963        |
| <b>673.3369</b> | <b>6</b> | <b>H 21</b> | 2358.1579        | 1179.5829        |
| <b>760.3689</b> | <b>7</b> | <b>S 20</b> | 2221.0990        | <b>1111.0534</b> |
| <b>861.4166</b> | <b>8</b> | <b>T 19</b> | 2134.0669        | <b>1067.5374</b> |
| 958.4694        | 9        | P 18        | 2033.0193        | <b>1017.0135</b> |
| 1055.5221       | 10       | P 17        | 1935.9665        | <b>968.4872</b>  |
| 1142.5542       | 11       | S 16        | 1838.9137        | <b>919.9608</b>  |
| 1213.5913       | 12       | A 15        | 1751.8817        | <b>876.4448</b>  |
| 1376.6546       | 13       | Y 14        | 1680.8446        | <b>840.9262</b>  |
| 1433.6761       | 14       | G 13        | 1517.7813        | <b>759.3945</b>  |
| 1520.7081       | 15       | S 12        | 1460.7598        | 730.8838         |
| 1619.7765       | 16       | V 11        | 1373.7278        | 687.3678         |
| 1781.9346       | 17       | <b>K 10</b> | 1274.6594        | 637.8336         |
| 1878.9874       | 18       | P 9         | <b>1112.5013</b> | 556.7545         |
| 2042.0507       | 19       | Y 8         | 1015.4485        | 508.2282         |
| 2143.0984       | 20       | T 7         | 852.3852         | 426.6965         |
| 2257.1413       | 21       | N 6         | 751.3375         | 376.1727         |
| 2404.2097       | 22       | F 5         | 637.2946         | 319.1512         |
| 2519.2367       | 23       | D 4         | 490.2262         | 245.6170         |
| 2590.2738       | 24       | A 3         | <b>375.1992</b>  | 188.1035         |
| 2719.3164       | 25       | E 2         | 304.1621         | 152.5850         |
|                 | 26       | R 1         | <b>175.1195</b>  | 88.0637          |

N-term:+35.07 K(17) :+162.16

X-range:

-

MassTol: Y-zoom:

MassType:

AVG  MONO

Axis:

1  2

Label:

I  M  -

Ions:

a  +  2+  3+

b  +  2+  3+

c  +  2+  3+

x  +  2+  3+

y  +  2+  3+

z  +  2+  3+

hide H<sub>2</sub>O/NH<sub>3</sub>

zoom 112-122

GO

SLEKSYELPDGQVITIGNER, MH+ 2316.2723, m/z 579.8235  
 H OS G26 P150811 220811-s1.06159.06159.4.dta

X-range:

-

MassTol: Y-zoom:

MassType:

AVG  MONO

Axis:

1  2

Label:

I  M  -

Ions:

a  +  2+  3+

b  +  2+  3+

c  +  2+  3+

x  +  2+  3+

y  +  2+  3+

z  +  2+  3+

hide H<sub>2</sub>O/NH<sub>3</sub>

zoom 112-122

GO

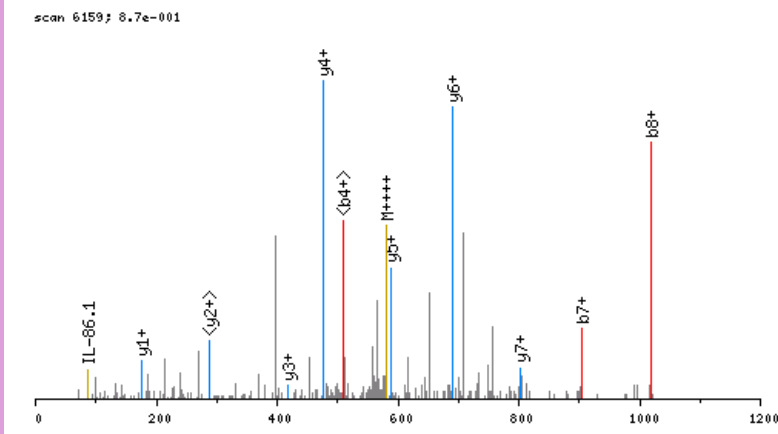

click image to zoom in; click top corners to zoom out [\[precursor±\]](#)

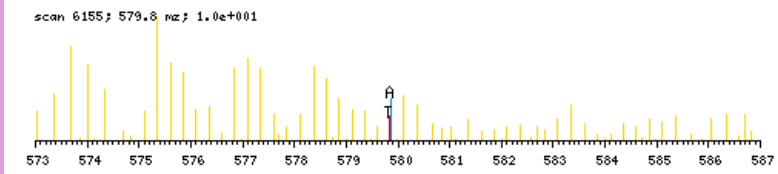

zoomed in precursor plot; T=theoretical m/z, A=acquired m/z

| b <sup>+</sup> | #  | AA | #  | y <sup>+</sup> | y <sup>2+</sup> |
|----------------|----|----|----|----------------|-----------------|
| 122.1029       | 1  | S  | 20 |                |                 |
| 235.1870       | 2  | L  | 19 | 2195.1772      | 1098.0925       |
| 364.2296       | 3  | E  | 18 | 2082.0932      | 1041.5505       |
| 526.3877       | 4  | K  | 17 | 1953.0506      | 977.0292        |
| 613.4197       | 5  | S  | 16 | 1790.8925      | 895.9501        |
| 776.4830       | 6  | Y  | 15 | 1703.8604      | 852.4341        |
| 905.5256       | 7  | E  | 14 | 1540.7971      | 770.9025        |
| 1018.6097      | 8  | L  | 13 | 1411.7545      | 706.3812        |
| 1115.6625      | 9  | P  | 12 | 1298.6705      | 649.8391        |
| 1230.6894      | 10 | D  | 11 | 1201.6177      | 601.3128        |
| 1287.7109      | 11 | G  | 10 | 1086.5907      | 543.7993        |
| 1415.7694      | 12 | Q  | 9  | 1029.5693      | 515.2886        |
| 1514.8379      | 13 | V  | 8  | 901.5107       | 451.2593        |
| 1627.9219      | 14 | I  | 7  | 802.4423       | 401.7251        |
| 1728.9696      | 15 | T  | 6  | 689.3582       | 345.1830        |
| 1842.0537      | 16 | I  | 5  | 588.3105       | 294.6592        |
| 1899.0751      | 17 | G  | 4  | 475.2265       | 238.1172        |
| 2013.1181      | 18 | N  | 3  | 418.2050       | 209.6064        |
| 2142.1607      | 19 | E  | 2  | 304.1621       | 152.5850        |
|                | 20 | R  | 1  | 175.1195       | 88.0637         |

N-term:+35.07 K(4):+162.16

SLGFDEPAEQPVR, MH+ 1472.7385, m/z 491.5844  
 L OS G25 P150811 220811-s1.05106.05106.3.dta

scan 5106; 1.8e+000

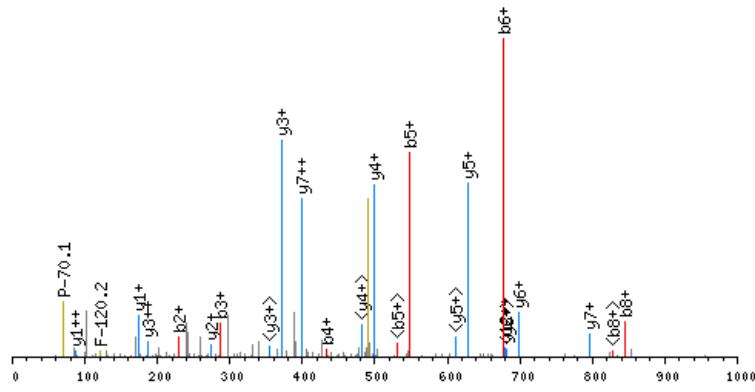

click image to zoom in; click top corners to zoom out [\[precursor±\]](#)

scan 5102; 491.6 m/z; 1.5e+001

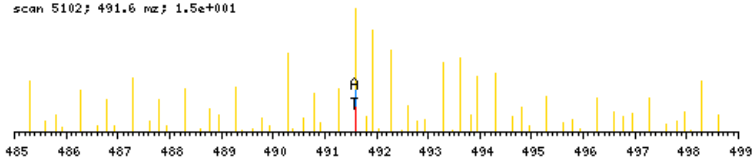

zoomed in precursor plot; T=theoretical m/z, A=acquired m/z

X-range:

-

MassTol: Y-zoom:

MassType:

AVG  MONO

Axis:

1  2

Label:

I  M  -

Ions:

a  +  2+  3+

b  +  2+  3+

c  +  2+  3+

x  +  2+  3+

y  +  2+  3+

z  +  2+  3+

hide H<sub>2</sub>O/NH<sub>3</sub>

zoom 112-122

GO

| b <sup>+</sup> | #  | AA # | y <sup>+</sup> | y <sup>2+</sup> |
|----------------|----|------|----------------|-----------------|
| 116.0711       | 1  | S 13 |                |                 |
| 229.1552       | 2  | L 12 | 1357.6752      | 679.3415        |
| 286.1767       | 3  | G 11 | 1244.5911      | 622.7995        |
| 433.2451       | 4  | F 10 | 1187.5697      | 594.2888        |
| 548.2720       | 5  | D 9  | 1040.5013      | 520.7545        |
| 677.3146       | 6  | E 8  | 925.4743       | 463.2411        |
| 774.3674       | 7  | P 7  | 796.4317       | 398.7198        |
| 845.4045       | 8  | A 6  | 699.3790       | 350.1934        |
| 974.4471       | 9  | E 5  | 628.3418       | 314.6748        |
| 1102.5057      | 10 | Q 4  | 499.2993       | 250.1535        |
| 1199.5584      | 11 | P 3  | 371.2407       | 186.1243        |
| 1298.6268      | 12 | V 2  | 274.1879       | 137.5979        |
|                | 13 | R 1  | 175.1195       | 88.0637         |

N-term:+29.04

SLGGGTGSGMGTLLISKIR, MH+ 1861.0581, m/z 621.0242  
 L OS G26 P150811 220811-s1.05872.05872.3.dta

X-range:

-

MassTol: Y-zoom:

MassType:

AVG  MONO

Axis:

1  2

Label:

I  M  -

Ions:

a  +  2+  3+

b  +  2+  3+

c  +  2+  3+

x  +  2+  3+

y  +  2+  3+

z  +  2+  3+

hide H<sub>2</sub>O/NH<sub>3</sub>

zoom 112-122

GO

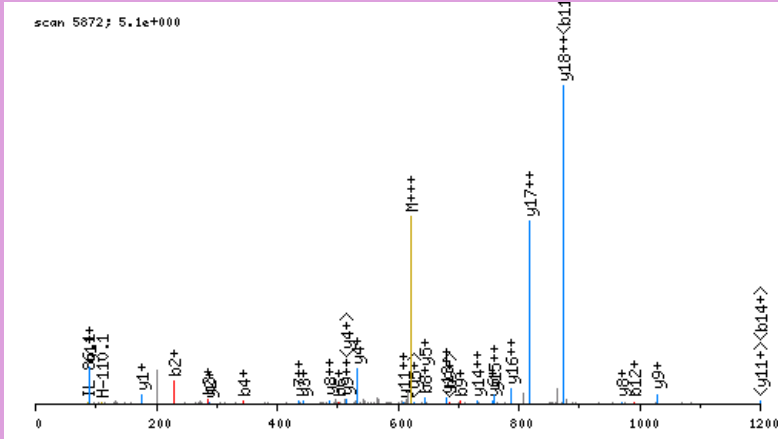

click image to zoom in; click top corners to zoom out [\[precursor±\]](#)

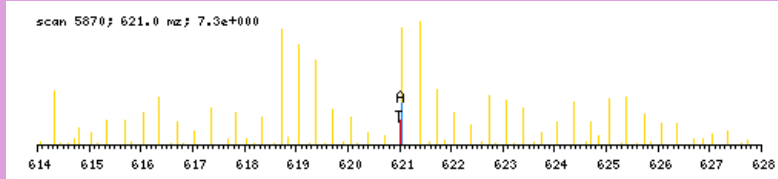

zoomed in precursor plot; T=theoretical m/z, A=acquired m/z

| b <sup>+</sup> | #  | AA # | y <sup>+</sup> | y <sup>2+</sup> |
|----------------|----|------|----------------|-----------------|
| 116.0711       | 1  | S 19 |                |                 |
| 229.1552       | 2  | L 18 | 1745.9948      | 873.5013        |
| 286.1767       | 3  | G 17 | 1632.9107      | 816.9593        |
| 343.1981       | 4  | G 16 | 1575.8893      | 788.4485        |
| 400.2196       | 5  | G 15 | 1518.8678      | 759.9378        |
| 501.2673       | 6  | T 14 | 1461.8463      | 731.4271        |
| 558.2887       | 7  | G 13 | 1360.7987      | 680.9032        |
| 645.3208       | 8  | S 12 | 1303.7772      | 652.3925        |
| 702.3422       | 9  | G 11 | 1216.7452      | 608.8765        |
| 833.3827       | 10 | M 10 | 1159.7237      | 580.3658        |
| 890.4042       | 11 | G 9  | 1028.6832      | 514.8455        |
| 991.4518       | 12 | T 8  | 971.6618       | 486.3348        |
| 1104.5359      | 13 | L 7  | 870.6141       | 435.8110        |
| 1217.6200      | 14 | L 6  | 757.5300       | 379.2689        |
| 1330.7040      | 15 | I 5  | 644.4460       | 322.7269        |
| 1417.7361      | 16 | S 4  | 531.3619       | 266.1849        |
| 1573.8624      | 17 | K 3  | 444.3299       | 222.6688        |
| 1686.9464      | 18 | I 2  | 288.2036       | 144.6057        |
|                | 19 | R 1  | 175.1195       | 88.0637         |

N-term:+29.04 K(17):+156.13

SLGGKATTASQAKAVLSAEKLR, MH+ 2299.3714, m/z 575.5983  
 L OS G28 P150811 220811-s1.04747.04747.4.dta

X-range:

-

MassTol: Y-zoom:

MassType:

AVG  MONO

Axis:

1  2

Label:

I  M  -

Ions:

a  +  2+  3+

b  +  2+  3+

c  +  2+  3+

x  +  2+  3+

y  +  2+  3+

z  +  2+  3+

hide H<sub>2</sub>O/NH<sub>3</sub>

zoom 112-122

GO

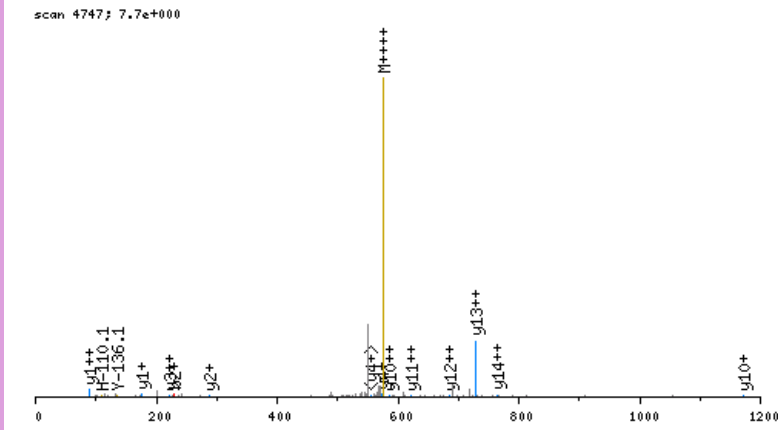

click image to zoom in; click top corners to zoom out [\[precursor±\]](#)

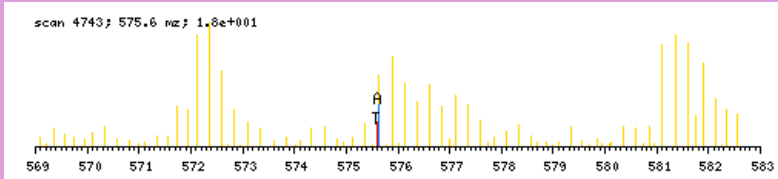

zoomed in precursor plot; T=theoretical m/z, A=acquired m/z

| b <sup>+</sup> | #  | AA | #  | y <sup>+</sup> | y <sup>2+</sup> |
|----------------|----|----|----|----------------|-----------------|
| 116.0711       | 1  | S  | 22 |                |                 |
| 229.1552       | 2  | L  | 21 | 2184.3081      | 1092.6580       |
| 286.1767       | 3  | G  | 20 | 2071.2240      | 1036.1159       |
| 343.1981       | 4  | G  | 19 | 2014.2026      | 1007.6052       |
| 499.3244       | 5  | K  | 18 | 1957.1811      | 979.0945        |
| 570.3615       | 6  | A  | 17 | 1801.0548      | 901.0313        |
| 671.4092       | 7  | T  | 16 | 1730.0177      | 865.5128        |
| 772.4569       | 8  | T  | 15 | 1628.9700      | 814.9889        |
| 843.4940       | 9  | A  | 14 | 1527.9223      | 764.4651        |
| 930.5260       | 10 | S  | 13 | 1456.8852      | 728.9465        |
| 1058.5846      | 11 | Q  | 12 | 1369.8532      | 685.4305        |
| 1129.6217      | 12 | A  | 11 | 1241.7946      | 621.4012        |
| 1285.7480      | 13 | K  | 10 | 1170.7575      | 585.8827        |
| 1356.7851      | 14 | A  | 9  | 1014.6312      | 507.8195        |
| 1455.8536      | 15 | V  | 8  | 943.5941       | 472.3010        |
| 1568.9376      | 16 | L  | 7  | 844.5257       | 422.7667        |
| 1655.9696      | 17 | S  | 6  | 731.4416       | 366.2247        |
| 1727.0068      | 18 | A  | 5  | 644.4096       | 322.7087        |
| 1856.0494      | 19 | E  | 4  | 573.3725       | 287.1901        |
| 2012.1757      | 20 | K  | 3  | 444.3299       | 222.6688        |
| 2125.2597      | 21 | L  | 2  | 288.2036       | 144.6057        |
|                | 22 | R  | 1  | 175.1195       | 88.0637         |

N-term:+29.04 K(5):+156.13  
 K(13):+156.13 K(20):+156.13

SLHLGVTSPVLR, MH+ 1306.7847, m/z 436.2664  
 L OS G27 P150811 220811-s1.05661.05661.3.dta

X-range:

-

MassTol: Y-zoom:

MassType:

AVG  MONO

Axis:

1  2

Label:

I  M  -

Ions:

a  +  2+  3+

b  +  2+  3+

c  +  2+  3+

x  +  2+  3+

y  +  2+  3+

z  +  2+  3+

hide H<sub>2</sub>O/NH<sub>3</sub>

zoom 112-122

GO

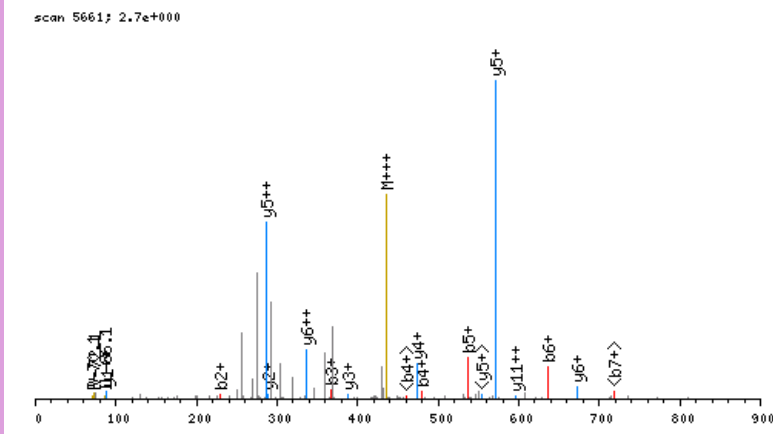

click image to zoom in; click top corners to zoom out [\[precursor±\]](#)

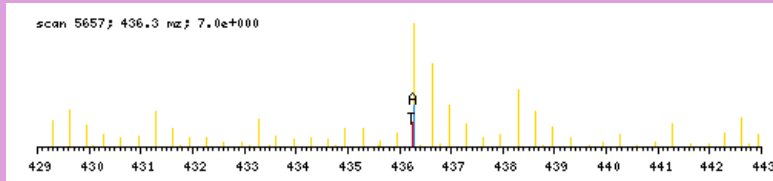

zoomed in precursor plot; T=theoretical m/z, A=acquired m/z

| b <sup>+</sup> | #  | AA # | y <sup>+</sup> | y <sup>2+</sup> |
|----------------|----|------|----------------|-----------------|
| 116.0711       | 1  | S 12 |                |                 |
| 229.1552       | 2  | L 11 | 1191.7214      | 596.3646        |
| 366.2141       | 3  | H 10 | 1078.6373      | 539.8226        |
| 479.2982       | 4  | L 9  | 941.5784       | 471.2931        |
| 536.3196       | 5  | G 8  | 828.4943       | 414.7511        |
| 635.3880       | 6  | V 7  | 771.4729       | 386.2403        |
| 736.4357       | 7  | T 6  | 672.4044       | 336.7061        |
| 833.4885       | 8  | P 5  | 571.3568       | 286.1823        |
| 920.5205       | 9  | S 4  | 474.3040       | 237.6559        |
| 1019.5889      | 10 | V 3  | 387.2720       | 194.1399        |
| 1132.6730      | 11 | L 2  | 288.2036       | 144.6057        |
|                | 12 | R 1  | 175.1195       | 88.0637         |

N-term:+29.04



SLHSIGKIGGAQNR, MH+ 1493.8552, m/z 374.2193  
 L OS G28 P150811 220811-s1.02519.02519.4.dta

X-range:

-

MassTol: Y-zoom:

MassType:

AVG  MONO

Axis:

1  2

Label:

I  M  -

Ions:

a  +  2+  3+

b  +  2+  3+

c  +  2+  3+

x  +  2+  3+

y  +  2+  3+

z  +  2+  3+

hide H<sub>2</sub>O/NH<sub>3</sub>

zoom 112-122

GO

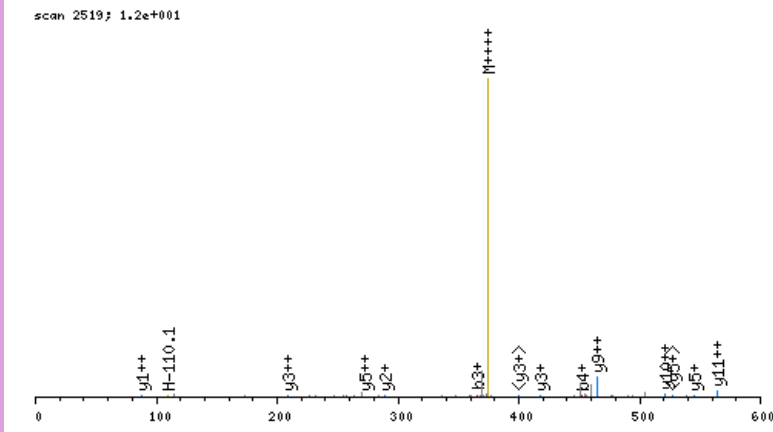

click image to zoom in; click top corners to zoom out [\[precursor±\]](#)

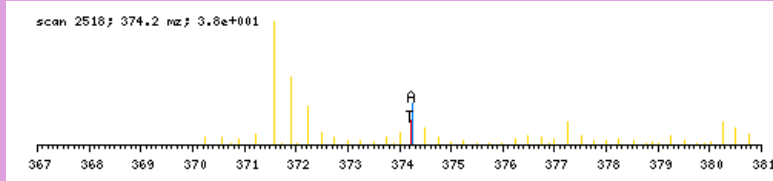

zoomed in precursor plot; T=theoretical m/z, A=acquired m/z

| b <sup>+</sup> | #  | AA # | y <sup>+</sup> | y <sup>2+</sup> |
|----------------|----|------|----------------|-----------------|
| 116.0711       | 1  | S 14 |                |                 |
| 229.1552       | 2  | L 13 | 1378.7919      | 689.8999        |
| 366.2141       | 3  | H 12 | 1265.7079      | 633.3579        |
| 453.2461       | 4  | S 11 | 1128.6490      | 564.8284        |
| 566.3302       | 5  | I 10 | 1041.6169      | 521.3124        |
| 623.3517       | 6  | G 9  | 928.5329       | 464.7703        |
| 779.4780       | 7  | K 8  | 871.5114       | 436.2596        |
| 892.5620       | 8  | I 7  | 715.3851       | 358.1965        |
| 949.5835       | 9  | G 6  | 602.3010       | 301.6544        |
| 1006.6050      | 10 | G 5  | 545.2796       | 273.1437        |
| 1077.6421      | 11 | A 4  | 488.2581       | 244.6330        |
| 1205.7006      | 12 | Q 3  | 417.2210       | 209.1144        |
| 1319.7436      | 13 | N 2  | 289.1624       | 145.0851        |
|                | 14 | R 1  | 175.1195       | 88.0637         |

N-term:+29.04 K(7):+156.13

SLHTLFGDKLCAIPNLR, MH+ 2011.1162, m/z 503.5345  
 L OS G28 P150811 220811-s1.08699.08699.4.dta

X-range:

-

MassTol: Y-zoom:

MassType:

AVG  MONO

Axis:

1  2

Label:

I  M  -

Ions:

a  +  2+  3+

b  +  2+  3+

c  +  2+  3+

x  +  2+  3+

y  +  2+  3+

z  +  2+  3+

hide H<sub>2</sub>O/NH<sub>3</sub>

zoom 112-122

GO

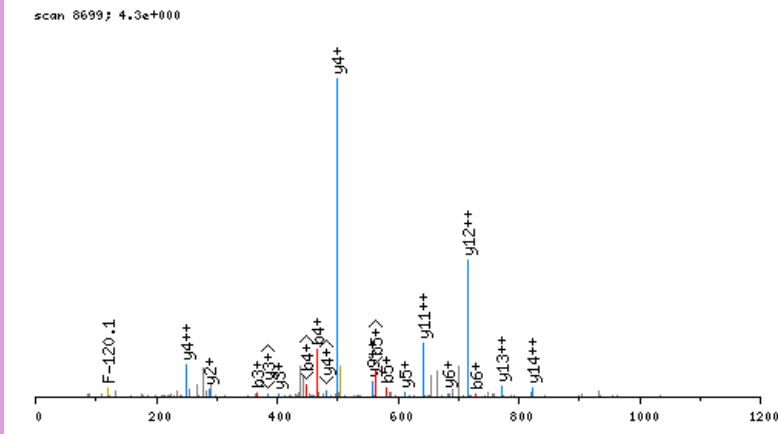

click image to zoom in; click top corners to zoom out [\[precursor±\]](#)

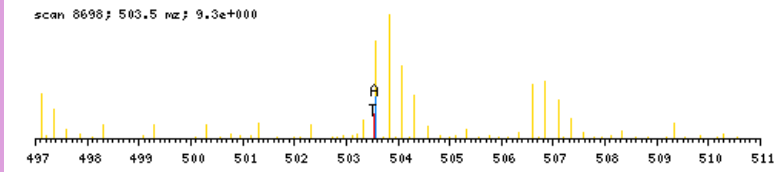

zoomed in precursor plot; T=theoretical m/z, A=acquired m/z

| b <sup>+</sup> | #  | AA | #  | y <sup>+</sup> | y <sup>2+</sup> |
|----------------|----|----|----|----------------|-----------------|
| 116.0711       | 1  | S  | 17 |                |                 |
| 229.1552       | 2  | L  | 16 | 1896.0529      | 948.5304        |
| 366.2141       | 3  | H  | 15 | 1782.9689      | 891.9883        |
| 467.2618       | 4  | T  | 14 | 1645.9100      | 823.4589        |
| 580.3458       | 5  | L  | 13 | 1544.8623      | 772.9351        |
| 727.4143       | 6  | F  | 12 | 1431.7782      | 716.3930        |
| 784.4357       | 7  | G  | 11 | 1284.7098      | 642.8588        |
| 899.4627       | 8  | D  | 10 | 1227.6883      | 614.3481        |
| 1055.5890      | 9  | K  | 9  | 1112.6614      | 556.8346        |
| 1168.6730      | 10 | L  | 8  | 956.5351       | 478.7715        |
| 1328.7036      | 11 | C  | 7  | 843.4510       | 422.2294        |
| 1399.7407      | 12 | A  | 6  | 683.4204       | 342.2141        |
| 1512.8248      | 13 | I  | 5  | 612.3833       | 306.6956        |
| 1609.8776      | 14 | P  | 4  | 499.2993       | 250.1535        |
| 1723.9205      | 15 | N  | 3  | 402.2465       | 201.6272        |
| 1837.0046      | 16 | L  | 2  | 288.2036       | 144.6057        |
|                | 17 | R  | 1  | 175.1195       | 88.0637         |

N-term:+29.04 K(9):+156.13  
 C(11):+160.03

SLKGVVPEDAVETLAGSLGTR, MH+ 2155.1974, m/z 719.0707  
 L OS G26 P150811 220811-s1.06767.06767.3.dta

X-range:

-

MassTol: Y-zoom:

MassType:

AVG  MONO

Axis:

1  2

Label:

I  M  -

Ions:

a  +  2+  3+

b  +  2+  3+

c  +  2+  3+

x  +  2+  3+

y  +  2+  3+

z  +  2+  3+

hide H<sub>2</sub>O/NH<sub>3</sub>

zoom 112-122

GO

scan 6767; 4.7e+000

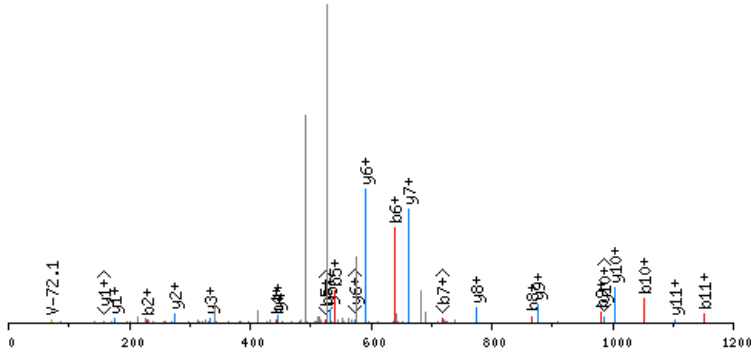

click image to zoom in; click top corners to zoom out [\[precursor±\]](#)

scan 6765; 719.1 m/z; 1.0e+001

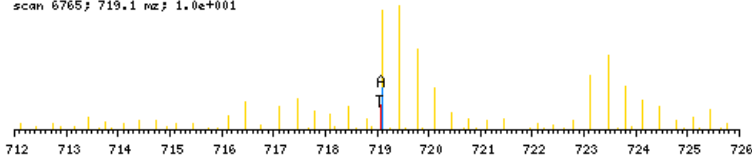

zoomed in precursor plot; T=theoretical m/z, A=acquired m/z

| b <sup>+</sup> | #  | AA # | y <sup>+</sup> | y <sup>2+</sup> |
|----------------|----|------|----------------|-----------------|
| 116.0711       | 1  | S 21 |                |                 |
| 229.1552       | 2  | L 20 | 2040.1341      | 1020.5710       |
| 385.2815       | 3  | K 19 | 1927.0501      | 964.0289        |
| 442.3030       | 4  | G 18 | 1770.9238      | 885.9658        |
| 541.3714       | 5  | V 17 | 1713.9023      | 857.4551        |
| 640.4398       | 6  | V 16 | 1614.8339      | 807.9209        |
| 737.4925       | 7  | P 15 | 1515.7655      | 758.3867        |
| 866.5351       | 8  | E 14 | 1418.7127      | 709.8603        |
| 981.5621       | 9  | D 13 | 1289.6701      | 645.3390        |
| 1052.5992      | 10 | A 12 | 1174.6432      | 587.8255        |
| 1151.6676      | 11 | V 11 | 1103.6061      | 552.3069        |
| 1280.7102      | 12 | E 10 | 1004.5376      | 502.7727        |
| 1381.7579      | 13 | T 9  | 875.4951       | 438.2514        |
| 1494.8419      | 14 | L 8  | 774.4474       | 387.7276        |
| 1565.8791      | 15 | A 7  | 661.3633       | 331.1856        |
| 1622.9005      | 16 | G 6  | 590.3262       | 295.6670        |
| 1709.9326      | 17 | S 5  | 533.3047       | 267.1563        |
| 1823.0166      | 18 | L 4  | 446.2727       | 223.6403        |
| 1880.0381      | 19 | G 3  | 333.1886       | 167.0982        |
| 1981.0858      | 20 | T 2  | 276.1672       | 138.5875        |
|                | 21 | R 1  | 175.1195       | 88.0637         |

N-term:+29.04 K(3):+156.13

SLLPASLLDHR, MH+ 1249.7268, m/z 417.2471  
 L OS G27 P150811 220811-s1.06469.06469.3.dta

X-range:

-

MassTol: Y-zoom:

MassType:

AVG  MONO

Axis:

1  2

Label:

I  M  -

Ions:

a  +  2+  3+

b  +  2+  3+

c  +  2+  3+

x  +  2+  3+

y  +  2+  3+

z  +  2+  3+

hide H<sub>2</sub>O/NH<sub>3</sub>

zoom 112-122

GO

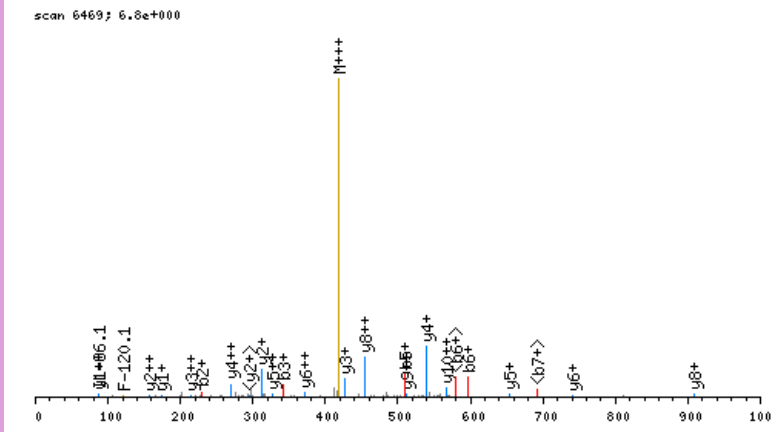

click image to zoom in; click top corners to zoom out [\[precursor±\]](#)

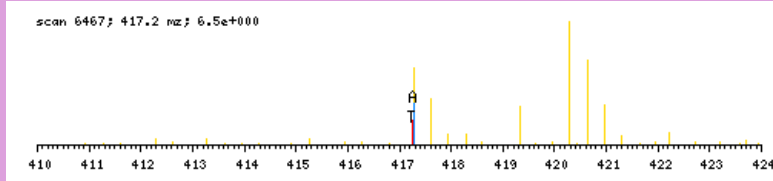

zoomed in precursor plot; T=theoretical m/z, A=acquired m/z

| b <sup>+</sup> | #  | AA # | y <sup>+</sup> | y <sup>2+</sup> |
|----------------|----|------|----------------|-----------------|
| 116.0711       | 1  | S 11 |                |                 |
| 229.1552       | 2  | L 10 | 1134.6635      | 567.8357        |
| 342.2393       | 3  | L 9  | 1021.5795      | 511.2936        |
| 439.2920       | 4  | P 8  | 908.4954       | 454.7516        |
| 510.3291       | 5  | A 7  | 811.4426       | 406.2252        |
| 597.3612       | 6  | S 6  | 740.4055       | 370.7067        |
| 710.4452       | 7  | L 5  | 653.3735       | 327.1907        |
| 823.5293       | 8  | L 4  | 540.2894       | 270.6486        |
| 938.5562       | 9  | D 3  | 427.2054       | 214.1066        |
| 1075.6151      | 10 | H 2  | 312.1784       | 156.5931        |
|                | 11 | R 1  | 175.1195       | 88.0637         |

N-term:+29.04

SLPEGVVDGIEVYSTKISKVTSR, MH+ 2726.5498, m/z 682.3929  
 H OS G28 P150811 220811-s1.09112.09112.4.dta

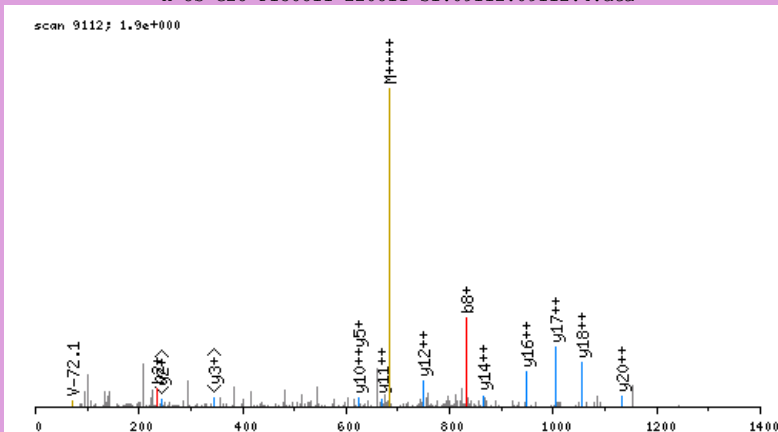

click image to zoom in; click top corners to zoom out [\[precursor±\]](#)

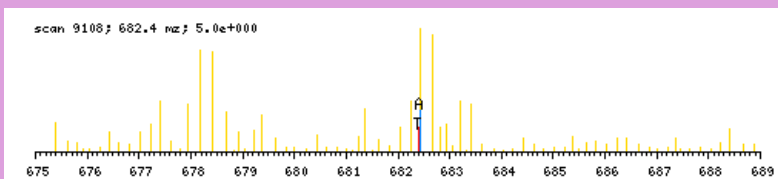

zoomed in precursor plot; T=theoretical m/z, A=acquired m/z

X-range:

-

MassTol: Y-zoom:

MassType:

AVG  MONO

Axis:

1  2

Label:

I  M  -

Ions:

a  +  2+  3+

b  +  2+  3+

c  +  2+  3+

x  +  2+  3+

y  +  2+  3+

z  +  2+  3+

hide H<sub>2</sub>O/NH<sub>3</sub>

zoom 112-122

GO

| b <sup>+</sup> | #  | AA # | y <sup>+</sup> | y <sup>2+</sup> |
|----------------|----|------|----------------|-----------------|
| 122.1029       | 1  | S 24 |                |                 |
| 235.1870       | 2  | L 23 | 2605.4547      | 1303.2313       |
| 332.2398       | 3  | P 22 | 2492.3707      | 1246.6893       |
| 461.2823       | 4  | E 21 | 2395.3179      | 1198.1629       |
| 518.3038       | 5  | G 20 | 2266.2753      | 1133.6416       |
| 617.3722       | 6  | V 19 | 2209.2539      | 1105.1308       |
| 716.4406       | 7  | V 18 | 2110.1854      | 1055.5966       |
| 831.4676       | 8  | D 17 | 2011.1170      | 1006.0624       |
| 888.4890       | 9  | G 16 | 1896.0901      | 948.5490        |
| 1001.5731      | 10 | I 15 | 1839.0686      | 920.0382        |
| 1130.6157      | 11 | E 14 | 1725.9846      | 863.4962        |
| 1229.6841      | 12 | V 13 | 1596.9420      | 798.9749        |
| 1392.7474      | 13 | Y 12 | 1497.8735      | 749.4407        |
| 1479.7795      | 14 | S 11 | 1334.8102      | 667.9090        |
| 1580.8272      | 15 | T 10 | 1247.7782      | 624.3930        |
| 1742.9853      | 16 | K 9  | 1146.7305      | 573.8692        |
| 1856.0693      | 17 | I 8  | 984.5724       | 492.7901        |
| 1943.1013      | 18 | S 7  | 871.4884       | 436.2481        |
| 2103.1319      | 19 | C 6  | 784.4563       | 392.7321        |
| 2265.2900      | 20 | K 5  | 624.4257       | 312.7168        |
| 2364.3585      | 21 | V 4  | 462.2676       | 231.6377        |
| 2465.4061      | 22 | T 3  | 363.1992       | 182.1035        |
| 2552.4382      | 23 | S 2  | 262.1515       | 131.5797        |
|                | 24 | R 1  | 175.1195       | 88.0637         |

N-term:+35.07 K(16):+162.16  
 C(19):+160.03 K(20):+162.16

SLPELQQNPLVQR, MH+ 1549.8702, m/z 517.2949  
 L OS G25 P150811 220811-s1.06596.06596.3.dta

scan 6596; 6.7e+000

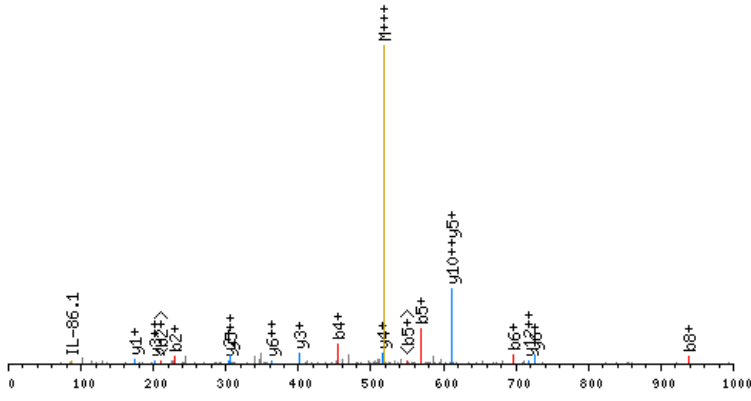

click image to zoom in; click top corners to zoom out [\[precursor±\]](#)

scan 6592; 517.3 m/z; 2.3e+001

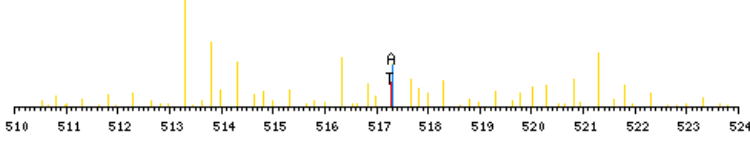

zoomed in precursor plot; T=theoretical m/z, A=acquired m/z

X-range:

-

MassTol: Y-zoom:

MassType:

AVG  MONO

Axis:

1  2

Label:

I  M  -

Ions:

a  +  2+  3+

b  +  2+  3+

c  +  2+  3+

x  +  2+  3+

y  +  2+  3+

z  +  2+  3+

hide H<sub>2</sub>O/NH<sub>3</sub>

zoom 112-122

GO

| b <sup>+</sup> | #  | AA # | y <sup>+</sup> | y <sup>2+</sup> |
|----------------|----|------|----------------|-----------------|
| 116.0711       | 1  | S 13 |                |                 |
| 229.1552       | 2  | L 12 | 1434.8069      | 717.9074        |
| 326.2080       | 3  | P 11 | 1321.7228      | 661.3653        |
| 455.2505       | 4  | E 10 | 1224.6701      | 612.8389        |
| 568.3346       | 5  | L 9  | 1095.6275      | 548.3176        |
| 696.3932       | 6  | Q 8  | 982.5434       | 491.7756        |
| 824.4518       | 7  | Q 7  | 854.4848       | 427.7463        |
| 938.4947       | 8  | N 6  | 726.4262       | 363.7170        |
| 1035.5475      | 9  | P 5  | 612.3833       | 306.6956        |
| 1148.6315      | 10 | L 4  | 515.3306       | 258.1692        |
| 1247.6999      | 11 | V 3  | 402.2465       | 201.6272        |
| 1375.7585      | 12 | Q 2  | 303.1781       | 152.0930        |
|                | 13 | R 1  | 175.1195       | 88.0637         |

N-term:+29.04

SLPGNYLVPIYSGR, MH+ 1569.8853, m/z 785.4463  
 H OS G25 P150811 220811-s1.07626.07626.2.dta

X-range:

-

MassTol: Y-zoom:

MassType:

AVG  MONO

Axis:

1  2

Label:

I  M  -

Ions:

a  +  2+  3+

b  +  2+  3+

c  +  2+  3+

x  +  2+  3+

y  +  2+  3+

z  +  2+  3+

hide H<sub>2</sub>O/NH<sub>3</sub>

zoom 112-122

GO

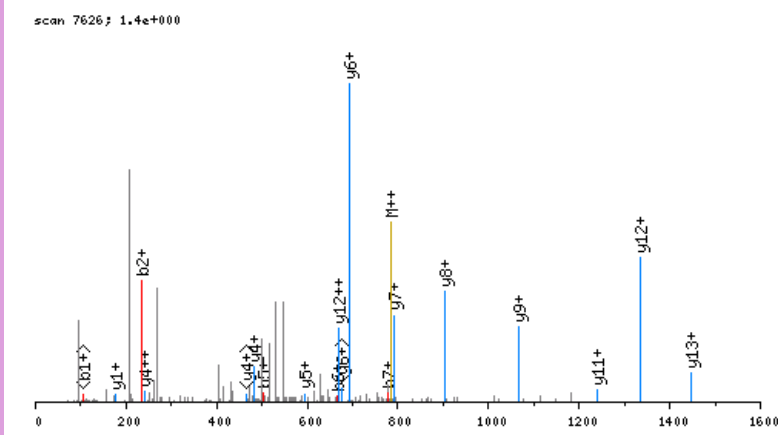

click image to zoom in; click top corners to zoom out [\[precursor±\]](#)

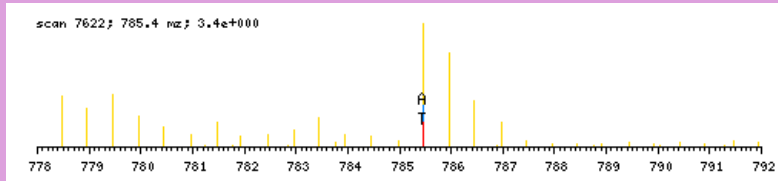

zoomed in precursor plot; T=theoretical m/z, A=acquired m/z

| b <sup>+</sup> | #  | AA # | y <sup>+</sup> | y <sup>2+</sup> |
|----------------|----|------|----------------|-----------------|
| 122.1029       | 1  | S 14 |                |                 |
| 235.1870       | 2  | L 13 | 1448.7902      | 724.8990        |
| 332.2398       | 3  | P 12 | 1335.7061      | 668.3570        |
| 389.2612       | 4  | G 11 | 1238.6533      | 619.8306        |
| 503.3041       | 5  | N 10 | 1181.6319      | 591.3199        |
| 666.3675       | 6  | Y 9  | 1067.5890      | 534.2984        |
| 779.4515       | 7  | L 8  | 904.5256       | 452.7667        |
| 878.5200       | 8  | V 7  | 791.4416       | 396.2247        |
| 975.5727       | 9  | P 6  | 692.3731       | 346.6905        |
| 1088.6568      | 10 | I 5  | 595.3204       | 298.1641        |
| 1251.7201      | 11 | Y 4  | 482.2363       | 241.6221        |
| 1338.7521      | 12 | S 3  | 319.1730       | 160.0904        |
| 1395.7736      | 13 | G 2  | 232.1410       | 116.5744        |
|                | 14 | R 1  | 175.1195       | 88.0637         |

N-term:+35.07

SLPPHQKVLPLSLPTMQAGTIAR, MH+ 2594.5129, m/z 649.3837  
 H OS G27 P150811 220811-s1.06120.06120.4.dta

scan 6120; 1.3e+000

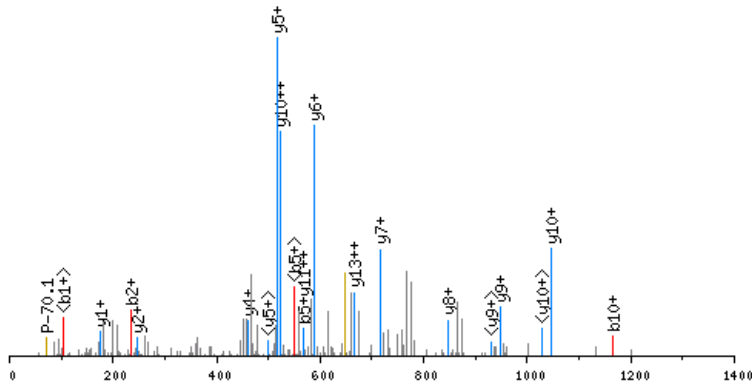

click image to zoom in; click top corners to zoom out [precursor±]

scan 6117; 649.4 nz; 4.3e+000

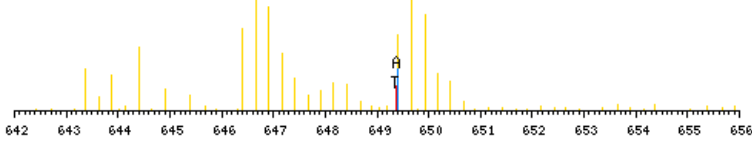

zoomed in precursor plot; T=theoretical m/z, A=acquired m/z

X-range:

-

MassTol: Y-zoom:

MassType:

AVG  MONO

Axis:

1  2

Label:

I  M  -

Ions:

a  +  2+  3+

b  +  2+  3+

c  +  2+  3+

x  +  2+  3+

y  +  2+  3+

z  +  2+  3+

hide H<sub>2</sub>O/NH<sub>3</sub>

zoom 112-122

GO

| b <sup>+</sup> | #  | AA # | y <sup>+</sup> | y <sup>2+</sup> |
|----------------|----|------|----------------|-----------------|
| 122.1029       | 1  | S 24 |                |                 |
| 235.1870       | 2  | L 23 | 2473.4177      | 1237.2128       |
| 332.2398       | 3  | P 22 | 2360.3337      | 1180.6708       |
| 429.2925       | 4  | P 21 | 2263.2809      | 1132.1444       |
| 566.3514       | 5  | H 20 | 2166.2282      | 1083.6180       |
| 694.4100       | 6  | Q 19 | 2029.1692      | 1015.0885       |
| 856.5681       | 7  | K 18 | 1901.1107      | 951.0592        |
| 955.6365       | 8  | V 17 | 1738.9526      | 869.9802        |
| 1052.6893      | 9  | P 16 | 1639.8842      | 820.4460        |
| 1165.7734      | 10 | L 15 | 1542.8314      | 771.9196        |
| 1262.8261      | 11 | P 14 | 1429.7473      | 715.3776        |
| 1349.8581      | 12 | S 13 | 1332.6946      | 666.8512        |
| 1462.9422      | 13 | L 12 | 1245.6625      | 623.3352        |
| 1549.9742      | 14 | S 11 | 1132.5785      | 566.7931        |
| 1647.0270      | 15 | P 10 | 1045.5464      | 523.2771        |
| 1748.0747      | 16 | T 9  | 948.4937       | 474.7508        |
| 1879.1152      | 17 | M 8  | 847.4460       | 424.2269        |
| 2007.1737      | 18 | Q 7  | 716.4055       | 358.7067        |
| 2078.2109      | 19 | A 6  | 588.3469       | 294.6774        |
| 2135.2323      | 20 | G 5  | 517.3098       | 259.1588        |
| 2236.2800      | 21 | T 4  | 460.2884       | 230.6481        |
| 2349.3641      | 22 | I 3  | 359.2407       | 180.1243        |
| 2420.4012      | 23 | A 2  | 246.1566       | 123.5822        |
|                | 24 | R 1  | 175.1195       | 88.0637         |

N-term:+35.07 K(7):+162.16



SLPSSTSTAAKTPPGSSSAGTQSSTSNR, MH+ 2708.3339, m/z 677.8389  
 L\_OS\_G26\_P150811\_220811-s1.02369.02369.4.dta

scan 2369; 5.3e-001

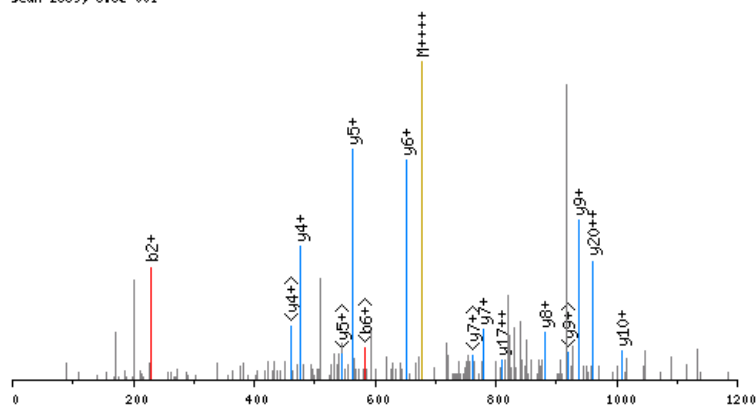

click image to zoom in; click top corners to zoom out [precursor±]

scan 2365; 677.8 mz; 1.5e+000

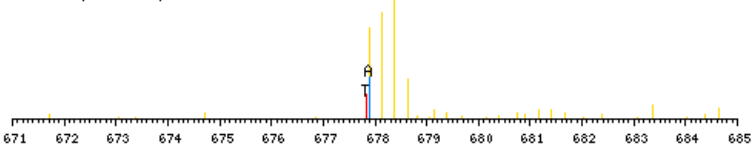

zoomed in precursor plot; T=theoretical m/z, A=acquired m/z

| b <sup>+</sup>  | #  | AA # | y <sup>+</sup>   | y <sup>2+</sup> |
|-----------------|----|------|------------------|-----------------|
| 116.0711        | 1  | S 28 |                  |                 |
| <b>229.1552</b> | 2  | L 27 | 2593.2706        | 1297.1392       |
| 326.2080        | 3  | P 26 | 2480.1865        | 1240.5972       |
| 413.2400        | 4  | S 25 | 2383.1338        | 1192.0708       |
| 500.2720        | 5  | S 24 | 2296.1017        | 1148.5548       |
| 601.3197        | 6  | T 23 | 2209.0697        | 1105.0388       |
| 688.3517        | 7  | S 22 | 2108.0220        | 1054.5149       |
| 789.3994        | 8  | T 21 | 2020.9900        | 1010.9989       |
| 860.4365        | 9  | A 20 | 1919.9423        | <b>960.4751</b> |
| 931.4736        | 10 | A 19 | 1848.9052        | 924.9565        |
| 1087.5999       | 11 | K 18 | 1777.8681        | 889.4380        |
| 1188.6476       | 12 | T 17 | 1621.7418        | <b>811.3748</b> |
| 1285.7004       | 13 | P 16 | 1520.6941        | 760.8510        |
| 1382.7531       | 14 | P 15 | 1423.6413        | 712.3246        |
| 1439.7746       | 15 | G 14 | 1326.5886        | 663.7982        |
| 1526.8066       | 16 | S 13 | 1269.5671        | 635.2875        |
| 1613.8387       | 17 | S 12 | 1182.5351        | 591.7715        |
| 1700.8707       | 18 | S 11 | 1095.5031        | 548.2554        |
| 1771.9078       | 19 | A 10 | <b>1008.4710</b> | 504.7394        |
| 1828.9293       | 20 | G 9  | <b>937.4339</b>  | 469.2209        |
| 1929.9769       | 21 | T 8  | <b>880.4124</b>  | 440.7101        |
| 2058.0355       | 22 | Q 7  | <b>779.3648</b>  | 390.1863        |
| 2145.0675       | 23 | S 6  | <b>651.3062</b>  | 326.1570        |
| 2232.0996       | 24 | S 5  | <b>564.2742</b>  | 282.6410        |
| 2333.1473       | 25 | T 4  | <b>477.2421</b>  | 239.1250        |
| 2420.1793       | 26 | S 3  | 376.1945         | 188.6011        |
| 2534.2222       | 27 | N 2  | 289.1624         | 145.0851        |
|                 | 28 | R 1  | 175.1195         | 88.0637         |

N-term:+29.04 K(11):+156.13

X-range:

-

MassTol: Y-zoom:

MassType:

AVG  MONO

Axis:

1  2

Label:

I  M  -

Ions:

a  +  2+  3+

b  +  2+  3+

c  +  2+  3+

x  +  2+  3+

y  +  2+  3+

z  +  2+  3+

hide H<sub>2</sub>O/NH<sub>3</sub>

zoom 112-122

GO

SLSKLGDVYVNDAFGTAHR, MH+ 2106.0984, m/z 527.2801  
L OS G28 P150811 220811-s1.07200.07200.4.dta

X-range:

-

MassTol: Y-zoom:

MassType:

AVG  MONO

Axis:

1  2

Label:

I  M  -

Ions:

a  +  2+  3+

b  +  2+  3+

c  +  2+  3+

x  +  2+  3+

y  +  2+  3+

z  +  2+  3+

hide H<sub>2</sub>O/NH<sub>3</sub>

zoom 112-122

GO

scan 7200; 4.0e+000

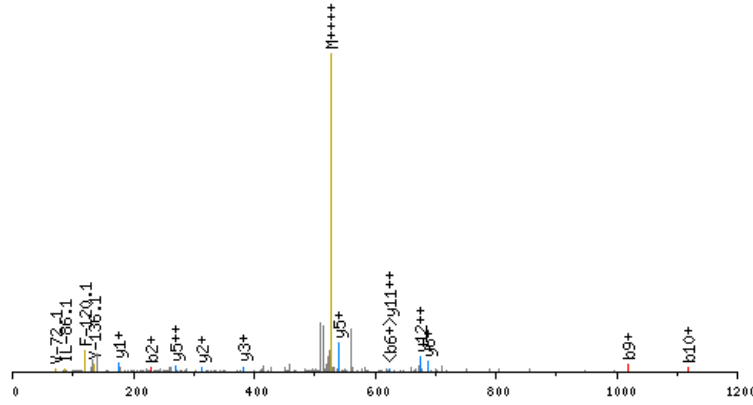

click image to zoom in; click top corners to zoom out [precursor±]

scan 7198; 527.3 m/z; 4.4e+001

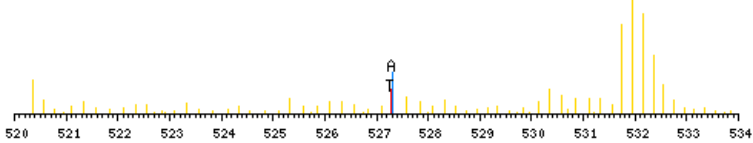

zoomed in precursor plot; T=theoretical m/z, A=acquired m/z

| b <sup>+</sup> | #  | AA # | y <sup>+</sup> | y <sup>2+</sup> |
|----------------|----|------|----------------|-----------------|
| 116.0711       | 1  | S 19 |                |                 |
| 229.1552       | 2  | L 18 | 1991.0351      | 996.0215        |
| 316.1872       | 3  | S 17 | 1877.9510      | 939.4794        |
| 472.3135       | 4  | K 16 | 1790.9190      | 895.9634        |
| 585.3976       | 5  | L 15 | 1634.7927      | 817.9003        |
| 642.4190       | 6  | G 14 | 1521.7086      | 761.3582        |
| 757.4460       | 7  | D 13 | 1464.6872      | 732.8475        |
| 856.5144       | 8  | V 12 | 1349.6602      | 675.3340        |
| 1019.5777      | 9  | Y 11 | 1250.5918      | 625.7998        |
| 1118.6461      | 10 | V 10 | 1087.5285      | 544.2682        |
| 1232.6891      | 11 | N 9  | 988.4601       | 494.7339        |
| 1347.7160      | 12 | D 8  | 874.4171       | 437.7125        |
| 1418.7531      | 13 | A 7  | 759.3902       | 380.1990        |
| 1565.8215      | 14 | F 6  | 688.3531       | 344.6805        |
| 1622.8430      | 15 | G 5  | 541.2847       | 271.1462        |
| 1723.8907      | 16 | T 4  | 484.2632       | 242.6355        |
| 1794.9278      | 17 | A 3  | 383.2155       | 192.1117        |
| 1931.9867      | 18 | H 2  | 312.1784       | 156.5931        |
|                | 19 | R 1  | 175.1195       | 88.0637         |

N-term:+29.04 K(4):+156.13

SLTKDLGGNAKCSDFTEEICR, MH+ 2485.2066, m/z 622.0571  
 L\_OS\_G28\_P150811\_220811-s1.05986.05986.4.dta

X-range:

-

MassTol: Y-zoom:

MassType:

AVG  MONO

Axis:

1  2

Label:

I  M  -

Ions:

a  +  2+  3+

b  +  2+  3+

c  +  2+  3+

x  +  2+  3+

y  +  2+  3+

z  +  2+  3+

hide H<sub>2</sub>O/NH<sub>3</sub>

zoom 112-122

GO

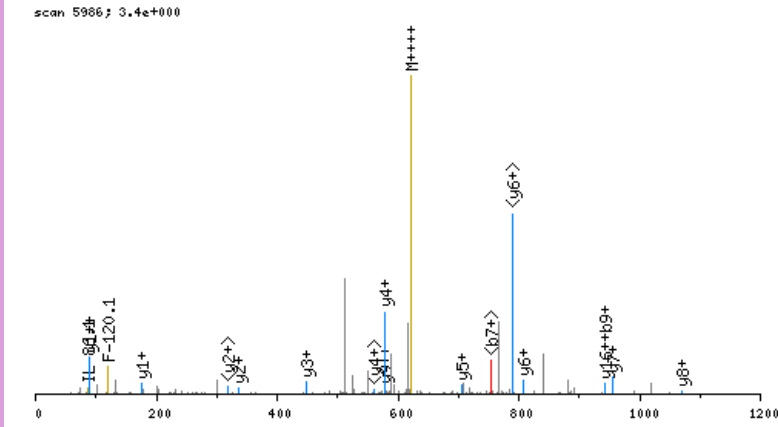

click image to zoom in; click top corners to zoom out [[precursor±](#)]

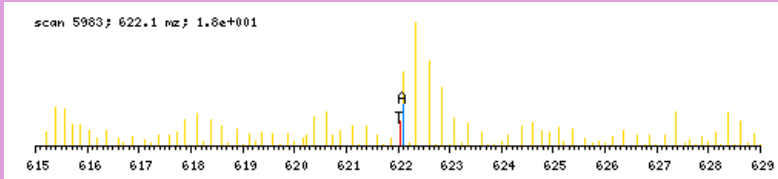

zoomed in precursor plot; T=theoretical m/z, A=acquired m/z

| b <sup>+</sup> | #  | AA | #  | y <sup>+</sup> | y <sup>2+</sup> |
|----------------|----|----|----|----------------|-----------------|
| 116.0711       | 1  | S  | 21 |                |                 |
| 229.1552       | 2  | L  | 20 | 2370.1433      | 1185.5756       |
| 330.2029       | 3  | T  | 19 | 2257.0593      | 1129.0335       |
| 486.3292       | 4  | K  | 18 | 2156.0116      | 1078.5097       |
| 601.3561       | 5  | D  | 17 | 1999.8853      | 1000.4466       |
| 714.4402       | 6  | L  | 16 | 1884.8583      | 942.9331        |
| 771.4616       | 7  | G  | 15 | 1771.7743      | 886.3911        |
| 828.4831       | 8  | G  | 14 | 1714.7528      | 857.8803        |
| 942.5260       | 9  | N  | 13 | 1657.7314      | 829.3696        |
| 1013.5631      | 10 | A  | 12 | 1543.6884      | 772.3481        |
| 1169.6894      | 11 | K  | 11 | 1472.6513      | 736.8296        |
| 1329.7200      | 12 | C  | 10 | 1316.5250      | 658.7664        |
| 1416.7521      | 13 | S  | 9  | 1156.4944      | 578.7511        |
| 1531.7790      | 14 | D  | 8  | 1069.4624      | 535.2351        |
| 1678.8474      | 15 | F  | 7  | 954.4354       | 477.7216        |
| 1779.8951      | 16 | T  | 6  | 807.3670       | 404.1874        |
| 1908.9377      | 17 | E  | 5  | 706.3194       | 353.6636        |
| 2037.9803      | 18 | E  | 4  | 577.2768       | 289.1423        |
| 2151.0644      | 19 | I  | 3  | 448.2342       | 224.6210        |
| 2311.0950      | 20 | C  | 2  | 335.1501       | 168.0790        |
|                | 21 | R  | 1  | 175.1195       | 88.0637         |

N-term:+29.04 K(4):+156.13  
 K(11):+156.13 C(12):+160.03  
 C(20):+160.03

SMPPAQQQITSGQMHR, MH+ 1824.8849, m/z 608.9665  
 L OS G26 P150811 220811-s1.02676.02676.3.dta

X-range:

-

MassTol: Y-zoom:

MassType:

AVG  MONO

Axis:

1  2

Label:

I  M  -

Ions:

a  +  2+  3+

b  +  2+  3+

c  +  2+  3+

x  +  2+  3+

y  +  2+  3+

z  +  2+  3+

hide H<sub>2</sub>O/NH<sub>3</sub>

zoom 112-122

GO

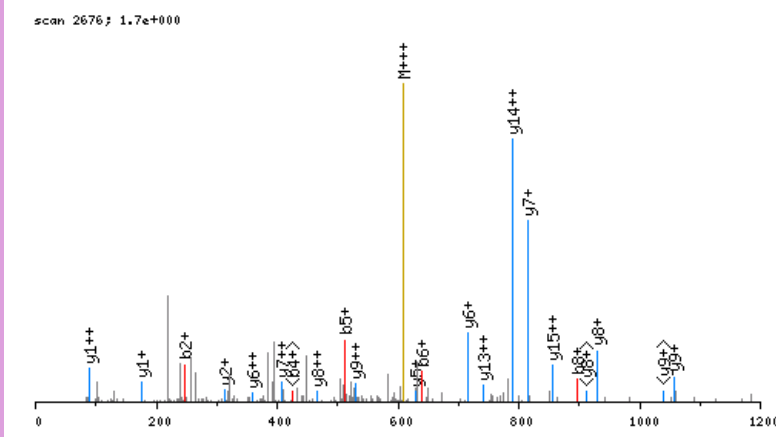

click image to zoom in; click top corners to zoom out [\[precursor±\]](#)

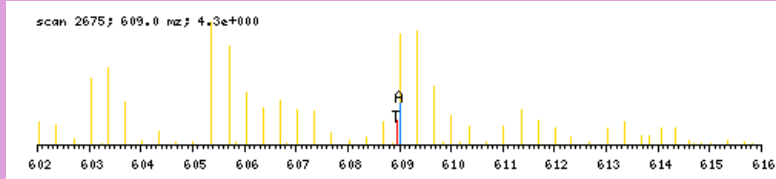

zoomed in precursor plot; T=theoretical m/z, A=acquired m/z

| b <sup>+</sup> | #  | AA # | y <sup>+</sup> | y <sup>2+</sup> |
|----------------|----|------|----------------|-----------------|
| 116.0711       | 1  | S 16 |                |                 |
| 247.1116       | 2  | M 15 | 1709.8216      | 855.4147        |
| 344.1644       | 3  | P 14 | 1578.7811      | 789.8945        |
| 441.2171       | 4  | P 13 | 1481.7283      | 741.3681        |
| 512.2543       | 5  | A 12 | 1384.6756      | 692.8417        |
| 640.3128       | 6  | Q 11 | 1313.6384      | 657.3231        |
| 768.3714       | 7  | Q 10 | 1185.5799      | 593.2938        |
| 896.4300       | 8  | Q 9  | 1057.5213      | 529.2646        |
| 1009.5141      | 9  | I 8  | 929.4627       | 465.2353        |
| 1110.5617      | 10 | T 7  | 816.3786       | 408.6932        |
| 1197.5938      | 11 | S 6  | 715.3310       | 358.1694        |
| 1254.6152      | 12 | G 5  | 628.2989       | 314.6534        |
| 1382.6738      | 13 | Q 4  | 571.2775       | 286.1426        |
| 1513.7143      | 14 | M 3  | 443.2189       | 222.1134        |
| 1650.7732      | 15 | H 2  | 312.1784       | 156.5931        |
|                | 16 | R 1  | 175.1195       | 88.0637         |

N-term:+29.04

SNAVSSLASTGLSLTKVDER, MH+ 2091.1297, m/z 697.7148  
 L OS G26 P150811 220811-s1.06187.06187.3.dta

X-range:

-

MassTol: Y-zoom:

MassType:

AVG  MONO

Axis:

1  2

Label:

I  M  -

Ions:

a  +  2+  3+

b  +  2+  3+

c  +  2+  3+

x  +  2+  3+

y  +  2+  3+

z  +  2+  3+

hide H<sub>2</sub>O/NH<sub>3</sub>

zoom 112-122

GO

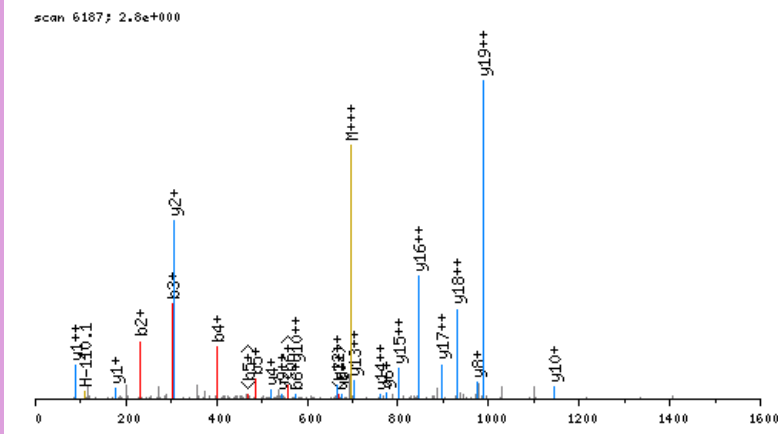

click image to zoom in; click top corners to zoom out [\[precursor±\]](#)

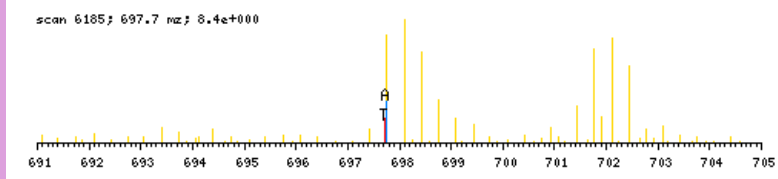

zoomed in precursor plot; T=theoretical m/z, A=acquired m/z

| b <sup>+</sup> | #  | AA | #  | y <sup>+</sup> | y <sup>2+</sup> |
|----------------|----|----|----|----------------|-----------------|
| 116.0711       | 1  | S  | 20 |                |                 |
| 230.1141       | 2  | N  | 19 | 1976.0664      | 988.5371        |
| 301.1512       | 3  | A  | 18 | 1862.0235      | 931.5157        |
| 400.2196       | 4  | V  | 17 | 1790.9864      | 895.9971        |
| 487.2516       | 5  | S  | 16 | 1691.9180      | 846.4629        |
| 574.2836       | 6  | S  | 15 | 1604.8860      | 802.9469        |
| 687.3677       | 7  | L  | 14 | 1517.8539      | 759.4309        |
| 758.4048       | 8  | A  | 13 | 1404.7699      | 702.8888        |
| 845.4368       | 9  | S  | 12 | 1333.7328      | 667.3703        |
| 946.4845       | 10 | T  | 11 | 1246.7007      | 623.8543        |
| 1003.5060      | 11 | G  | 10 | 1145.6530      | 573.3304        |
| 1116.5901      | 12 | L  | 9  | 1088.6316      | 544.8197        |
| 1203.6221      | 13 | S  | 8  | 975.5475       | 488.2777        |
| 1316.7061      | 14 | L  | 7  | 888.5155       | 444.7617        |
| 1417.7538      | 15 | T  | 6  | 775.4314       | 388.2196        |
| 1573.8801      | 16 | K  | 5  | 674.3838       | 337.6958        |
| 1672.9485      | 17 | V  | 4  | 518.2575       | 259.6326        |
| 1787.9755      | 18 | D  | 3  | 419.1890       | 210.0984        |
| 1917.0181      | 19 | E  | 2  | 304.1621       | 152.5850        |
|                | 20 | R  | 1  | 175.1195       | 88.0637         |

N-term:+29.04 K(16);+156.13

SNEEIAMATVTALR, MH+ 1533.7946, m/z 511.9364  
 L OS G25 P150811 220811-s1.06919.06919.3.dta

X-range:

-

MassTol: Y-zoom:

MassType:

AVG  MONO

Axis:

1  2

Label:

I  M  -

Ions:

a  +  2+  3+

b  +  2+  3+

c  +  2+  3+

x  +  2+  3+

y  +  2+  3+

z  +  2+  3+

hide H<sub>2</sub>O/NH<sub>3</sub>

zoom 112-122

GO

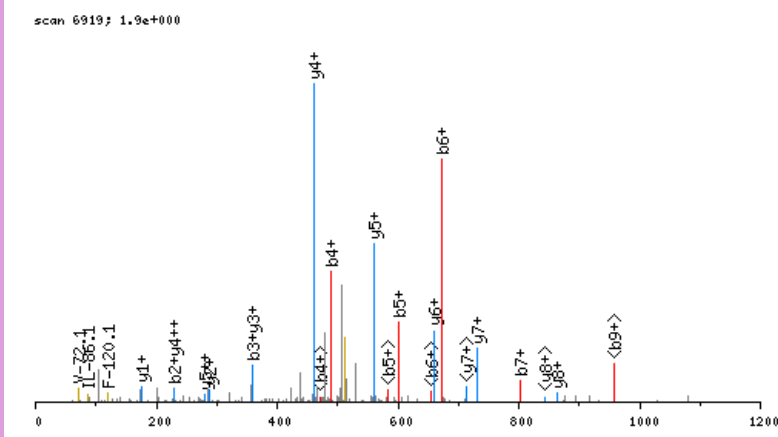

click image to zoom in; click top corners to zoom out [\[precursor±\]](#)

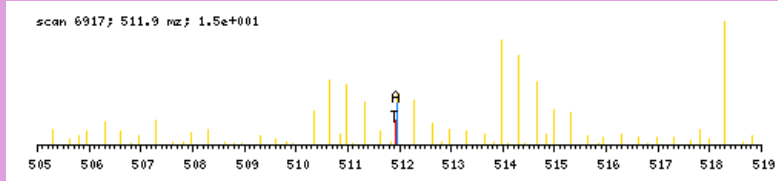

zoomed in precursor plot; T=theoretical m/z, A=acquired m/z

| b <sup>+</sup> | #  | AA # | y <sup>+</sup> | y <sup>2+</sup> |
|----------------|----|------|----------------|-----------------|
| 116.0711       | 1  | S 14 |                |                 |
| 230.1141       | 2  | N 13 | 1418.7313      | 709.8696        |
| 359.1566       | 3  | E 12 | 1304.6884      | 652.8481        |
| 488.1992       | 4  | E 11 | 1175.6458      | 588.3268        |
| 601.2833       | 5  | I 10 | 1046.6032      | 523.8055        |
| 672.3204       | 6  | A 9  | 933.5192       | 467.2635        |
| 803.3609       | 7  | M 8  | 862.4820       | 431.7449        |
| 874.3980       | 8  | A 7  | 731.4416       | 366.2247        |
| 975.4457       | 9  | T 6  | 660.4044       | 330.7061        |
| 1074.5141      | 10 | V 5  | 559.3568       | 280.1823        |
| 1175.5618      | 11 | T 4  | 460.2884       | 230.6481        |
| 1246.5989      | 12 | A 3  | 359.2407       | 180.1243        |
| 1359.6830      | 13 | L 2  | 288.2036       | 144.6057        |
|                | 14 | R 1  | 175.1195       | 88.0637         |

N-term:+29.04

SNEPAASAAEEVEEDDALVR, MH+ 2129.9838, m/z 710.6661  
 L OS G24 P150811 220811-s1.03975.03975.3.dta

scan 3975; 9.6e-001

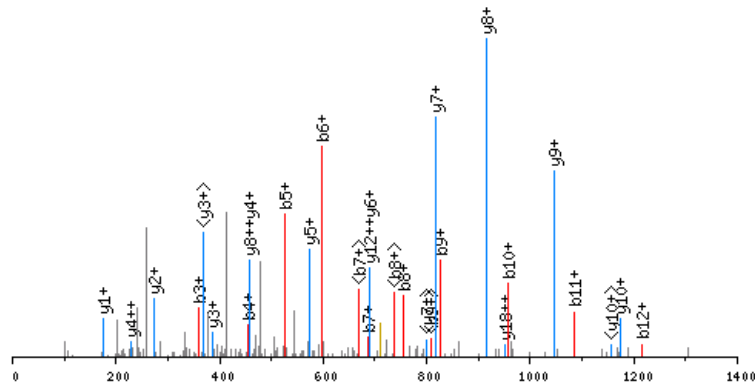

click image to zoom in; click top corners to zoom out [precursor±]

scan 3972; 710.7 mz; 1.7e+000

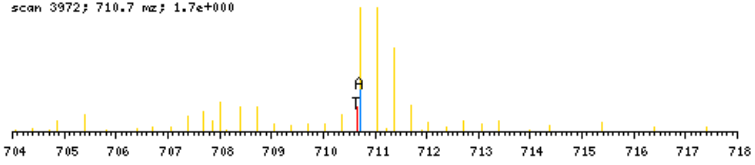

zoomed in precursor plot; T=theoretical m/z, A=acquired m/z

X-range:

-

MassTol: Y-zoom:

MassType:

AVG  MONO

Axis:

1  2

Label:

I  M  -

Ions:

a  +  2+  3+

b  +  2+  3+

c  +  2+  3+

x  +  2+  3+

y  +  2+  3+

z  +  2+  3+

hide H<sub>2</sub>O/NH<sub>3</sub>

zoom 112-122

GO

| b <sup>+</sup> | #  | AA # | y <sup>+</sup> | y <sup>2+</sup> |
|----------------|----|------|----------------|-----------------|
| 116.0711       | 1  | S 20 |                |                 |
| 230.1141       | 2  | N 19 | 2014.9205      | 1007.9642       |
| 359.1566       | 3  | E 18 | 1900.8776      | 950.9427        |
| 456.2094       | 4  | P 17 | 1771.8350      | 886.4214        |
| 527.2465       | 5  | A 16 | 1674.7822      | 837.8950        |
| 598.2836       | 6  | A 15 | 1603.7451      | 802.3765        |
| 685.3157       | 7  | S 14 | 1532.7080      | 766.8579        |
| 756.3528       | 8  | A 13 | 1445.6760      | 723.3419        |
| 827.3899       | 9  | A 12 | 1374.6389      | 687.8234        |
| 956.4325       | 10 | E 11 | 1303.6018      | 652.3048        |
| 1085.4751      | 11 | E 10 | 1174.5592      | 587.7835        |
| 1214.5177      | 12 | E 9  | 1045.5166      | 523.2622        |
| 1313.5861      | 13 | V 8  | 916.4740       | 458.7409        |
| 1442.6287      | 14 | E 7  | 817.4056       | 409.2067        |
| 1557.6556      | 15 | D 6  | 688.3630       | 344.6854        |
| 1672.6826      | 16 | D 5  | 573.3360       | 287.1719        |
| 1743.7197      | 17 | A 4  | 458.3091       | 229.6585        |
| 1856.8037      | 18 | L 3  | 387.2720       | 194.1399        |
| 1955.8722      | 19 | V 2  | 274.1879       | 137.5979        |
|                | 20 | R 1  | 175.1195       | 88.0637         |

N-term:+29.04

SNIEANEESEVVR, MH+ 1404.6607, m/z 702.8340  
 L OS G25 P150811 220811-s1.02343.02343.2.dta

X-range:

-

MassTol: Y-zoom:

MassType:

AVG  MONO

Axis:

1  2

Label:

I  M  -

Ions:

a  +  2+  3+

b  +  2+  3+

c  +  2+  3+

x  +  2+  3+

y  +  2+  3+

z  +  2+  3+

hide H<sub>2</sub>O/NH<sub>3</sub>

zoom 112-122

GO

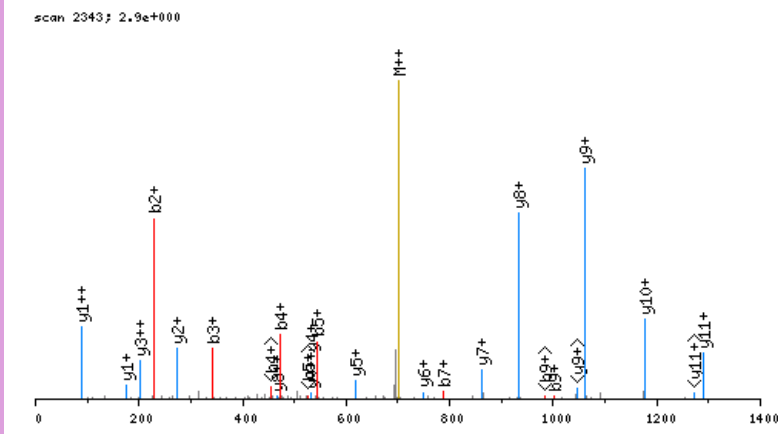

click image to zoom in; click top corners to zoom out [\[precursor±\]](#)

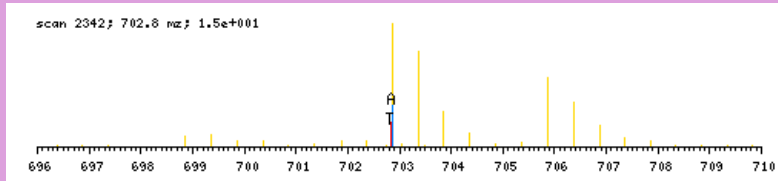

zoomed in precursor plot; T=theoretical m/z, A=acquired m/z

| b <sup>+</sup> | #  | AA # | y <sup>+</sup> | y <sup>2+</sup> |
|----------------|----|------|----------------|-----------------|
| 116.0711       | 1  | S 12 |                |                 |
| 230.1141       | 2  | N 11 | 1289.5973      | 645.3026        |
| 343.1981       | 3  | I 10 | 1175.5544      | 588.2811        |
| 472.2407       | 4  | E 9  | 1062.4704      | 531.7391        |
| 543.2778       | 5  | A 8  | 933.4278       | 467.2178        |
| 657.3208       | 6  | N 7  | 862.3907       | 431.6992        |
| 786.3633       | 7  | E 6  | 748.3477       | 374.6778        |
| 873.3954       | 8  | S 5  | 619.3051       | 310.1565        |
| 1002.4380      | 9  | E 4  | 532.2731       | 266.6405        |
| 1131.4806      | 10 | E 3  | 403.2305       | 202.1192        |
| 1230.5490      | 11 | V 2  | 274.1879       | 137.5979        |
|                | 12 | R 1  | 175.1195       | 88.0637         |

N-term:+29.04



SNISAAKAVADAIR, MH+ 1442.8331, m/z 481.6159  
 L OS G27 P150811 220811-s1.05288.05288.3.dta

X-range:

-

MassTol: Y-zoom:

MassType:

AVG  MONO

Axis:

1  2

Label:

I  M  -

Ions:

a  +  2+  3+

b  +  2+  3+

c  +  2+  3+

x  +  2+  3+

y  +  2+  3+

z  +  2+  3+

hide H<sub>2</sub>O/NH<sub>3</sub>

zoom 112-122

GO

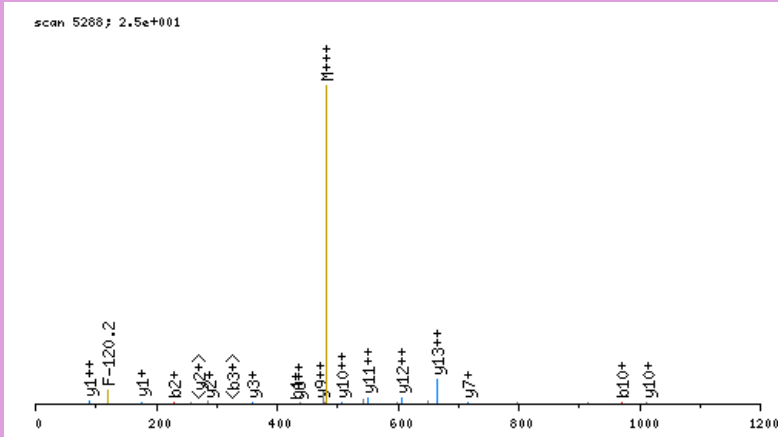

click image to zoom in; click top corners to zoom out [\[precursor±\]](#)

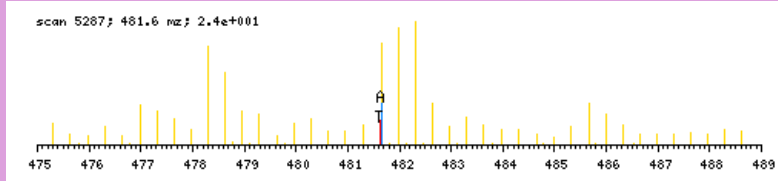

zoomed in precursor plot; T=theoretical m/z, A=acquired m/z

| b <sup>+</sup> | #  | AA # | y <sup>+</sup> | y <sup>2+</sup> |
|----------------|----|------|----------------|-----------------|
| 116.0711       | 1  | S 14 |                |                 |
| 230.1141       | 2  | N 13 | 1327.7698      | 664.3888        |
| 343.1981       | 3  | I 12 | 1213.7269      | 607.3674        |
| 430.2301       | 4  | S 11 | 1100.6428      | 550.8253        |
| 501.2673       | 5  | A 10 | 1013.6108      | 507.3093        |
| 572.3044       | 6  | A 9  | 942.5737       | 471.7908        |
| 728.4307       | 7  | K 8  | 871.5366       | 436.2722        |
| 799.4678       | 8  | A 7  | 715.4103       | 358.2090        |
| 898.5362       | 9  | V 6  | 644.3731       | 322.6905        |
| 969.5733       | 10 | A 5  | 545.3047       | 273.1563        |
| 1084.6003      | 11 | D 4  | 474.2676       | 237.6377        |
| 1155.6374      | 12 | A 3  | 359.2407       | 180.1243        |
| 1268.7214      | 13 | I 2  | 288.2036       | 144.6057        |
|                | 14 | R 1  | 175.1195       | 88.0637         |

N-term:+29.04 K(7):+156.13

SNLVGAAHEELQQSR, MH+ 1672.8830, m/z 558.2992  
 H OS G27 P150811 220811-s1.04029.04029.3.dta

scan 4029; 5.4e+000

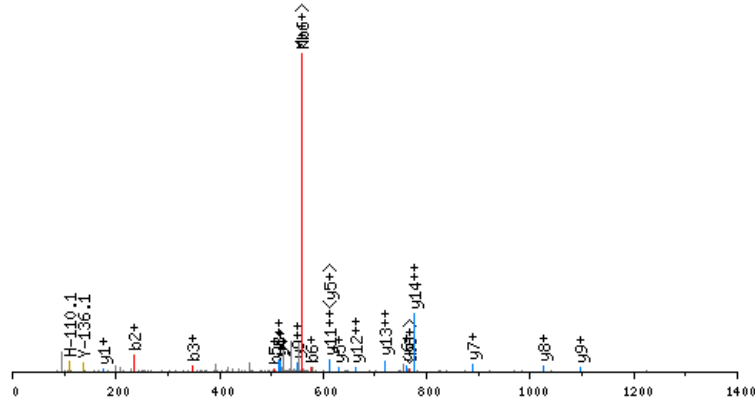

click image to zoom in; click top corners to zoom out [\[precursor±\]](#)

scan 4027; 558.3 m/z; 3.0e+002

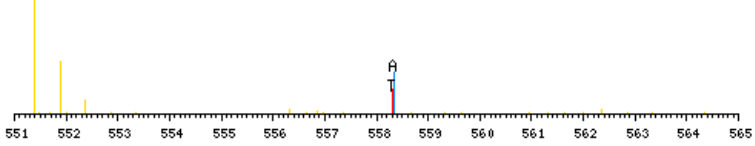

zoomed in precursor plot; T=theoretical m/z, A=acquired m/z

X-range:

-

MassTol: Y-zoom:

MassType:

AVG  MONO

Axis:

1  2

Label:

I  M  -

Ions:

a  +  2+  3+

b  +  2+  3+

c  +  2+  3+

x  +  2+  3+

y  +  2+  3+

z  +  2+  3+

hide H<sub>2</sub>O/NH<sub>3</sub>

zoom 112-122

GO

| b <sup>+</sup> | #  | AA | #  | y <sup>+</sup> | y <sup>2+</sup> |
|----------------|----|----|----|----------------|-----------------|
| 122.1029       | 1  | S  | 15 |                |                 |
| 236.1459       | 2  | N  | 14 | 1551.7879      | 776.3979        |
| 349.2299       | 3  | L  | 13 | 1437.7450      | 719.3764        |
| 448.2983       | 4  | V  | 12 | 1324.6610      | 662.8344        |
| 505.3198       | 5  | G  | 11 | 1225.5925      | 613.3002        |
| 576.3569       | 6  | A  | 10 | 1168.5711      | 584.7894        |
| 647.3940       | 7  | A  | 9  | 1097.5340      | 549.2709        |
| 784.4529       | 8  | H  | 8  | 1026.4968      | 513.7523        |
| 913.4955       | 9  | E  | 7  | 889.4379       | 445.2229        |
| 1042.5381      | 10 | E  | 6  | 760.3953       | 380.7016        |
| 1155.6222      | 11 | L  | 5  | 631.3527       | 316.1803        |
| 1283.6808      | 12 | Q  | 4  | 518.2687       | 259.6383        |
| 1411.7393      | 13 | Q  | 3  | 390.2101       | 195.6090        |
| 1498.7714      | 14 | S  | 2  | 262.1515       | 131.5797        |
|                | 15 | R  | 1  | 175.1195       | 88.0637         |

N-term:+35.07

SNNKDQGGYEDFVVEGLR, MH+ 1996.0048, m/z 666.0065  
 H OS G27 P150811 220811-s1.05943.05943.3.dta

scan 5943; 2.7e+000

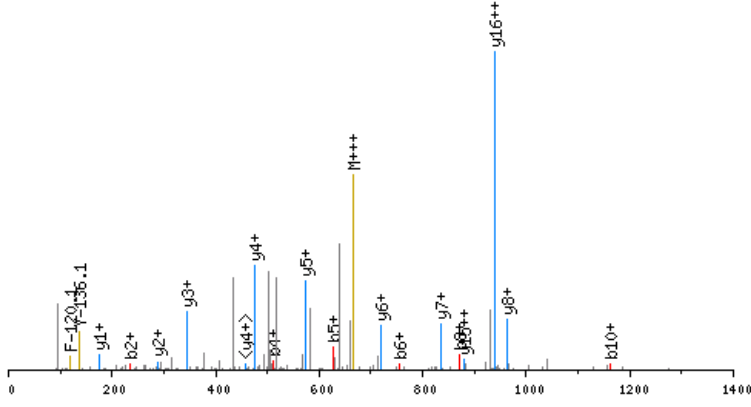

click image to zoom in; click top corners to zoom out [\[precursor±\]](#)

scan 5942; 666.0 m/z; 1.5e+001

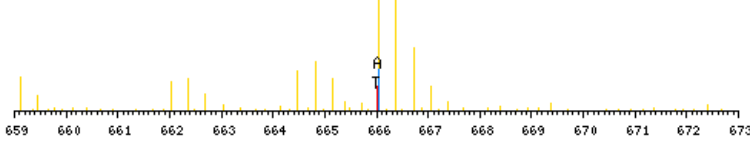

zoomed in precursor plot; T=theoretical m/z, A=acquired m/z

X-range:

-

MassTol: Y-zoom:

MassType:

AVG  MONO

Axis:

1  2

Label:

I  M  -

Ions:

a  +  2+  3+

b  +  2+  3+

c  +  2+  3+

x  +  2+  3+

y  +  2+  3+

z  +  2+  3+

hide H<sub>2</sub>O/NH<sub>3</sub>

zoom 112-122

GO

| b <sup>+</sup> | #  | AA | #  | y <sup>+</sup> | y <sup>2+</sup> |
|----------------|----|----|----|----------------|-----------------|
| 122.1029       | 1  | S  | 17 |                |                 |
| 236.1459       | 2  | N  | 16 | 1874.9097      | 937.9588        |
| 350.1888       | 3  | N  | 15 | 1760.8668      | 880.9373        |
| 512.3469       | 4  | K  | 14 | 1646.8239      | 823.9158        |
| 627.3738       | 5  | D  | 13 | 1484.6658      | 742.8368        |
| 755.4324       | 6  | Q  | 12 | 1369.6388      | 685.3233        |
| 812.4539       | 7  | G  | 11 | 1241.5802      | 621.2940        |
| 869.4753       | 8  | G  | 10 | 1184.5588      | 592.7833        |
| 1032.5387      | 9  | Y  | 9  | 1127.5373      | 564.2726        |
| 1161.5813      | 10 | E  | 8  | 964.4740       | 482.7409        |
| 1276.6082      | 11 | D  | 7  | 835.4314       | 418.2196        |
| 1423.6766      | 12 | F  | 6  | 720.4044       | 360.7061        |
| 1522.7450      | 13 | V  | 5  | 573.3360       | 287.1719        |
| 1651.7876      | 14 | E  | 4  | 474.2676       | 237.6377        |
| 1708.8091      | 15 | G  | 3  | 345.2250       | 173.1164        |
| 1821.8931      | 16 | L  | 2  | 288.2036       | 144.6057        |
|                | 17 | R  | 1  | 175.1195       | 88.0637         |

N-term:+35.07 K(4):+162.16

SNPGESEFDLADR, MH+ 1422.6501, m/z 711.8287  
 L OS G25 P150811 220811-s1.04438.04438.2.dta

X-range:

-

MassTol: Y-zoom:

MassType:

AVG  MONO

Axis:

1  2

Label:

I  M  -

Ions:

a  +  2+  3+

b  +  2+  3+

c  +  2+  3+

x  +  2+  3+

y  +  2+  3+

z  +  2+  3+

hide H<sub>2</sub>O/NH<sub>3</sub>

zoom 112-122

GO

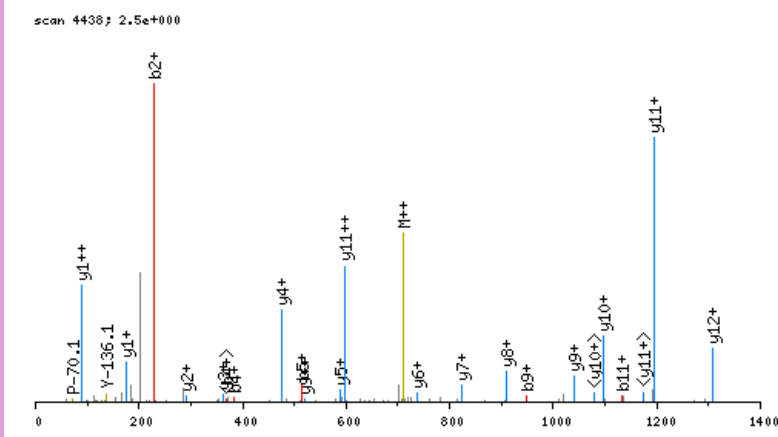

click image to zoom in; click top corners to zoom out [\[precursor±\]](#)

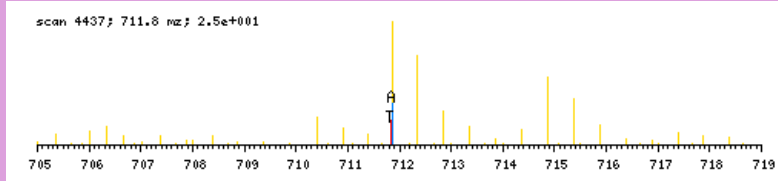

zoomed in precursor plot; T=theoretical m/z, A=acquired m/z

| b <sup>+</sup> | #  | AA # | y <sup>+</sup> | y <sup>2+</sup> |
|----------------|----|------|----------------|-----------------|
| 116.0711       | 1  | S 13 |                |                 |
| 230.1141       | 2  | N 12 | 1307.5868      | 654.2973        |
| 327.1668       | 3  | P 11 | 1193.5439      | 597.2758        |
| 384.1883       | 4  | G 10 | 1096.4911      | 548.7495        |
| 513.2309       | 5  | E 9  | 1039.4696      | 520.2387        |
| 600.2629       | 6  | S 8  | 910.4270       | 455.7174        |
| 687.2949       | 7  | S 7  | 823.3950       | 412.2014        |
| 834.3633       | 8  | F 6  | 736.3630       | 368.6854        |
| 949.3903       | 9  | D 5  | 589.2946       | 295.1512        |
| 1062.4744      | 10 | L 4  | 474.2676       | 237.6377        |
| 1133.5115      | 11 | A 3  | 361.1836       | 181.0957        |
| 1248.5384      | 12 | D 2  | 290.1464       | 145.5771        |
|                | 13 | R 1  | 175.1195       | 88.0637         |

N-term:+29.04

SNPGESEFDLADRLDPVEKIDR, MH+ 2528.3269, m/z 632.8372  
 H OS G28 P150811 220811-s1.08107.08107.4.dta

X-range:

-

MassTol: Y-zoom:

MassType:

AVG  MONO

Axis:

1  2

Label:

I  M  -

Ions:

a  +  2+  3+

b  +  2+  3+

c  +  2+  3+

x  +  2+  3+

y  +  2+  3+

z  +  2+  3+

hide H<sub>2</sub>O/NH<sub>3</sub>

zoom 112-122

GO

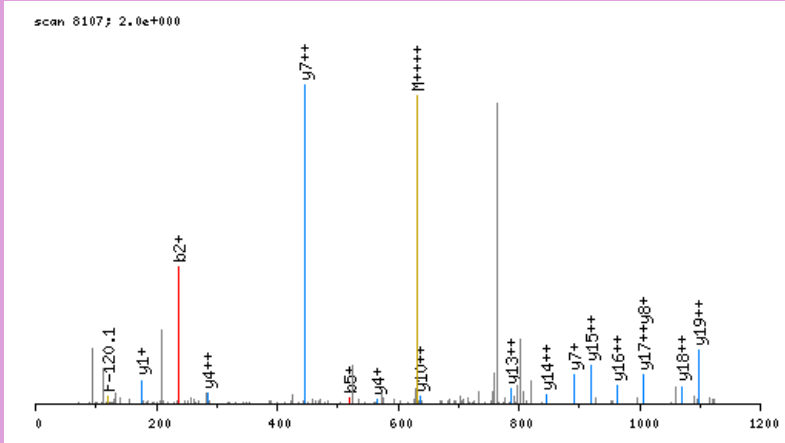

click image to zoom in; click top corners to zoom out [precursor±]

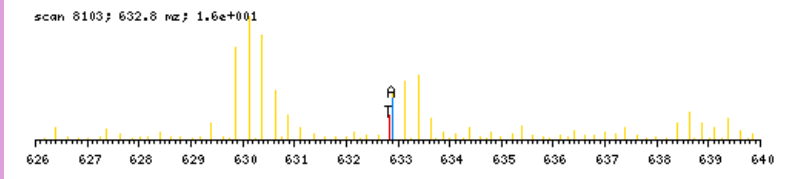

zoomed in precursor plot; T=theoretical m/z, A=acquired m/z

| b <sup>+</sup> | #  | AA | #  | y <sup>+</sup> | y <sup>2+</sup> |
|----------------|----|----|----|----------------|-----------------|
| 122.1029       | 1  | S  | 22 |                |                 |
| 236.1459       | 2  | N  | 21 | 2407.2318      | 1204.1198       |
| 333.1986       | 3  | P  | 20 | 2293.1889      | 1147.0983       |
| 390.2201       | 4  | G  | 19 | 2196.1361      | 1098.5720       |
| 519.2627       | 5  | E  | 18 | 2139.1146      | 1070.0612       |
| 606.2947       | 6  | S  | 17 | 2010.0720      | 1005.5399       |
| 693.3267       | 7  | S  | 16 | 1923.0400      | 962.0239        |
| 840.3951       | 8  | F  | 15 | 1836.0080      | 918.5079        |
| 955.4221       | 9  | D  | 14 | 1688.9396      | 844.9737        |
| 1068.5062      | 10 | L  | 13 | 1573.9126      | 787.4602        |
| 1139.5433      | 11 | A  | 12 | 1460.8286      | 730.9182        |
| 1254.5702      | 12 | D  | 11 | 1389.7914      | 695.3996        |
| 1410.6713      | 13 | R  | 10 | 1274.7645      | 637.8862        |
| 1523.7554      | 14 | L  | 9  | 1118.6634      | 559.8356        |
| 1638.7823      | 15 | D  | 8  | 1005.5793      | 503.2936        |
| 1735.8351      | 16 | P  | 7  | 890.5524       | 445.7801        |
| 1834.9035      | 17 | V  | 6  | 793.4996       | 397.2537        |
| 1963.9461      | 18 | E  | 5  | 694.4312       | 347.7195        |
| 2126.1042      | 19 | K  | 4  | 565.3886       | 283.1982        |
| 2239.1883      | 20 | I  | 3  | 403.2305       | 202.1192        |
| 2354.2152      | 21 | D  | 2  | 290.1464       | 145.5771        |
|                | 22 | R  | 1  | 175.1195       | 88.0637         |

N-term:+35.07 K(19):+162.16

SNPTLNEYHTR, MH+ 1359.6657, m/z 453.8934  
 L OS G27 P150811 220811-s1.02301.02301.3.dta

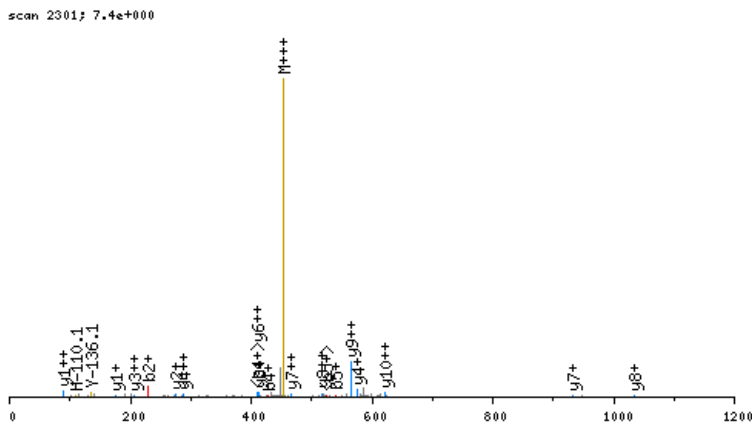

click image to zoom in; click top corners to zoom out [\[precursor±\]](#)

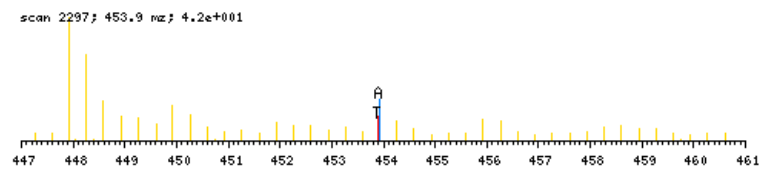

zoomed in precursor plot; T=theoretical m/z, A=acquired m/z

X-range:

-

MassTol: Y-zoom:

MassType:

AVG  MONO

Axis:

1  2

Label:

I  M  -

Ions:

a  +  2+  3+

b  +  2+  3+

c  +  2+  3+

x  +  2+  3+

y  +  2+  3+

z  +  2+  3+

hide H<sub>2</sub>O/NH<sub>3</sub>

zoom 112-122

GO

| b <sup>+</sup> | #  | AA # | y <sup>+</sup> | y <sup>2+</sup>    |
|----------------|----|------|----------------|--------------------|
| 116.0711       | 1  | S    | 11             |                    |
| 230.1141       | 2  | N    | 10             | 1244.6024 622.8051 |
| 327.1668       | 3  | P    | 9              | 1130.5594 565.7836 |
| 428.2145       | 4  | T    | 8              | 1033.5067 517.2573 |
| 541.2986       | 5  | L    | 7              | 932.4590 466.7334  |
| 655.3415       | 6  | N    | 6              | 819.3749 410.1914  |
| 784.3841       | 7  | E    | 5              | 705.3320 353.1699  |
| 947.4474       | 8  | Y    | 4              | 576.2894 288.6486  |
| 1084.5063      | 9  | H    | 3              | 413.2261 207.1170  |
| 1185.5540      | 10 | T    | 2              | 276.1672 138.5875  |
|                | 11 | R    | 1              | 175.1195 88.0637   |

N-term:+29.04

SNQERPQYEHSVVVGR, MH+ 1918.9947, m/z 480.5041  
 H OS G28 P150811 220811-s1.02605.02605.4.dta

X-range:

-

MassTol: Y-zoom:

MassType:

AVG  MONO

Axis:

1  2

Label:

I  M  -

Ions:

a  +  2+  3+

b  +  2+  3+

c  +  2+  3+

x  +  2+  3+

y  +  2+  3+

z  +  2+  3+

hide H<sub>2</sub>O/NH<sub>3</sub>

zoom 112-122

GO

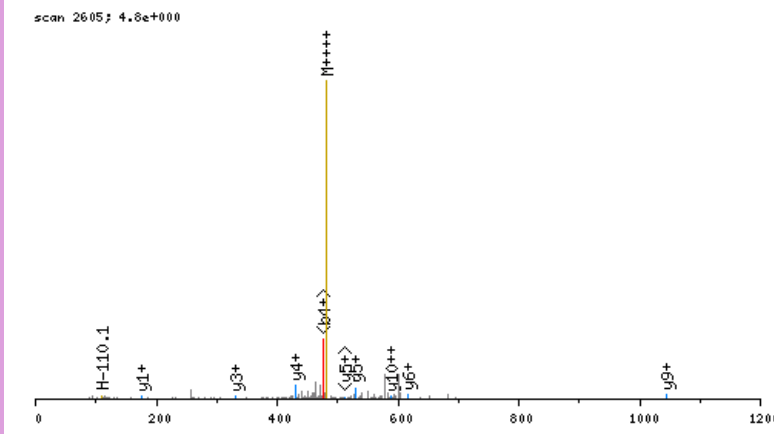

click image to zoom in; click top corners to zoom out [\[precursor±\]](#)

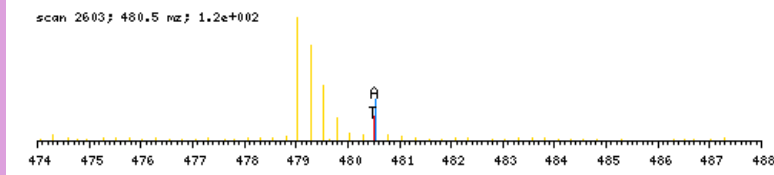

zoomed in precursor plot; T=theoretical m/z, A=acquired m/z

| b <sup>+</sup> | #  | AA # | y <sup>+</sup>   | y <sup>2+</sup> |
|----------------|----|------|------------------|-----------------|
| 122.1029       | 1  | S 16 |                  |                 |
| 236.1459       | 2  | N 15 | 1797.8996        | 899.4537        |
| 364.2044       | 3  | Q 14 | 1683.8567        | 842.4323        |
| 493.2470       | 4  | E 13 | 1555.7981        | 778.4030        |
| 649.3481       | 5  | R 12 | 1426.7555        | 713.8817        |
| 746.4009       | 6  | P 11 | 1270.6544        | 635.8311        |
| 874.4595       | 7  | Q 10 | 1173.6016        | <b>587.3047</b> |
| 1037.5228      | 8  | Y 9  | <b>1045.5431</b> | 523.2754        |
| 1166.5654      | 9  | E 8  | 882.4797         | 441.7438        |
| 1303.6243      | 10 | H 7  | 753.4371         | 377.2225        |
| 1390.6563      | 11 | S 6  | <b>616.3782</b>  | 308.6930        |
| 1489.7248      | 12 | V 5  | <b>529.3462</b>  | 265.1770        |
| 1588.7932      | 13 | V 4  | <b>430.2778</b>  | 215.6428        |
| 1687.8616      | 14 | V 3  | <b>331.2094</b>  | 166.1086        |
| 1744.8830      | 15 | G 2  | 232.1410         | 116.5744        |
|                | 16 | R 1  | <b>175.1195</b>  | 88.0637         |

N-term:+35.07

SNTDFAFSLYR, MH+ 1348.6537, m/z 674.8305  
 L OS G25 P150811 220811-s1.07148.07148.2.dta

X-range:

-

MassTol: Y-zoom:

MassType:

AVG  MONO

Axis:

1  2

Label:

I  M  -

Ions:

a  +  2+  3+

b  +  2+  3+

c  +  2+  3+

x  +  2+  3+

y  +  2+  3+

z  +  2+  3+

hide H<sub>2</sub>O/NH<sub>3</sub>

zoom 112-122

GO

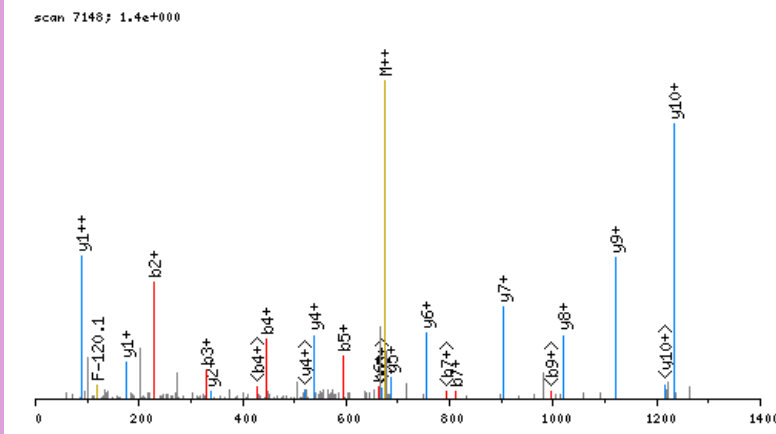

click image to zoom in; click top corners to zoom out [\[precursor±\]](#)

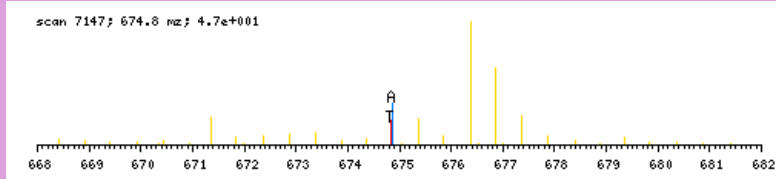

zoomed in precursor plot; T=theoretical m/z, A=acquired m/z

| b <sup>+</sup> | #  | AA # | y <sup>+</sup> | y <sup>2+</sup> |
|----------------|----|------|----------------|-----------------|
| 116.0711       | 1  | S 11 |                |                 |
| 230.1141       | 2  | N 10 | 1233.5904      | 617.2991        |
| 331.1617       | 3  | T 9  | 1119.5475      | 560.2777        |
| 446.1887       | 4  | D 8  | 1018.4998      | 509.7538        |
| 593.2571       | 5  | F 7  | 903.4729       | 452.2403        |
| 664.2942       | 6  | A 6  | 756.4044       | 378.7061        |
| 811.3626       | 7  | F 5  | 685.3673       | 343.1876        |
| 898.3946       | 8  | S 4  | 538.2989       | 269.6534        |
| 1011.4787      | 9  | L 3  | 451.2669       | 226.1374        |
| 1174.5420      | 10 | Y 2  | 338.1828       | 169.5953        |
|                | 11 | R 1  | 175.1195       | 88.0637         |

N-term:+29.04



SNTDVEIQPGKTVIR, MH+ 1712.9819, m/z 571.6655  
 H OS G26 P150811 220811-s1.02412.02412.3.dta

scan 2412; 1.1e+001

X-range:

-

MassTol: Y-zoom:

MassType:

AVG  MONO

Axis:

1  2

Label:

I  M  -

Ions:

a  +  2+  3+

b  +  2+  3+

c  +  2+  3+

x  +  2+  3+

y  +  2+  3+

z  +  2+  3+

hide H<sub>2</sub>O/NH<sub>3</sub>

zoom 112-122

GO

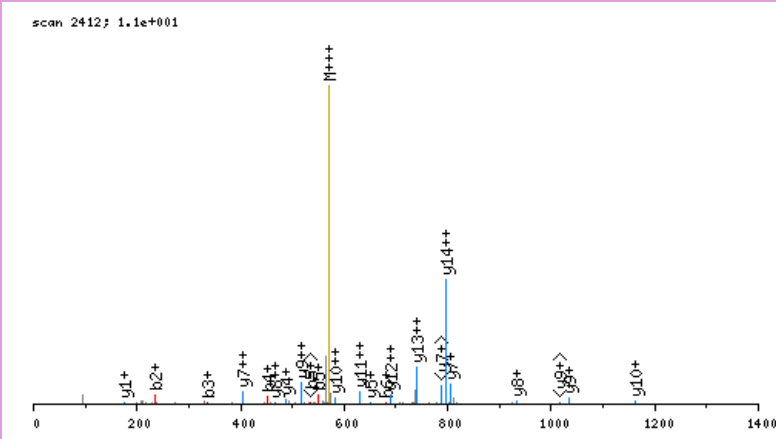

click image to zoom in; click top corners to zoom out [\[precursor±\]](#)

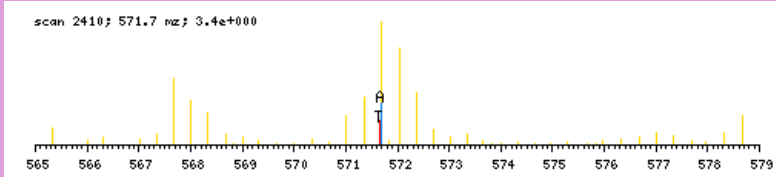

zoomed in precursor plot; T=theoretical m/z, A=acquired m/z

| b <sup>+</sup> | #  | AA | #  | y <sup>+</sup> | y <sup>2+</sup> |
|----------------|----|----|----|----------------|-----------------|
| 122.1029       | 1  | S  | 15 |                |                 |
| 236.1459       | 2  | N  | 14 | 1591.8868      | 796.4473        |
| 337.1935       | 3  | T  | 13 | 1477.8439      | 739.4258        |
| 452.2205       | 4  | D  | 12 | 1376.7962      | 688.9020        |
| 551.2889       | 5  | V  | 11 | 1261.7692      | 631.3885        |
| 680.3315       | 6  | E  | 10 | 1162.7008      | 581.8543        |
| 781.3792       | 7  | T  | 9  | 1033.6582      | 517.3330        |
| 909.4377       | 8  | Q  | 8  | 932.6106       | 466.8092        |
| 1006.4905      | 9  | P  | 7  | 804.5520       | 402.7799        |
| 1063.5120      | 10 | G  | 6  | 707.4992       | 354.2535        |
| 1225.6701      | 11 | K  | 5  | 650.4778       | 325.7428        |
| 1326.7177      | 12 | T  | 4  | 488.3197       | 244.6637        |
| 1425.7862      | 13 | V  | 3  | 387.2720       | 194.1399        |
| 1538.8702      | 14 | I  | 2  | 288.2036       | 144.6057        |
|                | 15 | R  | 1  | 175.1195       | 88.0637         |

N-term:+35.07 K(11):+162.16

SNVDELGCSHLGQSYESR, MH+ 2071.9566, m/z 691.3237  
 H OS G27 P150811 220811-s1.04238.04238.3.dta

X-range:

-

MassTol: Y-zoom:

MassType:

AVG  MONO

Axis:

1  2

Label:

I  M  -

Ions:

a  +  2+  3+

b  +  2+  3+

c  +  2+  3+

x  +  2+  3+

y  +  2+  3+

z  +  2+  3+

hide H<sub>2</sub>O/NH<sub>3</sub>

zoom 112-122

GO

scan 4238; 3.1e+000

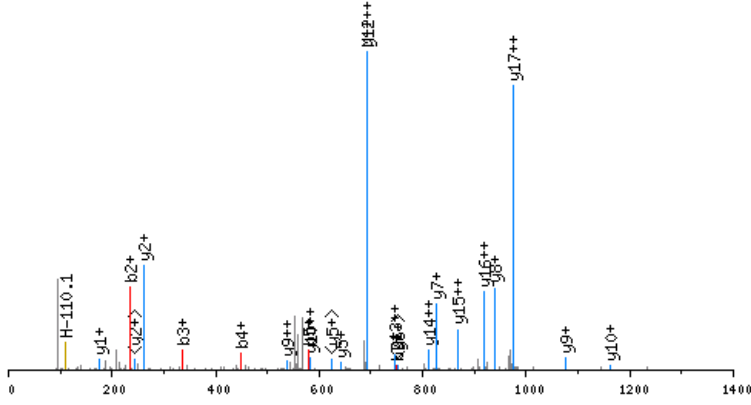

click image to zoom in; click top corners to zoom out [\[precursor±\]](#)

scan 4237; 691.3 m/z; 1.3e+001

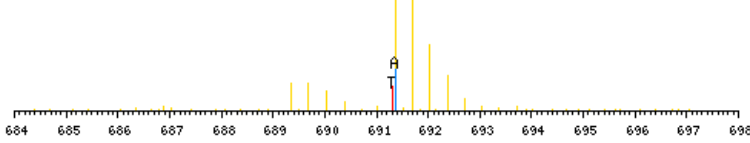

zoomed in precursor plot; T=theoretical m/z, A=acquired m/z

| b <sup>+</sup> | #  | AA # | y <sup>+</sup> | y <sup>2+</sup> |
|----------------|----|------|----------------|-----------------|
| 122.1029       | 1  | S 18 |                |                 |
| 236.1459       | 2  | N 17 | 1950.8615      | 975.9347        |
| 335.2143       | 3  | V 16 | 1836.8186      | 918.9132        |
| 450.2412       | 4  | D 15 | 1737.7502      | 869.3790        |
| 579.2838       | 5  | E 14 | 1622.7232      | 811.8655        |
| 692.3679       | 6  | L 13 | 1493.6807      | 747.3442        |
| 749.3893       | 7  | G 12 | 1380.5966      | 690.8022        |
| 909.4199       | 8  | C 11 | 1323.5751      | 662.2915        |
| 996.4520       | 9  | S 10 | 1163.5445      | 582.2762        |
| 1133.5109      | 10 | H 9  | 1076.5125      | 538.7602        |
| 1246.5949      | 11 | L 8  | 939.4536       | 470.2307        |
| 1303.6164      | 12 | G 7  | 826.3695       | 413.6887        |
| 1431.6750      | 13 | Q 6  | 769.3481       | 385.1779        |
| 1518.7070      | 14 | S 5  | 641.2895       | 321.1487        |
| 1681.7703      | 15 | Y 4  | 554.2575       | 277.6326        |
| 1810.8129      | 16 | E 3  | 391.1941       | 196.1010        |
| 1897.8450      | 17 | S 2  | 262.1515       | 131.5797        |
|                | 18 | R 1  | 175.1195       | 88.0637         |

N-term:+35.07 C(8):+160.03

SPASHEIATNLGDFALR, MH+ 1826.9401, m/z 609.6515  
 L OS G27 P150811 220811-s1.06349.06349.3.dta

X-range:

-

MassTol: Y-zoom:

MassType:

AVG  MONO

Axis:

1  2

Label:

I  M  -

Ions:

a  +  2+  3+

b  +  2+  3+

c  +  2+  3+

x  +  2+  3+

y  +  2+  3+

z  +  2+  3+

hide H<sub>2</sub>O/NH<sub>3</sub>

zoom 112-122

GO

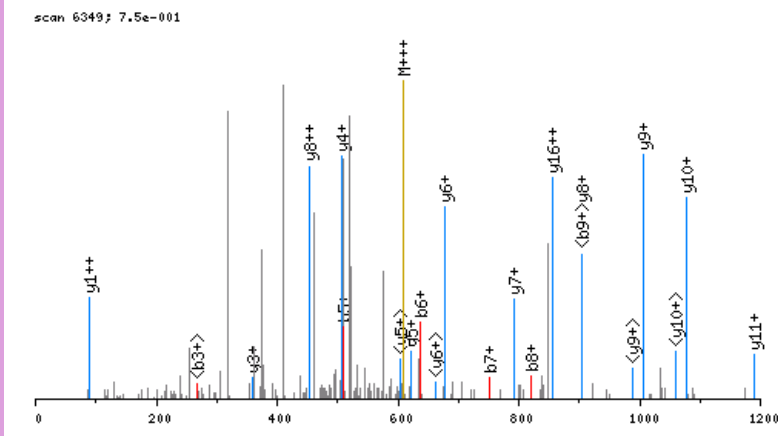

click image to zoom in; click top corners to zoom out [\[precursor±\]](#)

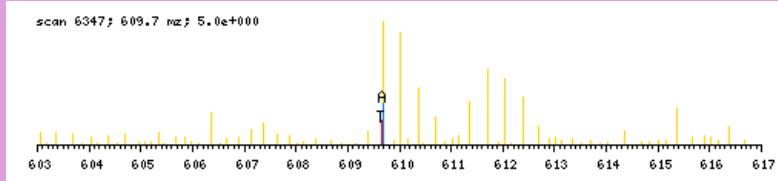

zoomed in precursor plot; T=theoretical m/z, A=acquired m/z

| b <sup>+</sup> | #  | AA # | y <sup>+</sup> | y <sup>2+</sup> |
|----------------|----|------|----------------|-----------------|
| 116.0711       | 1  | S 17 |                |                 |
| 213.1239       | 2  | P 16 | 1711.8768      | 856.4423        |
| 284.1610       | 3  | A 15 | 1614.8240      | 807.9159        |
| 371.1930       | 4  | S 14 | 1543.7869      | 772.3974        |
| 508.2519       | 5  | H 13 | 1456.7549      | 728.8813        |
| 637.2945       | 6  | E 12 | 1319.6959      | 660.3519        |
| 750.3786       | 7  | I 11 | 1190.6533      | 595.8306        |
| 821.4157       | 8  | A 10 | 1077.5693      | 539.2886        |
| 922.4634       | 9  | T 9  | 1006.5322      | 503.7700        |
| 1036.5063      | 10 | N 8  | 905.4845       | 453.2462        |
| 1149.5904      | 11 | L 7  | 791.4416       | 396.2247        |
| 1206.6119      | 12 | G 6  | 678.3575       | 339.6827        |
| 1321.6388      | 13 | D 5  | 621.3360       | 311.1719        |
| 1468.7072      | 14 | F 4  | 506.3091       | 253.6585        |
| 1539.7443      | 15 | A 3  | 359.2407       | 180.1243        |
| 1652.8284      | 16 | L 2  | 288.2036       | 144.6057        |
|                | 17 | R 1  | 175.1195       | 88.0637         |

N-term:+29.04

SPDPGLTALLSDHR, MH+ 1506.7916, m/z 502.9354  
 L OS G27 P150811 220811-s1.06205.06205.3.dta

X-range:

-

MassTol: Y-zoom:

MassType:

AVG  MONO

Axis:

1  2

Label:

I  M  -

Ions:

a  +  2+  3+

b  +  2+  3+

c  +  2+  3+

x  +  2+  3+

y  +  2+  3+

z  +  2+  3+

hide H<sub>2</sub>O/NH<sub>3</sub>

zoom 112-122

GO

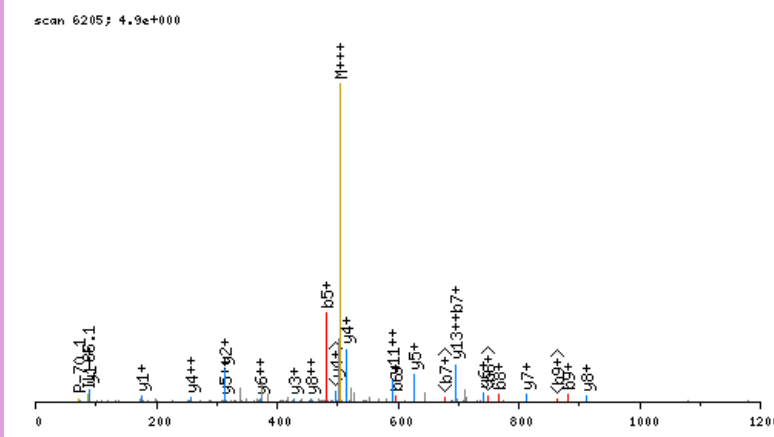

click image to zoom in; click top corners to zoom out [\[precursor±\]](#)

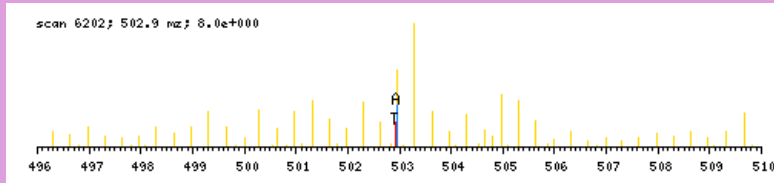

zoomed in precursor plot; T=theoretical m/z, A=acquired m/z

| b <sup>+</sup> | #  | AA # | y <sup>+</sup> | y <sup>2+</sup> |
|----------------|----|------|----------------|-----------------|
| 116.0711       | 1  | S 14 |                |                 |
| 213.1239       | 2  | P 13 | 1391.7283      | 696.3681        |
| 328.1508       | 3  | D 12 | 1294.6755      | 647.8417        |
| 425.2036       | 4  | P 11 | 1179.6486      | 590.3282        |
| 482.2251       | 5  | G 10 | 1082.5958      | 541.8018        |
| 595.3091       | 6  | L 9  | 1025.5744      | 513.2911        |
| 696.3568       | 7  | T 8  | 912.4903       | 456.7491        |
| 767.3939       | 8  | A 7  | 811.4426       | 406.2252        |
| 880.4780       | 9  | L 6  | 740.4055       | 370.7067        |
| 993.5620       | 10 | L 5  | 627.3214       | 314.1646        |
| 1080.5941      | 11 | S 4  | 514.2374       | 257.6226        |
| 1195.6210      | 12 | D 3  | 427.2054       | 214.1066        |
| 1332.6799      | 13 | H 2  | 312.1784       | 156.5931        |
|                | 14 | R 1  | 175.1195       | 88.0637         |

N-term:+29.04

SPKVGQPGAAGPVSPMCPGR, MH+ 2006.0315, m/z 669.3487  
 L OS G26 P150811 220811-s1.02948.02948.3.dta

scan 2948; 1.8e+000

X-range:

-

MassTol: Y-zoom:

MassType:

AVG  MONO

Axis:

1  2

Label:

I  M  -

Ions:

a  +  2+  3+

b  +  2+  3+

c  +  2+  3+

x  +  2+  3+

y  +  2+  3+

z  +  2+  3+

hide H<sub>2</sub>O/NH<sub>3</sub>

zoom 112-122

GO

scan 2945; 669.3 mz; 5.6e+000

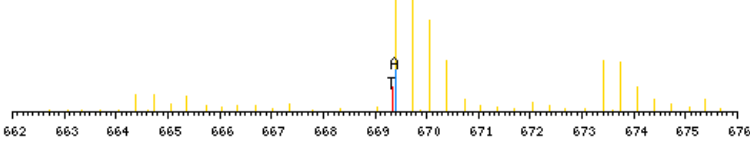

zoomed in precursor plot; T=theoretical m/z, A=acquired m/z

click image to zoom in; click top corners to zoom out [\[precursor±\]](#)

| b <sup>+</sup> | #  | AA # | y <sup>+</sup> | y <sup>2+</sup> |
|----------------|----|------|----------------|-----------------|
| 116.0711       | 1  | S    | 20             |                 |
| 213.1239       | 2  | P    | 19             | 1890.9682       |
| 369.2502       | 3  | K    | 18             | 1793.9155       |
| 468.3186       | 4  | V    | 17             | 1637.7892       |
| 525.3401       | 5  | G    | 16             | 1538.7207       |
| 653.3986       | 6  | Q    | 15             | 1481.6993       |
| 750.4514       | 7  | P    | 14             | 1353.6407       |
| 807.4729       | 8  | G    | 13             | 1256.5879       |
| 878.5100       | 9  | A    | 12             | 1199.5665       |
| 949.5471       | 10 | A    | 11             | 1128.5294       |
| 1006.5686      | 11 | G    | 10             | 1057.4922       |
| 1103.6213      | 12 | P    | 9              | 1000.4708       |
| 1202.6897      | 13 | V    | 8              | 903.4180        |
| 1289.7218      | 14 | S    | 7              | 804.3496        |
| 1386.7745      | 15 | P    | 6              | 717.3176        |
| 1517.8150      | 16 | M    | 5              | 620.2648        |
| 1677.8456      | 17 | C    | 4              | 489.2243        |
| 1774.8984      | 18 | P    | 3              | 329.1937        |
| 1831.9198      | 19 | G    | 2              | 232.1410        |
|                | 20 | R    | 1              | 175.1195        |

N-term:+29.04 K(3):+156.13  
 C(17):+160.03

SPSQSSDSQVHSGVQVEGR, MH+ 1998.9481, m/z 666.9875  
 L OS G26 P150811 220811-s1.02123.02123.3.dta

X-range:

-

MassTol: Y-zoom:

MassType:

AVG  MONO

Axis:

1  2

Label:

I  M  -

Ions:

a  +  2+  3+

b  +  2+  3+

c  +  2+  3+

x  +  2+  3+

y  +  2+  3+

z  +  2+  3+

hide H<sub>2</sub>O/NH<sub>3</sub>

zoom 112-122

GO

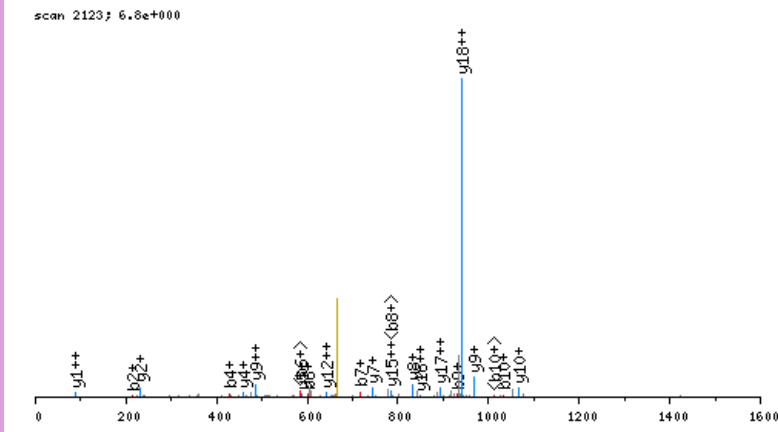

click image to zoom in; click top corners to zoom out [\[precursor±\]](#)

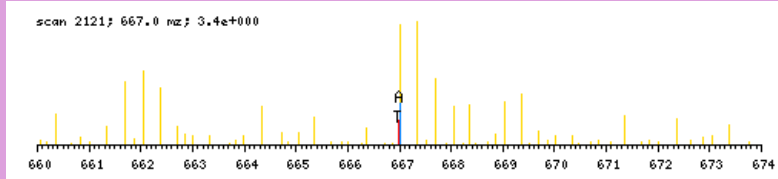

zoomed in precursor plot; T=theoretical m/z, A=acquired m/z

| b <sup>+</sup> | #  | AA # | y <sup>+</sup> | y <sup>2+</sup> |
|----------------|----|------|----------------|-----------------|
| 116.0711       | 1  | S 19 |                |                 |
| 213.1239       | 2  | P 18 | 1883.8848      | 942.4463        |
| 300.1559       | 3  | S 17 | 1786.8320      | 893.9199        |
| 428.2145       | 4  | Q 16 | 1699.8000      | 850.4039        |
| 515.2465       | 5  | S 15 | 1571.7414      | 786.3746        |
| 602.2786       | 6  | S 14 | 1484.7094      | 742.8586        |
| 717.3055       | 7  | D 13 | 1397.6773      | 699.3426        |
| 804.3375       | 8  | S 12 | 1282.6504      | 641.8291        |
| 932.3961       | 9  | Q 11 | 1195.6184      | 598.3131        |
| 1031.4645      | 10 | V 10 | 1067.5598      | 534.2838        |
| 1168.5234      | 11 | H 9  | 968.4914       | 484.7496        |
| 1255.5555      | 12 | S 8  | 831.4325       | 416.2201        |
| 1312.5769      | 13 | G 7  | 744.4004       | 372.7041        |
| 1411.6453      | 14 | V 6  | 687.3790       | 344.1934        |
| 1539.7039      | 15 | Q 5  | 588.3105       | 294.6592        |
| 1638.7723      | 16 | V 4  | 460.2520       | 230.6299        |
| 1767.8149      | 17 | E 3  | 361.1836       | 181.0957        |
| 1824.8364      | 18 | G 2  | 232.1410       | 116.5744        |
|                | 19 | R 1  | 175.1195       | 88.0637         |

N-term:+29.04

SPVHPESSEGEHVSVPQR, MH+ 2115.0107, m/z 529.5081  
 L OS G28 P150811 220811-s1.02639.02639.4.dta

X-range:

-

MassTol: Y-zoom:

MassType:

AVG  MONO

Axis:

1  2

Label:

I  M  -

Ions:

a  +  2+  3+

b  +  2+  3+

c  +  2+  3+

x  +  2+  3+

y  +  2+  3+

z  +  2+  3+

hide H<sub>2</sub>O/NH<sub>3</sub>

zoom 112-122

GO

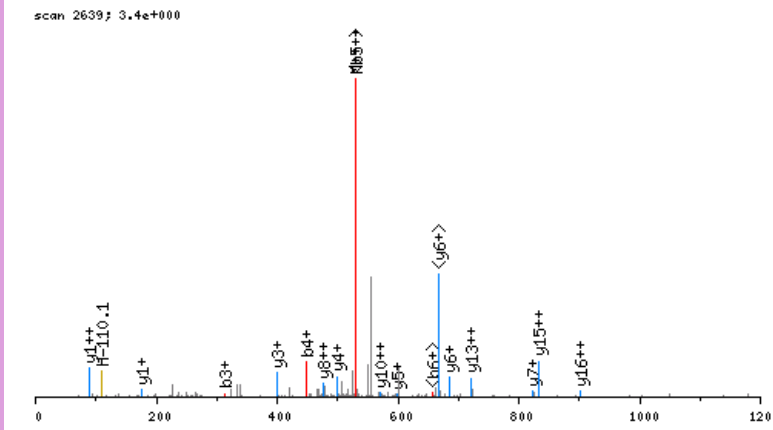

click image to zoom in; click top corners to zoom out [precursor±]

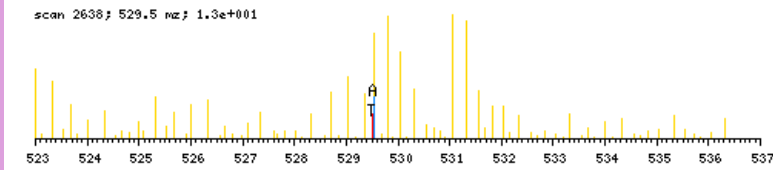

zoomed in precursor plot; T=theoretical m/z, A=acquired m/z

| b <sup>+</sup> | #  | AA | #  | y <sup>+</sup> | y <sup>2+</sup> |
|----------------|----|----|----|----------------|-----------------|
| 116.0711       | 1  | S  | 19 |                |                 |
| 213.1239       | 2  | P  | 18 | 1999.9474      | 1000.4776       |
| 312.1923       | 3  | V  | 17 | 1902.8946      | 951.9512        |
| 449.2512       | 4  | H  | 16 | 1803.8262      | 902.4170        |
| 546.3040       | 5  | P  | 15 | 1666.7673      | 833.8875        |
| 675.3466       | 6  | E  | 14 | 1569.7145      | 785.3612        |
| 762.3786       | 7  | S  | 13 | 1440.6719      | 720.8399        |
| 849.4106       | 8  | S  | 12 | 1353.6399      | 677.3239        |
| 978.4532       | 9  | E  | 11 | 1266.6079      | 633.8078        |
| 1035.4747      | 10 | G  | 10 | 1137.5653      | 569.2865        |
| 1164.5173      | 11 | E  | 9  | 1080.5438      | 540.7758        |
| 1293.5599      | 12 | E  | 8  | 951.5012       | 476.2545        |
| 1430.6188      | 13 | H  | 7  | 822.4586       | 411.7332        |
| 1517.6508      | 14 | S  | 6  | 685.3997       | 343.2038        |
| 1616.7192      | 15 | V  | 5  | 598.3677       | 299.6877        |
| 1715.7876      | 16 | V  | 4  | 499.2993       | 250.1535        |
| 1812.8404      | 17 | P  | 3  | 400.2308       | 200.6193        |
| 1940.8990      | 18 | Q  | 2  | 303.1781       | 152.0930        |
|                | 19 | R  | 1  | 175.1195       | 88.0637         |

N-term:+29.04

SPVQADVYFPR, MH+ 1306.6795, m/z 436.2314  
 L OS G25 P150811 220811-s1.05631.05631.3.dta

X-range:

-

MassTol: Y-zoom:

MassType:

AVG  MONO

Axis:

1  2

Label:

I  M  -

Ions:

a  +  2+  3+

b  +  2+  3+

c  +  2+  3+

x  +  2+  3+

y  +  2+  3+

z  +  2+  3+

hide H<sub>2</sub>O/NH<sub>3</sub>

zoom 112-122

GO

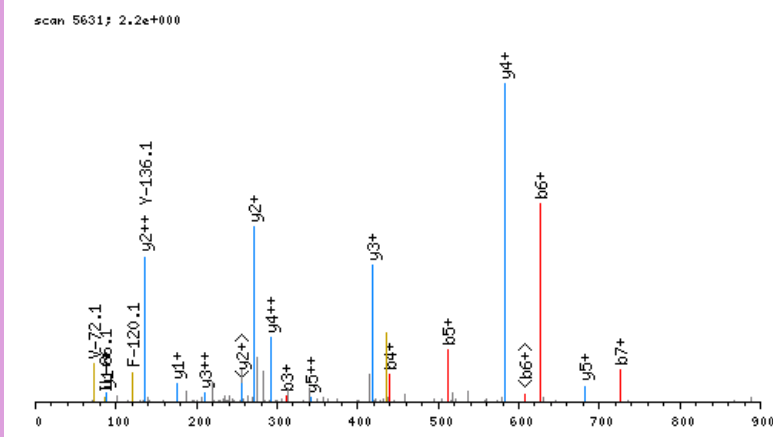

click image to zoom in; click top corners to zoom out [\[precursor±\]](#)

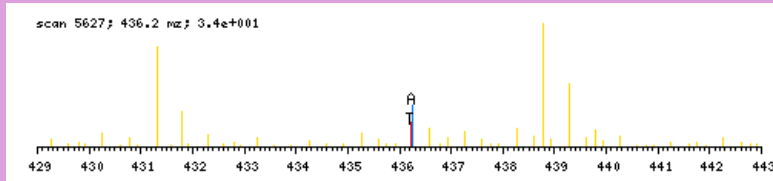

zoomed in precursor plot; T=theoretical m/z, A=acquired m/z

| b <sup>+</sup> | #  | AA # | y <sup>+</sup> | y <sup>2+</sup> |
|----------------|----|------|----------------|-----------------|
| 116.0711       | 1  | S 11 |                |                 |
| 213.1239       | 2  | P 10 | 1191.6162      | 596.3120        |
| 312.1923       | 3  | V 9  | 1094.5635      | 547.7856        |
| 440.2509       | 4  | Q 8  | 995.4951       | 498.2514        |
| 511.2880       | 5  | A 7  | 867.4365       | 434.2222        |
| 626.3149       | 6  | D 6  | 796.3994       | 398.7036        |
| 725.3834       | 7  | V 5  | 681.3724       | 341.1901        |
| 888.4467       | 8  | Y 4  | 582.3040       | 291.6559        |
| 1035.5151      | 9  | F 3  | 419.2407       | 210.1243        |
| 1132.5679      | 10 | P 2  | 272.1723       | 136.5900        |
|                | 11 | R 1  | 175.1195       | 88.0637         |

N-term:+29.04



SQFQESDDAEDYGR, MH+ 1789.7153, m/z 597.2433  
 L OS G25 P150811 220811-s1.03024.03024.3.dta

X-range:

-

MassTol: Y-zoom:

MassType:

AVG  MONO

Axis:

1  2

Label:

I  M  -

Ions:

a  +  2+  3+

b  +  2+  3+

c  +  2+  3+

x  +  2+  3+

y  +  2+  3+

z  +  2+  3+

hide H<sub>2</sub>O/NH<sub>3</sub>

zoom 112-122

GO

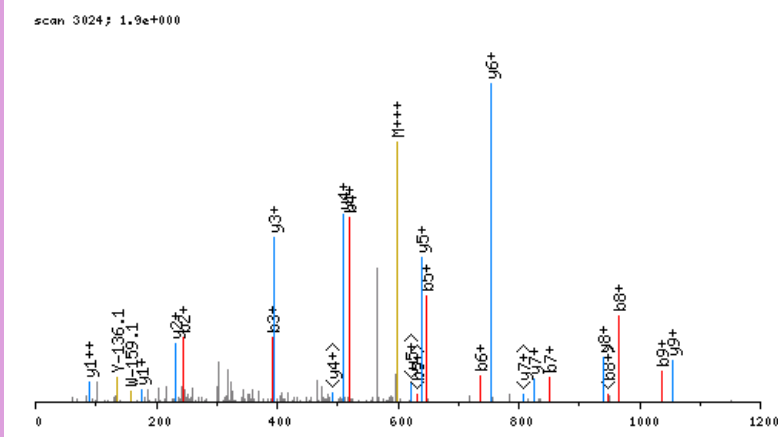

click image to zoom in; click top corners to zoom out [\[precursor±\]](#)

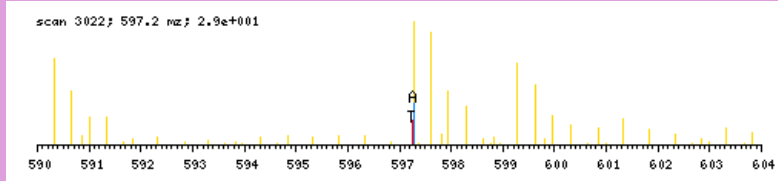

zoomed in precursor plot; T=theoretical m/z, A=acquired m/z

| b <sup>+</sup> | #  | AA | #  | y <sup>+</sup> | y <sup>2+</sup> |
|----------------|----|----|----|----------------|-----------------|
| 116.0711       | 1  | S  | 15 |                |                 |
| 244.1297       | 2  | Q  | 14 | 1674.6520      | 837.8299        |
| 391.1981       | 3  | F  | 13 | 1546.5934      | 773.8006        |
| 519.2567       | 4  | Q  | 12 | 1399.5250      | 700.2664        |
| 648.2993       | 5  | E  | 11 | 1271.4664      | 636.2371        |
| 735.3313       | 6  | S  | 10 | 1142.4238      | 571.7158        |
| 850.3583       | 7  | D  | 9  | 1055.3918      | 528.1998        |
| 965.3852       | 8  | D  | 8  | 940.3648       | 470.6863        |
| 1036.4223      | 9  | A  | 7  | 825.3379       | 413.1729        |
| 1151.4493      | 10 | D  | 6  | 754.3008       | 377.6543        |
| 1280.4919      | 11 | E  | 5  | 639.2738       | 320.1408        |
| 1395.5188      | 12 | D  | 4  | 510.2312       | 255.6195        |
| 1558.5821      | 13 | Y  | 3  | 395.2043       | 198.1061        |
| 1615.6036      | 14 | G  | 2  | 232.1410       | 116.5744        |
|                | 15 | R  | 1  | 175.1195       | 88.0637         |

N-term:+29.04

SQLGIQTVKR, MH+ 1185.7319, m/z 395.9155  
 L OS G27 P150811 220811-s1.02800.02800.3.dta

scan 2800; 2.8e+001

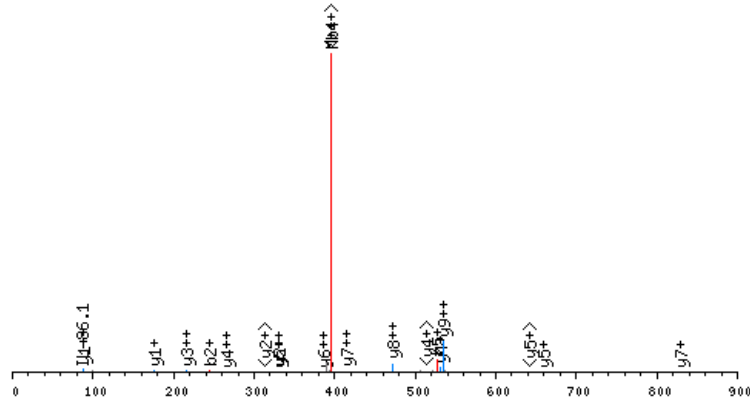

click image to zoom in; click top corners to zoom out [\[precursor±\]](#)

scan 2797; 395.9 m/z; 6.8e+000

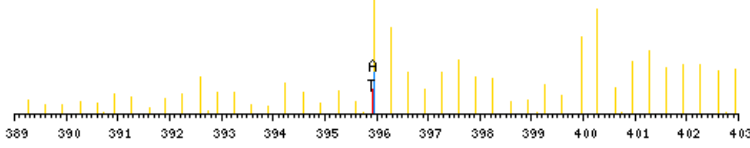

zoomed in precursor plot; T=theoretical m/z, A=acquired m/z

X-range:

-

MassTol: Y-zoom:

MassType:

AVG  MONO

Axis:

1  2

Label:

I  M  -

Ions:

a  +  2+  3+

b  +  2+  3+

c  +  2+  3+

x  +  2+  3+

y  +  2+  3+

z  +  2+  3+

hide H<sub>2</sub>O/NH<sub>3</sub>

zoom 112-122

GO

| b <sup>+</sup> | #  | AA # | y <sup>+</sup> | y <sup>2+</sup> |
|----------------|----|------|----------------|-----------------|
| 116.0711       | 1  | S 10 |                |                 |
| 244.1297       | 2  | Q 9  | 1070.6686      | 535.8382        |
| 357.2138       | 3  | L 8  | 942.6101       | 471.8089        |
| 414.2352       | 4  | G 7  | 829.5260       | 415.2669        |
| 527.3193       | 5  | I 6  | 772.5045       | 386.7562        |
| 655.3779       | 6  | Q 5  | 659.4205       | 330.2141        |
| 756.4256       | 7  | T 4  | 531.3619       | 266.1849        |
| 855.4940       | 8  | V 3  | 430.3142       | 215.6610        |
| 1011.6203      | 9  | K 2  | 331.2458       | 166.1268        |
|                | 10 | R 1  | 175.1195       | 88.0637         |

N-term:+29.04 K(9):+156.13

SQLLPKFAEQLIR, MH+ 1740.0696, m/z 580.6947  
 H OS G26 P150811 220811-s1.06658.06658.3.dta

scan 6658; 8.6e+000

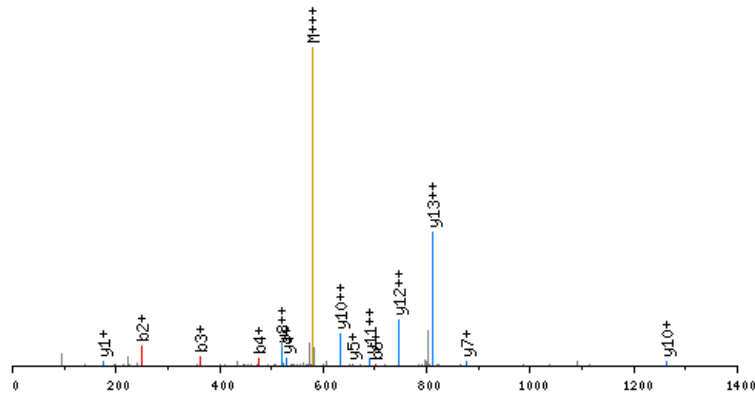

click image to zoom in; click top corners to zoom out [\[precursor±\]](#)

scan 6655; 580.7 m/z; 3.8e+000

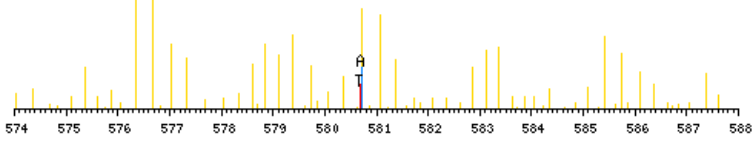

zoomed in precursor plot; T=theoretical m/z, A=acquired m/z

X-range:

-

MassTol: Y-zoom:

MassType:

AVG  MONO

Axis:

1  2

Label:

I  M  -

Ions:

a  +  2+  3+

b  +  2+  3+

c  +  2+  3+

x  +  2+  3+

y  +  2+  3+

z  +  2+  3+

hide H<sub>2</sub>O/NH<sub>3</sub>

zoom 112-122

GO

| b <sup>+</sup> | #  | AA # | y <sup>+</sup> | y <sup>2+</sup> |
|----------------|----|------|----------------|-----------------|
| 122.1029       | 1  | S 14 |                |                 |
| 250.1615       | 2  | Q 13 | 1618.9745      | 809.9912        |
| 363.2456       | 3  | L 12 | 1490.9159      | 745.9619        |
| 476.3296       | 4  | L 11 | 1377.8318      | 689.4198        |
| 573.3824       | 5  | P 10 | 1264.7478      | 632.8778        |
| 702.4250       | 6  | E 9  | 1167.6950      | 584.3514        |
| 864.5831       | 7  | K 8  | 1038.6524      | 519.8301        |
| 1011.6515      | 8  | F 7  | 876.4943       | 438.7511        |
| 1082.6886      | 9  | A 6  | 729.4259       | 365.2169        |
| 1211.7312      | 10 | E 5  | 658.3888       | 329.6983        |
| 1339.7898      | 11 | Q 4  | 529.3462       | 265.1770        |
| 1452.8739      | 12 | L 3  | 401.2876       | 201.1477        |
| 1565.9579      | 13 | I 2  | 288.2036       | 144.6057        |
|                | 14 | R 1  | 175.1195       | 88.0637         |

N-term:+35.07 K(7):+162.16

SQLLQEDSLNVADLSSLR, MH+ 2016.0613, m/z 672.6920  
 L OS G24 P150811 220811-s1.04821.04821.3.dta

X-range:

-

MassTol: Y-zoom:

MassType:

AVG  MONO

Axis:

1  2

Label:

I  M  -

Ions:

a  +  2+  3+

b  +  2+  3+

c  +  2+  3+

x  +  2+  3+

y  +  2+  3+

z  +  2+  3+

hide H<sub>2</sub>O/NH<sub>3</sub>

zoom 112-122

GO

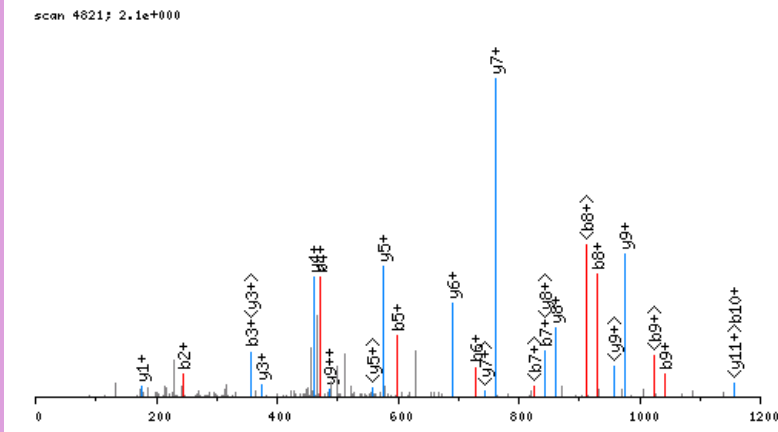

click image to zoom in; click top corners to zoom out [\[precursor±\]](#)

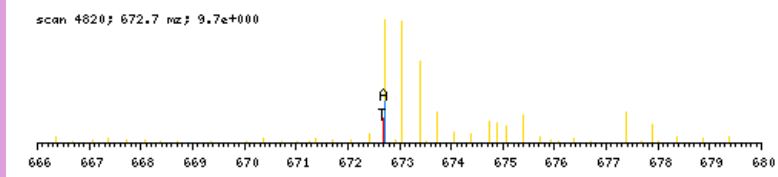

zoomed in precursor plot; T=theoretical m/z, A=acquired m/z

| b <sup>+</sup> | #  | AA | #  | y <sup>+</sup> | y <sup>2+</sup> |
|----------------|----|----|----|----------------|-----------------|
| 116.0711       | 1  | S  | 18 |                |                 |
| 244.1297       | 2  | Q  | 17 | 1900.9980      | 951.0029        |
| 357.2138       | 3  | L  | 16 | 1772.9394      | 886.9736        |
| 470.2978       | 4  | L  | 15 | 1659.8554      | 830.4316        |
| 598.3564       | 5  | Q  | 14 | 1546.7713      | 773.8896        |
| 727.3990       | 6  | E  | 13 | 1418.7127      | 709.8603        |
| 842.4259       | 7  | D  | 12 | 1289.6701      | 645.3390        |
| 929.4580       | 8  | S  | 11 | 1174.6432      | 587.8255        |
| 1042.5420      | 9  | L  | 10 | 1087.6111      | 544.3095        |
| 1156.5850      | 10 | N  | 9  | 974.5271       | 487.7675        |
| 1255.6534      | 11 | V  | 8  | 860.4842       | 430.7460        |
| 1326.6905      | 12 | A  | 7  | 761.4157       | 381.2118        |
| 1441.7174      | 13 | D  | 6  | 690.3786       | 345.6932        |
| 1554.8015      | 14 | L  | 5  | 575.3517       | 288.1798        |
| 1641.8335      | 15 | S  | 4  | 462.2676       | 231.6377        |
| 1728.8656      | 16 | S  | 3  | 375.2356       | 188.1217        |
| 1841.9496      | 17 | L  | 2  | 288.2036       | 144.6057        |
|                | 18 | R  | 1  | 175.1195       | 88.0637         |

N-term:+29.04

SQNAAAASATAPEVR, MH+ 1627.8768, m/z 543.2971  
 L OS G26 P150811 220811-s1.02112.02112.3.dta

X-range:

-

MassTol: Y-zoom:

MassType:

AVG  MONO

Axis:

1  2

Label:

I  M  -

Ions:

a  +  2+  3+

b  +  2+  3+

c  +  2+  3+

x  +  2+  3+

y  +  2+  3+

z  +  2+  3+

hide H<sub>2</sub>O/NH<sub>3</sub>

zoom 112-122

GO

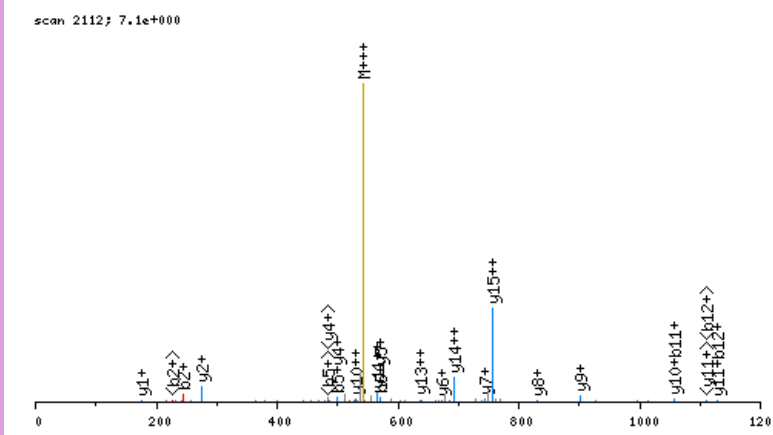

click image to zoom in; click top corners to zoom out [\[precursor±\]](#)

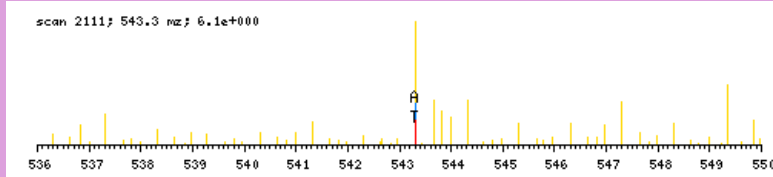

zoomed in precursor plot; T=theoretical m/z, A=acquired m/z

| b <sup>+</sup> | #  | AA # | y <sup>+</sup> | y <sup>2+</sup> |
|----------------|----|------|----------------|-----------------|
| 116.0711       | 1  | S 16 |                |                 |
| 244.1297       | 2  | Q 15 | 1512.8135      | 756.9106        |
| 358.1726       | 3  | N 14 | 1384.7549      | 692.8814        |
| 429.2097       | 4  | A 13 | 1270.7120      | 635.8599        |
| 500.2469       | 5  | A 12 | 1199.6748      | 600.3413        |
| 571.2840       | 6  | A 11 | 1128.6377      | 564.8228        |
| 727.4103       | 7  | K 10 | 1057.6006      | 529.3042        |
| 798.4474       | 8  | A 9  | 901.4743       | 451.2411        |
| 885.4794       | 9  | S 8  | 830.4372       | 415.7225        |
| 956.5165       | 10 | A 7  | 743.4052       | 372.2065        |
| 1057.5642      | 11 | T 6  | 672.3681       | 336.6879        |
| 1128.6013      | 12 | A 5  | 571.3204       | 286.1641        |
| 1225.6541      | 13 | P 4  | 500.2833       | 250.6455        |
| 1354.6967      | 14 | E 3  | 403.2305       | 202.1192        |
| 1453.7651      | 15 | V 2  | 274.1879       | 137.5979        |
|                | 16 | R 1  | 175.1195       | 88.0637         |

N-term:+29.04 K(7):+156.13

SQQSASGAPVLLR, MH+ 1341.7490, m/z 447.9212  
 L OS G25 P150811 220811-s1.03918.03918.3.dta

X-range:

-

MassTol: Y-zoom:

MassType:

AVG  MONO

Axis:

1  2

Label:

I  M  -

Ions:

a  +  2+  3+

b  +  2+  3+

c  +  2+  3+

x  +  2+  3+

y  +  2+  3+

z  +  2+  3+

hide H<sub>2</sub>O/NH<sub>3</sub>

zoom 112-122

GO

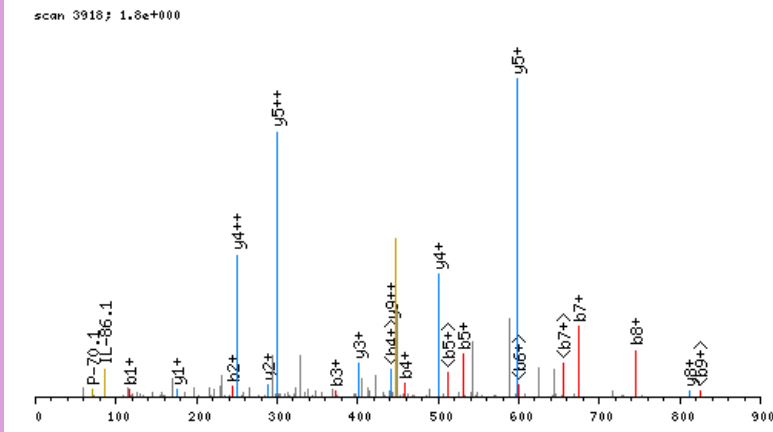

click image to zoom in; click top corners to zoom out [\[precursor±\]](#)

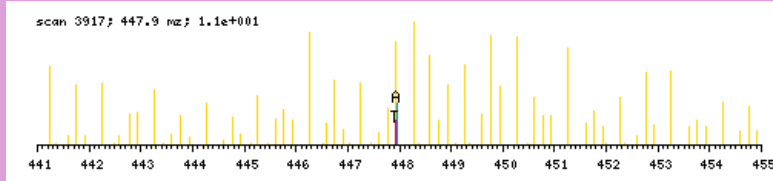

zoomed in precursor plot; T=theoretical m/z, A=acquired m/z

| b <sup>+</sup> | #  | AA # | y <sup>+</sup> | y <sup>2+</sup> |
|----------------|----|------|----------------|-----------------|
| 116.0711       | 1  | S 13 |                |                 |
| 244.1297       | 2  | Q 12 | 1226.6857      | 613.8468        |
| 372.1883       | 3  | Q 11 | 1098.6271      | 549.8175        |
| 459.2203       | 4  | S 10 | 970.5686       | 485.7882        |
| 530.2574       | 5  | A 9  | 883.5365       | 442.2722        |
| 617.2895       | 6  | S 8  | 812.4994       | 406.7536        |
| 674.3109       | 7  | G 7  | 725.4674       | 363.2376        |
| 745.3480       | 8  | A 6  | 668.4459       | 334.7269        |
| 842.4008       | 9  | P 5  | 597.4088       | 299.2083        |
| 941.4692       | 10 | V 4  | 500.3560       | 250.6819        |
| 1054.5533      | 11 | L 3  | 401.2876       | 201.1477        |
| 1167.6373      | 12 | L 2  | 288.2036       | 144.6057        |
|                | 13 | R 1  | 175.1195       | 88.0637         |

N-term:+29.04

SQSSDSQVHSGVQVEGR, MH+ 1820.8951, m/z 607.6365  
 H OS G27 P150811 220811-s1.02064.02064.3.dta

X-range:

-

MassTol: Y-zoom:

MassType:

AVG  MONO

Axis:

1  2

Label:

I  M  -

Ions:

a  +  2+  3+

b  +  2+  3+

c  +  2+  3+

x  +  2+  3+

y  +  2+  3+

z  +  2+  3+

hide H<sub>2</sub>O/NH<sub>3</sub>

zoom 112-122

GO

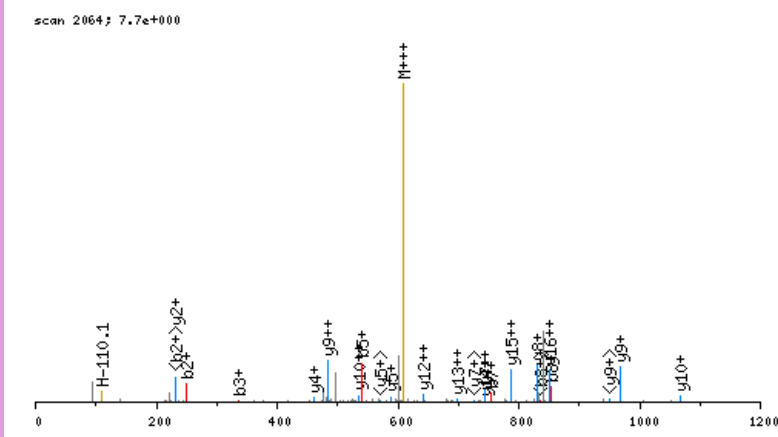

click image to zoom in; click top corners to zoom out [\[precursor±\]](#)

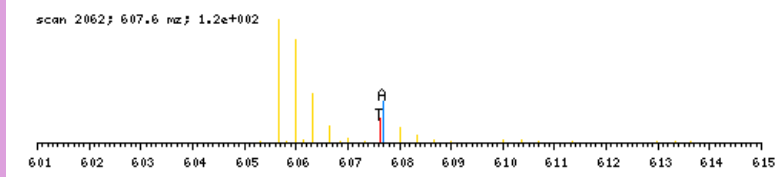

zoomed in precursor plot; T=theoretical m/z, A=acquired m/z

| b <sup>+</sup> | #  | AA # | y <sup>+</sup> | y <sup>2+</sup> |
|----------------|----|------|----------------|-----------------|
| 122.1029       | 1  | S 17 |                |                 |
| 250.1615       | 2  | Q 16 | 1699.8000      | 850.4039        |
| 337.1935       | 3  | S 15 | 1571.7414      | 786.3746        |
| 424.2256       | 4  | S 14 | 1484.7094      | 742.8586        |
| 539.2525       | 5  | D 13 | 1397.6773      | 699.3426        |
| 626.2845       | 6  | S 12 | 1282.6504      | 641.8291        |
| 754.3431       | 7  | Q 11 | 1195.6184      | 598.3131        |
| 853.4115       | 8  | V 10 | 1067.5598      | 534.2838        |
| 990.4704       | 9  | H 9  | 968.4914       | 484.7496        |
| 1077.5025      | 10 | S 8  | 831.4325       | 416.2201        |
| 1134.5239      | 11 | G 7  | 744.4004       | 372.7041        |
| 1233.5923      | 12 | V 6  | 687.3790       | 344.1934        |
| 1361.6509      | 13 | Q 5  | 588.3105       | 294.6592        |
| 1460.7193      | 14 | V 4  | 460.2520       | 230.6299        |
| 1589.7619      | 15 | E 3  | 361.1836       | 181.0957        |
| 1646.7834      | 16 | G 2  | 232.1410       | 116.5744        |
|                | 17 | R 1  | 175.1195       | 88.0637         |

N-term:+35.07

SRGESQEVALPSR, MH+ 1449.7874, m/z 483.9340  
 H OS G27 P150811 220811-s1.02630.02630.3.dta

X-range:

-

MassTol: Y-zoom:

MassType:

AVG  MONO

Axis:

1  2

Label:

I  M  -

Ions:

a  +  2+  3+

b  +  2+  3+

c  +  2+  3+

x  +  2+  3+

y  +  2+  3+

z  +  2+  3+

hide H<sub>2</sub>O/NH<sub>3</sub>

zoom 112-122

GO

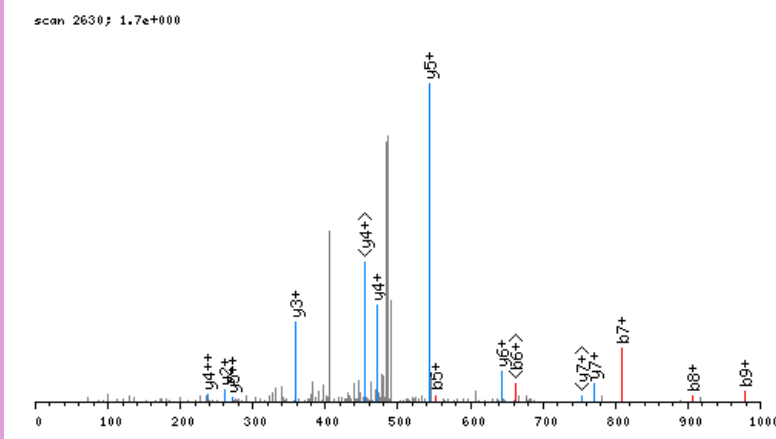

click image to zoom in; click top corners to zoom out [\[precursor±\]](#)

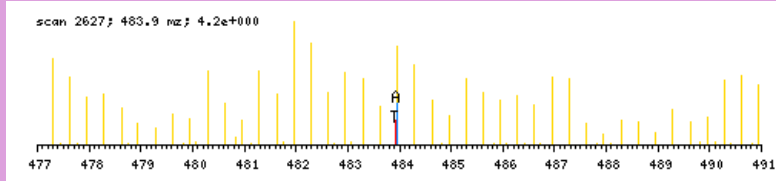

zoomed in precursor plot; T=theoretical m/z, A=acquired m/z

| b <sup>+</sup> | #  | AA # | y <sup>+</sup> | y <sup>2+</sup> |
|----------------|----|------|----------------|-----------------|
| 122.1029       | 1  | S 13 |                |                 |
| 278.2040       | 2  | R 12 | 1328.6923      | 664.8500        |
| 335.2255       | 3  | G 11 | 1172.5911      | 586.7995        |
| 464.2681       | 4  | E 10 | 1115.5697      | 558.2888        |
| 551.3001       | 5  | S 9  | 986.5271       | 493.7675        |
| 679.3587       | 6  | Q 8  | 899.4951       | 450.2514        |
| 808.4013       | 7  | E 7  | 771.4365       | 386.2222        |
| 907.4697       | 8  | V 6  | 642.3939       | 321.7009        |
| 978.5068       | 9  | A 5  | 543.3255       | 272.1666        |
| 1091.5909      | 10 | L 4  | 472.2884       | 236.6481        |
| 1188.6437      | 11 | P 3  | 359.2043       | 180.1061        |
| 1275.6757      | 12 | S 2  | 262.1515       | 131.5797        |
|                | 13 | R 1  | 175.1195       | 88.0637         |

N-term:+35.07



SSAAAEASAAALKVRPER, MH+ 1782.0510, m/z 446.2682  
 H OS G28 P150811 220811-s1.04150.04150.4.dta

X-range:

-

MassTol: Y-zoom:

MassType:

AVG  MONO

Axis:

1  2

Label:

I  M  -

Ions:

a  +  2+  3+

b  +  2+  3+

c  +  2+  3+

x  +  2+  3+

y  +  2+  3+

z  +  2+  3+

hide H<sub>2</sub>O/NH<sub>3</sub>

zoom 112-122

GO

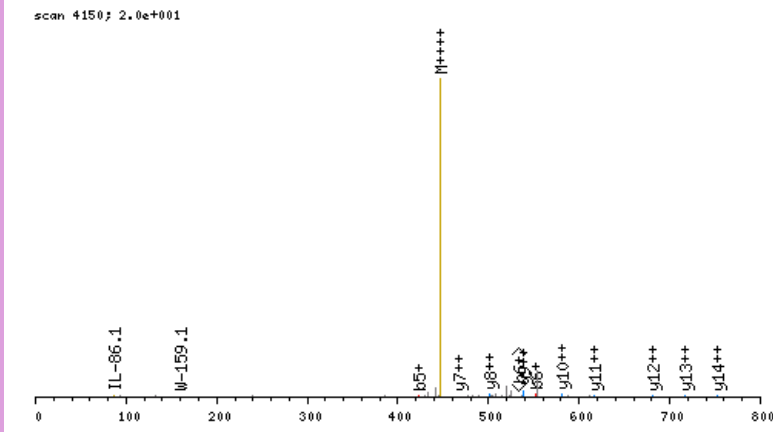

click image to zoom in; click top corners to zoom out [\[precursor±\]](#)

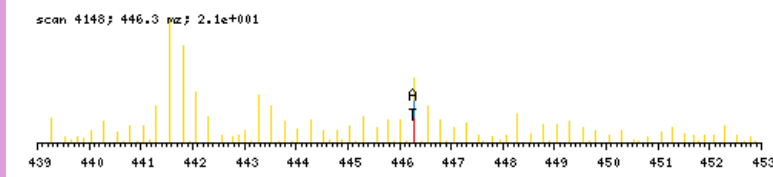

zoomed in precursor plot; T=theoretical m/z, A=acquired m/z

| b <sup>+</sup> | #  | AA # | y <sup>+</sup> | y <sup>2+</sup> |
|----------------|----|------|----------------|-----------------|
| 122.1029       | 1  | S 17 |                |                 |
| 209.1350       | 2  | S 16 | 1660.9559      | 830.9819        |
| 280.1721       | 3  | A 15 | 1573.9239      | 787.4658        |
| 351.2092       | 4  | A 14 | 1502.8867      | 751.9473        |
| 422.2463       | 5  | A 13 | 1431.8496      | 716.4287        |
| 551.2889       | 6  | E 12 | 1360.8125      | 680.9102        |
| 622.3260       | 7  | A 11 | 1231.7699      | 616.3889        |
| 709.3580       | 8  | S 10 | 1160.7328      | 580.8703        |
| 780.3951       | 9  | A 9  | 1073.7008      | 537.3543        |
| 851.4323       | 10 | A 8  | 1002.6637      | 501.8357        |
| 964.5163       | 11 | L 7  | 931.6265       | 466.3172        |
| 1126.6744      | 12 | K 6  | 818.5425       | 409.7752        |
| 1225.7428      | 13 | V 5  | 656.3844       | 328.6961        |
| 1381.8440      | 14 | R 4  | 557.3160       | 279.1619        |
| 1478.8967      | 15 | P 3  | 401.2149       | 201.1113        |
| 1607.9393      | 16 | E 2  | 304.1621       | 152.5850        |
|                | 17 | R 1  | 175.1195       | 88.0637         |

N-term:+35.07 K(12):+162.16

SSAPVASPNVR, MH+ 1112.6064, m/z 556.8068  
 L OS G25 P150811 220811-s1.02255.02255.2.dta

scan 2255; 7.8e+000

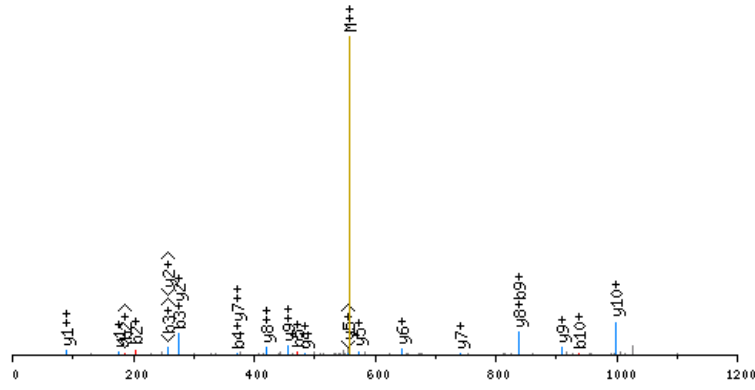

click image to zoom in; click top corners to zoom out [precursor±]

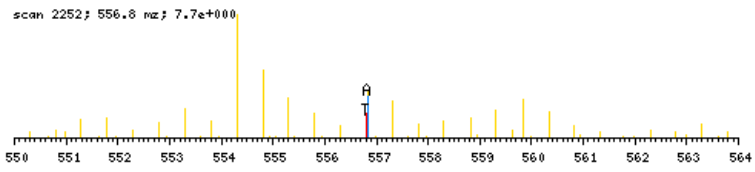

zoomed in precursor plot; T=theoretical m/z, A=acquired m/z

X-range:

-

MassTol: Y-zoom:

MassType:

AVG  MONO

Axis:

1  2

Label:

I  M  -

Ions:

a  +  2+  3+

b  +  2+  3+

c  +  2+  3+

x  +  2+  3+

y  +  2+  3+

z  +  2+  3+

hide H<sub>2</sub>O/NH<sub>3</sub>

zoom 112-122

GO

| b <sup>+</sup> | #  | AA # | y <sup>+</sup> | y <sup>2+</sup>   |
|----------------|----|------|----------------|-------------------|
| 116.0711       | 1  | S    | 11             |                   |
| 203.1032       | 2  | S    | 10             | 997.5431 499.2754 |
| 274.1403       | 3  | A    | 9              | 910.5110 455.7594 |
| 371.1930       | 4  | P    | 8              | 839.4739 420.2409 |
| 470.2614       | 5  | V    | 7              | 742.4212 371.7145 |
| 541.2986       | 6  | A    | 6              | 643.3527 322.1803 |
| 628.3306       | 7  | S    | 5              | 572.3156 286.6617 |
| 725.3834       | 8  | P    | 4              | 485.2836 243.1457 |
| 839.4263       | 9  | N    | 3              | 388.2308 194.6193 |
| 938.4947       | 10 | V    | 2              | 274.1879 137.5979 |
|                | 11 | R    | 1              | 175.1195 88.0637  |

N-term: +29.04

SSCPDDAIFQSLAR, MH+ 1594.7535, m/z 532.2560  
 L OS G25 P150811 220811-s1.07051.07051.3.dta

X-range:

-

MassTol: Y-zoom:

MassType:

AVG  MONO

Axis:

1  2

Label:

I  M  -

Ions:

a  +  2+  3+

b  +  2+  3+

c  +  2+  3+

x  +  2+  3+

y  +  2+  3+

z  +  2+  3+

hide H<sub>2</sub>O/NH<sub>3</sub>

zoom 112-122

GO

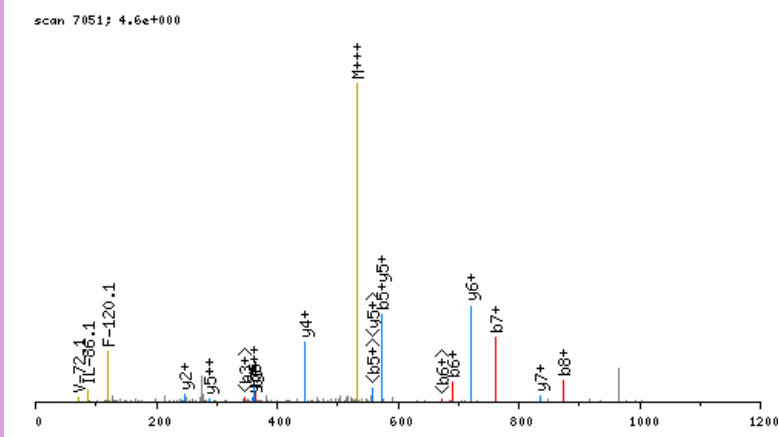

click image to zoom in; click top corners to zoom out [\[precursor±\]](#)

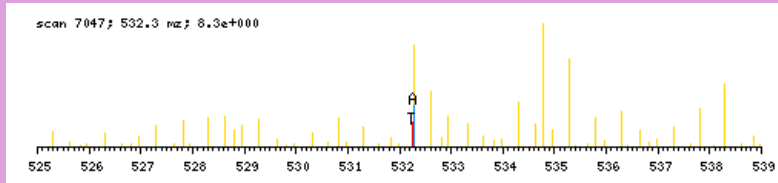

zoomed in precursor plot; T=theoretical m/z, A=acquired m/z

| b <sup>+</sup> | #  | AA # | y <sup>+</sup> | y <sup>2+</sup> |
|----------------|----|------|----------------|-----------------|
| 116.0711       | 1  | S 14 |                |                 |
| 203.1032       | 2  | S 13 | 1479.6902      | 740.3490        |
| 363.1338       | 3  | C 12 | 1392.6581      | 696.8330        |
| 460.1865       | 4  | P 11 | 1232.6275      | 616.8177        |
| 575.2135       | 5  | D 10 | 1135.5748      | 568.2913        |
| 690.2404       | 6  | D 9  | 1020.5478      | 510.7778        |
| 761.2775       | 7  | A 8  | 905.5209       | 453.2644        |
| 874.3616       | 8  | I 7  | 834.4838       | 417.7458        |
| 1021.4300      | 9  | F 6  | 721.3997       | 361.2038        |
| 1149.4886      | 10 | Q 5  | 574.3313       | 287.6696        |
| 1236.5206      | 11 | S 4  | 446.2727       | 223.6403        |
| 1349.6047      | 12 | L 3  | 359.2407       | 180.1243        |
| 1420.6418      | 13 | A 2  | 246.1566       | 123.5822        |
|                | 14 | R 1  | 175.1195       | 88.0637         |

N-term:+29.04 C(3):+160.03

SSDAVAGPASSLKQR, MH+ 1529.8288, m/z 510.6144  
 L OS G27 P150811 220811-s1.02696.02696.3.dta

X-range:

-

MassTol: Y-zoom:

MassType:

AVG  MONO

Axis:

1  2

Label:

I  M  -

Ions:

a  +  2+  3+

b  +  2+  3+

c  +  2+  3+

x  +  2+  3+

y  +  2+  3+

z  +  2+  3+

hide H<sub>2</sub>O/NH<sub>3</sub>

zoom 112-122

GO

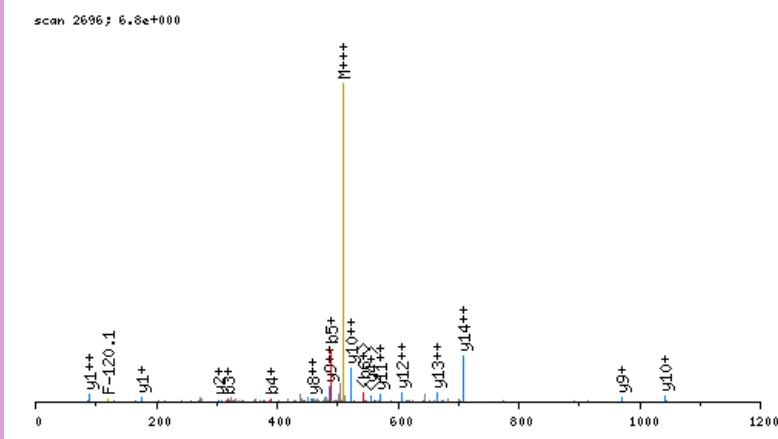

click image to zoom in; click top corners to zoom out [\[precursor±\]](#)

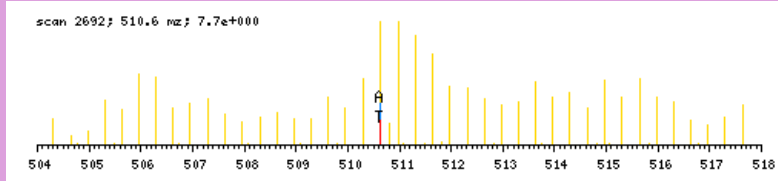

zoomed in precursor plot; T=theoretical m/z, A=acquired m/z

| b <sup>+</sup> | #  | AA # | y <sup>+</sup> | y <sup>2+</sup> |
|----------------|----|------|----------------|-----------------|
| 116.0711       | 1  | S 15 |                |                 |
| 203.1032       | 2  | S 14 | 1414.7655      | 707.8866        |
| 318.1301       | 3  | D 13 | 1327.7334      | 664.3706        |
| 389.1672       | 4  | A 12 | 1212.7065      | 606.8572        |
| 488.2356       | 5  | V 11 | 1141.6694      | 571.3386        |
| 559.2727       | 6  | A 10 | 1042.6010      | 521.8044        |
| 616.2942       | 7  | G 9  | 971.5638       | 486.2858        |
| 713.3470       | 8  | P 8  | 914.5424       | 457.7751        |
| 784.3841       | 9  | A 7  | 817.4896       | 409.2487        |
| 871.4161       | 10 | S 6  | 746.4525       | 373.7302        |
| 958.4481       | 11 | S 5  | 659.4205       | 330.2141        |
| 1071.5322      | 12 | L 4  | 572.3884       | 286.6981        |
| 1227.6585      | 13 | K 3  | 459.3044       | 230.1561        |
| 1355.7171      | 14 | Q 2  | 303.1781       | 152.0930        |
|                | 15 | R 1  | 175.1195       | 88.0637         |

N-term:+29.04 K(13):+156.13

SSDSMDTGAGSIR, MH+ 1317.6168, m/z 659.3121  
 H OS G25 P150811 220811-s1.02459.02459.2.dta

scan 2459; 4.9e+000

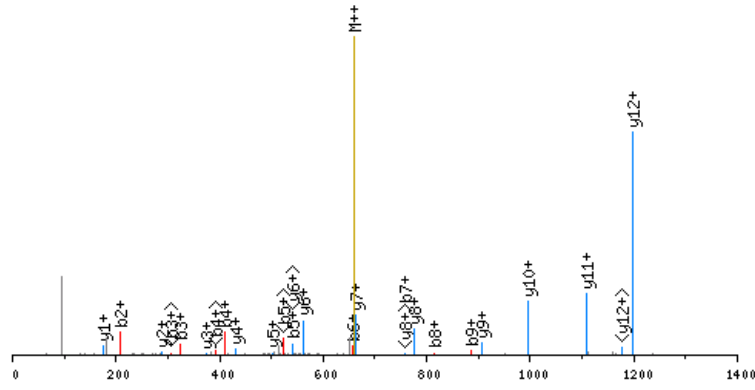

click image to zoom in; click top corners to zoom out [precursor±]

scan 2457; 659.3 m/z; 2.3e+001

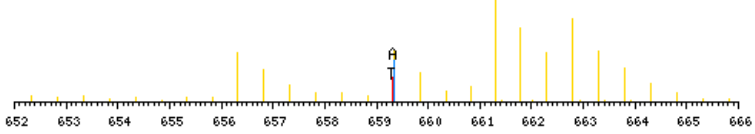

zoomed in precursor plot; T=theoretical m/z, A=acquired m/z

X-range:

-

MassTol: Y-zoom:

MassType:

AVG  MONO

Axis:

1  2

Label:

I  M  -

Ions:

a  +  2+  3+

b  +  2+  3+

c  +  2+  3+

x  +  2+  3+

y  +  2+  3+

z  +  2+  3+

hide H<sub>2</sub>O/NH<sub>3</sub>

zoom 112-122

GO

| b <sup>+</sup> | #  | AA # | y <sup>+</sup> | y <sup>2+</sup> |
|----------------|----|------|----------------|-----------------|
| 122.1029       | 1  | S 13 |                |                 |
| 209.1350       | 2  | S 12 | 1196.5217      | 598.7648        |
| 324.1619       | 3  | D 11 | 1109.4897      | 555.2488        |
| 411.1939       | 4  | S 10 | 994.4628       | 497.7353        |
| 542.2344       | 5  | M 9  | 907.4307       | 454.2193        |
| 657.2614       | 6  | D 8  | 776.3903       | 388.6990        |
| 758.3090       | 7  | T 7  | 661.3633       | 331.1856        |
| 815.3305       | 8  | G 6  | 560.3156       | 280.6617        |
| 886.3676       | 9  | A 5  | 503.2942       | 252.1510        |
| 943.3891       | 10 | G 4  | 432.2571       | 216.6324        |
| 1030.4211      | 11 | S 3  | 375.2356       | 188.1217        |
| 1143.5052      | 12 | I 2  | 288.2036       | 144.6057        |
|                | 13 | R 1  | 175.1195       | 88.0637         |

N-term:+35.07

SSDSQVHSGVQVEGR, MH+ 1599.7727, m/z 533.9291  
 L OS G27 P150811 220811-s1.02036.02036.3.dta

X-range:

-

MassTol: Y-zoom:

MassType:

AVG  MONO

Axis:

1  2

Label:

I  M  -

Ions:

a  +  2+  3+

b  +  2+  3+

c  +  2+  3+

x  +  2+  3+

y  +  2+  3+

z  +  2+  3+

hide H<sub>2</sub>O/NH<sub>3</sub>

zoom 112-122

GO

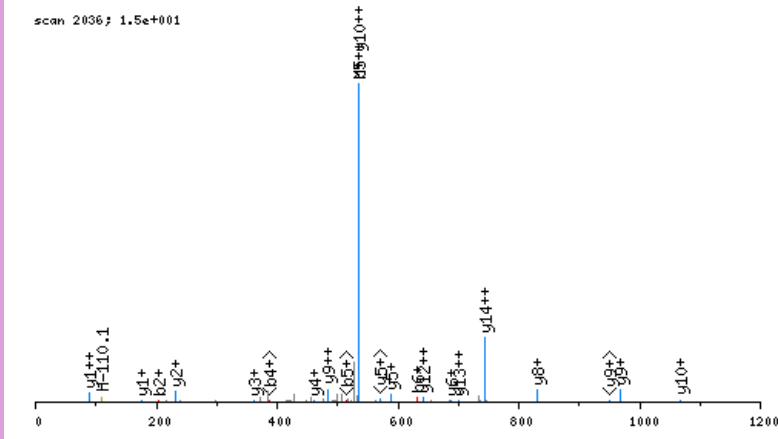

click image to zoom in; click top corners to zoom out [\[precursor±\]](#)

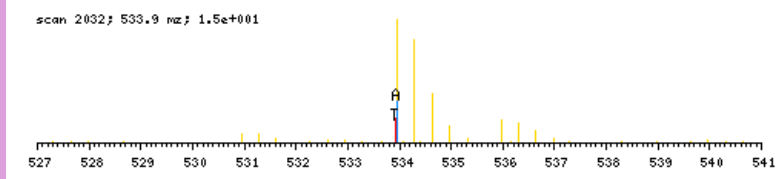

zoomed in precursor plot; T=theoretical m/z, A=acquired m/z

| b <sup>+</sup> | #  | AA | #  | y <sup>+</sup> | y <sup>2+</sup> |
|----------------|----|----|----|----------------|-----------------|
| 116.0711       | 1  | S  | 15 |                |                 |
| 203.1032       | 2  | S  | 14 | 1484.7094      | 742.8586        |
| 318.1301       | 3  | D  | 13 | 1397.6773      | 699.3426        |
| 405.1621       | 4  | S  | 12 | 1282.6504      | 641.8291        |
| 533.2207       | 5  | Q  | 11 | 1195.6184      | 598.3131        |
| 632.2891       | 6  | V  | 10 | 1067.5598      | 534.2838        |
| 769.3480       | 7  | H  | 9  | 968.4914       | 484.7496        |
| 856.3801       | 8  | S  | 8  | 831.4325       | 416.2201        |
| 913.4015       | 9  | G  | 7  | 744.4004       | 372.7041        |
| 1012.4699      | 10 | V  | 6  | 687.3790       | 344.1934        |
| 1140.5285      | 11 | Q  | 5  | 588.3105       | 294.6592        |
| 1239.5969      | 12 | V  | 4  | 460.2520       | 230.6299        |
| 1368.6395      | 13 | E  | 3  | 361.1836       | 181.0957        |
| 1425.6610      | 14 | G  | 2  | 232.1410       | 116.5744        |
|                | 15 | R  | 1  | 175.1195       | 88.0637         |

N-term:+29.04

SSEAPPLVNEDVKR, MH+ 1596.8597, m/z 532.9581  
 L OS G26 P150811 220811-s1.02787.02787.3.dta

X-range:

-

MassTol: Y-zoom:

MassType:

AVG  MONO

Axis:

1  2

Label:

I  M  -

Ions:

a  +  2+  3+

b  +  2+  3+

c  +  2+  3+

x  +  2+  3+

y  +  2+  3+

z  +  2+  3+

hide H<sub>2</sub>O/NH<sub>3</sub>

zoom 112-122

GO

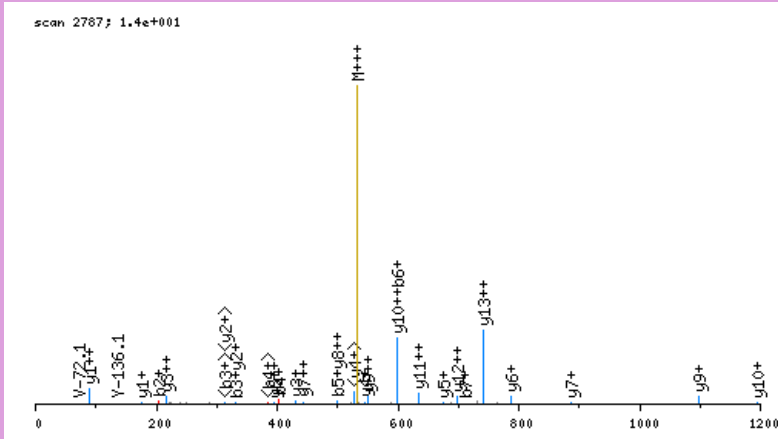

click image to zoom in; click top corners to zoom out [\[precursor±\]](#)

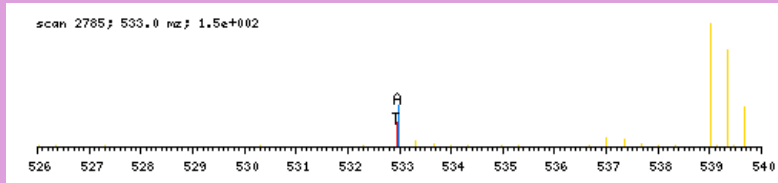

zoomed in precursor plot; T=theoretical m/z, A=acquired m/z

| b <sup>+</sup> | #  | AA # | y <sup>+</sup> | y <sup>2+</sup> |
|----------------|----|------|----------------|-----------------|
| 116.0711       | 1  | S 14 |                |                 |
| 203.1032       | 2  | S 13 | 1481.7964      | 741.4021        |
| 332.1458       | 3  | E 12 | 1394.7644      | 697.8861        |
| 403.1829       | 4  | A 11 | 1265.7218      | 633.3648        |
| 500.2356       | 5  | P 10 | 1194.6847      | 597.8463        |
| 597.2884       | 6  | P 9  | 1097.6319      | 549.3199        |
| 710.3725       | 7  | L 8  | 1000.5792      | 500.7935        |
| 809.4409       | 8  | V 7  | 887.4951       | 444.2515        |
| 923.4838       | 9  | N 6  | 788.4267       | 394.7173        |
| 1052.5264      | 10 | E 5  | 674.3838       | 337.6958        |
| 1167.5533      | 11 | D 4  | 545.3412       | 273.1745        |
| 1266.6217      | 12 | V 3  | 430.3142       | 215.6610        |
| 1422.7480      | 13 | K 2  | 331.2458       | 166.1268        |
|                | 14 | R 1  | 175.1195       | 88.0637         |

N-term:+29.04 K(13):+156.13

SSEGEHHSVVPQR, MH+ 1468.7032, m/z 490.2392  
 L OS G27 P150811 220811-s1.02038.02038.3.dta

scan 2038; 1.3e+001

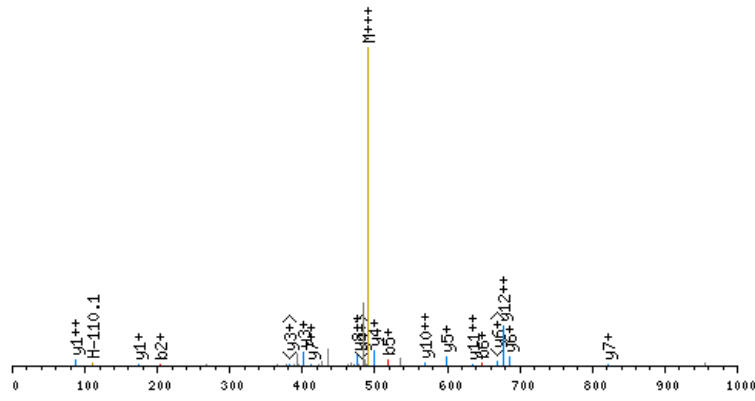

click image to zoom in; click top corners to zoom out [\[precursor±\]](#)

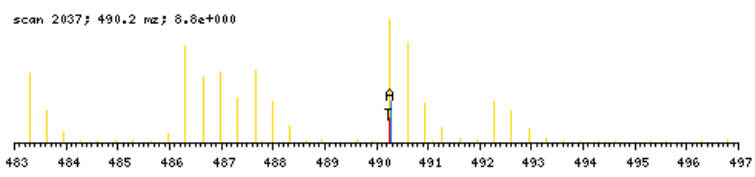

zoomed in precursor plot; T=theoretical m/z, A=acquired m/z

X-range:

-

MassTol: Y-zoom:

MassType:

AVG  MONO

Axis:

1  2

Label:

I  M  -

Ions:

a  +  2+  3+

b  +  2+  3+

c  +  2+  3+

x  +  2+  3+

y  +  2+  3+

z  +  2+  3+

hide H<sub>2</sub>O/NH<sub>3</sub>

zoom 112-122

GO

| b <sup>+</sup> | #  | AA # | y <sup>+</sup> | y <sup>2+</sup> |
|----------------|----|------|----------------|-----------------|
| 116.0711       | 1  | S 13 |                |                 |
| 203.1032       | 2  | S 12 | 1353.6399      | 677.3239        |
| 332.1458       | 3  | E 11 | 1266.6079      | 633.8078        |
| 389.1672       | 4  | G 10 | 1137.5653      | 569.2865        |
| 518.2098       | 5  | E 9  | 1080.5438      | 540.7758        |
| 647.2524       | 6  | E 8  | 951.5012       | 476.2545        |
| 784.3113       | 7  | H 7  | 822.4586       | 411.7332        |
| 871.3433       | 8  | S 6  | 685.3997       | 343.2038        |
| 970.4118       | 9  | V 5  | 598.3677       | 299.6877        |
| 1069.4802      | 10 | V 4  | 499.2993       | 250.1535        |
| 1166.5329      | 11 | P 3  | 400.2308       | 200.6193        |
| 1294.5915      | 12 | Q 2  | 303.1781       | 152.0930        |
|                | 13 | R 1  | 175.1195       | 88.0637         |

N-term:+29.04



SSFGEPISEVVVVKDR, MH+ 1687.0067, m/z 563.0071  
 H OS G26 P150811 220811-s1.05291.05291.3.dta

X-range:

-

MassTol: Y-zoom:

MassType:

AVG  MONO

Axis:

1  2

Label:

I  M  -

Ions:

a  +  2+  3+

b  +  2+  3+

c  +  2+  3+

x  +  2+  3+

y  +  2+  3+

z  +  2+  3+

hide H<sub>2</sub>O/NH<sub>3</sub>

zoom 112-122

GO

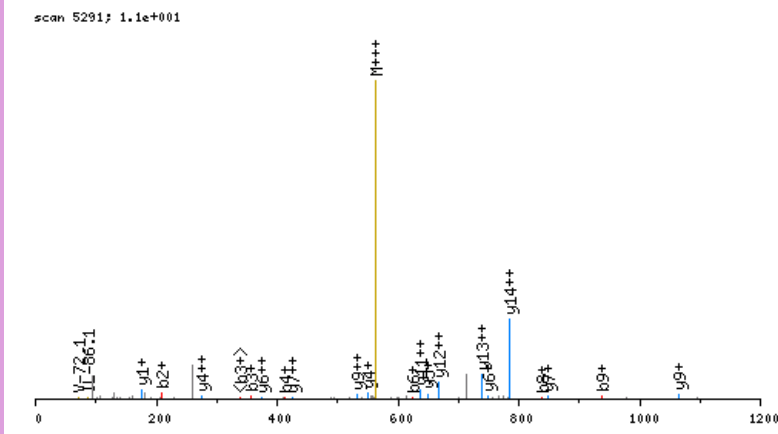

click image to zoom in; click top corners to zoom out [\[precursor±\]](#)

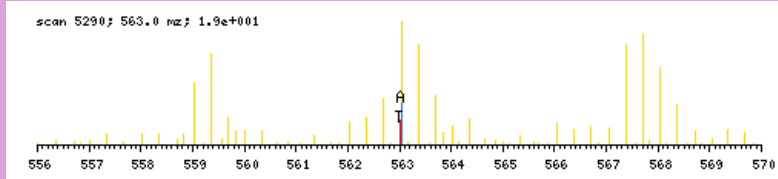

zoomed in precursor plot; T=theoretical m/z, A=acquired m/z

| b <sup>+</sup> | #  | AA # | y <sup>+</sup> | y <sup>2+</sup> |
|----------------|----|------|----------------|-----------------|
| 122.1029       | 1  | S 15 |                |                 |
| 209.1350       | 2  | S 14 | 1565.9116      | 783.4597        |
| 356.2034       | 3  | F 13 | 1478.8795      | 739.9437        |
| 413.2248       | 4  | G 12 | 1331.8111      | 666.4095        |
| 510.2776       | 5  | P 11 | 1274.7896      | 637.8987        |
| 623.3617       | 6  | I 10 | 1177.7369      | 589.3724        |
| 710.3937       | 7  | S 9  | 1064.6528      | 532.8303        |
| 839.4363       | 8  | E 8  | 977.6208       | 489.3143        |
| 938.5047       | 9  | V 7  | 848.5782       | 424.7930        |
| 1037.5731      | 10 | V 6  | 749.5098       | 375.2588        |
| 1136.6415      | 11 | V 5  | 650.4414       | 325.7246        |
| 1235.7099      | 12 | V 4  | 551.3730       | 276.1904        |
| 1397.8680      | 13 | K 3  | 452.3045       | 226.6562        |
| 1512.8950      | 14 | D 2  | 290.1464       | 145.5771        |
|                | 15 | R 1  | 175.1195       | 88.0637         |

N-term:+35.07 K(13):+162.16

SSFIQGFVDHVKEDCDR, MH+ 2094.9918, m/z 524.5034  
 L OS G28 P150811 220811-s1.08341.08341.4.dta

X-range:

-

MassTol: Y-zoom:

MassType:

AVG  MONO

Axis:

1  2

Label:

I  M  -

Ions:

a  +  2+  3+

b  +  2+  3+

c  +  2+  3+

x  +  2+  3+

y  +  2+  3+

z  +  2+  3+

hide H<sub>2</sub>O/NH<sub>3</sub>

zoom 112-122

GO

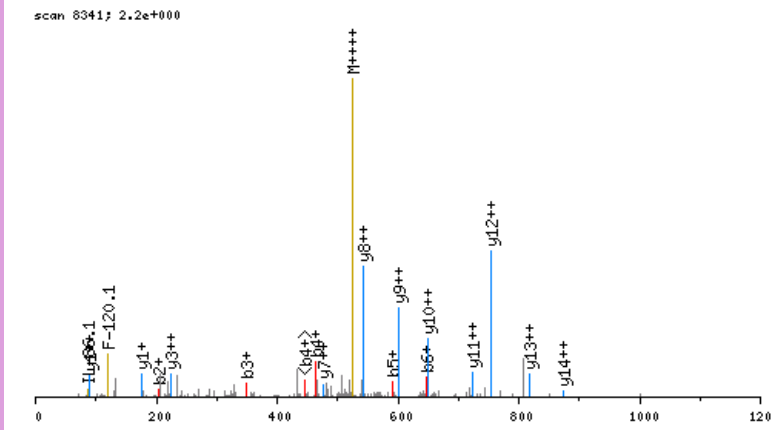

click image to zoom in; click top corners to zoom out [\[precursor±\]](#)

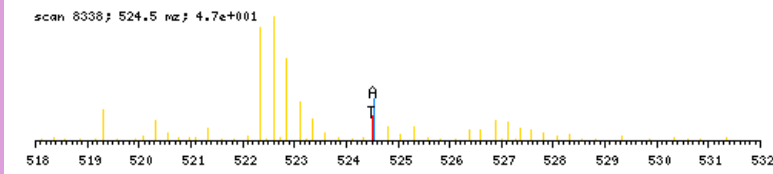

zoomed in precursor plot; T=theoretical m/z, A=acquired m/z

| b <sup>+</sup> | #  | AA | #  | y <sup>+</sup> | y <sup>2+</sup> |
|----------------|----|----|----|----------------|-----------------|
| 116.0711       | 1  | S  | 17 |                |                 |
| 203.1032       | 2  | S  | 16 | 1979.9285      | 990.4682        |
| 350.1716       | 3  | F  | 15 | 1892.8965      | 946.9522        |
| 463.2556       | 4  | I  | 14 | 1745.8281      | 873.4180        |
| 591.3142       | 5  | Q  | 13 | 1632.7440      | 816.8759        |
| 648.3357       | 6  | G  | 12 | 1504.6854      | 752.8466        |
| 795.4041       | 7  | F  | 11 | 1447.6640      | 724.3359        |
| 894.4725       | 8  | V  | 10 | 1300.5956      | 650.8017        |
| 1009.4994      | 9  | D  | 9  | 1201.5271      | 601.2675        |
| 1146.5584      | 10 | H  | 8  | 1086.5002      | 543.7540        |
| 1245.6268      | 11 | V  | 7  | 949.4413       | 475.2246        |
| 1401.7531      | 12 | K  | 6  | 850.3729       | 425.6904        |
| 1530.7957      | 13 | E  | 5  | 694.2466       | 347.6272        |
| 1645.8226      | 14 | D  | 4  | 565.2040       | 283.1059        |
| 1805.8532      | 15 | C  | 3  | 450.1770       | 225.5924        |
| 1920.8802      | 16 | D  | 2  | 290.1464       | 145.5771        |
|                | 17 | R  | 1  | 175.1195       | 88.0637         |

N-term:+29.04 K(12):+156.13  
 C(15):+160.03

SSGAIDTQQHEEVELR, MH+ 1832.9202, m/z 611.6449  
 H OS G26 P150811 220811-s1.02823.02823.3.dta

scan 2823; 4.0e+000

X-range:

-

MassTol: Y-zoom:

MassType:

AVG  MONO

Axis:

1  2

Label:

I  M  -

Ions:

a  +  2+  3+

b  +  2+  3+

c  +  2+  3+

x  +  2+  3+

y  +  2+  3+

z  +  2+  3+

hide H<sub>2</sub>O/NH<sub>3</sub>

zoom 112-122

GO

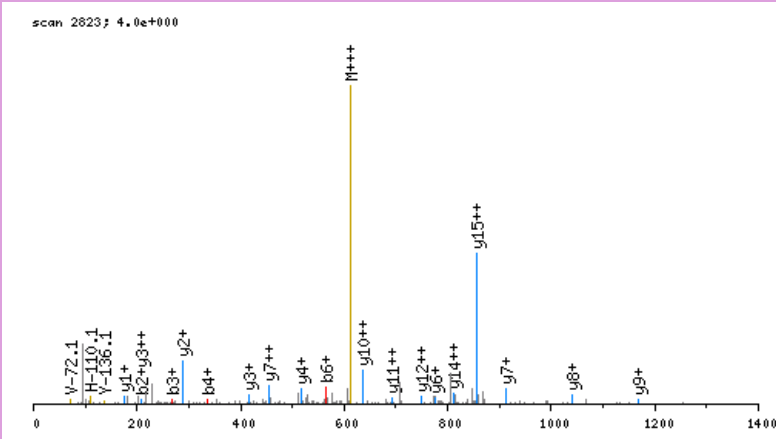

click image to zoom in; click top corners to zoom out [\[precursor±\]](#)

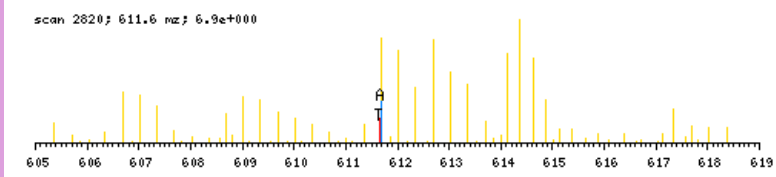

zoomed in precursor plot; T=theoretical m/z, A=acquired m/z

| b <sup>+</sup> | #  | AA # | y <sup>+</sup> | y <sup>2+</sup> |
|----------------|----|------|----------------|-----------------|
| 122.1029       | 1  | S 16 |                |                 |
| 209.1350       | 2  | S 15 | 1711.8251      | 856.4165        |
| 266.1564       | 3  | G 14 | 1624.7931      | 812.9005        |
| 337.1935       | 4  | A 13 | 1567.7716      | 784.3897        |
| 450.2776       | 5  | I 12 | 1496.7345      | 748.8712        |
| 565.3045       | 6  | D 11 | 1383.6504      | 692.3291        |
| 666.3522       | 7  | T 10 | 1268.6235      | 634.8157        |
| 794.4108       | 8  | Q 9  | 1167.5758      | 584.2918        |
| 922.4694       | 9  | Q 8  | 1039.5172      | 520.2625        |
| 1059.5283      | 10 | H 7  | 911.4587       | 456.2332        |
| 1188.5709      | 11 | E 6  | 774.3998       | 387.7038        |
| 1317.6135      | 12 | E 5  | 645.3572       | 323.1825        |
| 1416.6819      | 13 | V 4  | 516.3146       | 258.6612        |
| 1545.7245      | 14 | E 3  | 417.2462       | 209.1270        |
| 1658.8085      | 15 | L 2  | 288.2036       | 144.6057        |
|                | 16 | R 1  | 175.1195       | 88.0637         |

N-term:+35.07

SSGFSLEDPQTHSNR, MH+ 1689.7832, m/z 563.9326  
 L OS G27 P150811 220811-s1.03453.03453.3.dta

scan 3453; 5.0e+000

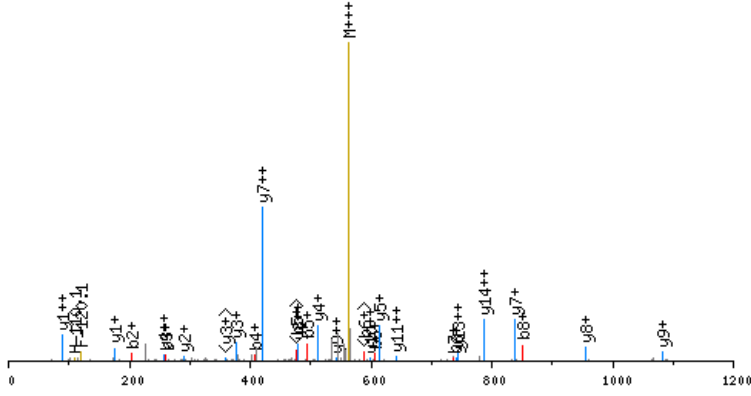

click image to zoom in; click top corners to zoom out [\[precursor±\]](#)

scan 3452; 563.9 m/z; 1.8e+001

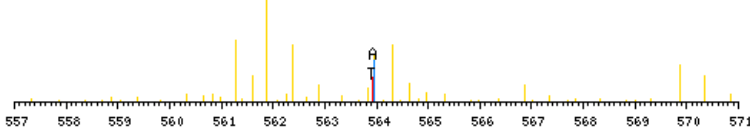

zoomed in precursor plot; T=theoretical m/z, A=acquired m/z

X-range:

-

MassTol: Y-zoom:

MassType:

AVG  MONO

Axis:

1  2

Label:

I  M  -

Ions:

a  +  2+  3+

b  +  2+  3+

c  +  2+  3+

x  +  2+  3+

y  +  2+  3+

z  +  2+  3+

hide H<sub>2</sub>O/NH<sub>3</sub>

zoom 112-122

GO

| b <sup>+</sup> | #  | AA # | y <sup>+</sup> | y <sup>2+</sup> |
|----------------|----|------|----------------|-----------------|
| 116.0711       | 1  | S 15 |                |                 |
| 203.1032       | 2  | S 14 | 1574.7199      | 787.8639        |
| 260.1246       | 3  | G 13 | 1487.6879      | 744.3479        |
| 407.1930       | 4  | F 12 | 1430.6664      | 715.8371        |
| 494.2251       | 5  | S 11 | 1283.5980      | 642.3029        |
| 607.3091       | 6  | L 10 | 1196.5660      | 598.7869        |
| 736.3517       | 7  | E 9  | 1083.4819      | 542.2449        |
| 851.3787       | 8  | D 8  | 954.4393       | 477.7236        |
| 948.4314       | 9  | P 7  | 839.4124       | 420.2101        |
| 1076.4900      | 10 | Q 6  | 742.3596       | 371.6837        |
| 1177.5377      | 11 | T 5  | 614.3010       | 307.6544        |
| 1314.5966      | 12 | H 4  | 513.2534       | 257.1306        |
| 1401.6286      | 13 | S 3  | 376.1945       | 188.6011        |
| 1515.6716      | 14 | N 2  | 289.1624       | 145.0851        |
|                | 15 | R 1  | 175.1195       | 88.0637         |

N-term:+29.04

SSGKDGQCPLVVEQVR, MH+ 1814.9434, m/z 605.6527  
 L OS G27 P150811 220811-s1.03604.03604.3.dta

X-range:

-

MassTol: Y-zoom:

MassType:

AVG  MONO

Axis:

1  2

Label:

I  M  -

Ions:

a  +  2+  3+

b  +  2+  3+

c  +  2+  3+

x  +  2+  3+

y  +  2+  3+

z  +  2+  3+

hide H<sub>2</sub>O/NH<sub>3</sub>

zoom 112-122

GO

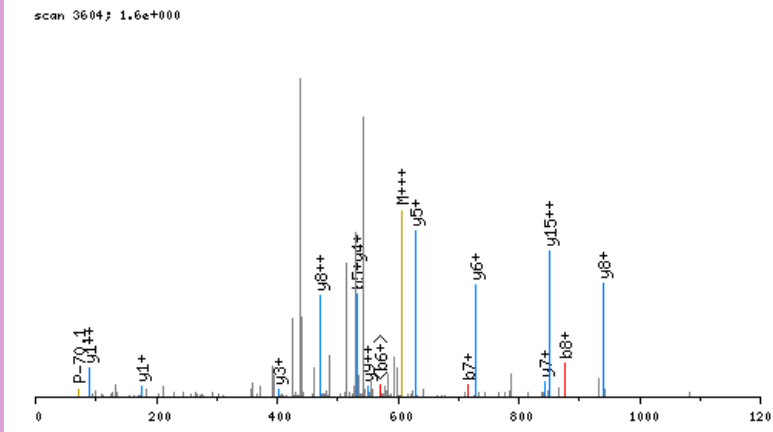

click image to zoom in; click top corners to zoom out [\[precursor±\]](#)

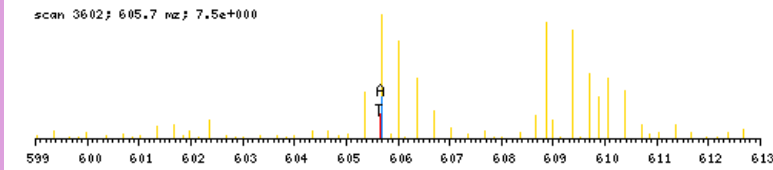

zoomed in precursor plot; T=theoretical m/z, A=acquired m/z

| b <sup>+</sup> | #  | AA # | y <sup>+</sup> | y <sup>2+</sup> |
|----------------|----|------|----------------|-----------------|
| 116.0711       | 1  | S 16 |                |                 |
| 203.1032       | 2  | S 15 | 1699.8801      | 850.4440        |
| 260.1246       | 3  | G 14 | 1612.8481      | 806.9280        |
| 416.2509       | 4  | K 13 | 1555.8266      | 778.4172        |
| 531.2779       | 5  | D 12 | 1399.7003      | 700.3541        |
| 588.2993       | 6  | G 11 | 1284.6734      | 642.8406        |
| 716.3579       | 7  | Q 10 | 1227.6519      | 614.3299        |
| 876.3885       | 8  | C 9  | 1099.5933      | 550.3006        |
| 973.4413       | 9  | P 8  | 939.5627       | 470.2853        |
| 1086.5253      | 10 | L 7  | 842.5100       | 421.7589        |
| 1185.5937      | 11 | V 6  | 729.4259       | 365.2169        |
| 1284.6622      | 12 | V 5  | 630.3575       | 315.6827        |
| 1413.7048      | 13 | E 4  | 531.2891       | 266.1485        |
| 1541.7633      | 14 | Q 3  | 402.2465       | 201.6272        |
| 1640.8317      | 15 | V 2  | 274.1879       | 137.5979        |
|                | 16 | R 1  | 175.1195       | 88.0637         |

N-term:+29.04 K(4):+156.13  
 C(8):+160.03

SSGKSDDEVDDSAVELKQFGVAPLTIAR, MH+ 3018.5636, m/z 755.3964  
 L OS G27 P150811 220811-s1.07131.07131.4.dta

scan 7131; 1.3e+000

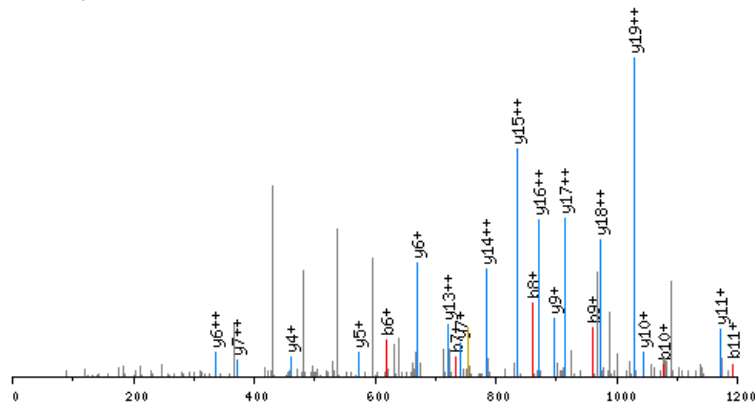

click image to zoom in; click top corners to zoom out [\[precursor±\]](#)

scan 7127; 755.4 mz; 2.0e+000

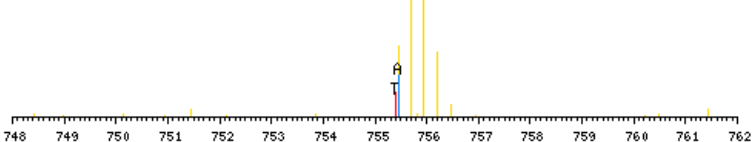

zoomed in precursor plot; T=theoretical m/z, A=acquired m/z

X-range:

-

MassTol: Y-zoom:

MassType:

AVG  MONO

Axis:

1  2

Label:

I  M  -

Ions:

a  +  2+  3+

b  +  2+  3+

c  +  2+  3+

x  +  2+  3+

y  +  2+  3+

z  +  2+  3+

hide H<sub>2</sub>O/NH<sub>3</sub>

zoom 112-122

GO

| b <sup>+</sup> | #  | AA # | y <sup>+</sup> | y <sup>2+</sup> |
|----------------|----|------|----------------|-----------------|
| 116.0711       | 1  | S 28 |                |                 |
| 203.1032       | 2  | S 27 | 2903.5003      | 1452.2541       |
| 260.1246       | 3  | G 26 | 2816.4683      | 1408.7380       |
| 416.2509       | 4  | K 25 | 2759.4468      | 1380.2273       |
| 503.2829       | 5  | S 24 | 2603.3205      | 1302.1642       |
| 618.3099       | 6  | D 23 | 2516.2885      | 1258.6481       |
| 733.3368       | 7  | D 22 | 2401.2615      | 1201.1347       |
| 862.3794       | 8  | E 21 | 2286.2346      | 1143.6212       |
| 961.4478       | 9  | V 20 | 2157.1920      | 1079.0999       |
| 1076.4748      | 10 | D 19 | 2058.1236      | 1029.5657       |
| 1191.5017      | 11 | D 18 | 1943.0966      | 972.0522        |
| 1278.5338      | 12 | S 17 | 1828.0697      | 914.5388        |
| 1349.5709      | 13 | A 16 | 1741.0377      | 871.0227        |
| 1448.6393      | 14 | V 15 | 1670.0005      | 835.5042        |
| 1577.6819      | 15 | E 14 | 1570.9321      | 785.9700        |
| 1690.7659      | 16 | L 13 | 1441.8895      | 721.4487        |
| 1846.8922      | 17 | K 12 | 1328.8055      | 664.9066        |
| 1974.9508      | 18 | Q 11 | 1172.6792      | 586.8435        |
| 2122.0192      | 19 | F 10 | 1044.6206      | 522.8142        |
| 2179.0407      | 20 | G 9  | 897.5522       | 449.2800        |
| 2278.1091      | 21 | V 8  | 840.5307       | 420.7693        |
| 2349.1462      | 22 | A 7  | 741.4623       | 371.2351        |
| 2446.1990      | 23 | P 6  | 670.4252       | 335.7165        |
| 2559.2831      | 24 | L 5  | 573.3724       | 287.1901        |
| 2660.3307      | 25 | T 4  | 460.2884       | 230.6481        |
| 2773.4148      | 26 | I 3  | 359.2407       | 180.1243        |
| 2844.4519      | 27 | A 2  | 246.1566       | 123.5822        |
|                | 28 | R 1  | 175.1195       | 88.0637         |

N-term:+29.04 K(4):+156.13  
 K(17):+156.13

SSGLEHDNLEAHSPEQPPR, MH+ 2134.0377, m/z 534.2649  
 H OS G28 P150811 220811-s1.03240.03240.4.dta

X-range:

-

MassTol: Y-zoom:

MassType:

AVG  MONO

Axis:

1  2

Label:

I  M  -

Ions:

a  +  2+  3+

b  +  2+  3+

c  +  2+  3+

x  +  2+  3+

y  +  2+  3+

z  +  2+  3+

hide H<sub>2</sub>O/NH<sub>3</sub>

zoom 112-122

GO

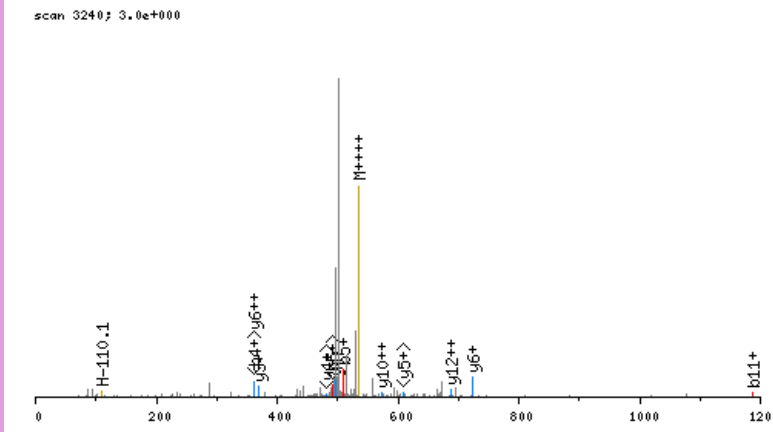

click image to zoom in; click top corners to zoom out [\[precursor±\]](#)

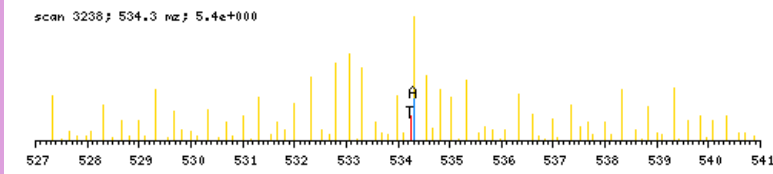

zoomed in precursor plot; T=theoretical m/z, A=acquired m/z

| b <sup>+</sup> | #  | AA | #  | y <sup>+</sup> | y <sup>2+</sup> |
|----------------|----|----|----|----------------|-----------------|
| 122.1029       | 1  | S  | 19 |                |                 |
| 209.1350       | 2  | S  | 18 | 2012.9426      | 1006.9752       |
| 266.1564       | 3  | G  | 17 | 1925.9106      | 963.4592        |
| 379.2405       | 4  | L  | 16 | 1868.8891      | 934.9485        |
| 508.2831       | 5  | E  | 15 | 1755.8050      | 878.4064        |
| 645.3420       | 6  | H  | 14 | 1626.7625      | 813.8851        |
| 760.3689       | 7  | D  | 13 | 1489.7035      | 745.3557        |
| 874.4119       | 8  | N  | 12 | 1374.6766      | 687.8422        |
| 987.4959       | 9  | L  | 11 | 1260.6337      | 630.8207        |
| 1116.5385      | 10 | E  | 10 | 1147.5496      | 574.2787        |
| 1187.5756      | 11 | A  | 9  | 1018.5070      | 509.7574        |
| 1324.6345      | 12 | H  | 8  | 947.4699       | 474.2389        |
| 1411.6666      | 13 | S  | 7  | 810.4110       | 405.7094        |
| 1508.7193      | 14 | P  | 6  | 723.3790       | 362.1934        |
| 1637.7619      | 15 | E  | 5  | 626.3262       | 313.6670        |
| 1765.8205      | 16 | Q  | 4  | 497.2836       | 249.1457        |
| 1862.8733      | 17 | P  | 3  | 369.2250       | 185.1164        |
| 1959.9260      | 18 | P  | 2  | 272.1723       | 136.5900        |
|                | 19 | R  | 1  | 175.1195       | 88.0637         |

N-term:+35.07

SSGPTNASAFter, MH+ 1352.6446, m/z 676.8259  
 L OS G25 P150811 220811-s1.02839.02839.2.dta

X-range:

-

MassTol: Y-zoom:

MassType:

AVG  MONO

Axis:

1  2

Label:

I  M  -

Ions:

a  +  2+  3+

b  +  2+  3+

c  +  2+  3+

x  +  2+  3+

y  +  2+  3+

z  +  2+  3+

hide H<sub>2</sub>O/NH<sub>3</sub>

zoom 112-122

GO

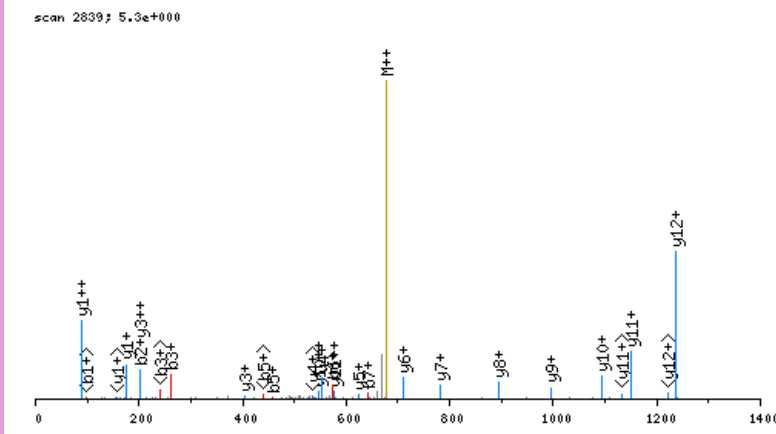

click image to zoom in; click top corners to zoom out [\[precursor±\]](#)

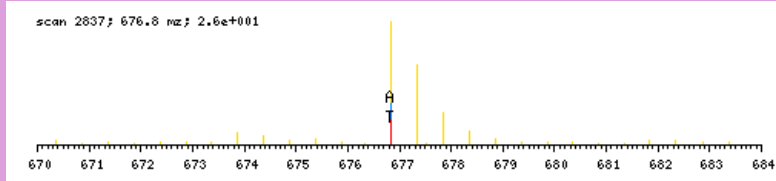

zoomed in precursor plot; T=theoretical m/z, A=acquired m/z

| b <sup>+</sup> | #  | AA # | y <sup>+</sup> | y <sup>2+</sup> |
|----------------|----|------|----------------|-----------------|
| 116.0711       | 1  | S 13 |                |                 |
| 203.1032       | 2  | S 12 | 1237.5813      | 619.2946        |
| 260.1246       | 3  | G 11 | 1150.5493      | 575.7786        |
| 357.1774       | 4  | P 10 | 1093.5278      | 547.2678        |
| 458.2251       | 5  | T 9  | 996.4750       | 498.7414        |
| 572.2680       | 6  | N 8  | 895.4274       | 448.2176        |
| 643.3051       | 7  | A 7  | 781.3844       | 391.1961        |
| 730.3371       | 8  | S 6  | 710.3473       | 355.6776        |
| 801.3742       | 9  | A 5  | 623.3153       | 312.1616        |
| 948.4427       | 10 | F 4  | 552.2782       | 276.6430        |
| 1049.4903      | 11 | T 3  | 405.2098       | 203.1088        |
| 1178.5329      | 12 | E 2  | 304.1621       | 152.5850        |
|                | 13 | R 1  | 175.1195       | 88.0637         |

N-term:+29.04



SSGTGASVGGPPQPSDQDTLVQR, MH+ 2212.0846, m/z 738.0330  
 L OS G24 P150811 220811-s1.03118.03118.3.dta

scan 3118; 2.7e+000

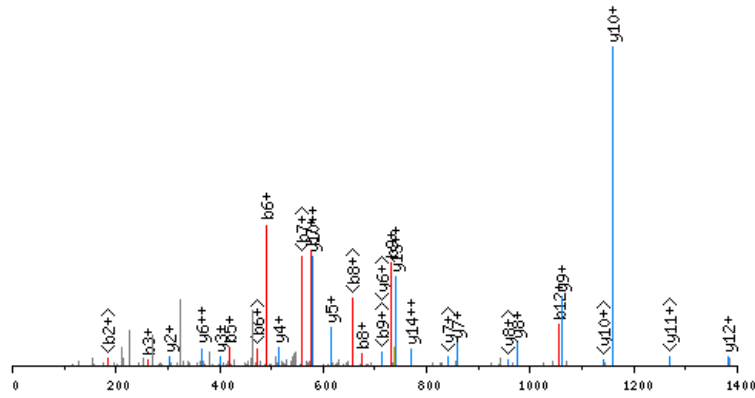

click image to zoom in; click top corners to zoom out [precursor±]

scan 3117; 738.0 mz; 4.9e+000

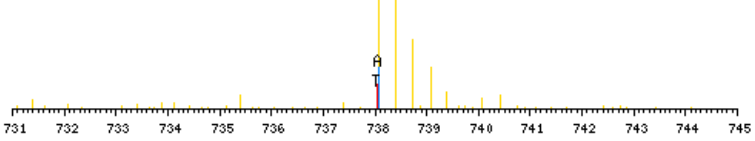

zoomed in precursor plot; T=theoretical m/z, A=acquired m/z

X-range:

-

MassTol: Y-zoom:

MassType:

AVG  MONO

Axis:

1  2

Label:

I  M  -

Ions:

a  +  2+  3+

b  +  2+  3+

c  +  2+  3+

x  +  2+  3+

y  +  2+  3+

z  +  2+  3+

hide H<sub>2</sub>O/NH<sub>3</sub>

zoom 112-122

GO

| b <sup>+</sup> | #  | AA | #  | y <sup>+</sup> | y <sup>2+</sup> |
|----------------|----|----|----|----------------|-----------------|
| 116.0711       | 1  | S  | 22 |                |                 |
| 203.1032       | 2  | S  | 21 | 2097.0213      | 1049.0145       |
| 260.1246       | 3  | G  | 20 | 2009.9892      | 1005.4985       |
| 361.1723       | 4  | T  | 19 | 1952.9678      | 976.9878        |
| 418.1938       | 5  | G  | 18 | 1851.9201      | 926.4640        |
| 489.2309       | 6  | A  | 17 | 1794.8986      | 897.9532        |
| 576.2629       | 7  | S  | 16 | 1723.8615      | 862.4347        |
| 675.3313       | 8  | V  | 15 | 1636.8295      | 818.9186        |
| 732.3528       | 9  | G  | 14 | 1537.7611      | 769.3844        |
| 829.4055       | 10 | P  | 13 | 1480.7396      | 740.8737        |
| 926.4583       | 11 | P  | 12 | 1383.6868      | 692.3473        |
| 1054.5169      | 12 | Q  | 11 | 1286.6341      | 643.8209        |
| 1151.5697      | 13 | P  | 10 | 1158.5755      | 579.7917        |
| 1238.6017      | 14 | S  | 9  | 1061.5227      | 531.2653        |
| 1353.6286      | 15 | D  | 8  | 974.4907       | 487.7493        |
| 1481.6872      | 16 | Q  | 7  | 859.4638       | 430.2358        |
| 1596.7141      | 17 | D  | 6  | 731.4052       | 366.2065        |
| 1697.7618      | 18 | T  | 5  | 616.3782       | 308.6930        |
| 1810.8459      | 19 | L  | 4  | 515.3306       | 258.1692        |
| 1909.9143      | 20 | V  | 3  | 402.2465       | 201.6272        |
| 2037.9729      | 21 | Q  | 2  | 303.1781       | 152.0930        |
|                | 22 | R  | 1  | 175.1195       | 88.0637         |

N-term:+29.04

SSIPLPSDDFKSTGIKIVYEDR, MH+ 2438.2819, m/z 610.3259  
 L OS G27 P150811 220811-s1.06494.06494.4.dta

X-range:

-

MassTol: Y-zoom:

MassType:

AVG  MONO

Axis:

1  2

Label:

I  M  -

Ions:

a  +  2+  3+

b  +  2+  3+

c  +  2+  3+

x  +  2+  3+

y  +  2+  3+

z  +  2+  3+

hide H<sub>2</sub>O/NH<sub>3</sub>

zoom 112-122

GO

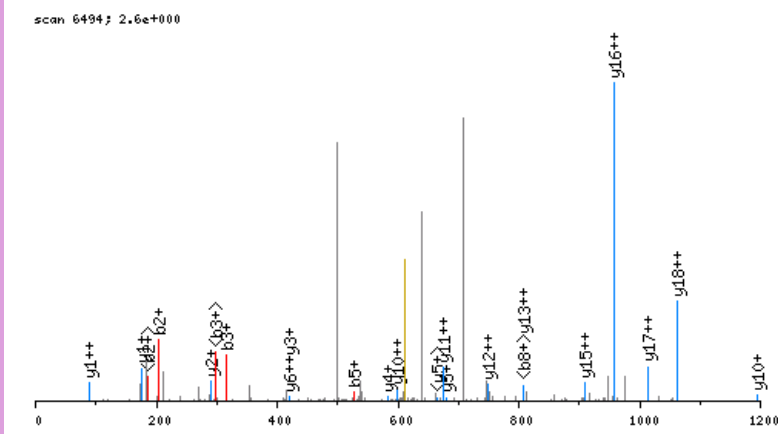

click image to zoom in; click top corners to zoom out [precursor±]

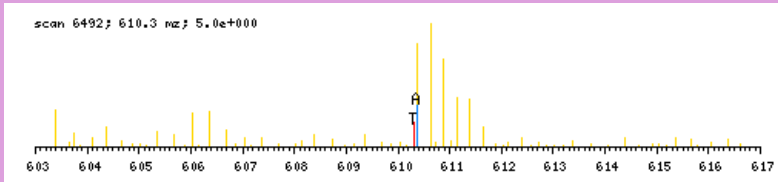

zoomed in precursor plot; T=theoretical m/z, A=acquired m/z

| b <sup>+</sup> | #  | AA | #  | y <sup>+</sup> | y <sup>2+</sup> |
|----------------|----|----|----|----------------|-----------------|
| 116.0711       | 1  | S  | 21 |                |                 |
| 203.1032       | 2  | S  | 20 | 2323.2186      | 1162.1132       |
| 316.1872       | 3  | I  | 19 | 2236.1866      | 1118.5972       |
| 413.2400       | 4  | P  | 18 | 2123.1025      | 1062.0552       |
| 526.3240       | 5  | L  | 17 | 2026.0498      | 1013.5288       |
| 623.3768       | 6  | P  | 16 | 1912.9657      | 956.9868        |
| 710.4088       | 7  | S  | 15 | 1815.9129      | 908.4604        |
| 825.4358       | 8  | D  | 14 | 1728.8809      | 864.9444        |
| 940.4627       | 9  | D  | 13 | 1613.8540      | 807.4309        |
| 1087.5311      | 10 | F  | 12 | 1498.8270      | 749.9174        |
| 1243.6574      | 11 | K  | 11 | 1351.7586      | 676.3832        |
| 1330.6895      | 12 | S  | 10 | 1195.6323      | 598.3201        |
| 1431.7371      | 13 | T  | 9  | 1108.6003      | 554.8041        |
| 1488.7586      | 14 | G  | 8  | 1007.5526      | 504.2802        |
| 1601.8427      | 15 | I  | 7  | 950.5311       | 475.7695        |
| 1757.9690      | 16 | K  | 6  | 837.4471       | 419.2275        |
| 1857.0374      | 17 | V  | 5  | 681.3208       | 341.1643        |
| 2020.1007      | 18 | Y  | 4  | 582.2524       | 291.6301        |
| 2149.1433      | 19 | E  | 3  | 419.1890       | 210.0984        |
| 2264.1703      | 20 | D  | 2  | 290.1464       | 145.5771        |
|                | 21 | R  | 1  | 175.1195       | 88.0637         |

N-term: +29.04 K(11): +156.13  
 K(16): +156.13

SSIPSHPSTAGKIFR, MH+ 1652.9760, m/z 413.9995  
 H OS G28 P150811 220811-s1.03559.03559.4.dta

X-range:

-

MassTol: Y-zoom:

MassType:

AVG  MONO

Axis:

1  2

Label:

I  M  -

Ions:

a  +  2+  3+

b  +  2+  3+

c  +  2+  3+

x  +  2+  3+

y  +  2+  3+

z  +  2+  3+

hide H<sub>2</sub>O/NH<sub>3</sub>

zoom 112-122

GO

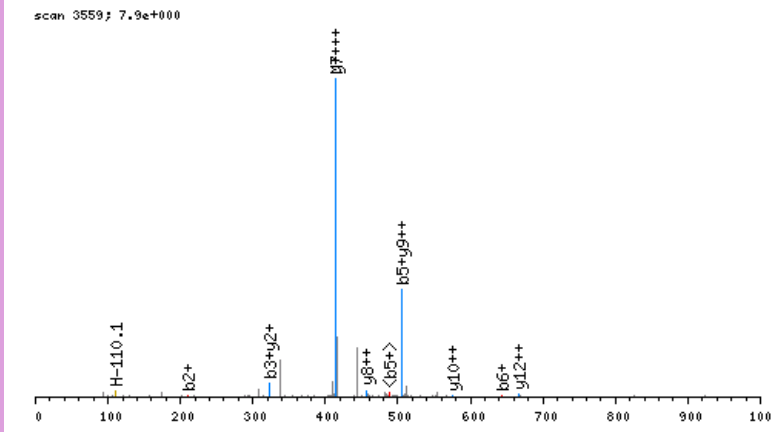

click image to zoom in; click top corners to zoom out [\[precursor±\]](#)

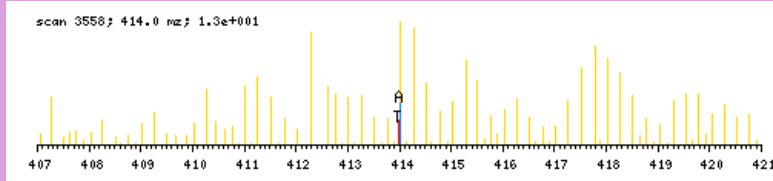

zoomed in precursor plot; T=theoretical m/z, A=acquired m/z

| b <sup>+</sup> | #  | AA # | y <sup>+</sup> | y <sup>2+</sup> |
|----------------|----|------|----------------|-----------------|
| 122.1029       | 1  | S 15 |                |                 |
| 209.1350       | 2  | S 14 | 1531.8809      | 766.4444        |
| 322.2190       | 3  | I 13 | 1444.8489      | 722.9284        |
| 419.2718       | 4  | P 12 | 1331.7648      | 666.3863        |
| 506.3038       | 5  | S 11 | 1234.7121      | 617.8599        |
| 643.3627       | 6  | H 10 | 1147.6800      | 574.3439        |
| 740.4155       | 7  | P 9  | 1010.6211      | 505.8145        |
| 827.4475       | 8  | S 8  | 913.5684       | 457.2881        |
| 928.4952       | 9  | T 7  | 826.5363       | 413.7721        |
| 999.5323       | 10 | A 6  | 725.4887       | 363.2482        |
| 1056.5538      | 11 | G 5  | 654.4515       | 327.7297        |
| 1218.7119      | 12 | K 4  | 597.4301       | 299.2190        |
| 1331.7959      | 13 | I 3  | 435.2720       | 218.1399        |
| 1478.8644      | 14 | F 2  | 322.1879       | 161.5979        |
|                | 15 | R 1  | 175.1195       | 88.0637         |

N-term:+35.07 K(12):+162.16

SSKELEDMNQKLFDLR, MH+ 2037.0691, m/z 510.0227  
 L OS G28 P150811 220811-s1.07734.07734.4.dta

X-range:

-

MassTol: Y-zoom:

MassType:

AVG  MONO

Axis:

1  2

Label:

I  M  -

Ions:

a  +  2+  3+

b  +  2+  3+

c  +  2+  3+

x  +  2+  3+

y  +  2+  3+

z  +  2+  3+

hide H<sub>2</sub>O/NH<sub>3</sub>

zoom 112-122

GO

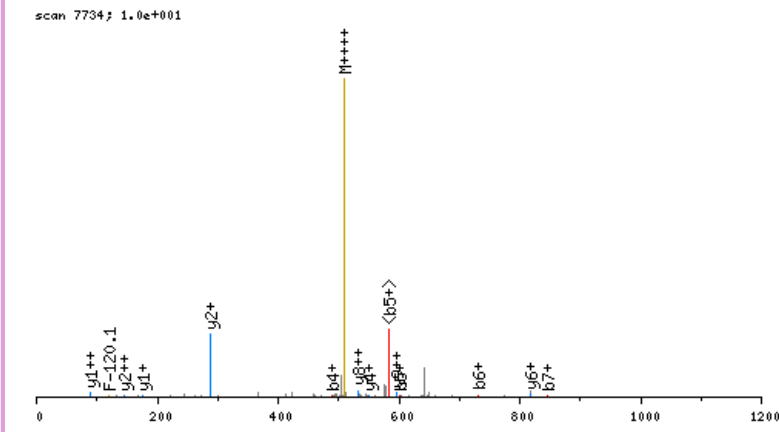

click image to zoom in; click top corners to zoom out [\[precursor±\]](#)

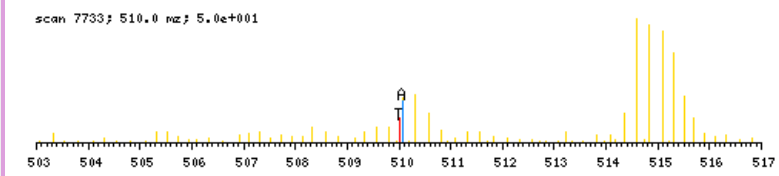

zoomed in precursor plot; T=theoretical m/z, A=acquired m/z

| b <sup>+</sup> | #  | AA | #  | y <sup>+</sup> | y <sup>2+</sup> |
|----------------|----|----|----|----------------|-----------------|
| 116.0711       | 1  | S  | 16 |                |                 |
| 203.1032       | 2  | S  | 15 | 1922.0058      | 961.5068        |
| 359.2295       | 3  | K  | 14 | 1834.9738      | 917.9908        |
| 488.2721       | 4  | E  | 13 | 1678.8475      | 839.9276        |
| 601.3561       | 5  | L  | 12 | 1549.8049      | 775.4064        |
| 730.3987       | 6  | E  | 11 | 1436.7208      | 718.8643        |
| 845.4257       | 7  | D  | 10 | 1307.6782      | 654.3430        |
| 976.4661       | 8  | M  | 9  | 1192.6513      | 596.8296        |
| 1090.5091      | 9  | N  | 8  | 1061.6108      | 531.3093        |
| 1218.5676      | 10 | Q  | 7  | 947.5679       | 474.2878        |
| 1374.6939      | 11 | K  | 6  | 819.5093       | 410.2586        |
| 1487.7780      | 12 | L  | 5  | 663.3830       | 332.1954        |
| 1634.8464      | 13 | F  | 4  | 550.2989       | 275.6534        |
| 1749.8734      | 14 | D  | 3  | 403.2305       | 202.1192        |
| 1862.9574      | 15 | L  | 2  | 288.2036       | 144.6057        |
|                | 16 | R  | 1  | 175.1195       | 88.0637         |

N-term: +29.04 K(3): +156.13  
 K(11): +156.13

SSLASTGLSLTKVDER, MH+ 1732.0129, m/z 578.0091  
 H OS G26 P150811 220811-s1.04502.04502.3.dta

X-range:

-

MassTol: Y-zoom:

MassType:

AVG  MONO

Axis:

1  2

Label:

I  M  -

Ions:

a  +  2+  3+

b  +  2+  3+

c  +  2+  3+

x  +  2+  3+

y  +  2+  3+

z  +  2+  3+

hide H<sub>2</sub>O/NH<sub>3</sub>

zoom 112-122

GO

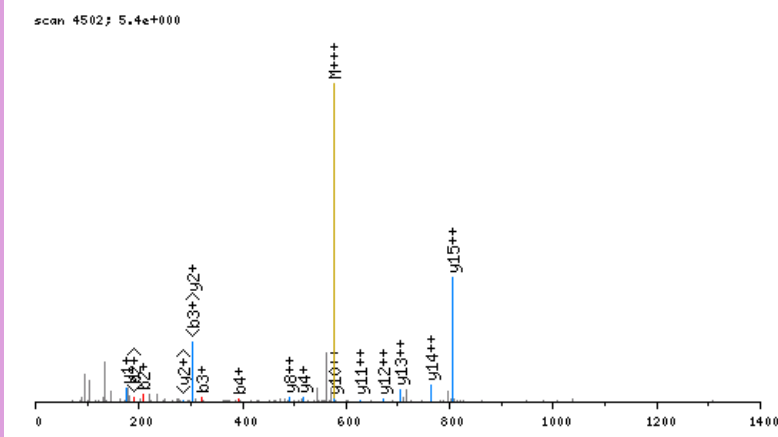

click image to zoom in; click top corners to zoom out [\[precursor±\]](#)

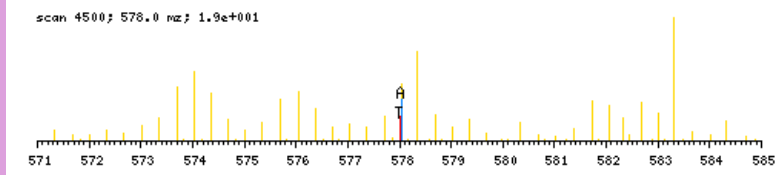

zoomed in precursor plot; T=theoretical m/z, A=acquired m/z

| b <sup>+</sup> | #  | AA # | y <sup>+</sup> | y <sup>2+</sup> |
|----------------|----|------|----------------|-----------------|
| 122.1029       | 1  | S 16 |                |                 |
| 209.1350       | 2  | S 15 | 1610.9178      | 805.9628        |
| 322.2190       | 3  | L 14 | 1523.8857      | 762.4468        |
| 393.2561       | 4  | A 13 | 1410.8017      | 705.9047        |
| 480.2882       | 5  | S 12 | 1339.7646      | 670.3862        |
| 581.3358       | 6  | T 11 | 1252.7325      | 626.8702        |
| 638.3573       | 7  | G 10 | 1151.6848      | 576.3463        |
| 751.4414       | 8  | L 9  | 1094.6634      | 547.8356        |
| 838.4734       | 9  | S 8  | 981.5793       | 491.2936        |
| 951.5575       | 10 | L 7  | 894.5473       | 447.7776        |
| 1052.6051      | 11 | T 6  | 781.4632       | 391.2355        |
| 1214.7632      | 12 | K 5  | 680.4156       | 340.7117        |
| 1313.8317      | 13 | V 4  | 518.2575       | 259.6326        |
| 1428.8586      | 14 | D 3  | 419.1890       | 210.0984        |
| 1557.9012      | 15 | E 2  | 304.1621       | 152.5850        |
|                | 16 | R 1  | 175.1195       | 88.0637         |

N-term:+35.07 K(12):+162.16

SSLEKSYELPDGQVITIGNER, MH+ 2391.2408, m/z 797.7518  
 L OS G26 P150811 220811-s1.06109.06109.3.dta

X-range:

-

MassTol: Y-zoom:

MassType:

AVG  MONO

Axis:

1  2

Label:

I  M  -

Ions:

a  +  2+  3+

b  +  2+  3+

c  +  2+  3+

x  +  2+  3+

y  +  2+  3+

z  +  2+  3+

hide H<sub>2</sub>O/NH<sub>3</sub>

zoom 112-122

GO

scan 6109; 1.5e+000

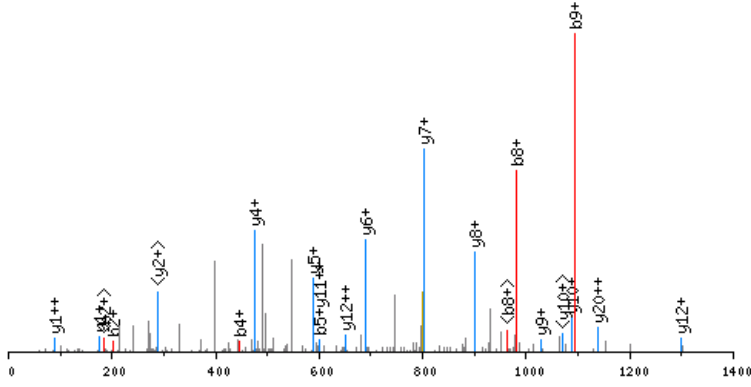

click image to zoom in; click top corners to zoom out [precursor±]

scan 6105; 797.8 mz; 5.5e+000

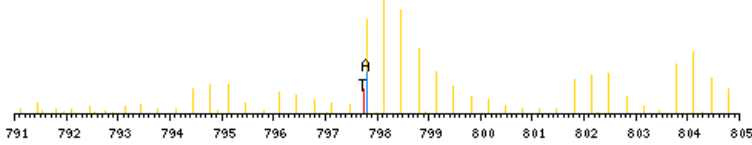

zoomed in precursor plot; T=theoretical m/z, A=acquired m/z

| b <sup>+</sup> | #  | AA | #  | y <sup>+</sup> | y <sup>2+</sup> |
|----------------|----|----|----|----------------|-----------------|
| 116.0711       | 1  | S  | 21 |                |                 |
| 203.1032       | 2  | S  | 20 | 2276.1775      | 1138.5926       |
| 316.1872       | 3  | L  | 19 | 2189.1454      | 1095.0766       |
| 445.2298       | 4  | E  | 18 | 2076.0614      | 1038.5346       |
| 601.3561       | 5  | K  | 17 | 1947.0188      | 974.0133        |
| 688.3881       | 6  | S  | 16 | 1790.8925      | 895.9501        |
| 851.4515       | 7  | Y  | 15 | 1703.8604      | 852.4341        |
| 980.4941       | 8  | E  | 14 | 1540.7971      | 770.9025        |
| 1093.5781      | 9  | L  | 13 | 1411.7545      | 706.3812        |
| 1190.6309      | 10 | P  | 12 | 1298.6705      | 649.8391        |
| 1305.6578      | 11 | D  | 11 | 1201.6177      | 601.3128        |
| 1362.6793      | 12 | G  | 10 | 1086.5907      | 543.7993        |
| 1490.7379      | 13 | Q  | 9  | 1029.5693      | 515.2886        |
| 1589.8063      | 14 | V  | 8  | 901.5107       | 451.2593        |
| 1702.8904      | 15 | I  | 7  | 802.4423       | 401.7251        |
| 1803.9380      | 16 | T  | 6  | 689.3582       | 345.1830        |
| 1917.0221      | 17 | I  | 5  | 588.3105       | 294.6592        |
| 1974.0436      | 18 | G  | 4  | 475.2265       | 238.1172        |
| 2088.0865      | 19 | N  | 3  | 418.2050       | 209.6064        |
| 2217.1291      | 20 | E  | 2  | 304.1621       | 152.5850        |
|                | 21 | R  | 1  | 175.1195       | 88.0637         |

N-term:+29.04 K(5):+156.13

SSLSELTSSVLVER, MH+ 1635.8805, m/z 409.7256  
 L OS G28 P150811 220811-s1.02117.02117.4.dta

X-range:

-

MassTol: Y-zoom:

MassType:

AVG  MONO

Axis:

1  2

Label:

I  M  -

Ions:

a  +  2+  3+

b  +  2+  3+

c  +  2+  3+

x  +  2+  3+

y  +  2+  3+

z  +  2+  3+

hide H<sub>2</sub>O/NH<sub>3</sub>

zoom 112-122

GO

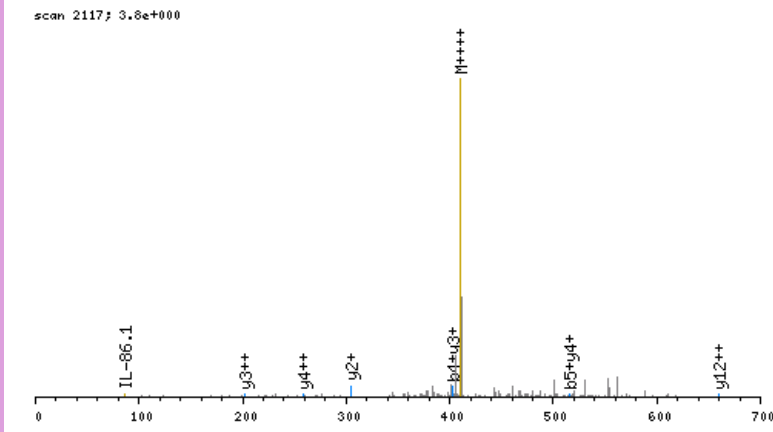

click image to zoom in; click top corners to zoom out [\[precursor±\]](#)

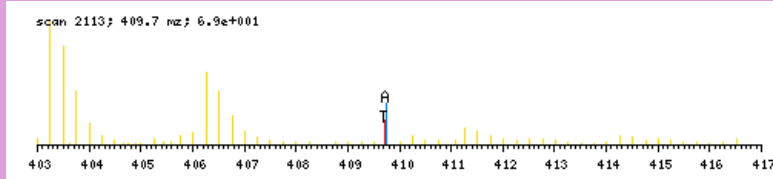

zoomed in precursor plot; T=theoretical m/z, A=acquired m/z

| b <sup>+</sup> | #  | AA # | y <sup>+</sup> | y <sup>2+</sup> |
|----------------|----|------|----------------|-----------------|
| 116.0711       | 1  | S 15 |                |                 |
| 203.1032       | 2  | S 14 | 1520.8172      | 760.9125        |
| 316.1872       | 3  | L 13 | 1433.7851      | 717.3965        |
| 403.2192       | 4  | S 12 | 1320.7011      | 660.8545        |
| 516.3033       | 5  | L 11 | 1233.6691      | 617.3384        |
| 645.3459       | 6  | E 10 | 1120.5850      | 560.7964        |
| 746.3936       | 7  | T 9  | 991.5424       | 496.2751        |
| 847.4413       | 8  | T 8  | 890.4947       | 445.7513        |
| 934.4733       | 9  | S 7  | 789.4470       | 395.2274        |
| 1021.5053      | 10 | S 6  | 702.4150       | 351.7114        |
| 1120.5737      | 11 | V 5  | 615.3830       | 308.1954        |
| 1233.6578      | 12 | L 4  | 516.3146       | 258.6612        |
| 1332.7262      | 13 | V 3  | 403.2305       | 202.1192        |
| 1461.7688      | 14 | E 2  | 304.1621       | 152.5850        |
|                | 15 | R 1  | 175.1195       | 88.0637         |

N-term:+29.04

SSLTETIEGADAEDGHSPGEQQKR, MH+ 2610.2920, m/z 653.3284  
 H OS G28 P150811 220811-s1.04666.04666.4.dta

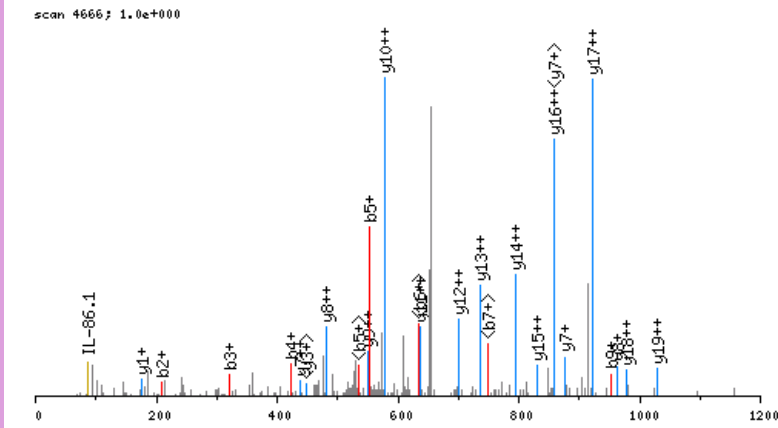

click image to zoom in; click top corners to zoom out [precursor±]

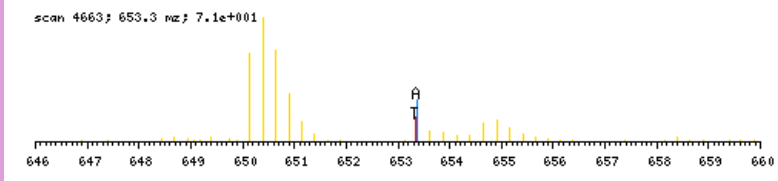

zoomed in precursor plot; T=theoretical m/z, A=acquired m/z

| b <sup>+</sup> | #  | AA # | y <sup>+</sup> | y <sup>2+</sup> |
|----------------|----|------|----------------|-----------------|
| 122.1029       | 1  | S 24 |                |                 |
| 209.1350       | 2  | S 23 | 2489.1969      | 1245.1023       |
| 322.2190       | 3  | L 22 | 2402.1648      | 1201.5863       |
| 423.2667       | 4  | T 21 | 2289.0808      | 1145.0443       |
| 552.3093       | 5  | E 20 | 2188.0331      | 1094.5205       |
| 653.3570       | 6  | T 19 | 2058.9905      | 1029.9992       |
| 766.4410       | 7  | I 18 | 1957.9428      | 979.4753        |
| 895.4836       | 8  | E 17 | 1844.8587      | 922.9333        |
| 952.5051       | 9  | G 16 | 1715.8162      | 858.4120        |
| 1023.5422      | 10 | A 15 | 1658.7947      | 829.9013        |
| 1138.5691      | 11 | D 14 | 1587.7576      | 794.3827        |
| 1209.6063      | 12 | A 13 | 1472.7306      | 736.8692        |
| 1338.6489      | 13 | E 12 | 1401.6935      | 701.3507        |
| 1453.6758      | 14 | D 11 | 1272.6509      | 636.8294        |
| 1510.6973      | 15 | G 10 | 1157.6240      | 579.3159        |
| 1647.7562      | 16 | H 9  | 1100.6025      | 550.8052        |
| 1734.7882      | 17 | S 8  | 963.5436       | 482.2757        |
| 1831.8410      | 18 | P 7  | 876.5116       | 438.7597        |
| 1888.8624      | 19 | G 6  | 779.4588       | 390.2333        |
| 2017.9050      | 20 | E 5  | 722.4373       | 361.7226        |
| 2145.9636      | 21 | Q 4  | 593.3948       | 297.2013        |
| 2274.0222      | 22 | Q 3  | 465.3362       | 233.1720        |
| 2436.1803      | 23 | K 2  | 337.2776       | 169.1427        |
|                | 24 | R 1  | 175.1195       | 88.0637         |

N-term:+35.07 K(23):+162.16

X-range:

0 - 0

MassTol: Y-zoom:

0. 1.

MassType:

AVG  MONO

Axis:

1  2

Label:

I  M  -

Ions:

a  +  2+  3+

b  +  2+  3+

c  +  2+  3+

x  +  2+  3+

y  +  2+  3+

z  +  2+  3+

hide H<sub>2</sub>O/NH<sub>3</sub>

zoom 112-122

GO



SSNTDFAFSLYR, MH+ 1435.6857, m/z 718.3465  
 L OS G25 P150811 220811-s1.07115.07115.2.dta

X-range:

-

MassTol: Y-zoom:

MassType:

AVG  MONO

Axis:

1  2

Label:

I  M  -

Ions:

a  +  2+  3+

b  +  2+  3+

c  +  2+  3+

x  +  2+  3+

y  +  2+  3+

z  +  2+  3+

hide H<sub>2</sub>O/NH<sub>3</sub>

zoom 112-122

GO

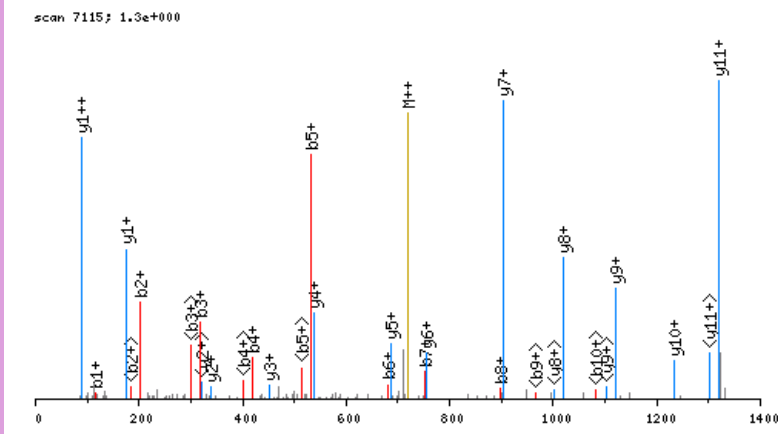

click image to zoom in; click top corners to zoom out [\[precursor±\]](#)

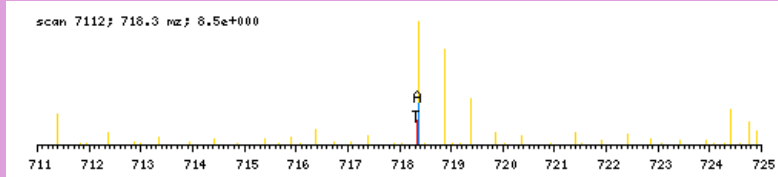

zoomed in precursor plot; T=theoretical m/z, A=acquired m/z

| b <sup>+</sup> | #  | AA # | y <sup>+</sup> | y <sup>2+</sup> |
|----------------|----|------|----------------|-----------------|
| 116.0711       | 1  | S 12 |                |                 |
| 203.1032       | 2  | S 11 | 1320.6224      | 660.8151        |
| 317.1461       | 3  | N 10 | 1233.5904      | 617.2991        |
| 418.1938       | 4  | T 9  | 1119.5475      | 560.2777        |
| 533.2207       | 5  | D 8  | 1018.4998      | 509.7538        |
| 680.2891       | 6  | F 7  | 903.4729       | 452.2403        |
| 751.3262       | 7  | A 6  | 756.4044       | 378.7061        |
| 898.3946       | 8  | F 5  | 685.3673       | 343.1876        |
| 985.4267       | 9  | S 4  | 538.2989       | 269.6534        |
| 1098.5107      | 10 | L 3  | 451.2669       | 226.1374        |
| 1261.5741      | 11 | Y 2  | 338.1828       | 169.5953        |
|                | 12 | R 1  | 175.1195       | 88.0637         |

N-term:+29.04

SSPFKVSPLSFGR, MH+ 1464.8215, m/z 488.9453  
 L OS G27 P150811 220811-s1.06269.06269.3.dta

scan 6269; 1.6e+001

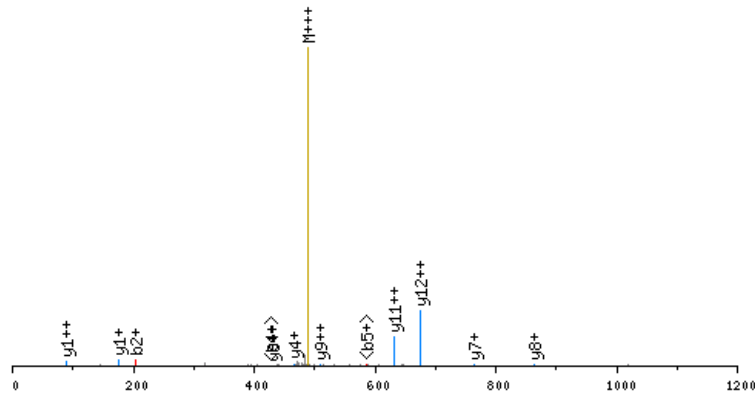

click image to zoom in; click top corners to zoom out [\[precursor±\]](#)

scan 6267; 488.9 m/z; 5.8e+001

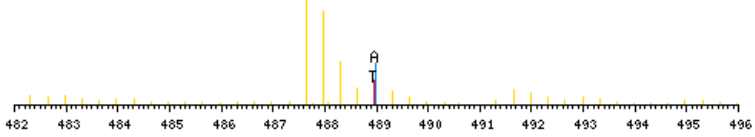

zoomed in precursor plot; T=theoretical m/z, A=acquired m/z

X-range:

-

MassTol: Y-zoom:

MassType:

AVG  MONO

Axis:

1  2

Label:

I  M  -

Ions:

a  +  2+  3+

b  +  2+  3+

c  +  2+  3+

x  +  2+  3+

y  +  2+  3+

z  +  2+  3+

hide H<sub>2</sub>O/NH<sub>3</sub>

zoom 112-122

GO

| b <sup>+</sup> | #  | AA # | y <sup>+</sup> | y <sup>2+</sup> |
|----------------|----|------|----------------|-----------------|
| 116.0711       | 1  | S 13 |                |                 |
| 203.1032       | 2  | S 12 | 1349.7582      | 675.3830        |
| 300.1559       | 3  | P 11 | 1262.7262      | 631.8670        |
| 447.2243       | 4  | F 10 | 1165.6734      | 583.3406        |
| 603.3506       | 5  | K 9  | 1018.6050      | 509.8064        |
| 702.4190       | 6  | V 8  | 862.4787       | 431.7433        |
| 789.4511       | 7  | S 7  | 763.4103       | 382.2090        |
| 886.5038       | 8  | P 6  | 676.3782       | 338.6930        |
| 999.5879       | 9  | L 5  | 579.3255       | 290.1666        |
| 1086.6199      | 10 | S 4  | 466.2414       | 233.6246        |
| 1233.6883      | 11 | F 3  | 379.2094       | 190.1086        |
| 1290.7098      | 12 | G 2  | 232.1410       | 116.5744        |
|                | 13 | R 1  | 175.1195       | 88.0637         |

N-term:+29.04 K(5):+156.13

SSPVHPESSEGEHSVVPQR, MH+ 2202.0427, m/z 551.2661  
 L OS G28 P150811 220811-s1.02811.02811.4.dta

X-range:

-

MassTol: Y-zoom:

MassType:

AVG  MONO

Axis:

1  2

Label:

I  M  -

Ions:

a  +  2+  3+

b  +  2+  3+

c  +  2+  3+

x  +  2+  3+

y  +  2+  3+

z  +  2+  3+

hide H<sub>2</sub>O/NH<sub>3</sub>

zoom 112-122

GO

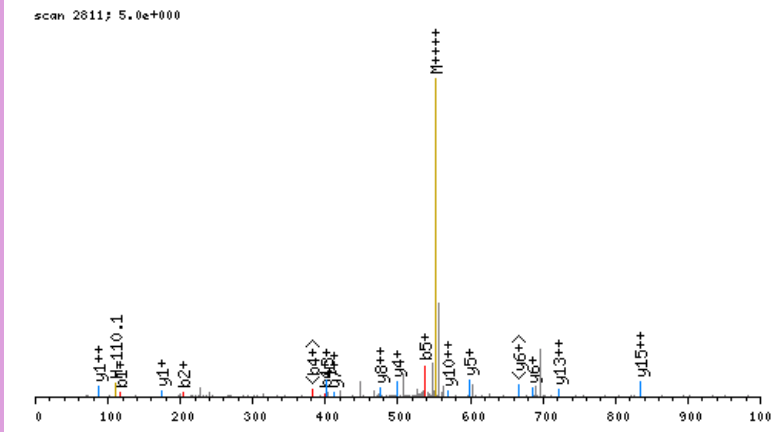

click image to zoom in; click top corners to zoom out [precursor±]

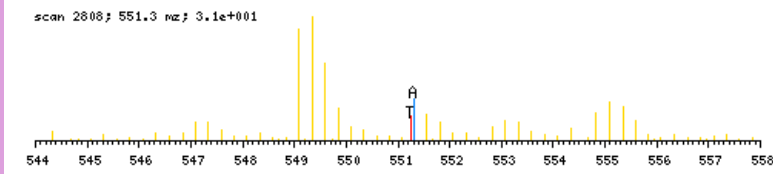

zoomed in precursor plot; T=theoretical m/z, A=acquired m/z

| b <sup>+</sup> | #  | AA | #  | y <sup>+</sup> | y <sup>2+</sup> |
|----------------|----|----|----|----------------|-----------------|
| 116.0711       | 1  | S  | 20 |                |                 |
| 203.1032       | 2  | S  | 19 | 2086.9794      | 1043.9936       |
| 300.1559       | 3  | P  | 18 | 1999.9474      | 1000.4776       |
| 399.2243       | 4  | V  | 17 | 1902.8946      | 951.9512        |
| 536.2832       | 5  | H  | 16 | 1803.8262      | 902.4170        |
| 633.3360       | 6  | P  | 15 | 1666.7673      | 833.8875        |
| 762.3786       | 7  | E  | 14 | 1569.7145      | 785.3612        |
| 849.4106       | 8  | S  | 13 | 1440.6719      | 720.8399        |
| 936.4427       | 9  | S  | 12 | 1353.6399      | 677.3239        |
| 1065.4853      | 10 | E  | 11 | 1266.6079      | 633.8078        |
| 1122.5067      | 11 | G  | 10 | 1137.5653      | 569.2865        |
| 1251.5493      | 12 | E  | 9  | 1080.5438      | 540.7758        |
| 1380.5919      | 13 | E  | 8  | 951.5012       | 476.2545        |
| 1517.6508      | 14 | H  | 7  | 822.4586       | 411.7332        |
| 1604.6828      | 15 | S  | 6  | 685.3997       | 343.2038        |
| 1703.7513      | 16 | V  | 5  | 598.3677       | 299.6877        |
| 1802.8197      | 17 | V  | 4  | 499.2993       | 250.1535        |
| 1899.8724      | 18 | P  | 3  | 400.2308       | 200.6193        |
| 2027.9310      | 19 | Q  | 2  | 303.1781       | 152.0930        |
|                | 20 | R  | 1  | 175.1195       | 88.0637         |

N-term:+29.04

SSQQTIPPSAKYGGK, MH+ 1632.8710, m/z 544.9618  
 L OS G27 P150811 220811-s1.02484.02484.3.dta

X-range:

-

MassTol: Y-zoom:

MassType:

AVG  MONO

Axis:

1  2

Label:

I  M  -

Ions:

a  +  2+  3+

b  +  2+  3+

c  +  2+  3+

x  +  2+  3+

y  +  2+  3+

z  +  2+  3+

hide H<sub>2</sub>O/NH<sub>3</sub>

zoom 112-122

GO

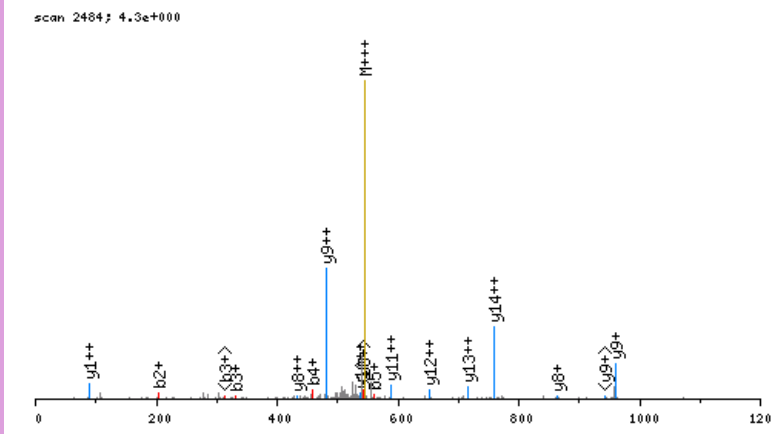

click image to zoom in; click top corners to zoom out [\[precursor±\]](#)

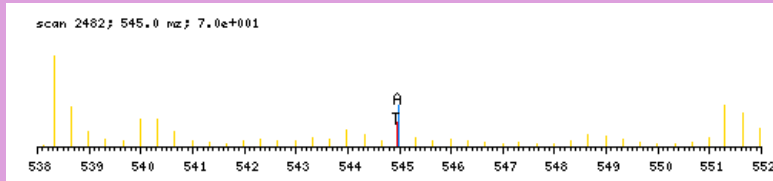

zoomed in precursor plot; T=theoretical m/z, A=acquired m/z

| b <sup>+</sup> | #  | AA | #  | y <sup>+</sup> | y <sup>2+</sup> |
|----------------|----|----|----|----------------|-----------------|
| 116.0711       | 1  | S  | 15 |                |                 |
| 203.1032       | 2  | S  | 14 | 1517.8077      | 759.4077        |
| 331.1617       | 3  | Q  | 13 | 1430.7756      | 715.8917        |
| 459.2203       | 4  | Q  | 12 | 1302.7170      | 651.8624        |
| 560.2680       | 5  | T  | 11 | 1174.6585      | 587.8331        |
| 673.3521       | 6  | I  | 10 | 1073.6108      | 537.3093        |
| 770.4048       | 7  | P  | 9  | 960.5267       | 480.7673        |
| 867.4576       | 8  | P  | 8  | 863.4740       | 432.2409        |
| 954.4896       | 9  | S  | 7  | 766.4212       | 383.7145        |
| 1025.5267      | 10 | A  | 6  | 679.3892       | 340.1985        |
| 1181.6530      | 11 | K  | 5  | 608.3521       | 304.6799        |
| 1344.7164      | 12 | Y  | 4  | 452.2258       | 226.6168        |
| 1401.7378      | 13 | G  | 3  | 289.1624       | 145.0851        |
| 1458.7593      | 14 | G  | 2  | 232.1410       | 116.5744        |
|                | 15 | R  | 1  | 175.1195       | 88.0637         |

N-term:+29.04 K(11):+156.13

SSSAPVVASPNVR, MH+ 1205.6702, m/z 603.3387  
 H OS G25 P150811 220811-s1.02263.02263.2.dta

scan 2263; 3.5e+000

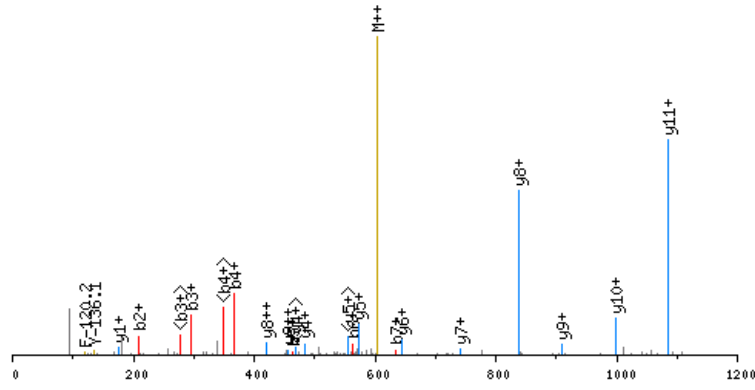

click image to zoom in; click top corners to zoom out [precursor±]

scan 2262; 603.3 m/z; 2.9e+001

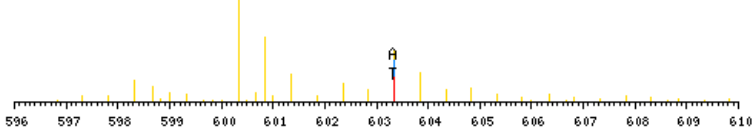

zoomed in precursor plot; T=theoretical m/z, A=acquired m/z

X-range:

-

MassTol: Y-zoom:

MassType:

AVG  MONO

Axis:

1  2

Label:

I  M  -

Ions:

a  +  2+  3+

b  +  2+  3+

c  +  2+  3+

x  +  2+  3+

y  +  2+  3+

z  +  2+  3+

hide H<sub>2</sub>O/NH<sub>3</sub>

zoom 112-122

GO

| b <sup>+</sup> | #  | AA # | y <sup>+</sup> | y <sup>2+</sup> |
|----------------|----|------|----------------|-----------------|
| 122.1029       | 1  | S 12 |                |                 |
| 209.1350       | 2  | S 11 | 1084.5751      | 542.7915        |
| 296.1670       | 3  | S 10 | 997.5431       | 499.2754        |
| 367.2041       | 4  | A 9  | 910.5110       | 455.7594        |
| 464.2569       | 5  | P 8  | 839.4739       | 420.2409        |
| 563.3253       | 6  | V 7  | 742.4212       | 371.7145        |
| 634.3624       | 7  | A 6  | 643.3527       | 322.1803        |
| 721.3944       | 8  | S 5  | 572.3156       | 286.6617        |
| 818.4472       | 9  | P 4  | 485.2836       | 243.1457        |
| 932.4901       | 10 | N 3  | 388.2308       | 194.6193        |
| 1031.5585      | 11 | V 2  | 274.1879       | 137.5979        |
|                | 12 | R 1  | 175.1195       | 88.0637         |

N-term:+35.07

SSSEDKITVHFKNR, MH+ 1731.9394, m/z 433.7403  
 L OS G28 P150811 220811-s1.02824.02824.4.dta

X-range:

-

MassTol: Y-zoom:

MassType:

AVG  MONO

Axis:

1  2

Label:

I  M  -

Ions:

a  +  2+  3+

b  +  2+  3+

c  +  2+  3+

x  +  2+  3+

y  +  2+  3+

z  +  2+  3+

hide H<sub>2</sub>O/NH<sub>3</sub>

zoom 112-122

GO

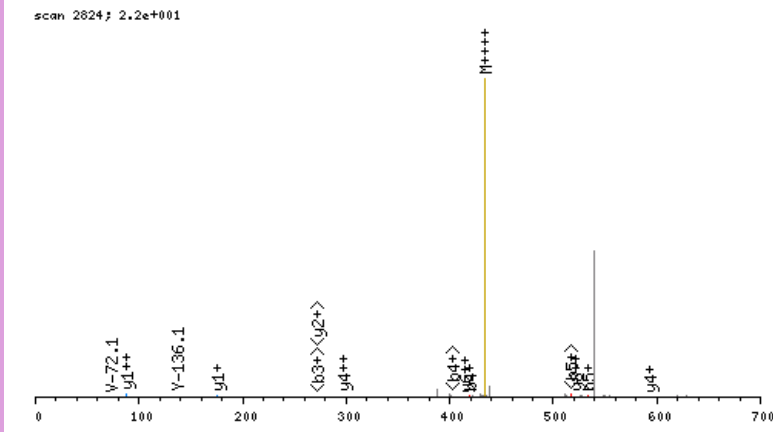

click image to zoom in; click top corners to zoom out [\[precursor±\]](#)

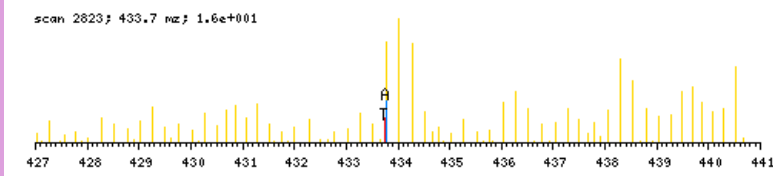

zoomed in precursor plot; T=theoretical m/z, A=acquired m/z

| b <sup>+</sup> | #  | AA # | y <sup>+</sup> | y <sup>2+</sup> |
|----------------|----|------|----------------|-----------------|
| 116.0711       | 1  | S 14 |                |                 |
| 203.1032       | 2  | S 13 | 1616.8761      | 808.9420        |
| 290.1352       | 3  | S 12 | 1529.8441      | 765.4260        |
| 419.1778       | 4  | E 11 | 1442.8120      | 721.9099        |
| 534.2047       | 5  | D 10 | 1313.7695      | 657.3886        |
| 690.3310       | 6  | K 9  | 1198.7425      | 599.8752        |
| 803.4151       | 7  | I 8  | 1042.6162      | 521.8120        |
| 904.4628       | 8  | T 7  | 929.5321       | 465.2700        |
| 1003.5312      | 9  | V 6  | 828.4845       | 414.7461        |
| 1140.5901      | 10 | H 5  | 729.4161       | 365.2119        |
| 1287.6585      | 11 | F 4  | 592.3571       | 296.6825        |
| 1443.7848      | 12 | K 3  | 445.2887       | 223.1483        |
| 1557.8277      | 13 | N 2  | 289.1624       | 145.0851        |
|                | 14 | R 1  | 175.1195       | 88.0637         |

N-term:+29.04 K(6):+156.13  
 K(12):+156.13

SSSLPDCYR, MH+ 1231.6204, m/z 616.3139  
 H OS G25 P150811 220811-s1.04881.04881.2.dta

X-range:

-

MassTol: Y-zoom:

MassType:

AVG  MONO

Axis:

1  2

Label:

I  M  -

Ions:

a  +  2+  3+

b  +  2+  3+

c  +  2+  3+

x  +  2+  3+

y  +  2+  3+

z  +  2+  3+

hide H<sub>2</sub>O/NH<sub>3</sub>

zoom 112-122

GO

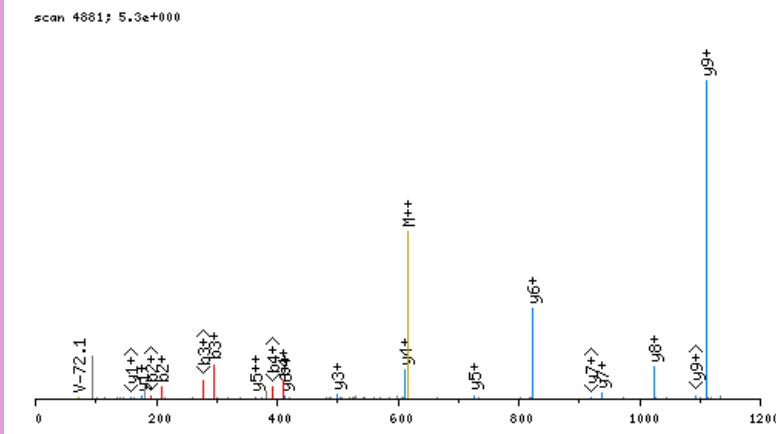

click image to zoom in; click top corners to zoom out [\[precursor±\]](#)

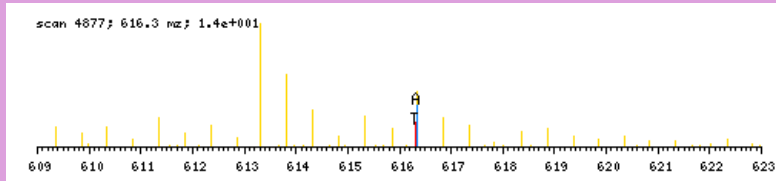

zoomed in precursor plot; T=theoretical m/z, A=acquired m/z

| b <sup>+</sup> | #  | AA # | y <sup>+</sup> | y <sup>2+</sup>    |
|----------------|----|------|----------------|--------------------|
| 122.1029       | 1  | S    | 10             |                    |
| 209.1350       | 2  | S    | 9              | 1110.5253 555.7666 |
| 296.1670       | 3  | S    | 8              | 1023.4933 512.2506 |
| 409.2510       | 4  | L    | 7              | 936.4613 468.7345  |
| 506.3038       | 5  | P    | 6              | 823.3772 412.1925  |
| 621.3308       | 6  | D    | 5              | 726.3244 363.6661  |
| 734.4148       | 7  | I    | 4              | 611.2975 306.1527  |
| 894.4454       | 8  | C    | 3              | 498.2134 249.6106  |
| 1057.5087      | 9  | Y    | 2              | 338.1828 169.5953  |
|                | 10 | R    | 1              | 175.1195 88.0637   |

N-term:+35.07 C(8):+160.03

SSVETQPAEEVR, MH+ 1359.6756, m/z 680.3414  
 L OS G25 P150811 220811-s1.02348.02348.2.dta

X-range:

-

MassTol: Y-zoom:

MassType:

AVG  MONO

Axis:

1  2

Label:

I  M  -

Ions:

a  +  2+  3+

b  +  2+  3+

c  +  2+  3+

x  +  2+  3+

y  +  2+  3+

z  +  2+  3+

hide H<sub>2</sub>O/NH<sub>3</sub>

zoom 112-122

GO

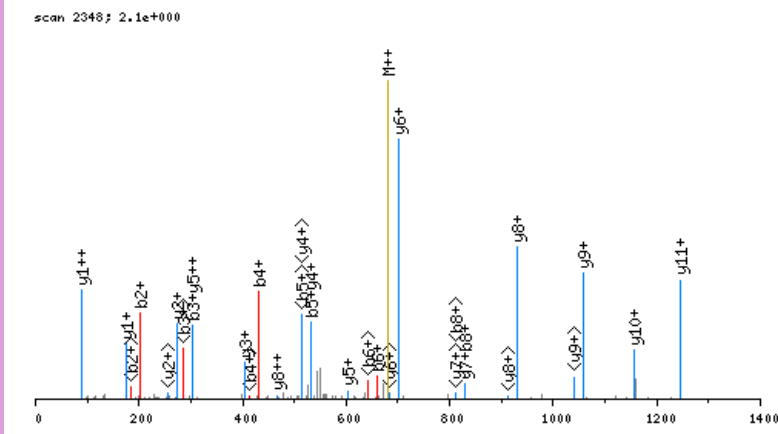

click image to zoom in; click top corners to zoom out [\[precursor±\]](#)

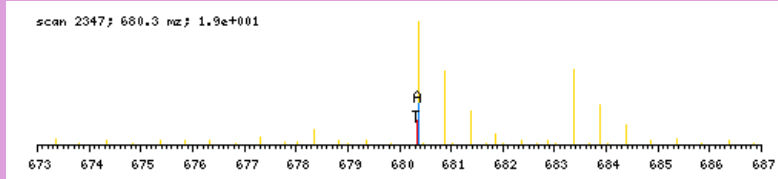

zoomed in precursor plot; T=theoretical m/z, A=acquired m/z

| b <sup>+</sup> | #  | AA # | y <sup>+</sup> | y <sup>2+</sup> |
|----------------|----|------|----------------|-----------------|
| 116.0711       | 1  | S 12 |                |                 |
| 203.1032       | 2  | S 11 | 1244.6123      | 622.8100        |
| 302.1716       | 3  | V 10 | 1157.5802      | 579.2940        |
| 431.2142       | 4  | E 9  | 1058.5118      | 529.7598        |
| 532.2618       | 5  | T 8  | 929.4692       | 465.2385        |
| 660.3204       | 6  | Q 7  | 828.4216       | 414.7147        |
| 757.3732       | 7  | P 6  | 700.3630       | 350.6854        |
| 828.4103       | 8  | A 5  | 603.3102       | 302.1590        |
| 957.4529       | 9  | E 4  | 532.2731       | 266.6405        |
| 1086.4955      | 10 | E 3  | 403.2305       | 202.1192        |
| 1185.5639      | 11 | V 2  | 274.1879       | 137.5979        |
|                | 12 | R 1  | 175.1195       | 88.0637         |

N-term:+29.04



SSVEYEPKEKTFDKILIANR, MH+ 2479.3813, m/z 620.6008  
 L OS G28 P150811 220811-s1.06027.06027.4.dta

X-range:

-

MassTol: Y-zoom:

MassType:

AVG  MONO

Axis:

1  2

Label:

I  M  -

Ions:

a  +  2+  3+

b  +  2+  3+

c  +  2+  3+

x  +  2+  3+

y  +  2+  3+

z  +  2+  3+

hide H<sub>2</sub>O/NH<sub>3</sub>

zoom 112-122

GO

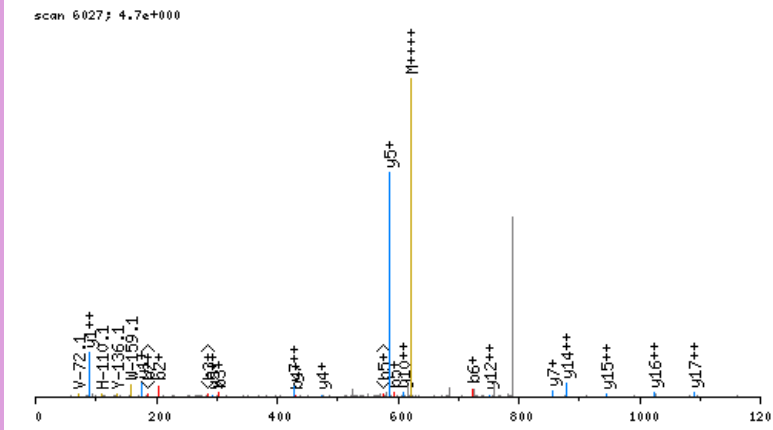

click image to zoom in; click top corners to zoom out [\[precursor±\]](#)

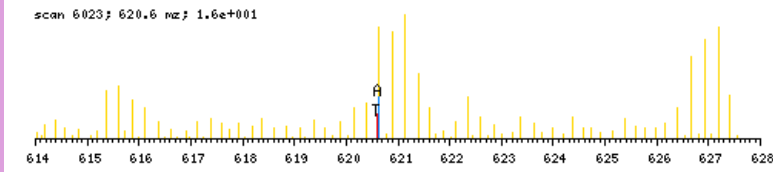

zoomed in precursor plot; T=theoretical m/z, A=acquired m/z

| b <sup>+</sup> | #  | AA | #  | y <sup>+</sup> | y <sup>2+</sup> |
|----------------|----|----|----|----------------|-----------------|
| 116.0711       | 1  | S  | 20 |                |                 |
| 203.1032       | 2  | S  | 19 | 2364.3180      | 1182.6629       |
| 302.1716       | 3  | V  | 18 | 2277.2860      | 1139.1469       |
| 431.2142       | 4  | E  | 17 | 2178.2175      | 1089.6127       |
| 594.2775       | 5  | Y  | 16 | 2049.1749      | 1025.0914       |
| 723.3201       | 6  | E  | 15 | 1886.1116      | 943.5597        |
| 820.3728       | 7  | P  | 14 | 1757.0690      | 879.0384        |
| 976.4991       | 8  | K  | 13 | 1660.0163      | 830.5120        |
| 1105.5417      | 9  | E  | 12 | 1503.8900      | 752.4489        |
| 1261.6680      | 10 | K  | 11 | 1374.8474      | 687.9276        |
| 1362.7157      | 11 | T  | 10 | 1218.7211      | 609.8644        |
| 1509.7841      | 12 | F  | 9  | 1117.6734      | 559.3406        |
| 1624.8111      | 13 | D  | 8  | 970.6050       | 485.8064        |
| 1780.9374      | 14 | K  | 7  | 855.5780       | 428.2929        |
| 1894.0214      | 15 | I  | 6  | 699.4517       | 350.2298        |
| 2007.1055      | 16 | L  | 5  | 586.3677       | 293.6877        |
| 2120.1896      | 17 | I  | 4  | 473.2836       | 237.1457        |
| 2191.2267      | 18 | A  | 3  | 360.1995       | 180.6037        |
| 2305.2696      | 19 | N  | 2  | 289.1624       | 145.0851        |
|                | 20 | R  | 1  | 175.1195       | 88.0637         |

N-term:+29.04 K(8):+156.13  
 K(10):+156.13 K(14):+156.13

SSVYGASVSDLDLKR, MH+ 1680.9081, m/z 560.9742  
 H OS G26 P150811 220811-s1.02977.02977.3.dta

X-range:

-

MassTol: Y-zoom:

MassType:

AVG  MONO

Axis:

1  2

Label:

I  M  -

Ions:

a  +  2+  3+

b  +  2+  3+

c  +  2+  3+

x  +  2+  3+

y  +  2+  3+

z  +  2+  3+

hide H<sub>2</sub>O/NH<sub>3</sub>

zoom 112-122

GO

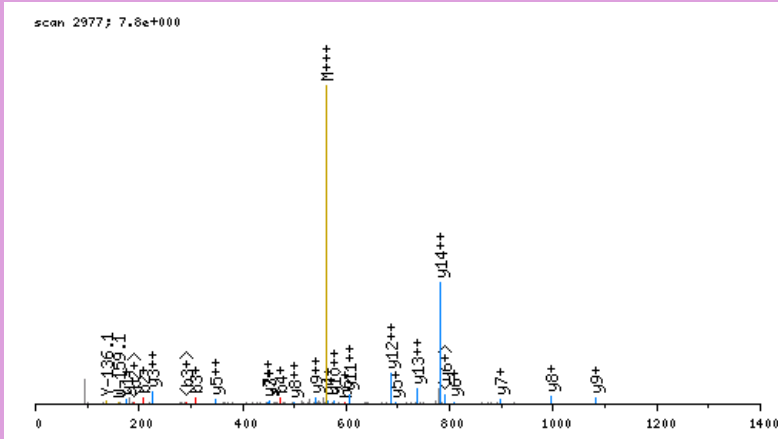

click image to zoom in; click top corners to zoom out [\[precursor±\]](#)

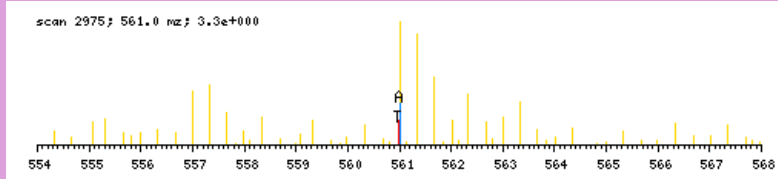

zoomed in precursor plot; T=theoretical m/z, A=acquired m/z

| b <sup>+</sup> | #  | AA | #  | y <sup>+</sup> | y <sup>2+</sup> |
|----------------|----|----|----|----------------|-----------------|
| 122.1029       | 1  | S  | 15 |                |                 |
| 209.1350       | 2  | S  | 14 | 1559.8130      | 780.4104        |
| 308.2034       | 3  | V  | 13 | 1472.7809      | 736.8944        |
| 471.2667       | 4  | Y  | 12 | 1373.7125      | 687.3602        |
| 528.2882       | 5  | G  | 11 | 1210.6492      | 605.8285        |
| 599.3253       | 6  | A  | 10 | 1153.6277      | 577.3178        |
| 686.3573       | 7  | S  | 9  | 1082.5906      | 541.7992        |
| 785.4257       | 8  | V  | 8  | 995.5586       | 498.2832        |
| 872.4577       | 9  | S  | 7  | 896.4902       | 448.7490        |
| 987.4847       | 10 | D  | 6  | 809.4581       | 405.2330        |
| 1116.5273      | 11 | E  | 5  | 694.4312       | 347.7195        |
| 1231.5542      | 12 | D  | 4  | 565.3886       | 283.1982        |
| 1344.6383      | 13 | L  | 3  | 450.3617       | 225.6847        |
| 1506.7964      | 14 | K  | 2  | 337.2776       | 169.1427        |
|                | 15 | R  | 1  | 175.1195       | 88.0637         |

N-term:+35.07 K(14):+162.16

STDITSLDQYVER, MH+ 1554.7651, m/z 518.9266  
 L OS G25 P150811 220811-s1.06689.06689.3.dta

scan 6689; 6.0e+000

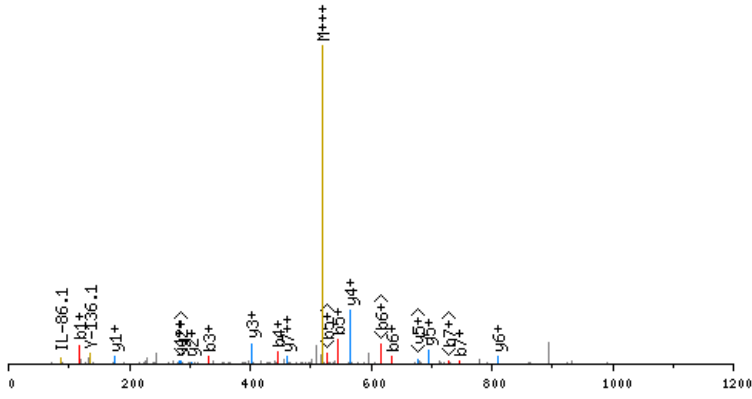

click image to zoom in; click top corners to zoom out [\[precursor±\]](#)

scan 6687; 518.9 m/z; 1.5e+001

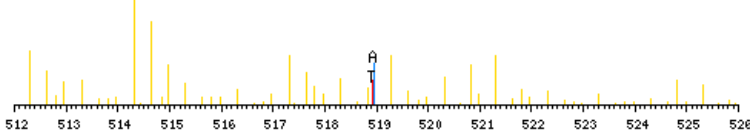

zoomed in precursor plot; T=theoretical m/z, A=acquired m/z

X-range:

-

MassTol: Y-zoom:

MassType:

AVG  MONO

Axis:

1  2

Label:

I  M  -

Ions:

a  +  2+  3+

b  +  2+  3+

c  +  2+  3+

x  +  2+  3+

y  +  2+  3+

z  +  2+  3+

hide H<sub>2</sub>O/NH<sub>3</sub>

zoom 112-122

GO

| b <sup>+</sup> | #  | AA # | y <sup>+</sup> | y <sup>2+</sup> |
|----------------|----|------|----------------|-----------------|
| 116.0711       | 1  | S 13 |                |                 |
| 217.1188       | 2  | T 12 | 1439.7018      | 720.3548        |
| 332.1458       | 3  | D 11 | 1338.6541      | 669.8310        |
| 445.2298       | 4  | I 10 | 1223.6272      | 612.3175        |
| 546.2775       | 5  | T 9  | 1110.5431      | 555.7755        |
| 633.3095       | 6  | S 8  | 1009.4954      | 505.2516        |
| 746.3936       | 7  | L 7  | 922.4634       | 461.7356        |
| 861.4205       | 8  | D 6  | 809.3794       | 405.1936        |
| 989.4791       | 9  | Q 5  | 694.3524       | 347.6801        |
| 1152.5424      | 10 | Y 4  | 566.2938       | 283.6508        |
| 1251.6108      | 11 | V 3  | 403.2305       | 202.1192        |
| 1380.6534      | 12 | E 2  | 304.1621       | 152.5850        |
|                | 13 | R 1  | 175.1195       | 88.0637         |

N-term:+29.04

STEALISHTLER, MH+ 1384.7436, m/z 462.2527  
 L OS G27 P150811 220811-s1.04671.04671.3.dta

X-range:

-

MassTol: Y-zoom:

MassType:

AVG  MONO

Axis:

1  2

Label:

I  M  -

Ions:

a  +  2+  3+

b  +  2+  3+

c  +  2+  3+

x  +  2+  3+

y  +  2+  3+

z  +  2+  3+

hide H<sub>2</sub>O/NH<sub>3</sub>

zoom 112-122

GO

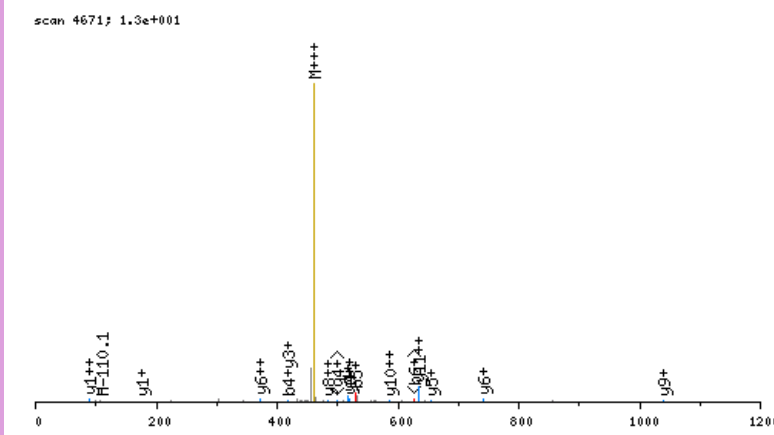

click image to zoom in; click top corners to zoom out [\[precursor±\]](#)

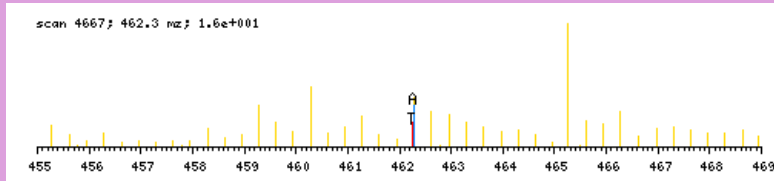

zoomed in precursor plot; T=theoretical m/z, A=acquired m/z

| b <sup>+</sup> | #  | AA # | y <sup>+</sup> | y <sup>2+</sup> |
|----------------|----|------|----------------|-----------------|
| 116.0711       | 1  | S 12 |                |                 |
| 217.1188       | 2  | T 11 | 1269.6803      | 635.3441        |
| 346.1614       | 3  | E 10 | 1168.6326      | 584.8202        |
| 417.1985       | 4  | A 9  | 1039.5900      | 520.2989        |
| 530.2826       | 5  | L 8  | 968.5529       | 484.7804        |
| 643.3666       | 6  | I 7  | 855.4688       | 428.2383        |
| 730.3987       | 7  | S 6  | 742.3848       | 371.6963        |
| 867.4576       | 8  | H 5  | 655.3527       | 328.1803        |
| 968.5053       | 9  | T 4  | 518.2938       | 259.6508        |
| 1081.5893      | 10 | L 3  | 417.2462       | 209.1270        |
| 1210.6319      | 11 | E 2  | 304.1621       | 152.5850        |
|                | 12 | R 1  | 175.1195       | 88.0637         |

N-term:+29.04

STESTASGMQDEV, MH+ 1531.7122, m/z 511.2423  
 H OS G25 P150811 220811-s1.02554.02554.3.dta

scan 2554; 2.8e+000

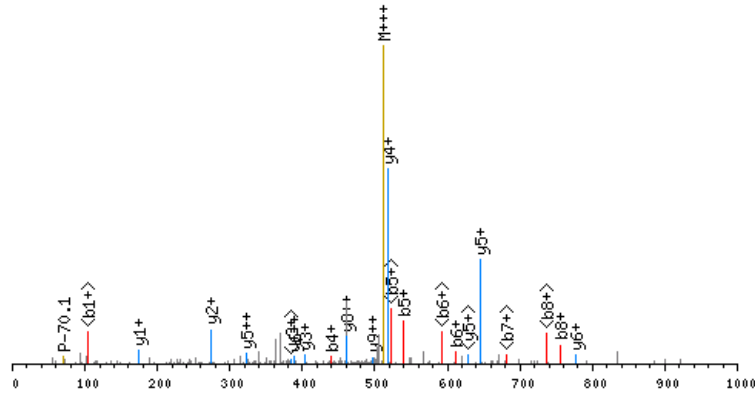

click image to zoom in; click top corners to zoom out [\[precursor±\]](#)

scan 2552; 511.2 m/z; 4.2e+001

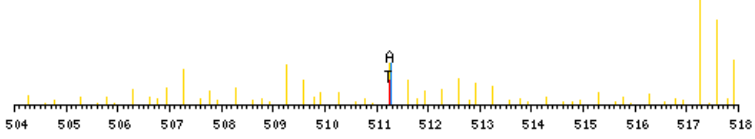

zoomed in precursor plot; T=theoretical m/z, A=acquired m/z

X-range:

-

MassTol: Y-zoom:

MassType:

AVG  MONO

Axis:

1  2

Label:

I  M  -

Ions:

a  +  2+  3+

b  +  2+  3+

c  +  2+  3+

x  +  2+  3+

y  +  2+  3+

z  +  2+  3+

hide H<sub>2</sub>O/NH<sub>3</sub>

zoom 112-122

GO

| b <sup>+</sup> | #  | AA # | y <sup>+</sup> | y <sup>2+</sup> |
|----------------|----|------|----------------|-----------------|
| 122.1029       | 1  | S 14 |                |                 |
| 223.1506       | 2  | T 13 | 1410.6171      | 705.8125        |
| 352.1932       | 3  | E 12 | 1309.5694      | 655.2886        |
| 439.2252       | 4  | S 11 | 1180.5268      | 590.7673        |
| 540.2729       | 5  | T 10 | 1093.4948      | 547.2513        |
| 611.3100       | 6  | A 9  | 992.4471       | 496.7275        |
| 698.3420       | 7  | S 8  | 921.4100       | 461.2089        |
| 755.3635       | 8  | G 7  | 834.3780       | 417.6929        |
| 886.4040       | 9  | M 6  | 777.3565       | 389.1822        |
| 1014.4626      | 10 | Q 5  | 646.3160       | 323.6619        |
| 1129.4895      | 11 | D 4  | 518.2575       | 259.6326        |
| 1258.5321      | 12 | E 3  | 403.2305       | 202.1192        |
| 1357.6005      | 13 | V 2  | 274.1879       | 137.5979        |
|                | 14 | R 1  | 175.1195       | 88.0637         |

N-term:+35.07

STGTFVVSQPLNYR, MH+ 1596.8386, m/z 532.9510  
 L OS G25 P150811 220811-s1.06739.06739.3.dta

X-range:

-

MassTol: Y-zoom:

MassType:

AVG  MONO

Axis:

1  2

Label:

I  M  -

Ions:

a  +  2+  3+

b  +  2+  3+

c  +  2+  3+

x  +  2+  3+

y  +  2+  3+

z  +  2+  3+

hide H<sub>2</sub>O/NH<sub>3</sub>

zoom 112-122

GO

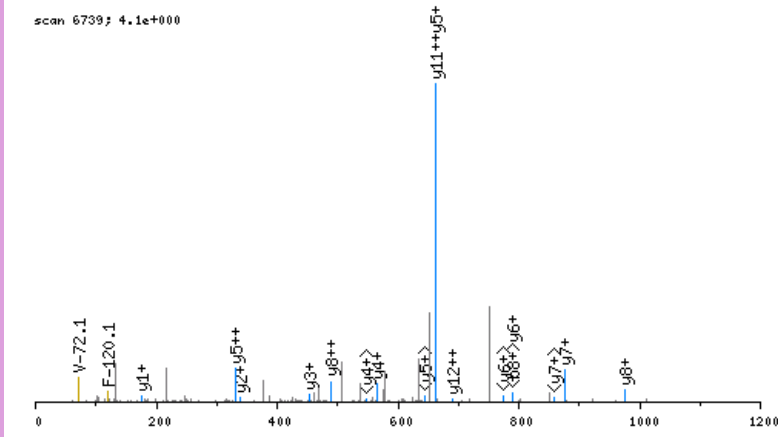

click image to zoom in; click top corners to zoom out [\[precursor±\]](#)

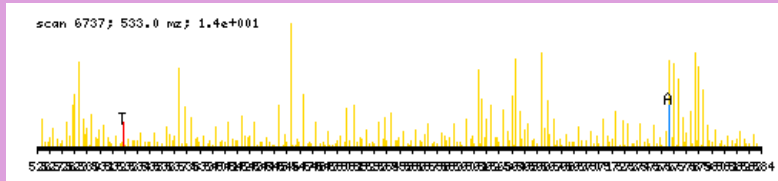

zoomed in precursor plot; T=theoretical m/z, A=acquired m/z

| b <sup>+</sup> | #  | AA # | y <sup>+</sup> | y <sup>2+</sup> |
|----------------|----|------|----------------|-----------------|
| 116.0711       | 1  | S 14 |                |                 |
| 217.1188       | 2  | T 13 | 1481.7753      | 741.3915        |
| 274.1403       | 3  | G 12 | 1380.7276      | 690.8677        |
| 375.1879       | 4  | T 11 | 1323.7061      | 662.3570        |
| 522.2564       | 5  | F 10 | 1222.6584      | 611.8331        |
| 621.3248       | 6  | V 9  | 1075.5900      | 538.2989        |
| 720.3932       | 7  | V 8  | 976.5216       | 488.7647        |
| 807.4252       | 8  | S 7  | 877.4532       | 439.2305        |
| 935.4838       | 9  | Q 6  | 790.4212       | 395.7145        |
| 1032.5366      | 10 | P 5  | 662.3626       | 331.6852        |
| 1145.6206      | 11 | L 4  | 565.3098       | 283.1588        |
| 1259.6636      | 12 | N 3  | 452.2258       | 226.6168        |
| 1422.7269      | 13 | Y 2  | 338.1828       | 169.5953        |
|                | 14 | R 1  | 175.1195       | 88.0637         |

N-term:+29.04

STHQAAVVSKIDSR, MH+ 1554.8604, m/z 389.4706  
 L OS G28 P150811 220811-s1.02209.02209.4.dta

X-range:

-

MassTol: Y-zoom:

MassType:

AVG  MONO

Axis:

1  2

Label:

I  M  -

Ions:

a  +  2+  3+

b  +  2+  3+

c  +  2+  3+

x  +  2+  3+

y  +  2+  3+

z  +  2+  3+

hide H<sub>2</sub>O/NH<sub>3</sub>

zoom 112-122

GO

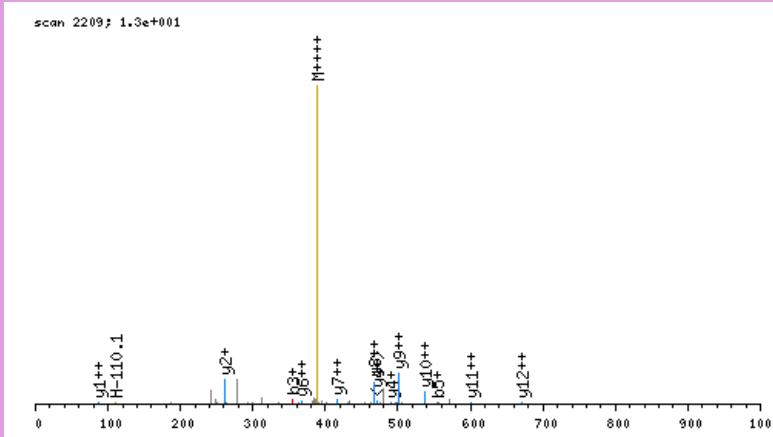

click image to zoom in; click top corners to zoom out [\[precursor±\]](#)

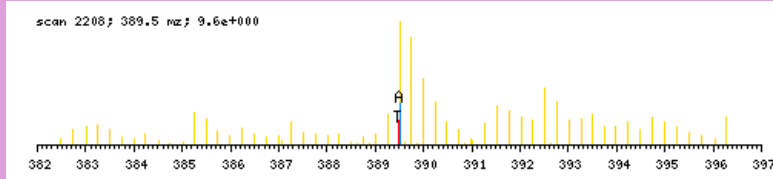

zoomed in precursor plot; T=theoretical m/z, A=acquired m/z

| b <sup>+</sup> | #  | AA # | y <sup>+</sup> | y <sup>2+</sup> |
|----------------|----|------|----------------|-----------------|
| 116.0711       | 1  | S 14 |                |                 |
| 217.1188       | 2  | T 13 | 1439.7971      | 720.4025        |
| 354.1777       | 3  | H 12 | 1338.7494      | 669.8786        |
| 482.2363       | 4  | Q 11 | 1201.6905      | 601.3492        |
| 553.2734       | 5  | A 10 | 1073.6319      | 537.3199        |
| 624.3105       | 6  | A 9  | 1002.5948      | 501.8013        |
| 723.3789       | 7  | V 8  | 931.5577       | 466.2828        |
| 822.4474       | 8  | V 7  | 832.4893       | 416.7486        |
| 909.4794       | 9  | S 6  | 733.4209       | 367.2143        |
| 1065.6057      | 10 | K 5  | 646.3888       | 323.6983        |
| 1178.6897      | 11 | I 4  | 490.2625       | 245.6352        |
| 1293.7167      | 12 | D 3  | 377.1785       | 189.0931        |
| 1380.7487      | 13 | S 2  | 262.1515       | 131.5797        |
|                | 14 | R 1  | 175.1195       | 88.0637         |

N-term:+29.04 K(10):+156.13

STIIHYEILEER, MH+ 1530.8168, m/z 510.9438  
 L OS G27 P150811 220811-s1.05880.05880.3.dta

X-range:

-

MassTol: Y-zoom:

MassType:

AVG  MONO

Axis:

1  2

Label:

I  M  -

Ions:

a  +  2+  3+

b  +  2+  3+

c  +  2+  3+

x  +  2+  3+

y  +  2+  3+

z  +  2+  3+

hide H<sub>2</sub>O/NH<sub>3</sub>

zoom 112-122

GO

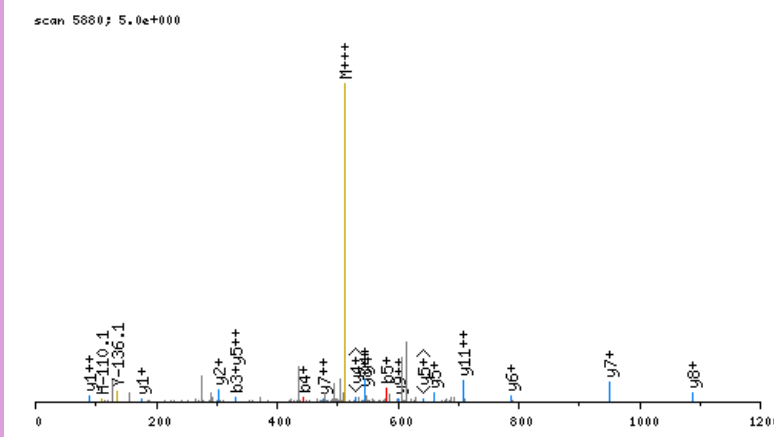

click image to zoom in; click top corners to zoom out [\[precursor±\]](#)

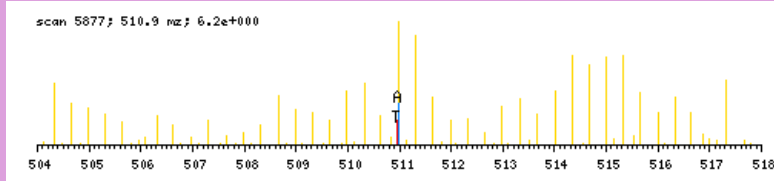

zoomed in precursor plot; T=theoretical m/z, A=acquired m/z

| b <sup>+</sup> | #  | AA # | y <sup>+</sup> | y <sup>2+</sup> |
|----------------|----|------|----------------|-----------------|
| 116.0711       | 1  | S 12 |                |                 |
| 217.1188       | 2  | T 11 | 1415.7535      | 708.3806        |
| 330.2029       | 3  | I 10 | 1314.7058      | 657.8568        |
| 443.2869       | 4  | I 9  | 1201.6217      | 601.3148        |
| 580.3458       | 5  | H 8  | 1088.5376      | 544.7727        |
| 743.4092       | 6  | Y 7  | 951.4787       | 476.2433        |
| 872.4518       | 7  | E 6  | 788.4154       | 394.7116        |
| 985.5358       | 8  | I 5  | 659.3728       | 330.1903        |
| 1098.6199      | 9  | L 4  | 546.2888       | 273.6483        |
| 1227.6625      | 10 | E 3  | 433.2047       | 217.1063        |
| 1356.7051      | 11 | E 2  | 304.1621       | 152.5850        |
|                | 12 | R 1  | 175.1195       | 88.0637         |

N-term:+29.04



STLSKPAPLTGTLEVR, MH+ 1726.0115, m/z 576.0087  
 L OS G26 P150811 220811-s1.04146.04146.3.dta

X-range:

-

MassTol: Y-zoom:

MassType:

AVG  MONO

Axis:

1  2

Label:

I  M  -

Ions:

a  +  2+  3+

b  +  2+  3+

c  +  2+  3+

x  +  2+  3+

y  +  2+  3+

z  +  2+  3+

hide H<sub>2</sub>O/NH<sub>3</sub>

zoom 112-122

GO

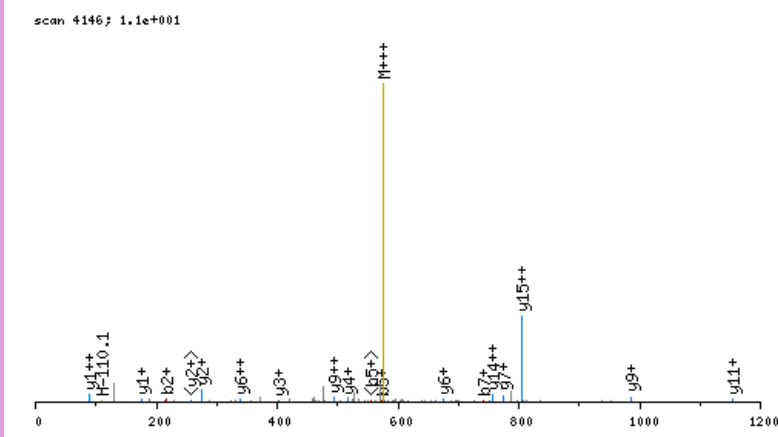

click image to zoom in; click top corners to zoom out [\[precursor±\]](#)

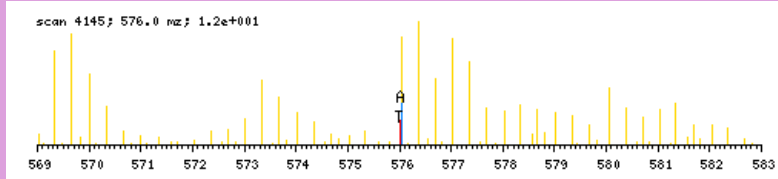

zoomed in precursor plot; T=theoretical m/z, A=acquired m/z

| b <sup>+</sup> | #  | AA # | y <sup>+</sup> | y <sup>2+</sup> |
|----------------|----|------|----------------|-----------------|
| 116.0711       | 1  | S 16 |                |                 |
| 217.1188       | 2  | T 15 | 1610.9482      | 805.9780        |
| 330.2029       | 3  | L 14 | 1509.9005      | 755.4542        |
| 417.2349       | 4  | S 13 | 1396.8164      | 698.9121        |
| 573.3612       | 5  | K 12 | 1309.7844      | 655.3961        |
| 670.4140       | 6  | P 11 | 1153.6581      | 577.3330        |
| 741.4511       | 7  | A 10 | 1056.6053      | 528.8066        |
| 838.5038       | 8  | P 9  | 985.5682       | 493.2880        |
| 951.5879       | 9  | L 8  | 888.5155       | 444.7616        |
| 1052.6356      | 10 | T 7  | 775.4314       | 388.2196        |
| 1109.6570      | 11 | G 6  | 674.3837       | 337.6958        |
| 1210.7047      | 12 | T 5  | 617.3623       | 309.1850        |
| 1323.7888      | 13 | L 4  | 516.3146       | 258.6612        |
| 1452.8314      | 14 | E 3  | 403.2305       | 202.1192        |
| 1551.8998      | 15 | V 2  | 274.1879       | 137.5979        |
|                | 16 | R 1  | 175.1195       | 88.0637         |

N-term:+29.04 K(5):+156.13

STPPSAYGSVKPYTNFDAER, MH+ 2243.0984, m/z 748.3710  
 L OS G26 P150811 220811-s1.04147.04147.3.dta

X-range:

-

MassTol: Y-zoom:

MassType:

AVG  MONO

Axis:

1  2

Label:

I  M  -

Ions:

a  +  2+  3+

b  +  2+  3+

c  +  2+  3+

x  +  2+  3+

y  +  2+  3+

z  +  2+  3+

hide H<sub>2</sub>O/NH<sub>3</sub>

zoom 112-122

GO

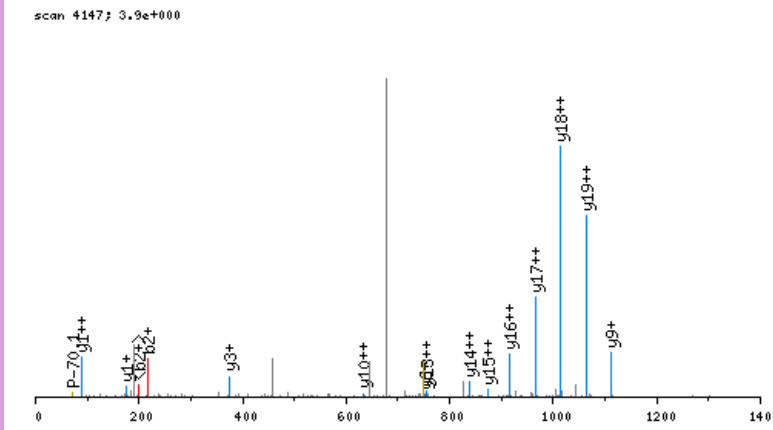

click image to zoom in; click top corners to zoom out [precursor±]

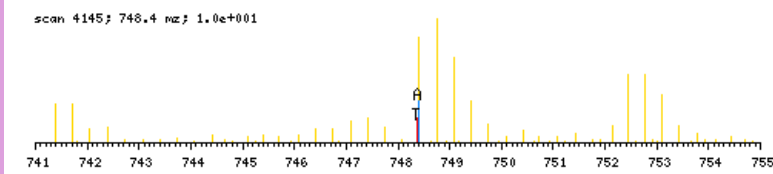

zoomed in precursor plot; T=theoretical m/z, A=acquired m/z

| b <sup>+</sup> | #  | AA | #  | y <sup>+</sup> | y <sup>2+</sup> |
|----------------|----|----|----|----------------|-----------------|
| 116.0711       | 1  | S  | 20 |                |                 |
| 217.1188       | 2  | T  | 19 | 2128.0351      | 1064.5215       |
| 314.1716       | 3  | P  | 18 | 2026.9875      | 1013.9976       |
| 411.2243       | 4  | P  | 17 | 1929.9347      | 965.4713        |
| 498.2564       | 5  | S  | 16 | 1832.8819      | 916.9449        |
| 569.2935       | 6  | A  | 15 | 1745.8499      | 873.4289        |
| 732.3568       | 7  | Y  | 14 | 1674.8128      | 837.9103        |
| 789.3783       | 8  | G  | 13 | 1511.7495      | 756.3786        |
| 876.4103       | 9  | S  | 12 | 1454.7280      | 727.8679        |
| 975.4787       | 10 | V  | 11 | 1367.6960      | 684.3519        |
| 1131.6050      | 11 | K  | 10 | 1268.6276      | 634.8177        |
| 1228.6578      | 12 | P  | 9  | 1112.5013      | 556.7545        |
| 1391.7211      | 13 | Y  | 8  | 1015.4485      | 508.2282        |
| 1492.7688      | 14 | T  | 7  | 852.3852       | 426.6965        |
| 1606.8117      | 15 | N  | 6  | 751.3375       | 376.1727        |
| 1753.8801      | 16 | F  | 5  | 637.2946       | 319.1512        |
| 1868.9071      | 17 | D  | 4  | 490.2262       | 245.6170        |
| 1939.9442      | 18 | A  | 3  | 375.1992       | 188.1035        |
| 2068.9868      | 19 | E  | 2  | 304.1621       | 152.5850        |
|                | 20 | R  | 1  | 175.1195       | 88.0637         |

N-term:+29.04 K(11):+156.13

STPQSQFQESSPVWKLGR, MH+ 2118.0984, m/z 706.7043  
 L OS G26 P150811 220811-s1.04971.04971.3.dta

X-range:

-

MassTol: Y-zoom:

MassType:

AVG  MONO

Axis:

1  2

Label:

I  M  -

Ions:

a  +  2+  3+

b  +  2+  3+

c  +  2+  3+

x  +  2+  3+

y  +  2+  3+

z  +  2+  3+

hide H<sub>2</sub>O/NH<sub>3</sub>

zoom 112-122

GO

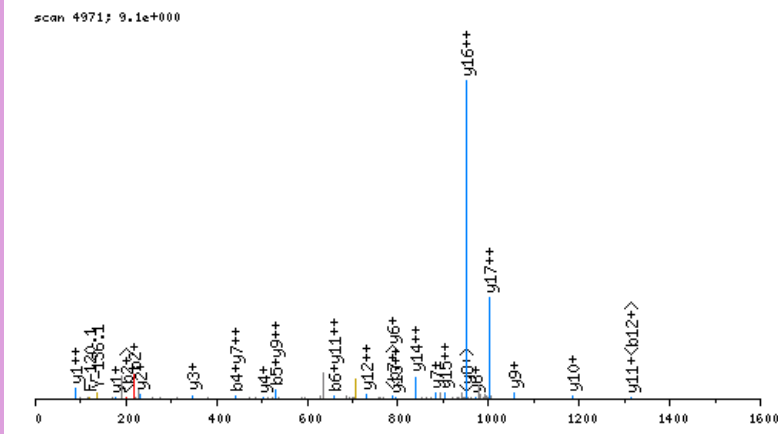

click image to zoom in; click top corners to zoom out [\[precursor±\]](#)

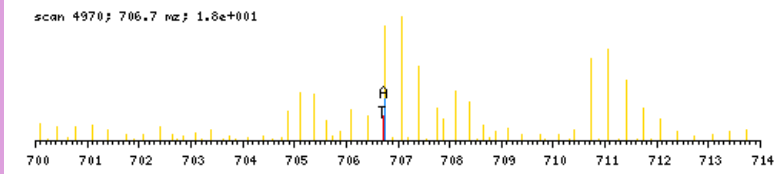

zoomed in precursor plot; T=theoretical m/z, A=acquired m/z

| b <sup>+</sup> | #  | AA | #  | y <sup>+</sup> | y <sup>2+</sup> |
|----------------|----|----|----|----------------|-----------------|
| 116.0711       | 1  | S  | 18 |                |                 |
| 217.1188       | 2  | T  | 17 | 2003.0351      | 1002.0215       |
| 314.1716       | 3  | P  | 16 | 1901.9874      | 951.4976        |
| 442.2301       | 4  | Q  | 15 | 1804.9346      | 902.9712        |
| 529.2622       | 5  | S  | 14 | 1676.8761      | 838.9419        |
| 657.3208       | 6  | Q  | 13 | 1589.8440      | 795.4259        |
| 804.3892       | 7  | F  | 12 | 1461.7855      | 731.3966        |
| 932.4477       | 8  | Q  | 11 | 1314.7170      | 657.8624        |
| 1061.4903      | 9  | E  | 10 | 1186.6585      | 593.8331        |
| 1148.5224      | 10 | S  | 9  | 1057.6159      | 529.3119        |
| 1235.5544      | 11 | S  | 8  | 970.5838       | 485.7958        |
| 1332.6072      | 12 | P  | 7  | 883.5518       | 442.2798        |
| 1431.6756      | 13 | V  | 6  | 786.4991       | 393.7534        |
| 1617.7549      | 14 | W  | 5  | 687.4306       | 344.2192        |
| 1773.8812      | 15 | K  | 4  | 501.3513       | 251.1796        |
| 1886.9653      | 16 | L  | 3  | 345.2250       | 173.1164        |
| 1943.9867      | 17 | G  | 2  | 232.1410       | 116.5744        |
|                | 18 | R  | 1  | 175.1195       | 88.0637         |

N-term:+29.04 K(15):+156.13

STQAAEDKEEESLHSIISNTEAVR, MH+ 2700.3328, m/z 675.8387  
 L OS G27 P150811 220811-s1.06331.06331.4.dta

scan 6331; 1.2e+000

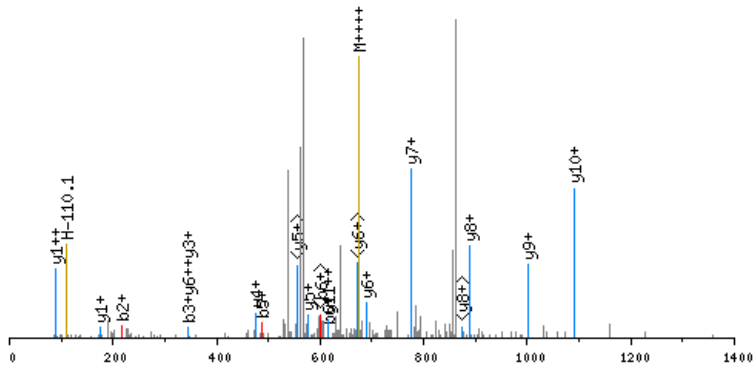

click image to zoom in; click top corners to zoom out [precursor±]

scan 6327; 675.8 m/z; 7.0e+000

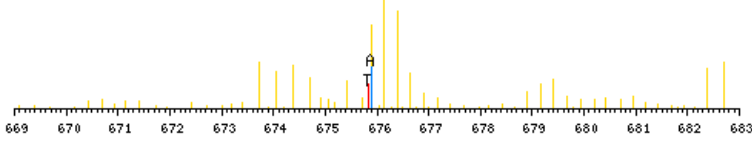

zoomed in precursor plot; T=theoretical m/z, A=acquired m/z

X-range:

-

MassTol: Y-zoom:

MassType:

AVG  MONO

Axis:

1  2

Label:

I  M  -

Ions:

a  +  2+  3+

b  +  2+  3+

c  +  2+  3+

x  +  2+  3+

y  +  2+  3+

z  +  2+  3+

hide H<sub>2</sub>O/NH<sub>3</sub>

zoom 112-122

GO

| b <sup>+</sup> | #  | AA # | y <sup>+</sup> | y <sup>2+</sup> |
|----------------|----|------|----------------|-----------------|
| 116.0711       | 1  | S 24 |                |                 |
| 217.1188       | 2  | T 23 | 2585.2695      | 1293.1387       |
| 345.1774       | 3  | Q 22 | 2484.2218      | 1242.6148       |
| 416.2145       | 4  | A 21 | 2356.1633      | 1178.5855       |
| 487.2516       | 5  | A 20 | 2285.1261      | 1143.0670       |
| 616.2942       | 6  | E 19 | 2214.0890      | 1107.5484       |
| 731.3211       | 7  | D 18 | 2085.0464      | 1043.0271       |
| 887.4474       | 8  | K 17 | 1970.0195      | 985.5137        |
| 1016.4900      | 9  | E 16 | 1813.8932      | 907.4505        |
| 1145.5326      | 10 | E 15 | 1684.8506      | 842.9292        |
| 1274.5752      | 11 | E 14 | 1555.8080      | 778.4079        |
| 1361.6073      | 12 | S 13 | 1426.7654      | 713.8866        |
| 1474.6913      | 13 | L 12 | 1339.7334      | 670.3706        |
| 1611.7502      | 14 | H 11 | 1226.6493      | 613.8286        |
| 1698.7823      | 15 | S 10 | 1089.5904      | 545.2991        |
| 1811.8663      | 16 | I 9  | 1002.5584      | 501.7831        |
| 1924.9504      | 17 | I 8  | 889.4743       | 445.2411        |
| 2011.9824      | 18 | S 7  | 776.3903       | 388.6990        |
| 2126.0253      | 19 | N 6  | 689.3582       | 345.1830        |
| 2227.0730      | 20 | T 5  | 575.3153       | 288.1616        |
| 2356.1156      | 21 | E 4  | 474.2676       | 237.6377        |
| 2427.1527      | 22 | A 3  | 345.2250       | 173.1164        |
| 2526.2211      | 23 | V 2  | 274.1879       | 137.5979        |
|                | 24 | R 1  | 175.1195       | 88.0637         |

N-term:+29.04 K(8):+156.13

STSNIQDALHGQLR, MH+ 1573.8510, m/z 525.2885  
 H OS G27 P150811 220811-s1.04838.04838.3.dta

X-range:

-

MassTol: Y-zoom:

MassType:

AVG  MONO

Axis:

1  2

Label:

I  M  -

Ions:

a  +  2+  3+

b  +  2+  3+

c  +  2+  3+

x  +  2+  3+

y  +  2+  3+

z  +  2+  3+

hide H<sub>2</sub>O/NH<sub>3</sub>

zoom 112-122

GO

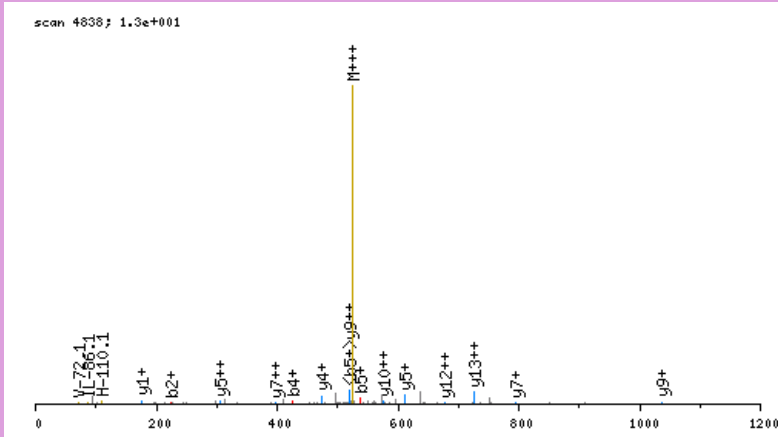

click image to zoom in; click top corners to zoom out [\[precursor±\]](#)

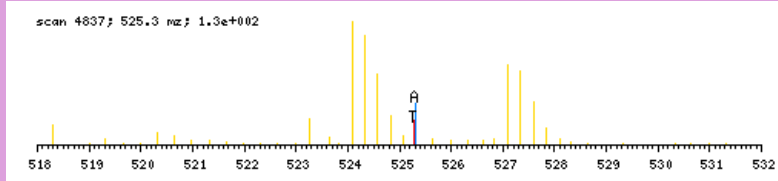

zoomed in precursor plot; T=theoretical m/z, A=acquired m/z

| b <sup>+</sup> | #  | AA # | y <sup>+</sup> | y <sup>2+</sup> |
|----------------|----|------|----------------|-----------------|
| 122.1029       | 1  | S 14 |                |                 |
| 223.1506       | 2  | T 13 | 1452.7559      | 726.8819        |
| 310.1826       | 3  | S 12 | 1351.7082      | 676.3580        |
| 424.2256       | 4  | N 11 | 1264.6762      | 632.8420        |
| 537.3096       | 5  | I 10 | 1150.6333      | 575.8206        |
| 665.3682       | 6  | Q 9  | 1037.5492      | 519.2785        |
| 780.3951       | 7  | D 8  | 909.4906       | 455.2492        |
| 851.4323       | 8  | A 7  | 794.4637       | 397.7358        |
| 964.5163       | 9  | L 6  | 723.4266       | 362.2172        |
| 1101.5752      | 10 | H 5  | 610.3425       | 305.6752        |
| 1158.5967      | 11 | G 4  | 473.2836       | 237.1457        |
| 1286.6553      | 12 | Q 3  | 416.2621       | 208.6350        |
| 1399.7393      | 13 | L 2  | 288.2036       | 144.6057        |
|                | 14 | R 1  | 175.1195       | 88.0637         |

N-term:+35.07

STSSMGTLPKQVKIVEVGPR, MH+ 2198.2583, m/z 550.3200  
 L OS G27 P150811 220811-s1.05275.05275.4.dta

scan 5275; 9.7e+000

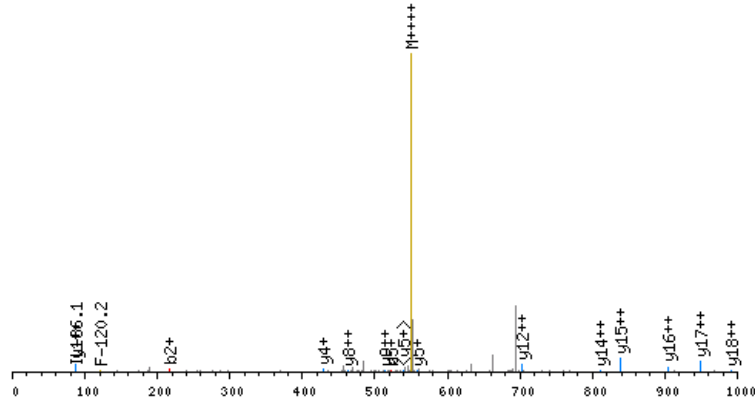

click image to zoom in; click top corners to zoom out [precursor±]

scan 5272; 550.3 mz; 2.2e+001

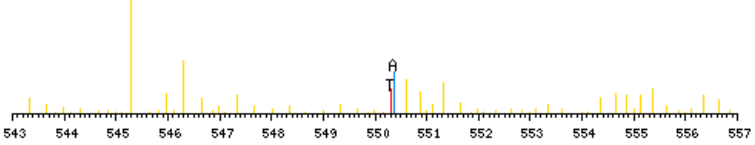

zoomed in precursor plot; T=theoretical m/z, A=acquired m/z

X-range:

-

MassTol: Y-zoom:

MassType:

AVG  MONO

Axis:

1  2

Label:

I  M  -

Ions:

a  +  2+  3+

b  +  2+  3+

c  +  2+  3+

x  +  2+  3+

y  +  2+  3+

z  +  2+  3+

hide H<sub>2</sub>O/NH<sub>3</sub>

zoom 112-122

GO

| b <sup>+</sup> | #  | AA | #  | y <sup>+</sup> | y <sup>2+</sup> |
|----------------|----|----|----|----------------|-----------------|
| 116.0711       | 1  | S  | 20 |                |                 |
| 217.1188       | 2  | T  | 19 | 2083.1950      | 1042.1014       |
| 304.1508       | 3  | S  | 18 | 1982.1473      | 991.5776        |
| 391.1829       | 4  | S  | 17 | 1895.1153      | 948.0616        |
| 522.2233       | 5  | M  | 16 | 1808.0833      | 904.5455        |
| 579.2448       | 6  | G  | 15 | 1677.0428      | 839.0253        |
| 680.2925       | 7  | T  | 14 | 1620.0213      | 810.5146        |
| 793.3766       | 8  | L  | 13 | 1518.9736      | 759.9907        |
| 890.4293       | 9  | P  | 12 | 1405.8896      | 703.4487        |
| 1046.5556      | 10 | K  | 11 | 1308.8368      | 654.9223        |
| 1174.6142      | 11 | Q  | 10 | 1152.7105      | 576.8592        |
| 1273.6826      | 12 | V  | 9  | 1024.6519      | 512.8299        |
| 1429.8089      | 13 | K  | 8  | 925.5835       | 463.2957        |
| 1542.8930      | 14 | I  | 7  | 769.4572       | 385.2325        |
| 1641.9614      | 15 | V  | 6  | 656.3731       | 328.6905        |
| 1771.0040      | 16 | E  | 5  | 557.3047       | 279.1563        |
| 1870.0724      | 17 | V  | 4  | 428.2621       | 214.6350        |
| 1927.0939      | 18 | G  | 3  | 329.1937       | 165.1008        |
| 2024.1466      | 19 | P  | 2  | 272.1723       | 136.5900        |
|                | 20 | R  | 1  | 175.1195       | 88.0637         |

N-term: +29.04 K(10): +156.13  
 K(13): +156.13

STSVTSDNLSR, MH+ 1200.6284, m/z 600.8178  
 H OS G25 P150811 220811-s1.02175.02175.2.dta

scan 2175; 5.5e+000

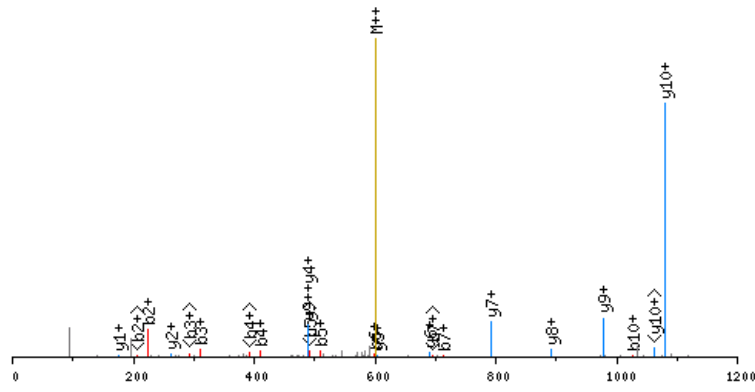

click image to zoom in; click top corners to zoom out [precursor±]

scan 2172; 600.8 m/z; 7.0e+000

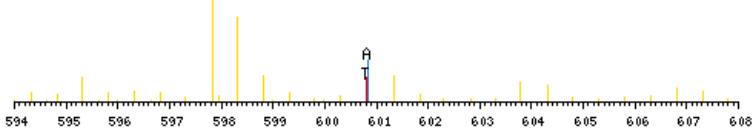

zoomed in precursor plot; T=theoretical m/z, A=acquired m/z

X-range:

-

MassTol: Y-zoom:

MassType:

AVG  MONO

Axis:

1  2

Label:

I  M  -

Ions:

a  +  2+  3+

b  +  2+  3+

c  +  2+  3+

x  +  2+  3+

y  +  2+  3+

z  +  2+  3+

hide H<sub>2</sub>O/NH<sub>3</sub>

zoom 112-122

GO

| b <sup>+</sup> | #  | AA # | y <sup>+</sup> | y <sup>2+</sup> |
|----------------|----|------|----------------|-----------------|
| 122.1029       | 1  | S 11 |                |                 |
| 223.1506       | 2  | T 10 | 1079.5333      | 540.2706        |
| 310.1826       | 3  | S 9  | 978.4856       | 489.7467        |
| 409.2510       | 4  | V 8  | 891.4536       | 446.2307        |
| 510.2987       | 5  | T 7  | 792.3852       | 396.6965        |
| 597.3308       | 6  | S 6  | 691.3375       | 346.1727        |
| 712.3577       | 7  | D 5  | 604.3055       | 302.6566        |
| 826.4006       | 8  | N 4  | 489.2785       | 245.1432        |
| 939.4847       | 9  | L 3  | 375.2356       | 188.1217        |
| 1026.5167      | 10 | S 2  | 262.1515       | 131.5797        |
|                | 11 | R 1  | 175.1195       | 88.0637         |

N-term:+35.07

SVATKKTEQGPPSSEYIFER, MH+ 2338.2295, m/z 585.3128  
 L OS G28 P150811 220811-s1.04424.04424.4.dta

X-range:

-

MassTol: Y-zoom:

MassType:

AVG  MONO

Axis:

1  2

Label:

I  M  -

Ions:

a  +  2+  3+

b  +  2+  3+

c  +  2+  3+

x  +  2+  3+

y  +  2+  3+

z  +  2+  3+

hide H<sub>2</sub>O/NH<sub>3</sub>

zoom 112-122

GO

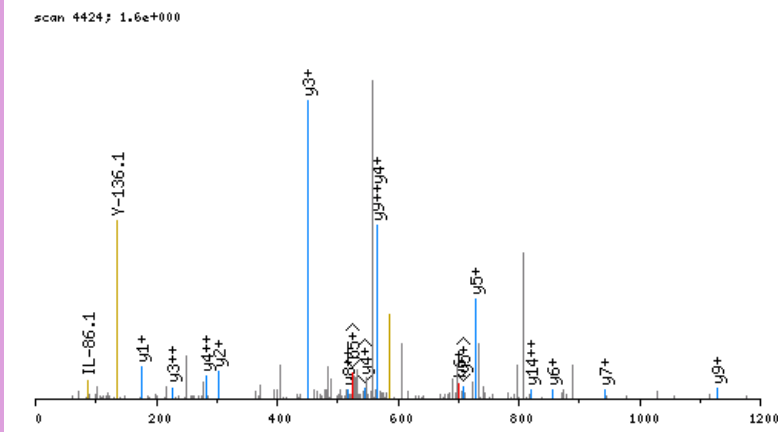

click image to zoom in; click top corners to zoom out [\[precursor±\]](#)

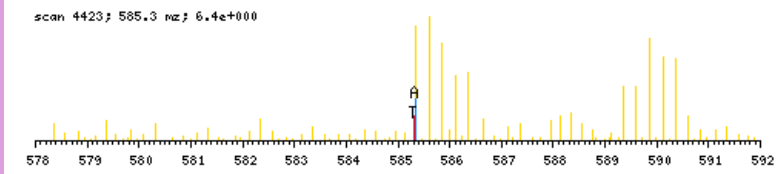

zoomed in precursor plot; T=theoretical m/z, A=acquired m/z

| b <sup>+</sup> | #  | AA | #  | y <sup>+</sup> | y <sup>2+</sup> |
|----------------|----|----|----|----------------|-----------------|
| 116.0711       | 1  | S  | 20 |                |                 |
| 215.1395       | 2  | V  | 19 | 2223.1662      | 1112.0870       |
| 286.1767       | 3  | A  | 18 | 2124.0978      | 1062.5528       |
| 387.2243       | 4  | T  | 17 | 2053.0607      | 1027.0342       |
| 543.3506       | 5  | K  | 16 | 1952.0130      | 976.5104        |
| 699.4769       | 6  | K  | 15 | 1795.8867      | 898.4473        |
| 800.5246       | 7  | T  | 14 | 1639.7604      | 820.3841        |
| 929.5672       | 8  | E  | 13 | 1538.7127      | 769.8603        |
| 1057.6258      | 9  | Q  | 12 | 1409.6701      | 705.3390        |
| 1114.6472      | 10 | G  | 11 | 1281.6115      | 641.3097        |
| 1211.7000      | 11 | P  | 10 | 1224.5901      | 612.7990        |
| 1308.7528      | 12 | P  | 9  | 1127.5373      | 564.2726        |
| 1395.7848      | 13 | S  | 8  | 1030.4846      | 515.7462        |
| 1482.8168      | 14 | S  | 7  | 943.4525       | 472.2302        |
| 1611.8594      | 15 | E  | 6  | 856.4205       | 428.7142        |
| 1774.9228      | 16 | Y  | 5  | 727.3779       | 364.1929        |
| 1888.0068      | 17 | I  | 4  | 564.3146       | 282.6612        |
| 2035.0752      | 18 | F  | 3  | 451.2305       | 226.1192        |
| 2164.1178      | 19 | E  | 2  | 304.1621       | 152.5850        |
|                | 20 | R  | 1  | 175.1195       | 88.0637         |

N-term:+29.04 K(5):+156.13  
 K(6):+156.13



SVGAQGPPGPSGEEGKR, MH+ 1677.9196, m/z 559.9781  
 H OS G27 P150811 220811-s1.02051.02051.3.dta

X-range:

-

MassTol: Y-zoom:

MassType:

AVG  MONO

Axis:

1  2

Label:

I  M  -

Ions:

a  +  2+  3+

b  +  2+  3+

c  +  2+  3+

x  +  2+  3+

y  +  2+  3+

z  +  2+  3+

hide H<sub>2</sub>O/NH<sub>3</sub>

zoom 112-122

GO

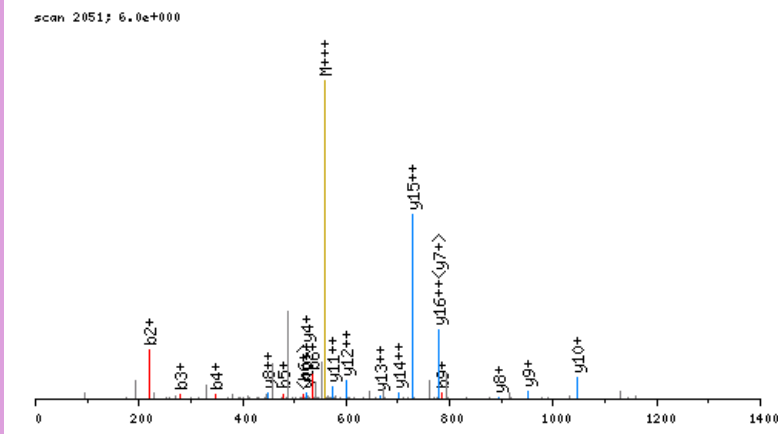

click image to zoom in; click top corners to zoom out [\[precursor±\]](#)

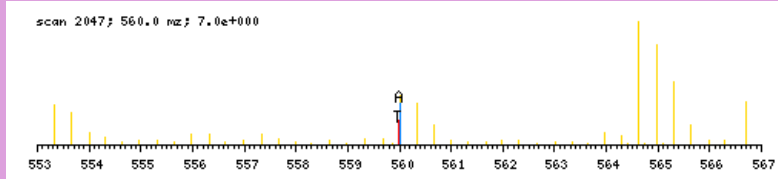

zoomed in precursor plot; T=theoretical m/z, A=acquired m/z

| b <sup>+</sup> | #  | AA | #  | y <sup>+</sup> | y <sup>2+</sup> |
|----------------|----|----|----|----------------|-----------------|
| 122.1029       | 1  | S  | 17 |                |                 |
| 221.1713       | 2  | V  | 16 | 1556.8245      | 778.9162        |
| 278.1928       | 3  | G  | 15 | 1457.7561      | 729.3820        |
| 349.2299       | 4  | A  | 14 | 1400.7347      | 700.8712        |
| 477.2885       | 5  | Q  | 13 | 1329.6975      | 665.3527        |
| 534.3100       | 6  | G  | 12 | 1201.6390      | 601.3234        |
| 631.3627       | 7  | P  | 11 | 1144.6175      | 572.8127        |
| 728.4155       | 8  | P  | 10 | 1047.5647      | 524.2863        |
| 785.4370       | 9  | G  | 9  | 950.5120       | 475.7599        |
| 882.4897       | 10 | P  | 8  | 893.4905       | 447.2492        |
| 969.5217       | 11 | S  | 7  | 796.4377       | 398.7228        |
| 1026.5432      | 12 | G  | 6  | 709.4057       | 355.2068        |
| 1155.5858      | 13 | E  | 5  | 652.3843       | 326.6960        |
| 1284.6284      | 14 | E  | 4  | 523.3417       | 262.1747        |
| 1341.6499      | 15 | G  | 3  | 394.2991       | 197.6534        |
| 1503.8080      | 16 | K  | 2  | 337.2776       | 169.1427        |
|                | 17 | R  | 1  | 175.1195       | 88.0637         |

N-term:+35.07 K(16):+162.16

SVIDYELIDQDAR, MH+ 1570.8177, m/z 524.2774  
 H OS G25 P150811 220811-s1.06830.06830.3.dta

X-range:

-

MassTol: Y-zoom:

MassType:

AVG  MONO

Axis:

1  2

Label:

I  M  -

Ions:

a  +  2+  3+

b  +  2+  3+

c  +  2+  3+

x  +  2+  3+

y  +  2+  3+

z  +  2+  3+

hide H<sub>2</sub>O/NH<sub>3</sub>

zoom 112-122

GO

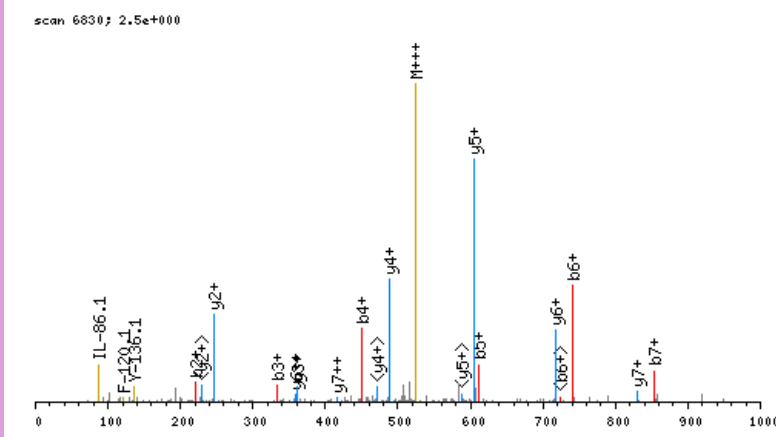

click image to zoom in; click top corners to zoom out [\[precursor±\]](#)

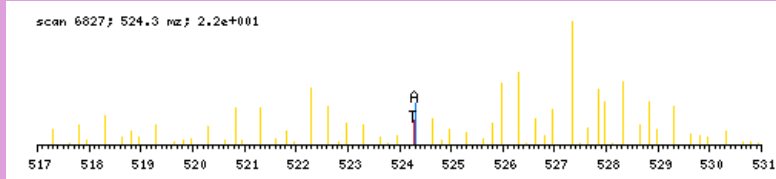

zoomed in precursor plot; T=theoretical m/z, A=acquired m/z

| b <sup>+</sup> | #  | AA # | y <sup>+</sup> | y <sup>2+</sup> |
|----------------|----|------|----------------|-----------------|
| 122.1029       | 1  | S 13 |                |                 |
| 221.1713       | 2  | V 12 | 1449.7225      | 725.3652        |
| 334.2554       | 3  | I 11 | 1350.6541      | 675.8310        |
| 449.2823       | 4  | D 10 | 1237.5701      | 619.2889        |
| 612.3457       | 5  | Y 9  | 1122.5431      | 561.7755        |
| 741.3883       | 6  | E 8  | 959.4798       | 480.2438        |
| 854.4723       | 7  | L 7  | 830.4372       | 415.7225        |
| 967.5564       | 8  | I 6  | 717.3531       | 359.1805        |
| 1082.5833      | 9  | D 5  | 604.2691       | 302.6385        |
| 1210.6419      | 10 | Q 4  | 489.2421       | 245.1250        |
| 1325.6689      | 11 | D 3  | 361.1836       | 181.0957        |
| 1396.7060      | 12 | A 2  | 246.1566       | 123.5822        |
|                | 13 | R 1  | 175.1195       | 88.0637         |

N-term:+35.07

SVIQTAVDQFAR, MH+ 1368.7699, m/z 684.8886  
 H OS G25 P150811 220811-s1.07040.07040.2.dta

X-range:

-

MassTol: Y-zoom:

MassType:

AVG  MONO

Axis:

1  2

Label:

I  M  -

Ions:

a  +  2+  3+

b  +  2+  3+

c  +  2+  3+

x  +  2+  3+

y  +  2+  3+

z  +  2+  3+

hide H<sub>2</sub>O/NH<sub>3</sub>

zoom 112-122

GO

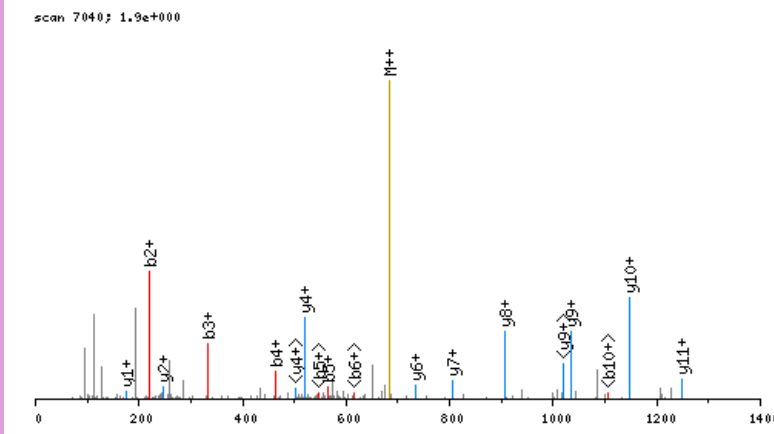

click image to zoom in; click top corners to zoom out [\[precursor±\]](#)

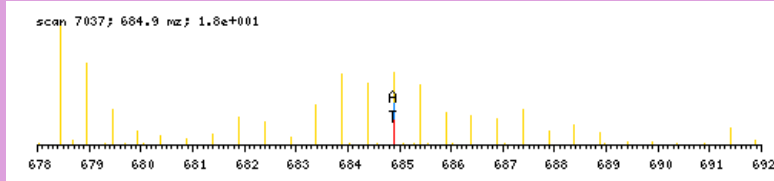

zoomed in precursor plot; T=theoretical m/z, A=acquired m/z

| b <sup>+</sup> | #  | AA | #  | y <sup>+</sup> | y <sup>2+</sup> |
|----------------|----|----|----|----------------|-----------------|
| 122.1029       | 1  | S  | 12 |                |                 |
| 221.1713       | 2  | V  | 11 | 1247.6748      | 624.3413        |
| 334.2554       | 3  | I  | 10 | 1148.6064      | 574.8071        |
| 462.3140       | 4  | Q  | 9  | 1035.5223      | 518.2651        |
| 563.3617       | 5  | T  | 8  | 907.4638       | 454.2358        |
| 634.3988       | 6  | A  | 7  | 806.4161       | 403.7120        |
| 733.4672       | 7  | V  | 6  | 735.3790       | 368.1934        |
| 848.4941       | 8  | D  | 5  | 636.3105       | 318.6592        |
| 976.5527       | 9  | Q  | 4  | 521.2836       | 261.1457        |
| 1123.6211      | 10 | F  | 3  | 393.2250       | 197.1164        |
| 1194.6582      | 11 | A  | 2  | 246.1566       | 123.5822        |
|                | 12 | R  | 1  | 175.1195       | 88.0637         |

N-term:+35.07

SVISGLKIVIGALLR, MH+ 1593.1103, m/z 399.0330  
 H OS G28 P150811 220811-s1.05015.05015.4.dta

X-range:

-

MassTol: Y-zoom:

MassType:

AVG  MONO

Axis:

1  2

Label:

I  M  -

Ions:

a  +  2+  3+

b  +  2+  3+

c  +  2+  3+

x  +  2+  3+

y  +  2+  3+

z  +  2+  3+

hide H<sub>2</sub>O/NH<sub>3</sub>

zoom 112-122

GO

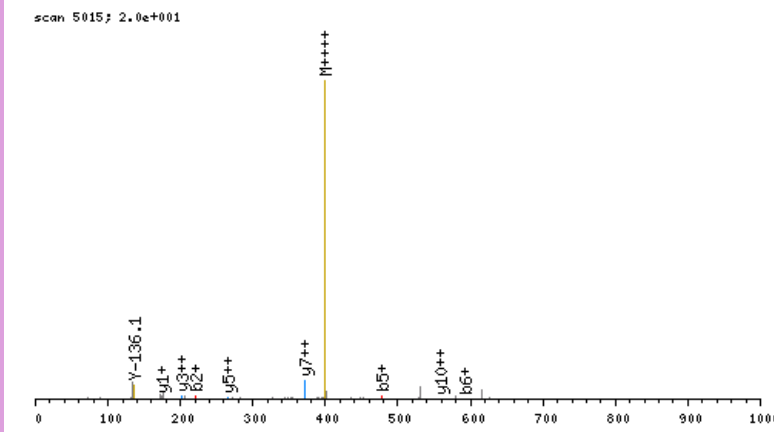

click image to zoom in; click top corners to zoom out [\[precursor±\]](#)

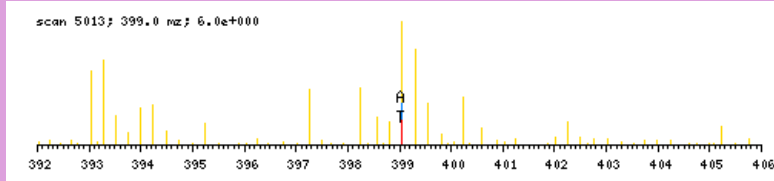

zoomed in precursor plot; T=theoretical m/z, A=acquired m/z

| b <sup>+</sup> | #  | AA | #  | y <sup>+</sup> | y <sup>2+</sup> |
|----------------|----|----|----|----------------|-----------------|
| 122.1029       | 1  | S  | 15 |                |                 |
| 221.1713       | 2  | V  | 14 | 1472.0152      | 736.5115        |
| 334.2554       | 3  | I  | 13 | 1372.9468      | 686.9773        |
| 421.2874       | 4  | S  | 12 | 1259.8628      | 630.4353        |
| 478.3089       | 5  | G  | 11 | 1172.8307      | 586.9193        |
| 591.3930       | 6  | L  | 10 | 1115.8093      | 558.4085        |
| 753.5511       | 7  | K  | 9  | 1002.7252      | 501.8665        |
| 852.6195       | 8  | V  | 8  | 840.5671       | 420.7875        |
| 965.7035       | 9  | I  | 7  | 741.4987       | 371.2533        |
| 1064.7720      | 10 | V  | 6  | 628.4146       | 314.7112        |
| 1121.7934      | 11 | G  | 5  | 529.3462       | 265.1770        |
| 1192.8305      | 12 | A  | 4  | 472.3247       | 236.6663        |
| 1305.9146      | 13 | L  | 3  | 401.2876       | 201.1477        |
| 1418.9987      | 14 | L  | 2  | 288.2036       | 144.6057        |
|                | 15 | R  | 1  | 175.1195       | 88.0637         |

N-term:+35.07 K(7):+162.16

SVMLQIAATELEKEESR, MH+ 2002.1167, m/z 668.0437  
 H OS G26 P150811 220811-s1.06626.06626.3.dta

X-range:

-

MassTol: Y-zoom:

MassType:

AVG  MONO

Axis:

1  2

Label:

I  M  -

Ions:

a  +  2+  3+

b  +  2+  3+

c  +  2+  3+

x  +  2+  3+

y  +  2+  3+

z  +  2+  3+

hide H<sub>2</sub>O/NH<sub>3</sub>

zoom 112-122

GO

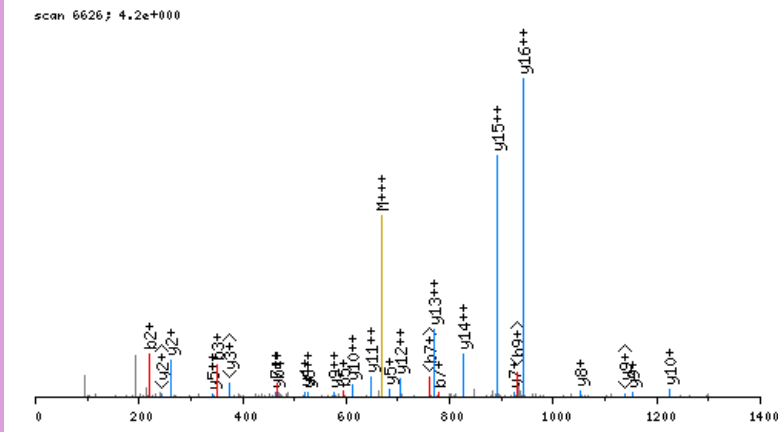

click image to zoom in; click top corners to zoom out [\[precursor±\]](#)

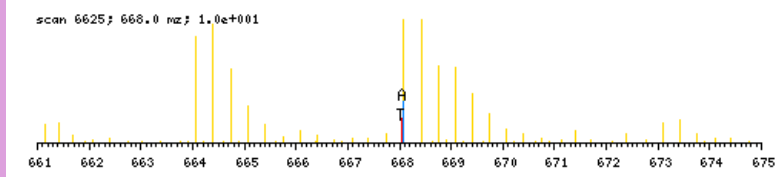

zoomed in precursor plot; T=theoretical m/z, A=acquired m/z

| b <sup>+</sup> | #  | AA | #  | y <sup>+</sup> | y <sup>2+</sup> |
|----------------|----|----|----|----------------|-----------------|
| 122.1029       | 1  | S  | 17 |                |                 |
| 221.1713       | 2  | V  | 16 | 1881.0216      | 941.0147        |
| 352.2118       | 3  | M  | 15 | 1781.9532      | 891.4805        |
| 465.2959       | 4  | L  | 14 | 1650.9127      | 825.9603        |
| 593.3545       | 5  | Q  | 13 | 1537.8286      | 769.4182        |
| 706.4385       | 6  | I  | 12 | 1409.7700      | 705.3889        |
| 777.4756       | 7  | A  | 11 | 1296.6860      | 648.8469        |
| 848.5128       | 8  | A  | 10 | 1225.6489      | 613.3283        |
| 949.5604       | 9  | T  | 9  | 1154.6117      | 577.8098        |
| 1078.6030      | 10 | E  | 8  | 1053.5641      | 527.2859        |
| 1191.6871      | 11 | L  | 7  | 924.5215       | 462.7646        |
| 1320.7297      | 12 | E  | 6  | 811.4374       | 406.2226        |
| 1482.8878      | 13 | K  | 5  | 682.3948       | 341.7013        |
| 1611.9304      | 14 | E  | 4  | 520.2367       | 260.6223        |
| 1740.9730      | 15 | E  | 3  | 391.1941       | 196.1010        |
| 1828.0050      | 16 | S  | 2  | 262.1515       | 131.5797        |
|                | 17 | R  | 1  | 175.1195       | 88.0637         |

N-term:+35.07 K(13):+162.16

SVPAASGGDKKEAVAR, MH+ 1482.8552, m/z 494.9566  
 H OS G26 P150811 220811-s1.02085.02085.3.dta

X-range:

-

MassTol: Y-zoom:

MassType:

AVG  MONO

Axis:

1  2

Label:

I  M  -

Ions:

a  +  2+  3+

b  +  2+  3+

c  +  2+  3+

x  +  2+  3+

y  +  2+  3+

z  +  2+  3+

hide H<sub>2</sub>O/NH<sub>3</sub>

zoom 112-122

GO

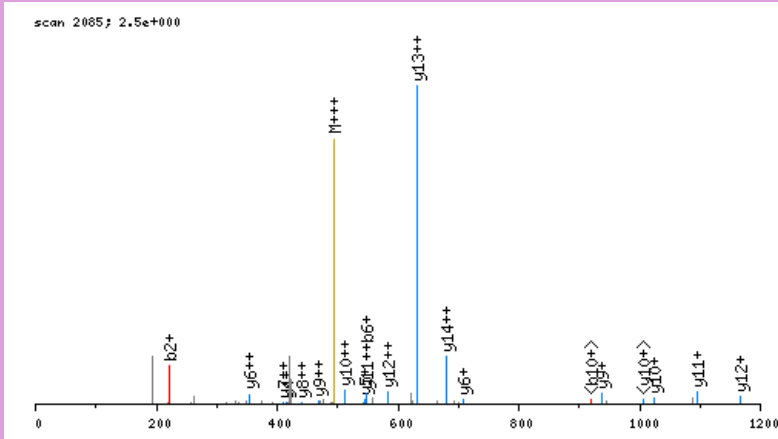

click image to zoom in; click top corners to zoom out [\[precursor±\]](#)

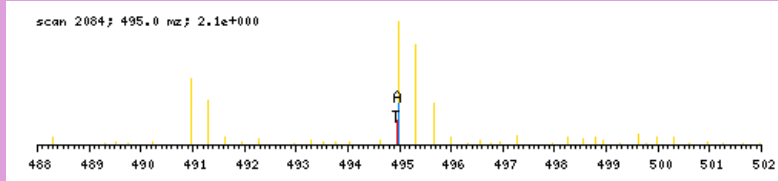

zoomed in precursor plot; T=theoretical m/z, A=acquired m/z

| b <sup>+</sup> | #  | AA # | y <sup>+</sup> | y <sup>2+</sup> |
|----------------|----|------|----------------|-----------------|
| 122.1029       | 1  | S 15 |                |                 |
| 221.1713       | 2  | V 14 | 1361.7601      | 681.3840        |
| 318.2241       | 3  | P 13 | 1262.6917      | 631.8498        |
| 389.2612       | 4  | A 12 | 1165.6390      | 583.3234        |
| 460.2983       | 5  | A 11 | 1094.6018      | 547.8048        |
| 547.3304       | 6  | S 10 | 1023.5647      | 512.2863        |
| 604.3518       | 7  | G 9  | 936.5327       | 468.7703        |
| 661.3733       | 8  | G 8  | 879.5112       | 440.2595        |
| 776.4002       | 9  | D 7  | 822.4898       | 411.7488        |
| 938.5583       | 10 | K 6  | 707.4628       | 354.2353        |
| 1067.6009      | 11 | E 5  | 545.3047       | 273.1563        |
| 1138.6380      | 12 | A 4  | 416.2621       | 208.6350        |
| 1237.7065      | 13 | V 3  | 345.2250       | 173.1164        |
| 1308.7436      | 14 | A 2  | 246.1566       | 123.5822        |
|                | 15 | R 1  | 175.1195       | 88.0637         |

N-term:+35.07 K(10):+162.16

SVPLPAENVITITAGQR, MH+ 1680.9284, m/z 560.9810  
 L OS G24 P150811 220811-s1.03781.03781.3.dta

scan 3781; 2.4e+000

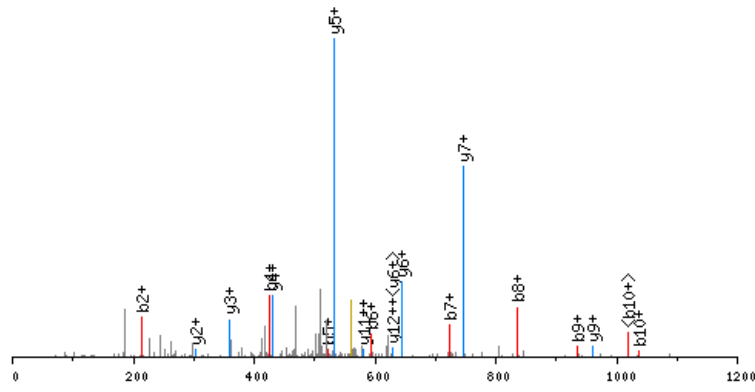

click image to zoom in; click top corners to zoom out [\[precursor±\]](#)

scan 3777; 561.0 m/z; 1.2e+001

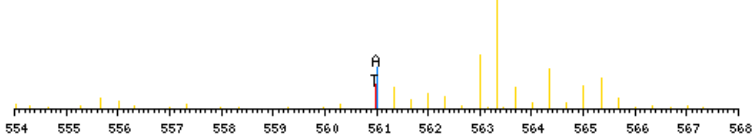

zoomed in precursor plot; T=theoretical m/z, A=acquired m/z

X-range:

-

MassTol: Y-zoom:

MassType:

AVG  MONO

Axis:

1  2

Label:

I  M  -

Ions:

a  +  2+  3+

b  +  2+  3+

c  +  2+  3+

x  +  2+  3+

y  +  2+  3+

z  +  2+  3+

hide H<sub>2</sub>O/NH<sub>3</sub>

zoom 112-122

GO

| b <sup>+</sup> | #  | AA # | y <sup>+</sup> | y <sup>2+</sup> |
|----------------|----|------|----------------|-----------------|
| 116.0711       | 1  | S 16 |                |                 |
| 215.1395       | 2  | V 15 | 1565.8651      | 783.4365        |
| 312.1923       | 3  | P 14 | 1466.7967      | 733.9023        |
| 425.2764       | 4  | L 13 | 1369.7440      | 685.3759        |
| 522.3291       | 5  | P 12 | 1256.6599      | 628.8339        |
| 593.3662       | 6  | A 11 | 1159.6071      | 580.3075        |
| 722.4088       | 7  | E 10 | 1088.5700      | 544.7889        |
| 836.4518       | 8  | N 9  | 959.5274       | 480.2676        |
| 935.5202       | 9  | V 8  | 845.4845       | 423.2462        |
| 1036.5679      | 10 | T 7  | 746.4161       | 373.7120        |
| 1149.6519      | 11 | I 6  | 645.3684       | 323.1881        |
| 1250.6996      | 12 | T 5  | 532.2843       | 266.6461        |
| 1321.7367      | 13 | A 4  | 431.2367       | 216.1222        |
| 1378.7582      | 14 | G 3  | 360.1995       | 180.6037        |
| 1506.8168      | 15 | Q 2  | 303.1781       | 152.0930        |
|                | 16 | R 1  | 175.1195       | 88.0637         |

N-term:+29.04

SVSVFNGAVSDDSKR, MH+ 1623.8342, m/z 541.9496  
 L OS G27 P150811 220811-s1.03949.03949.3.dta

X-range:

-

MassTol: Y-zoom:

MassType:

AVG  MONO

Axis:

1  2

Label:

I  M  -

Ions:

a  +  2+  3+

b  +  2+  3+

c  +  2+  3+

x  +  2+  3+

y  +  2+  3+

z  +  2+  3+

hide H<sub>2</sub>O/NH<sub>3</sub>

zoom 112-122

GO

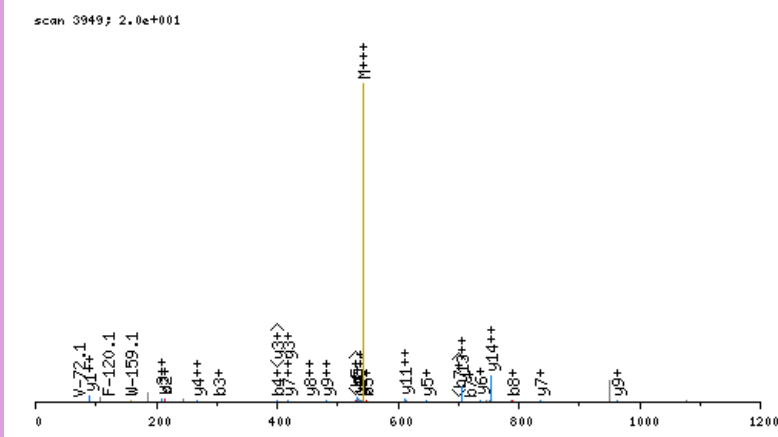

click image to zoom in; click top corners to zoom out [\[precursor±\]](#)

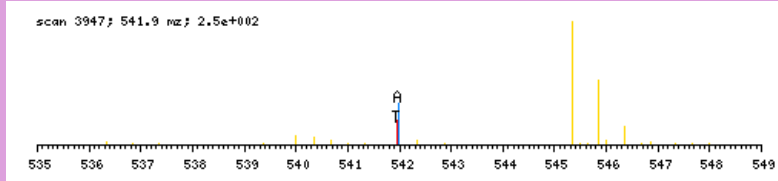

zoomed in precursor plot; T=theoretical m/z, A=acquired m/z

| b <sup>+</sup> | #  | AA # | y <sup>+</sup> | y <sup>2+</sup> |
|----------------|----|------|----------------|-----------------|
| 116.0711       | 1  | S 15 |                |                 |
| 215.1395       | 2  | V 14 | 1508.7709      | 754.8894        |
| 302.1716       | 3  | S 13 | 1409.7025      | 705.3552        |
| 401.2400       | 4  | V 12 | 1322.6705      | 661.8392        |
| 548.3084       | 5  | F 11 | 1223.6021      | 612.3050        |
| 662.3513       | 6  | N 10 | 1076.5337      | 538.7707        |
| 719.3728       | 7  | G 9  | 962.4907       | 481.7493        |
| 790.4099       | 8  | A 8  | 905.4693       | 453.2385        |
| 889.4783       | 9  | V 7  | 834.4322       | 417.7200        |
| 976.5103       | 10 | S 6  | 735.3637       | 368.1858        |
| 1091.5373      | 11 | D 5  | 648.3317       | 324.6698        |
| 1206.5642      | 12 | D 4  | 533.3048       | 267.1563        |
| 1293.5963      | 13 | S 3  | 418.2778       | 209.6428        |
| 1449.7226      | 14 | K 2  | 331.2458       | 166.1268        |
|                | 15 | R 1  | 175.1195       | 88.0637         |

N-term:+29.04 K(14):+156.13



SVTEQGAELSNEER, MH+ 1576.7454, m/z 526.2533  
 L OS G25 P150811 220811-s1.02886.02886.3.dta

X-range:

-

MassTol: Y-zoom:

MassType:

AVG  MONO

Axis:

1  2

Label:

I  M  -

Ions:

a  +  2+  3+

b  +  2+  3+

c  +  2+  3+

x  +  2+  3+

y  +  2+  3+

z  +  2+  3+

hide H<sub>2</sub>O/NH<sub>3</sub>

zoom 112-122

GO

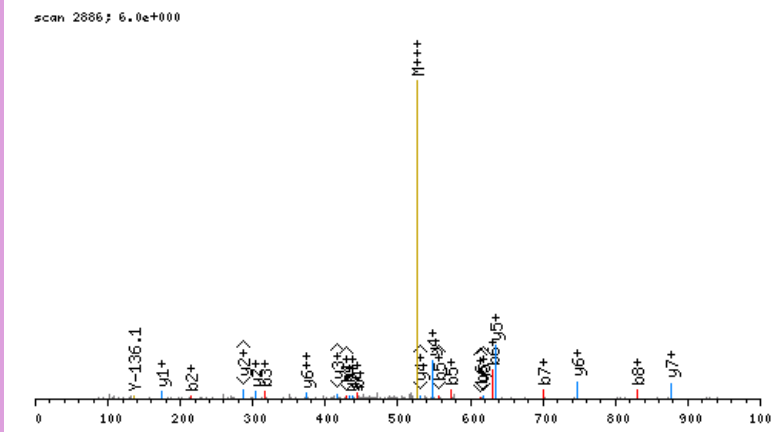

click image to zoom in; click top corners to zoom out [\[precursor±\]](#)

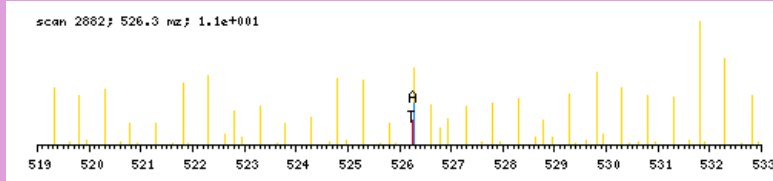

zoomed in precursor plot; T=theoretical m/z, A=acquired m/z

| b <sup>+</sup> | #  | AA # | y <sup>+</sup> | y <sup>2+</sup> |
|----------------|----|------|----------------|-----------------|
| 116.0711       | 1  | S 14 |                |                 |
| 215.1395       | 2  | V 13 | 1461.6821      | 731.3450        |
| 316.1872       | 3  | T 12 | 1362.6137      | 681.8108        |
| 445.2298       | 4  | E 11 | 1261.5660      | 631.2869        |
| 573.2884       | 5  | Q 10 | 1132.5235      | 566.7656        |
| 630.3099       | 6  | G 9  | 1004.4649      | 502.7364        |
| 701.3470       | 7  | A 8  | 947.4434       | 474.2256        |
| 830.3896       | 8  | E 7  | 876.4063       | 438.7071        |
| 943.4736       | 9  | L 6  | 747.3637       | 374.1858        |
| 1030.5057      | 10 | S 5  | 634.2796       | 317.6437        |
| 1144.5486      | 11 | N 4  | 547.2476       | 274.1277        |
| 1273.5912      | 12 | E 3  | 433.2047       | 217.1063        |
| 1402.6338      | 13 | E 2  | 304.1621       | 152.5850        |
|                | 14 | R 1  | 175.1195       | 88.0637         |

N-term:+29.04

SVTGEQYGNPIR, MH+ 1348.6861, m/z 450.2335  
 L OS G25 P150811 220811-s1.03471.03471.3.dta

X-range:

-

MassTol: Y-zoom:

MassType:

AVG  MONO

Axis:

1  2

Label:

I  M  -

Ions:

a  +  2+  3+

b  +  2+  3+

c  +  2+  3+

x  +  2+  3+

y  +  2+  3+

z  +  2+  3+

hide H<sub>2</sub>O/NH<sub>3</sub>

zoom 112-122

GO

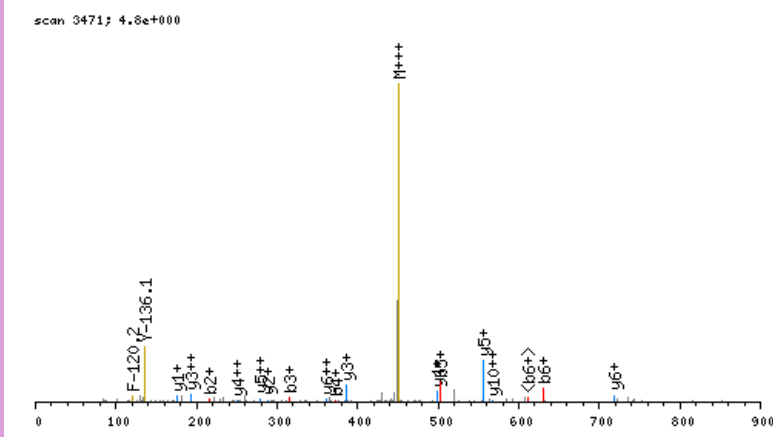

click image to zoom in; click top corners to zoom out [\[precursor±\]](#)

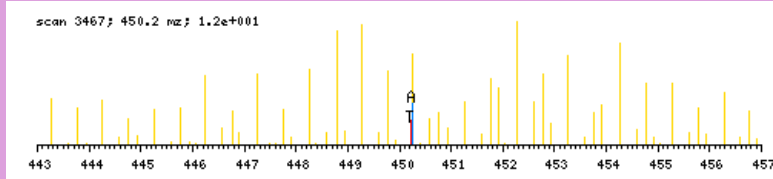

zoomed in precursor plot; T=theoretical m/z, A=acquired m/z

| b <sup>+</sup> | #  | AA # | y <sup>+</sup> | y <sup>2+</sup> |
|----------------|----|------|----------------|-----------------|
| 116.0711       | 1  | S 12 |                |                 |
| 215.1395       | 2  | V 11 | 1233.6228      | 617.3153        |
| 316.1872       | 3  | T 10 | 1134.5544      | 567.7811        |
| 373.2087       | 4  | G 9  | 1033.5067      | 517.2573        |
| 502.2513       | 5  | E 8  | 976.4852       | 488.7465        |
| 630.3099       | 6  | Q 7  | 847.4426       | 424.2252        |
| 793.3732       | 7  | Y 6  | 719.3840       | 360.1959        |
| 850.3946       | 8  | G 5  | 556.3207       | 278.6643        |
| 964.4376       | 9  | N 4  | 499.2993       | 250.1535        |
| 1061.4903      | 10 | P 3  | 385.2563       | 193.1321        |
| 1174.5744      | 11 | I 2  | 288.2036       | 144.6057        |
|                | 12 | R 1  | 175.1195       | 88.0637         |

N-term:+29.04

SVTPASTLTKSGPGR, MH+ 1514.8542, m/z 505.6229  
 L OS G26 P150811 220811-s1.02458.02458.3.dta

scan 2458; 1.4e+001

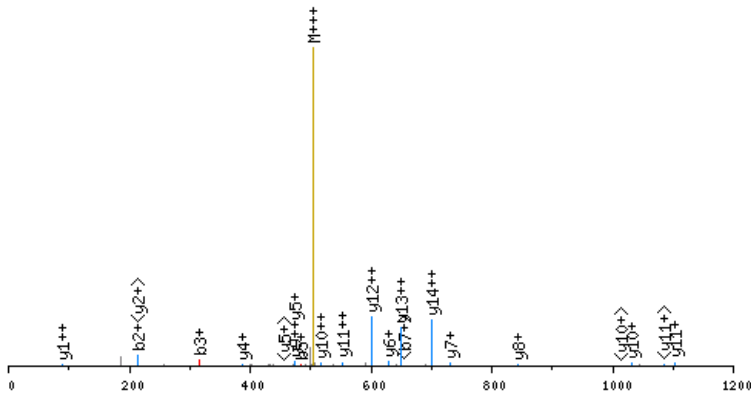

click image to zoom in; click top corners to zoom out [\[precursor±\]](#)

scan 2455; 505.6 m/z; 2.1e+000

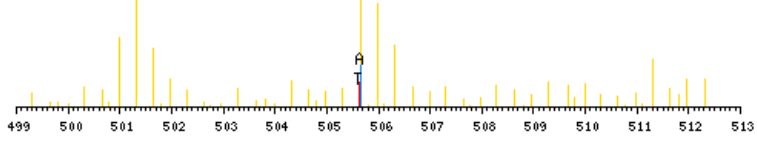

zoomed in precursor plot; T=theoretical m/z, A=acquired m/z

X-range:

-

MassTol: Y-zoom:

MassType:

AVG  MONO

Axis:

1  2

Label:

I  M  -

Ions:

a  +  2+  3+

b  +  2+  3+

c  +  2+  3+

x  +  2+  3+

y  +  2+  3+

z  +  2+  3+

hide H<sub>2</sub>O/NH<sub>3</sub>

zoom 112-122

GO

| b <sup>+</sup> | #  | AA | #  | y <sup>+</sup> | y <sup>2+</sup> |
|----------------|----|----|----|----------------|-----------------|
| 116.0711       | 1  | S  | 15 |                |                 |
| 215.1395       | 2  | V  | 14 | 1399.7909      | 700.3994        |
| 316.1872       | 3  | T  | 13 | 1300.7225      | 650.8652        |
| 413.2400       | 4  | P  | 12 | 1199.6748      | 600.3413        |
| 484.2771       | 5  | A  | 11 | 1102.6221      | 551.8150        |
| 571.3091       | 6  | S  | 10 | 1031.5850      | 516.2964        |
| 672.3568       | 7  | T  | 9  | 944.5529       | 472.7804        |
| 785.4409       | 8  | L  | 8  | 843.5053       | 422.2565        |
| 886.4885       | 9  | T  | 7  | 730.4212       | 365.7145        |
| 1042.6148      | 10 | K  | 6  | 629.3735       | 315.1907        |
| 1129.6469      | 11 | S  | 5  | 473.2472       | 237.1275        |
| 1186.6683      | 12 | G  | 4  | 386.2152       | 193.6115        |
| 1283.7211      | 13 | P  | 3  | 329.1937       | 165.1008        |
| 1340.7426      | 14 | G  | 2  | 232.1410       | 116.5744        |
|                | 15 | R  | 1  | 175.1195       | 88.0637         |

N-term:+29.04 K(10):+156.13

SVVAGGPEVLTTPER, MH+ 1545.8700, m/z 515.9615  
 H OS G24 P150811 220811-s1.03464.03464.3.dta

X-range:

-

MassTol: Y-zoom:

MassType:

AVG  MONO

Axis:

1  2

Label:

I  M  -

Ions:

a  +  2+  3+

b  +  2+  3+

c  +  2+  3+

x  +  2+  3+

y  +  2+  3+

z  +  2+  3+

hide H<sub>2</sub>O/NH<sub>3</sub>

zoom 112-122

GO

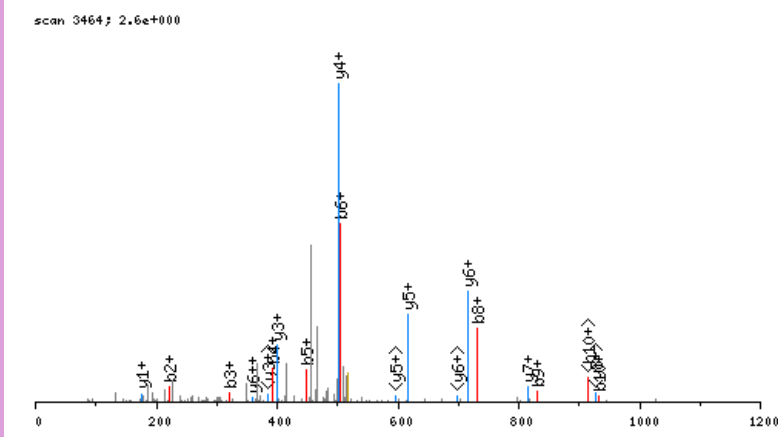

click image to zoom in; click top corners to zoom out [\[precursor±\]](#)

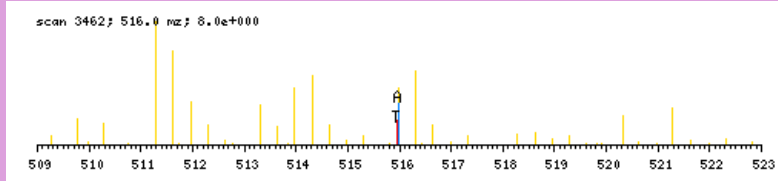

zoomed in precursor plot; T=theoretical m/z, A=acquired m/z

| b <sup>+</sup> | #  | AA # | y <sup>+</sup> | y <sup>2+</sup> |
|----------------|----|------|----------------|-----------------|
| 122.1029       | 1  | S 15 |                |                 |
| 221.1713       | 2  | V 14 | 1424.7749      | 712.8914        |
| 320.2398       | 3  | V 13 | 1325.7065      | 663.3572        |
| 391.2769       | 4  | A 12 | 1226.6381      | 613.8230        |
| 448.2983       | 5  | G 11 | 1155.6010      | 578.3044        |
| 505.3198       | 6  | G 10 | 1098.5795      | 549.7937        |
| 602.3726       | 7  | P 9  | 1041.5580      | 521.2829        |
| 731.4152       | 8  | E 8  | 944.5053       | 472.7566        |
| 830.4836       | 9  | V 7  | 815.4627       | 408.2353        |
| 931.5312       | 10 | T 6  | 716.3943       | 358.7011        |
| 1044.6153      | 11 | L 5  | 615.3466       | 308.1772        |
| 1145.6630      | 12 | T 4  | 502.2625       | 251.6352        |
| 1242.7158      | 13 | P 3  | 401.2149       | 201.1113        |
| 1371.7583      | 14 | E 2  | 304.1621       | 152.5850        |
|                | 15 | R 1  | 175.1195       | 88.0637         |

N-term:+35.07

SWYDNEYGYSNR, MH+ 1581.6610, m/z 527.8918  
 L OS G25 P150811 220811-s1.04793.04793.3.dta

X-range:

-

MassTol: Y-zoom:

MassType:

AVG  MONO

Axis:

1  2

Label:

I  M  -

Ions:

a  +  2+  3+

b  +  2+  3+

c  +  2+  3+

x  +  2+  3+

y  +  2+  3+

z  +  2+  3+

hide H<sub>2</sub>O/NH<sub>3</sub>

zoom 112-122

GO

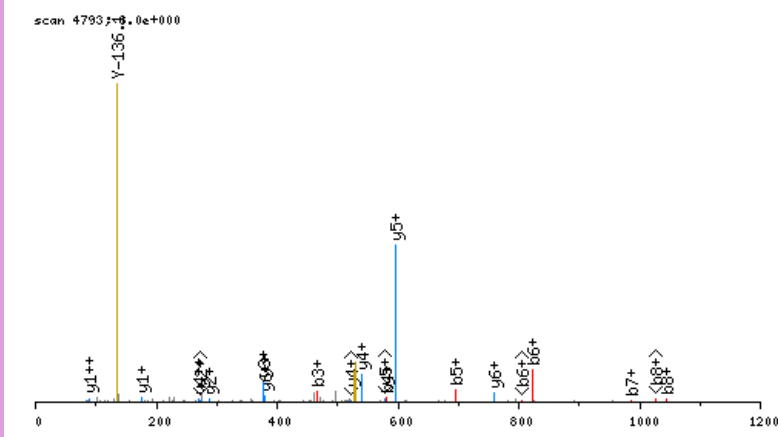

click image to zoom in; click top corners to zoom out [\[precursor±\]](#)

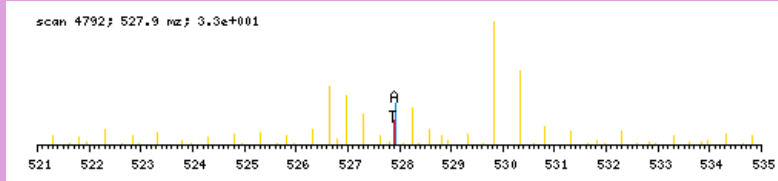

zoomed in precursor plot; T=theoretical m/z, A=acquired m/z

| b <sup>+</sup> | #  | AA # | y <sup>+</sup> | y <sup>2+</sup> |
|----------------|----|------|----------------|-----------------|
| 116.0711       | 1  | S 12 |                |                 |
| 302.1504       | 2  | W 11 | 1466.5977      | 733.8028        |
| 465.2138       | 3  | Y 10 | 1280.5184      | 640.7631        |
| 580.2407       | 4  | D 9  | 1117.4550      | 559.2314        |
| 694.2836       | 5  | N 8  | 1002.4281      | 501.7180        |
| 823.3262       | 6  | E 7  | 888.3852       | 444.6965        |
| 986.3896       | 7  | Y 6  | 759.3426       | 380.1752        |
| 1043.4110      | 8  | G 5  | 596.2792       | 298.6435        |
| 1206.4744      | 9  | Y 4  | 539.2578       | 270.1328        |
| 1293.5064      | 10 | S 3  | 376.1945       | 188.6011        |
| 1407.5493      | 11 | N 2  | 289.1624       | 145.0851        |
|                | 12 | R 1  | 175.1195       | 88.0637         |

N-term:+29.04

X-range:

-

MassTol: Y-zoom:

MassType:

AVG  MONO

Axis:

1  2

Label:

I  M  -

Ions:

a  +  2+  3+

b  +  2+  3+

c  +  2+  3+

x  +  2+  3+

y  +  2+  3+

z  +  2+  3+

hide H<sub>2</sub>O/NH<sub>3</sub>

zoom 112-122

GO

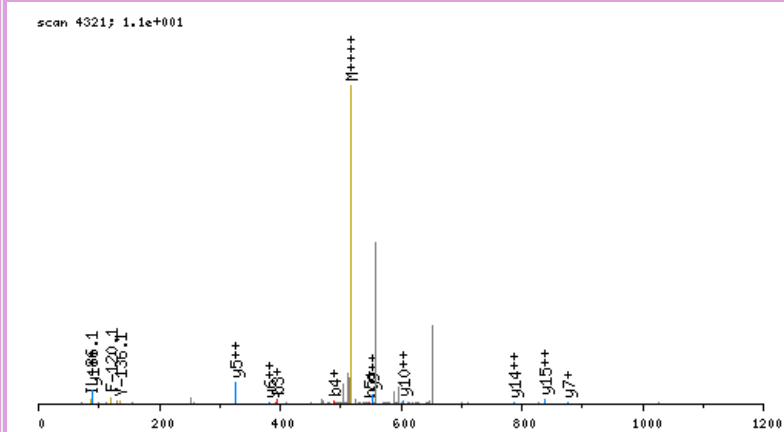

click image to zoom in; click top corners to zoom out [\[precursor±\]](#)

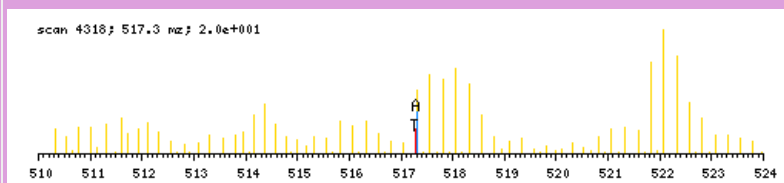

zoomed in precursor plot; T=theoretical m/z, A=acquired m/z

| b <sup>+</sup>  | #  | AA # | y <sup>+</sup>  | y <sup>2+</sup> |
|-----------------|----|------|-----------------|-----------------|
| 116.0711        | 1  | S 18 |                 |                 |
| 279.1345        | 2  | Y 17 | 1951.0071       | 976.0075        |
| <b>394.1614</b> | 3  | D 16 | 1787.9438       | 894.4758        |
| <b>491.2142</b> | 4  | P 15 | 1672.9169       | <b>836.9623</b> |
| <b>548.2356</b> | 5  | G 14 | 1575.8641       | <b>788.4360</b> |
| 635.2677        | 6  | S 13 | 1518.8426       | 759.9252        |
| 706.3048        | 7  | A 12 | 1431.8106       | 716.4092        |
| 862.4311        | 8  | K 11 | 1360.7735       | 680.8907        |
| 963.4787        | 9  | T 10 | 1204.6472       | <b>602.8275</b> |
| 1076.5628       | 10 | I 9  | 1103.5995       | <b>552.3037</b> |
| 1189.6469       | 11 | L 8  | 990.5155        | 495.7616        |
| 1303.6898       | 12 | N 7  | <b>877.4314</b> | 439.2196        |
| 1417.7327       | 13 | N 6  | 763.3885        | <b>382.1981</b> |
| 1474.7542       | 14 | G 5  | 649.3455        | <b>325.1767</b> |
| 1630.8805       | 15 | K 4  | 592.3241        | 296.6660        |
| 1731.9282       | 16 | T 3  | 436.1978        | 218.6028        |
| 1891.9588       | 17 | C 2  | 335.1501        | 168.0790        |
|                 | 18 | R 1  | 175.1195        | <b>88.0637</b>  |

N-term:+29.04 K(8):+156.13  
 K(15):+156.13 C(17):+160.03

SYELPDGQVITIGNER, MH+ 1818.9237, m/z 606.9794  
 L OS G25 P150811 220811-s1.07584.07584.3.dta

X-range:

-

MassTol: Y-zoom:

MassType:

AVG  MONO

Axis:

1  2

Label:

I  M  -

Ions:

a  +  2+  3+

b  +  2+  3+

c  +  2+  3+

x  +  2+  3+

y  +  2+  3+

z  +  2+  3+

hide H<sub>2</sub>O/NH<sub>3</sub>

zoom 112-122

GO

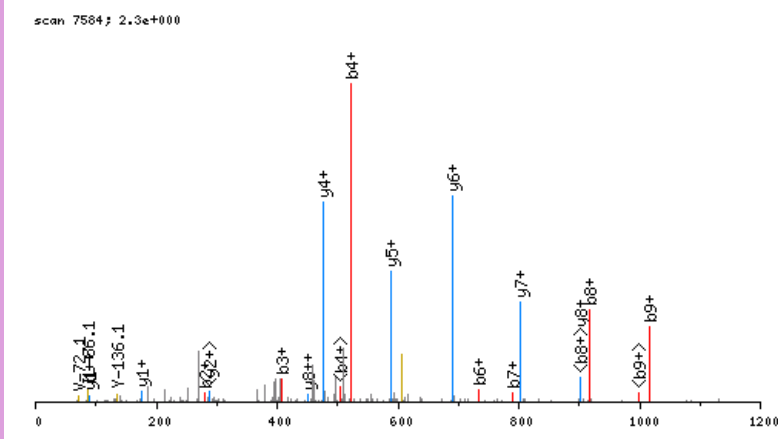

click image to zoom in; click top corners to zoom out [\[precursor±\]](#)

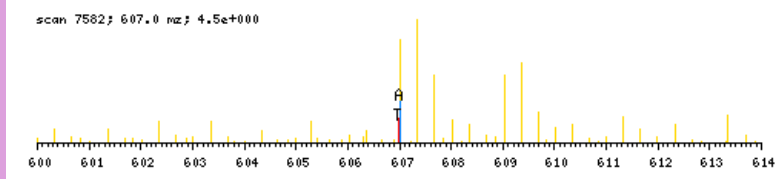

zoomed in precursor plot; T=theoretical m/z, A=acquired m/z

| b <sup>+</sup> | #  | AA # | y <sup>+</sup> | y <sup>2+</sup> |
|----------------|----|------|----------------|-----------------|
| 116.0711       | 1  | S 16 |                |                 |
| 279.1345       | 2  | Y 15 | 1703.8604      | 852.4341        |
| 408.1771       | 3  | E 14 | 1540.7971      | 770.9025        |
| 521.2611       | 4  | L 13 | 1411.7545      | 706.3812        |
| 618.3139       | 5  | P 12 | 1298.6705      | 649.8391        |
| 733.3408       | 6  | D 11 | 1201.6177      | 601.3128        |
| 790.3623       | 7  | G 10 | 1086.5907      | 543.7993        |
| 918.4209       | 8  | Q 9  | 1029.5693      | 515.2886        |
| 1017.4893      | 9  | V 8  | 901.5107       | 451.2593        |
| 1130.5733      | 10 | I 7  | 802.4423       | 401.7251        |
| 1231.6210      | 11 | T 6  | 689.3582       | 345.1830        |
| 1344.7051      | 12 | I 5  | 588.3105       | 294.6592        |
| 1401.7265      | 13 | G 4  | 475.2265       | 238.1172        |
| 1515.7695      | 14 | N 3  | 418.2050       | 209.6064        |
| 1644.8121      | 15 | E 2  | 304.1621       | 152.5850        |
|                | 16 | R 1  | 175.1195       | 88.0637         |

N-term:+29.04

SYGGYKEPAAPVSIQR, MH+ 1778.9441, m/z 593.6529  
 L OS G26 P150811 220811-s1.03414.03414.3.dta

X-range:

-

MassTol: Y-zoom:

MassType:

AVG  MONO

Axis:

1  2

Label:

I  M  -

Ions:

a  +  2+  3+

b  +  2+  3+

c  +  2+  3+

x  +  2+  3+

y  +  2+  3+

z  +  2+  3+

hide H<sub>2</sub>O/NH<sub>3</sub>

zoom 112-122

GO

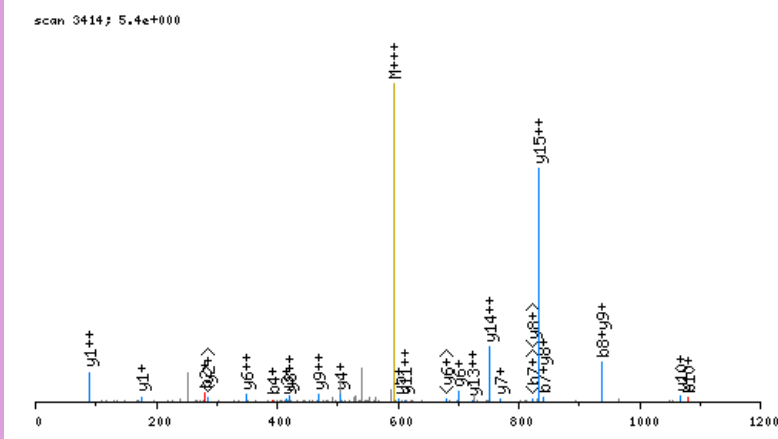

click image to zoom in; click top corners to zoom out [\[precursor±\]](#)

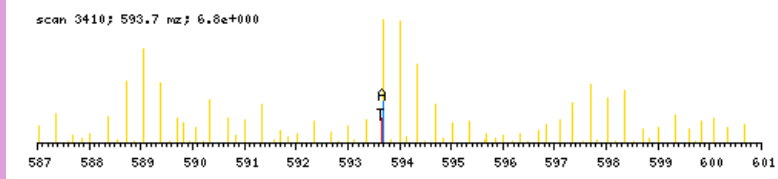

zoomed in precursor plot; T=theoretical m/z, A=acquired m/z

| b <sup>+</sup> | #  | AA # | y <sup>+</sup> | y <sup>2+</sup> |
|----------------|----|------|----------------|-----------------|
| 116.0711       | 1  | S 16 |                |                 |
| 279.1345       | 2  | Y 15 | 1663.8808      | 832.4443        |
| 336.1559       | 3  | G 14 | 1500.8175      | 750.9127        |
| 393.1774       | 4  | G 13 | 1443.7960      | 722.4019        |
| 556.2407       | 5  | Y 12 | 1386.7746      | 693.8912        |
| 712.3670       | 6  | K 11 | 1223.7112      | 612.3595        |
| 841.4096       | 7  | E 10 | 1067.5849      | 534.2964        |
| 938.4624       | 8  | P 9  | 938.5423       | 469.7751        |
| 1009.4995      | 9  | A 8  | 841.4896       | 421.2487        |
| 1080.5366      | 10 | A 7  | 770.4525       | 385.7301        |
| 1177.5894      | 11 | P 6  | 699.4153       | 350.2116        |
| 1276.6578      | 12 | V 5  | 602.3626       | 301.6852        |
| 1363.6898      | 13 | S 4  | 503.2942       | 252.1510        |
| 1476.7739      | 14 | I 3  | 416.2621       | 208.6350        |
| 1604.8324      | 15 | Q 2  | 303.1781       | 152.0930        |
|                | 16 | R 1  | 175.1195       | 88.0637         |

N-term:+29.04 K(6):+156.13



SYGYDEKSAGVSVPGPMGPGSPR, MH+ 2363.1978, m/z 788.4041  
 H OS G26 P150811 220811-s1.04308.04308.3.dta

scan 4308; 6.4e+000

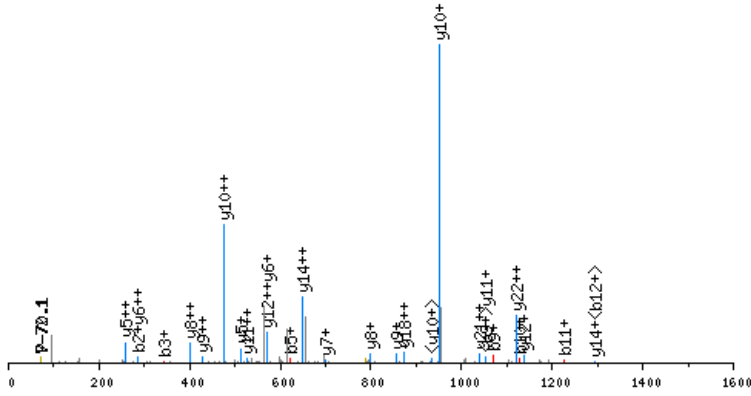

click image to zoom in; click top corners to zoom out [precursor±]

scan 4305; 788.4 m/z; 1.3e+001

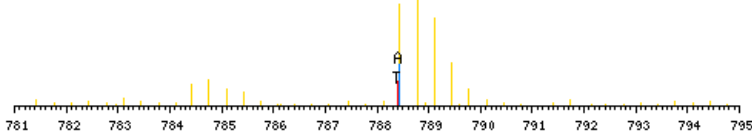

zoomed in precursor plot; T=theoretical m/z, A=acquired m/z

X-range:

0 - 0

MassTol: Y-zoom:

0. 1.

MassType:

AVG  MONO

Axis:

1  2

Label:

I  M  -

Ions:

a  +  2+  3+

b  +  2+  3+

c  +  2+  3+

x  +  2+  3+

y  +  2+  3+

z  +  2+  3+

hide H<sub>2</sub>O/NH<sub>3</sub>

zoom 112-122

GO

| b <sup>+</sup> | #  | AA # | y <sup>+</sup> | y <sup>2+</sup> |
|----------------|----|------|----------------|-----------------|
| 122.1029       | 1  | S 23 |                |                 |
| 285.1663       | 2  | Y 22 | 2242.1027      | 1121.5553       |
| 342.1877       | 3  | G 21 | 2079.0394      | 1040.0236       |
| 505.2510       | 4  | Y 20 | 2022.0179      | 1011.5129       |
| 620.2780       | 5  | D 19 | 1858.9546      | 929.9812        |
| 749.3206       | 6  | E 18 | 1743.9276      | 872.4677        |
| 911.4787       | 7  | K 17 | 1614.8850      | 807.9464        |
| 998.5107       | 8  | S 16 | 1452.7269      | 726.8674        |
| 1069.5478      | 9  | A 15 | 1365.6949      | 683.3514        |
| 1126.5693      | 10 | G 14 | 1294.6578      | 647.8328        |
| 1225.6377      | 11 | V 13 | 1237.6363      | 619.3221        |
| 1312.6697      | 12 | S 12 | 1138.5679      | 569.7879        |
| 1411.7381      | 13 | V 11 | 1051.5359      | 526.2718        |
| 1508.7909      | 14 | P 10 | 952.4675       | 476.7376        |
| 1565.8124      | 15 | G 9  | 855.4147       | 428.2113        |
| 1662.8651      | 16 | P 8  | 798.3932       | 399.7005        |
| 1793.9056      | 17 | M 7  | 701.3405       | 351.1741        |
| 1850.9271      | 18 | G 6  | 570.3000       | 285.6539        |
| 1947.9799      | 19 | P 5  | 513.2785       | 257.1432        |
| 2035.0119      | 20 | S 4  | 416.2258       | 208.6168        |
| 2092.0333      | 21 | G 3  | 329.1937       | 165.1008        |
| 2189.0861      | 22 | P 2  | 272.1723       | 136.5900        |
|                | 23 | R 1  | 175.1195       | 88.0637         |

N-term:+35.07 K(7):+162.16

TAAASHKGDEVPPNR, MH+ 1605.8349, m/z 535.9498  
 L OS G27 P150811 220811-s1.02768.02768.3.dta

X-range:

-

MassTol: Y-zoom:

MassType:

AVG  MONO

Axis:

1  2

Label:

I  M  -

Ions:

a  +  2+  3+

b  +  2+  3+

c  +  2+  3+

x  +  2+  3+

y  +  2+  3+

z  +  2+  3+

hide H<sub>2</sub>O/NH<sub>3</sub>

zoom 112-122

GO

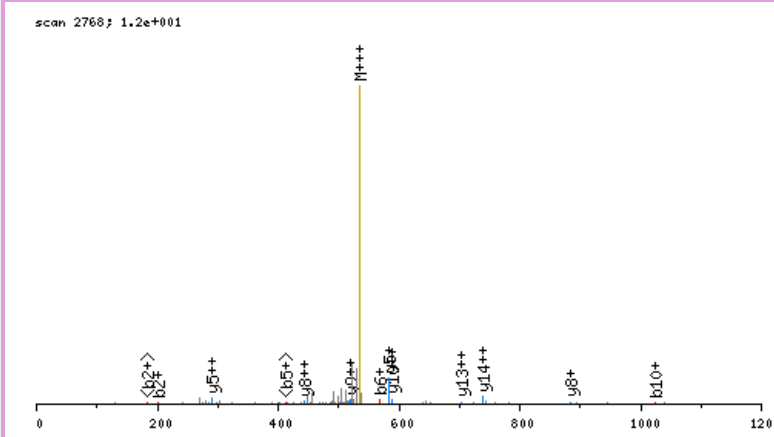

click image to zoom in; click top corners to zoom out [\[precursor±\]](#)

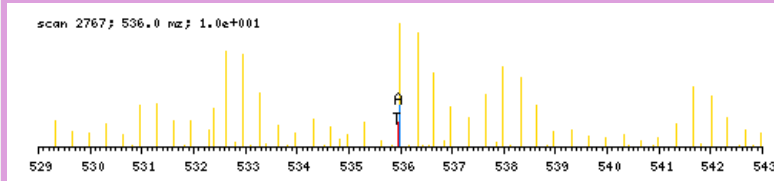

zoomed in precursor plot; T=theoretical m/z, A=acquired m/z

| b <sup>+</sup> | #  | AA # | y <sup>+</sup> | y <sup>2+</sup> |
|----------------|----|------|----------------|-----------------|
| 130.0868       | 1  | T    | 15             |                 |
| 201.1239       | 2  | A    | 14             | 1476.7560       |
| 272.1610       | 3  | A    | 13             | 1405.7188       |
| 343.1981       | 4  | A    | 12             | 1334.6817       |
| 430.2301       | 5  | S    | 11             | 1263.6446       |
| 567.2891       | 6  | H    | 10             | 1176.6126       |
| 723.4154       | 7  | K    | 9              | 1039.5537       |
| 780.4368       | 8  | G    | 8              | 883.4274        |
| 895.4638       | 9  | D    | 7              | 826.4059        |
| 1024.5064      | 10 | E    | 6              | 711.3790        |
| 1123.5748      | 11 | V    | 5              | 582.3364        |
| 1220.6275      | 12 | P    | 4              | 483.2680        |
| 1317.6803      | 13 | P    | 3              | 386.2152        |
| 1431.7232      | 14 | N    | 2              | 289.1624        |
|                | 15 | R    | 1              | 175.1195        |

N-term:+29.04 K(7):+156.13

TAATIATHDLQAVR, MH+ 1495.8232, m/z 499.2793  
 L OS G26 P150811 220811-s1.03167.03167.3.dta

X-range:

-

MassTol: Y-zoom:

MassType:

AVG  MONO

Axis:

1  2

Label:

I  M  -

Ions:

a  +  2+  3+

b  +  2+  3+

c  +  2+  3+

x  +  2+  3+

y  +  2+  3+

z  +  2+  3+

hide H<sub>2</sub>O/NH<sub>3</sub>

zoom 112-122

GO

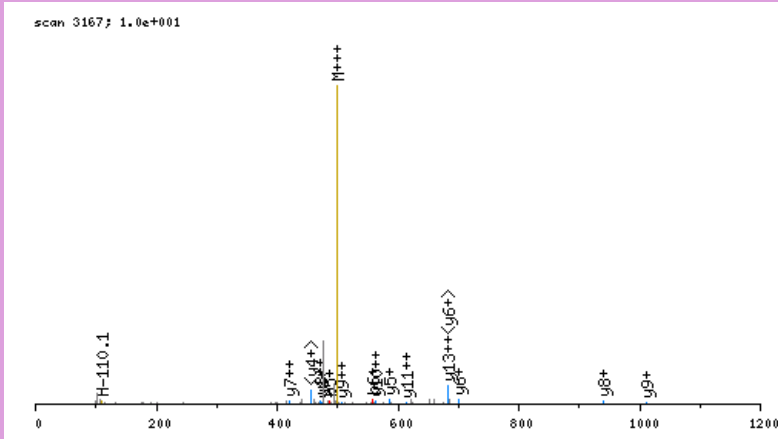

click image to zoom in; click top corners to zoom out [\[precursor±\]](#)

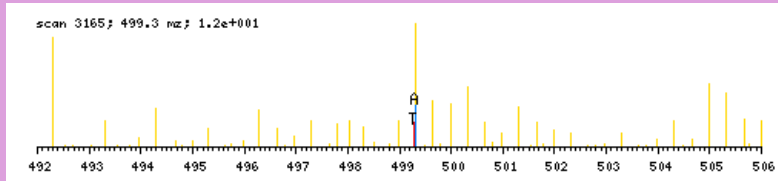

zoomed in precursor plot; T=theoretical m/z, A=acquired m/z

| b <sup>+</sup> | #  | AA # | y <sup>+</sup> | y <sup>2+</sup> |
|----------------|----|------|----------------|-----------------|
| 130.0868       | 1  | T 14 |                |                 |
| 201.1239       | 2  | A 13 | 1366.7443      | 683.8761        |
| 272.1610       | 3  | A 12 | 1295.7072      | 648.3575        |
| 373.2087       | 4  | T 11 | 1224.6701      | 612.8389        |
| 486.2927       | 5  | I 10 | 1123.6224      | 562.3151        |
| 557.3299       | 6  | A 9  | 1010.5383      | 505.7731        |
| 658.3775       | 7  | T 8  | 939.5012       | 470.2545        |
| 795.4365       | 8  | H 7  | 838.4535       | 419.7307        |
| 910.4634       | 9  | D 6  | 701.3946       | 351.2012        |
| 1023.5475      | 10 | L 5  | 586.3677       | 293.6877        |
| 1151.6060      | 11 | Q 4  | 473.2836       | 237.1457        |
| 1222.6432      | 12 | A 3  | 345.2250       | 173.1164        |
| 1321.7116      | 13 | V 2  | 274.1879       | 137.5979        |
|                | 14 | R 1  | 175.1195       | 88.0637         |

N-term:+29.04

TAAVGAVFDISNADR, MH+ 1534.7865, m/z 512.2670  
 L OS G25 P150811 220811-s1.06646.06646.3.dta

X-range:

-

MassTol: Y-zoom:

MassType:

AVG  MONO

Axis:

1  2

Label:

I  M  -

Ions:

a  +  2+  3+

b  +  2+  3+

c  +  2+  3+

x  +  2+  3+

y  +  2+  3+

z  +  2+  3+

hide H<sub>2</sub>O/NH<sub>3</sub>

zoom 112-122

GO

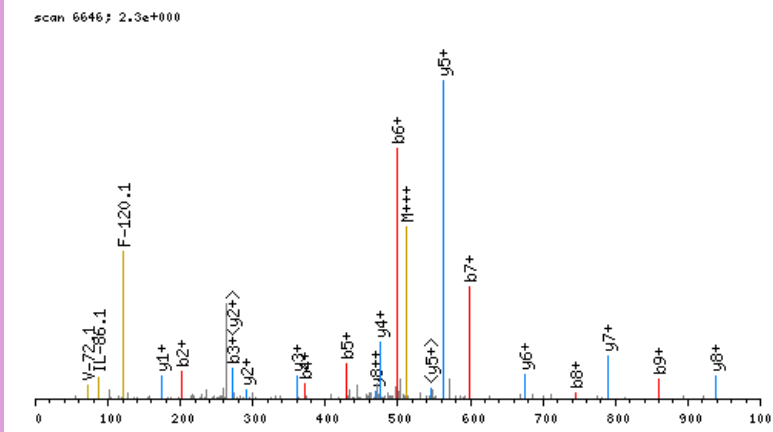

click image to zoom in; click top corners to zoom out [\[precursor±\]](#)

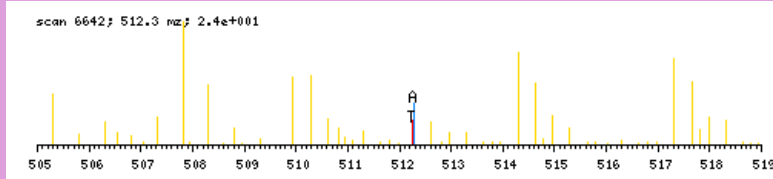

zoomed in precursor plot; T=theoretical m/z, A=acquired m/z

| b <sup>+</sup> | #  | AA # | y <sup>+</sup> | y <sup>2+</sup>    |
|----------------|----|------|----------------|--------------------|
| 130.0868       | 1  | T    | 15             |                    |
| 201.1239       | 2  | A    | 14             | 1405.7076 703.3577 |
| 272.1610       | 3  | A    | 13             | 1334.6705 667.8391 |
| 371.2294       | 4  | V    | 12             | 1263.6333 632.3206 |
| 428.2509       | 5  | G    | 11             | 1164.5649 582.7864 |
| 499.2880       | 6  | A    | 10             | 1107.5435 554.2756 |
| 598.3564       | 7  | V    | 9              | 1036.5063 518.7571 |
| 745.4248       | 8  | F    | 8              | 937.4379 469.2229  |
| 860.4518       | 9  | D    | 7              | 790.3695 395.6887  |
| 973.5358       | 10 | I    | 6              | 675.3426 338.1752  |
| 1060.5679      | 11 | S    | 5              | 562.2585 281.6332  |
| 1174.6108      | 12 | N    | 4              | 475.2265 238.1172  |
| 1245.6479      | 13 | A    | 3              | 361.1836 181.0957  |
| 1360.6748      | 14 | D    | 2              | 290.1464 145.5771  |
|                | 15 | R    | 1              | 175.1195 88.0637   |

N-term:+29.04

TADTDGGYIEER, MH+ 1354.6126, m/z 677.8100  
 L OS G25 P150811 220811-s1.02764.02764.2.dta

X-range:

-

MassTol: Y-zoom:

MassType:

AVG  MONO

Axis:

1  2

Label:

I  M  -

Ions:

a  +  2+  3+

b  +  2+  3+

c  +  2+  3+

x  +  2+  3+

y  +  2+  3+

z  +  2+  3+

hide H<sub>2</sub>O/NH<sub>3</sub>

zoom 112-122

GO

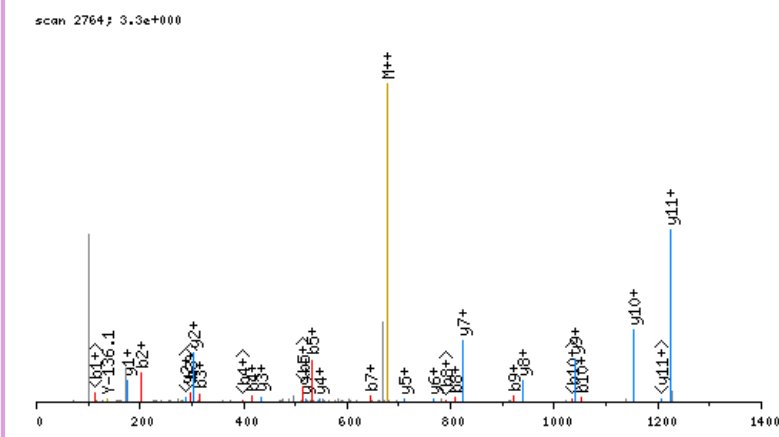

click image to zoom in; click top corners to zoom out [\[precursor±\]](#)

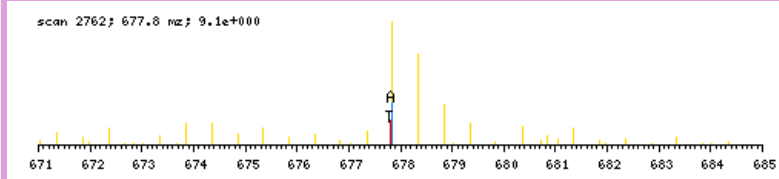

zoomed in precursor plot; T=theoretical m/z, A=acquired m/z

| b <sup>+</sup> | #  | AA # | y <sup>+</sup> | y <sup>2+</sup> |
|----------------|----|------|----------------|-----------------|
| 130.0868       | 1  | T 12 |                |                 |
| 201.1239       | 2  | A 11 | 1225.5337      | 613.2708        |
| 316.1508       | 3  | D 10 | 1154.4966      | 577.7522        |
| 417.1985       | 4  | T 9  | 1039.4696      | 520.2387        |
| 532.2255       | 5  | D 8  | 938.4220       | 469.7149        |
| 589.2469       | 6  | G 7  | 823.3950       | 412.2014        |
| 646.2684       | 7  | G 6  | 766.3735       | 383.6907        |
| 809.3317       | 8  | Y 5  | 709.3521       | 355.1800        |
| 922.4158       | 9  | I 4  | 546.2888       | 273.6483        |
| 1051.4584      | 10 | E 3  | 433.2047       | 217.1063        |
| 1180.5010      | 11 | E 2  | 304.1621       | 152.5850        |
|                | 12 | R 1  | 175.1195       | 88.0637         |

N-term:+29.04

TAESGELHGLTIDEKFVEGVYR, MH+ 2494.2466, m/z 624.3171  
 L OS G27 P150811 220811-s1.06235.06235.4.dta

scan 6235; 3.6e+000

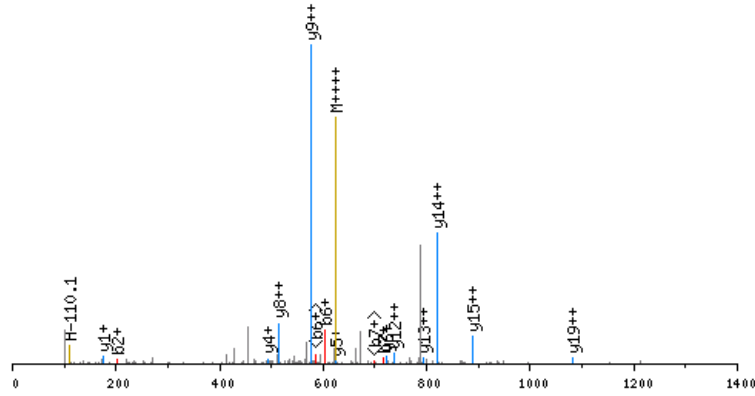

click image to zoom in; click top corners to zoom out [precursor±]

scan 6232; 624.3 m/z; 5.0e+000

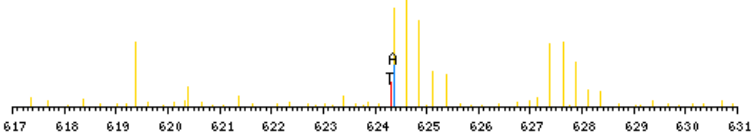

zoomed in precursor plot; T=theoretical m/z, A=acquired m/z

X-range:

-

MassTol: Y-zoom:

MassType:

AVG  MONO

Axis:

1  2

Label:

I  M  -

Ions:

a  +  2+  3+

b  +  2+  3+

c  +  2+  3+

x  +  2+  3+

y  +  2+  3+

z  +  2+  3+

hide H<sub>2</sub>O/NH<sub>3</sub>

zoom 112-122

GO

| b <sup>+</sup> | #  | AA # | y <sup>+</sup> | y <sup>2+</sup> |
|----------------|----|------|----------------|-----------------|
| 130.0868       | 1  | T 22 |                |                 |
| 201.1239       | 2  | A 21 | 2365.1676      | 1183.0877       |
| 330.1665       | 3  | E 20 | 2294.1305      | 1147.5692       |
| 417.1985       | 4  | S 19 | 2165.0879      | 1083.0479       |
| 474.2200       | 5  | G 18 | 2078.0559      | 1039.5319       |
| 603.2626       | 6  | E 17 | 2021.0344      | 1011.0211       |
| 716.3466       | 7  | L 16 | 1891.9918      | 946.4998        |
| 853.4055       | 8  | H 15 | 1778.9078      | 889.9578        |
| 910.4270       | 9  | G 14 | 1641.8488      | 821.4283        |
| 1023.5111      | 10 | L 13 | 1584.8274      | 792.9176        |
| 1124.5588      | 11 | T 12 | 1471.7433      | 736.3756        |
| 1225.6064      | 12 | T 11 | 1370.6956      | 685.8517        |
| 1340.6334      | 13 | D 10 | 1269.6480      | 635.3279        |
| 1469.6760      | 14 | E 9  | 1154.6210      | 577.8144        |
| 1625.8023      | 15 | K 8  | 1025.5784      | 513.2931        |
| 1772.8707      | 16 | F 7  | 869.4521       | 435.2300        |
| 1871.9391      | 17 | V 6  | 722.3837       | 361.6958        |
| 2000.9817      | 18 | E 5  | 623.3153       | 312.1616        |
| 2058.0032      | 19 | G 4  | 494.2727       | 247.6403        |
| 2157.0716      | 20 | V 3  | 437.2512       | 219.1295        |
| 2320.1349      | 21 | Y 2  | 338.1828       | 169.5953        |
|                | 22 | R 1  | 175.1195       | 88.0637         |

N-term:+29.04 K(15):+156.13

TAKIALLEEAR, MH+ 1282.8371, m/z 428.2839  
 H OS G27 P150811 220811-s1.04650.04650.3.dta

X-range:

-

MassTol: Y-zoom:

MassType:

AVG  MONO

Axis:

1  2

Label:

I  M  -

Ions:

a  +  2+  3+

b  +  2+  3+

c  +  2+  3+

x  +  2+  3+

y  +  2+  3+

z  +  2+  3+

hide H<sub>2</sub>O/NH<sub>3</sub>

zoom 112-122

GO

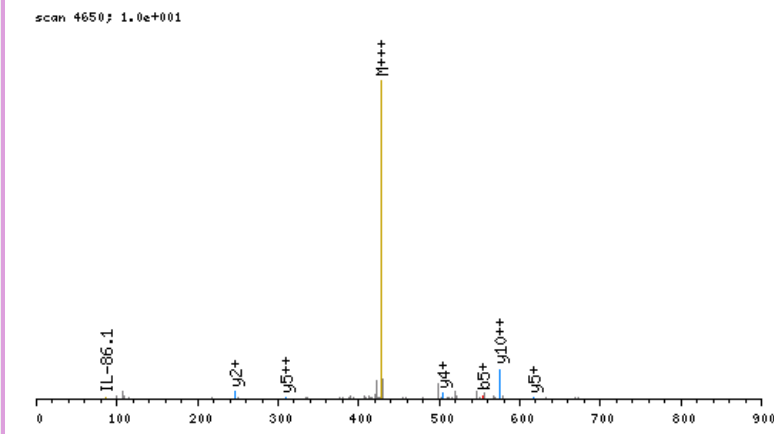

click image to zoom in; click top corners to zoom out [\[precursor±\]](#)

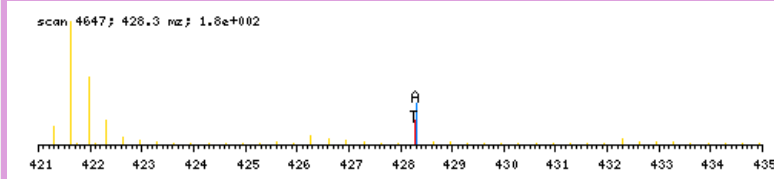

zoomed in precursor plot; T=theoretical m/z, A=acquired m/z

| b <sup>+</sup> | #  | AA # | y <sup>+</sup> | y <sup>2+</sup> |
|----------------|----|------|----------------|-----------------|
| 136.1186       | 1  | T 11 |                |                 |
| 207.1557       | 2  | A 10 | 1147.7263      | 574.3671        |
| 369.3138       | 3  | K 9  | 1076.6892      | 538.8485        |
| 482.3979       | 4  | I 8  | 914.5311       | 457.7695        |
| 553.4350       | 5  | A 7  | 801.4470       | 401.2274        |
| 666.5190       | 6  | L 6  | 730.4099       | 365.7089        |
| 779.6031       | 7  | L 5  | 617.3259       | 309.1668        |
| 908.6457       | 8  | E 4  | 504.2418       | 252.6248        |
| 1037.6883      | 9  | E 3  | 375.1992       | 188.1035        |
| 1108.7254      | 10 | A 2  | 246.1566       | 123.5822        |
|                | 11 | R 1  | 175.1195       | 88.0637         |

N-term:+35.07 K(3):+162.16

X-range:

-

MassTol: Y-zoom:

MassType:

AVG  MONO

Axis:

1  2

Label:

I  M  -

Ions:

a  +  2+  3+

b  +  2+  3+

c  +  2+  3+

x  +  2+  3+

y  +  2+  3+

z  +  2+  3+

hide H<sub>2</sub>O/NH<sub>3</sub>

zoom 112-122

GO

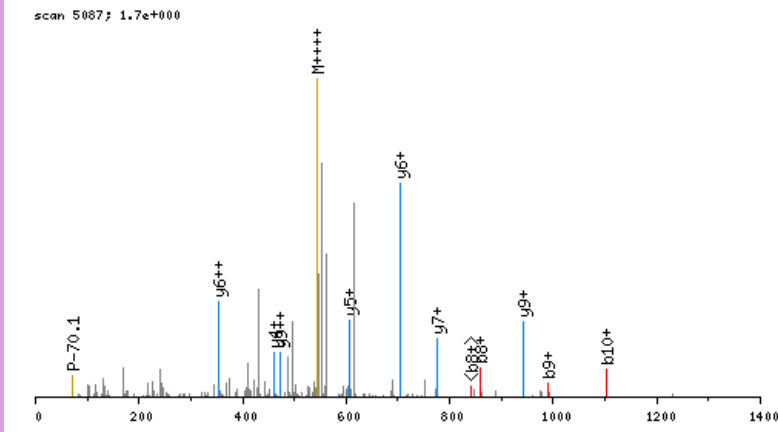

click image to zoom in; click top corners to zoom out [precursor±]

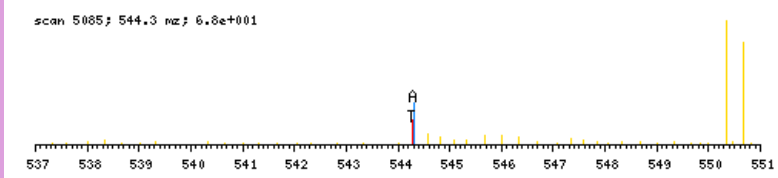

zoomed in precursor plot; T=theoretical m/z, A=acquired m/z

| b <sup>+</sup> | #  | AA | #  | y <sup>+</sup> | y <sup>2+</sup> |
|----------------|----|----|----|----------------|-----------------|
| 130.0868       | 1  | T  | 20 |                |                 |
| 201.1239       | 2  | A  | 19 | 2045.0643      | 1023.0361       |
| 357.2502       | 3  | K  | 18 | 1974.0272      | 987.5175        |
| 454.3030       | 4  | P  | 17 | 1817.9009      | 909.4543        |
| 601.3714       | 5  | F  | 16 | 1720.8481      | 860.9280        |
| 714.4554       | 6  | L  | 15 | 1573.7797      | 787.3938        |
| 771.4769       | 7  | G  | 14 | 1460.6956      | 730.8517        |
| 858.5089       | 8  | S  | 13 | 1403.6742      | 702.3410        |
| 989.5494       | 9  | M  | 12 | 1316.6421      | 658.8250        |
| 1103.5923      | 10 | N  | 11 | 1185.6016      | 593.3047        |
| 1231.6509      | 11 | Q  | 10 | 1071.5587      | 536.2833        |
| 1328.7037      | 12 | P  | 9  | 943.5001       | 472.2540        |
| 1399.7408      | 13 | A  | 8  | 846.4474       | 423.7276        |
| 1470.7779      | 14 | A  | 7  | 775.4103       | 388.2090        |
| 1567.8307      | 15 | P  | 6  | 704.3731       | 352.6905        |
| 1714.8991      | 16 | F  | 5  | 607.3204       | 304.1641        |
| 1801.9311      | 17 | S  | 4  | 460.2520       | 230.6299        |
| 1898.9839      | 18 | P  | 3  | 373.2199       | 187.1139        |
| 2000.0316      | 19 | T  | 2  | 276.1672       | 138.5875        |
|                | 20 | R  | 1  | 175.1195       | 88.0637         |

N-term:+29.04 K(3):+156.13



TANLGAGAAQPLR, MH+ 1267.7122, m/z 423.2423  
 L OS G25 P150811 220811-s1.03400.03400.3.dta

X-range:

-

MassTol: Y-zoom:

MassType:

AVG  MONO

Axis:

1  2

Label:

I  M  -

Ions:

a  +  2+  3+

b  +  2+  3+

c  +  2+  3+

x  +  2+  3+

y  +  2+  3+

z  +  2+  3+

hide H<sub>2</sub>O/NH<sub>3</sub>

zoom 112-122

GO

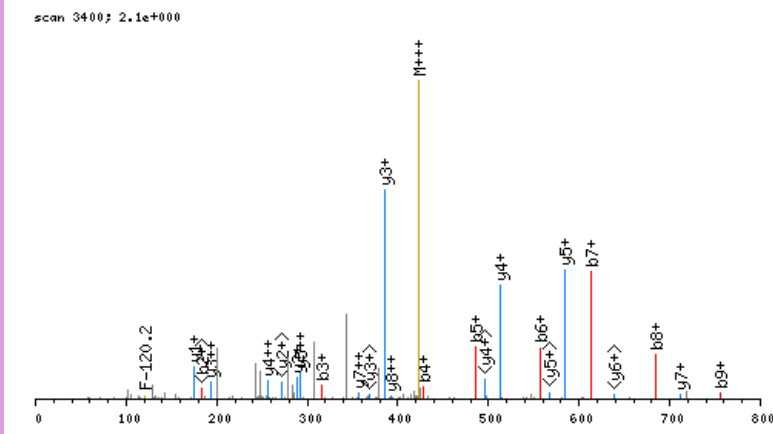

click image to zoom in; click top corners to zoom out [\[precursor±\]](#)

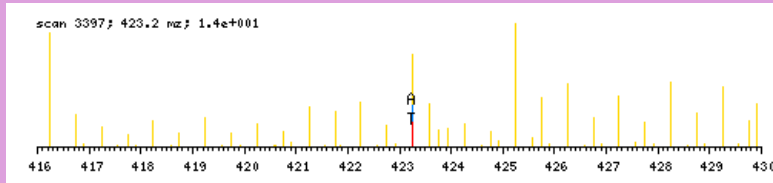

zoomed in precursor plot; T=theoretical m/z, A=acquired m/z

| b <sup>+</sup> | #  | AA # | y <sup>+</sup> | y <sup>2+</sup> |
|----------------|----|------|----------------|-----------------|
| 130.0868       | 1  | T 13 |                |                 |
| 201.1239       | 2  | A 12 | 1138.6333      | 569.8206        |
| 315.1668       | 3  | N 11 | 1067.5962      | 534.3020        |
| 428.2509       | 4  | L 10 | 953.5532       | 477.2805        |
| 485.2723       | 5  | G 9  | 840.4692       | 420.7385        |
| 556.3095       | 6  | A 8  | 783.4477       | 392.2278        |
| 613.3309       | 7  | G 7  | 712.4106       | 356.7092        |
| 684.3680       | 8  | A 6  | 655.3891       | 328.1985        |
| 755.4052       | 9  | A 5  | 584.3520       | 292.6799        |
| 883.4637       | 10 | Q 4  | 513.3149       | 257.1614        |
| 980.5165       | 11 | P 3  | 385.2563       | 193.1321        |
| 1093.6006      | 12 | L 2  | 288.2036       | 144.6057        |
|                | 13 | R 1  | 175.1195       | 88.0637         |

N-term:+29.04

TASAGIQVVGDDLTVTNPKR, MH+ 2098.1508, m/z 525.2932  
 L OS G26 P150811 220811-s1.04627.04627.4.dta

X-range:

-

MassTol: Y-zoom:

MassType:

AVG  MONO

Axis:

1  2

Label:

I  M  -

Ions:

a  +  2+  3+

b  +  2+  3+

c  +  2+  3+

x  +  2+  3+

y  +  2+  3+

z  +  2+  3+

hide H<sub>2</sub>O/NH<sub>3</sub>

zoom 112-122

GO

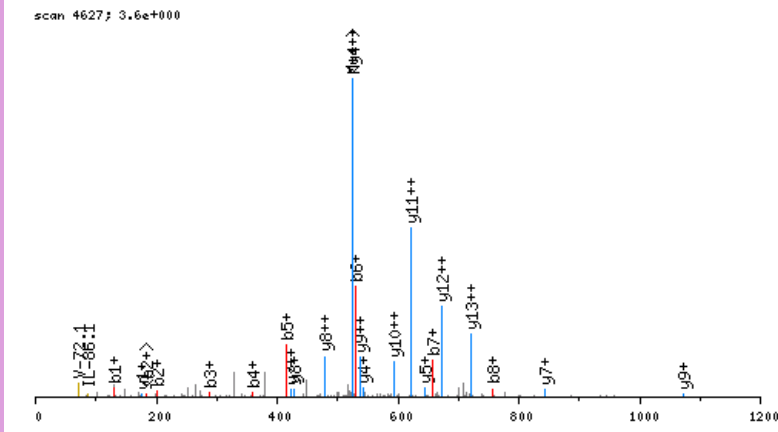

click image to zoom in; click top corners to zoom out [\[precursor±\]](#)

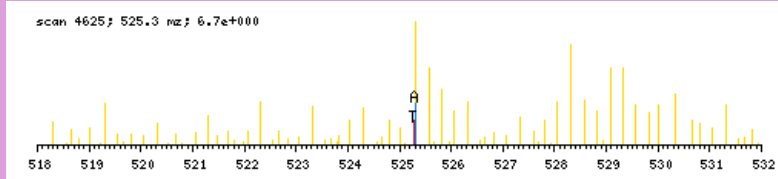

zoomed in precursor plot; T=theoretical m/z, A=acquired m/z

| b <sup>+</sup> | #  | AA | #  | y <sup>+</sup> | y <sup>2+</sup> |
|----------------|----|----|----|----------------|-----------------|
| 130.0868       | 1  | T  | 20 |                |                 |
| 201.1239       | 2  | A  | 19 | 1969.0719      | 985.0398        |
| 288.1559       | 3  | S  | 18 | 1898.0348      | 949.5213        |
| 359.1930       | 4  | A  | 17 | 1811.0027      | 906.0053        |
| 416.2145       | 5  | G  | 16 | 1739.9656      | 870.4867        |
| 529.2986       | 6  | I  | 15 | 1682.9441      | 841.9760        |
| 657.3571       | 7  | Q  | 14 | 1569.8601      | 785.4340        |
| 756.4256       | 8  | V  | 13 | 1441.8015      | 721.4047        |
| 855.4940       | 9  | V  | 12 | 1342.7331      | 671.8705        |
| 912.5154       | 10 | G  | 11 | 1243.6647      | 622.3363        |
| 1027.5424      | 11 | D  | 10 | 1186.6432      | 593.8255        |
| 1142.5693      | 12 | D  | 9  | 1071.6163      | 536.3120        |
| 1255.6534      | 13 | L  | 8  | 956.5893       | 478.7986        |
| 1356.7011      | 14 | T  | 7  | 843.5053       | 422.2565        |
| 1455.7695      | 15 | V  | 6  | 742.4576       | 371.7327        |
| 1556.8172      | 16 | T  | 5  | 643.3892       | 322.1985        |
| 1670.8601      | 17 | N  | 4  | 542.3415       | 271.6747        |
| 1767.9128      | 18 | P  | 3  | 428.2986       | 214.6532        |
| 1924.0391      | 19 | K  | 2  | 331.2458       | 166.1268        |
|                | 20 | R  | 1  | 175.1195       | 88.0637         |

N-term:+29.04 K(19);+156.13

TASESISNLSEAGSVKKGGER, MH+ 2134.1356, m/z 534.2894  
 L OS G28 P150811 220811-s1.03529.03529.4.dta

X-range:

-

MassTol: Y-zoom:

MassType:

AVG  MONO

Axis:

1  2

Label:

I  M  -

Ions:

a  +  2+  3+

b  +  2+  3+

c  +  2+  3+

x  +  2+  3+

y  +  2+  3+

z  +  2+  3+

hide H<sub>2</sub>O/NH<sub>3</sub>

zoom 112-122

GO

scan 3529; 3.2e+000

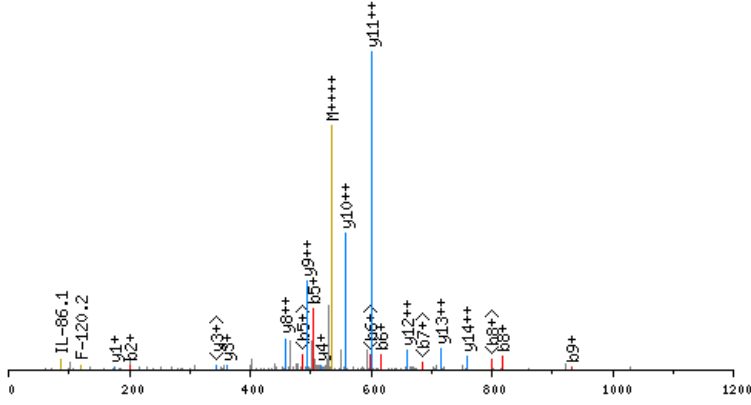

click image to zoom in; click top corners to zoom out [\[precursor±\]](#)

scan 3528; 534.3 m/z; 7.0e+000

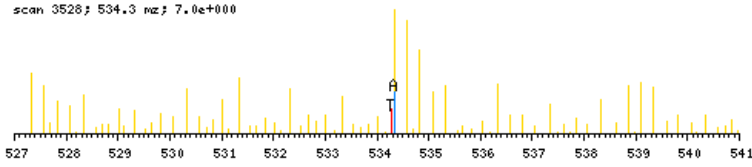

zoomed in precursor plot; T=theoretical m/z, A=acquired m/z

| b <sup>+</sup> | #  | AA # | y <sup>+</sup> | y <sup>2+</sup> |
|----------------|----|------|----------------|-----------------|
| 130.0868       | 1  | T 20 |                |                 |
| 201.1239       | 2  | A 19 | 2005.0566      | 1003.0322       |
| 288.1559       | 3  | S 18 | 1934.0195      | 967.5137        |
| 417.1985       | 4  | E 17 | 1846.9875      | 923.9977        |
| 504.2305       | 5  | S 16 | 1717.9449      | 859.4764        |
| 617.3146       | 6  | I 15 | 1630.9129      | 815.9604        |
| 704.3466       | 7  | S 14 | 1517.8288      | 759.4183        |
| 818.3896       | 8  | N 13 | 1430.7968      | 715.9023        |
| 931.4736       | 9  | L 12 | 1316.7539      | 658.8808        |
| 1018.5057      | 10 | S 11 | 1203.6698      | 602.3388        |
| 1147.5482      | 11 | E 10 | 1116.6378      | 558.8228        |
| 1218.5854      | 12 | A 9  | 987.5952       | 494.3015        |
| 1275.6068      | 13 | G 8  | 916.5581       | 458.7829        |
| 1362.6389      | 14 | S 7  | 859.5366       | 430.2722        |
| 1461.7073      | 15 | V 6  | 772.5046       | 386.7562        |
| 1617.8336      | 16 | K 5  | 673.4362       | 337.2220        |
| 1773.9599      | 17 | K 4  | 517.3099       | 259.1588        |
| 1830.9813      | 18 | G 3  | 361.1836       | 181.0957        |
| 1960.0239      | 19 | E 2  | 304.1621       | 152.5850        |
|                | 20 | R 1  | 175.1195       | 88.0637         |

N-term: +29.04 K(16): +156.13  
 K(17): +156.13

TATPQQAQEVHEKLR, MH+ 1804.0353, m/z 451.7643  
 H OS G28 P150811 220811-s1.02656.02656.4.dta

X-range:

-

MassTol: Y-zoom:

MassType:

AVG  MONO

Axis:

1  2

Label:

I  M  -

Ions:

a  +  2+  3+

b  +  2+  3+

c  +  2+  3+

x  +  2+  3+

y  +  2+  3+

z  +  2+  3+

hide H<sub>2</sub>O/NH<sub>3</sub>

zoom 112-122

GO

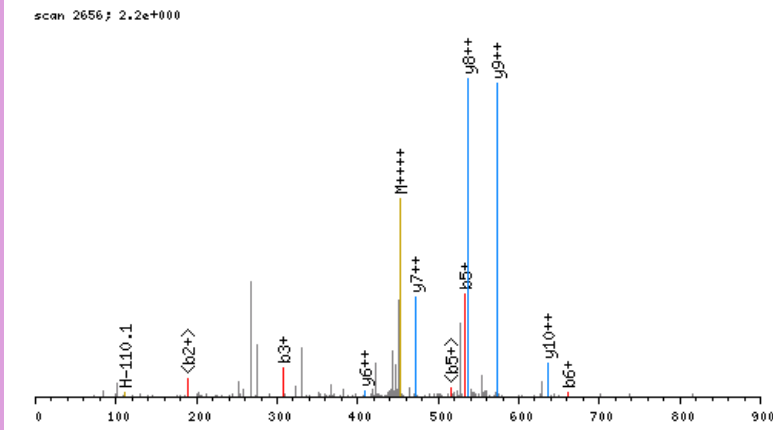

click image to zoom in; click top corners to zoom out [\[precursor±\]](#)

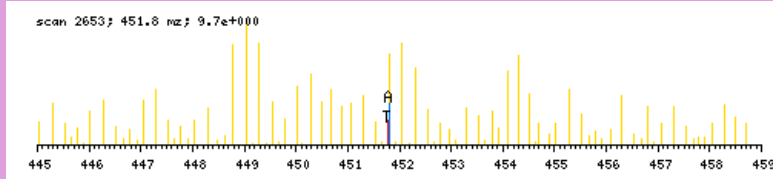

zoomed in precursor plot; T=theoretical m/z, A=acquired m/z

| b <sup>+</sup> | #  | AA | #  | y <sup>+</sup> | y <sup>2+</sup> |
|----------------|----|----|----|----------------|-----------------|
| 136.1186       | 1  | T  | 15 |                |                 |
| 207.1557       | 2  | A  | 14 | 1668.9246      | 834.9662        |
| 308.2034       | 3  | T  | 13 | 1597.8875      | 799.4476        |
| 405.2561       | 4  | P  | 12 | 1496.8398      | 748.9238        |
| 533.3147       | 5  | Q  | 11 | 1399.7870      | 700.3974        |
| 661.3733       | 6  | Q  | 10 | 1271.7284      | 636.3681        |
| 732.4104       | 7  | A  | 9  | 1143.6699      | 572.3388        |
| 860.4690       | 8  | Q  | 8  | 1072.6328      | 536.8203        |
| 989.5116       | 9  | E  | 7  | 944.5742       | 472.7910        |
| 1088.5800      | 10 | V  | 6  | 815.5316       | 408.2697        |
| 1225.6389      | 11 | H  | 5  | 716.4632       | 358.7355        |
| 1354.6815      | 12 | E  | 4  | 579.4043       | 290.2060        |
| 1516.8396      | 13 | K  | 3  | 450.3617       | 225.6847        |
| 1629.9237      | 14 | L  | 2  | 288.2036       | 144.6057        |
|                | 15 | R  | 1  | 175.1195       | 88.0637         |

N-term:+35.07 K(13):+162.16

TAVAPSAVNLDPR, MH+ 1409.7752, m/z 470.5966  
 L OS G25 P150811 220811-s1.04980.04980.3.dta

X-range:

-

MassTol: Y-zoom:

MassType:

AVG  MONO

Axis:

1  2

Label:

I  M  -

Ions:

a  +  2+  3+

b  +  2+  3+

c  +  2+  3+

x  +  2+  3+

y  +  2+  3+

z  +  2+  3+

hide H<sub>2</sub>O/NH<sub>3</sub>

zoom 112-122

GO

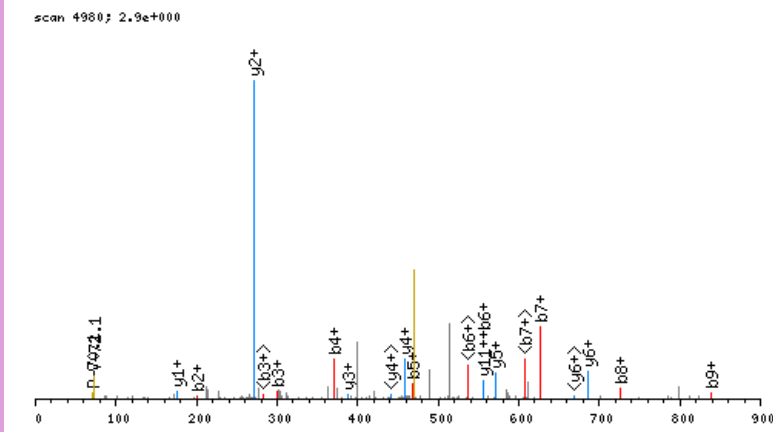

click image to zoom in; click top corners to zoom out [\[precursor±\]](#)

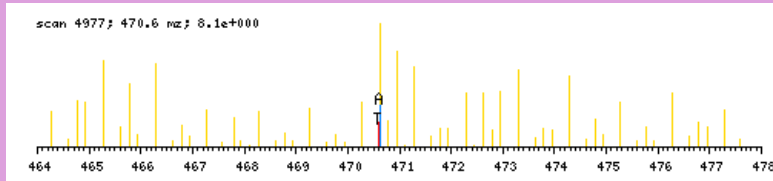

zoomed in precursor plot; T=theoretical m/z, A=acquired m/z

| b <sup>+</sup> | #  | AA # | y <sup>+</sup> | y <sup>2+</sup> |
|----------------|----|------|----------------|-----------------|
| 130.0868       | 1  | T 14 |                |                 |
| 201.1239       | 2  | A 13 | 1280.6963      | 640.8520        |
| 300.1923       | 3  | V 12 | 1209.6592      | 605.3335        |
| 371.2294       | 4  | A 11 | 1110.5907      | 555.7993        |
| 468.2822       | 5  | P 10 | 1039.5536      | 520.2807        |
| 555.3142       | 6  | S 9  | 942.5009       | 471.7543        |
| 626.3513       | 7  | A 8  | 855.4688       | 428.2383        |
| 725.4197       | 8  | V 7  | 784.4317       | 392.7198        |
| 839.4627       | 9  | N 6  | 685.3633       | 343.1856        |
| 952.5467       | 10 | L 5  | 571.3204       | 286.1641        |
| 1023.5838      | 11 | A 4  | 458.2363       | 229.6221        |
| 1138.6108      | 12 | D 3  | 387.1992       | 194.1035        |
| 1235.6636      | 13 | P 2  | 272.1723       | 136.5900        |
|                | 14 | R 1  | 175.1195       | 88.0637         |

N-term:+29.04

TAVQEISHLIEPLASAAR, MH+ 1934.0711, m/z 645.3619  
 L OS G26 P150811 220811-s1.06602.06602.3.dta

X-range:

-

MassTol: Y-zoom:

MassType:

AVG  MONO

Axis:

1  2

Label:

I  M  -

Ions:

a  +  2+  3+

b  +  2+  3+

c  +  2+  3+

x  +  2+  3+

y  +  2+  3+

z  +  2+  3+

hide H<sub>2</sub>O/NH<sub>3</sub>

zoom 112-122

GO

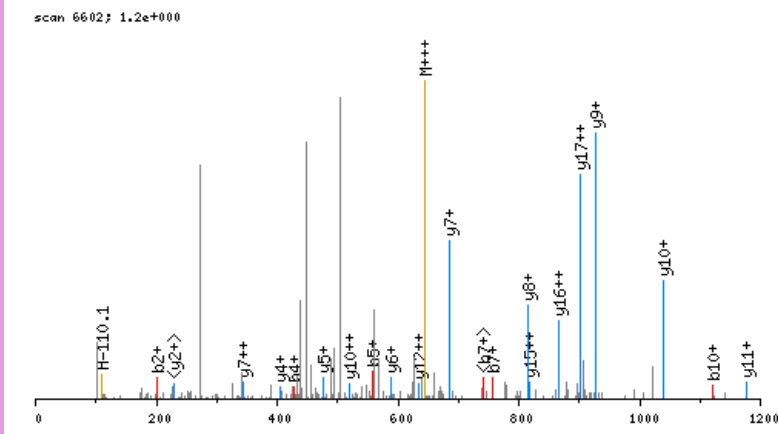

click image to zoom in; click top corners to zoom out [\[precursor±\]](#)

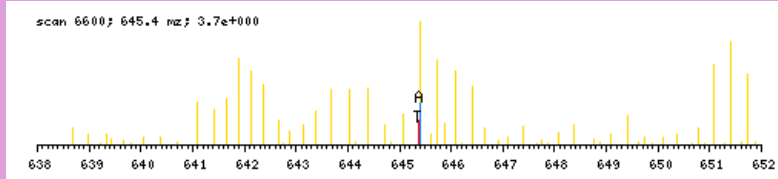

zoomed in precursor plot; T=theoretical m/z, A=acquired m/z

| b <sup>+</sup> | #  | AA # | y <sup>+</sup> | y <sup>2+</sup> |
|----------------|----|------|----------------|-----------------|
| 130.0868       | 1  | T 18 |                |                 |
| 201.1239       | 2  | A 17 | 1804.9921      | 903.0000        |
| 300.1923       | 3  | V 16 | 1733.9550      | 867.4814        |
| 428.2509       | 4  | Q 15 | 1634.8866      | 817.9472        |
| 557.2935       | 5  | E 14 | 1506.8280      | 753.9179        |
| 670.3775       | 6  | I 13 | 1377.7854      | 689.3966        |
| 757.4096       | 7  | S 12 | 1264.7014      | 632.8546        |
| 894.4685       | 8  | H 11 | 1177.6693      | 589.3386        |
| 1007.5525      | 9  | L 10 | 1040.6104      | 520.8091        |
| 1120.6366      | 10 | I 9  | 927.5264       | 464.2671        |
| 1249.6792      | 11 | E 8  | 814.4423       | 407.7251        |
| 1346.7320      | 12 | P 7  | 685.3997       | 343.2038        |
| 1459.8160      | 13 | L 6  | 588.3469       | 294.6774        |
| 1530.8531      | 14 | A 5  | 475.2629       | 238.1353        |
| 1617.8852      | 15 | S 4  | 404.2258       | 202.6168        |
| 1688.9223      | 16 | A 3  | 317.1937       | 159.1008        |
| 1759.9594      | 17 | A 2  | 246.1566       | 123.5822        |
|                | 18 | R 1  | 175.1195       | 88.0637         |

N-term:+29.04

TCCKAADKDTCFSTEGPNLVTR, MH+ 2633.3221, m/z 659.0860  
 H OS G28 P150811 220811-s1.04500.04500.4.dta

X-range:

-

MassTol: Y-zoom:

MassType:

AVG  MONO

Axis:

1  2

Label:

I  M  -

Ions:

a  +  2+  3+

b  +  2+  3+

c  +  2+  3+

x  +  2+  3+

y  +  2+  3+

z  +  2+  3+

hide H<sub>2</sub>O/NH<sub>3</sub>

zoom 112-122

GO

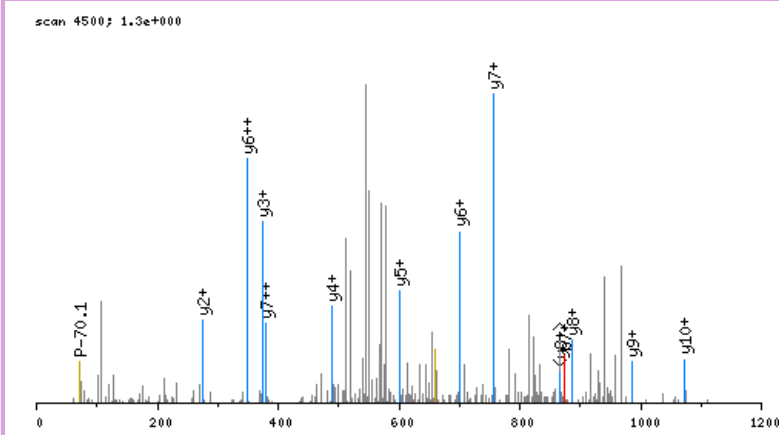

click image to zoom in; click top corners to zoom out [\[precursor±\]](#)

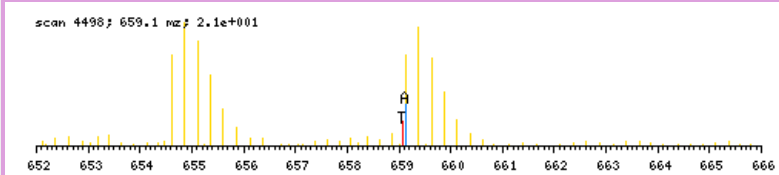

zoomed in precursor plot; T=theoretical m/z, A=acquired m/z

| b <sup>+</sup> | #  | AA # | y <sup>+</sup> | y <sup>2+</sup> |
|----------------|----|------|----------------|-----------------|
| 136.1186       | 1  | T 22 |                |                 |
| 296.1492       | 2  | C 21 | 2498.2113      | 1249.6096       |
| 456.1798       | 3  | C 20 | 2338.1807      | 1169.5943       |
| 618.3379       | 4  | K 19 | 2178.1501      | 1089.5790       |
| 689.3750       | 5  | A 18 | 2015.9920      | 1008.4999       |
| 760.4121       | 6  | A 17 | 1944.9549      | 972.9814        |
| 875.4390       | 7  | D 16 | 1873.9178      | 937.4628        |
| 1037.5971      | 8  | K 15 | 1758.8908      | 879.9493        |
| 1152.6241      | 9  | D 14 | 1596.7327      | 798.8703        |
| 1253.6718      | 10 | T 13 | 1481.7058      | 741.3568        |
| 1413.7024      | 11 | C 12 | 1380.6581      | 690.8330        |
| 1560.7708      | 12 | F 11 | 1220.6275      | 610.8177        |
| 1647.8028      | 13 | S 10 | 1073.5591      | 537.2835        |
| 1748.8505      | 14 | T 9  | 986.5271       | 493.7675        |
| 1877.8931      | 15 | E 8  | 885.4794       | 443.2436        |
| 1934.9145      | 16 | G 7  | 756.4368       | 378.7223        |
| 2031.9673      | 17 | P 6  | 699.4153       | 350.2116        |
| 2146.0102      | 18 | N 5  | 602.3626       | 301.6852        |
| 2259.0943      | 19 | L 4  | 488.3197       | 244.6637        |
| 2358.1627      | 20 | V 3  | 375.2356       | 188.1217        |
| 2459.2104      | 21 | T 2  | 276.1672       | 138.5875        |
|                | 22 | R 1  | 175.1195       | 88.0637         |

N-term:+35.07 C(2):+160.03  
 C(3):+160.03 K(4):+162.16 K(8):+162.16  
 C(11):+160.03

TCFSTEGPNLVTR, MH+ 1509.7371, m/z 503.9172  
 L OS G25 P150811 220811-s1.05114.05114.3.dta

scan 5114; 9.0e-001

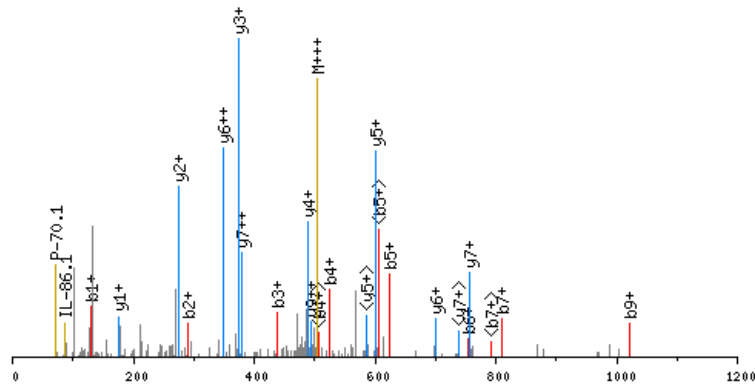

click image to zoom in; click top corners to zoom out [\[precursor±\]](#)

scan 5112; 503.9 m/z; 2.7e+001

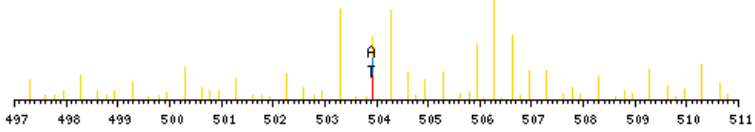

zoomed in precursor plot; T=theoretical m/z, A=acquired m/z

X-range:

-

MassTol: Y-zoom:

MassType:

AVG  MONO

Axis:

1  2

Label:

I  M  -

Ions:

a  +  2+  3+

b  +  2+  3+

c  +  2+  3+

x  +  2+  3+

y  +  2+  3+

z  +  2+  3+

hide H<sub>2</sub>O/NH<sub>3</sub>

zoom 112-122

GO

| b <sup>+</sup> | #  | AA # | y <sup>+</sup> | y <sup>2+</sup>    |
|----------------|----|------|----------------|--------------------|
| 130.0868       | 1  | T    | 13             |                    |
| 290.1174       | 2  | C    | 12             | 1380.6581 690.8330 |
| 437.1858       | 3  | F    | 11             | 1220.6275 610.8177 |
| 524.2178       | 4  | S    | 10             | 1073.5591 537.2835 |
| 625.2655       | 5  | T    | 9              | 986.5271 493.7675  |
| 754.3081       | 6  | E    | 8              | 885.4794 443.2436  |
| 811.3296       | 7  | G    | 7              | 756.4368 378.7223  |
| 908.3823       | 8  | P    | 6              | 699.4153 350.2116  |
| 1022.4252      | 9  | N    | 5              | 602.3626 301.6852  |
| 1135.5093      | 10 | L    | 4              | 488.3197 244.6637  |
| 1234.5777      | 11 | V    | 3              | 375.2356 188.1217  |
| 1335.6254      | 12 | T    | 2              | 276.1672 138.5875  |
|                | 13 | R    | 1              | 175.1195 88.0637   |

N-term:+29.04 C(2):+160.03



TCPLAAGGQQEKLK, MH+ 1584.8531, m/z 528.9559  
 L OS G27 P150811 220811-s1.02966.02966.3.dta

X-range:

-

MassTol: Y-zoom:

MassType:

AVG  MONO

Axis:

1  2

Label:

I  M  -

Ions:

a  +  2+  3+

b  +  2+  3+

c  +  2+  3+

x  +  2+  3+

y  +  2+  3+

z  +  2+  3+

hide H<sub>2</sub>O/NH<sub>3</sub>

zoom 112-122

GO

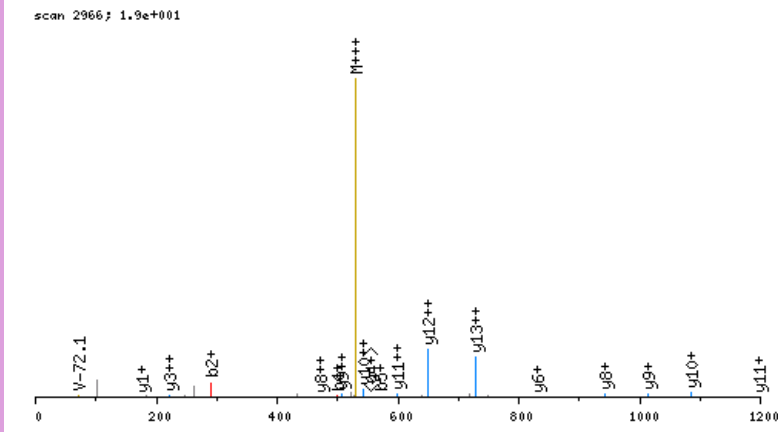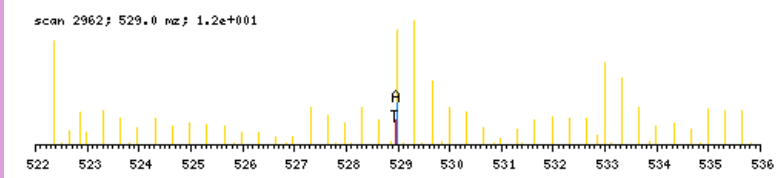

| b <sup>+</sup> | #  | AA # | y <sup>+</sup> | y <sup>2+</sup> |
|----------------|----|------|----------------|-----------------|
| 130.0868       | 1  | T 14 |                |                 |
| 290.1174       | 2  | C 13 | 1455.7742      | 728.3910        |
| 387.1701       | 3  | P 12 | 1295.7436      | 648.3757        |
| 500.2542       | 4  | L 11 | 1198.6908      | 599.8493        |
| 571.2913       | 5  | A 10 | 1085.6068      | 543.3073        |
| 642.3284       | 6  | A 9  | 1014.5697      | 507.7887        |
| 699.3499       | 7  | G 8  | 943.5325       | 472.2702        |
| 756.3714       | 8  | G 7  | 886.5111       | 443.7595        |
| 884.4299       | 9  | Q 6  | 829.4896       | 415.2487        |
| 1012.4885      | 10 | Q 5  | 701.4310       | 351.2194        |
| 1141.5311      | 11 | E 4  | 573.3725       | 287.1901        |
| 1297.6574      | 12 | K 3  | 444.3299       | 222.6688        |
| 1410.7415      | 13 | L 2  | 288.2036       | 144.6057        |
|                | 14 | R 1  | 175.1195       | 88.0637         |

N-term:+29.04 C(2):+160.03  
 K(12):+156.13

TDAEKSAVSCLWAKVNPDEVGGEALGR, MH+ 2961.5840, m/z 741.1515  
 H OS G27 P150811 220811-s1.07129.07129.4.dta

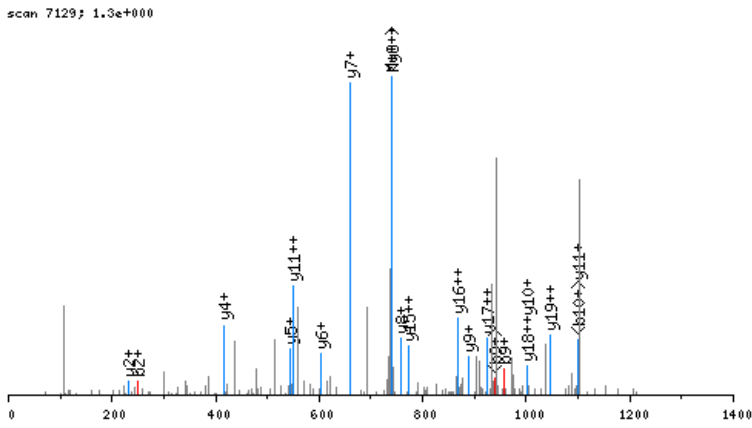

click image to zoom in; click top corners to zoom out [\[precursor±\]](#)

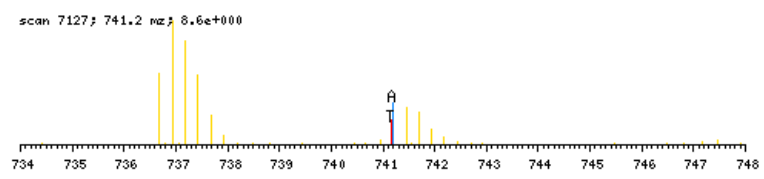

zoomed in precursor plot; T=theoretical m/z, A=acquired m/z

X-range:

-

MassTol: Y-zoom:

MassType:

AVG  MONO

Axis:

1  2

Label:

I  M  -

Ions:

a  2+  3+

b  2+  3+

c  2+  3+

x  2+  3+

y  2+  3+

z  2+  3+

hide H<sub>2</sub>O/NH<sub>3</sub>

zoom 112-122

GO

| b <sup>+</sup> | #  | AA | #  | y <sup>+</sup> | y <sup>2+</sup> |
|----------------|----|----|----|----------------|-----------------|
| 136.1186       | 1  | T  | 27 |                |                 |
| 251.1455       | 2  | D  | 26 | 2826.4732      | 1413.7405       |
| 322.1826       | 3  | A  | 25 | 2711.4463      | 1356.2271       |
| 451.2252       | 4  | E  | 24 | 2640.4092      | 1320.7085       |
| 613.3833       | 5  | K  | 23 | 2511.3666      | 1256.1872       |
| 700.4154       | 6  | S  | 22 | 2349.2085      | 1175.1082       |
| 771.4525       | 7  | A  | 21 | 2262.1765      | 1131.5921       |
| 870.5209       | 8  | V  | 20 | 2191.1394      | 1096.0736       |
| 957.5529       | 9  | S  | 19 | 2092.0709      | 1046.5394       |
| 1117.5835      | 10 | C  | 18 | 2005.0389      | 1003.0234       |
| 1230.6676      | 11 | L  | 17 | 1845.0083      | 923.0081        |
| 1416.7469      | 12 | W  | 16 | 1731.9242      | 866.4660        |
| 1487.7840      | 13 | A  | 15 | 1545.8449      | 773.4264        |
| 1649.9421      | 14 | K  | 14 | 1474.8078      | 737.9078        |
| 1749.0105      | 15 | V  | 13 | 1312.6497      | 656.8288        |
| 1863.0534      | 16 | N  | 12 | 1213.5813      | 607.2946        |
| 1960.1062      | 17 | P  | 11 | 1099.5384      | 550.2731        |
| 2075.1332      | 18 | D  | 10 | 1002.4856      | 501.7467        |
| 2204.1757      | 19 | E  | 9  | 887.4587       | 444.2332        |
| 2303.2442      | 20 | V  | 8  | 758.4161       | 379.7120        |
| 2360.2656      | 21 | G  | 7  | 659.3477       | 330.1777        |
| 2417.2871      | 22 | G  | 6  | 602.3262       | 301.6670        |
| 2546.3297      | 23 | E  | 5  | 545.3047       | 273.1563        |
| 2617.3668      | 24 | A  | 4  | 416.2621       | 208.6350        |
| 2730.4509      | 25 | L  | 3  | 345.2250       | 173.1164        |
| 2787.4723      | 26 | G  | 2  | 232.1410       | 116.5744        |
|                | 27 | R  | 1  | 175.1195       | 88.0637         |

N-term:+35.07 K(5):+162.16  
 C(10):+160.03 K(14):+162.16

TDDLGA VGGACLEDEASALR, MH+ 2053.9924, m/z 685.3356  
 H OS G24 P150811 220811-s1.04434.04434.3.dta

scan 4434; 2.1e+000

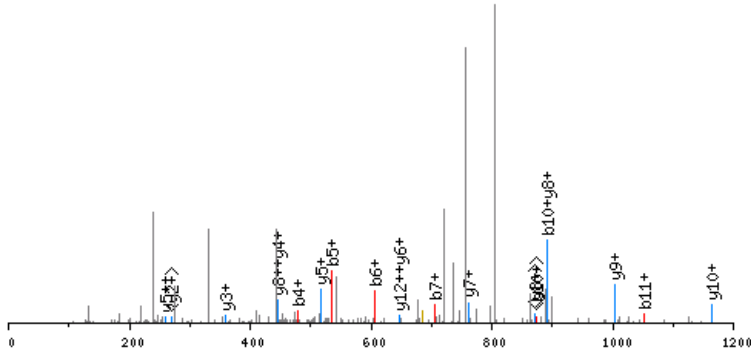

click image to zoom in; click top corners to zoom out [precursor±]

scan 4432; 685.3 m/z; 4.0e+000

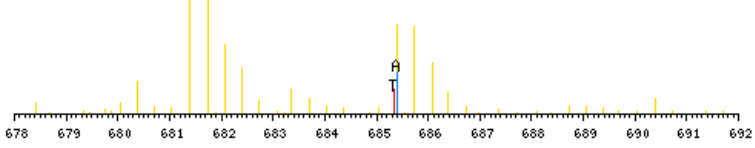

zoomed in precursor plot; T=theoretical m/z, A=acquired m/z

X-range:

-

MassTol: Y-zoom:

MassType:

AVG  MONO

Axis:

1  2

Label:

I  M  -

Ions:

a  +  2+  3+

b  +  2+  3+

c  +  2+  3+

x  +  2+  3+

y  +  2+  3+

z  +  2+  3+

hide H<sub>2</sub>O/NH<sub>3</sub>

zoom 112-122

GO

| b <sup>+</sup> | #  | AA | #  | y <sup>+</sup> | y <sup>2+</sup> |
|----------------|----|----|----|----------------|-----------------|
| 136.1186       | 1  | T  | 20 |                |                 |
| 251.1455       | 2  | D  | 19 | 1918.8816      | 959.9447        |
| 366.1725       | 3  | D  | 18 | 1803.8547      | 902.4312        |
| 479.2565       | 4  | L  | 17 | 1688.8277      | 844.9178        |
| 536.2780       | 5  | G  | 16 | 1575.7436      | 788.3757        |
| 607.3151       | 6  | A  | 15 | 1518.7222      | 759.8650        |
| 706.3835       | 7  | V  | 14 | 1447.6851      | 724.3464        |
| 763.4050       | 8  | G  | 13 | 1348.6167      | 674.8122        |
| 820.4264       | 9  | G  | 12 | 1291.5952      | 646.3015        |
| 891.4636       | 10 | A  | 11 | 1234.5737      | 617.7908        |
| 1051.4942      | 11 | C  | 10 | 1163.5366      | 582.2722        |
| 1164.5782      | 12 | L  | 9  | 1003.5060      | 502.2569        |
| 1293.6208      | 13 | E  | 8  | 890.4220       | 445.7149        |
| 1408.6478      | 14 | D  | 7  | 761.3794       | 381.1936        |
| 1537.6904      | 15 | E  | 6  | 646.3524       | 323.6801        |
| 1608.7275      | 16 | A  | 5  | 517.3098       | 259.1588        |
| 1695.7595      | 17 | S  | 4  | 446.2727       | 223.6403        |
| 1766.7966      | 18 | A  | 3  | 359.2407       | 180.1243        |
| 1879.8807      | 19 | L  | 2  | 288.2036       | 144.6057        |
|                | 20 | R  | 1  | 175.1195       | 88.0637         |

N-term:+35.07 C(11);+160.03

TDEAAFQKVMNSLDSNR, MH+ 1981.9653, m/z 661.3266  
 L OS G26 P150811 220811-s1.05682.05682.3.dta

scan 5682; 7.1e+000

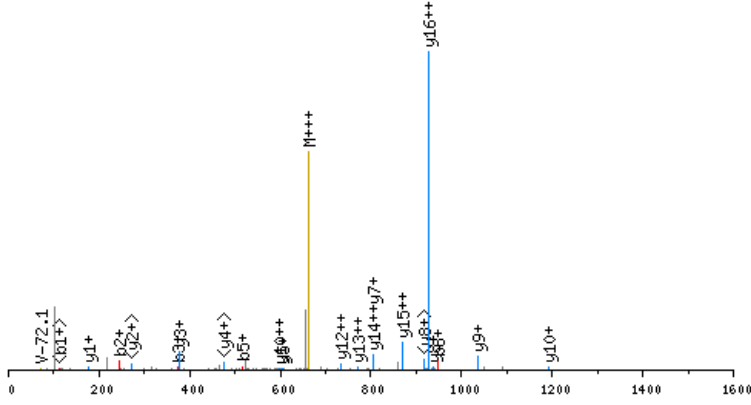

click image to zoom in; click top corners to zoom out [\[precursor±\]](#)

scan 5680; 661.3 m/z; 1.9e+001

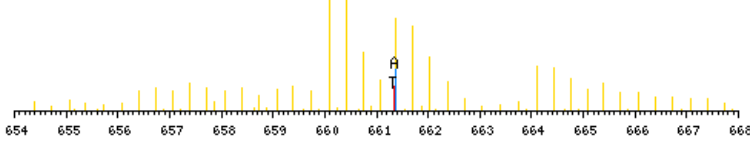

zoomed in precursor plot; T=theoretical m/z, A=acquired m/z

X-range:

-

MassTol: Y-zoom:

MassType:

AVG  MONO

Axis:

1  2

Label:

I  M  -

Ions:

a  +  2+  3+

b  +  2+  3+

c  +  2+  3+

x  +  2+  3+

y  +  2+  3+

z  +  2+  3+

hide H<sub>2</sub>O/NH<sub>3</sub>

zoom 112-122

GO

| b <sup>+</sup> | #  | AA | #  | y <sup>+</sup> | y <sup>2+</sup> |
|----------------|----|----|----|----------------|-----------------|
| 130.0868       | 1  | T  | 17 |                |                 |
| 245.1137       | 2  | D  | 16 | 1852.8864      | 926.9471        |
| 374.1563       | 3  | E  | 15 | 1737.8594      | 869.4336        |
| 445.1934       | 4  | A  | 14 | 1608.8168      | 804.9123        |
| 516.2305       | 5  | A  | 13 | 1537.7797      | 769.3938        |
| 663.2990       | 6  | F  | 12 | 1466.7426      | 733.8752        |
| 791.3575       | 7  | Q  | 11 | 1319.6742      | 660.3410        |
| 947.4838       | 8  | K  | 10 | 1191.6156      | 596.3117        |
| 1046.5522      | 9  | V  | 9  | 1035.4893      | 518.2486        |
| 1177.5927      | 10 | M  | 8  | 936.4209       | 468.7144        |
| 1264.6248      | 11 | S  | 7  | 805.3804       | 403.1941        |
| 1378.6677      | 12 | N  | 6  | 718.3484       | 359.6781        |
| 1491.7518      | 13 | L  | 5  | 604.3055       | 302.6566        |
| 1606.7787      | 14 | D  | 4  | 491.2214       | 246.1146        |
| 1693.8107      | 15 | S  | 3  | 376.1945       | 188.6011        |
| 1807.8537      | 16 | N  | 2  | 289.1624       | 145.0851        |
|                | 17 | R  | 1  | 175.1195       | 88.0637         |

N-term:+29.04 K(8):+156.13

TDEATIIDIVTHR, MH+ 1511.8069, m/z 504.6072  
 L OS G26 P150811 220811-s1.06334.06334.3.dta

X-range:

-

MassTol: Y-zoom:

MassType:

AVG  MONO

Axis:

1  2

Label:

I  M  -

Ions:

a  +  2+  3+

b  +  2+  3+

c  +  2+  3+

x  +  2+  3+

y  +  2+  3+

z  +  2+  3+

hide H<sub>2</sub>O/NH<sub>3</sub>

zoom 112-122

GO

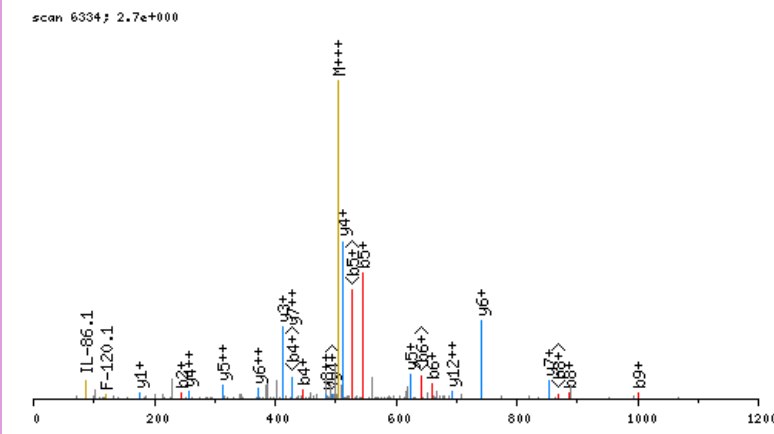

click image to zoom in; click top corners to zoom out [\[precursor±\]](#)

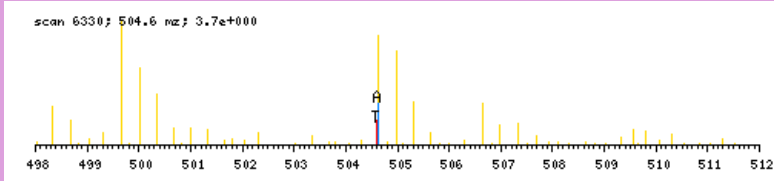

zoomed in precursor plot; T=theoretical m/z, A=acquired m/z

| b <sup>+</sup> | #  | AA # | y <sup>+</sup> | y <sup>2+</sup> |
|----------------|----|------|----------------|-----------------|
| 130.0868       | 1  | T 13 |                |                 |
| 245.1137       | 2  | D 12 | 1382.7280      | 691.8679        |
| 374.1563       | 3  | E 11 | 1267.7010      | 634.3544        |
| 445.1934       | 4  | A 10 | 1138.6584      | 569.8331        |
| 546.2411       | 5  | T 9  | 1067.6213      | 534.3146        |
| 659.3252       | 6  | I 8  | 966.5736       | 483.7907        |
| 772.4092       | 7  | I 7  | 853.4896       | 427.2487        |
| 887.4362       | 8  | D 6  | 740.4055       | 370.7067        |
| 1000.5202      | 9  | I 5  | 625.3786       | 313.1932        |
| 1099.5887      | 10 | V 4  | 512.2945       | 256.6512        |
| 1200.6363      | 11 | T 3  | 413.2261       | 207.1170        |
| 1337.6952      | 12 | H 2  | 312.1784       | 156.5931        |
|                | 13 | R 1  | 175.1195       | 88.0637         |

N-term:+29.04

TDEDSILNLLTSR, MH+ 1504.7859, m/z 502.2668  
 L OS G25 P150811 220811-s1.08228.08228.3.dta

X-range:

-

MassTol: Y-zoom:

MassType:

AVG  MONO

Axis:

1  2

Label:

I  M  -

Ions:

a  +  2+  3+

b  +  2+  3+

c  +  2+  3+

x  +  2+  3+

y  +  2+  3+

z  +  2+  3+

hide H<sub>2</sub>O/NH<sub>3</sub>

zoom 112-122

GO

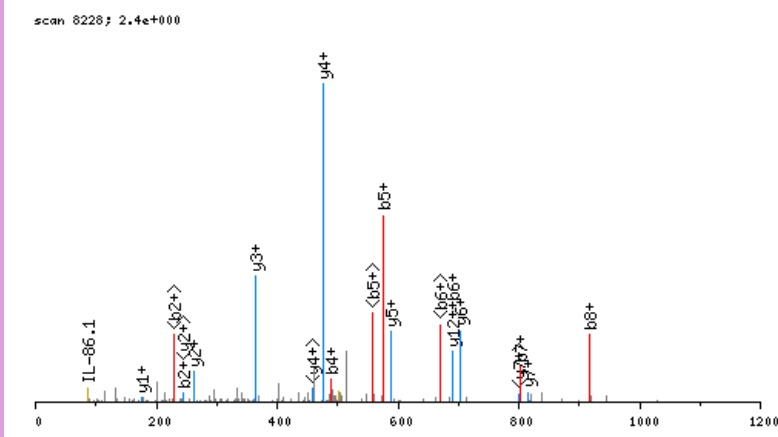

click image to zoom in; click top corners to zoom out [\[precursor±\]](#)

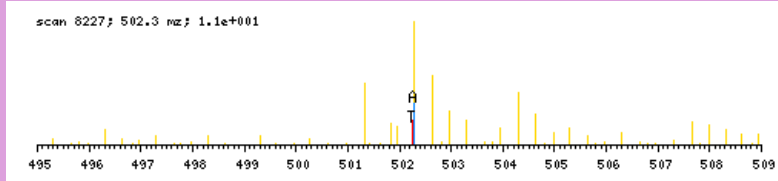

zoomed in precursor plot; T=theoretical m/z, A=acquired m/z

| b <sup>+</sup> | #  | AA # | y <sup>+</sup> | y <sup>2+</sup> |
|----------------|----|------|----------------|-----------------|
| 130.0868       | 1  | T 13 |                |                 |
| 245.1137       | 2  | D 12 | 1375.7069      | 688.3574        |
| 374.1563       | 3  | E 11 | 1260.6800      | 630.8439        |
| 489.1833       | 4  | D 10 | 1131.6374      | 566.3226        |
| 576.2153       | 5  | S 9  | 1016.6104      | 508.8091        |
| 689.2994       | 6  | I 8  | 929.5784       | 465.2931        |
| 802.3834       | 7  | L 7  | 816.4943       | 408.7511        |
| 916.4263       | 8  | N 6  | 703.4103       | 352.2090        |
| 1029.5104      | 9  | L 5  | 589.3673       | 295.1876        |
| 1142.5945      | 10 | L 4  | 476.2833       | 238.6455        |
| 1243.6421      | 11 | T 3  | 363.1992       | 182.1035        |
| 1330.6742      | 12 | S 2  | 262.1515       | 131.5797        |
|                | 13 | R 1  | 175.1195       | 88.0637         |

N-term:+29.04

TDEDSLIEIICSR, MH+ 1584.8002, m/z 528.9383  
 H OS G25 P150811 220811-s1.08080.08080.3.dta

scan 8080; 3.7e+000

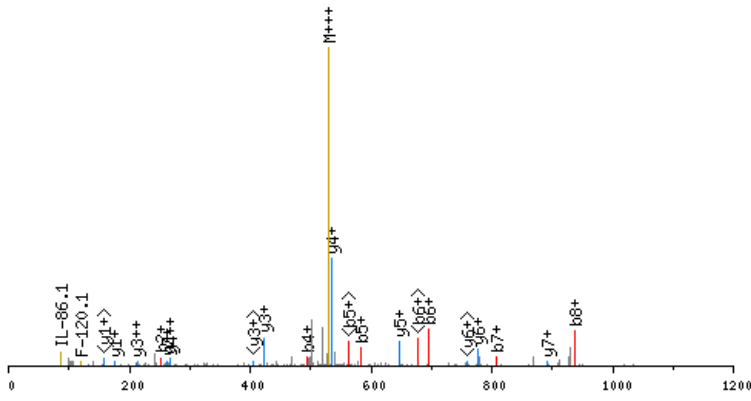

click image to zoom in; click top corners to zoom out [\[precursor±\]](#)

scan 8077; 528.9 m/z; 1.3e+001

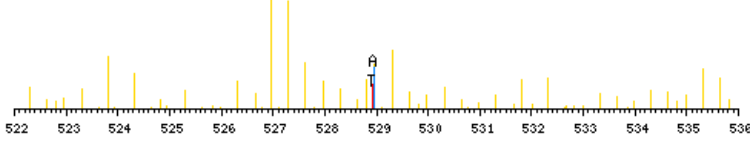

zoomed in precursor plot; T=theoretical m/z, A=acquired m/z

X-range:

-

MassTol: Y-zoom:

MassType:

AVG  MONO

Axis:

1  2

Label:

I  M  -

Ions:

a  +  2+  3+

b  +  2+  3+

c  +  2+  3+

x  +  2+  3+

y  +  2+  3+

z  +  2+  3+

hide H<sub>2</sub>O/NH<sub>3</sub>

zoom 112-122

GO

| b <sup>+</sup> | #  | AA # | y <sup>+</sup> | y <sup>2+</sup> |
|----------------|----|------|----------------|-----------------|
| 136.1186       | 1  | T 13 |                |                 |
| 251.1455       | 2  | D 12 | 1449.6895      | 725.3487        |
| 380.1881       | 3  | E 11 | 1334.6625      | 667.8352        |
| 495.2151       | 4  | D 10 | 1205.6199      | 603.3139        |
| 582.2471       | 5  | S 9  | 1090.5930      | 545.8004        |
| 695.3312       | 6  | L 8  | 1003.5610      | 502.2844        |
| 808.4152       | 7  | I 7  | 890.4769       | 445.7424        |
| 937.4578       | 8  | E 6  | 777.3929       | 389.2003        |
| 1050.5419      | 9  | I 5  | 648.3503       | 324.6790        |
| 1163.6259      | 10 | I 4  | 535.2662       | 268.1370        |
| 1323.6565      | 11 | C 3  | 422.1821       | 211.5950        |
| 1410.6886      | 12 | S 2  | 262.1515       | 131.5797        |
|                | 13 | R 1  | 175.1195       | 88.0637         |

N-term:+35.07 C(11):+160.03

TDEEKFITIFGTR, MH+ 1612.8587, m/z 538.2911  
 L OS G27 P150811 220811-s1.06766.06766.3.dta

scan 6766; 1.1e+001

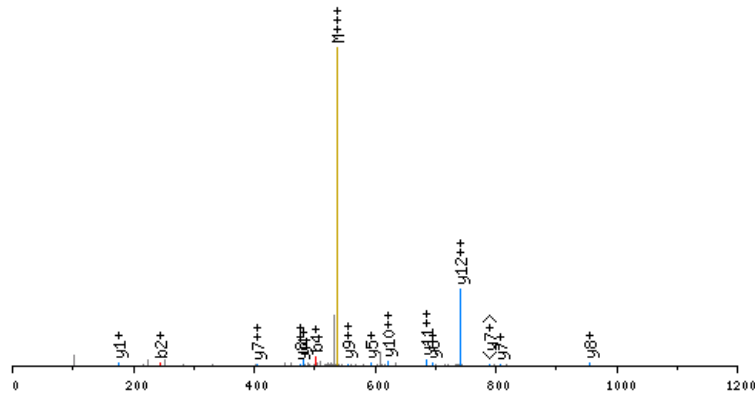

click image to zoom in; click top corners to zoom out [\[precursor±\]](#)

scan 6762; 538.3 m/z; 4.1e+000

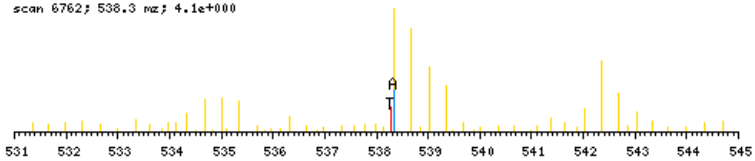

zoomed in precursor plot; T=theoretical m/z, A=acquired m/z

X-range:

-

MassTol: Y-zoom:

MassType:

AVG  MONO

Axis:

1  2

Label:

I  M  -

Ions:

a  +  2+  3+

b  +  2+  3+

c  +  2+  3+

x  +  2+  3+

y  +  2+  3+

z  +  2+  3+

hide H<sub>2</sub>O/NH<sub>3</sub>

zoom 112-122

GO

| b <sup>+</sup> | #  | AA | #  | y <sup>+</sup> | y <sup>2+</sup> |
|----------------|----|----|----|----------------|-----------------|
| 130.0868       | 1  | T  | 13 |                |                 |
| 245.1137       | 2  | D  | 12 | 1483.7797      | 742.3938        |
| 374.1563       | 3  | E  | 11 | 1368.7528      | 684.8803        |
| 503.1989       | 4  | E  | 10 | 1239.7102      | 620.3590        |
| 659.3252       | 5  | K  | 9  | 1110.6676      | 555.8377        |
| 806.3936       | 6  | F  | 8  | 954.5413       | 477.7746        |
| 919.4777       | 7  | I  | 7  | 807.4729       | 404.2403        |
| 1020.5254      | 8  | T  | 6  | 694.3888       | 347.6983        |
| 1133.6094      | 9  | I  | 5  | 593.3411       | 297.1745        |
| 1280.6778      | 10 | F  | 4  | 480.2571       | 240.6324        |
| 1337.6993      | 11 | G  | 3  | 333.1886       | 167.0982        |
| 1438.7470      | 12 | T  | 2  | 276.1672       | 138.5875        |
|                | 13 | R  | 1  | 175.1195       | 88.0637         |

N-term:+29.04 K(5):+156.13



TDEEPVKLLESR, MH+ 1646.0225, m/z 412.2611  
 H OS G28 P150811 220811-s1.05395.05395.4.dta

scan 5395; 2.8e+001

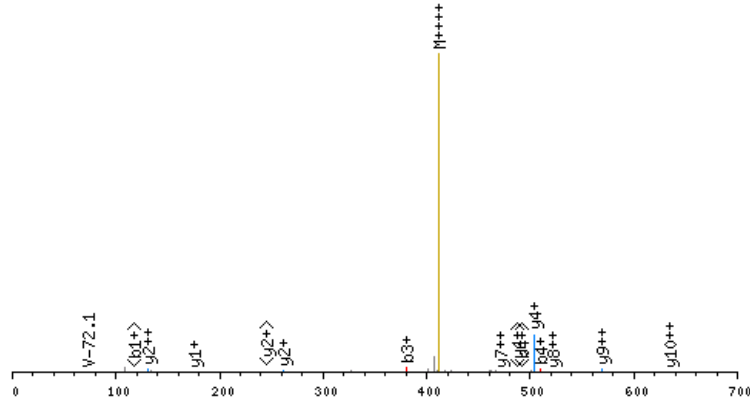

click image to zoom in; click top corners to zoom out [\[precursor±\]](#)

scan 5393; 412.3 mz; 1.9e+001

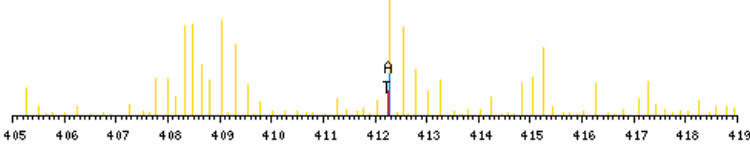

zoomed in precursor plot; T=theoretical m/z, A=acquired m/z

X-range:

-

MassTol: Y-zoom:

MassType:

AVG  MONO

Axis:

1  2

Label:

I  M  -

Ions:

a  +  2+  3+

b  +  2+  3+

c  +  2+  3+

x  +  2+  3+

y  +  2+  3+

z  +  2+  3+

hide H<sub>2</sub>O/NH<sub>3</sub>

zoom 112-122

GO

| b <sup>+</sup> | #  | AA | #  | y <sup>+</sup> | y <sup>2+</sup> |
|----------------|----|----|----|----------------|-----------------|
| 136.1186       | 1  | T  | 13 |                |                 |
| 251.1455       | 2  | D  | 12 | 1510.9118      | 755.9598        |
| 380.1881       | 3  | E  | 11 | 1395.8848      | 698.4463        |
| 509.2307       | 4  | E  | 10 | 1266.8422      | 633.9250        |
| 606.2835       | 5  | P  | 9  | 1137.7996      | 569.4037        |
| 705.3519       | 6  | V  | 8  | 1040.7469      | 520.8773        |
| 867.5100       | 7  | K  | 7  | 941.6785       | 471.3431        |
| 1029.6681      | 8  | K  | 6  | 779.5204       | 390.2641        |
| 1142.7521      | 9  | L  | 5  | 617.3623       | 309.1850        |
| 1255.8362      | 10 | L  | 4  | 504.2782       | 252.6430        |
| 1384.8788      | 11 | E  | 3  | 391.1941       | 196.1010        |
| 1471.9108      | 12 | S  | 2  | 262.1515       | 131.5797        |
|                | 13 | R  | 1  | 175.1195       | 88.0637         |

N-term:+35.07 K(7):+162.16  
 K(8):+162.16

TDEKCLIEILASR, MH+ 1603.8729, m/z 535.2958  
 L OS G27 P150811 220811-s1.07001.07001.3.dta

X-range:

-

MassTol: Y-zoom:

MassType:

AVG  MONO

Axis:

1  2

Label:

I  M  -

Ions:

a  +  2+  3+

b  +  2+  3+

c  +  2+  3+

x  +  2+  3+

y  +  2+  3+

z  +  2+  3+

hide H<sub>2</sub>O/NH<sub>3</sub>

zoom 112-122

GO

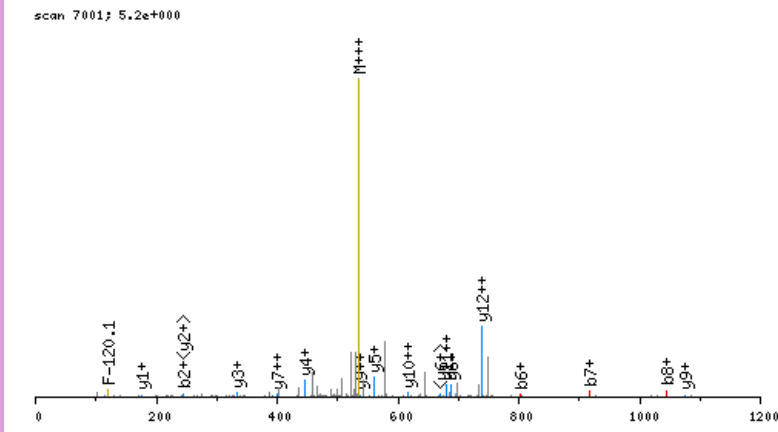

click image to zoom in; click top corners to zoom out [\[precursor±\]](#)

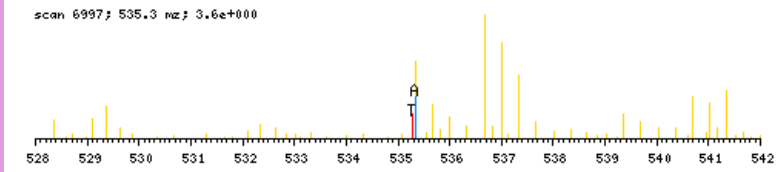

zoomed in precursor plot; T=theoretical m/z, A=acquired m/z

| b <sup>+</sup> | #  | AA | #  | y <sup>+</sup> | y <sup>2+</sup> |
|----------------|----|----|----|----------------|-----------------|
| 130.0868       | 1  | T  | 13 |                |                 |
| 245.1137       | 2  | D  | 12 | 1474.7939      | 737.9009        |
| 374.1563       | 3  | E  | 11 | 1359.7670      | 680.3874        |
| 530.2826       | 4  | K  | 10 | 1230.7244      | 615.8661        |
| 690.3132       | 5  | C  | 9  | 1074.5981      | 537.8030        |
| 803.3973       | 6  | L  | 8  | 914.5675       | 457.7877        |
| 916.4813       | 7  | I  | 7  | 801.4834       | 401.2456        |
| 1045.5239      | 8  | E  | 6  | 688.3994       | 344.7036        |
| 1158.6080      | 9  | I  | 5  | 559.3568       | 280.1823        |
| 1271.6921      | 10 | L  | 4  | 446.2727       | 223.6403        |
| 1342.7292      | 11 | A  | 3  | 333.1886       | 167.0982        |
| 1429.7612      | 12 | S  | 2  | 262.1515       | 131.5797        |
|                | 13 | R  | 1  | 175.1195       | 88.0637         |

N-term:+29.04 K(4):+156.13  
 C(5):+160.03

TDEKFEVGVYR, MH+ 1398.7269, m/z 466.9138  
 L OS G27 P150811 220811-s1.04098.04098.3.dta

X-range:

-

MassTol: Y-zoom:

MassType:

AVG  MONO

Axis:

1  2

Label:

I  M  -

Ions:

a  +  2+  3+

b  +  2+  3+

c  +  2+  3+

x  +  2+  3+

y  +  2+  3+

z  +  2+  3+

hide H<sub>2</sub>O/NH<sub>3</sub>

zoom 112-122

GO

scan 4098; 1.7e+001

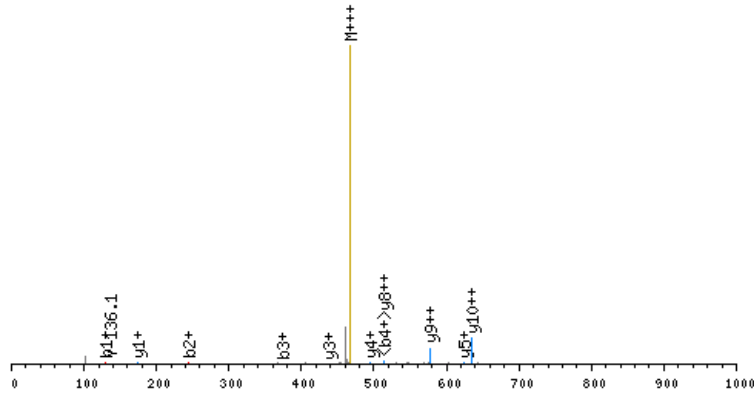

click image to zoom in; click top corners to zoom out [\[precursor±\]](#)

scan 4097; 466.9 m/z; 2.2e+001

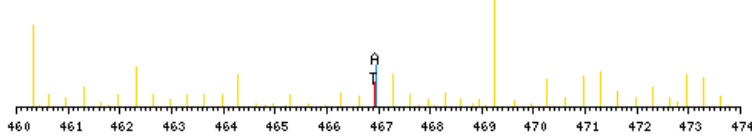

zoomed in precursor plot; T=theoretical m/z, A=acquired m/z

| b <sup>+</sup> | #  | AA # | y <sup>+</sup> | y <sup>2+</sup> |
|----------------|----|------|----------------|-----------------|
| 130.0868       | 1  | T 11 |                |                 |
| 245.1137       | 2  | D 10 | 1269.6480      | 635.3279        |
| 374.1563       | 3  | E 9  | 1154.6210      | 577.8144        |
| 530.2826       | 4  | K 8  | 1025.5784      | 513.2931        |
| 677.3510       | 5  | F 7  | 869.4521       | 435.2300        |
| 776.4194       | 6  | V 6  | 722.3837       | 361.6958        |
| 905.4620       | 7  | E 5  | 623.3153       | 312.1616        |
| 962.4835       | 8  | G 4  | 494.2727       | 247.6403        |
| 1061.5519      | 9  | V 3  | 437.2512       | 219.1295        |
| 1224.6152      | 10 | Y 2  | 338.1828       | 169.5953        |
|                | 11 | R 1  | 175.1195       | 88.0637         |

N-term:+29.04 K(4):+156.13

TDEKTLIEILATR, MH+ 1558.9056, m/z 520.3067  
 L OS G26 P150811 220811-s1.06662.06662.3.dta

X-range:

-

MassTol: Y-zoom:

MassType:

AVG  MONO

Axis:

1  2

Label:

I  M  -

Ions:

a  +  2+  3+

b  +  2+  3+

c  +  2+  3+

x  +  2+  3+

y  +  2+  3+

z  +  2+  3+

hide H<sub>2</sub>O/NH<sub>3</sub>

zoom 112-122

GO

scan 6662; 4.1e+000

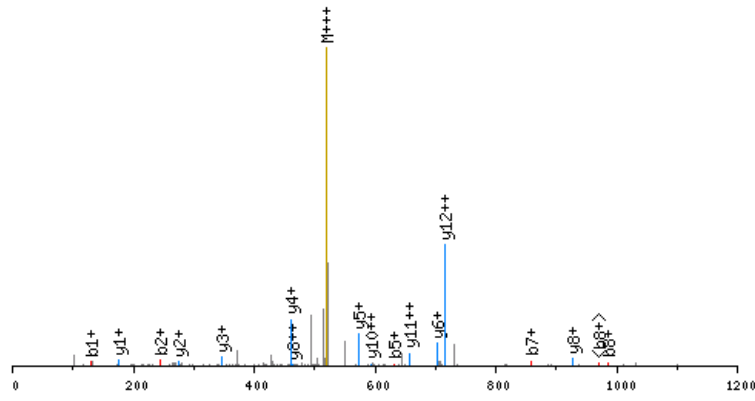

click image to zoom in; click top corners to zoom out [\[precursor±\]](#)

scan 6660; 520.3 m/z; 6.8e+000

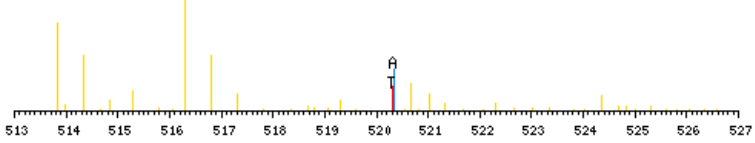

zoomed in precursor plot; T=theoretical m/z, A=acquired m/z

| b <sup>+</sup> | #  | AA # | y <sup>+</sup> | y <sup>2+</sup> |
|----------------|----|------|----------------|-----------------|
| 130.0868       | 1  | T    | 13             |                 |
| 245.1137       | 2  | D    | 12             | 1429.8267       |
| 374.1563       | 3  | E    | 11             | 1314.7997       |
| 530.2826       | 4  | K    | 10             | 1185.7571       |
| 631.3303       | 5  | T    | 9              | 1029.6308       |
| 744.4144       | 6  | L    | 8              | 928.5831        |
| 857.4984       | 7  | I    | 7              | 815.4991        |
| 986.5410       | 8  | E    | 6              | 702.4150        |
| 1099.6251      | 9  | I    | 5              | 573.3724        |
| 1212.7091      | 10 | L    | 4              | 460.2884        |
| 1283.7463      | 11 | A    | 3              | 347.2043        |
| 1384.7939      | 12 | T    | 2              | 276.1672        |
|                | 13 | R    | 1              | 175.1195        |

N-term:+29.04 K(4):+156.13

TDEKVLTEIIASR, MH+ 1530.8743, m/z 510.9630  
 L OS G26 P150811 220811-s1.05254.05254.3.dta

scan 5254; 2.4e+001

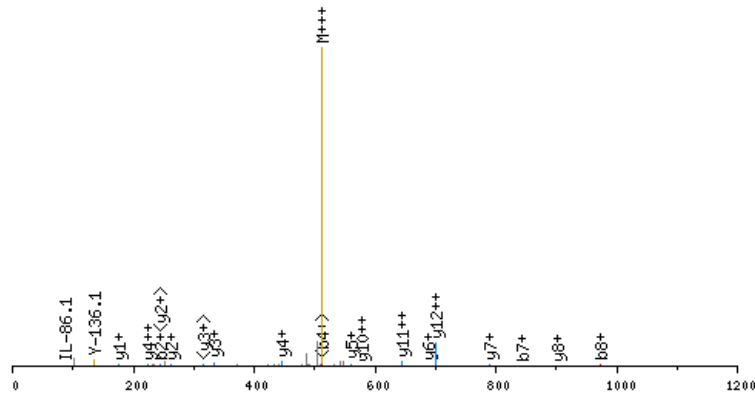

click image to zoom in; click top corners to zoom out [\[precursor±\]](#)

scan 5250; 511.0 m/z; 1.5e+001

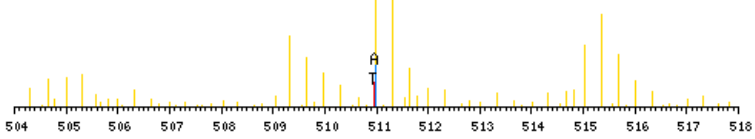

zoomed in precursor plot; T=theoretical m/z, A=acquired m/z

X-range:

-

MassTol: Y-zoom:

MassType:

AVG  MONO

Axis:

1  2

Label:

I  M  -

Ions:

a  +  2+  3+

b  +  2+  3+

c  +  2+  3+

x  +  2+  3+

y  +  2+  3+

z  +  2+  3+

hide H<sub>2</sub>O/NH<sub>3</sub>

zoom 112-122

GO

| b <sup>+</sup> | #  | AA | #  | y <sup>+</sup> | y <sup>2+</sup> |
|----------------|----|----|----|----------------|-----------------|
| 130.0868       | 1  | T  | 13 |                |                 |
| 245.1137       | 2  | D  | 12 | 1401.7954      | 701.4016        |
| 374.1563       | 3  | E  | 11 | 1286.7684      | 643.8881        |
| 530.2826       | 4  | K  | 10 | 1157.7258      | 579.3668        |
| 629.3510       | 5  | V  | 9  | 1001.5995      | 501.3037        |
| 742.4351       | 6  | L  | 8  | 902.5311       | 451.7695        |
| 843.4828       | 7  | T  | 7  | 789.4470       | 395.2274        |
| 972.5254       | 8  | E  | 6  | 688.3994       | 344.7036        |
| 1085.6094      | 9  | I  | 5  | 559.3568       | 280.1823        |
| 1198.6935      | 10 | I  | 4  | 446.2727       | 223.6403        |
| 1269.7306      | 11 | A  | 3  | 333.1886       | 167.0982        |
| 1356.7626      | 12 | S  | 2  | 262.1515       | 131.5797        |
|                | 13 | R  | 1  | 175.1195       | 88.0637         |

N-term:+29.04 K(4):+156.13

TDEQGNIVTKKIIR, MH+ 1717.1072, m/z 430.0323  
 H OS G28 P150811 220811-s1.03661.03661.4.dta

X-range:

-

MassTol: Y-zoom:

MassType:

AVG  MONO

Axis:

1  2

Label:

I  M  -

Ions:

a  +  2+  3+

b  +  2+  3+

c  +  2+  3+

x  +  2+  3+

y  +  2+  3+

z  +  2+  3+

hide H<sub>2</sub>O/NH<sub>3</sub>

zoom 112-122

GO

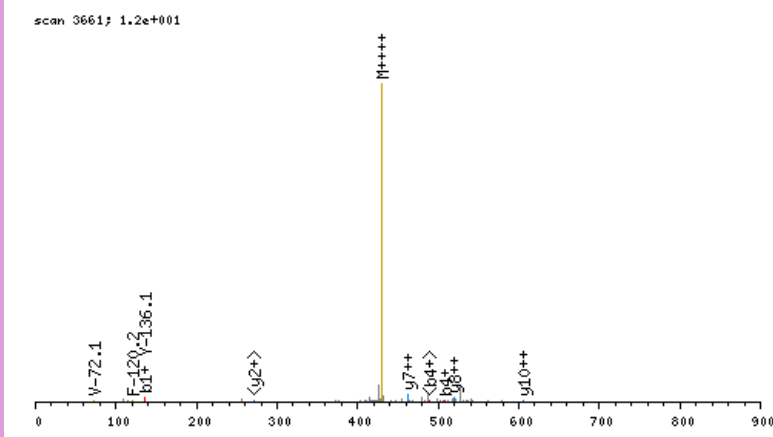

click image to zoom in; click top corners to zoom out [\[precursor±\]](#)

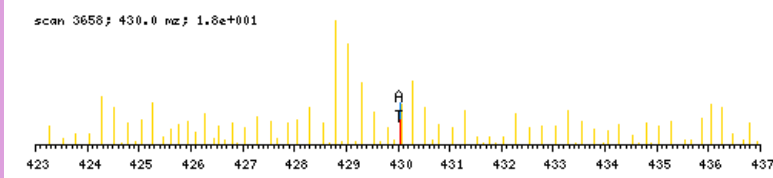

zoomed in precursor plot; T=theoretical m/z, A=acquired m/z

| b <sup>+</sup> | #  | AA # | y <sup>+</sup> | y <sup>2+</sup> |
|----------------|----|------|----------------|-----------------|
| 136.1186       | 1  | T    | 14             |                 |
| 251.1455       | 2  | D    | 13             | 1581.9965       |
| 380.1881       | 3  | E    | 12             | 1466.9695       |
| 508.2467       | 4  | Q    | 11             | 1337.9270       |
| 565.2682       | 5  | G    | 10             | 1209.8684       |
| 679.3111       | 6  | N    | 9              | 1152.8469       |
| 792.3951       | 7  | I    | 8              | 1038.8040       |
| 891.4636       | 8  | V    | 7              | 925.7199        |
| 992.5112       | 9  | T    | 6              | 826.6515        |
| 1154.6693      | 10 | K    | 5              | 725.6038        |
| 1316.8274      | 11 | K    | 4              | 563.4457        |
| 1429.9115      | 12 | I    | 3              | 401.2876        |
| 1542.9956      | 13 | I    | 2              | 288.2036        |
|                | 14 | R    | 1              | 175.1195        |

N-term:+35.07 K(10):+162.16  
 K(11):+162.16

TDESHCVEHIESR, MH+ 1626.7181, m/z 407.4350  
 L OS G28 P150811 220811-s1.02207.02207.4.dta

X-range:

-

MassTol: Y-zoom:

MassType:

AVG  MONO

Axis:

1  2

Label:

I  M  -

Ions:

a  +  2+  3+

b  +  2+  3+

c  +  2+  3+

x  +  2+  3+

y  +  2+  3+

z  +  2+  3+

hide H<sub>2</sub>O/NH<sub>3</sub>

zoom 112-122

GO

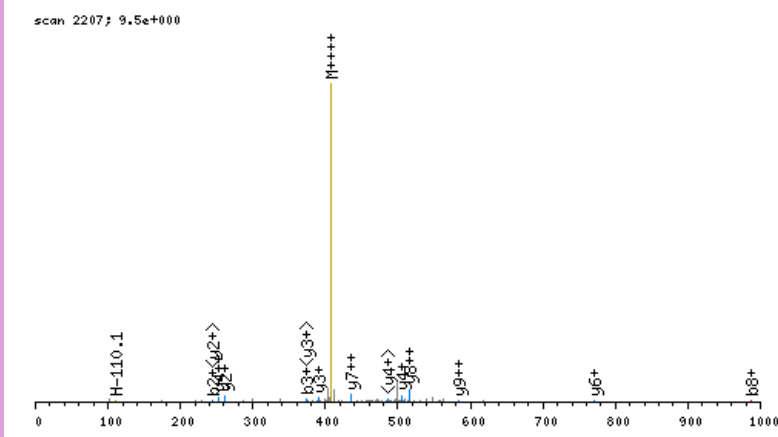

click image to zoom in; click top corners to zoom out [\[precursor±\]](#)

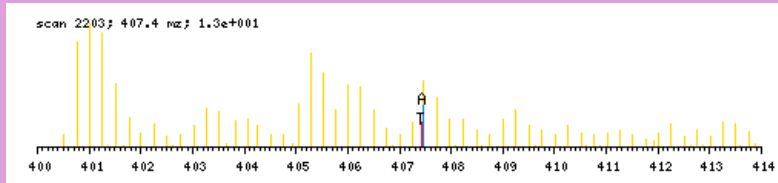

zoomed in precursor plot; T=theoretical m/z, A=acquired m/z

| b <sup>+</sup> | #  | AA # | y <sup>+</sup> | y <sup>2+</sup> |
|----------------|----|------|----------------|-----------------|
| 130.0868       | 1  | T 13 |                |                 |
| 245.1137       | 2  | D 12 | 1497.6392      | 749.3235        |
| 374.1563       | 3  | E 11 | 1382.6122      | 691.8100        |
| 461.1883       | 4  | S 10 | 1253.5696      | 627.2887        |
| 598.2473       | 5  | H 9  | 1166.5376      | 583.7727        |
| 758.2779       | 6  | C 8  | 1029.4787      | 515.2433        |
| 857.3463       | 7  | V 7  | 869.4481       | 435.2280        |
| 986.3889       | 8  | E 6  | 770.3797       | 385.6938        |
| 1123.4478      | 9  | H 5  | 641.3371       | 321.1725        |
| 1236.5318      | 10 | I 4  | 504.2782       | 252.6430        |
| 1365.5744      | 11 | E 3  | 391.1941       | 196.1010        |
| 1452.6065      | 12 | S 2  | 262.1515       | 131.5797        |
|                | 13 | R 1  | 175.1195       | 88.0637         |

N-term:+29.04 C(6):+160.03

TDGASSNCVTDISHLVR, MH+ 1946.9241, m/z 649.6462  
 L OS G26 P150811 220811-s1.04601.04601.3.dta

X-range:

-

MassTol: Y-zoom:

MassType:

AVG  MONO

Axis:

1  2

Label:

I  M  -

Ions:

a  +  2+  3+

b  +  2+  3+

c  +  2+  3+

x  +  2+  3+

y  +  2+  3+

z  +  2+  3+

hide H<sub>2</sub>O/NH<sub>3</sub>

zoom 112-122

GO

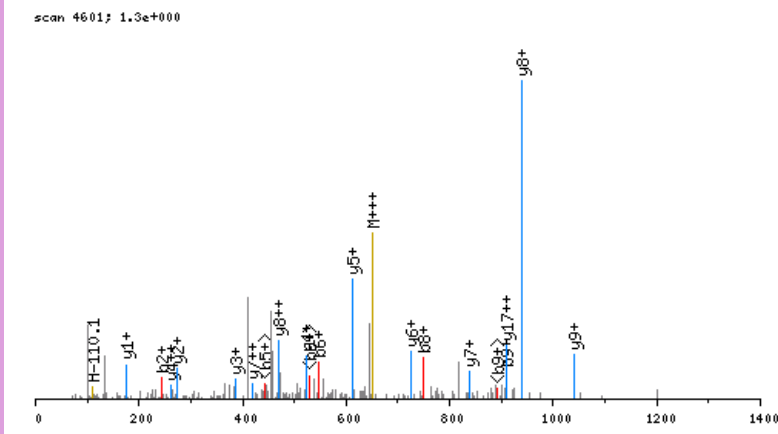

click image to zoom in; click top corners to zoom out [\[precursor±\]](#)

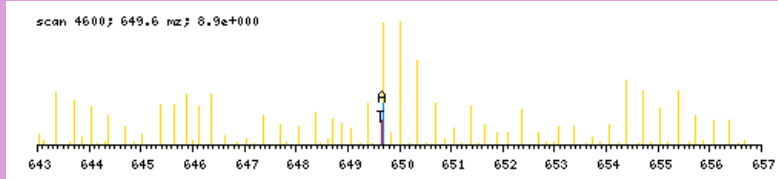

zoomed in precursor plot; T=theoretical m/z, A=acquired m/z

| b <sup>+</sup> | #  | AA # | y <sup>+</sup> | y <sup>2+</sup> |
|----------------|----|------|----------------|-----------------|
| 130.0868       | 1  | T 18 |                |                 |
| 245.1137       | 2  | D 17 | 1817.8452      | 909.4265        |
| 302.1352       | 3  | G 16 | 1702.8182      | 851.9130        |
| 373.1723       | 4  | A 15 | 1645.7967      | 823.4023        |
| 460.2043       | 5  | S 14 | 1574.7596      | 787.8837        |
| 547.2364       | 6  | S 13 | 1487.7276      | 744.3677        |
| 634.2684       | 7  | S 12 | 1400.6956      | 700.8517        |
| 748.3113       | 8  | N 11 | 1313.6635      | 657.3357        |
| 908.3419       | 9  | C 10 | 1199.6206      | 600.3142        |
| 1007.4103      | 10 | V 9  | 1039.5900      | 520.2989        |
| 1108.4580      | 11 | T 8  | 940.5216       | 470.7647        |
| 1223.4849      | 12 | D 7  | 839.4739       | 420.2409        |
| 1336.5690      | 13 | I 6  | 724.4470       | 362.7274        |
| 1423.6010      | 14 | S 5  | 611.3629       | 306.1854        |
| 1560.6600      | 15 | H 4  | 524.3309       | 262.6694        |
| 1673.7440      | 16 | L 3  | 387.2720       | 194.1399        |
| 1772.8124      | 17 | V 2  | 274.1879       | 137.5979        |
|                | 18 | R 1  | 175.1195       | 88.0637         |

N-term:+29.04 C(9):+160.03



TDGDANTGESRPEKIQENVNR, MH+ 2272.1170, m/z 568.7847  
 L OS G28 P150811 220811-s1.02394.02394.4.dta

X-range:

-

MassTol: Y-zoom:

MassType:

AVG  MONO

Axis:

1  2

Label:

I  M  -

Ions:

a  +  2+  3+

b  +  2+  3+

c  +  2+  3+

x  +  2+  3+

y  +  2+  3+

z  +  2+  3+

hide H<sub>2</sub>O/NH<sub>3</sub>

zoom 112-122

GO

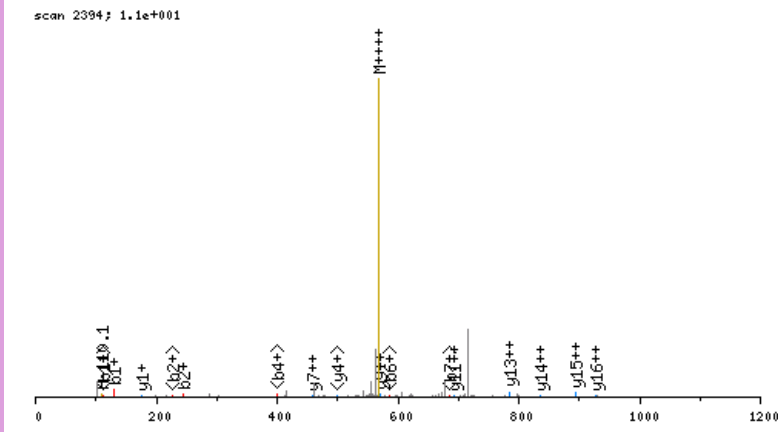

click image to zoom in; click top corners to zoom out [\[precursor±\]](#)

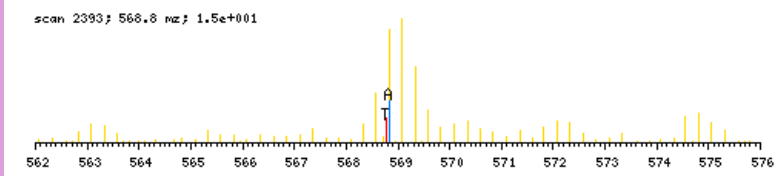

zoomed in precursor plot; T=theoretical m/z, A=acquired m/z

| b <sup>+</sup> | #  | AA | #  | y <sup>+</sup> | y <sup>2+</sup> |
|----------------|----|----|----|----------------|-----------------|
| 130.0868       | 1  | T  | 20 |                |                 |
| 245.1137       | 2  | D  | 19 | 2143.0380      | 1072.0229       |
| 302.1352       | 3  | G  | 18 | 2028.0111      | 1014.5094       |
| 417.1621       | 4  | D  | 17 | 1970.9896      | 985.9987        |
| 488.1992       | 5  | A  | 16 | 1855.9627      | 928.4852        |
| 602.2422       | 6  | N  | 15 | 1784.9255      | 892.9667        |
| 703.2898       | 7  | T  | 14 | 1670.8826      | 835.9452        |
| 760.3113       | 8  | G  | 13 | 1569.8349      | 785.4214        |
| 889.3539       | 9  | E  | 12 | 1512.8135      | 756.9106        |
| 976.3859       | 10 | S  | 11 | 1383.7709      | 692.3893        |
| 1132.4870      | 11 | R  | 10 | 1296.7388      | 648.8733        |
| 1229.5398      | 12 | P  | 9  | 1140.6377      | 570.8228        |
| 1358.5824      | 13 | E  | 8  | 1043.5850      | 522.2964        |
| 1514.7087      | 14 | K  | 7  | 914.5424       | 457.7751        |
| 1627.7928      | 15 | I  | 6  | 758.4161       | 379.7120        |
| 1755.8513      | 16 | Q  | 5  | 645.3320       | 323.1699        |
| 1884.8939      | 17 | E  | 4  | 517.2734       | 259.1406        |
| 1998.9369      | 18 | N  | 3  | 388.2308       | 194.6193        |
| 2098.0053      | 19 | V  | 2  | 274.1879       | 137.5979        |
|                | 20 | R  | 1  | 175.1195       | 88.0637         |

N-term:+29.04 K(14):+156.13

TDITDAIKLDSGVVKK, MH+ 1815.0592, m/z 454.5203  
 L OS G28 P150811 220811-s1.07290.07290.4.dta

X-range:

-

MassTol: Y-zoom:

MassType:

AVG  MONO

Axis:

1  2

Label:

I  M  -

Ions:

a  +  2+  3+

b  +  2+  3+

c  +  2+  3+

x  +  2+  3+

y  +  2+  3+

z  +  2+  3+

hide H<sub>2</sub>O/NH<sub>3</sub>

zoom 112-122

GO

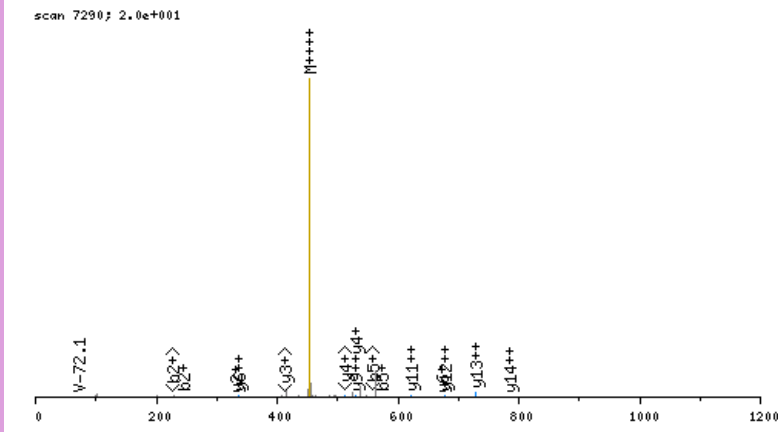

click image to zoom in; click top corners to zoom out [\[precursor±\]](#)

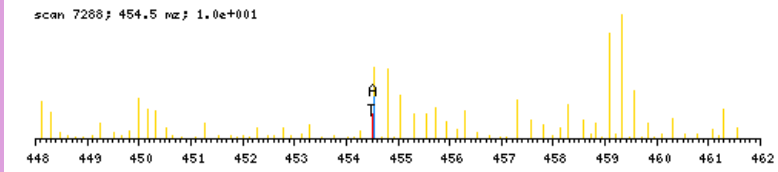

zoomed in precursor plot; T=theoretical m/z, A=acquired m/z

| b <sup>+</sup> | #  | AA | #  | y <sup>+</sup> | y <sup>2+</sup> |
|----------------|----|----|----|----------------|-----------------|
| 130.0868       | 1  | T  | 16 |                |                 |
| 245.1137       | 2  | D  | 15 | 1685.9802      | 843.4940        |
| 358.1978       | 3  | I  | 14 | 1570.9533      | 785.9806        |
| 459.2455       | 4  | T  | 13 | 1457.8692      | 729.4385        |
| 574.2724       | 5  | D  | 12 | 1356.8215      | 678.9147        |
| 645.3095       | 6  | A  | 11 | 1241.7946      | 621.4012        |
| 758.3936       | 7  | I  | 10 | 1170.7575      | 585.8827        |
| 914.5199       | 8  | K  | 9  | 1057.6734      | 529.3406        |
| 1027.6039      | 9  | L  | 8  | 901.5471       | 451.2775        |
| 1142.6309      | 10 | D  | 7  | 788.4631       | 394.7354        |
| 1229.6629      | 11 | S  | 6  | 673.4361       | 337.2220        |
| 1286.6844      | 12 | G  | 5  | 586.4041       | 293.7060        |
| 1385.7528      | 13 | V  | 4  | 529.3826       | 265.1952        |
| 1484.8212      | 14 | V  | 3  | 430.3142       | 215.6610        |
| 1640.9475      | 15 | K  | 2  | 331.2458       | 166.1268        |
|                | 16 | R  | 1  | 175.1195       | 88.0637         |

N-term:+29.04 K(8):+156.13  
 K(15):+156.13

TDITSLDQYVER, MH+ 1467.7331, m/z 489.9159  
 L OS G25 P150811 220811-s1.06974.06974.3.dta

X-range:

-

MassTol: Y-zoom:

MassType:

AVG  MONO

Axis:

1  2

Label:

I  M  -

Ions:

a  +  2+  3+

b  +  2+  3+

c  +  2+  3+

x  +  2+  3+

y  +  2+  3+

z  +  2+  3+

hide H<sub>2</sub>O/NH<sub>3</sub>

zoom 112-122

GO

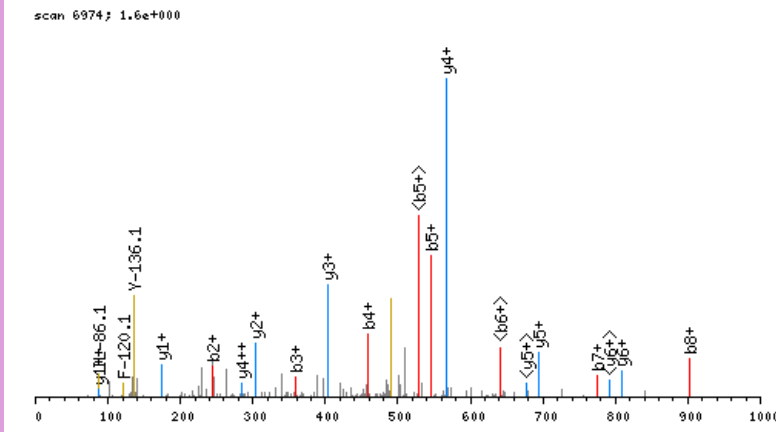

click image to zoom in; click top corners to zoom out [\[precursor±\]](#)

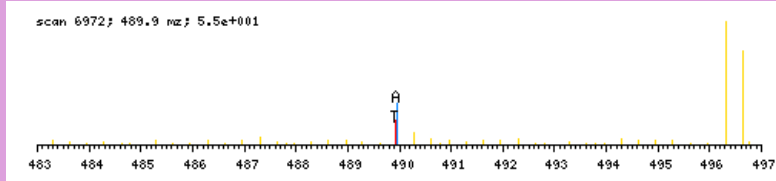

zoomed in precursor plot; T=theoretical m/z, A=acquired m/z

| b <sup>+</sup> | #  | AA # | y <sup>+</sup> | y <sup>2+</sup> |
|----------------|----|------|----------------|-----------------|
| 130.0868       | 1  | T 12 |                |                 |
| 245.1137       | 2  | D 11 | 1338.6541      | 669.8310        |
| 358.1978       | 3  | I 10 | 1223.6272      | 612.3175        |
| 459.2455       | 4  | T 9  | 1110.5431      | 555.7755        |
| 546.2775       | 5  | S 8  | 1009.4954      | 505.2516        |
| 659.3616       | 6  | L 7  | 922.4634       | 461.7356        |
| 774.3885       | 7  | D 6  | 809.3794       | 405.1936        |
| 902.4471       | 8  | Q 5  | 694.3524       | 347.6801        |
| 1065.5104      | 9  | Y 4  | 566.2938       | 283.6508        |
| 1164.5788      | 10 | V 3  | 403.2305       | 202.1192        |
| 1293.6214      | 11 | E 2  | 304.1621       | 152.5850        |
|                | 12 | R 1  | 175.1195       | 88.0637         |

N-term:+29.04

TDLEKDIISDTSGDFR, MH+ 1867.9289, m/z 623.3145  
 L OS G26 P150811 220811-s1.05729.05729.3.dta

X-range:

-

MassTol: Y-zoom:

MassType:

AVG  MONO

Axis:

1  2

Label:

I  M  -

Ions:

a  +  2+  3+

b  +  2+  3+

c  +  2+  3+

x  +  2+  3+

y  +  2+  3+

z  +  2+  3+

hide H<sub>2</sub>O/NH<sub>3</sub>

zoom 112-122

GO

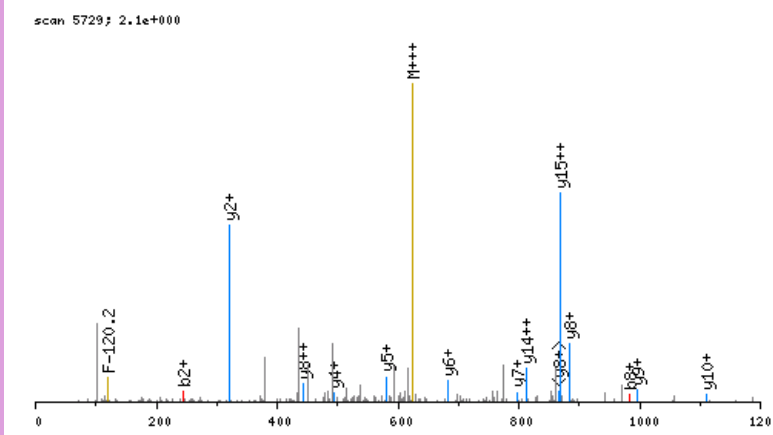

click image to zoom in; click top corners to zoom out [\[precursor±\]](#)

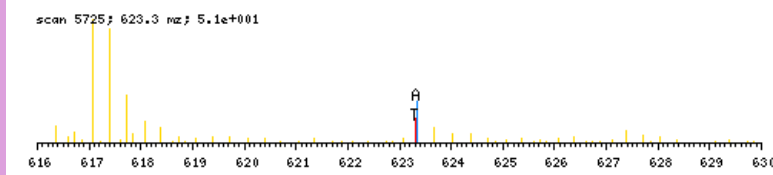

zoomed in precursor plot; T=theoretical m/z, A=acquired m/z

| b <sup>+</sup> | #  | AA # | y <sup>+</sup> | y <sup>2+</sup> |
|----------------|----|------|----------------|-----------------|
| 130.0868       | 1  | T    | 16             |                 |
| 245.1137       | 2  | D    | 15             | 1738.8500       |
| 358.1978       | 3  | L    | 14             | 1623.8230       |
| 487.2404       | 4  | E    | 13             | 1510.7390       |
| 643.3667       | 5  | K    | 12             | 1381.6964       |
| 758.3936       | 6  | D    | 11             | 1225.5701       |
| 871.4777       | 7  | I    | 10             | 1110.5431       |
| 984.5617       | 8  | I    | 9              | 997.4591        |
| 1071.5938      | 9  | S    | 8              | 884.3750        |
| 1186.6207      | 10 | D    | 7              | 797.3430        |
| 1287.6684      | 11 | T    | 6              | 682.3160        |
| 1374.7004      | 12 | S    | 5              | 581.2683        |
| 1431.7219      | 13 | G    | 4              | 494.2363        |
| 1546.7488      | 14 | D    | 3              | 437.2149        |
| 1693.8172      | 15 | F    | 2              | 322.1879        |
|                | 16 | R    | 1              | 175.1195        |

N-term:+29.04 K(5):+156.13

TDLNHNELKGGDDLDPNYVLSSR, MH+ 2628.2906, m/z 657.8281  
 L OS G28 P150811 220811-s1.06757.06757.4.dta

X-range:

-

MassTol: Y-zoom:

MassType:

AVG  MONO

Axis:

1  2

Label:

I  M  -

Ions:

a  +  2+  3+

b  +  2+  3+

c  +  2+  3+

x  +  2+  3+

y  +  2+  3+

z  +  2+  3+

hide H<sub>2</sub>O/NH<sub>3</sub>

zoom 112-122

GO

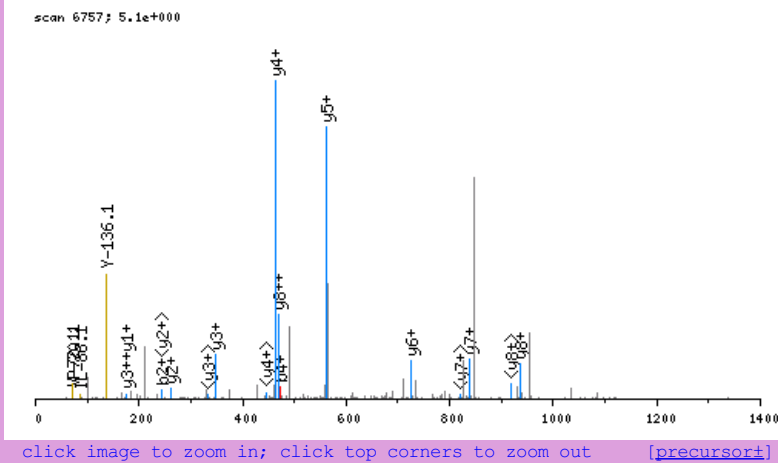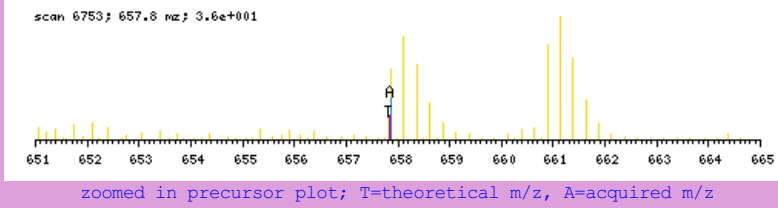

| b <sup>+</sup> | #  | AA | #  | y <sup>+</sup> | y <sup>2+</sup> |
|----------------|----|----|----|----------------|-----------------|
| 130.0868       | 1  | T  | 23 |                |                 |
| 245.1137       | 2  | D  | 22 | 2499.2116      | 1250.1097       |
| 358.1978       | 3  | L  | 21 | 2384.1847      | 1192.5962       |
| 472.2407       | 4  | N  | 20 | 2271.1006      | 1136.0542       |
| 609.2996       | 5  | H  | 19 | 2157.0577      | 1079.0327       |
| 738.3422       | 6  | E  | 18 | 2019.9988      | 1010.5033       |
| 852.3851       | 7  | N  | 17 | 1890.9562      | 945.9820        |
| 965.4692       | 8  | L  | 16 | 1776.9132      | 888.9605        |
| 1121.5955      | 9  | K  | 15 | 1663.8292      | 832.4185        |
| 1178.6170      | 10 | G  | 14 | 1507.7029      | 754.3554        |
| 1235.6384      | 11 | G  | 13 | 1450.6814      | 725.8446        |
| 1350.6654      | 12 | D  | 12 | 1393.6599      | 697.3339        |
| 1465.6923      | 13 | D  | 11 | 1278.6330      | 639.8204        |
| 1578.7764      | 14 | L  | 10 | 1163.6061      | 582.3069        |
| 1693.8033      | 15 | D  | 9  | 1050.5220      | 525.7649        |
| 1790.8561      | 16 | P  | 8  | 935.4951       | 468.2514        |
| 1904.8990      | 17 | N  | 7  | 838.4423       | 419.7251        |
| 2067.9624      | 18 | Y  | 6  | 724.3994       | 362.7036        |
| 2167.0308      | 19 | V  | 5  | 561.3360       | 281.1719        |
| 2280.1148      | 20 | L  | 4  | 462.2676       | 231.6377        |
| 2367.1469      | 21 | S  | 3  | 349.1836       | 175.0957        |
| 2454.1789      | 22 | S  | 2  | 262.1515       | 131.5797        |
|                | 23 | R  | 1  | 175.1195       | 88.0637         |

N-term:+29.04 K(9):+156.13

TDLQEAETFSR, MH+ 1492.8284, m/z 498.2810  
 H OS G27 P150811 220811-s1.04976.04976.3.dta

scan 4976; 1.5e+001

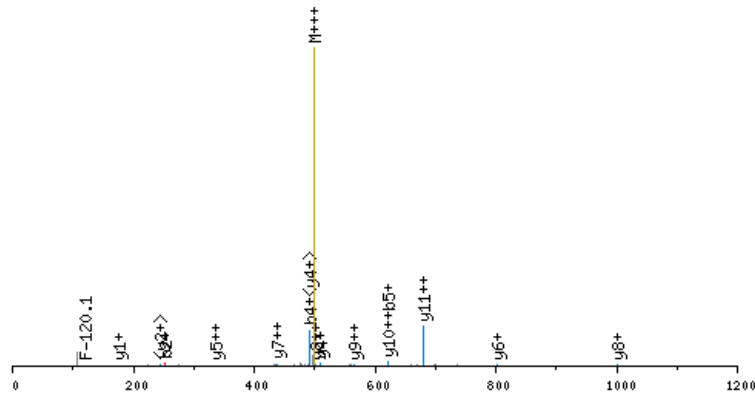

click image to zoom in; click top corners to zoom out [\[precursor±\]](#)

scan 4972; 498.3 m/z; 8.9e+001

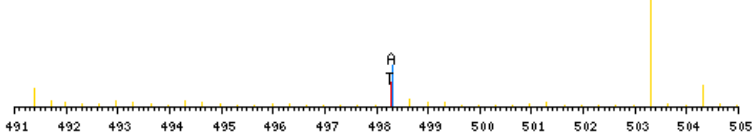

zoomed in precursor plot; T=theoretical m/z, A=acquired m/z

X-range:

-

MassTol: Y-zoom:

MassType:

AVG  MONO

Axis:

1  2

Label:

I  M  -

Ions:

a  +  2+  3+

b  +  2+  3+

c  +  2+  3+

x  +  2+  3+

y  +  2+  3+

z  +  2+  3+

hide H<sub>2</sub>O/NH<sub>3</sub>

zoom 112-122

GO

| b <sup>+</sup> | #  | AA # | y <sup>+</sup> | y <sup>2+</sup> |
|----------------|----|------|----------------|-----------------|
| 136.1186       | 1  | T    | 12             |                 |
| 251.1455       | 2  | D    | 11             | 1357.7176       |
| 364.2296       | 3  | L    | 10             | 1242.6907       |
| 492.2882       | 4  | Q    | 9              | 1129.6066       |
| 621.3308       | 5  | E    | 8              | 1001.5480       |
| 692.3679       | 6  | A    | 7              | 872.5054        |
| 821.4105       | 7  | E    | 6              | 801.4683        |
| 983.5686       | 8  | K    | 5              | 672.4257        |
| 1084.6162      | 9  | T    | 4              | 510.2676        |
| 1231.6847      | 10 | F    | 3              | 409.2199        |
| 1318.7167      | 11 | S    | 2              | 262.1515        |
|                | 12 | R    | 1              | 175.1195        |

N-term:+35.07 K(8):+162.16

TDLTKVNKECCHGDLLECADDR, MH+ 2733.2645, m/z 684.0716  
 L OS G28 P150811 220811-s1.04849.04849.4.dta

X-range:

-

MassTol: Y-zoom:

MassType:

AVG  MONO

Axis:

1  2

Label:

I  M  -

Ions:

a  +  2+  3+

b  +  2+  3+

c  +  2+  3+

x  +  2+  3+

y  +  2+  3+

z  +  2+  3+

hide H<sub>2</sub>O/NH<sub>3</sub>

zoom 112-122

GO

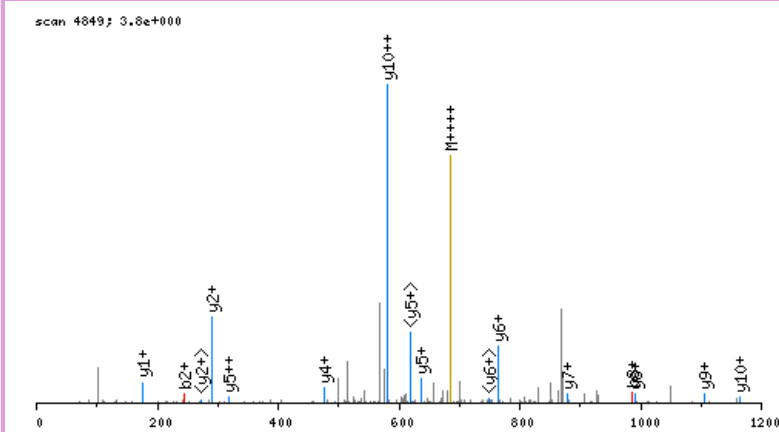

click image to zoom in; click top corners to zoom out [\[precursor±\]](#)

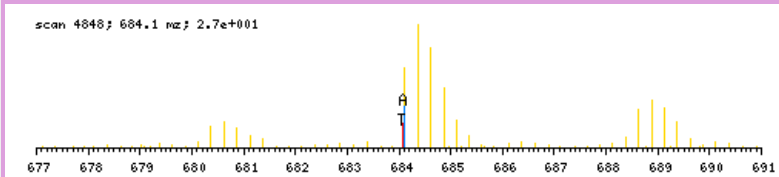

zoomed in precursor plot; T=theoretical m/z, A=acquired m/z

| b <sup>+</sup> | #  | AA # | y <sup>+</sup> | y <sup>2+</sup> |
|----------------|----|------|----------------|-----------------|
| 130.0868       | 1  | T 22 |                |                 |
| 245.1137       | 2  | D 21 | 2604.1856      | 1302.5967       |
| 358.1978       | 3  | L 20 | 2489.1586      | 1245.0832       |
| 459.2455       | 4  | T 19 | 2376.0746      | 1188.5412       |
| 615.3718       | 5  | K 18 | 2275.0269      | 1138.0174       |
| 714.4402       | 6  | V 17 | 2118.9006      | 1059.9542       |
| 828.4831       | 7  | N 16 | 2019.8322      | 1010.4200       |
| 984.6094       | 8  | K 15 | 1905.7892      | 953.3985        |
| 1113.6520      | 9  | E 14 | 1749.6629      | 875.3354        |
| 1273.6826      | 10 | C 13 | 1620.6203      | 810.8141        |
| 1433.7132      | 11 | C 12 | 1460.5897      | 730.7988        |
| 1570.7721      | 12 | H 11 | 1300.5591      | 650.7835        |
| 1627.7936      | 13 | G 10 | 1163.5002      | 582.2540        |
| 1742.8205      | 14 | D 9  | 1106.4788      | 553.7433        |
| 1855.9046      | 15 | L 8  | 991.4518       | 496.2298        |
| 1968.9886      | 16 | L 7  | 878.3678       | 439.6878        |
| 2098.0312      | 17 | E 6  | 765.2837       | 383.1458        |
| 2258.0618      | 18 | C 5  | 636.2411       | 318.6245        |
| 2329.0990      | 19 | A 4  | 476.2105       | 238.6092        |
| 2444.1259      | 20 | D 3  | 405.1734       | 203.0906        |
| 2559.1528      | 21 | D 2  | 290.1464       | 145.5771        |
|                | 22 | R 1  | 175.1195       | 88.0637         |

N-term:+29.04 K(5):+156.13  
 K(8):+156.13 C(10):+160.03  
 C(11):+160.03 C(18):+160.03

X-range:

-

MassTol: Y-zoom:

MassType:

AVG  MONO

Axis:

1  2

Label:

I  M  -

Ions:

a  +  2+  3+

b  +  2+  3+

c  +  2+  3+

x  +  2+  3+

y  +  2+  3+

z  +  2+  3+

hide H<sub>2</sub>O/NH<sub>3</sub>

zoom 112-122

GO

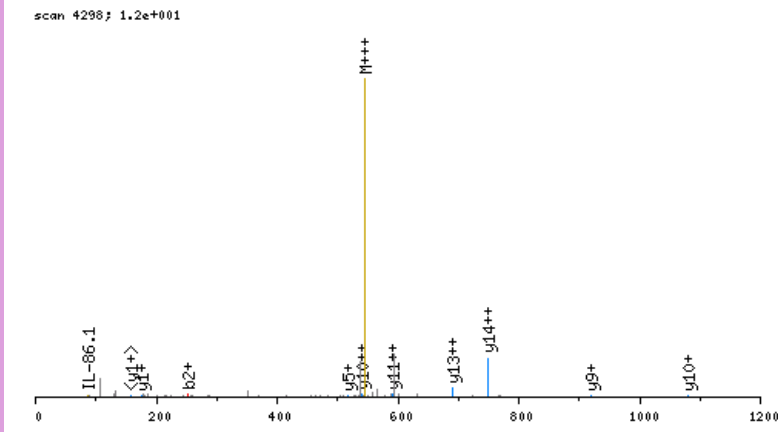

click image to zoom in; click top corners to zoom out [\[precursor±\]](#)

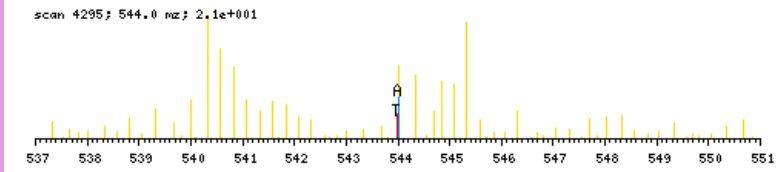

zoomed in precursor plot; T=theoretical m/z, A=acquired m/z

| b <sup>+</sup> | #  | AA # | y <sup>+</sup> | y <sup>2+</sup> |
|----------------|----|------|----------------|-----------------|
| 136.1186       | 1  | T    | 15             |                 |
| 251.1455       | 2  | D    | 14             | 1494.8526       |
| 338.1776       | 3  | S    | 13             | 1379.8257       |
| 451.2616       | 4  | L    | 12             | 1292.7936       |
| 550.3300       | 5  | V    | 11             | 1179.7096       |
| 710.3606       | 6  | C    | 10             | 1080.6412       |
| 872.5187       | 7  | K    | 9              | 920.6106        |
| 943.5558       | 8  | A    | 8              | 758.4525        |
| 1000.5773      | 9  | G    | 7              | 687.4153        |
| 1113.6614      | 10 | I    | 6              | 630.3939        |
| 1226.7454      | 11 | I    | 5              | 517.3098        |
| 1297.7825      | 12 | A    | 4              | 404.2258        |
| 1384.8146      | 13 | S    | 3              | 333.1886        |
| 1455.8517      | 14 | A    | 2              | 246.1566        |
|                | 15 | R    | 1              | 175.1195        |

N-term:+35.07 C(6):+160.03  
 K(7):+162.16



TDTEDKGEFLSEGGGVR, MH+ 1852.8929, m/z 618.3025  
 L OS G26 P150811 220811-s1.03226.03226.3.dta

X-range:

-

MassTol: Y-zoom:

MassType:

AVG  MONO

Axis:

1  2

Label:

I  M  -

Ions:

a  +  2+  3+

b  +  2+  3+

c  +  2+  3+

x  +  2+  3+

y  +  2+  3+

z  +  2+  3+

hide H<sub>2</sub>O/NH<sub>3</sub>

zoom 112-122

GO

scan 3226; 1.7e+001

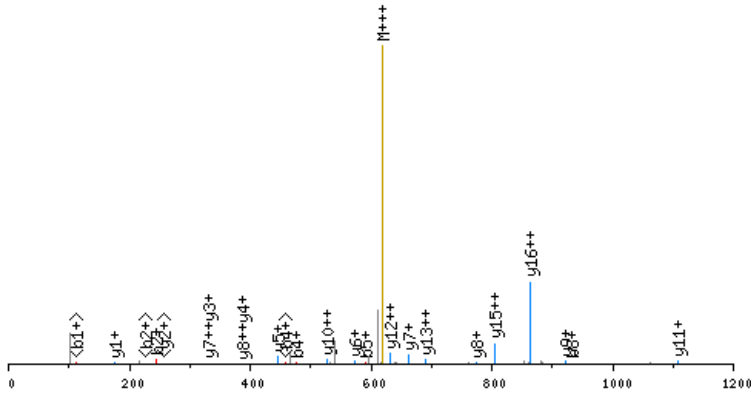

click image to zoom in; click top corners to zoom out [\[precursor±\]](#)

scan 3225; 618.3 m/z; 7.6e+001

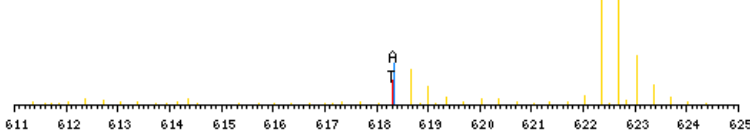

zoomed in precursor plot; T=theoretical m/z, A=acquired m/z

| b <sup>+</sup> | #  | AA | #  | y <sup>+</sup> | y <sup>2+</sup> |
|----------------|----|----|----|----------------|-----------------|
| 130.0868       | 1  | T  | 17 |                |                 |
| 245.1137       | 2  | D  | 16 | 1723.8139      | 862.4109        |
| 346.1614       | 3  | T  | 15 | 1608.7870      | 804.8974        |
| 475.2040       | 4  | E  | 14 | 1507.7393      | 754.3736        |
| 590.2309       | 5  | D  | 13 | 1378.6967      | 689.8523        |
| 746.3572       | 6  | K  | 12 | 1263.6698      | 632.3388        |
| 803.3787       | 7  | G  | 11 | 1107.5435      | 554.2756        |
| 932.4213       | 8  | E  | 10 | 1050.5220      | 525.7649        |
| 1079.4897      | 9  | F  | 9  | 921.4794       | 461.2436        |
| 1192.5738      | 10 | L  | 8  | 774.4110       | 387.7094        |
| 1279.6058      | 11 | S  | 7  | 661.3269       | 331.1674        |
| 1408.6484      | 12 | E  | 6  | 574.2949       | 287.6514        |
| 1465.6699      | 13 | G  | 5  | 445.2523       | 223.1301        |
| 1522.6913      | 14 | G  | 4  | 388.2308       | 194.6193        |
| 1579.7128      | 15 | G  | 3  | 331.2094       | 166.1086        |
| 1678.7812      | 16 | V  | 2  | 274.1879       | 137.5979        |
|                | 17 | R  | 1  | 175.1195       | 88.0637         |

N-term:+29.04 K(6):+156.13

TDVLDHNAVLDFEHR, MH+ 1936.9517, m/z 484.9934  
 L OS G28 P150811 220811-s1.06867.06867.4.dta

scan 6867; 4.8e+000

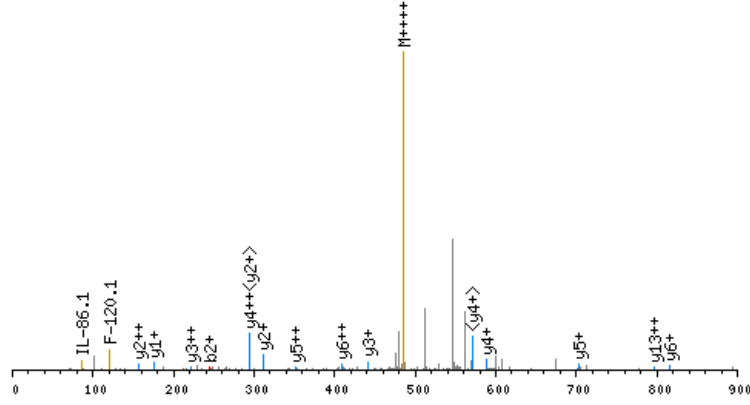

click image to zoom in; click top corners to zoom out [\[precursor±\]](#)

scan 6863; 485.0 m/z; 1.3e+001

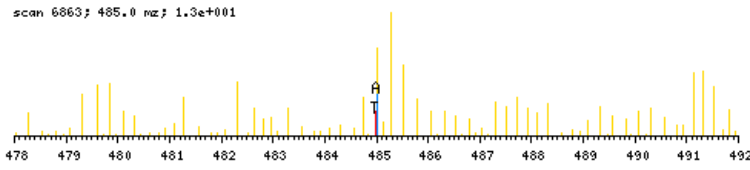

zoomed in precursor plot; T=theoretical m/z, A=acquired m/z

X-range:

-

MassTol: Y-zoom:

MassType:

AVG  MONO

Axis:

1  2

Label:

I  M  -

Ions:

a  +  2+  3+

b  +  2+  3+

c  +  2+  3+

x  +  2+  3+

y  +  2+  3+

z  +  2+  3+

hide H<sub>2</sub>O/NH<sub>3</sub>

zoom 112-122

GO

| b <sup>+</sup>  | #  | AA | #  | y <sup>+</sup>  | y <sup>2+</sup> |
|-----------------|----|----|----|-----------------|-----------------|
| 130.0868        | 1  | T  | 16 |                 |                 |
| <b>245.1137</b> | 2  | D  | 15 | 1807.8727       | 904.4403        |
| 344.1821        | 3  | V  | 14 | 1692.8458       | 846.9268        |
| 457.2662        | 4  | L  | 13 | 1593.7774       | <b>797.3926</b> |
| 585.3248        | 5  | Q  | 12 | 1480.6933       | 740.8506        |
| 700.3517        | 6  | D  | 11 | 1352.6347       | 676.8213        |
| 837.4106        | 7  | H  | 10 | 1237.6078       | 619.3078        |
| 951.4536        | 8  | N  | 9  | 1100.5489       | 550.7784        |
| 1022.4907       | 9  | A  | 8  | 986.5060        | 493.7569        |
| 1121.5591       | 10 | V  | 7  | 915.4688        | 458.2383        |
| 1234.6432       | 11 | L  | 6  | <b>816.4004</b> | <b>408.7041</b> |
| 1349.6701       | 12 | D  | 5  | <b>703.3164</b> | <b>352.1621</b> |
| 1496.7385       | 13 | F  | 4  | <b>588.2894</b> | <b>294.6486</b> |
| 1625.7811       | 14 | E  | 3  | <b>441.2210</b> | <b>221.1144</b> |
| 1762.8400       | 15 | H  | 2  | <b>312.1784</b> | <b>156.5931</b> |
|                 | 16 | R  | 1  | <b>175.1195</b> | 88.0637         |

N-term:+29.04

TEAAAAATGVIGGIR, MH+ 1320.7699, m/z 660.8886  
 H OS G25 P150811 220811-s1.04828.04828.2.dta

X-range:

-

MassTol: Y-zoom:

MassType:

AVG  MONO

Axis:

1  2

Label:

I  M  -

Ions:

a  +  2+  3+

b  +  2+  3+

c  +  2+  3+

x  +  2+  3+

y  +  2+  3+

z  +  2+  3+

hide H<sub>2</sub>O/NH<sub>3</sub>

zoom 112-122

GO

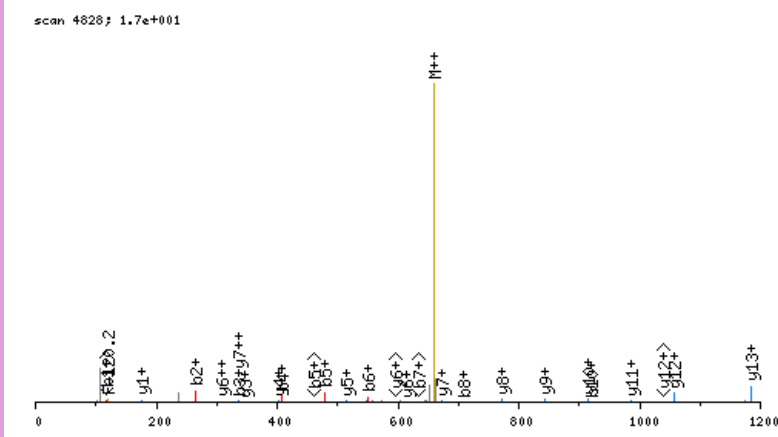

click image to zoom in; click top corners to zoom out [\[precursor±\]](#)

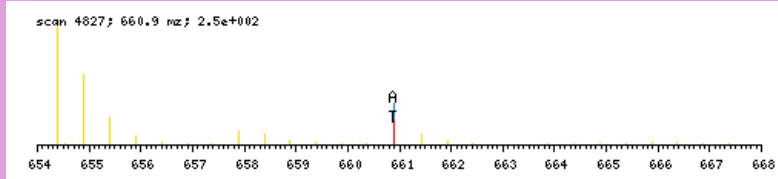

zoomed in precursor plot; T=theoretical m/z, A=acquired m/z

| b <sup>+</sup> | #  | AA # | y <sup>+</sup> | y <sup>2+</sup> |
|----------------|----|------|----------------|-----------------|
| 136.1186       | 1  | T 14 |                |                 |
| 265.1612       | 2  | E 13 | 1185.6592      | 593.3335        |
| 336.1983       | 3  | A 12 | 1056.6166      | 528.8122        |
| 407.2354       | 4  | A 11 | 985.5795       | 493.2936        |
| 478.2725       | 5  | A 10 | 914.5423       | 457.7751        |
| 549.3096       | 6  | A 9  | 843.5052       | 422.2565        |
| 650.3573       | 7  | T 8  | 772.4681       | 386.7380        |
| 707.3788       | 8  | G 7  | 671.4204       | 336.2141        |
| 806.4472       | 9  | V 6  | 614.3990       | 307.7034        |
| 919.5312       | 10 | I 5  | 515.3306       | 258.1692        |
| 976.5527       | 11 | G 4  | 402.2465       | 201.6272        |
| 1033.5742      | 12 | G 3  | 345.2250       | 173.1164        |
| 1146.6582      | 13 | I 2  | 288.2036       | 144.6057        |
|                | 14 | R 1  | 175.1195       | 88.0637         |

N-term:+35.07

TEAPQVTGPIEVPVVR, MH+ 1719.9645, m/z 573.9930  
 L OS G24 P150811 220811-s1.04164.04164.3.dta

X-range:

-

MassTol: Y-zoom:

MassType:

AVG  MONO

Axis:

1  2

Label:

I  M  -

Ions:

a  +  2+  3+

b  +  2+  3+

c  +  2+  3+

x  +  2+  3+

y  +  2+  3+

z  +  2+  3+

hide H<sub>2</sub>O/NH<sub>3</sub>

zoom 112-122

GO

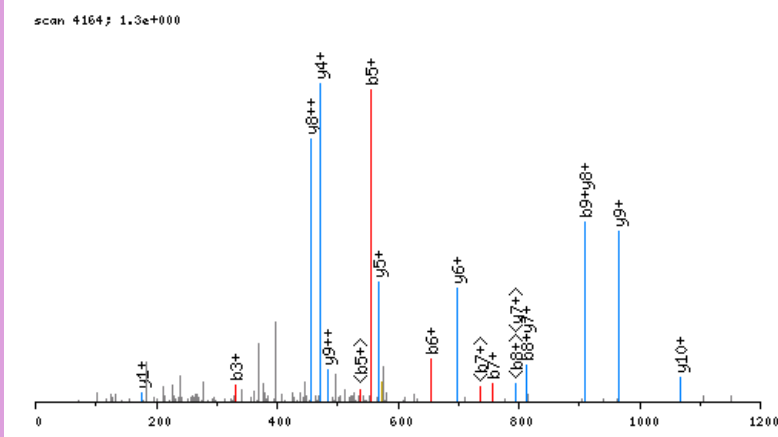

click image to zoom in; click top corners to zoom out [\[precursor±\]](#)

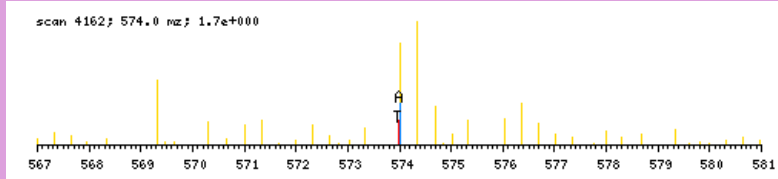

zoomed in precursor plot; T=theoretical m/z, A=acquired m/z

| b <sup>+</sup> | #  | AA # | y <sup>+</sup> | y <sup>2+</sup> |
|----------------|----|------|----------------|-----------------|
| 130.0868       | 1  | T 16 |                |                 |
| 259.1294       | 2  | E 15 | 1590.8855      | 795.9467        |
| 330.1665       | 3  | A 14 | 1461.8429      | 731.4254        |
| 427.2192       | 4  | P 13 | 1390.8058      | 695.9068        |
| 555.2778       | 5  | Q 12 | 1293.7531      | 647.3804        |
| 654.3462       | 6  | V 11 | 1165.6945      | 583.3512        |
| 755.3939       | 7  | T 10 | 1066.6261      | 533.8169        |
| 812.4154       | 8  | G 9  | 965.5784       | 483.2931        |
| 909.4681       | 9  | P 8  | 908.5569       | 454.7824        |
| 1022.5522      | 10 | I 7  | 811.5042       | 406.2560        |
| 1151.5948      | 11 | E 6  | 698.4201       | 349.7140        |
| 1250.6632      | 12 | V 5  | 569.3775       | 285.1927        |
| 1347.7160      | 13 | P 4  | 470.3091       | 235.6585        |
| 1446.7844      | 14 | V 3  | 373.2563       | 187.1321        |
| 1545.8528      | 15 | V 2  | 274.1879       | 137.5979        |
|                | 16 | R 1  | 175.1195       | 88.0637         |

N-term:+29.04

TEEDAASYVR, MH+ 1174.5804, m/z 587.7938  
 H OS G25 P150811 220811-s1.02783.02783.2.dta

X-range:

-

MassTol: Y-zoom:

MassType:

AVG  MONO

Axis:

1  2

Label:

I  M  -

Ions:

a  +  2+  3+

b  +  2+  3+

c  +  2+  3+

x  +  2+  3+

y  +  2+  3+

z  +  2+  3+

hide H<sub>2</sub>O/NH<sub>3</sub>

zoom 112-122

GO

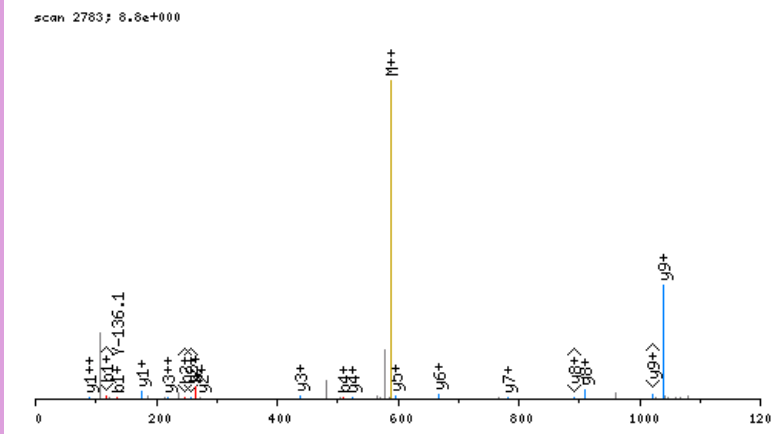

click image to zoom in; click top corners to zoom out [\[precursor±\]](#)

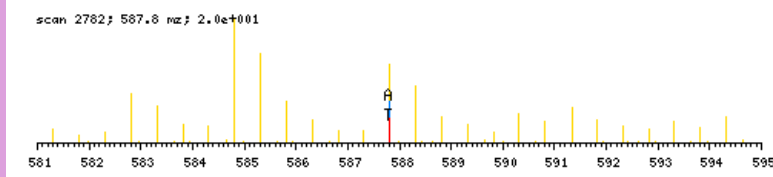

zoomed in precursor plot; T=theoretical m/z, A=acquired m/z

| b <sup>+</sup> | #  | AA # | y <sup>+</sup> | y <sup>2+</sup> |
|----------------|----|------|----------------|-----------------|
| 136.1186       | 1  | T    | 10             |                 |
| 265.1612       | 2  | E    | 9              | 1039.4696       |
| 394.2038       | 3  | E    | 8              | 910.4270        |
| 509.2307       | 4  | D    | 7              | 781.3844        |
| 580.2678       | 5  | A    | 6              | 666.3575        |
| 651.3049       | 6  | A    | 5              | 595.3204        |
| 738.3370       | 7  | S    | 4              | 524.2833        |
| 901.4003       | 8  | Y    | 3              | 437.2512        |
| 1000.4687      | 9  | V    | 2              | 274.1879        |
|                | 10 | R    | 1              | 175.1195        |

N-term:+35.07

TEEILEKSFQFGKLER, MH+ 2143.2499, m/z 536.5679  
 H OS G28 P150811 220811-s1.08025.08025.4.dta

scan 8025; 2.0e+001

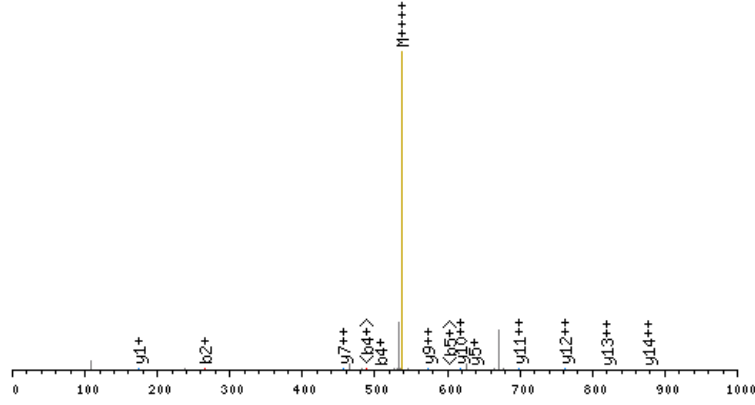

click image to zoom in; click top corners to zoom out [precursor±]

scan 8023; 536.6 mz; 1.2e+001

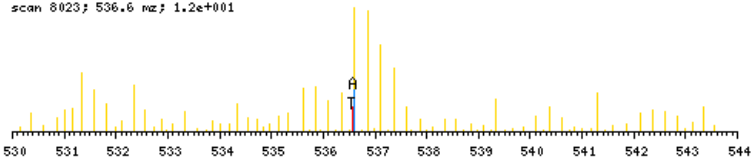

zoomed in precursor plot; T=theoretical m/z, A=acquired m/z

X-range:

-

MassTol: Y-zoom:

MassType:

AVG  MONO

Axis:

1  2

Label:

I  M  -

Ions:

a  +  2+  3+

b  +  2+  3+

c  +  2+  3+

x  +  2+  3+

y  +  2+  3+

z  +  2+  3+

hide H<sub>2</sub>O/NH<sub>3</sub>

zoom 112-122

GO

| b <sup>+</sup> | #  | AA | #  | y <sup>+</sup> | y <sup>2+</sup> |
|----------------|----|----|----|----------------|-----------------|
| 136.1186       | 1  | T  | 17 |                |                 |
| 265.1612       | 2  | E  | 16 | 2008.1392      | 1004.5735       |
| 394.2038       | 3  | E  | 15 | 1879.0966      | 940.0522        |
| 507.2878       | 4  | I  | 14 | 1750.0540      | 875.5309        |
| 620.3719       | 5  | L  | 13 | 1636.9699      | 818.9889        |
| 749.4145       | 6  | E  | 12 | 1523.8859      | 762.4469        |
| 911.5726       | 7  | K  | 11 | 1394.8433      | 697.9256        |
| 998.6046       | 8  | S  | 10 | 1232.6852      | 616.8465        |
| 1145.6730      | 9  | F  | 9  | 1145.6532      | 573.3305        |
| 1232.7051      | 10 | S  | 8  | 998.5847       | 499.7963        |
| 1360.7636      | 11 | Q  | 7  | 911.5527       | 456.2803        |
| 1507.8320      | 12 | F  | 6  | 783.4941       | 392.2510        |
| 1564.8535      | 13 | G  | 5  | 636.4257       | 318.7168        |
| 1727.0116      | 14 | K  | 4  | 579.4043       | 290.2060        |
| 1840.0957      | 15 | L  | 3  | 417.2462       | 209.1270        |
| 1969.1383      | 16 | E  | 2  | 304.1621       | 152.5850        |
|                | 17 | R  | 1  | 175.1195       | 88.0637         |

N-term: +35.07 K(7): +162.16  
 K(14): +162.16

TEILETPATNEQEAEHQQR, MH+ 2124.0209, m/z 708.6785  
L OS G26 P150811 220811-s1.03157.03157.3.dta

scan 3157; 1.1e+000

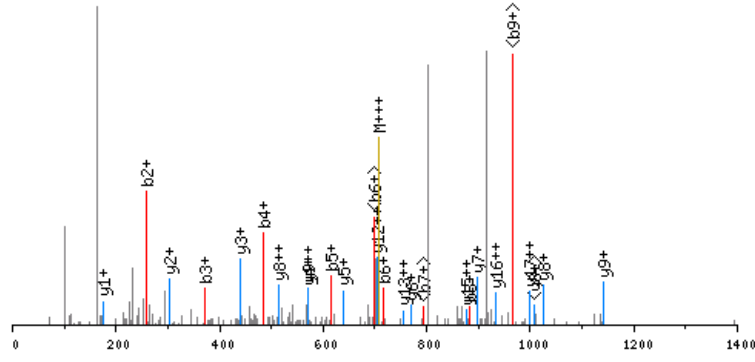

click image to zoom in; click top corners to zoom out [precursor±]

scan 3155; 708.7 m/z; 6.3e+000

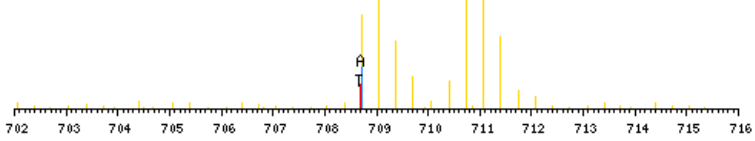

zoomed in precursor plot; T=theoretical m/z, A=acquired m/z

| b <sup>+</sup> | #  | AA # | y <sup>+</sup> | y <sup>2+</sup> |
|----------------|----|------|----------------|-----------------|
| 130.0868       | 1  | T 18 |                |                 |
| 259.1294       | 2  | E 17 | 1994.9419      | 997.9749        |
| 372.2134       | 3  | I 16 | 1865.8993      | 933.4536        |
| 485.2975       | 4  | L 15 | 1752.8153      | 876.9116        |
| 614.3401       | 5  | E 14 | 1639.7312      | 820.3695        |
| 715.3878       | 6  | T 13 | 1510.6886      | 755.8482        |
| 812.4405       | 7  | P 12 | 1409.6409      | 705.3244        |
| 883.4776       | 8  | A 11 | 1312.5882      | 656.7980        |
| 984.5253       | 9  | T 10 | 1241.5511      | 621.2794        |
| 1098.5683      | 10 | N 9  | 1140.5034      | 570.7556        |
| 1227.6108      | 11 | E 8  | 1026.4605      | 513.7341        |
| 1355.6694      | 12 | Q 7  | 897.4179       | 449.2128        |
| 1484.7120      | 13 | E 6  | 769.3593       | 385.1836        |
| 1555.7491      | 14 | A 5  | 640.3167       | 320.6623        |
| 1684.7917      | 15 | E 4  | 569.2796       | 285.1437        |
| 1821.8506      | 16 | H 3  | 440.2370       | 220.6224        |
| 1949.9092      | 17 | Q 2  | 303.1781       | 152.0930        |
|                | 18 | R 1  | 175.1195       | 88.0637         |

N-term:+29.04

X-range:

-

MassTol: Y-zoom:

MassType:

AVG  MONO

Axis:

1  2

Label:

I  M  -

Ions:

a  +  2+  3+

b  +  2+  3+

c  +  2+  3+

x  +  2+  3+

y  +  2+  3+

z  +  2+  3+

hide H<sub>2</sub>O/NH<sub>3</sub>

zoom 112-122

GO

TEMDSHEEKVFR, MH+ 1575.8113, m/z 394.7083  
 H OS G28 P150811 220811-s1.02906.02906.4.dta

scan 2906; 1.2e+001

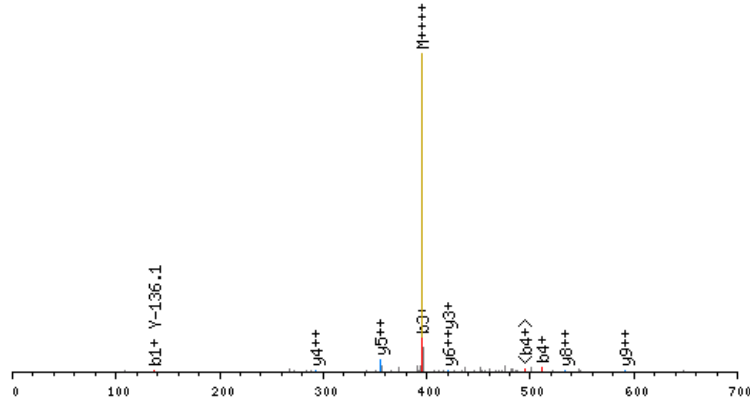

click image to zoom in; click top corners to zoom out [\[precursor±\]](#)

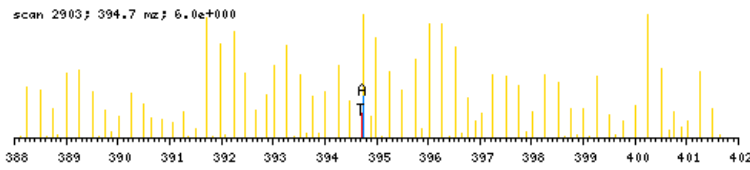

zoomed in precursor plot; T=theoretical m/z, A=acquired m/z

X-range:

-

MassTol: Y-zoom:

MassType:

AVG  MONO

Axis:

1  2

Label:

I  M  -

Ions:

a  +  2+  3+

b  +  2+  3+

c  +  2+  3+

x  +  2+  3+

y  +  2+  3+

z  +  2+  3+

hide H<sub>2</sub>O/NH<sub>3</sub>

zoom 112-122

GO

| b <sup>+</sup> | #  | AA # | y <sup>+</sup> | y <sup>2+</sup> |
|----------------|----|------|----------------|-----------------|
| 136.1186       | 1  | T 12 |                |                 |
| 265.1612       | 2  | E 11 | 1440.7006      | 720.8542        |
| 396.2017       | 3  | M 10 | 1311.6580      | 656.3329        |
| 511.2286       | 4  | D 9  | 1180.6175      | 590.8127        |
| 598.2606       | 5  | S 8  | 1065.5906      | 533.2992        |
| 735.3195       | 6  | H 7  | 978.5585       | 489.7832        |
| 864.3621       | 7  | E 6  | 841.4996       | 421.2537        |
| 993.4047       | 8  | E 5  | 712.4570       | 356.7324        |
| 1155.5628      | 9  | K 4  | 583.4144       | 292.2111        |
| 1254.6312      | 10 | V 3  | 421.2563       | 211.1321        |
| 1401.6997      | 11 | F 2  | 322.1879       | 161.5979        |
|                | 12 | R 1  | 175.1195       | 88.0637         |

N-term:+35.07 K(9):+162.16



TEMVEVGPEDDEVGAER, MH+ 1889.8438, m/z 630.6195  
 L OS G24 P150811 220811-s1.03405.03405.3.dta

X-range:

-

MassTol: Y-zoom:

MassType:

AVG  MONO

Axis:

1  2

Label:

I  M  -

Ions:

a  +  2+  3+

b  +  2+  3+

c  +  2+  3+

x  +  2+  3+

y  +  2+  3+

z  +  2+  3+

hide H<sub>2</sub>O/NH<sub>3</sub>

zoom 112-122

GO

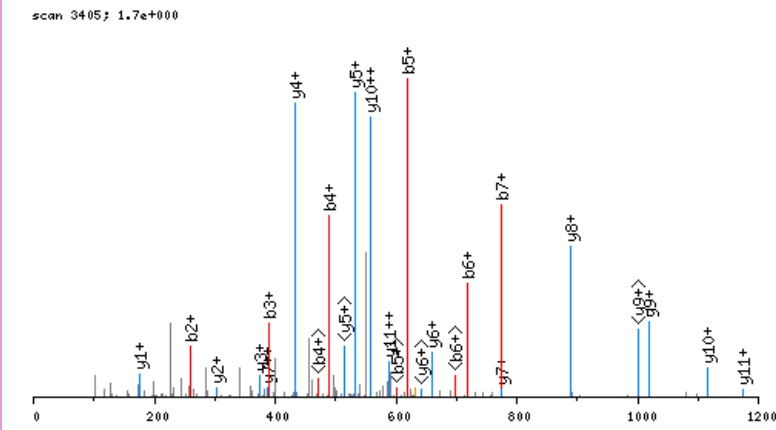

click image to zoom in; click top corners to zoom out [\[precursor±\]](#)

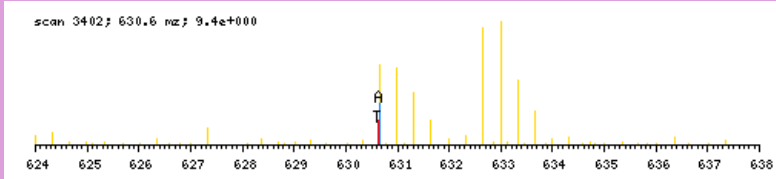

zoomed in precursor plot; T=theoretical m/z, A=acquired m/z

| b <sup>+</sup> | #  | AA # | y <sup>+</sup> | y <sup>2+</sup>    |
|----------------|----|------|----------------|--------------------|
| 130.0868       | 1  | T    | 17             |                    |
| 259.1294       | 2  | E    | 16             | 1760.7649 880.8864 |
| 390.1699       | 3  | M    | 15             | 1631.7223 816.3651 |
| 489.2383       | 4  | V    | 14             | 1500.6818 750.8448 |
| 618.2809       | 5  | E    | 13             | 1401.6134 701.3106 |
| 717.3493       | 6  | V    | 12             | 1272.5708 636.7893 |
| 774.3707       | 7  | G    | 11             | 1173.5024 587.2551 |
| 871.4235       | 8  | P    | 10             | 1116.4809 558.7444 |
| 1000.4661      | 9  | E    | 9              | 1019.4282 510.2180 |
| 1115.4930      | 10 | D    | 8              | 890.3856 445.6967  |
| 1230.5200      | 11 | D    | 7              | 775.3586 388.1832  |
| 1359.5626      | 12 | E    | 6              | 660.3317 330.6698  |
| 1458.6310      | 13 | V    | 5              | 531.2891 266.1485  |
| 1515.6525      | 14 | G    | 4              | 432.2207 216.6142  |
| 1586.6896      | 15 | A    | 3              | 375.1992 188.1035  |
| 1715.7322      | 16 | E    | 2              | 304.1621 152.5850  |
|                | 17 | R    | 1              | 175.1195 88.0637   |

N-term:+29.04

TEPVISFYDKR, MH+ 1422.8269, m/z 474.9472  
 H OS G27 P150811 220811-s1.05223.05223.3.dta

X-range:

-

MassTol: Y-zoom:

MassType:

AVG  MONO

Axis:

1  2

Label:

I  M  -

Ions:

a  +  2+  3+

b  +  2+  3+

c  +  2+  3+

x  +  2+  3+

y  +  2+  3+

z  +  2+  3+

hide H<sub>2</sub>O/NH<sub>3</sub>

zoom 112-122

GO

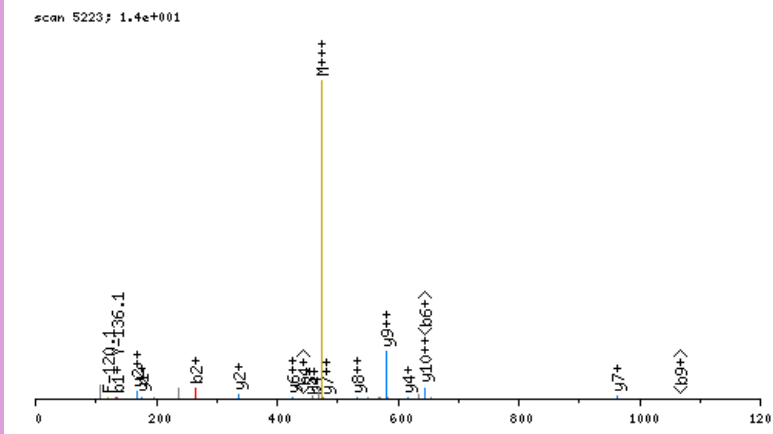

click image to zoom in; click top corners to zoom out [\[precursor±\]](#)

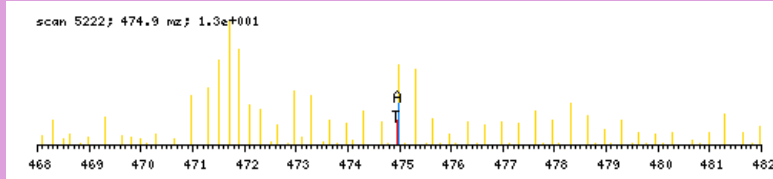

zoomed in precursor plot; T=theoretical m/z, A=acquired m/z

| b <sup>+</sup> | #  | AA # | y <sup>+</sup> | y <sup>2+</sup> |
|----------------|----|------|----------------|-----------------|
| 136.1186       | 1  | T 11 |                |                 |
| 265.1612       | 2  | E 10 | 1287.7161      | 644.3620        |
| 362.2139       | 3  | P 9  | 1158.6736      | 579.8407        |
| 461.2823       | 4  | V 8  | 1061.6208      | 531.3143        |
| 574.3664       | 5  | I 8  | 962.5524       | 481.7801        |
| 661.3984       | 6  | S 6  | 849.4683       | 425.2381        |
| 808.4669       | 7  | F 5  | 762.4363       | 381.7221        |
| 971.5302       | 8  | Y 4  | 615.3679       | 308.1878        |
| 1086.5571      | 9  | D 3  | 452.3045       | 226.6562        |
| 1248.7152      | 10 | K 2  | 337.2776       | 169.1427        |
|                | 11 | R 1  | 175.1195       | 88.0637         |

N-term:+35.07 K(10):+162.16

TEQEDAAVAKSKLR, MH+ 1629.9176, m/z 408.2349  
 L OS G28 P150811 220811-s1.02369.02369.4.dta

X-range:

-

MassTol: Y-zoom:

MassType:

AVG  MONO

Axis:

1  2

Label:

I  M  -

Ions:

a  +  2+  3+

b  +  2+  3+

c  +  2+  3+

x  +  2+  3+

y  +  2+  3+

z  +  2+  3+

hide H<sub>2</sub>O/NH<sub>3</sub>

zoom 112-122

GO

scan 2369; 1.6e+001

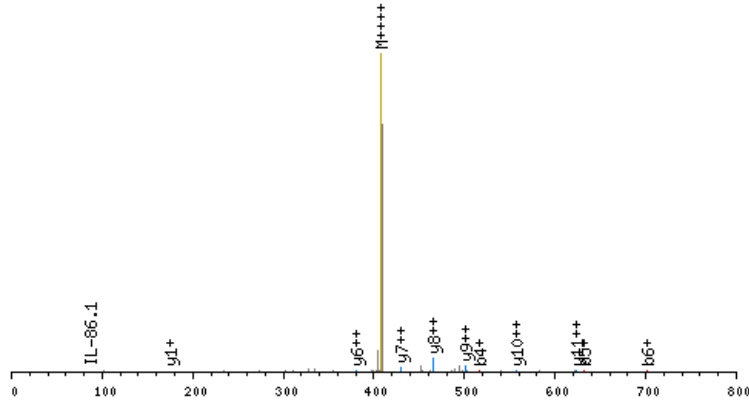

click image to zoom in; click top corners to zoom out [\[precursor±\]](#)

scan 2368; 408.2 m/z; 2.5e+001

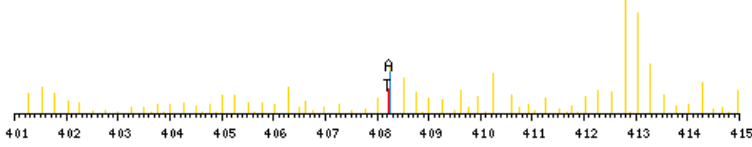

zoomed in precursor plot; T=theoretical m/z, A=acquired m/z

| b <sup>+</sup> | #  | AA # | y <sup>+</sup> | y <sup>2+</sup> |
|----------------|----|------|----------------|-----------------|
| 130.0868       | 1  | T 14 |                |                 |
| 259.1294       | 2  | E 13 | 1500.8387      | 750.9232        |
| 387.1879       | 3  | Q 12 | 1371.7961      | 686.4019        |
| 516.2305       | 4  | E 11 | 1243.7375      | 622.3727        |
| 631.2575       | 5  | D 10 | 1114.6949      | 557.8514        |
| 702.2946       | 6  | A 9  | 999.6679       | 500.3379        |
| 773.3317       | 7  | A 8  | 928.6308       | 464.8193        |
| 872.4001       | 8  | V 7  | 857.5937       | 429.3008        |
| 943.4372       | 9  | A 6  | 758.5253       | 379.7666        |
| 1099.5635      | 10 | K 5  | 687.4882       | 344.2480        |
| 1186.5956      | 11 | S 4  | 531.3619       | 266.1849        |
| 1342.7219      | 12 | K 3  | 444.3299       | 222.6688        |
| 1455.8059      | 13 | L 2  | 288.2036       | 144.6057        |
|                | 14 | R 1  | 175.1195       | 88.0637         |

N-term:+29.04 K(10):+156.13  
 K(12):+156.13

TESQIVQKEAEQAER, MH+ 1801.9296, m/z 601.3147  
 L OS G26 P150811 220811-s1.02682.02682.3.dta

X-range:

-

MassTol: Y-zoom:

MassType:

AVG  MONO

Axis:

1  2

Label:

I  M  -

Ions:

a  +  2+  3+

b  +  2+  3+

c  +  2+  3+

x  +  2+  3+

y  +  2+  3+

z  +  2+  3+

hide H<sub>2</sub>O/NH<sub>3</sub>

zoom 112-122

GO

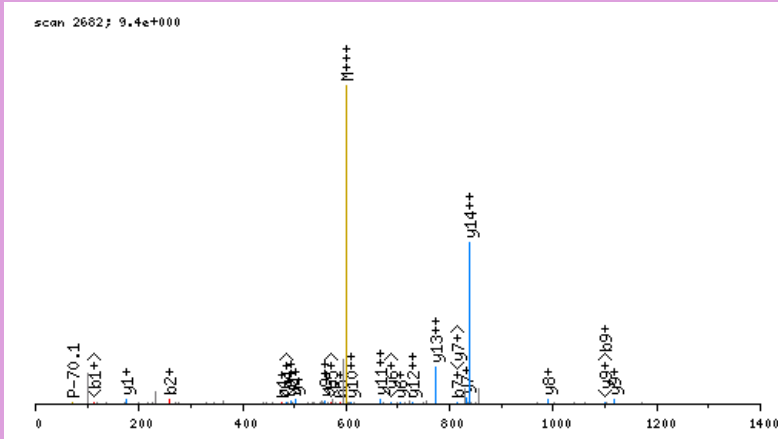

click image to zoom in; click top corners to zoom out [\[precursor±\]](#)

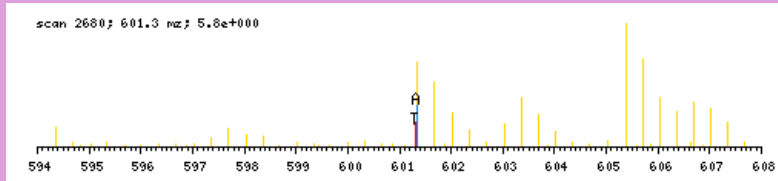

zoomed in precursor plot; T=theoretical m/z, A=acquired m/z

| b <sup>+</sup> | #  | AA | #  | y <sup>+</sup> | y <sup>2+</sup> |
|----------------|----|----|----|----------------|-----------------|
| 130.0868       | 1  | T  | 15 |                |                 |
| 259.1294       | 2  | E  | 14 | 1672.8506      | 836.9292        |
| 346.1614       | 3  | S  | 13 | 1543.8080      | 772.4079        |
| 474.2200       | 4  | Q  | 12 | 1456.7760      | 728.8919        |
| 587.3040       | 5  | I  | 11 | 1328.7174      | 664.8626        |
| 686.3725       | 6  | V  | 10 | 1215.6334      | 608.3206        |
| 814.4310       | 7  | Q  | 9  | 1116.5650      | 558.7864        |
| 970.5573       | 8  | K  | 8  | 988.5064       | 494.7571        |
| 1099.5999      | 9  | E  | 7  | 832.3801       | 416.6940        |
| 1170.6370      | 10 | A  | 6  | 703.3375       | 352.1727        |
| 1299.6796      | 11 | E  | 5  | 632.3004       | 316.6541        |
| 1427.7382      | 12 | Q  | 4  | 503.2578       | 252.1328        |
| 1498.7753      | 13 | A  | 3  | 375.1992       | 188.1035        |
| 1627.8179      | 14 | E  | 2  | 304.1621       | 152.5850        |
|                | 15 | R  | 1  | 175.1195       | 88.0637         |

N-term:+29.04 K(8):+156.13

TEVLVTPAGVASKR, MH+ 1495.9484, m/z 499.3210  
 H OS G26 P150811 220811-s1.03423.03423.3.dta

X-range:

-

MassTol: Y-zoom:

MassType:

AVG  MONO

Axis:

1  2

Label:

I  M  -

Ions:

a  +  2+  3+

b  +  2+  3+

c  +  2+  3+

x  +  2+  3+

y  +  2+  3+

z  +  2+  3+

hide H<sub>2</sub>O/NH<sub>3</sub>

zoom 112-122

GO

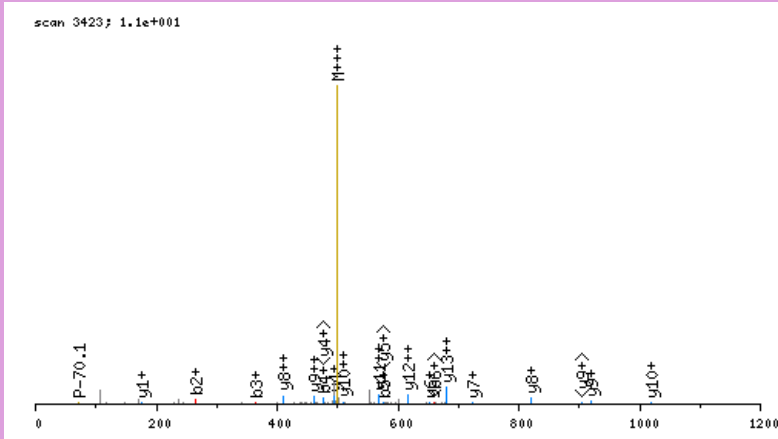

click image to zoom in; click top corners to zoom out [\[precursor±\]](#)

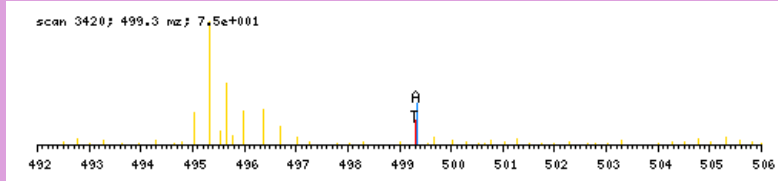

zoomed in precursor plot; T=theoretical m/z, A=acquired m/z

| b <sup>+</sup> | #  | AA # | y <sup>+</sup> | y <sup>2+</sup> |
|----------------|----|------|----------------|-----------------|
| 136.1186       | 1  | T 14 |                |                 |
| 265.1612       | 2  | E 13 | 1360.8377      | 680.9227        |
| 364.2296       | 3  | V 12 | 1231.7951      | 616.4014        |
| 477.3136       | 4  | L 11 | 1132.7267      | 566.8672        |
| 576.3821       | 5  | V 10 | 1019.6426      | 510.3252        |
| 677.4297       | 6  | T 9  | 920.5742       | 460.7910        |
| 774.4825       | 7  | P 8  | 819.5265       | 410.2672        |
| 845.5196       | 8  | A 7  | 722.4737       | 361.7408        |
| 902.5411       | 9  | G 6  | 651.4366       | 326.2222        |
| 1001.6095      | 10 | V 5  | 594.4152       | 297.7115        |
| 1072.6466      | 11 | A 4  | 495.3467       | 248.1773        |
| 1159.6786      | 12 | S 3  | 424.3096       | 212.6587        |
| 1321.8367      | 13 | K 2  | 337.2776       | 169.1427        |
|                | 14 | R 1  | 175.1195       | 88.0637         |

N-term:+35.07 K(13):+162.16

TEVVCAPPTAYIDFAR, MH+ 1843.9476, m/z 615.3207  
 H OS G24 P150811 220811-s1.04579.04579.3.dta

X-range:

-

MassTol: Y-zoom:

MassType:

AVG  MONO

Axis:

1  2

Label:

I  M  -

Ions:

a  +  2+  3+

b  +  2+  3+

c  +  2+  3+

x  +  2+  3+

y  +  2+  3+

z  +  2+  3+

hide H<sub>2</sub>O/NH<sub>3</sub>

zoom 112-122

GO

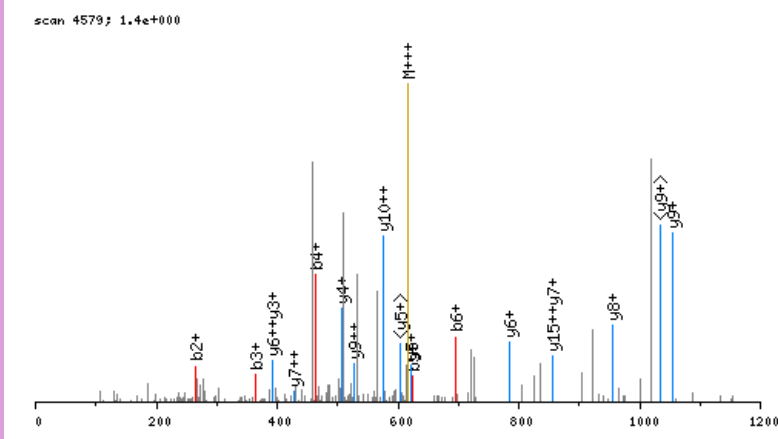

click image to zoom in; click top corners to zoom out [\[precursor±\]](#)

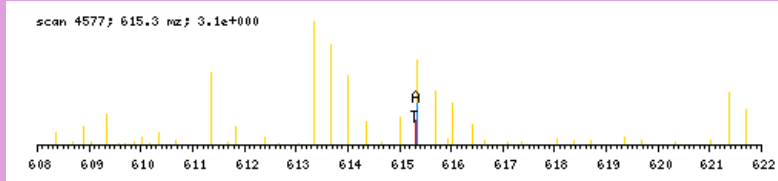

zoomed in precursor plot; T=theoretical m/z, A=acquired m/z

| b <sup>+</sup> | #  | AA # | y <sup>+</sup> | y <sup>2+</sup> |
|----------------|----|------|----------------|-----------------|
| 136.1186       | 1  | T    | 16             |                 |
| 265.1612       | 2  | E    | 15             | 1708.8368       |
| 364.2296       | 3  | V    | 14             | 790.4010        |
| 463.2980       | 4  | V    | 13             | 740.8668        |
| 623.3286       | 5  | C    | 12             | 1381.6574       |
| 694.3657       | 6  | A    | 11             | 1221.6268       |
| 791.4185       | 7  | P    | 10             | 1150.5897       |
| 888.4712       | 8  | P    | 9              | 1053.5369       |
| 989.5189       | 9  | T    | 8              | 956.4842        |
| 1060.5560      | 10 | A    | 7              | 855.4365        |
| 1223.6194      | 11 | Y    | 6              | 784.3994        |
| 1336.7034      | 12 | I    | 5              | 621.3360        |
| 1451.7304      | 13 | D    | 4              | 508.2520        |
| 1598.7988      | 14 | F    | 3              | 393.2250        |
| 1669.8359      | 15 | A    | 2              | 246.1566        |
|                | 16 | R    | 1              | 175.1195        |

N-term:+35.07 C(5):+160.03

TEYMQDPDEEALR, MH+ 1630.7483, m/z 544.2543  
 H OS G25 P150811 220811-s1.04674.04674.3.dta

scan 4674; 4.6e+000

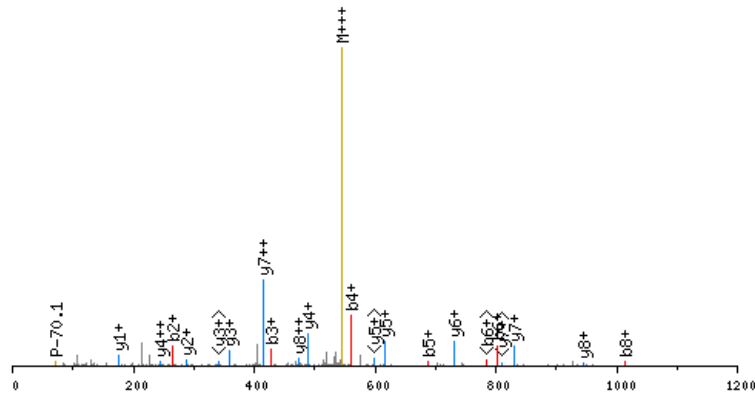

click image to zoom in; click top corners to zoom out [\[precursor±\]](#)

scan 4672; 544.3 m/z; 1.2e+001

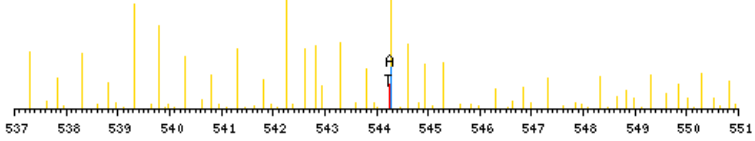

zoomed in precursor plot; T=theoretical m/z, A=acquired m/z

X-range:

-

MassTol: Y-zoom:

MassType:

AVG  MONO

Axis:

1  2

Label:

I  M  -

Ions:

a  +  2+  3+

b  +  2+  3+

c  +  2+  3+

x  +  2+  3+

y  +  2+  3+

z  +  2+  3+

hide H<sub>2</sub>O/NH<sub>3</sub>

zoom 112-122

GO

| b <sup>+</sup> | #  | AA # | y <sup>+</sup> | y <sup>2+</sup> |
|----------------|----|------|----------------|-----------------|
| 136.1186       | 1  | T 13 |                |                 |
| 265.1612       | 2  | E 12 | 1495.6375      | 748.3227        |
| 428.2245       | 3  | Y 11 | 1366.5949      | 683.8014        |
| 559.2650       | 4  | M 10 | 1203.5316      | 602.2697        |
| 687.3236       | 5  | Q 9  | 1072.4911      | 536.7495        |
| 802.3505       | 6  | D 8  | 944.4325       | 472.7202        |
| 899.4033       | 7  | P 7  | 829.4056       | 415.2067        |
| 1014.4302      | 8  | D 6  | 732.3528       | 366.6803        |
| 1143.4728      | 9  | E 5  | 617.3259       | 309.1668        |
| 1272.5154      | 10 | E 4  | 488.2833       | 244.6455        |
| 1343.5525      | 11 | A 3  | 359.2407       | 180.1243        |
| 1456.6366      | 12 | L 2  | 288.2036       | 144.6057        |
|                | 13 | R 1  | 175.1195       | 88.0637         |

N-term:+35.07

TEYMQDPDEEALRR, MH+ 1786.8494, m/z 596.2880  
 H OS G27 P150811 220811-s1.04073.04073.3.dta

X-range:

-

MassTol: Y-zoom:

MassType:

AVG  MONO

Axis:

1  2

Label:

I  M  -

Ions:

a  +  2+  3+

b  +  2+  3+

c  +  2+  3+

x  +  2+  3+

y  +  2+  3+

z  +  2+  3+

hide H<sub>2</sub>O/NH<sub>3</sub>

zoom 112-122

GO

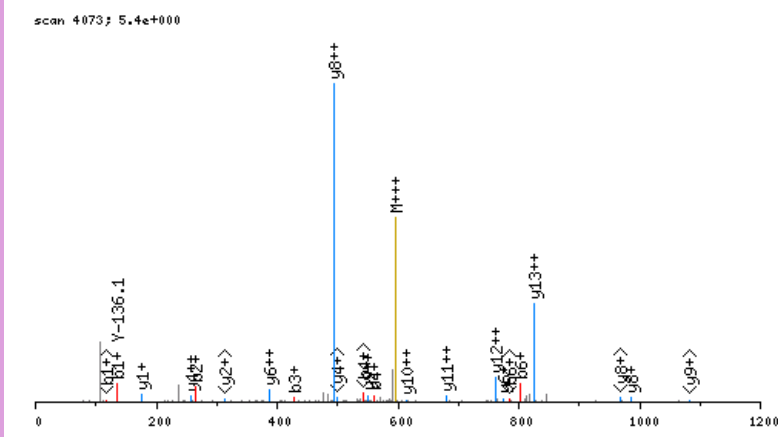

click image to zoom in; click top corners to zoom out [\[precursor±\]](#)

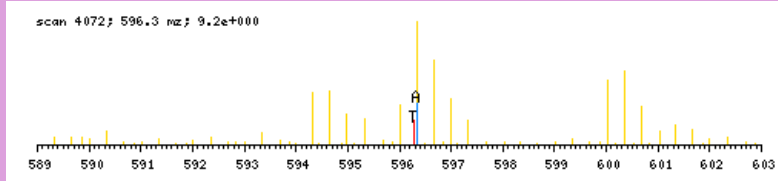

zoomed in precursor plot; T=theoretical m/z, A=acquired m/z

| b <sup>+</sup> | #  | AA # | y <sup>+</sup> | y <sup>2+</sup> |
|----------------|----|------|----------------|-----------------|
| 136.1186       | 1  | T 14 |                |                 |
| 265.1612       | 2  | E 13 | 1651.7386      | 826.3732        |
| 428.2245       | 3  | Y 12 | 1522.6960      | 761.8519        |
| 559.2650       | 4  | M 11 | 1359.6327      | 680.3203        |
| 687.3236       | 5  | Q 10 | 1228.5922      | 614.8000        |
| 802.3505       | 6  | D 9  | 1100.5336      | 550.7707        |
| 899.4033       | 7  | P 8  | 985.5067       | 493.2573        |
| 1014.4302      | 8  | D 7  | 888.4539       | 444.7309        |
| 1143.4728      | 9  | E 6  | 773.4270       | 387.2174        |
| 1272.5154      | 10 | E 5  | 644.3844       | 322.6961        |
| 1343.5525      | 11 | A 4  | 515.3418       | 258.1748        |
| 1456.6366      | 12 | L 3  | 444.3047       | 222.6563        |
| 1612.7377      | 13 | R 2  | 331.2206       | 166.1142        |
|                | 14 | R 1  | 175.1195       | 88.0637         |

N-term:+35.07



TFASLSELHCCKLHVDPENFR, MH+ 2571.2665, m/z 643.5721  
 L OS G28 P150811 220811-s1.07741.07741.4.dta

X-range:

0 - 0

MassTol: Y-zoom:

0. 1.

MassType:

AVG  MONO

Axis:

1  2

Label:

I  M  -

Ions:

a  +  2+  3+

b  +  2+  3+

c  +  2+  3+

x  +  2+  3+

y  +  2+  3+

z  +  2+  3+

hide H<sub>2</sub>O/NH<sub>3</sub>

zoom 112-122

GO

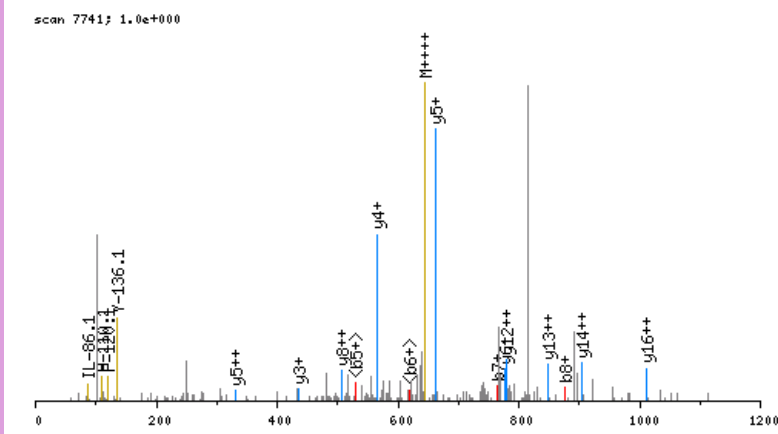

click image to zoom in; click top corners to zoom out [precursor±]

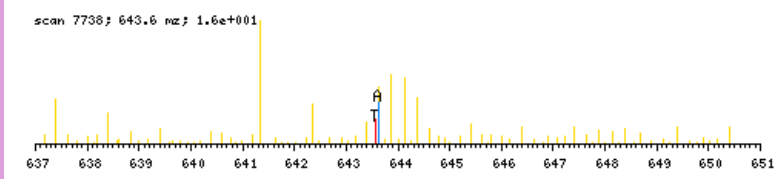

zoomed in precursor plot; T=theoretical m/z, A=acquired m/z

| b <sup>+</sup> | #  | AA # | y <sup>+</sup> | y <sup>2+</sup> |
|----------------|----|------|----------------|-----------------|
| 130.0868       | 1  | T 21 |                |                 |
| 277.1552       | 2  | F 20 | 2442.1876      | 1221.5977       |
| 348.1923       | 3  | A 19 | 2295.1192      | 1148.0635       |
| 435.2243       | 4  | S 18 | 2224.0821      | 1112.5449       |
| 548.3084       | 5  | L 17 | 2137.0500      | 1069.0289       |
| 635.3404       | 6  | S 16 | 2023.9660      | 1012.4869       |
| 764.3830       | 7  | E 15 | 1936.9339      | 968.9709        |
| 877.4671       | 8  | L 14 | 1807.8914      | 904.4496        |
| 1014.5260      | 9  | H 13 | 1694.8073      | 847.9076        |
| 1174.5566      | 10 | C 12 | 1557.7484      | 779.3781        |
| 1289.5835      | 11 | D 11 | 1397.7178      | 699.3628        |
| 1445.7098      | 12 | K 10 | 1282.6908      | 641.8493        |
| 1558.7939      | 13 | L 9  | 1126.5645      | 563.7862        |
| 1695.8528      | 14 | H 8  | 1013.4805      | 507.2441        |
| 1794.9212      | 15 | V 7  | 876.4216       | 438.7147        |
| 1909.9482      | 16 | D 6  | 777.3531       | 389.1805        |
| 2007.0009      | 17 | P 5  | 662.3262       | 331.6670        |
| 2136.0435      | 18 | E 4  | 565.2734       | 283.1406        |
| 2250.0865      | 19 | N 3  | 436.2308       | 218.6193        |
| 2397.1549      | 20 | F 2  | 322.1879       | 161.5979        |
|                | 21 | R 1  | 175.1195       | 88.0637         |

N-term: +29.04 C(10): +160.03  
 K(12): +156.13

TFDQGAHHAFGQGGR, MH+ 1613.7573, m/z 404.1948  
 L OS G28 P150811 220811-s1.02502.02502.4.dta

X-range:

-

MassTol: Y-zoom:

MassType:

AVG  MONO

Axis:

1  2

Label:

I  M  -

Ions:

a  +  2+  3+

b  +  2+  3+

c  +  2+  3+

x  +  2+  3+

y  +  2+  3+

z  +  2+  3+

hide H<sub>2</sub>O/NH<sub>3</sub>

zoom 112-122

GO

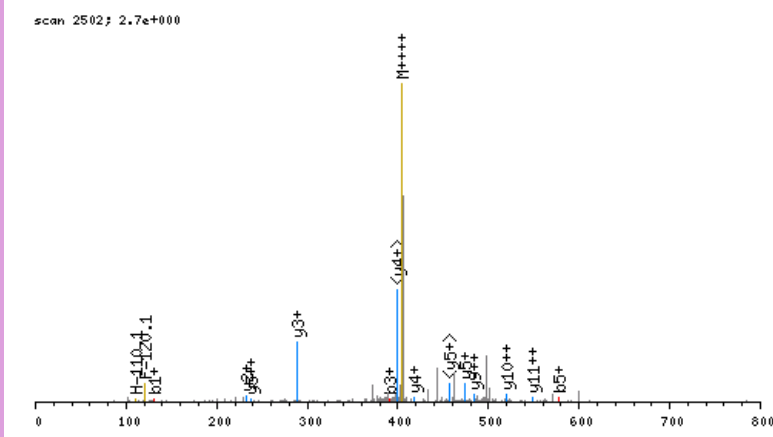

click image to zoom in; click top corners to zoom out [\[precursor±\]](#)

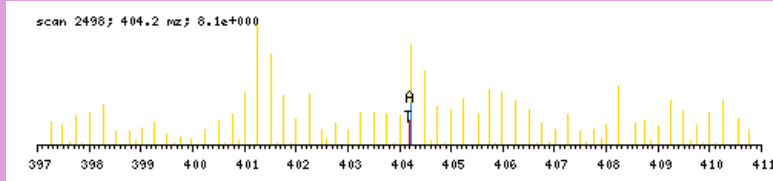

zoomed in precursor plot; T=theoretical m/z, A=acquired m/z

| b <sup>+</sup> | #  | AA | #  | y <sup>+</sup> | y <sup>2+</sup> |
|----------------|----|----|----|----------------|-----------------|
| 130.0868       | 1  | T  | 15 |                |                 |
| 277.1552       | 2  | F  | 14 | 1484.6783      | 742.8431        |
| 392.1821       | 3  | D  | 13 | 1337.6099      | 669.3089        |
| 520.2407       | 4  | Q  | 12 | 1222.5830      | 611.7954        |
| 577.2622       | 5  | G  | 11 | 1094.5244      | 547.7661        |
| 648.2993       | 6  | A  | 10 | 1037.5029      | 519.2554        |
| 785.3582       | 7  | H  | 9  | 966.4658       | 483.7368        |
| 922.4171       | 8  | H  | 8  | 829.4069       | 415.2074        |
| 993.4542       | 9  | A  | 7  | 692.3480       | 346.6779        |
| 1140.5226      | 10 | F  | 6  | 621.3109       | 311.1594        |
| 1197.5441      | 11 | G  | 5  | 474.2425       | 237.6251        |
| 1325.6027      | 12 | Q  | 4  | 417.2210       | 209.1144        |
| 1382.6241      | 13 | G  | 3  | 289.1624       | 145.0851        |
| 1439.6456      | 14 | G  | 2  | 232.1410       | 116.5744        |
|                | 15 | R  | 1  | 175.1195       | 88.0637         |

N-term:+29.04

TFEDVAVYFIWR, MH+ 1573.8055, m/z 525.2733  
 L OS G26 P150811 220811-s1.04378.04378.3.dta

scan 4378; 1.6e+001

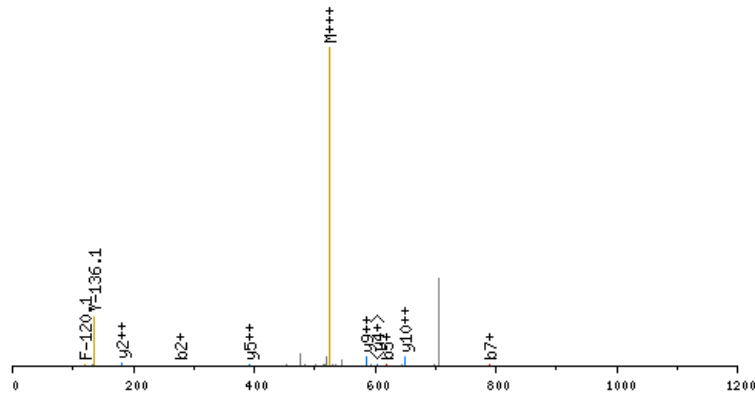

click image to zoom in; click top corners to zoom out [\[precursor±\]](#)

scan 4375; 525.3 m/z; 6.2e+000

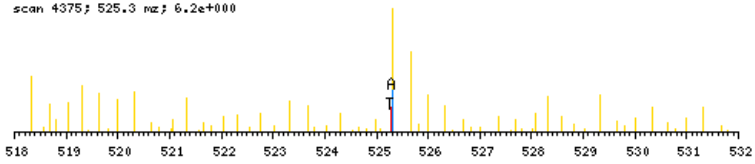

zoomed in precursor plot; T=theoretical m/z, A=acquired m/z

X-range:

-

MassTol: Y-zoom:

MassType:

AVG  MONO

Axis:

1  2

Label:

I  M  -

Ions:

a  +  2+  3+

b  +  2+  3+

c  +  2+  3+

x  +  2+  3+

y  +  2+  3+

z  +  2+  3+

hide H<sub>2</sub>O/NH<sub>3</sub>

zoom 112-122

GO

| b <sup>+</sup> | #  | AA # | y <sup>+</sup> | y <sup>2+</sup> |
|----------------|----|------|----------------|-----------------|
| 130.0868       | 1  | T 12 |                |                 |
| 277.1552       | 2  | F 11 | 1444.7265      | 722.8672        |
| 406.1978       | 3  | E 10 | 1297.6581      | 649.3330        |
| 521.2247       | 4  | D 9  | 1168.6155      | 584.8117        |
| 620.2931       | 5  | V 8  | 1053.5886      | 527.2982        |
| 691.3303       | 6  | A 7  | 954.5201       | 477.7640        |
| 790.3987       | 7  | V 6  | 883.4830       | 442.2454        |
| 953.4620       | 8  | Y 5  | 784.4146       | 392.7112        |
| 1100.5304      | 9  | F 4  | 621.3513       | 311.1796        |
| 1213.6145      | 10 | I 3  | 474.2829       | 237.6454        |
| 1399.6938      | 11 | W 2  | 361.1988       | 181.1033        |
|                | 12 | R 1  | 175.1195       | 88.0637         |

N-term:+29.04

TFESEFYLDDEKR, MH+ 1619.7957, m/z 540.6034  
 L OS G27 P150811 220811-s1.05544.05544.3.dta

scan 5544; 1.3e+001

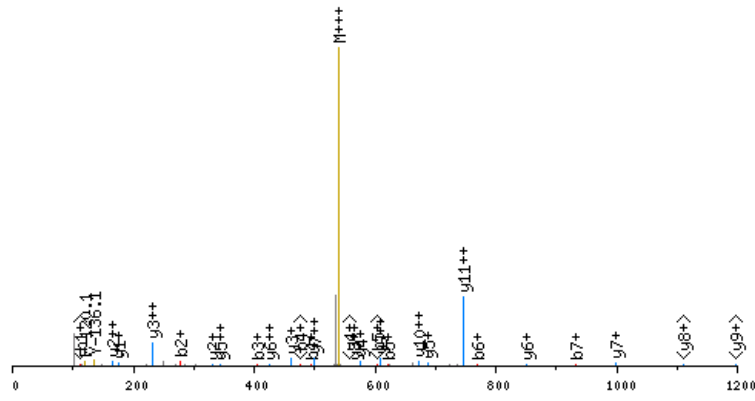

click image to zoom in; click top corners to zoom out [\[precursor±\]](#)

scan 5542; 540.6 m/z; 1.7e+002

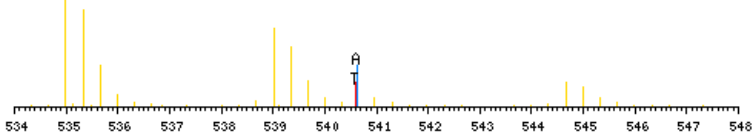

zoomed in precursor plot; T=theoretical m/z, A=acquired m/z

X-range:

-

MassTol: Y-zoom:

MassType:

AVG  MONO

Axis:

1  2

Label:

I  M  -

Ions:

a  +  2+  3+

b  +  2+  3+

c  +  2+  3+

x  +  2+  3+

y  +  2+  3+

z  +  2+  3+

hide H<sub>2</sub>O/NH<sub>3</sub>

zoom 112-122

GO

| b <sup>+</sup> | #  | AA # | y <sup>+</sup> | y <sup>2+</sup>    |
|----------------|----|------|----------------|--------------------|
| 130.0868       | 1  | T    | 12             |                    |
| 277.1552       | 2  | F    | 11             | 1490.7168 745.8623 |
| 406.1978       | 3  | E    | 10             | 1343.6484 672.3281 |
| 493.2298       | 4  | S    | 9              | 1214.6058 607.8068 |
| 622.2724       | 5  | E    | 8              | 1127.5737 564.2908 |
| 769.3408       | 6  | F    | 7              | 998.5311 499.7695  |
| 932.4041       | 7  | Y    | 6              | 851.4627 426.2353  |
| 1045.4882      | 8  | L    | 5              | 688.3994 344.7036  |
| 1160.5152      | 9  | D    | 4              | 575.3153 288.1616  |
| 1289.5577      | 10 | E    | 3              | 460.2884 230.6481  |
| 1445.6840      | 11 | K    | 2              | 331.2458 166.1268  |
|                | 12 | R    | 1              | 175.1195 88.0637   |

N-term:+29.04 K(11):+156.13

TFGKFDVEPDYCR, MH+ 1790.8423, m/z 597.6190  
 L OS G27 P150811 220811-s1.05673.05673.3.dta

X-range:

-

MassTol: Y-zoom:

MassType:

AVG  MONO

Axis:

1  2

Label:

I  M  -

Ions:

a  +  2+  3+

b  +  2+  3+

c  +  2+  3+

x  +  2+  3+

y  +  2+  3+

z  +  2+  3+

hide H<sub>2</sub>O/NH<sub>3</sub>

zoom 112-122

GO

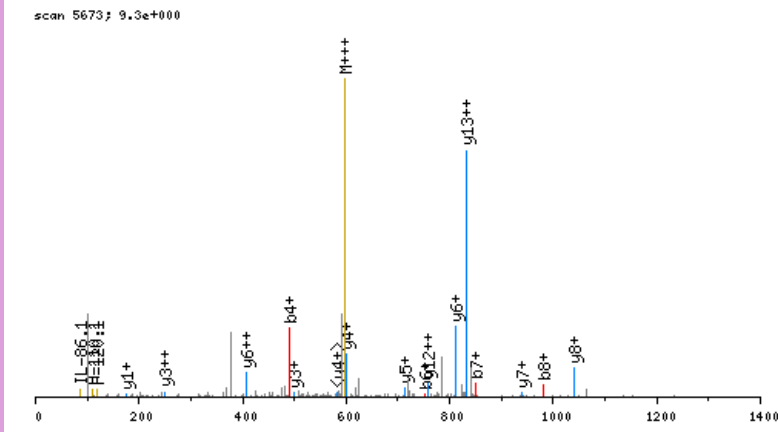

click image to zoom in; click top corners to zoom out [\[precursor±\]](#)

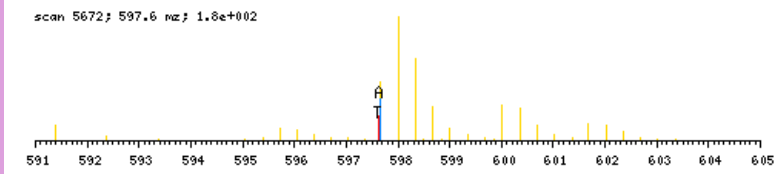

zoomed in precursor plot; T=theoretical m/z, A=acquired m/z

| b <sup>+</sup> | #  | AA # | y <sup>+</sup> | y <sup>2+</sup> |
|----------------|----|------|----------------|-----------------|
| 130.0868       | 1  | T 14 |                |                 |
| 277.1552       | 2  | F 13 | 1661.7634      | 831.3856        |
| 334.1767       | 3  | G 12 | 1514.6949      | 757.8514        |
| 490.3030       | 4  | K 11 | 1457.6735      | 729.3407        |
| 637.3714       | 5  | F 10 | 1301.5472      | 651.2775        |
| 752.3983       | 6  | D 9  | 1154.4788      | 577.7433        |
| 851.4667       | 7  | V 8  | 1039.4518      | 520.2298        |
| 980.5093       | 8  | E 7  | 940.3834       | 470.6956        |
| 1077.5621      | 9  | P 6  | 811.3408       | 406.1743        |
| 1192.5890      | 10 | D 5  | 714.2881       | 357.6479        |
| 1293.6367      | 11 | T 4  | 599.2611       | 300.1345        |
| 1456.7000      | 12 | Y 3  | 498.2134       | 249.6106        |
| 1616.7306      | 13 | C 2  | 335.1501       | 168.0790        |
|                | 14 | R 1  | 175.1195       | 88.0637         |

N-term:+29.04 K(4):+156.13  
 C(13):+160.03

TFIAIKPDGVQR, MH+ 1400.8266, m/z 467.6137  
 L OS G26 P150811 220811-s1.03894.03894.3.dta

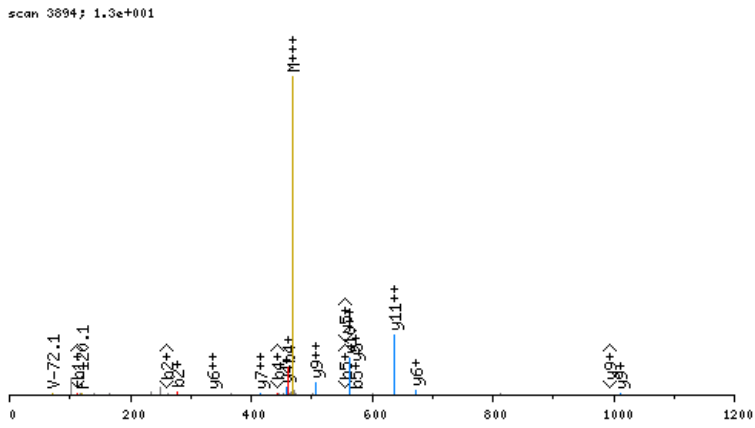

click image to zoom in; click top corners to zoom out [precursor±]

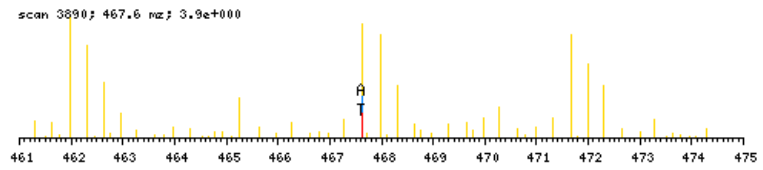

zoomed in precursor plot; T=theoretical m/z, A=acquired m/z

- X-range:  -
- MassTol: Y-zoom:
- MassType:  AVG  MONO
- Axis:  1  2
- Label:  I  M  -
- Ions:
- a  +  2+  3+
- b  +  2+  3+
- c  +  2+  3+
- x  +  2+  3+
- y  +  2+  3+
- z  +  2+  3+
- hide H<sub>2</sub>O/NH<sub>3</sub>
- zoom 112-122
- GO

| b <sup>+</sup> | #  | AA # | y <sup>+</sup> | y <sup>2+</sup>    |
|----------------|----|------|----------------|--------------------|
| 130.0868       | 1  | T    | 12             |                    |
| 277.1552       | 2  | F    | 11             | 1271.7476 636.3777 |
| 390.2393       | 3  | I    | 10             | 1124.6792 562.8435 |
| 461.2764       | 4  | A    | 9              | 1011.5951 506.3015 |
| 574.3604       | 5  | I    | 8              | 940.5580 470.7829  |
| 730.4867       | 6  | K    | 7              | 827.4740 414.2409  |
| 827.5395       | 7  | P    | 6              | 671.3477 336.1777  |
| 942.5664       | 8  | D    | 5              | 574.2949 287.6514  |
| 999.5879       | 9  | G    | 4              | 459.2680 230.1379  |
| 1098.6563      | 10 | V    | 3              | 402.2465 201.6272  |
| 1226.7149      | 11 | Q    | 2              | 303.1781 152.0930  |
|                | 12 | R    | 1              | 175.1195 88.0637   |

N-term:+29.04 K(6):+156.13

TFQDGLVQHQQWDGKESTIIR, MH+ 2601.3062, m/z 651.0820  
 L OS G28 P150811 220811-s1.05650.05650.4.dta

scan 5650; 3.2e+000

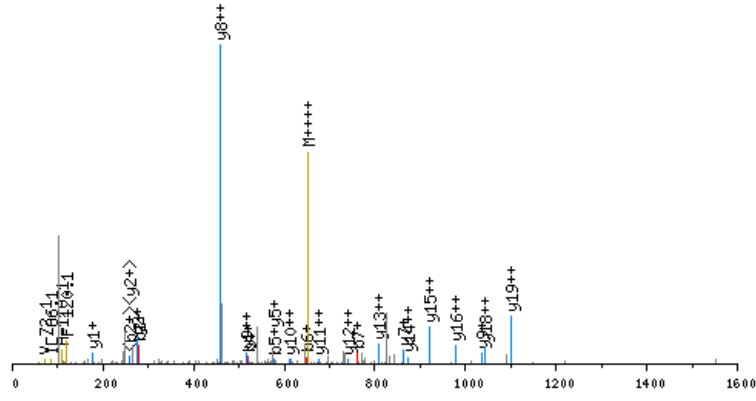

click image to zoom in; click top corners to zoom out [precursor±]

scan 5648; 651.1 m/z; 1.4e+001

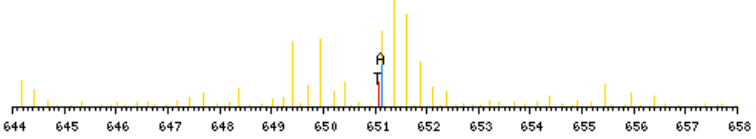

zoomed in precursor plot; T=theoretical m/z, A=acquired m/z

| b <sup>+</sup> | #  | AA | #  | y <sup>+</sup> | y <sup>2+</sup> |
|----------------|----|----|----|----------------|-----------------|
| 130.0868       | 1  | T  | 22 |                |                 |
| 277.1552       | 2  | F  | 21 | 2472.2272      | 1236.6175       |
| 405.2138       | 3  | Q  | 20 | 2325.1588      | 1163.0833       |
| 520.2407       | 4  | D  | 19 | 2197.1002      | 1099.0540       |
| 577.2622       | 5  | G  | 18 | 2082.0733      | 1041.5405       |
| 648.2993       | 6  | A  | 17 | 2025.0518      | 1013.0298       |
| 761.3834       | 7  | L  | 16 | 1954.0147      | 977.5113        |
| 860.4518       | 8  | V  | 15 | 1840.9306      | 920.9692        |
| 988.5103       | 9  | Q  | 14 | 1741.8622      | 871.4350        |
| 1125.5693      | 10 | H  | 13 | 1613.8036      | 807.4057        |
| 1253.6278      | 11 | Q  | 12 | 1476.7447      | 738.8763        |
| 1381.6864      | 12 | Q  | 11 | 1348.6861      | 674.8470        |
| 1567.7657      | 13 | W  | 10 | 1220.6276      | 610.8177        |
| 1682.7927      | 14 | D  | 9  | 1034.5483      | 517.7780        |
| 1739.8141      | 15 | G  | 8  | 919.5213       | 460.2646        |
| 1895.9404      | 16 | K  | 7  | 862.4998       | 431.7538        |
| 2024.9830      | 17 | E  | 6  | 706.3735       | 353.6907        |
| 2112.0151      | 18 | S  | 5  | 577.3310       | 289.1694        |
| 2213.0627      | 19 | T  | 4  | 490.2989       | 245.6534        |
| 2326.1468      | 20 | I  | 3  | 389.2512       | 195.1295        |
| 2427.1945      | 21 | T  | 2  | 276.1672       | 138.5875        |
|                | 22 | R  | 1  | 175.1195       | 88.0637         |

N-term:+29.04 K(16):+156.13

X-range:

-

MassTol: Y-zoom:

MassType:

AVG  MONO

Axis:

1  2

Label:

I  M  -

Ions:

a  +  2+  3+

b  +  2+  3+

c  +  2+  3+

x  +  2+  3+

y  +  2+  3+

z  +  2+  3+

hide H<sub>2</sub>O/NH<sub>3</sub>

zoom 112-122

GO

TFVAELKGLDPPAR, MH+ 1484.9113, m/z 495.6420  
 H OS G26 P150811 220811-s1.05113.05113.3.dta

scan 5113; 1.1e+001

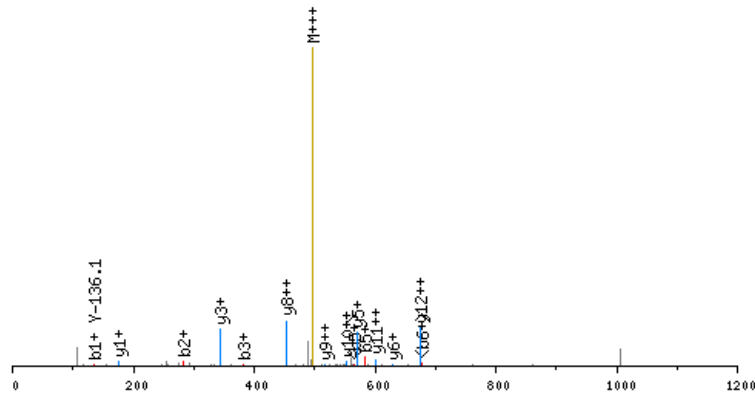

click image to zoom in; click top corners to zoom out [\[precursor±\]](#)

scan 5110; 495.6 m/z; 5.7e+000

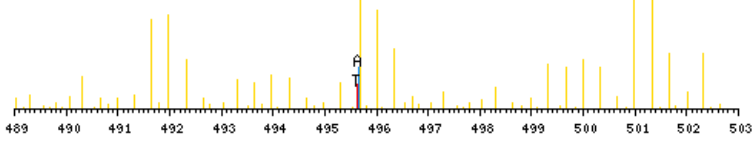

zoomed in precursor plot; T=theoretical m/z, A=acquired m/z

X-range:

-

MassTol: Y-zoom:

MassType:

AVG  MONO

Axis:

1  2

Label:

I  M  -

Ions:

a  +  2+  3+

b  +  2+  3+

c  +  2+  3+

x  +  2+  3+

y  +  2+  3+

z  +  2+  3+

hide H<sub>2</sub>O/NH<sub>3</sub>

zoom 112-122

GO

| b <sup>+</sup> | #  | AA # | y <sup>+</sup> | y <sup>2+</sup> |
|----------------|----|------|----------------|-----------------|
| 136.1186       | 1  | T    | 13             |                 |
| 283.1870       | 2  | F    | 12             | 1349.8005       |
| 382.2554       | 3  | V    | 11             | 1202.7321       |
| 453.2925       | 4  | A    | 10             | 1103.6637       |
| 582.3351       | 5  | E    | 9              | 1032.6266       |
| 695.4192       | 6  | L    | 8              | 903.5840        |
| 857.5773       | 7  | K    | 7              | 790.4999        |
| 914.5987       | 8  | G    | 6              | 628.3418        |
| 1027.6828      | 9  | L    | 5              | 571.3204        |
| 1142.7097      | 10 | D    | 4              | 458.2363        |
| 1239.7625      | 11 | P    | 3              | 343.2094        |
| 1310.7996      | 12 | A    | 2              | 246.1566        |
|                | 13 | R    | 1              | 175.1195        |

N-term:+35.07 K(7):+162.16



TGAIVDVPVGEELLGR, MH+ 1652.9223, m/z 551.6456  
 L OS G24 P150811 220811-s1.04769.04769.3.dta

X-range:

-

MassTol: Y-zoom:

MassType:

AVG  MONO

Axis:

1  2

Label:

I  M  -

Ions:

a  +  2+  3+

b  +  2+  3+

c  +  2+  3+

x  +  2+  3+

y  +  2+  3+

z  +  2+  3+

hide H<sub>2</sub>O/NH<sub>3</sub>

zoom 112-122

GO

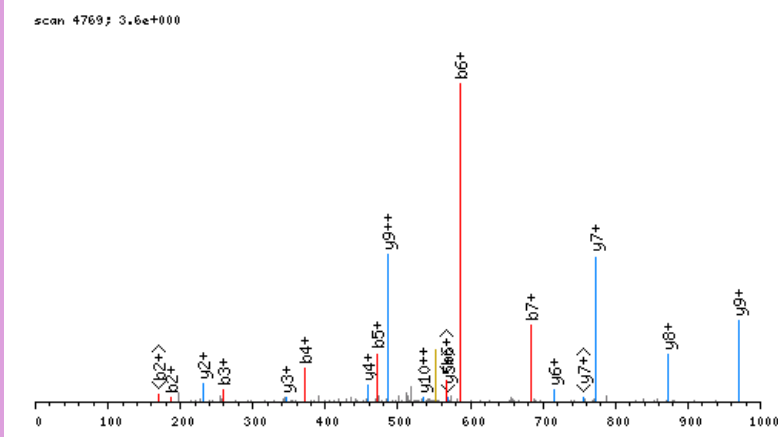

click image to zoom in; click top corners to zoom out [\[precursor±\]](#)

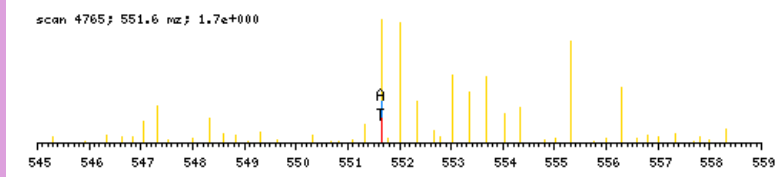

zoomed in precursor plot; T=theoretical m/z, A=acquired m/z

| b <sup>+</sup> | #  | AA # | y <sup>+</sup> | y <sup>2+</sup> |
|----------------|----|------|----------------|-----------------|
| 130.0868       | 1  | T 16 |                |                 |
| 187.1082       | 2  | G 15 | 1523.8433      | 762.4256        |
| 258.1454       | 3  | A 14 | 1466.8219      | 733.9148        |
| 371.2294       | 4  | I 13 | 1395.7848      | 698.3963        |
| 470.2978       | 5  | V 12 | 1282.7007      | 641.8543        |
| 585.3248       | 6  | D 11 | 1183.6323      | 592.3201        |
| 684.3932       | 7  | V 10 | 1068.6053      | 534.8066        |
| 781.4460       | 8  | P 9  | 969.5369       | 485.2724        |
| 880.5144       | 9  | V 8  | 872.4842       | 436.7460        |
| 937.5358       | 10 | G 7  | 773.4157       | 387.2118        |
| 1066.5784      | 11 | E 6  | 716.3943       | 358.7011        |
| 1195.6210      | 12 | E 5  | 587.3517       | 294.1798        |
| 1308.7051      | 13 | L 4  | 458.3091       | 229.6585        |
| 1421.7891      | 14 | L 3  | 345.2250       | 173.1164        |
| 1478.8106      | 15 | G 2  | 232.1410       | 116.5744        |
|                | 16 | R 1  | 175.1195       | 88.0637         |

N-term:+29.04

TGAPQGSGLGEYLFFER, MH+ 1658.8602, m/z 553.6249  
 H OS G25 P150811 220811-s1.07365.07365.3.dta

X-range:

-

MassTol: Y-zoom:

MassType:

AVG  MONO

Axis:

1  2

Label:

I  M  -

Ions:

a  +  2+  3+

b  +  2+  3+

c  +  2+  3+

x  +  2+  3+

y  +  2+  3+

z  +  2+  3+

hide H<sub>2</sub>O/NH<sub>3</sub>

zoom 112-122

GO

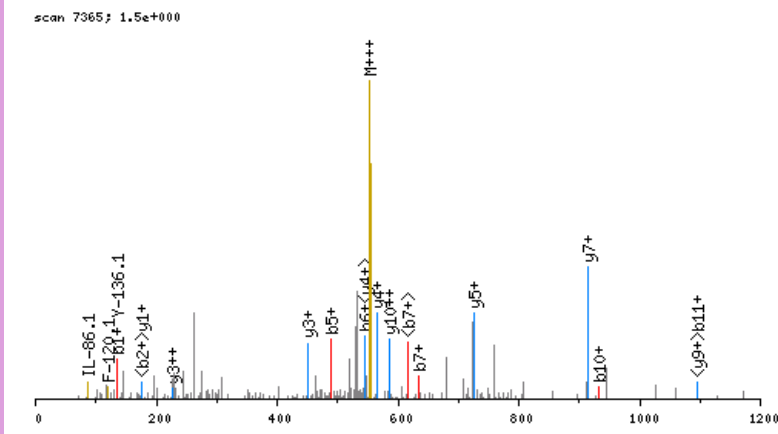

click image to zoom in; click top corners to zoom out [\[precursor±\]](#)

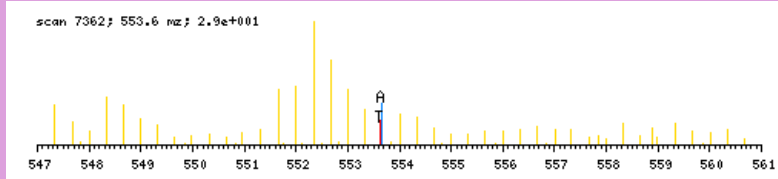

zoomed in precursor plot; T=theoretical m/z, A=acquired m/z

| b <sup>+</sup> | #  | AA # | y <sup>+</sup> | y <sup>2+</sup>                 |
|----------------|----|------|----------------|---------------------------------|
| 136.1186       | 1  | T    | 15             |                                 |
| 193.1400       | 2  | G    | 14             | 1523.7494 762.3786              |
| 264.1772       | 3  | A    | 13             | 1466.7280 733.8679              |
| 361.2299       | 4  | P    | 12             | 1395.6909 698.3493              |
| 489.2885       | 5  | Q    | 11             | 1298.6381 649.8230              |
| 546.3100       | 6  | G    | 10             | 1170.5795 <b>585.7937</b>       |
| 633.3420       | 7  | S    | 9              | 1113.5580 557.2829              |
| 746.4261       | 8  | L    | 8              | 1026.5260 513.7669              |
| 803.4475       | 9  | G    | 7              | <b>913.4420</b> 457.2249        |
| 932.4901       | 10 | E    | 6              | 856.4205 428.7142               |
| 1095.5534      | 11 | Y    | 5              | <b>727.3779</b> 364.1929        |
| 1208.6375      | 12 | L    | 4              | <b>564.3146</b> 282.6612        |
| 1355.7059      | 13 | F    | 3              | <b>451.2305</b> <b>226.1192</b> |
| 1484.7485      | 14 | E    | 2              | 304.1621 152.5850               |
|                | 15 | R    | 1              | <b>175.1195</b> 88.0637         |

N-term:+35.07

TGDAALDHDQALAAQAIR, MH+ 1793.9146, m/z 598.6430  
 L OS G26 P150811 220811-s1.04042.04042.3.dta

X-range:

-

MassTol: Y-zoom:

MassType:

AVG  MONO

Axis:

1  2

Label:

I  M  -

Ions:

a  +  2+  3+

b  +  2+  3+

c  +  2+  3+

x  +  2+  3+

y  +  2+  3+

z  +  2+  3+

hide H<sub>2</sub>O/NH<sub>3</sub>

zoom 112-122

GO

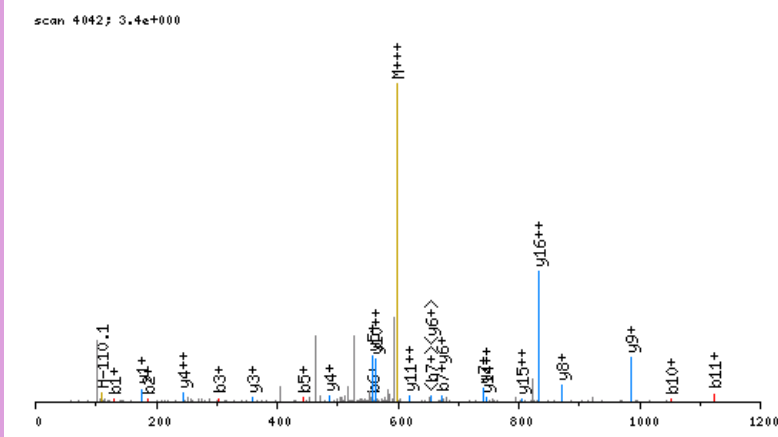

click image to zoom in; click top corners to zoom out [\[precursor±\]](#)

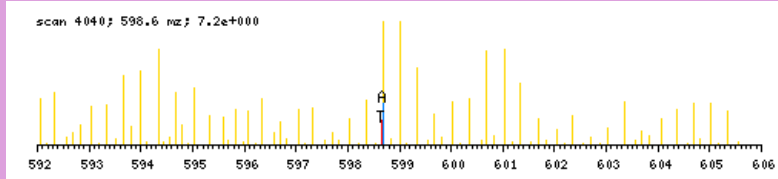

zoomed in precursor plot; T=theoretical m/z, A=acquired m/z

| b <sup>+</sup> | #  | AA # | y <sup>+</sup> | y <sup>2+</sup> |
|----------------|----|------|----------------|-----------------|
| 130.0868       | 1  | T    | 17             |                 |
| 187.1082       | 2  | G    | 16             | 1664.8356       |
| 302.1352       | 3  | D    | 15             | 1607.8142       |
| 373.1723       | 4  | A    | 14             | 1492.7872       |
| 444.2094       | 5  | A    | 13             | 1421.7501       |
| 557.2935       | 6  | L    | 12             | 1350.7130       |
| 672.3204       | 7  | D    | 11             | 1237.6289       |
| 809.3793       | 8  | H    | 10             | 1122.6020       |
| 924.4063       | 9  | D    | 9              | 985.5431        |
| 1052.4649      | 10 | Q    | 8              | 870.5161        |
| 1123.5020      | 11 | A    | 7              | 742.4575        |
| 1236.5860      | 12 | L    | 6              | 671.4204        |
| 1307.6231      | 13 | A    | 5              | 558.3364        |
| 1435.6817      | 14 | Q    | 4              | 487.2993        |
| 1506.7188      | 15 | A    | 3              | 359.2407        |
| 1619.8029      | 16 | I    | 2              | 288.2036        |
|                | 17 | R    | 1              | 175.1195        |

N-term:+29.04

TGECKITLSQVGDVLR, MH+ 1831.9951, m/z 611.3366  
 L OS G26 P150811 220811-s1.05268.05268.3.dta

X-range:

-

MassTol: Y-zoom:

MassType:

AVG  MONO

Axis:

1  2

Label:

I  M  -

Ions:

a  +  2+  3+

b  +  2+  3+

c  +  2+  3+

x  +  2+  3+

y  +  2+  3+

z  +  2+  3+

hide H<sub>2</sub>O/NH<sub>3</sub>

zoom 112-122

GO

scan 5268; 8.6e+000

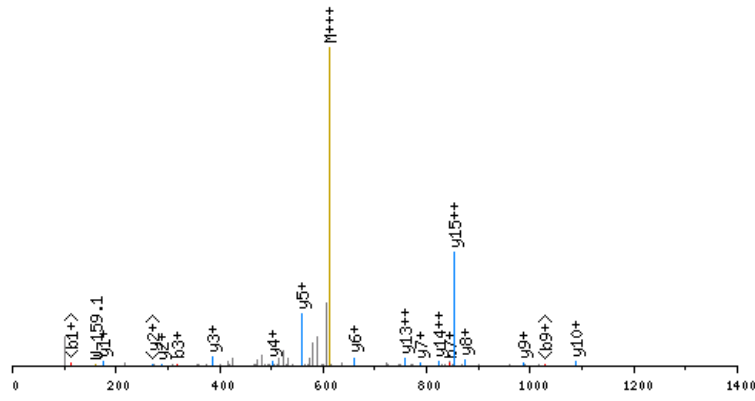

click image to zoom in; click top corners to zoom out [\[precursor±\]](#)

scan 5265; 611.3 m/z; 1.5e+001

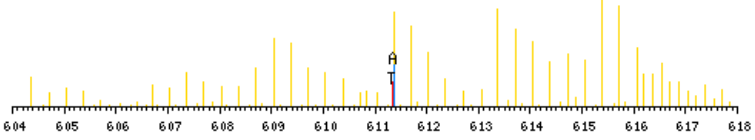

zoomed in precursor plot; T=theoretical m/z, A=acquired m/z

| b <sup>+</sup> | #  | AA | #  | y <sup>+</sup> | y <sup>2+</sup> |
|----------------|----|----|----|----------------|-----------------|
| 130.0868       | 1  | T  | 16 |                |                 |
| 187.1082       | 2  | G  | 15 | 1702.9162      | 851.9620        |
| 316.1508       | 3  | E  | 14 | 1645.8947      | 823.4513        |
| 476.1814       | 4  | C  | 13 | 1516.8521      | 758.9300        |
| 632.3077       | 5  | K  | 12 | 1356.8215      | 678.9147        |
| 745.3918       | 6  | I  | 11 | 1200.6952      | 600.8515        |
| 846.4395       | 7  | T  | 10 | 1087.6111      | 544.3095        |
| 959.5235       | 8  | L  | 9  | 986.5635       | 493.7856        |
| 1046.5556      | 9  | S  | 8  | 873.4794       | 437.2436        |
| 1174.6141      | 10 | Q  | 7  | 786.4474       | 393.7276        |
| 1273.6826      | 11 | V  | 6  | 658.3888       | 329.6983        |
| 1330.7040      | 12 | G  | 5  | 559.3204       | 280.1641        |
| 1445.7310      | 13 | D  | 4  | 502.2989       | 251.6534        |
| 1544.7994      | 14 | V  | 3  | 387.2720       | 194.1399        |
| 1657.8834      | 15 | L  | 2  | 288.2036       | 144.6057        |
|                | 16 | R  | 1  | 175.1195       | 88.0637         |

N-term:+29.04 C(4):+160.03  
 K(5):+156.13

TGESKEQVANSAFVER, MH+ 1807.9190, m/z 603.3112  
 L OS G26 P150811 220811-s1.02759.02759.3.dta

X-range:

-

MassTol: Y-zoom:

MassType:

AVG  MONO

Axis:

1  2

Label:

I  M  -

Ions:

a  +  2+  3+

b  +  2+  3+

c  +  2+  3+

x  +  2+  3+

y  +  2+  3+

z  +  2+  3+

hide H<sub>2</sub>O/NH<sub>3</sub>

zoom 112-122

GO

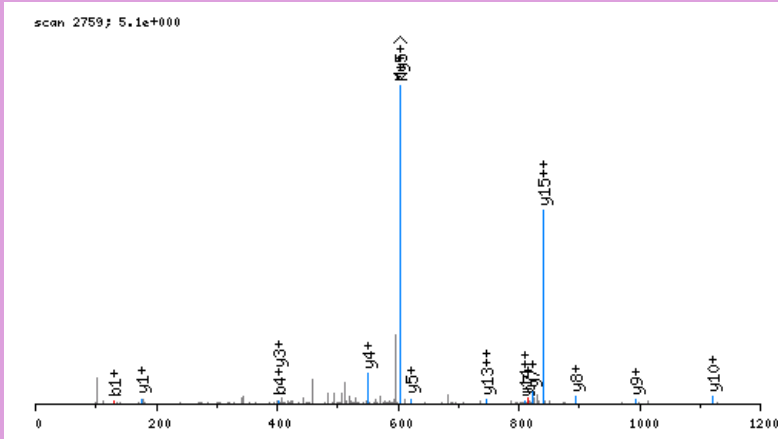

click image to zoom in; click top corners to zoom out [\[precursor±\]](#)

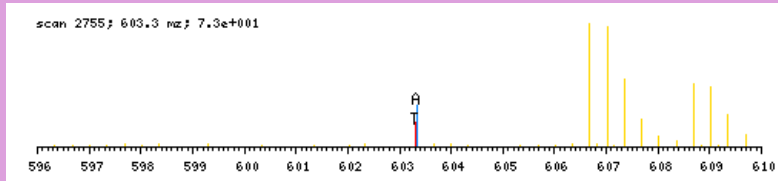

zoomed in precursor plot; T=theoretical m/z, A=acquired m/z

| b <sup>+</sup> | #  | AA | #  | y <sup>+</sup> | y <sup>2+</sup> |
|----------------|----|----|----|----------------|-----------------|
| 130.0868       | 1  | T  | 16 |                |                 |
| 187.1082       | 2  | G  | 15 | 1678.8401      | 839.9240        |
| 316.1508       | 3  | E  | 14 | 1621.8186      | 811.4132        |
| 403.1829       | 4  | S  | 13 | 1492.7760      | 746.8919        |
| 559.3092       | 5  | K  | 12 | 1405.7440      | 703.3759        |
| 688.3518       | 6  | E  | 11 | 1249.6177      | 625.3128        |
| 816.4103       | 7  | Q  | 10 | 1120.5751      | 560.7915        |
| 915.4787       | 8  | V  | 9  | 992.5165       | 496.7622        |
| 986.5159       | 9  | A  | 8  | 893.4481       | 447.2280        |
| 1100.5588      | 10 | N  | 7  | 822.4110       | 411.7094        |
| 1187.5908      | 11 | S  | 6  | 708.3681       | 354.6879        |
| 1258.6279      | 12 | A  | 5  | 621.3360       | 311.1719        |
| 1405.6963      | 13 | F  | 4  | 550.2989       | 275.6534        |
| 1504.7648      | 14 | V  | 3  | 403.2305       | 202.1192        |
| 1633.8074      | 15 | E  | 2  | 304.1621       | 152.5850        |
|                | 16 | R  | 1  | 175.1195       | 88.0637         |

N-term:+29.04 K(5):+156.13

TGGDAAAPGAAGTQAE LPHR, MH+ 1875.9313, m/z 625.9819  
 L OS G26 P150811 220811-s1.02627.02627.3.dta

X-range:

-

MassTol: Y-zoom:

MassType:

AVG  MONO

Axis:

1  2

Label:

I  M  -

Ions:

a  +  2+  3+

b  +  2+  3+

c  +  2+  3+

x  +  2+  3+

y  +  2+  3+

z  +  2+  3+

hide H<sub>2</sub>O/NH<sub>3</sub>

zoom 112-122

GO

scan 2627; 3.9e+000

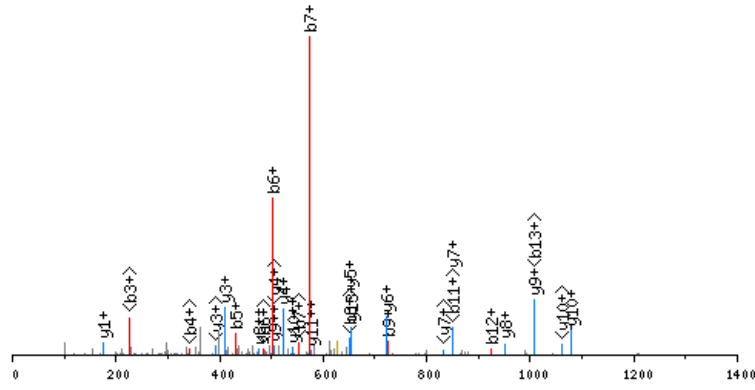

click image to zoom in; click top corners to zoom out [\[precursor±\]](#)

scan 2625; 626.0 m/z; 7.0e+000

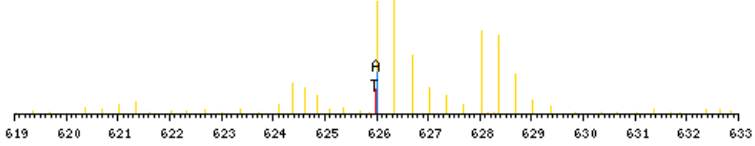

zoomed in precursor plot; T=theoretical m/z, A=acquired m/z

| b <sup>+</sup> | #  | AA # | y <sup>+</sup> | y <sup>2+</sup> |
|----------------|----|------|----------------|-----------------|
| 130.0868       | 1  | T 20 |                |                 |
| 187.1082       | 2  | G 19 | 1746.8523      | 873.9301        |
| 244.1297       | 3  | G 18 | 1689.8309      | 845.4193        |
| 359.1566       | 4  | D 17 | 1632.8094      | 816.9086        |
| 430.1938       | 5  | A 16 | 1517.7825      | 759.3951        |
| 501.2309       | 6  | A 15 | 1446.7454      | 723.8766        |
| 572.2680       | 7  | A 14 | 1375.7082      | 688.3580        |
| 669.3208       | 8  | P 13 | 1304.6711      | 652.8395        |
| 726.3422       | 9  | G 12 | 1207.6184      | 604.3131        |
| 797.3793       | 10 | A 11 | 1150.5969      | 575.8024        |
| 868.4164       | 11 | A 10 | 1079.5598      | 540.2838        |
| 925.4379       | 12 | G 9  | 1008.5227      | 504.7652        |
| 1026.4856      | 13 | T 8  | 951.5012       | 476.2545        |
| 1154.5442      | 14 | Q 7  | 850.4535       | 425.7307        |
| 1225.5813      | 15 | A 6  | 722.3949       | 361.7014        |
| 1354.6239      | 16 | E 5  | 651.3578       | 326.1828        |
| 1467.7079      | 17 | L 4  | 522.3152       | 261.6615        |
| 1564.7607      | 18 | P 3  | 409.2312       | 205.1195        |
| 1701.8196      | 19 | H 2  | 312.1784       | 156.5931        |
|                | 20 | R 1  | 175.1195       | 88.0637         |

N-term:+29.04

TGGVDTAAVGAVFDISNADR, MH+ 1963.9725, m/z 655.3290  
 L OS G24 P150811 220811-s1.04718.04718.3.dta

X-range:

-

MassTol: Y-zoom:

MassType:

AVG  MONO

Axis:

1  2

Label:

I  M  -

Ions:

a  +  2+  3+

b  +  2+  3+

c  +  2+  3+

x  +  2+  3+

y  +  2+  3+

z  +  2+  3+

hide H<sub>2</sub>O/NH<sub>3</sub>

zoom 112-122

GO

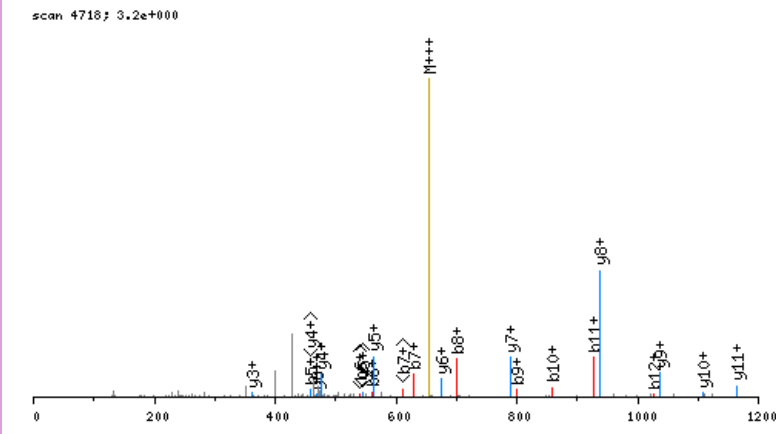

click image to zoom in; click top corners to zoom out [\[precursor±\]](#)

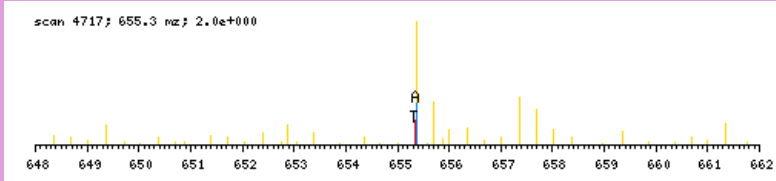

zoomed in precursor plot; T=theoretical m/z, A=acquired m/z

| b <sup>+</sup> | #  | AA # | y <sup>+</sup> | y <sup>2+</sup> |
|----------------|----|------|----------------|-----------------|
| 130.0868       | 1  | T 20 |                |                 |
| 187.1082       | 2  | G 19 | 1834.8935      | 917.9507        |
| 244.1297       | 3  | G 18 | 1777.8721      | 889.4399        |
| 343.1981       | 4  | V 17 | 1720.8506      | 860.9292        |
| 458.2251       | 5  | D 16 | 1621.7822      | 811.3950        |
| 559.2727       | 6  | T 15 | 1506.7552      | 753.8815        |
| 630.3099       | 7  | A 14 | 1405.7076      | 703.3577        |
| 701.3470       | 8  | A 13 | 1334.6705      | 667.8391        |
| 800.4154       | 9  | V 12 | 1263.6333      | 632.3206        |
| 857.4368       | 10 | G 11 | 1164.5649      | 582.7864        |
| 928.4740       | 11 | A 10 | 1107.5435      | 554.2756        |
| 1027.5424      | 12 | V 9  | 1036.5063      | 518.7571        |
| 1174.6108      | 13 | F 8  | 937.4379       | 469.2229        |
| 1289.6377      | 14 | D 7  | 790.3695       | 395.6887        |
| 1402.7218      | 15 | I 6  | 675.3426       | 338.1752        |
| 1489.7538      | 16 | S 5  | 562.2585       | 281.6332        |
| 1603.7968      | 17 | N 4  | 475.2265       | 238.1172        |
| 1674.8339      | 18 | A 3  | 361.1836       | 181.0957        |
| 1789.8608      | 19 | D 2  | 290.1464       | 145.5771        |
|                | 20 | R 1  | 175.1195       | 88.0637         |

N-term:+29.04

TGIGFGGLTQQVEKK, MH+ 1646.9482, m/z 549.6542  
 L OS G26 P150811 220811-s1.04787.04787.3.dta

scan 4787; 9.1e+000

X-range:

-

MassTol: Y-zoom:

MassType:

AVG  MONO

Axis:

1  2

Label:

I  M  -

Ions:

a  +  2+  3+

b  +  2+  3+

c  +  2+  3+

x  +  2+  3+

y  +  2+  3+

z  +  2+  3+

hide H<sub>2</sub>O/NH<sub>3</sub>

zoom 112-122

GO

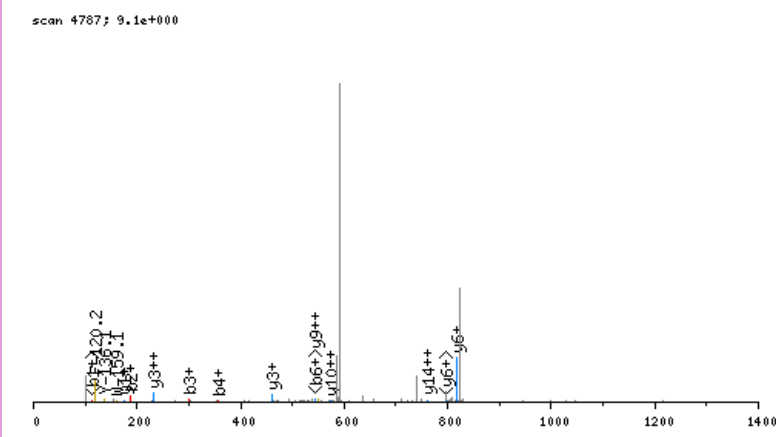

click image to zoom in; click top corners to zoom out [precursor±]

scan 4785; 549.7 mz; 2.0e+001

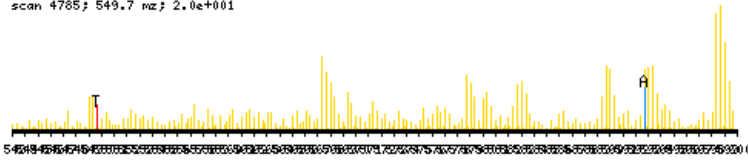

zoomed in precursor plot; T=theoretical m/z, A=acquired m/z

| b <sup>+</sup> | #  | AA | #  | y <sup>+</sup> | y <sup>2+</sup> |
|----------------|----|----|----|----------------|-----------------|
| 130.0868       | 1  | T  | 15 |                |                 |
| 187.1082       | 2  | G  | 14 | 1517.8692      | 759.4385        |
| 300.1923       | 3  | I  | 13 | 1460.8478      | 730.9278        |
| 357.2138       | 4  | G  | 12 | 1347.7637      | 674.3858        |
| 504.2822       | 5  | F  | 11 | 1290.7422      | 645.8750        |
| 561.3036       | 6  | G  | 10 | 1143.6738      | 572.3408        |
| 618.3251       | 7  | G  | 9  | 1086.6524      | 543.8301        |
| 731.4092       | 8  | L  | 8  | 1029.6309      | 515.3194        |
| 832.4569       | 9  | T  | 7  | 916.5468       | 458.7773        |
| 960.5154       | 10 | Q  | 6  | 815.4992       | 408.2535        |
| 1088.5740      | 11 | Q  | 5  | 687.4406       | 344.2242        |
| 1187.6424      | 12 | V  | 4  | 559.3820       | 280.1949        |
| 1316.6850      | 13 | E  | 3  | 460.3136       | 230.6607        |
| 1472.8113      | 14 | K  | 2  | 331.2710       | 166.1394        |
|                | 15 | K  | 1  | 175.1447       | 88.0763         |

N-term:+29.04 K(14):+156.13  
 K(15):+156.13



TGIKAVDSLVIPIGR, MH+ 1481.9056, m/z 494.6400  
 L OS G26 P150811 220811-s1.05167.05167.3.dta

scan 5167; 9.9e+000

X-range:

-

MassTol: Y-zoom:

MassType:

AVG  MONO

Axis:

1  2

Label:

I  M  -

Ions:

a  +  2+  3+

b  +  2+  3+

c  +  2+  3+

x  +  2+  3+

y  +  2+  3+

z  +  2+  3+

hide H<sub>2</sub>O/NH<sub>3</sub>

zoom 112-122

GO

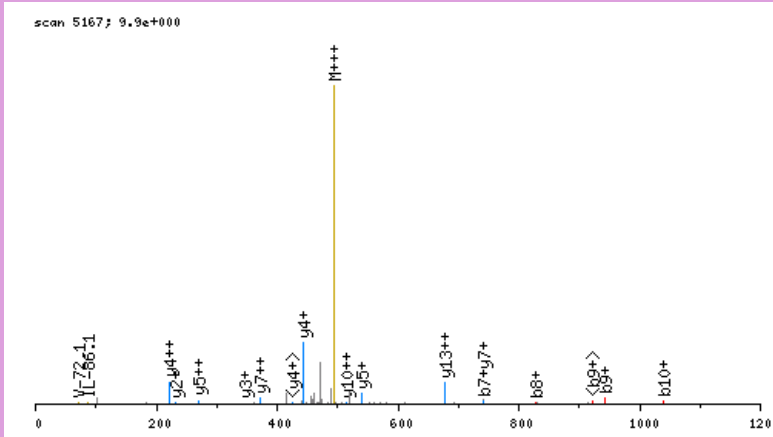

click image to zoom in; click top corners to zoom out [\[precursor±\]](#)

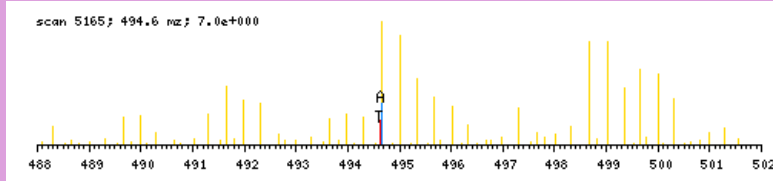

zoomed in precursor plot; T=theoretical m/z, A=acquired m/z

| b <sup>+</sup> | #  | AA # | y <sup>+</sup> | y <sup>2+</sup> |
|----------------|----|------|----------------|-----------------|
| 130.0868       | 1  | T 14 |                |                 |
| 187.1082       | 2  | G 13 | 1352.8266      | 676.9172        |
| 300.1923       | 3  | I 12 | 1295.8051      | 648.4065        |
| 456.3186       | 4  | K 11 | 1182.7211      | 591.8644        |
| 527.3557       | 5  | A 10 | 1026.5948      | 513.8013        |
| 626.4241       | 6  | V 9  | 955.5577       | 478.2827        |
| 741.4511       | 7  | D 8  | 856.4892       | 428.7485        |
| 828.4831       | 8  | S 7  | 741.4623       | 371.2351        |
| 941.5672       | 9  | L 6  | 654.4303       | 327.7190        |
| 1040.6356      | 10 | V 5  | 541.3462       | 271.1770        |
| 1137.6883      | 11 | P 4  | 442.2778       | 221.6428        |
| 1250.7724      | 12 | I 3  | 345.2250       | 173.1164        |
| 1307.7939      | 13 | G 2  | 232.1410       | 116.5744        |
|                | 14 | R 1  | 175.1195       | 88.0637         |

N-term:+29.04 K(4):+156.13

TGIYEALRLR, MH+ 1192.6577, m/z 596.8325  
 L OS G25 P150811 220811-s1.07175.07175.2.dta

X-range:

-

MassTol: Y-zoom:

MassType:

AVG  MONO

Axis:

1  2

Label:

I  M  -

Ions:

a  +  2+  3+

b  +  2+  3+

c  +  2+  3+

x  +  2+  3+

y  +  2+  3+

z  +  2+  3+

hide H<sub>2</sub>O/NH<sub>3</sub>

zoom 112-122

GO

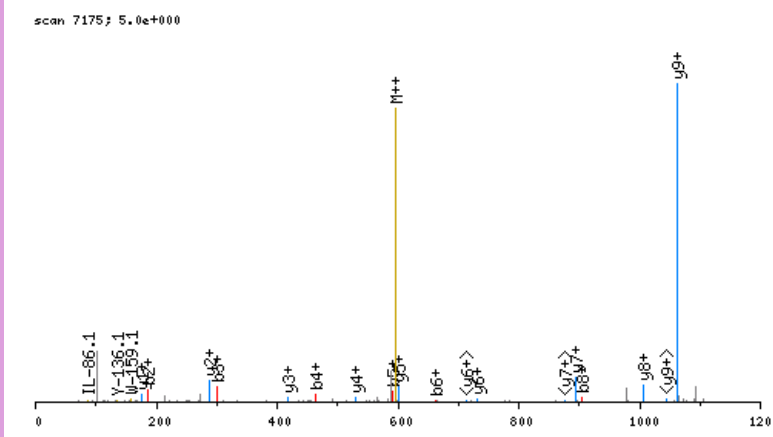

click image to zoom in; click top corners to zoom out [\[precursor±\]](#)

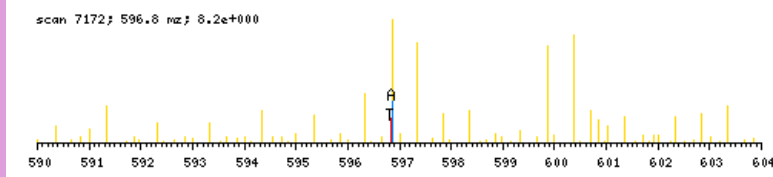

zoomed in precursor plot; T=theoretical m/z, A=acquired m/z

| b <sup>+</sup> | #  | AA # | y <sup>+</sup> | y <sup>2+</sup>    |
|----------------|----|------|----------------|--------------------|
| 130.0868       | 1  | T    | 10             |                    |
| 187.1082       | 2  | G    | 9              | 1063.5788 532.2933 |
| 300.1923       | 3  | I    | 8              | 1006.5573 503.7826 |
| 463.2556       | 4  | Y    | 7              | 893.4733 447.2405  |
| 592.2982       | 5  | E    | 6              | 730.4099 365.7089  |
| 663.3353       | 6  | A    | 5              | 601.3673 301.1876  |
| 776.4194       | 7  | L    | 4              | 530.3302 265.6690  |
| 905.4620       | 8  | E    | 3              | 417.2462 209.1270  |
| 1018.5461      | 9  | L    | 2              | 288.2036 144.6057  |
|                | 10 | R    | 1              | 175.1195 88.0637   |

N-term:+29.04

TGKTATPQQAEVHEKLR, MH+ 2106.1672, m/z 527.2973  
 L OS G28 P150811 220811-s1.02287.02287.4.dta

X-range:

-

MassTol: Y-zoom:

MassType:

AVG  MONO

Axis:

1  2

Label:

I  M  -

Ions:

a  +  2+  3+

b  +  2+  3+

c  +  2+  3+

x  +  2+  3+

y  +  2+  3+

z  +  2+  3+

hide H<sub>2</sub>O/NH<sub>3</sub>

zoom 112-122

GO

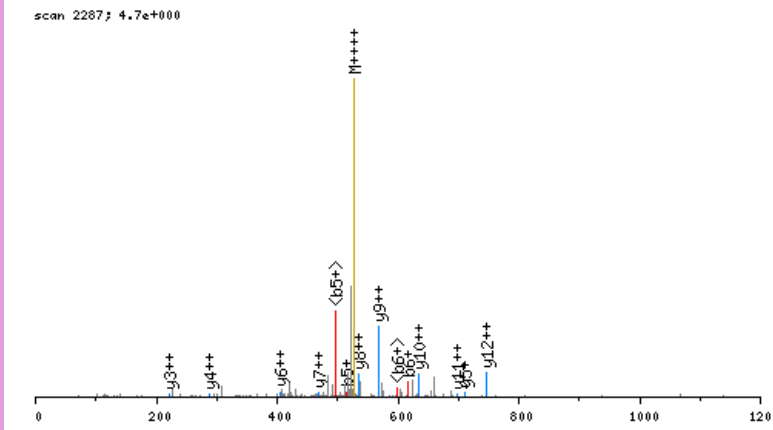

click image to zoom in; click top corners to zoom out [\[precursor±\]](#)

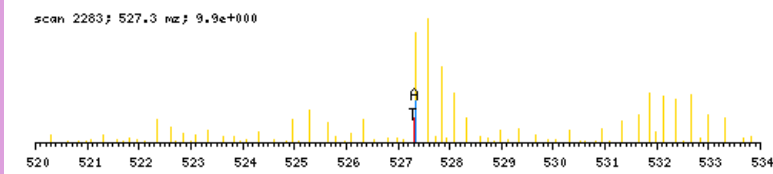

zoomed in precursor plot; T=theoretical m/z, A=acquired m/z

| b <sup>+</sup> | #  | AA | #  | y <sup>+</sup> | y <sup>2+</sup> |
|----------------|----|----|----|----------------|-----------------|
| 130.0868       | 1  | T  | 18 |                |                 |
| 187.1082       | 2  | G  | 17 | 1977.0882      | 989.0480        |
| 343.2345       | 3  | K  | 16 | 1920.0668      | 960.5373        |
| 444.2822       | 4  | T  | 15 | 1763.9405      | 882.4741        |
| 515.3193       | 5  | A  | 14 | 1662.8928      | 831.9503        |
| 616.3670       | 6  | T  | 13 | 1591.8557      | 796.4317        |
| 713.4198       | 7  | P  | 12 | 1490.8080      | 745.9079        |
| 841.4784       | 8  | Q  | 11 | 1393.7552      | 697.3815        |
| 969.5369       | 9  | Q  | 10 | 1265.6966      | 633.3522        |
| 1040.5740      | 10 | A  | 9  | 1137.6381      | 569.3229        |
| 1168.6326      | 11 | Q  | 8  | 1066.6010      | 533.8044        |
| 1297.6752      | 12 | E  | 7  | 938.5424       | 469.7751        |
| 1396.7436      | 13 | V  | 6  | 809.4998       | 405.2538        |
| 1533.8025      | 14 | H  | 5  | 710.4314       | 355.7196        |
| 1662.8451      | 15 | E  | 4  | 573.3725       | 287.1901        |
| 1818.9714      | 16 | K  | 3  | 444.3299       | 222.6688        |
| 1932.0555      | 17 | L  | 2  | 288.2036       | 144.6057        |
|                | 18 | R  | 1  | 175.1195       | 88.0637         |

N-term: +29.04 K(3): +156.13  
 K(16): +156.13

TGPNLHGLFGR, MH+ 1196.6540, m/z 399.5562  
 L OS G27 P150811 220811-s1.05763.05763.3.dta

scan 5763; 1.7e+001

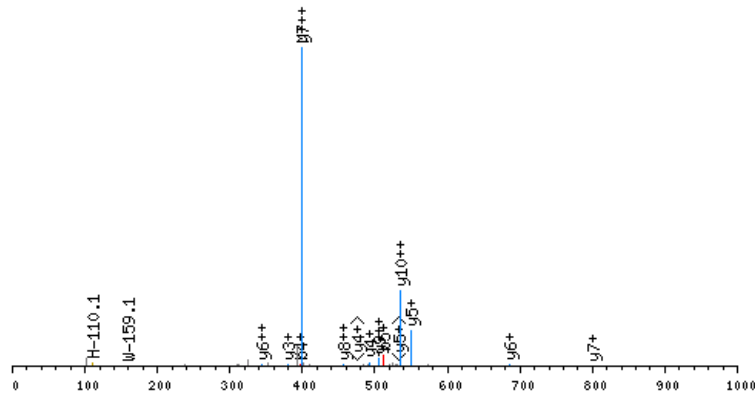

click image to zoom in; click top corners to zoom out [\[precursor±\]](#)

scan 5762; 399.6 m/z; 6.2e+000

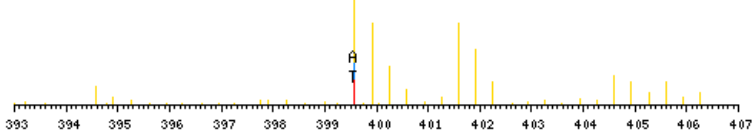

zoomed in precursor plot; T=theoretical m/z, A=acquired m/z

X-range:

-

MassTol: Y-zoom:

MassType:

AVG  MONO

Axis:

1  2

Label:

I  M  -

Ions:

a  +  2+  3+

b  +  2+  3+

c  +  2+  3+

x  +  2+  3+

y  +  2+  3+

z  +  2+  3+

hide H<sub>2</sub>O/NH<sub>3</sub>

zoom 112-122

GO

| b <sup>+</sup> | #  | AA # | y <sup>+</sup> | y <sup>2+</sup> |
|----------------|----|------|----------------|-----------------|
| 130.0868       | 1  | T 11 |                |                 |
| 187.1082       | 2  | G 10 | 1067.5750      | 534.2914        |
| 284.1610       | 3  | P 9  | 1010.5536      | 505.7807        |
| 398.2039       | 4  | N 8  | 913.5008       | 457.2543        |
| 511.2880       | 5  | L 7  | 799.4579       | 400.2329        |
| 648.3469       | 6  | H 6  | 686.3738       | 343.6908        |
| 705.3684       | 7  | G 5  | 549.3149       | 275.1614        |
| 818.4524       | 8  | L 4  | 492.2934       | 246.6506        |
| 965.5209       | 9  | F 3  | 379.2094       | 190.1086        |
| 1022.5423      | 10 | G 2  | 232.1410       | 116.5744        |
|                | 11 | R 1  | 175.1195       | 88.0637         |

N-term:+29.04

TGSVFDISNLDR, MH+ 1351.6857, m/z 676.3465  
 L OS G25 P150811 220811-s1.07134.07134.2.dta

X-range:

-

MassTol: Y-zoom:

MassType:

AVG  MONO

Axis:

1  2

Label:

I  M  -

Ions:

a  +  2+  3+

b  +  2+  3+

c  +  2+  3+

x  +  2+  3+

y  +  2+  3+

z  +  2+  3+

hide H<sub>2</sub>O/NH<sub>3</sub>

zoom 112-122

GO

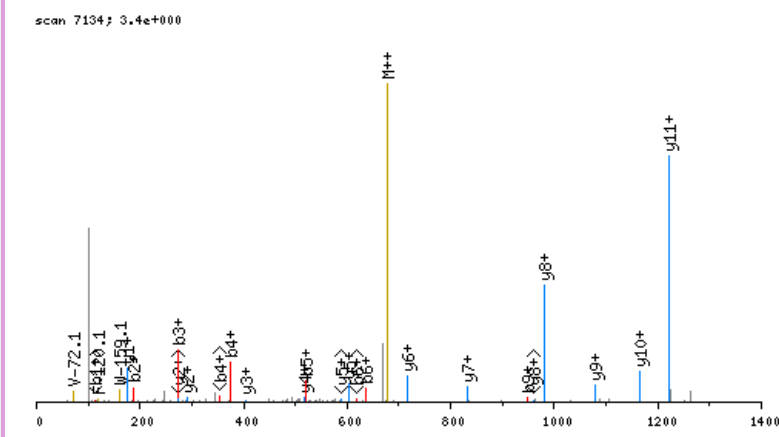

click image to zoom in; click top corners to zoom out [\[precursor±\]](#)

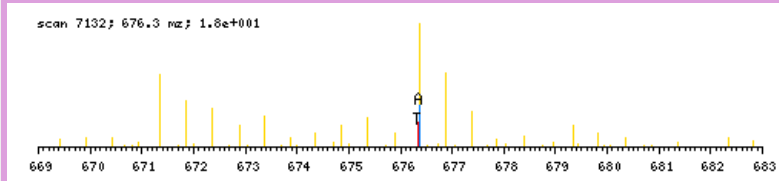

zoomed in precursor plot; T=theoretical m/z, A=acquired m/z

| b <sup>+</sup> | #  | AA # | y <sup>+</sup> | y <sup>2+</sup> |
|----------------|----|------|----------------|-----------------|
| 130.0868       | 1  | T 12 |                |                 |
| 187.1082       | 2  | G 11 | 1222.6068      | 611.8073        |
| 274.1403       | 3  | S 10 | 1165.5853      | 583.2966        |
| 373.2087       | 4  | V 9  | 1078.5533      | 539.7806        |
| 520.2771       | 5  | F 8  | 979.4849       | 490.2464        |
| 635.3040       | 6  | D 7  | 832.4165       | 416.7121        |
| 748.3881       | 7  | I 6  | 717.3895       | 359.1987        |
| 835.4201       | 8  | S 5  | 604.3055       | 302.6566        |
| 949.4631       | 9  | N 4  | 517.2734       | 259.1406        |
| 1062.5471      | 10 | L 3  | 403.2305       | 202.1192        |
| 1177.5741      | 11 | D 2  | 290.1464       | 145.5771        |
|                | 12 | R 1  | 175.1195       | 88.0637         |

N-term:+29.04

TGTEAAAATGVIGGIR, MH+ 1478.8391, m/z 493.6179  
 H OS G25 P150811 220811-s1.05198.05198.3.dta

X-range:

-

MassTol: Y-zoom:

MassType:

AVG  MONO

Axis:

1  2

Label:

I  M  -

Ions:

a  +  2+  3+

b  +  2+  3+

c  +  2+  3+

x  +  2+  3+

y  +  2+  3+

z  +  2+  3+

hide H<sub>2</sub>O/NH<sub>3</sub>

zoom 112-122

GO

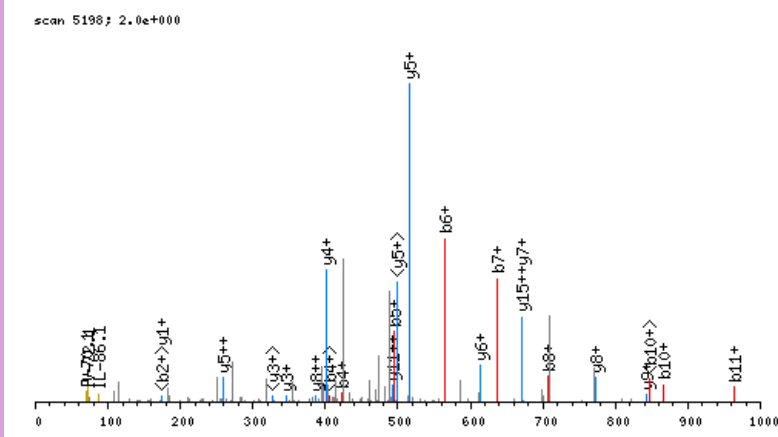

click image to zoom in; click top corners to zoom out [\[precursor±\]](#)

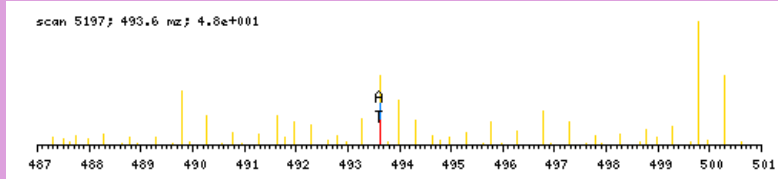

zoomed in precursor plot; T=theoretical m/z, A=acquired m/z

| b <sup>+</sup> | #  | AA # | y <sup>+</sup> | y <sup>2+</sup> |
|----------------|----|------|----------------|-----------------|
| 136.1186       | 1  | T 16 |                |                 |
| 193.1400       | 2  | G 15 | 1343.7283      | 672.3681        |
| 294.1877       | 3  | T 14 | 1286.7068      | 643.8573        |
| 423.2303       | 4  | E 13 | 1185.6592      | 593.3335        |
| 494.2674       | 5  | A 12 | 1056.6166      | 528.8122        |
| 565.3045       | 6  | A 11 | 985.5795       | 493.2936        |
| 636.3417       | 7  | A 10 | 914.5423       | 457.7751        |
| 707.3788       | 8  | A 9  | 843.5052       | 422.2565        |
| 808.4264       | 9  | T 8  | 772.4681       | 386.7380        |
| 865.4479       | 10 | G 7  | 671.4204       | 336.2141        |
| 964.5163       | 11 | V 6  | 614.3990       | 307.7034        |
| 1077.6004      | 12 | I 5  | 515.3306       | 258.1692        |
| 1134.6219      | 13 | G 4  | 402.2465       | 201.6272        |
| 1191.6433      | 14 | G 3  | 345.2250       | 173.1164        |
| 1304.7274      | 15 | I 2  | 288.2036       | 144.6057        |
|                | 16 | R 1  | 175.1195       | 88.0637         |

N-term:+35.07

THEQLTPLVR, MH+ 1221.6955, m/z 407.9034  
 L OS G27 P150811 220811-s1.03350.03350.3.dta

X-range:

-

MassTol: Y-zoom:

MassType:

AVG  MONO

Axis:

1  2

Label:

I  M  -

Ions:

a  +  2+  3+

b  +  2+  3+

c  +  2+  3+

x  +  2+  3+

y  +  2+  3+

z  +  2+  3+

hide H<sub>2</sub>O/NH<sub>3</sub>

zoom 112-122

GO

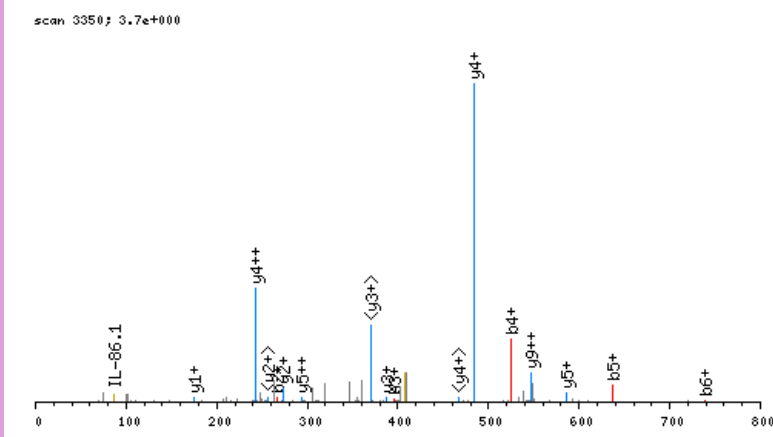

click image to zoom in; click top corners to zoom out [\[precursor±\]](#)

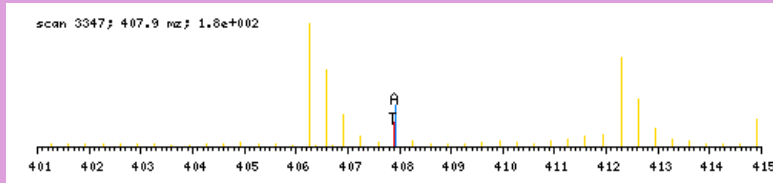

| b <sup>+</sup> | #  | AA # | y <sup>+</sup> | y <sup>2+</sup> |
|----------------|----|------|----------------|-----------------|
| 130.0868       | 1  | T    | 10             |                 |
| 267.1457       | 2  | H    | 9              | 1092.6166       |
| 396.1883       | 3  | E    | 8              | 955.5577        |
| 524.2469       | 4  | Q    | 7              | 826.5151        |
| 637.3309       | 5  | L    | 6              | 698.4565        |
| 738.3786       | 6  | T    | 5              | 585.3724        |
| 835.4314       | 7  | P    | 4              | 484.3247        |
| 948.5154       | 8  | L    | 3              | 387.2720        |
| 1047.5838      | 9  | V    | 2              | 274.1879        |
|                | 10 | R    | 1              | 175.1195        |

N-term:+29.04

THFDPSCLFPACR, MH+ 1635.7411, m/z 545.9185  
 L OS G27 P150811 220811-s1.06626.06626.3.dta

X-range:

-

MassTol: Y-zoom:

MassType:

AVG  MONO

Axis:

1  2

Label:

I  M  -

Ions:

a  +  2+  3+

b  +  2+  3+

c  +  2+  3+

x  +  2+  3+

y  +  2+  3+

z  +  2+  3+

hide H<sub>2</sub>O/NH<sub>3</sub>

zoom 112-122

GO

scan 6626; 4.8e+000

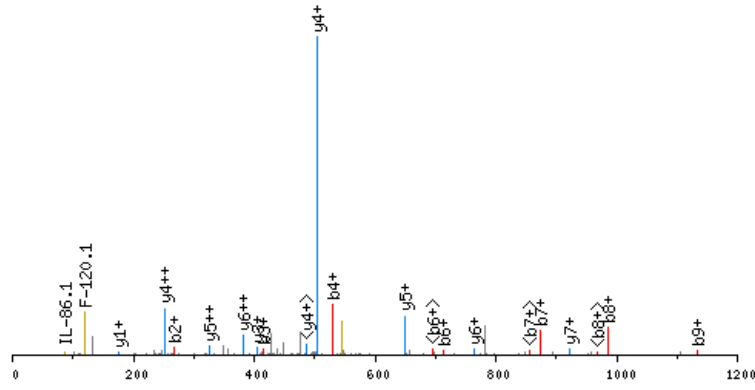

click image to zoom in; click top corners to zoom out [\[precursor±\]](#)

scan 6622; 545.9 m/z; 5.9e+000

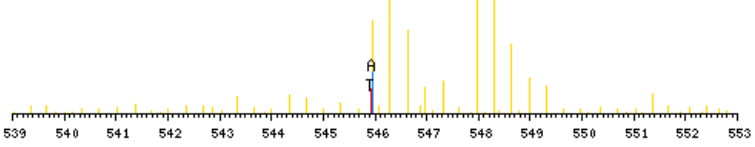

zoomed in precursor plot; T=theoretical m/z, A=acquired m/z

| b <sup>+</sup> | #  | AA # | y <sup>+</sup> | y <sup>2+</sup> |
|----------------|----|------|----------------|-----------------|
| 130.0868       | 1  | T 13 |                |                 |
| 267.1457       | 2  | H 12 | 1506.6621      | 753.8350        |
| 414.2141       | 3  | F 11 | 1369.6032      | 685.3055        |
| 529.2410       | 4  | D 10 | 1222.5348      | 611.7713        |
| 626.2938       | 5  | P 9  | 1107.5078      | 554.2578        |
| 713.3258       | 6  | S 8  | 1010.4551      | 505.7315        |
| 873.3564       | 7  | C 7  | 923.4231       | 462.2154        |
| 986.4405       | 8  | L 6  | 763.3925       | 382.2001        |
| 1133.5089      | 9  | F 5  | 650.3084       | 325.6581        |
| 1230.5617      | 10 | P 4  | 503.2400       | 252.1239        |
| 1301.5988      | 11 | A 3  | 406.1872       | 203.5975        |
| 1461.6294      | 12 | C 2  | 335.1501       | 168.0790        |
|                | 13 | R 1  | 175.1195       | 88.0637         |

N-term:+29.04 C(7):+160.03  
 C(12):+160.03



THLGGEDFDNR, MH+ 1288.5922, m/z 430.2022  
 L OS G28 P150811 220811-s1.02984.02984.3.dta

scan 2984; 4.7e+000

X-range:

-

MassTol: Y-zoom:

MassType:

AVG  MONO

Axis:

1  2

Label:

I  M  -

Ions:

a  +  2+  3+

b  +  2+  3+

c  +  2+  3+

x  +  2+  3+

y  +  2+  3+

z  +  2+  3+

hide H<sub>2</sub>O/NH<sub>3</sub>

zoom 112-122

GO

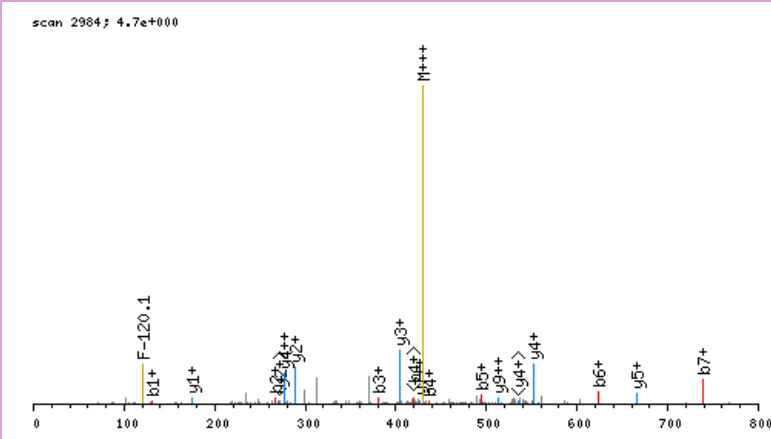

click image to zoom in; click top corners to zoom out [\[precursor±\]](#)

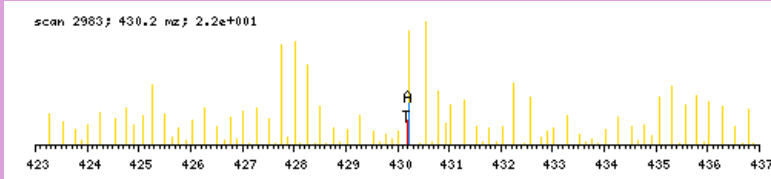

zoomed in precursor plot; T=theoretical m/z, A=acquired m/z

| b <sup>+</sup> | #  | AA # | y <sup>+</sup> | y <sup>2+</sup>                 |
|----------------|----|------|----------------|---------------------------------|
| 130.0868       | 1  | T    | 11             |                                 |
| 267.1457       | 2  | H    | 10             | 1159.5132 580.2605              |
| 380.2298       | 3  | L    | 9              | 1022.4543 <b>511.7311</b>       |
| 437.2512       | 4  | G    | 8              | 909.3702 455.1890               |
| 494.2727       | 5  | G    | 7              | 852.3488 <b>426.6783</b>        |
| 623.3153       | 6  | E    | 6              | 795.3273 398.1676               |
| 738.3422       | 7  | D    | 5              | <b>666.2847</b> 333.6463        |
| 885.4106       | 8  | F    | 4              | <b>551.2578</b> <b>276.1328</b> |
| 1000.4376      | 9  | D    | 3              | <b>404.1894</b> 202.5986        |
| 1114.4805      | 10 | N    | 2              | <b>289.1624</b> 145.0851        |
|                | 11 | R    | 1              | <b>175.1195</b> 88.0637         |

N-term:+29.04

THVNDIMLVR, MH+ 1225.6727, m/z 409.2291  
 L OS G27 P150811 220811-s1.04828.04828.3.dta

scan 4828; 5.6e+000

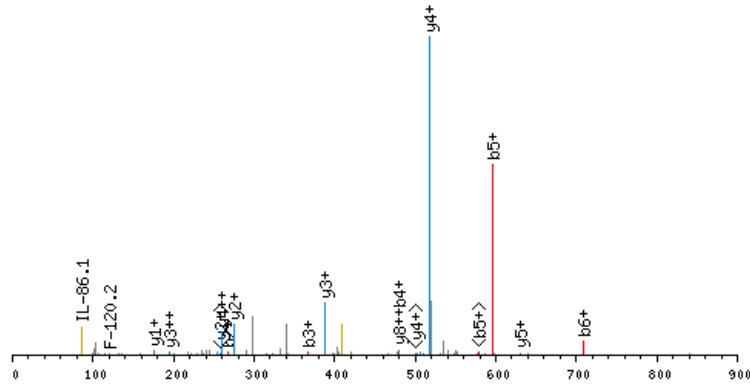

click image to zoom in; click top corners to zoom out [\[precursor±\]](#)

scan 4827; 409.2 m/z; 6.1e+001

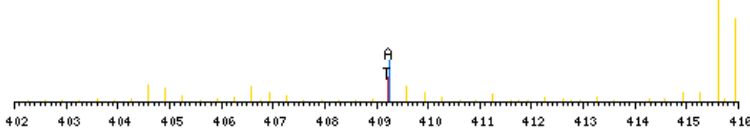

zoomed in precursor plot; T=theoretical m/z, A=acquired m/z

X-range:

-

MassTol: Y-zoom:

MassType:

AVG  MONO

Axis:

1  2

Label:

I  M  -

Ions:

a  +  2+  3+

b  +  2+  3+

c  +  2+  3+

x  +  2+  3+

y  +  2+  3+

z  +  2+  3+

hide H<sub>2</sub>O/NH<sub>3</sub>

zoom 112-122

GO

| b <sup>+</sup> | #  | AA # | y <sup>+</sup> | y <sup>2+</sup>                 |
|----------------|----|------|----------------|---------------------------------|
| 130.0868       | 1  | T    | 10             |                                 |
| 267.1457       | 2  | H    | 9              | 1096.5937 548.8008              |
| 366.2141       | 3  | V    | 8              | 959.5348 <b>480.2713</b>        |
| 480.2570       | 4  | N    | 7              | 860.4664 430.7371               |
| 595.2840       | 5  | D    | 6              | 746.4235 373.7156               |
| 708.3680       | 6  | I    | 5              | <b>631.3965</b> 316.2022        |
| 839.4085       | 7  | M    | 4              | <b>518.3125</b> <b>259.6601</b> |
| 952.4926       | 8  | L    | 3              | <b>387.2720</b> <b>194.1399</b> |
| 1051.5610      | 9  | V    | 2              | <b>274.1879</b> 137.5979        |
|                | 10 | R    | 1              | <b>175.1195</b> 88.0637         |

N-term:+29.04

X-range:

-

MassTol: Y-zoom:

MassType:

AVG  MONO

Axis:

1  2

Label:

I  M  -

Ions:

a  +  2+  3+

b  +  2+  3+

c  +  2+  3+

x  +  2+  3+

y  +  2+  3+

z  +  2+  3+

hide H<sub>2</sub>O/NH<sub>3</sub>

zoom 112-122

GO

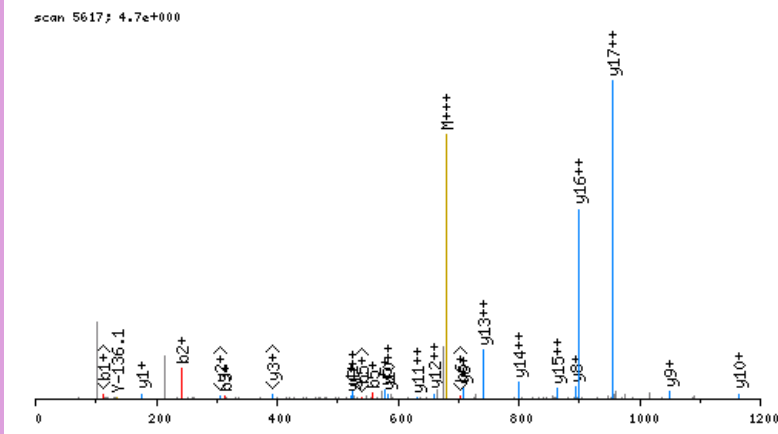

click image to zoom in; click top corners to zoom out [\[precursor±\]](#)

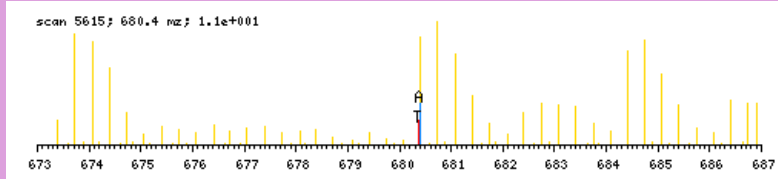

zoomed in precursor plot; T=theoretical m/z, A=acquired m/z

| b <sup>+</sup> | #  | AA | #  | y <sup>+</sup> | y <sup>2+</sup> |
|----------------|----|----|----|----------------|-----------------|
| 130.0868       | 1  | T  | 18 |                |                 |
| 243.1708       | 2  | I  | 17 | 1910.0024      | 955.5051        |
| 314.2080       | 3  | A  | 16 | 1796.9183      | 898.9631        |
| 442.2665       | 4  | Q  | 15 | 1725.8812      | 863.4445        |
| 557.2935       | 5  | D  | 14 | 1597.8226      | 799.4152        |
| 720.3568       | 6  | Y  | 13 | 1482.7957      | 741.9018        |
| 777.3783       | 7  | G  | 12 | 1319.7324      | 660.3701        |
| 876.4467       | 8  | V  | 11 | 1262.7109      | 631.8594        |
| 989.5307       | 9  | L  | 10 | 1163.6425      | 582.3252        |
| 1145.6570      | 10 | K  | 9  | 1050.5584      | 525.7831        |
| 1216.6942      | 11 | A  | 8  | 894.4321       | 447.7200        |
| 1331.7211      | 12 | D  | 7  | 823.3950       | 412.2014        |
| 1460.7637      | 13 | E  | 6  | 708.3681       | 354.6879        |
| 1517.7852      | 14 | G  | 5  | 579.3255       | 290.1666        |
| 1630.8692      | 15 | I  | 4  | 522.3040       | 261.6559        |
| 1717.9013      | 16 | S  | 3  | 409.2199       | 205.1139        |
| 1864.9697      | 17 | F  | 2  | 322.1879       | 161.5979        |
|                | 18 | R  | 1  | 175.1195       | 88.0637         |

N-term:+29.04 K(10):+156.13

TIFEVLPEKADR, MH+ 1485.8953, m/z 495.9700  
 H OS G27 P150811 220811-s1.05751.05751.3.dta

X-range:

-

MassTol: Y-zoom:

MassType:

AVG  MONO

Axis:

1  2

Label:

I  M  -

Ions:

a  +  2+  3+

b  +  2+  3+

c  +  2+  3+

x  +  2+  3+

y  +  2+  3+

z  +  2+  3+

hide H<sub>2</sub>O/NH<sub>3</sub>

zoom 112-122

GO

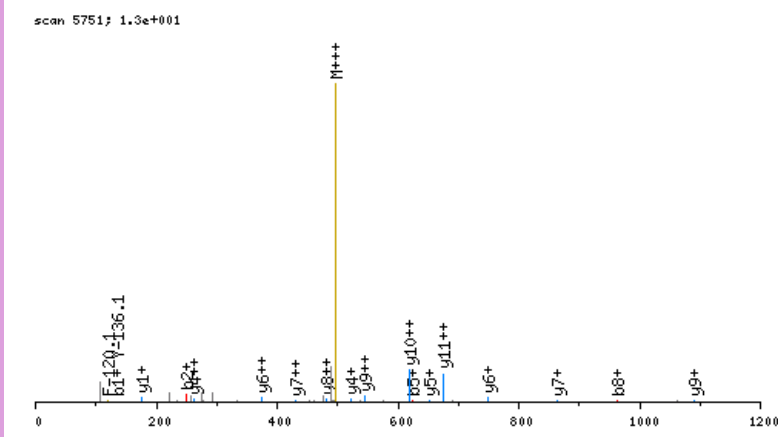

click image to zoom in; click top corners to zoom out [\[precursor±\]](#)

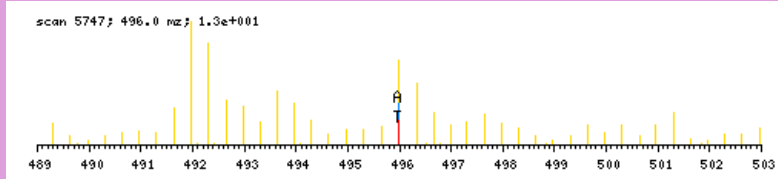

zoomed in precursor plot; T=theoretical m/z, A=acquired m/z

| b <sup>+</sup> | #  | AA # | y <sup>+</sup> | y <sup>2+</sup> |
|----------------|----|------|----------------|-----------------|
| 136.1186       | 1  | T 12 |                |                 |
| 249.2026       | 2  | I 11 | 1350.7846      | 675.8962        |
| 396.2711       | 3  | F 10 | 1237.7005      | 619.3542        |
| 525.3136       | 4  | E 9  | 1090.6321      | 545.8200        |
| 624.3821       | 5  | V 8  | 961.5895       | 481.2987        |
| 737.4661       | 6  | L 7  | 862.5211       | 431.7645        |
| 834.5189       | 7  | P 6  | 749.4370       | 375.2224        |
| 963.5615       | 8  | E 5  | 652.3843       | 326.6960        |
| 1125.7196      | 9  | K 4  | 523.3417       | 262.1747        |
| 1196.7567      | 10 | A 3  | 361.1836       | 181.0957        |
| 1311.7836      | 11 | D 2  | 290.1464       | 145.5771        |
|                | 12 | R 1  | 175.1195       | 88.0637         |

N-term:+35.07 K(9):+162.16

X-range:

-

MassTol: Y-zoom:

MassType:

AVG  MONO

Axis:

1  2

Label:

I  M  -

Ions:

a  +  2+  3+

b  +  2+  3+

c  +  2+  3+

x  +  2+  3+

y  +  2+  3+

z  +  2+  3+

hide H<sub>2</sub>O/NH<sub>3</sub>

zoom 112-122

GO

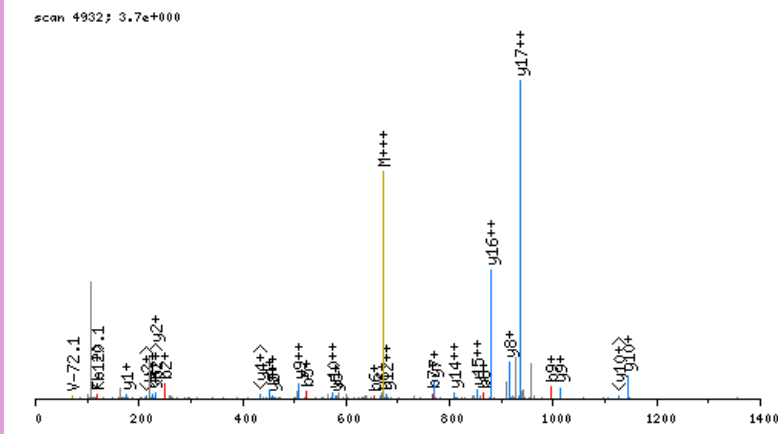

click image to zoom in; click top corners to zoom out [\[precursor±\]](#)

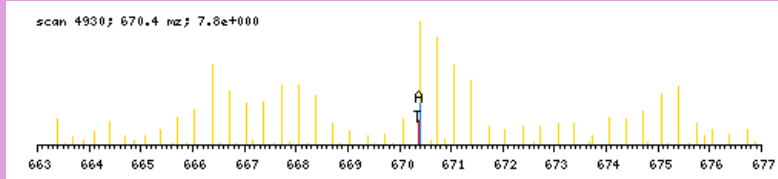

zoomed in precursor plot; T=theoretical m/z, A=acquired m/z

| b <sup>+</sup> | #  | AA | #  | y <sup>+</sup> | y <sup>2+</sup> |
|----------------|----|----|----|----------------|-----------------|
| 136.1186       | 1  | T  | 18 |                |                 |
| 249.2026       | 2  | I  | 17 | 1873.9542      | 937.4810        |
| 306.2241       | 3  | G  | 16 | 1760.8702      | 880.9390        |
| 393.2561       | 4  | S  | 15 | 1703.8487      | 852.4283        |
| 524.2966       | 5  | M  | 14 | 1616.8167      | 808.9122        |
| 653.3392       | 6  | E  | 13 | 1485.7762      | 743.3920        |
| 767.3821       | 7  | N  | 12 | 1356.7336      | 678.8707        |
| 866.4506       | 8  | V  | 11 | 1242.6907      | 621.8492        |
| 995.4931       | 9  | E  | 10 | 1143.6222      | 572.3150        |
| 1094.5616      | 10 | V  | 9  | 1014.5797      | 507.7937        |
| 1241.6300      | 11 | F  | 8  | 915.5112       | 458.2595        |
| 1342.6777      | 12 | T  | 7  | 768.4428       | 384.7253        |
| 1429.7097      | 13 | S  | 6  | 667.3951       | 334.2015        |
| 1558.7523      | 14 | E  | 5  | 580.3631       | 290.6855        |
| 1615.7737      | 15 | G  | 4  | 451.3205       | 226.1642        |
| 1777.9318      | 16 | K  | 3  | 394.2991       | 197.6534        |
| 1834.9533      | 17 | G  | 2  | 232.1410       | 116.5744        |
|                | 18 | R  | 1  | 175.1195       | 88.0637         |

N-term:+35.07 K(16):+162.16

TIKKQFLEELLTQCDR, MH+ 2207.2110, m/z 552.5582  
 L OS G28 P150811 220811-s1.07992.07992.4.dta

X-range:

-

MassTol: Y-zoom:

MassType:

AVG  MONO

Axis:

1  2

Label:

I  M  -

Ions:

a  +  2+  3+

b  +  2+  3+

c  +  2+  3+

x  +  2+  3+

y  +  2+  3+

z  +  2+  3+

hide H<sub>2</sub>O/NH<sub>3</sub>

zoom 112-122

GO

scan 7992; 1.5e+000

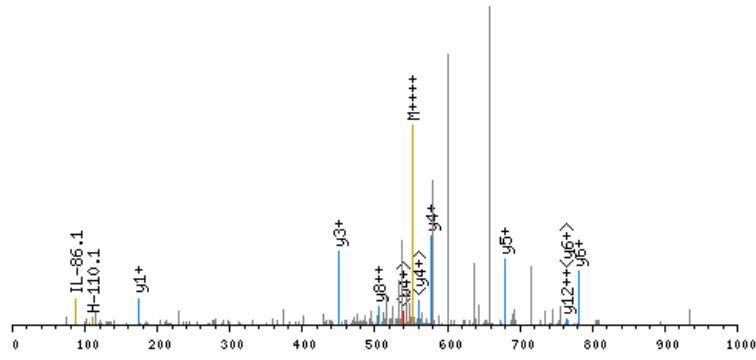

click image to zoom in; click top corners to zoom out [\[precursor±\]](#)

scan 7988; 552.6 m/z; 2.3e+001

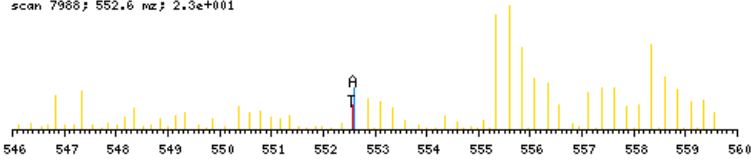

zoomed in precursor plot; T=theoretical m/z, A=acquired m/z

| b <sup>+</sup> | #  | AA # | y <sup>+</sup>  | y <sup>2+</sup> |
|----------------|----|------|-----------------|-----------------|
| 130.0868       | 1  | T 17 |                 |                 |
| 243.1708       | 2  | I 16 | 2078.1320       | 1039.5699       |
| 399.2971       | 3  | K 15 | 1965.0479       | 983.0279        |
| 555.4234       | 4  | K 14 | 1808.9216       | 904.9647        |
| 683.4820       | 5  | Q 13 | 1652.7953       | 826.9016        |
| 830.5504       | 6  | F 12 | 1524.7368       | <b>762.8723</b> |
| 943.6345       | 7  | L 11 | 1377.6684       | 689.3381        |
| 1072.6771      | 8  | E 10 | 1264.5843       | 632.7961        |
| 1201.7197      | 9  | E 9  | 1135.5417       | 568.2748        |
| 1314.8037      | 10 | L 8  | 1006.4991       | <b>503.7535</b> |
| 1427.8878      | 11 | L 7  | 893.4150        | 447.2114        |
| 1528.9355      | 12 | T 6  | <b>780.3310</b> | 390.6694        |
| 1629.9832      | 13 | T 5  | <b>679.2833</b> | 340.1456        |
| 1758.0417      | 14 | Q 4  | <b>578.2356</b> | 289.6217        |
| 1918.0723      | 15 | C 3  | <b>450.1770</b> | 225.5924        |
| 2033.0993      | 16 | D 2  | 290.1464        | 145.5771        |
|                | 17 | R 1  | <b>175.1195</b> | 88.0637         |

N-term:+29.04 K(3):+156.13  
 K(4):+156.13 C(15):+160.03

TITKTVTGPDGR, MH+ 1313.8065, m/z 438.6070  
 H OS G27 P150811 220811-s1.02166.02166.3.dta

X-range:

-

MassTol: Y-zoom:

MassType:

AVG  MONO

Axis:

1  2

Label:

I  M  -

Ions:

a  +  2+  3+

b  +  2+  3+

c  +  2+  3+

x  +  2+  3+

y  +  2+  3+

z  +  2+  3+

hide H<sub>2</sub>O/NH<sub>3</sub>

zoom 112-122

GO

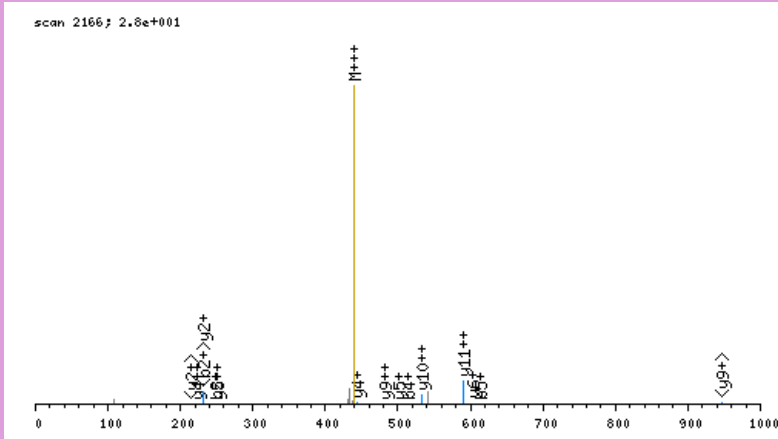

click image to zoom in; click top corners to zoom out [\[precursor±\]](#)

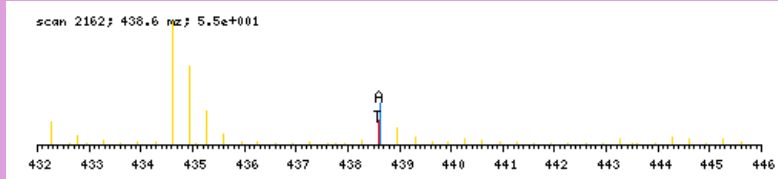

zoomed in precursor plot; T=theoretical m/z, A=acquired m/z

| b <sup>+</sup> | #  | AA # | y <sup>+</sup> | y <sup>2+</sup> |
|----------------|----|------|----------------|-----------------|
| 136.1186       | 1  | T 12 |                |                 |
| 249.2026       | 2  | I 11 | 1178.6957      | 589.8518        |
| 350.2503       | 3  | T 10 | 1065.6117      | 533.3098        |
| 512.4084       | 4  | K 9  | 964.5640       | 482.7859        |
| 613.4561       | 5  | T 8  | 802.4059       | 401.7069        |
| 712.5245       | 6  | V 7  | 701.3582       | 351.1830        |
| 813.5722       | 7  | T 6  | 602.2898       | 301.6488        |
| 870.5937       | 8  | G 5  | 501.2421       | 251.1250        |
| 967.6464       | 9  | P 4  | 444.2207       | 222.6142        |
| 1082.6734      | 10 | D 3  | 347.1679       | 174.0879        |
| 1139.6948      | 11 | G 2  | 232.1410       | 116.5744        |
|                | 12 | R 1  | 175.1195       | 88.0637         |

N-term:+35.07 K(4):+162.16

TIVCNTKEDGIWGTEHR, MH+ 2059.9871, m/z 515.7522  
 L OS G28 P150811 220811-s1.03105.03105.4.dta

X-range:

-

MassTol: Y-zoom:

MassType:

AVG  MONO

Axis:

1  2

Label:

I  M  -

Ions:

a  +  2+  3+

b  +  2+  3+

c  +  2+  3+

x  +  2+  3+

y  +  2+  3+

z  +  2+  3+

hide H<sub>2</sub>O/NH<sub>3</sub>

zoom 112-122

GO

scan 3105; 1.7e+001

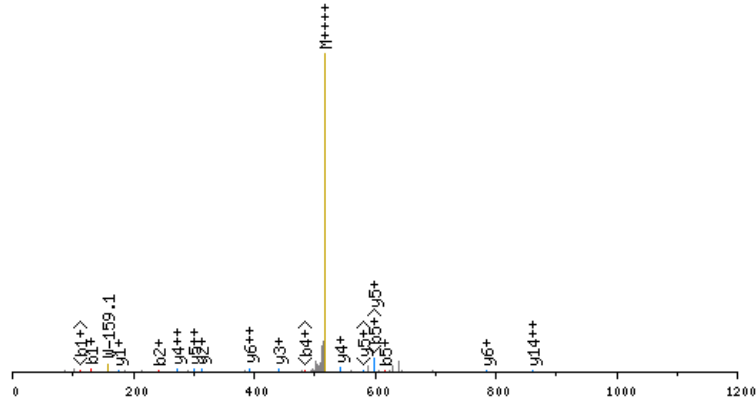

click image to zoom in; click top corners to zoom out [\[precursor±\]](#)

scan 3103; 515.8 mz; 1.1e+001

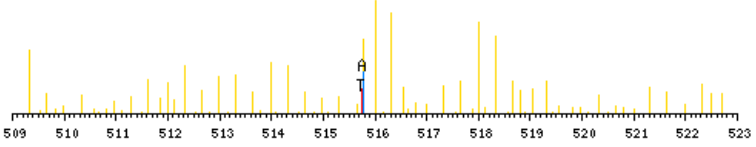

zoomed in precursor plot; T=theoretical m/z, A=acquired m/z

| b <sup>+</sup> | #  | AA | #  | y <sup>+</sup> | y <sup>2+</sup> |
|----------------|----|----|----|----------------|-----------------|
| 130.0868       | 1  | T  | 17 |                |                 |
| 243.1708       | 2  | I  | 16 | 1930.9081      | 965.9580        |
| 342.2393       | 3  | V  | 15 | 1817.8241      | 909.4159        |
| 502.2699       | 4  | C  | 14 | 1718.7556      | 859.8817        |
| 616.3128       | 5  | N  | 13 | 1558.7250      | 779.8664        |
| 717.3605       | 6  | T  | 12 | 1444.6821      | 722.8450        |
| 873.4868       | 7  | K  | 11 | 1343.6344      | 672.3211        |
| 1002.5294      | 8  | E  | 10 | 1187.5081      | 594.2580        |
| 1117.5563      | 9  | D  | 9  | 1058.4655      | 529.7367        |
| 1174.5778      | 10 | G  | 8  | 943.4386       | 472.2232        |
| 1275.6254      | 11 | T  | 7  | 886.4171       | 443.7125        |
| 1461.7048      | 12 | W  | 6  | 785.3695       | 393.1886        |
| 1518.7262      | 13 | G  | 5  | 599.2901       | 300.1490        |
| 1619.7739      | 14 | T  | 4  | 542.2687       | 271.6383        |
| 1748.8165      | 15 | E  | 3  | 441.2210       | 221.1144        |
| 1885.8754      | 16 | H  | 2  | 312.1784       | 156.5931        |
|                | 17 | R  | 1  | 175.1195       | 88.0637         |

N-term:+29.04 C(4):+160.03  
 K(7):+156.13



TIVEEVQDGKVISSR, MH+ 1715.9544, m/z 572.6563  
 L OS G26 P150811 220811-s1.03349.03349.3.dta

X-range:

-

MassTol: Y-zoom:

MassType:

AVG  MONO

Axis:

1  2

Label:

I  M  -

Ions:

a  +  2+  3+

b  +  2+  3+

c  +  2+  3+

x  +  2+  3+

y  +  2+  3+

z  +  2+  3+

hide H<sub>2</sub>O/NH<sub>3</sub>

zoom 112-122

GO

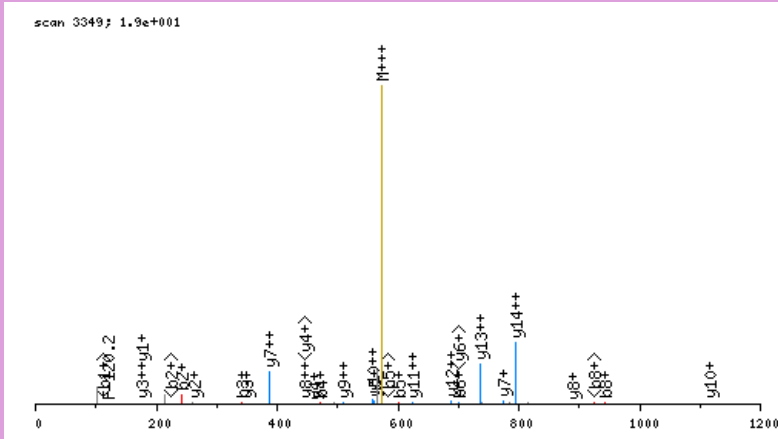

click image to zoom in; click top corners to zoom out [\[precursor±\]](#)

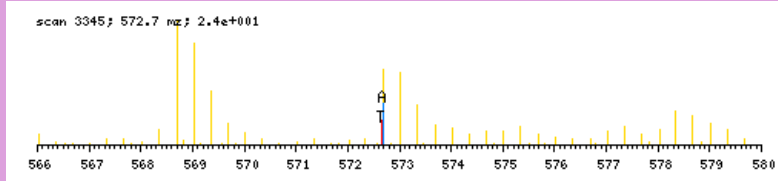

zoomed in precursor plot; T=theoretical m/z, A=acquired m/z

| b <sup>+</sup> | #  | AA | #  | y <sup>+</sup> | y <sup>2+</sup> |
|----------------|----|----|----|----------------|-----------------|
| 130.0868       | 1  | T  | 15 |                |                 |
| 243.1708       | 2  | I  | 14 | 1586.8754      | 793.9416        |
| 342.2393       | 3  | V  | 13 | 1473.7913      | 737.3996        |
| 471.2818       | 4  | E  | 12 | 1374.7229      | 687.8654        |
| 600.3244       | 5  | E  | 11 | 1245.6803      | 623.3441        |
| 699.3929       | 6  | V  | 10 | 1116.6377      | 558.8228        |
| 827.4514       | 7  | Q  | 9  | 1017.5693      | 509.2886        |
| 942.4784       | 8  | D  | 8  | 889.5107       | 445.2593        |
| 999.4998       | 9  | G  | 7  | 774.4838       | 387.7458        |
| 1155.6261      | 10 | K  | 6  | 717.4623       | 359.2351        |
| 1254.6946      | 11 | V  | 5  | 561.3360       | 281.1719        |
| 1367.7786      | 12 | I  | 4  | 462.2676       | 231.6377        |
| 1454.8106      | 13 | S  | 3  | 349.1836       | 175.0957        |
| 1541.8427      | 14 | S  | 2  | 262.1515       | 131.5797        |
|                | 15 | R  | 1  | 175.1195       | 88.0637         |

N-term:+29.04 K(10):+156.13

TKDAGTIAGLNVLRL, MH+ 1496.9437, m/z 499.6527  
 H OS G27 P150811 220811-s1.05493.05493.3.dta

scan 5493; 1.3e+001

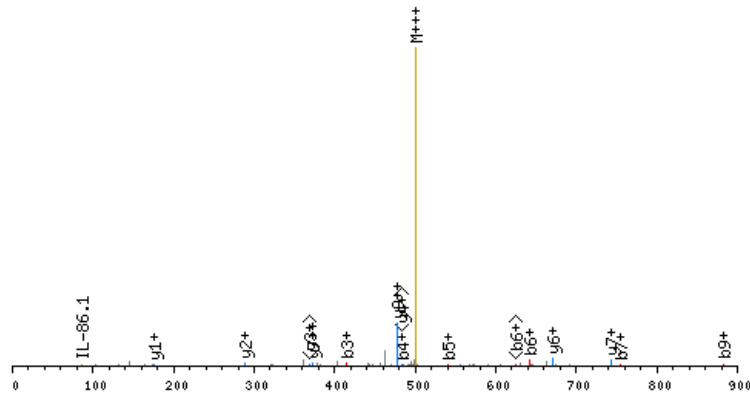

click image to zoom in; click top corners to zoom out [\[precursor±\]](#)

scan 5492; 499.7 m/z; 1.8e+001

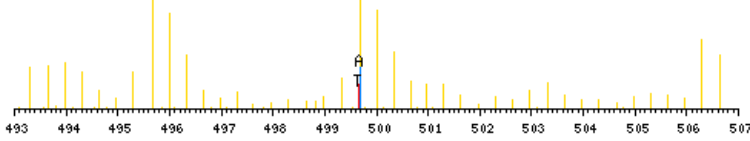

zoomed in precursor plot; T=theoretical m/z, A=acquired m/z

X-range:

-

MassTol: Y-zoom:

MassType:

AVG  MONO

Axis:

1  2

Label:

I  M  -

Ions:

a  +  2+  3+

b  +  2+  3+

c  +  2+  3+

x  +  2+  3+

y  +  2+  3+

z  +  2+  3+

hide H<sub>2</sub>O/NH<sub>3</sub>

zoom 112-122

GO

| b <sup>+</sup> | #  | AA # | y <sup>+</sup> | y <sup>2+</sup> |
|----------------|----|------|----------------|-----------------|
| 136.1186       | 1  | T 14 |                |                 |
| 298.2767       | 2  | K 13 | 1361.8329      | 681.4204        |
| 413.3036       | 3  | D 12 | 1199.6748      | 600.3413        |
| 484.3407       | 4  | A 11 | 1084.6479      | 542.8278        |
| 541.3622       | 5  | G 10 | 1013.6108      | 507.3093        |
| 642.4099       | 6  | T 9  | 956.5893       | 478.7986        |
| 755.4939       | 7  | I 8  | 855.5416       | 428.2747        |
| 826.5311       | 8  | A 7  | 742.4575       | 371.7327        |
| 883.5525       | 9  | G 6  | 671.4204       | 336.2141        |
| 996.6366       | 10 | L 5  | 614.3990       | 307.7034        |
| 1110.6795      | 11 | N 4  | 501.3149       | 251.1614        |
| 1209.7479      | 12 | V 3  | 387.2720       | 194.1399        |
| 1322.8320      | 13 | L 2  | 288.2036       | 144.6057        |
|                | 14 | R 1  | 175.1195       | 88.0637         |

N-term:+35.07 K(2):+162.16

TKQEYDEAGPSIVHR, MH+ 1797.9771, m/z 450.2497  
 H OS G28 P150811 220811-s1.02956.02956.4.dta

X-range:

-

MassTol: Y-zoom:

MassType:

AVG  MONO

Axis:

1  2

Label:

I  M  -

Ions:

a  +  2+  3+

b  +  2+  3+

c  +  2+  3+

x  +  2+  3+

y  +  2+  3+

z  +  2+  3+

hide H<sub>2</sub>O/NH<sub>3</sub>

zoom 112-122

GO

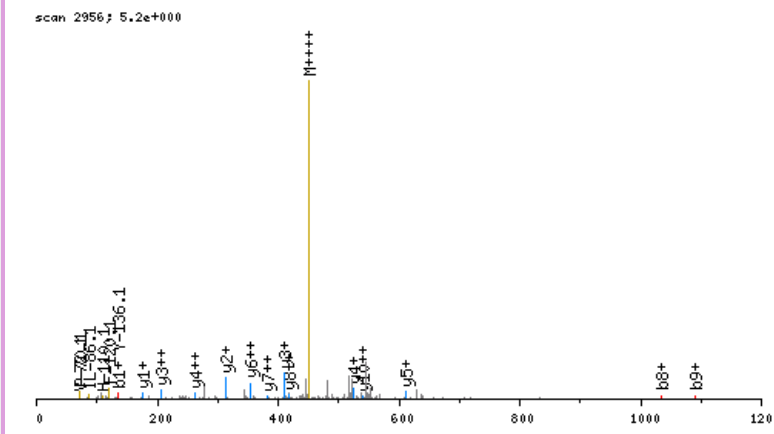

click image to zoom in; click top corners to zoom out [\[precursor±\]](#)

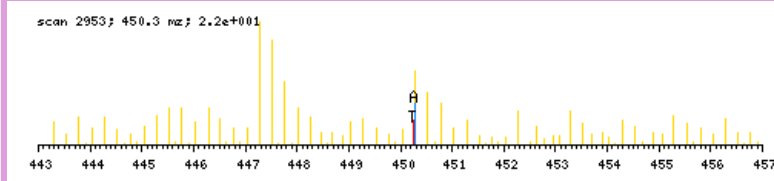

zoomed in precursor plot; T=theoretical m/z, A=acquired m/z

| b <sup>+</sup> | #  | AA # | y <sup>+</sup> | y <sup>2+</sup>    |
|----------------|----|------|----------------|--------------------|
| 136.1186       | 1  | T    | 15             |                    |
| 298.2767       | 2  | K    | 14             | 1662.8664 831.9371 |
| 426.3353       | 3  | Q    | 13             | 1500.7083 750.8581 |
| 555.3778       | 4  | E    | 12             | 1372.6497 686.8288 |
| 718.4412       | 5  | Y    | 11             | 1243.6071 622.3075 |
| 833.4681       | 6  | D    | 10             | 1080.5438 540.7758 |
| 962.5107       | 7  | E    | 9              | 965.5169 483.2623  |
| 1033.5478      | 8  | A    | 8              | 836.4743 418.7410  |
| 1090.5693      | 9  | G    | 7              | 765.4371 383.2225  |
| 1187.6221      | 10 | P    | 6              | 708.4157 354.7118  |
| 1274.6541      | 11 | S    | 5              | 611.3629 306.1854  |
| 1387.7381      | 12 | I    | 4              | 524.3309 262.6694  |
| 1486.8066      | 13 | V    | 3              | 411.2468 206.1273  |
| 1623.8655      | 14 | H    | 2              | 312.1784 156.5931  |
|                | 15 | R    | 1              | 175.1195 88.0637   |

N-term:+35.07 K(2):+162.16

TKSLMDEVVKATSR, MH+ 1648.9308, m/z 412.9882  
 L OS G28 P150811 220811-s1.06176.06176.4.dta

X-range:

-

MassTol: Y-zoom:

MassType:

AVG  MONO

Axis:

1  2

Label:

I  M  -

Ions:

a  +  2+  3+

b  +  2+  3+

c  +  2+  3+

x  +  2+  3+

y  +  2+  3+

z  +  2+  3+

hide H<sub>2</sub>O/NH<sub>3</sub>

zoom 112-122

GO

scan 6176; 2.0e+001

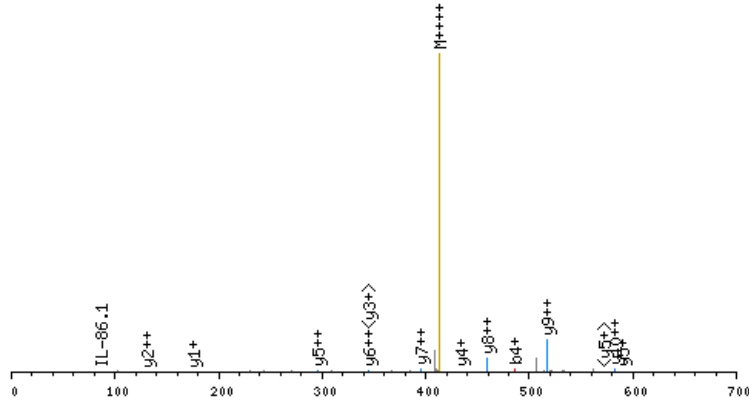

click image to zoom in; click top corners to zoom out [\[precursor±\]](#)

scan 6173; 413.0 nz; 1.9e+001

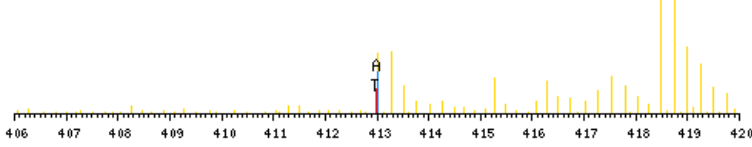

zoomed in precursor plot; T=theoretical m/z, A=acquired m/z

| b <sup>+</sup> | #  | AA # | y <sup>+</sup> | y <sup>2+</sup> |
|----------------|----|------|----------------|-----------------|
| 130.0868       | 1  | T 14 |                |                 |
| 286.2131       | 2  | K 13 | 1519.8519      | 760.4298        |
| 373.2451       | 3  | S 12 | 1363.7256      | 682.3667        |
| 486.3292       | 4  | L 11 | 1276.6935      | 638.8507        |
| 617.3697       | 5  | M 10 | 1163.6095      | 582.3086        |
| 732.3966       | 6  | D 9  | 1032.5690      | 516.7884        |
| 861.4392       | 7  | E 8  | 917.5420       | 459.2749        |
| 960.5076       | 8  | V 7  | 788.4994       | 394.7536        |
| 1059.5760      | 9  | V 6  | 689.4310       | 345.2194        |
| 1215.7023      | 10 | K 5  | 590.3626       | 295.6852        |
| 1286.7394      | 11 | A 4  | 434.2363       | 217.6221        |
| 1387.7871      | 12 | T 3  | 363.1992       | 182.1035        |
| 1474.8191      | 13 | S 2  | 262.1515       | 131.5797        |
|                | 14 | R 1  | 175.1195       | 88.0637         |

N-term:+29.04 K(2):+156.13  
 K(10):+156.13

X-range:

-

MassTol: Y-zoom:

MassType:

AVG  MONO

Axis:

1  2

Label:

I  M  -

Ions:

a  +  2+  3+

b  +  2+  3+

c  +  2+  3+

x  +  2+  3+

y  +  2+  3+

z  +  2+  3+

hide H<sub>2</sub>O/NH<sub>3</sub>

zoom 112-122

GO

scan 2925; 2.3e+000

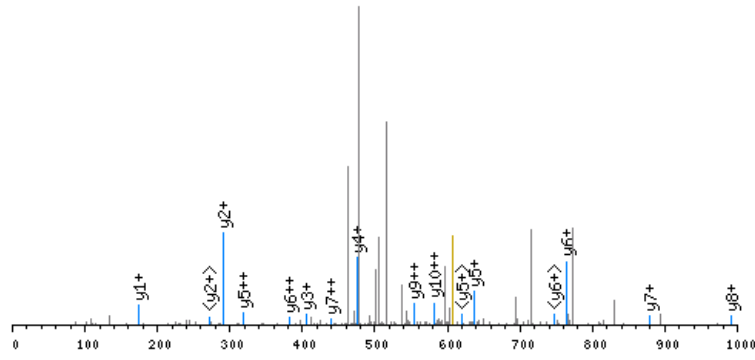

click image to zoom in; click top corners to zoom out [\[precursor±\]](#)

scan 2923; 606.3 mz; 1.8e+001

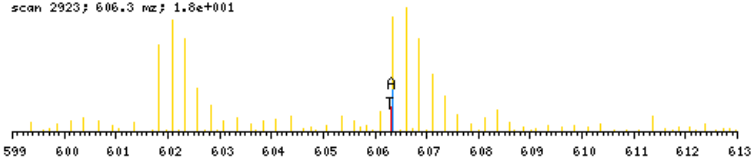

zoomed in precursor plot; T=theoretical m/z, A=acquired m/z

| b <sup>+</sup> | #  | AA | #  | y <sup>+</sup> | y <sup>2+</sup> |
|----------------|----|----|----|----------------|-----------------|
| 136.1186       | 1  | T  | 19 |                |                 |
| 298.2767       | 2  | K  | 18 | 2287.0905      | 1144.0492       |
| 397.3451       | 3  | V  | 17 | 2124.9324      | 1062.9701       |
| 511.3880       | 4  | N  | 16 | 2025.8640      | 1013.4359       |
| 673.5461       | 5  | K  | 15 | 1911.8210      | 956.4144        |
| 802.5887       | 6  | E  | 14 | 1749.6629      | 875.3354        |
| 962.6193       | 7  | C  | 13 | 1620.6203      | 810.8141        |
| 1122.6499      | 8  | C  | 12 | 1460.5897      | 730.7988        |
| 1259.7088      | 9  | H  | 11 | 1300.5591      | 650.7835        |
| 1316.7303      | 10 | G  | 10 | 1163.5002      | 582.2540        |
| 1431.7572      | 11 | D  | 9  | 1106.4788      | 553.7433        |
| 1544.8413      | 12 | L  | 8  | 991.4518       | 496.2298        |
| 1657.9254      | 13 | L  | 7  | 878.3678       | 439.6878        |
| 1786.9680      | 14 | E  | 6  | 765.2837       | 383.1458        |
| 1946.9986      | 15 | C  | 5  | 636.2411       | 318.6245        |
| 2018.0357      | 16 | A  | 4  | 476.2105       | 238.6092        |
| 2133.0626      | 17 | D  | 3  | 405.1734       | 203.0906        |
| 2248.0896      | 18 | D  | 2  | 290.1464       | 145.5771        |
|                | 19 | R  | 1  | 175.1195       | 88.0637         |

N-term:+35.07 K(2):+162.16  
K(5):+162.16 C(7):+160.03 C(8):+160.03  
C(15):+160.03

TLDPVEKALR, MH+ 1197.7207, m/z 399.9118  
 L OS G27 P150811 220811-s1.04313.04313.3.dta

scan 4313; 2.1e+001

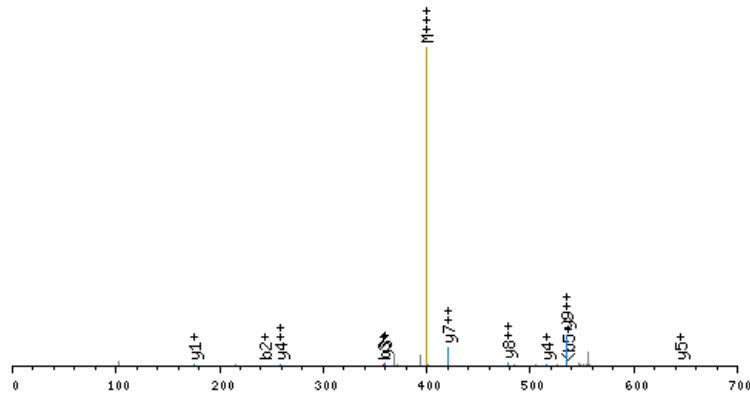

click image to zoom in; click top corners to zoom out [\[precursor±\]](#)

scan 4312; 399.9 m/z; 8.2e+000

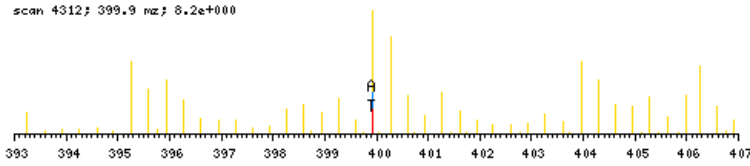

zoomed in precursor plot; T=theoretical m/z, A=acquired m/z

X-range:

-

MassTol: Y-zoom:

MassType:

AVG  MONO

Axis:

1  2

Label:

I  M  -

Ions:

a  +  2+  3+

b  +  2+  3+

c  +  2+  3+

x  +  2+  3+

y  +  2+  3+

z  +  2+  3+

hide H<sub>2</sub>O/NH<sub>3</sub>

zoom 112-122

GO

| b <sup>+</sup> | #  | AA # | y <sup>+</sup> | y <sup>2+</sup> |
|----------------|----|------|----------------|-----------------|
| 130.0868       | 1  | T    | 10             |                 |
| 243.1708       | 2  | L    | 9              | 1068.6418       |
| 358.1978       | 3  | D    | 8              | 955.5577        |
| 455.2505       | 4  | P    | 7              | 840.5307        |
| 554.3190       | 5  | V    | 6              | 743.4780        |
| 683.3616       | 6  | E    | 5              | 644.4096        |
| 839.4879       | 7  | K    | 4              | 515.3670        |
| 910.5250       | 8  | A    | 3              | 359.2407        |
| 1023.6090      | 9  | L    | 2              | 288.2036        |
|                | 10 | R    | 1              | 175.1195        |

N-term:+29.04 K(7):+156.13

TLEIPGSSDPNIVPDGDFSSSLVR, MH+ 2443.2356, m/z 815.0834  
 L OS G24 P150811 220811-s1.04902.04902.3.dta

X-range:

-

MassTol: Y-zoom:

MassType:

AVG  MONO

Axis:

1  2

Label:

I  M  -

Ions:

a  +  2+  3+

b  +  2+  3+

c  +  2+  3+

x  +  2+  3+

y  +  2+  3+

z  +  2+  3+

hide H<sub>2</sub>O/NH<sub>3</sub>

zoom 112-122

GO

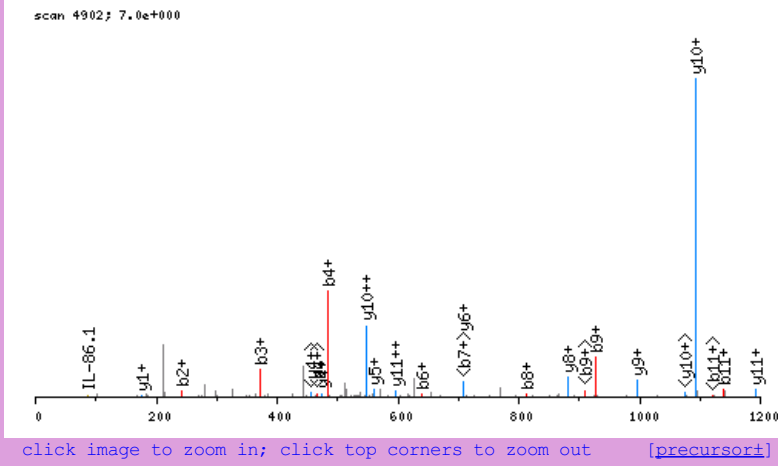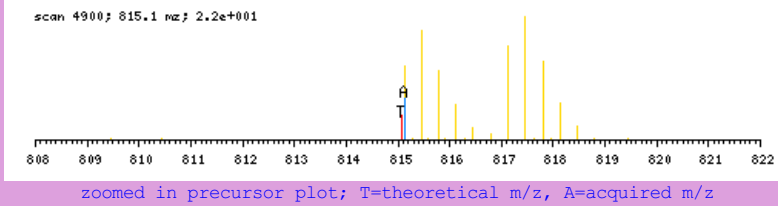

| b <sup>+</sup> | #  | AA # | y <sup>+</sup> | y <sup>2+</sup> |
|----------------|----|------|----------------|-----------------|
| 130.0868       | 1  | T 23 |                |                 |
| 243.1708       | 2  | L 22 | 2314.1567      | 1157.5823       |
| 372.2134       | 3  | E 21 | 2201.0726      | 1101.0402       |
| 485.2975       | 4  | I 20 | 2072.0300      | 1036.5189       |
| 582.3503       | 5  | P 19 | 1958.9460      | 979.9769        |
| 639.3717       | 6  | G 18 | 1861.8932      | 931.4505        |
| 726.4038       | 7  | S 17 | 1804.8717      | 902.9398        |
| 813.4358       | 8  | S 16 | 1717.8397      | 859.4238        |
| 928.4627       | 9  | D 15 | 1630.8077      | 815.9078        |
| 1025.5155      | 10 | P 14 | 1515.7807      | 758.3943        |
| 1139.5584      | 11 | N 13 | 1418.7280      | 709.8679        |
| 1252.6425      | 12 | I 12 | 1304.6850      | 652.8464        |
| 1351.7109      | 13 | V 11 | 1191.6010      | 596.3044        |
| 1448.7637      | 14 | P 10 | 1092.5326      | 546.7702        |
| 1563.7906      | 15 | D 9  | 995.4798       | 498.2438        |
| 1620.8121      | 16 | G 8  | 880.4529       | 440.7303        |
| 1735.8390      | 17 | D 7  | 823.4314       | 412.2196        |
| 1882.9074      | 18 | F 6  | 708.4044       | 354.7061        |
| 1969.9395      | 19 | S 5  | 561.3360       | 281.1719        |
| 2056.9715      | 20 | S 4  | 474.3040       | 237.6559        |
| 2170.0555      | 21 | L 3  | 387.2720       | 194.1399        |
| 2269.1240      | 22 | V 2  | 274.1879       | 137.5979        |
|                | 23 | R 1  | 175.1195       | 88.0637         |

N-term:+29.04

TLENCLLPDDKLR, MH+ 1642.8838, m/z 548.2994  
 L OS G26 P150811 220811-s1.04618.04618.3.dta

X-range:

-

MassTol: Y-zoom:

MassType:

AVG  MONO

Axis:

1  2

Label:

I  M  -

Ions:

a  +  2+  3+

b  +  2+  3+

c  +  2+  3+

x  +  2+  3+

y  +  2+  3+

z  +  2+  3+

hide H<sub>2</sub>O/NH<sub>3</sub>

zoom 112-122

GO

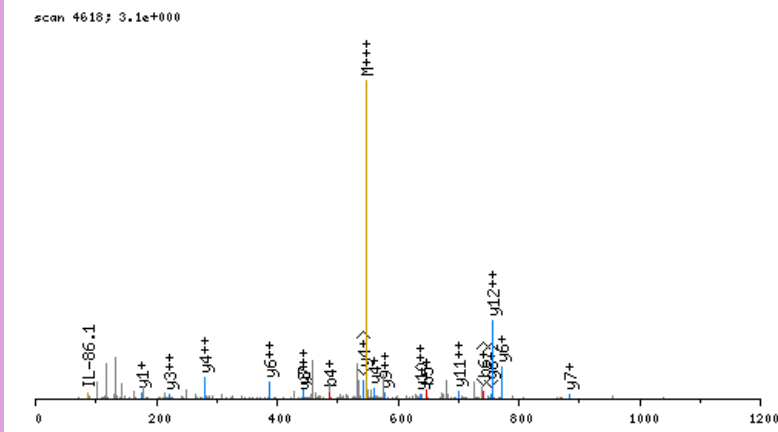

click image to zoom in; click top corners to zoom out [\[precursor±\]](#)

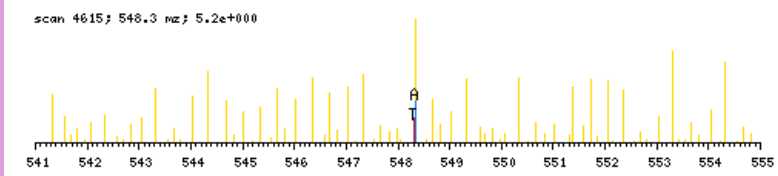

zoomed in precursor plot; T=theoretical m/z, A=acquired m/z

| b <sup>+</sup> | #  | AA | #  | y <sup>+</sup> | y <sup>2+</sup> |
|----------------|----|----|----|----------------|-----------------|
| 130.0868       | 1  | T  | 13 |                |                 |
| 243.1708       | 2  | L  | 12 | 1513.8048      | 757.4063        |
| 372.2134       | 3  | E  | 11 | 1400.7208      | 700.8643        |
| 486.2564       | 4  | N  | 10 | 1271.6782      | 636.3430        |
| 646.2870       | 5  | C  | 9  | 1157.6352      | 579.3215        |
| 759.3710       | 6  | L  | 8  | 997.6046       | 499.3062        |
| 872.4551       | 7  | L  | 7  | 884.5206       | 442.7642        |
| 969.5079       | 8  | P  | 6  | 771.4365       | 386.2222        |
| 1084.5348      | 9  | D  | 5  | 674.3838       | 337.6958        |
| 1199.5617      | 10 | D  | 4  | 559.3568       | 280.1823        |
| 1355.6880      | 11 | K  | 3  | 444.3299       | 222.6688        |
| 1468.7721      | 12 | L  | 2  | 288.2036       | 144.6057        |
|                | 13 | R  | 1  | 175.1195       | 88.0637         |

N-term: +29.04 C(5): +160.03  
 K(11): +156.13



TLEQKNIAVENEVR, MH+ 1698.9390, m/z 566.9845  
 L OS G26 P150811 220811-s1.02949.02949.3.dta

scan 2949; 9.5e+000

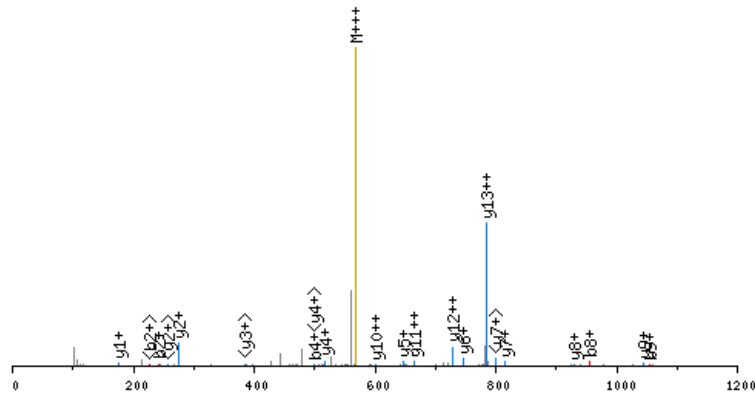

click image to zoom in; click top corners to zoom out [\[precursor±\]](#)

scan 2945; 567.0 m/z; 4.9e+000

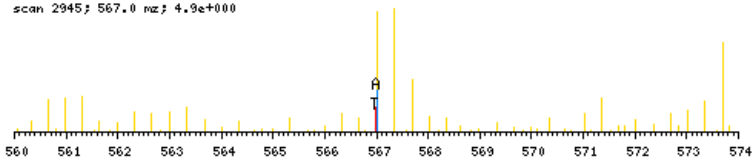

zoomed in precursor plot; T=theoretical m/z, A=acquired m/z

X-range:

-

MassTol: Y-zoom:

MassType:

AVG  MONO

Axis:

1  2

Label:

I  M  -

Ions:

a  +  2+  3+

b  +  2+  3+

c  +  2+  3+

x  +  2+  3+

y  +  2+  3+

z  +  2+  3+

hide H<sub>2</sub>O/NH<sub>3</sub>

zoom 112-122

GO

| b <sup>+</sup> | #  | AA # | y <sup>+</sup> | y <sup>2+</sup> |
|----------------|----|------|----------------|-----------------|
| 130.0868       | 1  | T 14 |                |                 |
| 243.1708       | 2  | L 13 | 1569.8601      | 785.4340        |
| 372.2134       | 3  | E 12 | 1456.7760      | 728.8919        |
| 500.2720       | 4  | Q 11 | 1327.7334      | 664.3706        |
| 656.3983       | 5  | K 10 | 1199.6748      | 600.3413        |
| 770.4412       | 6  | N 9  | 1043.5485      | 522.2782        |
| 883.5253       | 7  | I 8  | 929.5056       | 465.2567        |
| 954.5624       | 8  | A 7  | 816.4216       | 408.7147        |
| 1053.6308      | 9  | V 6  | 745.3844       | 373.1961        |
| 1182.6734      | 10 | E 5  | 646.3160       | 323.6619        |
| 1296.7164      | 11 | N 4  | 517.2734       | 259.1406        |
| 1425.7589      | 12 | E 3  | 403.2305       | 202.1192        |
| 1524.8274      | 13 | V 2  | 274.1879       | 137.5979        |
|                | 14 | R 1  | 175.1195       | 88.0637         |

N-term:+29.04 K(5):+156.13

TLFGDKLCAIPNLR, MH+ 1673.9412, m/z 558.6519  
 L OS G26 P150811 220811-s1.06277.06277.3.dta

X-range:

-

MassTol: Y-zoom:

MassType:

AVG  MONO

Axis:

1  2

Label:

I  M  -

Ions:

a  +  2+  3+

b  +  2+  3+

c  +  2+  3+

x  +  2+  3+

y  +  2+  3+

z  +  2+  3+

hide H<sub>2</sub>O/NH<sub>3</sub>

zoom 112-122

GO

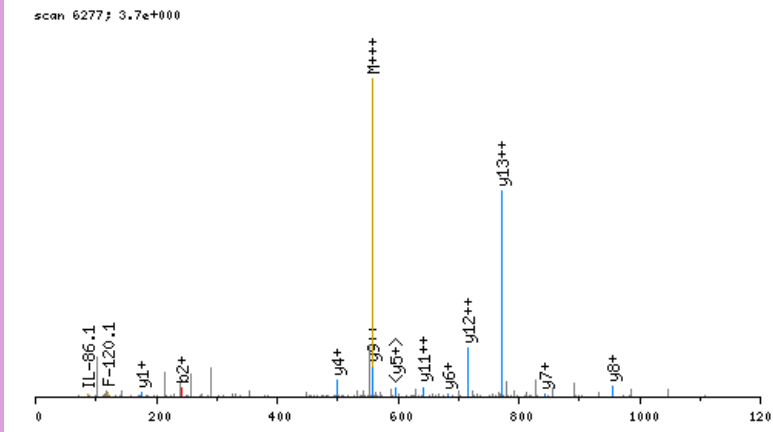

click image to zoom in; click top corners to zoom out [\[precursor±\]](#)

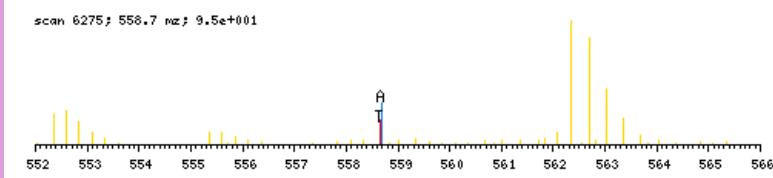

zoomed in precursor plot; T=theoretical m/z, A=acquired m/z

| b <sup>+</sup>  | #  | AA | #  | y <sup>+</sup>  | y <sup>2+</sup> |
|-----------------|----|----|----|-----------------|-----------------|
| 130.0868        | 1  | T  | 14 |                 |                 |
| <b>243.1708</b> | 2  | L  | 13 | 1544.8623       | <b>772.9351</b> |
| 390.2393        | 3  | F  | 12 | 1431.7782       | <b>716.3930</b> |
| 447.2607        | 4  | G  | 11 | 1284.7098       | <b>642.8588</b> |
| 562.2877        | 5  | D  | 10 | 1227.6883       | 614.3481        |
| 718.4140        | 6  | K  | 9  | 1112.6614       | <b>556.8346</b> |
| 831.4980        | 7  | L  | 8  | <b>956.5351</b> | 478.7715        |
| 991.5286        | 8  | C  | 7  | <b>843.4510</b> | 422.2294        |
| 1062.5657       | 9  | A  | 6  | <b>683.4204</b> | 342.2141        |
| 1175.6498       | 10 | I  | 5  | 612.3833        | 306.6956        |
| 1272.7026       | 11 | P  | 4  | <b>499.2993</b> | 250.1535        |
| 1386.7455       | 12 | N  | 3  | 402.2465        | 201.6272        |
| 1499.8296       | 13 | L  | 2  | 288.2036        | 144.6057        |
|                 | 14 | R  | 1  | <b>175.1195</b> | 88.0637         |

N-term:+29.04 K(6):+156.13  
 C(8):+160.03

TLKSLSQIENIR, MH+ 1597.9913, m/z 533.3353  
 H OS G27 P150811 220811-s1.05269.05269.3.dta

X-range:

-

MassTol: Y-zoom:

MassType:

AVG  MONO

Axis:

1  2

Label:

I  M  -

Ions:

a  +  2+  3+

b  +  2+  3+

c  +  2+  3+

x  +  2+  3+

y  +  2+  3+

z  +  2+  3+

hide H<sub>2</sub>O/NH<sub>3</sub>

zoom 112-122

GO

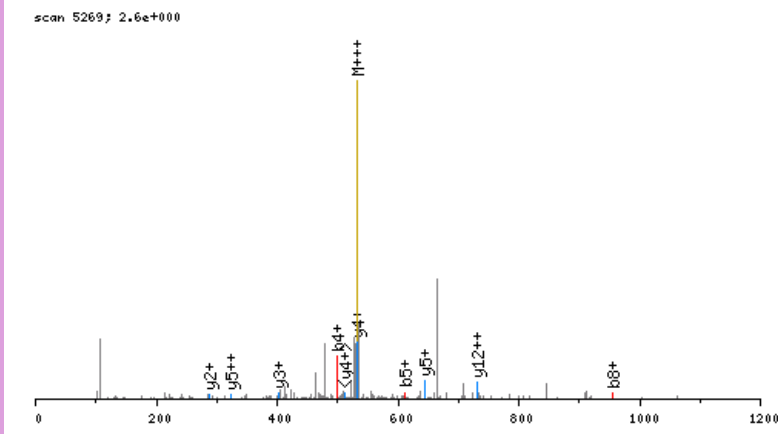

click image to zoom in; click top corners to zoom out [\[precursor±\]](#)

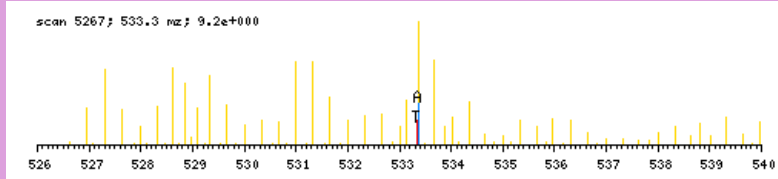

zoomed in precursor plot; T=theoretical m/z, A=acquired m/z

| b <sup>+</sup> | #  | AA # | y <sup>+</sup> | y <sup>2+</sup> |
|----------------|----|------|----------------|-----------------|
| 136.1186       | 1  | T 13 |                |                 |
| 249.2026       | 2  | L 12 | 1462.8806      | 731.9442        |
| 411.3607       | 3  | K 11 | 1349.7965      | 675.4022        |
| 498.3928       | 4  | S 10 | 1187.6384      | 594.3231        |
| 611.4768       | 5  | L 9  | 1100.6064      | 550.8071        |
| 698.5089       | 6  | S 8  | 987.5223       | 494.2651        |
| 826.5674       | 7  | Q 7  | 900.4903       | 450.7491        |
| 954.6260       | 8  | Q 6  | 772.4317       | 386.7198        |
| 1067.7101      | 9  | I 5  | 644.3731       | 322.6905        |
| 1196.7527      | 10 | E 4  | 531.2891       | 266.1485        |
| 1310.7956      | 11 | N 3  | 402.2465       | 201.6272        |
| 1423.8797      | 12 | I 2  | 288.2036       | 144.6057        |
|                | 13 | R 1  | 175.1195       | 88.0637         |

N-term:+35.07 K(3):+162.16

TLLTEAPLNPKANR, MH+ 1593.9328, m/z 531.9825  
 L OS G26 P150811 220811-s1.03809.03809.3.dta

X-range:

-

MassTol: Y-zoom:

MassType:

AVG  MONO

Axis:

1  2

Label:

I  M  -

Ions:

a  +  2+  3+

b  +  2+  3+

c  +  2+  3+

x  +  2+  3+

y  +  2+  3+

z  +  2+  3+

hide H<sub>2</sub>O/NH<sub>3</sub>

zoom 112-122

GO

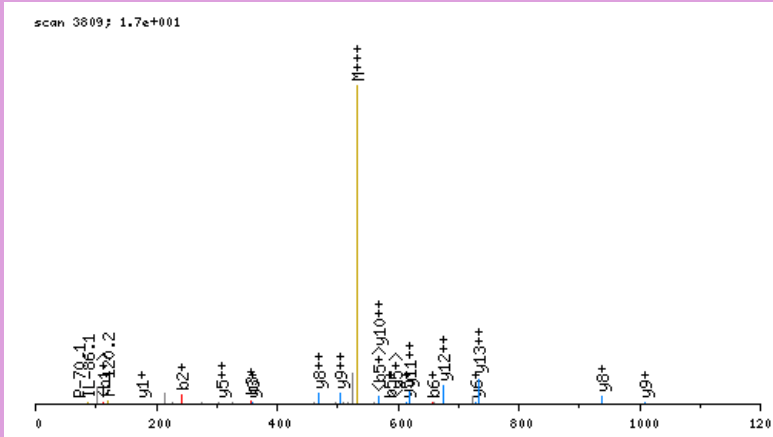

click image to zoom in; click top corners to zoom out [\[precursor±\]](#)

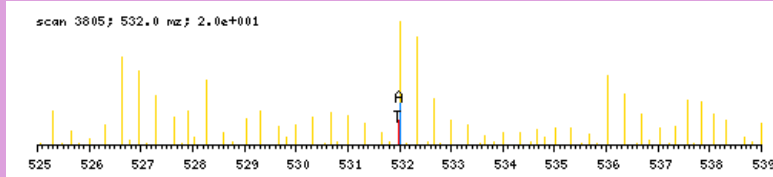

zoomed in precursor plot; T=theoretical m/z, A=acquired m/z

| b <sup>+</sup> | #  | AA # | y <sup>+</sup> | y <sup>2+</sup> |
|----------------|----|------|----------------|-----------------|
| 130.0868       | 1  | T    | 14             |                 |
| 243.1708       | 2  | L    | 13             | 1464.8539       |
| 356.2549       | 3  | L    | 12             | 1351.7698       |
| 457.3026       | 4  | T    | 11             | 1238.6857       |
| 586.3452       | 5  | E    | 10             | 1137.6381       |
| 657.3823       | 6  | A    | 9              | 1008.5955       |
| 754.4351       | 7  | P    | 8              | 937.5584        |
| 867.5191       | 8  | L    | 7              | 840.5056        |
| 981.5620       | 9  | N    | 6              | 727.4215        |
| 1078.6148      | 10 | P    | 5              | 613.3786        |
| 1234.7411      | 11 | K    | 4              | 516.3258        |
| 1305.7782      | 12 | A    | 3              | 360.1995        |
| 1419.8212      | 13 | N    | 2              | 289.1624        |
|                | 14 | R    | 1              | 175.1195        |

N-term:+29.04 K(11):+156.13

TLPGLSLPPEVEKYR, MH+ 1599.9110, m/z 533.9752  
 L OS G26 P150811 220811-s1.04253.04253.3.dta

scan 4253; 3.7e+000

X-range:

-

MassTol: Y-zoom:

MassType:

AVG  MONO

Axis:

1  2

Label:

I  M  -

Ions:

a  +  2+  3+

b  +  2+  3+

c  +  2+  3+

x  +  2+  3+

y  +  2+  3+

z  +  2+  3+

hide H<sub>2</sub>O/NH<sub>3</sub>

zoom 112-122

GO

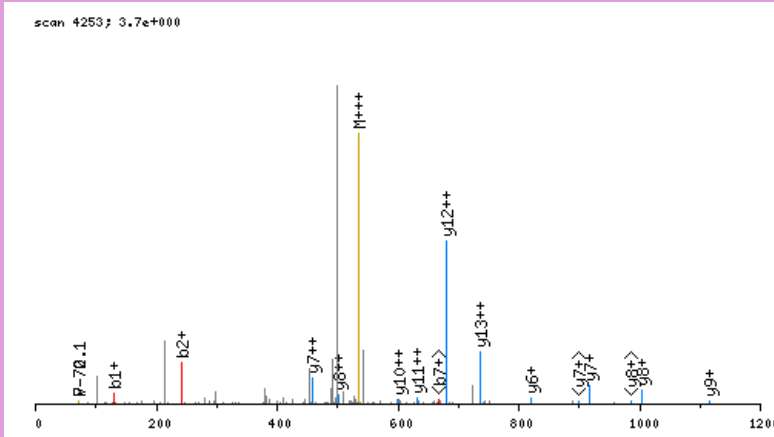

click image to zoom in; click top corners to zoom out [\[precursor±\]](#)

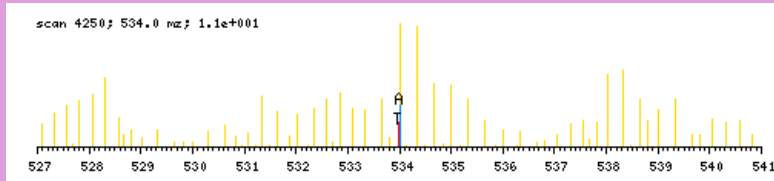

zoomed in precursor plot; T=theoretical m/z, A=acquired m/z

| b <sup>+</sup> | #  | AA # | y <sup>+</sup> | y <sup>2+</sup> |
|----------------|----|------|----------------|-----------------|
| 130.0868       | 1  | T    | 14             |                 |
| 243.1708       | 2  | L    | 13             | 1470.8321       |
| 340.2236       | 3  | P    | 12             | 1357.7480       |
| 397.2451       | 4  | G    | 11             | 1260.6952       |
| 484.2771       | 5  | S    | 10             | 1203.6738       |
| 597.3612       | 6  | L    | 9              | 1116.6418       |
| 684.3932       | 7  | S    | 8              | 1003.5577       |
| 781.4460       | 8  | P    | 7              | 916.5257        |
| 878.4987       | 9  | P    | 6              | 819.4729        |
| 977.5671       | 10 | V    | 5              | 722.4201        |
| 1106.6097      | 11 | E    | 4              | 623.3517        |
| 1262.7360      | 12 | K    | 3              | 494.3091        |
| 1425.7994      | 13 | Y    | 2              | 338.1828        |
|                | 14 | R    | 1              | 175.1195        |

N-term:+29.04 K(12):+156.13

X-range:

-

MassTol: Y-zoom:

MassType:

AVG  MONO

Axis:

1  2

Label:

I  M  -

Ions:

a  +  2+  3+

b  +  2+  3+

c  +  2+  3+

x  +  2+  3+

y  +  2+  3+

z  +  2+  3+

hide H<sub>2</sub>O/NH<sub>3</sub>

zoom 112-122

GO

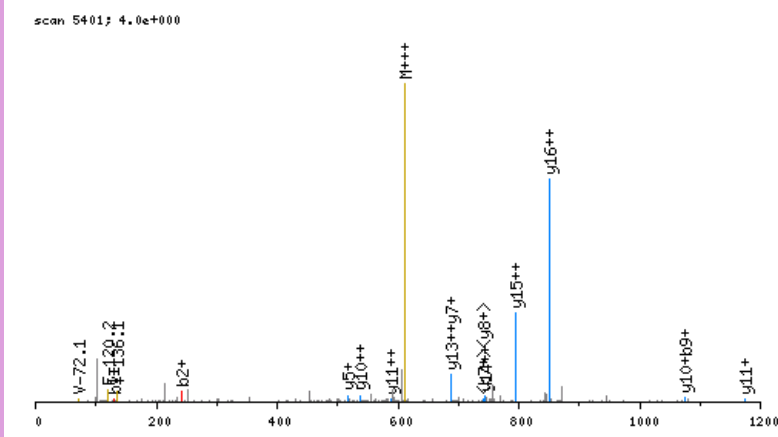

click image to zoom in; click top corners to zoom out [\[precursor±\]](#)

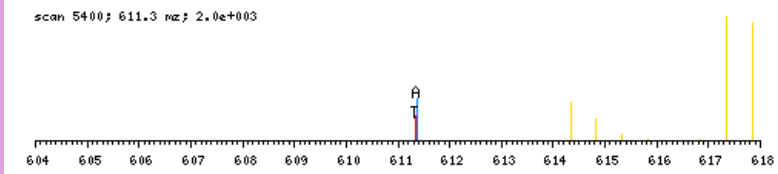

zoomed in precursor plot; T=theoretical m/z, A=acquired m/z

| b <sup>+</sup> | #  | AA | #  | y <sup>+</sup> | y <sup>2+</sup> |
|----------------|----|----|----|----------------|-----------------|
| 130.0868       | 1  | T  | 17 |                |                 |
| 243.1708       | 2  | L  | 16 | 1702.9526      | 851.9802        |
| 344.2185       | 3  | T  | 15 | 1589.8685      | 795.4382        |
| 459.2455       | 4  | D  | 14 | 1488.8208      | 744.9143        |
| 546.2775       | 5  | S  | 13 | 1373.7939      | 687.4008        |
| 659.3616       | 6  | L  | 12 | 1286.7618      | 643.8848        |
| 758.4300       | 7  | V  | 11 | 1173.6778      | 587.3428        |
| 918.4606       | 8  | C  | 10 | 1074.6094      | 537.8086        |
| 1074.5869      | 9  | K  | 9  | 914.5788       | 457.7933        |
| 1145.6240      | 10 | A  | 8  | 758.4525       | 379.7301        |
| 1202.6454      | 11 | G  | 7  | 687.4153       | 344.2116        |
| 1315.7295      | 12 | I  | 6  | 630.3939       | 315.7009        |
| 1428.8136      | 13 | I  | 5  | 517.3098       | 259.1588        |
| 1499.8507      | 14 | A  | 4  | 404.2258       | 202.6168        |
| 1586.8827      | 15 | S  | 3  | 333.1886       | 167.0982        |
| 1657.9198      | 16 | A  | 2  | 246.1566       | 123.5822        |
|                | 17 | R  | 1  | 175.1195       | 88.0637         |

N-term: +29.04 C(8): +160.03  
 K(9): +156.13

TMVADTPENLR, MH+ 1280.6732, m/z 640.8403  
 H OS G25 P150811 220811-s1.04014.04014.2.dta

X-range:

-

MassTol: Y-zoom:

MassType:

AVG  MONO

Axis:

1  2

Label:

I  M  -

Ions:

a  +  2+  3+

b  +  2+  3+

c  +  2+  3+

x  +  2+  3+

y  +  2+  3+

z  +  2+  3+

hide H<sub>2</sub>O/NH<sub>3</sub>

zoom 112-122

GO

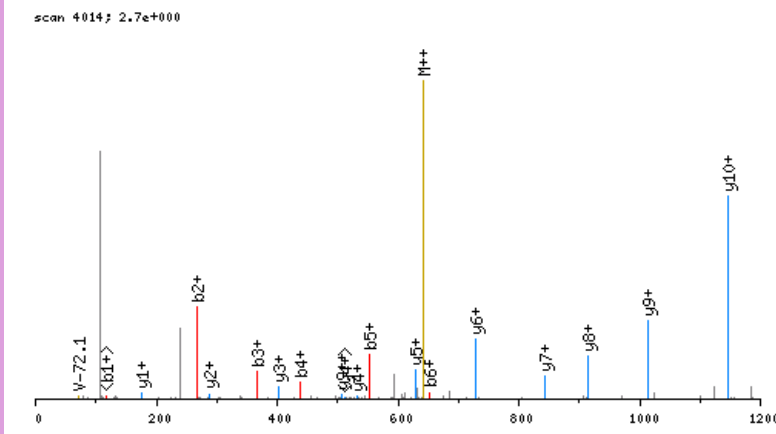

click image to zoom in; click top corners to zoom out [\[precursor±\]](#)

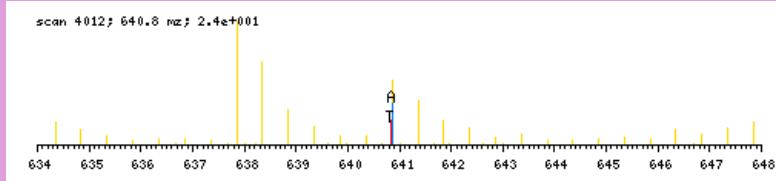

zoomed in precursor plot; T=theoretical m/z, A=acquired m/z

| b <sup>+</sup> | #  | AA # | y <sup>+</sup> | y <sup>2+</sup> |
|----------------|----|------|----------------|-----------------|
| 136.1186       | 1  | T 11 |                |                 |
| 267.1591       | 2  | M 10 | 1145.5625      | 573.2852        |
| 366.2275       | 3  | V 9  | 1014.5220      | 507.7649        |
| 437.2646       | 4  | A 8  | 915.4536       | 458.2307        |
| 552.2915       | 5  | D 7  | 844.4165       | 422.7121        |
| 653.3392       | 6  | T 6  | 729.3895       | 365.1987        |
| 750.3920       | 7  | P 5  | 628.3418       | 314.6748        |
| 879.4346       | 8  | E 4  | 531.2891       | 266.1485        |
| 993.4775       | 9  | N 3  | 402.2465       | 201.6272        |
| 1106.5616      | 10 | L 2  | 288.2036       | 144.6057        |
|                | 11 | R 1  | 175.1195       | 88.0637         |

N-term:+35.07

TNGETTTQGLDGLSER, MH+ 1706.8197, m/z 569.6114  
 L OS G25 P150811 220811-s1.03994.03994.3.dta

X-range:

-

MassTol: Y-zoom:

MassType:

AVG  MONO

Axis:

1  2

Label:

I  M  -

Ions:

a  +  2+  3+

b  +  2+  3+

c  +  2+  3+

x  +  2+  3+

y  +  2+  3+

z  +  2+  3+

hide H<sub>2</sub>O/NH<sub>3</sub>

zoom 112-122

GO

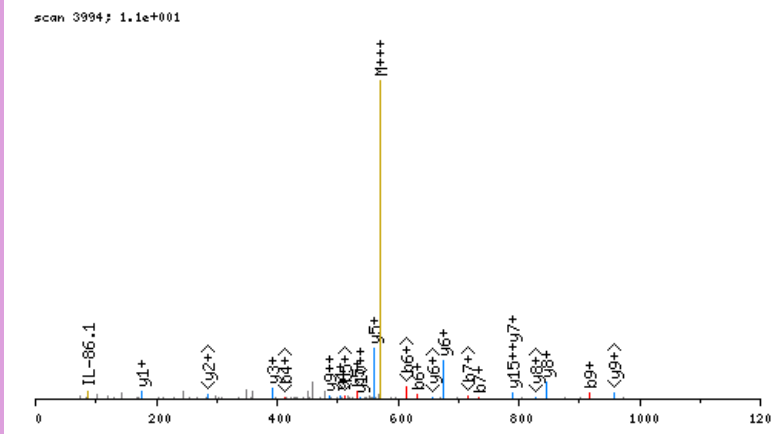

click image to zoom in; click top corners to zoom out [\[precursor±\]](#)

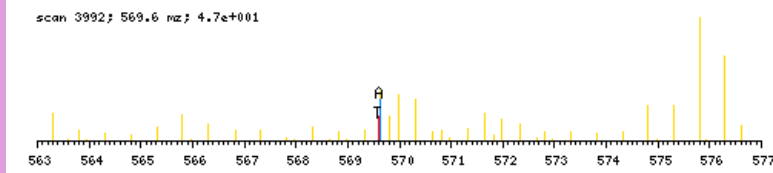

zoomed in precursor plot; T=theoretical m/z, A=acquired m/z

| b <sup>+</sup> | #  | AA # | y <sup>+</sup> | y <sup>2+</sup> |
|----------------|----|------|----------------|-----------------|
| 130.0868       | 1  | T 16 |                |                 |
| 244.1297       | 2  | N 15 | 1577.7407      | 789.3743        |
| 301.1512       | 3  | G 14 | 1463.6978      | 732.3528        |
| 430.1938       | 4  | E 13 | 1406.6763      | 703.8421        |
| 531.2414       | 5  | T 12 | 1277.6337      | 639.3208        |
| 632.2891       | 6  | T 11 | 1176.5861      | 588.7969        |
| 733.3368       | 7  | T 10 | 1075.5384      | 538.2731        |
| 861.3954       | 8  | Q 9  | 974.4907       | 487.7493        |
| 918.4168       | 9  | G 8  | 846.4321       | 423.7200        |
| 1031.5009      | 10 | L 7  | 789.4107       | 395.2092        |
| 1146.5278      | 11 | D 6  | 676.3266       | 338.6672        |
| 1203.5493      | 12 | G 5  | 561.2997       | 281.1537        |
| 1316.6334      | 13 | L 4  | 504.2782       | 252.6430        |
| 1403.6654      | 14 | S 3  | 391.1941       | 196.1010        |
| 1532.7080      | 15 | E 2  | 304.1621       | 152.5850        |
|                | 16 | R 1  | 175.1195       | 88.0637         |

N-term:+29.04



TNLGDFAIISLYR, MH+ 1403.7747, m/z 702.3910  
 H OS G25 P150811 220811-s1.08126.08126.2.dta

X-range:

-

MassTol: Y-zoom:

MassType:

AVG  MONO

Axis:

1  2

Label:

I  M  -

Ions:

a  +  2+  3+

b  +  2+  3+

c  +  2+  3+

x  +  2+  3+

y  +  2+  3+

z  +  2+  3+

hide H<sub>2</sub>O/NH<sub>3</sub>

zoom 112-122

GO

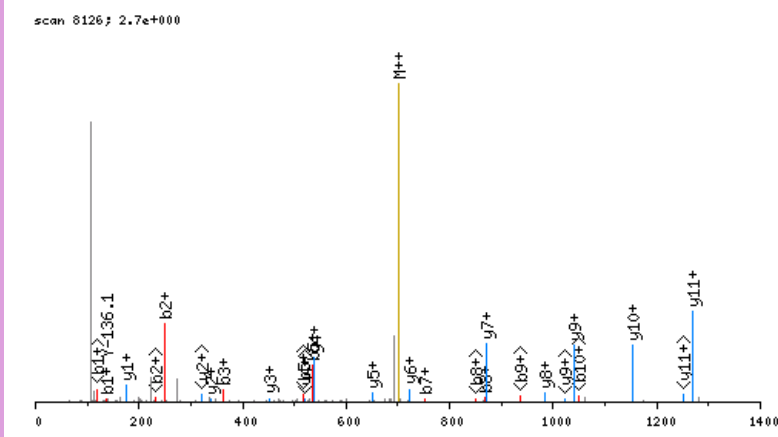

click image to zoom in; click top corners to zoom out [\[precursor±\]](#)

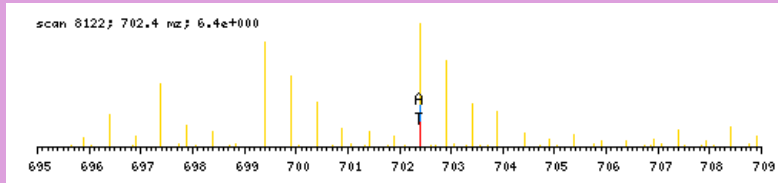

zoomed in precursor plot; T=theoretical m/z, A=acquired m/z

| b <sup>+</sup> | #  | AA # | y <sup>+</sup> | y <sup>2+</sup> |
|----------------|----|------|----------------|-----------------|
| 136.1186       | 1  | T 12 |                |                 |
| 250.1615       | 2  | N 11 | 1268.6639      | 634.8359        |
| 363.2456       | 3  | L 10 | 1154.6210      | 577.8144        |
| 420.2670       | 4  | G 9  | 1041.5369      | 521.2724        |
| 535.2940       | 5  | D 8  | 984.5155       | 492.7616        |
| 682.3624       | 6  | F 7  | 869.4885       | 435.2482        |
| 753.3995       | 7  | A 6  | 722.4201       | 361.7140        |
| 866.4836       | 8  | I 5  | 651.3830       | 326.1954        |
| 953.5156       | 9  | S 4  | 538.2989       | 269.6534        |
| 1066.5997      | 10 | L 3  | 451.2669       | 226.1374        |
| 1229.6630      | 11 | Y 2  | 338.1828       | 169.5953        |
|                | 12 | R 1  | 175.1195       | 88.0637         |

N-term:+35.07

TNLVPHGTEKDVYR, MH+ 1684.9023, m/z 421.9810  
 L OS G28 P150811 220811-s1.03465.03465.4.dta

scan 3465; 1.3e+001

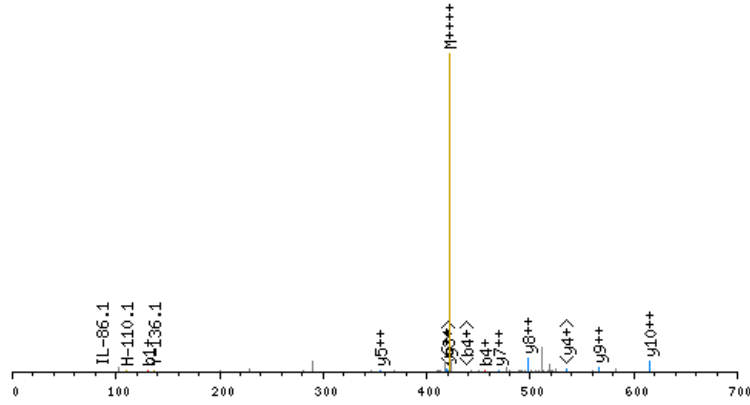

click image to zoom in; click top corners to zoom out [\[precursor±\]](#)

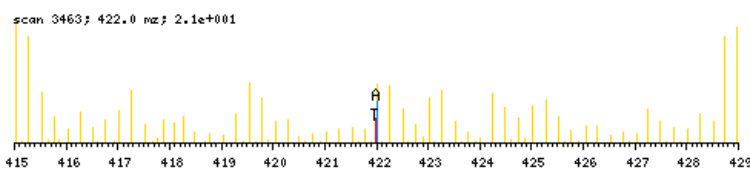

zoomed in precursor plot; T=theoretical m/z, A=acquired m/z

X-range:

-

MassTol: Y-zoom:

MassType:

AVG  MONO

Axis:

1  2

Label:

I  M  -

Ions:

a  +  2+  3+

b  +  2+  3+

c  +  2+  3+

x  +  2+  3+

y  +  2+  3+

z  +  2+  3+

hide H<sub>2</sub>O/NH<sub>3</sub>

zoom 112-122

GO

| b <sup>+</sup> | #  | AA # | y <sup>+</sup> | y <sup>2+</sup> |
|----------------|----|------|----------------|-----------------|
| 130.0868       | 1  | T    | 14             |                 |
| 244.1297       | 2  | N    | 13             | 1555.8233       |
| 357.2138       | 3  | L    | 12             | 1441.7804       |
| 456.2822       | 4  | V    | 11             | 1328.6963       |
| 553.3349       | 5  | P    | 10             | 1229.6279       |
| 690.3939       | 6  | H    | 9              | 1132.5751       |
| 747.4153       | 7  | G    | 8              | 995.5162        |
| 848.4630       | 8  | T    | 7              | 938.4948        |
| 977.5056       | 9  | E    | 6              | 837.4471        |
| 1133.6319      | 10 | K    | 5              | 708.4045        |
| 1248.6588      | 11 | D    | 4              | 552.2782        |
| 1347.7273      | 12 | V    | 3              | 437.2512        |
| 1510.7906      | 13 | Y    | 2              | 338.1828        |
|                | 14 | R    | 1              | 175.1195        |

N-term:+29.04 K(10):+156.13

TNSELVQSGKSEISELR, MH+ 1933.0242, m/z 645.0129  
 L OS G26 P150811 220811-s1.04017.04017.3.dta

X-range:

-

MassTol: Y-zoom:

MassType:

AVG  MONO

Axis:

1  2

Label:

I  M  -

Ions:

a  +  2+  3+

b  +  2+  3+

c  +  2+  3+

x  +  2+  3+

y  +  2+  3+

z  +  2+  3+

hide H<sub>2</sub>O/NH<sub>3</sub>

zoom 112-122

GO

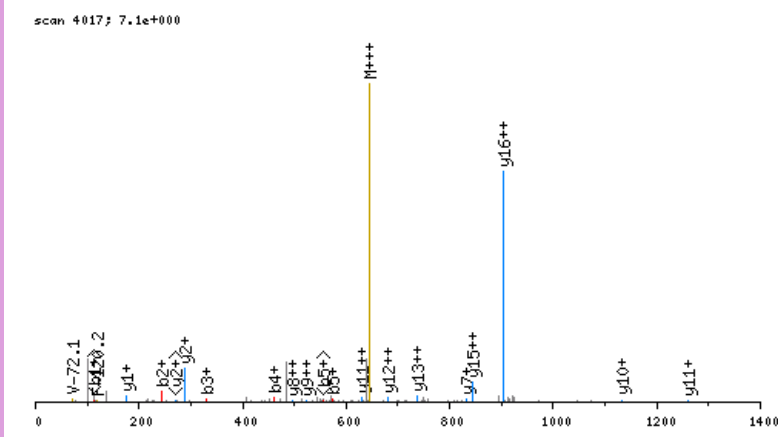

click image to zoom in; click top corners to zoom out [\[precursor±\]](#)

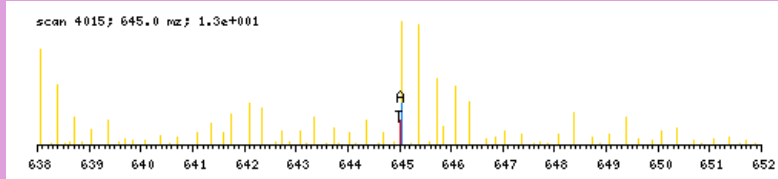

zoomed in precursor plot; T=theoretical m/z, A=acquired m/z

| b <sup>+</sup> | #  | AA | #  | y <sup>+</sup> | y <sup>2+</sup> |
|----------------|----|----|----|----------------|-----------------|
| 130.0868       | 1  | T  | 17 |                |                 |
| 244.1297       | 2  | N  | 16 | 1803.9453      | 902.4765        |
| 331.1617       | 3  | S  | 15 | 1689.9023      | 845.4551        |
| 460.2043       | 4  | E  | 14 | 1602.8703      | 801.9391        |
| 573.2884       | 5  | L  | 13 | 1473.8277      | 737.4178        |
| 672.3568       | 6  | V  | 12 | 1360.7437      | 680.8757        |
| 800.4154       | 7  | Q  | 11 | 1261.6752      | 631.3415        |
| 887.4474       | 8  | S  | 10 | 1133.6167      | 567.3122        |
| 944.4689       | 9  | G  | 9  | 1046.5846      | 523.7962        |
| 1100.5952      | 10 | K  | 8  | 989.5632       | 495.2855        |
| 1187.6272      | 11 | S  | 7  | 833.4369       | 417.2223        |
| 1316.6698      | 12 | E  | 6  | 746.4048       | 373.7063        |
| 1429.7539      | 13 | I  | 5  | 617.3623       | 309.1850        |
| 1516.7859      | 14 | S  | 4  | 504.2782       | 252.6430        |
| 1645.8285      | 15 | E  | 3  | 417.2462       | 209.1270        |
| 1758.9125      | 16 | L  | 2  | 288.2036       | 144.6057        |
|                | 17 | R  | 1  | 175.1195       | 88.0637         |

N-term:+29.04 K(10):+156.13

TNVVMNYSEIESKVR, MH+ 1837.0166, m/z 613.0104  
 H OS G26 P150811 220811-s1.04898.04898.3.dta

X-range:

-

MassTol: Y-zoom:

MassType:

AVG  MONO

Axis:

1  2

Label:

I  M  -

Ions:

a  +  2+  3+

b  +  2+  3+

c  +  2+  3+

x  +  2+  3+

y  +  2+  3+

z  +  2+  3+

hide H<sub>2</sub>O/NH<sub>3</sub>

zoom 112-122

GO

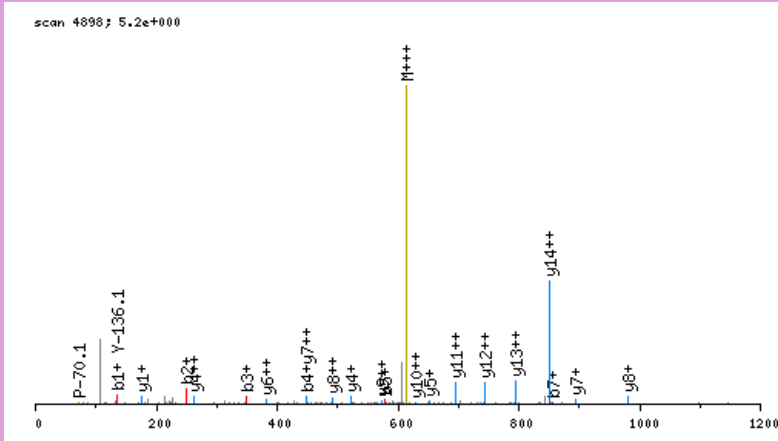

click image to zoom in; click top corners to zoom out [\[precursor±\]](#)

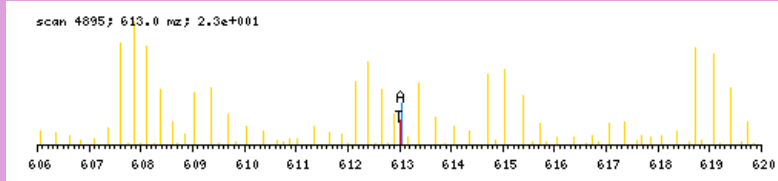

zoomed in precursor plot; T=theoretical m/z, A=acquired m/z

| b <sup>+</sup> | #  | AA # | y <sup>+</sup> | y <sup>2+</sup> |
|----------------|----|------|----------------|-----------------|
| 136.1186       | 1  | T    | 15             |                 |
| 250.1615       | 2  | N    | 14             | 1701.9058       |
| 349.2299       | 3  | V    | 13             | 1587.8629       |
| 448.2983       | 4  | V    | 12             | 1488.7945       |
| 579.3388       | 5  | M    | 11             | 1389.7261       |
| 693.3817       | 6  | N    | 10             | 1258.6856       |
| 856.4451       | 7  | Y    | 9              | 1144.6427       |
| 943.4771       | 8  | S    | 8              | 981.5793        |
| 1072.5197      | 9  | E    | 7              | 894.5473        |
| 1185.6038      | 10 | I    | 6              | 765.5047        |
| 1314.6464      | 11 | E    | 5              | 652.4206        |
| 1401.6784      | 12 | S    | 4              | 523.3780        |
| 1563.8365      | 13 | K    | 3              | 436.3460        |
| 1662.9049      | 14 | V    | 2              | 274.1879        |
|                | 15 | R    | 1              | 175.1195        |

N-term:+35.07 K(13):+162.16

TPEKYLGAEYMQSVGNMR, MH+ 2130.0364, m/z 710.6836  
L OS G26 P150811 220811-s1.04972.04972.3.dta

scan 4972; 4.4e+000

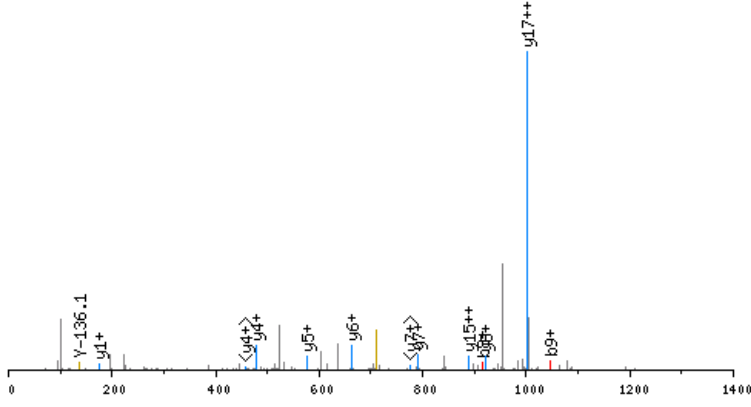

click image to zoom in; click top corners to zoom out [precursor±]

scan 4970; 710.7 mz; 1.8e+001

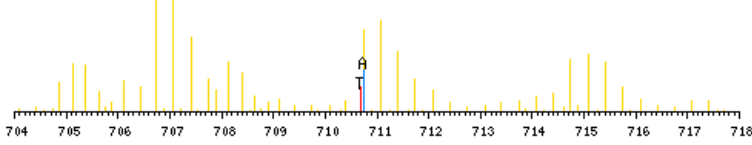

zoomed in precursor plot; T=theoretical m/z, A=acquired m/z

| b <sup>+</sup> | #  | AA # | y <sup>+</sup> | y <sup>2+</sup> |
|----------------|----|------|----------------|-----------------|
| 130.0868       | 1  | T 18 |                |                 |
| 227.1395       | 2  | P 17 | 2000.9574      | 1000.9826       |
| 356.1821       | 3  | E 16 | 1903.9047      | 952.4562        |
| 512.3084       | 4  | K 15 | 1774.8621      | 887.9349        |
| 675.3718       | 5  | Y 14 | 1618.7358      | 809.8718        |
| 788.4558       | 6  | L 13 | 1455.6724      | 728.3401        |
| 845.4773       | 7  | G 12 | 1342.5884      | 671.7981        |
| 916.5144       | 8  | A 11 | 1285.5669      | 643.2874        |
| 1045.5570      | 9  | E 10 | 1214.5298      | 607.7688        |
| 1208.6203      | 10 | Y 9  | 1085.4872      | 543.2475        |
| 1339.6608      | 11 | M 8  | 922.4239       | 461.7159        |
| 1467.7194      | 12 | Q 7  | 791.3834       | 396.1956        |
| 1554.7514      | 13 | S 6  | 663.3248       | 332.1663        |
| 1653.8198      | 14 | V 5  | 576.2928       | 288.6503        |
| 1710.8413      | 15 | G 4  | 477.2244       | 239.1161        |
| 1824.8842      | 16 | N 3  | 420.2029       | 210.6054        |
| 1955.9247      | 17 | M 2  | 306.1600       | 153.5839        |
|                | 18 | R 1  | 175.1195       | 88.0637         |

N-term:+29.04 K(4):+156.13

X-range:

0 - 0

MassTol: Y-zoom:

0. 1.

MassType:

AVG MONO

Axis:

1 2

Label:

I M -

Ions:

a + 2+ 3+

b + 2+ 3+

c + 2+ 3+

x + 2+ 3+

y + 2+ 3+

z + 2+ 3+

hide H<sub>2</sub>O/NH<sub>3</sub>

zoom 112-122

GO

TPEQKKELSDIAHR, MH+ 1735.9707, m/z 434.7481  
 L OS G28 P150811 220811-s1.02300.02300.4.dta

X-range:

-

MassTol: Y-zoom:

MassType:

AVG  MONO

Axis:

1  2

Label:

I  M  -

Ions:

a  +  2+  3+

b  +  2+  3+

c  +  2+  3+

x  +  2+  3+

y  +  2+  3+

z  +  2+  3+

hide H<sub>2</sub>O/NH<sub>3</sub>

zoom 112-122

GO

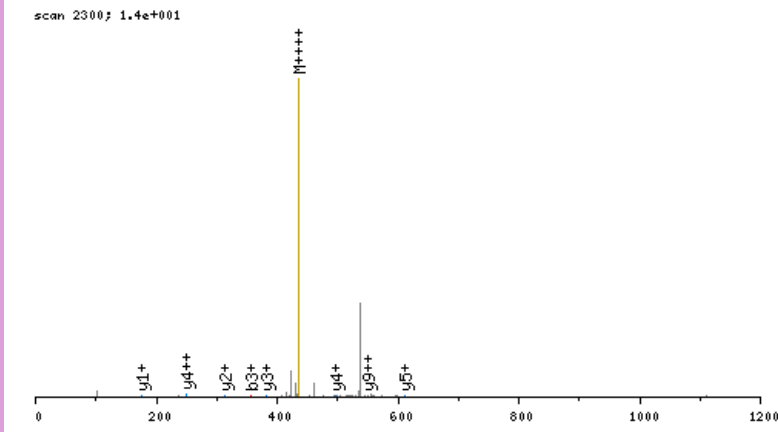

click image to zoom in; click top corners to zoom out [\[precursor±\]](#)

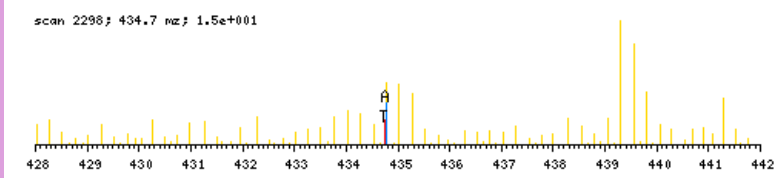

zoomed in precursor plot; T=theoretical m/z, A=acquired m/z

| b <sup>+</sup> | #  | AA # | y <sup>+</sup> | y <sup>2+</sup> |
|----------------|----|------|----------------|-----------------|
| 130.0868       | 1  | T 14 |                |                 |
| 227.1395       | 2  | P 13 | 1606.8918      | 803.9498        |
| 356.1821       | 3  | E 12 | 1509.8390      | 755.4234        |
| 484.2407       | 4  | Q 11 | 1380.7964      | 690.9021        |
| 640.3670       | 5  | K 10 | 1252.7378      | 626.8728        |
| 796.4933       | 6  | K 9  | 1096.6115      | 548.8097        |
| 925.5359       | 7  | E 8  | 940.4852       | 470.7465        |
| 1038.6200      | 8  | L 7  | 811.4426       | 406.2252        |
| 1125.6520      | 9  | S 6  | 698.3586       | 349.6832        |
| 1240.6789      | 10 | D 5  | 611.3265       | 306.1672        |
| 1353.7630      | 11 | I 4  | 496.2996       | 248.6537        |
| 1424.8001      | 12 | A 3  | 383.2155       | 192.1117        |
| 1561.8590      | 13 | H 2  | 312.1784       | 156.5931        |
|                | 14 | R 1  | 175.1195       | 88.0637         |

N-term:+29.04 K(5):+156.13  
 K(6):+156.13

TPGVAADLSHIETR, MH+ 1494.7916, m/z 498.9354  
 L OS G27 P150811 220811-s1.04704.04704.3.dta

X-range:

-

MassTol: Y-zoom:

MassType:

AVG  MONO

Axis:

1  2

Label:

I  M  -

Ions:

a  +  2+  3+

b  +  2+  3+

c  +  2+  3+

x  +  2+  3+

y  +  2+  3+

z  +  2+  3+

hide H<sub>2</sub>O/NH<sub>3</sub>

zoom 112-122

GO

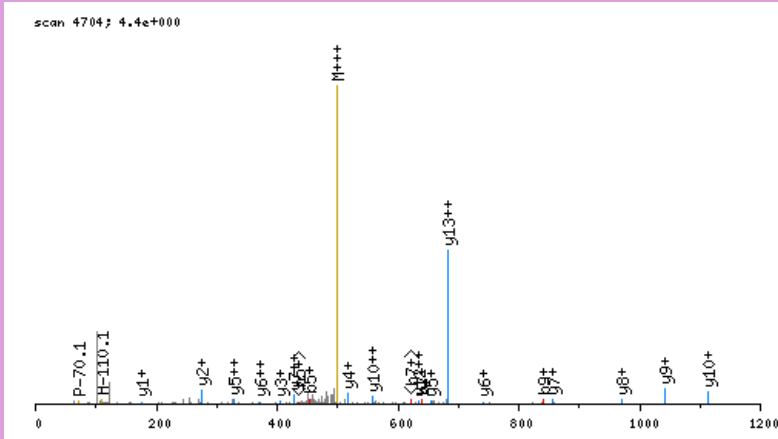

click image to zoom in; click top corners to zoom out [\[precursor±\]](#)

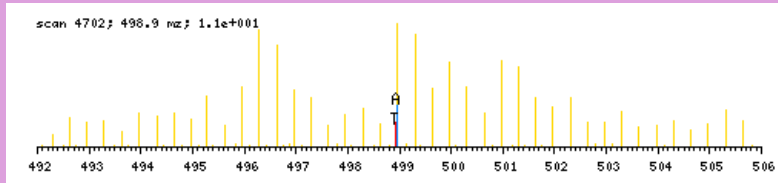

zoomed in precursor plot; T=theoretical m/z, A=acquired m/z

| b <sup>+</sup> | #  | AA # | y <sup>+</sup> | y <sup>2+</sup> |
|----------------|----|------|----------------|-----------------|
| 130.0868       | 1  | T 14 |                |                 |
| 227.1395       | 2  | P 13 | 1365.7127      | 683.3602        |
| 284.1610       | 3  | G 12 | 1268.6599      | 634.8339        |
| 383.2294       | 4  | V 11 | 1211.6384      | 606.3231        |
| 454.2665       | 5  | A 10 | 1112.5700      | 556.7889        |
| 525.3036       | 6  | A 9  | 1041.5329      | 521.2704        |
| 640.3306       | 7  | D 8  | 970.4958       | 485.7518        |
| 753.4147       | 8  | L 7  | 855.4688       | 428.2383        |
| 840.4467       | 9  | S 6  | 742.3848       | 371.6963        |
| 977.5056       | 10 | H 5  | 655.3527       | 328.1803        |
| 1090.5897      | 11 | I 4  | 518.2938       | 259.6508        |
| 1219.6323      | 12 | E 3  | 405.2098       | 203.1088        |
| 1320.6799      | 13 | T 2  | 276.1672       | 138.5875        |
|                | 14 | R 1  | 175.1195       | 88.0637         |

N-term:+29.04

TPKVDFFPQDLATLTGR, MH+ 1943.0602, m/z 648.3583  
 L OS G26 P150811 220811-s1.05702.05702.3.dta

scan 5702; 7.5e-001

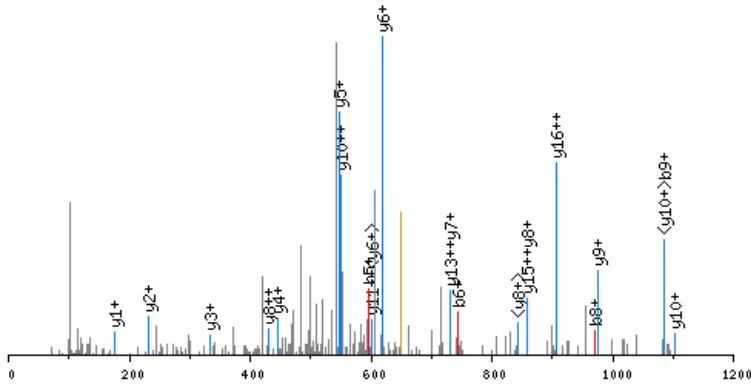

click image to zoom in; click top corners to zoom out [\[precursor±\]](#)

scan 5700; 648.4 m/z; 6.1e+000

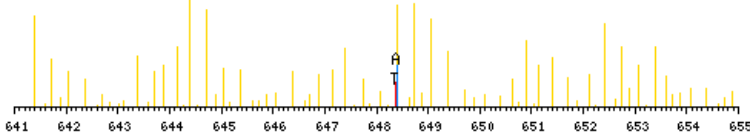

zoomed in precursor plot; T=theoretical m/z, A=acquired m/z

X-range:

-

MassTol: Y-zoom:

MassType:

AVG  MONO

Axis:

1  2

Label:

I  M  -

Ions:

a  +  2+  3+

b  +  2+  3+

c  +  2+  3+

x  +  2+  3+

y  +  2+  3+

z  +  2+  3+

hide H<sub>2</sub>O/NH<sub>3</sub>

zoom 112-122

GO

| b <sup>+</sup> | #  | AA | #  | y <sup>+</sup> | y <sup>2+</sup> |
|----------------|----|----|----|----------------|-----------------|
| 130.0868       | 1  | T  | 17 |                |                 |
| 227.1395       | 2  | P  | 16 | 1813.9813      | 907.4945        |
| 383.2658       | 3  | K  | 15 | 1716.9285      | 858.9682        |
| 482.3343       | 4  | V  | 14 | 1560.8022      | 780.9050        |
| 597.3612       | 5  | D  | 13 | 1461.7338      | 731.3708        |
| 744.4296       | 6  | F  | 12 | 1346.7068      | 673.8573        |
| 841.4824       | 7  | P  | 11 | 1199.6384      | 600.3231        |
| 969.5410       | 8  | Q  | 10 | 1102.5857      | 551.7967        |
| 1084.5679      | 9  | D  | 9  | 974.5271       | 487.7675        |
| 1212.6265      | 10 | Q  | 8  | 859.5001       | 430.2540        |
| 1325.7105      | 11 | L  | 7  | 731.4416       | 366.2247        |
| 1396.7477      | 12 | A  | 6  | 618.3575       | 309.6827        |
| 1497.7953      | 13 | T  | 5  | 547.3204       | 274.1641        |
| 1610.8794      | 14 | L  | 4  | 446.2727       | 223.6403        |
| 1711.9271      | 15 | T  | 3  | 333.1886       | 167.0982        |
| 1768.9485      | 16 | G  | 2  | 232.1410       | 116.5744        |
|                | 17 | R  | 1  | 175.1195       | 88.0637         |

N-term:+29.04 K(3):+156.13



TPLPNLQNGPIYAR, MH+ 1581.8753, m/z 527.9633  
 L OS G25 P150811 220811-s1.06405.06405.3.dta

X-range:

-

MassTol: Y-zoom:

MassType:

AVG  MONO

Axis:

1  2

Label:

I  M  -

Ions:

a  +  2+  3+

b  +  2+  3+

c  +  2+  3+

x  +  2+  3+

y  +  2+  3+

z  +  2+  3+

hide H<sub>2</sub>O/NH<sub>3</sub>

zoom 112-122

GO

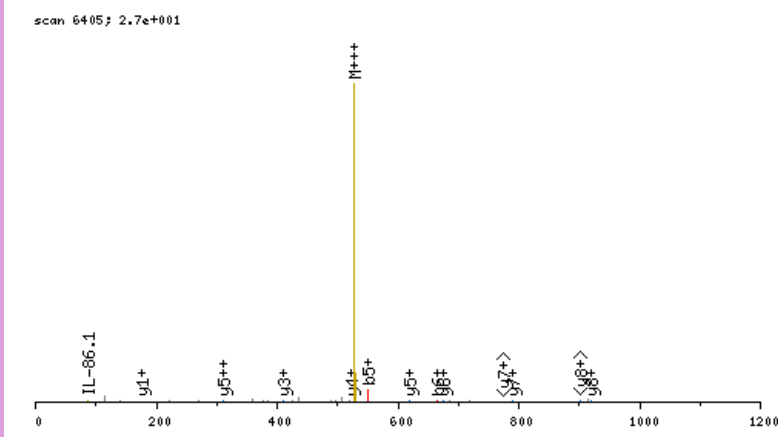

click image to zoom in; click top corners to zoom out [\[precursor±\]](#)

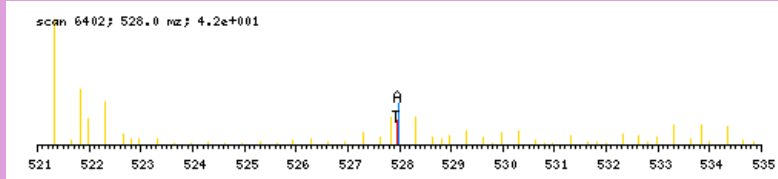

zoomed in precursor plot; T=theoretical m/z, A=acquired m/z

| b <sup>+</sup> | #  | AA # | y <sup>+</sup> | y <sup>2+</sup> |
|----------------|----|------|----------------|-----------------|
| 130.0868       | 1  | T 14 |                |                 |
| 227.1395       | 2  | P 13 | 1452.7963      | 726.9021        |
| 340.2236       | 3  | L 12 | 1355.7436      | 678.3757        |
| 437.2764       | 4  | P 11 | 1242.6595      | 621.8337        |
| 551.3193       | 5  | N 10 | 1145.6067      | 573.3073        |
| 664.4034       | 6  | L 9  | 1031.5638      | 516.2858        |
| 792.4619       | 7  | Q 8  | 918.4797       | 459.7438        |
| 906.5049       | 8  | N 7  | 790.4212       | 395.7145        |
| 963.5263       | 9  | G 6  | 676.3782       | 338.6930        |
| 1060.5791      | 10 | P 5  | 619.3568       | 310.1823        |
| 1173.6632      | 11 | I 4  | 522.3040       | 261.6559        |
| 1336.7265      | 12 | Y 3  | 409.2199       | 205.1139        |
| 1407.7636      | 13 | A 2  | 246.1566       | 123.5822        |
|                | 14 | R 1  | 175.1195       | 88.0637         |

N-term:+29.04

TPSALAIMENANVLAR, MH+ 1704.9530, m/z 568.9892  
 H OS G25 P150811 220811-s1.08109.08109.3.dta

X-range:

-

MassTol: Y-zoom:

MassType:

AVG  MONO

Axis:

1  2

Label:

I  M  -

Ions:

a  +  2+  3+

b  +  2+  3+

c  +  2+  3+

x  +  2+  3+

y  +  2+  3+

z  +  2+  3+

hide H<sub>2</sub>O/NH<sub>3</sub>

zoom 112-122

GO

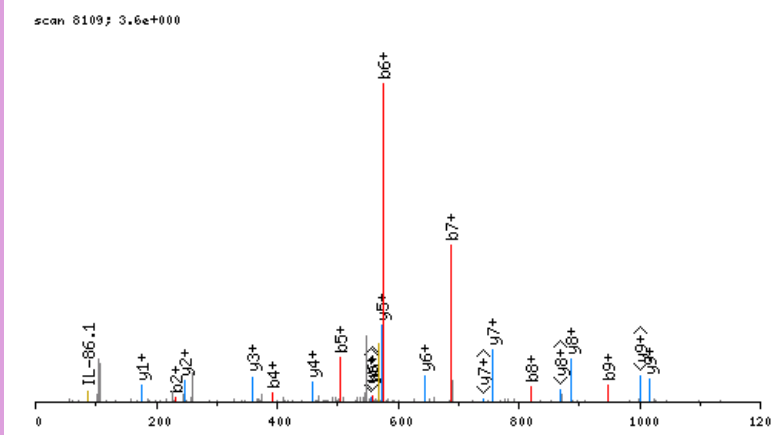

click image to zoom in; click top corners to zoom out [\[precursor±\]](#)

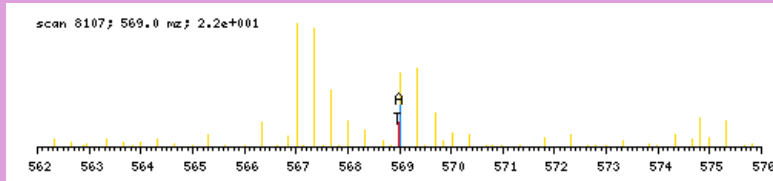

zoomed in precursor plot; T=theoretical m/z, A=acquired m/z

| b <sup>+</sup> | #  | AA # | y <sup>+</sup> | y <sup>2+</sup> |
|----------------|----|------|----------------|-----------------|
| 136.1186       | 1  | T 16 |                |                 |
| 233.1713       | 2  | P 15 | 1569.8423      | 785.4251        |
| 320.2034       | 3  | S 14 | 1472.7895      | 736.8987        |
| 391.2405       | 4  | A 13 | 1385.7575      | 693.3827        |
| 504.3245       | 5  | L 12 | 1314.7204      | 657.8641        |
| 575.3617       | 6  | A 11 | 1201.6363      | 601.3221        |
| 688.4457       | 7  | I 10 | 1130.5992      | 565.8035        |
| 819.4862       | 8  | M 9  | 1017.5151      | 509.2615        |
| 948.5288       | 9  | E 8  | 886.4747       | 443.7412        |
| 1062.5717      | 10 | N 7  | 757.4321       | 379.2199        |
| 1133.6088      | 11 | A 6  | 643.3891       | 322.1985        |
| 1247.6518      | 12 | N 5  | 572.3520       | 286.6799        |
| 1346.7202      | 13 | V 4  | 458.3091       | 229.6585        |
| 1459.8043      | 14 | L 3  | 359.2407       | 180.1243        |
| 1530.8414      | 15 | A 2  | 246.1566       | 123.5822        |
|                | 16 | R 1  | 175.1195       | 88.0637         |

N-term:+35.07

TPSVDHGFLVTR, MH+ 1356.7275, m/z 452.9140  
 L OS G27 P150811 220811-s1.04464.04464.3.dta

X-range:

-

MassTol: Y-zoom:

MassType:

AVG  MONO

Axis:

1  2

Label:

I  M  -

Ions:

a  +  2+  3+

b  +  2+  3+

c  +  2+  3+

x  +  2+  3+

y  +  2+  3+

z  +  2+  3+

hide H<sub>2</sub>O/NH<sub>3</sub>

zoom 112-122

GO

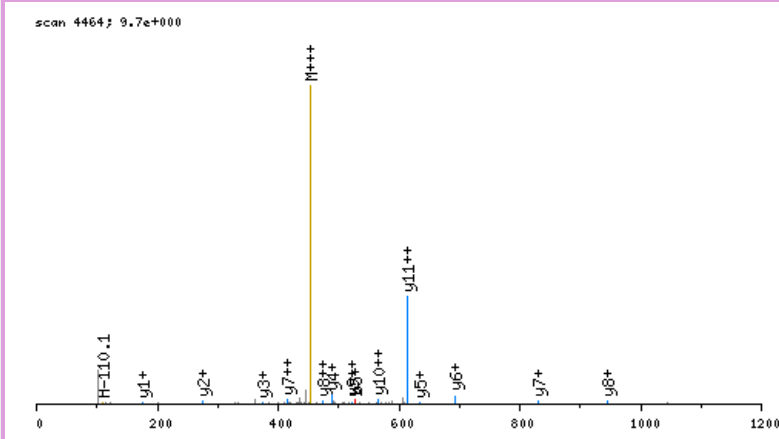

click image to zoom in; click top corners to zoom out [\[precursor±\]](#)

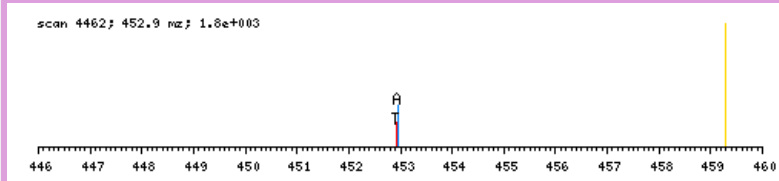

zoomed in precursor plot; T=theoretical m/z, A=acquired m/z

| b <sup>+</sup> | #  | AA # | y <sup>+</sup> | y <sup>2+</sup> |
|----------------|----|------|----------------|-----------------|
| 130.0868       | 1  | T 12 |                |                 |
| 227.1395       | 2  | P 11 | 1227.6486      | 614.3282        |
| 314.1716       | 3  | S 10 | 1130.5958      | 565.8018        |
| 413.2400       | 4  | V 9  | 1043.5638      | 522.2858        |
| 528.2669       | 5  | D 8  | 944.4954       | 472.7516        |
| 665.3258       | 6  | H 7  | 829.4684       | 415.2381        |
| 722.3473       | 7  | G 6  | 692.4095       | 346.7087        |
| 869.4157       | 8  | F 5  | 635.3881       | 318.1979        |
| 982.4998       | 9  | L 4  | 488.3197       | 244.6637        |
| 1081.5682      | 10 | V 3  | 375.2356       | 188.1217        |
| 1182.6159      | 11 | T 2  | 276.1672       | 138.5875        |
|                | 12 | R 1  | 175.1195       | 88.0637         |

N-term:+29.04

TPVSEHVTKCCSGSLVER, MH+ 2114.1009, m/z 529.2807  
 H OS G28 P150811 220811-s1.02894.02894.4.dta

X-range:

-

MassTol: Y-zoom:

MassType:

AVG  MONO

Axis:

1  2

Label:

I  M  -

Ions:

a  +  2+  3+

b  +  2+  3+

c  +  2+  3+

x  +  2+  3+

y  +  2+  3+

z  +  2+  3+

hide H<sub>2</sub>O/NH<sub>3</sub>

zoom 112-122

GO

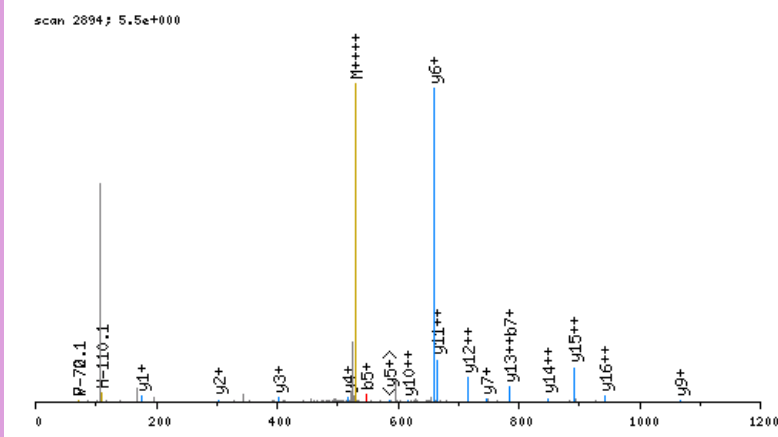

click image to zoom in; click top corners to zoom out [\[precursor±\]](#)

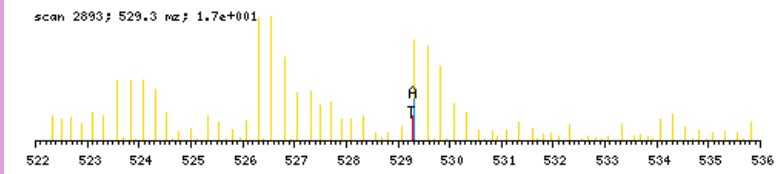

zoomed in precursor plot; T=theoretical m/z, A=acquired m/z

| b <sup>+</sup> | #  | AA | #  | y <sup>+</sup> | y <sup>2+</sup> |
|----------------|----|----|----|----------------|-----------------|
| 136.1186       | 1  | T  | 18 |                |                 |
| 233.1713       | 2  | P  | 17 | 1978.9902      | 989.9990        |
| 332.2398       | 3  | V  | 16 | 1881.9374      | 941.4726        |
| 419.2718       | 4  | S  | 15 | 1782.8690      | 891.9384        |
| 548.3144       | 5  | E  | 14 | 1695.8370      | 848.4224        |
| 685.3733       | 6  | H  | 13 | 1566.7944      | 783.9011        |
| 784.4417       | 7  | V  | 12 | 1429.7355      | 715.3717        |
| 885.4894       | 8  | T  | 11 | 1330.6671      | 665.8374        |
| 1047.6475      | 9  | K  | 10 | 1229.6194      | 615.3136        |
| 1207.6781      | 10 | C  | 9  | 1067.4613      | 534.2346        |
| 1367.7087      | 11 | C  | 8  | 907.4307       | 454.2193        |
| 1454.7407      | 12 | S  | 7  | 747.4001       | 374.2040        |
| 1511.7622      | 13 | G  | 6  | 660.3681       | 330.6879        |
| 1598.7942      | 14 | S  | 5  | 603.3466       | 302.1772        |
| 1711.8783      | 15 | L  | 4  | 516.3146       | 258.6612        |
| 1810.9467      | 16 | V  | 3  | 403.2305       | 202.1192        |
| 1939.9893      | 17 | E  | 2  | 304.1621       | 152.5850        |
|                | 18 | R  | 1  | 175.1195       | 88.0637         |

N-term:+35.07 K(9):+162.16  
 C(10):+160.03 C(11):+160.03

TQKAPQVSTPTLVEAAR, MH+ 1853.0496, m/z 618.3547  
 L OS G26 P150811 220811-s1.03144.03144.3.dta

X-range:

-

MassTol: Y-zoom:

MassType:

AVG  MONO

Axis:

1  2

Label:

I  M  -

Ions:

a  +  2+  3+

b  +  2+  3+

c  +  2+  3+

x  +  2+  3+

y  +  2+  3+

z  +  2+  3+

hide H<sub>2</sub>O/NH<sub>3</sub>

zoom 112-122

GO

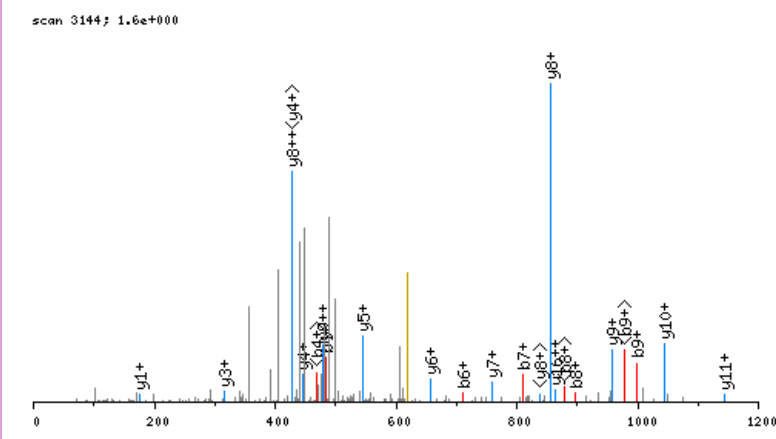

click image to zoom in; click top corners to zoom out [\[precursor±\]](#)

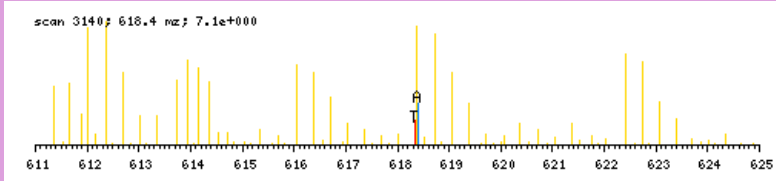

zoomed in precursor plot; T=theoretical m/z, A=acquired m/z

| b <sup>+</sup> | #  | AA # | y <sup>+</sup> | y <sup>2+</sup> |
|----------------|----|------|----------------|-----------------|
| 130.0868       | 1  | T 17 |                |                 |
| 258.1454       | 2  | Q 16 | 1723.9707      | 862.4893        |
| 414.2717       | 3  | K 15 | 1595.9121      | 798.4600        |
| 485.3088       | 4  | A 14 | 1439.7858      | 720.3968        |
| 582.3615       | 5  | P 13 | 1368.7487      | 684.8783        |
| 710.4201       | 6  | Q 12 | 1271.6959      | 636.3519        |
| 809.4885       | 7  | V 11 | 1143.6374      | 572.3226        |
| 896.5206       | 8  | S 10 | 1044.5689      | 522.7884        |
| 997.5682       | 9  | T 9  | 957.5369       | 479.2724        |
| 1094.6210      | 10 | P 8  | 856.4892       | 428.7485        |
| 1195.6687      | 11 | T 7  | 759.4365       | 380.2222        |
| 1308.7527      | 12 | L 6  | 658.3888       | 329.6983        |
| 1407.8212      | 13 | V 5  | 545.3047       | 273.1563        |
| 1536.8637      | 14 | E 4  | 446.2363       | 223.6221        |
| 1607.9009      | 15 | A 3  | 317.1937       | 159.1008        |
| 1678.9380      | 16 | A 2  | 246.1566       | 123.5822        |
|                | 17 | R 1  | 175.1195       | 88.0637         |

N-term:+29.04 K(3):+156.13

TQKFSNEEIAMATVTALR, MH+ 2078.1592, m/z 693.3913  
 H OS G26 P150811 220811-s1.05808.05808.3.dta

scan 5808; 8.1e+000

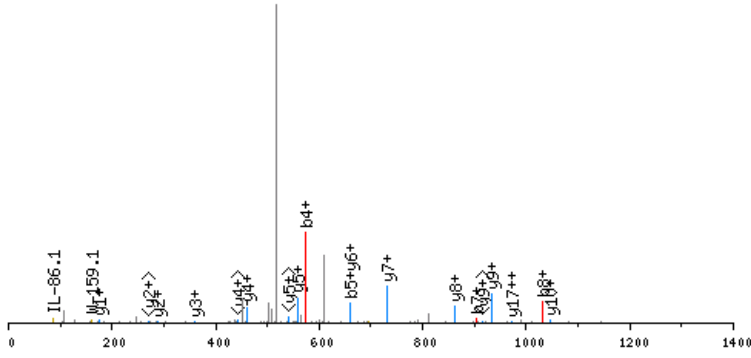

click image to zoom in; click top corners to zoom out [\[precursor±\]](#)

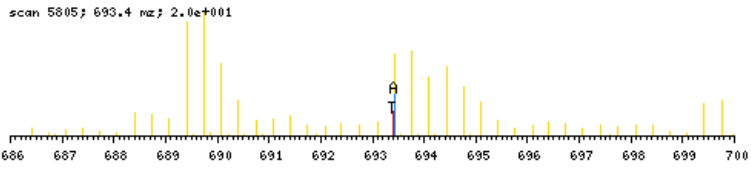

zoomed in precursor plot; T=theoretical m/z, A=acquired m/z

X-range:

-

MassTol: Y-zoom:

MassType:

AVG  MONO

Axis:

1  2

Label:

I  M  -

Ions:

a  +  2+  3+

b  +  2+  3+

c  +  2+  3+

x  +  2+  3+

y  +  2+  3+

z  +  2+  3+

hide H<sub>2</sub>O/NH<sub>3</sub>

zoom 112-122

GO

| b <sup>+</sup> | #  | AA | #  | y <sup>+</sup> | y <sup>2+</sup> |
|----------------|----|----|----|----------------|-----------------|
| 136.1186       | 1  | T  | 18 |                |                 |
| 264.1772       | 2  | Q  | 17 | 1943.0485      | 972.0281        |
| 426.3353       | 3  | K  | 16 | 1814.9899      | 907.9989        |
| 573.4037       | 4  | F  | 15 | 1652.8318      | 826.9198        |
| 660.4357       | 5  | S  | 14 | 1505.7634      | 753.3856        |
| 774.4786       | 6  | N  | 13 | 1418.7313      | 709.8696        |
| 903.5212       | 7  | E  | 12 | 1304.6884      | 652.8481        |
| 1032.5638      | 8  | E  | 11 | 1175.6458      | 588.3268        |
| 1145.6479      | 9  | I  | 10 | 1046.6032      | 523.8055        |
| 1216.6850      | 10 | A  | 9  | 933.5192       | 467.2635        |
| 1347.7255      | 11 | M  | 8  | 862.4820       | 431.7449        |
| 1418.7626      | 12 | A  | 7  | 731.4416       | 366.2247        |
| 1519.8103      | 13 | T  | 6  | 660.4044       | 330.7061        |
| 1618.8787      | 14 | V  | 5  | 559.3568       | 280.1823        |
| 1719.9264      | 15 | T  | 4  | 460.2884       | 230.6481        |
| 1790.9635      | 16 | A  | 3  | 359.2407       | 180.1243        |
| 1904.0475      | 17 | L  | 2  | 288.2036       | 144.6057        |
|                | 18 | R  | 1  | 175.1195       | 88.0637         |

N-term:+35.07 K(3):+162.16

TQSSLPPDMYECLR, MH+ 1730.8305, m/z 577.6150  
 H OS G25 P150811 220811-s1.06180.06180.3.dta

X-range:

-

MassTol: Y-zoom:

MassType:

AVG  MONO

Axis:

1  2

Label:

I  M  -

Ions:

a  +  2+  3+

b  +  2+  3+

c  +  2+  3+

x  +  2+  3+

y  +  2+  3+

z  +  2+  3+

hide H<sub>2</sub>O/NH<sub>3</sub>

zoom 112-122

GO

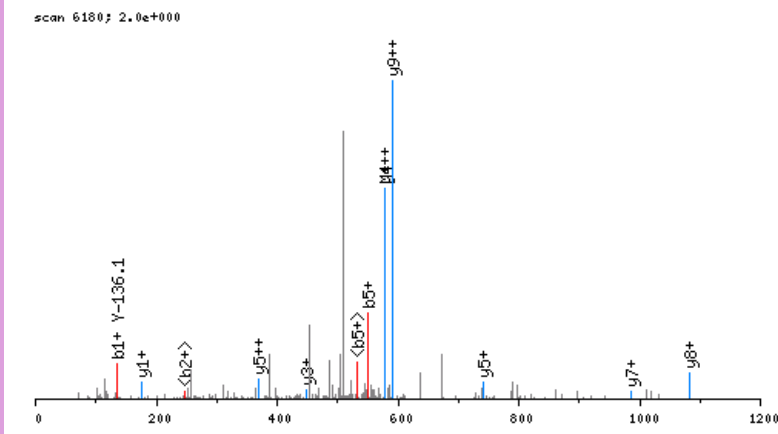

click image to zoom in; click top corners to zoom out [\[precursor±\]](#)

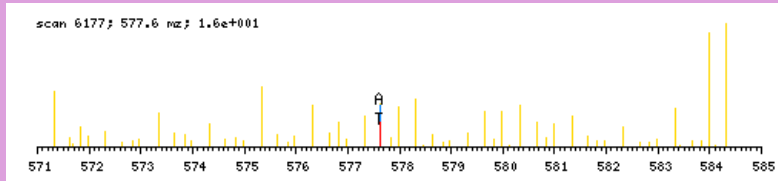

zoomed in precursor plot; T=theoretical m/z, A=acquired m/z

| b <sup>+</sup> | #  | AA # | y <sup>+</sup> | y <sup>2+</sup> |
|----------------|----|------|----------------|-----------------|
| 136.1186       | 1  | T 14 |                |                 |
| 264.1772       | 2  | Q 13 | 1595.7197      | 798.3638        |
| 351.2092       | 3  | S 12 | 1467.6612      | 734.3345        |
| 438.2412       | 4  | S 11 | 1380.6291      | 690.8185        |
| 551.3253       | 5  | L 10 | 1293.5971      | 647.3025        |
| 648.3780       | 6  | P 9  | 1180.5130      | 590.7604        |
| 745.4308       | 7  | P 8  | 1083.4603      | 542.2341        |
| 860.4577       | 8  | D 7  | 986.4075       | 493.7077        |
| 991.4982       | 9  | M 6  | 871.3806       | 436.1942        |
| 1154.5616      | 10 | Y 5  | 740.3401       | 370.6740        |
| 1283.6042      | 11 | E 4  | 577.2768       | 289.1423        |
| 1443.6348      | 12 | C 3  | 448.2342       | 224.6210        |
| 1556.7188      | 13 | L 2  | 288.2036       | 144.6057        |
|                | 14 | R 1  | 175.1195       | 88.0637         |

N-term:+35.07 C(12):+160.03

TQVEGDEEAALLER, MH+ 1593.8184, m/z 531.9443  
 H OS G25 P150811 220811-s1.05291.05291.3.dta

scan 5291; 2.0e+000

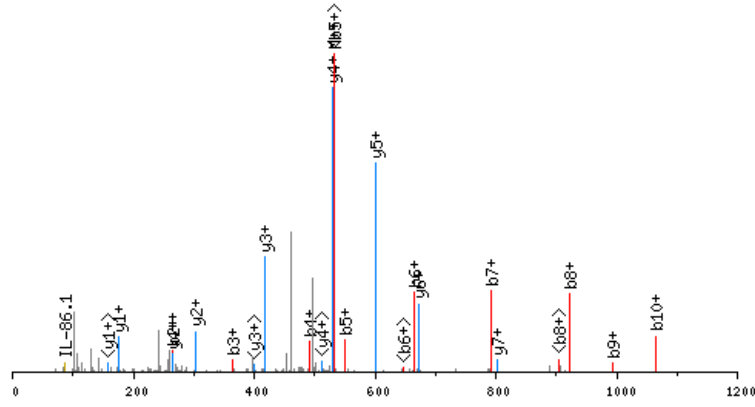

click image to zoom in; click top corners to zoom out [\[precursor±\]](#)

scan 5287; 531.9 m/z; 9.9e+001

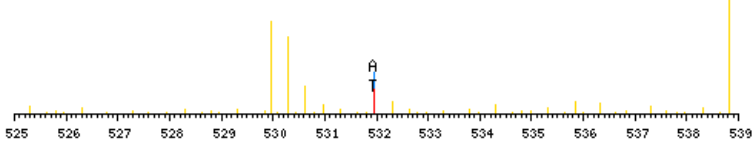

zoomed in precursor plot; T=theoretical m/z, A=acquired m/z

X-range:

-

MassTol: Y-zoom:

MassType:

AVG  MONO

Axis:

1  2

Label:

I  M  -

Ions:

a  +  2+  3+

b  +  2+  3+

c  +  2+  3+

x  +  2+  3+

y  +  2+  3+

z  +  2+  3+

hide H<sub>2</sub>O/NH<sub>3</sub>

zoom 112-122

GO

| b <sup>+</sup> | #  | AA | #  | y <sup>+</sup> | y <sup>2+</sup> |
|----------------|----|----|----|----------------|-----------------|
| 136.1186       | 1  | T  | 14 |                |                 |
| 264.1772       | 2  | Q  | 13 | 1458.7076      | 729.8577        |
| 363.2456       | 3  | V  | 12 | 1330.6490      | 665.8284        |
| 492.2882       | 4  | E  | 11 | 1231.5806      | 616.2942        |
| 549.3096       | 5  | G  | 10 | 1102.5380      | 551.7729        |
| 664.3366       | 6  | D  | 9  | 1045.5166      | 523.2622        |
| 793.3792       | 7  | E  | 8  | 930.4896       | 465.7487        |
| 922.4218       | 8  | E  | 7  | 801.4470       | 401.2274        |
| 993.4589       | 9  | A  | 6  | 672.4044       | 336.7061        |
| 1064.4960      | 10 | A  | 5  | 601.3673       | 301.1876        |
| 1177.5800      | 11 | L  | 4  | 530.3302       | 265.6690        |
| 1290.6641      | 12 | L  | 3  | 417.2462       | 209.1270        |
| 1419.7067      | 13 | E  | 2  | 304.1621       | 152.5850        |
|                | 14 | R  | 1  | 175.1195       | 88.0637         |

N-term:+35.07



TQWREDEEEAAR, MH+ 1682.7834, m/z 561.5993  
 H OS G27 P150811 220811-s1.02604.02604.3.dta

X-range:

-

MassTol: Y-zoom:

MassType:

AVG  MONO

Axis:

1  2

Label:

I  M  -

Ions:

a  +  2+  3+

b  +  2+  3+

c  +  2+  3+

x  +  2+  3+

y  +  2+  3+

z  +  2+  3+

hide H<sub>2</sub>O/NH<sub>3</sub>

zoom 112-122

GO

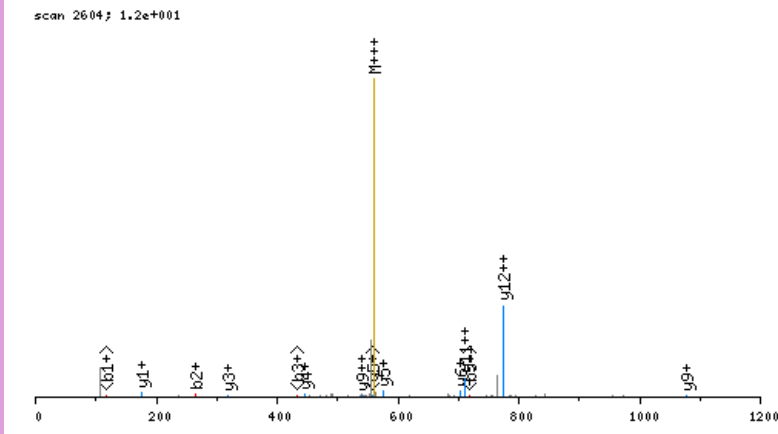

click image to zoom in; click top corners to zoom out [\[precursor±\]](#)

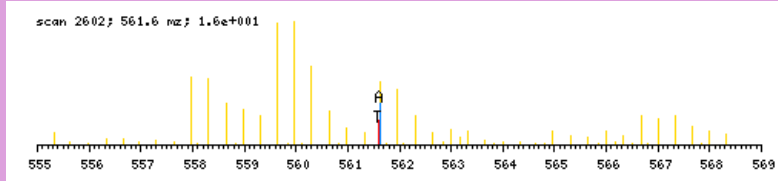

zoomed in precursor plot; T=theoretical m/z, A=acquired m/z

| b <sup>+</sup> | #  | AA # | y <sup>+</sup> | y <sup>2+</sup> |
|----------------|----|------|----------------|-----------------|
| 136.1186       | 1  | T    | 13             |                 |
| 264.1772       | 2  | Q    | 12             | 1547.6726       |
| 450.2565       | 3  | W    | 11             | 1419.6141       |
| 606.3576       | 4  | R    | 10             | 1233.5347       |
| 735.4002       | 5  | E    | 9              | 1077.4336       |
| 864.4428       | 6  | E    | 8              | 948.3910        |
| 979.4697       | 7  | D    | 7              | 819.3485        |
| 1108.5123      | 8  | E    | 6              | 704.3215        |
| 1237.5549      | 9  | E    | 5              | 575.2789        |
| 1366.5975      | 10 | E    | 4              | 446.2363        |
| 1437.6346      | 11 | A    | 3              | 317.1937        |
| 1508.6717      | 12 | A    | 2              | 246.1566        |
|                | 13 | R    | 1              | 175.1195        |

N-term:+35.07

TREAVTEILGIEPDR, MH+ 1726.9339, m/z 576.3162  
 L OS G27 P150811 220811-s1.06376.06376.3.dta

X-range:

-

MassTol: Y-zoom:

MassType:

AVG  MONO

Axis:

1  2

Label:

I  M  -

Ions:

a  +  2+  3+

b  +  2+  3+

c  +  2+  3+

x  +  2+  3+

y  +  2+  3+

z  +  2+  3+

hide H<sub>2</sub>O/NH<sub>3</sub>

zoom 112-122

GO

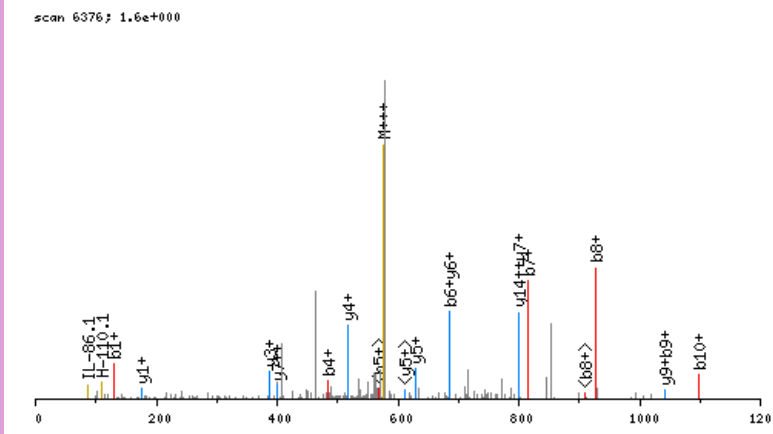

click image to zoom in; click top corners to zoom out [\[precursor±\]](#)

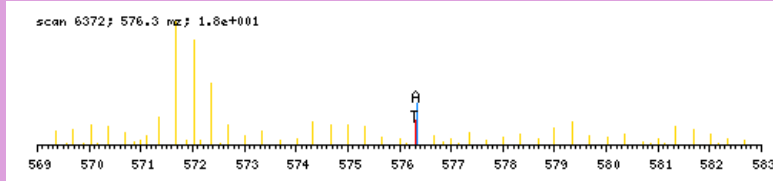

zoomed in precursor plot; T=theoretical m/z, A=acquired m/z

| b <sup>+</sup> | #  | AA # | y <sup>+</sup> | y <sup>2+</sup> |
|----------------|----|------|----------------|-----------------|
| 130.0868       | 1  | T 15 |                |                 |
| 286.1879       | 2  | R 14 | 1597.8550      | 799.4314        |
| 415.2305       | 3  | E 13 | 1441.7538      | 721.3808        |
| 486.2676       | 4  | A 12 | 1312.7113      | 656.8595        |
| 585.3360       | 5  | V 11 | 1241.6741      | 621.3410        |
| 686.3837       | 6  | T 10 | 1142.6057      | 571.8068        |
| 815.4263       | 7  | E 9  | 1041.5580      | 521.2829        |
| 928.5103       | 8  | I 8  | 912.5155       | 456.7616        |
| 1041.5944      | 9  | L 7  | 799.4314       | 400.2196        |
| 1098.6159      | 10 | G 6  | 686.3473       | 343.6776        |
| 1211.6999      | 11 | I 5  | 629.3259       | 315.1668        |
| 1340.7425      | 12 | E 4  | 516.2418       | 258.6248        |
| 1437.7953      | 13 | P 3  | 387.1992       | 194.1035        |
| 1552.8222      | 14 | D 2  | 290.1464       | 145.5771        |
|                | 15 | R 1  | 175.1195       | 88.0637         |

N-term:+29.04

TRGTVTDFPGFDGR, MH+ 1553.7712, m/z 518.5953  
 L OS G27 P150811 220811-s1.05135.05135.3.dta

X-range:

-

MassTol: Y-zoom:

MassType:

AVG  MONO

Axis:

1  2

Label:

I  M  -

Ions:

a  +  2+  3+

b  +  2+  3+

c  +  2+  3+

x  +  2+  3+

y  +  2+  3+

z  +  2+  3+

hide H<sub>2</sub>O/NH<sub>3</sub>

zoom 112-122

GO

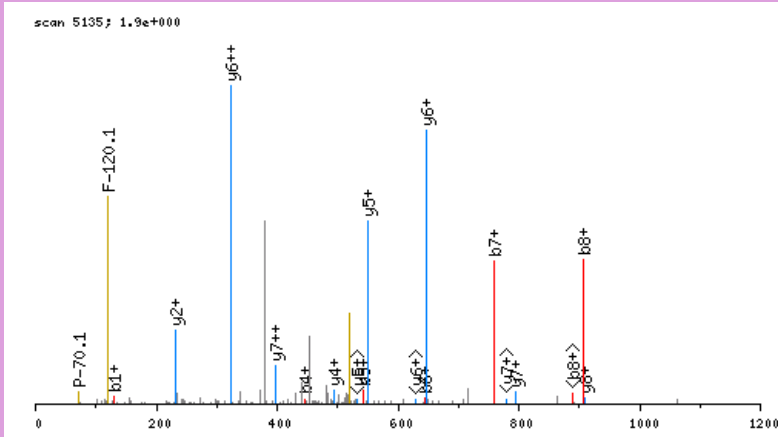

click image to zoom in; click top corners to zoom out [\[precursor±\]](#)

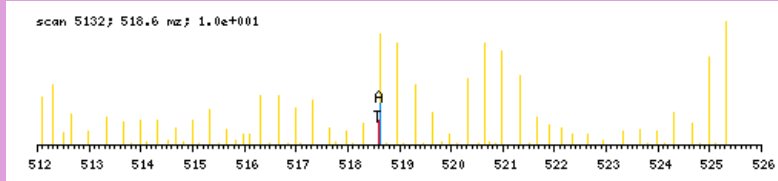

zoomed in precursor plot; T=theoretical m/z, A=acquired m/z

| b <sup>+</sup> | #  | AA # | y <sup>+</sup> | y <sup>2+</sup> |
|----------------|----|------|----------------|-----------------|
| 130.0868       | 1  | T 14 |                |                 |
| 286.1879       | 2  | R 13 | 1424.6923      | 712.8500        |
| 343.2094       | 3  | G 12 | 1268.5911      | 634.7995        |
| 444.2570       | 4  | T 11 | 1211.5697      | 606.2888        |
| 543.3254       | 5  | V 10 | 1110.5220      | 555.7649        |
| 644.3731       | 6  | T 9  | 1011.4536      | 506.2307        |
| 759.4001       | 7  | D 8  | 910.4059       | 455.7069        |
| 906.4685       | 8  | F 7  | 795.3790       | 398.1934        |
| 1003.5212      | 9  | P 6  | 648.3105       | 324.6592        |
| 1060.5427      | 10 | G 5  | 551.2578       | 276.1328        |
| 1207.6111      | 11 | F 4  | 494.2363       | 247.6221        |
| 1322.6381      | 12 | D 3  | 347.1679       | 174.0879        |
| 1379.6595      | 13 | G 2  | 232.1410       | 116.5744        |
|                | 14 | R 1  | 175.1195       | 88.0637         |

N-term:+29.04

TRKPVDPYEDCYLAR, MH+ 1982.0441, m/z 496.2665  
 H OS G28 P150811 220811-s1.03922.03922.4.dta

X-range:

-

MassTol: Y-zoom:

MassType:

AVG  MONO

Axis:

1  2

Label:

I  M  -

Ions:

a  +  2+  3+

b  +  2+  3+

c  +  2+  3+

x  +  2+  3+

y  +  2+  3+

z  +  2+  3+

hide H<sub>2</sub>O/NH<sub>3</sub>

zoom 112-122

GO

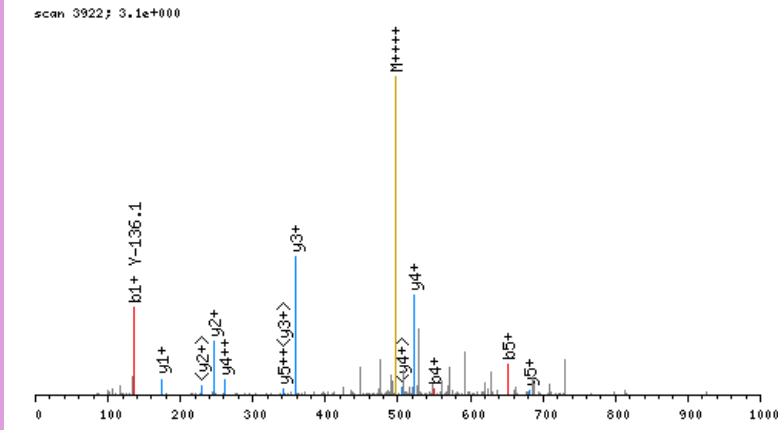

click image to zoom in; click top corners to zoom out [\[precursor±\]](#)

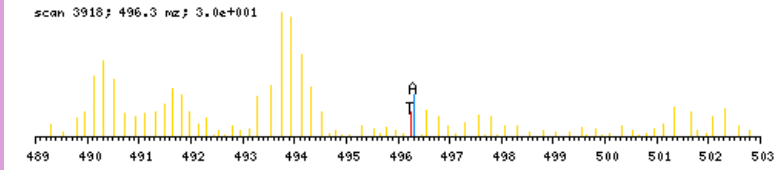

zoomed in precursor plot; T=theoretical m/z, A=acquired m/z

| b <sup>+</sup> | #  | AA | #  | y <sup>+</sup> | y <sup>2+</sup> |
|----------------|----|----|----|----------------|-----------------|
| 136.1186       | 1  | T  | 15 |                |                 |
| 292.2197       | 2  | R  | 14 | 1846.9334      | 923.9706        |
| 454.3778       | 3  | K  | 13 | 1690.8323      | 845.9200        |
| 551.4306       | 4  | P  | 12 | 1528.6742      | 764.8410        |
| 650.4990       | 5  | V  | 11 | 1431.6214      | 716.3146        |
| 765.5259       | 6  | D  | 10 | 1332.5530      | 666.7804        |
| 893.5845       | 7  | Q  | 9  | 1217.5260      | 609.2669        |
| 1056.6478      | 8  | Y  | 8  | 1089.4675      | 545.2376        |
| 1185.6904      | 9  | E  | 7  | 926.4041       | 463.7060        |
| 1300.7174      | 10 | D  | 6  | 797.3616       | 399.1847        |
| 1460.7480      | 11 | C  | 5  | 682.3346       | 341.6712        |
| 1623.8113      | 12 | Y  | 4  | 522.3040       | 261.6559        |
| 1736.8953      | 13 | L  | 3  | 359.2407       | 180.1243        |
| 1807.9325      | 14 | A  | 2  | 246.1566       | 123.5822        |
|                | 15 | R  | 1  | 175.1195       | 88.0637         |

N-term:+35.07 K(3):+162.16  
 C(11):+160.03

TSAIQDYLQQLTGAR, MH+ 1692.8920, m/z 564.9689  
 L OS G25 P150811 220811-s1.08226.08226.3.dta

scan 8226; 1.8e+000

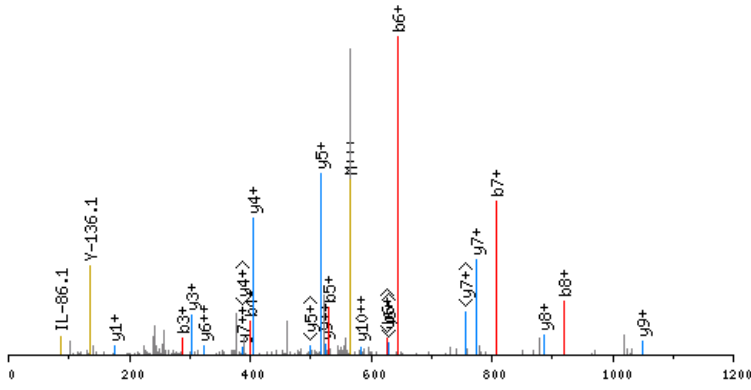

click image to zoom in; click top corners to zoom out [precursor±]

scan 8222; 565.0 m/z; 5.4e+001

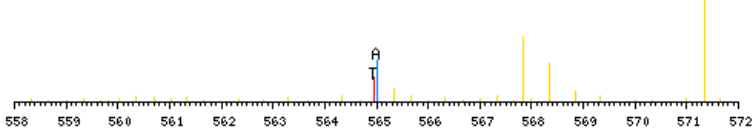

zoomed in precursor plot; T=theoretical m/z, A=acquired m/z

X-range:

-

MassTol: Y-zoom:

MassType:

AVG  MONO

Axis:

1  2

Label:

I  M  -

Ions:

a  +  2+  3+

b  +  2+  3+

c  +  2+  3+

x  +  2+  3+

y  +  2+  3+

z  +  2+  3+

hide H<sub>2</sub>O/NH<sub>3</sub>

zoom 112-122

GO

| b <sup>+</sup> | #  | AA | #  | y <sup>+</sup> | y <sup>2+</sup> |
|----------------|----|----|----|----------------|-----------------|
| 130.0868       | 1  | T  | 15 |                |                 |
| 217.1188       | 2  | S  | 14 | 1563.8131      | 782.4105        |
| 288.1559       | 3  | A  | 13 | 1476.7811      | 738.8944        |
| 401.2400       | 4  | I  | 12 | 1405.7440      | 703.3759        |
| 529.2986       | 5  | Q  | 11 | 1292.6599      | 646.8339        |
| 644.3255       | 6  | D  | 10 | 1164.6013      | 582.8046        |
| 807.3888       | 7  | Y  | 9  | 1049.5744      | 525.2911        |
| 920.4729       | 8  | L  | 8  | 886.5110       | 443.7594        |
| 1048.5315      | 9  | Q  | 7  | 773.4270       | 387.2174        |
| 1176.5901      | 10 | Q  | 6  | 645.3684       | 323.1881        |
| 1289.6741      | 11 | L  | 5  | 517.3098       | 259.1588        |
| 1390.7218      | 12 | T  | 4  | 404.2258       | 202.6168        |
| 1447.7433      | 13 | G  | 3  | 303.1781       | 152.0930        |
| 1518.7804      | 14 | A  | 2  | 246.1566       | 123.5822        |
|                | 15 | R  | 1  | 175.1195       | 88.0637         |

N-term:+29.04

TSIAIDTIINQKR, MH+ 1528.9063, m/z 510.3069  
 L OS G26 P150811 220811-s1.05002.05002.3.dta

X-range:

-

MassTol: Y-zoom:

MassType:

AVG  MONO

Axis:

1  2

Label:

I  M  -

Ions:

a  +  2+  3+

b  +  2+  3+

c  +  2+  3+

x  +  2+  3+

y  +  2+  3+

z  +  2+  3+

hide H<sub>2</sub>O/NH<sub>3</sub>

zoom 112-122

GO

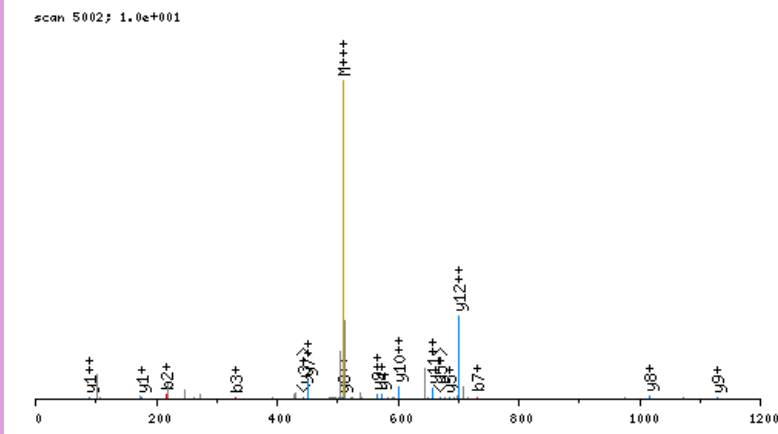

click image to zoom in; click top corners to zoom out [\[precursor±\]](#)

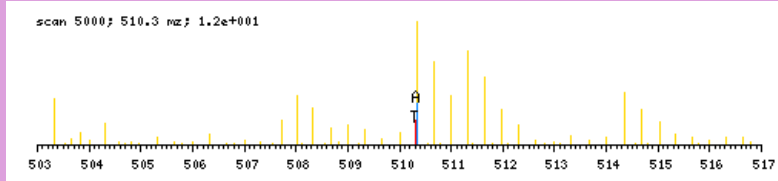

zoomed in precursor plot; T=theoretical m/z, A=acquired m/z

| b <sup>+</sup> | #  | AA # | y <sup>+</sup> | y <sup>2+</sup> |
|----------------|----|------|----------------|-----------------|
| 130.0868       | 1  | T 13 |                |                 |
| 217.1188       | 2  | S 12 | 1399.8273      | 700.4176        |
| 330.2029       | 3  | I 11 | 1312.7953      | 656.9016        |
| 401.2400       | 4  | A 10 | 1199.7112      | 600.3595        |
| 514.3240       | 5  | I 9  | 1128.6741      | 564.8410        |
| 629.3510       | 6  | D 8  | 1015.5901      | 508.2989        |
| 730.3987       | 7  | T 7  | 900.5631       | 450.7855        |
| 843.4827       | 8  | I 6  | 799.5154       | 400.2616        |
| 956.5668       | 9  | I 5  | 686.4314       | 343.7196        |
| 1070.6097      | 10 | N 4  | 573.3473       | 287.1776        |
| 1198.6683      | 11 | Q 3  | 459.3044       | 230.1561        |
| 1354.7946      | 12 | K 2  | 331.2458       | 166.1268        |
|                | 13 | R 1  | 175.1195       | 88.0637         |

N-term:+29.04 K(12):+156.13

TSSMGLPKQVKIVEVGPR, MH+ 2111.2263, m/z 528.5620  
 L OS G27 P150811 220811-s1.05274.05274.4.dta

scan 5274; 1.6e+001

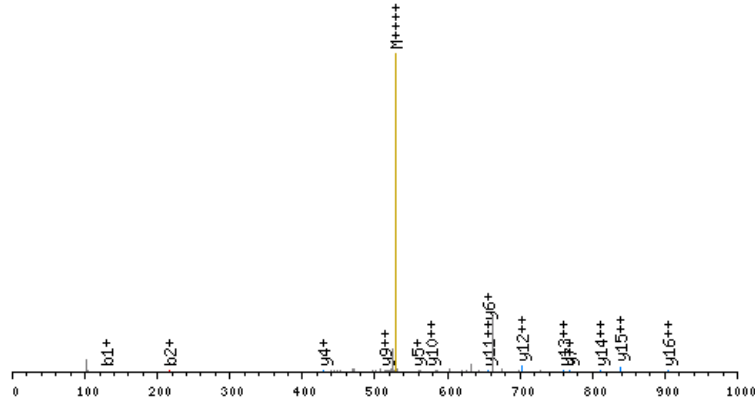

click image to zoom in; click top corners to zoom out [\[precursor±\]](#)

scan 5272; 528.6 m/z; 1.3e+001

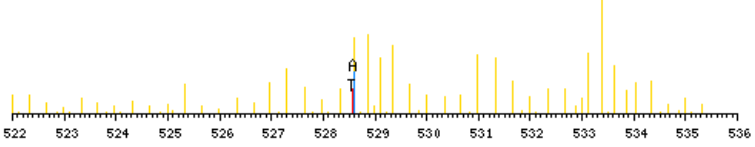

zoomed in precursor plot; T=theoretical m/z, A=acquired m/z

X-range:

-

MassTol: Y-zoom:

MassType:

AVG  MONO

Axis:

1  2

Label:

I  M  -

Ions:

a  +  2+  3+

b  +  2+  3+

c  +  2+  3+

x  +  2+  3+

y  +  2+  3+

z  +  2+  3+

hide H<sub>2</sub>O/NH<sub>3</sub>

zoom 112-122

GO

| b <sup>+</sup> | #  | AA | #  | y <sup>+</sup> | y <sup>2+</sup> |
|----------------|----|----|----|----------------|-----------------|
| 130.0868       | 1  | T  | 19 |                |                 |
| 217.1188       | 2  | S  | 18 | 1982.1473      | 991.5776        |
| 304.1508       | 3  | S  | 17 | 1895.1153      | 948.0616        |
| 435.1913       | 4  | M  | 16 | 1808.0833      | 904.5455        |
| 492.2128       | 5  | G  | 15 | 1677.0428      | 839.0253        |
| 593.2605       | 6  | T  | 14 | 1620.0213      | 810.5146        |
| 706.3445       | 7  | L  | 13 | 1518.9736      | 759.9907        |
| 803.3973       | 8  | P  | 12 | 1405.8896      | 703.4487        |
| 959.5236       | 9  | K  | 11 | 1308.8368      | 654.9223        |
| 1087.5822      | 10 | Q  | 10 | 1152.7105      | 576.8592        |
| 1186.6506      | 11 | V  | 9  | 1024.6519      | 512.8299        |
| 1342.7769      | 12 | K  | 8  | 925.5835       | 463.2957        |
| 1455.8609      | 13 | I  | 7  | 769.4572       | 385.2325        |
| 1554.9294      | 14 | V  | 6  | 656.3731       | 328.6905        |
| 1683.9720      | 15 | E  | 5  | 557.3047       | 279.1563        |
| 1783.0404      | 16 | V  | 4  | 428.2621       | 214.6350        |
| 1840.0618      | 17 | G  | 3  | 329.1937       | 165.1008        |
| 1937.1146      | 18 | P  | 2  | 272.1723       | 136.5900        |
|                | 19 | R  | 1  | 175.1195       | 88.0637         |

N-term:+29.04 K(9):+156.13  
 K(12):+156.13

TSSYSALSEPSR, MH+ 1312.6385, m/z 656.8229  
 L OS G25 P150811 220811-s1.02963.02963.2.dta

scan 2963; 4.2e+000

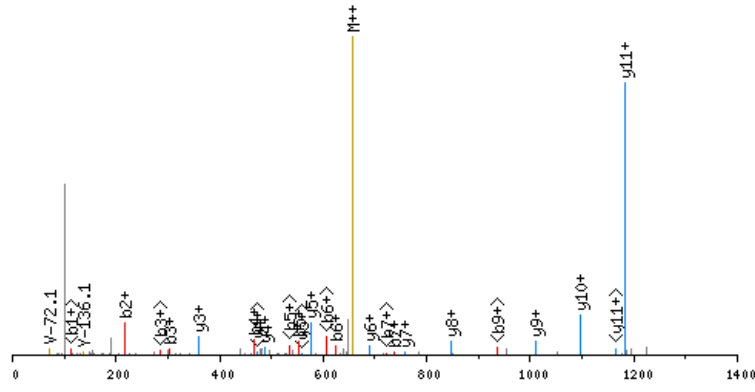

click image to zoom in; click top corners to zoom out [\[precursor±\]](#)

scan 2962; 656.8 m/z; 2.2e+001

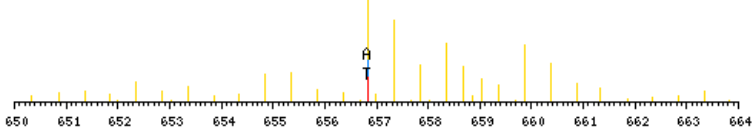

zoomed in precursor plot; T=theoretical m/z, A=acquired m/z

X-range:

-

MassTol: Y-zoom:

MassType:

AVG  MONO

Axis:

1  2

Label:

I  M  -

Ions:

a  +  2+  3+

b  +  2+  3+

c  +  2+  3+

x  +  2+  3+

y  +  2+  3+

z  +  2+  3+

hide H<sub>2</sub>O/NH<sub>3</sub>

zoom 112-122

GO

| b <sup>+</sup> | #  | AA # | y <sup>+</sup> | y <sup>2+</sup> |
|----------------|----|------|----------------|-----------------|
| 130.0868       | 1  | T    | 12             |                 |
| 217.1188       | 2  | S    | 11             | 1183.5595       |
| 304.1508       | 3  | S    | 10             | 1096.5275       |
| 467.2142       | 4  | Y    | 9              | 1009.4954       |
| 554.2462       | 5  | S    | 8              | 846.4321        |
| 625.2833       | 6  | A    | 7              | 759.4001        |
| 738.3674       | 7  | L    | 6              | 688.3630        |
| 825.3994       | 8  | S    | 5              | 575.2789        |
| 954.4420       | 9  | E    | 4              | 488.2469        |
| 1051.4948      | 10 | P    | 3              | 359.2043        |
| 1138.5268      | 11 | S    | 2              | 262.1515        |
|                | 12 | R    | 1              | 175.1195        |

N-term:+29.04



TSTAVSVSGPEDIGSSSSSSHER, MH+ 2205.0271, m/z 735.6806  
 L OS G26 P150811 220811-s1.02921.02921.3.dta

scan 2921; 3.1e+000

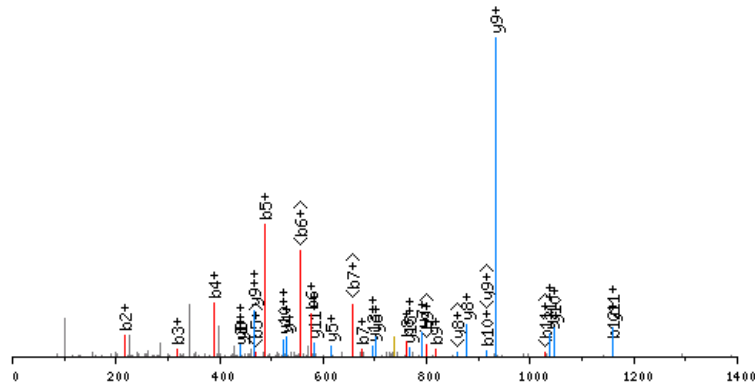

click image to zoom in; click top corners to zoom out [precursor±]

scan 2920; 735.7 mz; 7.8e+000

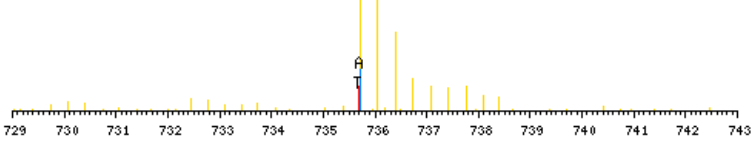

zoomed in precursor plot; T=theoretical m/z, A=acquired m/z

| b <sup>+</sup> | #  | AA # | y <sup>+</sup> | y <sup>2+</sup> |
|----------------|----|------|----------------|-----------------|
| 130.0868       | 1  | T 22 |                |                 |
| 217.1188       | 2  | S 21 | 2075.9481      | 1038.4780       |
| 318.1665       | 3  | T 20 | 1988.9161      | 994.9620        |
| 389.2036       | 4  | A 19 | 1887.8684      | 944.4381        |
| 488.2720       | 5  | V 18 | 1816.8313      | 908.9196        |
| 575.3040       | 6  | S 17 | 1717.7629      | 859.3854        |
| 674.3725       | 7  | V 16 | 1630.7309      | 815.8694        |
| 761.4045       | 8  | S 15 | 1531.6625      | 766.3351        |
| 818.4259       | 9  | G 14 | 1444.6304      | 722.8191        |
| 915.4787       | 10 | P 13 | 1387.6090      | 694.3084        |
| 1044.5213      | 11 | E 12 | 1290.5562      | 645.7820        |
| 1159.5482      | 12 | D 11 | 1161.5136      | 581.2607        |
| 1272.6323      | 13 | I 10 | 1046.4867      | 523.7473        |
| 1329.6538      | 14 | G 9  | 933.4026       | 467.2052        |
| 1416.6858      | 15 | S 8  | 876.3811       | 438.6945        |
| 1503.7178      | 16 | S 7  | 789.3491       | 395.1785        |
| 1590.7499      | 17 | S 6  | 702.3171       | 351.6625        |
| 1677.7819      | 18 | S 5  | 615.2851       | 308.1464        |
| 1764.8139      | 19 | S 4  | 528.2530       | 264.6304        |
| 1901.8728      | 20 | H 3  | 441.2210       | 221.1144        |
| 2030.9154      | 21 | E 2  | 304.1621       | 152.5850        |
|                | 22 | R 1  | 175.1195       | 88.0637         |

N-term:+29.04

X-range:

-

MassTol: Y-zoom:

MassType:

AVG  MONO

Axis:

1  2

Label:

I  M  -

Ions:

a  +  2+  3+

b  +  2+  3+

c  +  2+  3+

x  +  2+  3+

y  +  2+  3+

z  +  2+  3+

hide H<sub>2</sub>O/NH<sub>3</sub>

zoom 112-122

GO

TSVATKKTEQGPPSSEYIFER, MH+ 2457.3726, m/z 615.0986  
 H OS G27 P150811 220811-s1.04278.04278.4.dta

X-range:

0 - 0

MassTol: Y-zoom:

0. 1.

MassType:

AVG  MONO

Axis:

1  2

Label:

I  M  -

Ions:

a  +  2+  3+

b  +  2+  3+

c  +  2+  3+

x  +  2+  3+

y  +  2+  3+

z  +  2+  3+

hide H<sub>2</sub>O/NH<sub>3</sub>

zoom 112-122

GO

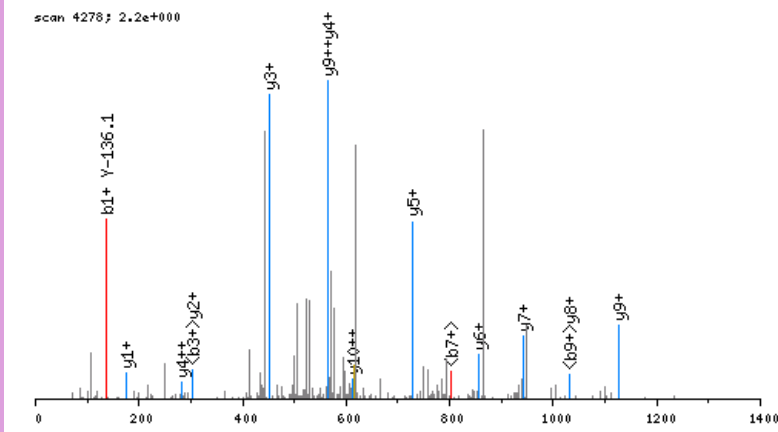

click image to zoom in; click top corners to zoom out [precursor±]

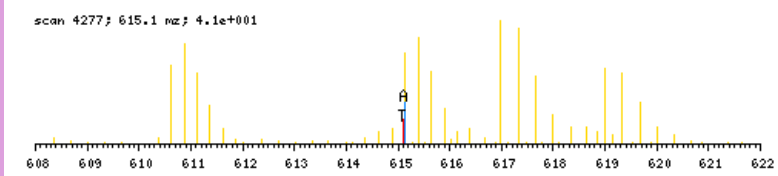

zoomed in precursor plot; T=theoretical m/z, A=acquired m/z

| b <sup>+</sup> | #  | AA # | y <sup>+</sup> | y <sup>2+</sup> |
|----------------|----|------|----------------|-----------------|
| 136.1186       | 1  | T 21 |                |                 |
| 223.1506       | 2  | S 20 | 2322.2618      | 1161.6348       |
| 322.2190       | 3  | V 19 | 2235.2298      | 1118.1188       |
| 393.2561       | 4  | A 18 | 2136.1614      | 1068.5846       |
| 494.3038       | 5  | T 17 | 2065.1243      | 1033.0660       |
| 656.4619       | 6  | K 16 | 1964.0766      | 982.5422        |
| 818.6200       | 7  | K 15 | 1801.9185      | 901.4632        |
| 919.6677       | 8  | T 14 | 1639.7604      | 820.3841        |
| 1048.7103      | 9  | E 13 | 1538.7127      | 769.8603        |
| 1176.7689      | 10 | Q 12 | 1409.6701      | 705.3390        |
| 1233.7903      | 11 | G 11 | 1281.6115      | 641.3097        |
| 1330.8431      | 12 | P 10 | 1224.5901      | 612.7990        |
| 1427.8959      | 13 | P 9  | 1127.5373      | 564.2726        |
| 1514.9279      | 14 | S 8  | 1030.4846      | 515.7462        |
| 1601.9599      | 15 | S 7  | 943.4525       | 472.2302        |
| 1731.0025      | 16 | E 6  | 856.4205       | 428.7142        |
| 1894.0658      | 17 | Y 5  | 727.3779       | 364.1929        |
| 2007.1499      | 18 | I 4  | 564.3146       | 282.6612        |
| 2154.2183      | 19 | F 3  | 451.2305       | 226.1192        |
| 2283.2609      | 20 | E 2  | 304.1621       | 152.5850        |
|                | 21 | R 1  | 175.1195       | 88.0637         |

N-term:+35.07 K(6):+162.16  
 K(7):+162.16

TSYLPSQVTEMFNQGR, MH+ 1891.9436, m/z 631.3194  
 H OS G25 P150811 220811-s1.08050.08050.3.dta

X-range:

-

MassTol: Y-zoom:

MassType:

AVG  MONO

Axis:

1  2

Label:

I  M  -

Ions:

a  +  2+  3+

b  +  2+  3+

c  +  2+  3+

x  +  2+  3+

y  +  2+  3+

z  +  2+  3+

hide H<sub>2</sub>O/NH<sub>3</sub>

zoom 112-122

GO

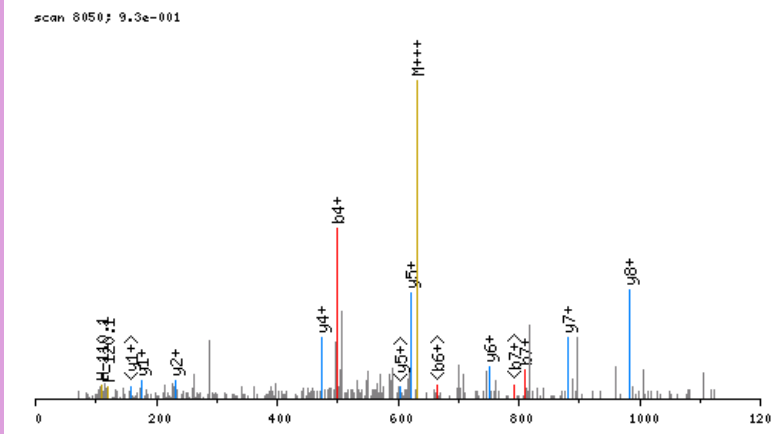

click image to zoom in; click top corners to zoom out [\[precursor±\]](#)

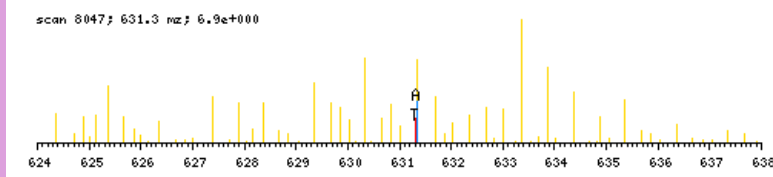

zoomed in precursor plot; T=theoretical m/z, A=acquired m/z

| b <sup>+</sup> | #  | AA # | y <sup>+</sup> | y <sup>2+</sup> |
|----------------|----|------|----------------|-----------------|
| 136.1186       | 1  | T 16 |                |                 |
| 223.1506       | 2  | S 15 | 1756.8328      | 878.9203        |
| 386.2139       | 3  | Y 14 | 1669.8008      | 835.4043        |
| 499.2980       | 4  | L 13 | 1506.7375      | 753.8727        |
| 596.3508       | 5  | P 12 | 1393.6534      | 697.3306        |
| 683.3828       | 6  | S 11 | 1296.6007      | 648.8042        |
| 811.4414       | 7  | Q 10 | 1209.5686      | 605.2882        |
| 910.5098       | 8  | V 9  | 1081.5101      | 541.2589        |
| 1011.5575      | 9  | T 8  | 982.4416       | 491.7247        |
| 1140.6001      | 10 | E 7  | 881.3940       | 441.2009        |
| 1271.6405      | 11 | M 6  | 752.3514       | 376.6796        |
| 1418.7090      | 12 | F 5  | 621.3109       | 311.1594        |
| 1532.7519      | 13 | N 4  | 474.2425       | 237.6251        |
| 1660.8105      | 14 | Q 3  | 360.1995       | 180.6037        |
| 1717.8319      | 15 | G 2  | 232.1410       | 116.5744        |
|                | 16 | R 1  | 175.1195       | 88.0637         |

N-term:+35.07

TTAAPKAGPMVR, MH+ 1312.7411, m/z 438.2519  
 L OS G26 P150811 220811-s1.02172.02172.3.dta

X-range:

-

MassTol: Y-zoom:

MassType:

AVG  MONO

Axis:

1  2

Label:

I  M  -

Ions:

a  +  2+  3+

b  +  2+  3+

c  +  2+  3+

x  +  2+  3+

y  +  2+  3+

z  +  2+  3+

hide H<sub>2</sub>O/NH<sub>3</sub>

zoom 112-122

GO

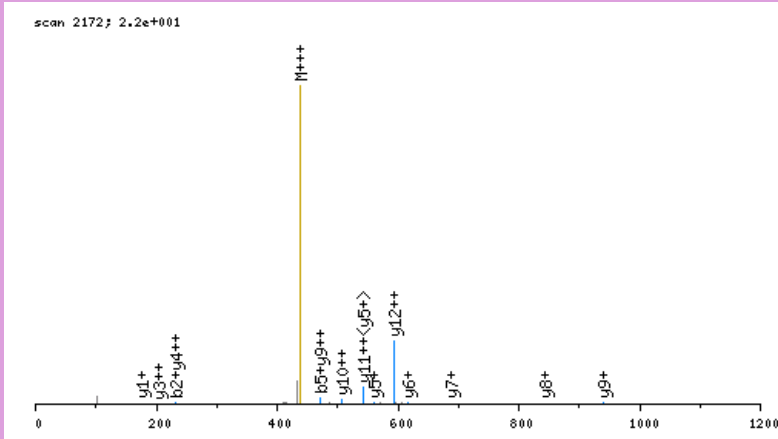

click image to zoom in; click top corners to zoom out [\[precursor±\]](#)

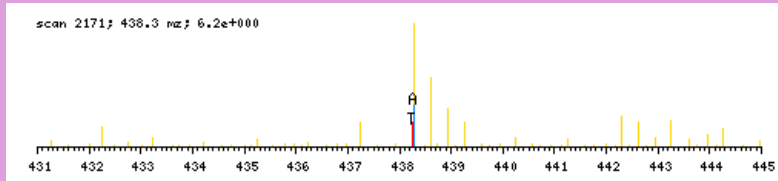

zoomed in precursor plot; T=theoretical m/z, A=acquired m/z

| b <sup>+</sup> | #  | AA # | y <sup>+</sup> | y <sup>2+</sup> |
|----------------|----|------|----------------|-----------------|
| 130.0868       | 1  | T 13 |                |                 |
| 231.1345       | 2  | T 12 | 1183.6622      | 592.3350        |
| 302.1716       | 3  | A 11 | 1082.6145      | 541.8112        |
| 373.2087       | 4  | A 10 | 1011.5774      | 506.2926        |
| 470.2614       | 5  | P 9  | 940.5403       | 470.7740        |
| 626.3877       | 6  | K 8  | 843.4875       | 422.2477        |
| 697.4249       | 7  | A 7  | 687.3612       | 344.1845        |
| 754.4463       | 8  | G 6  | 616.3241       | 308.6660        |
| 851.4991       | 9  | P 5  | 559.3026       | 280.1552        |
| 908.5206       | 10 | G 4  | 462.2499       | 231.6288        |
| 1039.5610      | 11 | M 3  | 405.2284       | 203.1181        |
| 1138.6295      | 12 | V 2  | 274.1879       | 137.5979        |
|                | 13 | R 1  | 175.1195       | 88.0637         |

N-term:+29.04 K(6):+156.13

TTCPPLAGGQEKLR, MH+ 1685.9008, m/z 562.6385  
 L OS G26 P150811 220811-s1.02619.02619.3.dta

X-range:

-

MassTol: Y-zoom:

MassType:

AVG  MONO

Axis:

1  2

Label:

I  M  -

Ions:

a  +  2+  3+

b  +  2+  3+

c  +  2+  3+

x  +  2+  3+

y  +  2+  3+

z  +  2+  3+

hide H<sub>2</sub>O/NH<sub>3</sub>

zoom 112-122

GO

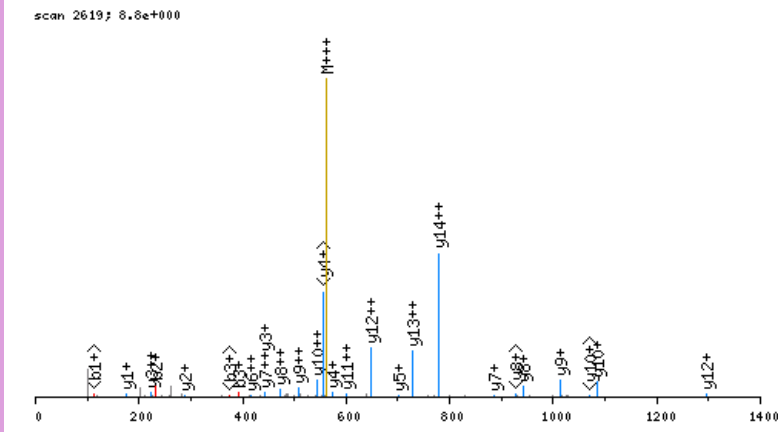

click image to zoom in; click top corners to zoom out [\[precursor±\]](#)

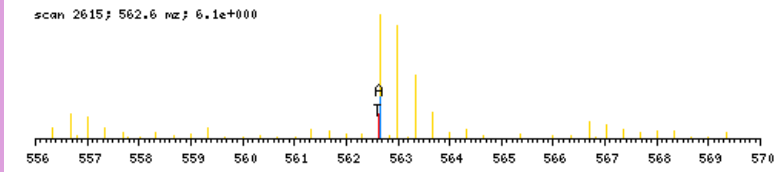

zoomed in precursor plot; T=theoretical m/z, A=acquired m/z

| b <sup>+</sup> | #  | AA # | y <sup>+</sup> | y <sup>2+</sup> |
|----------------|----|------|----------------|-----------------|
| 130.0868       | 1  | T    | 15             |                 |
| 231.1345       | 2  | T    | 14             | 1556.8219       |
| 391.1651       | 3  | C    | 13             | 1455.7742       |
| 488.2178       | 4  | P    | 12             | 1295.7436       |
| 601.3019       | 5  | L    | 11             | 1198.6908       |
| 672.3390       | 6  | A    | 10             | 1085.6068       |
| 743.3761       | 7  | A    | 9              | 1014.5697       |
| 800.3976       | 8  | G    | 8              | 943.5325        |
| 857.4190       | 9  | G    | 7              | 886.5111        |
| 985.4776       | 10 | Q    | 6              | 829.4896        |
| 1113.5362      | 11 | Q    | 5              | 701.4310        |
| 1242.5788      | 12 | E    | 4              | 573.3725        |
| 1398.7051      | 13 | K    | 3              | 444.3299        |
| 1511.7892      | 14 | L    | 2              | 288.2036        |
|                | 15 | R    | 1              | 175.1195        |

N-term:+29.04 C(3):+160.03  
 K(13):+156.13

TTDEKFFVEGVYR, MH+ 1511.8382, m/z 504.6176  
 H OS G27 P150811 220811-s1.04224.04224.3.dta

X-range:

-

MassTol: Y-zoom:

MassType:

AVG  MONO

Axis:

1  2

Label:

I  M  -

Ions:

a  +  2+  3+

b  +  2+  3+

c  +  2+  3+

x  +  2+  3+

y  +  2+  3+

z  +  2+  3+

hide H<sub>2</sub>O/NH<sub>3</sub>

zoom 112-122

GO

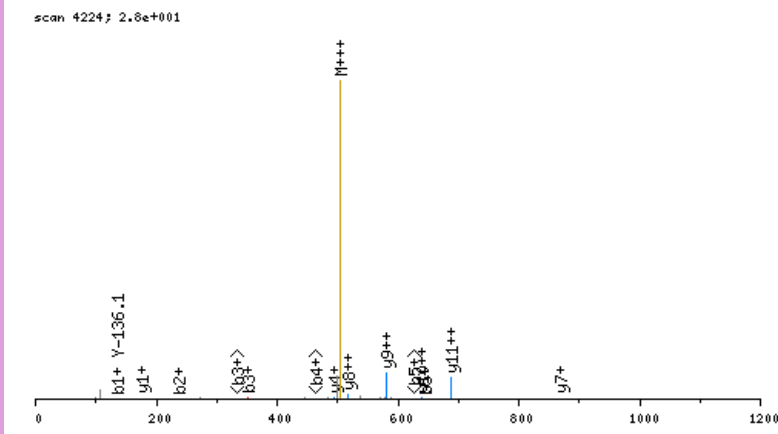

click image to zoom in; click top corners to zoom out [\[precursor±\]](#)

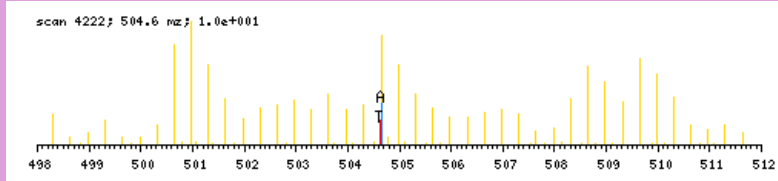

zoomed in precursor plot; T=theoretical m/z, A=acquired m/z

| b <sup>+</sup> | #  | AA # | y <sup>+</sup> | y <sup>2+</sup> |
|----------------|----|------|----------------|-----------------|
| 136.1186       | 1  | T 12 |                |                 |
| 237.1663       | 2  | T 11 | 1376.7274      | 688.8676        |
| 352.1932       | 3  | D 10 | 1275.6798      | 638.3438        |
| 481.2358       | 4  | E 9  | 1160.6528      | 580.8303        |
| 643.3939       | 5  | K 8  | 1031.6102      | 516.3090        |
| 790.4623       | 6  | F 7  | 869.4521       | 435.2300        |
| 889.5307       | 7  | V 6  | 722.3837       | 361.6958        |
| 1018.5733      | 8  | E 5  | 623.3153       | 312.1616        |
| 1075.5948      | 9  | G 4  | 494.2727       | 247.6403        |
| 1174.6632      | 10 | V 3  | 437.2512       | 219.1295        |
| 1337.7265      | 11 | Y 2  | 338.1828       | 169.5953        |
|                | 12 | R 1  | 175.1195       | 88.0637         |

N-term:+35.07 K(5):+162.16

TTELQDELSHLR, MH+ 1469.7600, m/z 490.5915  
 L OS G27 P150811 220811-s1.05914.05914.3.dta

scan 5914; 8.1e+000

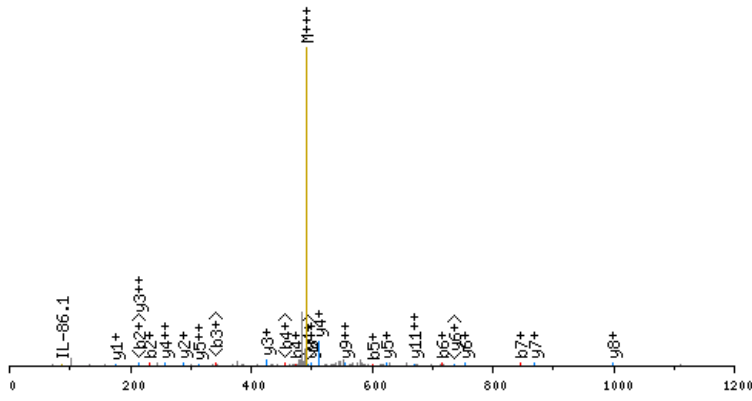

click image to zoom in; click top corners to zoom out [\[precursor±\]](#)

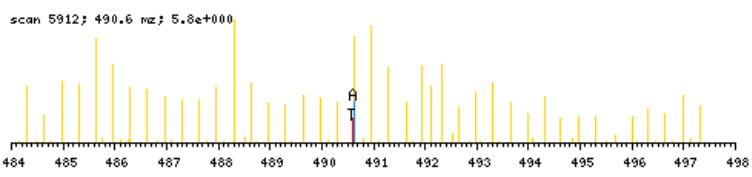

zoomed in precursor plot; T=theoretical m/z, A=acquired m/z

X-range:

-

MassTol: Y-zoom:

MassType:

AVG  MONO

Axis:

1  2

Label:

I  M  -

Ions:

a  +  2+  3+

b  +  2+  3+

c  +  2+  3+

x  +  2+  3+

y  +  2+  3+

z  +  2+  3+

hide H<sub>2</sub>O/NH<sub>3</sub>

zoom 112-122

GO

| b <sup>+</sup> | #  | AA # | y <sup>+</sup> | y <sup>2+</sup> |
|----------------|----|------|----------------|-----------------|
| 130.0868       | 1  | T 12 |                |                 |
| 231.1345       | 2  | T 11 | 1340.6810      | 670.8444        |
| 360.1771       | 3  | E 10 | 1239.6333      | 620.3206        |
| 473.2611       | 4  | L 9  | 1110.5907      | 555.7993        |
| 601.3197       | 5  | Q 8  | 997.5067       | 499.2573        |
| 716.3466       | 6  | D 7  | 869.4481       | 435.2280        |
| 845.3892       | 7  | E 6  | 754.4212       | 377.7145        |
| 958.4733       | 8  | L 5  | 625.3786       | 313.1932        |
| 1045.5053      | 9  | S 4  | 512.2945       | 256.6512        |
| 1182.5642      | 10 | H 3  | 425.2625       | 213.1352        |
| 1295.6483      | 11 | L 2  | 288.2036       | 144.6057        |
|                | 12 | R 1  | 175.1195       | 88.0637         |

N-term:+29.04

TTFMGHYLHEVAR, MH+ 1595.8216, m/z 399.7109  
 H OS G28 P150811 220811-s1.05332.05332.4.dta

X-range:

-

MassTol: Y-zoom:

MassType:

AVG  MONO

Axis:

1  2

Label:

I  M  -

Ions:

a  +  2+  3+

b  +  2+  3+

c  +  2+  3+

x  +  2+  3+

y  +  2+  3+

z  +  2+  3+

hide H<sub>2</sub>O/NH<sub>3</sub>

zoom 112-122

GO

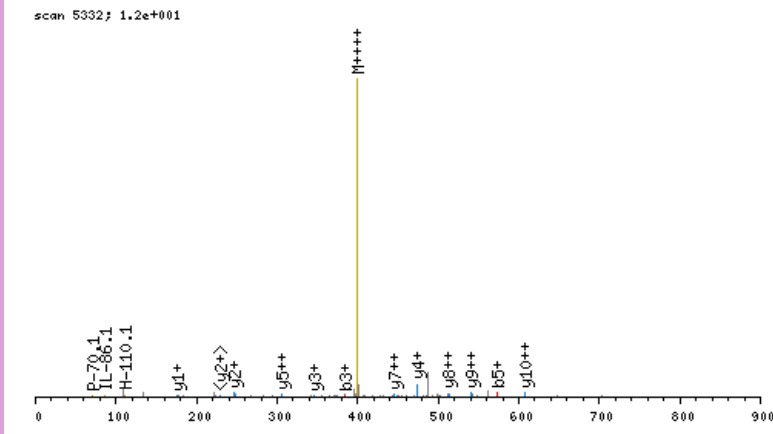

click image to zoom in; click top corners to zoom out [\[precursor±\]](#)

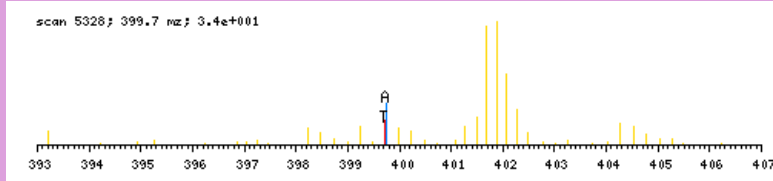

zoomed in precursor plot; T=theoretical m/z, A=acquired m/z

| b <sup>+</sup> | #  | AA # | y <sup>+</sup> | y <sup>2+</sup> |
|----------------|----|------|----------------|-----------------|
| 136.1186       | 1  | T 13 |                |                 |
| 237.1663       | 2  | T 12 | 1460.7109      | 730.8594        |
| 384.2347       | 3  | F 11 | 1359.6632      | 680.3355        |
| 515.2752       | 4  | M 10 | 1212.5948      | 606.8013        |
| 572.2966       | 5  | G 9  | 1081.5543      | 541.2811        |
| 709.3555       | 6  | H 8  | 1024.5328      | 512.7703        |
| 872.4189       | 7  | Y 7  | 887.4739       | 444.2409        |
| 985.5029       | 8  | L 6  | 724.4106       | 362.7092        |
| 1122.5618      | 9  | H 5  | 611.3265       | 306.1672        |
| 1251.6044      | 10 | E 4  | 474.2676       | 237.6377        |
| 1350.6728      | 11 | V 3  | 345.2250       | 173.1164        |
| 1421.7100      | 12 | A 2  | 246.1566       | 123.5822        |
|                | 13 | R 1  | 175.1195       | 88.0637         |

N-term:+35.07



TTFNVQDGPDPQDR, MH+ 1673.7983, m/z 558.6043  
 H OS G25 P150811 220811-s1.05708.05708.3.dta

scan 5708; 1.6e+001

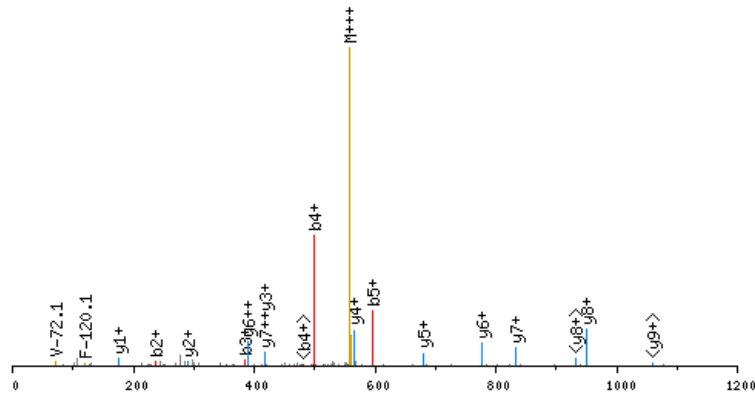

click image to zoom in; click top corners to zoom out [\[precursor±\]](#)

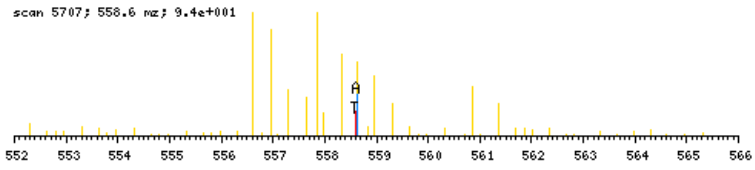

zoomed in precursor plot; T=theoretical m/z, A=acquired m/z

X-range:

-

MassTol: Y-zoom:

MassType:

AVG  MONO

Axis:

1  2

Label:

I  M  -

Ions:

a  +  2+  3+

b  +  2+  3+

c  +  2+  3+

x  +  2+  3+

y  +  2+  3+

z  +  2+  3+

hide H<sub>2</sub>O/NH<sub>3</sub>

zoom 112-122

GO

| b <sup>+</sup> | #  | AA | #  | y <sup>+</sup> | y <sup>2+</sup> |
|----------------|----|----|----|----------------|-----------------|
| 136.1186       | 1  | T  | 14 |                |                 |
| 237.1663       | 2  | T  | 13 | 1538.6876      | 769.8477        |
| 384.2347       | 3  | F  | 12 | 1437.6399      | 719.3239        |
| 498.2776       | 4  | N  | 11 | 1290.5715      | 645.7896        |
| 597.3460       | 5  | V  | 10 | 1176.5285      | 588.7682        |
| 725.4046       | 6  | Q  | 9  | 1077.4601      | 539.2340        |
| 840.4315       | 7  | D  | 8  | 949.4015       | 475.2047        |
| 897.4530       | 8  | G  | 7  | 834.3746       | 417.6912        |
| 994.5058       | 9  | P  | 6  | 777.3531       | 389.1805        |
| 1109.5327      | 10 | D  | 5  | 680.3004       | 340.6541        |
| 1256.6011      | 11 | F  | 4  | 565.2734       | 283.1406        |
| 1384.6597      | 12 | Q  | 3  | 418.2050       | 209.6064        |
| 1499.6866      | 13 | D  | 2  | 290.1464       | 145.5771        |
|                | 14 | R  | 1  | 175.1195       | 88.0637         |

N-term:+35.07

TTIAGLVFR, MH+ 1011.6415, m/z 506.3244  
 H OS G25 P150811 220811-s1.07329.07329.2.dta

X-range:

-

MassTol: Y-zoom:

MassType:

AVG  MONO

Axis:

1  2

Label:

I  M  -

Ions:

a  +  2+  3+

b  +  2+  3+

c  +  2+  3+

x  +  2+  3+

y  +  2+  3+

z  +  2+  3+

hide H<sub>2</sub>O/NH<sub>3</sub>

zoom 112-122

GO

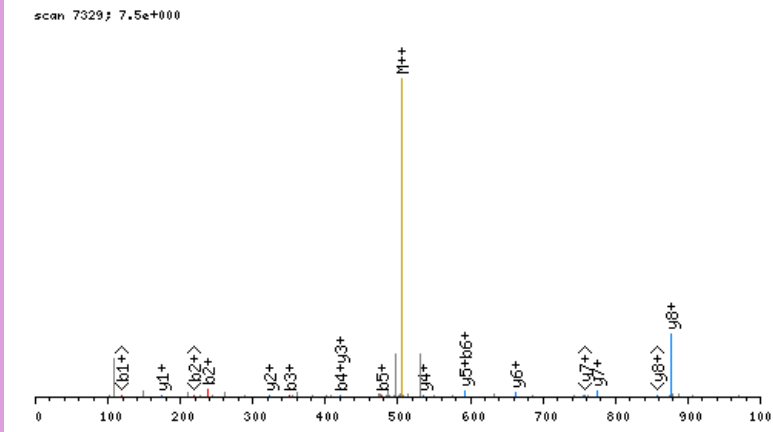

click image to zoom in; click top corners to zoom out [\[precursor±\]](#)

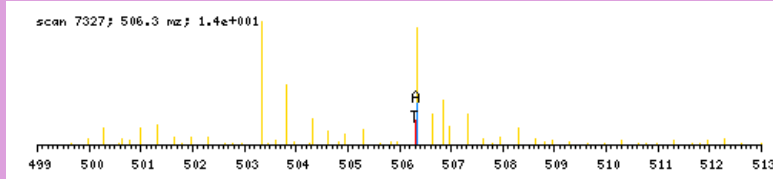

zoomed in precursor plot; T=theoretical m/z, A=acquired m/z

| b <sup>+</sup> | # | AA # | y <sup>+</sup> | y <sup>2+</sup> |
|----------------|---|------|----------------|-----------------|
| 136.1186       | 1 | T 9  |                |                 |
| 237.1663       | 2 | T 8  | 876.5307       | 438.7693        |
| 350.2503       | 3 | I 7  | 775.4830       | 388.2454        |
| 421.2874       | 4 | A 6  | 662.3990       | 331.7034        |
| 478.3089       | 5 | G 5  | 591.3619       | 296.1848        |
| 591.3930       | 6 | L 4  | 534.3404       | 267.6741        |
| 690.4614       | 7 | V 3  | 421.2563       | 211.1321        |
| 837.5298       | 8 | F 2  | 322.1879       | 161.5979        |
|                | 9 | R 1  | 175.1195       | 88.0637         |

N-term:+35.07

TTIAGVVYKDGIVLGADTR, MH+ 2005.1334, m/z 669.0493  
 L OS G26 P150811 220811-s1.05961.05961.3.dta

X-range:

-

MassTol: Y-zoom:

MassType:

AVG  MONO

Axis:

1  2

Label:

I  M  -

Ions:

a  +  2+  3+

b  +  2+  3+

c  +  2+  3+

x  +  2+  3+

y  +  2+  3+

z  +  2+  3+

hide H<sub>2</sub>O/NH<sub>3</sub>

zoom 112-122

GO

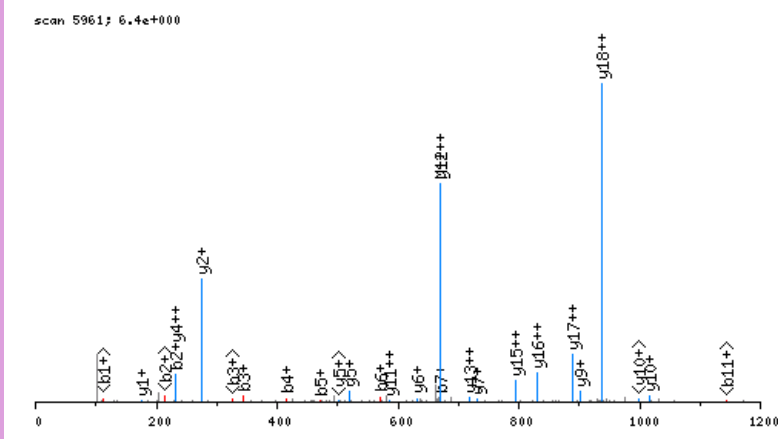

click image to zoom in; click top corners to zoom out [\[precursor±\]](#)

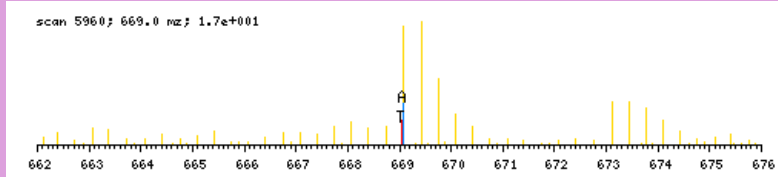

zoomed in precursor plot; T=theoretical m/z, A=acquired m/z

| b <sup>+</sup> | #  | AA | #  | y <sup>+</sup> | y <sup>2+</sup> |
|----------------|----|----|----|----------------|-----------------|
| 130.0868       | 1  | T  | 19 |                |                 |
| 231.1345       | 2  | T  | 18 | 1876.0544      | 938.5311        |
| 344.2185       | 3  | I  | 17 | 1775.0067      | 888.0073        |
| 415.2556       | 4  | A  | 16 | 1661.9227      | 831.4653        |
| 472.2771       | 5  | G  | 15 | 1590.8856      | 795.9467        |
| 571.3455       | 6  | V  | 14 | 1533.8641      | 767.4360        |
| 670.4139       | 7  | V  | 13 | 1434.7957      | 717.9018        |
| 833.4773       | 8  | Y  | 12 | 1335.7273      | 668.3676        |
| 989.6036       | 9  | K  | 11 | 1172.6639      | 586.8359        |
| 1104.6305      | 10 | D  | 10 | 1016.5376      | 508.7727        |
| 1161.6520      | 11 | G  | 9  | 901.5107       | 451.2593        |
| 1274.7360      | 12 | I  | 8  | 844.4892       | 422.7485        |
| 1373.8044      | 13 | V  | 7  | 731.4052       | 366.2065        |
| 1486.8885      | 14 | L  | 6  | 632.3368       | 316.6723        |
| 1543.9100      | 15 | G  | 5  | 519.2527       | 260.1303        |
| 1614.9471      | 16 | A  | 4  | 462.2312       | 231.6195        |
| 1729.9740      | 17 | D  | 3  | 391.1941       | 196.1010        |
| 1831.0217      | 18 | T  | 2  | 276.1672       | 138.5875        |
|                | 19 | R  | 1  | 175.1195       | 88.0637         |

N-term:+29.04 K(9):+156.13

TTIFEVLPEKADR, MH+ 1586.9430, m/z 529.6525  
 H OS G26 P150811 220811-s1.05697.05697.3.dta

X-range:

-

MassTol: Y-zoom:

MassType:

AVG  MONO

Axis:

1  2

Label:

I  M  -

Ions:

a  +  2+  3+

b  +  2+  3+

c  +  2+  3+

x  +  2+  3+

y  +  2+  3+

z  +  2+  3+

hide H<sub>2</sub>O/NH<sub>3</sub>

zoom 112-122

GO

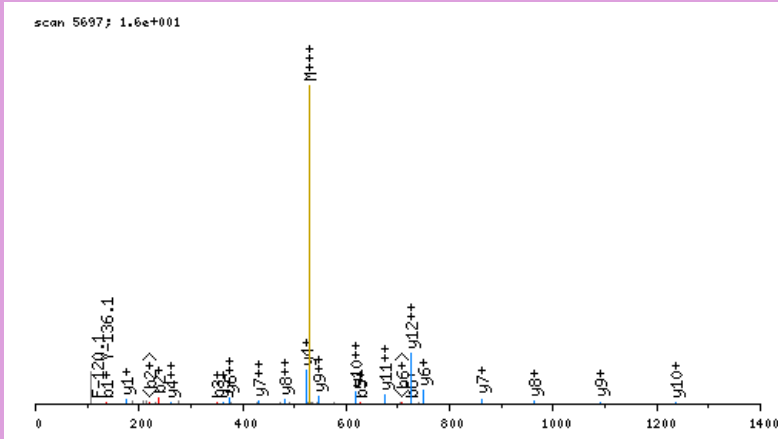

click image to zoom in; click top corners to zoom out [\[precursor±\]](#)

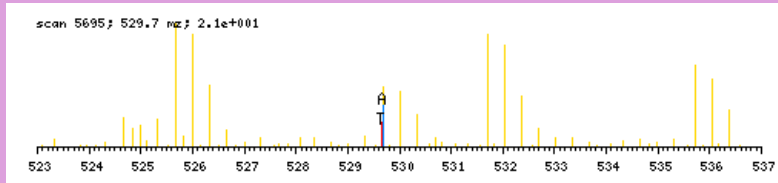

zoomed in precursor plot; T=theoretical m/z, A=acquired m/z

| b <sup>+</sup> | #  | AA # | y <sup>+</sup> | y <sup>2+</sup> |
|----------------|----|------|----------------|-----------------|
| 136.1186       | 1  | T    | 13             |                 |
| 237.1663       | 2  | T    | 12             | 1451.8322       |
| 350.2503       | 3  | I    | 11             | 1350.7846       |
| 497.3187       | 4  | F    | 10             | 1237.7005       |
| 626.3613       | 5  | E    | 9              | 1090.6321       |
| 725.4297       | 6  | V    | 8              | 961.5895        |
| 838.5138       | 7  | L    | 7              | 862.5211        |
| 935.5666       | 8  | P    | 6              | 749.4370        |
| 1064.6092      | 9  | E    | 5              | 652.3843        |
| 1226.7673      | 10 | K    | 4              | 523.3417        |
| 1297.8044      | 11 | A    | 3              | 361.1836        |
| 1412.8313      | 12 | D    | 2              | 290.1464        |
|                | 13 | R    | 1              | 175.1195        |

N-term:+35.07 K(10):+162.16

TTMYPGIADR, MH+ 1158.6041, m/z 579.8057  
 H OS G25 P150811 220811-s1.04191.04191.2.dta

X-range:

-

MassTol: Y-zoom:

MassType:

AVG  MONO

Axis:

1  2

Label:

I  M  -

Ions:

a  +  2+  3+

b  +  2+  3+

c  +  2+  3+

x  +  2+  3+

y  +  2+  3+

z  +  2+  3+

hide H<sub>2</sub>O/NH<sub>3</sub>

zoom 112-122

GO

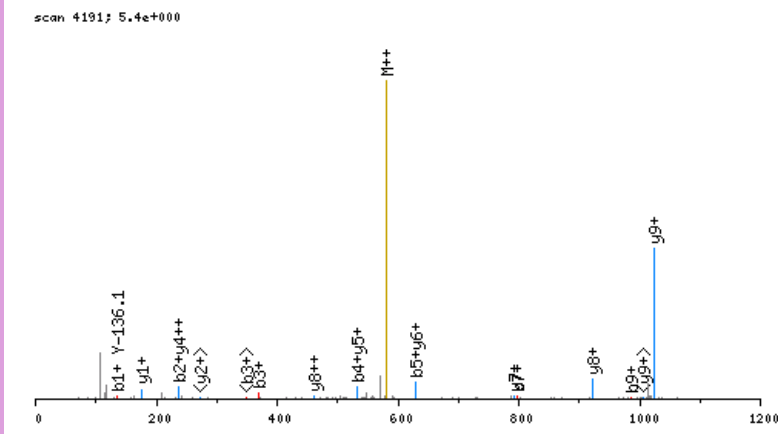

click image to zoom in; click top corners to zoom out [\[precursor±\]](#)

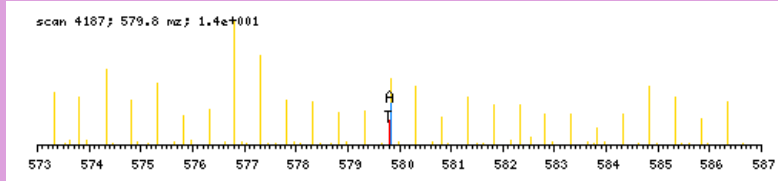

zoomed in precursor plot; T=theoretical m/z, A=acquired m/z

| b <sup>+</sup> | #  | AA | #  | y <sup>+</sup> | y <sup>2+</sup> |
|----------------|----|----|----|----------------|-----------------|
| 136.1186       | 1  | T  | 10 |                |                 |
| 237.1663       | 2  | T  | 9  | 1023.4933      | 512.2506        |
| 368.2067       | 3  | M  | 8  | 922.4457       | 461.7267        |
| 531.2701       | 4  | Y  | 7  | 791.4052       | 396.2065        |
| 628.3228       | 5  | P  | 6  | 628.3418       | 314.6748        |
| 685.3443       | 6  | G  | 5  | 531.2891       | 266.1485        |
| 798.4284       | 7  | I  | 4  | 474.2676       | 237.6377        |
| 869.4655       | 8  | A  | 3  | 361.1836       | 181.0957        |
| 984.4924       | 9  | D  | 2  | 290.1464       | 145.5771        |
|                | 10 | R  | 1  | 175.1195       | 88.0637         |

N-term:+35.07

TTPEKYLGAEYMQSVGNMR, MH+ 2231.0841, m/z 744.3662  
 L OS G26 P150811 220811-s1.05399.05399.3.dta

scan 5399; 2.7e+000

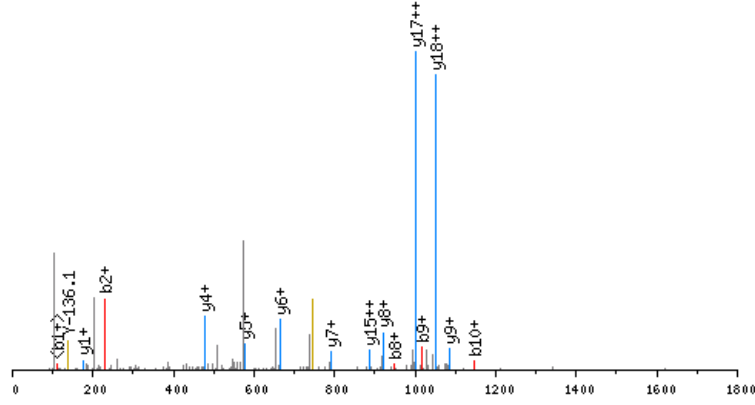

click image to zoom in; click top corners to zoom out [precursor±]

scan 5395; 744.4 m/z; 1.0e+001

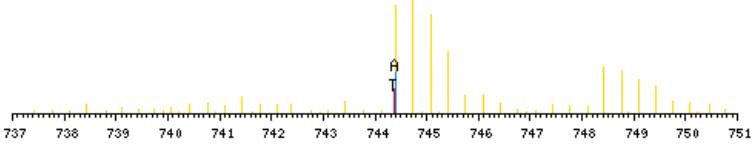

zoomed in precursor plot; T=theoretical m/z, A=acquired m/z

X-range:

-

MassTol: Y-zoom:

MassType:

AVG  MONO

Axis:

1  2

Label:

I  M  -

Ions:

a  2+  3+

b  2+  3+

c  2+  3+

x  2+  3+

y  2+  3+

z  2+  3+

hide H<sub>2</sub>O/NH<sub>3</sub>

zoom 112-122

GO

| b <sup>+</sup> | #  | AA | #  | y <sup>+</sup> | y <sup>2+</sup> |
|----------------|----|----|----|----------------|-----------------|
| 130.0868       | 1  | T  | 19 |                |                 |
| 231.1345       | 2  | T  | 18 | 2102.0051      | 1051.5065       |
| 328.1872       | 3  | P  | 17 | 2000.9574      | 1000.9826       |
| 457.2298       | 4  | E  | 16 | 1903.9047      | 952.4562        |
| 613.3561       | 5  | K  | 15 | 1774.8621      | 887.9349        |
| 776.4194       | 6  | Y  | 14 | 1618.7358      | 809.8718        |
| 889.5035       | 7  | L  | 13 | 1455.6724      | 728.3401        |
| 946.5250       | 8  | G  | 12 | 1342.5884      | 671.7981        |
| 1017.5621      | 9  | A  | 11 | 1285.5669      | 643.2874        |
| 1146.6047      | 10 | E  | 10 | 1214.5298      | 607.7688        |
| 1309.6680      | 11 | Y  | 9  | 1085.4872      | 543.2475        |
| 1440.7085      | 12 | M  | 8  | 922.4239       | 461.7159        |
| 1568.7671      | 13 | Q  | 7  | 791.3834       | 396.1956        |
| 1655.7991      | 14 | S  | 6  | 663.3248       | 332.1663        |
| 1754.8675      | 15 | V  | 5  | 576.2928       | 288.6503        |
| 1811.8890      | 16 | G  | 4  | 477.2244       | 239.1161        |
| 1925.9319      | 17 | N  | 3  | 420.2029       | 210.6054        |
| 2056.9724      | 18 | M  | 2  | 306.1600       | 153.5839        |
|                | 19 | R  | 1  | 175.1195       | 88.0637         |

N-term:+29.04 K(5):+156.13

TTQGLDGLSER, MH+ 1210.6491, m/z 605.8282  
 H OS G25 P150811 220811-s1.03365.03365.2.dta

scan 3365; 4.0e+000

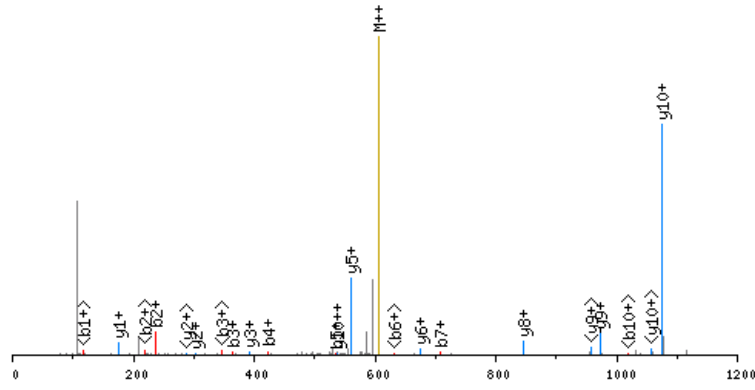

click image to zoom in; click top corners to zoom out [precursor±]

scan 3362; 605.8 m/z; 1.0e+001

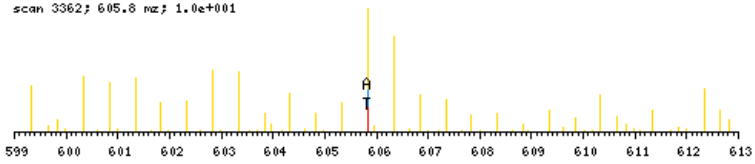

zoomed in precursor plot; T=theoretical m/z, A=acquired m/z

X-range:

-

MassTol: Y-zoom:

MassType:

AVG  MONO

Axis:

1  2

Label:

I  M  -

Ions:

a  +  2+  3+

b  +  2+  3+

c  +  2+  3+

x  +  2+  3+

y  +  2+  3+

z  +  2+  3+

hide H<sub>2</sub>O/NH<sub>3</sub>

zoom 112-122

GO

| b <sup>+</sup> | #  | AA # | y <sup>+</sup> | y <sup>2+</sup> |
|----------------|----|------|----------------|-----------------|
| 136.1186       | 1  | T 11 |                |                 |
| 237.1663       | 2  | T 10 | 1075.5384      | 538.2731        |
| 365.2248       | 3  | Q 9  | 974.4907       | 487.7493        |
| 422.2463       | 4  | G 8  | 846.4321       | 423.7200        |
| 535.3304       | 5  | L 7  | 789.4107       | 395.2092        |
| 650.3573       | 6  | D 6  | 676.3266       | 338.6672        |
| 707.3788       | 7  | G 5  | 561.2997       | 281.1537        |
| 820.4628       | 8  | L 4  | 504.2782       | 252.6430        |
| 907.4949       | 9  | S 3  | 391.1941       | 196.1010        |
| 1036.5375      | 10 | E 2  | 304.1621       | 152.5850        |
|                | 11 | R 1  | 175.1195       | 88.0637         |

N-term:+35.07

TTSGGHPLEFLR, MH+ 1342.7119, m/z 448.2422  
 L OS G27 P150811 220811-s1.04769.04769.3.dta

X-range:

-

MassTol: Y-zoom:

MassType:

AVG  MONO

Axis:

1  2

Label:

I  M  -

Ions:

a  +  2+  3+

b  +  2+  3+

c  +  2+  3+

x  +  2+  3+

y  +  2+  3+

z  +  2+  3+

hide H<sub>2</sub>O/NH<sub>3</sub>

zoom 112-122

GO

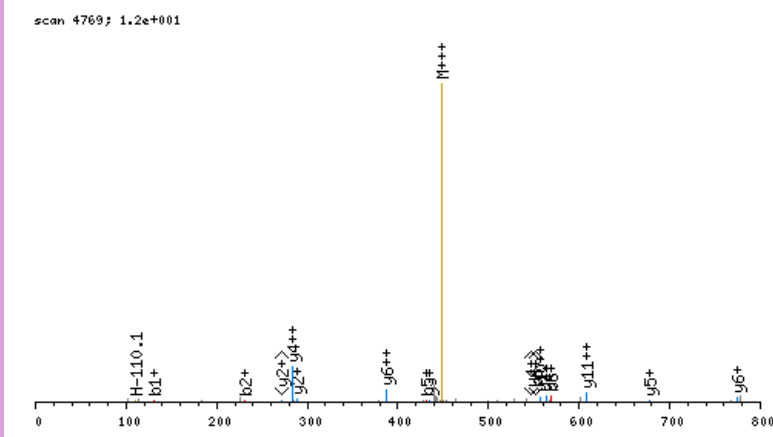

click image to zoom in; click top corners to zoom out [\[precursor±\]](#)

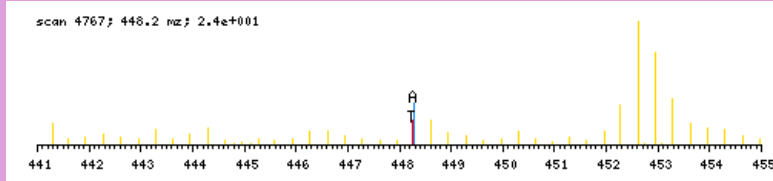

zoomed in precursor plot; T=theoretical m/z, A=acquired m/z

| b <sup>+</sup> | #  | AA # | y <sup>+</sup> | y <sup>2+</sup> |
|----------------|----|------|----------------|-----------------|
| 130.0868       | 1  | T 12 |                |                 |
| 231.1345       | 2  | T 11 | 1213.6329      | 607.3204        |
| 318.1665       | 3  | S 10 | 1112.5853      | 556.7965        |
| 375.1879       | 4  | G 9  | 1025.5532      | 513.2805        |
| 432.2094       | 5  | G 8  | 968.5318       | 484.7698        |
| 569.2683       | 6  | H 7  | 911.5103       | 456.2591        |
| 666.3211       | 7  | P 6  | 774.4514       | 387.7296        |
| 779.4052       | 8  | L 5  | 677.3986       | 339.2032        |
| 908.4477       | 9  | E 4  | 564.3146       | 282.6612        |
| 1055.5162      | 10 | F 3  | 435.2720       | 218.1399        |
| 1168.6002      | 11 | L 2  | 288.2036       | 144.6057        |
|                | 12 | R 1  | 175.1195       | 88.0637         |

N-term:+29.04



TTTSGGHPLLEFLR, MH+ 1443.7596, m/z 481.9247  
 L OS G27 P150811 220811-s1.04846.04846.3.dta

X-range:

-

MassTol: Y-zoom:

MassType:

AVG  MONO

Axis:

1  2

Label:

I  M  -

Ions:

a  +  2+  3+

b  +  2+  3+

c  +  2+  3+

x  +  2+  3+

y  +  2+  3+

z  +  2+  3+

hide H<sub>2</sub>O/NH<sub>3</sub>

zoom 112-122

GO

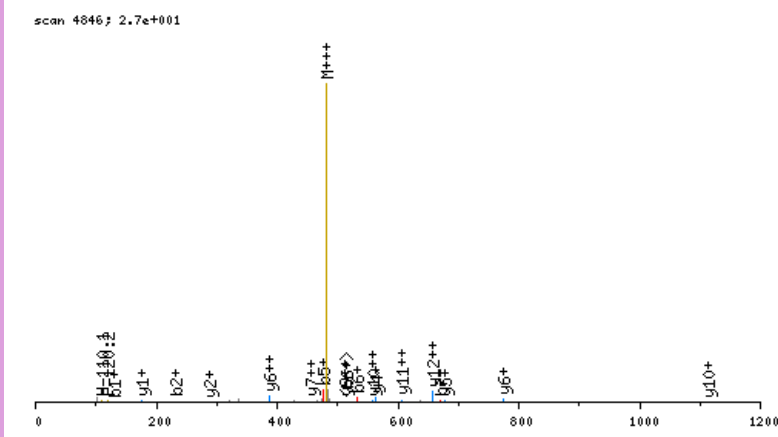

click image to zoom in; click top corners to zoom out [\[precursor±\]](#)

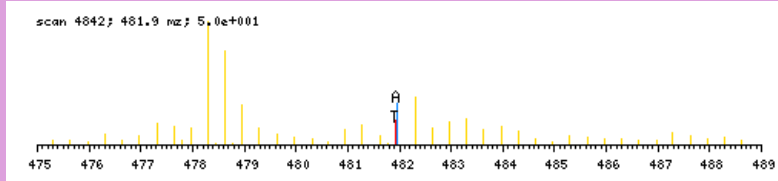

zoomed in precursor plot; T=theoretical m/z, A=acquired m/z

| b <sup>+</sup> | #  | AA # | y <sup>+</sup> | y <sup>2+</sup> |
|----------------|----|------|----------------|-----------------|
| 130.0868       | 1  | T 13 |                |                 |
| 231.1345       | 2  | T 12 | 1314.6806      | 657.8442        |
| 332.1821       | 3  | T 11 | 1213.6329      | 607.3204        |
| 419.2142       | 4  | S 10 | 1112.5853      | 556.7965        |
| 476.2356       | 5  | G 9  | 1025.5532      | 513.2805        |
| 533.2571       | 6  | G 8  | 968.5318       | 484.7698        |
| 670.3160       | 7  | H 7  | 911.5103       | 456.2591        |
| 767.3688       | 8  | P 6  | 774.4514       | 387.7296        |
| 880.4528       | 9  | L 5  | 677.3986       | 339.2032        |
| 1009.4954      | 10 | E 4  | 564.3146       | 282.6612        |
| 1156.5638      | 11 | F 3  | 435.2720       | 218.1399        |
| 1269.6479      | 12 | L 2  | 288.2036       | 144.6057        |
|                | 13 | R 1  | 175.1195       | 88.0637         |

N-term:+29.04

TTTTAVHIQPAQEQAR, MH+ 1785.9671, m/z 595.9939  
 H OS G26 P150811 220811-s1.02407.02407.3.dta

scan 2407; 3.0e+000

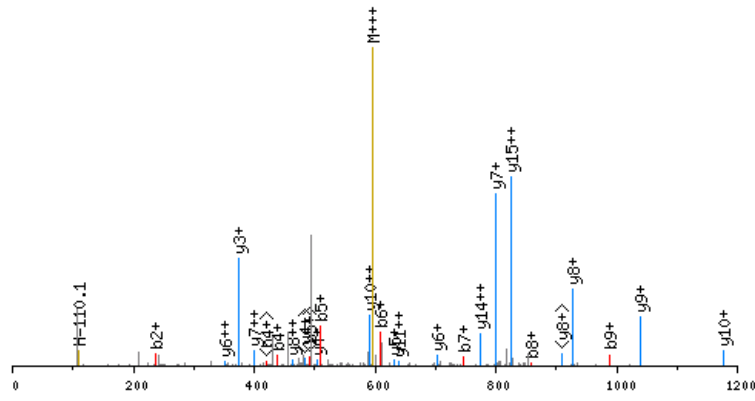

click image to zoom in; click top corners to zoom out [\[precursor±\]](#)

scan 2405; 596.0 m/z; 4.4e+000

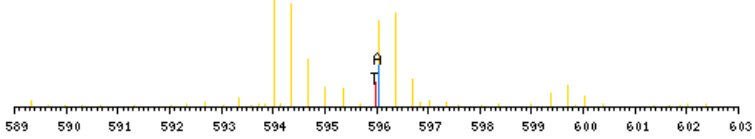

zoomed in precursor plot; T=theoretical m/z, A=acquired m/z

X-range:

-

MassTol: Y-zoom:

MassType:

AVG  MONO

Axis:

1  2

Label:

I  M  -

Ions:

a  +  2+  3+

b  +  2+  3+

c  +  2+  3+

x  +  2+  3+

y  +  2+  3+

z  +  2+  3+

hide H<sub>2</sub>O/NH<sub>3</sub>

zoom 112-122

GO

| b <sup>+</sup> | #  | AA # | y <sup>+</sup> | y <sup>2+</sup> |
|----------------|----|------|----------------|-----------------|
| 136.1186       | 1  | T 16 |                |                 |
| 237.1663       | 2  | T 15 | 1650.8564      | 825.9321        |
| 338.2139       | 3  | T 14 | 1549.8087      | 775.4083        |
| 439.2616       | 4  | T 13 | 1448.7610      | 724.8844        |
| 510.2987       | 5  | A 12 | 1347.7133      | 674.3606        |
| 609.3671       | 6  | V 11 | 1276.6762      | 638.8420        |
| 746.4261       | 7  | H 10 | 1177.6078      | 589.3078        |
| 859.5101       | 8  | I 9  | 1040.5489      | 520.7784        |
| 987.5687       | 9  | Q 8  | 927.4648       | 464.2363        |
| 1084.6215      | 10 | P 7  | 799.4062       | 400.2070        |
| 1155.6586      | 11 | A 6  | 702.3535       | 351.6807        |
| 1283.7172      | 12 | Q 5  | 631.3164       | 316.1621        |
| 1412.7597      | 13 | E 4  | 503.2578       | 252.1328        |
| 1540.8183      | 14 | Q 3  | 374.2152       | 187.6115        |
| 1611.8554      | 15 | A 2  | 246.1566       | 123.5822        |
|                | 16 | R 1  | 175.1195       | 88.0637         |

N-term:+35.07

TTVFSCNLGKFKDETTADGR, MH+ 2304.0818, m/z 768.6988  
 L OS G26 P150811 220811-s1.05183.05183.3.dta

X-range:

-

MassTol: Y-zoom:

MassType:

AVG  MONO

Axis:

1  2

Label:

I  M  -

Ions:

a  +  2+  3+

b  +  2+  3+

c  +  2+  3+

x  +  2+  3+

y  +  2+  3+

z  +  2+  3+

hide H<sub>2</sub>O/NH<sub>3</sub>

zoom 112-122

GO

scan 5183; 5.1e+000

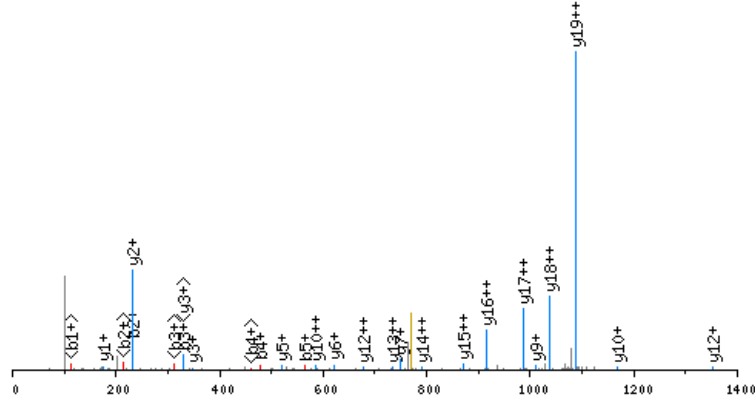

click image to zoom in; click top corners to zoom out [precursor±]

scan 5180; 768.7 mz; 1.2e+001

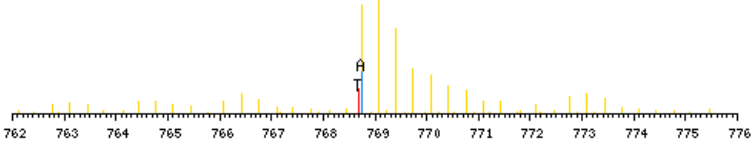

zoomed in precursor plot; T=theoretical m/z, A=acquired m/z

| b <sup>+</sup> | #  | AA | #  | y <sup>+</sup> | y <sup>2+</sup> |
|----------------|----|----|----|----------------|-----------------|
| 130.0868       | 1  | T  | 20 |                |                 |
| 231.1345       | 2  | T  | 19 | 2175.0028      | 1088.0053       |
| 330.2029       | 3  | V  | 18 | 2073.9551      | 1037.4815       |
| 477.2713       | 4  | F  | 17 | 1974.8867      | 987.9473        |
| 564.3033       | 5  | S  | 16 | 1827.8183      | 914.4131        |
| 724.3339       | 6  | C  | 15 | 1740.7863      | 870.8971        |
| 838.3768       | 7  | N  | 14 | 1580.7557      | 790.8818        |
| 951.4609       | 8  | L  | 13 | 1466.7127      | 733.8603        |
| 1008.4824      | 9  | G  | 12 | 1353.6287      | 677.3183        |
| 1137.5250      | 10 | E  | 11 | 1296.6072      | 648.8075        |
| 1293.6513      | 11 | K  | 10 | 1167.5646      | 584.2862        |
| 1440.7197      | 12 | F  | 9  | 1011.4383      | 506.2231        |
| 1555.7466      | 13 | D  | 8  | 864.3699       | 432.6889        |
| 1684.7892      | 14 | E  | 7  | 749.3430       | 375.1754        |
| 1785.8369      | 15 | T  | 6  | 620.3004       | 310.6541        |
| 1886.8846      | 16 | T  | 5  | 519.2527       | 260.1303        |
| 1957.9217      | 17 | A  | 4  | 418.2050       | 209.6064        |
| 2072.9486      | 18 | D  | 3  | 347.1679       | 174.0879        |
| 2129.9701      | 19 | G  | 2  | 232.1410       | 116.5744        |
|                | 20 | R  | 1  | 175.1195       | 88.0637         |

N-term: +29.04 C(6): +160.03  
 K(11): +156.13

TVATPLNQVANPNSAIFGGAR, MH+ 2126.1358, m/z 709.3835  
 L OS G24 P150811 220811-s1.04453.04453.3.dta

X-range:

-

MassTol: Y-zoom:

MassType:

AVG  MONO

Axis:

1  2

Label:

I  M  -

Ions:

a  +  2+  3+

b  +  2+  3+

c  +  2+  3+

x  +  2+  3+

y  +  2+  3+

z  +  2+  3+

hide H<sub>2</sub>O/NH<sub>3</sub>

zoom 112-122

GO

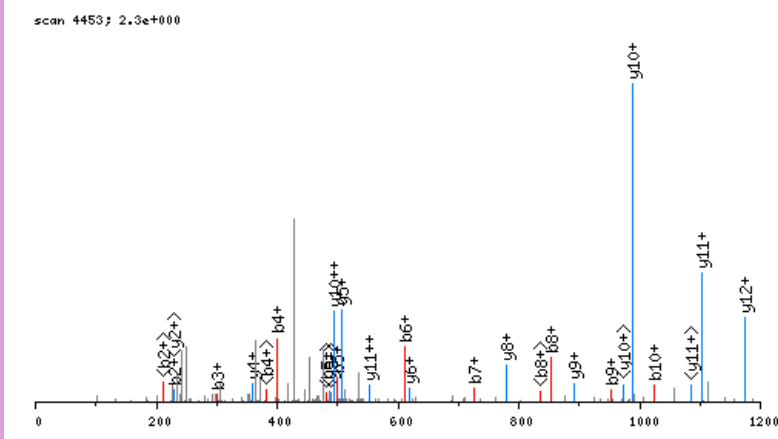

click image to zoom in; click top corners to zoom out [\[precursor±\]](#)

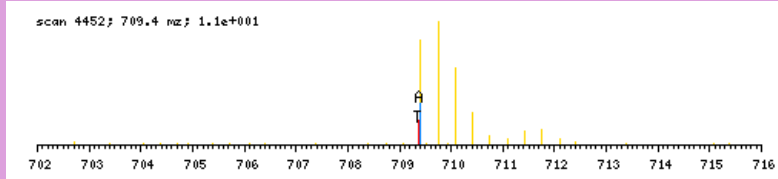

zoomed in precursor plot; T=theoretical m/z, A=acquired m/z

| b <sup>+</sup> | #  | AA | #  | y <sup>+</sup> | y <sup>2+</sup> |
|----------------|----|----|----|----------------|-----------------|
| 130.0868       | 1  | T  | 21 |                |                 |
| 229.1552       | 2  | V  | 20 | 1997.0568      | 999.0323        |
| 300.1923       | 3  | A  | 19 | 1897.9884      | 949.4981        |
| 401.2400       | 4  | T  | 18 | 1826.9513      | 913.9796        |
| 498.2927       | 5  | P  | 17 | 1725.9036      | 863.4557        |
| 611.3768       | 6  | L  | 16 | 1628.8509      | 814.9294        |
| 725.4197       | 7  | N  | 15 | 1515.7668      | 758.3873        |
| 853.4783       | 8  | Q  | 14 | 1401.7239      | 701.3659        |
| 952.5467       | 9  | V  | 13 | 1273.6653      | 637.3366        |
| 1023.5838      | 10 | A  | 12 | 1174.5969      | 587.8024        |
| 1137.6268      | 11 | N  | 11 | 1103.5598      | 552.2838        |
| 1234.6795      | 12 | P  | 10 | 989.5169       | 495.2623        |
| 1348.7225      | 13 | N  | 9  | 892.4641       | 446.7360        |
| 1435.7545      | 14 | S  | 8  | 778.4212       | 389.7145        |
| 1506.7916      | 15 | A  | 7  | 691.3891       | 346.1985        |
| 1619.8757      | 16 | I  | 6  | 620.3520       | 310.6799        |
| 1766.9441      | 17 | F  | 5  | 507.2680       | 254.1379        |
| 1823.9655      | 18 | G  | 4  | 360.1995       | 180.6037        |
| 1880.9870      | 19 | G  | 3  | 303.1781       | 152.0930        |
| 1952.0241      | 20 | A  | 2  | 246.1566       | 123.5822        |
|                | 21 | R  | 1  | 175.1195       | 88.0637         |

N-term:+29.04

TVATPLNQVANPNSAIFGGARPR, MH+ 2379.2897, m/z 595.5779  
 L OS G26 P150811 220811-s1.05572.05572.4.dta

X-range:

-

MassTol: Y-zoom:

MassType:

AVG  MONO

Axis:

1  2

Label:

I  M  -

Ions:

a  +  2+  3+

b  +  2+  3+

c  +  2+  3+

x  +  2+  3+

y  +  2+  3+

z  +  2+  3+

hide H<sub>2</sub>O/NH<sub>3</sub>

zoom 112-122

GO

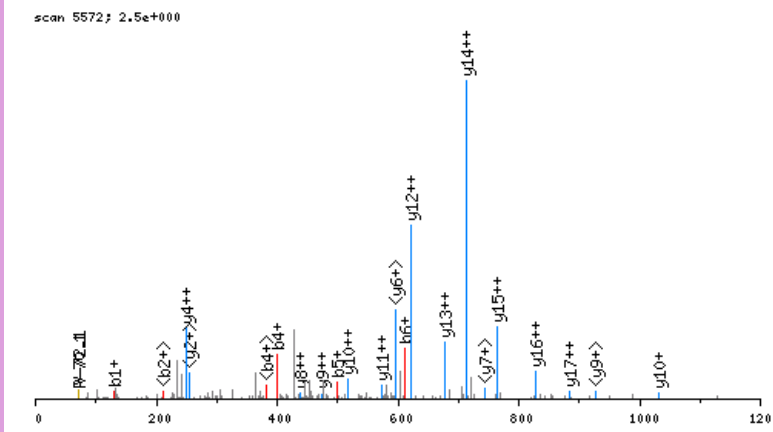

click image to zoom in; click top corners to zoom out [precursor±]

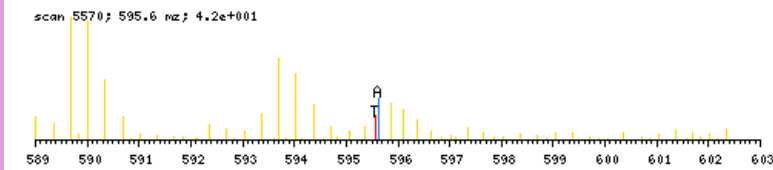

zoomed in precursor plot; T=theoretical m/z, A=acquired m/z

| b <sup>+</sup> | #  | AA # | y <sup>+</sup> | y <sup>2+</sup> |
|----------------|----|------|----------------|-----------------|
| 130.0868       | 1  | T 23 |                |                 |
| 229.1552       | 2  | V 22 | 2250.2107      | 1125.6093       |
| 300.1923       | 3  | A 21 | 2151.1423      | 1076.0751       |
| 401.2400       | 4  | T 20 | 2080.1052      | 1040.5565       |
| 498.2927       | 5  | P 19 | 1979.0575      | 990.0327        |
| 611.3768       | 6  | L 18 | 1882.0048      | 941.5063        |
| 725.4197       | 7  | N 17 | 1768.9207      | 884.9643        |
| 853.4783       | 8  | Q 16 | 1654.8778      | 827.9428        |
| 952.5467       | 9  | V 15 | 1526.8192      | 763.9135        |
| 1023.5838      | 10 | A 14 | 1427.7508      | 714.3793        |
| 1137.6268      | 11 | N 13 | 1356.7137      | 678.8607        |
| 1234.6795      | 12 | P 12 | 1242.6707      | 621.8393        |
| 1348.7225      | 13 | N 11 | 1145.6180      | 573.3129        |
| 1435.7545      | 14 | S 10 | 1031.5750      | 516.2914        |
| 1506.7916      | 15 | A 9  | 944.5430       | 472.7754        |
| 1619.8757      | 16 | I 8  | 873.5059       | 437.2569        |
| 1766.9441      | 17 | F 7  | 760.4218       | 380.7148        |
| 1823.9655      | 18 | G 6  | 613.3534       | 307.1806        |
| 1880.9870      | 19 | G 5  | 556.3320       | 278.6699        |
| 1952.0241      | 20 | A 4  | 499.3105       | 250.1592        |
| 2108.1252      | 21 | R 3  | 428.2734       | 214.6406        |
| 2205.1780      | 22 | P 2  | 272.1723       | 136.5900        |
|                | 23 | R 1  | 175.1195       | 88.0637         |

N-term:+29.04

TVEGDVNTDPWAGYR, MH+ 1707.7978, m/z 569.9375  
 L OS G25 P150811 220811-s1.05860.05860.3.dta

scan 5860; 2.3e+000

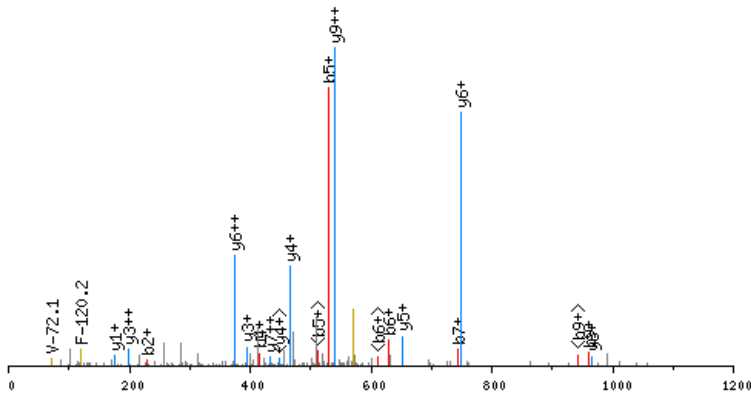

click image to zoom in; click top corners to zoom out [precursor±]

scan 5857; 569.9 m/z; 5.8e+000

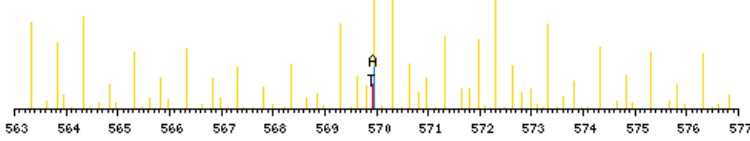

zoomed in precursor plot; T=theoretical m/z, A=acquired m/z

X-range:

0 - 0

MassTol: Y-zoom:

0. 1.

MassType:

AVG  MONO

Axis:

1  2

Label:

I  M  -

Ions:

a  +  2+  3+

b  +  2+  3+

c  +  2+  3+

x  +  2+  3+

y  +  2+  3+

z  +  2+  3+

hide H<sub>2</sub>O/NH<sub>3</sub>

zoom 112-122

GO

| b <sup>+</sup> | #  | AA | #  | y <sup>+</sup> | y <sup>2+</sup> |
|----------------|----|----|----|----------------|-----------------|
| 130.0868       | 1  | T  | 15 |                |                 |
| 229.1552       | 2  | V  | 14 | 1578.7189      | 789.8633        |
| 358.1978       | 3  | E  | 13 | 1479.6504      | 740.3291        |
| 415.2192       | 4  | G  | 12 | 1350.6079      | 675.8078        |
| 530.2462       | 5  | D  | 11 | 1293.5864      | 647.2971        |
| 629.3146       | 6  | V  | 10 | 1178.5594      | 589.7836        |
| 743.3575       | 7  | N  | 9  | 1079.4910      | 540.2494        |
| 844.4052       | 8  | T  | 8  | 965.4481       | 483.2280        |
| 959.4322       | 9  | D  | 7  | 864.4004       | 432.7041        |
| 1056.4849      | 10 | P  | 6  | 749.3735       | 375.1907        |
| 1242.5642      | 11 | W  | 5  | 652.3207       | 326.6643        |
| 1313.6013      | 12 | A  | 4  | 466.2414       | 233.6246        |
| 1370.6228      | 13 | G  | 3  | 395.2043       | 198.1061        |
| 1533.6861      | 14 | Y  | 2  | 338.1828       | 169.5953        |
|                | 15 | R  | 1  | 175.1195       | 88.0637         |

N-term:+29.04

TVFKDLFDPIIQDR, MH+ 1775.0380, m/z 592.3508  
 H OS G27 P150811 220811-s1.07308.07308.3.dta

scan 7308; 4.0e+000

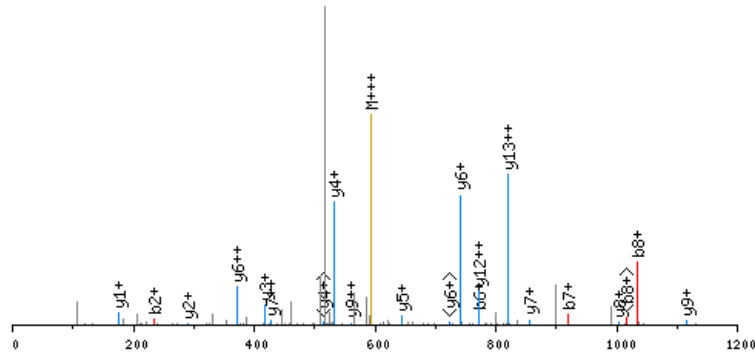

click image to zoom in; click top corners to zoom out [\[precursor±\]](#)

scan 7305; 592.4 m/z; 9.4e+000

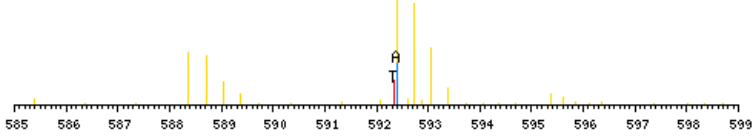

zoomed in precursor plot; T=theoretical m/z, A=acquired m/z

X-range:

-

MassTol: Y-zoom:

MassType:

AVG  MONO

Axis:

1  2

Label:

I  M  -

Ions:

a  +  2+  3+

b  +  2+  3+

c  +  2+  3+

x  +  2+  3+

y  +  2+  3+

z  +  2+  3+

hide H<sub>2</sub>O/NH<sub>3</sub>

zoom 112-122

GO

| b <sup>+</sup> | #  | AA # | y <sup>+</sup> | y <sup>2+</sup> |
|----------------|----|------|----------------|-----------------|
| 136.1186       | 1  | T 14 |                |                 |
| 235.1870       | 2  | V 13 | 1639.9272      | 820.4675        |
| 382.2554       | 3  | F 12 | 1540.8588      | 770.9333        |
| 544.4135       | 4  | K 11 | 1393.7904      | 697.3991        |
| 659.4404       | 5  | D 10 | 1231.6323      | 616.3201        |
| 772.5245       | 6  | L 9  | 1116.6053      | 558.8066        |
| 919.5929       | 7  | F 8  | 1003.5213      | 502.2645        |
| 1034.6199      | 8  | D 7  | 856.4529       | 428.7303        |
| 1131.6726      | 9  | P 6  | 741.4259       | 371.2169        |
| 1244.7567      | 10 | I 5  | 644.3731       | 322.6905        |
| 1357.8408      | 11 | I 4  | 531.2891       | 266.1485        |
| 1485.8993      | 12 | Q 3  | 418.2050       | 209.6064        |
| 1600.9263      | 13 | D 2  | 290.1464       | 145.5771        |
|                | 14 | R 1  | 175.1195       | 88.0637         |

N-term:+35.07 K(4):+162.16

TVHNLVLFDR, MH+ 1311.7273, m/z 437.9140  
 H OS G27 P150811 220811-s1.05571.05571.3.dta

X-range:

-

MassTol: Y-zoom:

MassType:

AVG  MONO

Axis:

1  2

Label:

I  M  -

Ions:

a  +  2+  3+

b  +  2+  3+

c  +  2+  3+

x  +  2+  3+

y  +  2+  3+

z  +  2+  3+

hide H<sub>2</sub>O/NH<sub>3</sub>

zoom 112-122

GO

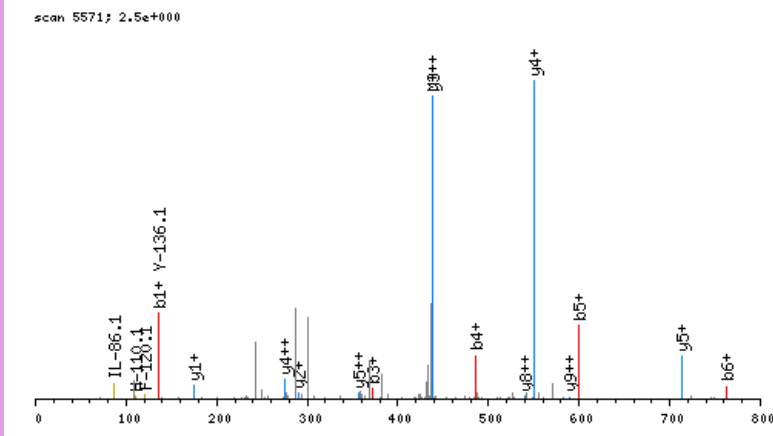

click image to zoom in; click top corners to zoom out [\[precursor±\]](#)

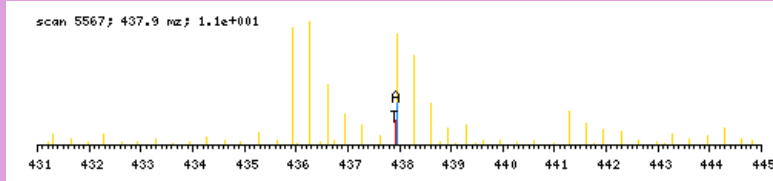

zoomed in precursor plot; T=theoretical m/z, A=acquired m/z

| b <sup>+</sup> | #  | AA # | y <sup>+</sup> | y <sup>2+</sup> |
|----------------|----|------|----------------|-----------------|
| 136.1186       | 1  | T    | 10             |                 |
| 235.1870       | 2  | V    | 9              | 1176.6166       |
| 372.2459       | 3  | H    | 8              | 1077.5482       |
| 486.2888       | 4  | N    | 7              | 940.4892        |
| 599.3729       | 5  | L    | 6              | 826.4463        |
| 762.4362       | 6  | Y    | 5              | 713.3623        |
| 875.5203       | 7  | L    | 4              | 550.2989        |
| 1022.5887      | 8  | F    | 3              | 437.2149        |
| 1137.6156      | 9  | D    | 2              | 290.1464        |
|                | 10 | R    | 1              | 175.1195        |

N-term:+35.07



TVIQEVKTSNVAR, MH+ 1500.8750, m/z 500.9632  
 L OS G26 P150811 220811-s1.02511.02511.3.dta

scan 2511; 2.5e+001

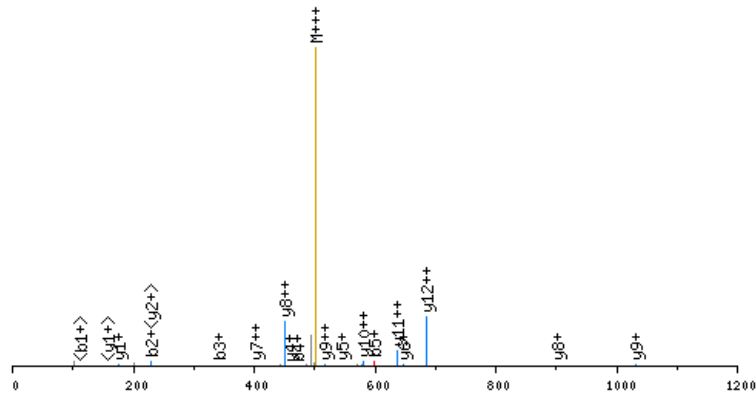

click image to zoom in; click top corners to zoom out [\[precursor±\]](#)

scan 2510; 501.0 m/z; 1.8e+001

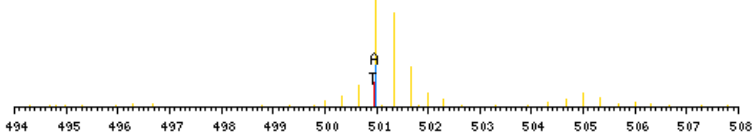

zoomed in precursor plot; T=theoretical m/z, A=acquired m/z

X-range:

-

MassTol: Y-zoom:

MassType:

AVG  MONO

Axis:

1  2

Label:

I  M  -

Ions:

a  +  2+  3+

b  +  2+  3+

c  +  2+  3+

x  +  2+  3+

y  +  2+  3+

z  +  2+  3+

hide H<sub>2</sub>O/NH<sub>3</sub>

zoom 112-122

GO

| b <sup>+</sup> | #  | AA | #  | y <sup>+</sup> | y <sup>2+</sup> |
|----------------|----|----|----|----------------|-----------------|
| 130.0868       | 1  | T  | 13 |                |                 |
| 229.1552       | 2  | V  | 12 | 1371.7960      | 686.4019        |
| 342.2393       | 3  | I  | 11 | 1272.7276      | 636.8677        |
| 470.2978       | 4  | Q  | 10 | 1159.6435      | 580.3257        |
| 599.3404       | 5  | E  | 9  | 1031.5850      | 516.2964        |
| 698.4088       | 6  | V  | 8  | 902.5424       | 451.7751        |
| 854.5351       | 7  | K  | 7  | 803.4740       | 402.2409        |
| 955.5828       | 8  | T  | 6  | 647.3477       | 324.1777        |
| 1042.6148      | 9  | S  | 5  | 546.3000       | 273.6539        |
| 1156.6578      | 10 | N  | 4  | 459.2680       | 230.1379        |
| 1255.7262      | 11 | V  | 3  | 345.2250       | 173.1164        |
| 1326.7633      | 12 | A  | 2  | 246.1566       | 123.5822        |
|                | 13 | R  | 1  | 175.1195       | 88.0637         |

N-term:+29.04 K(7):+156.13

TVKTTVFSCNLGKFDETTADGR, MH+ 2660.3242, m/z 665.8365  
 L OS G27 P150811 220811-s1.05795.05795.4.dta

X-range:

0 - 0

MassTol: Y-zoom:

0. 1.

MassType:

AVG  MONO

Axis:

1  2

Label:

I  M  -

Ions:

a  +  2+  3+

b  +  2+  3+

c  +  2+  3+

x  +  2+  3+

y  +  2+  3+

z  +  2+  3+

hide H<sub>2</sub>O/NH<sub>3</sub>

zoom 112-122

GO

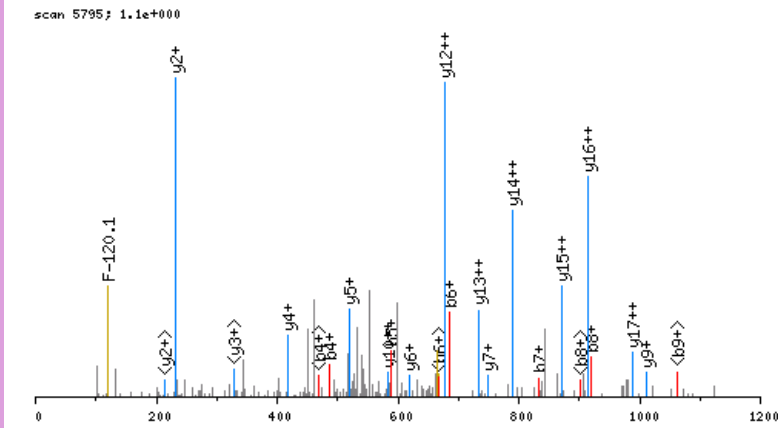

click image to zoom in; click top corners to zoom out [\[precursor±\]](#)

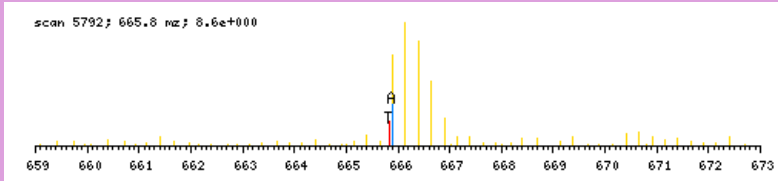

zoomed in precursor plot; T=theoretical m/z, A=acquired m/z

| b <sup>+</sup> | #  | AA | #  | y <sup>+</sup> | y <sup>2+</sup> |
|----------------|----|----|----|----------------|-----------------|
| 130.0868       | 1  | T  | 23 |                |                 |
| 229.1552       | 2  | V  | 22 | 2531.2452      | 1266.1265       |
| 385.2815       | 3  | K  | 21 | 2432.1768      | 1216.5923       |
| 486.3292       | 4  | T  | 20 | 2276.0505      | 1138.5292       |
| 587.3768       | 5  | T  | 19 | 2175.0028      | 1088.0053       |
| 686.4453       | 6  | V  | 18 | 2073.9551      | 1037.4815       |
| 833.5137       | 7  | F  | 17 | 1974.8867      | 987.9473        |
| 920.5457       | 8  | S  | 16 | 1827.8183      | 914.4131        |
| 1080.5763      | 9  | C  | 15 | 1740.7863      | 870.8971        |
| 1194.6192      | 10 | N  | 14 | 1580.7557      | 790.8818        |
| 1307.7033      | 11 | L  | 13 | 1466.7127      | 733.8603        |
| 1364.7248      | 12 | G  | 12 | 1353.6287      | 677.3183        |
| 1493.7674      | 13 | E  | 11 | 1296.6072      | 648.8075        |
| 1649.8937      | 14 | K  | 10 | 1167.5646      | 584.2862        |
| 1796.9621      | 15 | F  | 9  | 1011.4383      | 506.2231        |
| 1911.9890      | 16 | D  | 8  | 864.3699       | 432.6889        |
| 2041.0316      | 17 | E  | 7  | 749.3430       | 375.1754        |
| 2142.0793      | 18 | T  | 6  | 620.3004       | 310.6541        |
| 2243.1270      | 19 | T  | 5  | 519.2527       | 260.1303        |
| 2314.1641      | 20 | A  | 4  | 418.2050       | 209.6064        |
| 2429.1910      | 21 | D  | 3  | 347.1679       | 174.0879        |
| 2486.2125      | 22 | G  | 2  | 232.1410       | 116.5744        |
|                | 23 | R  | 1  | 175.1195       | 88.0637         |

N-term:+29.04 K(3):+156.13  
 C(9):+160.03 K(14):+156.13

TVLGLLDShLIKGAGDAESR, MH+ 2108.1716, m/z 527.7983  
 L OS G28 P150811 220811-s1.07899.07899.4.dta

scan 7899; 9.8e+000

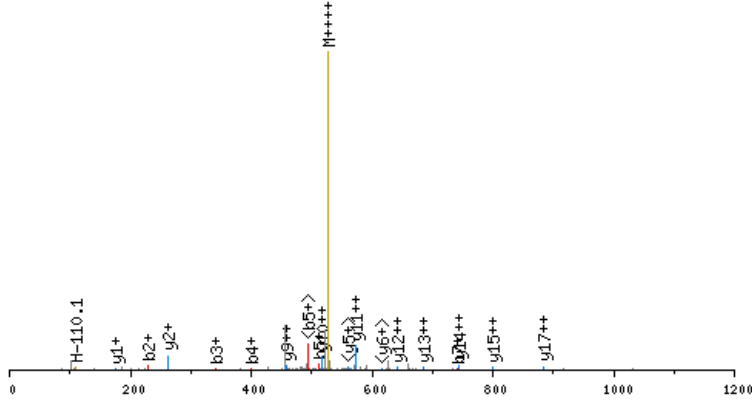

click image to zoom in; click top corners to zoom out [\[precursor±\]](#)

scan 7898; 527.8 m/z; 5.7e+001

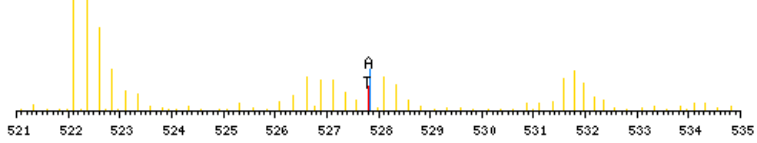

zoomed in precursor plot; T=theoretical m/z, A=acquired m/z

X-range:

-

MassTol: Y-zoom:

MassType:

AVG  MONO

Axis:

1  2

Label:

I  M  -

Ions:

a  +  2+  3+

b  +  2+  3+

c  +  2+  3+

x  +  2+  3+

y  +  2+  3+

z  +  2+  3+

hide H<sub>2</sub>O/NH<sub>3</sub>

zoom 112-122

GO

| b <sup>+</sup> | #  | AA | #  | y <sup>+</sup> | y <sup>2+</sup> |
|----------------|----|----|----|----------------|-----------------|
| 130.0868       | 1  | T  | 20 |                |                 |
| 229.1552       | 2  | V  | 19 | 1979.0926      | 990.0502        |
| 342.2393       | 3  | L  | 18 | 1880.0242      | 940.5160        |
| 399.2607       | 4  | G  | 17 | 1766.9401      | 883.9740        |
| 512.3448       | 5  | L  | 16 | 1709.9187      | 855.4632        |
| 625.4288       | 6  | L  | 15 | 1596.8346      | 798.9212        |
| 740.4558       | 7  | D  | 14 | 1483.7505      | 742.3792        |
| 827.4878       | 8  | S  | 13 | 1368.7236      | 684.8657        |
| 964.5467       | 9  | H  | 12 | 1281.6916      | 641.3497        |
| 1077.6308      | 10 | L  | 11 | 1144.6326      | 572.8202        |
| 1190.7149      | 11 | I  | 10 | 1031.5486      | 516.2782        |
| 1346.8412      | 12 | K  | 9  | 918.4645       | 459.7362        |
| 1403.8626      | 13 | G  | 8  | 762.3382       | 381.6730        |
| 1474.8997      | 14 | A  | 7  | 705.3168       | 353.1623        |
| 1531.9212      | 15 | G  | 6  | 634.2796       | 317.6437        |
| 1646.9481      | 16 | D  | 5  | 577.2582       | 289.1330        |
| 1717.9853      | 17 | A  | 4  | 462.2312       | 231.6195        |
| 1847.0279      | 18 | E  | 3  | 391.1941       | 196.1010        |
| 1934.0599      | 19 | S  | 2  | 262.1515       | 131.5797        |
|                | 20 | R  | 1  | 175.1195       | 88.0637         |

N-term:+29.04 K(12);+156.13

TVLSDYVGSPPSGTGLHR, MH+ 1927.9877, m/z 643.3341  
 L OS G26 P150811 220811-s1.04418.04418.3.dta

X-range:

-

MassTol: Y-zoom:

MassType:

AVG  MONO

Axis:

1  2

Label:

I  M  -

Ions:

a  +  2+  3+

b  +  2+  3+

c  +  2+  3+

x  +  2+  3+

y  +  2+  3+

z  +  2+  3+

hide H<sub>2</sub>O/NH<sub>3</sub>

zoom 112-122

GO

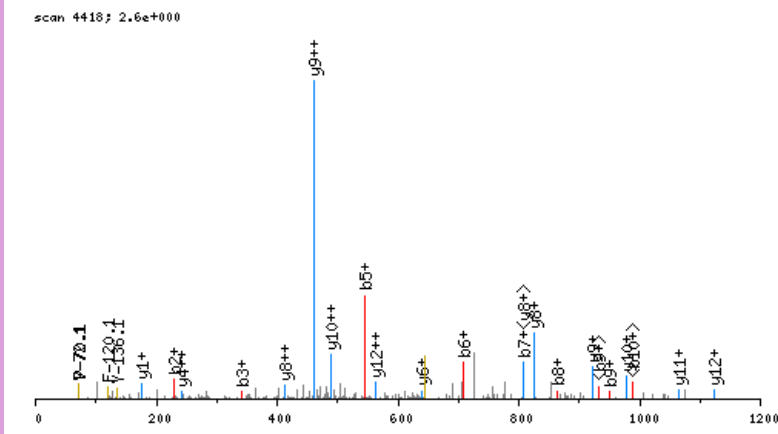

click image to zoom in; click top corners to zoom out [\[precursor±\]](#)

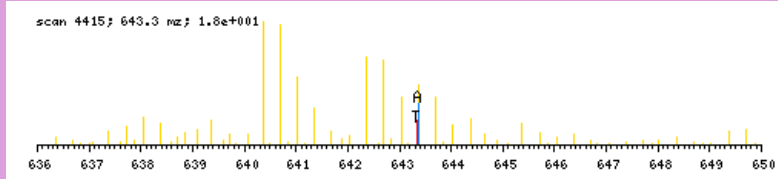

zoomed in precursor plot; T=theoretical m/z, A=acquired m/z

| b <sup>+</sup> | #  | AA # | y <sup>+</sup> | y <sup>2+</sup> |
|----------------|----|------|----------------|-----------------|
| 130.0868       | 1  | T 19 |                |                 |
| 229.1552       | 2  | V 18 | 1798.9088      | 899.9583        |
| 342.2393       | 3  | L 17 | 1699.8404      | 850.4241        |
| 429.2713       | 4  | S 16 | 1586.7563      | 793.8821        |
| 544.2982       | 5  | D 15 | 1499.7243      | 750.3661        |
| 707.3616       | 6  | Y 14 | 1384.6973      | 692.8526        |
| 806.4300       | 7  | V 13 | 1221.6340      | 611.3209        |
| 863.4514       | 8  | G 12 | 1122.5656      | 561.7867        |
| 950.4835       | 9  | S 11 | 1065.5441      | 533.2760        |
| 1007.5049      | 10 | G 10 | 978.5121       | 489.7600        |
| 1104.5577      | 11 | P 9  | 921.4906       | 461.2492        |
| 1201.6105      | 12 | P 8  | 824.4379       | 412.7228        |
| 1288.6425      | 13 | S 7  | 727.3851       | 364.1965        |
| 1345.6639      | 14 | G 6  | 640.3531       | 320.6805        |
| 1446.7116      | 15 | T 5  | 583.3316       | 292.1697        |
| 1503.7331      | 16 | G 4  | 482.2839       | 241.6459        |
| 1616.8172      | 17 | L 3  | 425.2625       | 213.1352        |
| 1753.8761      | 18 | H 2  | 312.1784       | 156.5931        |
|                | 19 | R 1  | 175.1195       | 88.0637         |

N-term:+29.04

TVLSGGTTMYPGIADR, MH+ 1666.8474, m/z 556.2873  
 L OS G24 P150811 220811-s1.03749.03749.3.dta

X-range:

-

MassTol: Y-zoom:

MassType:

AVG  MONO

Axis:

1  2

Label:

I  M  -

Ions:

a  +  2+  3+

b  +  2+  3+

c  +  2+  3+

x  +  2+  3+

y  +  2+  3+

z  +  2+  3+

hide H<sub>2</sub>O/NH<sub>3</sub>

zoom 112-122

GO

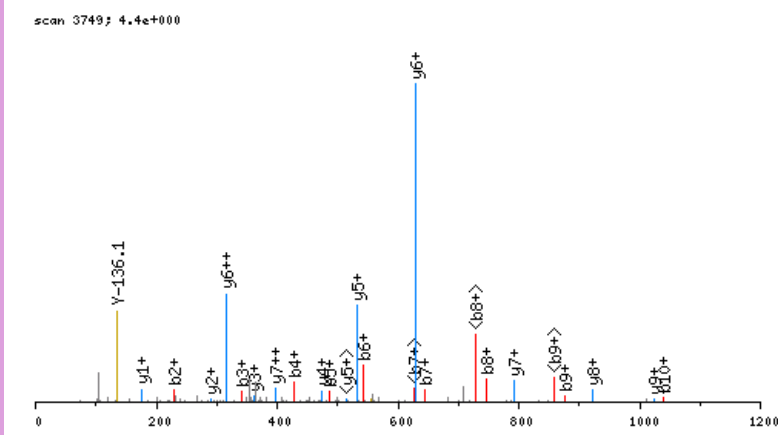

click image to zoom in; click top corners to zoom out [\[precursor±\]](#)

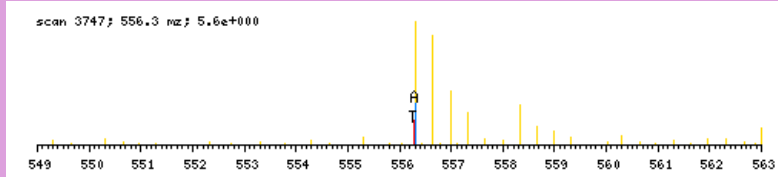

zoomed in precursor plot; T=theoretical m/z, A=acquired m/z

| b <sup>+</sup> | #  | AA # | y <sup>+</sup> | y <sup>2+</sup> |
|----------------|----|------|----------------|-----------------|
| 130.0868       | 1  | T 16 |                |                 |
| 229.1552       | 2  | V 15 | 1537.7685      | 769.3881        |
| 342.2393       | 3  | L 14 | 1438.7000      | 719.8539        |
| 429.2713       | 4  | S 13 | 1325.6160      | 663.3119        |
| 486.2927       | 5  | G 12 | 1238.5839      | 619.7959        |
| 543.3142       | 6  | G 11 | 1181.5625      | 591.2852        |
| 644.3619       | 7  | T 10 | 1124.5410      | 562.7744        |
| 745.4096       | 8  | T 9  | 1023.4933      | 512.2506        |
| 876.4501       | 9  | M 8  | 922.4457       | 461.7267        |
| 1039.5134      | 10 | Y 7  | 791.4052       | 396.2065        |
| 1136.5661      | 11 | P 6  | 628.3418       | 314.6748        |
| 1193.5876      | 12 | G 5  | 531.2891       | 266.1485        |
| 1306.6717      | 13 | I 4  | 474.2676       | 237.6377        |
| 1377.7088      | 14 | A 3  | 361.1836       | 181.0957        |
| 1492.7357      | 15 | D 2  | 290.1464       | 145.5771        |
|                | 16 | R 1  | 175.1195       | 88.0637         |

N-term:+29.04

TVPIEAVTSKTSNIR, MH+ 1684.0281, m/z 562.0142  
 H OS G26 P150811 220811-s1.03891.03891.3.dta

X-range:

-

MassTol: Y-zoom:

MassType:

AVG  MONO

Axis:

1  2

Label:

I  M  -

Ions:

a  +  2+  3+

b  +  2+  3+

c  +  2+  3+

x  +  2+  3+

y  +  2+  3+

z  +  2+  3+

hide H<sub>2</sub>O/NH<sub>3</sub>

zoom 112-122

GO

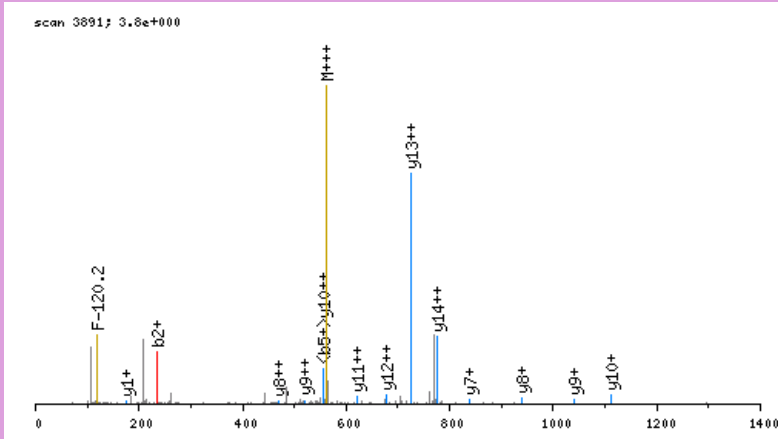

click image to zoom in; click top corners to zoom out [\[precursor±\]](#)

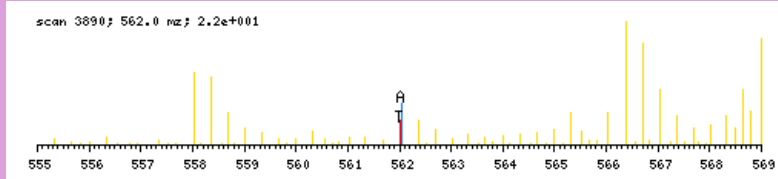

zoomed in precursor plot; T=theoretical m/z, A=acquired m/z

| b <sup>+</sup>  | #  | AA # | y <sup>+</sup> | y <sup>2+</sup> |
|-----------------|----|------|----------------|-----------------|
| 136.1186        | 1  | T    | 15             |                 |
| <b>235.1870</b> | 2  | V    | 14             | 1548.9174       |
| 332.2398        | 3  | P    | 13             | 1449.8490       |
| 445.3238        | 4  | I    | 12             | 1352.7962       |
| 574.3664        | 5  | E    | 11             | 1239.7121       |
| 645.4035        | 6  | A    | 10             | 1110.6695       |
| 744.4719        | 7  | V    | 9              | 1039.6324       |
| 845.5196        | 8  | T    | 8              | 940.5640        |
| 932.5516        | 9  | S    | 7              | 839.5163        |
| 1094.7097       | 10 | K    | 6              | 752.4843        |
| 1195.7574       | 11 | T    | 5              | 590.3262        |
| 1282.7895       | 12 | S    | 4              | 489.2785        |
| 1396.8324       | 13 | N    | 3              | 402.2465        |
| 1509.9164       | 14 | I    | 2              | 288.2036        |
|                 | 15 | R    | 1              | 175.1195        |

N-term:+35.07 K(10):+162.16

TVPIYEGYALPHAILR, MH+ 1841.0325, m/z 614.3490  
 L OS G26 P150811 220811-s1.06484.06484.3.dta

X-range:

-

MassTol: Y-zoom:

MassType:

AVG  MONO

Axis:

1  2

Label:

I  M  -

Ions:

a  +  2+  3+

b  +  2+  3+

c  +  2+  3+

x  +  2+  3+

y  +  2+  3+

z  +  2+  3+

hide H<sub>2</sub>O/NH<sub>3</sub>

zoom 112-122

GO

scan 6484; 1.0e+000

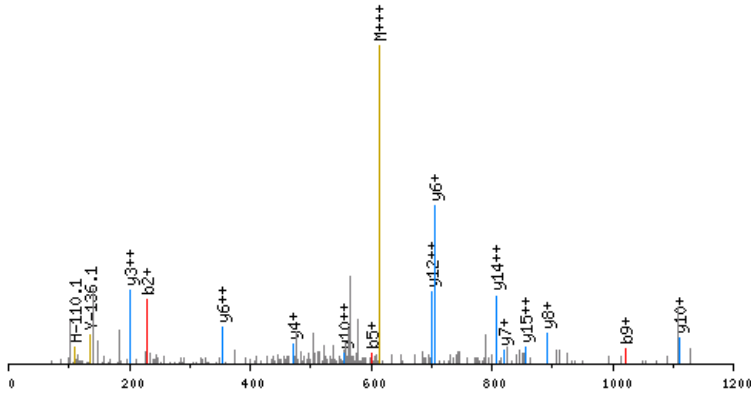

click image to zoom in; click top corners to zoom out [\[precursor±\]](#)

scan 6480; 614.3 m/z; 3.1e+000

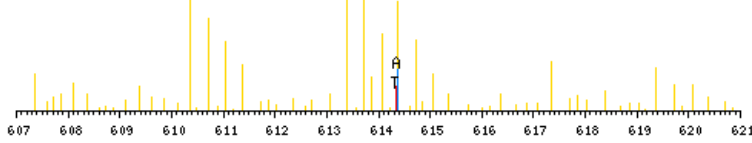

zoomed in precursor plot; T=theoretical m/z, A=acquired m/z

| b <sup>+</sup> | #  | AA # | y <sup>+</sup> | y <sup>2+</sup> |
|----------------|----|------|----------------|-----------------|
| 130.0868       | 1  | T 16 |                |                 |
| 229.1552       | 2  | V 15 | 1711.9536      | 856.4807        |
| 326.2080       | 3  | P 14 | 1612.8851      | 806.9465        |
| 439.2920       | 4  | I 13 | 1515.8324      | 758.4201        |
| 602.3553       | 5  | Y 12 | 1402.7483      | 701.8781        |
| 731.3979       | 6  | E 11 | 1239.6850      | 620.3464        |
| 788.4194       | 7  | G 10 | 1110.6424      | 555.8251        |
| 951.4827       | 8  | Y 9  | 1053.6209      | 527.3144        |
| 1022.5198      | 9  | A 8  | 890.5576       | 445.7827        |
| 1135.6039      | 10 | L 7  | 819.5205       | 410.2642        |
| 1232.6567      | 11 | P 6  | 706.4364       | 353.7221        |
| 1369.7156      | 12 | H 5  | 609.3837       | 305.1957        |
| 1440.7527      | 13 | A 4  | 472.3247       | 236.6663        |
| 1553.8368      | 14 | I 3  | 401.2876       | 201.1477        |
| 1666.9208      | 15 | L 2  | 288.2036       | 144.6057        |
|                | 16 | R 1  | 175.1195       | 88.0637         |

N-term:+29.04

TVTDFPGFDGR, MH+ 1239.6010, m/z 620.3041  
 L OS G25 P150811 220811-s1.06069.06069.2.dta

X-range:

-

MassTol: Y-zoom:

MassType:

AVG  MONO

Axis:

1  2

Label:

I  M  -

Ions:

a  +  2+  3+

b  +  2+  3+

c  +  2+  3+

x  +  2+  3+

y  +  2+  3+

z  +  2+  3+

hide H<sub>2</sub>O/NH<sub>3</sub>

zoom 112-122

GO

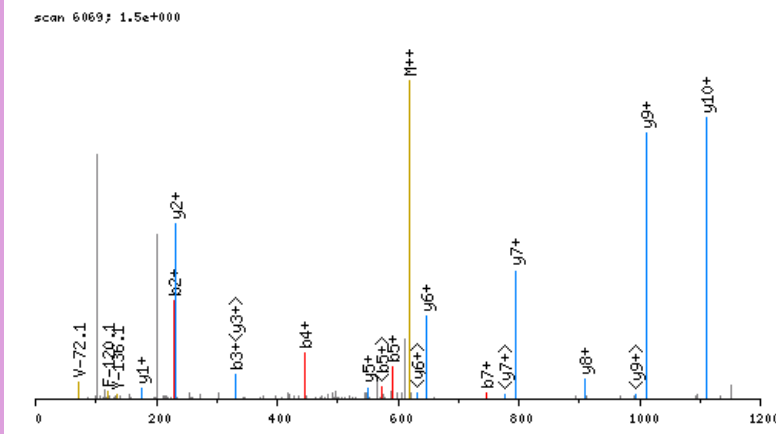

click image to zoom in; click top corners to zoom out [\[precursor±\]](#)

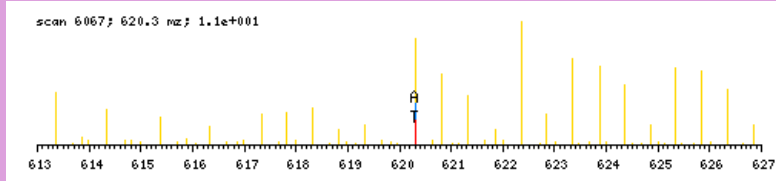

zoomed in precursor plot; T=theoretical m/z, A=acquired m/z

| b <sup>+</sup> | #  | AA # | y <sup>+</sup> | y <sup>2+</sup> |
|----------------|----|------|----------------|-----------------|
| 130.0868       | 1  | T 11 |                |                 |
| 229.1552       | 2  | V 10 | 1110.5220      | 555.7649        |
| 330.2029       | 3  | T 9  | 1011.4536      | 506.2307        |
| 445.2298       | 4  | D 8  | 910.4059       | 455.7069        |
| 592.2982       | 5  | F 7  | 795.3790       | 398.1934        |
| 689.3510       | 6  | P 6  | 648.3105       | 324.6592        |
| 746.3725       | 7  | G 5  | 551.2578       | 276.1328        |
| 893.4409       | 8  | F 4  | 494.2363       | 247.6221        |
| 1008.4678      | 9  | D 3  | 347.1679       | 174.0879        |
| 1065.4893      | 10 | G 2  | 232.1410       | 116.5744        |
|                | 11 | R 1  | 175.1195       | 88.0637         |

N-term:+29.04



TWVVLGHSER, MH+ 1211.6537, m/z 404.5561  
 L OS G27 P150811 220811-s1.04799.04799.3.dta

X-range:

-

MassTol: Y-zoom:

MassType:

AVG  MONO

Axis:

1  2

Label:

I  M  -

Ions:

a  +  2+  3+

b  +  2+  3+

c  +  2+  3+

x  +  2+  3+

y  +  2+  3+

z  +  2+  3+

hide H<sub>2</sub>O/NH<sub>3</sub>

zoom 112-122

GO

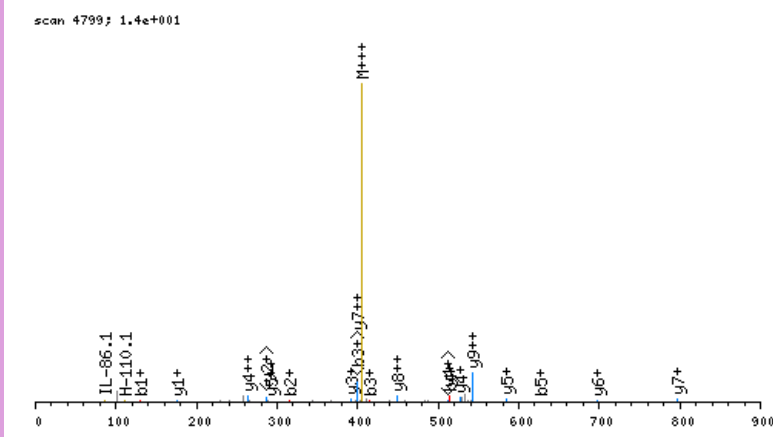

click image to zoom in; click top corners to zoom out [\[precursor±\]](#)

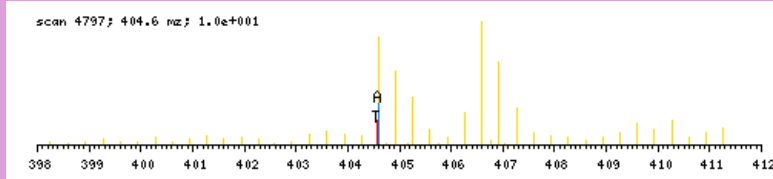

zoomed in precursor plot; T=theoretical m/z, A=acquired m/z

| b <sup>+</sup> | #  | AA # | y <sup>+</sup> | y <sup>2+</sup> |
|----------------|----|------|----------------|-----------------|
| 130.0868       | 1  | T    | 10             |                 |
| 316.1661       | 2  | W    | 9              | 1082.5747       |
| 415.2345       | 3  | V    | 8              | 896.4954        |
| 514.3029       | 4  | V    | 7              | 797.4270        |
| 627.3870       | 5  | L    | 6              | 698.3586        |
| 684.4084       | 6  | G    | 5              | 585.2745        |
| 821.4674       | 7  | H    | 4              | 528.2530        |
| 908.4994       | 8  | S    | 3              | 391.1941        |
| 1037.5420      | 9  | E    | 2              | 304.1621        |
|                | 10 | R    | 1              | 175.1195        |

N-term:+29.04

TYHGDSLQLDR, MH+ 1447.6817, m/z 483.2321  
 L OS G27 P150811 220811-s1.03155.03155.3.dta

X-range:

-

MassTol: Y-zoom:

MassType:

AVG  MONO

Axis:

1  2

Label:

I  M  -

Ions:

a  +  2+  3+

b  +  2+  3+

c  +  2+  3+

x  +  2+  3+

y  +  2+  3+

z  +  2+  3+

hide H<sub>2</sub>O/NH<sub>3</sub>

zoom 112-122

GO

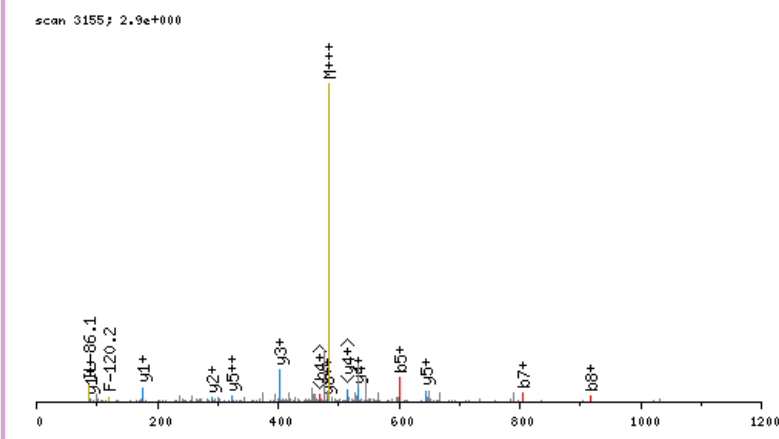

click image to zoom in; click top corners to zoom out [\[precursor±\]](#)

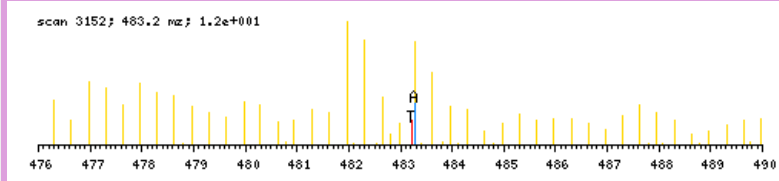

zoomed in precursor plot; T=theoretical m/z, A=acquired m/z

| b <sup>+</sup> | #  | AA # | y <sup>+</sup> | y <sup>2+</sup> |
|----------------|----|------|----------------|-----------------|
| 130.0868       | 1  | T 12 |                |                 |
| 293.1501       | 2  | Y 11 | 1318.6028      | 659.8053        |
| 430.2090       | 3  | H 10 | 1155.5394      | 578.2736        |
| 487.2305       | 4  | G 9  | 1018.4805      | 509.7442        |
| 602.2574       | 5  | D 8  | 961.4591       | 481.2334        |
| 689.2895       | 6  | S 7  | 846.4321       | 423.7200        |
| 804.3164       | 7  | D 6  | 759.4001       | 380.2040        |
| 917.4005       | 8  | L 5  | 644.3731       | 322.6905        |
| 1045.4590      | 9  | Q 4  | 531.2891       | 266.1485        |
| 1158.5431      | 10 | L 3  | 403.2305       | 202.1192        |
| 1273.5700      | 11 | D 2  | 290.1464       | 145.5771        |
|                | 12 | R 1  | 175.1195       | 88.0637         |

N-term:+29.04

TYKMADEAGSEAHR, MH+ 1633.8280, m/z 409.2125  
 H OS G28 P150811 220811-s1.02220.02220.4.dta

X-range:

-

MassTol: Y-zoom:

MassType:

AVG  MONO

Axis:

1  2

Label:

I  M  -

Ions:

a  +  2+  3+

b  +  2+  3+

c  +  2+  3+

x  +  2+  3+

y  +  2+  3+

z  +  2+  3+

hide H<sub>2</sub>O/NH<sub>3</sub>

zoom 112-122

GO

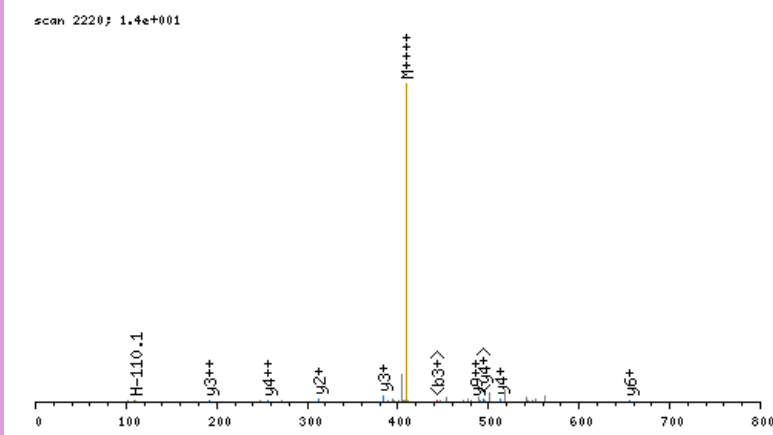

click image to zoom in; click top corners to zoom out [\[precursor±\]](#)

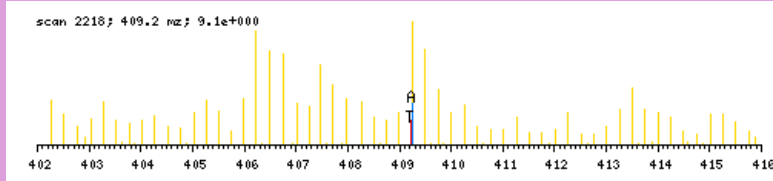

zoomed in precursor plot; T=theoretical m/z, A=acquired m/z

| b <sup>+</sup> | #  | AA # | y <sup>+</sup> | y <sup>2+</sup> |
|----------------|----|------|----------------|-----------------|
| 136.1186       | 1  | T 14 |                |                 |
| 299.1819       | 2  | Y 13 | 1498.7173      | 749.8626        |
| 461.3400       | 3  | K 12 | 1335.6540      | 668.3309        |
| 592.3805       | 4  | M 11 | 1173.4959      | 587.2518        |
| 663.4176       | 5  | A 10 | 1042.4554      | 521.7316        |
| 778.4445       | 6  | D 9  | 971.4183       | 486.2130        |
| 907.4871       | 7  | E 8  | 856.3913       | 428.6996        |
| 978.5243       | 8  | A 7  | 727.3487       | 364.1783        |
| 1035.5457      | 9  | G 6  | 656.3116       | 328.6597        |
| 1122.5777      | 10 | S 5  | 599.2901       | 300.1490        |
| 1251.6203      | 11 | E 4  | 512.2581       | 256.6330        |
| 1322.6575      | 12 | A 3  | 383.2155       | 192.1117        |
| 1459.7164      | 13 | H 2  | 312.1784       | 156.5931        |
|                | 14 | R 1  | 175.1195       | 88.0637         |

N-term:+35.07 K(3):+162.16

VAEQADLEQAFSPSPDCVDR, MH+ 2377.0617, m/z 793.0254  
 L OS G24 P150811 220811-s1.03971.03971.3.dta

scan 3971; 1.2e+000

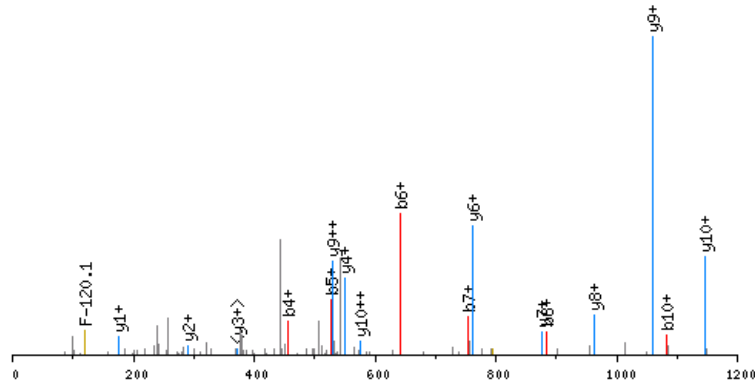

click image to zoom in; click top corners to zoom out [precursor±]

scan 3967; 793.0 m/z; 2.4e+000

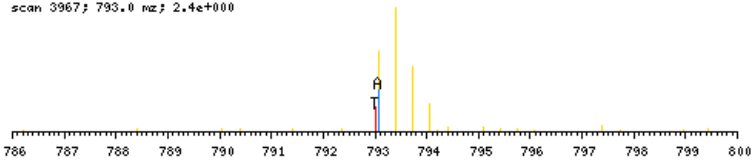

zoomed in precursor plot; T=theoretical m/z, A=acquired m/z

| b <sup>+</sup> | #  | AA # | y <sup>+</sup> | y <sup>2+</sup> |
|----------------|----|------|----------------|-----------------|
| 128.1075       | 1  | V 21 |                |                 |
| 199.1446       | 2  | A 20 | 2249.9620      | 1125.4849       |
| 328.1872       | 3  | E 19 | 2178.9249      | 1089.9664       |
| 456.2458       | 4  | Q 18 | 2049.8823      | 1025.4451       |
| 527.2829       | 5  | A 17 | 1921.8237      | 961.4158        |
| 642.3099       | 6  | D 16 | 1850.7866      | 925.8972        |
| 755.3939       | 7  | L 15 | 1735.7597      | 868.3838        |
| 884.4365       | 8  | E 14 | 1622.6756      | 811.8417        |
| 1012.4951      | 9  | Q 13 | 1493.6330      | 747.3204        |
| 1083.5322      | 10 | A 12 | 1365.5745      | 683.2911        |
| 1230.6006      | 11 | F 11 | 1294.5373      | 647.7726        |
| 1317.6326      | 12 | S 10 | 1147.4689      | 574.2384        |
| 1414.6854      | 13 | P 9  | 1060.4369      | 530.7224        |
| 1501.7174      | 14 | S 8  | 963.3841       | 482.1960        |
| 1616.7444      | 15 | D 7  | 876.3521       | 438.6800        |
| 1713.7971      | 16 | P 6  | 761.3252       | 381.1665        |
| 1828.8241      | 17 | D 5  | 664.2724       | 332.6401        |
| 1988.8547      | 18 | C 4  | 549.2455       | 275.1266        |
| 2087.9231      | 19 | V 3  | 389.2149       | 195.1113        |
| 2202.9500      | 20 | D 2  | 290.1464       | 145.5771        |
|                | 21 | R 1  | 175.1195       | 88.0637         |

N-term:+29.04 C(18):+160.03

X-range:

-

MassTol: Y-zoom:

MassType:

AVG  MONO

Axis:

1  2

Label:

I  M  -

Ions:

a  +  2+  3+

b  +  2+  3+

c  +  2+  3+

x  +  2+  3+

y  +  2+  3+

z  +  2+  3+

hide H<sub>2</sub>O/NH<sub>3</sub>

zoom 112-122

GO

VAETGTEAAAAATGVIGGIR, MH+ 1771.9554, m/z 591.3233  
 L OS G24 P150811 220811-s1.03766.03766.3.dta

X-range:

-

MassTol: Y-zoom:

MassType:

AVG  MONO

Axis:

1  2

Label:

I  M  -

Ions:

a  +  2+  3+

b  +  2+  3+

c  +  2+  3+

x  +  2+  3+

y  +  2+  3+

z  +  2+  3+

hide H<sub>2</sub>O/NH<sub>3</sub>

zoom 112-122

GO

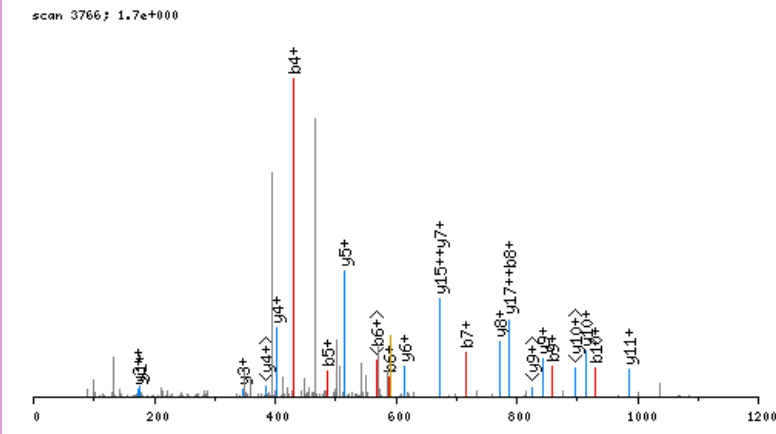

click image to zoom in; click top corners to zoom out [\[precursor±\]](#)

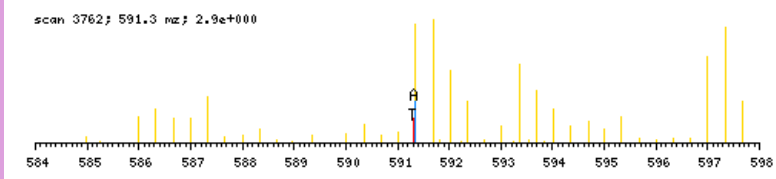

zoomed in precursor plot; T=theoretical m/z, A=acquired m/z

| b <sup>+</sup> | #  | AA # | y <sup>+</sup> | y <sup>2+</sup> |
|----------------|----|------|----------------|-----------------|
| 128.1075       | 1  | V 19 |                |                 |
| 199.1446       | 2  | A 18 | 1644.8557      | 822.9318        |
| 328.1872       | 3  | E 17 | 1573.8186      | 787.4132        |
| 429.2349       | 4  | T 16 | 1444.7760      | 722.8919        |
| 486.2564       | 5  | G 15 | 1343.7283      | 672.3681        |
| 587.3040       | 6  | T 14 | 1286.7068      | 643.8573        |
| 716.3466       | 7  | E 13 | 1185.6592      | 593.3335        |
| 787.3837       | 8  | A 12 | 1056.6166      | 528.8122        |
| 858.4209       | 9  | A 11 | 985.5795       | 493.2936        |
| 929.4580       | 10 | A 10 | 914.5423       | 457.7751        |
| 1000.4951      | 11 | A 9  | 843.5052       | 422.2565        |
| 1101.5428      | 12 | T 8  | 772.4681       | 386.7380        |
| 1158.5642      | 13 | G 7  | 671.4204       | 336.2141        |
| 1257.6326      | 14 | V 6  | 614.3990       | 307.7034        |
| 1370.7167      | 15 | I 5  | 515.3306       | 258.1692        |
| 1427.7382      | 16 | G 4  | 402.2465       | 201.6272        |
| 1484.7596      | 17 | G 3  | 345.2250       | 173.1164        |
| 1597.8437      | 18 | I 2  | 288.2036       | 144.6057        |
|                | 19 | R 1  | 175.1195       | 88.0637         |

N-term:+29.04

VAEVFEIIFRR, MH+ 1412.8478, m/z 471.6208  
 H OS G27 P150811 220811-s1.06514.06514.3.dta

X-range:

-

MassTol: Y-zoom:

MassType:

AVG  MONO

Axis:

1  2

Label:

I  M  -

Ions:

a  +  2+  3+

b  +  2+  3+

c  +  2+  3+

x  +  2+  3+

y  +  2+  3+

z  +  2+  3+

hide H<sub>2</sub>O/NH<sub>3</sub>

zoom 112-122

GO

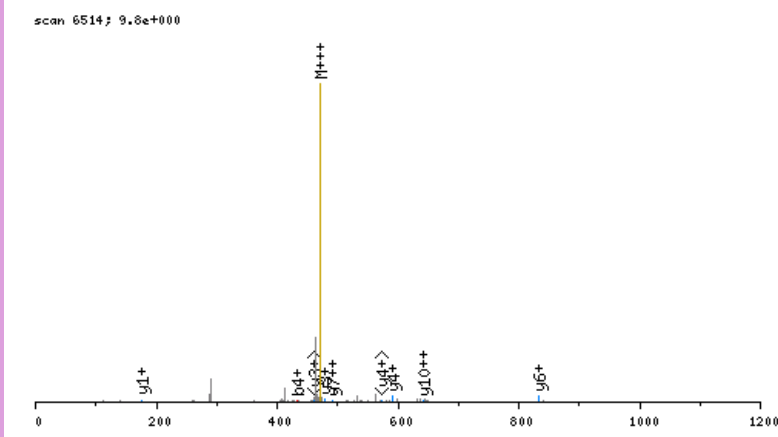

click image to zoom in; click top corners to zoom out [\[precursor±\]](#)

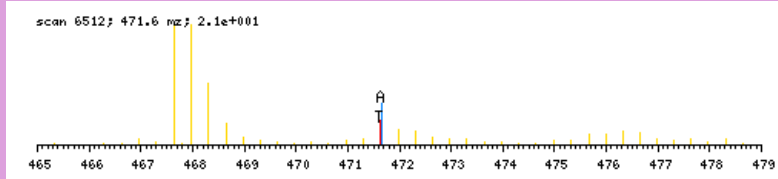

zoomed in precursor plot; T=theoretical m/z, A=acquired m/z

| b <sup>+</sup> | #  | AA # | y <sup>+</sup> | y <sup>2+</sup> |
|----------------|----|------|----------------|-----------------|
| 134.1393       | 1  | V 11 |                |                 |
| 205.1764       | 2  | A 10 | 1279.7163      | 640.3621        |
| 334.2190       | 3  | E 9  | 1208.6792      | 604.8435        |
| 433.2874       | 4  | V 8  | 1079.6366      | 540.3222        |
| 580.3558       | 5  | F 7  | 980.5682       | 490.7880        |
| 709.3984       | 6  | E 6  | 833.4997       | 417.2538        |
| 822.4825       | 7  | I 5  | 704.4572       | 352.7325        |
| 935.5666       | 8  | I 4  | 591.3731       | 296.1905        |
| 1082.6350      | 9  | F 3  | 478.2890       | 239.6484        |
| 1238.7361      | 10 | R 2  | 331.2206       | 166.1142        |
|                | 11 | R 1  | 175.1195       | 88.0637         |

N-term:+35.07

VAGEMGQNEPDQGGQR, MH+ 1700.7662, m/z 567.5936  
 L OS G25 P150811 220811-s1.02118.02118.3.dta

X-range:

-

MassTol: Y-zoom:

MassType:

AVG  MONO

Axis:

1  2

Label:

I  M  -

Ions:

a  +  2+  3+

b  +  2+  3+

c  +  2+  3+

x  +  2+  3+

y  +  2+  3+

z  +  2+  3+

hide H<sub>2</sub>O/NH<sub>3</sub>

zoom 112-122

GO

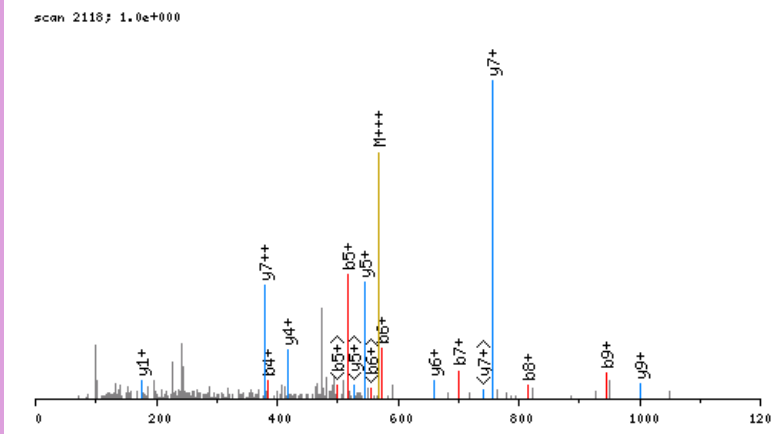

click image to zoom in; click top corners to zoom out [\[precursor±\]](#)

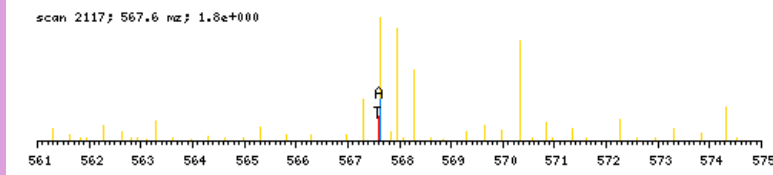

zoomed in precursor plot; T=theoretical m/z, A=acquired m/z

| b <sup>+</sup> | #  | AA # | y <sup>+</sup> | y <sup>2+</sup> |
|----------------|----|------|----------------|-----------------|
| 128.1075       | 1  | V 16 |                |                 |
| 199.1446       | 2  | A 15 | 1573.6665      | 787.3372        |
| 256.1661       | 3  | G 14 | 1502.6294      | 751.8186        |
| 385.2087       | 4  | E 13 | 1445.6079      | 723.3079        |
| 516.2492       | 5  | M 12 | 1316.5653      | 658.7866        |
| 573.2706       | 6  | G 11 | 1185.5249      | 593.2663        |
| 701.3292       | 7  | Q 10 | 1128.5034      | 564.7556        |
| 815.3721       | 8  | N 9  | 1000.4448      | 500.7263        |
| 944.4147       | 9  | E 8  | 886.4019       | 443.7049        |
| 1041.4675      | 10 | P 7  | 757.3593       | 379.1836        |
| 1156.4944      | 11 | D 6  | 660.3065       | 330.6572        |
| 1284.5530      | 12 | Q 5  | 545.2796       | 273.1437        |
| 1341.5745      | 13 | G 4  | 417.2210       | 209.1144        |
| 1398.5959      | 14 | G 3  | 360.1995       | 180.6037        |
| 1526.6545      | 15 | Q 2  | 303.1781       | 152.0930        |
|                | 16 | R 1  | 175.1195       | 88.0637         |

N-term:+29.04

VAHGVQITGVNQAGKETQR, MH+ 1936.0365, m/z 484.7646  
 L OS G28 P150811 220811-s1.01879.01879.4.dta

scan 1879; 1.8e+000

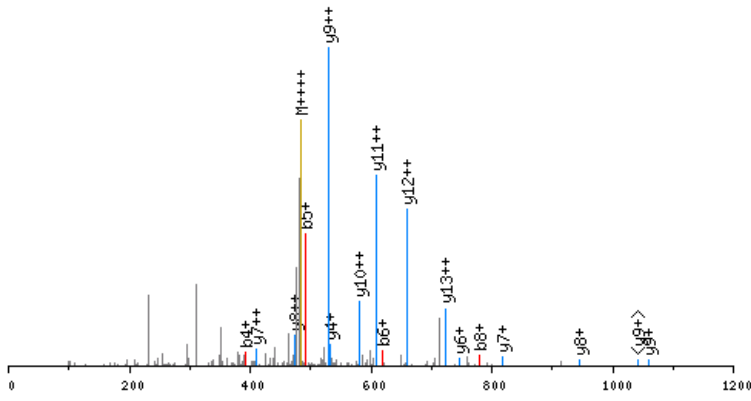

click image to zoom in; click top corners to zoom out [precursor±]

scan 1878; 484.8 m/z; 3.5e+000

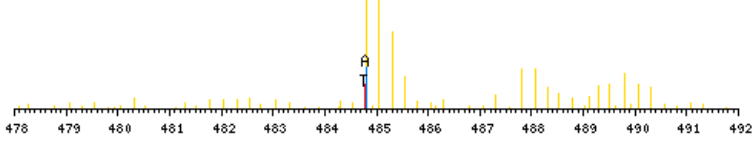

zoomed in precursor plot; T=theoretical m/z, A=acquired m/z

X-range:

-

MassTol: Y-zoom:

MassType:

AVG  MONO

Axis:

1  2

Label:

I  M  -

Ions:

a  +  2+  3+

b  +  2+  3+

c  +  2+  3+

x  +  2+  3+

y  +  2+  3+

z  +  2+  3+

hide H<sub>2</sub>O/NH<sub>3</sub>

zoom 112-122

GO

| b <sup>+</sup> | #  | AA # | y <sup>+</sup> | y <sup>2+</sup> |
|----------------|----|------|----------------|-----------------|
| 128.1075       | 1  | V 18 |                |                 |
| 199.1446       | 2  | A 17 | 1808.9368      | 904.9723        |
| 336.2035       | 3  | H 16 | 1737.8997      | 869.4537        |
| 393.2250       | 4  | G 15 | 1600.8407      | 800.9243        |
| 492.2934       | 5  | V 14 | 1543.8193      | 772.4136        |
| 620.3520       | 6  | Q 13 | 1444.7509      | 722.8793        |
| 721.3997       | 7  | T 12 | 1316.6923      | 658.8501        |
| 778.4211       | 8  | G 11 | 1215.6446      | 608.3262        |
| 877.4896       | 9  | V 10 | 1158.6231      | 579.8155        |
| 991.5325       | 10 | N 9  | 1059.5547      | 530.2813        |
| 1119.5911      | 11 | Q 8  | 945.5118       | 473.2598        |
| 1190.6282      | 12 | A 7  | 817.4532       | 409.2305        |
| 1247.6496      | 13 | G 6  | 746.4161       | 373.7120        |
| 1403.7759      | 14 | K 5  | 689.3946       | 345.2012        |
| 1532.8185      | 15 | E 4  | 533.2683       | 267.1381        |
| 1633.8662      | 16 | T 3  | 404.2258       | 202.6168        |
| 1761.9248      | 17 | Q 2  | 303.1781       | 152.0930        |
|                | 18 | R 1  | 175.1195       | 88.0637         |

N-term:+29.04 K(14):+156.13



VANQDFVENLVR, MH+ 1530.8280, m/z 510.9475  
 L OS G25 P150811 220811-s1.07076.07076.3.dta

scan 7076; 2.3e+000

X-range:

-

MassTol: Y-zoom:

MassType:

AVG  MONO

Axis:

1  2

Label:

I  M  -

Ions:

a  +  2+  3+

b  +  2+  3+

c  +  2+  3+

x  +  2+  3+

y  +  2+  3+

z  +  2+  3+

hide H<sub>2</sub>O/NH<sub>3</sub>

zoom 112-122

GO

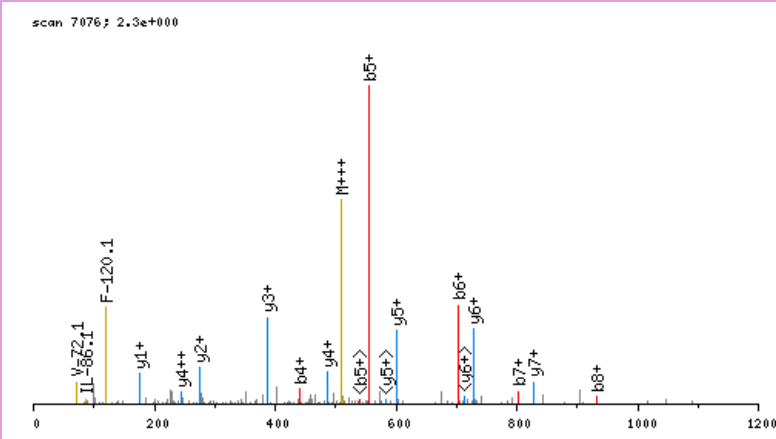

click image to zoom in; click top corners to zoom out [\[precursor±\]](#)

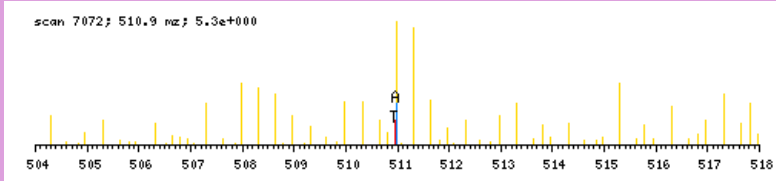

zoomed in precursor plot; T=theoretical m/z, A=acquired m/z

| b <sup>+</sup> | #  | AA # | y <sup>+</sup> | y <sup>2+</sup> |
|----------------|----|------|----------------|-----------------|
| 128.1075       | 1  | V 13 |                |                 |
| 199.1446       | 2  | A 12 | 1403.7283      | 702.3681        |
| 313.1876       | 3  | N 11 | 1332.6912      | 666.8495        |
| 441.2461       | 4  | Q 10 | 1218.6483      | 609.8280        |
| 556.2731       | 5  | D 9  | 1090.5897      | 545.7988        |
| 703.3415       | 6  | F 8  | 975.5627       | 488.2853        |
| 802.4099       | 7  | V 7  | 828.4943       | 414.7511        |
| 931.4525       | 8  | E 6  | 729.4259       | 365.2169        |
| 1045.4954      | 9  | N 5  | 600.3833       | 300.6956        |
| 1144.5638      | 10 | V 4  | 486.3404       | 243.6741        |
| 1257.6479      | 11 | L 3  | 387.2720       | 194.1399        |
| 1356.7163      | 12 | V 2  | 274.1879       | 137.5979        |
|                | 13 | R 1  | 175.1195       | 88.0637         |

N-term:+29.04

VANSPANADYQER, MH+ 1462.6926, m/z 488.2357  
 L OS G25 P150811 220811-s1.02169.02169.3.dta

scan 2169; 1.1e+000

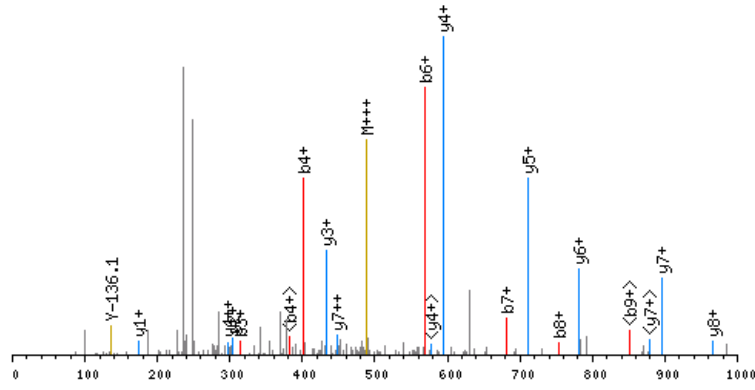

click image to zoom in; click top corners to zoom out [\[precursor±\]](#)

scan 2167; 488.2 m/z; 1.2e+001

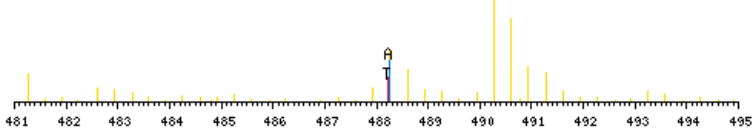

zoomed in precursor plot; T=theoretical m/z, A=acquired m/z

X-range:

-

MassTol: Y-zoom:

MassType:

AVG  MONO

Axis:

1  2

Label:

I  M  -

Ions:

a  +  2+  3+

b  +  2+  3+

c  +  2+  3+

x  +  2+  3+

y  +  2+  3+

z  +  2+  3+

hide H<sub>2</sub>O/NH<sub>3</sub>

zoom 112-122

GO

| b <sup>+</sup> | #  | AA # | y <sup>+</sup> | y <sup>2+</sup> |
|----------------|----|------|----------------|-----------------|
| 128.1075       | 1  | V 13 |                |                 |
| 199.1446       | 2  | A 12 | 1335.5929      | 668.3004        |
| 313.1876       | 3  | N 11 | 1264.5558      | 632.7818        |
| 400.2196       | 4  | S 10 | 1150.5129      | 575.7604        |
| 497.2723       | 5  | P 9  | 1063.4809      | 532.2443        |
| 568.3095       | 6  | A 8  | 966.4281       | 483.7180        |
| 682.3524       | 7  | N 7  | 895.3910       | 448.1994        |
| 753.3895       | 8  | A 6  | 781.3481       | 391.1779        |
| 868.4164       | 9  | D 5  | 710.3109       | 355.6594        |
| 1031.4798      | 10 | Y 4  | 595.2840       | 298.1459        |
| 1159.5384      | 11 | Q 3  | 432.2207       | 216.6142        |
| 1288.5809      | 12 | E 2  | 304.1621       | 152.5850        |
|                | 13 | R 1  | 175.1195       | 88.0637         |

N-term:+29.04

VAPEEHPTLLTEAPLNPKANR, MH+ 2353.2880, m/z 589.0775  
 L OS G27 P150811 220811-s1.05213.05213.4.dta

X-range:

-

MassTol: Y-zoom:

MassType:

AVG  MONO

Axis:

1  2

Label:

I  M  -

Ions:

a  +  2+  3+

b  +  2+  3+

c  +  2+  3+

x  +  2+  3+

y  +  2+  3+

z  +  2+  3+

hide H<sub>2</sub>O/NH<sub>3</sub>

zoom 112-122

GO

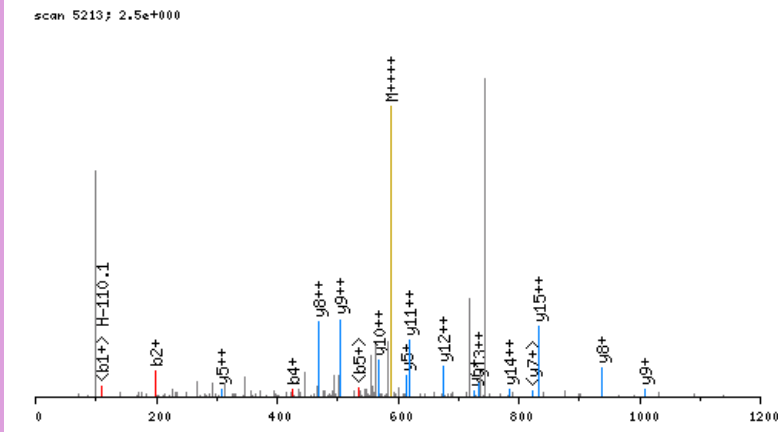

click image to zoom in; click top corners to zoom out [\[precursor±\]](#)

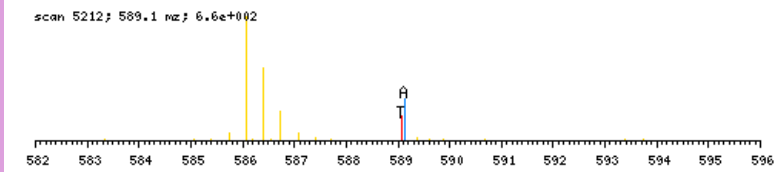

zoomed in precursor plot; T=theoretical m/z, A=acquired m/z

| b <sup>+</sup> | #  | AA | #  | y <sup>+</sup> | y <sup>2+</sup> |
|----------------|----|----|----|----------------|-----------------|
| 128.1075       | 1  | V  | 21 |                |                 |
| 199.1446       | 2  | A  | 20 | 2226.1883      | 1113.5981       |
| 296.1974       | 3  | P  | 19 | 2155.1512      | 1078.0795       |
| 425.2400       | 4  | E  | 18 | 2058.0984      | 1029.5531       |
| 554.2826       | 5  | E  | 17 | 1929.0558      | 965.0318        |
| 691.3415       | 6  | H  | 16 | 1800.0132      | 900.5105        |
| 788.3943       | 7  | P  | 15 | 1662.9543      | 831.9811        |
| 889.4419       | 8  | T  | 14 | 1565.9016      | 783.4547        |
| 1002.5260      | 9  | L  | 13 | 1464.8539      | 732.9308        |
| 1115.6101      | 10 | L  | 12 | 1351.7698      | 676.3888        |
| 1216.6577      | 11 | T  | 11 | 1238.6857      | 619.8468        |
| 1345.7003      | 12 | E  | 10 | 1137.6381      | 569.3229        |
| 1416.7374      | 13 | A  | 9  | 1008.5955      | 504.8017        |
| 1513.7902      | 14 | P  | 8  | 937.5584       | 469.2831        |
| 1626.8743      | 15 | L  | 7  | 840.5056       | 420.7567        |
| 1740.9172      | 16 | N  | 6  | 727.4215       | 364.2147        |
| 1837.9700      | 17 | P  | 5  | 613.3786       | 307.1932        |
| 1994.0963      | 18 | K  | 4  | 516.3258       | 258.6668        |
| 2065.1334      | 19 | A  | 3  | 360.1995       | 180.6037        |
| 2179.1763      | 20 | N  | 2  | 289.1624       | 145.0851        |
|                | 21 | R  | 1  | 175.1195       | 88.0637         |

N-term:+29.04 K(18):+156.13

VAPEEHPVLLTEAPLNPKANR, MH+ 2351.3087, m/z 588.5826  
 L OS G27 P150811 220811-s1.05391.05391.4.dta

X-range:

-

MassTol: Y-zoom:

MassType:

AVG  MONO

Axis:

1  2

Label:

I  M  -

Ions:

a  +  2+  3+

b  +  2+  3+

c  +  2+  3+

x  +  2+  3+

y  +  2+  3+

z  +  2+  3+

hide H<sub>2</sub>O/NH<sub>3</sub>

zoom 112-122

GO

scan 5391; 2.5e+000

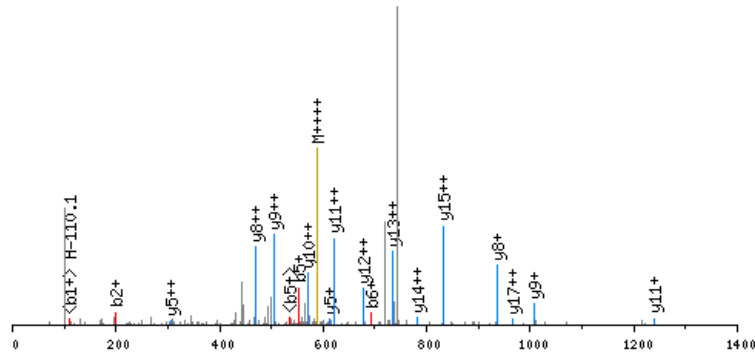

click image to zoom in; click top corners to zoom out [precursor±]

scan 5387; 588.6 mz; 1.6e+001

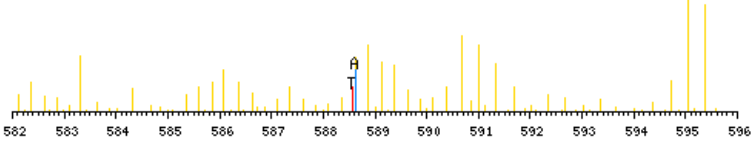

zoomed in precursor plot; T=theoretical m/z, A=acquired m/z

| b <sup>+</sup> | #  | AA | #  | y <sup>+</sup> | y <sup>2+</sup> |
|----------------|----|----|----|----------------|-----------------|
| 128.1075       | 1  | V  | 21 |                |                 |
| 199.1446       | 2  | A  | 20 | 2224.2090      | 1112.6084       |
| 296.1974       | 3  | P  | 19 | 2153.1719      | 1077.0899       |
| 425.2400       | 4  | E  | 18 | 2056.1192      | 1028.5635       |
| 554.2826       | 5  | E  | 17 | 1927.0766      | 964.0422        |
| 691.3415       | 6  | H  | 16 | 1798.0340      | 899.5209        |
| 788.3943       | 7  | P  | 15 | 1660.9751      | 830.9914        |
| 887.4627       | 8  | V  | 14 | 1563.9223      | 782.4651        |
| 1000.5467      | 9  | L  | 13 | 1464.8539      | 732.9308        |
| 1113.6308      | 10 | L  | 12 | 1351.7698      | 676.3888        |
| 1214.6785      | 11 | T  | 11 | 1238.6857      | 619.8468        |
| 1343.7211      | 12 | E  | 10 | 1137.6381      | 569.3229        |
| 1414.7582      | 13 | A  | 9  | 1008.5955      | 504.8017        |
| 1511.8109      | 14 | P  | 8  | 937.5584       | 469.2831        |
| 1624.8950      | 15 | L  | 7  | 840.5056       | 420.7567        |
| 1738.9379      | 16 | N  | 6  | 727.4215       | 364.2147        |
| 1835.9907      | 17 | P  | 5  | 613.3786       | 307.1932        |
| 1992.1170      | 18 | K  | 4  | 516.3258       | 258.6668        |
| 2063.1541      | 19 | A  | 3  | 360.1995       | 180.6037        |
| 2177.1970      | 20 | N  | 2  | 289.1624       | 145.0851        |
|                | 21 | R  | 1  | 175.1195       | 88.0637         |

N-term:+29.04 K(18):+156.13

VAQPKNLEGYVGFANLPNQVYR, MH+ 2545.4203, m/z 637.1105  
 H OS G26 P150811 220811-s1.06306.06306.4.dta

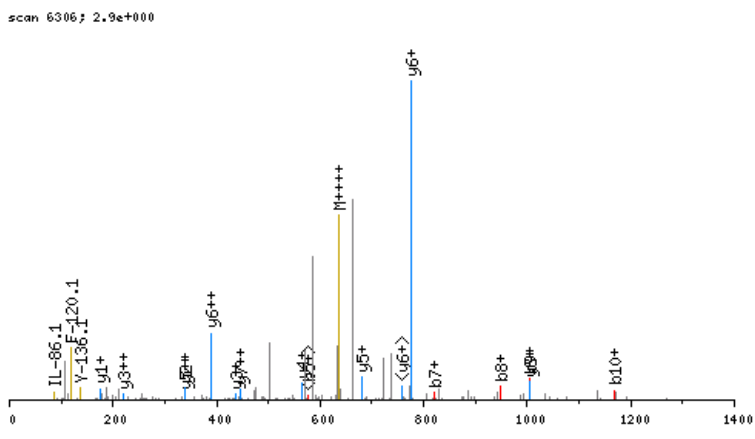

click image to zoom in; click top corners to zoom out [precursor±]

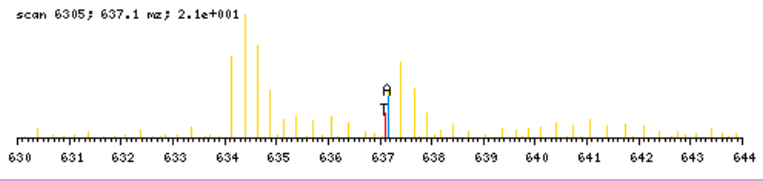

zoomed in precursor plot; T=theoretical m/z, A=acquired m/z

| b <sup>+</sup> | #  | AA # | y <sup>+</sup> | y <sup>2+</sup> |
|----------------|----|------|----------------|-----------------|
| 134.1393       | 1  | V 22 |                |                 |
| 205.1764       | 2  | A 21 | 2412.2888      | 1206.6483       |
| 333.2350       | 3  | Q 20 | 2341.2517      | 1171.1298       |
| 430.2878       | 4  | P 19 | 2213.1931      | 1107.1005       |
| 592.4459       | 5  | K 18 | 2116.1404      | 1058.5741       |
| 706.4888       | 6  | N 17 | 1953.9823      | 977.4951        |
| 819.5729       | 7  | L 16 | 1839.9394      | 920.4736        |
| 948.6155       | 8  | E 15 | 1726.8553      | 863.9316        |
| 1005.6369      | 9  | G 14 | 1597.8127      | 799.4103        |
| 1168.7002      | 10 | Y 13 | 1540.7912      | 770.8995        |
| 1267.7687      | 11 | V 12 | 1377.7279      | 689.3679        |
| 1324.7901      | 12 | G 11 | 1278.6595      | 639.8337        |
| 1471.8585      | 13 | F 10 | 1221.6380      | 611.3229        |
| 1542.8957      | 14 | A 9  | 1074.5696      | 537.7887        |
| 1656.9386      | 15 | N 8  | 1003.5325      | 502.2702        |
| 1770.0226      | 16 | L 7  | 889.4896       | 445.2487        |
| 1867.0754      | 17 | P 6  | 776.4055       | 388.7067        |
| 1981.1183      | 18 | N 5  | 679.3527       | 340.1803        |
| 2109.1769      | 19 | Q 4  | 565.3098       | 283.1588        |
| 2208.2453      | 20 | V 3  | 437.2512       | 219.1295        |
| 2371.3087      | 21 | Y 2  | 338.1828       | 169.5953        |
|                | 22 | R 1  | 175.1195       | 88.0637         |

N-term:+35.07 K(5):+162.16

X-range:  -

MassTol: Y-zoom:

MassType:  AVG  MONO

Axis:  1  2

Label:  I  M  -

Ions: a  +  2+  3+  
 b  +  2+  3+  
 c  +  2+  3+  
 x  +  2+  3+  
 y  +  2+  3+  
 z  +  2+  3+

hide H<sub>2</sub>O/NH<sub>3</sub>

zoom 112-122

VATGLMEDDGKPR, MH+ 1444.7470, m/z 482.2539  
 L OS G27 P150811 220811-s1.03000.03000.3.dta

X-range:

-

MassTol: Y-zoom:

MassType:

AVG  MONO

Axis:

1  2

Label:

I  M  -

Ions:

a  +  2+  3+

b  +  2+  3+

c  +  2+  3+

x  +  2+  3+

y  +  2+  3+

z  +  2+  3+

hide H<sub>2</sub>O/NH<sub>3</sub>

zoom 112-122

GO

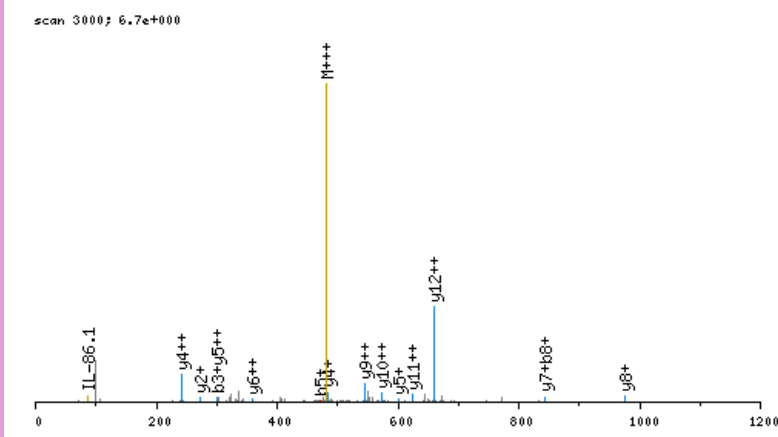

click image to zoom in; click top corners to zoom out [\[precursor±\]](#)

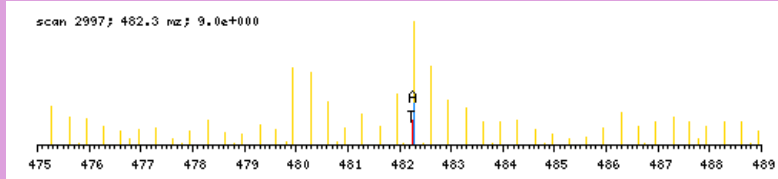

zoomed in precursor plot; T=theoretical m/z, A=acquired m/z

| b <sup>+</sup> | #  | AA # | y <sup>+</sup> | y <sup>2+</sup> |
|----------------|----|------|----------------|-----------------|
| 128.1075       | 1  | V 13 |                |                 |
| 199.1446       | 2  | A 12 | 1317.6473      | 659.3276        |
| 300.1923       | 3  | T 11 | 1246.6102      | 623.8090        |
| 357.2138       | 4  | G 10 | 1145.5625      | 573.2852        |
| 470.2978       | 5  | L 9  | 1088.5411      | 544.7744        |
| 601.3383       | 6  | M 8  | 975.4570       | 488.2324        |
| 730.3809       | 7  | E 7  | 844.4165       | 422.7122        |
| 845.4079       | 8  | D 6  | 715.3739       | 358.1909        |
| 960.4348       | 9  | D 5  | 600.3470       | 300.6774        |
| 1017.4563      | 10 | G 4  | 485.3200       | 243.1639        |
| 1173.5826      | 11 | K 3  | 428.2986       | 214.6532        |
| 1270.6353      | 12 | P 2  | 272.1723       | 136.5900        |
|                | 13 | R 1  | 175.1195       | 88.0637         |

N-term:+29.04 K(11):+156.13

VATKKTEQGPPSSEYIFER, MH+ 2269.2929, m/z 568.0787  
 H OS G28 P150811 220811-s1.04315.04315.4.dta

X-range:

-

MassTol: Y-zoom:

MassType:

AVG  MONO

Axis:

1  2

Label:

I  M  -

Ions:

a  +  2+  3+

b  +  2+  3+

c  +  2+  3+

x  +  2+  3+

y  +  2+  3+

z  +  2+  3+

hide H<sub>2</sub>O/NH<sub>3</sub>

zoom 112-122

GO

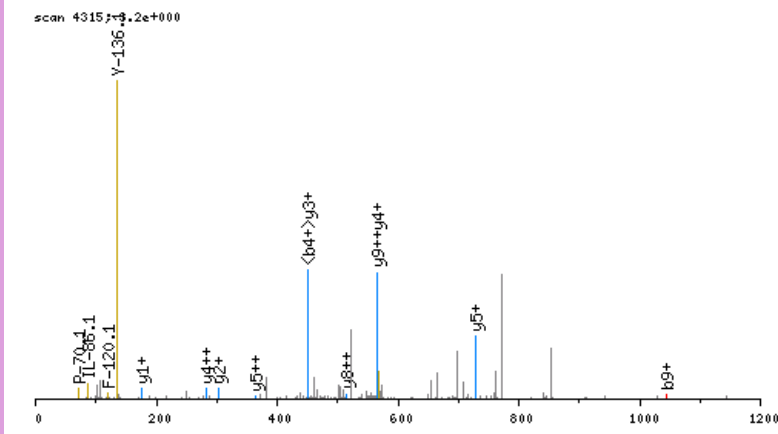

click image to zoom in; click top corners to zoom out [\[precursor±\]](#)

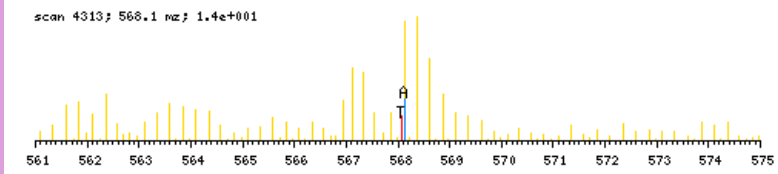

zoomed in precursor plot; T=theoretical m/z, A=acquired m/z

| b <sup>+</sup> | #  | AA # | y <sup>+</sup> | y <sup>2+</sup> |
|----------------|----|------|----------------|-----------------|
| 134.1393       | 1  | V    | 19             |                 |
| 205.1764       | 2  | A    | 18             | 2136.1614       |
| 306.2241       | 3  | T    | 17             | 2065.1243       |
| 468.3822       | 4  | K    | 16             | 1964.0766       |
| 630.5403       | 5  | K    | 15             | 1801.9185       |
| 731.5880       | 6  | T    | 14             | 1639.7604       |
| 860.6306       | 7  | E    | 13             | 1538.7127       |
| 988.6892       | 8  | Q    | 12             | 1409.6701       |
| 1045.7106      | 9  | G    | 11             | 1281.6115       |
| 1142.7634      | 10 | P    | 10             | 1224.5901       |
| 1239.8161      | 11 | P    | 9              | 1127.5373       |
| 1326.8482      | 12 | S    | 8              | 1030.4846       |
| 1413.8802      | 13 | S    | 7              | 943.4525        |
| 1542.9228      | 14 | E    | 6              | 856.4205        |
| 1705.9861      | 15 | Y    | 5              | 727.3779        |
| 1819.0702      | 16 | I    | 4              | 564.3146        |
| 1966.1386      | 17 | F    | 3              | 451.2305        |
| 2095.1812      | 18 | E    | 2              | 304.1621        |
|                | 19 | R    | 1              | 175.1195        |

N-term:+35.07 K(4):+162.16  
 K(5):+162.16

VDELGCSHLGQSYESR, MH+ 1870.8817, m/z 624.2987  
 H OS G27 P150811 220811-s1.03900.03900.3.dta

X-range:

-

MassTol: Y-zoom:

MassType:

AVG  MONO

Axis:

1  2

Label:

I  M  -

Ions:

a  +  2+  3+

b  +  2+  3+

c  +  2+  3+

x  +  2+  3+

y  +  2+  3+

z  +  2+  3+

hide H<sub>2</sub>O/NH<sub>3</sub>

zoom 112-122

GO

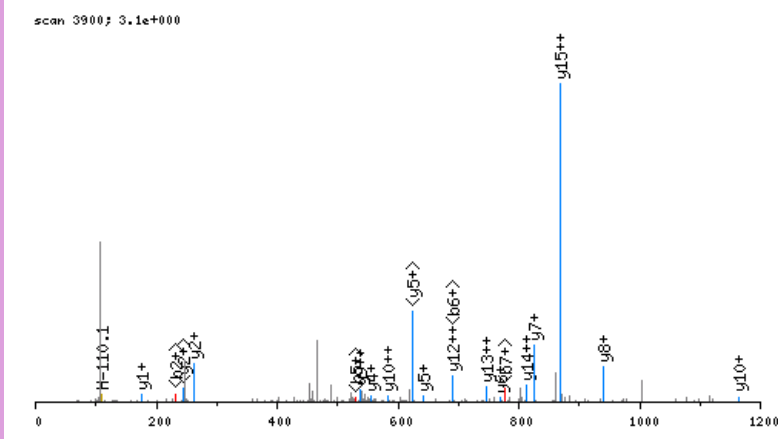

click image to zoom in; click top corners to zoom out [\[precursor±\]](#)

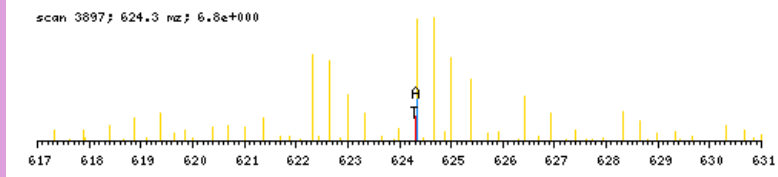

zoomed in precursor plot; T=theoretical m/z, A=acquired m/z

| b <sup>+</sup> | #  | AA # | y <sup>+</sup> | y <sup>2+</sup> |
|----------------|----|------|----------------|-----------------|
| 134.1393       | 1  | V 16 |                |                 |
| 249.1663       | 2  | D 15 | 1737.7502      | 869.3790        |
| 378.2089       | 3  | E 14 | 1622.7232      | 811.8655        |
| 491.2929       | 4  | L 13 | 1493.6807      | 747.3442        |
| 548.3144       | 5  | G 12 | 1380.5966      | 690.8022        |
| 708.3450       | 6  | C 11 | 1323.5751      | 662.2915        |
| 795.3770       | 7  | S 10 | 1163.5445      | 582.2762        |
| 932.4359       | 8  | H 9  | 1076.5125      | 538.7602        |
| 1045.5200      | 9  | L 8  | 939.4536       | 470.2307        |
| 1102.5414      | 10 | G 7  | 826.3695       | 413.6887        |
| 1230.6000      | 11 | Q 6  | 769.3481       | 385.1779        |
| 1317.6321      | 12 | S 5  | 641.2895       | 321.1487        |
| 1480.6954      | 13 | Y 4  | 554.2575       | 277.6326        |
| 1609.7380      | 14 | E 3  | 391.1941       | 196.1010        |
| 1696.7700      | 15 | S 2  | 262.1515       | 131.5797        |
|                | 16 | R 1  | 175.1195       | 88.0637         |

N-term:+35.07 C(6):+160.03



VDEYVKGHEEQQR, MH+ 1785.9135, m/z 595.9760  
 L OS G24 P150811 220811-s1.02651.02651.3.dta

scan 2651; 4.6e-001

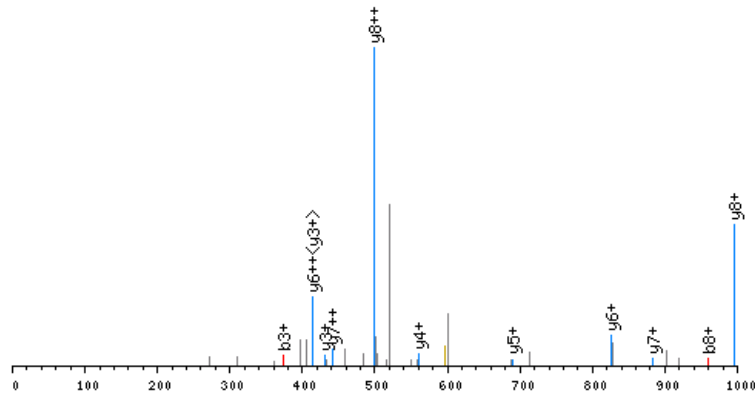

click image to zoom in; click top corners to zoom out [\[precursor±\]](#)

scan 2650; 596.0 m/z; 1.0e+000

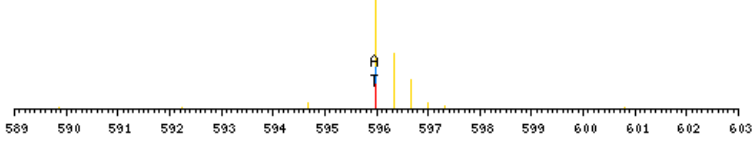

zoomed in precursor plot; T=theoretical m/z, A=acquired m/z

X-range:

-

MassTol: Y-zoom:

MassType:

AVG  MONO

Axis:

1  2

Label:

I  M  -

Ions:

a  +  2+  3+

b  +  2+  3+

c  +  2+  3+

x  +  2+  3+

y  +  2+  3+

z  +  2+  3+

hide H<sub>2</sub>O/NH<sub>3</sub>

zoom 112-122

GO

| b <sup>+</sup> | #  | AA # | y <sup>+</sup> | y <sup>2+</sup> |
|----------------|----|------|----------------|-----------------|
| 128.1075       | 1  | V 14 |                |                 |
| 243.1345       | 2  | D 13 | 1658.8139      | 829.9108        |
| 372.1771       | 3  | E 12 | 1543.7869      | 772.3974        |
| 535.2404       | 4  | Y 11 | 1414.7443      | 707.8761        |
| 634.3088       | 5  | V 10 | 1251.6810      | 626.3444        |
| 790.4351       | 6  | K 9  | 1152.6126      | 576.8102        |
| 903.5192       | 7  | L 8  | 996.4863       | 498.7471        |
| 960.5406       | 8  | G 7  | 883.4022       | 442.2050        |
| 1097.5995      | 9  | H 6  | 826.3808       | 413.6943        |
| 1226.6421      | 10 | E 5  | 689.3218       | 345.1648        |
| 1355.6847      | 11 | E 4  | 560.2792       | 280.6435        |
| 1483.7433      | 12 | Q 3  | 431.2367       | 216.1222        |
| 1611.8019      | 13 | Q 2  | 303.1781       | 152.0930        |
|                | 14 | R 1  | 175.1195       | 88.0637         |

N-term:+29.04 K(6):+156.13

VDGSSSLGPSNFNAIR, MH+ 1648.8294, m/z 550.2813  
 L OS G25 P150811 220811-s1.05635.05635.3.dta

X-range:

-

MassTol: Y-zoom:

MassType:

AVG  MONO

Axis:

1  2

Label:

I  M  -

Ions:

a  +  2+  3+

b  +  2+  3+

c  +  2+  3+

x  +  2+  3+

y  +  2+  3+

z  +  2+  3+

hide H<sub>2</sub>O/NH<sub>3</sub>

zoom 112-122

GO

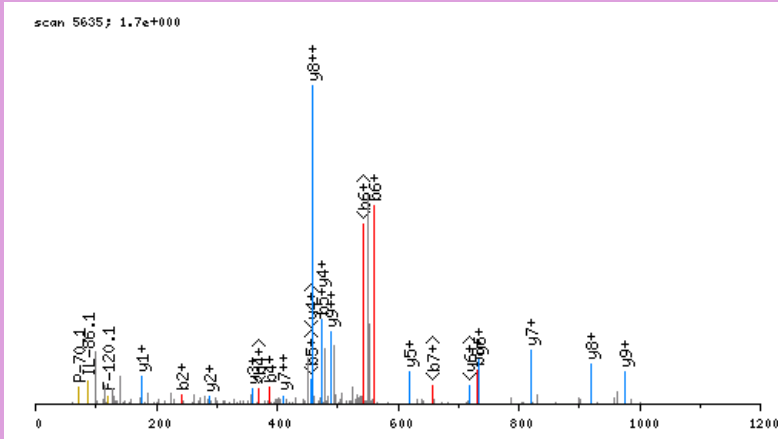

click image to zoom in; click top corners to zoom out [\[precursor±\]](#)

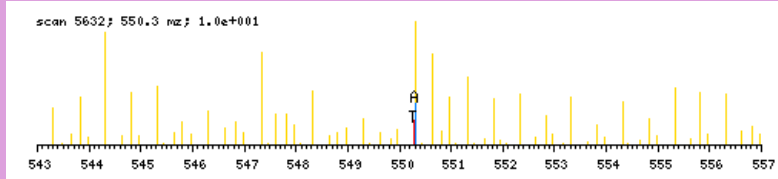

zoomed in precursor plot; T=theoretical m/z, A=acquired m/z

| b <sup>+</sup> | #  | AA # | y <sup>+</sup> | y <sup>2+</sup> |
|----------------|----|------|----------------|-----------------|
| 128.1075       | 1  | V 16 |                |                 |
| 243.1345       | 2  | D 15 | 1521.7298      | 761.3688        |
| 300.1559       | 3  | G 14 | 1406.7028      | 703.8553        |
| 387.1879       | 4  | S 13 | 1349.6814      | 675.3446        |
| 474.2200       | 5  | S 12 | 1262.6493      | 631.8286        |
| 561.2520       | 6  | S 11 | 1175.6173      | 588.3126        |
| 674.3361       | 7  | L 10 | 1088.5853      | 544.7965        |
| 731.3575       | 8  | G 9  | 975.5012       | 488.2545        |
| 828.4103       | 9  | P 8  | 918.4797       | 459.7438        |
| 915.4423       | 10 | S 7  | 821.4270       | 411.2174        |
| 1029.4853      | 11 | N 6  | 734.3949       | 367.7014        |
| 1176.5537      | 12 | F 5  | 620.3520       | 310.6799        |
| 1290.5966      | 13 | N 4  | 473.2836       | 237.1457        |
| 1361.6337      | 14 | A 3  | 359.2407       | 180.1243        |
| 1474.7178      | 15 | I 2  | 288.2036       | 144.6057        |
|                | 16 | R 1  | 175.1195       | 88.0637         |

N-term:+29.04

VDLEPTVIDEIR, MH+ 1426.7793, m/z 713.8933  
 L OS G25 P150811 220811-s1.07459.07459.2.dta

X-range:

-

MassTol: Y-zoom:

MassType:

AVG  MONO

Axis:

1  2

Label:

I  M  -

Ions:

a  +  2+  3+

b  +  2+  3+

c  +  2+  3+

x  +  2+  3+

y  +  2+  3+

z  +  2+  3+

hide H<sub>2</sub>O/NH<sub>3</sub>

zoom 112-122

GO

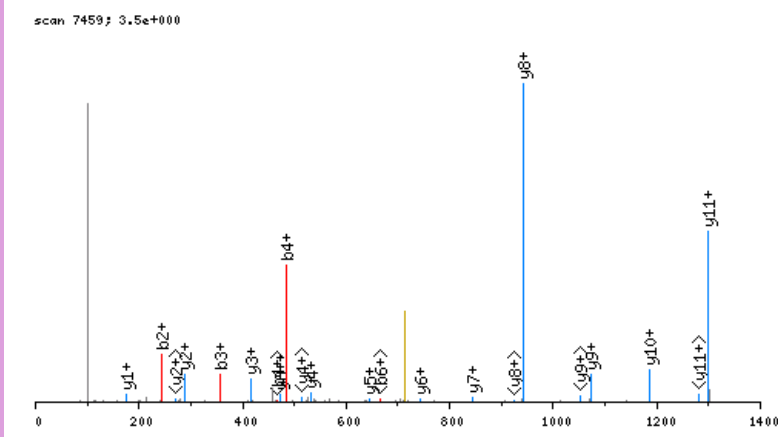

click image to zoom in; click top corners to zoom out [\[precursor±\]](#)

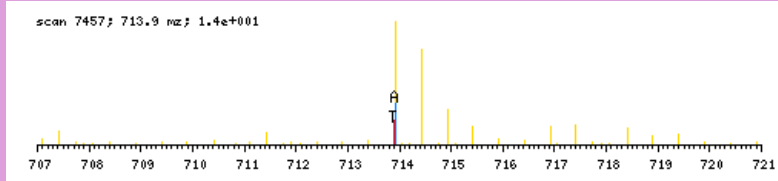

zoomed in precursor plot; T=theoretical m/z, A=acquired m/z

| b <sup>+</sup> | #  | AA # | y <sup>+</sup> | y <sup>2+</sup> |
|----------------|----|------|----------------|-----------------|
| 128.1075       | 1  | V 12 |                |                 |
| 243.1345       | 2  | D 11 | 1299.6796      | 650.3437        |
| 356.2185       | 3  | L 10 | 1184.6527      | 592.8303        |
| 485.2611       | 4  | E 9  | 1071.5686      | 536.2882        |
| 582.3139       | 5  | P 8  | 942.5260       | 471.7669        |
| 683.3616       | 6  | T 7  | 845.4733       | 423.2405        |
| 782.4300       | 7  | V 6  | 744.4256       | 372.7167        |
| 895.5140       | 8  | I 5  | 645.3572       | 323.1825        |
| 1010.5410      | 9  | D 4  | 532.2731       | 266.6405        |
| 1139.5836      | 10 | E 3  | 417.2462       | 209.1270        |
| 1252.6676      | 11 | I 2  | 288.2036       | 144.6057        |
|                | 12 | R 1  | 175.1195       | 88.0637         |

N-term:+29.04

VDLEPTVIDEVR, MH+ 1418.7955, m/z 473.6033  
 H OS G24 P150811 220811-s1.04216.04216.3.dta

X-range:

-

MassTol: Y-zoom:

MassType:

AVG  MONO

Axis:

1  2

Label:

I  M  -

Ions:

a  +  2+  3+

b  +  2+  3+

c  +  2+  3+

x  +  2+  3+

y  +  2+  3+

z  +  2+  3+

hide H<sub>2</sub>O/NH<sub>3</sub>

zoom 112-122

GO

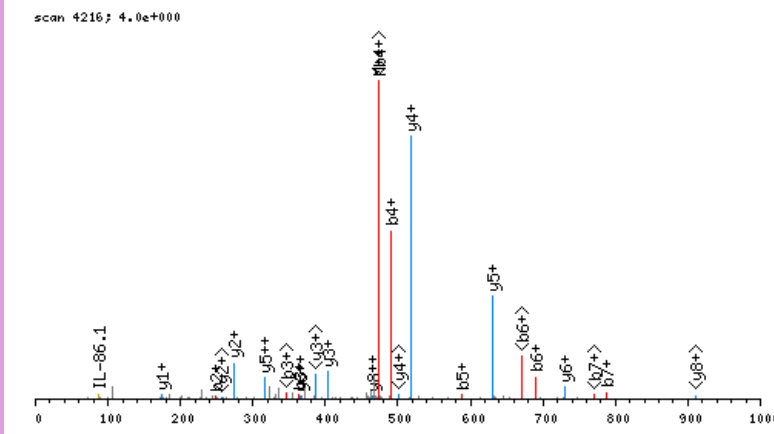

click image to zoom in; click top corners to zoom out [\[precursor±\]](#)

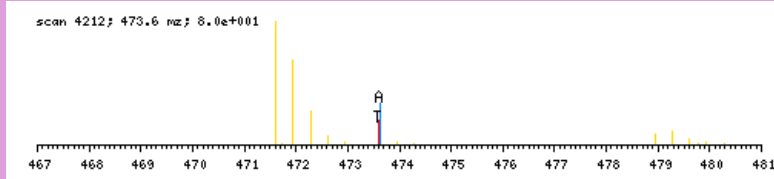

zoomed in precursor plot; T=theoretical m/z, A=acquired m/z

| b <sup>+</sup> | #  | AA # | y <sup>+</sup> | y <sup>2+</sup> |
|----------------|----|------|----------------|-----------------|
| 134.1393       | 1  | V 12 |                |                 |
| 249.1663       | 2  | D 11 | 1285.6640      | 643.3359        |
| 362.2503       | 3  | L 10 | 1170.6370      | 585.8224        |
| 491.2929       | 4  | E 9  | 1057.5530      | 529.2804        |
| 588.3457       | 5  | P 8  | 928.5104       | 464.7591        |
| 689.3934       | 6  | T 7  | 831.4576       | 416.2327        |
| 788.4618       | 7  | V 6  | 730.4099       | 365.7089        |
| 901.5458       | 8  | I 5  | 631.3415       | 316.1747        |
| 1016.5728      | 9  | D 4  | 518.2575       | 259.6326        |
| 1145.6154      | 10 | E 3  | 403.2305       | 202.1192        |
| 1244.6838      | 11 | V 2  | 274.1879       | 137.5979        |
|                | 12 | R 1  | 175.1195       | 88.0637         |

N-term:+35.07

VDQEEKEDVKSCAEFVSGSQLR, MH+ 2624.2878, m/z 656.8274  
 L OS G27 P150811 220811-s1.04756.04756.4.dta

X-range:

-

MassTol: Y-zoom:

MassType:

AVG  MONO

Axis:

1  2

Label:

I  M  -

Ions:

a  +  2+  3+

b  +  2+  3+

c  +  2+  3+

x  +  2+  3+

y  +  2+  3+

z  +  2+  3+

hide H<sub>2</sub>O/NH<sub>3</sub>

zoom 112-122

GO

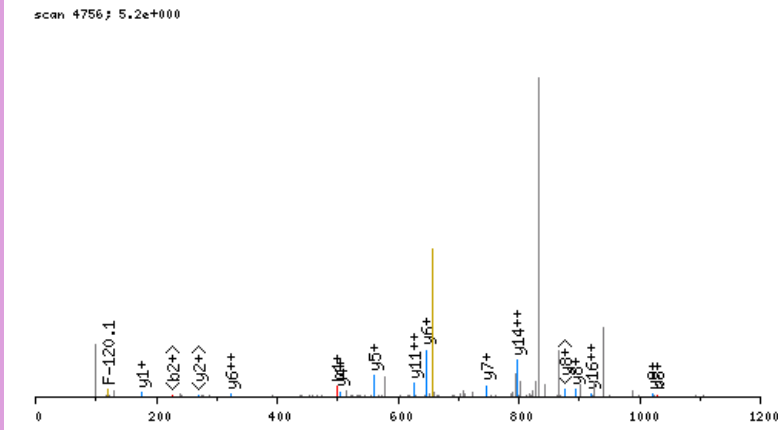

click image to zoom in; click top corners to zoom out [\[precursor±\]](#)

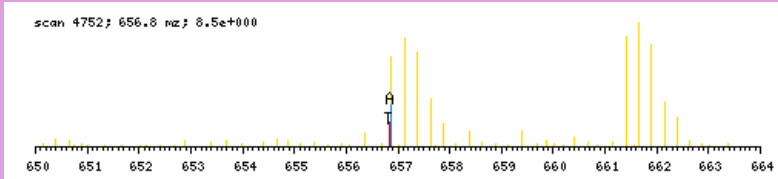

zoomed in precursor plot; T=theoretical m/z, A=acquired m/z

| b <sup>+</sup> | #  | AA | #  | y <sup>+</sup> | y <sup>2+</sup> |
|----------------|----|----|----|----------------|-----------------|
| 128.1075       | 1  | V  | 22 |                |                 |
| 243.1345       | 2  | D  | 21 | 2497.1881      | 1249.0980       |
| 371.1930       | 3  | Q  | 20 | 2382.1611      | 1191.5845       |
| 500.2356       | 4  | E  | 19 | 2254.1026      | 1127.5552       |
| 629.2782       | 5  | E  | 18 | 2125.0600      | 1063.0339       |
| 785.4045       | 6  | K  | 17 | 1996.0174      | 998.5126        |
| 914.4471       | 7  | E  | 16 | 1839.8911      | 920.4495        |
| 1029.4741      | 8  | D  | 15 | 1710.8485      | 855.9282        |
| 1128.5425      | 9  | V  | 14 | 1595.8215      | 798.4147        |
| 1284.6688      | 10 | K  | 13 | 1496.7531      | 748.8805        |
| 1371.7008      | 11 | S  | 12 | 1340.6268      | 670.8173        |
| 1531.7314      | 12 | C  | 11 | 1253.5948      | 627.3013        |
| 1602.7685      | 13 | A  | 10 | 1093.5642      | 547.2860        |
| 1731.8111      | 14 | E  | 9  | 1022.5271      | 511.7675        |
| 1878.8795      | 15 | F  | 8  | 893.4845       | 447.2462        |
| 1977.9479      | 16 | V  | 7  | 746.4161       | 373.7120        |
| 2064.9800      | 17 | S  | 6  | 647.3477       | 324.1777        |
| 2122.0014      | 18 | G  | 5  | 560.3156       | 280.6617        |
| 2209.0335      | 19 | S  | 4  | 503.2942       | 252.1510        |
| 2337.0920      | 20 | Q  | 3  | 416.2621       | 208.6350        |
| 2450.1761      | 21 | L  | 2  | 288.2036       | 144.6057        |
|                | 22 | R  | 1  | 175.1195       | 88.0637         |

N-term:+29.04 K(6):+156.13  
 K(10):+156.13 C(12):+160.03

VDSASPVYQAVIKTQSKPEDEADEWAR, MH+ 3121.6542, m/z 781.1690  
 H OS G27 P150811 220811-s1.06401.06401.4.dta

scan 6401; 4.3e+000

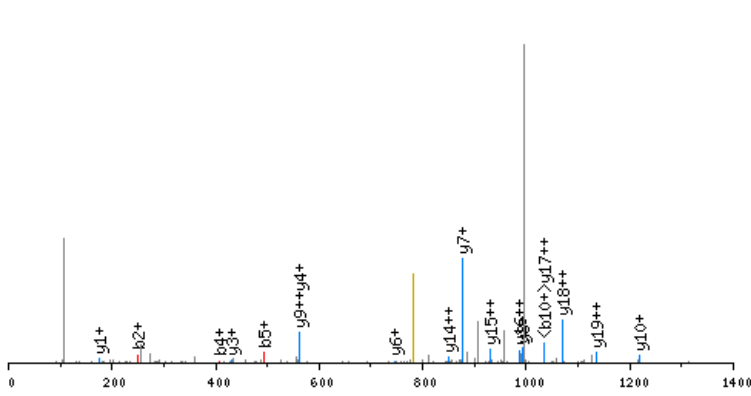

click image to zoom in; click top corners to zoom out [\[precursor±\]](#)

scan 6397; 781.2 m/z; 5.8e+000

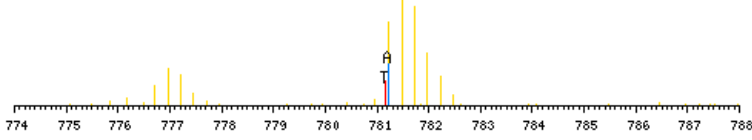

zoomed in precursor plot; T=theoretical m/z, A=acquired m/z

X-range:

-

MassTol: Y-zoom:

MassType:

AVG  MONO

Axis:

1  2

Label:

I  M  -

Ions:

a  +  2+  3+

b  +  2+  3+

c  +  2+  3+

x  +  2+  3+

y  +  2+  3+

z  +  2+  3+

hide H<sub>2</sub>O/NH<sub>3</sub>

zoom 112-122

GO

| b <sup>+</sup>  | #        | AA #     | y <sup>+</sup> | y <sup>2+</sup>            |
|-----------------|----------|----------|----------------|----------------------------|
| 134.1393        | 1        | V        | 27             |                            |
| <b>249.1663</b> | <b>2</b> | <b>D</b> | <b>26</b>      | 2988.5227 1494.7653        |
| 336.1983        | 3        | S        | 25             | 2873.4958 1437.2518        |
| <b>407.2354</b> | <b>4</b> | <b>A</b> | <b>24</b>      | 2786.4638 1393.7358        |
| <b>494.2674</b> | <b>5</b> | <b>S</b> | <b>23</b>      | 2715.4267 1358.2172        |
| 591.3202        | 6        | P        | 22             | 2628.3946 1314.7012        |
| 690.3886        | 7        | V        | 21             | 2531.3419 1266.1748        |
| 853.4519        | 8        | Y        | 20             | 2432.2735 1216.6406        |
| 981.5105        | 9        | Q        | 19             | 2269.2101 <b>1135.1090</b> |
| 1052.5476       | 10       | A        | 18             | 2141.1515 <b>1071.0797</b> |
| 1151.6160       | 11       | V        | 17             | 2070.1144 <b>1035.5611</b> |
| 1264.7001       | 12       | I        | 16             | 1971.0460 <b>986.0269</b>  |
| 1426.8582       | 13       | K        | 15             | 1857.9620 <b>929.4849</b>  |
| 1527.9059       | 14       | T        | 14             | 1695.8039 <b>848.4058</b>  |
| 1655.9645       | 15       | Q        | 13             | 1594.7562 797.8820         |
| 1742.9965       | 16       | S        | 12             | 1466.6976 733.8527         |
| 1905.1546       | 17       | K        | 11             | 1379.6656 690.3367         |
| 2002.2074       | 18       | P        | 10             | <b>1217.5075</b> 609.2576  |
| 2131.2499       | 19       | E        | 9              | 1120.4547 <b>560.7313</b>  |
| 2246.2769       | 20       | D        | 8              | <b>991.4121</b> 496.2100   |
| 2375.3195       | 21       | E        | 7              | <b>876.3852</b> 438.6965   |
| 2446.3566       | 22       | A        | 6              | <b>747.3426</b> 374.1752   |
| 2561.3835       | 23       | D        | 5              | 676.3055 338.6566          |
| 2690.4261       | 24       | E        | 4              | <b>561.2785</b> 281.1432   |
| 2876.5054       | 25       | W        | 3              | <b>432.2359</b> 216.6219   |
| 2947.5426       | 26       | A        | 2              | 246.1566 123.5822          |
|                 | 27       | R        | 1              | <b>175.1195</b> 88.0637    |

N-term: +35.07 K(13) : +162.16  
 K(17) : +162.16

VDVHPESQTAAGR, MH+ 1394.7028, m/z 465.5724  
 L OS G27 P150811 220811-s1.02136.02136.3.dta

X-range:

-

MassTol: Y-zoom:

MassType:

AVG  MONO

Axis:

1  2

Label:

I  M  -

Ions:

a  +  2+  3+

b  +  2+  3+

c  +  2+  3+

x  +  2+  3+

y  +  2+  3+

z  +  2+  3+

hide H<sub>2</sub>O/NH<sub>3</sub>

zoom 112-122

GO

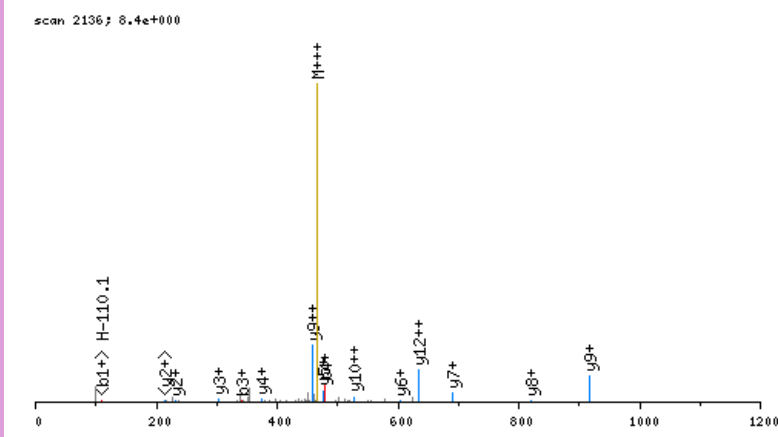

click image to zoom in; click top corners to zoom out [\[precursor±\]](#)

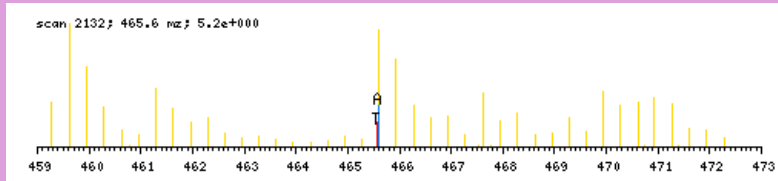

zoomed in precursor plot; T=theoretical m/z, A=acquired m/z

| b <sup>+</sup> | #  | AA # | y <sup>+</sup> | y <sup>2+</sup> |
|----------------|----|------|----------------|-----------------|
| 128.1075       | 1  | V 13 |                |                 |
| 243.1345       | 2  | D 12 | 1267.6031      | 634.3055        |
| 342.2029       | 3  | V 11 | 1152.5762      | 576.7920        |
| 479.2618       | 4  | H 10 | 1053.5077      | 527.2578        |
| 576.3145       | 5  | P 9  | 916.4488       | 458.7283        |
| 705.3571       | 6  | E 8  | 819.3961       | 410.2019        |
| 792.3892       | 7  | S 7  | 690.3535       | 345.6807        |
| 920.4477       | 8  | Q 6  | 603.3214       | 302.1646        |
| 1021.4954      | 9  | T 5  | 475.2629       | 238.1353        |
| 1092.5325      | 10 | A 4  | 374.2152       | 187.6115        |
| 1163.5697      | 11 | A 3  | 303.1781       | 152.0930        |
| 1220.5911      | 12 | G 2  | 232.1410       | 116.5744        |
|                | 13 | R 1  | 175.1195       | 88.0637         |

N-term:+29.04

VDVPAADLSDQVPDPTDSETR, MH+ 2158.0151, m/z 720.0099  
 L OS G24 P150811 220811-s1.03763.03763.3.dta

X-range:

-

MassTol: Y-zoom:

MassType:

AVG  MONO

Axis:

1  2

Label:

I  M  -

Ions:

a  +  2+  3+

b  +  2+  3+

c  +  2+  3+

x  +  2+  3+

y  +  2+  3+

z  +  2+  3+

hide H<sub>2</sub>O/NH<sub>3</sub>

zoom 112-122

GO

scan 3763; 5.6e+000

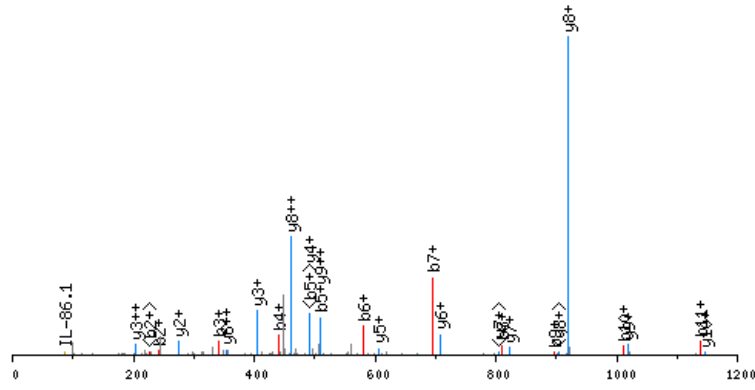

click image to zoom in; click top corners to zoom out [\[precursor±\]](#)

scan 3762; 720.0 m/z; 1.2e+001

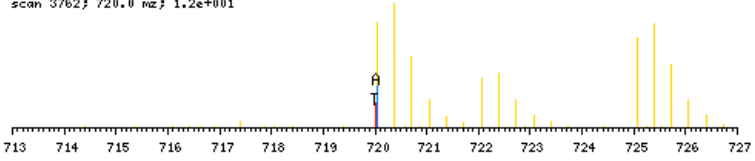

zoomed in precursor plot; T=theoretical m/z, A=acquired m/z

| b <sup>+</sup> | #  | AA # | y <sup>+</sup> | y <sup>2+</sup> |
|----------------|----|------|----------------|-----------------|
| 128.1075       | 1  | V 20 |                |                 |
| 243.1345       | 2  | D 19 | 2030.9154      | 1015.9616       |
| 342.2029       | 3  | V 18 | 1915.8885      | 958.4482        |
| 439.2556       | 4  | P 17 | 1816.8201      | 908.9140        |
| 510.2927       | 5  | A 16 | 1719.7673      | 860.3876        |
| 581.3299       | 6  | A 15 | 1648.7302      | 824.8690        |
| 696.3568       | 7  | D 14 | 1577.6931      | 789.3505        |
| 809.4409       | 8  | L 13 | 1462.6662      | 731.8370        |
| 896.4729       | 9  | S 12 | 1349.5821      | 675.2950        |
| 1011.4998      | 10 | D 11 | 1262.5501      | 631.7789        |
| 1139.5584      | 11 | Q 10 | 1147.5231      | 574.2655        |
| 1238.6268      | 12 | V 9  | 1019.4645      | 510.2362        |
| 1335.6796      | 13 | P 8  | 920.3961       | 460.7020        |
| 1450.7065      | 14 | D 7  | 823.3434       | 412.1756        |
| 1551.7542      | 15 | T 6  | 708.3164       | 354.6621        |
| 1666.7812      | 16 | D 5  | 607.2687       | 304.1383        |
| 1753.8132      | 17 | S 4  | 492.2418       | 246.6248        |
| 1882.8558      | 18 | E 3  | 405.2098       | 203.1088        |
| 1983.9035      | 19 | T 2  | 276.1672       | 138.5875        |
|                | 20 | R 1  | 175.1195       | 88.0637         |

N-term:+29.04



VEAEAAVGAAAEDSCDAR, MH+ 1819.8132, m/z 607.2759  
 L OS G24 P150811 220811-s1.03030.03030.3.dta

scan 3030; 1.1e+000

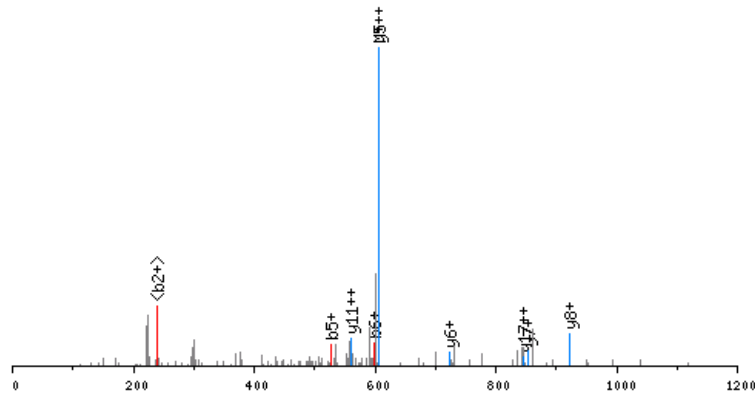

click image to zoom in; click top corners to zoom out [\[precursor±\]](#)

scan 3027; 607.3 m/z; 1.4e+000

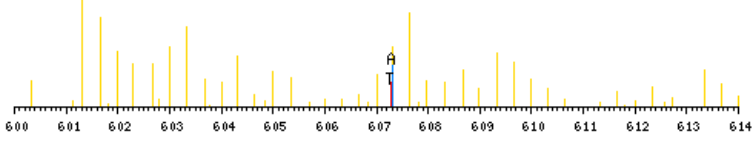

zoomed in precursor plot; T=theoretical m/z, A=acquired m/z

X-range:

-

MassTol: Y-zoom:

MassType:

AVG  MONO

Axis:

1  2

Label:

I  M  -

Ions:

a  +  2+  3+

b  +  2+  3+

c  +  2+  3+

x  +  2+  3+

y  +  2+  3+

z  +  2+  3+

hide H<sub>2</sub>O/NH<sub>3</sub>

zoom 112-122

GO

| b <sup>+</sup> | #  | AA # | y <sup>+</sup> | y <sup>2+</sup> |
|----------------|----|------|----------------|-----------------|
| 128.1075       | 1  | V 18 |                |                 |
| 257.1501       | 2  | E 17 | 1692.7135      | 846.8606        |
| 328.1872       | 3  | A 16 | 1563.6709      | 782.3394        |
| 457.2298       | 4  | E 15 | 1492.6338      | 746.8208        |
| 528.2669       | 5  | A 14 | 1363.5912      | 682.2995        |
| 599.3040       | 6  | A 13 | 1292.5541      | 646.7809        |
| 698.3725       | 7  | V 12 | 1221.5169      | 611.2624        |
| 755.3939       | 8  | G 11 | 1122.4485      | 561.7282        |
| 826.4310       | 9  | A 10 | 1065.4271      | 533.2174        |
| 897.4681       | 10 | A 9  | 994.3899       | 497.6989        |
| 968.5053       | 11 | A 8  | 923.3528       | 462.1803        |
| 1097.5479      | 12 | E 7  | 852.3157       | 426.6618        |
| 1212.5748      | 13 | D 6  | 723.2731       | 362.1405        |
| 1299.6068      | 14 | S 5  | 608.2462       | 304.6270        |
| 1459.6374      | 15 | C 4  | 521.2142       | 261.1110        |
| 1574.6644      | 16 | D 3  | 361.1836       | 181.0957        |
| 1645.7015      | 17 | A 2  | 246.1566       | 123.5822        |
|                | 18 | R 1  | 175.1195       | 88.0637         |

N-term:+29.04 C(15):+160.03

VEDQEFHISSFEER, MH+ 1785.8507, m/z 595.9551  
 H OS G27 P150811 220811-s1.05618.05618.3.dta

scan 5618; 2.9e+000

X-range:

-

MassTol: Y-zoom:

MassType:

AVG  MONO

Axis:

1  2

Label:

I  M  -

Ions:

a  +  2+  3+

b  +  2+  3+

c  +  2+  3+

x  +  2+  3+

y  +  2+  3+

z  +  2+  3+

hide H<sub>2</sub>O/NH<sub>3</sub>

zoom 112-122

GO

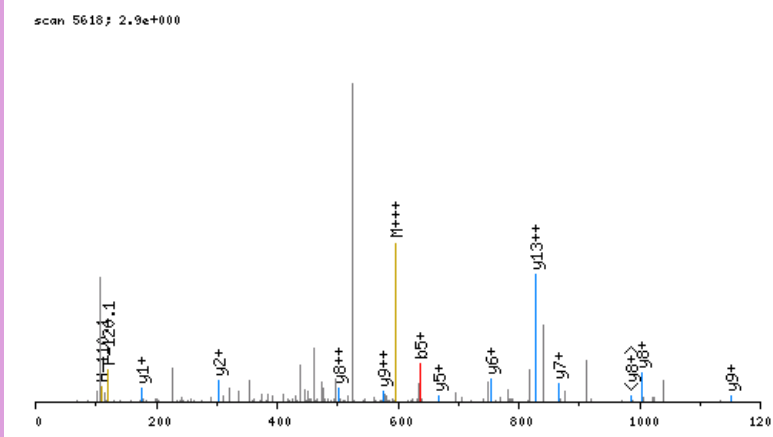

click image to zoom in; click top corners to zoom out [\[precursor±\]](#)

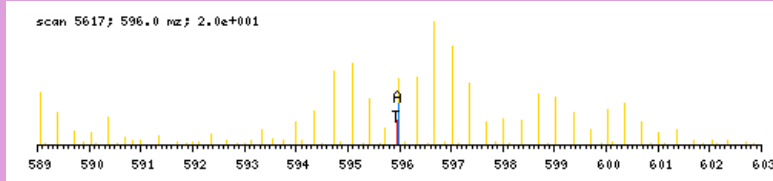

zoomed in precursor plot; T=theoretical m/z, A=acquired m/z

| b <sup>+</sup> | #  | AA # | y <sup>+</sup> | y <sup>2+</sup> |
|----------------|----|------|----------------|-----------------|
| 134.1393       | 1  | V 14 |                |                 |
| 263.1819       | 2  | E 13 | 1652.7193      | 826.8635        |
| 378.2089       | 3  | D 12 | 1523.6767      | 762.3422        |
| 506.2674       | 4  | Q 11 | 1408.6497      | 704.8288        |
| 635.3100       | 5  | E 10 | 1280.5911      | 640.7995        |
| 782.3784       | 6  | F 9  | 1151.5485      | 576.2782        |
| 919.4373       | 7  | H 8  | 1004.4801      | 502.7440        |
| 1032.5214      | 8  | I 7  | 867.4212       | 434.2145        |
| 1119.5534      | 9  | S 6  | 754.3372       | 377.6725        |
| 1206.5855      | 10 | S 5  | 667.3051       | 334.1565        |
| 1353.6539      | 11 | F 4  | 580.2731       | 290.6405        |
| 1482.6965      | 12 | E 3  | 433.2047       | 217.1063        |
| 1611.7391      | 13 | E 2  | 304.1621       | 152.5850        |
|                | 14 | R 1  | 175.1195       | 88.0637         |

N-term:+35.07

scan 8061; 2.0e+000

X-range:

0 - 0

MassTol: Y-zoom:

0. 1.

MassType:

AVG  MONO

Axis:

1  2

Label:

I  M  -

Ions:

a  +  2+  3+

b  +  2+  3+

c  +  2+  3+

x  +  2+  3+

y  +  2+  3+

z  +  2+  3+

hide H<sub>2</sub>O/NH<sub>3</sub>

zoom 112-122

GO

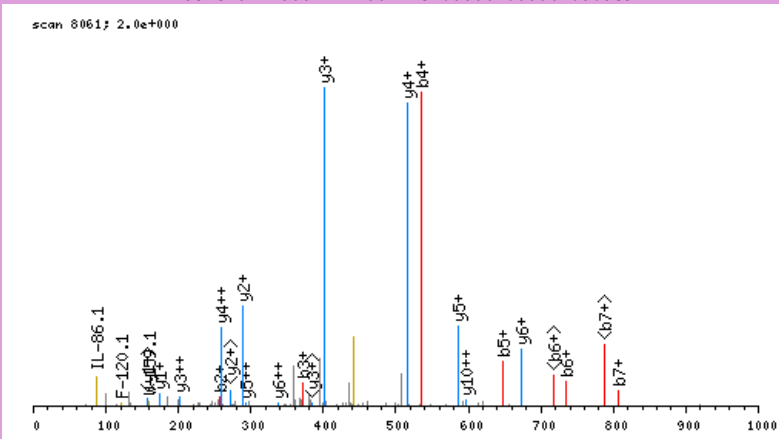

click image to zoom in; click top corners to zoom out [\[precursor±\]](#)

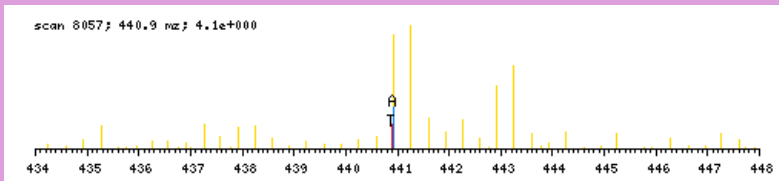

zoomed in precursor plot; T=theoretical m/z, A=acquired m/z

| b <sup>+</sup> | #  | AA # | y <sup>+</sup> | y <sup>2+</sup> |
|----------------|----|------|----------------|-----------------|
| 128.1075       | 1  | V 11 |                |                 |
| 257.1501       | 2  | E 10 | 1193.6166      | 597.3122        |
| 372.1771       | 3  | D 9  | 1064.5740      | 532.7909        |
| 535.2404       | 4  | Y 8  | 949.5471       | 475.2775        |
| 648.3244       | 5  | L 7  | 786.4838       | 393.7458        |
| 735.3565       | 6  | S 6  | 673.3997       | 337.2038        |
| 806.3936       | 7  | A 5  | 586.3677       | 293.6877        |
| 919.4776       | 8  | I 4  | 515.3306       | 258.1692        |
| 1032.5617      | 9  | L 3  | 402.2465       | 201.6272        |
| 1146.6046      | 10 | N 2  | 289.1624       | 145.0851        |
|                | 11 | R 1  | 175.1195       | 88.0637         |

N-term:+29.04

VEGELYCETHAR, MH+ 1491.6901, m/z 497.9016  
 L OS G27 P150811 220811-s1.02734.02734.3.dta

X-range:

-

MassTol: Y-zoom:

MassType:

AVG  MONO

Axis:

1  2

Label:

I  M  -

Ions:

a  +  2+  3+

b  +  2+  3+

c  +  2+  3+

x  +  2+  3+

y  +  2+  3+

z  +  2+  3+

hide H<sub>2</sub>O/NH<sub>3</sub>

zoom 112-122

GO

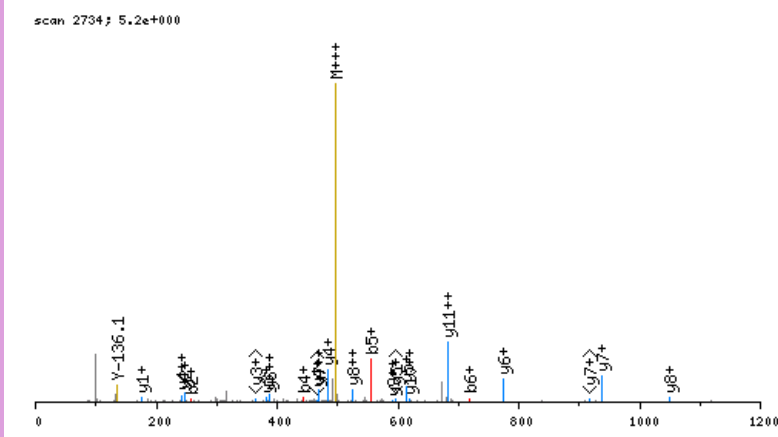

click image to zoom in; click top corners to zoom out [\[precursor±\]](#)

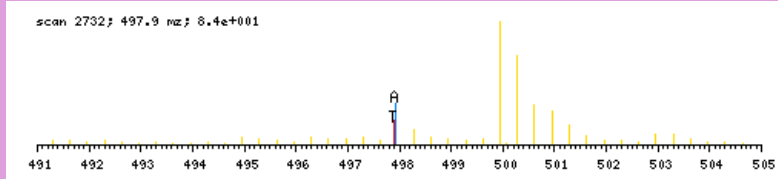

zoomed in precursor plot; T=theoretical m/z, A=acquired m/z

| b <sup>+</sup> | #  | AA # | y <sup>+</sup> | y <sup>2+</sup> |
|----------------|----|------|----------------|-----------------|
| 128.1075       | 1  | V 12 |                |                 |
| 257.1501       | 2  | E 11 | 1364.5904      | 682.7991        |
| 314.1716       | 3  | G 10 | 1235.5478      | 618.2778        |
| 443.2142       | 4  | E 9  | 1178.5264      | 589.7671        |
| 556.2982       | 5  | L 8  | 1049.4838      | 525.2458        |
| 719.3616       | 6  | Y 7  | 936.3997       | 468.7038        |
| 879.3922       | 7  | C 6  | 773.3364       | 387.1721        |
| 1008.4347      | 8  | E 5  | 613.3058       | 307.1568        |
| 1109.4824      | 9  | T 4  | 484.2632       | 242.6355        |
| 1246.5413      | 10 | H 3  | 383.2155       | 192.1117        |
| 1317.5785      | 11 | A 2  | 246.1566       | 123.5822        |
|                | 12 | R 1  | 175.1195       | 88.0637         |

N-term:+29.04 C(7):+160.03

VEKEEAGGGGGGISEEEAAQYDR, MH+ 2451.1276, m/z 817.7140  
 L OS G26 P150811 220811-s1.02786.02786.3.dta

scan 2786; 2.9e+000

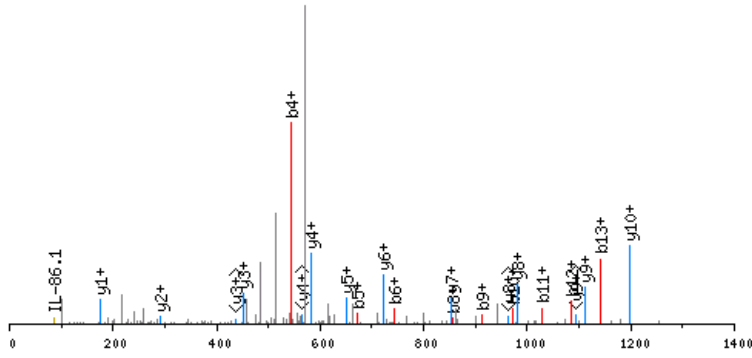

click image to zoom in; click top corners to zoom out [precursor±]

scan 2785; 817.7 m/z; 2.2e+001

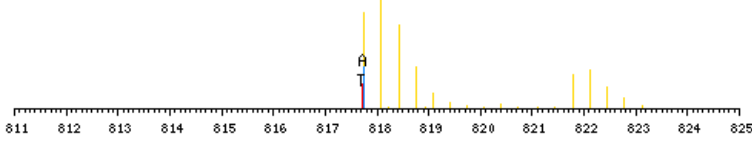

zoomed in precursor plot; T=theoretical m/z, A=acquired m/z

X-range:

-

MassTol: Y-zoom:

MassType:

AVG  MONO

Axis:

1  2

Label:

I  M  -

Ions:

a  +  2+  3+

b  +  2+  3+

c  +  2+  3+

x  +  2+  3+

y  +  2+  3+

z  +  2+  3+

hide H<sub>2</sub>O/NH<sub>3</sub>

zoom 112-122

GO

| b <sup>+</sup> | #  | AA # | y <sup>+</sup> | y <sup>2+</sup> |
|----------------|----|------|----------------|-----------------|
| 128.1075       | 1  | V 24 |                |                 |
| 257.1501       | 2  | E 23 | 2324.0279      | 1162.5179       |
| 413.2764       | 3  | K 22 | 2194.9853      | 1097.9966       |
| 542.3190       | 4  | E 21 | 2038.8590      | 1019.9334       |
| 671.3616       | 5  | E 20 | 1909.8164      | 955.4121        |
| 742.3987       | 6  | A 19 | 1780.7738      | 890.8908        |
| 799.4202       | 7  | G 18 | 1709.7367      | 855.3723        |
| 856.4416       | 8  | G 17 | 1652.7152      | 826.8615        |
| 913.4631       | 9  | G 16 | 1595.6938      | 798.3508        |
| 970.4846       | 10 | G 15 | 1538.6723      | 769.8401        |
| 1027.5060      | 11 | G 14 | 1481.6508      | 741.3293        |
| 1084.5275      | 12 | G 13 | 1424.6294      | 712.8186        |
| 1141.5490      | 13 | G 12 | 1367.6079      | 684.3079        |
| 1254.6330      | 14 | I 11 | 1310.5864      | 655.7971        |
| 1341.6650      | 15 | S 10 | 1197.5024      | 599.2551        |
| 1470.7076      | 16 | E 9  | 1110.4704      | 555.7391        |
| 1599.7502      | 17 | E 8  | 981.4278       | 491.2178        |
| 1728.7928      | 18 | E 7  | 852.3852       | 426.6965        |
| 1799.8299      | 19 | A 6  | 723.3426       | 362.1752        |
| 1870.8671      | 20 | A 5  | 652.3055       | 326.6566        |
| 1998.9256      | 21 | Q 4  | 581.2683       | 291.1381        |
| 2161.9890      | 22 | Y 3  | 453.2098       | 227.1088        |
| 2277.0159      | 23 | D 2  | 290.1464       | 145.5771        |
|                | 24 | R 1  | 175.1195       | 88.0637         |

N-term:+29.04 K(3):+156.13

VEKGAEAGSQAEGSPLHPR, MH+ 1976.0201, m/z 494.7605  
 L OS G28 P150811 220811-s1.02271.02271.4.dta

X-range:

-

MassTol: Y-zoom:

MassType:

AVG  MONO

Axis:

1  2

Label:

I  M  -

Ions:

a  +  2+  3+

b  +  2+  3+

c  +  2+  3+

x  +  2+  3+

y  +  2+  3+

z  +  2+  3+

hide H<sub>2</sub>O/NH<sub>3</sub>

zoom 112-122

GO

scan 2271; 2.4e+000

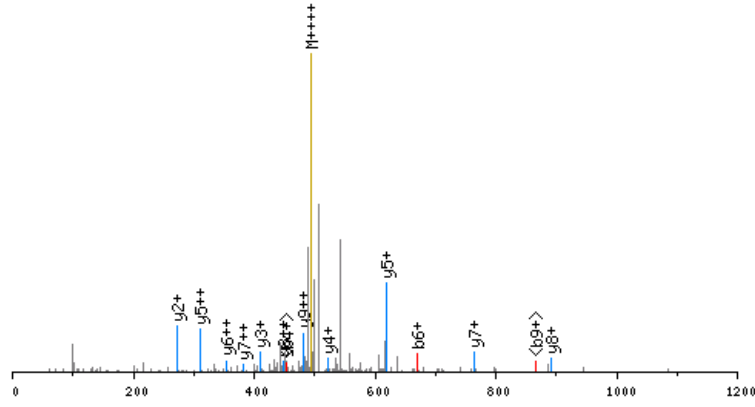

click image to zoom in; click top corners to zoom out [\[precursor±\]](#)

scan 2268; 494.8 m/z; 9.8e+000

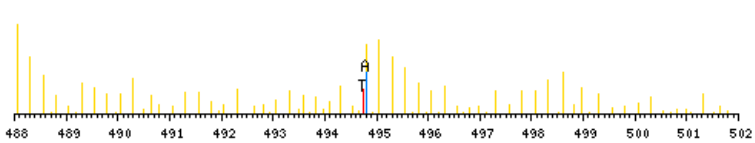

zoomed in precursor plot; T=theoretical m/z, A=acquired m/z

| b <sup>+</sup> | #  | AA # | y <sup>+</sup> | y <sup>2+</sup> |
|----------------|----|------|----------------|-----------------|
| 128.1075       | 1  | V 19 |                |                 |
| 257.1501       | 2  | E 18 | 1848.9205      | 924.9641        |
| 413.2764       | 3  | K 17 | 1719.8779      | 860.4428        |
| 470.2979       | 4  | G 16 | 1563.7516      | 782.3797        |
| 541.3350       | 5  | A 15 | 1506.7301      | 753.8690        |
| 670.3776       | 6  | E 14 | 1435.6930      | 718.3504        |
| 741.4147       | 7  | A 13 | 1306.6504      | 653.8291        |
| 798.4362       | 8  | G 12 | 1235.6133      | 618.3105        |
| 885.4682       | 9  | S 11 | 1178.5918      | 589.7998        |
| 1013.5268      | 10 | Q 10 | 1091.5598      | 546.2838        |
| 1084.5639      | 11 | A 9  | 963.5012       | 482.2545        |
| 1213.6065      | 12 | E 8  | 892.4641       | 446.7360        |
| 1270.6279      | 13 | G 7  | 763.4215       | 382.2147        |
| 1357.6600      | 14 | S 6  | 706.4000       | 353.7039        |
| 1454.7127      | 15 | P 5  | 619.3680       | 310.1879        |
| 1567.7968      | 16 | L 4  | 522.3152       | 261.6615        |
| 1704.8557      | 17 | H 3  | 409.2312       | 205.1195        |
| 1801.9085      | 18 | P 2  | 272.1723       | 136.5900        |
|                | 19 | R 1  | 175.1195       | 88.0637         |

N-term:+29.04 K(3):+156.13

VELGEELEAVTARPEAVER, MH+ 2254.1567, m/z 752.0571  
 L OS G26 P150811 220811-s1.05649.05649.3.dta

X-range:

-

MassTol: Y-zoom:

MassType:

AVG  MONO

Axis:

1  2

Label:

I  M  -

Ions:

a  +  2+  3+

b  +  2+  3+

c  +  2+  3+

x  +  2+  3+

y  +  2+  3+

z  +  2+  3+

hide H<sub>2</sub>O/NH<sub>3</sub>

zoom 112-122

GO

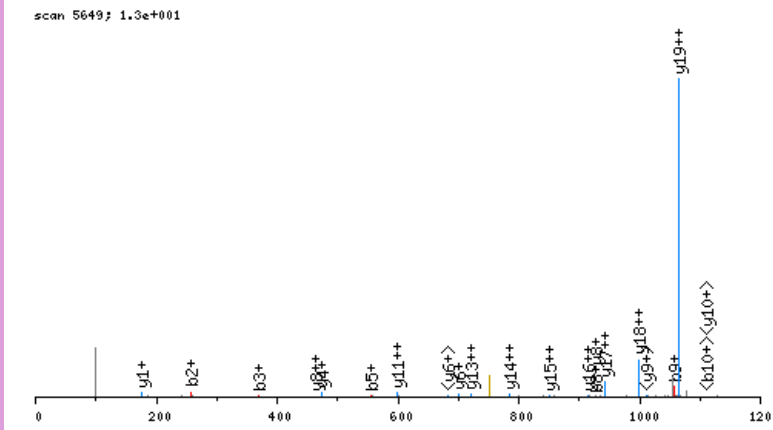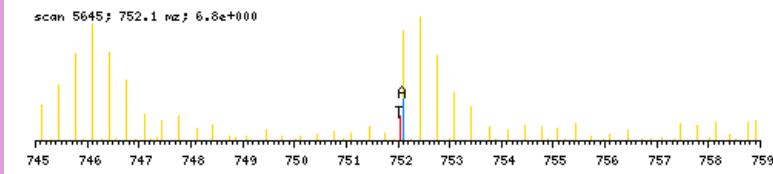

| b <sup>+</sup> | #  | AA # | y <sup>+</sup> | y <sup>2+</sup> |
|----------------|----|------|----------------|-----------------|
| 128.1075       | 1  | V    | 20             |                 |
| 257.1501       | 2  | E    | 19             | 1064.0324       |
| 370.2342       | 3  | L    | 18             | 999.5111        |
| 427.2556       | 4  | G    | 17             | 942.9691        |
| 556.2982       | 5  | E    | 16             | 914.4583        |
| 685.3408       | 6  | E    | 15             | 849.9370        |
| 814.3834       | 7  | E    | 14             | 785.4157        |
| 927.4675       | 8  | L    | 13             | 720.8944        |
| 1056.5101      | 9  | E    | 12             | 664.3524        |
| 1127.5472      | 10 | A    | 11             | 599.8311        |
| 1226.6156      | 11 | V    | 10             | 564.3126        |
| 1327.6633      | 12 | T    | 9              | 514.7784        |
| 1398.7004      | 13 | A    | 8              | 464.2545        |
| 1554.8015      | 14 | R    | 7              | 428.7360        |
| 1651.8543      | 15 | P    | 6              | 350.6854        |
| 1780.8969      | 16 | E    | 5              | 302.1590        |
| 1851.9340      | 17 | A    | 4              | 237.6377        |
| 1951.0024      | 18 | V    | 3              | 202.1192        |
| 2080.0450      | 19 | E    | 2              | 152.5850        |
|                | 20 | R    | 1              | 88.0637         |

N-term:+29.04

VEVGPEDEVGAER, MH+ 1528.7131, m/z 764.8602  
 L OS G25 P150811 220811-s1.03731.03731.2.dta

X-range:

-

MassTol: Y-zoom:

MassType:

AVG  MONO

Axis:

1  2

Label:

I  M  -

Ions:

a  +  2+  3+

b  +  2+  3+

c  +  2+  3+

x  +  2+  3+

y  +  2+  3+

z  +  2+  3+

hide H<sub>2</sub>O/NH<sub>3</sub>

zoom 112-122

GO

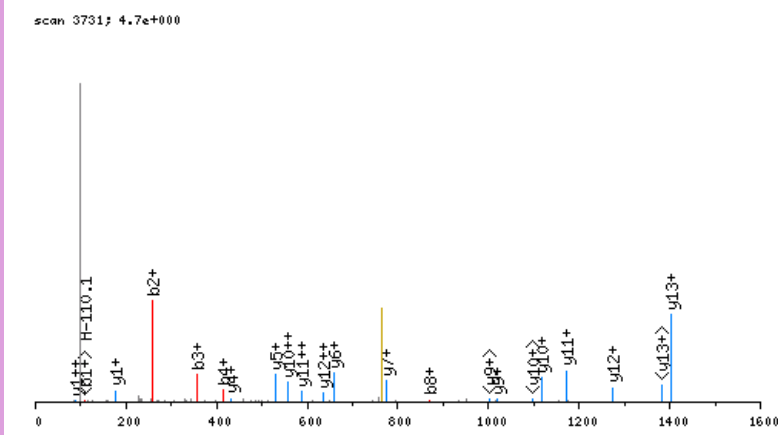

click image to zoom in; click top corners to zoom out [\[precursor±\]](#)

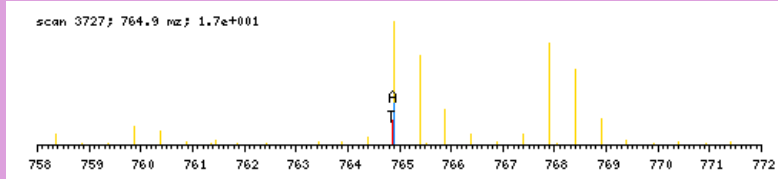

zoomed in precursor plot; T=theoretical m/z, A=acquired m/z

| b <sup>+</sup> | #  | AA # | y <sup>+</sup> | y <sup>2+</sup> |
|----------------|----|------|----------------|-----------------|
| 128.1075       | 1  | V 14 |                |                 |
| 257.1501       | 2  | E 13 | 1401.6134      | 701.3106        |
| 356.2185       | 3  | V 12 | 1272.5708      | 636.7893        |
| 413.2400       | 4  | G 11 | 1173.5024      | 587.2551        |
| 510.2927       | 5  | P 10 | 1116.4809      | 558.7444        |
| 639.3353       | 6  | E 9  | 1019.4282      | 510.2180        |
| 754.3623       | 7  | D 8  | 890.3856       | 445.6967        |
| 869.3892       | 8  | D 7  | 775.3586       | 388.1832        |
| 998.4318       | 9  | E 6  | 660.3317       | 330.6698        |
| 1097.5002      | 10 | V 5  | 531.2891       | 266.1485        |
| 1154.5217      | 11 | G 4  | 432.2207       | 216.6142        |
| 1225.5588      | 12 | A 3  | 375.1992       | 188.1035        |
| 1354.6014      | 13 | E 2  | 304.1621       | 152.5850        |
|                | 14 | R 1  | 175.1195       | 88.0637         |

N-term:+29.04



VGDLSPQQQEALAR, MH+ 1539.8131, m/z 513.9425  
 L OS G25 P150811 220811-s1.03988.03988.3.dta

X-range:

-

MassTol: Y-zoom:

MassType:

AVG  MONO

Axis:

1  2

Label:

I  M  -

Ions:

a  +  2+  3+

b  +  2+  3+

c  +  2+  3+

x  +  2+  3+

y  +  2+  3+

z  +  2+  3+

hide H<sub>2</sub>O/NH<sub>3</sub>

zoom 112-122

GO

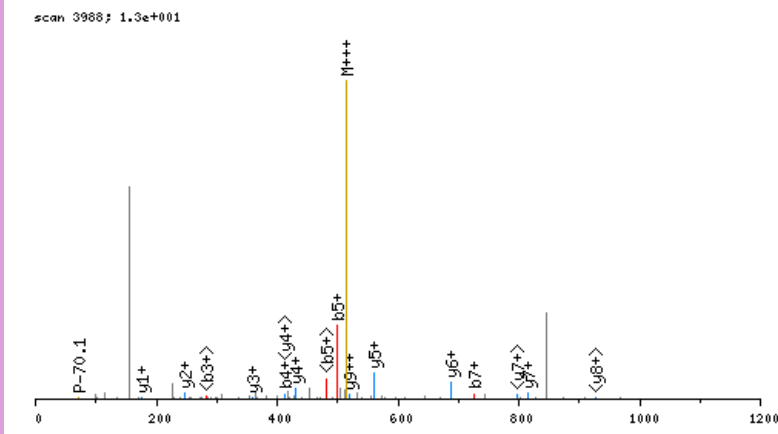

click image to zoom in; click top corners to zoom out [\[precursor±\]](#)

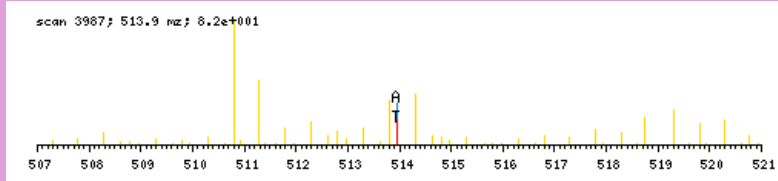

zoomed in precursor plot; T=theoretical m/z, A=acquired m/z

| b <sup>+</sup> | #  | AA # | y <sup>+</sup> | y <sup>2+</sup> |
|----------------|----|------|----------------|-----------------|
| 128.1075       | 1  | V 14 |                |                 |
| 185.1290       | 2  | G 13 | 1412.7134      | 706.8606        |
| 300.1559       | 3  | D 12 | 1355.6919      | 678.3499        |
| 413.2400       | 4  | L 11 | 1240.6650      | 620.8364        |
| 500.2720       | 5  | S 10 | 1127.5809      | 564.2944        |
| 597.3248       | 6  | P 9  | 1040.5489      | 520.7784        |
| 725.3834       | 7  | Q 8  | 943.4961       | 472.2520        |
| 853.4419       | 8  | Q 7  | 815.4375       | 408.2227        |
| 981.5005       | 9  | Q 6  | 687.3790       | 344.1934        |
| 1110.5431      | 10 | E 5  | 559.3204       | 280.1641        |
| 1181.5802      | 11 | A 4  | 430.2778       | 215.6428        |
| 1294.6643      | 12 | L 3  | 359.2407       | 180.1243        |
| 1365.7014      | 13 | A 2  | 246.1566       | 123.5822        |
|                | 14 | R 1  | 175.1195       | 88.0637         |

N-term:+29.04

VGEGMEEGEGFSEAR, MH+ 1554.6746, m/z 777.8409  
 L OS G25 P150811 220811-s1.04135.04135.2.dta

X-range:

-

MassTol: Y-zoom:

MassType:

AVG  MONO

Axis:

1  2

Label:

I  M  -

Ions:

a  +  2+  3+

b  +  2+  3+

c  +  2+  3+

x  +  2+  3+

y  +  2+  3+

z  +  2+  3+

hide H<sub>2</sub>O/NH<sub>3</sub>

zoom 112-122

GO

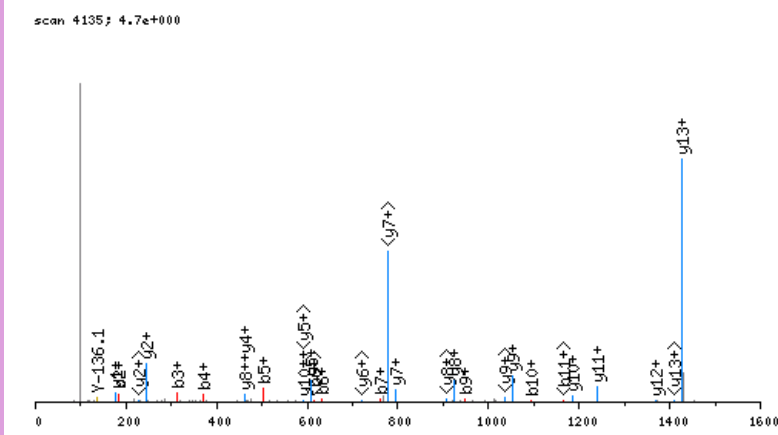

click image to zoom in; click top corners to zoom out [\[precursor±\]](#)

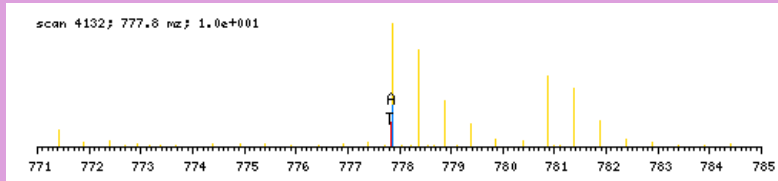

zoomed in precursor plot; T=theoretical m/z, A=acquired m/z

| b <sup>+</sup> | #  | AA # | y <sup>+</sup> | y <sup>2+</sup> |
|----------------|----|------|----------------|-----------------|
| 128.1075       | 1  | V 14 |                |                 |
| 185.1290       | 2  | G 13 | 1427.5749      | 714.2914        |
| 314.1716       | 3  | E 12 | 1370.5534      | 685.7806        |
| 371.1930       | 4  | G 11 | 1241.5108      | 621.2593        |
| 502.2335       | 5  | M 10 | 1184.4894      | 592.7486        |
| 631.2761       | 6  | E 9  | 1053.4489      | 527.2284        |
| 760.3187       | 7  | E 8  | 924.4063       | 462.7071        |
| 817.3402       | 8  | G 7  | 795.3637       | 398.1858        |
| 946.3828       | 9  | E 6  | 738.3422       | 369.6750        |
| 1093.4512      | 10 | F 5  | 609.2997       | 305.1537        |
| 1180.4832      | 11 | S 4  | 462.2312       | 231.6195        |
| 1309.5258      | 12 | E 3  | 375.1992       | 188.1035        |
| 1380.5629      | 13 | A 2  | 246.1566       | 123.5822        |
|                | 14 | R 1  | 175.1195       | 88.0637         |

N-term:+29.04

VGGEASAAVEKLVSGVR, MH+ 1697.0234, m/z 566.3460  
 H OS G26 P150811 220811-s1.05683.05683.3.dta

X-range:

-

MassTol: Y-zoom:

MassType:

AVG  MONO

Axis:

1  2

Label:

I  M  -

Ions:

a  +  2+  3+

b  +  2+  3+

c  +  2+  3+

x  +  2+  3+

y  +  2+  3+

z  +  2+  3+

hide H<sub>2</sub>O/NH<sub>3</sub>

zoom 112-122

GO

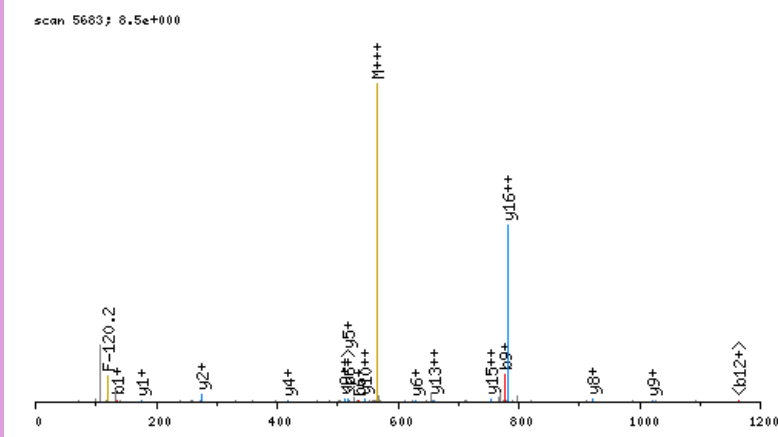

click image to zoom in; click top corners to zoom out [\[precursor±\]](#)

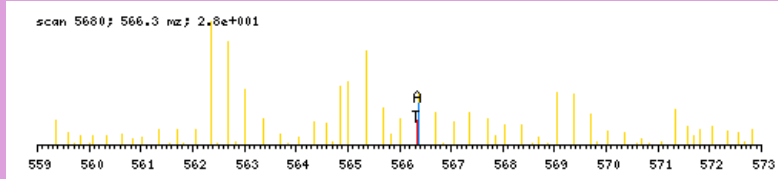

zoomed in precursor plot; T=theoretical m/z, A=acquired m/z

| b <sup>+</sup> | #  | AA # | y <sup>+</sup> | y <sup>2+</sup> |
|----------------|----|------|----------------|-----------------|
| 134.1393       | 1  | V 17 |                |                 |
| 191.1608       | 2  | G 16 | 1563.8919      | 782.4499        |
| 248.1822       | 3  | G 15 | 1506.8704      | 753.9391        |
| 377.2248       | 4  | E 14 | 1449.8490      | 725.4284        |
| 448.2619       | 5  | A 13 | 1320.8064      | 660.9071        |
| 535.2940       | 6  | S 12 | 1249.7692      | 625.3885        |
| 606.3311       | 7  | A 11 | 1162.7372      | 581.8725        |
| 677.3682       | 8  | A 10 | 1091.7001      | 546.3540        |
| 776.4366       | 9  | V 9  | 1020.6630      | 510.8354        |
| 905.4792       | 10 | E 8  | 921.5946       | 461.3012        |
| 1067.6373      | 11 | K 7  | 792.5520       | 396.7799        |
| 1180.7214      | 12 | L 6  | 630.3939       | 315.7009        |
| 1279.7898      | 13 | V 5  | 517.3098       | 259.1588        |
| 1366.8218      | 14 | S 4  | 418.2414       | 209.6246        |
| 1423.8433      | 15 | G 3  | 331.2094       | 166.1086        |
| 1522.9117      | 16 | V 2  | 274.1879       | 137.5979        |
|                | 17 | R 1  | 175.1195       | 88.0637         |

N-term:+35.07 K(11):+162.16

VGNLPADITEDEFKFR, MH+ 1771.9867, m/z 591.3337  
 H OS G26 P150811 220811-s1.04859.04859.3.dta

scan 4859; 2.0e+000

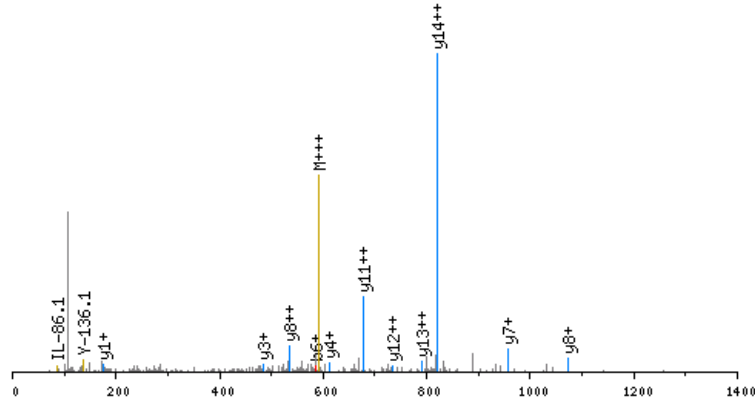

click image to zoom in; click top corners to zoom out [\[precursor±\]](#)

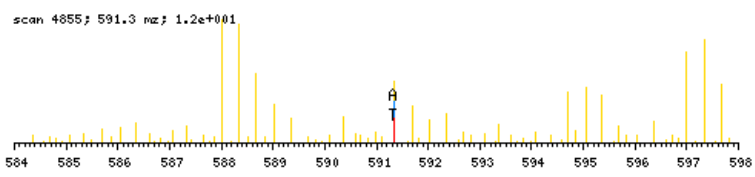

zoomed in precursor plot; T=theoretical m/z, A=acquired m/z

X-range:

-

MassTol: Y-zoom:

MassType:

AVG  MONO

Axis:

1  2

Label:

I  M  -

Ions:

a  +  2+  3+

b  +  2+  3+

c  +  2+  3+

x  +  2+  3+

y  +  2+  3+

z  +  2+  3+

hide H<sub>2</sub>O/NH<sub>3</sub>

zoom 112-122

GO

| b <sup>+</sup> | #  | AA | #  | y <sup>+</sup> | y <sup>2+</sup> |
|----------------|----|----|----|----------------|-----------------|
| 134.1393       | 1  | V  | 15 |                |                 |
| 191.1608       | 2  | G  | 14 | 1638.8552      | 819.9315        |
| 305.2037       | 3  | N  | 13 | 1581.8337      | 791.4208        |
| 418.2878       | 4  | L  | 12 | 1467.7908      | 734.3993        |
| 515.3405       | 5  | P  | 11 | 1354.7067      | 677.8573        |
| 586.3776       | 6  | A  | 10 | 1257.6539      | 629.3309        |
| 701.4046       | 7  | D  | 9  | 1186.6168      | 593.8123        |
| 814.4887       | 8  | I  | 8  | 1071.5899      | 536.2989        |
| 915.5363       | 9  | T  | 7  | 958.5058       | 479.7568        |
| 1044.5789      | 10 | E  | 6  | 857.4581       | 429.2330        |
| 1159.6059      | 11 | D  | 5  | 728.4156       | 364.7117        |
| 1288.6485      | 12 | E  | 4  | 613.3886       | 307.1982        |
| 1435.7169      | 13 | F  | 3  | 484.3460       | 242.6769        |
| 1597.8750      | 14 | K  | 2  | 337.2776       | 169.1427        |
|                | 15 | R  | 1  | 175.1195       | 88.0637         |

N-term:+35.07 K(14):+162.16

VGQPGAAGPVSPMCPGR, MH+ 1665.8204, m/z 555.9450  
 L OS G25 P150811 220811-s1.03944.03944.3.dta

X-range:

-

MassTol: Y-zoom:

MassType:

AVG  MONO

Axis:

1  2

Label:

I  M  -

Ions:

a  +  2+  3+

b  +  2+  3+

c  +  2+  3+

x  +  2+  3+

y  +  2+  3+

z  +  2+  3+

hide H<sub>2</sub>O/NH<sub>3</sub>

zoom 112-122

GO

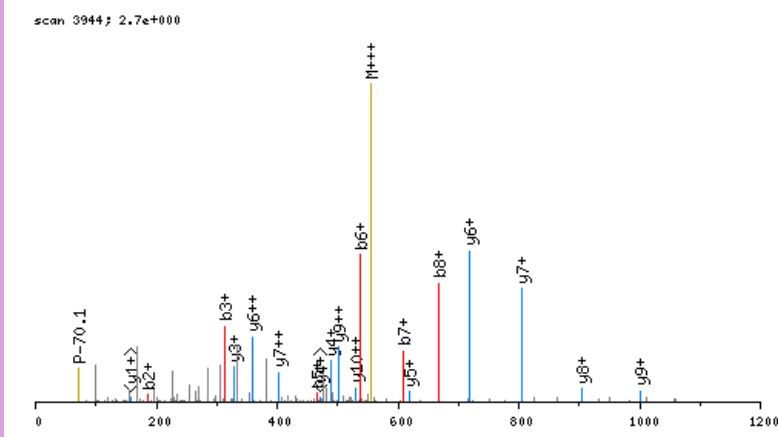

click image to zoom in; click top corners to zoom out [\[precursor±\]](#)

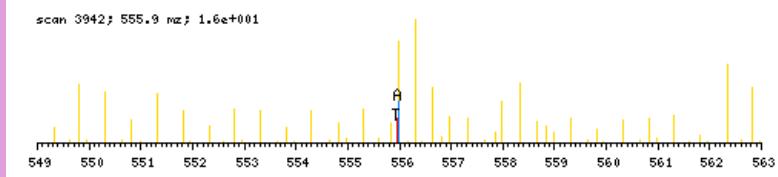

zoomed in precursor plot; T=theoretical m/z, A=acquired m/z

| b <sup>+</sup> | #  | AA # | y <sup>+</sup> | y <sup>2+</sup> |
|----------------|----|------|----------------|-----------------|
| 128.1075       | 1  | V 17 |                |                 |
| 185.1290       | 2  | G 16 | 1538.7207      | 769.8643        |
| 313.1876       | 3  | Q 15 | 1481.6993      | 741.3536        |
| 410.2403       | 4  | P 14 | 1353.6407      | 677.3243        |
| 467.2618       | 5  | G 13 | 1256.5879      | 628.7979        |
| 538.2989       | 6  | A 12 | 1199.5665      | 600.2871        |
| 609.3360       | 7  | A 11 | 1128.5294      | 564.7686        |
| 666.3575       | 8  | G 10 | 1057.4922      | 529.2500        |
| 763.4102       | 9  | P 9  | 1000.4708      | 500.7393        |
| 862.4787       | 10 | V 8  | 903.4180       | 452.2129        |
| 949.5107       | 11 | S 7  | 804.3496       | 402.6787        |
| 1046.5634      | 12 | P 6  | 717.3176       | 359.1627        |
| 1177.6039      | 13 | M 5  | 620.2648       | 310.6363        |
| 1337.6345      | 14 | C 4  | 489.2243       | 245.1161        |
| 1434.6873      | 15 | P 3  | 329.1937       | 165.1008        |
| 1491.7088      | 16 | G 2  | 232.1410       | 116.5744        |
|                | 17 | R 1  | 175.1195       | 88.0637         |

N-term:+29.04 C(14):+160.03

VGKPKVGSDDPDFQPELSGAGSR, MH+ 2267.2308, m/z 756.4151  
 H OS G26 P150811 220811-s1.04353.04353.3.dta

scan 4353; 2.8e+000

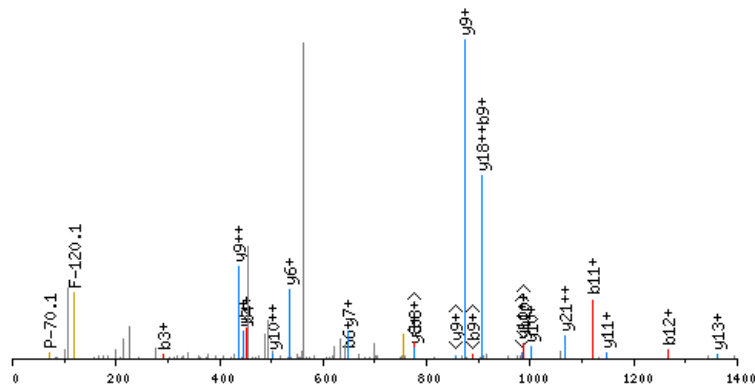

click image to zoom in; click top corners to zoom out [precursor±]

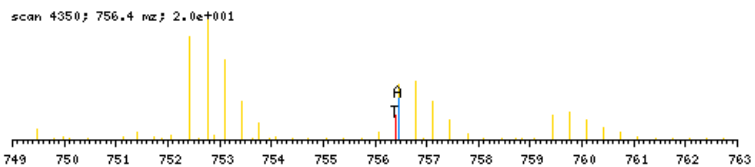

zoomed in precursor plot; T=theoretical m/z, A=acquired m/z

X-range:

-

MassTol: Y-zoom:

MassType:

AVG  MONO

Axis:

1  2

Label:

I  M  -

Ions:

a  +  2+  3+

b  +  2+  3+

c  +  2+  3+

x  +  2+  3+

y  +  2+  3+

z  +  2+  3+

hide H<sub>2</sub>O/NH<sub>3</sub>

zoom 112-122

GO

| b <sup>+</sup> | #  | AA # | y <sup>+</sup> | y <sup>2+</sup> |
|----------------|----|------|----------------|-----------------|
| 134.1393       | 1  | V 22 |                |                 |
| 191.1608       | 2  | G 21 | 2134.0993      | 1067.5536       |
| 290.2292       | 3  | V 20 | 2077.0778      | 1039.0428       |
| 452.3873       | 4  | K 19 | 1978.0094      | 989.5086        |
| 549.4401       | 5  | P 18 | 1815.8513      | 908.4296        |
| 648.5085       | 6  | V 17 | 1718.7986      | 859.9032        |
| 705.5299       | 7  | G 16 | 1619.7302      | 810.3690        |
| 792.5620       | 8  | S 15 | 1562.7087      | 781.8583        |
| 907.5889       | 9  | D 14 | 1475.6767      | 738.3422        |
| 1004.6417      | 10 | P 13 | 1360.6497      | 680.8288        |
| 1119.6686      | 11 | D 12 | 1263.5970      | 632.3024        |
| 1266.7370      | 12 | F 11 | 1148.5700      | 574.7889        |
| 1394.7956      | 13 | Q 10 | 1001.5016      | 501.2547        |
| 1491.8484      | 14 | P 9  | 873.4430       | 437.2254        |
| 1620.8910      | 15 | E 8  | 776.3903       | 388.6990        |
| 1733.9750      | 16 | L 7  | 647.3477       | 324.1777        |
| 1821.0071      | 17 | S 6  | 534.2636       | 267.6357        |
| 1878.0285      | 18 | G 5  | 447.2316       | 224.1197        |
| 1949.0656      | 19 | A 4  | 390.2101       | 195.6090        |
| 2006.0871      | 20 | G 3  | 319.1730       | 160.0904        |
| 2093.1191      | 21 | S 2  | 262.1515       | 131.5797        |
|                | 22 | R 1  | 175.1195       | 88.0637         |

N-term:+35.07 K(4):+162.16

VGVNKMDSTEPAYSEKR, MH+ 2013.1176, m/z 504.0348  
 H OS G28 P150811 220811-s1.02834.02834.4.dta

X-range:

-

MassTol: Y-zoom:

MassType:

AVG  MONO

Axis:

1  2

Label:

I  M  -

Ions:

a  +  2+  3+

b  +  2+  3+

c  +  2+  3+

x  +  2+  3+

y  +  2+  3+

z  +  2+  3+

hide H<sub>2</sub>O/NH<sub>3</sub>

zoom 112-122

GO

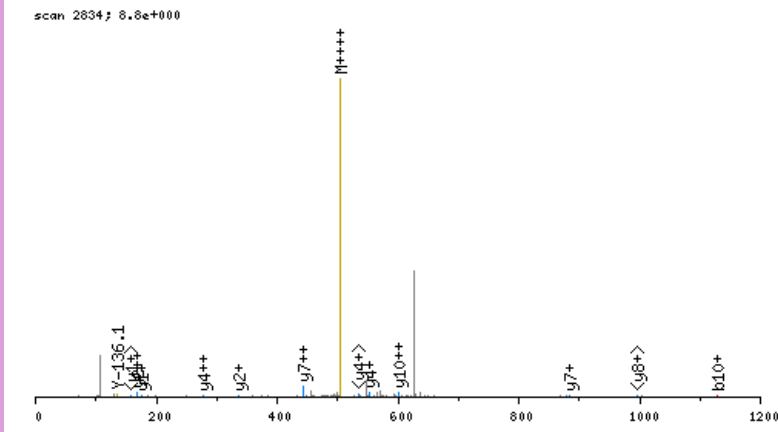

click image to zoom in; click top corners to zoom out [\[precursor±\]](#)

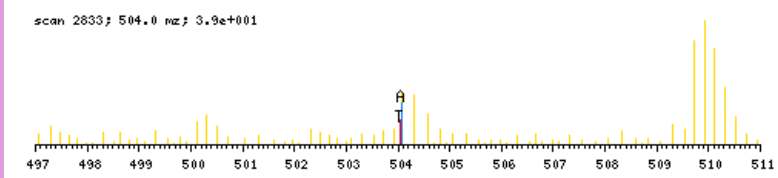

zoomed in precursor plot; T=theoretical m/z, A=acquired m/z

| b <sup>+</sup> | #  | AA # | y <sup>+</sup> | y <sup>2+</sup> |
|----------------|----|------|----------------|-----------------|
| 134.1393       | 1  | V 17 |                |                 |
| 191.1608       | 2  | G 16 | 1879.9861      | 940.4969        |
| 290.2292       | 3  | V 15 | 1822.9646      | 911.9862        |
| 404.2721       | 4  | N 14 | 1723.8962      | 862.4520        |
| 566.4302       | 5  | K 13 | 1609.8533      | 805.4305        |
| 697.4707       | 6  | M 12 | 1447.6952      | 724.3515        |
| 812.4976       | 7  | D 11 | 1316.6547      | 658.8312        |
| 899.5297       | 8  | S 10 | 1201.6277      | 601.3178        |
| 1000.5774      | 9  | T 9  | 1114.5957      | 557.8018        |
| 1129.6199      | 10 | E 8  | 1013.5480      | 507.2779        |
| 1226.6727      | 11 | P 7  | 884.5054       | 442.7566        |
| 1297.7098      | 12 | A 6  | 787.4527       | 394.2302        |
| 1460.7732      | 13 | Y 5  | 716.4156       | 358.7117        |
| 1547.8052      | 14 | S 4  | 553.3522       | 277.1800        |
| 1676.8478      | 15 | E 3  | 466.3202       | 233.6640        |
| 1839.0059      | 16 | K 2  | 337.2776       | 169.1427        |
|                | 17 | R 1  | 175.1195       | 88.0637         |

N-term:+35.07 K(5):+162.16  
 K(16):+162.16

VHHHSTVADGLITTLHYPAKPR, MH+ 2518.4319, m/z 630.3634  
 H OS G26 P150811 220811-s1.06704.06704.4.dta

scan 6704; 2.0e+001

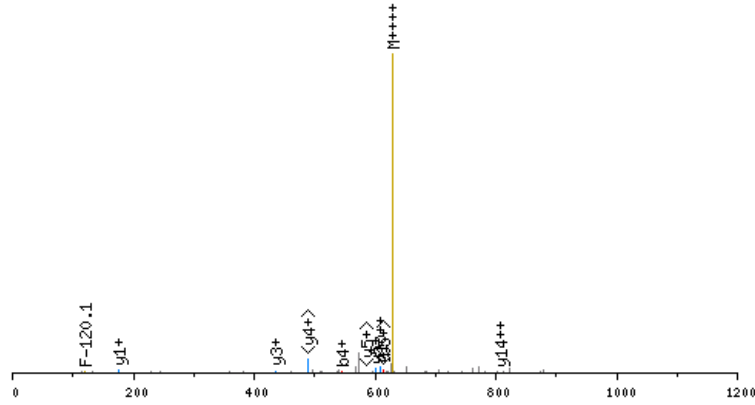

click image to zoom in; click top corners to zoom out [precursor±]

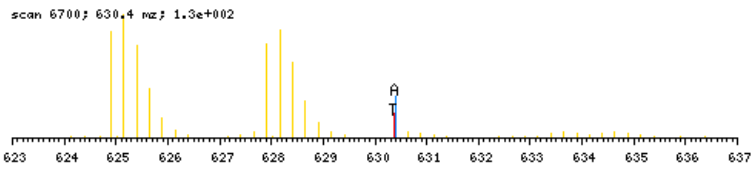

zoomed in precursor plot; T=theoretical m/z, A=acquired m/z

X-range:

-

MassTol: Y-zoom:

MassType:

AVG  MONO

Axis:

1  2

Label:

I  M  -

Ions:

a  +  2+  3+

b  +  2+  3+

c  +  2+  3+

x  +  2+  3+

y  +  2+  3+

z  +  2+  3+

hide H<sub>2</sub>O/NH<sub>3</sub>

zoom 112-122

GO

| b <sup>+</sup> | #  | AA # | y <sup>+</sup> | y <sup>2+</sup> |
|----------------|----|------|----------------|-----------------|
| 134.1393       | 1  | V 22 |                |                 |
| 271.1982       | 2  | H 21 | 2385.3004      | 1193.1541       |
| 408.2571       | 3  | H 20 | 2248.2415      | 1124.6247       |
| 545.3160       | 4  | H 19 | 2111.1826      | 1056.0952       |
| 632.3481       | 5  | S 18 | 1974.1237      | 987.5657        |
| 733.3958       | 6  | T 17 | 1887.0916      | 944.0497        |
| 832.4642       | 7  | V 16 | 1786.0440      | 893.5259        |
| 903.5013       | 8  | A 15 | 1686.9756      | 843.9917        |
| 1018.5282      | 9  | D 14 | 1615.9384      | 808.4731        |
| 1075.5497      | 10 | G 13 | 1500.9115      | 750.9597        |
| 1188.6338      | 11 | L 12 | 1443.8900      | 722.4489        |
| 1301.7178      | 12 | I 11 | 1330.8060      | 665.9069        |
| 1402.7655      | 13 | T 10 | 1217.7219      | 609.3649        |
| 1503.8132      | 14 | T 9  | 1116.6742      | 558.8410        |
| 1616.8972      | 15 | L 8  | 1015.6265      | 508.3172        |
| 1753.9562      | 16 | H 7  | 902.5425       | 451.7752        |
| 1917.0195      | 17 | Y 6  | 765.4836       | 383.2457        |
| 2014.0722      | 18 | P 5  | 602.4202       | 301.7140        |
| 2085.1094      | 19 | A 4  | 505.3675       | 253.1877        |
| 2182.1621      | 20 | P 3  | 434.3304       | 217.6691        |
| 2344.3202      | 21 | K 2  | 337.2776       | 169.1427        |
|                | 22 | R 1  | 175.1195       | 88.0637         |

N-term:+35.07 K(21):+162.16



VHPESSEGEHHSVVPQR, MH+ 1936.9577, m/z 484.9949  
 H OS G28 P150811 220811-s1.02329.02329.4.dta

X-range:

-

MassTol: Y-zoom:

MassType:

AVG  MONO

Axis:

1  2

Label:

I  M  -

Ions:

a  +  2+  3+

b  +  2+  3+

c  +  2+  3+

x  +  2+  3+

y  +  2+  3+

z  +  2+  3+

hide H<sub>2</sub>O/NH<sub>3</sub>

zoom 112-122

GO

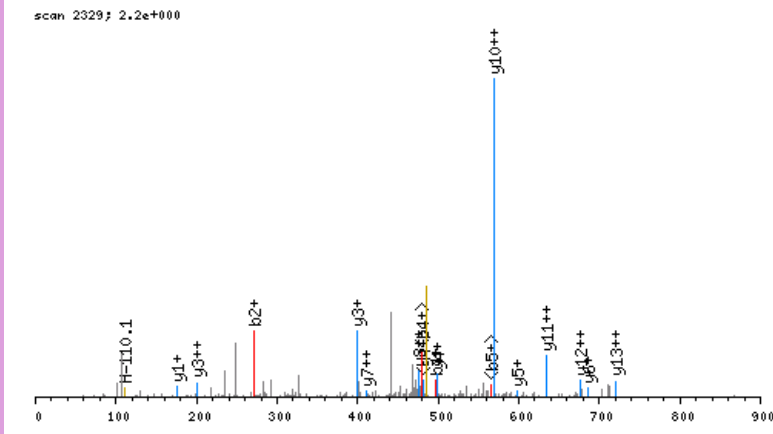

click image to zoom in; click top corners to zoom out [\[precursor±\]](#)

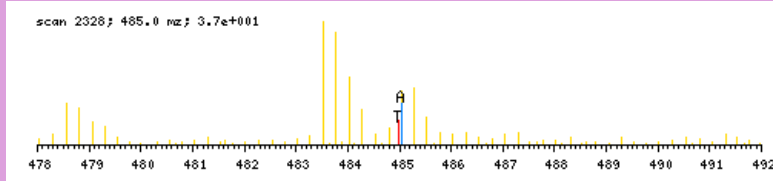

zoomed in precursor plot; T=theoretical m/z, A=acquired m/z

| b <sup>+</sup> | #  | AA # | y <sup>+</sup> | y <sup>2+</sup> |
|----------------|----|------|----------------|-----------------|
| 134.1393       | 1  | V 17 |                |                 |
| 271.1982       | 2  | H 16 | 1803.8262      | 902.4170        |
| 368.2510       | 3  | P 15 | 1666.7673      | 833.8875        |
| 497.2936       | 4  | E 14 | 1569.7145      | 785.3612        |
| 584.3256       | 5  | S 13 | 1440.6719      | 720.8399        |
| 671.3576       | 6  | S 12 | 1353.6399      | 677.3239        |
| 800.4002       | 7  | E 11 | 1266.6079      | 633.8078        |
| 857.4217       | 8  | G 10 | 1137.5653      | 569.2865        |
| 986.4643       | 9  | E 9  | 1080.5438      | 540.7758        |
| 1115.5069      | 10 | E 8  | 951.5012       | 476.2545        |
| 1252.5658      | 11 | H 7  | 822.4586       | 411.7332        |
| 1339.5978      | 12 | S 6  | 685.3997       | 343.2038        |
| 1438.6662      | 13 | V 5  | 598.3677       | 299.6877        |
| 1537.7347      | 14 | V 4  | 499.2993       | 250.1535        |
| 1634.7874      | 15 | P 3  | 400.2308       | 200.6193        |
| 1762.8460      | 16 | Q 2  | 303.1781       | 152.0930        |
|                | 17 | R 1  | 175.1195       | 88.0637         |

N-term:+35.07

VHVTDLGKETICR, MH+ 1670.8899, m/z 418.4779  
 L OS G28 P150811 220811-s1.03946.03946.4.dta

X-range:

-

MassTol: Y-zoom:

MassType:

AVG  MONO

Axis:

1  2

Label:

I  M  -

Ions:

a  +  2+  3+

b  +  2+  3+

c  +  2+  3+

x  +  2+  3+

y  +  2+  3+

z  +  2+  3+

hide H<sub>2</sub>O/NH<sub>3</sub>

zoom 112-122

GO

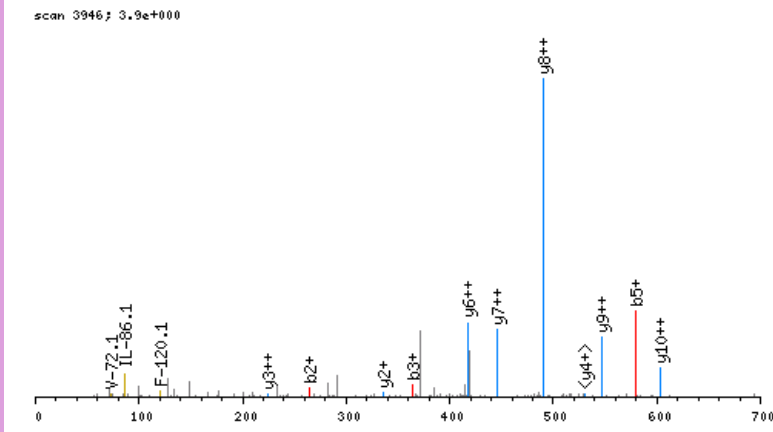

click image to zoom in; click top corners to zoom out [\[precursor±\]](#)

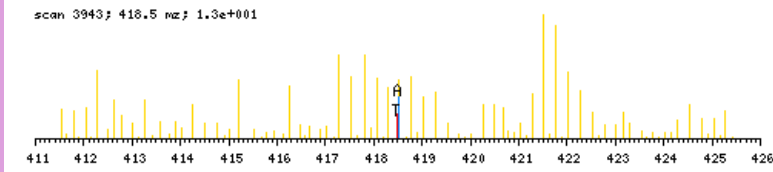

zoomed in precursor plot; T=theoretical m/z, A=acquired m/z

| b <sup>+</sup> | #  | AA | #  | y <sup>+</sup> | y <sup>2+</sup> |
|----------------|----|----|----|----------------|-----------------|
| 128.1075       | 1  | V  | 14 |                |                 |
| 265.1664       | 2  | H  | 13 | 1543.7902      | 772.3990        |
| 364.2348       | 3  | V  | 12 | 1406.7313      | 703.8696        |
| 465.2825       | 4  | T  | 11 | 1307.6629      | 654.3354        |
| 580.3095       | 5  | D  | 10 | 1206.6152      | 603.8115        |
| 693.3935       | 6  | L  | 9  | 1091.5883      | 546.2981        |
| 780.4256       | 7  | S  | 8  | 978.5042       | 489.7560        |
| 837.4470       | 8  | G  | 7  | 891.4722       | 446.2400        |
| 993.5733       | 9  | K  | 6  | 834.4507       | 417.7293        |
| 1122.6159      | 10 | E  | 5  | 678.3244       | 339.6661        |
| 1223.6636      | 11 | T  | 4  | 549.2818       | 275.1448        |
| 1336.7477      | 12 | I  | 3  | 448.2342       | 224.6210        |
| 1496.7783      | 13 | C  | 2  | 335.1501       | 168.0790        |
|                | 14 | R  | 1  | 175.1195       | 88.0637         |

N-term:+29.04 K(9):+156.13  
 C(13):+160.03

VISSGHAELAR, MH+ 1302.7230, m/z 434.9125  
 H OS G27 P150811 220811-s1.02203.02203.3.dta

X-range:

-

MassTol: Y-zoom:

MassType:

AVG  MONO

Axis:

1  2

Label:

I  M  -

Ions:

a  +  2+  3+

b  +  2+  3+

c  +  2+  3+

x  +  2+  3+

y  +  2+  3+

z  +  2+  3+

hide H<sub>2</sub>O/NH<sub>3</sub>

zoom 112-122

GO

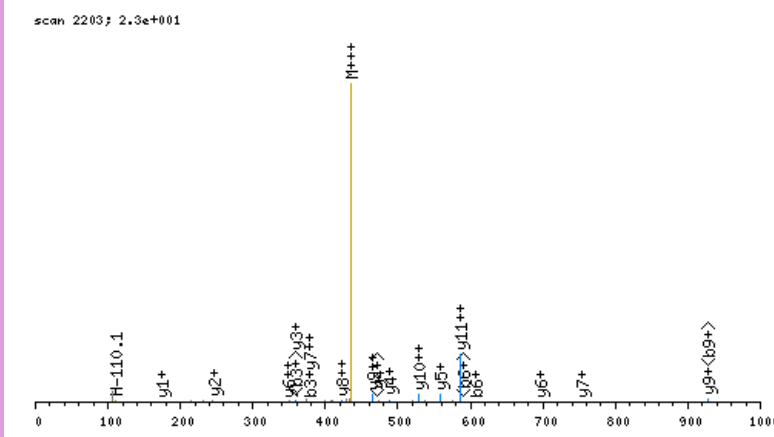

click image to zoom in; click top corners to zoom out [\[precursor±\]](#)

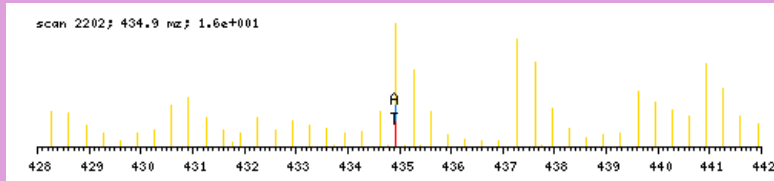

zoomed in precursor plot; T=theoretical m/z, A=acquired m/z

| b <sup>+</sup> | #  | AA # | y <sup>+</sup> | y <sup>2+</sup> |
|----------------|----|------|----------------|-----------------|
| 134.1393       | 1  | V 12 |                |                 |
| 247.2234       | 2  | I 11 | 1169.5915      | 585.2997        |
| 376.2660       | 3  | E 10 | 1056.5074      | 528.7576        |
| 463.2980       | 4  | S 9  | 927.4648       | 464.2363        |
| 550.3300       | 5  | S 8  | 840.4328       | 420.7203        |
| 607.3515       | 6  | G 7  | 753.4008       | 377.2043        |
| 744.4104       | 7  | H 6  | 696.3793       | 348.6936        |
| 815.4475       | 8  | A 5  | 559.3204       | 280.1641        |
| 944.4901       | 9  | E 4  | 488.2833       | 244.6455        |
| 1057.5742      | 10 | L 3  | 359.2407       | 180.1243        |
| 1128.6113      | 11 | A 2  | 246.1566       | 123.5822        |
|                | 12 | R 1  | 175.1195       | 88.0637         |

N-term:+35.07

VIKTQSKPEDEADWAR, MH+ 2104.1775, m/z 526.7998  
 H OS G28 P150811 220811-s1.03667.03667.4.dta

X-range:

-

MassTol: Y-zoom:

MassType:

AVG  MONO

Axis:

1  2

Label:

I  M  -

Ions:

a  +  2+  3+

b  +  2+  3+

c  +  2+  3+

x  +  2+  3+

y  +  2+  3+

z  +  2+  3+

hide H<sub>2</sub>O/NH<sub>3</sub>

zoom 112-122

GO

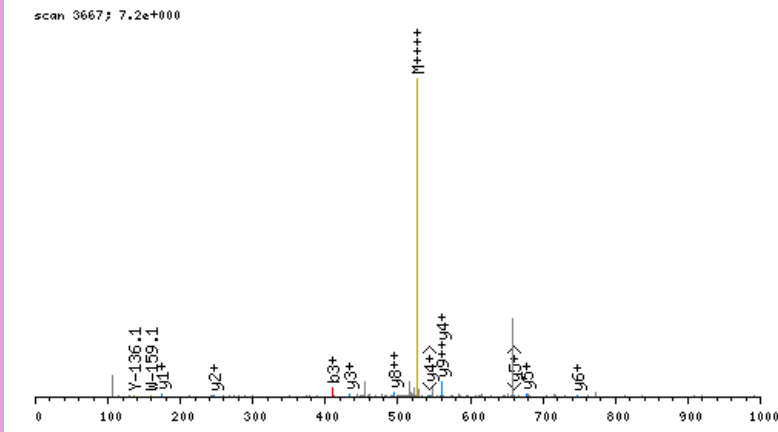

click image to zoom in; click top corners to zoom out [precursor±]

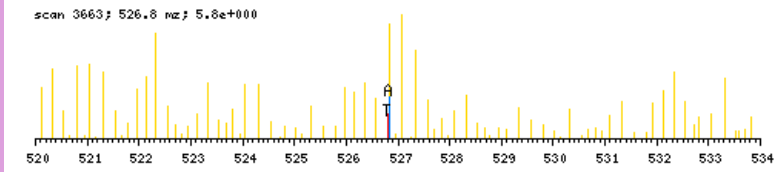

zoomed in precursor plot; T=theoretical m/z, A=acquired m/z

| b <sup>+</sup> | #  | AA # | y <sup>+</sup> | y <sup>2+</sup> |
|----------------|----|------|----------------|-----------------|
| 134.1393       | 1  | V 17 |                |                 |
| 247.2234       | 2  | I 16 | 1971.0460      | 986.0269        |
| 409.3815       | 3  | K 15 | 1857.9620      | 929.4849        |
| 510.4292       | 4  | T 14 | 1695.8039      | 848.4058        |
| 638.4877       | 5  | Q 13 | 1594.7562      | 797.8820        |
| 725.5198       | 6  | S 12 | 1466.6976      | 733.8527        |
| 887.6779       | 7  | K 11 | 1379.6656      | 690.3367        |
| 984.7306       | 8  | P 10 | 1217.5075      | 609.2576        |
| 1113.7732      | 9  | E 9  | 1120.4547      | 560.7313        |
| 1228.8002      | 10 | D 8  | 991.4121       | 496.2100        |
| 1357.8428      | 11 | E 7  | 876.3852       | 438.6965        |
| 1428.8799      | 12 | A 6  | 747.3426       | 374.1752        |
| 1543.9068      | 13 | D 5  | 676.3055       | 338.6566        |
| 1672.9494      | 14 | E 4  | 561.2785       | 281.1432        |
| 1859.0287      | 15 | W 3  | 432.2359       | 216.6219        |
| 1930.0658      | 16 | A 2  | 246.1566       | 123.5822        |
|                | 17 | R 1  | 175.1195       | 88.0637         |

N-term:+35.07 K(3):+162.16  
 K(7):+162.16

VIPELNGKLTGMAFR, MH+ 1701.9726, m/z 567.9957  
 L OS G27 P150811 220811-s1.06828.06828.3.dta

X-range:

-

MassTol: Y-zoom:

MassType:

AVG  MONO

Axis:

1  2

Label:

I  M  -

Ions:

a  +  2+  3+

b  +  2+  3+

c  +  2+  3+

x  +  2+  3+

y  +  2+  3+

z  +  2+  3+

hide H<sub>2</sub>O/NH<sub>3</sub>

zoom 112-122

GO

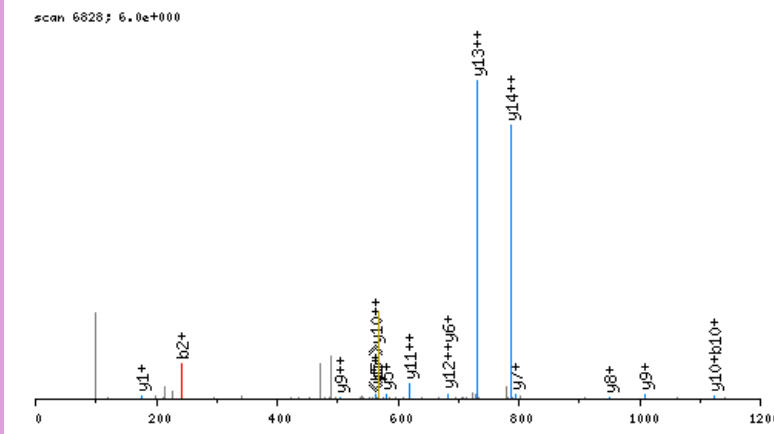

click image to zoom in; click top corners to zoom out [\[precursor±\]](#)

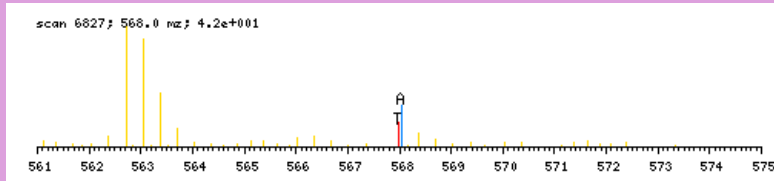

zoomed in precursor plot; T=theoretical m/z, A=acquired m/z

| b <sup>+</sup> | #  | AA # | y <sup>+</sup> | y <sup>2+</sup> |
|----------------|----|------|----------------|-----------------|
| 128.1075       | 1  | V 15 |                |                 |
| 241.1916       | 2  | I 14 | 1574.8729      | 787.9404        |
| 338.2443       | 3  | P 13 | 1461.7888      | 731.3983        |
| 467.2869       | 4  | E 12 | 1364.7361      | 682.8719        |
| 580.3710       | 5  | L 11 | 1235.6935      | 618.3506        |
| 694.4139       | 6  | N 10 | 1122.6094      | 561.8086        |
| 751.4354       | 7  | G 9  | 1008.5665      | 504.7872        |
| 907.5617       | 8  | K 8  | 951.5450       | 476.2764        |
| 1020.6458      | 9  | L 7  | 795.4187       | 398.2133        |
| 1121.6934      | 10 | T 6  | 682.3347       | 341.6712        |
| 1178.7149      | 11 | G 5  | 581.2870       | 291.1474        |
| 1309.7554      | 12 | M 4  | 524.2655       | 262.6367        |
| 1380.7925      | 13 | A 3  | 393.2250       | 197.1164        |
| 1527.8609      | 14 | F 2  | 322.1879       | 161.5979        |
|                | 15 | R 1  | 175.1195       | 88.0637         |

N-term:+29.04 K(8):+156.13

VISQHQSLGNIR, MH+ 1492.8600, m/z 498.2915  
 L OS G27 P150811 220811-s1.04424.04424.3.dta

X-range:

-

MassTol: Y-zoom:

MassType:

AVG  MONO

Axis:

1  2

Label:

I  M  -

Ions:

a  +  2+  3+

b  +  2+  3+

c  +  2+  3+

x  +  2+  3+

y  +  2+  3+

z  +  2+  3+

hide H<sub>2</sub>O/NH<sub>3</sub>

zoom 112-122

GO

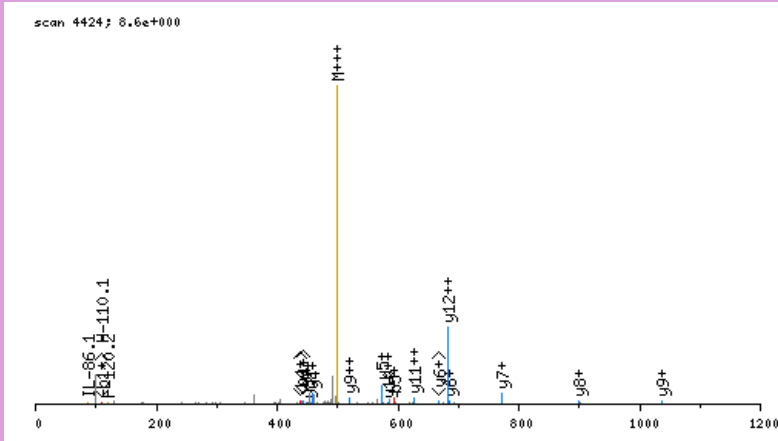

click image to zoom in; click top corners to zoom out [\[precursor±\]](#)

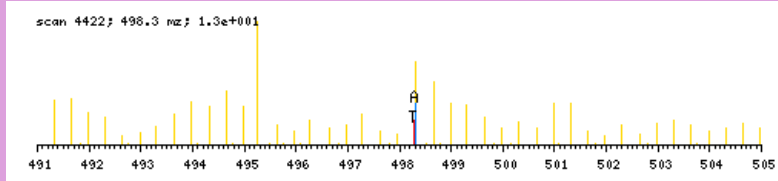

zoomed in precursor plot; T=theoretical m/z, A=acquired m/z

| b <sup>+</sup> | #  | AA # | y <sup>+</sup> | y <sup>2+</sup> |
|----------------|----|------|----------------|-----------------|
| 128.1075       | 1  | V 13 |                |                 |
| 241.1916       | 2  | I 12 | 1365.7603      | 683.3840        |
| 328.2236       | 3  | S 11 | 1252.6762      | 626.8420        |
| 456.2822       | 4  | Q 10 | 1165.6442      | 583.3260        |
| 593.3411       | 5  | H 9  | 1037.5856      | 519.2967        |
| 721.3997       | 6  | Q 8  | 900.5267       | 450.7673        |
| 808.4317       | 7  | S 7  | 772.4681       | 386.7380        |
| 921.5158       | 8  | L 6  | 685.4361       | 343.2220        |
| 1034.5998      | 9  | L 5  | 572.3520       | 286.6799        |
| 1091.6213      | 10 | G 4  | 459.2680       | 230.1379        |
| 1205.6642      | 11 | N 3  | 402.2465       | 201.6272        |
| 1318.7483      | 12 | I 2  | 288.2036       | 144.6057        |
|                | 13 | R 1  | 175.1195       | 88.0637         |

N-term:+29.04

VKAGFAGDDAPR, MH+ 1271.7384, m/z 424.5843  
 H OS G27 P150811 220811-s1.02351.02351.3.dta

X-range:

-

MassTol: Y-zoom:

MassType:

AVG  MONO

Axis:

1  2

Label:

I  M  -

Ions:

a  +  2+  3+

b  +  2+  3+

c  +  2+  3+

x  +  2+  3+

y  +  2+  3+

z  +  2+  3+

hide H<sub>2</sub>O/NH<sub>3</sub>

zoom 112-122

GO

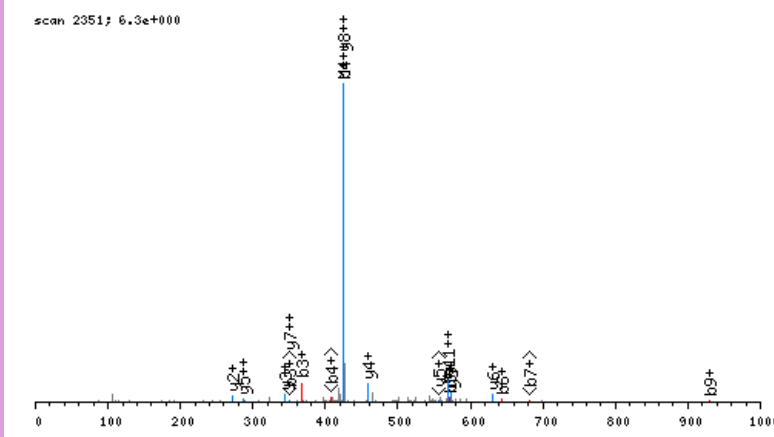

click image to zoom in; click top corners to zoom out [\[precursor±\]](#)

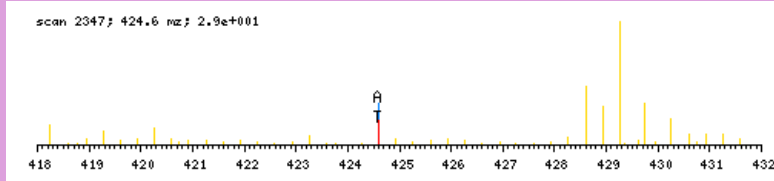

zoomed in precursor plot; T=theoretical m/z, A=acquired m/z

| b <sup>+</sup> | #  | AA # | y <sup>+</sup> | y <sup>2+</sup> |
|----------------|----|------|----------------|-----------------|
| 134.1393       | 1  | V 12 |                |                 |
| 296.2974       | 2  | K 11 | 1138.6069      | 569.8074        |
| 367.3345       | 3  | A 10 | 976.4488       | 488.7283        |
| 424.3560       | 4  | G 9  | 905.4117       | 453.2098        |
| 571.4244       | 5  | F 8  | 848.3903       | 424.6990        |
| 642.4615       | 6  | A 7  | 701.3218       | 351.1648        |
| 699.4830       | 7  | G 6  | 630.2847       | 315.6463        |
| 814.5099       | 8  | D 5  | 573.2633       | 287.1355        |
| 929.5369       | 9  | D 4  | 458.2363       | 229.6221        |
| 1000.5740      | 10 | A 3  | 343.2094       | 172.1086        |
| 1097.6267      | 11 | P 2  | 272.1723       | 136.5900        |
|                | 12 | R 1  | 175.1195       | 88.0637         |

N-term:+35.07 K(2):+162.16

VKGEYDVTVPR, MH+ 1318.7371, m/z 440.2505  
 L OS G27 P150811 220811-s1.03319.03319.3.dta

X-range:

-

MassTol: Y-zoom:

MassType:

AVG  MONO

Axis:

1  2

Label:

I  M  -

Ions:

a  +  2+  3+

b  +  2+  3+

c  +  2+  3+

x  +  2+  3+

y  +  2+  3+

z  +  2+  3+

hide H<sub>2</sub>O/NH<sub>3</sub>

zoom 112-122

GO

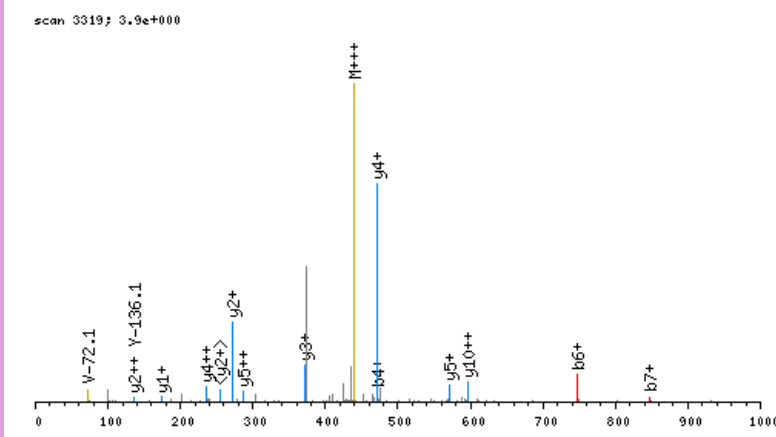

click image to zoom in; click top corners to zoom out [\[precursor±\]](#)

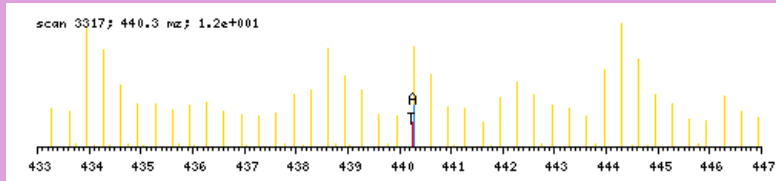

zoomed in precursor plot; T=theoretical m/z, A=acquired m/z

| b <sup>+</sup> | #  | AA # | y <sup>+</sup> | y <sup>2+</sup> |
|----------------|----|------|----------------|-----------------|
| 128.1075       | 1  | V 11 |                |                 |
| 284.2338       | 2  | K 10 | 1191.6374      | 596.3226        |
| 341.2553       | 3  | G 9  | 1035.5111      | 518.2595        |
| 470.2979       | 4  | E 8  | 978.4896       | 489.7487        |
| 633.3612       | 5  | Y 7  | 849.4470       | 425.2274        |
| 748.3881       | 6  | D 6  | 686.3837       | 343.6958        |
| 847.4566       | 7  | V 5  | 571.3568       | 286.1823        |
| 948.5042       | 8  | T 4  | 472.2884       | 236.6481        |
| 1047.5726      | 9  | V 3  | 371.2407       | 186.1243        |
| 1144.6254      | 10 | P 2  | 272.1723       | 136.5900        |
|                | 11 | R 1  | 175.1195       | 88.0637         |

N-term:+29.04 K(2):+156.13



VKLVESGGGLVQPGGSLR, MH+ 1821.1234, m/z 607.7127  
 H OS G26 P150811 220811-s1.04647.04647.3.dta

scan 4647; 1.1e+001

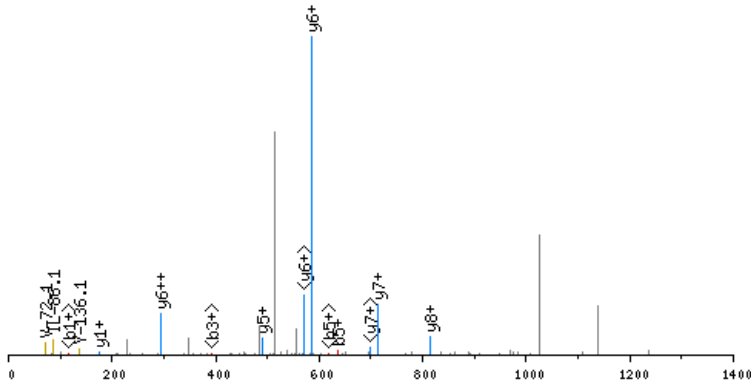

click image to zoom in; click top corners to zoom out [\[precursor±\]](#)

scan 4645; 607.7 m/z; 2.9e+002

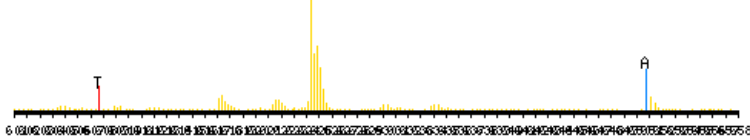

zoomed in precursor plot; T=theoretical m/z, A=acquired m/z

X-range:

-

MassTol: Y-zoom:

MassType:

AVG  MONO

Axis:

1  2

Label:

I  M  -

Ions:

a  +  2+  3+

b  +  2+  3+

c  +  2+  3+

x  +  2+  3+

y  +  2+  3+

z  +  2+  3+

hide H<sub>2</sub>O/NH<sub>3</sub>

zoom 112-122

GO

| b <sup>+</sup> | #  | AA | #  | y <sup>+</sup> | y <sup>2+</sup> |
|----------------|----|----|----|----------------|-----------------|
| 134.1393       | 1  | V  | 18 |                |                 |
| 296.2974       | 2  | K  | 17 | 1687.9919      | 844.4999        |
| 409.3815       | 3  | L  | 16 | 1525.8338      | 763.4208        |
| 508.4499       | 4  | V  | 15 | 1412.7498      | 706.8788        |
| 637.4925       | 5  | E  | 14 | 1313.6814      | 657.3446        |
| 724.5245       | 6  | S  | 13 | 1184.6388      | 592.8233        |
| 781.5460       | 7  | G  | 12 | 1097.6067      | 549.3073        |
| 838.5674       | 8  | G  | 11 | 1040.5853      | 520.7965        |
| 895.5889       | 9  | G  | 10 | 983.5638       | 492.2858        |
| 1008.6730      | 10 | L  | 9  | 926.5423       | 463.7751        |
| 1107.7414      | 11 | V  | 8  | 813.4583       | 407.2331        |
| 1235.8000      | 12 | Q  | 7  | 714.3899       | 357.6988        |
| 1332.8527      | 13 | P  | 6  | 586.3313       | 293.6696        |
| 1389.8742      | 14 | G  | 5  | 489.2785       | 245.1432        |
| 1446.8957      | 15 | G  | 4  | 432.2571       | 216.6324        |
| 1533.9277      | 16 | S  | 3  | 375.2356       | 188.1217        |
| 1647.0117      | 17 | L  | 2  | 288.2036       | 144.6057        |
|                | 18 | R  | 1  | 175.1195       | 88.0637         |

N-term:+35.07 K(2):+162.16

VLASEPEIIPKGIK, MH+ 1464.8790, m/z 488.9645  
 L OS G26 P150811 220811-s1.03796.03796.3.dta

X-range:

-

MassTol: Y-zoom:

MassType:

AVG  MONO

Axis:

1  2

Label:

I  M  -

Ions:

a  +  2+  3+

b  +  2+  3+

c  +  2+  3+

x  +  2+  3+

y  +  2+  3+

z  +  2+  3+

hide H<sub>2</sub>O/NH<sub>3</sub>

zoom 112-122

GO

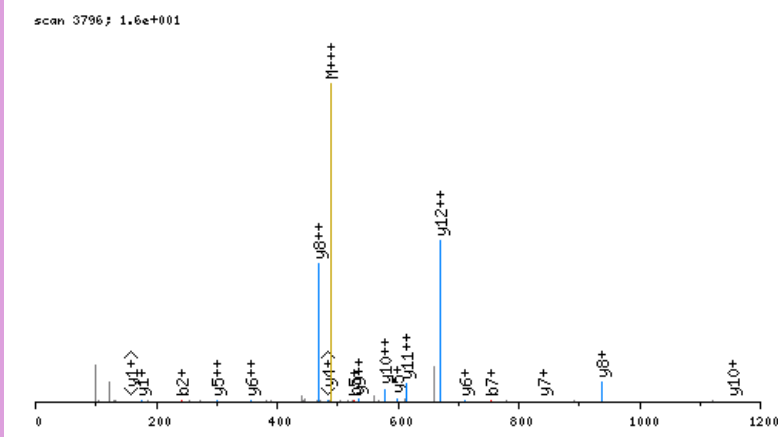

click image to zoom in; click top corners to zoom out [\[precursor±\]](#)

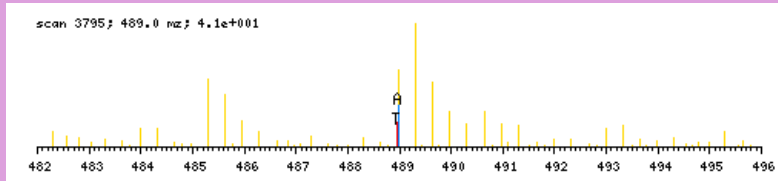

zoomed in precursor plot; T=theoretical m/z, A=acquired m/z

| b <sup>+</sup> | #  | AA # | y <sup>+</sup> | y <sup>2+</sup> |
|----------------|----|------|----------------|-----------------|
| 128.1075       | 1  | V 13 |                |                 |
| 241.1916       | 2  | L 12 | 1337.7793      | 669.3936        |
| 312.2287       | 3  | A 11 | 1224.6952      | 612.8515        |
| 399.2607       | 4  | S 10 | 1153.6581      | 577.3330        |
| 528.3033       | 5  | E 9  | 1066.6261      | 533.8170        |
| 625.3561       | 6  | P 8  | 937.5835       | 469.2957        |
| 754.3987       | 7  | E 7  | 840.5307       | 420.7693        |
| 867.4827       | 8  | I 6  | 711.4882       | 356.2480        |
| 964.5355       | 9  | P 5  | 598.4041       | 299.7060        |
| 1120.6618      | 10 | K 4  | 501.3513       | 251.1796        |
| 1177.6833      | 11 | G 3  | 345.2250       | 173.1164        |
| 1290.7673      | 12 | I 2  | 288.2036       | 144.6057        |
|                | 13 | R 1  | 175.1195       | 88.0637         |

N-term:+29.04 K(10):+156.13

VLESTMVCDNSEYMR, MH+ 1960.8818, m/z 654.2988  
 L OS G25 P150811 220811-s1.06208.06208.3.dta

X-range:

-

MassTol: Y-zoom:

MassType:

AVG  MONO

Axis:

1  2

Label:

I  M  -

Ions:

a  +  2+  3+

b  +  2+  3+

c  +  2+  3+

x  +  2+  3+

y  +  2+  3+

z  +  2+  3+

hide H<sub>2</sub>O/NH<sub>3</sub>

zoom 112-122

GO

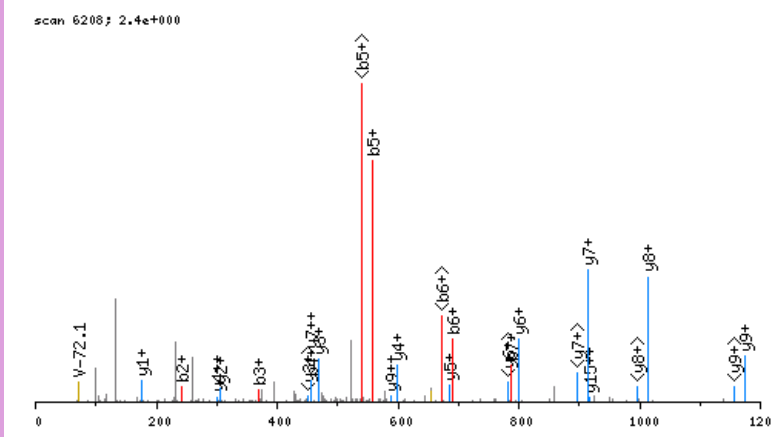

click image to zoom in; click top corners to zoom out [\[precursor±\]](#)

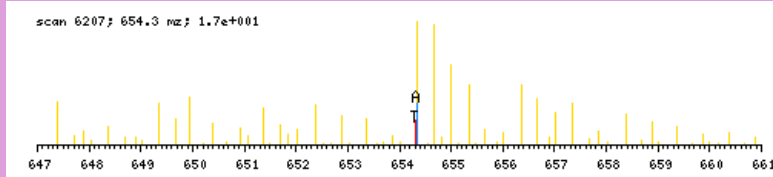

zoomed in precursor plot; T=theoretical m/z, A=acquired m/z

| b <sup>+</sup> | #  | AA # | y <sup>+</sup> | y <sup>2+</sup> |
|----------------|----|------|----------------|-----------------|
| 128.1075       | 1  | V 16 |                |                 |
| 241.1916       | 2  | L 15 | 1833.7821      | 917.3950        |
| 370.2342       | 3  | E 14 | 1720.6980      | 860.8529        |
| 457.2662       | 4  | S 13 | 1591.6554      | 796.3316        |
| 558.3139       | 5  | T 12 | 1504.6234      | 752.8156        |
| 689.3544       | 6  | M 11 | 1403.5757      | 702.2918        |
| 788.4228       | 7  | V 10 | 1272.5352      | 636.7715        |
| 948.4534       | 8  | C 9  | 1173.4668      | 587.2373        |
| 1047.5218      | 9  | V 8  | 1013.4362      | 507.2220        |
| 1162.5487      | 10 | D 7  | 914.3678       | 457.6878        |
| 1276.5917      | 11 | N 6  | 799.3409       | 400.1743        |
| 1363.6237      | 12 | S 5  | 685.2979       | 343.1529        |
| 1492.6663      | 13 | E 4  | 598.2659       | 299.6369        |
| 1655.7296      | 14 | Y 3  | 469.2233       | 235.1156        |
| 1786.7701      | 15 | M 2  | 306.1600       | 153.5839        |
|                | 16 | R 1  | 175.1195       | 88.0637         |

N-term:+29.04 C(8):+160.03

VLKDAEGILEDLQSYR, MH+ 1905.0333, m/z 635.6826  
 L OS G26 P150811 220811-s1.06739.06739.3.dta

X-range:

-

MassTol: Y-zoom:

MassType:

AVG  MONO

Axis:

1  2

Label:

I  M  -

Ions:

a  +  2+  3+

b  +  2+  3+

c  +  2+  3+

x  +  2+  3+

y  +  2+  3+

z  +  2+  3+

hide H<sub>2</sub>O/NH<sub>3</sub>

zoom 112-122

GO

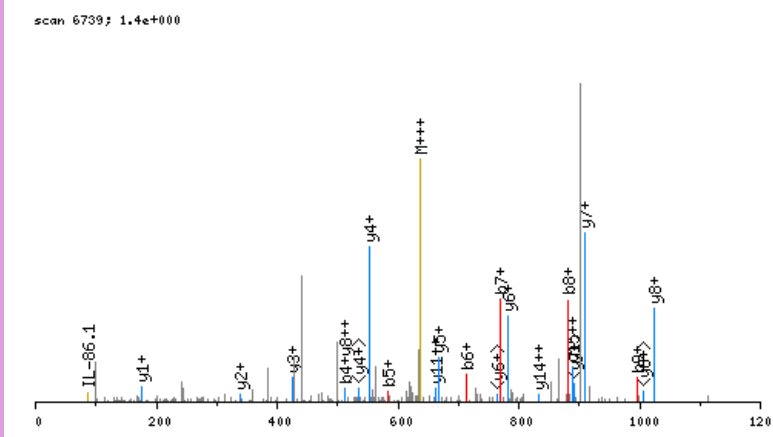

click image to zoom in; click top corners to zoom out [\[precursor±\]](#)

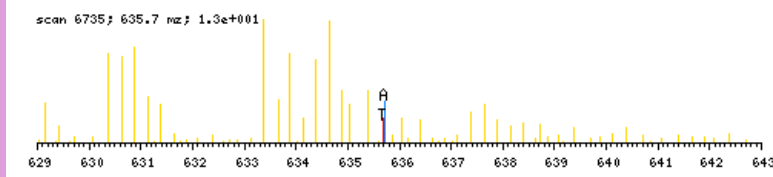

zoomed in precursor plot; T=theoretical m/z, A=acquired m/z

| b <sup>+</sup> | #  | AA # | y <sup>+</sup> | y <sup>2+</sup> |
|----------------|----|------|----------------|-----------------|
| 128.1075       | 1  | V 16 |                |                 |
| 241.1916       | 2  | L 15 | 1777.9336      | 889.4707        |
| 397.3179       | 3  | K 14 | 1664.8496      | 832.9287        |
| 512.3448       | 4  | D 13 | 1508.7233      | 754.8656        |
| 583.3819       | 5  | A 12 | 1393.6963      | 697.3521        |
| 712.4245       | 6  | E 11 | 1322.6592      | 661.8335        |
| 769.4460       | 7  | G 10 | 1193.6166      | 597.3122        |
| 882.5301       | 8  | I 9  | 1136.5952      | 568.8015        |
| 995.6141       | 9  | L 8  | 1023.5111      | 512.2595        |
| 1124.6567      | 10 | E 7  | 910.4270       | 455.7174        |
| 1239.6837      | 11 | D 6  | 781.3844       | 391.1961        |
| 1352.7677      | 12 | L 5  | 666.3575       | 333.6827        |
| 1480.8263      | 13 | Q 4  | 553.2734       | 277.1406        |
| 1567.8583      | 14 | S 3  | 425.2149       | 213.1113        |
| 1730.9217      | 15 | Y 2  | 338.1828       | 169.5953        |
|                | 16 | R 1  | 175.1195       | 88.0637         |

N-term:+29.04 K(3):+156.13

VLLDVNDNAPIPEPR, MH+ 1689.9175, m/z 563.9774  
 L OS G24 P150811 220811-s1.04118.04118.3.dta

X-range:

-

MassTol: Y-zoom:

MassType:

AVG  MONO

Axis:

1  2

Label:

I  M  -

Ions:

a  +  2+  3+

b  +  2+  3+

c  +  2+  3+

x  +  2+  3+

y  +  2+  3+

z  +  2+  3+

hide H<sub>2</sub>O/NH<sub>3</sub>

zoom 112-122

GO

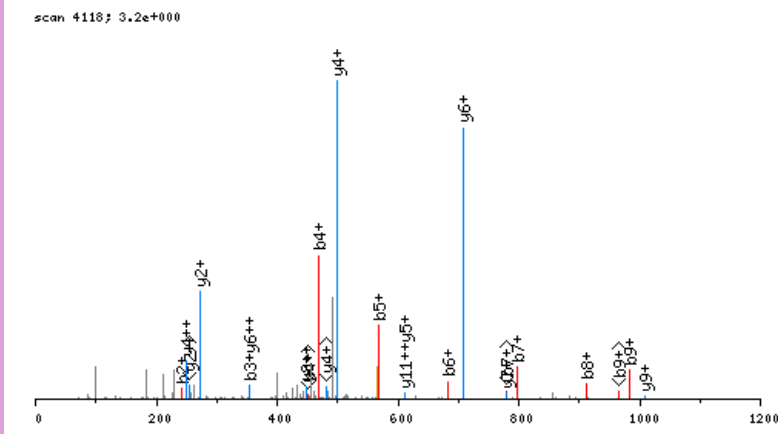

click image to zoom in; click top corners to zoom out [\[precursor±\]](#)

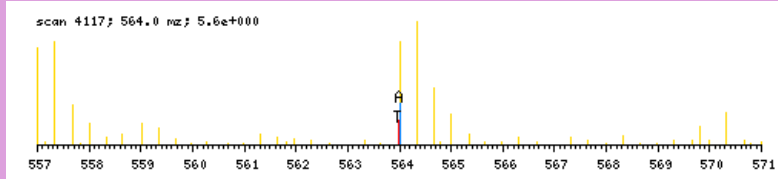

zoomed in precursor plot; T=theoretical m/z, A=acquired m/z

| b <sup>+</sup> | #  | AA | #  | y <sup>+</sup> | y <sup>2+</sup> |
|----------------|----|----|----|----------------|-----------------|
| 128.1075       | 1  | V  | 15 |                |                 |
| 241.1916       | 2  | L  | 14 | 1562.8178      | 781.9128        |
| 354.2756       | 3  | L  | 13 | 1449.7338      | 725.3708        |
| 469.3026       | 4  | D  | 12 | 1336.6497      | 668.8288        |
| 568.3710       | 5  | V  | 11 | 1221.6228      | 611.3153        |
| 682.4139       | 6  | N  | 10 | 1122.5544      | 561.7811        |
| 797.4409       | 7  | D  | 9  | 1008.5114      | 504.7596        |
| 911.4838       | 8  | N  | 8  | 893.4845       | 447.2462        |
| 982.5209       | 9  | A  | 7  | 779.4416       | 390.2247        |
| 1079.5737      | 10 | P  | 6  | 708.4044       | 354.7061        |
| 1192.6577      | 11 | I  | 5  | 611.3517       | 306.1798        |
| 1289.7105      | 12 | P  | 4  | 498.2676       | 249.6377        |
| 1418.7531      | 13 | E  | 3  | 401.2149       | 201.1113        |
| 1515.8059      | 14 | P  | 2  | 272.1723       | 136.5900        |
|                | 15 | R  | 1  | 175.1195       | 88.0637         |

N-term:+29.04

VLQEIILESDGKGPDKPSGFR, MH+ 2370.2669, m/z 593.3222  
 L OS G27 P150811 220811-s1.05065.05065.4.dta

X-range:

0 - 0

MassTol: Y-zoom:

0. 1.

MassType:

AVG  MONO

Axis:

1  2

Label:

I  M  -

Ions:

a  +  2+  3+

b  +  2+  3+

c  +  2+  3+

x  +  2+  3+

y  +  2+  3+

z  +  2+  3+

hide H<sub>2</sub>O/NH<sub>3</sub>

zoom 112-122

GO

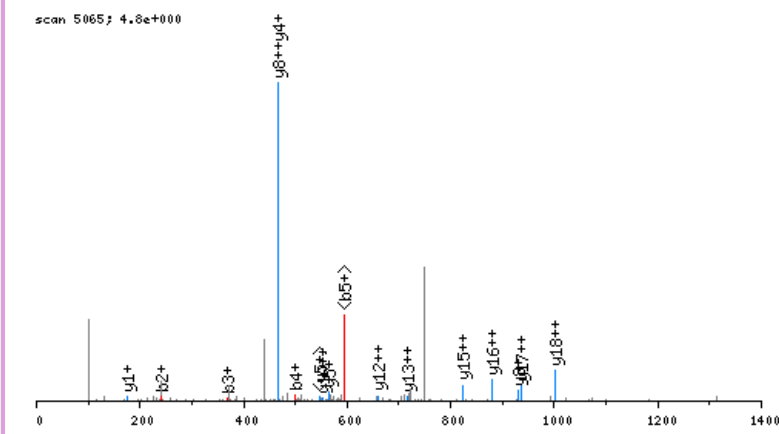

click image to zoom in; click top corners to zoom out [precursor±]

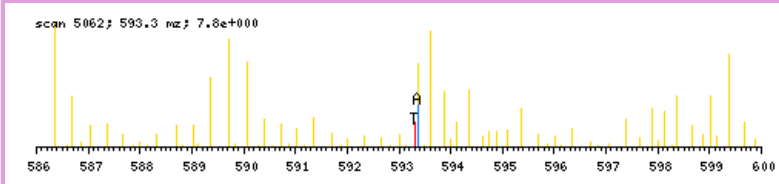

zoomed in precursor plot; T=theoretical m/z, A=acquired m/z

| b <sup>+</sup> | #  | AA | #  | y <sup>+</sup> | y <sup>2+</sup> |
|----------------|----|----|----|----------------|-----------------|
| 128.1075       | 1  | V  | 21 |                |                 |
| 241.1916       | 2  | L  | 20 | 2243.1673      | 1122.0875       |
| 369.2502       | 3  | Q  | 19 | 2130.0832      | 1065.5455       |
| 498.2927       | 4  | E  | 18 | 2002.0246      | 1001.5162       |
| 611.3768       | 5  | I  | 17 | 1872.9820      | 936.9949        |
| 724.4609       | 6  | L  | 16 | 1759.8980      | 880.4529        |
| 853.5035       | 7  | E  | 15 | 1646.8139      | 823.9109        |
| 940.5355       | 8  | S  | 14 | 1517.7713      | 759.3896        |
| 1055.5624      | 9  | D  | 13 | 1430.7393      | 715.8736        |
| 1112.5839      | 10 | G  | 12 | 1315.7123      | 658.3601        |
| 1268.7102      | 11 | K  | 11 | 1258.6909      | 629.8493        |
| 1325.7317      | 12 | G  | 10 | 1102.5646      | 551.7862        |
| 1440.7586      | 13 | D  | 9  | 1045.5431      | 523.2755        |
| 1537.8114      | 14 | P  | 8  | 930.5162       | 465.7620        |
| 1651.8543      | 15 | N  | 7  | 833.4634       | 417.2356        |
| 1807.9806      | 16 | K  | 6  | 719.4205       | 360.2141        |
| 1905.0334      | 17 | P  | 5  | 563.2942       | 282.1510        |
| 1992.0654      | 18 | S  | 4  | 466.2414       | 233.6246        |
| 2049.0869      | 19 | G  | 3  | 379.2094       | 190.1086        |
| 2196.1553      | 20 | F  | 2  | 322.1879       | 161.5979        |
|                | 21 | R  | 1  | 175.1195       | 88.0637         |

N-term:+29.04 K(11):+156.13  
 K(16):+156.13

VLSNEPAASAAEEEEVEDDALVR, MH+ 2342.1363, m/z 781.3836  
 L OS G24 P150811 220811-s1.04341.04341.3.dta

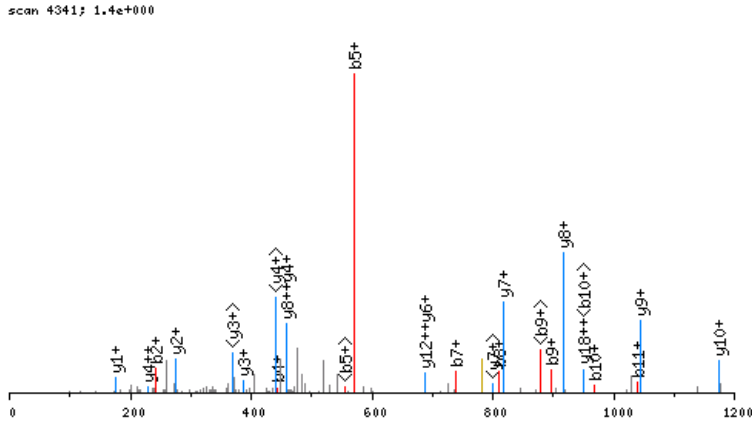

click image to zoom in; click top corners to zoom out [precursor±]

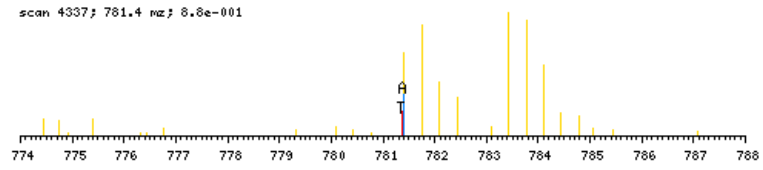

zoomed in precursor plot; T=theoretical m/z, A=acquired m/z

X-range:

-

MassTol: Y-zoom:

MassType:

AVG  MONO

Axis:

1  2

Label:

I  M  -

Ions:

a  +  2+  3+

b  +  2+  3+

c  +  2+  3+

x  +  2+  3+

y  +  2+  3+

z  +  2+  3+

hide H<sub>2</sub>O/NH<sub>3</sub>

zoom 112-122

GO

| b <sup>+</sup> | #  | AA # | y <sup>+</sup> | y <sup>2+</sup> |
|----------------|----|------|----------------|-----------------|
| 128.1075       | 1  | V 22 |                |                 |
| 241.1916       | 2  | L 21 | 2215.0366      | 1108.0222       |
| 328.2236       | 3  | S 20 | 2101.9526      | 1051.4802       |
| 442.2665       | 4  | N 19 | 2014.9205      | 1007.9642       |
| 571.3091       | 5  | E 18 | 1900.8776      | 950.9427        |
| 668.3619       | 6  | P 17 | 1771.8350      | 886.4214        |
| 739.3990       | 7  | A 16 | 1674.7822      | 837.8950        |
| 810.4361       | 8  | A 15 | 1603.7451      | 802.3765        |
| 897.4681       | 9  | S 14 | 1532.7080      | 766.8579        |
| 968.5053       | 10 | A 13 | 1445.6760      | 723.3419        |
| 1039.5424      | 11 | A 12 | 1374.6389      | 687.8234        |
| 1168.5850      | 12 | E 11 | 1303.6018      | 652.3048        |
| 1297.6276      | 13 | E 10 | 1174.5592      | 587.7835        |
| 1426.6702      | 14 | E 9  | 1045.5166      | 523.2622        |
| 1525.7386      | 15 | V 8  | 916.4740       | 458.7409        |
| 1654.7812      | 16 | E 7  | 817.4056       | 409.2067        |
| 1769.8081      | 17 | D 6  | 688.3630       | 344.6854        |
| 1884.8350      | 18 | D 5  | 573.3360       | 287.1719        |
| 1955.8722      | 19 | A 4  | 458.3091       | 229.6585        |
| 2068.9562      | 20 | L 3  | 387.2720       | 194.1399        |
| 2168.0246      | 21 | V 2  | 274.1879       | 137.5979        |
|                | 22 | R 1  | 175.1195       | 88.0637         |

N-term:+29.04

VLTAEPGDDVR, MH+ 1286.6592, m/z 643.8332  
 L OS G25 P150811 220811-s1.02918.02918.2.dta

scan 2918; 4.8e+000

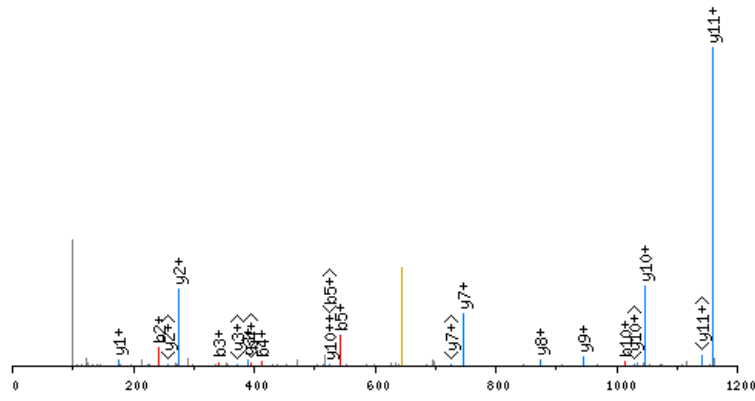

click image to zoom in; click top corners to zoom out [\[precursor±\]](#)

scan 2917; 643.8 m/z; 1.4e+001

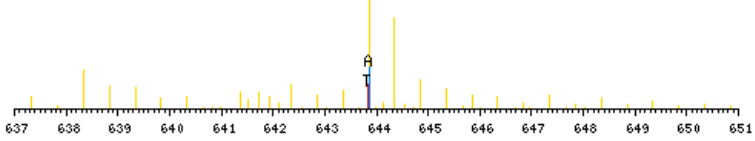

zoomed in precursor plot; T=theoretical m/z, A=acquired m/z

X-range:

-

MassTol: Y-zoom:

MassType:

AVG  MONO

Axis:

1  2

Label:

I  M  -

Ions:

a  +  2+  3+

b  +  2+  3+

c  +  2+  3+

x  +  2+  3+

y  +  2+  3+

z  +  2+  3+

hide H<sub>2</sub>O/NH<sub>3</sub>

zoom 112-122

GO

| b <sup>+</sup> | #  | AA # | y <sup>+</sup> | y <sup>2+</sup> |
|----------------|----|------|----------------|-----------------|
| 128.1075       | 1  | V 12 |                |                 |
| 241.1916       | 2  | L 11 | 1159.5595      | 580.2837        |
| 342.2393       | 3  | T 10 | 1046.4754      | 523.7416        |
| 413.2764       | 4  | A 9  | 945.4278       | 473.2178        |
| 542.3190       | 5  | E 8  | 874.3907       | 437.6992        |
| 639.3717       | 6  | P 7  | 745.3481       | 373.1779        |
| 726.4038       | 7  | S 6  | 648.2953       | 324.6516        |
| 783.4252       | 8  | G 5  | 561.2633       | 281.1355        |
| 898.4522       | 9  | D 4  | 504.2418       | 252.6248        |
| 1013.4791      | 10 | D 3  | 389.2149       | 195.1113        |
| 1112.5475      | 11 | V 2  | 274.1879       | 137.5979        |
|                | 12 | R 1  | 175.1195       | 88.0637         |

N-term:+29.04



VLTTSHLFPYVKKR, MH+ 1791.1745, m/z 597.7297  
 H OS G24 P150811 220811-s1.05868.05868.3.dta

X-range:

-

MassTol: Y-zoom:

MassType:

AVG  MONO

Axis:

1  2

Label:

I  M  -

Ions:

a  +  2+  3+

b  +  2+  3+

c  +  2+  3+

x  +  2+  3+

y  +  2+  3+

z  +  2+  3+

hide H<sub>2</sub>O/NH<sub>3</sub>

zoom 112-122

GO

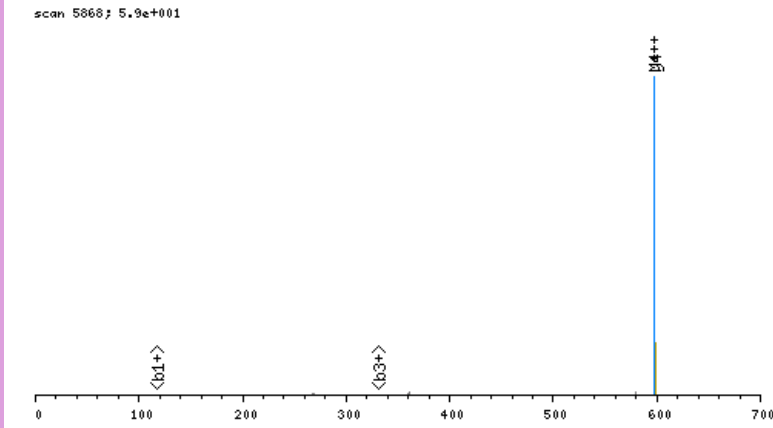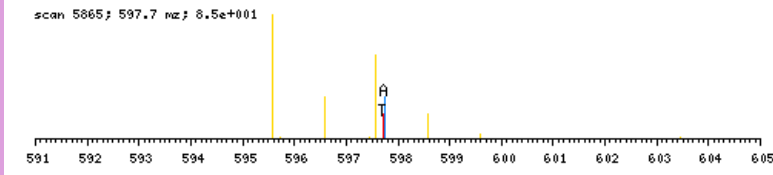

| b <sup>+</sup> | #  | AA # | y <sup>+</sup> | y <sup>2+</sup> |
|----------------|----|------|----------------|-----------------|
| 134.1393       | 1  | V    | 14             |                 |
| 247.2234       | 2  | L    | 13             | 1658.0430       |
| 348.2711       | 3  | T    | 12             | 1544.9590       |
| 449.3187       | 4  | T    | 11             | 1443.9113       |
| 536.3508       | 5  | S    | 10             | 1342.8636       |
| 673.4097       | 6  | H    | 9              | 1255.8316       |
| 786.4937       | 7  | L    | 8              | 1118.7727       |
| 933.5622       | 8  | F    | 7              | 1005.6886       |
| 1030.6149      | 9  | P    | 6              | 858.6202        |
| 1193.6782      | 10 | Y    | 5              | 761.5674        |
| 1292.7467      | 11 | V    | 4              | 598.5041        |
| 1454.9048      | 12 | K    | 3              | 499.4357        |
| 1617.0629      | 13 | K    | 2              | 337.2776        |
|                | 14 | R    | 1              | 175.1195        |

N-term:+35.07 K(12):+162.16  
 K(13):+162.16

VMDTAEIFHSADAR, MH+ 1590.7586, m/z 530.9244  
 L OS G27 P150811 220811-s1.05491.05491.3.dta

X-range:

-

MassTol: Y-zoom:

MassType:

AVG  MONO

Axis:

1  2

Label:

I  M  -

Ions:

a  +  2+  3+

b  +  2+  3+

c  +  2+  3+

x  +  2+  3+

y  +  2+  3+

z  +  2+  3+

hide H<sub>2</sub>O/NH<sub>3</sub>

zoom 112-122

GO

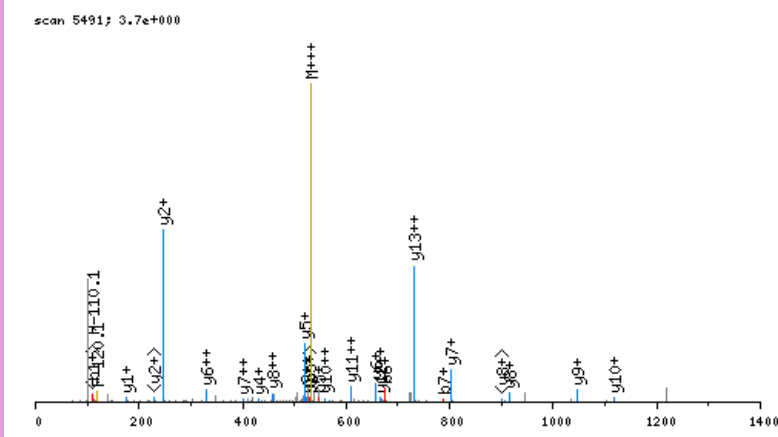

click image to zoom in; click top corners to zoom out [\[precursor±\]](#)

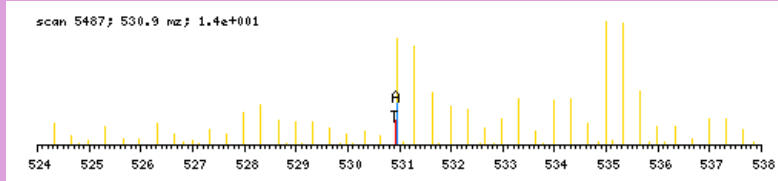

zoomed in precursor plot; T=theoretical m/z, A=acquired m/z

| b <sup>+</sup> | #  | AA # | y <sup>+</sup> | y <sup>2+</sup> |
|----------------|----|------|----------------|-----------------|
| 128.1075       | 1  | V 14 |                |                 |
| 259.1480       | 2  | M 13 | 1463.6589      | 732.3334        |
| 374.1749       | 3  | D 12 | 1332.6184      | 666.8131        |
| 475.2226       | 4  | T 11 | 1217.5915      | 609.2997        |
| 546.2597       | 5  | A 10 | 1116.5438      | 558.7758        |
| 675.3023       | 6  | E 9  | 1045.5067      | 523.2573        |
| 788.3864       | 7  | I 8  | 916.4641       | 458.7360        |
| 935.4548       | 8  | F 7  | 803.3800       | 402.1939        |
| 1072.5137      | 9  | H 6  | 656.3116       | 328.6597        |
| 1159.5457      | 10 | S 5  | 519.2527       | 260.1303        |
| 1230.5829      | 11 | A 4  | 432.2207       | 216.6142        |
| 1345.6098      | 12 | D 3  | 361.1836       | 181.0957        |
| 1416.6469      | 13 | A 2  | 246.1566       | 123.5822        |
|                | 14 | R 1  | 175.1195       | 88.0637         |

N-term:+29.04

VNEQAKPLVIHSVKQLTYVR, MH+ 2520.4667, m/z 630.8721  
 L OS G27 P150811 220811-s1.06895.06895.4.dta

X-range:

0 - 0

MassTol: Y-zoom:

0. 1.

MassType:

AVG  MONO

Axis:

1  2

Label:

I  M  -

Ions:

a  +  2+  3+

b  +  2+  3+

c  +  2+  3+

x  +  2+  3+

y  +  2+  3+

z  +  2+  3+

hide H<sub>2</sub>O/NH<sub>3</sub>

zoom 112-122

GO

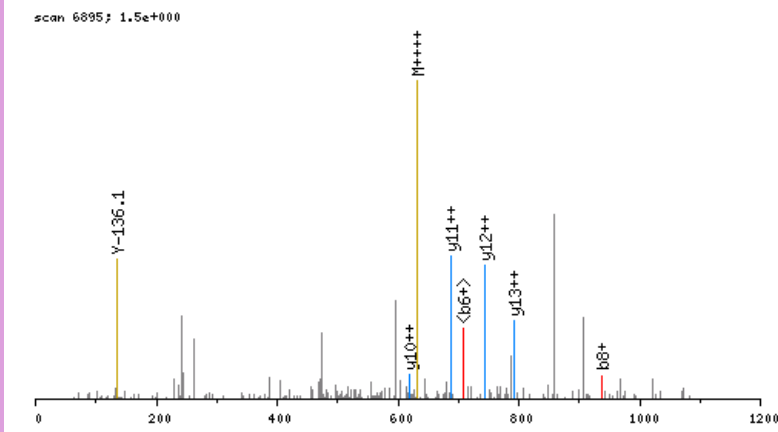

click image to zoom in; click top corners to zoom out [precursor±]

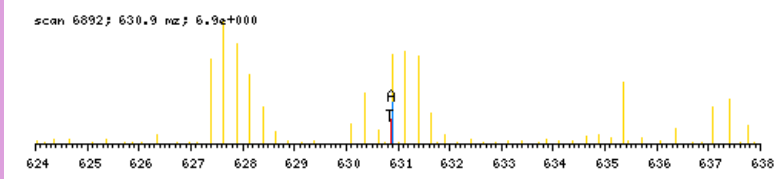

zoomed in precursor plot; T=theoretical m/z, A=acquired m/z

| b <sup>+</sup> | #  | AA # | y <sup>+</sup> | y <sup>2+</sup> |
|----------------|----|------|----------------|-----------------|
| 128.1075       | 1  | V 21 |                |                 |
| 242.1504       | 2  | N 20 | 2393.3670      | 1197.1874       |
| 371.1930       | 3  | E 19 | 2279.3240      | 1140.1659       |
| 499.2516       | 4  | Q 18 | 2150.2814      | 1075.6446       |
| 570.2887       | 5  | A 17 | 2022.2229      | 1011.6153       |
| 726.4150       | 6  | K 16 | 1951.1858      | 976.0968        |
| 823.4678       | 7  | P 15 | 1795.0595      | 898.0336        |
| 936.5519       | 8  | L 14 | 1698.0067      | 849.5073        |
| 1035.6203      | 9  | V 13 | 1584.9226      | 792.9652        |
| 1148.7043      | 10 | I 12 | 1485.8542      | 743.4310        |
| 1285.7632      | 11 | H 11 | 1372.7701      | 686.8890        |
| 1372.7953      | 12 | S 10 | 1235.7112      | 618.3595        |
| 1471.8637      | 13 | V 9  | 1148.6792      | 574.8435        |
| 1627.9900      | 14 | K 8  | 1049.6108      | 525.3093        |
| 1756.0486      | 15 | Q 7  | 893.4845       | 447.2462        |
| 1870.0915      | 16 | N 6  | 765.4259       | 383.2169        |
| 1983.1756      | 17 | L 5  | 651.3830       | 326.1954        |
| 2084.2232      | 18 | T 4  | 538.2989       | 269.6534        |
| 2247.2866      | 19 | Y 3  | 437.2512       | 219.1295        |
| 2346.3550      | 20 | V 2  | 274.1879       | 137.5979        |
|                | 21 | R 1  | 175.1195       | 88.0637         |

N-term:+29.04 K(6):+156.13  
 K(14):+156.13

VNLTDAPDIPNPYR, MH+ 1612.8335, m/z 538.2827  
 L OS G25 P150811 220811-s1.06791.06791.3.dta

X-range:

-

MassTol: Y-zoom:

MassType:

AVG  MONO

Axis:

1  2

Label:

I  M  -

Ions:

a  +  2+  3+

b  +  2+  3+

c  +  2+  3+

x  +  2+  3+

y  +  2+  3+

z  +  2+  3+

hide H<sub>2</sub>O/NH<sub>3</sub>

zoom 112-122

GO

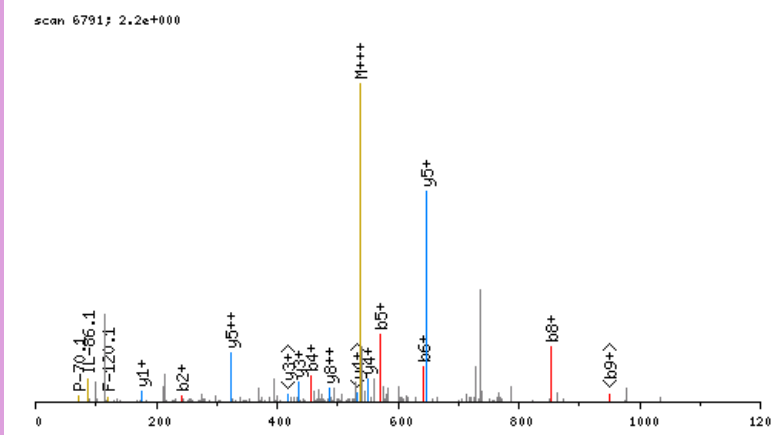

click image to zoom in; click top corners to zoom out [\[precursor±\]](#)

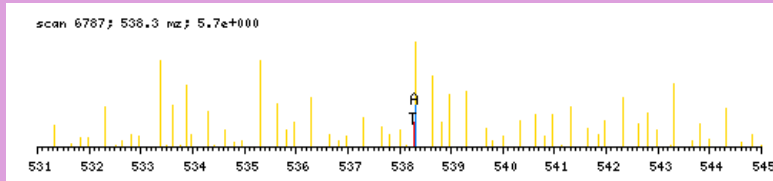

zoomed in precursor plot; T=theoretical m/z, A=acquired m/z

| b <sup>+</sup> | #  | AA # | y <sup>+</sup> | y <sup>2+</sup> |
|----------------|----|------|----------------|-----------------|
| 128.1075       | 1  | V 14 |                |                 |
| 242.1504       | 2  | N 13 | 1485.7338      | 743.3708        |
| 355.2345       | 3  | L 12 | 1371.6909      | 686.3493        |
| 456.2822       | 4  | T 11 | 1258.6068      | 629.8073        |
| 571.3091       | 5  | D 10 | 1157.5591      | 579.2835        |
| 642.3462       | 6  | A 9  | 1042.5322      | 521.7700        |
| 739.3990       | 7  | P 8  | 971.4951       | 486.2514        |
| 854.4259       | 8  | D 7  | 874.4423       | 437.7251        |
| 967.5100       | 9  | I 6  | 759.4153       | 380.2116        |
| 1064.5628      | 10 | P 5  | 646.3313       | 323.6696        |
| 1178.6057      | 11 | N 4  | 549.2785       | 275.1432        |
| 1275.6585      | 12 | P 3  | 435.2356       | 218.1217        |
| 1438.7218      | 13 | Y 2  | 338.1828       | 169.5953        |
|                | 14 | R 1  | 175.1195       | 88.0637         |

N-term:+29.04

VPGICMVDPEALPPR, MH+ 1684.8978, m/z 562.3041  
 H OS G26 P150811 220811-s1.06316.06316.3.dta

X-range:

-

MassTol: Y-zoom:

MassType:

AVG  MONO

Axis:

1  2

Label:

I  M  -

Ions:

a  +  2+  3+

b  +  2+  3+

c  +  2+  3+

x  +  2+  3+

y  +  2+  3+

z  +  2+  3+

hide H<sub>2</sub>O/NH<sub>3</sub>

zoom 112-122

GO

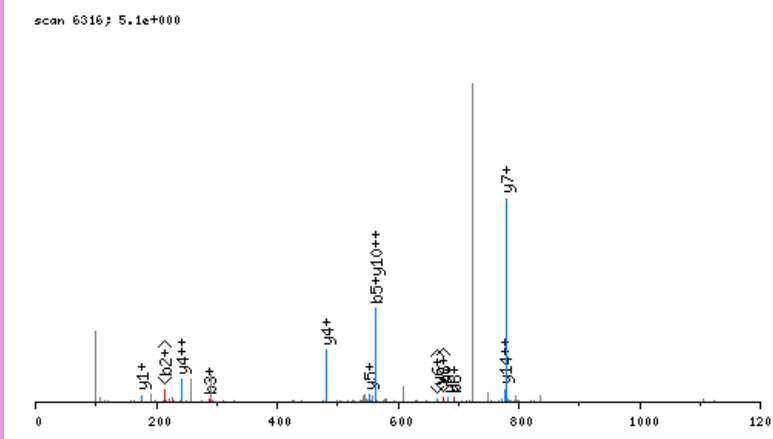

click image to zoom in; click top corners to zoom out [\[precursor±\]](#)

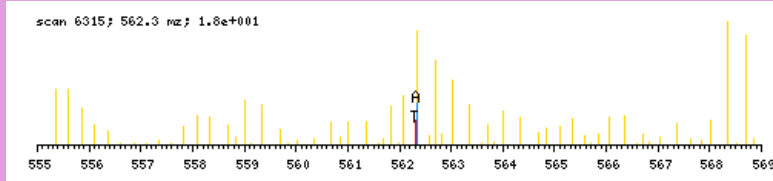

zoomed in precursor plot; T=theoretical m/z, A=acquired m/z

| b <sup>+</sup> | #  | AA # | y <sup>+</sup> | y <sup>2+</sup> |
|----------------|----|------|----------------|-----------------|
| 134.1393       | 1  | V 15 |                |                 |
| 231.1921       | 2  | P 14 | 1551.7663      | 776.3871        |
| 288.2135       | 3  | G 13 | 1454.7135      | 727.8607        |
| 401.2976       | 4  | I 12 | 1397.6921      | 699.3499        |
| 561.3282       | 5  | C 11 | 1284.6080      | 642.8079        |
| 692.3687       | 6  | M 10 | 1124.5774      | 562.7926        |
| 791.4371       | 7  | V 9  | 993.5369       | 497.2724        |
| 906.4640       | 8  | D 8  | 894.4685       | 447.7382        |
| 1003.5168      | 9  | P 7  | 779.4416       | 390.2247        |
| 1132.5594      | 10 | E 6  | 682.3888       | 341.6983        |
| 1203.5965      | 11 | A 5  | 553.3462       | 277.1770        |
| 1316.6806      | 12 | L 4  | 482.3091       | 241.6585        |
| 1413.7333      | 13 | P 3  | 369.2250       | 185.1164        |
| 1510.7861      | 14 | P 2  | 272.1723       | 136.5900        |
|                | 15 | R 1  | 175.1195       | 88.0637         |

N-term:+35.07 C(5):+160.03

VPTPNVSVVDLTCR, MH+ 1584.8419, m/z 528.9521  
 L OS G24 P150811 220811-s1.04126.04126.3.dta

X-range:

-

MassTol: Y-zoom:

MassType:

AVG  MONO

Axis:

1  2

Label:

I  M  -

Ions:

a  +  2+  3+

b  +  2+  3+

c  +  2+  3+

x  +  2+  3+

y  +  2+  3+

z  +  2+  3+

hide H<sub>2</sub>O/NH<sub>3</sub>

zoom 112-122

GO

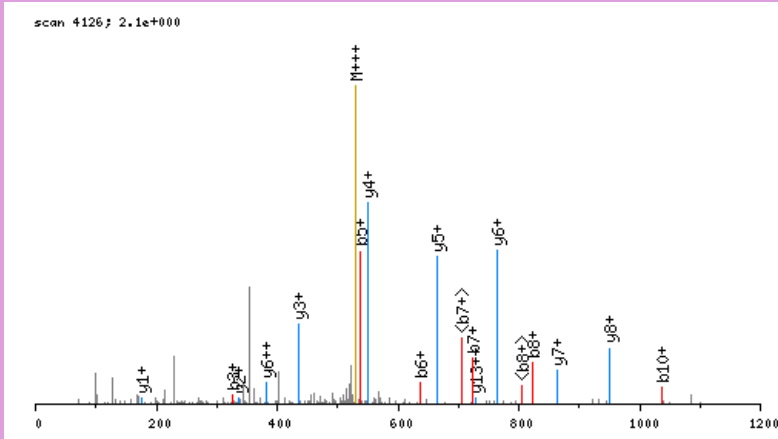

click image to zoom in; click top corners to zoom out [\[precursor±\]](#)

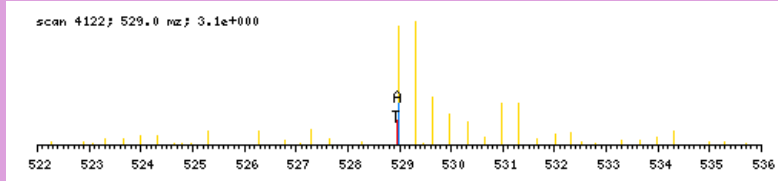

zoomed in precursor plot; T=theoretical m/z, A=acquired m/z

| b <sup>+</sup> | #  | AA # | y <sup>+</sup> | y <sup>2+</sup> |
|----------------|----|------|----------------|-----------------|
| 128.1075       | 1  | V 14 |                |                 |
| 225.1603       | 2  | P 13 | 1457.7422      | 729.3750        |
| 326.2080       | 3  | T 12 | 1360.6894      | 680.8486        |
| 423.2607       | 4  | P 11 | 1259.6417      | 630.3248        |
| 537.3036       | 5  | N 10 | 1162.5890      | 581.7984        |
| 636.3721       | 6  | V 9  | 1048.5461      | 524.7769        |
| 723.4041       | 7  | S 8  | 949.4776       | 475.2427        |
| 822.4725       | 8  | V 7  | 862.4456       | 431.7267        |
| 921.5409       | 9  | V 6  | 763.3772       | 382.1925        |
| 1036.5679      | 10 | D 5  | 664.3088       | 332.6583        |
| 1149.6519      | 11 | L 4  | 549.2818       | 275.1448        |
| 1250.6996      | 12 | T 3  | 436.1978       | 218.6028        |
| 1410.7302      | 13 | C 2  | 335.1501       | 168.0790        |
|                | 14 | R 1  | 175.1195       | 88.0637         |

N-term:+29.04 C(13):+160.03

VQAWYMDESTADPR, MH+ 1696.7641, m/z 566.2595  
 L OS G25 P150811 220811-s1.05664.05664.3.dta

X-range:

-

MassTol: Y-zoom:

MassType:

AVG  MONO

Axis:

1  2

Label:

I  M  -

Ions:

a  +  2+  3+

b  +  2+  3+

c  +  2+  3+

x  +  2+  3+

y  +  2+  3+

z  +  2+  3+

hide H<sub>2</sub>O/NH<sub>3</sub>

zoom 112-122

GO

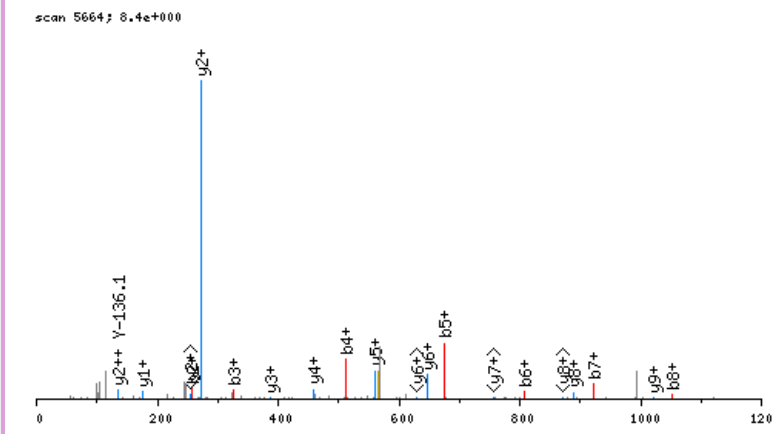

click image to zoom in; click top corners to zoom out [\[precursor±\]](#)

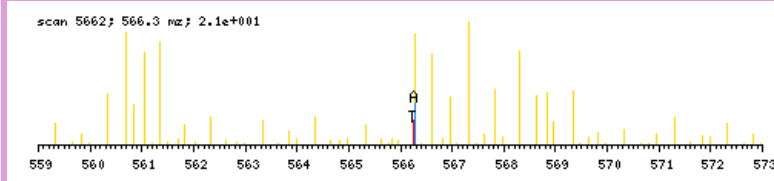

zoomed in precursor plot; T=theoretical m/z, A=acquired m/z

| b <sup>+</sup> | #  | AA # | y <sup>+</sup> | y <sup>2+</sup> |
|----------------|----|------|----------------|-----------------|
| 128.1075       | 1  | V 14 |                |                 |
| 256.1661       | 2  | Q 13 | 1569.6644      | 785.3361        |
| 327.2032       | 3  | A 12 | 1441.6058      | 721.3068        |
| 513.2825       | 4  | W 11 | 1370.5687      | 685.7883        |
| 676.3458       | 5  | Y 10 | 1184.4894      | 592.7486        |
| 807.3863       | 6  | M 9  | 1021.4260      | 511.2169        |
| 922.4133       | 7  | D 8  | 890.3856       | 445.6967        |
| 1051.4559      | 8  | E 7  | 775.3586       | 388.1832        |
| 1138.4879      | 9  | S 6  | 646.3160       | 323.6619        |
| 1239.5356      | 10 | T 5  | 559.2840       | 280.1459        |
| 1310.5727      | 11 | A 4  | 458.2363       | 229.6221        |
| 1425.5996      | 12 | D 3  | 387.1992       | 194.1035        |
| 1522.6524      | 13 | P 2  | 272.1723       | 136.5900        |
|                | 14 | R 1  | 175.1195       | 88.0637         |

N-term:+29.04

VQKDKDSEAEELQR, MH+ 1646.0337, m/z 412.2639  
 H OS G28 P150811 220811-s1.02436.02436.4.dta

X-range:

-

MassTol: Y-zoom:

MassType:

AVG  MONO

Axis:

1  2

Label:

I  M  -

Ions:

a  +  2+  3+

b  +  2+  3+

c  +  2+  3+

x  +  2+  3+

y  +  2+  3+

z  +  2+  3+

hide H<sub>2</sub>O/NH<sub>3</sub>

zoom 112-122

GO

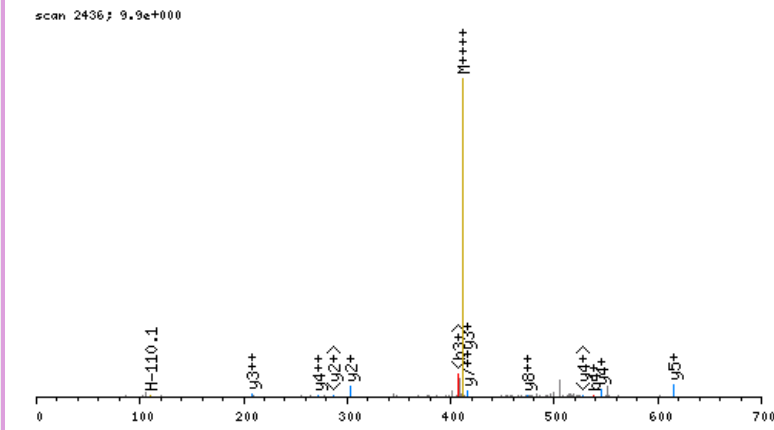

click image to zoom in; click top corners to zoom out [\[precursor±\]](#)

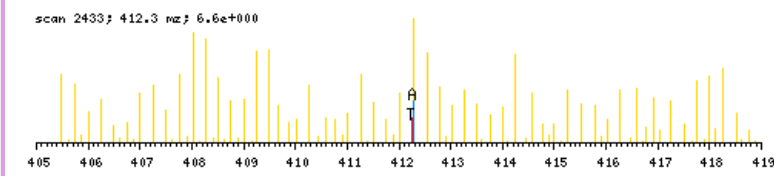

zoomed in precursor plot; T=theoretical m/z, A=acquired m/z

| b <sup>+</sup> | #  | AA # | y <sup>+</sup> | y <sup>2+</sup> |
|----------------|----|------|----------------|-----------------|
| 134.1393       | 1  | V    | 13             |                 |
| 262.1979       | 2  | Q    | 12             | 1512.9023       |
| 424.3560       | 3  | K    | 11             | 1384.8437       |
| 537.4401       | 4  | L    | 10             | 1222.6856       |
| 699.5982       | 5  | K    | 9              | 1109.6015       |
| 814.6251       | 6  | D    | 8              | 947.4434        |
| 901.6571       | 7  | S    | 7              | 832.4165        |
| 1030.6997      | 8  | E    | 6              | 745.3844        |
| 1101.7368      | 9  | A    | 5              | 616.3418        |
| 1230.7794      | 10 | E    | 4              | 545.3047        |
| 1343.8635      | 11 | L    | 3              | 416.2621        |
| 1471.9221      | 12 | Q    | 2              | 303.1781        |
|                | 13 | R    | 1              | 175.1195        |

N-term:+35.07 K(3):+162.16  
 K(5):+162.16



VRDNQSGSLLFIGR, MH+ 1589.8763, m/z 530.6303  
 L OS G27 P150811 220811-s1.05616.05616.3.dta

X-range:

-

MassTol: Y-zoom:

MassType:

AVG  MONO

Axis:

1  2

Label:

I  M  -

Ions:

a  +  2+  3+

b  +  2+  3+

c  +  2+  3+

x  +  2+  3+

y  +  2+  3+

z  +  2+  3+

hide H<sub>2</sub>O/NH<sub>3</sub>

zoom 112-122

GO

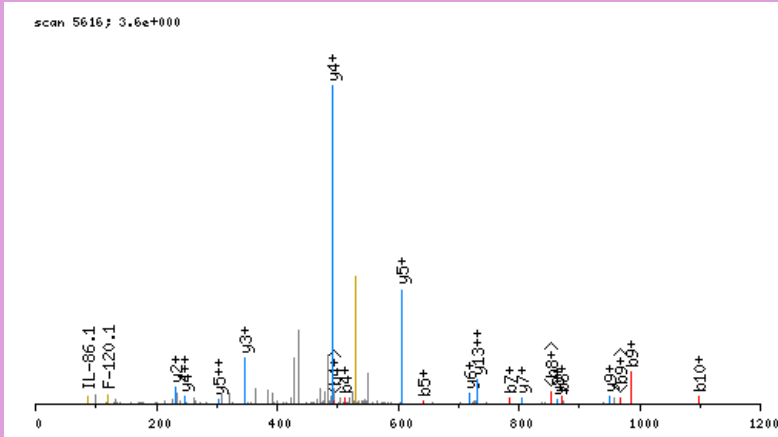

click image to zoom in; click top corners to zoom out [\[precursor±\]](#)

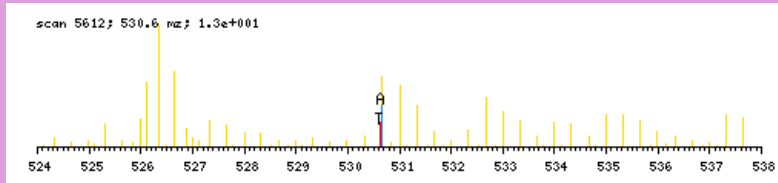

zoomed in precursor plot; T=theoretical m/z, A=acquired m/z

| b <sup>+</sup> | #  | AA # | y <sup>+</sup> | y <sup>2+</sup> |
|----------------|----|------|----------------|-----------------|
| 128.1075       | 1  | V 14 |                |                 |
| 284.2086       | 2  | R 13 | 1462.7767      | 731.8922        |
| 399.2356       | 3  | D 12 | 1306.6755      | 653.8417        |
| 513.2785       | 4  | N 11 | 1191.6486      | 596.3282        |
| 641.3371       | 5  | Q 10 | 1077.6057      | 539.3067        |
| 728.3691       | 6  | S 9  | 949.5471       | 475.2775        |
| 785.3906       | 7  | G 8  | 862.5151       | 431.7614        |
| 872.4226       | 8  | S 7  | 805.4936       | 403.2507        |
| 985.5067       | 9  | L 6  | 718.4616       | 359.7347        |
| 1098.5907      | 10 | L 5  | 605.3775       | 303.1927        |
| 1245.6591      | 11 | F 4  | 492.2934       | 246.6506        |
| 1358.7432      | 12 | I 3  | 345.2250       | 173.1164        |
| 1415.7647      | 13 | G 2  | 232.1410       | 116.5744        |
|                | 14 | R 1  | 175.1195       | 88.0637         |

N-term:+29.04

VREGDVLTLLESER, MH+ 1649.9286, m/z 550.6477  
 H OS G27 P150811 220811-s1.07009.07009.3.dta

X-range:

-

MassTol: Y-zoom:

MassType:

AVG  MONO

Axis:

1  2

Label:

I  M  -

Ions:

a  +  2+  3+

b  +  2+  3+

c  +  2+  3+

x  +  2+  3+

y  +  2+  3+

z  +  2+  3+

hide H<sub>2</sub>O/NH<sub>3</sub>

zoom 112-122

GO

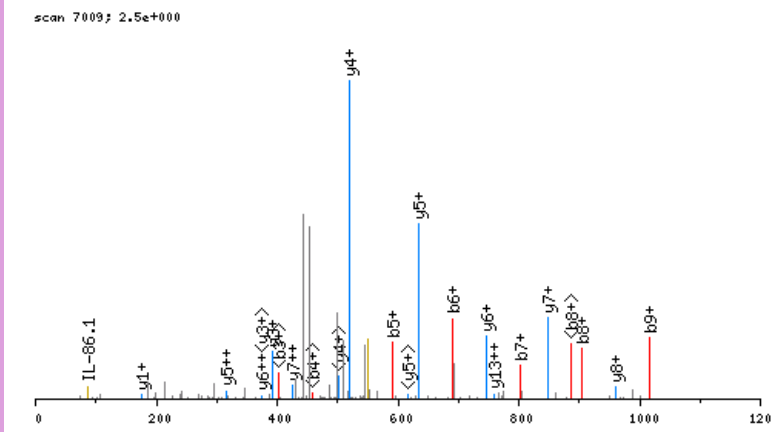

click image to zoom in; click top corners to zoom out [\[precursor±\]](#)

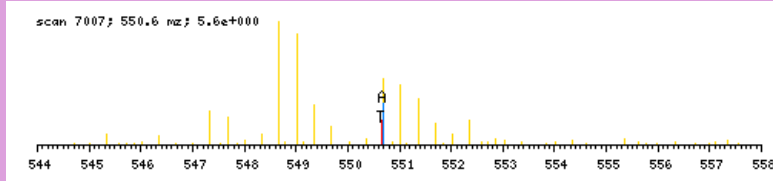

zoomed in precursor plot; T=theoretical m/z, A=acquired m/z

| b <sup>+</sup> | #  | AA # | y <sup>+</sup> | y <sup>2+</sup> |
|----------------|----|------|----------------|-----------------|
| 134.1393       | 1  | V 14 |                |                 |
| 290.2404       | 2  | R 13 | 1516.7971      | 758.9025        |
| 419.2830       | 3  | E 12 | 1360.6960      | 680.8519        |
| 476.3045       | 4  | G 11 | 1231.6534      | 616.3306        |
| 591.3314       | 5  | D 10 | 1174.6319      | 587.8199        |
| 690.3998       | 6  | V 9  | 1059.6050      | 530.3064        |
| 803.4839       | 7  | L 8  | 960.5366       | 480.7722        |
| 904.5316       | 8  | T 7  | 847.4525       | 424.2302        |
| 1017.6156      | 9  | L 6  | 746.4048       | 373.7063        |
| 1130.6997      | 10 | L 5  | 633.3208       | 317.1643        |
| 1259.7423      | 11 | E 4  | 520.2367       | 260.6223        |
| 1346.7743      | 12 | S 3  | 391.1941       | 196.1010        |
| 1475.8169      | 13 | E 2  | 304.1621       | 152.5850        |
|                | 14 | R 1  | 175.1195       | 88.0637         |

N-term:+35.07

VRELENEVENEQKR, MH+ 1840.0201, m/z 460.7605  
 H OS G28 P150811 220811-s1.02719.02719.4.dta

X-range:

-

MassTol: Y-zoom:

MassType:

AVG  MONO

Axis:

1  2

Label:

I  M  -

Ions:

a  +  2+  3+

b  +  2+  3+

c  +  2+  3+

x  +  2+  3+

y  +  2+  3+

z  +  2+  3+

hide H<sub>2</sub>O/NH<sub>3</sub>

zoom 112-122

GO

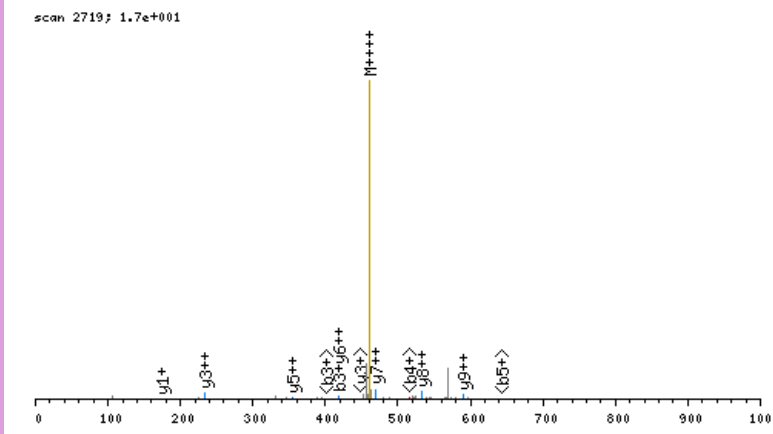

click image to zoom in; click top corners to zoom out [\[precursor±\]](#)

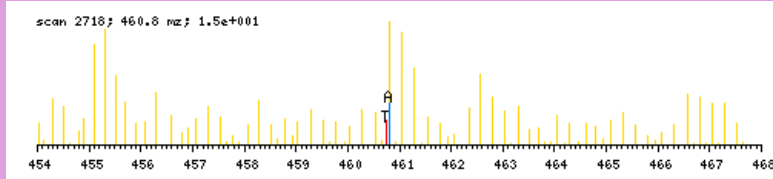

zoomed in precursor plot; T=theoretical m/z, A=acquired m/z

| b <sup>+</sup> | #  | AA # | y <sup>+</sup> | y <sup>2+</sup> |
|----------------|----|------|----------------|-----------------|
| 134.1393       | 1  | V 14 |                |                 |
| 290.2404       | 2  | R 13 | 1706.8886      | 853.9482        |
| 419.2830       | 3  | E 12 | 1550.7875      | 775.8977        |
| 532.3671       | 4  | L 11 | 1421.7449      | 711.3764        |
| 661.4097       | 5  | E 10 | 1308.6608      | 654.8343        |
| 775.4526       | 6  | N 9  | 1179.6182      | 590.3130        |
| 904.4952       | 7  | E 8  | 1065.5753      | 533.2916        |
| 1003.5636      | 8  | V 7  | 936.5327       | 468.7703        |
| 1132.6062      | 9  | E 6  | 837.4643       | 419.2361        |
| 1246.6491      | 10 | N 5  | 708.4217       | 354.7148        |
| 1375.6917      | 11 | E 4  | 594.3788       | 297.6933        |
| 1503.7503      | 12 | Q 3  | 465.3362       | 233.1720        |
| 1665.9084      | 13 | K 2  | 337.2776       | 169.1427        |
|                | 14 | R 1  | 175.1195       | 88.0637         |

N-term:+35.07 K(13):+162.16

VRPPVQVYGIEGR, MH+ 1497.8541, m/z 499.9562  
 L OS G27 P150811 220811-s1.04895.04895.3.dta

scan 4895; 4.6e+000

X-range:

-

MassTol: Y-zoom:

MassType:

AVG  MONO

Axis:

1  2

Label:

I  M  -

Ions:

a  +  2+  3+

b  +  2+  3+

c  +  2+  3+

x  +  2+  3+

y  +  2+  3+

z  +  2+  3+

hide H<sub>2</sub>O/NH<sub>3</sub>

zoom 112-122

GO

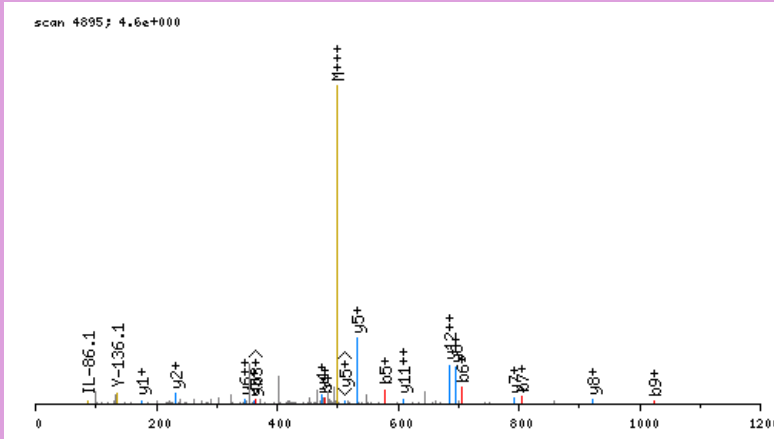

click image to zoom in; click top corners to zoom out [\[precursor±\]](#)

scan 4892; 500.0 m/z; 1.5e+002

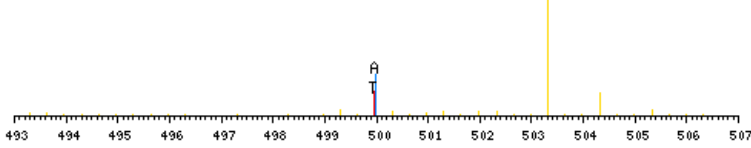

zoomed in precursor plot; T=theoretical m/z, A=acquired m/z

| b <sup>+</sup> | #  | AA # | y <sup>+</sup> | y <sup>2+</sup> |
|----------------|----|------|----------------|-----------------|
| 128.1075       | 1  | V 13 |                |                 |
| 284.2086       | 2  | R 12 | 1370.7545      | 685.8811        |
| 381.2614       | 3  | P 11 | 1214.6533      | 607.8306        |
| 478.3142       | 4  | P 10 | 1117.6006      | 559.3042        |
| 577.3826       | 5  | V 9  | 1020.5478      | 510.7778        |
| 705.4411       | 6  | Q 8  | 921.4794       | 461.2436        |
| 804.5096       | 7  | V 7  | 793.4208       | 397.2143        |
| 967.5729       | 8  | Y 6  | 694.3524       | 347.6801        |
| 1024.5944      | 9  | G 5  | 531.2891       | 266.1485        |
| 1137.6784      | 10 | I 4  | 474.2676       | 237.6377        |
| 1266.7210      | 11 | E 3  | 361.1836       | 181.0957        |
| 1323.7425      | 12 | G 2  | 232.1410       | 116.5744        |
|                | 13 | R 1  | 175.1195       | 88.0637         |

N-term:+29.04

VSASEEEEEVENENR, MH+ 1654.7620, m/z 552.2588  
 H OS G25 P150811 220811-s1.02628.02628.3.dta

X-range:

-

MassTol: Y-zoom:

MassType:

AVG  MONO

Axis:

1  2

Label:

I  M  -

Ions:

a  +  2+  3+

b  +  2+  3+

c  +  2+  3+

x  +  2+  3+

y  +  2+  3+

z  +  2+  3+

hide H<sub>2</sub>O/NH<sub>3</sub>

zoom 112-122

GO

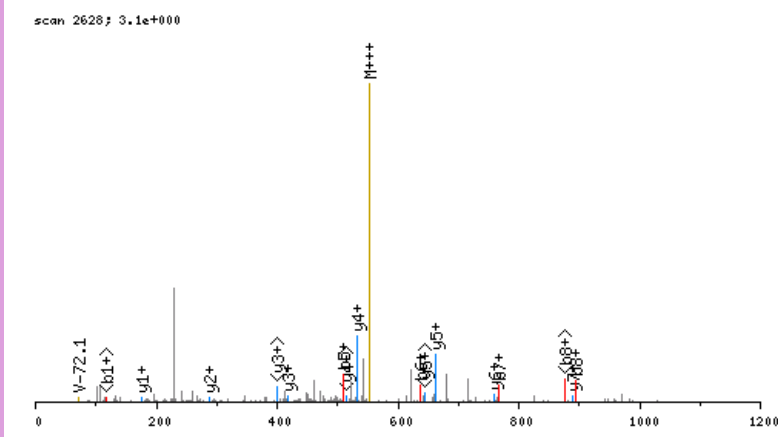

click image to zoom in; click top corners to zoom out [\[precursor±\]](#)

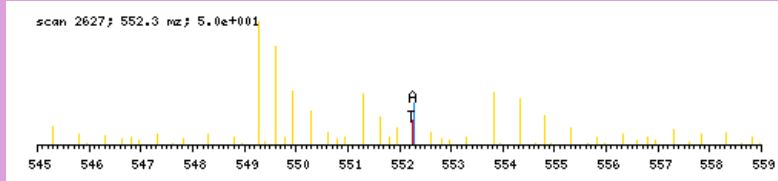

zoomed in precursor plot; T=theoretical m/z, A=acquired m/z

| b <sup>+</sup> | #  | AA # | y <sup>+</sup> | y <sup>2+</sup> |
|----------------|----|------|----------------|-----------------|
| 134.1393       | 1  | V 14 |                |                 |
| 221.1713       | 2  | S 13 | 1521.6305      | 761.3192        |
| 292.2085       | 3  | A 12 | 1434.5985      | 717.8031        |
| 379.2405       | 4  | S 11 | 1363.5614      | 682.2846        |
| 508.2831       | 5  | E 10 | 1276.5293      | 638.7686        |
| 637.3257       | 6  | E 9  | 1147.4867      | 574.2473        |
| 766.3683       | 7  | E 8  | 1018.4441      | 509.7260        |
| 895.4109       | 8  | E 7  | 889.4015       | 445.2047        |
| 994.4793       | 9  | V 6  | 760.3590       | 380.6834        |
| 1123.5219      | 10 | E 5  | 661.2905       | 331.1492        |
| 1237.5648      | 11 | N 4  | 532.2479       | 266.6279        |
| 1366.6074      | 12 | E 3  | 418.2050       | 209.6064        |
| 1480.6503      | 13 | N 2  | 289.1624       | 145.0851        |
|                | 14 | R 1  | 175.1195       | 88.0637         |

N-term:+35.07

VSASSPSVAAASQADSKQQR, MH+ 2031.0471, m/z 508.5172  
 L OS G26 P150811 220811-s1.02307.02307.4.dta

scan 2307; 2.2e+000

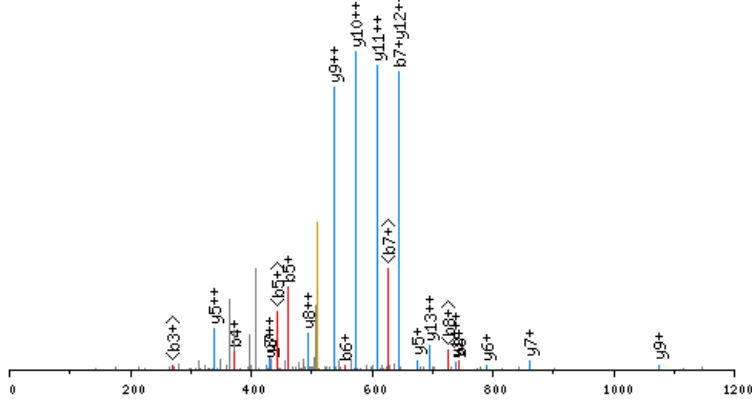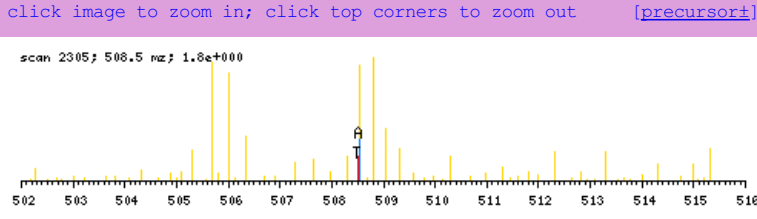

X-range:

-

MassTol: Y-zoom:

MassType:

AVG  MONO

Axis:

1  2

Label:

I  M  -

Ions:

a  +  2+  3+

b  +  2+  3+

c  +  2+  3+

x  +  2+  3+

y  +  2+  3+

z  +  2+  3+

hide H<sub>2</sub>O/NH<sub>3</sub>

zoom 112-122

GO

| b <sup>+</sup> | #  | AA # | y <sup>+</sup> | y <sup>2+</sup> |
|----------------|----|------|----------------|-----------------|
| 128.1075       | 1  | V 20 |                |                 |
| 215.1395       | 2  | S 19 | 1903.9474      | 952.4776        |
| 286.1767       | 3  | A 18 | 1816.9154      | 908.9616        |
| 373.2087       | 4  | S 17 | 1745.8783      | 873.4430        |
| 460.2407       | 5  | S 16 | 1658.8462      | 829.9270        |
| 557.2935       | 6  | P 15 | 1571.8142      | 786.4110        |
| 644.3255       | 7  | S 14 | 1474.7614      | 737.8846        |
| 743.3939       | 8  | V 13 | 1387.7294      | 694.3686        |
| 814.4310       | 9  | A 12 | 1288.6610      | 644.8344        |
| 885.4681       | 10 | A 11 | 1217.6239      | 609.3158        |
| 956.5053       | 11 | A 10 | 1146.5868      | 573.7973        |
| 1043.5373      | 12 | S 9  | 1075.5496      | 538.2787        |
| 1171.5959      | 13 | Q 8  | 988.5176       | 494.7627        |
| 1242.6330      | 14 | A 7  | 860.4590       | 430.7334        |
| 1357.6599      | 15 | D 6  | 789.4219       | 395.2149        |
| 1444.6920      | 16 | S 5  | 674.3950       | 337.7014        |
| 1600.8183      | 17 | K 4  | 587.3630       | 294.1854        |
| 1728.8768      | 18 | Q 3  | 431.2367       | 216.1222        |
| 1856.9354      | 19 | Q 2  | 303.1781       | 152.0930        |
|                | 20 | R 1  | 175.1195       | 88.0637         |

N-term:+29.04 K(17);+156.13

VSDENDAKILNDVQDR, MH+ 1886.9460, m/z 629.6535  
 L OS G26 P150811 220811-s1.03591.03591.3.dta

X-range:

-

MassTol: Y-zoom:

MassType:

AVG  MONO

Axis:

1  2

Label:

I  M  -

Ions:

a  +  2+  3+

b  +  2+  3+

c  +  2+  3+

x  +  2+  3+

y  +  2+  3+

z  +  2+  3+

hide H<sub>2</sub>O/NH<sub>3</sub>

zoom 112-122

GO

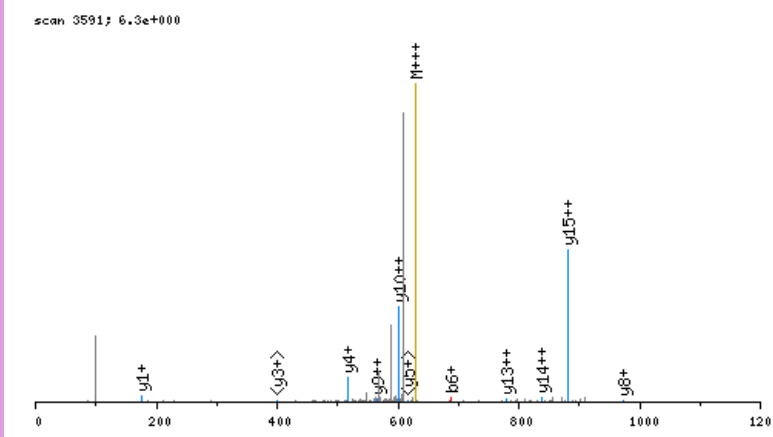

click image to zoom in; click top corners to zoom out [\[precursor±\]](#)

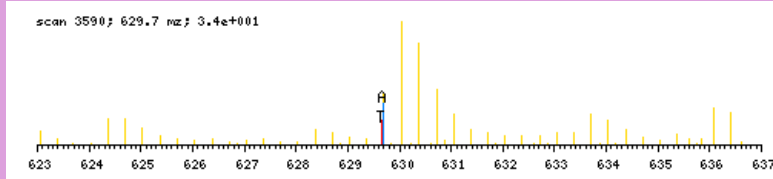

zoomed in precursor plot; T=theoretical m/z, A=acquired m/z

| b <sup>+</sup> | #  | AA # | y <sup>+</sup> | y <sup>2+</sup> |
|----------------|----|------|----------------|-----------------|
| 128.1075       | 1  | V 16 |                |                 |
| 215.1395       | 2  | S 15 | 1759.8463      | 880.4271        |
| 330.1665       | 3  | D 14 | 1672.8143      | 836.9110        |
| 459.2091       | 4  | E 13 | 1557.7873      | 779.3976        |
| 573.2520       | 5  | N 12 | 1428.7447      | 714.8763        |
| 688.2789       | 6  | D 11 | 1314.7018      | 657.8548        |
| 759.3161       | 7  | A 10 | 1199.6748      | 600.3413        |
| 915.4424       | 8  | K 9  | 1128.6377      | 564.8228        |
| 1028.5264      | 9  | I 8  | 972.5114       | 486.7596        |
| 1141.6105      | 10 | L 7  | 859.4274       | 430.2176        |
| 1255.6534      | 11 | N 6  | 746.3433       | 373.6756        |
| 1370.6804      | 12 | D 5  | 632.3004       | 316.6541        |
| 1469.7488      | 13 | V 4  | 517.2734       | 259.1406        |
| 1597.8074      | 14 | Q 3  | 418.2050       | 209.6064        |
| 1712.8343      | 15 | D 2  | 290.1464       | 145.5771        |
|                | 16 | R 1  | 175.1195       | 88.0637         |

N-term:+29.04 K(8):+156.13

VSDNELQELSTQGSR, MH+ 1690.8248, m/z 564.2798  
 L OS G25 P150811 220811-s1.04976.04976.3.dta

X-range:

-

MassTol: Y-zoom:

MassType:

AVG  MONO

Axis:

1  2

Label:

I  M  -

Ions:

a  +  2+  3+

b  +  2+  3+

c  +  2+  3+

x  +  2+  3+

y  +  2+  3+

z  +  2+  3+

hide H<sub>2</sub>O/NH<sub>3</sub>

zoom 112-122

GO

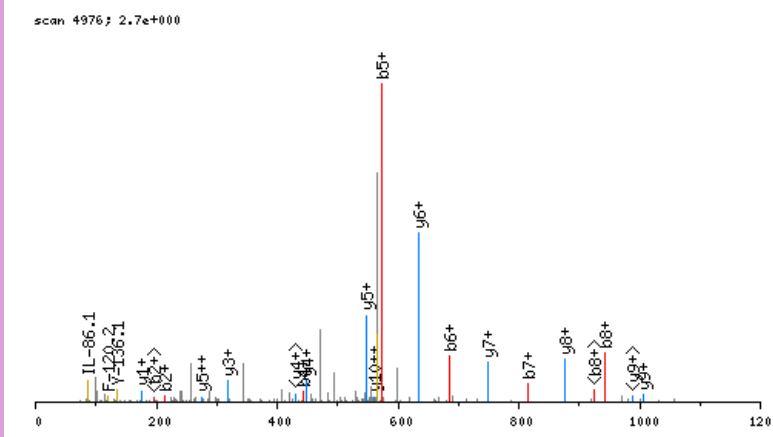

click image to zoom in; click top corners to zoom out [\[precursor±\]](#)

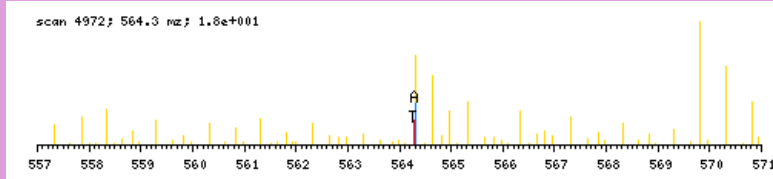

zoomed in precursor plot; T=theoretical m/z, A=acquired m/z

| b <sup>+</sup> | #  | AA # | y <sup>+</sup> | y <sup>2+</sup> |
|----------------|----|------|----------------|-----------------|
| 128.1075       | 1  | V 15 |                |                 |
| 215.1395       | 2  | S 14 | 1563.7251      | 782.3664        |
| 330.1665       | 3  | D 13 | 1476.6930      | 738.8504        |
| 444.2094       | 4  | N 12 | 1361.6661      | 681.3370        |
| 573.2520       | 5  | E 11 | 1247.6232      | 624.3155        |
| 686.3361       | 6  | L 10 | 1118.5806      | 559.7942        |
| 814.3946       | 7  | Q 9  | 1005.4965      | 503.2522        |
| 943.4372       | 8  | E 8  | 877.4379       | 439.2229        |
| 1056.5213      | 9  | L 7  | 748.3953       | 374.7016        |
| 1143.5533      | 10 | S 6  | 635.3113       | 318.1596        |
| 1244.6010      | 11 | T 5  | 548.2792       | 274.6435        |
| 1372.6596      | 12 | Q 4  | 447.2316       | 224.1197        |
| 1429.6811      | 13 | G 3  | 319.1730       | 160.0904        |
| 1516.7131      | 14 | S 2  | 262.1515       | 131.5797        |
|                | 15 | R 1  | 175.1195       | 88.0637         |

N-term:+29.04



X-range:

-

MassTol: Y-zoom:

MassType:

AVG  MONO

Axis:

1  2

Label:

I  M  -

Ions:

a  +  2+  3+

b  +  2+  3+

c  +  2+  3+

x  +  2+  3+

y  +  2+  3+

z  +  2+  3+

hide H<sub>2</sub>O/NH<sub>3</sub>

zoom 112-122

GO

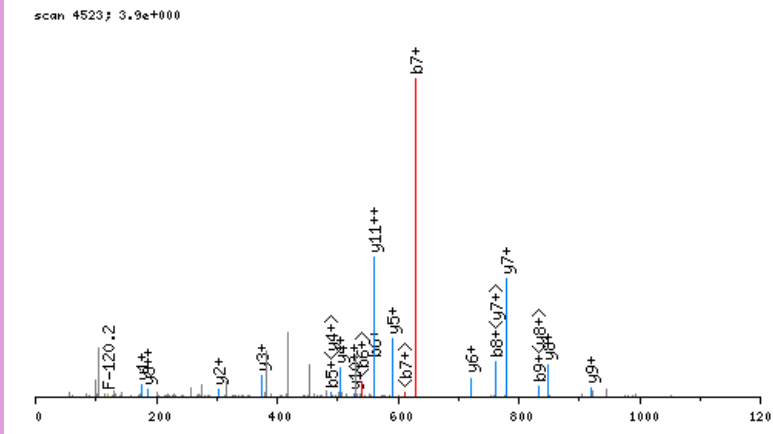

click image to zoom in; click top corners to zoom out [\[precursor±\]](#)

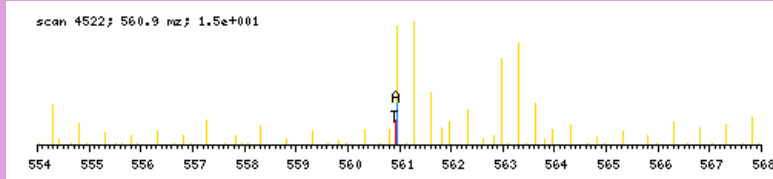

zoomed in precursor plot; T=theoretical m/z, A=acquired m/z

| b <sup>+</sup> | #  | AA # | y <sup>+</sup> | y <sup>2+</sup> |
|----------------|----|------|----------------|-----------------|
| 128.1075       | 1  | V 17 |                |                 |
| 215.1395       | 2  | S 16 | 1553.6688      | 777.3383        |
| 344.1821       | 3  | E 15 | 1466.6368      | 733.8223        |
| 401.2036       | 4  | G 14 | 1337.5942      | 669.3010        |
| 488.2356       | 5  | S 13 | 1280.5727      | 640.7903        |
| 559.2727       | 6  | A 12 | 1193.5407      | 597.2743        |
| 630.3099       | 7  | A 11 | 1122.5036      | 561.7557        |
| 761.3503       | 8  | M 10 | 1051.4665      | 526.2371        |
| 832.3875       | 9  | A 9  | 920.4260       | 460.7169        |
| 903.4246       | 10 | A 8  | 849.3889       | 425.1984        |
| 960.4460       | 11 | G 7  | 778.3518       | 389.6798        |
| 1089.4886      | 12 | E 6  | 721.3303       | 361.1691        |
| 1176.5207      | 13 | S 5  | 592.2877       | 296.6478        |
| 1307.5611      | 14 | M 4  | 505.2557       | 253.1318        |
| 1378.5983      | 15 | A 3  | 374.2152       | 187.6115        |
| 1506.6568      | 16 | Q 2  | 303.1781       | 152.0930        |
|                | 17 | R 1  | 175.1195       | 88.0637         |

N-term:+29.04

VSGEHMDLTTCPPLAAGGQEKLR, MH+ 2554.2757, m/z 639.3244  
 L OS G27 P150811 220811-s1.05118.05118.4.dta

X-range:

0 - 0

MassTol: Y-zoom:

0. 1.

MassType:

AVG  MONO

Axis:

1  2

Label:

I  M  -

Ions:

a  +  2+  3+

b  +  2+  3+

c  +  2+  3+

x  +  2+  3+

y  +  2+  3+

z  +  2+  3+

hide H<sub>2</sub>O/NH<sub>3</sub>

zoom 112-122

GO

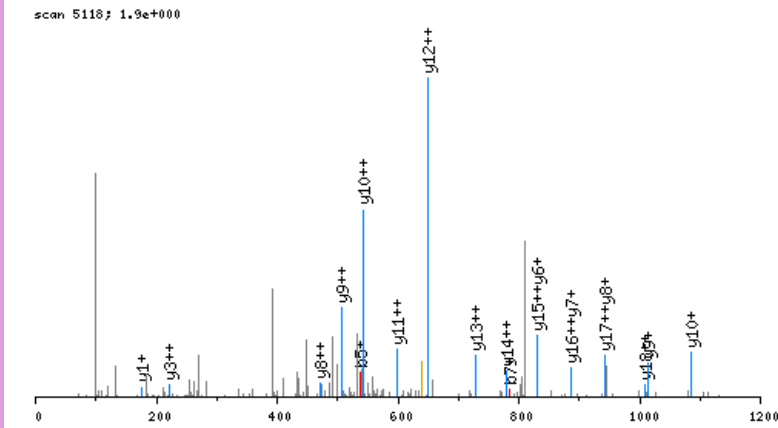

click image to zoom in; click top corners to zoom out [\[precursor±\]](#)

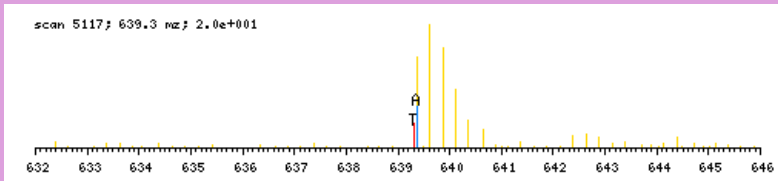

zoomed in precursor plot; T=theoretical m/z, A=acquired m/z

| b <sup>+</sup> | #  | AA # | y <sup>+</sup> | y <sup>2+</sup> |
|----------------|----|------|----------------|-----------------|
| 128.1075       | 1  | V 23 |                |                 |
| 215.1395       | 2  | S 22 | 2427.1760      | 1214.0919       |
| 272.1610       | 3  | G 21 | 2340.1440      | 1170.5759       |
| 401.2036       | 4  | E 20 | 2283.1225      | 1142.0652       |
| 538.2625       | 5  | H 19 | 2154.0800      | 1077.5439       |
| 669.3030       | 6  | M 18 | 2017.0210      | 1009.0144       |
| 784.3299       | 7  | D 17 | 1885.9806      | 943.4942        |
| 897.4140       | 8  | L 16 | 1770.9536      | 885.9807        |
| 998.4617       | 9  | T 15 | 1657.8696      | 829.4387        |
| 1099.5094      | 10 | T 14 | 1556.8219      | 778.9148        |
| 1259.5400      | 11 | C 13 | 1455.7742      | 728.3910        |
| 1356.5927      | 12 | P 12 | 1295.7436      | 648.3757        |
| 1469.6768      | 13 | L 11 | 1198.6908      | 599.8493        |
| 1540.7139      | 14 | A 10 | 1085.6068      | 543.3073        |
| 1611.7510      | 15 | A 9  | 1014.5697      | 507.7887        |
| 1668.7725      | 16 | G 8  | 943.5325       | 472.2702        |
| 1725.7939      | 17 | G 7  | 886.5111       | 443.7595        |
| 1853.8525      | 18 | Q 6  | 829.4896       | 415.2487        |
| 1981.9111      | 19 | Q 5  | 701.4310       | 351.2194        |
| 2110.9537      | 20 | E 4  | 573.3725       | 287.1901        |
| 2267.0800      | 21 | K 3  | 444.3299       | 222.6688        |
| 2380.1641      | 22 | L 2  | 288.2036       | 144.6057        |
|                | 23 | R 1  | 175.1195       | 88.0637         |

N-term:+29.04 C(11):+160.03  
 K(21):+156.13

VTGAWDPEVLQALR, MH+ 1582.8593, m/z 528.2913  
 L OS G25 P150811 220811-s1.05321.05321.3.dta

scan 5321; 5.9e+000

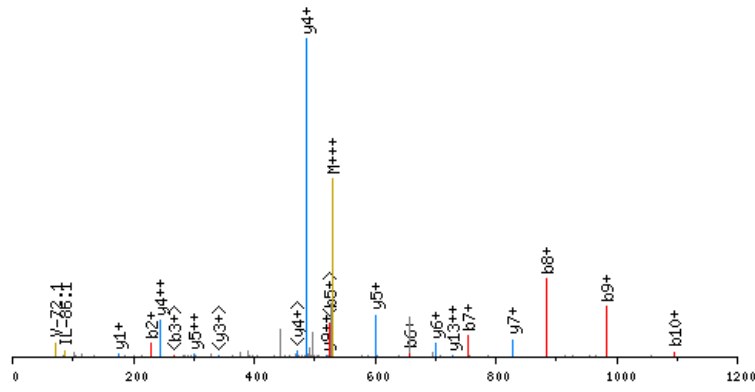

click image to zoom in; click top corners to zoom out [\[precursor±\]](#)

scan 5317; 528.3 m/z; 2.3e+001

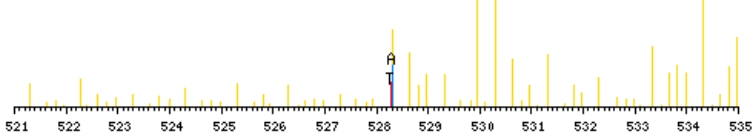

zoomed in precursor plot; T=theoretical m/z, A=acquired m/z

X-range:

-

MassTol: Y-zoom:

MassType:

AVG  MONO

Axis:

1  2

Label:

I  M  -

Ions:

a  +  2+  3+

b  +  2+  3+

c  +  2+  3+

x  +  2+  3+

y  +  2+  3+

z  +  2+  3+

hide H<sub>2</sub>O/NH<sub>3</sub>

zoom 112-122

GO

| b <sup>+</sup> | #  | AA # | y <sup>+</sup> | y <sup>2+</sup> |
|----------------|----|------|----------------|-----------------|
| 128.1075       | 1  | V 14 |                |                 |
| 229.1552       | 2  | T 13 | 1455.7596      | 728.3837        |
| 286.1767       | 3  | G 12 | 1354.7119      | 677.8599        |
| 357.2138       | 4  | A 11 | 1297.6905      | 649.3491        |
| 543.2931       | 5  | W 10 | 1226.6533      | 613.8306        |
| 658.3200       | 6  | D 9  | 1040.5740      | 520.7909        |
| 755.3728       | 7  | P 8  | 925.5471       | 463.2775        |
| 884.4154       | 8  | E 7  | 828.4943       | 414.7511        |
| 983.4838       | 9  | V 6  | 699.4517       | 350.2298        |
| 1096.5679      | 10 | L 5  | 600.3833       | 300.6956        |
| 1224.6264      | 11 | Q 4  | 487.2993       | 244.1535        |
| 1295.6636      | 12 | A 3  | 359.2407       | 180.1243        |
| 1408.7476      | 13 | L 2  | 288.2036       | 144.6057        |
|                | 14 | R 1  | 175.1195       | 88.0637         |

N-term:+29.04

VTIIDAPGHR, MH+ 1112.6640, m/z 371.5595  
 H OS G27 P150811 220811-s1.03268.03268.3.dta

X-range:

-

MassTol: Y-zoom:

MassType:

AVG  MONO

Axis:

1  2

Label:

I  M  -

Ions:

a  +  2+  3+

b  +  2+  3+

c  +  2+  3+

x  +  2+  3+

y  +  2+  3+

z  +  2+  3+

hide H<sub>2</sub>O/NH<sub>3</sub>

zoom 112-122

GO

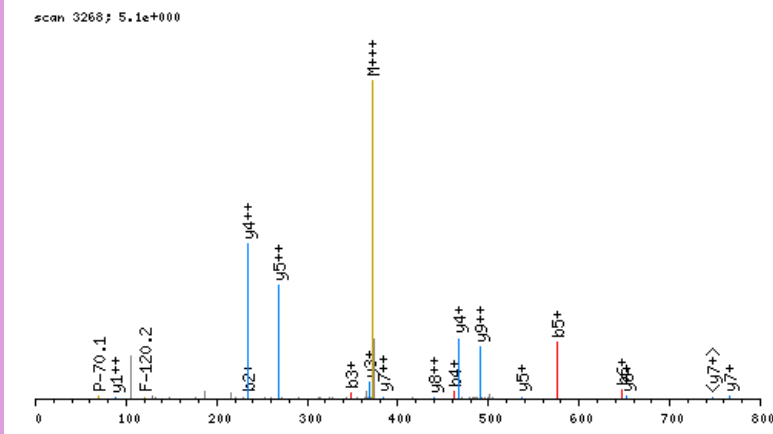

click image to zoom in; click top corners to zoom out [\[precursor±\]](#)

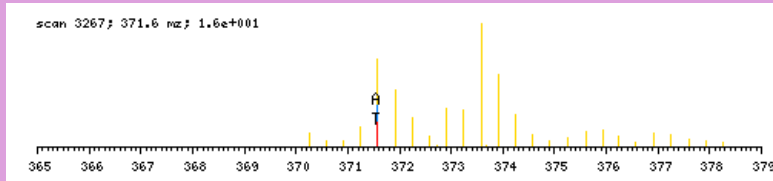

zoomed in precursor plot; T=theoretical m/z, A=acquired m/z

| b <sup>+</sup> | #  | AA # | y <sup>+</sup> | y <sup>2+</sup> |
|----------------|----|------|----------------|-----------------|
| 134.1393       | 1  | V    | 10             |                 |
| 235.1870       | 2  | T    | 9              | 979.5325        |
| 348.2711       | 3  | I    | 8              | 878.4848        |
| 461.3551       | 4  | I    | 7              | 765.4008        |
| 576.3821       | 5  | D    | 6              | 652.3167        |
| 647.4192       | 6  | A    | 5              | 537.2898        |
| 744.4719       | 7  | P    | 4              | 466.2526        |
| 801.4934       | 8  | G    | 3              | 369.1999        |
| 938.5523       | 9  | H    | 2              | 312.1784        |
|                | 10 | R    | 1              | 175.1195        |

N-term: +35.07

VTQLDLDPKELSR, MH+ 1638.9703, m/z 546.9949  
 H OS G26 P150811 220811-s1.04022.04022.3.dta

X-range:

-

MassTol: Y-zoom:

MassType:

AVG  MONO

Axis:

1  2

Label:

I  M  -

Ions:

a  +  2+  3+

b  +  2+  3+

c  +  2+  3+

x  +  2+  3+

y  +  2+  3+

z  +  2+  3+

hide H<sub>2</sub>O/NH<sub>3</sub>

zoom 112-122

GO

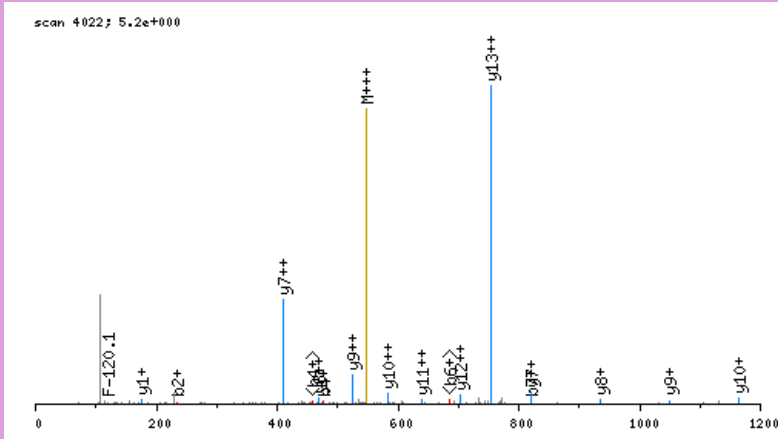

click image to zoom in; click top corners to zoom out [\[precursor±\]](#)

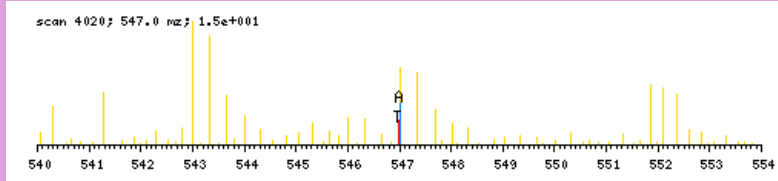

zoomed in precursor plot; T=theoretical m/z, A=acquired m/z

| b <sup>+</sup> | #  | AA # | y <sup>+</sup> | y <sup>2+</sup> |
|----------------|----|------|----------------|-----------------|
| 134.1393       | 1  | V 14 |                |                 |
| 235.1870       | 2  | T 13 | 1505.8388      | 753.4233        |
| 363.2456       | 3  | Q 12 | 1404.7911      | 702.8995        |
| 476.3296       | 4  | L 11 | 1276.7325      | 638.8702        |
| 591.3566       | 5  | D 10 | 1163.6485      | 582.3281        |
| 704.4406       | 6  | L 9  | 1048.6215      | 524.8147        |
| 819.4676       | 7  | D 8  | 935.5375       | 468.2726        |
| 876.4890       | 8  | G 7  | 820.5105       | 410.7592        |
| 973.5418       | 9  | P 6  | 763.4891       | 382.2484        |
| 1135.6999      | 10 | K 5  | 666.4363       | 333.7221        |
| 1264.7425      | 11 | E 4  | 504.2782       | 252.6430        |
| 1377.8266      | 12 | L 3  | 375.2356       | 188.1217        |
| 1464.8586      | 13 | S 2  | 262.1515       | 131.5797        |
|                | 14 | R 1  | 175.1195       | 88.0637         |

N-term:+35.07 K(10):+162.16

VVAGGPEVLTPER, MH+ 1458.8380, m/z 486.9508  
 H OS G24 P150811 220811-s1.03305.03305.3.dta

X-range:

-

MassTol: Y-zoom:

MassType:

AVG  MONO

Axis:

1  2

Label:

I  M  -

Ions:

a  +  2+  3+

b  +  2+  3+

c  +  2+  3+

x  +  2+  3+

y  +  2+  3+

z  +  2+  3+

hide H<sub>2</sub>O/NH<sub>3</sub>

zoom 112-122

GO

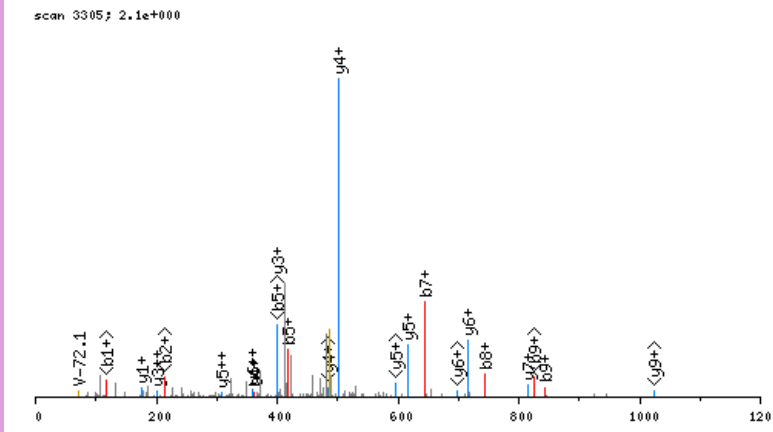

click image to zoom in; click top corners to zoom out [\[precursor±\]](#)

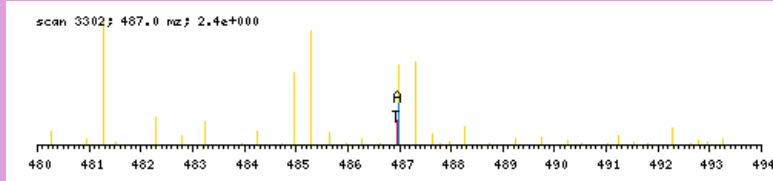

zoomed in precursor plot; T=theoretical m/z, A=acquired m/z

| b <sup>+</sup> | #  | AA # | y <sup>+</sup> | y <sup>2+</sup> |
|----------------|----|------|----------------|-----------------|
| 134.1393       | 1  | V 14 |                |                 |
| 233.2077       | 2  | V 13 | 1325.7065      | 663.3572        |
| 304.2448       | 3  | A 12 | 1226.6381      | 613.8230        |
| 361.2663       | 4  | G 11 | 1155.6010      | 578.3044        |
| 418.2878       | 5  | G 10 | 1098.5795      | 549.7937        |
| 515.3405       | 6  | P 9  | 1041.5580      | 521.2829        |
| 644.3831       | 7  | E 8  | 944.5053       | 472.7566        |
| 743.4515       | 8  | V 7  | 815.4627       | 408.2353        |
| 844.4992       | 9  | T 6  | 716.3943       | 358.7011        |
| 957.5833       | 10 | L 5  | 615.3466       | 308.1772        |
| 1058.6310      | 11 | T 4  | 502.2625       | 251.6352        |
| 1155.6837      | 12 | P 3  | 401.2149       | 201.1113        |
| 1284.7263      | 13 | E 2  | 304.1621       | 152.5850        |
|                | 14 | R 1  | 175.1195       | 88.0637         |

N-term:+35.07

VVANSPANADYQER, MH+ 1567.7928, m/z 523.2691  
 H OS G25 P150811 220811-s1.02558.02558.3.dta

scan 2558; 5.8e+000

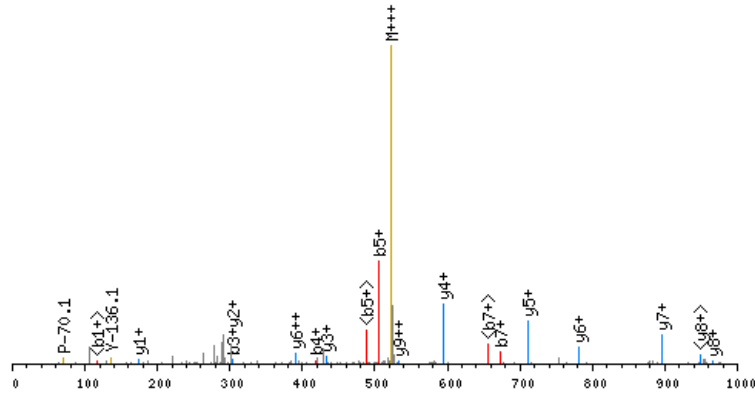

click image to zoom in; click top corners to zoom out [\[precursor±\]](#)

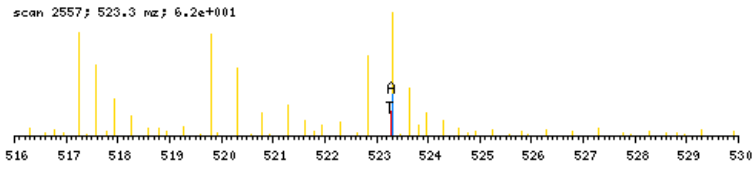

zoomed in precursor plot; T=theoretical m/z, A=acquired m/z

X-range:

-

MassTol: Y-zoom:

MassType:

AVG  MONO

Axis:

1  2

Label:

I  M  -

Ions:

a  +  2+  3+

b  +  2+  3+

c  +  2+  3+

x  +  2+  3+

y  +  2+  3+

z  +  2+  3+

hide H<sub>2</sub>O/NH<sub>3</sub>

zoom 112-122

GO

| b <sup>+</sup> | #  | AA # | y <sup>+</sup> | y <sup>2+</sup> |
|----------------|----|------|----------------|-----------------|
| 134.1393       | 1  | V 14 |                |                 |
| 233.2077       | 2  | V 13 | 1434.6613      | 717.8346        |
| 304.2448       | 3  | A 12 | 1335.5929      | 668.3004        |
| 418.2878       | 4  | N 11 | 1264.5558      | 632.7818        |
| 505.3198       | 5  | S 10 | 1150.5129      | 575.7604        |
| 602.3726       | 6  | P 9  | 1063.4809      | 532.2443        |
| 673.4097       | 7  | A 8  | 966.4281       | 483.7180        |
| 787.4526       | 8  | N 7  | 895.3910       | 448.1994        |
| 858.4897       | 9  | A 6  | 781.3481       | 391.1779        |
| 973.5167       | 10 | D 5  | 710.3109       | 355.6594        |
| 1136.5800      | 11 | Y 4  | 595.2840       | 298.1459        |
| 1264.6386      | 12 | Q 3  | 432.2207       | 216.6142        |
| 1393.6812      | 13 | E 2  | 304.1621       | 152.5850        |
|                | 14 | R 1  | 175.1195       | 88.0637         |

N-term:+35.07

VVAPTISSPVCQEQLVEAGR, MH+ 2168.1385, m/z 723.3843  
 L OS G24 P150811 220811-s1.04053.04053.3.dta

X-range:

-

MassTol: Y-zoom:

MassType:

AVG  MONO

Axis:

1  2

Label:

I  M  -

Ions:

a  +  2+  3+

b  +  2+  3+

c  +  2+  3+

x  +  2+  3+

y  +  2+  3+

z  +  2+  3+

hide H<sub>2</sub>O/NH<sub>3</sub>

zoom 112-122

GO

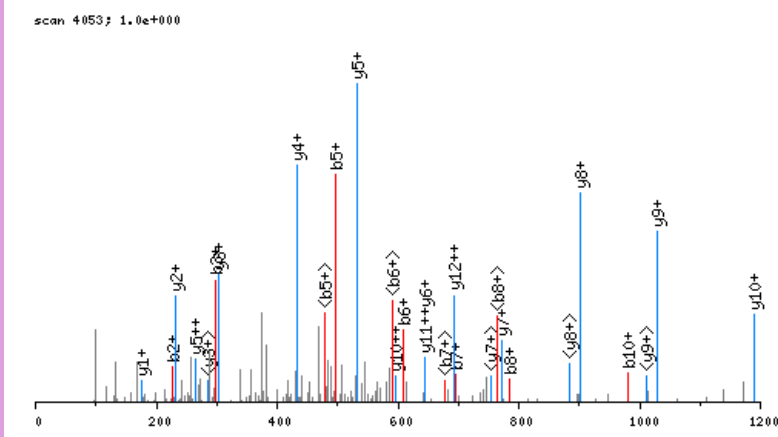

click image to zoom in; click top corners to zoom out [\[precursor±\]](#)

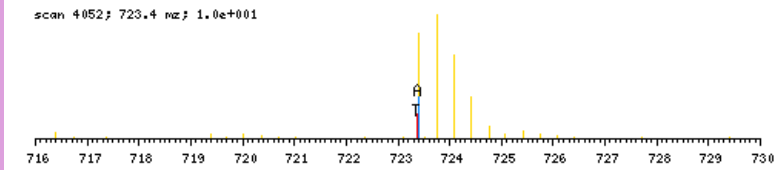

zoomed in precursor plot; T=theoretical m/z, A=acquired m/z

| b <sup>+</sup> | #  | AA # | y <sup>+</sup> | y <sup>2+</sup> |
|----------------|----|------|----------------|-----------------|
| 128.1075       | 1  | V    | 20             |                 |
| 227.1759       | 2  | V    | 19             | 2041.0388       |
| 298.2130       | 3  | A    | 18             | 1941.9704       |
| 395.2658       | 4  | P    | 17             | 1870.9332       |
| 496.3135       | 5  | T    | 16             | 1773.8805       |
| 609.3975       | 6  | I    | 15             | 1672.8328       |
| 696.4296       | 7  | S    | 14             | 1559.7487       |
| 783.4616       | 8  | S    | 13             | 1472.7167       |
| 880.5144       | 9  | P    | 12             | 1385.6847       |
| 979.5828       | 10 | V    | 11             | 1288.6319       |
| 1139.6134      | 11 | C    | 10             | 1189.5635       |
| 1267.6720      | 12 | Q    | 9              | 1029.5329       |
| 1396.7146      | 13 | E    | 8              | 901.4743        |
| 1524.7731      | 14 | Q    | 7              | 772.4317        |
| 1637.8572      | 15 | L    | 6              | 644.3731        |
| 1736.9256      | 16 | V    | 5              | 531.2891        |
| 1865.9682      | 17 | E    | 4              | 432.2207        |
| 1937.0053      | 18 | A    | 3              | 303.1781        |
| 1994.0268      | 19 | G    | 2              | 232.1410        |
|                | 20 | R    | 1              | 175.1195        |

N-term:+29.04 C(11):+160.03



VVDSDTVQAHTVR, MH+ 1460.7921, m/z 487.6022  
 H OS G27 P150811 220811-s1.02539.02539.3.dta

scan 2539; 6.9e+000

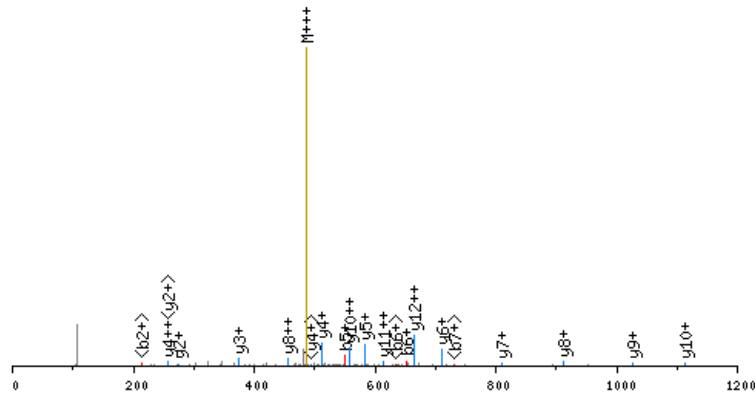

scan 2537; 487.6 m/z; 5.5e+000

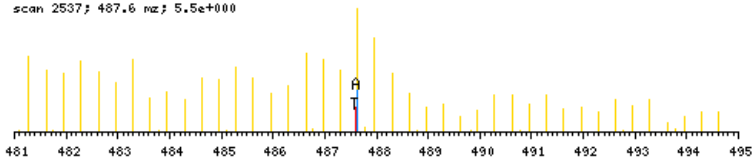

X-range:

-

MassTol: Y-zoom:

MassType:

AVG  MONO

Axis:

1  2

Label:

I  M  -

Ions:

a  +  2+  3+

b  +  2+  3+

c  +  2+  3+

x  +  2+  3+

y  +  2+  3+

z  +  2+  3+

hide H<sub>2</sub>O/NH<sub>3</sub>

zoom 112-122

GO

| b <sup>+</sup> | #  | AA # | y <sup>+</sup> | y <sup>2+</sup> |
|----------------|----|------|----------------|-----------------|
| 134.1393       | 1  | V 13 |                |                 |
| 233.2077       | 2  | V 12 | 1327.6606      | 664.3342        |
| 348.2347       | 3  | D 11 | 1228.5922      | 614.8000        |
| 435.2667       | 4  | S 10 | 1113.5653      | 557.2865        |
| 550.2936       | 5  | D 9  | 1026.5332      | 513.7705        |
| 651.3413       | 6  | T 8  | 911.5063       | 456.2571        |
| 750.4097       | 7  | V 7  | 810.4586       | 405.7332        |
| 878.4683       | 8  | Q 6  | 711.3902       | 356.1990        |
| 949.5054       | 9  | A 5  | 583.3316       | 292.1697        |
| 1086.5643      | 10 | H 4  | 512.2945       | 256.6512        |
| 1187.6120      | 11 | T 3  | 375.2356       | 188.1217        |
| 1286.6804      | 12 | V 2  | 274.1879       | 137.5979        |
|                | 13 | R 1  | 175.1195       | 88.0637         |

N-term:+35.07

VVEHPEFLKAGKEPGLQIWR, MH+ 2417.3710, m/z 605.0982  
 L OS G28 P150811 220811-s1.07212.07212.4.dta

X-range:

-

MassTol: Y-zoom:

MassType:

AVG  MONO

Axis:

1  2

Label:

I  M  -

Ions:

a  +  2+  3+

b  +  2+  3+

c  +  2+  3+

x  +  2+  3+

y  +  2+  3+

z  +  2+  3+

hide H<sub>2</sub>O/NH<sub>3</sub>

zoom 112-122

GO

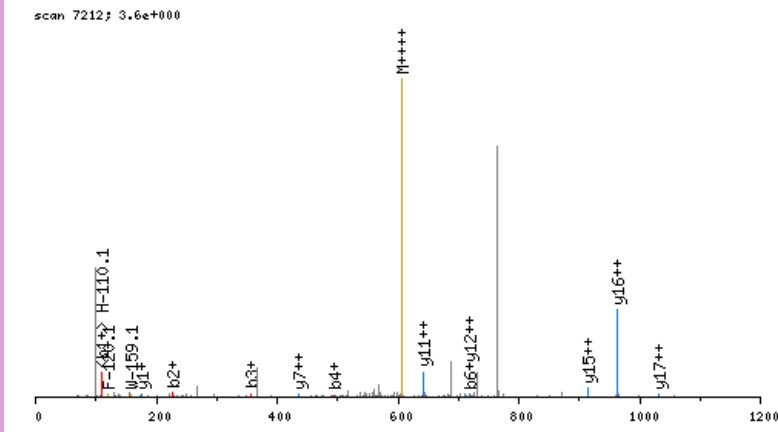

click image to zoom in; click top corners to zoom out [\[precursor±\]](#)

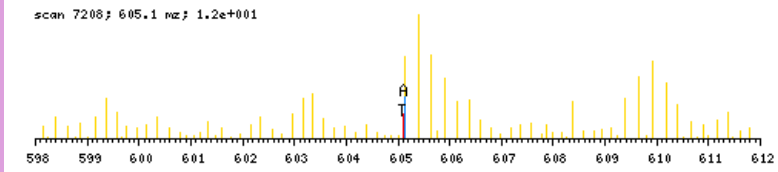

zoomed in precursor plot; T=theoretical m/z, A=acquired m/z

| b <sup>+</sup> | #  | AA | #  | y <sup>+</sup> | y <sup>2+</sup> |
|----------------|----|----|----|----------------|-----------------|
| 128.1075       | 1  | V  | 20 |                |                 |
| 227.1759       | 2  | V  | 19 | 2290.2713      | 1145.6395       |
| 356.2185       | 3  | E  | 18 | 2191.2029      | 1096.1053       |
| 493.2774       | 4  | H  | 17 | 2062.1603      | 1031.5840       |
| 590.3302       | 5  | P  | 16 | 1925.1014      | 963.0546        |
| 719.3728       | 6  | E  | 15 | 1828.0486      | 914.5282        |
| 866.4412       | 7  | F  | 14 | 1699.0060      | 850.0069        |
| 979.5253       | 8  | L  | 13 | 1551.9376      | 776.4727        |
| 1135.6516      | 9  | K  | 12 | 1438.8535      | 719.9307        |
| 1206.6887      | 10 | A  | 11 | 1282.7272      | 641.8675        |
| 1263.7101      | 11 | G  | 10 | 1211.6901      | 606.3490        |
| 1419.8364      | 12 | K  | 9  | 1154.6686      | 577.8382        |
| 1548.8790      | 13 | E  | 8  | 998.5423       | 499.7751        |
| 1645.9318      | 14 | P  | 7  | 869.4997       | 435.2538        |
| 1702.9533      | 15 | G  | 6  | 772.4470       | 386.7274        |
| 1816.0373      | 16 | L  | 5  | 715.4255       | 358.2167        |
| 1944.0959      | 17 | Q  | 4  | 602.3415       | 301.6746        |
| 2057.1800      | 18 | I  | 3  | 474.2829       | 237.6454        |
| 2243.2593      | 19 | W  | 2  | 361.1988       | 181.1033        |
|                | 20 | R  | 1  | 175.1195       | 88.0637         |

N-term:+29.04 K(9):+156.13  
 K(12):+156.13

VVEKDTTINEIEDTFR, MH+ 1965.0181, m/z 655.6775  
 L OS G26 P150811 220811-s1.05768.05768.3.dta

X-range:

-

MassTol: Y-zoom:

MassType:

AVG  MONO

Axis:

1  2

Label:

I  M  -

Ions:

a  +  2+  3+

b  +  2+  3+

c  +  2+  3+

x  +  2+  3+

y  +  2+  3+

z  +  2+  3+

hide H<sub>2</sub>O/NH<sub>3</sub>

zoom 112-122

GO

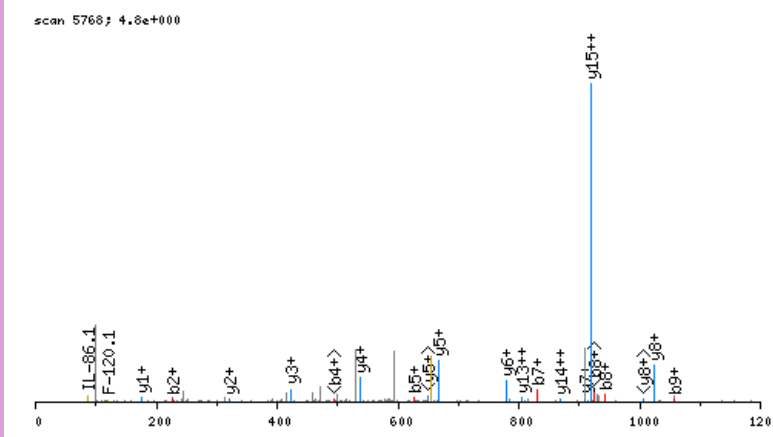

click image to zoom in; click top corners to zoom out [\[precursor±\]](#)

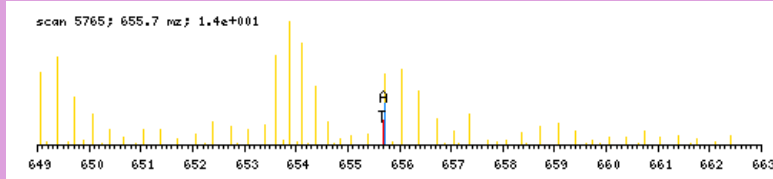

zoomed in precursor plot; T=theoretical m/z, A=acquired m/z

| b <sup>+</sup> | #  | AA # | y <sup>+</sup> | y <sup>2+</sup> |
|----------------|----|------|----------------|-----------------|
| 128.1075       | 1  | V 16 |                |                 |
| 227.1759       | 2  | V 15 | 1837.9184      | 919.4631        |
| 356.2185       | 3  | E 14 | 1738.8500      | 869.9289        |
| 512.3448       | 4  | K 13 | 1609.8074      | 805.4076        |
| 627.3718       | 5  | D 12 | 1453.6811      | 727.3445        |
| 728.4194       | 6  | T 11 | 1338.6541      | 669.8310        |
| 829.4671       | 7  | T 10 | 1237.6065      | 619.3071        |
| 942.5512       | 8  | I 9  | 1136.5588      | 568.7833        |
| 1056.5941      | 9  | N 8  | 1023.4747      | 512.2413        |
| 1185.6367      | 10 | E 7  | 909.4318       | 455.2198        |
| 1298.7208      | 11 | I 6  | 780.3892       | 390.6985        |
| 1427.7634      | 12 | E 5  | 667.3051       | 334.1565        |
| 1542.7903      | 13 | D 4  | 538.2625       | 269.6352        |
| 1643.8380      | 14 | T 3  | 423.2356       | 212.1217        |
| 1790.9064      | 15 | F 2  | 322.1879       | 161.5979        |
|                | 16 | R 1  | 175.1195       | 88.0637         |

N-term:+29.04 K(4):+156.13

VVREEEMGEEEEEVER, MH+ 1876.8598, m/z 626.2915  
 L OS G27 P150811 220811-s1.03045.03045.3.dta

X-range:

-

MassTol: Y-zoom:

MassType:

AVG  MONO

Axis:

1  2

Label:

I  M  -

Ions:

a  +  2+  3+

b  +  2+  3+

c  +  2+  3+

x  +  2+  3+

y  +  2+  3+

z  +  2+  3+

hide H<sub>2</sub>O/NH<sub>3</sub>

zoom 112-122

GO

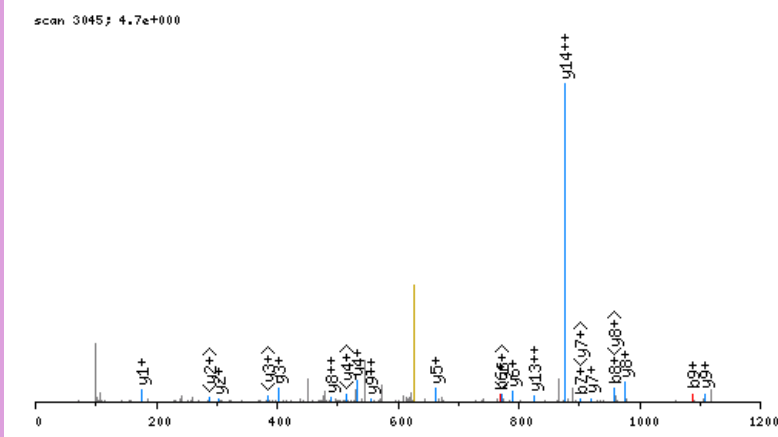

click image to zoom in; click top corners to zoom out [\[precursor±\]](#)

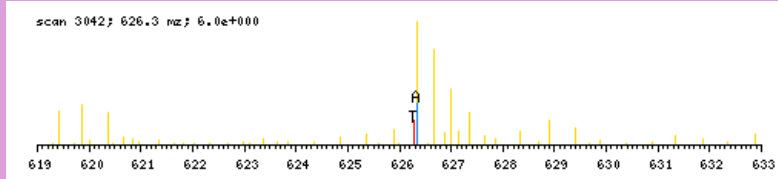

zoomed in precursor plot; T=theoretical m/z, A=acquired m/z

| b <sup>+</sup> | #  | AA # | y <sup>+</sup> | y <sup>2+</sup> |
|----------------|----|------|----------------|-----------------|
| 128.1075       | 1  | V    | 15             |                 |
| 227.1759       | 2  | V    | 14             | 875.3840        |
| 383.2770       | 3  | R    | 13             | 825.8498        |
| 512.3196       | 4  | E    | 12             | 747.7992        |
| 641.3622       | 5  | E    | 11             | 683.2779        |
| 770.4048       | 6  | E    | 10             | 618.7566        |
| 901.4453       | 7  | M    | 9              | 554.2353        |
| 958.4668       | 8  | G    | 8              | 488.7151        |
| 1087.5094      | 9  | E    | 7              | 460.2044        |
| 1216.5520      | 10 | E    | 6              | 395.6831        |
| 1345.5945      | 11 | E    | 5              | 331.1618        |
| 1474.6371      | 12 | E    | 4              | 266.6405        |
| 1573.7056      | 13 | V    | 3              | 202.1192        |
| 1702.7481      | 14 | E    | 2              | 152.5850        |
|                | 15 | R    | 1              | 88.0637         |

N-term:+29.04

VVVPDVESLPSWAQKR, MH+ 1866.0489, m/z 622.6878  
 L OS G26 P150811 220811-s1.06028.06028.3.dta

X-range:

-

MassTol: Y-zoom:

MassType:

AVG  MONO

Axis:

1  2

Label:

I  M  -

Ions:

a  +  2+  3+

b  +  2+  3+

c  +  2+  3+

x  +  2+  3+

y  +  2+  3+

z  +  2+  3+

hide H<sub>2</sub>O/NH<sub>3</sub>

zoom 112-122

GO

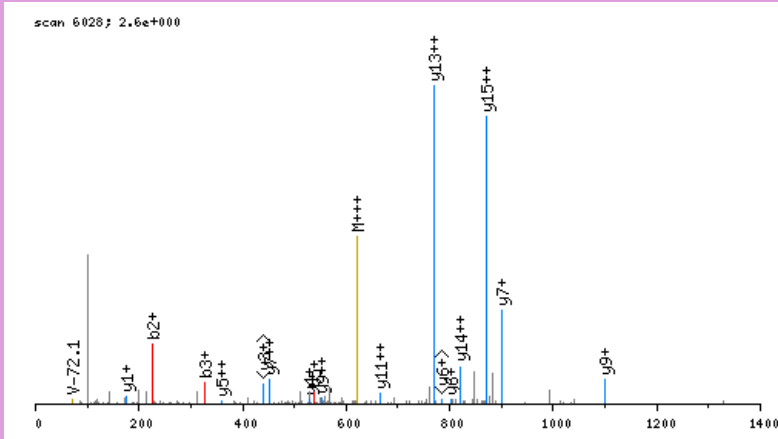

click image to zoom in; click top corners to zoom out [\[precursor±\]](#)

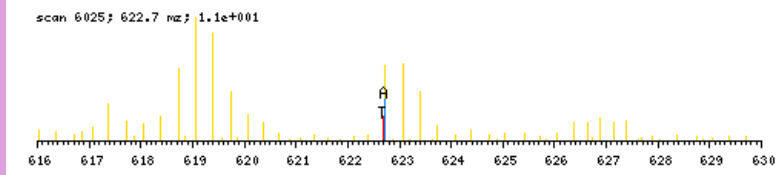

zoomed in precursor plot; T=theoretical m/z, A=acquired m/z

| b <sup>+</sup> | #  | AA # | y <sup>+</sup> | y <sup>2+</sup> |
|----------------|----|------|----------------|-----------------|
| 128.1075       | 1  | V 16 |                |                 |
| 227.1759       | 2  | V 15 | 1738.9492      | 869.9785        |
| 326.2443       | 3  | V 14 | 1639.8808      | 820.4443        |
| 423.2971       | 4  | P 13 | 1540.8124      | 770.9101        |
| 538.3240       | 5  | D 12 | 1443.7596      | 722.3837        |
| 637.3925       | 6  | V 11 | 1328.7327      | 664.8703        |
| 766.4351       | 7  | E 10 | 1229.6643      | 615.3361        |
| 853.4671       | 8  | S 9  | 1100.6217      | 550.8148        |
| 966.5511       | 9  | L 8  | 1013.5897      | 507.2987        |
| 1063.6039      | 10 | P 7  | 900.5056       | 450.7567        |
| 1150.6359      | 11 | S 6  | 803.4528       | 402.2303        |
| 1336.7153      | 12 | W 5  | 716.4208       | 358.7143        |
| 1407.7524      | 13 | A 4  | 530.3415       | 265.6747        |
| 1535.8109      | 14 | Q 3  | 459.3044       | 230.1561        |
| 1691.9372      | 15 | K 2  | 331.2458       | 166.1268        |
|                | 16 | R 1  | 175.1195       | 88.0637         |

N-term:+29.04 K(15):+156.13

VYDQELLGPSDKSEAAALR, MH+ 2059.1348, m/z 687.0498  
 H OS G26 P150811 220811-s1.04269.04269.3.dta

scan 4269; 8.2e+000

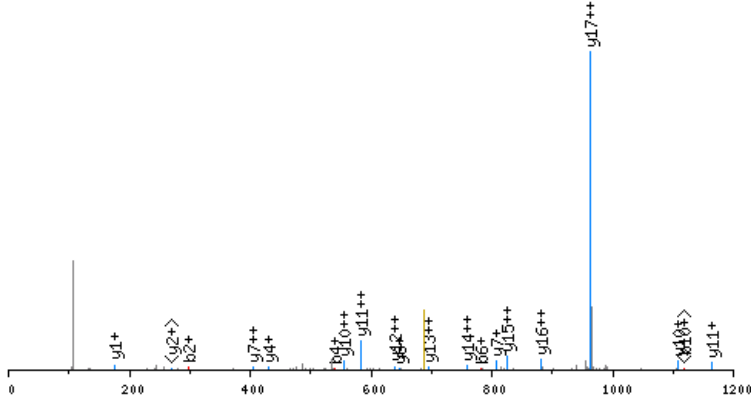

click image to zoom in; click top corners to zoom out [\[precursor±\]](#)

scan 4265; 687.1 m/z; 3.6e+001

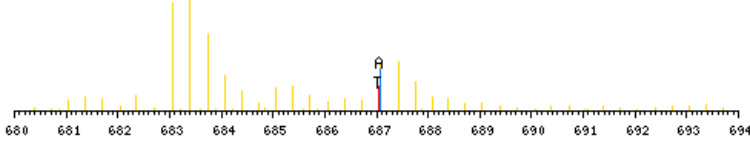

zoomed in precursor plot; T=theoretical m/z, A=acquired m/z

X-range:

-

MassTol: Y-zoom:

MassType:

AVG  MONO

Axis:

1  2

Label:

I  M  -

Ions:

a  +  2+  3+

b  +  2+  3+

c  +  2+  3+

x  +  2+  3+

y  +  2+  3+

z  +  2+  3+

hide H<sub>2</sub>O/NH<sub>3</sub>

zoom 112-122

GO

| b <sup>+</sup> | #  | AA # | y <sup>+</sup> | y <sup>2+</sup> |
|----------------|----|------|----------------|-----------------|
| 134.1393       | 1  | V 18 |                |                 |
| 297.2026       | 2  | Y 17 | 1926.0033      | 963.5056        |
| 412.2296       | 3  | D 16 | 1762.9400      | 881.9739        |
| 540.2882       | 4  | Q 15 | 1647.9130      | 824.4604        |
| 669.3308       | 5  | E 14 | 1519.8544      | 760.4311        |
| 782.4148       | 6  | L 13 | 1390.8118      | 695.9098        |
| 895.4989       | 7  | L 12 | 1277.7278      | 639.3678        |
| 952.5203       | 8  | G 11 | 1164.6437      | 582.8258        |
| 1049.5731      | 9  | P 10 | 1107.6222      | 554.3150        |
| 1136.6051      | 10 | S 9  | 1010.5695      | 505.7887        |
| 1251.6321      | 11 | D 8  | 923.5375       | 462.2726        |
| 1413.7902      | 12 | K 7  | 808.5105       | 404.7592        |
| 1500.8222      | 13 | S 6  | 646.3524       | 323.6801        |
| 1629.8648      | 14 | E 5  | 559.3204       | 280.1641        |
| 1700.9019      | 15 | A 4  | 430.2778       | 215.6428        |
| 1771.9390      | 16 | A 3  | 359.2407       | 180.1243        |
| 1885.0231      | 17 | L 2  | 288.2036       | 144.6057        |
|                | 18 | R 1  | 175.1195       | 88.0637         |

N-term:+35.07 K(12):+162.16

VYGTGKHGTSLKTLR, MH+ 1865.0649, m/z 622.3598  
 L OS G26 P150811 220811-s1.03397.03397.3.dta

X-range:

-

MassTol: Y-zoom:

MassType:

AVG  MONO

Axis:

1  2

Label:

I  M  -

Ions:

a  +  2+  3+

b  +  2+  3+

c  +  2+  3+

x  +  2+  3+

y  +  2+  3+

z  +  2+  3+

hide H<sub>2</sub>O/NH<sub>3</sub>

zoom 112-122

GO

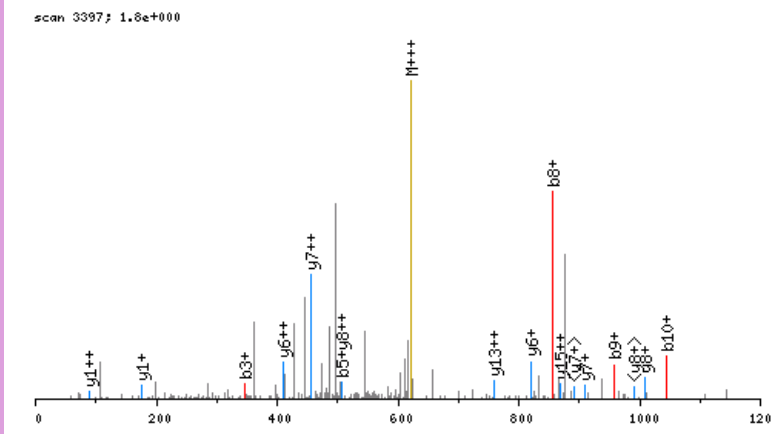

click image to zoom in; click top corners to zoom out [\[precursor±\]](#)

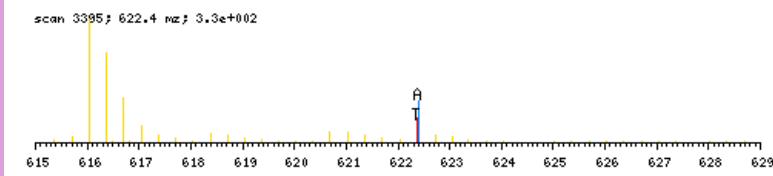

zoomed in precursor plot; T=theoretical m/z, A=acquired m/z

| b <sup>+</sup> | #  | AA | #  | y <sup>+</sup> | y <sup>2+</sup> |
|----------------|----|----|----|----------------|-----------------|
| 128.1075       | 1  | V  | 16 |                |                 |
| 291.1708       | 2  | Y  | 15 | 1737.9653      | 869.4865        |
| 348.1923       | 3  | G  | 14 | 1574.9019      | 787.9549        |
| 449.2400       | 4  | T  | 13 | 1517.8805      | 759.4441        |
| 506.2614       | 5  | G  | 12 | 1416.8328      | 708.9203        |
| 662.3877       | 6  | K  | 11 | 1359.8113      | 680.4096        |
| 799.4467       | 7  | H  | 10 | 1203.6850      | 602.3464        |
| 856.4681       | 8  | G  | 9  | 1066.6261      | 533.8170        |
| 957.5158       | 9  | T  | 8  | 1009.6046      | 505.3062        |
| 1044.5478      | 10 | S  | 7  | 908.5570       | 454.7824        |
| 1157.6319      | 11 | L  | 6  | 821.5249       | 411.2664        |
| 1313.7582      | 12 | K  | 5  | 708.4409       | 354.7243        |
| 1414.8059      | 13 | T  | 4  | 552.3146       | 276.6612        |
| 1527.8899      | 14 | L  | 3  | 451.2669       | 226.1374        |
| 1690.9533      | 15 | Y  | 2  | 338.1828       | 169.5953        |
|                | 16 | R  | 1  | 175.1195       | 88.0637         |

N-term:+29.04 K(6):+156.13  
 K(12):+156.13

WAKVNPDEVGGEALGR, MH+ 1753.9237, m/z 585.3128  
 L OS G26 P150811 220811-s1.04082.04082.3.dta

X-range:

-

MassTol: Y-zoom:

MassType:

AVG  MONO

Axis:

1  2

Label:

I  M  -

Ions:

a  +  2+  3+

b  +  2+  3+

c  +  2+  3+

x  +  2+  3+

y  +  2+  3+

z  +  2+  3+

hide H<sub>2</sub>O/NH<sub>3</sub>

zoom 112-122

GO

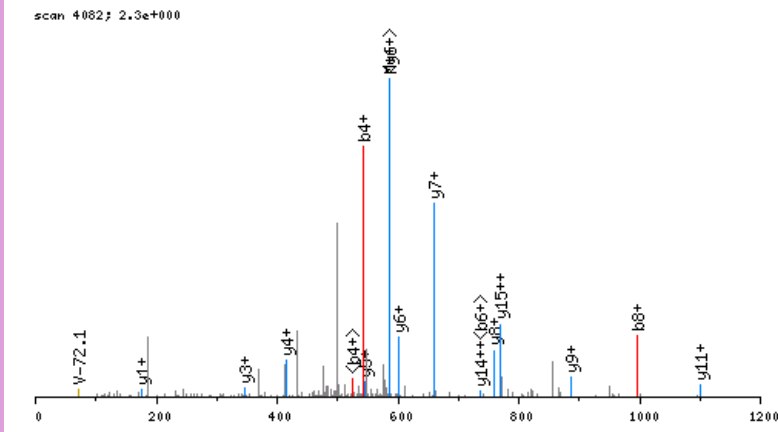

click image to zoom in; click top corners to zoom out [\[precursor±\]](#)

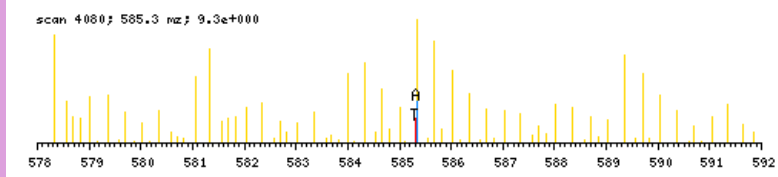

zoomed in precursor plot; T=theoretical m/z, A=acquired m/z

| b <sup>+</sup> | #  | AA # | y <sup>+</sup> | y <sup>2+</sup> |
|----------------|----|------|----------------|-----------------|
| 215.1184       | 1  | W 16 |                |                 |
| 286.1555       | 2  | A 15 | 1539.8131      | 770.4105        |
| 442.2818       | 3  | K 14 | 1468.7760      | 734.8919        |
| 541.3502       | 4  | V 13 | 1312.6497      | 656.8288        |
| 655.3932       | 5  | N 12 | 1213.5813      | 607.2946        |
| 752.4459       | 6  | P 11 | 1099.5384      | 550.2731        |
| 867.4729       | 7  | D 10 | 1002.4856      | 501.7467        |
| 996.5155       | 8  | E 9  | 887.4587       | 444.2332        |
| 1095.5839      | 9  | V 8  | 758.4161       | 379.7120        |
| 1152.6053      | 10 | G 7  | 659.3477       | 330.1777        |
| 1209.6268      | 11 | G 6  | 602.3262       | 301.6670        |
| 1338.6694      | 12 | E 5  | 545.3047       | 273.1563        |
| 1409.7065      | 13 | A 4  | 416.2621       | 208.6350        |
| 1522.7906      | 14 | L 3  | 345.2250       | 173.1164        |
| 1579.8120      | 15 | G 2  | 232.1410       | 116.5744        |
|                | 16 | R 1  | 175.1195       | 88.0637         |

N-term:+29.04 K(3):+156.13



WELTILHTNDVHSR, MH+ 1754.9402, m/z 439.4905  
 H OS G28 P150811 220811-s1.06980.06980.4.dta

X-range:

-

MassTol: Y-zoom:

MassType:

AVG  MONO

Axis:

1  2

Label:

I  M  -

Ions:

a  +  2+  3+

b  +  2+  3+

c  +  2+  3+

x  +  2+  3+

y  +  2+  3+

z  +  2+  3+

hide H<sub>2</sub>O/NH<sub>3</sub>

zoom 112-122

GO

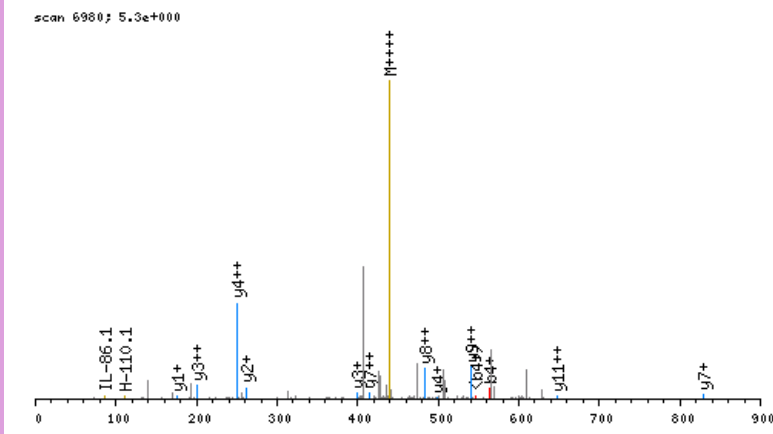

click image to zoom in; click top corners to zoom out [\[precursor±\]](#)

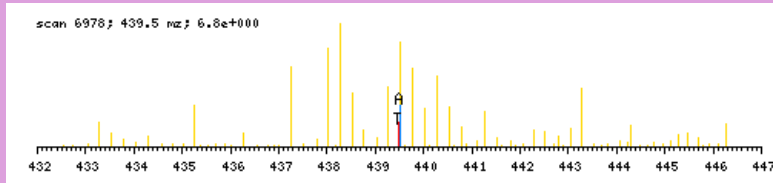

zoomed in precursor plot; T=theoretical m/z, A=acquired m/z

| b <sup>+</sup> | #  | AA # | y <sup>+</sup> | y <sup>2+</sup> |
|----------------|----|------|----------------|-----------------|
| 221.1502       | 1  | W 14 |                |                 |
| 350.1928       | 2  | E 13 | 1534.7978      | 767.9028        |
| 463.2769       | 3  | L 12 | 1405.7552      | 703.3815        |
| 564.3245       | 4  | T 11 | 1292.6711      | 646.8395        |
| 677.4086       | 5  | I 10 | 1191.6234      | 596.3156        |
| 790.4927       | 6  | L 9  | 1078.5394      | 539.7736        |
| 927.5516       | 7  | H 8  | 965.4553       | 483.2316        |
| 1028.5993      | 8  | T 7  | 828.3964       | 414.7021        |
| 1142.6422      | 9  | N 6  | 727.3487       | 364.1783        |
| 1257.6691      | 10 | D 5  | 613.3058       | 307.1568        |
| 1356.7376      | 11 | V 4  | 498.2789       | 249.6433        |
| 1493.7965      | 12 | H 3  | 399.2104       | 200.1091        |
| 1580.8285      | 13 | S 2  | 262.1515       | 131.5797        |
|                | 14 | R 1  | 175.1195       | 88.0637         |

N-term:+35.07

WGGALS LDVPR, MH+ 1198.6584, m/z 400.2243  
 L OS G27 P150811 220811-s1.02123.02123.3.dta

scan 2123; 8.5e+001

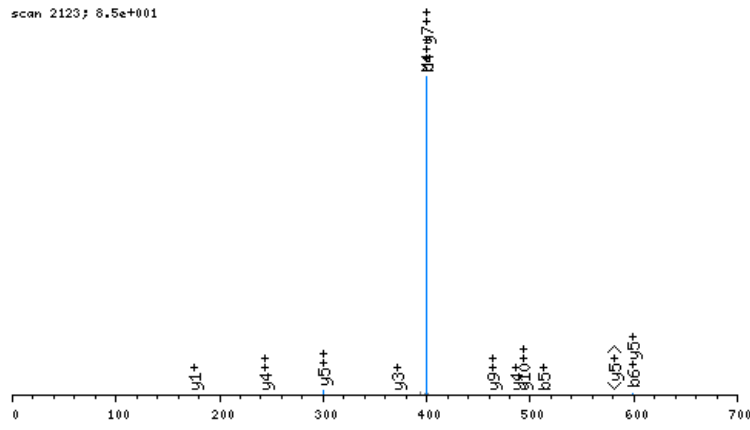

click image to zoom in; click top corners to zoom out [precursor±]

scan 2122; 400.2 m/z; 7.7e+000

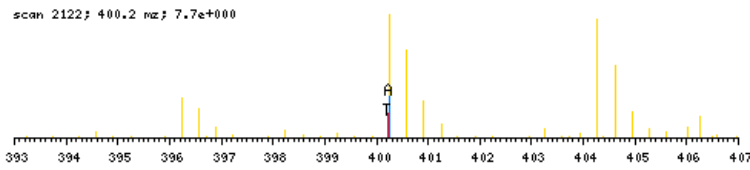

zoomed in precursor plot; T=theoretical m/z, A=acquired m/z

X-range:

-

MassTol: Y-zoom:

MassType:

AVG  MONO

Axis:

1  2

Label:

I  M  -

Ions:

a  +  2+  3+

b  +  2+  3+

c  +  2+  3+

x  +  2+  3+

y  +  2+  3+

z  +  2+  3+

hide H<sub>2</sub>O/NH<sub>3</sub>

zoom 112-122

GO

| b <sup>+</sup> | #  | AA # | y <sup>+</sup> | y <sup>2+</sup> |
|----------------|----|------|----------------|-----------------|
| 215.1184       | 1  | W 11 |                |                 |
| 272.1399       | 2  | G 10 | 984.5478       | 492.7778        |
| 329.1613       | 3  | G 9  | 927.5264       | 464.2671        |
| 400.1985       | 4  | A 8  | 870.5049       | 435.7564        |
| 513.2825       | 5  | L 7  | 799.4678       | 400.2378        |
| 600.3145       | 6  | S 6  | 686.3837       | 343.6958        |
| 713.3986       | 7  | L 5  | 599.3517       | 300.1798        |
| 828.4256       | 8  | D 4  | 486.2676       | 243.6377        |
| 927.4940       | 9  | V 3  | 371.2407       | 186.1243        |
| 1024.5467      | 10 | P 2  | 272.1723       | 136.5900        |
|                | 11 | R 1  | 175.1195       | 88.0637         |

N-term:+29.04

WGKVNSDEVGGEALGR, MH+ 1729.8873, m/z 577.3006  
 L OS G27 P150811 220811-s1.04979.04979.3.dta

X-range:

-

MassTol: Y-zoom:

MassType:

AVG  MONO

Axis:

1  2

Label:

I  M  -

Ions:

a  +  2+  3+

b  +  2+  3+

c  +  2+  3+

x  +  2+  3+

y  +  2+  3+

z  +  2+  3+

hide H<sub>2</sub>O/NH<sub>3</sub>

zoom 112-122

GO

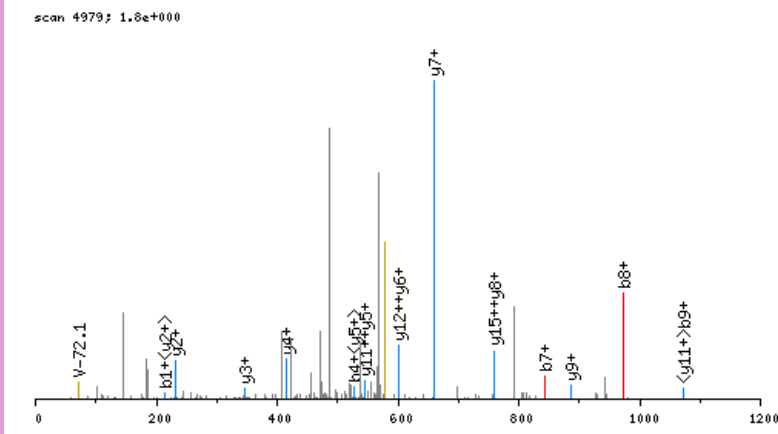

click image to zoom in; click top corners to zoom out [\[precursor±\]](#)

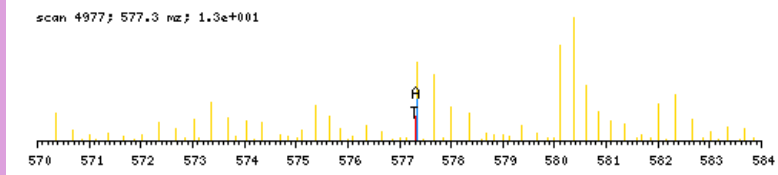

zoomed in precursor plot; T=theoretical m/z, A=acquired m/z

| b <sup>+</sup> | #  | AA # | y <sup>+</sup> | y <sup>2+</sup> |
|----------------|----|------|----------------|-----------------|
| 215.1184       | 1  | W 16 |                |                 |
| 272.1399       | 2  | G 15 | 1515.7767      | 758.3923        |
| 428.2662       | 3  | K 14 | 1458.7553      | 729.8816        |
| 527.3346       | 4  | V 13 | 1302.6290      | 651.8184        |
| 641.3775       | 5  | N 12 | 1203.5606      | 602.2842        |
| 728.4095       | 6  | S 11 | 1089.5176      | 545.2627        |
| 843.4365       | 7  | D 10 | 1002.4856      | 501.7467        |
| 972.4791       | 8  | E 9  | 887.4587       | 444.2332        |
| 1071.5475      | 9  | V 8  | 758.4161       | 379.7120        |
| 1128.5690      | 10 | G 7  | 659.3477       | 330.1777        |
| 1185.5904      | 11 | G 6  | 602.3262       | 301.6670        |
| 1314.6330      | 12 | E 5  | 545.3047       | 273.1563        |
| 1385.6701      | 13 | A 4  | 416.2621       | 208.6350        |
| 1498.7542      | 14 | L 3  | 345.2250       | 173.1164        |
| 1555.7757      | 15 | G 2  | 232.1410       | 116.5744        |
|                | 16 | R 1  | 175.1195       | 88.0637         |

N-term:+29.04 K(3):+156.13

WISKQEYDESGPSIVHR, MH+ 2099.1198, m/z 525.5354  
 H OS G28 P150811 220811-s1.04654.04654.4.dta

X-range:

-

MassTol: Y-zoom:

MassType:

AVG  MONO

Axis:

1  2

Label:

I  M  -

Ions:

a  +  2+  3+

b  +  2+  3+

c  +  2+  3+

x  +  2+  3+

y  +  2+  3+

z  +  2+  3+

hide H<sub>2</sub>O/NH<sub>3</sub>

zoom 112-122

GO

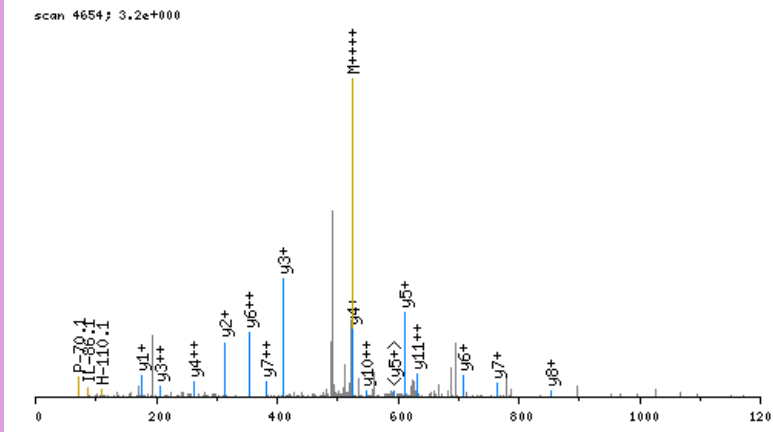

click image to zoom in; click top corners to zoom out [\[precursor±\]](#)

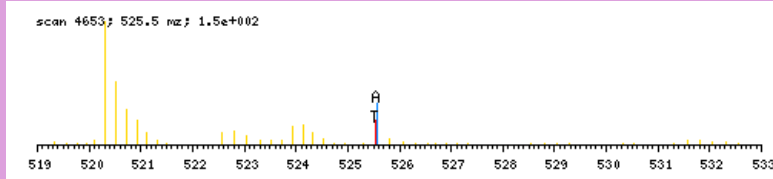

zoomed in precursor plot; T=theoretical m/z, A=acquired m/z

| b <sup>+</sup> | #  | AA # | y <sup>+</sup> | y <sup>2+</sup> |
|----------------|----|------|----------------|-----------------|
| 221.1502       | 1  | W 17 |                |                 |
| 334.2343       | 2  | I 16 | 1878.9774      | 939.9926        |
| 421.2663       | 3  | S 15 | 1765.8933      | 883.4506        |
| 583.4244       | 4  | K 14 | 1678.8613      | 839.9346        |
| 711.4830       | 5  | Q 13 | 1516.7032      | 758.8555        |
| 840.5256       | 6  | E 12 | 1388.6446      | 694.8262        |
| 1003.5889      | 7  | Y 11 | 1259.6020      | 630.3049        |
| 1118.6158      | 8  | D 10 | 1096.5387      | 548.7733        |
| 1247.6584      | 9  | E 9  | 981.5118       | 491.2598        |
| 1334.6905      | 10 | S 8  | 852.4692       | 426.7385        |
| 1391.7119      | 11 | G 7  | 765.4371       | 383.2225        |
| 1488.7647      | 12 | P 6  | 708.4157       | 354.7118        |
| 1575.7967      | 13 | S 5  | 611.3629       | 306.1854        |
| 1688.8808      | 14 | I 4  | 524.3309       | 262.6694        |
| 1787.9492      | 15 | V 3  | 411.2468       | 206.1273        |
| 1925.0081      | 16 | H 2  | 312.1784       | 156.5931        |
|                | 17 | R 1  | 175.1195       | 88.0637         |

N-term:+35.07 K(4):+162.16

WISKTDSDHGSQEVK, MH+ 1998.0317, m/z 500.2634  
 H OS G28 P150811 220811-s1.02020.02020.4.dta

scan 2020; 5.5e+000

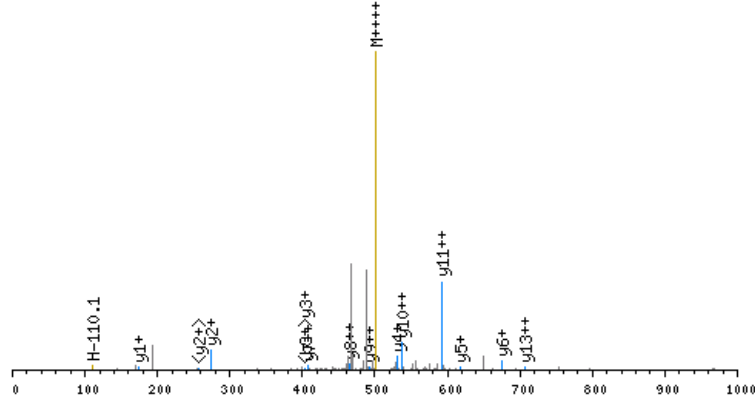

click image to zoom in; click top corners to zoom out [\[precursor±\]](#)

scan 2018; 500.3 m/z; 5.5e+000

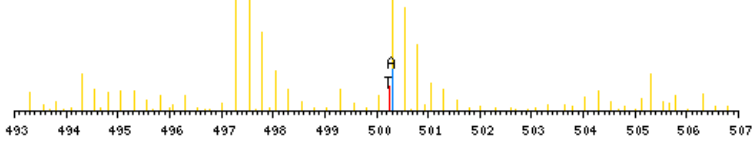

zoomed in precursor plot; T=theoretical m/z, A=acquired m/z

X-range:

-

MassTol: Y-zoom:

MassType:

AVG  MONO

Axis:

1  2

Label:

I  M  -

Ions:

a  +  2+  3+

b  +  2+  3+

c  +  2+  3+

x  +  2+  3+

y  +  2+  3+

z  +  2+  3+

hide H<sub>2</sub>O/NH<sub>3</sub>

zoom 112-122

GO

| b <sup>+</sup> | #  | AA # | y <sup>+</sup> | y <sup>2+</sup> |
|----------------|----|------|----------------|-----------------|
| 221.1502       | 1  | W 17 |                |                 |
| 334.2343       | 2  | I 16 | 1777.8893      | 889.4486        |
| 421.2663       | 3  | S 15 | 1664.8053      | 832.9065        |
| 583.4244       | 4  | K 14 | 1577.7732      | 789.3905        |
| 684.4721       | 5  | T 13 | 1415.6151      | 708.3115        |
| 812.5307       | 6  | Q 12 | 1314.5674      | 657.7876        |
| 927.5576       | 7  | D 11 | 1186.5089      | 593.7583        |
| 1014.5896      | 8  | S 10 | 1071.4819      | 536.2449        |
| 1071.6111      | 9  | G 9  | 984.4499       | 492.7289        |
| 1186.6380      | 10 | D 8  | 927.4284       | 464.2181        |
| 1323.6970      | 11 | H 7  | 812.4015       | 406.7047        |
| 1380.7184      | 12 | G 6  | 675.3426       | 338.1752        |
| 1467.7504      | 13 | S 5  | 618.3211       | 309.6645        |
| 1595.8090      | 14 | Q 4  | 531.2891       | 266.1485        |
| 1724.8516      | 15 | E 3  | 403.2305       | 202.1192        |
| 1823.9200      | 16 | V 2  | 274.1879       | 137.5979        |
|                | 17 | R 1  | 175.1195       | 88.0637         |

N-term:+35.07 K(4):+162.16

WLQTFNIVILEPGMLEPR, MH+ 2190.2209, m/z 730.7451  
 H OS G24 P150811 220811-s1.04898.04898.3.dta

scan 4898; 1.5e+000

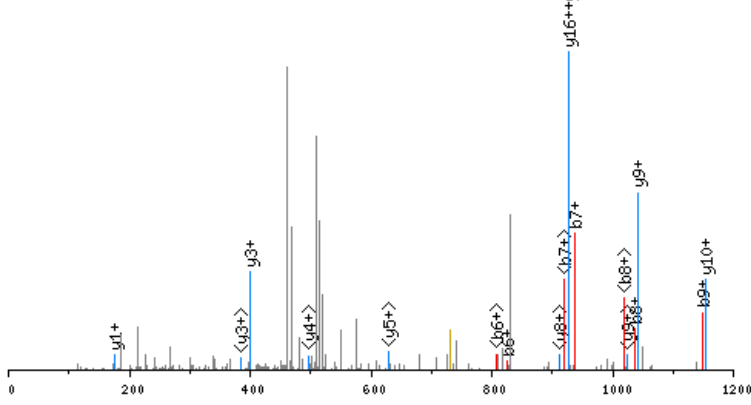

click image to zoom in; click top corners to zoom out [\[precursor±\]](#)

scan 4895; 730.7 m/z; 4.5e+000

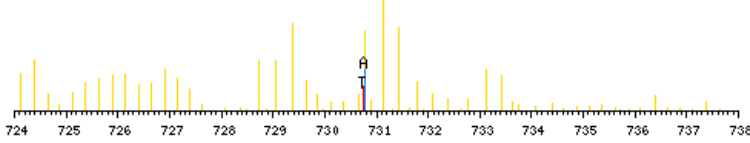

zoomed in precursor plot; T=theoretical m/z, A=acquired m/z

X-range:

-

MassTol: Y-zoom:

MassType:

AVG  MONO

Axis:

1  2

Label:

I  M  -

Ions:

a  +  2+  3+

b  +  2+  3+

c  +  2+  3+

x  +  2+  3+

y  +  2+  3+

z  +  2+  3+

hide H<sub>2</sub>O/NH<sub>3</sub>

zoom 112-122

GO

| b <sup>+</sup> | #  | AA | #  | y <sup>+</sup> | y <sup>2+</sup> |
|----------------|----|----|----|----------------|-----------------|
| 221.1502       | 1  | W  | 18 |                |                 |
| 334.2343       | 2  | L  | 17 | 1970.0785      | 985.5432        |
| 462.2929       | 3  | Q  | 16 | 1856.9944      | 929.0011        |
| 563.3405       | 4  | T  | 15 | 1728.9359      | 864.9718        |
| 710.4089       | 5  | F  | 14 | 1627.8882      | 814.4480        |
| 824.4519       | 6  | N  | 13 | 1480.8198      | 740.9138        |
| 937.5359       | 7  | I  | 12 | 1366.7768      | 683.8923        |
| 1036.6044      | 8  | V  | 11 | 1253.6928      | 627.3503        |
| 1149.6884      | 9  | I  | 10 | 1154.6244      | 577.8161        |
| 1262.7725      | 10 | L  | 9  | 1041.5403      | 521.2741        |
| 1391.8151      | 11 | E  | 8  | 928.4562       | 464.7320        |
| 1488.8678      | 12 | P  | 7  | 799.4136       | 400.2107        |
| 1545.8893      | 13 | G  | 6  | 702.3609       | 351.6843        |
| 1676.9298      | 14 | M  | 5  | 645.3394       | 323.1736        |
| 1790.0138      | 15 | L  | 4  | 514.2989       | 257.6534        |
| 1919.0564      | 16 | E  | 3  | 401.2149       | 201.1113        |
| 2016.1092      | 17 | P  | 2  | 272.1723       | 136.5900        |
|                | 18 | R  | 1  | 175.1195       | 88.0637         |

N-term:+35.07

WSHPLLIPDNR, MH+ 1375.7486, m/z 459.2544  
 L OS G27 P150811 220811-s1.05413.05413.3.dta

scan 5413; 5.1e+000

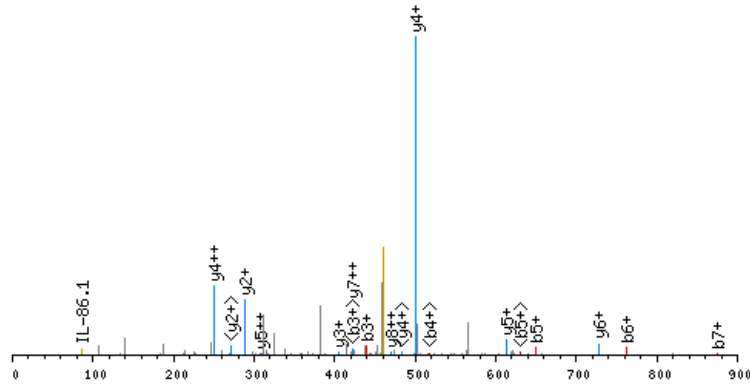

click image to zoom in; click top corners to zoom out [\[precursor±\]](#)

scan 5412; 459.3 m/z; 2.7e+001

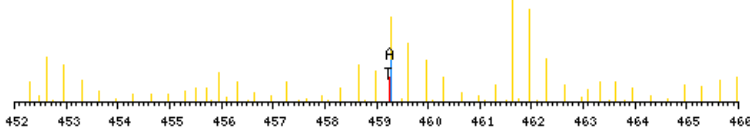

zoomed in precursor plot; T=theoretical m/z, A=acquired m/z

X-range:

-

MassTol: Y-zoom:

MassType:

AVG  MONO

Axis:

1  2

Label:

I  M  -

Ions:

a  +  2+  3+

b  +  2+  3+

c  +  2+  3+

x  +  2+  3+

y  +  2+  3+

z  +  2+  3+

hide H<sub>2</sub>O/NH<sub>3</sub>

zoom 112-122

GO

| b <sup>+</sup> | #  | AA # | y <sup>+</sup> | y <sup>2+</sup> |
|----------------|----|------|----------------|-----------------|
| 215.1184       | 1  | W 11 |                |                 |
| 302.1504       | 2  | S 10 | 1161.6380      | 581.3229        |
| 439.2094       | 3  | H 9  | 1074.6060      | 537.8069        |
| 536.2621       | 4  | P 8  | 937.5471       | 469.2775        |
| 649.3462       | 5  | L 7  | 840.4943       | 420.7511        |
| 762.4302       | 6  | L 6  | 727.4103       | 364.2090        |
| 875.5143       | 7  | I 5  | 614.3262       | 307.6670        |
| 972.5671       | 8  | P 4  | 501.2421       | 251.1250        |
| 1087.5940      | 9  | D 3  | 404.1894       | 202.5986        |
| 1201.6369      | 10 | N 2  | 289.1624       | 145.0851        |
|                | 11 | R 1  | 175.1195       | 88.0637         |

N-term:+29.04

WTQDSDENEQER, MH+ 1564.6515, m/z 522.2220  
 L OS G25 P150811 220811-s1.02069.02069.3.dta

X-range:

-

MassTol: Y-zoom:

MassType:

AVG  MONO

Axis:

1  2

Label:

I  M  -

Ions:

a  +  2+  3+

b  +  2+  3+

c  +  2+  3+

x  +  2+  3+

y  +  2+  3+

z  +  2+  3+

hide H<sub>2</sub>O/NH<sub>3</sub>

zoom 112-122

GO

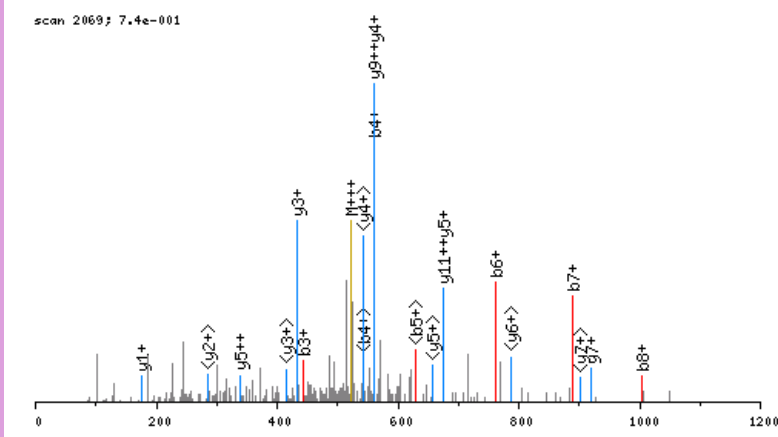

click image to zoom in; click top corners to zoom out [\[precursor±\]](#)

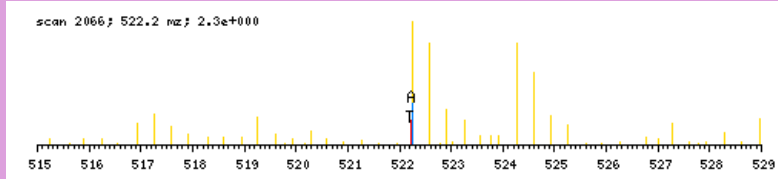

zoomed in precursor plot; T=theoretical m/z, A=acquired m/z

| b <sup>+</sup> | #  | AA # | y <sup>+</sup> | y <sup>2+</sup> |
|----------------|----|------|----------------|-----------------|
| 215.1184       | 1  | W 12 |                |                 |
| 316.1661       | 2  | T 11 | 1350.5410      | 675.7744        |
| 444.2247       | 3  | Q 10 | 1249.4933      | 625.2506        |
| 559.2516       | 4  | D 9  | 1121.4347      | 561.2213        |
| 646.2836       | 5  | S 8  | 1006.4078      | 503.7078        |
| 761.3106       | 6  | D 7  | 919.3757       | 460.1918        |
| 890.3532       | 7  | E 6  | 804.3488       | 402.6783        |
| 1004.3961      | 8  | N 5  | 675.3062       | 338.1570        |
| 1133.4387      | 9  | E 4  | 561.2633       | 281.1355        |
| 1261.4973      | 10 | Q 3  | 432.2207       | 216.6142        |
| 1390.5399      | 11 | E 2  | 304.1621       | 152.5850        |
|                | 12 | R 1  | 175.1195       | 88.0637         |

N-term:+29.04



YDESGPSIVHR, MH+ 1287.6333, m/z 429.8826  
 L OS G27 P150811 220811-s1.02839.02839.3.dta

scan 2839; 8.5e+000

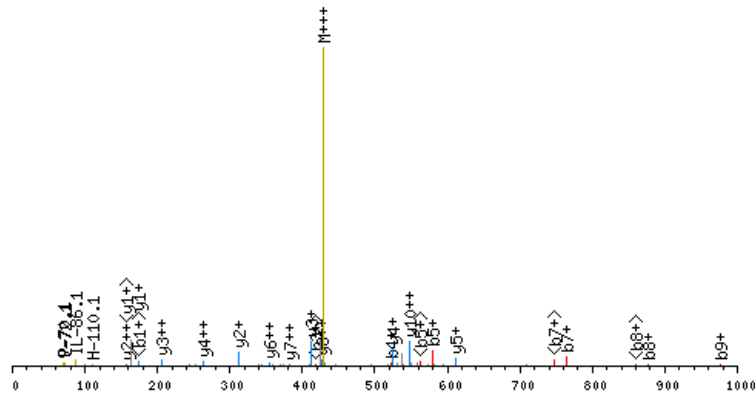

click image to zoom in; click top corners to zoom out [precursor±]

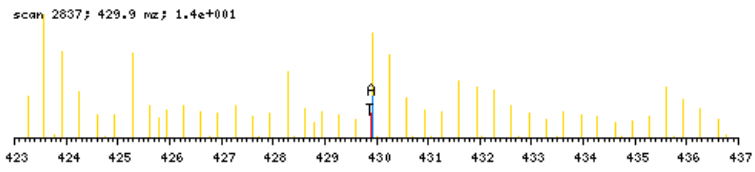

zoomed in precursor plot; T=theoretical m/z, A=acquired m/z

X-range:

-

MassTol: Y-zoom:

MassType:

AVG  MONO

Axis:

1  2

Label:

I  M  -

Ions:

a  +  2+  3+

b  +  2+  3+

c  +  2+  3+

x  +  2+  3+

y  +  2+  3+

z  +  2+  3+

hide H<sub>2</sub>O/NH<sub>3</sub>

zoom 112-122

GO

| b <sup>+</sup> | #  | AA # | y <sup>+</sup> | y <sup>2+</sup> |
|----------------|----|------|----------------|-----------------|
| 192.1024       | 1  | Y    | 11             |                 |
| 307.1294       | 2  | D    | 10             | 1096.5387       |
| 436.1720       | 3  | E    | 9              | 981.5118        |
| 523.2040       | 4  | S    | 8              | 852.4692        |
| 580.2255       | 5  | G    | 7              | 765.4371        |
| 677.2782       | 6  | P    | 6              | 708.4157        |
| 764.3102       | 7  | S    | 5              | 611.3629        |
| 877.3943       | 8  | I    | 4              | 524.3309        |
| 976.4627       | 9  | V    | 3              | 411.2468        |
| 1113.5216      | 10 | H    | 2              | 312.1784        |
|                | 11 | R    | 1              | 175.1195        |

N-term:+29.04

YDFIEDQGGLEAVR, MH+ 1639.7968, m/z 547.2704  
 L OS G25 P150811 220811-s1.07090.07090.3.dta

X-range:

-

MassTol: Y-zoom:

MassType:

AVG  MONO

Axis:

1  2

Label:

I  M  -

Ions:

a  +  2+  3+

b  +  2+  3+

c  +  2+  3+

x  +  2+  3+

y  +  2+  3+

z  +  2+  3+

hide H<sub>2</sub>O/NH<sub>3</sub>

zoom 112-122

GO

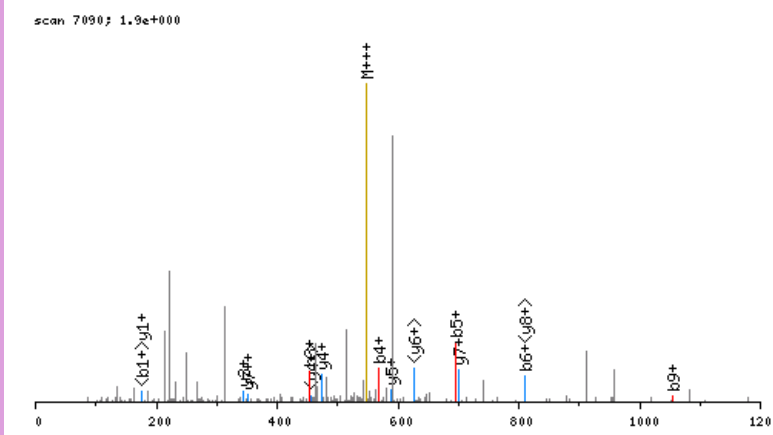

click image to zoom in; click top corners to zoom out [\[precursor±\]](#)

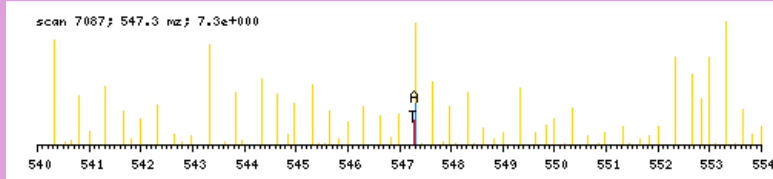

zoomed in precursor plot; T=theoretical m/z, A=acquired m/z

| b <sup>+</sup> | #  | AA # | y <sup>+</sup> | y <sup>2+</sup> |
|----------------|----|------|----------------|-----------------|
| 192.1024       | 1  | Y 14 |                |                 |
| 307.1294       | 2  | D 13 | 1448.7021      | 724.8550        |
| 454.1978       | 3  | F 12 | 1333.6752      | 667.3415        |
| 567.2818       | 4  | I 11 | 1186.6068      | 593.8073        |
| 696.3244       | 5  | E 10 | 1073.5227      | 537.2653        |
| 811.3514       | 6  | D 9  | 944.4801       | 472.7440        |
| 939.4100       | 7  | Q 8  | 829.4532       | 415.2305        |
| 996.4314       | 8  | G 7  | 701.3946       | 351.2012        |
| 1053.4529      | 9  | G 6  | 644.3731       | 322.6905        |
| 1166.5370      | 10 | L 5  | 587.3517       | 294.1798        |
| 1295.5795      | 11 | E 4  | 474.2676       | 237.6377        |
| 1366.6167      | 12 | A 3  | 345.2250       | 173.1164        |
| 1465.6851      | 13 | V 2  | 274.1879       | 137.5979        |
|                | 14 | R 1  | 175.1195       | 88.0637         |

N-term:+29.04

YDLADQLHAAVGASR, MH+ 1614.8240, m/z 538.9462  
 L OS G27 P150811 220811-s1.06413.06413.3.dta

X-range:

-

MassTol: Y-zoom:

MassType:

AVG  MONO

Axis:

1  2

Label:

I  M  -

Ions:

a  +  2+  3+

b  +  2+  3+

c  +  2+  3+

x  +  2+  3+

y  +  2+  3+

z  +  2+  3+

hide H<sub>2</sub>O/NH<sub>3</sub>

zoom 112-122

GO

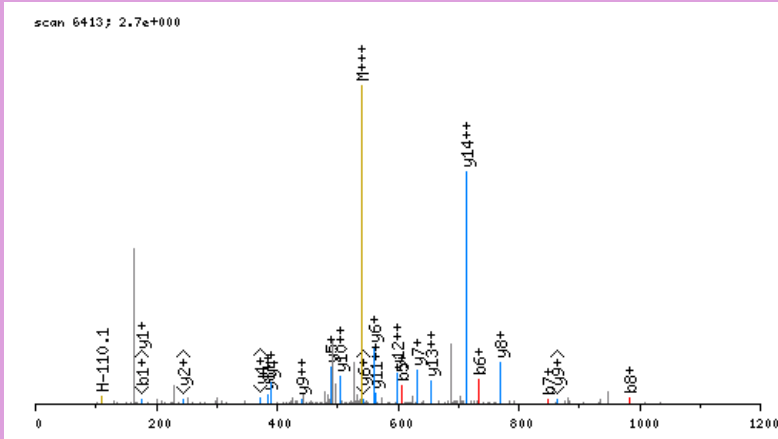

click image to zoom in; click top corners to zoom out [\[precursor±\]](#)

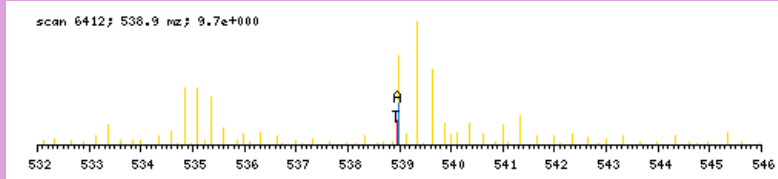

zoomed in precursor plot; T=theoretical m/z, A=acquired m/z

| b <sup>+</sup> | #  | AA | #  | y <sup>+</sup> | y <sup>2+</sup> |
|----------------|----|----|----|----------------|-----------------|
| 192.1024       | 1  | Y  | 15 |                |                 |
| 307.1294       | 2  | D  | 14 | 1423.7294      | 712.3686        |
| 420.2134       | 3  | L  | 13 | 1308.7024      | 654.8551        |
| 491.2505       | 4  | A  | 12 | 1195.6184      | 598.3131        |
| 606.2775       | 5  | D  | 11 | 1124.5812      | 562.7945        |
| 734.3361       | 6  | Q  | 10 | 1009.5543      | 505.2811        |
| 847.4201       | 7  | L  | 9  | 881.4957       | 441.2518        |
| 984.4790       | 8  | H  | 8  | 768.4117       | 384.7097        |
| 1055.5162      | 9  | A  | 7  | 631.3527       | 316.1803        |
| 1126.5533      | 10 | A  | 6  | 560.3156       | 280.6617        |
| 1225.6217      | 11 | V  | 5  | 489.2785       | 245.1432        |
| 1282.6432      | 12 | G  | 4  | 390.2101       | 195.6090        |
| 1353.6803      | 13 | A  | 3  | 333.1886       | 167.0982        |
| 1440.7123      | 14 | S  | 2  | 262.1515       | 131.5797        |
|                | 15 | R  | 1  | 175.1195       | 88.0637         |

N-term:+29.04

YDNEYGYSNR, MH+ 1308.5496, m/z 654.7785  
 L OS G25 P150811 220811-s1.02511.02511.2.dta

X-range:

-

MassTol: Y-zoom:

MassType:

AVG  MONO

Axis:

1  2

Label:

I  M  -

Ions:

a  +  2+  3+

b  +  2+  3+

c  +  2+  3+

x  +  2+  3+

y  +  2+  3+

z  +  2+  3+

hide H<sub>2</sub>O/NH<sub>3</sub>

zoom 112-122

GO

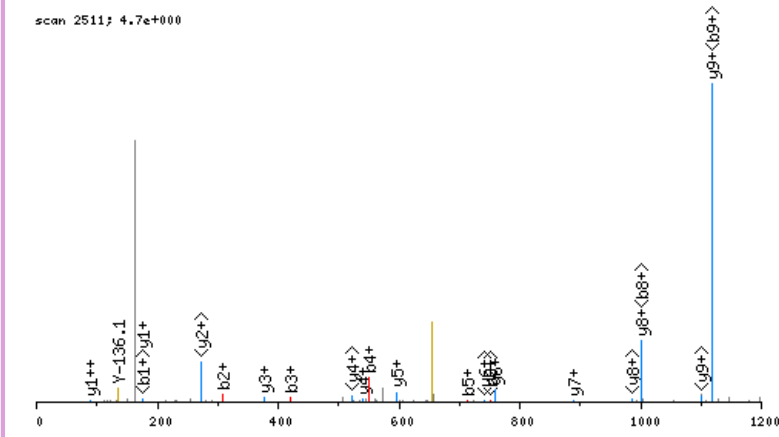

click image to zoom in; click top corners to zoom out [\[precursor±\]](#)

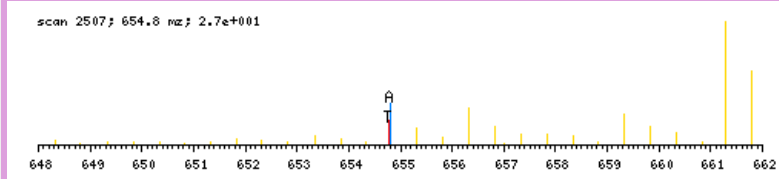

zoomed in precursor plot; T=theoretical m/z, A=acquired m/z

| b <sup>+</sup> | #  | AA # | y <sup>+</sup> | y <sup>2+</sup>    |
|----------------|----|------|----------------|--------------------|
| 192.1024       | 1  | Y    | 10             |                    |
| 307.1294       | 2  | D    | 9              | 1117.4550 559.2314 |
| 421.1723       | 3  | N    | 8              | 1002.4281 501.7180 |
| 550.2149       | 4  | E    | 7              | 888.3852 444.6965  |
| 713.2782       | 5  | Y    | 6              | 759.3426 380.1752  |
| 770.2997       | 6  | G    | 5              | 596.2792 298.6435  |
| 933.3630       | 7  | Y    | 4              | 539.2578 270.1328  |
| 1020.3950      | 8  | S    | 3              | 376.1945 188.6011  |
| 1134.4380      | 9  | N    | 2              | 289.1624 145.0851  |
|                | 10 | R    | 1              | 175.1195 88.0637   |

N-term:+29.04

YDPAGGEDPLGAVHLR, MH+ 1694.8502, m/z 565.6216  
 L OS G26 P150811 220811-s1.05217.05217.3.dta

X-range:

-

MassTol: Y-zoom:

MassType:

AVG  MONO

Axis:

1  2

Label:

I  M  -

Ions:

a  +  2+  3+

b  +  2+  3+

c  +  2+  3+

x  +  2+  3+

y  +  2+  3+

z  +  2+  3+

hide H<sub>2</sub>O/NH<sub>3</sub>

zoom 112-122

GO

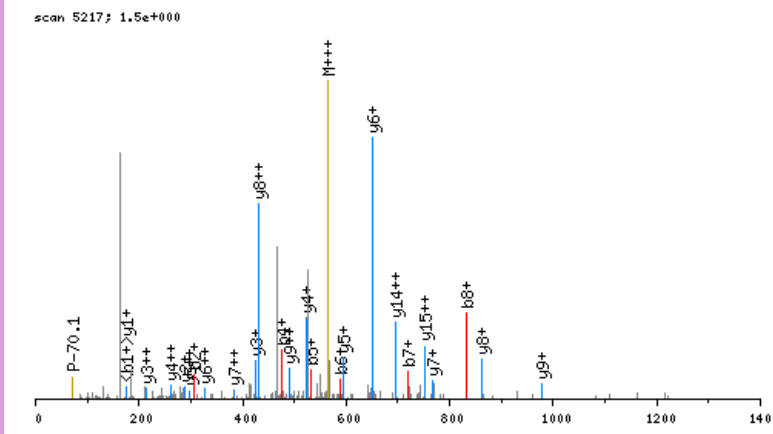

click image to zoom in; click top corners to zoom out [\[precursor±\]](#)

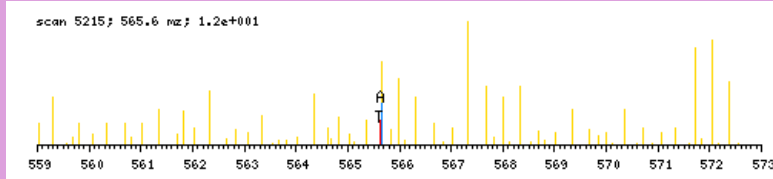

zoomed in precursor plot; T=theoretical m/z, A=acquired m/z

| b <sup>+</sup> | #  | AA # | y <sup>+</sup> | y <sup>2+</sup> |
|----------------|----|------|----------------|-----------------|
| 192.1024       | 1  | Y 16 |                |                 |
| 307.1294       | 2  | D 15 | 1503.7556      | 752.3817        |
| 404.1821       | 3  | P 14 | 1388.7286      | 694.8682        |
| 475.2192       | 4  | A 13 | 1291.6759      | 646.3418        |
| 532.2407       | 5  | G 12 | 1220.6388      | 610.8233        |
| 589.2622       | 6  | G 11 | 1163.6173      | 582.3126        |
| 718.3048       | 7  | E 10 | 1106.5958      | 553.8018        |
| 833.3317       | 8  | D 9  | 977.5532       | 489.2805        |
| 930.3845       | 9  | P 8  | 862.5263       | 431.7671        |
| 1043.4685      | 10 | L 7  | 765.4735       | 383.2407        |
| 1100.4900      | 11 | G 6  | 652.3895       | 326.6986        |
| 1171.5271      | 12 | A 5  | 595.3680       | 298.1879        |
| 1270.5955      | 13 | V 4  | 524.3309       | 262.6694        |
| 1407.6544      | 14 | H 3  | 425.2625       | 213.1352        |
| 1520.7385      | 15 | L 2  | 288.2036       | 144.6057        |
|                | 16 | R 1  | 175.1195       | 88.0637         |

N-term:+29.04

YEKPTQTEAPQVTGPIEVPVVR, MH+ 2393.3080, m/z 599.0825  
 L OS G26 P150811 220811-s1.05018.05018.4.dta

X-range:

-

MassTol: Y-zoom:

MassType:

AVG  MONO

Axis:

1  2

Label:

I  M  -

Ions:

a  +  2+  3+

b  +  2+  3+

c  +  2+  3+

x  +  2+  3+

y  +  2+  3+

z  +  2+  3+

hide H<sub>2</sub>O/NH<sub>3</sub>

zoom 112-122

GO

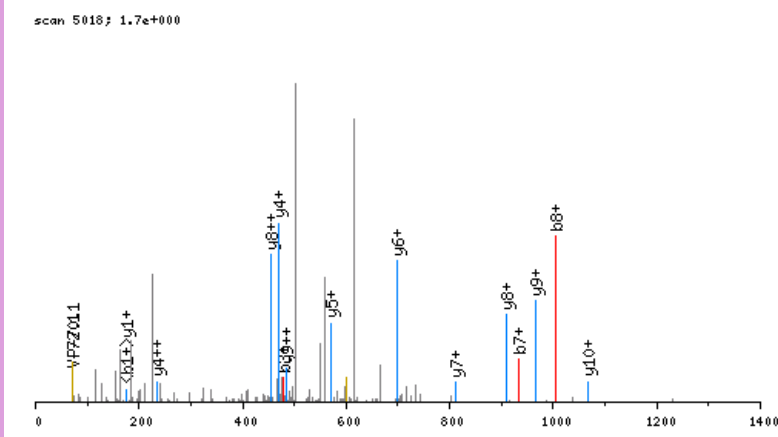

click image to zoom in; click top corners to zoom out [precursor±]

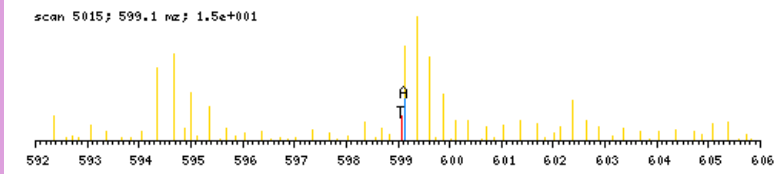

zoomed in precursor plot; T=theoretical m/z, A=acquired m/z

| b <sup>+</sup> | #  | AA # | y <sup>+</sup> | y <sup>2+</sup> |
|----------------|----|------|----------------|-----------------|
| 192.1024       | 1  | Y 21 |                |                 |
| 321.1450       | 2  | E 20 | 2202.2134      | 1101.6106       |
| 477.2713       | 3  | K 19 | 2073.1709      | 1037.0893       |
| 574.3241       | 4  | P 18 | 1917.0446      | 959.0262        |
| 702.3827       | 5  | Q 17 | 1819.9918      | 910.4998        |
| 803.4303       | 6  | T 16 | 1691.9332      | 846.4705        |
| 932.4729       | 7  | E 15 | 1590.8855      | 795.9467        |
| 1003.5100      | 8  | A 14 | 1461.8429      | 731.4254        |
| 1100.5628      | 9  | P 13 | 1390.8058      | 695.9068        |
| 1228.6214      | 10 | Q 12 | 1293.7531      | 647.3804        |
| 1327.6898      | 11 | V 11 | 1165.6945      | 583.3512        |
| 1428.7375      | 12 | T 10 | 1066.6261      | 533.8169        |
| 1485.7589      | 13 | G 9  | 965.5784       | 483.2931        |
| 1582.8117      | 14 | P 8  | 908.5569       | 454.7824        |
| 1695.8958      | 15 | I 7  | 811.5042       | 406.2560        |
| 1824.9384      | 16 | E 6  | 698.4201       | 349.7140        |
| 1924.0068      | 17 | V 5  | 569.3775       | 285.1927        |
| 2021.0595      | 18 | P 4  | 470.3091       | 235.6585        |
| 2120.1280      | 19 | V 3  | 373.2563       | 187.1321        |
| 2219.1964      | 20 | V 2  | 274.1879       | 137.5979        |
|                | 21 | R 1  | 175.1195       | 88.0637         |

N-term:+29.04 K(3):+156.13

YELPDGQVITIGNER, MH+ 1731.8917, m/z 577.9688  
 L OS G25 P150811 220811-s1.07248.07248.3.dta

X-range:

-

MassTol: Y-zoom:

MassType:

AVG  MONO

Axis:

1  2

Label:

I  M  -

Ions:

a  +  2+  3+

b  +  2+  3+

c  +  2+  3+

x  +  2+  3+

y  +  2+  3+

z  +  2+  3+

hide H<sub>2</sub>O/NH<sub>3</sub>

zoom 112-122

GO

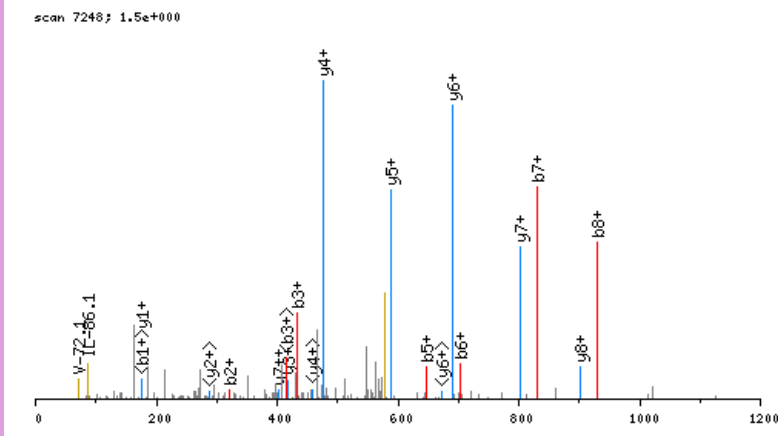

click image to zoom in; click top corners to zoom out [\[precursor±\]](#)

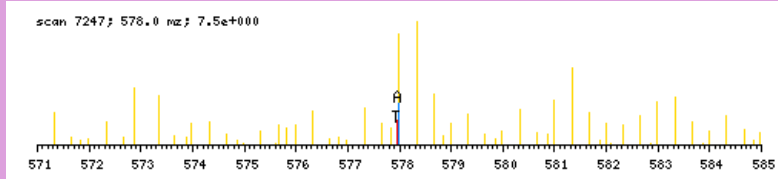

zoomed in precursor plot; T=theoretical m/z, A=acquired m/z

| b <sup>+</sup> | #  | AA # | y <sup>+</sup> | y <sup>2+</sup> |
|----------------|----|------|----------------|-----------------|
| 192.1024       | 1  | Y 15 |                |                 |
| 321.1450       | 2  | E 14 | 1540.7971      | 770.9025        |
| 434.2291       | 3  | L 13 | 1411.7545      | 706.3812        |
| 531.2818       | 4  | P 12 | 1298.6705      | 649.8391        |
| 646.3088       | 5  | D 11 | 1201.6177      | 601.3128        |
| 703.3303       | 6  | G 10 | 1086.5907      | 543.7993        |
| 831.3888       | 7  | Q 9  | 1029.5693      | 515.2886        |
| 930.4572       | 8  | V 8  | 901.5107       | 451.2593        |
| 1043.5413      | 9  | I 7  | 802.4423       | 401.7251        |
| 1144.5890      | 10 | T 6  | 689.3582       | 345.1830        |
| 1257.6731      | 11 | I 5  | 588.3105       | 294.6592        |
| 1314.6945      | 12 | G 4  | 475.2265       | 238.1172        |
| 1428.7374      | 13 | N 3  | 418.2050       | 209.6064        |
| 1557.7800      | 14 | E 2  | 304.1621       | 152.5850        |
|                | 15 | R 1  | 175.1195       | 88.0637         |

N-term:+29.04

YENMTTVPDGSVIPGGTASPRK, MH+ 2420.2404, m/z 605.8156  
 H OS G28 P150811 220811-s1.04444.04444.4.dta

X-range:

-

MassTol: Y-zoom:

MassType:

AVG  MONO

Axis:

1  2

Label:

I  M  -

Ions:

a  +  2+  3+

b  +  2+  3+

c  +  2+  3+

x  +  2+  3+

y  +  2+  3+

z  +  2+  3+

hide H<sub>2</sub>O/NH<sub>3</sub>

zoom 112-122

GO

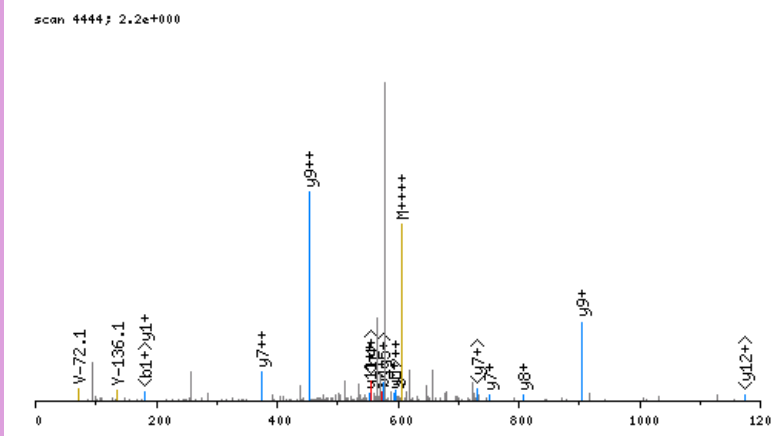

click image to zoom in; click top corners to zoom out [precursor±]

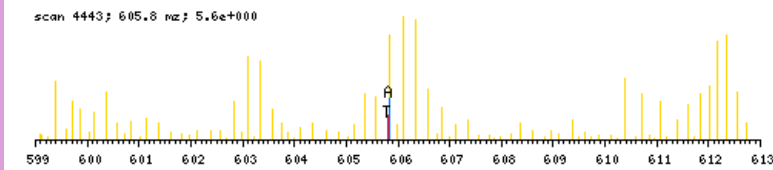

zoomed in precursor plot; T=theoretical m/z, A=acquired m/z

| b <sup>+</sup> | #  | AA # | y <sup>+</sup> | y <sup>2+</sup> |
|----------------|----|------|----------------|-----------------|
| 198.1342       | 1  | Y 23 |                |                 |
| 327.1768       | 2  | E 22 | 2223.1140      | 1112.0609       |
| 441.2197       | 3  | N 21 | 2094.0714      | 1047.5396       |
| 572.2602       | 4  | M 20 | 1980.0285      | 990.5181        |
| 673.3079       | 5  | T 19 | 1848.9880      | 924.9979        |
| 774.3556       | 6  | T 18 | 1747.9403      | 874.4741        |
| 873.4240       | 7  | V 17 | 1646.8926      | 823.9502        |
| 970.4768       | 8  | P 16 | 1547.8242      | 774.4160        |
| 1057.5088      | 9  | S 15 | 1450.7714      | 725.8896        |
| 1172.5357      | 10 | D 14 | 1363.7394      | 682.3736        |
| 1229.5572      | 11 | G 13 | 1248.7125      | 624.8601        |
| 1316.5892      | 12 | S 12 | 1191.6910      | 596.3494        |
| 1415.6576      | 13 | V 11 | 1104.6590      | 552.8334        |
| 1516.7053      | 14 | T 10 | 1005.5906      | 503.2992        |
| 1613.7581      | 15 | P 9  | 904.5429       | 452.7754        |
| 1670.7796      | 16 | G 8  | 807.4901       | 404.2490        |
| 1727.8010      | 17 | G 7  | 750.4686       | 375.7382        |
| 1828.8487      | 18 | T 6  | 693.4472       | 347.2275        |
| 1899.8858      | 19 | A 5  | 592.3995       | 296.7037        |
| 1986.9178      | 20 | S 4  | 521.3624       | 261.1851        |
| 2083.9706      | 21 | P 3  | 434.3304       | 217.6691        |
| 2240.0717      | 22 | R 2  | 337.2776       | 169.1427        |
|                | 23 | K 1  | 181.1765       | 91.0922         |

N-term:+35.07 K(23):+162.16



YERDEGNLLTEKQKLR, MH+ 2208.2837, m/z 552.8264  
 H OS G28 P150811 220811-s1.03574.03574.4.dta

X-range:

-

MassTol: Y-zoom:

MassType:

AVG  MONO

Axis:

1  2

Label:

I  M  -

Ions:

a  +  2+  3+

b  +  2+  3+

c  +  2+  3+

x  +  2+  3+

y  +  2+  3+

z  +  2+  3+

hide H<sub>2</sub>O/NH<sub>3</sub>

zoom 112-122

GO

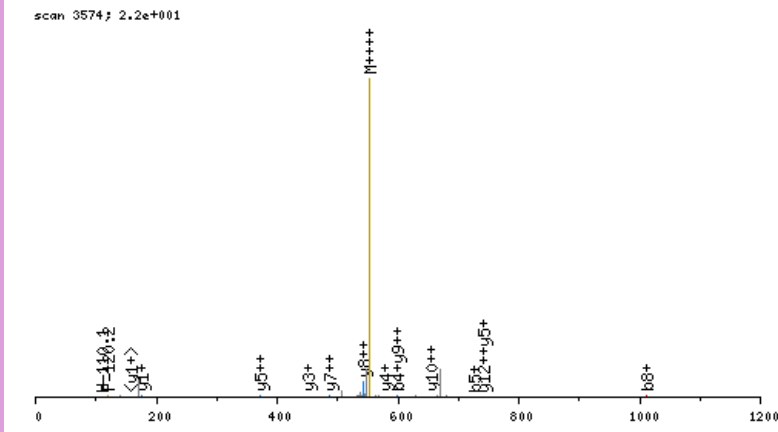

click image to zoom in; click top corners to zoom out [\[precursor±\]](#)

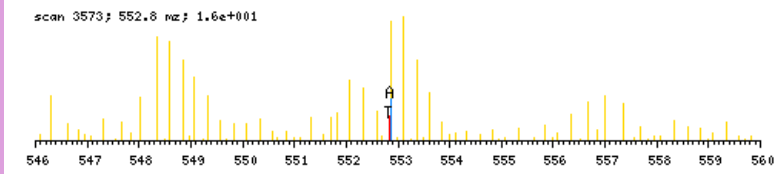

zoomed in precursor plot; T=theoretical m/z, A=acquired m/z

| b <sup>+</sup> | #  | AA | #  | y <sup>+</sup> | y <sup>2+</sup> |
|----------------|----|----|----|----------------|-----------------|
| 198.1342       | 1  | Y  | 17 |                |                 |
| 327.1768       | 2  | E  | 16 | 2011.1573      | 1006.0826       |
| 483.2779       | 3  | R  | 15 | 1882.1147      | 941.5613        |
| 598.3049       | 4  | D  | 14 | 1726.0136      | 863.5107        |
| 727.3475       | 5  | E  | 13 | 1610.9867      | 805.9972        |
| 784.3689       | 6  | G  | 12 | 1481.9441      | 741.4759        |
| 898.4119       | 7  | N  | 11 | 1424.9226      | 712.9652        |
| 1012.4548      | 8  | N  | 10 | 1310.8797      | 655.9437        |
| 1125.5389      | 9  | L  | 9  | 1196.8367      | 598.9223        |
| 1238.6229      | 10 | L  | 8  | 1083.7527      | 542.3803        |
| 1339.6706      | 11 | T  | 7  | 970.6686       | 485.8382        |
| 1468.7132      | 12 | E  | 6  | 869.6209       | 435.3144        |
| 1630.8713      | 13 | K  | 5  | 740.5783       | 370.7931        |
| 1758.9299      | 14 | Q  | 4  | 578.4202       | 289.7140        |
| 1921.0880      | 15 | K  | 3  | 450.3617       | 225.6847        |
| 2034.1720      | 16 | L  | 2  | 288.2036       | 144.6057        |
|                | 17 | R  | 1  | 175.1195       | 88.0637         |

N-term: +35.07 K(13): +162.16  
 K(15): +162.16

YERPVLHLVALNTPVAGDIR, MH+ 2261.2770, m/z 566.0747  
 L OS G28 P150811 220811-s1.07906.07906.4.dta

X-range:

-

MassTol: Y-zoom:

MassType:

AVG  MONO

Axis:

1  2

Label:

I  M  -

Ions:

a  +  2+  3+

b  +  2+  3+

c  +  2+  3+

x  +  2+  3+

y  +  2+  3+

z  +  2+  3+

hide H<sub>2</sub>O/NH<sub>3</sub>

zoom 112-122

GO

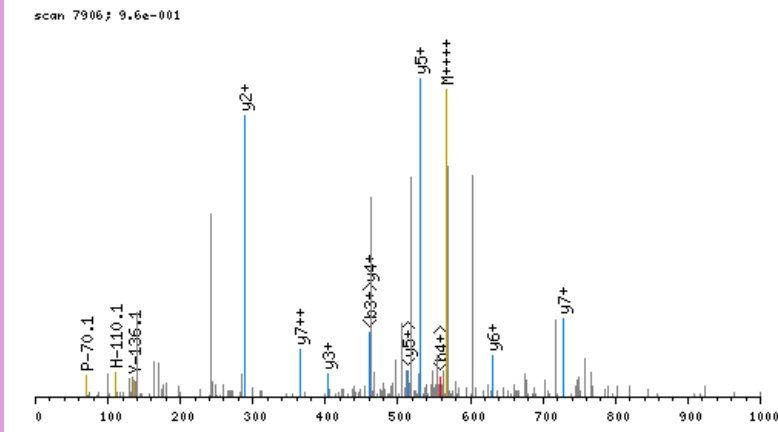

click image to zoom in; click top corners to zoom out [\[precursor±\]](#)

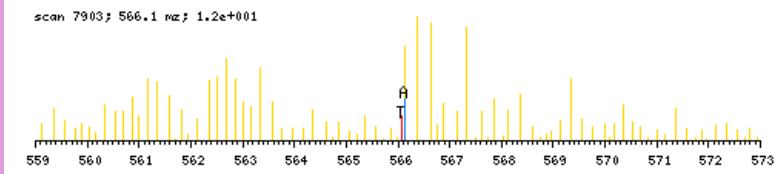

zoomed in precursor plot; T=theoretical m/z, A=acquired m/z

| b <sup>+</sup> | #  | AA | #  | y <sup>+</sup> | y <sup>2+</sup> |
|----------------|----|----|----|----------------|-----------------|
| 192.1024       | 1  | Y  | 20 |                |                 |
| 321.1450       | 2  | E  | 19 | 2070.1824      | 1035.5951       |
| 477.2461       | 3  | R  | 18 | 1941.1398      | 971.0738        |
| 574.2989       | 4  | P  | 17 | 1785.0387      | 893.0233        |
| 673.3673       | 5  | V  | 16 | 1687.9859      | 844.4969        |
| 786.4514       | 6  | L  | 15 | 1588.9175      | 794.9627        |
| 923.5103       | 7  | H  | 14 | 1475.8334      | 738.4206        |
| 1036.5944      | 8  | L  | 13 | 1338.7745      | 669.8912        |
| 1135.6628      | 9  | V  | 12 | 1225.6905      | 613.3491        |
| 1206.6999      | 10 | A  | 11 | 1126.6220      | 563.8149        |
| 1319.7839      | 11 | L  | 10 | 1055.5849      | 528.2964        |
| 1433.8269      | 12 | N  | 9  | 942.5009       | 471.7543        |
| 1534.8745      | 13 | T  | 8  | 828.4579       | 414.7329        |
| 1631.9273      | 14 | P  | 7  | 727.4103       | 364.2090        |
| 1730.9957      | 15 | V  | 6  | 630.3575       | 315.6827        |
| 1802.0328      | 16 | A  | 5  | 531.2891       | 266.1485        |
| 1859.0543      | 17 | G  | 4  | 460.2520       | 230.6299        |
| 1974.0812      | 18 | D  | 3  | 403.2305       | 202.1192        |
| 2087.1653      | 19 | I  | 2  | 288.2036       | 144.6057        |
|                | 20 | R  | 1  | 175.1195       | 88.0637         |

N-term:+29.04

YFIHSLCLLGR, MH+ 1406.7618, m/z 469.5921  
 L OS G26 P150811 220811-s1.06702.06702.3.dta

scan 6702; 4.6e+000

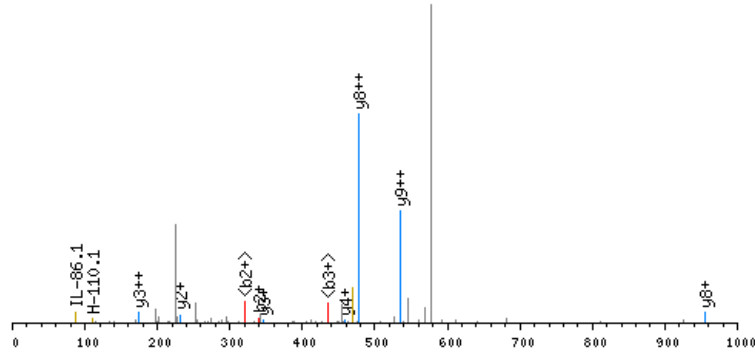

click image to zoom in; click top corners to zoom out [\[precursor±\]](#)

scan 6700; 469.6 m/z; 5.2e+000

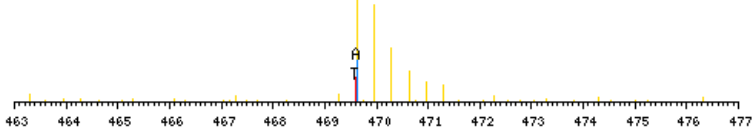

zoomed in precursor plot; T=theoretical m/z, A=acquired m/z

X-range:

-

MassTol: Y-zoom:

MassType:

AVG  MONO

Axis:

1  2

Label:

I  M  -

Ions:

a  +  2+  3+

b  +  2+  3+

c  +  2+  3+

x  +  2+  3+

y  +  2+  3+

z  +  2+  3+

hide H<sub>2</sub>O/NH<sub>3</sub>

zoom 112-122

GO

| b <sup>+</sup> | #  | AA # | y <sup>+</sup> | y <sup>2+</sup>    |
|----------------|----|------|----------------|--------------------|
| 192.1024       | 1  | Y    | 11             |                    |
| 339.1708       | 2  | F    | 10             | 1215.6672 608.3375 |
| 452.2549       | 3  | I    | 9              | 1068.5988 534.8033 |
| 589.3138       | 4  | H    | 8              | 955.5147 478.2613  |
| 676.3458       | 5  | S    | 7              | 818.4558 409.7318  |
| 789.4299       | 6  | L    | 6              | 731.4238 366.2158  |
| 949.4605       | 7  | C    | 5              | 618.3397 309.6738  |
| 1062.5446      | 8  | L    | 4              | 458.3091 229.6585  |
| 1175.6286      | 9  | L    | 3              | 345.2250 173.1164  |
| 1232.6501      | 10 | G    | 2              | 232.1410 116.5744  |
|                | 11 | R    | 1              | 175.1195 88.0637   |

N-term:+29.04 C(7):+160.03

YGELADCCTKQEPER, MH+ 1923.9216, m/z 641.9787  
 H OS G26 P150811 220811-s1.02423.02423.3.dta

X-range:

-

MassTol: Y-zoom:

MassType:

AVG  MONO

Axis:

1  2

Label:

I  M  -

Ions:

a  +  2+  3+

b  +  2+  3+

c  +  2+  3+

x  +  2+  3+

y  +  2+  3+

z  +  2+  3+

hide H<sub>2</sub>O/NH<sub>3</sub>

zoom 112-122

GO

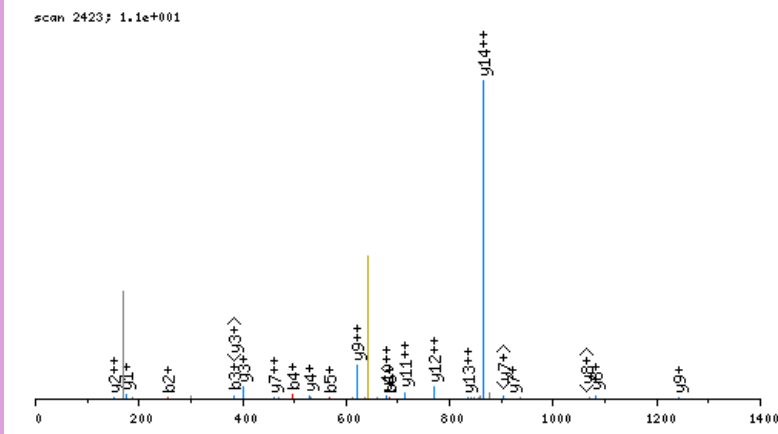

click image to zoom in; click top corners to zoom out [precursor±]

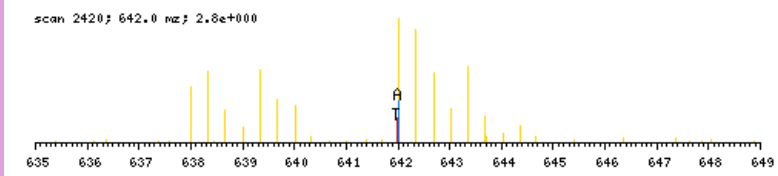

zoomed in precursor plot; T=theoretical m/z, A=acquired m/z

| b <sup>+</sup> | #  | AA | #  | y <sup>+</sup> | y <sup>2+</sup> |
|----------------|----|----|----|----------------|-----------------|
| 198.1342       | 1  | Y  | 15 |                |                 |
| 255.1557       | 2  | G  | 14 | 1726.7952      | 863.9015        |
| 384.1983       | 3  | E  | 13 | 1669.7737      | 835.3908        |
| 497.2823       | 4  | L  | 12 | 1540.7311      | 770.8695        |
| 568.3195       | 5  | A  | 11 | 1427.6471      | 714.3274        |
| 683.3464       | 6  | D  | 10 | 1356.6100      | 678.8089        |
| 843.3770       | 7  | C  | 9  | 1241.5830      | 621.2954        |
| 1003.4076      | 8  | C  | 8  | 1081.5524      | 541.2801        |
| 1104.4553      | 9  | T  | 7  | 921.5218       | 461.2648        |
| 1266.6134      | 10 | K  | 6  | 820.4741       | 410.7410        |
| 1394.6720      | 11 | Q  | 5  | 658.3160       | 329.6619        |
| 1523.7146      | 12 | E  | 4  | 530.2575       | 265.6326        |
| 1620.7673      | 13 | P  | 3  | 401.2149       | 201.1113        |
| 1749.8099      | 14 | E  | 2  | 304.1621       | 152.5850        |
|                | 15 | R  | 1  | 175.1195       | 88.0637         |

N-term:+35.07 C(7):+160.03  
 C(8):+160.03 K(10):+162.16

YGGYKEPAAPVSIQR, MH+ 1703.9757, m/z 568.6634  
 H OS G26 P150811 220811-s1.03342.03342.3.dta

scan 3342; 3.2e+001

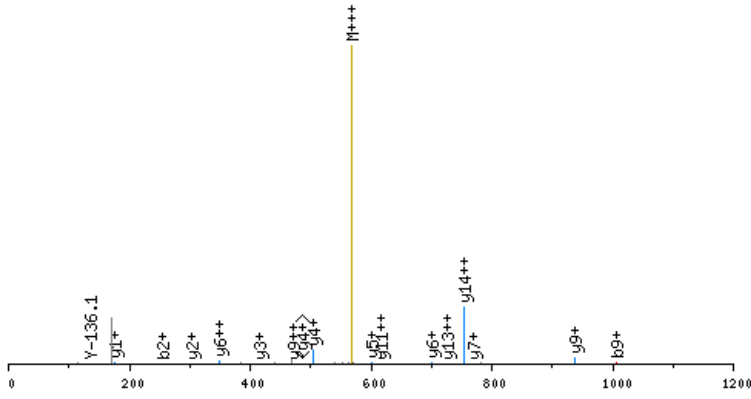

click image to zoom in; click top corners to zoom out [\[precursor±\]](#)

scan 3340; 568.7 m/z; 1.1e+001

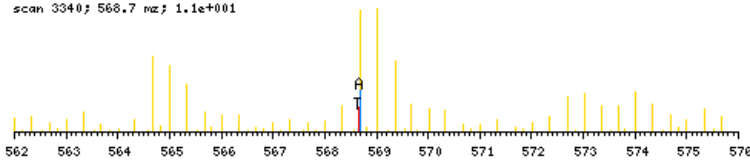

zoomed in precursor plot; T=theoretical m/z, A=acquired m/z

X-range:

-

MassTol: Y-zoom:

MassType:

AVG  MONO

Axis:

1  2

Label:

I  M  -

Ions:

a  +  2+  3+

b  +  2+  3+

c  +  2+  3+

x  +  2+  3+

y  +  2+  3+

z  +  2+  3+

hide H<sub>2</sub>O/NH<sub>3</sub>

zoom 112-122

GO

| b <sup>+</sup> | #  | AA | #  | y <sup>+</sup> | y <sup>2+</sup> |
|----------------|----|----|----|----------------|-----------------|
| 198.1342       | 1  | Y  | 15 |                |                 |
| 255.1557       | 2  | G  | 14 | 1506.8493      | 753.9286        |
| 312.1772       | 3  | G  | 13 | 1449.8278      | 725.4178        |
| 475.2405       | 4  | Y  | 12 | 1392.8064      | 696.9071        |
| 637.3986       | 5  | K  | 11 | 1229.7430      | 615.3754        |
| 766.4412       | 6  | E  | 10 | 1067.5849      | 534.2964        |
| 863.4939       | 7  | P  | 9  | 938.5423       | 469.7751        |
| 934.5311       | 8  | A  | 8  | 841.4896       | 421.2487        |
| 1005.5682      | 9  | A  | 7  | 770.4525       | 385.7301        |
| 1102.6209      | 10 | P  | 6  | 699.4153       | 350.2116        |
| 1201.6893      | 11 | V  | 5  | 602.3626       | 301.6852        |
| 1288.7214      | 12 | S  | 4  | 503.2942       | 252.1510        |
| 1401.8054      | 13 | I  | 3  | 416.2621       | 208.6350        |
| 1529.8640      | 14 | Q  | 2  | 303.1781       | 152.0930        |
|                | 15 | R  | 1  | 175.1195       | 88.0637         |

N-term:+35.07 K(5):+162.16

YGINDPVADKLLKR, MH+ 1685.9955, m/z 422.2543  
 L OS G28 P150811 220811-s1.06346.06346.4.dta

X-range:

-

MassTol: Y-zoom:

MassType:

AVG  MONO

Axis:

1  2

Label:

I  M  -

Ions:

a  +  2+  3+

b  +  2+  3+

c  +  2+  3+

x  +  2+  3+

y  +  2+  3+

z  +  2+  3+

hide H<sub>2</sub>O/NH<sub>3</sub>

zoom 112-122

GO

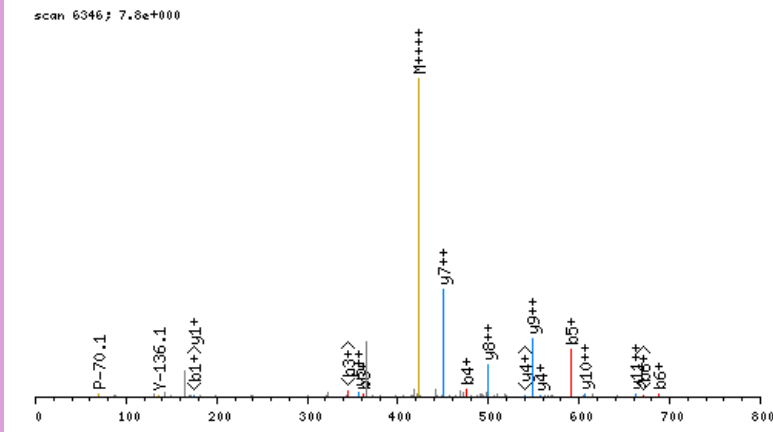

click image to zoom in; click top corners to zoom out [\[precursor±\]](#)

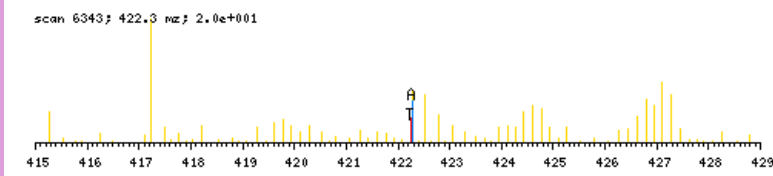

zoomed in precursor plot; T=theoretical m/z, A=acquired m/z

| b <sup>+</sup> | #  | AA | #  | y <sup>+</sup> | y <sup>2+</sup> |
|----------------|----|----|----|----------------|-----------------|
| 192.1024       | 1  | Y  | 14 |                |                 |
| 249.1239       | 2  | G  | 13 | 1494.9009      | 747.9543        |
| 362.2080       | 3  | I  | 12 | 1437.8794      | 719.4436        |
| 476.2509       | 4  | N  | 11 | 1324.7953      | 662.9016        |
| 591.2778       | 5  | D  | 10 | 1210.7524      | 605.8801        |
| 688.3306       | 6  | P  | 9  | 1095.7255      | 548.3666        |
| 787.3990       | 7  | V  | 8  | 998.6727       | 499.8403        |
| 858.4361       | 8  | A  | 7  | 899.6043       | 450.3061        |
| 973.4631       | 9  | D  | 6  | 828.5672       | 414.7875        |
| 1129.5894      | 10 | K  | 5  | 713.5402       | 357.2740        |
| 1242.6734      | 11 | L  | 4  | 557.4139       | 279.2109        |
| 1355.7575      | 12 | L  | 3  | 444.3299       | 222.6688        |
| 1511.8838      | 13 | K  | 2  | 331.2458       | 166.1268        |
|                | 14 | R  | 1  | 175.1195       | 88.0637         |

N-term:+29.04 K(10):+156.13  
 K(13):+156.13

YGYDEKSAGVSVPGMGPSPGR, MH+ 2276.1658, m/z 759.3934  
 H OS G26 P150811 220811-s1.04261.04261.3.dta

scan 4261; 4.8e+000

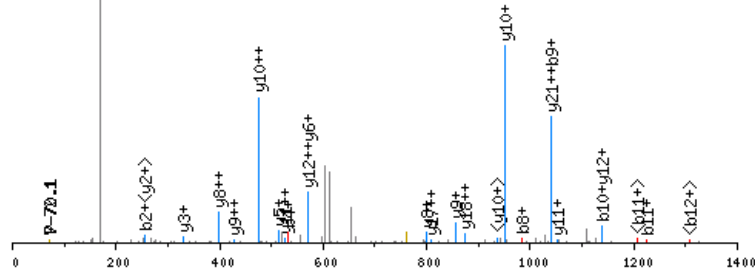

click image to zoom in; click top corners to zoom out [precursor±]

scan 4260; 759.4 nz; 2.7e+001

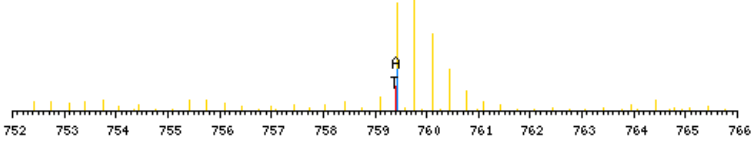

zoomed in precursor plot; T=theoretical m/z, A=acquired m/z

X-range:

-

MassTol: Y-zoom:

MassType:

AVG  MONO

Axis:

1  2

Label:

I  M  -

Ions:

a  +  2+  3+

b  +  2+  3+

c  +  2+  3+

x  +  2+  3+

y  +  2+  3+

z  +  2+  3+

hide H<sub>2</sub>O/NH<sub>3</sub>

zoom 112-122

GO

| b <sup>+</sup> | #  | AA | #  | y <sup>+</sup> | y <sup>2+</sup> |
|----------------|----|----|----|----------------|-----------------|
| 198.1342       | 1  | Y  | 22 |                |                 |
| 255.1557       | 2  | G  | 21 | 2079.0394      | 1040.0236       |
| 418.2190       | 3  | Y  | 20 | 2022.0179      | 1011.5129       |
| 533.2460       | 4  | D  | 19 | 1858.9546      | 929.9812        |
| 662.2886       | 5  | E  | 18 | 1743.9276      | 872.4677        |
| 824.4467       | 6  | K  | 17 | 1614.8850      | 807.9464        |
| 911.4787       | 7  | S  | 16 | 1452.7269      | 726.8674        |
| 982.5158       | 8  | A  | 15 | 1365.6949      | 683.3514        |
| 1039.5373      | 9  | G  | 14 | 1294.6578      | 647.8328        |
| 1138.6057      | 10 | V  | 13 | 1237.6363      | 619.3221        |
| 1225.6377      | 11 | S  | 12 | 1138.5679      | 569.7879        |
| 1324.7061      | 12 | V  | 11 | 1051.5359      | 526.2718        |
| 1421.7589      | 13 | P  | 10 | 952.4675       | 476.7376        |
| 1478.7803      | 14 | G  | 9  | 855.4147       | 428.2113        |
| 1575.8331      | 15 | P  | 8  | 798.3932       | 399.7005        |
| 1706.8736      | 16 | M  | 7  | 701.3405       | 351.1741        |
| 1763.8951      | 17 | G  | 6  | 570.3000       | 285.6539        |
| 1860.9478      | 18 | P  | 5  | 513.2785       | 257.1432        |
| 1947.9799      | 19 | S  | 4  | 416.2258       | 208.6168        |
| 2005.0013      | 20 | G  | 3  | 329.1937       | 165.1008        |
| 2102.0541      | 21 | P  | 2  | 272.1723       | 136.5900        |
|                | 22 | R  | 1  | 175.1195       | 88.0637         |

N-term:+35.07 K(6):+162.16

YGYTHLSTGDLRL, MH+ 1529.8176, m/z 510.6107  
 H OS G27 P150811 220811-s1.05590.05590.3.dta

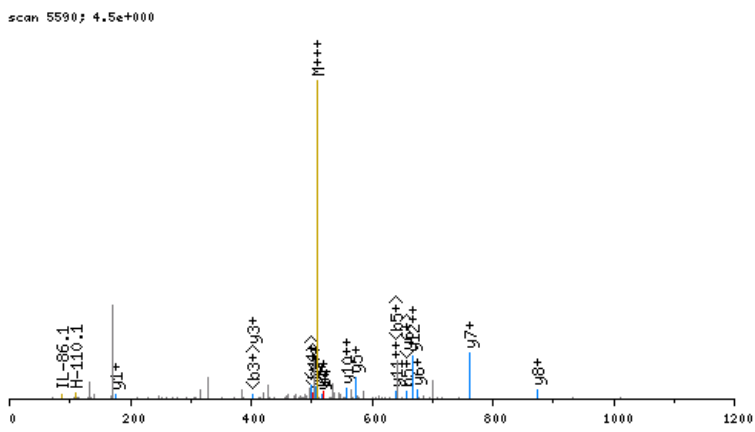

click image to zoom in; click top corners to zoom out [\[precursor±\]](#)

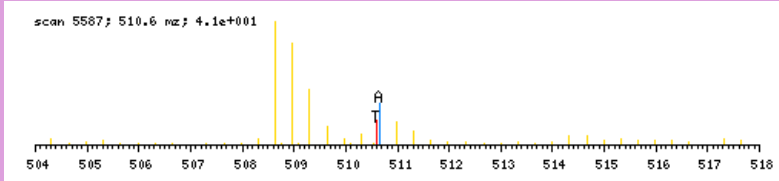

zoomed in precursor plot; T=theoretical m/z, A=acquired m/z

X-range:

-

MassTol: Y-zoom:

MassType:

AVG  MONO

Axis:

1  2

Label:

I  M  -

Ions:

a  +  2+  3+

b  +  2+  3+

c  +  2+  3+

x  +  2+  3+

y  +  2+  3+

z  +  2+  3+

hide H<sub>2</sub>O/NH<sub>3</sub>

zoom 112-122

GO

| b <sup>+</sup> | #  | AA | #  | y <sup>+</sup> | y <sup>2+</sup> |
|----------------|----|----|----|----------------|-----------------|
| 198.1342       | 1  | Y  | 13 |                |                 |
| 255.1557       | 2  | G  | 12 | 1332.6912      | 666.8495        |
| 418.2190       | 3  | Y  | 11 | 1275.6697      | 638.3388        |
| 519.2667       | 4  | T  | 10 | 1112.6064      | 556.8071        |
| 656.3256       | 5  | H  | 9  | 1011.5587      | 506.2833        |
| 769.4097       | 6  | L  | 8  | 874.4998       | 437.7538        |
| 856.4417       | 7  | S  | 7  | 761.4157       | 381.2118        |
| 957.4894       | 8  | T  | 6  | 674.3837       | 337.6958        |
| 1014.5108      | 9  | G  | 5  | 573.3360       | 287.1719        |
| 1129.5378      | 10 | D  | 4  | 516.3146       | 258.6612        |
| 1242.6219      | 11 | L  | 3  | 401.2876       | 201.1477        |
| 1355.7059      | 12 | L  | 2  | 288.2036       | 144.6057        |
|                | 13 | R  | 1  | 175.1195       | 88.0637         |

N-term:+35.07



YHAFAGAEQAETAANR, MH+ 1734.8199, m/z 578.9448  
 L OS G27 P150811 220811-s1.03185.03185.3.dta

X-range:

-

MassTol: Y-zoom:

MassType:

AVG  MONO

Axis:

1  2

Label:

I  M  -

Ions:

a  +  2+  3+

b  +  2+  3+

c  +  2+  3+

x  +  2+  3+

y  +  2+  3+

z  +  2+  3+

hide H<sub>2</sub>O/NH<sub>3</sub>

zoom 112-122

GO

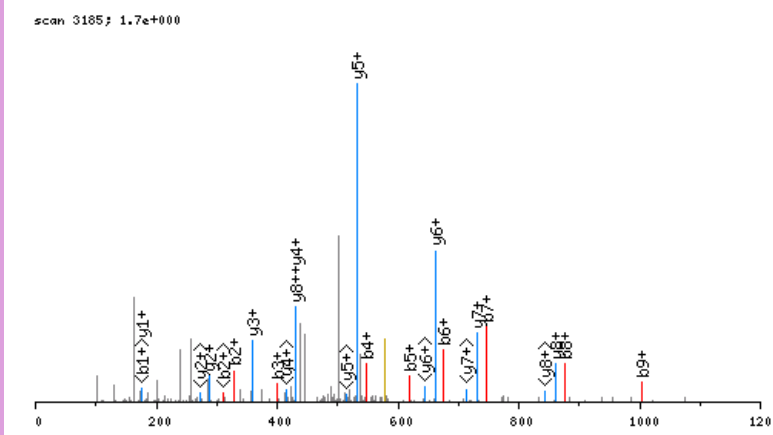

click image to zoom in; click top corners to zoom out [\[precursor±\]](#)

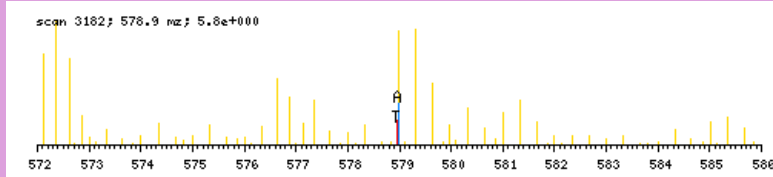

zoomed in precursor plot; T=theoretical m/z, A=acquired m/z

| b <sup>+</sup> | #  | AA # | y <sup>+</sup> | y <sup>2+</sup>    |
|----------------|----|------|----------------|--------------------|
| 192.1024       | 1  | Y    | 16             |                    |
| 329.1613       | 2  | H    | 15             | 1543.7253 772.3666 |
| 400.1985       | 3  | A    | 14             | 1406.6664 703.8371 |
| 547.2669       | 4  | F    | 13             | 1335.6293 668.3186 |
| 618.3040       | 5  | A    | 12             | 1188.5609 594.7844 |
| 675.3254       | 6  | G    | 11             | 1117.5238 559.2658 |
| 746.3626       | 7  | A    | 10             | 1060.5023 530.7551 |
| 875.4052       | 8  | E    | 9              | 989.4652 495.2365  |
| 1003.4637      | 9  | Q    | 8              | 860.4226 430.7152  |
| 1074.5008      | 10 | A    | 7              | 732.3640 366.6859  |
| 1203.5434      | 11 | E    | 6              | 661.3269 331.1674  |
| 1304.5911      | 12 | T    | 5              | 532.2843 266.6461  |
| 1375.6282      | 13 | A    | 4              | 431.2367 216.1222  |
| 1446.6653      | 14 | A    | 3              | 360.1995 180.6037  |
| 1560.7083      | 15 | N    | 2              | 289.1624 145.0851  |
|                | 16 | R    | 1              | 175.1195 88.0637   |

N-term:+29.04

YITGESKEQVANSADFVER, MH+ 2084.0664, m/z 695.3603  
 L OS G26 P150811 220811-s1.03477.03477.3.dta

X-range:

-

MassTol: Y-zoom:

MassType:

AVG  MONO

Axis:

1  2

Label:

I  M  -

Ions:

a  +  2+  3+

b  +  2+  3+

c  +  2+  3+

x  +  2+  3+

y  +  2+  3+

z  +  2+  3+

hide H<sub>2</sub>O/NH<sub>3</sub>

zoom 112-122

GO

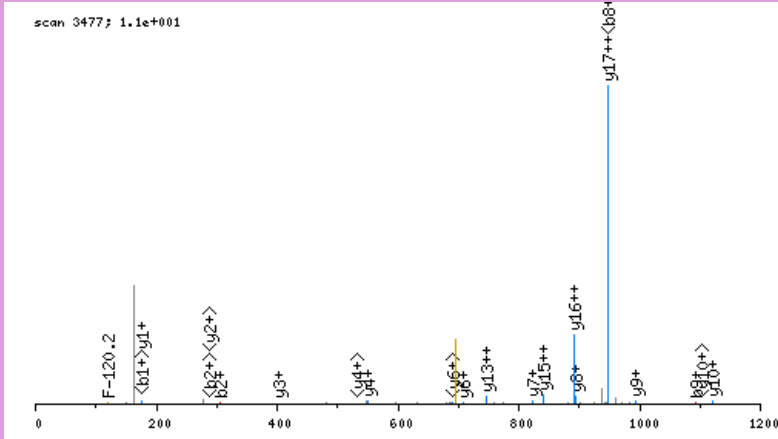

click image to zoom in; click top corners to zoom out [\[precursor±\]](#)

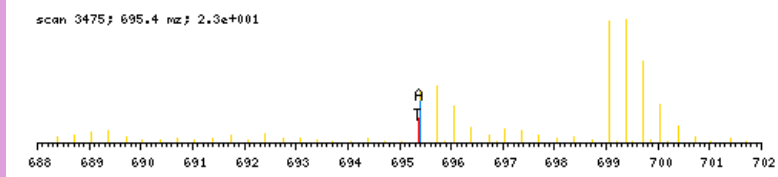

zoomed in precursor plot; T=theoretical m/z, A=acquired m/z

| b <sup>+</sup> | #  | AA # | y <sup>+</sup> | y <sup>2+</sup> |
|----------------|----|------|----------------|-----------------|
| 192.1024       | 1  | Y 18 |                |                 |
| 305.1865       | 2  | I 17 | 1892.9718      | 946.9898        |
| 406.2342       | 3  | T 16 | 1779.8878      | 890.4478        |
| 463.2556       | 4  | G 15 | 1678.8401      | 839.9240        |
| 592.2982       | 5  | E 14 | 1621.8186      | 811.4132        |
| 679.3303       | 6  | S 13 | 1492.7760      | 746.8919        |
| 835.4566       | 7  | K 12 | 1405.7440      | 703.3759        |
| 964.4991       | 8  | E 11 | 1249.6177      | 625.3128        |
| 1092.5577      | 9  | Q 10 | 1120.5751      | 560.7915        |
| 1191.6261      | 10 | V 9  | 992.5165       | 496.7622        |
| 1262.6633      | 11 | A 8  | 893.4481       | 447.2280        |
| 1376.7062      | 12 | N 7  | 822.4110       | 411.7094        |
| 1463.7382      | 13 | S 6  | 708.3681       | 354.6879        |
| 1534.7753      | 14 | A 5  | 621.3360       | 311.1719        |
| 1681.8437      | 15 | F 4  | 550.2989       | 275.6534        |
| 1780.9122      | 16 | V 3  | 403.2305       | 202.1192        |
| 1909.9547      | 17 | E 2  | 304.1621       | 152.5850        |
|                | 18 | R 1  | 175.1195       | 88.0637         |

N-term:+29.04 K(7):+156.13

YKTDLEKDIISDTSGDFR, MH+ 2187.1186, m/z 547.5351  
 L OS G28 P150811 220811-s1.07499.07499.4.dta

X-range:

-

MassTol: Y-zoom:

MassType:

AVG  MONO

Axis:

1  2

Label:

I  M  -

Ions:

a  +  2+  3+

b  +  2+  3+

c  +  2+  3+

x  +  2+  3+

y  +  2+  3+

z  +  2+  3+

hide H<sub>2</sub>O/NH<sub>3</sub>

zoom 112-122

GO

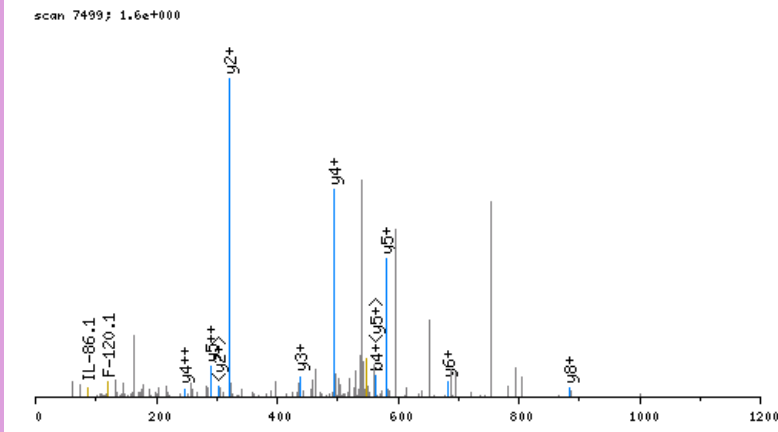

click image to zoom in; click top corners to zoom out [\[precursor±\]](#)

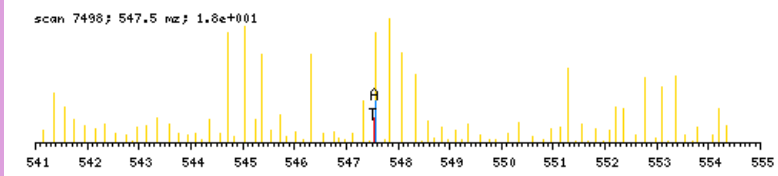

zoomed in precursor plot; T=theoretical m/z, A=acquired m/z

| b <sup>+</sup> | #  | AA # | y <sup>+</sup> | y <sup>2+</sup> |
|----------------|----|------|----------------|-----------------|
| 192.1024       | 1  | Y 18 |                |                 |
| 348.2287       | 2  | K 17 | 1996.0239      | 998.5159        |
| 449.2764       | 3  | T 16 | 1839.8976      | 920.4527        |
| 564.3034       | 4  | D 15 | 1738.8500      | 869.9289        |
| 677.3874       | 5  | L 14 | 1623.8230      | 812.4154        |
| 806.4300       | 6  | E 13 | 1510.7390      | 755.8734        |
| 962.5563       | 7  | K 12 | 1381.6964      | 691.3521        |
| 1077.5833      | 8  | D 11 | 1225.5701      | 613.2889        |
| 1190.6673      | 9  | I 10 | 1110.5431      | 555.7755        |
| 1303.7514      | 10 | I 9  | 997.4591       | 499.2334        |
| 1390.7834      | 11 | S 8  | 884.3750       | 442.6914        |
| 1505.8103      | 12 | D 7  | 797.3430       | 399.1754        |
| 1606.8580      | 13 | T 6  | 682.3160       | 341.6619        |
| 1693.8901      | 14 | S 5  | 581.2683       | 291.1381        |
| 1750.9115      | 15 | G 4  | 494.2363       | 247.6221        |
| 1865.9385      | 16 | D 3  | 437.2149       | 219.1113        |
| 2013.0069      | 17 | F 2  | 322.1879       | 161.5979        |
|                | 18 | R 1  | 175.1195       | 88.0637         |

N-term:+29.04 K(2):+156.13  
 K(7):+156.13

YLDNNKISNIPDEYFKR, MH+ 2231.2561, m/z 558.5695  
 H OS G28 P150811 220811-s1.07224.07224.4.dta

X-range:

-

MassTol: Y-zoom:

MassType:

AVG  MONO

Axis:

1  2

Label:

I  M  -

Ions:

a  +  2+  3+

b  +  2+  3+

c  +  2+  3+

x  +  2+  3+

y  +  2+  3+

z  +  2+  3+

hide H<sub>2</sub>O/NH<sub>3</sub>

zoom 112-122

GO

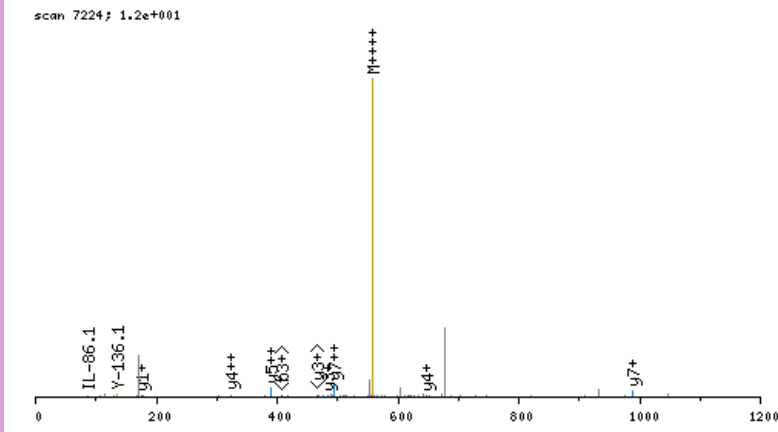

click image to zoom in; click top corners to zoom out [\[precursor±\]](#)

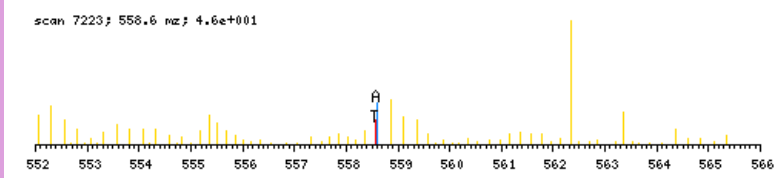

zoomed in precursor plot; T=theoretical m/z, A=acquired m/z

| b <sup>+</sup> | #  | AA # | y <sup>+</sup> | y <sup>2+</sup> |
|----------------|----|------|----------------|-----------------|
| 198.1342       | 1  | Y    | 17             |                 |
| 311.2183       | 2  | L    | 16             | 2034.1297       |
| 426.2452       | 3  | D    | 15             | 1921.0456       |
| 540.2882       | 4  | N    | 14             | 1806.0187       |
| 654.3311       | 5  | N    | 13             | 1691.9758       |
| 816.4892       | 6  | K    | 12             | 1577.9328       |
| 929.5733       | 7  | I    | 11             | 1415.7747       |
| 1016.6053      | 8  | S    | 10             | 1302.6907       |
| 1130.6482      | 9  | N    | 9              | 1215.6586       |
| 1243.7323      | 10 | I    | 8              | 1101.6157       |
| 1340.7850      | 11 | P    | 7              | 988.5316        |
| 1455.8120      | 12 | D    | 6              | 891.4789        |
| 1584.8546      | 13 | E    | 5              | 776.4519        |
| 1747.9179      | 14 | Y    | 4              | 647.4093        |
| 1894.9863      | 15 | F    | 3              | 484.3460        |
| 2057.1444      | 16 | K    | 2              | 337.2776        |
|                | 17 | R    | 1              | 175.1195        |

N-term: +35.07 K(6) : +162.16  
 K(16) : +162.16

YMEKNQLEEVPSALPR, MH+ 1972.0850, m/z 658.0332  
 H OS G26 P150811 220811-s1.04552.04552.3.dta

X-range:

-

MassTol: Y-zoom:

MassType:

AVG  MONO

Axis:

1  2

Label:

I  M  -

Ions:

a  +  2+  3+

b  +  2+  3+

c  +  2+  3+

x  +  2+  3+

y  +  2+  3+

z  +  2+  3+

hide H<sub>2</sub>O/NH<sub>3</sub>

zoom 112-122

GO

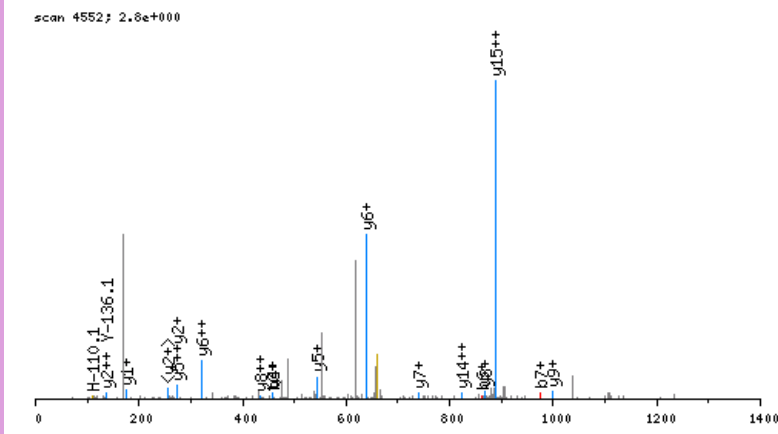

click image to zoom in; click top corners to zoom out [\[precursor±\]](#)

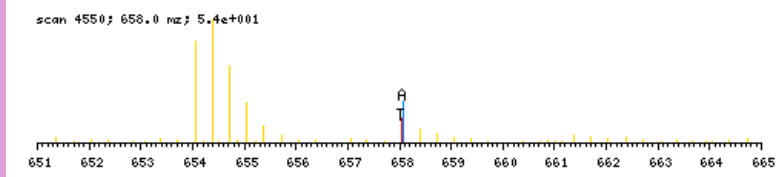

zoomed in precursor plot; T=theoretical m/z, A=acquired m/z

| b <sup>+</sup> | #  | AA | #  | y <sup>+</sup> | y <sup>2+</sup> |
|----------------|----|----|----|----------------|-----------------|
| 198.1342       | 1  | Y  | 16 |                |                 |
| 329.1747       | 2  | M  | 15 | 1774.9586      | 887.9832        |
| 458.2173       | 3  | E  | 14 | 1643.9181      | 822.4630        |
| 620.3754       | 4  | K  | 13 | 1514.8755      | 757.9417        |
| 734.4183       | 5  | N  | 12 | 1352.7174      | 676.8626        |
| 862.4769       | 6  | Q  | 11 | 1238.6745      | 619.8412        |
| 975.5610       | 7  | L  | 10 | 1110.6159      | 555.8119        |
| 1104.6036      | 8  | E  | 9  | 997.5318       | 499.2698        |
| 1233.6462      | 9  | E  | 8  | 868.4892       | 434.7485        |
| 1332.7146      | 10 | V  | 7  | 739.4466       | 370.2272        |
| 1429.7673      | 11 | P  | 6  | 640.3782       | 320.6930        |
| 1516.7994      | 12 | S  | 5  | 543.3255       | 272.1666        |
| 1587.8365      | 13 | A  | 4  | 456.2934       | 228.6506        |
| 1700.9205      | 14 | L  | 3  | 385.2563       | 193.1321        |
| 1797.9733      | 15 | P  | 2  | 272.1723       | 136.5900        |
|                | 16 | R  | 1  | 175.1195       | 88.0637         |

N-term:+35.07 K(4):+162.16

YNATEPVISFYDKR, MH+ 1770.9703, m/z 590.9949  
 H OS G26 P150811 220811-s1.04928.04928.3.dta

X-range:

-

MassTol: Y-zoom:

MassType:

AVG  MONO

Axis:

1  2

Label:

I  M  -

Ions:

a  +  2+  3+

b  +  2+  3+

c  +  2+  3+

x  +  2+  3+

y  +  2+  3+

z  +  2+  3+

hide H<sub>2</sub>O/NH<sub>3</sub>

zoom 112-122

GO

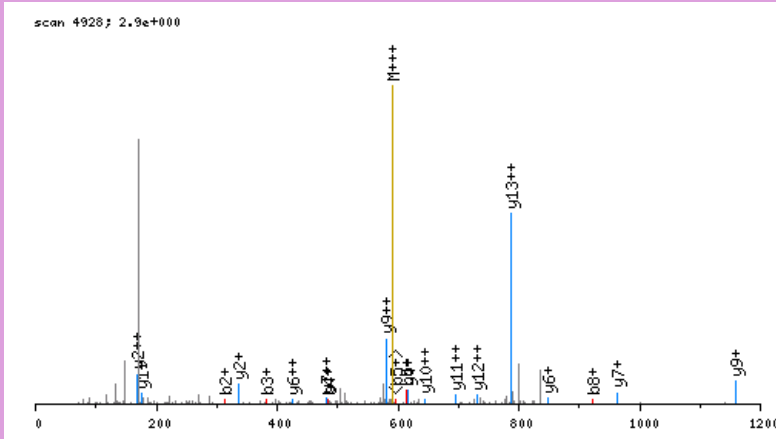

click image to zoom in; click top corners to zoom out [\[precursor±\]](#)

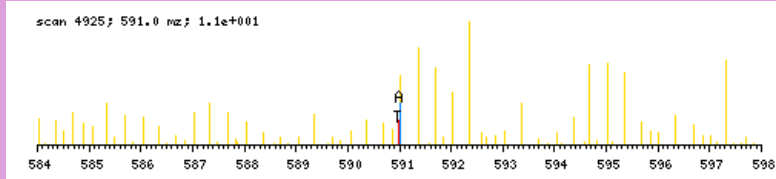

zoomed in precursor plot; T=theoretical m/z, A=acquired m/z

| b <sup>+</sup> | #  | AA # | y <sup>+</sup> | y <sup>2+</sup> |
|----------------|----|------|----------------|-----------------|
| 198.1342       | 1  | Y 14 |                |                 |
| 312.1772       | 2  | N 13 | 1573.8439      | 787.4258        |
| 383.2143       | 3  | A 12 | 1459.8009      | 730.4044        |
| 484.2619       | 4  | T 11 | 1388.7638      | 694.8858        |
| 613.3045       | 5  | E 10 | 1287.7161      | 644.3620        |
| 710.3573       | 6  | P 9  | 1158.6736      | 579.8407        |
| 809.4257       | 7  | V 8  | 1061.6208      | 531.3143        |
| 922.5098       | 8  | I 7  | 962.5524       | 481.7801        |
| 1009.5418      | 9  | S 6  | 849.4683       | 425.2381        |
| 1156.6102      | 10 | F 5  | 762.4363       | 381.7221        |
| 1319.6736      | 11 | Y 4  | 615.3679       | 308.1878        |
| 1434.7005      | 12 | D 3  | 452.3045       | 226.6562        |
| 1596.8586      | 13 | K 2  | 337.2776       | 169.1427        |
|                | 14 | R 1  | 175.1195       | 88.0637         |

N-term:+35.07 K(13):+162.16

YNLGAQVTEGKQDLR, MH+ 1992.0038, m/z 664.6728  
 L OS G26 P150811 220811-s1.03747.03747.3.dta

X-range:

-

MassTol: Y-zoom:

MassType:

AVG  MONO

Axis:

1  2

Label:

I  M  -

Ions:

a  +  2+  3+

b  +  2+  3+

c  +  2+  3+

x  +  2+  3+

y  +  2+  3+

z  +  2+  3+

hide H<sub>2</sub>O/NH<sub>3</sub>

zoom 112-122

GO

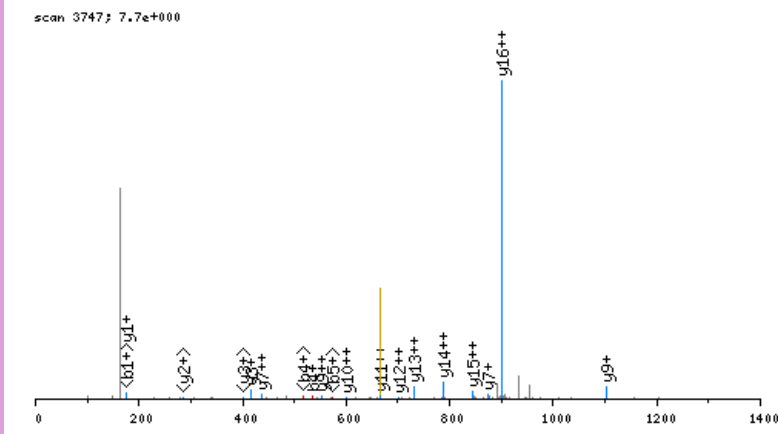

click image to zoom in; click top corners to zoom out [\[precursor±\]](#)

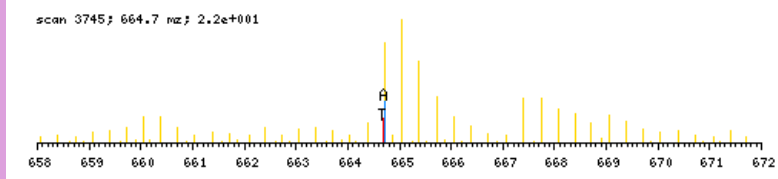

zoomed in precursor plot; T=theoretical m/z, A=acquired m/z

| b <sup>+</sup> | #  | AA | #  | y <sup>+</sup> | y <sup>2+</sup> |
|----------------|----|----|----|----------------|-----------------|
| 192.1024       | 1  | Y  | 17 |                |                 |
| 306.1454       | 2  | N  | 16 | 1800.9092      | 900.9585        |
| 421.1723       | 3  | D  | 15 | 1686.8663      | 843.9371        |
| 534.2564       | 4  | L  | 14 | 1571.8393      | 786.4236        |
| 591.2778       | 5  | G  | 13 | 1458.7553      | 729.8816        |
| 662.3149       | 6  | A  | 12 | 1401.7338      | 701.3708        |
| 790.3735       | 7  | Q  | 11 | 1330.6967      | 665.8523        |
| 889.4419       | 8  | V  | 10 | 1202.6381      | 601.8230        |
| 990.4896       | 9  | T  | 9  | 1103.5697      | 552.2888        |
| 1119.5322      | 10 | E  | 8  | 1002.5220      | 501.7649        |
| 1176.5537      | 11 | G  | 7  | 873.4794       | 437.2436        |
| 1332.6800      | 12 | K  | 6  | 816.4580       | 408.7329        |
| 1460.7385      | 13 | Q  | 5  | 660.3317       | 330.6698        |
| 1575.7655      | 14 | D  | 4  | 532.2731       | 266.6405        |
| 1688.8496      | 15 | L  | 3  | 417.2462       | 209.1270        |
| 1817.8921      | 16 | E  | 2  | 304.1621       | 152.5850        |
|                | 17 | R  | 1  | 175.1195       | 88.0637         |

N-term:+29.04 K(12):+156.13

YNEATGGKYVPR, MH+ 1410.7382, m/z 470.9176  
 L OS G27 P150811 220811-s1.02588.02588.3.dta

scan 2588; 1.3e+001

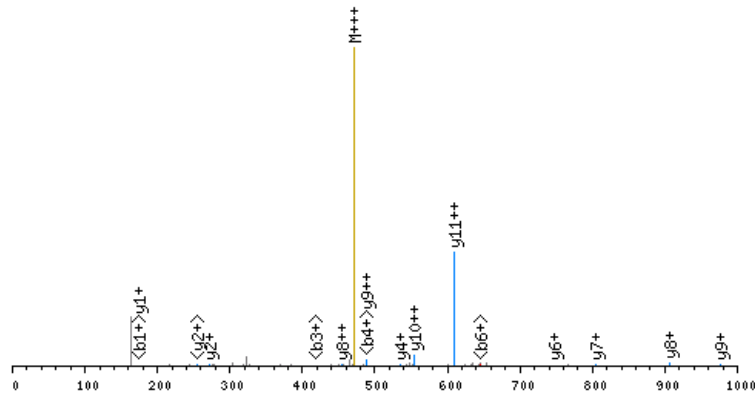

click image to zoom in; click top corners to zoom out [\[precursor±\]](#)

scan 2587; 470.9 m/z; 1.7e+001

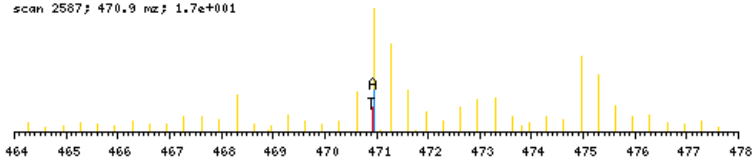

zoomed in precursor plot; T=theoretical m/z, A=acquired m/z

X-range:

-

MassTol: Y-zoom:

MassType:

AVG  MONO

Axis:

1  2

Label:

I  M  -

Ions:

a  +  2+  3+

b  +  2+  3+

c  +  2+  3+

x  +  2+  3+

y  +  2+  3+

z  +  2+  3+

hide H<sub>2</sub>O/NH<sub>3</sub>

zoom 112-122

GO

| b <sup>+</sup> | #  | AA # | y <sup>+</sup> | y <sup>2+</sup> |
|----------------|----|------|----------------|-----------------|
| 192.1024       | 1  | Y 12 |                |                 |
| 306.1454       | 2  | N 11 | 1219.6435      | 610.3257        |
| 435.1879       | 3  | E 10 | 1105.6006      | 553.3042        |
| 506.2251       | 4  | A 9  | 976.5580       | 488.7829        |
| 607.2727       | 5  | T 8  | 905.5209       | 453.2644        |
| 664.2942       | 6  | G 7  | 804.4732       | 402.7405        |
| 721.3157       | 7  | G 6  | 747.4518       | 374.2298        |
| 877.4420       | 8  | K 5  | 690.4303       | 345.7191        |
| 1040.5053      | 9  | Y 4  | 534.3040       | 267.6559        |
| 1139.5737      | 10 | V 3  | 371.2407       | 186.1243        |
| 1236.6265      | 11 | P 2  | 272.1723       | 136.5900        |
|                | 12 | R 1  | 175.1195       | 88.0637         |

N-term:+29.04 K(8):+156.13



YNLDPQEGGECALMR, MH+ 1780.7998, m/z 594.2714  
 L OS G25 P150811 220811-s1.05959.05959.3.dta

X-range:

-

MassTol: Y-zoom:

MassType:

AVG  MONO

Axis:

1  2

Label:

I  M  -

Ions:

a  +  2+  3+

b  +  2+  3+

c  +  2+  3+

x  +  2+  3+

y  +  2+  3+

z  +  2+  3+

hide H<sub>2</sub>O/NH<sub>3</sub>

zoom 112-122

GO

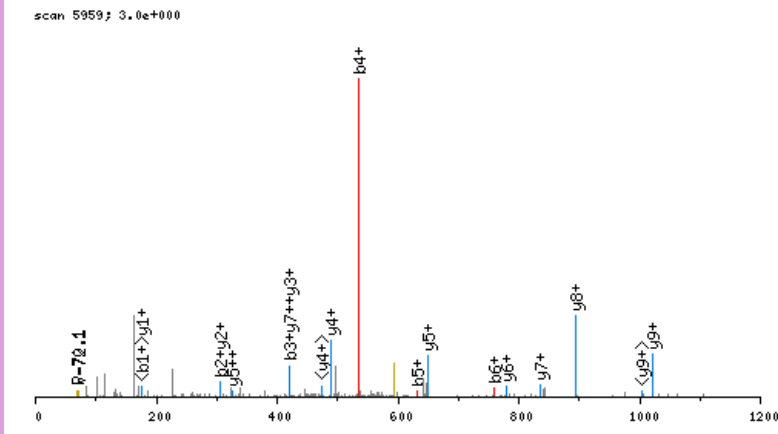

click image to zoom in; click top corners to zoom out [\[precursor±\]](#)

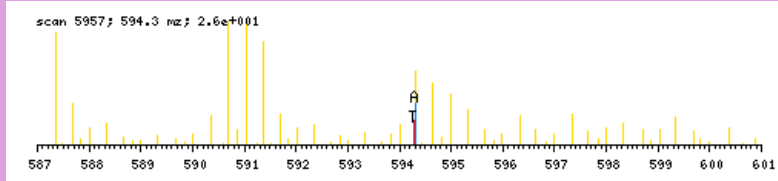

zoomed in precursor plot; T=theoretical m/z, A=acquired m/z

| b <sup>+</sup> | #  | AA # | y <sup>+</sup> | y <sup>2+</sup> |
|----------------|----|------|----------------|-----------------|
| 192.1024       | 1  | Y 15 |                |                 |
| 306.1454       | 2  | N 14 | 1589.7052      | 795.3565        |
| 419.2294       | 3  | L 13 | 1475.6622      | 738.3350        |
| 534.2564       | 4  | D 12 | 1362.5782      | 681.7930        |
| 631.3091       | 5  | P 11 | 1247.5512      | 624.2795        |
| 759.3677       | 6  | Q 10 | 1150.4985      | 575.7531        |
| 888.4103       | 7  | E 9  | 1022.4399      | 511.7239        |
| 945.4318       | 8  | G 8  | 893.3973       | 447.2026        |
| 1002.4532      | 9  | G 7  | 836.3758       | 418.6918        |
| 1131.4958      | 10 | E 6  | 779.3544       | 390.1811        |
| 1291.5264      | 11 | C 5  | 650.3118       | 325.6598        |
| 1362.5635      | 12 | A 4  | 490.2812       | 245.6445        |
| 1475.6476      | 13 | L 3  | 419.2440       | 210.1259        |
| 1606.6881      | 14 | M 2  | 306.1600       | 153.5839        |
|                | 15 | R 1  | 175.1195       | 88.0637         |

N-term:+29.04 C(11):+160.03

YQACSGPILPHR, MH+ 1426.7265, m/z 476.2470  
 L OS G27 P150811 220811-s1.03379.03379.3.dta

X-range:

-

MassTol: Y-zoom:

MassType:

AVG  MONO

Axis:

1  2

Label:

I  M  -

Ions:

a  +  2+  3+

b  +  2+  3+

c  +  2+  3+

x  +  2+  3+

y  +  2+  3+

z  +  2+  3+

hide H<sub>2</sub>O/NH<sub>3</sub>

zoom 112-122

GO

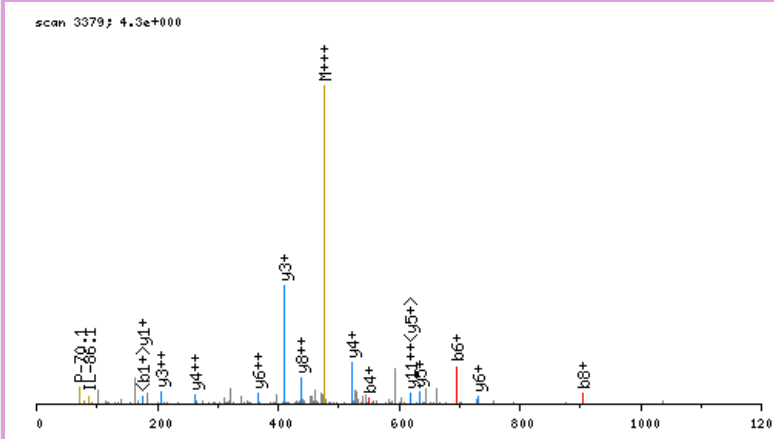

click image to zoom in; click top corners to zoom out [\[precursor±\]](#)

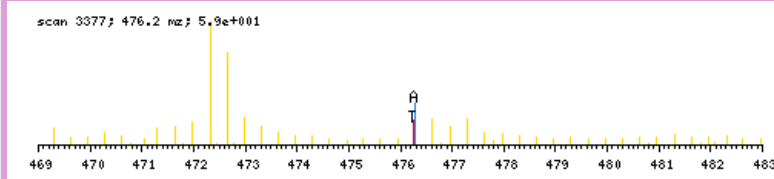

zoomed in precursor plot; T=theoretical m/z, A=acquired m/z

| b <sup>+</sup> | #  | AA # | y <sup>+</sup> | y <sup>2+</sup> |
|----------------|----|------|----------------|-----------------|
| 192.1024       | 1  | Y 12 |                |                 |
| 320.1610       | 2  | Q 11 | 1235.6319      | 618.3198        |
| 391.1981       | 3  | A 10 | 1107.5733      | 554.2905        |
| 551.2287       | 4  | C 9  | 1036.5362      | 518.7720        |
| 638.2607       | 5  | S 8  | 876.5056       | 438.7567        |
| 695.2822       | 6  | G 7  | 789.4735       | 395.2407        |
| 792.3350       | 7  | P 6  | 732.4521       | 366.7299        |
| 905.4190       | 8  | I 5  | 635.3993       | 318.2036        |
| 1018.5031      | 9  | L 4  | 522.3152       | 261.6615        |
| 1115.5559      | 10 | P 3  | 409.2312       | 205.1195        |
| 1252.6148      | 11 | H 2  | 312.1784       | 156.5931        |
|                | 12 | R 1  | 175.1195       | 88.0637         |

N-term:+29.04 C(4):+160.03

YQLETDKFEEFGKLR, MH+ 2167.3076, m/z 542.5824  
 H OS G28 P150811 220811-s1.06309.06309.4.dta

X-range:

-

MassTol: Y-zoom:

MassType:

AVG  MONO

Axis:

1  2

Label:

I  M  -

Ions:

a  +  2+  3+

b  +  2+  3+

c  +  2+  3+

x  +  2+  3+

y  +  2+  3+

z  +  2+  3+

hide H<sub>2</sub>O/NH<sub>3</sub>

zoom 112-122

GO

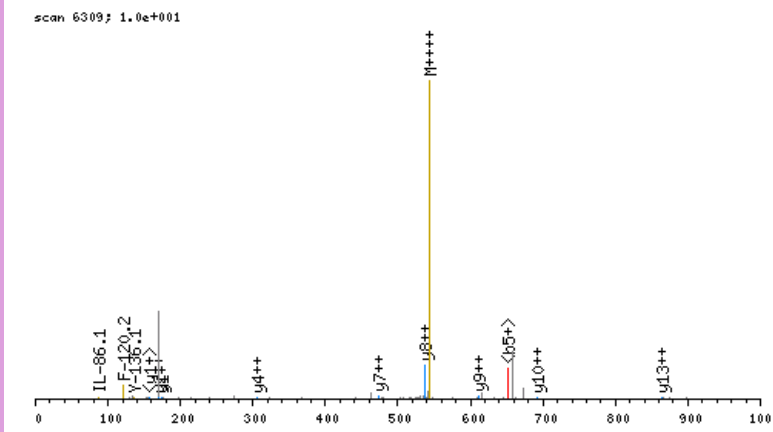

click image to zoom in; click top corners to zoom out [\[precursor±\]](#)

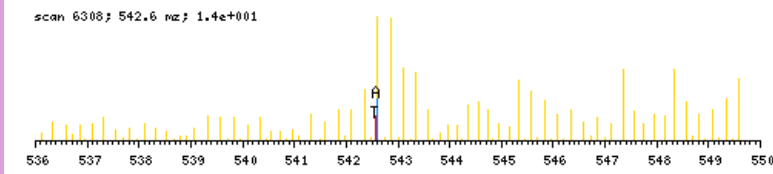

zoomed in precursor plot; T=theoretical m/z, A=acquired m/z

| b <sup>+</sup> | #  | AA | #  | y <sup>+</sup> | y <sup>2+</sup> |
|----------------|----|----|----|----------------|-----------------|
| 198.1342       | 1  | Y  | 16 |                |                 |
| 326.1928       | 2  | Q  | 15 | 1970.1812      | 985.5945        |
| 439.2769       | 3  | L  | 14 | 1842.1226      | 921.5652        |
| 568.3195       | 4  | E  | 13 | 1729.0386      | 865.0232        |
| 669.3671       | 5  | T  | 12 | 1599.9960      | 800.5019        |
| 784.3941       | 6  | D  | 11 | 1498.9483      | 749.9781        |
| 946.5522       | 7  | K  | 10 | 1383.9213      | 692.4646        |
| 1093.6206      | 8  | F  | 9  | 1221.7632      | 611.3855        |
| 1222.6632      | 9  | E  | 8  | 1074.6948      | 537.8513        |
| 1369.7316      | 10 | F  | 7  | 945.6522       | 473.3300        |
| 1426.7531      | 11 | G  | 6  | 798.5838       | 399.7958        |
| 1555.7957      | 12 | E  | 5  | 741.5624       | 371.2851        |
| 1717.9538      | 13 | K  | 4  | 612.5198       | 306.7638        |
| 1831.0378      | 14 | L  | 3  | 450.3617       | 225.6847        |
| 1993.1959      | 15 | K  | 2  | 337.2776       | 169.1427        |
|                | 16 | R  | 1  | 175.1195       | 88.0637         |

N-term:+35.07 K(7):+162.16  
 K(13):+162.16 K(15):+162.16

YRPPVLDALGR, MH+ 1381.7956, m/z 461.2700  
 L OS G27 P150811 220811-s1.05840.05840.3.dta

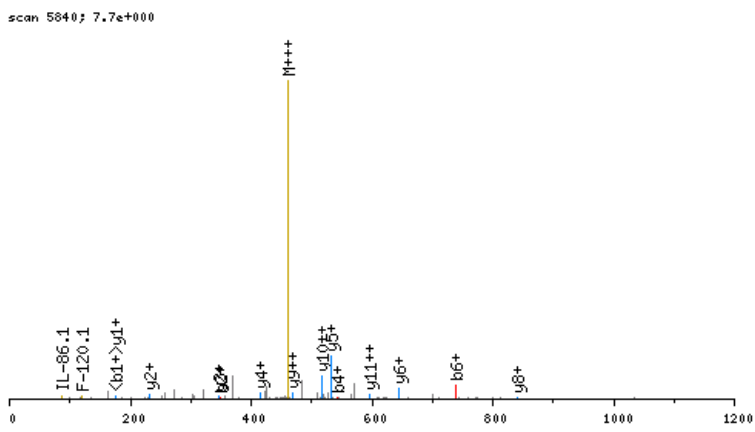

click image to zoom in; click top corners to zoom out [\[precursor±\]](#)

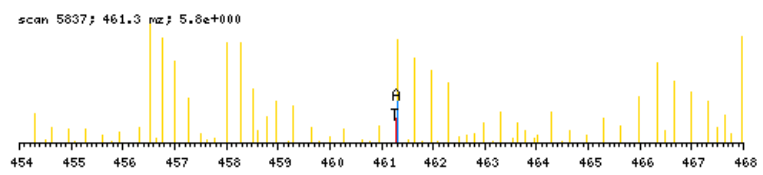

zoomed in precursor plot; T=theoretical m/z, A=acquired m/z

X-range:  -

MassTol: Y-zoom:

MassType:  AVG  MONO

Axis:  1  2

Label:  I  M  -

Ions:

a  +  2+  3+

b  +  2+  3+

c  +  2+  3+

x  +  2+  3+

y  +  2+  3+

z  +  2+  3+

hide H<sub>2</sub>O/NH<sub>3</sub>

zoom 112-122

| b <sup>+</sup> | #  | AA # | y <sup>+</sup> | y <sup>2+</sup> |
|----------------|----|------|----------------|-----------------|
| 192.1024       | 1  | Y    | 12             |                 |
| 348.2035       | 2  | R    | 11             | 1190.7010       |
| 445.2563       | 3  | P    | 10             | 1034.5999       |
| 542.3091       | 4  | P    | 9              | 937.5471        |
| 639.3618       | 5  | P    | 8              | 840.4943        |
| 738.4302       | 6  | V    | 7              | 743.4416        |
| 851.5143       | 7  | L    | 6              | 644.3731        |
| 966.5413       | 8  | D    | 5              | 531.2891        |
| 1037.5784      | 9  | A    | 4              | 416.2621        |
| 1150.6624      | 10 | L    | 3              | 345.2250        |
| 1207.6839      | 11 | G    | 2              | 232.1410        |
|                | 12 | R    | 1              | 175.1195        |

N-term:+29.04

YSDKGVSSGPGMGLMGPR, MH+ 1948.9625, m/z 650.3257  
 L OS G27 P150811 220811-s1.05355.05355.3.dta

X-range:

-

MassTol: Y-zoom:

MassType:

AVG  MONO

Axis:

1  2

Label:

I  M  -

Ions:

a  +  2+  3+

b  +  2+  3+

c  +  2+  3+

x  +  2+  3+

y  +  2+  3+

z  +  2+  3+

hide H<sub>2</sub>O/NH<sub>3</sub>

zoom 112-122

GO

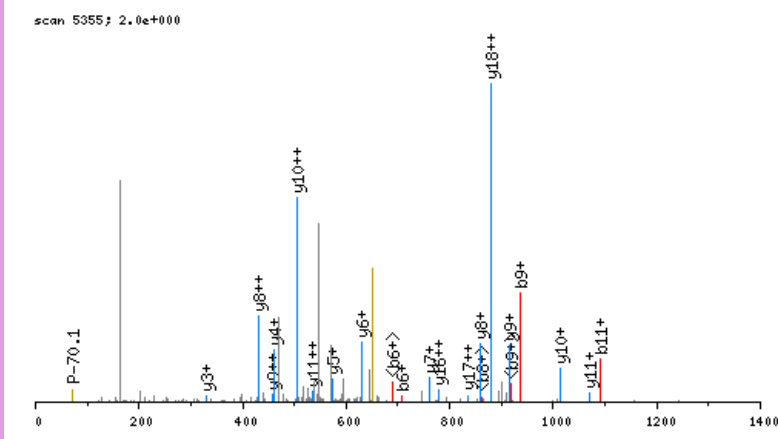

click image to zoom in; click top corners to zoom out [\[precursor±\]](#)

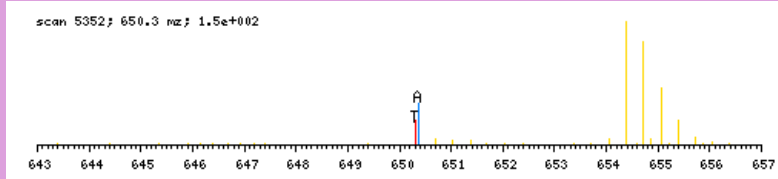

zoomed in precursor plot; T=theoretical m/z, A=acquired m/z

| b <sup>+</sup> | #  | AA # | y <sup>+</sup> | y <sup>2+</sup> |
|----------------|----|------|----------------|-----------------|
| 192.1024       | 1  | Y    | 19             |                 |
| 279.1345       | 2  | S    | 18             | 1757.8679       |
| 394.1614       | 3  | D    | 17             | 1670.8359       |
| 550.2877       | 4  | K    | 16             | 1555.8089       |
| 607.3092       | 5  | G    | 15             | 1399.6826       |
| 706.3776       | 6  | V    | 14             | 1342.6612       |
| 793.4096       | 7  | S    | 13             | 1243.5927       |
| 880.4416       | 8  | S    | 12             | 1156.5607       |
| 937.4631       | 9  | G    | 11             | 1069.5287       |
| 1034.5159      | 10 | P    | 10             | 1012.5072       |
| 1091.5373      | 11 | G    | 9              | 915.4545        |
| 1188.5901      | 12 | P    | 8              | 858.4330        |
| 1319.6306      | 13 | M    | 7              | 761.3802        |
| 1376.6520      | 14 | G    | 6              | 630.3397        |
| 1489.7361      | 15 | L    | 5              | 573.3183        |
| 1620.7766      | 16 | M    | 4              | 460.2342        |
| 1677.7981      | 17 | G    | 3              | 329.1937        |
| 1774.8508      | 18 | P    | 2              | 272.1723        |
|                | 19 | R    | 1              | 175.1195        |

N-term:+29.04 K(4):+156.13

YSEEPGEEEEPAWVQTER, MH+ 2063.9198, m/z 688.6448  
 L OS G25 P150811 220811-s1.05280.05280.3.dta

X-range:

-

MassTol: Y-zoom:

MassType:

AVG  MONO

Axis:

1  2

Label:

I  M  -

Ions:

a  +  2+  3+

b  +  2+  3+

c  +  2+  3+

x  +  2+  3+

y  +  2+  3+

z  +  2+  3+

hide H<sub>2</sub>O/NH<sub>3</sub>

zoom 112-122

GO

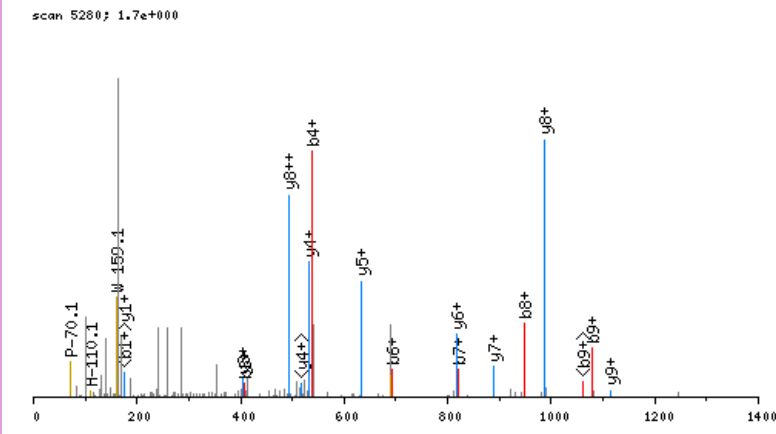

click image to zoom in; click top corners to zoom out [\[precursor±\]](#)

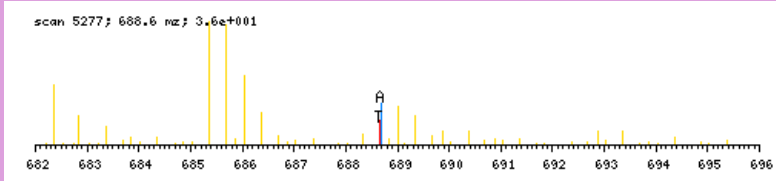

zoomed in precursor plot; T=theoretical m/z, A=acquired m/z

| b <sup>+</sup> | #  | AA # | y <sup>+</sup> | y <sup>2+</sup> |
|----------------|----|------|----------------|-----------------|
| 192.1024       | 1  | Y 17 |                |                 |
| 279.1345       | 2  | S 16 | 1872.8252      | 936.9165        |
| 408.1771       | 3  | E 15 | 1785.7931      | 893.4005        |
| 537.2196       | 4  | E 14 | 1656.7506      | 828.8792        |
| 634.2724       | 5  | P 13 | 1527.7080      | 764.3579        |
| 691.2939       | 6  | G 12 | 1430.6552      | 715.8315        |
| 820.3365       | 7  | E 11 | 1373.6337      | 687.3208        |
| 949.3791       | 8  | E 10 | 1244.5911      | 622.7995        |
| 1078.4217      | 9  | E 9  | 1115.5485      | 558.2782        |
| 1175.4744      | 10 | P 8  | 986.5060       | 493.7569        |
| 1246.5115      | 11 | A 7  | 889.4532       | 445.2305        |
| 1432.5908      | 12 | W 6  | 818.4161       | 409.7120        |
| 1531.6593      | 13 | V 5  | 632.3368       | 316.6723        |
| 1659.7178      | 14 | Q 4  | 533.2683       | 267.1381        |
| 1760.7655      | 15 | T 3  | 405.2098       | 203.1088        |
| 1889.8081      | 16 | E 2  | 304.1621       | 152.5850        |
|                | 17 | R 1  | 175.1195       | 88.0637         |

N-term:+29.04

YSEGEAHSEVSQR, MH+ 1506.6824, m/z 502.8990  
 L OS G27 P150811 220811-s1.01972.01972.3.dta

scan 1972; 5.6e+000

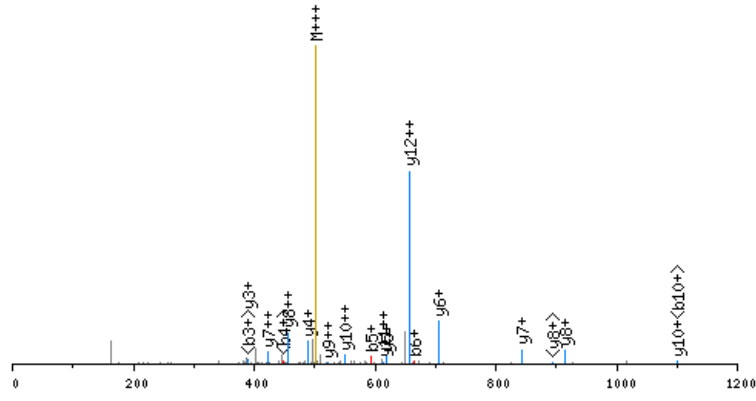

click image to zoom in; click top corners to zoom out [\[precursor±\]](#)

scan 1971; 502.9 m/z; 3.3e+000

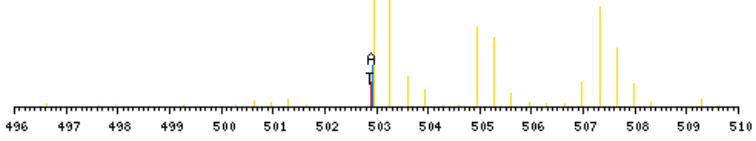

zoomed in precursor plot; T=theoretical m/z, A=acquired m/z

X-range:

-

MassTol: Y-zoom:

MassType:

AVG  MONO

Axis:

1  2

Label:

I  M  -

Ions:

a  +  2+  3+

b  +  2+  3+

c  +  2+  3+

x  +  2+  3+

y  +  2+  3+

z  +  2+  3+

hide H<sub>2</sub>O/NH<sub>3</sub>

zoom 112-122

GO

| b <sup>+</sup> | #  | AA | #  | y <sup>+</sup> | y <sup>2+</sup> |
|----------------|----|----|----|----------------|-----------------|
| 192.1024       | 1  | Y  | 13 |                |                 |
| 279.1345       | 2  | S  | 12 | 1315.5878      | 658.2978        |
| 408.1771       | 3  | E  | 11 | 1228.5558      | 614.7818        |
| 465.1985       | 4  | G  | 10 | 1099.5132      | 550.2605        |
| 594.2411       | 5  | E  | 9  | 1042.4918      | 521.7498        |
| 665.2782       | 6  | A  | 8  | 913.4492       | 457.2285        |
| 802.3371       | 7  | H  | 7  | 842.4121       | 421.7099        |
| 889.3692       | 8  | S  | 6  | 705.3531       | 353.1805        |
| 1018.4118      | 9  | E  | 5  | 618.3211       | 309.6645        |
| 1117.4802      | 10 | V  | 4  | 489.2785       | 245.1432        |
| 1204.5122      | 11 | S  | 3  | 390.2101       | 195.6090        |
| 1332.5708      | 12 | Q  | 2  | 303.1781       | 152.0930        |
|                | 13 | R  | 1  | 175.1195       | 88.0637         |

N-term:+29.04

YSIPFPPTPTPLTGR, MH+ 1675.9059, m/z 559.3068  
 L OS G24 P150811 220811-s1.04724.04724.3.dta

scan 4724; 5.5e-001

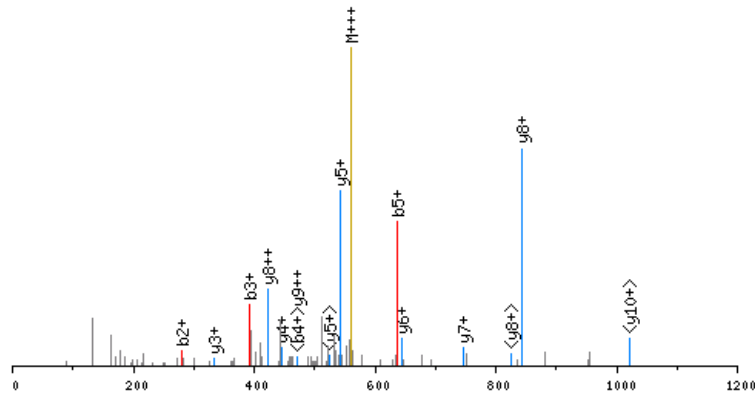

click image to zoom in; click top corners to zoom out [\[precursor±\]](#)

scan 4722; 559.3 m/z; 1.0e+000

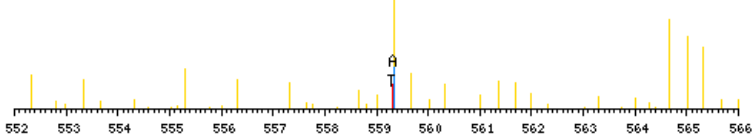

zoomed in precursor plot; T=theoretical m/z, A=acquired m/z

X-range:

-

MassTol: Y-zoom:

MassType:

AVG  MONO

Axis:

1  2

Label:

I  M  -

Ions:

a  +  2+  3+

b  +  2+  3+

c  +  2+  3+

x  +  2+  3+

y  +  2+  3+

z  +  2+  3+

hide H<sub>2</sub>O/NH<sub>3</sub>

zoom 112-122

GO

| b <sup>+</sup> | #  | AA | #  | y <sup>+</sup> | y <sup>2+</sup> |
|----------------|----|----|----|----------------|-----------------|
| 192.1024       | 1  | Y  | 15 |                |                 |
| 279.1345       | 2  | S  | 14 | 1484.8113      | 742.9096        |
| 392.2185       | 3  | I  | 13 | 1397.7793      | 699.3936        |
| 489.2713       | 4  | P  | 12 | 1284.6952      | 642.8515        |
| 636.3397       | 5  | F  | 11 | 1187.6424      | 594.3251        |
| 733.3925       | 6  | P  | 10 | 1040.5740      | 520.7909        |
| 834.4401       | 7  | T  | 9  | 943.5213       | 472.2645        |
| 931.4929       | 8  | P  | 8  | 842.4736       | 421.7407        |
| 1032.5406      | 9  | T  | 7  | 745.4208       | 373.2143        |
| 1133.5883      | 10 | T  | 6  | 644.3731       | 322.6905        |
| 1230.6410      | 11 | P  | 5  | 543.3255       | 272.1666        |
| 1343.7251      | 12 | L  | 4  | 446.2727       | 223.6403        |
| 1444.7728      | 13 | T  | 3  | 333.1886       | 167.0982        |
| 1501.7942      | 14 | G  | 2  | 232.1410       | 116.5744        |
|                | 15 | R  | 1  | 175.1195       | 88.0637         |

N-term:+29.04



YLLPASLLDHR, MH+ 1412.7901, m/z 471.6016  
 L OS G27 P150811 220811-s1.06955.06955.3.dta

X-range:

-

MassTol: Y-zoom:

MassType:

AVG  MONO

Axis:

1  2

Label:

I  M  -

Ions:

a  +  2+  3+

b  +  2+  3+

c  +  2+  3+

x  +  2+  3+

y  +  2+  3+

z  +  2+  3+

hide H<sub>2</sub>O/NH<sub>3</sub>

zoom 112-122

GO

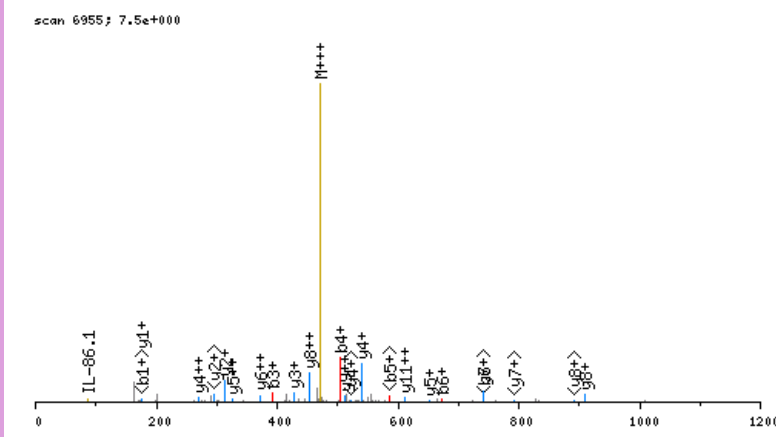

click image to zoom in; click top corners to zoom out [\[precursor±\]](#)

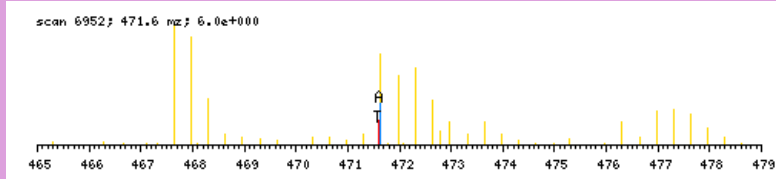

zoomed in precursor plot; T=theoretical m/z, A=acquired m/z

| b <sup>+</sup> | #  | AA # | y <sup>+</sup> | y <sup>2+</sup> |
|----------------|----|------|----------------|-----------------|
| 192.1024       | 1  | Y 12 |                |                 |
| 279.1345       | 2  | S 11 | 1221.6955      | 611.3517        |
| 392.2185       | 3  | L 10 | 1134.6635      | 567.8357        |
| 505.3026       | 4  | L 9  | 1021.5795      | 511.2936        |
| 602.3553       | 5  | P 8  | 908.4954       | 454.7516        |
| 673.3925       | 6  | A 7  | 811.4426       | 406.2252        |
| 760.4245       | 7  | S 6  | 740.4055       | 370.7067        |
| 873.5086       | 8  | L 5  | 653.3735       | 327.1907        |
| 986.5926       | 9  | L 4  | 540.2894       | 270.6486        |
| 1101.6196      | 10 | D 3  | 427.2054       | 214.1066        |
| 1238.6785      | 11 | H 2  | 312.1784       | 156.5931        |
|                | 12 | R 1  | 175.1195       | 88.0637         |

N-term:+29.04

YSSADQSSLMEESAEEQAQR, MH+ 2144.9406, m/z 715.6517  
 L OS G25 P150811 220811-s1.04715.04715.3.dta

scan 4715; 1.1e+000

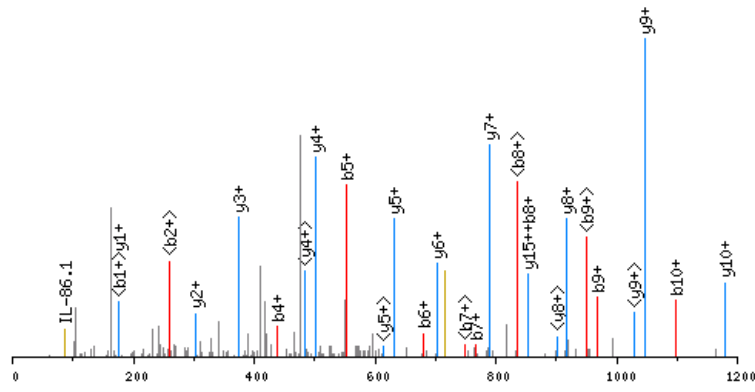

click image to zoom in; click top corners to zoom out [\[precursor±\]](#)

scan 4712; 715.7 m/z; 2.0e+001

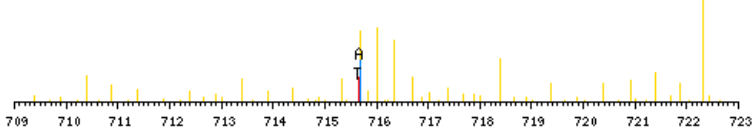

zoomed in precursor plot; T=theoretical m/z, A=acquired m/z

X-range:

-

MassTol: Y-zoom:

MassType:

AVG  MONO

Axis:

1  2

Label:

I  M  -

Ions:

a  +  2+  3+

b  +  2+  3+

c  +  2+  3+

x  +  2+  3+

y  +  2+  3+

z  +  2+  3+

hide H<sub>2</sub>O/NH<sub>3</sub>

zoom 112-122

GO

| b <sup>+</sup> | #  | AA # | y <sup>+</sup> | y <sup>2+</sup>    |
|----------------|----|------|----------------|--------------------|
| 192.1024       | 1  | Y    | 19             |                    |
| 279.1345       | 2  | S    | 18             | 1953.8460 977.4269 |
| 366.1665       | 3  | S    | 17             | 1866.8140 933.9109 |
| 437.2036       | 4  | A    | 16             | 1779.7819 890.3949 |
| 552.2305       | 5  | D    | 15             | 1708.7448 854.8763 |
| 680.2891       | 6  | Q    | 14             | 1593.7179 797.3628 |
| 767.3211       | 7  | S    | 13             | 1465.6593 733.3336 |
| 854.3532       | 8  | S    | 12             | 1378.6273 689.8175 |
| 967.4372       | 9  | L    | 11             | 1291.5952 646.3015 |
| 1098.4777      | 10 | M    | 10             | 1178.5112 589.7595 |
| 1227.5203      | 11 | E    | 9              | 1047.4707 524.2393 |
| 1356.5629      | 12 | E    | 8              | 918.4281 459.7180  |
| 1443.5949      | 13 | S    | 7              | 789.3855 395.1967  |
| 1514.6321      | 14 | A    | 6              | 702.3535 351.6807  |
| 1643.6746      | 15 | E    | 5              | 631.3164 316.1621  |
| 1771.7332      | 16 | Q    | 4              | 502.2738 251.6408  |
| 1842.7703      | 17 | A    | 3              | 374.2152 187.6115  |
| 1970.8289      | 18 | Q    | 2              | 303.1781 152.0930  |
|                | 19 | R    | 1              | 175.1195 88.0637   |

N-term:+29.04

YSSSDVIELTPSNFNR, MH+ 1977.9618, m/z 659.9921  
 H OS G25 P150811 220811-s1.06925.06925.3.dta

X-range:

-

MassTol: Y-zoom:

MassType:

AVG  MONO

Axis:

1  2

Label:

I  M  -

Ions:

a  +  2+  3+

b  +  2+  3+

c  +  2+  3+

x  +  2+  3+

y  +  2+  3+

z  +  2+  3+

hide H<sub>2</sub>O/NH<sub>3</sub>

zoom 112-122

GO

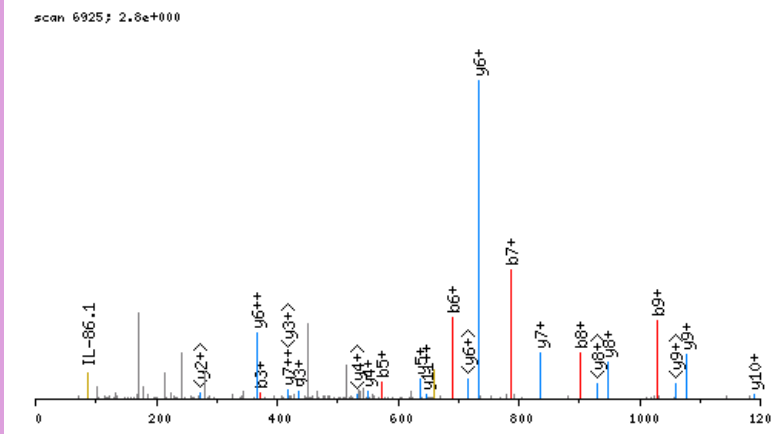

click image to zoom in; click top corners to zoom out [\[precursor±\]](#)

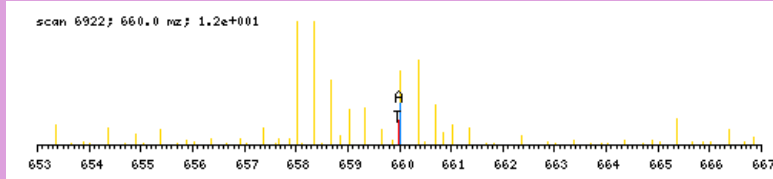

zoomed in precursor plot; T=theoretical m/z, A=acquired m/z

| b <sup>+</sup> | #  | AA # | y <sup>+</sup> | y <sup>2+</sup> |
|----------------|----|------|----------------|-----------------|
| 198.1342       | 1  | Y 17 |                |                 |
| 285.1663       | 2  | S 16 | 1780.8353      | 890.9216        |
| 372.1983       | 3  | S 15 | 1693.8033      | 847.4056        |
| 459.2303       | 4  | S 14 | 1606.7713      | 803.8896        |
| 574.2573       | 5  | D 13 | 1519.7393      | 760.3735        |
| 689.2842       | 6  | D 12 | 1404.7123      | 702.8601        |
| 788.3526       | 7  | V 11 | 1289.6854      | 645.3466        |
| 901.4367       | 8  | I 10 | 1190.6170      | 595.8124        |
| 1030.4793      | 9  | E 9  | 1077.5329      | 539.2704        |
| 1143.5633      | 10 | L 8  | 948.4903       | 474.7491        |
| 1244.6110      | 11 | T 7  | 835.4062       | 418.2070        |
| 1341.6638      | 12 | P 6  | 734.3586       | 367.6832        |
| 1428.6958      | 13 | S 5  | 637.3058       | 319.1568        |
| 1542.7387      | 14 | N 4  | 550.2738       | 275.6408        |
| 1689.8071      | 15 | F 3  | 436.2308       | 218.6193        |
| 1803.8501      | 16 | N 2  | 289.1624       | 145.0851        |
|                | 17 | R 1  | 175.1195       | 88.0637         |

N-term:+35.07

YSVPEGQSKYVEEPR, MH+ 1823.9180, m/z 608.6442  
 L OS G26 P150811 220811-s1.03014.03014.3.dta

X-range:

-

MassTol: Y-zoom:

MassType:

AVG  MONO

Axis:

1  2

Label:

I  M  -

Ions:

a  +  2+  3+

b  +  2+  3+

c  +  2+  3+

x  +  2+  3+

y  +  2+  3+

z  +  2+  3+

hide H<sub>2</sub>O/NH<sub>3</sub>

zoom 112-122

GO

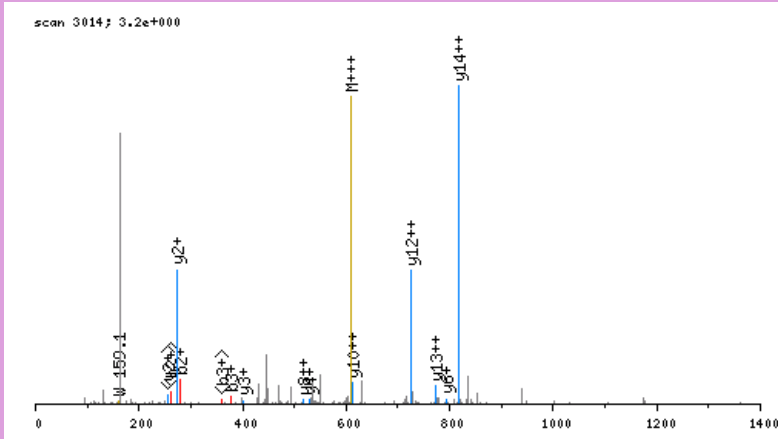

click image to zoom in; click top corners to zoom out [\[precursor±\]](#)

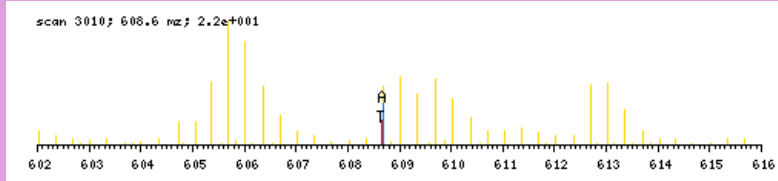

zoomed in precursor plot; T=theoretical m/z, A=acquired m/z

| b <sup>+</sup> | #  | AA | #  | y <sup>+</sup> | y <sup>2+</sup> |
|----------------|----|----|----|----------------|-----------------|
| 192.1024       | 1  | Y  | 15 |                |                 |
| 279.1345       | 2  | S  | 14 | 1632.8234      | 816.9156        |
| 378.2029       | 3  | V  | 13 | 1545.7913      | 773.3996        |
| 475.2556       | 4  | P  | 12 | 1446.7229      | 723.8654        |
| 604.2982       | 5  | E  | 11 | 1349.6702      | 675.3390        |
| 661.3197       | 6  | G  | 10 | 1220.6276      | 610.8177        |
| 789.3783       | 7  | Q  | 9  | 1163.6061      | 582.3070        |
| 876.4103       | 8  | S  | 8  | 1035.5475      | 518.2777        |
| 1032.5366      | 9  | K  | 7  | 948.5155       | 474.7617        |
| 1195.5999      | 10 | Y  | 6  | 792.3892       | 396.6985        |
| 1294.6683      | 11 | V  | 5  | 629.3259       | 315.1668        |
| 1423.7109      | 12 | E  | 4  | 530.2575       | 265.6326        |
| 1552.7535      | 13 | E  | 3  | 401.2149       | 201.1113        |
| 1649.8063      | 14 | P  | 2  | 272.1723       | 136.5900        |
|                | 15 | R  | 1  | 175.1195       | 88.0637         |

N-term:+29.04 K(9):+156.13

YTCTASNEAGSSSSAAVAVR, MH+ 2109.9934, m/z 528.2538  
 H OS G28 P150811 220811-s1.06756.06756.4.dta

X-range:

-

MassTol: Y-zoom:

MassType:

AVG  MONO

Axis:

1  2

Label:

I  M  -

Ions:

a  +  2+  3+

b  +  2+  3+

c  +  2+  3+

x  +  2+  3+

y  +  2+  3+

z  +  2+  3+

hide H<sub>2</sub>O/NH<sub>3</sub>

zoom 112-122

GO

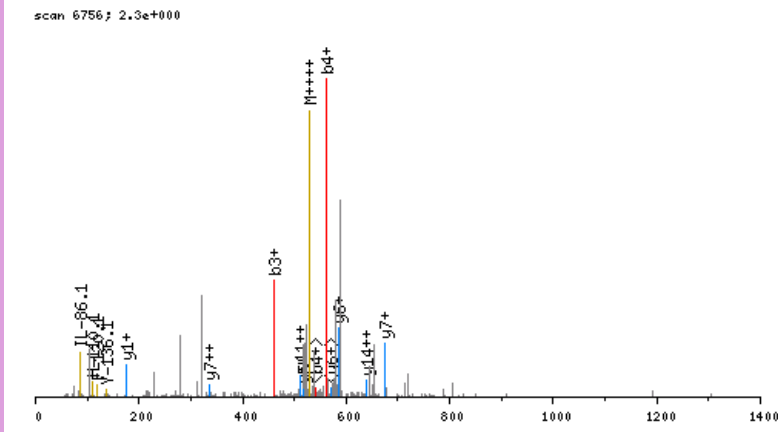

click image to zoom in; click top corners to zoom out [\[precursor±\]](#)

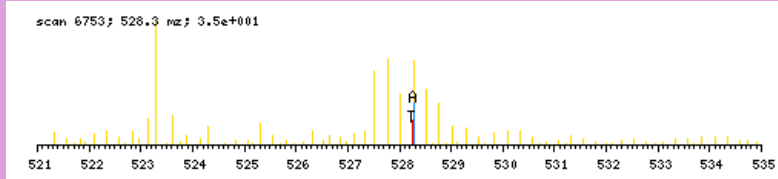

zoomed in precursor plot; T=theoretical m/z, A=acquired m/z

| b <sup>+</sup> | #  | AA # | y <sup>+</sup> | y <sup>2+</sup> |
|----------------|----|------|----------------|-----------------|
| 198.1342       | 1  | Y 21 |                |                 |
| 299.1819       | 2  | T 20 | 1912.8670      | 956.9374        |
| 459.2125       | 3  | C 19 | 1811.8193      | 906.4136        |
| 560.2602       | 4  | T 18 | 1651.7887      | 826.3983        |
| 631.2973       | 5  | A 17 | 1550.7411      | 775.8744        |
| 718.3293       | 6  | S 16 | 1479.7039      | 740.3559        |
| 832.3723       | 7  | N 15 | 1392.6719      | 696.8399        |
| 961.4148       | 8  | E 14 | 1278.6290      | 639.8184        |
| 1032.4520      | 9  | A 13 | 1149.5864      | 575.2971        |
| 1089.4734      | 10 | G 12 | 1078.5493      | 539.7786        |
| 1176.5055      | 11 | S 11 | 1021.5278      | 511.2678        |
| 1263.5375      | 12 | S 10 | 934.4958       | 467.7518        |
| 1350.5695      | 13 | S 9  | 847.4638       | 424.2358        |
| 1437.6015      | 14 | S 8  | 760.4317       | 380.7198        |
| 1524.6336      | 15 | S 7  | 673.3997       | 337.2038        |
| 1595.6707      | 16 | A 6  | 586.3677       | 293.6877        |
| 1666.7078      | 17 | A 5  | 515.3306       | 258.1692        |
| 1765.7762      | 18 | V 4  | 444.2934       | 222.6506        |
| 1836.8133      | 19 | A 3  | 345.2250       | 173.1164        |
| 1935.8817      | 20 | V 2  | 274.1879       | 137.5979        |
|                | 21 | R 1  | 175.1195       | 88.0637         |

N-term:+35.07 C(3):+160.03

YTPEPNGMASEEVTEKER, MH+ 2122.9967, m/z 708.3371  
 L OS G26 P150811 220811-s1.03072.03072.3.dta

X-range:

-

MassTol: Y-zoom:

MassType:

AVG  MONO

Axis:

1  2

Label:

I  M  -

Ions:

a  +  2+  3+

b  +  2+  3+

c  +  2+  3+

x  +  2+  3+

y  +  2+  3+

z  +  2+  3+

hide H<sub>2</sub>O/NH<sub>3</sub>

zoom 112-122

GO

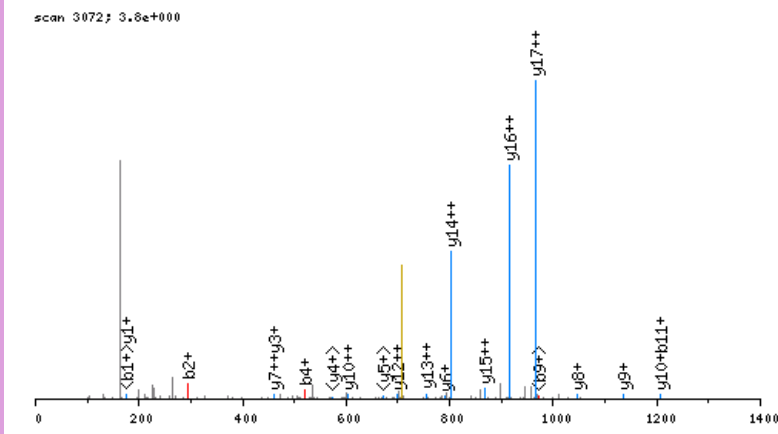

click image to zoom in; click top corners to zoom out [\[precursor±\]](#)

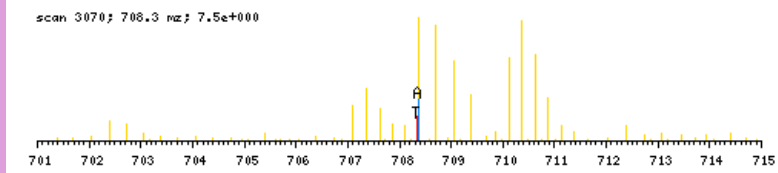

zoomed in precursor plot; T=theoretical m/z, A=acquired m/z

| b <sup>+</sup> | #  | AA # | y <sup>+</sup> | y <sup>2+</sup> |
|----------------|----|------|----------------|-----------------|
| 192.1024       | 1  | Y 18 |                |                 |
| 293.1501       | 2  | T 17 | 1931.9021      | 966.4550        |
| 390.2029       | 3  | P 16 | 1830.8544      | 915.9311        |
| 519.2455       | 4  | E 15 | 1733.8016      | 867.4047        |
| 616.2982       | 5  | P 14 | 1604.7590      | 802.8834        |
| 730.3412       | 6  | N 13 | 1507.7063      | 754.3571        |
| 787.3626       | 7  | G 12 | 1393.6634      | 697.3356        |
| 918.4031       | 8  | M 11 | 1336.6419      | 668.8249        |
| 989.4402       | 9  | A 10 | 1205.6014      | 603.3046        |
| 1076.4722      | 10 | S 9  | 1134.5643      | 567.7861        |
| 1205.5148      | 11 | E 8  | 1047.5323      | 524.2700        |
| 1334.5574      | 12 | E 7  | 918.4897       | 459.7487        |
| 1433.6258      | 13 | V 6  | 789.4471       | 395.2275        |
| 1534.6735      | 14 | T 5  | 690.3787       | 345.6932        |
| 1663.7161      | 15 | E 4  | 589.3310       | 295.1694        |
| 1819.8424      | 16 | K 3  | 460.2884       | 230.6481        |
| 1948.8850      | 17 | E 2  | 304.1621       | 152.5850        |
|                | 18 | R 1  | 175.1195       | 88.0637         |

N-term:+29.04 K(16):+156.13

YTQKAPQVSTPTLVEEAR, MH+ 2016.1130, m/z 672.7092  
 L OS G26 P150811 220811-s1.03748.03748.3.dta

X-range:

-

MassTol: Y-zoom:

MassType:

AVG  MONO

Axis:

1  2

Label:

I  M  -

Ions:

a  +  2+  3+

b  +  2+  3+

c  +  2+  3+

x  +  2+  3+

y  +  2+  3+

z  +  2+  3+

hide H<sub>2</sub>O/NH<sub>3</sub>

zoom 112-122

GO

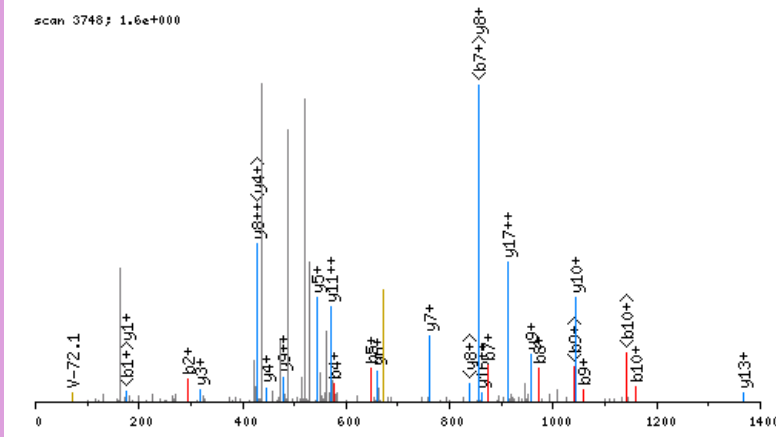

click image to zoom in; click top corners to zoom out [\[precursor±\]](#)

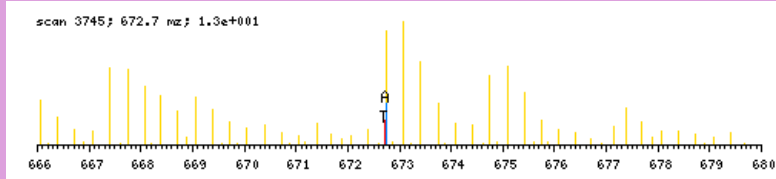

zoomed in precursor plot; T=theoretical m/z, A=acquired m/z

| b <sup>+</sup> | #  | AA # | y <sup>+</sup> | y <sup>2+</sup> |
|----------------|----|------|----------------|-----------------|
| 192.1024       | 1  | Y 18 |                |                 |
| 293.1501       | 2  | T 17 | 1825.0184      | 913.0131        |
| 421.2087       | 3  | Q 16 | 1723.9707      | 862.4893        |
| 577.3350       | 4  | K 15 | 1595.9121      | 798.4600        |
| 648.3721       | 5  | A 14 | 1439.7858      | 720.3968        |
| 745.4249       | 6  | P 13 | 1368.7487      | 684.8783        |
| 873.4834       | 7  | Q 12 | 1271.6959      | 636.3519        |
| 972.5519       | 8  | V 11 | 1143.6374      | 572.3226        |
| 1059.5839      | 9  | S 10 | 1044.5689      | 522.7884        |
| 1160.6316      | 10 | T 9  | 957.5369       | 479.2724        |
| 1257.6843      | 11 | P 8  | 856.4892       | 428.7485        |
| 1358.7320      | 12 | T 7  | 759.4365       | 380.2222        |
| 1471.8161      | 13 | L 6  | 658.3888       | 329.6983        |
| 1570.8845      | 14 | V 5  | 545.3047       | 273.1563        |
| 1699.9271      | 15 | E 4  | 446.2363       | 223.6221        |
| 1770.9642      | 16 | A 3  | 317.1937       | 159.1008        |
| 1842.0013      | 17 | A 2  | 246.1566       | 123.5822        |
|                | 18 | R 1  | 175.1195       | 88.0637         |

N-term:+29.04 K(4):+156.13

YVDAGAETMTQR, MH+ 1375.6740, m/z 459.2295  
 H OS G25 P150811 220811-s1.02813.02813.3.dta

scan 2813; 7.5e+000

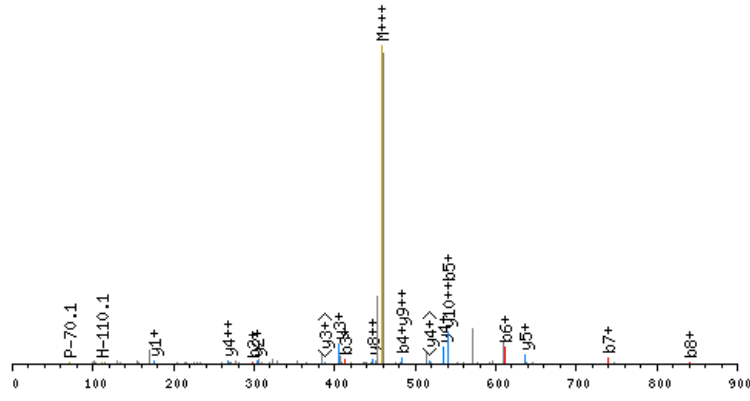

click image to zoom in; click top corners to zoom out [precursor±]

scan 2812; 459.2 m/z; 1.7e+001

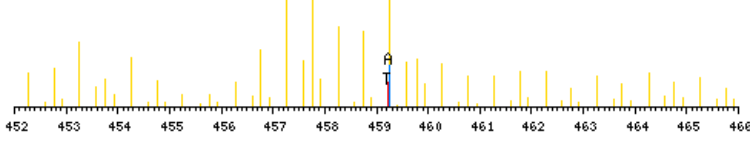

zoomed in precursor plot; T=theoretical m/z, A=acquired m/z

X-range:

-

MassTol: Y-zoom:

MassType:

AVG  MONO

Axis:

1  2

Label:

I  M  -

Ions:

a  +  2+  3+

b  +  2+  3+

c  +  2+  3+

x  +  2+  3+

y  +  2+  3+

z  +  2+  3+

hide H<sub>2</sub>O/NH<sub>3</sub>

zoom 112-122

GO

| b <sup>+</sup> | #  | AA # | y <sup>+</sup> | y <sup>2+</sup> |
|----------------|----|------|----------------|-----------------|
| 198.1342       | 1  | Y 12 |                |                 |
| 297.2026       | 2  | V 11 | 1178.5476      | 589.7777        |
| 412.2296       | 3  | D 10 | 1079.4791      | 540.2435        |
| 483.2667       | 4  | A 9  | 964.4522       | 482.7300        |
| 540.2882       | 5  | G 8  | 893.4151       | 447.2115        |
| 611.3253       | 6  | A 7  | 836.3936       | 418.7007        |
| 740.3679       | 7  | E 6  | 765.3565       | 383.1822        |
| 841.4155       | 8  | T 5  | 636.3139       | 318.6609        |
| 972.4560       | 9  | M 4  | 535.2662       | 268.1370        |
| 1073.5037      | 10 | T 3  | 404.2258       | 202.6168        |
| 1201.5623      | 11 | Q 2  | 303.1781       | 152.0930        |
|                | 12 | R 1  | 175.1195       | 88.0637         |

N-term:+35.07



YVGEEMEEGEFSEAR, MH+ 1717.7379, m/z 573.2508  
 L OS G25 P150811 220811-s1.04813.04813.3.dta

X-range:

-

MassTol: Y-zoom:

MassType:

AVG  MONO

Axis:

1  2

Label:

I  M  -

Ions:

a  +  2+  3+

b  +  2+  3+

c  +  2+  3+

x  +  2+  3+

y  +  2+  3+

z  +  2+  3+

hide H<sub>2</sub>O/NH<sub>3</sub>

zoom 112-122

GO

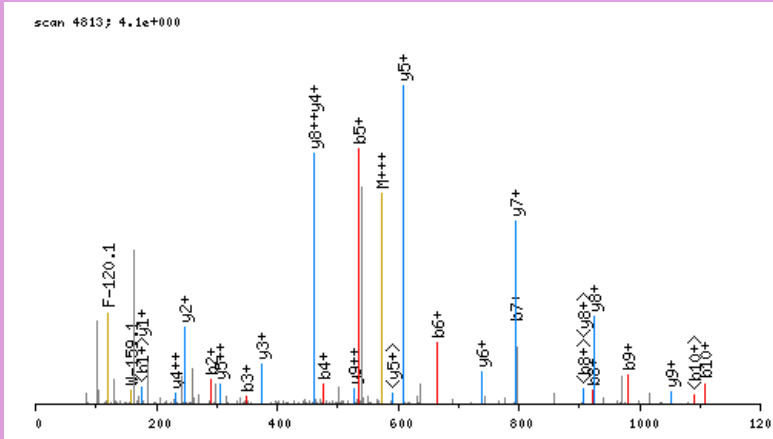

click image to zoom in; click top corners to zoom out [\[precursor±\]](#)

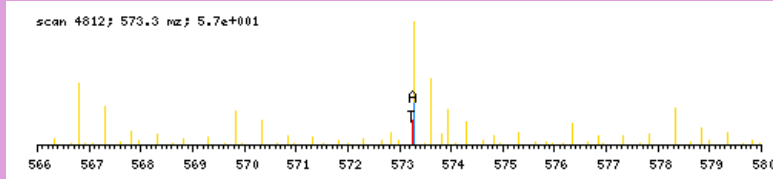

zoomed in precursor plot; T=theoretical m/z, A=acquired m/z

| b <sup>+</sup> | #  | AA # | y <sup>+</sup> | y <sup>2+</sup> |
|----------------|----|------|----------------|-----------------|
| 192.1024       | 1  | Y 15 |                |                 |
| 291.1708       | 2  | V 14 | 1526.6433      | 763.8256        |
| 348.1923       | 3  | G 13 | 1427.5749      | 714.2914        |
| 477.2349       | 4  | E 12 | 1370.5534      | 685.7806        |
| 534.2564       | 5  | G 11 | 1241.5108      | 621.2593        |
| 665.2968       | 6  | M 10 | 1184.4894      | 592.7486        |
| 794.3394       | 7  | E 9  | 1053.4489      | 527.2284        |
| 923.3820       | 8  | E 8  | 924.4063       | 462.7071        |
| 980.4035       | 9  | G 7  | 795.3637       | 398.1858        |
| 1109.4461      | 10 | E 6  | 738.3422       | 369.6750        |
| 1256.5145      | 11 | F 5  | 609.2997       | 305.1537        |
| 1343.5465      | 12 | S 4  | 462.2312       | 231.6195        |
| 1472.5891      | 13 | E 3  | 375.1992       | 188.1035        |
| 1543.6262      | 14 | A 2  | 246.1566       | 123.5822        |
|                | 15 | R 1  | 175.1195       | 88.0637         |

N-term:+29.04

YVLDDSDGLGR, MH+ 1237.6064, m/z 619.3069  
 L OS G25 P150811 220811-s1.04796.04796.2.dta

X-range:

-

MassTol: Y-zoom:

MassType:

AVG  MONO

Axis:

1  2

Label:

I  M  -

Ions:

a  +  2+  3+

b  +  2+  3+

c  +  2+  3+

x  +  2+  3+

y  +  2+  3+

z  +  2+  3+

hide H<sub>2</sub>O/NH<sub>3</sub>

zoom 112-122

GO

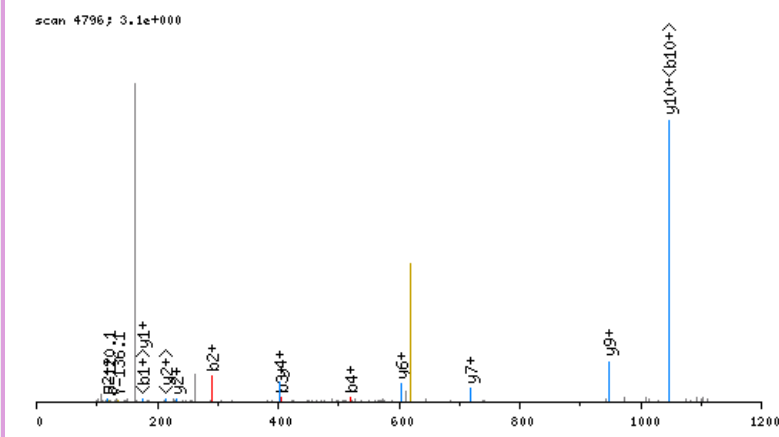

click image to zoom in; click top corners to zoom out [\[precursor±\]](#)

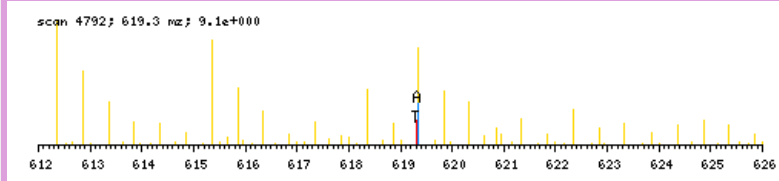

zoomed in precursor plot; T=theoretical m/z, A=acquired m/z

| b <sup>+</sup> | #  | AA # | y <sup>+</sup> | y <sup>2+</sup>    |
|----------------|----|------|----------------|--------------------|
| 192.1024       | 1  | Y    | 11             |                    |
| 291.1708       | 2  | V    | 10             | 1046.5118 523.7598 |
| 404.2549       | 3  | L    | 9              | 947.4434 474.2256  |
| 519.2818       | 4  | D    | 8              | 834.3593 417.6836  |
| 634.3088       | 5  | D    | 7              | 719.3324 360.1701  |
| 721.3408       | 6  | S    | 6              | 604.3055 302.6566  |
| 836.3678       | 7  | D    | 5              | 517.2734 259.1406  |
| 893.3892       | 8  | G    | 4              | 402.2465 201.6272  |
| 1006.4733      | 9  | L    | 3              | 345.2250 173.1164  |
| 1063.4948      | 10 | G    | 2              | 232.1410 116.5744  |
|                | 11 | R    | 1              | 175.1195 88.0637   |

N-term:+29.04

YVLEQASSHIGNSTQAAVR, MH+ 2059.0572, m/z 687.0239  
 L OS G26 P150811 220811-s1.03452.03452.3.dta

X-range:

-

MassTol: Y-zoom:

MassType:

AVG  MONO

Axis:

1  2

Label:

I  M  -

Ions:

a  +  2+  3+

b  +  2+  3+

c  +  2+  3+

x  +  2+  3+

y  +  2+  3+

z  +  2+  3+

hide H<sub>2</sub>O/NH<sub>3</sub>

zoom 112-122

GO

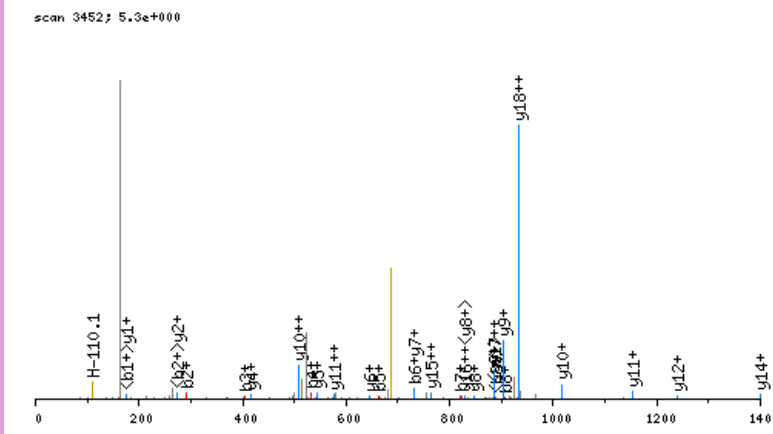

click image to zoom in; click top corners to zoom out [\[precursor±\]](#)

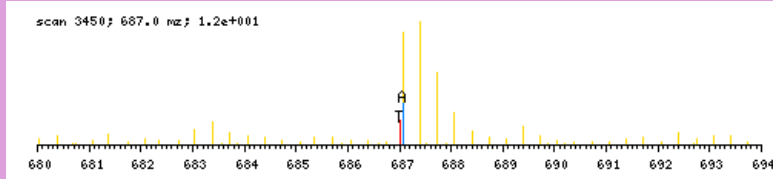

zoomed in precursor plot; T=theoretical m/z, A=acquired m/z

| b <sup>+</sup> | #  | AA # | y <sup>+</sup> | y <sup>2+</sup> |
|----------------|----|------|----------------|-----------------|
| 192.1024       | 1  | Y    | 19             |                 |
| 291.1708       | 2  | V    | 18             | 1867.9626       |
| 404.2549       | 3  | L    | 17             | 1768.8942       |
| 533.2975       | 4  | E    | 16             | 1655.8101       |
| 661.3561       | 5  | Q    | 15             | 1526.7675       |
| 732.3932       | 6  | A    | 14             | 1398.7090       |
| 819.4252       | 7  | S    | 13             | 1327.6719       |
| 906.4572       | 8  | S    | 12             | 1240.6398       |
| 1043.5162      | 9  | H    | 11             | 1153.6078       |
| 1156.6002      | 10 | I    | 10             | 1016.5489       |
| 1213.6217      | 11 | G    | 9              | 903.4648        |
| 1327.6646      | 12 | N    | 8              | 846.4434        |
| 1414.6966      | 13 | S    | 7              | 732.4004        |
| 1515.7443      | 14 | T    | 6              | 645.3684        |
| 1643.8029      | 15 | Q    | 5              | 544.3207        |
| 1714.8400      | 16 | A    | 4              | 416.2621        |
| 1785.8771      | 17 | A    | 3              | 345.2250        |
| 1884.9455      | 18 | V    | 2              | 274.1879        |
|                | 19 | R    | 1              | 175.1195        |

N-term:+29.04

YVLTCPNSNLGTGLR, MH+ 1578.8313, m/z 526.9486  
 L OS G25 P150811 220811-s1.06281.06281.3.dta

X-range:

-

MassTol: Y-zoom:

MassType:

AVG  MONO

Axis:

1  2

Label:

I  M  -

Ions:

a  +  2+  3+

b  +  2+  3+

c  +  2+  3+

x  +  2+  3+

y  +  2+  3+

z  +  2+  3+

hide H<sub>2</sub>O/NH<sub>3</sub>

zoom 112-122

GO

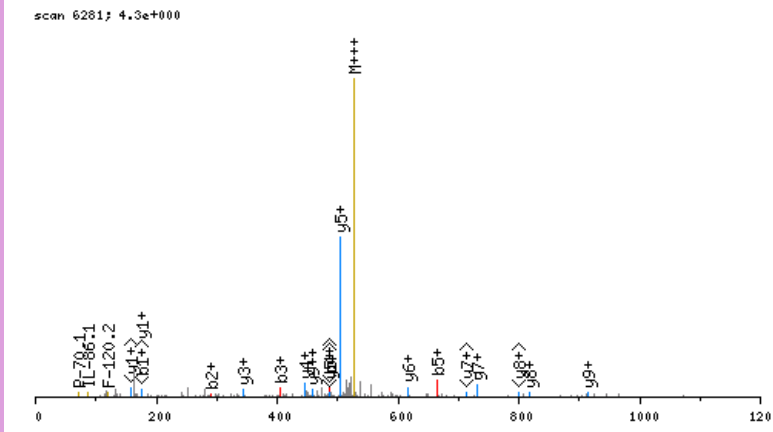

click image to zoom in; click top corners to zoom out [\[precursor±\]](#)

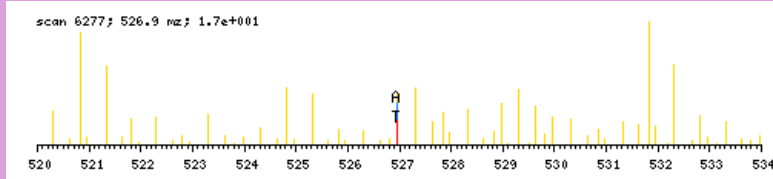

zoomed in precursor plot; T=theoretical m/z, A=acquired m/z

| b <sup>+</sup> | #  | AA # | y <sup>+</sup> | y <sup>2+</sup>    |
|----------------|----|------|----------------|--------------------|
| 192.1024       | 1  | Y    | 14             |                    |
| 291.1708       | 2  | V    | 13             | 1387.7367 694.3723 |
| 404.2549       | 3  | L    | 12             | 1288.6683 644.8381 |
| 505.3026       | 4  | T    | 11             | 1175.5842 588.2960 |
| 665.3332       | 5  | C    | 10             | 1074.5366 537.7722 |
| 762.3859       | 6  | P    | 9              | 914.5060 457.7569  |
| 849.4180       | 7  | S    | 8              | 817.4532 409.2305  |
| 963.4609       | 8  | N    | 7              | 730.4212 365.7145  |
| 1076.5450      | 9  | L    | 6              | 616.3782 308.6930  |
| 1133.5664      | 10 | G    | 5              | 503.2942 252.1510  |
| 1234.6141      | 11 | T    | 4              | 446.2727 223.6403  |
| 1291.6356      | 12 | G    | 3              | 345.2250 173.1164  |
| 1404.7196      | 13 | L    | 2              | 288.2036 144.6057  |
|                | 14 | R    | 1              | 175.1195 88.0637   |

N-term:+29.04 C(5):+160.03

YYEPDCLAYGAKAAR, MH+ 1803.8739, m/z 601.9628  
 L OS G26 P150811 220811-s1.03532.03532.3.dta

X-range:

-

MassTol: Y-zoom:

MassType:

AVG  MONO

Axis:

1  2

Label:

I  M  -

Ions:

a  +  2+  3+

b  +  2+  3+

c  +  2+  3+

x  +  2+  3+

y  +  2+  3+

z  +  2+  3+

hide H<sub>2</sub>O/NH<sub>3</sub>

zoom 112-122

GO

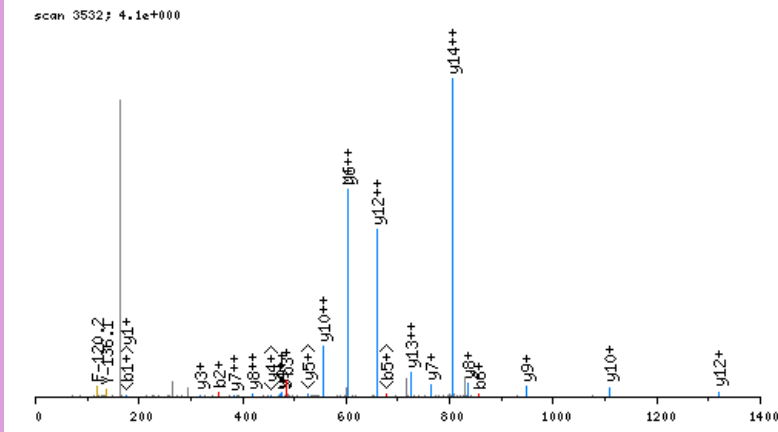

click image to zoom in; click top corners to zoom out [\[precursor±\]](#)

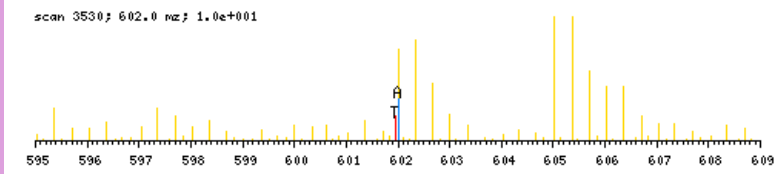

zoomed in precursor plot; T=theoretical m/z, A=acquired m/z

| b <sup>+</sup> | #  | AA | #  | y <sup>+</sup> | y <sup>2+</sup> |
|----------------|----|----|----|----------------|-----------------|
| 192.1024       | 1  | Y  | 15 |                |                 |
| 355.1658       | 2  | Y  | 14 | 1612.7793      | 806.8936        |
| 484.2084       | 3  | E  | 13 | 1449.7160      | 725.3619        |
| 581.2611       | 4  | P  | 12 | 1320.6734      | 660.8406        |
| 696.2881       | 5  | D  | 11 | 1223.6207      | 612.3142        |
| 856.3187       | 6  | C  | 10 | 1108.5937      | 554.8008        |
| 969.4027       | 7  | L  | 9  | 948.5631       | 474.7855        |
| 1040.4398      | 8  | A  | 8  | 835.4790       | 418.2434        |
| 1203.5032      | 9  | Y  | 7  | 764.4419       | 382.7249        |
| 1260.5246      | 10 | G  | 6  | 601.3786       | 301.1932        |
| 1331.5617      | 11 | A  | 5  | 544.3571       | 272.6825        |
| 1487.6880      | 12 | K  | 4  | 473.3200       | 237.1639        |
| 1558.7252      | 13 | A  | 3  | 317.1937       | 159.1008        |
| 1629.7623      | 14 | A  | 2  | 246.1566       | 123.5822        |
|                | 15 | R  | 1  | 175.1195       | 88.0637         |

N-term:+29.04 C(6):+160.03  
 K(12):+156.13

YYSSSIWGPTCDGLDR, MH+ 1910.8806, m/z 478.4756  
 H OS G28 P150811 220811-s1.05394.05394.4.dta

X-range:

-

MassTol: Y-zoom:

MassType:

AVG  MONO

Axis:

1  2

Label:

I  M  -

Ions:

a  +  2+  3+

b  +  2+  3+

c  +  2+  3+

x  +  2+  3+

y  +  2+  3+

z  +  2+  3+

hide H<sub>2</sub>O/NH<sub>3</sub>

zoom 112-122

GO

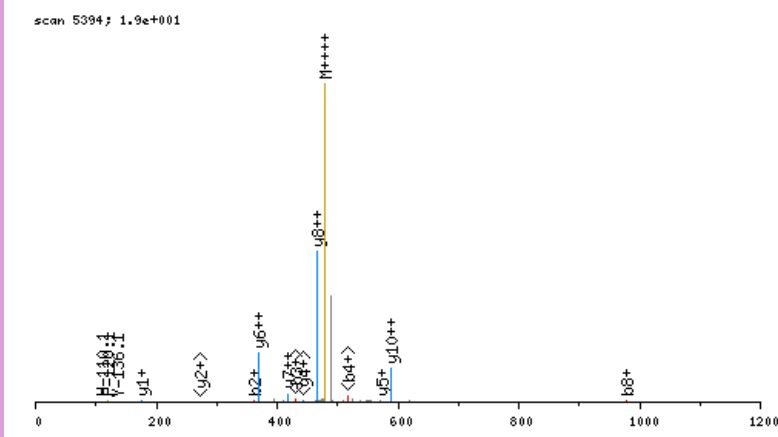

click image to zoom in; click top corners to zoom out [\[precursor±\]](#)

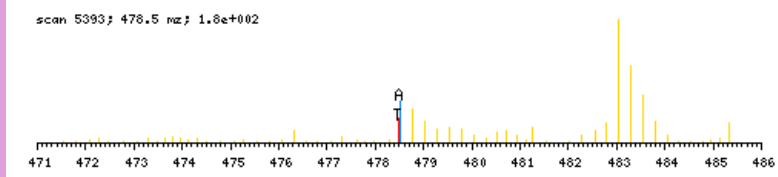

zoomed in precursor plot; T=theoretical m/z, A=acquired m/z

| b <sup>+</sup> | #  | AA # | y <sup>+</sup> | y <sup>2+</sup> |
|----------------|----|------|----------------|-----------------|
| 198.1342       | 1  | Y 16 |                |                 |
| 361.1976       | 2  | Y 15 | 1713.7542      | 857.3810        |
| 448.2296       | 3  | S 14 | 1550.6909      | 775.8494        |
| 535.2616       | 4  | S 13 | 1463.6589      | 732.3333        |
| 622.2936       | 5  | S 12 | 1376.6268      | 688.8173        |
| 735.3777       | 6  | I 11 | 1289.5948      | 645.3013        |
| 921.4570       | 7  | W 10 | 1176.5107      | 588.7593        |
| 978.4785       | 8  | G 9  | 990.4314       | 495.7196        |
| 1075.5312      | 9  | P 8  | 933.4100       | 467.2089        |
| 1176.5789      | 10 | T 7  | 836.3572       | 418.6825        |
| 1336.6095      | 11 | C 6  | 735.3095       | 368.1587        |
| 1451.6365      | 12 | D 5  | 575.2789       | 288.1434        |
| 1508.6579      | 13 | G 4  | 460.2520       | 230.6299        |
| 1621.7420      | 14 | L 3  | 403.2305       | 202.1192        |
| 1736.7689      | 15 | D 2  | 290.1464       | 145.5771        |
|                | 16 | R 1  | 175.1195       | 88.0637         |

N-term:+35.07 C(11):+160.03
