# Supplementary material
Source: PubMed Central journal article supplement (PMC3591655)
Supplement: supp_M112.017962_mcp.M112.017962-24.pdf [file supp_M112.017962_mcp.M112.017962-24.pdf]

AAAPSAVGSAAAAPR, MH+ 1327.7546, m/z 443.2564  
 H OSG37 P180811 230811-s1.02568.02568.3.dta

X-range:

-

MassTol: Y-zoom:

MassType:

AVG  MONO

Axis:

1  2

Label:

I  M  -

Ions:

a  +  2+  3+

b  +  2+  3+

c  +  2+  3+

x  +  2+  3+

y  +  2+  3+

z  +  2+  3+

hide H<sub>2</sub>O/NH<sub>3</sub>

zoom 112-122

GO

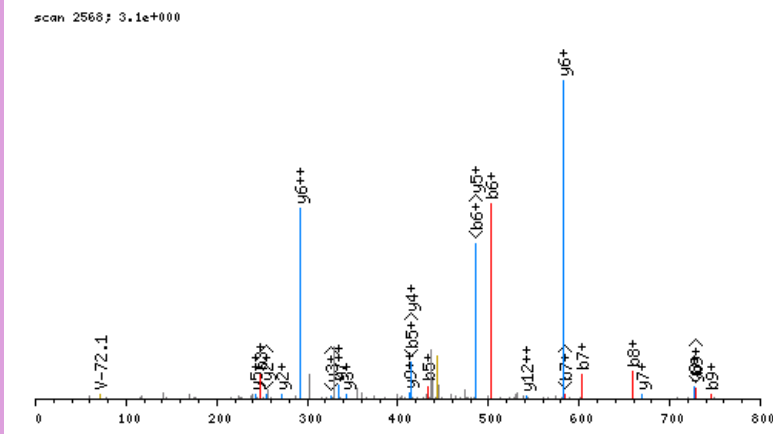

click image to zoom in; click top corners to zoom out [\[precursor±\]](#)

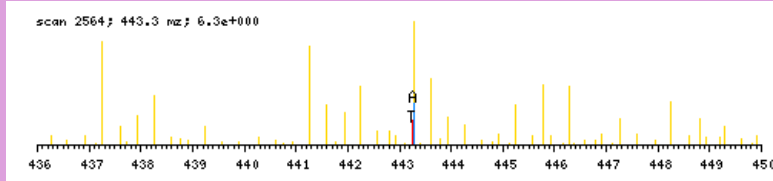

zoomed in precursor plot; T=theoretical m/z, A=acquired m/z

| b <sup>+</sup> | #  | AA # | y <sup>+</sup> | y <sup>2+</sup> |
|----------------|----|------|----------------|-----------------|
| 106.1080       | 1  | A 15 |                |                 |
| 177.1451       | 2  | A 14 | 1222.6544      | 611.8311        |
| 248.1822       | 3  | A 13 | 1151.6173      | 576.3126        |
| 345.2350       | 4  | P 12 | 1080.5802      | 540.7940        |
| 432.2670       | 5  | S 11 | 983.5274       | 492.2676        |
| 503.3041       | 6  | A 10 | 896.4954       | 448.7516        |
| 602.3726       | 7  | V 9  | 825.4583       | 413.2331        |
| 659.3940       | 8  | G 8  | 726.3899       | 363.6988        |
| 746.4261       | 9  | S 7  | 669.3684       | 335.1881        |
| 843.4788       | 10 | P 6  | 582.3364       | 291.6721        |
| 914.5159       | 11 | A 5  | 485.2836       | 243.1457        |
| 985.5530       | 12 | A 4  | 414.2465       | 207.6272        |
| 1056.5902      | 13 | A 3  | 343.2094       | 172.1086        |
| 1153.6429      | 14 | P 2  | 272.1723       | 136.5900        |
|                | 15 | R 1  | 175.1195       | 88.0637         |

N-term:+35.07

AALPADPPASVVVGPVVVPR, MH+ 1945.1698, m/z 649.0615  
 H OSG36 P180811 230811-s1.05251.05251.3.dta

X-range:

-

MassTol: Y-zoom:

MassType:

AVG  MONO

Axis:

1  2

Label:

I  M  -

Ions:

a  +  2+  3+

b  +  2+  3+

c  +  2+  3+

x  +  2+  3+

y  +  2+  3+

z  +  2+  3+

hide H<sub>2</sub>O/NH<sub>3</sub>

zoom 112-122

GO

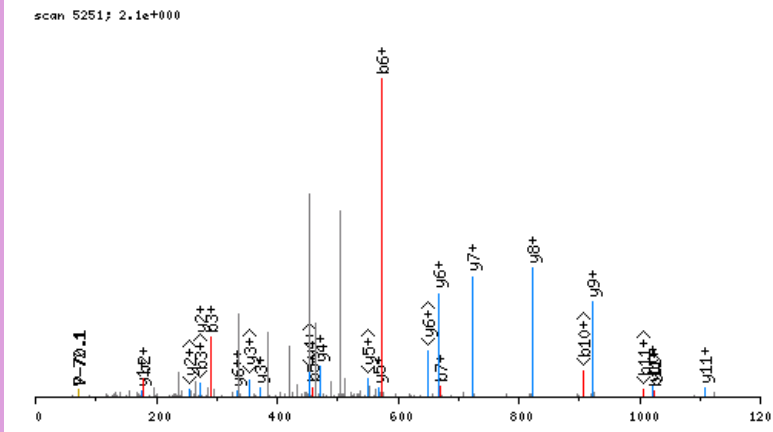

click image to zoom in; click top corners to zoom out [\[precursor±\]](#)

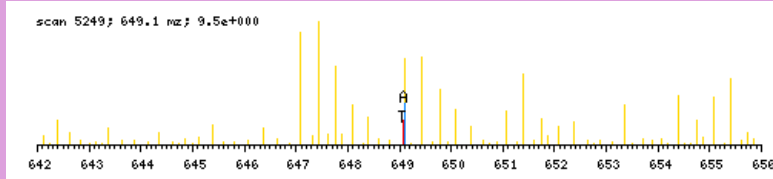

zoomed in precursor plot; T=theoretical m/z, A=acquired m/z

| b <sup>+</sup> | #  | AA # | y <sup>+</sup> | y <sup>2+</sup> |
|----------------|----|------|----------------|-----------------|
| 106.1080       | 1  | A 20 |                |                 |
| 177.1451       | 2  | A 19 | 1840.0696      | 920.5387        |
| 290.2292       | 3  | L 18 | 1769.0325      | 885.0202        |
| 387.2820       | 4  | P 17 | 1655.9485      | 828.4781        |
| 458.3191       | 5  | A 16 | 1558.8957      | 779.9518        |
| 573.3460       | 6  | D 15 | 1487.8586      | 744.4332        |
| 670.3988       | 7  | P 14 | 1372.8316      | 686.9197        |
| 767.4515       | 8  | P 13 | 1275.7789      | 638.3934        |
| 838.4887       | 9  | A 12 | 1178.7261      | 589.8670        |
| 925.5207       | 10 | S 11 | 1107.6890      | 554.3484        |
| 1024.5891      | 11 | V 10 | 1020.6570      | 510.8324        |
| 1123.6575      | 12 | V 9  | 921.5886       | 461.2982        |
| 1222.7259      | 13 | V 8  | 822.5201       | 411.7640        |
| 1279.7474      | 14 | G 7  | 723.4517       | 362.2298        |
| 1376.8002      | 15 | P 6  | 666.4303       | 333.7190        |
| 1475.8686      | 16 | V 5  | 569.3775       | 285.1927        |
| 1574.9370      | 17 | V 4  | 470.3091       | 235.6585        |
| 1674.0054      | 18 | V 3  | 371.2407       | 186.1243        |
| 1771.0582      | 19 | P 2  | 272.1723       | 136.5900        |
|                | 20 | R 1  | 175.1195       | 88.0637         |

N-term:+35.07



AAPEEESAYVAGER, MH+ 1512.7394, m/z 504.9180  
 H OSG37 P180811 230811-s1.03127.03127.3.dta

X-range:

-

MassTol: Y-zoom:

MassType:

AVG  MONO

Axis:

1  2

Label:

I  M  -

Ions:

a  +  2+  3+

b  +  2+  3+

c  +  2+  3+

x  +  2+  3+

y  +  2+  3+

z  +  2+  3+

hide H<sub>2</sub>O/NH<sub>3</sub>

zoom 112-122

GO

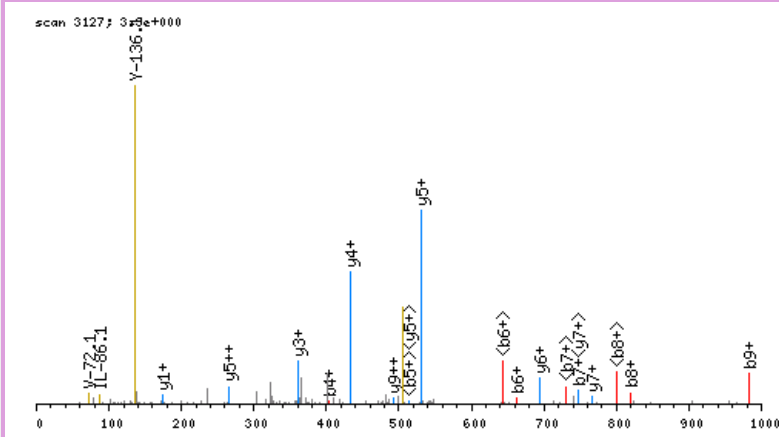

click image to zoom in; click top corners to zoom out [\[precursor±\]](#)

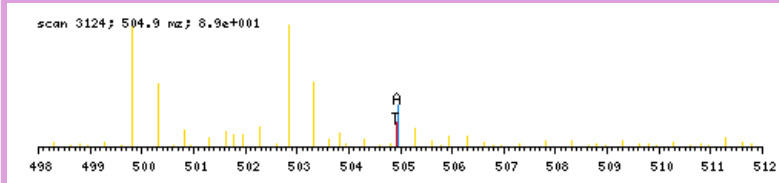

zoomed in precursor plot; T=theoretical m/z, A=acquired m/z

| b <sup>+</sup> | #  | AA # | y <sup>+</sup> | y <sup>2+</sup> |
|----------------|----|------|----------------|-----------------|
| 106.1080       | 1  | A 14 |                |                 |
| 177.1451       | 2  | A 13 | 1407.6392      | 704.3235        |
| 274.1979       | 3  | P 12 | 1336.6021      | 668.8050        |
| 403.2405       | 4  | E 11 | 1239.5493      | 620.2786        |
| 532.2831       | 5  | E 10 | 1110.5067      | 555.7573        |
| 661.3257       | 6  | E 9  | 981.4641       | 491.2360        |
| 748.3577       | 7  | S 8  | 852.4216       | 426.7147        |
| 819.3948       | 8  | A 7  | 765.3895       | 383.1987        |
| 982.4581       | 9  | Y 6  | 694.3524       | 347.6801        |
| 1081.5266      | 10 | V 5  | 531.2891       | 266.1485        |
| 1152.5637      | 11 | A 4  | 432.2207       | 216.6142        |
| 1209.5851      | 12 | G 3  | 361.1836       | 181.0957        |
| 1338.6277      | 13 | E 2  | 304.1621       | 152.5850        |
|                | 14 | R 1  | 175.1195       | 88.0637         |

N-term:+35.07

AAPELPVPTGGPMAGAR, MH+ 1625.8897, m/z 542.6348  
 H OSG37 P180811 230811-s1.06051.06051.3.dta

X-range:

-

MassTol: Y-zoom:

MassType:

AVG  MONO

Axis:

1  2

Label:

I  M  -

Ions:

a  +  2+  3+

b  +  2+  3+

c  +  2+  3+

x  +  2+  3+

y  +  2+  3+

z  +  2+  3+

hide H<sub>2</sub>O/NH<sub>3</sub>

zoom 112-122

GO

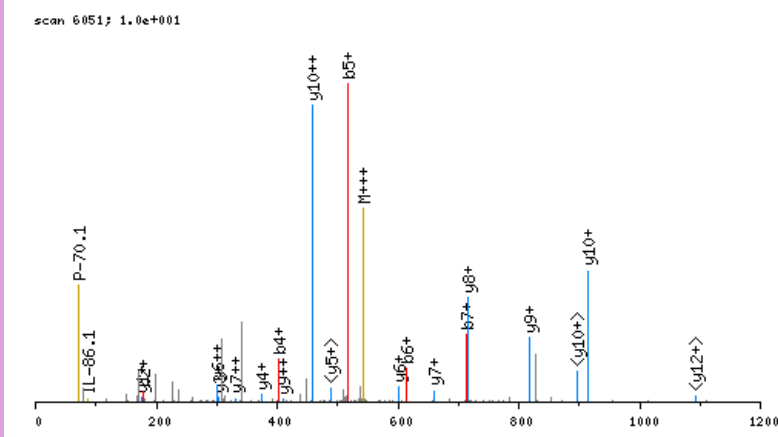

click image to zoom in; click top corners to zoom out [\[precursor±\]](#)

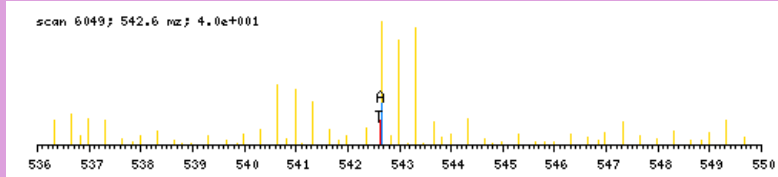

zoomed in precursor plot; T=theoretical m/z, A=acquired m/z

| b <sup>+</sup> | #  | AA # | y <sup>+</sup> | y <sup>2+</sup> |
|----------------|----|------|----------------|-----------------|
| 106.1080       | 1  | A 17 |                |                 |
| 177.1451       | 2  | A 16 | 1520.7895      | 760.8987        |
| 274.1979       | 3  | P 15 | 1449.7524      | 725.3801        |
| 403.2405       | 4  | E 14 | 1352.6996      | 676.8537        |
| 516.3245       | 5  | L 13 | 1223.6571      | 612.3324        |
| 613.3773       | 6  | P 12 | 1110.5730      | 555.7904        |
| 712.4457       | 7  | V 11 | 1013.5202      | 507.2640        |
| 809.4985       | 8  | P 10 | 914.4518       | 457.7298        |
| 910.5462       | 9  | T 9  | 817.3990       | 409.2034        |
| 967.5676       | 10 | G 8  | 716.3514       | 358.6796        |
| 1024.5891      | 11 | G 7  | 659.3299       | 330.1689        |
| 1121.6419      | 12 | P 6  | 602.3084       | 301.6581        |
| 1252.6823      | 13 | M 5  | 505.2557       | 253.1318        |
| 1323.7195      | 14 | A 4  | 374.2152       | 187.6115        |
| 1380.7409      | 15 | G 3  | 303.1781       | 152.0930        |
| 1451.7780      | 16 | A 2  | 246.1566       | 123.5822        |
|                | 17 | R 1  | 175.1195       | 88.0637         |

N-term:+35.07

AAPVPPAAAPLLDFSSDSVPPAPR, MH+ 2371.2661, m/z 593.5720  
 L OSG36 P180811 230811-s1.06021.06021.4.dta

scan 6021; 1.3e+001

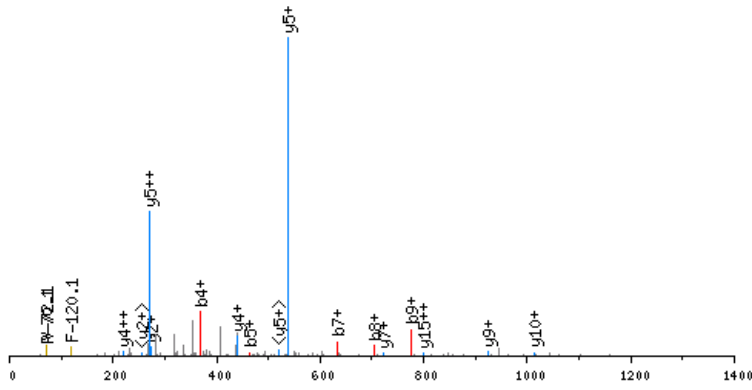

click image to zoom in; click top corners to zoom out [precursor±]

scan 6019; 593.6 mz; 5.3e+001

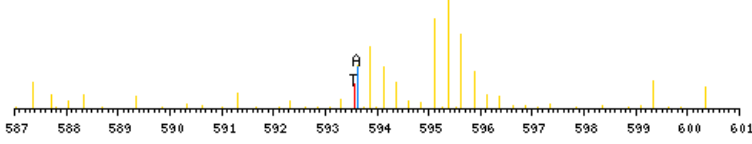

zoomed in precursor plot; T=theoretical m/z, A=acquired m/z

X-range:

-

MassTol: Y-zoom:

MassType:

AVG  MONO

Axis:

1  2

Label:

I  M  -

Ions:

a  +  2+  3+

b  +  2+  3+

c  +  2+  3+

x  +  2+  3+

y  +  2+  3+

z  +  2+  3+

hide H<sub>2</sub>O/NH<sub>3</sub>

zoom 112-122

GO

| b <sup>+</sup> | #  | AA # | y <sup>+</sup> | y <sup>2+</sup> |
|----------------|----|------|----------------|-----------------|
| 100.0762       | 1  | A 24 |                |                 |
| 171.1133       | 2  | A 23 | 2272.1978      | 1136.6028       |
| 268.1661       | 3  | P 22 | 2201.1606      | 1101.0842       |
| 367.2345       | 4  | V 21 | 2104.1079      | 1052.5579       |
| 464.2873       | 5  | P 20 | 2005.0395      | 1003.0236       |
| 561.3400       | 6  | P 19 | 1907.9867      | 954.4973        |
| 632.3771       | 7  | A 18 | 1810.9339      | 905.9709        |
| 703.4143       | 8  | A 17 | 1739.8968      | 870.4523        |
| 774.4514       | 9  | A 16 | 1668.8597      | 834.9338        |
| 871.5041       | 10 | P 15 | 1597.8226      | 799.4152        |
| 984.5882       | 11 | L 14 | 1500.7698      | 750.8888        |
| 1097.6723      | 12 | L 13 | 1387.6858      | 694.3468        |
| 1212.6992      | 13 | D 12 | 1274.6017      | 637.8048        |
| 1359.7676      | 14 | F 11 | 1159.5748      | 580.2913        |
| 1446.7997      | 15 | S 10 | 1012.5063      | 506.7571        |
| 1533.8317      | 16 | S 9  | 925.4743       | 463.2411        |
| 1648.8586      | 17 | D 8  | 838.4423       | 419.7251        |
| 1735.8907      | 18 | S 7  | 723.4153       | 362.2116        |
| 1834.9591      | 19 | V 6  | 636.3833       | 318.6956        |
| 1932.0118      | 20 | P 5  | 537.3149       | 269.1614        |
| 2029.0646      | 21 | P 4  | 440.2621       | 220.6350        |
| 2100.1017      | 22 | A 3  | 343.2094       | 172.1086        |
| 2197.1545      | 23 | P 2  | 272.1723       | 136.5900        |
|                | 24 | R 1  | 175.1195       | 88.0637         |

N-term:+29.04

AASIFGGAKPVDTAAR, MH+ 1587.8859, m/z 529.9668  
 L OSG39 P180811 230811-s1.03499.03499.3.dta

X-range:

-

MassTol: Y-zoom:

MassType:

AVG  MONO

Axis:

1  2

Label:

I  M  -

Ions:

a  +  2+  3+

b  +  2+  3+

c  +  2+  3+

x  +  2+  3+

y  +  2+  3+

z  +  2+  3+

hide H<sub>2</sub>O/NH<sub>3</sub>

zoom 112-122

GO

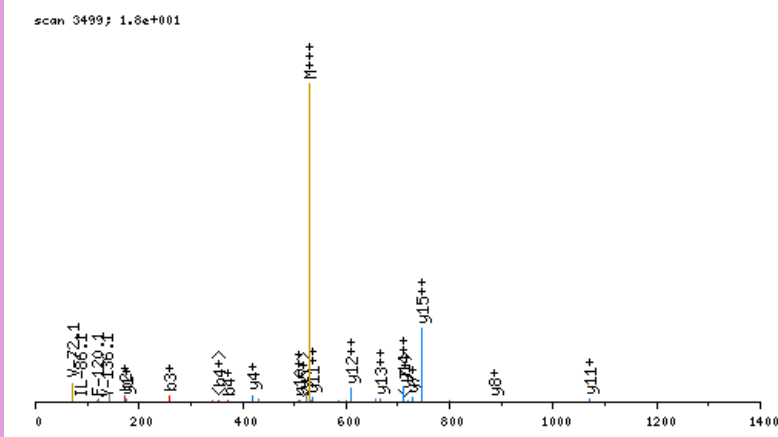

click image to zoom in; click top corners to zoom out [\[precursor±\]](#)

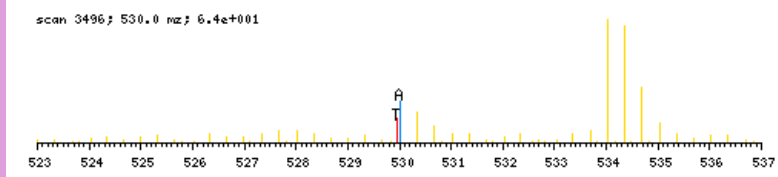

zoomed in precursor plot; T=theoretical m/z, A=acquired m/z

| b <sup>+</sup> | #  | AA # | y <sup>+</sup> | y <sup>2+</sup> |
|----------------|----|------|----------------|-----------------|
| 100.0762       | 1  | A 16 |                |                 |
| 171.1133       | 2  | A 15 | 1488.8175      | 744.9127        |
| 258.1454       | 3  | S 14 | 1417.7804      | 709.3941        |
| 371.2294       | 4  | I 13 | 1330.7483      | 665.8781        |
| 518.2978       | 5  | F 12 | 1217.6643      | 609.3361        |
| 575.3193       | 6  | G 11 | 1070.5959      | 535.8018        |
| 632.3408       | 7  | G 10 | 1013.5744      | 507.2911        |
| 703.3779       | 8  | A 9  | 956.5529       | 478.7804        |
| 859.5042       | 9  | K 8  | 885.5158       | 443.2618        |
| 956.5569       | 10 | P 7  | 729.3895       | 365.1987        |
| 1055.6254      | 11 | V 6  | 632.3368       | 316.6723        |
| 1170.6523      | 12 | D 5  | 533.2683       | 267.1381        |
| 1271.7000      | 13 | T 4  | 418.2414       | 209.6246        |
| 1342.7371      | 14 | A 3  | 317.1937       | 159.1008        |
| 1413.7742      | 15 | A 2  | 246.1566       | 123.5822        |
|                | 16 | R 1  | 175.1195       | 88.0637         |

N-term:+29.04 K(9):+156.13

AAAYISNAVGAAAYSSAR, MH+ 1605.8449, m/z 535.9531  
 H OSG39 P180811 230811-s1.07322.07322.3.dta

X-range:

-

MassTol: Y-zoom:

MassType:

AVG  MONO

Axis:

1  2

Label:

I  M  -

Ions:

a  +  2+  3+

b  +  2+  3+

c  +  2+  3+

x  +  2+  3+

y  +  2+  3+

z  +  2+  3+

hide H<sub>2</sub>O/NH<sub>3</sub>

zoom 112-122

GO

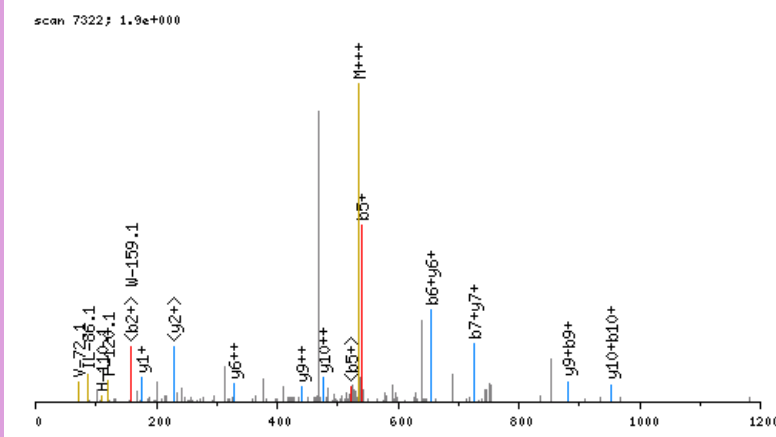

click image to zoom in; click top corners to zoom out [\[precursor±\]](#)

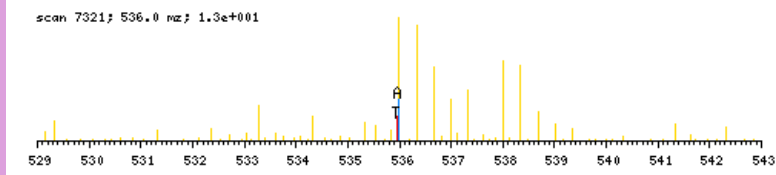

zoomed in precursor plot; T=theoretical m/z, A=acquired m/z

| b <sup>+</sup> | #  | AA # | y <sup>+</sup> | y <sup>2+</sup> |
|----------------|----|------|----------------|-----------------|
| 106.1080       | 1  | A 16 |                |                 |
| 177.1451       | 2  | A 15 | 1500.7447      | 750.8763        |
| 340.2085       | 3  | Y 14 | 1429.7076      | 715.3577        |
| 453.2925       | 4  | I 13 | 1266.6442      | 633.8260        |
| 540.3245       | 5  | S 12 | 1153.5602      | 577.2840        |
| 654.3675       | 6  | N 11 | 1066.5281      | 533.7680        |
| 725.4046       | 7  | A 10 | 952.4852       | 476.7465        |
| 824.4730       | 8  | V 9  | 881.4481       | 441.2280        |
| 881.4945       | 9  | G 8  | 782.3797       | 391.6938        |
| 952.5316       | 10 | A 7  | 725.3582       | 363.1830        |
| 1023.5687      | 11 | A 6  | 654.3211       | 327.6645        |
| 1186.6320      | 12 | Y 5  | 583.2840       | 292.1459        |
| 1273.6641      | 13 | S 4  | 420.2207       | 210.6142        |
| 1360.6961      | 14 | S 3  | 333.1886       | 167.0982        |
| 1431.7332      | 15 | A 2  | 246.1566       | 123.5822        |
|                | 16 | R 1  | 175.1195       | 88.0637         |

N-term:+35.07

ACGLVASNLNLKPGECKLQVR, MH+ 2301.3635, m/z 576.0963  
 H OSG40 P180811 230811-sl.06330.06330.4.dta

X-range:

-

MassTol: Y-zoom:

MassType:

AVG  MONO

Axis:

1  2

Label:

I  M  -

Ions:

a  +  2+  3+

b  +  2+  3+

c  +  2+  3+

x  +  2+  3+

y  +  2+  3+

z  +  2+  3+

hide H<sub>2</sub>O/NH<sub>3</sub>

zoom 112-122

GO

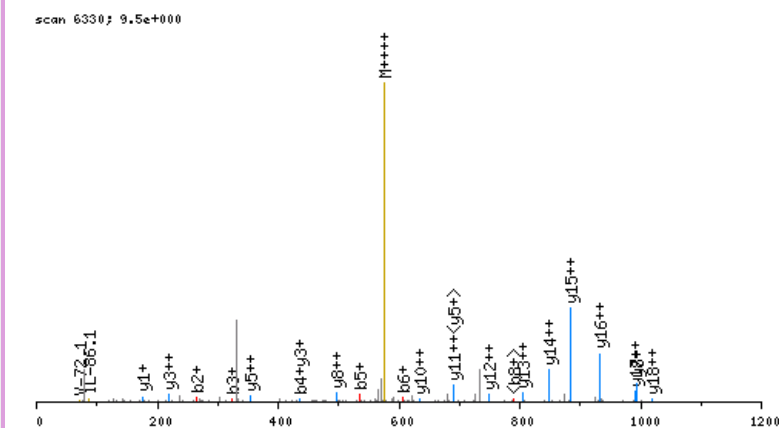

click image to zoom in; click top corners to zoom out [\[precursor±\]](#)

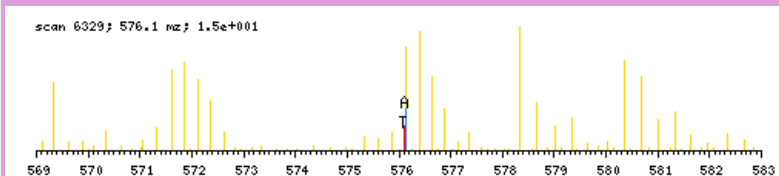

zoomed in precursor plot; T=theoretical m/z, A=acquired m/z

| b <sup>+</sup> | #  | AA | #  | y <sup>+</sup> | y <sup>2+</sup> |
|----------------|----|----|----|----------------|-----------------|
| 106.1080       | 1  | A  | 20 |                |                 |
| 266.1386       | 2  | C  | 19 | 2196.2633      | 1098.6355       |
| 323.1601       | 3  | G  | 18 | 2036.2327      | 1018.6202       |
| 436.2441       | 4  | L  | 17 | 1979.2112      | 990.1095        |
| 535.3126       | 5  | V  | 16 | 1866.1271      | 933.5675        |
| 606.3497       | 6  | A  | 15 | 1767.0587      | 884.0333        |
| 693.3817       | 7  | S  | 14 | 1696.0216      | 848.5147        |
| 807.4246       | 8  | N  | 13 | 1608.9896      | 804.9987        |
| 920.5087       | 9  | L  | 12 | 1494.9467      | 747.9772        |
| 1034.5516      | 10 | N  | 11 | 1381.8626      | 691.4352        |
| 1147.6357      | 11 | L  | 10 | 1267.8197      | 634.4137        |
| 1309.7938      | 12 | K  | 9  | 1154.7356      | 577.8717        |
| 1406.8465      | 13 | P  | 8  | 992.5775       | 496.7927        |
| 1463.8680      | 14 | G  | 7  | 895.5247       | 448.2663        |
| 1592.9106      | 15 | E  | 6  | 838.5033       | 419.7555        |
| 1752.9412      | 16 | C  | 5  | 709.4607       | 355.2343        |
| 1866.0253      | 17 | L  | 4  | 549.4301       | 275.2190        |
| 2028.1834      | 18 | K  | 3  | 436.3460       | 218.6769        |
| 2127.2518      | 19 | V  | 2  | 274.1879       | 137.5979        |
|                | 20 | R  | 1  | 175.1195       | 88.0637         |

N-term:+35.07 C(2):+160.03  
 K(12):+162.16 C(16):+160.03  
 K(18):+162.16

ADASKGDDLLPAGTEDYIHIR, MH+ 2313.1727, m/z 579.0486  
 L OSG40 P180811 230811-s1.07330.07330.4.dta

X-range:

-

MassTol: Y-zoom:

MassType:

AVG  MONO

Axis:

1  2

Label:

I  M  -

Ions:

a  +  2+  3+

b  +  2+  3+

c  +  2+  3+

x  +  2+  3+

y  +  2+  3+

z  +  2+  3+

hide H<sub>2</sub>O/NH<sub>3</sub>

zoom 112-122

GO

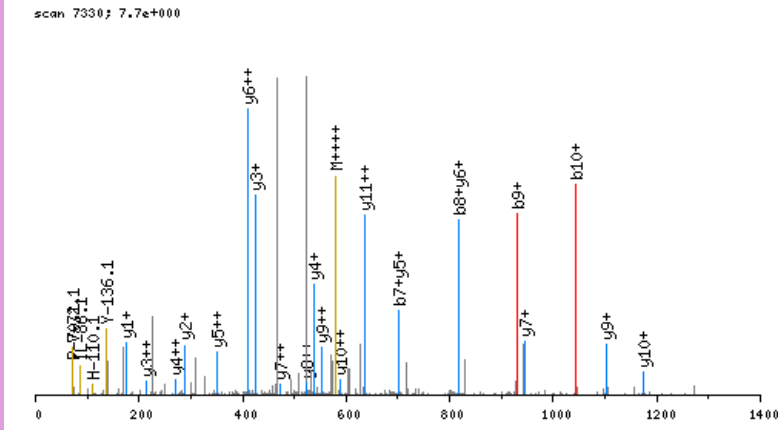

click image to zoom in; click top corners to zoom out [\[precursor±\]](#)

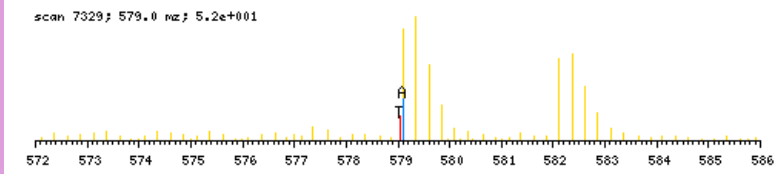

zoomed in precursor plot; T=theoretical m/z, A=acquired m/z

| b <sup>+</sup> | #  | AA # | y <sup>+</sup> | y <sup>2+</sup> |
|----------------|----|------|----------------|-----------------|
| 100.0762       | 1  | A 21 |                |                 |
| 215.1032       | 2  | D 20 | 2214.1043      | 1107.5561       |
| 286.1403       | 3  | A 19 | 2099.0773      | 1050.0426       |
| 373.1723       | 4  | S 18 | 2028.0402      | 1014.5240       |
| 529.2986       | 5  | K 17 | 1941.0082      | 971.0080        |
| 586.3201       | 6  | G 16 | 1784.8819      | 892.9449        |
| 701.3470       | 7  | D 15 | 1727.8604      | 864.4341        |
| 816.3739       | 8  | D 14 | 1612.8335      | 806.9207        |
| 929.4580       | 9  | L 13 | 1497.8066      | 749.4072        |
| 1042.5421      | 10 | L 12 | 1384.7225      | 692.8652        |
| 1139.5948      | 11 | P 11 | 1271.6384      | 636.3231        |
| 1210.6320      | 12 | A 10 | 1174.5857      | 587.7967        |
| 1267.6534      | 13 | G 9  | 1103.5485      | 552.2782        |
| 1368.7011      | 14 | T 8  | 1046.5271      | 523.7675        |
| 1497.7437      | 15 | E 7  | 945.4794       | 473.2436        |
| 1612.7706      | 16 | D 6  | 816.4368       | 408.7223        |
| 1775.8340      | 17 | Y 5  | 701.4099       | 351.2088        |
| 1888.9180      | 18 | I 4  | 538.3465       | 269.6772        |
| 2025.9769      | 19 | H 3  | 425.2625       | 213.1352        |
| 2139.0610      | 20 | I 2  | 288.2036       | 144.6057        |
|                | 21 | R 1  | 175.1195       | 88.0637         |

N-term:+29.04 K(5):+156.13

ADATKGDLLPAGTEDYIHIR, MH+ 2327.1883, m/z 776.4010  
 L OSG39 P180811 230811-s1.06710.06710.3.dta

scan 6710; 1.7e+000

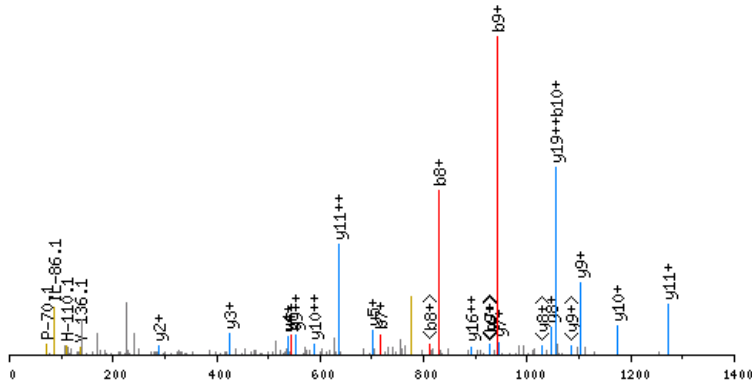

click image to zoom in; click top corners to zoom out [precursor±]

scan 6706; 776.4 mz; 1.3e+001

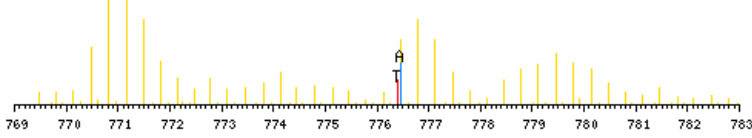

zoomed in precursor plot; T=theoretical m/z, A=acquired m/z

| b <sup>+</sup> | #  | AA # | y <sup>+</sup> | y <sup>2+</sup> |
|----------------|----|------|----------------|-----------------|
| 100.0762       | 1  | A 21 |                |                 |
| 215.1032       | 2  | D 20 | 2228.1199      | 1114.5639       |
| 286.1403       | 3  | A 19 | 2113.0930      | 1057.0504       |
| 387.1879       | 4  | T 18 | 2042.0559      | 1021.5319       |
| 543.3142       | 5  | K 17 | 1941.0082      | 971.0080        |
| 600.3357       | 6  | G 16 | 1784.8819      | 892.9449        |
| 715.3627       | 7  | D 15 | 1727.8604      | 864.4341        |
| 830.3896       | 8  | D 14 | 1612.8335      | 806.9207        |
| 943.4737       | 9  | L 13 | 1497.8066      | 749.4072        |
| 1056.5577      | 10 | L 12 | 1384.7225      | 692.8652        |
| 1153.6105      | 11 | P 11 | 1271.6384      | 636.3231        |
| 1224.6476      | 12 | A 10 | 1174.5857      | 587.7967        |
| 1281.6691      | 13 | G 9  | 1103.5485      | 552.2782        |
| 1382.7167      | 14 | T 8  | 1046.5271      | 523.7675        |
| 1511.7593      | 15 | E 7  | 945.4794       | 473.2436        |
| 1626.7863      | 16 | D 6  | 816.4368       | 408.7223        |
| 1789.8496      | 17 | Y 5  | 701.4099       | 351.2088        |
| 1902.9337      | 18 | I 4  | 538.3465       | 269.6772        |
| 2039.9926      | 19 | H 3  | 425.2625       | 213.1352        |
| 2153.0767      | 20 | I 2  | 288.2036       | 144.6057        |
|                | 21 | R 1  | 175.1195       | 88.0637         |

N-term:+29.04 K(5):+156.13

X-range:

-

MassTol: Y-zoom:

MassType:

AVG  MONO

Axis:

1  2

Label:

I  M  -

Ions:

a  +  2+  3+

b  +  2+  3+

c  +  2+  3+

x  +  2+  3+

y  +  2+  3+

z  +  2+  3+

hide H<sub>2</sub>O/NH<sub>3</sub>

zoom 112-122

GO



X-range:

-

MassTol: Y-zoom:

MassType:

AVG  MONO

Axis:

1  2

Label:

I  M  -

Ions:

a  +  2+  3+

b  +  2+  3+

c  +  2+  3+

x  +  2+  3+

y  +  2+  3+

z  +  2+  3+

hide H<sub>2</sub>O/NH<sub>3</sub>

zoom 112-122

GO

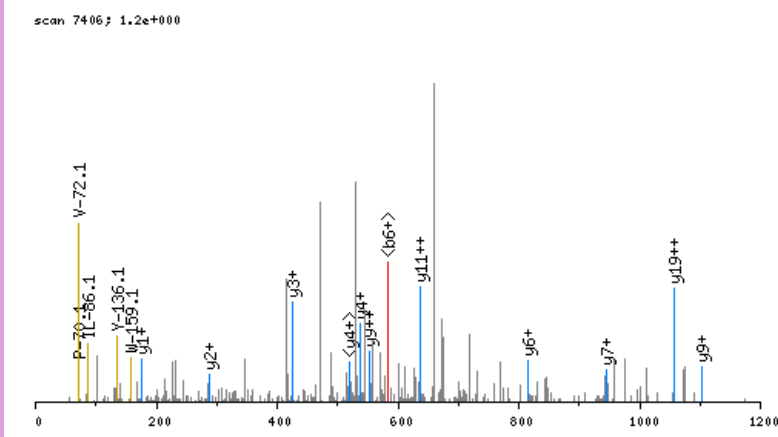

click image to zoom in; click top corners to zoom out [\[precursor±\]](#)

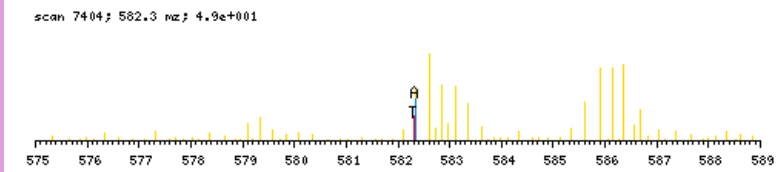

zoomed in precursor plot; T=theoretical m/z, A=acquired m/z

| b <sup>+</sup> | #  | AA | #  | y <sup>+</sup> | y <sup>2+</sup> |
|----------------|----|----|----|----------------|-----------------|
| 100.0762       | 1  | A  | 21 |                |                 |
| 215.1032       | 2  | D  | 20 | 2227.1359      | 1114.0719       |
| 286.1403       | 3  | A  | 19 | 2112.1090      | 1056.5584       |
| 387.1879       | 4  | T  | 18 | 2041.0719      | 1021.0398       |
| 543.3142       | 5  | K  | 17 | 1940.0242      | 970.5160        |
| 600.3357       | 6  | G  | 16 | 1783.8979      | 892.4529        |
| 714.3786       | 7  | N  | 15 | 1726.8764      | 863.9421        |
| 829.4056       | 8  | D  | 14 | 1612.8335      | 806.9207        |
| 942.4896       | 9  | L  | 13 | 1497.8066      | 749.4072        |
| 1055.5737      | 10 | L  | 12 | 1384.7225      | 692.8652        |
| 1152.6265      | 11 | P  | 11 | 1271.6384      | 636.3231        |
| 1223.6636      | 12 | A  | 10 | 1174.5857      | 587.7967        |
| 1280.6851      | 13 | G  | 9  | 1103.5485      | 552.2782        |
| 1381.7327      | 14 | T  | 8  | 1046.5271      | 523.7675        |
| 1510.7753      | 15 | E  | 7  | 945.4794       | 473.2436        |
| 1625.8023      | 16 | D  | 6  | 816.4368       | 408.7223        |
| 1788.8656      | 17 | Y  | 5  | 701.4099       | 351.2088        |
| 1901.9497      | 18 | I  | 4  | 538.3465       | 269.6772        |
| 2039.0086      | 19 | H  | 3  | 425.2625       | 213.1352        |
| 2152.0926      | 20 | I  | 2  | 288.2036       | 144.6057        |
|                | 21 | R  | 1  | 175.1195       | 88.0637         |

N-term:+29.04 K(5):+156.13

ADDDYDEPTDSDLAR, MH+ 1725.7091, m/z 575.9079  
 L OSG41 P180811 230811-s1.03726.03726.3.dta

X-range:

-

MassTol: Y-zoom:

MassType:

AVG  MONO

Axis:

1  2

Label:

I  M  -

Ions:

a  +  2+  3+

b  +  2+  3+

c  +  2+  3+

x  +  2+  3+

y  +  2+  3+

z  +  2+  3+

hide H<sub>2</sub>O/NH<sub>3</sub>

zoom 112-122

GO

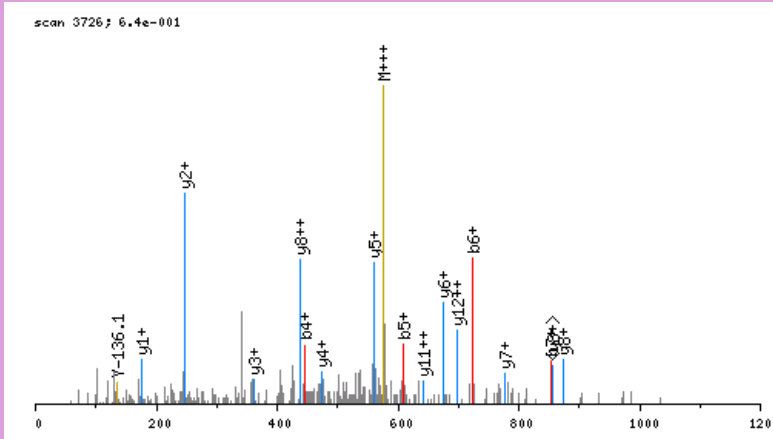

click image to zoom in; click top corners to zoom out [\[precursor±\]](#)

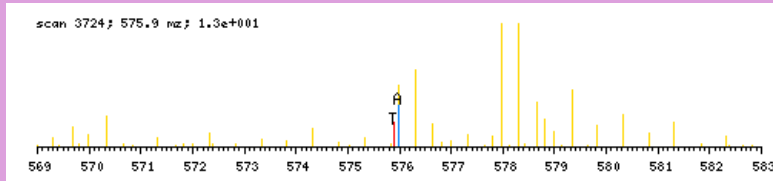

zoomed in precursor plot; T=theoretical m/z, A=acquired m/z

| b <sup>+</sup> | #  | AA # | y <sup>+</sup> | y <sup>2+</sup> |
|----------------|----|------|----------------|-----------------|
| 100.0762       | 1  | A 15 |                |                 |
| 215.1032       | 2  | D 14 | 1626.6407      | 813.8243        |
| 330.1301       | 3  | D 13 | 1511.6138      | 756.3108        |
| 445.1570       | 4  | D 12 | 1396.5868      | 698.7973        |
| 608.2204       | 5  | Y 11 | 1281.5599      | 641.2839        |
| 723.2473       | 6  | D 10 | 1118.4966      | 559.7522        |
| 852.2899       | 7  | E 9  | 1003.4696      | 502.2387        |
| 949.3427       | 8  | P 8  | 874.4270       | 437.7174        |
| 1050.3904      | 9  | T 7  | 777.3743       | 389.1910        |
| 1165.4173      | 10 | D 6  | 676.3266       | 338.6672        |
| 1252.4493      | 11 | S 5  | 561.2997       | 281.1537        |
| 1365.5334      | 12 | L 4  | 474.2676       | 237.6377        |
| 1480.5603      | 13 | D 3  | 361.1836       | 181.0957        |
| 1551.5974      | 14 | A 2  | 246.1566       | 123.5822        |
|                | 15 | R 1  | 175.1195       | 88.0637         |

N-term:+29.04

ADDLECTPGFQR, MH+ 1436.6479, m/z 479.5542  
 L OSG37 P180811 230811-s1.04225.04225.3.dta

X-range:

-

MassTol: Y-zoom:

MassType:

AVG  MONO

Axis:

1  2

Label:

I  M  -

Ions:

a  +  2+  3+

b  +  2+  3+

c  +  2+  3+

x  +  2+  3+

y  +  2+  3+

z  +  2+  3+

hide H<sub>2</sub>O/NH<sub>3</sub>

zoom 112-122

GO

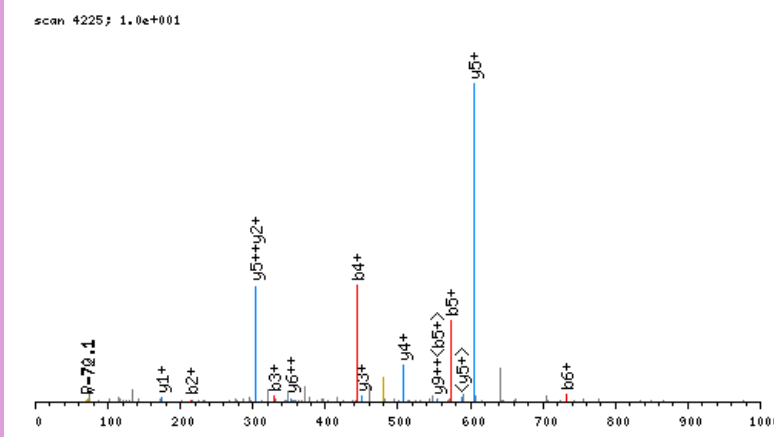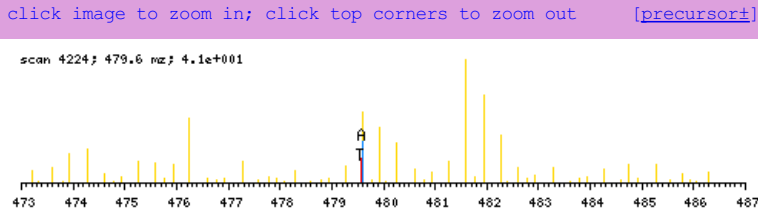

zoomed in precursor plot; T=theoretical m/z, A=acquired m/z

| b <sup>+</sup> | #  | AA # | y <sup>+</sup> | y <sup>2+</sup> |
|----------------|----|------|----------------|-----------------|
| 100.0762       | 1  | A 12 |                |                 |
| 215.1032       | 2  | D 11 | 1337.5795      | 669.2937        |
| 330.1301       | 3  | D 10 | 1222.5526      | 611.7802        |
| 443.2142       | 4  | L 9  | 1107.5257      | 554.2667        |
| 572.2568       | 5  | E 8  | 994.4416       | 497.7247        |
| 732.2874       | 6  | C 7  | 865.3990       | 433.2034        |
| 833.3350       | 7  | T 6  | 705.3684       | 353.1881        |
| 930.3878       | 8  | P 5  | 604.3207       | 302.6643        |
| 987.4093       | 9  | G 4  | 507.2680       | 254.1379        |
| 1134.4777      | 10 | F 3  | 450.2465       | 225.6272        |
| 1262.5363      | 11 | Q 2  | 303.1781       | 152.0930        |
|                | 12 | R 1  | 175.1195       | 88.0637         |

N-term:+29.04 C(6):+160.03

ADFKKAFLLFDR, MH+ 1539.8848, m/z 513.9664  
 H OSG40 P180811 230811-s1.09300.09300.3.dta

X-range:

-

MassTol: Y-zoom:

MassType:

AVG  MONO

Axis:

1  2

Label:

I  M  -

Ions:

a  +  2+  3+

b  +  2+  3+

c  +  2+  3+

x  +  2+  3+

y  +  2+  3+

z  +  2+  3+

hide H<sub>2</sub>O/NH<sub>3</sub>

zoom 112-122

GO

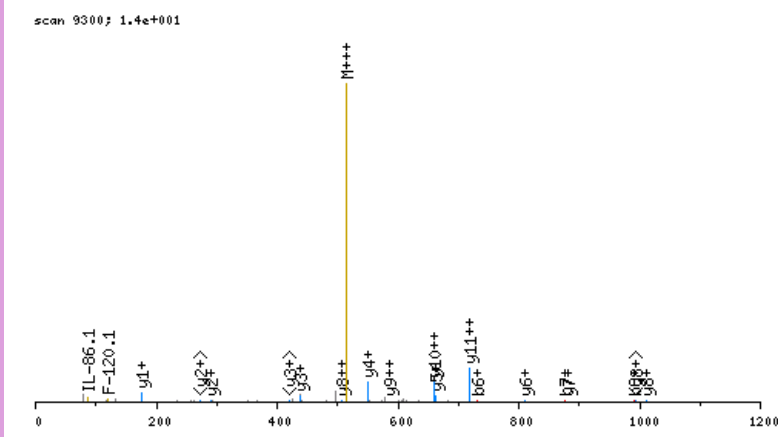

click image to zoom in; click top corners to zoom out [\[precursor±\]](#)

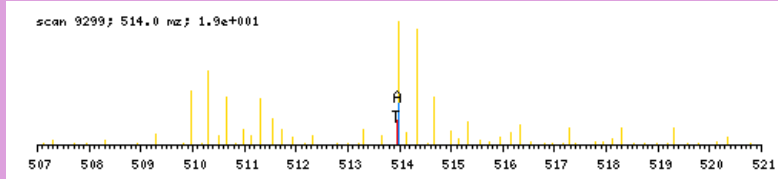

zoomed in precursor plot; T=theoretical m/z, A=acquired m/z

| b <sup>+</sup> | #  | AA # | y <sup>+</sup> | y <sup>2+</sup> |
|----------------|----|------|----------------|-----------------|
| 106.1080       | 1  | A 12 |                |                 |
| 221.1350       | 2  | D 11 | 1434.7846      | 717.8962        |
| 368.2034       | 3  | F 10 | 1319.7576      | 660.3827        |
| 530.3615       | 4  | K 9  | 1172.6892      | 586.8485        |
| 659.4041       | 5  | E 8  | 1010.5311      | 505.7695        |
| 730.4412       | 6  | A 7  | 881.4885       | 441.2482        |
| 877.5096       | 7  | F 6  | 810.4514       | 405.7296        |
| 990.5937       | 8  | L 5  | 663.3830       | 332.1954        |
| 1103.6777      | 9  | L 4  | 550.2989       | 275.6534        |
| 1250.7461      | 10 | F 3  | 437.2149       | 219.1113        |
| 1365.7731      | 11 | D 2  | 290.1464       | 145.5771        |
|                | 12 | R 1  | 175.1195       | 88.0637         |

N-term:+35.07 K(4):+162.16

ADLFDPVIKLR, MH+ 1342.8099, m/z 448.2748  
 L OSG39 P180811 230811-s1.06803.06803.3.dta

X-range:

-

MassTol: Y-zoom:

MassType:

AVG  MONO

Axis:

1  2

Label:

I  M  -

Ions:

a  +  2+  3+

b  +  2+  3+

c  +  2+  3+

x  +  2+  3+

y  +  2+  3+

z  +  2+  3+

hide H<sub>2</sub>O/NH<sub>3</sub>

zoom 112-122

GO

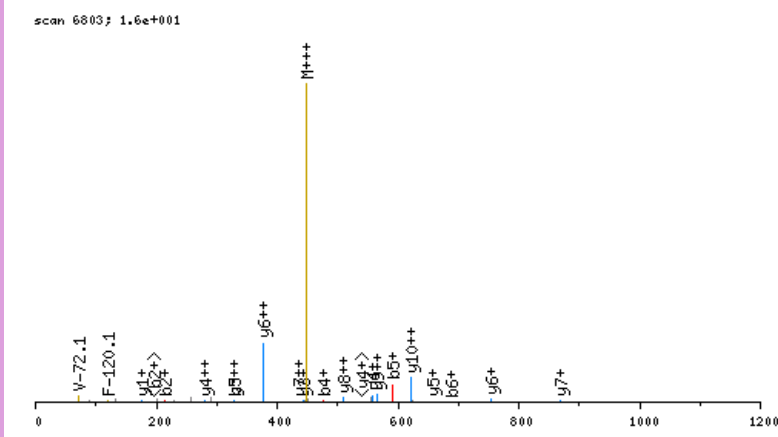

click image to zoom in; click top corners to zoom out [\[precursor±\]](#)

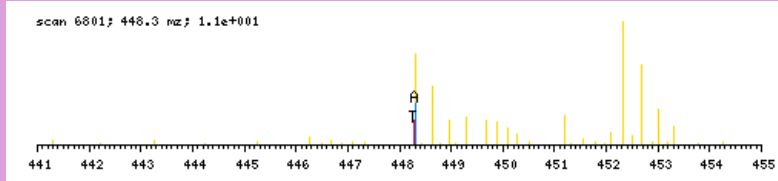

zoomed in precursor plot; T=theoretical m/z, A=acquired m/z

| b <sup>+</sup> | #  | AA # | y <sup>+</sup> | y <sup>2+</sup> |
|----------------|----|------|----------------|-----------------|
| 100.0762       | 1  | A 11 |                |                 |
| 215.1032       | 2  | D 10 | 1243.7415      | 622.3746        |
| 328.1872       | 3  | L 9  | 1128.7145      | 564.8612        |
| 475.2556       | 4  | F 8  | 1015.6305      | 508.3191        |
| 590.2826       | 5  | D 7  | 868.5620       | 434.7849        |
| 687.3353       | 6  | P 6  | 753.5351       | 377.2715        |
| 786.4038       | 7  | V 5  | 656.4823       | 328.7451        |
| 899.4878       | 8  | I 4  | 557.4139       | 279.2109        |
| 1055.6141      | 9  | K 3  | 444.3299       | 222.6688        |
| 1168.6982      | 10 | L 2  | 288.2036       | 144.6057        |
|                | 11 | R 1  | 175.1195       | 88.0637         |

N-term:+29.04 K(9):+156.13

ADLHGMLLEIPDLR, MH+ 1507.7942, m/z 503.2696  
 L OSG40 P180811 230811-s1.08593.08593.3.dta

scan 8593; 5.8e-001

X-range:

-

MassTol: Y-zoom:

MassType:

AVG  MONO

Axis:

1  2

Label:

I  M  -

Ions:

a  +  2+  3+

b  +  2+  3+

c  +  2+  3+

x  +  2+  3+

y  +  2+  3+

z  +  2+  3+

hide H<sub>2</sub>O/NH<sub>3</sub>

zoom 112-122

GO

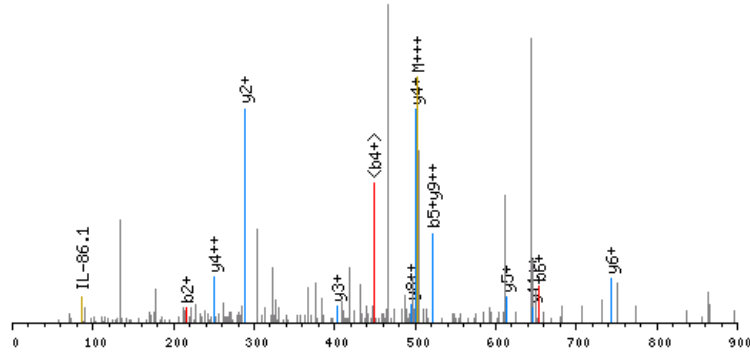

click image to zoom in; click top corners to zoom out [\[precursor±\]](#)

scan 8589; 503.3 m/z; 7.4e+000

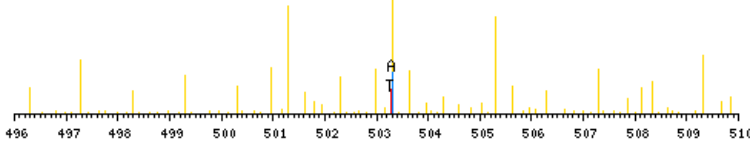

zoomed in precursor plot; T=theoretical m/z, A=acquired m/z

| b <sup>+</sup> | #  | AA # | y <sup>+</sup> | y <sup>2+</sup> |
|----------------|----|------|----------------|-----------------|
| 100.0762       | 1  | A 13 |                |                 |
| 215.1032       | 2  | D 12 | 1408.7259      | 704.8668        |
| 328.1872       | 3  | L 11 | 1293.6989      | 647.3534        |
| 465.2461       | 4  | H 10 | 1180.6149      | 590.8113        |
| 522.2676       | 5  | G 9  | 1043.5559      | 522.2819        |
| 653.3081       | 6  | M 8  | 986.5345       | 493.7712        |
| 766.3921       | 7  | L 7  | 855.4940       | 428.2509        |
| 895.4347       | 8  | E 6  | 742.4099       | 371.7089        |
| 1008.5188      | 9  | I 5  | 613.3673       | 307.1876        |
| 1105.5716      | 10 | P 4  | 500.2833       | 250.6455        |
| 1220.5985      | 11 | D 3  | 403.2305       | 202.1192        |
| 1333.6826      | 12 | L 2  | 288.2036       | 144.6057        |
|                | 13 | R 1  | 175.1195       | 88.0637         |

N-term:+29.04

ADLVQDLISICTR, MH+ 1505.7633, m/z 502.5926  
 L OSG37 P180811 230811-s1.06736.06736.3.dta

X-range:

-

MassTol: Y-zoom:

MassType:

AVG  MONO

Axis:

1  2

Label:

I  M  -

Ions:

a  +  2+  3+

b  +  2+  3+

c  +  2+  3+

x  +  2+  3+

y  +  2+  3+

z  +  2+  3+

hide H<sub>2</sub>O/NH<sub>3</sub>

zoom 112-122

GO

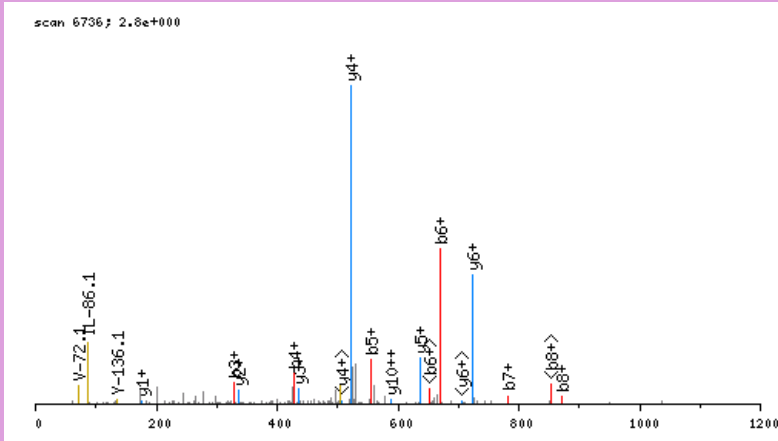

click image to zoom in; click top corners to zoom out [\[precursor±\]](#)

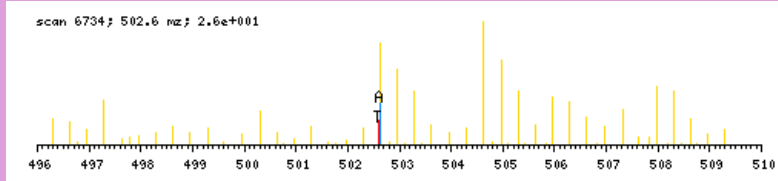

zoomed in precursor plot; T=theoretical m/z, A=acquired m/z

| b <sup>+</sup> | #  | AA # | y <sup>+</sup> | y <sup>2+</sup> |
|----------------|----|------|----------------|-----------------|
| 100.0762       | 1  | A 13 |                |                 |
| 215.1032       | 2  | D 12 | 1406.6949      | 703.8514        |
| 328.1872       | 3  | L 11 | 1291.6680      | 646.3379        |
| 427.2556       | 4  | V 10 | 1178.5839      | 589.7959        |
| 555.3142       | 5  | Q 9  | 1079.5155      | 540.2617        |
| 670.3412       | 6  | D 8  | 951.4569       | 476.2324        |
| 783.4252       | 7  | L 7  | 836.4300       | 418.7189        |
| 870.4572       | 8  | S 6  | 723.3459       | 362.1769        |
| 983.5413       | 9  | I 5  | 636.3139       | 318.6608        |
| 1070.5733      | 10 | S 4  | 523.2298       | 262.1188        |
| 1171.6210      | 11 | T 3  | 436.1978       | 218.6028        |
| 1331.6516      | 12 | C 2  | 335.1501       | 168.0790        |
|                | 13 | R 1  | 175.1195       | 88.0637         |

N-term:+29.04 C(12):+160.03

ADPLAPGAFCTQIVR, MH+ 1649.8897, m/z 550.6347  
 H OSG37 P180811 230811-s1.06842.06842.3.dta

X-range:

-

MassTol: Y-zoom:

MassType:

AVG  MONO

Axis:

1  2

Label:

I  M  -

Ions:

a  +  2+  3+

b  +  2+  3+

c  +  2+  3+

x  +  2+  3+

y  +  2+  3+

z  +  2+  3+

hide H<sub>2</sub>O/NH<sub>3</sub>

zoom 112-122

GO

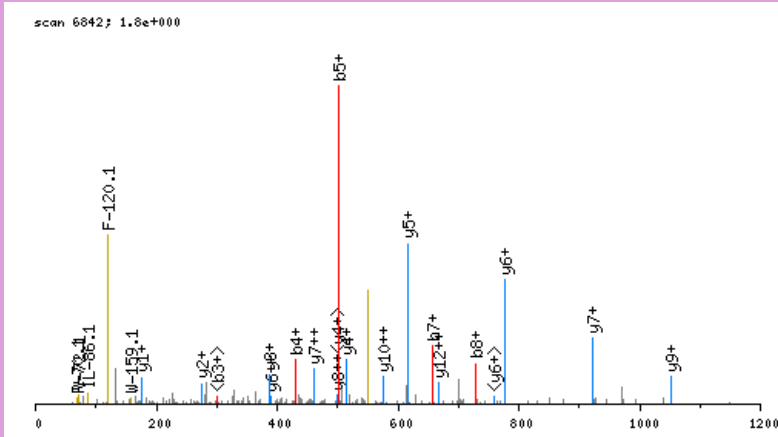

click image to zoom in; click top corners to zoom out [\[precursor±\]](#)

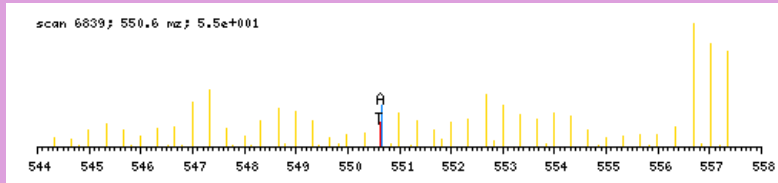

zoomed in precursor plot; T=theoretical m/z, A=acquired m/z

| b <sup>+</sup> | #  | AA # | y <sup>+</sup> | y <sup>2+</sup> |
|----------------|----|------|----------------|-----------------|
| 106.1080       | 1  | A 15 |                |                 |
| 221.1350       | 2  | D 14 | 1544.7895      | 772.8986        |
| 318.1877       | 3  | P 13 | 1429.7625      | 715.3852        |
| 431.2718       | 4  | L 12 | 1332.7098      | 666.8588        |
| 502.3089       | 5  | A 11 | 1219.6257      | 610.3168        |
| 599.3617       | 6  | P 10 | 1148.5886      | 574.7982        |
| 656.3831       | 7  | G 9  | 1051.5358      | 526.2718        |
| 727.4202       | 8  | A 8  | 994.5144       | 497.7611        |
| 874.4887       | 9  | F 7  | 923.4772       | 462.2425        |
| 1034.5193      | 10 | C 6  | 776.4088       | 388.7083        |
| 1135.5669      | 11 | T 5  | 616.3782       | 308.6930        |
| 1263.6255      | 12 | Q 4  | 515.3306       | 258.1692        |
| 1376.7096      | 13 | I 3  | 387.2720       | 194.1399        |
| 1475.7780      | 14 | V 2  | 274.1879       | 137.5979        |
|                | 15 | R 1  | 175.1195       | 88.0637         |

N-term:+35.07 C(10):+160.03



ADTPGEATPPPR, MH+ 1236.6224, m/z 412.8790  
 L OSG37 P180811 230811-s1.02067.02067.3.dta

scan 2067; 4.8e+000

X-range:

-

MassTol: Y-zoom:

MassType:

AVG  MONO

Axis:

1  2

Label:

I  M  -

Ions:

a  +  2+  3+

b  +  2+  3+

c  +  2+  3+

x  +  2+  3+

y  +  2+  3+

z  +  2+  3+

hide H<sub>2</sub>O/NH<sub>3</sub>

zoom 112-122

GO

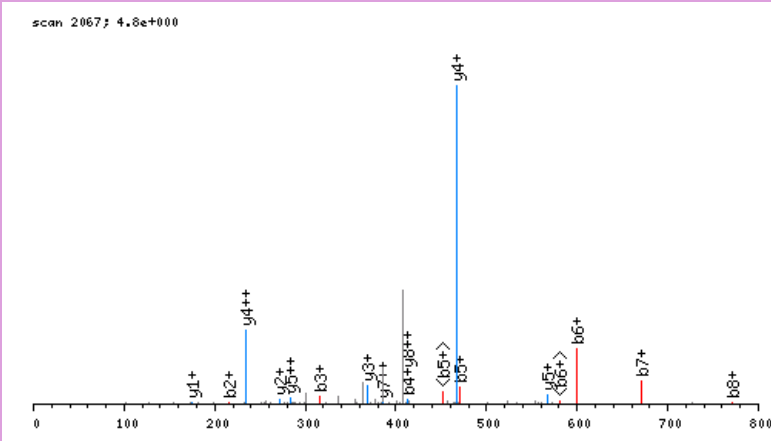

click image to zoom in; click top corners to zoom out [\[precursor±\]](#)

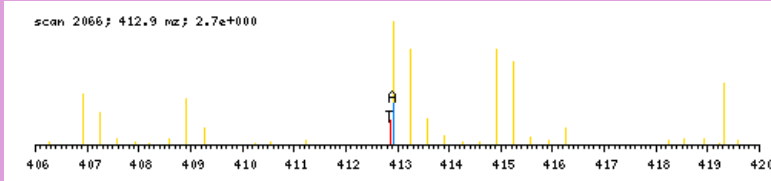

zoomed in precursor plot; T=theoretical m/z, A=acquired m/z

| b <sup>+</sup> | #  | AA # | y <sup>+</sup> | y <sup>2+</sup> |
|----------------|----|------|----------------|-----------------|
| 100.0762       | 1  | A 12 |                |                 |
| 215.1032       | 2  | D 11 | 1137.5540      | 569.2809        |
| 316.1508       | 3  | T 10 | 1022.5271      | 511.7675        |
| 413.2036       | 4  | P 9  | 921.4794       | 461.2436        |
| 470.2251       | 5  | G 8  | 824.4266       | 412.7172        |
| 599.2677       | 6  | E 7  | 767.4052       | 384.2065        |
| 670.3048       | 7  | A 6  | 638.3626       | 319.6852        |
| 771.3524       | 8  | T 5  | 567.3255       | 284.1666        |
| 868.4052       | 9  | P 4  | 466.2778       | 233.6428        |
| 965.4580       | 10 | P 3  | 369.2250       | 185.1164        |
| 1062.5107      | 11 | P 2  | 272.1723       | 136.5900        |
|                | 12 | R 1  | 175.1195       | 88.0637         |

N-term:+29.04

ADVVFETANDSGHR, MH+ 1422.7189, m/z 474.9112  
 H OSG40 P180811 230811-s1.03060.03060.3.dta

X-range:

-

MassTol: Y-zoom:

MassType:

AVG  MONO

Axis:

1  2

Label:

I  M  -

Ions:

a  +  2+  3+

b  +  2+  3+

c  +  2+  3+

x  +  2+  3+

y  +  2+  3+

z  +  2+  3+

hide H<sub>2</sub>O/NH<sub>3</sub>

zoom 112-122

GO

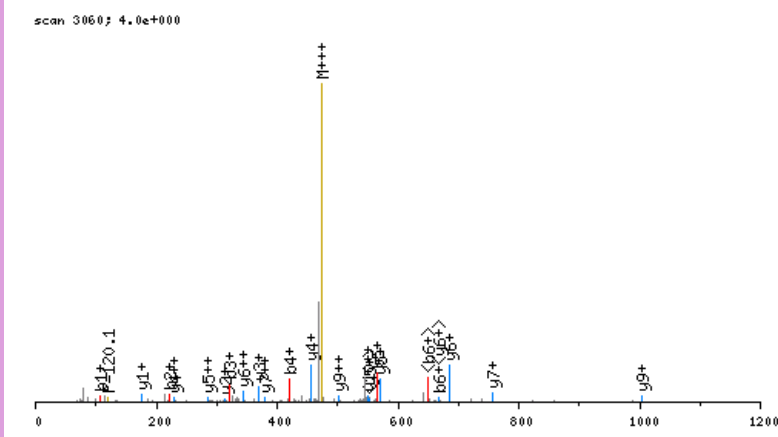

click image to zoom in; click top corners to zoom out [\[precursor±\]](#)

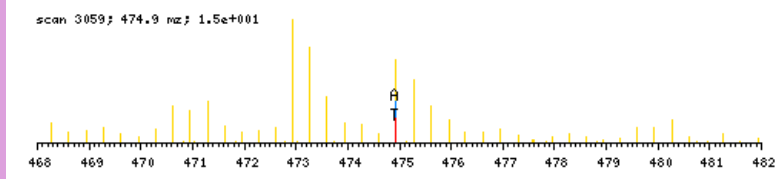

zoomed in precursor plot; T=theoretical m/z, A=acquired m/z

| b <sup>+</sup> | #  | AA # | y <sup>+</sup> | y <sup>2+</sup> |
|----------------|----|------|----------------|-----------------|
| 106.1080       | 1  | A 13 |                |                 |
| 221.1350       | 2  | D 12 | 1317.6188      | 659.3133        |
| 320.2034       | 3  | V 11 | 1202.5918      | 601.7998        |
| 419.2718       | 4  | V 10 | 1103.5234      | 552.2656        |
| 566.3402       | 5  | F 9  | 1004.4550      | 502.7314        |
| 667.3879       | 6  | T 8  | 857.3866       | 429.1972        |
| 738.4250       | 7  | A 7  | 756.3389       | 378.6734        |
| 852.4679       | 8  | N 6  | 685.3018       | 343.1548        |
| 967.4949       | 9  | D 5  | 571.2588       | 286.1333        |
| 1054.5269      | 10 | S 4  | 456.2319       | 228.6199        |
| 1111.5484      | 11 | G 3  | 369.1999       | 185.1039        |
| 1248.6073      | 12 | H 2  | 312.1784       | 156.5931        |
|                | 13 | R 1  | 175.1195       | 88.0637         |

N-term:+35.07

AEAPGVLDLILPEGR, MH+ 1521.8277, m/z 761.4175  
 L OSG37 P180811 230811-s1.06906.06906.2.dta

X-range:

-

MassTol: Y-zoom:

MassType:

AVG  MONO

Axis:

1  2

Label:

I  M  -

Ions:

a  +  2+  3+

b  +  2+  3+

c  +  2+  3+

x  +  2+  3+

y  +  2+  3+

z  +  2+  3+

hide H<sub>2</sub>O/NH<sub>3</sub>

zoom 112-122

GO

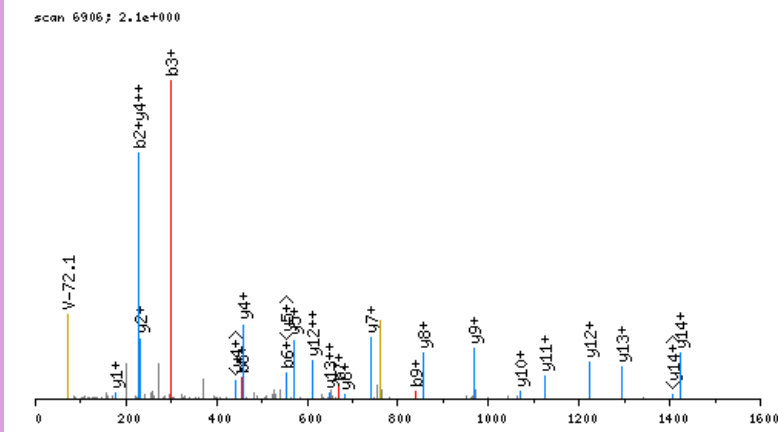

click image to zoom in; click top corners to zoom out [\[precursor±\]](#)

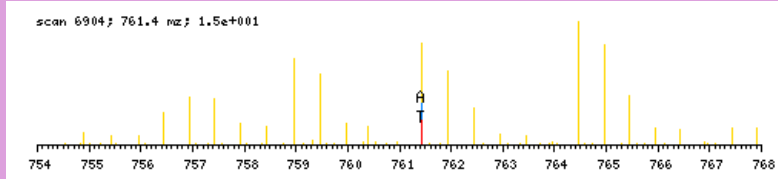

zoomed in precursor plot; T=theoretical m/z, A=acquired m/z

| b <sup>+</sup> | #  | AA # | y <sup>+</sup> | y <sup>2+</sup> |
|----------------|----|------|----------------|-----------------|
| 100.0762       | 1  | A 15 |                |                 |
| 229.1188       | 2  | E 14 | 1422.7593      | 711.8835        |
| 300.1559       | 3  | A 13 | 1293.7167      | 647.3623        |
| 397.2087       | 4  | P 12 | 1222.6796      | 611.8437        |
| 454.2301       | 5  | G 11 | 1125.6268      | 563.3173        |
| 553.2986       | 6  | V 10 | 1068.6053      | 534.8066        |
| 668.3255       | 7  | D 9  | 969.5369       | 485.2724        |
| 781.4096       | 8  | L 8  | 854.5100       | 427.7589        |
| 838.4310       | 9  | G 7  | 741.4259       | 371.2169        |
| 951.5151       | 10 | I 6  | 684.4044       | 342.7061        |
| 1064.5992      | 11 | L 5  | 571.3204       | 286.1641        |
| 1161.6519      | 12 | P 4  | 458.2363       | 229.6221        |
| 1290.6945      | 13 | E 3  | 361.1836       | 181.0957        |
| 1347.7160      | 14 | G 2  | 232.1410       | 116.5744        |
|                | 15 | R 1  | 175.1195       | 88.0637         |

N-term:+29.04

AEDSAEAAVSVPEER, MH+ 1545.7396, m/z 515.9181  
 L OSG37 P180811 230811-s1.03397.03397.3.dta

X-range:

-

MassTol: Y-zoom:

MassType:

AVG  MONO

Axis:

1  2

Label:

I  M  -

Ions:

a  +  2+  3+

b  +  2+  3+

c  +  2+  3+

x  +  2+  3+

y  +  2+  3+

z  +  2+  3+

hide H<sub>2</sub>O/NH<sub>3</sub>

zoom 112-122

GO

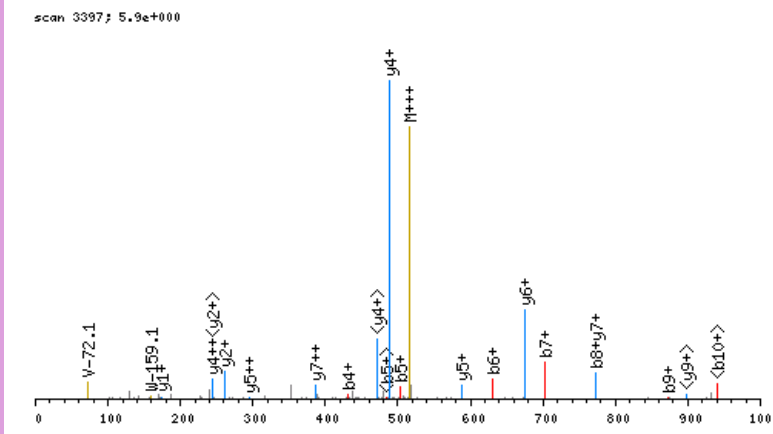

click image to zoom in; click top corners to zoom out [\[precursor±\]](#)

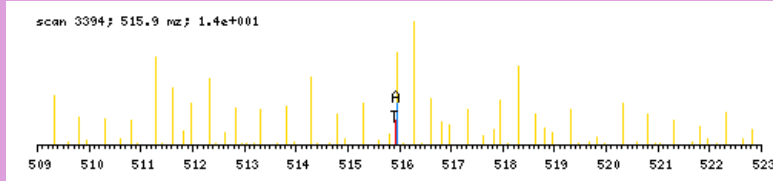

zoomed in precursor plot; T=theoretical m/z, A=acquired m/z

| b <sup>+</sup> | #  | AA # | y <sup>+</sup> | y <sup>2+</sup> |
|----------------|----|------|----------------|-----------------|
| 100.0762       | 1  | A 15 |                |                 |
| 229.1188       | 2  | E 14 | 1446.6712      | 723.8395        |
| 344.1458       | 3  | D 13 | 1317.6286      | 659.3182        |
| 431.1778       | 4  | S 12 | 1202.6017      | 601.8048        |
| 502.2149       | 5  | A 11 | 1115.5697      | 558.2888        |
| 631.2575       | 6  | E 10 | 1044.5326      | 522.7702        |
| 702.2946       | 7  | A 9  | 915.4900       | 458.2489        |
| 773.3317       | 8  | A 8  | 844.4529       | 422.7303        |
| 872.4001       | 9  | V 7  | 773.4157       | 387.2118        |
| 959.4322       | 10 | S 6  | 674.3473       | 337.6776        |
| 1058.5006      | 11 | V 5  | 587.3153       | 294.1616        |
| 1155.5533      | 12 | P 4  | 488.2469       | 244.6274        |
| 1284.5959      | 13 | E 3  | 391.1941       | 196.1010        |
| 1371.6280      | 14 | S 2  | 262.1515       | 131.5797        |
|                | 15 | R 1  | 175.1195       | 88.0637         |

N-term:+29.04

AEFASEACR, MH+ 1074.5101, m/z 537.7587  
 H OSG38 P180811 230811-s1.02265.02265.2.dta

X-range:

-

MassTol: Y-zoom:

MassType:

AVG  MONO

Axis:

1  2

Label:

I  M  -

Ions:

a  +  2+  3+

b  +  2+  3+

c  +  2+  3+

x  +  2+  3+

y  +  2+  3+

z  +  2+  3+

hide H<sub>2</sub>O/NH<sub>3</sub>

zoom 112-122

GO

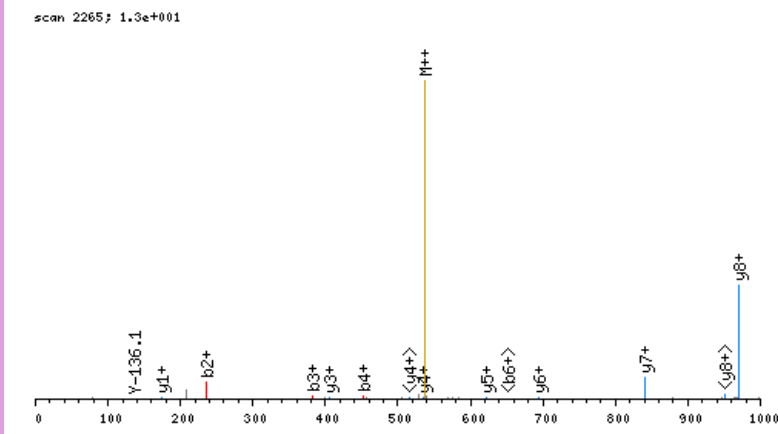

click image to zoom in; click top corners to zoom out [\[precursor±\]](#)

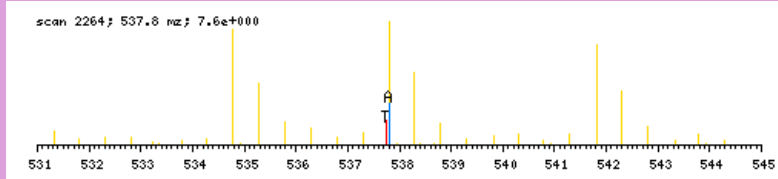

zoomed in precursor plot; T=theoretical m/z, A=acquired m/z

| b <sup>+</sup> | # | AA # | y <sup>+</sup> | y <sup>2+</sup> |
|----------------|---|------|----------------|-----------------|
| 106.1080       | 1 | A    | 9              |                 |
| 235.1506       | 2 | E    | 8              | 969.4100        |
| 382.2190       | 3 | F    | 7              | 840.3674        |
| 453.2561       | 4 | A    | 6              | 693.2989        |
| 540.2882       | 5 | S    | 5              | 622.2618        |
| 669.3308       | 6 | E    | 4              | 535.2298        |
| 740.3679       | 7 | A    | 3              | 406.1872        |
| 900.3985       | 8 | C    | 2              | 335.1501        |
|                | 9 | R    | 1              | 175.1195        |

N-term:+35.07 C(8):+160.03

AEPPPPKPDLSR, MH+ 1456.8164, m/z 486.2770  
 L OSG39 P180811 230811-s1.02702.02702.3.dta

X-range:

-

MassTol: Y-zoom:

MassType:

AVG  MONO

Axis:

1  2

Label:

I  M  -

Ions:

a  +  2+  3+

b  +  2+  3+

c  +  2+  3+

x  +  2+  3+

y  +  2+  3+

z  +  2+  3+

hide H<sub>2</sub>O/NH<sub>3</sub>

zoom 112-122

GO

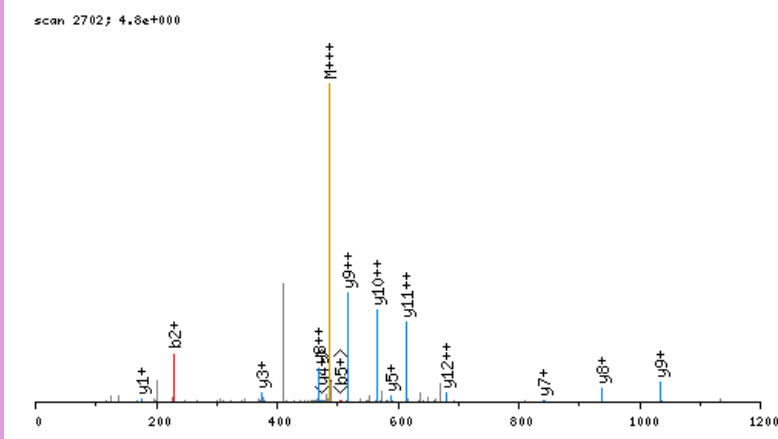

click image to zoom in; click top corners to zoom out [\[precursor±\]](#)

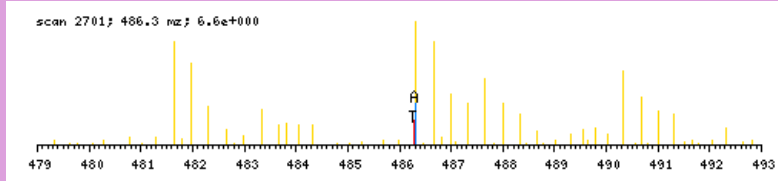

zoomed in precursor plot; T=theoretical m/z, A=acquired m/z

| b <sup>+</sup> | #  | AA # | y <sup>+</sup> | y <sup>2+</sup> |
|----------------|----|------|----------------|-----------------|
| 100.0762       | 1  | A 13 |                |                 |
| 229.1188       | 2  | E 12 | 1357.7480      | 679.3779        |
| 326.1716       | 3  | P 11 | 1228.7054      | 614.8566        |
| 423.2243       | 4  | P 10 | 1131.6527      | 566.3302        |
| 520.2771       | 5  | P 9  | 1034.5999      | 517.8039        |
| 617.3299       | 6  | P 8  | 937.5471       | 469.2775        |
| 714.3826       | 7  | P 7  | 840.4944       | 420.7511        |
| 870.5089       | 8  | K 6  | 743.4416       | 372.2247        |
| 967.5617       | 9  | P 5  | 587.3153       | 294.1616        |
| 1082.5886      | 10 | D 4  | 490.2625       | 245.6352        |
| 1195.6727      | 11 | L 3  | 375.2356       | 188.1217        |
| 1282.7047      | 12 | S 2  | 262.1515       | 131.5797        |
|                | 13 | R 1  | 175.1195       | 88.0637         |

N-term:+29.04 K(8):+156.13

AEPVDVLEAWGVHR, MH+ 1605.8389, m/z 535.9511  
 L OSG40 P180811 230811-s1.08803.08803.3.dta

X-range:

-

MassTol: Y-zoom:

MassType:

AVG  MONO

Axis:

1  2

Label:

I  M  -

Ions:

a  +  2+  3+

b  +  2+  3+

c  +  2+  3+

x  +  2+  3+

y  +  2+  3+

z  +  2+  3+

hide H<sub>2</sub>O/NH<sub>3</sub>

zoom 112-122

GO

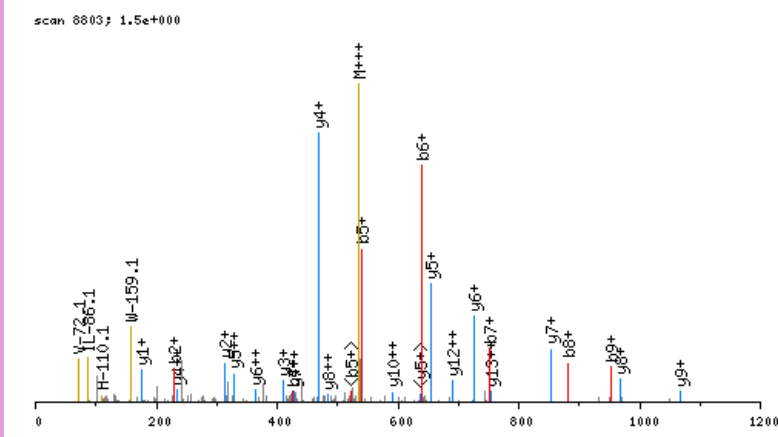

click image to zoom in; click top corners to zoom out [\[precursor±\]](#)

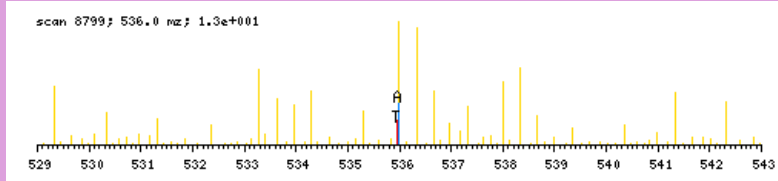

zoomed in precursor plot; T=theoretical m/z, A=acquired m/z

| b <sup>+</sup> | #  | AA # | y <sup>+</sup> | y <sup>2+</sup> |
|----------------|----|------|----------------|-----------------|
| 100.0762       | 1  | A 14 |                |                 |
| 229.1188       | 2  | E 13 | 1506.7705      | 753.8892        |
| 326.1716       | 3  | P 12 | 1377.7279      | 689.3679        |
| 425.2400       | 4  | V 11 | 1280.6751      | 640.8415        |
| 540.2669       | 5  | D 10 | 1181.6067      | 591.3073        |
| 639.3353       | 6  | V 9  | 1066.5798      | 533.7938        |
| 752.4194       | 7  | L 8  | 967.5114       | 484.2596        |
| 881.4620       | 8  | E 7  | 854.4273       | 427.7176        |
| 952.4991       | 9  | A 6  | 725.3847       | 363.1963        |
| 1138.5784      | 10 | W 5  | 654.3476       | 327.6777        |
| 1195.5999      | 11 | G 4  | 468.2683       | 234.6381        |
| 1294.6683      | 12 | V 3  | 411.2468       | 206.1273        |
| 1431.7272      | 13 | H 2  | 312.1784       | 156.5931        |
|                | 14 | R 1  | 175.1195       | 88.0637         |

N-term:+29.04

AESQSPTNVDLEDKER, MH+ 1885.9779, m/z 629.3308  
 H OSG39 P180811 230811-s1.02547.02547.3.dta

X-range:

-

MassTol: Y-zoom:

MassType:

AVG  MONO

Axis:

1  2

Label:

I  M  -

Ions:

a  +  2+  3+

b  +  2+  3+

c  +  2+  3+

x  +  2+  3+

y  +  2+  3+

z  +  2+  3+

hide H<sub>2</sub>O/NH<sub>3</sub>

zoom 112-122

GO

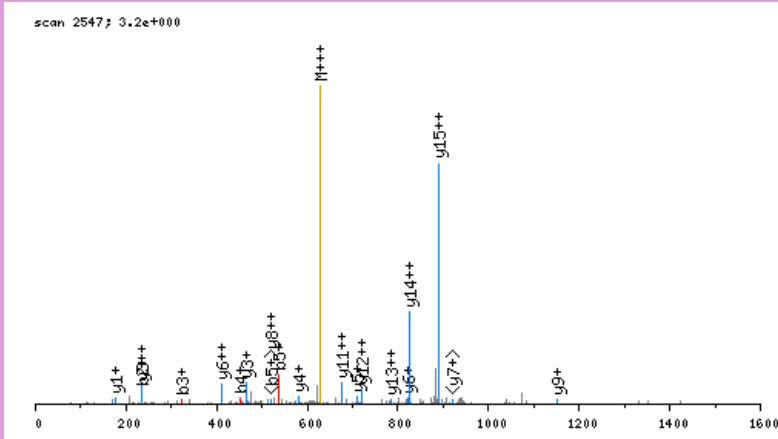

click image to zoom in; click top corners to zoom out [\[precursor±\]](#)

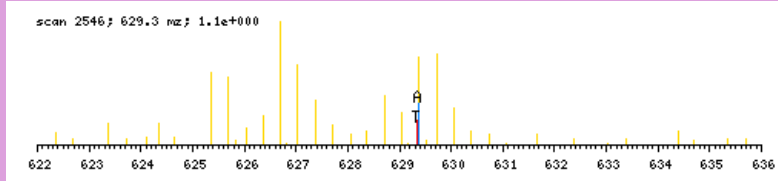

zoomed in precursor plot; T=theoretical m/z, A=acquired m/z

| b <sup>+</sup> | #  | AA # | y <sup>+</sup> | y <sup>2+</sup> |
|----------------|----|------|----------------|-----------------|
| 106.1080       | 1  | A 16 |                |                 |
| 235.1506       | 2  | E 15 | 1780.8777      | 890.9428        |
| 322.1826       | 3  | S 14 | 1651.8352      | 826.4215        |
| 450.2412       | 4  | Q 13 | 1564.8031      | 782.9055        |
| 537.2732       | 5  | S 12 | 1436.7445      | 718.8762        |
| 634.3260       | 6  | P 11 | 1349.7125      | 675.3602        |
| 735.3737       | 7  | T 10 | 1252.6598      | 626.8338        |
| 849.4166       | 8  | N 9  | 1151.6121      | 576.3100        |
| 948.4850       | 9  | V 8  | 1037.5692      | 519.2885        |
| 1063.5120      | 10 | D 7  | 938.5007       | 469.7543        |
| 1176.5960      | 11 | L 6  | 823.4738       | 412.2408        |
| 1305.6386      | 12 | E 5  | 710.3897       | 355.6988        |
| 1420.6656      | 13 | D 4  | 581.3471       | 291.1775        |
| 1582.8237      | 14 | K 3  | 466.3202       | 233.6640        |
| 1711.8663      | 15 | E 2  | 304.1621       | 152.5850        |
|                | 16 | R 1  | 175.1195       | 88.0637         |

N-term:+35.07 K(14):+162.16



AETPVAAALPEFPR, MH+ 1425.7742, m/z 475.9296  
 L OSG37 P180811 230811-s1.06811.06811.3.dta

X-range:

-

MassTol: Y-zoom:

MassType:

AVG  MONO

Axis:

1  2

Label:

I  M  -

Ions:

a  +  2+  3+

b  +  2+  3+

c  +  2+  3+

x  +  2+  3+

y  +  2+  3+

z  +  2+  3+

hide H<sub>2</sub>O/NH<sub>3</sub>

zoom 112-122

GO

scan 6811; 4.3e+000

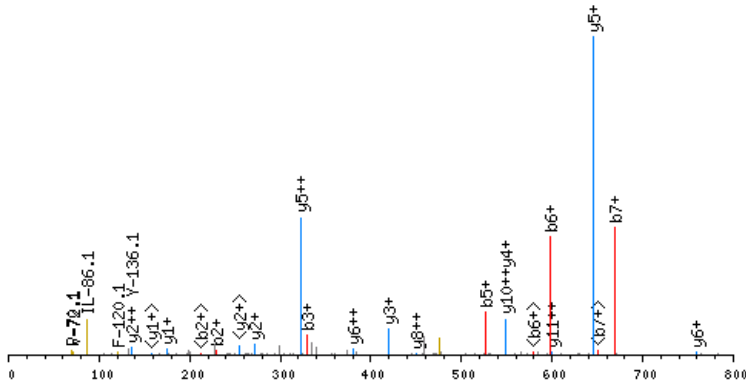

click image to zoom in; click top corners to zoom out [\[precursor±\]](#)

scan 6809; 475.9 m/z; 1.7e+001

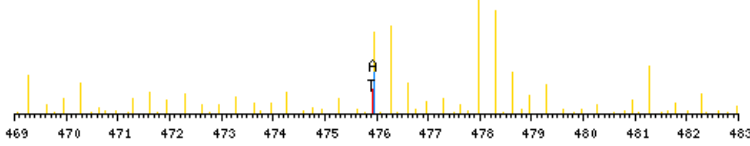

zoomed in precursor plot; T=theoretical m/z, A=acquired m/z

| b <sup>+</sup> | #  | AA # | y <sup>+</sup> | y <sup>2+</sup> |
|----------------|----|------|----------------|-----------------|
| 100.0762       | 1  | A 13 |                |                 |
| 229.1188       | 2  | E 12 | 1326.7058      | 663.8568        |
| 330.1665       | 3  | T 11 | 1197.6632      | 599.3355        |
| 427.2192       | 4  | P 10 | 1096.6155      | 548.8117        |
| 526.2877       | 5  | V 9  | 999.5627       | 500.2853        |
| 597.3248       | 6  | A 8  | 900.4943       | 450.7511        |
| 668.3619       | 7  | A 7  | 829.4572       | 415.2325        |
| 781.4460       | 8  | L 6  | 758.4201       | 379.7140        |
| 878.4987       | 9  | P 5  | 645.3360       | 323.1719        |
| 1007.5413      | 10 | E 4  | 548.2833       | 274.6455        |
| 1154.6097      | 11 | F 3  | 419.2407       | 210.1243        |
| 1251.6625      | 12 | P 2  | 272.1723       | 136.5900        |
|                | 13 | R 1  | 175.1195       | 88.0637         |

N-term:+29.04

AEVGQVAGPGPQR, MH+ 1299.7233, m/z 433.9126  
 H OSG37 P180811 230811-s1.02443.02443.3.dta

scan 2443; 1.4e+000

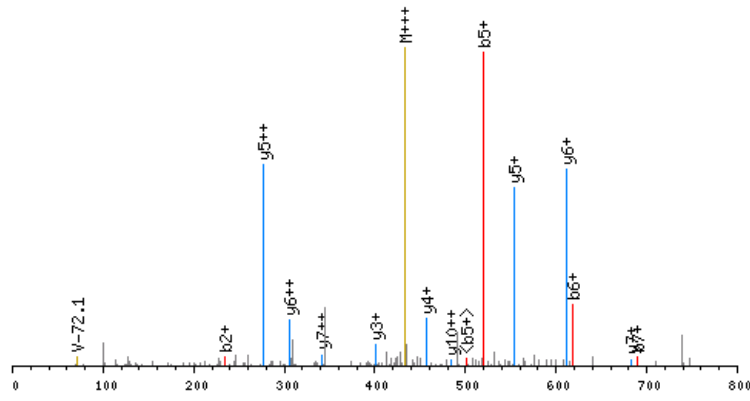

click image to zoom in; click top corners to zoom out [\[precursor±\]](#)

scan 2439; 433.9 m/z; 6.2e+000

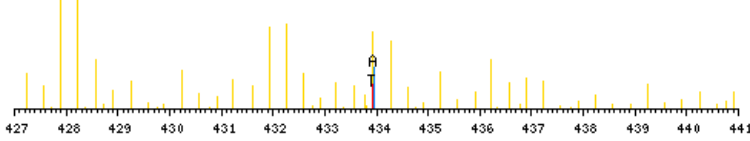

zoomed in precursor plot; T=theoretical m/z, A=acquired m/z

X-range:

-

MassTol: Y-zoom:

MassType:

AVG  MONO

Axis:

1  2

Label:

I  M  -

Ions:

a  +  2+  3+

b  +  2+  3+

c  +  2+  3+

x  +  2+  3+

y  +  2+  3+

z  +  2+  3+

hide H<sub>2</sub>O/NH<sub>3</sub>

zoom 112-122

GO

| b <sup>+</sup> | #  | AA # | y <sup>+</sup> | y <sup>2+</sup> |
|----------------|----|------|----------------|-----------------|
| 106.1080       | 1  | A 13 |                |                 |
| 235.1506       | 2  | E 12 | 1194.6231      | 597.8155        |
| 334.2190       | 3  | V 11 | 1065.5805      | 533.2942        |
| 391.2405       | 4  | G 10 | 966.5121       | 483.7600        |
| 519.2991       | 5  | Q 9  | 909.4906       | 455.2492        |
| 618.3675       | 6  | V 8  | 781.4321       | 391.2199        |
| 689.4046       | 7  | A 7  | 682.3636       | 341.6857        |
| 746.4261       | 8  | G 6  | 611.3265       | 306.1672        |
| 843.4788       | 9  | P 5  | 554.3051       | 277.6564        |
| 900.5003       | 10 | G 4  | 457.2523       | 229.1301        |
| 997.5530       | 11 | P 3  | 400.2308       | 200.6193        |
| 1125.6116      | 12 | Q 2  | 303.1781       | 152.0930        |
|                | 13 | R 1  | 175.1195       | 88.0637         |

N-term:+35.07

AEVNADVVDWIR, MH+ 1420.7648, m/z 474.2598  
 H OSG37 P180811 230811-s1.07703.07703.3.dta

X-range:

-

MassTol: Y-zoom:

MassType:

AVG  MONO

Axis:

1  2

Label:

I  M  -

Ions:

a  +  2+  3+

b  +  2+  3+

c  +  2+  3+

x  +  2+  3+

y  +  2+  3+

z  +  2+  3+

hide H<sub>2</sub>O/NH<sub>3</sub>

zoom 112-122

GO

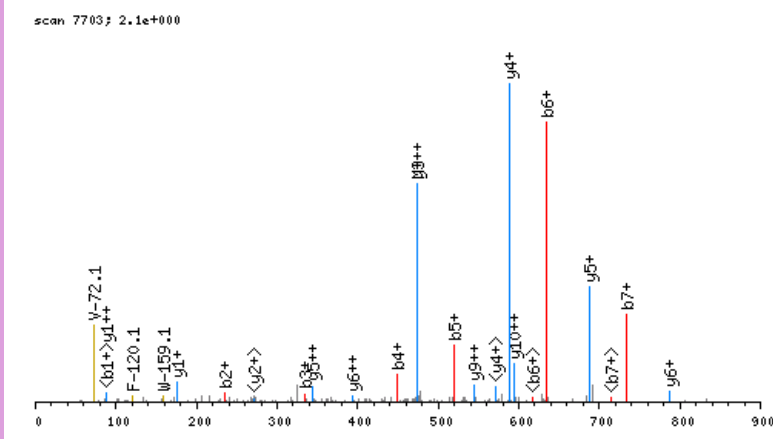

click image to zoom in; click top corners to zoom out [\[precursor±\]](#)

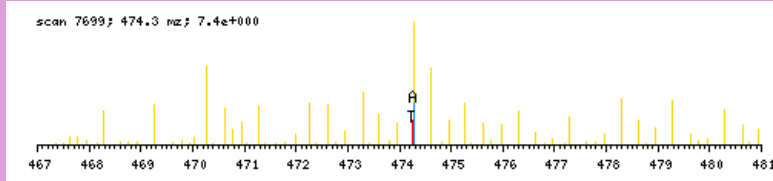

zoomed in precursor plot; T=theoretical m/z, A=acquired m/z

| b <sup>+</sup> | #  | AA | #  | y <sup>+</sup> | y <sup>2+</sup> |
|----------------|----|----|----|----------------|-----------------|
| 106.1080       | 1  | A  | 12 |                |                 |
| 235.1506       | 2  | E  | 11 | 1315.6646      | 658.3362        |
| 334.2190       | 3  | V  | 10 | 1186.6220      | 593.8149        |
| 448.2619       | 4  | N  | 9  | 1087.5536      | 544.2807        |
| 519.2991       | 5  | A  | 8  | 973.5107       | 487.2593        |
| 634.3260       | 6  | D  | 7  | 902.4736       | 451.7407        |
| 733.3944       | 7  | V  | 6  | 787.4466       | 394.2272        |
| 832.4628       | 8  | V  | 5  | 688.3782       | 344.6930        |
| 947.4898       | 9  | D  | 4  | 589.3098       | 295.1588        |
| 1133.5691      | 10 | W  | 3  | 474.2829       | 237.6454        |
| 1246.6532      | 11 | I  | 2  | 288.2036       | 144.6057        |
|                | 12 | R  | 1  | 175.1195       | 88.0637         |

N-term:+35.07

AFPQKVMPPQAR, MH+ 1522.8568, m/z 508.2905  
 L OSG39 P180811 230811-s1.03154.03154.3.dta

X-range:

-

MassTol: Y-zoom:

MassType:

AVG  MONO

Axis:

1  2

Label:

I  M  -

Ions:

a  +  2+  3+

b  +  2+  3+

c  +  2+  3+

x  +  2+  3+

y  +  2+  3+

z  +  2+  3+

hide H<sub>2</sub>O/NH<sub>3</sub>

zoom 112-122

GO

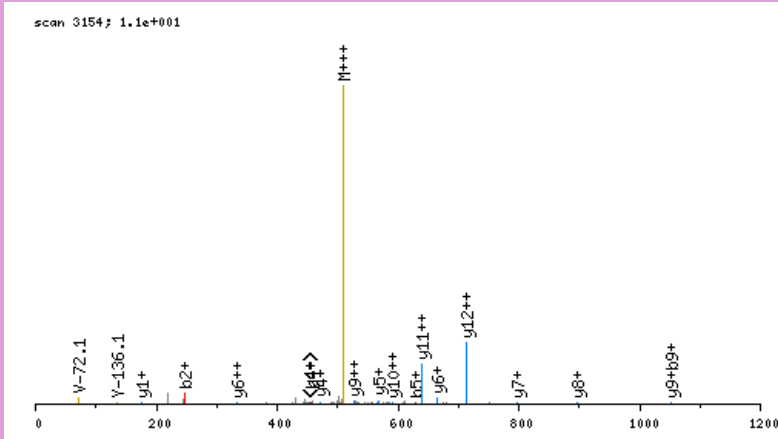

click image to zoom in; click top corners to zoom out

[precursor±]

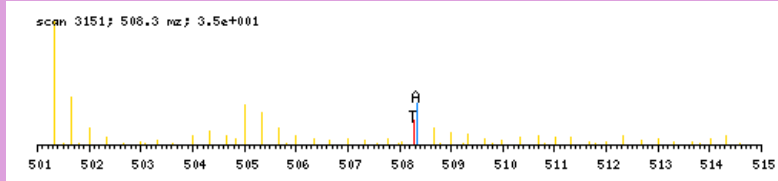

zoomed in precursor plot; T=theoretical m/z, A=acquired m/z

| b <sup>+</sup> | #  | AA # | y <sup>+</sup> | y <sup>2+</sup> |
|----------------|----|------|----------------|-----------------|
| 100.0762       | 1  | A 13 |                |                 |
| 247.1446       | 2  | F 12 | 1423.7884      | 712.3981        |
| 344.1974       | 3  | P 11 | 1276.7200      | 638.8639        |
| 472.2560       | 4  | Q 10 | 1179.6673      | 590.3375        |
| 628.3823       | 5  | K 9  | 1051.6087      | 526.3083        |
| 727.4507       | 6  | V 8  | 895.4824       | 448.2451        |
| 858.4912       | 7  | M 7  | 796.4140       | 398.7109        |
| 955.5439       | 8  | P 6  | 665.3735       | 333.1907        |
| 1052.5967      | 9  | P 5  | 568.3207       | 284.6643        |
| 1149.6495      | 10 | P 4  | 471.2680       | 236.1379        |
| 1277.7080      | 11 | Q 3  | 374.2152       | 187.6115        |
| 1348.7452      | 12 | A 2  | 246.1566       | 123.5822        |
|                | 13 | R 1  | 175.1195       | 88.0637         |

N-term:+29.04 K(5):+156.13

X-range:

-

MassTol: Y-zoom:

MassType:

AVG  MONO

Axis:

1  2

Label:

I  M  -

Ions:

a  +  2+  3+

b  +  2+  3+

c  +  2+  3+

x  +  2+  3+

y  +  2+  3+

z  +  2+  3+

hide H<sub>2</sub>O/NH<sub>3</sub>

zoom 112-122

GO

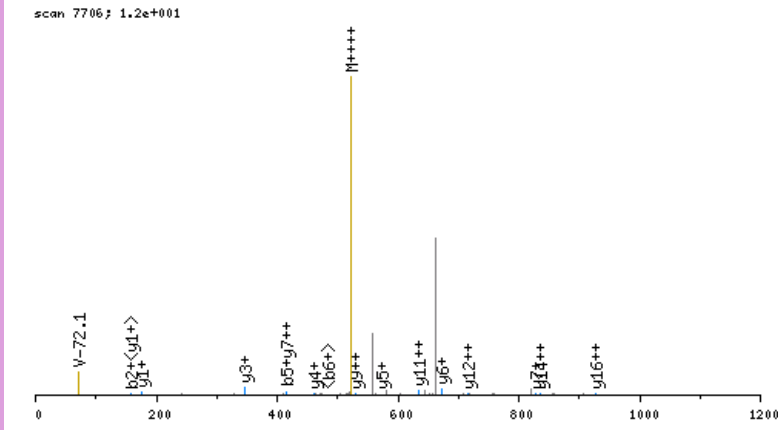

click image to zoom in; click top corners to zoom out [\[precursor±\]](#)

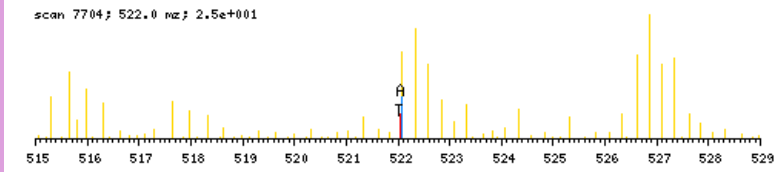

zoomed in precursor plot; T=theoretical m/z, A=acquired m/z

| b <sup>+</sup> | #  | AA | #  | y <sup>+</sup> | y <sup>2+</sup> |
|----------------|----|----|----|----------------|-----------------|
| 100.0762       | 1  | A  | 19 |                |                 |
| 157.0977       | 2  | G  | 18 | 1986.0880      | 993.5479        |
| 228.1348       | 3  | A  | 17 | 1929.0666      | 965.0372        |
| 285.1563       | 4  | G  | 16 | 1858.0295      | 929.5186        |
| 414.1988       | 5  | E  | 15 | 1801.0080      | 901.0079        |
| 501.2309       | 6  | S  | 14 | 1671.9654      | 836.4866        |
| 657.3572       | 7  | K  | 13 | 1584.9334      | 792.9706        |
| 817.3878       | 8  | C  | 12 | 1428.8071      | 714.9075        |
| 914.4405       | 9  | P  | 11 | 1268.7765      | 634.8922        |
| 1027.5246      | 10 | L  | 10 | 1171.7237      | 586.3658        |
| 1158.5651      | 11 | M  | 9  | 1058.6396      | 529.8237        |
| 1257.6335      | 12 | V  | 8  | 927.5992       | 464.3035        |
| 1413.7598      | 13 | K  | 7  | 828.5307       | 414.7693        |
| 1512.8282      | 14 | V  | 6  | 672.4044       | 336.7061        |
| 1625.9123      | 15 | L  | 5  | 573.3360       | 287.1719        |
| 1740.9392      | 16 | D  | 4  | 460.2520       | 230.6299        |
| 1811.9763      | 17 | A  | 3  | 345.2250       | 173.1164        |
| 1911.0448      | 18 | V  | 2  | 274.1879       | 137.5979        |
|                | 19 | R  | 1  | 175.1195       | 88.0637         |

N-term:+29.04 K(7):+156.13  
 C(8):+160.03 K(13):+156.13

AGEEAAADSPPELPR, MH+ 1375.6917, m/z 459.2354  
 H OSG37 P180811 230811-s1.03241.03241.3.dta

X-range:

-

MassTol: Y-zoom:

MassType:

AVG  MONO

Axis:

1  2

Label:

I  M  -

Ions:

a  +  2+  3+

b  +  2+  3+

c  +  2+  3+

x  +  2+  3+

y  +  2+  3+

z  +  2+  3+

hide H<sub>2</sub>O/NH<sub>3</sub>

zoom 112-122

GO

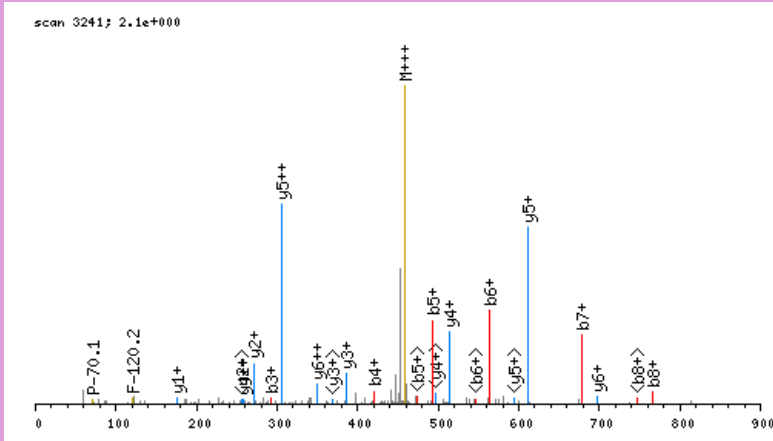

click image to zoom in; click top corners to zoom out [\[precursor±\]](#)

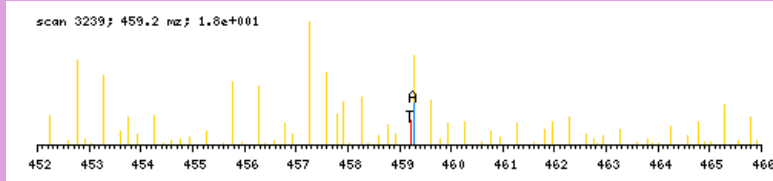

zoomed in precursor plot; T=theoretical m/z, A=acquired m/z

| b <sup>+</sup> | #  | AA # | y <sup>+</sup> | y <sup>2+</sup> |
|----------------|----|------|----------------|-----------------|
| 106.1080       | 1  | A 13 |                |                 |
| 163.1295       | 2  | G 12 | 1270.5915      | 635.7997        |
| 292.1721       | 3  | E 11 | 1213.5701      | 607.2889        |
| 421.2147       | 4  | E 10 | 1084.5275      | 542.7677        |
| 492.2518       | 5  | A 9  | 955.4849       | 478.2464        |
| 563.2889       | 6  | A 8  | 884.4478       | 442.7278        |
| 678.3158       | 7  | D 7  | 813.4107       | 407.2092        |
| 765.3479       | 8  | S 6  | 698.3837       | 349.6958        |
| 862.4006       | 9  | P 5  | 611.3517       | 306.1798        |
| 991.4432       | 10 | E 4  | 514.2989       | 257.6534        |
| 1104.5273      | 11 | L 3  | 385.2563       | 193.1321        |
| 1201.5800      | 12 | P 2  | 272.1723       | 136.5900        |
|                | 13 | R 1  | 175.1195       | 88.0637         |

N-term:+35.07

AGEFVDLYVPR, MH+ 1299.7161, m/z 650.3617  
 H OSG37 P180811 230811-s1.06928.06928.2.dta

X-range:

-

MassTol: Y-zoom:

MassType:

AVG  MONO

Axis:

1  2

Label:

I  M  -

Ions:

a  +  2+  3+

b  +  2+  3+

c  +  2+  3+

x  +  2+  3+

y  +  2+  3+

z  +  2+  3+

hide H<sub>2</sub>O/NH<sub>3</sub>

zoom 112-122

GO

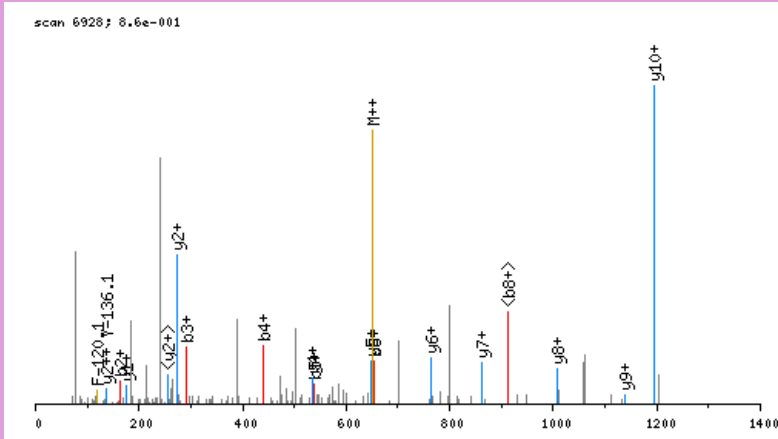

click image to zoom in; click top corners to zoom out [\[precursor±\]](#)

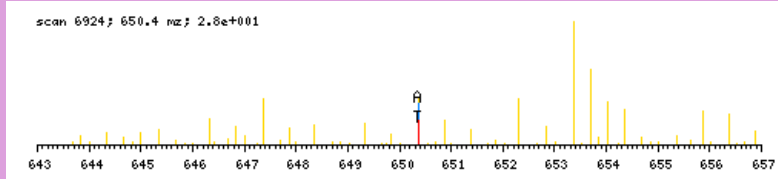

zoomed in precursor plot; T=theoretical m/z, A=acquired m/z

| b <sup>+</sup> | #  | AA # | y <sup>+</sup> | y <sup>2+</sup> |
|----------------|----|------|----------------|-----------------|
| 106.1080       | 1  | A 11 |                |                 |
| 163.1295       | 2  | G 10 | 1194.6159      | 597.8119        |
| 292.1721       | 3  | E 9  | 1137.5944      | 569.3011        |
| 439.2405       | 4  | F 8  | 1008.5518      | 504.7798        |
| 538.3089       | 5  | V 7  | 861.4834       | 431.2456        |
| 653.3358       | 6  | D 6  | 762.4150       | 381.7114        |
| 766.4199       | 7  | L 5  | 647.3881       | 324.1979        |
| 929.4832       | 8  | Y 4  | 534.3040       | 267.6559        |
| 1028.5516      | 9  | V 3  | 371.2407       | 186.1243        |
| 1125.6044      | 10 | P 2  | 272.1723       | 136.5900        |
|                | 11 | R 1  | 175.1195       | 88.0637         |

N-term:+35.07

AGFAGDDAPR, MH+ 1010.5119, m/z 505.7596  
 H OSG38 P180811 230811-s1.02316.02316.2.dta

scan 2316; 1.2e+001

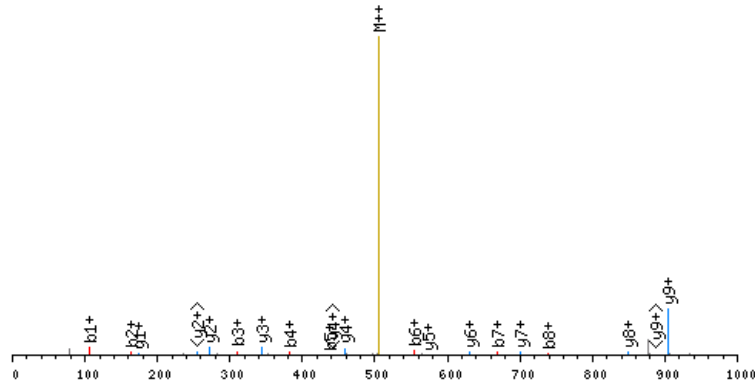

click image to zoom in; click top corners to zoom out [\[precursor±\]](#)

scan 2314; 505.8 m/z; 5.3e+001

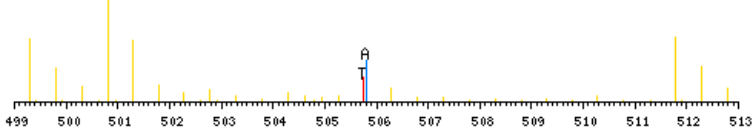

zoomed in precursor plot; T=theoretical m/z, A=acquired m/z

X-range:

-

MassTol: Y-zoom:

MassType:

AVG  MONO

Axis:

1  2

Label:

I  M  -

Ions:

a  +  2+  3+

b  +  2+  3+

c  +  2+  3+

x  +  2+  3+

y  +  2+  3+

z  +  2+  3+

hide H<sub>2</sub>O/NH<sub>3</sub>

zoom 112-122

GO

| b <sup>+</sup> | #  | AA | #  | y <sup>+</sup> | y <sup>2+</sup> |
|----------------|----|----|----|----------------|-----------------|
| 106.1080       | 1  | A  | 10 |                |                 |
| 163.1295       | 2  | G  | 9  | 905.4117       | 453.2098        |
| 310.1979       | 3  | F  | 8  | 848.3903       | 424.6990        |
| 381.2350       | 4  | A  | 7  | 701.3218       | 351.1648        |
| 438.2565       | 5  | G  | 6  | 630.2847       | 315.6463        |
| 553.2834       | 6  | D  | 5  | 573.2633       | 287.1355        |
| 668.3104       | 7  | D  | 4  | 458.2363       | 229.6221        |
| 739.3475       | 8  | A  | 3  | 343.2094       | 172.1086        |
| 836.4002       | 9  | P  | 2  | 272.1723       | 136.5900        |
|                | 10 | R  | 1  | 175.1195       | 88.0637         |

N-term: +35.07



AGGEAGVTLGQPHLSR, MH+ 1577.8400, m/z 526.6182  
 L OSG37 P180811 230811-s1.04690.04690.3.dta

X-range:

-

MassTol: Y-zoom:

MassType:

AVG  MONO

Axis:

1  2

Label:

I  M  -

Ions:

a  +  2+  3+

b  +  2+  3+

c  +  2+  3+

x  +  2+  3+

y  +  2+  3+

z  +  2+  3+

hide H<sub>2</sub>O/NH<sub>3</sub>

zoom 112-122

GO

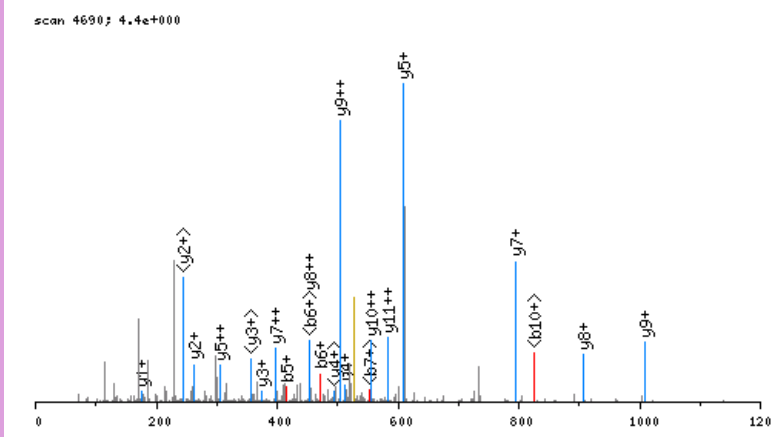

click image to zoom in; click top corners to zoom out [\[precursor±\]](#)

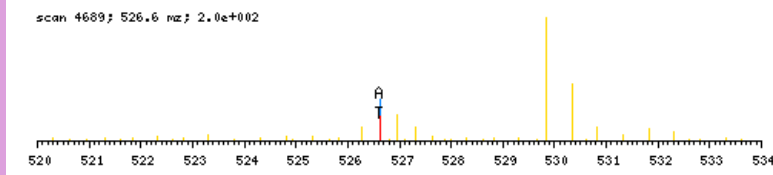

zoomed in precursor plot; T=theoretical m/z, A=acquired m/z

| b <sup>+</sup> | #  | AA # | y <sup>+</sup> | y <sup>2+</sup> |
|----------------|----|------|----------------|-----------------|
| 100.0762       | 1  | A 16 |                |                 |
| 157.0977       | 2  | G 15 | 1478.7716      | 739.8897        |
| 214.1191       | 3  | G 14 | 1421.7501      | 711.3790        |
| 343.1617       | 4  | E 13 | 1364.7286      | 682.8682        |
| 414.1988       | 5  | A 12 | 1235.6860      | 618.3469        |
| 471.2203       | 6  | G 11 | 1164.6489      | 582.8284        |
| 570.2887       | 7  | V 10 | 1107.6275      | 554.3176        |
| 671.3364       | 8  | T 9  | 1008.5591      | 504.7834        |
| 784.4205       | 9  | L 8  | 907.5114       | 454.2596        |
| 841.4419       | 10 | G 7  | 794.4273       | 397.7176        |
| 969.5005       | 11 | Q 6  | 737.4058       | 369.2068        |
| 1066.5533      | 12 | P 5  | 609.3473       | 305.1775        |
| 1203.6122      | 13 | H 4  | 512.2945       | 256.6512        |
| 1316.6962      | 14 | L 3  | 375.2356       | 188.1217        |
| 1403.7283      | 15 | S 2  | 262.1515       | 131.5797        |
|                | 16 | R 1  | 175.1195       | 88.0637         |

N-term:+29.04

AGLDLNSSDNQSGGSTASKGR, MH+ 2078.0114, m/z 520.2583  
 L OSG39 P180811 230811-s1.02405.02405.4.dta

X-range:

-

MassTol: Y-zoom:

MassType:

AVG  MONO

Axis:

1  2

Label:

I  M  -

Ions:

a  +  2+  3+

b  +  2+  3+

c  +  2+  3+

x  +  2+  3+

y  +  2+  3+

z  +  2+  3+

hide H<sub>2</sub>O/NH<sub>3</sub>

zoom 112-122

GO

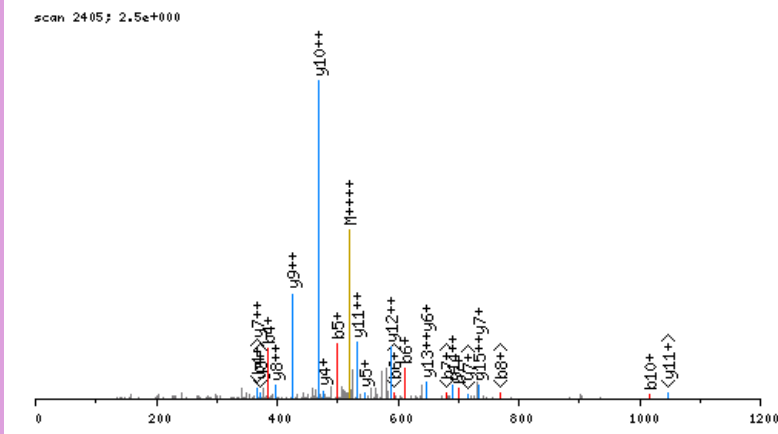

click image to zoom in; click top corners to zoom out [\[precursor±\]](#)

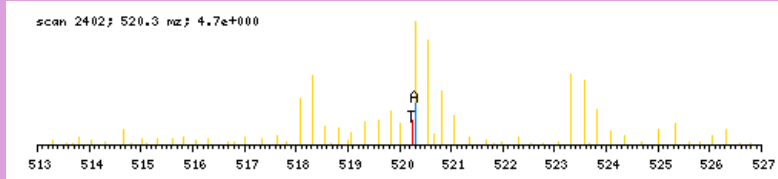

zoomed in precursor plot; T=theoretical m/z, A=acquired m/z

| b <sup>+</sup> | #  | AA # | y <sup>+</sup> | y <sup>2+</sup> |
|----------------|----|------|----------------|-----------------|
| 100.0762       | 1  | A 21 |                |                 |
| 157.0977       | 2  | G 20 | 1978.9430      | 989.9754        |
| 270.1817       | 3  | L 19 | 1921.9216      | 961.4647        |
| 385.2087       | 4  | D 18 | 1808.8375      | 904.9227        |
| 498.2927       | 5  | L 17 | 1693.8106      | 847.4092        |
| 612.3357       | 6  | N 16 | 1580.7265      | 790.8672        |
| 699.3677       | 7  | S 15 | 1466.6836      | 733.8457        |
| 786.3997       | 8  | S 14 | 1379.6515      | 690.3297        |
| 901.4267       | 9  | D 13 | 1292.6195      | 646.8137        |
| 1015.4696      | 10 | N 12 | 1177.5926      | 589.3002        |
| 1143.5282      | 11 | Q 11 | 1063.5496      | 532.2787        |
| 1230.5602      | 12 | S 10 | 935.4911       | 468.2494        |
| 1287.5817      | 13 | G 9  | 848.4590       | 424.7334        |
| 1344.6031      | 14 | G 8  | 791.4376       | 396.2227        |
| 1431.6352      | 15 | S 7  | 734.4161       | 367.7120        |
| 1532.6828      | 16 | T 6  | 647.3841       | 324.1960        |
| 1603.7200      | 17 | A 5  | 546.3364       | 273.6721        |
| 1690.7520      | 18 | S 4  | 475.2993       | 238.1536        |
| 1846.8783      | 19 | K 3  | 388.2673       | 194.6375        |
| 1903.8997      | 20 | G 2  | 232.1410       | 116.5744        |
|                | 21 | R 1  | 175.1195       | 88.0637         |

N-term: +29.04 K(19): +156.13

AGPPGFPGAPGPKGELGPVGNPAGPAGPR, MH+ 2798.5378, m/z 700.3899  
 H OSG38 P180811 230811-s1.04583.04583.4.dta

scan 4583; 3.4e+000

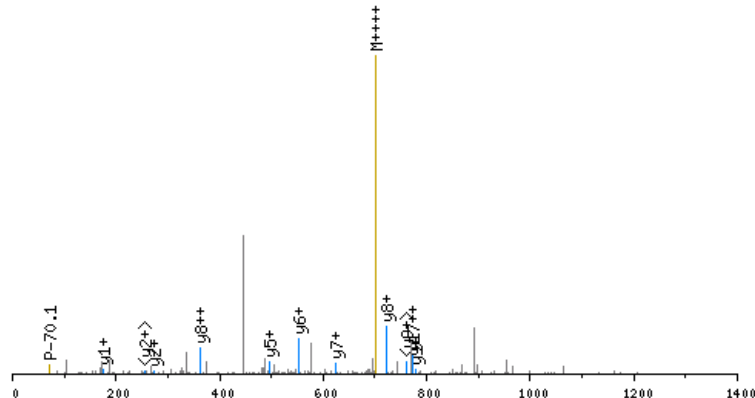

click image to zoom in; click top corners to zoom out [\[precursor±\]](#)

scan 4579; 700.4 m/z; 8.3e+000

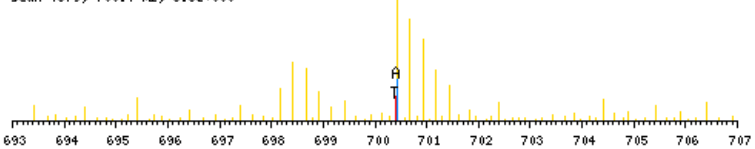

zoomed in precursor plot; T=theoretical m/z, A=acquired m/z

| b <sup>+</sup> | #  | AA # | y <sup>+</sup>  | y <sup>2+</sup> |
|----------------|----|------|-----------------|-----------------|
| 106.1080       | 1  | A 31 |                 |                 |
| 163.1295       | 2  | G 30 | 2693.4376       | 1347.2227       |
| 260.1822       | 3  | P 29 | 2636.4162       | 1318.7120       |
| 357.2350       | 4  | P 28 | 2539.3634       | 1270.1856       |
| 414.2565       | 5  | G 27 | 2442.3106       | 1221.6592       |
| 561.3249       | 6  | F 26 | 2385.2892       | 1193.1485       |
| 658.3776       | 7  | P 25 | 2238.2208       | 1119.6143       |
| 715.3991       | 8  | G 24 | 2141.1680       | 1071.0879       |
| 786.4362       | 9  | A 23 | 2084.1465       | 1042.5772       |
| 883.4890       | 10 | P 22 | 2013.1094       | 1007.0586       |
| 940.5105       | 11 | G 21 | 1916.0567       | 958.5322        |
| 1037.5632      | 12 | P 20 | 1859.0352       | 930.0215        |
| 1199.7213      | 13 | K 19 | 1761.9824       | 881.4951        |
| 1256.7428      | 14 | G 18 | 1599.8243       | 800.4161        |
| 1385.7854      | 15 | E 17 | 1542.8029       | <b>771.9053</b> |
| 1498.8694      | 16 | L 16 | 1413.7603       | 707.3840        |
| 1555.8909      | 17 | G 15 | 1300.6762       | 650.8420        |
| 1652.9437      | 18 | P 14 | 1243.6547       | 622.3313        |
| 1752.0121      | 19 | V 13 | 1146.6020       | 573.8049        |
| 1809.0335      | 20 | G 12 | 1047.5336       | 524.2707        |
| 1923.0765      | 21 | N 11 | 990.5121        | 495.7600        |
| 2020.1292      | 22 | P 10 | 876.4692        | 438.7385        |
| 2077.1507      | 23 | G 9  | <b>779.4164</b> | 390.2121        |
| 2174.2035      | 24 | P 8  | <b>722.3949</b> | <b>361.7014</b> |
| 2245.2406      | 25 | A 7  | <b>625.3422</b> | 313.1750        |
| 2302.2620      | 26 | G 6  | <b>554.3051</b> | 277.6564        |
| 2399.3148      | 27 | P 5  | <b>497.2836</b> | 249.1457        |
| 2470.3519      | 28 | A 4  | 400.2308        | 200.6193        |
| 2527.3734      | 29 | G 3  | 329.1937        | 165.1008        |
| 2624.4261      | 30 | P 2  | <b>272.1723</b> | 136.5900        |
|                | 31 | R 1  | <b>175.1195</b> | 88.0637         |

N-term:+35.07 K(13):+162.16

X-range:

-

MassTol: Y-zoom:

MassType:

AVG  MONO

Axis:

1  2

Label:

I  M  -

Ions:

a  +  2+  3+

b  +  2+  3+

c  +  2+  3+

x  +  2+  3+

y  +  2+  3+

z  +  2+  3+

hide H<sub>2</sub>O/NH<sub>3</sub>

zoom 112-122

GO

AGSSSGSGVQGASAGGLAADASR, MH+ 1954.9642, m/z 652.3263  
 H OSG37 P180811 230811-s1.03178.03178.3.dta

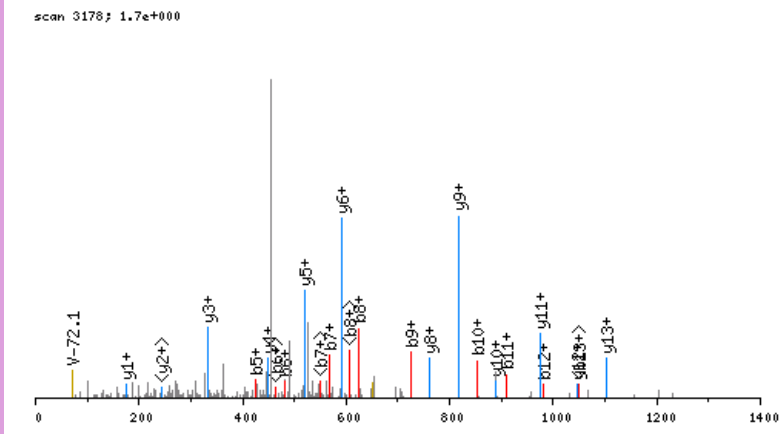

click image to zoom in; click top corners to zoom out [precursor±]

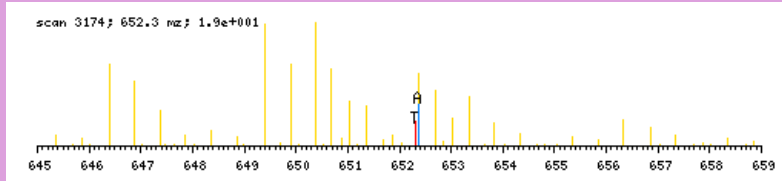

zoomed in precursor plot; T=theoretical m/z, A=acquired m/z

X-range:

-

MassTol: Y-zoom:

MassType:

AVG  MONO

Axis:

1  2

Label:

I  M  -

Ions:

a  +  2+  3+

b  +  2+  3+

c  +  2+  3+

x  +  2+  3+

y  +  2+  3+

z  +  2+  3+

hide H<sub>2</sub>O/NH<sub>3</sub>

zoom 112-122

GO

| b <sup>+</sup> | #  | AA | #  | y <sup>+</sup> | y <sup>2+</sup> |
|----------------|----|----|----|----------------|-----------------|
| 106.1080       | 1  | A  | 23 |                |                 |
| 163.1295       | 2  | G  | 22 | 1849.8640      | 925.4359        |
| 250.1615       | 3  | S  | 21 | 1792.8426      | 896.9252        |
| 337.1935       | 4  | S  | 20 | 1705.8105      | 853.4092        |
| 424.2256       | 5  | S  | 19 | 1618.7785      | 809.8932        |
| 481.2470       | 6  | G  | 18 | 1531.7465      | 766.3771        |
| 568.2791       | 7  | S  | 17 | 1474.7250      | 737.8664        |
| 625.3005       | 8  | G  | 16 | 1387.6930      | 694.3504        |
| 724.3689       | 9  | V  | 15 | 1330.6715      | 665.8397        |
| 852.4275       | 10 | Q  | 14 | 1231.6031      | 616.3055        |
| 909.4490       | 11 | G  | 13 | 1103.5445      | 552.2762        |
| 980.4861       | 12 | A  | 12 | 1046.5231      | 523.7654        |
| 1067.5181      | 13 | S  | 11 | 975.4859       | 488.2469        |
| 1138.5552      | 14 | A  | 10 | 888.4539       | 444.7309        |
| 1195.5767      | 15 | G  | 9  | 817.4168       | 409.2123        |
| 1252.5982      | 16 | G  | 8  | 760.3953       | 380.7016        |
| 1365.6822      | 17 | L  | 7  | 703.3739       | 352.1909        |
| 1436.7193      | 18 | A  | 6  | 590.2898       | 295.6488        |
| 1507.7564      | 19 | A  | 5  | 519.2527       | 260.1303        |
| 1622.7834      | 20 | D  | 4  | 448.2156       | 224.6117        |
| 1693.8205      | 21 | A  | 3  | 333.1886       | 167.0982        |
| 1780.8525      | 22 | S  | 2  | 262.1515       | 131.5797        |
|                | 23 | R  | 1  | 175.1195       | 88.0637         |

N-term:+35.07

AGVGEFEAGISKNGQTR, MH+ 1776.9244, m/z 592.9797  
 L OSG40 P180811 230811-s1.04550.04550.3.dta

X-range:

-

MassTol: Y-zoom:

MassType:

AVG  MONO

Axis:

1  2

Label:

I  M  -

Ions:

a  +  2+  3+

b  +  2+  3+

c  +  2+  3+

x  +  2+  3+

y  +  2+  3+

z  +  2+  3+

hide H<sub>2</sub>O/NH<sub>3</sub>

zoom 112-122

GO

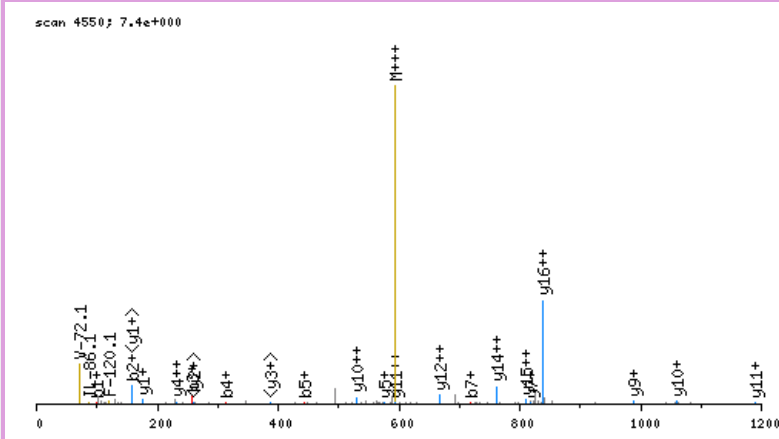

click image to zoom in; click top corners to zoom out [[precursor±](#)]

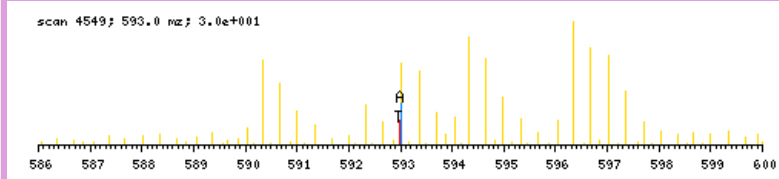

zoomed in precursor plot; T=theoretical m/z, A=acquired m/z

| b <sup>+</sup> | #  | AA | #  | y <sup>+</sup> | y <sup>2+</sup> |
|----------------|----|----|----|----------------|-----------------|
| 100.0762       | 1  | A  | 17 |                |                 |
| 157.0977       | 2  | G  | 16 | 1677.8561      | 839.4319        |
| 256.1661       | 3  | V  | 15 | 1620.8346      | 810.9212        |
| 313.1876       | 4  | G  | 14 | 1521.7662      | 761.3870        |
| 442.2301       | 5  | E  | 13 | 1464.7447      | 732.8763        |
| 589.2986       | 6  | F  | 12 | 1335.7021      | 668.3550        |
| 718.3412       | 7  | E  | 11 | 1188.6337      | 594.8208        |
| 789.3783       | 8  | A  | 10 | 1059.5911      | 530.2995        |
| 846.3997       | 9  | G  | 9  | 988.5540       | 494.7809        |
| 959.4838       | 10 | I  | 8  | 931.5325       | 466.2702        |
| 1046.5158      | 11 | S  | 7  | 818.4485       | 409.7282        |
| 1202.6421      | 12 | K  | 6  | 731.4164       | 366.2121        |
| 1316.6851      | 13 | N  | 5  | 575.2901       | 288.1490        |
| 1373.7065      | 14 | G  | 4  | 461.2472       | 231.1275        |
| 1501.7651      | 15 | Q  | 3  | 404.2258       | 202.6168        |
| 1602.8128      | 16 | T  | 2  | 276.1672       | 138.5875        |
|                | 17 | R  | 1  | 175.1195       | 88.0637         |

N-term:+29.04 K(12):+156.13

AGVSDGSEVAKAQAAPGGASPTIFSR, MH+ 2661.5061, m/z 666.1320  
 H OSG40 P180811 230811-s1.05383.05383.4.dta

scan 5383; 7.5e+000

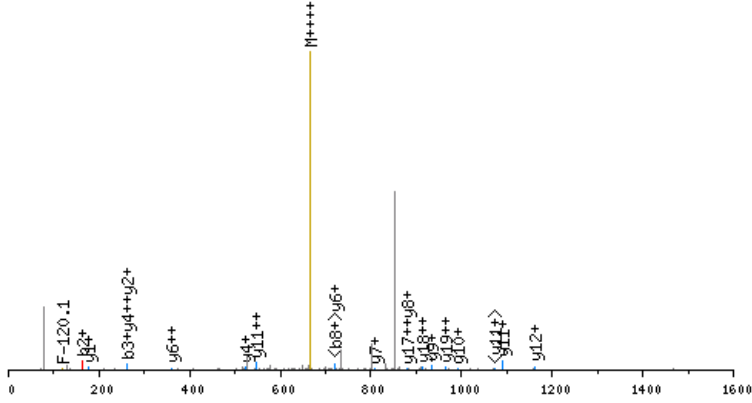

click image to zoom in; click top corners to zoom out [\[precursor±\]](#)

scan 5379; 666.1 m/z; 2.3e+001

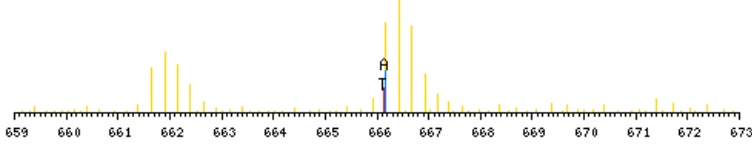

zoomed in precursor plot; T=theoretical m/z, A=acquired m/z

X-range:

-

MassTol: Y-zoom:

MassType:

AVG  MONO

Axis:

1  2

Label:

I  M  -

Ions:

a  +  2+  3+

b  +  2+  3+

c  +  2+  3+

x  +  2+  3+

y  +  2+  3+

z  +  2+  3+

hide H<sub>2</sub>O/NH<sub>3</sub>

zoom 112-122

GO

| b <sup>+</sup> | #  | AA # | y <sup>+</sup> | y <sup>2+</sup> |
|----------------|----|------|----------------|-----------------|
| 106.1080       | 1  | A 27 |                |                 |
| 163.1295       | 2  | G 26 | 2556.4059      | 1278.7068       |
| 262.1979       | 3  | V 25 | 2499.3844      | 1250.1961       |
| 349.2299       | 4  | S 24 | 2400.3160      | 1200.6619       |
| 464.2569       | 5  | D 23 | 2313.2840      | 1157.1459       |
| 521.2783       | 6  | G 22 | 2198.2570      | 1099.6324       |
| 608.3104       | 7  | S 21 | 2141.2356      | 1071.1217       |
| 737.3529       | 8  | E 20 | 2054.2035      | 1027.6057       |
| 836.4214       | 9  | V 19 | 1925.1609      | 963.0844        |
| 907.4585       | 10 | A 18 | 1826.0925      | 913.5502        |
| 1069.6166      | 11 | K 17 | 1755.0554      | 878.0316        |
| 1140.6537      | 12 | A 16 | 1592.8973      | 796.9526        |
| 1268.7123      | 13 | Q 15 | 1521.8602      | 761.4340        |
| 1430.8704      | 14 | K 14 | 1393.8016      | 697.4047        |
| 1501.9075      | 15 | A 13 | 1231.6435      | 616.3257        |
| 1572.9446      | 16 | A 12 | 1160.6064      | 580.8071        |
| 1669.9974      | 17 | P 11 | 1089.5693      | 545.2886        |
| 1727.0188      | 18 | G 10 | 992.5165       | 496.7622        |
| 1784.0403      | 19 | G 9  | 935.4951       | 468.2514        |
| 1855.0774      | 20 | A 8  | 878.4736       | 439.7407        |
| 1942.1094      | 21 | S 7  | 807.4365       | 404.2222        |
| 2039.1622      | 22 | P 6  | 720.4044       | 360.7061        |
| 2140.2099      | 23 | T 5  | 623.3517       | 312.1798        |
| 2253.2939      | 24 | I 4  | 522.3040       | 261.6559        |
| 2400.3623      | 25 | F 3  | 409.2199       | 205.1139        |
| 2487.3944      | 26 | S 2  | 262.1515       | 131.5797        |
|                | 27 | R 1  | 175.1195       | 88.0637         |

N-term: +35.07 K(11) : +162.16  
 K(14) : +162.16

AIGPSAQASTGSLVITCPSNLNLDLKESNNR, MH+ 3269.7072, m/z 818.1822  
 H OSG38 P180811 230811-s1.06305.06305.4.dta

scan 6305; 6.9e-001

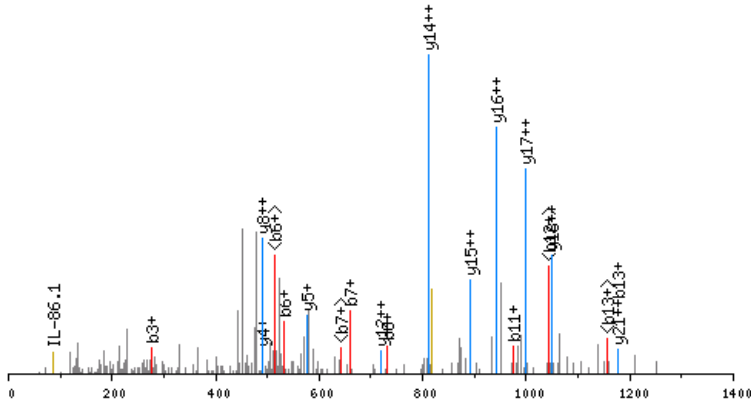

click image to zoom in; click top corners to zoom out [\[precursor±\]](#)

scan 6304; 818.2 m/z; 1.4e+001

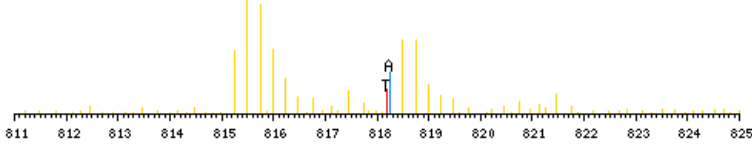

zoomed in precursor plot; T=theoretical m/z, A=acquired m/z

X-range:

-

MassTol: Y-zoom:

MassType:

AVG  MONO

Axis:

1  2

Label:

I  M  -

Ions:

a  +  2+  3+

b  +  2+  3+

c  +  2+  3+

x  +  2+  3+

y  +  2+  3+

z  +  2+  3+

hide H<sub>2</sub>O/NH<sub>3</sub>

zoom 112-122

GO

| b <sup>+</sup> | #  | AA | #  | y <sup>+</sup> | y <sup>2+</sup> |
|----------------|----|----|----|----------------|-----------------|
| 106.1080       | 1  | A  | 31 |                |                 |
| 219.1921       | 2  | I  | 30 | 3164.6070      | 1582.8074       |
| 276.2135       | 3  | G  | 29 | 3051.5229      | 1526.2654       |
| 373.2663       | 4  | P  | 28 | 2994.5014      | 1497.7546       |
| 460.2983       | 5  | S  | 27 | 2897.4487      | 1449.2283       |
| 531.3354       | 6  | A  | 26 | 2810.4166      | 1405.7122       |
| 659.3940       | 7  | Q  | 25 | 2739.3795      | 1370.1937       |
| 730.4311       | 8  | A  | 24 | 2611.3210      | 1306.1644       |
| 817.4632       | 9  | S  | 23 | 2540.2838      | 1270.6458       |
| 918.5108       | 10 | T  | 22 | 2453.2518      | 1227.1298       |
| 975.5323       | 11 | G  | 21 | 2352.2041      | 1176.6060       |
| 1062.5643      | 12 | S  | 20 | 2295.1827      | 1148.0952       |
| 1175.6484      | 13 | L  | 19 | 2208.1506      | 1104.5792       |
| 1274.7168      | 14 | V  | 18 | 2095.0666      | 1048.0372       |
| 1387.8009      | 15 | I  | 17 | 1995.9982      | 998.5030        |
| 1488.8486      | 16 | T  | 16 | 1882.9141      | 941.9610        |
| 1648.8792      | 17 | C  | 15 | 1781.8664      | 891.4371        |
| 1745.9319      | 18 | P  | 14 | 1621.8358      | 811.4218        |
| 1832.9640      | 19 | S  | 13 | 1524.7831      | 762.8954        |
| 1947.0069      | 20 | N  | 12 | 1437.7510      | 719.3794        |
| 2060.0909      | 21 | L  | 11 | 1323.7081      | 662.3580        |
| 2174.1339      | 22 | N  | 10 | 1210.6240      | 605.8159        |
| 2289.1608      | 23 | D  | 9  | 1096.5811      | 548.7945        |
| 2402.2449      | 24 | L  | 8  | 981.5542       | 491.2810        |
| 2564.4030      | 25 | K  | 7  | 868.4701       | 434.7390        |
| 2693.4456      | 26 | E  | 6  | 706.3120       | 353.6599        |
| 2780.4776      | 27 | S  | 5  | 577.2694       | 289.1386        |
| 2867.5096      | 28 | S  | 4  | 490.2374       | 245.6226        |
| 2981.5526      | 29 | N  | 3  | 403.2054       | 202.1066        |
| 3095.5955      | 30 | N  | 2  | 289.1624       | 145.0851        |
|                | 31 | R  | 1  | 175.1195       | 88.0637         |

N-term:+35.07 C(17):+160.03  
 K(25):+162.16

AIKGGKAFKMKR, MH+ 1667.2832, m/z 417.5763  
 H OSG40 P180811 230811-s1.02985.02985.4.dta

scan 2985; 1.2e+001

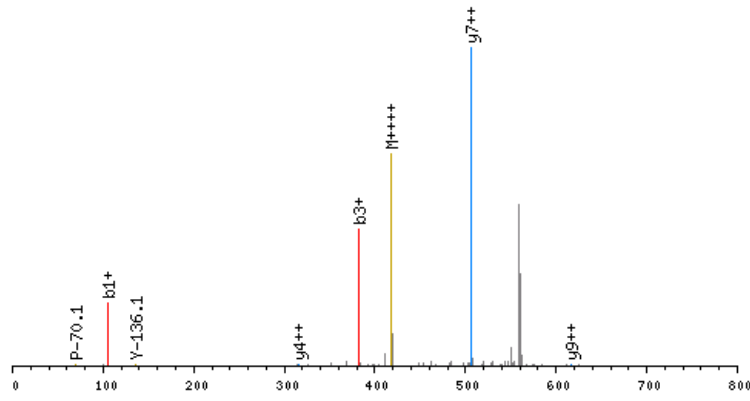

click image to zoom in; click top corners to zoom out [\[precursor±\]](#)

scan 2984; 417.6 nz; 7.6e+001

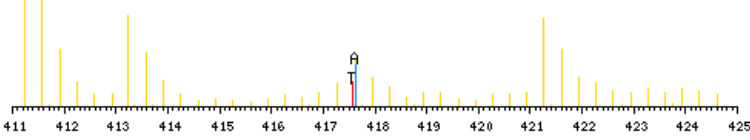

zoomed in precursor plot; T=theoretical m/z, A=acquired m/z

X-range:

-

MassTol: Y-zoom:

MassType:

AVG  MONO

Axis:

1  2

Label:

I  M  -

Ions:

a  +  2+  3+

b  +  2+  3+

c  +  2+  3+

x  +  2+  3+

y  +  2+  3+

z  +  2+  3+

hide H<sub>2</sub>O/NH<sub>3</sub>

zoom 112-122

GO

| b <sup>+</sup> | #  | AA | #  | y <sup>+</sup> | y <sup>2+</sup> |
|----------------|----|----|----|----------------|-----------------|
| 106.1080       | 1  | A  | 13 |                |                 |
| 219.1921       | 2  | I  | 12 | 1562.1830      | 781.5954        |
| 381.3502       | 3  | K  | 11 | 1449.0989      | 725.0534        |
| 438.3716       | 4  | G  | 10 | 1286.9408      | 643.9743        |
| 495.3931       | 5  | G  | 9  | 1229.9194      | 615.4636        |
| 657.5512       | 6  | K  | 8  | 1172.8979      | 586.9529        |
| 819.7093       | 7  | K  | 7  | 1010.7398      | 505.8738        |
| 890.7464       | 8  | A  | 6  | 848.5817       | 424.7948        |
| 1037.8148      | 9  | F  | 5  | 777.5446       | 389.2762        |
| 1199.9729      | 10 | K  | 4  | 630.4762       | 315.7420        |
| 1331.0134      | 11 | M  | 3  | 468.3181       | 234.6630        |
| 1493.1715      | 12 | K  | 2  | 337.2776       | 169.1427        |
|                | 13 | R  | 1  | 175.1195       | 88.0637         |

N-term:+35.07 K(3):+162.16  
 K(6):+162.16 K(7):+162.16  
 K(10):+162.16 K(12):+162.16



AIPENTNIGSLFPIPLATDR, MH+ 2167.1763, m/z 723.0636  
 L OSG36 P180811 230811-s1.06273.06273.3.dta

scan 6273; 1.4e+000

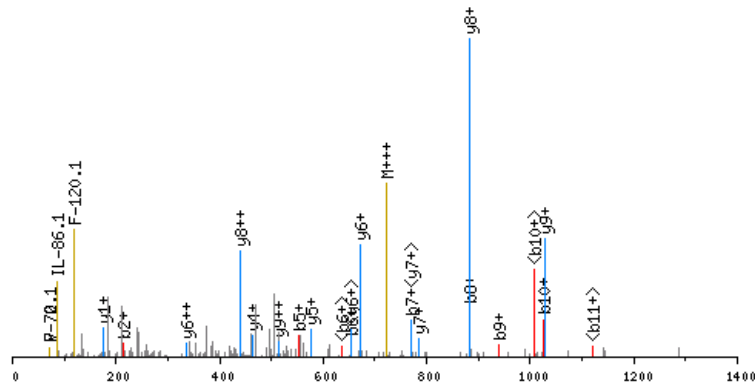

click image to zoom in; click top corners to zoom out [precursor±]

scan 6269; 723.1 m/z; 2.1e+001

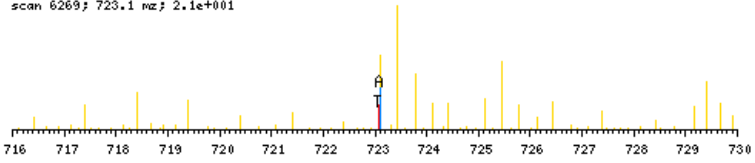

zoomed in precursor plot; T=theoretical m/z, A=acquired m/z

X-range:

-

MassTol: Y-zoom:

MassType:

AVG  MONO

Axis:

1  2

Label:

I  M  -

Ions:

a  +  2+  3+

b  +  2+  3+

c  +  2+  3+

x  +  2+  3+

y  +  2+  3+

z  +  2+  3+

hide H<sub>2</sub>O/NH<sub>3</sub>

zoom 112-122

GO

| b <sup>+</sup> | #  | AA # | y <sup>+</sup> | y <sup>2+</sup> |
|----------------|----|------|----------------|-----------------|
| 100.0762       | 1  | A 20 |                |                 |
| 213.1603       | 2  | I 19 | 2068.1079      | 1034.5579       |
| 310.2130       | 3  | P 18 | 1955.0238      | 978.0158        |
| 439.2556       | 4  | E 17 | 1857.9711      | 929.4894        |
| 553.2986       | 5  | N 16 | 1728.9285      | 864.9681        |
| 654.3462       | 6  | T 15 | 1614.8855      | 807.9467        |
| 768.3892       | 7  | N 14 | 1513.8379      | 757.4228        |
| 881.4732       | 8  | I 13 | 1399.7949      | 700.4014        |
| 938.4947       | 9  | G 12 | 1286.7109      | 643.8593        |
| 1025.5267      | 10 | S 11 | 1229.6894      | 615.3486        |
| 1138.6108      | 11 | L 10 | 1142.6574      | 571.8326        |
| 1285.6792      | 12 | F 9  | 1029.5733      | 515.2906        |
| 1382.7320      | 13 | P 8  | 882.5049       | 441.7564        |
| 1495.8160      | 14 | I 7  | 785.4521       | 393.2300        |
| 1592.8688      | 15 | P 6  | 672.3681       | 336.6879        |
| 1705.9529      | 16 | L 5  | 575.3153       | 288.1616        |
| 1776.9900      | 17 | A 4  | 462.2312       | 231.6195        |
| 1878.0377      | 18 | T 3  | 391.1941       | 196.1010        |
| 1993.0646      | 19 | D 2  | 290.1464       | 145.5771        |
|                | 20 | R 1  | 175.1195       | 88.0637         |

N-term:+29.04

AIPGLAGAGNSVLLVSNLNPER, MH+ 2196.2564, m/z 732.7570  
 H OSG36 P180811 230811-s1.06083.06083.3.dta

scan 6083; 1.2e+000

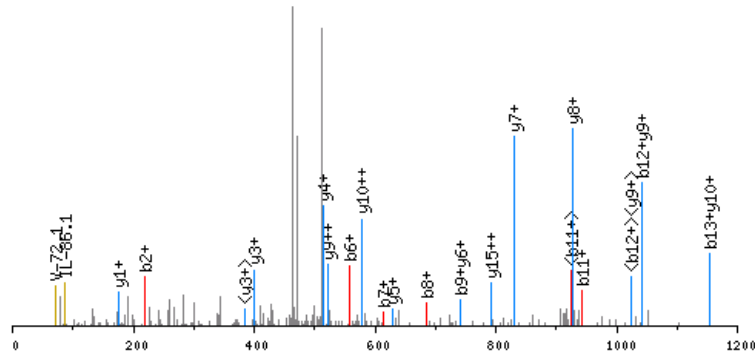

click image to zoom in; click top corners to zoom out [precursor±]

scan 6079; 732.8 nz; 5.4e+001

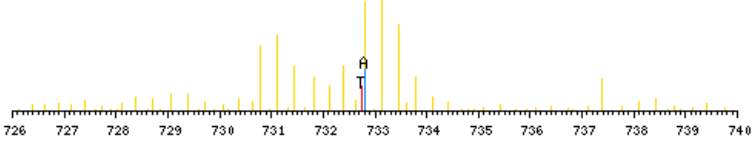

zoomed in precursor plot; T=theoretical m/z, A=acquired m/z

X-range:

-

MassTol: Y-zoom:

MassType:

AVG  MONO

Axis:

1  2

Label:

I  M  -

Ions:

a  +  2+  3+

b  +  2+  3+

c  +  2+  3+

x  +  2+  3+

y  +  2+  3+

z  +  2+  3+

hide H<sub>2</sub>O/NH<sub>3</sub>

zoom 112-122

GO

| b <sup>+</sup> | #  | AA # | y <sup>+</sup> | y <sup>2+</sup> |
|----------------|----|------|----------------|-----------------|
| 106.1080       | 1  | A 22 |                |                 |
| 219.1921       | 2  | I 21 | 2091.1562      | 1046.0820       |
| 316.2448       | 3  | P 20 | 1978.0722      | 989.5400        |
| 373.2663       | 4  | G 19 | 1881.0194      | 941.0136        |
| 486.3504       | 5  | L 18 | 1823.9979      | 912.5029        |
| 557.3875       | 6  | A 17 | 1710.9139      | 855.9608        |
| 614.4089       | 7  | G 16 | 1639.8768      | 820.4423        |
| 685.4461       | 8  | A 15 | 1582.8553      | 791.9316        |
| 742.4675       | 9  | G 14 | 1511.8182      | 756.4130        |
| 856.5105       | 10 | N 13 | 1454.7967      | 727.9023        |
| 943.5425       | 11 | S 12 | 1340.7538      | 670.8808        |
| 1042.6109      | 12 | V 11 | 1253.7218      | 627.3648        |
| 1155.6950      | 13 | L 10 | 1154.6533      | 577.8306        |
| 1268.7790      | 14 | L 9  | 1041.5693      | 521.2886        |
| 1367.8474      | 15 | V 8  | 928.4852       | 464.7465        |
| 1454.8795      | 16 | S 7  | 829.4168       | 415.2123        |
| 1568.9224      | 17 | N 6  | 742.3848       | 371.6963        |
| 1682.0065      | 18 | L 5  | 628.3418       | 314.6748        |
| 1796.0494      | 19 | N 4  | 515.2578       | 258.1328        |
| 1893.1021      | 20 | P 3  | 401.2149       | 201.1113        |
| 2022.1447      | 21 | E 2  | 304.1621       | 152.5850        |
|                | 22 | R 1  | 175.1195       | 88.0637         |

N-term:+35.07

AISEAAAQYNPEPPPPR, MH+ 1841.9610, m/z 614.6585  
 H OSG37 P180811 230811-s1.04187.04187.3.dta

X-range:

-

MassTol: Y-zoom:

MassType:

AVG  MONO

Axis:

1  2

Label:

I  M  -

Ions:

a  +  2+  3+

b  +  2+  3+

c  +  2+  3+

x  +  2+  3+

y  +  2+  3+

z  +  2+  3+

hide H<sub>2</sub>O/NH<sub>3</sub>

zoom 112-122

GO

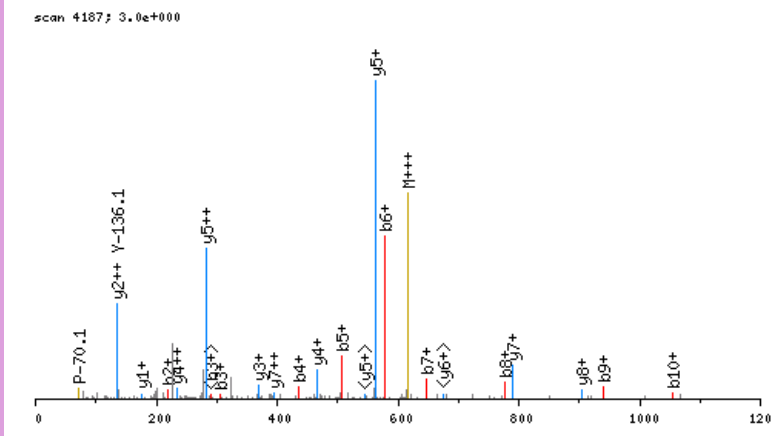

click image to zoom in; click top corners to zoom out [\[precursor±\]](#)

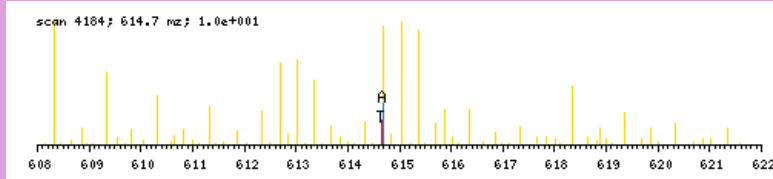

zoomed in precursor plot; T=theoretical m/z, A=acquired m/z

| b <sup>+</sup> | #  | AA # | y <sup>+</sup> | y <sup>2+</sup> |
|----------------|----|------|----------------|-----------------|
| 106.1080       | 1  | A 17 |                |                 |
| 219.1921       | 2  | I 16 | 1736.8608      | 868.9343        |
| 306.2241       | 3  | S 15 | 1623.7767      | 812.3923        |
| 435.2667       | 4  | E 14 | 1536.7447      | 768.8763        |
| 506.3038       | 5  | A 13 | 1407.7021      | 704.3550        |
| 577.3409       | 6  | A 12 | 1336.6650      | 668.8364        |
| 648.3780       | 7  | A 11 | 1265.6279      | 633.3178        |
| 776.4366       | 8  | Q 10 | 1194.5907      | 597.7993        |
| 939.4999       | 9  | Y 9  | 1066.5322      | 533.7700        |
| 1053.5429      | 10 | N 8  | 903.4688       | 452.2383        |
| 1150.5956      | 11 | P 7  | 789.4259       | 395.2169        |
| 1279.6382      | 12 | E 6  | 692.3731       | 346.6905        |
| 1376.6910      | 13 | P 5  | 563.3306       | 282.1692        |
| 1473.7438      | 14 | P 4  | 466.2778       | 233.6428        |
| 1570.7965      | 15 | P 3  | 369.2250       | 185.1164        |
| 1667.8493      | 16 | P 2  | 272.1723       | 136.5900        |
|                | 17 | R 1  | 175.1195       | 88.0637         |

N-term:+35.07

AIYFKEQFLDGDWTNR, MH+ 2130.0660, m/z 710.6935  
 L OSG39 P180811 230811-s1.07153.07153.3.dta

X-range:

-

MassTol: Y-zoom:

MassType:

AVG  MONO

Axis:

1  2

Label:

I  M  -

Ions:

a  +  2+  3+

b  +  2+  3+

c  +  2+  3+

x  +  2+  3+

y  +  2+  3+

z  +  2+  3+

hide H<sub>2</sub>O/NH<sub>3</sub>

zoom 112-122

GO

scan 7153; 5.1e+000

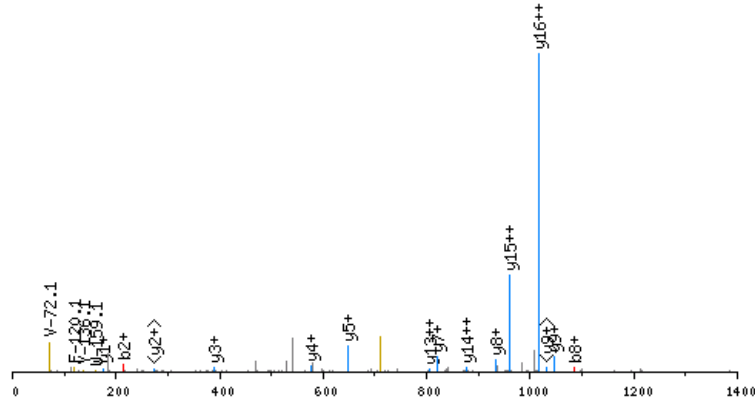

click image to zoom in; click top corners to zoom out [\[precursor±\]](#)

scan 7151; 710.7 m/z; 1.5e+001

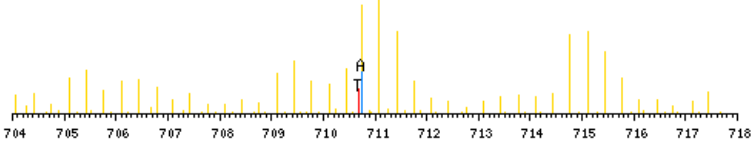

zoomed in precursor plot; T=theoretical m/z, A=acquired m/z

| b <sup>+</sup> | #  | AA | #  | y <sup>+</sup> | y <sup>2+</sup> |
|----------------|----|----|----|----------------|-----------------|
| 100.0762       | 1  | A  | 17 |                |                 |
| 213.1603       | 2  | I  | 16 | 2030.9976      | 1016.0027       |
| 376.2236       | 3  | Y  | 15 | 1917.9136      | 959.4607        |
| 523.2920       | 4  | F  | 14 | 1754.8502      | 877.9290        |
| 679.4183       | 5  | K  | 13 | 1607.7818      | 804.3948        |
| 808.4609       | 6  | E  | 12 | 1451.6555      | 726.3317        |
| 936.5195       | 7  | Q  | 11 | 1322.6129      | 661.8104        |
| 1083.5879      | 8  | F  | 10 | 1194.5544      | 597.7811        |
| 1196.6720      | 9  | L  | 9  | 1047.4859      | 524.2469        |
| 1311.6989      | 10 | D  | 8  | 934.4019       | 467.7049        |
| 1368.7204      | 11 | G  | 7  | 819.3749       | 410.1914        |
| 1483.7473      | 12 | D  | 6  | 762.3535       | 381.6807        |
| 1554.7844      | 13 | A  | 5  | 647.3265       | 324.1672        |
| 1740.8637      | 14 | W  | 4  | 576.2894       | 288.6486        |
| 1841.9114      | 15 | T  | 3  | 390.2101       | 195.6090        |
| 1955.9544      | 16 | N  | 2  | 289.1624       | 145.0851        |
|                | 17 | R  | 1  | 175.1195       | 88.0637         |

N-term:+29.04 K(5):+156.13

AKGGDVSVCWEYR, MH+ 1582.7688, m/z 528.2611  
 L OSG40 P180811 230811-s1.05025.05025.3.dta

scan 5025; 1.6e+000

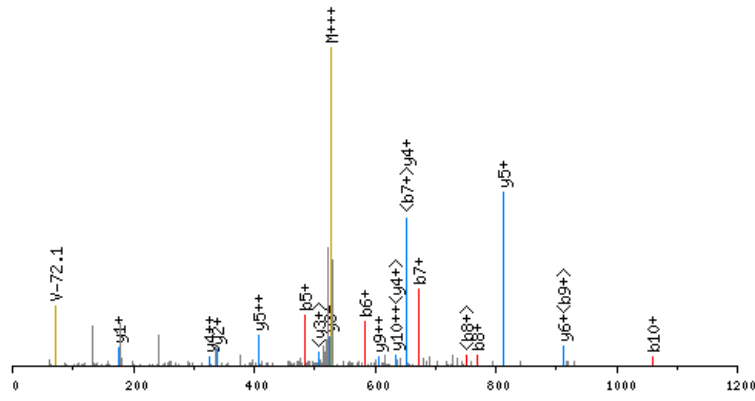

click image to zoom in; click top corners to zoom out [precursor±]

scan 5024; 528.3 nz; 1.6e+002

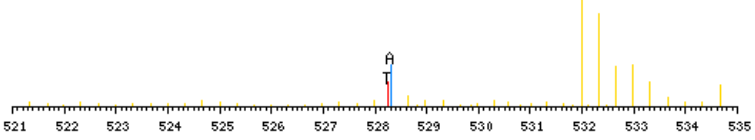

zoomed in precursor plot; T=theoretical m/z, A=acquired m/z

X-range:

-

MassTol: Y-zoom:

MassType:

AVG  MONO

Axis:

1  2

Label:

I  M  -

Ions:

a  +  2+  3+

b  +  2+  3+

c  +  2+  3+

x  +  2+  3+

y  +  2+  3+

z  +  2+  3+

hide H<sub>2</sub>O/NH<sub>3</sub>

zoom 112-122

GO

| b <sup>+</sup> | #  | AA # | y <sup>+</sup> | y <sup>2+</sup> |
|----------------|----|------|----------------|-----------------|
| 100.0762       | 1  | A 13 |                |                 |
| 256.2025       | 2  | K 12 | 1483.7004      | 742.3541        |
| 313.2240       | 3  | G 11 | 1327.5741      | 664.2909        |
| 370.2454       | 4  | G 10 | 1270.5526      | 635.7802        |
| 485.2724       | 5  | D 9  | 1213.5311      | 607.2695        |
| 584.3408       | 6  | V 8  | 1098.5042      | 549.7560        |
| 671.3728       | 7  | S 7  | 999.4358       | 500.2218        |
| 770.4412       | 8  | V 6  | 912.4037       | 456.7058        |
| 930.4718       | 9  | C 5  | 813.3353       | 407.1716        |
| 1059.5144      | 10 | E 4  | 653.3047       | 327.1563        |
| 1245.5937      | 11 | W 3  | 524.2621       | 262.6350        |
| 1408.6571      | 12 | Y 2  | 338.1828       | 169.5953        |
|                | 13 | R 1  | 175.1195       | 88.0637         |

N-term:+29.04 K(2):+156.13  
 C(9):+160.03

AKLPSSSLVDR, MH+ 1353.8742, m/z 451.9629  
 H OSG40 P180811 230811-s1.05113.05113.3.dta

X-range:

-

MassTol: Y-zoom:

MassType:

AVG  MONO

Axis:

1  2

Label:

I  M  -

Ions:

a  +  2+  3+

b  +  2+  3+

c  +  2+  3+

x  +  2+  3+

y  +  2+  3+

z  +  2+  3+

hide H<sub>2</sub>O/NH<sub>3</sub>

zoom 112-122

GO

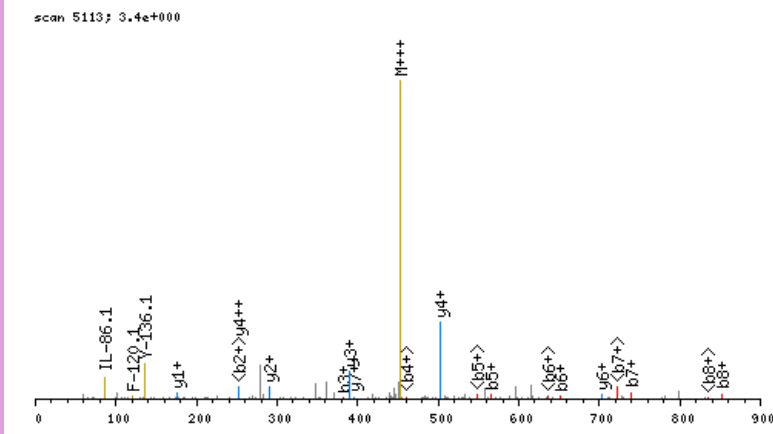

click image to zoom in; click top corners to zoom out [\[precursor±\]](#)

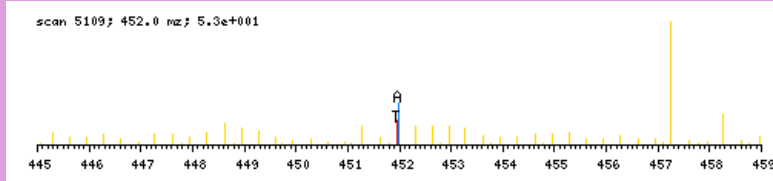

zoomed in precursor plot; T=theoretical m/z, A=acquired m/z

| b <sup>+</sup> | #  | AA # | y <sup>+</sup> | y <sup>2+</sup> |
|----------------|----|------|----------------|-----------------|
| 106.1080       | 1  | A 12 |                |                 |
| 268.2661       | 2  | K 11 | 1248.7740      | 624.8909        |
| 381.3502       | 3  | L 10 | 1086.6159      | 543.8119        |
| 478.4029       | 4  | P 9  | 973.5318       | 487.2698        |
| 565.4350       | 5  | S 8  | 876.4791       | 438.7434        |
| 652.4670       | 6  | S 7  | 789.4470       | 395.2274        |
| 739.4990       | 7  | S 6  | 702.4150       | 351.7114        |
| 852.5831       | 8  | L 5  | 615.3830       | 308.1954        |
| 965.6672       | 9  | L 4  | 502.2989       | 251.6534        |
| 1064.7356      | 10 | V 3  | 389.2149       | 195.1113        |
| 1179.7625      | 11 | D 2  | 290.1464       | 145.5771        |
|                | 12 | R 1  | 175.1195       | 88.0637         |

N-term:+35.07 K(2):+162.16

AKVNPDEVGGEALGR, MH+ 1567.8444, m/z 523.2863  
 L OSG40 P180811 230811-s1.03595.03595.3.dta

X-range:

-

MassTol: Y-zoom:

MassType:

AVG  MONO

Axis:

1  2

Label:

I  M  -

Ions:

a  +  2+  3+

b  +  2+  3+

c  +  2+  3+

x  +  2+  3+

y  +  2+  3+

z  +  2+  3+

hide H<sub>2</sub>O/NH<sub>3</sub>

zoom 112-122

GO

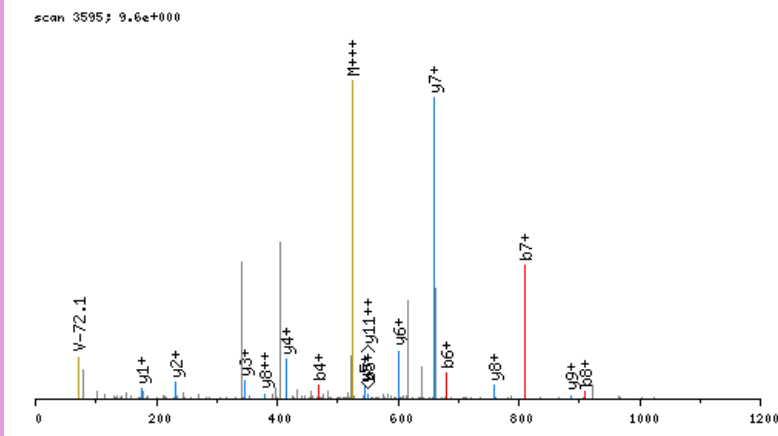

click image to zoom in; click top corners to zoom out [\[precursor±\]](#)

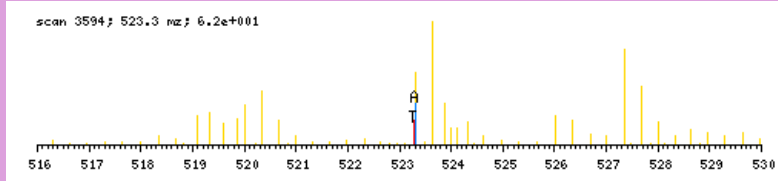

zoomed in precursor plot; T=theoretical m/z, A=acquired m/z

| b <sup>+</sup> | #  | AA # | y <sup>+</sup> | y <sup>2+</sup> |
|----------------|----|------|----------------|-----------------|
| 100.0762       | 1  | A 15 |                |                 |
| 256.2025       | 2  | K 14 | 1468.7760      | 734.8919        |
| 355.2709       | 3  | V 13 | 1312.6497      | 656.8288        |
| 469.3139       | 4  | N 12 | 1213.5813      | 607.2946        |
| 566.3666       | 5  | P 11 | 1099.5384      | 550.2731        |
| 681.3936       | 6  | D 10 | 1002.4856      | 501.7467        |
| 810.4362       | 7  | E 9  | 887.4587       | 444.2332        |
| 909.5046       | 8  | V 8  | 758.4161       | 379.7120        |
| 966.5260       | 9  | G 7  | 659.3477       | 330.1777        |
| 1023.5475      | 10 | G 6  | 602.3262       | 301.6670        |
| 1152.5901      | 11 | E 5  | 545.3047       | 273.1563        |
| 1223.6272      | 12 | A 4  | 416.2621       | 208.6350        |
| 1336.7113      | 13 | L 3  | 345.2250       | 173.1164        |
| 1393.7327      | 14 | G 2  | 232.1410       | 116.5744        |
|                | 15 | R 1  | 175.1195       | 88.0637         |

N-term:+29.04 K(2):+156.13

X-range:

-

MassTol: Y-zoom:

MassType:

AVG  MONO

Axis:

1  2

Label:

I  M  -

Ions:

a  +  2+  3+

b  +  2+  3+

c  +  2+  3+

x  +  2+  3+

y  +  2+  3+

z  +  2+  3+

hide H<sub>2</sub>O/NH<sub>3</sub>

zoom 112-122

GO

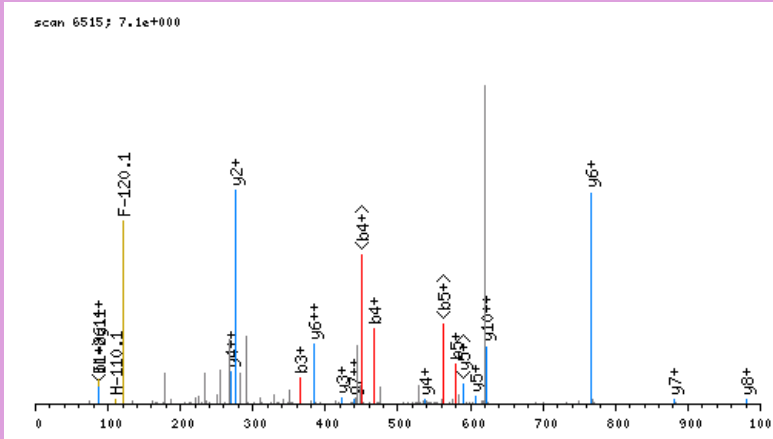

click image to zoom in; click top corners to zoom out [\[precursor±\]](#)

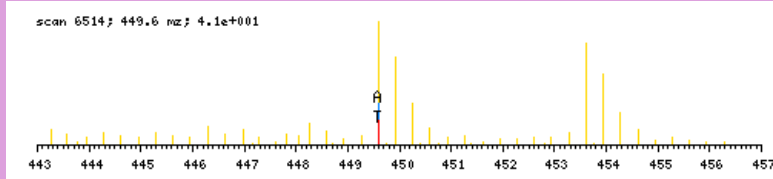

zoomed in precursor plot; T=theoretical m/z, A=acquired m/z

| b <sup>+</sup> | #  | AA # | y <sup>+</sup> | y <sup>2+</sup> |
|----------------|----|------|----------------|-----------------|
| 106.1080       | 1  | A 11 |                |                 |
| 219.1921       | 2  | L 10 | 1241.6716      | 621.3397        |
| 366.2605       | 3  | F 9  | 1128.5875      | 564.7977        |
| 467.3082       | 4  | T 8  | 981.5191       | 491.2635        |
| 580.3922       | 5  | L 7  | 880.4714       | 440.7396        |
| 740.4228       | 6  | C 6  | 767.3874       | 384.1976        |
| 811.4599       | 7  | A 5  | 607.3568       | 304.1823        |
| 924.5440       | 8  | L 4  | 536.3197       | 268.6637        |
| 1071.6124      | 9  | F 3  | 423.2356       | 212.1217        |
| 1172.6601      | 10 | T 2  | 276.1672       | 138.5875        |
|                | 11 | R 1  | 175.1195       | 88.0637         |

N-term:+35.07 C(6):+160.03



ALNEDTQDELGDPR, MH+ 1606.7772, m/z 536.2639  
 H OSG37 P180811 230811-s1.03736.03736.3.dta

X-range:

-

MassTol: Y-zoom:

MassType:

AVG  MONO

Axis:

1  2

Label:

I  M  -

Ions:

a  +  2+  3+

b  +  2+  3+

c  +  2+  3+

x  +  2+  3+

y  +  2+  3+

z  +  2+  3+

hide H<sub>2</sub>O/NH<sub>3</sub>

zoom 112-122

GO

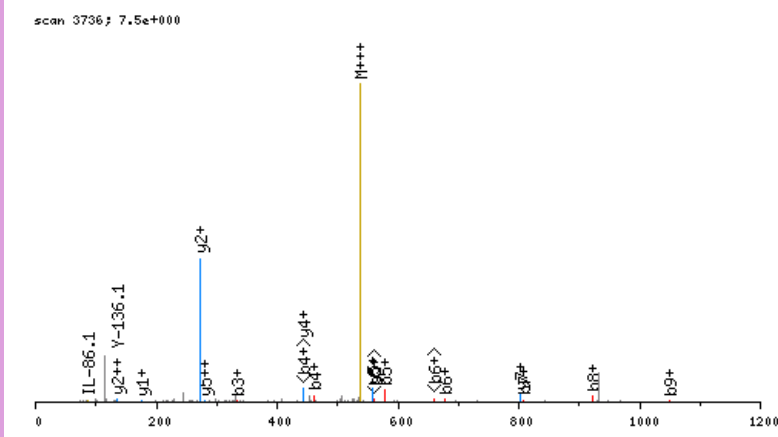

click image to zoom in; click top corners to zoom out [\[precursor±\]](#)

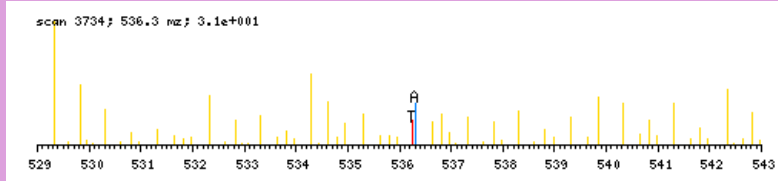

zoomed in precursor plot; T=theoretical m/z, A=acquired m/z

| b <sup>+</sup> | #  | AA # | y <sup>+</sup> | y <sup>2+</sup> |
|----------------|----|------|----------------|-----------------|
| 106.1080       | 1  | A 14 |                |                 |
| 219.1921       | 2  | L 13 | 1501.6771      | 751.3424        |
| 333.2350       | 3  | N 12 | 1388.5930      | 694.8004        |
| 462.2776       | 4  | E 11 | 1274.5501      | 637.7789        |
| 577.3045       | 5  | D 10 | 1145.5075      | 573.2576        |
| 678.3522       | 6  | T 9  | 1030.4805      | 515.7442        |
| 806.4108       | 7  | Q 8  | 929.4328       | 465.2203        |
| 921.4377       | 8  | D 7  | 801.3743       | 401.1910        |
| 1050.4803      | 9  | E 6  | 686.3473       | 343.6776        |
| 1163.5644      | 10 | L 5  | 557.3047       | 279.1563        |
| 1220.5859      | 11 | G 4  | 444.2207       | 222.6142        |
| 1335.6128      | 12 | D 3  | 387.1992       | 194.1035        |
| 1432.6656      | 13 | P 2  | 272.1723       | 136.5900        |
|                | 14 | R 1  | 175.1195       | 88.0637         |

N-term:+35.07

X-range:

-

MassTol: Y-zoom:

MassType:

AVG  MONO

Axis:

1  2

Label:

I  M  -

Ions:

a  +  2+  3+

b  +  2+  3+

c  +  2+  3+

x  +  2+  3+

y  +  2+  3+

z  +  2+  3+

hide H<sub>2</sub>O/NH<sub>3</sub>

zoom 112-122

GO

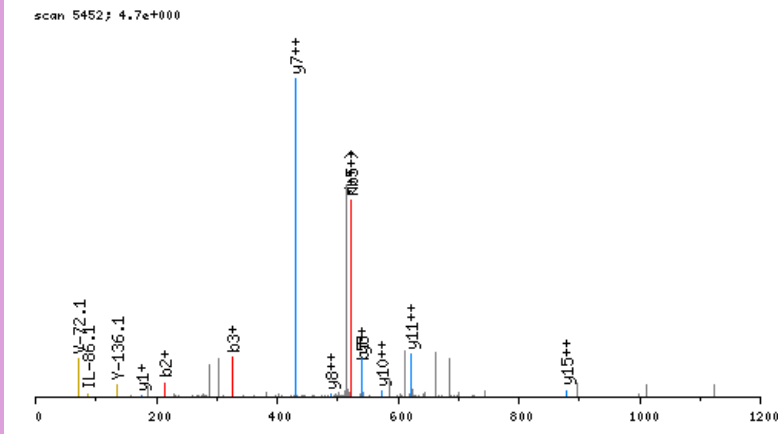

click image to zoom in; click top corners to zoom out [\[precursor±\]](#)

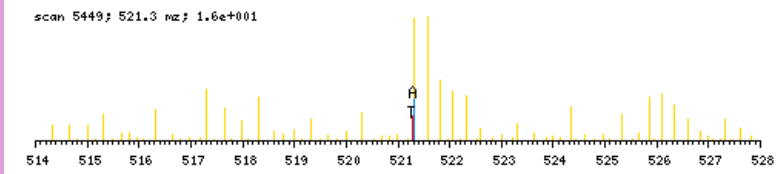

zoomed in precursor plot; T=theoretical m/z, A=acquired m/z

| b <sup>+</sup> | #  | AA | #  | y <sup>+</sup> | y <sup>2+</sup> |
|----------------|----|----|----|----------------|-----------------|
| 100.0762       | 1  | A  | 18 |                |                 |
| 213.1603       | 2  | L  | 17 | 1983.0704      | 992.0391        |
| 327.2032       | 3  | N  | 16 | 1869.9864      | 935.4971        |
| 424.2560       | 4  | P  | 15 | 1755.9435      | 878.4756        |
| 539.2829       | 5  | D  | 14 | 1658.8907      | 829.9493        |
| 686.3513       | 6  | F  | 13 | 1543.8637      | 772.4358        |
| 842.4776       | 7  | K  | 12 | 1396.7953      | 698.9016        |
| 939.5304       | 8  | P  | 11 | 1240.6690      | 620.8384        |
| 1036.5832      | 9  | P  | 10 | 1143.6163      | 572.3120        |
| 1107.6203      | 10 | A  | 9  | 1046.5635      | 523.7857        |
| 1222.6472      | 11 | D  | 8  | 975.5264       | 488.2671        |
| 1385.7105      | 12 | Y  | 7  | 860.4994       | 430.7536        |
| 1541.8368      | 13 | K  | 6  | 697.4361       | 349.2220        |
| 1638.8896      | 14 | P  | 5  | 541.3098       | 271.1588        |
| 1735.9424      | 15 | P  | 4  | 444.2571       | 222.6324        |
| 1806.9795      | 16 | A  | 3  | 347.2043       | 174.1061        |
| 1908.0272      | 17 | T  | 2  | 276.1672       | 138.5875        |
|                | 18 | R  | 1  | 175.1195       | 88.0637         |

N-term:+29.04 K(7):+156.13  
 K(13):+156.13

ALPADPPASVVVGPVVVPR, MH+ 1868.1009, m/z 623.3718  
 L OSG36 P180811 230811-s1.05262.05262.3.dta

X-range:

-

MassTol: Y-zoom:

MassType:

AVG  MONO

Axis:

1  2

Label:

I  M  -

Ions:

a  +  2+  3+

b  +  2+  3+

c  +  2+  3+

x  +  2+  3+

y  +  2+  3+

z  +  2+  3+

hide H<sub>2</sub>O/NH<sub>3</sub>

zoom 112-122

GO

scan 5262; 2.0e+000

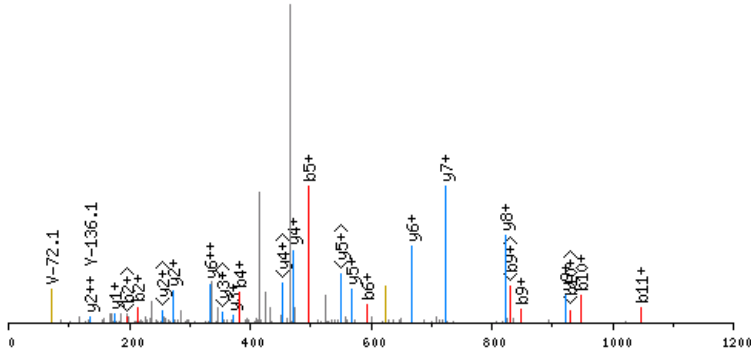

click image to zoom in; click top corners to zoom out [\[precursor±\]](#)

scan 5259; 623.4 m/z; 8.9e+000

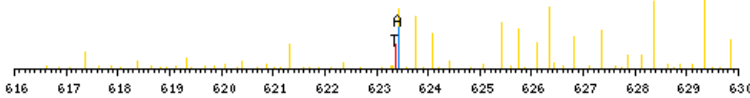

zoomed in precursor plot; T=theoretical m/z, A=acquired m/z

| b <sup>+</sup> | #  | AA # | y <sup>+</sup> | y <sup>2+</sup> |
|----------------|----|------|----------------|-----------------|
| 100.0762       | 1  | A 19 |                |                 |
| 213.1603       | 2  | L 18 | 1769.0325      | 885.0202        |
| 310.2130       | 3  | P 17 | 1655.9485      | 828.4781        |
| 381.2502       | 4  | A 16 | 1558.8957      | 779.9518        |
| 496.2771       | 5  | D 15 | 1487.8586      | 744.4332        |
| 593.3299       | 6  | P 14 | 1372.8316      | 686.9197        |
| 690.3826       | 7  | P 13 | 1275.7789      | 638.3934        |
| 761.4197       | 8  | A 12 | 1178.7261      | 589.8670        |
| 848.4518       | 9  | S 11 | 1107.6890      | 554.3484        |
| 947.5202       | 10 | V 10 | 1020.6570      | 510.8324        |
| 1046.5886      | 11 | V 9  | 921.5886       | 461.2982        |
| 1145.6570      | 12 | V 8  | 822.5201       | 411.7640        |
| 1202.6785      | 13 | G 7  | 723.4517       | 362.2298        |
| 1299.7312      | 14 | P 6  | 666.4303       | 333.7190        |
| 1398.7997      | 15 | V 5  | 569.3775       | 285.1927        |
| 1497.8681      | 16 | V 4  | 470.3091       | 235.6585        |
| 1596.9365      | 17 | V 3  | 371.2407       | 186.1243        |
| 1693.9892      | 18 | P 2  | 272.1723       | 136.5900        |
|                | 19 | R 1  | 175.1195       | 88.0637         |

N-term:+29.04

ALSEASQTDPSPGPPR, MH+ 1643.8453, m/z 548.6199  
 H OSG37 P180811 230811-s1.02581.02581.3.dta

X-range:

-

MassTol: Y-zoom:

MassType:

AVG  MONO

Axis:

1  2

Label:

I  M  -

Ions:

a  +  2+  3+

b  +  2+  3+

c  +  2+  3+

x  +  2+  3+

y  +  2+  3+

z  +  2+  3+

hide H<sub>2</sub>O/NH<sub>3</sub>

zoom 112-122

GO

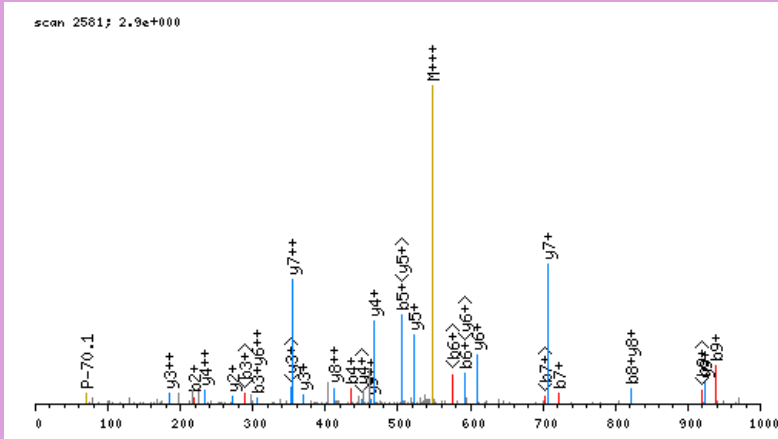

click image to zoom in; click top corners to zoom out [\[precursor±\]](#)

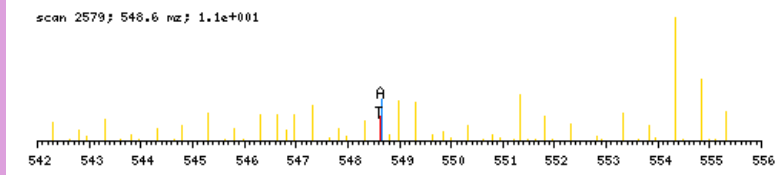

zoomed in precursor plot; T=theoretical m/z, A=acquired m/z

| b <sup>+</sup> | #  | AA # | y <sup>+</sup> | y <sup>2+</sup> |
|----------------|----|------|----------------|-----------------|
| 106.1080       | 1  | A 16 |                |                 |
| 219.1921       | 2  | L 15 | 1538.7451      | 769.8765        |
| 306.2241       | 3  | S 14 | 1425.6610      | 713.3344        |
| 435.2667       | 4  | E 13 | 1338.6290      | 669.8184        |
| 506.3038       | 5  | A 12 | 1209.5864      | 605.2971        |
| 593.3358       | 6  | S 11 | 1138.5493      | 569.7786        |
| 721.3944       | 7  | Q 10 | 1051.5172      | 526.2625        |
| 822.4421       | 8  | T 9  | 923.4587       | 462.2332        |
| 937.4690       | 9  | D 8  | 822.4110       | 411.7094        |
| 1034.5218      | 10 | P 7  | 707.3840       | 354.1959        |
| 1121.5538      | 11 | S 6  | 610.3313       | 305.6696        |
| 1178.5753      | 12 | G 5  | 523.2993       | 262.1535        |
| 1275.6281      | 13 | P 4  | 466.2778       | 233.6428        |
| 1372.6808      | 14 | P 3  | 369.2250       | 185.1164        |
| 1469.7336      | 15 | P 2  | 272.1723       | 136.5900        |
|                | 16 | R 1  | 175.1195       | 88.0637         |

N-term:+35.07

ALVNDPQPEHPLR, MH+ 1513.8127, m/z 505.2757  
 L OSG40 P180811 230811-s1.03460.03460.3.dta

X-range:

-

MassTol: Y-zoom:

MassType:

AVG  MONO

Axis:

1  2

Label:

I  M  -

Ions:

a  +  2+  3+

b  +  2+  3+

c  +  2+  3+

x  +  2+  3+

y  +  2+  3+

z  +  2+  3+

hide H<sub>2</sub>O/NH<sub>3</sub>

zoom 112-122

GO

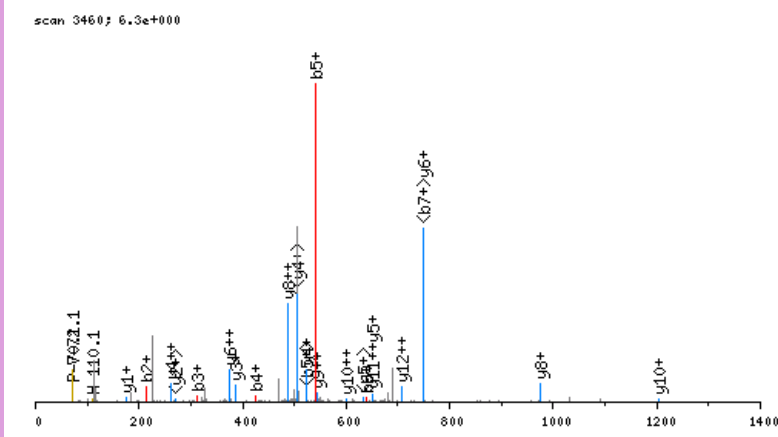

click image to zoom in; click top corners to zoom out [\[precursor±\]](#)

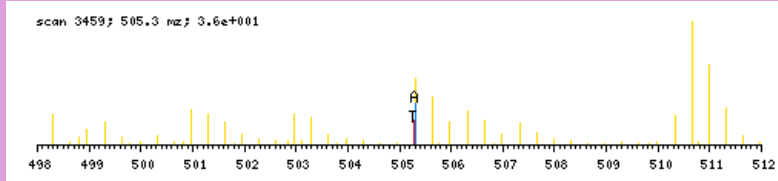

zoomed in precursor plot; T=theoretical m/z, A=acquired m/z

| b <sup>+</sup> | #  | AA # | y <sup>+</sup> | y <sup>2+</sup> |
|----------------|----|------|----------------|-----------------|
| 100.0762       | 1  | A 13 |                |                 |
| 213.1603       | 2  | L 12 | 1414.7443      | 707.8761        |
| 312.2287       | 3  | V 11 | 1301.6602      | 651.3340        |
| 426.2716       | 4  | N 10 | 1202.5918      | 601.7998        |
| 541.2986       | 5  | D 9  | 1088.5489      | 544.7784        |
| 638.3513       | 6  | P 8  | 973.5219       | 487.2649        |
| 766.4099       | 7  | Q 7  | 876.4692       | 438.7385        |
| 863.4627       | 8  | P 6  | 748.4106       | 374.7092        |
| 992.5053       | 9  | E 5  | 651.3578       | 326.1828        |
| 1129.5642      | 10 | H 4  | 522.3152       | 261.6615        |
| 1226.6169      | 11 | P 3  | 385.2563       | 193.1321        |
| 1339.7010      | 12 | L 2  | 288.2036       | 144.6057        |
|                | 13 | R 1  | 175.1195       | 88.0637         |

N-term:+29.04

ALYDASFETKESR, MH+ 1572.7910, m/z 524.9352  
 L OSG40 P180811 230811-s1.04557.04557.3.dta

X-range:

-

MassTol: Y-zoom:

MassType:

AVG  MONO

Axis:

1  2

Label:

I  M  -

Ions:

a  +  2+  3+

b  +  2+  3+

c  +  2+  3+

x  +  2+  3+

y  +  2+  3+

z  +  2+  3+

hide H<sub>2</sub>O/NH<sub>3</sub>

zoom 112-122

GO

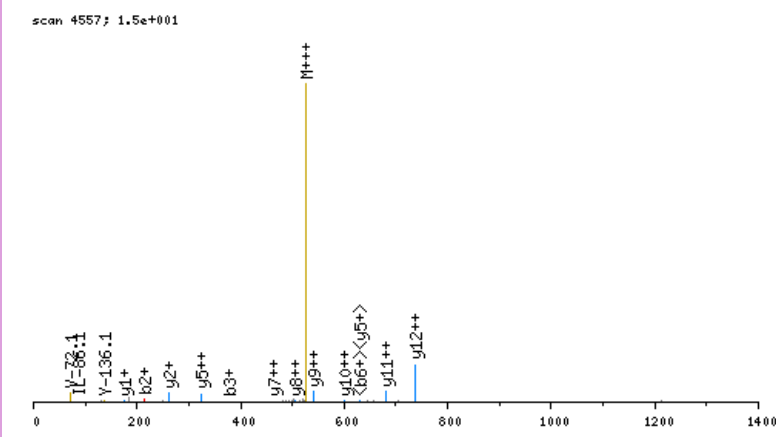

click image to zoom in; click top corners to zoom out [\[precursor±\]](#)

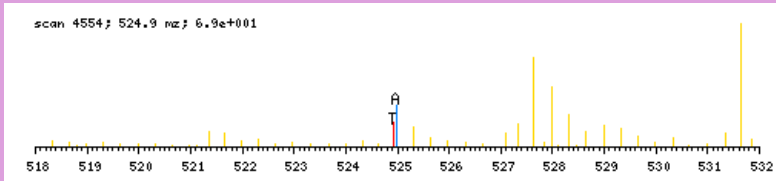

zoomed in precursor plot; T=theoretical m/z, A=acquired m/z

| b <sup>+</sup> | #  | AA # | y <sup>+</sup> | y <sup>2+</sup> |
|----------------|----|------|----------------|-----------------|
| 100.0762       | 1  | A 13 |                |                 |
| 213.1603       | 2  | L 12 | 1473.7226      | 737.3652        |
| 376.2236       | 3  | Y 11 | 1360.6385      | 680.8232        |
| 491.2505       | 4  | D 10 | 1197.5752      | 599.2915        |
| 562.2877       | 5  | A 9  | 1082.5483      | 541.7780        |
| 649.3197       | 6  | S 8  | 1011.5111      | 506.2595        |
| 796.3881       | 7  | F 7  | 924.4791       | 462.7435        |
| 925.4307       | 8  | E 6  | 777.4107       | 389.2093        |
| 1026.4784      | 9  | T 5  | 648.3681       | 324.6880        |
| 1182.6047      | 10 | K 4  | 547.3204       | 274.1641        |
| 1311.6473      | 11 | E 3  | 391.1941       | 196.1010        |
| 1398.6793      | 12 | S 2  | 262.1515       | 131.5797        |
|                | 13 | R 1  | 175.1195       | 88.0637         |

N-term:+29.04 K(10):+156.13

AMDDDIAALVVDNNGSMCKAGFAGDDAPR, MH+ 2995.3599, m/z 749.5954  
 L OSG36 P180811 230811-s1.05651.05651.4.dta

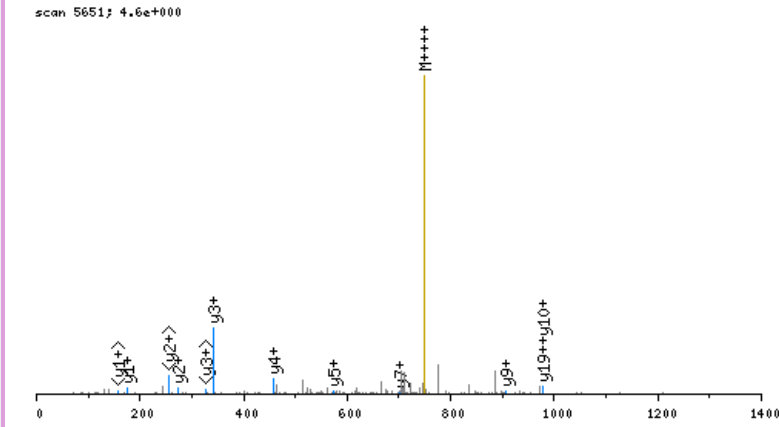

click image to zoom in; click top corners to zoom out [\[precursor±\]](#)

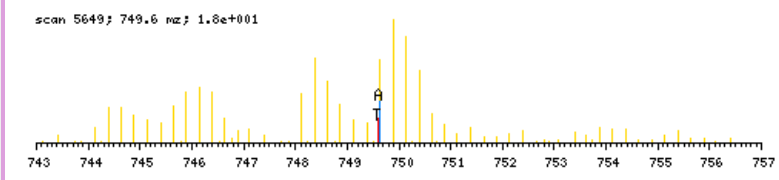

zoomed in precursor plot; T=theoretical m/z, A=acquired m/z

| b <sup>+</sup> | #  | AA # | y <sup>+</sup>  | y <sup>2+</sup> |
|----------------|----|------|-----------------|-----------------|
| 100.0762       | 1  | A 29 |                 |                 |
| 231.1167       | 2  | M 28 | 2896.2915       | 1448.6497       |
| 346.1436       | 3  | D 27 | 2765.2511       | 1383.1294       |
| 461.1706       | 4  | D 26 | 2650.2241       | 1325.6160       |
| 576.1975       | 5  | D 25 | 2535.1972       | 1268.1025       |
| 689.2816       | 6  | I 24 | 2420.1702       | 1210.5890       |
| 760.3187       | 7  | A 23 | 2307.0862       | 1154.0470       |
| 831.3558       | 8  | A 22 | 2236.0491       | 1118.5284       |
| 944.4399       | 9  | L 21 | 2165.0119       | 1083.0099       |
| 1043.5083      | 10 | V 20 | 2051.9279       | 1026.4678       |
| 1142.5767      | 11 | V 19 | 1952.8595       | <b>976.9336</b> |
| 1257.6037      | 12 | D 18 | 1853.7910       | 927.3994        |
| 1371.6466      | 13 | N 17 | 1738.7641       | 869.8860        |
| 1428.6680      | 14 | G 16 | 1624.7212       | 812.8645        |
| 1515.7001      | 15 | S 15 | 1567.6997       | 784.3538        |
| 1572.7215      | 16 | G 14 | 1480.6677       | 740.8378        |
| 1703.7620      | 17 | M 13 | 1423.6462       | 712.3270        |
| 1863.7926      | 18 | C 12 | 1292.6057       | 646.8068        |
| 2019.9189      | 19 | K 11 | 1132.5751       | 566.7915        |
| 2090.9560      | 20 | A 10 | <b>976.4488</b> | 488.7283        |
| 2147.9775      | 21 | G 9  | <b>905.4117</b> | 453.2098        |
| 2295.0459      | 22 | F 8  | 848.3903        | 424.6990        |
| 2366.0830      | 23 | A 7  | <b>701.3218</b> | 351.1648        |
| 2423.1045      | 24 | G 6  | 630.2847        | 315.6463        |
| 2538.1314      | 25 | D 5  | <b>573.2633</b> | 287.1355        |
| 2653.1584      | 26 | D 4  | <b>458.2363</b> | 229.6221        |
| 2724.1955      | 27 | A 3  | <b>343.2094</b> | 172.1086        |
| 2821.2483      | 28 | P 2  | <b>272.1723</b> | 136.5900        |
|                | 29 | R 1  | <b>175.1195</b> | 88.0637         |

N-term: +29.04 C(18): +160.03  
 K(19): +156.13

X-range:

-

MassTol: Y-zoom:

MassType:

AVG  MONO

Axis:

1  2

Label:

I  M  -

Ions:

a  +  2+  3+

b  +  2+  3+

c  +  2+  3+

x  +  2+  3+

y  +  2+  3+

z  +  2+  3+

hide H<sub>2</sub>O/NH<sub>3</sub>

zoom 112-122

GO

AMEGPWKTVAIAADR, MH+ 1683.9528, m/z 561.9891  
 H OSG39 P180811 230811-s1.05158.05158.3.dta

X-range:

-

MassTol: Y-zoom:

MassType:

AVG  MONO

Axis:

1  2

Label:

I  M  -

Ions:

a  +  2+  3+

b  +  2+  3+

c  +  2+  3+

x  +  2+  3+

y  +  2+  3+

z  +  2+  3+

hide H<sub>2</sub>O/NH<sub>3</sub>

zoom 112-122

GO

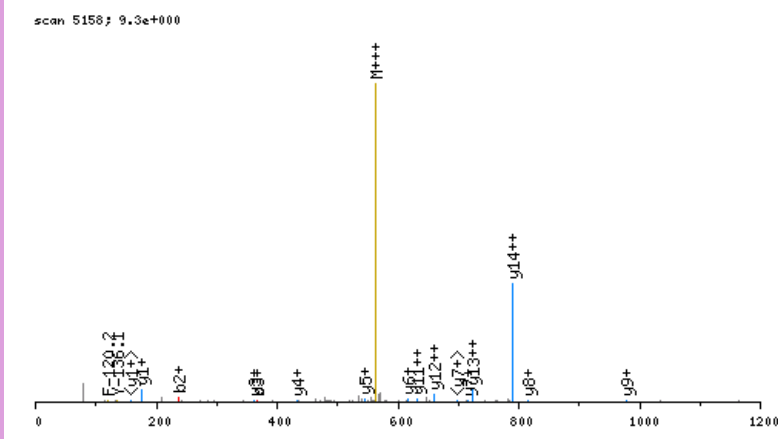

click image to zoom in; click top corners to zoom out [\[precursor±\]](#)

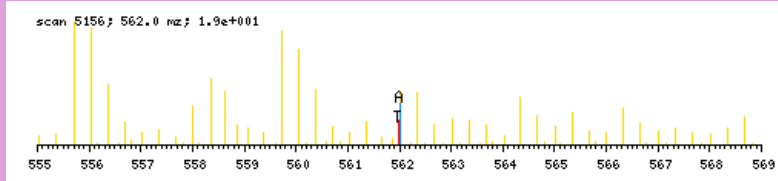

zoomed in precursor plot; T=theoretical m/z, A=acquired m/z

| b <sup>+</sup> | #  | AA # | y <sup>+</sup> | y <sup>2+</sup> |
|----------------|----|------|----------------|-----------------|
| 106.1080       | 1  | A 15 |                |                 |
| 237.1485       | 2  | M 14 | 1578.8527      | 789.9302        |
| 366.1911       | 3  | E 13 | 1447.8122      | 724.4100        |
| 423.2126       | 4  | G 12 | 1318.7696      | 659.8887        |
| 520.2653       | 5  | P 11 | 1261.7481      | 631.3780        |
| 706.3446       | 6  | W 10 | 1164.6954      | 582.8516        |
| 868.5027       | 7  | K 9  | 978.6160       | 489.8119        |
| 969.5504       | 8  | T 8  | 816.4579       | 408.7329        |
| 1068.6188      | 9  | V 7  | 715.4103       | 358.2090        |
| 1139.6559      | 10 | A 6  | 616.3418       | 308.6748        |
| 1252.7400      | 11 | I 5  | 545.3047       | 273.1563        |
| 1323.7771      | 12 | A 4  | 432.2207       | 216.6142        |
| 1394.8142      | 13 | A 3  | 361.1836       | 181.0957        |
| 1509.8412      | 14 | D 2  | 290.1464       | 145.5771        |
|                | 15 | R 1  | 175.1195       | 88.0637         |

N-term:+35.07 K(7):+162.16



AMSTTSVTSSQPGKLR, MH+ 1706.9111, m/z 569.6419  
 L OSG39 P180811 230811-s1.02614.02614.3.dta

X-range:

-

MassTol: Y-zoom:

MassType:

AVG  MONO

Axis:

1  2

Label:

I  M  -

Ions:

a  +  2+  3+

b  +  2+  3+

c  +  2+  3+

x  +  2+  3+

y  +  2+  3+

z  +  2+  3+

hide H<sub>2</sub>O/NH<sub>3</sub>

zoom 112-122

GO

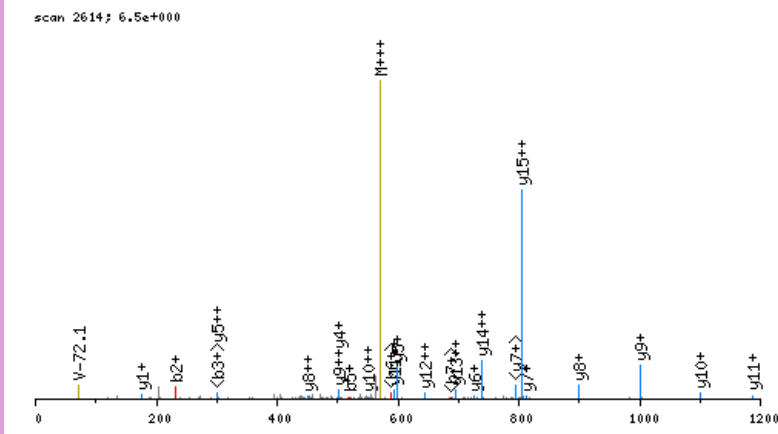

click image to zoom in; click top corners to zoom out [\[precursor±\]](#)

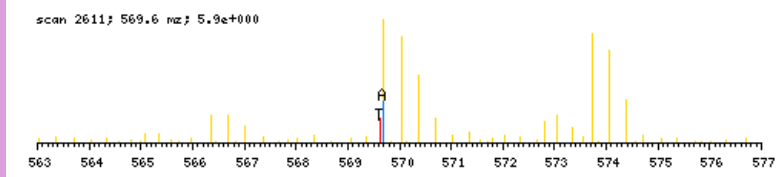

zoomed in precursor plot; T=theoretical m/z, A=acquired m/z

| b <sup>+</sup> | #  | AA # | y <sup>+</sup> | y <sup>2+</sup> |
|----------------|----|------|----------------|-----------------|
| 100.0762       | 1  | A 16 |                |                 |
| 231.1167       | 2  | M 15 | 1607.8427      | 804.4253        |
| 318.1487       | 3  | S 14 | 1476.8022      | 738.9050        |
| 419.1964       | 4  | T 13 | 1389.7702      | 695.3890        |
| 520.2441       | 5  | T 12 | 1288.7225      | 644.8652        |
| 607.2761       | 6  | S 11 | 1187.6748      | 594.3413        |
| 706.3445       | 7  | V 10 | 1100.6428      | 550.8253        |
| 807.3922       | 8  | T 9  | 1001.5744      | 501.2911        |
| 894.4242       | 9  | S 8  | 900.5267       | 450.7673        |
| 981.4563       | 10 | S 7  | 813.4947       | 407.2513        |
| 1109.5148      | 11 | Q 6  | 726.4627       | 363.7352        |
| 1206.5676      | 12 | P 5  | 598.4041       | 299.7060        |
| 1263.5891      | 13 | G 4  | 501.3513       | 251.1796        |
| 1419.7154      | 14 | K 3  | 444.3299       | 222.6688        |
| 1532.7994      | 15 | L 2  | 288.2036       | 144.6057        |
|                | 16 | R 1  | 175.1195       | 88.0637         |

N-term:+29.04 K(14):+156.13

ANDGSFLELFKR, MH+ 1452.7851, m/z 484.9332  
 L OSG40 P180811 230811-s1.08360.08360.3.dta

X-range:

-

MassTol: Y-zoom:

MassType:

AVG  MONO

Axis:

1  2

Label:

I  M  -

Ions:

a  +  2+  3+

b  +  2+  3+

c  +  2+  3+

x  +  2+  3+

y  +  2+  3+

z  +  2+  3+

hide H<sub>2</sub>O/NH<sub>3</sub>

zoom 112-122

GO

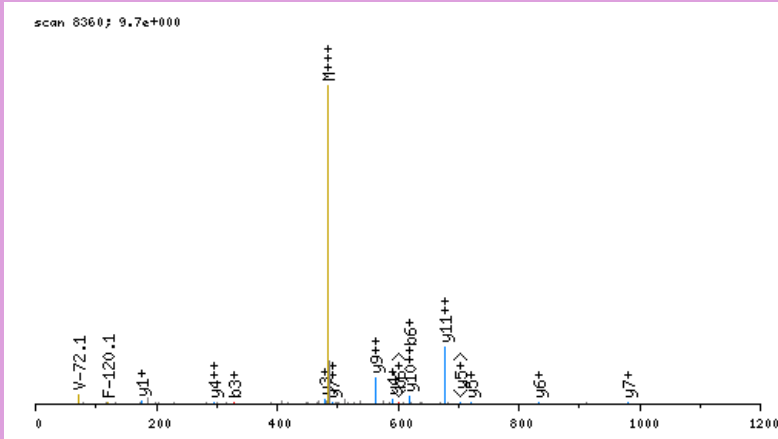

click image to zoom in; click top corners to zoom out [\[precursor±\]](#)

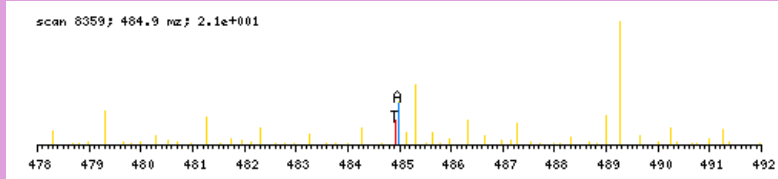

zoomed in precursor plot; T=theoretical m/z, A=acquired m/z

| b <sup>+</sup> | #  | AA # | y <sup>+</sup> | y <sup>2+</sup> |
|----------------|----|------|----------------|-----------------|
| 100.0762       | 1  | A 12 |                |                 |
| 214.1191       | 2  | N 11 | 1353.7167      | 677.3623        |
| 329.1461       | 3  | D 10 | 1239.6738      | 620.3408        |
| 386.1675       | 4  | G 9  | 1124.6468      | 562.8273        |
| 473.1996       | 5  | S 8  | 1067.6254      | 534.3166        |
| 620.2680       | 6  | F 7  | 980.5933       | 490.8006        |
| 733.3521       | 7  | L 6  | 833.5249       | 417.2664        |
| 862.3946       | 8  | E 5  | 720.4409       | 360.7243        |
| 975.4787       | 9  | L 4  | 591.3983       | 296.2031        |
| 1122.5471      | 10 | F 3  | 478.3142       | 239.6610        |
| 1278.6734      | 11 | K 2  | 331.2458       | 166.1268        |
|                | 12 | R 1  | 175.1195       | 88.0637         |

N-term:+29.04 K(11):+156.13

ANKTVEEAENIVVTTGVVR, MH+ 2097.2192, m/z 525.0602  
 H OSG39 P180811 230811-s1.05933.05933.4.dta

scan 5933; 5.0e+000

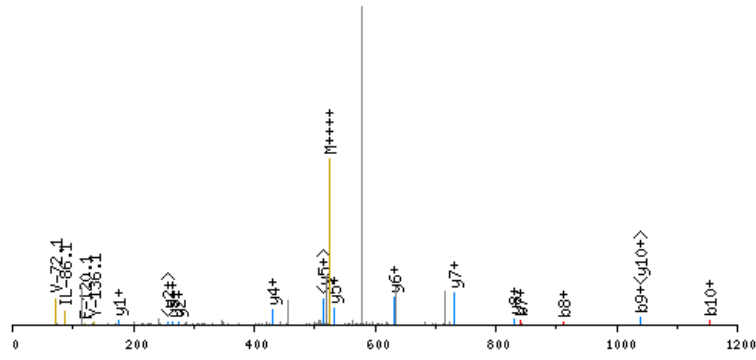

click image to zoom in; click top corners to zoom out [precursor±]

scan 5931; 525.1 m/z; 1.6e+001

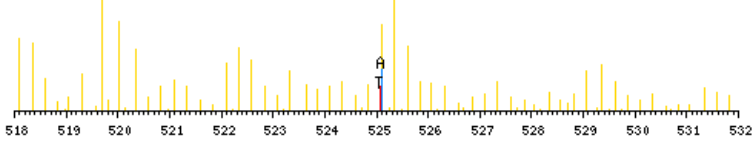

zoomed in precursor plot; T=theoretical m/z, A=acquired m/z

X-range:

-

MassTol: Y-zoom:

MassType:

AVG  MONO

Axis:

1  2

Label:

I  M  -

Ions:

a  +  2+  3+

b  +  2+  3+

c  +  2+  3+

x  +  2+  3+

y  +  2+  3+

z  +  2+  3+

hide H<sub>2</sub>O/NH<sub>3</sub>

zoom 112-122

GO

| b <sup>+</sup> | #  | AA | #  | y <sup>+</sup> | y <sup>2+</sup> |
|----------------|----|----|----|----------------|-----------------|
| 106.1080       | 1  | A  | 19 |                |                 |
| 220.1509       | 2  | N  | 18 | 1992.1190      | 996.5634        |
| 382.3090       | 3  | K  | 17 | 1878.0761      | 939.5419        |
| 483.3567       | 4  | T  | 16 | 1715.9180      | 858.4629        |
| 582.4251       | 5  | V  | 15 | 1614.8703      | 807.9391        |
| 711.4677       | 6  | E  | 14 | 1515.8019      | 758.4048        |
| 840.5103       | 7  | E  | 13 | 1386.7593      | 693.8835        |
| 911.5474       | 8  | A  | 12 | 1257.7167      | 629.3623        |
| 1040.5900      | 9  | E  | 11 | 1186.6796      | 593.8437        |
| 1154.6330      | 10 | N  | 10 | 1057.6370      | 529.3224        |
| 1267.7170      | 11 | I  | 9  | 943.5940       | 472.3009        |
| 1366.7854      | 12 | V  | 8  | 830.5100       | 415.7589        |
| 1465.8538      | 13 | V  | 7  | 731.4416       | 366.2247        |
| 1566.9015      | 14 | T  | 6  | 632.3731       | 316.6905        |
| 1667.9492      | 15 | T  | 5  | 531.3255       | 266.1666        |
| 1724.9707      | 16 | G  | 4  | 430.2778       | 215.6428        |
| 1824.0391      | 17 | V  | 3  | 373.2563       | 187.1321        |
| 1923.1075      | 18 | V  | 2  | 274.1879       | 137.5979        |
|                | 19 | R  | 1  | 175.1195       | 88.0637         |

N-term:+35.07 K(3):+162.16

ANNVMSGTTMYPGIADR, MH+ 1888.9109, m/z 630.3085  
 H OSG37 P180811 230811-s1.05451.05451.3.dta

X-range:

-

MassTol: Y-zoom:

MassType:

AVG  MONO

Axis:

1  2

Label:

I  M  -

Ions:

a  +  2+  3+

b  +  2+  3+

c  +  2+  3+

x  +  2+  3+

y  +  2+  3+

z  +  2+  3+

hide H<sub>2</sub>O/NH<sub>3</sub>

zoom 112-122

GO

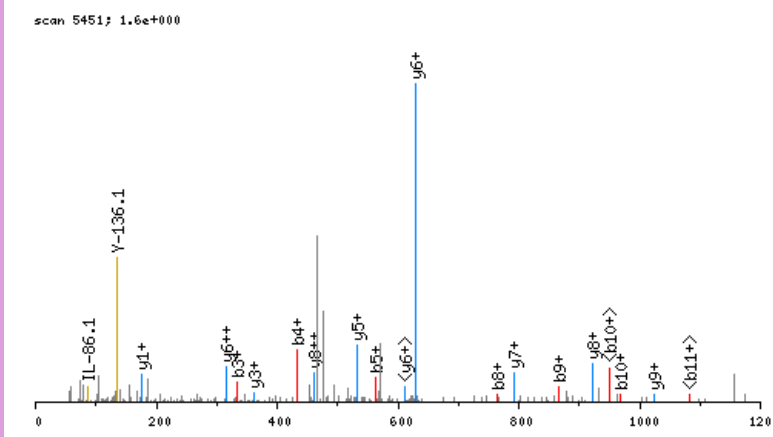

click image to zoom in; click top corners to zoom out [\[precursor±\]](#)

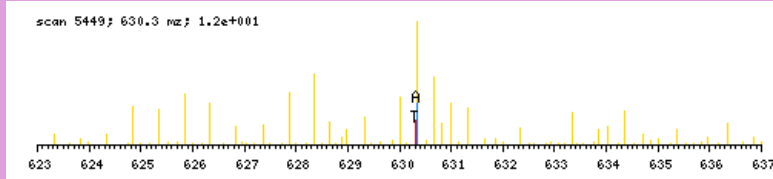

zoomed in precursor plot; T=theoretical m/z, A=acquired m/z

| b <sup>+</sup> | #  | AA # | y <sup>+</sup> | y <sup>2+</sup> |
|----------------|----|------|----------------|-----------------|
| 106.1080       | 1  | A 18 |                |                 |
| 220.1509       | 2  | N 17 | 1783.8107      | 892.4093        |
| 334.1939       | 3  | N 16 | 1669.7678      | 835.3878        |
| 433.2623       | 4  | V 15 | 1555.7249      | 778.3663        |
| 564.3028       | 5  | M 14 | 1456.6565      | 728.8321        |
| 651.3348       | 6  | S 13 | 1325.6160      | 663.3119        |
| 708.3563       | 7  | G 12 | 1238.5839      | 619.7959        |
| 765.3777       | 8  | G 11 | 1181.5625      | 591.2852        |
| 866.4254       | 9  | T 10 | 1124.5410      | 562.7744        |
| 967.4731       | 10 | T 9  | 1023.4933      | 512.2506        |
| 1098.5136      | 11 | M 8  | 922.4457       | 461.7267        |
| 1261.5769      | 12 | Y 7  | 791.4052       | 396.2065        |
| 1358.6297      | 13 | P 6  | 628.3418       | 314.6748        |
| 1415.6511      | 14 | G 5  | 531.2891       | 266.1485        |
| 1528.7352      | 15 | I 4  | 474.2676       | 237.6377        |
| 1599.7723      | 16 | A 3  | 361.1836       | 181.0957        |
| 1714.7992      | 17 | D 2  | 290.1464       | 145.5771        |
|                | 18 | R 1  | 175.1195       | 88.0637         |

N-term:+35.07

APEEHPTLLTEAPLNPKANR, MH+ 2254.2196, m/z 564.3103  
 L OSG40 P180811 230811-s1.05336.05336.4.dta

X-range:

-

MassTol: Y-zoom:

MassType:

AVG  MONO

Axis:

1  2

Label:

I  M  -

Ions:

a  +  2+  3+

b  +  2+  3+

c  +  2+  3+

x  +  2+  3+

y  +  2+  3+

z  +  2+  3+

hide H<sub>2</sub>O/NH<sub>3</sub>

zoom 112-122

GO

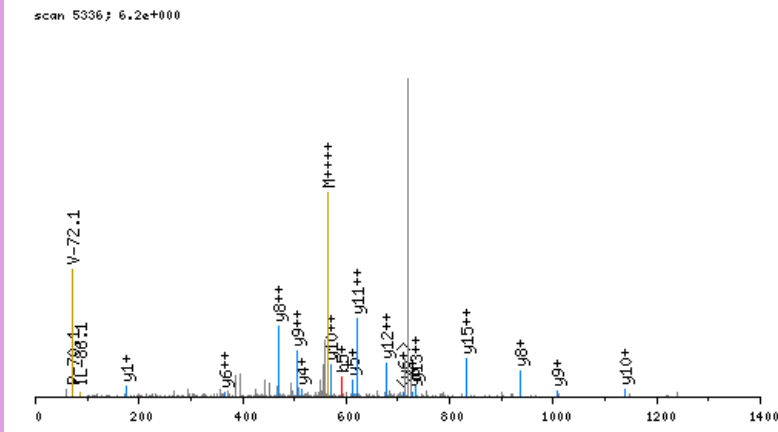

click image to zoom in; click top corners to zoom out [\[precursor±\]](#)

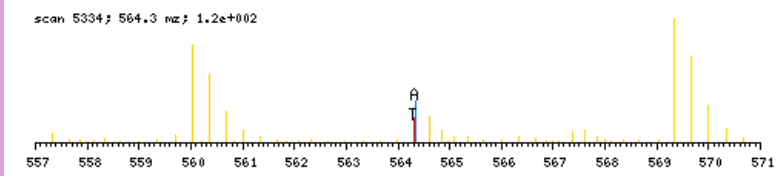

zoomed in precursor plot; T=theoretical m/z, A=acquired m/z

| b <sup>+</sup> | #  | AA # | y <sup>+</sup> | y <sup>2+</sup> |
|----------------|----|------|----------------|-----------------|
| 100.0762       | 1  | A 20 |                |                 |
| 197.1290       | 2  | P 19 | 2155.1512      | 1078.0795       |
| 326.1716       | 3  | E 18 | 2058.0984      | 1029.5531       |
| 455.2142       | 4  | E 17 | 1929.0558      | 965.0318        |
| 592.2731       | 5  | H 16 | 1800.0132      | 900.5105        |
| 689.3258       | 6  | P 15 | 1662.9543      | 831.9811        |
| 790.3735       | 7  | T 14 | 1565.9016      | 783.4547        |
| 903.4576       | 8  | L 13 | 1464.8539      | 732.9308        |
| 1016.5416      | 9  | L 12 | 1351.7698      | 676.3888        |
| 1117.5893      | 10 | T 11 | 1238.6857      | 619.8468        |
| 1246.6319      | 11 | E 10 | 1137.6381      | 569.3229        |
| 1317.6690      | 12 | A 9  | 1008.5955      | 504.8017        |
| 1414.7218      | 13 | P 8  | 937.5584       | 469.2831        |
| 1527.8059      | 14 | L 7  | 840.5056       | 420.7567        |
| 1641.8488      | 15 | N 6  | 727.4215       | 364.2147        |
| 1738.9016      | 16 | P 5  | 613.3786       | 307.1932        |
| 1895.0279      | 17 | K 4  | 516.3258       | 258.6668        |
| 1966.0650      | 18 | A 3  | 360.1995       | 180.6037        |
| 2080.1079      | 19 | N 2  | 289.1624       | 145.0851        |
|                | 20 | R 1  | 175.1195       | 88.0637         |

N-term:+29.04 K(17):+156.13

APLDTINVHLR, MH+ 1276.7377, m/z 426.2508  
 L OSG40 P180811 230811-s1.05895.05895.3.dta

X-range:

-

MassTol: Y-zoom:

MassType:

AVG  MONO

Axis:

1  2

Label:

I  M  -

Ions:

a  +  2+  3+

b  +  2+  3+

c  +  2+  3+

x  +  2+  3+

y  +  2+  3+

z  +  2+  3+

hide H<sub>2</sub>O/NH<sub>3</sub>

zoom 112-122

GO

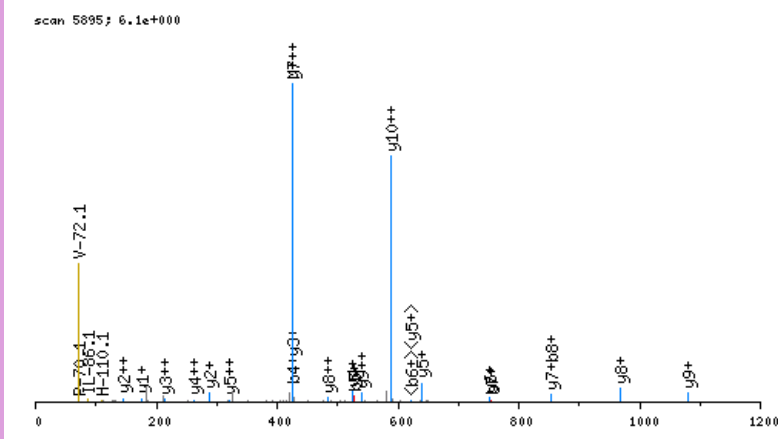

click image to zoom in; click top corners to zoom out [\[precursor±\]](#)

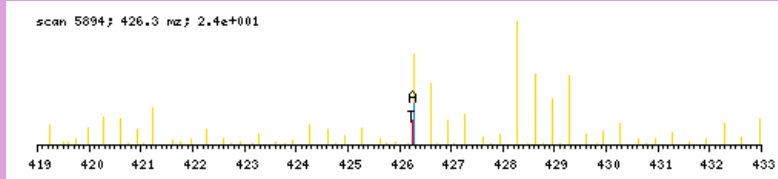

zoomed in precursor plot; T=theoretical m/z, A=acquired m/z

| b <sup>+</sup> | #  | AA # | y <sup>+</sup> | y <sup>2+</sup> |
|----------------|----|------|----------------|-----------------|
| 100.0762       | 1  | A 11 |                |                 |
| 197.1290       | 2  | P 10 | 1177.6693      | 589.3386        |
| 310.2130       | 3  | L 9  | 1080.6166      | 540.8122        |
| 425.2400       | 4  | D 8  | 967.5325       | 484.2702        |
| 526.2877       | 5  | T 7  | 852.5056       | 426.7567        |
| 639.3717       | 6  | I 6  | 751.4579       | 376.2329        |
| 753.4147       | 7  | N 5  | 638.3738       | 319.6908        |
| 852.4831       | 8  | V 4  | 524.3309       | 262.6694        |
| 989.5420       | 9  | H 3  | 425.2625       | 213.1352        |
| 1102.6260      | 10 | L 2  | 288.2036       | 144.6057        |
|                | 11 | R 1  | 175.1195       | 88.0637         |

N-term:+29.04

APNVLASEPEIIPKGIK, MH+ 1747.0118, m/z 583.0088  
 L OSG39 P180811 230811-s1.04928.04928.3.dta

X-range:

-

MassTol: Y-zoom:

MassType:

AVG  MONO

Axis:

1  2

Label:

I  M  -

Ions:

a  +  2+  3+

b  +  2+  3+

c  +  2+  3+

x  +  2+  3+

y  +  2+  3+

z  +  2+  3+

hide H<sub>2</sub>O/NH<sub>3</sub>

zoom 112-122

GO

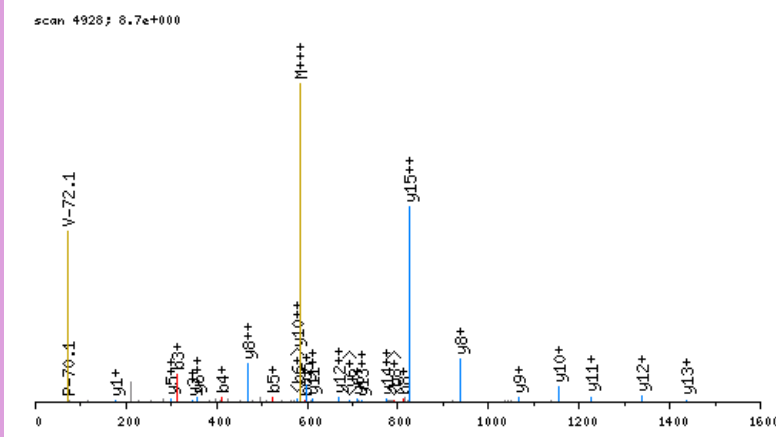

click image to zoom in; click top corners to zoom out [\[precursor±\]](#)

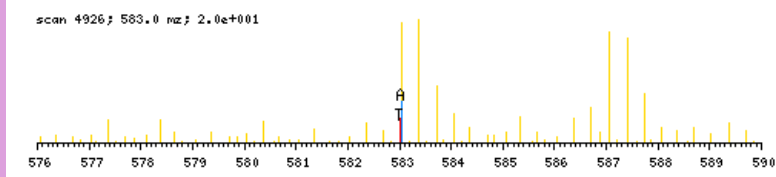

zoomed in precursor plot; T=theoretical m/z, A=acquired m/z

| b <sup>+</sup> | #  | AA # | y <sup>+</sup> | y <sup>2+</sup> |
|----------------|----|------|----------------|-----------------|
| 100.0762       | 1  | A 16 |                |                 |
| 197.1290       | 2  | P 15 | 1647.9434      | 824.4756        |
| 311.1719       | 3  | N 14 | 1550.8907      | 775.9492        |
| 410.2403       | 4  | V 13 | 1436.8477      | 718.9278        |
| 523.3244       | 5  | L 12 | 1337.7793      | 669.3936        |
| 594.3615       | 6  | A 11 | 1224.6952      | 612.8515        |
| 681.3935       | 7  | S 10 | 1153.6581      | 577.3330        |
| 810.4361       | 8  | E 9  | 1066.6261      | 533.8170        |
| 907.4889       | 9  | P 8  | 937.5835       | 469.2957        |
| 1036.5315      | 10 | E 7  | 840.5307       | 420.7693        |
| 1149.6155      | 11 | I 6  | 711.4882       | 356.2480        |
| 1246.6683      | 12 | P 5  | 598.4041       | 299.7060        |
| 1402.7946      | 13 | K 4  | 501.3513       | 251.1796        |
| 1459.8161      | 14 | G 3  | 345.2250       | 173.1164        |
| 1572.9001      | 15 | I 2  | 288.2036       | 144.6057        |
|                | 16 | R 1  | 175.1195       | 88.0637         |

N-term:+29.04 K(13):+156.13

X-range:

-

MassTol: Y-zoom:

MassType:

AVG  MONO

Axis:

1  2

Label:

I  M  -

Ions:

a  +  2+  3+

b  +  2+  3+

c  +  2+  3+

x  +  2+  3+

y  +  2+  3+

z  +  2+  3+

hide H<sub>2</sub>O/NH<sub>3</sub>

zoom 112-122

GO

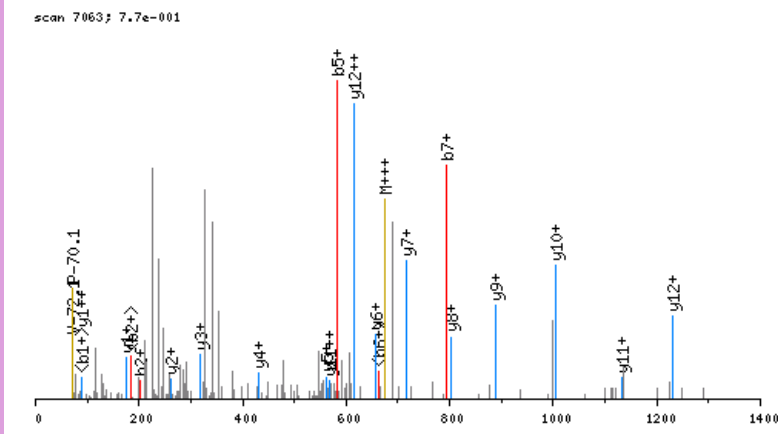

click image to zoom in; click top corners to zoom out [\[precursor±\]](#)

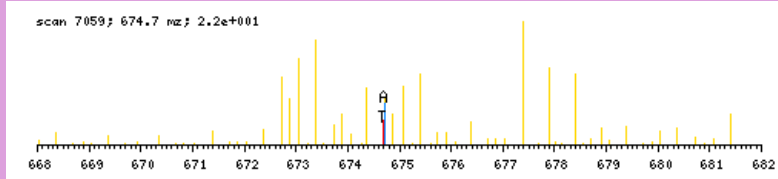

zoomed in precursor plot; T=theoretical m/z, A=acquired m/z

| b <sup>+</sup> | #  | AA # | y <sup>+</sup> | y <sup>2+</sup> |
|----------------|----|------|----------------|-----------------|
| 106.1080       | 1  | A 19 |                |                 |
| 203.1608       | 2  | P 18 | 1916.9507      | 958.9792        |
| 300.2135       | 3  | P 17 | 1819.8979      | 910.4529        |
| 397.2663       | 4  | P 16 | 1722.8451      | 861.9265        |
| 583.3456       | 5  | W 15 | 1625.7924      | 813.4001        |
| 680.3984       | 6  | P 14 | 1439.7130      | 720.3604        |
| 793.4824       | 7  | I 13 | 1342.6603      | 671.8341        |
| 890.5352       | 8  | P 12 | 1229.5762      | 615.2920        |
| 1018.5938      | 9  | Q 11 | 1132.5235      | 566.7656        |
| 1133.6207      | 10 | D 10 | 1004.4649      | 502.7364        |
| 1220.6528      | 11 | S 9  | 889.4379       | 445.2229        |
| 1307.6848      | 12 | S 8  | 802.4059       | 401.7069        |
| 1364.7063      | 13 | G 7  | 715.3739       | 358.1909        |
| 1461.7590      | 14 | P 6  | 658.3524       | 329.6801        |
| 1590.8016      | 15 | E 5  | 561.2997       | 281.1537        |
| 1703.8857      | 16 | L 4  | 432.2571       | 216.6324        |
| 1760.9071      | 17 | G 3  | 319.1730       | 160.0904        |
| 1847.9392      | 18 | S 2  | 262.1515       | 131.5797        |
|                | 19 | R 1  | 175.1195       | 88.0637         |

N-term:+35.07



X-range:

-

MassTol: Y-zoom:

MassType:

AVG  MONO

Axis:

1  2

Label:

I  M  -

Ions:

a  +  2+  3+

b  +  2+  3+

c  +  2+  3+

x  +  2+  3+

y  +  2+  3+

z  +  2+  3+

hide H<sub>2</sub>O/NH<sub>3</sub>

zoom 112-122

GO

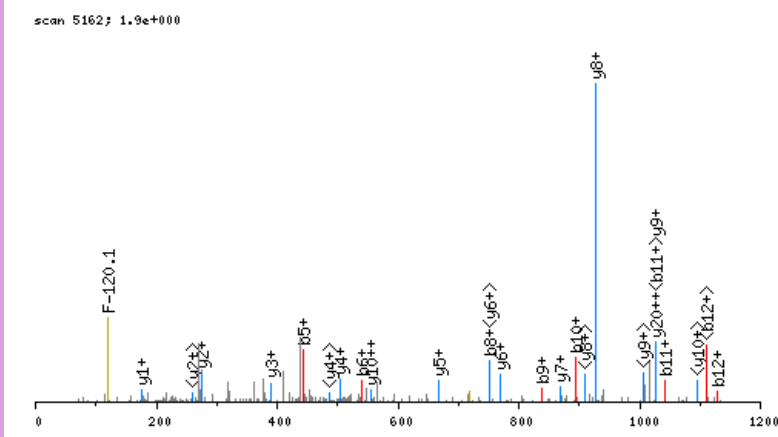

click image to zoom in; click top corners to zoom out [\[precursor±\]](#)

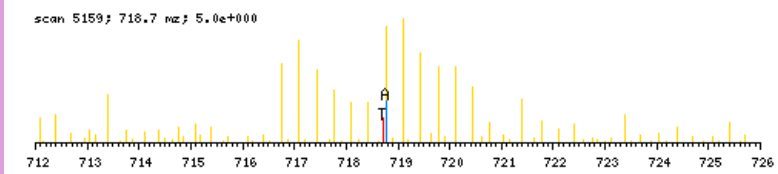

zoomed in precursor plot; T=theoretical m/z, A=acquired m/z

| b <sup>+</sup> | #  | AA # | y <sup>+</sup> | y <sup>2+</sup> |
|----------------|----|------|----------------|-----------------|
| 106.1080       | 1  | A 21 |                |                 |
| 203.1608       | 2  | P 20 | 2049.0293      | 1025.0186       |
| 300.2135       | 3  | P 19 | 1951.9765      | 976.4922        |
| 387.2456       | 4  | S 18 | 1854.9238      | 927.9658        |
| 444.2670       | 5  | G 17 | 1767.8917      | 884.4498        |
| 541.3198       | 6  | P 16 | 1710.8703      | 855.9391        |
| 638.3726       | 7  | P 15 | 1613.8175      | 807.4127        |
| 751.4566       | 8  | I 14 | 1516.7647      | 758.8863        |
| 838.4887       | 9  | S 13 | 1403.6807      | 702.3443        |
| 895.5101       | 10 | G 12 | 1316.6487      | 658.8282        |
| 1042.5785      | 11 | F 11 | 1259.6272      | 630.3175        |
| 1129.6106      | 12 | S 10 | 1112.5588      | 556.7833        |
| 1228.6790      | 13 | V 9  | 1025.5267      | 513.2673        |
| 1285.7004      | 14 | G 8  | 926.4583       | 463.7331        |
| 1386.7481      | 15 | T 7  | 869.4369       | 435.2223        |
| 1487.7958      | 16 | T 6  | 768.3892       | 384.6985        |
| 1650.8591      | 17 | Y 5  | 667.3415       | 334.1747        |
| 1765.8861      | 18 | D 4  | 504.2782       | 252.6430        |
| 1878.9701      | 19 | I 3  | 389.2512       | 195.1295        |
| 1980.0178      | 20 | T 2  | 276.1672       | 138.5875        |
|                | 21 | R 1  | 175.1195       | 88.0637         |

N-term:+35.07

APQGSLGEYLFER, MH+ 1500.7910, m/z 500.9352  
 H OSG37 P180811 230811-s1.07003.07003.3.dta

X-range:

-

MassTol: Y-zoom:

MassType:

AVG  MONO

Axis:

1  2

Label:

I  M  -

Ions:

a  +  2+  3+

b  +  2+  3+

c  +  2+  3+

x  +  2+  3+

y  +  2+  3+

z  +  2+  3+

hide H<sub>2</sub>O/NH<sub>3</sub>

zoom 112-122

GO

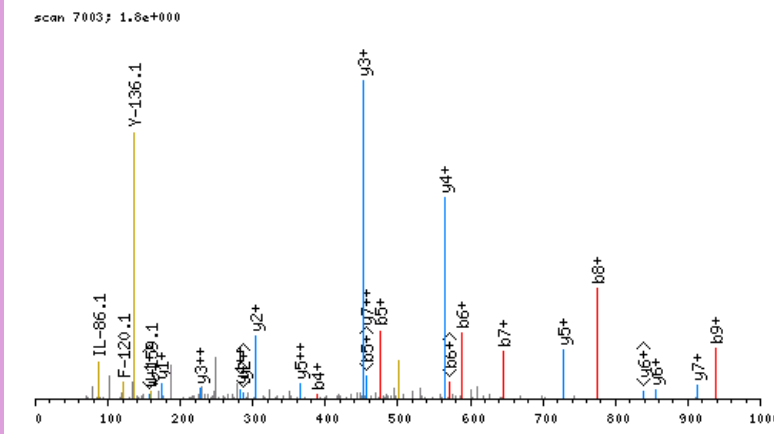

click image to zoom in; click top corners to zoom out [\[precursor±\]](#)

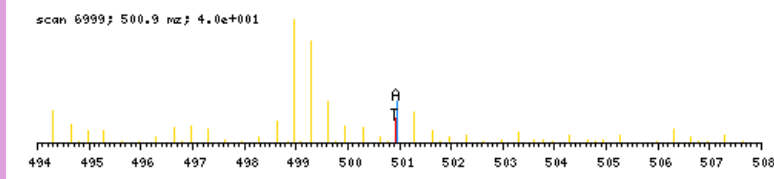

zoomed in precursor plot; T=theoretical m/z, A=acquired m/z

| b <sup>+</sup> | #  | AA # | y <sup>+</sup> | y <sup>2+</sup> |
|----------------|----|------|----------------|-----------------|
| 106.1080       | 1  | A 13 |                |                 |
| 203.1608       | 2  | P 12 | 1395.6909      | 698.3493        |
| 331.2194       | 3  | Q 11 | 1298.6381      | 649.8230        |
| 388.2408       | 4  | G 10 | 1170.5795      | 585.7937        |
| 475.2728       | 5  | S 9  | 1113.5580      | 557.2829        |
| 588.3569       | 6  | L 8  | 1026.5260      | 513.7669        |
| 645.3784       | 7  | G 7  | 913.4420       | 457.2249        |
| 774.4210       | 8  | E 6  | 856.4205       | 428.7142        |
| 937.4843       | 9  | Y 5  | 727.3779       | 364.1929        |
| 1050.5684      | 10 | L 4  | 564.3146       | 282.6612        |
| 1197.6368      | 11 | F 3  | 451.2305       | 226.1192        |
| 1326.6794      | 12 | E 2  | 304.1621       | 152.5850        |
|                | 13 | R 1  | 175.1195       | 88.0637         |

N-term:+35.07

APQVSTPTLVEAAR, MH+ 1467.8171, m/z 489.9439  
 L OSG37 P180811 230811-s1.04808.04808.3.dta

X-range:

-

MassTol: Y-zoom:

MassType:

AVG  MONO

Axis:

1  2

Label:

I  M  -

Ions:

a  +  2+  3+

b  +  2+  3+

c  +  2+  3+

x  +  2+  3+

y  +  2+  3+

z  +  2+  3+

hide H<sub>2</sub>O/NH<sub>3</sub>

zoom 112-122

GO

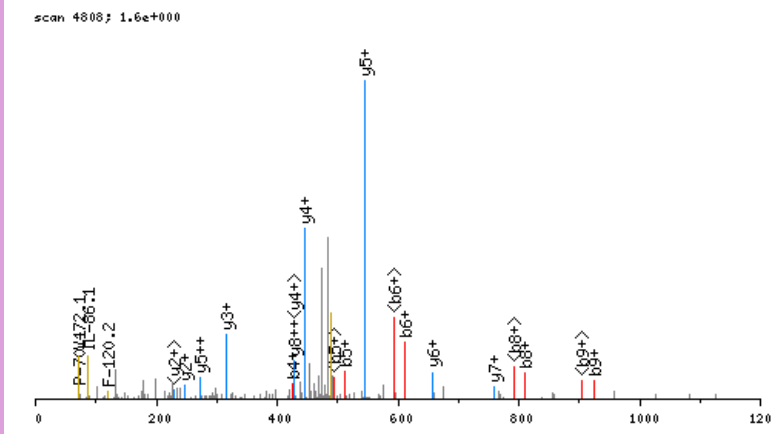

click image to zoom in; click top corners to zoom out [\[precursor±\]](#)

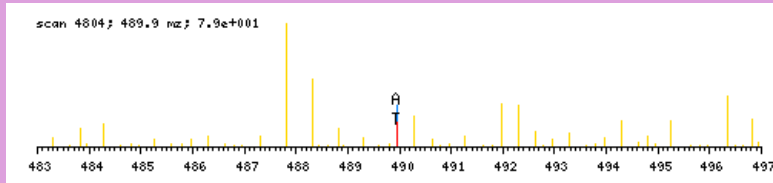

zoomed in precursor plot; T=theoretical m/z, A=acquired m/z

| b <sup>+</sup> | #  | AA | #  | y <sup>+</sup> | y <sup>2+</sup> |
|----------------|----|----|----|----------------|-----------------|
| 100.0762       | 1  | A  | 14 |                |                 |
| 197.1290       | 2  | P  | 13 | 1368.7487      | 684.8783        |
| 325.1876       | 3  | Q  | 12 | 1271.6959      | 636.3519        |
| 424.2560       | 4  | V  | 11 | 1143.6374      | 572.3226        |
| 511.2880       | 5  | S  | 10 | 1044.5689      | 522.7884        |
| 612.3357       | 6  | T  | 9  | 957.5369       | 479.2724        |
| 709.3884       | 7  | P  | 8  | 856.4892       | 428.7485        |
| 810.4361       | 8  | T  | 7  | 759.4365       | 380.2222        |
| 923.5202       | 9  | L  | 6  | 658.3888       | 329.6983        |
| 1022.5886      | 10 | V  | 5  | 545.3047       | 273.1563        |
| 1151.6312      | 11 | E  | 4  | 446.2363       | 223.6221        |
| 1222.6683      | 12 | A  | 3  | 317.1937       | 159.1008        |
| 1293.7054      | 13 | A  | 2  | 246.1566       | 123.5822        |
|                | 14 | R  | 1  | 175.1195       | 88.0637         |

N-term:+29.04

APQVYILPPPAEQLSR, MH+ 1813.0436, m/z 605.0194  
 H OSG37 P180811 230811-s1.07142.07142.3.dta

X-range:

-

MassTol: Y-zoom:

MassType:

AVG  MONO

Axis:

1  2

Label:

I  M  -

Ions:

a  +  2+  3+

b  +  2+  3+

c  +  2+  3+

x  +  2+  3+

y  +  2+  3+

z  +  2+  3+

hide H<sub>2</sub>O/NH<sub>3</sub>

zoom 112-122

GO

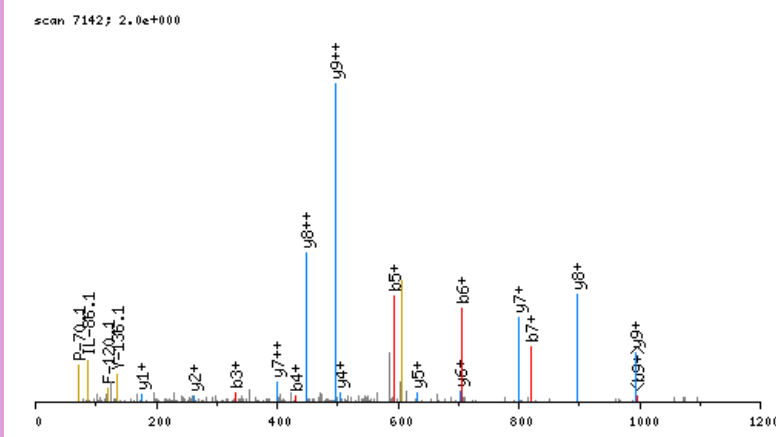

click image to zoom in; click top corners to zoom out [\[precursor±\]](#)

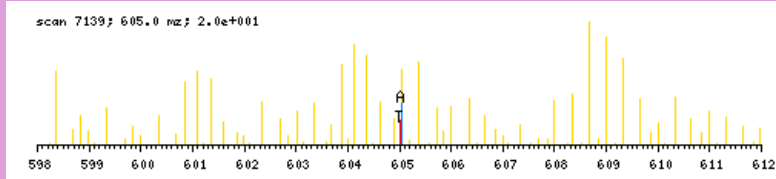

zoomed in precursor plot; T=theoretical m/z, A=acquired m/z

| b <sup>+</sup> | #  | AA # | y <sup>+</sup> | y <sup>2+</sup> |
|----------------|----|------|----------------|-----------------|
| 106.1080       | 1  | A 16 |                |                 |
| 203.1608       | 2  | P 15 | 1707.9434      | 854.4756        |
| 331.2194       | 3  | Q 14 | 1610.8906      | 805.9492        |
| 430.2878       | 4  | V 13 | 1482.8320      | 741.9199        |
| 593.3511       | 5  | Y 12 | 1383.7636      | 692.3857        |
| 706.4352       | 6  | I 11 | 1220.7003      | 610.8541        |
| 819.5192       | 7  | L 10 | 1107.6162      | 554.3120        |
| 916.5720       | 8  | P 9  | 994.5322       | 497.7700        |
| 1013.6248      | 9  | P 8  | 897.4794       | 449.2436        |
| 1110.6775      | 10 | P 7  | 800.4266       | 400.7172        |
| 1181.7146      | 11 | A 6  | 703.3739       | 352.1909        |
| 1310.7572      | 12 | E 5  | 632.3368       | 316.6723        |
| 1438.8158      | 13 | Q 4  | 503.2942       | 252.1510        |
| 1551.8999      | 14 | L 3  | 375.2356       | 188.1217        |
| 1638.9319      | 15 | S 2  | 262.1515       | 131.5797        |
|                | 16 | R 1  | 175.1195       | 88.0637         |

N-term:+35.07

APVEHVVDAGAF<sub>1</sub>LR, MH+ 1579.8596, m/z 527.2914  
 L OSG39 P180811 230811-s1.05743.05743.3.dta

X-range:

-

MassTol: Y-zoom:

MassType:

AVG  MONO

Axis:

1  2

Label:

I  M  -

Ions:

a  +  2+  3+

b  +  2+  3+

c  +  2+  3+

x  +  2+  3+

y  +  2+  3+

z  +  2+  3+

hide H<sub>2</sub>O/NH<sub>3</sub>

zoom 112-122

GO

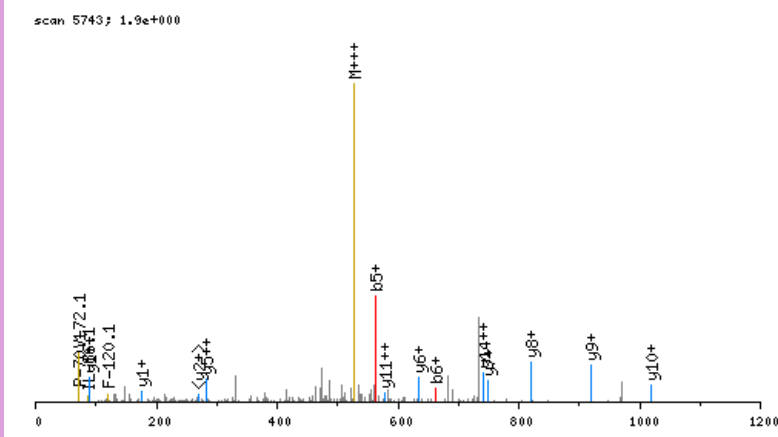

click image to zoom in; click top corners to zoom out [\[precursor±\]](#)

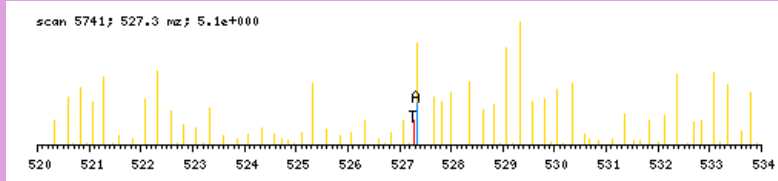

zoomed in precursor plot; T=theoretical m/z, A=acquired m/z

| b <sup>+</sup> | #  | AA # | y <sup>+</sup> | y <sup>2+</sup> |
|----------------|----|------|----------------|-----------------|
| 100.0762       | 1  | A 15 |                |                 |
| 197.1290       | 2  | P 14 | 1480.7912      | 740.8995        |
| 296.1974       | 3  | V 13 | 1383.7385      | 692.3731        |
| 425.2400       | 4  | E 12 | 1284.6701      | 642.8389        |
| 562.2989       | 5  | H 11 | 1155.6275      | 578.3176        |
| 661.3673       | 6  | V 10 | 1018.5686      | 509.7882        |
| 760.4357       | 7  | V 9  | 919.5001       | 460.2540        |
| 831.4728       | 8  | A 8  | 820.4317       | 410.7198        |
| 946.4998       | 9  | D 7  | 749.3946       | 375.2012        |
| 1017.5369      | 10 | A 6  | 634.3677       | 317.6877        |
| 1074.5584      | 11 | G 5  | 563.3306       | 282.1692        |
| 1145.5955      | 12 | A 4  | 506.3091       | 253.6585        |
| 1292.6639      | 13 | F 3  | 435.2720       | 218.1399        |
| 1405.7480      | 14 | L 2  | 288.2036       | 144.6057        |
|                | 15 | R 1  | 175.1195       | 88.0637         |

N-term:+29.04

APVIEPSGPELVVEPGETVTLR, MH+ 2317.2655, m/z 773.0933  
 L OSG36 P180811 230811-s1.05448.05448.3.dta

scan 5448; 2.3e+000

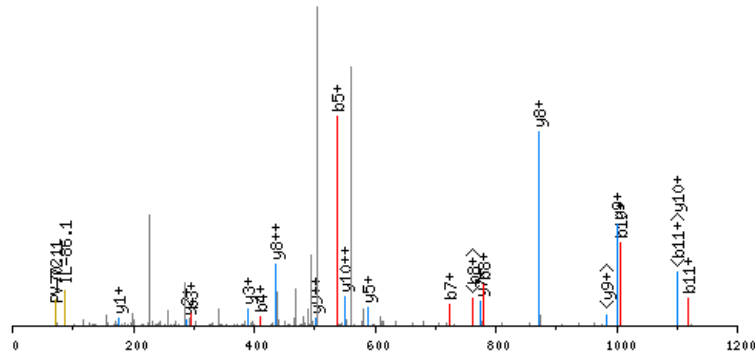

click image to zoom in; click top corners to zoom out [precursor±]

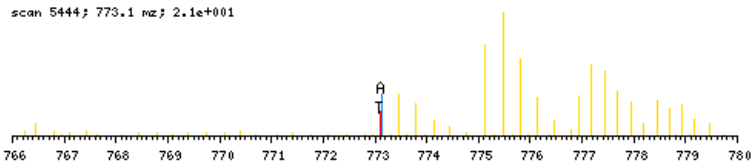

zoomed in precursor plot; T=theoretical m/z, A=acquired m/z

| b <sup>+</sup> | #  | AA # | y <sup>+</sup> | y <sup>2+</sup> |
|----------------|----|------|----------------|-----------------|
| 100.0762       | 1  | A 22 |                |                 |
| 197.1290       | 2  | P 21 | 2218.1971      | 1109.6025       |
| 296.1974       | 3  | V 20 | 2121.1443      | 1061.0761       |
| 409.2815       | 4  | I 19 | 2022.0759      | 1011.5419       |
| 538.3240       | 5  | E 18 | 1908.9918      | 954.9998        |
| 635.3768       | 6  | P 17 | 1779.9493      | 890.4785        |
| 722.4088       | 7  | S 16 | 1682.8965      | 841.9522        |
| 779.4303       | 8  | G 15 | 1595.8645      | 798.4361        |
| 876.4831       | 9  | P 14 | 1538.8430      | 769.9254        |
| 1005.5257      | 10 | E 13 | 1441.7902      | 721.3990        |
| 1118.6097      | 11 | L 12 | 1312.7476      | 656.8777        |
| 1217.6781      | 12 | V 11 | 1199.6636      | 600.3357        |
| 1316.7466      | 13 | V 10 | 1100.5952      | 550.8015        |
| 1445.7891      | 14 | E 9  | 1001.5267      | 501.2673        |
| 1542.8419      | 15 | P 8  | 872.4842       | 436.7460        |
| 1599.8634      | 16 | G 7  | 775.4314       | 388.2196        |
| 1728.9060      | 17 | E 6  | 718.4099       | 359.7089        |
| 1829.9536      | 18 | T 5  | 589.3673       | 295.1876        |
| 1929.0221      | 19 | V 4  | 488.3197       | 244.6637        |
| 2030.0697      | 20 | T 3  | 389.2512       | 195.1295        |
| 2143.1538      | 21 | L 2  | 288.2036       | 144.6057        |
|                | 22 | R 1  | 175.1195       | 88.0637         |

N-term:+29.04

X-range:

-

MassTol: Y-zoom:

MassType:

AVG  MONO

Axis:

1  2

Label:

I  M  -

Ions:

a  +  2+  3+

b  +  2+  3+

c  +  2+  3+

x  +  2+  3+

y  +  2+  3+

z  +  2+  3+

hide H<sub>2</sub>O/NH<sub>3</sub>

zoom 112-122

GO

AQMIGTEYMQDPDEEALR, MH+ 2118.9536, m/z 706.9894  
 H OSG37 P180811 230811-s1.05421.05421.3.dta

scan 5421; 8.0e+000

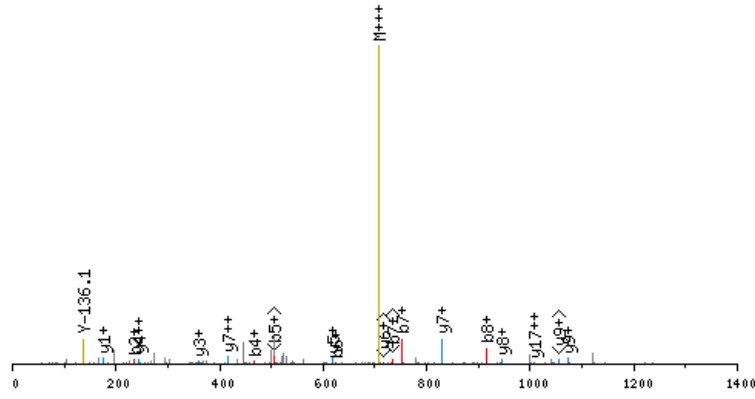

click image to zoom in; click top corners to zoom out [precursor±]

scan 5419; 707.0 mz; 3.1e+001

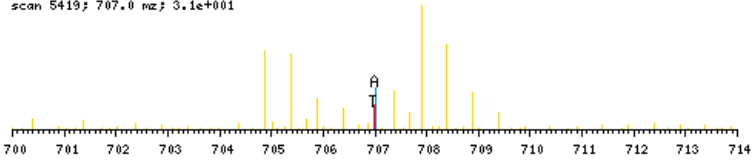

zoomed in precursor plot; T=theoretical m/z, A=acquired m/z

X-range:

-

MassTol: Y-zoom:

MassType:

AVG  MONO

Axis:

1  2

Label:

I  M  -

Ions:

a  +  2+  3+

b  +  2+  3+

c  +  2+  3+

x  +  2+  3+

y  +  2+  3+

z  +  2+  3+

hide H<sub>2</sub>O/NH<sub>3</sub>

zoom 112-122

GO

| b <sup>+</sup> | #  | AA # | y <sup>+</sup> | y <sup>2+</sup> |
|----------------|----|------|----------------|-----------------|
| 106.1080       | 1  | A 18 |                |                 |
| 234.1666       | 2  | Q 17 | 2013.8534      | 1007.4306       |
| 365.2071       | 3  | M 16 | 1885.7948      | 943.4013        |
| 466.2548       | 4  | T 15 | 1754.7543      | 877.8811        |
| 523.2762       | 5  | G 14 | 1653.7066      | 827.3572        |
| 624.3239       | 6  | T 13 | 1596.6852      | 798.8465        |
| 753.3665       | 7  | E 12 | 1495.6375      | 748.3227        |
| 916.4298       | 8  | Y 11 | 1366.5949      | 683.8014        |
| 1047.4703      | 9  | M 10 | 1203.5316      | 602.2697        |
| 1175.5289      | 10 | Q 9  | 1072.4911      | 536.7495        |
| 1290.5558      | 11 | D 8  | 944.4325       | 472.7202        |
| 1387.6086      | 12 | P 7  | 829.4056       | 415.2067        |
| 1502.6355      | 13 | D 6  | 732.3528       | 366.6803        |
| 1631.6781      | 14 | E 5  | 617.3259       | 309.1668        |
| 1760.7207      | 15 | E 4  | 488.2833       | 244.6455        |
| 1831.7578      | 16 | A 3  | 359.2407       | 180.1243        |
| 1944.8419      | 17 | L 2  | 288.2036       | 144.6057        |
|                | 18 | R 1  | 175.1195       | 88.0637         |

N-term:+35.07

ARPAPASPAARFPFHTGQRLR, MH+ 2345.3279, m/z 587.0874  
 H OSG36 P180811 230811-s1.03462.03462.4.dta

scan 3462; 4.9e-001

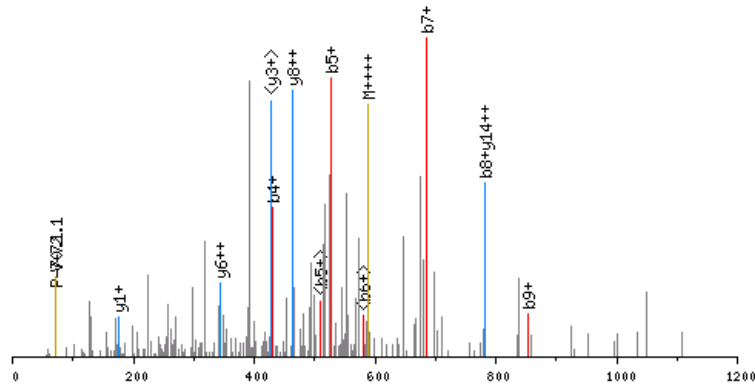

click image to zoom in; click top corners to zoom out [precursor±]

scan 3459; 587.1 m/z; 1.0e+001

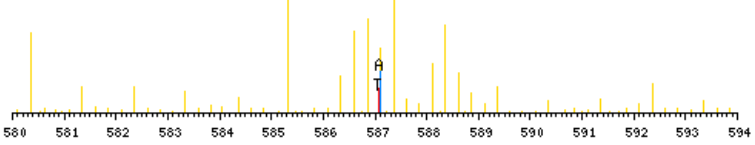

zoomed in precursor plot; T=theoretical m/z, A=acquired m/z

| b <sup>+</sup> | #  | AA # | y <sup>+</sup> | y <sup>2+</sup> |
|----------------|----|------|----------------|-----------------|
| 106.1080       | 1  | A 22 |                |                 |
| 262.2091       | 2  | R 21 | 2240.2277      | 1120.6178       |
| 359.2619       | 3  | P 20 | 2084.1266      | 1042.5672       |
| 430.2990       | 4  | A 19 | 1987.0738      | 994.0408        |
| 527.3518       | 5  | P 18 | 1916.0367      | 958.5223        |
| 598.3889       | 6  | A 17 | 1818.9840      | 909.9959        |
| 685.4209       | 7  | S 16 | 1747.9468      | 874.4773        |
| 782.4737       | 8  | P 15 | 1660.9148      | 830.9613        |
| 853.5108       | 9  | A 14 | 1563.8621      | 782.4349        |
| 924.5479       | 10 | A 13 | 1492.8249      | 746.9164        |
| 1080.6490      | 11 | R 12 | 1421.7878      | 711.3978        |
| 1177.7018      | 12 | P 11 | 1265.6867      | 633.3473        |
| 1324.7702      | 13 | F 10 | 1168.6339      | 584.8209        |
| 1421.8230      | 14 | P 9  | 1021.5655      | 511.2867        |
| 1558.8819      | 15 | H 8  | 924.5128       | 462.7603        |
| 1659.9295      | 16 | T 7  | 787.4539       | 394.2308        |
| 1716.9510      | 17 | G 6  | 686.4062       | 343.7070        |
| 1845.0096      | 18 | Q 5  | 629.3847       | 315.1963        |
| 1902.0310      | 19 | G 4  | 501.3261       | 251.1670        |
| 2058.1322      | 20 | R 3  | 444.3047       | 222.6563        |
| 2171.2162      | 21 | L 2  | 288.2036       | 144.6057        |
|                | 22 | R 1  | 175.1195       | 88.0637         |

N-term:+35.07

X-range:

-

MassTol: Y-zoom:

MassType:

AVG  MONO

Axis:

1  2

Label:

I  M  -

Ions:

a  +  2+  3+

b  +  2+  3+

c  +  2+  3+

x  +  2+  3+

y  +  2+  3+

z  +  2+  3+

hide H<sub>2</sub>O/NH<sub>3</sub>

zoom 112-122

GO



ASAAAVDAGMAMAGQSPVLR, MH+ 1901.9577, m/z 634.6574  
 L OSG37 P180811 230811-s1.06660.06660.3.dta

X-range:

-

MassTol: Y-zoom:

MassType:

AVG  MONO

Axis:

1  2

Label:

I  M  -

Ions:

a  +  2+  3+

b  +  2+  3+

c  +  2+  3+

x  +  2+  3+

y  +  2+  3+

z  +  2+  3+

hide H<sub>2</sub>O/NH<sub>3</sub>

zoom 112-122

GO

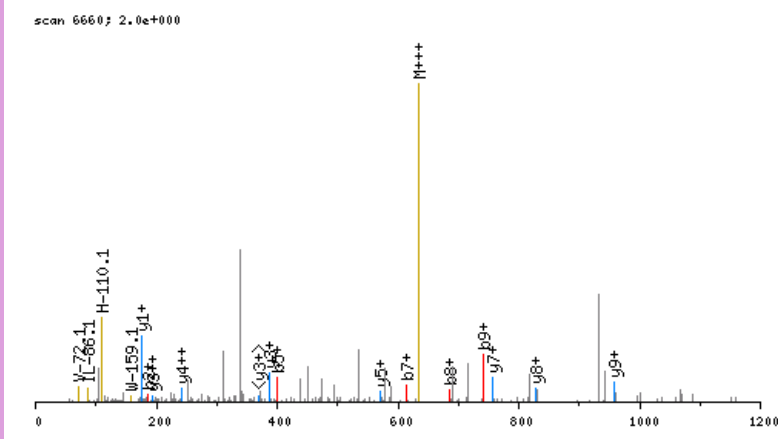

click image to zoom in; click top corners to zoom out [\[precursor±\]](#)

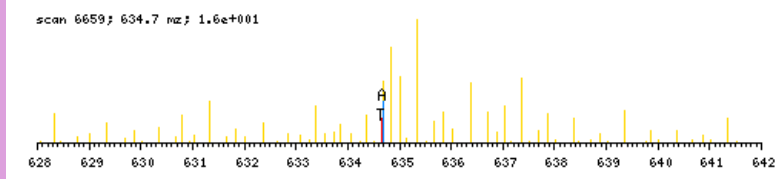

zoomed in precursor plot; T=theoretical m/z, A=acquired m/z

| b <sup>+</sup> | #  | AA # | y <sup>+</sup> | y <sup>2+</sup> |
|----------------|----|------|----------------|-----------------|
| 100.0762       | 1  | A 20 |                |                 |
| 187.1082       | 2  | S 19 | 1802.8893      | 901.9486        |
| 258.1454       | 3  | A 18 | 1715.8573      | 858.4326        |
| 329.1825       | 4  | A 17 | 1644.8202      | 822.9140        |
| 400.2196       | 5  | A 16 | 1573.7831      | 787.3954        |
| 499.2880       | 6  | V 15 | 1502.7459      | 751.8769        |
| 614.3149       | 7  | D 14 | 1403.6775      | 702.3427        |
| 685.3521       | 8  | A 13 | 1288.6506      | 644.8292        |
| 742.3735       | 9  | G 12 | 1217.6135      | 609.3106        |
| 873.4140       | 10 | M 11 | 1160.5920      | 580.7999        |
| 944.4511       | 11 | A 10 | 1029.5515      | 515.2797        |
| 1075.4916      | 12 | M 9  | 958.5144       | 479.7611        |
| 1146.5287      | 13 | A 8  | 827.4739       | 414.2409        |
| 1203.5502      | 14 | G 7  | 756.4368       | 378.7223        |
| 1331.6088      | 15 | Q 6  | 699.4153       | 350.2116        |
| 1418.6408      | 16 | S 5  | 571.3568       | 286.1823        |
| 1515.6935      | 17 | P 4  | 484.3247       | 242.6663        |
| 1614.7620      | 18 | V 3  | 387.2720       | 194.1399        |
| 1727.8460      | 19 | L 2  | 288.2036       | 144.6057        |
|                | 20 | R 1  | 175.1195       | 88.0637         |

N-term:+29.04

ASAFGSSTESLVAR, MH+ 1416.7547, m/z 708.8810  
 H OSG37 P180811 230811-s1.04740.04740.2.dta

X-range:

-

MassTol: Y-zoom:

MassType:

AVG  MONO

Axis:

1  2

Label:

I  M  -

Ions:

a  +  2+  3+

b  +  2+  3+

c  +  2+  3+

x  +  2+  3+

y  +  2+  3+

z  +  2+  3+

hide H<sub>2</sub>O/NH<sub>3</sub>

zoom 112-122

GO

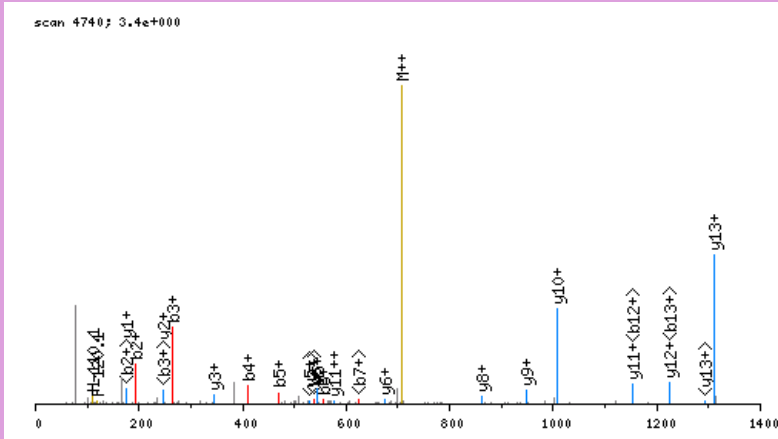

click image to zoom in; click top corners to zoom out [\[precursor±\]](#)

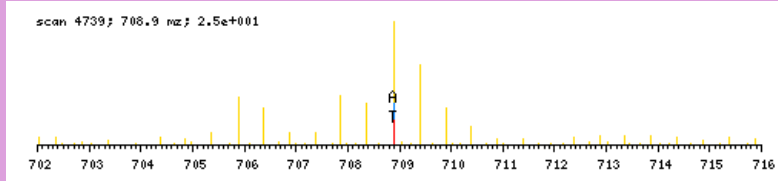

zoomed in precursor plot; T=theoretical m/z, A=acquired m/z

| b <sup>+</sup> | #  | AA # | y <sup>+</sup> | y <sup>2+</sup> |
|----------------|----|------|----------------|-----------------|
| 106.1080       | 1  | A 14 |                |                 |
| 193.1400       | 2  | S 13 | 1311.6545      | 656.3311        |
| 264.1772       | 3  | A 12 | 1224.6224      | 612.8151        |
| 411.2456       | 4  | F 11 | 1153.5853      | 577.2966        |
| 468.2670       | 5  | G 10 | 1006.5169      | 503.7624        |
| 555.2991       | 6  | S 9  | 949.4954       | 475.2516        |
| 642.3311       | 7  | S 8  | 862.4634       | 431.7356        |
| 743.3788       | 8  | T 7  | 775.4314       | 388.2196        |
| 872.4214       | 9  | E 6  | 674.3837       | 337.6958        |
| 959.4534       | 10 | S 5  | 545.3411       | 273.1745        |
| 1072.5375      | 11 | L 4  | 458.3091       | 229.6585        |
| 1171.6059      | 12 | V 3  | 345.2250       | 173.1164        |
| 1242.6430      | 13 | A 2  | 246.1566       | 123.5822        |
|                | 14 | R 1  | 175.1195       | 88.0637         |

N-term:+35.07

ASAQTTSHLTPNDLIGCIIGR, MH+ 2501.3245, m/z 626.0866  
 H OSG39 P180811 230811-s1.07794.07794.4.dta

scan 7794; 1.8e+001

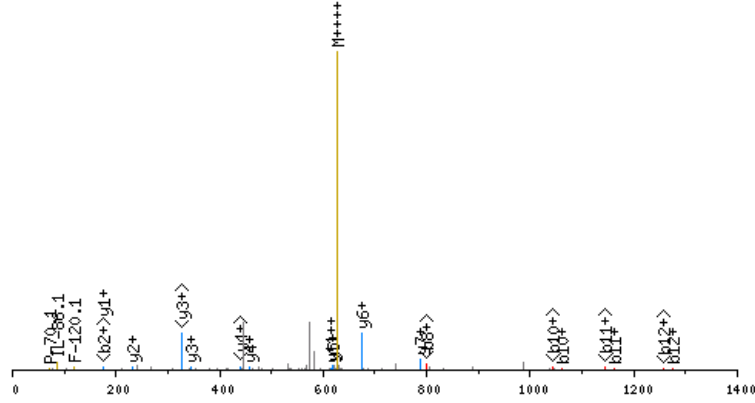

click image to zoom in; click top corners to zoom out [precursor±]

scan 7791; 626.1 m/z; 3.8e+001

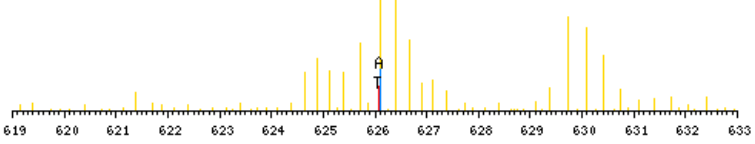

zoomed in precursor plot; T=theoretical m/z, A=acquired m/z

| b <sup>+</sup> | #  | AA # | y <sup>+</sup> | y <sup>2+</sup> |
|----------------|----|------|----------------|-----------------|
| 106.1080       | 1  | A 23 |                |                 |
| 193.1400       | 2  | S 22 | 2396.2243      | 1198.6161       |
| 264.1772       | 3  | A 21 | 2309.1923      | 1155.1001       |
| 392.2357       | 4  | Q 20 | 2238.1552      | 1119.5815       |
| 493.2834       | 5  | T 19 | 2110.0966      | 1055.5522       |
| 594.3311       | 6  | T 18 | 2009.0489      | 1005.0284       |
| 681.3631       | 7  | S 17 | 1908.0013      | 954.5045        |
| 818.4220       | 8  | H 16 | 1820.9692      | 910.9885        |
| 947.4646       | 9  | E 15 | 1683.9103      | 842.4591        |
| 1060.5487      | 10 | L 14 | 1554.8677      | 777.9378        |
| 1161.5964      | 11 | T 13 | 1441.7837      | 721.3957        |
| 1274.6804      | 12 | I 12 | 1340.7360      | 670.8719        |
| 1371.7332      | 13 | P 11 | 1227.6519      | 614.3299        |
| 1485.7761      | 14 | N 10 | 1130.5992      | 565.8035        |
| 1600.8031      | 15 | D 9  | 1016.5562      | 508.7820        |
| 1713.8871      | 16 | L 8  | 901.5293       | 451.2686        |
| 1826.9712      | 17 | I 7  | 788.4452       | 394.7265        |
| 1883.9927      | 18 | G 6  | 675.3612       | 338.1845        |
| 2044.0233      | 19 | C 5  | 618.3397       | 309.6738        |
| 2157.1073      | 20 | I 4  | 458.3091       | 229.6585        |
| 2270.1914      | 21 | I 3  | 345.2250       | 173.1164        |
| 2327.2128      | 22 | G 2  | 232.1410       | 116.5744        |
|                | 23 | R 1  | 175.1195       | 88.0637         |

N-term:+35.07 C(19):+160.03

X-range:

-

MassTol: Y-zoom:

MassType:

AVG  MONO

Axis:

1  2

Label:

I  M  -

Ions:

a  +  2+  3+

b  +  2+  3+

c  +  2+  3+

x  +  2+  3+

y  +  2+  3+

z  +  2+  3+

hide H<sub>2</sub>O/NH<sub>3</sub>

zoom 112-122

GO

ASASSTNLKDVLSNLPKEQAR, MH+ 2444.4573, m/z 611.8698  
 H OSG40 P180811 230811-s1.07938.07938.4.dta

X-range:

-

MassTol: Y-zoom:

MassType:

AVG  MONO

Axis:

1  2

Label:

I  M  -

Ions:

a  +  2+  3+

b  +  2+  3+

c  +  2+  3+

x  +  2+  3+

y  +  2+  3+

z  +  2+  3+

hide H<sub>2</sub>O/NH<sub>3</sub>

zoom 112-122

GO

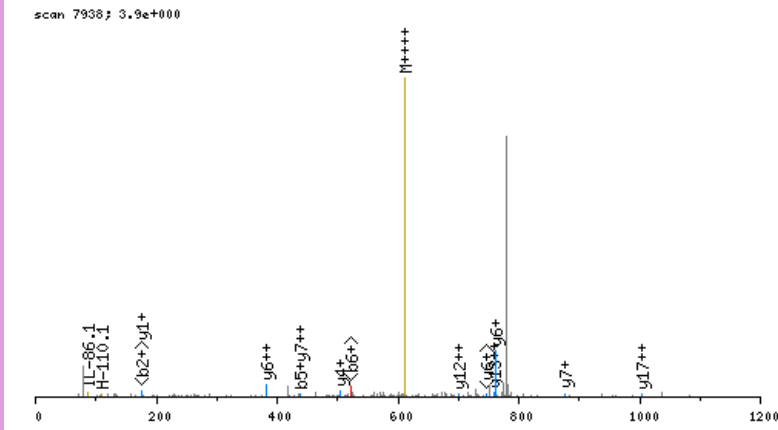

click image to zoom in; click top corners to zoom out [\[precursor±\]](#)

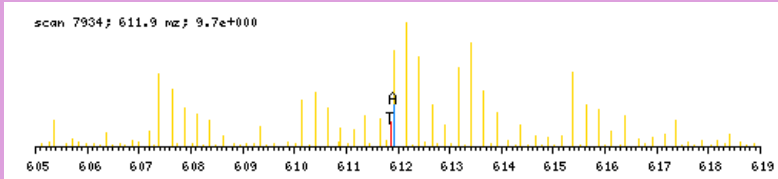

zoomed in precursor plot; T=theoretical m/z, A=acquired m/z

| b <sup>+</sup> | #  | AA | #  | y <sup>+</sup> | y <sup>2+</sup> |
|----------------|----|----|----|----------------|-----------------|
| 106.1080       | 1  | A  | 22 |                |                 |
| 193.1400       | 2  | S  | 21 | 2339.3571      | 1170.1825       |
| 264.1772       | 3  | A  | 20 | 2252.3251      | 1126.6665       |
| 351.2092       | 4  | S  | 19 | 2181.2880      | 1091.1479       |
| 438.2412       | 5  | S  | 18 | 2094.2560      | 1047.6319       |
| 539.2889       | 6  | T  | 17 | 2007.2239      | 1004.1159       |
| 653.3318       | 7  | N  | 16 | 1906.1762      | 953.5920        |
| 766.4159       | 8  | L  | 15 | 1792.1333      | 896.5706        |
| 928.5740       | 9  | K  | 14 | 1679.0493      | 840.0285        |
| 1043.6009      | 10 | D  | 13 | 1516.8912      | 758.9495        |
| 1142.6693      | 11 | V  | 12 | 1401.8642      | 701.4360        |
| 1255.7534      | 12 | L  | 11 | 1302.7958      | 651.9018        |
| 1342.7854      | 13 | S  | 10 | 1189.7117      | 595.3598        |
| 1456.8284      | 14 | N  | 9  | 1102.6797      | 551.8438        |
| 1569.9124      | 15 | L  | 8  | 988.6368       | 494.8223        |
| 1682.9965      | 16 | I  | 7  | 875.5527       | 438.2803        |
| 1780.0493      | 17 | P  | 6  | 762.4686       | 381.7382        |
| 1942.2074      | 18 | K  | 5  | 665.4159       | 333.2119        |
| 2071.2499      | 19 | E  | 4  | 503.2578       | 252.1328        |
| 2199.3085      | 20 | Q  | 3  | 374.2152       | 187.6115        |
| 2270.3456      | 21 | A  | 2  | 246.1566       | 123.5822        |
|                | 22 | R  | 1  | 175.1195       | 88.0637         |

N-term:+35.07 K(9):+162.16  
 K(18):+162.16

ASDPILYRFPVAVALDTKGPEIR, MH+ 2437.3819, m/z 610.1009  
 L OSG40 P180811 230811-s1.07888.07888.4.dta

X-range:

-

MassTol: Y-zoom:

MassType:

AVG  MONO

Axis:

1  2

Label:

I  M  -

Ions:

a  +  2+  3+

b  +  2+  3+

c  +  2+  3+

x  +  2+  3+

y  +  2+  3+

z  +  2+  3+

hide H<sub>2</sub>O/NH<sub>3</sub>

zoom 112-122

GO

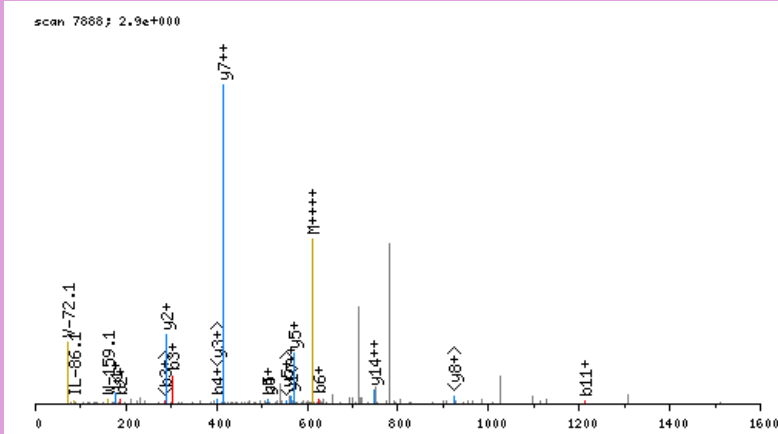

click image to zoom in; click top corners to zoom out [precursor±]

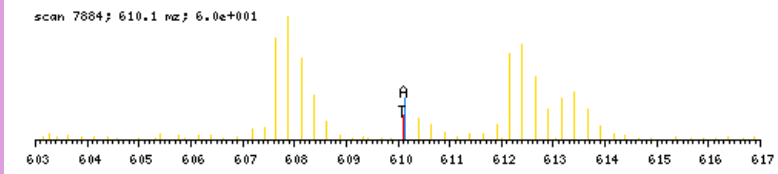

zoomed in precursor plot; T=theoretical m/z, A=acquired m/z

| b <sup>+</sup> | #  | AA # | y <sup>+</sup> | y <sup>2+</sup> |
|----------------|----|------|----------------|-----------------|
| 100.0762       | 1  | A 22 |                |                 |
| 187.1082       | 2  | S 21 | 2338.3135      | 1169.6607       |
| 302.1352       | 3  | D 20 | 2251.2815      | 1126.1446       |
| 399.1879       | 4  | P 19 | 2136.2545      | 1068.6312       |
| 512.2720       | 5  | I 18 | 2039.2018      | 1020.1048       |
| 625.3561       | 6  | L 17 | 1926.1177      | 963.5628        |
| 788.4194       | 7  | Y 16 | 1813.0336      | 907.0207        |
| 944.5205       | 8  | R 15 | 1649.9703      | 825.4891        |
| 1041.5733      | 9  | P 14 | 1493.8692      | 747.4385        |
| 1140.6417      | 10 | V 13 | 1396.8164      | 698.9121        |
| 1211.6788      | 11 | A 12 | 1297.7480      | 649.3779        |
| 1310.7472      | 12 | V 11 | 1226.7109      | 613.8594        |
| 1381.7843      | 13 | A 10 | 1127.6425      | 564.3252        |
| 1494.8684      | 14 | L 9  | 1056.6054      | 528.8066        |
| 1609.8953      | 15 | D 8  | 943.5213       | 472.2646        |
| 1710.9430      | 16 | T 7  | 828.4944       | 414.7511        |
| 1867.0693      | 17 | K 6  | 727.4467       | 364.2273        |
| 1924.0908      | 18 | G 5  | 571.3204       | 286.1641        |
| 2021.1435      | 19 | P 4  | 514.2989       | 257.6534        |
| 2150.1861      | 20 | E 3  | 417.2462       | 209.1270        |
| 2263.2702      | 21 | I 2  | 288.2036       | 144.6057        |
|                | 22 | R 1  | 175.1195       | 88.0637         |

N-term:+29.04 K(17):+156.13

ASFFGENHLEVPVPSALTR, MH+ 2099.0925, m/z 700.3690  
 L OSG39 P180811 230811-s1.07435.07435.3.dta

X-range:

-

MassTol: Y-zoom:

MassType:

AVG  MONO

Axis:

1  2

Label:

I  M  -

Ions:

a  +  2+  3+

b  +  2+  3+

c  +  2+  3+

x  +  2+  3+

y  +  2+  3+

z  +  2+  3+

hide H<sub>2</sub>O/NH<sub>3</sub>

zoom 112-122

GO

scan 7435; 6.9e-001

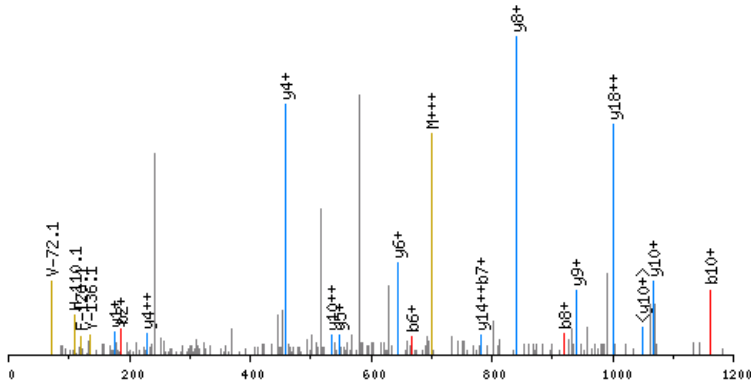

click image to zoom in; click top corners to zoom out [\[precursor±\]](#)

scan 7431; 700.4 nz; 3.4e+001

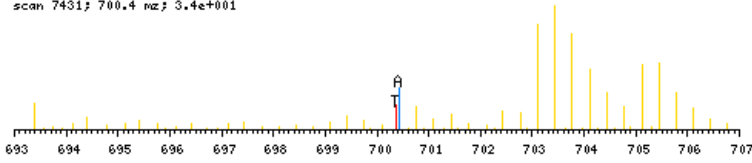

zoomed in precursor plot; T=theoretical m/z, A=acquired m/z

| b <sup>+</sup> | #  | AA # | y <sup>+</sup> | y <sup>2+</sup> |
|----------------|----|------|----------------|-----------------|
| 100.0762       | 1  | A 19 |                |                 |
| 187.1082       | 2  | S 18 | 2000.0242      | 1000.5160       |
| 334.1767       | 3  | F 17 | 1912.9921      | 957.0000        |
| 481.2451       | 4  | F 16 | 1765.9237      | 883.4658        |
| 538.2665       | 5  | G 15 | 1618.8553      | 809.9316        |
| 667.3091       | 6  | E 14 | 1561.8338      | 781.4208        |
| 781.3521       | 7  | N 13 | 1432.7912      | 716.8995        |
| 918.4110       | 8  | H 12 | 1318.7483      | 659.8781        |
| 1031.4950      | 9  | L 11 | 1181.6894      | 591.3486        |
| 1160.5376      | 10 | E 10 | 1068.6053      | 534.8066        |
| 1259.6060      | 11 | V 9  | 939.5627       | 470.2853        |
| 1356.6588      | 12 | P 8  | 840.4943       | 420.7511        |
| 1455.7272      | 13 | V 7  | 743.4416       | 372.2247        |
| 1552.7800      | 14 | P 6  | 644.3731       | 322.6905        |
| 1639.8120      | 15 | S 5  | 547.3204       | 274.1641        |
| 1710.8491      | 16 | A 4  | 460.2884       | 230.6481        |
| 1823.9332      | 17 | L 3  | 389.2512       | 195.1295        |
| 1924.9809      | 18 | T 2  | 276.1672       | 138.5875        |
|                | 19 | R 1  | 175.1195       | 88.0637         |

N-term:+29.04

ASFNDTFVHVTDLSGKETICR, MH+ 2453.2134, m/z 614.0588  
 L OSG40 P180811 230811-s1.07543.07543.4.dta

X-range:

0 - 0

MassTol: Y-zoom:

0. 1.

MassType:

AVG  MONO

Axis:

1  2

Label:

I  M  -

Ions:

a  +  2+  3+

b  +  2+  3+

c  +  2+  3+

x  +  2+  3+

y  +  2+  3+

z  +  2+  3+

hide H<sub>2</sub>O/NH<sub>3</sub>

zoom 112-122

GO

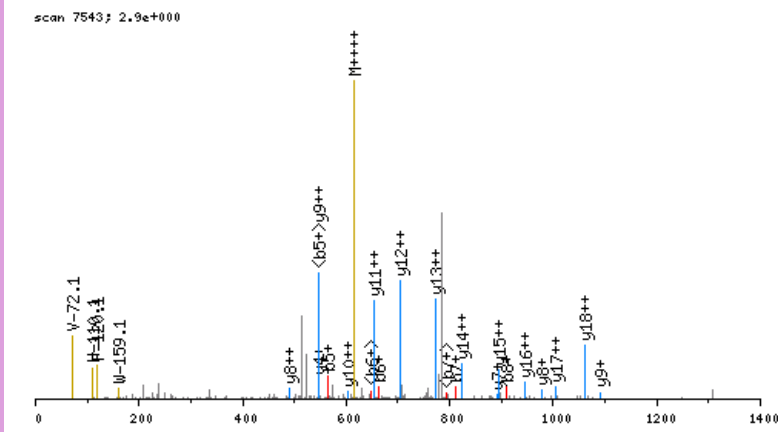

click image to zoom in; click top corners to zoom out [precursor±]

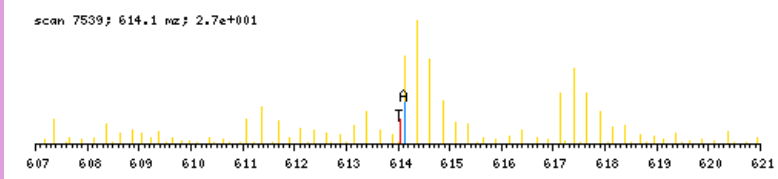

zoomed in precursor plot; T=theoretical m/z, A=acquired m/z

| b <sup>+</sup> | #  | AA # | y <sup>+</sup> | y <sup>2+</sup> |
|----------------|----|------|----------------|-----------------|
| 100.0762       | 1  | A 21 |                |                 |
| 187.1082       | 2  | S 20 | 2354.1451      | 1177.5764       |
| 334.1767       | 3  | F 19 | 2267.1130      | 1134.0604       |
| 448.2196       | 4  | N 18 | 2120.0446      | 1060.5262       |
| 563.2465       | 5  | D 17 | 2006.0017      | 1003.5048       |
| 664.2942       | 6  | T 16 | 1890.9747      | 945.9913        |
| 811.3626       | 7  | F 15 | 1789.9271      | 895.4674        |
| 910.4310       | 8  | V 14 | 1642.8587      | 821.9332        |
| 1047.4899      | 9  | H 13 | 1543.7902      | 772.3990        |
| 1146.5584      | 10 | V 12 | 1406.7313      | 703.8696        |
| 1247.6060      | 11 | T 11 | 1307.6629      | 654.3354        |
| 1362.6330      | 12 | D 10 | 1206.6152      | 603.8115        |
| 1475.7170      | 13 | L 9  | 1091.5883      | 546.2981        |
| 1562.7491      | 14 | S 8  | 978.5042       | 489.7560        |
| 1619.7705      | 15 | G 7  | 891.4722       | 446.2400        |
| 1775.8968      | 16 | K 6  | 834.4507       | 417.7293        |
| 1904.9394      | 17 | E 5  | 678.3244       | 339.6661        |
| 2005.9871      | 18 | T 4  | 549.2818       | 275.1448        |
| 2119.0712      | 19 | I 3  | 448.2342       | 224.6210        |
| 2279.1018      | 20 | C 2  | 335.1501       | 168.0790        |
|                | 21 | R 1  | 175.1195       | 88.0637         |

N-term: +29.04 K(16): +156.13  
 C(20): +160.03

ASGGVPTDEEQATGLER, MH+ 1801.8568, m/z 601.2904  
 L OSG37 P180811 230811-s1.03676.03676.3.dta

X-range:

-

MassTol: Y-zoom:

MassType:

AVG  MONO

Axis:

1  2

Label:

I  M  -

Ions:

a  +  2+  3+

b  +  2+  3+

c  +  2+  3+

x  +  2+  3+

y  +  2+  3+

z  +  2+  3+

hide H<sub>2</sub>O/NH<sub>3</sub>

zoom 112-122

GO

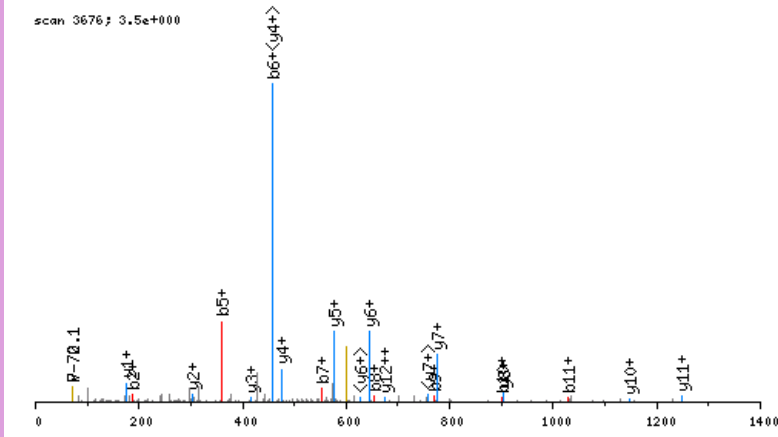

click image to zoom in; click top corners to zoom out [\[precursor±\]](#)

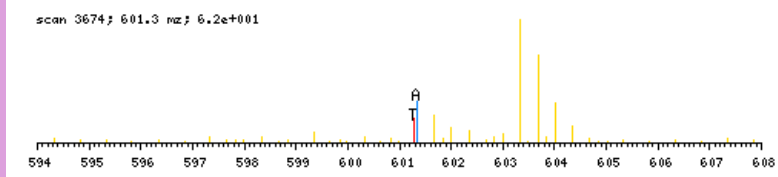

zoomed in precursor plot; T=theoretical m/z, A=acquired m/z

| b <sup>+</sup> | #  | AA # | y <sup>+</sup> | y <sup>2+</sup> |
|----------------|----|------|----------------|-----------------|
| 100.0762       | 1  | A 18 |                |                 |
| 187.1082       | 2  | S 17 | 1702.7884      | 851.8981        |
| 244.1297       | 3  | G 16 | 1615.7564      | 808.3821        |
| 301.1512       | 4  | G 15 | 1558.7349      | 779.8714        |
| 358.1726       | 5  | G 14 | 1501.7134      | 751.3606        |
| 457.2410       | 6  | V 13 | 1444.6920      | 722.8499        |
| 554.2938       | 7  | P 12 | 1345.6236      | 673.3157        |
| 655.3415       | 8  | T 11 | 1248.5708      | 624.7893        |
| 770.3684       | 9  | D 10 | 1147.5231      | 574.2655        |
| 899.4110       | 10 | E 9  | 1032.4962      | 516.7520        |
| 1028.4536      | 11 | E 8  | 903.4536       | 452.2307        |
| 1156.5122      | 12 | Q 7  | 774.4110       | 387.7094        |
| 1227.5493      | 13 | A 6  | 646.3524       | 323.6801        |
| 1328.5970      | 14 | T 5  | 575.3153       | 288.1616        |
| 1385.6185      | 15 | G 4  | 474.2676       | 237.6377        |
| 1498.7025      | 16 | L 3  | 417.2462       | 209.1270        |
| 1627.7451      | 17 | E 2  | 304.1621       | 152.5850        |
|                | 18 | R 1  | 175.1195       | 88.0637         |

N-term:+29.04



ASGPGGLHADLLR, MH+ 1297.7440, m/z 433.2529  
 H OSG40 P180811 230811-s1.04995.04995.3.dta

X-range:

-

MassTol: Y-zoom:

MassType:

AVG  MONO

Axis:

1  2

Label:

I  M  -

Ions:

a  +  2+  3+

b  +  2+  3+

c  +  2+  3+

x  +  2+  3+

y  +  2+  3+

z  +  2+  3+

hide H<sub>2</sub>O/NH<sub>3</sub>

zoom 112-122

GO

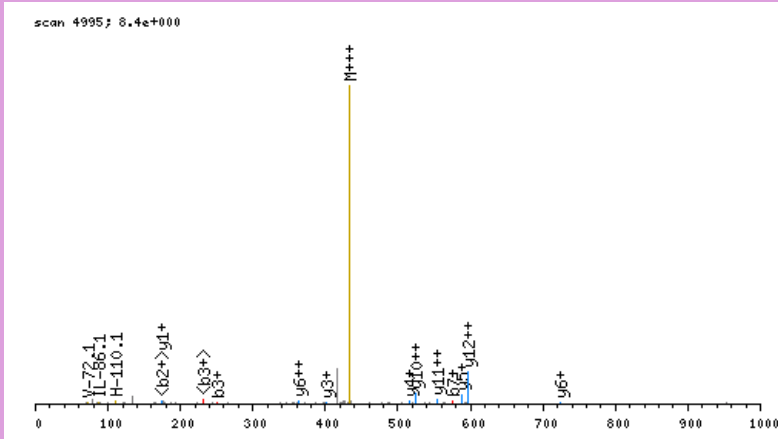

click image to zoom in; click top corners to zoom out [\[precursor±\]](#)

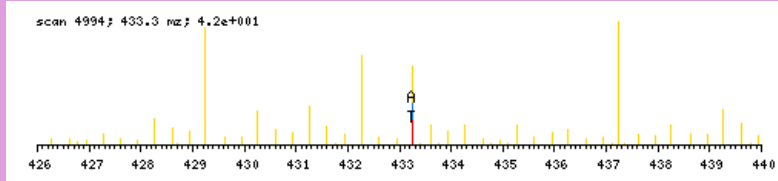

zoomed in precursor plot; T=theoretical m/z, A=acquired m/z

| b <sup>+</sup> | #  | AA # | y <sup>+</sup> | y <sup>2+</sup> |
|----------------|----|------|----------------|-----------------|
| 106.1080       | 1  | A 13 |                |                 |
| 193.1400       | 2  | S 12 | 1192.6438      | 596.8258        |
| 250.1615       | 3  | G 11 | 1105.6118      | 553.3098        |
| 347.2143       | 4  | P 10 | 1048.5904      | 524.7991        |
| 404.2357       | 5  | G 9  | 951.5376       | 476.2727        |
| 461.2572       | 6  | G 8  | 894.5161       | 447.7620        |
| 574.3413       | 7  | L 7  | 837.4947       | 419.2512        |
| 711.4002       | 8  | H 6  | 724.4106       | 362.7092        |
| 782.4373       | 9  | A 5  | 587.3517       | 294.1798        |
| 897.4642       | 10 | D 4  | 516.3146       | 258.6612        |
| 1010.5483      | 11 | L 3  | 401.2876       | 201.1477        |
| 1123.6324      | 12 | L 2  | 288.2036       | 144.6057        |
|                | 13 | R 1  | 175.1195       | 88.0637         |

N-term:+35.07

ASGQAFELILSPR, MH+ 1416.7851, m/z 472.9332  
 L OSG40 P180811 230811-s1.06335.06335.3.dta

X-range:

-

MassTol: Y-zoom:

MassType:

AVG  MONO

Axis:

1  2

Label:

I  M  -

Ions:

a  +  2+  3+

b  +  2+  3+

c  +  2+  3+

x  +  2+  3+

y  +  2+  3+

z  +  2+  3+

hide H<sub>2</sub>O/NH<sub>3</sub>

zoom 112-122

GO

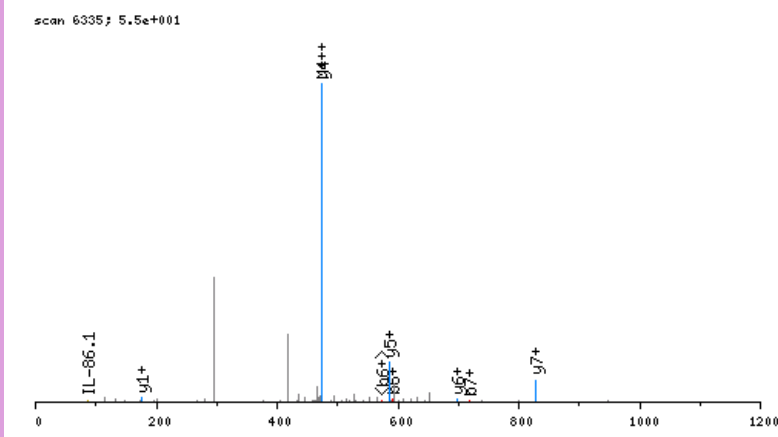

click image to zoom in; click top corners to zoom out [\[precursor±\]](#)

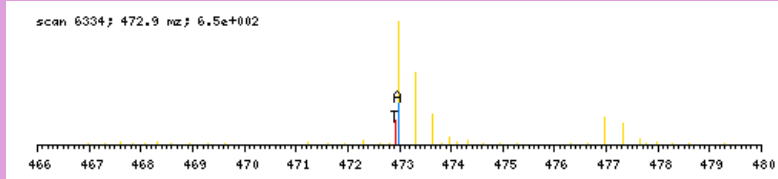

zoomed in precursor plot; T=theoretical m/z, A=acquired m/z

| b <sup>+</sup> | #  | AA # | y <sup>+</sup> | y <sup>2+</sup> |
|----------------|----|------|----------------|-----------------|
| 100.0762       | 1  | A 13 |                |                 |
| 187.1082       | 2  | S 12 | 1317.7167      | 659.3623        |
| 244.1297       | 3  | G 11 | 1230.6846      | 615.8462        |
| 372.1883       | 4  | Q 10 | 1173.6632      | 587.3355        |
| 443.2254       | 5  | A 9  | 1045.6046      | 523.3062        |
| 590.2938       | 6  | F 8  | 974.5675       | 487.7877        |
| 719.3364       | 7  | E 7  | 827.4991       | 414.2535        |
| 832.4205       | 8  | L 6  | 698.4565       | 349.7322        |
| 945.5045       | 9  | I 5  | 585.3724       | 293.1901        |
| 1058.5886      | 10 | L 4  | 472.2884       | 236.6481        |
| 1145.6206      | 11 | S 3  | 359.2043       | 180.1061        |
| 1242.6734      | 12 | P 2  | 272.1723       | 136.5900        |
|                | 13 | R 1  | 175.1195       | 88.0637         |

N-term:+29.04

ASKPTLNEVVIVSAIR, MH+ 1753.0588, m/z 585.0244  
 L OSG39 P180811 230811-s1.05207.05207.3.dta

X-range:

-

MassTol: Y-zoom:

MassType:

AVG  MONO

Axis:

1  2

Label:

I  M  -

Ions:

a  +  2+  3+

b  +  2+  3+

c  +  2+  3+

x  +  2+  3+

y  +  2+  3+

z  +  2+  3+

hide H<sub>2</sub>O/NH<sub>3</sub>

zoom 112-122

GO

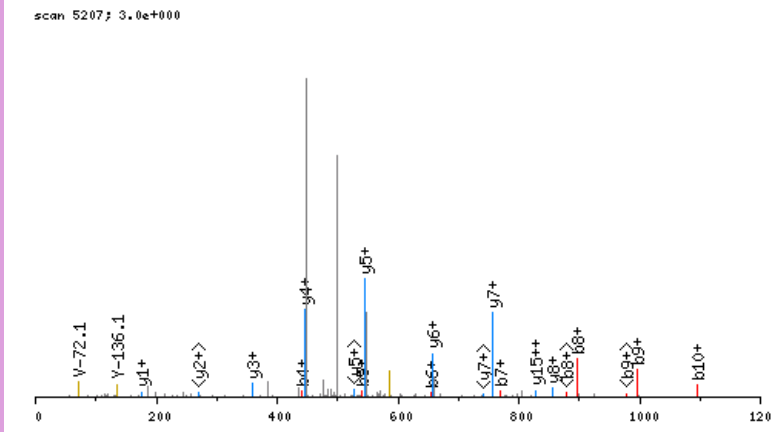

click image to zoom in; click top corners to zoom out [\[precursor±\]](#)

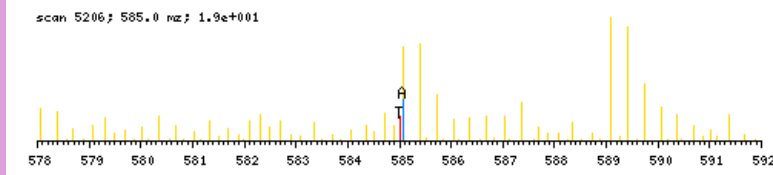

zoomed in precursor plot; T=theoretical m/z, A=acquired m/z

| b <sup>+</sup> | #  | AA # | y <sup>+</sup> | y <sup>2+</sup> |
|----------------|----|------|----------------|-----------------|
| 100.0762       | 1  | A 16 |                |                 |
| 187.1082       | 2  | S 15 | 1653.9904      | 827.4991        |
| 343.2345       | 3  | K 14 | 1566.9583      | 783.9831        |
| 440.2873       | 4  | P 13 | 1410.8320      | 705.9199        |
| 541.3350       | 5  | T 12 | 1313.7793      | 657.3936        |
| 654.4190       | 6  | L 11 | 1212.7316      | 606.8697        |
| 768.4620       | 7  | N 10 | 1099.6475      | 550.3277        |
| 897.5046       | 8  | E 9  | 985.6046       | 493.3062        |
| 996.5730       | 9  | V 8  | 856.5620       | 428.7849        |
| 1095.6414      | 10 | V 7  | 757.4936       | 379.2507        |
| 1208.7255      | 11 | I 6  | 658.4252       | 329.7165        |
| 1307.7939      | 12 | V 5  | 545.3411       | 273.1745        |
| 1394.8259      | 13 | S 4  | 446.2727       | 223.6403        |
| 1465.8630      | 14 | A 3  | 359.2407       | 180.1243        |
| 1578.9471      | 15 | I 2  | 288.2036       | 144.6057        |
|                | 16 | R 1  | 175.1195       | 88.0637         |

N-term:+29.04 K(3):+156.13

ASLDASTQTTHLTIPTNLLIGCIIGR, MH+ 2823.4674, m/z 706.6223  
 L OSG38 P180811 230811-s1.07952.07952.4.dta

scan 7952: 7.8e+000

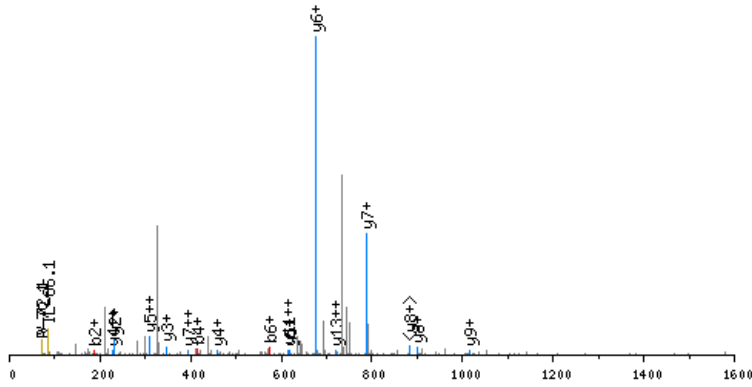

click image to zoom in; click top corners to zoom out [precursor±]

scan 7949: 706.6 m/z; 3.3e+001

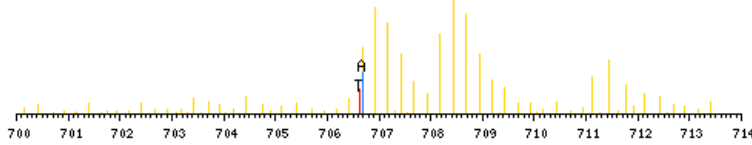

zoomed in precursor plot; T=theoretical m/z, A=acquired m/z

X-range:

-

MassTol: Y-zoom:

MassType:

AVG  MONO

Axis:

1  2

Label:

I  M  -

Ions:

a  +  2+  3+

b  +  2+  3+

c  +  2+  3+

x  +  2+  3+

y  +  2+  3+

z  +  2+  3+

hide H<sub>2</sub>O/NH<sub>3</sub>

zoom 112-122

GO

| b <sup>+</sup> | #  | AA # | y <sup>+</sup> | y <sup>2+</sup> |
|----------------|----|------|----------------|-----------------|
| 100.0762       | 1  | A 26 |                |                 |
| 187.1082       | 2  | S 25 | 2724.3990      | 1362.7034       |
| 300.1923       | 3  | L 24 | 2637.3670      | 1319.1874       |
| 415.2192       | 4  | D 23 | 2524.2829      | 1262.6454       |
| 486.2564       | 5  | A 22 | 2409.2560      | 1205.1319       |
| 573.2884       | 6  | S 21 | 2338.2189      | 1169.6133       |
| 674.3361       | 7  | T 20 | 2251.1868      | 1126.0973       |
| 802.3946       | 8  | Q 19 | 2150.1391      | 1075.5735       |
| 903.4423       | 9  | T 18 | 2022.0806      | 1011.5442       |
| 1004.4900      | 10 | T 17 | 1921.0329      | 961.0204        |
| 1141.5489      | 11 | H 16 | 1819.9852      | 910.4965        |
| 1270.5915      | 12 | E 15 | 1682.9263      | 841.9671        |
| 1383.6756      | 13 | L 14 | 1553.8837      | 777.4458        |
| 1484.7233      | 14 | T 13 | 1440.7996      | 720.9037        |
| 1597.8073      | 15 | I 12 | 1339.7520      | 670.3799        |
| 1694.8601      | 16 | P 11 | 1226.6679      | 613.8379        |
| 1808.9030      | 17 | N 10 | 1129.6151      | 565.3115        |
| 1922.9459      | 18 | N 9  | 1015.5722      | 508.2900        |
| 2036.0300      | 19 | L 8  | 901.5293       | 451.2686        |
| 2149.1141      | 20 | I 7  | 788.4452       | 394.7265        |
| 2206.1355      | 21 | G 6  | 675.3612       | 338.1845        |
| 2366.1661      | 22 | C 5  | 618.3397       | 309.6738        |
| 2479.2502      | 23 | I 4  | 458.3091       | 229.6585        |
| 2592.3343      | 24 | I 3  | 345.2250       | 173.1164        |
| 2649.3557      | 25 | G 2  | 232.1410       | 116.5744        |
|                | 26 | R 1  | 175.1195       | 88.0637         |

N-term: +29.04 C(22) : +160.03

ASLEQSLEASPIKVR, MH+ 1770.9966, m/z 591.0037  
 L OSG39 P180811 230811-s1.05419.05419.3.dta

X-range:

-

MassTol: Y-zoom:

MassType:

AVG  MONO

Axis:

1  2

Label:

I  M  -

Ions:

a  +  2+  3+

b  +  2+  3+

c  +  2+  3+

x  +  2+  3+

y  +  2+  3+

z  +  2+  3+

hide H<sub>2</sub>O/NH<sub>3</sub>

zoom 112-122

GO

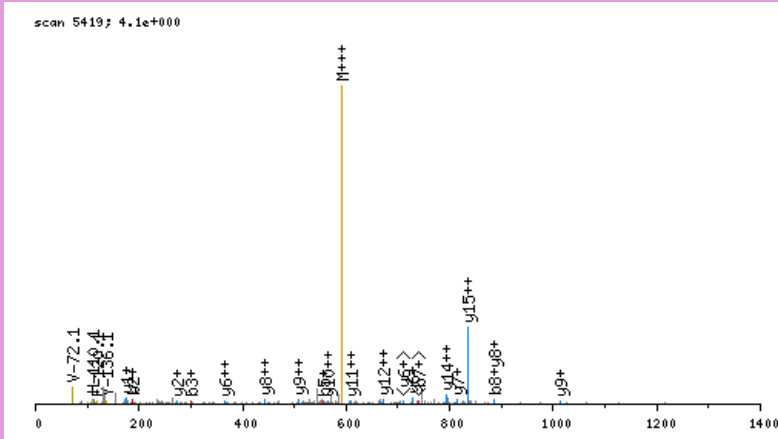

click image to zoom in; click top corners to zoom out [\[precursor±\]](#)

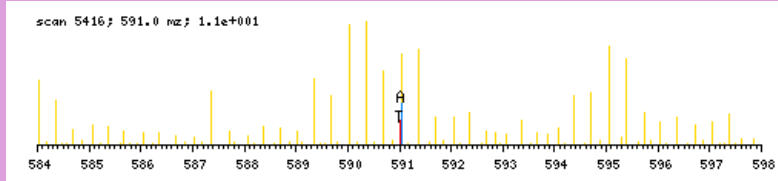

zoomed in precursor plot; T=theoretical m/z, A=acquired m/z

| b <sup>+</sup> | #  | AA # | y <sup>+</sup> | y <sup>2+</sup> |
|----------------|----|------|----------------|-----------------|
| 100.0762       | 1  | A 16 |                |                 |
| 187.1082       | 2  | S 15 | 1671.9282      | 836.4680        |
| 300.1923       | 3  | L 14 | 1584.8961      | 792.9520        |
| 429.2349       | 4  | E 13 | 1471.8121      | 736.4099        |
| 557.2935       | 5  | Q 12 | 1342.7695      | 671.8887        |
| 644.3255       | 6  | S 11 | 1214.7109      | 607.8594        |
| 757.4096       | 7  | L 10 | 1127.6789      | 564.3433        |
| 886.4522       | 8  | E 9  | 1014.5948      | 507.8013        |
| 957.4893       | 9  | A 8  | 885.5522       | 443.2800        |
| 1044.5213      | 10 | S 7  | 814.5151       | 407.7615        |
| 1141.5741      | 11 | P 6  | 727.4831       | 364.2454        |
| 1254.6581      | 12 | I 5  | 630.4303       | 315.7191        |
| 1341.6902      | 13 | S 4  | 517.3462       | 259.1770        |
| 1497.8165      | 14 | K 3  | 430.3142       | 215.6610        |
| 1596.8849      | 15 | V 2  | 274.1879       | 137.5979        |
|                | 16 | R 1  | 175.1195       | 88.0637         |

N-term:+29.04 K(14):+156.13

ASNTQDGVGSLCSR, MH+ 1479.6861, m/z 493.9002  
 L OSG37 P180811 230811-s1.02633.02633.3.dta

X-range:

-

MassTol: Y-zoom:

MassType:

AVG  MONO

Axis:

1  2

Label:

I  M  -

Ions:

a  +  2+  3+

b  +  2+  3+

c  +  2+  3+

x  +  2+  3+

y  +  2+  3+

z  +  2+  3+

hide H<sub>2</sub>O/NH<sub>3</sub>

zoom 112-122

GO

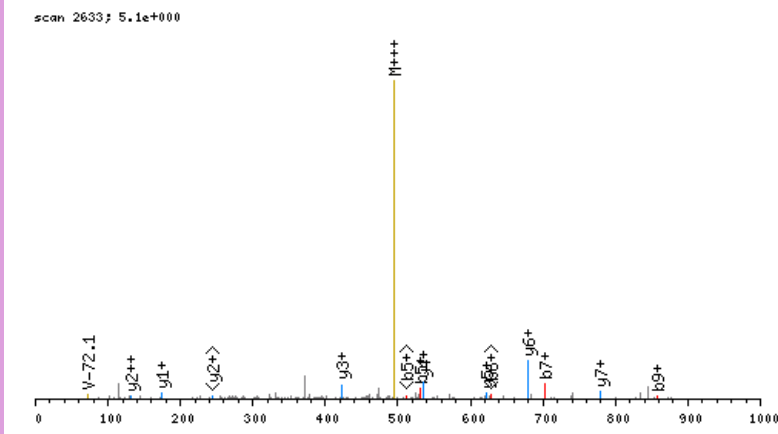

click image to zoom in; click top corners to zoom out [\[precursor±\]](#)

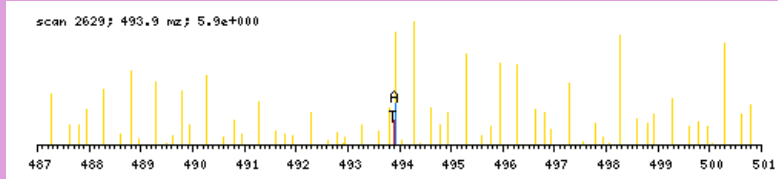

zoomed in precursor plot; T=theoretical m/z, A=acquired m/z

| b <sup>+</sup> | #  | AA # | y <sup>+</sup> | y <sup>2+</sup> |
|----------------|----|------|----------------|-----------------|
| 100.0762       | 1  | A 14 |                |                 |
| 187.1082       | 2  | S 13 | 1380.6177      | 690.8128        |
| 301.1512       | 3  | N 12 | 1293.5857      | 647.2968        |
| 402.1988       | 4  | T 11 | 1179.5428      | 590.2753        |
| 530.2574       | 5  | Q 10 | 1078.4951      | 539.7515        |
| 645.2844       | 6  | D 9  | 950.4365       | 475.7222        |
| 702.3058       | 7  | G 8  | 835.4096       | 418.2087        |
| 801.3742       | 8  | V 7  | 778.3881       | 389.6980        |
| 858.3957       | 9  | G 6  | 679.3197       | 340.1638        |
| 945.4277       | 10 | S 5  | 622.2982       | 311.6530        |
| 1058.5118      | 11 | L 4  | 535.2662       | 268.1370        |
| 1218.5424      | 12 | C 3  | 422.1821       | 211.5950        |
| 1305.5744      | 13 | S 2  | 262.1515       | 131.5797        |
|                | 14 | R 1  | 175.1195       | 88.0637         |

N-term:+29.04 C(12):+160.03

ASQTQGIQQLLQAEKR, MH+ 1855.0401, m/z 619.0182  
 L OSG37 P180811 230811-s1.06560.06560.3.dta

X-range:

-

MassTol: Y-zoom:

MassType:

AVG  MONO

Axis:

1  2

Label:

I  M  -

Ions:

a  +  2+  3+

b  +  2+  3+

c  +  2+  3+

x  +  2+  3+

y  +  2+  3+

z  +  2+  3+

hide H<sub>2</sub>O/NH<sub>3</sub>

zoom 112-122

GO

scan 6560; 4.2e+000

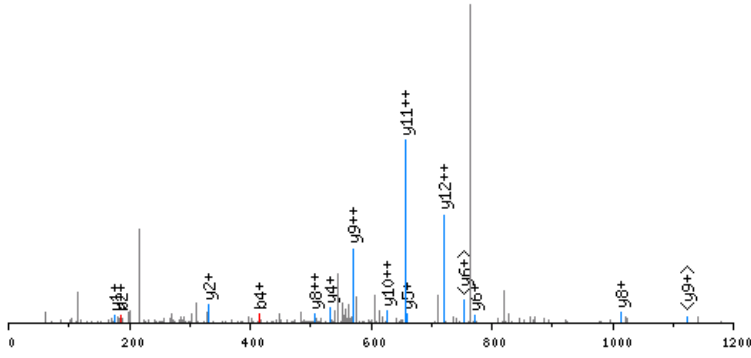

click image to zoom in; click top corners to zoom out [\[precursor±\]](#)

scan 6559; 619.0 m/z; 3.7e+001

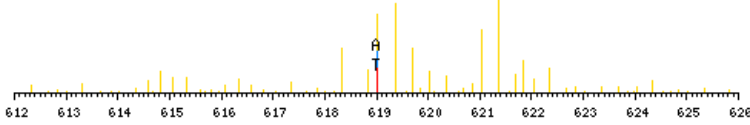

zoomed in precursor plot; T=theoretical m/z, A=acquired m/z

| b <sup>+</sup> | #  | AA # | y <sup>+</sup> | y <sup>2+</sup> |
|----------------|----|------|----------------|-----------------|
| 100.0762       | 1  | A 16 |                |                 |
| 187.1082       | 2  | S 15 | 1755.9718      | 878.4898        |
| 315.1668       | 3  | Q 14 | 1668.9397      | 834.9738        |
| 416.2145       | 4  | T 13 | 1540.8812      | 770.9445        |
| 544.2731       | 5  | Q 12 | 1439.8335      | 720.4206        |
| 601.2945       | 6  | G 11 | 1311.7749      | 656.3914        |
| 714.3786       | 7  | I 10 | 1254.7534      | 627.8806        |
| 842.4372       | 8  | Q 9  | 1141.6694      | 571.3386        |
| 970.4958       | 9  | Q 8  | 1013.6108      | 507.3093        |
| 1083.5798      | 10 | L 7  | 885.5522       | 443.2800        |
| 1196.6639      | 11 | L 6  | 772.4681       | 386.7380        |
| 1324.7225      | 12 | Q 5  | 659.3841       | 330.1960        |
| 1395.7596      | 13 | A 4  | 531.3255       | 266.1667        |
| 1524.8022      | 14 | E 3  | 460.2884       | 230.6481        |
| 1680.9285      | 15 | K 2  | 331.2458       | 166.1268        |
|                | 16 | R 1  | 175.1195       | 88.0637         |

N-term:+29.04 K(15):+156.13

ASSLSSASLVPR, MH+ 1208.7063, m/z 604.8568  
 H OSG37 P180811 230811-s1.04353.04353.2.dta

X-range:

-

MassTol: Y-zoom:

MassType:

AVG  MONO

Axis:

1  2

Label:

I  M  -

Ions:

a  +  2+  3+

b  +  2+  3+

c  +  2+  3+

x  +  2+  3+

y  +  2+  3+

z  +  2+  3+

hide H<sub>2</sub>O/NH<sub>3</sub>

zoom 112-122

GO

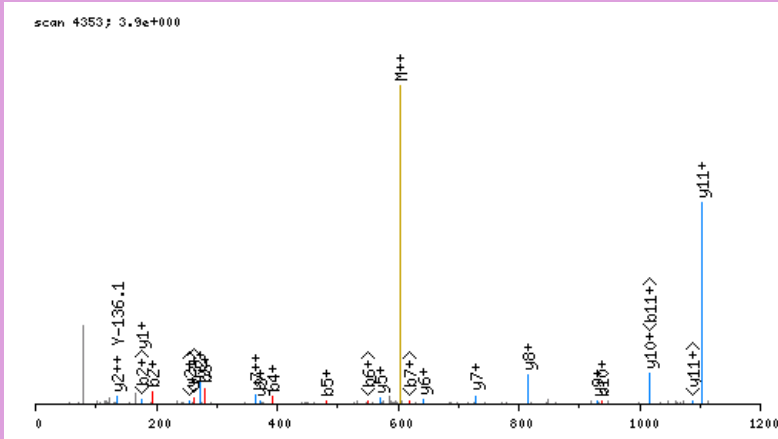

click image to zoom in; click top corners to zoom out [\[precursor±\]](#)

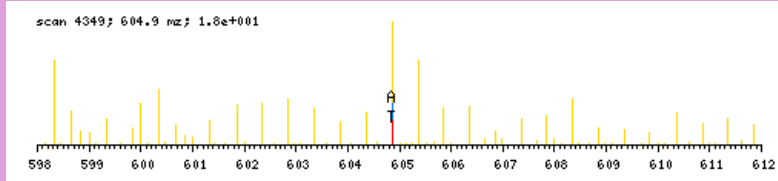

zoomed in precursor plot; T=theoretical m/z, A=acquired m/z

| b <sup>+</sup> | #  | AA # | y <sup>+</sup> | y <sup>2+</sup> |
|----------------|----|------|----------------|-----------------|
| 106.1080       | 1  | A 12 |                |                 |
| 193.1400       | 2  | S 11 | 1103.6061      | 552.3069        |
| 280.1721       | 3  | S 10 | 1016.5740      | 508.7909        |
| 393.2561       | 4  | L 9  | 929.5420       | 465.2749        |
| 480.2882       | 5  | S 8  | 816.4579       | 408.7329        |
| 567.3202       | 6  | S 7  | 729.4259       | 365.2169        |
| 638.3573       | 7  | A 6  | 642.3939       | 321.7009        |
| 725.3893       | 8  | S 5  | 571.3568       | 286.1823        |
| 838.4734       | 9  | L 4  | 484.3247       | 242.6663        |
| 937.5418       | 10 | V 3  | 371.2407       | 186.1243        |
| 1034.5946      | 11 | P 2  | 272.1723       | 136.5900        |
|                | 12 | R 1  | 175.1195       | 88.0637         |

N-term:+35.07



ASTQTTHLTIPTNLLIGCIIGR, MH+ 2443.3190, m/z 815.1112  
H OSG39 P180811 230811-s1.07678.07678.3.dta

scan 7678; 9.7e+000

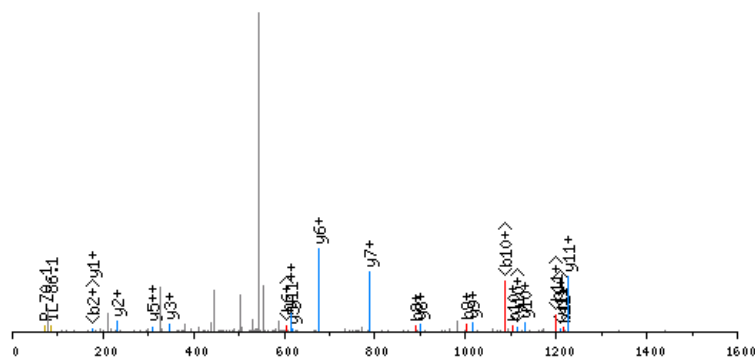

click image to zoom in; click top corners to zoom out [precursor±]

scan 7676; 815.1 mz; 3.6e+001

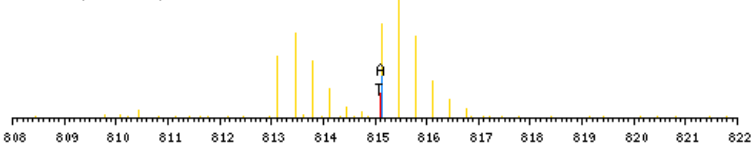

zoomed in precursor plot; T=theoretical m/z, A=acquired m/z

| b <sup>+</sup> | #  | AA # | y <sup>+</sup> | y <sup>2+</sup> |
|----------------|----|------|----------------|-----------------|
| 106.1080       | 1  | A 22 |                |                 |
| 193.1400       | 2  | S 21 | 2338.2189      | 1169.6133       |
| 294.1877       | 3  | T 20 | 2251.1868      | 1126.0973       |
| 422.2463       | 4  | Q 19 | 2150.1391      | 1075.5735       |
| 523.2940       | 5  | T 18 | 2022.0806      | 1011.5442       |
| 624.3417       | 6  | T 17 | 1921.0329      | 961.0204        |
| 761.4006       | 7  | H 16 | 1819.9852      | 910.4965        |
| 890.4432       | 8  | E 15 | 1682.9263      | 841.9671        |
| 1003.5272      | 9  | L 14 | 1553.8837      | 777.4458        |
| 1104.5749      | 10 | T 13 | 1440.7996      | 720.9037        |
| 1217.6590      | 11 | I 12 | 1339.7520      | 670.3799        |
| 1314.7117      | 12 | P 11 | 1226.6679      | 613.8379        |
| 1428.7547      | 13 | N 10 | 1129.6151      | 565.3115        |
| 1542.7976      | 14 | N 9  | 1015.5722      | 508.2900        |
| 1655.8816      | 15 | L 8  | 901.5293       | 451.2686        |
| 1768.9657      | 16 | I 7  | 788.4452       | 394.7265        |
| 1825.9872      | 17 | G 6  | 675.3612       | 338.1845        |
| 1986.0178      | 18 | C 5  | 618.3397       | 309.6738        |
| 2099.1018      | 19 | I 4  | 458.3091       | 229.6585        |
| 2212.1859      | 20 | I 3  | 345.2250       | 173.1164        |
| 2269.2074      | 21 | G 2  | 232.1410       | 116.5744        |
|                | 22 | R 1  | 175.1195       | 88.0637         |

N-term:+35.07 C(18):+160.03

X-range:

0 - 0

MassTol: Y-zoom:

0. 1.

MassType:

AVG  MONO

Axis:

1  2

Label:

I  M  -

Ions:

a  +  2+  3+

b  +  2+  3+

c  +  2+  3+

x  +  2+  3+

y  +  2+  3+

z  +  2+  3+

hide H<sub>2</sub>O/NH<sub>3</sub>

zoom 112-122

GO

ASTSYLPSQVTEMFNQGR, MH+ 2050.0127, m/z 684.0091  
 H OSG37 P180811 230811-s1.08375.08375.3.dta

X-range:

-

MassTol: Y-zoom:

MassType:

AVG  MONO

Axis:

1  2

Label:

I  M  -

Ions:

a  +  2+  3+

b  +  2+  3+

c  +  2+  3+

x  +  2+  3+

y  +  2+  3+

z  +  2+  3+

hide H<sub>2</sub>O/NH<sub>3</sub>

zoom 112-122

GO

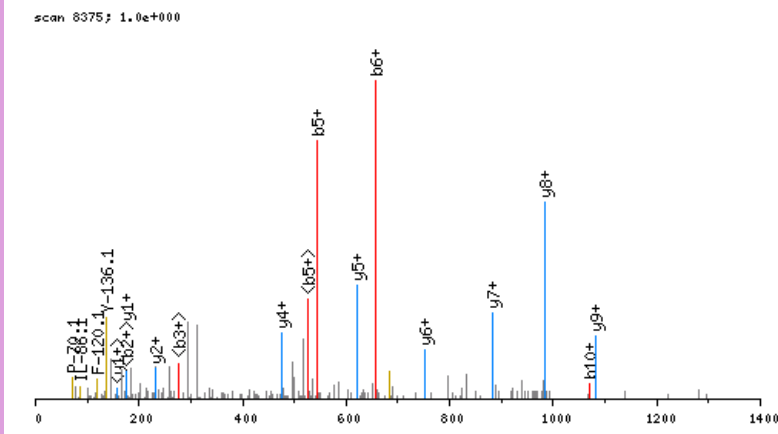

click image to zoom in; click top corners to zoom out [\[precursor±\]](#)

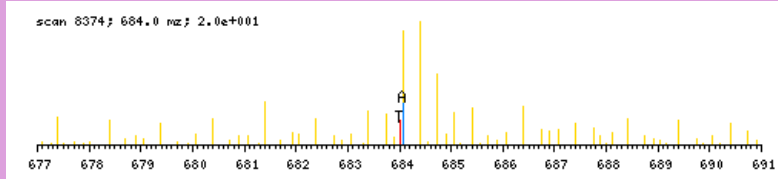

zoomed in precursor plot; T=theoretical m/z, A=acquired m/z

| b <sup>+</sup> | #  | AA # | y <sup>+</sup> | y <sup>2+</sup> |
|----------------|----|------|----------------|-----------------|
| 106.1080       | 1  | A 18 |                |                 |
| 193.1400       | 2  | S 17 | 1944.9126      | 972.9602        |
| 294.1877       | 3  | T 16 | 1857.8805      | 929.4442        |
| 381.2197       | 4  | S 15 | 1756.8328      | 878.9203        |
| 544.2831       | 5  | Y 14 | 1669.8008      | 835.4043        |
| 657.3671       | 6  | L 13 | 1506.7375      | 753.8727        |
| 754.4199       | 7  | P 12 | 1393.6534      | 697.3306        |
| 841.4519       | 8  | S 11 | 1296.6007      | 648.8042        |
| 969.5105       | 9  | Q 10 | 1209.5686      | 605.2882        |
| 1068.5789      | 10 | V 9  | 1081.5101      | 541.2589        |
| 1169.6266      | 11 | T 8  | 982.4416       | 491.7247        |
| 1298.6692      | 12 | E 7  | 881.3940       | 441.2009        |
| 1429.7097      | 13 | M 6  | 752.3514       | 376.6796        |
| 1576.7781      | 14 | F 5  | 621.3109       | 311.1594        |
| 1690.8210      | 15 | N 4  | 474.2425       | 237.6251        |
| 1818.8796      | 16 | Q 3  | 360.1995       | 180.6037        |
| 1875.9011      | 17 | G 2  | 232.1410       | 116.5744        |
|                | 18 | R 1  | 175.1195       | 88.0637         |

N-term:+35.07

ATEMVEVGPEDDEVGAER, MH+ 1966.9128, m/z 656.3091  
 H OSG37 P180811 230811-s1.04917.04917.3.dta

X-range:

-

MassTol: Y-zoom:

MassType:

AVG  MONO

Axis:

1  2

Label:

I  M  -

Ions:

a  +  2+  3+

b  +  2+  3+

c  +  2+  3+

x  +  2+  3+

y  +  2+  3+

z  +  2+  3+

hide H<sub>2</sub>O/NH<sub>3</sub>

zoom 112-122

GO

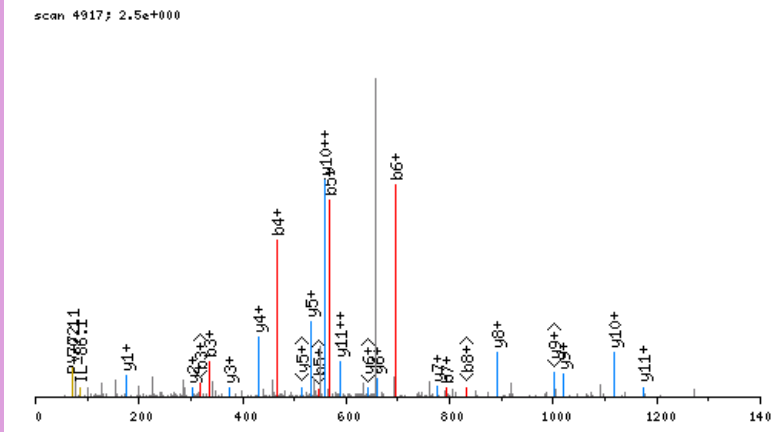

click image to zoom in; click top corners to zoom out [\[precursor±\]](#)

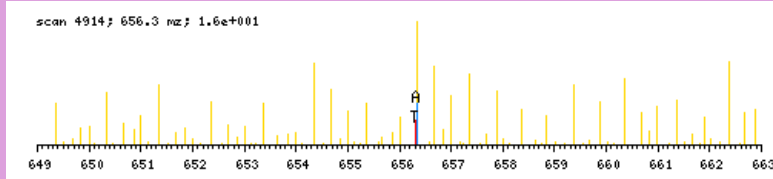

zoomed in precursor plot; T=theoretical m/z, A=acquired m/z

| b <sup>+</sup> | #  | AA # | y <sup>+</sup> | y <sup>2+</sup> |
|----------------|----|------|----------------|-----------------|
| 106.1080       | 1  | A 18 |                |                 |
| 207.1557       | 2  | T 17 | 1861.8126      | 931.4102        |
| 336.1983       | 3  | E 16 | 1760.7649      | 880.8864        |
| 467.2388       | 4  | M 15 | 1631.7223      | 816.3651        |
| 566.3072       | 5  | V 14 | 1500.6818      | 750.8448        |
| 695.3498       | 6  | E 13 | 1401.6134      | 701.3106        |
| 794.4182       | 7  | V 12 | 1272.5708      | 636.7893        |
| 851.4397       | 8  | G 11 | 1173.5024      | 587.2551        |
| 948.4924       | 9  | P 10 | 1116.4809      | 558.7444        |
| 1077.5350      | 10 | E 9  | 1019.4282      | 510.2180        |
| 1192.5620      | 11 | D 8  | 890.3856       | 445.6967        |
| 1307.5889      | 12 | D 7  | 775.3586       | 388.1832        |
| 1436.6315      | 13 | E 6  | 660.3317       | 330.6698        |
| 1535.6999      | 14 | V 5  | 531.2891       | 266.1485        |
| 1592.7214      | 15 | G 4  | 432.2207       | 216.6142        |
| 1663.7585      | 16 | A 3  | 375.1992       | 188.1035        |
| 1792.8011      | 17 | E 2  | 304.1621       | 152.5850        |
|                | 18 | R 1  | 175.1195       | 88.0637         |

N-term:+35.07

ATIEKIPFESAFR, MH+ 1576.9375, m/z 526.3174  
 H OSG39 P180811 230811-s1.05873.05873.3.dta

X-range:

-

MassTol: Y-zoom:

MassType:

AVG  MONO

Axis:

1  2

Label:

I  M  -

Ions:

a  +  2+  3+

b  +  2+  3+

c  +  2+  3+

x  +  2+  3+

y  +  2+  3+

z  +  2+  3+

hide H<sub>2</sub>O/NH<sub>3</sub>

zoom 112-122

GO

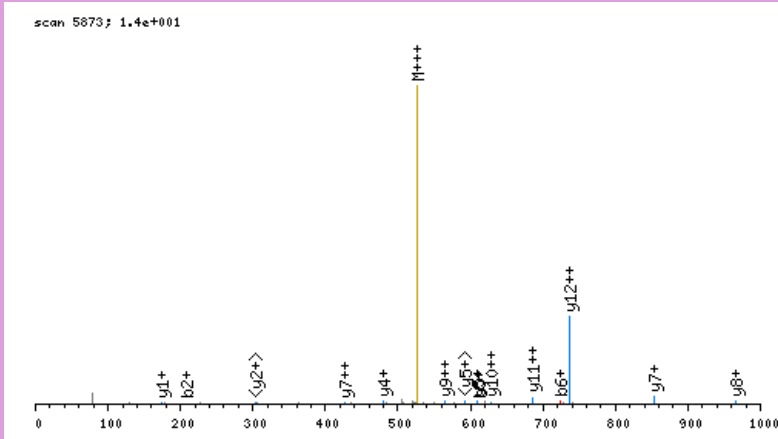

click image to zoom in; click top corners to zoom out [\[precursor±\]](#)

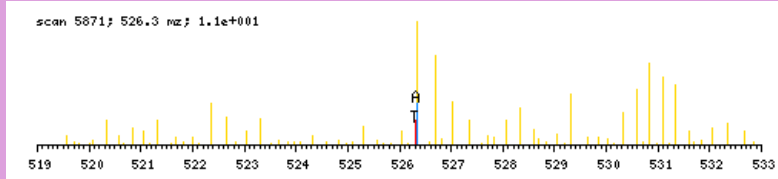

zoomed in precursor plot; T=theoretical m/z, A=acquired m/z

| b <sup>+</sup> | #  | AA # | y <sup>+</sup> | y <sup>2+</sup> |
|----------------|----|------|----------------|-----------------|
| 106.1080       | 1  | A 13 |                |                 |
| 207.1557       | 2  | T 12 | 1471.8373      | 736.4226        |
| 320.2398       | 3  | I 11 | 1370.7896      | 685.8987        |
| 449.2823       | 4  | E 10 | 1257.7056      | 629.3567        |
| 611.4404       | 5  | K 9  | 1128.6630      | 564.8354        |
| 724.5245       | 6  | I 8  | 966.5049       | 483.7564        |
| 821.5773       | 7  | P 7  | 853.4208       | 427.2143        |
| 968.6457       | 8  | F 6  | 756.3681       | 378.6879        |
| 1097.6883      | 9  | E 5  | 609.2997       | 305.1537        |
| 1184.7203      | 10 | S 4  | 480.2571       | 240.6324        |
| 1255.7574      | 11 | A 3  | 393.2250       | 197.1164        |
| 1402.8258      | 12 | F 2  | 322.1879       | 161.5979        |
|                | 13 | R 1  | 175.1195       | 88.0637         |

N-term:+35.07 K(5):+162.16

ATLDVYNPFENR, MH+ 1472.7597, m/z 491.5914  
 H OSG37 P180811 230811-s1.07437.07437.3.dta

X-range:

-

MassTol: Y-zoom:

MassType:

AVG  MONO

Axis:

1  2

Label:

I  M  -

Ions:

a  +  2+  3+

b  +  2+  3+

c  +  2+  3+

x  +  2+  3+

y  +  2+  3+

z  +  2+  3+

hide H<sub>2</sub>O/NH<sub>3</sub>

zoom 112-122

GO

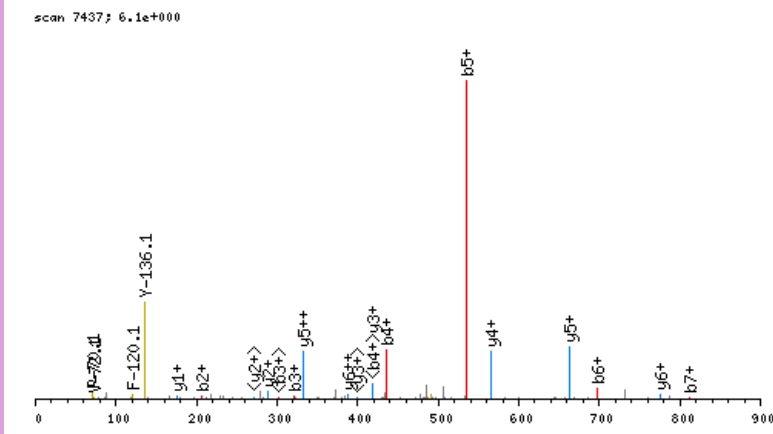

click image to zoom in; click top corners to zoom out [\[precursor±\]](#)

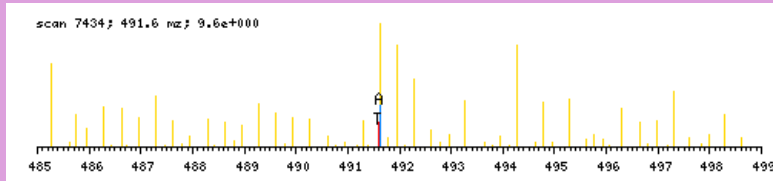

zoomed in precursor plot; T=theoretical m/z, A=acquired m/z

| b <sup>+</sup> | #  | AA # | y <sup>+</sup> | y <sup>2+</sup> |
|----------------|----|------|----------------|-----------------|
| 106.1080       | 1  | A 12 |                |                 |
| 207.1557       | 2  | T 11 | 1367.6596      | 684.3337        |
| 320.2398       | 3  | L 10 | 1266.6119      | 633.8099        |
| 435.2667       | 4  | D 9  | 1153.5278      | 577.2678        |
| 534.3351       | 5  | V 8  | 1038.5009      | 519.7543        |
| 697.3984       | 6  | Y 7  | 939.4325       | 470.2201        |
| 811.4414       | 7  | N 6  | 776.3691       | 388.6885        |
| 908.4941       | 8  | P 5  | 662.3262       | 331.6670        |
| 1055.5625      | 9  | F 4  | 565.2734       | 283.1406        |
| 1184.6051      | 10 | E 3  | 418.2050       | 209.6064        |
| 1298.6481      | 11 | N 2  | 289.1624       | 145.0851        |
|                | 12 | R 1  | 175.1195       | 88.0637         |

N-term:+35.07

ATPATAAPAASAAATTTSAQEEPAAPPEPR, MH+ 2834.4172, m/z 709.3598  
 L OSG36 P180811 230811-s1.03593.03593.4.dta

scan 3593; 6.8e-001

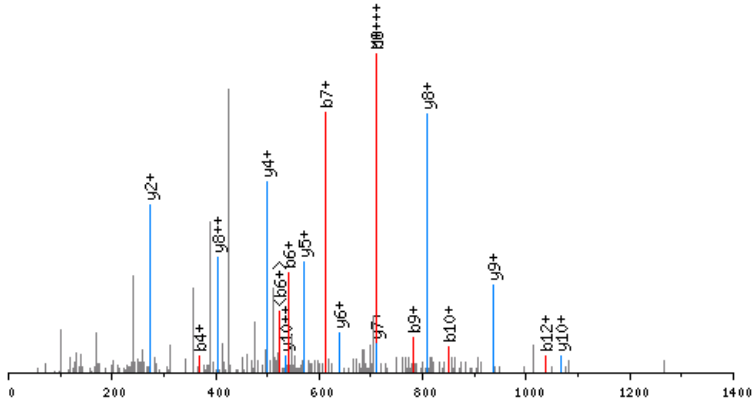

click image to zoom in; click top corners to zoom out [\[precursor±\]](#)

scan 3599; 709.4 m/z; 2.6e+000

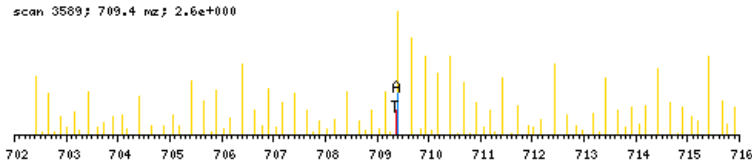

zoomed in precursor plot; T=theoretical m/z, A=acquired m/z

X-range:

-

MassTol: Y-zoom:

MassType:

AVG  MONO

Axis:

1  2

Label:

I  M  -

Ions:

a  +  2+  3+

b  +  2+  3+

c  +  2+  3+

x  +  2+  3+

y  +  2+  3+

z  +  2+  3+

hide H<sub>2</sub>O/NH<sub>3</sub>

zoom 112-122

GO

| b <sup>+</sup> | #  | AA | #  | y <sup>+</sup> | y <sup>2+</sup> |
|----------------|----|----|----|----------------|-----------------|
| 100.0762       | 1  | A  | 30 |                |                 |
| 201.1239       | 2  | T  | 29 | 2735.3488      | 1368.1783       |
| 298.1767       | 3  | P  | 28 | 2634.3011      | 1317.6545       |
| 369.2138       | 4  | A  | 27 | 2537.2483      | 1269.1281       |
| 470.2614       | 5  | T  | 26 | 2466.2112      | 1233.6095       |
| 541.2986       | 6  | A  | 25 | 2365.1636      | 1183.0857       |
| 612.3357       | 7  | A  | 24 | 2294.1264      | 1147.5671       |
| 709.3884       | 8  | P  | 23 | 2223.0893      | 1112.0486       |
| 780.4256       | 9  | A  | 22 | 2126.0366      | 1063.5222       |
| 851.4627       | 10 | A  | 21 | 2054.9995      | 1028.0036       |
| 950.5311       | 11 | V  | 20 | 1983.9623      | 992.4851        |
| 1037.5631      | 12 | S  | 19 | 1884.8939      | 942.9509        |
| 1108.6002      | 13 | A  | 18 | 1797.8619      | 899.4349        |
| 1179.6373      | 14 | A  | 17 | 1726.8248      | 863.9163        |
| 1280.6850      | 15 | T  | 16 | 1655.7877      | 828.3977        |
| 1381.7327      | 16 | T  | 15 | 1554.7400      | 777.8739        |
| 1482.7804      | 17 | T  | 14 | 1453.6923      | 727.3501        |
| 1569.8124      | 18 | S  | 13 | 1352.6446      | 676.8262        |
| 1640.8495      | 19 | A  | 12 | 1265.6126      | 633.3102        |
| 1768.9081      | 20 | Q  | 11 | 1194.5755      | 597.7917        |
| 1897.9507      | 21 | E  | 10 | 1066.5169      | 533.7624        |
| 2026.9933      | 22 | E  | 9  | 937.4743       | 469.2411        |
| 2124.0460      | 23 | P  | 8  | 808.4317       | 404.7198        |
| 2195.0832      | 24 | A  | 7  | 711.3790       | 356.1934        |
| 2266.1203      | 25 | A  | 6  | 640.3418       | 320.6748        |
| 2337.1574      | 26 | A  | 5  | 569.3047       | 285.1563        |
| 2434.2101      | 27 | P  | 4  | 498.2676       | 249.6377        |
| 2563.2527      | 28 | E  | 3  | 401.2149       | 201.1113        |
| 2660.3055      | 29 | P  | 2  | 272.1723       | 136.5900        |
|                | 30 | R  | 1  | 175.1195       | 88.0637         |

N-term:+29.04

ATTVSAPDLKSVR, MH+ 1412.8749, m/z 471.6298  
 H OSG39 P180811 230811-s1.03164.03164.3.dta

X-range:

-

MassTol: Y-zoom:

MassType:

AVG  MONO

Axis:

1  2

Label:

I  M  -

Ions:

a  +  2+  3+

b  +  2+  3+

c  +  2+  3+

x  +  2+  3+

y  +  2+  3+

z  +  2+  3+

hide H<sub>2</sub>O/NH<sub>3</sub>

zoom 112-122

GO

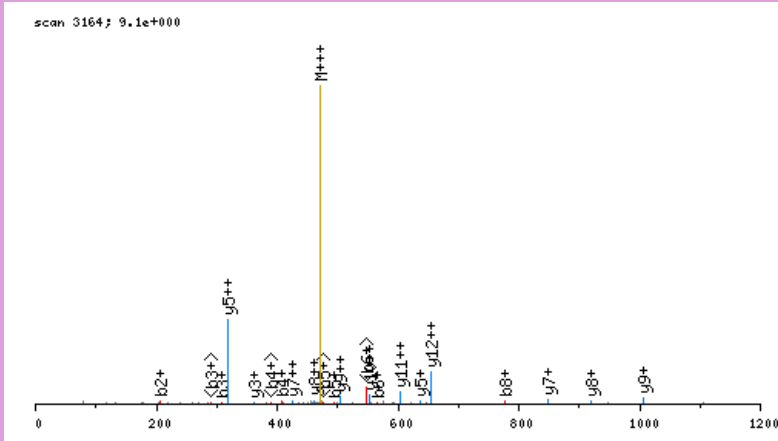

click image to zoom in; click top corners to zoom out [\[precursor±\]](#)

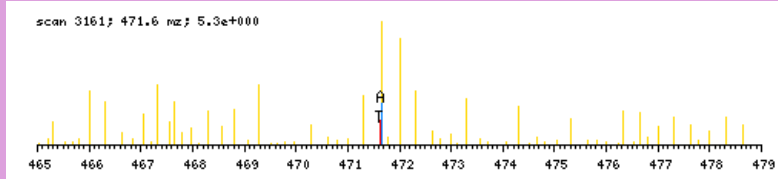

zoomed in precursor plot; T=theoretical m/z, A=acquired m/z

| b <sup>+</sup> | #  | AA # | y <sup>+</sup> | y <sup>2+</sup> |
|----------------|----|------|----------------|-----------------|
| 106.1080       | 1  | A 13 |                |                 |
| 207.1557       | 2  | T 12 | 1307.7747      | 654.3913        |
| 308.2034       | 3  | T 11 | 1206.7270      | 603.8674        |
| 407.2718       | 4  | V 10 | 1105.6794      | 553.3436        |
| 494.3038       | 5  | S 9  | 1006.6110      | 503.8094        |
| 565.3409       | 6  | A 8  | 919.5789       | 460.2934        |
| 662.3937       | 7  | P 7  | 848.5418       | 424.7748        |
| 777.4206       | 8  | D 6  | 751.4891       | 376.2484        |
| 890.5047       | 9  | L 5  | 636.4621       | 318.7350        |
| 1052.6628      | 10 | K 4  | 523.3780       | 262.1929        |
| 1139.6948      | 11 | S 3  | 361.2199       | 181.1139        |
| 1238.7632      | 12 | V 2  | 274.1879       | 137.5979        |
|                | 13 | R 1  | 175.1195       | 88.0637         |

N-term:+35.07 K(10):+162.16

AVAATAPPDAPNREEVDFER, MH+ 2183.0733, m/z 546.5238  
 L OSG39 P180811 230811-s1.03815.03815.4.dta

X-range:

-

MassTol: Y-zoom:

MassType:

AVG  MONO

Axis:

1  2

Label:

I  M  -

Ions:

a  +  2+  3+

b  +  2+  3+

c  +  2+  3+

x  +  2+  3+

y  +  2+  3+

z  +  2+  3+

hide H<sub>2</sub>O/NH<sub>3</sub>

zoom 112-122

GO

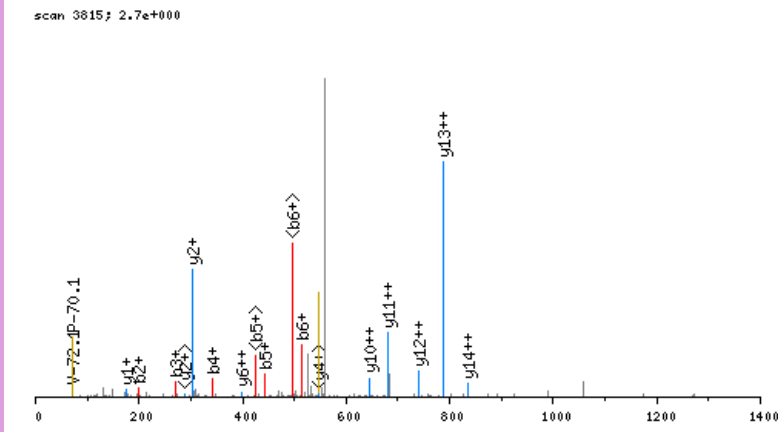

click image to zoom in; click top corners to zoom out [\[precursor±\]](#)

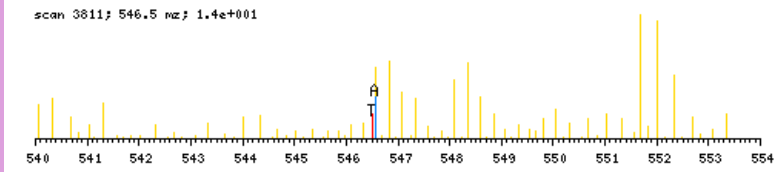

zoomed in precursor plot; T=theoretical m/z, A=acquired m/z

| b <sup>+</sup> | #  | AA | #  | y <sup>+</sup> | y <sup>2+</sup> |
|----------------|----|----|----|----------------|-----------------|
| 100.0762       | 1  | A  | 20 |                |                 |
| 199.1446       | 2  | V  | 19 | 2084.0049      | 1042.5063       |
| 270.1817       | 3  | A  | 18 | 1984.9365      | 992.9721        |
| 341.2189       | 4  | A  | 17 | 1913.8993      | 957.4536        |
| 442.2665       | 5  | T  | 16 | 1842.8622      | 921.9350        |
| 513.3036       | 6  | A  | 15 | 1741.8146      | 871.4112        |
| 610.3564       | 7  | P  | 14 | 1670.7774      | 835.8926        |
| 707.4092       | 8  | P  | 13 | 1573.7247      | 787.3662        |
| 822.4361       | 9  | D  | 12 | 1476.6719      | 738.8399        |
| 893.4732       | 10 | A  | 11 | 1361.6450      | 681.3264        |
| 990.5260       | 11 | P  | 10 | 1290.6079      | 645.8078        |
| 1104.5689      | 12 | N  | 9  | 1193.5551      | 597.2815        |
| 1260.6700      | 13 | R  | 8  | 1079.5122      | 540.2600        |
| 1389.7126      | 14 | E  | 7  | 923.4111       | 462.2094        |
| 1518.7552      | 15 | E  | 6  | 794.3685       | 397.6881        |
| 1617.8236      | 16 | V  | 5  | 665.3259       | 333.1668        |
| 1764.8920      | 17 | F  | 4  | 566.2575       | 283.6326        |
| 1879.9190      | 18 | D  | 3  | 419.1890       | 210.0984        |
| 2008.9616      | 19 | E  | 2  | 304.1621       | 152.5850        |
|                | 20 | R  | 1  | 175.1195       | 88.0637         |

N-term:+29.04



AVADKVKEDSQVPATQTLQR, MH+ 2268.2564, m/z 567.8196  
 L OSG40 P180811 230811-s1.03816.03816.4.dta

scan 3816; 1.7e+000

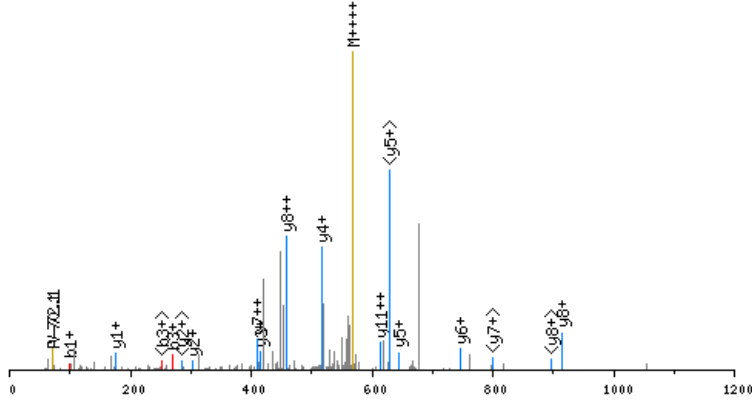

click image to zoom in; click top corners to zoom out [precursor±]

scan 3814; 567.8 m/z; 2.3e+001

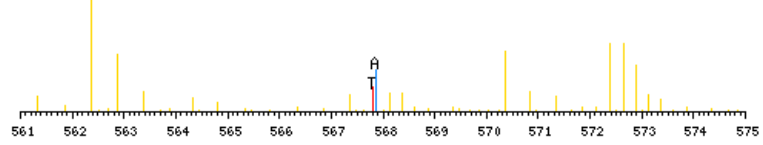

zoomed in precursor plot; T=theoretical m/z, A=acquired m/z

X-range:

-

MassTol: Y-zoom:

MassType:

AVG  MONO

Axis:

1  2

Label:

I  M  -

Ions:

a  +  2+  3+

b  +  2+  3+

c  +  2+  3+

x  +  2+  3+

y  +  2+  3+

z  +  2+  3+

hide H<sub>2</sub>O/NH<sub>3</sub>

zoom 112-122

GO

| b <sup>+</sup> | #  | AA | #  | y <sup>+</sup> | y <sup>2+</sup> |
|----------------|----|----|----|----------------|-----------------|
| 100.0762       | 1  | A  | 20 |                |                 |
| 199.1446       | 2  | V  | 19 | 2169.1880      | 1085.0979       |
| 270.1817       | 3  | A  | 18 | 2070.1196      | 1035.5637       |
| 385.2087       | 4  | D  | 17 | 1999.0825      | 1000.0451       |
| 541.3350       | 5  | K  | 16 | 1884.0555      | 942.5317        |
| 640.4034       | 6  | V  | 15 | 1727.9292      | 864.4685        |
| 796.5297       | 7  | K  | 14 | 1628.8608      | 814.9343        |
| 925.5723       | 8  | E  | 13 | 1472.7345      | 736.8712        |
| 1040.5992      | 9  | D  | 12 | 1343.6919      | 672.3499        |
| 1127.6313      | 10 | S  | 11 | 1228.6650      | 614.8364        |
| 1255.6898      | 11 | Q  | 10 | 1141.6329      | 571.3204        |
| 1354.7583      | 12 | V  | 9  | 1013.5744      | 507.2911        |
| 1451.8110      | 13 | P  | 8  | 914.5060       | 457.7569        |
| 1522.8481      | 14 | A  | 7  | 817.4532       | 409.2305        |
| 1623.8958      | 15 | T  | 6  | 746.4161       | 373.7120        |
| 1751.9544      | 16 | Q  | 5  | 645.3684       | 323.1881        |
| 1853.0021      | 17 | T  | 4  | 517.3098       | 259.1588        |
| 1966.0861      | 18 | L  | 3  | 416.2621       | 208.6350        |
| 2094.1447      | 19 | Q  | 2  | 303.1781       | 152.0930        |
|                | 20 | R  | 1  | 175.1195       | 88.0637         |

N-term:+29.04 K(5):+156.13  
 K(7):+156.13

AVAAELENVSGKYFDGLR, MH+ 2053.0606, m/z 685.0251  
 L OSG39 P180811 230811-s1.07089.07089.3.dta

X-range:

-

MassTol: Y-zoom:

MassType:

AVG  MONO

Axis:

1  2

Label:

I  M  -

Ions:

a  +  2+  3+

b  +  2+  3+

c  +  2+  3+

x  +  2+  3+

y  +  2+  3+

z  +  2+  3+

hide H<sub>2</sub>O/NH<sub>3</sub>

zoom 112-122

GO

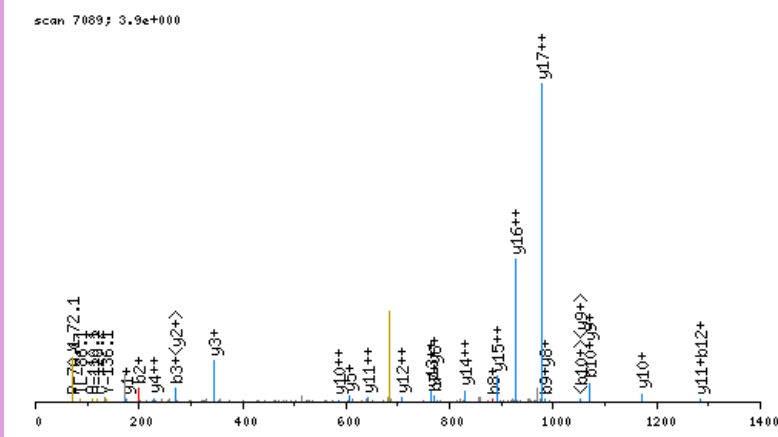

click image to zoom in; click top corners to zoom out [\[precursor±\]](#)

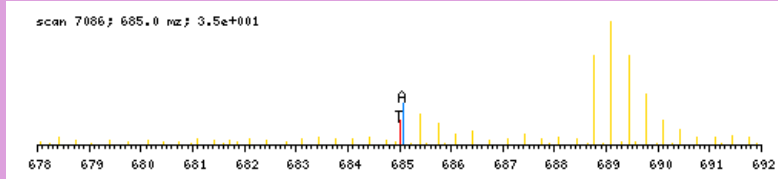

zoomed in precursor plot; T=theoretical m/z, A=acquired m/z

| b <sup>+</sup> | #  | AA # | y <sup>+</sup> | y <sup>2+</sup> |
|----------------|----|------|----------------|-----------------|
| 100.0762       | 1  | A 18 |                |                 |
| 199.1446       | 2  | V 17 | 1953.9922      | 977.5000        |
| 270.1817       | 3  | A 16 | 1854.9238      | 927.9658        |
| 399.2243       | 4  | E 15 | 1783.8867      | 892.4473        |
| 528.2669       | 5  | E 14 | 1654.8441      | 827.9260        |
| 641.3510       | 6  | L 13 | 1525.8015      | 763.4047        |
| 770.3936       | 7  | E 12 | 1412.7174      | 706.8626        |
| 884.4365       | 8  | N 11 | 1283.6748      | 642.3413        |
| 983.5049       | 9  | V 10 | 1169.6319      | 585.3199        |
| 1070.5370      | 10 | S 9  | 1070.5635      | 535.7857        |
| 1127.5584      | 11 | G 8  | 983.5315       | 492.2697        |
| 1283.6847      | 12 | K 7  | 926.5100       | 463.7589        |
| 1446.7480      | 13 | Y 6  | 770.3837       | 385.6958        |
| 1593.8165      | 14 | F 5  | 607.3204       | 304.1641        |
| 1708.8434      | 15 | D 4  | 460.2520       | 230.6299        |
| 1765.8649      | 16 | G 3  | 345.2250       | 173.1164        |
| 1878.9489      | 17 | L 2  | 288.2036       | 144.6057        |
|                | 18 | R 1  | 175.1195       | 88.0637         |

N-term:+29.04 K(12):+156.13

AVEEQYSCEYGSGR, MH+ 1668.7387, m/z 556.9178  
 H OSG37 P180811 230811-s1.02950.02950.3.dta

X-range:

-

MassTol: Y-zoom:

MassType:

AVG  MONO

Axis:

1  2

Label:

I  M  -

Ions:

a  +  2+  3+

b  +  2+  3+

c  +  2+  3+

x  +  2+  3+

y  +  2+  3+

z  +  2+  3+

hide H<sub>2</sub>O/NH<sub>3</sub>

zoom 112-122

GO

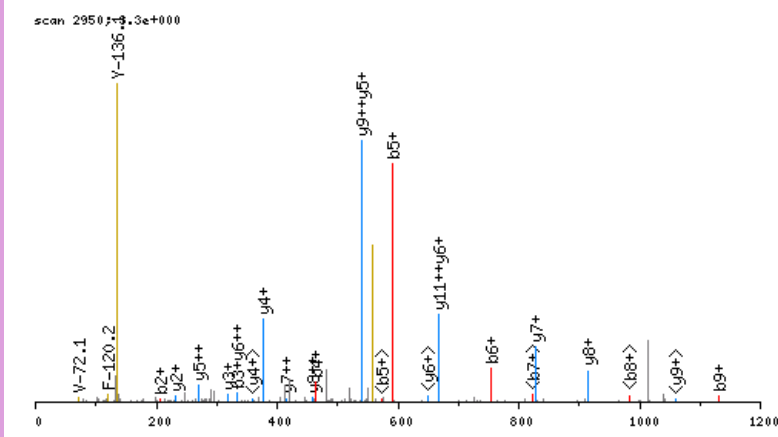

click image to zoom in; click top corners to zoom out [\[precursor±\]](#)

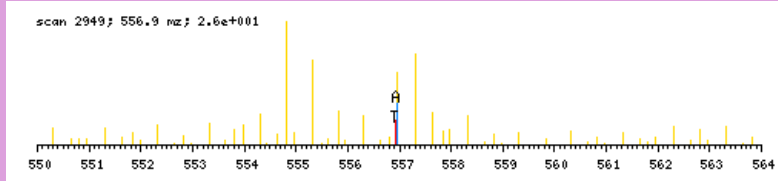

zoomed in precursor plot; T=theoretical m/z, A=acquired m/z

| b <sup>+</sup> | #  | AA # | y <sup>+</sup> | y <sup>2+</sup> |
|----------------|----|------|----------------|-----------------|
| 106.1080       | 1  | A 14 |                |                 |
| 205.1764       | 2  | V 13 | 1563.6385      | 782.3232        |
| 334.2190       | 3  | E 12 | 1464.5701      | 732.7890        |
| 463.2616       | 4  | E 11 | 1335.5275      | 668.2677        |
| 591.3202       | 5  | Q 10 | 1206.4849      | 603.7464        |
| 754.3835       | 6  | Y 9  | 1078.4263      | 539.7171        |
| 841.4155       | 7  | S 8  | 915.3630       | 458.1854        |
| 1001.4461      | 8  | C 7  | 828.3310       | 414.6694        |
| 1130.4887      | 9  | E 6  | 668.3004       | 334.6541        |
| 1293.5521      | 10 | Y 5  | 539.2578       | 270.1328        |
| 1350.5735      | 11 | G 4  | 376.1945       | 188.6011        |
| 1437.6056      | 12 | S 3  | 319.1730       | 160.0904        |
| 1494.6270      | 13 | G 2  | 232.1410       | 116.5744        |
|                | 14 | R 1  | 175.1195       | 88.0637         |

N-term:+35.07 C(8):+160.03

AVGKVIPELNGKLTGMAFR, MH+ 2085.2259, m/z 522.0619  
 L OSG40 P180811 230811-s1.07430.07430.4.dta

scan 7430; 2.1e+001

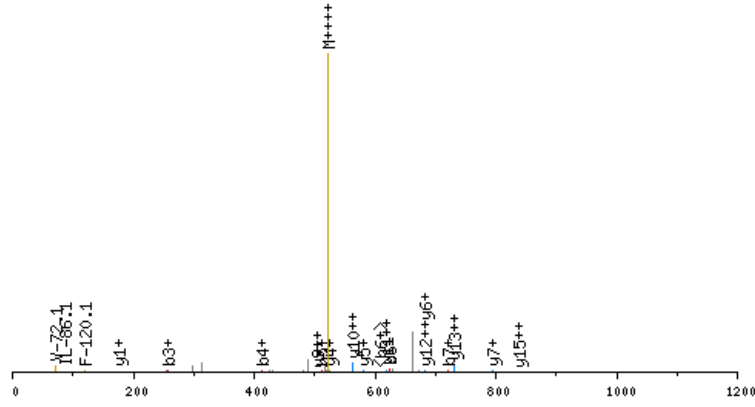

click image to zoom in; click top corners to zoom out [\[precursor±\]](#)

scan 7429; 522.1 m/z; 3.0e+001

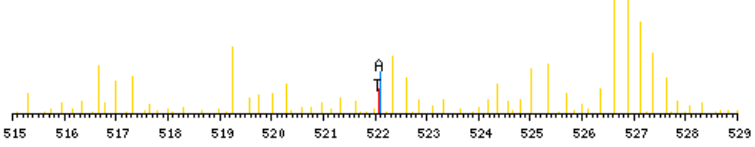

zoomed in precursor plot; T=theoretical m/z, A=acquired m/z

X-range:

-

MassTol: Y-zoom:

MassType:

AVG  MONO

Axis:

1  2

Label:

I  M  -

Ions:

a  +  2+  3+

b  +  2+  3+

c  +  2+  3+

x  +  2+  3+

y  +  2+  3+

z  +  2+  3+

hide H<sub>2</sub>O/NH<sub>3</sub>

zoom 112-122

GO

| b <sup>+</sup> | #  | AA # | y <sup>+</sup> | y <sup>2+</sup> |
|----------------|----|------|----------------|-----------------|
| 100.0762       | 1  | A 19 |                |                 |
| 199.1446       | 2  | V 18 | 1986.1575      | 993.5827        |
| 256.1661       | 3  | G 17 | 1887.0891      | 944.0484        |
| 412.2924       | 4  | K 16 | 1830.0676      | 915.5377        |
| 511.3608       | 5  | V 15 | 1673.9413      | 837.4746        |
| 624.4449       | 6  | I 14 | 1574.8729      | 787.9404        |
| 721.4976       | 7  | P 13 | 1461.7888      | 731.3983        |
| 850.5402       | 8  | E 12 | 1364.7361      | 682.8719        |
| 963.6243       | 9  | L 11 | 1235.6935      | 618.3506        |
| 1077.6672      | 10 | N 10 | 1122.6094      | 561.8086        |
| 1134.6887      | 11 | G 9  | 1008.5665      | 504.7872        |
| 1290.8150      | 12 | K 8  | 951.5450       | 476.2764        |
| 1403.8990      | 13 | L 7  | 795.4187       | 398.2133        |
| 1504.9467      | 14 | T 6  | 682.3347       | 341.6712        |
| 1561.9682      | 15 | G 5  | 581.2870       | 291.1474        |
| 1693.0087      | 16 | M 4  | 524.2655       | 262.6367        |
| 1764.0458      | 17 | A 3  | 393.2250       | 197.1164        |
| 1911.1142      | 18 | F 2  | 322.1879       | 161.5979        |
|                | 19 | R 1  | 175.1195       | 88.0637         |

N-term:+29.04 K(4):+156.13  
 K(12):+156.13

AVIMGAPGSGKGTVSSR, MH+ 1642.9587, m/z 548.3244  
 H OSG39 P180811 230811-s1.02623.02623.3.dta

X-range:

-

MassTol: Y-zoom:

MassType:

AVG  MONO

Axis:

1  2

Label:

I  M  -

Ions:

a  +  2+  3+

b  +  2+  3+

c  +  2+  3+

x  +  2+  3+

y  +  2+  3+

z  +  2+  3+

hide H<sub>2</sub>O/NH<sub>3</sub>

zoom 112-122

GO

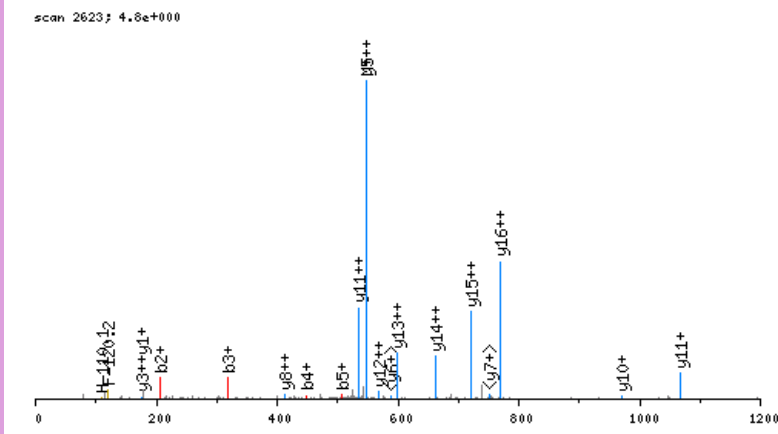

click image to zoom in; click top corners to zoom out [\[precursor±\]](#)

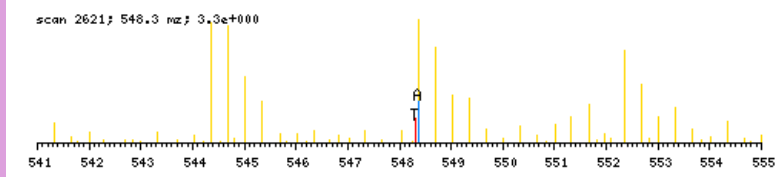

zoomed in precursor plot; T=theoretical m/z, A=acquired m/z

| b <sup>+</sup> | #  | AA # | y <sup>+</sup> | y <sup>2+</sup> |
|----------------|----|------|----------------|-----------------|
| 106.1080       | 1  | A 17 |                |                 |
| 205.1764       | 2  | V 16 | 1537.8585      | 769.4331        |
| 318.2605       | 3  | I 15 | 1438.7901      | 719.8989        |
| 449.3010       | 4  | M 14 | 1325.7060      | 663.3569        |
| 506.3224       | 5  | G 13 | 1194.6655      | 597.8367        |
| 577.3596       | 6  | A 12 | 1137.6440      | 569.3259        |
| 674.4123       | 7  | P 11 | 1066.6069      | 533.8074        |
| 731.4338       | 8  | G 10 | 969.5542       | 485.2810        |
| 818.4658       | 9  | S 9  | 912.5327       | 456.7703        |
| 875.4873       | 10 | G 8  | 825.5007       | 413.2543        |
| 1037.6454      | 11 | K 7  | 768.4792       | 384.7435        |
| 1094.6668      | 12 | G 6  | 606.3211       | 303.6645        |
| 1195.7145      | 13 | T 5  | 549.2997       | 275.1537        |
| 1294.7829      | 14 | V 4  | 448.2520       | 224.6299        |
| 1381.8150      | 15 | S 3  | 349.1836       | 175.0957        |
| 1468.8470      | 16 | S 2  | 262.1515       | 131.5797        |
|                | 17 | R 1  | 175.1195       | 88.0637         |

N-term:+35.07 K(11):+162.16

AVLDKPELSSDASTR, MH+ 1745.9285, m/z 582.6477  
 L OSG39 P180811 230811-s1.03067.03067.3.dta

X-range:

-

MassTol: Y-zoom:

MassType:

AVG  MONO

Axis:

1  2

Label:

I  M  -

Ions:

a  +  2+  3+

b  +  2+  3+

c  +  2+  3+

x  +  2+  3+

y  +  2+  3+

z  +  2+  3+

hide H<sub>2</sub>O/NH<sub>3</sub>

zoom 112-122

GO

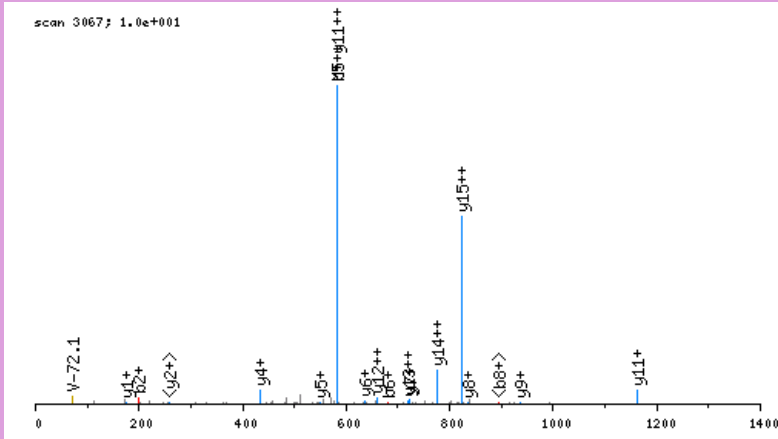

click image to zoom in; click top corners to zoom out [\[precursor±\]](#)

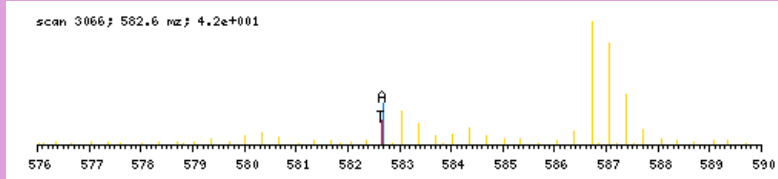

zoomed in precursor plot; T=theoretical m/z, A=acquired m/z

| b <sup>+</sup> | #  | AA # | y <sup>+</sup> | y <sup>2+</sup> |
|----------------|----|------|----------------|-----------------|
| 100.0762       | 1  | A 16 |                |                 |
| 199.1446       | 2  | V 15 | 1646.8601      | 823.9340        |
| 312.2287       | 3  | L 14 | 1547.7917      | 774.3998        |
| 427.2556       | 4  | D 13 | 1434.7077      | 717.8577        |
| 583.3819       | 5  | K 12 | 1319.6807      | 660.3443        |
| 680.4347       | 6  | P 11 | 1163.5544      | 582.2811        |
| 809.4773       | 7  | E 10 | 1066.5017      | 533.7547        |
| 910.5250       | 8  | T 9  | 937.4591       | 469.2334        |
| 1023.6090      | 9  | L 8  | 836.4114       | 418.7096        |
| 1110.6411      | 10 | S 7  | 723.3273       | 362.1676        |
| 1197.6731      | 11 | S 6  | 636.2953       | 318.6516        |
| 1312.7000      | 12 | D 5  | 549.2633       | 275.1355        |
| 1383.7371      | 13 | A 4  | 434.2363       | 217.6221        |
| 1470.7692      | 14 | S 3  | 363.1992       | 182.1035        |
| 1571.8169      | 15 | T 2  | 276.1672       | 138.5875        |
|                | 16 | R 1  | 175.1195       | 88.0637         |

N-term:+29.04 K(5):+156.13

AVMHGETEGTVPGNALVVDPEKPFPR, MH+ 2706.3925, m/z 677.3536  
 L OSG40 P180811 230811-s1.06793.06793.4.dta

scan 6793; 1.3e+000

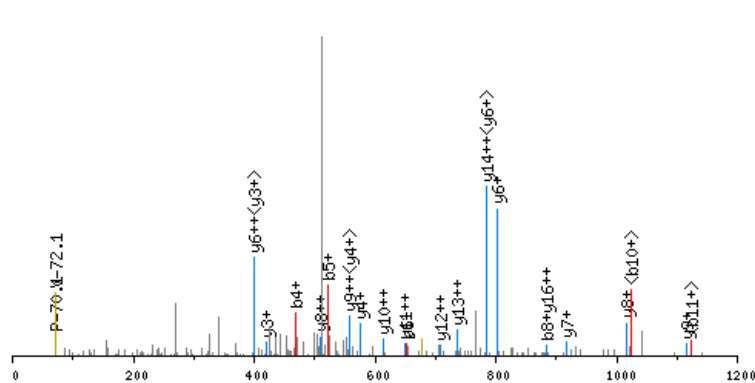

click image to zoom in; click top corners to zoom out [precursor±]

scan 6789; 677.4 m/z; 1.5e+001

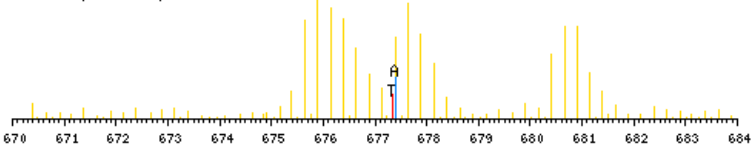

zoomed in precursor plot; T=theoretical m/z, A=acquired m/z

X-range:

0 - 0

MassTol: Y-zoom:

0. 1.

MassType:

AVG  MONO

Axis:

1  2

Label:

I  M  -

Ions:

a  +  2+  3+

b  +  2+  3+

c  +  2+  3+

x  +  2+  3+

y  +  2+  3+

z  +  2+  3+

hide H<sub>2</sub>O/NH<sub>3</sub>

zoom 112-122

GO

| b <sup>+</sup> | #  | AA # | y <sup>+</sup> | y <sup>2+</sup> |
|----------------|----|------|----------------|-----------------|
| 100.0762       | 1  | A 25 |                |                 |
| 199.1446       | 2  | V 24 | 2607.3241      | 1304.1660       |
| 330.1851       | 3  | M 23 | 2508.2557      | 1254.6318       |
| 467.2440       | 4  | H 22 | 2377.2152      | 1189.1115       |
| 524.2655       | 5  | G 21 | 2240.1563      | 1120.5821       |
| 653.3081       | 6  | E 20 | 2183.1349      | 1092.0713       |
| 754.3558       | 7  | T 19 | 2054.0923      | 1027.5500       |
| 883.3984       | 8  | E 18 | 1953.0446      | 977.0262        |
| 940.4198       | 9  | G 17 | 1824.0020      | 912.5049        |
| 1041.4675      | 10 | T 16 | 1766.9805      | 883.9942        |
| 1140.5359      | 11 | V 15 | 1665.9329      | 833.4703        |
| 1237.5887      | 12 | P 14 | 1566.8644      | 783.9361        |
| 1294.6101      | 13 | G 13 | 1469.8117      | 735.4098        |
| 1408.6531      | 14 | N 12 | 1412.7902      | 706.8990        |
| 1479.6902      | 15 | A 11 | 1298.7473      | 649.8776        |
| 1592.7742      | 16 | L 10 | 1227.7102      | 614.3590        |
| 1691.8427      | 17 | V 9  | 1114.6261      | 557.8170        |
| 1790.9111      | 18 | V 8  | 1015.5577      | 508.2828        |
| 1905.9380      | 19 | D 7  | 916.4893       | 458.7486        |
| 2002.9908      | 20 | P 6  | 801.4623       | 401.2351        |
| 2132.0334      | 21 | E 5  | 704.4096       | 352.7087        |
| 2288.1597      | 22 | K 4  | 575.3670       | 288.1874        |
| 2385.2124      | 23 | P 3  | 419.2407       | 210.1243        |
| 2532.2808      | 24 | F 2  | 322.1879       | 161.5979        |
|                | 25 | R 1  | 175.1195       | 88.0637         |

N-term:+29.04 K(22):+156.13

AVNAAQDSTDLVAKLR, MH+ 1727.9656, m/z 576.6600  
 L OSG39 P180811 230811-s1.04903.04903.3.dta

X-range:

-

MassTol: Y-zoom:

MassType:

AVG  MONO

Axis:

1  2

Label:

I  M  -

Ions:

a  +  2+  3+

b  +  2+  3+

c  +  2+  3+

x  +  2+  3+

y  +  2+  3+

z  +  2+  3+

hide H<sub>2</sub>O/NH<sub>3</sub>

zoom 112-122

GO

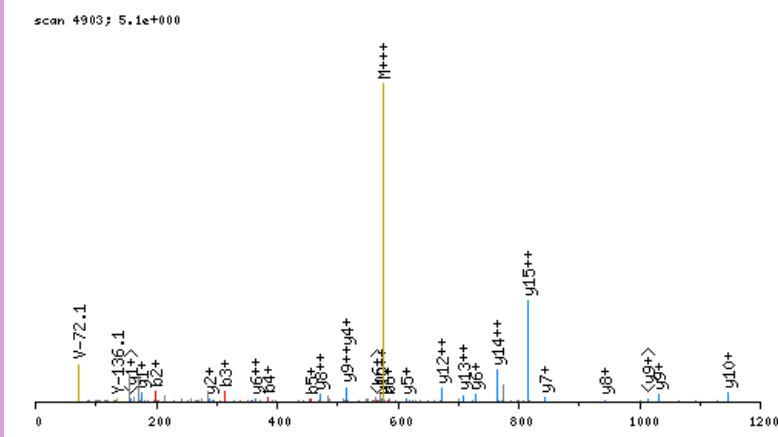

click image to zoom in; click top corners to zoom out [\[precursor±\]](#)

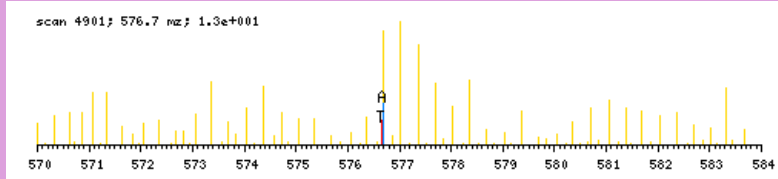

zoomed in precursor plot; T=theoretical m/z, A=acquired m/z

| b <sup>+</sup> | #  | AA # | y <sup>+</sup> | y <sup>2+</sup> |
|----------------|----|------|----------------|-----------------|
| 100.0762       | 1  | A 16 |                |                 |
| 199.1446       | 2  | V 15 | 1628.8972      | 814.9525        |
| 313.1876       | 3  | N 14 | 1529.8288      | 765.4183        |
| 384.2247       | 4  | A 13 | 1415.7859      | 708.3968        |
| 455.2618       | 5  | A 12 | 1344.7487      | 672.8783        |
| 583.3204       | 6  | Q 11 | 1273.7116      | 637.3597        |
| 698.3473       | 7  | D 10 | 1145.6530      | 573.3304        |
| 785.3793       | 8  | S 9  | 1030.6261      | 515.8170        |
| 886.4270       | 9  | T 8  | 943.5941       | 472.3010        |
| 1001.4540      | 10 | D 7  | 842.5464       | 421.7771        |
| 1114.5380      | 11 | L 6  | 727.5195       | 364.2636        |
| 1213.6064      | 12 | V 5  | 614.4354       | 307.7216        |
| 1284.6435      | 13 | A 4  | 515.3670       | 258.1874        |
| 1440.7698      | 14 | K 3  | 444.3299       | 222.6688        |
| 1553.8539      | 15 | L 2  | 288.2036       | 144.6057        |
|                | 16 | R 1  | 175.1195       | 88.0637         |

N-term:+29.04 K(14):+156.13



AVPIAQKSEPOSLSNEALMR, MH+ 2225.1964, m/z 557.0546  
 L OSG39 P180811 230811-s1.04460.04460.4.dta

X-range:

-

MassTol: Y-zoom:

MassType:

AVG  MONO

Axis:

1  2

Label:

I  M  -

Ions:

a  +  2+  3+

b  +  2+  3+

c  +  2+  3+

x  +  2+  3+

y  +  2+  3+

z  +  2+  3+

hide H<sub>2</sub>O/NH<sub>3</sub>

zoom 112-122

GO

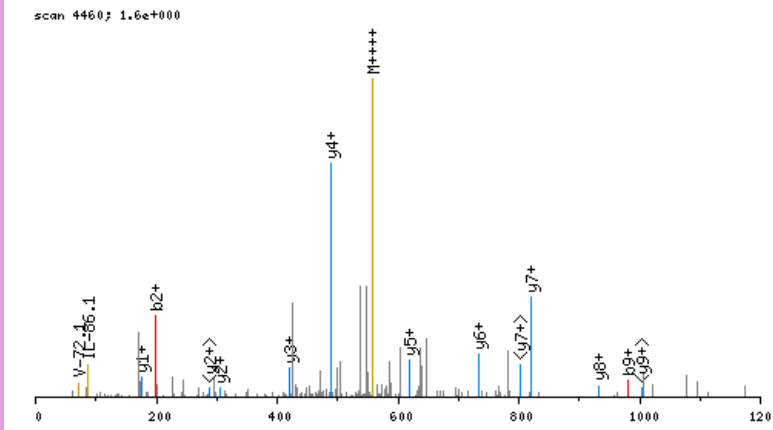

click image to zoom in; click top corners to zoom out [\[precursor±\]](#)

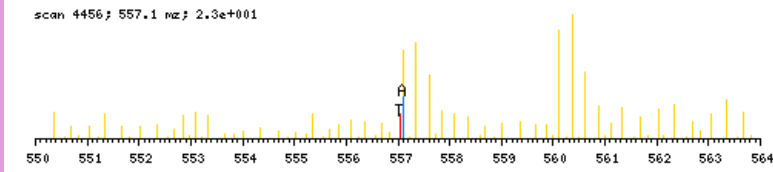

zoomed in precursor plot; T=theoretical m/z, A=acquired m/z

| b <sup>+</sup> | #  | AA | #  | y <sup>+</sup> | y <sup>2+</sup> |
|----------------|----|----|----|----------------|-----------------|
| 100.0762       | 1  | A  | 20 |                |                 |
| 199.1446       | 2  | V  | 19 | 2126.1280      | 1063.5679       |
| 296.1974       | 3  | P  | 18 | 2027.0596      | 1014.0337       |
| 409.2815       | 4  | I  | 17 | 1930.0068      | 965.5073        |
| 480.3186       | 5  | A  | 16 | 1816.9228      | 908.9653        |
| 608.3771       | 6  | Q  | 15 | 1745.8856      | 873.4467        |
| 764.5034       | 7  | K  | 14 | 1617.8271      | 809.4174        |
| 851.5355       | 8  | S  | 13 | 1461.7008      | 731.3543        |
| 980.5781       | 9  | E  | 12 | 1374.6687      | 687.8383        |
| 1077.6308      | 10 | P  | 11 | 1245.6261      | 623.3170        |
| 1205.6894      | 11 | Q  | 10 | 1148.5734      | 574.7906        |
| 1292.7214      | 12 | S  | 9  | 1020.5148      | 510.7613        |
| 1405.8055      | 13 | L  | 8  | 933.4828       | 467.2453        |
| 1492.8375      | 14 | S  | 7  | 820.3987       | 410.7033        |
| 1606.8805      | 15 | N  | 6  | 733.3667       | 367.1873        |
| 1735.9231      | 16 | E  | 5  | 619.3238       | 310.1658        |
| 1806.9602      | 17 | A  | 4  | 490.2812       | 245.6445        |
| 1920.0442      | 18 | L  | 3  | 419.2440       | 210.1259        |
| 2051.0847      | 19 | M  | 2  | 306.1600       | 153.5839        |
|                | 20 | R  | 1  | 175.1195       | 88.0637         |

N-term:+29.04 K(7):+156.13

AVPNTTPSTFPVKLEEDLPQEPTSR, MH+ 2658.3990, m/z 665.3552  
 L OSG38 P180811 230811-s1.05888.05888.4.dta

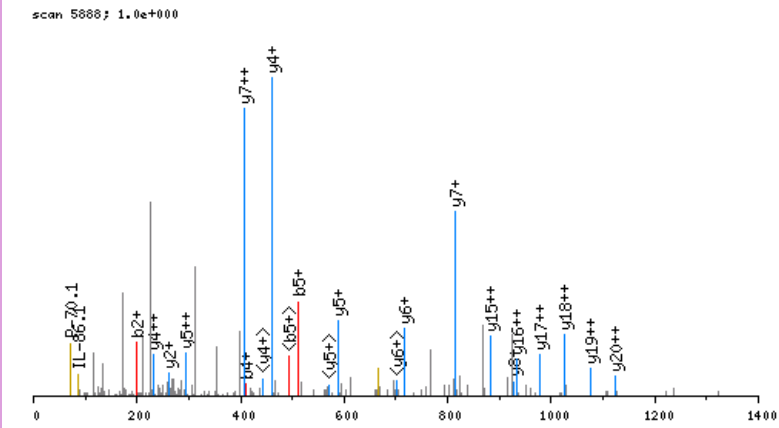

click image to zoom in; click top corners to zoom out [precursor±]

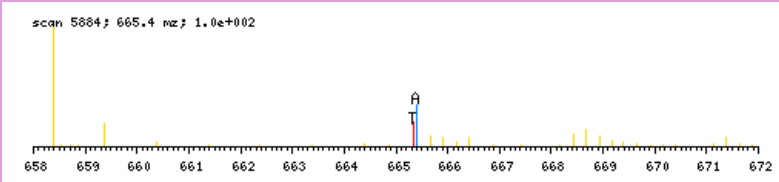

zoomed in precursor plot; T=theoretical m/z, A=acquired m/z

X-range:  -   
 MassTol: Y-zoom:    
 MassType:  AVG  MONO  
 Axis:  1  2  
 Label:  I  M  -  
 Ions:  
 a  +  2+  3+  
 b  +  2+  3+  
 c  +  2+  3+  
 x  +  2+  3+  
 y  +  2+  3+  
 z  +  2+  3+  
 hide H<sub>2</sub>O/NH<sub>3</sub>   
 zoom 112-122

| b <sup>+</sup> | #  | AA # | y <sup>+</sup> | y <sup>2+</sup> |
|----------------|----|------|----------------|-----------------|
| 100.0762       | 1  | A 24 |                |                 |
| 199.1446       | 2  | V 23 | 2559.3307      | 1280.1692       |
| 296.1974       | 3  | P 22 | 2460.2622      | 1230.6350       |
| 410.2403       | 4  | N 21 | 2363.2095      | 1182.1087       |
| 511.2880       | 5  | T 20 | 2249.1666      | 1125.0872       |
| 608.3408       | 6  | P 19 | 2148.1189      | 1074.5634       |
| 705.3935       | 7  | P 18 | 2051.0661      | 1026.0370       |
| 792.4256       | 8  | S 17 | 1954.0133      | 977.5106        |
| 893.4732       | 9  | T 16 | 1866.9813      | 933.9946        |
| 990.5260       | 10 | P 15 | 1765.9336      | 883.4707        |
| 1089.5944      | 11 | V 14 | 1668.8809      | 834.9444        |
| 1245.7207      | 12 | K 13 | 1569.8125      | 785.4101        |
| 1358.8048      | 13 | L 12 | 1413.6862      | 707.3470        |
| 1487.8474      | 14 | E 11 | 1300.6021      | 650.8050        |
| 1616.8900      | 15 | E 10 | 1171.5595      | 586.2837        |
| 1731.9169      | 16 | D 9  | 1042.5169      | 521.7624        |
| 1845.0010      | 17 | L 8  | 927.4900       | 464.2489        |
| 1942.0537      | 18 | P 7  | 814.4059       | 407.7069        |
| 2070.1123      | 19 | Q 6  | 717.3531       | 359.1805        |
| 2199.1549      | 20 | E 5  | 589.2946       | 295.1512        |
| 2296.2077      | 21 | P 4  | 460.2520       | 230.6299        |
| 2397.2553      | 22 | T 3  | 363.1992       | 182.1035        |
| 2484.2874      | 23 | S 2  | 262.1515       | 131.5797        |
|                | 24 | R 1  | 175.1195       | 88.0637         |

N-term:+29.04 K(12):+156.13

AVRPLQLLGTCALCR, MH+ 1891.0469, m/z 631.0205  
 H OSG40 P180811 230811-s1.07371.07371.3.dta

X-range:

-

MassTol: Y-zoom:

MassType:

AVG  MONO

Axis:

1  2

Label:

I  M  -

Ions:

a  +  2+  3+

b  +  2+  3+

c  +  2+  3+

x  +  2+  3+

y  +  2+  3+

z  +  2+  3+

hide H<sub>2</sub>O/NH<sub>3</sub>

zoom 112-122

GO

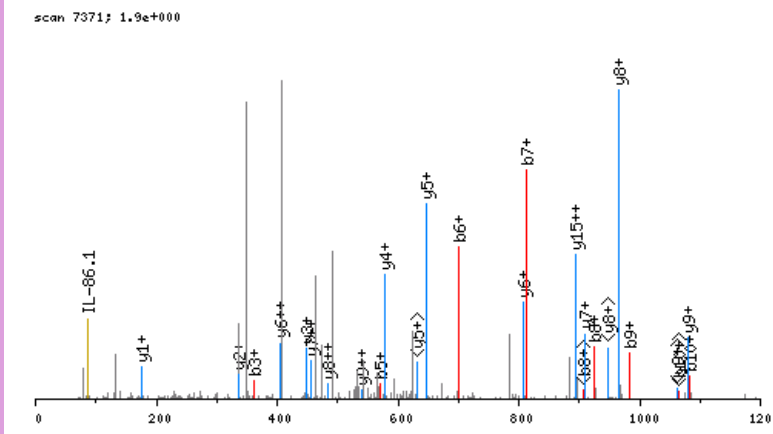

click image to zoom in; click top corners to zoom out [\[precursor±\]](#)

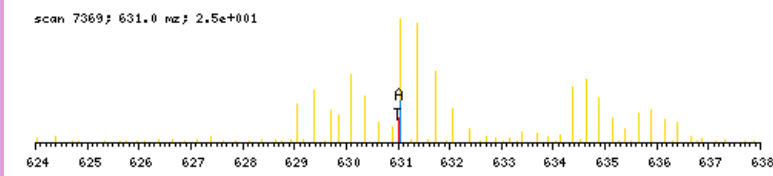

zoomed in precursor plot; T=theoretical m/z, A=acquired m/z

| b <sup>+</sup> | #  | AA | #  | y <sup>+</sup> | y <sup>2+</sup> |
|----------------|----|----|----|----------------|-----------------|
| 106.1080       | 1  | A  | 16 |                |                 |
| 205.1764       | 2  | V  | 15 | 1785.9467      | 893.4772        |
| 361.2775       | 3  | R  | 14 | 1686.8783      | 843.9430        |
| 458.3303       | 4  | P  | 13 | 1530.7771      | 765.8925        |
| 571.4144       | 5  | L  | 12 | 1433.7244      | 717.3661        |
| 699.4729       | 6  | Q  | 11 | 1320.6403      | 660.8241        |
| 812.5570       | 7  | L  | 10 | 1192.5817      | 596.7948        |
| 925.6411       | 8  | L  | 9  | 1079.4977      | 540.2528        |
| 982.6625       | 9  | G  | 8  | 966.4136       | 483.7107        |
| 1083.7102      | 10 | T  | 7  | 909.3922       | 455.2000        |
| 1243.7408      | 11 | C  | 6  | 808.3445       | 404.6761        |
| 1314.7779      | 12 | A  | 5  | 648.3139       | 324.6608        |
| 1443.8205      | 13 | E  | 4  | 577.2768       | 289.1423        |
| 1556.9046      | 14 | L  | 3  | 448.2342       | 224.6210        |
| 1716.9352      | 15 | C  | 2  | 335.1501       | 168.0790        |
|                | 16 | R  | 1  | 175.1195       | 88.0637         |

N-term:+35.07 C(11):+160.03  
 C(15):+160.03

AVSQNPGDVLTPVPTGSQEFGAADQDDLR, MH+ 3140.5136, m/z 785.8839  
L OSG36 P180811 230811-s1.04841.04841.4.dta

scan 4841: 1.1e+000

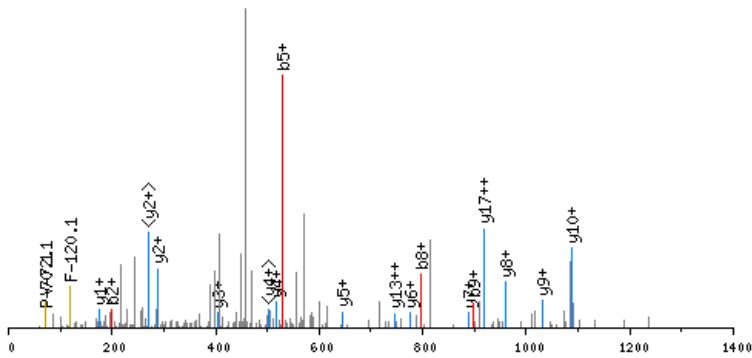

click image to zoom in; click top corners to zoom out [\[precursor±\]](#)

scan 4839: 785.9 m/z; 2.0e+001

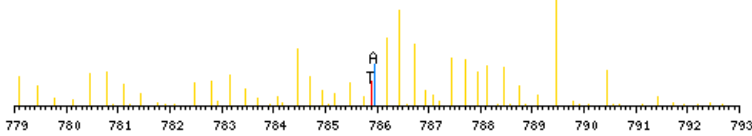

zoomed in precursor plot; T=theoretical m/z, A=acquired m/z

| b <sup>+</sup> | #  | AA # | y <sup>+</sup> | y <sup>2+</sup> |
|----------------|----|------|----------------|-----------------|
| 100.0762       | 1  | A 30 |                |                 |
| 199.1446       | 2  | V 29 | 3041.4452      | 1521.2265       |
| 286.1767       | 3  | S 28 | 2942.3768      | 1471.6923       |
| 414.2352       | 4  | Q 27 | 2855.3448      | 1428.1763       |
| 528.2782       | 5  | N 26 | 2727.2862      | 1364.1470       |
| 625.3309       | 6  | P 25 | 2613.2433      | 1307.1255       |
| 682.3524       | 7  | G 24 | 2516.1905      | 1258.5992       |
| 797.3793       | 8  | D 23 | 2459.1690      | 1230.0884       |
| 896.4477       | 9  | V 22 | 2344.1421      | 1172.5750       |
| 1009.5318      | 10 | L 21 | 2245.0737      | 1123.0408       |
| 1110.5795      | 11 | T 20 | 2131.9896      | 1066.4987       |
| 1207.6323      | 12 | P 19 | 2030.9419      | 1015.9749       |
| 1306.7007      | 13 | V 18 | 1933.8892      | 967.4485        |
| 1403.7534      | 14 | P 17 | 1834.8208      | 917.9143        |
| 1504.8011      | 15 | T 16 | 1737.7680      | 869.3879        |
| 1561.8226      | 16 | G 15 | 1636.7203      | 818.8641        |
| 1648.8546      | 17 | S 14 | 1579.6989      | 790.3533        |
| 1776.9132      | 18 | Q 13 | 1492.6668      | 746.8373        |
| 1905.9558      | 19 | E 12 | 1364.6082      | 682.8080        |
| 2053.0242      | 20 | F 11 | 1235.5657      | 618.2867        |
| 2110.0456      | 21 | G 10 | 1088.4972      | 544.7525        |
| 2181.0828      | 22 | A 9  | 1031.4758      | 516.2418        |
| 2252.1199      | 23 | A 8  | 960.4387       | 480.7232        |
| 2367.1468      | 24 | D 7  | 889.4015       | 445.2047        |
| 2495.2054      | 25 | Q 6  | 774.3746       | 387.6912        |
| 2623.2640      | 26 | Q 5  | 646.3160       | 323.6619        |
| 2738.2909      | 27 | D 4  | 518.2575       | 259.6326        |
| 2853.3179      | 28 | D 3  | 403.2305       | 202.1192        |
| 2966.4019      | 29 | L 2  | 288.2036       | 144.6057        |
|                | 30 | R 1  | 175.1195       | 88.0637         |

N-term:+29.04

X-range:

-

MassTol: Y-zoom:

MassType:

AVG  MONO

Axis:

1  2

Label:

I  M  -

Ions:

a  +  2+  3+

b  +  2+  3+

c  +  2+  3+

x  +  2+  3+

y  +  2+  3+

z  +  2+  3+

hide H<sub>2</sub>O/NH<sub>3</sub>

zoom 112-122

GO

AVSSELQIQSFPVDECPR, MH+ 2224.1131, m/z 742.0426  
 H OSG37 P180811 230811-s1.06776.06776.3.dta

scan 6776; 1.9e+000

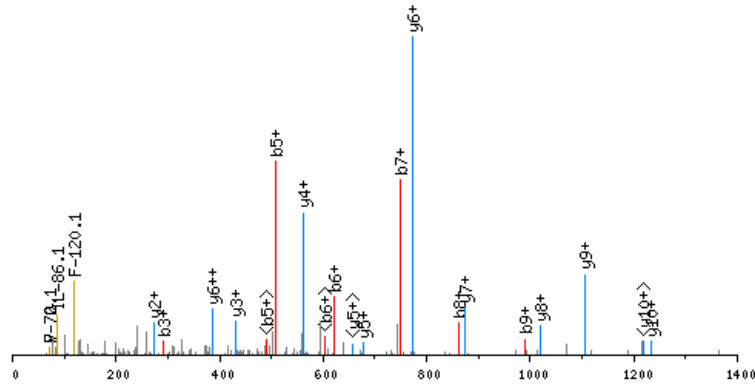

click image to zoom in; click top corners to zoom out [precursor±]

scan 6774; 742.0 m/z; 2.0e+001

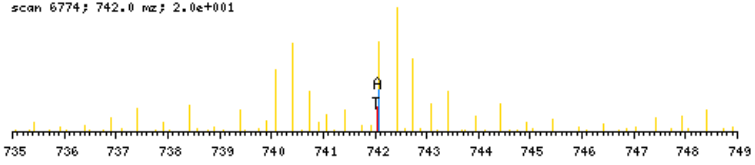

zoomed in precursor plot; T=theoretical m/z, A=acquired m/z

X-range:

-

MassTol: Y-zoom:

MassType:

AVG  MONO

Axis:

1  2

Label:

I  M  -

Ions:

a  +  2+  3+

b  +  2+  3+

c  +  2+  3+

x  +  2+  3+

y  +  2+  3+

z  +  2+  3+

hide H<sub>2</sub>O/NH<sub>3</sub>

zoom 112-122

GO

| b <sup>+</sup> | #  | AA | #  | y <sup>+</sup> | y <sup>2+</sup> |
|----------------|----|----|----|----------------|-----------------|
| 106.1080       | 1  | A  | 19 |                |                 |
| 205.1764       | 2  | V  | 18 | 2119.0129      | 1060.0104       |
| 292.2085       | 3  | S  | 17 | 2019.9445      | 1010.4762       |
| 379.2405       | 4  | S  | 16 | 1932.9125      | 966.9602        |
| 508.2831       | 5  | E  | 15 | 1845.8805      | 923.4441        |
| 621.3671       | 6  | L  | 14 | 1716.8379      | 858.9229        |
| 749.4257       | 7  | Q  | 13 | 1603.7538      | 802.3808        |
| 862.5098       | 8  | I  | 12 | 1475.6952      | 738.3515        |
| 990.5684       | 9  | Q  | 11 | 1362.6112      | 681.8095        |
| 1118.6269      | 10 | Q  | 10 | 1234.5526      | 617.7802        |
| 1205.6590      | 11 | S  | 9  | 1106.4940      | 553.7509        |
| 1352.7274      | 12 | F  | 8  | 1019.4620      | 510.2349        |
| 1451.7958      | 13 | V  | 7  | 872.3936       | 436.7007        |
| 1548.8486      | 14 | P  | 6  | 773.3252       | 387.1665        |
| 1663.8755      | 15 | D  | 5  | 676.2724       | 338.6401        |
| 1792.9181      | 16 | E  | 4  | 561.2455       | 281.1266        |
| 1952.9487      | 17 | C  | 3  | 432.2029       | 216.6053        |
| 2050.0015      | 18 | P  | 2  | 272.1723       | 136.5900        |
|                | 19 | R  | 1  | 175.1195       | 88.0637         |

N-term:+35.07 C(17):+160.03

AVSSLATARKGPSEVR, MH+ 1597.9550, m/z 533.3232  
 H OSG39 P180811 230811-s1.02564.02564.3.dta

X-range:

-

MassTol: Y-zoom:

MassType:

AVG  MONO

Axis:

1  2

Label:

I  M  -

Ions:

a  +  2+  3+

b  +  2+  3+

c  +  2+  3+

x  +  2+  3+

y  +  2+  3+

z  +  2+  3+

hide H<sub>2</sub>O/NH<sub>3</sub>

zoom 112-122

GO

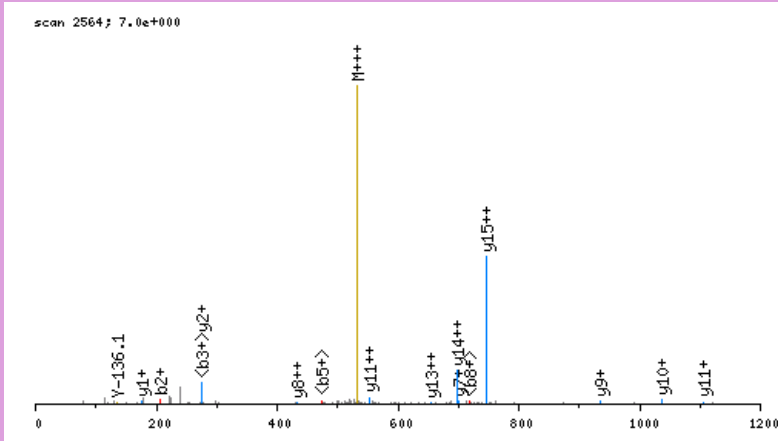

click image to zoom in; click top corners to zoom out [\[precursor±\]](#)

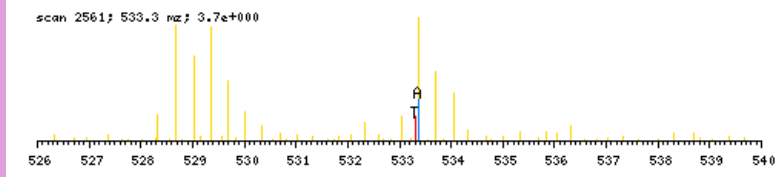

zoomed in precursor plot; T=theoretical m/z, A=acquired m/z

| b <sup>+</sup> | #  | AA # | y <sup>+</sup> | y <sup>2+</sup> |
|----------------|----|------|----------------|-----------------|
| 106.1080       | 1  | A 16 |                |                 |
| 205.1764       | 2  | V 15 | 1492.8548      | 746.9313        |
| 292.2085       | 3  | S 14 | 1393.7864      | 697.3971        |
| 379.2405       | 4  | S 13 | 1306.7543      | 653.8811        |
| 492.3245       | 5  | L 12 | 1219.7223      | 610.3651        |
| 563.3617       | 6  | A 11 | 1106.6382      | 553.8230        |
| 664.4093       | 7  | T 10 | 1035.6011      | 518.3045        |
| 735.4465       | 8  | A 9  | 934.5534       | 467.7806        |
| 897.6046       | 9  | K 8  | 863.5163       | 432.2621        |
| 954.6260       | 10 | G 7  | 701.3582       | 351.1830        |
| 1011.6475      | 11 | G 6  | 644.3368       | 322.6723        |
| 1108.7002      | 12 | P 5  | 587.3153       | 294.1616        |
| 1195.7323      | 13 | S 4  | 490.2625       | 245.6352        |
| 1324.7749      | 14 | E 3  | 403.2305       | 202.1192        |
| 1423.8433      | 15 | V 2  | 274.1879       | 137.5979        |
|                | 16 | R 1  | 175.1195       | 88.0637         |

N-term:+35.07 K(9):+162.16

AVTVDPSTNAKR, MH+ 1571.8215, m/z 524.6120  
 L OSG39 P180811 230811-s1.02303.02303.3.dta

X-range:

-

MassTol: Y-zoom:

MassType:

AVG  MONO

Axis:

1  2

Label:

I  M  -

Ions:

a  +  2+  3+

b  +  2+  3+

c  +  2+  3+

x  +  2+  3+

y  +  2+  3+

z  +  2+  3+

hide H<sub>2</sub>O/NH<sub>3</sub>

zoom 112-122

GO

scan 2303; 5.5e+000

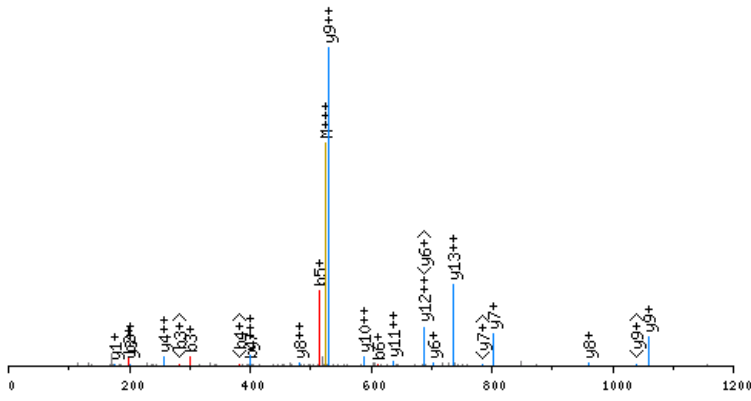

click image to zoom in; click top corners to zoom out [\[precursor±\]](#)

scan 2302; 524.6 mz; 5.6e+001

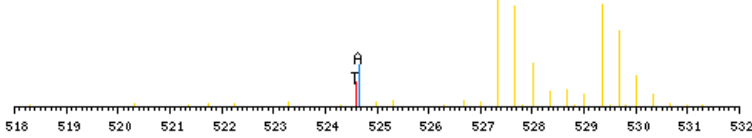

zoomed in precursor plot; T=theoretical m/z, A=acquired m/z

| b <sup>+</sup> | #  | AA # | y <sup>+</sup> | y <sup>2+</sup> |
|----------------|----|------|----------------|-----------------|
| 100.0762       | 1  | A 14 |                |                 |
| 199.1446       | 2  | V 13 | 1472.7531      | 736.8805        |
| 300.1923       | 3  | T 12 | 1373.6847      | 687.3463        |
| 399.2607       | 4  | V 11 | 1272.6370      | 636.8224        |
| 514.2877       | 5  | D 10 | 1173.5686      | 587.2882        |
| 611.3404       | 6  | P 9  | 1058.5417      | 529.7748        |
| 771.3710       | 7  | C 8  | 961.4889       | 481.2484        |
| 868.4238       | 8  | P 7  | 801.4583       | 401.2331        |
| 955.4558       | 9  | S 6  | 704.4055       | 352.7067        |
| 1056.5035      | 10 | T 5  | 617.3735       | 309.1907        |
| 1170.5464      | 11 | N 4  | 516.3258       | 258.6668        |
| 1241.5835      | 12 | A 3  | 402.2829       | 201.6454        |
| 1397.7098      | 13 | K 2  | 331.2458       | 166.1268        |
|                | 14 | R 1  | 175.1195       | 88.0637         |

N-term:+29.04 C(7):+160.03  
 K(13):+156.13

AVVTCGSVVKLLNTR, MH+ 1685.0420, m/z 562.3522  
 H OSG39 P180811 230811-s1.05487.05487.3.dta

X-range:

-

MassTol: Y-zoom:

MassType:

AVG  MONO

Axis:

1  2

Label:

I  M  -

Ions:

a  +  2+  3+

b  +  2+  3+

c  +  2+  3+

x  +  2+  3+

y  +  2+  3+

z  +  2+  3+

hide H<sub>2</sub>O/NH<sub>3</sub>

zoom 112-122

GO

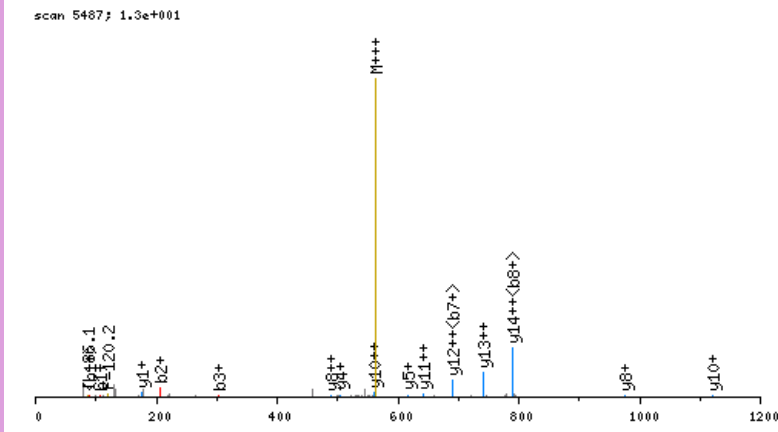

click image to zoom in; click top corners to zoom out [\[precursor±\]](#)

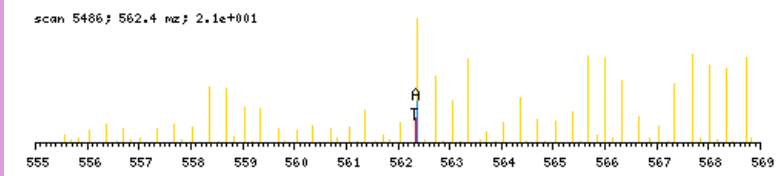

zoomed in precursor plot; T=theoretical m/z, A=acquired m/z

| b <sup>+</sup> | #  | AA | #  | y <sup>+</sup> | y <sup>2+</sup> |
|----------------|----|----|----|----------------|-----------------|
| 106.1080       | 1  | A  | 15 |                |                 |
| 205.1764       | 2  | V  | 14 | 1579.9418      | 790.4748        |
| 304.2448       | 3  | V  | 13 | 1480.8733      | 740.9406        |
| 405.2925       | 4  | T  | 12 | 1381.8049      | 691.4064        |
| 565.3231       | 5  | C  | 11 | 1280.7573      | 640.8825        |
| 622.3446       | 6  | G  | 10 | 1120.7267      | 560.8672        |
| 709.3766       | 7  | S  | 9  | 1063.7052      | 532.3565        |
| 808.4450       | 8  | V  | 8  | 976.6732       | 488.8405        |
| 907.5134       | 9  | V  | 7  | 877.6047       | 439.3063        |
| 1069.6715      | 10 | K  | 6  | 778.5363       | 389.7721        |
| 1182.7556      | 11 | L  | 5  | 616.3782       | 308.6930        |
| 1295.8397      | 12 | L  | 4  | 503.2942       | 252.1510        |
| 1409.8826      | 13 | N  | 3  | 390.2101       | 195.6090        |
| 1510.9303      | 14 | T  | 2  | 276.1672       | 138.5875        |
|                | 15 | R  | 1  | 175.1195       | 88.0637         |

N-term:+35.07 C(5):+160.03  
 K(10):+162.16



CASQVGMTAPGTR, MH+ 1369.6780, m/z 457.2308  
 H OSG37 P180811 230811-s1.02623.02623.3.dta

X-range:

-

MassTol: Y-zoom:

MassType:

AVG  MONO

Axis:

1  2

Label:

I  M  -

Ions:

a  +  2+  3+

b  +  2+  3+

c  +  2+  3+

x  +  2+  3+

y  +  2+  3+

z  +  2+  3+

hide H<sub>2</sub>O/NH<sub>3</sub>

zoom 112-122

GO

scan 2623; 1.9e+000

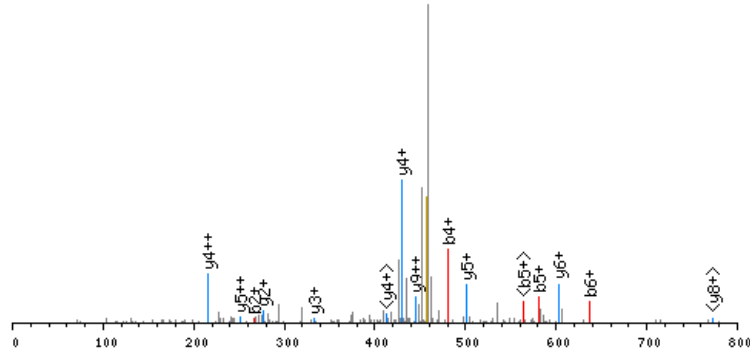

click image to zoom in; click top corners to zoom out [\[precursor±\]](#)

scan 2619; 457.2 m/z; 6.7e+000

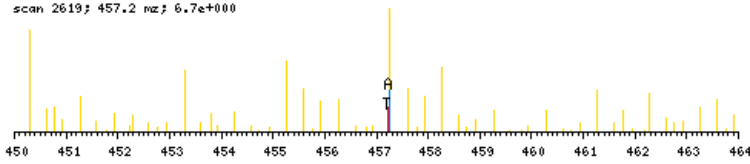

zoomed in precursor plot; T=theoretical m/z, A=acquired m/z

| b <sup>+</sup> | #  | AA # | y <sup>+</sup> | y <sup>2+</sup> |
|----------------|----|------|----------------|-----------------|
| 195.1015       | 1  | C 13 |                |                 |
| 266.1386       | 2  | A 12 | 1175.5843      | 588.2961        |
| 353.1706       | 3  | S 11 | 1104.5472      | 552.7775        |
| 481.2292       | 4  | Q 10 | 1017.5151      | 509.2615        |
| 580.2976       | 5  | V 9  | 889.4566       | 445.2322        |
| 637.3191       | 6  | G 8  | 790.3881       | 395.6980        |
| 768.3596       | 7  | M 7  | 733.3667       | 367.1873        |
| 869.4073       | 8  | T 6  | 602.3262       | 301.6670        |
| 940.4444       | 9  | A 5  | 501.2785       | 251.1432        |
| 1037.4971      | 10 | P 4  | 430.2414       | 215.6246        |
| 1094.5186      | 11 | G 3  | 333.1886       | 167.0982        |
| 1195.5663      | 12 | T 2  | 276.1672       | 138.5875        |
|                | 13 | R 1  | 175.1195       | 88.0637         |

N-term:+35.07 C(1):+160.03

CCTLPEDQR, MH+ 1212.5564, m/z 606.7818  
 H OSG38 P180811 230811-s1.02203.02203.2.dta

scan 2203; 3.3e+000

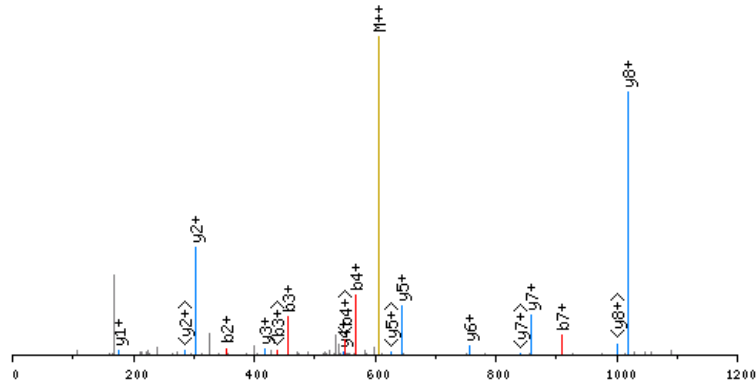

click image to zoom in; click top corners to zoom out [precursor±]

scan 2199; 606.8 nz; 7.6e+000

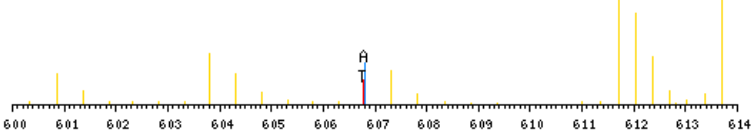

zoomed in precursor plot; T=theoretical m/z, A=acquired m/z

X-range:

-

MassTol: Y-zoom:

MassType:

AVG  MONO

Axis:

1  2

Label:

I  M  -

Ions:

a  +  2+  3+

b  +  2+  3+

c  +  2+  3+

x  +  2+  3+

y  +  2+  3+

z  +  2+  3+

hide H<sub>2</sub>O/NH<sub>3</sub>

zoom 112-122

GO

| b <sup>+</sup> | # | AA # | y <sup>+</sup> | y <sup>2+</sup> |
|----------------|---|------|----------------|-----------------|
| 195.1015       | 1 | C    | 9              |                 |
| 355.1321       | 2 | C    | 8              | 1018.4627       |
| 456.1798       | 3 | T    | 7              | 858.4321        |
| 569.2638       | 4 | L    | 6              | 757.3844        |
| 666.3166       | 5 | P    | 5              | 644.3004        |
| 795.3592       | 6 | E    | 4              | 547.2476        |
| 910.3861       | 7 | D    | 3              | 418.2050        |
| 1038.4447      | 8 | Q    | 2              | 303.1781        |
|                | 9 | R    | 1              | 175.1195        |

N-term: +35.07 C(1): +160.03  
 C(2): +160.03

CDTFVALPPATVGNR, MH+ 1651.8689, m/z 551.2945  
 H OSG37 P180811 230811-s1.06238.06238.3.dta

X-range:

-

MassTol: Y-zoom:

MassType:

AVG  MONO

Axis:

1  2

Label:

I  M  -

Ions:

a  +  2+  3+

b  +  2+  3+

c  +  2+  3+

x  +  2+  3+

y  +  2+  3+

z  +  2+  3+

hide H<sub>2</sub>O/NH<sub>3</sub>

zoom 112-122

GO

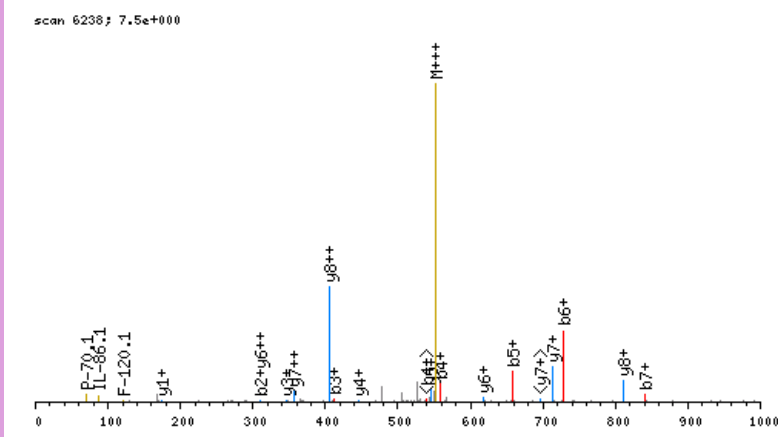

click image to zoom in; click top corners to zoom out [\[precursor±\]](#)

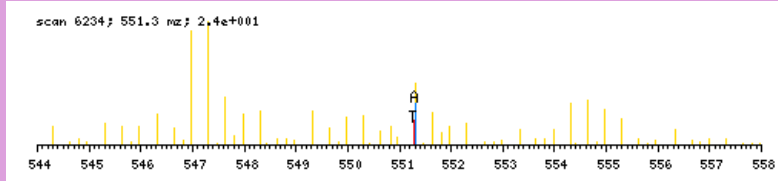

zoomed in precursor plot; T=theoretical m/z, A=acquired m/z

| b <sup>+</sup> | #  | AA # | y <sup>+</sup> | y <sup>2+</sup> |
|----------------|----|------|----------------|-----------------|
| 195.1015       | 1  | C 15 |                |                 |
| 310.1284       | 2  | D 14 | 1457.7753      | 729.3915        |
| 411.1761       | 3  | T 13 | 1342.7483      | 671.8781        |
| 558.2445       | 4  | F 12 | 1241.7006      | 621.3542        |
| 657.3129       | 5  | V 11 | 1094.6322      | 547.8200        |
| 728.3501       | 6  | A 10 | 995.5638       | 498.2858        |
| 841.4341       | 7  | L 9  | 924.5267       | 462.7673        |
| 938.4869       | 8  | P 8  | 811.4426       | 406.2252        |
| 1035.5397      | 9  | P 7  | 714.3899       | 357.6988        |
| 1106.5768      | 10 | A 6  | 617.3371       | 309.1725        |
| 1207.6244      | 11 | T 5  | 546.3000       | 273.6539        |
| 1306.6929      | 12 | V 4  | 445.2523       | 223.1301        |
| 1363.7143      | 13 | G 3  | 346.1839       | 173.5959        |
| 1477.7573      | 14 | N 2  | 289.1624       | 145.0851        |
|                | 15 | R 1  | 175.1195       | 88.0637         |

N-term:+35.07 C(1):+160.03

CEEETALVCDNNGSLCKAGFAGDDAPR, MH+ 3056.3398, m/z 764.8404  
 L OSG36 P180811 230811-s1.04576.04576.4.dta

scan 4576; 2.5e+000

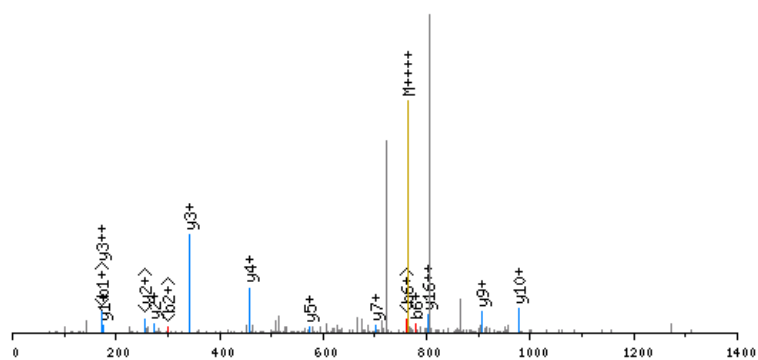

click image to zoom in; click top corners to zoom out [precursor±]

scan 4574; 764.8 m/z; 1.3e+001

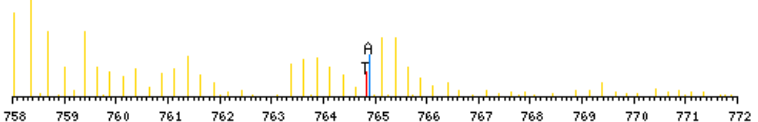

zoomed in precursor plot; T=theoretical m/z, A=acquired m/z

X-range:

-

MassTol: Y-zoom:

MassType:

AVG  MONO

Axis:

1  2

Label:

I  M  -

Ions:

a  +  2+  3+

b  +  2+  3+

c  +  2+  3+

x  +  2+  3+

y  +  2+  3+

z  +  2+  3+

hide H<sub>2</sub>O/NH<sub>3</sub>

zoom 112-122

GO

| b <sup>+</sup> | #  | AA # | y <sup>+</sup> | y <sup>2+</sup> |
|----------------|----|------|----------------|-----------------|
| 189.0697       | 1  | C 28 |                |                 |
| 318.1123       | 2  | E 27 | 2868.2780      | 1434.6429       |
| 447.1549       | 3  | E 26 | 2739.2354      | 1370.1216       |
| 576.1975       | 4  | E 25 | 2610.1928      | 1305.6003       |
| 677.2452       | 5  | T 24 | 2481.1502      | 1241.0790       |
| 778.2928       | 6  | T 23 | 2380.1025      | 1190.5552       |
| 849.3300       | 7  | A 22 | 2279.0548      | 1140.0313       |
| 962.4140       | 8  | L 21 | 2208.0177      | 1104.5128       |
| 1061.4824      | 9  | V 20 | 2094.9336      | 1047.9707       |
| 1221.5130      | 10 | C 19 | 1995.8652      | 998.4365        |
| 1336.5400      | 11 | D 18 | 1835.8346      | 918.4212        |
| 1450.5829      | 12 | N 17 | 1720.8077      | 860.9078        |
| 1507.6044      | 13 | G 16 | 1606.7648      | 803.8863        |
| 1594.6364      | 14 | S 15 | 1549.7433      | 775.3756        |
| 1651.6579      | 15 | G 14 | 1462.7113      | 731.8595        |
| 1764.7419      | 16 | L 13 | 1405.6898      | 703.3488        |
| 1924.7725      | 17 | C 12 | 1292.6057      | 646.8068        |
| 2080.8988      | 18 | K 11 | 1132.5751      | 566.7915        |
| 2151.9359      | 19 | A 10 | 976.4488       | 488.7283        |
| 2208.9574      | 20 | G 9  | 905.4117       | 453.2098        |
| 2356.0258      | 21 | F 8  | 848.3903       | 424.6990        |
| 2427.0629      | 22 | A 7  | 701.3218       | 351.1648        |
| 2484.0844      | 23 | G 6  | 630.2847       | 315.6463        |
| 2599.1113      | 24 | D 5  | 573.2633       | 287.1355        |
| 2714.1383      | 25 | D 4  | 458.2363       | 229.6221        |
| 2785.1754      | 26 | A 3  | 343.2094       | 172.1086        |
| 2882.2282      | 27 | P 2  | 272.1723       | 136.5900        |
|                | 28 | R 1  | 175.1195       | 88.0637         |

N-term:+29.04 C(1):+160.03  
 C(10):+160.03 C(17):+160.03  
 K(18):+156.13

CEIGYELDR, MH+ 1182.5464, m/z 591.7769  
 L OSG38 P180811 230811-s1.04452.04452.2.dta

X-range:

-

MassTol: Y-zoom:

MassType:

AVG  MONO

Axis:

1  2

Label:

I  M  -

Ions:

a  +  2+  3+

b  +  2+  3+

c  +  2+  3+

x  +  2+  3+

y  +  2+  3+

z  +  2+  3+

hide H<sub>2</sub>O/NH<sub>3</sub>

zoom 112-122

GO

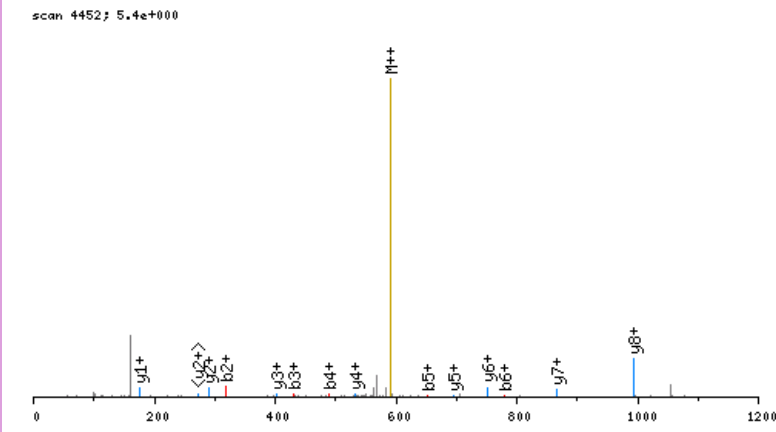

click image to zoom in; click top corners to zoom out [\[precursor±\]](#)

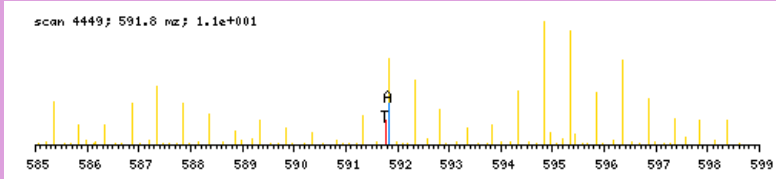

zoomed in precursor plot; T=theoretical m/z, A=acquired m/z

| b <sup>+</sup> | # | AA # | y <sup>+</sup> | y <sup>2+</sup> |
|----------------|---|------|----------------|-----------------|
| 189.0697       | 1 | C    | 9              |                 |
| 318.1123       | 2 | E    | 8              | 994.4846        |
| 431.1964       | 3 | I    | 7              | 865.4420        |
| 488.2178       | 4 | G    | 6              | 752.3579        |
| 651.2811       | 5 | Y    | 5              | 695.3364        |
| 780.3237       | 6 | E    | 4              | 532.2731        |
| 893.4078       | 7 | L    | 3              | 403.2305        |
| 1008.4347      | 8 | D    | 2              | 290.1464        |
|                | 9 | R    | 1              | 175.1195        |

N-term:+29.04 C(1):+160.03

CEPTVCQPTCYQR, MH+ 1726.7350, m/z 576.2498  
 L OSG37 P180811 230811-s1.03117.03117.3.dta

X-range:

-

MassTol: Y-zoom:

MassType:

AVG  MONO

Axis:

1  2

Label:

I  M  -

Ions:

a  +  2+  3+

b  +  2+  3+

c  +  2+  3+

x  +  2+  3+

y  +  2+  3+

z  +  2+  3+

hide H<sub>2</sub>O/NH<sub>3</sub>

zoom 112-122

GO

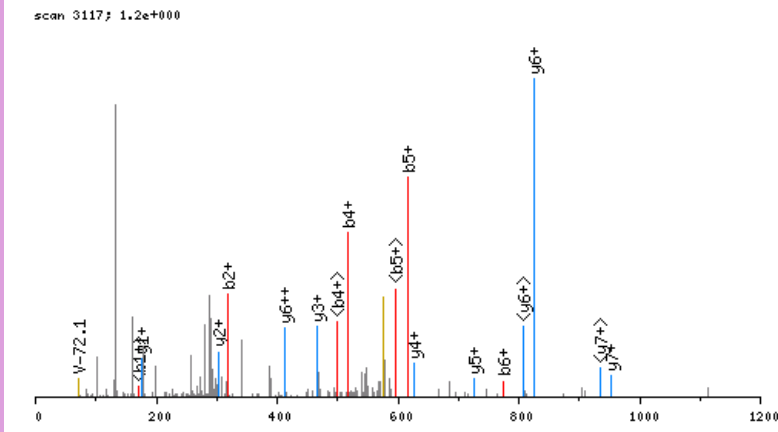

click image to zoom in; click top corners to zoom out [\[precursor±\]](#)

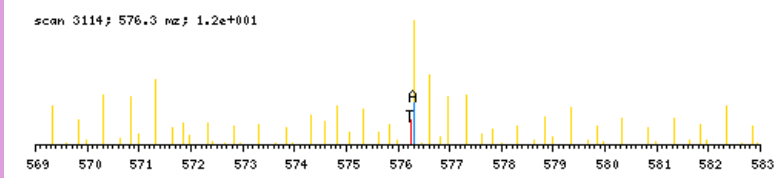

zoomed in precursor plot; T=theoretical m/z, A=acquired m/z

| b <sup>+</sup> | #  | AA # | y <sup>+</sup> | y <sup>2+</sup> |
|----------------|----|------|----------------|-----------------|
| 189.0697       | 1  | C 13 |                |                 |
| 318.1123       | 2  | E 12 | 1538.6731      | 769.8405        |
| 415.1651       | 3  | P 11 | 1409.6305      | 705.3192        |
| 516.2127       | 4  | T 10 | 1312.5777      | 656.7928        |
| 615.2811       | 5  | V 9  | 1211.5300      | 606.2689        |
| 775.3117       | 6  | C 8  | 1112.4616      | 556.7347        |
| 903.3703       | 7  | Q 7  | 952.4310       | 476.7194        |
| 1000.4231      | 8  | P 6  | 824.3724       | 412.6901        |
| 1101.4708      | 9  | T 5  | 727.3197       | 364.1638        |
| 1261.5014      | 10 | C 4  | 626.2720       | 313.6399        |
| 1424.5647      | 11 | Y 3  | 466.2414       | 233.6246        |
| 1552.6233      | 12 | Q 2  | 303.1781       | 152.0930        |
|                | 13 | R 1  | 175.1195       | 88.0637         |

N-term:+29.04 C(1):+160.03  
 C(6):+160.03 C(10):+160.03

CFSTEGPNLVTR, MH+ 1408.6894, m/z 470.2347  
 L OSG38 P180811 230811-s1.04846.04846.3.dta

X-range:

-

MassTol: Y-zoom:

MassType:

AVG  MONO

Axis:

1  2

Label:

I  M  -

Ions:

a  +  2+  3+

b  +  2+  3+

c  +  2+  3+

x  +  2+  3+

y  +  2+  3+

z  +  2+  3+

hide H<sub>2</sub>O/NH<sub>3</sub>

zoom 112-122

GO

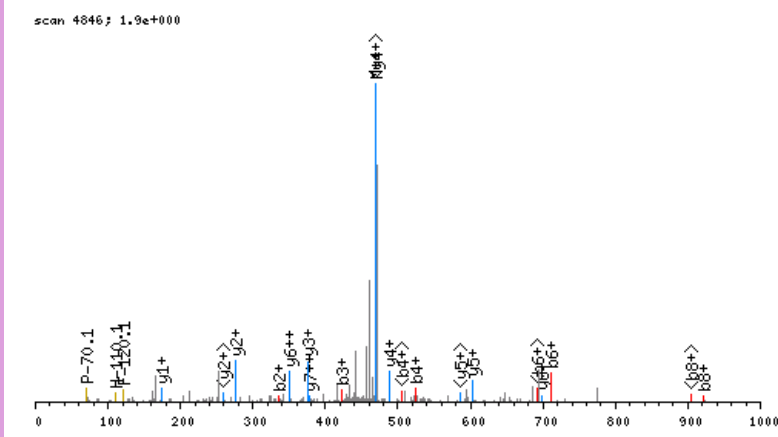

click image to zoom in; click top corners to zoom out [\[precursor±\]](#)

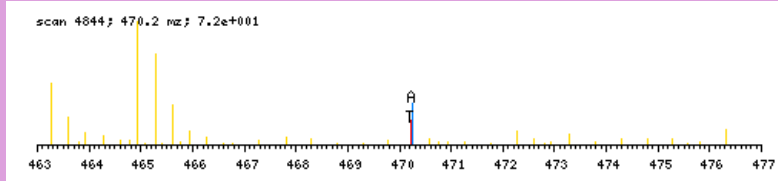

zoomed in precursor plot; T=theoretical m/z, A=acquired m/z

| b <sup>+</sup> | #  | AA # | y <sup>+</sup> | y <sup>2+</sup> |
|----------------|----|------|----------------|-----------------|
| 189.0697       | 1  | C 12 |                |                 |
| 336.1381       | 2  | F 11 | 1220.6275      | 610.8177        |
| 423.1701       | 3  | S 10 | 1073.5591      | 537.2835        |
| 524.2178       | 4  | T 9  | 986.5271       | 493.7675        |
| 653.2604       | 5  | E 8  | 885.4794       | 443.2436        |
| 710.2819       | 6  | G 7  | 756.4368       | 378.7223        |
| 807.3346       | 7  | P 6  | 699.4153       | 350.2116        |
| 921.3776       | 8  | N 5  | 602.3626       | 301.6852        |
| 1034.4616      | 9  | L 4  | 488.3197       | 244.6637        |
| 1133.5300      | 10 | V 3  | 375.2356       | 188.1217        |
| 1234.5777      | 11 | T 2  | 276.1672       | 138.5875        |
|                | 12 | R 1  | 175.1195       | 88.0637         |

N-term:+29.04 C(1):+160.03

CFVYPLDFAR, MH+ 1321.6826, m/z 661.3450  
 H OSG37 P180811 230811-s1.08213.08213.2.dta

X-range:

-

MassTol: Y-zoom:

MassType:

AVG  MONO

Axis:

1  2

Label:

I  M  -

Ions:

a  +  2+  3+

b  +  2+  3+

c  +  2+  3+

x  +  2+  3+

y  +  2+  3+

z  +  2+  3+

hide H<sub>2</sub>O/NH<sub>3</sub>

zoom 112-122

GO

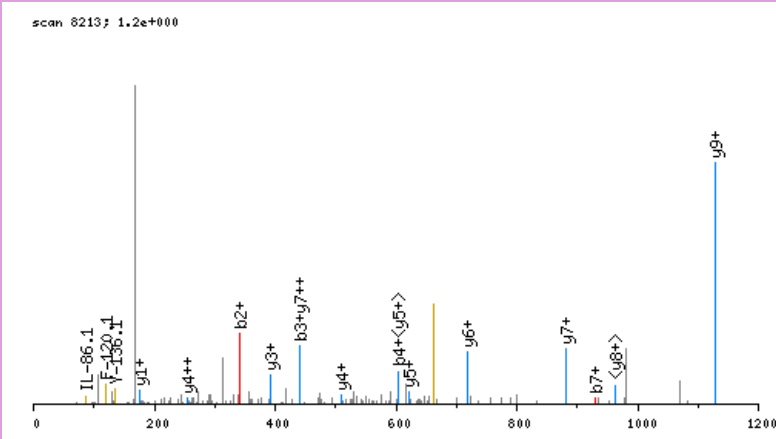

click image to zoom in; click top corners to zoom out [\[precursor±\]](#)

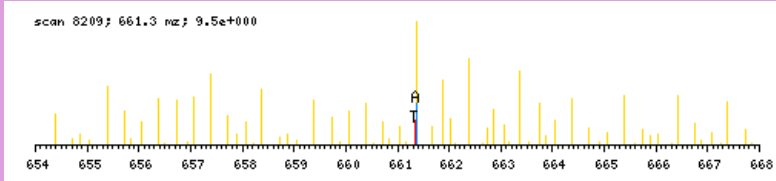

zoomed in precursor plot; T=theoretical m/z, A=acquired m/z

| b <sup>+</sup> | #  | AA # | y <sup>+</sup> | y <sup>2+</sup> |
|----------------|----|------|----------------|-----------------|
| 195.1015       | 1  | C 10 |                |                 |
| 342.1699       | 2  | F 9  | 1127.5890      | 564.2984        |
| 441.2383       | 3  | V 8  | 980.5205       | 490.7642        |
| 604.3017       | 4  | Y 7  | 881.4521       | 441.2300        |
| 701.3544       | 5  | P 6  | 718.3888       | 359.6983        |
| 814.4385       | 6  | L 5  | 621.3360       | 311.1719        |
| 929.4654       | 7  | D 4  | 508.2520       | 254.6299        |
| 1076.5338      | 8  | F 3  | 393.2250       | 197.1164        |
| 1147.5710      | 9  | A 2  | 246.1566       | 123.5822        |
|                | 10 | R 1  | 175.1195       | 88.0637         |

N-term:+35.07 C(1):+160.03



CGEEQGADAALHFNPR, MH+ 1799.8134, m/z 600.6093  
 L OSG40 P180811 230811-s1.04885.04885.3.dta

X-range:

-

MassTol: Y-zoom:

MassType:

AVG  MONO

Axis:

1  2

Label:

I  M  -

Ions:

a  +  2+  3+

b  +  2+  3+

c  +  2+  3+

x  +  2+  3+

y  +  2+  3+

z  +  2+  3+

hide H<sub>2</sub>O/NH<sub>3</sub>

zoom 112-122

GO

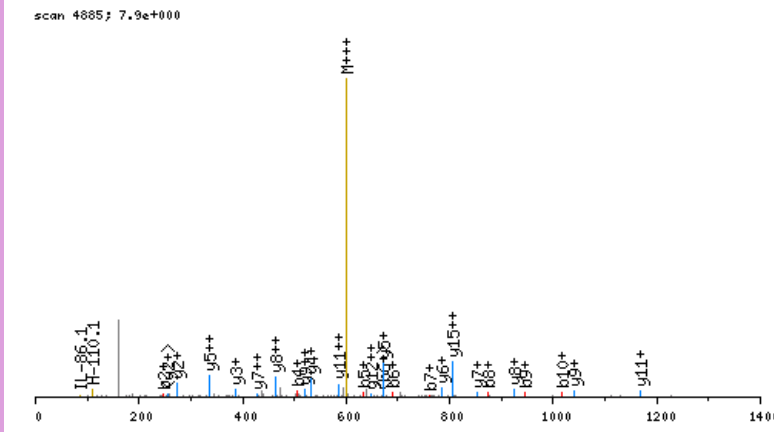

click image to zoom in; click top corners to zoom out [\[precursor±\]](#)

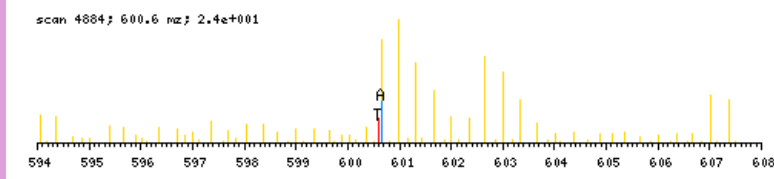

zoomed in precursor plot; T=theoretical m/z, A=acquired m/z

| b <sup>+</sup> | #  | AA # | y <sup>+</sup> | y <sup>2+</sup> |
|----------------|----|------|----------------|-----------------|
| 189.0697       | 1  | C 16 |                |                 |
| 246.0912       | 2  | G 15 | 1611.7516      | 806.3797        |
| 375.1338       | 3  | E 14 | 1554.7301      | 777.8690        |
| 504.1764       | 4  | E 13 | 1425.6875      | 713.3477        |
| 632.2349       | 5  | Q 12 | 1296.6449      | 648.8264        |
| 689.2564       | 6  | G 11 | 1168.5863      | 584.7971        |
| 760.2935       | 7  | A 10 | 1111.5649      | 556.2863        |
| 875.3204       | 8  | D 9  | 1040.5278      | 520.7678        |
| 946.3576       | 9  | A 8  | 925.5008       | 463.2543        |
| 1017.3947      | 10 | A 7  | 854.4637       | 427.7358        |
| 1130.4787      | 11 | L 6  | 783.4266       | 392.2172        |
| 1267.5377      | 12 | H 5  | 670.3425       | 335.6752        |
| 1414.6061      | 13 | F 4  | 533.2836       | 267.1457        |
| 1528.6490      | 14 | N 3  | 386.2152       | 193.6115        |
| 1625.7018      | 15 | P 2  | 272.1723       | 136.5900        |
|                | 16 | R 1  | 175.1195       | 88.0637         |

N-term:+29.04 C(1):+160.03

CGYYGNYYGGR, MH+ 1357.5635, m/z 679.2854  
 L OSG38 P180811 230811-s1.03696.03696.2.dta

X-range:

-

MassTol: Y-zoom:

MassType:

AVG  MONO

Axis:

1  2

Label:

I  M  -

Ions:

a  +  2+  3+

b  +  2+  3+

c  +  2+  3+

x  +  2+  3+

y  +  2+  3+

z  +  2+  3+

hide H<sub>2</sub>O/NH<sub>3</sub>

zoom 112-122

GO

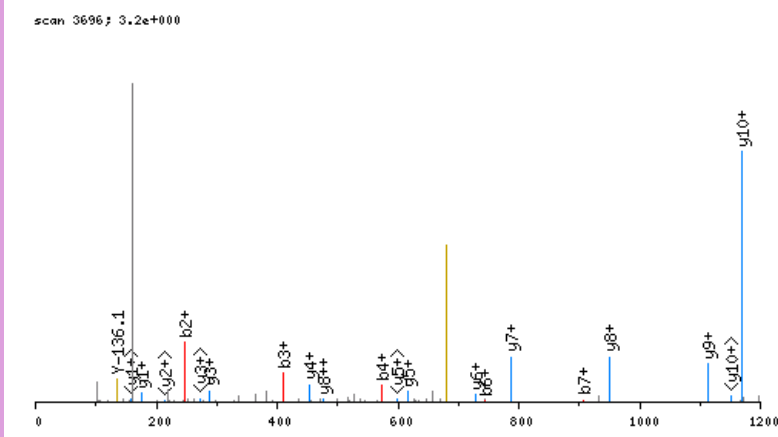

click image to zoom in; click top corners to zoom out [\[precursor±\]](#)

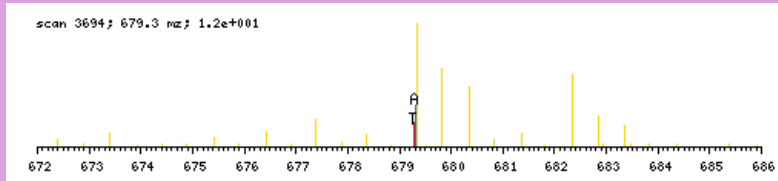

zoomed in precursor plot; T=theoretical m/z, A=acquired m/z

| b <sup>+</sup> | #  | AA # | y <sup>+</sup> | y <sup>2+</sup> |
|----------------|----|------|----------------|-----------------|
| 189.0697       | 1  | C 11 |                |                 |
| 246.0912       | 2  | G 10 | 1169.5016      | 585.2547        |
| 409.1545       | 3  | Y 9  | 1112.4801      | 556.7440        |
| 572.2178       | 4  | Y 8  | 949.4168       | 475.2123        |
| 629.2393       | 5  | G 7  | 786.3535       | 393.6807        |
| 743.2822       | 6  | N 6  | 729.3320       | 365.1699        |
| 906.3455       | 7  | Y 5  | 615.2891       | 308.1485        |
| 1069.4089      | 8  | Y 4  | 452.2258       | 226.6168        |
| 1126.4303      | 9  | G 3  | 289.1624       | 145.0851        |
| 1183.4518      | 10 | G 2  | 232.1410       | 116.5744        |
|                | 11 | R 1  | 175.1195       | 88.0637         |

N-term:+29.04 C(1):+160.03

CKEIIIGTSESEPMLSHTVR, MH+ 2299.2062, m/z 575.5570  
 H OSG36 P180811 230811-s1.05468.05468.4.dta

X-range:

-

MassTol: Y-zoom:

MassType:

AVG  MONO

Axis:

1  2

Label:

I  M  -

Ions:

a  +  2+  3+

b  +  2+  3+

c  +  2+  3+

x  +  2+  3+

y  +  2+  3+

z  +  2+  3+

hide H<sub>2</sub>O/NH<sub>3</sub>

zoom 112-122

GO

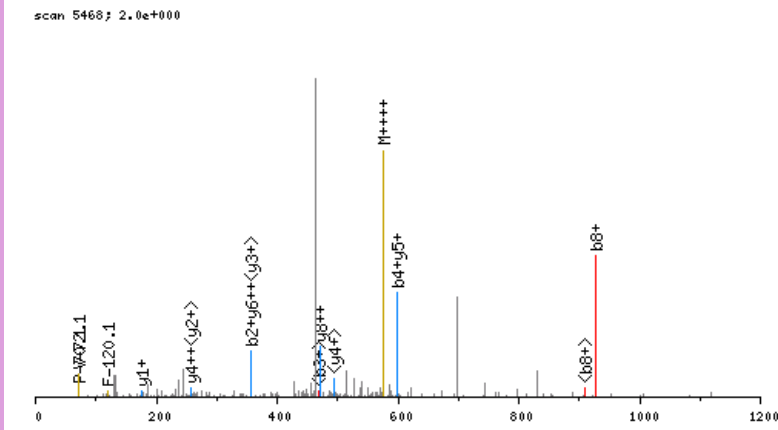

click image to zoom in; click top corners to zoom out [\[precursor±\]](#)

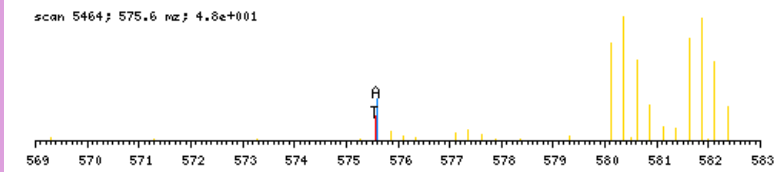

zoomed in precursor plot; T=theoretical m/z, A=acquired m/z

| b <sup>+</sup> | #  | AA | #  | y <sup>+</sup> | y <sup>2+</sup> |
|----------------|----|----|----|----------------|-----------------|
| 195.1015       | 1  | C  | 20 |                |                 |
| 357.2596       | 2  | K  | 19 | 2105.1125      | 1053.0602       |
| 486.3022       | 3  | E  | 18 | 1942.9544      | 971.9811        |
| 599.3863       | 4  | I  | 17 | 1813.9118      | 907.4598        |
| 712.4703       | 5  | I  | 16 | 1700.8278      | 850.9178        |
| 769.4918       | 6  | G  | 15 | 1587.7437      | 794.3758        |
| 826.5132       | 7  | G  | 14 | 1530.7222      | 765.8650        |
| 927.5609       | 8  | T  | 13 | 1473.7008      | 737.3543        |
| 1014.5930      | 9  | S  | 12 | 1372.6531      | 686.8305        |
| 1143.6355      | 10 | E  | 11 | 1285.6211      | 643.3144        |
| 1230.6676      | 11 | S  | 10 | 1156.5785      | 578.7931        |
| 1359.7102      | 12 | E  | 9  | 1069.5464      | 535.2771        |
| 1456.7629      | 13 | P  | 8  | 940.5038       | 470.7558        |
| 1587.8034      | 14 | M  | 7  | 843.4511       | 422.2295        |
| 1700.8875      | 15 | L  | 6  | 712.4106       | 356.7092        |
| 1787.9195      | 16 | S  | 5  | 599.3265       | 300.1672        |
| 1924.9784      | 17 | H  | 4  | 512.2945       | 256.6512        |
| 2026.0261      | 18 | T  | 3  | 375.2356       | 188.1217        |
| 2125.0945      | 19 | V  | 2  | 274.1879       | 137.5979        |
|                | 20 | R  | 1  | 175.1195       | 88.0637         |

N-term:+35.07 C(1):+160.03  
 K(2):+162.16

CQFVGGISTVCQPTCGVSR, MH+ 2090.9784, m/z 697.6643  
 L OSG37 P180811 230811-s1.04400.04400.3.dta

X-range:

-

MassTol: Y-zoom:

MassType:

AVG  MONO

Axis:

1  2

Label:

I  M  -

Ions:

a  +  2+  3+

b  +  2+  3+

c  +  2+  3+

x  +  2+  3+

y  +  2+  3+

z  +  2+  3+

hide H<sub>2</sub>O/NH<sub>3</sub>

zoom 112-122

GO

scan 4400; 1.5e+000

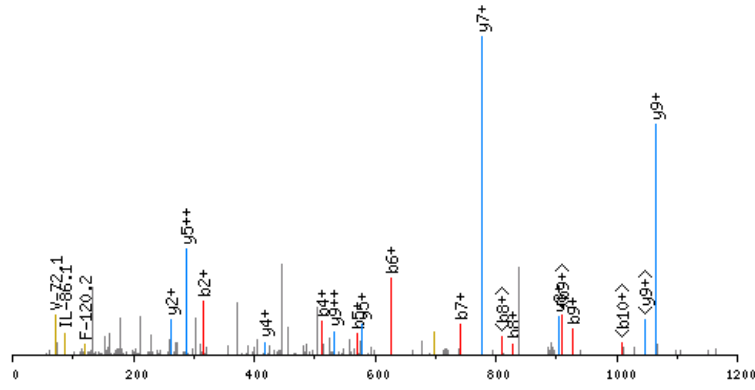

click image to zoom in; click top corners to zoom out [\[precursor±\]](#)

scan 4399; 697.7 m/z; 3.3e+001

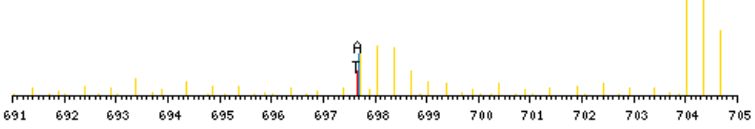

zoomed in precursor plot; T=theoretical m/z, A=acquired m/z

| b <sup>+</sup> | #  | AA | #  | y <sup>+</sup> | y <sup>2+</sup> |
|----------------|----|----|----|----------------|-----------------|
| 189.0697       | 1  | C  | 19 |                |                 |
| 317.1283       | 2  | Q  | 18 | 1902.9165      | 951.9622        |
| 414.1810       | 3  | P  | 17 | 1774.8579      | 887.9329        |
| 513.2495       | 4  | V  | 16 | 1677.8052      | 839.4065        |
| 570.2709       | 5  | G  | 15 | 1578.7367      | 789.8723        |
| 627.2924       | 6  | G  | 14 | 1521.7153      | 761.3616        |
| 740.3764       | 7  | I  | 13 | 1464.6938      | 732.8508        |
| 827.4085       | 8  | S  | 12 | 1351.6097      | 676.3088        |
| 928.4562       | 9  | T  | 11 | 1264.5777      | 632.7928        |
| 1027.5246      | 10 | V  | 10 | 1163.5300      | 582.2689        |
| 1187.5552      | 11 | C  | 9  | 1064.4616      | 532.7347        |
| 1315.6137      | 12 | Q  | 8  | 904.4310       | 452.7194        |
| 1412.6665      | 13 | P  | 7  | 776.3724       | 388.6901        |
| 1513.7142      | 14 | T  | 6  | 679.3197       | 340.1638        |
| 1673.7448      | 15 | C  | 5  | 578.2720       | 289.6399        |
| 1730.7663      | 16 | G  | 4  | 418.2414       | 209.6246        |
| 1829.8347      | 17 | V  | 3  | 361.2199       | 181.1139        |
| 1916.8667      | 18 | S  | 2  | 262.1515       | 131.5797        |
|                | 19 | R  | 1  | 175.1195       | 88.0637         |

N-term:+29.04 C(1):+160.03  
 C(11):+160.03 C(15):+160.03

CVTDISHLVR, MH+ 1227.6519, m/z 409.8888  
 L OSG40 P180811 230811-s1.05693.05693.3.dta

scan 5693; 1.2e+001

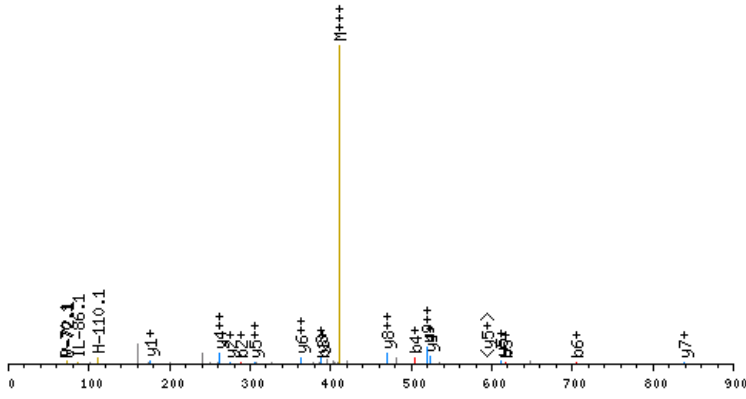

click image to zoom in; click top corners to zoom out [\[precursor±\]](#)

scan 5689; 409.9 m/z; 1.8e+001

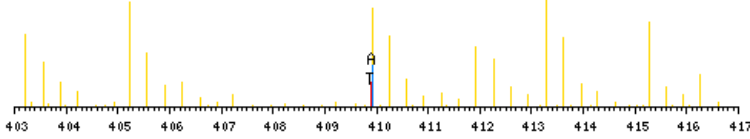

zoomed in precursor plot; T=theoretical m/z, A=acquired m/z

X-range:

-

MassTol: Y-zoom:

MassType:

AVG  MONO

Axis:

1  2

Label:

I  M  -

Ions:

a  +  2+  3+

b  +  2+  3+

c  +  2+  3+

x  +  2+  3+

y  +  2+  3+

z  +  2+  3+

hide H<sub>2</sub>O/NH<sub>3</sub>

zoom 112-122

GO

| b <sup>+</sup> | #  | AA | #  | y <sup>+</sup> | y <sup>2+</sup> |
|----------------|----|----|----|----------------|-----------------|
| 189.0697       | 1  | C  | 10 |                |                 |
| 288.1381       | 2  | V  | 9  | 1039.5900      | 520.2989        |
| 389.1858       | 3  | T  | 8  | 940.5216       | 470.7647        |
| 504.2127       | 4  | D  | 7  | 839.4739       | 420.2409        |
| 617.2968       | 5  | I  | 6  | 724.4470       | 362.7274        |
| 704.3288       | 6  | S  | 5  | 611.3629       | 306.1854        |
| 841.3877       | 7  | H  | 4  | 524.3309       | 262.6694        |
| 954.4718       | 8  | L  | 3  | 387.2720       | 194.1399        |
| 1053.5402      | 9  | V  | 2  | 274.1879       | 137.5979        |
|                | 10 | R  | 1  | 175.1195       | 88.0637         |

N-term:+29.04 C(1):+160.03

DADGGDISVKELGTVMR, MH+ 1888.0122, m/z 630.0089  
 H OSG39 P180811 230811-s1.05713.05713.3.dta

X-range:

-

MassTol: Y-zoom:

MassType:

AVG  MONO

Axis:

1  2

Label:

I  M  -

Ions:

a  +  2+  3+

b  +  2+  3+

c  +  2+  3+

x  +  2+  3+

y  +  2+  3+

z  +  2+  3+

hide H<sub>2</sub>O/NH<sub>3</sub>

zoom 112-122

GO

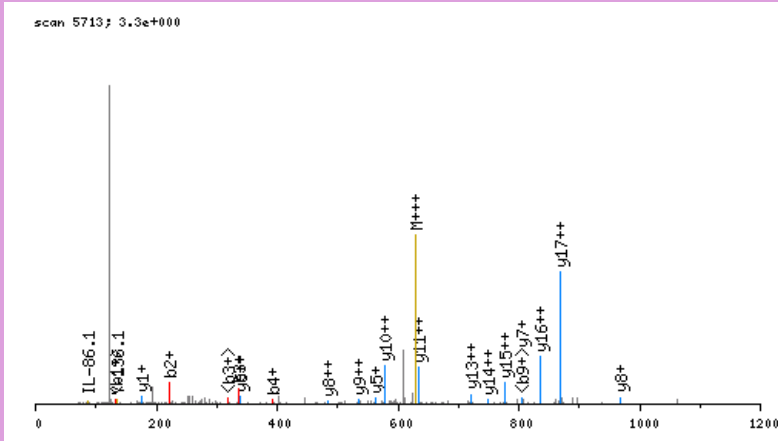

click image to zoom in; click top corners to zoom out [\[precursor±\]](#)

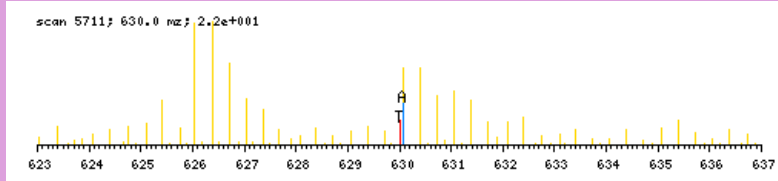

zoomed in precursor plot; T=theoretical m/z, A=acquired m/z

| b <sup>+</sup> | #  | AA # | y <sup>+</sup> | y <sup>2+</sup> |
|----------------|----|------|----------------|-----------------|
| 150.0978       | 1  | D 18 |                |                 |
| 221.1350       | 2  | A 17 | 1738.9222      | 869.9650        |
| 336.1619       | 3  | D 16 | 1667.8851      | 834.4465        |
| 393.1834       | 4  | G 15 | 1552.8581      | 776.9330        |
| 450.2048       | 5  | G 14 | 1495.8367      | 748.4223        |
| 507.2263       | 6  | G 13 | 1438.8152      | 719.9115        |
| 622.2532       | 7  | D 12 | 1381.7937      | 691.4008        |
| 735.3373       | 8  | I 11 | 1266.7668      | 633.8873        |
| 822.3693       | 9  | S 10 | 1153.6827      | 577.3453        |
| 921.4377       | 10 | V 9  | 1066.6507      | 533.8293        |
| 1083.5958      | 11 | K 8  | 967.5823       | 484.2951        |
| 1212.6384      | 12 | E 7  | 805.4242       | 403.2160        |
| 1325.7225      | 13 | L 6  | 676.3816       | 338.6947        |
| 1382.7440      | 14 | G 5  | 563.2975       | 282.1527        |
| 1483.7916      | 15 | T 4  | 506.2761       | 253.6420        |
| 1582.8601      | 16 | V 3  | 405.2284       | 203.1181        |
| 1713.9005      | 17 | M 2  | 306.1600       | 153.5839        |
|                | 18 | R 1  | 175.1195       | 88.0637         |

N-term:+35.07 K(11):+162.16

DAGEFVDLYVPR, MH+ 1414.7430, m/z 472.2525  
 H OSG37 P180811 230811-s1.08226.08226.3.dta

X-range:

-

MassTol: Y-zoom:

MassType:

AVG  MONO

Axis:

1  2

Label:

I  M  -

Ions:

a  +  2+  3+

b  +  2+  3+

c  +  2+  3+

x  +  2+  3+

y  +  2+  3+

z  +  2+  3+

hide H<sub>2</sub>O/NH<sub>3</sub>

zoom 112-122

GO

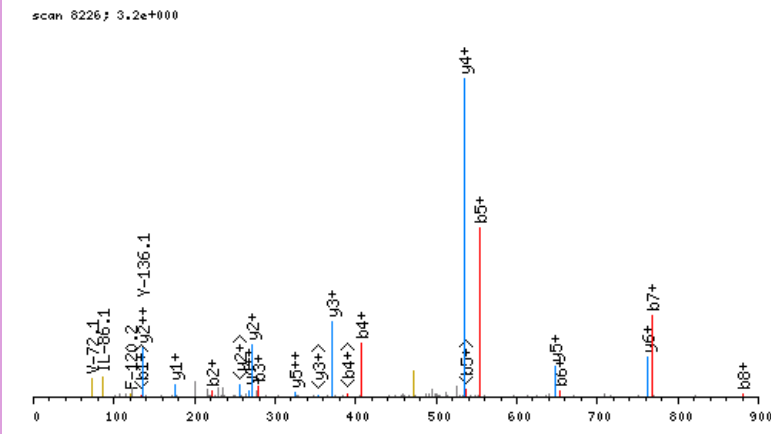

click image to zoom in; click top corners to zoom out [\[precursor±\]](#)

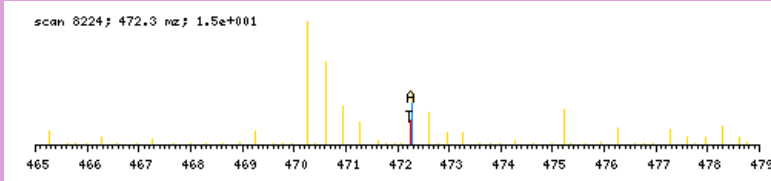

zoomed in precursor plot; T=theoretical m/z, A=acquired m/z

| b <sup>+</sup> | #  | AA # | y <sup>+</sup> | y <sup>2+</sup> |
|----------------|----|------|----------------|-----------------|
| 150.0978       | 1  | D 12 |                |                 |
| 221.1350       | 2  | A 11 | 1265.6530      | 633.3304        |
| 278.1564       | 3  | G 10 | 1194.6159      | 597.8119        |
| 407.1990       | 4  | E 9  | 1137.5944      | 569.3011        |
| 554.2674       | 5  | F 8  | 1008.5518      | 504.7798        |
| 653.3358       | 6  | V 7  | 861.4834       | 431.2456        |
| 768.3628       | 7  | D 6  | 762.4150       | 381.7114        |
| 881.4468       | 8  | L 5  | 647.3881       | 324.1979        |
| 1044.5102      | 9  | Y 4  | 534.3040       | 267.6559        |
| 1143.5786      | 10 | V 3  | 371.2407       | 186.1243        |
| 1240.6314      | 11 | P 2  | 272.1723       | 136.5900        |
|                | 12 | R 1  | 175.1195       | 88.0637         |

N-term:+35.07

DAVDTYIPVPTR, MH+ 1380.7587, m/z 690.8830  
 H OSG37 P180811 230811-s1.06217.06217.2.dta

X-range:

-

MassTol: Y-zoom:

MassType:

AVG  MONO

Axis:

1  2

Label:

I  M  -

Ions:

a  +  2+  3+

b  +  2+  3+

c  +  2+  3+

x  +  2+  3+

y  +  2+  3+

z  +  2+  3+

hide H<sub>2</sub>O/NH<sub>3</sub>

zoom 112-122

GO

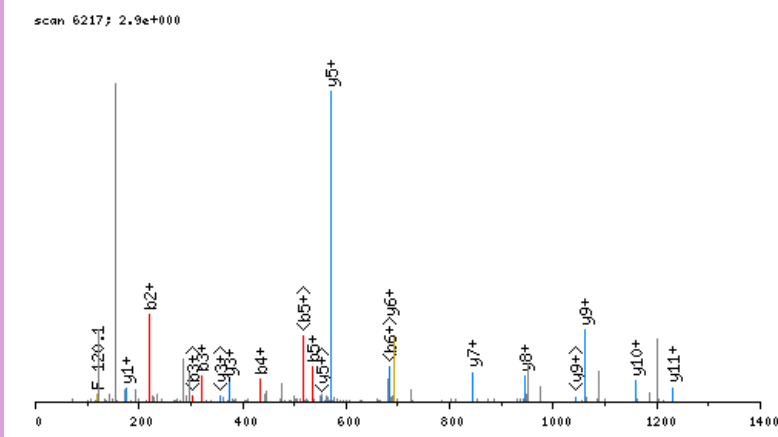

click image to zoom in; click top corners to zoom out [\[precursor±\]](#)

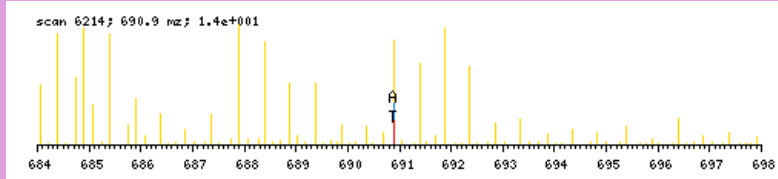

zoomed in precursor plot; T=theoretical m/z, A=acquired m/z

| b <sup>+</sup> | #  | AA # | y <sup>+</sup> | y <sup>2+</sup> |
|----------------|----|------|----------------|-----------------|
| 150.0978       | 1  | D 12 |                |                 |
| 221.1350       | 2  | A 11 | 1231.6687      | 616.3382        |
| 320.2034       | 3  | V 10 | 1160.6315      | 580.8197        |
| 435.2303       | 4  | D 9  | 1061.5631      | 531.2855        |
| 536.2780       | 5  | T 8  | 946.5362       | 473.7720        |
| 699.3413       | 6  | Y 7  | 845.4885       | 423.2482        |
| 812.4254       | 7  | I 6  | 682.4252       | 341.7165        |
| 909.4781       | 8  | P 5  | 569.3411       | 285.1745        |
| 1008.5466      | 9  | V 4  | 472.2884       | 236.6481        |
| 1105.5993      | 10 | P 3  | 373.2199       | 187.1139        |
| 1206.6470      | 11 | T 2  | 276.1672       | 138.5875        |
|                | 12 | R 1  | 175.1195       | 88.0637         |

N-term:+35.07



DCPCSEALCQPIR, MH+ 1704.7506, m/z 568.9217  
 L OSG37 P180811 230811-s1.04533.04533.3.dta

X-range:

-

MassTol: Y-zoom:

MassType:

AVG  MONO

Axis:

1  2

Label:

I  M  -

Ions:

a  +  2+  3+

b  +  2+  3+

c  +  2+  3+

x  +  2+  3+

y  +  2+  3+

z  +  2+  3+

hide H<sub>2</sub>O/NH<sub>3</sub>

zoom 112-122

GO

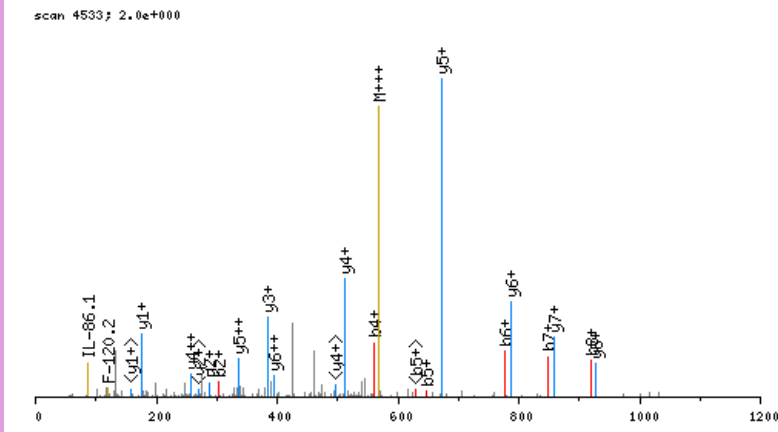

click image to zoom in; click top corners to zoom out [\[precursor±\]](#)

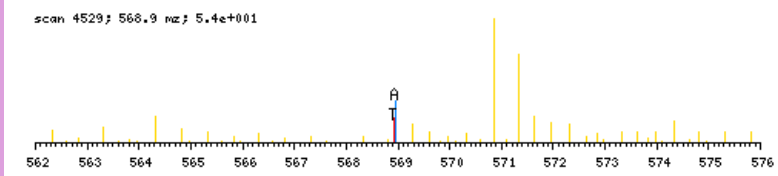

zoomed in precursor plot; T=theoretical m/z, A=acquired m/z

| b <sup>+</sup> | #  | AA # | y <sup>+</sup> | y <sup>2+</sup>    |
|----------------|----|------|----------------|--------------------|
| 144.0660       | 1  | D    | 14             |                    |
| 304.0966       | 2  | C    | 13             | 1561.6924 781.3501 |
| 401.1494       | 3  | P    | 12             | 1401.6618 701.3348 |
| 561.1800       | 4  | C    | 11             | 1304.6090 652.8084 |
| 648.2120       | 5  | S    | 10             | 1144.5784 572.7931 |
| 777.2546       | 6  | E    | 9              | 1057.5464 529.2771 |
| 848.2917       | 7  | A    | 8              | 928.5038 464.7558  |
| 919.3289       | 8  | A    | 7              | 857.4667 429.2373  |
| 1032.4129      | 9  | L    | 6              | 786.4296 393.7187  |
| 1192.4435      | 10 | C    | 5              | 673.3455 337.1767  |
| 1320.5021      | 11 | Q    | 4              | 513.3149 257.1614  |
| 1417.5549      | 12 | P    | 3              | 385.2563 193.1321  |
| 1530.6389      | 13 | I    | 2              | 288.2036 144.6057  |
|                | 14 | R    | 1              | 175.1195 88.0637   |

N-term:+29.04 C(2):+160.03  
 C(4):+160.03 C(10):+160.03

DCSEYLALSKR, MH+ 1409.7734, m/z 470.5960  
 H OSG39 P180811 230811-s1.03723.03723.3.dta

scan 3723; 6.6e+000

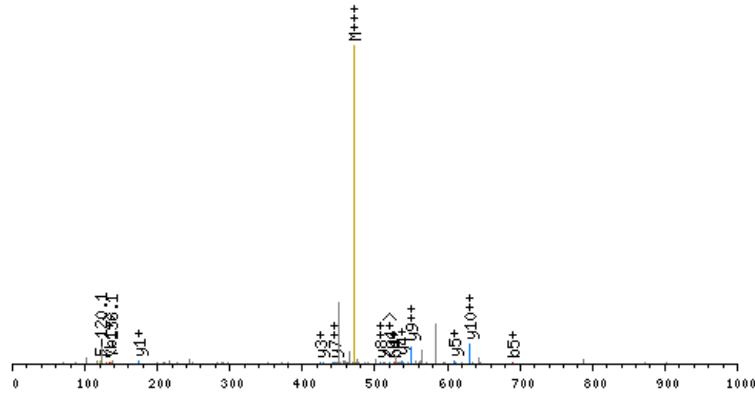

click image to zoom in; click top corners to zoom out [precursor±]

scan 3721; 470.6 mz; 3.7e+001

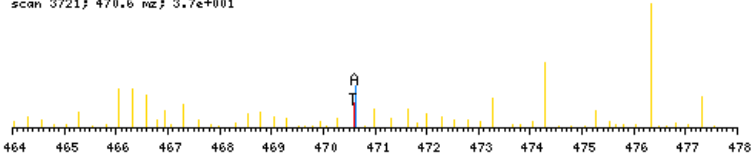

zoomed in precursor plot; T=theoretical m/z, A=acquired m/z

X-range:

-

MassTol: Y-zoom:

MassType:

AVG  MONO

Axis:

1  2

Label:

I  M  -

Ions:

a  +  2+  3+

b  +  2+  3+

c  +  2+  3+

x  +  2+  3+

y  +  2+  3+

z  +  2+  3+

hide H<sub>2</sub>O/NH<sub>3</sub>

zoom 112-122

GO

| b <sup>+</sup> | #  | AA | #  | y <sup>+</sup> | y <sup>2+</sup> |
|----------------|----|----|----|----------------|-----------------|
| 150.0978       | 1  | D  | 11 |                |                 |
| 310.1284       | 2  | C  | 10 | 1260.6834      | 630.8456        |
| 397.1605       | 3  | S  | 9  | 1100.6528      | 550.8303        |
| 526.2031       | 4  | E  | 8  | 1013.6208      | 507.3143        |
| 689.2664       | 5  | Y  | 7  | 884.5782       | 442.7930        |
| 802.3505       | 6  | L  | 6  | 721.5149       | 361.2613        |
| 873.3876       | 7  | A  | 5  | 608.4308       | 304.7193        |
| 986.4716       | 8  | L  | 4  | 537.3937       | 269.2008        |
| 1073.5037      | 9  | S  | 3  | 424.3096       | 212.6587        |
| 1235.6618      | 10 | K  | 2  | 337.2776       | 169.1427        |
|                | 11 | R  | 1  | 175.1195       | 88.0637         |

N-term:+35.07 C(2):+160.03  
 K(10):+162.16

X-range:

-

MassTol: Y-zoom:

MassType:

AVG  MONO

Axis:

1  2

Label:

I  M  -

Ions:

a  +  2+  3+

b  +  2+  3+

c  +  2+  3+

x  +  2+  3+

y  +  2+  3+

z  +  2+  3+

hide H<sub>2</sub>O/NH<sub>3</sub>

zoom 112-122

GO

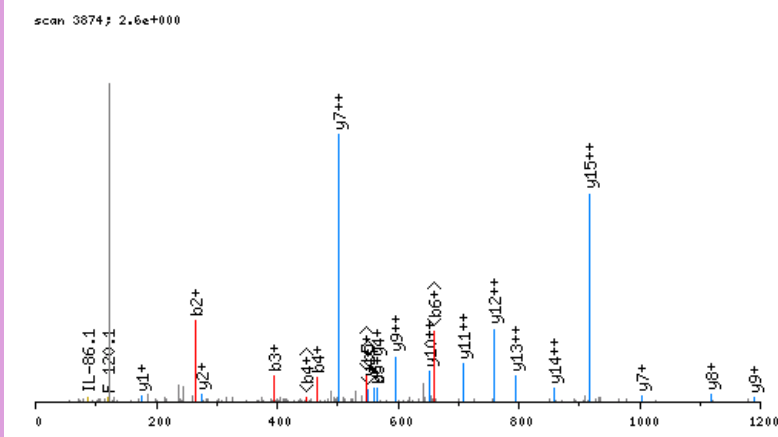

click image to zoom in; click top corners to zoom out [\[precursor±\]](#)

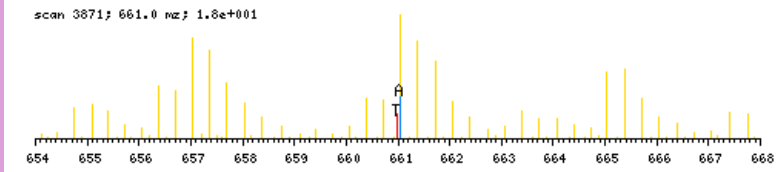

zoomed in precursor plot; T=theoretical m/z, A=acquired m/z

| b <sup>+</sup> | #  | AA # | y <sup>+</sup> | y <sup>2+</sup> |
|----------------|----|------|----------------|-----------------|
| 150.0978       | 1  | D    | 16             |                 |
| 265.1248       | 2  | D    | 15             | 1831.8564       |
| 394.1674       | 3  | E    | 14             | 1716.8295       |
| 465.2045       | 4  | A    | 13             | 1587.7869       |
| 566.2522       | 5  | T    | 12             | 1516.7498       |
| 679.3362       | 6  | I    | 11             | 1415.7021       |
| 792.4203       | 7  | L    | 10             | 1302.6180       |
| 863.4574       | 8  | A    | 9              | 1189.5339       |
| 978.4844       | 9  | D    | 8              | 1118.4968       |
| 1092.5273      | 10 | N    | 7              | 1003.4699       |
| 1254.6854      | 11 | K    | 6              | 889.4270        |
| 1414.7160      | 12 | C    | 5              | 727.2689        |
| 1545.7565      | 13 | M    | 4              | 567.2383        |
| 1705.7871      | 14 | C    | 3              | 436.1978        |
| 1806.8347      | 15 | T    | 2              | 276.1672        |
|                | 16 | R    | 1              | 175.1195        |

N-term:+35.07 K(11):+162.16  
C(12):+160.03 C(14):+160.03

DDEVVDVDTVEEDLGKSR, MH+ 2046.0151, m/z 682.6766  
 H OSG39 P180811 230811-s1.05072.05072.3.dta

X-range:

-

MassTol: Y-zoom:

MassType:

AVG  MONO

Axis:

1  2

Label:

I  M  -

Ions:

a  +  2+  3+

b  +  2+  3+

c  +  2+  3+

x  +  2+  3+

y  +  2+  3+

z  +  2+  3+

hide H<sub>2</sub>O/NH<sub>3</sub>

zoom 112-122

GO

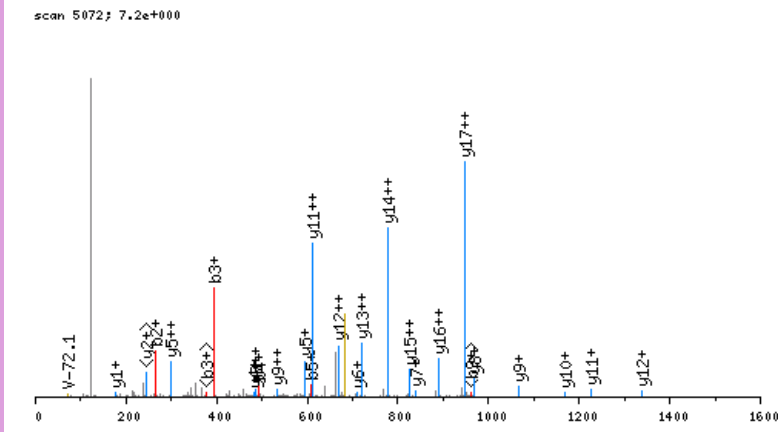

click image to zoom in; click top corners to zoom out [\[precursor±\]](#)

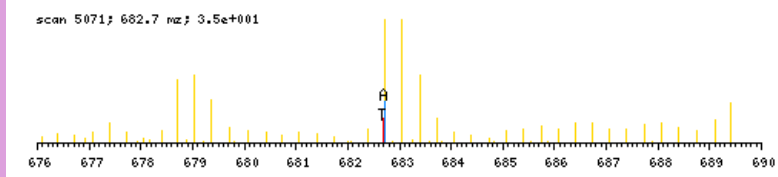

zoomed in precursor plot; T=theoretical m/z, A=acquired m/z

| b <sup>+</sup> | #  | AA # | y <sup>+</sup> | y <sup>2+</sup> |
|----------------|----|------|----------------|-----------------|
| 150.0978       | 1  | D 18 |                |                 |
| 265.1248       | 2  | D 17 | 1896.9251      | 948.9665        |
| 394.1674       | 3  | E 16 | 1781.8981      | 891.4530        |
| 493.2358       | 4  | V 15 | 1652.8556      | 826.9317        |
| 608.2627       | 5  | D 14 | 1553.7871      | 777.3975        |
| 707.3312       | 6  | V 13 | 1438.7602      | 719.8840        |
| 822.3581       | 7  | D 12 | 1339.6918      | 670.3498        |
| 879.3796       | 8  | G 11 | 1224.6648      | 612.8363        |
| 980.4272       | 9  | T 10 | 1167.6434      | 584.3256        |
| 1079.4956      | 10 | V 9  | 1066.5957      | 533.8018        |
| 1208.5382      | 11 | E 8  | 967.5273       | 484.2676        |
| 1337.5808      | 12 | E 7  | 838.4847       | 419.7463        |
| 1452.6078      | 13 | D 6  | 709.4421       | 355.2250        |
| 1565.6918      | 14 | L 5  | 594.4152       | 297.7115        |
| 1622.7133      | 15 | G 4  | 481.3311       | 241.1695        |
| 1784.8714      | 16 | K 3  | 424.3096       | 212.6587        |
| 1871.9034      | 17 | S 2  | 262.1515       | 131.5797        |
|                | 18 | R 1  | 175.1195       | 88.0637         |

N-term:+35.07 K(16):+162.16

DDHFLFDKPVSPLLLASGMAR, MH+ 2397.3277, m/z 600.0874  
 H OSG40 P180811 230811-s1.09365.09365.4.dta

X-range:

-

MassTol: Y-zoom:

MassType:

AVG  MONO

Axis:

1  2

Label:

I  M  -

Ions:

a  +  2+  3+

b  +  2+  3+

c  +  2+  3+

x  +  2+  3+

y  +  2+  3+

z  +  2+  3+

hide H<sub>2</sub>O/NH<sub>3</sub>

zoom 112-122

GO

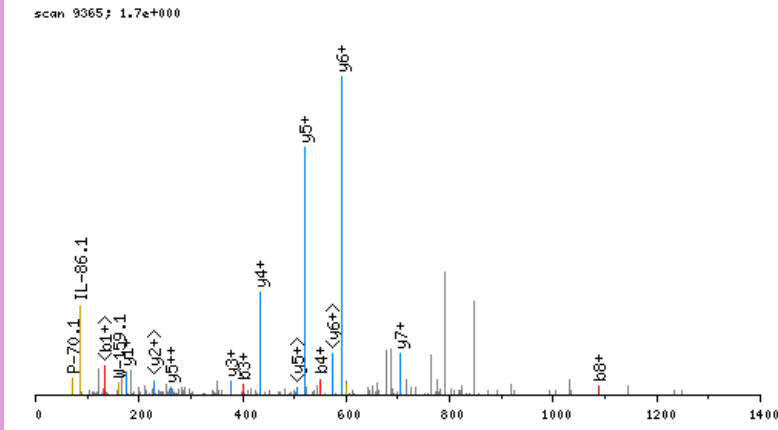

click image to zoom in; click top corners to zoom out [precursor±]

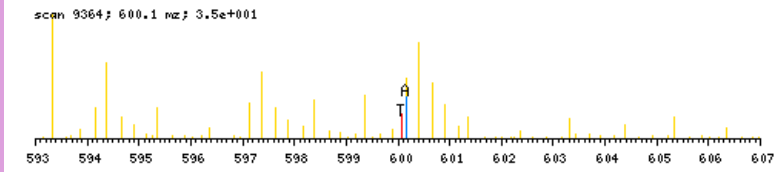

zoomed in precursor plot; T=theoretical m/z, A=acquired m/z

| b <sup>+</sup> | #  | AA | #  | y <sup>+</sup> | y <sup>2+</sup> |
|----------------|----|----|----|----------------|-----------------|
| 150.0978       | 1  | D  | 21 |                |                 |
| 265.1248       | 2  | D  | 20 | 2248.2377      | 1124.6227       |
| 402.1837       | 3  | H  | 19 | 2133.2107      | 1067.1093       |
| 549.2521       | 4  | F  | 18 | 1996.1518      | 998.5798        |
| 662.3362       | 5  | L  | 17 | 1849.0834      | 925.0456        |
| 809.4046       | 6  | F  | 16 | 1735.9993      | 868.5036        |
| 924.4315       | 7  | D  | 15 | 1588.9309      | 794.9694        |
| 1086.5896      | 8  | K  | 14 | 1473.9040      | 737.4559        |
| 1183.6424      | 9  | P  | 13 | 1311.7459      | 656.3768        |
| 1282.7108      | 10 | V  | 12 | 1214.6931      | 607.8505        |
| 1369.7428      | 11 | S  | 11 | 1115.6247      | 558.3163        |
| 1466.7956      | 12 | P  | 10 | 1028.5927      | 514.8002        |
| 1579.8797      | 13 | L  | 9  | 931.5399       | 466.2739        |
| 1692.9637      | 14 | L  | 8  | 818.4558       | 409.7318        |
| 1806.0478      | 15 | L  | 7  | 705.3718       | 353.1898        |
| 1877.0849      | 16 | A  | 6  | 592.2877       | 296.6478        |
| 1964.1169      | 17 | S  | 5  | 521.2506       | 261.1292        |
| 2021.1384      | 18 | G  | 4  | 434.2186       | 217.6132        |
| 2152.1789      | 19 | M  | 3  | 377.1971       | 189.1025        |
| 2223.2160      | 20 | A  | 2  | 246.1566       | 123.5822        |
|                | 21 | R  | 1  | 175.1195       | 88.0637         |

N-term:+35.07 K(8):+162.16

DDESYVNIQNLDKAR, MH+ 1803.9241, m/z 601.9796  
 L OSG39 P180811 230811-s1.04897.04897.3.dta

X-range:

-

MassTol: Y-zoom:

MassType:

AVG  MONO

Axis:

1  2

Label:

I  M  -

Ions:

a  +  2+  3+

b  +  2+  3+

c  +  2+  3+

x  +  2+  3+

y  +  2+  3+

z  +  2+  3+

hide H<sub>2</sub>O/NH<sub>3</sub>

zoom 112-122

GO

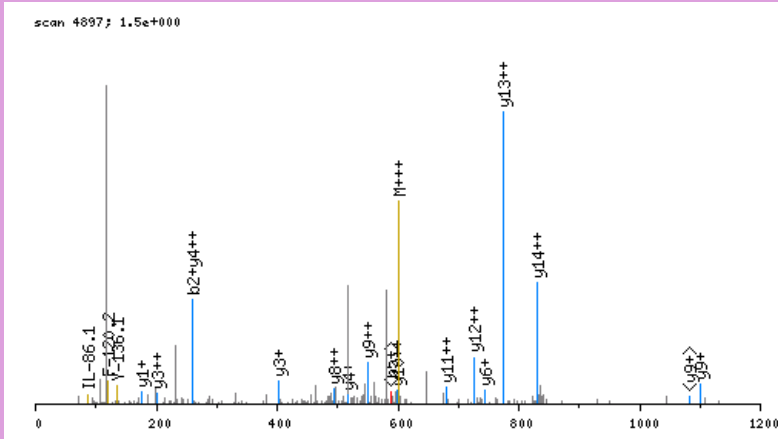

click image to zoom in; click top corners to zoom out [\[precursor±\]](#)

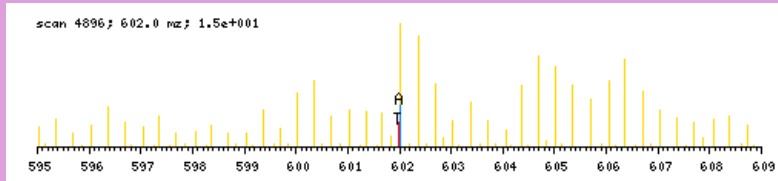

zoomed in precursor plot; T=theoretical m/z, A=acquired m/z

| b <sup>+</sup>  | #  | AA # | y <sup>+</sup>   | y <sup>2+</sup> |
|-----------------|----|------|------------------|-----------------|
| 144.0660        | 1  | D 15 |                  |                 |
| <b>259.0930</b> | 2  | D 14 | 1660.8659        | <b>830.9369</b> |
| 356.1458        | 3  | P 13 | 1545.8390        | <b>773.4234</b> |
| 443.1778        | 4  | S 12 | 1448.7862        | <b>724.8970</b> |
| 606.2411        | 5  | Y 11 | 1361.7542        | <b>681.3810</b> |
| 705.3095        | 6  | V 10 | 1198.6908        | <b>599.8493</b> |
| 819.3524        | 7  | N 9  | <b>1099.6224</b> | <b>550.3151</b> |
| 932.4365        | 8  | I 8  | 985.5795         | <b>493.2937</b> |
| 1060.4951       | 9  | Q 7  | 872.4954         | 436.7516        |
| 1174.5380       | 10 | N 6  | <b>744.4368</b>  | 372.7223        |
| 1287.6221       | 11 | L 5  | 630.3939         | 315.7009        |
| 1402.6490       | 12 | D 4  | <b>517.3099</b>  | <b>259.1588</b> |
| 1558.7753       | 13 | K 3  | <b>402.2829</b>  | <b>201.6454</b> |
| 1629.8124       | 14 | A 2  | 246.1566         | 123.5822        |
|                 | 15 | R 1  | <b>175.1195</b>  | 88.0637         |

N-term:+29.04 K(13):+156.13

DDSISMGYKLDLTDVQIMAR, MH+ 2467.2849, m/z 823.0998  
 H OSG39 P180811 230811-s1.06055.06055.3.dta

X-range:

-

MassTol: Y-zoom:

MassType:

AVG  MONO

Axis:

1  2

Label:

I  M  -

Ions:

a  +  2+  3+

b  +  2+  3+

c  +  2+  3+

x  +  2+  3+

y  +  2+  3+

z  +  2+  3+

hide H<sub>2</sub>O/NH<sub>3</sub>

zoom 112-122

GO

scan 6055; 4.4e+000

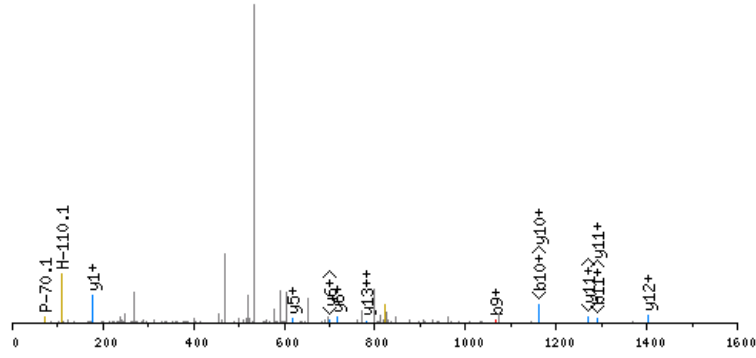

click image to zoom in; click top corners to zoom out [precursor±]

scan 6051; 823.1 m/z; 2.7e+001

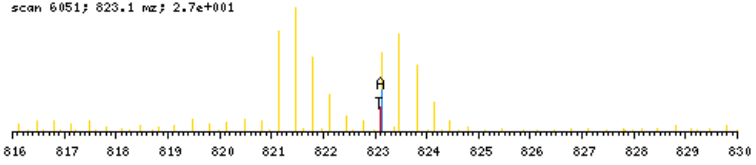

zoomed in precursor plot; T=theoretical m/z, A=acquired m/z

| b <sup>+</sup> | #  | AA # | y <sup>+</sup> | y <sup>2+</sup> |
|----------------|----|------|----------------|-----------------|
| 150.0978       | 1  | D 21 |                |                 |
| 265.1248       | 2  | D 20 | 2318.1949      | 1159.6013       |
| 352.1568       | 3  | S 19 | 2203.1679      | 1102.0879       |
| 465.2409       | 4  | I 18 | 2116.1359      | 1058.5719       |
| 552.2729       | 5  | S 17 | 2003.0518      | 1002.0298       |
| 683.3134       | 6  | M 16 | 1916.0198      | 958.5138        |
| 740.3349       | 7  | G 15 | 1784.9793      | 892.9936        |
| 903.3982       | 8  | Y 14 | 1727.9579      | 864.4828        |
| 1065.5563      | 9  | K 13 | 1564.8945      | 782.9512        |
| 1178.6403      | 10 | L 12 | 1402.7364      | 701.8721        |
| 1306.6989      | 11 | Q 11 | 1289.6524      | 645.3301        |
| 1421.7259      | 12 | D 10 | 1161.5938      | 581.3008        |
| 1534.8099      | 13 | L 9  | 1046.5668      | 523.7873        |
| 1635.8576      | 14 | T 8  | 933.4828       | 467.2453        |
| 1750.8846      | 15 | D 7  | 832.4351       | 416.7215        |
| 1849.9530      | 16 | V 6  | 717.4082       | 359.2080        |
| 1978.0115      | 17 | Q 5  | 618.3397       | 309.6738        |
| 2091.0956      | 18 | I 4  | 490.2812       | 245.6445        |
| 2222.1361      | 19 | M 3  | 377.1971       | 189.1025        |
| 2293.1732      | 20 | A 2  | 246.1566       | 123.5822        |
|                | 21 | R 1  | 175.1195       | 88.0637         |

N-term:+35.07 K(9):+162.16

DDSNMEDYPDPQSANPMNSSLLSLYR, MH+ 2987.3039, m/z 747.5814  
 L OSG40 P180811 230811-s1.09195.09195.4.dta

scan 9195; 4.0e+001

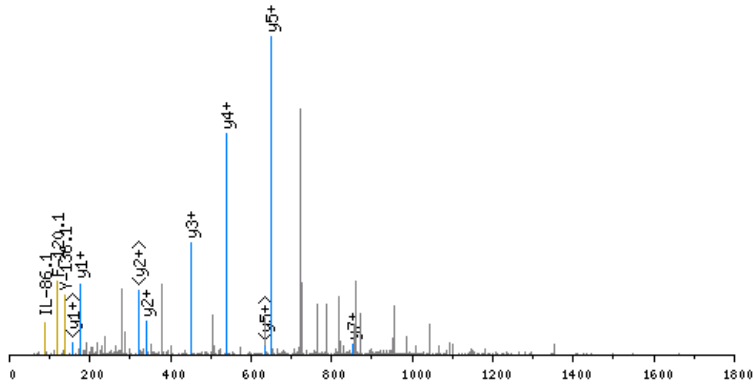

click image to zoom in; click top corners to zoom out [precursor±]

scan 9194; 747.6 m/z; 2.2e+002

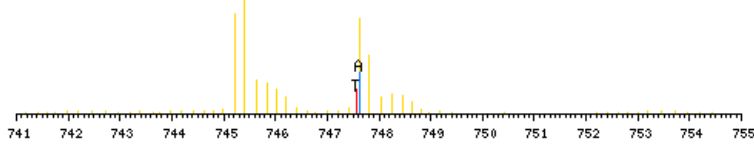

zoomed in precursor plot; T=theoretical m/z, A=acquired m/z

| b <sup>+</sup> | #  | AA # | y <sup>+</sup> | y <sup>2+</sup> |
|----------------|----|------|----------------|-----------------|
| 144.0660       | 1  | D 26 |                |                 |
| 259.0930       | 2  | D 25 | 2844.2456      | 1422.6267       |
| 346.1250       | 3  | S 24 | 2729.2187      | 1365.1133       |
| 460.1679       | 4  | N 23 | 2642.1867      | 1321.5973       |
| 591.2084       | 5  | M 22 | 2528.1438      | 1264.5758       |
| 720.2510       | 6  | E 21 | 2397.1033      | 1199.0555       |
| 835.2780       | 7  | D 20 | 2268.0607      | 1134.5342       |
| 998.3413       | 8  | Y 19 | 2153.0337      | 1077.0208       |
| 1095.3941      | 9  | P 18 | 1989.9704      | 995.4891        |
| 1210.4210      | 10 | D 17 | 1892.9176      | 946.9627        |
| 1307.4738      | 11 | P 16 | 1777.8907      | 889.4493        |
| 1435.5323      | 12 | Q 15 | 1680.8379      | 840.9229        |
| 1522.5644      | 13 | S 14 | 1552.7794      | 776.8936        |
| 1593.6015      | 14 | A 13 | 1465.7473      | 733.3776        |
| 1707.6444      | 15 | N 12 | 1394.7102      | 697.8590        |
| 1804.6972      | 16 | P 11 | 1280.6673      | 640.8376        |
| 1935.7377      | 17 | M 10 | 1183.6145      | 592.3112        |
| 2049.7806      | 18 | N 9  | 1052.5740      | 526.7909        |
| 2136.8126      | 19 | S 8  | 938.5311       | 469.7695        |
| 2223.8446      | 20 | S 7  | 851.4991       | 426.2535        |
| 2336.9287      | 21 | L 6  | 764.4670       | 382.7374        |
| 2450.0128      | 22 | L 5  | 651.3830       | 326.1954        |
| 2537.0448      | 23 | S 4  | 538.2989       | 269.6534        |
| 2650.1289      | 24 | L 3  | 451.2669       | 226.1374        |
| 2813.1922      | 25 | Y 2  | 338.1828       | 169.5953        |
|                | 26 | R 1  | 175.1195       | 88.0637         |

N-term:+29.04

X-range:

-

MassTol: Y-zoom:

MassType:

AVG  MONO

Axis:

1  2

Label:

I  M  -

Ions:

a  +  2+  3+

b  +  2+  3+

c  +  2+  3+

x  +  2+  3+

y  +  2+  3+

z  +  2+  3+

hide H<sub>2</sub>O/NH<sub>3</sub>

zoom 112-122

GO



DDTVHVVIATPGR, MH+ 1407.7596, m/z 469.9247  
 L OSG39 P180811 230811-s1.03934.03934.3.dta

X-range:

-

MassTol: Y-zoom:

MassType:

AVG  MONO

Axis:

1  2

Label:

I  M  -

Ions:

a  +  2+  3+

b  +  2+  3+

c  +  2+  3+

x  +  2+  3+

y  +  2+  3+

z  +  2+  3+

hide H<sub>2</sub>O/NH<sub>3</sub>

zoom 112-122

GO

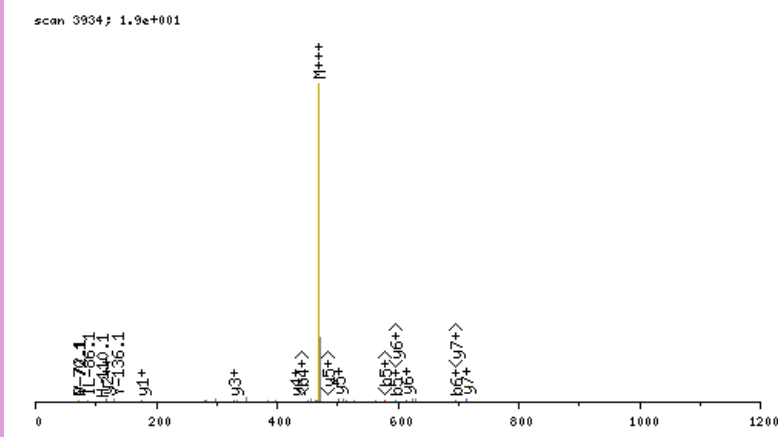

click image to zoom in; click top corners to zoom out [\[precursor±\]](#)

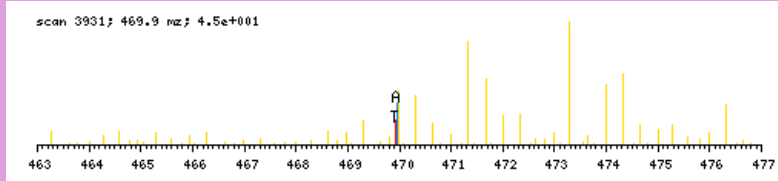

zoomed in precursor plot; T=theoretical m/z, A=acquired m/z

| b <sup>+</sup> | #  | AA # | y <sup>+</sup> | y <sup>2+</sup> |
|----------------|----|------|----------------|-----------------|
| 144.0660       | 1  | D 13 |                |                 |
| 259.0930       | 2  | D 12 | 1264.7014      | 632.8546        |
| 360.1407       | 3  | T 11 | 1149.6744      | 575.3411        |
| 459.2091       | 4  | V 10 | 1048.6267      | 524.8173        |
| 596.2680       | 5  | H 9  | 949.5583       | 475.2831        |
| 695.3364       | 6  | V 8  | 812.4994       | 406.7536        |
| 794.4048       | 7  | V 7  | 713.4310       | 357.2194        |
| 907.4889       | 8  | I 6  | 614.3626       | 307.6852        |
| 978.5260       | 9  | A 5  | 501.2785       | 251.1432        |
| 1079.5737      | 10 | T 4  | 430.2414       | 215.6246        |
| 1176.6264      | 11 | P 3  | 329.1937       | 165.1008        |
| 1233.6479      | 12 | G 2  | 232.1410       | 116.5744        |
|                | 13 | R 1  | 175.1195       | 88.0637         |

N-term:+29.04

DDYMKKEVGVGFATR, MH+ 1655.8739, m/z 552.6295  
 H OSG39 P180811 230811-s1.05605.05605.3.dta

X-range:

-

MassTol: Y-zoom:

MassType:

AVG  MONO

Axis:

1  2

Label:

I  M  -

Ions:

a  +  2+  3+

b  +  2+  3+

c  +  2+  3+

x  +  2+  3+

y  +  2+  3+

z  +  2+  3+

hide H<sub>2</sub>O/NH<sub>3</sub>

zoom 112-122

GO

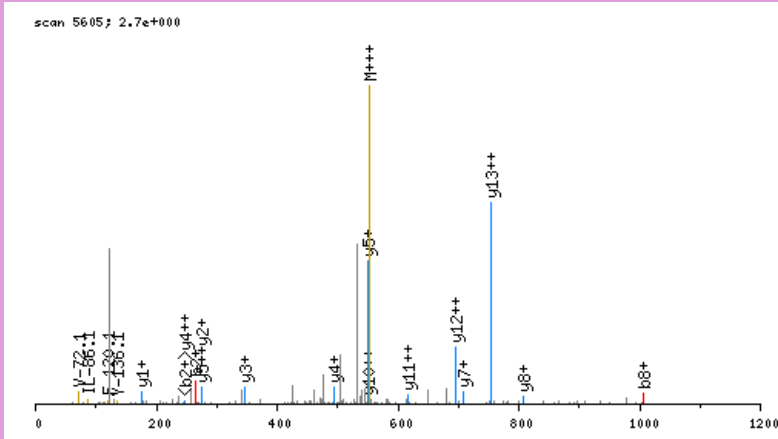

click image to zoom in; click top corners to zoom out [\[precursor±\]](#)

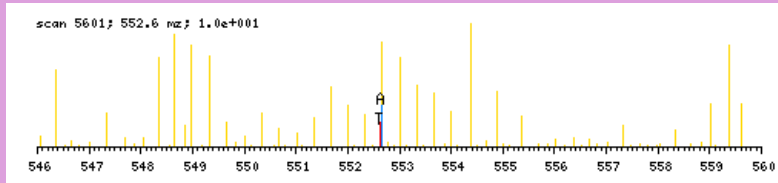

zoomed in precursor plot; T=theoretical m/z, A=acquired m/z

| b <sup>+</sup> | #  | AA # | y <sup>+</sup> | y <sup>2+</sup> |
|----------------|----|------|----------------|-----------------|
| 150.0978       | 1  | D 14 |                |                 |
| 265.1248       | 2  | D 13 | 1506.7839      | 753.8959        |
| 428.1881       | 3  | Y 12 | 1391.7570      | 696.3824        |
| 559.2286       | 4  | M 11 | 1228.6936      | 614.8507        |
| 721.3867       | 5  | K 10 | 1097.6532      | 549.3305        |
| 850.4293       | 6  | E 9  | 935.4951       | 468.2514        |
| 949.4977       | 7  | V 8  | 806.4525       | 403.7301        |
| 1006.5192      | 8  | G 7  | 707.3840       | 354.1959        |
| 1105.5876      | 9  | V 6  | 650.3626       | 325.6852        |
| 1162.6090      | 10 | G 5  | 551.2942       | 276.1510        |
| 1309.6775      | 11 | F 4  | 494.2727       | 247.6403        |
| 1380.7146      | 12 | A 3  | 347.2043       | 174.1061        |
| 1481.7623      | 13 | T 2  | 276.1672       | 138.5875        |
|                | 14 | R 1  | 175.1195       | 88.0637         |

N-term:+35.07 K(5):+162.16

DEEATGTTIQEDYLR, MH+ 1667.7764, m/z 556.5970  
 L OSG37 P180811 230811-s1.05395.05395.3.dta

X-range:

-

MassTol: Y-zoom:

MassType:

AVG  MONO

Axis:

1  2

Label:

I  M  -

Ions:

a  +  2+  3+

b  +  2+  3+

c  +  2+  3+

x  +  2+  3+

y  +  2+  3+

z  +  2+  3+

hide H<sub>2</sub>O/NH<sub>3</sub>

zoom 112-122

GO

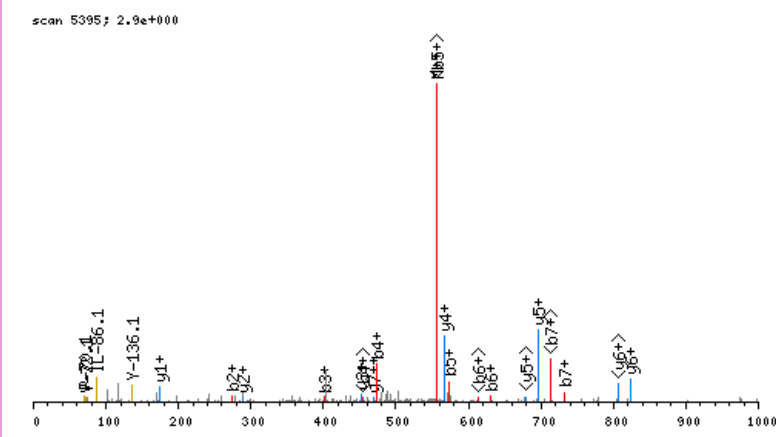

click image to zoom in; click top corners to zoom out [\[precursor±\]](#)

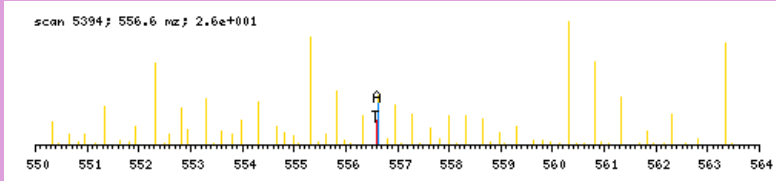

zoomed in precursor plot; T=theoretical m/z, A=acquired m/z

| b <sup>+</sup> | #  | AA # | y <sup>+</sup> | y <sup>2+</sup> |
|----------------|----|------|----------------|-----------------|
| 144.0660       | 1  | D 14 |                |                 |
| 273.1086       | 2  | E 13 | 1524.7182      | 762.8630        |
| 402.1512       | 3  | E 12 | 1395.6756      | 698.3417        |
| 473.1883       | 4  | A 11 | 1266.6330      | 633.8204        |
| 574.2360       | 5  | T 10 | 1195.5959      | 598.3019        |
| 631.2575       | 6  | G 9  | 1094.5482      | 547.7780        |
| 732.3052       | 7  | T 8  | 1037.5267      | 519.2673        |
| 845.3892       | 8  | I 7  | 936.4791       | 468.7434        |
| 973.4478       | 9  | Q 6  | 823.3950       | 412.2014        |
| 1102.4904      | 10 | E 5  | 695.3364       | 348.1721        |
| 1217.5173      | 11 | D 4  | 566.2938       | 283.6508        |
| 1380.5807      | 12 | Y 3  | 451.2669       | 226.1374        |
| 1493.6647      | 13 | L 2  | 288.2036       | 144.6057        |
|                | 14 | R 1  | 175.1195       | 88.0637         |

N-term:+29.04

DEEVHTGLGELLR, MH+ 1495.7756, m/z 499.2634  
 L OSG39 P180811 230811-s1.05538.05538.3.dta

scan 5538; 7.1e+000

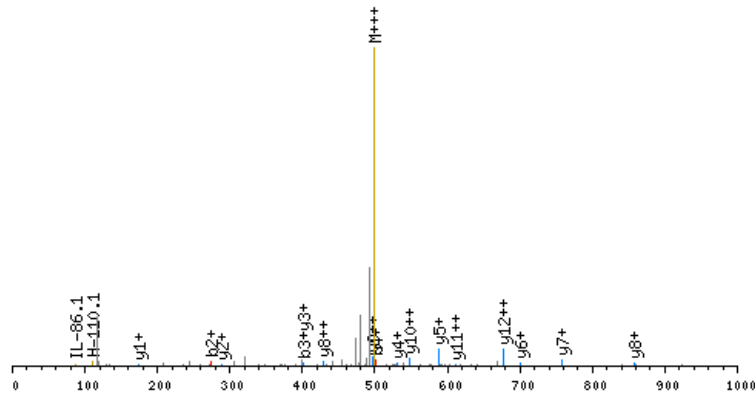

click image to zoom in; click top corners to zoom out [\[precursor±\]](#)

scan 5536; 499.3 m/z; 1.0e+001

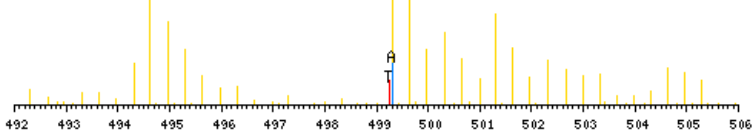

zoomed in precursor plot; T=theoretical m/z, A=acquired m/z

X-range:

-

MassTol: Y-zoom:

MassType:

AVG  MONO

Axis:

1  2

Label:

I  M  -

Ions:

a  +  2+  3+

b  +  2+  3+

c  +  2+  3+

x  +  2+  3+

y  +  2+  3+

z  +  2+  3+

hide H<sub>2</sub>O/NH<sub>3</sub>

zoom 112-122

GO

| b <sup>+</sup> | #  | AA # | y <sup>+</sup> | y <sup>2+</sup> |
|----------------|----|------|----------------|-----------------|
| 144.0660       | 1  | D 13 |                |                 |
| 273.1086       | 2  | E 12 | 1352.7174      | 676.8626        |
| 402.1512       | 3  | E 11 | 1223.6748      | 612.3413        |
| 501.2196       | 4  | V 10 | 1094.6322      | 547.8200        |
| 638.2786       | 5  | H 9  | 995.5638       | 498.2858        |
| 739.3262       | 6  | T 8  | 858.5049       | 429.7564        |
| 796.3477       | 7  | G 7  | 757.4572       | 379.2325        |
| 909.4318       | 8  | L 6  | 700.4357       | 350.7218        |
| 966.4532       | 9  | G 5  | 587.3517       | 294.1798        |
| 1095.4958      | 10 | E 4  | 530.3302       | 265.6690        |
| 1208.5799      | 11 | L 3  | 401.2876       | 201.1477        |
| 1321.6639      | 12 | L 2  | 288.2036       | 144.6057        |
|                | 13 | R 1  | 175.1195       | 88.0637         |

N-term:+29.04

DEILEASDGIMVAR, MH+ 1552.8105, m/z 518.2750  
 H OSG37 P180811 230811-s1.07032.07032.3.dta

X-range:

-

MassTol: Y-zoom:

MassType:

AVG  MONO

Axis:

1  2

Label:

I  M  -

Ions:

a  +  2+  3+

b  +  2+  3+

c  +  2+  3+

x  +  2+  3+

y  +  2+  3+

z  +  2+  3+

hide H<sub>2</sub>O/NH<sub>3</sub>

zoom 112-122

GO

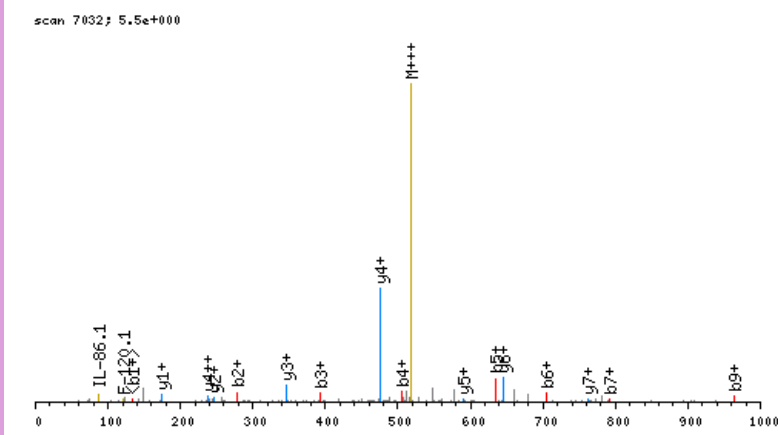

click image to zoom in; click top corners to zoom out [\[precursor±\]](#)

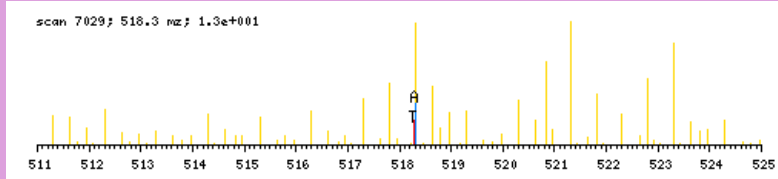

zoomed in precursor plot; T=theoretical m/z, A=acquired m/z

| b <sup>+</sup> | #  | AA # | y <sup>+</sup> | y <sup>2+</sup> |
|----------------|----|------|----------------|-----------------|
| 150.0978       | 1  | D 14 |                |                 |
| 279.1404       | 2  | E 13 | 1403.7204      | 702.3641        |
| 392.2245       | 3  | I 12 | 1274.6778      | 637.8428        |
| 505.3086       | 4  | L 11 | 1161.5938      | 581.3008        |
| 634.3512       | 5  | E 10 | 1048.5097      | 524.7588        |
| 705.3883       | 6  | A 9  | 919.4671       | 460.2375        |
| 792.4203       | 7  | S 8  | 848.4300       | 424.7189        |
| 907.4472       | 8  | D 7  | 761.3980       | 381.2029        |
| 964.4687       | 9  | G 6  | 646.3710       | 323.6894        |
| 1077.5528      | 10 | I 5  | 589.3496       | 295.1787        |
| 1208.5933      | 11 | M 4  | 476.2655       | 238.6367        |
| 1307.6617      | 12 | V 3  | 345.2250       | 173.1164        |
| 1378.6988      | 13 | A 2  | 246.1566       | 123.5822        |
|                | 14 | R 1  | 175.1195       | 88.0637         |

N-term:+35.07

X-range:

-

MassTol: Y-zoom:

MassType:

AVG  MONO

Axis:

1  2

Label:

I  M  -

Ions:

a  +  2+  3+

b  +  2+  3+

c  +  2+  3+

x  +  2+  3+

y  +  2+  3+

z  +  2+  3+

hide H<sub>2</sub>O/NH<sub>3</sub>

zoom 112-122

GO

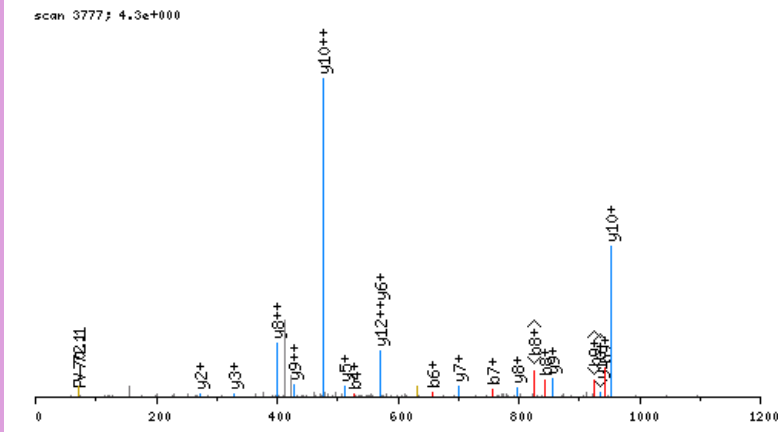

click image to zoom in; click top corners to zoom out [\[precursor±\]](#)

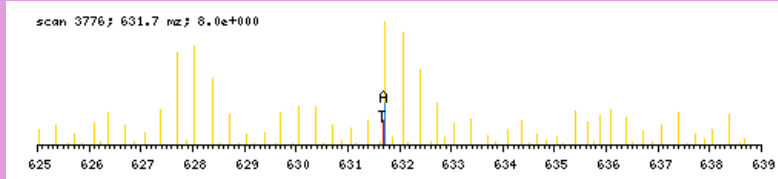

zoomed in precursor plot; T=theoretical m/z, A=acquired m/z

| b <sup>+</sup> | #  | AA # | y <sup>+</sup> | y <sup>2+</sup> |
|----------------|----|------|----------------|-----------------|
| 150.0978       | 1  | D 19 |                |                 |
| 279.1404       | 2  | E 18 | 1743.9276      | 872.4677        |
| 441.2985       | 3  | K 17 | 1614.8850      | 807.9464        |
| 528.3306       | 4  | S 16 | 1452.7269      | 726.8674        |
| 599.3677       | 5  | A 15 | 1365.6949      | 683.3514        |
| 656.3891       | 6  | G 14 | 1294.6578      | 647.8328        |
| 755.4576       | 7  | V 13 | 1237.6363      | 619.3221        |
| 842.4896       | 8  | S 12 | 1138.5679      | 569.7879        |
| 941.5580       | 9  | V 11 | 1051.5359      | 526.2718        |
| 1038.6108      | 10 | P 10 | 952.4675       | 476.7376        |
| 1095.6322      | 11 | G 9  | 855.4147       | 428.2113        |
| 1192.6850      | 12 | P 8  | 798.3932       | 399.7005        |
| 1323.7255      | 13 | M 7  | 701.3405       | 351.1741        |
| 1380.7469      | 14 | G 6  | 570.3000       | 285.6539        |
| 1477.7997      | 15 | P 5  | 513.2785       | 257.1432        |
| 1564.8317      | 16 | S 4  | 416.2258       | 208.6168        |
| 1621.8532      | 17 | G 3  | 329.1937       | 165.1008        |
| 1718.9060      | 18 | P 2  | 272.1723       | 136.5900        |
|                | 19 | R 1  | 175.1195       | 88.0637         |

N-term:+35.07 K(3):+162.16

DELGSILKGFSSDAR, MH+ 1650.8703, m/z 550.9616  
 L OSG39 P180811 230811-s1.07614.07614.3.dta

X-range:

-

MassTol: Y-zoom:

MassType:

AVG  MONO

Axis:

1  2

Label:

I  M  -

Ions:

a  +  2+  3+

b  +  2+  3+

c  +  2+  3+

x  +  2+  3+

y  +  2+  3+

z  +  2+  3+

hide H<sub>2</sub>O/NH<sub>3</sub>

zoom 112-122

GO

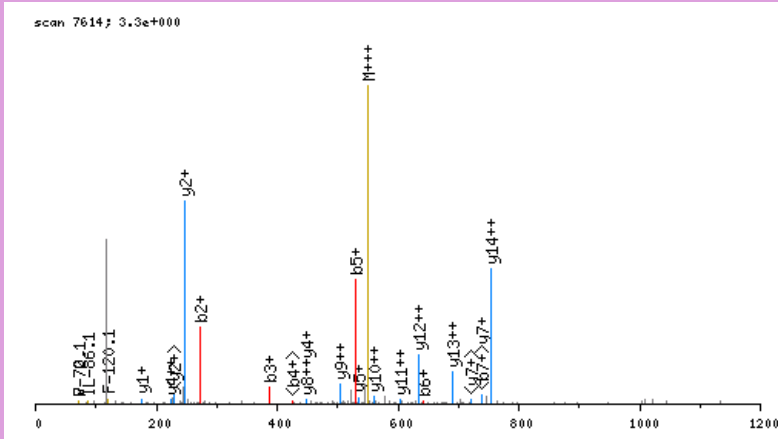

click image to zoom in; click top corners to zoom out [\[precursor±\]](#)

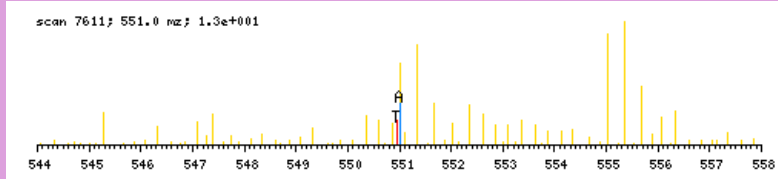

zoomed in precursor plot; T=theoretical m/z, A=acquired m/z

| b <sup>+</sup> | #  | AA # | y <sup>+</sup> | y <sup>2+</sup> |
|----------------|----|------|----------------|-----------------|
| 144.0660       | 1  | D 15 |                |                 |
| 273.1086       | 2  | E 14 | 1507.8121      | 754.4099        |
| 386.1927       | 3  | L 13 | 1378.7695      | 689.8887        |
| 443.2142       | 4  | G 12 | 1265.6854      | 633.3466        |
| 530.2462       | 5  | S 11 | 1208.6639      | 604.8359        |
| 643.3303       | 6  | I 10 | 1121.6319      | 561.3199        |
| 756.4143       | 7  | L 9  | 1008.5479      | 504.7778        |
| 912.5406       | 8  | K 8  | 895.4638       | 448.2358        |
| 969.5621       | 9  | G 7  | 739.3375       | 370.1727        |
| 1116.6305      | 10 | F 6  | 682.3160       | 341.6619        |
| 1203.6625      | 11 | S 5  | 535.2476       | 268.1277        |
| 1290.6946      | 12 | S 4  | 448.2156       | 224.6117        |
| 1405.7215      | 13 | D 3  | 361.1836       | 181.0957        |
| 1476.7586      | 14 | A 2  | 246.1566       | 123.5822        |
|                | 15 | R 1  | 175.1195       | 88.0637         |

N-term:+29.04 K(8):+156.13

DGIIVVWNAQTGEKLELR, MH+ 2210.2549, m/z 553.3192  
 L OSG36 P180811 230811-s1.08044.08044.4.dta

scan 8044; 4.4e+000

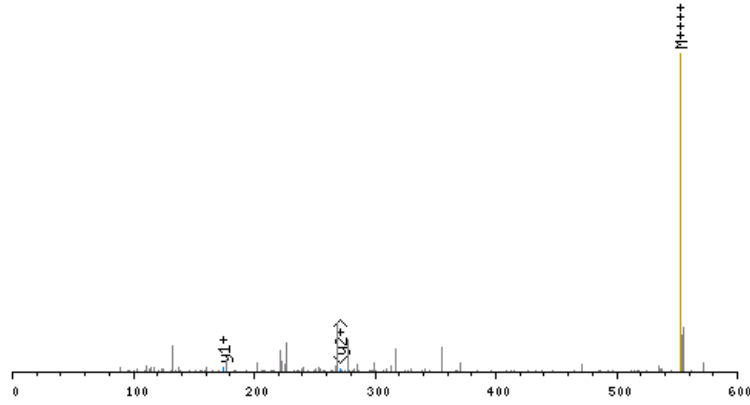

click image to zoom in; click top corners to zoom out [\[precursor±\]](#)

scan 8043; 553.3 mz; 3.0e+000

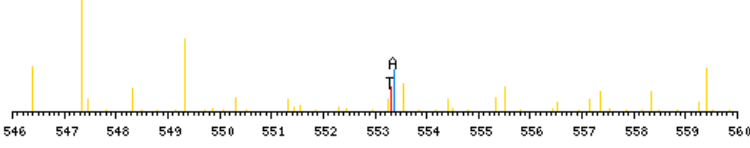

zoomed in precursor plot; T=theoretical m/z, A=acquired m/z

X-range:

-

MassTol: Y-zoom:

MassType:

AVG  MONO

Axis:

1  2

Label:

I  M  -

Ions:

a  +  2+  3+

b  +  2+  3+

c  +  2+  3+

x  +  2+  3+

y  +  2+  3+

z  +  2+  3+

hide H<sub>2</sub>O/NH<sub>3</sub>

zoom 112-122

GO

| b <sup>+</sup> | #  | AA # | y <sup>+</sup> | y <sup>2+</sup> |
|----------------|----|------|----------------|-----------------|
| 144.0660       | 1  | D    | 19             |                 |
| 201.0875       | 2  | G    | 18             | 2067.1967       |
| 314.1716       | 3  | I    | 17             | 2010.1752       |
| 427.2556       | 4  | I    | 16             | 1897.0911       |
| 526.3240       | 5  | V    | 15             | 1784.0071       |
| 625.3925       | 6  | V    | 14             | 1684.9387       |
| 811.4718       | 7  | W    | 13             | 1585.8703       |
| 925.5147       | 8  | N    | 12             | 1399.7909       |
| 996.5518       | 9  | A    | 11             | 1285.7480       |
| 1124.6104      | 10 | Q    | 10             | 1214.7109       |
| 1225.6581      | 11 | T    | 9              | 1086.6523       |
| 1282.6795      | 12 | G    | 8              | 985.6046        |
| 1411.7221      | 13 | E    | 7              | 928.5832        |
| 1567.8484      | 14 | K    | 6              | 799.5406        |
| 1680.9325      | 15 | L    | 5              | 643.4143        |
| 1794.0166      | 16 | L    | 4              | 530.3302        |
| 1923.0592      | 17 | E    | 3              | 417.2462        |
| 2036.1432      | 18 | L    | 2              | 288.2036        |
|                | 19 | R    | 1              | 175.1195        |

N-term:+29.04 K(14):+156.13



DHASIQMNVAEVDR, MH+ 1612.7753, m/z 538.2633  
 L OSG40 P180811 230811-s1.05033.05033.3.dta

scan 5033; 5.1e+000

X-range:

-

MassTol: Y-zoom:

MassType:

AVG  MONO

Axis:

1  2

Label:

I  M  -

Ions:

a  +  2+  3+

b  +  2+  3+

c  +  2+  3+

x  +  2+  3+

y  +  2+  3+

z  +  2+  3+

hide H<sub>2</sub>O/NH<sub>3</sub>

zoom 112-122

GO

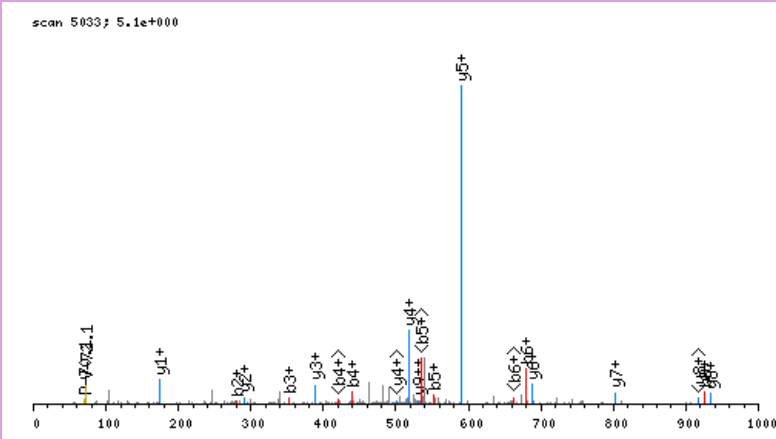

click image to zoom in; click top corners to zoom out [\[precursor±\]](#)

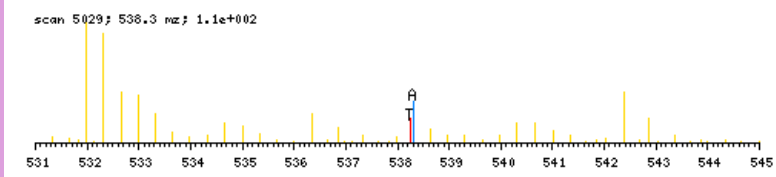

zoomed in precursor plot; T=theoretical m/z, A=acquired m/z

| b <sup>+</sup> | #  | AA # | y <sup>+</sup> | y <sup>2+</sup> |
|----------------|----|------|----------------|-----------------|
| 144.0660       | 1  | D 14 |                |                 |
| 281.1250       | 2  | H 13 | 1469.7171      | 735.3625        |
| 352.1621       | 3  | A 12 | 1332.6582      | 666.8330        |
| 439.1941       | 4  | S 11 | 1261.6211      | 631.3144        |
| 552.2782       | 5  | I 10 | 1174.5890      | 587.7984        |
| 680.3367       | 6  | Q 9  | 1061.5050      | 531.2564        |
| 811.3772       | 7  | M 8  | 933.4464       | 467.2271        |
| 925.4202       | 8  | N 7  | 802.4059       | 401.7069        |
| 1024.4886      | 9  | V 6  | 688.3630       | 344.6854        |
| 1095.5257      | 10 | A 5  | 589.2946       | 295.1512        |
| 1224.5683      | 11 | E 4  | 518.2575       | 259.6326        |
| 1323.6367      | 12 | V 3  | 389.2149       | 195.1113        |
| 1438.6636      | 13 | D 2  | 290.1464       | 145.5771        |
|                | 14 | R 1  | 175.1195       | 88.0637         |

N-term:+29.04

DIAALVVDNNGSMCKAGFAGDDAPR, MH+ 2563.2284, m/z 641.5626  
 L OSG38 P180811 230811-s1.07175.07175.4.dta

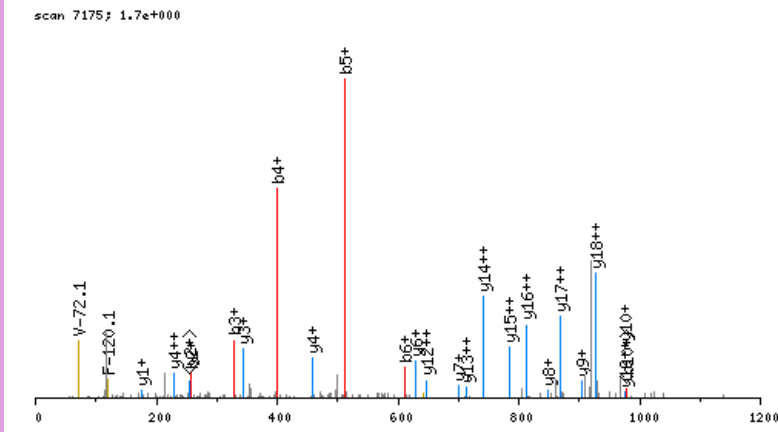

click image to zoom in; click top corners to zoom out [\[precursor±\]](#)

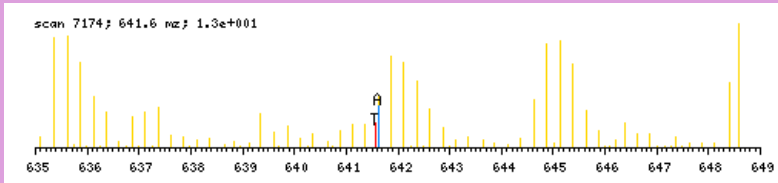

zoomed in precursor plot; T=theoretical m/z, A=acquired m/z

| b <sup>+</sup> | #  | AA # | y <sup>+</sup> | y <sup>2+</sup> |
|----------------|----|------|----------------|-----------------|
| 144.0660       | 1  | D 25 |                |                 |
| 257.1501       | 2  | I 24 | 2420.1702      | 1210.5890       |
| 328.1872       | 3  | A 23 | 2307.0862      | 1154.0470       |
| 399.2243       | 4  | A 22 | 2236.0491      | 1118.5284       |
| 512.3084       | 5  | L 21 | 2165.0119      | 1083.0099       |
| 611.3768       | 6  | V 20 | 2051.9279      | 1026.4678       |
| 710.4452       | 7  | V 19 | 1952.8595      | 976.9336        |
| 825.4722       | 8  | D 18 | 1853.7910      | 927.3994        |
| 939.5151       | 9  | N 17 | 1738.7641      | 869.8860        |
| 996.5366       | 10 | G 16 | 1624.7212      | 812.8645        |
| 1083.5686      | 11 | S 15 | 1567.6997      | 784.3538        |
| 1140.5901      | 12 | G 14 | 1480.6677      | 740.8378        |
| 1271.6305      | 13 | M 13 | 1423.6462      | 712.3270        |
| 1431.6611      | 14 | C 12 | 1292.6057      | 646.8068        |
| 1587.7874      | 15 | K 11 | 1132.5751      | 566.7915        |
| 1658.8246      | 16 | A 10 | 976.4488       | 488.7283        |
| 1715.8460      | 17 | G 9  | 905.4117       | 453.2098        |
| 1862.9144      | 18 | F 8  | 848.3903       | 424.6990        |
| 1933.9515      | 19 | A 7  | 701.3218       | 351.1648        |
| 1990.9730      | 20 | G 6  | 630.2847       | 315.6463        |
| 2105.9999      | 21 | D 5  | 573.2633       | 287.1355        |
| 2221.0269      | 22 | D 4  | 458.2363       | 229.6221        |
| 2292.0640      | 23 | A 3  | 343.2094       | 172.1086        |
| 2389.1168      | 24 | P 2  | 272.1723       | 136.5900        |
|                | 25 | R 1  | 175.1195       | 88.0637         |

N-term: +29.04 C(14) : +160.03  
 K(15) : +156.13

X-range:

-

MassTol: Y-zoom:

MassType:

AVG  MONO

Axis:

1  2

Label:

I  M  -

Ions:

a  +  2+  3+

b  +  2+  3+

c  +  2+  3+

x  +  2+  3+

y  +  2+  3+

z  +  2+  3+

hide H<sub>2</sub>O/NH<sub>3</sub>

zoom 112-122

GO

DILLTQSPAILSVSPGER, MH+ 1924.0755, m/z 642.0300  
 L OSG36 P180811 230811-s1.05950.05950.3.dta

X-range:

-

MassTol: Y-zoom:

MassType:

AVG  MONO

Axis:

1  2

Label:

I  M  -

Ions:

a  +  2+  3+

b  +  2+  3+

c  +  2+  3+

x  +  2+  3+

y  +  2+  3+

z  +  2+  3+

hide H<sub>2</sub>O/NH<sub>3</sub>

zoom 112-122

GO

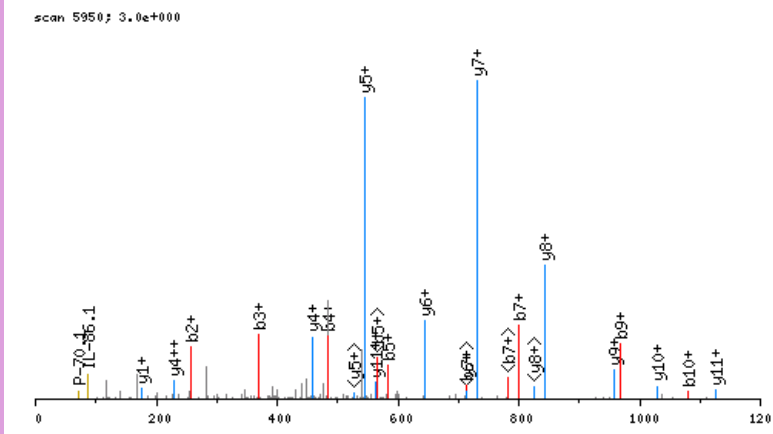

click image to zoom in; click top corners to zoom out [\[precursor±\]](#)

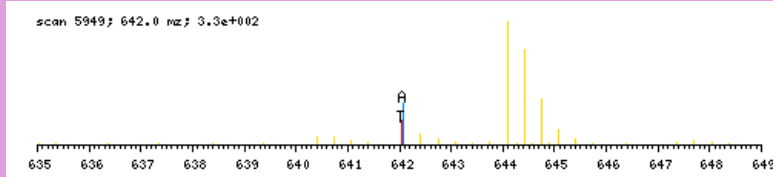

zoomed in precursor plot; T=theoretical m/z, A=acquired m/z

| b <sup>+</sup> | #  | AA # | y <sup>+</sup> | y <sup>2+</sup> |
|----------------|----|------|----------------|-----------------|
| 144.0660       | 1  | D 18 |                |                 |
| 257.1501       | 2  | I 17 | 1781.0173      | 891.0125        |
| 370.2342       | 3  | L 16 | 1667.9332      | 834.4705        |
| 483.3182       | 4  | L 15 | 1554.8491      | 777.9285        |
| 584.3659       | 5  | T 14 | 1441.7651      | 721.3865        |
| 712.4245       | 6  | Q 13 | 1340.7174      | 670.8626        |
| 799.4565       | 7  | S 12 | 1212.6588      | 606.8333        |
| 896.5093       | 8  | P 11 | 1125.6268      | 563.3173        |
| 967.5464       | 9  | A 10 | 1028.5740      | 514.7909        |
| 1080.6305      | 10 | I 9  | 957.5369       | 479.2724        |
| 1193.7145      | 11 | L 8  | 844.4529       | 422.7303        |
| 1280.7466      | 12 | S 7  | 731.3688       | 366.1883        |
| 1379.8150      | 13 | V 6  | 644.3368       | 322.6723        |
| 1466.8470      | 14 | S 5  | 545.2683       | 273.1381        |
| 1563.8998      | 15 | P 4  | 458.2363       | 229.6221        |
| 1620.9212      | 16 | G 3  | 361.1836       | 181.0957        |
| 1749.9638      | 17 | E 2  | 304.1621       | 152.5850        |
|                | 18 | R 1  | 175.1195       | 88.0637         |

N-term:+29.04

DIQMTQSPSSLSASLGER, MH+ 1934.9493, m/z 645.6546  
 L OSG36 P180811 230811-s1.04450.04450.3.dta

scan 4450; 9.9e-001

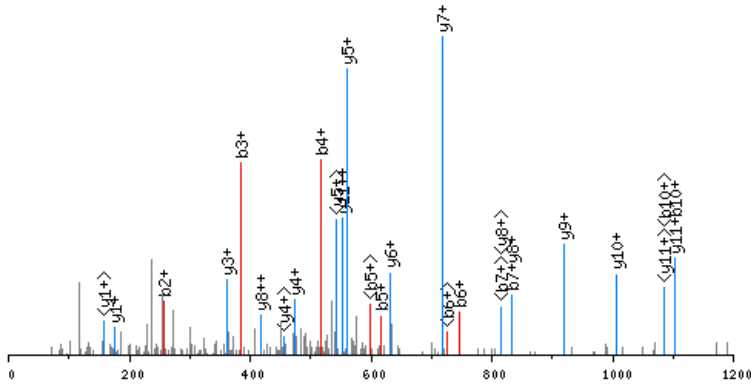

click image to zoom in; click top corners to zoom out [\[precursor±\]](#)

scan 4449; 645.7 m/z; 4.1e+001

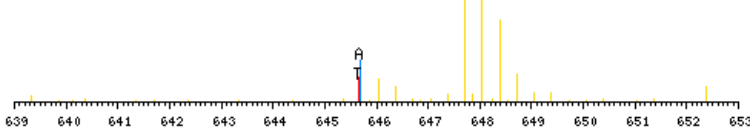

zoomed in precursor plot; T=theoretical m/z, A=acquired m/z

X-range:

-

MassTol: Y-zoom:

MassType:

AVG  MONO

Axis:

1  2

Label:

I  M  -

Ions:

a  +  2+  3+

b  +  2+  3+

c  +  2+  3+

x  +  2+  3+

y  +  2+  3+

z  +  2+  3+

hide H<sub>2</sub>O/NH<sub>3</sub>

zoom 112-122

GO

| b <sup>+</sup> | #  | AA | #  | y <sup>+</sup> | y <sup>2+</sup> |
|----------------|----|----|----|----------------|-----------------|
| 144.0660       | 1  | D  | 18 |                |                 |
| 257.1501       | 2  | I  | 17 | 1791.8911      | 896.4495        |
| 385.2087       | 3  | Q  | 16 | 1678.8070      | 839.9074        |
| 516.2492       | 4  | M  | 15 | 1550.7484      | 775.8781        |
| 617.2968       | 5  | T  | 14 | 1419.7080      | 710.3579        |
| 745.3554       | 6  | Q  | 13 | 1318.6603      | 659.8341        |
| 832.3875       | 7  | S  | 12 | 1190.6017      | 595.8048        |
| 929.4402       | 8  | P  | 11 | 1103.5697      | 552.2888        |
| 1016.4722      | 9  | S  | 10 | 1006.5169      | 503.7624        |
| 1103.5043      | 10 | S  | 9  | 919.4849       | 460.2464        |
| 1216.5883      | 11 | L  | 8  | 832.4529       | 416.7303        |
| 1303.6204      | 12 | S  | 7  | 719.3688       | 360.1883        |
| 1374.6575      | 13 | A  | 6  | 632.3368       | 316.6723        |
| 1461.6895      | 14 | S  | 5  | 561.2997       | 281.1537        |
| 1574.7736      | 15 | L  | 4  | 474.2676       | 237.6377        |
| 1631.7950      | 16 | G  | 3  | 361.1836       | 181.0957        |
| 1760.8376      | 17 | E  | 2  | 304.1621       | 152.5850        |
|                | 18 | R  | 1  | 175.1195       | 88.0637         |

N-term:+29.04

DISSKQVESTASAAGPSR, MH+ 1846.9511, m/z 616.3219  
 L OSG39 P180811 230811-s1.02970.02970.3.dta

scan 2970; 6.5e-001

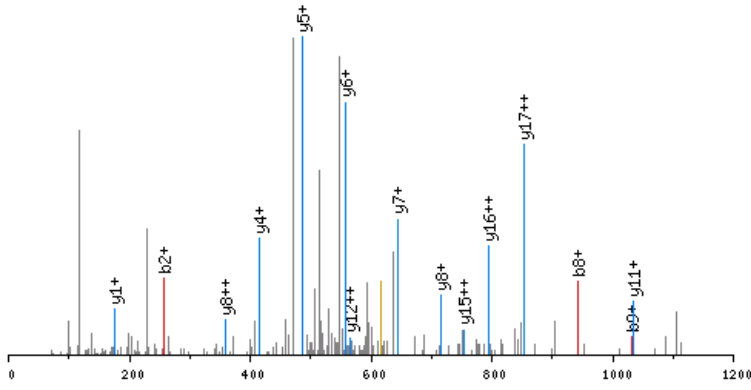

click image to zoom in; click top corners to zoom out [\[precursor±\]](#)

scan 2966; 616.3 m/z; 3.4e+000

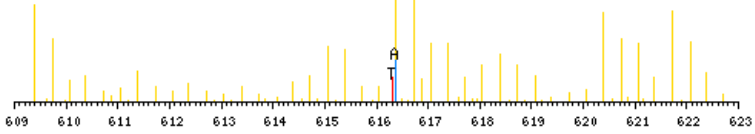

zoomed in precursor plot; T=theoretical m/z, A=acquired m/z

X-range:

-

MassTol: Y-zoom:

MassType:

AVG  MONO

Axis:

1  2

Label:

I  M  -

Ions:

a  +  2+  3+

b  +  2+  3+

c  +  2+  3+

x  +  2+  3+

y  +  2+  3+

z  +  2+  3+

hide H<sub>2</sub>O/NH<sub>3</sub>

zoom 112-122

GO

| b <sup>+</sup> | #  | AA # | y <sup>+</sup> | y <sup>2+</sup> |
|----------------|----|------|----------------|-----------------|
| 144.0660       | 1  | D    | 18             |                 |
| 257.1501       | 2  | I    | 17             | 1703.8928       |
| 344.1821       | 3  | S    | 16             | 1590.8088       |
| 431.2142       | 4  | S    | 15             | 1503.7767       |
| 587.3405       | 5  | K    | 14             | 1416.7447       |
| 715.3990       | 6  | Q    | 13             | 1260.6184       |
| 814.4675       | 7  | V    | 12             | 1132.5598       |
| 943.5100       | 8  | E    | 11             | 1033.4914       |
| 1030.5421      | 9  | S    | 10             | 904.4488        |
| 1131.5898      | 10 | T    | 9              | 817.4168        |
| 1202.6269      | 11 | A    | 8              | 716.3691        |
| 1289.6589      | 12 | S    | 7              | 645.3320        |
| 1360.6960      | 13 | A    | 6              | 558.3000        |
| 1431.7331      | 14 | A    | 5              | 487.2629        |
| 1488.7546      | 15 | G    | 4              | 416.2258        |
| 1585.8074      | 16 | P    | 3              | 359.2043        |
| 1672.8394      | 17 | S    | 2              | 262.1515        |
|                | 18 | R    | 1              | 175.1195        |

N-term:+29.04 K(5):+156.13

DKPVSPLLLASGMAR, MH+ 1622.9940, m/z 541.6695  
 H OSG39 P180811 230811-s1.06154.06154.3.dta

X-range:

-

MassTol: Y-zoom:

MassType:

AVG  MONO

Axis:

1  2

Label:

I  M  -

Ions:

a  +  2+  3+

b  +  2+  3+

c  +  2+  3+

x  +  2+  3+

y  +  2+  3+

z  +  2+  3+

hide H<sub>2</sub>O/NH<sub>3</sub>

zoom 112-122

GO

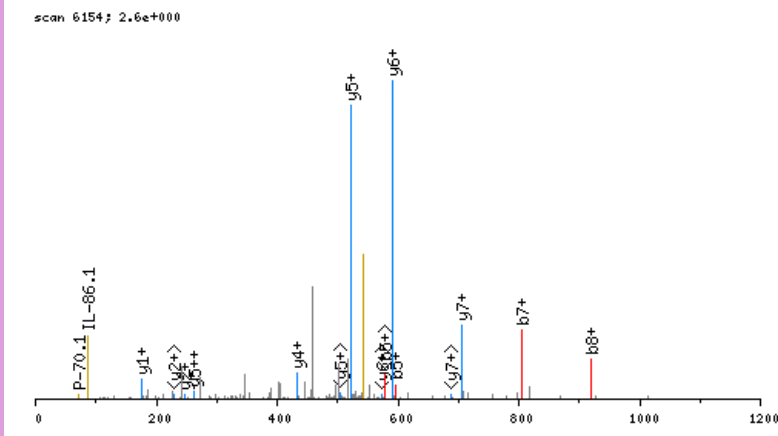

click image to zoom in; click top corners to zoom out [\[precursor±\]](#)

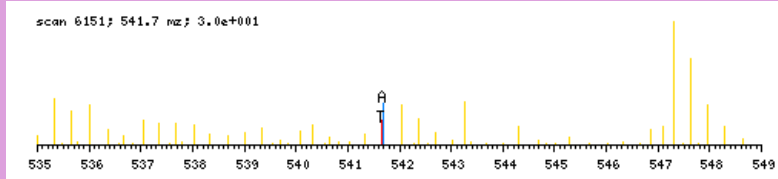

zoomed in precursor plot; T=theoretical m/z, A=acquired m/z

| b <sup>+</sup> | #  | AA # | y <sup>+</sup> | y <sup>2+</sup> |
|----------------|----|------|----------------|-----------------|
| 150.0978       | 1  | D 15 |                |                 |
| 312.2559       | 2  | K 14 | 1473.9040      | 737.4559        |
| 409.3087       | 3  | P 13 | 1311.7459      | 656.3768        |
| 508.3771       | 4  | V 12 | 1214.6931      | 607.8505        |
| 595.4091       | 5  | S 11 | 1115.6247      | 558.3163        |
| 692.4619       | 6  | P 10 | 1028.5927      | 514.8002        |
| 805.5460       | 7  | L 9  | 931.5399       | 466.2739        |
| 918.6300       | 8  | L 8  | 818.4558       | 409.7318        |
| 1031.7141      | 9  | L 7  | 705.3718       | 353.1898        |
| 1102.7512      | 10 | A 6  | 592.2877       | 296.6478        |
| 1189.7832      | 11 | S 5  | 521.2506       | 261.1292        |
| 1246.8047      | 12 | G 4  | 434.2186       | 217.6132        |
| 1377.8452      | 13 | M 3  | 377.1971       | 189.1025        |
| 1448.8823      | 14 | A 2  | 246.1566       | 123.5822        |
|                | 15 | R 1  | 175.1195       | 88.0637         |

N-term:+35.07 K(2):+162.16

DLEKDIISDTSGDFR, MH+ 1778.9448, m/z 593.6531  
 H OSG39 P180811 230811-s1.06814.06814.3.dta

scan 6814; 6.7e-001

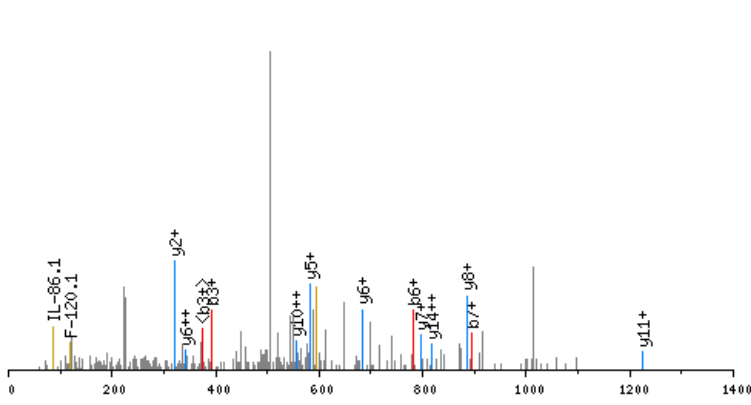

click image to zoom in; click top corners to zoom out [precursor±]

scan 6811; 593.7 m/z; 5.9e+000

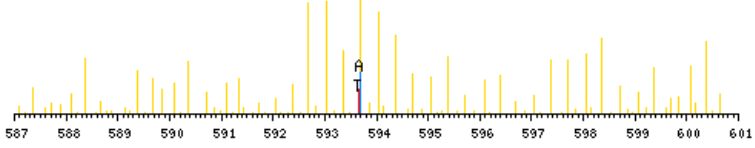

zoomed in precursor plot; T=theoretical m/z, A=acquired m/z

X-range:

-

MassTol: Y-zoom:

MassType:

AVG  MONO

Axis:

1  2

Label:

I  M  -

Ions:

a  +  2+  3+

b  +  2+  3+

c  +  2+  3+

x  +  2+  3+

y  +  2+  3+

z  +  2+  3+

hide H<sub>2</sub>O/NH<sub>3</sub>

zoom 112-122

GO

| b <sup>+</sup> | #  | AA # | y <sup>+</sup> | y <sup>2+</sup> |
|----------------|----|------|----------------|-----------------|
| 150.0978       | 1  | D 15 |                |                 |
| 263.1819       | 2  | L 14 | 1629.8548      | 815.4313        |
| 392.2245       | 3  | E 13 | 1516.7708      | 758.8893        |
| 554.3826       | 4  | K 12 | 1387.7282      | 694.3680        |
| 669.4095       | 5  | D 11 | 1225.5701      | 613.2889        |
| 782.4936       | 6  | I 10 | 1110.5431      | 555.7755        |
| 895.5777       | 7  | I 9  | 997.4591       | 499.2334        |
| 982.6097       | 8  | S 8  | 884.3750       | 442.6914        |
| 1097.6366      | 9  | D 7  | 797.3430       | 399.1754        |
| 1198.6843      | 10 | T 6  | 682.3160       | 341.6619        |
| 1285.7163      | 11 | S 5  | 581.2683       | 291.1381        |
| 1342.7378      | 12 | G 4  | 494.2363       | 247.6221        |
| 1457.7648      | 13 | D 3  | 437.2149       | 219.1113        |
| 1604.8332      | 14 | F 2  | 322.1879       | 161.5979        |
|                | 15 | R 1  | 175.1195       | 88.0637         |

N-term:+35.07 K(4):+162.16

DLIAQQPVNEVEHR, MH+ 1675.8767, m/z 559.2971  
 L OSG39 P180811 230811-s1.03935.03935.3.dta

X-range:

-

MassTol: Y-zoom:

MassType:

AVG  MONO

Axis:

1  2

Label:

I  M  -

Ions:

a  +  2+  3+

b  +  2+  3+

c  +  2+  3+

x  +  2+  3+

y  +  2+  3+

z  +  2+  3+

hide H<sub>2</sub>O/NH<sub>3</sub>

zoom 112-122

GO

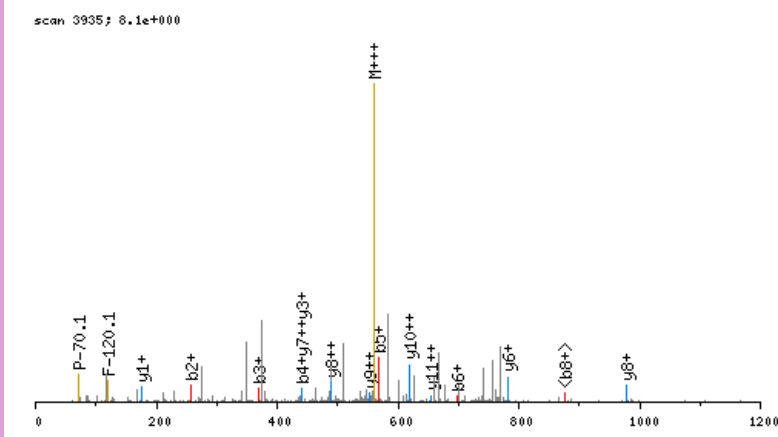

click image to zoom in; click top corners to zoom out [\[precursor±\]](#)

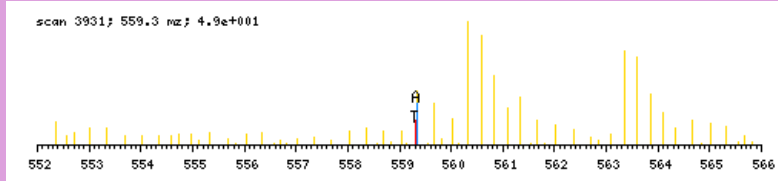

zoomed in precursor plot; T=theoretical m/z, A=acquired m/z

| b <sup>+</sup> | #  | AA # | y <sup>+</sup> | y <sup>2+</sup> |
|----------------|----|------|----------------|-----------------|
| 144.0660       | 1  | D 14 |                |                 |
| 257.1501       | 2  | L 13 | 1532.8185      | 766.9132        |
| 370.2342       | 3  | I 12 | 1419.7345      | 710.3711        |
| 441.2713       | 4  | A 11 | 1306.6504      | 653.8291        |
| 569.3299       | 5  | Q 10 | 1235.6133      | 618.3105        |
| 697.3884       | 6  | Q 9  | 1107.5547      | 554.2813        |
| 794.4412       | 7  | P 8  | 979.4961       | 490.2520        |
| 893.5096       | 8  | V 7  | 882.4434       | 441.7256        |
| 1007.5525      | 9  | N 6  | 783.3749       | 392.1914        |
| 1136.5951      | 10 | E 5  | 669.3320       | 335.1699        |
| 1235.6636      | 11 | V 4  | 540.2894       | 270.6486        |
| 1364.7061      | 12 | E 3  | 441.2210       | 221.1144        |
| 1501.7651      | 13 | H 2  | 312.1784       | 156.5931        |
|                | 14 | R 1  | 175.1195       | 88.0637         |

N-term:+29.04



DLNLDLSKFR, MH+ 1288.7901, m/z 430.2682  
 H OSG40 P180811 230811-s1.07770.07770.3.dta

scan 7770; 8.3e+000

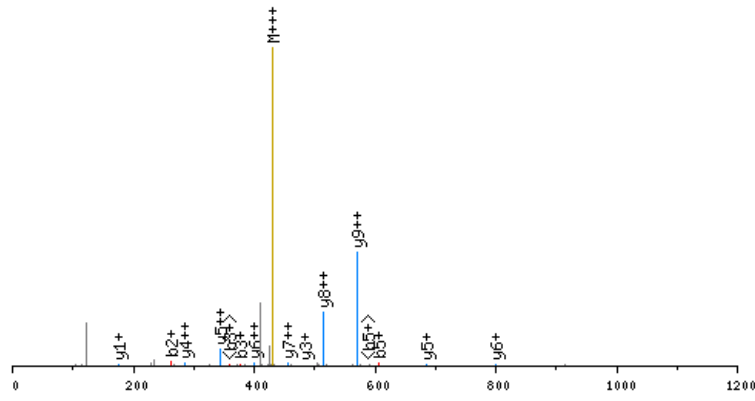

click image to zoom in; click top corners to zoom out [\[precursor±\]](#)

scan 7769; 430.3 m/z; 5.8e+000

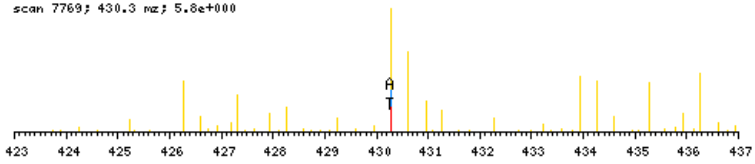

zoomed in precursor plot; T=theoretical m/z, A=acquired m/z

X-range:

-

MassTol: Y-zoom:

MassType:

AVG  MONO

Axis:

1  2

Label:

I  M  -

Ions:

a  +  2+  3+

b  +  2+  3+

c  +  2+  3+

x  +  2+  3+

y  +  2+  3+

z  +  2+  3+

hide H<sub>2</sub>O/NH<sub>3</sub>

zoom 112-122

GO

| b <sup>+</sup> | #  | AA # | y <sup>+</sup> | y <sup>2+</sup> |
|----------------|----|------|----------------|-----------------|
| 150.0978       | 1  | D 10 |                |                 |
| 263.1819       | 2  | L 9  | 1139.7001      | 570.3540        |
| 377.2248       | 3  | N 8  | 1026.6160      | 513.8119        |
| 490.3089       | 4  | L 7  | 912.5731       | 456.7905        |
| 605.3358       | 5  | D 6  | 799.4891       | 400.2484        |
| 718.4199       | 6  | L 5  | 684.4621       | 342.7350        |
| 805.4519       | 7  | S 4  | 571.3780       | 286.1929        |
| 967.6100       | 8  | K 3  | 484.3460       | 242.6769        |
| 1114.6784      | 9  | F 2  | 322.1879       | 161.5979        |
|                | 10 | R 1  | 175.1195       | 88.0637         |

N-term:+35.07 K(8):+162.16

DLPAAAAAGPASPAS, MH+ 1510.8018, m/z 504.2721  
 L OSG36 P180811 230811-s1.04117.04117.3.dta

X-range:

-

MassTol: Y-zoom:

MassType:

AVG  MONO

Axis:

1  2

Label:

I  M  -

Ions:

a  +  2+  3+

b  +  2+  3+

c  +  2+  3+

x  +  2+  3+

y  +  2+  3+

z  +  2+  3+

hide H<sub>2</sub>O/NH<sub>3</sub>

zoom 112-122

GO

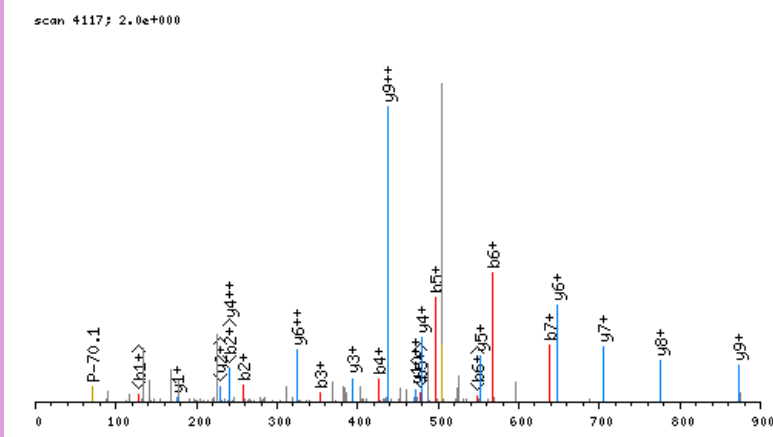

click image to zoom in; click top corners to zoom out [\[precursor±\]](#)

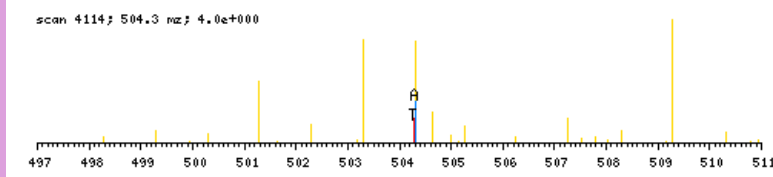

zoomed in precursor plot; T=theoretical m/z, A=acquired m/z

| b <sup>+</sup> | #  | AA # | y <sup>+</sup> | y <sup>2+</sup> |
|----------------|----|------|----------------|-----------------|
| 144.0660       | 1  | D 16 |                |                 |
| 257.1501       | 2  | L 15 | 1367.7436      | 684.3757        |
| 354.2029       | 3  | P 14 | 1254.6595      | 627.8337        |
| 425.2400       | 4  | A 13 | 1157.6067      | 579.3073        |
| 496.2771       | 5  | A 12 | 1086.5696      | 543.7887        |
| 567.3142       | 6  | A 11 | 1015.5325      | 508.2702        |
| 638.3513       | 7  | A 10 | 944.4954       | 472.7516        |
| 735.4041       | 8  | P 9  | 873.4583       | 437.2331        |
| 806.4412       | 9  | A 8  | 776.4055       | 388.7067        |
| 863.4627       | 10 | G 7  | 705.3684       | 353.1881        |
| 960.5154       | 11 | P 6  | 648.3469       | 324.6774        |
| 1031.5525      | 12 | A 5  | 551.2942       | 276.1510        |
| 1118.5846      | 13 | S 4  | 480.2571       | 240.6324        |
| 1265.6530      | 14 | F 3  | 393.2250       | 197.1164        |
| 1336.6901      | 15 | A 2  | 246.1566       | 123.5822        |
|                | 16 | R 1  | 175.1195       | 88.0637         |

N-term:+29.04

DLSSSDLSTASKIVK, MH+ 1634.9217, m/z 545.6454  
 L OSG38 P180811 230811-s1.05400.05400.3.dta

X-range:

-

MassTol: Y-zoom:

MassType:

AVG  MONO

Axis:

1  2

Label:

I  M  -

Ions:

a  +  2+  3+

b  +  2+  3+

c  +  2+  3+

x  +  2+  3+

y  +  2+  3+

z  +  2+  3+

hide H<sub>2</sub>O/NH<sub>3</sub>

zoom 112-122

GO

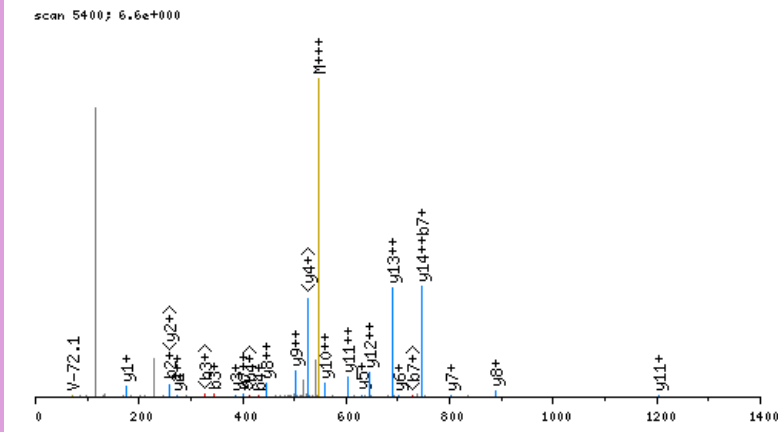

click image to zoom in; click top corners to zoom out [precursor±]

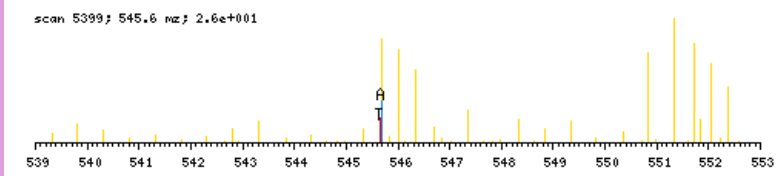

zoomed in precursor plot; T=theoretical m/z, A=acquired m/z

| b <sup>+</sup> | #  | AA # | y <sup>+</sup> | y <sup>2+</sup> |
|----------------|----|------|----------------|-----------------|
| 144.0660       | 1  | D    | 15             |                 |
| 257.1501       | 2  | L    | 14             | 1491.8635       |
| 344.1821       | 3  | S    | 13             | 1378.7794       |
| 431.2142       | 4  | S    | 12             | 1291.7474       |
| 518.2462       | 5  | S    | 11             | 1204.7154       |
| 633.2731       | 6  | D    | 10             | 1117.6833       |
| 746.3572       | 7  | L    | 9              | 1002.6564       |
| 833.3892       | 8  | S    | 8              | 889.5723        |
| 934.4369       | 9  | T    | 7              | 802.5403        |
| 1005.4740      | 10 | A    | 6              | 701.4926        |
| 1092.5060      | 11 | S    | 5              | 630.4555        |
| 1248.6323      | 12 | K    | 4              | 543.4235        |
| 1361.7164      | 13 | I    | 3              | 387.2972        |
| 1460.7848      | 14 | V    | 2              | 274.2131        |
|                | 15 | K    | 1              | 175.1447        |

N-term:+29.04 K(12):+156.13  
 K(15):+156.13

DLTTCPAAGGQEKLR, MH+ 1926.0754, m/z 642.6967  
 H OSG39 P180811 230811-s1.04273.04273.3.dta

X-range:

-

MassTol: Y-zoom:

MassType:

AVG  MONO

Axis:

1  2

Label:

I  M  -

Ions:

a  +  2+  3+

b  +  2+  3+

c  +  2+  3+

x  +  2+  3+

y  +  2+  3+

z  +  2+  3+

hide H<sub>2</sub>O/NH<sub>3</sub>

zoom 112-122

GO

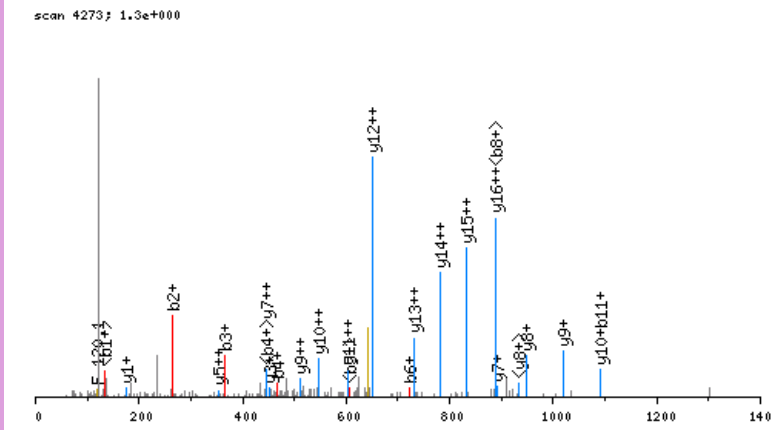

click image to zoom in; click top corners to zoom out [precursor±]

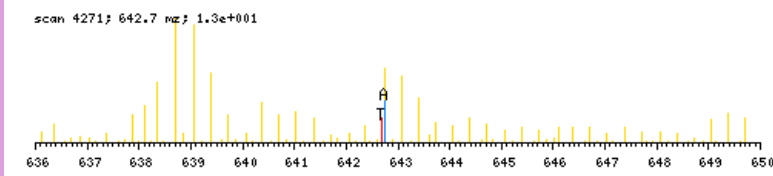

zoomed in precursor plot; T=theoretical m/z, A=acquired m/z

| b <sup>+</sup> | #  | AA | #  | y <sup>+</sup> | y <sup>2+</sup> |
|----------------|----|----|----|----------------|-----------------|
| 150.0978       | 1  | D  | 17 |                |                 |
| 263.1819       | 2  | L  | 16 | 1776.9854      | 888.9966        |
| 364.2296       | 3  | T  | 15 | 1663.9014      | 832.4546        |
| 465.2773       | 4  | T  | 14 | 1562.8537      | 781.9307        |
| 625.3079       | 5  | C  | 13 | 1461.8060      | 731.4069        |
| 722.3606       | 6  | P  | 12 | 1301.7754      | 651.3916        |
| 835.4447       | 7  | L  | 11 | 1204.7226      | 602.8652        |
| 906.4818       | 8  | A  | 10 | 1091.6386      | 546.3232        |
| 977.5189       | 9  | A  | 9  | 1020.6015      | 510.8046        |
| 1034.5404      | 10 | G  | 8  | 949.5643       | 475.2861        |
| 1091.5618      | 11 | G  | 7  | 892.5429       | 446.7754        |
| 1219.6204      | 12 | Q  | 6  | 835.5214       | 418.2646        |
| 1347.6790      | 13 | Q  | 5  | 707.4628       | 354.2353        |
| 1476.7216      | 14 | E  | 4  | 579.4043       | 290.2060        |
| 1638.8797      | 15 | K  | 3  | 450.3617       | 225.6847        |
| 1751.9638      | 16 | L  | 2  | 288.2036       | 144.6057        |
|                | 17 | R  | 1  | 175.1195       | 88.0637         |

N-term:+35.07 C(5):+160.03  
 K(15):+162.16

DNGSGLCKAGFAGDDAPR, MH+ 1863.8659, m/z 621.9602  
 L OSG39 P180811 230811-s1.03184.03184.3.dta

X-range:

-

MassTol: Y-zoom:

MassType:

AVG  MONO

Axis:

1  2

Label:

I  M  -

Ions:

a  +  2+  3+

b  +  2+  3+

c  +  2+  3+

x  +  2+  3+

y  +  2+  3+

z  +  2+  3+

hide H<sub>2</sub>O/NH<sub>3</sub>

zoom 112-122

GO

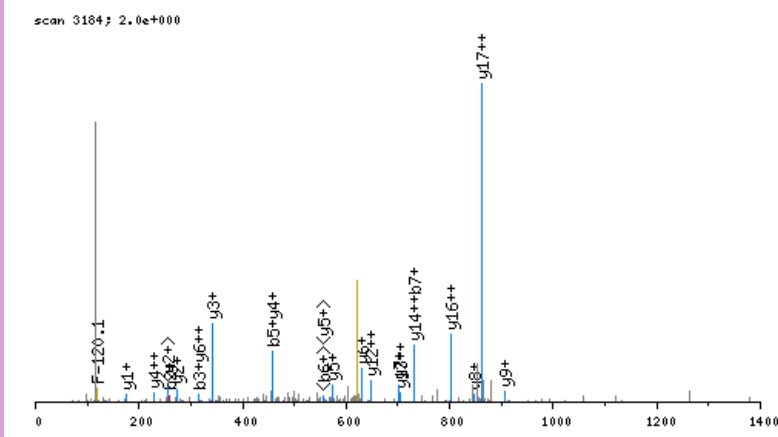

click image to zoom in; click top corners to zoom out [\[precursor±\]](#)

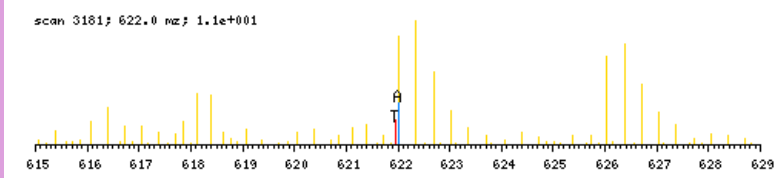

zoomed in precursor plot; T=theoretical m/z, A=acquired m/z

| b <sup>+</sup> | #  | AA | #  | y <sup>+</sup> | y <sup>2+</sup> |
|----------------|----|----|----|----------------|-----------------|
| 144.0660       | 1  | D  | 18 |                |                 |
| 258.1090       | 2  | N  | 17 | 1720.8077      | 860.9078        |
| 315.1304       | 3  | G  | 16 | 1606.7648      | 803.8863        |
| 402.1625       | 4  | S  | 15 | 1549.7433      | 775.3756        |
| 459.1839       | 5  | G  | 14 | 1462.7113      | 731.8595        |
| 572.2680       | 6  | L  | 13 | 1405.6898      | 703.3488        |
| 732.2986       | 7  | C  | 12 | 1292.6057      | 646.8068        |
| 888.4249       | 8  | K  | 11 | 1132.5751      | 566.7915        |
| 959.4620       | 9  | A  | 10 | 976.4488       | 488.7283        |
| 1016.4835      | 10 | G  | 9  | 905.4117       | 453.2098        |
| 1163.5519      | 11 | F  | 8  | 848.3903       | 424.6990        |
| 1234.5890      | 12 | A  | 7  | 701.3218       | 351.1648        |
| 1291.6105      | 13 | G  | 6  | 630.2847       | 315.6463        |
| 1406.6374      | 14 | D  | 5  | 573.2633       | 287.1355        |
| 1521.6643      | 15 | D  | 4  | 458.2363       | 229.6221        |
| 1592.7015      | 16 | A  | 3  | 343.2094       | 172.1086        |
| 1689.7542      | 17 | P  | 2  | 272.1723       | 136.5900        |
|                | 18 | R  | 1  | 175.1195       | 88.0637         |

N-term:+29.04 C(7):+160.03  
 K(8):+156.13

DNGSGLVKAGFAGDDAPR, MH+ 1802.9037, m/z 601.6394  
 L OSG39 P180811 230811-s1.03894.03894.3.dta

X-range:

-

MassTol: Y-zoom:

MassType:

AVG  MONO

Axis:

1  2

Label:

I  M  -

Ions:

a  +  2+  3+

b  +  2+  3+

c  +  2+  3+

x  +  2+  3+

y  +  2+  3+

z  +  2+  3+

hide H<sub>2</sub>O/NH<sub>3</sub>

zoom 112-122

GO

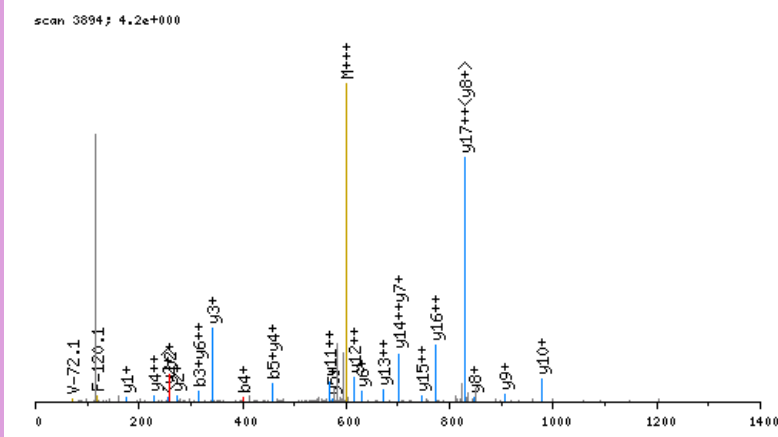

click image to zoom in; click top corners to zoom out [\[precursor±\]](#)

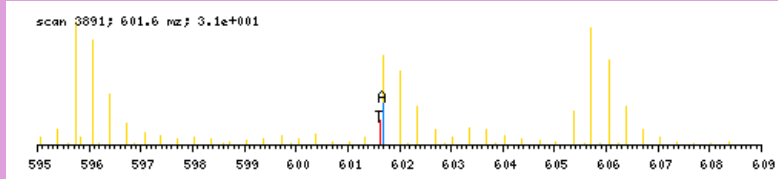

zoomed in precursor plot; T=theoretical m/z, A=acquired m/z

| b <sup>+</sup> | #  | AA # | y <sup>+</sup> | y <sup>2+</sup> |
|----------------|----|------|----------------|-----------------|
| 144.0660       | 1  | D 18 |                |                 |
| 258.1090       | 2  | N 17 | 1659.8455      | 830.4267        |
| 315.1304       | 3  | G 16 | 1545.8026      | 773.4052        |
| 402.1625       | 4  | S 15 | 1488.7811      | 744.8945        |
| 459.1839       | 5  | G 14 | 1401.7491      | 701.3785        |
| 572.2680       | 6  | L 13 | 1344.7276      | 672.8677        |
| 671.3364       | 7  | V 12 | 1231.6435      | 616.3257        |
| 827.4627       | 8  | K 11 | 1132.5751      | 566.7915        |
| 898.4998       | 9  | A 10 | 976.4488       | 488.7283        |
| 955.5213       | 10 | G 9  | 905.4117       | 453.2098        |
| 1102.5897      | 11 | F 8  | 848.3903       | 424.6990        |
| 1173.6268      | 12 | A 7  | 701.3218       | 351.1648        |
| 1230.6483      | 13 | G 6  | 630.2847       | 315.6463        |
| 1345.6752      | 14 | D 5  | 573.2633       | 287.1355        |
| 1460.7022      | 15 | D 4  | 458.2363       | 229.6221        |
| 1531.7393      | 16 | A 3  | 343.2094       | 172.1086        |
| 1628.7920      | 17 | P 2  | 272.1723       | 136.5900        |
|                | 18 | R 1  | 175.1195       | 88.0637         |

N-term:+29.04 K(8):+156.13

DNLIKVTPEVNR, MH+ 1453.8379, m/z 485.2841  
 L OSG39 P180811 230811-s1.03738.03738.3.dta

scan 3738; 1.3e+001

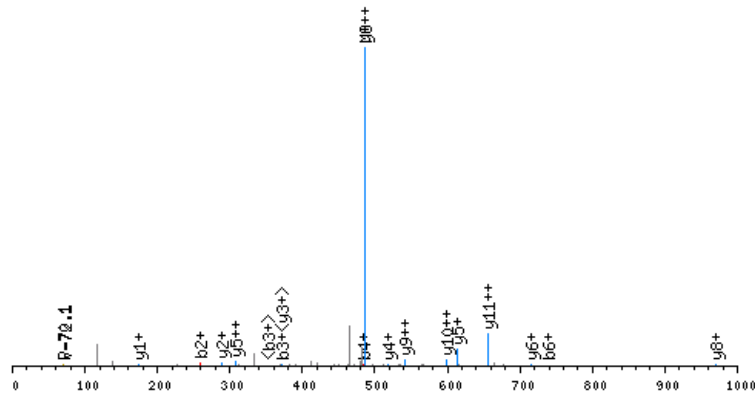

click image to zoom in; click top corners to zoom out [\[precursor±\]](#)

scan 3736; 485.3 m/z; 4.4e+002

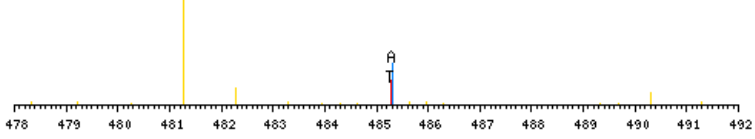

zoomed in precursor plot; T=theoretical m/z, A=acquired m/z

X-range:

-

MassTol: Y-zoom:

MassType:

AVG  MONO

Axis:

1  2

Label:

I  M  -

Ions:

a  +  2+  3+

b  +  2+  3+

c  +  2+  3+

x  +  2+  3+

y  +  2+  3+

z  +  2+  3+

hide H<sub>2</sub>O/NH<sub>3</sub>

zoom 112-122

GO

| b <sup>+</sup> | #  | AA # | y <sup>+</sup> | y <sup>2+</sup> |
|----------------|----|------|----------------|-----------------|
| 144.0660       | 1  | D 12 |                |                 |
| 258.1090       | 2  | N 11 | 1310.7796      | 655.8937        |
| 371.1930       | 3  | L 10 | 1196.7367      | 598.8723        |
| 484.2771       | 4  | I 9  | 1083.6527      | 542.3302        |
| 640.4034       | 5  | K 8  | 970.5686       | 485.7882        |
| 739.4718       | 6  | V 7  | 814.4423       | 407.7251        |
| 840.5195       | 7  | T 6  | 715.3739       | 358.1909        |
| 937.5723       | 8  | P 5  | 614.3262       | 307.6670        |
| 1066.6148      | 9  | E 4  | 517.2734       | 259.1406        |
| 1165.6833      | 10 | V 3  | 388.2308       | 194.6193        |
| 1279.7262      | 11 | N 2  | 289.1624       | 145.0851        |
|                | 12 | R 1  | 175.1195       | 88.0637         |

N-term:+29.04 K(5):+156.13

DNLYNNIINR, MH+ 1276.6649, m/z 426.2265  
 L OSG37 P180811 230811-s1.03392.03392.3.dta

X-range:

-

MassTol: Y-zoom:

MassType:

AVG  MONO

Axis:

1  2

Label:

I  M  -

Ions:

a  +  2+  3+

b  +  2+  3+

c  +  2+  3+

x  +  2+  3+

y  +  2+  3+

z  +  2+  3+

hide H<sub>2</sub>O/NH<sub>3</sub>

zoom 112-122

GO

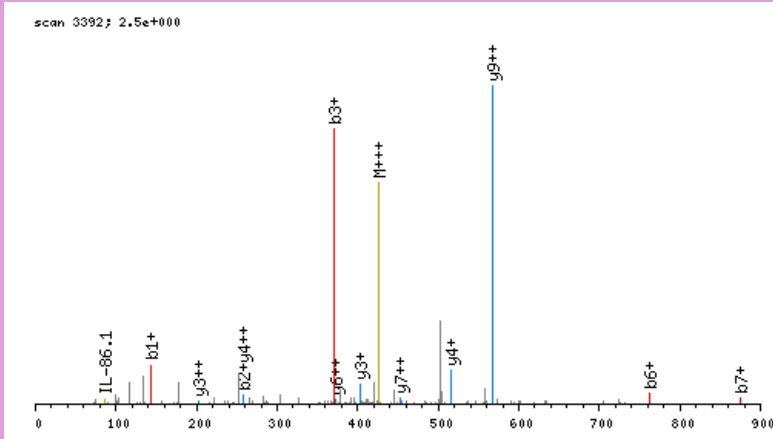

click image to zoom in; click top corners to zoom out [\[precursor±\]](#)

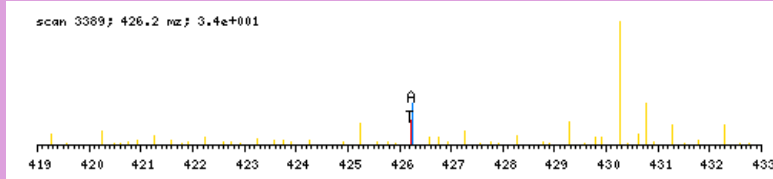

zoomed in precursor plot; T=theoretical m/z, A=acquired m/z

| b <sup>+</sup> | #  | AA # | y <sup>+</sup> | y <sup>2+</sup> |
|----------------|----|------|----------------|-----------------|
| 144.0660       | 1  | D 10 |                |                 |
| 258.1090       | 2  | N 9  | 1133.6067      | 567.3073        |
| 371.1930       | 3  | L 8  | 1019.5638      | 510.2858        |
| 534.2564       | 4  | Y 7  | 906.4797       | 453.7438        |
| 648.2993       | 5  | N 6  | 743.4164       | 372.2121        |
| 762.3422       | 6  | N 5  | 629.3735       | 315.1907        |
| 875.4263       | 7  | I 4  | 515.3306       | 258.1692        |
| 988.5103       | 8  | I 3  | 402.2465       | 201.6272        |
| 1102.5533      | 9  | N 2  | 289.1624       | 145.0851        |
|                | 10 | R 1  | 175.1195       | 88.0637         |

N-term:+29.04



DNQLQEGKNVIGLQMGNTNR, MH+ 2171.1243, m/z 724.3796  
 L OSG39 P180811 230811-s1.04973.04973.3.dta

X-range:

-

MassTol: Y-zoom:

MassType:

AVG  MONO

Axis:

1  2

Label:

I  M  -

Ions:

a  +  2+  3+

b  +  2+  3+

c  +  2+  3+

x  +  2+  3+

y  +  2+  3+

z  +  2+  3+

hide H<sub>2</sub>O/NH<sub>3</sub>

zoom 112-122

GO

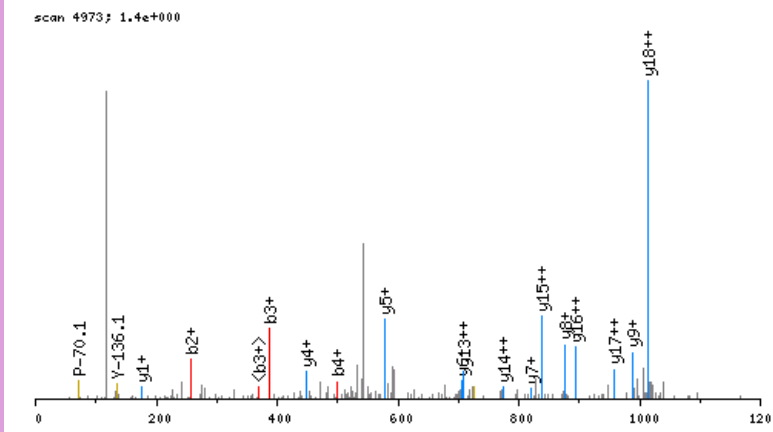

click image to zoom in; click top corners to zoom out [\[precursor±\]](#)

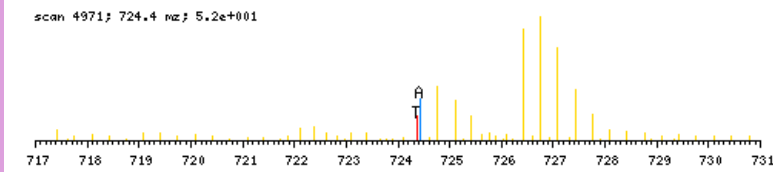

zoomed in precursor plot; T=theoretical m/z, A=acquired m/z

| b <sup>+</sup> | #  | AA | #  | y <sup>+</sup> | y <sup>2+</sup> |
|----------------|----|----|----|----------------|-----------------|
| 144.0660       | 1  | D  | 19 |                |                 |
| 258.1090       | 2  | N  | 18 | 2028.0661      | 1014.5369       |
| 386.1675       | 3  | Q  | 17 | 1914.0231      | 957.5155        |
| 499.2516       | 4  | L  | 16 | 1785.9646      | 893.4862        |
| 627.3102       | 5  | Q  | 15 | 1672.8805      | 836.9442        |
| 756.3528       | 6  | E  | 14 | 1544.8219      | 772.9149        |
| 813.3742       | 7  | G  | 13 | 1415.7793      | 708.3936        |
| 969.5005       | 8  | K  | 12 | 1358.7579      | 679.8828        |
| 1083.5435      | 9  | N  | 11 | 1202.6316      | 601.8197        |
| 1182.6119      | 10 | V  | 10 | 1088.5886      | 544.7982        |
| 1295.6960      | 11 | I  | 9  | 989.5202       | 495.2640        |
| 1352.7174      | 12 | G  | 8  | 876.4362       | 438.7220        |
| 1465.8015      | 13 | L  | 7  | 819.4147       | 410.2113        |
| 1593.8601      | 14 | Q  | 6  | 706.3306       | 353.6692        |
| 1724.9005      | 15 | M  | 5  | 578.2721       | 289.6399        |
| 1781.9220      | 16 | G  | 4  | 447.2316       | 224.1197        |
| 1882.9697      | 17 | T  | 3  | 390.2101       | 195.6090        |
| 1997.0126      | 18 | N  | 2  | 289.1624       | 145.0851        |
|                | 19 | R  | 1  | 175.1195       | 88.0637         |

N-term:+29.04 K(8):+156.13

DPAIYFKEQFLDGDWTNR, MH+ 2342.1457, m/z 586.2919  
 L OSG40 P180811 230811-s1.09332.09332.4.dta

X-range:

-

MassTol: Y-zoom:

MassType:

AVG  MONO

Axis:

1  2

Label:

I  M  -

Ions:

a  +  2+  3+

b  +  2+  3+

c  +  2+  3+

x  +  2+  3+

y  +  2+  3+

z  +  2+  3+

hide H<sub>2</sub>O/NH<sub>3</sub>

zoom 112-122

GO

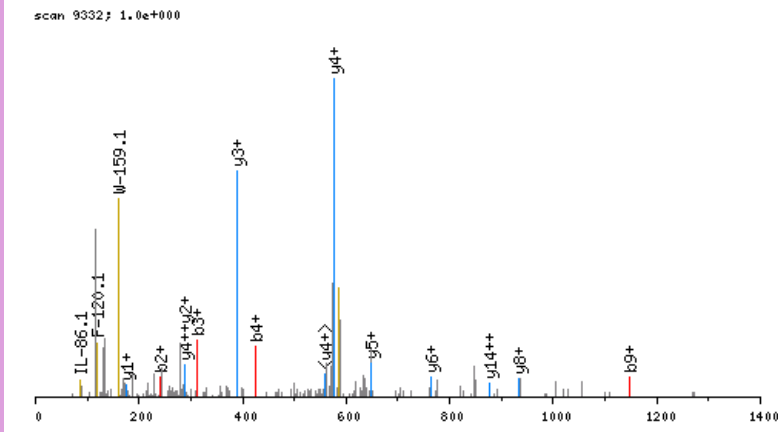

click image to zoom in; click top corners to zoom out [precursor±]

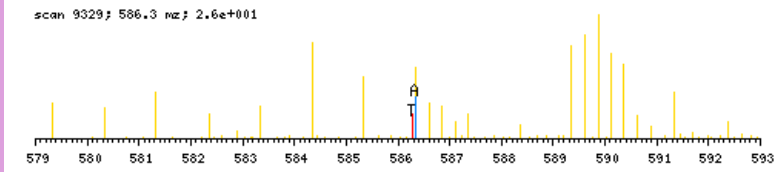

zoomed in precursor plot; T=theoretical m/z, A=acquired m/z

| b <sup>+</sup> | #  | AA | #  | y <sup>+</sup> | y <sup>2+</sup> |
|----------------|----|----|----|----------------|-----------------|
| 144.0660       | 1  | D  | 19 |                |                 |
| 241.1188       | 2  | P  | 18 | 2199.0875      | 1100.0477       |
| 312.1559       | 3  | A  | 17 | 2102.0348      | 1051.5213       |
| 425.2400       | 4  | I  | 16 | 2030.9976      | 1016.0027       |
| 588.3033       | 5  | Y  | 15 | 1917.9136      | 959.4607        |
| 735.3717       | 6  | F  | 14 | 1754.8502      | 877.9290        |
| 891.4980       | 7  | K  | 13 | 1607.7818      | 804.3948        |
| 1020.5406      | 8  | E  | 12 | 1451.6555      | 726.3317        |
| 1148.5992      | 9  | Q  | 11 | 1322.6129      | 661.8104        |
| 1295.6676      | 10 | F  | 10 | 1194.5544      | 597.7811        |
| 1408.7517      | 11 | L  | 9  | 1047.4859      | 524.2469        |
| 1523.7786      | 12 | D  | 8  | 934.4019       | 467.7049        |
| 1580.8001      | 13 | G  | 7  | 819.3749       | 410.1914        |
| 1695.8270      | 14 | D  | 6  | 762.3535       | 381.6807        |
| 1766.8641      | 15 | A  | 5  | 647.3265       | 324.1672        |
| 1952.9435      | 16 | W  | 4  | 576.2894       | 288.6486        |
| 2053.9911      | 17 | T  | 3  | 390.2101       | 195.6090        |
| 2168.0341      | 18 | N  | 2  | 289.1624       | 145.0851        |
|                | 19 | R  | 1  | 175.1195       | 88.0637         |

N-term:+29.04 K(7):+156.13

DPASTLPDIQVQENFSESR, MH+ 2167.0731, m/z 723.0292  
 H OSG36 P180811 230811-s1.04877.04877.3.dta

X-range:

-

MassTol: Y-zoom:

MassType:

AVG  MONO

Axis:

1  2

Label:

I  M  -

Ions:

a  +  2+  3+

b  +  2+  3+

c  +  2+  3+

x  +  2+  3+

y  +  2+  3+

z  +  2+  3+

hide H<sub>2</sub>O/NH<sub>3</sub>

zoom 112-122

GO

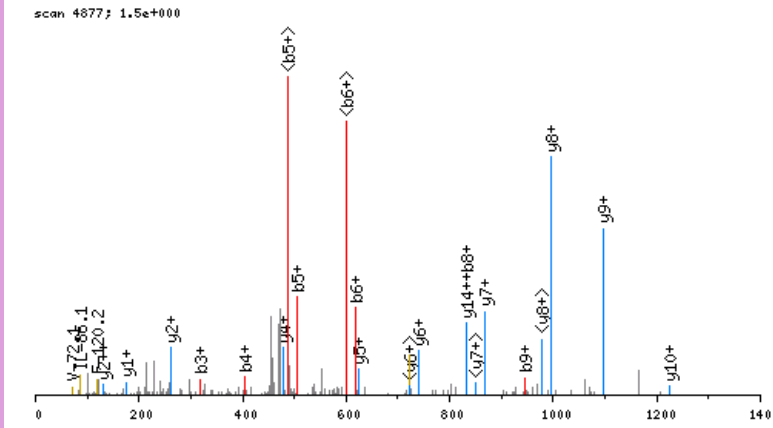

click image to zoom in; click top corners to zoom out [\[precursor±\]](#)

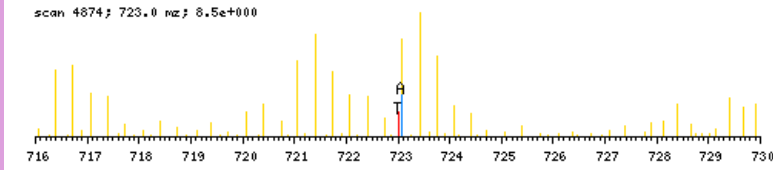

zoomed in precursor plot; T=theoretical m/z, A=acquired m/z

| b <sup>+</sup> | #  | AA | #  | y <sup>+</sup> | y <sup>2+</sup> |
|----------------|----|----|----|----------------|-----------------|
| 150.0978       | 1  | D  | 19 |                |                 |
| 247.1506       | 2  | P  | 18 | 2017.9831      | 1009.4954       |
| 318.1877       | 3  | A  | 17 | 1920.9303      | 960.9691        |
| 405.2197       | 4  | S  | 16 | 1849.8932      | 925.4505        |
| 506.2674       | 5  | T  | 15 | 1762.8612      | 881.9345        |
| 619.3515       | 6  | L  | 14 | 1661.8135      | 831.4107        |
| 716.4043       | 7  | P  | 13 | 1548.7294      | 774.8686        |
| 831.4312       | 8  | D  | 12 | 1451.6767      | 726.3422        |
| 944.5153       | 9  | I  | 11 | 1336.6497      | 668.8288        |
| 1072.5738      | 10 | Q  | 10 | 1223.5657      | 612.2867        |
| 1171.6423      | 11 | V  | 9  | 1095.5071      | 548.2575        |
| 1299.7008      | 12 | Q  | 8  | 996.4387       | 498.7232        |
| 1428.7434      | 13 | E  | 7  | 868.3801       | 434.6940        |
| 1542.7864      | 14 | N  | 6  | 739.3375       | 370.1727        |
| 1689.8548      | 15 | F  | 5  | 625.2946       | 313.1512        |
| 1776.8868      | 16 | S  | 4  | 478.2262       | 239.6170        |
| 1905.9294      | 17 | E  | 3  | 391.1941       | 196.1010        |
| 1992.9614      | 18 | S  | 2  | 262.1515       | 131.5797        |
|                | 19 | R  | 1  | 175.1195       | 88.0637         |

N-term:+35.07

DPPASVVVGPVVVPR, MH+ 1515.8899, m/z 505.9681  
 L OSG36 P180811 230811-s1.04710.04710.3.dta

scan 4710; 4.1e+000

X-range:

-

MassTol: Y-zoom:

MassType:

AVG  MONO

Axis:

1  2

Label:

I  M  -

Ions:

a  +  2+  3+

b  +  2+  3+

c  +  2+  3+

x  +  2+  3+

y  +  2+  3+

z  +  2+  3+

hide H<sub>2</sub>O/NH<sub>3</sub>

zoom 112-122

GO

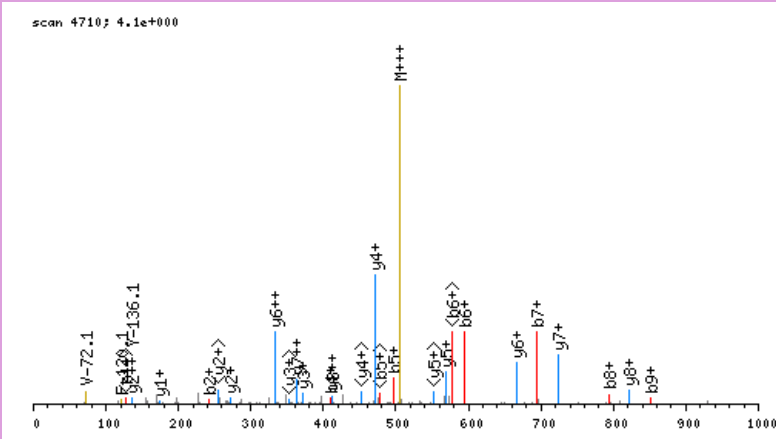

click image to zoom in; click top corners to zoom out [\[precursor±\]](#)

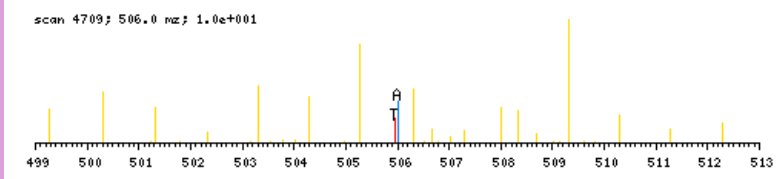

zoomed in precursor plot; T=theoretical m/z, A=acquired m/z

| b <sup>+</sup> | #  | AA # | y <sup>+</sup> | y <sup>2+</sup> |
|----------------|----|------|----------------|-----------------|
| 144.0660       | 1  | D 15 |                |                 |
| 241.1188       | 2  | P 14 | 1372.8316      | 686.9197        |
| 338.1716       | 3  | P 13 | 1275.7789      | 638.3934        |
| 409.2087       | 4  | A 12 | 1178.7261      | 589.8670        |
| 496.2407       | 5  | S 11 | 1107.6890      | 554.3484        |
| 595.3091       | 6  | V 10 | 1020.6570      | 510.8324        |
| 694.3775       | 7  | V 9  | 921.5886       | 461.2982        |
| 793.4460       | 8  | V 8  | 822.5201       | 411.7640        |
| 850.4674       | 9  | G 7  | 723.4517       | 362.2298        |
| 947.5202       | 10 | P 6  | 666.4303       | 333.7190        |
| 1046.5886      | 11 | V 5  | 569.3775       | 285.1927        |
| 1145.6570      | 12 | V 4  | 470.3091       | 235.6585        |
| 1244.7254      | 13 | V 3  | 371.2407       | 186.1243        |
| 1341.7782      | 14 | P 2  | 272.1723       | 136.5900        |
|                | 15 | R 1  | 175.1195       | 88.0637         |

N-term:+29.04

DPTSVTLKPMIEIR, MH+ 1554.9202, m/z 518.9782  
 H OSG39 P180811 230811-s1.04820.04820.3.dta

X-range:

-

MassTol: Y-zoom:

MassType:

AVG  MONO

Axis:

1  2

Label:

I  M  -

Ions:

a  +  2+  3+

b  +  2+  3+

c  +  2+  3+

x  +  2+  3+

y  +  2+  3+

z  +  2+  3+

hide H<sub>2</sub>O/NH<sub>3</sub>

zoom 112-122

GO

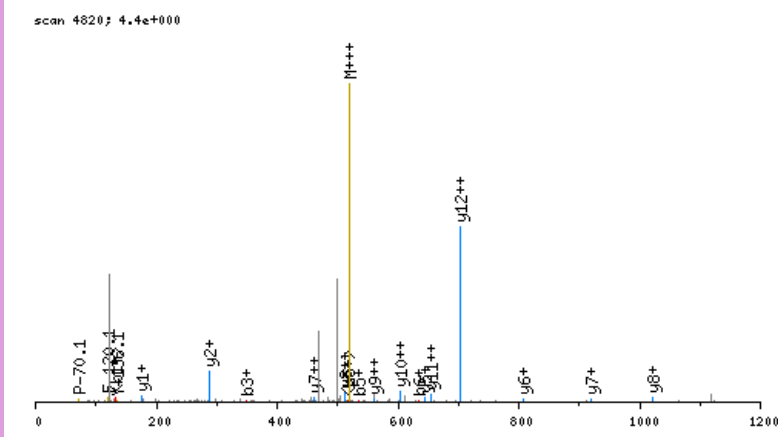

click image to zoom in; click top corners to zoom out [\[precursor±\]](#)

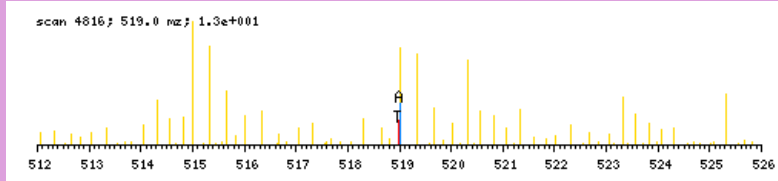

zoomed in precursor plot; T=theoretical m/z, A=acquired m/z

| b <sup>+</sup> | #  | AA # | y <sup>+</sup> | y <sup>2+</sup> |
|----------------|----|------|----------------|-----------------|
| 150.0978       | 1  | D 13 |                |                 |
| 247.1506       | 2  | P 12 | 1405.8301      | 703.4190        |
| 348.1983       | 3  | T 11 | 1308.7774      | 654.8926        |
| 435.2303       | 4  | S 10 | 1207.7297      | 604.3688        |
| 534.2987       | 5  | V 9  | 1120.6977      | 560.8527        |
| 635.3464       | 6  | T 8  | 1021.6292      | 511.3185        |
| 748.4305       | 7  | L 7  | 920.5816       | 460.7947        |
| 910.5886       | 8  | K 6  | 807.4975       | 404.2527        |
| 1007.6413      | 9  | P 5  | 645.3394       | 323.1736        |
| 1138.6818      | 10 | M 4  | 548.2866       | 274.6472        |
| 1267.7244      | 11 | E 3  | 417.2462       | 209.1270        |
| 1380.8085      | 12 | I 2  | 288.2036       | 144.6057        |
|                | 13 | R 1  | 175.1195       | 88.0637         |

N-term:+35.07 K(8):+162.16

DPVLCFTQYEESGR, MH+ 1821.8541, m/z 607.9562  
 H OSG37 P180811 230811-s1.07286.07286.3.dta

X-range:

-

MassTol: Y-zoom:

MassType:

AVG  MONO

Axis:

1  2

Label:

I  M  -

Ions:

a  +  2+  3+

b  +  2+  3+

c  +  2+  3+

x  +  2+  3+

y  +  2+  3+

z  +  2+  3+

hide H<sub>2</sub>O/NH<sub>3</sub>

zoom 112-122

GO

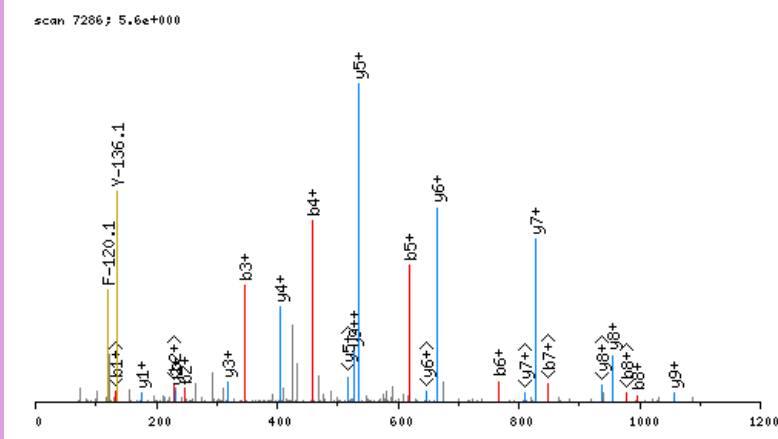

click image to zoom in; click top corners to zoom out [\[precursor±\]](#)

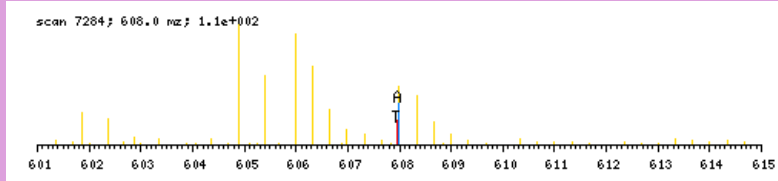

zoomed in precursor plot; T=theoretical m/z, A=acquired m/z

| b <sup>+</sup> | #  | AA | #  | y <sup>+</sup> | y <sup>2+</sup> |
|----------------|----|----|----|----------------|-----------------|
| 150.0978       | 1  | D  | 15 |                |                 |
| 247.1506       | 2  | P  | 14 | 1672.7640      | 836.8859        |
| 346.2190       | 3  | V  | 13 | 1575.7113      | 788.3596        |
| 459.3031       | 4  | L  | 12 | 1476.6429      | 738.8253        |
| 619.3337       | 5  | C  | 11 | 1363.5588      | 682.2833        |
| 766.4021       | 6  | F  | 10 | 1203.5282      | 602.2680        |
| 867.4498       | 7  | T  | 9  | 1056.4598      | 528.7338        |
| 995.5084       | 8  | Q  | 8  | 955.4121       | 478.2100        |
| 1158.5717      | 9  | Y  | 7  | 827.3535       | 414.1807        |
| 1287.6143      | 10 | E  | 6  | 664.2902       | 332.6490        |
| 1416.6569      | 11 | E  | 5  | 535.2476       | 268.1277        |
| 1503.6889      | 12 | S  | 4  | 406.2050       | 203.6064        |
| 1590.7209      | 13 | S  | 3  | 319.1730       | 160.0904        |
| 1647.7424      | 14 | G  | 2  | 232.1410       | 116.5744        |
|                | 15 | R  | 1  | 175.1195       | 88.0637         |

N-term:+35.07 C(5):+160.03

DQDEIDCLPGLAKQPSFR, MH+ 2145.0650, m/z 715.6932  
 L OSG39 P180811 230811-s1.06167.06167.3.dta

X-range:

-

MassTol: Y-zoom:

MassType:

AVG  MONO

Axis:

1  2

Label:

I  M  -

Ions:

a  +  2+  3+

b  +  2+  3+

c  +  2+  3+

x  +  2+  3+

y  +  2+  3+

z  +  2+  3+

hide H<sub>2</sub>O/NH<sub>3</sub>

zoom 112-122

GO

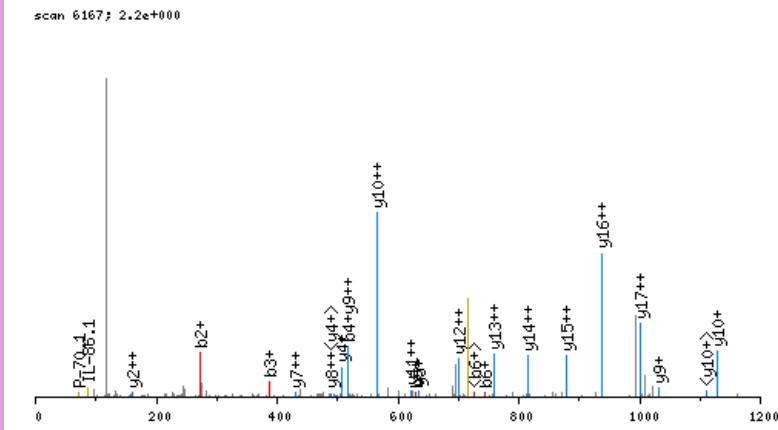

click image to zoom in; click top corners to zoom out [\[precursor±\]](#)

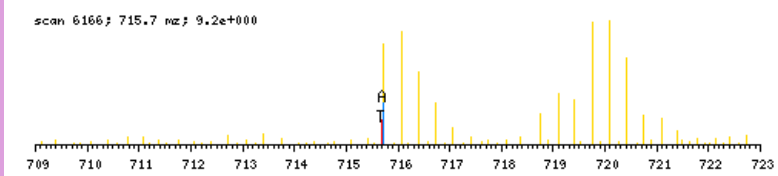

zoomed in precursor plot; T=theoretical m/z, A=acquired m/z

| b <sup>+</sup> | #  | AA # | y <sup>+</sup> | y <sup>2+</sup> |
|----------------|----|------|----------------|-----------------|
| 144.0660       | 1  | D 18 |                |                 |
| 272.1246       | 2  | Q 17 | 2002.0068      | 1001.5073       |
| 387.1516       | 3  | D 16 | 1873.9482      | 937.4780        |
| 516.1942       | 4  | E 15 | 1758.9213      | 879.9645        |
| 629.2782       | 5  | I 14 | 1629.8787      | 815.4432        |
| 744.3052       | 6  | D 13 | 1516.7946      | 758.9012        |
| 904.3358       | 7  | C 12 | 1401.7677      | 701.3877        |
| 1017.4198      | 8  | L 11 | 1241.7371      | 621.3724        |
| 1114.4726      | 9  | P 10 | 1128.6530      | 564.8304        |
| 1171.4941      | 10 | G 9  | 1031.6002      | 516.3040        |
| 1284.5781      | 11 | L 8  | 974.5788       | 487.7933        |
| 1355.6152      | 12 | A 7  | 861.4947       | 431.2513        |
| 1511.7415      | 13 | K 6  | 790.4576       | 395.7327        |
| 1639.8001      | 14 | Q 5  | 634.3313       | 317.6696        |
| 1736.8529      | 15 | P 4  | 506.2727       | 253.6403        |
| 1823.8849      | 16 | S 3  | 409.2199       | 205.1139        |
| 1970.9533      | 17 | F 2  | 322.1879       | 161.5979        |
|                | 18 | R 1  | 175.1195       | 88.0637         |

N-term: +29.04 C(7): +160.03  
 K(13): +156.13

DQGAPGPVGPAGPR, MH+ 1303.6758, m/z 652.3416  
 L OSG37 P180811 230811-s1.02712.02712.2.dta

X-range:

-

MassTol: Y-zoom:

MassType:

AVG  MONO

Axis:

1  2

Label:

I  M  -

Ions:

a  +  2+  3+

b  +  2+  3+

c  +  2+  3+

x  +  2+  3+

y  +  2+  3+

z  +  2+  3+

hide H<sub>2</sub>O/NH<sub>3</sub>

zoom 112-122

GO

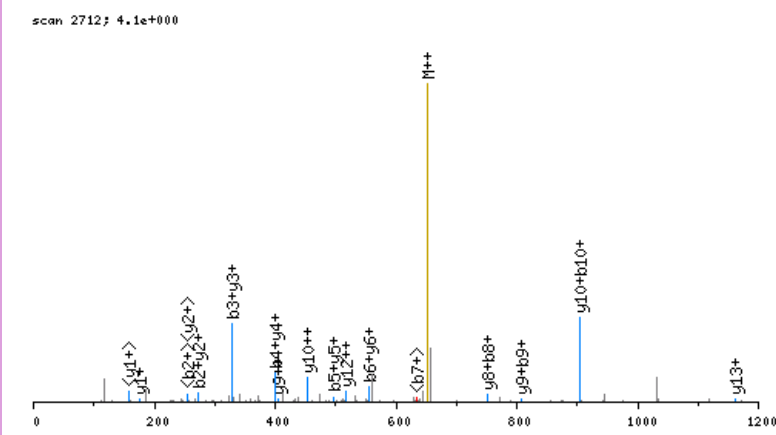

click image to zoom in; click top corners to zoom out [\[precursor±\]](#)

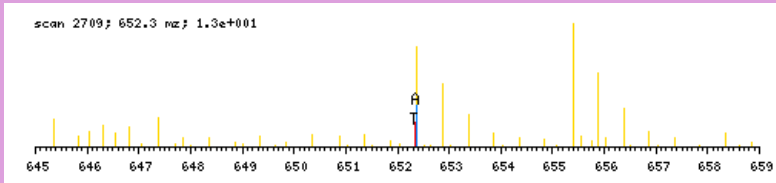

zoomed in precursor plot; T=theoretical m/z, A=acquired m/z

| b <sup>+</sup> | #  | AA # | y <sup>+</sup> | y <sup>2+</sup> |
|----------------|----|------|----------------|-----------------|
| 144.0660       | 1  | D 14 |                |                 |
| 272.1246       | 2  | Q 13 | 1160.6176      | 580.8127        |
| 329.1461       | 3  | G 12 | 1032.5591      | 516.7834        |
| 400.1832       | 4  | A 11 | 975.5376       | 488.2727        |
| 497.2360       | 5  | P 10 | 904.5005       | 452.7542        |
| 554.2574       | 6  | G 9  | 807.4477       | 404.2278        |
| 651.3102       | 7  | P 8  | 750.4262       | 375.7170        |
| 750.3786       | 8  | V 7  | 653.3735       | 327.1907        |
| 807.4001       | 9  | G 6  | 554.3051       | 277.6564        |
| 904.4528       | 10 | P 5  | 497.2836       | 249.1457        |
| 975.4899       | 11 | A 4  | 400.2308       | 200.6193        |
| 1032.5114      | 12 | G 3  | 329.1937       | 165.1008        |
| 1129.5642      | 13 | P 2  | 272.1723       | 136.5900        |
|                | 14 | R 1  | 175.1195       | 88.0637         |

N-term:+29.04



DQSPASHEIATNLGDFAIPLYR, MH+ 2433.2050, m/z 811.7399  
 L OSG38 P180811 230811-s1.07975.07975.3.dta

scan 7975; 1.2e+001

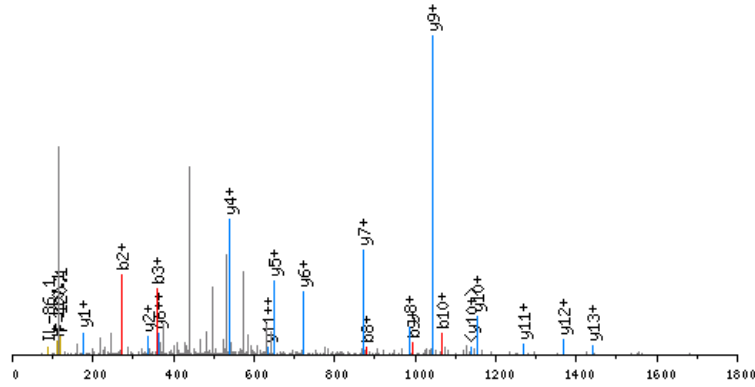

click image to zoom in; click top corners to zoom out [precursor±]

scan 7974; 811.7 mz; 2.0e+002

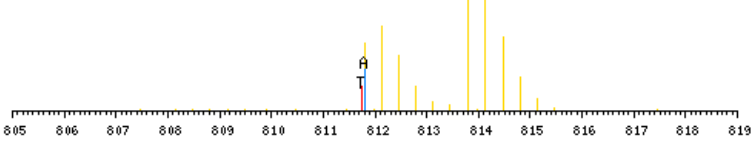

zoomed in precursor plot; T=theoretical m/z, A=acquired m/z

X-range:

-

MassTol: Y-zoom:

MassType:

AVG  MONO

Axis:

1  2

Label:

I  M  -

Ions:

a  +  2+  3+

b  +  2+  3+

c  +  2+  3+

x  +  2+  3+

y  +  2+  3+

z  +  2+  3+

hide H<sub>2</sub>O/NH<sub>3</sub>

zoom 112-122

GO

| b <sup>+</sup> | #  | AA # | y <sup>+</sup> | y <sup>2+</sup> |
|----------------|----|------|----------------|-----------------|
| 144.0660       | 1  | D 22 |                |                 |
| 272.1246       | 2  | Q 21 | 2290.1468      | 1145.5773       |
| 359.1566       | 3  | S 20 | 2162.0882      | 1081.5480       |
| 456.2094       | 4  | P 19 | 2075.0562      | 1038.0320       |
| 527.2465       | 5  | A 18 | 1978.0034      | 989.5056        |
| 614.2786       | 6  | S 17 | 1906.9663      | 953.9871        |
| 751.3375       | 7  | H 16 | 1819.9343      | 910.4710        |
| 880.3801       | 8  | E 15 | 1682.8754      | 841.9416        |
| 993.4641       | 9  | I 14 | 1553.8328      | 777.4203        |
| 1064.5012      | 10 | A 13 | 1440.7487      | 720.8783        |
| 1165.5489      | 11 | T 12 | 1369.7116      | 685.3597        |
| 1279.5918      | 12 | N 11 | 1268.6639      | 634.8359        |
| 1392.6759      | 13 | L 10 | 1154.6210      | 577.8144        |
| 1449.6974      | 14 | G 9  | 1041.5369      | 521.2724        |
| 1564.7243      | 15 | D 8  | 984.5155       | 492.7616        |
| 1711.7927      | 16 | F 7  | 869.4885       | 435.2482        |
| 1782.8298      | 17 | A 6  | 722.4201       | 361.7140        |
| 1895.9139      | 18 | I 5  | 651.3830       | 326.1954        |
| 1982.9459      | 19 | S 4  | 538.2989       | 269.6534        |
| 2096.0300      | 20 | L 3  | 451.2669       | 226.1374        |
| 2259.0933      | 21 | Y 2  | 338.1828       | 169.5953        |
|                | 22 | R 1  | 175.1195       | 88.0637         |

N-term:+29.04

DQSPASHEIATNLGDFALR, MH+ 2076.0574, m/z 692.6906  
 H OSG39 P180811 230811-s1.06399.06399.3.dta

X-range:

-

MassTol: Y-zoom:

MassType:

AVG  MONO

Axis:

1  2

Label:

I  M  -

Ions:

a  +  2+  3+

b  +  2+  3+

c  +  2+  3+

x  +  2+  3+

y  +  2+  3+

z  +  2+  3+

hide H<sub>2</sub>O/NH<sub>3</sub>

zoom 112-122

GO

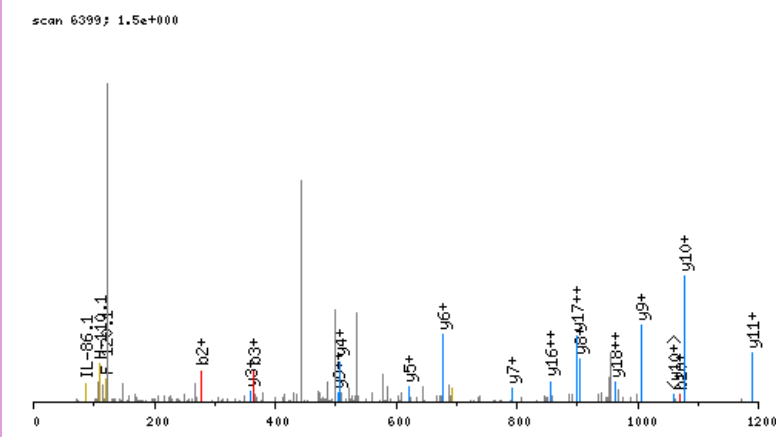

click image to zoom in; click top corners to zoom out [\[precursor±\]](#)

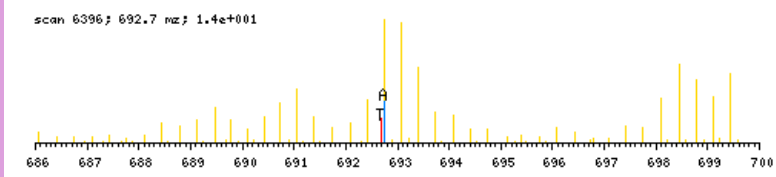

zoomed in precursor plot; T=theoretical m/z, A=acquired m/z

| b <sup>+</sup> | #  | AA # | y <sup>+</sup> | y <sup>2+</sup> |
|----------------|----|------|----------------|-----------------|
| 150.0978       | 1  | D 19 |                |                 |
| 278.1564       | 2  | Q 18 | 1926.9674      | 963.9876        |
| 365.1884       | 3  | S 17 | 1798.9088      | 899.9583        |
| 462.2412       | 4  | P 16 | 1711.8768      | 856.4423        |
| 533.2783       | 5  | A 15 | 1614.8240      | 807.9159        |
| 620.3104       | 6  | S 14 | 1543.7869      | 772.3974        |
| 757.3693       | 7  | H 13 | 1456.7549      | 728.8813        |
| 886.4119       | 8  | E 12 | 1319.6959      | 660.3519        |
| 999.4959       | 9  | I 11 | 1190.6533      | 595.8306        |
| 1070.5330      | 10 | A 10 | 1077.5693      | 539.2886        |
| 1171.5807      | 11 | T 9  | 1006.5322      | 503.7700        |
| 1285.6236      | 12 | N 8  | 905.4845       | 453.2462        |
| 1398.7077      | 13 | L 7  | 791.4416       | 396.2247        |
| 1455.7292      | 14 | G 6  | 678.3575       | 339.6827        |
| 1570.7561      | 15 | D 5  | 621.3360       | 311.1719        |
| 1717.8245      | 16 | F 4  | 506.3091       | 253.6585        |
| 1788.8616      | 17 | A 3  | 359.2407       | 180.1243        |
| 1901.9457      | 18 | L 2  | 288.2036       | 144.6057        |
|                | 19 | R 1  | 175.1195       | 88.0637         |

N-term:+35.07

DQTIQEFKEAFTVIDQNR, MH+ 2366.1992, m/z 592.3053  
L OSG38 P180811 230811-s1.07866.07866.4.dta

X-range:

-

MassTol: Y-zoom:

MassType:

AVG  MONO

Axis:

1  2

Label:

I  M  -

Ions:

a  2+  3+

b  2+  3+

c  2+  3+

x  2+  3+

y  2+  3+

z  2+  3+

hide H<sub>2</sub>O/NH<sub>3</sub>

zoom 112-122

GO

scan 7866; 1.1e+001

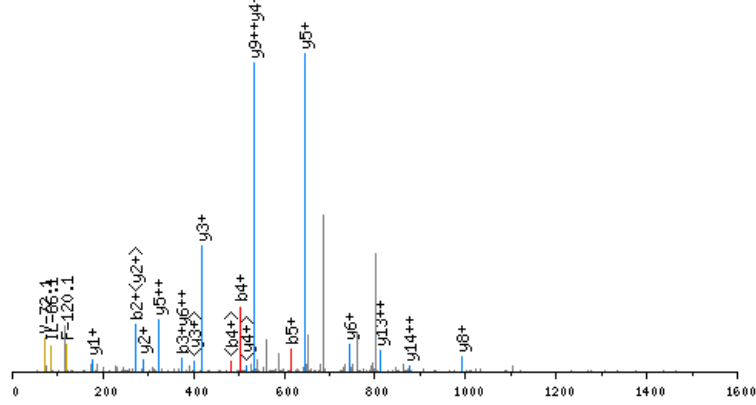

click image to zoom in; click top corners to zoom out [\[precursor±\]](#)

scan 7864; 592.3 m/z; 7.5e+001

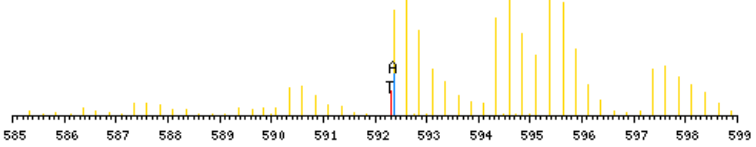

zoomed in precursor plot; T=theoretical m/z, A=acquired m/z

| b <sup>+</sup> | #  | AA | #  | y <sup>+</sup> | y <sup>2+</sup> |
|----------------|----|----|----|----------------|-----------------|
| 144.0660       | 1  | D  | 19 |                |                 |
| 272.1246       | 2  | Q  | 18 | 2223.1410      | 1112.0744       |
| 373.1723       | 3  | T  | 17 | 2095.0824      | 1048.0451       |
| 501.2309       | 4  | Q  | 16 | 1994.0348      | 997.5213        |
| 614.3149       | 5  | I  | 15 | 1865.9762      | 933.4920        |
| 742.3735       | 6  | Q  | 14 | 1752.8921      | 876.9500        |
| 871.4161       | 7  | E  | 13 | 1624.8335      | 812.9207        |
| 1018.4845      | 8  | F  | 12 | 1495.7909      | 748.3994        |
| 1174.6108      | 9  | K  | 11 | 1348.7225      | 674.8652        |
| 1303.6534      | 10 | E  | 10 | 1192.5962      | 596.8020        |
| 1374.6905      | 11 | A  | 9  | 1063.5536      | 532.2807        |
| 1521.7589      | 12 | F  | 8  | 992.5165       | 496.7622        |
| 1622.8066      | 13 | T  | 7  | 845.4481       | 423.2280        |
| 1721.8750      | 14 | V  | 6  | 744.4004       | 372.7041        |
| 1834.9591      | 15 | I  | 5  | 645.3320       | 323.1699        |
| 1949.9860      | 16 | D  | 4  | 532.2479       | 266.6279        |
| 2078.0446      | 17 | Q  | 3  | 417.2210       | 209.1144        |
| 2192.0876      | 18 | N  | 2  | 289.1624       | 145.0851        |
|                | 19 | R  | 1  | 175.1195       | 88.0637         |

N-term:+29.04 K(9):+156.13

DSFRDQAVAIMR, MH+ 1442.7638, m/z 481.5928  
 H OSG40 P180811 230811-s1.06286.06286.3.dta

X-range:

-

MassTol: Y-zoom:

MassType:

AVG  MONO

Axis:

1  2

Label:

I  M  -

Ions:

a  +  2+  3+

b  +  2+  3+

c  +  2+  3+

x  +  2+  3+

y  +  2+  3+

z  +  2+  3+

hide H<sub>2</sub>O/NH<sub>3</sub>

zoom 112-122

GO

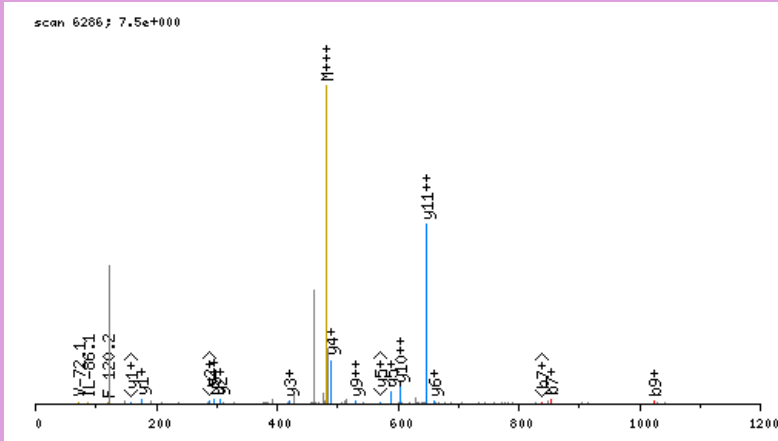

click image to zoom in; click top corners to zoom out [\[precursor±\]](#)

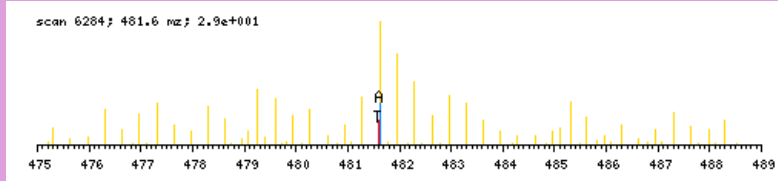

zoomed in precursor plot; T=theoretical m/z, A=acquired m/z

| b <sup>+</sup> | #  | AA # | y <sup>+</sup> | y <sup>2+</sup> |
|----------------|----|------|----------------|-----------------|
| 150.0978       | 1  | D 12 |                |                 |
| 237.1299       | 2  | S 11 | 1293.6738      | 647.3408        |
| 384.1983       | 3  | F 10 | 1206.6417      | 603.8248        |
| 540.2994       | 4  | R 9  | 1059.5733      | 530.2906        |
| 655.3263       | 5  | D 8  | 903.4722       | 452.2400        |
| 783.3849       | 6  | Q 7  | 788.4453       | 394.7265        |
| 854.4220       | 7  | A 6  | 660.3867       | 330.6973        |
| 953.4904       | 8  | V 5  | 589.3496       | 295.1787        |
| 1024.5276      | 9  | A 4  | 490.2812       | 245.6445        |
| 1137.6116      | 10 | I 3  | 419.2440       | 210.1259        |
| 1268.6521      | 11 | M 2  | 306.1600       | 153.5839        |
|                | 12 | R 1  | 175.1195       | 88.0637         |

N-term:+35.07

DSMDTGAGSIR, MH+ 1137.5210, m/z 569.2641  
 L OSG37 P180811 230811-s1.02635.02635.2.dta

X-range:

-

MassTol: Y-zoom:

MassType:

AVG  MONO

Axis:

1  2

Label:

I  M  -

Ions:

a  +  2+  3+

b  +  2+  3+

c  +  2+  3+

x  +  2+  3+

y  +  2+  3+

z  +  2+  3+

hide H<sub>2</sub>O/NH<sub>3</sub>

zoom 112-122

GO

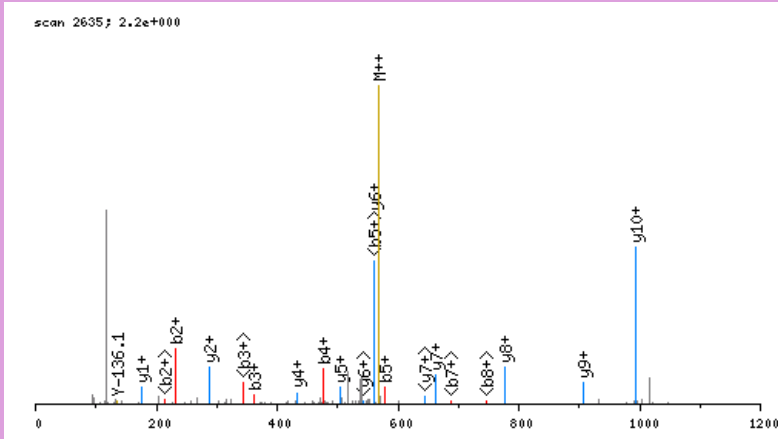

click image to zoom in; click top corners to zoom out [\[precursor±\]](#)

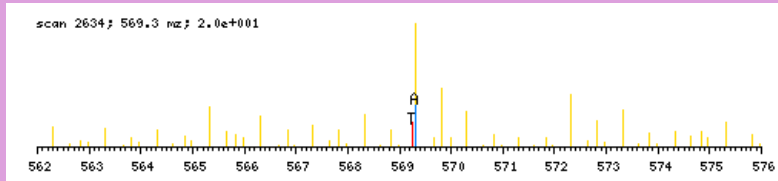

zoomed in precursor plot; T=theoretical m/z, A=acquired m/z

| b <sup>+</sup> | #  | AA | #  | y <sup>+</sup> | y <sup>2+</sup> |
|----------------|----|----|----|----------------|-----------------|
| 144.0660       | 1  | D  | 11 |                |                 |
| 231.0981       | 2  | S  | 10 | 994.4628       | 497.7353        |
| 362.1386       | 3  | M  | 9  | 907.4307       | 454.2193        |
| 477.1655       | 4  | D  | 8  | 776.3903       | 388.6990        |
| 578.2132       | 5  | T  | 7  | 661.3633       | 331.1856        |
| 635.2346       | 6  | G  | 6  | 560.3156       | 280.6617        |
| 706.2718       | 7  | A  | 5  | 503.2942       | 252.1510        |
| 763.2932       | 8  | G  | 4  | 432.2571       | 216.6324        |
| 850.3252       | 9  | S  | 3  | 375.2356       | 188.1217        |
| 963.4093       | 10 | I  | 2  | 288.2036       | 144.6057        |
|                | 11 | R  | 1  | 175.1195       | 88.0637         |

N-term: +29.04

DSQVHSGVQVEGR, MH+ 1425.7086, m/z 475.9077  
 L OSG40 P180811 230811-s1.02111.02111.3.dta

X-range:

-

MassTol: Y-zoom:

MassType:

AVG  MONO

Axis:

1  2

Label:

I  M  -

Ions:

a  +  2+  3+

b  +  2+  3+

c  +  2+  3+

x  +  2+  3+

y  +  2+  3+

z  +  2+  3+

hide H<sub>2</sub>O/NH<sub>3</sub>

zoom 112-122

GO

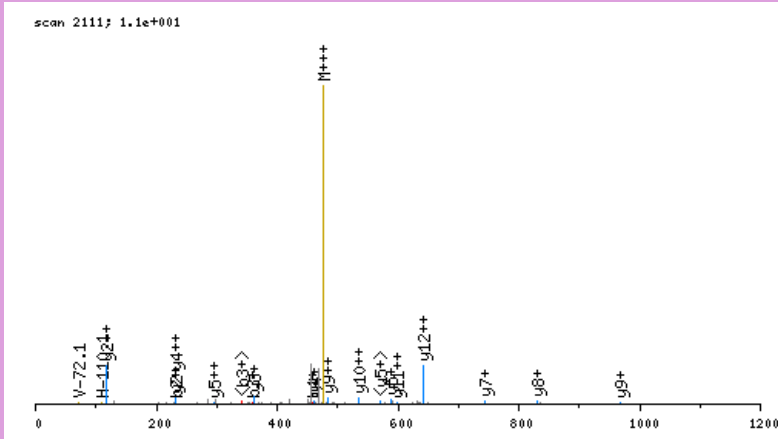

click image to zoom in; click top corners to zoom out [\[precursor±\]](#)

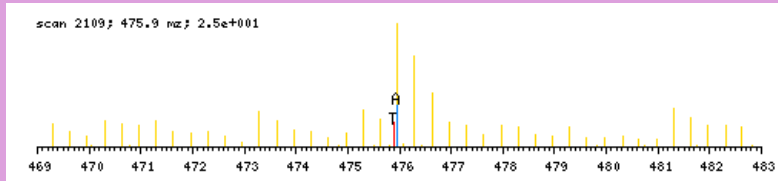

zoomed in precursor plot; T=theoretical m/z, A=acquired m/z

| b <sup>+</sup> | #  | AA # | y <sup>+</sup> | y <sup>2+</sup>    |
|----------------|----|------|----------------|--------------------|
| 144.0660       | 1  | D    | 13             |                    |
| 231.0981       | 2  | S    | 12             | 1282.6504 641.8291 |
| 359.1566       | 3  | Q    | 11             | 1195.6184 598.3131 |
| 458.2251       | 4  | V    | 10             | 1067.5598 534.2838 |
| 595.2840       | 5  | H    | 9              | 968.4914 484.7496  |
| 682.3160       | 6  | S    | 8              | 831.4325 416.2201  |
| 739.3375       | 7  | G    | 7              | 744.4004 372.7041  |
| 838.4059       | 8  | V    | 6              | 687.3790 344.1934  |
| 966.4645       | 9  | Q    | 5              | 588.3105 294.6592  |
| 1065.5329      | 10 | V    | 4              | 460.2520 230.6299  |
| 1194.5755      | 11 | E    | 3              | 361.1836 181.0957  |
| 1251.5969      | 12 | G    | 2              | 232.1410 116.5744  |
|                | 13 | R    | 1              | 175.1195 88.0637   |

N-term:+29.04

DSSDSMDTGAGSIR, MH+ 1432.6438, m/z 716.8255  
 H OSG37 P180811 230811-s1.02812.02812.2.dta

X-range:

-

MassTol: Y-zoom:

MassType:

AVG  MONO

Axis:

1  2

Label:

I  M  -

Ions:

a  +  2+  3+

b  +  2+  3+

c  +  2+  3+

x  +  2+  3+

y  +  2+  3+

z  +  2+  3+

hide H<sub>2</sub>O/NH<sub>3</sub>

zoom 112-122

GO

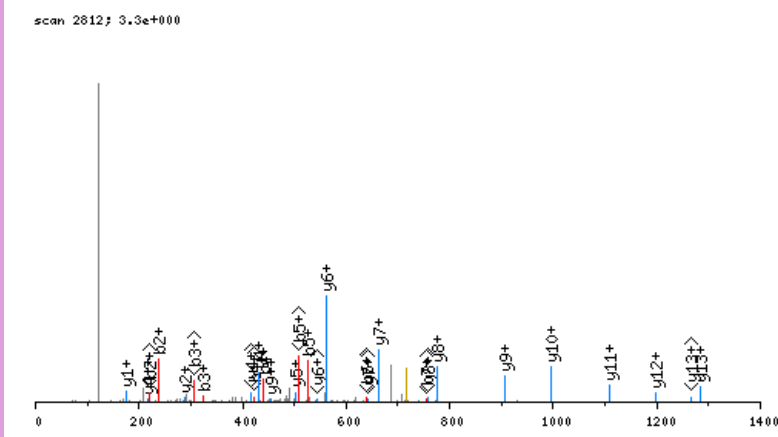

click image to zoom in; click top corners to zoom out [\[precursor±\]](#)

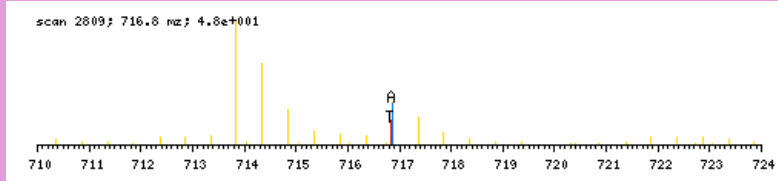

zoomed in precursor plot; T=theoretical m/z, A=acquired m/z

| b <sup>+</sup> | #  | AA # | y <sup>+</sup> | y <sup>2+</sup> |
|----------------|----|------|----------------|-----------------|
| 150.0978       | 1  | D 14 |                |                 |
| 237.1299       | 2  | S 13 | 1283.5538      | 642.2808        |
| 324.1619       | 3  | S 12 | 1196.5217      | 598.7648        |
| 439.1888       | 4  | D 11 | 1109.4897      | 555.2488        |
| 526.2209       | 5  | S 10 | 994.4628       | 497.7353        |
| 657.2614       | 6  | M 9  | 907.4307       | 454.2193        |
| 772.2883       | 7  | D 8  | 776.3903       | 388.6990        |
| 873.3360       | 8  | T 7  | 661.3633       | 331.1856        |
| 930.3574       | 9  | G 6  | 560.3156       | 280.6617        |
| 1001.3946      | 10 | A 5  | 503.2942       | 252.1510        |
| 1058.4160      | 11 | G 4  | 432.2571       | 216.6324        |
| 1145.4480      | 12 | S 3  | 375.2356       | 188.1217        |
| 1258.5321      | 13 | I 2  | 288.2036       | 144.6057        |
|                | 14 | R 1  | 175.1195       | 88.0637         |

N-term:+35.07

DSVSVFNGAVSDDSKR, MH+ 1738.8612, m/z 580.2919  
 L OSG39 P180811 230811-s1.03857.03857.3.dta

X-range:

-

MassTol: Y-zoom:

MassType:

AVG  MONO

Axis:

1  2

Label:

I  M  -

Ions:

a  +  2+  3+

b  +  2+  3+

c  +  2+  3+

x  +  2+  3+

y  +  2+  3+

z  +  2+  3+

hide H<sub>2</sub>O/NH<sub>3</sub>

zoom 112-122

GO

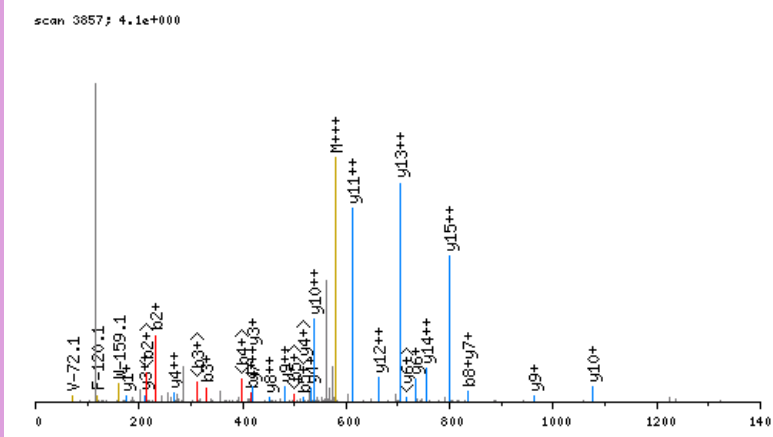

click image to zoom in; click top corners to zoom out [\[precursor±\]](#)

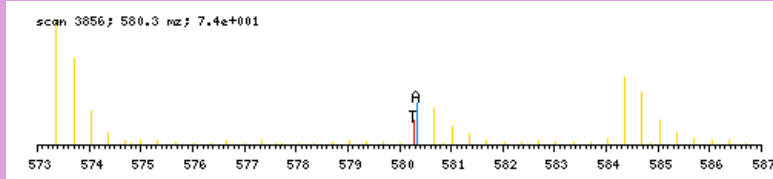

zoomed in precursor plot; T=theoretical m/z, A=acquired m/z

| b <sup>+</sup> | #  | AA # | y <sup>+</sup> | y <sup>2+</sup> |
|----------------|----|------|----------------|-----------------|
| 144.0660       | 1  | D    | 16             |                 |
| 231.0981       | 2  | S    | 15             | 1595.8030       |
| 330.1665       | 3  | V    | 14             | 1508.7709       |
| 417.1985       | 4  | S    | 13             | 1409.7025       |
| 516.2669       | 5  | V    | 12             | 1322.6705       |
| 663.3353       | 6  | F    | 11             | 1223.6021       |
| 777.3783       | 7  | N    | 10             | 1076.5337       |
| 834.3997       | 8  | G    | 9              | 962.4907        |
| 905.4368       | 9  | A    | 8              | 905.4693        |
| 1004.5053      | 10 | V    | 7              | 834.4322        |
| 1091.5373      | 11 | S    | 6              | 735.3637        |
| 1206.5642      | 12 | D    | 5              | 648.3317        |
| 1321.5912      | 13 | D    | 4              | 533.3048        |
| 1408.6232      | 14 | S    | 3              | 418.2778        |
| 1564.7495      | 15 | K    | 2              | 331.2458        |
|                | 16 | R    | 1              | 175.1195        |

N-term:+29.04 K(15):+156.13



DSYVGDQAQSKR, MH+ 1422.7501, m/z 474.9216  
 H OSG40 P180811 230811-s1.02066.02066.3.dta

scan 2066; 9.0e+000

X-range:

-

MassTol: Y-zoom:

MassType:

AVG  MONO

Axis:

1  2

Label:

I  M  -

Ions:

a  +  2+  3+

b  +  2+  3+

c  +  2+  3+

x  +  2+  3+

y  +  2+  3+

z  +  2+  3+

hide H<sub>2</sub>O/NH<sub>3</sub>

zoom 112-122

GO

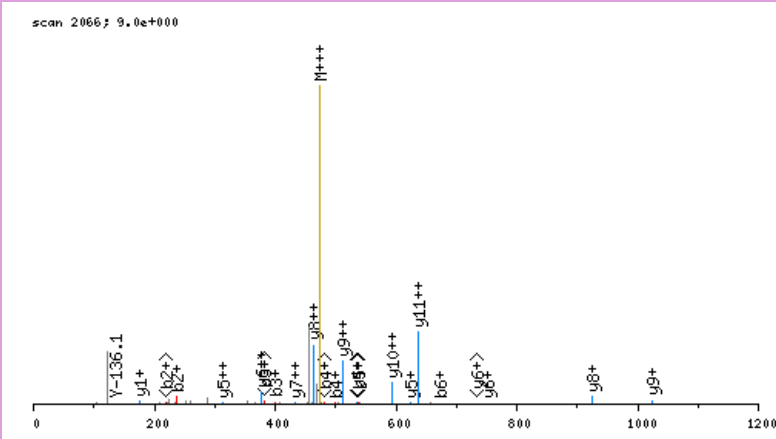

click image to zoom in; click top corners to zoom out [\[precursor±\]](#)

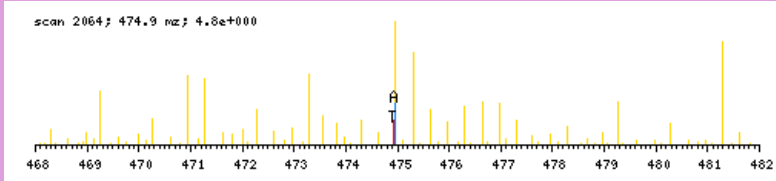

zoomed in precursor plot; T=theoretical m/z, A=acquired m/z

| b <sup>+</sup> | #  | AA # | y <sup>+</sup> | y <sup>2+</sup> |
|----------------|----|------|----------------|-----------------|
| 150.0978       | 1  | D 12 |                |                 |
| 237.1299       | 2  | S 11 | 1273.6601      | 637.3340        |
| 400.1932       | 3  | Y 10 | 1186.6281      | 593.8179        |
| 499.2616       | 4  | V 9  | 1023.5647      | 512.2863        |
| 556.2831       | 5  | G 8  | 924.4963       | 462.7521        |
| 671.3100       | 6  | D 7  | 867.4749       | 434.2413        |
| 800.3526       | 7  | E 6  | 752.4479       | 376.7279        |
| 871.3897       | 8  | A 5  | 623.4053       | 312.2066        |
| 999.4483       | 9  | Q 4  | 552.3682       | 276.6880        |
| 1086.4803      | 10 | S 3  | 424.3096       | 212.6587        |
| 1248.6384      | 11 | K 2  | 337.2776       | 169.1427        |
|                | 12 | R 1  | 175.1195       | 88.0637         |

N-term:+35.07 K(11):+162.16

DTFSQLGSLQALDLSWNAIR, MH+ 2269.2040, m/z 757.0729  
 H OSG39 P180811 230811-s1.07973.07973.3.dta

scan 7973; 1.4e+000

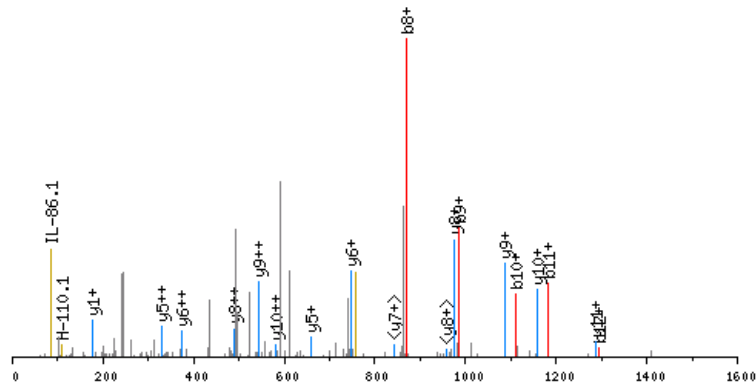

click image to zoom in; click top corners to zoom out [\[precursor±\]](#)

scan 7971; 757.1 m/z; 1.3e+001

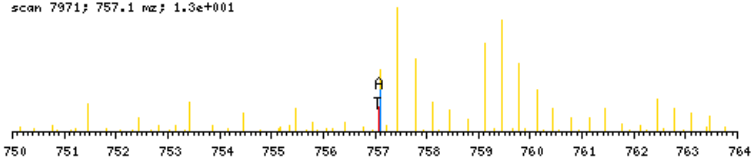

zoomed in precursor plot; T=theoretical m/z, A=acquired m/z

X-range:

-

MassTol: Y-zoom:

MassType:

AVG  MONO

Axis:

1  2

Label:

I  M  -

Ions:

a  +  2+  3+

b  +  2+  3+

c  +  2+  3+

x  +  2+  3+

y  +  2+  3+

z  +  2+  3+

hide H<sub>2</sub>O/NH<sub>3</sub>

zoom 112-122

GO

| b <sup>+</sup> | #  | AA # | y <sup>+</sup> | y <sup>2+</sup> |
|----------------|----|------|----------------|-----------------|
| 150.0978       | 1  | D    | 20             |                 |
| 251.1455       | 2  | T    | 19             | 2120.1140       |
| 398.2139       | 3  | F    | 18             | 2019.0664       |
| 485.2460       | 4  | S    | 17             | 1871.9979       |
| 613.3045       | 5  | Q    | 16             | 1784.9659       |
| 726.3886       | 6  | L    | 15             | 1656.9073       |
| 783.4101       | 7  | G    | 14             | 1543.8233       |
| 870.4421       | 8  | S    | 13             | 1486.8018       |
| 983.5262       | 9  | L    | 12             | 1399.7698       |
| 1111.5847      | 10 | Q    | 11             | 1286.6857       |
| 1182.6219      | 11 | A    | 10             | 1158.6271       |
| 1295.7059      | 12 | L    | 9              | 1087.5900       |
| 1410.7329      | 13 | D    | 8              | 974.5060        |
| 1523.8169      | 14 | L    | 7              | 859.4790        |
| 1610.8490      | 15 | S    | 6              | 746.3949        |
| 1796.9283      | 16 | W    | 5              | 659.3629        |
| 1910.9712      | 17 | N    | 4              | 473.2836        |
| 1982.0083      | 18 | A    | 3              | 359.2407        |
| 2095.0924      | 19 | I    | 2              | 288.2036        |
|                | 20 | R    | 1              | 175.1195        |

N-term:+35.07

DTPQESPVKSPVVR, MH+ 1592.8648, m/z 531.6265  
 L OSG39 P180811 230811-s1.02529.02529.3.dta

X-range:

-

MassTol: Y-zoom:

MassType:

AVG  MONO

Axis:

1  2

Label:

I  M  -

Ions:

a  +  2+  3+

b  +  2+  3+

c  +  2+  3+

x  +  2+  3+

y  +  2+  3+

z  +  2+  3+

hide H<sub>2</sub>O/NH<sub>3</sub>

zoom 112-122

GO

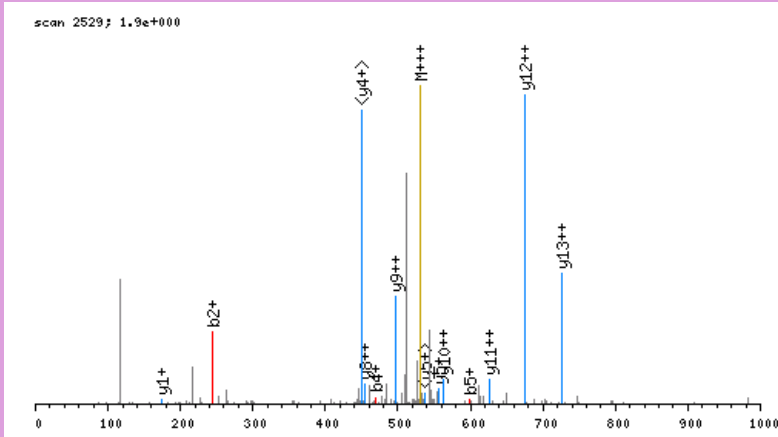

click image to zoom in; click top corners to zoom out [\[precursor±\]](#)

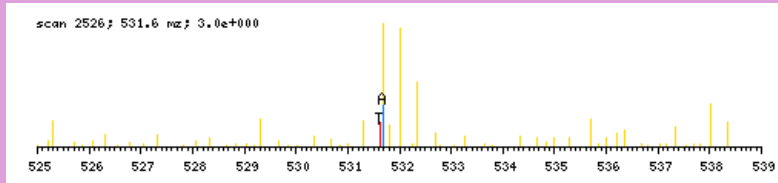

zoomed in precursor plot; T=theoretical m/z, A=acquired m/z

| b <sup>+</sup> | #  | AA # | y <sup>+</sup> | y <sup>2+</sup> |
|----------------|----|------|----------------|-----------------|
| 144.0660       | 1  | D    | 14             |                 |
| 245.1137       | 2  | T    | 13             | 1449.8066       |
| 342.1665       | 3  | P    | 12             | 1348.7589       |
| 470.2251       | 4  | Q    | 11             | 1251.7061       |
| 599.2677       | 5  | E    | 10             | 1123.6476       |
| 686.2997       | 6  | S    | 9              | 994.6050        |
| 783.3524       | 7  | P    | 8              | 907.5729        |
| 882.4209       | 8  | V    | 7              | 810.5202        |
| 1038.5472      | 9  | K    | 6              | 711.4518        |
| 1125.5792      | 10 | S    | 5              | 555.3255        |
| 1222.6320      | 11 | P    | 4              | 468.2934        |
| 1319.6847      | 12 | P    | 3              | 371.2407        |
| 1418.7531      | 13 | V    | 2              | 274.1879        |
|                | 14 | R    | 1              | 175.1195        |

N-term:+29.04 K(9):+156.13

DVPVVADPTVFNVTVTR, MH+ 1813.0283, m/z 605.0143  
 H OSG36 P180811 230811-s1.04615.04615.3.dta

X-range:

-

MassTol: Y-zoom:

MassType:

AVG  MONO

Axis:

1  2

Label:

I  M  -

Ions:

a  +  2+  3+

b  +  2+  3+

c  +  2+  3+

x  +  2+  3+

y  +  2+  3+

z  +  2+  3+

hide H<sub>2</sub>O/NH<sub>3</sub>

zoom 112-122

GO

scan 4615; 2.6e+000

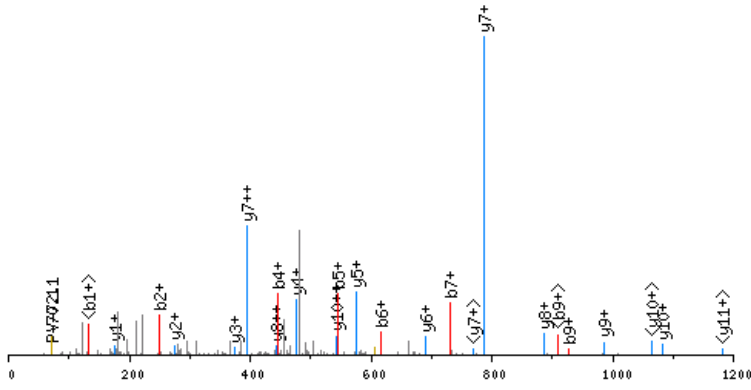

click image to zoom in; click top corners to zoom out [\[precursor±\]](#)

scan 4614; 605.0 m/z; 6.1e+000

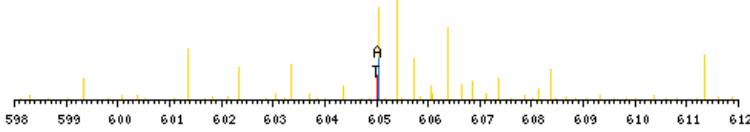

zoomed in precursor plot; T=theoretical m/z, A=acquired m/z

| b <sup>+</sup> | #  | AA # | y <sup>+</sup> | y <sup>2+</sup> |
|----------------|----|------|----------------|-----------------|
| 150.0978       | 1  | D 17 |                |                 |
| 249.1663       | 2  | V 16 | 1663.9383      | 832.4731        |
| 346.2190       | 3  | P 15 | 1564.8699      | 782.9389        |
| 445.2874       | 4  | V 14 | 1467.8171      | 734.4125        |
| 544.3558       | 5  | V 13 | 1368.7487      | 684.8783        |
| 615.3930       | 6  | A 12 | 1269.6803      | 635.3441        |
| 730.4199       | 7  | D 11 | 1198.6432      | 599.8255        |
| 827.4727       | 8  | P 10 | 1083.6162      | 542.3120        |
| 928.5203       | 9  | T 9  | 986.5635       | 493.7856        |
| 1027.5888      | 10 | V 8  | 885.5158       | 443.2618        |
| 1124.6415      | 11 | P 7  | 786.4474       | 393.7276        |
| 1238.6845      | 12 | N 6  | 689.3946       | 345.2012        |
| 1337.7529      | 13 | V 5  | 575.3517       | 288.1798        |
| 1438.8005      | 14 | T 4  | 476.2833       | 238.6455        |
| 1537.8690      | 15 | V 3  | 375.2356       | 188.1217        |
| 1638.9166      | 16 | T 2  | 276.1672       | 138.5875        |
|                | 17 | R 1  | 175.1195       | 88.0637         |

N-term:+35.07

DVQETDTSQKQSPASHEIATNLGDFAIISLYR, MH+ 3604.8043, m/z 901.9565  
H OSG40 P180811 230811-s1.09250.09250.4.dta

scan 9250; 3.6e+000

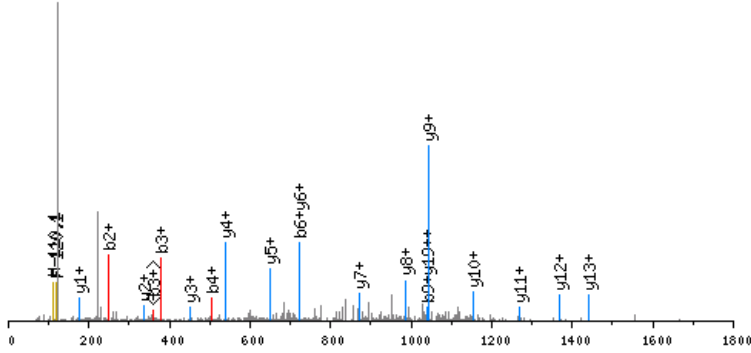

click image to zoom in; click top corners to zoom out [\[precursor±\]](#)

scan 9249; 902.0 nz; 5.5e+001

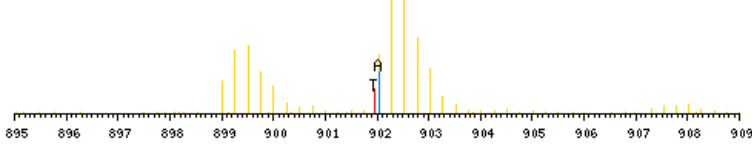

zoomed in precursor plot; T=theoretical m/z, A=acquired m/z

| b <sup>+</sup> | #  | AA # | y <sup>+</sup> | y <sup>2+</sup> |
|----------------|----|------|----------------|-----------------|
| 150.0978       | 1  | D    | 32             |                 |
| 249.1663       | 2  | V    | 31             | 3455.7143       |
| 377.2248       | 3  | Q    | 30             | 3356.6459       |
| 506.2674       | 4  | E    | 29             | 3228.5873       |
| 607.3151       | 5  | T    | 28             | 3099.5447       |
| 722.3420       | 6  | D    | 27             | 2998.4971       |
| 823.3897       | 7  | T    | 26             | 2883.4701       |
| 910.4218       | 8  | S    | 25             | 2782.4224       |
| 1038.4803      | 9  | Q    | 24             | 2695.3904       |
| 1200.6384      | 10 | K    | 23             | 2567.3318       |
| 1315.6654      | 11 | D    | 22             | 2405.1737       |
| 1443.7240      | 12 | Q    | 21             | 2290.1468       |
| 1530.7560      | 13 | S    | 20             | 2162.0882       |
| 1627.8087      | 14 | P    | 19             | 2075.0562       |
| 1698.8459      | 15 | A    | 18             | 1978.0034       |
| 1785.8779      | 16 | S    | 17             | 1906.9663       |
| 1922.9368      | 17 | H    | 16             | 1819.9343       |
| 2051.9794      | 18 | E    | 15             | 1682.8754       |
| 2165.0635      | 19 | I    | 14             | 1553.8328       |
| 2236.1006      | 20 | A    | 13             | 1440.7487       |
| 2337.1483      | 21 | T    | 12             | 1369.7116       |
| 2451.1912      | 22 | N    | 11             | 1268.6639       |
| 2564.2752      | 23 | L    | 10             | 1154.6210       |
| 2621.2967      | 24 | G    | 9              | 1041.5369       |
| 2736.3236      | 25 | D    | 8              | 984.5155        |
| 2883.3921      | 26 | F    | 7              | 869.4885        |
| 2954.4292      | 27 | A    | 6              | 722.4201        |
| 3067.5132      | 28 | I    | 5              | 651.3830        |
| 3154.5453      | 29 | S    | 4              | 538.2989        |
| 3267.6293      | 30 | L    | 3              | 451.2669        |
| 3430.6927      | 31 | Y    | 2              | 338.1828        |
|                | 32 | R    | 1              | 175.1195        |

N-term:+35.07 K(10):+162.16

X-range:

-

MassTol: Y-zoom:

MassType:

AVG  MONO

Axis:

1  2

Label:

I  M  -

Ions:

a  +  2+  3+

b  +  2+  3+

c  +  2+  3+

x  +  2+  3+

y  +  2+  3+

z  +  2+  3+

hide H<sub>2</sub>O/NH<sub>3</sub>

zoom 112-122

GO

DVQLVESGGGLVQPGGSR, MH+ 1782.9350, m/z 594.9832  
 L OSG37 P180811 230811-s1.06150.06150.3.dta

X-range:

-

MassTol: Y-zoom:

MassType:

AVG  MONO

Axis:

1  2

Label:

I  M  -

Ions:

a  +  2+  3+

b  +  2+  3+

c  +  2+  3+

x  +  2+  3+

y  +  2+  3+

z  +  2+  3+

hide H<sub>2</sub>O/NH<sub>3</sub>

zoom 112-122

GO

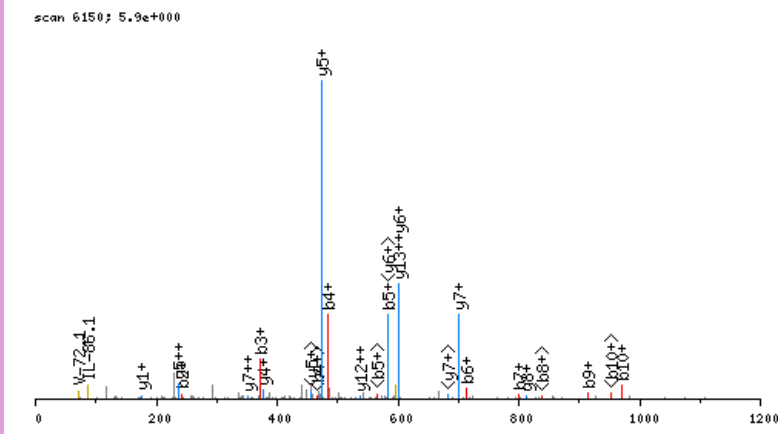

click image to zoom in; click top corners to zoom out [\[precursor±\]](#)

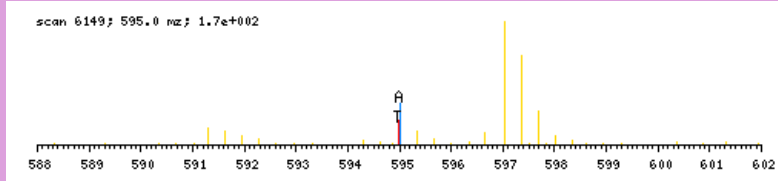

zoomed in precursor plot; T=theoretical m/z, A=acquired m/z

| b <sup>+</sup> | #  | AA # | y <sup>+</sup> | y <sup>2+</sup> |
|----------------|----|------|----------------|-----------------|
| 144.0660       | 1  | D 18 |                |                 |
| 243.1345       | 2  | V 17 | 1639.8768      | 820.4423        |
| 371.1930       | 3  | Q 16 | 1540.8083      | 770.9081        |
| 484.2771       | 4  | L 15 | 1412.7498      | 706.8788        |
| 583.3455       | 5  | V 14 | 1299.6657      | 650.3368        |
| 712.3881       | 6  | E 13 | 1200.5973      | 600.8026        |
| 799.4201       | 7  | S 12 | 1071.5547      | 536.2813        |
| 856.4416       | 8  | G 11 | 984.5227       | 492.7652        |
| 913.4631       | 9  | G 10 | 927.5012       | 464.2545        |
| 970.4845       | 10 | G 9  | 870.4797       | 435.7438        |
| 1083.5686      | 11 | L 8  | 813.4583       | 407.2331        |
| 1182.6370      | 12 | V 7  | 700.3742       | 350.6910        |
| 1310.6956      | 13 | Q 6  | 601.3058       | 301.1568        |
| 1407.7483      | 14 | P 5  | 473.2472       | 237.1275        |
| 1464.7698      | 15 | G 4  | 376.1945       | 188.6011        |
| 1521.7913      | 16 | G 3  | 319.1730       | 160.0904        |
| 1608.8233      | 17 | S 2  | 262.1515       | 131.5797        |
|                | 18 | R 1  | 175.1195       | 88.0637         |

N-term:+29.04

DVYKIGGIGTVPVGR, MH+ 1586.9270, m/z 529.6472  
 L OSG39 P180811 230811-s1.05375.05375.3.dta

X-range:

-

MassTol: Y-zoom:

MassType:

AVG  MONO

Axis:

1  2

Label:

I  M  -

Ions:

a  +  2+  3+

b  +  2+  3+

c  +  2+  3+

x  +  2+  3+

y  +  2+  3+

z  +  2+  3+

hide H<sub>2</sub>O/NH<sub>3</sub>

zoom 112-122

GO

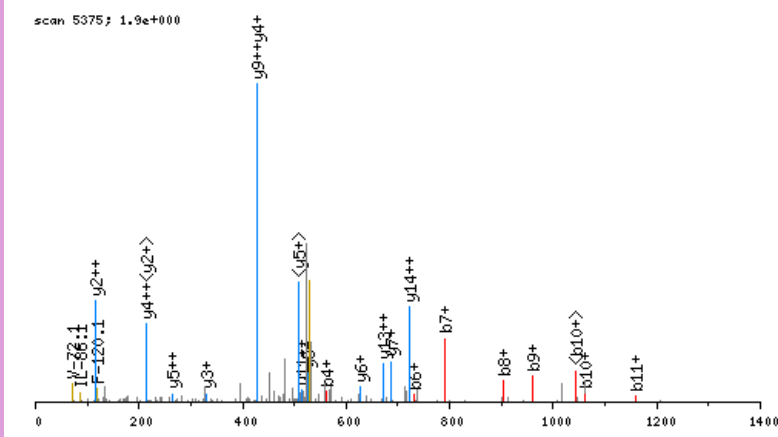

click image to zoom in; click top corners to zoom out [\[precursor±\]](#)

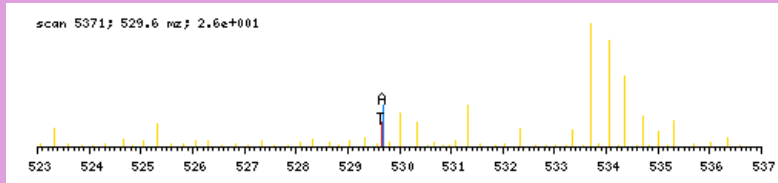

zoomed in precursor plot; T=theoretical m/z, A=acquired m/z

| b <sup>+</sup> | #  | AA # | y <sup>+</sup> | y <sup>2+</sup> |
|----------------|----|------|----------------|-----------------|
| 144.0660       | 1  | D 15 |                |                 |
| 243.1345       | 2  | V 14 | 1443.8688      | 722.4383        |
| 406.1978       | 3  | Y 13 | 1344.8004      | 672.9041        |
| 562.3241       | 4  | K 12 | 1181.7371      | 591.3724        |
| 675.4081       | 5  | I 11 | 1025.6108      | 513.3093        |
| 732.4296       | 6  | G 10 | 912.5267       | 456.7673        |
| 789.4511       | 7  | G 9  | 855.5052       | 428.2565        |
| 902.5351       | 8  | I 8  | 798.4838       | 399.7458        |
| 959.5566       | 9  | G 7  | 685.3997       | 343.2038        |
| 1060.6043      | 10 | T 6  | 628.3782       | 314.6930        |
| 1159.6727      | 11 | V 5  | 527.3306       | 264.1692        |
| 1256.7255      | 12 | P 4  | 428.2621       | 214.6350        |
| 1355.7939      | 13 | V 3  | 331.2094       | 166.1086        |
| 1412.8153      | 14 | G 2  | 232.1410       | 116.5744        |
|                | 15 | R 1  | 175.1195       | 88.0637         |

N-term:+29.04 K(4):+156.13

DWLSISLPHR, MH+ 1257.7168, m/z 419.9104  
 H OSG40 P180811 230811-s1.08300.08300.3.dta

X-range:

-

MassTol: Y-zoom:

MassType:

AVG  MONO

Axis:

1  2

Label:

I  M  -

Ions:

a  +  2+  3+

b  +  2+  3+

c  +  2+  3+

x  +  2+  3+

y  +  2+  3+

z  +  2+  3+

hide H<sub>2</sub>O/NH<sub>3</sub>

zoom 112-122

GO

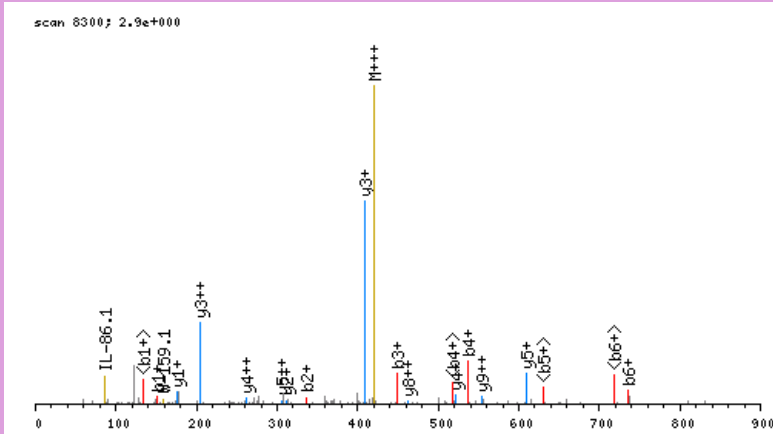

click image to zoom in; click top corners to zoom out [\[precursor±\]](#)

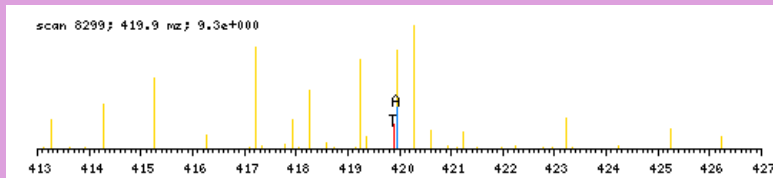

zoomed in precursor plot; T=theoretical m/z, A=acquired m/z

| b <sup>+</sup> | #  | AA # | y <sup>+</sup> | y <sup>2+</sup> |
|----------------|----|------|----------------|-----------------|
| 150.0978       | 1  | D 10 |                |                 |
| 336.1772       | 2  | W 9  | 1108.6267      | 554.8173        |
| 449.2612       | 3  | L 8  | 922.5474       | 461.7776        |
| 536.2932       | 4  | S 7  | 809.4634       | 405.2356        |
| 649.3773       | 5  | I 6  | 722.4313       | 361.7196        |
| 736.4093       | 6  | S 5  | 609.3473       | 305.1775        |
| 849.4934       | 7  | L 4  | 522.3152       | 261.6615        |
| 946.5462       | 8  | P 3  | 409.2312       | 205.1195        |
| 1083.6051      | 9  | H 2  | 312.1784       | 156.5931        |
|                | 10 | R 1  | 175.1195       | 88.0637         |

N-term:+35.07



DWVIPPINLPENSR, MH+ 1677.8964, m/z 559.9703  
 L OSG37 P180811 230811-s1.08615.08615.3.dta

X-range:

-

MassTol: Y-zoom:

MassType:

AVG  MONO

Axis:

1  2

Label:

I  M  -

Ions:

a  +  2+  3+

b  +  2+  3+

c  +  2+  3+

x  +  2+  3+

y  +  2+  3+

z  +  2+  3+

hide H<sub>2</sub>O/NH<sub>3</sub>

zoom 112-122

GO

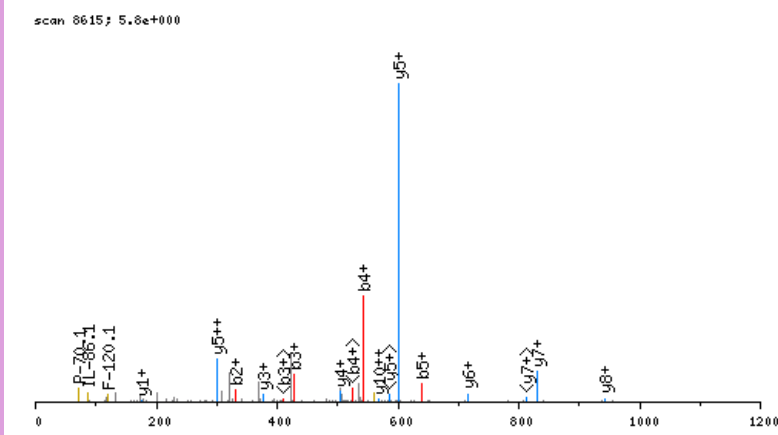

click image to zoom in; click top corners to zoom out [\[precursor±\]](#)

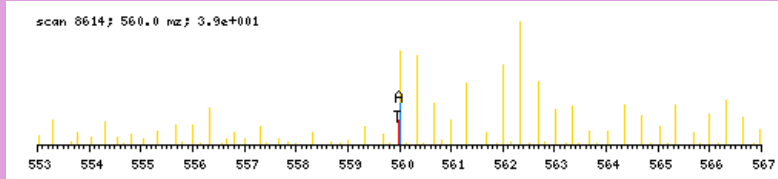

zoomed in precursor plot; T=theoretical m/z, A=acquired m/z

| b <sup>+</sup> | #  | AA # | y <sup>+</sup> | y <sup>2+</sup> |
|----------------|----|------|----------------|-----------------|
| 144.0660       | 1  | D 14 |                |                 |
| 330.1454       | 2  | W 13 | 1534.8382      | 767.9230        |
| 429.2138       | 3  | V 12 | 1348.7589      | 674.8833        |
| 542.2978       | 4  | I 11 | 1249.6905      | 625.3491        |
| 639.3506       | 5  | P 10 | 1136.6064      | 568.8071        |
| 736.4034       | 6  | P 9  | 1039.5536      | 520.2807        |
| 849.4874       | 7  | I 8  | 942.5009       | 471.7543        |
| 963.5304       | 8  | N 7  | 829.4168       | 415.2123        |
| 1076.6144      | 9  | L 6  | 715.3739       | 358.1909        |
| 1173.6672      | 10 | P 5  | 602.2898       | 301.6488        |
| 1302.7098      | 11 | E 4  | 505.2370       | 253.1224        |
| 1416.7527      | 12 | N 3  | 376.1945       | 188.6011        |
| 1503.7847      | 13 | S 2  | 262.1515       | 131.5797        |
|                | 14 | R 1  | 175.1195       | 88.0637         |

N-term:+29.04

EACCVVLLWLALFLSIQPR, MH+ 2429.3452, m/z 608.0917  
 L OSG40 P180811 230811-s1.07687.07687.4.dta

X-range:

-

MassTol: Y-zoom:

MassType:

AVG  MONO

Axis:

1  2

Label:

I  M  -

Ions:

a  +  2+  3+

b  +  2+  3+

c  +  2+  3+

x  +  2+  3+

y  +  2+  3+

z  +  2+  3+

hide H<sub>2</sub>O/NH<sub>3</sub>

zoom 112-122

GO

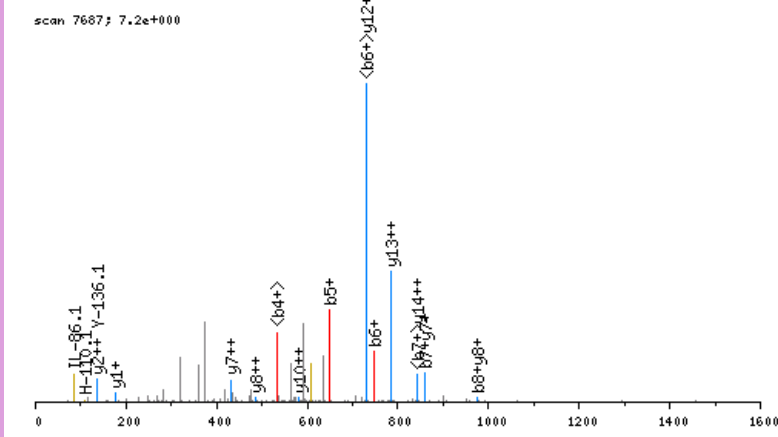

click image to zoom in; click top corners to zoom out [\[precursor±\]](#)

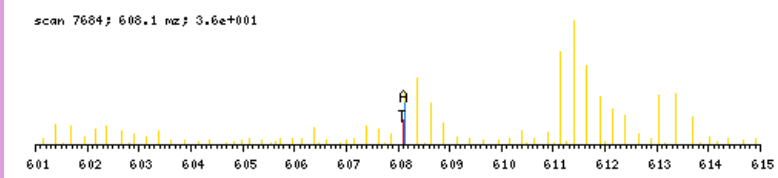

zoomed in precursor plot; T=theoretical m/z, A=acquired m/z

| b <sup>+</sup> | #  | AA # | y <sup>+</sup> | y <sup>2+</sup> |
|----------------|----|------|----------------|-----------------|
| 158.0817       | 1  | E 20 |                |                 |
| 229.1188       | 2  | A 19 | 2272.2713      | 1136.6396       |
| 389.1494       | 3  | C 18 | 2201.2342      | 1101.1210       |
| 549.1800       | 4  | C 17 | 2041.2036      | 1021.1057       |
| 648.2484       | 5  | V 16 | 1881.1730      | 941.0904        |
| 747.3168       | 6  | V 15 | 1782.1046      | 891.5562        |
| 860.4009       | 7  | L 14 | 1683.0362      | 842.0220        |
| 973.4850       | 8  | L 13 | 1569.9521      | 785.4800        |
| 1086.5690      | 9  | L 12 | 1456.8680      | 728.9379        |
| 1272.6483      | 10 | W 11 | 1343.7840      | 672.3959        |
| 1385.7324      | 11 | L 10 | 1157.7047      | 579.3562        |
| 1456.7695      | 12 | A 9  | 1044.6206      | 522.8142        |
| 1569.8536      | 13 | L 8  | 973.5835       | 487.2957        |
| 1716.9220      | 14 | F 7  | 860.4994       | 430.7536        |
| 1830.0061      | 15 | L 6  | 713.4310       | 357.2194        |
| 1917.0381      | 16 | S 5  | 600.3469       | 300.6774        |
| 2030.1222      | 17 | I 4  | 513.3149       | 257.1614        |
| 2158.1807      | 18 | Q 3  | 400.2308       | 200.6193        |
| 2255.2335      | 19 | P 2  | 272.1723       | 136.5900        |
|                | 20 | R 1  | 175.1195       | 88.0637         |

N-term:+29.04 C(3):+160.03  
 C(4):+160.03

EALDCILPPTRPTDKPLR, MH+ 2160.2486, m/z 540.8176  
 H OSG40 P180811 230811-s1.06327.06327.4.dta

X-range:

-

MassTol: Y-zoom:

MassType:

AVG  MONO

Axis:

1  2

Label:

I  M  -

Ions:

a  +  2+  3+

b  +  2+  3+

c  +  2+  3+

x  +  2+  3+

y  +  2+  3+

z  +  2+  3+

hide H<sub>2</sub>O/NH<sub>3</sub>

zoom 112-122

GO

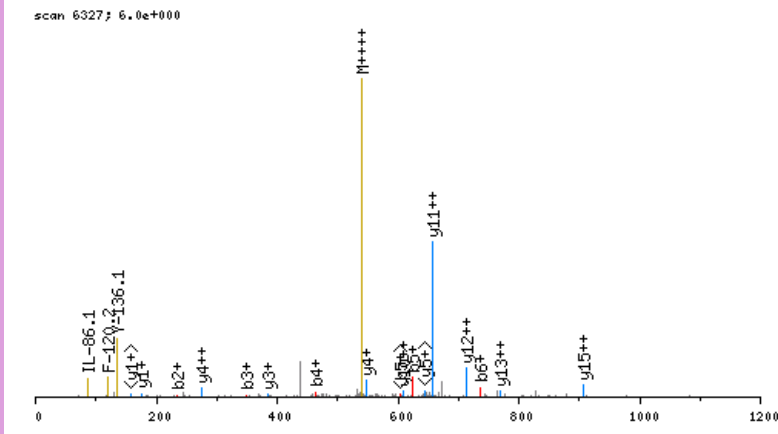

click image to zoom in; click top corners to zoom out [\[precursor±\]](#)

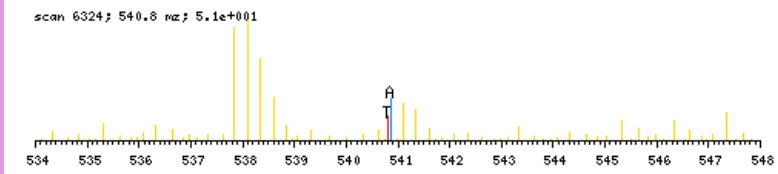

zoomed in precursor plot; T=theoretical m/z, A=acquired m/z

| b <sup>+</sup> | #  | AA | #  | y <sup>+</sup> | y <sup>2+</sup> |
|----------------|----|----|----|----------------|-----------------|
| 164.1135       | 1  | E  | 18 |                |                 |
| 235.1506       | 2  | A  | 17 | 1997.1430      | 999.0754        |
| 348.2347       | 3  | L  | 16 | 1926.1059      | 963.5568        |
| 463.2616       | 4  | D  | 15 | 1813.0218      | 907.0148        |
| 623.2922       | 5  | C  | 14 | 1697.9949      | 849.5013        |
| 736.3763       | 6  | I  | 13 | 1537.9643      | 769.4860        |
| 849.4603       | 7  | L  | 12 | 1424.8802      | 712.9440        |
| 946.5131       | 8  | P  | 11 | 1311.7961      | 656.4020        |
| 1043.5659      | 9  | P  | 10 | 1214.7434      | 607.8756        |
| 1144.6135      | 10 | T  | 9  | 1117.6906      | 559.3492        |
| 1300.7147      | 11 | R  | 8  | 1016.6429      | 508.8254        |
| 1397.7674      | 12 | P  | 7  | 860.5418       | 430.7748        |
| 1498.8151      | 13 | T  | 6  | 763.4891       | 382.2484        |
| 1613.8420      | 14 | D  | 5  | 662.4414       | 331.7246        |
| 1776.0001      | 15 | K  | 4  | 547.4144       | 274.2111        |
| 1873.0529      | 16 | P  | 3  | 385.2563       | 193.1321        |
| 1986.1370      | 17 | L  | 2  | 288.2036       | 144.6057        |
|                | 18 | R  | 1  | 175.1195       | 88.0637         |

N-term:+35.07 C(5):+160.03  
 K(15):+162.16

EAPKVVVEEQESR, MH+ 1456.7648, m/z 486.2598  
 L OSG40 P180811 230811-s1.02288.02288.3.dta

scan 2288; 2.3e+001

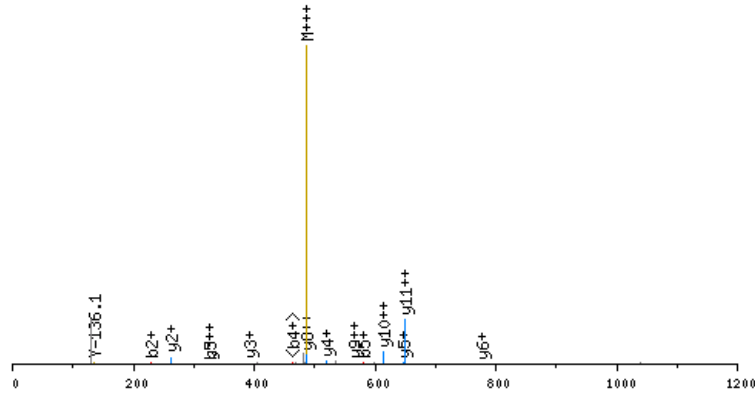

click image to zoom in; click top corners to zoom out [\[precursor±\]](#)

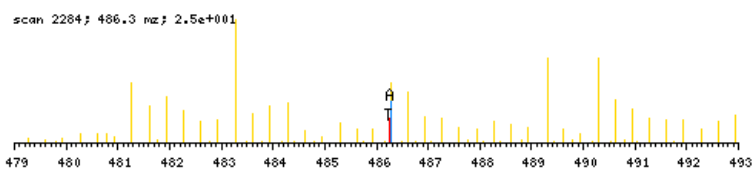

zoomed in precursor plot; T=theoretical m/z, A=acquired m/z

X-range:

-

MassTol: Y-zoom:

MassType:

AVG  MONO

Axis:

1  2

Label:

I  M  -

Ions:

a  +  2+  3+

b  +  2+  3+

c  +  2+  3+

x  +  2+  3+

y  +  2+  3+

z  +  2+  3+

hide H<sub>2</sub>O/NH<sub>3</sub>

zoom 112-122

GO

| b <sup>+</sup> | #  | AA # | y <sup>+</sup> | y <sup>2+</sup> |
|----------------|----|------|----------------|-----------------|
| 158.0817       | 1  | E 12 |                |                 |
| 229.1188       | 2  | A 11 | 1299.6909      | 650.3494        |
| 326.1716       | 3  | P 10 | 1228.6538      | 614.8308        |
| 482.2979       | 4  | K 9  | 1131.6010      | 566.3044        |
| 581.3663       | 5  | V 8  | 975.4747       | 488.2413        |
| 680.4347       | 6  | V 7  | 876.4063       | 438.7071        |
| 809.4773       | 7  | E 6  | 777.3379       | 389.1729        |
| 938.5199       | 8  | E 5  | 648.2953       | 324.6516        |
| 1066.5785      | 9  | Q 4  | 519.2527       | 260.1303        |
| 1195.6211      | 10 | E 3  | 391.1941       | 196.1010        |
| 1282.6531      | 11 | S 2  | 262.1515       | 131.5797        |
|                | 12 | R 1  | 175.1195       | 88.0637         |

N-term:+29.04 K(4):+156.13

EAPQVTGPIEVPVVR, MH+ 1618.9168, m/z 540.3105  
 L OSG37 P180811 230811-s1.06526.06526.3.dta

X-range:

-

MassTol: Y-zoom:

MassType:

AVG  MONO

Axis:

1  2

Label:

I  M  -

Ions:

a  +  2+  3+

b  +  2+  3+

c  +  2+  3+

x  +  2+  3+

y  +  2+  3+

z  +  2+  3+

hide H<sub>2</sub>O/NH<sub>3</sub>

zoom 112-122

GO

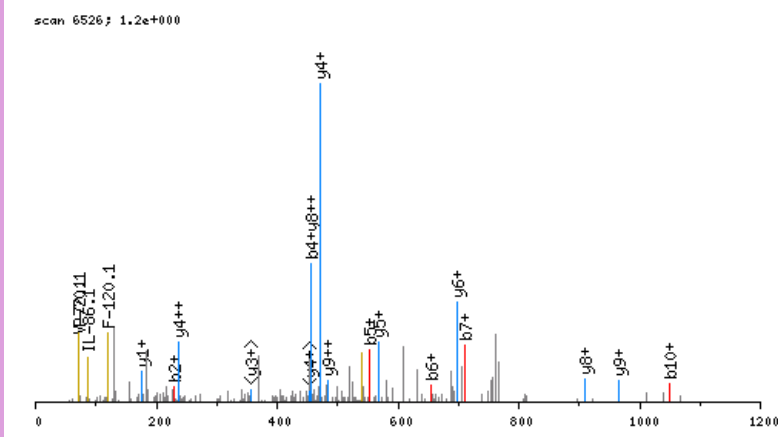

click image to zoom in; click top corners to zoom out [\[precursor±\]](#)

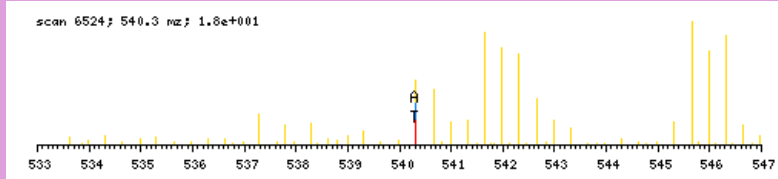

zoomed in precursor plot; T=theoretical m/z, A=acquired m/z

| b <sup>+</sup> | #  | AA # | y <sup>+</sup> | y <sup>2+</sup> |
|----------------|----|------|----------------|-----------------|
| 158.0817       | 1  | E 15 |                |                 |
| 229.1188       | 2  | A 14 | 1461.8429      | 731.4254        |
| 326.1716       | 3  | P 13 | 1390.8058      | 695.9068        |
| 454.2301       | 4  | Q 12 | 1293.7531      | 647.3804        |
| 553.2986       | 5  | V 11 | 1165.6945      | 583.3512        |
| 654.3462       | 6  | T 10 | 1066.6261      | 533.8169        |
| 711.3677       | 7  | G 9  | 965.5784       | 483.2931        |
| 808.4205       | 8  | P 8  | 908.5569       | 454.7824        |
| 921.5045       | 9  | I 7  | 811.5042       | 406.2560        |
| 1050.5471      | 10 | E 6  | 698.4201       | 349.7140        |
| 1149.6155      | 11 | V 5  | 569.3775       | 285.1927        |
| 1246.6683      | 12 | P 4  | 470.3091       | 235.6585        |
| 1345.7367      | 13 | V 3  | 373.2563       | 187.1321        |
| 1444.8051      | 14 | V 2  | 274.1879       | 137.5979        |
|                | 15 | R 1  | 175.1195       | 88.0637         |

N-term:+29.04

EAVPMSMPILR, MH+ 1368.7383, m/z 456.9176  
 L OSG37 P180811 230811-s1.07558.07558.3.dta

X-range:

-

MassTol: Y-zoom:

MassType:

AVG  MONO

Axis:

1  2

Label:

I  M  -

Ions:

a  +  2+  3+

b  +  2+  3+

c  +  2+  3+

x  +  2+  3+

y  +  2+  3+

z  +  2+  3+

hide H<sub>2</sub>O/NH<sub>3</sub>

zoom 112-122

GO

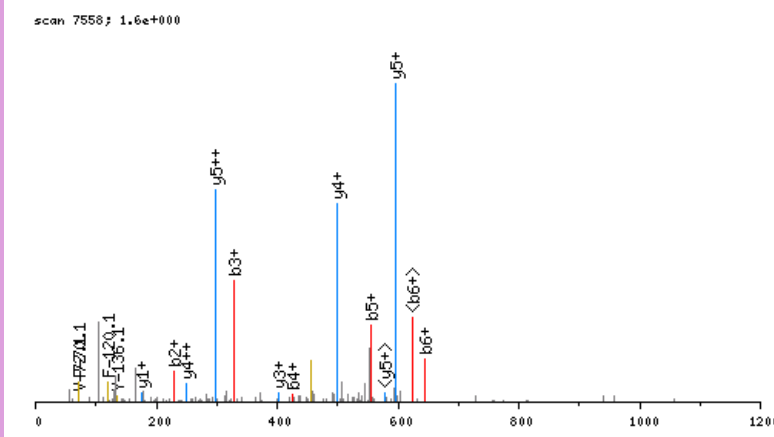

click image to zoom in; click top corners to zoom out [\[precursor±\]](#)

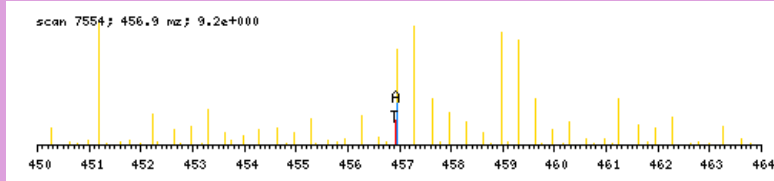

zoomed in precursor plot; T=theoretical m/z, A=acquired m/z

| b <sup>+</sup> | #  | AA # | y <sup>+</sup> | y <sup>2+</sup> |
|----------------|----|------|----------------|-----------------|
| 158.0817       | 1  | E 12 |                |                 |
| 229.1188       | 2  | A 11 | 1211.6644      | 606.3361        |
| 328.1872       | 3  | V 10 | 1140.6273      | 570.8176        |
| 425.2400       | 4  | P 9  | 1041.5589      | 521.2834        |
| 556.2805       | 5  | M 8  | 944.5062       | 472.7570        |
| 643.3125       | 6  | S 7  | 813.4657       | 407.2367        |
| 774.3530       | 7  | M 6  | 726.4336       | 363.7207        |
| 871.4057       | 8  | P 5  | 595.3932       | 298.2005        |
| 968.4585       | 9  | P 4  | 498.3404       | 249.6741        |
| 1081.5426      | 10 | I 3  | 401.2876       | 201.1477        |
| 1194.6266      | 11 | L 2  | 288.2036       | 144.6057        |
|                | 12 | R 1  | 175.1195       | 88.0637         |

N-term:+29.04

EDGLDFPEYDGVDR, MH+ 1660.7554, m/z 830.8814  
 H OSG37 P180811 230811-s1.06518.06518.2.dta

X-range:

-

MassTol: Y-zoom:

MassType:

AVG  MONO

Axis:

1  2

Label:

I  M  -

Ions:

a  +  2+  3+

b  +  2+  3+

c  +  2+  3+

x  +  2+  3+

y  +  2+  3+

z  +  2+  3+

hide H<sub>2</sub>O/NH<sub>3</sub>

zoom 112-122

GO

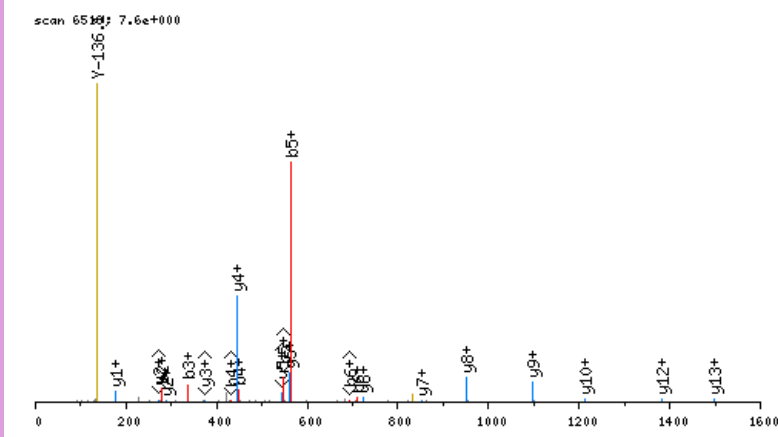

click image to zoom in; click top corners to zoom out [\[precursor±\]](#)

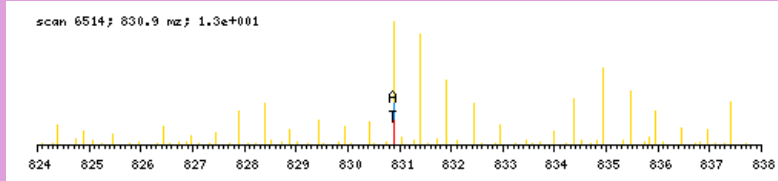

zoomed in precursor plot; T=theoretical m/z, A=acquired m/z

| b <sup>+</sup> | #  | AA # | y <sup>+</sup> | y <sup>2+</sup> |
|----------------|----|------|----------------|-----------------|
| 164.1135       | 1  | E 14 |                |                 |
| 279.1404       | 2  | D 13 | 1497.6498      | 749.3288        |
| 336.1619       | 3  | G 12 | 1382.6228      | 691.8153        |
| 449.2460       | 4  | L 11 | 1325.6014      | 663.3046        |
| 564.2729       | 5  | D 10 | 1212.5173      | 606.7626        |
| 711.3413       | 6  | F 9  | 1097.4904      | 549.2491        |
| 808.3941       | 7  | P 8  | 950.4220       | 475.7149        |
| 937.4367       | 8  | E 7  | 853.3692       | 427.1885        |
| 1100.5000      | 9  | Y 6  | 724.3266       | 362.6672        |
| 1215.5269      | 10 | D 5  | 561.2633       | 281.1355        |
| 1272.5484      | 11 | G 4  | 446.2363       | 223.6221        |
| 1371.6168      | 12 | V 3  | 389.2149       | 195.1113        |
| 1486.6438      | 13 | D 2  | 290.1464       | 145.5771        |
|                | 14 | R 1  | 175.1195       | 88.0637         |

N-term:+35.07

EDIDLPEPFDAR, MH+ 1454.7227, m/z 727.8650  
 H OSG37 P180811 230811-s1.06647.06647.2.dta

X-range:

-

MassTol: Y-zoom:

MassType:

AVG  MONO

Axis:

1  2

Label:

I  M  -

Ions:

a  +  2+  3+

b  +  2+  3+

c  +  2+  3+

x  +  2+  3+

y  +  2+  3+

z  +  2+  3+

hide H<sub>2</sub>O/NH<sub>3</sub>

zoom 112-122

GO

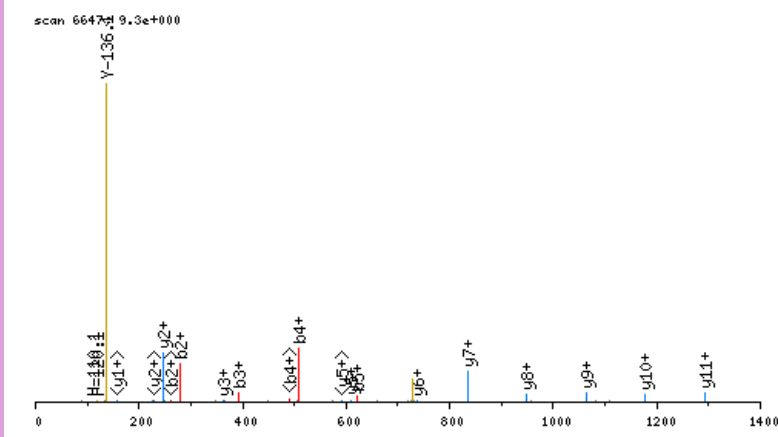

click image to zoom in; click top corners to zoom out [\[precursor±\]](#)

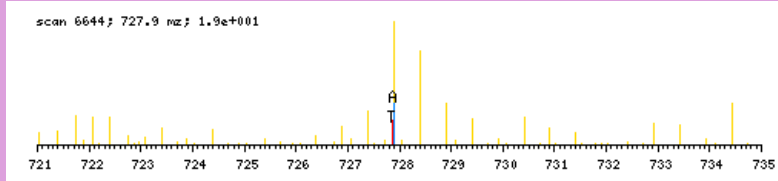

zoomed in precursor plot; T=theoretical m/z, A=acquired m/z

| b <sup>+</sup> | #  | AA # | y <sup>+</sup> | y <sup>2+</sup> |
|----------------|----|------|----------------|-----------------|
| 164.1135       | 1  | E 12 |                |                 |
| 279.1404       | 2  | D 11 | 1291.6170      | 646.3124        |
| 392.2245       | 3  | I 10 | 1176.5901      | 588.7990        |
| 507.2514       | 4  | D 9  | 1063.5060      | 532.2569        |
| 620.3355       | 5  | L 8  | 948.4791       | 474.7434        |
| 717.3883       | 6  | P 7  | 835.3950       | 418.2014        |
| 846.4309       | 7  | E 6  | 738.3422       | 369.6750        |
| 947.4785       | 8  | T 5  | 609.2997       | 305.1537        |
| 1094.5470      | 9  | F 4  | 508.2520       | 254.6299        |
| 1209.5739      | 10 | D 3  | 361.1836       | 181.0957        |
| 1280.6110      | 11 | A 2  | 246.1566       | 123.5822        |
|                | 12 | R 1  | 175.1195       | 88.0637         |

N-term:+35.07



EDIPEVSCIHNGLR, MH+ 1672.8540, m/z 558.2895  
 H OSG40 P180811 230811-s1.05856.05856.3.dta

X-range:

-

MassTol: Y-zoom:

MassType:

AVG  MONO

Axis:

1  2

Label:

I  M  -

Ions:

a  +  2+  3+

b  +  2+  3+

c  +  2+  3+

x  +  2+  3+

y  +  2+  3+

z  +  2+  3+

hide H<sub>2</sub>O/NH<sub>3</sub>

zoom 112-122

GO

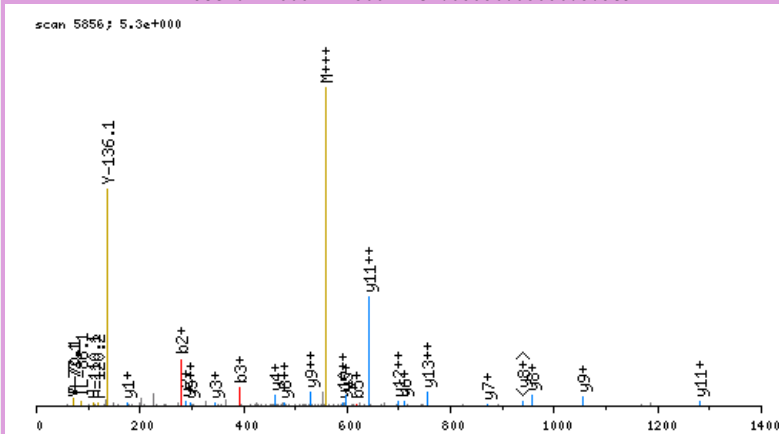

click image to zoom in; click top corners to zoom out [\[precursor±\]](#)

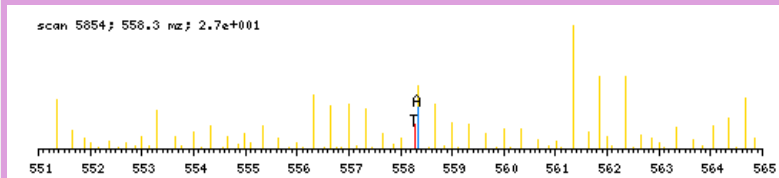

zoomed in precursor plot; T=theoretical m/z, A=acquired m/z

| b <sup>+</sup> | #  | AA # | y <sup>+</sup> | y <sup>2+</sup> |
|----------------|----|------|----------------|-----------------|
| 164.1135       | 1  | E 14 |                |                 |
| 279.1404       | 2  | D 13 | 1509.7483      | 755.3781        |
| 392.2245       | 3  | I 12 | 1394.7214      | 697.8646        |
| 489.2773       | 4  | P 11 | 1281.6373      | 641.3226        |
| 618.3199       | 5  | E 10 | 1184.5846      | 592.7962        |
| 717.3883       | 6  | V 9  | 1055.5420      | 528.2749        |
| 804.4203       | 7  | S 8  | 956.4736       | 478.7407        |
| 964.4509       | 8  | C 7  | 869.4415       | 435.2247        |
| 1077.5350      | 9  | I 6  | 709.4109       | 355.2094        |
| 1214.5939      | 10 | H 5  | 596.3269       | 298.6673        |
| 1328.6368      | 11 | N 4  | 459.2680       | 230.1379        |
| 1385.6583      | 12 | G 3  | 345.2250       | 173.1164        |
| 1498.7423      | 13 | L 2  | 288.2036       | 144.6057        |
|                | 14 | R 1  | 175.1195       | 88.0637         |

N-term:+35.07 C(8):+160.03

EDKPADDYSAVLQR, MH+ 1674.8975, m/z 558.9707  
 H OSG39 P180811 230811-s1.03630.03630.3.dta

X-range:

-

MassTol: Y-zoom:

MassType:

AVG  MONO

Axis:

1  2

Label:

I  M  -

Ions:

a  +  2+  3+

b  +  2+  3+

c  +  2+  3+

x  +  2+  3+

y  +  2+  3+

z  +  2+  3+

hide H<sub>2</sub>O/NH<sub>3</sub>

zoom 112-122

GO

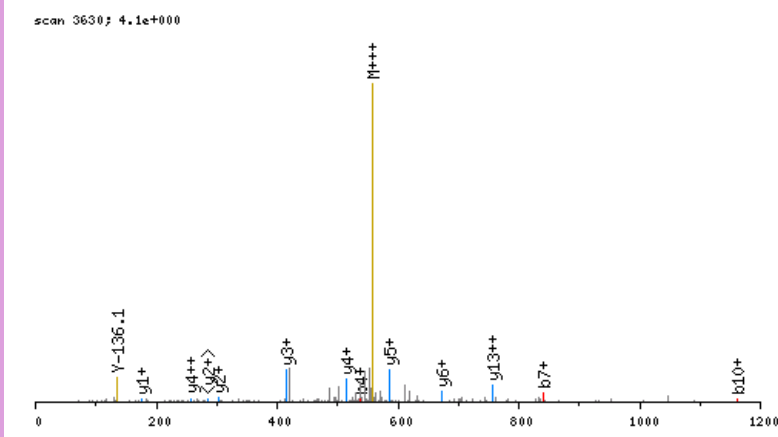

click image to zoom in; click top corners to zoom out [\[precursor±\]](#)

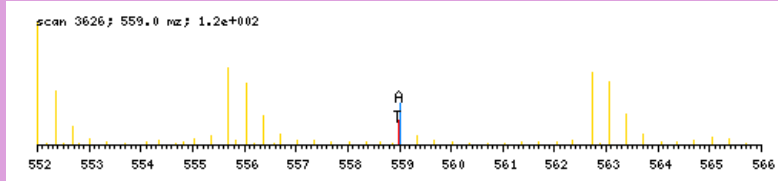

zoomed in precursor plot; T=theoretical m/z, A=acquired m/z

| b <sup>+</sup> | #  | AA # | y <sup>+</sup> | y <sup>2+</sup> |
|----------------|----|------|----------------|-----------------|
| 164.1135       | 1  | E 14 |                |                 |
| 279.1404       | 2  | D 13 | 1511.7918      | 756.3998        |
| 441.2985       | 3  | K 12 | 1396.7649      | 698.8864        |
| 538.3513       | 4  | P 11 | 1234.6068      | 617.8073        |
| 609.3884       | 5  | A 10 | 1137.5540      | 569.2809        |
| 724.4154       | 6  | D 9  | 1066.5169      | 533.7624        |
| 839.4423       | 7  | D 8  | 951.4900       | 476.2489        |
| 1002.5056      | 8  | Y 7  | 836.4630       | 418.7354        |
| 1089.5377      | 9  | S 6  | 673.3997       | 337.2038        |
| 1160.5748      | 10 | A 5  | 586.3677       | 293.6877        |
| 1259.6432      | 11 | V 4  | 515.3306       | 258.1692        |
| 1372.7272      | 12 | L 3  | 416.2621       | 208.6350        |
| 1500.7858      | 13 | Q 2  | 303.1781       | 152.0930        |
|                | 14 | R 1  | 175.1195       | 88.0637         |

N-term:+35.07 K(3):+162.16

EDLVFPSEIVGKR, MH+ 1556.9324, m/z 519.6490  
 H OSG39 P180811 230811-s1.05918.05918.3.dta

X-range:

-

MassTol: Y-zoom:

MassType:

AVG  MONO

Axis:

1  2

Label:

I  M  -

Ions:

a  +  2+  3+

b  +  2+  3+

c  +  2+  3+

x  +  2+  3+

y  +  2+  3+

z  +  2+  3+

hide H<sub>2</sub>O/NH<sub>3</sub>

zoom 112-122

GO

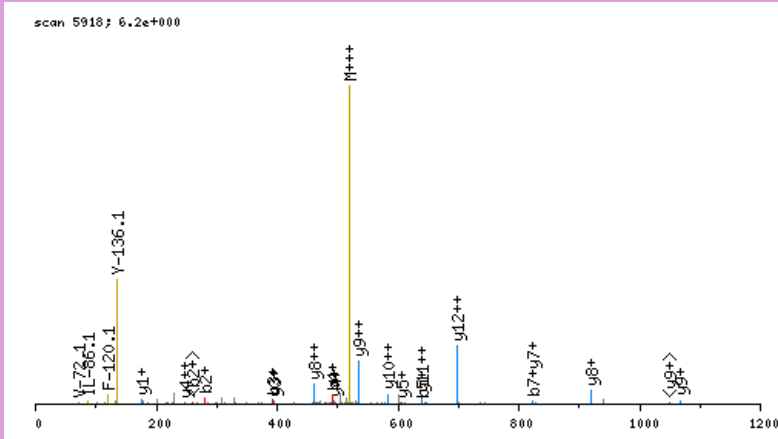

click image to zoom in; click top corners to zoom out [\[precursor±\]](#)

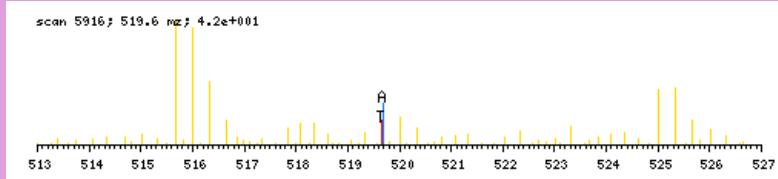

zoomed in precursor plot; T=theoretical m/z, A=acquired m/z

| b <sup>+</sup> | #  | AA # | y <sup>+</sup> | y <sup>2+</sup> |
|----------------|----|------|----------------|-----------------|
| 164.1135       | 1  | E 13 |                |                 |
| 279.1404       | 2  | D 12 | 1393.8268      | 697.4173        |
| 392.2245       | 3  | L 11 | 1278.7998      | 639.9038        |
| 491.2929       | 4  | V 10 | 1165.7158      | 583.3618        |
| 638.3613       | 5  | F 9  | 1066.6473      | 533.8276        |
| 735.4141       | 6  | P 8  | 919.5789       | 460.2934        |
| 822.4461       | 7  | S 7  | 822.5262       | 411.7670        |
| 951.4887       | 8  | E 6  | 735.4941       | 368.2510        |
| 1064.5728      | 9  | I 5  | 606.4515       | 303.7297        |
| 1163.6412      | 10 | V 4  | 493.3675       | 247.1877        |
| 1220.6627      | 11 | G 3  | 394.2991       | 197.6534        |
| 1382.8208      | 12 | K 2  | 337.2776       | 169.1427        |
|                | 13 | R 1  | 175.1195       | 88.0637         |

N-term:+35.07 K(12):+162.16

EDPVKIEGFSR, MH+ 1572.8910, m/z 524.9685  
 H OSG39 P180811 230811-s1.07338.07338.3.dta

X-range:

-

MassTol: Y-zoom:

MassType:

AVG  MONO

Axis:

1  2

Label:

I  M  -

Ions:

a  +  2+  3+

b  +  2+  3+

c  +  2+  3+

x  +  2+  3+

y  +  2+  3+

z  +  2+  3+

hide H<sub>2</sub>O/NH<sub>3</sub>

zoom 112-122

GO

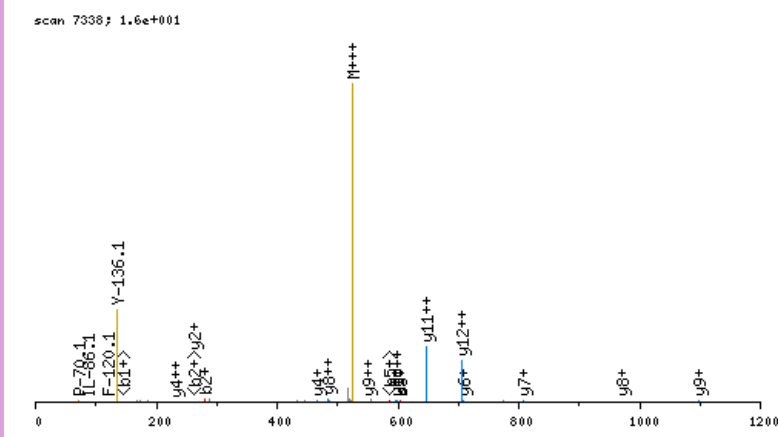

click image to zoom in; click top corners to zoom out [\[precursor±\]](#)

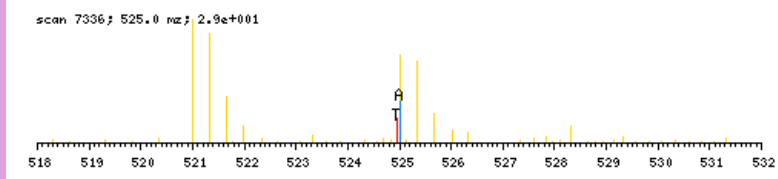

zoomed in precursor plot; T=theoretical m/z, A=acquired m/z

| b <sup>+</sup> | #  | AA # | y <sup>+</sup> | y <sup>2+</sup> |
|----------------|----|------|----------------|-----------------|
| 164.1135       | 1  | E 13 |                |                 |
| 279.1404       | 2  | D 12 | 1409.7853      | 705.3966        |
| 376.1932       | 3  | P 11 | 1294.7583      | 647.8831        |
| 475.2616       | 4  | V 10 | 1197.7056      | 599.3567        |
| 604.3042       | 5  | E 9  | 1098.6372      | 549.8225        |
| 766.4623       | 6  | K 8  | 969.5946       | 485.3012        |
| 865.5307       | 7  | V 7  | 807.4365       | 404.2222        |
| 978.6148       | 8  | I 6  | 708.3681       | 354.6879        |
| 1107.6574      | 9  | E 5  | 595.2840       | 298.1459        |
| 1164.6788      | 10 | G 4  | 466.2414       | 233.6246        |
| 1311.7473      | 11 | F 3  | 409.2199       | 205.1139        |
| 1398.7793      | 12 | S 2  | 262.1515       | 131.5797        |
|                | 13 | R 1  | 175.1195       | 88.0637         |

N-term:+35.07 K(6):+162.16

EDVQETDTSQKDKSPASHEIATNLGDFAIISLYR, MH+ 3733.8469, m/z 934.2172  
H OSG40 P180811 230811-s1.09066.09066.4.dta

X-range:

-

MassTol: Y-zoom:

MassType:

AVG  MONO

Axis:

1  2

Label:

I  M  -

Ions:

a  +  2+  3+

b  +  2+  3+

c  +  2+  3+

x  +  2+  3+

y  +  2+  3+

z  +  2+  3+

hide H<sub>2</sub>O/NH<sub>3</sub>

zoom 112-122

GO

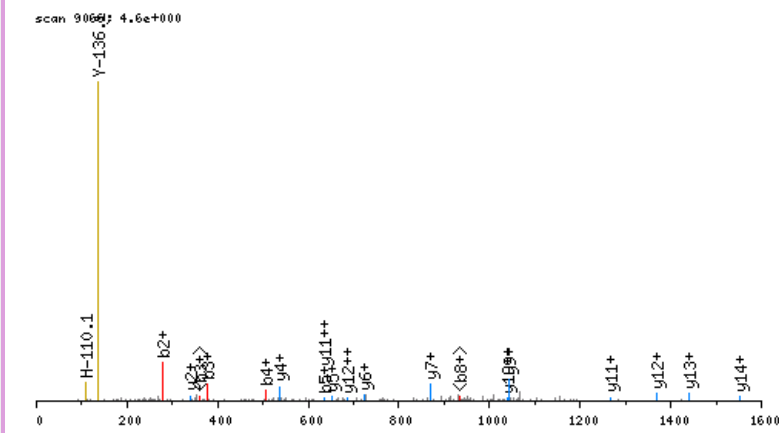

click image to zoom in; click top corners to zoom out [\[precursor±\]](#)

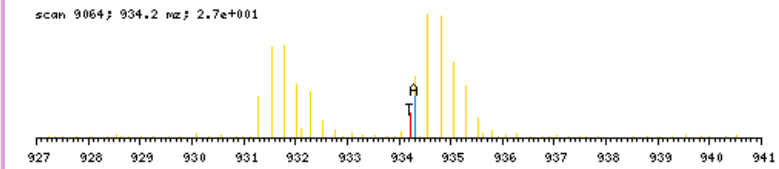

zoomed in precursor plot; T=theoretical m/z, A=acquired m/z

| b <sup>+</sup> | #  | AA | #  | y <sup>+</sup> | y <sup>2+</sup> |
|----------------|----|----|----|----------------|-----------------|
| 164.1135       | 1  | E  | 33 |                |                 |
| 279.1404       | 2  | D  | 32 | 3570.7413      | 1785.8745       |
| 378.2089       | 3  | V  | 31 | 3455.7143      | 1728.3611       |
| 506.2674       | 4  | Q  | 30 | 3356.6459      | 1678.8269       |
| 635.3100       | 5  | E  | 29 | 3228.5873      | 1614.7976       |
| 736.3577       | 6  | T  | 28 | 3099.5447      | 1550.2763       |
| 851.3846       | 7  | D  | 27 | 2998.4971      | 1499.7524       |
| 952.4323       | 8  | T  | 26 | 2883.4701      | 1442.2390       |
| 1039.4643      | 9  | S  | 25 | 2782.4224      | 1391.7151       |
| 1167.5229      | 10 | Q  | 24 | 2695.3904      | 1348.1991       |
| 1329.6810      | 11 | K  | 23 | 2567.3318      | 1284.1698       |
| 1444.7080      | 12 | D  | 22 | 2405.1737      | 1203.0908       |
| 1572.7665      | 13 | Q  | 21 | 2290.1468      | 1145.5773       |
| 1659.7986      | 14 | S  | 20 | 2162.0882      | 1081.5480       |
| 1756.8513      | 15 | P  | 19 | 2075.0562      | 1038.0320       |
| 1827.8885      | 16 | A  | 18 | 1978.0034      | 989.5056        |
| 1914.9205      | 17 | S  | 17 | 1906.9663      | 953.9871        |
| 2051.9794      | 18 | H  | 16 | 1819.9343      | 910.4710        |
| 2181.0220      | 19 | E  | 15 | 1682.8754      | 841.9416        |
| 2294.1061      | 20 | I  | 14 | 1553.8328      | 777.4203        |
| 2365.1432      | 21 | A  | 13 | 1440.7487      | 720.8783        |
| 2466.1908      | 22 | T  | 12 | 1369.7116      | 685.3597        |
| 2580.2338      | 23 | N  | 11 | 1268.6639      | 634.8359        |
| 2693.3178      | 24 | L  | 10 | 1154.6210      | 577.8144        |
| 2750.3393      | 25 | G  | 9  | 1041.5369      | 521.2724        |
| 2865.3662      | 26 | D  | 8  | 984.5155       | 492.7616        |
| 3012.4347      | 27 | F  | 7  | 869.4885       | 435.2482        |
| 3083.4718      | 28 | A  | 6  | 722.4201       | 361.7140        |
| 3196.5558      | 29 | I  | 5  | 651.3830       | 326.1954        |
| 3283.5879      | 30 | S  | 4  | 538.2989       | 269.6534        |
| 3396.6719      | 31 | L  | 3  | 451.2669       | 226.1374        |
| 3559.7353      | 32 | Y  | 2  | 338.1828       | 169.5953        |
|                | 33 | R  | 1  | 175.1195       | 88.0637         |

N-term:+35.07 K(11):+162.16

EDVQETDTSQKDQSPASHEIATNLGDFALR, MH+ 3370.6675, m/z 1124.2274  
 H OSG40 P180811 230811-s1.07368.07368.3.dta

X-range:

-

MassTol: Y-zoom:

MassType:

AVG  MONO

Axis:

1  2

Label:

I  M  -

Ions:

a  +  2+  3+

b  +  2+  3+

c  +  2+  3+

x  +  2+  3+

y  +  2+  3+

z  +  2+  3+

hide H<sub>2</sub>O/NH<sub>3</sub>

zoom 112-122

GO

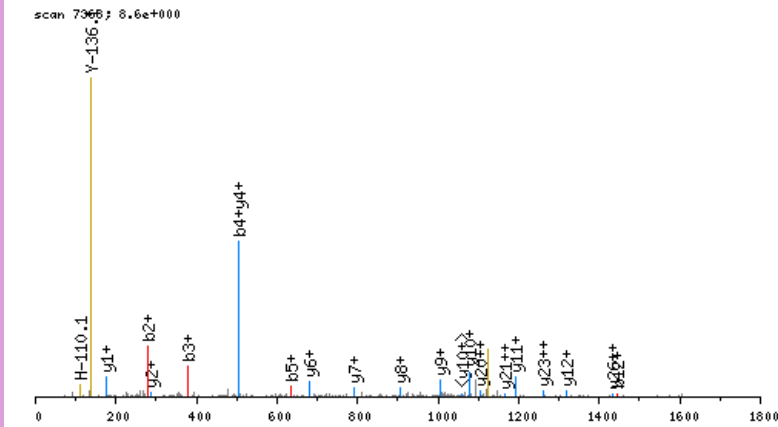

click image to zoom in; click top corners to zoom out [\[precursor±\]](#)

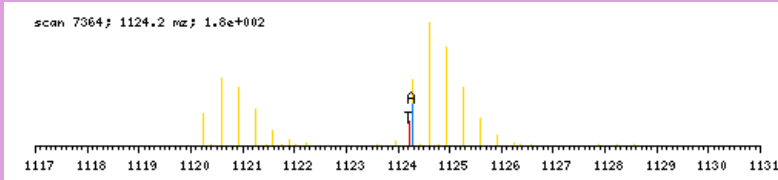

zoomed in precursor plot; T=theoretical m/z, A=acquired m/z

| b <sup>+</sup> | #  | AA | #  | y <sup>+</sup> | y <sup>2+</sup> |
|----------------|----|----|----|----------------|-----------------|
| 164.1135       | 1  | E  | 30 |                |                 |
| 279.1404       | 2  | D  | 29 | 3207.5618      | 1604.2848       |
| 378.2089       | 3  | V  | 28 | 3092.5349      | 1546.7714       |
| 506.2674       | 4  | Q  | 27 | 2993.4665      | 1497.2372       |
| 635.3100       | 5  | E  | 26 | 2865.4079      | 1433.2079       |
| 736.3577       | 6  | T  | 25 | 2736.3653      | 1368.6866       |
| 851.3846       | 7  | D  | 24 | 2635.3176      | 1318.1627       |
| 952.4323       | 8  | T  | 23 | 2520.2907      | 1260.6493       |
| 1039.4643      | 9  | S  | 22 | 2419.2430      | 1210.1254       |
| 1167.5229      | 10 | Q  | 21 | 2332.2110      | 1166.6094       |
| 1329.6810      | 11 | K  | 20 | 2204.1524      | 1102.5801       |
| 1444.7080      | 12 | D  | 19 | 2041.9943      | 1021.5011       |
| 1572.7665      | 13 | Q  | 18 | 1926.9674      | 963.9876        |
| 1659.7986      | 14 | S  | 17 | 1798.9088      | 899.9583        |
| 1756.8513      | 15 | P  | 16 | 1711.8768      | 856.4423        |
| 1827.8885      | 16 | A  | 15 | 1614.8240      | 807.9159        |
| 1914.9205      | 17 | S  | 14 | 1543.7869      | 772.3974        |
| 2051.9794      | 18 | H  | 13 | 1456.7549      | 728.8813        |
| 2181.0220      | 19 | E  | 12 | 1319.6959      | 660.3519        |
| 2294.1061      | 20 | I  | 11 | 1190.6533      | 595.8306        |
| 2365.1432      | 21 | A  | 10 | 1077.5693      | 539.2886        |
| 2466.1908      | 22 | T  | 9  | 1006.5322      | 503.7700        |
| 2580.2338      | 23 | N  | 8  | 905.4845       | 453.2462        |
| 2693.3178      | 24 | L  | 7  | 791.4416       | 396.2247        |
| 2750.3393      | 25 | G  | 6  | 678.3575       | 339.6827        |
| 2865.3662      | 26 | D  | 5  | 621.3360       | 311.1719        |
| 3012.4347      | 27 | F  | 4  | 506.3091       | 253.6585        |
| 3083.4718      | 28 | A  | 3  | 359.2407       | 180.1243        |
| 3196.5558      | 29 | L  | 2  | 288.2036       | 144.6057        |
|                | 30 | R  | 1  | 175.1195       | 88.0637         |

N-term:+35.07 K(11):+162.16

EDYYYYHPPPR, MH+ 1364.6275, m/z 455.5474  
 L OSG40 P180811 230811-s1.03203.03203.3.dta

X-range:

-

MassTol: Y-zoom:

MassType:

AVG  MONO

Axis:

1  2

Label:

I  M  -

Ions:

a  +  2+  3+

b  +  2+  3+

c  +  2+  3+

x  +  2+  3+

y  +  2+  3+

z  +  2+  3+

hide H<sub>2</sub>O/NH<sub>3</sub>

zoom 112-122

GO

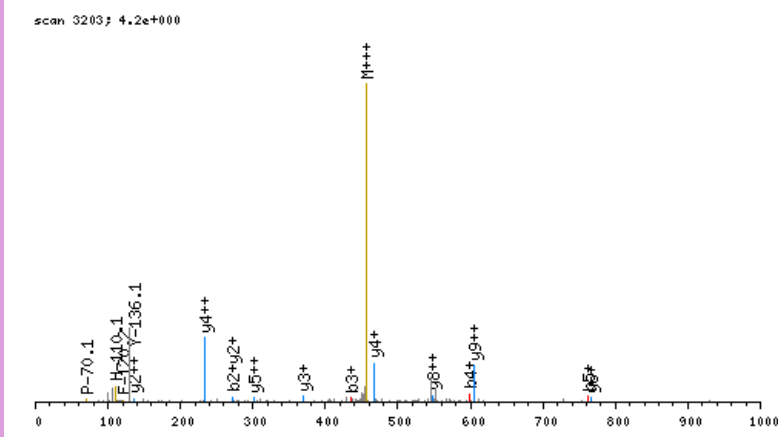

click image to zoom in; click top corners to zoom out [\[precursor±\]](#)

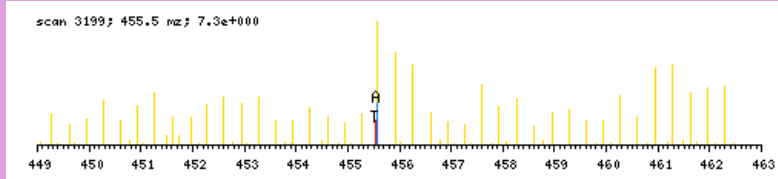

zoomed in precursor plot; T=theoretical m/z, A=acquired m/z

| b <sup>+</sup> | #  | AA # | y <sup>+</sup> | y <sup>2+</sup> |
|----------------|----|------|----------------|-----------------|
| 158.0817       | 1  | E    | 10             |                 |
| 273.1086       | 2  | D    | 9              | 1207.5536       |
| 436.1720       | 3  | Y    | 8              | 1092.5267       |
| 599.2353       | 4  | Y    | 7              | 929.4634        |
| 762.2986       | 5  | Y    | 6              | 766.4000        |
| 899.3575       | 6  | H    | 5              | 603.3367        |
| 996.4103       | 7  | P    | 4              | 466.2778        |
| 1093.4631      | 8  | P    | 3              | 369.2250        |
| 1190.5158      | 9  | P    | 2              | 272.1723        |
|                | 10 | R    | 1              | 175.1195        |

N-term:+29.04

EEAGDGTITATVLAR, MH+ 1525.7922, m/z 509.2689  
 H OSG37 P180811 230811-s1.03426.03426.3.dta

scan 3426; 6.5e+000

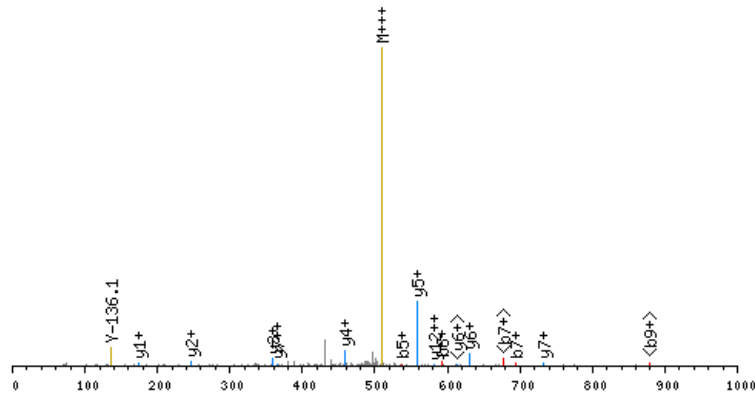

click image to zoom in; click top corners to zoom out [\[precursor±\]](#)

scan 3424; 509.3 m/z; 4.2e+001

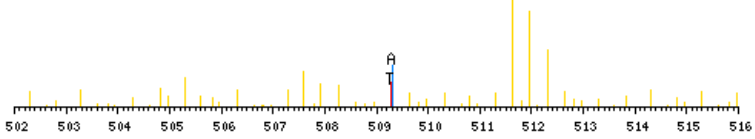

zoomed in precursor plot; T=theoretical m/z, A=acquired m/z

X-range:

-

MassTol: Y-zoom:

MassType:

AVG  MONO

Axis:

1  2

Label:

I  M  -

Ions:

a  +  2+  3+

b  +  2+  3+

c  +  2+  3+

x  +  2+  3+

y  +  2+  3+

z  +  2+  3+

hide H<sub>2</sub>O/NH<sub>3</sub>

zoom 112-122

GO

| b <sup>+</sup> | #  | AA # | y <sup>+</sup> | y <sup>2+</sup> |
|----------------|----|------|----------------|-----------------|
| 164.1135       | 1  | E 15 |                |                 |
| 293.1561       | 2  | E 14 | 1362.6865      | 681.8472        |
| 364.1932       | 3  | A 13 | 1233.6439      | 617.3259        |
| 421.2147       | 4  | G 12 | 1162.6068      | 581.8073        |
| 536.2416       | 5  | D 11 | 1105.5853      | 553.2966        |
| 593.2631       | 6  | G 10 | 990.5584       | 495.7831        |
| 694.3107       | 7  | T 9  | 933.5369       | 467.2724        |
| 795.3584       | 8  | T 8  | 832.4892       | 416.7485        |
| 896.4061       | 9  | T 7  | 731.4416       | 366.2247        |
| 967.4432       | 10 | A 6  | 630.3939       | 315.7009        |
| 1068.4909      | 11 | T 5  | 559.3568       | 280.1823        |
| 1167.5593      | 12 | V 4  | 458.3091       | 229.6585        |
| 1280.6434      | 13 | L 3  | 359.2407       | 180.1243        |
| 1351.6805      | 14 | A 2  | 246.1566       | 123.5822        |
|                | 15 | R 1  | 175.1195       | 88.0637         |

N-term:+35.07



EEAQEIDCND EAVFQAVDASLKKLNAR, MH+ 3147.5632, m/z 787.6463  
 L OSG40 P180811 230811-s1.09360.09360.4.dta

scan 9360; 4.2e+000

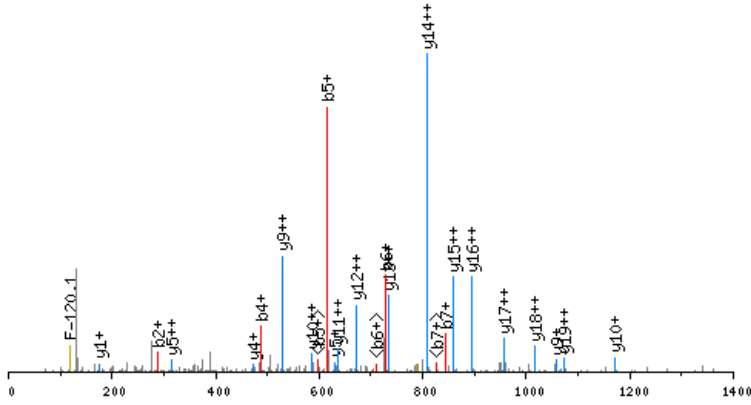

click image to zoom in; click top corners to zoom out [\[precursor±\]](#)

scan 9359; 787.6 nz; 5.7e+001

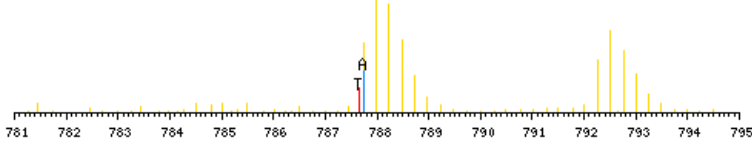

zoomed in precursor plot; T=theoretical m/z, A=acquired m/z

X-range:

-

MassTol: Y-zoom:

MassType:

AVG  MONO

Axis:

1  2

Label:

I  M  -

Ions:

a  +  2+  3+

b  +  2+  3+

c  +  2+  3+

x  +  2+  3+

y  +  2+  3+

z  +  2+  3+

hide H<sub>2</sub>O/NH<sub>3</sub>

zoom 112-122

GO

| b <sup>+</sup>  | #        | AA #        | y <sup>+</sup>   | y <sup>2+</sup>  |
|-----------------|----------|-------------|------------------|------------------|
| 158.0817        | 1        | E 27        |                  |                  |
| <b>287.1243</b> | <b>2</b> | <b>E 26</b> | 2990.4894        | 1495.7486        |
| 358.1614        | 3        | A 25        | 2861.4468        | 1431.2273        |
| <b>486.2200</b> | <b>4</b> | <b>Q 24</b> | 2790.4096        | 1395.7087        |
| <b>615.2626</b> | <b>5</b> | <b>E 23</b> | 2662.3511        | 1331.6794        |
| <b>728.3466</b> | <b>6</b> | <b>I 22</b> | 2533.3085        | 1267.1581        |
| <b>843.3736</b> | <b>7</b> | <b>D 21</b> | 2420.2244        | 1210.6161        |
| 1003.4042       | 8        | C 20        | 2305.1975        | 1153.1026        |
| 1117.4471       | 9        | N 19        | 2145.1669        | <b>1073.0873</b> |
| 1232.4740       | 10       | D 18        | 2031.1239        | <b>1016.0659</b> |
| 1361.5166       | 11       | E 17        | 1916.0970        | <b>958.5524</b>  |
| 1432.5538       | 12       | A 16        | 1787.0544        | <b>894.0311</b>  |
| 1531.6222       | 13       | V 15        | 1716.0173        | <b>858.5126</b>  |
| 1678.6906       | 14       | F 14        | 1616.9489        | <b>808.9783</b>  |
| 1806.7492       | 15       | Q 13        | 1469.8805        | <b>735.4441</b>  |
| 1877.7863       | 16       | A 12        | 1341.8219        | <b>671.4149</b>  |
| 1976.8547       | 17       | V 11        | 1270.7848        | <b>635.8963</b>  |
| 2091.8816       | 18       | D 10        | <b>1171.7164</b> | <b>586.3621</b>  |
| 2162.9187       | 19       | A 9         | <b>1056.6894</b> | <b>528.8486</b>  |
| 2249.9508       | 20       | S 8         | 985.6523         | 493.3301         |
| 2363.0348       | 21       | L 7         | 898.6203         | 449.8140         |
| 2519.1611       | 22       | K 6         | 785.5362         | 393.2720         |
| 2675.2874       | 23       | K 5         | <b>629.4099</b>  | <b>315.2089</b>  |
| 2788.3715       | 24       | L 4         | <b>473.2836</b>  | 237.1457         |
| 2902.4144       | 25       | N 3         | 360.1995         | 180.6037         |
| 2973.4515       | 26       | A 2         | 246.1566         | 123.5822         |
|                 | 27       | R 1         | <b>175.1195</b>  | 88.0637          |

N-term:+29.04 C(8):+160.03  
 K(22):+156.13 K(23):+156.13

EEEEIAALVIDNGSGMKAGFAGDDAPR, MH+ 2849.3449, m/z 713.0917  
L OSG36 P180811 230811-s1.05675.05675.4.dta

scan 5675; 4.2e-001

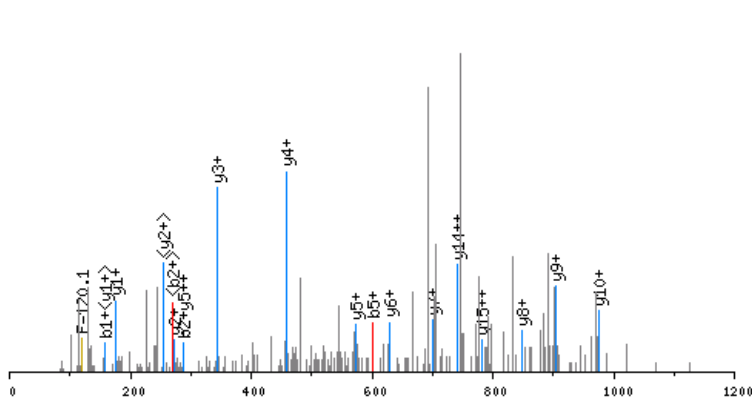

click image to zoom in; click top corners to zoom out [\[precursor±\]](#)

scan 5674; 713.1 m/z: 9.5e+001

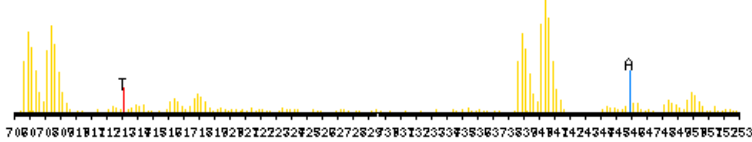

zoomed in precursor plot; T=theoretical m/z, A=acquired m/z

| b <sup>+</sup> | #  | AA # | y <sup>+</sup> | y <sup>2+</sup> |
|----------------|----|------|----------------|-----------------|
| 158.0817       | 1  | E 27 |                |                 |
| 287.1243       | 2  | E 26 | 2692.2711      | 1346.6394       |
| 416.1669       | 3  | E 25 | 2563.2285      | 1282.1181       |
| 529.2509       | 4  | I 24 | 2434.1859      | 1217.5969       |
| 600.2881       | 5  | A 23 | 2321.1018      | 1161.0548       |
| 671.3252       | 6  | A 22 | 2250.0647      | 1125.5363       |
| 784.4092       | 7  | L 21 | 2179.0276      | 1090.0177       |
| 883.4776       | 8  | V 20 | 2065.9435      | 1033.4757       |
| 996.5617       | 9  | I 19 | 1966.8751      | 983.9415        |
| 1111.5887      | 10 | D 18 | 1853.7910      | 927.3994        |
| 1225.6316      | 11 | N 17 | 1738.7641      | 869.8860        |
| 1282.6530      | 12 | G 16 | 1624.7212      | 812.8645        |
| 1369.6851      | 13 | S 15 | 1567.6997      | 784.3538        |
| 1426.7065      | 14 | G 14 | 1480.6677      | 740.8378        |
| 1557.7470      | 15 | M 13 | 1423.6462      | 712.3270        |
| 1717.7776      | 16 | C 12 | 1292.6057      | 646.8068        |
| 1873.9039      | 17 | K 11 | 1132.5751      | 566.7915        |
| 1944.9410      | 18 | A 10 | 976.4488       | 488.7283        |
| 2001.9625      | 19 | G 9  | 905.4117       | 453.2098        |
| 2149.0309      | 20 | F 8  | 848.3903       | 424.6990        |
| 2220.0680      | 21 | A 7  | 701.3218       | 351.1648        |
| 2277.0895      | 22 | G 6  | 630.2847       | 315.6463        |
| 2392.1164      | 23 | D 5  | 573.2633       | 287.1355        |
| 2507.1434      | 24 | D 4  | 458.2363       | 229.6221        |
| 2578.1805      | 25 | A 3  | 343.2094       | 172.1086        |
| 2675.2333      | 26 | P 2  | 272.1723       | 136.5900        |
|                | 27 | R 1  | 175.1195       | 88.0637         |

N-term: +29.04 C(16) : +160.03  
K(17) : +156.13

X-range:

-

MassTol: Y-zoom:

MassType:

AVG  MONO

Axis:

1  2

Label:

I  M  -

Ions:

a  +  2+  3+

b  +  2+  3+

c  +  2+  3+

x  +  2+  3+

y  +  2+  3+

z  +  2+  3+

hide H<sub>2</sub>O/NH<sub>3</sub>

zoom 112-122

GO

EEFLAAFEGSDGNKVKTFVR, MH+ 2328.2240, m/z 582.8115  
 L OSG40 P180811 230811-s1.07906.07906.4.dta

X-range:

-

MassTol: Y-zoom:

MassType:

AVG  MONO

Axis:

1  2

Label:

I  M  -

Ions:

a  +  2+  3+

b  +  2+  3+

c  +  2+  3+

x  +  2+  3+

y  +  2+  3+

z  +  2+  3+

hide H<sub>2</sub>O/NH<sub>3</sub>

zoom 112-122

GO

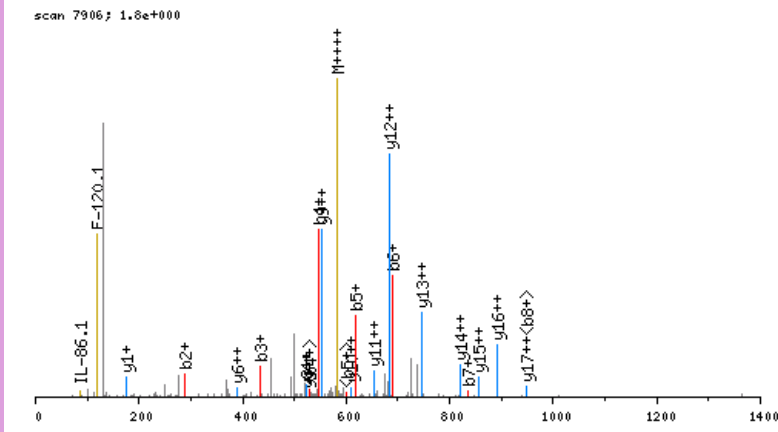

click image to zoom in; click top corners to zoom out [\[precursor±\]](#)

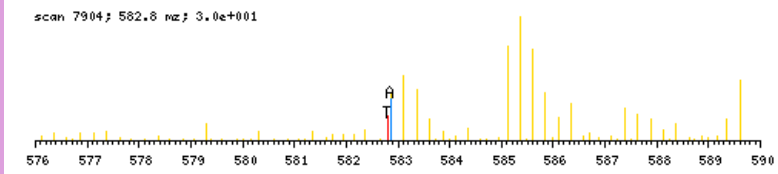

zoomed in precursor plot; T=theoretical m/z, A=acquired m/z

| b <sup>+</sup> | #  | AA | #  | y <sup>+</sup> | y <sup>2+</sup> |
|----------------|----|----|----|----------------|-----------------|
| 158.0817       | 1  | E  | 20 |                |                 |
| 287.1243       | 2  | E  | 19 | 2171.1502      | 1086.0790       |
| 434.1927       | 3  | F  | 18 | 2042.1076      | 1021.5577       |
| 547.2768       | 4  | L  | 17 | 1895.0391      | 948.0235        |
| 618.3139       | 5  | A  | 16 | 1781.9551      | 891.4815        |
| 689.3510       | 6  | A  | 15 | 1710.9180      | 855.9629        |
| 836.4194       | 7  | F  | 14 | 1639.8809      | 820.4443        |
| 965.4620       | 8  | E  | 13 | 1492.8124      | 746.9101        |
| 1022.4835      | 9  | G  | 12 | 1363.7698      | 682.3888        |
| 1109.5155      | 10 | S  | 11 | 1306.7484      | 653.8781        |
| 1224.5424      | 11 | D  | 10 | 1219.7164      | 610.3621        |
| 1281.5639      | 12 | G  | 9  | 1104.6894      | 552.8486        |
| 1395.6068      | 13 | N  | 8  | 1047.6679      | 524.3379        |
| 1551.7331      | 14 | K  | 7  | 933.6250       | 467.3164        |
| 1650.8015      | 15 | V  | 6  | 777.4987       | 389.2533        |
| 1806.9278      | 16 | K  | 5  | 678.4303       | 339.7191        |
| 1907.9755      | 17 | T  | 4  | 522.3040       | 261.6559        |
| 2055.0439      | 18 | F  | 3  | 421.2563       | 211.1321        |
| 2154.1123      | 19 | V  | 2  | 274.1879       | 137.5979        |
|                | 20 | R  | 1  | 175.1195       | 88.0637         |

N-term:+29.04 K(14):+156.13  
 K(16):+156.13

EEIAMATVTALR, MH+ 1332.7197, m/z 666.8635  
 L OSG37 P180811 230811-s1.06267.06267.2.dta

X-range:

-

MassTol: Y-zoom:

MassType:

AVG  MONO

Axis:

1  2

Label:

I  M  -

Ions:

a  +  2+  3+

b  +  2+  3+

c  +  2+  3+

x  +  2+  3+

y  +  2+  3+

z  +  2+  3+

hide H<sub>2</sub>O/NH<sub>3</sub>

zoom 112-122

GO

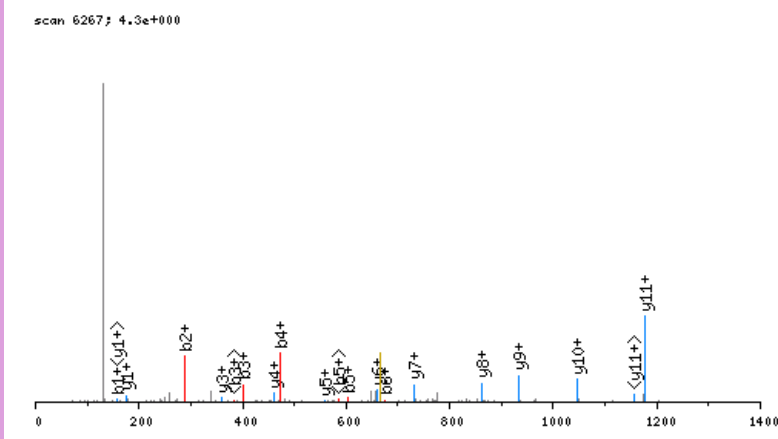

click image to zoom in; click top corners to zoom out [\[precursor±\]](#)

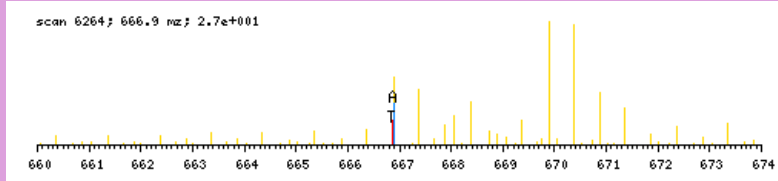

| b <sup>+</sup> | #  | AA # | y <sup>+</sup> | y <sup>2+</sup> |
|----------------|----|------|----------------|-----------------|
| 158.0817       | 1  | E 12 |                |                 |
| 287.1243       | 2  | E 11 | 1175.6458      | 588.3268        |
| 400.2084       | 3  | I 10 | 1046.6032      | 523.8055        |
| 471.2455       | 4  | A 9  | 933.5192       | 467.2635        |
| 602.2859       | 5  | M 8  | 862.4820       | 431.7449        |
| 673.3231       | 6  | A 7  | 731.4416       | 366.2247        |
| 774.3707       | 7  | T 6  | 660.4044       | 330.7061        |
| 873.4392       | 8  | V 5  | 559.3568       | 280.1823        |
| 974.4868       | 9  | T 4  | 460.2884       | 230.6481        |
| 1045.5239      | 10 | A 3  | 359.2407       | 180.1243        |
| 1158.6080      | 11 | L 2  | 288.2036       | 144.6057        |
|                | 12 | R 1  | 175.1195       | 88.0637         |

N-term:+29.04

EEIKDFLLTAR, MH+ 1402.8582, m/z 468.2909  
 H OSG40 P180811 230811-s1.07525.07525.3.dta

X-range:

-

MassTol: Y-zoom:

MassType:

AVG  MONO

Axis:

1  2

Label:

I  M  -

Ions:

a  +  2+  3+

b  +  2+  3+

c  +  2+  3+

x  +  2+  3+

y  +  2+  3+

z  +  2+  3+

hide H<sub>2</sub>O/NH<sub>3</sub>

zoom 112-122

GO

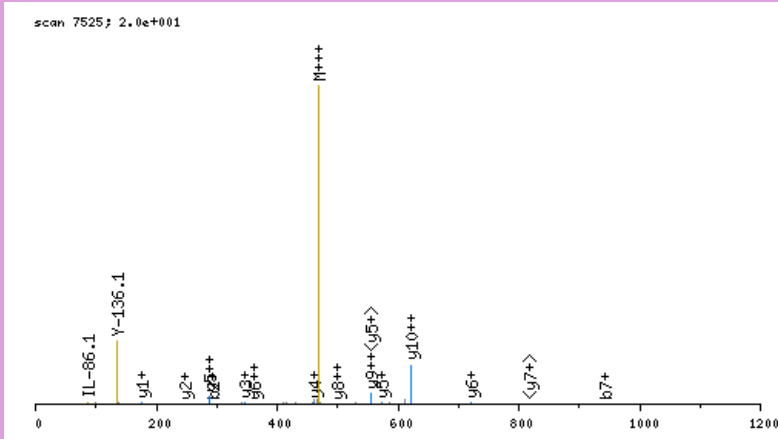

click image to zoom in; click top corners to zoom out [\[precursor±\]](#)

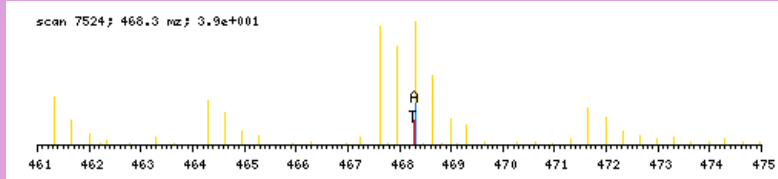

zoomed in precursor plot; T=theoretical m/z, A=acquired m/z

| b <sup>+</sup> | #  | AA # | y <sup>+</sup> | y <sup>2+</sup> |
|----------------|----|------|----------------|-----------------|
| 164.1135       | 1  | E 11 |                |                 |
| 293.1561       | 2  | E 10 | 1239.7525      | 620.3802        |
| 406.2402       | 3  | I 9  | 1110.7099      | 555.8589        |
| 568.3983       | 4  | K 8  | 997.6259       | 499.3169        |
| 683.4252       | 5  | D 7  | 835.4678       | 418.2378        |
| 830.4936       | 6  | F 6  | 720.4408       | 360.7243        |
| 943.5777       | 7  | L 5  | 573.3724       | 287.1901        |
| 1056.6617      | 8  | L 4  | 460.2884       | 230.6481        |
| 1157.7094      | 9  | T 3  | 347.2043       | 174.1061        |
| 1228.7465      | 10 | A 2  | 246.1566       | 123.5822        |
|                | 11 | R 1  | 175.1195       | 88.0637         |

N-term:+35.07 K(4):+162.16

EKQCDFPTVENGR, MH+ 1776.8862, m/z 592.9669  
 H OSG40 P180811 230811-s1.03290.03290.3.dta

X-range:

-

MassTol: Y-zoom:

MassType:

AVG  MONO

Axis:

1  2

Label:

I  M  -

Ions:

a  +  2+  3+

b  +  2+  3+

c  +  2+  3+

x  +  2+  3+

y  +  2+  3+

z  +  2+  3+

hide H<sub>2</sub>O/NH<sub>3</sub>

zoom 112-122

GO

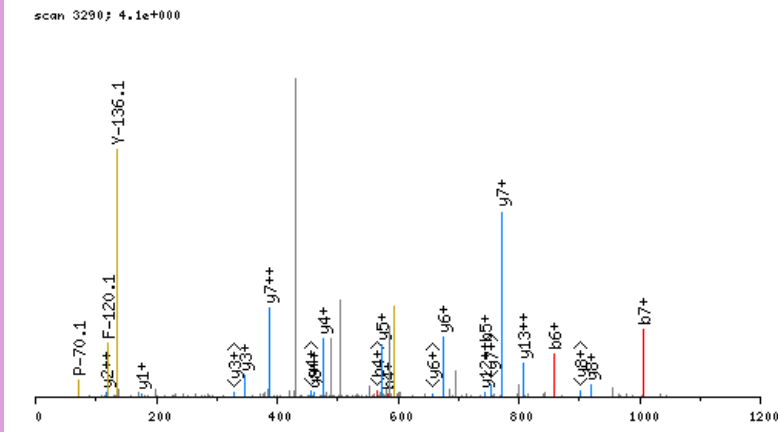

click image to zoom in; click top corners to zoom out [\[precursor±\]](#)

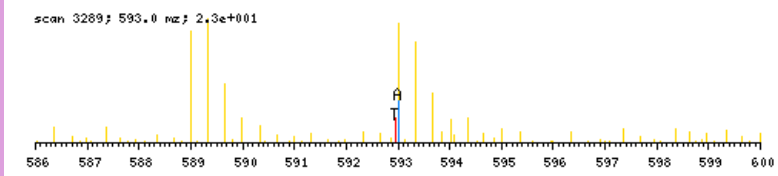

zoomed in precursor plot; T=theoretical m/z, A=acquired m/z

| b <sup>+</sup> | #  | AA # | y <sup>+</sup> | y <sup>2+</sup> |
|----------------|----|------|----------------|-----------------|
| 164.1135       | 1  | E 14 |                |                 |
| 293.1561       | 2  | E 13 | 1613.7806      | 807.3942        |
| 455.3142       | 3  | K 12 | 1484.7380      | 742.8729        |
| 583.3728       | 4  | Q 11 | 1322.5799      | 661.7939        |
| 743.4034       | 5  | C 10 | 1194.5213      | 597.7646        |
| 858.4303       | 6  | D 9  | 1034.4907      | 517.7493        |
| 1005.4987      | 7  | F 8  | 919.4638       | 460.2358        |
| 1102.5515      | 8  | P 7  | 772.3953       | 386.7016        |
| 1203.5992      | 9  | T 6  | 675.3426       | 338.1752        |
| 1302.6676      | 10 | V 5  | 574.2949       | 287.6514        |
| 1431.7102      | 11 | E 4  | 475.2265       | 238.1172        |
| 1545.7531      | 12 | N 3  | 346.1839       | 173.5959        |
| 1602.7746      | 13 | G 2  | 232.1410       | 116.5744        |
|                | 14 | R 1  | 175.1195       | 88.0637         |

N-term:+35.07 K(3):+162.16  
 C(5):+160.03

EEMEGTSPSSPPHSVAR, MH+ 1825.8390, m/z 609.2845  
 L OSG39 P180811 230811-s1.02306.02306.3.dta

X-range:

-

MassTol: Y-zoom:

MassType:

AVG  MONO

Axis:

1  2

Label:

I  M  -

Ions:

a  +  2+  3+

b  +  2+  3+

c  +  2+  3+

x  +  2+  3+

y  +  2+  3+

z  +  2+  3+

hide H<sub>2</sub>O/NH<sub>3</sub>

zoom 112-122

GO

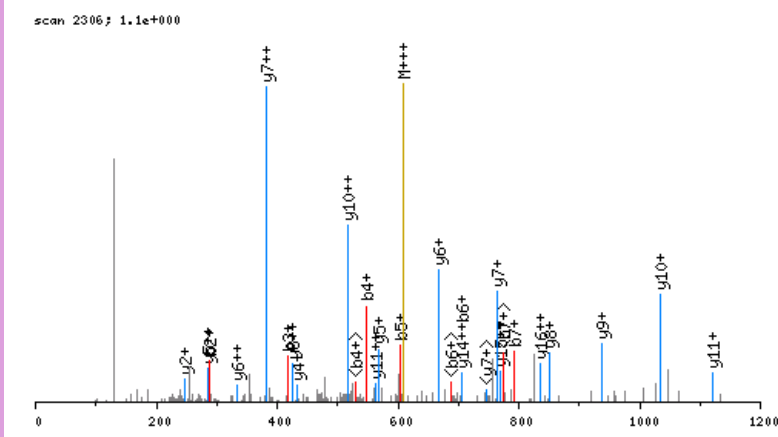

click image to zoom in; click top corners to zoom out [\[precursor±\]](#)

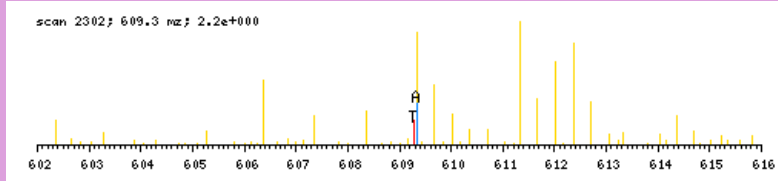

zoomed in precursor plot; T=theoretical m/z, A=acquired m/z

| b <sup>+</sup> | #  | AA # | y <sup>+</sup> | y <sup>2+</sup> |
|----------------|----|------|----------------|-----------------|
| 158.0817       | 1  | E 17 |                |                 |
| 287.1243       | 2  | E 16 | 1668.7652      | 834.8865        |
| 418.1648       | 3  | M 15 | 1539.7226      | 770.3652        |
| 547.2074       | 4  | E 14 | 1408.6821      | 704.8450        |
| 604.2288       | 5  | G 13 | 1279.6395      | 640.3237        |
| 705.2765       | 6  | T 12 | 1222.6180      | 611.8129        |
| 792.3085       | 7  | S 11 | 1121.5703      | 561.2891        |
| 889.3613       | 8  | P 10 | 1034.5383      | 517.7731        |
| 976.3933       | 9  | S 9  | 937.4856       | 469.2467        |
| 1063.4254      | 10 | S 8  | 850.4535       | 425.7307        |
| 1160.4781      | 11 | P 7  | 763.4215       | 382.2147        |
| 1257.5309      | 12 | P 6  | 666.3687       | 333.6883        |
| 1394.5898      | 13 | H 5  | 569.3160       | 285.1619        |
| 1481.6218      | 14 | S 4  | 432.2571       | 216.6324        |
| 1580.6902      | 15 | V 3  | 345.2250       | 173.1164        |
| 1651.7274      | 16 | A 2  | 246.1566       | 123.5822        |
|                | 17 | R 1  | 175.1195       | 88.0637         |

N-term:+29.04

EEVEDASEEAPLR, MH+ 1507.7340, m/z 754.3706  
 H OSG37 P180811 230811-s1.03605.03605.2.dta

X-range:

-

MassTol: Y-zoom:

MassType:

AVG  MONO

Axis:

1  2

Label:

I  M  -

Ions:

a  +  2+  3+

b  +  2+  3+

c  +  2+  3+

x  +  2+  3+

y  +  2+  3+

z  +  2+  3+

hide H<sub>2</sub>O/NH<sub>3</sub>

zoom 112-122

GO

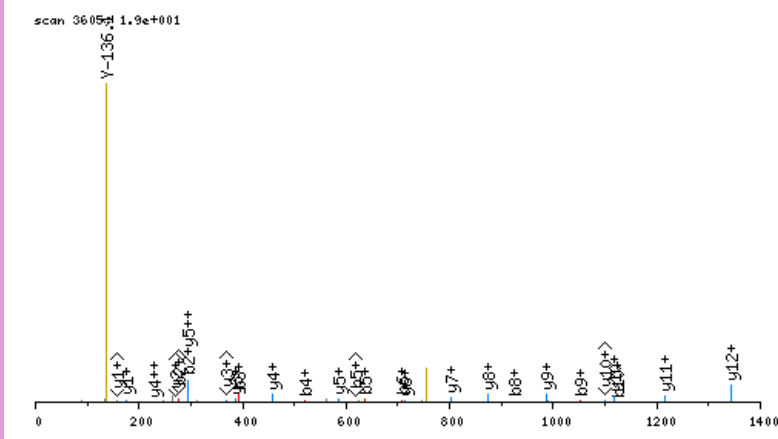

click image to zoom in; click top corners to zoom out [\[precursor±\]](#)

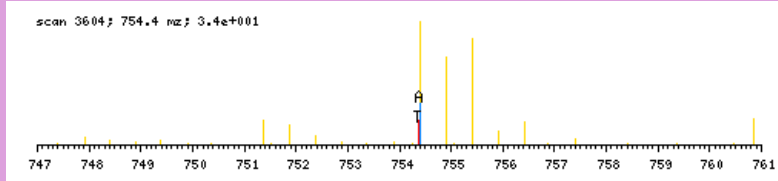

zoomed in precursor plot; T=theoretical m/z, A=acquired m/z

| b <sup>+</sup> | #  | AA # | y <sup>+</sup> | y <sup>2+</sup> |
|----------------|----|------|----------------|-----------------|
| 164.1135       | 1  | E 13 |                |                 |
| 293.1561       | 2  | E 12 | 1344.6283      | 672.8181        |
| 392.2245       | 3  | V 11 | 1215.5857      | 608.2968        |
| 521.2671       | 4  | E 10 | 1116.5173      | 558.7626        |
| 636.2940       | 5  | D 9  | 987.4747       | 494.2413        |
| 707.3312       | 6  | A 8  | 872.4478       | 436.7278        |
| 794.3632       | 7  | S 7  | 801.4107       | 401.2092        |
| 923.4058       | 8  | E 6  | 714.3786       | 357.6932        |
| 1052.4484      | 9  | E 5  | 585.3360       | 293.1719        |
| 1123.4855      | 10 | A 4  | 456.2934       | 228.6506        |
| 1220.5382      | 11 | P 3  | 385.2563       | 193.1321        |
| 1333.6223      | 12 | L 2  | 288.2036       | 144.6057        |
|                | 13 | R 1  | 175.1195       | 88.0637         |

N-term:+35.07



EEVEDASEEAPLRDR, MH+ 1778.8620, m/z 593.6255  
 H OSG40 P180811 230811-s1.03520.03520.3.dta

X-range:

-

MassTol: Y-zoom:

MassType:

AVG  MONO

Axis:

1  2

Label:

I  M  -

Ions:

a  +  2+  3+

b  +  2+  3+

c  +  2+  3+

x  +  2+  3+

y  +  2+  3+

z  +  2+  3+

hide H<sub>2</sub>O/NH<sub>3</sub>

zoom 112-122

GO

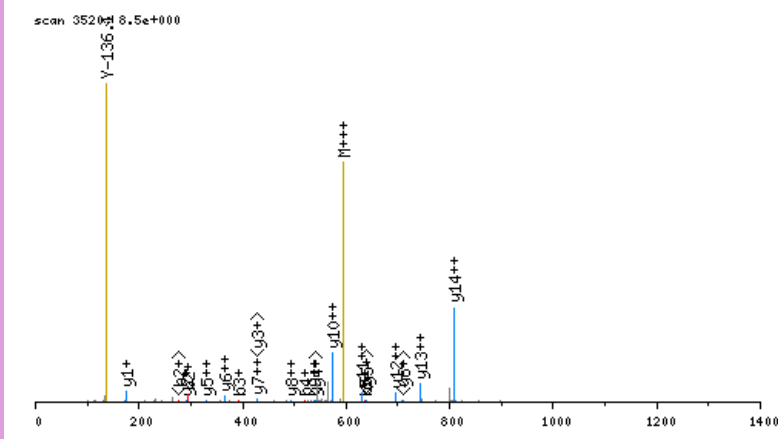

click image to zoom in; click top corners to zoom out [\[precursor±\]](#)

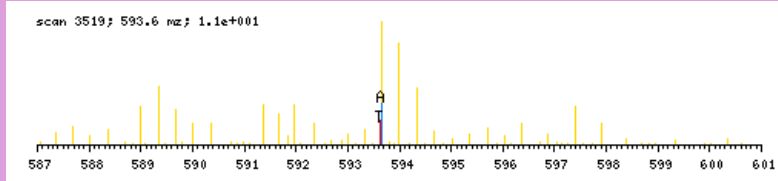

zoomed in precursor plot; T=theoretical m/z, A=acquired m/z

| b <sup>+</sup> | #  | AA | #  | y <sup>+</sup> | y <sup>2+</sup> |
|----------------|----|----|----|----------------|-----------------|
| 164.1135       | 1  | E  | 15 |                |                 |
| 293.1561       | 2  | E  | 14 | 1615.7564      | 808.3821        |
| 392.2245       | 3  | V  | 13 | 1486.7138      | 743.8608        |
| 521.2671       | 4  | E  | 12 | 1387.6454      | 694.3266        |
| 636.2940       | 5  | D  | 11 | 1258.6028      | 629.8053        |
| 707.3312       | 6  | A  | 10 | 1143.5758      | 572.2918        |
| 794.3632       | 7  | S  | 9  | 1072.5387      | 536.7733        |
| 923.4058       | 8  | E  | 8  | 985.5067       | 493.2573        |
| 1052.4484      | 9  | E  | 7  | 856.4641       | 428.7360        |
| 1123.4855      | 10 | A  | 6  | 727.4215       | 364.2147        |
| 1220.5382      | 11 | P  | 5  | 656.3844       | 328.6961        |
| 1333.6223      | 12 | L  | 4  | 559.3316       | 280.1697        |
| 1489.7234      | 13 | R  | 3  | 446.2476       | 223.6277        |
| 1604.7504      | 14 | D  | 2  | 290.1464       | 145.5771        |
|                | 15 | R  | 1  | 175.1195       | 88.0637         |

N-term:+35.07

EEVHTGLGELLR, MH+ 1386.7805, m/z 462.9317  
 H OSG40 P180811 230811-s1.06318.06318.3.dta

X-range:

-

MassTol: Y-zoom:

MassType:

AVG  MONO

Axis:

1  2

Label:

I  M  -

Ions:

a  +  2+  3+

b  +  2+  3+

c  +  2+  3+

x  +  2+  3+

y  +  2+  3+

z  +  2+  3+

hide H<sub>2</sub>O/NH<sub>3</sub>

zoom 112-122

GO

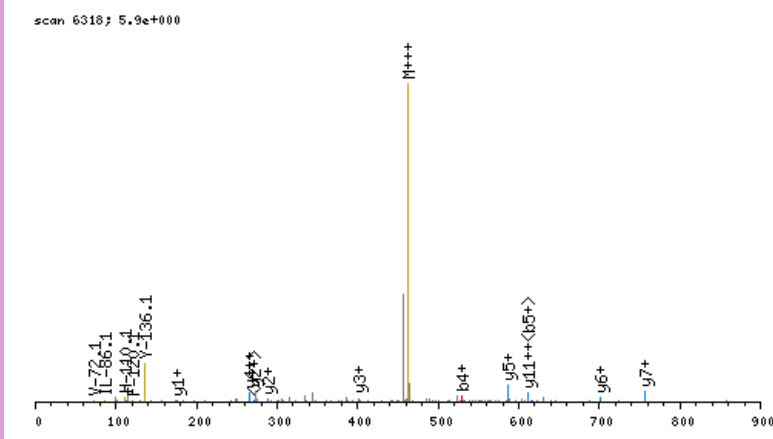

click image to zoom in; click top corners to zoom out [\[precursor±\]](#)

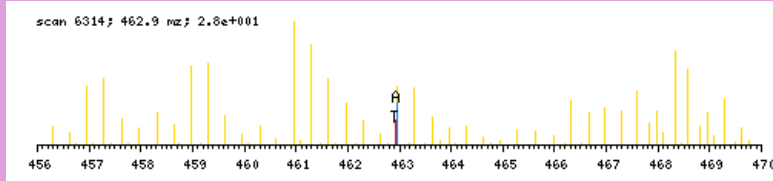

zoomed in precursor plot; T=theoretical m/z, A=acquired m/z

| b <sup>+</sup> | #  | AA | #  | y <sup>+</sup> | y <sup>2+</sup> |
|----------------|----|----|----|----------------|-----------------|
| 164.1135       | 1  | E  | 12 |                |                 |
| 293.1561       | 2  | E  | 11 | 1223.6748      | 612.3413        |
| 392.2245       | 3  | V  | 10 | 1094.6322      | 547.8200        |
| 529.2834       | 4  | H  | 9  | 995.5638       | 498.2858        |
| 630.3311       | 5  | T  | 8  | 858.5049       | 429.7564        |
| 687.3526       | 6  | G  | 7  | 757.4572       | 379.2325        |
| 800.4366       | 7  | L  | 6  | 700.4357       | 350.7218        |
| 857.4581       | 8  | G  | 5  | 587.3517       | 294.1798        |
| 986.5007       | 9  | E  | 4  | 530.3302       | 265.6690        |
| 1099.5847      | 10 | L  | 3  | 401.2876       | 201.1477        |
| 1212.6688      | 11 | L  | 2  | 288.2036       | 144.6057        |
|                | 12 | R  | 1  | 175.1195       | 88.0637         |

N-term:+35.07

EEVHVSSNADEEDIR, MH+ 1756.7989, m/z 586.2712  
 L OSG40 P180811 230811-s1.03185.03185.3.dta

X-range:

-

MassTol: Y-zoom:

MassType:

AVG  MONO

Axis:

1  2

Label:

I  M  -

Ions:

a  +  2+  3+

b  +  2+  3+

c  +  2+  3+

x  +  2+  3+

y  +  2+  3+

z  +  2+  3+

hide H<sub>2</sub>O/NH<sub>3</sub>

zoom 112-122

GO

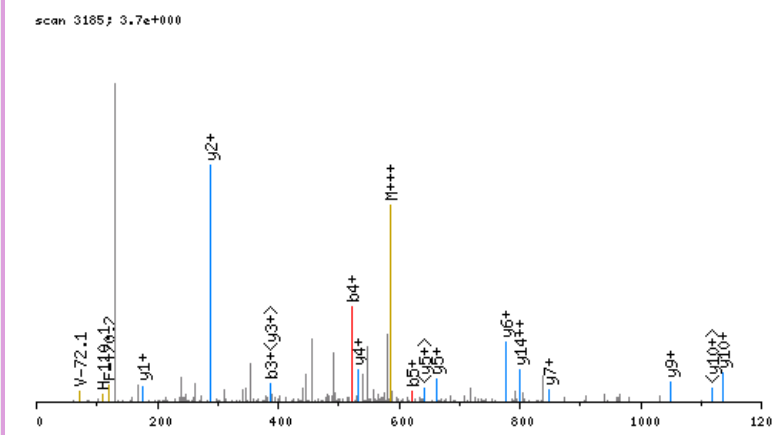

click image to zoom in; click top corners to zoom out [\[precursor±\]](#)

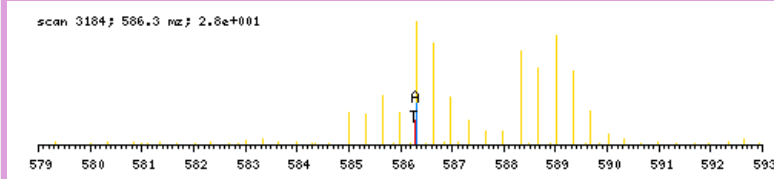

zoomed in precursor plot; T=theoretical m/z, A=acquired m/z

| b <sup>+</sup> | #  | AA # | y <sup>+</sup> | y <sup>2+</sup> |
|----------------|----|------|----------------|-----------------|
| 158.0817       | 1  | E 15 |                |                 |
| 287.1243       | 2  | E 14 | 1599.7251      | 800.3664        |
| 386.1927       | 3  | V 13 | 1470.6825      | 735.8452        |
| 523.2516       | 4  | H 12 | 1371.6141      | 686.3109        |
| 622.3200       | 5  | V 11 | 1234.5551      | 617.7815        |
| 709.3521       | 6  | S 10 | 1135.4867      | 568.2473        |
| 796.3841       | 7  | S 9  | 1048.4547      | 524.7313        |
| 910.4270       | 8  | N 8  | 961.4227       | 481.2153        |
| 981.4641       | 9  | A 7  | 847.3798       | 424.1938        |
| 1096.4911      | 10 | D 6  | 776.3426       | 388.6752        |
| 1225.5337      | 11 | E 5  | 661.3157       | 331.1618        |
| 1354.5763      | 12 | E 4  | 532.2731       | 266.6405        |
| 1469.6032      | 13 | D 3  | 403.2305       | 202.1192        |
| 1582.6873      | 14 | I 2  | 288.2036       | 144.6057        |
|                | 15 | R 1  | 175.1195       | 88.0637         |

N-term:+29.04

EEYGKIDTIEIITDR, MH+ 1863.0387, m/z 621.6844  
 H OSG39 P180811 230811-s1.05898.05898.3.dta

X-range:

-

MassTol: Y-zoom:

MassType:

AVG  MONO

Axis:

1  2

Label:

I  M  -

Ions:

a  +  2+  3+

b  +  2+  3+

c  +  2+  3+

x  +  2+  3+

y  +  2+  3+

z  +  2+  3+

hide H<sub>2</sub>O/NH<sub>3</sub>

zoom 112-122

GO

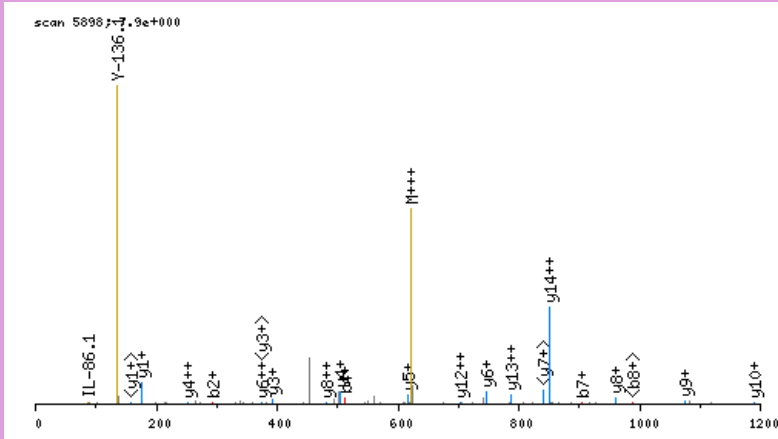

click image to zoom in; click top corners to zoom out [\[precursor±\]](#)

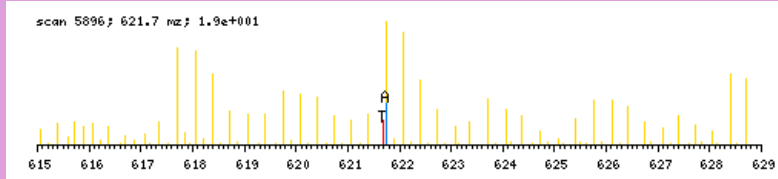

zoomed in precursor plot; T=theoretical m/z, A=acquired m/z

| b <sup>+</sup> | #  | AA # | y <sup>+</sup> | y <sup>2+</sup> |
|----------------|----|------|----------------|-----------------|
| 164.1135       | 1  | E 15 |                |                 |
| 293.1561       | 2  | E 14 | 1699.9331      | 850.4705        |
| 456.2194       | 3  | Y 13 | 1570.8905      | 785.9492        |
| 513.2409       | 4  | G 12 | 1407.8272      | 704.4175        |
| 675.3990       | 5  | K 11 | 1350.8057      | 675.9068        |
| 788.4830       | 6  | I 10 | 1188.6476      | 594.8277        |
| 903.5100       | 7  | D 9  | 1075.5635      | 538.2857        |
| 1004.5577      | 8  | T 8  | 960.5366       | 480.7722        |
| 1117.6417      | 9  | I 7  | 859.4889       | 430.2484        |
| 1246.6843      | 10 | E 6  | 746.4048       | 373.7063        |
| 1359.7684      | 11 | I 5  | 617.3623       | 309.1850        |
| 1472.8524      | 12 | I 4  | 504.2782       | 252.6430        |
| 1573.9001      | 13 | T 3  | 391.1941       | 196.1010        |
| 1688.9271      | 14 | D 2  | 290.1464       | 145.5771        |
|                | 15 | R 1  | 175.1195       | 88.0637         |

N-term:+35.07 K(5):+162.16

EFDDLPLAEQR, MH+ 1360.6748, m/z 454.2298  
 L OSG37 P180811 230811-s1.06153.06153.3.dta

X-range:

-

MassTol: Y-zoom:

MassType:

AVG  MONO

Axis:

1  2

Label:

I  M  -

Ions:

a  +  2+  3+

b  +  2+  3+

c  +  2+  3+

x  +  2+  3+

y  +  2+  3+

z  +  2+  3+

hide H<sub>2</sub>O/NH<sub>3</sub>

zoom 112-122

GO

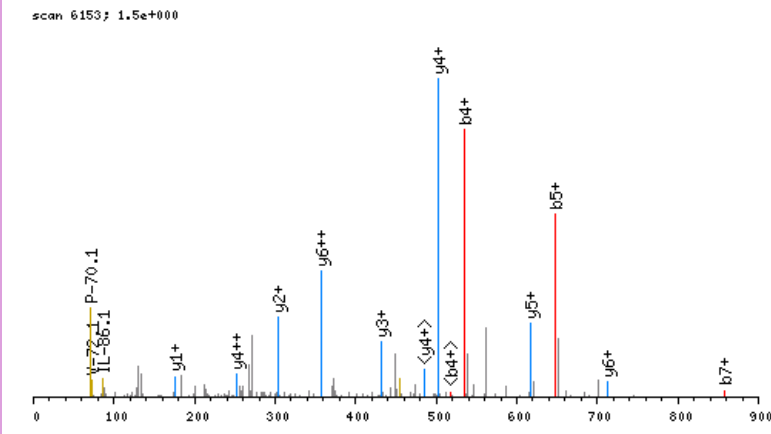

click image to zoom in; click top corners to zoom out [\[precursor±\]](#)

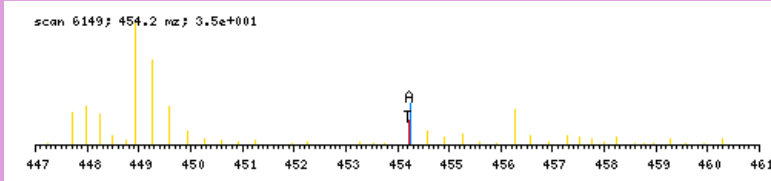

zoomed in precursor plot; T=theoretical m/z, A=acquired m/z

| b <sup>+</sup> | #  | AA # | y <sup>+</sup> | y <sup>2+</sup> |
|----------------|----|------|----------------|-----------------|
| 158.0817       | 1  | E 11 |                |                 |
| 305.1501       | 2  | F 10 | 1203.6010      | 602.3044        |
| 420.1771       | 3  | D 9  | 1056.5326      | 528.7702        |
| 535.2040       | 4  | D 8  | 941.5056       | 471.2567        |
| 648.2881       | 5  | L 7  | 826.4787       | 413.7433        |
| 745.3408       | 6  | P 6  | 713.3946       | 357.2012        |
| 858.4249       | 7  | L 5  | 616.3418       | 308.6748        |
| 929.4620       | 8  | A 4  | 503.2578       | 252.1328        |
| 1058.5046      | 9  | E 3  | 432.2207       | 216.6142        |
| 1186.5632      | 10 | Q 2  | 303.1781       | 152.0930        |
|                | 11 | R 1  | 175.1195       | 88.0637         |

N-term:+29.04

EGATAAPELSALEEAFR, MH+ 1789.8972, m/z 895.4522  
 L OSG37 P180811 230811-s1.08640.08640.2.dta

X-range:

-

MassTol: Y-zoom:

MassType:

AVG  MONO

Axis:

1  2

Label:

I  M  -

Ions:

a  +  2+  3+

b  +  2+  3+

c  +  2+  3+

x  +  2+  3+

y  +  2+  3+

z  +  2+  3+

hide H<sub>2</sub>O/NH<sub>3</sub>

zoom 112-122

GO

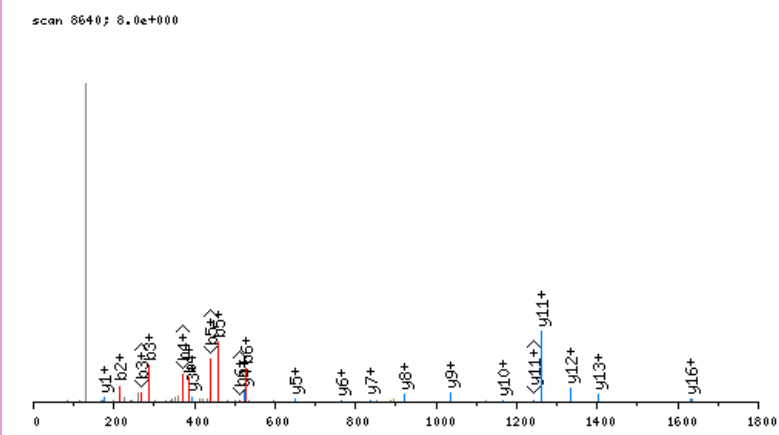

click image to zoom in; click top corners to zoom out [\[precursor±\]](#)

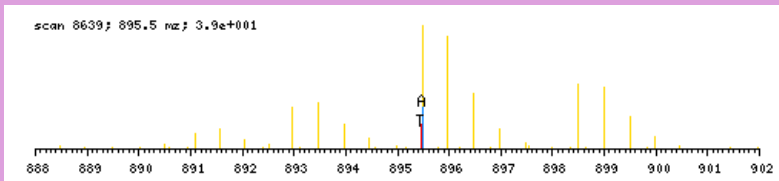

zoomed in precursor plot; T=theoretical m/z, A=acquired m/z

| b <sup>+</sup> | #  | AA # | y <sup>+</sup> | y <sup>2+</sup> |
|----------------|----|------|----------------|-----------------|
| 158.0817       | 1  | E 17 |                |                 |
| 215.1032       | 2  | G 16 | 1632.8233      | 816.9156        |
| 286.1403       | 3  | A 15 | 1575.8019      | 788.4048        |
| 387.1879       | 4  | T 14 | 1504.7647      | 752.8863        |
| 458.2251       | 5  | A 13 | 1403.7171      | 702.3624        |
| 529.2622       | 6  | A 12 | 1332.6800      | 666.8439        |
| 626.3149       | 7  | P 11 | 1261.6428      | 631.3253        |
| 755.3575       | 8  | E 10 | 1164.5901      | 582.7990        |
| 868.4416       | 9  | L 9  | 1035.5475      | 518.2777        |
| 955.4736       | 10 | S 8  | 922.4634       | 461.7356        |
| 1026.5107      | 11 | A 7  | 835.4314       | 418.2196        |
| 1139.5948      | 12 | L 6  | 764.3943       | 382.7011        |
| 1268.6374      | 13 | E 5  | 651.3102       | 326.1590        |
| 1397.6800      | 14 | E 4  | 522.2676       | 261.6377        |
| 1468.7171      | 15 | A 3  | 393.2250       | 197.1164        |
| 1615.7855      | 16 | F 2  | 322.1879       | 161.5979        |
|                | 17 | R 1  | 175.1195       | 88.0637         |

N-term:+29.04

EGDVLTLLESER, MH+ 1388.7273, m/z 694.8673  
 L OSG37 P180811 230811-s1.08086.08086.2.dta

X-range:

-

MassTol: Y-zoom:

MassType:

AVG  MONO

Axis:

1  2

Label:

I  M  -

Ions:

a  +  2+  3+

b  +  2+  3+

c  +  2+  3+

x  +  2+  3+

y  +  2+  3+

z  +  2+  3+

hide H<sub>2</sub>O/NH<sub>3</sub>

zoom 112-122

GO

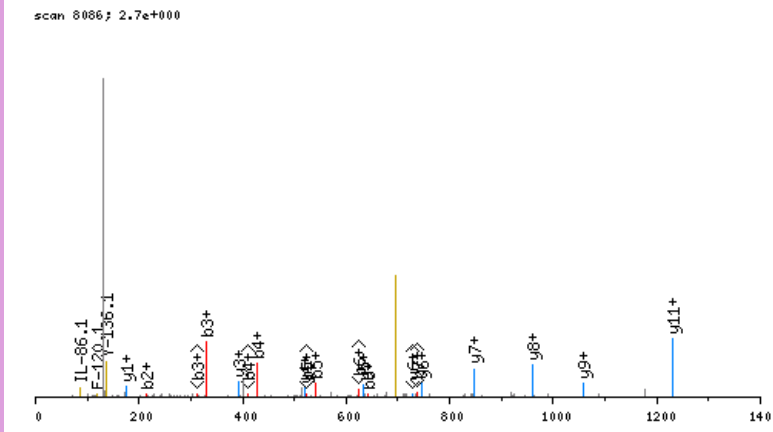

click image to zoom in; click top corners to zoom out [\[precursor±\]](#)

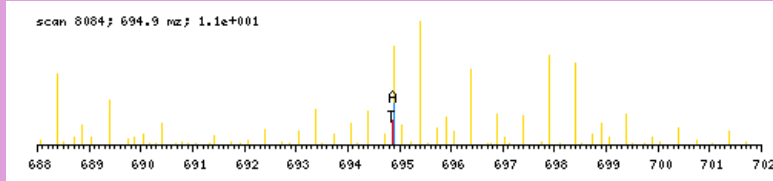

zoomed in precursor plot; T=theoretical m/z, A=acquired m/z

| b <sup>+</sup> | #  | AA # | y <sup>+</sup> | y <sup>2+</sup> |
|----------------|----|------|----------------|-----------------|
| 158.0817       | 1  | E 12 |                |                 |
| 215.1032       | 2  | G 11 | 1231.6534      | 616.3306        |
| 330.1301       | 3  | D 10 | 1174.6319      | 587.8199        |
| 429.1985       | 4  | V 9  | 1059.6050      | 530.3064        |
| 542.2826       | 5  | L 8  | 960.5366       | 480.7722        |
| 643.3303       | 6  | T 7  | 847.4525       | 424.2302        |
| 756.4143       | 7  | L 6  | 746.4048       | 373.7063        |
| 869.4984       | 8  | L 5  | 633.3208       | 317.1643        |
| 998.5410       | 9  | E 4  | 520.2367       | 260.6223        |
| 1085.5730      | 10 | S 3  | 391.1941       | 196.1010        |
| 1214.6156      | 11 | E 2  | 304.1621       | 152.5850        |
|                | 12 | R 1  | 175.1195       | 88.0637         |

N-term:+29.04

EHLGYVLTCPNLGTGLR, MH+ 2015.0383, m/z 672.3510  
 L OSG39 P180811 230811-s1.05702.05702.3.dta

scan 5702; 4.4e+000

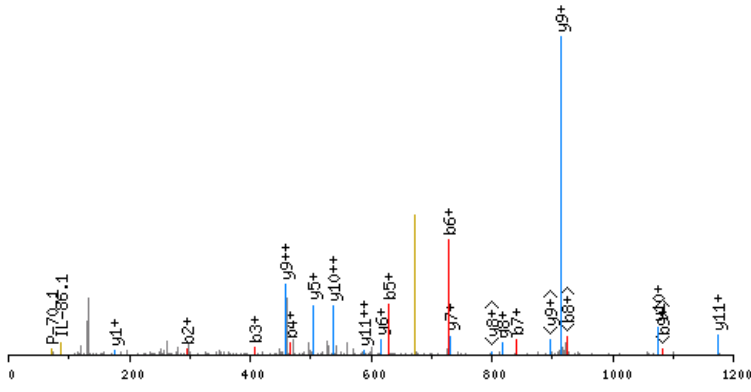

click image to zoom in; click top corners to zoom out [\[precursor±\]](#)

scan 5701; 672.4 m/z; 4.7e+001

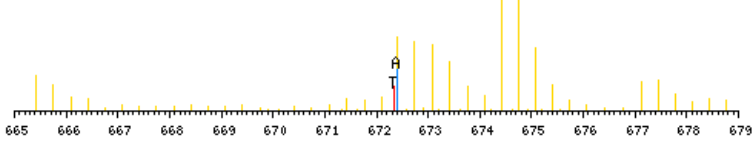

zoomed in precursor plot; T=theoretical m/z, A=acquired m/z

X-range:

-

MassTol: Y-zoom:

MassType:

AVG  MONO

Axis:

1  2

Label:

I  M  -

Ions:

a  +  2+  3+

b  +  2+  3+

c  +  2+  3+

x  +  2+  3+

y  +  2+  3+

z  +  2+  3+

hide H<sub>2</sub>O/NH<sub>3</sub>

zoom 112-122

GO

| b <sup>+</sup> | #  | AA | #  | y <sup>+</sup> | y <sup>2+</sup> |
|----------------|----|----|----|----------------|-----------------|
| 158.0817       | 1  | E  | 18 |                |                 |
| 295.1406       | 2  | H  | 17 | 1857.9645      | 929.4862        |
| 408.2247       | 3  | L  | 16 | 1720.9056      | 860.9567        |
| 465.2461       | 4  | G  | 15 | 1607.8215      | 804.4147        |
| 628.3095       | 5  | Y  | 14 | 1550.8000      | 775.9039        |
| 727.3779       | 6  | V  | 13 | 1387.7367      | 694.3723        |
| 840.4619       | 7  | L  | 12 | 1288.6683      | 644.8381        |
| 941.5096       | 8  | T  | 11 | 1175.5842      | 588.2960        |
| 1101.5402      | 9  | C  | 10 | 1074.5366      | 537.7722        |
| 1198.5930      | 10 | P  | 9  | 914.5060       | 457.7569        |
| 1285.6250      | 11 | S  | 8  | 817.4532       | 409.2305        |
| 1399.6679      | 12 | N  | 7  | 730.4212       | 365.7145        |
| 1512.7520      | 13 | L  | 6  | 616.3782       | 308.6930        |
| 1569.7735      | 14 | G  | 5  | 503.2942       | 252.1510        |
| 1670.8211      | 15 | T  | 4  | 446.2727       | 223.6403        |
| 1727.8426      | 16 | G  | 3  | 345.2250       | 173.1164        |
| 1840.9267      | 17 | L  | 2  | 288.2036       | 144.6057        |
|                | 18 | R  | 1  | 175.1195       | 88.0637         |

N-term:+29.04 C(9):+160.03



EIDVSNPQTVGVGR, MH+ 1498.7865, m/z 500.2670  
 L OSG37 P180811 230811-s1.04615.04615.3.dta

scan 4615; 1.1e+000

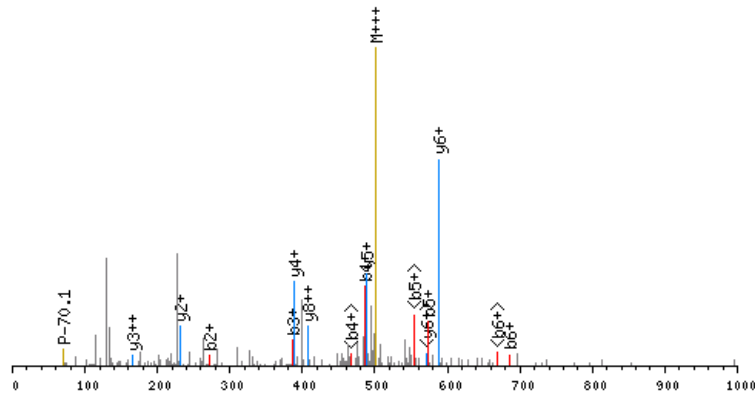

click image to zoom in; click top corners to zoom out [\[precursor±\]](#)

scan 4614; 500.3 m/z; 3.4e+001

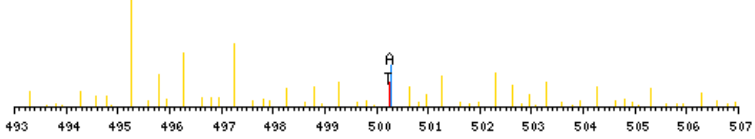

zoomed in precursor plot; T=theoretical m/z, A=acquired m/z

X-range:

-

MassTol: Y-zoom:

MassType:

AVG  MONO

Axis:

1  2

Label:

I  M  -

Ions:

a  +  2+  3+

b  +  2+  3+

c  +  2+  3+

x  +  2+  3+

y  +  2+  3+

z  +  2+  3+

hide H<sub>2</sub>O/NH<sub>3</sub>

zoom 112-122

GO

| b <sup>+</sup> | #  | AA | #  | y <sup>+</sup> | y <sup>2+</sup> |
|----------------|----|----|----|----------------|-----------------|
| 158.0817       | 1  | E  | 14 |                |                 |
| 271.1658       | 2  | I  | 13 | 1341.7127      | 671.3602        |
| 386.1927       | 3  | D  | 12 | 1228.6286      | 614.8182        |
| 485.2611       | 4  | V  | 11 | 1113.6016      | 557.3047        |
| 572.2931       | 5  | S  | 10 | 1014.5332      | 507.7705        |
| 686.3361       | 6  | N  | 9  | 927.5012       | 464.2545        |
| 783.3888       | 7  | P  | 8  | 813.4583       | 407.2331        |
| 911.4474       | 8  | Q  | 7  | 716.4055       | 358.7067        |
| 1012.4951      | 9  | T  | 6  | 588.3469       | 294.6774        |
| 1111.5635      | 10 | V  | 5  | 487.2993       | 244.1535        |
| 1168.5850      | 11 | G  | 4  | 388.2308       | 194.6193        |
| 1267.6534      | 12 | V  | 3  | 331.2094       | 166.1086        |
| 1324.6748      | 13 | G  | 2  | 232.1410       | 116.5744        |
|                | 14 | R  | 1  | 175.1195       | 88.0637         |

N-term:+29.04

X-range:

-

MassTol: Y-zoom:

MassType:

AVG  MONO

Axis:

1  2

Label:

I  M  -

Ions:

a  +  2+  3+

b  +  2+  3+

c  +  2+  3+

x  +  2+  3+

y  +  2+  3+

z  +  2+  3+

hide H<sub>2</sub>O/NH<sub>3</sub>

zoom 112-122

GO

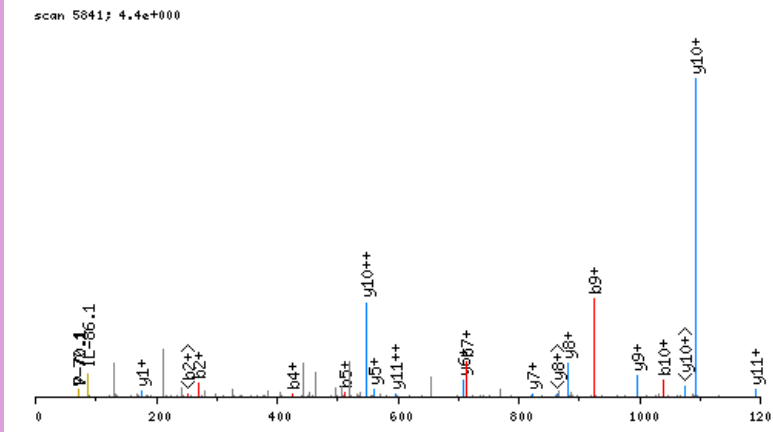

click image to zoom in; click top corners to zoom out [\[precursor±\]](#)

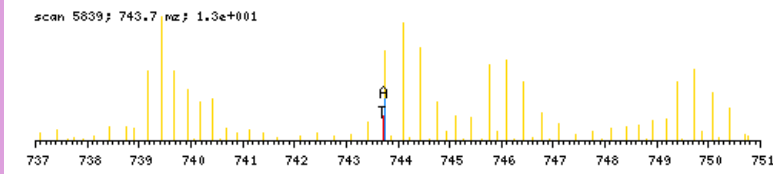

zoomed in precursor plot; T=theoretical m/z, A=acquired m/z

| b <sup>+</sup> | #  | AA # | y <sup>+</sup> | y <sup>2+</sup> |
|----------------|----|------|----------------|-----------------|
| 158.0817       | 1  | E 21 |                |                 |
| 271.1658       | 2  | I 20 | 2072.0300      | 1036.5189       |
| 368.2185       | 3  | P 19 | 1958.9460      | 979.9769        |
| 425.2400       | 4  | G 18 | 1861.8932      | 931.4505        |
| 512.2720       | 5  | S 17 | 1804.8717      | 902.9398        |
| 599.3040       | 6  | S 16 | 1717.8397      | 859.4238        |
| 714.3310       | 7  | D 15 | 1630.8077      | 815.9078        |
| 811.3837       | 8  | P 14 | 1515.7807      | 758.3943        |
| 925.4267       | 9  | N 13 | 1418.7280      | 709.8679        |
| 1038.5107      | 10 | I 12 | 1304.6850      | 652.8464        |
| 1137.5792      | 11 | V 11 | 1191.6010      | 596.3044        |
| 1234.6319      | 12 | P 10 | 1092.5326      | 546.7702        |
| 1349.6589      | 13 | D 9  | 995.4798       | 498.2438        |
| 1406.6803      | 14 | G 8  | 880.4529       | 440.7303        |
| 1521.7073      | 15 | D 7  | 823.4314       | 412.2196        |
| 1668.7757      | 16 | F 6  | 708.4044       | 354.7061        |
| 1755.8077      | 17 | S 5  | 561.3360       | 281.1719        |
| 1842.8397      | 18 | S 4  | 474.3040       | 237.6559        |
| 1955.9238      | 19 | L 3  | 387.2720       | 194.1399        |
| 2054.9922      | 20 | V 2  | 274.1879       | 137.5979        |
|                | 21 | R 1  | 175.1195       | 88.0637         |

N-term:+29.04

EKLGEYGFQNAILVR, MH+ 1792.9962, m/z 598.3369  
 L OSG39 P180811 230811-s1.05853.05853.3.dta

X-range:

-

MassTol: Y-zoom:

MassType:

AVG  MONO

Axis:

1  2

Label:

I  M  -

Ions:

a  +  2+  3+

b  +  2+  3+

c  +  2+  3+

x  +  2+  3+

y  +  2+  3+

z  +  2+  3+

hide H<sub>2</sub>O/NH<sub>3</sub>

zoom 112-122

GO

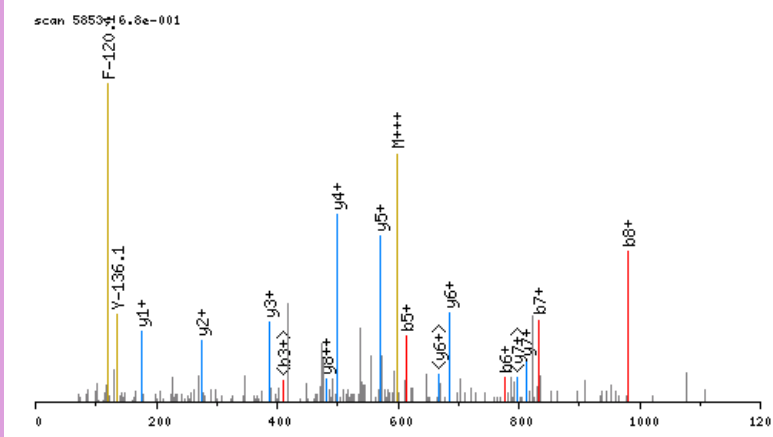

click image to zoom in; click top corners to zoom out [\[precursor±\]](#)

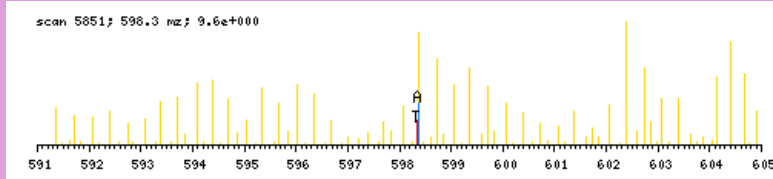

zoomed in precursor plot; T=theoretical m/z, A=acquired m/z

| b <sup>+</sup> | #  | AA # | y <sup>+</sup> | y <sup>2+</sup> |
|----------------|----|------|----------------|-----------------|
| 158.0817       | 1  | E 15 |                |                 |
| 314.2080       | 2  | K 14 | 1635.9223      | 818.4651        |
| 427.2921       | 3  | L 13 | 1479.7960      | 740.4019        |
| 484.3135       | 4  | G 12 | 1366.7119      | 683.8599        |
| 613.3561       | 5  | E 11 | 1309.6905      | 655.3491        |
| 776.4194       | 6  | Y 10 | 1180.6479      | 590.8278        |
| 833.4409       | 7  | G 9  | 1017.5845      | 509.2962        |
| 980.5093       | 8  | F 8  | 960.5631       | 480.7855        |
| 1108.5679      | 9  | Q 7  | 813.4947       | 407.2512        |
| 1222.6108      | 10 | N 6  | 685.4361       | 343.2220        |
| 1293.6479      | 11 | A 5  | 571.3932       | 286.2005        |
| 1406.7320      | 12 | I 4  | 500.3560       | 250.6819        |
| 1519.8161      | 13 | L 3  | 387.2720       | 194.1399        |
| 1618.8845      | 14 | V 2  | 274.1879       | 137.5979        |
|                | 15 | R 1  | 175.1195       | 88.0637         |

N-term:+29.04 K(2):+156.13

EKNGIDIYSLTVDSR, MH+ 1777.9972, m/z 593.3373  
 H OSG40 P180811 230811-s1.07033.07033.3.dta

X-range:

-

MassTol: Y-zoom:

MassType:

AVG  MONO

Axis:

1  2

Label:

I  M  -

Ions:

a  +  2+  3+

b  +  2+  3+

c  +  2+  3+

x  +  2+  3+

y  +  2+  3+

z  +  2+  3+

hide H<sub>2</sub>O/NH<sub>3</sub>

zoom 112-122

GO

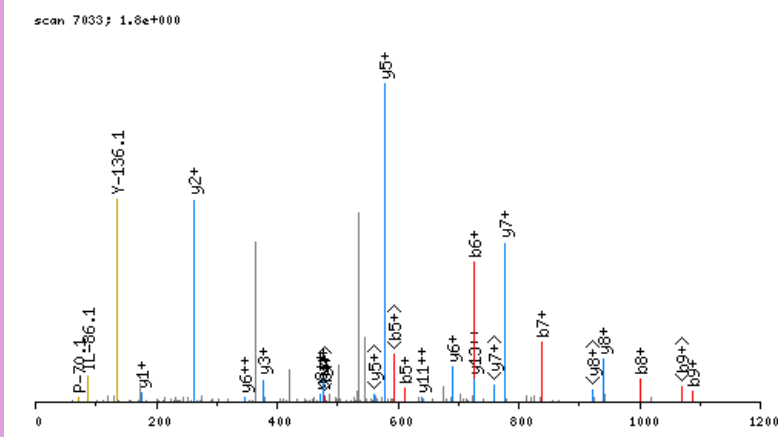

click image to zoom in; click top corners to zoom out [\[precursor±\]](#)

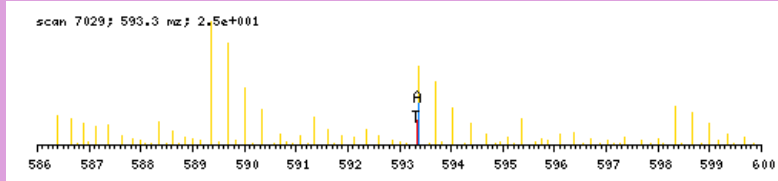

zoomed in precursor plot; T=theoretical m/z, A=acquired m/z

| b <sup>+</sup>   | #  | AA # | y <sup>+</sup>  | y <sup>2+</sup> |
|------------------|----|------|-----------------|-----------------|
| 164.1135         | 1  | E 15 |                 |                 |
| 326.2716         | 2  | K 14 | 1614.8915       | 807.9497        |
| 440.3145         | 3  | N 13 | 1452.7334       | <b>726.8706</b> |
| 497.3360         | 4  | G 12 | 1338.6905       | 669.8492        |
| <b>610.4200</b>  | 5  | I 11 | 1281.6691       | <b>641.3384</b> |
| <b>725.4470</b>  | 6  | D 10 | 1168.5850       | 584.7964        |
| <b>838.5311</b>  | 7  | I 9  | 1053.5580       | 527.2829        |
| <b>1001.5944</b> | 8  | Y 8  | <b>940.4740</b> | <b>470.7409</b> |
| <b>1088.6264</b> | 9  | S 7  | <b>777.4107</b> | 389.2092        |
| 1201.7105        | 10 | L 6  | <b>690.3786</b> | <b>345.6932</b> |
| 1302.7582        | 11 | T 5  | <b>577.2946</b> | 289.1512        |
| 1401.8266        | 12 | V 4  | <b>476.2469</b> | 238.6274        |
| 1516.8535        | 13 | D 3  | <b>377.1785</b> | 189.0931        |
| 1603.8855        | 14 | S 2  | <b>262.1515</b> | 131.5797        |
|                  | 15 | R 1  | <b>175.1195</b> | 88.0637         |

N-term:+35.07 K(2):+162.16

EKNQLEEVPSALPR, MH+ 1677.9812, m/z 559.9986  
 H OSG40 P180811 230811-s1.05326.05326.3.dta

X-range:

-

MassTol: Y-zoom:

MassType:

AVG  MONO

Axis:

1  2

Label:

I  M  -

Ions:

a  +  2+  3+

b  +  2+  3+

c  +  2+  3+

x  +  2+  3+

y  +  2+  3+

z  +  2+  3+

hide H<sub>2</sub>O/NH<sub>3</sub>

zoom 112-122

GO

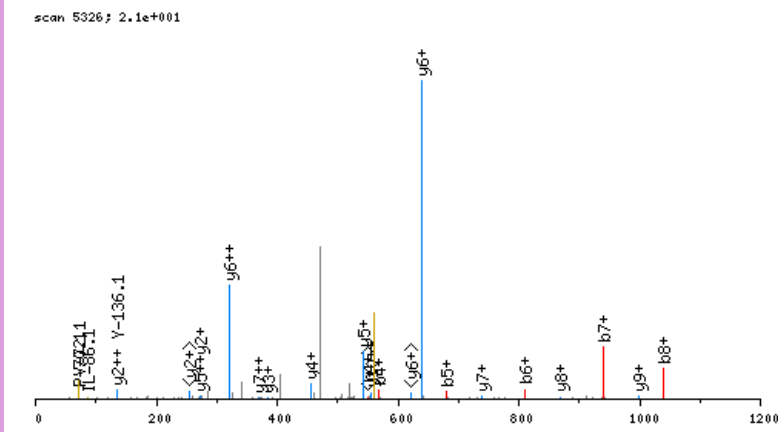

click image to zoom in; click top corners to zoom out [\[precursor±\]](#)

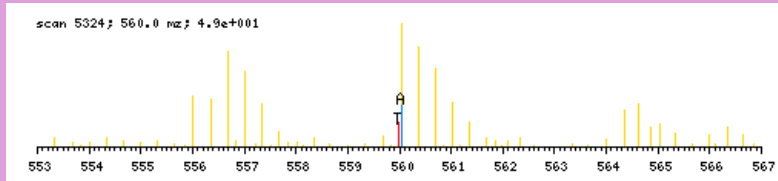

zoomed in precursor plot; T=theoretical m/z, A=acquired m/z

| b <sup>+</sup> | #  | AA # | y <sup>+</sup> | y <sup>2+</sup> |
|----------------|----|------|----------------|-----------------|
| 164.1135       | 1  | E 14 |                |                 |
| 326.2716       | 2  | K 13 | 1514.8755      | 757.9417        |
| 440.3145       | 3  | N 12 | 1352.7174      | 676.8626        |
| 568.3731       | 4  | Q 11 | 1238.6745      | 619.8412        |
| 681.4572       | 5  | L 10 | 1110.6159      | 555.8119        |
| 810.4998       | 6  | E 9  | 997.5318       | 499.2698        |
| 939.5423       | 7  | E 8  | 868.4892       | 434.7485        |
| 1038.6108      | 8  | V 7  | 739.4466       | 370.2272        |
| 1135.6635      | 9  | P 6  | 640.3782       | 320.6930        |
| 1222.6956      | 10 | S 5  | 543.3255       | 272.1666        |
| 1293.7327      | 11 | A 4  | 456.2934       | 228.6506        |
| 1406.8167      | 12 | L 3  | 385.2563       | 193.1321        |
| 1503.8695      | 13 | P 2  | 272.1723       | 136.5900        |
|                | 14 | R 1  | 175.1195       | 88.0637         |

N-term:+35.07 K(2):+162.16

EKPQTEAPQVTGPIEVVVVR, MH+ 2230.2447, m/z 558.3166  
 L OSG39 P180811 230811-s1.05149.05149.4.dta

scan 5149; 5.6e+000

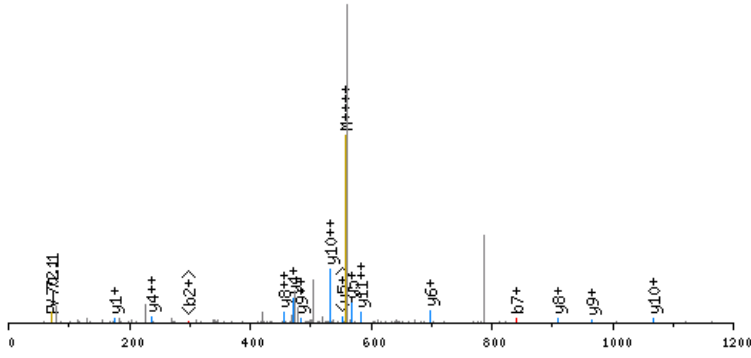

click image to zoom in; click top corners to zoom out [precursor±]

scan 5146; 558.3 m/z; 6.2e+001

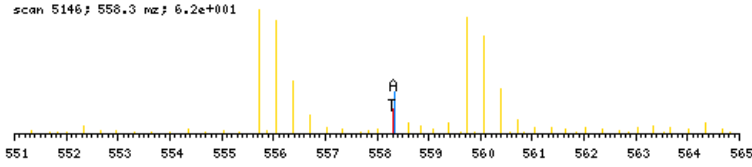

zoomed in precursor plot; T=theoretical m/z, A=acquired m/z

X-range:

-

MassTol: Y-zoom:

MassType:

AVG  MONO

Axis:

1  2

Label:

I  M  -

Ions:

a  +  2+  3+

b  +  2+  3+

c  +  2+  3+

x  +  2+  3+

y  +  2+  3+

z  +  2+  3+

hide H<sub>2</sub>O/NH<sub>3</sub>

zoom 112-122

GO

| b <sup>+</sup> | #  | AA # | y <sup>+</sup> | y <sup>2+</sup> |
|----------------|----|------|----------------|-----------------|
| 158.0817       | 1  | E 20 |                |                 |
| 314.2080       | 2  | K 19 | 2073.1709      | 1037.0893       |
| 411.2608       | 3  | P 18 | 1917.0446      | 959.0262        |
| 539.3193       | 4  | Q 17 | 1819.9918      | 910.4998        |
| 640.3670       | 5  | T 16 | 1691.9332      | 846.4705        |
| 769.4096       | 6  | E 15 | 1590.8855      | 795.9467        |
| 840.4467       | 7  | A 14 | 1461.8429      | 731.4254        |
| 937.4995       | 8  | P 13 | 1390.8058      | 695.9068        |
| 1065.5581      | 9  | Q 12 | 1293.7531      | 647.3804        |
| 1164.6265      | 10 | V 11 | 1165.6945      | 583.3512        |
| 1265.6742      | 11 | T 10 | 1066.6261      | 533.8169        |
| 1322.6956      | 12 | G 9  | 965.5784       | 483.2931        |
| 1419.7484      | 13 | P 8  | 908.5569       | 454.7824        |
| 1532.8324      | 14 | I 7  | 811.5042       | 406.2560        |
| 1661.8750      | 15 | E 6  | 698.4201       | 349.7140        |
| 1760.9435      | 16 | V 5  | 569.3775       | 285.1927        |
| 1857.9962      | 17 | P 4  | 470.3091       | 235.6585        |
| 1957.0646      | 18 | V 3  | 373.2563       | 187.1321        |
| 2056.1330      | 19 | V 2  | 274.1879       | 137.5979        |
|                | 20 | R 1  | 175.1195       | 88.0637         |

N-term:+29.04 K(2):+156.13

ELADCCTKQEPER, MH+ 1703.8368, m/z 568.6171  
 H OSG40 P180811 230811-s1.02045.02045.3.dta

X-range:

-

MassTol: Y-zoom:

MassType:

AVG  MONO

Axis:

1  2

Label:

I  M  -

Ions:

a  +  2+  3+

b  +  2+  3+

c  +  2+  3+

x  +  2+  3+

y  +  2+  3+

z  +  2+  3+

hide H<sub>2</sub>O/NH<sub>3</sub>

zoom 112-122

GO

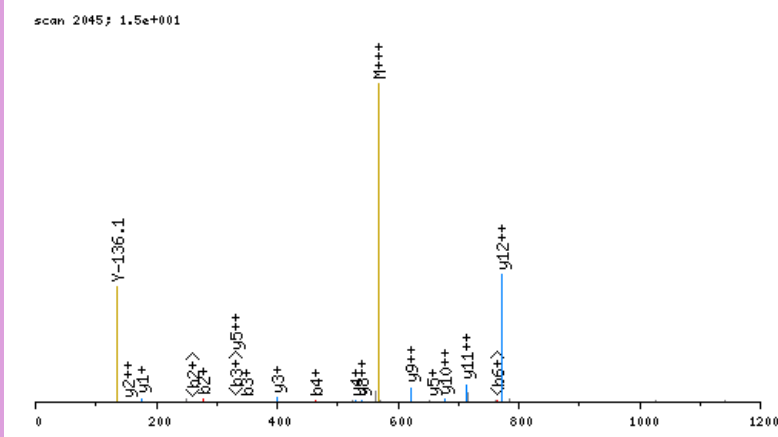

click image to zoom in; click top corners to zoom out [\[precursor±\]](#)

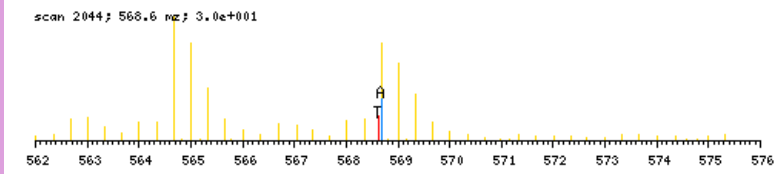

zoomed in precursor plot; T=theoretical m/z, A=acquired m/z

| b <sup>+</sup> | #  | AA # | y <sup>+</sup> | y <sup>2+</sup> |
|----------------|----|------|----------------|-----------------|
| 164.1135       | 1  | E 13 |                |                 |
| 277.1976       | 2  | L 12 | 1540.7311      | 770.8695        |
| 348.2347       | 3  | A 11 | 1427.6471      | 714.3274        |
| 463.2616       | 4  | D 10 | 1356.6100      | 678.8089        |
| 623.2922       | 5  | C 9  | 1241.5830      | 621.2954        |
| 783.3228       | 6  | C 8  | 1081.5524      | 541.2801        |
| 884.3705       | 7  | T 7  | 921.5218       | 461.2648        |
| 1046.5286      | 8  | K 6  | 820.4741       | 410.7410        |
| 1174.5872      | 9  | Q 5  | 658.3160       | 329.6619        |
| 1303.6298      | 10 | E 4  | 530.2575       | 265.6326        |
| 1400.6825      | 11 | P 3  | 401.2149       | 201.1113        |
| 1529.7251      | 12 | E 2  | 304.1621       | 152.5850        |
|                | 13 | R 1  | 175.1195       | 88.0637         |

N-term:+35.07 C(5):+160.03  
 C(6):+160.03 K(8):+162.16

ELALPSYKPKVR, MH+ 1425.8470, m/z 475.9538  
 L OSG39 P180811 230811-s1.04729.04729.3.dta

X-range:

-

MassTol: Y-zoom:

MassType:

AVG  MONO

Axis:

1  2

Label:

I  M  -

Ions:

a  +  2+  3+

b  +  2+  3+

c  +  2+  3+

x  +  2+  3+

y  +  2+  3+

z  +  2+  3+

hide H<sub>2</sub>O/NH<sub>3</sub>

zoom 112-122

GO

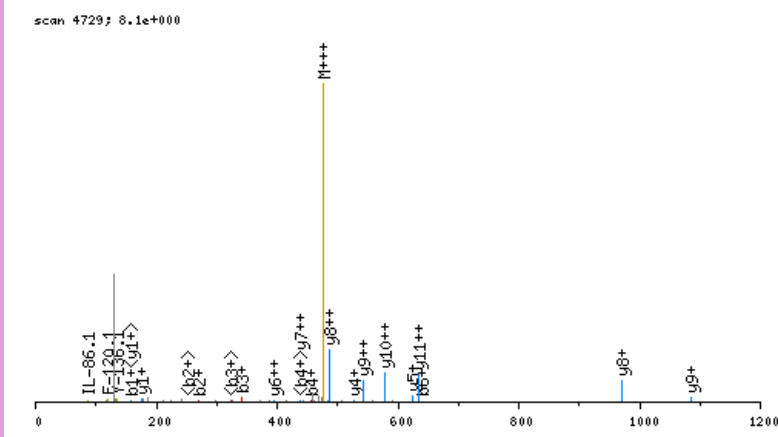

click image to zoom in; click top corners to zoom out [\[precursor±\]](#)

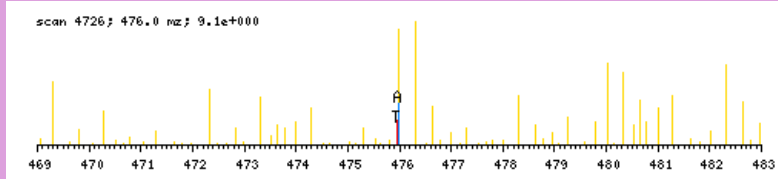

zoomed in precursor plot; T=theoretical m/z, A=acquired m/z

| b <sup>+</sup> | #  | AA # | y <sup>+</sup> | y <sup>2+</sup> |
|----------------|----|------|----------------|-----------------|
| 158.0817       | 1  | E 12 |                |                 |
| 271.1658       | 2  | L 11 | 1268.7731      | 634.8905        |
| 342.2029       | 3  | A 10 | 1155.6890      | 578.3484        |
| 455.2869       | 4  | L 9  | 1084.6519      | 542.8299        |
| 552.3397       | 5  | P 8  | 971.5679       | 486.2878        |
| 639.3717       | 6  | S 7  | 874.5151       | 437.7615        |
| 802.4351       | 7  | Y 6  | 787.4831       | 394.2454        |
| 899.4878       | 8  | P 5  | 624.4197       | 312.7138        |
| 1055.6141      | 9  | K 4  | 527.3670       | 264.1874        |
| 1152.6669      | 10 | P 3  | 371.2407       | 186.1243        |
| 1251.7353      | 11 | V 2  | 274.1879       | 137.5979        |
|                | 12 | R 1  | 175.1195       | 88.0637         |

N-term:+29.04 K(9):+156.13



ELFELLGPEGLDLIEKLLQNR, MH+ 2507.4761, m/z 627.6245  
H OSG40 P180811 230811-s1.07457.07457.4.dta

scan 7457; 4.0e+000

X-range:

0 - 0

MassTol: Y-zoom:

0. 1.

MassType:

AVG MONO

Axis:

1 2

Label:

I M -

Ions:

a + 2+ 3+

b + 2+ 3+

c + 2+ 3+

x + 2+ 3+

y + 2+ 3+

z + 2+ 3+

hide H<sub>2</sub>O/NH<sub>3</sub>

zoom 112-122

GO

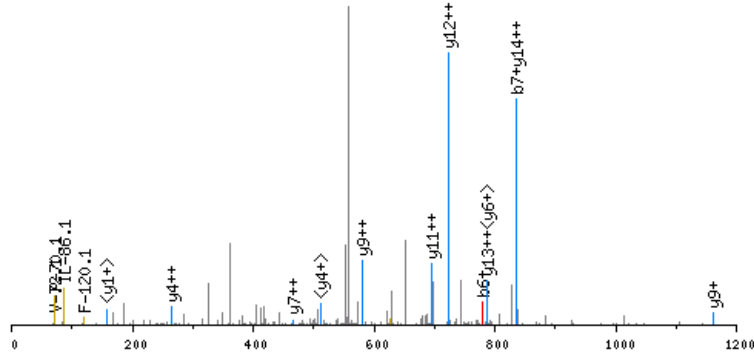

click image to zoom in; click top corners to zoom out [precursor±]

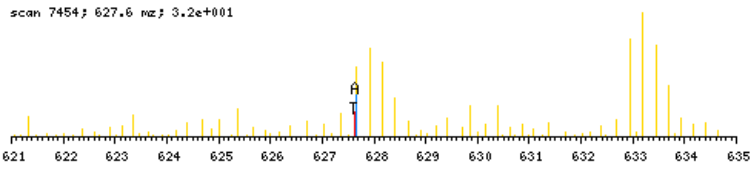

zoomed in precursor plot; T=theoretical m/z, A=acquired m/z

| b <sup>+</sup> | #  | AA # | y <sup>+</sup> | y <sup>2+</sup> |
|----------------|----|------|----------------|-----------------|
| 164.1135       | 1  | E 21 |                |                 |
| 277.1976       | 2  | L 20 | 2344.3704      | 1172.6891       |
| 424.2660       | 3  | F 19 | 2231.2864      | 1116.1471       |
| 553.3086       | 4  | E 18 | 2084.2180      | 1042.6129       |
| 666.3926       | 5  | L 17 | 1955.1754      | 978.0916        |
| 779.4767       | 6  | L 16 | 1842.0913      | 921.5496        |
| 836.4982       | 7  | G 15 | 1729.0072      | 865.0075        |
| 933.5509       | 8  | P 14 | 1671.9858      | 836.4968        |
| 1062.5935      | 9  | E 13 | 1574.9330      | 787.9704        |
| 1119.6150      | 10 | G 12 | 1445.8904      | 723.4491        |
| 1232.6990      | 11 | L 11 | 1388.8690      | 694.9384        |
| 1347.7260      | 12 | D 10 | 1275.7849      | 638.3964        |
| 1460.8100      | 13 | L 9  | 1160.7580      | 580.8829        |
| 1573.8941      | 14 | I 8  | 1047.6739      | 524.3409        |
| 1702.9367      | 15 | E 7  | 934.5898       | 467.7988        |
| 1865.0948      | 16 | K 6  | 805.5472       | 403.2775        |
| 1978.1789      | 17 | L 5  | 643.3891       | 322.1985        |
| 2091.2629      | 18 | L 4  | 530.3051       | 265.6564        |
| 2219.3215      | 19 | Q 3  | 417.2210       | 209.1144        |
| 2333.3644      | 20 | N 2  | 289.1624       | 145.0851        |
|                | 21 | R 1  | 175.1195       | 88.0637         |

N-term:+35.07 K(16):+162.16

ELGGDVHSGTALPASR, MH+ 1594.8189, m/z 532.2778  
 L OSG39 P180811 230811-s1.02873.02873.3.dta

X-range:

-

MassTol: Y-zoom:

MassType:

AVG  MONO

Axis:

1  2

Label:

I  M  -

Ions:

a  +  2+  3+

b  +  2+  3+

c  +  2+  3+

x  +  2+  3+

y  +  2+  3+

z  +  2+  3+

hide H<sub>2</sub>O/NH<sub>3</sub>

zoom 112-122

GO

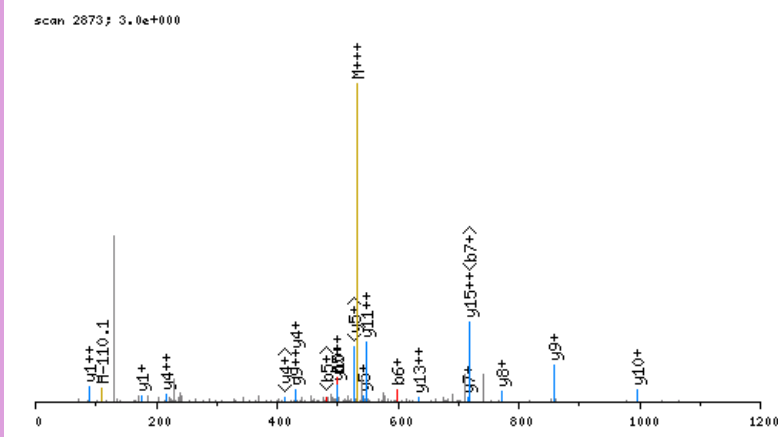

click image to zoom in; click top corners to zoom out [\[precursor±\]](#)

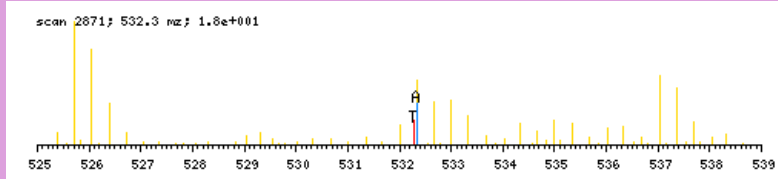

zoomed in precursor plot; T=theoretical m/z, A=acquired m/z

| b <sup>+</sup> | #  | AA # | y <sup>+</sup> | y <sup>2+</sup> |
|----------------|----|------|----------------|-----------------|
| 158.0817       | 1  | E 16 |                |                 |
| 271.1658       | 2  | L 15 | 1437.7450      | 719.3764        |
| 328.1872       | 3  | G 14 | 1324.6610      | 662.8344        |
| 385.2087       | 4  | G 13 | 1267.6395      | 634.3237        |
| 500.2356       | 5  | D 12 | 1210.6180      | 605.8129        |
| 599.3040       | 6  | V 11 | 1095.5911      | 548.2995        |
| 736.3630       | 7  | H 10 | 996.5227       | 498.7652        |
| 823.3950       | 8  | S 9  | 859.4638       | 430.2358        |
| 880.4164       | 9  | G 8  | 772.4317       | 386.7198        |
| 981.4641       | 10 | T 7  | 715.4103       | 358.2090        |
| 1052.5012      | 11 | A 6  | 614.3626       | 307.6852        |
| 1165.5853      | 12 | L 5  | 543.3255       | 272.1666        |
| 1262.6381      | 13 | P 4  | 430.2414       | 215.6246        |
| 1333.6752      | 14 | A 3  | 333.1886       | 167.0982        |
| 1420.7072      | 15 | S 2  | 262.1515       | 131.5797        |
|                | 16 | R 1  | 175.1195       | 88.0637         |

N-term:+29.04

ELQALIDSHFEAR, MH+ 1562.8391, m/z 521.6179  
 H OSG40 P180811 230811-s1.07127.07127.3.dta

X-range:

-

MassTol: Y-zoom:

MassType:

AVG  MONO

Axis:

1  2

Label:

I  M  -

Ions:

a  +  2+  3+

b  +  2+  3+

c  +  2+  3+

x  +  2+  3+

y  +  2+  3+

z  +  2+  3+

hide H<sub>2</sub>O/NH<sub>3</sub>

zoom 112-122

GO

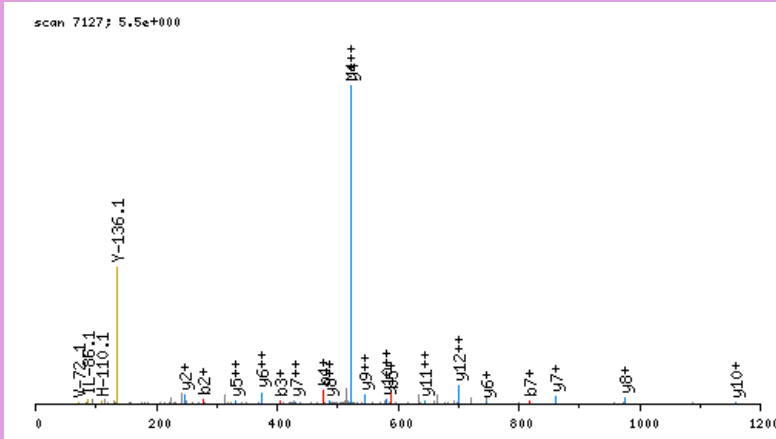

click image to zoom in; click top corners to zoom out [\[precursor±\]](#)

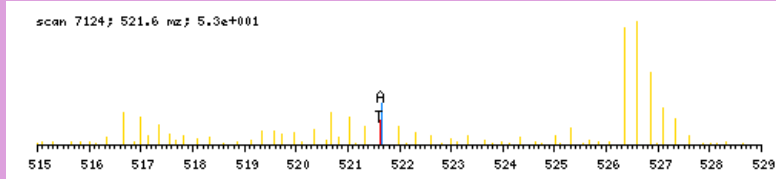

zoomed in precursor plot; T=theoretical m/z, A=acquired m/z

| b <sup>+</sup> | #  | AA # | y <sup>+</sup> | y <sup>2+</sup> |
|----------------|----|------|----------------|-----------------|
| 164.1135       | 1  | E 13 |                |                 |
| 277.1976       | 2  | L 12 | 1399.7334      | 700.3706        |
| 405.2561       | 3  | Q 11 | 1286.6493      | 643.8286        |
| 476.2932       | 4  | A 10 | 1158.5907      | 579.7993        |
| 589.3773       | 5  | L 9  | 1087.5536      | 544.2807        |
| 702.4614       | 6  | I 8  | 974.4696       | 487.7387        |
| 817.4883       | 7  | D 7  | 861.3855       | 431.1967        |
| 904.5203       | 8  | S 6  | 746.3586       | 373.6832        |
| 1041.5793      | 9  | H 5  | 659.3265       | 330.1672        |
| 1188.6477      | 10 | F 4  | 522.2676       | 261.6377        |
| 1317.6903      | 11 | E 3  | 375.1992       | 188.1035        |
| 1388.7274      | 12 | A 2  | 246.1566       | 123.5822        |
|                | 13 | R 1  | 175.1195       | 88.0637         |

N-term:+35.07

ELSGTIKEILGTAQSVGCNVNDR, MH+ 2460.2768, m/z 615.8247  
 L OSG39 P180811 230811-s1.07819.07819.4.dta

scan 7819; 3.0e+000

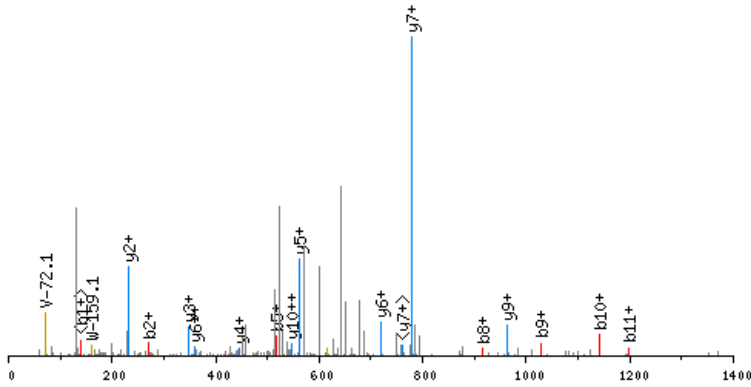

click image to zoom in; click top corners to zoom out [\[precursor±\]](#)

scan 7816; 615.8 mz; 2.4e+001

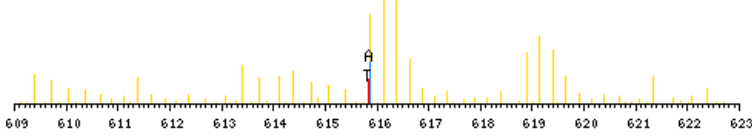

zoomed in precursor plot; T=theoretical m/z, A=acquired m/z

| b <sup>+</sup>   | #  | AA # | y <sup>+</sup>  | y <sup>2+</sup> |
|------------------|----|------|-----------------|-----------------|
| 158.0817         | 1  | E 23 |                 |                 |
| <b>271.1658</b>  | 2  | L 22 | 2303.2029       | 1152.1054       |
| 358.1978         | 3  | S 21 | 2190.1188       | 1095.5633       |
| 415.2192         | 4  | G 20 | 2103.0868       | 1052.0473       |
| <b>516.2669</b>  | 5  | T 19 | 2046.0654       | 1023.5366       |
| 629.3510         | 6  | I 18 | 1945.0177       | 973.0127        |
| 785.4773         | 7  | K 17 | 1831.9336       | 916.4707        |
| <b>914.5199</b>  | 8  | E 16 | 1675.8073       | 838.4076        |
| <b>1027.6039</b> | 9  | I 15 | 1546.7647       | 773.8863        |
| <b>1140.6880</b> | 10 | L 14 | 1433.6807       | 717.3442        |
| <b>1197.7095</b> | 11 | G 13 | 1320.5966       | 660.8022        |
| 1298.7572        | 12 | T 12 | 1263.5751       | 632.2915        |
| 1369.7943        | 13 | A 11 | 1162.5274       | 581.7676        |
| 1497.8528        | 14 | Q 10 | 1091.4903       | <b>546.2491</b> |
| 1584.8849        | 15 | S 9  | <b>963.4318</b> | 482.2198        |
| 1683.9533        | 16 | V 8  | 876.3997        | 438.7038        |
| 1740.9748        | 17 | G 7  | <b>777.3313</b> | 389.1696        |
| 1901.0054        | 18 | C 6  | <b>720.3098</b> | <b>360.6588</b> |
| 2015.0483        | 19 | N 5  | <b>560.2792</b> | 280.6435        |
| 2114.1167        | 20 | V 4  | <b>446.2363</b> | 223.6221        |
| 2229.1436        | 21 | D 3  | <b>347.1679</b> | 174.0879        |
| 2286.1651        | 22 | G 2  | <b>232.1410</b> | 116.5744        |
|                  | 23 | R 1  | 175.1195        | 88.0637         |

N-term:+29.04 K(7):+156.13  
 C(18):+160.03

X-range:

-

MassTol: Y-zoom:

MassType:

AVG  MONO

Axis:

1  2

Label:

I  M  -

Ions:

a  +  2+  3+

b  +  2+  3+

c  +  2+  3+

x  +  2+  3+

y  +  2+  3+

z  +  2+  3+

hide H<sub>2</sub>O/NH<sub>3</sub>

zoom 112-122

GO

EMGFCDRQLNLRLLR, MH+ 1949.0213, m/z 650.3453  
 L OSG39 P180811 230811-s1.05815.05815.3.dta

X-range:

-

MassTol: Y-zoom:

MassType:

AVG  MONO

Axis:

1  2

Label:

I  M  -

Ions:

a  +  2+  3+

b  +  2+  3+

c  +  2+  3+

x  +  2+  3+

y  +  2+  3+

z  +  2+  3+

hide H<sub>2</sub>O/NH<sub>3</sub>

zoom 112-122

GO

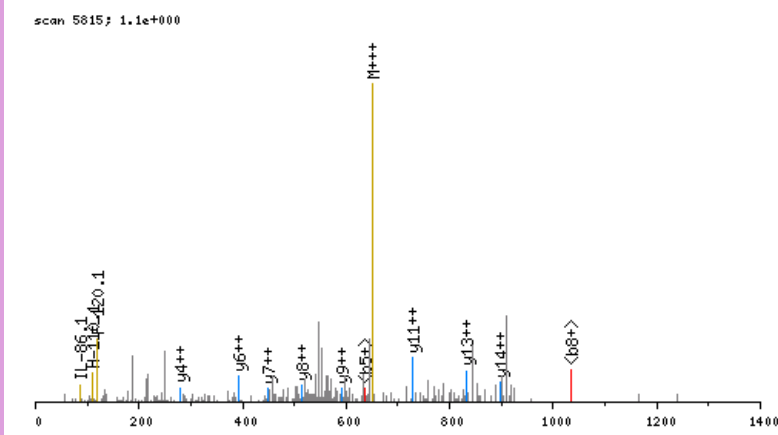

click image to zoom in; click top corners to zoom out [\[precursor±\]](#)

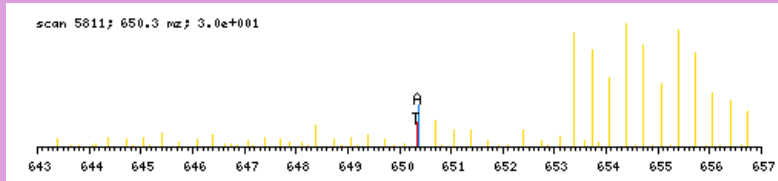

zoomed in precursor plot; T=theoretical m/z, A=acquired m/z

| b <sup>+</sup> | #  | AA # | y <sup>+</sup> | y <sup>2+</sup> |
|----------------|----|------|----------------|-----------------|
| 158.0817       | 1  | E 15 |                |                 |
| 289.1222       | 2  | M 14 | 1791.9474      | 896.4776        |
| 346.1436       | 3  | G 13 | 1660.9069      | 830.9574        |
| 493.2121       | 4  | F 12 | 1603.8854      | 802.4466        |
| 653.2427       | 5  | C 11 | 1456.8170      | 728.9124        |
| 768.2696       | 6  | D 10 | 1296.7864      | 648.8971        |
| 924.3707       | 7  | R 9  | 1181.7595      | 591.3837        |
| 1052.4293      | 8  | Q 8  | 1025.6584      | 513.3331        |
| 1165.5134      | 9  | L 7  | 897.5998       | 449.3038        |
| 1279.5563      | 10 | N 6  | 784.5157       | 392.7618        |
| 1392.6403      | 11 | L 5  | 670.4728       | 335.7403        |
| 1548.7415      | 12 | R 4  | 557.3887       | 279.1983        |
| 1661.8255      | 13 | L 3  | 401.2876       | 201.1477        |
| 1774.9096      | 14 | L 2  | 288.2036       | 144.6057        |
|                | 15 | R 1  | 175.1195       | 88.0637         |

N-term:+29.04 C(5):+160.03

ENLKGGDDLDENYVLSSR, MH+ 2060.0936, m/z 687.3694  
 H OSG39 P180811 230811-s1.04969.04969.3.dta

scan 4969; 2.7e+000

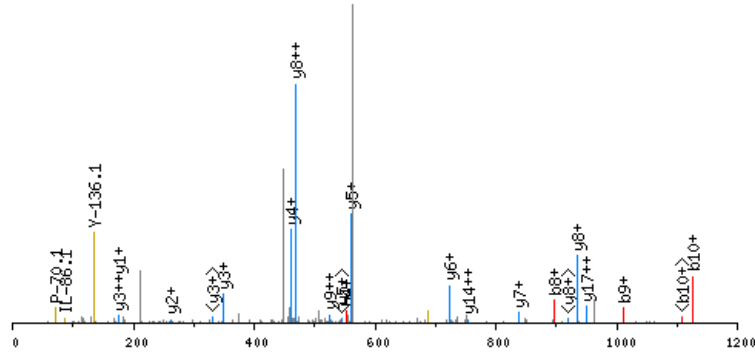

click image to zoom in; click top corners to zoom out [\[precursor±\]](#)

scan 4966; 687.4 m/z; 1.3e+001

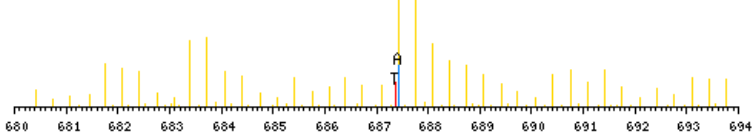

zoomed in precursor plot; T=theoretical m/z, A=acquired m/z

X-range:

-

MassTol: Y-zoom:

MassType:

AVG  MONO

Axis:

1  2

Label:

I  M  -

Ions:

a  +  2+  3+

b  +  2+  3+

c  +  2+  3+

x  +  2+  3+

y  +  2+  3+

z  +  2+  3+

hide H<sub>2</sub>O/NH<sub>3</sub>

zoom 112-122

GO

| b <sup>+</sup> | #  | AA # | y <sup>+</sup> | y <sup>2+</sup> |
|----------------|----|------|----------------|-----------------|
| 164.1135       | 1  | E 18 |                |                 |
| 278.1564       | 2  | N 17 | 1896.9880      | 948.9979        |
| 391.2405       | 3  | L 16 | 1782.9450      | 891.9764        |
| 553.3986       | 4  | K 15 | 1669.8610      | 835.4344        |
| 610.4200       | 5  | G 14 | 1507.7029      | 754.3554        |
| 667.4415       | 6  | G 13 | 1450.6814      | 725.8446        |
| 782.4685       | 7  | D 12 | 1393.6599      | 697.3339        |
| 897.4954       | 8  | D 11 | 1278.6330      | 639.8204        |
| 1010.5795      | 9  | L 10 | 1163.6061      | 582.3069        |
| 1125.6064      | 10 | D 9  | 1050.5220      | 525.7649        |
| 1222.6592      | 11 | P 8  | 935.4951       | 468.2514        |
| 1336.7021      | 12 | N 7  | 838.4423       | 419.7251        |
| 1499.7654      | 13 | Y 6  | 724.3994       | 362.7036        |
| 1598.8338      | 14 | V 5  | 561.3360       | 281.1719        |
| 1711.9179      | 15 | L 4  | 462.2676       | 231.6377        |
| 1798.9499      | 16 | S 3  | 349.1836       | 175.0957        |
| 1885.9820      | 17 | S 2  | 262.1515       | 131.5797        |
|                | 18 | R 1  | 175.1195       | 88.0637         |

N-term:+35.07 K(4):+162.16

ENPLYGSVSSFPKLVPR, MH+ 1946.0751, m/z 649.3632  
 L OSG39 P180811 230811-s1.06762.06762.3.dta

X-range:

-

MassTol: Y-zoom:

MassType:

AVG  MONO

Axis:

1  2

Label:

I  M  -

Ions:

a  +  2+  3+

b  +  2+  3+

c  +  2+  3+

x  +  2+  3+

y  +  2+  3+

z  +  2+  3+

hide H<sub>2</sub>O/NH<sub>3</sub>

zoom 112-122

GO

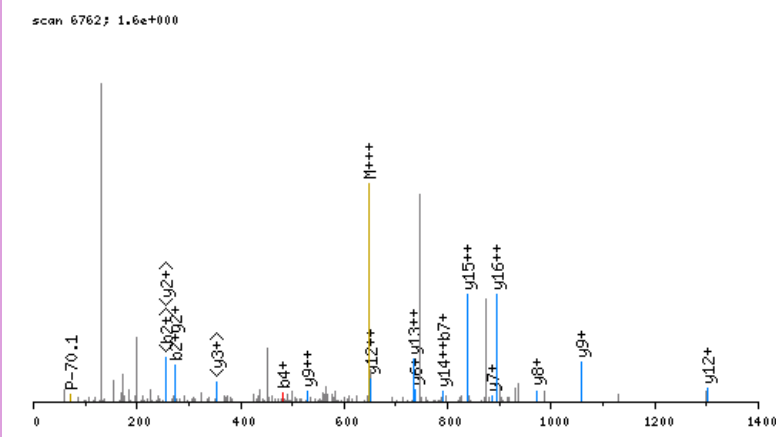

click image to zoom in; click top corners to zoom out [\[precursor±\]](#)

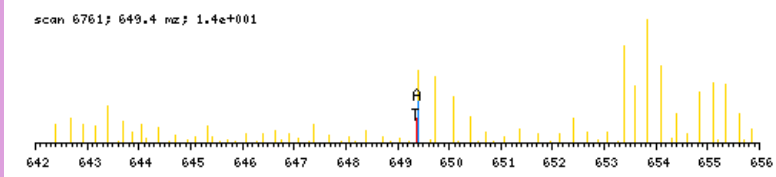

zoomed in precursor plot; T=theoretical m/z, A=acquired m/z

| b <sup>+</sup> | #  | AA | #  | y <sup>+</sup> | y <sup>2+</sup> |
|----------------|----|----|----|----------------|-----------------|
| 158.0817       | 1  | E  | 17 |                |                 |
| 272.1246       | 2  | N  | 16 | 1789.0013      | 895.0045        |
| 369.1774       | 3  | P  | 15 | 1674.9583      | 837.9831        |
| 482.2614       | 4  | L  | 14 | 1577.9056      | 789.4567        |
| 645.3248       | 5  | Y  | 13 | 1464.8215      | 732.9147        |
| 702.3462       | 6  | G  | 12 | 1301.7582      | 651.3830        |
| 789.3783       | 7  | S  | 11 | 1244.7367      | 622.8723        |
| 888.4467       | 8  | V  | 10 | 1157.7047      | 579.3563        |
| 975.4787       | 9  | S  | 9  | 1058.6363      | 529.8221        |
| 1062.5107      | 10 | S  | 8  | 971.6042       | 486.3060        |
| 1209.5792      | 11 | F  | 7  | 884.5722       | 442.7900        |
| 1306.6319      | 12 | P  | 6  | 737.5038       | 369.2558        |
| 1462.7582      | 13 | K  | 5  | 640.4510       | 320.7294        |
| 1575.8423      | 14 | L  | 4  | 484.3247       | 242.6663        |
| 1674.9107      | 15 | V  | 3  | 371.2407       | 186.1243        |
| 1771.9635      | 16 | P  | 2  | 272.1723       | 136.5900        |
|                | 17 | R  | 1  | 175.1195       | 88.0637         |

N-term:+29.04 K(13):+156.13

ENYGLADCCTKQEPER, MH+ 2154.9435, m/z 718.9860  
 L OSG39 P180811 230811-s1.02917.02917.3.dta

X-range:

-

MassTol: Y-zoom:

MassType:

AVG  MONO

Axis:

1  2

Label:

I  M  -

Ions:

a  +  2+  3+

b  +  2+  3+

c  +  2+  3+

x  +  2+  3+

y  +  2+  3+

z  +  2+  3+

hide H<sub>2</sub>O/NH<sub>3</sub>

zoom 112-122

GO

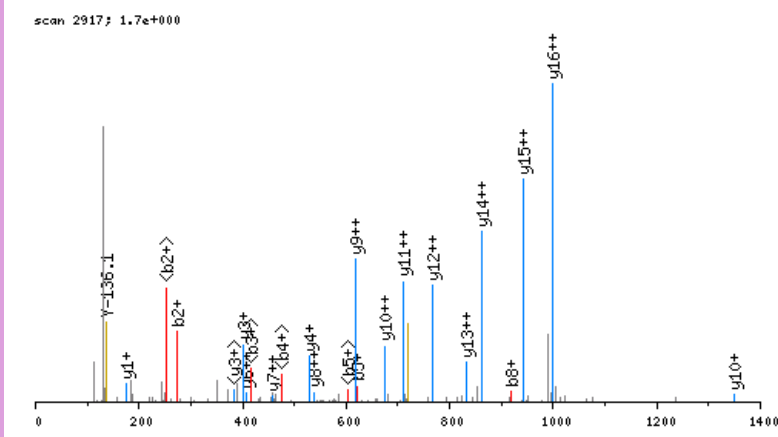

click image to zoom in; click top corners to zoom out [\[precursor±\]](#)

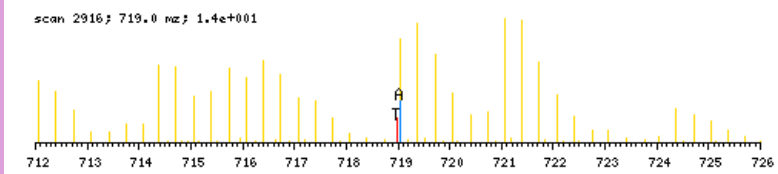

zoomed in precursor plot; T=theoretical m/z, A=acquired m/z

| b <sup>+</sup> | #  | AA # | y <sup>+</sup> | y <sup>2+</sup> |
|----------------|----|------|----------------|-----------------|
| 158.0817       | 1  | E 17 |                |                 |
| 272.1246       | 2  | N 16 | 1997.8696      | 999.4387        |
| 435.1879       | 3  | Y 15 | 1883.8267      | 942.4173        |
| 492.2094       | 4  | G 14 | 1720.7634      | 860.8856        |
| 621.2520       | 5  | E 13 | 1663.7419      | 832.3749        |
| 734.3361       | 6  | L 12 | 1534.6993      | 767.8536        |
| 805.3732       | 7  | A 11 | 1421.6153      | 711.3115        |
| 920.4001       | 8  | D 10 | 1350.5782      | 675.7930        |
| 1080.4307      | 9  | C 9  | 1235.5512      | 618.2795        |
| 1240.4613      | 10 | C 8  | 1075.5206      | 538.2642        |
| 1341.5090      | 11 | T 7  | 915.4900       | 458.2489        |
| 1497.6353      | 12 | K 6  | 814.4423       | 407.7251        |
| 1625.6939      | 13 | Q 5  | 658.3160       | 329.6619        |
| 1754.7365      | 14 | E 4  | 530.2575       | 265.6326        |
| 1851.7892      | 15 | P 3  | 401.2149       | 201.1113        |
| 1980.8318      | 16 | E 2  | 304.1621       | 152.5850        |
|                | 17 | R 1  | 175.1195       | 88.0637         |

N-term:+29.04 C(9):+160.03  
 C(10):+160.03 K(12):+156.13



EPPSLSLVGTAPPNTPR, MH+ 1760.9546, m/z 587.6564  
 L OSG40 P180811 230811-s1.03457.03457.3.dta

X-range:

-

MassTol: Y-zoom:

MassType:

AVG  MONO

Axis:

1  2

Label:

I  M  -

Ions:

a  +  2+  3+

b  +  2+  3+

c  +  2+  3+

x  +  2+  3+

y  +  2+  3+

z  +  2+  3+

hide H<sub>2</sub>O/NH<sub>3</sub>

zoom 112-122

GO

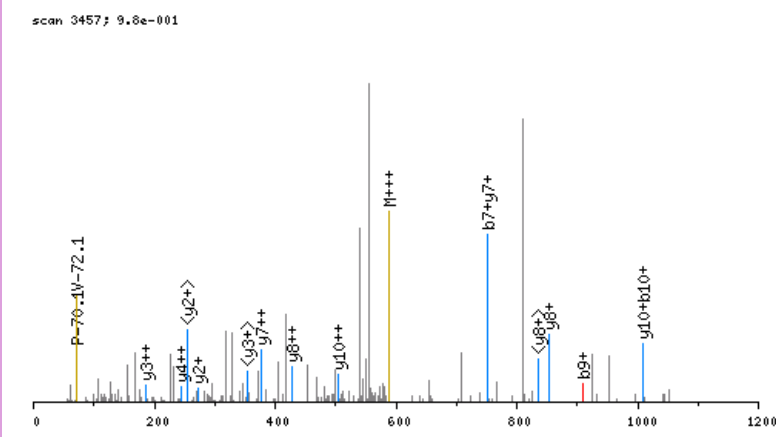

click image to zoom in; click top corners to zoom out [\[precursor±\]](#)

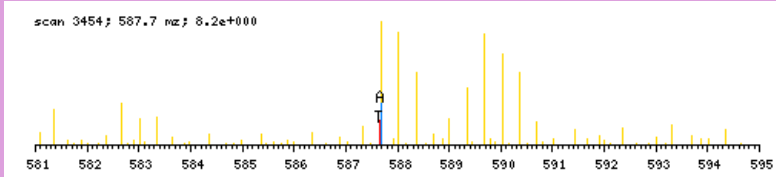

zoomed in precursor plot; T=theoretical m/z, A=acquired m/z

| b <sup>+</sup> | #  | AA # | y <sup>+</sup> | y <sup>2+</sup> |
|----------------|----|------|----------------|-----------------|
| 158.0817       | 1  | E 17 |                |                 |
| 255.1345       | 2  | P 16 | 1603.8808      | 802.4443        |
| 352.1872       | 3  | P 15 | 1506.8280      | 753.9179        |
| 439.2192       | 4  | S 14 | 1409.7753      | 705.3915        |
| 552.3033       | 5  | L 13 | 1322.7432      | 661.8755        |
| 639.3353       | 6  | S 12 | 1209.6592      | 605.3335        |
| 752.4194       | 7  | L 11 | 1122.6271      | 561.8175        |
| 851.4878       | 8  | V 10 | 1009.5431      | 505.2754        |
| 908.5093       | 9  | G 9  | 910.4747       | 455.7412        |
| 1009.5570      | 10 | T 8  | 853.4532       | 427.2305        |
| 1080.5941      | 11 | A 7  | 752.4055       | 376.7067        |
| 1177.6468      | 12 | P 6  | 681.3684       | 341.1881        |
| 1274.6996      | 13 | P 5  | 584.3156       | 292.6617        |
| 1388.7425      | 14 | N 4  | 487.2629       | 244.1353        |
| 1489.7902      | 15 | T 3  | 373.2199       | 187.1139        |
| 1586.8430      | 16 | P 2  | 272.1723       | 136.5900        |
|                | 17 | R 1  | 175.1195       | 88.0637         |

N-term:+29.04

EPPVPLVGNWRPPQPVKGR, MH+ 2191.3140, m/z 548.5840  
 H OSG40 P180811 230811-s1.06921.06921.4.dta

X-range:

-

MassTol: Y-zoom:

MassType:

AVG  MONO

Axis:

1  2

Label:

I  M  -

Ions:

a  +  2+  3+

b  +  2+  3+

c  +  2+  3+

x  +  2+  3+

y  +  2+  3+

z  +  2+  3+

hide H<sub>2</sub>O/NH<sub>3</sub>

zoom 112-122

GO

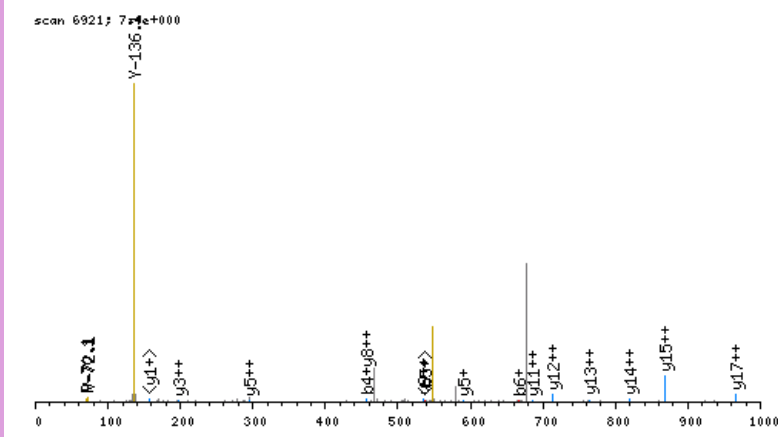

click image to zoom in; click top corners to zoom out [precursor±]

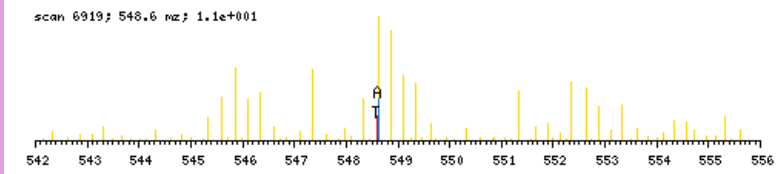

zoomed in precursor plot; T=theoretical m/z, A=acquired m/z

| b <sup>+</sup> | #  | AA | #  | y <sup>+</sup> | y <sup>2+</sup> |
|----------------|----|----|----|----------------|-----------------|
| 164.1135       | 1  | E  | 19 |                |                 |
| 261.1663       | 2  | P  | 18 | 2028.2083      | 1014.6081       |
| 358.2190       | 3  | P  | 17 | 1931.1556      | 966.0817        |
| 457.2874       | 4  | V  | 16 | 1834.1028      | 917.5553        |
| 554.3402       | 5  | P  | 15 | 1735.0344      | 868.0211        |
| 667.4243       | 6  | L  | 14 | 1637.9816      | 819.4947        |
| 766.4927       | 7  | V  | 13 | 1524.8976      | 762.9527        |
| 823.5141       | 8  | G  | 12 | 1425.8292      | 713.4185        |
| 937.5571       | 9  | N  | 11 | 1368.8077      | 684.9078        |
| 1123.6364      | 10 | W  | 10 | 1254.7648      | 627.8863        |
| 1279.7375      | 11 | R  | 9  | 1068.6855      | 534.8466        |
| 1376.7903      | 12 | P  | 8  | 912.5843       | 456.7961        |
| 1473.8430      | 13 | P  | 7  | 815.5316       | 408.2697        |
| 1601.9016      | 14 | Q  | 6  | 718.4788       | 359.7433        |
| 1698.9544      | 15 | P  | 5  | 590.4202       | 295.7140        |
| 1798.0228      | 16 | V  | 4  | 493.3675       | 247.1877        |
| 1960.1809      | 17 | K  | 3  | 394.2991       | 197.6534        |
| 2017.2023      | 18 | G  | 2  | 232.1410       | 116.5744        |
|                | 19 | R  | 1  | 175.1195       | 88.0637         |

N-term:+35.07 K(17):+162.16

EPVDVLEAWGVHR, MH+ 1534.8018, m/z 512.2721  
 L OSG40 P180811 230811-s1.08130.08130.3.dta

X-range:

-

MassTol: Y-zoom:

MassType:

AVG  MONO

Axis:

1  2

Label:

I  M  -

Ions:

a  +  2+  3+

b  +  2+  3+

c  +  2+  3+

x  +  2+  3+

y  +  2+  3+

z  +  2+  3+

hide H<sub>2</sub>O/NH<sub>3</sub>

zoom 112-122

GO

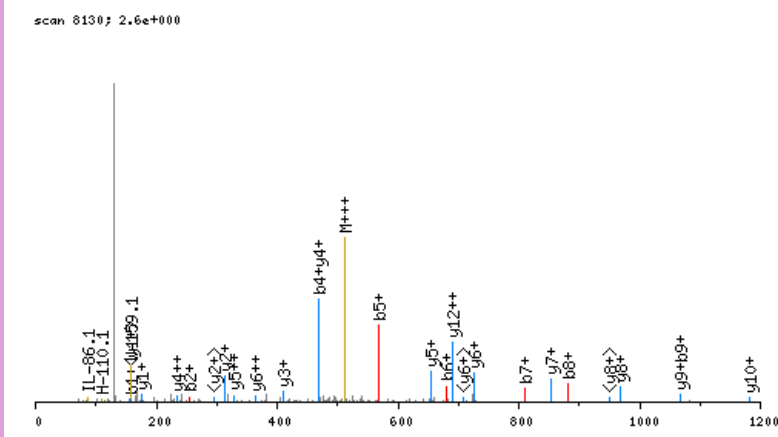

click image to zoom in; click top corners to zoom out [\[precursor±\]](#)

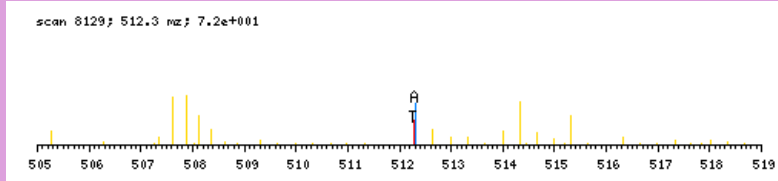

zoomed in precursor plot; T=theoretical m/z, A=acquired m/z

| b <sup>+</sup> | #  | AA # | y <sup>+</sup> | y <sup>2+</sup> |
|----------------|----|------|----------------|-----------------|
| 158.0817       | 1  | E 13 |                |                 |
| 255.1345       | 2  | P 12 | 1377.7279      | 689.3679        |
| 354.2029       | 3  | V 11 | 1280.6751      | 640.8415        |
| 469.2298       | 4  | D 10 | 1181.6067      | 591.3073        |
| 568.2982       | 5  | V 9  | 1066.5798      | 533.7938        |
| 681.3823       | 6  | L 8  | 967.5114       | 484.2596        |
| 810.4249       | 7  | E 7  | 854.4273       | 427.7176        |
| 881.4620       | 8  | A 6  | 725.3847       | 363.1963        |
| 1067.5413      | 9  | W 5  | 654.3476       | 327.6777        |
| 1124.5628      | 10 | G 4  | 468.2683       | 234.6381        |
| 1223.6312      | 11 | V 3  | 411.2468       | 206.1273        |
| 1360.6901      | 12 | H 2  | 312.1784       | 156.5931        |
|                | 13 | R 1  | 175.1195       | 88.0637         |

N-term:+29.04

EQDFYDFKAVNIR, MH+ 1700.8648, m/z 567.6265  
 L OSG40 P180811 230811-s1.07196.07196.3.dta

X-range:

-

MassTol: Y-zoom:

MassType:

AVG  MONO

Axis:

1  2

Label:

I  M  -

Ions:

a  +  2+  3+

b  +  2+  3+

c  +  2+  3+

x  +  2+  3+

y  +  2+  3+

z  +  2+  3+

hide H<sub>2</sub>O/NH<sub>3</sub>

zoom 112-122

GO

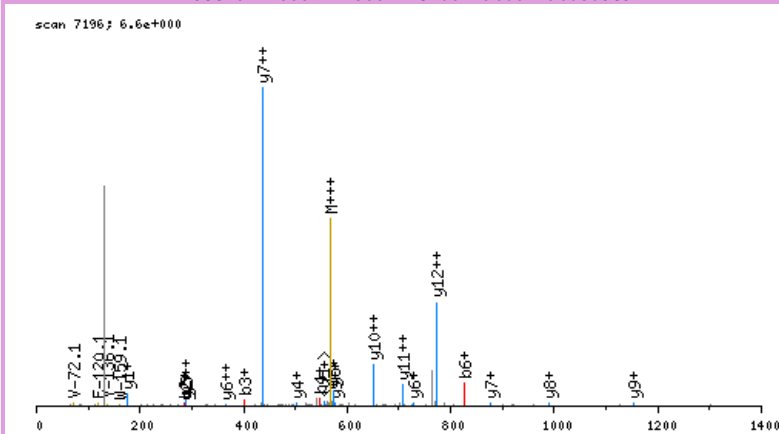

click image to zoom in; click top corners to zoom out [\[precursor±\]](#)

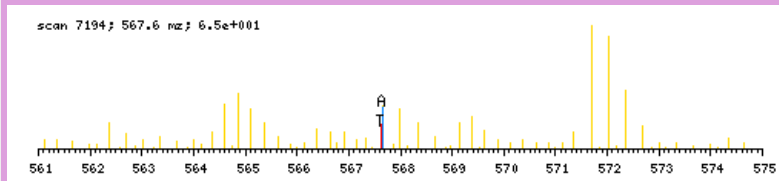

zoomed in precursor plot; T=theoretical m/z, A=acquired m/z

| b <sup>+</sup> | #  | AA # | y <sup>+</sup> | y <sup>2+</sup> |
|----------------|----|------|----------------|-----------------|
| 158.0817       | 1  | E 13 |                |                 |
| 286.1403       | 2  | Q 12 | 1543.7909      | 772.3994        |
| 401.1672       | 3  | D 11 | 1415.7324      | 708.3701        |
| 548.2356       | 4  | F 10 | 1300.7054      | 650.8566        |
| 711.2990       | 5  | Y 9  | 1153.6370      | 577.3224        |
| 826.3259       | 6  | D 8  | 990.5737       | 495.7908        |
| 973.3943       | 7  | F 7  | 875.5467       | 438.2773        |
| 1129.5206      | 8  | K 6  | 728.4783       | 364.7431        |
| 1200.5577      | 9  | A 5  | 572.3520       | 286.6799        |
| 1299.6261      | 10 | V 4  | 501.3149       | 251.1614        |
| 1413.6691      | 11 | N 3  | 402.2465       | 201.6272        |
| 1526.7531      | 12 | I 2  | 288.2036       | 144.6057        |
|                | 13 | R 1  | 175.1195       | 88.0637         |

N-term:+29.04 K(8):+156.13

EQEVSDNELQELSTQGSR, MH+ 2076.9685, m/z 692.9944  
 L OSG37 P180811 230811-s1.05246.05246.3.dta

scan 5246; 2.5e+000

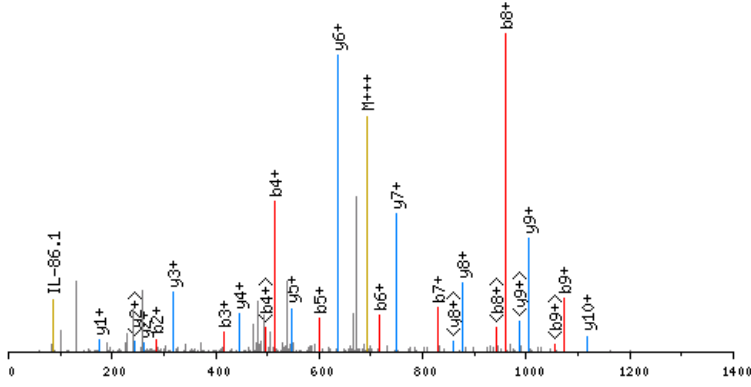

click image to zoom in; click top corners to zoom out [\[precursor±\]](#)

scan 5244; 693.0 m/z; 3.3e+001

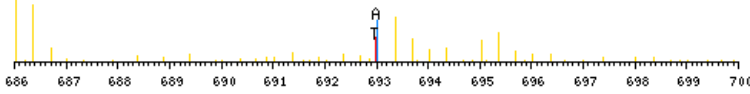

zoomed in precursor plot; T=theoretical m/z, A=acquired m/z

X-range:

-

MassTol: Y-zoom:

MassType:

AVG  MONO

Axis:

1  2

Label:

I  M  -

Ions:

a  +  2+  3+

b  +  2+  3+

c  +  2+  3+

x  +  2+  3+

y  +  2+  3+

z  +  2+  3+

hide H<sub>2</sub>O/NH<sub>3</sub>

zoom 112-122

GO

| b <sup>+</sup> | #  | AA | #  | y <sup>+</sup> | y <sup>2+</sup> |
|----------------|----|----|----|----------------|-----------------|
| 158.0817       | 1  | E  | 18 |                |                 |
| 286.1403       | 2  | Q  | 17 | 1919.8947      | 960.4512        |
| 415.1829       | 3  | E  | 16 | 1791.8361      | 896.4220        |
| 514.2513       | 4  | V  | 15 | 1662.7935      | 831.9007        |
| 601.2833       | 5  | S  | 14 | 1563.7251      | 782.3664        |
| 716.3102       | 6  | D  | 13 | 1476.6930      | 738.8504        |
| 830.3532       | 7  | N  | 12 | 1361.6661      | 681.3370        |
| 959.3958       | 8  | E  | 11 | 1247.6232      | 624.3155        |
| 1072.4798      | 9  | L  | 10 | 1118.5806      | 559.7942        |
| 1200.5384      | 10 | Q  | 9  | 1005.4965      | 503.2522        |
| 1329.5810      | 11 | E  | 8  | 877.4379       | 439.2229        |
| 1442.6651      | 12 | L  | 7  | 748.3953       | 374.7016        |
| 1529.6971      | 13 | S  | 6  | 635.3113       | 318.1596        |
| 1630.7448      | 14 | T  | 5  | 548.2792       | 274.6435        |
| 1758.8034      | 15 | Q  | 4  | 447.2316       | 224.1197        |
| 1815.8248      | 16 | G  | 3  | 319.1730       | 160.0904        |
| 1902.8568      | 17 | S  | 2  | 262.1515       | 131.5797        |
|                | 18 | R  | 1  | 175.1195       | 88.0637         |

N-term:+29.04

EQQPSGASGPAGPR, MH+ 1301.6662, m/z 651.3367  
 H OSG37 P180811 230811-s1.02060.02060.2.dta

scan 2060; 8.2e-001

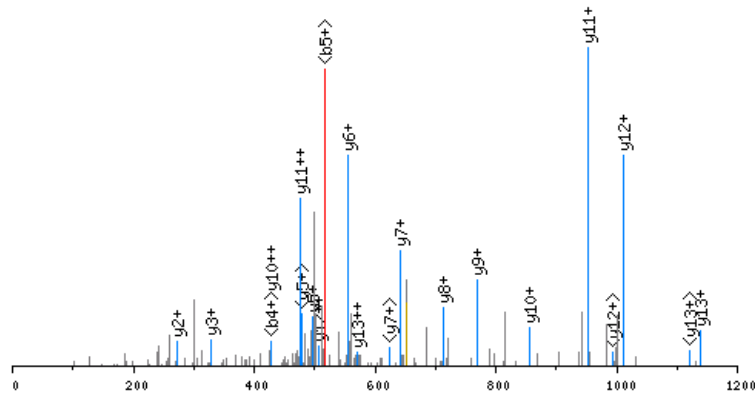

click image to zoom in; click top corners to zoom out [precursor±]

scan 2059; 651.3 m/z; 9.8e+000

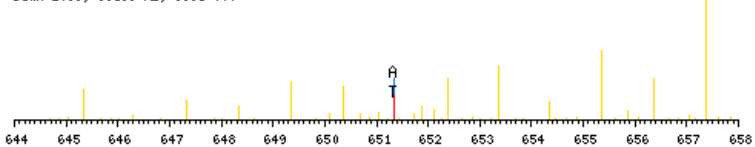

zoomed in precursor plot; T=theoretical m/z, A=acquired m/z

X-range:

-

MassTol: Y-zoom:

MassType:

AVG  MONO

Axis:

1  2

Label:

I  M  -

Ions:

a  +  2+  3+

b  +  2+  3+

c  +  2+  3+

x  +  2+  3+

y  +  2+  3+

z  +  2+  3+

hide H<sub>2</sub>O/NH<sub>3</sub>

zoom 112-122

GO

| b <sup>+</sup> | #  | AA # | y <sup>+</sup> | y <sup>2+</sup> |
|----------------|----|------|----------------|-----------------|
| 164.1135       | 1  | E 14 |                |                 |
| 292.1721       | 2  | Q 13 | 1138.5605      | 569.7842        |
| 349.1935       | 3  | G 12 | 1010.5019      | 505.7549        |
| 446.2463       | 4  | P 11 | 953.4805       | 477.2441        |
| 533.2783       | 5  | S 10 | 856.4277       | 428.7178        |
| 590.2998       | 6  | G 9  | 769.3957       | 385.2018        |
| 661.3369       | 7  | A 8  | 712.3742       | 356.6910        |
| 748.3689       | 8  | S 7  | 641.3371       | 321.1725        |
| 805.3904       | 9  | G 6  | 554.3051       | 277.6564        |
| 902.4432       | 10 | P 5  | 497.2836       | 249.1457        |
| 973.4803       | 11 | A 4  | 400.2308       | 200.6193        |
| 1030.5017      | 12 | G 3  | 329.1937       | 165.1008        |
| 1127.5545      | 13 | P 2  | 272.1723       | 136.5900        |
|                | 14 | R 1  | 175.1195       | 88.0637         |

N-term:+35.07

ESAGIHETTYNSIMKCDIDIR, MH+ 2509.2066, m/z 628.0571  
 L OSG40 P180811 230811-s1.06426.06426.4.dta

X-range:

-

MassTol: Y-zoom:

MassType:

AVG  MONO

Axis:

1  2

Label:

I  M  -

Ions:

a  +  2+  3+

b  +  2+  3+

c  +  2+  3+

x  +  2+  3+

y  +  2+  3+

z  +  2+  3+

hide H<sub>2</sub>O/NH<sub>3</sub>

zoom 112-122

GO

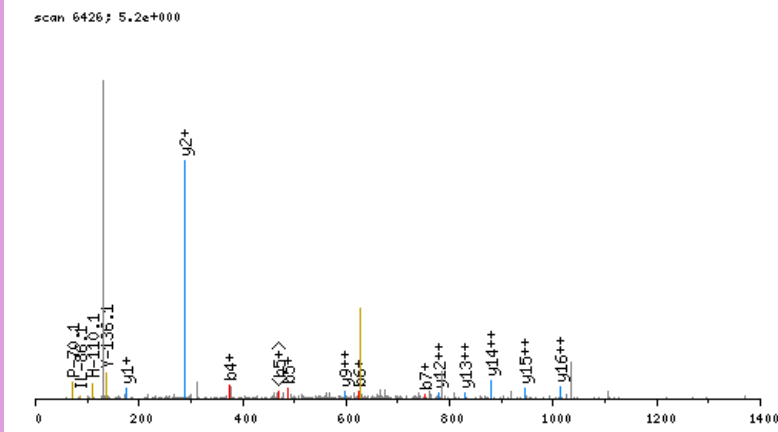

click image to zoom in; click top corners to zoom out [\[precursor±\]](#)

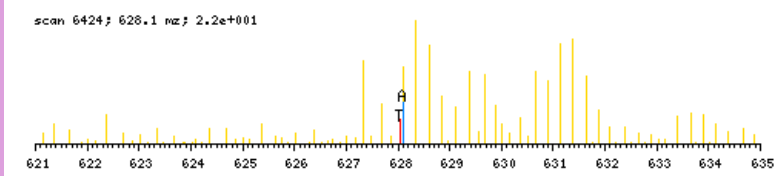

zoomed in precursor plot; T=theoretical m/z, A=acquired m/z

| b <sup>+</sup> | #  | AA # | y <sup>+</sup> | y <sup>2+</sup> |
|----------------|----|------|----------------|-----------------|
| 158.0817       | 1  | E 21 |                |                 |
| 245.1137       | 2  | S 20 | 2352.1328      | 1176.5703       |
| 316.1508       | 3  | A 19 | 2265.1008      | 1133.0543       |
| 373.1723       | 4  | G 18 | 2194.0636      | 1097.5357       |
| 486.2564       | 5  | I 17 | 2137.0422      | 1069.0250       |
| 623.3153       | 6  | H 16 | 2023.9581      | 1012.4830       |
| 752.3579       | 7  | E 15 | 1886.8992      | 943.9535        |
| 853.4055       | 8  | T 14 | 1757.8566      | 879.4322        |
| 954.4532       | 9  | T 13 | 1656.8089      | 828.9084        |
| 1117.5166      | 10 | Y 12 | 1555.7612      | 778.3845        |
| 1231.5595      | 11 | N 11 | 1392.6979      | 696.8529        |
| 1318.5915      | 12 | S 10 | 1278.6550      | 639.8314        |
| 1431.6756      | 13 | I 9  | 1191.6230      | 596.3154        |
| 1562.7161      | 14 | M 8  | 1078.5389      | 539.7734        |
| 1718.8424      | 15 | K 7  | 947.4984       | 474.2531        |
| 1878.8730      | 16 | C 6  | 791.3721       | 396.1900        |
| 1993.8999      | 17 | D 5  | 631.3415       | 316.1747        |
| 2106.9840      | 18 | I 4  | 516.3146       | 258.6612        |
| 2222.0109      | 19 | D 3  | 403.2305       | 202.1192        |
| 2335.0950      | 20 | I 2  | 288.2036       | 144.6057        |
|                | 21 | R 1  | 175.1195       | 88.0637         |

N-term: +29.04 K(15): +156.13  
 C(16): +160.03

ESALSPGEDVQR, MH+ 1321.6812, m/z 441.2319  
 H OSG37 P180811 230811-s1.02747.02747.3.dta

X-range:

-

MassTol: Y-zoom:

MassType:

AVG  MONO

Axis:

1  2

Label:

I  M  -

Ions:

a  +  2+  3+

b  +  2+  3+

c  +  2+  3+

x  +  2+  3+

y  +  2+  3+

z  +  2+  3+

hide H<sub>2</sub>O/NH<sub>3</sub>

zoom 112-122

GO

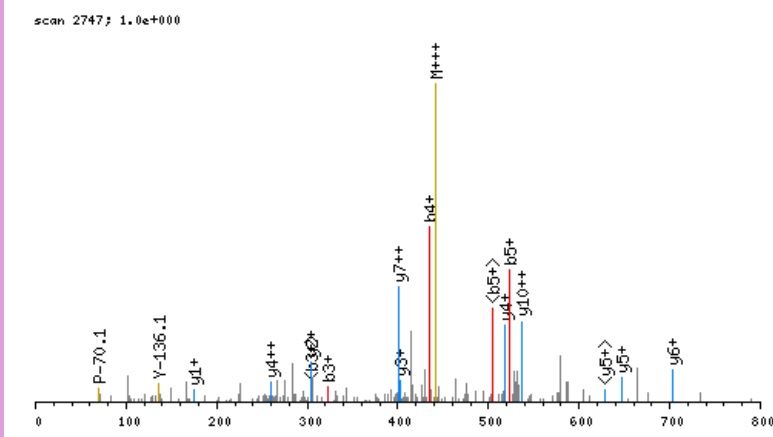

click image to zoom in; click top corners to zoom out [\[precursor±\]](#)

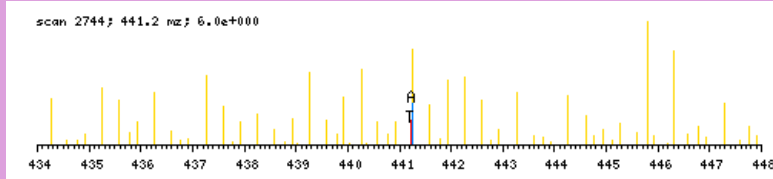

zoomed in precursor plot; T=theoretical m/z, A=acquired m/z

| b <sup>+</sup> | #  | AA # | y <sup>+</sup> | y <sup>2+</sup> |
|----------------|----|------|----------------|-----------------|
| 164.1135       | 1  | E 12 |                |                 |
| 251.1455       | 2  | S 11 | 1158.5755      | 579.7917        |
| 322.1826       | 3  | A 10 | 1071.5435      | 536.2756        |
| 435.2667       | 4  | L 9  | 1000.5063      | 500.7571        |
| 522.2987       | 5  | S 8  | 887.4223       | 444.2151        |
| 619.3515       | 6  | P 7  | 800.3903       | 400.6990        |
| 676.3730       | 7  | G 6  | 703.3375       | 352.1727        |
| 805.4155       | 8  | E 5  | 646.3160       | 323.6619        |
| 920.4425       | 9  | D 4  | 517.2734       | 259.1406        |
| 1019.5109      | 10 | V 3  | 402.2465       | 201.6272        |
| 1147.5695      | 11 | Q 2  | 303.1781       | 152.0930        |
|                | 12 | R 1  | 175.1195       | 88.0637         |

N-term:+35.07



ESGAAGPSGPIGSR, MH+ 1276.6709, m/z 638.8391  
 H OSG37 P180811 230811-s1.02233.02233.2.dta

X-range:

-

MassTol: Y-zoom:

MassType:

AVG  MONO

Axis:

1  2

Label:

I  M  -

Ions:

a  +  2+  3+

b  +  2+  3+

c  +  2+  3+

x  +  2+  3+

y  +  2+  3+

z  +  2+  3+

hide H<sub>2</sub>O/NH<sub>3</sub>

zoom 112-122

GO

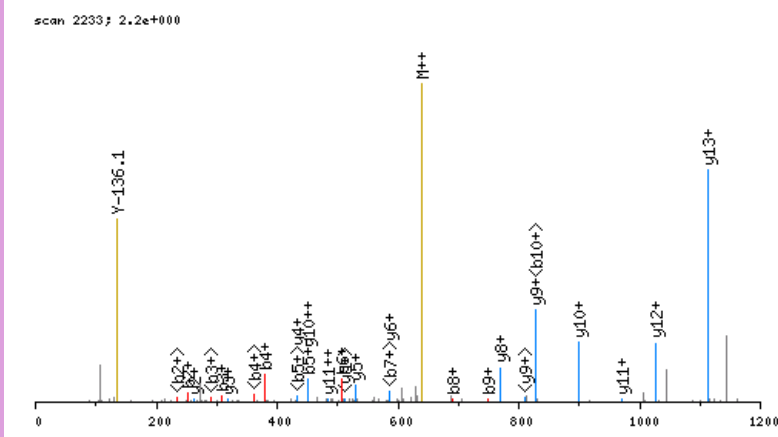

click image to zoom in; click top corners to zoom out [\[precursor±\]](#)

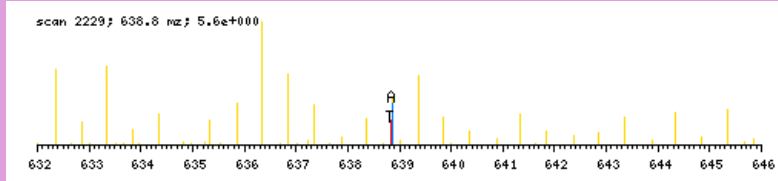

zoomed in precursor plot; T=theoretical m/z, A=acquired m/z

| b <sup>+</sup> | #  | AA # | y <sup>+</sup> | y <sup>2+</sup> |
|----------------|----|------|----------------|-----------------|
| 164.1135       | 1  | E 14 |                |                 |
| 251.1455       | 2  | S 13 | 1113.5653      | 557.2865        |
| 308.1670       | 3  | G 12 | 1026.5332      | 513.7705        |
| 379.2041       | 4  | A 11 | 969.5118       | 485.2598        |
| 450.2412       | 5  | A 10 | 898.4747       | 449.7412        |
| 507.2627       | 6  | G 9  | 827.4375       | 414.2227        |
| 604.3154       | 7  | P 8  | 770.4161       | 385.7120        |
| 691.3475       | 8  | S 7  | 673.3633       | 337.1856        |
| 748.3689       | 9  | G 6  | 586.3313       | 293.6696        |
| 845.4217       | 10 | P 5  | 529.3098       | 265.1588        |
| 958.5058       | 11 | I 4  | 432.2571       | 216.6324        |
| 1015.5272      | 12 | G 3  | 319.1730       | 160.0904        |
| 1102.5593      | 13 | S 2  | 262.1515       | 131.5797        |
|                | 14 | R 1  | 175.1195       | 88.0637         |

N-term:+35.07

ESLQTSSLHAAR, MH+ 1353.7490, m/z 451.9212  
 L OSG40 P180811 230811-s1.05247.05247.3.dta

X-range:

-

MassTol: Y-zoom:

MassType:

AVG  MONO

Axis:

1  2

Label:

I  M  -

Ions:

a  +  2+  3+

b  +  2+  3+

c  +  2+  3+

x  +  2+  3+

y  +  2+  3+

z  +  2+  3+

hide H<sub>2</sub>O/NH<sub>3</sub>

zoom 112-122

GO

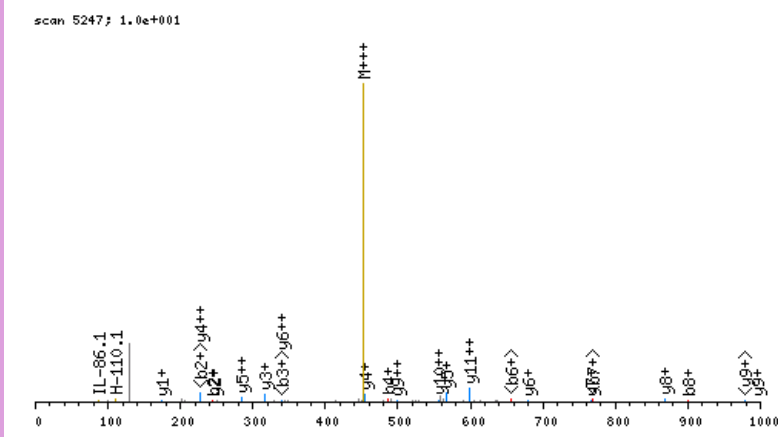

click image to zoom in; click top corners to zoom out [\[precursor±\]](#)

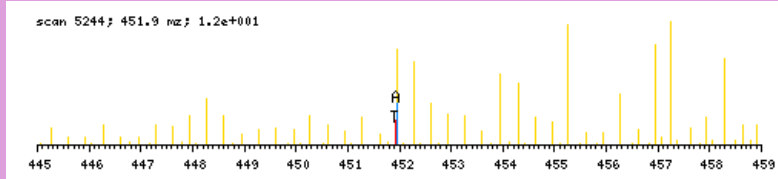

zoomed in precursor plot; T=theoretical m/z, A=acquired m/z

| b <sup>+</sup> | #  | AA # | y <sup>+</sup> | y <sup>2+</sup> |
|----------------|----|------|----------------|-----------------|
| 158.0817       | 1  | E 12 |                |                 |
| 245.1137       | 2  | S 11 | 1196.6751      | 598.8415        |
| 358.1978       | 3  | L 10 | 1109.6431      | 555.3255        |
| 486.2564       | 4  | Q 9  | 996.5591       | 498.7834        |
| 587.3040       | 5  | T 8  | 868.5005       | 434.7542        |
| 674.3361       | 6  | S 7  | 767.4528       | 384.2303        |
| 787.4201       | 7  | L 6  | 680.4208       | 340.7143        |
| 900.5042       | 8  | L 5  | 567.3367       | 284.1723        |
| 1037.5631      | 9  | H 4  | 454.2526       | 227.6302        |
| 1108.6002      | 10 | A 3  | 317.1937       | 159.1008        |
| 1179.6373      | 11 | A 2  | 246.1566       | 123.5822        |
|                | 12 | R 1  | 175.1195       | 88.0637         |

N-term:+29.04

ESSEGEHSHVVPQR, MH+ 1603.7776, m/z 535.2640  
 H OSG40 P180811 230811-s1.02138.02138.3.dta

X-range:

-

MassTol: Y-zoom:

MassType:

AVG  MONO

Axis:

1  2

Label:

I  M  -

Ions:

a  +  2+  3+

b  +  2+  3+

c  +  2+  3+

x  +  2+  3+

y  +  2+  3+

z  +  2+  3+

hide H<sub>2</sub>O/NH<sub>3</sub>

zoom 112-122

GO

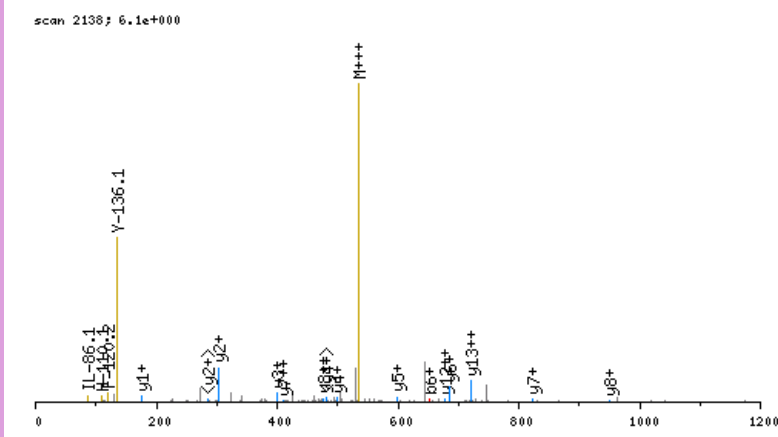

click image to zoom in; click top corners to zoom out [\[precursor±\]](#)

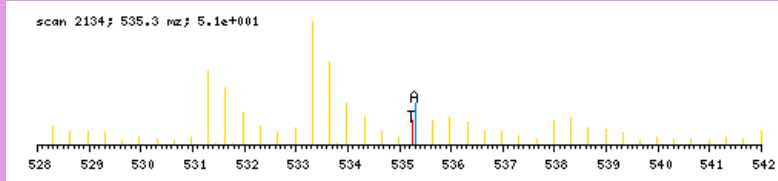

zoomed in precursor plot; T=theoretical m/z, A=acquired m/z

| b <sup>+</sup> | #  | AA # | y <sup>+</sup> | y <sup>2+</sup> |
|----------------|----|------|----------------|-----------------|
| 164.1135       | 1  | E 14 |                |                 |
| 251.1455       | 2  | S 13 | 1440.6719      | 720.8399        |
| 338.1776       | 3  | S 12 | 1353.6399      | 677.3239        |
| 467.2201       | 4  | E 11 | 1266.6079      | 633.8078        |
| 524.2416       | 5  | G 10 | 1137.5653      | 569.2865        |
| 653.2842       | 6  | E 9  | 1080.5438      | 540.7758        |
| 782.3268       | 7  | E 8  | 951.5012       | 476.2545        |
| 919.3857       | 8  | H 7  | 822.4586       | 411.7332        |
| 1006.4177      | 9  | S 6  | 685.3997       | 343.2038        |
| 1105.4861      | 10 | V 5  | 598.3677       | 299.6877        |
| 1204.5546      | 11 | V 4  | 499.2993       | 250.1535        |
| 1301.6073      | 12 | P 3  | 400.2308       | 200.6193        |
| 1429.6659      | 13 | Q 2  | 303.1781       | 152.0930        |
|                | 14 | R 1  | 175.1195       | 88.0637         |

N-term:+35.07

ETGPAGPAGPIGPAGAR, MH+ 1503.7919, m/z 501.9355  
 L OSG37 P180811 230811-s1.03462.03462.3.dta

X-range:

-

MassTol: Y-zoom:

MassType:

AVG  MONO

Axis:

1  2

Label:

I  M  -

Ions:

a  +  2+  3+

b  +  2+  3+

c  +  2+  3+

x  +  2+  3+

y  +  2+  3+

z  +  2+  3+

hide H<sub>2</sub>O/NH<sub>3</sub>

zoom 112-122

GO

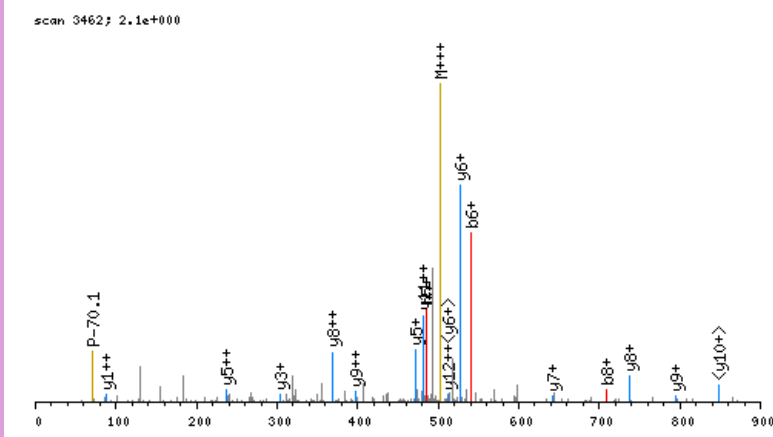

click image to zoom in; click top corners to zoom out [\[precursor±\]](#)

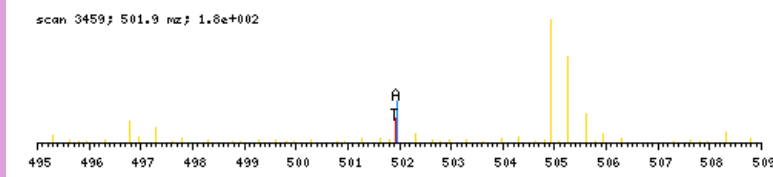

zoomed in precursor plot; T=theoretical m/z, A=acquired m/z

| b <sup>+</sup> | #  | AA # | y <sup>+</sup> | y <sup>2+</sup> |
|----------------|----|------|----------------|-----------------|
| 158.0817       | 1  | E 17 |                |                 |
| 259.1294       | 2  | T 16 | 1346.7181      | 673.8629        |
| 316.1508       | 3  | G 15 | 1245.6704      | 623.3391        |
| 413.2036       | 4  | P 14 | 1188.6489      | 594.8284        |
| 484.2407       | 5  | A 13 | 1091.5962      | 546.3020        |
| 541.2622       | 6  | G 12 | 1020.5591      | 510.7834        |
| 638.3149       | 7  | P 11 | 963.5376       | 482.2727        |
| 709.3521       | 8  | A 10 | 866.4848       | 433.7463        |
| 766.3735       | 9  | G 9  | 795.4477       | 398.2278        |
| 863.4263       | 10 | P 8  | 738.4262       | 369.7170        |
| 976.5103       | 11 | I 7  | 641.3735       | 321.1907        |
| 1033.5318      | 12 | G 6  | 528.2894       | 264.6486        |
| 1130.5846      | 13 | P 5  | 471.2680       | 236.1379        |
| 1201.6217      | 14 | A 4  | 374.2152       | 187.6115        |
| 1258.6432      | 15 | G 3  | 303.1781       | 152.0930        |
| 1329.6803      | 16 | A 2  | 246.1566       | 123.5822        |
|                | 17 | R 1  | 175.1195       | 88.0637         |

N-term:+29.04

ETTSSIPEAGEGQIR, MH+ 1608.8293, m/z 536.9479  
 H OSG37 P180811 230811-s1.03636.03636.3.dta

X-range:

-

MassTol: Y-zoom:

MassType:

AVG  MONO

Axis:

1  2

Label:

I  M  -

Ions:

a  +  2+  3+

b  +  2+  3+

c  +  2+  3+

x  +  2+  3+

y  +  2+  3+

z  +  2+  3+

hide H<sub>2</sub>O/NH<sub>3</sub>

zoom 112-122

GO

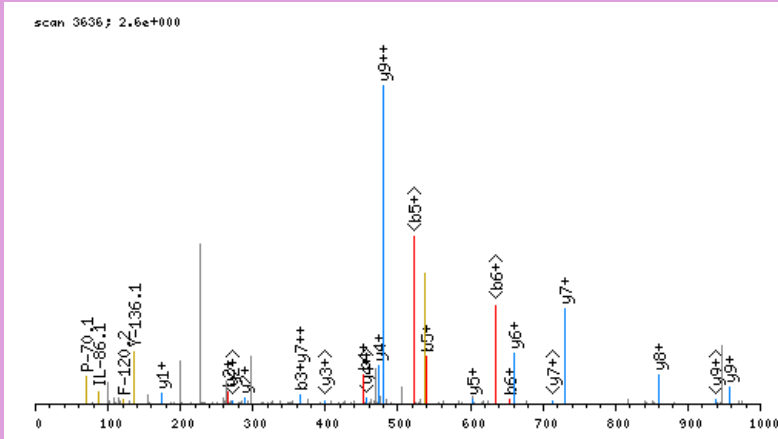

click image to zoom in; click top corners to zoom out [\[precursor±\]](#)

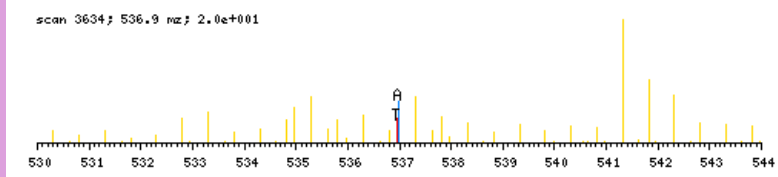

zoomed in precursor plot; T=theoretical m/z, A=acquired m/z

| b <sup>+</sup> | #  | AA | #  | y <sup>+</sup> | y <sup>2+</sup> |
|----------------|----|----|----|----------------|-----------------|
| 164.1135       | 1  | E  | 15 |                |                 |
| 265.1612       | 2  | T  | 14 | 1445.7236      | 723.3657        |
| 366.2089       | 3  | T  | 13 | 1344.6759      | 672.8419        |
| 453.2409       | 4  | S  | 12 | 1243.6283      | 622.3180        |
| 540.2729       | 5  | S  | 11 | 1156.5962      | 578.8020        |
| 653.3570       | 6  | I  | 10 | 1069.5642      | 535.2860        |
| 750.4097       | 7  | P  | 9  | 956.4801       | 478.7440        |
| 879.4523       | 8  | E  | 8  | 859.4274       | 430.2176        |
| 950.4894       | 9  | A  | 7  | 730.3848       | 365.6963        |
| 1007.5109      | 10 | G  | 6  | 659.3477       | 330.1777        |
| 1136.5535      | 11 | E  | 5  | 602.3262       | 301.6670        |
| 1193.5750      | 12 | G  | 4  | 473.2836       | 237.1457        |
| 1321.6335      | 13 | Q  | 3  | 416.2621       | 208.6350        |
| 1434.7176      | 14 | I  | 2  | 288.2036       | 144.6057        |
|                | 15 | R  | 1  | 175.1195       | 88.0637         |

N-term:+35.07

EVEDASEEAPLR, MH+ 1378.6914, m/z 689.8493  
 H OSG37 P180811 230811-s1.03142.03142.2.dta

X-range:

-

MassTol: Y-zoom:

MassType:

AVG  MONO

Axis:

1  2

Label:

I  M  -

Ions:

a  +  2+  3+

b  +  2+  3+

c  +  2+  3+

x  +  2+  3+

y  +  2+  3+

z  +  2+  3+

hide H<sub>2</sub>O/NH<sub>3</sub>

zoom 112-122

GO

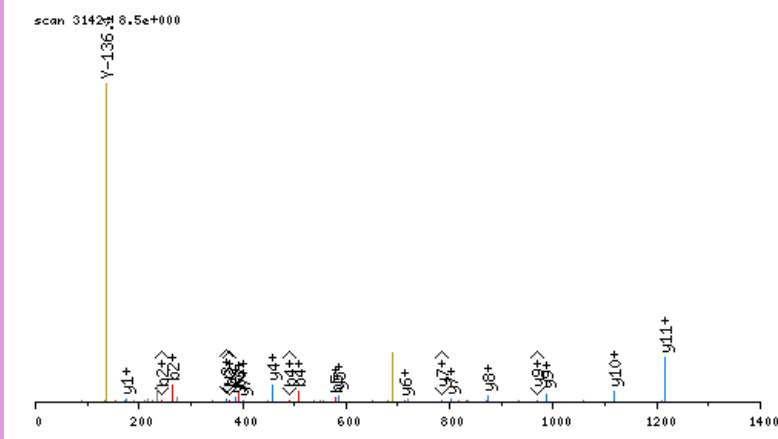

click image to zoom in; click top corners to zoom out [\[precursor±\]](#)

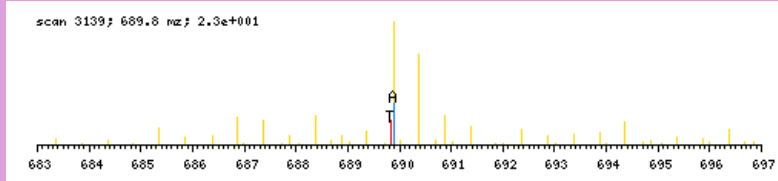

zoomed in precursor plot; T=theoretical m/z, A=acquired m/z

| b <sup>+</sup> | #  | AA # | y <sup>+</sup> | y <sup>2+</sup> |
|----------------|----|------|----------------|-----------------|
| 164.1135       | 1  | E 12 |                |                 |
| 263.1819       | 2  | V 11 | 1215.5857      | 608.2968        |
| 392.2245       | 3  | E 10 | 1116.5173      | 558.7626        |
| 507.2514       | 4  | D 9  | 987.4747       | 494.2413        |
| 578.2886       | 5  | A 8  | 872.4478       | 436.7278        |
| 665.3206       | 6  | S 7  | 801.4107       | 401.2092        |
| 794.3632       | 7  | E 6  | 714.3786       | 357.6932        |
| 923.4058       | 8  | E 5  | 585.3360       | 293.1719        |
| 994.4429       | 9  | A 4  | 456.2934       | 228.6506        |
| 1091.4956      | 10 | P 3  | 385.2563       | 193.1321        |
| 1204.5797      | 11 | L 2  | 288.2036       | 144.6057        |
|                | 12 | R 1  | 175.1195       | 88.0637         |

N-term:+35.07

EVGKALEGINNGITQAGR, MH+ 1895.0987, m/z 632.3711  
 H OSG39 P180811 230811-s1.04379.04379.3.dta

X-range:

-

MassTol: Y-zoom:

MassType:

AVG  MONO

Axis:

1  2

Label:

I  M  -

Ions:

a  +  2+  3+

b  +  2+  3+

c  +  2+  3+

x  +  2+  3+

y  +  2+  3+

z  +  2+  3+

hide H<sub>2</sub>O/NH<sub>3</sub>

zoom 112-122

GO

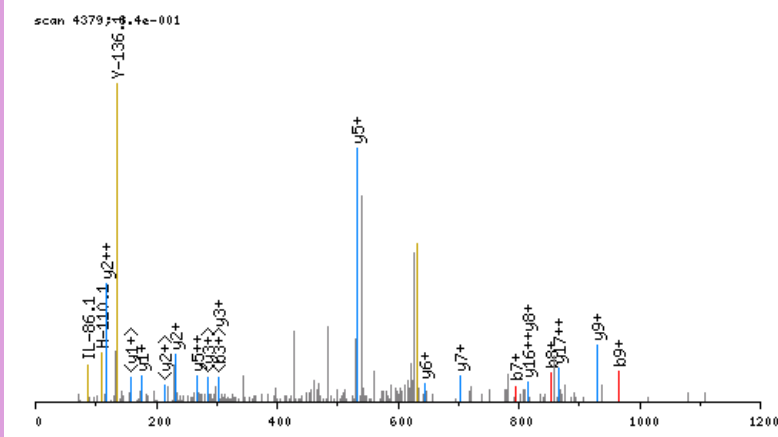

click image to zoom in; click top corners to zoom out [\[precursor±\]](#)

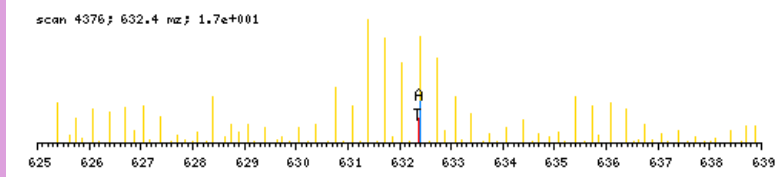

zoomed in precursor plot; T=theoretical m/z, A=acquired m/z

| b <sup>+</sup> | #  | AA # | y <sup>+</sup> | y <sup>2+</sup> |
|----------------|----|------|----------------|-----------------|
| 164.1135       | 1  | E 18 |                |                 |
| 263.1819       | 2  | V 17 | 1731.9930      | 866.5004        |
| 320.2034       | 3  | G 16 | 1632.9246      | 816.9662        |
| 482.3615       | 4  | K 15 | 1575.9031      | 788.4555        |
| 553.3986       | 5  | A 14 | 1413.7450      | 707.3764        |
| 666.4826       | 6  | L 13 | 1342.7079      | 671.8579        |
| 795.5252       | 7  | E 12 | 1229.6238      | 615.3158        |
| 852.5467       | 8  | G 11 | 1100.5812      | 550.7945        |
| 965.6308       | 9  | I 10 | 1043.5598      | 522.2838        |
| 1079.6737      | 10 | N 9  | 930.4757       | 465.7418        |
| 1193.7166      | 11 | N 8  | 816.4328       | 408.7203        |
| 1250.7381      | 12 | G 7  | 702.3899       | 351.6988        |
| 1363.8222      | 13 | I 6  | 645.3684       | 323.1881        |
| 1464.8698      | 14 | T 5  | 532.2843       | 266.6461        |
| 1592.9284      | 15 | Q 4  | 431.2367       | 216.1222        |
| 1663.9655      | 16 | A 3  | 303.1781       | 152.0930        |
| 1720.9870      | 17 | G 2  | 232.1410       | 116.5744        |
|                | 18 | R 1  | 175.1195       | 88.0637         |

N-term:+35.07 K(4):+162.16

EVHTGLGELLR, MH+ 1257.7379, m/z 419.9175  
 H OSG40 P180811 230811-s1.06096.06096.3.dta

X-range:

-

MassTol: Y-zoom:

MassType:

AVG  MONO

Axis:

1  2

Label:

I  M  -

Ions:

a  +  2+  3+

b  +  2+  3+

c  +  2+  3+

x  +  2+  3+

y  +  2+  3+

z  +  2+  3+

hide H<sub>2</sub>O/NH<sub>3</sub>

zoom 112-122

GO

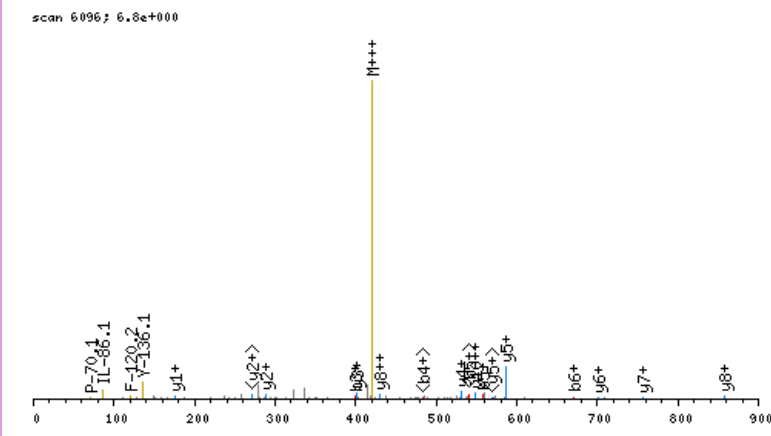

click image to zoom in; click top corners to zoom out [precursor±]

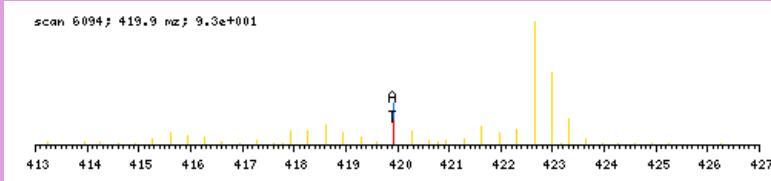

zoomed in precursor plot; T=theoretical m/z, A=acquired m/z

| b <sup>+</sup> | #  | AA # | y <sup>+</sup> | y <sup>2+</sup> |
|----------------|----|------|----------------|-----------------|
| 164.1135       | 1  | E 11 |                |                 |
| 263.1819       | 2  | V 10 | 1094.6322      | 547.8200        |
| 400.2408       | 3  | H 9  | 995.5638       | 498.2858        |
| 501.2885       | 4  | T 8  | 858.5049       | 429.7564        |
| 558.3100       | 5  | G 7  | 757.4572       | 379.2325        |
| 671.3940       | 6  | L 6  | 700.4357       | 350.7218        |
| 728.4155       | 7  | G 5  | 587.3517       | 294.1798        |
| 857.4581       | 8  | E 4  | 530.3302       | 265.6690        |
| 970.5421       | 9  | L 3  | 401.2876       | 201.1477        |
| 1083.6262      | 10 | L 2  | 288.2036       | 144.6057        |
|                | 11 | R 1  | 175.1195       | 88.0637         |

N-term:+35.07



EVPKEAPKVGILGSGDFAR, MH+ 2072.2604, m/z 518.8206  
 H OSG40 P180811 230811-s1.06147.06147.4.dta

X-range:

-

MassTol: Y-zoom:

MassType:

AVG  MONO

Axis:

1  2

Label:

I  M  -

Ions:

a  +  2+  3+

b  +  2+  3+

c  +  2+  3+

x  +  2+  3+

y  +  2+  3+

z  +  2+  3+

hide H<sub>2</sub>O/NH<sub>3</sub>

zoom 112-122

GO

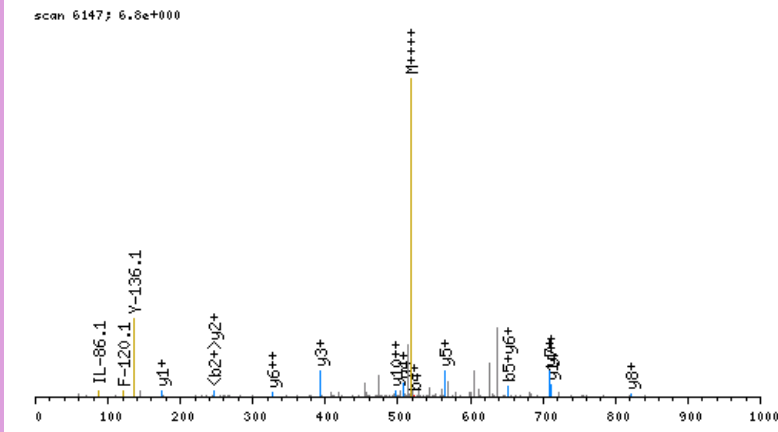

click image to zoom in; click top corners to zoom out [\[precursor±\]](#)

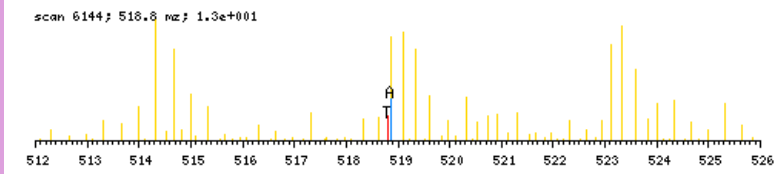

zoomed in precursor plot; T=theoretical m/z, A=acquired m/z

| b <sup>+</sup> | #  | AA | #  | y <sup>+</sup> | y <sup>2+</sup> |
|----------------|----|----|----|----------------|-----------------|
| 164.1135       | 1  | E  | 19 |                |                 |
| 263.1819       | 2  | V  | 18 | 1909.1548      | 955.0813        |
| 360.2347       | 3  | P  | 17 | 1810.0864      | 905.5471        |
| 522.3928       | 4  | K  | 16 | 1713.0336      | 857.0207        |
| 651.4354       | 5  | E  | 15 | 1550.8755      | 775.9417        |
| 722.4725       | 6  | A  | 14 | 1421.8329      | 711.4204        |
| 819.5252       | 7  | P  | 13 | 1350.7958      | 675.9018        |
| 981.6833       | 8  | K  | 12 | 1253.7430      | 627.3754        |
| 1080.7518      | 9  | V  | 11 | 1091.5849      | 546.2964        |
| 1137.7732      | 10 | G  | 10 | 992.5165       | 496.7622        |
| 1250.8573      | 11 | I  | 9  | 935.4951       | 468.2514        |
| 1363.9413      | 12 | L  | 8  | 822.4110       | 411.7094        |
| 1420.9628      | 13 | G  | 7  | 709.3269       | 355.1674        |
| 1507.9948      | 14 | S  | 6  | 652.3055       | 326.6566        |
| 1565.0163      | 15 | G  | 5  | 565.2734       | 283.1406        |
| 1680.0432      | 16 | D  | 4  | 508.2520       | 254.6299        |
| 1827.1117      | 17 | F  | 3  | 393.2250       | 197.1164        |
| 1898.1488      | 18 | A  | 2  | 246.1566       | 123.5822        |
|                | 19 | R  | 1  | 175.1195       | 88.0637         |

N-term:+35.07 K(4):+162.16  
 K(8):+162.16

EVQLQQSGAELVR, MH+ 1490.8391, m/z 497.6179  
 H OSG37 P180811 230811-s1.04741.04741.3.dta

X-range:

-

MassTol: Y-zoom:

MassType:

AVG  MONO

Axis:

1  2

Label:

I  M  -

Ions:

a  +  2+  3+

b  +  2+  3+

c  +  2+  3+

x  +  2+  3+

y  +  2+  3+

z  +  2+  3+

hide H<sub>2</sub>O/NH<sub>3</sub>

zoom 112-122

GO

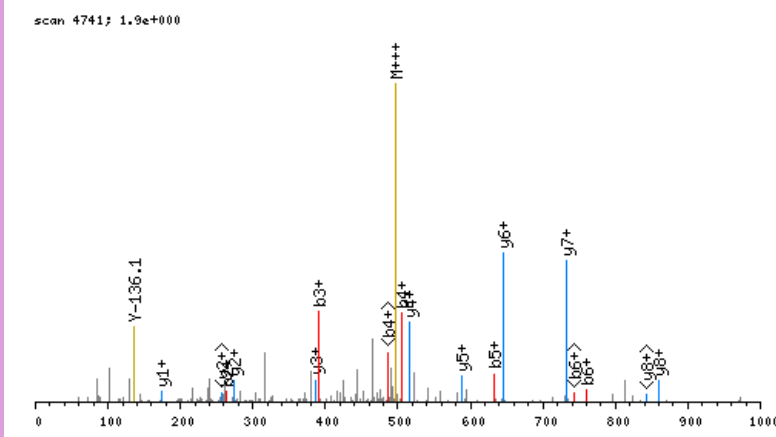

click image to zoom in; click top corners to zoom out [\[precursor±\]](#)

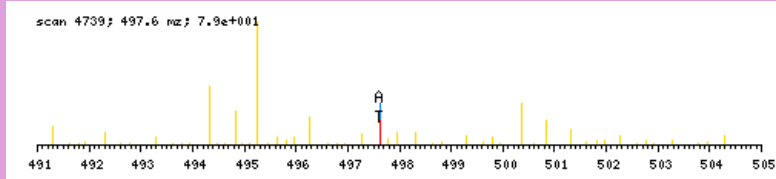

zoomed in precursor plot; T=theoretical m/z, A=acquired m/z

| b <sup>+</sup> | #  | AA | #  | y <sup>+</sup> | y <sup>2+</sup> |
|----------------|----|----|----|----------------|-----------------|
| 164.1135       | 1  | E  | 13 |                |                 |
| 263.1819       | 2  | V  | 12 | 1327.7334      | 664.3706        |
| 391.2405       | 3  | Q  | 11 | 1228.6650      | 614.8364        |
| 504.3245       | 4  | L  | 10 | 1100.6064      | 550.8071        |
| 632.3831       | 5  | Q  | 9  | 987.5223       | 494.2651        |
| 760.4417       | 6  | Q  | 8  | 859.4638       | 430.2358        |
| 847.4737       | 7  | S  | 7  | 731.4052       | 366.2065        |
| 904.4952       | 8  | G  | 6  | 644.3731       | 322.6905        |
| 975.5323       | 9  | A  | 5  | 587.3517       | 294.1798        |
| 1104.5749      | 10 | E  | 4  | 516.3146       | 258.6612        |
| 1217.6590      | 11 | L  | 3  | 387.2720       | 194.1399        |
| 1316.7274      | 12 | V  | 2  | 274.1879       | 137.5979        |
|                | 13 | R  | 1  | 175.1195       | 88.0637         |

N-term:+35.07

EWASQTTDGKLPVTKDVER, MH+ 2391.3256, m/z 598.5869  
 H OSG40 P180811 230811-s1.05723.05723.4.dta

X-range:

-

MassTol: Y-zoom:

MassType:

AVG  MONO

Axis:

1  2

Label:

I  M  -

Ions:

a  +  2+  3+

b  +  2+  3+

c  +  2+  3+

x  +  2+  3+

y  +  2+  3+

z  +  2+  3+

hide H<sub>2</sub>O/NH<sub>3</sub>

zoom 112-122

GO

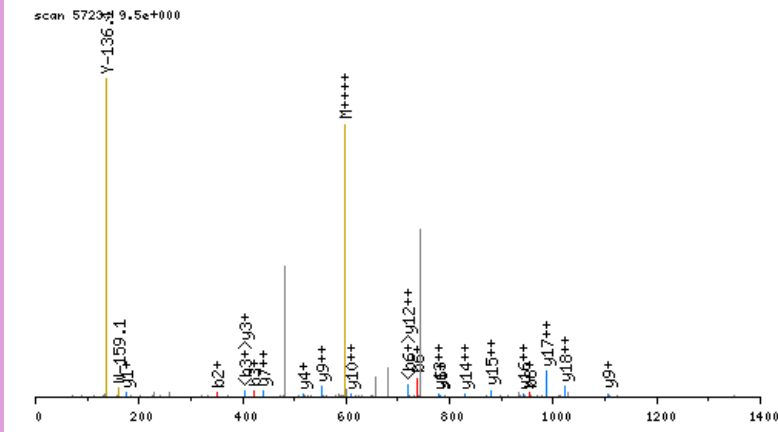

click image to zoom in; click top corners to zoom out [precursor±]

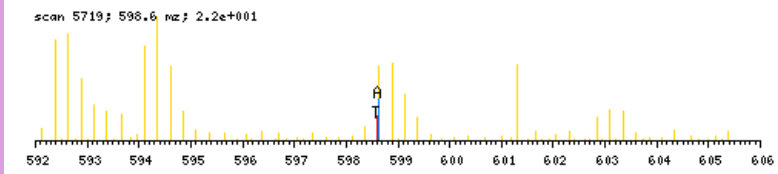

zoomed in precursor plot; T=theoretical m/z, A=acquired m/z

| b <sup>+</sup> | #  | AA | #  | y <sup>+</sup> | y <sup>2+</sup> |
|----------------|----|----|----|----------------|-----------------|
| 164.1135       | 1  | E  | 20 |                |                 |
| 350.1928       | 2  | W  | 19 | 2228.2200      | 1114.6139       |
| 421.2299       | 3  | A  | 18 | 2042.1406      | 1021.5742       |
| 508.2619       | 4  | S  | 17 | 1971.1035      | 986.0557        |
| 636.3205       | 5  | Q  | 16 | 1884.0715      | 942.5397        |
| 737.3682       | 6  | T  | 15 | 1756.0129      | 878.5104        |
| 838.4159       | 7  | T  | 14 | 1654.9652      | 827.9865        |
| 953.4428       | 8  | D  | 13 | 1553.9176      | 777.4627        |
| 1010.4643      | 9  | G  | 12 | 1438.8906      | 719.9492        |
| 1172.6224      | 10 | K  | 11 | 1381.8692      | 691.4385        |
| 1285.7065      | 11 | L  | 10 | 1219.7111      | 610.3594        |
| 1382.7592      | 12 | P  | 9  | 1106.6270      | 553.8174        |
| 1511.8018      | 13 | E  | 8  | 1009.5742      | 505.2910        |
| 1610.8702      | 14 | V  | 7  | 880.5316       | 440.7697        |
| 1711.9179      | 15 | T  | 6  | 781.4632       | 391.2355        |
| 1874.0760      | 16 | K  | 5  | 680.4156       | 340.7117        |
| 1989.1029      | 17 | D  | 4  | 518.2575       | 259.6326        |
| 2088.1714      | 18 | V  | 3  | 403.2305       | 202.1192        |
| 2217.2140      | 19 | E  | 2  | 304.1621       | 152.5850        |
|                | 20 | R  | 1  | 175.1195       | 88.0637         |

N-term: +35.07 K(10): +162.16  
 K(16): +162.16

EYQPHVIVSTTGPENFNLTDTR, MH+ 2520.2947, m/z 630.8291  
 H OSG39 P180811 230811-s1.06564.06564.4.dta

X-range:

-

MassTol: Y-zoom:

MassType:

AVG  MONO

Axis:

1  2

Label:

I  M  -

Ions:

a  +  2+  3+

b  +  2+  3+

c  +  2+  3+

x  +  2+  3+

y  +  2+  3+

z  +  2+  3+

hide H<sub>2</sub>O/NH<sub>3</sub>

zoom 112-122

GO

scan 6564; 4.8e-001

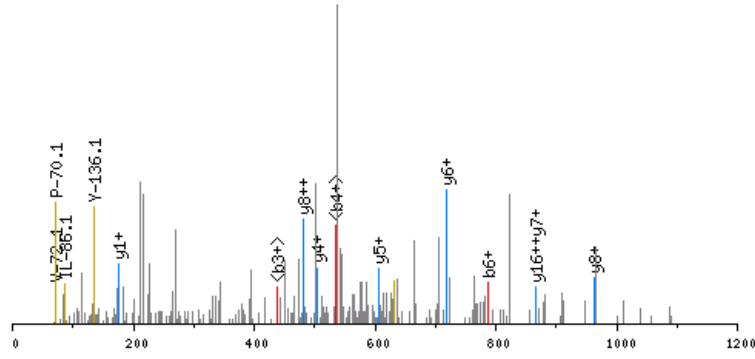

click image to zoom in; click top corners to zoom out [precursor±]

scan 6561; 630.8 mz; 1.5e+001

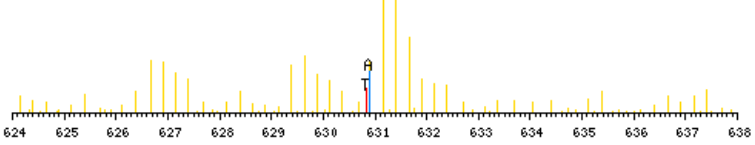

zoomed in precursor plot; T=theoretical m/z, A=acquired m/z

| b <sup>+</sup> | #  | AA # | y <sup>+</sup> | y <sup>2+</sup> |
|----------------|----|------|----------------|-----------------|
| 164.1135       | 1  | E 22 |                |                 |
| 327.1768       | 2  | Y 21 | 2357.1890      | 1179.0984       |
| 455.2354       | 3  | Q 20 | 2194.1257      | 1097.5667       |
| 552.2882       | 4  | P 19 | 2066.0671      | 1033.5375       |
| 689.3471       | 5  | H 18 | 1969.0143      | 985.0111        |
| 788.4155       | 6  | V 17 | 1831.9554      | 916.4816        |
| 901.4996       | 7  | I 16 | 1732.8870      | 866.9474        |
| 1000.5680      | 8  | V 15 | 1619.8029      | 810.4054        |
| 1087.6000      | 9  | S 14 | 1520.7345      | 760.8712        |
| 1188.6477      | 10 | T 13 | 1433.7025      | 717.3552        |
| 1289.6954      | 11 | T 12 | 1332.6548      | 666.8313        |
| 1346.7168      | 12 | G 11 | 1231.6071      | 616.3075        |
| 1443.7696      | 13 | P 10 | 1174.5857      | 587.7967        |
| 1557.8125      | 14 | N 9  | 1077.5329      | 539.2704        |
| 1654.8653      | 15 | P 8  | 963.4900       | 482.2489        |
| 1801.9337      | 16 | F 7  | 866.4372       | 433.7225        |
| 1915.9766      | 17 | N 6  | 719.3688       | 360.1883        |
| 2017.0243      | 18 | T 5  | 605.3259       | 303.1668        |
| 2130.1084      | 19 | L 4  | 504.2782       | 252.6430        |
| 2231.1560      | 20 | T 3  | 391.1941       | 196.1010        |
| 2346.1830      | 21 | D 2  | 290.1464       | 145.5771        |
|                | 22 | R 1  | 175.1195       | 88.0637         |

N-term:+35.07

FAAGQEPDASAASGR, MH+ 1468.7244, m/z 490.2463  
 H OSG37 P180811 230811-s1.02332.02332.3.dta

X-range:

-

MassTol: Y-zoom:

MassType:

AVG  MONO

Axis:

1  2

Label:

I  M  -

Ions:

a  +  2+  3+

b  +  2+  3+

c  +  2+  3+

x  +  2+  3+

y  +  2+  3+

z  +  2+  3+

hide H<sub>2</sub>O/NH<sub>3</sub>

zoom 112-122

GO

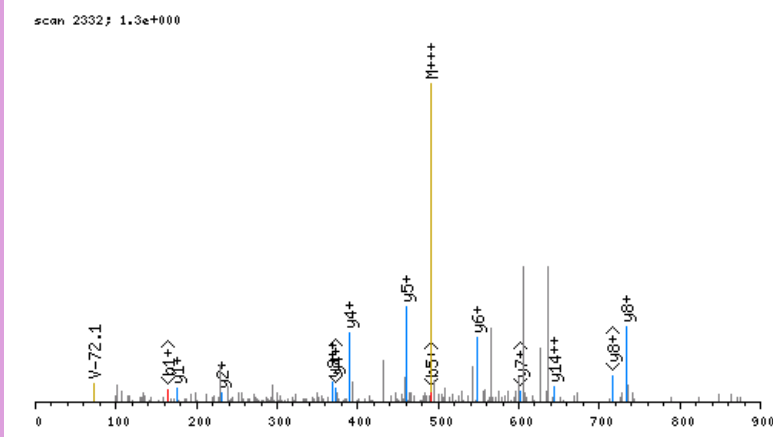

click image to zoom in; click top corners to zoom out [\[precursor±\]](#)

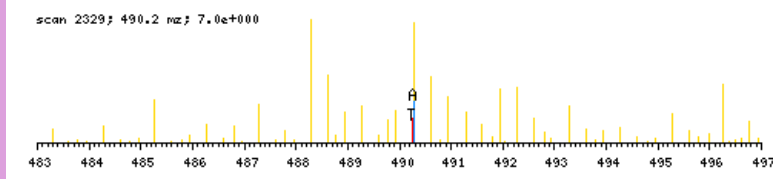

zoomed in precursor plot; T=theoretical m/z, A=acquired m/z

| b <sup>+</sup> | #  | AA # | y <sup>+</sup> | y <sup>2+</sup>                 |
|----------------|----|------|----------------|---------------------------------|
| 182.1393       | 1  | F    | 15             |                                 |
| 253.1764       | 2  | A    | 14             | 1287.5929 <b>644.3004</b>       |
| 324.2135       | 3  | A    | 13             | 608.7818                        |
| 381.2350       | 4  | G    | 12             | 573.2633                        |
| 509.2936       | 5  | Q    | 11             | 544.7525                        |
| 638.3362       | 6  | E    | 10             | 480.7232                        |
| 735.3889       | 7  | P    | 9              | 416.2019                        |
| 850.4159       | 8  | D    | 8              | <b>734.3433</b> <b>367.6756</b> |
| 921.4530       | 9  | A    | 7              | 310.1621                        |
| 1008.4850      | 10 | S    | 6              | <b>548.2792</b> 274.6435        |
| 1079.5221      | 11 | A    | 5              | <b>461.2472</b> 231.1275        |
| 1150.5593      | 12 | A    | 4              | <b>390.2101</b> 195.6090        |
| 1237.5913      | 13 | S    | 3              | 319.1730 160.0904               |
| 1294.6127      | 14 | G    | 2              | <b>232.1410</b> 116.5744        |
|                | 15 | R    | 1              | <b>175.1195</b> 88.0637         |

N-term:+35.07

FDELDSIAKAR, MH+ 1332.7800, m/z 444.9315  
 H OSG40 P180811 230811-s1.05557.05557.3.dta

X-range:

-

MassTol: Y-zoom:

MassType:

AVG  MONO

Axis:

1  2

Label:

I  M  -

Ions:

a  +  2+  3+

b  +  2+  3+

c  +  2+  3+

x  +  2+  3+

y  +  2+  3+

z  +  2+  3+

hide H<sub>2</sub>O/NH<sub>3</sub>

zoom 112-122

GO

scan 5557; 1.7e+001

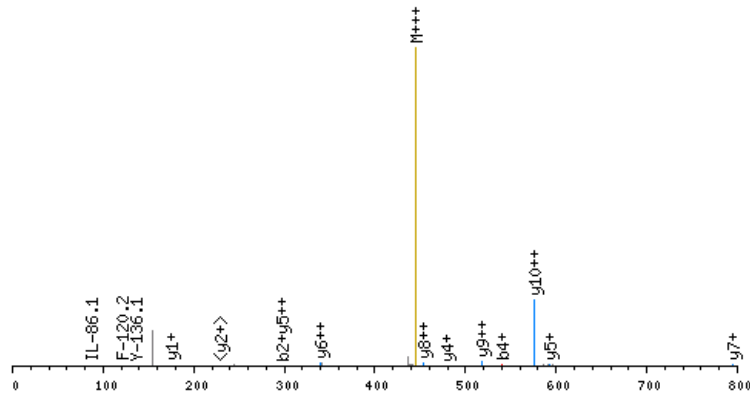

click image to zoom in; click top corners to zoom out [\[precursor±\]](#)

scan 5554; 444.9 m/z; 1.2e+001

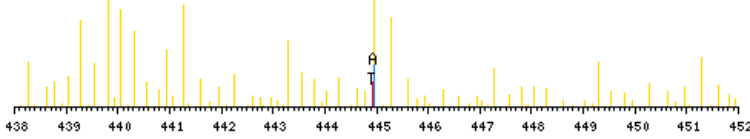

zoomed in precursor plot; T=theoretical m/z, A=acquired m/z

| b <sup>+</sup> | #  | AA # | y <sup>+</sup> | y <sup>2+</sup> |
|----------------|----|------|----------------|-----------------|
| 182.1393       | 1  | F 11 |                |                 |
| 297.1663       | 2  | D 10 | 1151.6485      | 576.3281        |
| 426.2089       | 3  | E 9  | 1036.6215      | 518.8147        |
| 539.2929       | 4  | L 8  | 907.5789       | 454.2934        |
| 654.3199       | 5  | D 7  | 794.4949       | 397.7513        |
| 741.3519       | 6  | S 6  | 679.4679       | 340.2379        |
| 854.4359       | 7  | I 5  | 592.4359       | 296.7219        |
| 925.4731       | 8  | A 4  | 479.3518       | 240.1798        |
| 1087.6312      | 9  | K 3  | 408.3147       | 204.6613        |
| 1158.6683      | 10 | A 2  | 246.1566       | 123.5822        |
|                | 11 | R 1  | 175.1195       | 88.0637         |

N-term:+35.07 K(9):+162.16

FDEPPNPTNVEESLKR, MH+ 1927.9765, m/z 643.3304  
 L OSG39 P180811 230811-s1.04835.04835.3.dta

X-range:

-

MassTol: Y-zoom:

MassType:

AVG  MONO

Axis:

1  2

Label:

I  M  -

Ions:

a  +  2+  3+

b  +  2+  3+

c  +  2+  3+

x  +  2+  3+

y  +  2+  3+

z  +  2+  3+

hide H<sub>2</sub>O/NH<sub>3</sub>

zoom 112-122

GO

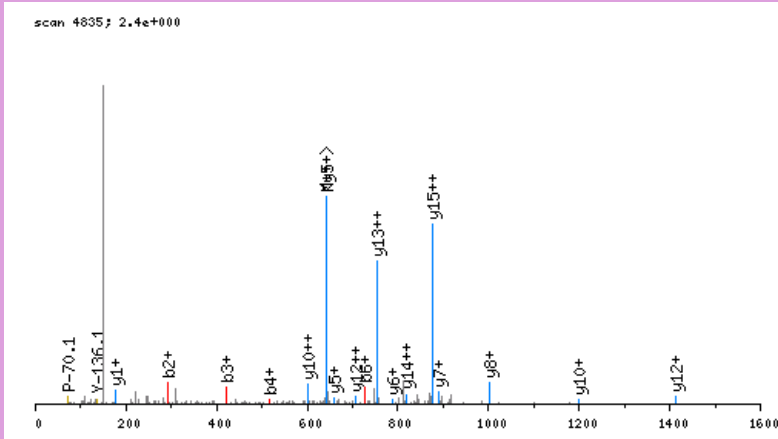

click image to zoom in; click top corners to zoom out [\[precursor±\]](#)

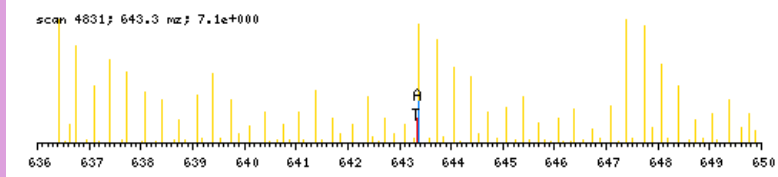

zoomed in precursor plot; T=theoretical m/z, A=acquired m/z

| b <sup>+</sup> | #  | AA # | y <sup>+</sup> | y <sup>2+</sup> |
|----------------|----|------|----------------|-----------------|
| 176.1075       | 1  | F 16 |                |                 |
| 291.1345       | 2  | D 15 | 1752.8769      | 876.9423        |
| 420.1771       | 3  | E 14 | 1637.8499      | 819.4289        |
| 517.2298       | 4  | P 13 | 1508.8073      | 754.9076        |
| 614.2826       | 5  | P 12 | 1411.7546      | 706.3812        |
| 728.3255       | 6  | N 11 | 1314.7018      | 657.8548        |
| 825.3783       | 7  | P 10 | 1200.6589      | 600.8333        |
| 926.4259       | 8  | T 9  | 1103.6061      | 552.3070        |
| 1040.4689      | 9  | N 8  | 1002.5584      | 501.7831        |
| 1139.5373      | 10 | V 7  | 888.5155       | 444.7617        |
| 1268.5799      | 11 | E 6  | 789.4471       | 395.2275        |
| 1397.6225      | 12 | E 5  | 660.4045       | 330.7062        |
| 1484.6545      | 13 | S 4  | 531.3619       | 266.1849        |
| 1597.7386      | 14 | L 3  | 444.3299       | 222.6688        |
| 1753.8649      | 15 | K 2  | 331.2458       | 166.1268        |
|                | 16 | R 1  | 175.1195       | 88.0637         |

N-term:+29.04 K(15):+156.13

FDFAGEEVR, MH+ 1103.5585, m/z 552.2829  
 H OSG38 P180811 230811-s1.05461.05461.2.dta

X-range:

-

MassTol: Y-zoom:

MassType:

AVG  MONO

Axis:

1  2

Label:

I  M  -

Ions:

a  +  2+  3+

b  +  2+  3+

c  +  2+  3+

x  +  2+  3+

y  +  2+  3+

z  +  2+  3+

hide H<sub>2</sub>O/NH<sub>3</sub>

zoom 112-122

GO

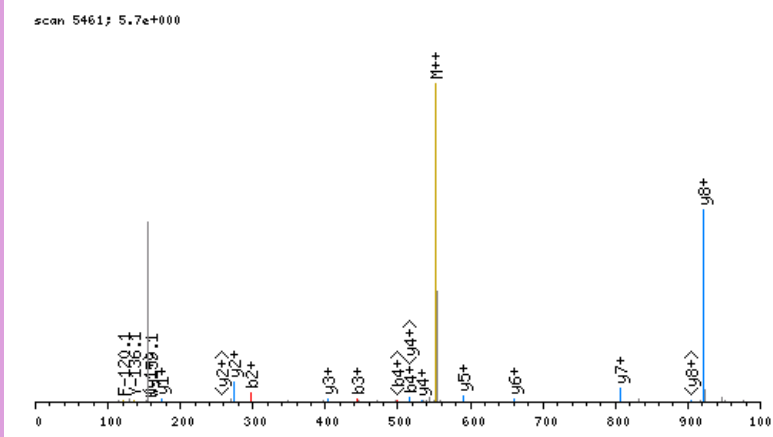

click image to zoom in; click top corners to zoom out [\[precursor±\]](#)

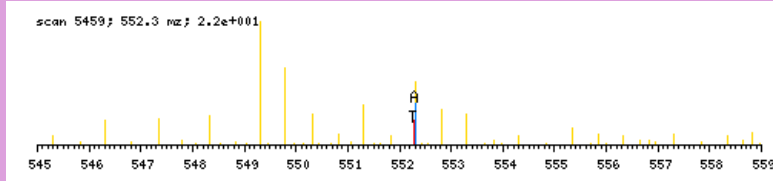

zoomed in precursor plot; T=theoretical m/z, A=acquired m/z

| b <sup>+</sup> | # | AA # | y <sup>+</sup> | y <sup>2+</sup> |
|----------------|---|------|----------------|-----------------|
| 182.1393       | 1 | F    | 9              |                 |
| 297.1663       | 2 | D    | 8              | 461.7174        |
| 444.2347       | 3 | F    | 7              | 404.2040        |
| 515.2718       | 4 | A    | 6              | 330.6698        |
| 572.2932       | 5 | G    | 5              | 295.1512        |
| 701.3358       | 6 | E    | 4              | 266.6405        |
| 830.3784       | 7 | E    | 3              | 202.1192        |
| 929.4468       | 8 | V    | 2              | 137.5979        |
|                | 9 | R    | 1              | 88.0637         |

N-term:+35.07



FDITADDEPLGR, MH+ 1382.7016, m/z 691.8544  
 H OSG37 P180811 230811-s1.06223.06223.2.dta

X-range:

-

MassTol: Y-zoom:

MassType:

AVG  MONO

Axis:

1  2

Label:

I  M  -

Ions:

a  +  2+  3+

b  +  2+  3+

c  +  2+  3+

x  +  2+  3+

y  +  2+  3+

z  +  2+  3+

hide H<sub>2</sub>O/NH<sub>3</sub>

zoom 112-122

GO

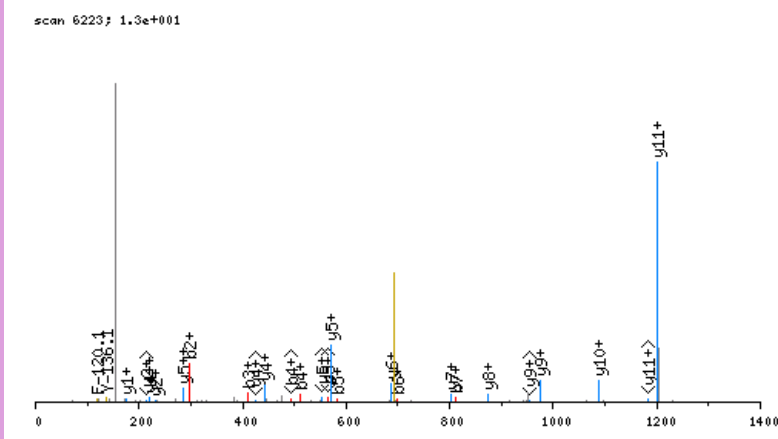

click image to zoom in; click top corners to zoom out [\[precursor±\]](#)

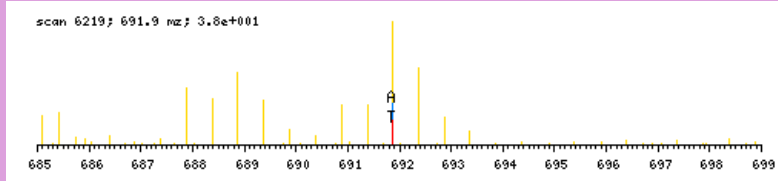

zoomed in precursor plot; T=theoretical m/z, A=acquired m/z

| b <sup>+</sup> | #  | AA # | y <sup>+</sup> | y <sup>2+</sup> |
|----------------|----|------|----------------|-----------------|
| 182.1393       | 1  | F 12 |                |                 |
| 297.1663       | 2  | D 11 | 1201.5701      | 601.2889        |
| 410.2503       | 3  | I 10 | 1086.5431      | 543.7755        |
| 511.2980       | 4  | T 9  | 973.4591       | 487.2334        |
| 582.3351       | 5  | A 8  | 872.4114       | 436.7096        |
| 697.3621       | 6  | D 7  | 801.3743       | 401.1910        |
| 812.3890       | 7  | D 6  | 686.3473       | 343.6776        |
| 941.4316       | 8  | E 5  | 571.3204       | 286.1641        |
| 1038.4844      | 9  | P 4  | 442.2778       | 221.6428        |
| 1151.5684      | 10 | L 3  | 345.2250       | 173.1164        |
| 1208.5899      | 11 | G 2  | 232.1410       | 116.5744        |
|                | 12 | R 1  | 175.1195       | 88.0637         |

N-term:+35.07

FDKFCANTCVDCR, MH+ 1760.8193, m/z 587.6113  
 H OSG40 P180811 230811-s1.03837.03837.3.dta

X-range:

-

MassTol: Y-zoom:

MassType:

AVG  MONO

Axis:

1  2

Label:

I  M  -

Ions:

a  +  2+  3+

b  +  2+  3+

c  +  2+  3+

x  +  2+  3+

y  +  2+  3+

z  +  2+  3+

hide H<sub>2</sub>O/NH<sub>3</sub>

zoom 112-122

GO

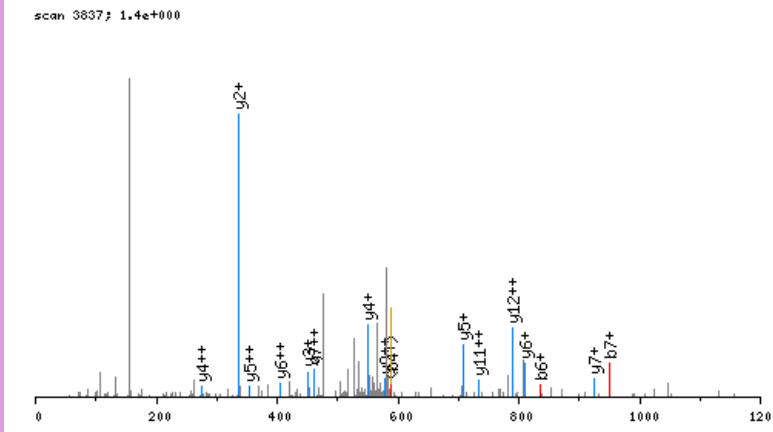

click image to zoom in; click top corners to zoom out [\[precursor±\]](#)

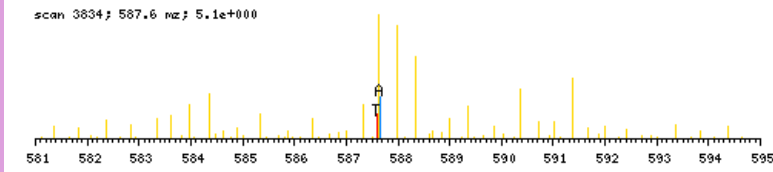

zoomed in precursor plot; T=theoretical m/z, A=acquired m/z

| b <sup>+</sup> | #  | AA | #  | y <sup>+</sup> | y <sup>2+</sup> |
|----------------|----|----|----|----------------|-----------------|
| 182.1393       | 1  | F  | 13 |                |                 |
| 297.1663       | 2  | D  | 12 | 1579.6878      | 790.3478        |
| 459.3244       | 3  | K  | 11 | 1464.6609      | 732.8344        |
| 606.3928       | 4  | F  | 10 | 1302.5028      | 651.7553        |
| 766.4234       | 5  | C  | 9  | 1155.4344      | 578.2211        |
| 837.4605       | 6  | A  | 8  | 995.4038       | 498.2058        |
| 951.5034       | 7  | N  | 7  | 924.3667       | 462.6872        |
| 1052.5511      | 8  | T  | 6  | 810.3237       | 405.6658        |
| 1212.5817      | 9  | C  | 5  | 709.2761       | 355.1419        |
| 1311.6501      | 10 | V  | 4  | 549.2455       | 275.1266        |
| 1426.6770      | 11 | D  | 3  | 450.1770       | 225.5924        |
| 1586.7076      | 12 | C  | 2  | 335.1501       | 168.0790        |
|                | 13 | R  | 1  | 175.1195       | 88.0637         |

N-term:+35.07 K(3):+162.16  
 C(5):+160.03 C(9):+160.03  
 C(12):+160.03

FDKPVSPDLLASGMAR, MH+ 1770.0624, m/z 590.6923  
 H OSG39 P180811 230811-s1.06527.06527.3.dta

X-range:

-

MassTol: Y-zoom:

MassType:

AVG  MONO

Axis:

1  2

Label:

I  M  -

Ions:

a  +  2+  3+

b  +  2+  3+

c  +  2+  3+

x  +  2+  3+

y  +  2+  3+

z  +  2+  3+

hide H<sub>2</sub>O/NH<sub>3</sub>

zoom 112-122

GO

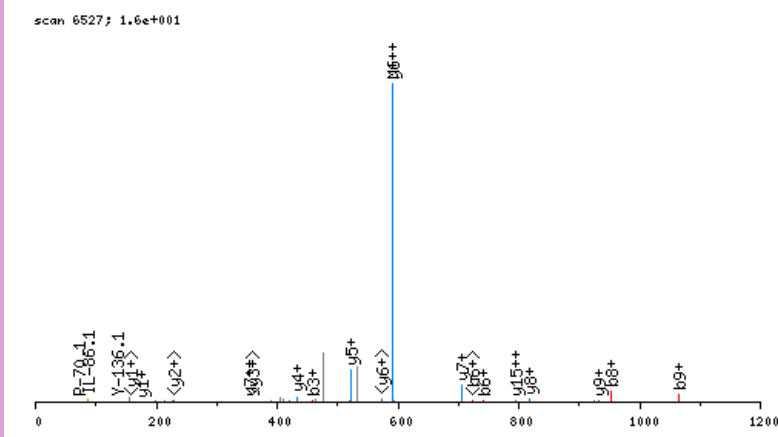

click image to zoom in; click top corners to zoom out [\[precursor±\]](#)

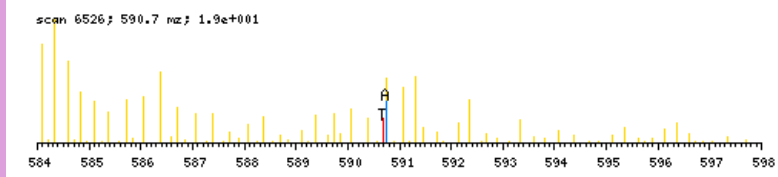

zoomed in precursor plot; T=theoretical m/z, A=acquired m/z

| b <sup>+</sup> | #  | AA # | y <sup>+</sup> | y <sup>2+</sup> |
|----------------|----|------|----------------|-----------------|
| 182.1393       | 1  | F 16 |                |                 |
| 297.1663       | 2  | D 15 | 1588.9309      | 794.9694        |
| 459.3244       | 3  | K 14 | 1473.9040      | 737.4559        |
| 556.3771       | 4  | P 13 | 1311.7459      | 656.3768        |
| 655.4455       | 5  | V 12 | 1214.6931      | 607.8505        |
| 742.4776       | 6  | S 11 | 1115.6247      | 558.3163        |
| 839.5303       | 7  | P 10 | 1028.5927      | 514.8002        |
| 952.6144       | 8  | L 9  | 931.5399       | 466.2739        |
| 1065.6985      | 9  | L 8  | 818.4558       | 409.7318        |
| 1178.7825      | 10 | L 7  | 705.3718       | 353.1898        |
| 1249.8196      | 11 | A 6  | 592.2877       | 296.6478        |
| 1336.8517      | 12 | S 5  | 521.2506       | 261.1292        |
| 1393.8731      | 13 | G 4  | 434.2186       | 217.6132        |
| 1524.9136      | 14 | M 3  | 377.1971       | 189.1025        |
| 1595.9507      | 15 | A 2  | 246.1566       | 123.5822        |
|                | 16 | R 1  | 175.1195       | 88.0637         |

N-term:+35.07 K(3):+162.16

FDLQIGDESVGR, MH+ 1369.7175, m/z 685.3624  
 H OSG37 P180811 230811-s1.06782.06782.2.dta

X-range:

-

MassTol: Y-zoom:

MassType:

AVG  MONO

Axis:

1  2

Label:

I  M  -

Ions:

a  +  2+  3+

b  +  2+  3+

c  +  2+  3+

x  +  2+  3+

y  +  2+  3+

z  +  2+  3+

hide H<sub>2</sub>O/NH<sub>3</sub>

zoom 112-122

GO

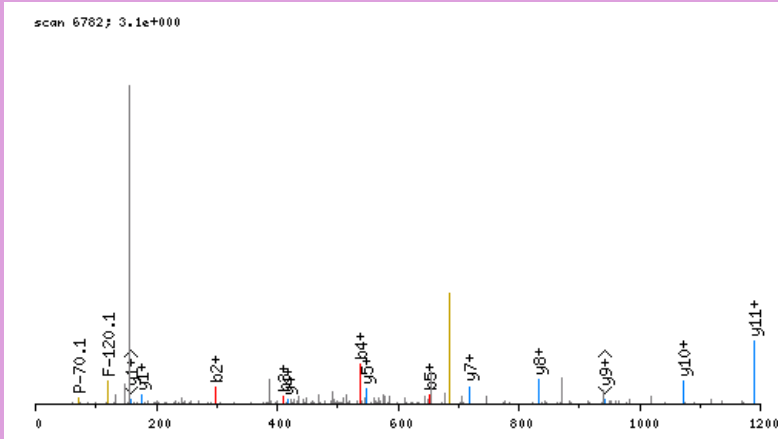

click image to zoom in; click top corners to zoom out [\[precursor±\]](#)

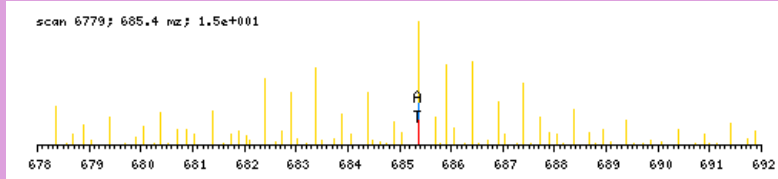

zoomed in precursor plot; T=theoretical m/z, A=acquired m/z

| b <sup>+</sup> | #  | AA # | y <sup>+</sup> | y <sup>2+</sup> |
|----------------|----|------|----------------|-----------------|
| 182.1393       | 1  | F 12 |                |                 |
| 297.1663       | 2  | D 11 | 1188.5861      | 594.7969        |
| 410.2503       | 3  | L 10 | 1073.5591      | 537.2835        |
| 538.3089       | 4  | Q 9  | 960.4750       | 480.7414        |
| 651.3930       | 5  | I 8  | 832.4165       | 416.7121        |
| 708.4144       | 6  | G 7  | 719.3324       | 360.1701        |
| 823.4414       | 7  | D 6  | 662.3109       | 331.6594        |
| 952.4840       | 8  | E 5  | 547.2840       | 274.1459        |
| 1039.5160      | 9  | S 4  | 418.2414       | 209.6246        |
| 1138.5844      | 10 | V 3  | 331.2094       | 166.1086        |
| 1195.6059      | 11 | G 2  | 232.1410       | 116.5744        |
|                | 12 | R 1  | 175.1195       | 88.0637         |

N-term:+35.07

FQAKVQAINVSSR, MH+ 1504.8488, m/z 502.2878  
 L OSG40 P180811 230811-s1.04698.04698.3.dta

scan 4698; 1.5e+001

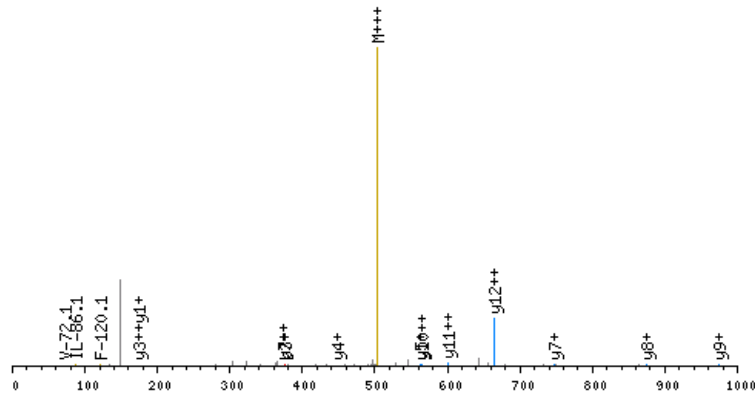

click image to zoom in; click top corners to zoom out [\[precursor±\]](#)

scan 4694; 502.3 m/z; 1.6e+001

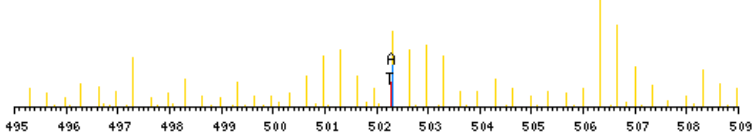

zoomed in precursor plot; T=theoretical m/z, A=acquired m/z

X-range:

-

MassTol: Y-zoom:

MassType:

AVG  MONO

Axis:

1  2

Label:

I  M  -

Ions:

a  +  2+  3+

b  +  2+  3+

c  +  2+  3+

x  +  2+  3+

y  +  2+  3+

z  +  2+  3+

hide H<sub>2</sub>O/NH<sub>3</sub>

zoom 112-122

GO

| b <sup>+</sup> | #  | AA # | y <sup>+</sup> | y <sup>2+</sup> |
|----------------|----|------|----------------|-----------------|
| 176.1075       | 1  | F 13 |                |                 |
| 305.1501       | 2  | E 12 | 1329.7491      | 665.3785        |
| 376.1872       | 3  | A 11 | 1200.7065      | 600.8572        |
| 532.3135       | 4  | K 10 | 1129.6694      | 565.3386        |
| 631.3819       | 5  | V 9  | 973.5431       | 487.2754        |
| 759.4405       | 6  | Q 8  | 874.4747       | 437.7412        |
| 830.4776       | 7  | A 7  | 746.4161       | 373.7120        |
| 943.5617       | 8  | I 6  | 675.3790       | 338.1934        |
| 1057.6046      | 9  | N 5  | 562.2949       | 281.6514        |
| 1156.6730      | 10 | V 4  | 448.2520       | 224.6299        |
| 1243.7051      | 11 | S 3  | 349.1836       | 175.0957        |
| 1330.7371      | 12 | S 2  | 262.1515       | 131.5797        |
|                | 13 | R 1  | 175.1195       | 88.0637         |

N-term:+29.04 K(4):+156.13

FEEISDEASKLVDR, MH+ 1693.8649, m/z 565.2931  
 L OSG39 P180811 230811-s1.05175.05175.3.dta

scan 5175; 6.5e+000

X-range:

-

MassTol: Y-zoom:

MassType:

AVG  MONO

Axis:

1  2

Label:

I  M  -

Ions:

a  +  2+  3+

b  +  2+  3+

c  +  2+  3+

x  +  2+  3+

y  +  2+  3+

z  +  2+  3+

hide H<sub>2</sub>O/NH<sub>3</sub>

zoom 112-122

GO

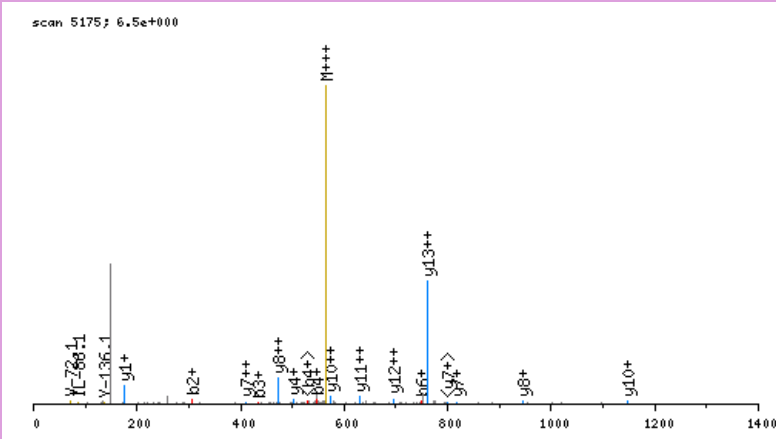

click image to zoom in; click top corners to zoom out [\[precursor±\]](#)

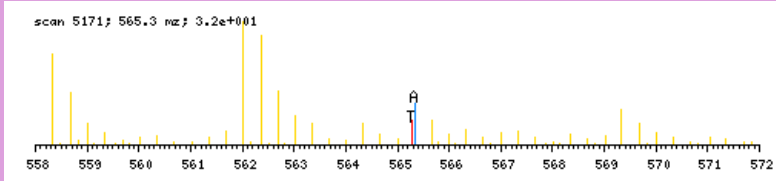

zoomed in precursor plot; T=theoretical m/z, A=acquired m/z

| b <sup>+</sup> | #  | AA # | y <sup>+</sup> | y <sup>2+</sup> |
|----------------|----|------|----------------|-----------------|
| 176.1075       | 1  | F 14 |                |                 |
| 305.1501       | 2  | E 13 | 1518.7652      | 759.8865        |
| 434.1927       | 3  | E 12 | 1389.7226      | 695.3652        |
| 547.2768       | 4  | I 11 | 1260.6800      | 630.8439        |
| 634.3088       | 5  | S 10 | 1147.5959      | 574.3019        |
| 749.3357       | 6  | D 9  | 1060.5639      | 530.7859        |
| 878.3783       | 7  | E 8  | 945.5370       | 473.2724        |
| 949.4154       | 8  | A 7  | 816.4944       | 408.7511        |
| 1036.4475      | 9  | S 6  | 745.4573       | 373.2325        |
| 1192.5738      | 10 | K 5  | 658.4252       | 329.7165        |
| 1305.6578      | 11 | L 4  | 502.2989       | 251.6534        |
| 1404.7262      | 12 | V 3  | 389.2149       | 195.1113        |
| 1519.7532      | 13 | D 2  | 290.1464       | 145.5771        |
|                | 14 | R 1  | 175.1195       | 88.0637         |

N-term:+29.04 K(10):+156.13

FEEYGKIDTIEIITDR, MH+ 1998.0436, m/z 666.6860  
 L OSG39 P180811 230811-s1.06535.06535.3.dta

X-range:

-

MassTol: Y-zoom:

MassType:

AVG  MONO

Axis:

1  2

Label:

I  M  -

Ions:

a  +  2+  3+

b  +  2+  3+

c  +  2+  3+

x  +  2+  3+

y  +  2+  3+

z  +  2+  3+

hide H<sub>2</sub>O/NH<sub>3</sub>

zoom 112-122

GO

scan 6535; 6.3e+000

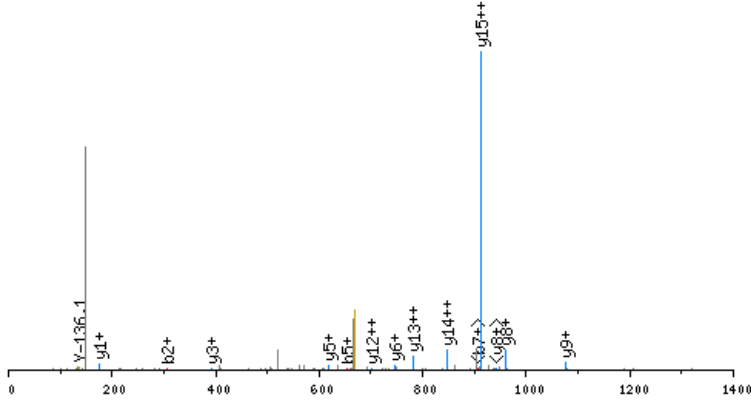

click image to zoom in; click top corners to zoom out [\[precursor±\]](#)

scan 6531; 666.7 m/z; 8.8e+000

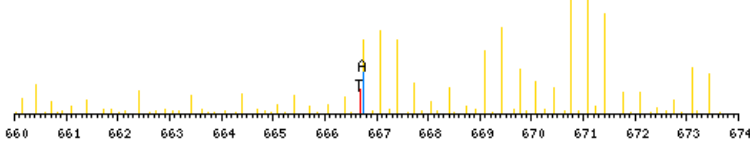

zoomed in precursor plot; T=theoretical m/z, A=acquired m/z

| b <sup>+</sup> | #  | AA # | y <sup>+</sup> | y <sup>2+</sup> |
|----------------|----|------|----------------|-----------------|
| 176.1075       | 1  | F 16 |                |                 |
| 305.1501       | 2  | E 15 | 1822.9439      | 911.9758        |
| 434.1927       | 3  | E 14 | 1693.9013      | 847.4546        |
| 597.2560       | 4  | Y 13 | 1564.8587      | 782.9333        |
| 654.2775       | 5  | G 12 | 1401.7954      | 701.4016        |
| 810.4038       | 6  | K 11 | 1344.7739      | 672.8909        |
| 923.4879       | 7  | I 10 | 1188.6476      | 594.8277        |
| 1038.5148      | 8  | D 9  | 1075.5635      | 538.2857        |
| 1139.5625      | 9  | T 8  | 960.5366       | 480.7722        |
| 1252.6465      | 10 | I 7  | 859.4889       | 430.2484        |
| 1381.6891      | 11 | E 6  | 746.4048       | 373.7063        |
| 1494.7732      | 12 | I 5  | 617.3623       | 309.1850        |
| 1607.8573      | 13 | I 4  | 504.2782       | 252.6430        |
| 1708.9049      | 14 | T 3  | 391.1941       | 196.1010        |
| 1823.9319      | 15 | D 2  | 290.1464       | 145.5771        |
|                | 16 | R 1  | 175.1195       | 88.0637         |

N-term:+29.04 K(6):+156.13

FEVLPQQVTIDAIR, MH+ 1656.9325, m/z 552.9823  
 L OSG37 P180811 230811-s1.08193.08193.3.dta

X-range:

-

MassTol: Y-zoom:

MassType:

AVG  MONO

Axis:

1  2

Label:

I  M  -

Ions:

a  +  2+  3+

b  +  2+  3+

c  +  2+  3+

x  +  2+  3+

y  +  2+  3+

z  +  2+  3+

hide H<sub>2</sub>O/NH<sub>3</sub>

zoom 112-122

GO

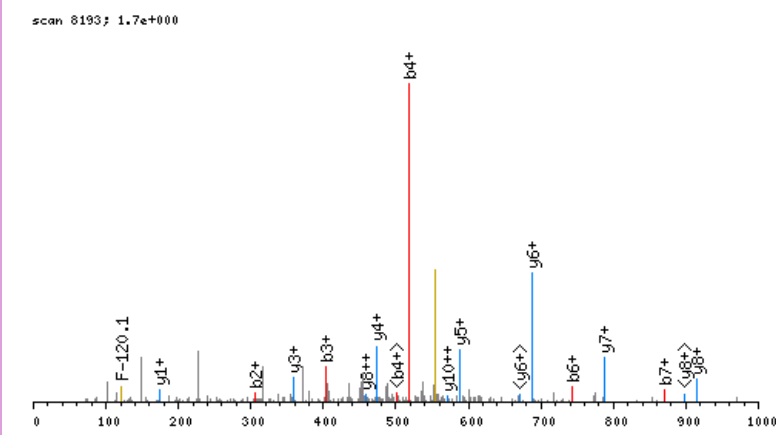

click image to zoom in; click top corners to zoom out [\[precursor±\]](#)

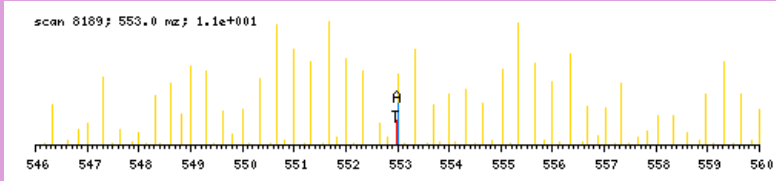

zoomed in precursor plot; T=theoretical m/z, A=acquired m/z

| b <sup>+</sup> | #  | AA # | y <sup>+</sup> | y <sup>2+</sup> |
|----------------|----|------|----------------|-----------------|
| 176.1075       | 1  | F 14 |                |                 |
| 305.1501       | 2  | E 13 | 1481.8328      | 741.4203        |
| 404.2185       | 3  | V 12 | 1352.7902      | 676.8990        |
| 517.3026       | 4  | L 11 | 1253.7218      | 627.3648        |
| 614.3553       | 5  | P 10 | 1140.6377      | 570.8228        |
| 742.4139       | 6  | Q 9  | 1043.5849      | 522.2964        |
| 870.4725       | 7  | Q 8  | 915.5264       | 458.2671        |
| 969.5409       | 8  | V 7  | 787.4678       | 394.2378        |
| 1070.5886      | 9  | T 6  | 688.3994       | 344.7036        |
| 1183.6727      | 10 | I 5  | 587.3517       | 294.1798        |
| 1298.6996      | 11 | D 4  | 474.2676       | 237.6377        |
| 1369.7367      | 12 | A 3  | 359.2407       | 180.1243        |
| 1482.8208      | 13 | I 2  | 288.2036       | 144.6057        |
|                | 14 | R 1  | 175.1195       | 88.0637         |

N-term:+29.04



FFDELDSIAKAR, MH+ 1467.7848, m/z 489.9331  
 L OSG40 P180811 230811-s1.07153.07153.3.dta

X-range:

-

MassTol: Y-zoom:

MassType:

AVG  MONO

Axis:

1  2

Label:

I  M  -

Ions:

a  +  2+  3+

b  +  2+  3+

c  +  2+  3+

x  +  2+  3+

y  +  2+  3+

z  +  2+  3+

hide H<sub>2</sub>O/NH<sub>3</sub>

zoom 112-122

GO

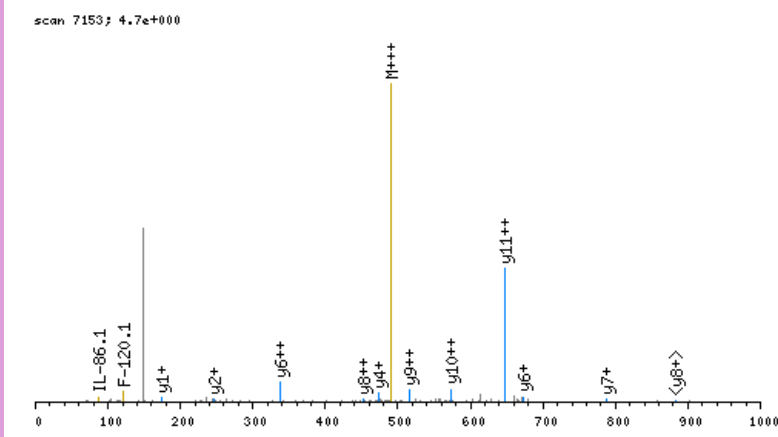

click image to zoom in; click top corners to zoom out [\[precursor±\]](#)

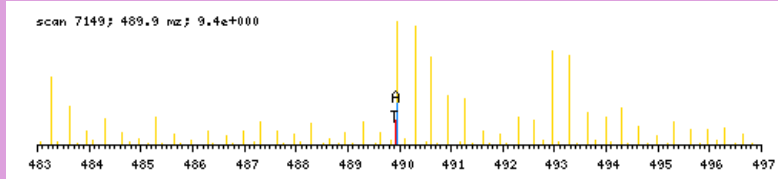

zoomed in precursor plot; T=theoretical m/z, A=acquired m/z

| b <sup>+</sup> | #  | AA # | y <sup>+</sup> | y <sup>2+</sup> |
|----------------|----|------|----------------|-----------------|
| 176.1075       | 1  | F 12 |                |                 |
| 323.1759       | 2  | F 11 | 1292.6851      | 646.8465        |
| 438.2029       | 3  | D 10 | 1145.6167      | 573.3122        |
| 567.2455       | 4  | E 9  | 1030.5897      | 515.7988        |
| 680.3295       | 5  | L 8  | 901.5471       | 451.2775        |
| 795.3565       | 6  | D 7  | 788.4631       | 394.7354        |
| 882.3885       | 7  | S 6  | 673.4361       | 337.2220        |
| 995.4726       | 8  | I 5  | 586.4041       | 293.7060        |
| 1066.5097      | 9  | A 4  | 473.3200       | 237.1639        |
| 1222.6360      | 10 | K 3  | 402.2829       | 201.6454        |
| 1293.6731      | 11 | A 2  | 246.1566       | 123.5822        |
|                | 12 | R 1  | 175.1195       | 88.0637         |

N-term:+29.04 K(10):+156.13

FGPISEVVVVKDR, MH+ 1512.9426, m/z 504.9857  
 H OSG39 P180811 230811-s1.05288.05288.3.dta

X-range:

-

MassTol: Y-zoom:

MassType:

AVG  MONO

Axis:

1  2

Label:

I  M  -

Ions:

a  +  2+  3+

b  +  2+  3+

c  +  2+  3+

x  +  2+  3+

y  +  2+  3+

z  +  2+  3+

hide H<sub>2</sub>O/NH<sub>3</sub>

zoom 112-122

GO

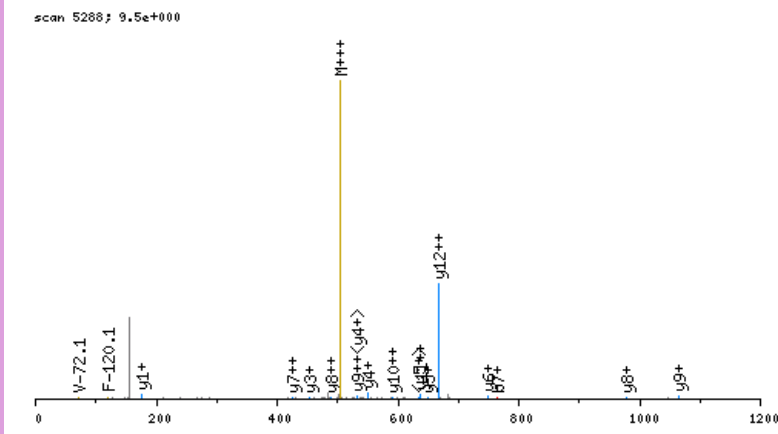

click image to zoom in; click top corners to zoom out [\[precursor±\]](#)

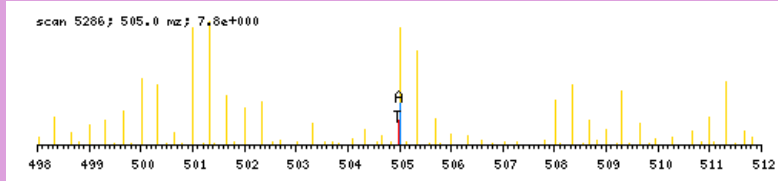

zoomed in precursor plot; T=theoretical m/z, A=acquired m/z

| b <sup>+</sup> | #  | AA # | y <sup>+</sup> | y <sup>2+</sup> |
|----------------|----|------|----------------|-----------------|
| 182.1393       | 1  | F    | 13             |                 |
| 239.1608       | 2  | G    | 12             | 1331.8111       |
| 336.2135       | 3  | P    | 11             | 1274.7896       |
| 449.2976       | 4  | I    | 10             | 1177.7369       |
| 536.3296       | 5  | S    | 9              | 1064.6528       |
| 665.3722       | 6  | E    | 8              | 977.6208        |
| 764.4406       | 7  | V    | 7              | 848.5782        |
| 863.5091       | 8  | V    | 6              | 749.5098        |
| 962.5775       | 9  | V    | 5              | 650.4414        |
| 1061.6459      | 10 | V    | 4              | 551.3730        |
| 1223.8040      | 11 | K    | 3              | 452.3045        |
| 1338.8309      | 12 | D    | 2              | 290.1464        |
|                | 13 | R    | 1              | 175.1195        |

N-term:+35.07 K(11):+162.16

FKDLFDPIIQDR, MH+ 1574.9219, m/z 525.6455  
 H OSG40 P180811 230811-s1.08087.08087.3.dta

X-range:

-

MassTol: Y-zoom:

MassType:

AVG  MONO

Axis:

1  2

Label:

I  M  -

Ions:

a  +  2+  3+

b  +  2+  3+

c  +  2+  3+

x  +  2+  3+

y  +  2+  3+

z  +  2+  3+

hide H<sub>2</sub>O/NH<sub>3</sub>

zoom 112-122

GO

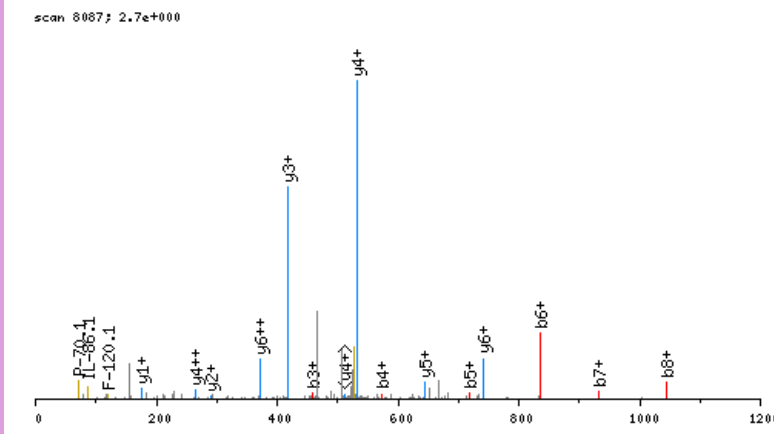

click image to zoom in; click top corners to zoom out [\[precursor±\]](#)

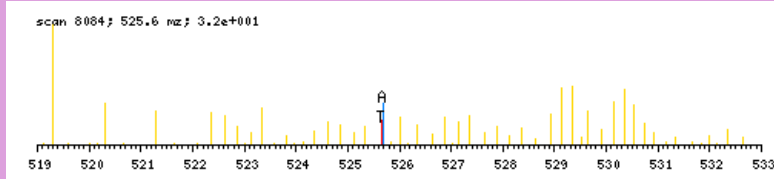

zoomed in precursor plot; T=theoretical m/z, A=acquired m/z

| b <sup>+</sup> | #  | AA # | y <sup>+</sup> | y <sup>2+</sup> |
|----------------|----|------|----------------|-----------------|
| 182.1393       | 1  | F 12 |                |                 |
| 344.2974       | 2  | K 11 | 1393.7904      | 697.3991        |
| 459.3244       | 3  | D 10 | 1231.6323      | 616.3201        |
| 572.4084       | 4  | L 9  | 1116.6053      | 558.8066        |
| 719.4768       | 5  | F 8  | 1003.5213      | 502.2645        |
| 834.5038       | 6  | D 7  | 856.4529       | 428.7303        |
| 931.5565       | 7  | P 6  | 741.4259       | 371.2169        |
| 1044.6406      | 8  | I 5  | 644.3731       | 322.6905        |
| 1157.7247      | 9  | I 4  | 531.2891       | 266.1485        |
| 1285.7832      | 10 | Q 3  | 418.2050       | 209.6064        |
| 1400.8102      | 11 | D 2  | 290.1464       | 145.5771        |
|                | 12 | R 1  | 175.1195       | 88.0637         |

N-term:+35.07 K(2):+162.16

FKEETEIPAR, MH+ 1287.7585, m/z 429.9243  
 H OSG40 P180811 230811-s1.02933.02933.3.dta

X-range:

-

MassTol: Y-zoom:

MassType:

AVG  MONO

Axis:

1  2

Label:

I  M  -

Ions:

a  +  2+  3+

b  +  2+  3+

c  +  2+  3+

x  +  2+  3+

y  +  2+  3+

z  +  2+  3+

hide H<sub>2</sub>O/NH<sub>3</sub>

zoom 112-122

GO

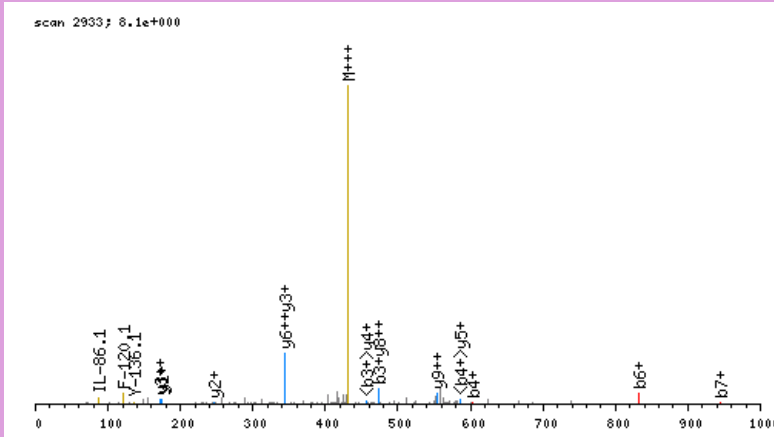

click image to zoom in; click top corners to zoom out [\[precursor±\]](#)

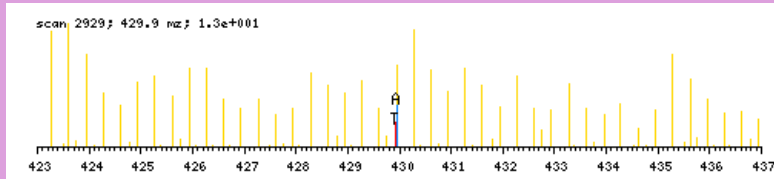

zoomed in precursor plot; T=theoretical m/z, A=acquired m/z

| b <sup>+</sup> | #  | AA | #  | y <sup>+</sup> | y <sup>2+</sup> |
|----------------|----|----|----|----------------|-----------------|
| 182.1393       | 1  | F  | 10 |                |                 |
| 344.2974       | 2  | K  | 9  | 1106.6270      | 553.8174        |
| 473.3400       | 3  | E  | 8  | 944.4689       | 472.7384        |
| 602.3826       | 4  | E  | 7  | 815.4263       | 408.2171        |
| 703.4303       | 5  | T  | 6  | 686.3837       | 343.6958        |
| 832.4729       | 6  | E  | 5  | 585.3360       | 293.1719        |
| 945.5569       | 7  | I  | 4  | 456.2934       | 228.6506        |
| 1042.6097      | 8  | P  | 3  | 343.2094       | 172.1086        |
| 1113.6468      | 9  | A  | 2  | 246.1566       | 123.5822        |
|                | 10 | R  | 1  | 175.1195       | 88.0637         |

N-term:+35.07 K(2):+162.16

FNKPDIDAWELR, MH+ 1559.8222, m/z 520.6123  
 L OSG40 P180811 230811-s1.07258.07258.3.dta

X-range:

-

MassTol: Y-zoom:

MassType:

AVG  MONO

Axis:

1  2

Label:

I  M  -

Ions:

a  +  2+  3+

b  +  2+  3+

c  +  2+  3+

x  +  2+  3+

y  +  2+  3+

z  +  2+  3+

hide H<sub>2</sub>O/NH<sub>3</sub>

zoom 112-122

GO

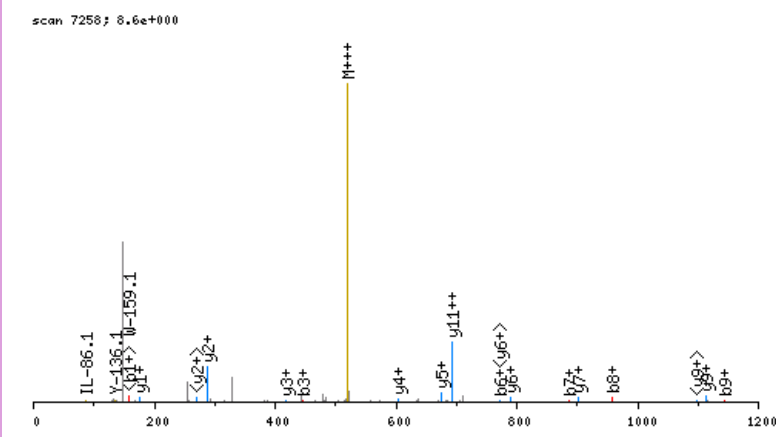

click image to zoom in; click top corners to zoom out [\[precursor±\]](#)

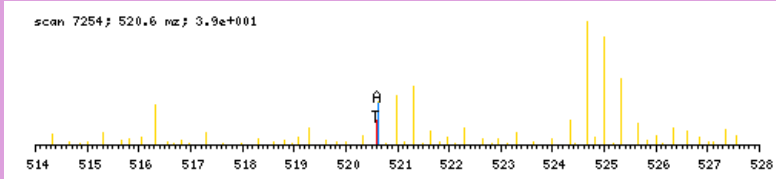

zoomed in precursor plot; T=theoretical m/z, A=acquired m/z

| b <sup>+</sup> | #  | AA # | y <sup>+</sup> | y <sup>2+</sup> |
|----------------|----|------|----------------|-----------------|
| 176.1075       | 1  | F 12 |                |                 |
| 290.1504       | 2  | N 11 | 1384.7225      | 692.8652        |
| 446.2767       | 3  | K 10 | 1270.6796      | 635.8437        |
| 543.3295       | 4  | P 9  | 1114.5533      | 557.7806        |
| 658.3564       | 5  | D 8  | 1017.5005      | 509.2542        |
| 771.4405       | 6  | I 7  | 902.4736       | 451.7407        |
| 886.4675       | 7  | D 6  | 789.3895       | 395.1987        |
| 957.5046       | 8  | A 5  | 674.3626       | 337.6852        |
| 1143.5839      | 9  | W 4  | 603.3255       | 302.1666        |
| 1272.6265      | 10 | E 3  | 417.2462       | 209.1270        |
| 1385.7105      | 11 | L 2  | 288.2036       | 144.6057        |
|                | 12 | R 1  | 175.1195       | 88.0637         |

N-term:+29.04 K(3):+156.13

FSLGFDEPAEQPVR, MH+ 1619.8069, m/z 540.6072  
 L OSG37 P180811 230811-s1.07007.07007.3.dta

X-range:

-

MassTol: Y-zoom:

MassType:

AVG  MONO

Axis:

1  2

Label:

I  M  -

Ions:

a  +  2+  3+

b  +  2+  3+

c  +  2+  3+

x  +  2+  3+

y  +  2+  3+

z  +  2+  3+

hide H<sub>2</sub>O/NH<sub>3</sub>

zoom 112-122

GO

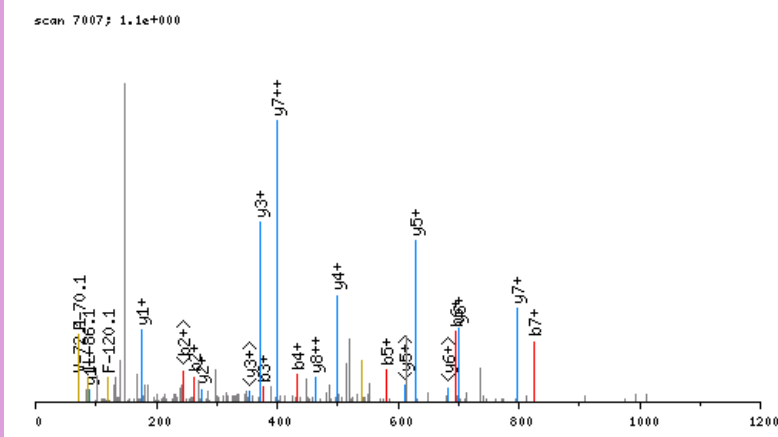

click image to zoom in; click top corners to zoom out [\[precursor±\]](#)

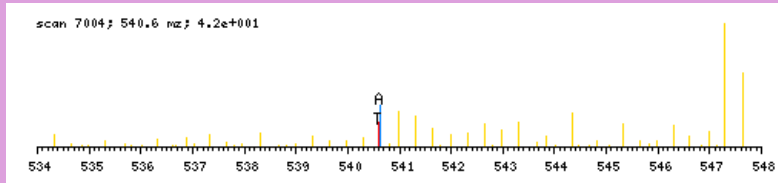

zoomed in precursor plot; T=theoretical m/z, A=acquired m/z

| b <sup>+</sup> | #  | AA # | y <sup>+</sup> | y <sup>2+</sup> |
|----------------|----|------|----------------|-----------------|
| 176.1075       | 1  | F 14 |                |                 |
| 263.1395       | 2  | S 13 | 1444.7072      | 722.8575        |
| 376.2236       | 3  | L 12 | 1357.6752      | 679.3415        |
| 433.2451       | 4  | G 11 | 1244.5911      | 622.7995        |
| 580.3135       | 5  | F 10 | 1187.5697      | 594.2888        |
| 695.3404       | 6  | D 9  | 1040.5013      | 520.7545        |
| 824.3830       | 7  | E 8  | 925.4743       | 463.2411        |
| 921.4358       | 8  | P 7  | 796.4317       | 398.7198        |
| 992.4729       | 9  | A 6  | 699.3790       | 350.1934        |
| 1121.5155      | 10 | E 5  | 628.3418       | 314.6748        |
| 1249.5741      | 11 | Q 4  | 499.2993       | 250.1535        |
| 1346.6268      | 12 | P 3  | 371.2407       | 186.1243        |
| 1445.6952      | 13 | V 2  | 274.1879       | 137.5979        |
|                | 14 | R 1  | 175.1195       | 88.0637         |

N-term:+29.04

FSLSGAQIDDNIPR, MH+ 1566.8340, m/z 522.9495  
 H OSG37 P180811 230811-s1.06791.06791.3.dta

X-range:

-

MassTol: Y-zoom:

MassType:

AVG  MONO

Axis:

1  2

Label:

I  M  -

Ions:

a  +  2+  3+

b  +  2+  3+

c  +  2+  3+

x  +  2+  3+

y  +  2+  3+

z  +  2+  3+

hide H<sub>2</sub>O/NH<sub>3</sub>

zoom 112-122

GO

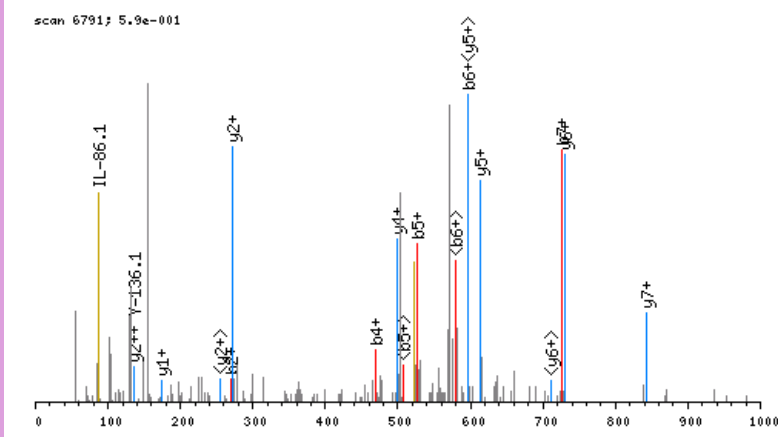

click image to zoom in; click top corners to zoom out [\[precursor±\]](#)

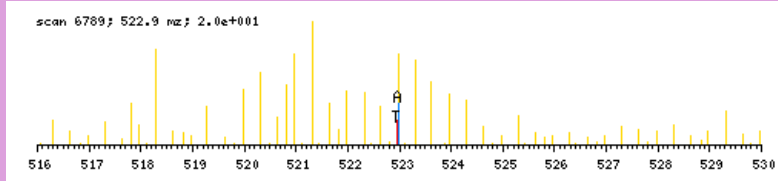

zoomed in precursor plot; T=theoretical m/z, A=acquired m/z

| b <sup>+</sup> | #  | AA # | y <sup>+</sup> | y <sup>2+</sup> |
|----------------|----|------|----------------|-----------------|
| 182.1393       | 1  | F 14 |                |                 |
| 269.1713       | 2  | S 13 | 1385.7025      | 693.3552        |
| 382.2554       | 3  | L 12 | 1298.6705      | 649.8391        |
| 469.2874       | 4  | S 11 | 1185.5864      | 593.2971        |
| 526.3089       | 5  | G 10 | 1098.5544      | 549.7811        |
| 597.3460       | 6  | A 9  | 1041.5329      | 521.2704        |
| 725.4046       | 7  | Q 8  | 970.4958       | 485.7518        |
| 838.4887       | 8  | I 7  | 842.4372       | 421.7225        |
| 953.5156       | 9  | D 6  | 729.3531       | 365.1805        |
| 1068.5425      | 10 | D 5  | 614.3262       | 307.6670        |
| 1182.5855      | 11 | N 4  | 499.2993       | 250.1535        |
| 1295.6695      | 12 | I 3  | 385.2563       | 193.1321        |
| 1392.7223      | 13 | P 2  | 272.1723       | 136.5900        |
|                | 14 | R 1  | 175.1195       | 88.0637         |

N-term:+35.07

FSPEKSQLPGIVAGGR, MH+ 1711.0179, m/z 571.0108  
 H OSG40 P180811 230811-s1.05861.05861.3.dta

X-range:

-

MassTol: Y-zoom:

MassType:

AVG  MONO

Axis:

1  2

Label:

I  M  -

Ions:

a  +  2+  3+

b  +  2+  3+

c  +  2+  3+

x  +  2+  3+

y  +  2+  3+

z  +  2+  3+

hide H<sub>2</sub>O/NH<sub>3</sub>

zoom 112-122

GO

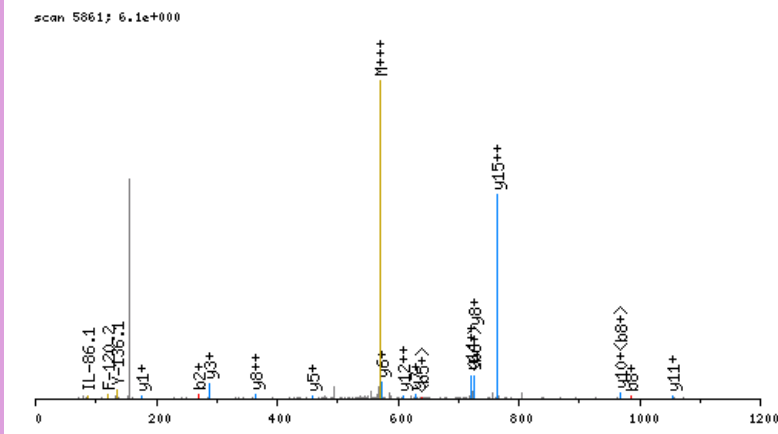

click image to zoom in; click top corners to zoom out [\[precursor±\]](#)

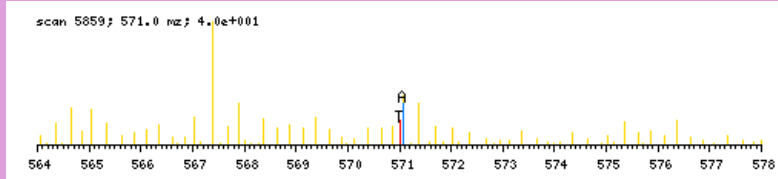

zoomed in precursor plot; T=theoretical m/z, A=acquired m/z

| b <sup>+</sup> | #  | AA # | y <sup>+</sup> | y <sup>2+</sup> |
|----------------|----|------|----------------|-----------------|
| 182.1393       | 1  | F 16 |                |                 |
| 269.1713       | 2  | S 15 | 1529.8864      | 765.4471        |
| 366.2241       | 3  | P 14 | 1442.8544      | 721.9311        |
| 495.2667       | 4  | E 13 | 1345.8016      | 673.4047        |
| 657.4248       | 5  | K 12 | 1216.7590      | 608.8834        |
| 744.4568       | 6  | S 11 | 1054.6009      | 527.8044        |
| 872.5154       | 7  | Q 10 | 967.5689       | 484.2884        |
| 985.5995       | 8  | L 9  | 839.5103       | 420.2591        |
| 1082.6522      | 9  | P 8  | 726.4262       | 363.7170        |
| 1139.6737      | 10 | G 7  | 629.3735       | 315.1907        |
| 1252.7578      | 11 | I 6  | 572.3520       | 286.6799        |
| 1351.8262      | 12 | V 5  | 459.2680       | 230.1379        |
| 1422.8633      | 13 | A 4  | 360.1995       | 180.6037        |
| 1479.8848      | 14 | G 3  | 289.1624       | 145.0851        |
| 1536.9062      | 15 | G 2  | 232.1410       | 116.5744        |
|                | 16 | R 1  | 175.1195       | 88.0637         |

N-term:+35.07 K(5):+162.16



FVGGLDWSTTQETLR, MH+ 1737.8811, m/z 579.9652  
 L OSG37 P180811 230811-s1.07308.07308.3.dta

X-range:

-

MassTol: Y-zoom:

MassType:

AVG  MONO

Axis:

1  2

Label:

I  M  -

Ions:

a  +  2+  3+

b  +  2+  3+

c  +  2+  3+

x  +  2+  3+

y  +  2+  3+

z  +  2+  3+

hide H<sub>2</sub>O/NH<sub>3</sub>

zoom 112-122

GO

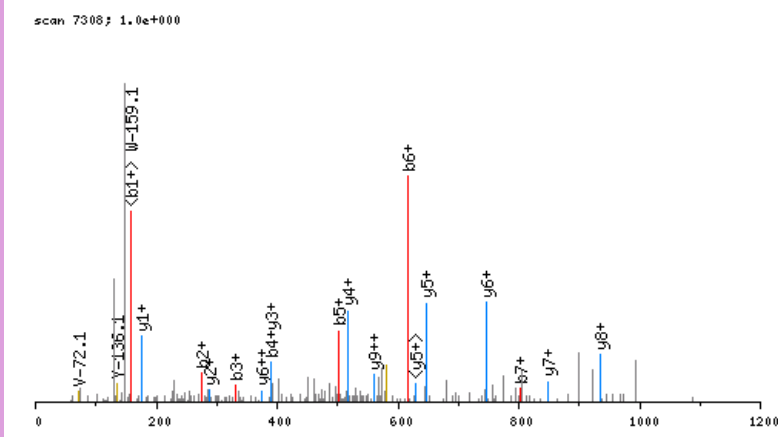

click image to zoom in; click top corners to zoom out [\[precursor±\]](#)

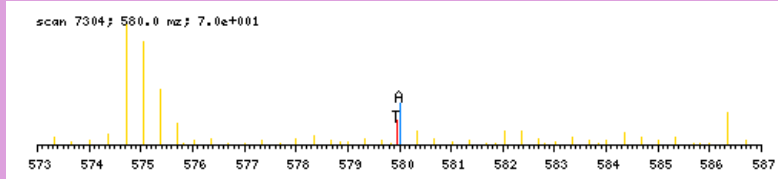

zoomed in precursor plot; T=theoretical m/z, A=acquired m/z

| b <sup>+</sup> | #  | AA # | y <sup>+</sup> | y <sup>2+</sup> |
|----------------|----|------|----------------|-----------------|
| 176.1075       | 1  | F 15 |                |                 |
| 275.1759       | 2  | V 14 | 1562.7815      | 781.8946        |
| 332.1974       | 3  | G 13 | 1463.7130      | 732.3604        |
| 389.2189       | 4  | G 12 | 1406.6916      | 703.8497        |
| 502.3029       | 5  | L 11 | 1349.6701      | 675.3390        |
| 617.3299       | 6  | D 10 | 1236.5861      | 618.7969        |
| 803.4092       | 7  | W 9  | 1121.5591      | 561.2835        |
| 890.4412       | 8  | S 8  | 935.4798       | 468.2438        |
| 991.4889       | 9  | T 7  | 848.4478       | 424.7278        |
| 1092.5366      | 10 | T 6  | 747.4001       | 374.2040        |
| 1220.5951      | 11 | Q 5  | 646.3524       | 323.6801        |
| 1349.6377      | 12 | E 4  | 518.2938       | 259.6508        |
| 1450.6854      | 13 | T 3  | 389.2512       | 195.1295        |
| 1563.7695      | 14 | L 2  | 288.2036       | 144.6057        |
|                | 15 | R 1  | 175.1195       | 88.0637         |

N-term:+29.04

FVLDEADEMLSR, MH+ 1452.7044, m/z 484.9063  
 L OSG37 P180811 230811-s1.07573.07573.3.dta

X-range:

-

MassTol: Y-zoom:

MassType:

AVG  MONO

Axis:

1  2

Label:

I  M  -

Ions:

a  +  2+  3+

b  +  2+  3+

c  +  2+  3+

x  +  2+  3+

y  +  2+  3+

z  +  2+  3+

hide H<sub>2</sub>O/NH<sub>3</sub>

zoom 112-122

GO

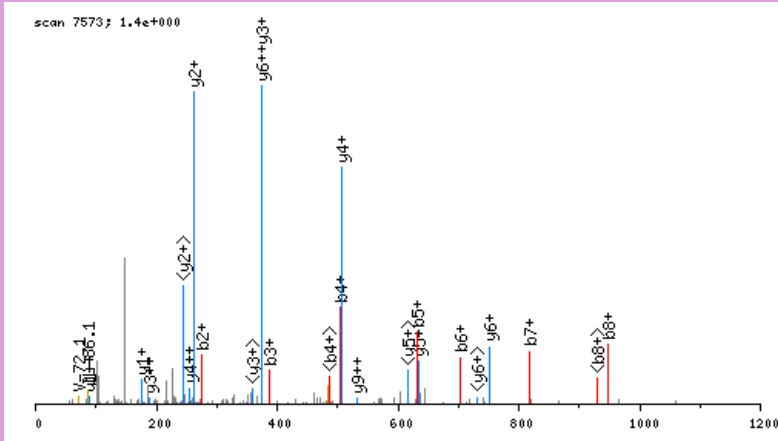

click image to zoom in; click top corners to zoom out [\[precursor±\]](#)

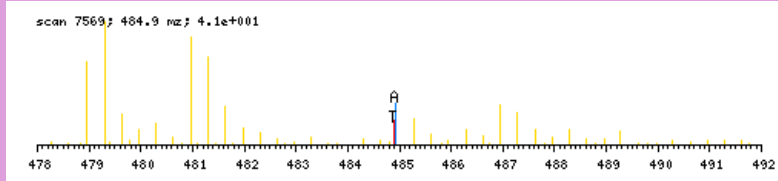

zoomed in precursor plot; T=theoretical m/z, A=acquired m/z

| b <sup>+</sup> | #  | AA # | y <sup>+</sup> | y <sup>2+</sup> |
|----------------|----|------|----------------|-----------------|
| 176.1075       | 1  | F 12 |                |                 |
| 275.1759       | 2  | V 11 | 1277.6047      | 639.3063        |
| 388.2600       | 3  | L 10 | 1178.5363      | 589.7721        |
| 503.2869       | 4  | D 9  | 1065.4523      | 533.2300        |
| 632.3295       | 5  | E 8  | 950.4253       | 475.7166        |
| 703.3666       | 6  | A 7  | 821.3827       | 411.1953        |
| 818.3936       | 7  | D 6  | 750.3456       | 375.6767        |
| 947.4362       | 8  | E 5  | 635.3187       | 318.1632        |
| 1078.4767      | 9  | M 4  | 506.2761       | 253.6420        |
| 1191.5607      | 10 | L 3  | 375.2356       | 188.1217        |
| 1278.5928      | 11 | S 2  | 262.1515       | 131.5797        |
|                | 12 | R 1  | 175.1195       | 88.0637         |

N-term:+29.04

FVLLPEQSPGSYSKR, MH+ 1763.9696, m/z 588.6614  
 L OSG39 P180811 230811-s1.04905.04905.3.dta

X-range:

-

MassTol: Y-zoom:

MassType:

AVG  MONO

Axis:

1  2

Label:

I  M  -

Ions:

a  +  2+  3+

b  +  2+  3+

c  +  2+  3+

x  +  2+  3+

y  +  2+  3+

z  +  2+  3+

hide H<sub>2</sub>O/NH<sub>3</sub>

zoom 112-122

GO

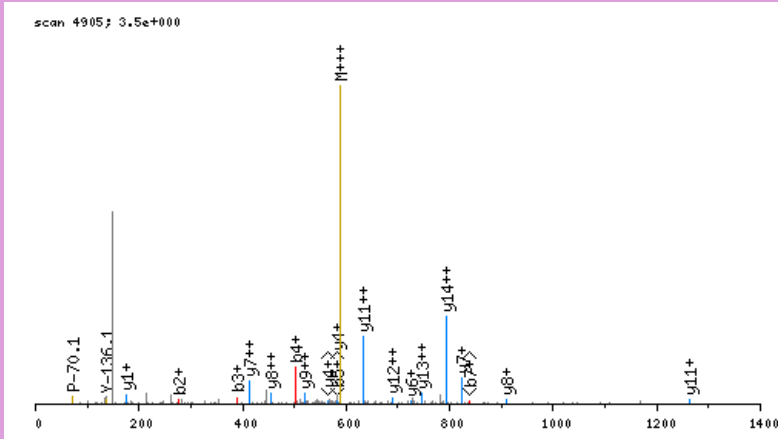

click image to zoom in; click top corners to zoom out [\[precursor±\]](#)

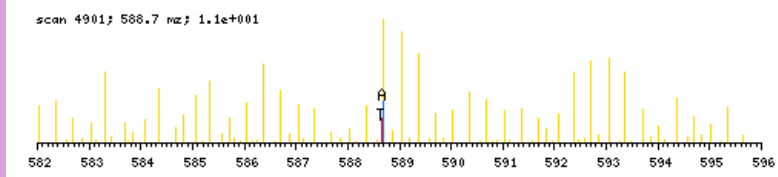

zoomed in precursor plot; T=theoretical m/z, A=acquired m/z

| b <sup>+</sup> | #  | AA | #  | y <sup>+</sup> | y <sup>2+</sup> |
|----------------|----|----|----|----------------|-----------------|
| 176.1075       | 1  | F  | 15 |                |                 |
| 275.1759       | 2  | V  | 14 | 1588.8699      | 794.9389        |
| 388.2600       | 3  | L  | 13 | 1489.8015      | 745.4047        |
| 501.3441       | 4  | L  | 12 | 1376.7174      | 688.8626        |
| 598.3968       | 5  | P  | 11 | 1263.6334      | 632.3206        |
| 727.4394       | 6  | E  | 10 | 1166.5806      | 583.7942        |
| 855.4980       | 7  | Q  | 9  | 1037.5380      | 519.2729        |
| 942.5300       | 8  | S  | 8  | 909.4794       | 455.2436        |
| 1039.5828      | 9  | P  | 7  | 822.4474       | 411.7276        |
| 1096.6042      | 10 | G  | 6  | 725.3946       | 363.2012        |
| 1183.6363      | 11 | S  | 5  | 668.3732       | 334.6905        |
| 1346.6996      | 12 | Y  | 4  | 581.3412       | 291.1745        |
| 1433.7316      | 13 | S  | 3  | 418.2778       | 209.6428        |
| 1589.8579      | 14 | K  | 2  | 331.2458       | 166.1268        |
|                | 15 | R  | 1  | 175.1195       | 88.0637         |

N-term:+29.04 K(14):+156.13

FVSSGPTNASAFTEr, MH+ 1604.8132, m/z 535.6093  
 H OSG37 P180811 230811-s1.04295.04295.3.dta

X-range:

-

MassTol: Y-zoom:

MassType:

AVG  MONO

Axis:

1  2

Label:

I  M  -

Ions:

a  +  2+  3+

b  +  2+  3+

c  +  2+  3+

x  +  2+  3+

y  +  2+  3+

z  +  2+  3+

hide H<sub>2</sub>O/NH<sub>3</sub>

zoom 112-122

GO

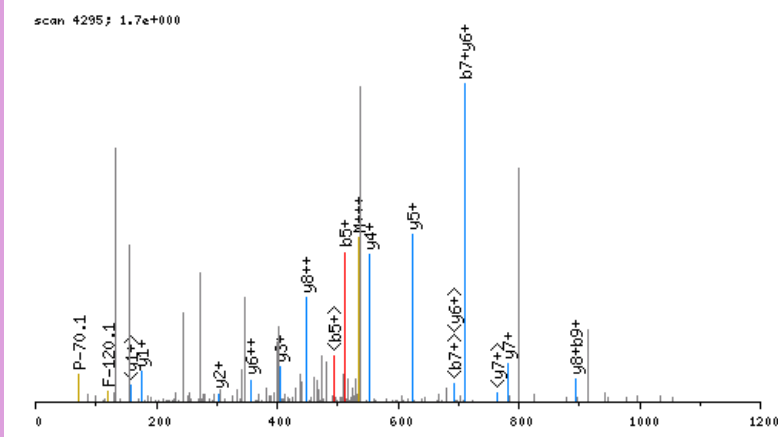

click image to zoom in; click top corners to zoom out [\[precursor±\]](#)

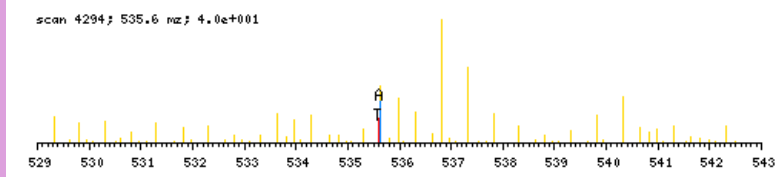

zoomed in precursor plot; T=theoretical m/z, A=acquired m/z

| b <sup>+</sup> | #  | AA # | y <sup>+</sup> | y <sup>2+</sup> |
|----------------|----|------|----------------|-----------------|
| 182.1393       | 1  | F 15 |                |                 |
| 281.2077       | 2  | V 14 | 1423.6817      | 712.3448        |
| 368.2398       | 3  | S 13 | 1324.6133      | 662.8106        |
| 455.2718       | 4  | S 12 | 1237.5813      | 619.2946        |
| 512.2932       | 5  | G 11 | 1150.5493      | 575.7786        |
| 609.3460       | 6  | P 10 | 1093.5278      | 547.2678        |
| 710.3937       | 7  | T 9  | 996.4750       | 498.7414        |
| 824.4366       | 8  | N 8  | 895.4274       | 448.2176        |
| 895.4737       | 9  | A 7  | 781.3844       | 391.1961        |
| 982.5058       | 10 | S 6  | 710.3473       | 355.6776        |
| 1053.5429      | 11 | A 5  | 623.3153       | 312.1616        |
| 1200.6113      | 12 | F 4  | 552.2782       | 276.6430        |
| 1301.6590      | 13 | T 3  | 405.2098       | 203.1088        |
| 1430.7016      | 14 | E 2  | 304.1621       | 152.5850        |
|                | 15 | R 1  | 175.1195       | 88.0637         |

N-term:+35.07

GAAGAGGGPPPGPPGAGDR, MH+ 1549.7935, m/z 517.2694  
 H OSG37 P180811 230811-s1.02271.02271.3.dta

scan 2271; 3.5e+000

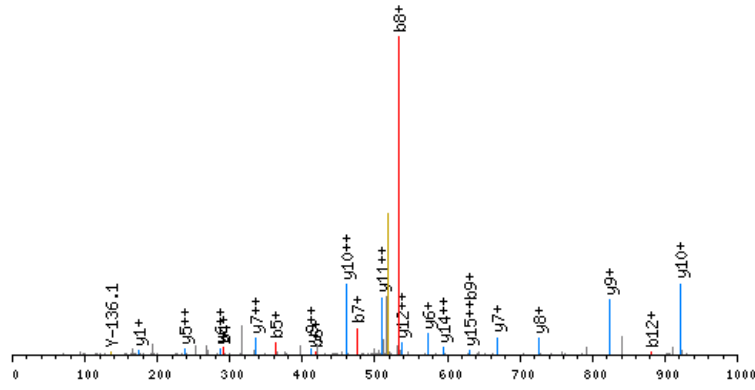

click image to zoom in; click top corners to zoom out [\[precursor±\]](#)

scan 2269; 517.3 m/z; 5.1e+000

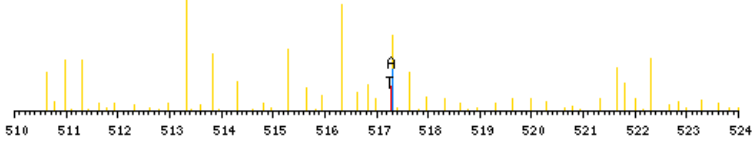

zoomed in precursor plot; T=theoretical m/z, A=acquired m/z

X-range:

-

MassTol: Y-zoom:

MassType:

AVG  MONO

Axis:

1  2

Label:

I  M  -

Ions:

a  +  2+  3+

b  +  2+  3+

c  +  2+  3+

x  +  2+  3+

y  +  2+  3+

z  +  2+  3+

hide H<sub>2</sub>O/NH<sub>3</sub>

zoom 112-122

GO

| b <sup>+</sup> | #  | AA # | y <sup>+</sup> | y <sup>2+</sup>    |
|----------------|----|------|----------------|--------------------|
| 92.0924        | 1  | G    | 19             |                    |
| 163.1295       | 2  | A    | 18             | 1458.7090 729.8584 |
| 234.1666       | 3  | A    | 17             | 1387.6719 694.3398 |
| 291.1881       | 4  | G    | 16             | 1316.6347 658.8213 |
| 362.2252       | 5  | A    | 15             | 1259.6133 630.3105 |
| 419.2466       | 6  | G    | 14             | 1188.5762 594.7920 |
| 476.2681       | 7  | G    | 13             | 1131.5547 566.2813 |
| 533.2896       | 8  | G    | 12             | 1074.5332 537.7705 |
| 630.3423       | 9  | P    | 11             | 1017.5118 509.2598 |
| 727.3951       | 10 | P    | 10             | 920.4590 460.7334  |
| 824.4479       | 11 | P    | 9              | 823.4062 412.2070  |
| 881.4693       | 12 | G    | 8              | 726.3535 363.6807  |
| 978.5221       | 13 | P    | 7              | 669.3320 335.1699  |
| 1075.5748      | 14 | P    | 6              | 572.2792 286.6435  |
| 1132.5963      | 15 | G    | 5              | 475.2265 238.1172  |
| 1203.6334      | 16 | A    | 4              | 418.2050 209.6064  |
| 1260.6549      | 17 | G    | 3              | 347.1679 174.0879  |
| 1375.6818      | 18 | D    | 2              | 290.1464 145.5771  |
|                | 19 | R    | 1              | 175.1195 88.0637   |

N-term:+35.07

GAAGGGGGGGMGLGGGGGGGTAMR, MH+ 1981.9144, m/z 661.3097  
H OSG37 P180811 230811-s1.03103.03103.3.dta

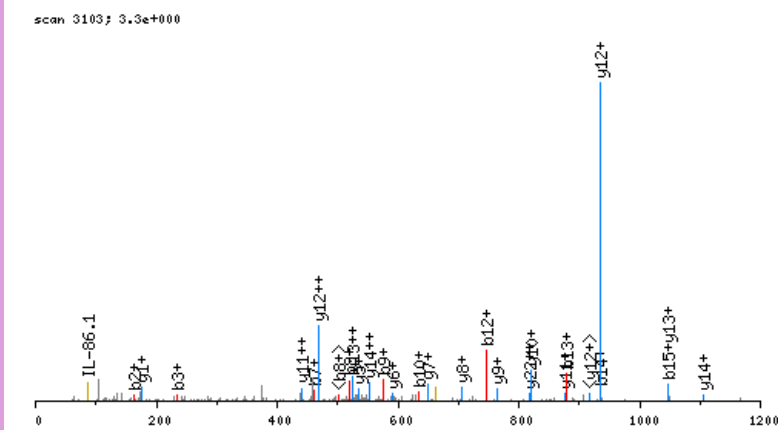

click image to zoom in; click top corners to zoom out [precursor±]

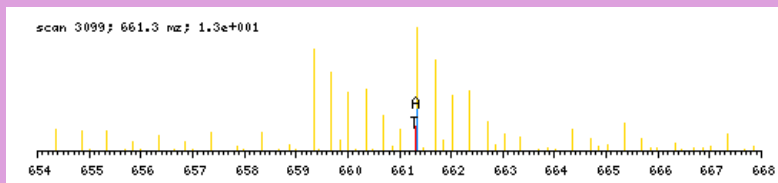

zoomed in precursor plot; T=theoretical m/z, A=acquired m/z

X-range:

-

MassTol: Y-zoom:

MassType:

AVG  MONO

Axis:

1  2

Label:

I  M  -

Ions:

a  +  2+  3+

b  +  2+  3+

c  +  2+  3+

x  +  2+  3+

y  +  2+  3+

z  +  2+  3+

hide H<sub>2</sub>O/NH<sub>3</sub>

zoom 112-122

GO

| b <sup>+</sup> | #  | AA # | y <sup>+</sup> | y <sup>2+</sup> |
|----------------|----|------|----------------|-----------------|
| 92.0924        | 1  | G 27 |                |                 |
| 163.1295       | 2  | A 26 | 1890.8299      | 945.9189        |
| 234.1666       | 3  | A 25 | 1819.7928      | 910.4003        |
| 291.1881       | 4  | G 24 | 1748.7557      | 874.8817        |
| 348.2095       | 5  | G 23 | 1691.7342      | 846.3710        |
| 405.2310       | 6  | G 22 | 1634.7127      | 817.8603        |
| 462.2524       | 7  | G 21 | 1577.6913      | 789.3496        |
| 519.2739       | 8  | G 20 | 1520.6698      | 760.8388        |
| 576.2954       | 9  | G 19 | 1463.6484      | 732.3281        |
| 633.3168       | 10 | G 18 | 1406.6269      | 703.8174        |
| 690.3383       | 11 | G 17 | 1349.6054      | 675.3066        |
| 747.3598       | 12 | G 16 | 1292.5840      | 646.7959        |
| 878.4002       | 13 | M 15 | 1235.5625      | 618.2852        |
| 935.4217       | 14 | G 14 | 1104.5220      | 552.7649        |
| 1048.5058      | 15 | L 13 | 1047.5006      | 524.2542        |
| 1105.5272      | 16 | G 12 | 934.4165       | 467.7122        |
| 1162.5487      | 17 | G 11 | 877.3950       | 439.2014        |
| 1219.5702      | 18 | G 10 | 820.3736       | 410.6907        |
| 1276.5916      | 19 | G 9  | 763.3521       | 382.1800        |
| 1333.6131      | 20 | G 8  | 706.3306       | 353.6692        |
| 1390.6346      | 21 | G 7  | 649.3092       | 325.1585        |
| 1447.6560      | 22 | G 6  | 592.2877       | 296.6478        |
| 1504.6775      | 23 | G 5  | 535.2662       | 268.1370        |
| 1605.7252      | 24 | T 4  | 478.2448       | 239.6263        |
| 1676.7623      | 25 | A 3  | 377.1971       | 189.1025        |
| 1807.8028      | 26 | M 2  | 306.1600       | 153.5839        |
|                | 27 | R 1  | 175.1195       | 88.0637         |

N-term:+35.07

GAGAVGAGPVVR, MH+ 1038.6060, m/z 519.8066  
 L OSG37 P180811 230811-s1.02511.02511.2.dta

X-range:

-

MassTol: Y-zoom:

MassType:

AVG  MONO

Axis:

1  2

Label:

I  M  -

Ions:

a  +  2+  3+

b  +  2+  3+

c  +  2+  3+

x  +  2+  3+

y  +  2+  3+

z  +  2+  3+

hide H<sub>2</sub>O/NH<sub>3</sub>

zoom 112-122

GO

scan 2511; 5.4e+000

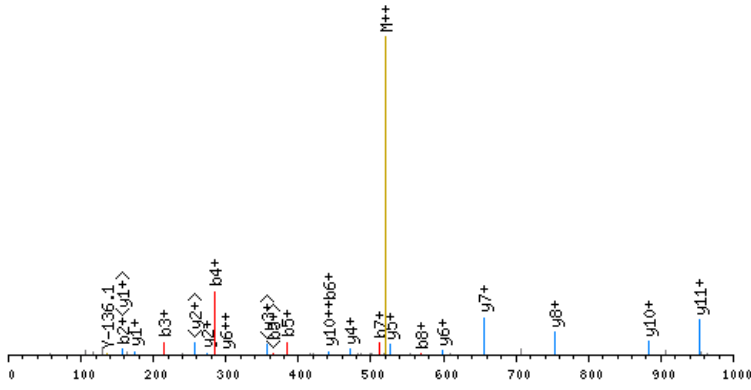

click image to zoom in; click top corners to zoom out [\[precursor±\]](#)

scan 2509; 519.8 m/z; 1.4e+001

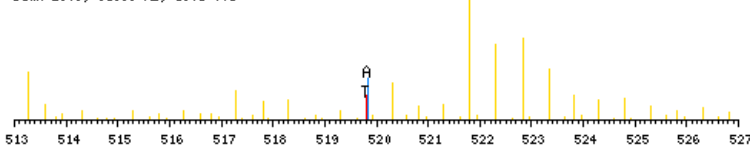

zoomed in precursor plot; T=theoretical m/z, A=acquired m/z

| b <sup>+</sup> | #  | AA | #  | y <sup>+</sup> | y <sup>2+</sup> |
|----------------|----|----|----|----------------|-----------------|
| 86.0606        | 1  | G  | 12 |                |                 |
| 157.0977       | 2  | A  | 11 | 953.5532       | 477.2805        |
| 214.1191       | 3  | G  | 10 | 882.5161       | 441.7620        |
| 285.1563       | 4  | A  | 9  | 825.4947       | 413.2512        |
| 384.2247       | 5  | V  | 8  | 754.4575       | 377.7327        |
| 441.2461       | 6  | G  | 7  | 655.3891       | 328.1985        |
| 512.2832       | 7  | A  | 6  | 598.3677       | 299.6877        |
| 569.3047       | 8  | G  | 5  | 527.3306       | 264.1692        |
| 666.3575       | 9  | P  | 4  | 470.3091       | 235.6585        |
| 765.4259       | 10 | V  | 3  | 373.2563       | 187.1321        |
| 864.4943       | 11 | V  | 2  | 274.1879       | 137.5979        |
|                | 12 | R  | 1  | 175.1195       | 88.0637         |

N-term: +29.04

GAGGALFVHR, MH+ 1012.5692, m/z 506.7882  
 L OSG40 P180811 230811-s1.03015.03015.2.dta

X-range:

-

MassTol: Y-zoom:

MassType:

AVG  MONO

Axis:

1  2

Label:

I  M  -

Ions:

a  +  2+  3+

b  +  2+  3+

c  +  2+  3+

x  +  2+  3+

y  +  2+  3+

z  +  2+  3+

hide H<sub>2</sub>O/NH<sub>3</sub>

zoom 112-122

GO

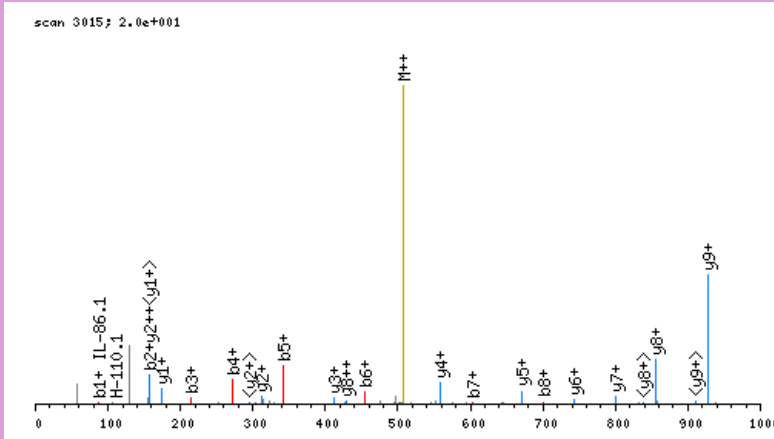

click image to zoom in; click top corners to zoom out [\[precursor±\]](#)

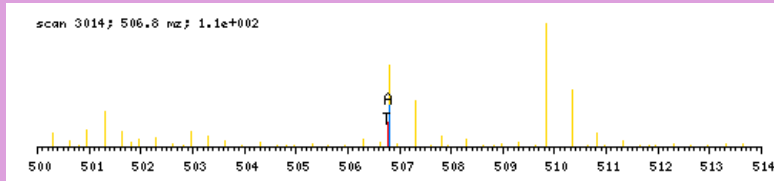

zoomed in precursor plot; T=theoretical m/z, A=acquired m/z

| b <sup>+</sup> | #  | AA | #  | y <sup>+</sup> | y <sup>2+</sup> |
|----------------|----|----|----|----------------|-----------------|
| 86.0606        | 1  | G  | 10 |                |                 |
| 157.0977       | 2  | A  | 9  | 927.5165       | 464.2621        |
| 214.1191       | 3  | G  | 8  | 856.4793       | 428.7436        |
| 271.1406       | 4  | G  | 7  | 799.4579       | 400.2329        |
| 342.1777       | 5  | A  | 6  | 742.4364       | 371.7221        |
| 455.2618       | 6  | L  | 5  | 671.3993       | 336.2036        |
| 602.3302       | 7  | F  | 4  | 558.3152       | 279.6615        |
| 701.3986       | 8  | V  | 3  | 411.2468       | 206.1273        |
| 838.4575       | 9  | H  | 2  | 312.1784       | 156.5931        |
|                | 10 | R  | 1  | 175.1195       | 88.0637         |

N-term: +29.04



GALTKAPVPGAQNSSQSR, MH+ 1824.9932, m/z 609.0026  
 L OSG39 P180811 230811-s1.02350.02350.3.dta

X-range:

-

MassTol: Y-zoom:

MassType:

AVG  MONO

Axis:

1  2

Label:

I  M  -

Ions:

a  +  2+  3+

b  +  2+  3+

c  +  2+  3+

x  +  2+  3+

y  +  2+  3+

z  +  2+  3+

hide H<sub>2</sub>O/NH<sub>3</sub>

zoom 112-122

GO

scan 2350; 4.0e+000

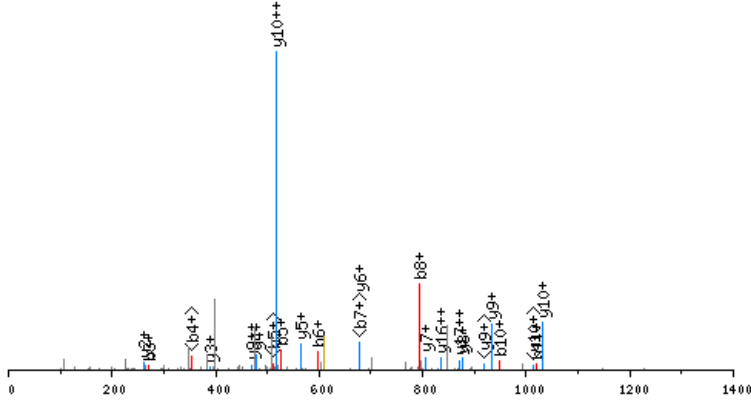

click image to zoom in; click top corners to zoom out [\[precursor±\]](#)

scan 2349; 609.0 m/z; 3.7e+000

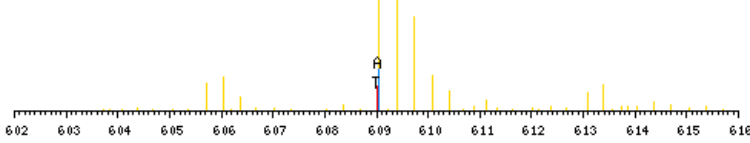

zoomed in precursor plot; T=theoretical m/z, A=acquired m/z

| b <sup>+</sup> | #  | AA | #  | y <sup>+</sup> | y <sup>2+</sup> |
|----------------|----|----|----|----------------|-----------------|
| 86.0606        | 1  | G  | 18 |                |                 |
| 157.0977       | 2  | A  | 17 | 1739.9405      | 870.4741        |
| 270.1817       | 3  | L  | 16 | 1668.9033      | 834.9556        |
| 371.2294       | 4  | T  | 15 | 1555.8193      | 778.4136        |
| 527.3557       | 5  | K  | 14 | 1454.7716      | 727.8897        |
| 598.3928       | 6  | A  | 13 | 1298.6453      | 649.8266        |
| 695.4456       | 7  | P  | 12 | 1227.6082      | 614.3080        |
| 794.5140       | 8  | V  | 11 | 1130.5554      | 565.7816        |
| 891.5668       | 9  | P  | 10 | 1031.4870      | 516.2474        |
| 948.5882       | 10 | G  | 9  | 934.4342       | 467.7210        |
| 1019.6254      | 11 | A  | 8  | 877.4128       | 439.2103        |
| 1147.6839      | 12 | Q  | 7  | 806.3757       | 403.6917        |
| 1261.7269      | 13 | N  | 6  | 678.3171       | 339.6625        |
| 1348.7589      | 14 | S  | 5  | 564.2742       | 282.6410        |
| 1435.7909      | 15 | S  | 4  | 477.2421       | 239.1250        |
| 1563.8495      | 16 | Q  | 3  | 390.2101       | 195.6090        |
| 1650.8815      | 17 | S  | 2  | 262.1515       | 131.5797        |
|                | 18 | R  | 1  | 175.1195       | 88.0637         |

N-term:+29.04 K(5):+156.13

GAPEEADANEEGVR, MH+ 1471.6665, m/z 491.2270  
 L OSG37 P180811 230811-s1.02227.02227.3.dta

X-range:

-

MassTol: Y-zoom:

MassType:

AVG  MONO

Axis:

1  2

Label:

I  M  -

Ions:

a  +  2+  3+

b  +  2+  3+

c  +  2+  3+

x  +  2+  3+

y  +  2+  3+

z  +  2+  3+

hide H<sub>2</sub>O/NH<sub>3</sub>

zoom 112-122

GO

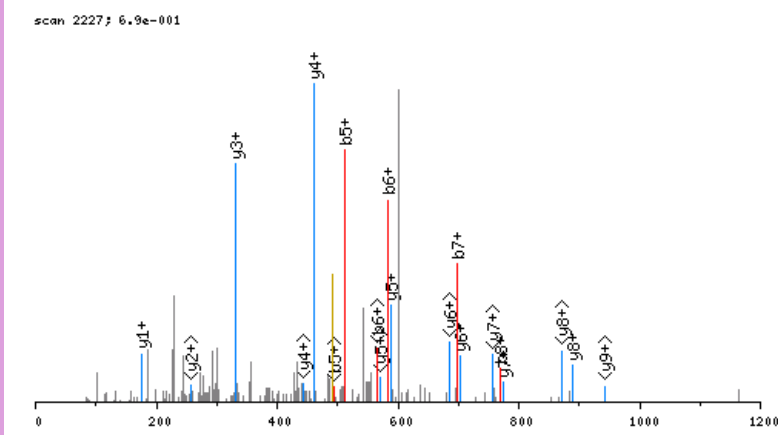

click image to zoom in; click top corners to zoom out [\[precursor±\]](#)

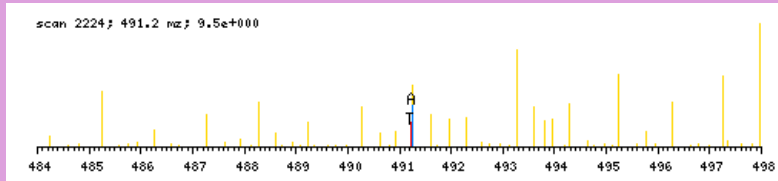

zoomed in precursor plot; T=theoretical m/z, A=acquired m/z

| b <sup>+</sup> | #  | AA # | y <sup>+</sup> | y <sup>2+</sup> |
|----------------|----|------|----------------|-----------------|
| 86.0606        | 1  | G 14 |                |                 |
| 157.0977       | 2  | A 13 | 1386.6137      | 693.8108        |
| 254.1504       | 3  | P 12 | 1315.5766      | 658.2922        |
| 383.1930       | 4  | E 11 | 1218.5238      | 609.7658        |
| 512.2356       | 5  | E 10 | 1089.4813      | 545.2445        |
| 583.2727       | 6  | A 9  | 960.4387       | 480.7232        |
| 698.2997       | 7  | D 8  | 889.4015       | 445.2047        |
| 769.3368       | 8  | A 7  | 774.3746       | 387.6912        |
| 883.3797       | 9  | N 6  | 703.3375       | 352.1727        |
| 1012.4223      | 10 | E 5  | 589.2946       | 295.1512        |
| 1141.4649      | 11 | E 4  | 460.2520       | 230.6299        |
| 1198.4864      | 12 | G 3  | 331.2094       | 166.1086        |
| 1297.5548      | 13 | V 2  | 274.1879       | 137.5979        |
|                | 14 | R 1  | 175.1195       | 88.0637         |

N-term:+29.04

GAPQGS LG EYL FER, MH+ 1551.7807, m/z 517.9318  
 L OSG37 P180811 230811-s1.07170.07170.3.dta

X-range:

-

MassTol: Y-zoom:

MassType:

AVG  MONO

Axis:

1  2

Label:

I  M  -

Ions:

a  +  2+  3+

b  +  2+  3+

c  +  2+  3+

x  +  2+  3+

y  +  2+  3+

z  +  2+  3+

hide H<sub>2</sub>O/NH<sub>3</sub>

zoom 112-122

GO

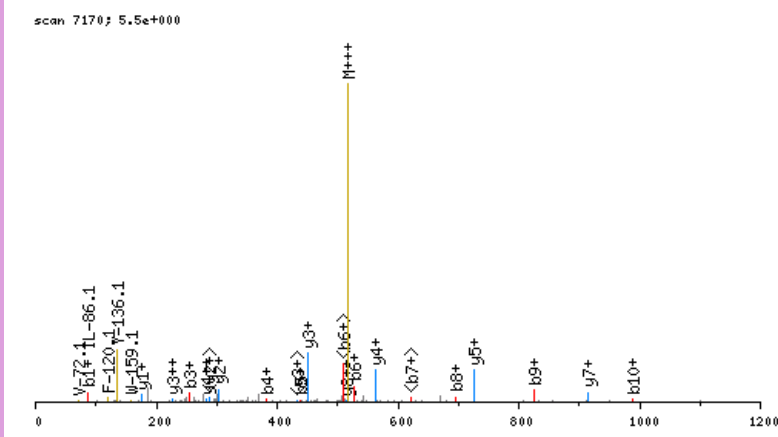

click image to zoom in; click top corners to zoom out [\[precursor±\]](#)

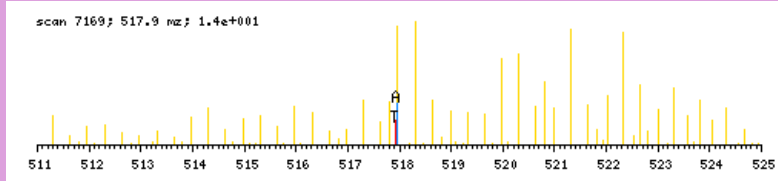

zoomed in precursor plot; T=theoretical m/z, A=acquired m/z

| b <sup>+</sup> | #  | AA # | y <sup>+</sup> | y <sup>2+</sup> |
|----------------|----|------|----------------|-----------------|
| 86.0606        | 1  | G 14 |                |                 |
| 157.0977       | 2  | A 13 | 1466.7280      | 733.8679        |
| 254.1504       | 3  | P 12 | 1395.6909      | 698.3493        |
| 382.2090       | 4  | Q 11 | 1298.6381      | 649.8230        |
| 439.2305       | 5  | G 10 | 1170.5795      | 585.7937        |
| 526.2625       | 6  | S 9  | 1113.5580      | 557.2829        |
| 639.3466       | 7  | L 8  | 1026.5260      | 513.7669        |
| 696.3680       | 8  | G 7  | 913.4420       | 457.2249        |
| 825.4106       | 9  | E 6  | 856.4205       | 428.7142        |
| 988.4740       | 10 | Y 5  | 727.3779       | 364.1929        |
| 1101.5580      | 11 | L 4  | 564.3146       | 282.6612        |
| 1248.6264      | 12 | F 3  | 451.2305       | 226.1192        |
| 1377.6690      | 13 | E 2  | 304.1621       | 152.5850        |
|                | 14 | R 1  | 175.1195       | 88.0637         |

N-term:+29.04

GAPSASVAAAPAPAR, MH+ 1327.7546, m/z 443.2564  
 H OSG37 P180811 230811-s1.02666.02666.3.dta

X-range:

-

MassTol: Y-zoom:

MassType:

AVG  MONO

Axis:

1  2

Label:

I  M  -

Ions:

a  +  2+  3+

b  +  2+  3+

c  +  2+  3+

x  +  2+  3+

y  +  2+  3+

z  +  2+  3+

hide H<sub>2</sub>O/NH<sub>3</sub>

zoom 112-122

GO

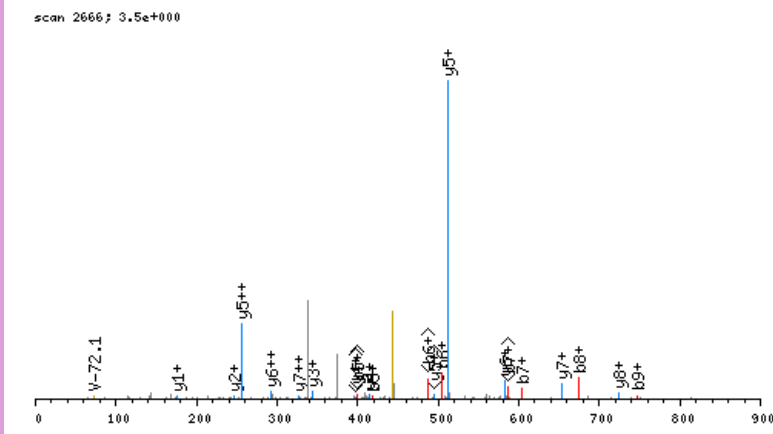

click image to zoom in; click top corners to zoom out [\[precursor±\]](#)

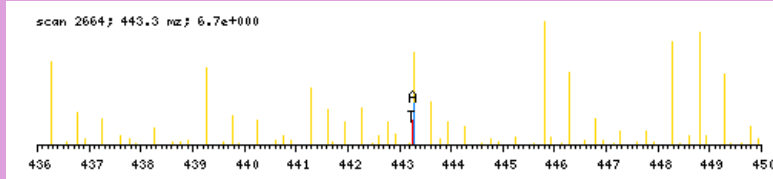

zoomed in precursor plot; T=theoretical m/z, A=acquired m/z

| b <sup>+</sup> | #  | AA # | y <sup>+</sup> | y <sup>2+</sup> |
|----------------|----|------|----------------|-----------------|
| 92.0924        | 1  | G 15 |                |                 |
| 163.1295       | 2  | A 14 | 1236.6701      | 618.8389        |
| 260.1822       | 3  | P 13 | 1165.6329      | 583.3204        |
| 347.2143       | 4  | S 12 | 1068.5802      | 534.7940        |
| 418.2514       | 5  | A 11 | 981.5482       | 491.2780        |
| 505.2834       | 6  | S 10 | 910.5110       | 455.7594        |
| 604.3518       | 7  | V 9  | 823.4790       | 412.2434        |
| 675.3889       | 8  | A 8  | 724.4106       | 362.7092        |
| 746.4261       | 9  | A 7  | 653.3735       | 327.1907        |
| 817.4632       | 10 | A 6  | 582.3364       | 291.6721        |
| 914.5159       | 11 | P 5  | 511.2993       | 256.1535        |
| 985.5530       | 12 | A 4  | 414.2465       | 207.6272        |
| 1082.6058      | 13 | P 3  | 343.2094       | 172.1086        |
| 1153.6429      | 14 | A 2  | 246.1566       | 123.5822        |
|                | 15 | R 1  | 175.1195       | 88.0637         |

N-term:+35.07

GASAGGLAADASR, MH+ 1137.6076, m/z 569.3074  
 H OSG37 P180811 230811-s1.02281.02281.2.dta

scan 2281; 4.8e+000

X-range:

-

MassTol: Y-zoom:

MassType:

AVG  MONO

Axis:

1  2

Label:

I  M  -

Ions:

a  +  2+  3+

b  +  2+  3+

c  +  2+  3+

x  +  2+  3+

y  +  2+  3+

z  +  2+  3+

hide H<sub>2</sub>O/NH<sub>3</sub>

zoom 112-122

GO

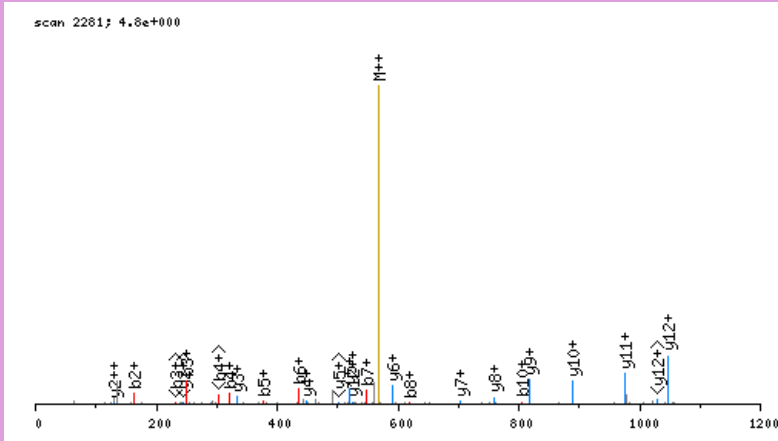

click image to zoom in; click top corners to zoom out [\[precursor±\]](#)

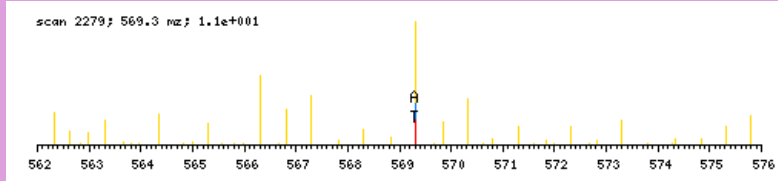

zoomed in precursor plot; T=theoretical m/z, A=acquired m/z

| b <sup>+</sup> | #  | AA | #  | y <sup>+</sup> | y <sup>2+</sup> |
|----------------|----|----|----|----------------|-----------------|
| 92.0924        | 1  | G  | 13 |                |                 |
| 163.1295       | 2  | A  | 12 | 1046.5231      | 523.7654        |
| 250.1615       | 3  | S  | 11 | 975.4859       | 488.2469        |
| 321.1986       | 4  | A  | 10 | 888.4539       | 444.7309        |
| 378.2201       | 5  | G  | 9  | 817.4168       | 409.2123        |
| 435.2415       | 6  | G  | 8  | 760.3953       | 380.7016        |
| 548.3256       | 7  | L  | 7  | 703.3739       | 352.1909        |
| 619.3627       | 8  | A  | 6  | 590.2898       | 295.6488        |
| 690.3998       | 9  | A  | 5  | 519.2527       | 260.1303        |
| 805.4268       | 10 | D  | 4  | 448.2156       | 224.6117        |
| 876.4639       | 11 | A  | 3  | 333.1886       | 167.0982        |
| 963.4959       | 12 | S  | 2  | 262.1515       | 131.5797        |
|                | 13 | R  | 1  | 175.1195       | 88.0637         |

N-term:+35.07

GASQAGMLAPGTR, MH+ 1244.6421, m/z 622.8247  
 L OSG37 P180811 230811-s1.02818.02818.2.dta

X-range:

-

MassTol: Y-zoom:

MassType:

AVG  MONO

Axis:

1  2

Label:

I  M  -

Ions:

a  +  2+  3+

b  +  2+  3+

c  +  2+  3+

x  +  2+  3+

y  +  2+  3+

z  +  2+  3+

hide H<sub>2</sub>O/NH<sub>3</sub>

zoom 112-122

GO

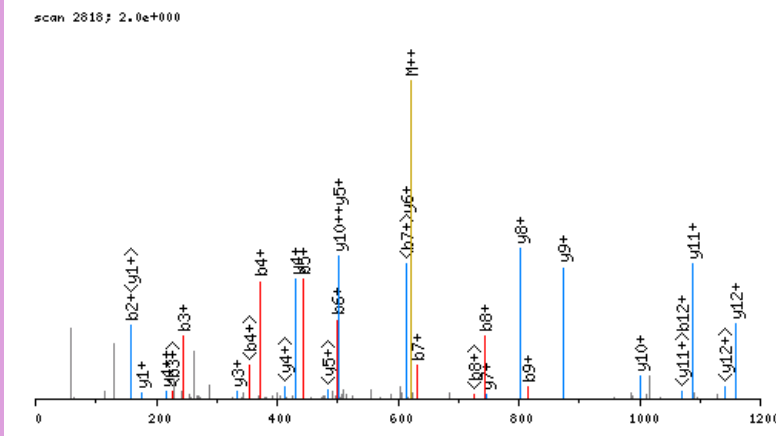

click image to zoom in; click top corners to zoom out [\[precursor±\]](#)

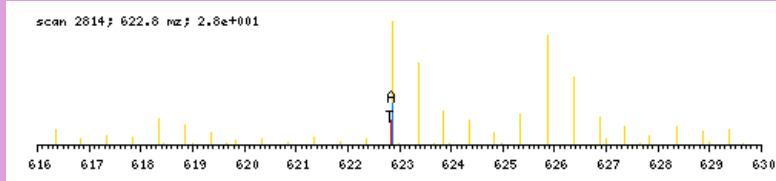

zoomed in precursor plot; T=theoretical m/z, A=acquired m/z

| b <sup>+</sup> | #  | AA # | y <sup>+</sup> | y <sup>2+</sup> |
|----------------|----|------|----------------|-----------------|
| 86.0606        | 1  | G 13 |                |                 |
| 157.0977       | 2  | A 12 | 1159.5894      | 580.2986        |
| 244.1297       | 3  | S 11 | 1088.5523      | 544.7800        |
| 372.1883       | 4  | Q 10 | 1001.5202      | 501.2640        |
| 443.2254       | 5  | A 9  | 873.4616       | 437.2347        |
| 500.2469       | 6  | G 8  | 802.4245       | 401.7162        |
| 631.2873       | 7  | M 7  | 745.4031       | 373.2054        |
| 744.3714       | 8  | L 6  | 614.3626       | 307.6852        |
| 815.4085       | 9  | A 5  | 501.2785       | 251.1432        |
| 912.4613       | 10 | P 4  | 430.2414       | 215.6246        |
| 969.4828       | 11 | G 3  | 333.1886       | 167.0982        |
| 1070.5304      | 12 | T 2  | 276.1672       | 138.5875        |
|                | 13 | R 1  | 175.1195       | 88.0637         |

N-term:+29.04

GCPGCGAGMQTGCR, MH+ 1496.5865, m/z 499.5337  
 L OSG38 P180811 230811-s1.02071.02071.3.dta

scan 2071; 1.0e+000

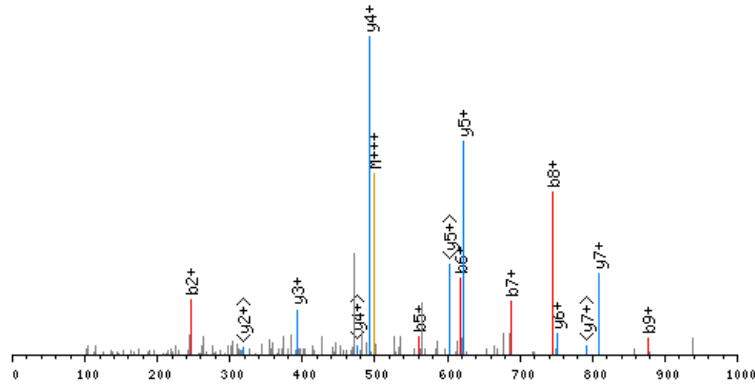

click image to zoom in; click top corners to zoom out [precursor±]

scan 2070; 499.5 m/z; 1.8e+001

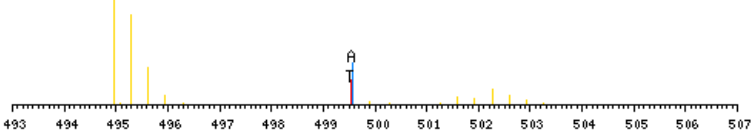

zoomed in precursor plot; T=theoretical m/z, A=acquired m/z

X-range:

-

MassTol: Y-zoom:

MassType:

AVG  MONO

Axis:

1  2

Label:

I  M  -

Ions:

a  +  2+  3+

b  +  2+  3+

c  +  2+  3+

x  +  2+  3+

y  +  2+  3+

z  +  2+  3+

hide H<sub>2</sub>O/NH<sub>3</sub>

zoom 112-122

GO

| b <sup>+</sup> | #  | AA # | y <sup>+</sup> | y <sup>2+</sup> |
|----------------|----|------|----------------|-----------------|
| 86.0606        | 1  | G 14 |                |                 |
| 246.0912       | 2  | C 13 | 1411.5338      | 706.2708        |
| 343.1439       | 3  | P 12 | 1251.5032      | 626.2555        |
| 400.1654       | 4  | G 11 | 1154.4504      | 577.7291        |
| 560.1960       | 5  | C 10 | 1097.4289      | 549.2184        |
| 617.2175       | 6  | G 9  | 937.3983       | 469.2031        |
| 688.2546       | 7  | A 8  | 880.3769       | 440.6924        |
| 745.2760       | 8  | G 7  | 809.3398       | 405.1738        |
| 876.3165       | 9  | M 6  | 752.3183       | 376.6631        |
| 1004.3751      | 10 | Q 5  | 621.2778       | 311.1428        |
| 1105.4228      | 11 | T 4  | 493.2192       | 247.1135        |
| 1162.4442      | 12 | G 3  | 392.1716       | 196.5897        |
| 1322.4748      | 13 | C 2  | 335.1501       | 168.0790        |
|                | 14 | R 1  | 175.1195       | 88.0637         |

N-term:+29.04 C(2):+160.03  
 C(5):+160.03 C(13):+160.03

GCVAGDEESYTVFKDLFDPIIQDR, MH+ 2842.4245, m/z 711.3616  
 H OSG38 P180811 230811-s1.08130.08130.4.dta

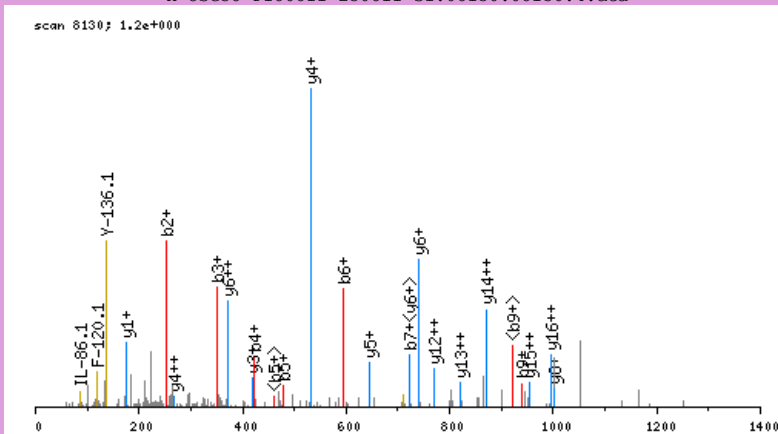

click image to zoom in; click top corners to zoom out [\[precursor±\]](#)

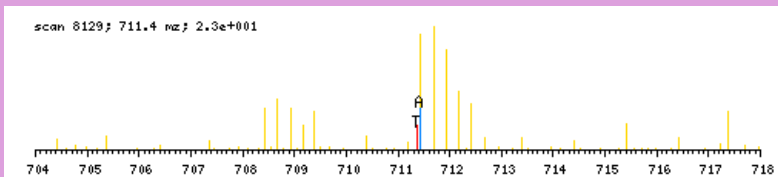

zoomed in precursor plot; T=theoretical m/z, A=acquired m/z

X-range:

-

MassTol: Y-zoom:

MassType:

AVG  MONO

Axis:

1  2

Label:

I  M  -

Ions:

a  +  2+  3+

b  +  2+  3+

c  +  2+  3+

x  +  2+  3+

y  +  2+  3+

z  +  2+  3+

hide H<sub>2</sub>O/NH<sub>3</sub>

zoom 112-122

GO

| b <sup>+</sup> | #  | AA | #  | y <sup>+</sup> | y <sup>2+</sup> |
|----------------|----|----|----|----------------|-----------------|
| 92.0924        | 1  | G  | 24 |                |                 |
| 252.1230       | 2  | C  | 23 | 2751.3400      | 1376.1739       |
| 351.1914       | 3  | V  | 22 | 2591.3094      | 1296.1586       |
| 422.2285       | 4  | A  | 21 | 2492.2409      | 1246.6244       |
| 479.2500       | 5  | G  | 20 | 2421.2038      | 1211.1058       |
| 594.2769       | 6  | D  | 19 | 2364.1824      | 1182.5951       |
| 723.3195       | 7  | E  | 18 | 2249.1554      | 1125.0816       |
| 852.3621       | 8  | E  | 17 | 2120.1128      | 1060.5603       |
| 939.3941       | 9  | S  | 16 | 1991.0702      | 996.0390        |
| 1102.4574      | 10 | Y  | 15 | 1904.0382      | 952.5230        |
| 1203.5051      | 11 | T  | 14 | 1740.9749      | 870.9914        |
| 1302.5735      | 12 | V  | 13 | 1639.9272      | 820.4675        |
| 1449.6419      | 13 | F  | 12 | 1540.8588      | 770.9333        |
| 1611.8000      | 14 | K  | 11 | 1393.7904      | 697.3991        |
| 1726.8270      | 15 | D  | 10 | 1231.6323      | 616.3201        |
| 1839.9111      | 16 | L  | 9  | 1116.6053      | 558.8066        |
| 1986.9795      | 17 | F  | 8  | 1003.5213      | 502.2645        |
| 2102.0064      | 18 | D  | 7  | 856.4529       | 428.7303        |
| 2199.0592      | 19 | P  | 6  | 741.4259       | 371.2169        |
| 2312.1432      | 20 | I  | 5  | 644.3731       | 322.6905        |
| 2425.2273      | 21 | I  | 4  | 531.2891       | 266.1485        |
| 2553.2859      | 22 | Q  | 3  | 418.2050       | 209.6064        |
| 2668.3128      | 23 | D  | 2  | 290.1464       | 145.5771        |
|                | 24 | R  | 1  | 175.1195       | 88.0637         |

N-term:+35.07 C(2):+160.03  
 K(14):+162.16



GDEAATLLENLASER, MH+ 1616.8131, m/z 539.6092  
 L OSG40 P180811 230811-s1.01915.01915.3.dta

X-range:

-

MassTol: Y-zoom:

MassType:

AVG  MONO

Axis:

1  2

Label:

I  M  -

Ions:

a  +  2+  3+

b  +  2+  3+

c  +  2+  3+

x  +  2+  3+

y  +  2+  3+

z  +  2+  3+

hide H<sub>2</sub>O/NH<sub>3</sub>

zoom 112-122

GO

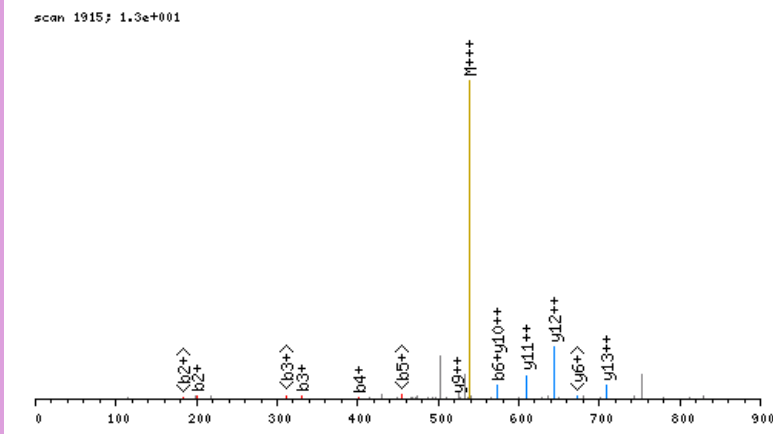

click image to zoom in; click top corners to zoom out [\[precursor±\]](#)

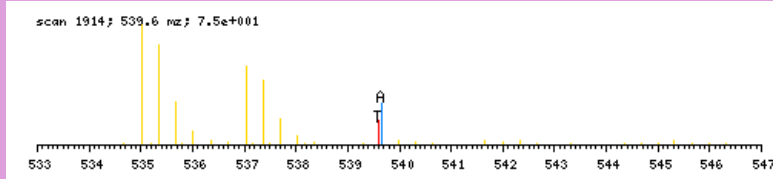

zoomed in precursor plot; T=theoretical m/z, A=acquired m/z

| b <sup>+</sup> | #  | AA # | y <sup>+</sup> | y <sup>2+</sup> |
|----------------|----|------|----------------|-----------------|
| 86.0606        | 1  | G 15 |                |                 |
| 201.0875       | 2  | D 14 | 1531.7604      | 766.3841        |
| 330.1301       | 3  | E 13 | 1416.7334      | 708.8706        |
| 401.1672       | 4  | A 12 | 1287.6909      | 644.3493        |
| 472.2043       | 5  | A 11 | 1216.6537      | 608.8308        |
| 573.2520       | 6  | T 10 | 1145.6166      | 573.3122        |
| 686.3361       | 7  | L 9  | 1044.5689      | 522.7884        |
| 799.4201       | 8  | L 8  | 931.4849       | 466.2464        |
| 928.4627       | 9  | E 7  | 818.4008       | 409.7043        |
| 1042.5057      | 10 | N 6  | 689.3582       | 345.1830        |
| 1155.5897      | 11 | L 5  | 575.3153       | 288.1616        |
| 1226.6268      | 12 | A 4  | 462.2312       | 231.6195        |
| 1313.6589      | 13 | S 3  | 391.1941       | 196.1010        |
| 1442.7015      | 14 | E 2  | 304.1621       | 152.5850        |
|                | 15 | R 1  | 175.1195       | 88.0637         |

N-term:+29.04

GDFAIISLYR, MH+ 1069.5682, m/z 535.2877  
 L OSG38 P180811 230811-s1.06157.06157.2.dta

X-range:

-

MassTol: Y-zoom:

MassType:

AVG  MONO

Axis:

1  2

Label:

I  M  -

Ions:

a  +  2+  3+

b  +  2+  3+

c  +  2+  3+

x  +  2+  3+

y  +  2+  3+

z  +  2+  3+

hide H<sub>2</sub>O/NH<sub>3</sub>

zoom 112-122

GO

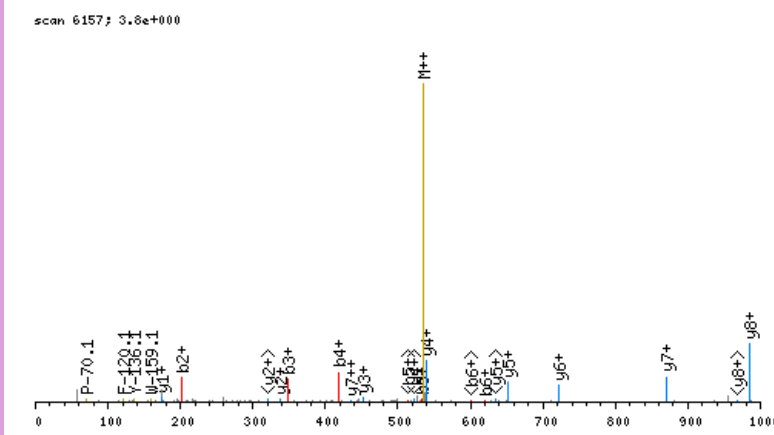

click image to zoom in; click top corners to zoom out [\[precursor±\]](#)

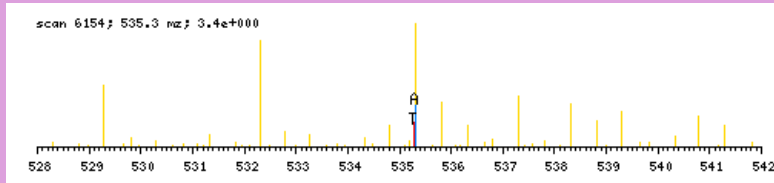

zoomed in precursor plot; T=theoretical m/z, A=acquired m/z

| b <sup>+</sup> | # | AA # | y <sup>+</sup> | y <sup>2+</sup> |
|----------------|---|------|----------------|-----------------|
| 86.0606        | 1 | G    | 9              |                 |
| 201.0875       | 2 | D    | 8              | 984.5155        |
| 348.1559       | 3 | F    | 7              | 869.4885        |
| 419.1930       | 4 | A    | 6              | 722.4201        |
| 532.2771       | 5 | I    | 5              | 651.3830        |
| 619.3091       | 6 | S    | 4              | 538.2989        |
| 732.3932       | 7 | L    | 3              | 451.2669        |
| 895.4565       | 8 | Y    | 2              | 338.1828        |
|                | 9 | R    | 1              | 175.1195        |

N-term:+29.04

GDPKEEEEEELVDPLTTVR, MH+ 2253.1774, m/z 751.7307  
 H OSG39 P180811 230811-s1.06048.06048.3.dta

scan 6048; 1.5e+001

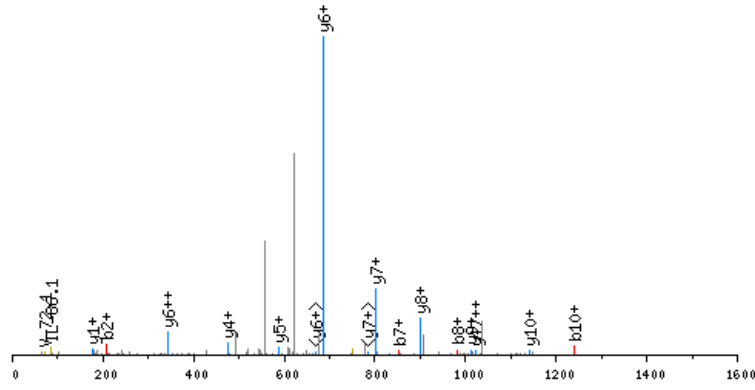

click image to zoom in; click top corners to zoom out [precursor±]

scan 6046; 751.7 m/z; 2.8e+001

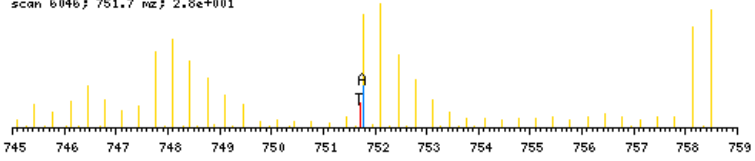

zoomed in precursor plot; T=theoretical m/z, A=acquired m/z

X-range:

-

MassTol: Y-zoom:

MassType:

AVG  MONO

Axis:

1  2

Label:

I  M  -

Ions:

a  +  2+  3+

b  +  2+  3+

c  +  2+  3+

x  +  2+  3+

y  +  2+  3+

z  +  2+  3+

hide H<sub>2</sub>O/NH<sub>3</sub>

zoom 112-122

GO

| b <sup>+</sup> | #  | AA | #  | y <sup>+</sup> | y <sup>2+</sup> |
|----------------|----|----|----|----------------|-----------------|
| 92.0924        | 1  | G  | 19 |                |                 |
| 207.1193       | 2  | D  | 18 | 2162.0929      | 1081.5504       |
| 304.1721       | 3  | P  | 17 | 2047.0659      | 1024.0369       |
| 466.3302       | 4  | K  | 16 | 1950.0132      | 975.5105        |
| 595.3728       | 5  | E  | 15 | 1787.8551      | 894.4315        |
| 724.4154       | 6  | E  | 14 | 1658.8125      | 829.9102        |
| 853.4580       | 7  | E  | 13 | 1529.7699      | 765.3889        |
| 982.5005       | 8  | E  | 12 | 1400.7273      | 700.8676        |
| 1111.5431      | 9  | E  | 11 | 1271.6847      | 636.3463        |
| 1240.5857      | 10 | E  | 10 | 1142.6421      | 571.8250        |
| 1353.6698      | 11 | L  | 9  | 1013.5995      | 507.3037        |
| 1452.7382      | 12 | V  | 8  | 900.5155       | 450.7616        |
| 1567.7652      | 13 | D  | 7  | 801.4470       | 401.2274        |
| 1664.8179      | 14 | P  | 6  | 686.4201       | 343.7140        |
| 1777.9020      | 15 | L  | 5  | 589.3673       | 295.1876        |
| 1878.9497      | 16 | T  | 4  | 476.2833       | 238.6455        |
| 1979.9973      | 17 | T  | 3  | 375.2356       | 188.1217        |
| 2079.0657      | 18 | V  | 2  | 274.1879       | 137.5979        |
|                | 19 | R  | 1  | 175.1195       | 88.0637         |

N-term:+35.07 K(4):+162.16

GDRGETGPAGPAGPIGPAGAR, MH+ 1894.9947, m/z 632.3364  
 H OSG40 P180811 230811-s1.03243.03243.3.dta

X-range:

-

MassTol: Y-zoom:

MassType:

AVG  MONO

Axis:

1  2

Label:

I  M  -

Ions:

a  +  2+  3+

b  +  2+  3+

c  +  2+  3+

x  +  2+  3+

y  +  2+  3+

z  +  2+  3+

hide H<sub>2</sub>O/NH<sub>3</sub>

zoom 112-122

GO

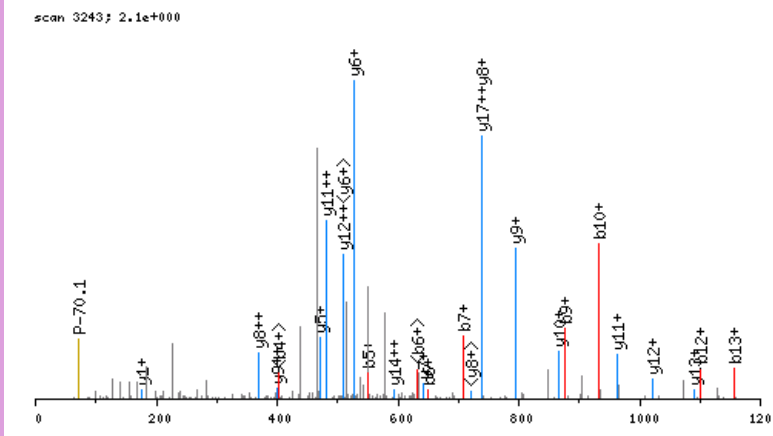

click image to zoom in; click top corners to zoom out [\[precursor±\]](#)

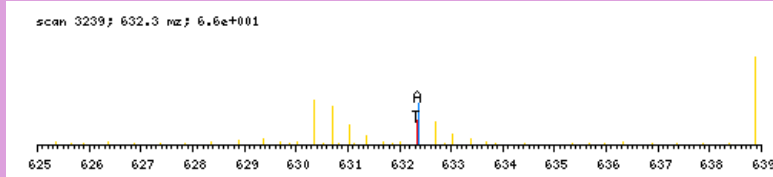

zoomed in precursor plot; T=theoretical m/z, A=acquired m/z

| b <sup>+</sup> | #  | AA # | y <sup>+</sup> | y <sup>2+</sup> |
|----------------|----|------|----------------|-----------------|
| 92.0924        | 1  | G 21 |                |                 |
| 207.1193       | 2  | D 20 | 1803.9102      | 902.4590        |
| 363.2204       | 3  | R 19 | 1688.8832      | 844.9455        |
| 420.2419       | 4  | G 18 | 1532.7821      | 766.8950        |
| 549.2845       | 5  | E 17 | 1475.7607      | 738.3842        |
| 650.3322       | 6  | T 16 | 1346.7181      | 673.8629        |
| 707.3536       | 7  | G 15 | 1245.6704      | 623.3391        |
| 804.4064       | 8  | P 14 | 1188.6489      | 594.8284        |
| 875.4435       | 9  | A 13 | 1091.5962      | 546.3020        |
| 932.4650       | 10 | G 12 | 1020.5591      | 510.7834        |
| 1029.5177      | 11 | P 11 | 963.5376       | 482.2727        |
| 1100.5548      | 12 | A 10 | 866.4848       | 433.7463        |
| 1157.5763      | 13 | G 9  | 795.4477       | 398.2278        |
| 1254.6291      | 14 | P 8  | 738.4262       | 369.7170        |
| 1367.7131      | 15 | I 7  | 641.3735       | 321.1907        |
| 1424.7346      | 16 | G 6  | 528.2894       | 264.6486        |
| 1521.7874      | 17 | P 5  | 471.2680       | 236.1379        |
| 1592.8245      | 18 | A 4  | 374.2152       | 187.6115        |
| 1649.8459      | 19 | G 3  | 303.1781       | 152.0930        |
| 1720.8830      | 20 | A 2  | 246.1566       | 123.5822        |
|                | 21 | R 1  | 175.1195       | 88.0637         |

N-term:+35.07

GDSTVNTEASATASAPR, MH+ 1591.7563, m/z 531.2570  
 L OSG37 P180811 230811-s1.02330.02330.3.dta

X-range:

-

MassTol: Y-zoom:

MassType:

AVG  MONO

Axis:

1  2

Label:

I  M  -

Ions:

a  +  2+  3+

b  +  2+  3+

c  +  2+  3+

x  +  2+  3+

y  +  2+  3+

z  +  2+  3+

hide H<sub>2</sub>O/NH<sub>3</sub>

zoom 112-122

GO

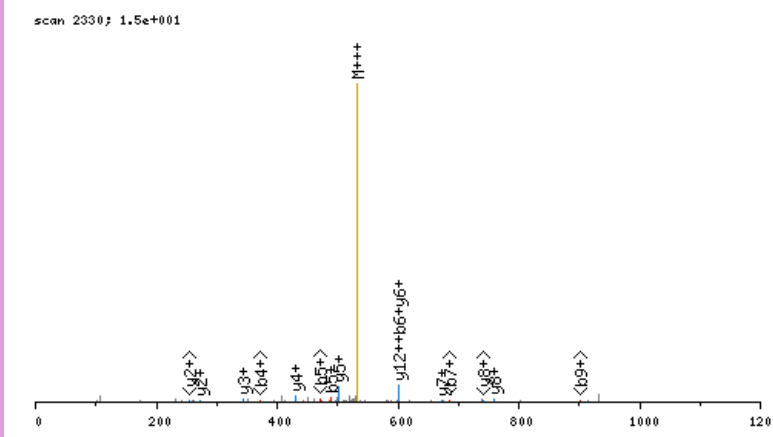

click image to zoom in; click top corners to zoom out [\[precursor±\]](#)

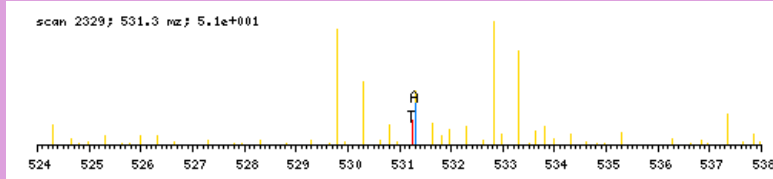

zoomed in precursor plot; T=theoretical m/z, A=acquired m/z

| b <sup>+</sup> | #  | AA # | y <sup>+</sup> | y <sup>2+</sup> |
|----------------|----|------|----------------|-----------------|
| 86.0606        | 1  | G 16 |                |                 |
| 201.0875       | 2  | D 15 | 1506.7036      | 753.8557        |
| 288.1195       | 3  | S 14 | 1391.6767      | 696.3422        |
| 389.1672       | 4  | T 13 | 1304.6446      | 652.8262        |
| 488.2356       | 5  | V 12 | 1203.5970      | 602.3024        |
| 602.2786       | 6  | N 11 | 1104.5285      | 552.7682        |
| 703.3262       | 7  | T 10 | 990.4856       | 495.7467        |
| 832.3688       | 8  | E 9  | 889.4379       | 445.2229        |
| 919.4009       | 9  | S 8  | 760.3953       | 380.7016        |
| 990.4380       | 10 | A 7  | 673.3633       | 337.1856        |
| 1091.4856      | 11 | T 6  | 602.3262       | 301.6670        |
| 1162.5228      | 12 | A 5  | 501.2785       | 251.1432        |
| 1249.5548      | 13 | S 4  | 430.2414       | 215.6246        |
| 1320.5919      | 14 | A 3  | 343.2094       | 172.1086        |
| 1417.6447      | 15 | P 2  | 272.1723       | 136.5900        |
|                | 16 | R 1  | 175.1195       | 88.0637         |

N-term:+29.04

X-range:

-

MassTol: Y-zoom:

MassType:

AVG  MONO

Axis:

1  2

Label:

I  M  -

Ions:

a  +  2+  3+

b  +  2+  3+

c  +  2+  3+

x  +  2+  3+

y  +  2+  3+

z  +  2+  3+

hide H<sub>2</sub>O/NH<sub>3</sub>

zoom 112-122

GO

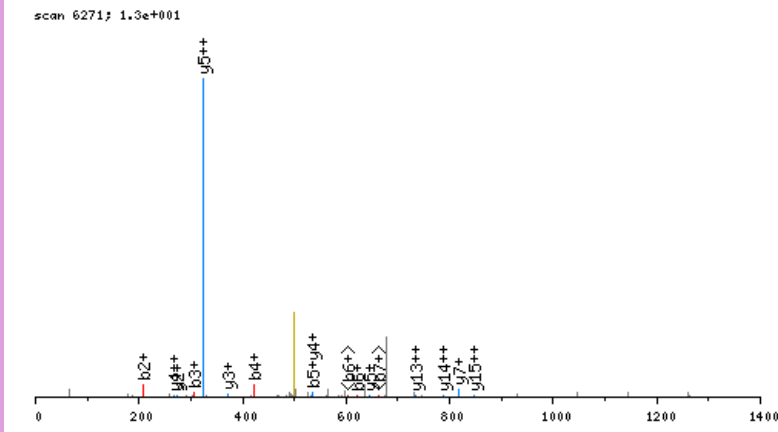

click image to zoom in; click top corners to zoom out [\[precursor±\]](#)

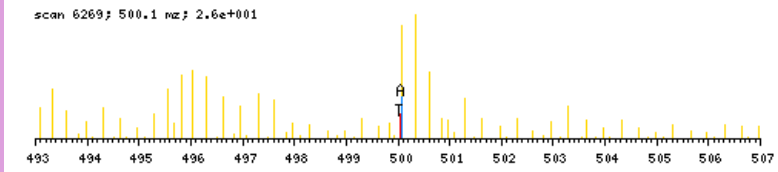

zoomed in precursor plot; T=theoretical m/z, A=acquired m/z

| b <sup>+</sup> | #  | AA | #  | y <sup>+</sup> | y <sup>2+</sup> |
|----------------|----|----|----|----------------|-----------------|
| 92.0924        | 1  | G  | 18 |                |                 |
| 207.1193       | 2  | D  | 17 | 1906.1286      | 953.5682        |
| 306.1877       | 3  | V  | 16 | 1791.1017      | 896.0548        |
| 421.2147       | 4  | D  | 15 | 1692.0333      | 846.5205        |
| 534.2987       | 5  | I  | 14 | 1577.0063      | 789.0071        |
| 621.3308       | 6  | S  | 13 | 1463.9223      | 732.4650        |
| 678.3522       | 7  | G  | 12 | 1376.8902      | 688.9490        |
| 775.4050       | 8  | P  | 11 | 1319.8688      | 660.4383        |
| 937.5631       | 9  | K  | 10 | 1222.8160      | 611.9119        |
| 1050.6471      | 10 | L  | 9  | 1060.6579      | 530.8329        |
| 1179.6897      | 11 | E  | 8  | 947.5738       | 474.2908        |
| 1236.7112      | 12 | G  | 7  | 818.5312       | 409.7695        |
| 1351.7381      | 13 | D  | 6  | 761.5098       | 381.2588        |
| 1464.8222      | 14 | I  | 5  | 646.4828       | 323.7453        |
| 1626.9803      | 15 | K  | 4  | 533.3988       | 267.2033        |
| 1726.0487      | 16 | V  | 3  | 371.2407       | 186.1243        |
| 1823.1015      | 17 | P  | 2  | 272.1723       | 136.5900        |
|                | 18 | R  | 1  | 175.1195       | 88.0637         |

N-term:+35.07 K(9):+162.16  
K(15):+162.16

GDVFPVVADPTVPNVTVTR, MH+ 1864.0180, m/z 622.0108  
 L OSG36 P180811 230811-s1.04376.04376.3.dta

X-range:

-

MassTol: Y-zoom:

MassType:

AVG  MONO

Axis:

1  2

Label:

I  M  -

Ions:

a  +  2+  3+

b  +  2+  3+

c  +  2+  3+

x  +  2+  3+

y  +  2+  3+

z  +  2+  3+

hide H<sub>2</sub>O/NH<sub>3</sub>

zoom 112-122

GO

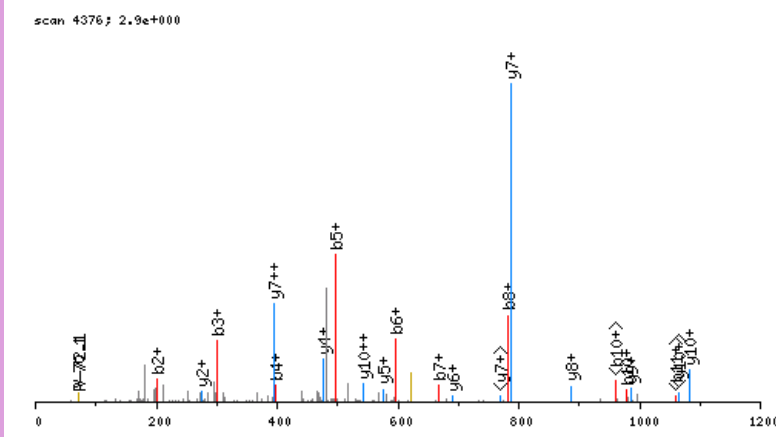

click image to zoom in; click top corners to zoom out [\[precursor±\]](#)

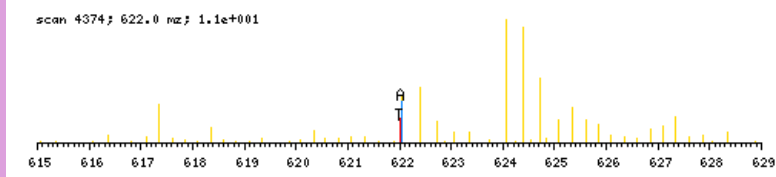

zoomed in precursor plot; T=theoretical m/z, A=acquired m/z

| b <sup>+</sup> | #  | AA # | y <sup>+</sup> | y <sup>2+</sup> |
|----------------|----|------|----------------|-----------------|
| 86.0606        | 1  | G 18 |                |                 |
| 201.0875       | 2  | D 17 | 1778.9652      | 889.9865        |
| 300.1559       | 3  | V 16 | 1663.9383      | 832.4731        |
| 397.2087       | 4  | P 15 | 1564.8699      | 782.9389        |
| 496.2771       | 5  | V 14 | 1467.8171      | 734.4125        |
| 595.3455       | 6  | V 13 | 1368.7487      | 684.8783        |
| 666.3826       | 7  | A 12 | 1269.6803      | 635.3441        |
| 781.4096       | 8  | D 11 | 1198.6432      | 599.8255        |
| 878.4623       | 9  | P 10 | 1083.6162      | 542.3120        |
| 979.5100       | 10 | T 9  | 986.5635       | 493.7856        |
| 1078.5784      | 11 | V 8  | 885.5158       | 443.2618        |
| 1175.6312      | 12 | P 7  | 786.4474       | 393.7276        |
| 1289.6741      | 13 | N 6  | 689.3946       | 345.2012        |
| 1388.7425      | 14 | V 5  | 575.3517       | 288.1798        |
| 1489.7902      | 15 | T 4  | 476.2833       | 238.6455        |
| 1588.8586      | 16 | V 3  | 375.2356       | 188.1217        |
| 1689.9063      | 17 | T 2  | 276.1672       | 138.5875        |
|                | 18 | R 1  | 175.1195       | 88.0637         |

N-term:+29.04

GDVSSCDNPSGTEPSGTNR, MH+ 1964.8255, m/z 655.6134  
 L OSG37 P180811 230811-s1.02105.02105.3.dta

X-range:

-

MassTol: Y-zoom:

MassType:

AVG  MONO

Axis:

1  2

Label:

I  M  -

Ions:

a  +  2+  3+

b  +  2+  3+

c  +  2+  3+

x  +  2+  3+

y  +  2+  3+

z  +  2+  3+

hide H<sub>2</sub>O/NH<sub>3</sub>

zoom 112-122

GO

scan 2105; 2.4e+000

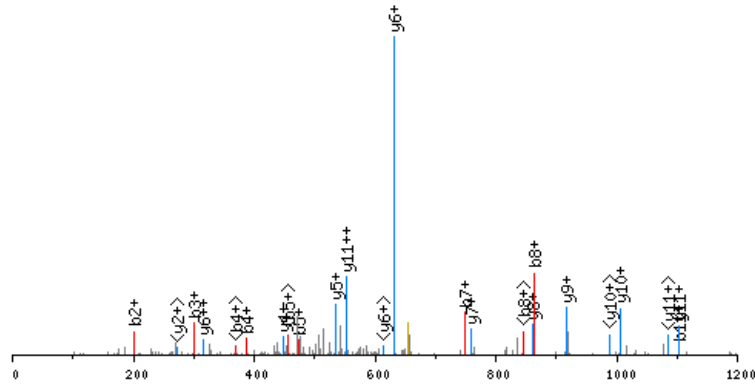

click image to zoom in; click top corners to zoom out [\[precursor±\]](#)

scan 2104; 655.6 m/z; 8.8e+000

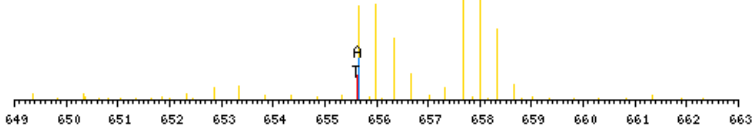

zoomed in precursor plot; T=theoretical m/z, A=acquired m/z

| b <sup>+</sup> | #  | AA # | y <sup>+</sup> | y <sup>2+</sup> |
|----------------|----|------|----------------|-----------------|
| 86.0606        | 1  | G 19 |                |                 |
| 201.0875       | 2  | D 18 | 1879.7728      | 940.3903        |
| 300.1559       | 3  | V 17 | 1764.7458      | 882.8768        |
| 387.1879       | 4  | S 16 | 1665.6774      | 833.3426        |
| 474.2200       | 5  | S 15 | 1578.6454      | 789.8266        |
| 634.2506       | 6  | C 14 | 1491.6134      | 746.3106        |
| 749.2775       | 7  | D 13 | 1331.5828      | 666.2953        |
| 863.3204       | 8  | N 12 | 1216.5558      | 608.7818        |
| 960.3732       | 9  | P 11 | 1102.5129      | 551.7604        |
| 1047.4052      | 10 | S 10 | 1005.4601      | 503.2340        |
| 1104.4267      | 11 | G 9  | 918.4281       | 459.7180        |
| 1205.4744      | 12 | T 8  | 861.4066       | 431.2072        |
| 1334.5170      | 13 | E 7  | 760.3590       | 380.6834        |
| 1431.5697      | 14 | P 6  | 631.3164       | 316.1621        |
| 1518.6018      | 15 | S 5  | 534.2636       | 267.6357        |
| 1575.6232      | 16 | G 4  | 447.2316       | 224.1197        |
| 1676.6709      | 17 | T 3  | 390.2101       | 195.6090        |
| 1790.7138      | 18 | N 2  | 289.1624       | 145.0851        |
|                | 19 | R 1  | 175.1195       | 88.0637         |

N-term:+29.04 C(6):+160.03



GEEQGADAALHFNPR, MH+ 1645.8146, m/z 549.2764  
 H OSG40 P180811 230811-s1.04635.04635.3.dta

X-range:

-

MassTol: Y-zoom:

MassType:

AVG  MONO

Axis:

1  2

Label:

I  M  -

Ions:

a  +  2+  3+

b  +  2+  3+

c  +  2+  3+

x  +  2+  3+

y  +  2+  3+

z  +  2+  3+

hide H<sub>2</sub>O/NH<sub>3</sub>

zoom 112-122

GO

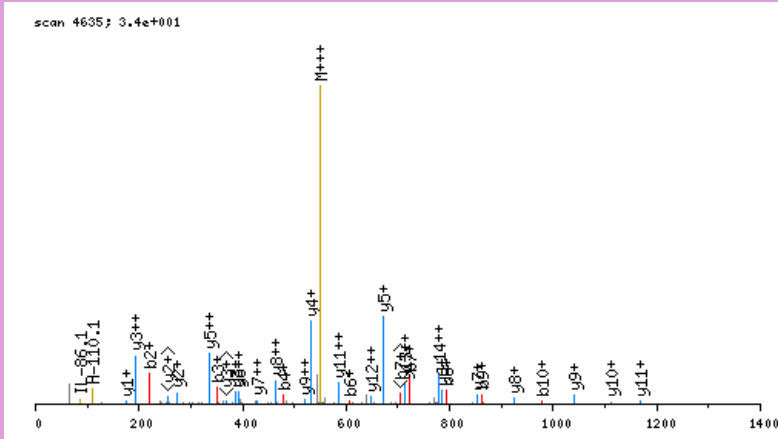

click image to zoom in; click top corners to zoom out [\[precursor±\]](#)

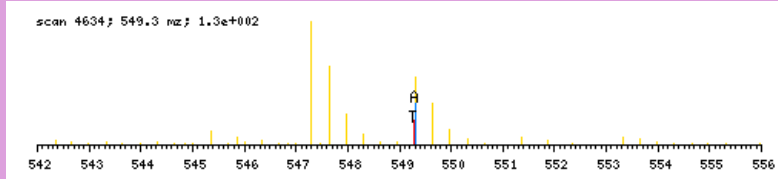

zoomed in precursor plot; T=theoretical m/z, A=acquired m/z

| b <sup>+</sup> | #  | AA # | y <sup>+</sup> | y <sup>2+</sup> |
|----------------|----|------|----------------|-----------------|
| 92.0924        | 1  | G    | 15             |                 |
| 221.1350       | 2  | E    | 14             | 1554.7301       |
| 350.1776       | 3  | E    | 13             | 1425.6875       |
| 478.2361       | 4  | Q    | 12             | 1296.6449       |
| 535.2576       | 5  | G    | 11             | 1168.5863       |
| 606.2947       | 6  | A    | 10             | 1111.5649       |
| 721.3216       | 7  | D    | 9              | 1040.5278       |
| 792.3588       | 8  | A    | 8              | 925.5008        |
| 863.3959       | 9  | A    | 7              | 854.4637        |
| 976.4799       | 10 | L    | 6              | 783.4266        |
| 1113.5389      | 11 | H    | 5              | 670.3425        |
| 1260.6073      | 12 | F    | 4              | 533.2836        |
| 1374.6502      | 13 | N    | 3              | 386.2152        |
| 1471.7030      | 14 | P    | 2              | 272.1723        |
|                | 15 | R    | 1              | 175.1195        |

N-term:+35.07

GELEDKPPAPPVR, MH+ 1460.8113, m/z 487.6086  
 L OSG39 P180811 230811-s1.02823.02823.3.dta

scan 2823; 1.0e+001

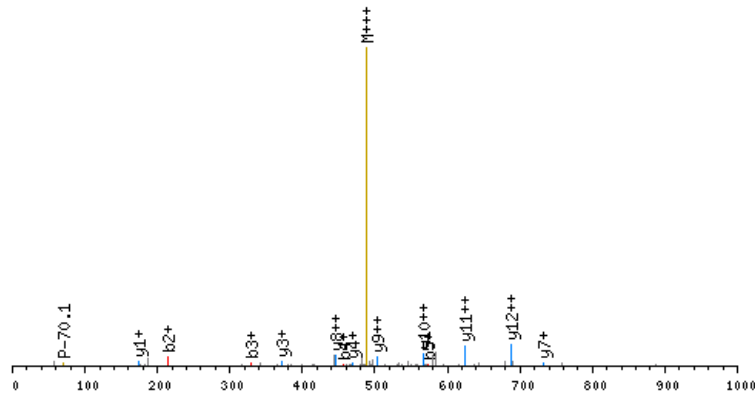

click image to zoom in; click top corners to zoom out [\[precursor±\]](#)

scan 2821; 487.6 m/z; 5.3e+000

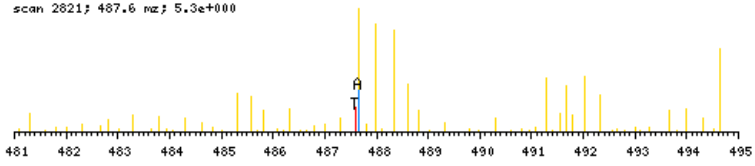

zoomed in precursor plot; T=theoretical m/z, A=acquired m/z

X-range:

-

MassTol: Y-zoom:

MassType:

AVG  MONO

Axis:

1  2

Label:

I  M  -

Ions:

a  +  2+  3+

b  +  2+  3+

c  +  2+  3+

x  +  2+  3+

y  +  2+  3+

z  +  2+  3+

hide H<sub>2</sub>O/NH<sub>3</sub>

zoom 112-122

GO

| b <sup>+</sup> | #  | AA # | y <sup>+</sup> | y <sup>2+</sup> |
|----------------|----|------|----------------|-----------------|
| 86.0606        | 1  | G 13 |                |                 |
| 215.1032       | 2  | E 12 | 1375.7586      | 688.3832        |
| 328.1872       | 3  | L 11 | 1246.7160      | 623.8619        |
| 457.2298       | 4  | E 10 | 1133.6319      | 567.3199        |
| 572.2568       | 5  | D 9  | 1004.5893      | 502.7986        |
| 728.3831       | 6  | K 8  | 889.5624       | 445.2851        |
| 825.4358       | 7  | P 7  | 733.4361       | 367.2220        |
| 922.4886       | 8  | P 6  | 636.3833       | 318.6956        |
| 993.5257       | 9  | A 5  | 539.3306       | 270.1692        |
| 1090.5785      | 10 | P 4  | 468.2934       | 234.6506        |
| 1187.6312      | 11 | P 3  | 371.2407       | 186.1243        |
| 1286.6996      | 12 | V 2  | 274.1879       | 137.5979        |
|                | 13 | R 1  | 175.1195       | 88.0637         |

N-term:+29.04 K(6):+156.13

GESSFDLADR, MH+ 1130.5542, m/z 565.7807  
 H OSG37 P180811 230811-s1.03942.03942.2.dta

scan 3942; 1.4e+001

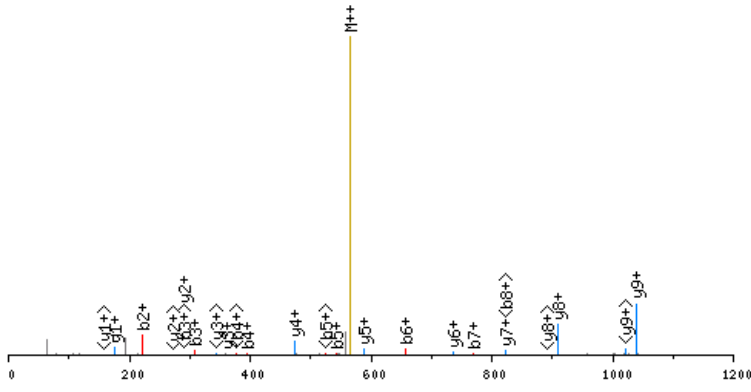

click image to zoom in; click top corners to zoom out [precursor±]

scan 3939; 565.8 m/z; 3.3e+001

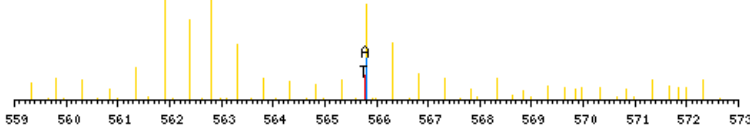

zoomed in precursor plot; T=theoretical m/z, A=acquired m/z

X-range:

-

MassTol: Y-zoom:

MassType:

AVG  MONO

Axis:

1  2

Label:

I  M  -

Ions:

a  +  2+  3+

b  +  2+  3+

c  +  2+  3+

x  +  2+  3+

y  +  2+  3+

z  +  2+  3+

hide H<sub>2</sub>O/NH<sub>3</sub>

zoom 112-122

GO

| b <sup>+</sup> | #  | AA | #  | y <sup>+</sup> | y <sup>2+</sup> |
|----------------|----|----|----|----------------|-----------------|
| 92.0924        | 1  | G  | 10 |                |                 |
| 221.1350       | 2  | E  | 9  | 1039.4696      | 520.2387        |
| 308.1670       | 3  | S  | 8  | 910.4270       | 455.7174        |
| 395.1990       | 4  | S  | 7  | 823.3950       | 412.2014        |
| 542.2674       | 5  | F  | 6  | 736.3630       | 368.6854        |
| 657.2944       | 6  | D  | 5  | 589.2946       | 295.1512        |
| 770.3784       | 7  | L  | 4  | 474.2676       | 237.6377        |
| 841.4155       | 8  | A  | 3  | 361.1836       | 181.0957        |
| 956.4425       | 9  | D  | 2  | 290.1464       | 145.5771        |
|                | 10 | R  | 1  | 175.1195       | 88.0637         |

N-term:+35.07

GETPTEKLPFPIIDDKGR, MH+ 2115.2550, m/z 529.5692  
 H OSG40 P180811 230811-s1.07081.07081.4.dta

X-range:

-

MassTol: Y-zoom:

MassType:

AVG  MONO

Axis:

1  2

Label:

I  M  -

Ions:

a  +  2+  3+

b  +  2+  3+

c  +  2+  3+

x  +  2+  3+

y  +  2+  3+

z  +  2+  3+

hide H<sub>2</sub>O/NH<sub>3</sub>

zoom 112-122

GO

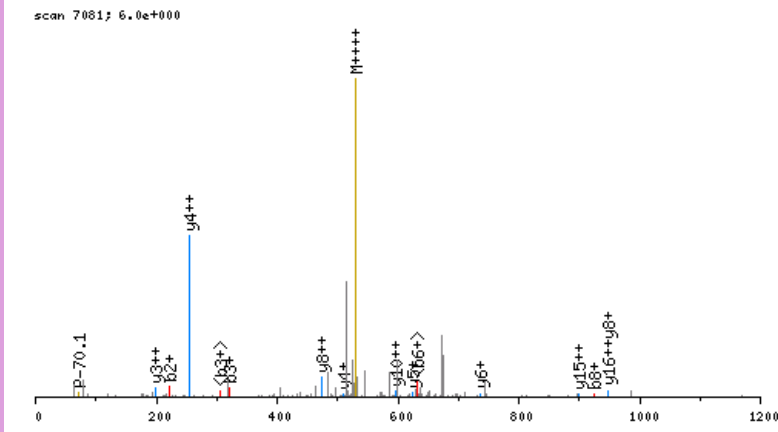

click image to zoom in; click top corners to zoom out [precursor±]

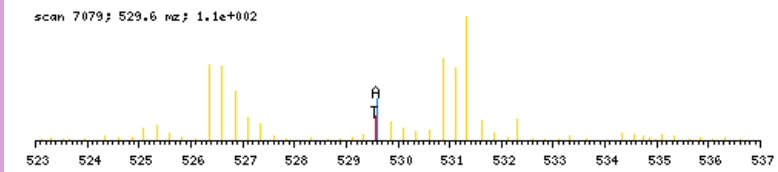

zoomed in precursor plot; T=theoretical m/z, A=acquired m/z

| b <sup>+</sup> | #  | AA | #  | y <sup>+</sup> | y <sup>2+</sup> |
|----------------|----|----|----|----------------|-----------------|
| 92.0924        | 1  | G  | 18 |                |                 |
| 221.1350       | 2  | E  | 17 | 2024.1705      | 1012.5892       |
| 322.1826       | 3  | T  | 16 | 1895.1279      | 948.0679        |
| 419.2354       | 4  | P  | 15 | 1794.0802      | 897.5440        |
| 520.2831       | 5  | T  | 14 | 1697.0275      | 849.0176        |
| 649.3257       | 6  | E  | 13 | 1595.9798      | 798.4938        |
| 811.4838       | 7  | K  | 12 | 1466.9372      | 733.9725        |
| 924.5678       | 8  | L  | 11 | 1304.7791      | 652.8935        |
| 1021.6206      | 9  | P  | 10 | 1191.6950      | 596.3514        |
| 1168.6890      | 10 | F  | 9  | 1094.6423      | 547.8250        |
| 1265.7418      | 11 | P  | 8  | 947.5738       | 474.2908        |
| 1378.8258      | 12 | I  | 7  | 850.5211       | 425.7645        |
| 1491.9099      | 13 | I  | 6  | 737.4370       | 369.2224        |
| 1606.9368      | 14 | D  | 5  | 624.3530       | 312.6804        |
| 1721.9638      | 15 | D  | 4  | 509.3260       | 255.1669        |
| 1884.1219      | 16 | K  | 3  | 394.2991       | 197.6534        |
| 1941.1434      | 17 | G  | 2  | 232.1410       | 116.5744        |
|                | 18 | R  | 1  | 175.1195       | 88.0637         |

N-term: +35.07 K(7): +162.16  
 K(16): +162.16

GETTTQGLDGLSER, MH+ 1491.7291, m/z 497.9145  
 L OSG37 P180811 230811-s1.03793.03793.3.dta

X-range:

-

MassTol: Y-zoom:

MassType:

AVG  MONO

Axis:

1  2

Label:

I  M  -

Ions:

a  +  2+  3+

b  +  2+  3+

c  +  2+  3+

x  +  2+  3+

y  +  2+  3+

z  +  2+  3+

hide H<sub>2</sub>O/NH<sub>3</sub>

zoom 112-122

GO

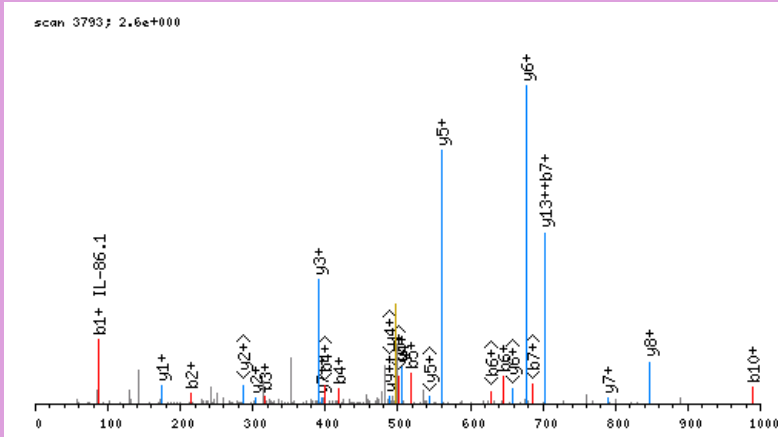

click image to zoom in; click top corners to zoom out [\[precursor±\]](#)

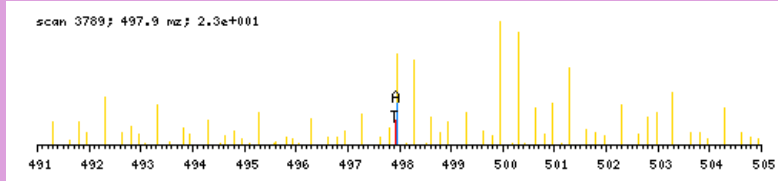

zoomed in precursor plot; T=theoretical m/z, A=acquired m/z

| b <sup>+</sup> | #  | AA # | y <sup>+</sup> | y <sup>2+</sup> |
|----------------|----|------|----------------|-----------------|
| 86.0606        | 1  | G 14 |                |                 |
| 215.1032       | 2  | E 13 | 1406.6763      | 703.8421        |
| 316.1508       | 3  | T 12 | 1277.6337      | 639.3208        |
| 417.1985       | 4  | T 11 | 1176.5861      | 588.7969        |
| 518.2462       | 5  | T 10 | 1075.5384      | 538.2731        |
| 646.3048       | 6  | Q 9  | 974.4907       | 487.7493        |
| 703.3262       | 7  | G 8  | 846.4321       | 423.7200        |
| 816.4103       | 8  | L 7  | 789.4107       | 395.2092        |
| 931.4372       | 9  | D 6  | 676.3266       | 338.6672        |
| 988.4587       | 10 | G 5  | 561.2997       | 281.1537        |
| 1101.5428      | 11 | L 4  | 504.2782       | 252.6430        |
| 1188.5748      | 12 | S 3  | 391.1941       | 196.1010        |
| 1317.6174      | 13 | E 2  | 304.1621       | 152.5850        |
|                | 14 | R 1  | 175.1195       | 88.0637         |

N-term:+29.04

GEVVDCTIKTDPVTGR, MH+ 1814.9958, m/z 605.6701  
 H OSG39 P180811 230811-s1.03397.03397.3.dta

X-range:

-

MassTol: Y-zoom:

MassType:

AVG  MONO

Axis:

1  2

Label:

I  M  -

Ions:

a  +  2+  3+

b  +  2+  3+

c  +  2+  3+

x  +  2+  3+

y  +  2+  3+

z  +  2+  3+

hide H<sub>2</sub>O/NH<sub>3</sub>

zoom 112-122

GO

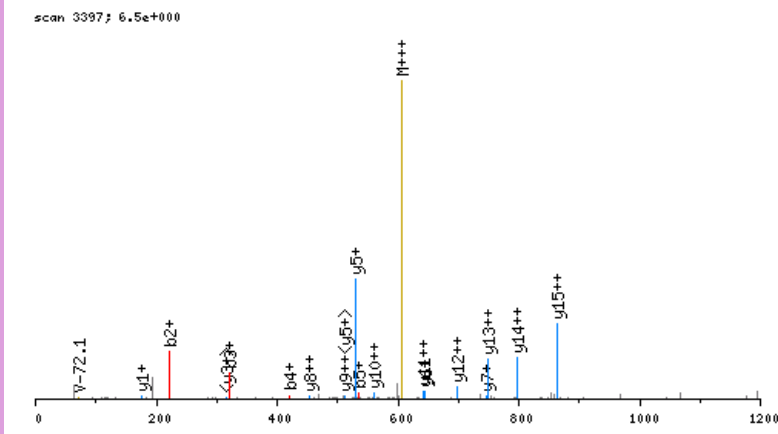

click image to zoom in; click top corners to zoom out [\[precursor±\]](#)

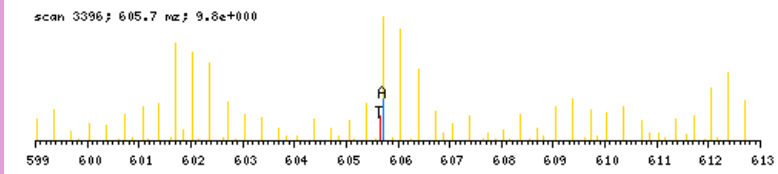

zoomed in precursor plot; T=theoretical m/z, A=acquired m/z

| b <sup>+</sup> | #  | AA | #  | y <sup>+</sup> | y <sup>2+</sup> |
|----------------|----|----|----|----------------|-----------------|
| 92.0924        | 1  | G  | 16 |                |                 |
| 221.1350       | 2  | E  | 15 | 1723.9112      | 862.4595        |
| 320.2034       | 3  | V  | 14 | 1594.8687      | 797.9382        |
| 419.2718       | 4  | V  | 13 | 1495.8002      | 748.4040        |
| 534.2987       | 5  | D  | 12 | 1396.7318      | 698.8698        |
| 694.3293       | 6  | C  | 11 | 1281.7049      | 641.3564        |
| 795.3770       | 7  | T  | 10 | 1121.6743      | 561.3411        |
| 908.4611       | 8  | I  | 9  | 1020.6266      | 510.8172        |
| 1070.6192      | 9  | K  | 8  | 907.5425       | 454.2752        |
| 1171.6668      | 10 | T  | 7  | 745.3844       | 373.1961        |
| 1286.6938      | 11 | D  | 6  | 644.3368       | 322.6723        |
| 1383.7466      | 12 | P  | 5  | 529.3098       | 265.1588        |
| 1482.8150      | 13 | V  | 4  | 432.2571       | 216.6324        |
| 1583.8626      | 14 | T  | 3  | 333.1886       | 167.0982        |
| 1640.8841      | 15 | G  | 2  | 232.1410       | 116.5744        |
|                | 16 | R  | 1  | 175.1195       | 88.0637         |

N-term:+35.07 C(6):+160.03  
 K(9):+162.16

GEYDVTVPR, MH+ 1069.5742, m/z 535.2907  
 H OSG37 P180811 230811-s1.03796.03796.2.dta

X-range:

-

MassTol: Y-zoom:

MassType:

AVG  MONO

Axis:

1  2

Label:

I  M  -

Ions:

a  +  2+  3+

b  +  2+  3+

c  +  2+  3+

x  +  2+  3+

y  +  2+  3+

z  +  2+  3+

hide H<sub>2</sub>O/NH<sub>3</sub>

zoom 112-122

GO

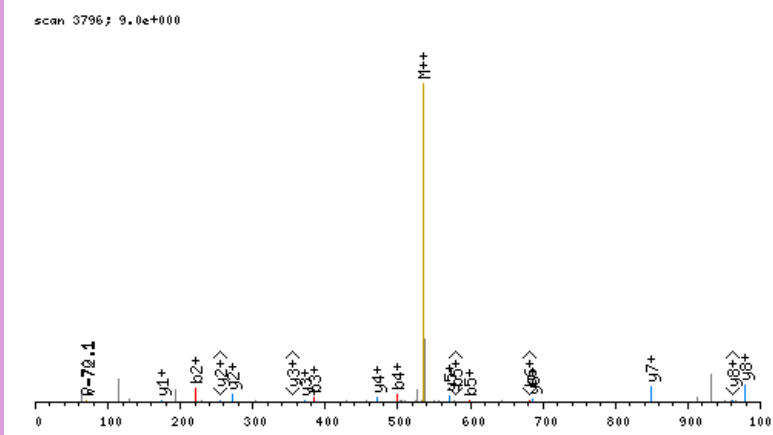

click image to zoom in; click top corners to zoom out [\[precursor±\]](#)

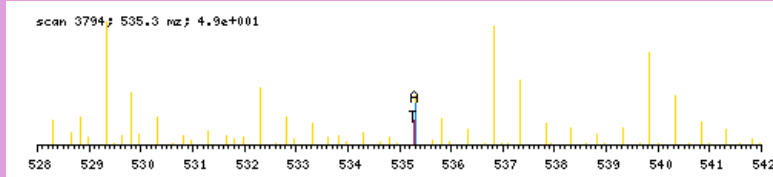

zoomed in precursor plot; T=theoretical m/z, A=acquired m/z

| b <sup>+</sup> | # | AA # | y <sup>+</sup> | y <sup>2+</sup> |
|----------------|---|------|----------------|-----------------|
| 92.0924        | 1 | G    | 9              |                 |
| 221.1350       | 2 | E    | 8              | 489.7487        |
| 384.1983       | 3 | Y    | 7              | 425.2274        |
| 499.2252       | 4 | D    | 6              | 343.6958        |
| 598.2936       | 5 | V    | 5              | 286.1823        |
| 699.3413       | 6 | T    | 4              | 236.6481        |
| 798.4097       | 7 | V    | 3              | 186.1243        |
| 895.4625       | 8 | P    | 2              | 136.5900        |
|                | 9 | R    | 1              | 88.0637         |

N-term:+35.07

GFCSGSGR, MH+ 861.4100, m/z 431.2087  
 H OSG41 P180811 230811-s1.04176.04176.2.dta

X-range:

-

MassTol: Y-zoom:

MassType:

AVG  MONO

Axis:

1  2

Label:

I  M  -

Ions:

a  +  2+  3+

b  +  2+  3+

c  +  2+  3+

x  +  2+  3+

y  +  2+  3+

z  +  2+  3+

hide H<sub>2</sub>O/NH<sub>3</sub>

zoom 112-122

GO

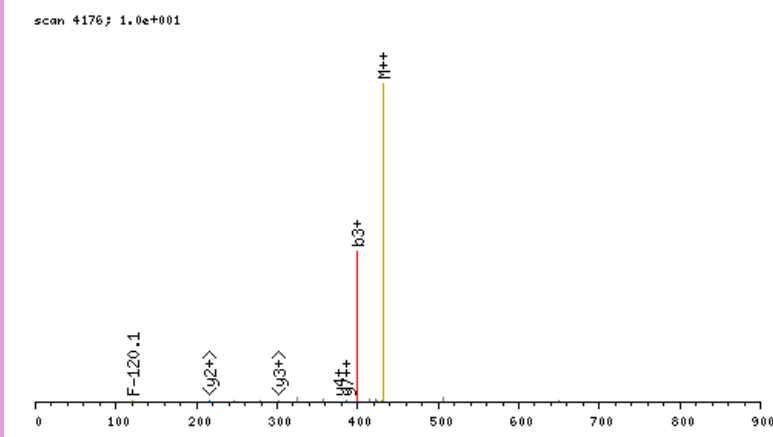

click image to zoom in; click top corners to zoom out [\[precursor±\]](#)

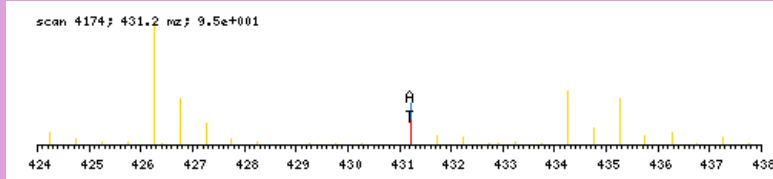

zoomed in precursor plot; T=theoretical m/z, A=acquired m/z

| b <sup>+</sup> | # | AA # | y <sup>+</sup> | y <sup>2+</sup> |
|----------------|---|------|----------------|-----------------|
| 92.0924        | 1 | G 8  |                |                 |
| 239.1608       | 2 | F 7  | 770.3255       | 385.6667        |
| 399.1914       | 3 | C 6  | 623.2571       | 312.1325        |
| 486.2234       | 4 | S 5  | 463.2265       | 232.1172        |
| 543.2449       | 5 | G 4  | 376.1945       | 188.6011        |
| 630.2769       | 6 | S 3  | 319.1730       | 160.0904        |
| 687.2984       | 7 | G 2  | 232.1410       | 116.5744        |
|                | 8 | R 1  | 175.1195       | 88.0637         |

N-term:+35.07 C(3):+160.03



GGAGSYIYEKPKQTEAPQVTGPIEVPVVR, MH+ 2998.5890, m/z 750.4027  
 L\_OSG38\_P180811\_230811-s1.06660.06660.4.dta

scan 6660; 1.2e+000

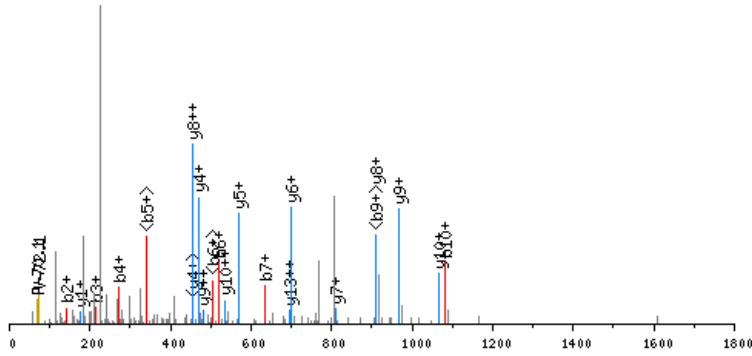

click image to zoom in; click top corners to zoom out [precursor±]

scan 6659; 750.4 m/z; 1.8e+001

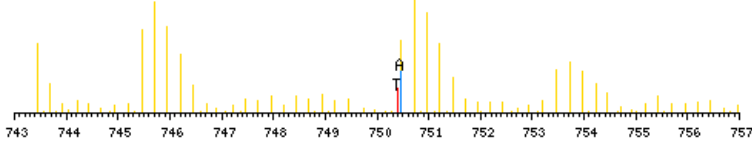

zoomed in precursor plot; T=theoretical m/z, A=acquired m/z

X-range:

-

MassTol: Y-zoom:

MassType:

AVG  MONO

Axis:

1  2

Label:

I  M  -

Ions:

a  +  2+  3+

b  +  2+  3+

c  +  2+  3+

x  +  2+  3+

y  +  2+  3+

z  +  2+  3+

hide H<sub>2</sub>O/NH<sub>3</sub>

zoom 112-122

GO

| b <sup>+</sup> | #  | AA # | y <sup>+</sup> | y <sup>2+</sup> |
|----------------|----|------|----------------|-----------------|
| 86.0606        | 1  | G 28 |                |                 |
| 143.0820       | 2  | G 27 | 2913.5362      | 1457.2720       |
| 214.1191       | 3  | A 26 | 2856.5148      | 1428.7613       |
| 271.1406       | 4  | G 25 | 2785.4777      | 1393.2427       |
| 358.1726       | 5  | S 24 | 2728.4562      | 1364.7320       |
| 521.2360       | 6  | Y 23 | 2641.4242      | 1321.2160       |
| 634.3200       | 7  | I 22 | 2478.3608      | 1239.6843       |
| 797.3834       | 8  | Y 21 | 2365.2768      | 1183.1423       |
| 926.4259       | 9  | E 20 | 2202.2134      | 1101.6106       |
| 1082.5522      | 10 | K 19 | 2073.1709      | 1037.0893       |
| 1179.6050      | 11 | P 18 | 1917.0446      | 959.0262        |
| 1307.6636      | 12 | Q 17 | 1819.9918      | 910.4998        |
| 1408.7113      | 13 | T 16 | 1691.9332      | 846.4705        |
| 1537.7539      | 14 | E 15 | 1590.8855      | 795.9467        |
| 1608.7910      | 15 | A 14 | 1461.8429      | 731.4254        |
| 1705.8437      | 16 | P 13 | 1390.8058      | 695.9068        |
| 1833.9023      | 17 | Q 12 | 1293.7531      | 647.3804        |
| 1932.9707      | 18 | V 11 | 1165.6945      | 583.3512        |
| 2034.0184      | 19 | T 10 | 1066.6261      | 533.8169        |
| 2091.0399      | 20 | G 9  | 965.5784       | 483.2931        |
| 2188.0926      | 21 | P 8  | 908.5569       | 454.7824        |
| 2301.1767      | 22 | I 7  | 811.5042       | 406.2560        |
| 2430.2193      | 23 | E 6  | 698.4201       | 349.7140        |
| 2529.2877      | 24 | V 5  | 569.3775       | 285.1927        |
| 2626.3405      | 25 | P 4  | 470.3091       | 235.6585        |
| 2725.4089      | 26 | V 3  | 373.2563       | 187.1321        |
| 2824.4773      | 27 | V 2  | 274.1879       | 137.5979        |
|                | 28 | R 1  | 175.1195       | 88.0637         |

N-term:+29.04 K(10) :+156.13

GGGGNFGPGPGSNFR, MH+ 1405.6613, m/z 469.2253  
 L OSG38 P180811 230811-s1.03785.03785.3.dta

X-range:

-

MassTol: Y-zoom:

MassType:

AVG  MONO

Axis:

1  2

Label:

I  M  -

Ions:

a  +  2+  3+

b  +  2+  3+

c  +  2+  3+

x  +  2+  3+

y  +  2+  3+

z  +  2+  3+

hide H<sub>2</sub>O/NH<sub>3</sub>

zoom 112-122

GO

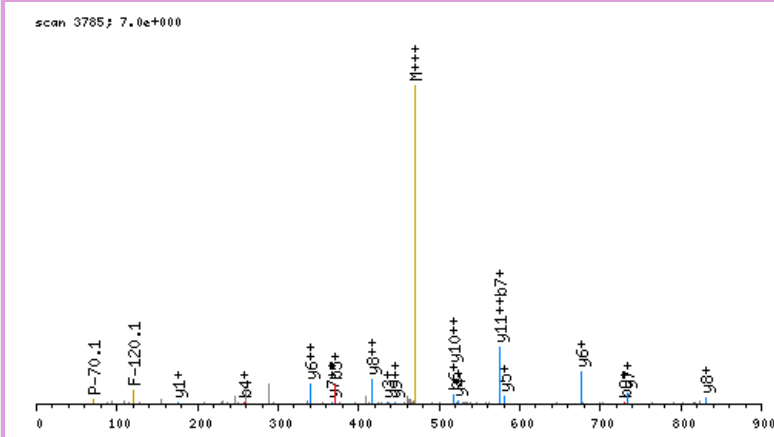

click image to zoom in; click top corners to zoom out [\[precursor±\]](#)

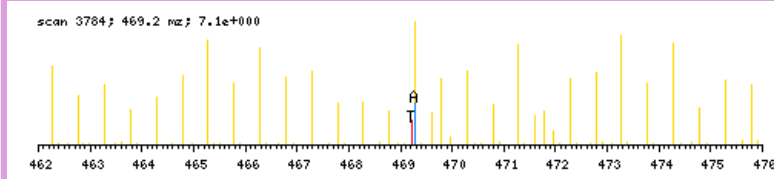

zoomed in precursor plot; T=theoretical m/z, A=acquired m/z

| b <sup>+</sup> | #  | AA # | y <sup>+</sup> | y <sup>2+</sup> |
|----------------|----|------|----------------|-----------------|
| 86.0606        | 1  | G 15 |                |                 |
| 143.0820       | 2  | G 14 | 1320.6085      | 660.8082        |
| 200.1035       | 3  | G 13 | 1263.5871      | 632.2974        |
| 257.1250       | 4  | G 12 | 1206.5656      | 603.7867        |
| 371.1679       | 5  | N 11 | 1149.5441      | 575.2760        |
| 518.2363       | 6  | F 10 | 1035.5012      | 518.2545        |
| 575.2578       | 7  | G 9  | 888.4328       | 444.7203        |
| 672.3105       | 8  | P 8  | 831.4113       | 416.2096        |
| 729.3320       | 9  | G 7  | 734.3586       | 367.6832        |
| 826.3848       | 10 | P 6  | 677.3371       | 339.1725        |
| 883.4062       | 11 | G 5  | 580.2843       | 290.6461        |
| 970.4382       | 12 | S 4  | 523.2629       | 262.1353        |
| 1084.4812      | 13 | N 3  | 436.2308       | 218.6193        |
| 1231.5496      | 14 | F 2  | 322.1879       | 161.5979        |
|                | 15 | R 1  | 175.1195       | 88.0637         |

N-term:+29.04

GGHGAEYGAELER, MH+ 1450.7139, m/z 484.2428  
 H OSG40 P180811 230811-s1.02960.02960.3.dta

X-range:

-

MassTol: Y-zoom:

MassType:

AVG  MONO

Axis:

1  2

Label:

I  M  -

Ions:

a  +  2+  3+

b  +  2+  3+

c  +  2+  3+

x  +  2+  3+

y  +  2+  3+

z  +  2+  3+

hide H<sub>2</sub>O/NH<sub>3</sub>

zoom 112-122

GO

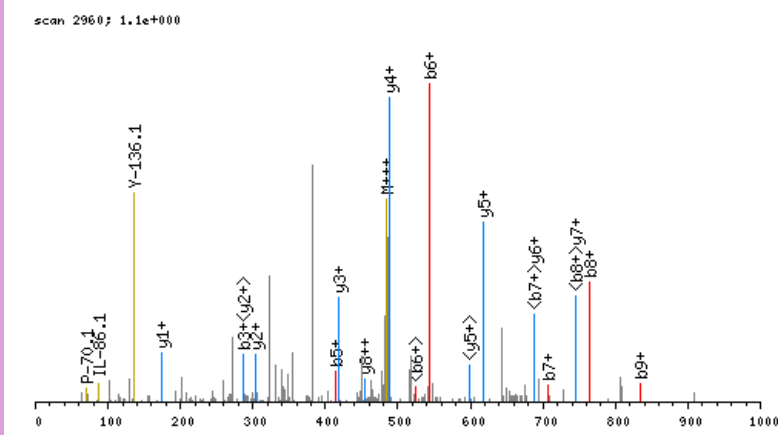

click image to zoom in; click top corners to zoom out [\[precursor±\]](#)

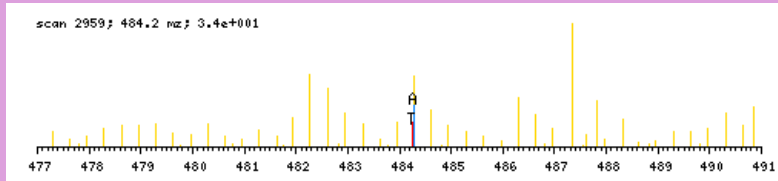

zoomed in precursor plot; T=theoretical m/z, A=acquired m/z

| b <sup>+</sup> | #  | AA # | y <sup>+</sup> | y <sup>2+</sup> |
|----------------|----|------|----------------|-----------------|
| 92.0924        | 1  | G 14 |                |                 |
| 149.1138       | 2  | G 13 | 1359.6293      | 680.3186        |
| 286.1727       | 3  | H 12 | 1302.6079      | 651.8078        |
| 343.1942       | 4  | G 11 | 1165.5489      | 583.2784        |
| 414.2313       | 5  | A 10 | 1108.5275      | 554.7677        |
| 543.2739       | 6  | E 9  | 1037.4904      | 519.2491        |
| 706.3372       | 7  | Y 8  | 908.4478       | 454.7278        |
| 763.3587       | 8  | G 7  | 745.3844       | 373.1961        |
| 834.3958       | 9  | A 6  | 688.3630       | 344.6854        |
| 963.4384       | 10 | E 5  | 617.3259       | 309.1668        |
| 1034.4755      | 11 | A 4  | 488.2833       | 244.6455        |
| 1147.5596      | 12 | L 3  | 417.2462       | 209.1270        |
| 1276.6022      | 13 | E 2  | 304.1621       | 152.5850        |
|                | 14 | R 1  | 175.1195       | 88.0637         |

N-term:+35.07

GGLDSLIGDSNFGAPSASVAAAPAPAR, MH+ 2497.2687, m/z 625.0726  
 L OSG36 P180811 230811-s1.05648.05648.4.dta

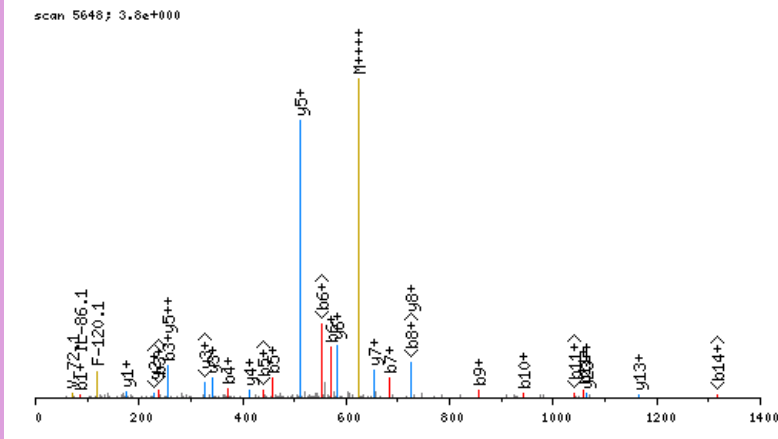

click image to zoom in; click top corners to zoom out [precursor±]

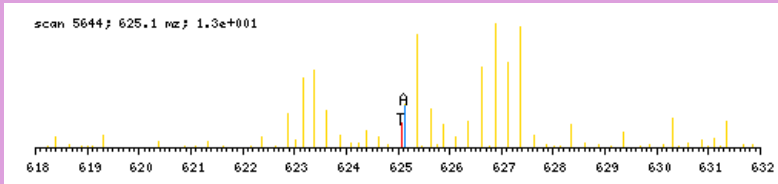

zoomed in precursor plot; T=theoretical m/z, A=acquired m/z

| b <sup>+</sup> | #  | AA | #  | y <sup>+</sup> | y <sup>2+</sup> |
|----------------|----|----|----|----------------|-----------------|
| 86.0606        | 1  | G  | 27 |                |                 |
| 143.0820       | 2  | G  | 26 | 2412.2159      | 1206.6119       |
| 256.1661       | 3  | L  | 25 | 2355.1945      | 1178.1011       |
| 371.1930       | 4  | D  | 24 | 2242.1104      | 1121.5591       |
| 458.2251       | 5  | S  | 23 | 2127.0835      | 1064.0456       |
| 571.3091       | 6  | L  | 22 | 2040.0514      | 1020.5296       |
| 684.3932       | 7  | I  | 21 | 1926.9674      | 963.9876        |
| 741.4147       | 8  | G  | 20 | 1813.8833      | 907.4456        |
| 856.4416       | 9  | D  | 19 | 1756.8618      | 878.9348        |
| 943.4736       | 10 | S  | 18 | 1641.8349      | 821.4214        |
| 1057.5166      | 11 | N  | 17 | 1554.8029      | 777.9053        |
| 1204.5850      | 12 | F  | 16 | 1440.7599      | 720.8839        |
| 1261.6064      | 13 | G  | 15 | 1293.6915      | 647.3497        |
| 1332.6435      | 14 | A  | 14 | 1236.6701      | 618.8389        |
| 1429.6963      | 15 | P  | 13 | 1165.6329      | 583.3204        |
| 1516.7283      | 16 | S  | 12 | 1068.5802      | 534.7940        |
| 1587.7655      | 17 | A  | 11 | 981.5482       | 491.2780        |
| 1674.7975      | 18 | S  | 10 | 910.5110       | 455.7594        |
| 1773.8659      | 19 | V  | 9  | 823.4790       | 412.2434        |
| 1844.9030      | 20 | A  | 8  | 724.4106       | 362.7092        |
| 1915.9401      | 21 | A  | 7  | 653.3735       | 327.1907        |
| 1986.9772      | 22 | A  | 6  | 582.3364       | 291.6721        |
| 2084.0300      | 23 | P  | 5  | 511.2993       | 256.1535        |
| 2155.0671      | 24 | A  | 4  | 414.2465       | 207.6272        |
| 2252.1199      | 25 | P  | 3  | 343.2094       | 172.1086        |
| 2323.1570      | 26 | A  | 2  | 246.1566       | 123.5822        |
|                | 27 | R  | 1  | 175.1195       | 88.0637         |

N-term:+29.04

X-range:

-

MassTol: Y-zoom:

MassType:

AVG  MONO

Axis:

1  2

Label:

I  M  -

Ions:

a  +  2+  3+

b  +  2+  3+

c  +  2+  3+

x  +  2+  3+

y  +  2+  3+

z  +  2+  3+

hide H<sub>2</sub>O/NH<sub>3</sub>

zoom 112-122

GO

GGSGGYGGGGGGYGGGEGYSISPNSYR, MH+ 2461.0868, m/z 616.0272  
 H OSG36 P180811 230811-s1.04643.04643.4.dta

scan 4643; 1.9e+000

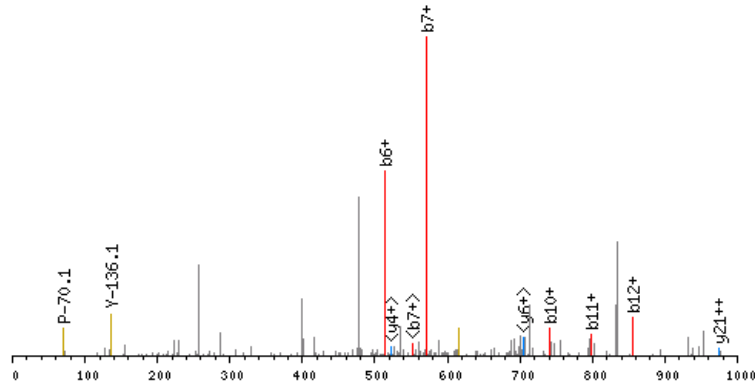

click image to zoom in; click top corners to zoom out [\[precursor±\]](#)

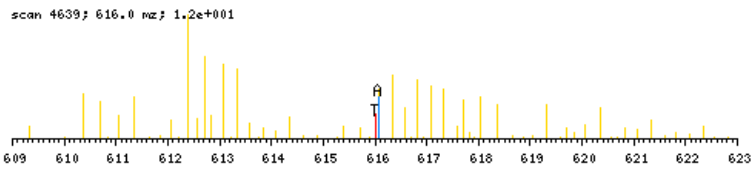

zoomed in precursor plot; T=theoretical m/z, A=acquired m/z

| b <sup>+</sup> | #  | AA # | y <sup>+</sup> | y <sup>2+</sup> |
|----------------|----|------|----------------|-----------------|
| 92.0924        | 1  | G 27 |                |                 |
| 149.1138       | 2  | G 26 | 2370.0023      | 1185.5051       |
| 236.1459       | 3  | S 25 | 2312.9808      | 1156.9943       |
| 293.1673       | 4  | G 24 | 2225.9488      | 1113.4783       |
| 350.1888       | 5  | G 23 | 2168.9273      | 1084.9676       |
| 513.2521       | 6  | Y 22 | 2111.9059      | 1056.4569       |
| 570.2736       | 7  | G 21 | 1948.8426      | 974.9252        |
| 627.2950       | 8  | G 20 | 1891.8211      | 946.4145        |
| 684.3165       | 9  | G 19 | 1834.7996      | 917.9037        |
| 741.3380       | 10 | G 18 | 1777.7782      | 889.3930        |
| 798.3594       | 11 | G 17 | 1720.7567      | 860.8823        |
| 855.3809       | 12 | G 16 | 1663.7352      | 832.3715        |
| 1018.4442      | 13 | Y 15 | 1606.7138      | 803.8608        |
| 1075.4657      | 14 | G 14 | 1443.6504      | 722.3291        |
| 1132.4872      | 15 | G 13 | 1386.6290      | 693.8184        |
| 1189.5086      | 16 | G 12 | 1329.6075      | 665.3077        |
| 1318.5512      | 17 | E 11 | 1272.5861      | 636.7969        |
| 1375.5727      | 18 | G 10 | 1143.5435      | 572.2756        |
| 1538.6360      | 19 | Y 9  | 1086.5220      | 543.7649        |
| 1625.6680      | 20 | S 8  | 923.4587       | 462.2332        |
| 1738.7521      | 21 | I 7  | 836.4266       | 418.7172        |
| 1825.7841      | 22 | S 6  | 723.3426       | 362.1752        |
| 1922.8369      | 23 | P 5  | 636.3105       | 318.6592        |
| 2036.8798      | 24 | N 4  | 539.2578       | 270.1328        |
| 2123.9118      | 25 | S 3  | 425.2149       | 213.1113        |
| 2286.9752      | 26 | Y 2  | 338.1828       | 169.5953        |
|                | 27 | R 1  | 175.1195       | 88.0637         |

N-term:+35.07

X-range:

-

MassTol: Y-zoom:

MassType:

AVG  MONO

Axis:

1  2

Label:

I  M  -

Ions:

a  +  2+  3+

b  +  2+  3+

c  +  2+  3+

x  +  2+  3+

y  +  2+  3+

z  +  2+  3+

hide H<sub>2</sub>O/NH<sub>3</sub>

zoom 112-122

GO

GGSIITVYPKEIR, MH+ 1488.8790, m/z 496.9645  
 L OSG39 P180811 230811-s1.04275.04275.3.dta

X-range:

-

MassTol: Y-zoom:

MassType:

AVG  MONO

Axis:

1  2

Label:

I  M  -

Ions:

a  +  2+  3+

b  +  2+  3+

c  +  2+  3+

x  +  2+  3+

y  +  2+  3+

z  +  2+  3+

hide H<sub>2</sub>O/NH<sub>3</sub>

zoom 112-122

GO

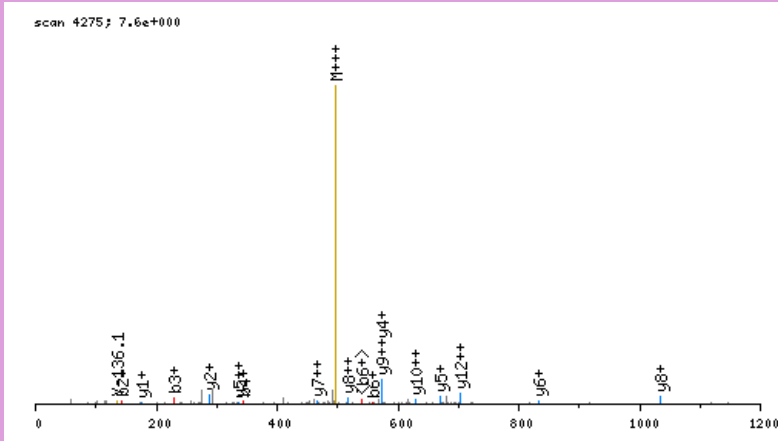

click image to zoom in; click top corners to zoom out [\[precursor±\]](#)

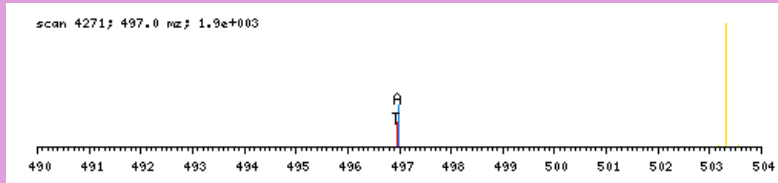

zoomed in precursor plot; T=theoretical m/z, A=acquired m/z

| b <sup>+</sup> | #  | AA # | y <sup>+</sup> | y <sup>2+</sup> |
|----------------|----|------|----------------|-----------------|
| 86.0606        | 1  | G 13 |                |                 |
| 143.0820       | 2  | G 12 | 1403.8263      | 702.4170        |
| 230.1141       | 3  | S 11 | 1346.8048      | 673.9063        |
| 343.1981       | 4  | I 10 | 1259.7728      | 630.3903        |
| 456.2822       | 5  | I 9  | 1146.6887      | 573.8483        |
| 557.3299       | 6  | T 8  | 1033.6046      | 517.3062        |
| 656.3983       | 7  | V 7  | 932.5570       | 466.7824        |
| 819.4616       | 8  | Y 6  | 833.4886       | 417.2482        |
| 916.5144       | 9  | P 5  | 670.4252       | 335.7165        |
| 1072.6407      | 10 | K 4  | 573.3725       | 287.1901        |
| 1201.6833      | 11 | E 3  | 417.2462       | 209.1270        |
| 1314.7673      | 12 | I 2  | 288.2036       | 144.6057        |
|                | 13 | R 1  | 175.1195       | 88.0637         |

N-term:+29.04 K(10):+156.13

GGSKSIFGNLVGR, MH+ 1347.7749, m/z 449.9298  
 L OSG40 P180811 230811-s1.05998.05998.3.dta

X-range:

-

MassTol: Y-zoom:

MassType:

AVG  MONO

Axis:

1  2

Label:

I  M  -

Ions:

a  +  2+  3+

b  +  2+  3+

c  +  2+  3+

x  +  2+  3+

y  +  2+  3+

z  +  2+  3+

hide H<sub>2</sub>O/NH<sub>3</sub>

zoom 112-122

GO

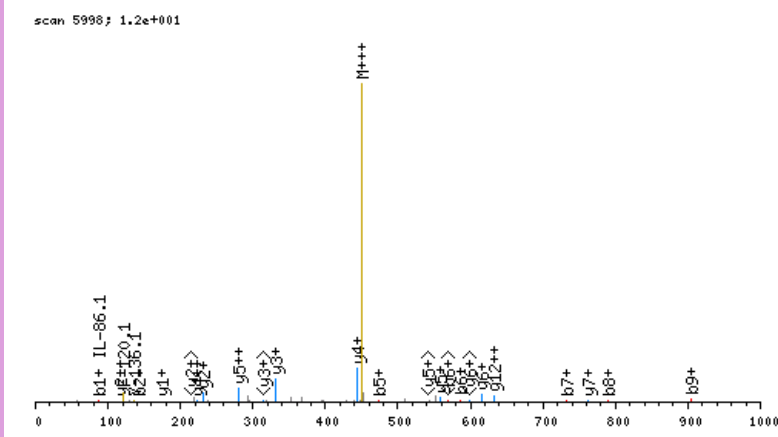

click image to zoom in; click top corners to zoom out [\[precursor±\]](#)

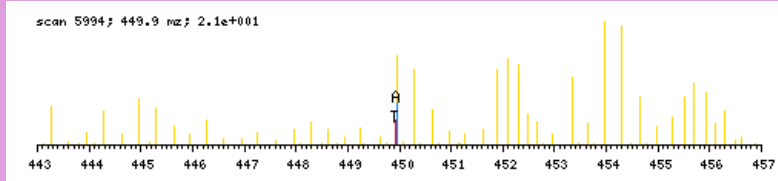

zoomed in precursor plot; T=theoretical m/z, A=acquired m/z

| b <sup>+</sup> | #  | AA # | y <sup>+</sup> | y <sup>2+</sup> |
|----------------|----|------|----------------|-----------------|
| 86.0606        | 1  | G 13 |                |                 |
| 143.0820       | 2  | G 12 | 1262.7221      | 631.8650        |
| 230.1141       | 3  | S 11 | 1205.7007      | 603.3542        |
| 386.2404       | 4  | K 10 | 1118.6686      | 559.8382        |
| 473.2724       | 5  | S 9  | 962.5423       | 481.7751        |
| 586.3564       | 6  | I 8  | 875.5103       | 438.2591        |
| 733.4249       | 7  | F 7  | 762.4262       | 381.7170        |
| 790.4463       | 8  | G 6  | 615.3578       | 308.1828        |
| 904.4893       | 9  | N 5  | 558.3364       | 279.6721        |
| 1017.5733      | 10 | L 4  | 444.2934       | 222.6506        |
| 1116.6417      | 11 | V 3  | 331.2094       | 166.1086        |
| 1173.6632      | 12 | G 2  | 232.1410       | 116.5744        |
|                | 13 | R 1  | 175.1195       | 88.0637         |

N-term:+29.04 K(4):+156.13

GGYKEPAAPVSIQR, MH+ 1528.8488, m/z 510.2878  
 L OSG39 P180811 230811-s1.02967.02967.3.dta

scan 2967; 3.3e+000

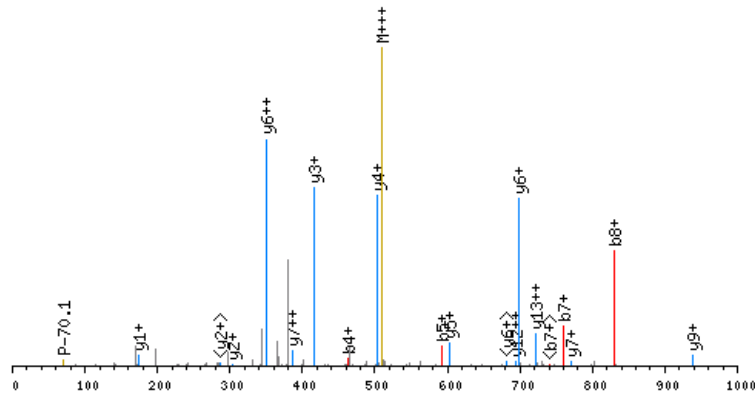

click image to zoom in; click top corners to zoom out [precursor±]

scan 2966; 510.3 m/z; 9.2e+000

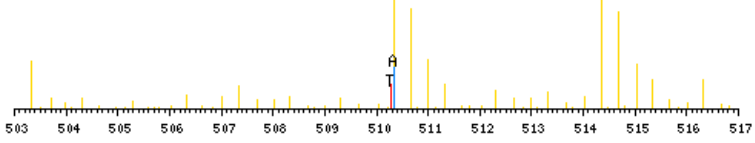

zoomed in precursor plot; T=theoretical m/z, A=acquired m/z

X-range:

-

MassTol: Y-zoom:

MassType:

AVG  MONO

Axis:

1  2

Label:

I  M  -

Ions:

a  +  2+  3+

b  +  2+  3+

c  +  2+  3+

x  +  2+  3+

y  +  2+  3+

z  +  2+  3+

hide H<sub>2</sub>O/NH<sub>3</sub>

zoom 112-122

GO

| b <sup>+</sup> | #  | AA # | y <sup>+</sup> | y <sup>2+</sup> |
|----------------|----|------|----------------|-----------------|
| 86.0606        | 1  | G 14 |                |                 |
| 143.0820       | 2  | G 13 | 1443.7960      | 722.4019        |
| 306.1454       | 3  | Y 12 | 1386.7746      | 693.8912        |
| 462.2717       | 4  | K 11 | 1223.7112      | 612.3595        |
| 591.3142       | 5  | E 10 | 1067.5849      | 534.2964        |
| 688.3670       | 6  | P 9  | 938.5423       | 469.7751        |
| 759.4041       | 7  | A 8  | 841.4896       | 421.2487        |
| 830.4412       | 8  | A 7  | 770.4525       | 385.7301        |
| 927.4940       | 9  | P 6  | 699.4153       | 350.2116        |
| 1026.5624      | 10 | V 5  | 602.3626       | 301.6852        |
| 1113.5944      | 11 | S 4  | 503.2942       | 252.1510        |
| 1226.6785      | 12 | I 3  | 416.2621       | 208.6350        |
| 1354.7371      | 13 | Q 2  | 303.1781       | 152.0930        |
|                | 14 | R 1  | 175.1195       | 88.0637         |

N-term:+29.04 K(4):+156.13



GHGEQQSQPPAAAAQQQPSQQR, MH+ 2357.1346, m/z 590.0391  
 L OSG40 P180811 230811-s1.01886.01886.4.dta

scan 1886; 4.2e-001

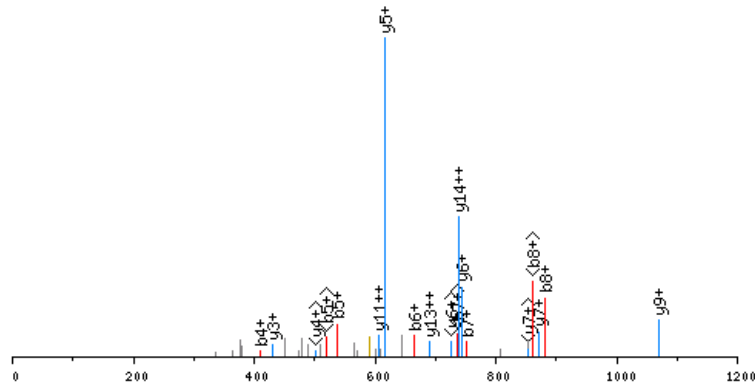

click image to zoom in; click top corners to zoom out [precursor±]

scan 1883; 590.0 nz; 7.3e+000

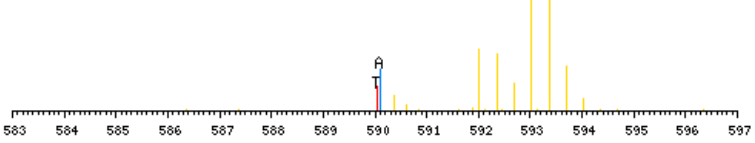

zoomed in precursor plot; T=theoretical m/z, A=acquired m/z

X-range:

-

MassTol: Y-zoom:

MassType:

AVG  MONO

Axis:

1  2

Label:

I  M  -

Ions:

a  +  2+  3+

b  +  2+  3+

c  +  2+  3+

x  +  2+  3+

y  +  2+  3+

z  +  2+  3+

hide H<sub>2</sub>O/NH<sub>3</sub>

zoom 112-122

GO

| b <sup>+</sup> | #  | AA | #  | y <sup>+</sup> | y <sup>2+</sup> |
|----------------|----|----|----|----------------|-----------------|
| 86.0606        | 1  | G  | 22 |                |                 |
| 223.1195       | 2  | H  | 21 | 2272.0819      | 1136.5449       |
| 280.1409       | 3  | G  | 20 | 2135.0230      | 1068.0154       |
| 409.1835       | 4  | E  | 19 | 2078.0015      | 1039.5047       |
| 537.2421       | 5  | Q  | 18 | 1948.9589      | 974.9834        |
| 665.3007       | 6  | Q  | 17 | 1820.9003      | 910.9541        |
| 752.3327       | 7  | S  | 16 | 1692.8418      | 846.9248        |
| 880.3913       | 8  | Q  | 15 | 1605.8097      | 803.4088        |
| 977.4441       | 9  | P  | 14 | 1477.7512      | 739.3795        |
| 1074.4968      | 10 | P  | 13 | 1380.6984      | 690.8531        |
| 1145.5339      | 11 | A  | 12 | 1283.6456      | 642.3267        |
| 1216.5710      | 12 | A  | 11 | 1212.6085      | 606.8082        |
| 1287.6082      | 13 | A  | 10 | 1141.5714      | 571.2896        |
| 1358.6453      | 14 | A  | 9  | 1070.5343      | 535.7711        |
| 1486.7039      | 15 | Q  | 8  | 999.4972       | 500.2525        |
| 1614.7624      | 16 | Q  | 7  | 871.4386       | 436.2232        |
| 1742.8210      | 17 | Q  | 6  | 743.3800       | 372.1939        |
| 1839.8738      | 18 | P  | 5  | 615.3214       | 308.1646        |
| 1926.9058      | 19 | S  | 4  | 518.2687       | 259.6383        |
| 2054.9644      | 20 | Q  | 3  | 431.2367       | 216.1222        |
| 2183.0230      | 21 | Q  | 2  | 303.1781       | 152.0930        |
|                | 22 | R  | 1  | 175.1195       | 88.0637         |

N-term:+29.04

GIGFGQGAGCLSTDTGEHLGLQFQQSPKPAR, MH+ 3282.6965, m/z 821.4296  
H OSG40 P180811 230811-s1.07562.07562.4.dta

scan 7562; 5.7e-001

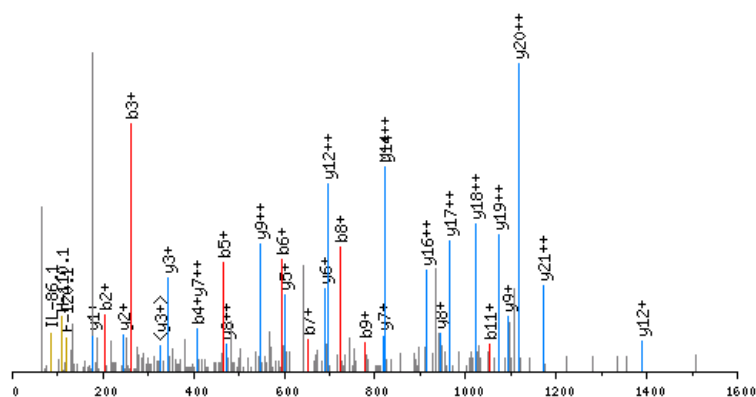

click image to zoom in; click top corners to zoom out [\[precursor±\]](#)

scan 7559; 821.4 m/z; 2.2e+001

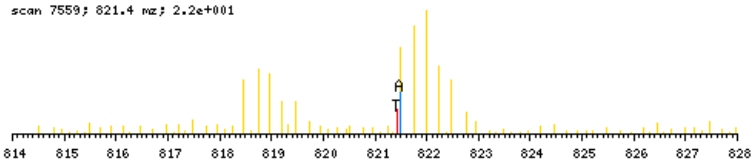

zoomed in precursor plot; T=theoretical m/z, A=acquired m/z

X-range:

-

MassTol: Y-zoom:

MassType:

AVG  MONO

Axis:

1  2

Label:

I  M  -

Ions:

a  +  2+  3+

b  +  2+  3+

c  +  2+  3+

x  +  2+  3+

y  +  2+  3+

z  +  2+  3+

hide H<sub>2</sub>O/NH<sub>3</sub>

zoom 112-122

GO

| b <sup>+</sup> | #  | AA | #  | y <sup>+</sup> | y <sup>2+</sup> |
|----------------|----|----|----|----------------|-----------------|
| 92.0924        | 1  | G  | 31 |                |                 |
| 205.1764       | 2  | I  | 30 | 3191.6120      | 1596.3099       |
| 262.1979       | 3  | G  | 29 | 3078.5279      | 1539.7679       |
| 409.2663       | 4  | F  | 28 | 3021.5065      | 1511.2571       |
| 466.2878       | 5  | G  | 27 | 2874.4381      | 1437.7229       |
| 594.3463       | 6  | Q  | 26 | 2817.4166      | 1409.2122       |
| 651.3678       | 7  | G  | 25 | 2689.3580      | 1345.1829       |
| 722.4049       | 8  | A  | 24 | 2632.3365      | 1316.6722       |
| 779.4264       | 9  | G  | 23 | 2561.2994      | 1281.1536       |
| 939.4570       | 10 | C  | 22 | 2504.2780      | 1252.6429       |
| 1052.5411      | 11 | L  | 21 | 2344.2474      | 1172.6276       |
| 1139.5731      | 12 | S  | 20 | 2231.1633      | 1116.0856       |
| 1240.6208      | 13 | T  | 19 | 2144.1313      | 1072.5696       |
| 1355.6477      | 14 | D  | 18 | 2043.0836      | 1022.0457       |
| 1456.6954      | 15 | T  | 17 | 1928.0567      | 964.5322        |
| 1513.7168      | 16 | G  | 16 | 1827.0090      | 914.0084        |
| 1642.7594      | 17 | E  | 15 | 1769.9875      | 885.4977        |
| 1779.8183      | 18 | H  | 14 | 1640.9449      | 820.9764        |
| 1892.9024      | 19 | L  | 13 | 1503.8860      | 752.4469        |
| 1949.9239      | 20 | G  | 12 | 1390.8019      | 695.9049        |
| 2063.0079      | 21 | L  | 11 | 1333.7805      | 667.3942        |
| 2191.0665      | 22 | Q  | 10 | 1220.6964      | 610.8521        |
| 2338.1349      | 23 | F  | 9  | 1092.6378      | 546.8228        |
| 2466.1935      | 24 | Q  | 8  | 945.5694       | 473.2886        |
| 2594.2521      | 25 | Q  | 7  | 817.5108       | 409.2593        |
| 2681.2841      | 26 | S  | 6  | 689.4523       | 345.2300        |
| 2778.3369      | 27 | P  | 5  | 602.4202       | 301.7140        |
| 2940.4950      | 28 | K  | 4  | 505.3675       | 253.1877        |
| 3037.5477      | 29 | P  | 3  | 343.2094       | 172.1086        |
| 3108.5849      | 30 | A  | 2  | 246.1566       | 123.5822        |
|                | 31 | R  | 1  | 175.1195       | 88.0637         |

N-term:+35.07 C(10):+160.03  
K(28):+162.16

GIQDGYLSLLQDSGEVR, MH+ 1883.9927, m/z 628.6691  
 H OSG37 P180811 230811-s1.08472.08472.3.dta

X-range:

-

MassTol: Y-zoom:

MassType:

AVG  MONO

Axis:

1  2

Label:

I  M  -

Ions:

a  +  2+  3+

b  +  2+  3+

c  +  2+  3+

x  +  2+  3+

y  +  2+  3+

z  +  2+  3+

hide H<sub>2</sub>O/NH<sub>3</sub>

zoom 112-122

GO

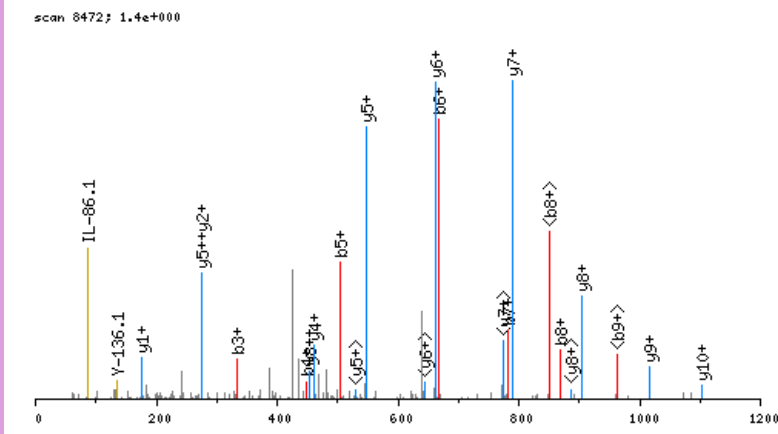

click image to zoom in; click top corners to zoom out [\[precursor±\]](#)

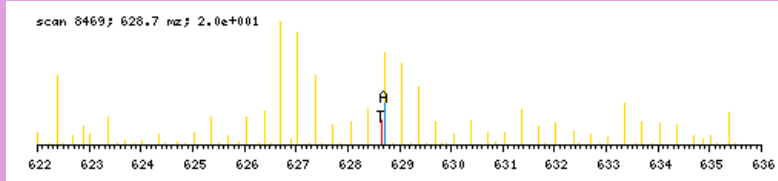

zoomed in precursor plot; T=theoretical m/z, A=acquired m/z

| b <sup>+</sup> | #  | AA # | y <sup>+</sup> | y <sup>2+</sup> |
|----------------|----|------|----------------|-----------------|
| 92.0924        | 1  | G 17 |                |                 |
| 205.1764       | 2  | I 16 | 1792.9081      | 896.9580        |
| 333.2350       | 3  | Q 15 | 1679.8241      | 840.4159        |
| 448.2619       | 4  | D 14 | 1551.7655      | 776.3867        |
| 505.2834       | 5  | G 13 | 1436.7385      | 718.8732        |
| 668.3467       | 6  | Y 12 | 1379.7171      | 690.3624        |
| 781.4308       | 7  | L 11 | 1216.6537      | 608.8308        |
| 868.4628       | 8  | S 10 | 1103.5697      | 552.2888        |
| 981.5469       | 9  | L 9  | 1016.5376      | 508.7727        |
| 1094.6310      | 10 | L 8  | 903.4536       | 452.2307        |
| 1222.6895      | 11 | Q 7  | 790.3695       | 395.6887        |
| 1337.7165      | 12 | D 6  | 662.3109       | 331.6594        |
| 1424.7485      | 13 | S 5  | 547.2840       | 274.1459        |
| 1481.7700      | 14 | G 4  | 460.2520       | 230.6299        |
| 1610.8126      | 15 | E 3  | 403.2305       | 202.1192        |
| 1709.8810      | 16 | V 2  | 274.1879       | 137.5979        |
|                | 17 | R 1  | 175.1195       | 88.0637         |

N-term:+35.07

GISDVVKVTLTPPEEAR, MH+ 1911.1075, m/z 637.7073  
 H OSG39 P180811 230811-s1.06063.06063.3.dta

X-range:

-

MassTol: Y-zoom:

MassType:

AVG  MONO

Axis:

1  2

Label:

I  M  -

Ions:

a  +  2+  3+

b  +  2+  3+

c  +  2+  3+

x  +  2+  3+

y  +  2+  3+

z  +  2+  3+

hide H<sub>2</sub>O/NH<sub>3</sub>

zoom 112-122

GO

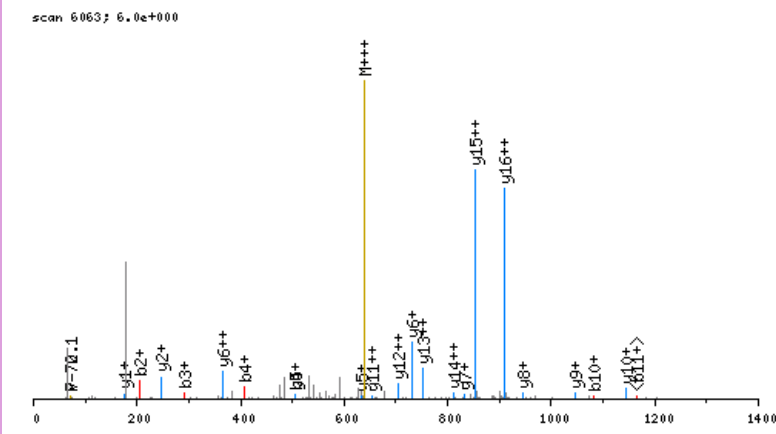

click image to zoom in; click top corners to zoom out [\[precursor±\]](#)

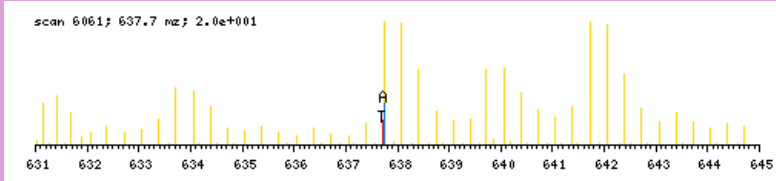

zoomed in precursor plot; T=theoretical m/z, A=acquired m/z

| b <sup>+</sup> | #  | AA # | y <sup>+</sup> | y <sup>2+</sup> |
|----------------|----|------|----------------|-----------------|
| 92.0924        | 1  | G 17 |                |                 |
| 205.1764       | 2  | I 16 | 1820.0230      | 910.5154        |
| 292.2085       | 3  | S 15 | 1706.9389      | 853.9734        |
| 407.2354       | 4  | D 14 | 1619.9069      | 810.4573        |
| 506.3038       | 5  | V 13 | 1504.8799      | 752.9439        |
| 605.3722       | 6  | V 12 | 1405.8115      | 703.4097        |
| 767.5303       | 7  | K 11 | 1306.7431      | 653.8755        |
| 866.5987       | 8  | V 10 | 1144.5850      | 572.7964        |
| 967.6464       | 9  | T 9  | 1045.5166      | 523.2622        |
| 1080.7305      | 10 | L 8  | 944.4689       | 472.7384        |
| 1181.7782      | 11 | T 7  | 831.3848       | 416.1963        |
| 1278.8309      | 12 | P 6  | 730.3372       | 365.6725        |
| 1407.8735      | 13 | E 5  | 633.2844       | 317.1461        |
| 1536.9161      | 14 | E 4  | 504.2418       | 252.6248        |
| 1665.9587      | 15 | E 3  | 375.1992       | 188.1035        |
| 1736.9958      | 16 | A 2  | 246.1566       | 123.5822        |
|                | 17 | R 1  | 175.1195       | 88.0637         |

N-term:+35.07 K(7):+162.16

GISTVCQPTCGVSR, MH+ 1549.7466, m/z 517.2537  
 L OSG37 P180811 230811-s1.03183.03183.3.dta

X-range:

-

MassTol: Y-zoom:

MassType:

AVG  MONO

Axis:

1  2

Label:

I  M  -

Ions:

a  +  2+  3+

b  +  2+  3+

c  +  2+  3+

x  +  2+  3+

y  +  2+  3+

z  +  2+  3+

hide H<sub>2</sub>O/NH<sub>3</sub>

zoom 112-122

GO

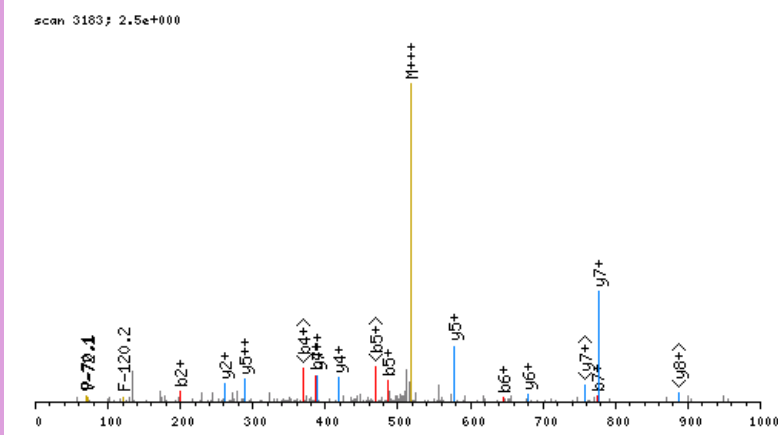

click image to zoom in; click top corners to zoom out [\[precursor±\]](#)

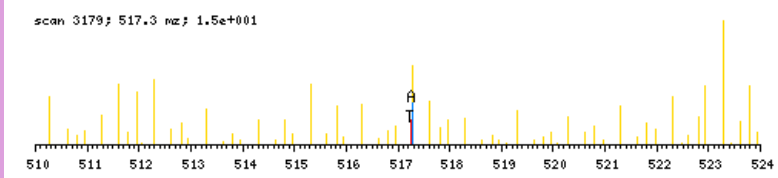

zoomed in precursor plot; T=theoretical m/z, A=acquired m/z

| b <sup>+</sup> | #  | AA # | y <sup>+</sup> | y <sup>2+</sup> |
|----------------|----|------|----------------|-----------------|
| 86.0606        | 1  | G 14 |                |                 |
| 199.1446       | 2  | I 13 | 1464.6938      | 732.8508        |
| 286.1767       | 3  | S 12 | 1351.6097      | 676.3088        |
| 387.2243       | 4  | T 11 | 1264.5777      | 632.7928        |
| 486.2927       | 5  | V 10 | 1163.5300      | 582.2689        |
| 646.3233       | 6  | C 9  | 1064.4616      | 532.7347        |
| 774.3819       | 7  | Q 8  | 904.4310       | 452.7194        |
| 871.4347       | 8  | P 7  | 776.3724       | 388.6901        |
| 972.4824       | 9  | T 6  | 679.3197       | 340.1638        |
| 1132.5130      | 10 | C 5  | 578.2720       | 289.6399        |
| 1189.5344      | 11 | G 4  | 418.2414       | 209.6246        |
| 1288.6028      | 12 | V 3  | 361.2199       | 181.1139        |
| 1375.6349      | 13 | S 2  | 262.1515       | 131.5797        |
|                | 14 | R 1  | 175.1195       | 88.0637         |

N-term:+29.04 C(6):+160.03  
 C(10):+160.03

GIVPIVEPEILPDGDHDLKR, MH+ 2268.2604, m/z 567.8205  
 L OSG40 P180811 230811-s1.07950.07950.4.dta

X-range:

-

MassTol: Y-zoom:

MassType:

AVG  MONO

Axis:

1  2

Label:

I  M  -

Ions:

a  +  2+  3+

b  +  2+  3+

c  +  2+  3+

x  +  2+  3+

y  +  2+  3+

z  +  2+  3+

hide H<sub>2</sub>O/NH<sub>3</sub>

zoom 112-122

GO

scan 7950; 7.0e+000

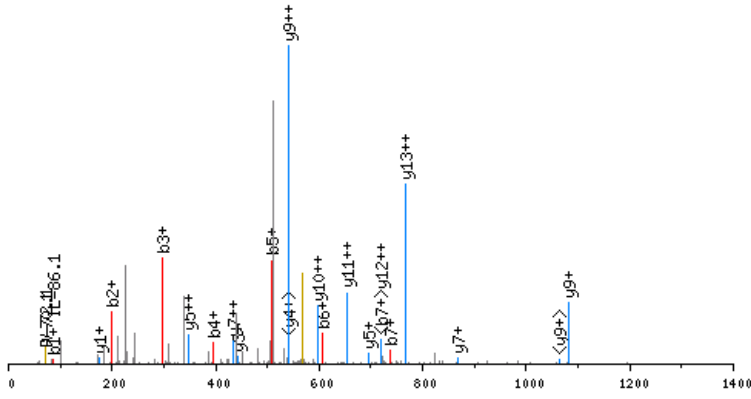

click image to zoom in; click top corners to zoom out [\[precursor±\]](#)

scan 7949; 567.8 mz; 2.1e+002

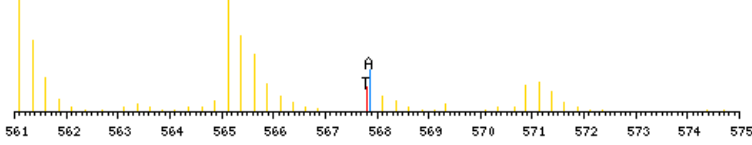

zoomed in precursor plot; T=theoretical m/z, A=acquired m/z

| b <sup>+</sup> | #  | AA | #  | y <sup>+</sup> | y <sup>2+</sup> |
|----------------|----|----|----|----------------|-----------------|
| 86.0606        | 1  | G  | 20 |                |                 |
| 199.1446       | 2  | I  | 19 | 2183.2076      | 1092.1077       |
| 298.2130       | 3  | V  | 18 | 2070.1236      | 1035.5657       |
| 395.2658       | 4  | P  | 17 | 1971.0552      | 986.0315        |
| 508.3499       | 5  | I  | 16 | 1874.0024      | 937.5051        |
| 607.4183       | 6  | V  | 15 | 1760.9183      | 880.9631        |
| 736.4609       | 7  | E  | 14 | 1661.8499      | 831.4289        |
| 833.5136       | 8  | P  | 13 | 1532.8073      | 766.9076        |
| 962.5562       | 9  | E  | 12 | 1435.7546      | 718.3812        |
| 1075.6403      | 10 | I  | 11 | 1306.7120      | 653.8599        |
| 1188.7244      | 11 | L  | 10 | 1193.6279      | 597.3179        |
| 1285.7771      | 12 | P  | 9  | 1080.5438      | 540.7758        |
| 1400.8041      | 13 | D  | 8  | 983.4911       | 492.2494        |
| 1457.8255      | 14 | G  | 7  | 868.4641       | 434.7360        |
| 1572.8525      | 15 | D  | 6  | 811.4427       | 406.2252        |
| 1709.9114      | 16 | H  | 5  | 696.4157       | 348.7118        |
| 1824.9383      | 17 | D  | 4  | 559.3568       | 280.1823        |
| 1938.0224      | 18 | L  | 3  | 444.3299       | 222.6688        |
| 2094.1487      | 19 | K  | 2  | 331.2458       | 166.1268        |
|                | 20 | R  | 1  | 175.1195       | 88.0637         |

N-term:+29.04 K(19):+156.13

GKDYIQTGLAR, MH+ 1452.8487, m/z 484.9544  
 H OSG40 P180811 230811-s1.05337.05337.3.dta

X-range:

-

MassTol: Y-zoom:

MassType:

AVG  MONO

Axis:

1  2

Label:

I  M  -

Ions:

a  +  2+  3+

b  +  2+  3+

c  +  2+  3+

x  +  2+  3+

y  +  2+  3+

z  +  2+  3+

hide H<sub>2</sub>O/NH<sub>3</sub>

zoom 112-122

GO

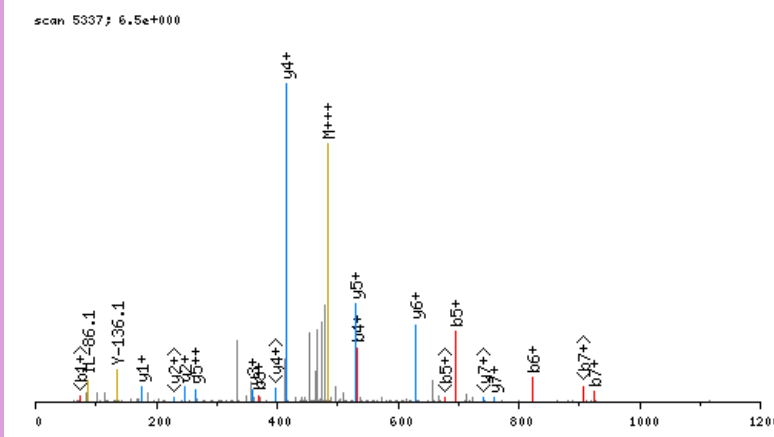

click image to zoom in; click top corners to zoom out [\[precursor±\]](#)

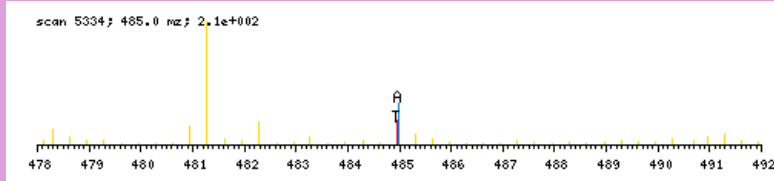

zoomed in precursor plot; T=theoretical m/z, A=acquired m/z

| b <sup>+</sup> | #  | AA | #  | y <sup>+</sup> | y <sup>2+</sup> |
|----------------|----|----|----|----------------|-----------------|
| 92.0924        | 1  | G  | 12 |                |                 |
| 254.2505       | 2  | K  | 11 | 1361.7642      | 681.3860        |
| 369.2774       | 3  | D  | 10 | 1199.6061      | 600.3069        |
| 532.3407       | 4  | Y  | 9  | 1084.5791      | 542.7935        |
| 695.4041       | 5  | Y  | 8  | 921.5158       | 461.2618        |
| 823.4626       | 6  | Q  | 7  | 758.4525       | 379.7301        |
| 924.5103       | 7  | T  | 6  | 630.3939       | 315.7009        |
| 1037.5944      | 8  | L  | 5  | 529.3462       | 265.1770        |
| 1094.6158      | 9  | G  | 4  | 416.2621       | 208.6350        |
| 1207.6999      | 10 | L  | 3  | 359.2407       | 180.1243        |
| 1278.7370      | 11 | A  | 2  | 246.1566       | 123.5822        |
|                | 12 | R  | 1  | 175.1195       | 88.0637         |

N-term:+35.07 K(2):+162.16

GKFDVEPDTYCR, MH+ 1554.7898, m/z 518.9348  
 H OSG40 P180811 230811-s1.04350.04350.3.dta

scan 4350; 1.0e+000

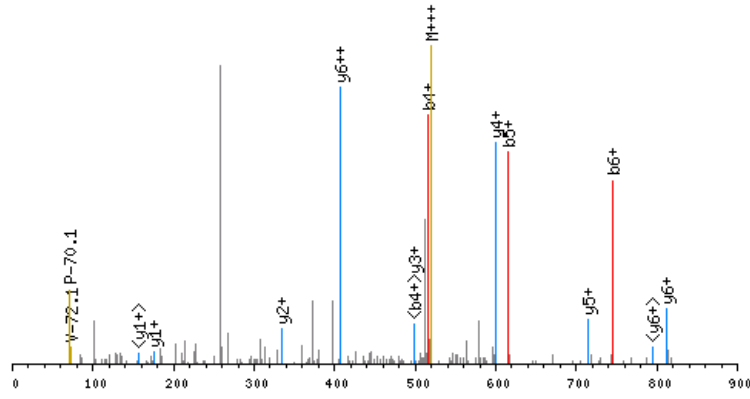

click image to zoom in; click top corners to zoom out [precursor±]

scan 4349; 518.9 m/z; 2.9e+001

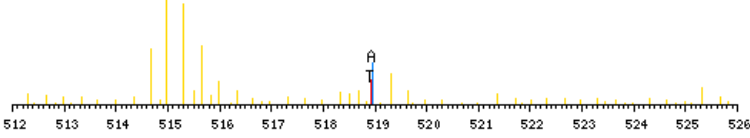

zoomed in precursor plot; T=theoretical m/z, A=acquired m/z

X-range:

-

MassTol: Y-zoom:

MassType:

AVG  MONO

Axis:

1  2

Label:

I  M  -

Ions:

a  +  2+  3+

b  +  2+  3+

c  +  2+  3+

x  +  2+  3+

y  +  2+  3+

z  +  2+  3+

hide H<sub>2</sub>O/NH<sub>3</sub>

zoom 112-122

GO

| b <sup>+</sup> | #  | AA | #  | y <sup>+</sup> | y <sup>2+</sup> |
|----------------|----|----|----|----------------|-----------------|
| 92.0924        | 1  | G  | 12 |                |                 |
| 254.2505       | 2  | K  | 11 | 1463.7053      | 732.3566        |
| 401.3189       | 3  | F  | 10 | 1301.5472      | 651.2775        |
| 516.3458       | 4  | D  | 9  | 1154.4788      | 577.7433        |
| 615.4142       | 5  | V  | 8  | 1039.4518      | 520.2298        |
| 744.4568       | 6  | E  | 7  | 940.3834       | 470.6956        |
| 841.5096       | 7  | P  | 6  | 811.3408       | 406.1743        |
| 956.5365       | 8  | D  | 5  | 714.2881       | 357.6479        |
| 1057.5842      | 9  | T  | 4  | 599.2611       | 300.1345        |
| 1220.6475      | 10 | Y  | 3  | 498.2134       | 249.6106        |
| 1380.6781      | 11 | C  | 2  | 335.1501       | 168.0790        |
|                | 12 | R  | 1  | 175.1195       | 88.0637         |

N-term:+35.07 K(2):+162.16  
 C(11):+160.03



GKPITIFQER, MH+ 1244.7367, m/z 415.5837  
 L OSG40 P180811 230811-s1.03801.03801.3.dta

X-range:

-

MassTol: Y-zoom:

MassType:

AVG  MONO

Axis:

1  2

Label:

I  M  -

Ions:

a  +  2+  3+

b  +  2+  3+

c  +  2+  3+

x  +  2+  3+

y  +  2+  3+

z  +  2+  3+

hide H<sub>2</sub>O/NH<sub>3</sub>

zoom 112-122

GO

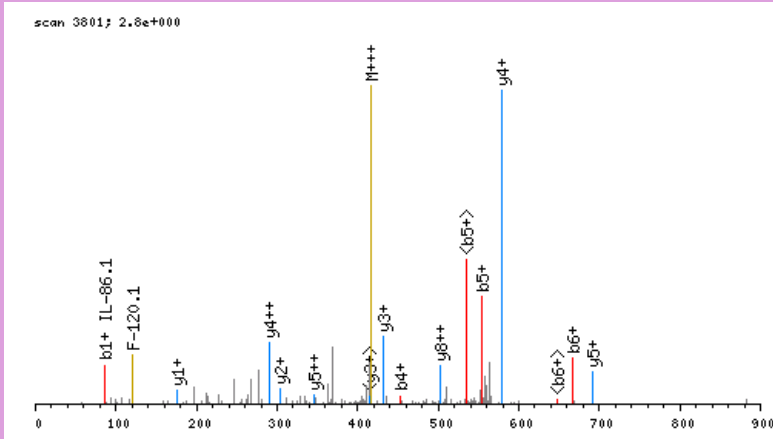

click image to zoom in; click top corners to zoom out [\[precursor±\]](#)

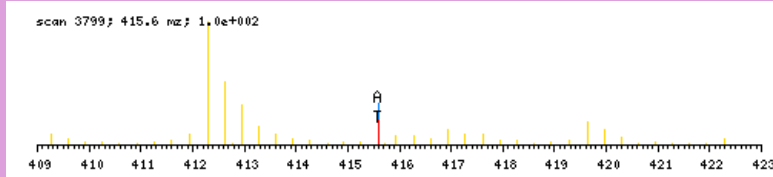

zoomed in precursor plot; T=theoretical m/z, A=acquired m/z

| b <sup>+</sup> | #  | AA # | y <sup>+</sup> | y <sup>2+</sup> |
|----------------|----|------|----------------|-----------------|
| 86.0606        | 1  | G 10 |                |                 |
| 242.1869       | 2  | K 9  | 1159.6840      | 580.3459        |
| 339.2396       | 3  | P 8  | 1003.5577      | 502.2827        |
| 452.3237       | 4  | I 7  | 906.5049       | 453.7564        |
| 553.3714       | 5  | T 6  | 793.4208       | 397.2143        |
| 666.4554       | 6  | I 5  | 692.3731       | 346.6905        |
| 813.5238       | 7  | F 4  | 579.2891       | 290.1485        |
| 941.5824       | 8  | Q 3  | 432.2207       | 216.6142        |
| 1070.6250      | 9  | E 2  | 304.1621       | 152.5850        |
|                | 10 | R 1  | 175.1195       | 88.0637         |

N-term:+29.04 K(2):+156.13

GKVNSDEVGGEALGR, MH+ 1555.8716, m/z 519.2954  
 H OSG40 P180811 230811-s1.02853.02853.3.dta

X-range:

-

MassTol: Y-zoom:

MassType:

AVG  MONO

Axis:

1  2

Label:

I  M  -

Ions:

a  +  2+  3+

b  +  2+  3+

c  +  2+  3+

x  +  2+  3+

y  +  2+  3+

z  +  2+  3+

hide H<sub>2</sub>O/NH<sub>3</sub>

zoom 112-122

GO

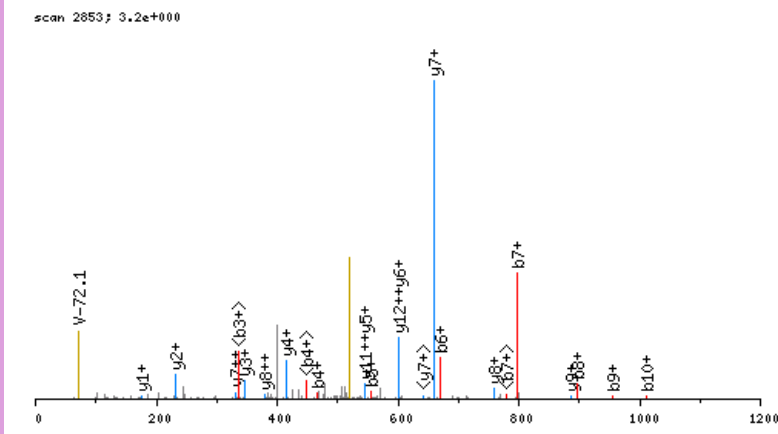

click image to zoom in; click top corners to zoom out [\[precursor±\]](#)

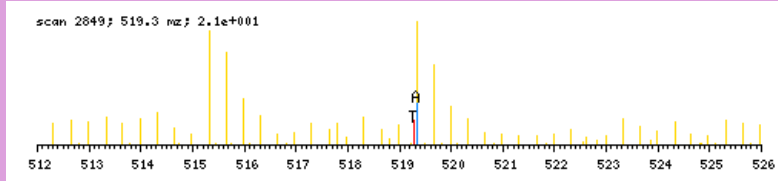

zoomed in precursor plot; T=theoretical m/z, A=acquired m/z

| b <sup>+</sup> | #  | AA # | y <sup>+</sup> | y <sup>2+</sup> |
|----------------|----|------|----------------|-----------------|
| 92.0924        | 1  | G 15 |                |                 |
| 254.2505       | 2  | K 14 | 1464.7871      | 732.8975        |
| 353.3189       | 3  | V 13 | 1302.6290      | 651.8184        |
| 467.3618       | 4  | N 12 | 1203.5606      | 602.2842        |
| 554.3938       | 5  | S 11 | 1089.5176      | 545.2627        |
| 669.4208       | 6  | D 10 | 1002.4856      | 501.7467        |
| 798.4634       | 7  | E 9  | 887.4587       | 444.2332        |
| 897.5318       | 8  | V 8  | 758.4161       | 379.7120        |
| 954.5532       | 9  | G 7  | 659.3477       | 330.1777        |
| 1011.5747      | 10 | G 6  | 602.3262       | 301.6670        |
| 1140.6173      | 11 | E 5  | 545.3047       | 273.1563        |
| 1211.6544      | 12 | A 4  | 416.2621       | 208.6350        |
| 1324.7385      | 13 | L 3  | 345.2250       | 173.1164        |
| 1381.7599      | 14 | G 2  | 232.1410       | 116.5744        |
|                | 15 | R 1  | 175.1195       | 88.0637         |

N-term:+35.07 K(2):+162.16

GLAPVAAATGPFLAR, MH+ 1445.8692, m/z 482.6279  
 H OSG37 P180811 230811-s1.04860.04860.3.dta

X-range:

-

MassTol: Y-zoom:

MassType:

AVG  MONO

Axis:

1  2

Label:

I  M  -

Ions:

a  +  2+  3+

b  +  2+  3+

c  +  2+  3+

x  +  2+  3+

y  +  2+  3+

z  +  2+  3+

hide H<sub>2</sub>O/NH<sub>3</sub>

zoom 112-122

GO

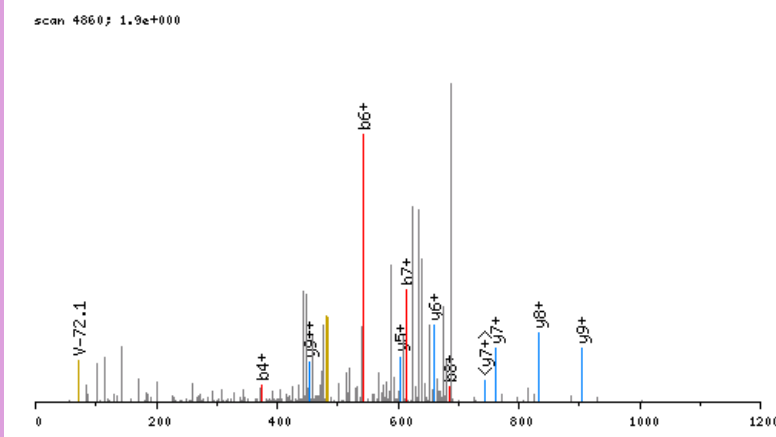

click image to zoom in; click top corners to zoom out [\[precursor±\]](#)

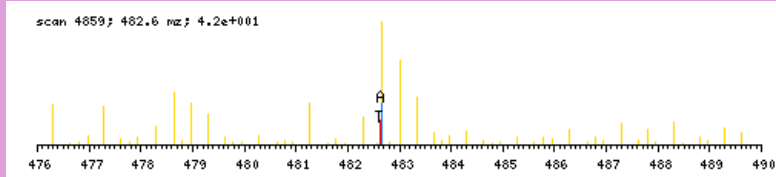

zoomed in precursor plot; T=theoretical m/z, A=acquired m/z

| b <sup>+</sup> | #  | AA # | y <sup>+</sup> | y <sup>2+</sup> |
|----------------|----|------|----------------|-----------------|
| 92.0924        | 1  | G 15 |                |                 |
| 205.1764       | 2  | L 14 | 1354.7847      | 677.8963        |
| 276.2135       | 3  | A 13 | 1241.7006      | 621.3542        |
| 373.2663       | 4  | P 12 | 1170.6635      | 585.8357        |
| 472.3347       | 5  | V 11 | 1073.6108      | 537.3093        |
| 543.3718       | 6  | A 10 | 974.5423       | 487.7751        |
| 614.4089       | 7  | A 9  | 903.5052       | 452.2565        |
| 685.4461       | 8  | A 8  | 832.4681       | 416.7380        |
| 786.4937       | 9  | T 7  | 761.4310       | 381.2194        |
| 843.5152       | 10 | G 6  | 660.3833       | 330.6956        |
| 940.5680       | 11 | P 5  | 603.3619       | 302.1848        |
| 1087.6364      | 12 | F 4  | 506.3091       | 253.6585        |
| 1200.7204      | 13 | L 3  | 359.2407       | 180.1243        |
| 1271.7576      | 14 | A 2  | 246.1566       | 123.5822        |
|                | 15 | R 1  | 175.1195       | 88.0637         |

N-term:+35.07

GLDEGEPAGSWDLTVEGR, MH+ 1921.9355, m/z 641.3167  
 H OSG37 P180811 230811-s1.06795.06795.3.dta

X-range:

-

MassTol: Y-zoom:

MassType:

AVG  MONO

Axis:

1  2

Label:

I  M  -

Ions:

a  +  2+  3+

b  +  2+  3+

c  +  2+  3+

x  +  2+  3+

y  +  2+  3+

z  +  2+  3+

hide H<sub>2</sub>O/NH<sub>3</sub>

zoom 112-122

GO

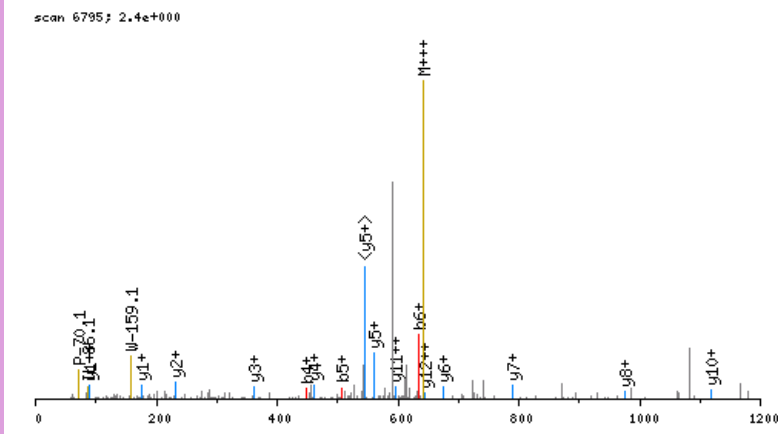

click image to zoom in; click top corners to zoom out [\[precursor±\]](#)

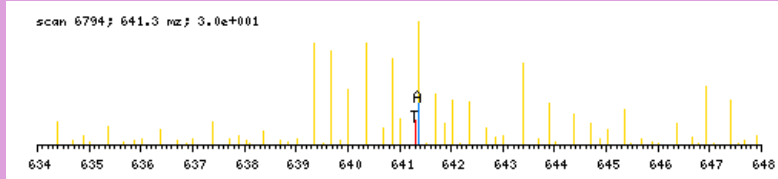

zoomed in precursor plot; T=theoretical m/z, A=acquired m/z

| b <sup>+</sup> | #  | AA # | y <sup>+</sup> | y <sup>2+</sup> |
|----------------|----|------|----------------|-----------------|
| 92.0924        | 1  | G 18 |                |                 |
| 205.1764       | 2  | L 17 | 1830.8510      | 915.9294        |
| 320.2034       | 3  | D 16 | 1717.7669      | 859.3874        |
| 449.2460       | 4  | E 15 | 1602.7400      | 801.8739        |
| 506.2674       | 5  | G 14 | 1473.6974      | 737.3526        |
| 635.3100       | 6  | E 13 | 1416.6759      | 708.8419        |
| 732.3628       | 7  | P 12 | 1287.6333      | 644.3206        |
| 803.3999       | 8  | A 11 | 1190.5806      | 595.7942        |
| 860.4214       | 9  | G 10 | 1119.5435      | 560.2756        |
| 947.4534       | 10 | S 9  | 1062.5220      | 531.7649        |
| 1133.5327      | 11 | W 8  | 975.4900       | 488.2489        |
| 1248.5596      | 12 | D 7  | 789.4107       | 395.2092        |
| 1361.6437      | 13 | L 6  | 674.3837       | 337.6958        |
| 1462.6914      | 14 | T 5  | 561.2997       | 281.1537        |
| 1561.7598      | 15 | V 4  | 460.2520       | 230.6299        |
| 1690.8024      | 16 | E 3  | 361.1836       | 181.0957        |
| 1747.8239      | 17 | G 2  | 232.1410       | 116.5744        |
|                | 18 | R 1  | 175.1195       | 88.0637         |

N-term:+35.07

GLDPCSVAAAILQQR, MH+ 1555.8266, m/z 519.2804  
 L OSG37 P180811 230811-s1.08343.08343.3.dta

scan 8343; 5.1e+000

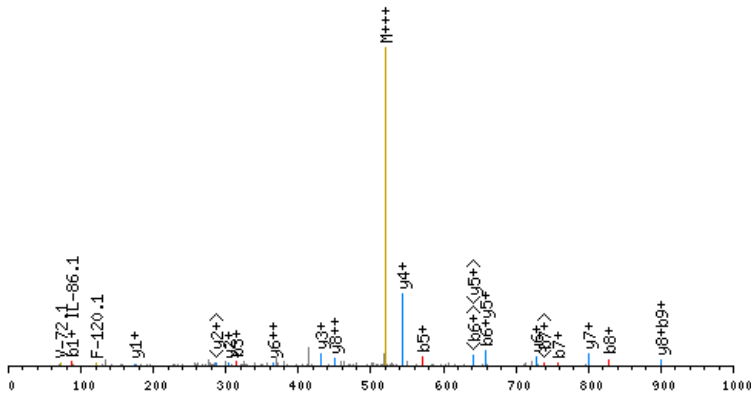

click image to zoom in; click top corners to zoom out [\[precursor±\]](#)

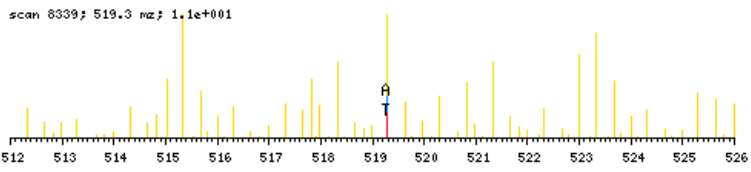

zoomed in precursor plot; T=theoretical m/z, A=acquired m/z

X-range:

-

MassTol: Y-zoom:

MassType:

AVG  MONO

Axis:

1  2

Label:

I  M  -

Ions:

a  +  2+  3+

b  +  2+  3+

c  +  2+  3+

x  +  2+  3+

y  +  2+  3+

z  +  2+  3+

hide H<sub>2</sub>O/NH<sub>3</sub>

zoom 112-122

GO

| b <sup>+</sup> | #  | AA # | y <sup>+</sup> | y <sup>2+</sup> |
|----------------|----|------|----------------|-----------------|
| 86.0606        | 1  | G 14 |                |                 |
| 199.1446       | 2  | L 13 | 1470.7738      | 735.8908        |
| 314.1716       | 3  | D 12 | 1357.6898      | 679.3488        |
| 411.2243       | 4  | P 11 | 1242.6628      | 621.8353        |
| 571.2549       | 5  | C 10 | 1145.6101      | 573.3089        |
| 658.2870       | 6  | S 9  | 985.5795       | 493.2936        |
| 757.3554       | 7  | V 8  | 898.5474       | 449.7776        |
| 828.3925       | 8  | A 7  | 799.4790       | 400.2434        |
| 899.4296       | 9  | A 6  | 728.4419       | 364.7249        |
| 1012.5137      | 10 | I 5  | 657.4048       | 329.2063        |
| 1125.5977      | 11 | L 4  | 544.3207       | 272.6643        |
| 1253.6563      | 12 | Q 3  | 431.2367       | 216.1222        |
| 1381.7149      | 13 | Q 2  | 303.1781       | 152.0930        |
|                | 14 | R 1  | 175.1195       | 88.0637         |

N-term:+29.04 C(5):+160.03

GLHGDQGAGPVGPGAGPR, MH+ 1667.8618, m/z 556.6254  
 L OSG40 P180811 230811-s1.02930.02930.3.dta

X-range:

-

MassTol: Y-zoom:

MassType:

AVG  MONO

Axis:

1  2

Label:

I  M  -

Ions:

a  +  2+  3+

b  +  2+  3+

c  +  2+  3+

x  +  2+  3+

y  +  2+  3+

z  +  2+  3+

hide H<sub>2</sub>O/NH<sub>3</sub>

zoom 112-122

GO

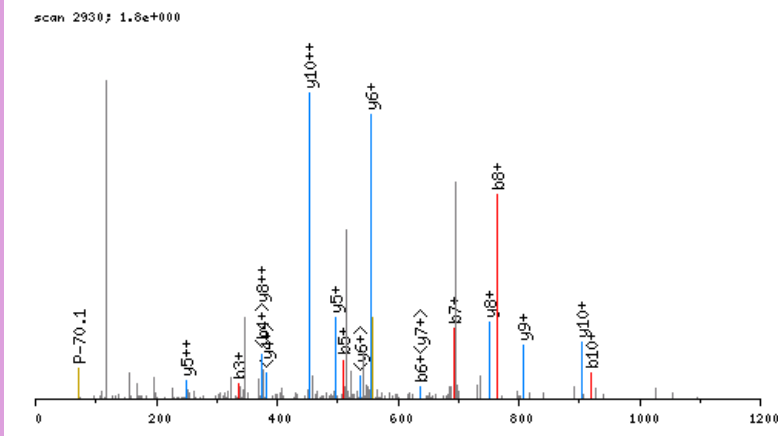

click image to zoom in; click top corners to zoom out [\[precursor±\]](#)

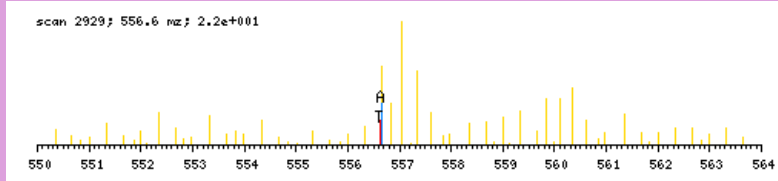

zoomed in precursor plot; T=theoretical m/z, A=acquired m/z

| b <sup>+</sup> | #  | AA # | y <sup>+</sup> | y <sup>2+</sup> |
|----------------|----|------|----------------|-----------------|
| 86.0606        | 1  | G 18 |                |                 |
| 199.1446       | 2  | L 17 | 1582.8090      | 791.9084        |
| 336.2035       | 3  | H 16 | 1469.7249      | 735.3664        |
| 393.2250       | 4  | G 15 | 1332.6660      | 666.8369        |
| 508.2519       | 5  | D 14 | 1275.6446      | 638.3262        |
| 636.3105       | 6  | Q 13 | 1160.6176      | 580.8127        |
| 693.3320       | 7  | G 12 | 1032.5591      | 516.7834        |
| 764.3691       | 8  | A 11 | 975.5376       | 488.2727        |
| 861.4219       | 9  | P 10 | 904.5005       | 452.7542        |
| 918.4433       | 10 | G 9  | 807.4477       | 404.2278        |
| 1015.4961      | 11 | P 8  | 750.4262       | 375.7170        |
| 1114.5645      | 12 | V 7  | 653.3735       | 327.1907        |
| 1171.5860      | 13 | G 6  | 554.3051       | 277.6564        |
| 1268.6387      | 14 | P 5  | 497.2836       | 249.1457        |
| 1339.6758      | 15 | A 4  | 400.2308       | 200.6193        |
| 1396.6973      | 16 | G 3  | 329.1937       | 165.1008        |
| 1493.7501      | 17 | P 2  | 272.1723       | 136.5900        |
|                | 18 | R 1  | 175.1195       | 88.0637         |

N-term:+29.04

GLKLISEVIGER, MH+ 1381.9055, m/z 461.3067  
 H OSG40 P180811 230811-s1.07527.07527.3.dta

X-range:

-

MassTol: Y-zoom:

MassType:

AVG  MONO

Axis:

1  2

Label:

I  M  -

Ions:

a  +  2+  3+

b  +  2+  3+

c  +  2+  3+

x  +  2+  3+

y  +  2+  3+

z  +  2+  3+

hide H<sub>2</sub>O/NH<sub>3</sub>

zoom 112-122

GO

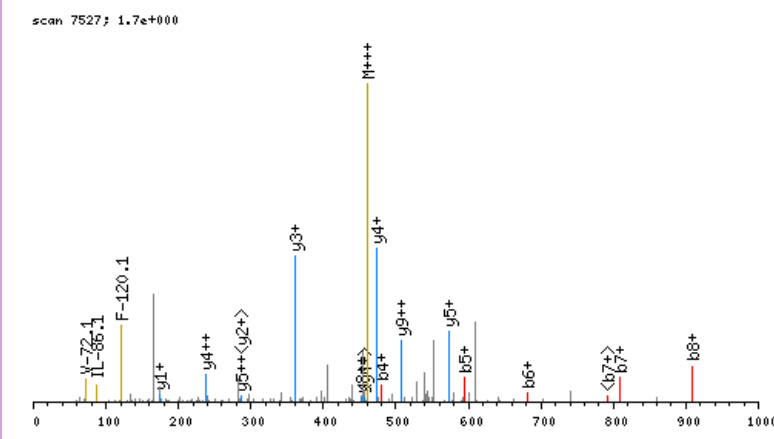

click image to zoom in; click top corners to zoom out [\[precursor±\]](#)

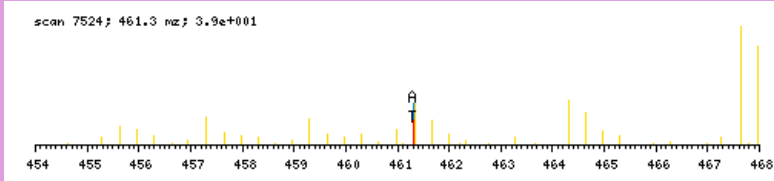

zoomed in precursor plot; T=theoretical m/z, A=acquired m/z

| b <sup>+</sup> | #  | AA # | y <sup>+</sup> | y <sup>2+</sup> |
|----------------|----|------|----------------|-----------------|
| 92.0924        | 1  | G 12 |                |                 |
| 205.1764       | 2  | L 11 | 1290.8209      | 645.9144        |
| 367.3345       | 3  | K 10 | 1177.7369      | 589.3724        |
| 480.4186       | 4  | L 9  | 1015.5788      | 508.2933        |
| 593.5027       | 5  | I 8  | 902.4947       | 451.7513        |
| 680.5347       | 6  | S 7  | 789.4107       | 395.2092        |
| 809.5773       | 7  | E 6  | 702.3786       | 351.6932        |
| 908.6457       | 8  | V 5  | 573.3360       | 287.1719        |
| 1021.7298      | 9  | I 4  | 474.2676       | 237.6377        |
| 1078.7512      | 10 | G 3  | 361.1836       | 181.0957        |
| 1207.7938      | 11 | E 2  | 304.1621       | 152.5850        |
|                | 12 | R 1  | 175.1195       | 88.0637         |

N-term:+35.07 K(3):+162.16

GLLGSNPADGVAVTCFR, MH+ 1854.9384, m/z 618.9843  
 H OSG37 P180811 230811-s1.08317.08317.3.dta

X-range:

-

MassTol: Y-zoom:

MassType:

AVG  MONO

Axis:

1  2

Label:

I  M  -

Ions:

a  +  2+  3+

b  +  2+  3+

c  +  2+  3+

x  +  2+  3+

y  +  2+  3+

z  +  2+  3+

hide H<sub>2</sub>O/NH<sub>3</sub>

zoom 112-122

GO

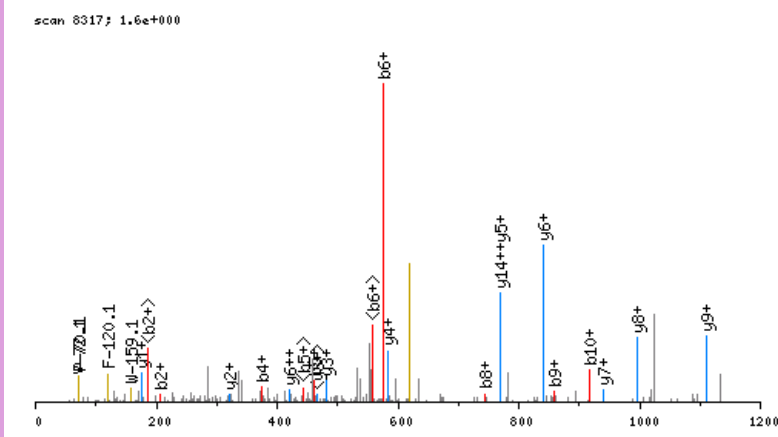

click image to zoom in; click top corners to zoom out [\[precursor±\]](#)

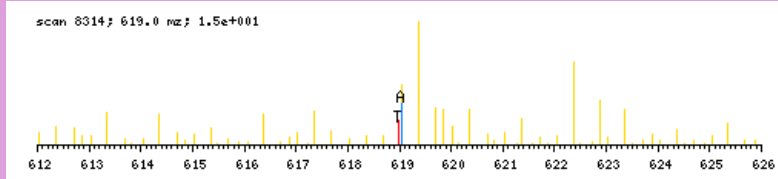

zoomed in precursor plot; T=theoretical m/z, A=acquired m/z

| b <sup>+</sup> | #  | AA # | y <sup>+</sup> | y <sup>2+</sup> |
|----------------|----|------|----------------|-----------------|
| 92.0924        | 1  | G 17 |                |                 |
| 205.1764       | 2  | L 16 | 1763.8539      | 882.4308        |
| 318.2605       | 3  | L 15 | 1650.7698      | 825.8888        |
| 375.2820       | 4  | G 14 | 1537.6857      | 769.3468        |
| 462.3140       | 5  | S 13 | 1480.6643      | 740.8360        |
| 576.3569       | 6  | N 12 | 1393.6322      | 697.3200        |
| 673.4097       | 7  | P 11 | 1279.5893      | 640.2986        |
| 744.4468       | 8  | A 10 | 1182.5366      | 591.7722        |
| 859.4737       | 9  | D 9  | 1111.4994      | 556.2536        |
| 916.4952       | 10 | G 8  | 996.4725       | 498.7402        |
| 1015.5636      | 11 | V 7  | 939.4510       | 470.2294        |
| 1086.6007      | 12 | A 6  | 840.3826       | 420.6952        |
| 1272.6800      | 13 | W 5  | 769.3455       | 385.1767        |
| 1373.7277      | 14 | T 4  | 583.2662       | 292.1370        |
| 1533.7583      | 15 | C 3  | 482.2185       | 241.6132        |
| 1680.8267      | 16 | F 2  | 322.1879       | 161.5979        |
|                | 17 | R 1  | 175.1195       | 88.0637         |

N-term:+35.07 C(15):+160.03



GLLSQGSPLSWEETQR, MH+ 1815.9241, m/z 605.9795  
 L OSG37 P180811 230811-s1.07050.07050.3.dta

X-range:

-

MassTol: Y-zoom:

MassType:

AVG  MONO

Axis:

1  2

Label:

I  M  -

Ions:

a  +  2+  3+

b  +  2+  3+

c  +  2+  3+

x  +  2+  3+

y  +  2+  3+

z  +  2+  3+

hide H<sub>2</sub>O/NH<sub>3</sub>

zoom 112-122

GO

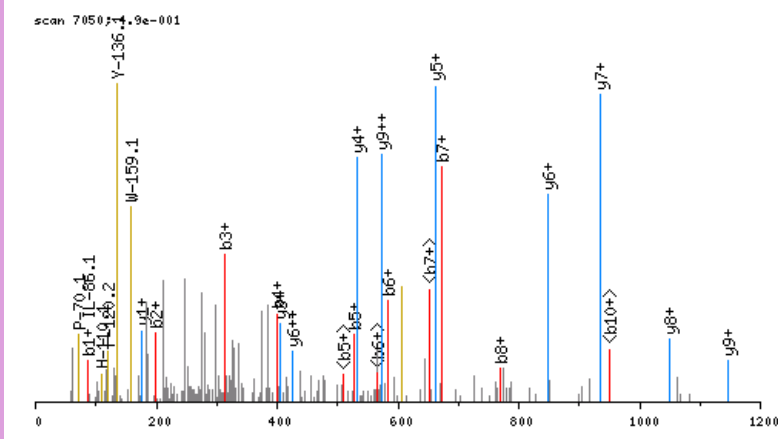

click image to zoom in; click top corners to zoom out [\[precursor±\]](#)

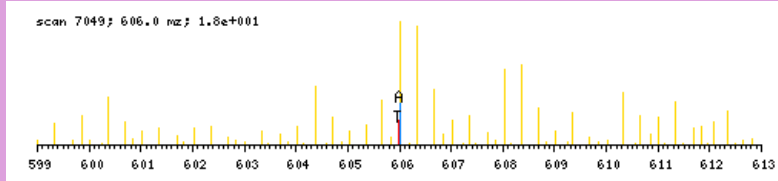

zoomed in precursor plot; T=theoretical m/z, A=acquired m/z

| b <sup>+</sup> | #  | AA # | y <sup>+</sup> | y <sup>2+</sup> |
|----------------|----|------|----------------|-----------------|
| 86.0606        | 1  | G 16 |                |                 |
| 199.1446       | 2  | L 15 | 1730.8713      | 865.9396        |
| 312.2287       | 3  | L 14 | 1617.7873      | 809.3975        |
| 399.2607       | 4  | S 13 | 1504.7032      | 752.8555        |
| 527.3193       | 5  | Q 12 | 1417.6712      | 709.3395        |
| 584.3408       | 6  | G 11 | 1289.6126      | 645.3102        |
| 671.3728       | 7  | S 10 | 1232.5911      | 616.7995        |
| 768.4256       | 8  | P 9  | 1145.5591      | 573.2835        |
| 881.5096       | 9  | L 8  | 1048.5063      | 524.7571        |
| 968.5416       | 10 | S 7  | 935.4223       | 468.2151        |
| 1154.6210      | 11 | W 6  | 848.3903       | 424.6990        |
| 1283.6636      | 12 | E 5  | 662.3109       | 331.6594        |
| 1412.7061      | 13 | E 4  | 533.2683       | 267.1381        |
| 1513.7538      | 14 | T 3  | 404.2258       | 202.6168        |
| 1641.8124      | 15 | Q 2  | 303.1781       | 152.0930        |
|                | 16 | R 1  | 175.1195       | 88.0637         |

N-term:+29.04

GLPKGPEGQGLPEVETR, MH+ 1832.0554, m/z 611.3567  
 H OSG39 P180811 230811-s1.04110.04110.3.dta

X-range:

-

MassTol: Y-zoom:

MassType:

AVG  MONO

Axis:

1  2

Label:

I  M  -

Ions:

a  +  2+  3+

b  +  2+  3+

c  +  2+  3+

x  +  2+  3+

y  +  2+  3+

z  +  2+  3+

hide H<sub>2</sub>O/NH<sub>3</sub>

zoom 112-122

GO

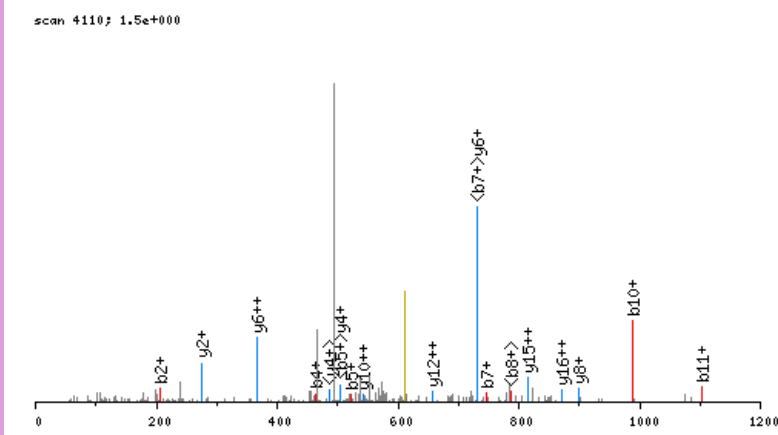

click image to zoom in; click top corners to zoom out [\[precursor±\]](#)

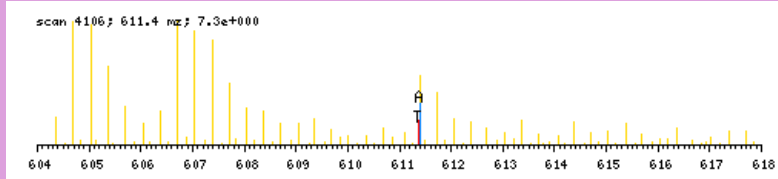

zoomed in precursor plot; T=theoretical m/z, A=acquired m/z

| b <sup>+</sup> | #  | AA # | y <sup>+</sup> | y <sup>2+</sup> |
|----------------|----|------|----------------|-----------------|
| 92.0924        | 1  | G 17 |                |                 |
| 205.1764       | 2  | L 16 | 1740.9709      | 870.9893        |
| 302.2292       | 3  | P 15 | 1627.8868      | 814.4473        |
| 464.3873       | 4  | K 14 | 1530.8340      | 765.9209        |
| 521.4088       | 5  | G 13 | 1368.6759      | 684.8419        |
| 618.4615       | 6  | P 12 | 1311.6545      | 656.3311        |
| 747.5041       | 7  | E 11 | 1214.6017      | 607.8048        |
| 804.5256       | 8  | G 10 | 1085.5591      | 543.2835        |
| 932.5842       | 9  | Q 9  | 1028.5376      | 514.7727        |
| 989.6056       | 10 | G 8  | 900.4791       | 450.7434        |
| 1102.6897      | 11 | L 7  | 843.4576       | 422.2327        |
| 1199.7424      | 12 | P 6  | 730.3735       | 365.6907        |
| 1328.7850      | 13 | E 5  | 633.3208       | 317.1643        |
| 1427.8535      | 14 | V 4  | 504.2782       | 252.6430        |
| 1556.8960      | 15 | E 3  | 405.2098       | 203.1088        |
| 1657.9437      | 16 | T 2  | 276.1672       | 138.5875        |
|                | 17 | R 1  | 175.1195       | 88.0637         |

N-term:+35.07 K(4):+162.16

GLPPSYETIKKEEYGVTELGEPSNSAVVR, MH+ 3089.6319, m/z 773.1634  
H\_OSG38\_P180811\_230811-s1.06807.06807.4.dta

scan 6807; 1.4e+000

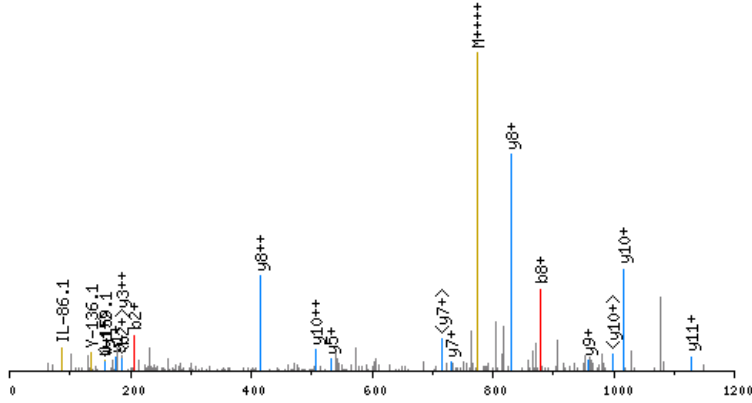

click image to zoom in; click top corners to zoom out [precursor±]

scan 6804; 773.2 m/z; 1.8e+001

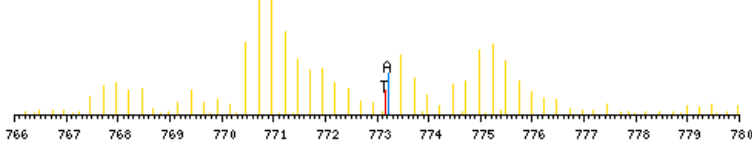

zoomed in precursor plot; T=theoretical m/z, A=acquired m/z

| b <sup>+</sup> | #  | AA # | y <sup>+</sup> | y <sup>2+</sup> |
|----------------|----|------|----------------|-----------------|
| 92.0924        | 1  | G 28 |                |                 |
| 205.1764       | 2  | L 27 | 2998.5474      | 1499.7776       |
| 302.2292       | 3  | P 26 | 2885.4633      | 1443.2356       |
| 399.2820       | 4  | P 25 | 2788.4105      | 1394.7092       |
| 486.3140       | 5  | S 24 | 2691.3578      | 1346.1828       |
| 649.3773       | 6  | Y 23 | 2604.3257      | 1302.6668       |
| 778.4199       | 7  | E 22 | 2441.2624      | 1221.1351       |
| 879.4676       | 8  | T 21 | 2312.2198      | 1156.6138       |
| 992.5516       | 9  | I 20 | 2211.1721      | 1106.0900       |
| 1154.7097      | 10 | K 19 | 2098.0881      | 1049.5480       |
| 1283.7523      | 11 | E 18 | 1935.9300      | 968.4689        |
| 1412.7949      | 12 | E 17 | 1806.8874      | 903.9476        |
| 1575.8583      | 13 | Y 16 | 1677.8448      | 839.4263        |
| 1632.8797      | 14 | G 15 | 1514.7815      | 757.8946        |
| 1731.9481      | 15 | V 14 | 1457.7600      | 729.3839        |
| 1832.9958      | 16 | T 13 | 1358.6916      | 679.8497        |
| 1962.0384      | 17 | E 12 | 1257.6439      | 629.3259        |
| 2075.1225      | 18 | L 11 | 1128.6013      | 564.8046        |
| 2132.1439      | 19 | G 10 | 1015.5172      | 508.2625        |
| 2261.1865      | 20 | E 9  | 958.4958       | 479.7518        |
| 2358.2393      | 21 | P 8  | 829.4532       | 415.2305        |
| 2445.2713      | 22 | S 7  | 732.4004       | 366.7041        |
| 2559.3143      | 23 | N 6  | 645.3684       | 323.1881        |
| 2646.3463      | 24 | S 5  | 531.3255       | 266.1666        |
| 2717.3834      | 25 | A 4  | 444.2934       | 222.6506        |
| 2816.4518      | 26 | V 3  | 373.2563       | 187.1321        |
| 2915.5202      | 27 | V 2  | 274.1879       | 137.5979        |
|                | 28 | R 1  | 175.1195       | 88.0637         |

N-term:+35.07 K(10) :+162.16

X-range:

-

MassTol: Y-zoom:

MassType:

AVG  MONO

Axis:

1  2

Label:

I  M  -

Ions:

a  +  2+  3+

b  +  2+  3+

c  +  2+  3+

x  +  2+  3+

y  +  2+  3+

z  +  2+  3+

hide H<sub>2</sub>O/NH<sub>3</sub>

zoom 112-122

GO

GLTLDPEADSEYLSR, MH+ 1699.8602, m/z 850.4338  
 H OSG37 P180811 230811-s1.07060.07060.2.dta

X-range:

-

MassTol: Y-zoom:

MassType:

AVG  MONO

Axis:

1  2

Label:

I  M  -

Ions:

a  +  2+  3+

b  +  2+  3+

c  +  2+  3+

x  +  2+  3+

y  +  2+  3+

z  +  2+  3+

hide H<sub>2</sub>O/NH<sub>3</sub>

zoom 112-122

GO

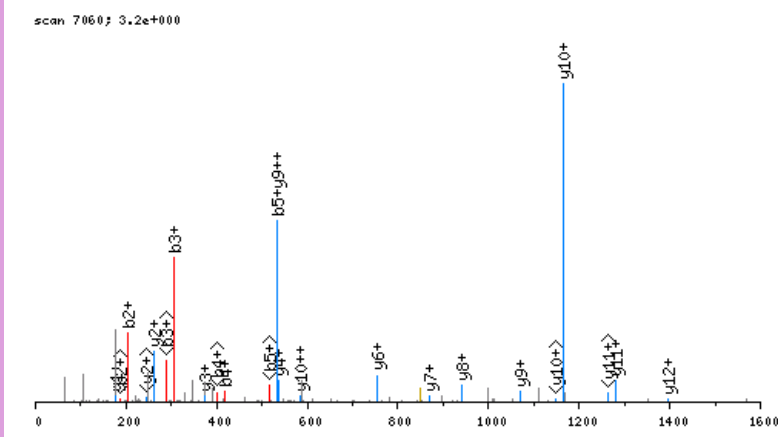

click image to zoom in; click top corners to zoom out [\[precursor±\]](#)

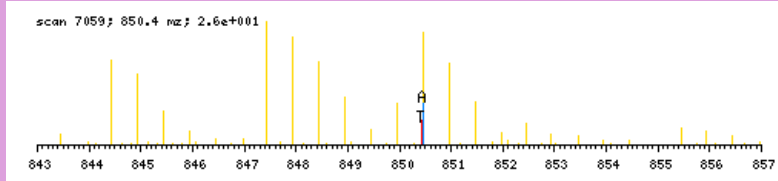

zoomed in precursor plot; T=theoretical m/z, A=acquired m/z

| b <sup>+</sup> | #  | AA | #  | y <sup>+</sup> | y <sup>2+</sup> |
|----------------|----|----|----|----------------|-----------------|
| 92.0924        | 1  | G  | 15 |                |                 |
| 205.1764       | 2  | L  | 14 | 1608.7757      | 804.8918        |
| 306.2241       | 3  | T  | 13 | 1495.6916      | 748.3497        |
| 419.3082       | 4  | L  | 12 | 1394.6440      | 697.8259        |
| 534.3351       | 5  | D  | 11 | 1281.5599      | 641.2839        |
| 631.3879       | 6  | P  | 10 | 1166.5330      | 583.7704        |
| 760.4305       | 7  | E  | 9  | 1069.4802      | 535.2440        |
| 831.4676       | 8  | A  | 8  | 940.4376       | 470.7227        |
| 946.4945       | 9  | D  | 7  | 869.4005       | 435.2042        |
| 1033.5266      | 10 | S  | 6  | 754.3735       | 377.6907        |
| 1162.5691      | 11 | E  | 5  | 667.3415       | 334.1747        |
| 1325.6325      | 12 | Y  | 4  | 538.2989       | 269.6534        |
| 1438.7165      | 13 | L  | 3  | 375.2356       | 188.1217        |
| 1525.7486      | 14 | S  | 2  | 262.1515       | 131.5797        |
|                | 15 | R  | 1  | 175.1195       | 88.0637         |

N-term:+35.07

GLTPDLPKSASQER, MH+ 1566.9128, m/z 522.9758  
 H OSG39 P180811 230811-s1.03068.03068.3.dta

X-range:

-

MassTol: Y-zoom:

MassType:

AVG  MONO

Axis:

1  2

Label:

I  M  -

Ions:

a  +  2+  3+

b  +  2+  3+

c  +  2+  3+

x  +  2+  3+

y  +  2+  3+

z  +  2+  3+

hide H<sub>2</sub>O/NH<sub>3</sub>

zoom 112-122

GO

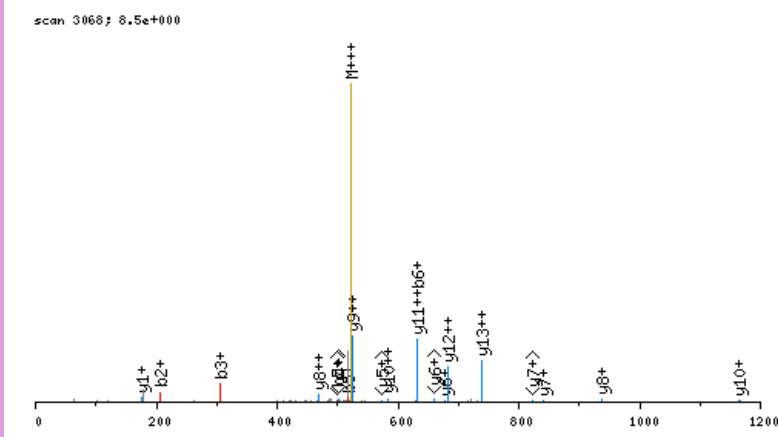

click image to zoom in; click top corners to zoom out [\[precursor±\]](#)

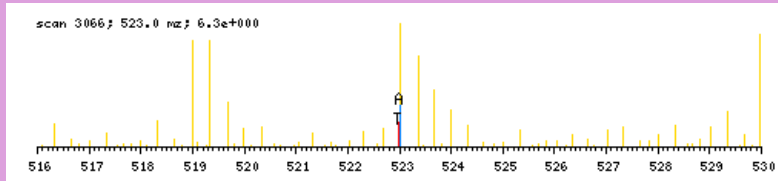

zoomed in precursor plot; T=theoretical m/z, A=acquired m/z

| b <sup>+</sup> | #  | AA # | y <sup>+</sup> | y <sup>2+</sup> |
|----------------|----|------|----------------|-----------------|
| 92.0924        | 1  | G 14 |                |                 |
| 205.1764       | 2  | L 13 | 1475.8282      | 738.4180        |
| 306.2241       | 3  | T 12 | 1362.7442      | 681.8760        |
| 403.2769       | 4  | P 11 | 1261.6965      | 631.3522        |
| 518.3038       | 5  | D 10 | 1164.6437      | 582.8258        |
| 631.3879       | 6  | L 9  | 1049.6168      | 525.3123        |
| 728.4406       | 7  | P 8  | 936.5327       | 468.7703        |
| 890.5987       | 8  | K 7  | 839.4799       | 420.2439        |
| 977.6308       | 9  | S 6  | 677.3218       | 339.1648        |
| 1048.6679      | 10 | A 5  | 590.2898       | 295.6488        |
| 1135.6999      | 11 | S 4  | 519.2527       | 260.1303        |
| 1263.7585      | 12 | Q 3  | 432.2207       | 216.6142        |
| 1392.8011      | 13 | E 2  | 304.1621       | 152.5850        |
|                | 14 | R 1  | 175.1195       | 88.0637         |

N-term:+35.07 K(8):+162.16

GNSHTSSSSSSSSSSSSSSSSSSSSSR, MH+ 2178.8983, m/z 545.4800  
 L OSG40 P180811 230811-s1.03751.03751.4.dta

X-range:

-

MassTol: Y-zoom:

MassType:

AVG  MONO

Axis:

1  2

Label:

I  M  -

Ions:

a  +  2+  3+

b  +  2+  3+

c  +  2+  3+

x  +  2+  3+

y  +  2+  3+

z  +  2+  3+

hide H<sub>2</sub>O/NH<sub>3</sub>

zoom 112-122

GO

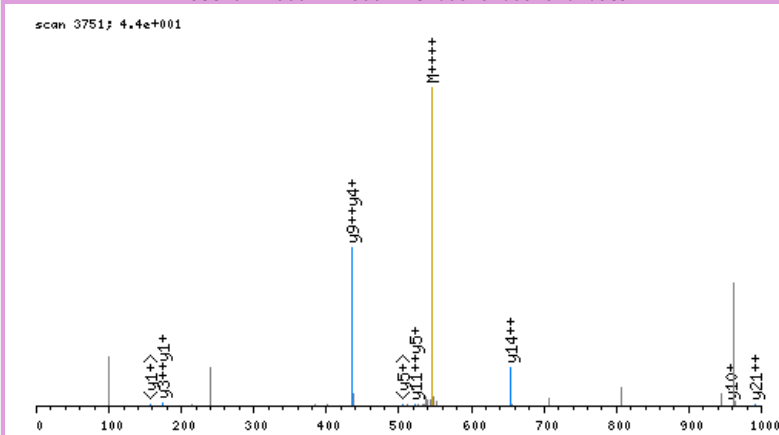

click image to zoom in; click top corners to zoom out [precursor±]

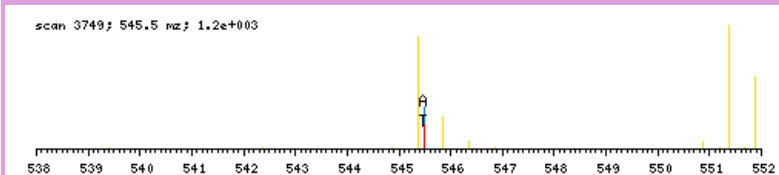

zoomed in precursor plot; T=theoretical m/z, A=acquired m/z

| b <sup>+</sup> | #  | AA # | y <sup>+</sup> | y <sup>2+</sup> |
|----------------|----|------|----------------|-----------------|
| 86.0606        | 1  | G 23 |                |                 |
| 200.1035       | 2  | N 22 | 2093.8455      | 1047.4267       |
| 287.1355       | 3  | S 21 | 1979.8026      | 990.4052        |
| 424.1944       | 4  | H 20 | 1892.7706      | 946.8892        |
| 525.2421       | 5  | T 19 | 1755.7117      | 878.3597        |
| 612.2741       | 6  | S 18 | 1654.6640      | 827.8359        |
| 699.3062       | 7  | S 17 | 1567.6320      | 784.3199        |
| 786.3382       | 8  | S 16 | 1480.5999      | 740.8039        |
| 873.3702       | 9  | S 15 | 1393.5679      | 697.2879        |
| 960.4023       | 10 | S 14 | 1306.5359      | 653.7718        |
| 1047.4343      | 11 | S 13 | 1219.5038      | 610.2558        |
| 1134.4663      | 12 | S 12 | 1132.4718      | 566.7398        |
| 1221.4983      | 13 | S 11 | 1045.4398      | 523.2238        |
| 1308.5304      | 14 | S 10 | 958.4078       | 479.7078        |
| 1395.5624      | 15 | S 9  | 871.3757       | 436.1918        |
| 1482.5944      | 16 | S 8  | 784.3437       | 392.6758        |
| 1569.6265      | 17 | S 7  | 697.3117       | 349.1597        |
| 1656.6585      | 18 | S 6  | 610.2796       | 305.6437        |
| 1743.6905      | 19 | S 5  | 523.2476       | 262.1277        |
| 1830.7225      | 20 | S 4  | 436.2156       | 218.6117        |
| 1917.7546      | 21 | S 3  | 349.1836       | 175.0957        |
| 2004.7866      | 22 | S 2  | 262.1515       | 131.5797        |
|                | 23 | R 1  | 175.1195       | 88.0637         |

N-term:+29.04

GPAGAGESKCPMLMKVLDVAVR, MH+ 2239.2307, m/z 747.0817  
 L OSG40 P180811 230811-s1.07900.07900.3.dta

X-range:

0 - 0

MassTol: Y-zoom:

0. 1.

MassType:

AVG  MONO

Axis:

1  2

Label:

I  M  -

Ions:

a  +  2+  3+

b  +  2+  3+

c  +  2+  3+

x  +  2+  3+

y  +  2+  3+

z  +  2+  3+

hide H<sub>2</sub>O/NH<sub>3</sub>

zoom 112-122

GO

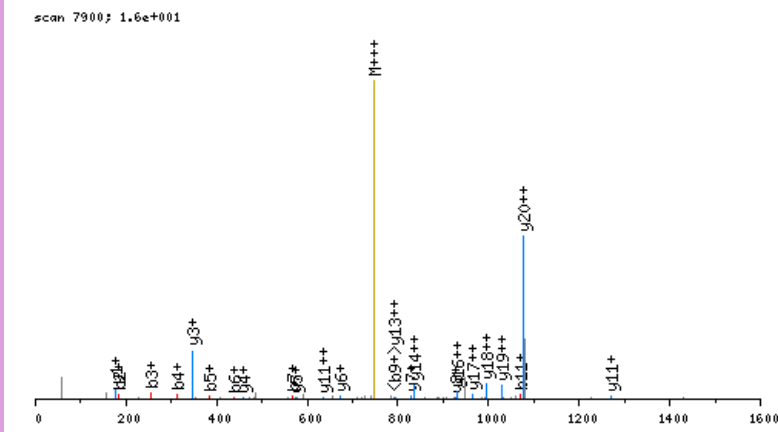

click image to zoom in; click top corners to zoom out [precursor±]

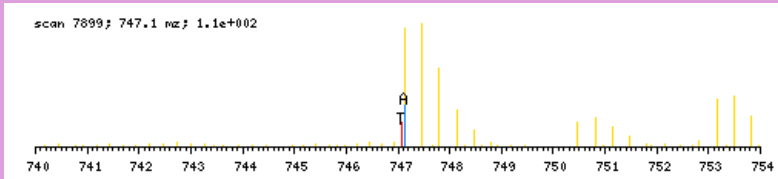

zoomed in precursor plot; T=theoretical m/z, A=acquired m/z

| b <sup>+</sup> | #  | AA # | y <sup>+</sup> | y <sup>2+</sup> |
|----------------|----|------|----------------|-----------------|
| 86.0606        | 1  | G 21 |                |                 |
| 183.1133       | 2  | P 20 | 2154.1779      | 1077.5929       |
| 254.1504       | 3  | A 19 | 2057.1252      | 1029.0665       |
| 311.1719       | 4  | G 18 | 1986.0880      | 993.5479        |
| 382.2090       | 5  | A 17 | 1929.0666      | 965.0372        |
| 439.2305       | 6  | G 16 | 1858.0295      | 929.5186        |
| 568.2731       | 7  | E 15 | 1801.0080      | 901.0079        |
| 655.3051       | 8  | S 14 | 1671.9654      | 836.4866        |
| 811.4314       | 9  | K 13 | 1584.9334      | 792.9706        |
| 971.4620       | 10 | C 12 | 1428.8071      | 714.9075        |
| 1068.5148      | 11 | P 11 | 1268.7765      | 634.8922        |
| 1181.5988      | 12 | L 10 | 1171.7237      | 586.3658        |
| 1312.6393      | 13 | M 9  | 1058.6396      | 529.8237        |
| 1411.7077      | 14 | V 8  | 927.5992       | 464.3035        |
| 1567.8340      | 15 | K 7  | 828.5307       | 414.7693        |
| 1666.9024      | 16 | V 6  | 672.4044       | 336.7061        |
| 1779.9865      | 17 | L 5  | 573.3360       | 287.1719        |
| 1895.0135      | 18 | D 4  | 460.2520       | 230.6299        |
| 1966.0506      | 19 | A 3  | 345.2250       | 173.1164        |
| 2065.1190      | 20 | V 2  | 274.1879       | 137.5979        |
|                | 21 | R 1  | 175.1195       | 88.0637         |

N-term:+29.04 K(9):+156.13  
 C(10):+160.03 K(15):+156.13

GPNVKGEYDVTVPR, MH+ 1586.8542, m/z 529.6229  
 L OSG40 P180811 230811-s1.03945.03945.3.dta

X-range:

-

MassTol: Y-zoom:

MassType:

AVG  MONO

Axis:

1  2

Label:

I  M  -

Ions:

a  +  2+  3+

b  +  2+  3+

c  +  2+  3+

x  +  2+  3+

y  +  2+  3+

z  +  2+  3+

hide H<sub>2</sub>O/NH<sub>3</sub>

zoom 112-122

GO

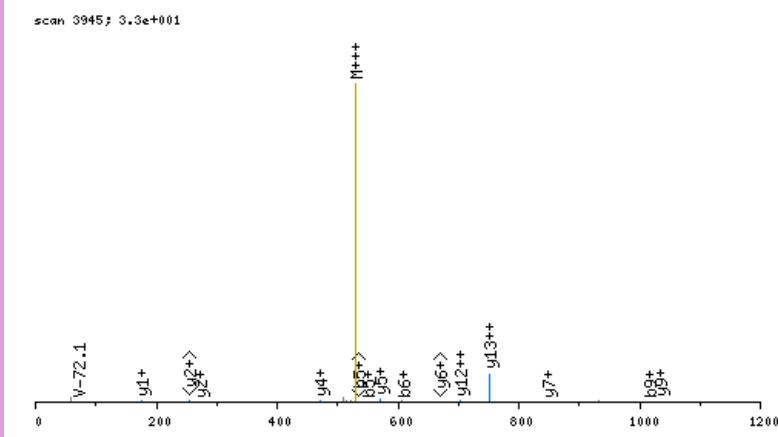

click image to zoom in; click top corners to zoom out [\[precursor±\]](#)

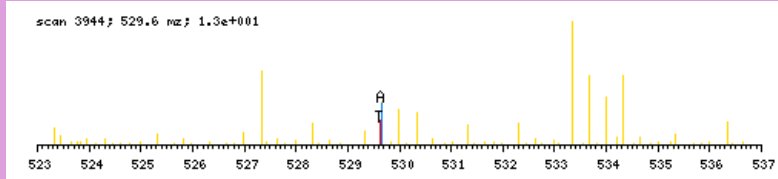

zoomed in precursor plot; T=theoretical m/z, A=acquired m/z

| b <sup>+</sup> | #  | AA # | y <sup>+</sup> | y <sup>2+</sup> |
|----------------|----|------|----------------|-----------------|
| 86.0606        | 1  | G 14 |                |                 |
| 183.1133       | 2  | P 13 | 1501.8015      | 751.4047        |
| 297.1563       | 3  | N 12 | 1404.7487      | 702.8783        |
| 396.2247       | 4  | V 11 | 1290.7058      | 645.8568        |
| 552.3510       | 5  | K 10 | 1191.6374      | 596.3226        |
| 609.3724       | 6  | G 9  | 1035.5111      | 518.2595        |
| 738.4150       | 7  | E 8  | 978.4896       | 489.7487        |
| 901.4784       | 8  | Y 7  | 849.4470       | 425.2274        |
| 1016.5053      | 9  | D 6  | 686.3837       | 343.6958        |
| 1115.5737      | 10 | V 5  | 571.3568       | 286.1823        |
| 1216.6214      | 11 | T 4  | 472.2884       | 236.6481        |
| 1315.6898      | 12 | V 3  | 371.2407       | 186.1243        |
| 1412.7426      | 13 | P 2  | 272.1723       | 136.5900        |
|                | 14 | R 1  | 175.1195       | 88.0637         |

N-term:+29.04 K(5):+156.13



GPTPAPASPAAEVGSQEELSSSAQSPGR, MH+ 2764.3389, m/z 691.8402  
 L OSG36 P180811 230811-s1.03942.03942.4.dta

scan 3942; 7.1e-001

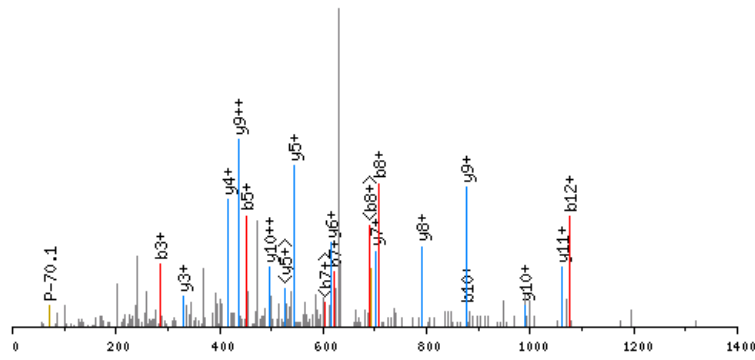

click image to zoom in; click top corners to zoom out [precursor±]

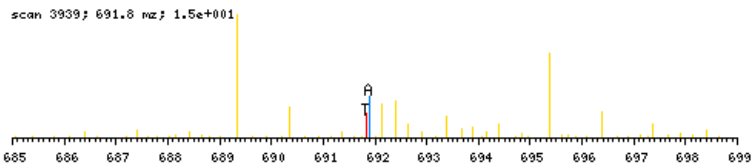

zoomed in precursor plot; T=theoretical m/z, A=acquired m/z

X-range:

-

MassTol: Y-zoom:

MassType:

AVG  MONO

Axis:

1  2

Label:

I  M  -

Ions:

a  +  2+  3+

b  +  2+  3+

c  +  2+  3+

x  +  2+  3+

y  +  2+  3+

z  +  2+  3+

hide H<sub>2</sub>O/NH<sub>3</sub>

zoom 112-122

GO

| b <sup>+</sup> | #  | AA # | y <sup>+</sup> | y <sup>2+</sup> |
|----------------|----|------|----------------|-----------------|
| 86.0606        | 1  | G 29 |                |                 |
| 183.1133       | 2  | P 28 | 2679.2862      | 1340.1470       |
| 284.1610       | 3  | T 27 | 2582.2334      | 1291.6206       |
| 381.2138       | 4  | P 26 | 2481.1857      | 1241.0968       |
| 452.2509       | 5  | A 25 | 2384.1330      | 1192.5704       |
| 549.3036       | 6  | P 24 | 2313.0959      | 1157.0518       |
| 620.3408       | 7  | A 23 | 2216.0431      | 1108.5255       |
| 707.3728       | 8  | S 22 | 2145.0060      | 1073.0069       |
| 804.4256       | 9  | P 21 | 2057.9740      | 1029.4909       |
| 875.4627       | 10 | A 20 | 1960.9212      | 980.9645        |
| 946.4998       | 11 | A 19 | 1889.8841      | 945.4460        |
| 1075.5424      | 12 | E 18 | 1818.8470      | 909.9274        |
| 1174.6108      | 13 | V 17 | 1689.8044      | 845.4061        |
| 1231.6323      | 14 | G 16 | 1590.7360      | 795.8719        |
| 1318.6643      | 15 | S 15 | 1533.7145      | 767.3612        |
| 1446.7229      | 16 | Q 14 | 1446.6825      | 723.8452        |
| 1575.7655      | 17 | E 13 | 1318.6239      | 659.8159        |
| 1704.8080      | 18 | E 12 | 1189.5813      | 595.2946        |
| 1775.8452      | 19 | A 11 | 1060.5387      | 530.7733        |
| 1888.9292      | 20 | L 10 | 989.5016       | 495.2547        |
| 1975.9613      | 21 | S 9  | 876.4175       | 438.7127        |
| 2062.9933      | 22 | S 8  | 789.3855       | 395.1967        |
| 2150.0253      | 23 | S 7  | 702.3535       | 351.6807        |
| 2221.0624      | 24 | A 6  | 615.3214       | 308.1646        |
| 2349.1210      | 25 | Q 5  | 544.2843       | 272.6461        |
| 2436.1530      | 26 | S 4  | 416.2258       | 208.6168        |
| 2533.2058      | 27 | P 3  | 329.1937       | 165.1008        |
| 2590.2273      | 28 | G 2  | 232.1410       | 116.5744        |
|                | 29 | R 1  | 175.1195       | 88.0637         |

N-term:+29.04

GQESGGFSGPGENR, MH+ 1412.6618, m/z 471.5588  
 H OSG38 P180811 230811-s1.02211.02211.3.dta

X-range:

-

MassTol: Y-zoom:

MassType:

AVG  MONO

Axis:

1  2

Label:

I  M  -

Ions:

a  +  2+  3+

b  +  2+  3+

c  +  2+  3+

x  +  2+  3+

y  +  2+  3+

z  +  2+  3+

hide H<sub>2</sub>O/NH<sub>3</sub>

zoom 112-122

GO

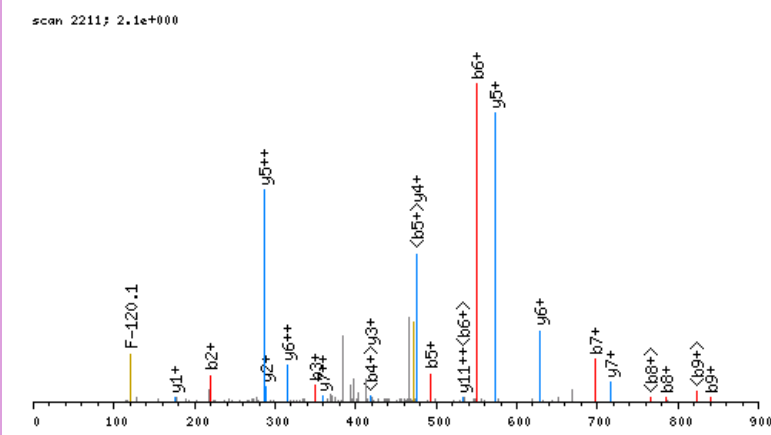

click image to zoom in; click top corners to zoom out [\[precursor±\]](#)

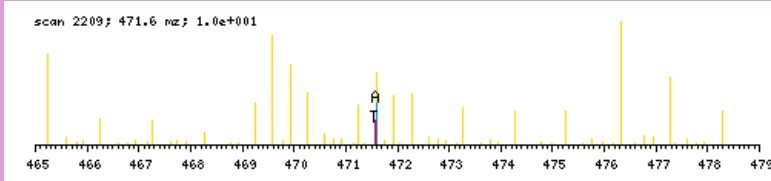

zoomed in precursor plot; T=theoretical m/z, A=acquired m/z

| b <sup>+</sup> | #  | AA # | y <sup>+</sup> | y <sup>2+</sup> |
|----------------|----|------|----------------|-----------------|
| 92.0924        | 1  | G 14 |                |                 |
| 220.1509       | 2  | Q 13 | 1321.5773      | 661.2926        |
| 349.1935       | 3  | E 12 | 1193.5187      | 597.2633        |
| 436.2256       | 4  | S 11 | 1064.4761      | 532.7420        |
| 493.2470       | 5  | G 10 | 977.4441       | 489.2260        |
| 550.2685       | 6  | G 9  | 920.4226       | 460.7152        |
| 697.3369       | 7  | F 8  | 863.4012       | 432.2045        |
| 784.3689       | 8  | S 7  | 716.3327       | 358.6703        |
| 841.3904       | 9  | G 6  | 629.3007       | 315.1543        |
| 938.4432       | 10 | P 5  | 572.2792       | 286.6435        |
| 995.4646       | 11 | G 4  | 475.2265       | 238.1172        |
| 1124.5072      | 12 | E 3  | 418.2050       | 209.6064        |
| 1238.5501      | 13 | N 2  | 289.1624       | 145.0851        |
|                | 14 | R 1  | 175.1195       | 88.0637         |

N-term:+35.07

QLDQHPIDGYLSHTELAFLR, MH+ 2394.2630, m/z 599.3212  
 H OSG40 P180811 230811-s1.07383.07383.4.dta

X-range:

-

MassTol: Y-zoom:

MassType:

AVG  MONO

Axis:

1  2

Label:

I  M  -

Ions:

a  +  2+  3+

b  +  2+  3+

c  +  2+  3+

x  +  2+  3+

y  +  2+  3+

z  +  2+  3+

hide H<sub>2</sub>O/NH<sub>3</sub>

zoom 112-122

GO

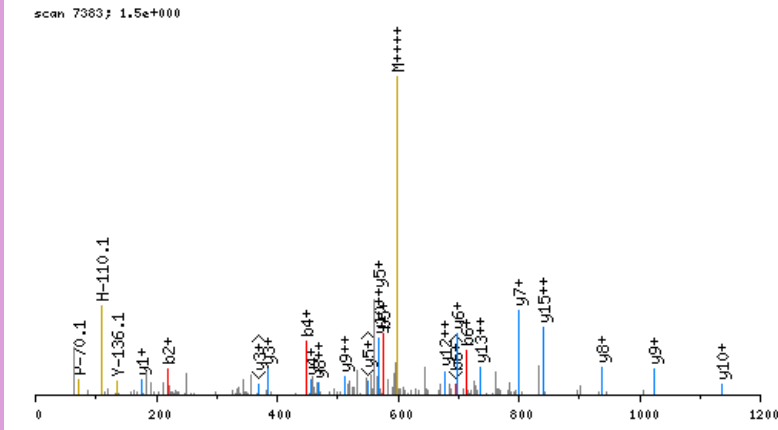

click image to zoom in; click top corners to zoom out [\[precursor±\]](#)

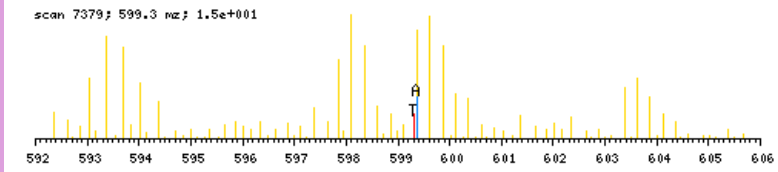

zoomed in precursor plot; T=theoretical m/z, A=acquired m/z

| b <sup>+</sup> | #  | AA # | y <sup>+</sup> | y <sup>2+</sup> |
|----------------|----|------|----------------|-----------------|
| 92.0924        | 1  | G 21 |                |                 |
| 220.1509       | 2  | Q 20 | 2303.1784      | 1152.0931       |
| 333.2350       | 3  | L 19 | 2175.1198      | 1088.0638       |
| 448.2619       | 4  | D 18 | 2062.0358      | 1031.5218       |
| 576.3205       | 5  | Q 17 | 1947.0088      | 974.0083        |
| 713.3794       | 6  | H 16 | 1818.9503      | 909.9790        |
| 810.4322       | 7  | P 15 | 1681.8913      | 841.4496        |
| 923.5163       | 8  | I 14 | 1584.8386      | 792.9232        |
| 1038.5432      | 9  | D 13 | 1471.7545      | 736.3812        |
| 1095.5647      | 10 | G 12 | 1356.7276      | 678.8677        |
| 1258.6280      | 11 | Y 11 | 1299.7061      | 650.3570        |
| 1371.7121      | 12 | L 10 | 1136.6428      | 568.8253        |
| 1458.7441      | 13 | S 9  | 1023.5587      | 512.2833        |
| 1595.8030      | 14 | H 8  | 936.5267       | 468.7673        |
| 1696.8507      | 15 | T 7  | 799.4678       | 400.2378        |
| 1825.8933      | 16 | E 6  | 698.4201       | 349.7140        |
| 1938.9773      | 17 | L 5  | 569.3775       | 285.1927        |
| 2010.0145      | 18 | A 4  | 456.2934       | 228.6506        |
| 2107.0672      | 19 | P 3  | 385.2563       | 193.1321        |
| 2220.1513      | 20 | L 2  | 288.2036       | 144.6057        |
|                | 21 | R 1  | 175.1195       | 88.0637         |

N-term:+35.07

GQPPPEPSAPAKVVR, MH+ 1585.9066, m/z 529.3071  
 L OSG39 P180811 230811-s1.02454.02454.3.dta

X-range:

-

MassTol: Y-zoom:

MassType:

AVG  MONO

Axis:

1  2

Label:

I  M  -

Ions:

a  +  2+  3+

b  +  2+  3+

c  +  2+  3+

x  +  2+  3+

y  +  2+  3+

z  +  2+  3+

hide H<sub>2</sub>O/NH<sub>3</sub>

zoom 112-122

GO

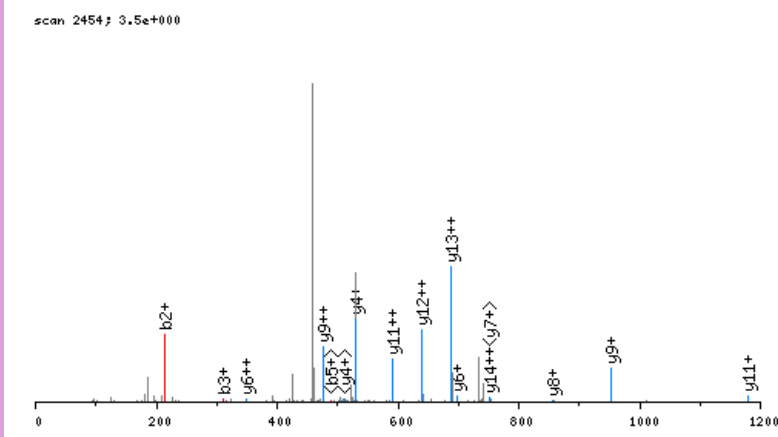

click image to zoom in; click top corners to zoom out [\[precursor±\]](#)

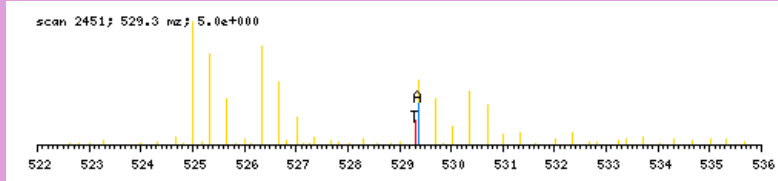

zoomed in precursor plot; T=theoretical m/z, A=acquired m/z

| b <sup>+</sup> | #  | AA | #  | y <sup>+</sup> | y <sup>2+</sup> |
|----------------|----|----|----|----------------|-----------------|
| 86.0606        | 1  | G  | 15 |                |                 |
| 214.1191       | 2  | Q  | 14 | 1500.8539      | 750.9308        |
| 311.1719       | 3  | P  | 13 | 1372.7953      | 686.9016        |
| 408.2247       | 4  | P  | 12 | 1275.7425      | 638.3752        |
| 505.2774       | 5  | P  | 11 | 1178.6898      | 589.8488        |
| 634.3200       | 6  | E  | 10 | 1081.6370      | 541.3224        |
| 731.3728       | 7  | P  | 9  | 952.5944       | 476.8011        |
| 818.4048       | 8  | S  | 8  | 855.5416       | 428.2747        |
| 889.4419       | 9  | A  | 7  | 768.5096       | 384.7587        |
| 986.4947       | 10 | P  | 6  | 697.4725       | 349.2402        |
| 1057.5318      | 11 | A  | 5  | 600.4197       | 300.7138        |
| 1213.6581      | 12 | K  | 4  | 529.3826       | 265.1952        |
| 1312.7265      | 13 | V  | 3  | 373.2563       | 187.1321        |
| 1411.7949      | 14 | V  | 2  | 274.1879       | 137.5979        |
|                | 15 | R  | 1  | 175.1195       | 88.0637         |

N-term:+29.04 K(12):+156.13

GQPQQTTGAASGGYIKR, MH+ 1788.0040, m/z 596.6729  
 H OSG40 P180811 230811-s1.02238.02238.3.dta

X-range:

-

MassTol: Y-zoom:

MassType:

AVG  MONO

Axis:

1  2

Label:

I  M  -

Ions:

a  +  2+  3+

b  +  2+  3+

c  +  2+  3+

x  +  2+  3+

y  +  2+  3+

z  +  2+  3+

hide H<sub>2</sub>O/NH<sub>3</sub>

zoom 112-122

GO

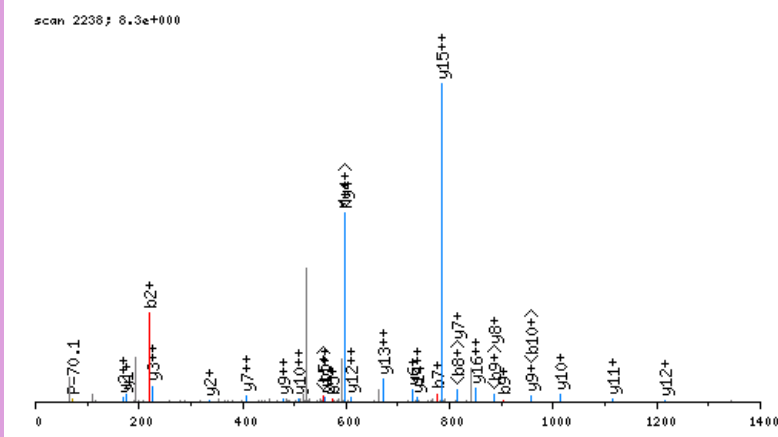

click image to zoom in; click top corners to zoom out [\[precursor±\]](#)

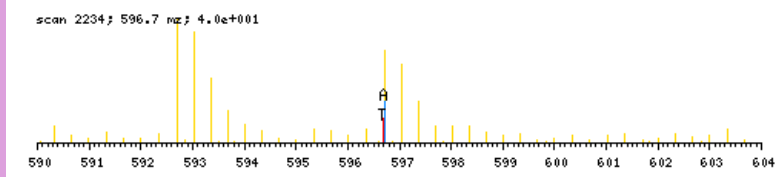

zoomed in precursor plot; T=theoretical m/z, A=acquired m/z

| b <sup>+</sup> | #  | AA # | y <sup>+</sup> | y <sup>2+</sup> |
|----------------|----|------|----------------|-----------------|
| 92.0924        | 1  | G 17 |                |                 |
| 220.1509       | 2  | Q 16 | 1696.9195      | 848.9637        |
| 317.2037       | 3  | P 15 | 1568.8609      | 784.9344        |
| 445.2623       | 4  | Q 14 | 1471.8082      | 736.4080        |
| 573.3209       | 5  | Q 13 | 1343.7496      | 672.3787        |
| 674.3685       | 6  | T 12 | 1215.6910      | 608.3494        |
| 775.4162       | 7  | T 11 | 1114.6433      | 557.8256        |
| 832.4377       | 8  | G 10 | 1013.5956      | 507.3017        |
| 903.4748       | 9  | A 9  | 956.5742       | 478.7910        |
| 974.5119       | 10 | A 8  | 885.5371       | 443.2724        |
| 1061.5439      | 11 | S 7  | 814.4999       | 407.7539        |
| 1118.5654      | 12 | G 6  | 727.4679       | 364.2379        |
| 1175.5869      | 13 | G 5  | 670.4465       | 335.7271        |
| 1338.6502      | 14 | Y 4  | 613.4250       | 307.2164        |
| 1451.7343      | 15 | I 3  | 450.3617       | 225.6847        |
| 1613.8924      | 16 | K 2  | 337.2776       | 169.1427        |
|                | 17 | R 1  | 175.1195       | 88.0637         |

N-term:+35.07 K(16):+162.16

GQVVQFKLSDIGEGIR, MH+ 1814.0812, m/z 605.3653  
 H OSG39 P180811 230811-s1.06164.06164.3.dta

X-range:

-

MassTol: Y-zoom:

MassType:

AVG  MONO

Axis:

1  2

Label:

I  M  -

Ions:

a  +  2+  3+

b  +  2+  3+

c  +  2+  3+

x  +  2+  3+

y  +  2+  3+

z  +  2+  3+

hide H<sub>2</sub>O/NH<sub>3</sub>

zoom 112-122

GO

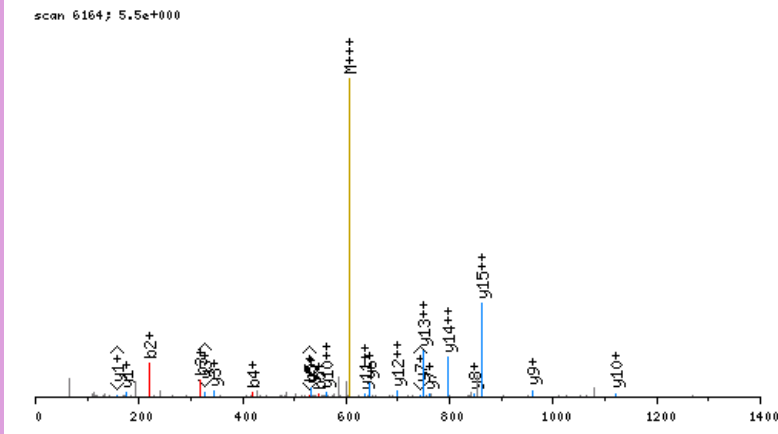

click image to zoom in; click top corners to zoom out [\[precursor±\]](#)

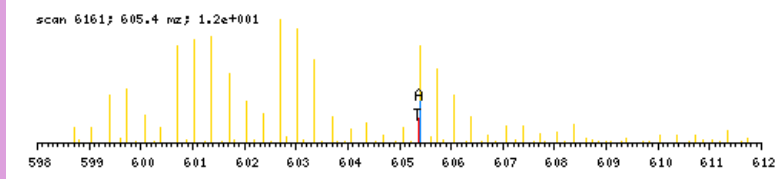

zoomed in precursor plot; T=theoretical m/z, A=acquired m/z

| b <sup>+</sup> | #  | AA # | y <sup>+</sup> | y <sup>2+</sup> |
|----------------|----|------|----------------|-----------------|
| 92.0924        | 1  | G 16 |                |                 |
| 220.1509       | 2  | Q 15 | 1722.9967      | 862.0023        |
| 319.2194       | 3  | V 14 | 1594.9381      | 797.9730        |
| 418.2878       | 4  | V 13 | 1495.8697      | 748.4388        |
| 546.3463       | 5  | Q 12 | 1396.8013      | 698.9046        |
| 693.4148       | 6  | F 11 | 1268.7427      | 634.8753        |
| 855.5729       | 7  | K 10 | 1121.6743      | 561.3411        |
| 968.6569       | 8  | L 9  | 959.5162       | 480.2620        |
| 1055.6890      | 9  | S 8  | 846.4321       | 423.7200        |
| 1170.7159      | 10 | D 7  | 759.4001       | 380.2040        |
| 1283.8000      | 11 | I 6  | 644.3731       | 322.6905        |
| 1340.8214      | 12 | G 5  | 531.2891       | 266.1485        |
| 1469.8640      | 13 | E 4  | 474.2676       | 237.6377        |
| 1526.8855      | 14 | G 3  | 345.2250       | 173.1164        |
| 1639.9695      | 15 | I 2  | 288.2036       | 144.6057        |
|                | 16 | R 1  | 175.1195       | 88.0637         |

N-term:+35.07 K(7):+162.16

GRVPDSIDYR, MH+ 1205.6278, m/z 402.5475  
 L OSG40 P180811 230811-s1.03210.03210.3.dta

X-range:

-

MassTol: Y-zoom:

MassType:

AVG  MONO

Axis:

1  2

Label:

I  M  -

Ions:

a  +  2+  3+

b  +  2+  3+

c  +  2+  3+

x  +  2+  3+

y  +  2+  3+

z  +  2+  3+

hide H<sub>2</sub>O/NH<sub>3</sub>

zoom 112-122

GO

scan 3210; 8.8e+000

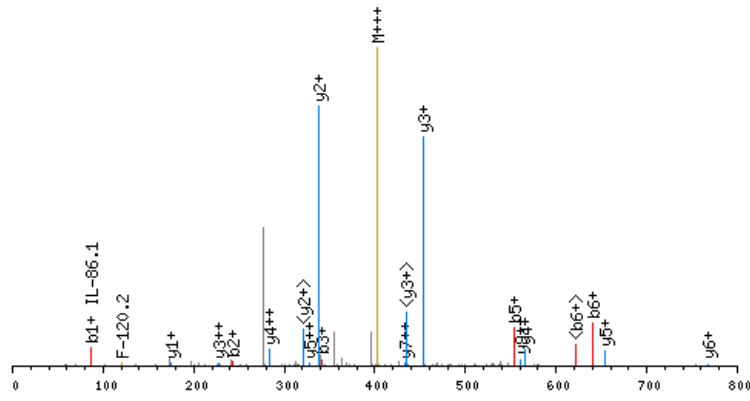

click image to zoom in; click top corners to zoom out [\[precursor±\]](#)

scan 3209; 402.5 m/z; 1.9e+003

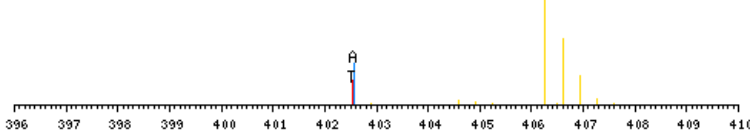

zoomed in precursor plot; T=theoretical m/z, A=acquired m/z

| b <sup>+</sup> | #  | AA # | y <sup>+</sup> | y <sup>2+</sup> |
|----------------|----|------|----------------|-----------------|
| 86.0606        | 1  | G 10 |                |                 |
| 242.1617       | 2  | R 9  | 1120.5751      | 560.7915        |
| 341.2301       | 3  | V 8  | 964.4740       | 482.7409        |
| 438.2829       | 4  | P 7  | 865.4056       | 433.2067        |
| 553.3098       | 5  | D 6  | 768.3528       | 384.6803        |
| 640.3418       | 6  | S 5  | 653.3259       | 327.1668        |
| 753.4259       | 7  | I 4  | 566.2938       | 283.6508        |
| 868.4528       | 8  | D 3  | 453.2098       | 227.1088        |
| 1031.5162      | 9  | Y 2  | 338.1828       | 169.5953        |
|                | 10 | R 1  | 175.1195       | 88.0637         |

N-term:+29.04

GSGLCAGFAGDDAPR, MH+ 1646.8596, m/z 549.6247  
 H OSG36 P180811 230811-s1.02282.02282.3.dta

X-range:

-

MassTol: Y-zoom:

MassType:

AVG  MONO

Axis:

1  2

Label:

I  M  -

Ions:

a  +  2+  3+

b  +  2+  3+

c  +  2+  3+

x  +  2+  3+

y  +  2+  3+

z  +  2+  3+

hide H<sub>2</sub>O/NH<sub>3</sub>

zoom 112-122

GO

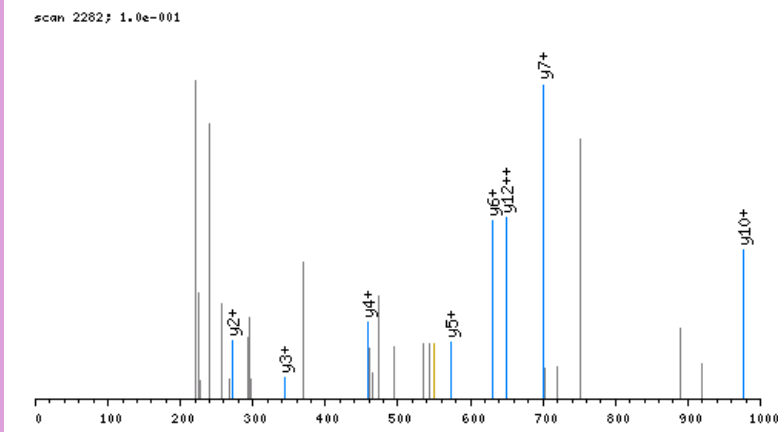

click image to zoom in; click top corners to zoom out [\[precursor±\]](#)

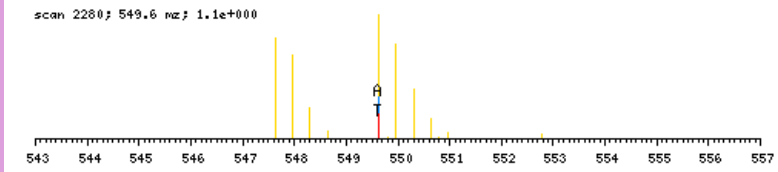

zoomed in precursor plot; T=theoretical m/z, A=acquired m/z

| b <sup>+</sup> | #  | AA | #  | y <sup>+</sup> | y <sup>2+</sup> |
|----------------|----|----|----|----------------|-----------------|
| 92.0924        | 1  | G  | 16 |                |                 |
| 179.1244       | 2  | S  | 15 | 1555.7751      | 778.3915        |
| 236.1459       | 3  | G  | 14 | 1468.7431      | 734.8754        |
| 349.2299       | 4  | L  | 13 | 1411.7216      | 706.3647        |
| 509.2605       | 5  | C  | 12 | 1298.6375      | 649.8227        |
| 671.4186       | 6  | K  | 11 | 1138.6069      | 569.8074        |
| 742.4557       | 7  | A  | 10 | 976.4488       | 488.7283        |
| 799.4772       | 8  | G  | 9  | 905.4117       | 453.2098        |
| 946.5456       | 9  | F  | 8  | 848.3903       | 424.6990        |
| 1017.5827      | 10 | A  | 7  | 701.3218       | 351.1648        |
| 1074.6042      | 11 | G  | 6  | 630.2847       | 315.6463        |
| 1189.6311      | 12 | D  | 5  | 573.2633       | 287.1355        |
| 1304.6581      | 13 | D  | 4  | 458.2363       | 229.6221        |
| 1375.6952      | 14 | A  | 3  | 343.2094       | 172.1086        |
| 1472.7480      | 15 | P  | 2  | 272.1723       | 136.5900        |
|                | 16 | R  | 1  | 175.1195       | 88.0637         |

N-term:+35.07 C(5):+160.03  
 K(6):+162.16



GSGLVKAGFAGDDAPR, MH+ 1573.8338, m/z 525.2828  
 L OSG39 P180811 230811-s1.03103.03103.3.dta

X-range:

-

MassTol: Y-zoom:

MassType:

AVG  MONO

Axis:

1  2

Label:

I  M  -

Ions:

a  +  2+  3+

b  +  2+  3+

c  +  2+  3+

x  +  2+  3+

y  +  2+  3+

z  +  2+  3+

hide H<sub>2</sub>O/NH<sub>3</sub>

zoom 112-122

GO

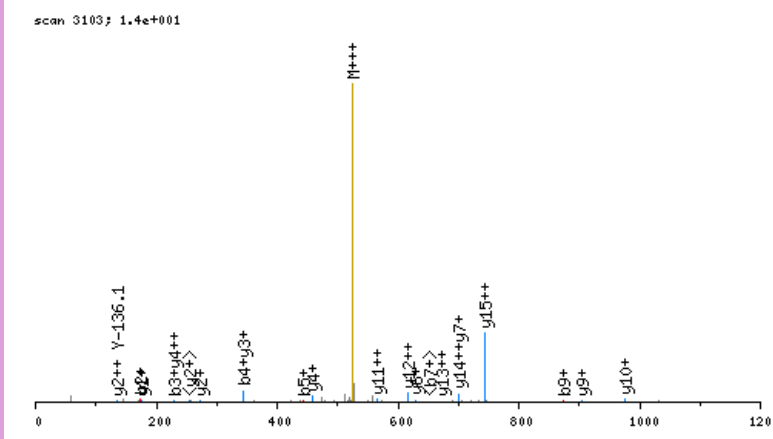

click image to zoom in; click top corners to zoom out [\[precursor±\]](#)

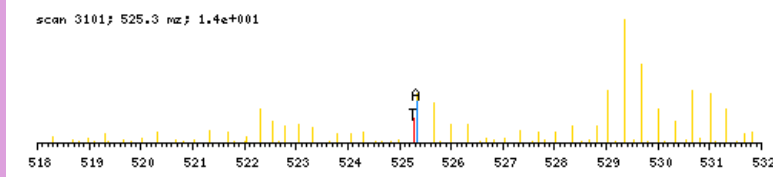

zoomed in precursor plot; T=theoretical m/z, A=acquired m/z

| b <sup>+</sup> | #  | AA # | y <sup>+</sup> | y <sup>2+</sup> |
|----------------|----|------|----------------|-----------------|
| 86.0606        | 1  | G 16 |                |                 |
| 173.0926       | 2  | S 15 | 1488.7811      | 744.8945        |
| 230.1141       | 3  | G 14 | 1401.7491      | 701.3785        |
| 343.1981       | 4  | L 13 | 1344.7276      | 672.8677        |
| 442.2665       | 5  | V 12 | 1231.6435      | 616.3257        |
| 598.3928       | 6  | K 11 | 1132.5751      | 566.7915        |
| 669.4299       | 7  | A 10 | 976.4488       | 488.7283        |
| 726.4514       | 8  | G 9  | 905.4117       | 453.2098        |
| 873.5198       | 9  | F 8  | 848.3903       | 424.6990        |
| 944.5569       | 10 | A 7  | 701.3218       | 351.1648        |
| 1001.5784      | 11 | G 6  | 630.2847       | 315.6463        |
| 1116.6053      | 12 | D 5  | 573.2633       | 287.1355        |
| 1231.6323      | 13 | D 4  | 458.2363       | 229.6221        |
| 1302.6694      | 14 | A 3  | 343.2094       | 172.1086        |
| 1399.7222      | 15 | P 2  | 272.1723       | 136.5900        |
|                | 16 | R 1  | 175.1195       | 88.0637         |

N-term:+29.04 K(6):+156.13

GSIIITVYPKEIR, MH+ 1431.8575, m/z 477.9574  
 L OSG39 P180811 230811-s1.04219.04219.3.dta

X-range:

-

MassTol: Y-zoom:

MassType:

AVG  MONO

Axis:

1  2

Label:

I  M  -

Ions:

a  +  2+  3+

b  +  2+  3+

c  +  2+  3+

x  +  2+  3+

y  +  2+  3+

z  +  2+  3+

hide H<sub>2</sub>O/NH<sub>3</sub>

zoom 112-122

GO

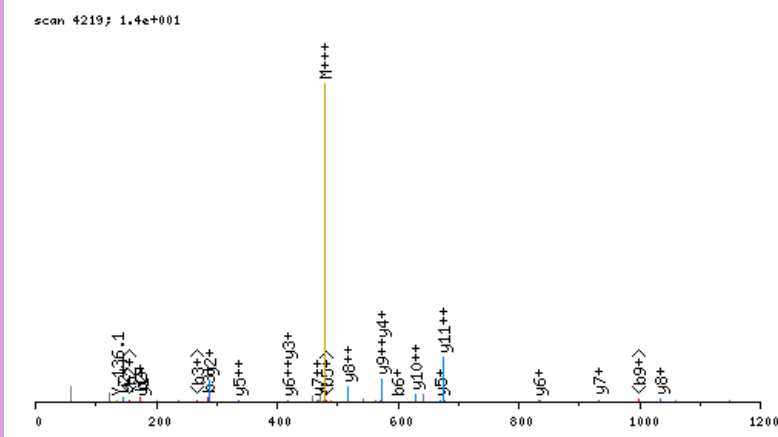

click image to zoom in; click top corners to zoom out [\[precursor±\]](#)

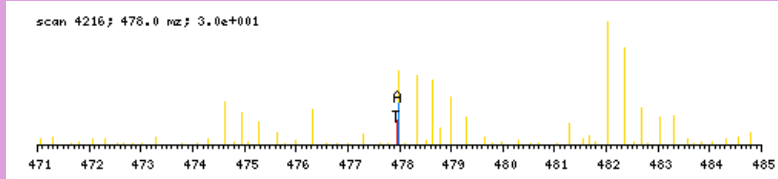

zoomed in precursor plot; T=theoretical m/z, A=acquired m/z

| b <sup>+</sup> | #  | AA # | y <sup>+</sup> | y <sup>2+</sup> |
|----------------|----|------|----------------|-----------------|
| 86.0606        | 1  | G 12 |                |                 |
| 173.0926       | 2  | S 11 | 1346.8048      | 673.9063        |
| 286.1767       | 3  | I 10 | 1259.7728      | 630.3903        |
| 399.2607       | 4  | I 9  | 1146.6887      | 573.8483        |
| 500.3084       | 5  | T 8  | 1033.6046      | 517.3062        |
| 599.3768       | 6  | V 7  | 932.5570       | 466.7824        |
| 762.4401       | 7  | Y 6  | 833.4886       | 417.2482        |
| 859.4929       | 8  | P 5  | 670.4252       | 335.7165        |
| 1015.6192      | 9  | K 4  | 573.3725       | 287.1901        |
| 1144.6618      | 10 | E 3  | 417.2462       | 209.1270        |
| 1257.7459      | 11 | I 2  | 288.2036       | 144.6057        |
|                | 12 | R 1  | 175.1195       | 88.0637         |

N-term:+29.04 K(9):+156.13

GSLDLGGDAAGR, MH+ 1116.5649, m/z 558.7861  
 L OSG38 P180811 230811-s1.03406.03406.2.dta

scan 3406; 1.6e+001

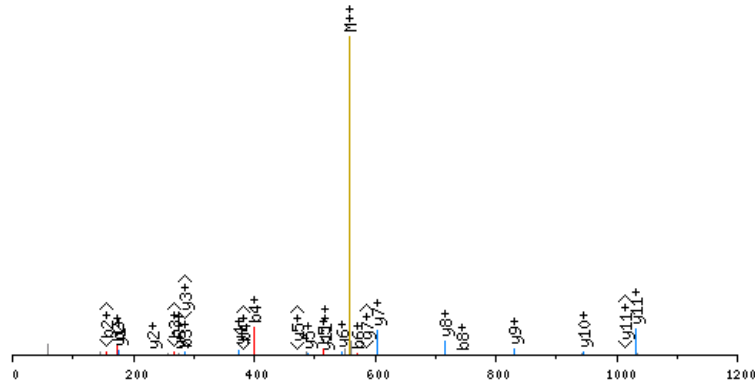

click image to zoom in; click top corners to zoom out [precursor±]

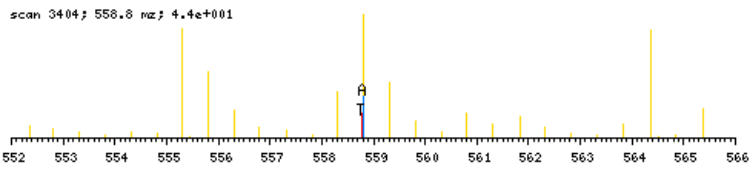

zoomed in precursor plot; T=theoretical m/z, A=acquired m/z

X-range:

-

MassTol: Y-zoom:

MassType:

AVG  MONO

Axis:

1  2

Label:

I  M  -

Ions:

a  +  2+  3+

b  +  2+  3+

c  +  2+  3+

x  +  2+  3+

y  +  2+  3+

z  +  2+  3+

hide H<sub>2</sub>O/NH<sub>3</sub>

zoom 112-122

GO

| b <sup>+</sup> | #  | AA | #  | y <sup>+</sup> | y <sup>2+</sup> |
|----------------|----|----|----|----------------|-----------------|
| 86.0606        | 1  | G  | 12 |                |                 |
| 173.0926       | 2  | S  | 11 | 1031.5122      | 516.2600        |
| 286.1767       | 3  | L  | 10 | 944.4801       | 472.7440        |
| 401.2036       | 4  | D  | 9  | 831.3961       | 416.2019        |
| 514.2877       | 5  | L  | 8  | 716.3691       | 358.6885        |
| 571.3091       | 6  | G  | 7  | 603.2851       | 302.1464        |
| 628.3306       | 7  | G  | 6  | 546.2636       | 273.6357        |
| 743.3575       | 8  | D  | 5  | 489.2421       | 245.1250        |
| 814.3946       | 9  | A  | 4  | 374.2152       | 187.6115        |
| 885.4318       | 10 | A  | 3  | 303.1781       | 152.0930        |
| 942.4532       | 11 | G  | 2  | 232.1410       | 116.5744        |
|                | 12 | R  | 1  | 175.1195       | 88.0637         |

N-term:+29.04

GSSQSVEIPGGTEGYHVLK, MH+ 2058.0256, m/z 686.6800  
 L OSG39 P180811 230811-s1.04445.04445.3.dta

X-range:

-

MassTol: Y-zoom:

MassType:

AVG  MONO

Axis:

1  2

Label:

I  M  -

Ions:

a  +  2+  3+

b  +  2+  3+

c  +  2+  3+

x  +  2+  3+

y  +  2+  3+

z  +  2+  3+

hide H<sub>2</sub>O/NH<sub>3</sub>

zoom 112-122

GO

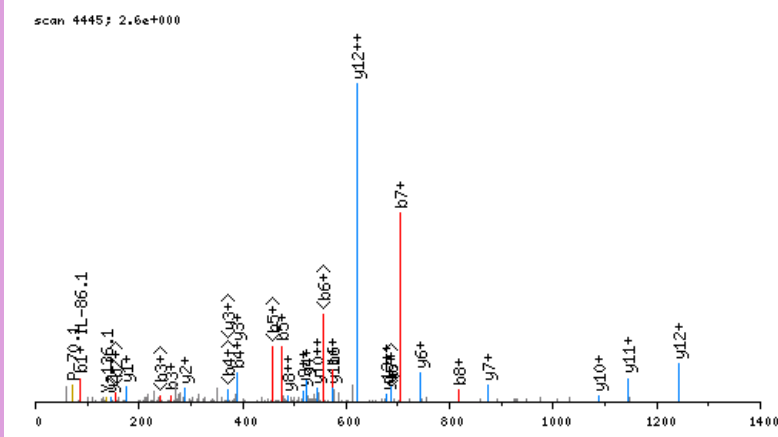

click image to zoom in; click top corners to zoom out [\[precursor±\]](#)

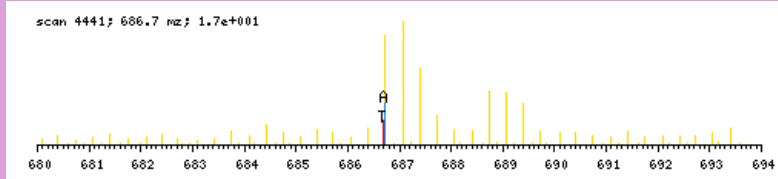

zoomed in precursor plot; T=theoretical m/z, A=acquired m/z

| b <sup>+</sup> | #  | AA | #  | y <sup>+</sup> | y <sup>2+</sup> |
|----------------|----|----|----|----------------|-----------------|
| 86.0606        | 1  | G  | 20 |                |                 |
| 173.0926       | 2  | S  | 19 | 1972.9728      | 986.9903        |
| 260.1246       | 3  | S  | 18 | 1885.9408      | 943.4743        |
| 388.1832       | 4  | Q  | 17 | 1798.9088      | 899.9583        |
| 475.2152       | 5  | S  | 16 | 1670.8502      | 835.9290        |
| 574.2836       | 6  | V  | 15 | 1583.8182      | 792.4130        |
| 703.3262       | 7  | E  | 14 | 1484.7498      | 742.8788        |
| 816.4103       | 8  | I  | 13 | 1355.7072      | 678.3575        |
| 913.4631       | 9  | P  | 12 | 1242.6231      | 621.8155        |
| 970.4845       | 10 | G  | 11 | 1145.5703      | 573.2891        |
| 1027.5060      | 11 | G  | 10 | 1088.5489      | 544.7784        |
| 1084.5275      | 12 | G  | 9  | 1031.5274      | 516.2676        |
| 1185.5751      | 13 | T  | 8  | 974.5060       | 487.7569        |
| 1314.6177      | 14 | E  | 7  | 873.4583       | 437.2331        |
| 1371.6392      | 15 | G  | 6  | 744.4157       | 372.7118        |
| 1534.7025      | 16 | Y  | 5  | 687.3942       | 344.2010        |
| 1671.7614      | 17 | H  | 4  | 524.3309       | 262.6694        |
| 1770.8298      | 18 | V  | 3  | 387.2720       | 194.1399        |
| 1883.9139      | 19 | L  | 2  | 288.2036       | 144.6057        |
|                | 20 | R  | 1  | 175.1195       | 88.0637         |

N-term:+29.04

GSSSGSGVQGASAGGLAADASR, MH+ 1877.8953, m/z 626.6366  
 L OSG37 P180811 230811-s1.03163.03163.3.dta

scan 3163; 1.1e+000

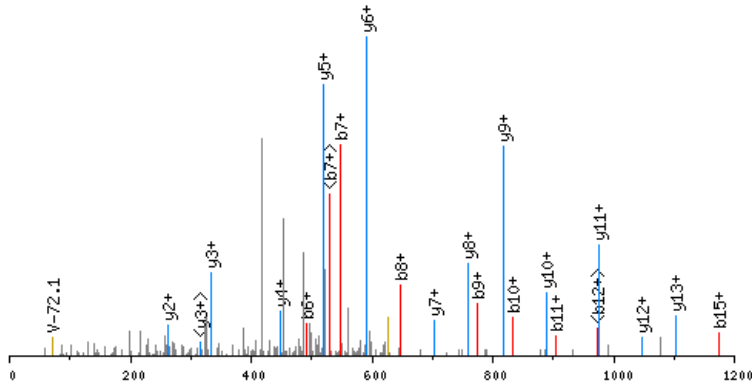

click image to zoom in; click top corners to zoom out [\[precursor±\]](#)

scan 3159; 626.6 m/z; 1.3e+001

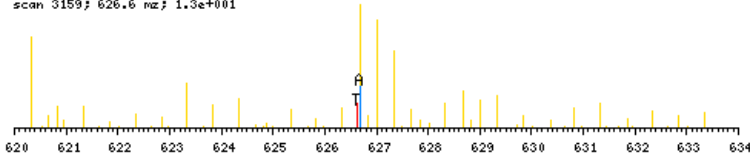

zoomed in precursor plot; T=theoretical m/z, A=acquired m/z

X-range:

-

MassTol: Y-zoom:

MassType:

AVG  MONO

Axis:

1  2

Label:

I  M  -

Ions:

a  +  2+  3+

b  +  2+  3+

c  +  2+  3+

x  +  2+  3+

y  +  2+  3+

z  +  2+  3+

hide H<sub>2</sub>O/NH<sub>3</sub>

zoom 112-122

GO

| b <sup>+</sup> | #  | AA # | y <sup>+</sup> | y <sup>2+</sup> |
|----------------|----|------|----------------|-----------------|
| 86.0606        | 1  | G 22 |                |                 |
| 173.0926       | 2  | S 21 | 1792.8426      | 896.9252        |
| 260.1246       | 3  | S 20 | 1705.8105      | 853.4092        |
| 347.1566       | 4  | S 19 | 1618.7785      | 809.8932        |
| 404.1781       | 5  | G 18 | 1531.7465      | 766.3771        |
| 491.2101       | 6  | S 17 | 1474.7250      | 737.8664        |
| 548.2316       | 7  | G 16 | 1387.6930      | 694.3504        |
| 647.3000       | 8  | V 15 | 1330.6715      | 665.8397        |
| 775.3586       | 9  | Q 14 | 1231.6031      | 616.3055        |
| 832.3801       | 10 | G 13 | 1103.5445      | 552.2762        |
| 903.4172       | 11 | A 12 | 1046.5231      | 523.7654        |
| 990.4492       | 12 | S 11 | 975.4859       | 488.2469        |
| 1061.4863      | 13 | A 10 | 888.4539       | 444.7309        |
| 1118.5078      | 14 | G 9  | 817.4168       | 409.2123        |
| 1175.5292      | 15 | G 8  | 760.3953       | 380.7016        |
| 1288.6133      | 16 | L 7  | 703.3739       | 352.1909        |
| 1359.6504      | 17 | A 6  | 590.2898       | 295.6488        |
| 1430.6875      | 18 | A 5  | 519.2527       | 260.1303        |
| 1545.7145      | 19 | D 4  | 448.2156       | 224.6117        |
| 1616.7516      | 20 | A 3  | 333.1886       | 167.0982        |
| 1703.7836      | 21 | S 2  | 262.1515       | 131.5797        |
|                | 22 | R 1  | 175.1195       | 88.0637         |

N-term:+29.04

GSTPVGSGVYR, MH+ 1113.6116, m/z 557.3094  
 H OSG38 P180811 230811-s1.02507.02507.2.dta

scan 2507; 4.9e+000

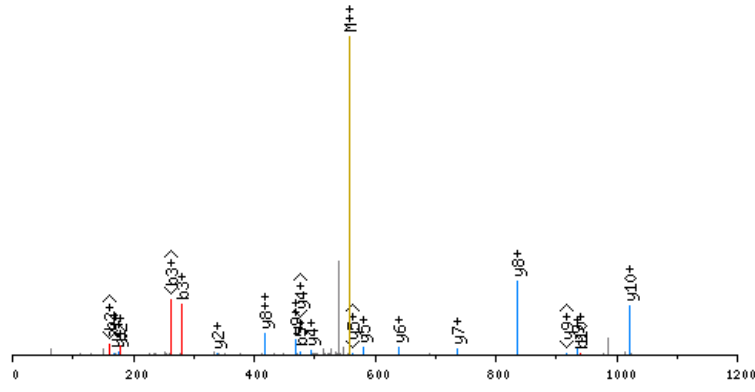

click image to zoom in; click top corners to zoom out [precursor±]

scan 2504; 557.3 m/z; 2.0e+001

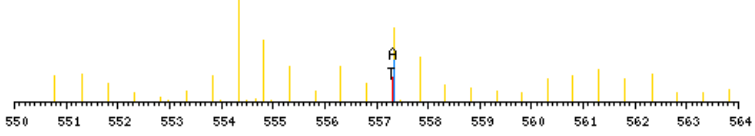

zoomed in precursor plot; T=theoretical m/z, A=acquired m/z

X-range:

-

MassTol: Y-zoom:

MassType:

AVG  MONO

Axis:

1  2

Label:

I  M  -

Ions:

a  +  2+  3+

b  +  2+  3+

c  +  2+  3+

x  +  2+  3+

y  +  2+  3+

z  +  2+  3+

hide H<sub>2</sub>O/NH<sub>3</sub>

zoom 112-122

GO

| b <sup>+</sup> | #  | AA | #  | y <sup>+</sup> | y <sup>2+</sup> |
|----------------|----|----|----|----------------|-----------------|
| 92.0924        | 1  | G  | 11 |                |                 |
| 179.1244       | 2  | S  | 10 | 1022.5271      | 511.7675        |
| 280.1721       | 3  | T  | 9  | 935.4951       | 468.2514        |
| 377.2248       | 4  | P  | 8  | 834.4474       | 417.7276        |
| 476.2932       | 5  | V  | 7  | 737.3946       | 369.2012        |
| 533.3147       | 6  | G  | 6  | 638.3262       | 319.6670        |
| 620.3467       | 7  | S  | 5  | 581.3047       | 291.1563        |
| 677.3682       | 8  | G  | 4  | 494.2727       | 247.6403        |
| 776.4366       | 9  | V  | 3  | 437.2512       | 219.1295        |
| 939.4999       | 10 | Y  | 2  | 338.1828       | 169.5953        |
|                | 11 | R  | 1  | 175.1195       | 88.0637         |

N-term:+35.07

GSVELAHLHGILR, MH+ 1429.8279, m/z 477.2808  
 L OSG40 P180811 230811-s1.07747.07747.3.dta

X-range:

-

MassTol: Y-zoom:

MassType:

AVG  MONO

Axis:

1  2

Label:

I  M  -

Ions:

a  +  2+  3+

b  +  2+  3+

c  +  2+  3+

x  +  2+  3+

y  +  2+  3+

z  +  2+  3+

hide H<sub>2</sub>O/NH<sub>3</sub>

zoom 112-122

GO

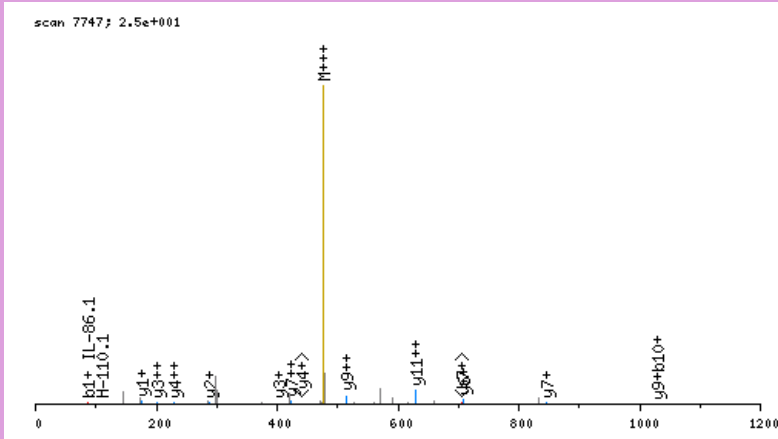

click image to zoom in; click top corners to zoom out [\[precursor±\]](#)

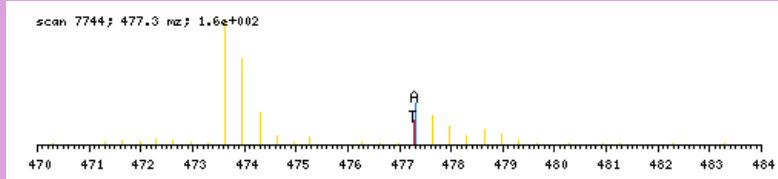

zoomed in precursor plot; T=theoretical m/z, A=acquired m/z

| b <sup>+</sup> | #  | AA # | y <sup>+</sup> | y <sup>2+</sup> |
|----------------|----|------|----------------|-----------------|
| 86.0606        | 1  | G 13 |                |                 |
| 173.0926       | 2  | S 12 | 1344.7752      | 672.8915        |
| 272.1610       | 3  | V 11 | 1257.7432      | 629.3755        |
| 401.2036       | 4  | E 10 | 1158.6748      | 579.8413        |
| 514.2877       | 5  | L 9  | 1029.6322      | 515.3200        |
| 585.3248       | 6  | A 8  | 916.5481       | 458.7780        |
| 722.3837       | 7  | H 7  | 845.5110       | 423.2594        |
| 835.4678       | 8  | L 6  | 708.4521       | 354.7299        |
| 972.5267       | 9  | H 5  | 595.3680       | 298.1879        |
| 1029.5481      | 10 | G 4  | 458.3091       | 229.6585        |
| 1142.6322      | 11 | I 3  | 401.2876       | 201.1477        |
| 1255.7163      | 12 | L 2  | 288.2036       | 144.6057        |
|                | 13 | R 1  | 175.1195       | 88.0637         |

N-term:+29.04

GSVFSAPSASGTPNKETAGLKVGVSRR, MH+ 2675.4369, m/z 669.6147  
L OSG40 P180811 230811-s1.05467.05467.4.dta

scan 5467; 4.8e+000

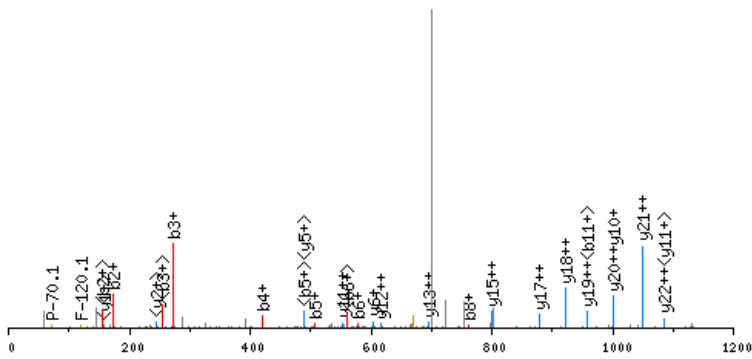

click image to zoom in; click top corners to zoom out [\[precursor±\]](#)

scan 5464; 669.6 nz; 1.9e+001

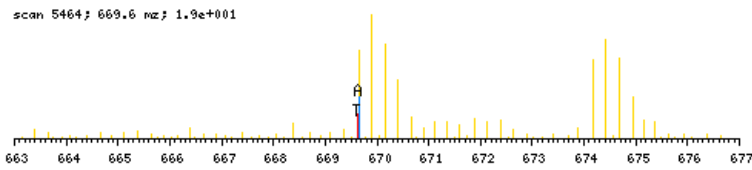

zoomed in precursor plot; T=theoretical m/z, A=acquired m/z

| b <sup>+</sup> | #  | AA | #  | y <sup>+</sup> | y <sup>2+</sup> |
|----------------|----|----|----|----------------|-----------------|
| 86.0606        | 1  | G  | 27 |                |                 |
| 173.0926       | 2  | S  | 26 | 2590.3841      | 1295.6960       |
| 272.1610       | 3  | V  | 25 | 2503.3521      | 1252.1800       |
| 419.2294       | 4  | F  | 24 | 2404.2837      | 1202.6458       |
| 506.2614       | 5  | S  | 23 | 2257.2153      | 1129.1115       |
| 577.2986       | 6  | A  | 22 | 2170.1832      | 1085.5955       |
| 674.3513       | 7  | P  | 21 | 2099.1461      | 1050.0770       |
| 761.3834       | 8  | S  | 20 | 2002.0934      | 1001.5506       |
| 832.4205       | 9  | A  | 19 | 1915.0613      | 958.0346        |
| 919.4525       | 10 | S  | 18 | 1844.0242      | 922.5160        |
| 976.4740       | 11 | G  | 17 | 1756.9922      | 879.0000        |
| 1077.5216      | 12 | T  | 16 | 1699.9707      | 850.4893        |
| 1174.5744      | 13 | P  | 15 | 1598.9231      | 799.9654        |
| 1288.6173      | 14 | N  | 14 | 1501.8703      | 751.4391        |
| 1444.7436      | 15 | K  | 13 | 1387.8274      | 694.4176        |
| 1573.7862      | 16 | E  | 12 | 1231.7011      | 616.3544        |
| 1674.8339      | 17 | T  | 11 | 1102.6585      | 551.8331        |
| 1745.8710      | 18 | A  | 10 | 1001.6108      | 501.3093        |
| 1802.8925      | 19 | G  | 9  | 930.5737       | 465.7908        |
| 1915.9765      | 20 | L  | 8  | 873.5522       | 437.2800        |
| 2072.1028      | 21 | K  | 7  | 760.4681       | 380.7380        |
| 2171.1713      | 22 | V  | 6  | 604.3418       | 302.6748        |
| 2228.1927      | 23 | G  | 5  | 505.2734       | 253.1406        |
| 2327.2611      | 24 | V  | 4  | 448.2520       | 224.6299        |
| 2414.2932      | 25 | S  | 3  | 349.1836       | 175.0957        |
| 2501.3252      | 26 | S  | 2  | 262.1515       | 131.5797        |
|                | 27 | R  | 1  | 175.1195       | 88.0637         |

N-term: +29.04 K(15): +156.13  
K(21): +156.13

X-range:

-

MassTol: Y-zoom:

MassType:

AVG  MONO

Axis:

1  2

Label:

I  M  -

Ions:

a  +  2+  3+

b  +  2+  3+

c  +  2+  3+

x  +  2+  3+

y  +  2+  3+

z  +  2+  3+

hide H<sub>2</sub>O/NH<sub>3</sub>

zoom 112-122

GO



GSVKPYTNFDAER, MH+ 1539.7807, m/z 513.9318  
 L OSG40 P180811 230811-s1.03330.03330.3.dta

X-range:

-

MassTol: Y-zoom:

MassType:

AVG  MONO

Axis:

1  2

Label:

I  M  -

Ions:

a  +  2+  3+

b  +  2+  3+

c  +  2+  3+

x  +  2+  3+

y  +  2+  3+

z  +  2+  3+

hide H<sub>2</sub>O/NH<sub>3</sub>

zoom 112-122

GO

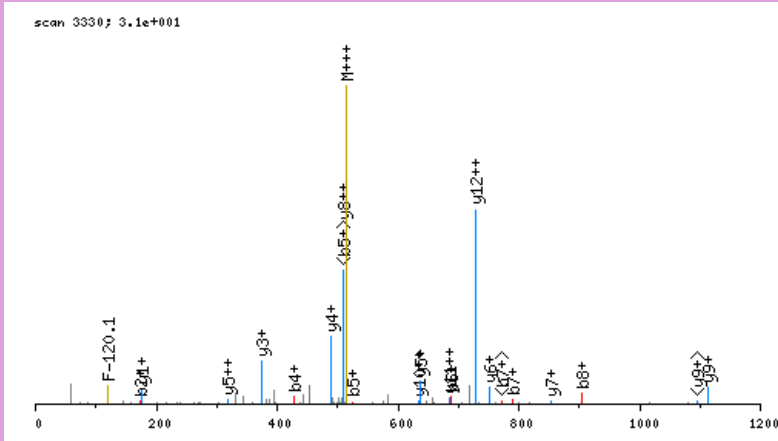

click image to zoom in; click top corners to zoom out [\[precursor±\]](#)

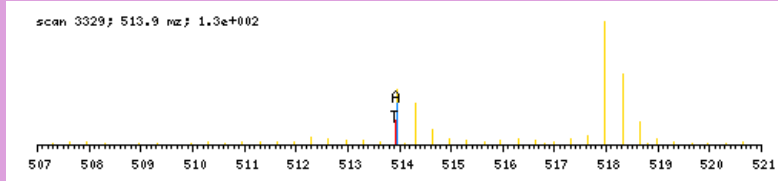

zoomed in precursor plot; T=theoretical m/z, A=acquired m/z

| b <sup>+</sup> | #  | AA # | y <sup>+</sup> | y <sup>2+</sup> |
|----------------|----|------|----------------|-----------------|
| 86.0606        | 1  | G 13 |                |                 |
| 173.0926       | 2  | S 12 | 1454.7280      | 727.8679        |
| 272.1610       | 3  | V 11 | 1367.6960      | 684.3519        |
| 428.2873       | 4  | K 10 | 1268.6276      | 634.8177        |
| 525.3401       | 5  | P 9  | 1112.5013      | 556.7545        |
| 688.4034       | 6  | Y 8  | 1015.4485      | 508.2282        |
| 789.4511       | 7  | T 7  | 852.3852       | 426.6965        |
| 903.4940       | 8  | N 6  | 751.3375       | 376.1727        |
| 1050.5624      | 9  | F 5  | 637.2946       | 319.1512        |
| 1165.5894      | 10 | D 4  | 490.2262       | 245.6170        |
| 1236.6265      | 11 | A 3  | 375.1992       | 188.1035        |
| 1365.6691      | 12 | E 2  | 304.1621       | 152.5850        |
|                | 13 | R 1  | 175.1195       | 88.0637         |

N-term:+29.04 K(4):+156.13

GSVVKSEDYAFPTYADR, MH+ 1960.9656, m/z 654.3267  
 L OSG39 P180811 230811-s1.04444.04444.3.dta

X-range:

-

MassTol: Y-zoom:

MassType:

AVG  MONO

Axis:

1  2

Label:

I  M  -

Ions:

a  +  2+  3+

b  +  2+  3+

c  +  2+  3+

x  +  2+  3+

y  +  2+  3+

z  +  2+  3+

hide H<sub>2</sub>O/NH<sub>3</sub>

zoom 112-122

GO

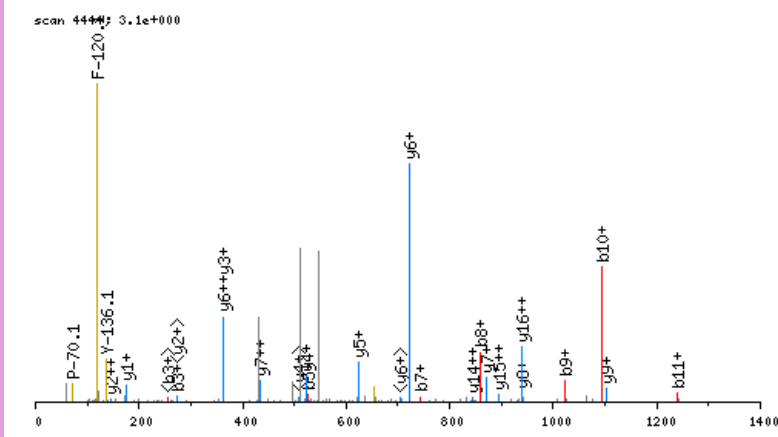

click image to zoom in; click top corners to zoom out [\[precursor±\]](#)

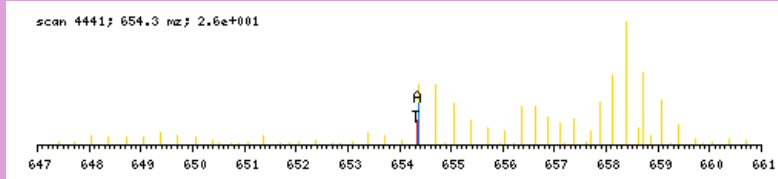

zoomed in precursor plot; T=theoretical m/z, A=acquired m/z

| b <sup>+</sup> | #  | AA # | y <sup>+</sup> | y <sup>2+</sup> |
|----------------|----|------|----------------|-----------------|
| 86.0606        | 1  | G 17 |                |                 |
| 173.0926       | 2  | S 16 | 1875.9129      | 938.4604        |
| 272.1610       | 3  | V 15 | 1788.8809      | 894.9444        |
| 371.2294       | 4  | V 14 | 1689.8125      | 845.4101        |
| 527.3557       | 5  | K 13 | 1590.7440      | 795.8759        |
| 614.3877       | 6  | S 12 | 1434.6177      | 717.8128        |
| 743.4303       | 7  | E 11 | 1347.5857      | 674.2968        |
| 858.4573       | 8  | D 10 | 1218.5431      | 609.7755        |
| 1021.5206      | 9  | Y 9  | 1103.5162      | 552.2620        |
| 1092.5577      | 10 | A 8  | 940.4529       | 470.7303        |
| 1239.6261      | 11 | F 7  | 869.4157       | 435.2118        |
| 1336.6789      | 12 | P 6  | 722.3473       | 361.6776        |
| 1437.7266      | 13 | T 5  | 625.2946       | 313.1512        |
| 1600.7899      | 14 | Y 4  | 524.2469       | 262.6274        |
| 1671.8270      | 15 | A 3  | 361.1836       | 181.0957        |
| 1786.8540      | 16 | D 2  | 290.1464       | 145.5771        |
|                | 17 | R 1  | 175.1195       | 88.0637         |

N-term:+29.04 K(5):+156.13

GTEYMQDPDEEALR, MH+ 1681.7379, m/z 561.2508  
 L OSG37 P180811 230811-s1.04503.04503.3.dta

X-range:

-

MassTol: Y-zoom:

MassType:

AVG  MONO

Axis:

1  2

Label:

I  M  -

Ions:

a  +  2+  3+

b  +  2+  3+

c  +  2+  3+

x  +  2+  3+

y  +  2+  3+

z  +  2+  3+

hide H<sub>2</sub>O/NH<sub>3</sub>

zoom 112-122

GO

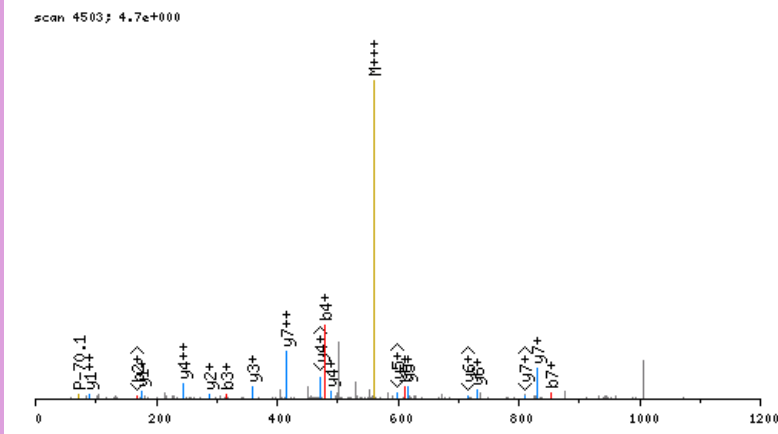

click image to zoom in; click top corners to zoom out [\[precursor±\]](#)

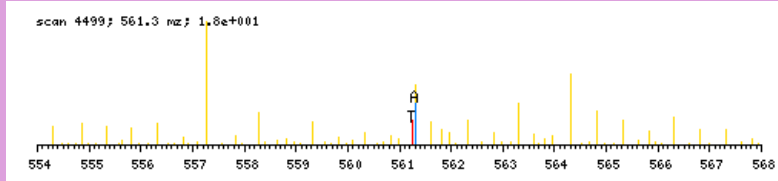

zoomed in precursor plot; T=theoretical m/z, A=acquired m/z

| b <sup>+</sup> | #  | AA # | y <sup>+</sup> | y <sup>2+</sup> |
|----------------|----|------|----------------|-----------------|
| 86.0606        | 1  | G 14 |                |                 |
| 187.1082       | 2  | T 13 | 1596.6852      | 798.8465        |
| 316.1508       | 3  | E 12 | 1495.6375      | 748.3227        |
| 479.2142       | 4  | Y 11 | 1366.5949      | 683.8014        |
| 610.2546       | 5  | M 10 | 1203.5316      | 602.2697        |
| 738.3132       | 6  | Q 9  | 1072.4911      | 536.7495        |
| 853.3402       | 7  | D 8  | 944.4325       | 472.7202        |
| 950.3929       | 8  | P 7  | 829.4056       | 415.2067        |
| 1065.4199      | 9  | D 6  | 732.3528       | 366.6803        |
| 1194.4625      | 10 | E 5  | 617.3259       | 309.1668        |
| 1323.5051      | 11 | E 4  | 488.2833       | 244.6455        |
| 1394.5422      | 12 | A 3  | 359.2407       | 180.1243        |
| 1507.6262      | 13 | L 2  | 288.2036       | 144.6057        |
|                | 14 | R 1  | 175.1195       | 88.0637         |

N-term:+29.04

GTEYMQDPDEEALRR, MH+ 1837.8390, m/z 613.2845  
 L OSG40 P180811 230811-s1.04445.04445.3.dta

X-range:

-

MassTol: Y-zoom:

MassType:

AVG  MONO

Axis:

1  2

Label:

I  M  -

Ions:

a  +  2+  3+

b  +  2+  3+

c  +  2+  3+

x  +  2+  3+

y  +  2+  3+

z  +  2+  3+

hide H<sub>2</sub>O/NH<sub>3</sub>

zoom 112-122

GO

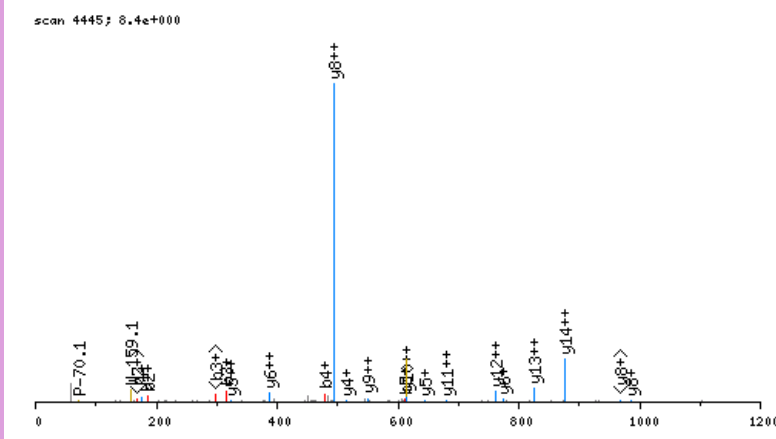

click image to zoom in; click top corners to zoom out [\[precursor±\]](#)

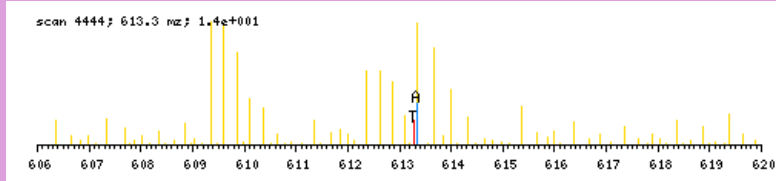

zoomed in precursor plot; T=theoretical m/z, A=acquired m/z

| b <sup>+</sup> | #  | AA | #  | y <sup>+</sup> | y <sup>2+</sup> |
|----------------|----|----|----|----------------|-----------------|
| 86.0606        | 1  | G  | 15 |                |                 |
| 187.1082       | 2  | T  | 14 | 1752.7863      | 876.8971        |
| 316.1508       | 3  | E  | 13 | 1651.7386      | 826.3732        |
| 479.2142       | 4  | Y  | 12 | 1522.6960      | 761.8519        |
| 610.2546       | 5  | M  | 11 | 1359.6327      | 680.3203        |
| 738.3132       | 6  | Q  | 10 | 1228.5922      | 614.8000        |
| 853.3402       | 7  | D  | 9  | 1100.5336      | 550.7707        |
| 950.3929       | 8  | P  | 8  | 985.5067       | 493.2573        |
| 1065.4199      | 9  | D  | 7  | 888.4539       | 444.7309        |
| 1194.4625      | 10 | E  | 6  | 773.4270       | 387.2174        |
| 1323.5051      | 11 | E  | 5  | 644.3844       | 322.6961        |
| 1394.5422      | 12 | A  | 4  | 515.3418       | 258.1748        |
| 1507.6262      | 13 | L  | 3  | 444.3047       | 222.6563        |
| 1663.7274      | 14 | R  | 2  | 331.2206       | 166.1142        |
|                | 15 | R  | 1  | 175.1195       | 88.0637         |

N-term:+29.04

GTGGVDTAAVGAVFDISNADR, MH+ 2020.9939, m/z 674.3362  
 L OSG37 P180811 230811-s1.08033.08033.3.dta

X-range:

-

MassTol: Y-zoom:

MassType:

AVG  MONO

Axis:

1  2

Label:

I  M  -

Ions:

a  +  2+  3+

b  +  2+  3+

c  +  2+  3+

x  +  2+  3+

y  +  2+  3+

z  +  2+  3+

hide H<sub>2</sub>O/NH<sub>3</sub>

zoom 112-122

GO

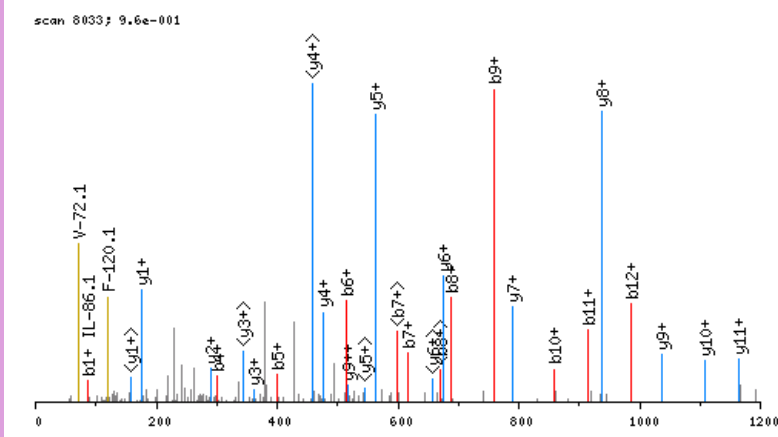

click image to zoom in; click top corners to zoom out [\[precursor±\]](#)

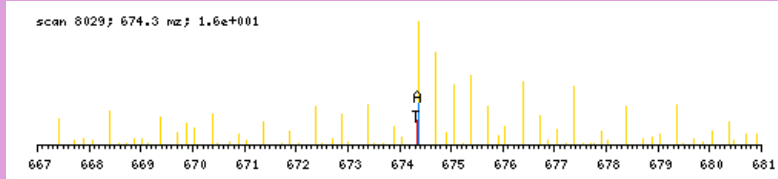

zoomed in precursor plot; T=theoretical m/z, A=acquired m/z

| b <sup>+</sup> | #  | AA # | y <sup>+</sup> | y <sup>2+</sup> |
|----------------|----|------|----------------|-----------------|
| 86.0606        | 1  | G 21 |                |                 |
| 187.1082       | 2  | T 20 | 1935.9412      | 968.4745        |
| 244.1297       | 3  | G 19 | 1834.8935      | 917.9507        |
| 301.1512       | 4  | G 18 | 1777.8721      | 889.4399        |
| 400.2196       | 5  | V 17 | 1720.8506      | 860.9292        |
| 515.2465       | 6  | D 16 | 1621.7822      | 811.3950        |
| 616.2942       | 7  | T 15 | 1506.7552      | 753.8815        |
| 687.3313       | 8  | A 14 | 1405.7076      | 703.3577        |
| 758.3684       | 9  | A 13 | 1334.6705      | 667.8391        |
| 857.4368       | 10 | V 12 | 1263.6333      | 632.3206        |
| 914.4583       | 11 | G 11 | 1164.5649      | 582.7864        |
| 985.4954       | 12 | A 10 | 1107.5435      | 554.2756        |
| 1084.5638      | 13 | V 9  | 1036.5063      | 518.7571        |
| 1231.6323      | 14 | F 8  | 937.4379       | 469.2229        |
| 1346.6592      | 15 | D 7  | 790.3695       | 395.6887        |
| 1459.7433      | 16 | I 6  | 675.3426       | 338.1752        |
| 1546.7753      | 17 | S 5  | 562.2585       | 281.6332        |
| 1660.8182      | 18 | N 4  | 475.2265       | 238.1172        |
| 1731.8553      | 19 | A 3  | 361.1836       | 181.0957        |
| 1846.8823      | 20 | D 2  | 290.1464       | 145.5771        |
|                | 21 | R 1  | 175.1195       | 88.0637         |

N-term:+29.04

GTKCCTLPEDQR, MH+ 1532.7836, m/z 511.5994  
 H OSG40 P180811 230811-s1.02525.02525.3.dta

scan 2525; 2.3e+000

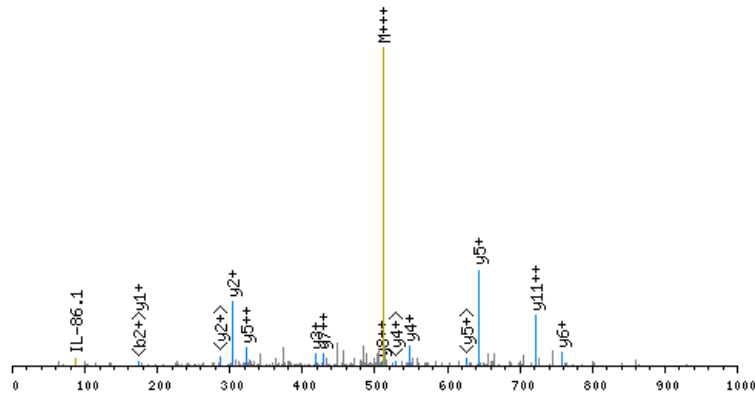

click image to zoom in; click top corners to zoom out [precursor±]

scan 2524; 511.6 m/z; 1.2e+001

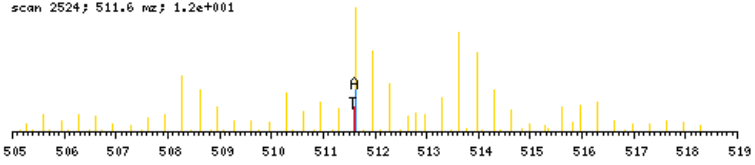

zoomed in precursor plot; T=theoretical m/z, A=acquired m/z

X-range:

-

MassTol: Y-zoom:

MassType:

AVG  MONO

Axis:

1  2

Label:

I  M  -

Ions:

a  +  2+  3+

b  +  2+  3+

c  +  2+  3+

x  +  2+  3+

y  +  2+  3+

z  +  2+  3+

hide H<sub>2</sub>O/NH<sub>3</sub>

zoom 112-122

GO

| b <sup>+</sup> | #  | AA # | y <sup>+</sup> | y <sup>2+</sup> |
|----------------|----|------|----------------|-----------------|
| 92.0924        | 1  | G    | 12             |                 |
| 193.1400       | 2  | T    | 11             | 1441.6991       |
| 355.2981       | 3  | K    | 10             | 1340.6514       |
| 515.3287       | 4  | C    | 9              | 1178.4933       |
| 675.3593       | 5  | C    | 8              | 1018.4627       |
| 776.4070       | 6  | T    | 7              | 858.4321        |
| 889.4911       | 7  | L    | 6              | 757.3844        |
| 986.5438       | 8  | P    | 5              | 644.3004        |
| 1115.5864      | 9  | E    | 4              | 547.2476        |
| 1230.6134      | 10 | D    | 3              | 418.2050        |
| 1358.6720      | 11 | Q    | 2              | 303.1781        |
|                | 12 | R    | 1              | 175.1195        |

N-term:+35.07 K(3):+162.16  
 C(4):+160.03 C(5):+160.03

GTLDPSSLDETAYER, MH+ 1795.8350, m/z 599.2832  
 L OSG37 P180811 230811-s1.04898.04898.3.dta

X-range:

-

MassTol: Y-zoom:

MassType:

AVG  MONO

Axis:

1  2

Label:

I  M  -

Ions:

a  +  2+  3+

b  +  2+  3+

c  +  2+  3+

x  +  2+  3+

y  +  2+  3+

z  +  2+  3+

hide H<sub>2</sub>O/NH<sub>3</sub>

zoom 112-122

GO

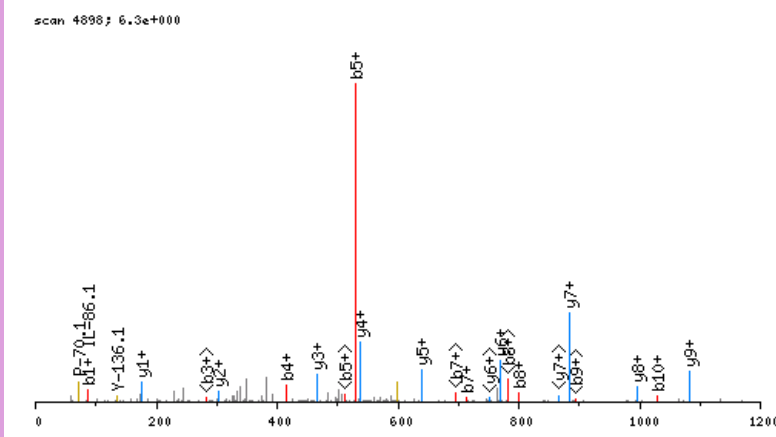

click image to zoom in; click top corners to zoom out [\[precursor±\]](#)

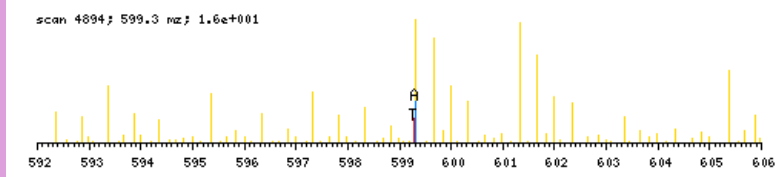

zoomed in precursor plot; T=theoretical m/z, A=acquired m/z

| b <sup>+</sup> | #  | AA # | y <sup>+</sup> | y <sup>2+</sup> |
|----------------|----|------|----------------|-----------------|
| 86.0606        | 1  | G 16 |                |                 |
| 187.1082       | 2  | T 15 | 1710.7822      | 855.8950        |
| 300.1923       | 3  | L 14 | 1609.7346      | 805.3712        |
| 415.2192       | 4  | D 13 | 1496.6505      | 748.8292        |
| 529.2622       | 5  | N 12 | 1381.6236      | 691.3157        |
| 626.3149       | 6  | P 11 | 1267.5806      | 634.2942        |
| 713.3470       | 7  | S 10 | 1170.5279      | 585.7678        |
| 800.3790       | 8  | S 9  | 1083.4958      | 542.2518        |
| 913.4631       | 9  | L 8  | 996.4638       | 498.7358        |
| 1028.4900      | 10 | D 7  | 883.3798       | 442.1938        |
| 1157.5326      | 11 | E 6  | 768.3528       | 384.6803        |
| 1258.5803      | 12 | T 5  | 639.3102       | 320.1590        |
| 1329.6174      | 13 | A 4  | 538.2625       | 269.6352        |
| 1492.6807      | 14 | Y 3  | 467.2254       | 234.1166        |
| 1621.7233      | 15 | E 2  | 304.1621       | 152.5850        |
|                | 16 | R 1  | 175.1195       | 88.0637         |

N-term:+29.04

GINKGASQAGMLAPGTR, MH+ 1672.8805, m/z 558.2983  
 L OSG40 P180811 230811-s1.02332.02332.3.dta

X-range:

-

MassTol: Y-zoom:

MassType:

AVG  MONO

Axis:

1  2

Label:

I  M  -

Ions:

a  +  2+  3+

b  +  2+  3+

c  +  2+  3+

x  +  2+  3+

y  +  2+  3+

z  +  2+  3+

hide H<sub>2</sub>O/NH<sub>3</sub>

zoom 112-122

GO

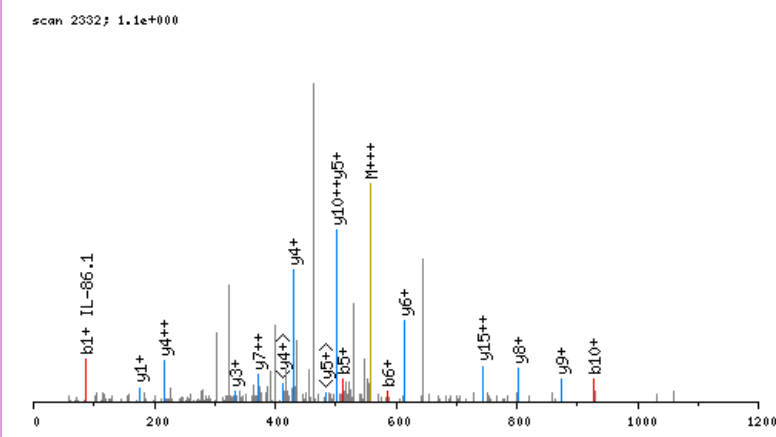

click image to zoom in; click top corners to zoom out [\[precursor±\]](#)

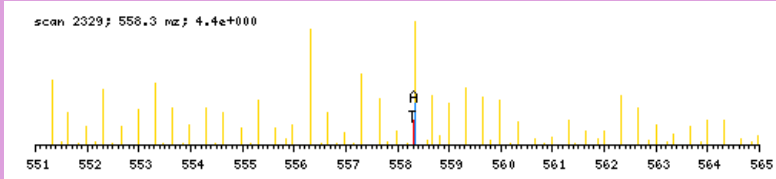

zoomed in precursor plot; T=theoretical m/z, A=acquired m/z

| b <sup>+</sup> | #  | AA # | y <sup>+</sup> | y <sup>2+</sup> |
|----------------|----|------|----------------|-----------------|
| 86.0606        | 1  | G 17 |                |                 |
| 187.1082       | 2  | T 16 | 1587.8277      | 794.4178        |
| 301.1512       | 3  | N 15 | 1486.7801      | 743.8939        |
| 457.2775       | 4  | K 14 | 1372.7371      | 686.8725        |
| 514.2989       | 5  | G 13 | 1216.6108      | 608.8093        |
| 585.3360       | 6  | A 12 | 1159.5894      | 580.2986        |
| 672.3681       | 7  | S 11 | 1088.5523      | 544.7800        |
| 800.4267       | 8  | Q 10 | 1001.5202      | 501.2640        |
| 871.4638       | 9  | A 9  | 873.4616       | 437.2347        |
| 928.4852       | 10 | G 8  | 802.4245       | 401.7162        |
| 1059.5257      | 11 | M 7  | 745.4031       | 373.2054        |
| 1172.6098      | 12 | L 6  | 614.3626       | 307.6852        |
| 1243.6469      | 13 | A 5  | 501.2785       | 251.1432        |
| 1340.6997      | 14 | P 4  | 430.2414       | 215.6246        |
| 1397.7211      | 15 | G 3  | 333.1886       | 167.0982        |
| 1498.7688      | 16 | T 2  | 276.1672       | 138.5875        |
|                | 17 | R 1  | 175.1195       | 88.0637         |

N-term:+29.04 K(4):+156.13



GTPSGTAEPYDGTKAR, MH+ 1675.8928, m/z 559.3024  
 H OSG39 P180811 230811-s1.02099.02099.3.dta

X-range:

-

MassTol: Y-zoom:

MassType:

AVG  MONO

Axis:

1  2

Label:

I  M  -

Ions:

a  +  2+  3+

b  +  2+  3+

c  +  2+  3+

x  +  2+  3+

y  +  2+  3+

z  +  2+  3+

hide H<sub>2</sub>O/NH<sub>3</sub>

zoom 112-122

GO

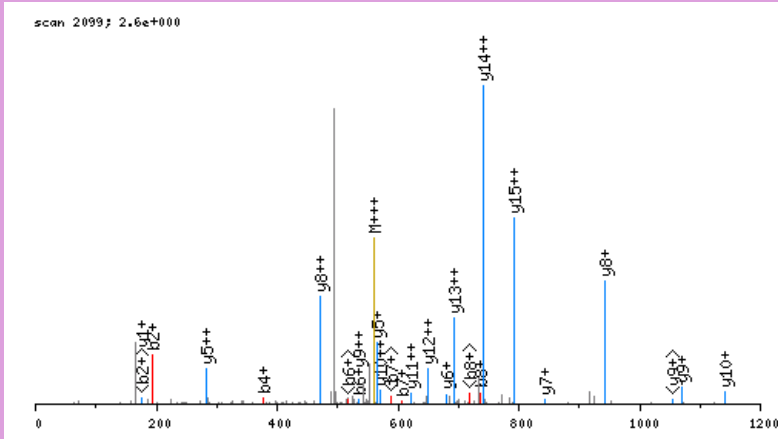

click image to zoom in; click top corners to zoom out [\[precursor±\]](#)

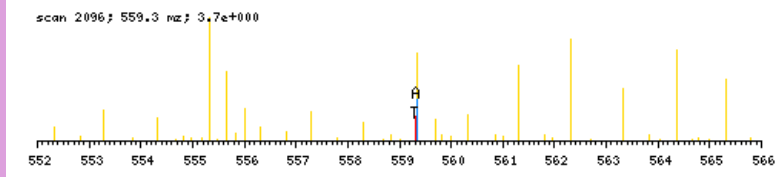

zoomed in precursor plot; T=theoretical m/z, A=acquired m/z

| b <sup>+</sup> | #  | AA # | y <sup>+</sup> | y <sup>2+</sup> |
|----------------|----|------|----------------|-----------------|
| 92.0924        | 1  | G 16 |                |                 |
| 193.1400       | 2  | T 15 | 1584.8082      | 792.9080        |
| 290.1928       | 3  | P 14 | 1483.7605      | 742.3842        |
| 377.2248       | 4  | S 13 | 1386.7078      | 693.8578        |
| 434.2463       | 5  | G 12 | 1299.6757      | 650.3418        |
| 535.2940       | 6  | T 11 | 1242.6543      | 621.8311        |
| 606.3311       | 7  | A 10 | 1141.6066      | 571.3072        |
| 735.3737       | 8  | E 9  | 1070.5695      | 535.7887        |
| 832.4264       | 9  | P 8  | 941.5269       | 471.2674        |
| 995.4898       | 10 | Y 7  | 844.4741       | 422.7410        |
| 1110.5167      | 11 | D 6  | 681.4108       | 341.2093        |
| 1167.5382      | 12 | G 5  | 566.3839       | 283.6958        |
| 1268.5859      | 13 | T 4  | 509.3624       | 255.1851        |
| 1430.7440      | 14 | K 3  | 408.3147       | 204.6613        |
| 1501.7811      | 15 | A 2  | 246.1566       | 123.5822        |
|                | 16 | R 1  | 175.1195       | 88.0637         |

N-term:+35.07 K(14):+162.16

GTSPAAEVTPSPPEPAPALEAPAR, MH+ 2347.2357, m/z 783.0834  
 H OSG36 P180811 230811-s1.03937.03937.3.dta

scan 3937; 1.9e+000

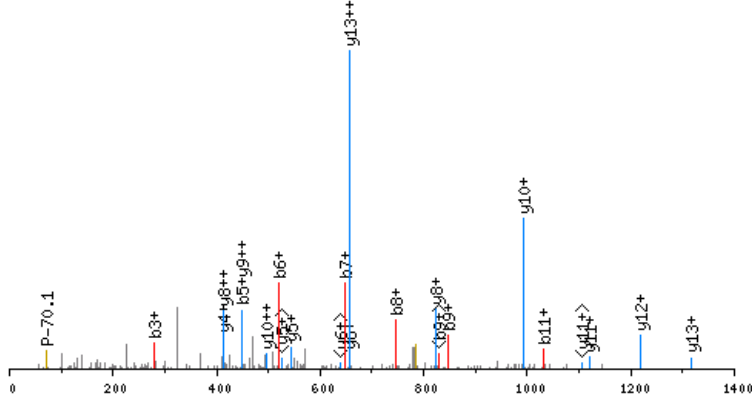

click image to zoom in; click top corners to zoom out [precursor±]

scan 3934; 783.1 nz; 4.8e+000

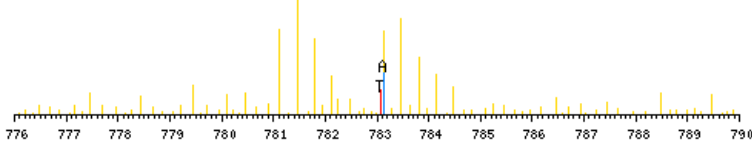

zoomed in precursor plot; T=theoretical m/z, A=acquired m/z

X-range:

0 - 0

MassTol: Y-zoom:

0. 1.

MassType:

AVG  MONO

Axis:

1  2

Label:

I  M  -

Ions:

a  +  2+  3+

b  +  2+  3+

c  +  2+  3+

x  +  2+  3+

y  +  2+  3+

z  +  2+  3+

hide H<sub>2</sub>O/NH<sub>3</sub>

zoom 112-122

GO

| b <sup>+</sup> | #  | AA # | y <sup>+</sup> | y <sup>2+</sup> |
|----------------|----|------|----------------|-----------------|
| 92.0924        | 1  | G 24 |                |                 |
| 193.1400       | 2  | T 23 | 2256.1512      | 1128.5795       |
| 280.1721       | 3  | S 22 | 2155.1035      | 1078.0557       |
| 377.2248       | 4  | P 21 | 2068.0715      | 1034.5397       |
| 448.2619       | 5  | A 20 | 1971.0187      | 986.0133        |
| 519.2991       | 6  | A 19 | 1899.9816      | 950.4947        |
| 648.3417       | 7  | E 18 | 1828.9445      | 914.9762        |
| 747.4101       | 8  | V 17 | 1699.9019      | 850.4549        |
| 848.4577       | 9  | T 16 | 1600.8335      | 800.9207        |
| 945.5105       | 10 | P 15 | 1499.7858      | 750.3968        |
| 1032.5425      | 11 | S 14 | 1402.7331      | 701.8704        |
| 1129.5953      | 12 | P 13 | 1315.7010      | 658.3544        |
| 1226.6481      | 13 | P 12 | 1218.6483      | 609.8280        |
| 1355.6907      | 14 | E 11 | 1121.5955      | 561.3017        |
| 1452.7434      | 15 | P 10 | 992.5529       | 496.7804        |
| 1523.7805      | 16 | A 9  | 895.5001       | 448.2540        |
| 1620.8333      | 17 | P 8  | 824.4630       | 412.7354        |
| 1691.8704      | 18 | A 7  | 727.4103       | 364.2090        |
| 1804.9545      | 19 | L 6  | 656.3731       | 328.6905        |
| 1933.9971      | 20 | E 5  | 543.2891       | 272.1485        |
| 2005.0342      | 21 | A 4  | 414.2465       | 207.6272        |
| 2102.0870      | 22 | P 3  | 343.2094       | 172.1086        |
| 2173.1241      | 23 | A 2  | 246.1566       | 123.5822        |
|                | 24 | R 1  | 175.1195       | 88.0637         |

N-term:+35.07

GVDTAAVGAVFDISNADR, MH+ 1811.9351, m/z 604.6499  
 H OSG37 P180811 230811-s1.07872.07872.3.dta

X-range:

-

MassTol: Y-zoom:

MassType:

AVG  MONO

Axis:

1  2

Label:

I  M  -

Ions:

a  +  2+  3+

b  +  2+  3+

c  +  2+  3+

x  +  2+  3+

y  +  2+  3+

z  +  2+  3+

hide H<sub>2</sub>O/NH<sub>3</sub>

zoom 112-122

GO

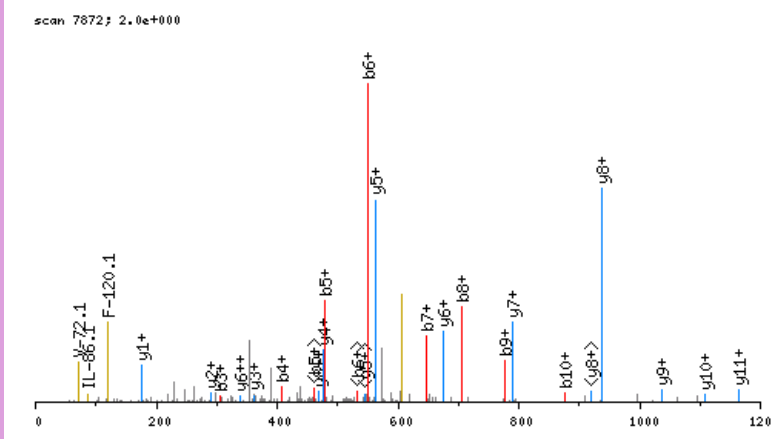

click image to zoom in; click top corners to zoom out [\[precursor±\]](#)

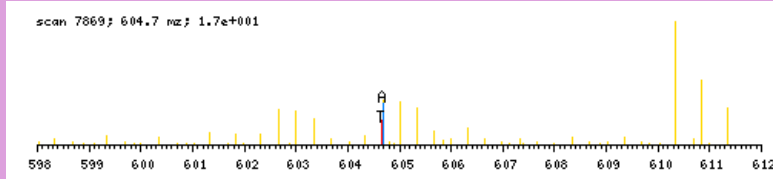

zoomed in precursor plot; T-theoretical m/z, A-acquired m/z

| b <sup>+</sup> | #  | AA # | y <sup>+</sup> | y <sup>2+</sup> |
|----------------|----|------|----------------|-----------------|
| 92.0924        | 1  | G 18 |                |                 |
| 191.1608       | 2  | V 17 | 1720.8506      | 860.9292        |
| 306.1877       | 3  | D 16 | 1621.7822      | 811.3950        |
| 407.2354       | 4  | T 15 | 1506.7552      | 753.8815        |
| 478.2725       | 5  | A 14 | 1405.7076      | 703.3577        |
| 549.3096       | 6  | A 13 | 1334.6705      | 667.8391        |
| 648.3780       | 7  | V 12 | 1263.6333      | 632.3206        |
| 705.3995       | 8  | G 11 | 1164.5649      | 582.7864        |
| 776.4366       | 9  | A 10 | 1107.5435      | 554.2756        |
| 875.5050       | 10 | V 9  | 1036.5063      | 518.7571        |
| 1022.5734      | 11 | F 8  | 937.4379       | 469.2229        |
| 1137.6004      | 12 | D 7  | 790.3695       | 395.6887        |
| 1250.6845      | 13 | I 6  | 675.3426       | 338.1752        |
| 1337.7165      | 14 | S 5  | 562.2585       | 281.6332        |
| 1451.7594      | 15 | N 4  | 475.2265       | 238.1172        |
| 1522.7965      | 16 | A 3  | 361.1836       | 181.0957        |
| 1637.8235      | 17 | D 2  | 290.1464       | 145.5771        |
|                | 18 | R 1  | 175.1195       | 88.0637         |

N-term:+35.07

GVEEHETLLLR, MH+ 1323.7272, m/z 441.9139  
 L OSG40 P180811 230811-s1.04771.04771.3.dta

scan 4771; 1.4e+001

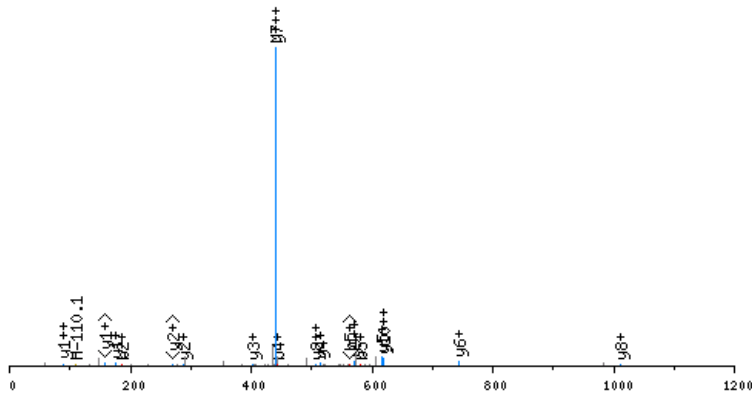

click image to zoom in; click top corners to zoom out [\[precursor±\]](#)

scan 4769; 441.9 m/z; 7.8e+002

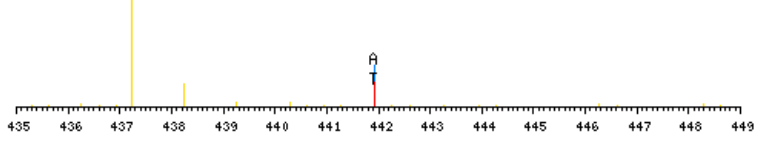

zoomed in precursor plot; T=theoretical m/z, A=acquired m/z

X-range:

-

MassTol: Y-zoom:

MassType:

AVG  MONO

Axis:

1  2

Label:

I  M  -

Ions:

a  +  2+  3+

b  +  2+  3+

c  +  2+  3+

x  +  2+  3+

y  +  2+  3+

z  +  2+  3+

hide H<sub>2</sub>O/NH<sub>3</sub>

zoom 112-122

GO

| b <sup>+</sup> | #  | AA # | y <sup>+</sup> | y <sup>2+</sup> |
|----------------|----|------|----------------|-----------------|
| 86.0606        | 1  | G 11 |                |                 |
| 185.1290       | 2  | V 10 | 1238.6745      | 619.8412        |
| 314.1716       | 3  | E 9  | 1139.6061      | 570.3069        |
| 443.2142       | 4  | E 8  | 1010.5635      | 505.7856        |
| 580.2731       | 5  | H 7  | 881.5209       | 441.2644        |
| 709.3157       | 6  | E 6  | 744.4620       | 372.7349        |
| 810.3633       | 7  | T 5  | 615.4194       | 308.2136        |
| 923.4474       | 8  | L 4  | 514.3717       | 257.6898        |
| 1036.5315      | 9  | L 3  | 401.2876       | 201.1477        |
| 1149.6155      | 10 | L 2  | 288.2036       | 144.6057        |
|                | 11 | R 1  | 175.1195       | 88.0637         |

N-term:+29.04

GVEGPKGDGPQGPR, MH+ 1503.7920, m/z 501.9355  
 L OSG40 P180811 230811-s1.02083.02083.3.dta

X-range:

-

MassTol: Y-zoom:

MassType:

AVG  MONO

Axis:

1  2

Label:

I  M  -

Ions:

a  +  2+  3+

b  +  2+  3+

c  +  2+  3+

x  +  2+  3+

y  +  2+  3+

z  +  2+  3+

hide H<sub>2</sub>O/NH<sub>3</sub>

zoom 112-122

GO

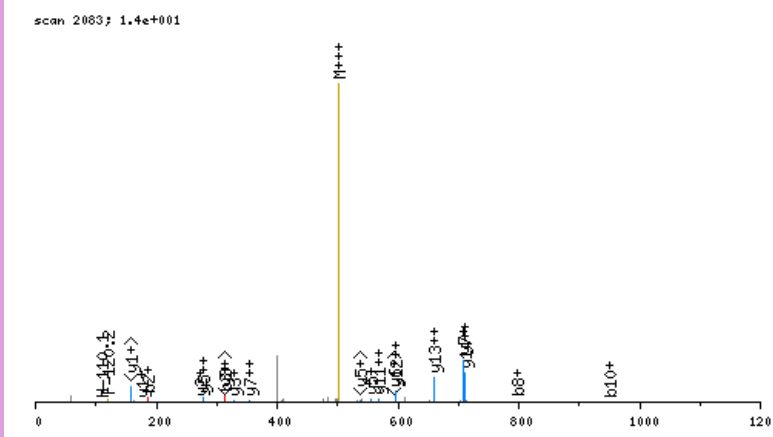

click image to zoom in; click top corners to zoom out [\[precursor±\]](#)

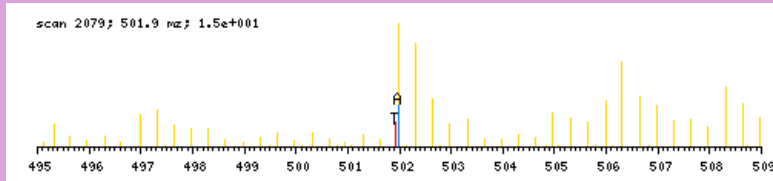

zoomed in precursor plot; T=theoretical m/z, A=acquired m/z

| b <sup>+</sup> | #  | AA # | y <sup>+</sup> | y <sup>2+</sup> |
|----------------|----|------|----------------|-----------------|
| 86.0606        | 1  | G 15 |                |                 |
| 185.1290       | 2  | V 14 | 1418.7392      | 709.8735        |
| 314.1716       | 3  | E 13 | 1319.6708      | 660.3393        |
| 371.1930       | 4  | G 12 | 1190.6282      | 595.8180        |
| 468.2458       | 5  | P 11 | 1133.6068      | 567.3073        |
| 624.3721       | 6  | K 10 | 1036.5540      | 518.7809        |
| 681.3936       | 7  | G 9  | 880.4277       | 440.7178        |
| 796.4205       | 8  | D 8  | 823.4062       | 412.2070        |
| 893.4733       | 9  | P 7  | 708.3793       | 354.6936        |
| 950.4947       | 10 | G 6  | 611.3265       | 306.1672        |
| 1047.5475      | 11 | P 5  | 554.3051       | 277.6564        |
| 1175.6061      | 12 | Q 4  | 457.2523       | 229.1301        |
| 1232.6275      | 13 | G 3  | 329.1937       | 165.1008        |
| 1329.6803      | 14 | P 2  | 272.1723       | 136.5900        |
|                | 15 | R 1  | 175.1195       | 88.0637         |

N-term:+29.04 K(6):+156.13

GVEIETISPGDGR, MH+ 1357.6963, m/z 453.2370  
 L OSG37 P180811 230811-s1.04602.04602.3.dta

X-range:

-

MassTol: Y-zoom:

MassType:

AVG  MONO

Axis:

1  2

Label:

I  M  -

Ions:

a  +  2+  3+

b  +  2+  3+

c  +  2+  3+

x  +  2+  3+

y  +  2+  3+

z  +  2+  3+

hide H<sub>2</sub>O/NH<sub>3</sub>

zoom 112-122

GO

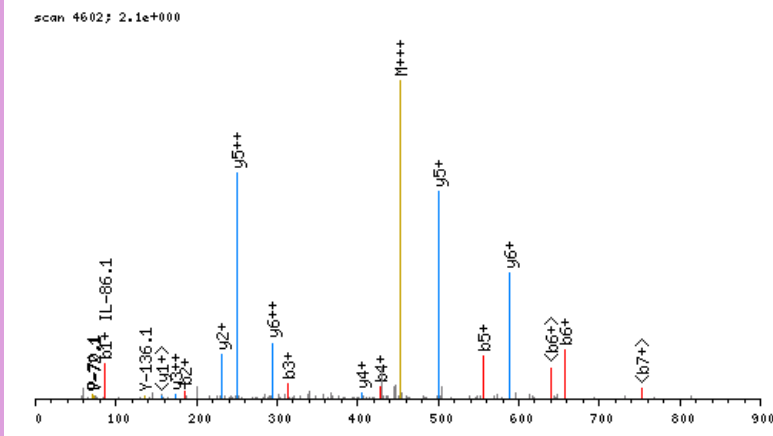

click image to zoom in; click top corners to zoom out [\[precursor±\]](#)

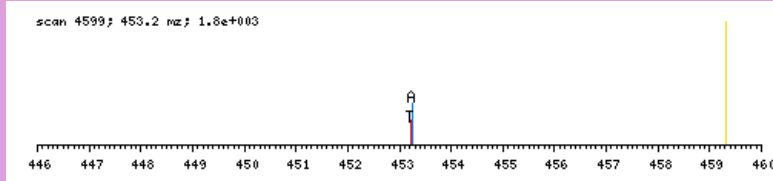

zoomed in precursor plot; T=theoretical m/z, A=acquired m/z

| b <sup>+</sup> | #  | AA # | y <sup>+</sup>  | y <sup>2+</sup> |
|----------------|----|------|-----------------|-----------------|
| 86.0606        | 1  | G 13 |                 |                 |
| 185.1290       | 2  | V 12 | 1272.6436       | 636.8257        |
| 314.1716       | 3  | E 11 | 1173.5752       | 587.2915        |
| 427.2556       | 4  | I 10 | 1044.5326       | 522.7702        |
| 556.2982       | 5  | E 9  | 931.4485        | 466.2282        |
| 657.3459       | 6  | T 8  | 802.4059        | 401.7069        |
| 770.4300       | 7  | I 7  | 701.3582        | 351.1830        |
| 857.4620       | 8  | S 6  | <b>588.2742</b> | <b>294.6410</b> |
| 954.5148       | 9  | P 5  | <b>501.2421</b> | <b>251.1250</b> |
| 1011.5362      | 10 | G 4  | <b>404.1894</b> | 202.5986        |
| 1126.5632      | 11 | D 3  | 347.1679        | <b>174.0879</b> |
| 1183.5846      | 12 | G 2  | <b>232.1410</b> | 116.5744        |
|                | 13 | R 1  | 175.1195        | 88.0637         |

N-term:+29.04

GVISAISEAAAQYNPEPPPPR, MH+ 2198.1669, m/z 550.2972  
 H OSG36 P180811 230811-s1.05198.05198.4.dta

X-range:

-

MassTol: Y-zoom:

MassType:

AVG  MONO

Axis:

1  2

Label:

I  M  -

Ions:

a  +  2+  3+

b  +  2+  3+

c  +  2+  3+

x  +  2+  3+

y  +  2+  3+

z  +  2+  3+

hide H<sub>2</sub>O/NH<sub>3</sub>

zoom 112-122

GO

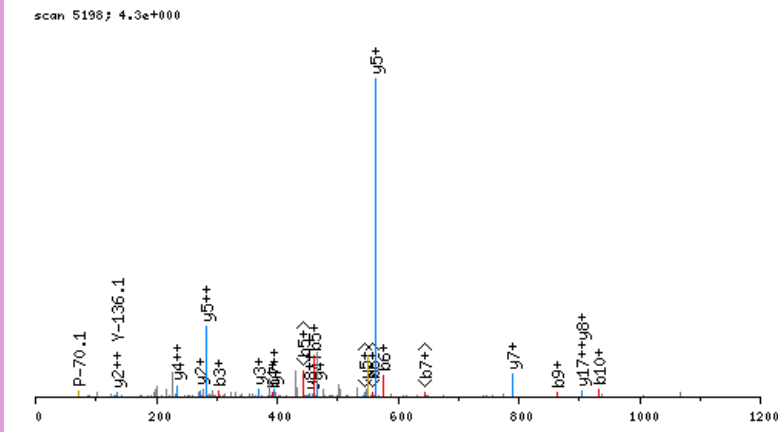

click image to zoom in; click top corners to zoom out [\[precursor±\]](#)

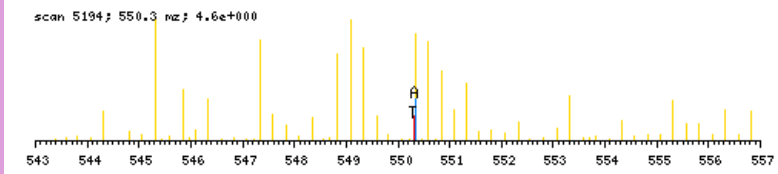

zoomed in precursor plot; T=theoretical m/z, A=acquired m/z

| b <sup>+</sup> | #  | AA # | y <sup>+</sup> | y <sup>2+</sup> |
|----------------|----|------|----------------|-----------------|
| 92.0924        | 1  | G 21 |                |                 |
| 191.1608       | 2  | V 20 | 2107.0824      | 1054.0451       |
| 304.2448       | 3  | I 19 | 2008.0140      | 1004.5109       |
| 391.2769       | 4  | S 18 | 1894.9299      | 947.9689        |
| 462.3140       | 5  | A 17 | 1807.8979      | 904.4529        |
| 575.3980       | 6  | I 16 | 1736.8608      | 868.9343        |
| 662.4301       | 7  | S 15 | 1623.7767      | 812.3923        |
| 791.4727       | 8  | E 14 | 1536.7447      | 768.8763        |
| 862.5098       | 9  | A 13 | 1407.7021      | 704.3550        |
| 933.5469       | 10 | A 12 | 1336.6650      | 668.8364        |
| 1004.5840      | 11 | A 11 | 1265.6279      | 633.3178        |
| 1132.6426      | 12 | Q 10 | 1194.5907      | 597.7993        |
| 1295.7059      | 13 | Y 9  | 1066.5322      | 533.7700        |
| 1409.7488      | 14 | N 8  | 903.4688       | 452.2383        |
| 1506.8016      | 15 | P 7  | 789.4259       | 395.2169        |
| 1635.8442      | 16 | E 6  | 692.3731       | 346.6905        |
| 1732.8970      | 17 | P 5  | 563.3306       | 282.1692        |
| 1829.9497      | 18 | P 4  | 466.2778       | 233.6428        |
| 1927.0025      | 19 | P 3  | 369.2250       | 185.1164        |
| 2024.0553      | 20 | P 2  | 272.1723       | 136.5900        |
|                | 21 | R 1  | 175.1195       | 88.0637         |

N-term:+35.07

GVQPPNFSWVLPGR, MH+ 1581.8541, m/z 527.9562  
 L OSG37 P180811 230811-s1.08476.08476.3.dta

X-range:

-

MassTol: Y-zoom:

MassType:

AVG  MONO

Axis:

1  2

Label:

I  M  -

Ions:

a  +  2+  3+

b  +  2+  3+

c  +  2+  3+

x  +  2+  3+

y  +  2+  3+

z  +  2+  3+

hide H<sub>2</sub>O/NH<sub>3</sub>

zoom 112-122

GO

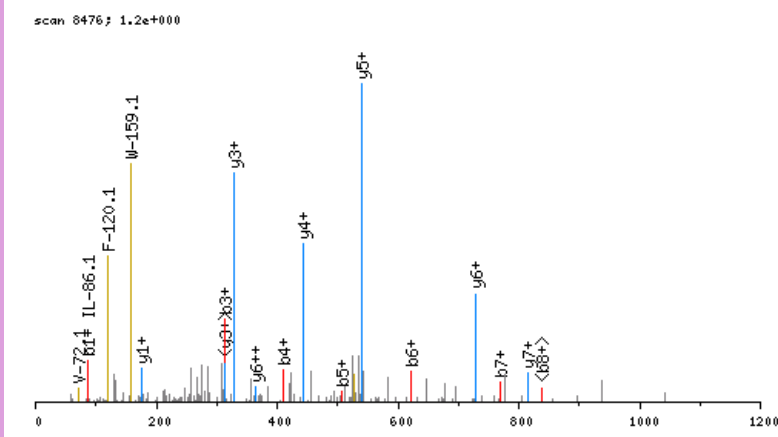

click image to zoom in; click top corners to zoom out [\[precursor±\]](#)

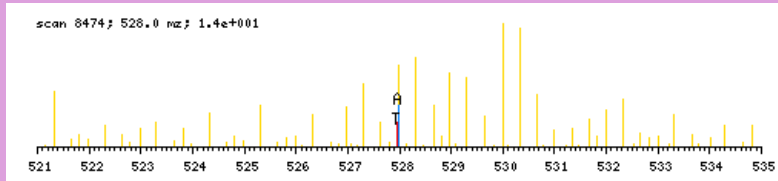

zoomed in precursor plot; T=theoretical m/z, A=acquired m/z

| b <sup>+</sup> | #  | AA # | y <sup>+</sup> | y <sup>2+</sup> |
|----------------|----|------|----------------|-----------------|
| 86.0606        | 1  | G 14 |                |                 |
| 185.1290       | 2  | V 13 | 1496.8014      | 748.9046        |
| 313.1876       | 3  | Q 12 | 1397.7330      | 699.3704        |
| 410.2403       | 4  | P 11 | 1269.6744      | 635.3411        |
| 507.2931       | 5  | P 10 | 1172.6217      | 586.8147        |
| 621.3360       | 6  | N 9  | 1075.5689      | 538.2884        |
| 768.4044       | 7  | F 8  | 961.5260       | 481.2669        |
| 855.4365       | 8  | S 7  | 814.4575       | 407.7327        |
| 1041.5158      | 9  | W 6  | 727.4255       | 364.2167        |
| 1140.5842      | 10 | V 5  | 541.3462       | 271.1770        |
| 1253.6682      | 11 | L 4  | 442.2778       | 221.6428        |
| 1350.7210      | 12 | P 3  | 329.1937       | 165.1008        |
| 1407.7425      | 13 | G 2  | 232.1410       | 116.5744        |
|                | 14 | R 1  | 175.1195       | 88.0637         |

N-term:+29.04



GVQVETISPGDGR, MH+ 1342.6966, m/z 671.8520  
 L OSG37 P180811 230811-s1.03535.03535.2.dta

X-range:

-

MassTol: Y-zoom:

MassType:

AVG  MONO

Axis:

1  2

Label:

I  M  -

Ions:

a  +  2+  3+

b  +  2+  3+

c  +  2+  3+

x  +  2+  3+

y  +  2+  3+

z  +  2+  3+

hide H<sub>2</sub>O/NH<sub>3</sub>

zoom 112-122

GO

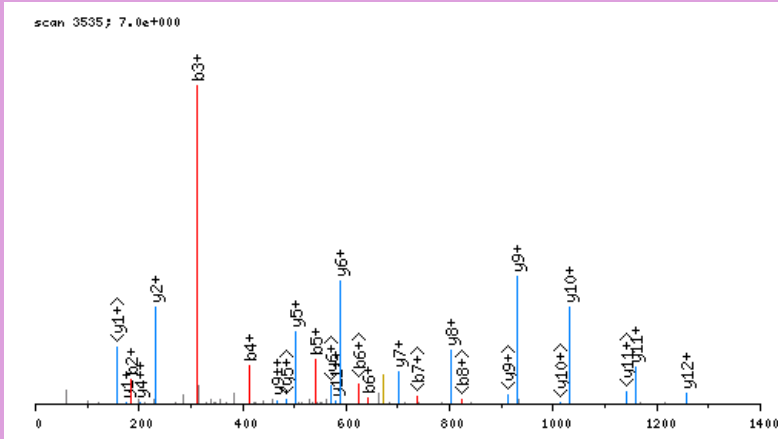

click image to zoom in; click top corners to zoom out [\[precursor±\]](#)

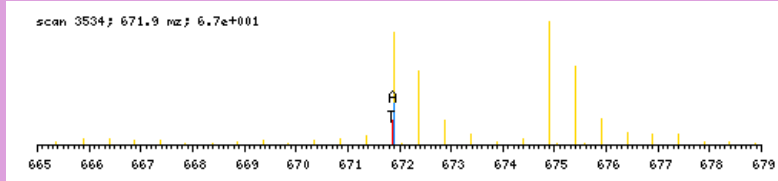

zoomed in precursor plot; T=theoretical m/z, A=acquired m/z

| b <sup>+</sup> | #  | AA # | y <sup>+</sup> | y <sup>2+</sup> |
|----------------|----|------|----------------|-----------------|
| 86.0606        | 1  | G 13 |                |                 |
| 185.1290       | 2  | V 12 | 1257.6439      | 629.3259        |
| 313.1876       | 3  | Q 11 | 1158.5755      | 579.7917        |
| 412.2560       | 4  | V 10 | 1030.5169      | 515.7624        |
| 541.2986       | 5  | E 9  | 931.4485       | 466.2282        |
| 642.3462       | 6  | T 8  | 802.4059       | 401.7069        |
| 755.4303       | 7  | I 7  | 701.3582       | 351.1830        |
| 842.4623       | 8  | S 6  | 588.2742       | 294.6410        |
| 939.5151       | 9  | P 5  | 501.2421       | 251.1250        |
| 996.5366       | 10 | G 4  | 404.1894       | 202.5986        |
| 1111.5635      | 11 | D 3  | 347.1679       | 174.0879        |
| 1168.5850      | 12 | G 2  | 232.1410       | 116.5744        |
|                | 13 | R 1  | 175.1195       | 88.0637         |

N-term:+29.04

GVSQAGEEME QFGQGV R, MH+ 1836.8550, m/z 612.9565  
 L OSG37 P180811 230811-s1.05661.05661.3.dta

scan 5661: 1.3e+000

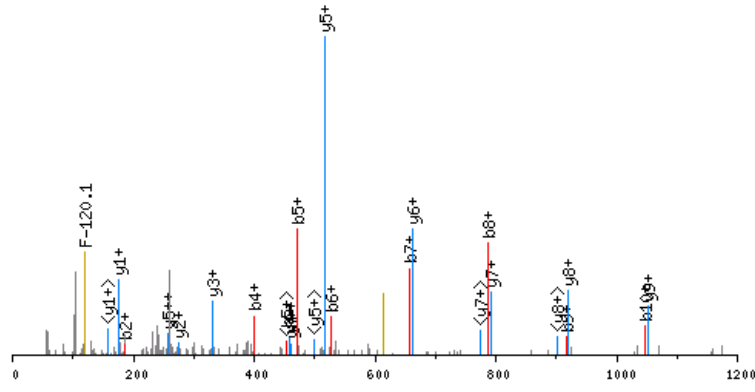

click image to zoom in; click top corners to zoom out [\[precursor±\]](#)

scan 5659: 613.0 m/z; 1.5e+001

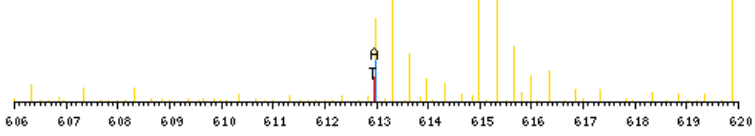

zoomed in precursor plot; T=theoretical m/z, A=acquired m/z

X-range:

-

MassTol: Y-zoom:

MassType:

AVG  MONO

Axis:

1  2

Label:

I  M  -

Ions:

a  +  2+  3+

b  +  2+  3+

c  +  2+  3+

x  +  2+  3+

y  +  2+  3+

z  +  2+  3+

hide H<sub>2</sub>O/NH<sub>3</sub>

zoom 112-122

GO

| b <sup>+</sup> | #  | AA # | y <sup>+</sup> | y <sup>2+</sup> |
|----------------|----|------|----------------|-----------------|
| 86.0606        | 1  | G 17 |                |                 |
| 185.1290       | 2  | V 16 | 1751.8023      | 876.4050        |
| 272.1610       | 3  | S 15 | 1652.7339      | 826.8708        |
| 400.2196       | 4  | Q 14 | 1565.7018      | 783.3548        |
| 471.2567       | 5  | A 13 | 1437.6433      | 719.3255        |
| 528.2782       | 6  | G 12 | 1366.6061      | 683.8070        |
| 657.3208       | 7  | E 11 | 1309.5847      | 655.2963        |
| 786.3633       | 8  | E 10 | 1180.5421      | 590.7750        |
| 917.4038       | 9  | M 9  | 1051.4995      | 526.2537        |
| 1046.4464      | 10 | E 8  | 920.4590       | 460.7334        |
| 1174.5050      | 11 | Q 7  | 791.4164       | 396.2121        |
| 1321.5734      | 12 | F 6  | 663.3578       | 332.1828        |
| 1378.5949      | 13 | G 5  | 516.2894       | 258.6486        |
| 1506.6535      | 14 | Q 4  | 459.2680       | 230.1379        |
| 1563.6749      | 15 | G 3  | 331.2094       | 166.1086        |
| 1662.7433      | 16 | V 2  | 274.1879       | 137.5979        |
|                | 17 | R 1  | 175.1195       | 88.0637         |

N-term:+29.04

GVSSGPGMGLMGPR, MH+ 1427.7139, m/z 714.3606  
 L OSG37 P180811 230811-s1.05420.05420.2.dta

X-range:

-

MassTol: Y-zoom:

MassType:

AVG  MONO

Axis:

1  2

Label:

I  M  -

Ions:

a  +  2+  3+

b  +  2+  3+

c  +  2+  3+

x  +  2+  3+

y  +  2+  3+

z  +  2+  3+

hide H<sub>2</sub>O/NH<sub>3</sub>

zoom 112-122

GO

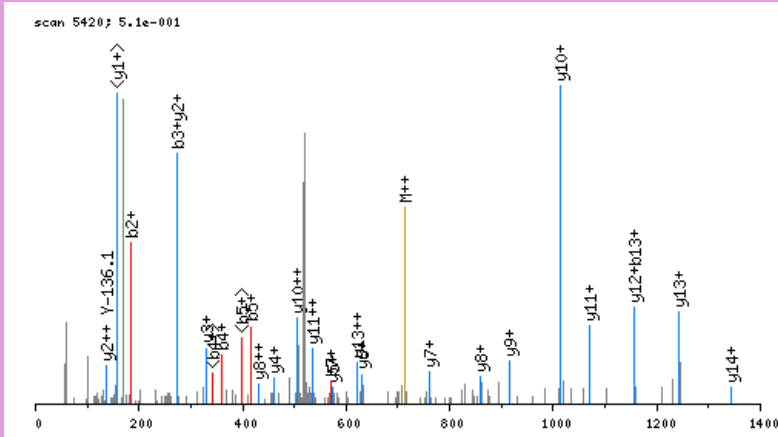

click image to zoom in; click top corners to zoom out [\[precursor±\]](#)

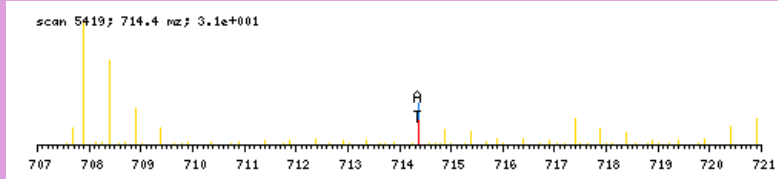

zoomed in precursor plot; T=theoretical m/z, A=acquired m/z

| b <sup>+</sup> | #  | AA # | y <sup>+</sup> | y <sup>2+</sup> |
|----------------|----|------|----------------|-----------------|
| 86.0606        | 1  | G 15 |                |                 |
| 185.1290       | 2  | V 14 | 1342.6612      | 671.8345        |
| 272.1610       | 3  | S 13 | 1243.5927      | 622.3003        |
| 359.1930       | 4  | S 12 | 1156.5607      | 578.7843        |
| 416.2145       | 5  | G 11 | 1069.5287      | 535.2683        |
| 513.2673       | 6  | P 10 | 1012.5072      | 506.7575        |
| 570.2887       | 7  | G 9  | 915.4545       | 458.2311        |
| 667.3415       | 8  | P 8  | 858.4330       | 429.7204        |
| 798.3820       | 9  | M 7  | 761.3802       | 381.1940        |
| 855.4034       | 10 | G 6  | 630.3397       | 315.6738        |
| 968.4875       | 11 | L 5  | 573.3183       | 287.1631        |
| 1099.5280      | 12 | M 4  | 460.2342       | 230.6210        |
| 1156.5495      | 13 | G 3  | 329.1937       | 165.1008        |
| 1253.6022      | 14 | P 2  | 272.1723       | 136.5900        |
|                | 15 | R 1  | 175.1195       | 88.0637         |

N-term:+29.04

GVTDNVVDTVVHYVPLPR, MH+ 2014.1185, m/z 672.0444  
 H OSG39 P180811 230811-s1.07884.07884.3.dta

X-range:

-

MassTol: Y-zoom:

MassType:

AVG  MONO

Axis:

1  2

Label:

I  M  -

Ions:

a  +  2+  3+

b  +  2+  3+

c  +  2+  3+

x  +  2+  3+

y  +  2+  3+

z  +  2+  3+

hide H<sub>2</sub>O/NH<sub>3</sub>

zoom 112-122

GO

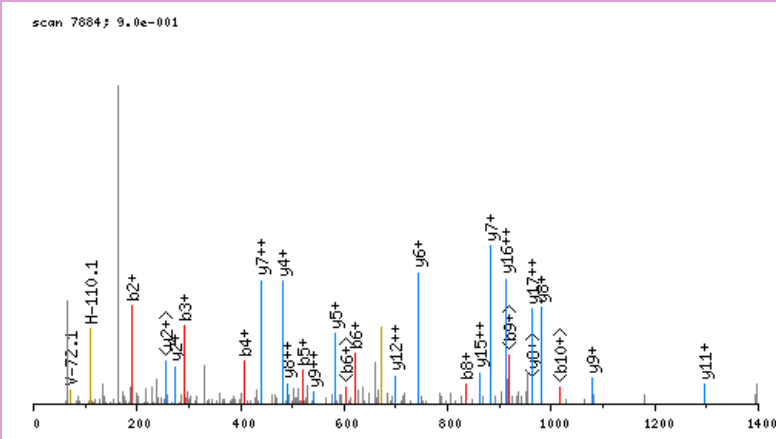

click image to zoom in; click top corners to zoom out [\[precursor±\]](#)

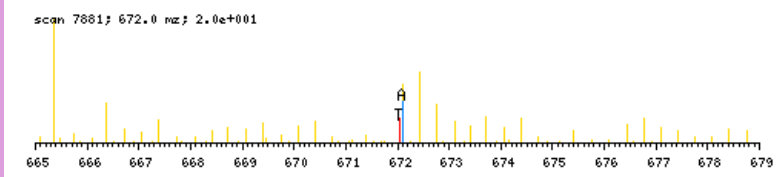

zoomed in precursor plot; T=theoretical m/z, A=acquired m/z

| b <sup>+</sup> | #  | AA | #  | y <sup>+</sup> | y <sup>2+</sup> |
|----------------|----|----|----|----------------|-----------------|
| 92.0924        | 1  | G  | 18 |                |                 |
| 191.1608       | 2  | V  | 17 | 1923.0340      | 962.0209        |
| 292.2085       | 3  | T  | 16 | 1823.9656      | 912.4867        |
| 407.2354       | 4  | D  | 15 | 1722.9179      | 861.9629        |
| 521.2783       | 5  | N  | 14 | 1607.8910      | 804.4494        |
| 620.3467       | 6  | V  | 13 | 1493.8480      | 747.4279        |
| 719.4152       | 7  | V  | 12 | 1394.7796      | 697.8937        |
| 834.4421       | 8  | D  | 11 | 1295.7112      | 648.3595        |
| 935.4898       | 9  | T  | 10 | 1180.6843      | 590.8460        |
| 1034.5582      | 10 | V  | 9  | 1079.6366      | 540.3222        |
| 1133.6266      | 11 | V  | 8  | 980.5682       | 490.7880        |
| 1270.6855      | 12 | H  | 7  | 881.4997       | 441.2538        |
| 1433.7488      | 13 | Y  | 6  | 744.4408       | 372.7243        |
| 1532.8173      | 14 | V  | 5  | 581.3775       | 291.1927        |
| 1629.8700      | 15 | P  | 4  | 482.3091       | 241.6585        |
| 1742.9541      | 16 | L  | 3  | 385.2563       | 193.1321        |
| 1840.0069      | 17 | P  | 2  | 272.1723       | 136.5900        |
|                | 18 | R  | 1  | 175.1195       | 88.0637         |

N-term:+35.07

GYEDHMAEDCR, MH+ 1410.5418, m/z 470.8521  
 L OSG40 P180811 230811-s1.02163.02163.3.dta

X-range:

-

MassTol: Y-zoom:

MassType:

AVG  MONO

Axis:

1  2

Label:

I  M  -

Ions:

a  +  2+  3+

b  +  2+  3+

c  +  2+  3+

x  +  2+  3+

y  +  2+  3+

z  +  2+  3+

hide H<sub>2</sub>O/NH<sub>3</sub>

zoom 112-122

GO

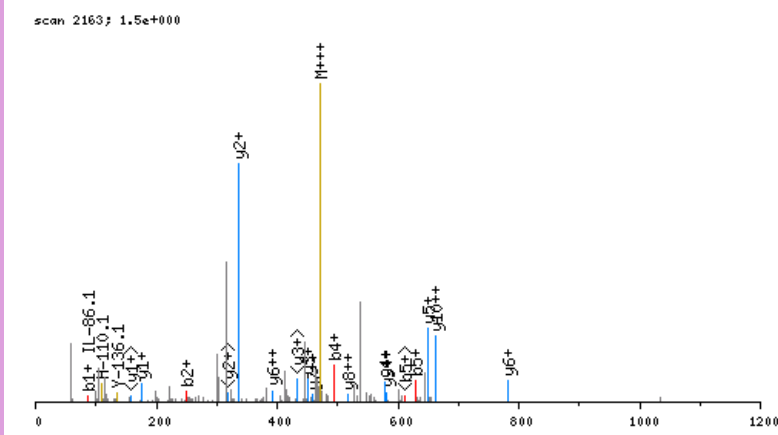

click image to zoom in; click top corners to zoom out [\[precursor±\]](#)

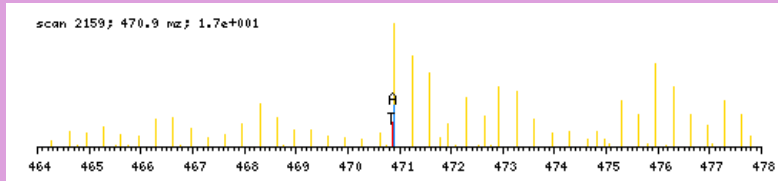

zoomed in precursor plot; T=theoretical m/z, A=acquired m/z

| b <sup>+</sup> | #  | AA # | y <sup>+</sup> | y <sup>2+</sup> |
|----------------|----|------|----------------|-----------------|
| 86.0606        | 1  | G 11 |                |                 |
| 249.1239       | 2  | Y 10 | 1325.4890      | 663.2484        |
| 378.1665       | 3  | E 9  | 1162.4257      | 581.7168        |
| 493.1934       | 4  | D 8  | 1033.3831      | 517.1955        |
| 630.2523       | 5  | H 7  | 918.3561       | 459.6820        |
| 761.2928       | 6  | M 6  | 781.2972       | 391.1525        |
| 832.3299       | 7  | A 5  | 650.2568       | 325.6323        |
| 961.3725       | 8  | E 4  | 579.2196       | 290.1137        |
| 1076.3995      | 9  | D 3  | 450.1770       | 225.5924        |
| 1236.4301      | 10 | C 2  | 335.1501       | 168.0790        |
|                | 11 | R 1  | 175.1195       | 88.0637         |

N-term:+29.04 C(10):+160.03

GYKEPAAPVSIQR, MH+ 1471.8273, m/z 491.2806  
 L OSG40 P180811 230811-s1.03586.03586.3.dta

scan 3586; 2.0e+000

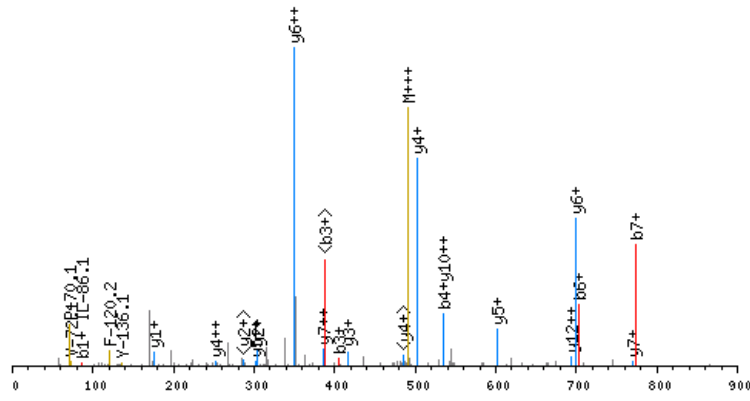

click image to zoom in; click top corners to zoom out [\[precursor±\]](#)

scan 3584; 491.3 m/z; 4.5e+001

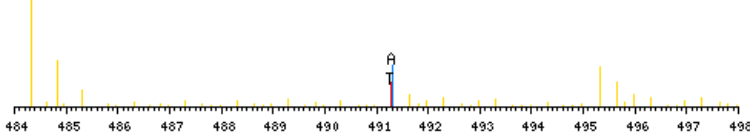

zoomed in precursor plot; T=theoretical m/z, A=acquired m/z

X-range:

-

MassTol: Y-zoom:

MassType:

AVG  MONO

Axis:

1  2

Label:

I  M  -

Ions:

a  +  2+  3+

b  +  2+  3+

c  +  2+  3+

x  +  2+  3+

y  +  2+  3+

z  +  2+  3+

hide H<sub>2</sub>O/NH<sub>3</sub>

zoom 112-122

GO

| b <sup>+</sup> | #  | AA # | y <sup>+</sup> | y <sup>2+</sup> |
|----------------|----|------|----------------|-----------------|
| 86.0606        | 1  | G 13 |                |                 |
| 249.1239       | 2  | Y 12 | 1386.7746      | 693.8912        |
| 405.2502       | 3  | K 11 | 1223.7112      | 612.3595        |
| 534.2928       | 4  | E 10 | 1067.5849      | 534.2964        |
| 631.3455       | 5  | P 9  | 938.5423       | 469.7751        |
| 702.3827       | 6  | A 8  | 841.4896       | 421.2487        |
| 773.4198       | 7  | A 7  | 770.4525       | 385.7301        |
| 870.4725       | 8  | P 6  | 699.4153       | 350.2116        |
| 969.5410       | 9  | V 5  | 602.3626       | 301.6852        |
| 1056.5730      | 10 | S 4  | 503.2942       | 252.1510        |
| 1169.6570      | 11 | I 3  | 416.2621       | 208.6350        |
| 1297.7156      | 12 | Q 2  | 303.1781       | 152.0930        |
|                | 13 | R 1  | 175.1195       | 88.0637         |

N-term:+29.04 K(3):+156.13

GYSGLQGLPGLAGLHGDQGAPGVPAGPR, MH+ 2781.4436, m/z 696.1164  
 L OSG38 P180811 230811-s1.07083.07083.4.dta

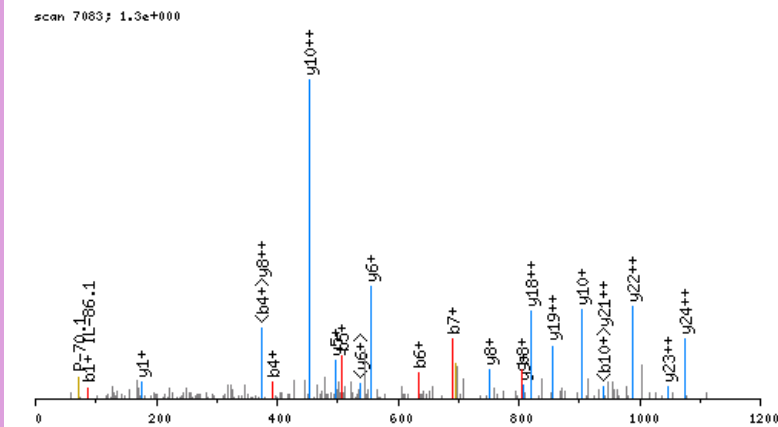

click image to zoom in; click top corners to zoom out [\[precursor±\]](#)

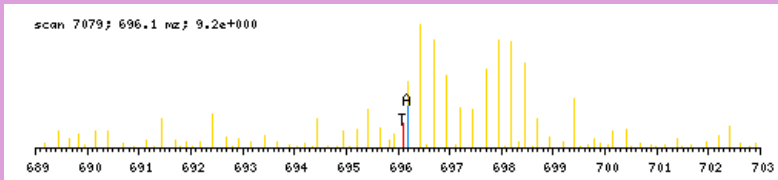

zoomed in precursor plot; T=theoretical m/z, A=acquired m/z

X-range:

-

MassTol: Y-zoom:

MassType:

AVG  MONO

Axis:

1  2

Label:

I  M  -

Ions:

a  +  2+  3+

b  +  2+  3+

c  +  2+  3+

x  +  2+  3+

y  +  2+  3+

z  +  2+  3+

hide H<sub>2</sub>O/NH<sub>3</sub>

zoom 112-122

GO

| b <sup>+</sup> | #  | AA | #  | y <sup>+</sup> | y <sup>2+</sup> |
|----------------|----|----|----|----------------|-----------------|
| 86.0606        | 1  | G  | 30 |                |                 |
| 249.1239       | 2  | Y  | 29 | 2696.3909      | 1348.6993       |
| 336.1559       | 3  | S  | 28 | 2533.3275      | 1267.1677       |
| 393.1774       | 4  | G  | 27 | 2446.2955      | 1223.6517       |
| 506.2614       | 5  | L  | 26 | 2389.2741      | 1195.1409       |
| 634.3200       | 6  | Q  | 25 | 2276.1900      | 1138.5989       |
| 691.3415       | 7  | G  | 24 | 2148.1314      | 1074.5696       |
| 804.4256       | 8  | L  | 23 | 2091.1099      | 1046.0589       |
| 901.4783       | 9  | P  | 22 | 1978.0259      | 989.5169        |
| 958.4998       | 10 | G  | 21 | 1880.9731      | 940.9905        |
| 1071.5838      | 11 | L  | 20 | 1823.9517      | 912.4797        |
| 1142.6210      | 12 | A  | 19 | 1710.8676      | 855.9377        |
| 1199.6424      | 13 | G  | 18 | 1639.8305      | 820.4192        |
| 1312.7265      | 14 | L  | 17 | 1582.8090      | 791.9084        |
| 1449.7854      | 15 | H  | 16 | 1469.7249      | 735.3664        |
| 1506.8069      | 16 | G  | 15 | 1332.6660      | 666.8369        |
| 1621.8338      | 17 | D  | 14 | 1275.6446      | 638.3262        |
| 1749.8924      | 18 | Q  | 13 | 1160.6176      | 580.8127        |
| 1806.9138      | 19 | G  | 12 | 1032.5591      | 516.7834        |
| 1877.9510      | 20 | A  | 11 | 975.5376       | 488.2727        |
| 1975.0037      | 21 | P  | 10 | 904.5005       | 452.7542        |
| 2032.0252      | 22 | G  | 9  | 807.4477       | 404.2278        |
| 2129.0780      | 23 | P  | 8  | 750.4262       | 375.7170        |
| 2228.1464      | 24 | V  | 7  | 653.3735       | 327.1907        |
| 2285.1678      | 25 | G  | 6  | 554.3051       | 277.6564        |
| 2382.2206      | 26 | P  | 5  | 497.2836       | 249.1457        |
| 2453.2577      | 27 | A  | 4  | 400.2308       | 200.6193        |
| 2510.2792      | 28 | G  | 3  | 329.1937       | 165.1008        |
| 2607.3319      | 29 | P  | 2  | 272.1723       | 136.5900        |
|                | 30 | R  | 1  | 175.1195       | 88.0637         |

N-term:+29.04

GYTHLSTGDLRL, MH+ 1366.7543, m/z 456.2563  
 H OSG40 P180811 230811-s1.05375.05375.3.dta

scan 5375; 1.3e+001

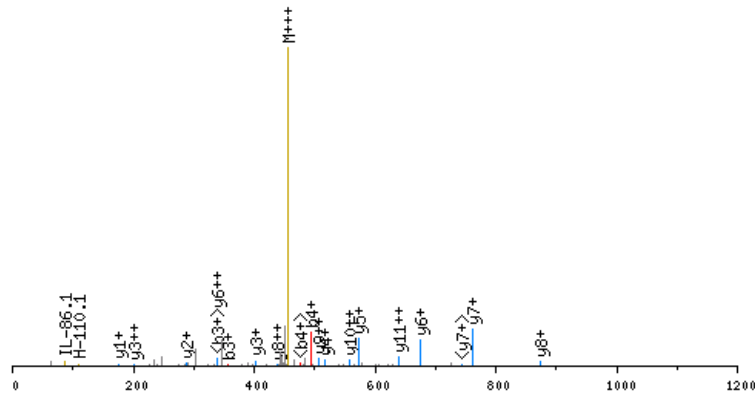

click image to zoom in; click top corners to zoom out [\[precursor±\]](#)

scan 5374; 456.3 m/z; 9.1e+001

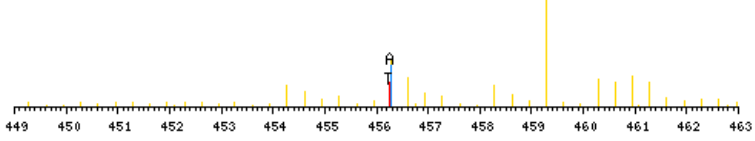

zoomed in precursor plot; T=theoretical m/z, A=acquired m/z

X-range:

-

MassTol: Y-zoom:

MassType:

AVG  MONO

Axis:

1  2

Label:

I  M  -

Ions:

a  +  2+  3+

b  +  2+  3+

c  +  2+  3+

x  +  2+  3+

y  +  2+  3+

z  +  2+  3+

hide H<sub>2</sub>O/NH<sub>3</sub>

zoom 112-122

GO

| b <sup>+</sup> | #  | AA # | y <sup>+</sup> | y <sup>2+</sup> |
|----------------|----|------|----------------|-----------------|
| 92.0924        | 1  | G 12 |                |                 |
| 255.1557       | 2  | Y 11 | 1275.6697      | 638.3388        |
| 356.2034       | 3  | T 10 | 1112.6064      | 556.8071        |
| 493.2623       | 4  | H 9  | 1011.5587      | 506.2833        |
| 606.3463       | 5  | L 8  | 874.4998       | 437.7538        |
| 693.3784       | 6  | S 7  | 761.4157       | 381.2118        |
| 794.4261       | 7  | T 6  | 674.3837       | 337.6958        |
| 851.4475       | 8  | G 5  | 573.3360       | 287.1719        |
| 966.4745       | 9  | D 4  | 516.3146       | 258.6612        |
| 1079.5585      | 10 | L 3  | 401.2876       | 201.1477        |
| 1192.6426      | 11 | L 2  | 288.2036       | 144.6057        |
|                | 12 | R 1  | 175.1195       | 88.0637         |

N-term:+35.07



GYTLPPHCSR, MH+ 1221.6262, m/z 407.8802  
 H OSG40 P180811 230811-s1.02696.02696.3.dta

X-range:

-

MassTol: Y-zoom:

MassType:

AVG  MONO

Axis:

1  2

Label:

I  M  -

Ions:

a  +  2+  3+

b  +  2+  3+

c  +  2+  3+

x  +  2+  3+

y  +  2+  3+

z  +  2+  3+

hide H<sub>2</sub>O/NH<sub>3</sub>

zoom 112-122

GO

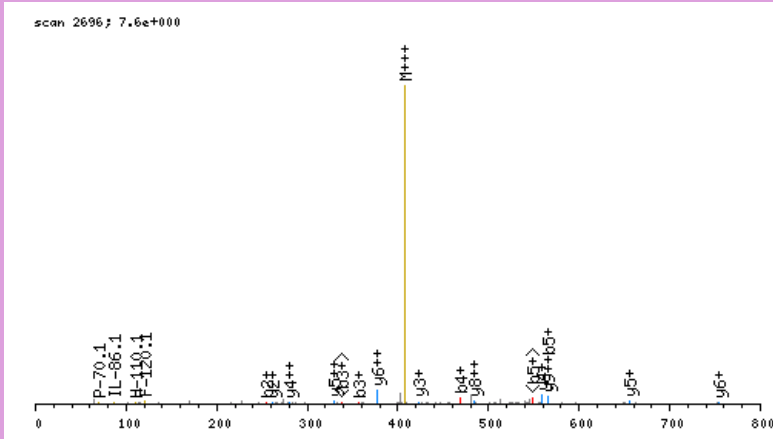

click image to zoom in; click top corners to zoom out [\[precursor±\]](#)

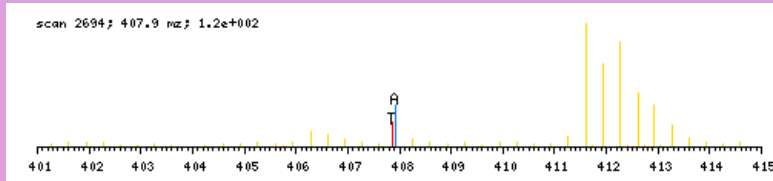

zoomed in precursor plot; T=theoretical m/z, A=acquired m/z

| b <sup>+</sup> | #  | AA # | y <sup>+</sup> | y <sup>2+</sup> |
|----------------|----|------|----------------|-----------------|
| 92.0924        | 1  | G    | 10             |                 |
| 255.1557       | 2  | Y    | 9              | 1130.5416       |
| 356.2034       | 3  | T    | 8              | 967.4783        |
| 469.2874       | 4  | L    | 7              | 866.4306        |
| 566.3402       | 5  | P    | 6              | 753.3466        |
| 663.3930       | 6  | P    | 5              | 656.2938        |
| 800.4519       | 7  | H    | 4              | 559.2410        |
| 960.4825       | 8  | C    | 3              | 422.1821        |
| 1047.5145      | 9  | S    | 2              | 262.1515        |
|                | 10 | R    | 1              | 175.1195        |

N-term:+35.07 C(8):+160.03

HDLPPAPQPAVLAAALNR, MH+ 1808.0183, m/z 603.3443  
 L OSG40 P180811 230811-s1.01962.01962.3.dta

X-range:

-

MassTol: Y-zoom:

MassType:

AVG  MONO

Axis:

1  2

Label:

I  M  -

Ions:

a  +  2+  3+

b  +  2+  3+

c  +  2+  3+

x  +  2+  3+

y  +  2+  3+

z  +  2+  3+

hide H<sub>2</sub>O/NH<sub>3</sub>

zoom 112-122

GO

scan 1962; 5.0e+000

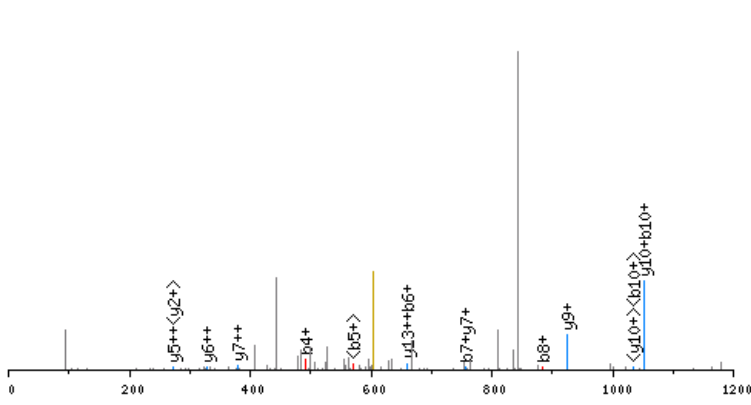

click image to zoom in; click top corners to zoom out [\[precursor±\]](#)

scan 1959; 603.3 m/z; 3.8e+000

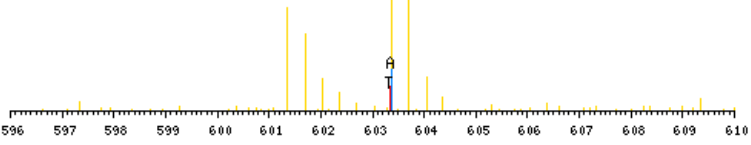

zoomed in precursor plot; T=theoretical m/z, A=acquired m/z

| b <sup>+</sup> | #  | AA # | y <sup>+</sup> | y <sup>2+</sup> |
|----------------|----|------|----------------|-----------------|
| 166.0980       | 1  | H 17 |                |                 |
| 281.1250       | 2  | D 16 | 1642.9281      | 821.9679        |
| 394.2090       | 3  | L 15 | 1527.9011      | 764.4545        |
| 491.2618       | 4  | P 14 | 1414.8171      | 707.9124        |
| 588.3145       | 5  | P 13 | 1317.7643      | 659.3861        |
| 659.3517       | 6  | A 12 | 1220.7115      | 610.8597        |
| 756.4044       | 7  | P 11 | 1149.6744      | 575.3411        |
| 884.4630       | 8  | Q 10 | 1052.6217      | 526.8147        |
| 981.5158       | 9  | P 9  | 924.5631       | 462.7855        |
| 1052.5529      | 10 | A 8  | 827.5103       | 414.2591        |
| 1151.6213      | 11 | V 7  | 756.4732       | 378.7405        |
| 1264.7054      | 12 | L 6  | 657.4048       | 329.2063        |
| 1335.7425      | 13 | A 5  | 544.3207       | 272.6643        |
| 1406.7796      | 14 | A 4  | 473.2836       | 237.1457        |
| 1519.8636      | 15 | L 3  | 402.2465       | 201.6272        |
| 1633.9066      | 16 | N 2  | 289.1624       | 145.0851        |
|                | 17 | R 1  | 175.1195       | 88.0637         |

N-term:+29.04

HEASEDCISQGGTLGTPQSELENEALFEYAR, MH+ 3472.6026, m/z 868.9061  
 H OSG39 P180811 230811-s1.07159.07159.4.dta

scan 7159; 4.0e-001

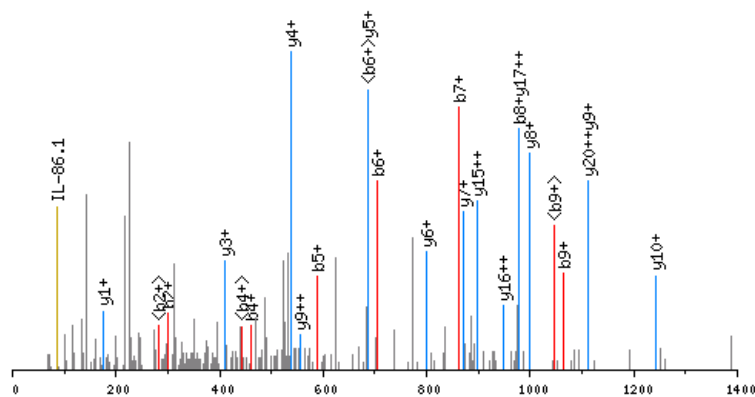

click image to zoom in; click top corners to zoom out [\[precursor±\]](#)

scan 7156; 868.9 mz; 2.0e+001

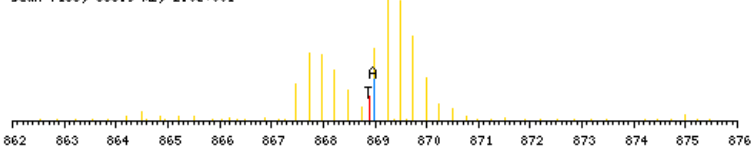

zoomed in precursor plot; T=theoretical m/z, A=acquired m/z

X-range:

-

MassTol: Y-zoom:

MassType:

AVG  MONO

Axis:

1  2

Label:

I  M  -

Ions:

a  +  2+  3+

b  +  2+  3+

c  +  2+  3+

x  +  2+  3+

y  +  2+  3+

z  +  2+  3+

hide H<sub>2</sub>O/NH<sub>3</sub>

zoom 112-122

GO

| b <sup>+</sup> | #  | AA | #  | y <sup>+</sup> | y <sup>2+</sup> |
|----------------|----|----|----|----------------|-----------------|
| 172.1298       | 1  | H  | 31 |                |                 |
| 301.1724       | 2  | E  | 30 | 3301.4806      | 1651.2442       |
| 372.2095       | 3  | A  | 29 | 3172.4380      | 1586.7229       |
| 459.2415       | 4  | S  | 28 | 3101.4009      | 1551.2044       |
| 588.2841       | 5  | E  | 27 | 3014.3689      | 1507.6884       |
| 703.3111       | 6  | D  | 26 | 2885.3263      | 1443.1671       |
| 863.3417       | 7  | C  | 25 | 2770.2994      | 1385.6536       |
| 976.4257       | 8  | I  | 24 | 2610.2688      | 1305.6383       |
| 1063.4578      | 9  | S  | 23 | 2497.1847      | 1249.0963       |
| 1191.5164      | 10 | Q  | 22 | 2410.1527      | 1205.5802       |
| 1248.5378      | 11 | G  | 21 | 2282.0941      | 1141.5510       |
| 1305.5593      | 12 | G  | 20 | 2225.0726      | 1113.0402       |
| 1406.6070      | 13 | T  | 19 | 2168.0512      | 1084.5295       |
| 1519.6910      | 14 | L  | 18 | 2067.0035      | 1034.0057       |
| 1576.7125      | 15 | G  | 17 | 1953.9194      | 977.4636        |
| 1677.7602      | 16 | T  | 16 | 1896.8979      | 948.9529        |
| 1774.8129      | 17 | P  | 15 | 1795.8503      | 898.4290        |
| 1902.8715      | 18 | Q  | 14 | 1698.7975      | 849.9027        |
| 1989.9035      | 19 | S  | 13 | 1570.7389      | 785.8734        |
| 2118.9461      | 20 | E  | 12 | 1483.7069      | 742.3574        |
| 2232.0302      | 21 | L  | 11 | 1354.6643      | 677.8361        |
| 2361.0728      | 22 | E  | 10 | 1241.5802      | 621.2940        |
| 2475.1157      | 23 | N  | 9  | 1112.5376      | 556.7727        |
| 2604.1583      | 24 | E  | 8  | 998.4947       | 499.7513        |
| 2675.1954      | 25 | A  | 7  | 869.4521       | 435.2300        |
| 2788.2795      | 26 | L  | 6  | 798.4150       | 399.7114        |
| 2935.3479      | 27 | F  | 5  | 685.3310       | 343.1694        |
| 3064.3905      | 28 | E  | 4  | 538.2625       | 269.6352        |
| 3227.4538      | 29 | Y  | 3  | 409.2199       | 205.1139        |
| 3298.4909      | 30 | A  | 2  | 246.1566       | 123.5822        |
|                | 31 | R  | 1  | 175.1195       | 88.0637         |

N-term:+35.07 C(7):+160.03

HEIATNLGDFAIISLYR, MH+ 1853.9973, m/z 618.6706  
 H OSG40 P180811 230811-s1.08998.08998.3.dta

X-range:

-

MassTol: Y-zoom:

MassType:

AVG  MONO

Axis:

1  2

Label:

I  M  -

Ions:

a  +  2+  3+

b  +  2+  3+

c  +  2+  3+

x  +  2+  3+

y  +  2+  3+

z  +  2+  3+

hide H<sub>2</sub>O/NH<sub>3</sub>

zoom 112-122

GO

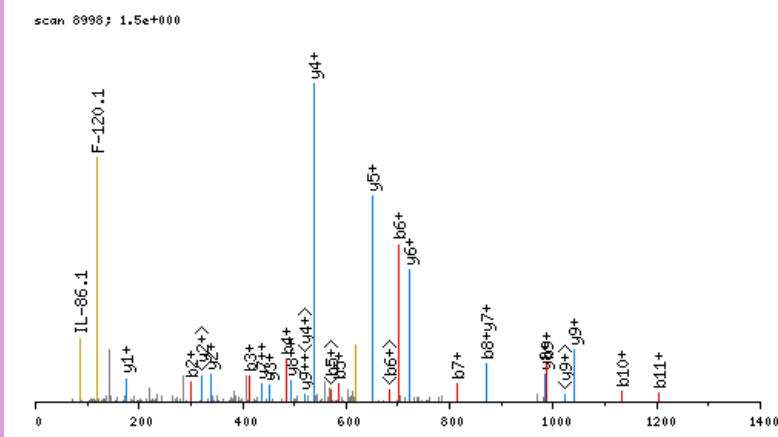

click image to zoom in; click top corners to zoom out [\[precursor±\]](#)

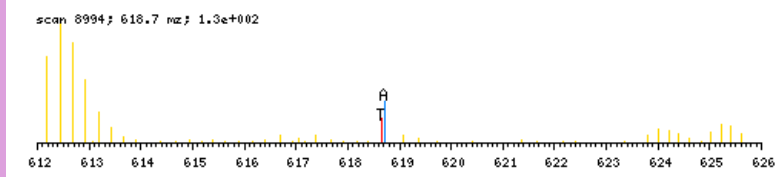

zoomed in precursor plot; T=theoretical m/z, A=acquired m/z

| b <sup>+</sup> | #  | AA # | y <sup>+</sup> | y <sup>2+</sup> |
|----------------|----|------|----------------|-----------------|
| 172.1298       | 1  | H 16 |                |                 |
| 301.1724       | 2  | E 15 | 1682.8754      | 841.9416        |
| 414.2565       | 3  | I 14 | 1553.8328      | 777.4203        |
| 485.2936       | 4  | A 13 | 1440.7487      | 720.8783        |
| 586.3413       | 5  | T 12 | 1369.7116      | 685.3597        |
| 700.3842       | 6  | N 11 | 1268.6639      | 634.8359        |
| 813.4683       | 7  | L 10 | 1154.6210      | 577.8144        |
| 870.4897       | 8  | G 9  | 1041.5369      | 521.2724        |
| 985.5167       | 9  | D 8  | 984.5155       | 492.7616        |
| 1132.5851      | 10 | F 7  | 869.4885       | 435.2482        |
| 1203.6222      | 11 | A 6  | 722.4201       | 361.7140        |
| 1316.7063      | 12 | I 5  | 651.3830       | 326.1954        |
| 1403.7383      | 13 | S 4  | 538.2989       | 269.6534        |
| 1516.8223      | 14 | L 3  | 451.2669       | 226.1374        |
| 1679.8857      | 15 | Y 2  | 338.1828       | 169.5953        |
|                | 16 | R 1  | 175.1195       | 88.0637         |

N-term:+35.07

HFDPSCLEPACR, MH+ 1540.7252, m/z 514.2466  
 H OSG40 P180811 230811-s1.07423.07423.3.dta

scan 7423; 2.4e+000

X-range:

-

MassTol: Y-zoom:

MassType:

AVG  MONO

Axis:

1  2

Label:

I  M  -

Ions:

a  +  2+  3+

b  +  2+  3+

c  +  2+  3+

x  +  2+  3+

y  +  2+  3+

z  +  2+  3+

hide H<sub>2</sub>O/NH<sub>3</sub>

zoom 112-122

GO

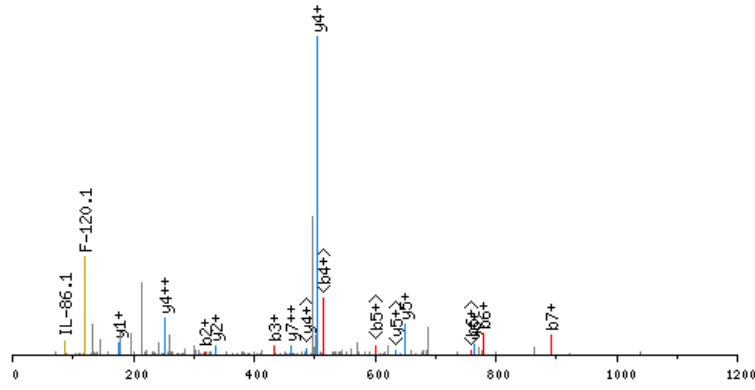

click image to zoom in; click top corners to zoom out [\[precursor±\]](#)

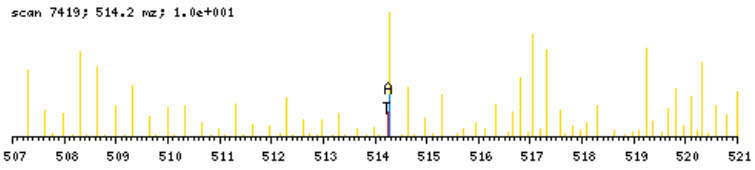

zoomed in precursor plot; T=theoretical m/z, A=acquired m/z

| b <sup>+</sup> | #  | AA # | y <sup>+</sup> | y <sup>2+</sup> |
|----------------|----|------|----------------|-----------------|
| 172.1298       | 1  | H 12 |                |                 |
| 319.1982       | 2  | F 11 | 1369.6032      | 685.3055        |
| 434.2252       | 3  | D 10 | 1222.5348      | 611.7713        |
| 531.2779       | 4  | P 9  | 1107.5078      | 554.2578        |
| 618.3100       | 5  | S 8  | 1010.4551      | 505.7315        |
| 778.3406       | 6  | C 7  | 923.4231       | 462.2154        |
| 891.4246       | 7  | L 6  | 763.3925       | 382.2001        |
| 1038.4930      | 8  | F 5  | 650.3084       | 325.6581        |
| 1135.5458      | 9  | P 4  | 503.2400       | 252.1239        |
| 1206.5829      | 10 | A 3  | 406.1872       | 203.5975        |
| 1366.6135      | 11 | C 2  | 335.1501       | 168.0790        |
|                | 12 | R 1  | 175.1195       | 88.0637         |

N-term:+35.07 C(6):+160.03  
 C(11):+160.03

HLQEGFGCVVTNR, MH+ 1544.7643, m/z 515.5929  
 L OSG40 P180811 230811-s1.04566.04566.3.dta

X-range:

-

MassTol: Y-zoom:

MassType:

AVG  MONO

Axis:

1  2

Label:

I  M  -

Ions:

a  +  2+  3+

b  +  2+  3+

c  +  2+  3+

x  +  2+  3+

y  +  2+  3+

z  +  2+  3+

hide H<sub>2</sub>O/NH<sub>3</sub>

zoom 112-122

GO

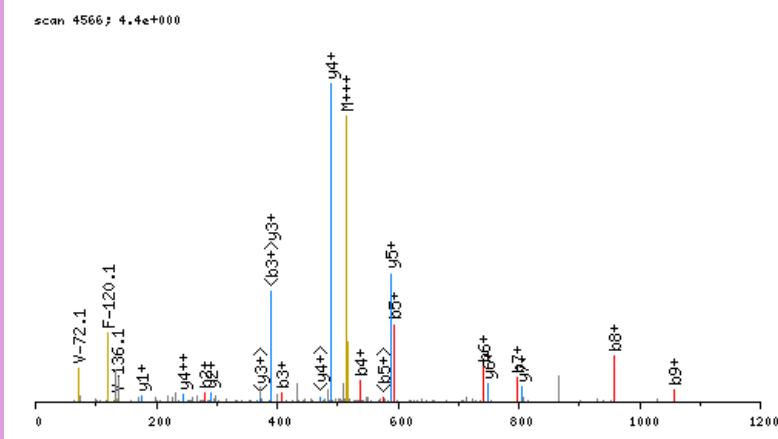

click image to zoom in; click top corners to zoom out [\[precursor±\]](#)

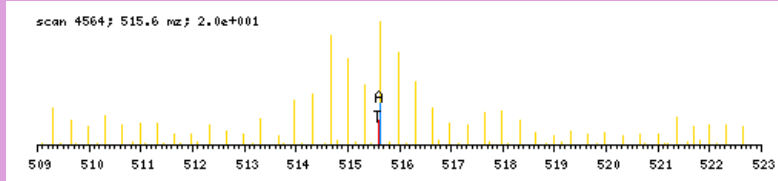

zoomed in precursor plot; T=theoretical m/z, A=acquired m/z

| b <sup>+</sup> | #  | AA # | y <sup>+</sup> | y <sup>2+</sup> |
|----------------|----|------|----------------|-----------------|
| 166.0980       | 1  | H 13 |                |                 |
| 279.1821       | 2  | L 12 | 1379.6741      | 690.3410        |
| 407.2407       | 3  | Q 11 | 1266.5900      | 633.7989        |
| 536.2832       | 4  | E 10 | 1138.5315      | 569.7696        |
| 593.3047       | 5  | G 9  | 1009.4889      | 505.2484        |
| 740.3731       | 6  | F 8  | 952.4674       | 476.7376        |
| 797.3946       | 7  | G 7  | 805.3990       | 403.2034        |
| 957.4252       | 8  | C 6  | 748.3775       | 374.6927        |
| 1056.4936      | 9  | V 5  | 588.3469       | 294.6774        |
| 1155.5620      | 10 | V 4  | 489.2785       | 245.1432        |
| 1256.6097      | 11 | T 3  | 390.2101       | 195.6090        |
| 1370.6526      | 12 | N 2  | 289.1624       | 145.0851        |
|                | 13 | R 1  | 175.1195       | 88.0637         |

N-term:+29.04 C(8):+160.03

HNPPSEAAAAPPVAR, MH+ 1441.7552, m/z 481.2566  
 L OSG40 P180811 230811-s1.02153.02153.3.dta

X-range:

-

MassTol: Y-zoom:

MassType:

AVG  MONO

Axis:

1  2

Label:

I  M  -

Ions:

a  +  2+  3+

b  +  2+  3+

c  +  2+  3+

x  +  2+  3+

y  +  2+  3+

z  +  2+  3+

hide H<sub>2</sub>O/NH<sub>3</sub>

zoom 112-122

GO

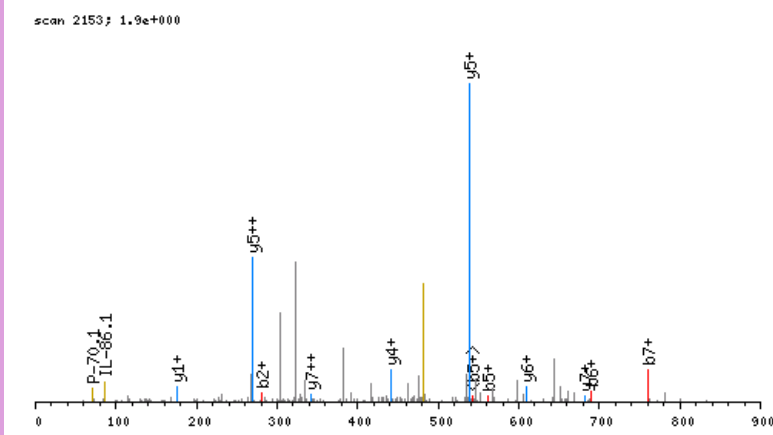

click image to zoom in; click top corners to zoom out [\[precursor±\]](#)

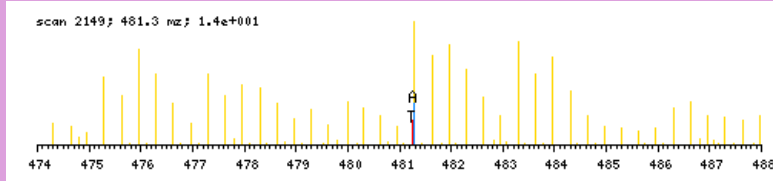

zoomed in precursor plot; T=theoretical m/z, A=acquired m/z

| b <sup>+</sup> | #  | AA # | y <sup>+</sup> | y <sup>2+</sup> |
|----------------|----|------|----------------|-----------------|
| 166.0980       | 1  | H 14 |                |                 |
| 280.1409       | 2  | N 13 | 1276.6650      | 638.8364        |
| 377.1937       | 3  | P 12 | 1162.6220      | 581.8149        |
| 474.2465       | 4  | P 11 | 1065.5693      | 533.2886        |
| 561.2785       | 5  | S 10 | 968.5165       | 484.7622        |
| 690.3211       | 6  | E 9  | 881.4845       | 441.2462        |
| 761.3582       | 7  | A 8  | 752.4419       | 376.7249        |
| 832.3953       | 8  | A 7  | 681.4048       | 341.2063        |
| 903.4324       | 9  | A 6  | 610.3677       | 305.6877        |
| 1000.4852      | 10 | P 5  | 539.3306       | 270.1692        |
| 1097.5380      | 11 | P 4  | 442.2778       | 221.6428        |
| 1196.6064      | 12 | V 3  | 345.2250       | 173.1164        |
| 1267.6435      | 13 | A 2  | 246.1566       | 123.5822        |
|                | 14 | R 1  | 175.1195       | 88.0637         |

N-term:+29.04

HVPIPAVAEMNPNVNVFVPPR, MH+ 2331.2859, m/z 583.5769  
 H OSG39 P180811 230811-s1.07414.07414.4.dta

X-range:

-

MassTol: Y-zoom:

MassType:

AVG  MONO

Axis:

1  2

Label:

I  M  -

Ions:

a  +  2+  3+

b  +  2+  3+

c  +  2+  3+

x  +  2+  3+

y  +  2+  3+

z  +  2+  3+

hide H<sub>2</sub>O/NH<sub>3</sub>

zoom 112-122

GO

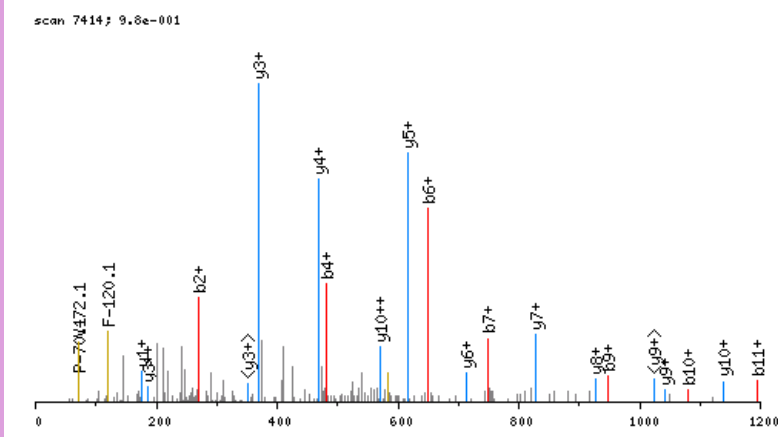

click image to zoom in; click top corners to zoom out [\[precursor±\]](#)

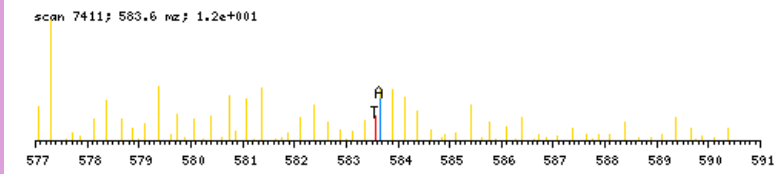

zoomed in precursor plot; T=theoretical m/z, A=acquired m/z

| b <sup>+</sup> | #  | AA # | y <sup>+</sup> | y <sup>2+</sup> |
|----------------|----|------|----------------|-----------------|
| 172.1298       | 1  | H 21 |                |                 |
| 271.1982       | 2  | V 20 | 2160.1640      | 1080.5859       |
| 368.2510       | 3  | P 19 | 2061.0955      | 1031.0517       |
| 481.3351       | 4  | I 18 | 1964.0428      | 982.5253        |
| 578.3878       | 5  | P 17 | 1850.9587      | 925.9833        |
| 649.4249       | 6  | A 16 | 1753.9059      | 877.4569        |
| 748.4933       | 7  | V 15 | 1682.8688      | 841.9383        |
| 819.5305       | 8  | A 14 | 1583.8004      | 792.4041        |
| 948.5731       | 9  | E 13 | 1512.7633      | 756.8856        |
| 1079.6135      | 10 | M 12 | 1383.7207      | 692.3643        |
| 1193.6565      | 11 | N 11 | 1252.6802      | 626.8440        |
| 1290.7092      | 12 | P 10 | 1138.6373      | 569.8226        |
| 1404.7522      | 13 | N 9  | 1041.5845      | 521.2962        |
| 1503.8206      | 14 | V 8  | 927.5416       | 464.2747        |
| 1617.8635      | 15 | N 7  | 828.4732       | 414.7405        |
| 1716.9319      | 16 | V 6  | 714.4303       | 357.7190        |
| 1864.0003      | 17 | F 5  | 615.3619       | 308.1848        |
| 1963.0687      | 18 | V 4  | 468.2934       | 234.6506        |
| 2060.1215      | 19 | P 3  | 369.2250       | 185.1164        |
| 2157.1743      | 20 | P 2  | 272.1723       | 136.5900        |
|                | 21 | R 1  | 175.1195       | 88.0637         |

N-term:+35.07



ICQENEGENDPVLQR, MH+ 1828.8499, m/z 610.2881  
 L OSG37 P180811 230811-s1.03326.03326.3.dta

X-range:

-

MassTol: Y-zoom:

MassType:

AVG  MONO

Axis:

1  2

Label:

I  M  -

Ions:

a  +  2+  3+

b  +  2+  3+

c  +  2+  3+

x  +  2+  3+

y  +  2+  3+

z  +  2+  3+

hide H<sub>2</sub>O/NH<sub>3</sub>

zoom 112-122

GO

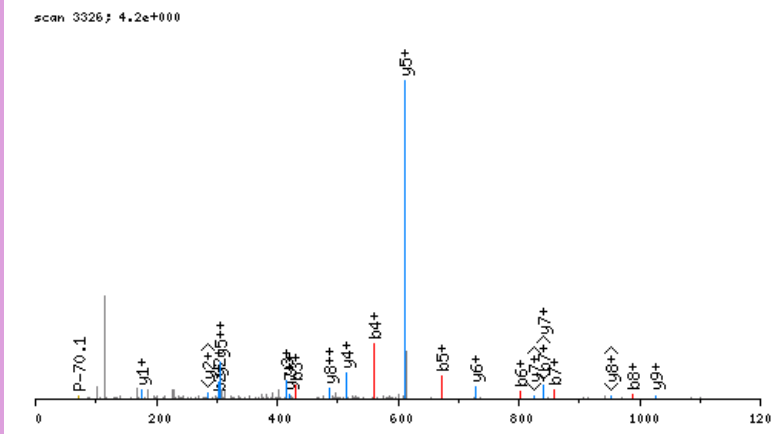

click image to zoom in; click top corners to zoom out [\[precursor±\]](#)

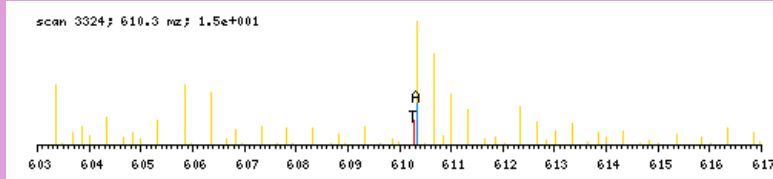

zoomed in precursor plot; T=theoretical m/z, A=acquired m/z

| b <sup>+</sup> | #  | AA # | y <sup>+</sup> | y <sup>2+</sup> |
|----------------|----|------|----------------|-----------------|
| 142.1232       | 1  | I 15 |                |                 |
| 302.1538       | 2  | C 14 | 1687.7345      | 844.3712        |
| 430.2123       | 3  | Q 13 | 1527.7039      | 764.3559        |
| 559.2549       | 4  | E 12 | 1399.6454      | 700.3266        |
| 673.2979       | 5  | N 11 | 1270.6028      | 635.8053        |
| 802.3405       | 6  | E 10 | 1156.5598      | 578.7838        |
| 859.3619       | 7  | G 9  | 1027.5172      | 514.2625        |
| 988.4045       | 8  | E 8  | 970.4958       | 485.7518        |
| 1102.4474      | 9  | N 7  | 841.4532       | 421.2305        |
| 1217.4744      | 10 | D 6  | 727.4103       | 364.2090        |
| 1314.5271      | 11 | P 5  | 612.3833       | 306.6956        |
| 1413.5956      | 12 | V 4  | 515.3306       | 258.1692        |
| 1526.6796      | 13 | L 3  | 416.2621       | 208.6350        |
| 1654.7382      | 14 | Q 2  | 303.1781       | 152.0930        |
|                | 15 | R 1  | 175.1195       | 88.0637         |

N-term:+29.04 C(2):+160.03

IDELDAIAPKR, MH+ 1308.8163, m/z 436.9436  
 H OSG40 P180811 230811-s1.05173.05173.3.dta

X-range:

-

MassTol: Y-zoom:

MassType:

AVG  MONO

Axis:

1  2

Label:

I  M  -

Ions:

a  +  2+  3+

b  +  2+  3+

c  +  2+  3+

x  +  2+  3+

y  +  2+  3+

z  +  2+  3+

hide H<sub>2</sub>O/NH<sub>3</sub>

zoom 112-122

GO

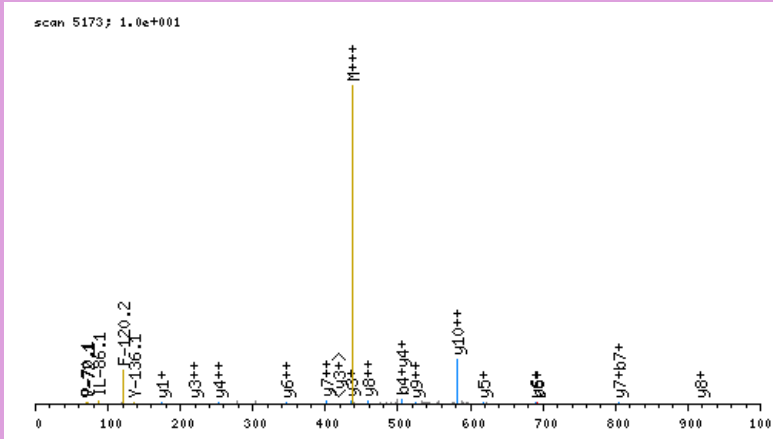

click image to zoom in; click top corners to zoom out [\[precursor±\]](#)

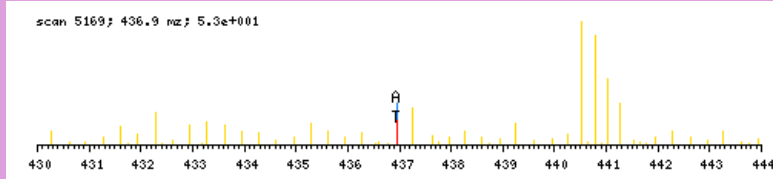

zoomed in precursor plot; T=theoretical m/z, A=acquired m/z

| b <sup>+</sup> | #  | AA # | y <sup>+</sup> | y <sup>2+</sup> |
|----------------|----|------|----------------|-----------------|
| 148.1550       | 1  | I 11 |                |                 |
| 263.1819       | 2  | D 10 | 1161.6692      | 581.3385        |
| 392.2245       | 3  | E 9  | 1046.6423      | 523.8250        |
| 505.3086       | 4  | L 8  | 917.5997       | 459.3037        |
| 620.3355       | 5  | D 7  | 804.5156       | 402.7617        |
| 691.3726       | 6  | A 6  | 689.4887       | 345.2482        |
| 804.4567       | 7  | I 5  | 618.4515       | 309.7297        |
| 875.4938       | 8  | A 4  | 505.3675       | 253.1877        |
| 972.5466       | 9  | P 3  | 434.3304       | 217.6691        |
| 1134.7047      | 10 | K 2  | 337.2776       | 169.1427        |
|                | 11 | R 1  | 175.1195       | 88.0637         |

N-term:+35.07 K(10):+162.16

IDFYGIDDNLLHYNR, MH+ 1895.9292, m/z 632.6479  
 L OSG39 P180811 230811-s1.07638.07638.3.dta

X-range:

-

MassTol: Y-zoom:

MassType:

AVG  MONO

Axis:

1  2

Label:

I  M  -

Ions:

a  +  2+  3+

b  +  2+  3+

c  +  2+  3+

x  +  2+  3+

y  +  2+  3+

z  +  2+  3+

hide H<sub>2</sub>O/NH<sub>3</sub>

zoom 112-122

GO

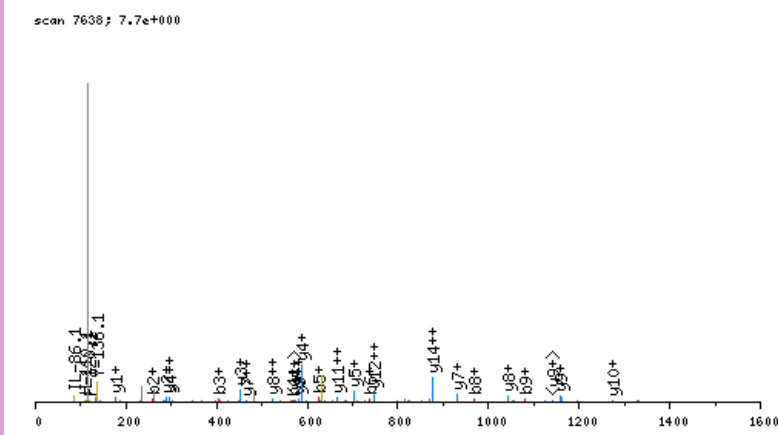

click image to zoom in; click top corners to zoom out [\[precursor±\]](#)

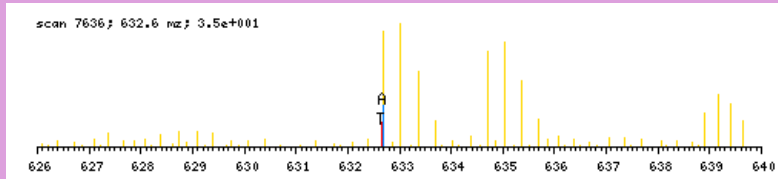

zoomed in precursor plot; T=theoretical m/z, A=acquired m/z

| b <sup>+</sup> | #  | AA # | y <sup>+</sup> | y <sup>2+</sup> |
|----------------|----|------|----------------|-----------------|
| 142.1232       | 1  | I    | 15             |                 |
| 257.1501       | 2  | D    | 14             | 1754.8138       |
| 404.2185       | 3  | F    | 13             | 1639.7869       |
| 567.2818       | 4  | Y    | 12             | 1492.7185       |
| 624.3033       | 5  | G    | 11             | 1329.6551       |
| 737.3874       | 6  | I    | 10             | 1272.6337       |
| 852.4143       | 7  | D    | 9              | 1159.5496       |
| 967.4413       | 8  | D    | 8              | 1044.5227       |
| 1081.4842      | 9  | N    | 7              | 929.4957        |
| 1194.5683      | 10 | L    | 6              | 815.4528        |
| 1307.6523      | 11 | L    | 5              | 702.3687        |
| 1444.7112      | 12 | H    | 4              | 589.2847        |
| 1607.7746      | 13 | Y    | 3              | 452.2258        |
| 1721.8175      | 14 | N    | 2              | 289.1624        |
|                | 15 | R    | 1              | 175.1195        |

N-term:+29.04

IDLDTIDVSNLNR, MH+ 1515.8018, m/z 505.9388  
 L OSG37 P180811 230811-s1.07365.07365.3.dta

X-range:

-

MassTol: Y-zoom:

MassType:

AVG  MONO

Axis:

1  2

Label:

I  M  -

Ions:

a  +  2+  3+

b  +  2+  3+

c  +  2+  3+

x  +  2+  3+

y  +  2+  3+

z  +  2+  3+

hide H<sub>2</sub>O/NH<sub>3</sub>

zoom 112-122

GO

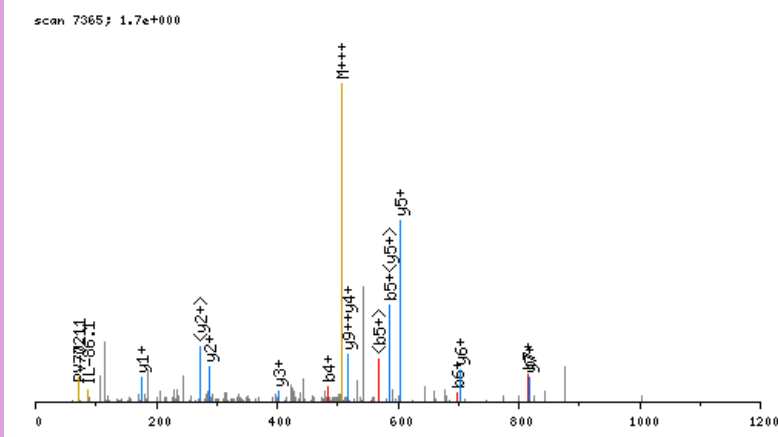

click image to zoom in; click top corners to zoom out [\[precursor±\]](#)

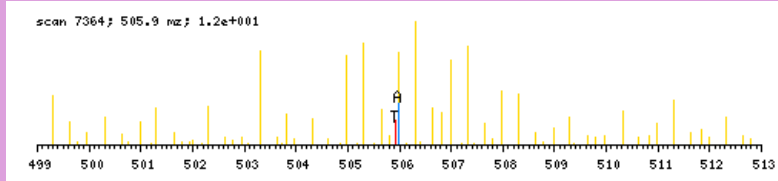

zoomed in precursor plot; T=theoretical m/z, A=acquired m/z

| b <sup>+</sup> | #  | AA # | y <sup>+</sup> | y <sup>2+</sup> |
|----------------|----|------|----------------|-----------------|
| 142.1232       | 1  | I 13 |                |                 |
| 257.1501       | 2  | D 12 | 1374.6865      | 687.8472        |
| 370.2342       | 3  | L 11 | 1259.6596      | 630.3337        |
| 485.2611       | 4  | D 10 | 1146.5755      | 573.7917        |
| 586.3088       | 5  | T 9  | 1031.5485      | 516.2782        |
| 699.3929       | 6  | I 8  | 930.5009       | 465.7543        |
| 814.4198       | 7  | D 7  | 817.4168       | 409.2123        |
| 913.4882       | 8  | V 6  | 702.3899       | 351.6988        |
| 1000.5202      | 9  | S 5  | 603.3214       | 302.1646        |
| 1114.5632      | 10 | N 4  | 516.2894       | 258.6486        |
| 1227.6472      | 11 | L 3  | 402.2465       | 201.6272        |
| 1341.6902      | 12 | N 2  | 289.1624       | 145.0851        |
|                | 13 | R 1  | 175.1195       | 88.0637         |

N-term:+29.04

IDLIAQQPVNEVEHR, MH+ 1788.9608, m/z 596.9918  
 L OSG39 P180811 230811-s1.04789.04789.3.dta

X-range:

-

MassTol: Y-zoom:

MassType:

AVG  MONO

Axis:

1  2

Label:

I  M  -

Ions:

a  +  2+  3+

b  +  2+  3+

c  +  2+  3+

x  +  2+  3+

y  +  2+  3+

z  +  2+  3+

hide H<sub>2</sub>O/NH<sub>3</sub>

zoom 112-122

GO

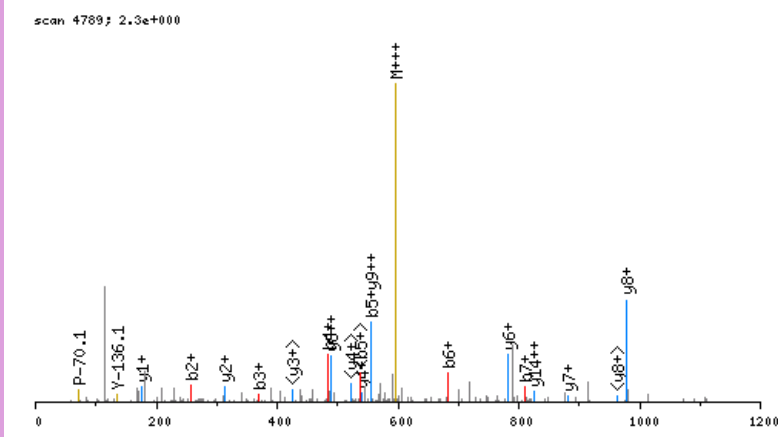

click image to zoom in; click top corners to zoom out [\[precursor±\]](#)

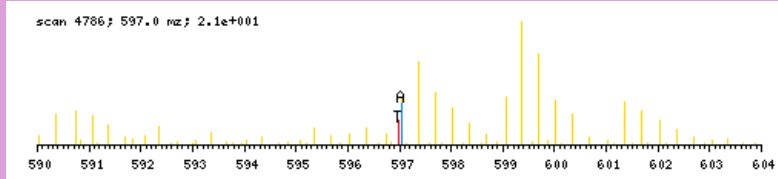

zoomed in precursor plot; T=theoretical m/z, A=acquired m/z

| b <sup>+</sup> | #  | AA # | y <sup>+</sup> | y <sup>2+</sup> |
|----------------|----|------|----------------|-----------------|
| 142.1232       | 1  | I 15 |                |                 |
| 257.1501       | 2  | D 14 | 1647.8455      | 824.4266        |
| 370.2342       | 3  | L 13 | 1532.8185      | 766.9132        |
| 483.3182       | 4  | I 12 | 1419.7345      | 710.3711        |
| 554.3553       | 5  | A 11 | 1306.6504      | 653.8291        |
| 682.4139       | 6  | Q 10 | 1235.6133      | 618.3105        |
| 810.4725       | 7  | Q 9  | 1107.5547      | 554.2813        |
| 907.5253       | 8  | P 8  | 979.4961       | 490.2520        |
| 1006.5937      | 9  | V 7  | 882.4434       | 441.7256        |
| 1120.6366      | 10 | N 6  | 783.3749       | 392.1914        |
| 1249.6792      | 11 | E 5  | 669.3320       | 335.1699        |
| 1348.7476      | 12 | V 4  | 540.2894       | 270.6486        |
| 1477.7902      | 13 | E 3  | 441.2210       | 221.1144        |
| 1614.8491      | 14 | H 2  | 312.1784       | 156.5931        |
|                | 15 | R 1  | 175.1195       | 88.0637         |

N-term:+29.04

IEEALGDKAVFAGR, MH+ 1531.8484, m/z 511.2877  
 L OSG39 P180811 230811-s1.03960.03960.3.dta

scan 3960; 1.2e+001

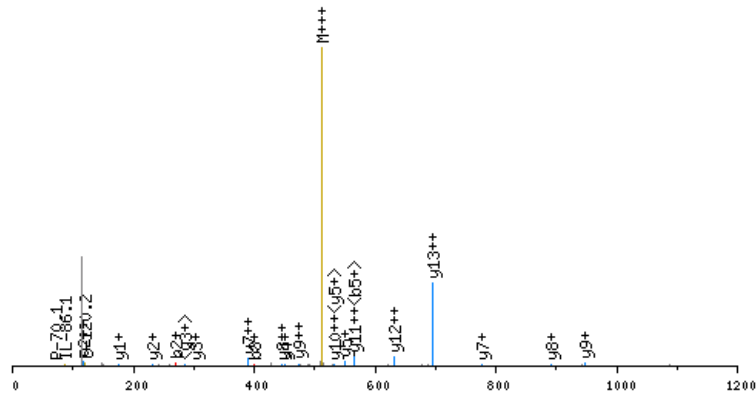

click image to zoom in; click top corners to zoom out [\[precursor±\]](#)

scan 3956; 511.3 m/z; 1.7e+001

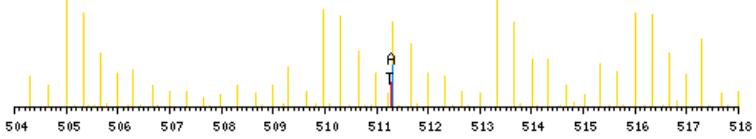

zoomed in precursor plot; T=theoretical m/z, A=acquired m/z

X-range:

-

MassTol: Y-zoom:

MassType:

AVG  MONO

Axis:

1  2

Label:

I  M  -

Ions:

a  +  2+  3+

b  +  2+  3+

c  +  2+  3+

x  +  2+  3+

y  +  2+  3+

z  +  2+  3+

hide H<sub>2</sub>O/NH<sub>3</sub>

zoom 112-122

GO

| b <sup>+</sup> | #  | AA | #  | y <sup>+</sup> | y <sup>2+</sup> |
|----------------|----|----|----|----------------|-----------------|
| 142.1232       | 1  | I  | 14 |                |                 |
| 271.1658       | 2  | E  | 13 | 1390.7331      | 695.8705        |
| 400.2084       | 3  | E  | 12 | 1261.6905      | 631.3492        |
| 471.2455       | 4  | A  | 11 | 1132.6479      | 566.8279        |
| 584.3295       | 5  | L  | 10 | 1061.6108      | 531.3093        |
| 641.3510       | 6  | G  | 9  | 948.5267       | 474.7673        |
| 756.3779       | 7  | D  | 8  | 891.5053       | 446.2565        |
| 912.5042       | 8  | K  | 7  | 776.4783       | 388.7431        |
| 983.5413       | 9  | A  | 6  | 620.3520       | 310.6799        |
| 1082.6098      | 10 | V  | 5  | 549.3149       | 275.1614        |
| 1229.6782      | 11 | F  | 4  | 450.2465       | 225.6272        |
| 1300.7153      | 12 | A  | 3  | 303.1781       | 152.0930        |
| 1357.7368      | 13 | G  | 2  | 232.1410       | 116.5744        |
|                | 14 | R  | 1  | 175.1195       | 88.0637         |

N-term:+29.04 K(8):+156.13

IEENDEVLVAGFGR, MH+ 1581.8336, m/z 527.9494  
 H OSG37 P180811 230811-s1.06610.06610.3.dta

X-range:

-

MassTol: Y-zoom:

MassType:

AVG  MONO

Axis:

1  2

Label:

I  M  -

Ions:

a  +  2+  3+

b  +  2+  3+

c  +  2+  3+

x  +  2+  3+

y  +  2+  3+

z  +  2+  3+

hide H<sub>2</sub>O/NH<sub>3</sub>

zoom 112-122

GO

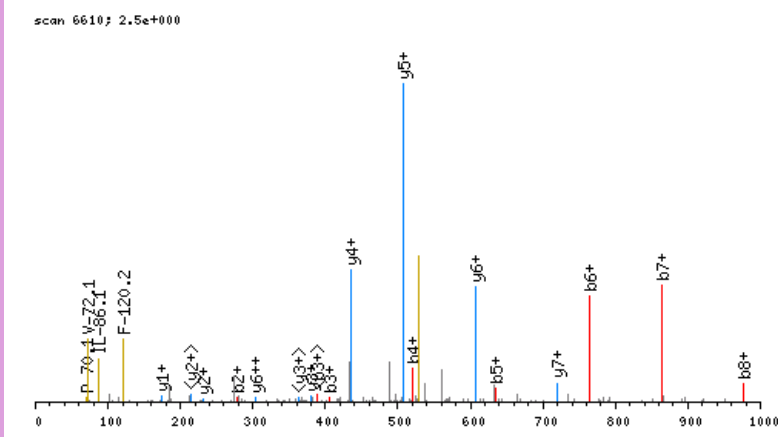

click image to zoom in; click top corners to zoom out [\[precursor±\]](#)

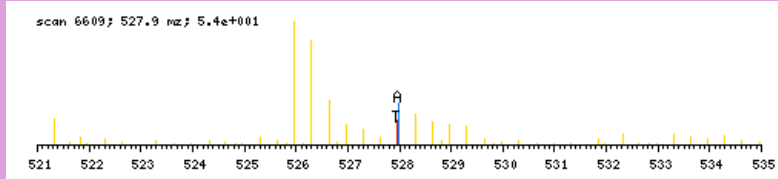

zoomed in precursor plot; T=theoretical m/z, A=acquired m/z

| b <sup>+</sup> | #  | AA # | y <sup>+</sup> | y <sup>2+</sup> |
|----------------|----|------|----------------|-----------------|
| 148.1550       | 1  | I 14 |                |                 |
| 277.1976       | 2  | E 13 | 1434.6865      | 717.8472        |
| 406.2402       | 3  | E 12 | 1305.6439      | 653.3259        |
| 520.2831       | 4  | N 11 | 1176.6013      | 588.8046        |
| 635.3100       | 5  | D 10 | 1062.5584      | 531.7831        |
| 764.3526       | 6  | E 9  | 947.5314       | 474.2696        |
| 863.4210       | 7  | V 8  | 818.4888       | 409.7483        |
| 976.5051       | 8  | L 7  | 719.4204       | 360.2141        |
| 1075.5735      | 9  | V 6  | 606.3364       | 303.6721        |
| 1146.6106      | 10 | A 5  | 507.2680       | 254.1379        |
| 1203.6321      | 11 | G 4  | 436.2308       | 218.6193        |
| 1350.7005      | 12 | F 3  | 379.2094       | 190.1086        |
| 1407.7220      | 13 | G 2  | 232.1410       | 116.5744        |
|                | 14 | R 1  | 175.1195       | 88.0637         |

N-term:+35.07

IGHFADPAHGGSWLR, MH+ 1654.8666, m/z 552.2937  
 H OSG37 P180811 230811-s1.02713.02713.3.dta

X-range:

-

MassTol: Y-zoom:

MassType:

AVG  MONO

Axis:

1  2

Label:

I  M  -

Ions:

a  +  2+  3+

b  +  2+  3+

c  +  2+  3+

x  +  2+  3+

y  +  2+  3+

z  +  2+  3+

hide H<sub>2</sub>O/NH<sub>3</sub>

zoom 112-122

GO

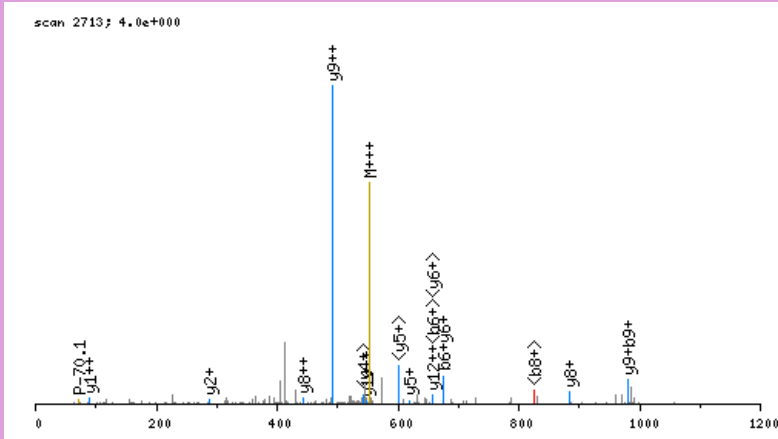

click image to zoom in; click top corners to zoom out [\[precursor±\]](#)

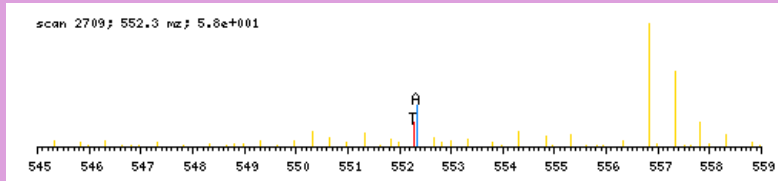

zoomed in precursor plot; T=theoretical m/z, A=acquired m/z

| b <sup>+</sup>  | #  | AA # | y <sup>+</sup>  | y <sup>2+</sup> |
|-----------------|----|------|-----------------|-----------------|
| 148.1550        | 1  | I 15 |                 |                 |
| 205.1764        | 2  | G 14 | 1507.7195       | 754.3636        |
| 342.2353        | 3  | H 13 | 1450.6980       | 725.8529        |
| 489.3038        | 4  | F 12 | 1313.6391       | <b>657.3235</b> |
| 560.3409        | 5  | A 11 | 1166.5707       | 583.7893        |
| <b>675.3678</b> | 6  | D 10 | 1095.5336       | <b>548.2707</b> |
| 772.4206        | 7  | P 9  | <b>980.5066</b> | <b>490.7572</b> |
| 843.4577        | 8  | A 8  | <b>883.4539</b> | <b>442.2308</b> |
| <b>980.5166</b> | 9  | H 7  | 812.4167        | 406.7123        |
| 1037.5381       | 10 | G 6  | <b>675.3578</b> | 338.1828        |
| 1094.5595       | 11 | G 5  | <b>618.3364</b> | 309.6721        |
| 1181.5916       | 12 | S 4  | 561.3149        | 281.1614        |
| 1367.6709       | 13 | W 3  | 474.2829        | 237.6454        |
| 1480.7549       | 14 | L 2  | <b>288.2036</b> | 144.6057        |
|                 | 15 | R 1  | 175.1195        | <b>88.0637</b>  |

N-term:+35.07



IIGGSMDAKGSFPWQAK, MH+ 1876.9996, m/z 470.0053  
 L OSG39 P180811 230811-s1.05507.05507.4.dta

X-range:

-

MassTol: Y-zoom:

MassType:

AVG  MONO

Axis:

1  2

Label:

I  M  -

Ions:

a  +  2+  3+

b  +  2+  3+

c  +  2+  3+

x  +  2+  3+

y  +  2+  3+

z  +  2+  3+

hide H<sub>2</sub>O/NH<sub>3</sub>

zoom 112-122

GO

scan 5507; 5.3e+000

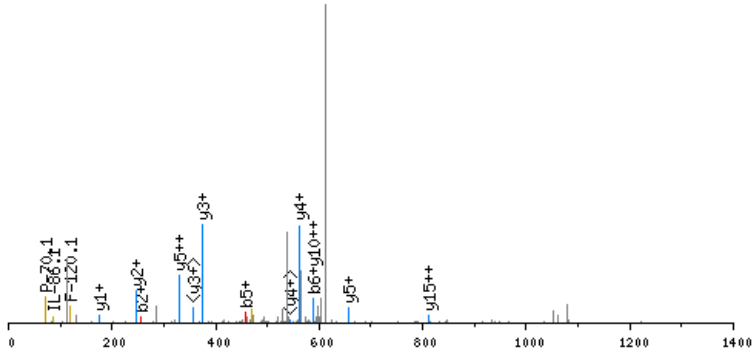

click image to zoom in; click top corners to zoom out [\[precursor±\]](#)

scan 5506; 470.0 mz; 1.8e+001

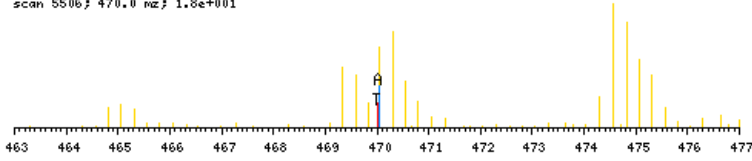

zoomed in precursor plot; T=theoretical m/z, A=acquired m/z

| b <sup>+</sup> | #  | AA | #  | y <sup>+</sup> | y <sup>2+</sup> |
|----------------|----|----|----|----------------|-----------------|
| 142.1232       | 1  | I  | 17 |                |                 |
| 255.2072       | 2  | I  | 16 | 1735.8842      | 868.4460        |
| 312.2287       | 3  | G  | 15 | 1622.8002      | 811.9040        |
| 369.2502       | 4  | G  | 14 | 1565.7787      | 783.3933        |
| 456.2822       | 5  | S  | 13 | 1508.7572      | 754.8825        |
| 587.3227       | 6  | M  | 12 | 1421.7252      | 711.3665        |
| 702.3496       | 7  | D  | 11 | 1290.6847      | 645.8463        |
| 773.3867       | 8  | A  | 10 | 1175.6578      | 588.3328        |
| 929.5130       | 9  | K  | 9  | 1104.6207      | 552.8142        |
| 986.5345       | 10 | G  | 8  | 948.4944       | 474.7511        |
| 1073.5665      | 11 | S  | 7  | 891.4729       | 446.2404        |
| 1220.6349      | 12 | F  | 6  | 804.4409       | 402.7243        |
| 1317.6877      | 13 | P  | 5  | 657.3725       | 329.1901        |
| 1503.7670      | 14 | W  | 4  | 560.3197       | 280.6638        |
| 1631.8256      | 15 | Q  | 3  | 374.2404       | 187.6241        |
| 1702.8627      | 16 | A  | 2  | 246.1818       | 123.5948        |
|                | 17 | K  | 1  | 175.1447       | 88.0763         |

N-term:+29.04 K(9):+156.13  
 K(17):+156.13

IKIPMKPSWKTAFLAR, MH+ 2023.3567, m/z 675.1238  
 H OSG40 P180811 230811-s1.07401.07401.3.dta

X-range:

-

MassTol: Y-zoom:

MassType:

AVG  MONO

Axis:

1  2

Label:

I  M  -

Ions:

a  +  2+  3+

b  +  2+  3+

c  +  2+  3+

x  +  2+  3+

y  +  2+  3+

z  +  2+  3+

hide H<sub>2</sub>O/NH<sub>3</sub>

zoom 112-122

GO

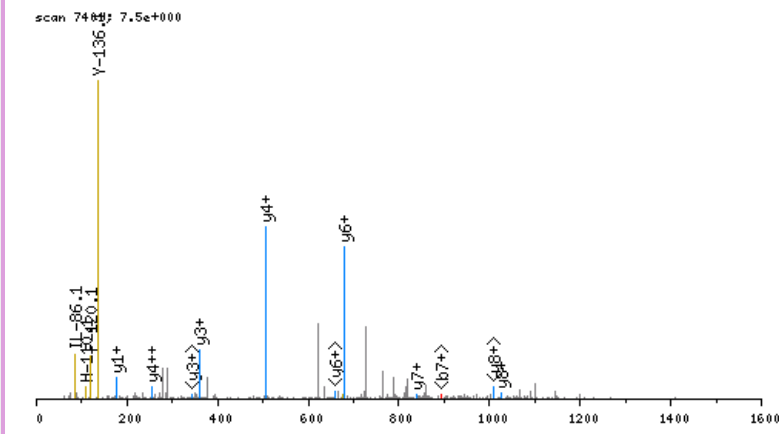

click image to zoom in; click top corners to zoom out [\[precursor±\]](#)

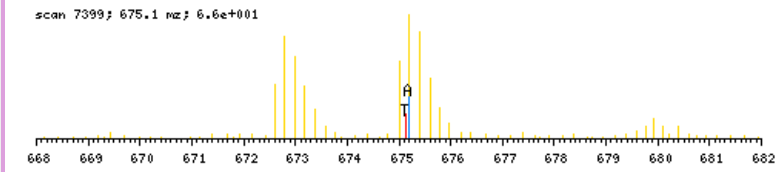

zoomed in precursor plot; T=theoretical m/z, A=acquired m/z

| b <sup>+</sup> | #  | AA | #  | y <sup>+</sup> | y <sup>2+</sup> |
|----------------|----|----|----|----------------|-----------------|
| 148.1550       | 1  | I  | 16 |                |                 |
| 310.3131       | 2  | K  | 15 | 1876.2096      | 938.6087        |
| 423.3971       | 3  | I  | 14 | 1714.0515      | 857.5297        |
| 520.4499       | 4  | P  | 13 | 1600.9674      | 800.9876        |
| 651.4904       | 5  | M  | 12 | 1503.9147      | 752.4612        |
| 813.6485       | 6  | K  | 11 | 1372.8742      | 686.9410        |
| 910.7012       | 7  | P  | 10 | 1210.7161      | 605.8620        |
| 997.7333       | 8  | S  | 9  | 1113.6633      | 557.3356        |
| 1183.8126      | 9  | W  | 8  | 1026.6313      | 513.8196        |
| 1345.9707      | 10 | K  | 7  | 840.5520       | 420.7799        |
| 1447.0184      | 11 | T  | 6  | 678.3939       | 339.7009        |
| 1518.0555      | 12 | A  | 5  | 577.3462       | 289.1770        |
| 1665.1239      | 13 | F  | 4  | 506.3091       | 253.6585        |
| 1778.2080      | 14 | L  | 3  | 359.2407       | 180.1243        |
| 1849.2451      | 15 | A  | 2  | 246.1566       | 123.5822        |
|                | 16 | R  | 1  | 175.1195       | 88.0637         |

N-term:+35.07 K(2):+162.16  
 K(6):+162.16 K(10):+162.16

ILGGQEAHAHAR, MH+ 1227.7022, m/z 409.9056  
 H OSG40 P180811 230811-s1.02060.02060.3.dta

X-range:

-

MassTol: Y-zoom:

MassType:

AVG  MONO

Axis:

1  2

Label:

I  M  -

Ions:

a  +  2+  3+

b  +  2+  3+

c  +  2+  3+

x  +  2+  3+

y  +  2+  3+

z  +  2+  3+

hide H<sub>2</sub>O/NH<sub>3</sub>

zoom 112-122

GO

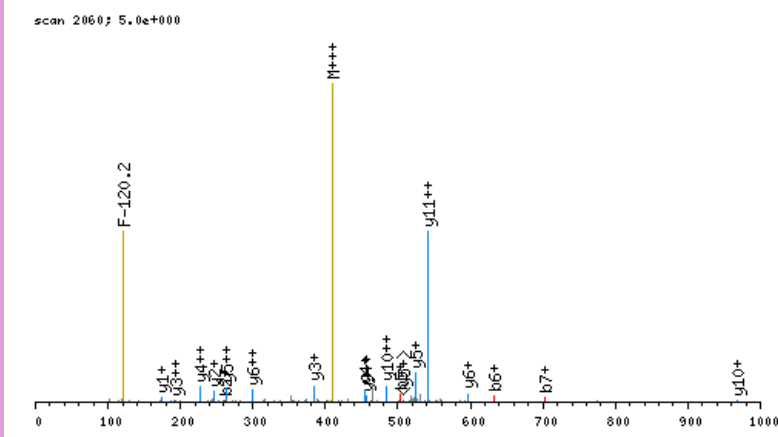

click image to zoom in; click top corners to zoom out [\[precursor±\]](#)

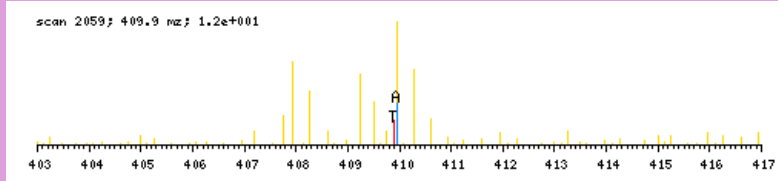

zoomed in precursor plot; T=theoretical m/z, A=acquired m/z

| b <sup>+</sup> | #  | AA # | y <sup>+</sup> | y <sup>2+</sup> |
|----------------|----|------|----------------|-----------------|
| 148.1550       | 1  | I 12 |                |                 |
| 261.2390       | 2  | L 11 | 1080.5550      | 540.7814        |
| 318.2605       | 3  | G 10 | 967.4710       | 484.2394        |
| 375.2820       | 4  | G 9  | 910.4495       | 455.7287        |
| 503.3405       | 5  | Q 8  | 853.4280       | 427.2179        |
| 632.3831       | 6  | E 7  | 725.3695       | 363.1886        |
| 703.4202       | 7  | A 6  | 596.3269       | 298.6673        |
| 774.4574       | 8  | A 5  | 525.2898       | 263.1488        |
| 845.4945       | 9  | A 4  | 454.2526       | 227.6302        |
| 982.5534       | 10 | H 3  | 383.2155       | 192.1117        |
| 1053.5905      | 11 | A 2  | 246.1566       | 123.5822        |
|                | 12 | R 1  | 175.1195       | 88.0637         |

N-term:+35.07

ILGVGPDGHTCSLFPDHPDLLQER, MH+ 2586.3138, m/z 647.3339  
 L OSG40 P180811 230811-s1.08222.08222.4.dta

scan 8222; 2.5e+000

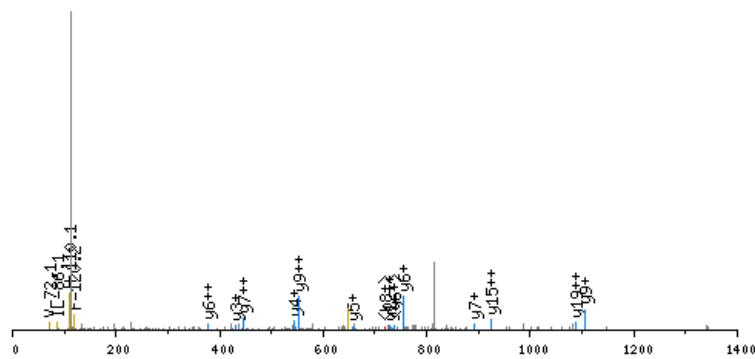

click image to zoom in; click top corners to zoom out [precursor±]

scan 8219; 647.3 m/z; 1.3e+001

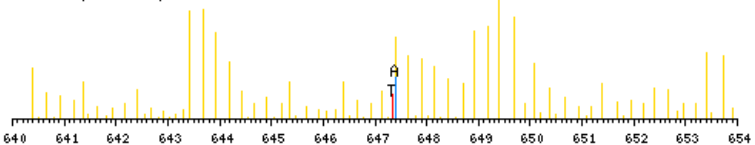

zoomed in precursor plot; T=theoretical m/z, A=acquired m/z

X-range:

0 - 0

MassTol: Y-zoom:

0. 1.

MassType:

AVG  MONO

Axis:

1  2

Label:

I  M  C-

Ions:

a  +  2+  3+

b  +  2+  3+

c  +  2+  3+

x  +  2+  3+

y  +  2+  3+

z  +  2+  3+

hide H<sub>2</sub>O/NH<sub>3</sub>

zoom 112-122

GO

| b <sup>+</sup> | #  | AA # | y <sup>+</sup>   | y <sup>2+</sup>  |
|----------------|----|------|------------------|------------------|
| 142.1232       | 1  | I 23 |                  |                  |
| 255.2072       | 2  | L 22 | 2445.1985        | 1223.1031        |
| 312.2287       | 3  | G 21 | 2332.1144        | 1166.5611        |
| 411.2971       | 4  | V 20 | 2275.0929        | 1138.0504        |
| 468.3186       | 5  | G 19 | 2176.0245        | <b>1088.5162</b> |
| 565.3713       | 6  | P 18 | 2119.0030        | 1060.0054        |
| 680.3983       | 7  | D 17 | 2021.9503        | 1011.4791        |
| 737.4197       | 8  | G 16 | 1906.9233        | 953.9656         |
| 874.4787       | 9  | H 15 | 1849.9019        | <b>925.4549</b>  |
| 975.5263       | 10 | T 14 | 1712.8430        | 856.9254         |
| 1135.5569      | 11 | C 13 | 1611.7953        | 806.4016         |
| 1222.5890      | 12 | S 12 | 1451.7647        | <b>726.3863</b>  |
| 1335.6730      | 13 | L 11 | 1364.7327        | 682.8702         |
| 1482.7414      | 14 | F 10 | 1251.6486        | 626.3282         |
| 1579.7942      | 15 | P 9  | <b>1104.5802</b> | <b>552.7940</b>  |
| 1694.8211      | 16 | D 8  | 1007.5274        | 504.2676         |
| 1831.8801      | 17 | H 7  | <b>892.5005</b>  | <b>446.7542</b>  |
| 1928.9328      | 18 | P 6  | <b>755.4416</b>  | <b>378.2247</b>  |
| 2042.0169      | 19 | L 5  | <b>658.3888</b>  | 329.6983         |
| 2155.1009      | 20 | L 4  | <b>545.3047</b>  | 273.1563         |
| 2283.1595      | 21 | Q 3  | <b>432.2207</b>  | 216.6142         |
| 2412.2021      | 22 | E 2  | 304.1621         | 152.5850         |
|                | 23 | R 1  | 175.1195         | 88.0637          |

N-term:+29.04 C(11):+160.03

ILNLPESWDWR, MH+ 1462.7906, m/z 488.2684  
 H OSG37 P180811 230811-s1.08560.08560.3.dta

X-range:

-

MassTol: Y-zoom:

MassType:

AVG  MONO

Axis:

1  2

Label:

I  M  -

Ions:

a  +  2+  3+

b  +  2+  3+

c  +  2+  3+

x  +  2+  3+

y  +  2+  3+

z  +  2+  3+

hide H<sub>2</sub>O/NH<sub>3</sub>

zoom 112-122

GO

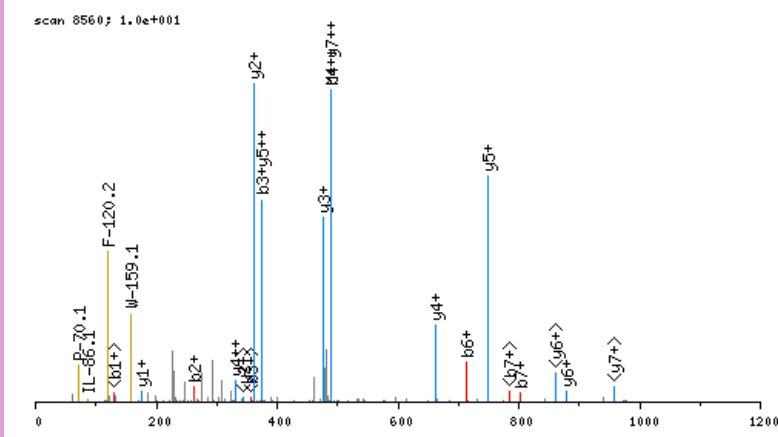

click image to zoom in; click top corners to zoom out [\[precursor±\]](#)

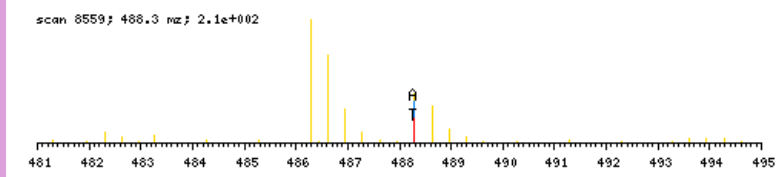

zoomed in precursor plot; T=theoretical m/z, A=acquired m/z

| b <sup>+</sup> | #  | AA # | y <sup>+</sup> | y <sup>2+</sup> |
|----------------|----|------|----------------|-----------------|
| 148.1550       | 1  | I 11 |                |                 |
| 261.2390       | 2  | L 10 | 1315.6435      | 658.3257        |
| 375.2820       | 3  | N 9  | 1202.5594      | 601.7836        |
| 488.3660       | 4  | L 8  | 1088.5165      | 544.7622        |
| 585.4188       | 5  | P 7  | 975.4325       | 488.2201        |
| 714.4614       | 6  | E 6  | 878.3797       | 439.6938        |
| 801.4934       | 7  | S 5  | 749.3371       | 375.1725        |
| 987.5727       | 8  | W 4  | 662.3051       | 331.6564        |
| 1102.5997      | 9  | D 3  | 476.2258       | 238.6168        |
| 1288.6790      | 10 | W 2  | 361.1988       | 181.1033        |
|                | 11 | R 1  | 175.1195       | 88.0637         |

N-term:+35.07

IPPTVPASASKVAFPEILGTSVKR, MH+ 2664.6553, m/z 666.9193  
 H OSG40 P180811 230811-s1.09453.09453.4.dta

scan 9453; 8.9e-001

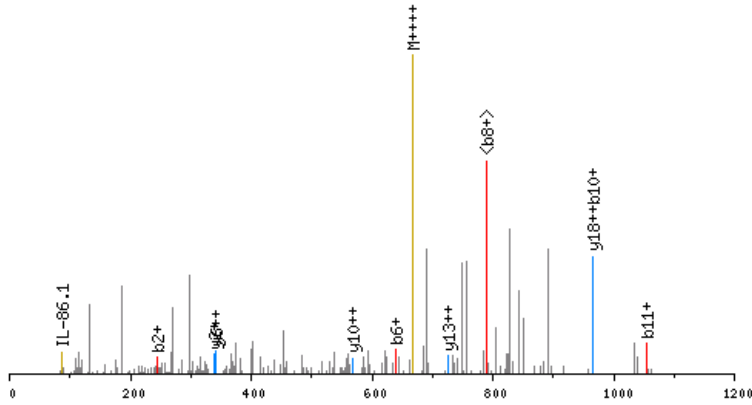

click image to zoom in; click top corners to zoom out [\[precursor±\]](#)

scan 9449; 666.9 nz; 1.6e+001

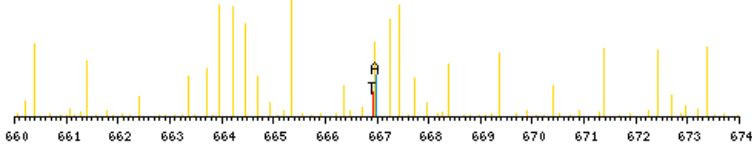

zoomed in precursor plot; T=theoretical m/z, A=acquired m/z

X-range:

-

MassTol: Y-zoom:

MassType:

AVG  MONO

Axis:

1  2

Label:

I  M  -

Ions:

a  +  2+  3+

b  +  2+  3+

c  +  2+  3+

x  +  2+  3+

y  +  2+  3+

z  +  2+  3+

hide H<sub>2</sub>O/NH<sub>3</sub>

zoom 112-122

GO

| b <sup>+</sup> | #  | AA | #  | y <sup>+</sup> | y <sup>2+</sup> |
|----------------|----|----|----|----------------|-----------------|
| 148.1550       | 1  | I  | 25 |                |                 |
| 245.2077       | 2  | P  | 24 | 2517.5081      | 1259.2580       |
| 342.2605       | 3  | P  | 23 | 2420.4554      | 1210.7316       |
| 443.3082       | 4  | T  | 22 | 2323.4026      | 1162.2052       |
| 540.3609       | 5  | P  | 21 | 2222.3549      | 1111.6814       |
| 639.4293       | 6  | V  | 20 | 2125.3022      | 1063.1550       |
| 736.4821       | 7  | P  | 19 | 2026.2338      | 1013.6208       |
| 807.5192       | 8  | A  | 18 | 1929.1810      | 965.0944        |
| 894.5513       | 9  | S  | 17 | 1858.1439      | 929.5759        |
| 965.5884       | 10 | A  | 16 | 1771.1119      | 886.0598        |
| 1052.6204      | 11 | S  | 15 | 1700.0747      | 850.5413        |
| 1214.7785      | 12 | K  | 14 | 1613.0427      | 807.0253        |
| 1313.8469      | 13 | V  | 13 | 1450.8846      | 725.9462        |
| 1384.8840      | 14 | A  | 12 | 1351.8162      | 676.4120        |
| 1531.9524      | 15 | F  | 11 | 1280.7791      | 640.8935        |
| 1629.0052      | 16 | P  | 10 | 1133.7107      | 567.3592        |
| 1758.0478      | 17 | E  | 9  | 1036.6579      | 518.8329        |
| 1871.1319      | 18 | I  | 8  | 907.6153       | 454.3116        |
| 1984.2159      | 19 | L  | 7  | 794.5312       | 397.7695        |
| 2041.2374      | 20 | G  | 6  | 681.4472       | 341.2275        |
| 2142.2851      | 21 | T  | 5  | 624.4257       | 312.7168        |
| 2229.3171      | 22 | S  | 4  | 523.3780       | 262.1929        |
| 2328.3855      | 23 | V  | 3  | 436.3460       | 218.6769        |
| 2490.5436      | 24 | K  | 2  | 337.2776       | 169.1427        |
|                | 25 | R  | 1  | 175.1195       | 88.0637         |

N-term: +35.07 K(12): +162.16  
 K(24): +162.16

IQMTQTPSSLSASLGDR, MH+ 1825.9542, m/z 609.3229  
 H OSG36 P180811 230811-s1.04326.04326.3.dta

X-range:

-

MassTol: Y-zoom:

MassType:

AVG  MONO

Axis:

1  2

Label:

I  M  -

Ions:

a  +  2+  3+

b  +  2+  3+

c  +  2+  3+

x  +  2+  3+

y  +  2+  3+

z  +  2+  3+

hide H<sub>2</sub>O/NH<sub>3</sub>

zoom 112-122

GO

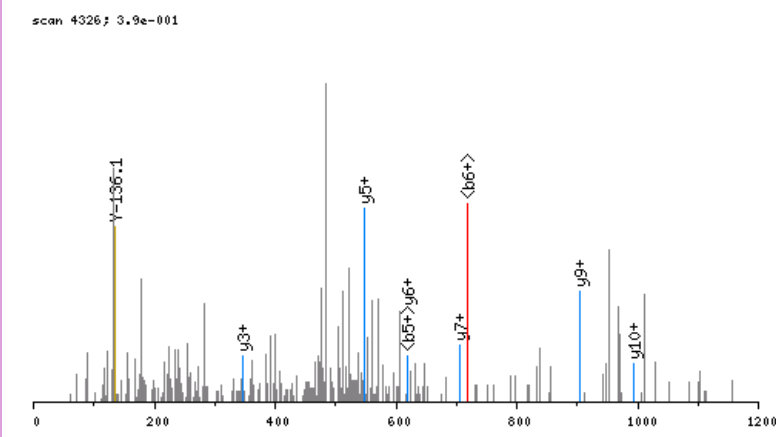

click image to zoom in; click top corners to zoom out [\[precursor±\]](#)

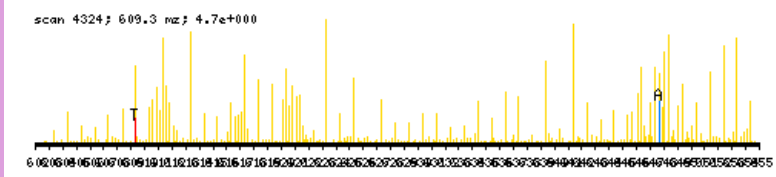

zoomed in precursor plot; T=theoretical m/z, A=acquired m/z

| b <sup>+</sup> | #  | AA | #  | y <sup>+</sup>  | y <sup>2+</sup> |
|----------------|----|----|----|-----------------|-----------------|
| 148.1550       | 1  | I  | 17 |                 |                 |
| 276.2135       | 2  | Q  | 16 | 1678.8070       | 839.9074        |
| 407.2540       | 3  | M  | 15 | 1550.7484       | 775.8781        |
| 508.3017       | 4  | T  | 14 | 1419.7080       | 710.3579        |
| 636.3603       | 5  | Q  | 13 | 1318.6603       | 659.8341        |
| 737.4080       | 6  | T  | 12 | 1190.6017       | 595.8048        |
| 834.4607       | 7  | P  | 11 | 1089.5540       | 545.2809        |
| 921.4928       | 8  | S  | 10 | <b>992.5013</b> | 496.7545        |
| 1008.5248      | 9  | S  | 9  | <b>905.4692</b> | 453.2385        |
| 1121.6088      | 10 | L  | 8  | 818.4372        | 409.7225        |
| 1208.6409      | 11 | S  | 7  | <b>705.3531</b> | 353.1805        |
| 1279.6780      | 12 | A  | 6  | <b>618.3211</b> | 309.6645        |
| 1366.7100      | 13 | S  | 5  | <b>547.2840</b> | 274.1459        |
| 1479.7941      | 14 | L  | 4  | 460.2520        | 230.6299        |
| 1536.8155      | 15 | G  | 3  | <b>347.1679</b> | 174.0879        |
| 1651.8425      | 16 | D  | 2  | 290.1464        | 145.5771        |
|                | 17 | R  | 1  | 175.1195        | 88.0637         |

N-term:+35.07

IQMTQTSSLSASLGDR, MH+ 1823.9173, m/z 608.6439  
 L OSG36 P180811 230811-s1.04520.04520.3.dta

scan 4520; 5.1e+000

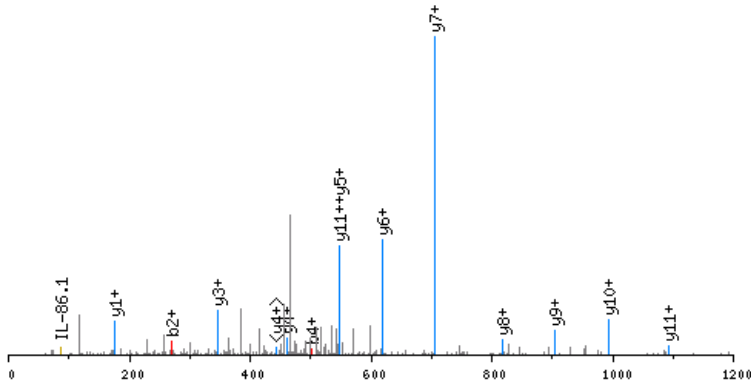

click image to zoom in; click top corners to zoom out [\[precursor±\]](#)

scan 4519; 608.6 m/z; 1.6e+002

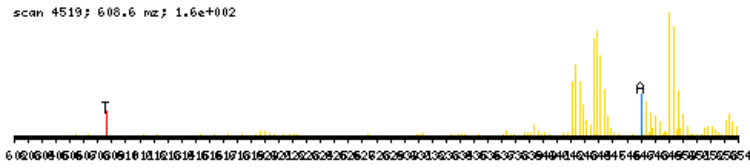

zoomed in precursor plot; T=theoretical m/z, A=acquired m/z

X-range:

-

MassTol: Y-zoom:

MassType:

AVG  MONO

Axis:

1  2

Label:

I  M  -

Ions:

a  +  2+  3+

b  +  2+  3+

c  +  2+  3+

x  +  2+  3+

y  +  2+  3+

z  +  2+  3+

hide H<sub>2</sub>O/NH<sub>3</sub>

zoom 112-122

GO

| b <sup>+</sup> | #  | AA | #  | y <sup>+</sup> | y <sup>2+</sup> |
|----------------|----|----|----|----------------|-----------------|
| 142.1232       | 1  | I  | 17 |                |                 |
| 270.1817       | 2  | Q  | 16 | 1682.8019      | 841.9049        |
| 401.2222       | 3  | M  | 15 | 1554.7434      | 777.8756        |
| 502.2699       | 4  | T  | 14 | 1423.7029      | 712.3554        |
| 630.3285       | 5  | Q  | 13 | 1322.6552      | 661.8315        |
| 731.3762       | 6  | T  | 12 | 1194.5966      | 597.8022        |
| 832.4238       | 7  | T  | 11 | 1093.5489      | 547.2784        |
| 919.4559       | 8  | S  | 10 | 992.5013       | 496.7545        |
| 1006.4879      | 9  | S  | 9  | 905.4692       | 453.2385        |
| 1119.5720      | 10 | L  | 8  | 818.4372       | 409.7225        |
| 1206.6040      | 11 | S  | 7  | 705.3531       | 353.1805        |
| 1277.6411      | 12 | A  | 6  | 618.3211       | 309.6645        |
| 1364.6731      | 13 | S  | 5  | 547.2840       | 274.1459        |
| 1477.7572      | 14 | L  | 4  | 460.2520       | 230.6299        |
| 1534.7787      | 15 | G  | 3  | 347.1679       | 174.0879        |
| 1649.8056      | 16 | D  | 2  | 290.1464       | 145.5771        |
|                | 17 | R  | 1  | 175.1195       | 88.0637         |

N-term:+29.04



IQVTPQEKKAIER, MH+ 1596.8961, m/z 532.9702  
 L OSG39 P180811 230811-s1.03032.03032.3.dta

X-range:

-

MassTol: Y-zoom:

MassType:

AVG  MONO

Axis:

1  2

Label:

I  M  -

Ions:

a  +  2+  3+

b  +  2+  3+

c  +  2+  3+

x  +  2+  3+

y  +  2+  3+

z  +  2+  3+

hide H<sub>2</sub>O/NH<sub>3</sub>

zoom 112-122

GO

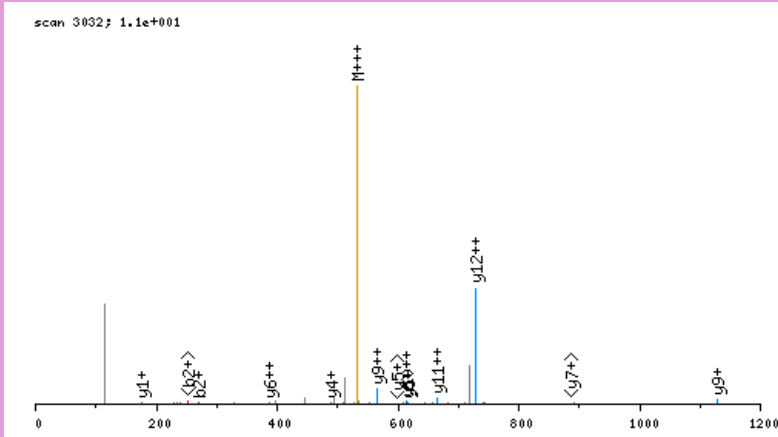

click image to zoom in; click top corners to zoom out [\[precursor±\]](#)

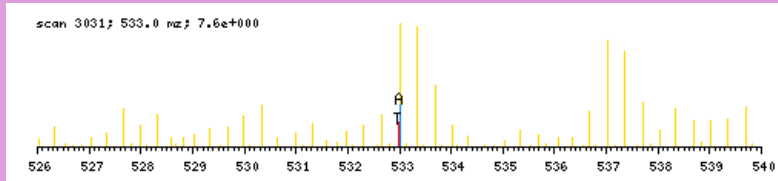

zoomed in precursor plot; T=theoretical m/z, A=acquired m/z

| b <sup>+</sup> | #  | AA # | y <sup>+</sup> | y <sup>2+</sup> |
|----------------|----|------|----------------|-----------------|
| 142.1232       | 1  | I 13 |                |                 |
| 270.1817       | 2  | Q 12 | 1455.7808      | 728.3943        |
| 369.2502       | 3  | V 11 | 1327.7222      | 664.3650        |
| 470.2978       | 4  | T 10 | 1228.6538      | 614.8308        |
| 567.3506       | 5  | P 9  | 1127.6061      | 564.3070        |
| 695.4092       | 6  | Q 8  | 1030.5533      | 515.7806        |
| 824.4518       | 7  | E 7  | 902.4948       | 451.7513        |
| 980.5781       | 8  | K 6  | 773.4522       | 387.2300        |
| 1109.6207      | 9  | E 5  | 617.3259       | 309.1668        |
| 1180.6578      | 10 | A 4  | 488.2833       | 244.6455        |
| 1293.7418      | 11 | I 3  | 417.2462       | 209.1270        |
| 1422.7844      | 12 | E 2  | 304.1621       | 152.5850        |
|                | 13 | R 1  | 175.1195       | 88.0637         |

N-term:+29.04 K(8):+156.13

X-range:

-

MassTol: Y-zoom:

MassType:

AVG  MONO

Axis:

1  2

Label:

I  M  -

Ions:

a  +  2+  3+

b  +  2+  3+

c  +  2+  3+

x  +  2+  3+

y  +  2+  3+

z  +  2+  3+

hide H<sub>2</sub>O/NH<sub>3</sub>

zoom 112-122

GO

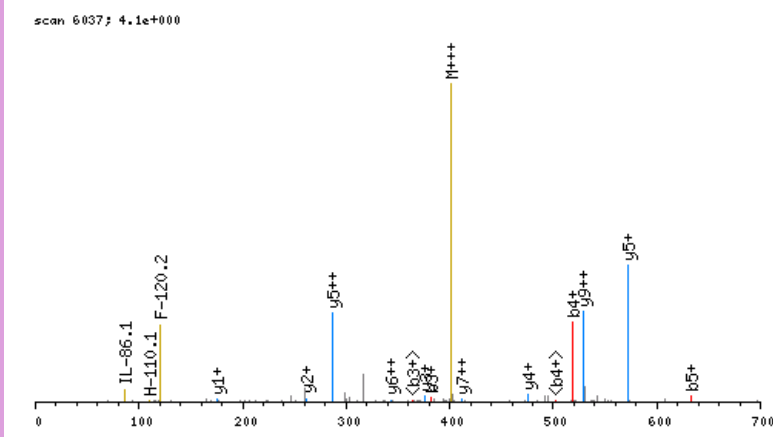

click image to zoom in; click top corners to zoom out [\[precursor±\]](#)

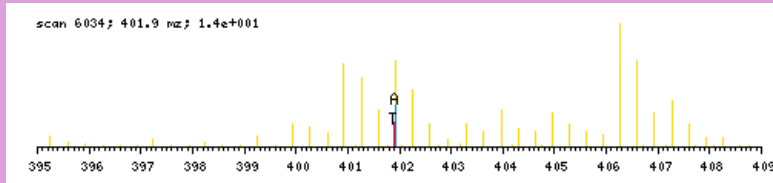

zoomed in precursor plot; T=theoretical m/z, A=acquired m/z

| b <sup>+</sup> | #  | AA # | y <sup>+</sup> | y <sup>2+</sup> |
|----------------|----|------|----------------|-----------------|
| 148.1550       | 1  | I 10 |                |                 |
| 235.1870       | 2  | S 9  | 1056.5591      | 528.7834        |
| 382.2554       | 3  | F 8  | 969.5270       | 485.2674        |
| 519.3143       | 4  | H 7  | 822.4586       | 411.7332        |
| 632.3984       | 5  | L 6  | 685.3997       | 343.2038        |
| 729.4511       | 6  | P 5  | 572.3156       | 286.6617        |
| 828.5196       | 7  | V 4  | 475.2629       | 238.1353        |
| 942.5625       | 8  | N 3  | 376.1945       | 188.6011        |
| 1029.5945      | 9  | S 2  | 262.1515       | 131.5797        |
|                | 10 | R 1  | 175.1195       | 88.0637         |

N-term:+35.07

ISWYDNEYGYSNR, MH+ 1700.7769, m/z 567.5971  
 H OSG37 P180811 230811-s1.05935.05935.3.dta

X-range:

-

MassTol: Y-zoom:

MassType:

AVG  MONO

Axis:

1  2

Label:

I  M  -

Ions:

a  +  2+  3+

b  +  2+  3+

c  +  2+  3+

x  +  2+  3+

y  +  2+  3+

z  +  2+  3+

hide H<sub>2</sub>O/NH<sub>3</sub>

zoom 112-122

GO

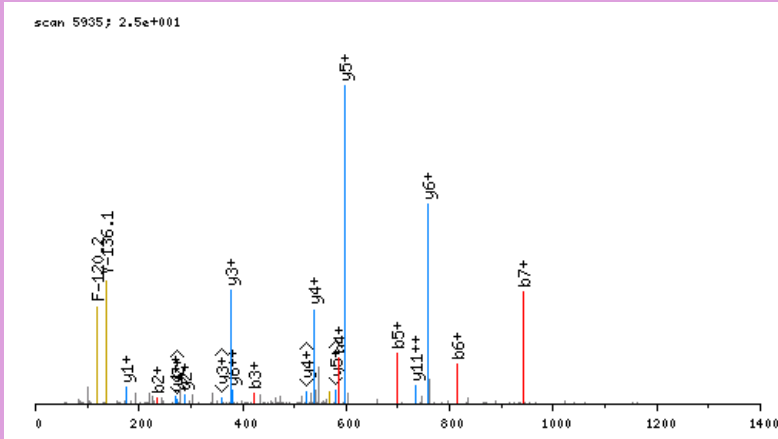

click image to zoom in; click top corners to zoom out [\[precursor±\]](#)

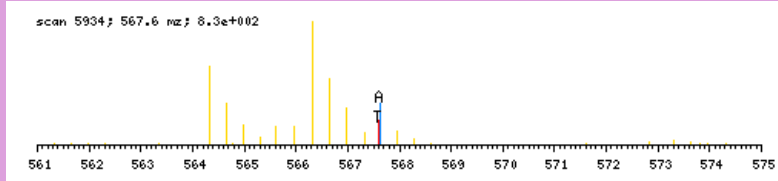

zoomed in precursor plot; T=theoretical m/z, A=acquired m/z

| b <sup>+</sup> | #  | AA # | y <sup>+</sup> | y <sup>2+</sup> |
|----------------|----|------|----------------|-----------------|
| 148.1550       | 1  | I 13 |                |                 |
| 235.1870       | 2  | S 12 | 1553.6297      | 777.3188        |
| 421.2663       | 3  | W 11 | 1466.5977      | 733.8028        |
| 584.3296       | 4  | Y 10 | 1280.5184      | 640.7631        |
| 699.3566       | 5  | D 9  | 1117.4550      | 559.2314        |
| 813.3995       | 6  | N 8  | 1002.4281      | 501.7180        |
| 942.4421       | 7  | E 7  | 888.3852       | 444.6965        |
| 1105.5054      | 8  | Y 6  | 759.3426       | 380.1752        |
| 1162.5269      | 9  | G 5  | 596.2792       | 298.6435        |
| 1325.5902      | 10 | Y 4  | 539.2578       | 270.1328        |
| 1412.6222      | 11 | S 3  | 376.1945       | 188.6011        |
| 1526.6652      | 12 | N 2  | 289.1624       | 145.0851        |
|                | 13 | R 1  | 175.1195       | 88.0637         |

N-term:+35.07

IVAPGKGIILAADESTGSIKR, MH+ 2138.2549, m/z 535.3192  
 L OSG40 P180811 230811-s1.05272.05272.4.dta

X-range:

-

MassTol: Y-zoom:

MassType:

AVG  MONO

Axis:

1  2

Label:

I  M  -

Ions:

a  +  2+  3+

b  +  2+  3+

c  +  2+  3+

x  +  2+  3+

y  +  2+  3+

z  +  2+  3+

hide H<sub>2</sub>O/NH<sub>3</sub>

zoom 112-122

GO

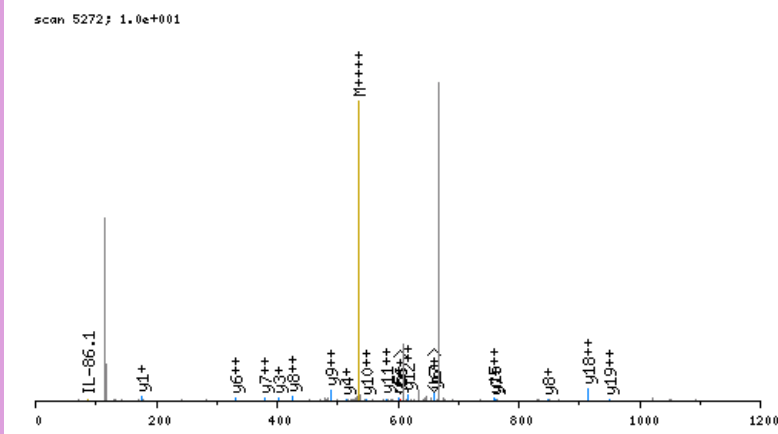

click image to zoom in; click top corners to zoom out [precursor±]

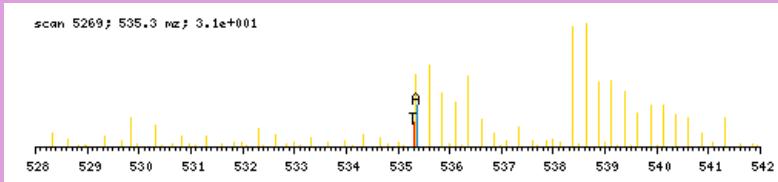

zoomed in precursor plot; T=theoretical m/z, A=acquired m/z

| b <sup>+</sup> | #  | AA # | y <sup>+</sup> | y <sup>2+</sup> |
|----------------|----|------|----------------|-----------------|
| 142.1232       | 1  | I 21 |                |                 |
| 241.1916       | 2  | V 20 | 1997.1396      | 999.0737        |
| 312.2287       | 3  | A 19 | 1898.0712      | 949.5395        |
| 409.2815       | 4  | P 18 | 1827.0341      | 914.0209        |
| 466.3029       | 5  | G 17 | 1729.9813      | 865.4946        |
| 622.4292       | 6  | K 16 | 1672.9598      | 836.9838        |
| 679.4507       | 7  | G 15 | 1516.8335      | 758.9207        |
| 792.5347       | 8  | I 14 | 1459.8121      | 730.4099        |
| 905.6188       | 9  | L 13 | 1346.7280      | 673.8679        |
| 976.6559       | 10 | A 12 | 1233.6439      | 617.3259        |
| 1047.6930      | 11 | A 11 | 1162.6068      | 581.8073        |
| 1162.7200      | 12 | D 10 | 1091.5697      | 546.2888        |
| 1291.7626      | 13 | E 9  | 976.5428       | 488.7753        |
| 1378.7946      | 14 | S 8  | 847.5002       | 424.2540        |
| 1479.8423      | 15 | T 7  | 760.4681       | 380.7380        |
| 1536.8637      | 16 | G 6  | 659.4205       | 330.2141        |
| 1623.8958      | 17 | S 5  | 602.3990       | 301.7034        |
| 1736.9798      | 18 | I 4  | 515.3670       | 258.1874        |
| 1808.0170      | 19 | A 3  | 402.2829       | 201.6454        |
| 1964.1433      | 20 | K 2  | 331.2458       | 166.1268        |
|                | 21 | R 1  | 175.1195       | 88.0637         |

N-term:+29.04 K(6):+156.13  
 K(20):+156.13

IVITQDELSNPVTSGESVSISCR, MH+ 2519.2662, m/z 630.5720  
 L OSG36 P180811 230811-s1.05427.05427.4.dta

X-range:

-

MassTol: Y-zoom:

MassType:

AVG  MONO

Axis:

1  2

Label:

I  M  -

Ions:

a  +  2+  3+

b  +  2+  3+

c  +  2+  3+

x  +  2+  3+

y  +  2+  3+

z  +  2+  3+

hide H<sub>2</sub>O/NH<sub>3</sub>

zoom 112-122

GO

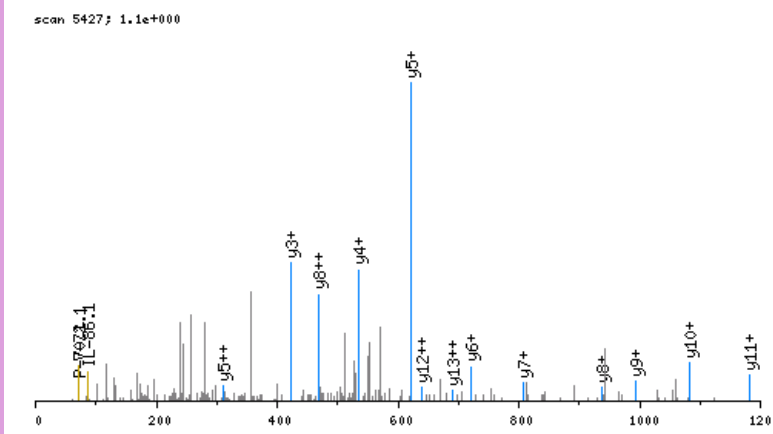

click image to zoom in; click top corners to zoom out [\[precursor±\]](#)

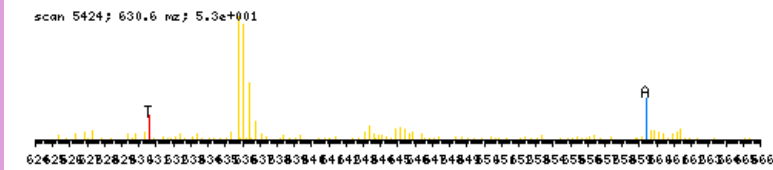

zoomed in precursor plot; T=theoretical m/z, A=acquired m/z

| b <sup>+</sup> | #  | AA # | y <sup>+</sup>   | y <sup>2+</sup> |
|----------------|----|------|------------------|-----------------|
| 142.1232       | 1  | I 23 |                  |                 |
| 241.1916       | 2  | V 22 | 2378.1509        | 1189.5794       |
| 354.2756       | 3  | I 21 | 2279.0825        | 1140.0452       |
| 455.3233       | 4  | T 20 | 2165.9984        | 1083.5031       |
| 583.3819       | 5  | Q 19 | 2064.9507        | 1032.9793       |
| 698.4088       | 6  | D 18 | 1936.8922        | 968.9500        |
| 827.4514       | 7  | E 17 | 1821.8652        | 911.4365        |
| 940.5355       | 8  | L 16 | 1692.8226        | 846.9152        |
| 1027.5675      | 9  | S 15 | 1579.7386        | 790.3732        |
| 1141.6105      | 10 | N 14 | 1492.7065        | 746.8572        |
| 1238.6632      | 11 | P 13 | 1378.6636        | <b>689.8357</b> |
| 1337.7316      | 12 | V 12 | 1281.6108        | <b>641.3093</b> |
| 1438.7793      | 13 | T 11 | <b>1182.5424</b> | 591.7751        |
| 1525.8113      | 14 | S 10 | <b>1081.4947</b> | 541.2513        |
| 1582.8328      | 15 | G 9  | <b>994.4627</b>  | 497.7353        |
| 1711.8754      | 16 | E 8  | <b>937.4413</b>  | <b>469.2245</b> |
| 1798.9074      | 17 | S 7  | <b>808.3987</b>  | 404.7032        |
| 1897.9758      | 18 | V 6  | <b>721.3666</b>  | 361.1872        |
| 1985.0079      | 19 | S 5  | <b>622.2982</b>  | <b>311.6530</b> |
| 2098.0919      | 20 | I 4  | <b>535.2662</b>  | 268.1370        |
| 2185.1240      | 21 | S 3  | <b>422.1821</b>  | 211.5950        |
| 2345.1546      | 22 | C 2  | 335.1501         | 168.0790        |
|                | 23 | R 1  | 175.1195         | 88.0637         |

N-term:+29.04 C(22):+160.03

IVLTQSPAITAASLGQK, MH+ 1754.0428, m/z 585.3524  
 L OSG36 P180811 230811-s1.04935.04935.3.dta

X-range:

-

MassTol: Y-zoom:

MassType:

AVG  MONO

Axis:

1  2

Label:

I  M  -

Ions:

a  +  2+  3+

b  +  2+  3+

c  +  2+  3+

x  +  2+  3+

y  +  2+  3+

z  +  2+  3+

hide H<sub>2</sub>O/NH<sub>3</sub>

zoom 112-122

GO

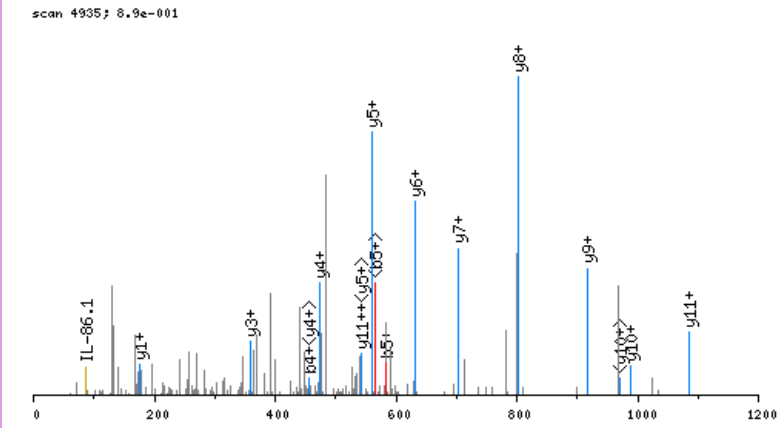

click image to zoom in; click top corners to zoom out [\[precursor±\]](#)

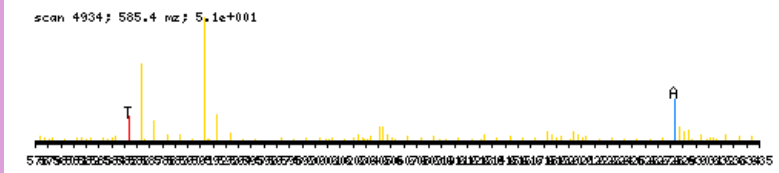

zoomed in precursor plot; T=theoretical m/z, A=acquired m/z

| b <sup>+</sup> | #  | AA # | y <sup>+</sup> | y <sup>2+</sup> |
|----------------|----|------|----------------|-----------------|
| 142.1232       | 1  | I 17 |                |                 |
| 241.1916       | 2  | V 16 | 1612.9274      | 806.9676        |
| 354.2756       | 3  | L 15 | 1513.8590      | 757.4334        |
| 455.3233       | 4  | T 14 | 1400.7750      | 700.8914        |
| 583.3819       | 5  | Q 13 | 1299.7273      | 650.3676        |
| 670.4139       | 6  | S 12 | 1171.6687      | 586.3383        |
| 767.4667       | 7  | P 11 | 1084.6367      | 542.8222        |
| 838.5038       | 8  | A 10 | 987.5839       | 494.2959        |
| 951.5879       | 9  | I 9  | 916.5468       | 458.7773        |
| 1052.6355      | 10 | T 8  | 803.4627       | 402.2353        |
| 1123.6727      | 11 | A 7  | 702.4151       | 351.7114        |
| 1194.7098      | 12 | A 6  | 631.3779       | 316.1929        |
| 1281.7418      | 13 | S 5  | 560.3408       | 280.6743        |
| 1394.8259      | 14 | L 4  | 473.3088       | 237.1583        |
| 1451.8473      | 15 | G 3  | 360.2247       | 180.6163        |
| 1579.9059      | 16 | Q 2  | 303.2033       | 152.1055        |
|                | 17 | K 1  | 175.1447       | 88.0763         |

N-term:+29.04 K(17):+156.13

IVLTQSPASLAVSLGQR, MH+ 1774.0650, m/z 592.0265  
 H OSG37 P180811 230811-s1.08480.08480.3.dta

X-range:

-

MassTol: Y-zoom:

MassType:

AVG  MONO

Axis:

1  2

Label:

I  M  -

Ions:

a  +  2+  3+

b  +  2+  3+

c  +  2+  3+

x  +  2+  3+

y  +  2+  3+

z  +  2+  3+

hide H<sub>2</sub>O/NH<sub>3</sub>

zoom 112-122

GO

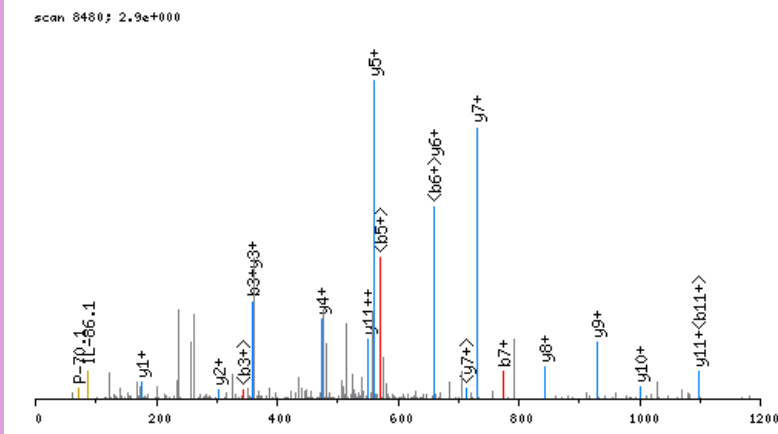

click image to zoom in; click top corners to zoom out [\[precursor±\]](#)

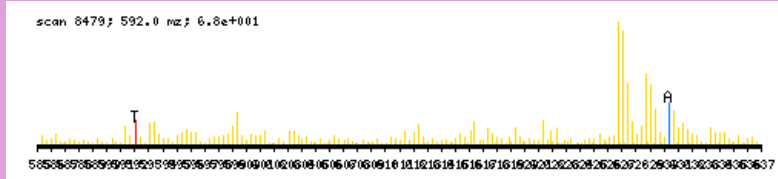

zoomed in precursor plot; T=theoretical m/z, A=acquired m/z

| b <sup>+</sup>  | #  | AA # | y <sup>+</sup>   | y <sup>2+</sup> |
|-----------------|----|------|------------------|-----------------|
| 148.1550        | 1  | I 17 |                  |                 |
| 247.2234        | 2  | V 16 | 1626.9179        | 813.9629        |
| <b>360.3074</b> | 3  | L 15 | 1527.8495        | 764.4287        |
| 461.3551        | 4  | T 14 | 1414.7654        | 707.8866        |
| 589.4137        | 5  | Q 13 | 1313.7177        | 657.3628        |
| 676.4457        | 6  | S 12 | 1185.6592        | 593.3335        |
| <b>773.4985</b> | 7  | P 11 | <b>1098.6271</b> | <b>549.8175</b> |
| 844.5356        | 8  | A 10 | <b>1001.5744</b> | 501.2911        |
| 931.5676        | 9  | S 9  | <b>930.5373</b>  | 465.7725        |
| 1044.6517       | 10 | L 8  | <b>843.5052</b>  | 422.2565        |
| 1115.6888       | 11 | A 7  | <b>730.4212</b>  | 365.7145        |
| 1214.7572       | 12 | V 6  | <b>659.3840</b>  | 330.1959        |
| 1301.7893       | 13 | S 5  | <b>560.3156</b>  | 280.6617        |
| 1414.8733       | 14 | L 4  | <b>473.2836</b>  | 237.1457        |
| 1471.8948       | 15 | G 3  | <b>360.1995</b>  | 180.6037        |
| 1599.9534       | 16 | Q 2  | <b>303.1781</b>  | 152.0930        |
|                 | 17 | R 1  | <b>175.1195</b>  | 88.0637         |

N-term:+35.07

IVPIVEPEILPDGDHDLKR, MH+ 2223.3025, m/z 556.5811  
 H OSG40 P180811 230811-s1.07548.07548.4.dta

X-range:

-

MassTol: Y-zoom:

MassType:

AVG  MONO

Axis:

1  2

Label:

I  M  -

Ions:

a  +  2+  3+

b  +  2+  3+

c  +  2+  3+

x  +  2+  3+

y  +  2+  3+

z  +  2+  3+

hide H<sub>2</sub>O/NH<sub>3</sub>

zoom 112-122

GO

scan 7548; 4.1e+000

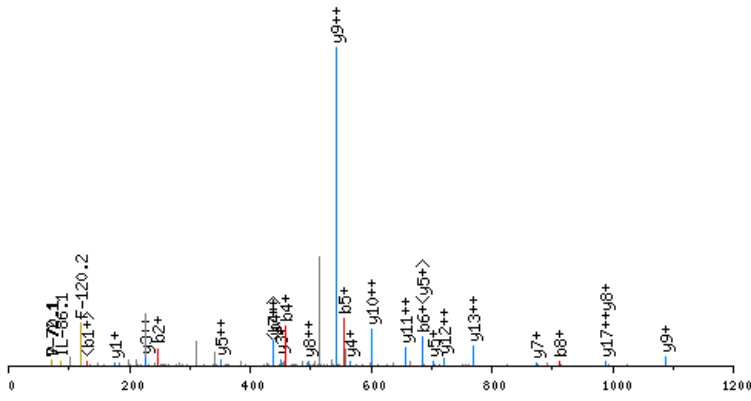

click image to zoom in; click top corners to zoom out [\[precursor±\]](#)

scan 7544; 556.6 mz; 1.4e+001

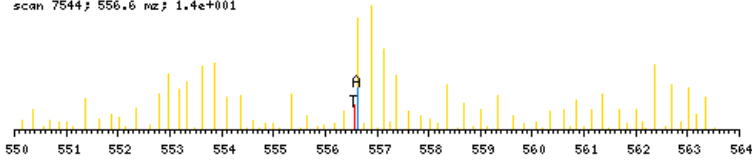

zoomed in precursor plot; T=theoretical m/z, A=acquired m/z

| b <sup>+</sup> | #  | AA | #  | y <sup>+</sup> | y <sup>2+</sup> |
|----------------|----|----|----|----------------|-----------------|
| 148.1550       | 1  | I  | 19 |                |                 |
| 247.2234       | 2  | V  | 18 | 2076.1554      | 1038.5816       |
| 344.2761       | 3  | P  | 17 | 1977.0870      | 989.0474        |
| 457.3602       | 4  | I  | 16 | 1880.0342      | 940.5210        |
| 556.4286       | 5  | V  | 15 | 1766.9501      | 883.9790        |
| 685.4712       | 6  | E  | 14 | 1667.8817      | 834.4448        |
| 782.5240       | 7  | P  | 13 | 1538.8391      | 769.9235        |
| 911.5666       | 8  | E  | 12 | 1441.7864      | 721.3971        |
| 1024.6506      | 9  | I  | 11 | 1312.7438      | 656.8758        |
| 1137.7347      | 10 | L  | 10 | 1199.6597      | 600.3338        |
| 1234.7875      | 11 | P  | 9  | 1086.5756      | 543.7917        |
| 1349.8144      | 12 | D  | 8  | 989.5229       | 495.2653        |
| 1406.8359      | 13 | G  | 7  | 874.4959       | 437.7519        |
| 1521.8628      | 14 | D  | 6  | 817.4745       | 409.2411        |
| 1658.9217      | 15 | H  | 5  | 702.4475       | 351.7277        |
| 1773.9487      | 16 | D  | 4  | 565.3886       | 283.1982        |
| 1887.0327      | 17 | L  | 3  | 450.3617       | 225.6847        |
| 2049.1908      | 18 | K  | 2  | 337.2776       | 169.1427        |
|                | 19 | R  | 1  | 175.1195       | 88.0637         |

N-term:+35.07 K(18):+162.16



KAPQVSTPTLVEAAR, MH+ 1623.9434, m/z 541.9860  
 L OSG39 P180811 230811-s1.03482.03482.3.dta

X-range:

-

MassTol: Y-zoom:

MassType:

AVG  MONO

Axis:

1  2

Label:

I  M  -

Ions:

a  +  2+  3+

b  +  2+  3+

c  +  2+  3+

x  +  2+  3+

y  +  2+  3+

z  +  2+  3+

hide H<sub>2</sub>O/NH<sub>3</sub>

zoom 112-122

GO

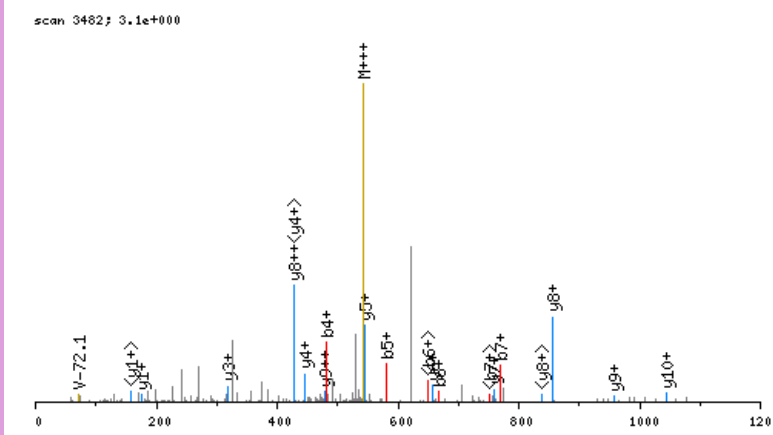

click image to zoom in; click top corners to zoom out [\[precursor±\]](#)

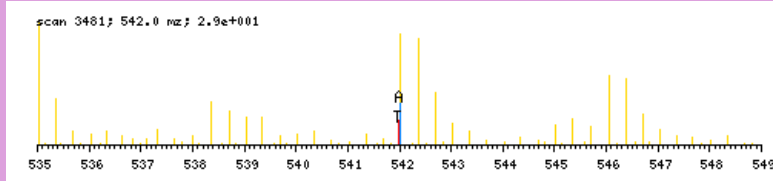

zoomed in precursor plot; T=theoretical m/z, A=acquired m/z

| b <sup>+</sup> | #  | AA # | y <sup>+</sup> | y <sup>2+</sup> |
|----------------|----|------|----------------|-----------------|
| 185.1654       | 1  | K 15 |                |                 |
| 256.2025       | 2  | A 14 | 1439.7858      | 720.3968        |
| 353.2553       | 3  | P 13 | 1368.7487      | 684.8783        |
| 481.3139       | 4  | Q 12 | 1271.6959      | 636.3519        |
| 580.3823       | 5  | V 11 | 1143.6374      | 572.3226        |
| 667.4143       | 6  | S 10 | 1044.5689      | 522.7884        |
| 768.4620       | 7  | T 9  | 957.5369       | 479.2724        |
| 865.5147       | 8  | P 8  | 856.4892       | 428.7485        |
| 966.5624       | 9  | T 7  | 759.4365       | 380.2222        |
| 1079.6465      | 10 | L 6  | 658.3888       | 329.6983        |
| 1178.7149      | 11 | V 5  | 545.3047       | 273.1563        |
| 1307.7575      | 12 | E 4  | 446.2363       | 223.6221        |
| 1378.7946      | 13 | A 3  | 317.1937       | 159.1008        |
| 1449.8317      | 14 | A 2  | 246.1566       | 123.5822        |
|                | 15 | R 1  | 175.1195       | 88.0637         |

N-term:+29.04 K(1):+156.13

KASPQTTKASPQAKPLR, MH+ 1921.1599, m/z 481.0454  
 L OSG40 P180811 230811-s1.05263.05263.4.dta

X-range:

-

MassTol: Y-zoom:

MassType:

AVG  MONO

Axis:

1  2

Label:

I  M  -

Ions:

a  +  2+  3+

b  +  2+  3+

c  +  2+  3+

x  +  2+  3+

y  +  2+  3+

z  +  2+  3+

hide H<sub>2</sub>O/NH<sub>3</sub>

zoom 112-122

GO

scan 5263; 4.3e+001

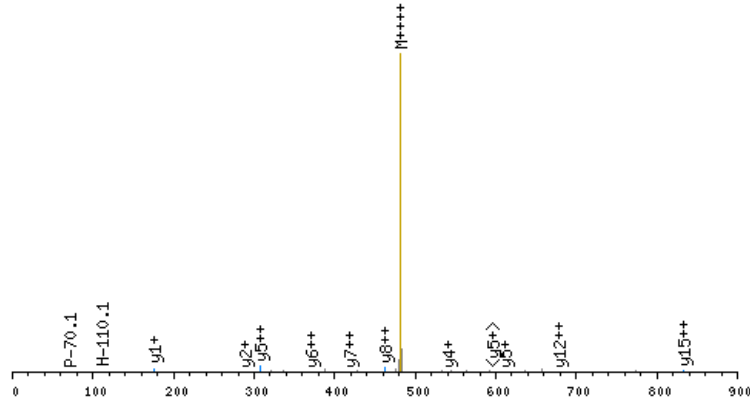

click image to zoom in; click top corners to zoom out [\[precursor±\]](#)

scan 5259; 481.0 m/z; 8.8e+002

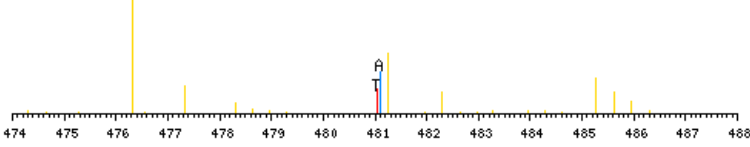

zoomed in precursor plot; T=theoretical m/z, A=acquired m/z

| b <sup>+</sup> | #  | AA | #  | y <sup>+</sup> | y <sup>2+</sup> |
|----------------|----|----|----|----------------|-----------------|
| 185.1654       | 1  | K  | 17 |                |                 |
| 256.2025       | 2  | A  | 16 | 1737.0024      | 869.0051        |
| 343.2345       | 3  | S  | 15 | 1665.9653      | 833.4865        |
| 440.2873       | 4  | P  | 14 | 1578.9332      | 789.9705        |
| 568.3459       | 5  | Q  | 13 | 1481.8805      | 741.4441        |
| 669.3936       | 6  | T  | 12 | 1353.8219      | 677.4149        |
| 770.4412       | 7  | T  | 11 | 1252.7742      | 626.8910        |
| 926.5675       | 8  | K  | 10 | 1151.7265      | 576.3672        |
| 997.6047       | 9  | A  | 9  | 995.6002       | 498.3040        |
| 1084.6367      | 10 | S  | 8  | 924.5631       | 462.7855        |
| 1181.6894      | 11 | P  | 7  | 837.5311       | 419.2695        |
| 1309.7480      | 12 | Q  | 6  | 740.4783       | 370.7431        |
| 1380.7851      | 13 | A  | 5  | 612.4197       | 306.7138        |
| 1536.9114      | 14 | K  | 4  | 541.3826       | 271.1952        |
| 1633.9642      | 15 | P  | 3  | 385.2563       | 193.1321        |
| 1747.0483      | 16 | L  | 2  | 288.2036       | 144.6057        |
|                | 17 | R  | 1  | 175.1195       | 88.0637         |

N-term:+29.04 K(1):+156.13  
 K(8):+156.13 K(14):+156.13

KATAVLGPPRK, MH+ 1221.8048, m/z 407.9398  
 L OSG40 P180811 230811-s1.03693.03693.3.dta

X-range:

-

MassTol: Y-zoom:

MassType:

AVG  MONO

Axis:

1  2

Label:

I  M  -

Ions:

a  +  2+  3+

b  +  2+  3+

c  +  2+  3+

x  +  2+  3+

y  +  2+  3+

z  +  2+  3+

hide H<sub>2</sub>O/NH<sub>3</sub>

zoom 112-122

GO

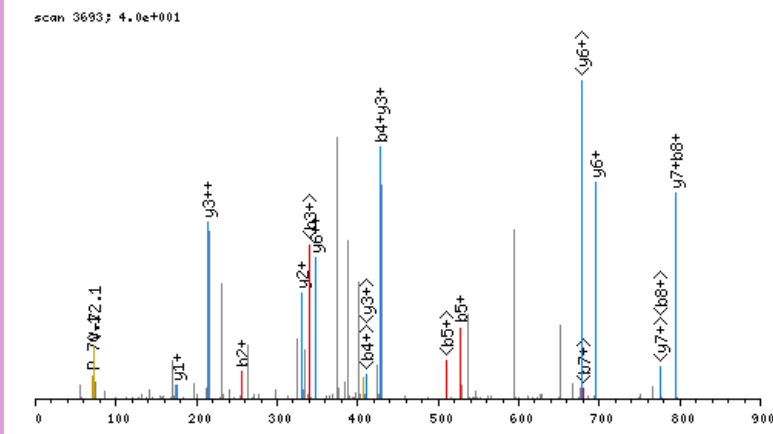

click image to zoom in; click top corners to zoom out [\[precursor±\]](#)

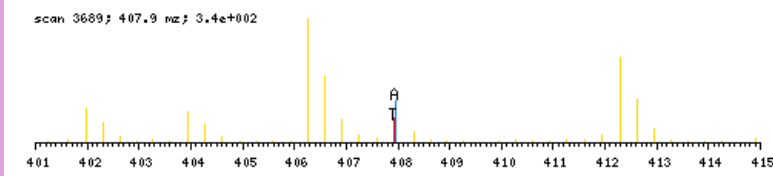

zoomed in precursor plot; T=theoretical m/z, A=acquired m/z

| b <sup>+</sup> | #  | AA # | y <sup>+</sup> | y <sup>2+</sup> |
|----------------|----|------|----------------|-----------------|
| 185.1654       | 1  | K 11 |                |                 |
| 256.2025       | 2  | A 10 | 1037.6472      | 519.3275        |
| 357.2502       | 3  | T 9  | 966.6101       | 483.8089        |
| 428.2873       | 4  | A 8  | 865.5624       | 433.2851        |
| 527.3557       | 5  | V 7  | 794.5253       | 397.7665        |
| 640.4398       | 6  | L 6  | 695.4569       | 348.2323        |
| 697.4612       | 7  | G 5  | 582.3728       | 291.6903        |
| 794.5140       | 8  | P 4  | 525.3513       | 263.1796        |
| 891.5668       | 9  | P 3  | 428.2986       | 214.6532        |
| 1047.6679      | 10 | R 2  | 331.2458       | 166.1268        |
|                | 11 | K 1  | 175.1447       | 88.0763         |

N-term:+29.04 K(1):+156.13  
 K(11):+156.13

KATEMVEVGPEDDEVGAER, MH+ 2129.0709, m/z 710.3618  
 H OSG39 P180811 230811-s1.03563.03563.3.dta

X-range:

-

MassTol: Y-zoom:

MassType:

AVG  MONO

Axis:

1  2

Label:

I  M  -

Ions:

a  +  2+  3+

b  +  2+  3+

c  +  2+  3+

x  +  2+  3+

y  +  2+  3+

z  +  2+  3+

hide H<sub>2</sub>O/NH<sub>3</sub>

zoom 112-122

GO

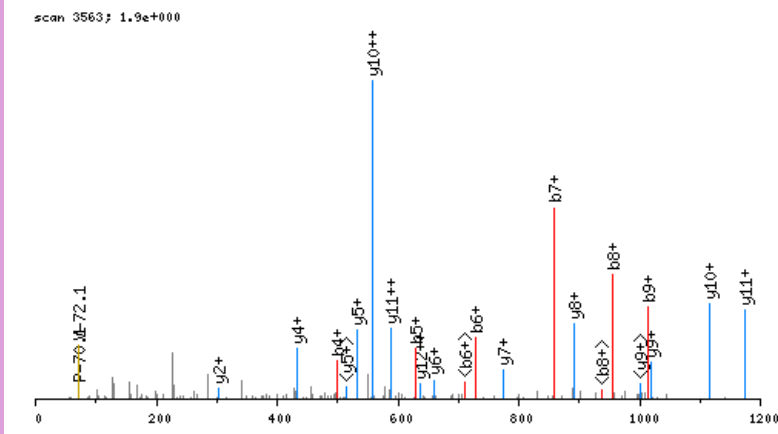

click image to zoom in; click top corners to zoom out [\[precursor±\]](#)

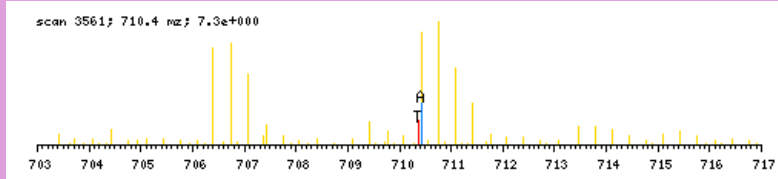

zoomed in precursor plot; T=theoretical m/z, A=acquired m/z

| b <sup>+</sup> | #  | AA # | y <sup>+</sup> | y <sup>2+</sup> |
|----------------|----|------|----------------|-----------------|
| 197.2290       | 1  | K 19 |                |                 |
| 268.2661       | 2  | A 18 | 1932.8497      | 966.9288        |
| 369.3138       | 3  | T 17 | 1861.8126      | 931.4102        |
| 498.3564       | 4  | E 16 | 1760.7649      | 880.8864        |
| 629.3969       | 5  | M 15 | 1631.7223      | 816.3651        |
| 728.4653       | 6  | V 14 | 1500.6818      | 750.8448        |
| 857.5079       | 7  | E 13 | 1401.6134      | 701.3106        |
| 956.5763       | 8  | V 12 | 1272.5708      | 636.7893        |
| 1013.5978      | 9  | G 11 | 1173.5024      | 587.2551        |
| 1110.6505      | 10 | P 10 | 1116.4809      | 558.7444        |
| 1239.6931      | 11 | E 9  | 1019.4282      | 510.2180        |
| 1354.7201      | 12 | D 8  | 890.3856       | 445.6967        |
| 1469.7470      | 13 | D 7  | 775.3586       | 388.1832        |
| 1598.7896      | 14 | E 6  | 660.3317       | 330.6698        |
| 1697.8580      | 15 | V 5  | 531.2891       | 266.1485        |
| 1754.8795      | 16 | G 4  | 432.2207       | 216.6142        |
| 1825.9166      | 17 | A 3  | 375.1992       | 188.1035        |
| 1954.9592      | 18 | E 2  | 304.1621       | 152.5850        |
|                | 19 | R 1  | 175.1195       | 88.0637         |

N-term:+35.07 K(1):+162.16

KATEMVEVGPEDDEVGAERGEATDLLR, MH+ 2972.4523, m/z 743.8685  
 I OSG40 P180811 230811-s1.06893.06893.4.dta

scan 6893; 7.8e-001

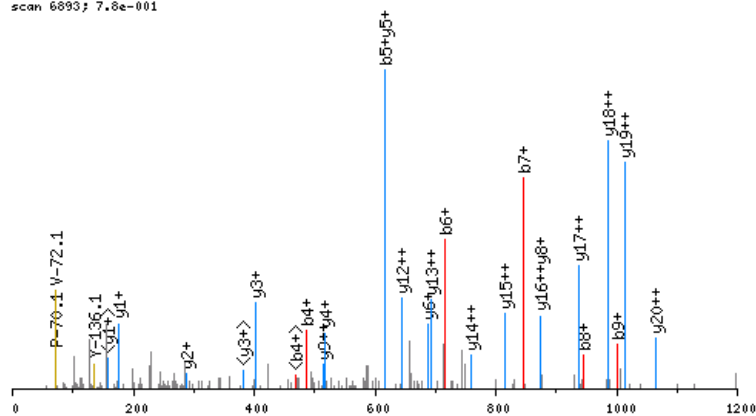

click image to zoom in; click top corners to zoom out [precursor±]

scan 6889; 743.9 m/z; 1.1e+001

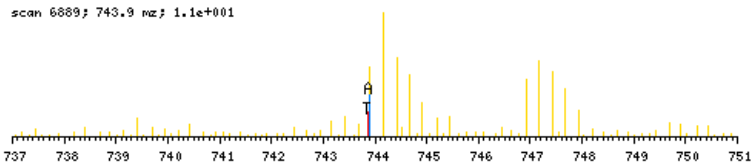

zoomed in precursor plot; T=theoretical m/z, A=acquired m/z

X-range:

0 - 0

MassTol: Y-zoom:

0. 1.

MassType:

AVG  MONO

Axis:

1  2

Label:

I  M  -

Ions:

a  +  2+  3+

b  +  2+  3+

c  +  2+  3+

x  +  2+  3+

y  +  2+  3+

z  +  2+  3+

hide H<sub>2</sub>O/NH<sub>3</sub>

zoom 112-122

GO

| b <sup>+</sup> | #  | AA # | y <sup>+</sup> | y <sup>2+</sup> |
|----------------|----|------|----------------|-----------------|
| 185.1654       | 1  | K 27 |                |                 |
| 256.2025       | 2  | A 26 | 2788.2947      | 1394.6513       |
| 357.2502       | 3  | T 25 | 2717.2576      | 1359.1327       |
| 486.2928       | 4  | E 24 | 2616.2099      | 1308.6089       |
| 617.3333       | 5  | M 23 | 2487.1673      | 1244.0876       |
| 716.4017       | 6  | V 22 | 2356.1268      | 1178.5673       |
| 845.4443       | 7  | E 21 | 2257.0584      | 1129.0331       |
| 944.5127       | 8  | V 20 | 2128.0158      | 1064.5118       |
| 1001.5342      | 9  | G 19 | 2028.9474      | 1014.9776       |
| 1098.5869      | 10 | P 18 | 1971.9260      | 986.4669        |
| 1227.6295      | 11 | E 17 | 1874.8732      | 937.9405        |
| 1342.6565      | 12 | D 16 | 1745.8306      | 873.4192        |
| 1457.6834      | 13 | D 15 | 1630.8037      | 815.9057        |
| 1586.7260      | 14 | E 14 | 1515.7767      | 758.3923        |
| 1685.7944      | 15 | V 13 | 1386.7341      | 693.8710        |
| 1742.8159      | 16 | G 12 | 1287.6657      | 644.3368        |
| 1813.8530      | 17 | A 11 | 1230.6442      | 615.8260        |
| 1942.8956      | 18 | E 10 | 1159.6071      | 580.3075        |
| 2098.9967      | 19 | R 9  | 1030.5645      | 515.7862        |
| 2156.0182      | 20 | G 8  | 874.4634       | 437.7356        |
| 2285.0607      | 21 | E 7  | 817.4420       | 409.2249        |
| 2356.0979      | 22 | A 6  | 688.3994       | 344.7036        |
| 2457.1455      | 23 | T 5  | 617.3623       | 309.1850        |
| 2572.1725      | 24 | D 4  | 516.3146       | 258.6612        |
| 2685.2565      | 25 | L 3  | 401.2876       | 201.1477        |
| 2798.3406      | 26 | L 2  | 288.2036       | 144.6057        |
|                | 27 | R 1  | 175.1195       | 88.0637         |

N-term:+29.04 K(1):+156.13

KDAPDGPVVLTVDGR, MH+ 1695.9281, m/z 565.9809  
 L OSG39 P180811 230811-s1.04033.04033.3.dta

X-range:

-

MassTol: Y-zoom:

MassType:

AVG  MONO

Axis:

1  2

Label:

I  M  -

Ions:

a  +  2+  3+

b  +  2+  3+

c  +  2+  3+

x  +  2+  3+

y  +  2+  3+

z  +  2+  3+

hide H<sub>2</sub>O/NH<sub>3</sub>

zoom 112-122

GO

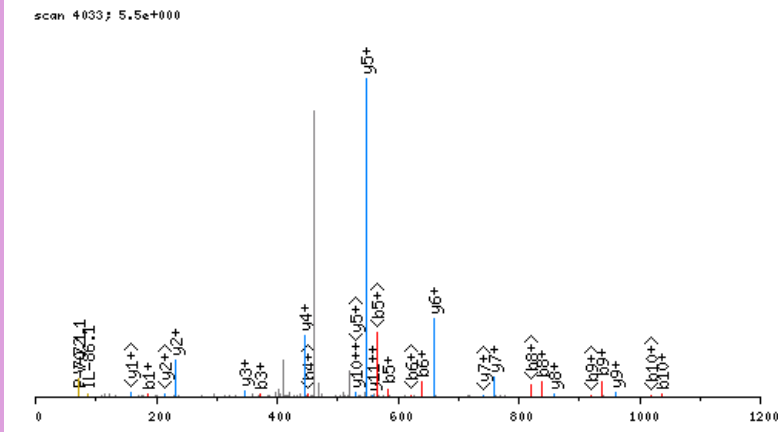

click image to zoom in; click top corners to zoom out [\[precursor±\]](#)

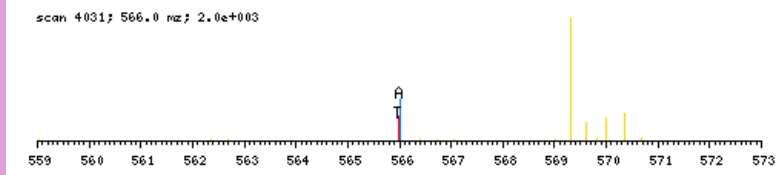

zoomed in precursor plot; T=theoretical m/z, A=acquired m/z

| b <sup>+</sup> | #  | AA # | y <sup>+</sup> | y <sup>2+</sup> |
|----------------|----|------|----------------|-----------------|
| 185.1654       | 1  | K 16 |                |                 |
| 300.1923       | 2  | D 15 | 1511.7706      | 756.3892        |
| 371.2295       | 3  | A 14 | 1396.7436      | 698.8757        |
| 468.2822       | 4  | P 13 | 1325.7065      | 663.3572        |
| 583.3092       | 5  | D 12 | 1228.6537      | 614.8308        |
| 640.3306       | 6  | G 11 | 1113.6268      | 557.3173        |
| 737.3834       | 7  | P 10 | 1056.6053      | 528.8066        |
| 838.4311       | 8  | T 9  | 959.5526       | 480.2802        |
| 937.4995       | 9  | V 8  | 858.5049       | 429.7564        |
| 1036.5679      | 10 | V 7  | 759.4365       | 380.2222        |
| 1149.6520      | 11 | L 6  | 660.3681       | 330.6879        |
| 1250.6996      | 12 | T 5  | 547.2840       | 274.1459        |
| 1349.7681      | 13 | V 4  | 446.2363       | 223.6221        |
| 1464.7950      | 14 | D 3  | 347.1679       | 174.0879        |
| 1521.8165      | 15 | G 2  | 232.1410       | 116.5744        |
|                | 16 | R 1  | 175.1195       | 88.0637         |

N-term:+29.04 K(1):+156.13

KDLFDPIIEER, MH+ 1442.8531, m/z 481.6226  
 H OSG40 P180811 230811-s1.07280.07280.3.dta

X-range:

-

MassTol: Y-zoom:

MassType:

AVG  MONO

Axis:

1  2

Label:

I  M  -

Ions:

a  +  2+  3+

b  +  2+  3+

c  +  2+  3+

x  +  2+  3+

y  +  2+  3+

z  +  2+  3+

hide H<sub>2</sub>O/NH<sub>3</sub>

zoom 112-122

GO

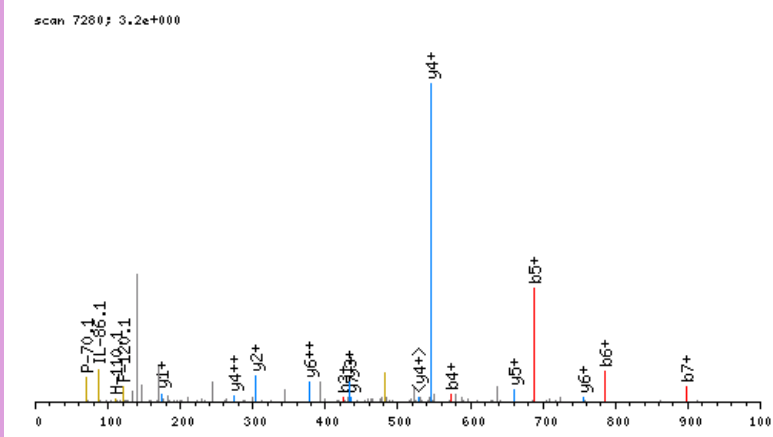

click image to zoom in; click top corners to zoom out [\[precursor±\]](#)

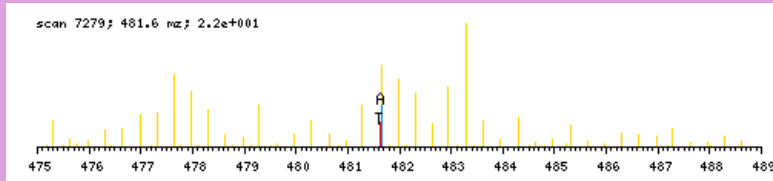

zoomed in precursor plot; T=theoretical m/z, A=acquired m/z

| b <sup>+</sup> | #  | AA # | y <sup>+</sup> | y <sup>2+</sup> |
|----------------|----|------|----------------|-----------------|
| 197.2290       | 1  | K 11 |                |                 |
| 312.2559       | 2  | D 10 | 1246.6319      | 623.8199        |
| 425.3400       | 3  | L 9  | 1131.6050      | 566.3064        |
| 572.4084       | 4  | F 8  | 1018.5209      | 509.7644        |
| 687.4354       | 5  | D 7  | 871.4525       | 436.2302        |
| 784.4881       | 6  | P 6  | 756.4256       | 378.7167        |
| 897.5722       | 7  | I 5  | 659.3728       | 330.1903        |
| 1010.6563      | 8  | I 4  | 546.2888       | 273.6483        |
| 1139.6988      | 9  | E 3  | 433.2047       | 217.1063        |
| 1268.7414      | 10 | E 2  | 304.1621       | 152.5850        |
|                | 11 | R 1  | 175.1195       | 88.0637         |

N-term:+35.07 K(1):+162.16

KDLFDPIIQDR, MH+ 1427.8535, m/z 476.6227  
 H OSG40 P180811 230811-s1.07025.07025.3.dta

scan 7025; 3.2e+001

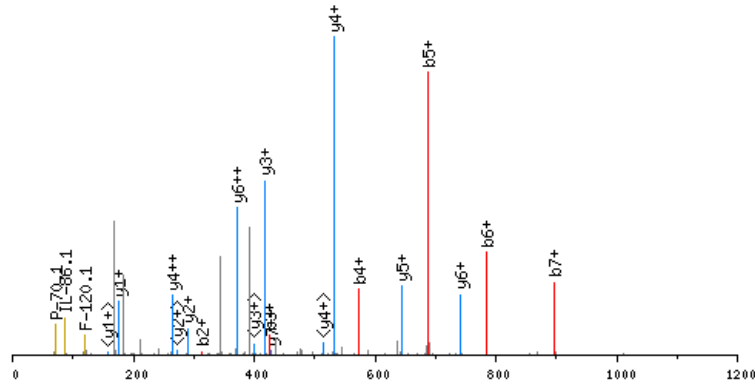

click image to zoom in; click top corners to zoom out [\[precursor±\]](#)

scan 7024; 476.6 m/z; 2.1e+002

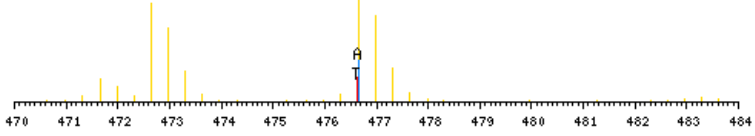

zoomed in precursor plot; T=theoretical m/z, A=acquired m/z

X-range:

-

MassTol: Y-zoom:

MassType:

AVG  MONO

Axis:

1  2

Label:

I  M  -

Ions:

a  +  2+  3+

b  +  2+  3+

c  +  2+  3+

x  +  2+  3+

y  +  2+  3+

z  +  2+  3+

hide H<sub>2</sub>O/NH<sub>3</sub>

zoom 112-122

GO

| b <sup>+</sup> | #  | AA # | y <sup>+</sup> | y <sup>2+</sup> |
|----------------|----|------|----------------|-----------------|
| 197.2290       | 1  | K 11 |                |                 |
| 312.2559       | 2  | D 10 | 1231.6323      | 616.3201        |
| 425.3400       | 3  | L 9  | 1116.6053      | 558.8066        |
| 572.4084       | 4  | F 8  | 1003.5213      | 502.2645        |
| 687.4354       | 5  | D 7  | 856.4529       | 428.7303        |
| 784.4881       | 6  | P 6  | 741.4259       | 371.2169        |
| 897.5722       | 7  | I 5  | 644.3731       | 322.6905        |
| 1010.6563      | 8  | I 4  | 531.2891       | 266.1485        |
| 1138.7148      | 9  | Q 3  | 418.2050       | 209.6064        |
| 1253.7418      | 10 | D 2  | 290.1464       | 145.5771        |
|                | 11 | R 1  | 175.1195       | 88.0637         |

N-term:+35.07 K(1):+162.16



KDQGGYEDFVEGLR, MH+ 1680.8869, m/z 560.9672  
 H OSG40 P180811 230811-s1.06673.06673.3.dta

X-range:

-

MassTol: Y-zoom:

MassType:

AVG  MONO

Axis:

1  2

Label:

I  M  -

Ions:

a  +  2+  3+

b  +  2+  3+

c  +  2+  3+

x  +  2+  3+

y  +  2+  3+

z  +  2+  3+

hide H<sub>2</sub>O/NH<sub>3</sub>

zoom 112-122

GO

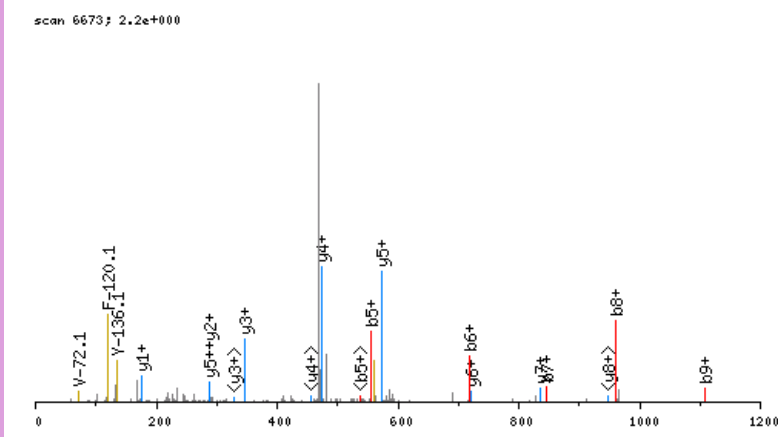

click image to zoom in; click top corners to zoom out [\[precursor±\]](#)

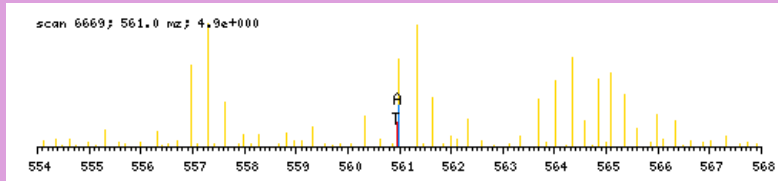

zoomed in precursor plot; T=theoretical m/z, A=acquired m/z

| b <sup>+</sup> | #  | AA # | y <sup>+</sup> | y <sup>2+</sup> |
|----------------|----|------|----------------|-----------------|
| 197.2290       | 1  | K 14 |                |                 |
| 312.2559       | 2  | D 13 | 1484.6658      | 742.8368        |
| 440.3145       | 3  | Q 12 | 1369.6388      | 685.3233        |
| 497.3360       | 4  | G 11 | 1241.5802      | 621.2940        |
| 554.3574       | 5  | G 10 | 1184.5588      | 592.7833        |
| 717.4208       | 6  | Y 9  | 1127.5373      | 564.2726        |
| 846.4634       | 7  | E 8  | 964.4740       | 482.7409        |
| 961.4903       | 8  | D 7  | 835.4314       | 418.2196        |
| 1108.5587      | 9  | F 6  | 720.4044       | 360.7061        |
| 1207.6271      | 10 | V 5  | 573.3360       | 287.1719        |
| 1336.6697      | 11 | E 4  | 474.2676       | 237.6377        |
| 1393.6912      | 12 | G 3  | 345.2250       | 173.1164        |
| 1506.7753      | 13 | L 2  | 288.2036       | 144.6057        |
|                | 14 | R 1  | 175.1195       | 88.0637         |

N-term:+35.07 K(1):+162.16

KDQSPASHEIATNLGDFAIISLYR, MH+ 2589.3313, m/z 648.0883  
 L OSG40 P180811 230811-s1.09031.09031.4.dta

X-range:

-

MassTol: Y-zoom:

MassType:

AVG  MONO

Axis:

1  2

Label:

I  M  -

Ions:

a  +  2+  3+

b  +  2+  3+

c  +  2+  3+

x  +  2+  3+

y  +  2+  3+

z  +  2+  3+

hide H<sub>2</sub>O/NH<sub>3</sub>

zoom 112-122

GO

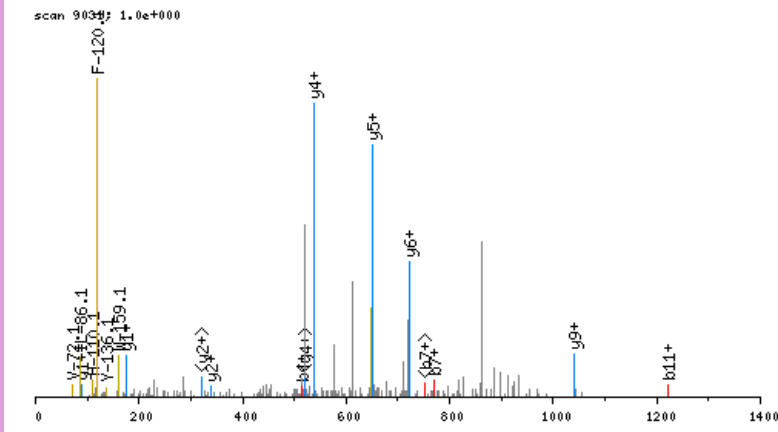

click image to zoom in; click top corners to zoom out [precursor±]

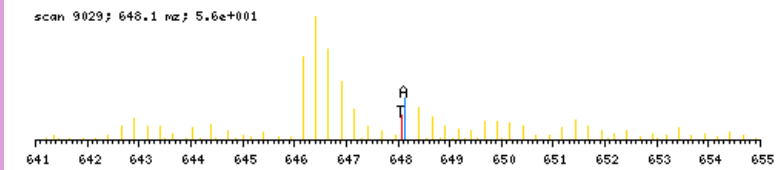

zoomed in precursor plot; T=theoretical m/z, A=acquired m/z

| b <sup>+</sup> | #  | AA # | y <sup>+</sup> | y <sup>2+</sup> |
|----------------|----|------|----------------|-----------------|
| 185.1654       | 1  | K 23 |                |                 |
| 300.1923       | 2  | D 22 | 2405.1737      | 1203.0908       |
| 428.2509       | 3  | Q 21 | 2290.1468      | 1145.5773       |
| 515.2829       | 4  | S 20 | 2162.0882      | 1081.5480       |
| 612.3357       | 5  | P 19 | 2075.0562      | 1038.0320       |
| 683.3728       | 6  | A 18 | 1978.0034      | 989.5056        |
| 770.4049       | 7  | S 17 | 1906.9663      | 953.9871        |
| 907.4638       | 8  | H 16 | 1819.9343      | 910.4710        |
| 1036.5064      | 9  | E 15 | 1682.8754      | 841.9416        |
| 1149.5904      | 10 | I 14 | 1553.8328      | 777.4203        |
| 1220.6275      | 11 | A 13 | 1440.7487      | 720.8783        |
| 1321.6752      | 12 | T 12 | 1369.7116      | 685.3597        |
| 1435.7181      | 13 | N 11 | 1268.6639      | 634.8359        |
| 1548.8022      | 14 | L 10 | 1154.6210      | 577.8144        |
| 1605.8237      | 15 | G 9  | 1041.5369      | 521.2724        |
| 1720.8506      | 16 | D 8  | 984.5155       | 492.7616        |
| 1867.9190      | 17 | F 7  | 869.4885       | 435.2482        |
| 1938.9561      | 18 | A 6  | 722.4201       | 361.7140        |
| 2052.0402      | 19 | I 5  | 651.3830       | 326.1954        |
| 2139.0722      | 20 | S 4  | 538.2989       | 269.6534        |
| 2252.1563      | 21 | L 3  | 451.2669       | 226.1374        |
| 2415.2196      | 22 | Y 2  | 338.1828       | 169.5953        |
|                | 23 | R 1  | 175.1195       | 88.0637         |

N-term:+29.04 K(1):+156.13

KDTPLPLVPPAAR, MH+ 1414.8422, m/z 472.2856  
 L OSG39 P180811 230811-s1.03049.03049.3.dta

X-range:

-

MassTol: Y-zoom:

MassType:

AVG  MONO

Axis:

1  2

Label:

I  M  -

Ions:

a  +  2+  3+

b  +  2+  3+

c  +  2+  3+

x  +  2+  3+

y  +  2+  3+

z  +  2+  3+

hide H<sub>2</sub>O/NH<sub>3</sub>

zoom 112-122

GO

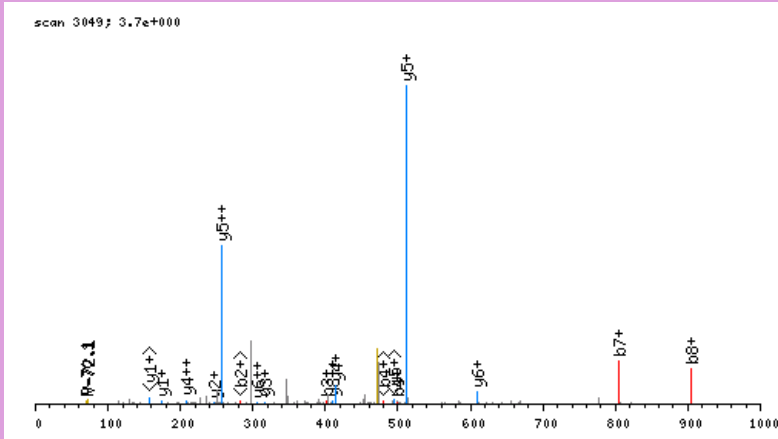

click image to zoom in; click top corners to zoom out [\[precursor±\]](#)

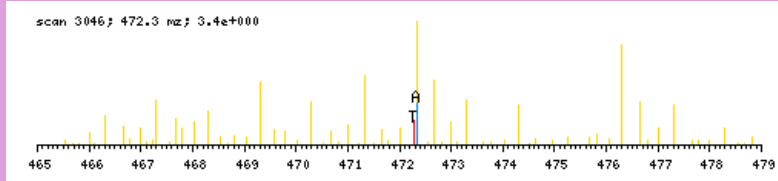

zoomed in precursor plot; T=theoretical m/z, A=acquired m/z

| b <sup>+</sup> | #  | AA # | y <sup>+</sup> | y <sup>2+</sup> |
|----------------|----|------|----------------|-----------------|
| 185.1654       | 1  | K 13 |                |                 |
| 300.1923       | 2  | D 12 | 1230.6846      | 615.8462        |
| 401.2400       | 3  | T 11 | 1115.6577      | 558.3328        |
| 498.2928       | 4  | P 10 | 1014.6100      | 507.8089        |
| 595.3455       | 5  | P 9  | 917.5573       | 459.2825        |
| 692.3983       | 6  | P 8  | 820.5045       | 410.7562        |
| 805.4824       | 7  | L 7  | 723.4517       | 362.2298        |
| 904.5508       | 8  | V 6  | 610.3677       | 305.6877        |
| 1001.6036      | 9  | P 5  | 511.2993       | 256.1535        |
| 1098.6563      | 10 | P 4  | 414.2465       | 207.6272        |
| 1169.6934      | 11 | A 3  | 317.1937       | 159.1008        |
| 1240.7305      | 12 | A 2  | 246.1566       | 123.5822        |
|                | 13 | R 1  | 175.1195       | 88.0637         |

N-term:+29.04 K(1):+156.13

KEAFTVIDQNR, MH+ 1376.7538, m/z 459.5895  
 L OSG40 P180811 230811-s1.03385.03385.3.dta

X-range:

-

MassTol: Y-zoom:

MassType:

AVG  MONO

Axis:

1  2

Label:

I  M  -

Ions:

a  +  2+  3+

b  +  2+  3+

c  +  2+  3+

x  +  2+  3+

y  +  2+  3+

z  +  2+  3+

hide H<sub>2</sub>O/NH<sub>3</sub>

zoom 112-122

GO

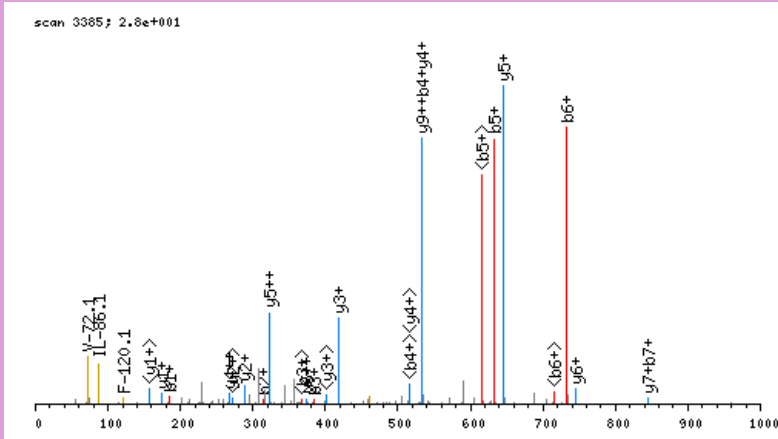

click image to zoom in; click top corners to zoom out [\[precursor±\]](#)

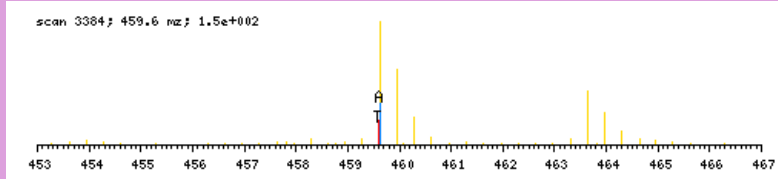

zoomed in precursor plot; T=theoretical m/z, A=acquired m/z

| b <sup>+</sup> | #  | AA # | y <sup>+</sup> | y <sup>2+</sup> |
|----------------|----|------|----------------|-----------------|
| 185.1654       | 1  | K 11 |                |                 |
| 314.2080       | 2  | E 10 | 1192.5962      | 596.8020        |
| 385.2451       | 3  | A 9  | 1063.5536      | 532.2807        |
| 532.3135       | 4  | F 8  | 992.5165       | 496.7622        |
| 633.3612       | 5  | T 7  | 845.4481       | 423.2280        |
| 732.4296       | 6  | V 6  | 744.4004       | 372.7041        |
| 845.5137       | 7  | I 5  | 645.3320       | 323.1699        |
| 960.5406       | 8  | D 4  | 532.2479       | 266.6279        |
| 1088.5992      | 9  | Q 3  | 417.2210       | 209.1144        |
| 1202.6421      | 10 | N 2  | 289.1624       | 145.0851        |
|                | 11 | R 1  | 175.1195       | 88.0637         |

N-term:+29.04 K(1):+156.13

KEILGTAQSVGCNVDR, MH+ 1872.0285, m/z 624.6810  
 H OSG40 P180811 230811-s1.04066.04066.3.dta

X-range:

-

MassTol: Y-zoom:

MassType:

AVG  MONO

Axis:

1  2

Label:

I  M  -

Ions:

a  +  2+  3+

b  +  2+  3+

c  +  2+  3+

x  +  2+  3+

y  +  2+  3+

z  +  2+  3+

hide H<sub>2</sub>O/NH<sub>3</sub>

zoom 112-122

GO

scan 4066; 1.7e+000

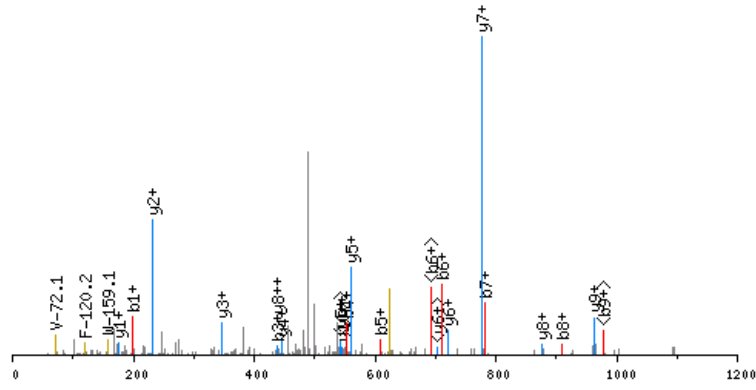

click image to zoom in; click top corners to zoom out [\[precursor±\]](#)

scan 4064; 624.7 mz; 1.4e+001

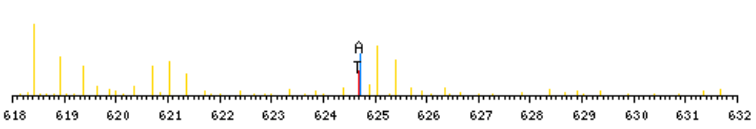

zoomed in precursor plot; T=theoretical m/z, A=acquired m/z

| b <sup>+</sup> | #  | AA # | y <sup>+</sup> | y <sup>2+</sup> |
|----------------|----|------|----------------|-----------------|
| 197.2290       | 1  | K 17 |                |                 |
| 326.2716       | 2  | E 16 | 1675.8073      | 838.4076        |
| 439.3557       | 3  | I 15 | 1546.7647      | 773.8863        |
| 552.4397       | 4  | L 14 | 1433.6807      | 717.3442        |
| 609.4612       | 5  | G 13 | 1320.5966      | 660.8022        |
| 710.5089       | 6  | T 12 | 1263.5751      | 632.2915        |
| 781.5460       | 7  | A 11 | 1162.5274      | 581.7676        |
| 909.6046       | 8  | Q 10 | 1091.4903      | 546.2491        |
| 996.6366       | 9  | S 9  | 963.4318       | 482.2198        |
| 1095.7050      | 10 | V 8  | 876.3997       | 438.7038        |
| 1152.7265      | 11 | G 7  | 777.3313       | 389.1696        |
| 1312.7571      | 12 | C 6  | 720.3098       | 360.6588        |
| 1426.8000      | 13 | N 5  | 560.2792       | 280.6435        |
| 1525.8684      | 14 | V 4  | 446.2363       | 223.6221        |
| 1640.8953      | 15 | D 3  | 347.1679       | 174.0879        |
| 1697.9168      | 16 | G 2  | 232.1410       | 116.5744        |
|                | 17 | R 1  | 175.1195       | 88.0637         |

N-term:+35.07 K(1):+162.16  
 C(12):+160.03

KEPAAPVSIQR, MH+ 1263.8061, m/z 421.9402  
 H OSG40 P180811 230811-s1.02835.02835.3.dta

X-range:

-

MassTol: Y-zoom:

MassType:

AVG  MONO

Axis:

1  2

Label:

I  M  -

Ions:

a  +  2+  3+

b  +  2+  3+

c  +  2+  3+

x  +  2+  3+

y  +  2+  3+

z  +  2+  3+

hide H<sub>2</sub>O/NH<sub>3</sub>

zoom 112-122

GO

scan 2835; 2.1e+001

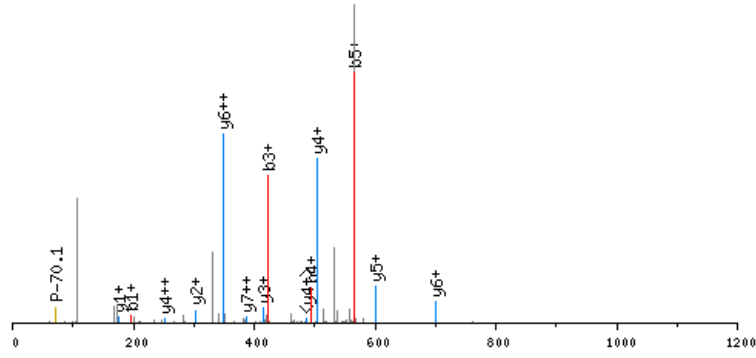

click image to zoom in; click top corners to zoom out [\[precursor±\]](#)

scan 2834; 421.9 m/z; 7.7e+001

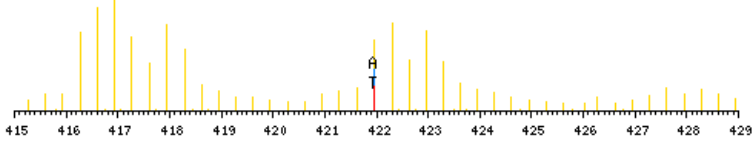

zoomed in precursor plot; T=theoretical m/z, A=acquired m/z

| b <sup>+</sup> | #  | AA # | y <sup>+</sup> | y <sup>2+</sup> |
|----------------|----|------|----------------|-----------------|
| 197.2290       | 1  | K 11 |                |                 |
| 326.2716       | 2  | E 10 | 1067.5849      | 534.2964        |
| 423.3244       | 3  | P 9  | 938.5423       | 469.7751        |
| 494.3615       | 4  | A 8  | 841.4896       | 421.2487        |
| 565.3986       | 5  | A 7  | 770.4525       | 385.7301        |
| 662.4513       | 6  | P 6  | 699.4153       | 350.2116        |
| 761.5198       | 7  | V 5  | 602.3626       | 301.6852        |
| 848.5518       | 8  | S 4  | 503.2942       | 252.1510        |
| 961.6359       | 9  | I 3  | 416.2621       | 208.6350        |
| 1089.6944      | 10 | Q 2  | 303.1781       | 152.0930        |
|                | 11 | R 1  | 175.1195       | 88.0637         |

N-term:+35.07 K(1):+162.16

KEQFLDGDWTNR, MH+ 1635.8131, m/z 545.9426  
 L OSG40 P180811 230811-s1.05816.05816.3.dta

X-range:

-

MassTol: Y-zoom:

MassType:

AVG  MONO

Axis:

1  2

Label:

I  M  -

Ions:

a  +  2+  3+

b  +  2+  3+

c  +  2+  3+

x  +  2+  3+

y  +  2+  3+

z  +  2+  3+

hide H<sub>2</sub>O/NH<sub>3</sub>

zoom 112-122

GO

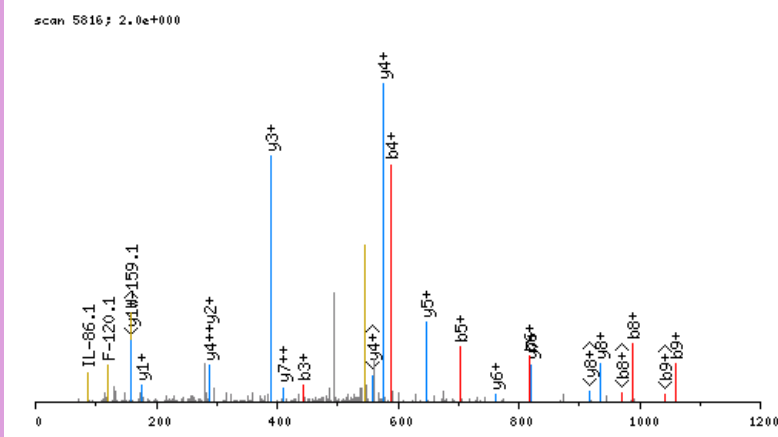

click image to zoom in; click top corners to zoom out [\[precursor±\]](#)

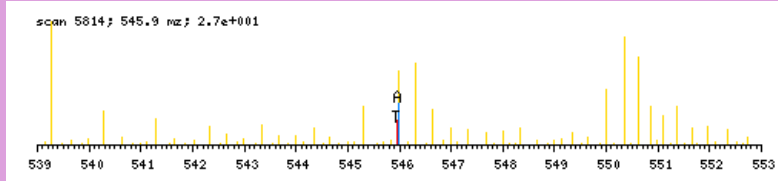

zoomed in precursor plot; T=theoretical m/z, A=acquired m/z

| b <sup>+</sup> | #  | AA # | y <sup>+</sup> | y <sup>2+</sup> |
|----------------|----|------|----------------|-----------------|
| 185.1654       | 1  | K 13 |                |                 |
| 314.2080       | 2  | E 12 | 1451.6555      | 726.3317        |
| 442.2666       | 3  | Q 11 | 1322.6129      | 661.8104        |
| 589.3350       | 4  | F 10 | 1194.5544      | 597.7811        |
| 702.4190       | 5  | L 9  | 1047.4859      | 524.2469        |
| 817.4460       | 6  | D 8  | 934.4019       | 467.7049        |
| 874.4675       | 7  | G 7  | 819.3749       | 410.1914        |
| 989.4944       | 8  | D 6  | 762.3535       | 381.6807        |
| 1060.5315      | 9  | A 5  | 647.3265       | 324.1672        |
| 1246.6108      | 10 | W 4  | 576.2894       | 288.6486        |
| 1347.6585      | 11 | T 3  | 390.2101       | 195.6090        |
| 1461.7014      | 12 | N 2  | 289.1624       | 145.0851        |
|                | 13 | R 1  | 175.1195       | 88.0637         |

N-term:+29.04 K(1):+156.13

KGPTLLDGLPEQENVLQR, MH+ 2190.2406, m/z 548.3156  
 H OSG39 P180811 230811-s1.05849.05849.4.dta

scan 5849; 1.3e+000

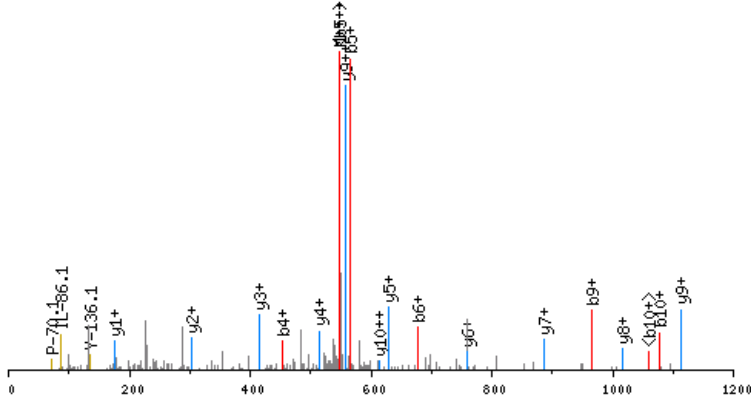

click image to zoom in; click top corners to zoom out [precursor±]

scan 5846; 548.3 m/z; 1.1e+001

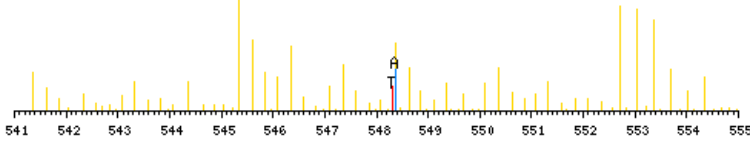

zoomed in precursor plot; T=theoretical m/z, A=acquired m/z

X-range:

0 - 0

MassTol: Y-zoom:

0. 1.

MassType:

AVG  MONO

Axis:

1  2

Label:

I  M  -

Ions:

a  +  2+  3+

b  +  2+  3+

c  +  2+  3+

x  +  2+  3+

y  +  2+  3+

z  +  2+  3+

hide H<sub>2</sub>O/NH<sub>3</sub>

zoom 112-122

GO

| b <sup>+</sup> | #  | AA | #  | y <sup>+</sup> | y <sup>2+</sup> |
|----------------|----|----|----|----------------|-----------------|
| 197.2290       | 1  | K  | 19 |                |                 |
| 254.2505       | 2  | G  | 18 | 1994.0195      | 997.5136        |
| 351.3032       | 3  | P  | 17 | 1936.9980      | 969.0029        |
| 452.3509       | 4  | T  | 16 | 1839.9452      | 920.4765        |
| 565.4350       | 5  | L  | 15 | 1738.8976      | 869.9527        |
| 678.5190       | 6  | L  | 14 | 1625.8135      | 813.4107        |
| 793.5460       | 7  | D  | 13 | 1512.7294      | 756.8686        |
| 850.5674       | 8  | G  | 12 | 1397.7025      | 699.3552        |
| 965.5944       | 9  | D  | 11 | 1340.6810      | 670.8444        |
| 1078.6784      | 10 | L  | 10 | 1225.6541      | 613.3310        |
| 1175.7312      | 11 | P  | 9  | 1112.5700      | 556.7889        |
| 1304.7738      | 12 | E  | 8  | 1015.5172      | 508.2625        |
| 1432.8324      | 13 | Q  | 7  | 886.4747       | 443.7412        |
| 1561.8750      | 14 | E  | 6  | 758.4161       | 379.7120        |
| 1675.9179      | 15 | N  | 5  | 629.3735       | 315.1907        |
| 1774.9863      | 16 | V  | 4  | 515.3306       | 258.1692        |
| 1888.0704      | 17 | L  | 3  | 416.2621       | 208.6350        |
| 2016.1290      | 18 | Q  | 2  | 303.1781       | 152.0930        |
|                | 19 | R  | 1  | 175.1195       | 88.0637         |

N-term:+35.07 K(1):+162.16



KGSDFDCELR, MH+ 1294.6737, m/z 432.2294  
 H OSG40 P180811 230811-s1.02978.02978.3.dta

scan 2978; 7.8e+000

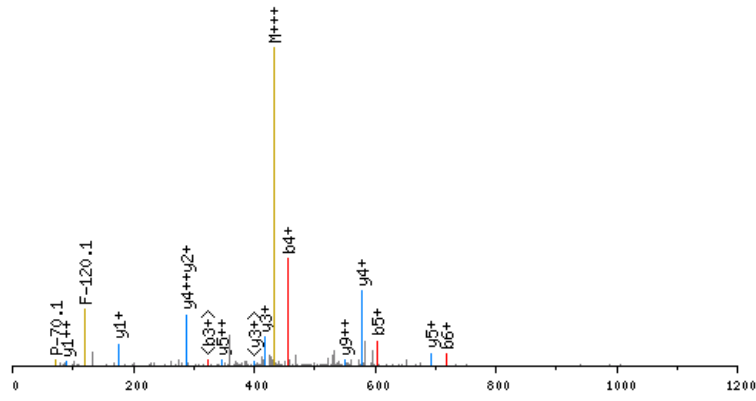

click image to zoom in; click top corners to zoom out [\[precursor±\]](#)

scan 2974; 432.2 m/z; 3.2e+002

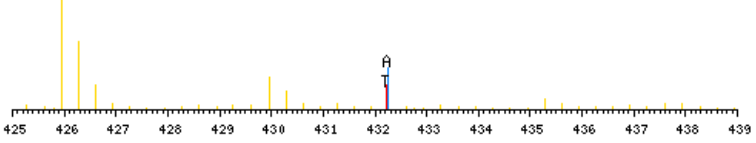

zoomed in precursor plot; T=theoretical m/z, A=acquired m/z

X-range:

-

MassTol: Y-zoom:

MassType:

AVG  MONO

Axis:

1  2

Label:

I  M  -

Ions:

a  +  2+  3+

b  +  2+  3+

c  +  2+  3+

x  +  2+  3+

y  +  2+  3+

z  +  2+  3+

hide H<sub>2</sub>O/NH<sub>3</sub>

zoom 112-122

GO

| b <sup>+</sup> | #  | AA | #  | y <sup>+</sup> | y <sup>2+</sup> |
|----------------|----|----|----|----------------|-----------------|
| 197.2290       | 1  | K  | 10 |                |                 |
| 254.2505       | 2  | G  | 9  | 1098.4526      | 549.7302        |
| 341.2825       | 3  | S  | 8  | 1041.4311      | 521.2195        |
| 456.3094       | 4  | D  | 7  | 954.3991       | 477.7034        |
| 603.3778       | 5  | F  | 6  | 839.3721       | 420.1900        |
| 718.4048       | 6  | D  | 5  | 692.3037       | 346.6558        |
| 878.4354       | 7  | C  | 4  | 577.2768       | 289.1423        |
| 1007.4780      | 8  | E  | 3  | 417.2462       | 209.1270        |
| 1120.5620      | 9  | L  | 2  | 288.2036       | 144.6057        |
|                | 10 | R  | 1  | 175.1195       | 88.0637         |

N-term:+35.07 K(1):+162.16  
 C(7):+160.03

KGSFSEQGINEFLR, MH+ 1667.8757, m/z 556.6301  
 L OSG40 P180811 230811-s1.06502.06502.3.dta

X-range:

-

MassTol: Y-zoom:

MassType:

AVG  MONO

Axis:

1  2

Label:

I  M  -

Ions:

a  +  2+  3+

b  +  2+  3+

c  +  2+  3+

x  +  2+  3+

y  +  2+  3+

z  +  2+  3+

hide H<sub>2</sub>O/NH<sub>3</sub>

zoom 112-122

GO

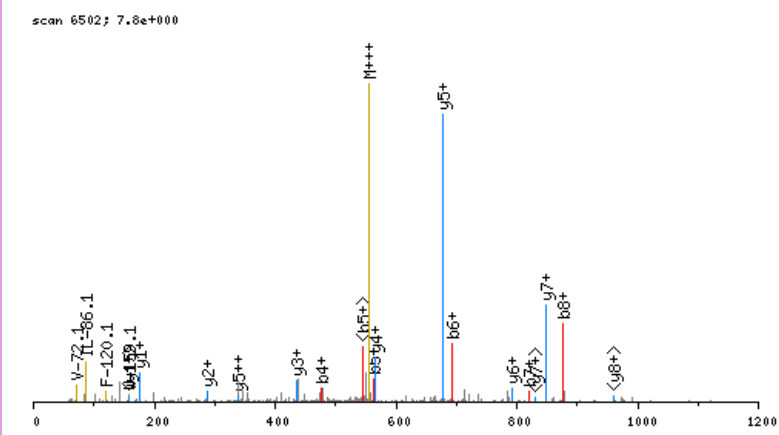

click image to zoom in; click top corners to zoom out [\[precursor±\]](#)

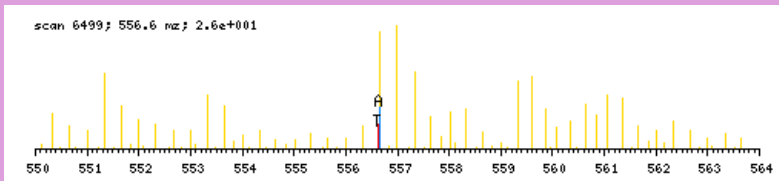

zoomed in precursor plot; T=theoretical m/z, A=acquired m/z

| b <sup>+</sup> | #  | AA | #  | y <sup>+</sup> | y <sup>2+</sup> |
|----------------|----|----|----|----------------|-----------------|
| 185.1654       | 1  | K  | 14 |                |                 |
| 242.1869       | 2  | G  | 13 | 1483.7181      | 742.3630        |
| 329.2189       | 3  | S  | 12 | 1426.6967      | 713.8522        |
| 476.2873       | 4  | F  | 11 | 1339.6646      | 670.3362        |
| 563.3193       | 5  | S  | 10 | 1192.5962      | 596.8020        |
| 692.3619       | 6  | E  | 9  | 1105.5642      | 553.2860        |
| 820.4205       | 7  | Q  | 8  | 976.5216       | 488.7647        |
| 877.4420       | 8  | G  | 7  | 848.4630       | 424.7354        |
| 990.5260       | 9  | I  | 6  | 791.4416       | 396.2247        |
| 1104.5690      | 10 | N  | 5  | 678.3575       | 339.6827        |
| 1233.6116      | 11 | E  | 4  | 564.3146       | 282.6612        |
| 1380.6800      | 12 | F  | 3  | 435.2720       | 218.1399        |
| 1493.7640      | 13 | L  | 2  | 288.2036       | 144.6057        |
|                | 14 | R  | 1  | 175.1195       | 88.0637         |

N-term:+29.04 K(1):+156.13

KGVPEDAVETLAGSLGTR, MH+ 1967.1449, m/z 656.3865  
 H OSG39 P180811 230811-s1.07015.07015.3.dta

X-range:

-

MassTol: Y-zoom:

MassType:

AVG  MONO

Axis:

1  2

Label:

I  M  -

Ions:

a  +  2+  3+

b  +  2+  3+

c  +  2+  3+

x  +  2+  3+

y  +  2+  3+

z  +  2+  3+

hide H<sub>2</sub>O/NH<sub>3</sub>

zoom 112-122

GO

scan 7015; 9.6e-001

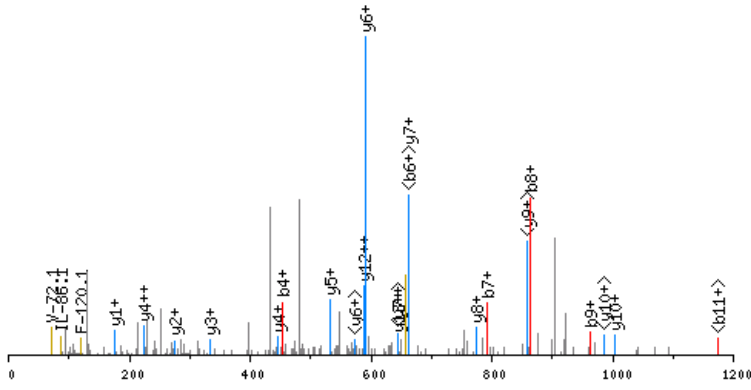

click image to zoom in; click top corners to zoom out [\[precursor±\]](#)

scan 7011; 656.4 m/z; 8.4e+000

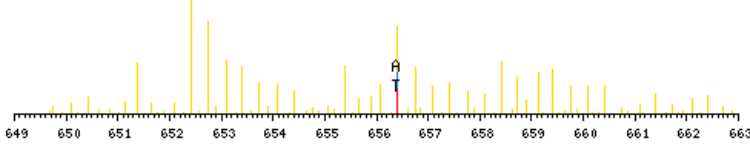

zoomed in precursor plot; T=theoretical m/z, A=acquired m/z

| b <sup>+</sup> | #  | AA # | y <sup>+</sup> | y <sup>2+</sup> |
|----------------|----|------|----------------|-----------------|
| 197.2290       | 1  | K 19 |                |                 |
| 254.2505       | 2  | G 18 | 1770.9238      | 885.9658        |
| 353.3189       | 3  | V 17 | 1713.9023      | 857.4551        |
| 452.3873       | 4  | V 16 | 1614.8339      | 807.9209        |
| 549.4401       | 5  | P 15 | 1515.7655      | 758.3867        |
| 678.4826       | 6  | E 14 | 1418.7127      | 709.8603        |
| 793.5096       | 7  | D 13 | 1289.6701      | 645.3390        |
| 864.5467       | 8  | A 12 | 1174.6432      | 587.8255        |
| 963.6151       | 9  | V 11 | 1103.6061      | 552.3069        |
| 1092.6577      | 10 | E 10 | 1004.5376      | 502.7727        |
| 1193.7054      | 11 | T 9  | 875.4951       | 438.2514        |
| 1306.7895      | 12 | L 8  | 774.4474       | 387.7276        |
| 1377.8266      | 13 | A 7  | 661.3633       | 331.1856        |
| 1434.8480      | 14 | G 6  | 590.3262       | 295.6670        |
| 1521.8801      | 15 | S 5  | 533.3047       | 267.1563        |
| 1634.9641      | 16 | L 4  | 446.2727       | 223.6403        |
| 1691.9856      | 17 | G 3  | 333.1886       | 167.0982        |
| 1793.0333      | 18 | T 2  | 276.1672       | 138.5875        |
|                | 19 | R 1  | 175.1195       | 88.0637         |

N-term:+35.07 K(1):+162.16

KIGGIGTVPVGR, MH+ 1221.8319, m/z 407.9488  
 H OSG40 P180811 230811-s1.03693.03693.3.dta

scan 3693; 4.0e+001

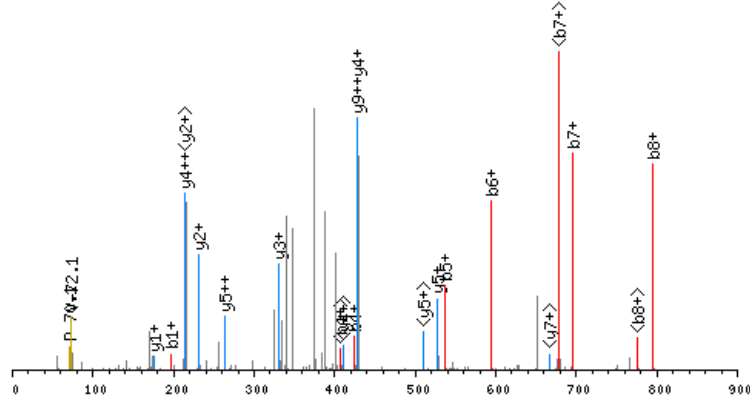

click image to zoom in; click top corners to zoom out [\[precursor±\]](#)

scan 3689; 407.9 m/z; 3.4e+002

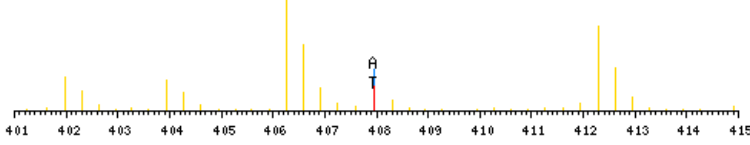

zoomed in precursor plot; T=theoretical m/z, A=acquired m/z

X-range:

-

MassTol: Y-zoom:

MassType:

AVG  MONO

Axis:

1  2

Label:

I  M  -

Ions:

a  +  2+  3+

b  +  2+  3+

c  +  2+  3+

x  +  2+  3+

y  +  2+  3+

z  +  2+  3+

hide H<sub>2</sub>O/NH<sub>3</sub>

zoom 112-122

GO

| b <sup>+</sup> | #  | AA # | y <sup>+</sup> | y <sup>2+</sup> |
|----------------|----|------|----------------|-----------------|
| 197.2290       | 1  | K 12 |                |                 |
| 310.3131       | 2  | I 11 | 1025.6108      | 513.3093        |
| 367.3345       | 3  | G 10 | 912.5267       | 456.7673        |
| 424.3560       | 4  | G 9  | 855.5052       | 428.2565        |
| 537.4401       | 5  | I 8  | 798.4838       | 399.7458        |
| 594.4615       | 6  | G 7  | 685.3997       | 343.2038        |
| 695.5092       | 7  | T 6  | 628.3782       | 314.6930        |
| 794.5776       | 8  | V 5  | 527.3306       | 264.1692        |
| 891.6304       | 9  | P 4  | 428.2621       | 214.6350        |
| 990.6988       | 10 | V 3  | 331.2094       | 166.1086        |
| 1047.7203      | 11 | G 2  | 232.1410       | 116.5744        |
|                | 12 | R 1  | 175.1195       | 88.0637         |

N-term:+35.07 K(1):+162.16

KKEDIEKENR, MH+ 1400.8114, m/z 467.6086  
 L OSG40 P180811 230811-s1.11363.11363.3.dta

X-range:

-

MassTol: Y-zoom:

MassType:

AVG  MONO

Axis:

1  2

Label:

I  M  -

Ions:

a  +  2+  3+

b  +  2+  3+

c  +  2+  3+

x  +  2+  3+

y  +  2+  3+

z  +  2+  3+

hide H<sub>2</sub>O/NH<sub>3</sub>

zoom 112-122

GO

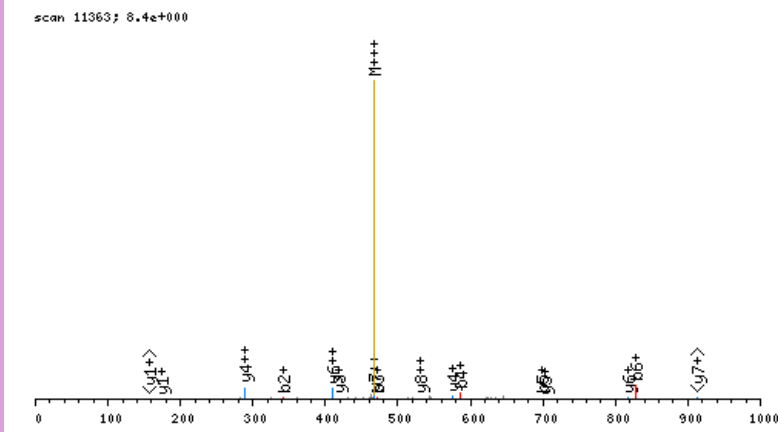

click image to zoom in; click top corners to zoom out [precursor±]

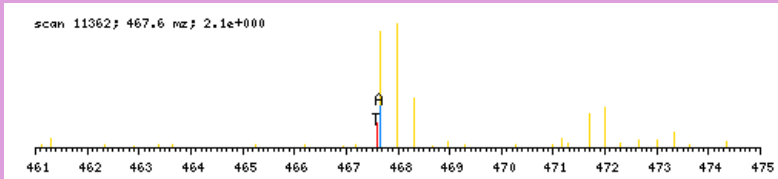

zoomed in precursor plot; T=theoretical m/z, A=acquired m/z

| b <sup>+</sup> | #  | AA # | y <sup>+</sup> | y <sup>2+</sup> |
|----------------|----|------|----------------|-----------------|
| 185.1654       | 1  | K 10 |                |                 |
| 341.2917       | 2  | K 9  | 1216.6538      | 608.8308        |
| 470.3343       | 3  | E 8  | 1060.5275      | 530.7677        |
| 585.3612       | 4  | D 7  | 931.4849       | 466.2464        |
| 698.4453       | 5  | I 6  | 816.4580       | 408.7329        |
| 827.4879       | 6  | E 5  | 703.3739       | 352.1909        |
| 983.6142       | 7  | K 4  | 574.3313       | 287.6696        |
| 1112.6568      | 8  | E 3  | 418.2050       | 209.6064        |
| 1226.6997      | 9  | N 2  | 289.1624       | 145.0851        |
|                | 10 | R 1  | 175.1195       | 88.0637         |

N-term:+29.04 K(1):+156.13  
 K(2):+156.13 K(7):+156.13

KLNFSGLR, MH+ 1002.6736, m/z 334.8961  
 H OSG40 P180811 230811-s1.05855.05855.3.dta

scan 5855; 6.8e+001

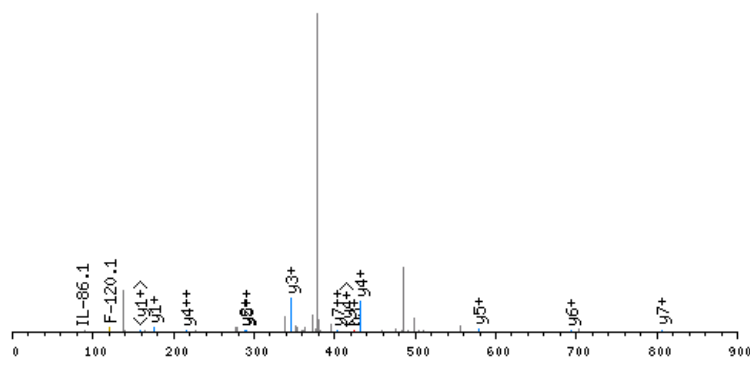

click image to zoom in; click top corners to zoom out [\[precursor±\]](#)

scan 5854; 334.9 m/z; 2.9e+002

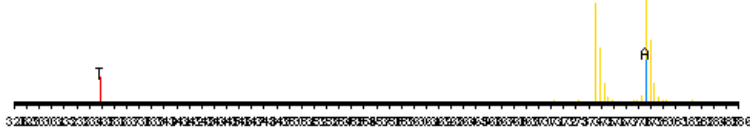

zoomed in precursor plot; T=theoretical m/z, A=acquired m/z

X-range:

-

MassTol: Y-zoom:

MassType:

AVG  MONO

Axis:

1  2

Label:

I  M  -

Ions:

a  +  2+  3+

b  +  2+  3+

c  +  2+  3+

x  +  2+  3+

y  +  2+  3+

z  +  2+  3+

hide H<sub>2</sub>O/NH<sub>3</sub>

zoom 112-122

GO

| b <sup>+</sup> | # | AA # | y <sup>+</sup> | y <sup>2+</sup>   |
|----------------|---|------|----------------|-------------------|
| 197.2290       | 1 | K    | 8              |                   |
| 310.3131       | 2 | L    | 7              | 806.4525 403.7301 |
| 424.3560       | 3 | N    | 6              | 693.3684 347.1881 |
| 571.4244       | 4 | F    | 5              | 579.3255 290.1666 |
| 658.4564       | 5 | S    | 4              | 432.2571 216.6324 |
| 715.4779       | 6 | G    | 3              | 345.2250 173.1164 |
| 828.5620       | 7 | L    | 2              | 288.2036 144.6057 |
|                | 8 | R    | 1              | 175.1195 88.0637  |

N-term:+35.07 K(1):+162.16

KMEKDMEISEHLLKALASCR, MH+ 2501.3294, m/z 626.0878  
 L OSG39 P180811 230811-s1.05400.05400.4.dta

X-range:

-

MassTol: Y-zoom:

MassType:

AVG  MONO

Axis:

1  2

Label:

I  M  -

Ions:

a  +  2+  3+

b  +  2+  3+

c  +  2+  3+

x  +  2+  3+

y  +  2+  3+

z  +  2+  3+

hide H<sub>2</sub>O/NH<sub>3</sub>

zoom 112-122

GO

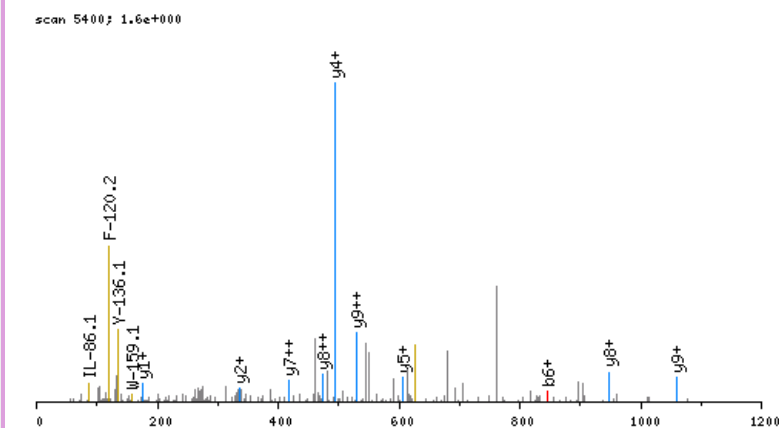

click image to zoom in; click top corners to zoom out [\[precursor±\]](#)

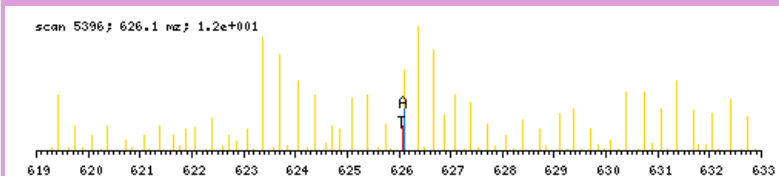

zoomed in precursor plot; T=theoretical m/z, A=acquired m/z

| b <sup>+</sup> | #  | AA # | y <sup>+</sup> | y <sup>2+</sup> |
|----------------|----|------|----------------|-----------------|
| 185.1654       | 1  | K 20 |                |                 |
| 316.2059       | 2  | M 19 | 2317.1718      | 1159.0898       |
| 445.2485       | 3  | E 18 | 2186.1314      | 1093.5696       |
| 601.3748       | 4  | K 17 | 2057.0888      | 1029.0483       |
| 716.4017       | 5  | D 16 | 1900.9625      | 950.9851        |
| 847.4422       | 6  | M 15 | 1785.9355      | 893.4717        |
| 976.4848       | 7  | E 14 | 1654.8950      | 827.9514        |
| 1089.5689      | 8  | I 13 | 1525.8524      | 763.4301        |
| 1176.6009      | 9  | S 12 | 1412.7684      | 706.8881        |
| 1305.6435      | 10 | E 11 | 1325.7364      | 663.3721        |
| 1442.7024      | 11 | H 10 | 1196.6938      | 598.8508        |
| 1555.7865      | 12 | L 9  | 1059.6348      | 530.3213        |
| 1668.8705      | 13 | L 8  | 946.5508       | 473.7793        |
| 1824.9968      | 14 | K 7  | 833.4667       | 417.2373        |
| 1896.0339      | 15 | A 6  | 677.3404       | 339.1741        |
| 2009.1180      | 16 | L 5  | 606.3033       | 303.6556        |
| 2080.1551      | 17 | A 4  | 493.2192       | 247.1135        |
| 2167.1871      | 18 | S 3  | 422.1821       | 211.5950        |
| 2327.2177      | 19 | C 2  | 335.1501       | 168.0790        |
|                | 20 | R 1  | 175.1195       | 88.0637         |

N-term:+29.04 K(1):+156.13  
 K(4):+156.13 K(14):+156.13  
 C(19):+160.03

KNITLDDASAPR, MH+ 1368.8123, m/z 456.9423  
 H OSG40 P180811 230811-s1.03063.03063.3.dta

X-range:

-

MassTol: Y-zoom:

MassType:

AVG  MONO

Axis:

1  2

Label:

I  M  -

Ions:

a  +  2+  3+

b  +  2+  3+

c  +  2+  3+

x  +  2+  3+

y  +  2+  3+

z  +  2+  3+

hide H<sub>2</sub>O/NH<sub>3</sub>

zoom 112-122

GO

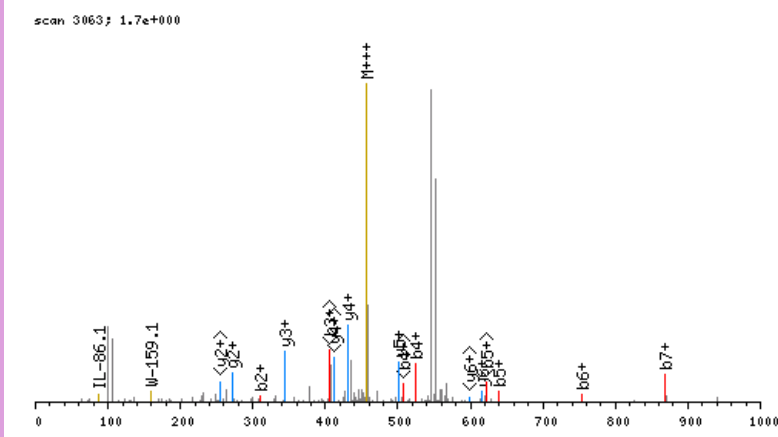

click image to zoom in; click top corners to zoom out [\[precursor±\]](#)

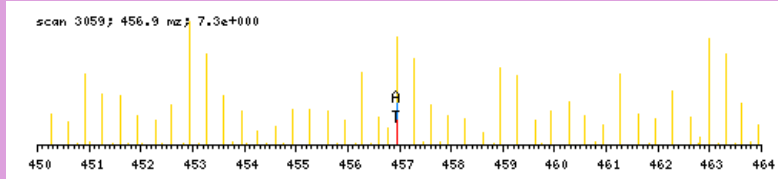

zoomed in precursor plot; T=theoretical m/z, A=acquired m/z

| b <sup>+</sup> | #  | AA # | y <sup>+</sup> | y <sup>2+</sup> |
|----------------|----|------|----------------|-----------------|
| 197.2290       | 1  | K 12 |                |                 |
| 311.2719       | 2  | N 11 | 1172.5911      | 586.7995        |
| 424.3560       | 3  | I 10 | 1058.5482      | 529.7780        |
| 525.4037       | 4  | T 9  | 945.4641       | 473.2360        |
| 638.4877       | 5  | L 8  | 844.4165       | 422.7121        |
| 753.5147       | 6  | D 7  | 731.3324       | 366.1701        |
| 868.5416       | 7  | D 6  | 616.3055       | 308.6566        |
| 939.5787       | 8  | A 5  | 501.2785       | 251.1432        |
| 1026.6108      | 9  | S 4  | 430.2414       | 215.6246        |
| 1097.6479      | 10 | A 3  | 343.2094       | 172.1086        |
| 1194.7006      | 11 | P 2  | 272.1723       | 136.5900        |
|                | 12 | R 1  | 175.1195       | 88.0637         |

N-term:+35.07 K(1):+162.16



KPPAACAGDVVDAASPASTVNHRLR, MH+ 2460.2669, m/z 615.8222  
 L OSG40 P180811 230811-s1.05483.05483.4.dta

scan 5483; 1.4e+000

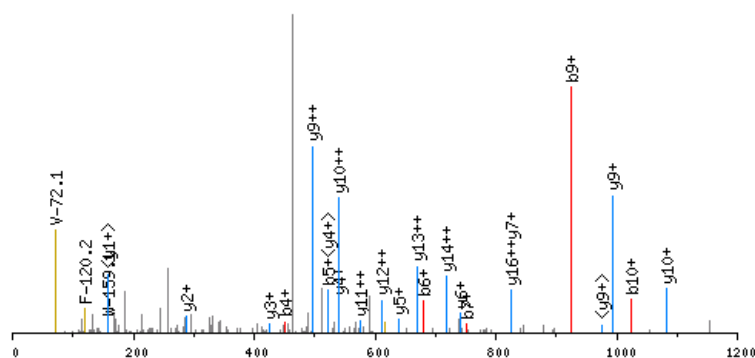

click image to zoom in; click top corners to zoom out [\[precursor±\]](#)

scan 5479; 615.8 mz; 1.4e+001

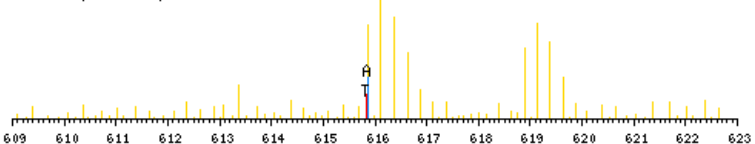

zoomed in precursor plot; T=theoretical m/z, A=acquired m/z

X-range:

-

MassTol: Y-zoom:

MassType:

AVG  MONO

Axis:

1  2

Label:

I  M  -

Ions:

a  +  2+  3+

b  +  2+  3+

c  +  2+  3+

x  +  2+  3+

y  +  2+  3+

z  +  2+  3+

hide H<sub>2</sub>O/NH<sub>3</sub>

zoom 112-122

GO

| b <sup>+</sup> | #  | AA # | y <sup>+</sup> | y <sup>2+</sup> |
|----------------|----|------|----------------|-----------------|
| 185.1654       | 1  | K 24 |                |                 |
| 282.2182       | 2  | P 23 | 2276.1093      | 1138.5586       |
| 379.2709       | 3  | P 22 | 2179.0565      | 1090.0322       |
| 450.3080       | 4  | A 21 | 2082.0038      | 1041.5058       |
| 521.3452       | 5  | A 20 | 2010.9667      | 1005.9872       |
| 681.3758       | 6  | C 19 | 1939.9296      | 970.4687        |
| 752.4129       | 7  | A 18 | 1779.8990      | 890.4534        |
| 809.4343       | 8  | G 17 | 1708.8618      | 854.9348        |
| 924.4613       | 9  | D 16 | 1651.8404      | 826.4241        |
| 1023.5297      | 10 | V 15 | 1536.8134      | 768.9106        |
| 1122.5981      | 11 | V 14 | 1437.7450      | 719.3764        |
| 1237.6250      | 12 | D 13 | 1338.6766      | 669.8422        |
| 1308.6622      | 13 | A 12 | 1223.6497      | 612.3287        |
| 1379.6993      | 14 | A 11 | 1152.6125      | 576.8102        |
| 1466.7313      | 15 | S 10 | 1081.5754      | 541.2916        |
| 1563.7841      | 16 | P 9  | 994.5434       | 497.7756        |
| 1634.8212      | 17 | A 8  | 897.4906       | 449.2492        |
| 1721.8532      | 18 | S 7  | 826.4535       | 413.7307        |
| 1822.9009      | 19 | T 6  | 739.4215       | 370.2147        |
| 1921.9693      | 20 | V 5  | 638.3738       | 319.6908        |
| 2036.0122      | 21 | N 4  | 539.3054       | 270.1566        |
| 2173.0711      | 22 | H 3  | 425.2625       | 213.1352        |
| 2286.1552      | 23 | L 2  | 288.2036       | 144.6057        |
|                | 24 | R 1  | 175.1195       | 88.0637         |

N-term:+29.04 K(1):+156.13  
 C(6):+160.03

KQFLELLLTQCDR, MH+ 1836.9529, m/z 612.9892  
 L OSG40 P180811 230811-s1.07681.07681.3.dta

X-range:

-

MassTol: Y-zoom:

MassType:

AVG  MONO

Axis:

1  2

Label:

I  M  -

Ions:

a  +  2+  3+

b  +  2+  3+

c  +  2+  3+

x  +  2+  3+

y  +  2+  3+

z  +  2+  3+

hide H<sub>2</sub>O/NH<sub>3</sub>

zoom 112-122

GO

scan 7681; 1.2e+000

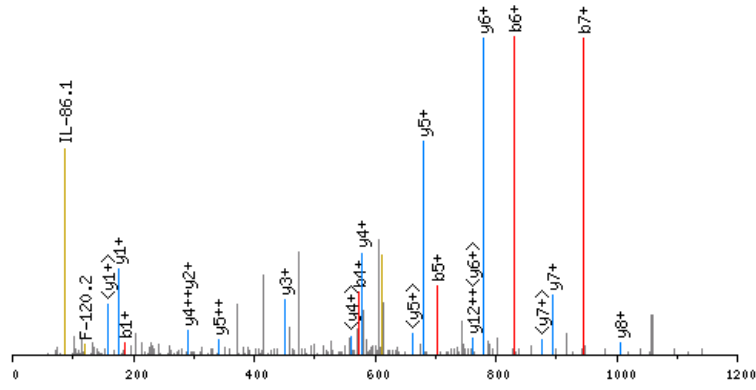

click image to zoom in; click top corners to zoom out [\[precursor±\]](#)

scan 7679; 613.0 nz; 1.8e+001

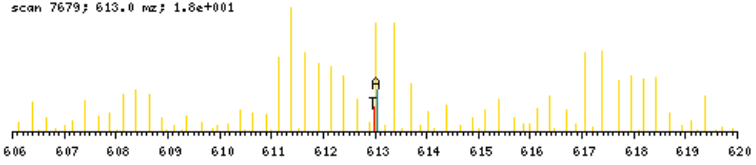

zoomed in precursor plot; T=theoretical m/z, A=acquired m/z

| b <sup>+</sup> | #  | AA | #  | y <sup>+</sup> | y <sup>2+</sup> |
|----------------|----|----|----|----------------|-----------------|
| 185.1654       | 1  | K  | 14 |                |                 |
| 313.2240       | 2  | Q  | 13 | 1652.7953      | 826.9016        |
| 460.2924       | 3  | F  | 12 | 1524.7368      | 762.8723        |
| 573.3765       | 4  | L  | 11 | 1377.6684      | 689.3381        |
| 702.4190       | 5  | E  | 10 | 1264.5843      | 632.7961        |
| 831.4616       | 6  | E  | 9  | 1135.5417      | 568.2748        |
| 944.5457       | 7  | L  | 8  | 1006.4991      | 503.7535        |
| 1057.6298      | 8  | L  | 7  | 893.4150       | 447.2114        |
| 1158.6774      | 9  | T  | 6  | 780.3310       | 390.6694        |
| 1259.7251      | 10 | T  | 5  | 679.2833       | 340.1456        |
| 1387.7837      | 11 | Q  | 4  | 578.2356       | 289.6217        |
| 1547.8143      | 12 | C  | 3  | 450.1770       | 225.5924        |
| 1662.8412      | 13 | D  | 2  | 290.1464       | 145.5771        |
|                | 14 | R  | 1  | 175.1195       | 88.0637         |

N-term:+29.04 K(1):+156.13  
 C(12):+160.03

KQNDIHRAFKR, MH+ 1496.8814, m/z 499.6320  
 L OSG39 P180811 230811-s1.06670.06670.3.dta

X-range:

-

MassTol: Y-zoom:

MassType:

AVG  MONO

Axis:

1  2

Label:

I  M  -

Ions:

a  +  2+  3+

b  +  2+  3+

c  +  2+  3+

x  +  2+  3+

y  +  2+  3+

z  +  2+  3+

hide H<sub>2</sub>O/NH<sub>3</sub>

zoom 112-122

GO

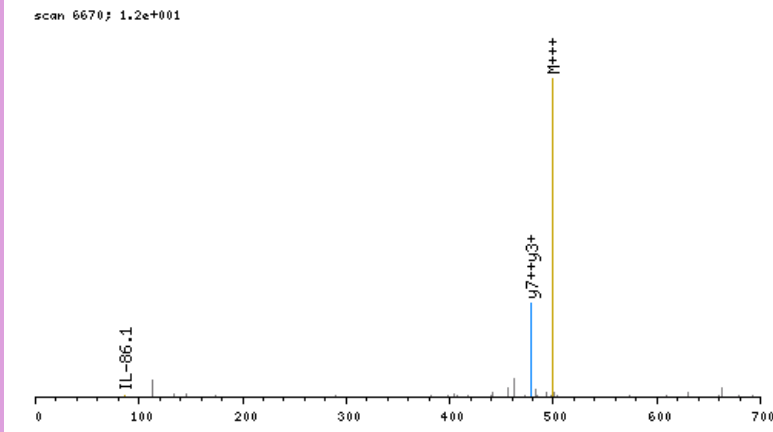

click image to zoom in; click top corners to zoom out [\[precursor±\]](#)

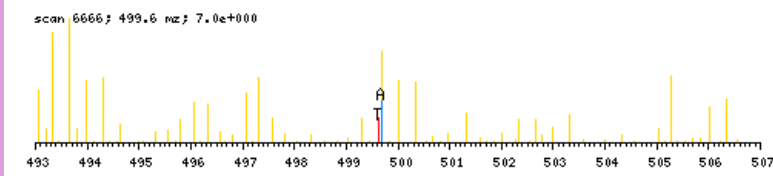

zoomed in precursor plot; T=theoretical m/z, A=acquired m/z

| b <sup>+</sup> | #  | AA # | y <sup>+</sup> | y <sup>2+</sup> |
|----------------|----|------|----------------|-----------------|
| 185.1654       | 1  | K 11 |                |                 |
| 313.2240       | 2  | Q 10 | 1312.7239      | 656.8658        |
| 427.2669       | 3  | N 9  | 1184.6653      | 592.8366        |
| 542.2938       | 4  | D 8  | 1070.6224      | 535.8151        |
| 655.3779       | 5  | I 7  | 955.5954       | 478.3016        |
| 792.4368       | 6  | H 6  | 842.5114       | 421.7596        |
| 948.5379       | 7  | R 5  | 705.4524       | 353.2301        |
| 1019.5750      | 8  | A 4  | 549.3513       | 275.1796        |
| 1166.6435      | 9  | F 3  | 478.3142       | 239.6610        |
| 1322.7698      | 10 | K 2  | 331.2458       | 166.1268        |
|                | 11 | R 1  | 175.1195       | 88.0637         |

N-term:+29.04 K(1):+156.13  
 K(10):+156.13

KSSLSDISSLLQIEPR, MH+ 1829.0384, m/z 610.3510  
 L OSG39 P180811 230811-s1.07535.07535.3.dta

X-range:

-

MassTol: Y-zoom:

MassType:

AVG  MONO

Axis:

1  2

Label:

I  M  -

Ions:

a  +  2+  3+

b  +  2+  3+

c  +  2+  3+

x  +  2+  3+

y  +  2+  3+

z  +  2+  3+

hide H<sub>2</sub>O/NH<sub>3</sub>

zoom 112-122

GO

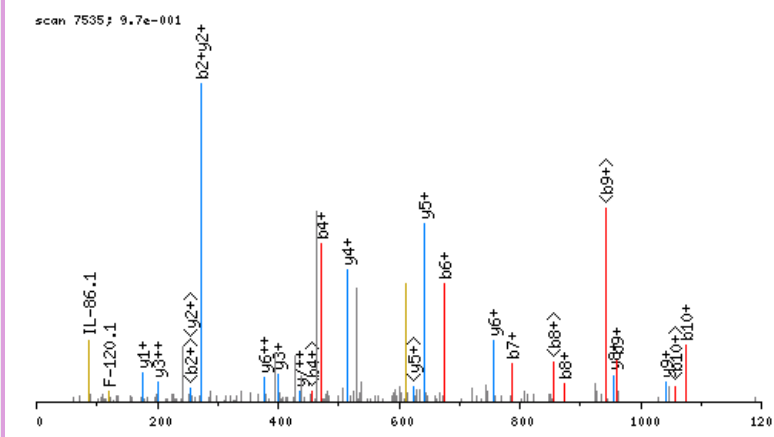

click image to zoom in; click top corners to zoom out [\[precursor±\]](#)

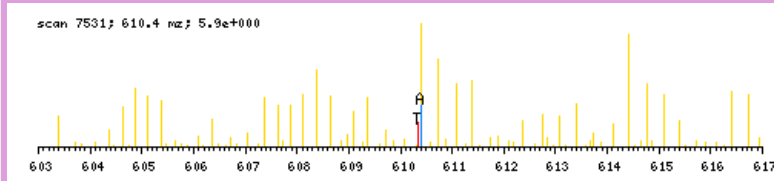

zoomed in precursor plot; T=theoretical m/z, A=acquired m/z

| b <sup>+</sup> | #  | AA # | y <sup>+</sup> | y <sup>2+</sup> |
|----------------|----|------|----------------|-----------------|
| 185.1654       | 1  | K 16 |                |                 |
| 272.1974       | 2  | S 15 | 1644.8808      | 822.9443        |
| 359.2295       | 3  | S 14 | 1557.8488      | 779.4283        |
| 472.3135       | 4  | L 13 | 1470.8168      | 735.9123        |
| 559.3455       | 5  | S 12 | 1357.7327      | 679.3703        |
| 674.3725       | 6  | D 11 | 1270.7007      | 635.8543        |
| 787.4566       | 7  | I 10 | 1155.6737      | 578.3408        |
| 874.4886       | 8  | S 9  | 1042.5897      | 521.7988        |
| 961.5206       | 9  | S 8  | 955.5577       | 478.2827        |
| 1074.6047      | 10 | L 7  | 868.5256       | 434.7667        |
| 1187.6887      | 11 | L 6  | 755.4416       | 378.2247        |
| 1315.7473      | 12 | Q 5  | 642.3575       | 321.6827        |
| 1428.8314      | 13 | I 4  | 514.2989       | 257.6534        |
| 1557.8740      | 14 | E 3  | 401.2149       | 201.1113        |
| 1654.9267      | 15 | P 2  | 272.1723       | 136.5900        |
|                | 16 | R 1  | 175.1195       | 88.0637         |

N-term:+29.04 K(1):+156.13

KTGSGGGSSGGGAGPGR, MH+ 1516.7468, m/z 506.2538  
 L OSG37 P180811 230811-s1.02258.02258.3.dta

X-range:

-

MassTol: Y-zoom:

MassType:

AVG  MONO

Axis:

1  2

Label:

I  M  -

Ions:

a  +  2+  3+

b  +  2+  3+

c  +  2+  3+

x  +  2+  3+

y  +  2+  3+

z  +  2+  3+

hide H<sub>2</sub>O/NH<sub>3</sub>

zoom 112-122

GO

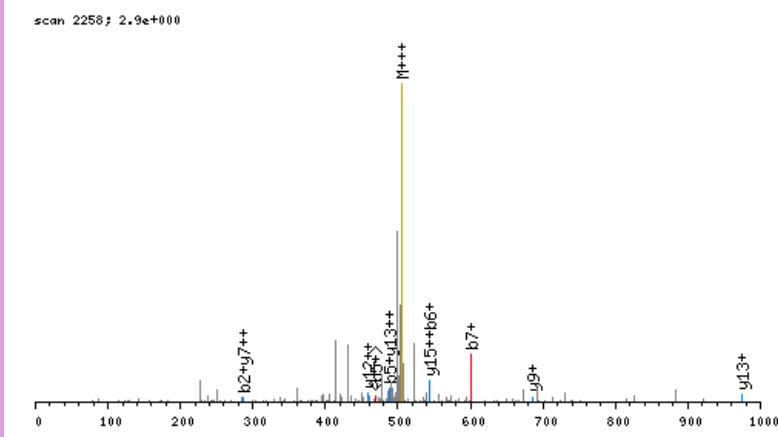

click image to zoom in; click top corners to zoom out [\[precursor±\]](#)

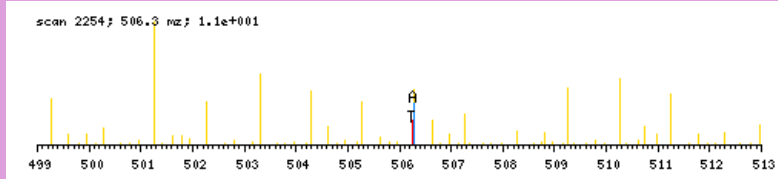

zoomed in precursor plot; T=theoretical m/z, A=acquired m/z

| b <sup>+</sup> | #  | AA # | y <sup>+</sup> | y <sup>2+</sup> |
|----------------|----|------|----------------|-----------------|
| 185.1654       | 1  | K 19 |                |                 |
| 286.2131       | 2  | T 18 | 1332.5892      | 666.7985        |
| 343.2345       | 3  | G 17 | 1231.5416      | 616.2747        |
| 430.2666       | 4  | S 16 | 1174.5201      | 587.7640        |
| 487.2880       | 5  | G 15 | 1087.4881      | 544.2479        |
| 544.3095       | 6  | G 14 | 1030.4666      | 515.7372        |
| 601.3310       | 7  | G 13 | 973.4451       | 487.2265        |
| 688.3630       | 8  | S 12 | 916.4237       | 458.7158        |
| 775.3950       | 9  | S 11 | 829.3917       | 415.1997        |
| 832.4165       | 10 | G 10 | 742.3596       | 371.6837        |
| 889.4379       | 11 | G 9  | 685.3382       | 343.1730        |
| 946.4594       | 12 | G 8  | 628.3167       | 314.6623        |
| 1003.4809      | 13 | G 7  | 571.2952       | 286.1515        |
| 1074.5180      | 14 | A 6  | 514.2738       | 257.6408        |
| 1131.5395      | 15 | G 5  | 443.2367       | 222.1222        |
| 1228.5922      | 16 | P 4  | 386.2152       | 193.6115        |
| 1285.6137      | 17 | G 3  | 289.1624       | 145.0851        |
| 1342.6351      | 18 | G 2  | 232.1410       | 116.5744        |
|                | 19 | R 1  | 175.1195       | 88.0637         |

N-term:+29.04 K(1):+156.13

KTGTAEEMSSILEER, MH+ 1619.8951, m/z 540.6365  
 H OSG40 P180811 230811-s1.05125.05125.3.dta

X-range:

-

MassTol: Y-zoom:

MassType:

AVG  MONO

Axis:

1  2

Label:

I  M  -

Ions:

a  +  2+  3+

b  +  2+  3+

c  +  2+  3+

x  +  2+  3+

y  +  2+  3+

z  +  2+  3+

hide H<sub>2</sub>O/NH<sub>3</sub>

zoom 112-122

GO

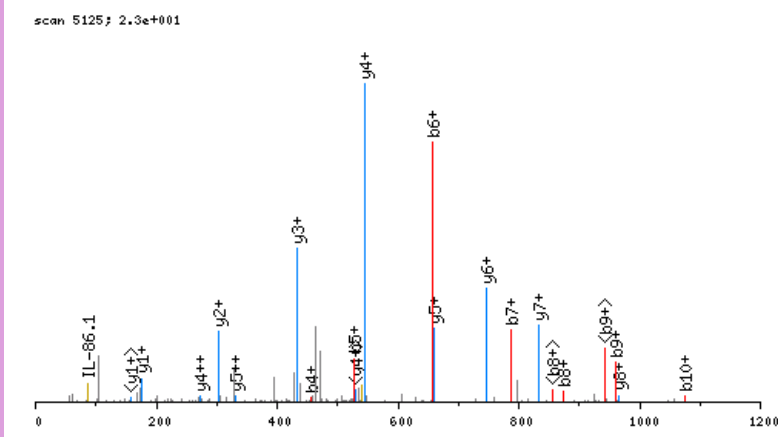

click image to zoom in; click top corners to zoom out [\[precursor±\]](#)

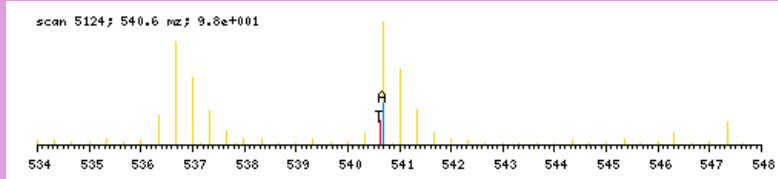

zoomed in precursor plot; T=theoretical m/z, A=acquired m/z

| b <sup>+</sup> | #  | AA # | y <sup>+</sup> | y <sup>2+</sup> |
|----------------|----|------|----------------|-----------------|
| 197.2290       | 1  | K 14 |                |                 |
| 298.2767       | 2  | T 13 | 1423.6739      | 712.3409        |
| 355.2981       | 3  | G 12 | 1322.6262      | 661.8170        |
| 456.3458       | 4  | T 11 | 1265.6047      | 633.3063        |
| 527.3829       | 5  | A 10 | 1164.5571      | 582.7824        |
| 656.4255       | 6  | E 9  | 1093.5199      | 547.2639        |
| 787.4660       | 7  | M 8  | 964.4774       | 482.7426        |
| 874.4980       | 8  | S 7  | 833.4369       | 417.2223        |
| 961.5301       | 9  | S 6  | 746.4048       | 373.7063        |
| 1074.6141      | 10 | I 5  | 659.3728       | 330.1903        |
| 1187.6982      | 11 | L 4  | 546.2888       | 273.6483        |
| 1316.7408      | 12 | E 3  | 433.2047       | 217.1063        |
| 1445.7834      | 13 | E 2  | 304.1621       | 152.5850        |
|                | 14 | R 1  | 175.1195       | 88.0637         |

N-term:+35.07 K(1):+162.16

KVAAAMSVTSIPVK, MH+ 1485.9079, m/z 495.9741  
 L OSG39 P180811 230811-s1.03759.03759.3.dta

X-range:

-

MassTol: Y-zoom:

MassType:

AVG  MONO

Axis:

1  2

Label:

I  M  -

Ions:

a  +  2+  3+

b  +  2+  3+

c  +  2+  3+

x  +  2+  3+

y  +  2+  3+

z  +  2+  3+

hide H<sub>2</sub>O/NH<sub>3</sub>

zoom 112-122

GO

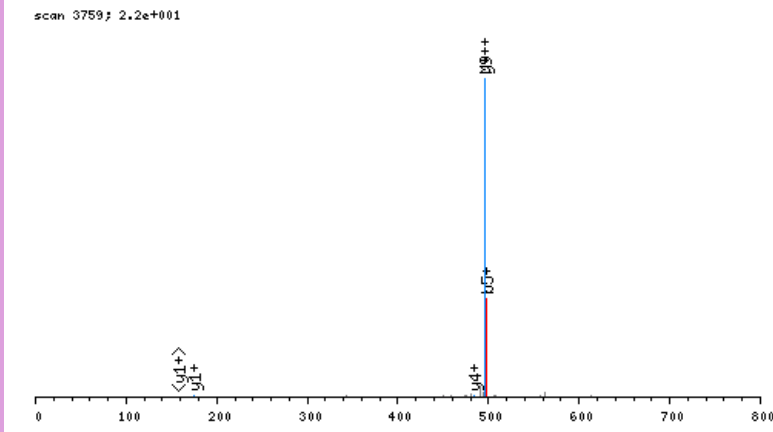

click image to zoom in; click top corners to zoom out [\[precursor±\]](#)

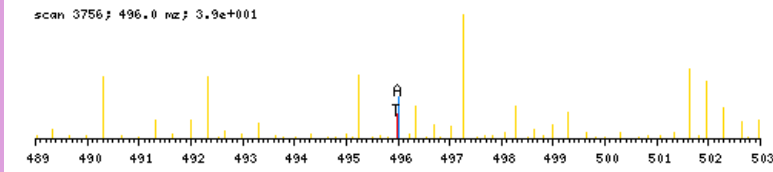

zoomed in precursor plot; T=theoretical m/z, A=acquired m/z

| b <sup>+</sup> | #  | AA # | y <sup>+</sup> | y <sup>2+</sup> |
|----------------|----|------|----------------|-----------------|
| 185.1654       | 1  | K 14 |                |                 |
| 284.2338       | 2  | V 13 | 1301.7503      | 651.3791        |
| 355.2709       | 3  | A 12 | 1202.6819      | 601.8449        |
| 426.3080       | 4  | A 11 | 1131.6448      | 566.3263        |
| 497.3452       | 5  | A 10 | 1060.6077      | 530.8078        |
| 628.3856       | 6  | M 9  | 989.5706       | 495.2892        |
| 715.4177       | 7  | S 8  | 858.5301       | 429.7690        |
| 814.4861       | 8  | V 7  | 771.4981       | 386.2529        |
| 915.5338       | 9  | T 6  | 672.4296       | 336.7187        |
| 1002.5658      | 10 | S 5  | 571.3820       | 286.1949        |
| 1115.6499      | 11 | I 4  | 484.3499       | 242.6789        |
| 1212.7026      | 12 | P 3  | 371.2659       | 186.1368        |
| 1311.7710      | 13 | V 2  | 274.2131       | 137.6105        |
|                | 14 | K 1  | 175.1447       | 88.0763         |

N-term:+29.04 K(1):+156.13  
 K(14):+156.13

LATTVSAPDLKSVR, MH+ 1513.8954, m/z 505.3033  
 L OSG39 P180811 230811-s1.03933.03933.3.dta

X-range:

-

MassTol: Y-zoom:

MassType:

AVG  MONO

Axis:

1  2

Label:

I  M  -

Ions:

a  +  2+  3+

b  +  2+  3+

c  +  2+  3+

x  +  2+  3+

y  +  2+  3+

z  +  2+  3+

hide H<sub>2</sub>O/NH<sub>3</sub>

zoom 112-122

GO

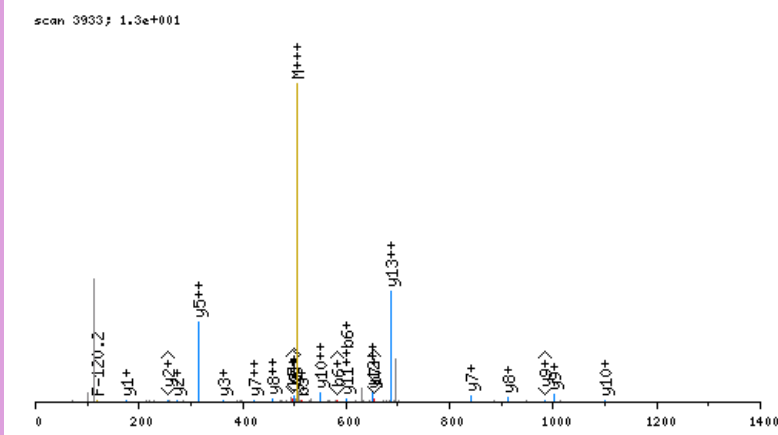

click image to zoom in; click top corners to zoom out [\[precursor±\]](#)

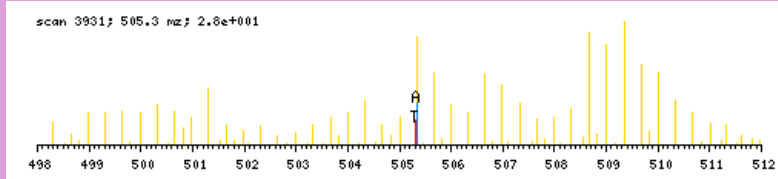

zoomed in precursor plot; T=theoretical m/z, A=acquired m/z

| b <sup>+</sup> | #  | AA # | y <sup>+</sup> | y <sup>2+</sup> |
|----------------|----|------|----------------|-----------------|
| 142.1232       | 1  | L 14 |                |                 |
| 213.1603       | 2  | A 13 | 1372.7800      | 686.8939        |
| 314.2080       | 3  | T 12 | 1301.7429      | 651.3754        |
| 415.2556       | 4  | T 11 | 1200.6952      | 600.8515        |
| 514.3240       | 5  | V 10 | 1099.6476      | 550.3277        |
| 601.3561       | 6  | S 9  | 1000.5792      | 500.7935        |
| 672.3932       | 7  | A 8  | 913.5471       | 457.2775        |
| 769.4460       | 8  | P 7  | 842.5100       | 421.7589        |
| 884.4729       | 9  | D 6  | 745.4573       | 373.2325        |
| 997.5570       | 10 | L 5  | 630.4303       | 315.7191        |
| 1153.6833      | 11 | K 4  | 517.3462       | 259.1770        |
| 1240.7153      | 12 | S 3  | 361.2199       | 181.1139        |
| 1339.7837      | 13 | V 2  | 274.1879       | 137.5979        |
|                | 14 | R 1  | 175.1195       | 88.0637         |

N-term:+29.04 K(11):+156.13



LCGEEQGADAALHFNPR, MH+ 1918.9293, m/z 640.3146  
 H OSG39 P180811 230811-s1.04282.04282.3.dta

X-range:

-

MassTol: Y-zoom:

MassType:

AVG  MONO

Axis:

1  2

Label:

I  M  -

Ions:

a  +  2+  3+

b  +  2+  3+

c  +  2+  3+

x  +  2+  3+

y  +  2+  3+

z  +  2+  3+

hide H<sub>2</sub>O/NH<sub>3</sub>

zoom 112-122

GO

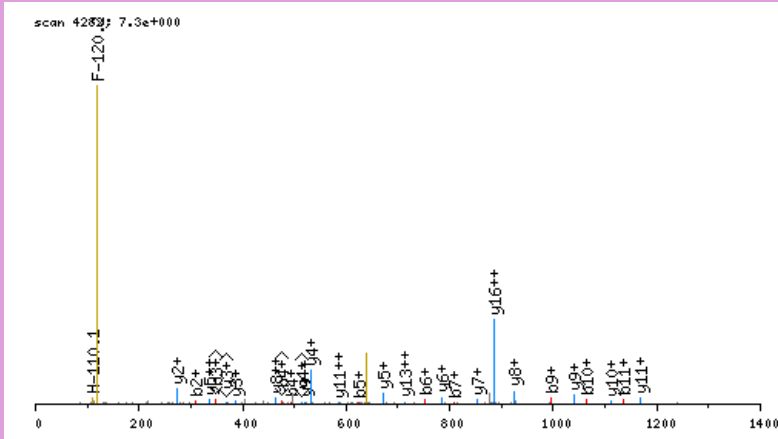

click image to zoom in; click top corners to zoom out [\[precursor±\]](#)

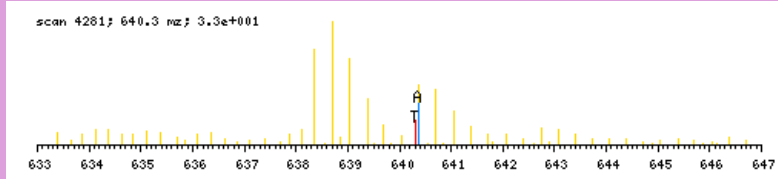

zoomed in precursor plot; T=theoretical m/z, A=acquired m/z

| b <sup>+</sup> | #  | AA # | y <sup>+</sup> | y <sup>2+</sup> |
|----------------|----|------|----------------|-----------------|
| 148.1550       | 1  | L 17 |                |                 |
| 308.1856       | 2  | C 16 | 1771.7822      | 886.3950        |
| 365.2070       | 3  | G 15 | 1611.7516      | 806.3797        |
| 494.2496       | 4  | E 14 | 1554.7301      | 777.8690        |
| 623.2922       | 5  | E 13 | 1425.6875      | 713.3477        |
| 751.3508       | 6  | Q 12 | 1296.6449      | 648.8264        |
| 808.3723       | 7  | G 11 | 1168.5863      | 584.7971        |
| 879.4094       | 8  | A 10 | 1111.5649      | 556.2863        |
| 994.4363       | 9  | D 9  | 1040.5278      | 520.7678        |
| 1065.4734      | 10 | A 8  | 925.5008       | 463.2543        |
| 1136.5105      | 11 | A 7  | 854.4637       | 427.7358        |
| 1249.5946      | 12 | L 6  | 783.4266       | 392.2172        |
| 1386.6535      | 13 | H 5  | 670.3425       | 335.6752        |
| 1533.7219      | 14 | F 4  | 533.2836       | 267.1457        |
| 1647.7649      | 15 | N 3  | 386.2152       | 193.6115        |
| 1744.8176      | 16 | P 2  | 272.1723       | 136.5900        |
|                | 17 | R 1  | 175.1195       | 88.0637         |

N-term:+35.07 C(2):+160.03

LDHNDLESVPPNLPESLR, MH+ 2079.0934, m/z 693.7027  
 H OSG39 P180811 230811-s1.05724.05724.3.dta

X-range:

-

MassTol: Y-zoom:

MassType:

AVG  MONO

Axis:

1  2

Label:

I  M  -

Ions:

a  +  2+  3+

b  +  2+  3+

c  +  2+  3+

x  +  2+  3+

y  +  2+  3+

z  +  2+  3+

hide H<sub>2</sub>O/NH<sub>3</sub>

zoom 112-122

GO

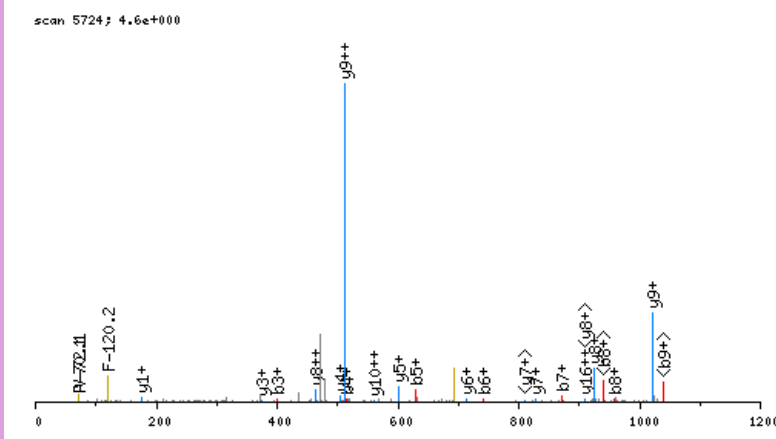

click image to zoom in; click top corners to zoom out [\[precursor±\]](#)

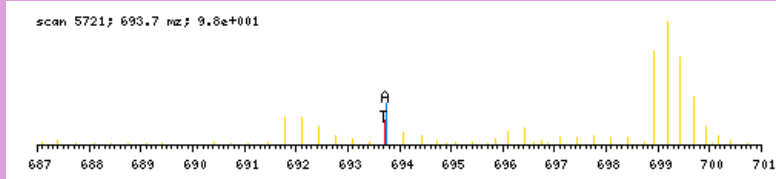

zoomed in precursor plot; T=theoretical m/z, A=acquired m/z

| b <sup>+</sup> | #  | AA | #  | y <sup>+</sup> | y <sup>2+</sup> |
|----------------|----|----|----|----------------|-----------------|
| 148.1550       | 1  | L  | 18 |                |                 |
| 263.1819       | 2  | D  | 17 | 1931.9463      | 966.4771        |
| 400.2408       | 3  | H  | 16 | 1816.9194      | 908.9636        |
| 514.2837       | 4  | N  | 15 | 1679.8604      | 840.4341        |
| 629.3107       | 5  | D  | 14 | 1565.8175      | 783.4127        |
| 742.3948       | 6  | L  | 13 | 1450.7906      | 725.8992        |
| 871.4373       | 7  | E  | 12 | 1337.7065      | 669.3572        |
| 958.4694       | 8  | S  | 11 | 1208.6639      | 604.8359        |
| 1057.5378      | 9  | V  | 10 | 1121.6319      | 561.3199        |
| 1154.5906      | 10 | P  | 9  | 1022.5635      | 511.7856        |
| 1251.6433      | 11 | P  | 8  | 925.5107       | 463.2593        |
| 1365.6862      | 12 | N  | 7  | 828.4579       | 414.7329        |
| 1478.7703      | 13 | L  | 6  | 714.4150       | 357.7114        |
| 1575.8231      | 14 | P  | 5  | 601.3310       | 301.1694        |
| 1704.8657      | 15 | E  | 4  | 504.2782       | 252.6430        |
| 1791.8977      | 16 | S  | 3  | 375.2356       | 188.1217        |
| 1904.9818      | 17 | L  | 2  | 288.2036       | 144.6057        |
|                | 18 | R  | 1  | 175.1195       | 88.0637         |

N-term:+35.07

LDIGAQGEALGYR, MH+ 1390.7330, m/z 464.2492  
 L OSG37 P180811 230811-s1.05842.05842.3.dta

scan 5842; 1.3e+000

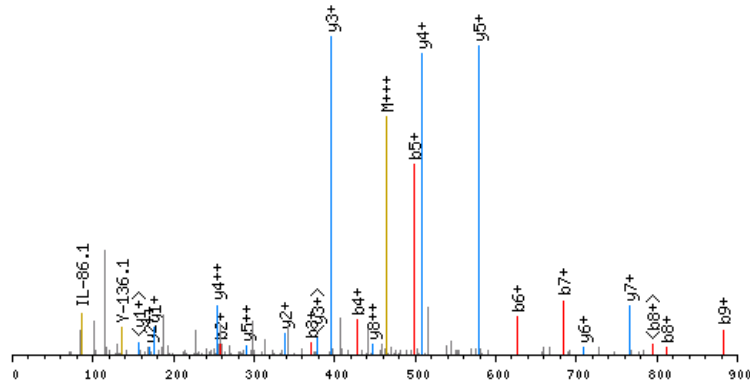

click image to zoom in; click top corners to zoom out [\[precursor±\]](#)

scan 5839; 464.2 m/z; 1.7e+001

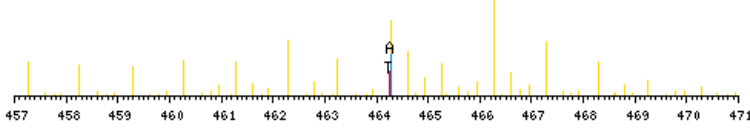

zoomed in precursor plot; T=theoretical m/z, A=acquired m/z

X-range:

-

MassTol: Y-zoom:

MassType:

AVG  MONO

Axis:

1  2

Label:

I  M  -

Ions:

a  +  2+  3+

b  +  2+  3+

c  +  2+  3+

x  +  2+  3+

y  +  2+  3+

z  +  2+  3+

hide H<sub>2</sub>O/NH<sub>3</sub>

zoom 112-122

GO

| b <sup>+</sup> | #  | AA | #  | y <sup>+</sup> | y <sup>2+</sup> |
|----------------|----|----|----|----------------|-----------------|
| 142.1232       | 1  | L  | 13 |                |                 |
| 257.1501       | 2  | D  | 12 | 1249.6177      | 625.3128        |
| 370.2342       | 3  | I  | 11 | 1134.5907      | 567.7993        |
| 427.2556       | 4  | G  | 10 | 1021.5067      | 511.2573        |
| 498.2927       | 5  | A  | 9  | 964.4852       | 482.7465        |
| 626.3513       | 6  | Q  | 8  | 893.4481       | 447.2280        |
| 683.3728       | 7  | G  | 7  | 765.3895       | 383.1987        |
| 812.4154       | 8  | E  | 6  | 708.3681       | 354.6879        |
| 883.4525       | 9  | A  | 5  | 579.3255       | 290.1666        |
| 996.5366       | 10 | L  | 4  | 508.2884       | 254.6481        |
| 1053.5580      | 11 | G  | 3  | 395.2043       | 198.1061        |
| 1216.6214      | 12 | Y  | 2  | 338.1828       | 169.5953        |
|                | 13 | R  | 1  | 175.1195       | 88.0637         |

N-term:+29.04

LDKGMSPVTEVR, MH+ 1518.8024, m/z 506.9390  
L OSG39 P180811 230811-s1.03813.03813.3.dta

X-range:

-

MassTol: Y-zoom:

MassType:

AVG  MONO

Axis:

1  2

Label:

I  M  -

Ions:

a  +  2+  3+

b  +  2+  3+

c  +  2+  3+

x  +  2+  3+

y  +  2+  3+

z  +  2+  3+

hide H<sub>2</sub>O/NH<sub>3</sub>

zoom 112-122

GO

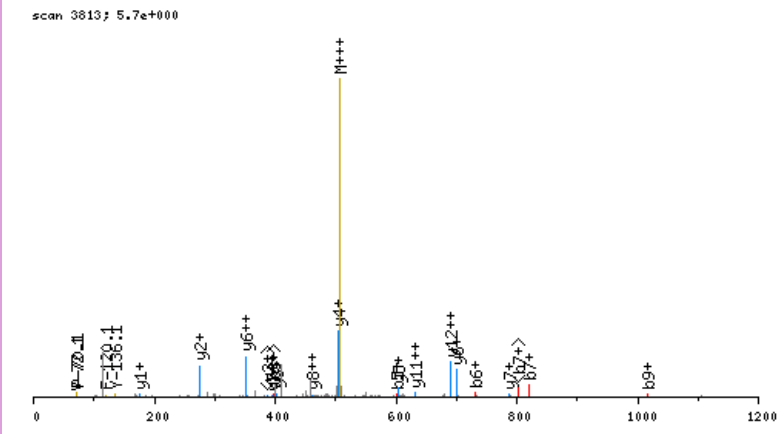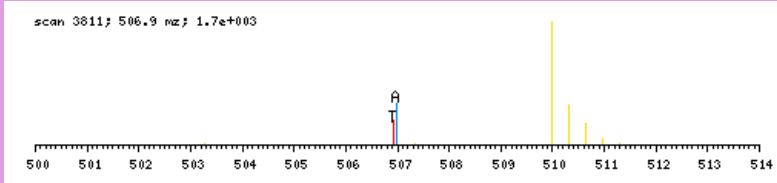

| b <sup>+</sup> | #  | AA # | y <sup>+</sup> | y <sup>2+</sup> |
|----------------|----|------|----------------|-----------------|
| 142.1232       | 1  | L 13 |                |                 |
| 257.1501       | 2  | D 12 | 1377.6871      | 689.3474        |
| 413.2764       | 3  | K 11 | 1262.6601      | 631.8340        |
| 470.2979       | 4  | G 10 | 1106.5338      | 553.7708        |
| 601.3384       | 5  | M 9  | 1049.5124      | 525.2601        |
| 732.3788       | 6  | M 8  | 918.4719       | 459.7399        |
| 819.4109       | 7  | S 7  | 787.4314       | 394.2196        |
| 916.4636       | 8  | P 6  | 700.3994       | 350.7036        |
| 1015.5320      | 9  | V 5  | 603.3466       | 302.1772        |
| 1116.5797      | 10 | T 4  | 504.2782       | 252.6430        |
| 1245.6223      | 11 | E 3  | 403.2305       | 202.1192        |
| 1344.6907      | 12 | V 2  | 274.1879       | 137.5979        |
|                | 13 | R 1  | 175.1195       | 88.0637         |

N-term:+29.04 K(3):+156.13

LDKIDMSLDDIIKLNR, MH+ 2004.2264, m/z 668.7470  
 H OSG39 P180811 230811-s1.07459.07459.3.dta

X-range:

-

MassTol: Y-zoom:

MassType:

AVG  MONO

Axis:

1  2

Label:

I  M  -

Ions:

a  +  2+  3+

b  +  2+  3+

c  +  2+  3+

x  +  2+  3+

y  +  2+  3+

z  +  2+  3+

hide H<sub>2</sub>O/NH<sub>3</sub>

zoom 112-122

GO

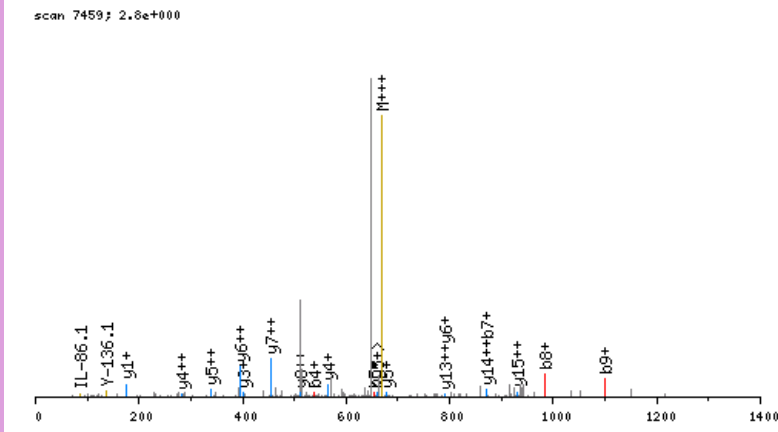

click image to zoom in; click top corners to zoom out [\[precursor±\]](#)

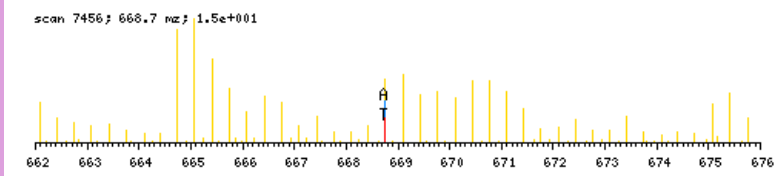

zoomed in precursor plot; T=theoretical m/z, A=acquired m/z

| b <sup>+</sup> | #  | AA # | y <sup>+</sup> | y <sup>2+</sup> |
|----------------|----|------|----------------|-----------------|
| 148.1550       | 1  | L    | 16             |                 |
| 263.1819       | 2  | D    | 15             | 1857.0792       |
| 425.3400       | 3  | K    | 14             | 1742.0523       |
| 538.4241       | 4  | I    | 13             | 1579.8942       |
| 653.4510       | 5  | D    | 12             | 1466.8101       |
| 784.4915       | 6  | M    | 11             | 1351.7832       |
| 871.5235       | 7  | S    | 10             | 1220.7427       |
| 984.6076       | 8  | L    | 9              | 1133.7107       |
| 1099.6345      | 9  | D    | 8              | 1020.6266       |
| 1214.6615      | 10 | D    | 7              | 905.5997        |
| 1327.7455      | 11 | I    | 6              | 790.5727        |
| 1440.8296      | 12 | I    | 5              | 677.4887        |
| 1602.9877      | 13 | K    | 4              | 564.4046        |
| 1716.0718      | 14 | L    | 3              | 402.2465        |
| 1830.1147      | 15 | N    | 2              | 289.1624        |
|                | 16 | R    | 1              | 175.1195        |

N-term:+35.07 K(3):+162.16  
 K(13):+162.16

LDLPCTPPPPAPIPSVR, MH+ 1855.0151, m/z 619.0099  
 L OSG36 P180811 230811-s1.05102.05102.3.dta

X-range:

-

MassTol: Y-zoom:

MassType:

AVG  MONO

Axis:

1  2

Label:

I  M  -

Ions:

a  +  2+  3+

b  +  2+  3+

c  +  2+  3+

x  +  2+  3+

y  +  2+  3+

z  +  2+  3+

hide H<sub>2</sub>O/NH<sub>3</sub>

zoom 112-122

GO

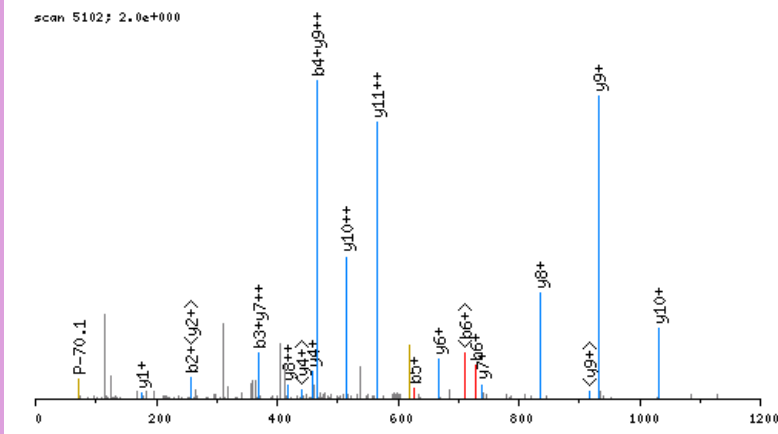

click image to zoom in; click top corners to zoom out [\[precursor±\]](#)

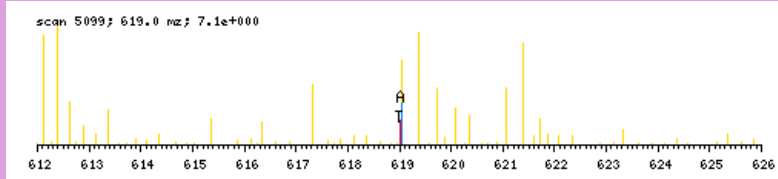

zoomed in precursor plot; T=theoretical m/z, A=acquired m/z

| b <sup>+</sup> | #  | AA # | y <sup>+</sup> | y <sup>2+</sup> |
|----------------|----|------|----------------|-----------------|
| 142.1232       | 1  | L 17 |                |                 |
| 257.1501       | 2  | D 16 | 1713.8998      | 857.4538        |
| 370.2342       | 3  | L 15 | 1598.8728      | 799.9403        |
| 467.2869       | 4  | P 14 | 1485.7887      | 743.3983        |
| 627.3175       | 5  | C 13 | 1388.7360      | 694.8719        |
| 728.3652       | 6  | T 12 | 1228.7054      | 614.8566        |
| 825.4180       | 7  | P 11 | 1127.6577      | 564.3328        |
| 922.4707       | 8  | P 10 | 1030.6049      | 515.8064        |
| 1019.5235      | 9  | P 9  | 933.5522       | 467.2800        |
| 1116.5763      | 10 | P 8  | 836.4994       | 418.7536        |
| 1187.6134      | 11 | A 7  | 739.4466       | 370.2272        |
| 1284.6661      | 12 | P 6  | 668.4095       | 334.7087        |
| 1397.7502      | 13 | I 5  | 571.3568       | 286.1823        |
| 1494.8030      | 14 | P 4  | 458.2727       | 229.6403        |
| 1581.8350      | 15 | S 3  | 361.2199       | 181.1139        |
| 1680.9034      | 16 | V 2  | 274.1879       | 137.5979        |
|                | 17 | R 1  | 175.1195       | 88.0637         |

N-term:+29.04 C(5):+160.03

LDPTSVTLKPMIEIR, MH+ 1655.9406, m/z 552.6517  
 L OSG39 P180811 230811-s1.05847.05847.3.dta

X-range:

-

MassTol: Y-zoom:

MassType:

AVG  MONO

Axis:

1  2

Label:

I  M  -

Ions:

a  +  2+  3+

b  +  2+  3+

c  +  2+  3+

x  +  2+  3+

y  +  2+  3+

z  +  2+  3+

hide H<sub>2</sub>O/NH<sub>3</sub>

zoom 112-122

GO

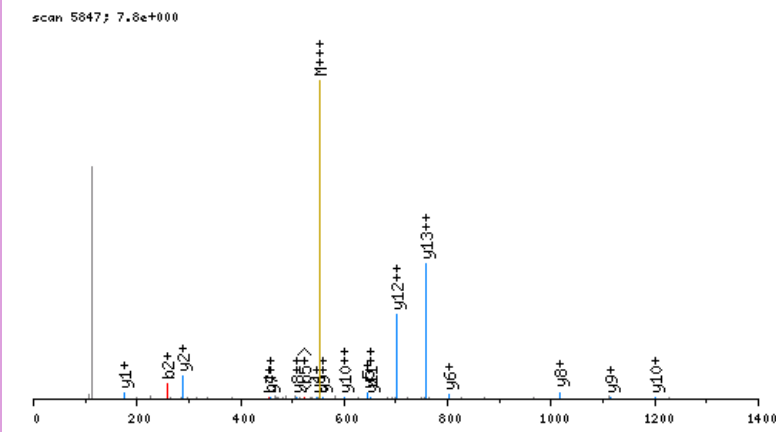

click image to zoom in; click top corners to zoom out [\[precursor±\]](#)

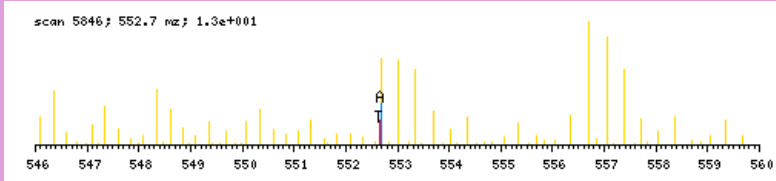

zoomed in precursor plot; T=theoretical m/z, A=acquired m/z

| b <sup>+</sup> | #  | AA # | y <sup>+</sup> | y <sup>2+</sup> |
|----------------|----|------|----------------|-----------------|
| 142.1232       | 1  | L 14 |                |                 |
| 257.1501       | 2  | D 13 | 1514.8253      | 757.9166        |
| 354.2029       | 3  | P 12 | 1399.7983      | 700.4031        |
| 455.2505       | 4  | T 11 | 1302.7456      | 651.8767        |
| 542.2826       | 5  | S 10 | 1201.6979      | 601.3529        |
| 641.3510       | 6  | V 9  | 1114.6659      | 557.8368        |
| 742.3987       | 7  | T 8  | 1015.5974      | 508.3026        |
| 855.4827       | 8  | L 7  | 914.5498       | 457.7788        |
| 1011.6090      | 9  | K 6  | 801.4657       | 401.2368        |
| 1108.6618      | 10 | P 5  | 645.3394       | 323.1736        |
| 1239.7023      | 11 | M 4  | 548.2866       | 274.6472        |
| 1368.7449      | 12 | E 3  | 417.2462       | 209.1270        |
| 1481.8289      | 13 | I 2  | 288.2036       | 144.6057        |
|                | 14 | R 1  | 175.1195       | 88.0637         |

N-term:+29.04 K(9):+156.13

LDTINVHLR, MH+ 1114.6796, m/z 372.2314  
 H OSG40 P180811 230811-s1.05118.05118.3.dta

X-range:

-

MassTol: Y-zoom:

MassType:

AVG  MONO

Axis:

1  2

Label:

I  M  -

Ions:

a  +  2+  3+

b  +  2+  3+

c  +  2+  3+

x  +  2+  3+

y  +  2+  3+

z  +  2+  3+

hide H<sub>2</sub>O/NH<sub>3</sub>

zoom 112-122

GO

scan 5118; 6.8e+000

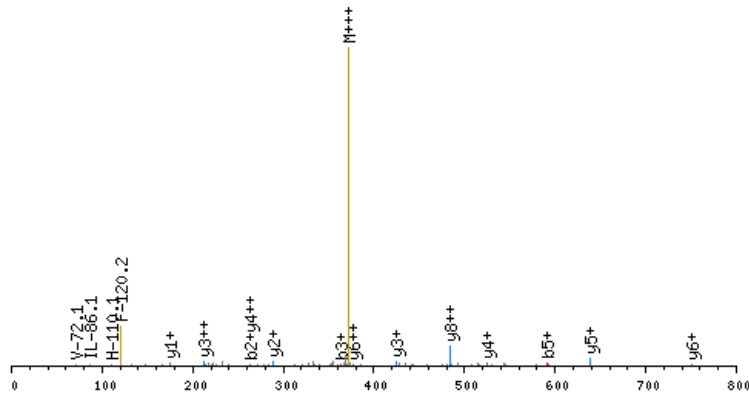

click image to zoom in; click top corners to zoom out [\[precursor±\]](#)

scan 5114; 372.2 m/z; 1.1e+002

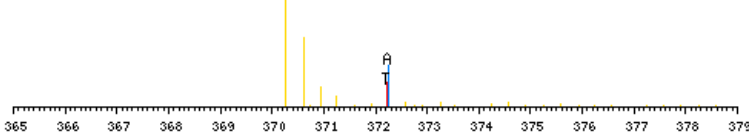

zoomed in precursor plot; T=theoretical m/z, A=acquired m/z

| b <sup>+</sup> | # | AA # | y <sup>+</sup> | y <sup>2+</sup> |
|----------------|---|------|----------------|-----------------|
| 148.1550       | 1 | L 9  |                |                 |
| 263.1819       | 2 | D 8  | 967.5325       | 484.2702        |
| 364.2296       | 3 | T 7  | 852.5056       | 426.7567        |
| 477.3136       | 4 | I 6  | 751.4579       | 376.2329        |
| 591.3566       | 5 | N 5  | 638.3738       | 319.6908        |
| 690.4250       | 6 | V 4  | 524.3309       | 262.6694        |
| 827.4839       | 7 | H 3  | 425.2625       | 213.1352        |
| 940.5680       | 8 | L 2  | 288.2036       | 144.6057        |
|                | 9 | R 1  | 175.1195       | 88.0637         |

N-term:+35.07



LDVNDNAPIPEPR, MH+ 1477.7651, m/z 493.2599  
 L OSG37 P180811 230811-s1.05088.05088.3.dta

X-range:

-

MassTol: Y-zoom:

MassType:

AVG  MONO

Axis:

1  2

Label:

I  M  -

Ions:

a  +  2+  3+

b  +  2+  3+

c  +  2+  3+

x  +  2+  3+

y  +  2+  3+

z  +  2+  3+

hide H<sub>2</sub>O/NH<sub>3</sub>

zoom 112-122

GO

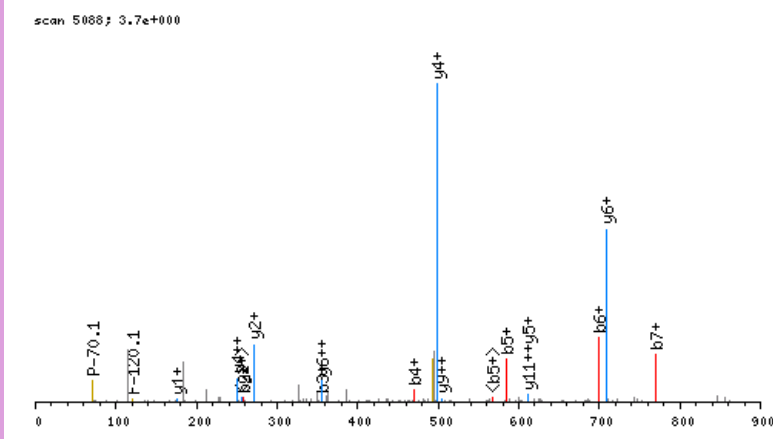

click image to zoom in; click top corners to zoom out [\[precursor±\]](#)

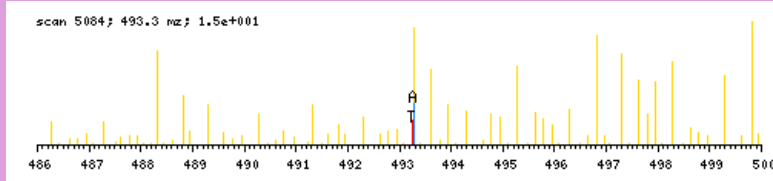

zoomed in precursor plot; T=theoretical m/z, A=acquired m/z

| b <sup>+</sup> | #  | AA # | y <sup>+</sup> | y <sup>2+</sup> |
|----------------|----|------|----------------|-----------------|
| 142.1232       | 1  | L 13 |                |                 |
| 257.1501       | 2  | D 12 | 1336.6497      | 668.8288        |
| 356.2185       | 3  | V 11 | 1221.6228      | 611.3153        |
| 470.2614       | 4  | N 10 | 1122.5544      | 561.7811        |
| 585.2884       | 5  | D 9  | 1008.5114      | 504.7596        |
| 699.3313       | 6  | N 8  | 893.4845       | 447.2462        |
| 770.3684       | 7  | A 7  | 779.4416       | 390.2247        |
| 867.4212       | 8  | P 6  | 708.4044       | 354.7061        |
| 980.5053       | 9  | I 5  | 611.3517       | 306.1798        |
| 1077.5580      | 10 | P 4  | 498.2676       | 249.6377        |
| 1206.6006      | 11 | E 3  | 401.2149       | 201.1113        |
| 1303.6534      | 12 | P 2  | 272.1723       | 136.5900        |
|                | 13 | R 1  | 175.1195       | 88.0637         |

N-term:+29.04

LDYSDEINQVVEVR, MH+ 1712.8919, m/z 571.6355  
 H OSG37 P180811 230811-s1.07561.07561.3.dta

scan 7561; 3.1e+000

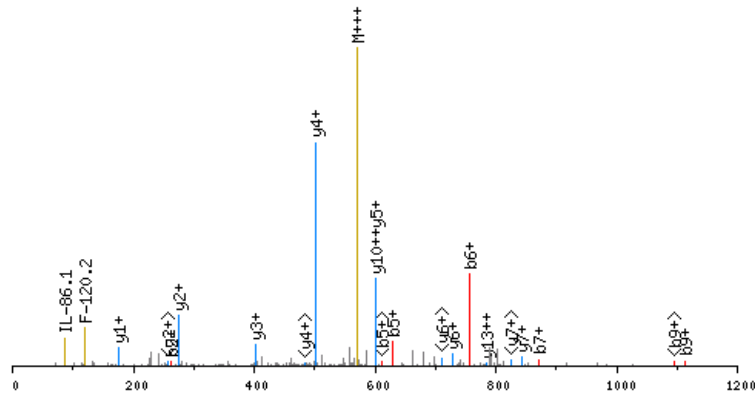

click image to zoom in; click top corners to zoom out [\[precursor±\]](#)

scan 7559; 571.6 m/z; 1.1e+001

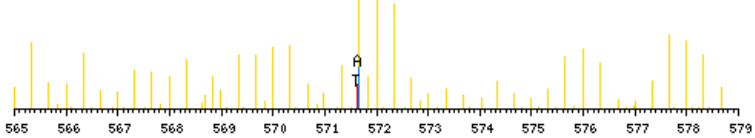

zoomed in precursor plot; T=theoretical m/z, A=acquired m/z

X-range:

-

MassTol: Y-zoom:

MassType:

AVG  MONO

Axis:

1  2

Label:

I  M  -

Ions:

a  +  2+  3+

b  +  2+  3+

c  +  2+  3+

x  +  2+  3+

y  +  2+  3+

z  +  2+  3+

hide H<sub>2</sub>O/NH<sub>3</sub>

zoom 112-122

GO

| b <sup>+</sup> | #  | AA # | y <sup>+</sup> | y <sup>2+</sup> |
|----------------|----|------|----------------|-----------------|
| 148.1550       | 1  | L 14 |                |                 |
| 263.1819       | 2  | D 13 | 1565.7447      | 783.3763        |
| 426.2452       | 3  | Y 12 | 1450.7178      | 725.8628        |
| 513.2773       | 4  | S 11 | 1287.6545      | 644.3311        |
| 628.3042       | 5  | D 10 | 1200.6224      | 600.8151        |
| 757.3468       | 6  | E 9  | 1085.5955      | 543.3017        |
| 870.4309       | 7  | I 8  | 956.5529       | 478.7804        |
| 984.4738       | 8  | N 7  | 843.4688       | 422.2383        |
| 1112.5324      | 9  | Q 6  | 729.4259       | 365.2169        |
| 1211.6008      | 10 | V 5  | 601.3673       | 301.1876        |
| 1310.6692      | 11 | V 4  | 502.2989       | 251.6534        |
| 1439.7118      | 12 | E 3  | 403.2305       | 202.1192        |
| 1538.7802      | 13 | V 2  | 274.1879       | 137.5979        |
|                | 14 | R 1  | 175.1195       | 88.0637         |

N-term:+35.07

LEALDCILPPTTRPTDKPLR, MH+ 2261.2691, m/z 566.0727  
 L OSG40 P180811 230811-s1.07311.07311.4.dta

X-range:

-

MassTol: Y-zoom:

MassType:

AVG  MONO

Axis:

1  2

Label:

I  M  -

Ions:

a  +  2+  3+

b  +  2+  3+

c  +  2+  3+

x  +  2+  3+

y  +  2+  3+

z  +  2+  3+

hide H<sub>2</sub>O/NH<sub>3</sub>

zoom 112-122

GO

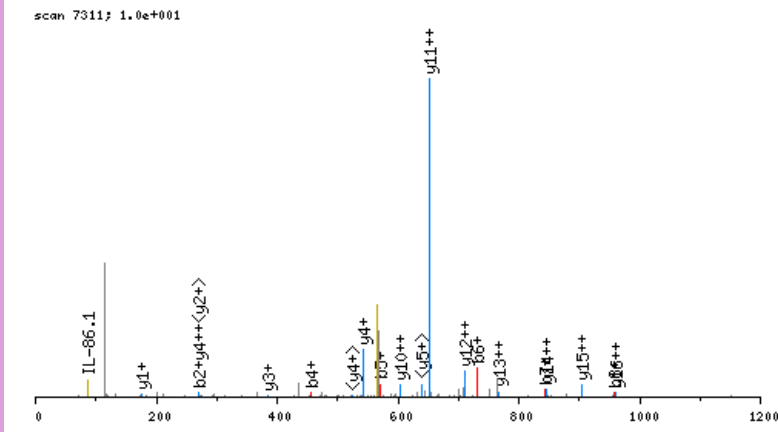

click image to zoom in; click top corners to zoom out [\[precursor±\]](#)

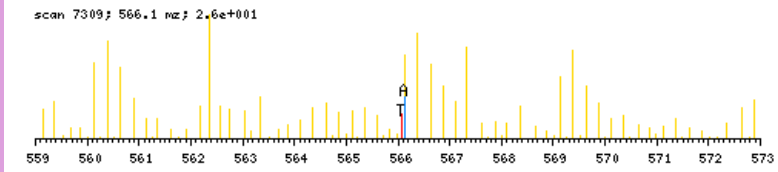

zoomed in precursor plot; T=theoretical m/z, A=acquired m/z

| b <sup>+</sup> | #  | AA | #  | y <sup>+</sup> | y <sup>2+</sup> |
|----------------|----|----|----|----------------|-----------------|
| 142.1232       | 1  | L  | 19 |                |                 |
| 271.1658       | 2  | E  | 18 | 2120.1538      | 1060.5808       |
| 342.2029       | 3  | A  | 17 | 1991.1112      | 996.0595        |
| 455.2869       | 4  | L  | 16 | 1920.0741      | 960.5409        |
| 570.3139       | 5  | D  | 15 | 1806.9900      | 903.9989        |
| 730.3445       | 6  | C  | 14 | 1691.9631      | 846.4854        |
| 843.4285       | 7  | I  | 13 | 1531.9325      | 766.4701        |
| 956.5126       | 8  | L  | 12 | 1418.8484      | 709.9281        |
| 1053.5654      | 9  | P  | 11 | 1305.7643      | 653.3861        |
| 1150.6181      | 10 | P  | 10 | 1208.7116      | 604.8597        |
| 1251.6658      | 11 | T  | 9  | 1111.6588      | 556.3333        |
| 1407.7669      | 12 | R  | 8  | 1010.6111      | 505.8095        |
| 1504.8197      | 13 | P  | 7  | 854.5100       | 427.7589        |
| 1605.8674      | 14 | T  | 6  | 757.4573       | 379.2325        |
| 1720.8943      | 15 | D  | 5  | 656.4096       | 328.7087        |
| 1877.0206      | 16 | K  | 4  | 541.3826       | 271.1952        |
| 1974.0734      | 17 | P  | 3  | 385.2563       | 193.1321        |
| 2087.1574      | 18 | L  | 2  | 288.2036       | 144.6057        |
|                | 19 | R  | 1  | 175.1195       | 88.0637         |

N-term:+29.04 C(6):+160.03  
 K(16):+156.13

LEALDTILPPTTRPTDKPLR, MH+ 2202.2862, m/z 551.3270  
 L OSG40 P180811 230811-s1.07275.07275.4.dta

scan 7275; 5.0e+000

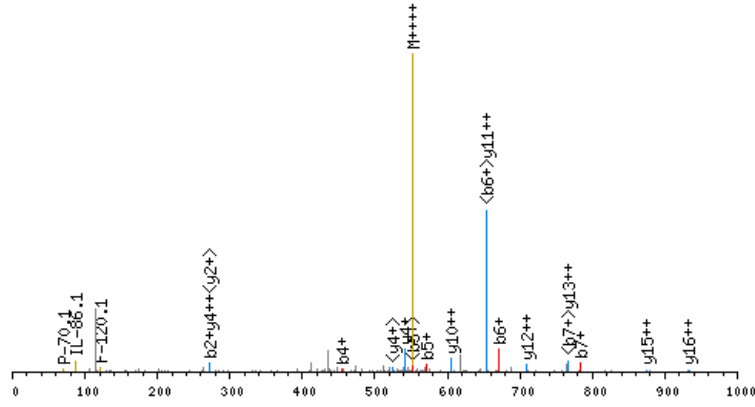

click image to zoom in; click top corners to zoom out [precursor±]

scan 7274; 551.3 m/z; 1.4e+001

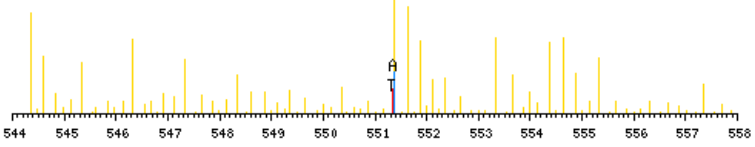

zoomed in precursor plot; T=theoretical m/z, A=acquired m/z

X-range:

0 - 0

MassTol: Y-zoom:

0. 1.

MassType:

AVG  MONO

Axis:

1  2

Label:

I  M  -

Ions:

a  +  2+  3+

b  +  2+  3+

c  +  2+  3+

x  +  2+  3+

y  +  2+  3+

z  +  2+  3+

hide H<sub>2</sub>O/NH<sub>3</sub>

zoom 112-122

GO

| b <sup>+</sup> | #  | AA # | y <sup>+</sup> | y <sup>2+</sup> |
|----------------|----|------|----------------|-----------------|
| 142.1232       | 1  | L 19 |                |                 |
| 271.1658       | 2  | E 18 | 2061.1709      | 1031.0893       |
| 342.2029       | 3  | A 17 | 1932.1283      | 966.5680        |
| 455.2869       | 4  | L 16 | 1861.0911      | 931.0495        |
| 570.3139       | 5  | D 15 | 1748.0071      | 874.5075        |
| 671.3616       | 6  | T 14 | 1632.9801      | 816.9940        |
| 784.4456       | 7  | I 13 | 1531.9325      | 766.4701        |
| 897.5297       | 8  | L 12 | 1418.8484      | 709.9281        |
| 994.5824       | 9  | P 11 | 1305.7643      | 653.3861        |
| 1091.6352      | 10 | P 10 | 1208.7116      | 604.8597        |
| 1192.6829      | 11 | T 9  | 1111.6588      | 556.3333        |
| 1348.7840      | 12 | R 8  | 1010.6111      | 505.8095        |
| 1445.8368      | 13 | P 7  | 854.5100       | 427.7589        |
| 1546.8844      | 14 | T 6  | 757.4573       | 379.2325        |
| 1661.9114      | 15 | D 5  | 656.4096       | 328.7087        |
| 1818.0377      | 16 | K 4  | 541.3826       | 271.1952        |
| 1915.0905      | 17 | P 3  | 385.2563       | 193.1321        |
| 2028.1745      | 18 | L 2  | 288.2036       | 144.6057        |
|                | 19 | R 1  | 175.1195       | 88.0637         |

N-term:+29.04 K(16):+156.13

LEALGIKEGTIPPEYR, MH+ 1842.0377, m/z 614.6841  
 L OSG39 P180811 230811-s1.05119.05119.3.dta

X-range:

-

MassTol: Y-zoom:

MassType:

AVG  MONO

Axis:

1  2

Label:

I  M  -

Ions:

a  +  2+  3+

b  +  2+  3+

c  +  2+  3+

x  +  2+  3+

y  +  2+  3+

z  +  2+  3+

hide H<sub>2</sub>O/NH<sub>3</sub>

zoom 112-122

GO

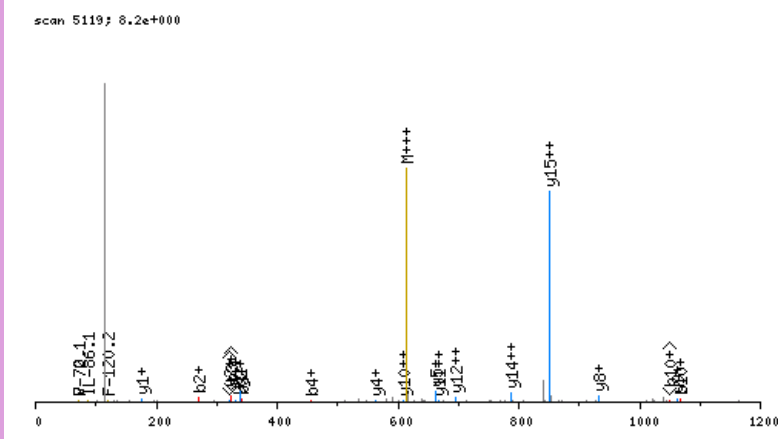

click image to zoom in; click top corners to zoom out [\[precursor±\]](#)

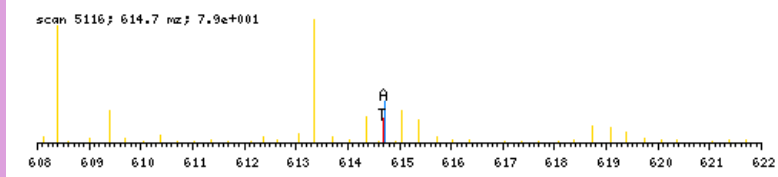

zoomed in precursor plot; T=theoretical m/z, A=acquired m/z

| b <sup>+</sup> | #  | AA | #  | y <sup>+</sup> | y <sup>2+</sup> |
|----------------|----|----|----|----------------|-----------------|
| 142.1232       | 1  | L  | 16 |                |                 |
| 271.1658       | 2  | E  | 15 | 1700.9223      | 850.9651        |
| 342.2029       | 3  | A  | 14 | 1571.8798      | 786.4438        |
| 455.2869       | 4  | L  | 13 | 1500.8426      | 750.9252        |
| 512.3084       | 5  | G  | 12 | 1387.7586      | 694.3832        |
| 625.3925       | 6  | I  | 11 | 1330.7371      | 665.8725        |
| 781.5188       | 7  | K  | 10 | 1217.6530      | 609.3304        |
| 910.5614       | 8  | E  | 9  | 1061.5267      | 531.2673        |
| 967.5828       | 9  | G  | 8  | 932.4842       | 466.7460        |
| 1068.6305      | 10 | T  | 7  | 875.4627       | 438.2353        |
| 1181.7146      | 11 | I  | 6  | 774.4150       | 387.7114        |
| 1278.7673      | 12 | P  | 5  | 661.3310       | 331.1694        |
| 1375.8201      | 13 | P  | 4  | 564.2782       | 282.6430        |
| 1504.8627      | 14 | E  | 3  | 467.2254       | 234.1166        |
| 1667.9260      | 15 | Y  | 2  | 338.1828       | 169.5953        |
|                | 16 | R  | 1  | 175.1195       | 88.0637         |

N-term:+29.04 K(7):+156.13

LEDLVFPSEIVGKR, MH+ 1657.9529, m/z 553.3225  
 L OSG39 P180811 230811-s1.06547.06547.3.dta

X-range:

-

MassTol: Y-zoom:

MassType:

AVG  MONO

Axis:

1  2

Label:

I  M  -

Ions:

a  +  2+  3+

b  +  2+  3+

c  +  2+  3+

x  +  2+  3+

y  +  2+  3+

z  +  2+  3+

hide H<sub>2</sub>O/NH<sub>3</sub>

zoom 112-122

GO

scan 6547; 3.6e+000

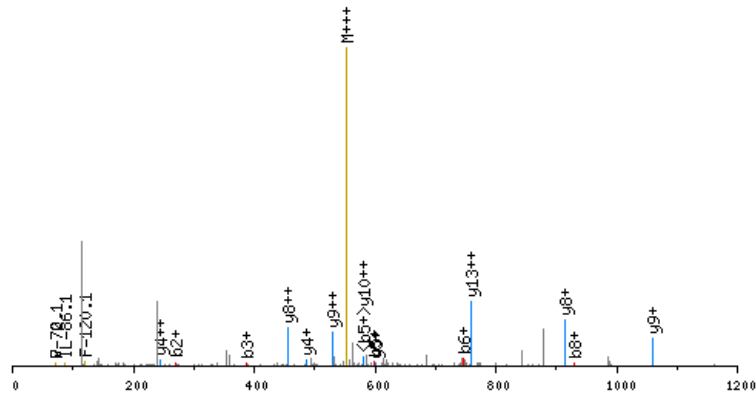

click image to zoom in; click top corners to zoom out [\[precursor±\]](#)

scan 6546; 553.3 m/z; 5.5e+001

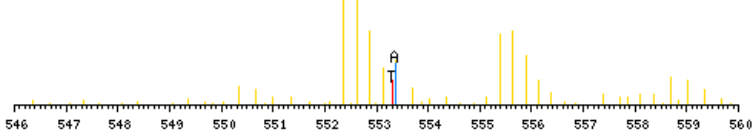

zoomed in precursor plot; T=theoretical m/z, A=acquired m/z

| b <sup>+</sup> | #  | AA | #  | y <sup>+</sup> | y <sup>2+</sup> |
|----------------|----|----|----|----------------|-----------------|
| 142.1232       | 1  | L  | 14 |                |                 |
| 271.1658       | 2  | E  | 13 | 1516.8376      | 758.9227        |
| 386.1927       | 3  | D  | 12 | 1387.7950      | 694.4014        |
| 499.2768       | 4  | L  | 11 | 1272.7680      | 636.8879        |
| 598.3452       | 5  | V  | 10 | 1159.6840      | 580.3459        |
| 745.4136       | 6  | F  | 9  | 1060.6155      | 530.8117        |
| 842.4664       | 7  | P  | 8  | 913.5471       | 457.2775        |
| 929.4984       | 8  | S  | 7  | 816.4944       | 408.7511        |
| 1058.5410      | 9  | E  | 6  | 729.4623       | 365.2351        |
| 1171.6250      | 10 | I  | 5  | 600.4197       | 300.7138        |
| 1270.6935      | 11 | V  | 4  | 487.3357       | 244.1718        |
| 1327.7149      | 12 | G  | 3  | 388.2673       | 194.6375        |
| 1483.8412      | 13 | K  | 2  | 331.2458       | 166.1268        |
|                | 14 | R  | 1  | 175.1195       | 88.0637         |

N-term:+29.04 K(13):+156.13

LEEVAVNFAKGLADR, MH+ 1700.0019, m/z 567.3388  
 H OSG39 P180811 230811-s1.06018.06018.3.dta

X-range:

-

MassTol: Y-zoom:

MassType:

AVG  MONO

Axis:

1  2

Label:

I  M  -

Ions:

a  +  2+  3+

b  +  2+  3+

c  +  2+  3+

x  +  2+  3+

y  +  2+  3+

z  +  2+  3+

hide H<sub>2</sub>O/NH<sub>3</sub>

zoom 112-122

GO

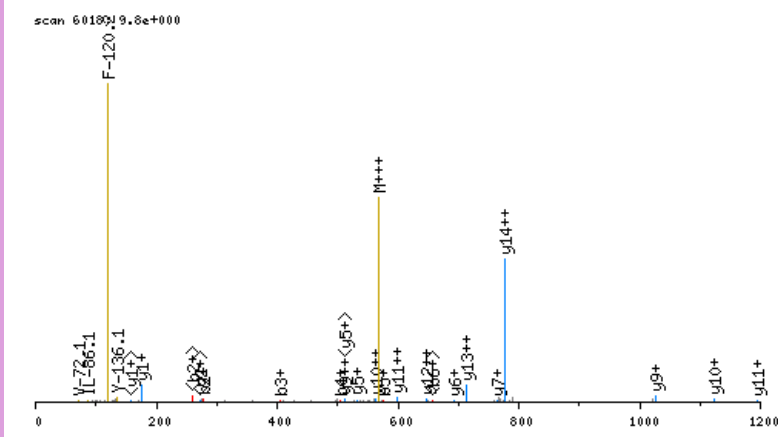

click image to zoom in; click top corners to zoom out [\[precursor±\]](#)

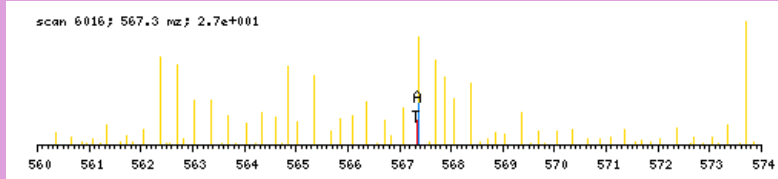

zoomed in precursor plot; T=theoretical m/z, A=acquired m/z

| b <sup>+</sup> | #  | AA # | y <sup>+</sup> | y <sup>2+</sup> |
|----------------|----|------|----------------|-----------------|
| 148.1550       | 1  | L 15 |                |                 |
| 277.1976       | 2  | E 14 | 1552.8548      | 776.9313        |
| 406.2402       | 3  | E 13 | 1423.8122      | 712.4100        |
| 505.3086       | 4  | V 12 | 1294.7696      | 647.8887        |
| 576.3457       | 5  | A 11 | 1195.7012      | 598.3545        |
| 675.4141       | 6  | V 10 | 1124.6641      | 562.8359        |
| 789.4570       | 7  | N 9  | 1025.5956      | 513.3017        |
| 936.5254       | 8  | F 8  | 911.5527       | 456.2803        |
| 1007.5625      | 9  | A 7  | 764.4843       | 382.7461        |
| 1169.7206      | 10 | K 6  | 693.4472       | 347.2275        |
| 1226.7421      | 11 | G 5  | 531.2891       | 266.1485        |
| 1339.8262      | 12 | L 4  | 474.2676       | 237.6377        |
| 1410.8633      | 13 | A 3  | 361.1836       | 181.0957        |
| 1525.8902      | 14 | D 2  | 290.1464       | 145.5771        |
|                | 15 | R 1  | 175.1195       | 88.0637         |

N-term:+35.07 K(10):+162.16

LEGEGLGQSLGNCKDDLLNVCMR, MH+ 2634.2689, m/z 659.3227  
 L OSG39 P180811 230811-s1.06650.06650.4.dta

scan 6650; 1.5e+000

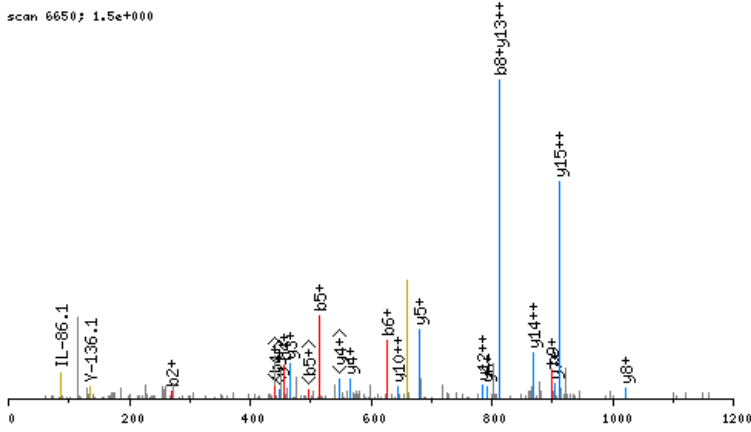

click image to zoom in; click top corners to zoom out [\[precursor±\]](#)

scan 6646; 659.3 m/z; 7.2e+000

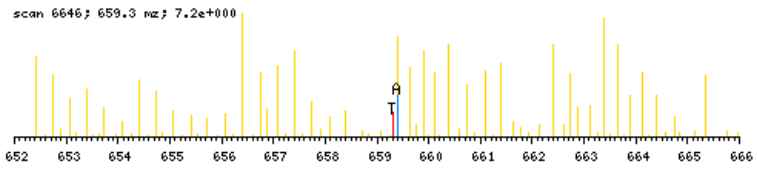

zoomed in precursor plot; T=theoretical m/z, A=acquired m/z

X-range:

-

MassTol: Y-zoom:

MassType:

AVG  MONO

Axis:

1  2

Label:

I  M  -

Ions:

a  +  2+  3+

b  +  2+  3+

c  +  2+  3+

x  +  2+  3+

y  +  2+  3+

z  +  2+  3+

hide H<sub>2</sub>O/NH<sub>3</sub>

zoom 112-122

GO

| b <sup>+</sup> | #  | AA | #  | y <sup>+</sup> | y <sup>2+</sup> |
|----------------|----|----|----|----------------|-----------------|
| 142.1232       | 1  | L  | 23 |                |                 |
| 271.1658       | 2  | E  | 22 | 2493.1535      | 1247.0807       |
| 328.1872       | 3  | G  | 21 | 2364.1110      | 1182.5594       |
| 457.2298       | 4  | E  | 20 | 2307.0895      | 1154.0487       |
| 514.2513       | 5  | G  | 19 | 2178.0469      | 1089.5274       |
| 627.3353       | 6  | L  | 18 | 2121.0254      | 1061.0166       |
| 684.3568       | 7  | G  | 17 | 2007.9414      | 1004.4746       |
| 812.4154       | 8  | Q  | 16 | 1950.9199      | 975.9639        |
| 899.4474       | 9  | S  | 15 | 1822.8613      | 911.9346        |
| 1012.5315      | 10 | L  | 14 | 1735.8293      | 868.4186        |
| 1069.5529      | 11 | G  | 13 | 1622.7452      | 811.8765        |
| 1183.5959      | 12 | N  | 12 | 1565.7238      | 783.3658        |
| 1343.6265      | 13 | C  | 11 | 1451.6808      | 726.3443        |
| 1499.7528      | 14 | K  | 10 | 1291.6502      | 646.3290        |
| 1614.7797      | 15 | D  | 9  | 1135.5239      | 568.2659        |
| 1729.8067      | 16 | D  | 8  | 1020.4970      | 510.7524        |
| 1842.8907      | 17 | L  | 7  | 905.4701       | 453.2389        |
| 1955.9748      | 18 | L  | 6  | 792.3860       | 396.6969        |
| 2070.0177      | 19 | N  | 5  | 679.3019       | 340.1549        |
| 2169.0861      | 20 | V  | 4  | 565.2590       | 283.1334        |
| 2329.1167      | 21 | C  | 3  | 466.1906       | 233.5992        |
| 2460.1572      | 22 | M  | 2  | 306.1600       | 153.5839        |
|                | 23 | R  | 1  | 175.1195       | 88.0637         |

N-term: +29.04 C(13): +160.03  
 K(14): +156.13 C(21): +160.03



LEIDVSNPQTVGVGR, MH+ 1617.9024, m/z 539.9723  
 H OSG37 P180811 230811-s1.06028.06028.3.dta

X-range:

-

MassTol: Y-zoom:

MassType:

AVG  MONO

Axis:

1  2

Label:

I  M  -

Ions:

a  +  2+  3+

b  +  2+  3+

c  +  2+  3+

x  +  2+  3+

y  +  2+  3+

z  +  2+  3+

hide H<sub>2</sub>O/NH<sub>3</sub>

zoom 112-122

GO

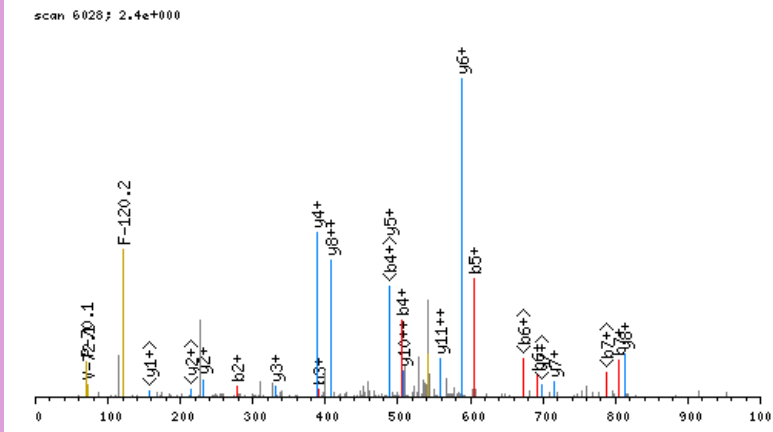

click image to zoom in; click top corners to zoom out [\[precursor±\]](#)

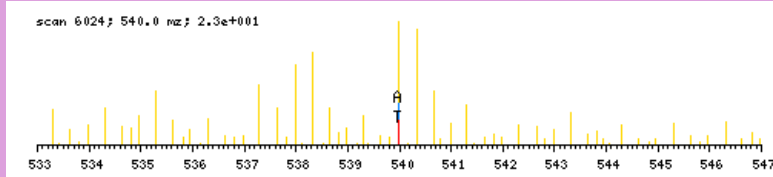

zoomed in precursor plot; T=theoretical m/z, A=acquired m/z

| b <sup>+</sup> | #  | AA # | y <sup>+</sup> | y <sup>2+</sup> |
|----------------|----|------|----------------|-----------------|
| 148.1550       | 1  | L 15 |                |                 |
| 277.1976       | 2  | E 14 | 1470.7552      | 735.8815        |
| 390.2816       | 3  | I 13 | 1341.7127      | 671.3602        |
| 505.3086       | 4  | D 12 | 1228.6286      | 614.8182        |
| 604.3770       | 5  | V 11 | 1113.6016      | 557.3047        |
| 691.4090       | 6  | S 10 | 1014.5332      | 507.7705        |
| 805.4519       | 7  | N 9  | 927.5012       | 464.2545        |
| 902.5047       | 8  | P 8  | 813.4583       | 407.2331        |
| 1030.5633      | 9  | Q 7  | 716.4055       | 358.7067        |
| 1131.6110      | 10 | T 6  | 588.3469       | 294.6774        |
| 1230.6794      | 11 | V 5  | 487.2993       | 244.1535        |
| 1287.7008      | 12 | G 4  | 388.2308       | 194.6193        |
| 1386.7692      | 13 | V 3  | 331.2094       | 166.1086        |
| 1443.7907      | 14 | G 2  | 232.1410       | 116.5744        |
|                | 15 | R 1  | 175.1195       | 88.0637         |

N-term:+35.07

LESSPATTEKNSNFTVTPR, MH+ 2135.0984, m/z 534.5301  
 L OSG40 P180811 230811-s1.06915.06915.4.dta

X-range:

-

MassTol: Y-zoom:

MassType:

AVG  MONO

Axis:

1  2

Label:

I  M  -

Ions:

a  +  2+  3+

b  +  2+  3+

c  +  2+  3+

x  +  2+  3+

y  +  2+  3+

z  +  2+  3+

hide H<sub>2</sub>O/NH<sub>3</sub>

zoom 112-122

GO

scan 6915; 1.4e+001

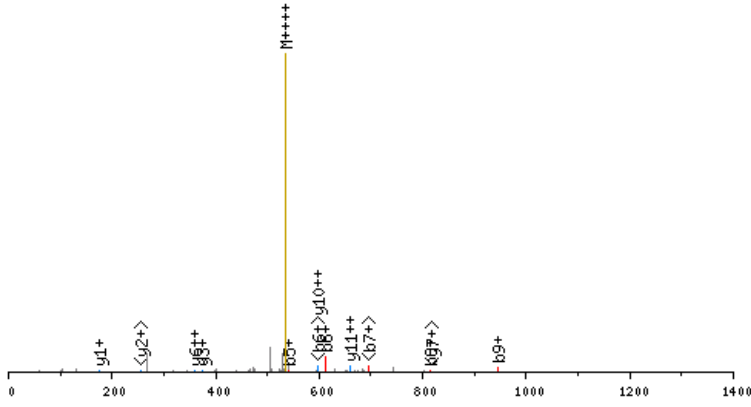

click image to zoom in; click top corners to zoom out

[precursor±]

scan 6914; 534.5 m/z; 1.7e+001

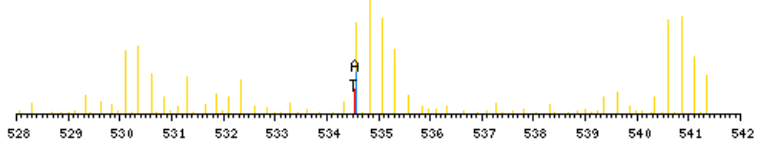

zoomed in precursor plot; T=theoretical m/z, A=acquired m/z

| b <sup>+</sup> | #  | AA # | y <sup>+</sup> | y <sup>2+</sup> |
|----------------|----|------|----------------|-----------------|
| 142.1232       | 1  | L 19 |                |                 |
| 271.1658       | 2  | E 18 | 1993.9831      | 997.4955        |
| 358.1978       | 3  | S 17 | 1864.9405      | 932.9742        |
| 445.2298       | 4  | S 16 | 1777.9085      | 889.4582        |
| 542.2826       | 5  | P 15 | 1690.8765      | 845.9421        |
| 613.3197       | 6  | A 14 | 1593.8237      | 797.4158        |
| 714.3674       | 7  | T 13 | 1522.7866      | 761.8972        |
| 815.4150       | 8  | T 12 | 1421.7389      | 711.3734        |
| 944.4576       | 9  | E 11 | 1320.6912      | 660.8495        |
| 1100.5839      | 10 | K 10 | 1191.6486      | 596.3282        |
| 1214.6269      | 11 | N 9  | 1035.5223      | 518.2651        |
| 1301.6589      | 12 | S 8  | 921.4794       | 461.2436        |
| 1415.7018      | 13 | N 7  | 834.4474       | 417.7276        |
| 1562.7702      | 14 | F 6  | 720.4044       | 360.7061        |
| 1663.8179      | 15 | T 5  | 573.3360       | 287.1719        |
| 1762.8863      | 16 | V 4  | 472.2884       | 236.6481        |
| 1863.9340      | 17 | T 3  | 373.2199       | 187.1139        |
| 1960.9868      | 18 | P 2  | 272.1723       | 136.5900        |
|                | 19 | R 1  | 175.1195       | 88.0637         |

N-term:+29.04 K(10):+156.13

LEVAEDSGHPWR, MH+ 1423.6970, m/z 475.2372  
 L OSG40 P180811 230811-s1.04555.04555.3.dta

X-range:

-

MassTol: Y-zoom:

MassType:

AVG  MONO

Axis:

1  2

Label:

I  M  -

Ions:

a  +  2+  3+

b  +  2+  3+

c  +  2+  3+

x  +  2+  3+

y  +  2+  3+

z  +  2+  3+

hide H<sub>2</sub>O/NH<sub>3</sub>

zoom 112-122

GO

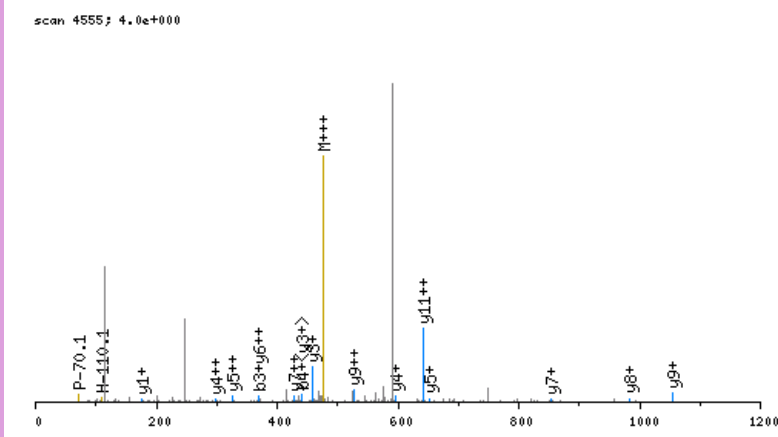

click image to zoom in; click top corners to zoom out [\[precursor±\]](#)

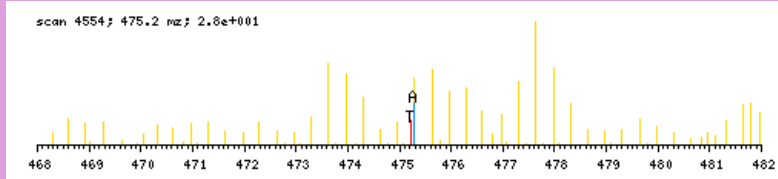

zoomed in precursor plot; T=theoretical m/z, A=acquired m/z

| b <sup>+</sup> | #  | AA # | y <sup>+</sup> | y <sup>2+</sup> |
|----------------|----|------|----------------|-----------------|
| 142.1232       | 1  | L 12 |                |                 |
| 271.1658       | 2  | E 11 | 1282.5816      | 641.7947        |
| 370.2342       | 3  | V 10 | 1153.5390      | 577.2734        |
| 441.2713       | 4  | A 9  | 1054.4706      | 527.7392        |
| 570.3139       | 5  | E 8  | 983.4335       | 492.2207        |
| 685.3408       | 6  | D 7  | 854.3909       | 427.6994        |
| 772.3728       | 7  | S 6  | 739.3640       | 370.1859        |
| 829.3943       | 8  | G 5  | 652.3320       | 326.6699        |
| 966.4532       | 9  | H 4  | 595.3105       | 298.1592        |
| 1063.5060      | 10 | P 3  | 458.2516       | 229.6297        |
| 1249.5853      | 11 | W 2  | 361.1988       | 181.1033        |
|                | 12 | R 1  | 175.1195       | 88.0637         |

N-term:+29.04

LEVLHSTDPQLSEASILR, MH+ 2170.1931, m/z 724.0692  
 H OSG39 P180811 230811-s1.06370.06370.3.dta

X-range:

-

MassTol: Y-zoom:

MassType:

AVG  MONO

Axis:

1  2

Label:

I  M  -

Ions:

a  +  2+  3+

b  +  2+  3+

c  +  2+  3+

x  +  2+  3+

y  +  2+  3+

z  +  2+  3+

hide H<sub>2</sub>O/NH<sub>3</sub>

zoom 112-122

GO

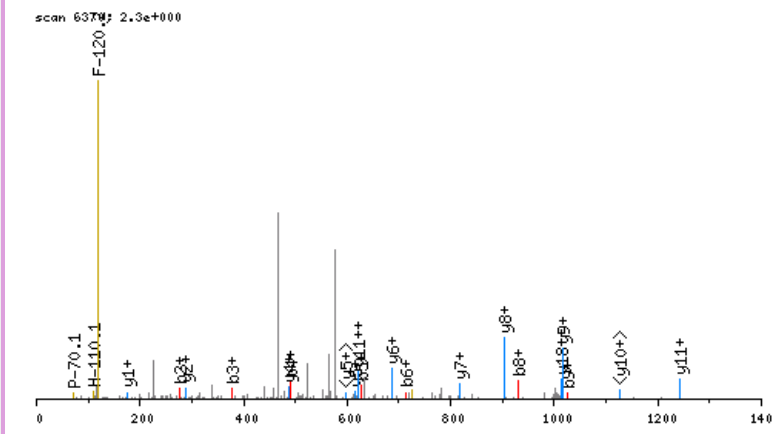

click image to zoom in; click top corners to zoom out [\[precursor±\]](#)

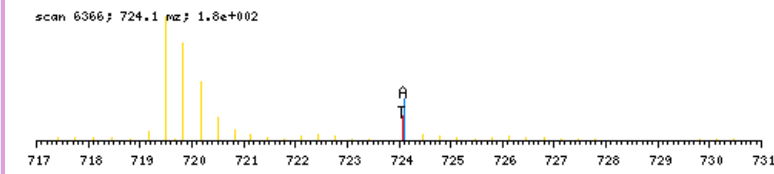

zoomed in precursor plot; T=theoretical m/z, A=acquired m/z

| b <sup>+</sup> | #  | AA | #  | y <sup>+</sup> | y <sup>2+</sup> |
|----------------|----|----|----|----------------|-----------------|
| 148.1550       | 1  | L  | 19 |                |                 |
| 277.1976       | 2  | E  | 18 | 2023.0460      | 1012.0269       |
| 376.2660       | 3  | V  | 17 | 1894.0034      | 947.5056        |
| 489.3500       | 4  | L  | 16 | 1794.9350      | 897.9714        |
| 626.4089       | 5  | H  | 15 | 1681.8509      | 841.4294        |
| 713.4410       | 6  | S  | 14 | 1544.7920      | 772.8999        |
| 814.4887       | 7  | T  | 13 | 1457.7600      | 729.3839        |
| 929.5156       | 8  | D  | 12 | 1356.7123      | 678.8601        |
| 1026.5684      | 9  | P  | 11 | 1241.6854      | 621.3466        |
| 1154.6269      | 10 | Q  | 10 | 1144.6326      | 572.8202        |
| 1267.7110      | 11 | L  | 9  | 1016.5740      | 508.7909        |
| 1354.7430      | 12 | S  | 8  | 903.4900       | 452.2489        |
| 1483.7856      | 13 | E  | 7  | 816.4579       | 408.7329        |
| 1554.8227      | 14 | A  | 6  | 687.4153       | 344.2116        |
| 1682.8813      | 15 | Q  | 5  | 616.3782       | 308.6930        |
| 1769.9133      | 16 | S  | 4  | 488.3197       | 244.6637        |
| 1882.9974      | 17 | I  | 3  | 401.2876       | 201.1477        |
| 1996.0815      | 18 | L  | 2  | 288.2036       | 144.6057        |
|                | 19 | R  | 1  | 175.1195       | 88.0637         |

N-term:+35.07

LEVNEEGSEAAASTSVVITGR, MH+ 2147.0832, m/z 716.3659  
 L OSG36 P180811 230811-s1.04167.04167.3.dta

X-range:

-

MassTol: Y-zoom:

MassType:

AVG  MONO

Axis:

1  2

Label:

I  M  -

Ions:

a  +  2+  3+

b  +  2+  3+

c  +  2+  3+

x  +  2+  3+

y  +  2+  3+

z  +  2+  3+

hide H<sub>2</sub>O/NH<sub>3</sub>

zoom 112-122

GO

scan 4167; 1.1e+000

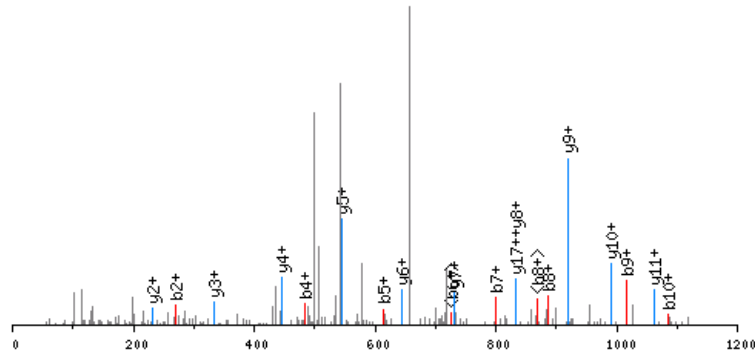

click image to zoom in; click top corners to zoom out [precursor±]

scan 4164; 716.4 nz; 4.6e+000

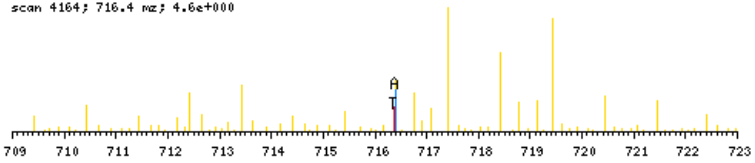

zoomed in precursor plot; T=theoretical m/z, A=acquired m/z

| b <sup>+</sup> | #  | AA | #  | y <sup>+</sup> | y <sup>2+</sup> |
|----------------|----|----|----|----------------|-----------------|
| 142.1232       | 1  | L  | 21 |                |                 |
| 271.1658       | 2  | E  | 20 | 2005.9678      | 1003.4878       |
| 370.2342       | 3  | V  | 19 | 1876.9252      | 938.9665        |
| 484.2771       | 4  | N  | 18 | 1777.8568      | 889.4323        |
| 613.3197       | 5  | E  | 17 | 1663.8139      | 832.4109        |
| 742.3623       | 6  | E  | 16 | 1534.7713      | 767.8896        |
| 799.3837       | 7  | G  | 15 | 1405.7287      | 703.3683        |
| 886.4158       | 8  | S  | 14 | 1348.7072      | 674.8575        |
| 1015.4584      | 9  | E  | 13 | 1261.6752      | 631.3415        |
| 1086.4955      | 10 | A  | 12 | 1132.6326      | 566.8202        |
| 1157.5326      | 11 | A  | 11 | 1061.5955      | 531.3017        |
| 1228.5697      | 12 | A  | 10 | 990.5584       | 495.7831        |
| 1315.6017      | 13 | S  | 9  | 919.5213       | 460.2645        |
| 1416.6494      | 14 | T  | 8  | 832.4892       | 416.7485        |
| 1503.6814      | 15 | S  | 7  | 731.4416       | 366.2247        |
| 1602.7499      | 16 | V  | 6  | 644.4095       | 322.7087        |
| 1701.8183      | 17 | V  | 5  | 545.3411       | 273.1745        |
| 1814.9023      | 18 | I  | 4  | 446.2727       | 223.6403        |
| 1915.9500      | 19 | T  | 3  | 333.1886       | 167.0982        |
| 1972.9715      | 20 | G  | 2  | 232.1410       | 116.5744        |
|                | 21 | R  | 1  | 175.1195       | 88.0637         |

N-term:+29.04

LFGDKLCAIPNLR, MH+ 1584.9572, m/z 528.9906  
 H OSG39 P180811 230811-s1.05900.05900.3.dta

X-range:

-

MassTol: Y-zoom:

MassType:

AVG  MONO

Axis:

1  2

Label:

I  M  -

Ions:

a  +  2+  3+

b  +  2+  3+

c  +  2+  3+

x  +  2+  3+

y  +  2+  3+

z  +  2+  3+

hide H<sub>2</sub>O/NH<sub>3</sub>

zoom 112-122

GO

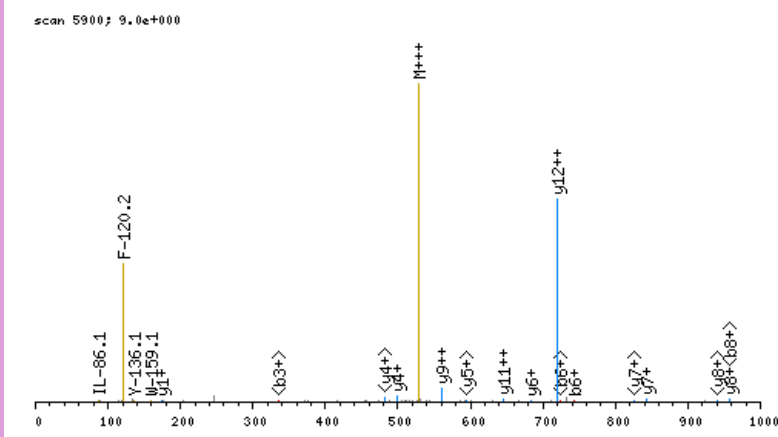

click image to zoom in; click top corners to zoom out [\[precursor±\]](#)

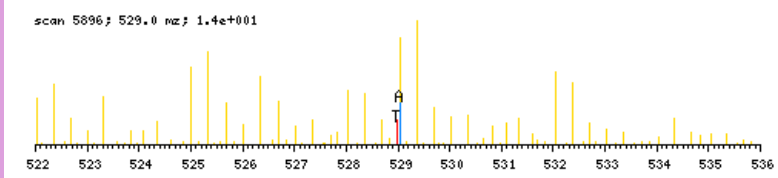

zoomed in precursor plot; T=theoretical m/z, A=acquired m/z

| b <sup>+</sup> | #  | AA # | y <sup>+</sup> | y <sup>2+</sup> |
|----------------|----|------|----------------|-----------------|
| 148.1550       | 1  | L 13 |                |                 |
| 295.2234       | 2  | F 12 | 1437.8100      | 719.4089        |
| 352.2448       | 3  | G 11 | 1290.7416      | 645.8747        |
| 467.2718       | 4  | D 10 | 1233.7201      | 617.3640        |
| 629.4299       | 5  | K 9  | 1118.6932      | 559.8505        |
| 742.5139       | 6  | L 8  | 956.5351       | 478.7715        |
| 902.5445       | 7  | C 7  | 843.4510       | 422.2294        |
| 973.5817       | 8  | A 6  | 683.4204       | 342.2141        |
| 1086.6657      | 9  | I 5  | 612.3833       | 306.6956        |
| 1183.7185      | 10 | P 4  | 499.2993       | 250.1535        |
| 1297.7614      | 11 | N 3  | 402.2465       | 201.6272        |
| 1410.8455      | 12 | L 2  | 288.2036       | 144.6057        |
|                | 13 | R 1  | 175.1195       | 88.0637         |

N-term:+35.07 K(5):+162.16  
 C(7):+160.03

LGFDPEAEQPVR, MH+ 1385.7065, m/z 462.5737  
 L OSG37 P180811 230811-s1.04921.04921.3.dta

X-range:

-

MassTol: Y-zoom:

MassType:

AVG  MONO

Axis:

1  2

Label:

I  M  -

Ions:

a  +  2+  3+

b  +  2+  3+

c  +  2+  3+

x  +  2+  3+

y  +  2+  3+

z  +  2+  3+

hide H<sub>2</sub>O/NH<sub>3</sub>

zoom 112-122

GO

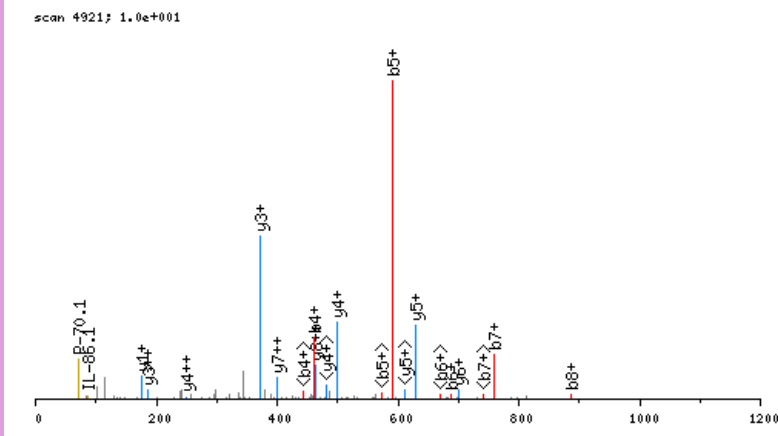

click image to zoom in; click top corners to zoom out [\[precursor±\]](#)

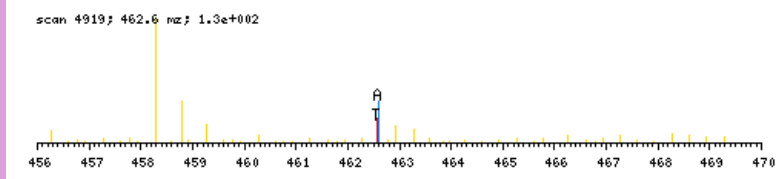

zoomed in precursor plot; T=theoretical m/z, A=acquired m/z

| b <sup>+</sup> | #  | AA | #  | y <sup>+</sup> | y <sup>2+</sup> |
|----------------|----|----|----|----------------|-----------------|
| 142.1232       | 1  | L  | 12 |                |                 |
| 199.1446       | 2  | G  | 11 | 1244.5911      | 622.7995        |
| 346.2130       | 3  | F  | 10 | 1187.5697      | 594.2888        |
| 461.2400       | 4  | D  | 9  | 1040.5013      | 520.7545        |
| 590.2826       | 5  | E  | 8  | 925.4743       | 463.2411        |
| 687.3353       | 6  | P  | 7  | 796.4317       | 398.7198        |
| 758.3725       | 7  | A  | 6  | 699.3790       | 350.1934        |
| 887.4150       | 8  | E  | 5  | 628.3418       | 314.6748        |
| 1015.4736      | 9  | Q  | 4  | 499.2993       | 250.1535        |
| 1112.5264      | 10 | P  | 3  | 371.2407       | 186.1243        |
| 1211.5948      | 11 | V  | 2  | 274.1879       | 137.5979        |
|                | 12 | R  | 1  | 175.1195       | 88.0637         |

N-term:+29.04

LGTLDPSSLDETAYER, MH+ 1908.9191, m/z 636.9779  
 L OSG37 P180811 230811-s1.05898.05898.3.dta

X-range:

-

MassTol: Y-zoom:

MassType:

AVG  MONO

Axis:

1  2

Label:

I  M  -

Ions:

a  +  2+  3+

b  +  2+  3+

c  +  2+  3+

x  +  2+  3+

y  +  2+  3+

z  +  2+  3+

hide H<sub>2</sub>O/NH<sub>3</sub>

zoom 112-122

GO

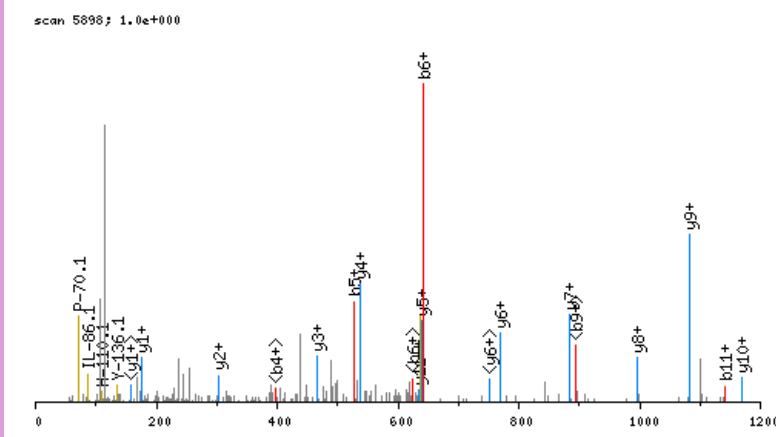

click image to zoom in; click top corners to zoom out [\[precursor±\]](#)

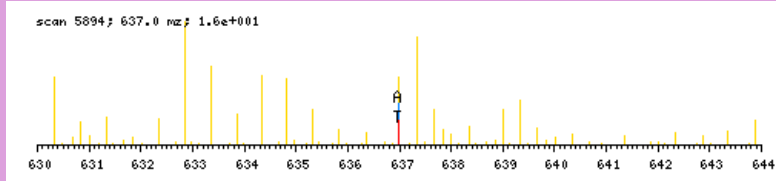

zoomed in precursor plot; T=theoretical m/z, A=acquired m/z

| b <sup>+</sup> | #  | AA # | y <sup>+</sup> | y <sup>2+</sup> |
|----------------|----|------|----------------|-----------------|
| 142.1232       | 1  | L 17 |                |                 |
| 199.1446       | 2  | G 16 | 1767.8037      | 884.4058        |
| 300.1923       | 3  | T 15 | 1710.7822      | 855.8950        |
| 413.2764       | 4  | L 14 | 1609.7346      | 805.3712        |
| 528.3033       | 5  | D 13 | 1496.6505      | 748.8292        |
| 642.3462       | 6  | N 12 | 1381.6236      | 691.3157        |
| 739.3990       | 7  | P 11 | 1267.5806      | 634.2942        |
| 826.4310       | 8  | S 10 | 1170.5279      | 585.7678        |
| 913.4631       | 9  | S 9  | 1083.4958      | 542.2518        |
| 1026.5471      | 10 | L 8  | 996.4638       | 498.7358        |
| 1141.5741      | 11 | D 7  | 883.3798       | 442.1938        |
| 1270.6167      | 12 | E 6  | 768.3528       | 384.6803        |
| 1371.6643      | 13 | T 5  | 639.3102       | 320.1590        |
| 1442.7015      | 14 | A 4  | 538.2625       | 269.6352        |
| 1605.7648      | 15 | Y 3  | 467.2254       | 234.1166        |
| 1734.8074      | 16 | E 2  | 304.1621       | 152.5850        |
|                | 17 | R 1  | 175.1195       | 88.0637         |

N-term:+29.04



LHPMGIDGPIDSFAPFHNVCPR, MH+ 2625.2918, m/z 657.0784  
 H OSG36 P180811 230811-s1.04085.04085.4.dta

scan 4085; 2.5e+000

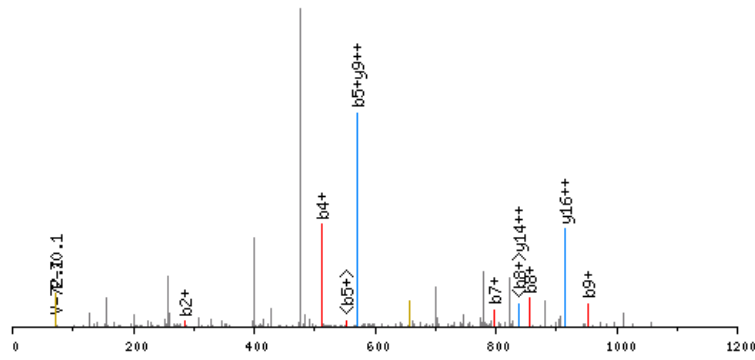

click image to zoom in; click top corners to zoom out [precursor±]

scan 4084; 657.1 m/z; 1.4e+001

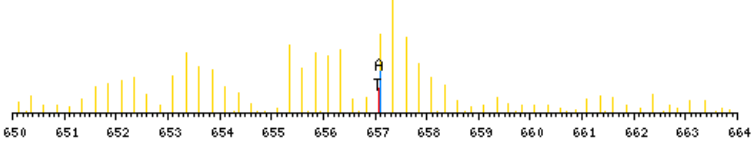

zoomed in precursor plot; T=theoretical m/z, A=acquired m/z

X-range:

-

MassTol: Y-zoom:

MassType:

AVG  MONO

Axis:

1  2

Label:

I  M  -

Ions:

a  +  2+  3+

b  +  2+  3+

c  +  2+  3+

x  +  2+  3+

y  +  2+  3+

z  +  2+  3+

hide H<sub>2</sub>O/NH<sub>3</sub>

zoom 112-122

GO

| b <sup>+</sup> | #  | AA # | y <sup>+</sup> | y <sup>2+</sup> |
|----------------|----|------|----------------|-----------------|
| 148.1550       | 1  | L 23 |                |                 |
| 285.2139       | 2  | H 22 | 2478.1446      | 1239.5762       |
| 382.2666       | 3  | P 21 | 2341.0857      | 1171.0468       |
| 513.3071       | 4  | M 20 | 2244.0330      | 1122.5204       |
| 570.3286       | 5  | G 19 | 2112.9925      | 1057.0002       |
| 683.4127       | 6  | I 18 | 2055.9710      | 1028.4894       |
| 798.4396       | 7  | D 17 | 1942.8870      | 971.9474        |
| 855.4611       | 8  | G 16 | 1827.8600      | 914.4339        |
| 952.5138       | 9  | P 15 | 1770.8386      | 885.9232        |
| 1065.5979      | 10 | I 14 | 1673.7858      | 837.3968        |
| 1180.6248      | 11 | D 13 | 1560.7017      | 780.8548        |
| 1267.6569      | 12 | S 12 | 1445.6748      | 723.3413        |
| 1414.7253      | 13 | F 11 | 1358.6428      | 679.8253        |
| 1485.7624      | 14 | A 10 | 1211.5743      | 606.2911        |
| 1582.8151      | 15 | P 9  | 1140.5372      | 570.7725        |
| 1729.8836      | 16 | F 8  | 1043.4845      | 522.2461        |
| 1866.9425      | 17 | H 7  | 896.4160       | 448.7119        |
| 1980.9854      | 18 | N 6  | 759.3571       | 380.1825        |
| 2080.0538      | 19 | V 5  | 645.3142       | 323.1610        |
| 2194.0967      | 20 | N 4  | 546.2458       | 273.6268        |
| 2354.1273      | 21 | C 3  | 432.2029       | 216.6053        |
| 2451.1801      | 22 | P 2  | 272.1723       | 136.5900        |
|                | 23 | R 1  | 175.1195       | 88.0637         |

N-term:+35.07 C(21):+160.03

LHVYSAISSKKKELLR, MH+ 2227.3907, m/z 557.6031  
 L OSG37 P180811 230811-s1.05522.05522.4.dta

X-range:

-

MassTol: Y-zoom:

MassType:

AVG  MONO

Axis:

1  2

Label:

I  M  -

Ions:

a  +  2+  3+

b  +  2+  3+

c  +  2+  3+

x  +  2+  3+

y  +  2+  3+

z  +  2+  3+

hide H<sub>2</sub>O/NH<sub>3</sub>

zoom 112-122

GO

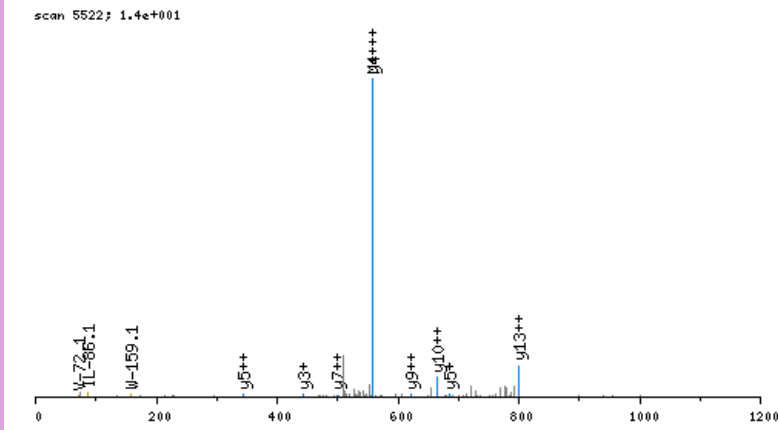

click image to zoom in; click top corners to zoom out [\[precursor±\]](#)

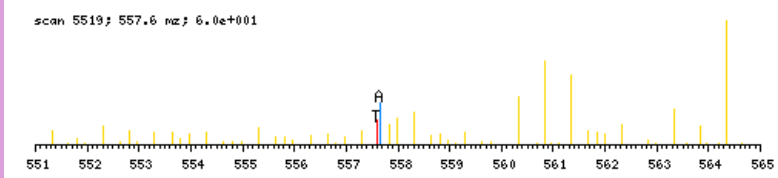

zoomed in precursor plot; T=theoretical m/z, A=acquired m/z

| b <sup>+</sup> | #  | AA | #  | y <sup>+</sup> | y <sup>2+</sup> |
|----------------|----|----|----|----------------|-----------------|
| 142.1232       | 1  | L  | 18 |                |                 |
| 279.1821       | 2  | H  | 17 | 2086.2754      | 1043.6416       |
| 378.2505       | 3  | V  | 16 | 1949.2165      | 975.1121        |
| 541.3138       | 4  | Y  | 15 | 1850.1480      | 925.5779        |
| 628.3458       | 5  | S  | 14 | 1687.0847      | 844.0463        |
| 699.3830       | 6  | A  | 13 | 1600.0527      | 800.5303        |
| 812.4670       | 7  | I  | 12 | 1529.0156      | 765.0117        |
| 899.4991       | 8  | S  | 11 | 1415.9315      | 708.4697        |
| 986.5311       | 9  | S  | 10 | 1328.8995      | 664.9537        |
| 1073.5631      | 10 | S  | 9  | 1241.8675      | 621.4376        |
| 1229.6894      | 11 | K  | 8  | 1154.8354      | 577.9216        |
| 1385.8157      | 12 | K  | 7  | 998.7091       | 499.8585        |
| 1541.9420      | 13 | K  | 6  | 842.5828       | 421.7953        |
| 1670.9846      | 14 | E  | 5  | 686.4565       | 343.7322        |
| 1784.0687      | 15 | L  | 4  | 557.4139       | 279.2109        |
| 1897.1527      | 16 | L  | 3  | 444.3299       | 222.6688        |
| 2053.2790      | 17 | K  | 2  | 331.2458       | 166.1268        |
|                | 18 | R  | 1  | 175.1195       | 88.0637         |

N-term: +29.04 K(11): +156.13  
 K(12): +156.13 K(13): +156.13  
 K(17): +156.13

LKGGDDLDPNYVLSSR, MH+ 1804.9445, m/z 602.3197  
 L OSG40 P180811 230811-s1.06155.06155.3.dta

X-range:

-

MassTol: Y-zoom:

MassType:

AVG  MONO

Axis:

1  2

Label:

I  M  -

Ions:

a  +  2+  3+

b  +  2+  3+

c  +  2+  3+

x  +  2+  3+

y  +  2+  3+

z  +  2+  3+

hide H<sub>2</sub>O/NH<sub>3</sub>

zoom 112-122

GO

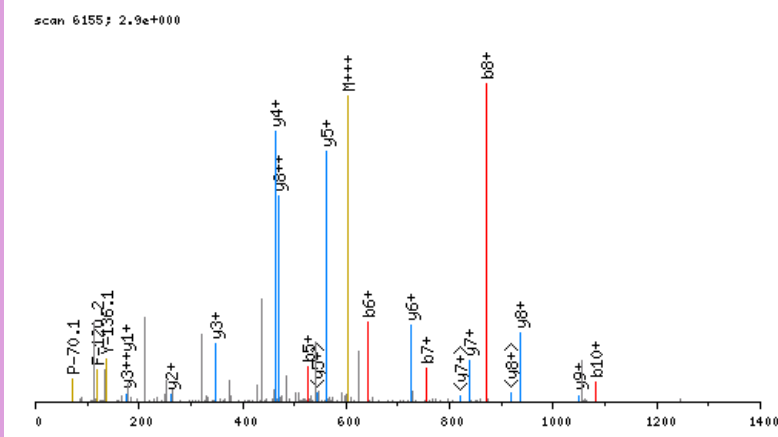

click image to zoom in; click top corners to zoom out [\[precursor±\]](#)

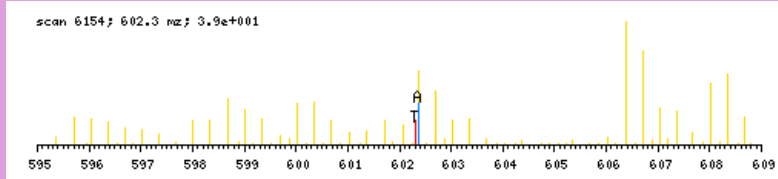

zoomed in precursor plot; T=theoretical m/z, A=acquired m/z

| b <sup>+</sup> | #  | AA # | y <sup>+</sup> | y <sup>2+</sup> |
|----------------|----|------|----------------|-----------------|
| 142.1232       | 1  | L 16 |                |                 |
| 298.2495       | 2  | K 15 | 1663.8292      | 832.4185        |
| 355.2709       | 3  | G 14 | 1507.7029      | 754.3554        |
| 412.2924       | 4  | G 13 | 1450.6814      | 725.8446        |
| 527.3193       | 5  | D 12 | 1393.6599      | 697.3339        |
| 642.3463       | 6  | D 11 | 1278.6330      | 639.8204        |
| 755.4303       | 7  | L 10 | 1163.6061      | 582.3069        |
| 870.4573       | 8  | D 9  | 1050.5220      | 525.7649        |
| 967.5100       | 9  | P 8  | 935.4951       | 468.2514        |
| 1081.5530      | 10 | N 7  | 838.4423       | 419.7251        |
| 1244.6163      | 11 | Y 6  | 724.3994       | 362.7036        |
| 1343.6847      | 12 | V 5  | 561.3360       | 281.1719        |
| 1456.7688      | 13 | L 4  | 462.2676       | 231.6377        |
| 1543.8008      | 14 | S 3  | 349.1836       | 175.0957        |
| 1630.8328      | 15 | S 2  | 262.1515       | 131.5797        |
|                | 16 | R 1  | 175.1195       | 88.0637         |

N-term:+29.04 K(2):+156.13

LKTIEGIVMAADSAR, MH+ 1630.9202, m/z 544.3116  
 L OSG39 P180811 230811-s1.05773.05773.3.dta

X-range:

-

MassTol: Y-zoom:

MassType:

AVG  MONO

Axis:

1  2

Label:

I  M  -

Ions:

a  +  2+  3+

b  +  2+  3+

c  +  2+  3+

x  +  2+  3+

y  +  2+  3+

z  +  2+  3+

hide H<sub>2</sub>O/NH<sub>3</sub>

zoom 112-122

GO

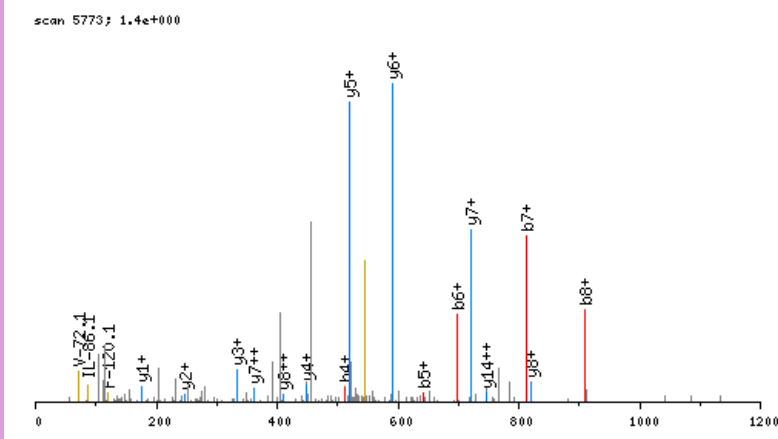

click image to zoom in; click top corners to zoom out [\[precursor±\]](#)

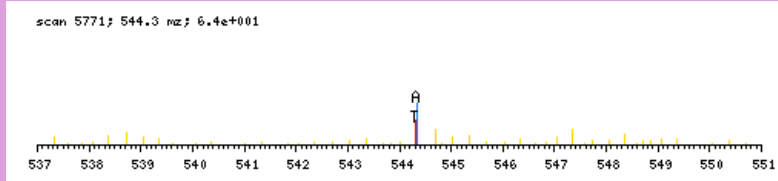

zoomed in precursor plot; T=theoretical m/z, A=acquired m/z

| b <sup>+</sup> | #  | AA # | y <sup>+</sup> | y <sup>2+</sup> |
|----------------|----|------|----------------|-----------------|
| 142.1232       | 1  | L 15 |                |                 |
| 298.2495       | 2  | K 14 | 1489.8049      | 745.4064        |
| 399.2971       | 3  | T 13 | 1333.6786      | 667.3432        |
| 512.3812       | 4  | I 12 | 1232.6309      | 616.8194        |
| 641.4238       | 5  | E 11 | 1119.5468      | 560.2773        |
| 698.4453       | 6  | G 10 | 990.5042       | 495.7560        |
| 811.5293       | 7  | I 9  | 933.4828       | 467.2453        |
| 910.5977       | 8  | V 8  | 820.3987       | 410.7033        |
| 1041.6382      | 9  | M 7  | 721.3303       | 361.1691        |
| 1112.6753      | 10 | A 6  | 590.2898       | 295.6488        |
| 1183.7125      | 11 | A 5  | 519.2527       | 260.1303        |
| 1298.7394      | 12 | D 4  | 448.2156       | 224.6117        |
| 1385.7714      | 13 | S 3  | 333.1886       | 167.0982        |
| 1456.8085      | 14 | A 2  | 246.1566       | 123.5822        |
|                | 15 | R 1  | 175.1195       | 88.0637         |

N-term:+29.04 K(2):+156.13

LLCGEEQGADAALHFNPR, MH+ 2025.9816, m/z 675.9987  
 L OSG39 P180811 230811-s1.04939.04939.3.dta

X-range:

-

MassTol: Y-zoom:

MassType:

AVG  MONO

Axis:

1  2

Label:

I  M  -

Ions:

a  +  2+  3+

b  +  2+  3+

c  +  2+  3+

x  +  2+  3+

y  +  2+  3+

z  +  2+  3+

hide H<sub>2</sub>O/NH<sub>3</sub>

zoom 112-122

GO

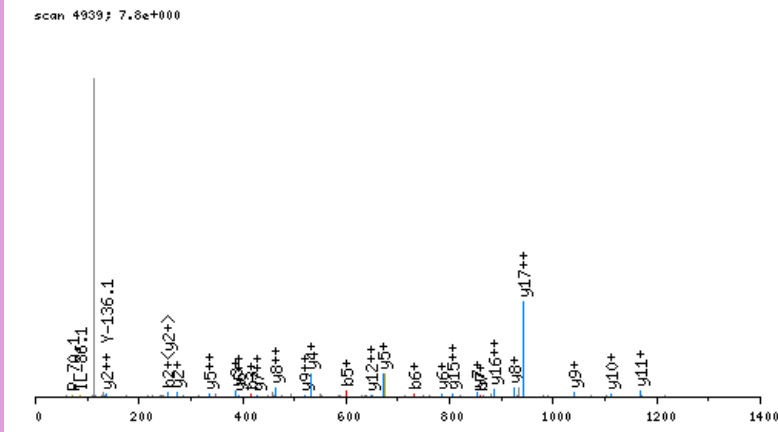

click image to zoom in; click top corners to zoom out [\[precursor±\]](#)

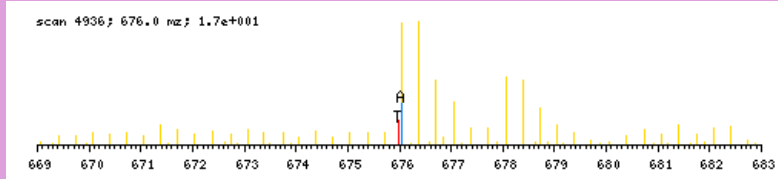

zoomed in precursor plot; T=theoretical m/z, A=acquired m/z

| b <sup>+</sup> | #  | AA | #  | y <sup>+</sup> | y <sup>2+</sup> |
|----------------|----|----|----|----------------|-----------------|
| 142.1232       | 1  | L  | 18 |                |                 |
| 255.2072       | 2  | L  | 17 | 1884.8662      | 942.9370        |
| 415.2378       | 3  | C  | 16 | 1771.7822      | 886.3950        |
| 472.2593       | 4  | G  | 15 | 1611.7516      | 806.3797        |
| 601.3019       | 5  | E  | 14 | 1554.7301      | 777.8690        |
| 730.3445       | 6  | E  | 13 | 1425.6875      | 713.3477        |
| 858.4031       | 7  | Q  | 12 | 1296.6449      | 648.8264        |
| 915.4245       | 8  | G  | 11 | 1168.5863      | 584.7971        |
| 986.4616       | 9  | A  | 10 | 1111.5649      | 556.2863        |
| 1101.4886      | 10 | D  | 9  | 1040.5278      | 520.7678        |
| 1172.5257      | 11 | A  | 8  | 925.5008       | 463.2543        |
| 1243.5628      | 12 | A  | 7  | 854.4637       | 427.7358        |
| 1356.6469      | 13 | L  | 6  | 783.4266       | 392.2172        |
| 1493.7058      | 14 | H  | 5  | 670.3425       | 335.6752        |
| 1640.7742      | 15 | F  | 4  | 533.2836       | 267.1457        |
| 1754.8171      | 16 | N  | 3  | 386.2152       | 193.6115        |
| 1851.8699      | 17 | P  | 2  | 272.1723       | 136.5900        |
|                | 18 | R  | 1  | 175.1195       | 88.0637         |

N-term:+29.04 C(3):+160.03

LLPPDLPDLEPCR, MH+ 1697.8996, m/z 566.6380  
 H OSG37 P180811 230811-s1.07947.07947.3.dta

X-range:

-

MassTol: Y-zoom:

MassType:

AVG  MONO

Axis:

1  2

Label:

I  M  -

Ions:

a  +  2+  3+

b  +  2+  3+

c  +  2+  3+

x  +  2+  3+

y  +  2+  3+

z  +  2+  3+

hide H<sub>2</sub>O/NH<sub>3</sub>

zoom 112-122

GO

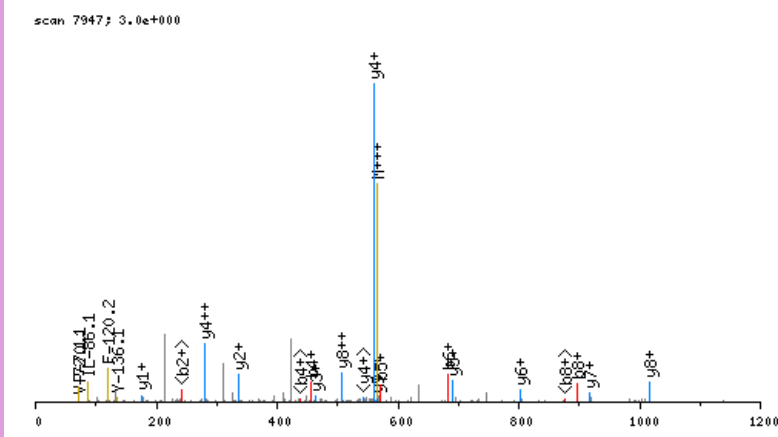

click image to zoom in; click top corners to zoom out [\[precursor±\]](#)

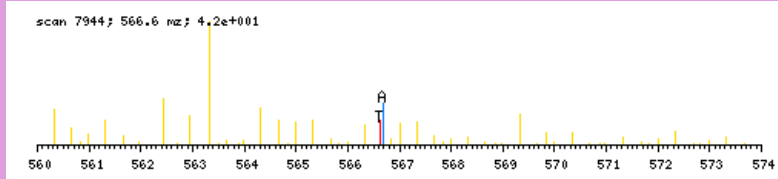

zoomed in precursor plot; T=theoretical m/z, A=acquired m/z

| b <sup>+</sup> | #  | AA # | y <sup>+</sup> | y <sup>2+</sup> |
|----------------|----|------|----------------|-----------------|
| 148.1550       | 1  | L 14 |                |                 |
| 261.2390       | 2  | L 13 | 1550.7524      | 775.8801        |
| 358.2918       | 3  | P 12 | 1437.6684      | 719.3381        |
| 455.3446       | 4  | P 11 | 1340.6156      | 670.8117        |
| 570.3715       | 5  | D 10 | 1243.5628      | 622.2853        |
| 683.4556       | 6  | L 9  | 1128.5359      | 564.7719        |
| 780.5083       | 7  | P 8  | 1015.4518      | 508.2298        |
| 895.5353       | 8  | D 7  | 918.3991       | 459.7034        |
| 1008.6193      | 9  | L 6  | 803.3721       | 402.1900        |
| 1137.6619      | 10 | E 5  | 690.2881       | 345.6479        |
| 1234.7147      | 11 | P 4  | 561.2455       | 281.1266        |
| 1363.7573      | 12 | E 3  | 464.1927       | 232.6003        |
| 1523.7879      | 13 | C 2  | 335.1501       | 168.0790        |
|                | 14 | R 1  | 175.1195       | 88.0637         |

N-term:+35.07 C(13):+160.03

LNSSHLSLFHGSR, MH+ 1488.8135, m/z 496.9427  
 H OSG40 P180811 230811-s1.03971.03971.3.dta

scan 3971; 1.9e+001

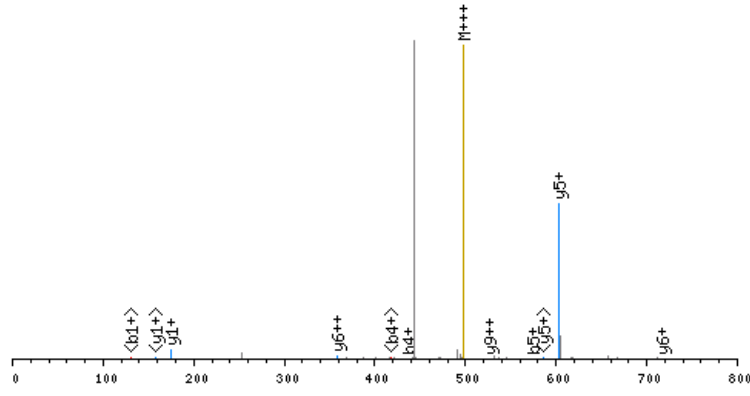

click image to zoom in; click top corners to zoom out [\[precursor±\]](#)

scan 3969; 496.9 m/z; 3.0e+001

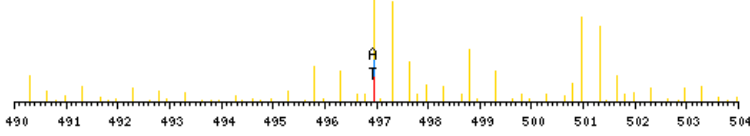

zoomed in precursor plot; T=theoretical m/z, A=acquired m/z

X-range:

-

MassTol: Y-zoom:

MassType:

AVG  MONO

Axis:

1  2

Label:

I  M  -

Ions:

a  +  2+  3+

b  +  2+  3+

c  +  2+  3+

x  +  2+  3+

y  +  2+  3+

z  +  2+  3+

hide H<sub>2</sub>O/NH<sub>3</sub>

zoom 112-122

GO

| b <sup>+</sup> | #  | AA # | y <sup>+</sup> | y <sup>2+</sup> |
|----------------|----|------|----------------|-----------------|
| 148.1550       | 1  | L 13 |                |                 |
| 262.1979       | 2  | N 12 | 1341.6664      | 671.3371        |
| 349.2299       | 3  | S 11 | 1227.6234      | 614.3156        |
| 436.2619       | 4  | S 10 | 1140.5914      | 570.7996        |
| 573.3209       | 5  | H 9  | 1053.5594      | 527.2836        |
| 686.4049       | 6  | L 8  | 916.5005       | 458.7542        |
| 773.4370       | 7  | S 7  | 803.4164       | 402.2121        |
| 886.5210       | 8  | L 6  | 716.3844       | 358.6961        |
| 1033.5894      | 9  | F 5  | 603.3003       | 302.1541        |
| 1170.6483      | 10 | H 4  | 456.2319       | 228.6199        |
| 1227.6698      | 11 | G 3  | 319.1730       | 160.0904        |
| 1314.7018      | 12 | S 2  | 262.1515       | 131.5797        |
|                | 13 | R 1  | 175.1195       | 88.0637         |

N-term:+35.07

LPCVEDYLSAILNR, MH+ 1690.8837, m/z 564.2994  
 L OSG37 P180811 230811-s1.08893.08893.3.dta

X-range:

-

MassTol: Y-zoom:

MassType:

AVG  MONO

Axis:

1  2

Label:

I  M  -

Ions:

a  +  2+  3+

b  +  2+  3+

c  +  2+  3+

x  +  2+  3+

y  +  2+  3+

z  +  2+  3+

hide H<sub>2</sub>O/NH<sub>3</sub>

zoom 112-122

GO

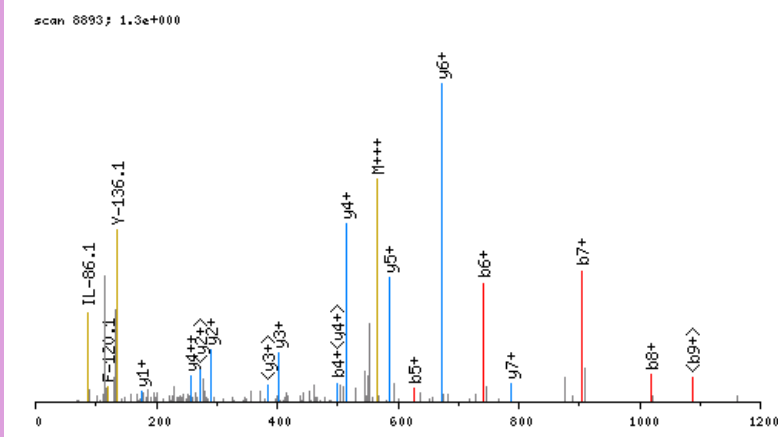

click image to zoom in; click top corners to zoom out [\[precursor±\]](#)

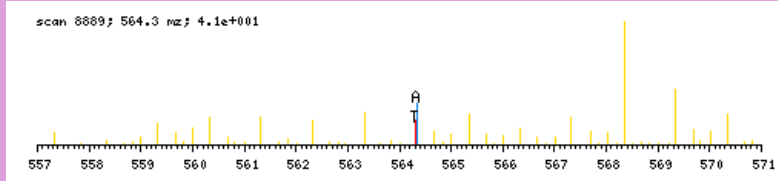

zoomed in precursor plot; T=theoretical m/z, A=acquired m/z

| b <sup>+</sup> | #  | AA # | y <sup>+</sup> | y <sup>2+</sup> |
|----------------|----|------|----------------|-----------------|
| 142.1232       | 1  | L 14 |                |                 |
| 239.1759       | 2  | P 13 | 1549.7684      | 775.3881        |
| 399.2065       | 3  | C 12 | 1452.7156      | 726.8617        |
| 498.2749       | 4  | V 11 | 1292.6850      | 646.8464        |
| 627.3175       | 5  | E 10 | 1193.6166      | 597.3122        |
| 742.3445       | 6  | D 9  | 1064.5740      | 532.7909        |
| 905.4078       | 7  | Y 8  | 949.5471       | 475.2775        |
| 1018.4919      | 8  | L 7  | 786.4838       | 393.7458        |
| 1105.5239      | 9  | S 6  | 673.3997       | 337.2038        |
| 1176.5610      | 10 | A 5  | 586.3677       | 293.6877        |
| 1289.6451      | 11 | I 4  | 515.3306       | 258.1692        |
| 1402.7291      | 12 | L 3  | 402.2465       | 201.6272        |
| 1516.7721      | 13 | N 2  | 289.1624       | 145.0851        |
|                | 14 | R 1  | 175.1195       | 88.0637         |

N-term:+29.04 C(3):+160.03



LPNTGKLAGCTVFITGASR, MH+ 2031.1697, m/z 508.5479  
 H OSG39 P180811 230811-s1.05833.05833.4.dta

X-range:

-

MassTol: Y-zoom:

MassType:

AVG  MONO

Axis:

1  2

Label:

I  M  -

Ions:

a  +  2+  3+

b  +  2+  3+

c  +  2+  3+

x  +  2+  3+

y  +  2+  3+

z  +  2+  3+

hide H<sub>2</sub>O/NH<sub>3</sub>

zoom 112-122

GO

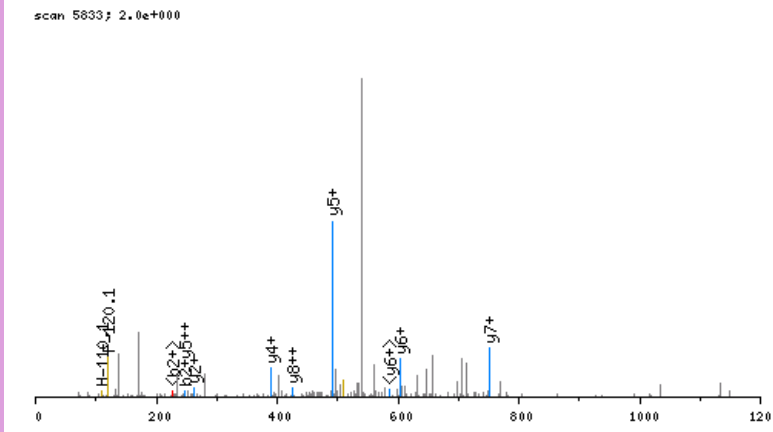

click image to zoom in; click top corners to zoom out [\[precursor±\]](#)

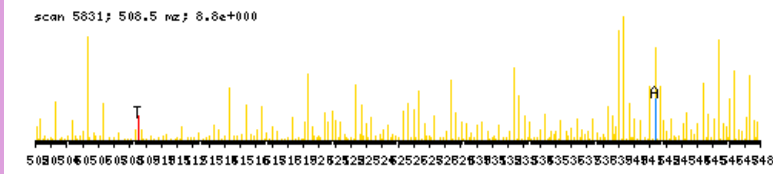

zoomed in precursor plot; T=theoretical m/z, A=acquired m/z

| b <sup>+</sup> | #  | AA # | y <sup>+</sup> | y <sup>2+</sup> |
|----------------|----|------|----------------|-----------------|
| 148.1550       | 1  | L 19 |                |                 |
| 245.2077       | 2  | P 18 | 1884.0225      | 942.5152        |
| 359.2507       | 3  | N 17 | 1786.9698      | 893.9888        |
| 460.2983       | 4  | T 16 | 1672.9268      | 836.9673        |
| 517.3198       | 5  | G 15 | 1571.8792      | 786.4435        |
| 679.4779       | 6  | K 14 | 1514.8577      | 757.9328        |
| 792.5620       | 7  | L 13 | 1352.6996      | 676.8537        |
| 863.5991       | 8  | A 12 | 1239.6155      | 620.3117        |
| 920.6205       | 9  | G 11 | 1168.5784      | 584.7931        |
| 1080.6511      | 10 | C 10 | 1111.5570      | 556.2824        |
| 1181.6988      | 11 | T 9  | 951.5264       | 476.2671        |
| 1280.7672      | 12 | V 8  | 850.4787       | 425.7433        |
| 1427.8356      | 13 | F 7  | 751.4103       | 376.2090        |
| 1540.9197      | 14 | I 6  | 604.3418       | 302.6748        |
| 1641.9674      | 15 | T 5  | 491.2578       | 246.1328        |
| 1698.9889      | 16 | G 4  | 390.2101       | 195.6090        |
| 1770.0260      | 17 | A 3  | 333.1886       | 167.0982        |
| 1857.0580      | 18 | S 2  | 262.1515       | 131.5797        |
|                | 19 | R 1  | 175.1195       | 88.0637         |

N-term:+35.07 K(6):+162.16  
 C(10):+160.03

LPSQVTEMFNQGR, MH+ 1534.7688, m/z 512.2611  
 L OSG37 P180811 230811-s1.06327.06327.3.dta

X-range:

-

MassTol: Y-zoom:

MassType:

AVG  MONO

Axis:

1  2

Label:

I  M  -

Ions:

a  +  2+  3+

b  +  2+  3+

c  +  2+  3+

x  +  2+  3+

y  +  2+  3+

z  +  2+  3+

hide H<sub>2</sub>O/NH<sub>3</sub>

zoom 112-122

GO

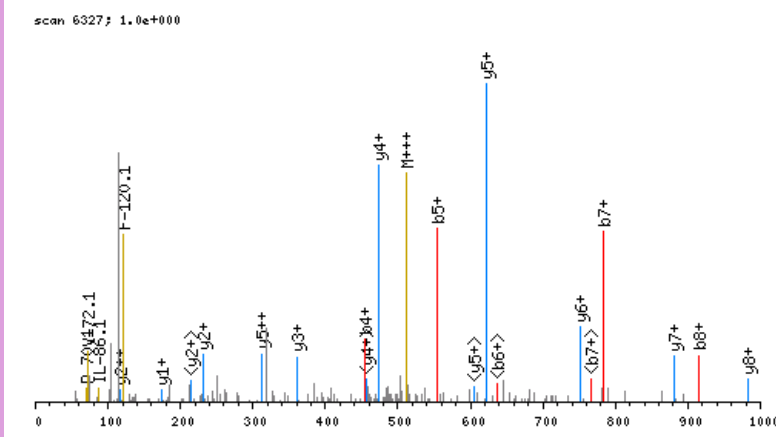

click image to zoom in; click top corners to zoom out [\[precursor±\]](#)

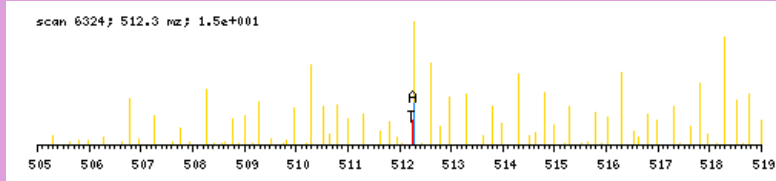

zoomed in precursor plot; T=theoretical m/z, A=acquired m/z

| b <sup>+</sup> | #  | AA # | y <sup>+</sup> | y <sup>2+</sup> |
|----------------|----|------|----------------|-----------------|
| 142.1232       | 1  | L 13 |                |                 |
| 239.1759       | 2  | P 12 | 1393.6534      | 697.3306        |
| 326.2080       | 3  | S 11 | 1296.6007      | 648.8042        |
| 454.2665       | 4  | Q 10 | 1209.5686      | 605.2882        |
| 553.3349       | 5  | V 9  | 1081.5101      | 541.2589        |
| 654.3826       | 6  | T 8  | 982.4416       | 491.7247        |
| 783.4252       | 7  | E 7  | 881.3940       | 441.2009        |
| 914.4657       | 8  | M 6  | 752.3514       | 376.6796        |
| 1061.5341      | 9  | F 5  | 621.3109       | 311.1594        |
| 1175.5770      | 10 | N 4  | 474.2425       | 237.6251        |
| 1303.6356      | 11 | Q 3  | 360.1995       | 180.6037        |
| 1360.6571      | 12 | G 2  | 232.1410       | 116.5744        |
|                | 13 | R 1  | 175.1195       | 88.0637         |

N-term:+29.04

LQCYECYGVPIETSCPAVTCR, MH+ 2597.1718, m/z 866.3955  
 H\_OSG37\_P180811\_230811-s1.06543.06543.3.dta

X-range:

-

MassTol: Y-zoom:

MassType:

AVG  MONO

Axis:

1  2

Label:

I  M  -

Ions:

a  +  2+  3+

b  +  2+  3+

c  +  2+  3+

x  +  2+  3+

y  +  2+  3+

z  +  2+  3+

hide H<sub>2</sub>O/NH<sub>3</sub>

zoom 112-122

GO

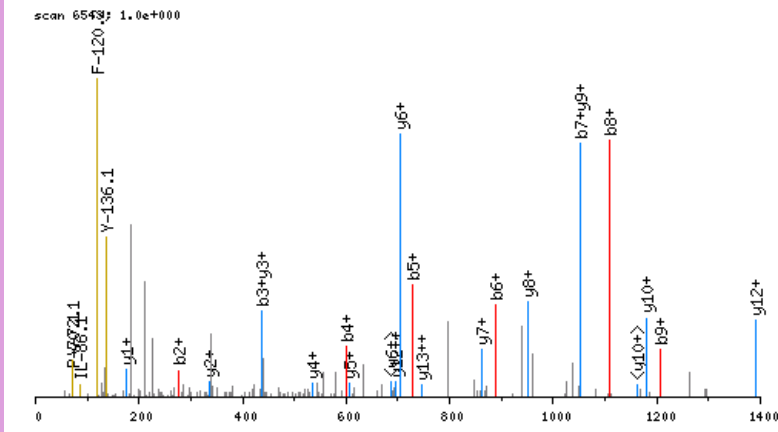

click image to zoom in; click top corners to zoom out [\[precursor±\]](#)

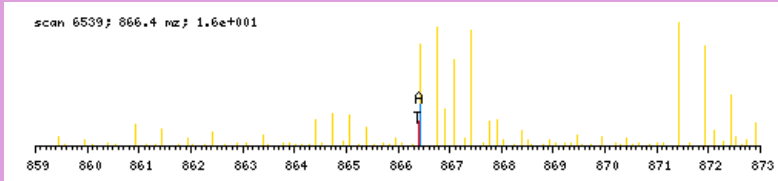

zoomed in precursor plot; T=theoretical m/z, A=acquired m/z

| b <sup>+</sup> | #  | AA | #  | y <sup>+</sup> | y <sup>2+</sup> |
|----------------|----|----|----|----------------|-----------------|
| 148.1550       | 1  | L  | 21 |                |                 |
| 276.2135       | 2  | Q  | 20 | 2450.0247      | 1225.5163       |
| 436.2441       | 3  | C  | 19 | 2321.9661      | 1161.4870       |
| 599.3075       | 4  | Y  | 18 | 2161.9355      | 1081.4717       |
| 728.3501       | 5  | E  | 17 | 1998.8722      | 999.9400        |
| 888.3807       | 6  | C  | 16 | 1869.8296      | 935.4187        |
| 1051.4440      | 7  | Y  | 15 | 1709.7990      | 855.4034        |
| 1108.4655      | 8  | G  | 14 | 1546.7357      | 773.8718        |
| 1207.5339      | 9  | V  | 13 | 1489.7142      | 745.3610        |
| 1304.5866      | 10 | P  | 12 | 1390.6458      | 695.8268        |
| 1417.6707      | 11 | I  | 11 | 1293.5930      | 647.3004        |
| 1546.7133      | 12 | E  | 10 | 1180.5090      | 590.7584        |
| 1647.7610      | 13 | T  | 9  | 1051.4664      | 526.2371        |
| 1734.7930      | 14 | S  | 8  | 950.4187       | 475.7133        |
| 1894.8236      | 15 | C  | 7  | 863.3867       | 432.1972        |
| 1991.8764      | 16 | P  | 6  | 703.3561       | 352.1819        |
| 2062.9135      | 17 | A  | 5  | 606.3033       | 303.6556        |
| 2161.9819      | 18 | V  | 4  | 535.2662       | 268.1370        |
| 2263.0296      | 19 | T  | 3  | 436.1978       | 218.6028        |
| 2423.0602      | 20 | C  | 2  | 335.1501       | 168.0790        |
|                | 21 | R  | 1  | 175.1195       | 88.0637         |

N-term:+35.07 C(3):+160.03  
 C(6):+160.03 C(15):+160.03  
 C(20):+160.03

LQEDSLNVADLSSLR, MH+ 1693.9184, m/z 565.3110  
 H OSG37 P180811 230811-s1.07438.07438.3.dta

scan 7438; 6.3e+000

X-range:

-

MassTol: Y-zoom:

MassType:

AVG  MONO

Axis:

1  2

Label:

I  M  -

Ions:

a  +  2+  3+

b  +  2+  3+

c  +  2+  3+

x  +  2+  3+

y  +  2+  3+

z  +  2+  3+

hide H<sub>2</sub>O/NH<sub>3</sub>

zoom 112-122

GO

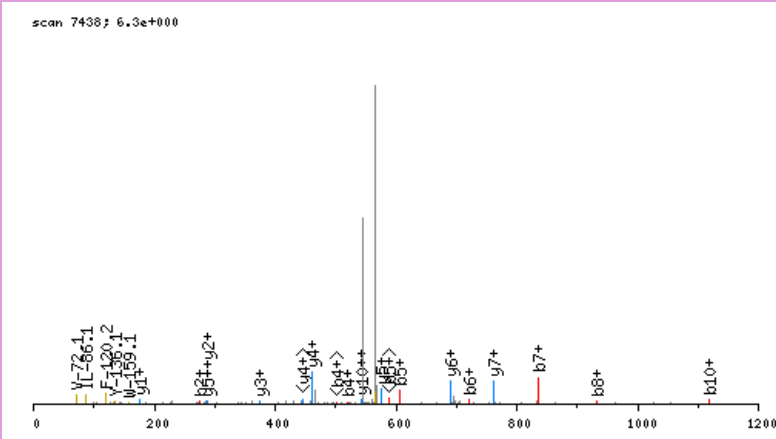

click image to zoom in; click top corners to zoom out [\[precursor±\]](#)

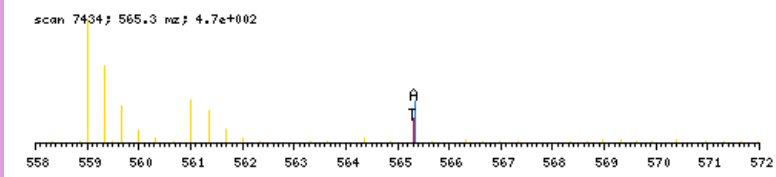

zoomed in precursor plot; T=theoretical m/z, A=acquired m/z

| b <sup>+</sup> | #  | AA # | y <sup>+</sup> | y <sup>2+</sup> |
|----------------|----|------|----------------|-----------------|
| 148.1550       | 1  | L 15 |                |                 |
| 276.2135       | 2  | Q 14 | 1546.7713      | 773.8896        |
| 405.2561       | 3  | E 13 | 1418.7127      | 709.8603        |
| 520.2831       | 4  | D 12 | 1289.6701      | 645.3390        |
| 607.3151       | 5  | S 11 | 1174.6432      | 587.8255        |
| 720.3992       | 6  | L 10 | 1087.6111      | 544.3095        |
| 834.4421       | 7  | N 9  | 974.5271       | 487.7675        |
| 933.5105       | 8  | V 8  | 860.4842       | 430.7460        |
| 1004.5476      | 9  | A 7  | 761.4157       | 381.2118        |
| 1119.5746      | 10 | D 6  | 690.3786       | 345.6932        |
| 1232.6586      | 11 | L 5  | 575.3517       | 288.1798        |
| 1319.6907      | 12 | S 4  | 462.2676       | 231.6377        |
| 1406.7227      | 13 | S 3  | 375.2356       | 188.1217        |
| 1519.8068      | 14 | L 2  | 288.2036       | 144.6057        |
|                | 15 | R 1  | 175.1195       | 88.0637         |

N-term:+35.07

LQEILSDGKGDPNKPSGFR, MH+ 2271.1985, m/z 568.5551  
 L OSG40 P180811 230811-s1.04922.04922.4.dta

X-range:

-

MassTol: Y-zoom:

MassType:

AVG  MONO

Axis:

1  2

Label:

I  M  -

Ions:

a  +  2+  3+

b  +  2+  3+

c  +  2+  3+

x  +  2+  3+

y  +  2+  3+

z  +  2+  3+

hide H<sub>2</sub>O/NH<sub>3</sub>

zoom 112-122

GO

scan 4922; 5.1e+000

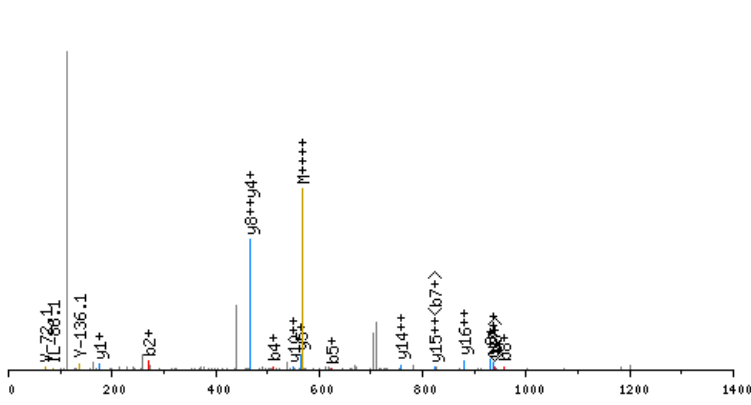

click image to zoom in; click top corners to zoom out [\[precursor±\]](#)

scan 4919; 568.6 m/z; 1.1e+001

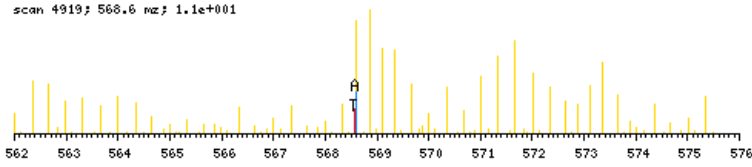

zoomed in precursor plot; T=theoretical m/z, A=acquired m/z

| b <sup>+</sup> | #  | AA | #  | y <sup>+</sup> | y <sup>2+</sup> |
|----------------|----|----|----|----------------|-----------------|
| 142.1232       | 1  | L  | 20 |                |                 |
| 270.1817       | 2  | Q  | 19 | 2130.0832      | 1065.5455       |
| 399.2243       | 3  | E  | 18 | 2002.0246      | 1001.5162       |
| 512.3084       | 4  | I  | 17 | 1872.9820      | 936.9949        |
| 625.3925       | 5  | L  | 16 | 1759.8980      | 880.4529        |
| 754.4351       | 6  | E  | 15 | 1646.8139      | 823.9109        |
| 841.4671       | 7  | S  | 14 | 1517.7713      | 759.3896        |
| 956.4940       | 8  | D  | 13 | 1430.7393      | 715.8736        |
| 1013.5155      | 9  | G  | 12 | 1315.7123      | 658.3601        |
| 1169.6418      | 10 | K  | 11 | 1258.6909      | 629.8493        |
| 1226.6633      | 11 | G  | 10 | 1102.5646      | 551.7862        |
| 1341.6902      | 12 | D  | 9  | 1045.5431      | 523.2755        |
| 1438.7430      | 13 | P  | 8  | 930.5162       | 465.7620        |
| 1552.7859      | 14 | N  | 7  | 833.4634       | 417.2356        |
| 1708.9122      | 15 | K  | 6  | 719.4205       | 360.2141        |
| 1805.9650      | 16 | P  | 5  | 563.2942       | 282.1510        |
| 1892.9970      | 17 | S  | 4  | 466.2414       | 233.6246        |
| 1950.0184      | 18 | G  | 3  | 379.2094       | 190.1086        |
| 2097.0869      | 19 | F  | 2  | 322.1879       | 161.5979        |
|                | 20 | R  | 1  | 175.1195       | 88.0637         |

N-term: +29.04 K(10): +156.13  
 K(15): +156.13

LQIAATELEKEESR, MH+ 1672.9122, m/z 558.3089  
 L OSG39 P180811 230811-s1.04027.04027.3.dta

X-range:

-

MassTol: Y-zoom:

MassType:

AVG  MONO

Axis:

1  2

Label:

I  M  -

Ions:

a  +  2+  3+

b  +  2+  3+

c  +  2+  3+

x  +  2+  3+

y  +  2+  3+

z  +  2+  3+

hide H<sub>2</sub>O/NH<sub>3</sub>

zoom 112-122

GO

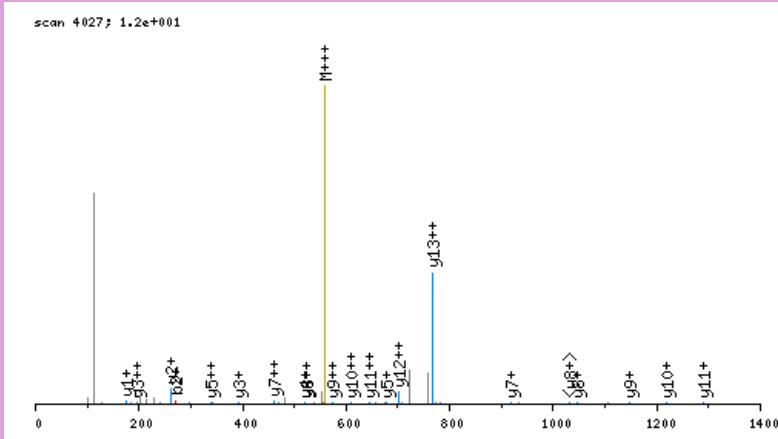

click image to zoom in; click top corners to zoom out [\[precursor±\]](#)

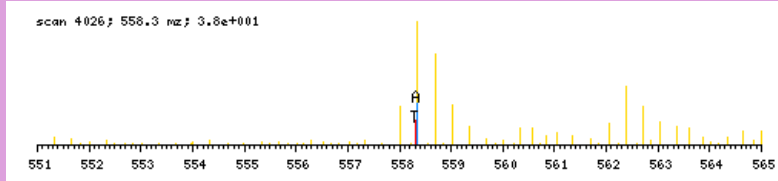

zoomed in precursor plot; T=theoretical m/z, A=acquired m/z

| b <sup>+</sup> | #  | AA # | y <sup>+</sup> | y <sup>2+</sup> |
|----------------|----|------|----------------|-----------------|
| 142.1232       | 1  | L 14 |                |                 |
| 270.1817       | 2  | Q 13 | 1531.7968      | 766.4023        |
| 383.2658       | 3  | I 12 | 1403.7382      | 702.3730        |
| 454.3029       | 4  | A 11 | 1290.6542      | 645.8310        |
| 525.3400       | 5  | A 10 | 1219.6171      | 610.3124        |
| 626.3877       | 6  | T 9  | 1148.5799      | 574.7939        |
| 755.4303       | 7  | E 8  | 1047.5323      | 524.2700        |
| 868.5144       | 8  | L 7  | 918.4897       | 459.7487        |
| 997.5570       | 9  | E 6  | 805.4056       | 403.2067        |
| 1153.6833      | 10 | K 5  | 676.3630       | 338.6854        |
| 1282.7259      | 11 | E 4  | 520.2367       | 260.6223        |
| 1411.7684      | 12 | E 3  | 391.1941       | 196.1010        |
| 1498.8005      | 13 | S 2  | 262.1515       | 131.5797        |
|                | 14 | R 1  | 175.1195       | 88.0637         |

N-term:+29.04 K(10):+156.13

LQSIGTENTEENR, MH+ 1518.7400, m/z 506.9182  
 L OSG37 P180811 230811-s1.02601.02601.3.dta

X-range:

-

MassTol: Y-zoom:

MassType:

AVG  MONO

Axis:

1  2

Label:

I  M  -

Ions:

a  +  2+  3+

b  +  2+  3+

c  +  2+  3+

x  +  2+  3+

y  +  2+  3+

z  +  2+  3+

hide H<sub>2</sub>O/NH<sub>3</sub>

zoom 112-122

GO

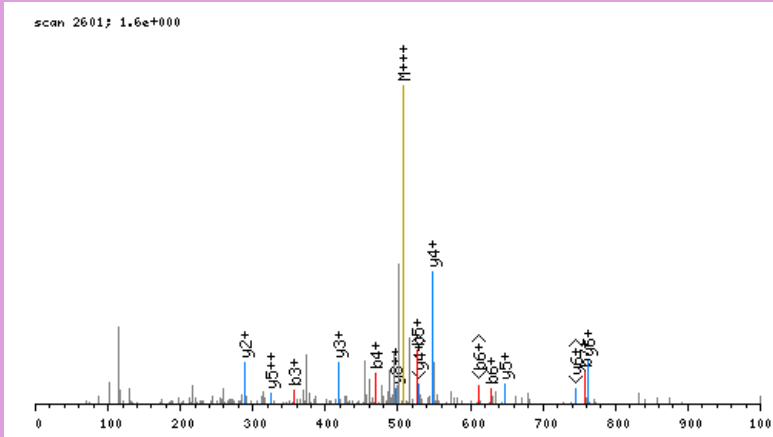

click image to zoom in; click top corners to zoom out [\[precursor±\]](#)

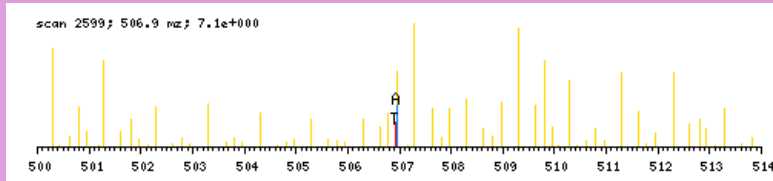

zoomed in precursor plot; T=theoretical m/z, A=acquired m/z

| b <sup>+</sup> | #  | AA # | y <sup>+</sup> | y <sup>2+</sup> |
|----------------|----|------|----------------|-----------------|
| 142.1232       | 1  | L 13 |                |                 |
| 270.1817       | 2  | Q 12 | 1377.6246      | 689.3162        |
| 357.2138       | 3  | S 11 | 1249.5660      | 625.2869        |
| 470.2978       | 4  | I 10 | 1162.5340      | 581.7709        |
| 527.3193       | 5  | G 9  | 1049.4500      | 525.2289        |
| 628.3670       | 6  | T 8  | 992.4285       | 496.7182        |
| 757.4096       | 7  | E 7  | 891.3808       | 446.1943        |
| 871.4525       | 8  | N 6  | 762.3382       | 381.6730        |
| 972.5002       | 9  | T 5  | 648.2953       | 324.6516        |
| 1101.5428      | 10 | E 4  | 547.2476       | 274.1277        |
| 1230.5854      | 11 | E 3  | 418.2050       | 209.6064        |
| 1344.6283      | 12 | N 2  | 289.1624       | 145.0851        |
|                | 13 | R 1  | 175.1195       | 88.0637         |

N-term:+29.04

LQSIGTENTEENRR, MH+ 1674.8411, m/z 558.9519  
 L OSG40 P180811 230811-s1.02227.02227.3.dta

X-range:

-

MassTol: Y-zoom:

MassType:

AVG  MONO

Axis:

1  2

Label:

I  M  -

Ions:

a  +  2+  3+

b  +  2+  3+

c  +  2+  3+

x  +  2+  3+

y  +  2+  3+

z  +  2+  3+

hide H<sub>2</sub>O/NH<sub>3</sub>

zoom 112-122

GO

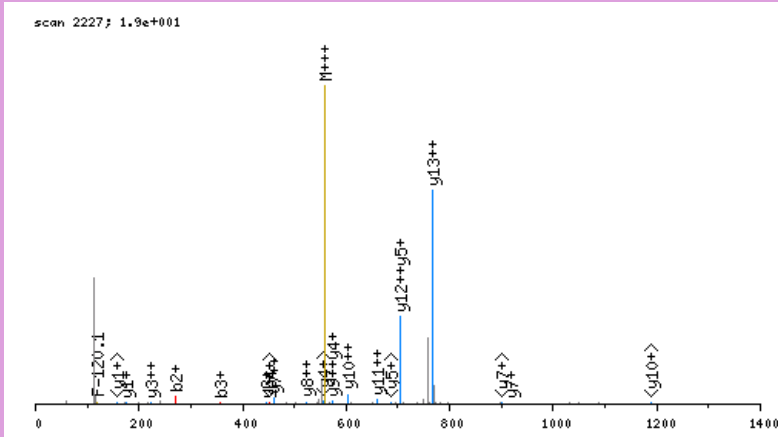

click image to zoom in; click top corners to zoom out [\[precursor±\]](#)

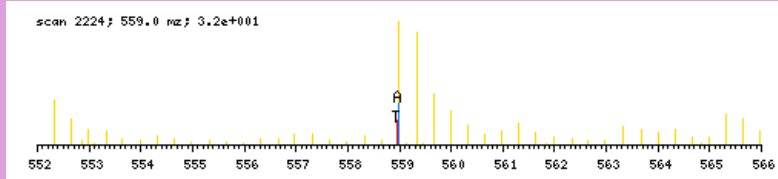

zoomed in precursor plot; T=theoretical m/z, A=acquired m/z

| b <sup>+</sup> | #  | AA # | y <sup>+</sup> | y <sup>2+</sup> |
|----------------|----|------|----------------|-----------------|
| 142.1232       | 1  | L 14 |                |                 |
| 270.1817       | 2  | Q 13 | 1533.7257      | 767.3668        |
| 357.2138       | 3  | S 12 | 1405.6672      | 703.3375        |
| 470.2978       | 4  | I 11 | 1318.6351      | 659.8215        |
| 527.3193       | 5  | G 10 | 1205.5511      | 603.2794        |
| 628.3670       | 6  | T 9  | 1148.5296      | 574.7687        |
| 757.4096       | 7  | E 8  | 1047.4819      | 524.2449        |
| 871.4525       | 8  | N 7  | 918.4393       | 459.7236        |
| 972.5002       | 9  | T 6  | 804.3964       | 402.7021        |
| 1101.5428      | 10 | E 5  | 703.3487       | 352.1783        |
| 1230.5854      | 11 | E 4  | 574.3061       | 287.6570        |
| 1344.6283      | 12 | N 3  | 445.2635       | 223.1357        |
| 1500.7294      | 13 | R 2  | 331.2206       | 166.1142        |
|                | 14 | R 1  | 175.1195       | 88.0637         |

N-term:+29.04



LRPGDCEVCISYLGR, MH+ 1828.9261, m/z 610.3135  
 H OSG40 P180811 230811-s1.06405.06405.3.dta

X-range:

-

MassTol: Y-zoom:

MassType:

AVG  MONO

Axis:

1  2

Label:

I  M  -

Ions:

a  +  2+  3+

b  +  2+  3+

c  +  2+  3+

x  +  2+  3+

y  +  2+  3+

z  +  2+  3+

hide H<sub>2</sub>O/NH<sub>3</sub>

zoom 112-122

GO

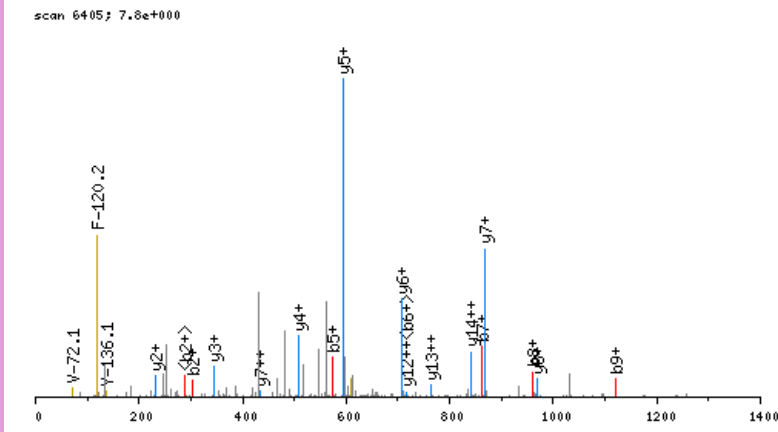

click image to zoom in; click top corners to zoom out [\[precursor±\]](#)

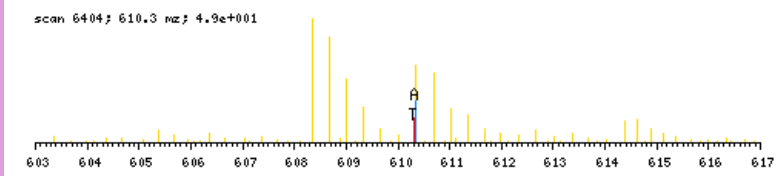

zoomed in precursor plot; T=theoretical m/z, A=acquired m/z

| b <sup>+</sup> | #  | AA | #  | y <sup>+</sup> | y <sup>2+</sup> |
|----------------|----|----|----|----------------|-----------------|
| 148.1550       | 1  | L  | 15 |                |                 |
| 304.2561       | 2  | R  | 14 | 1681.7789      | 841.3934        |
| 401.3088       | 3  | P  | 13 | 1525.6778      | 763.3428        |
| 458.3303       | 4  | G  | 12 | 1428.6251      | 714.8164        |
| 573.3572       | 5  | D  | 11 | 1371.6036      | 686.3057        |
| 733.3878       | 6  | C  | 10 | 1256.5767      | 628.7922        |
| 862.4304       | 7  | E  | 9  | 1096.5461      | 548.7769        |
| 961.4989       | 8  | V  | 8  | 967.5035       | 484.2556        |
| 1121.5295      | 9  | C  | 7  | 868.4350       | 434.7214        |
| 1234.6135      | 10 | I  | 6  | 708.4044       | 354.7061        |
| 1321.6455      | 11 | S  | 5  | 595.3204       | 298.1641        |
| 1484.7089      | 12 | Y  | 4  | 508.2884       | 254.6481        |
| 1597.7929      | 13 | L  | 3  | 345.2250       | 173.1164        |
| 1654.8144      | 14 | G  | 2  | 232.1410       | 116.5744        |
|                | 15 | R  | 1  | 175.1195       | 88.0637         |

N-term:+35.07 C(6):+160.03  
 C(9):+160.03

LSGGAQSSSSKSHPSER, MH+ 1769.9418, m/z 590.6521  
 H OSG36 P180811 230811-s1.04190.04190.3.dta

X-range:

-

MassTol: Y-zoom:

MassType:

AVG  MONO

Axis:

1  2

Label:

I  M  -

Ions:

a  +  2+  3+

b  +  2+  3+

c  +  2+  3+

x  +  2+  3+

y  +  2+  3+

z  +  2+  3+

hide H<sub>2</sub>O/NH<sub>3</sub>

zoom 112-122

GO

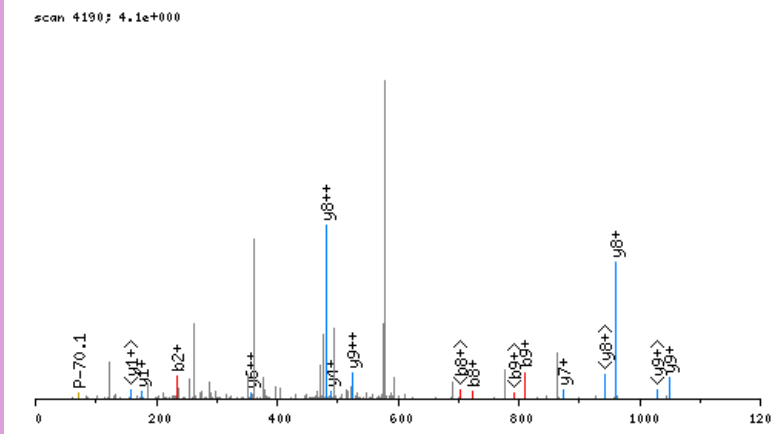

click image to zoom in; click top corners to zoom out [\[precursor±\]](#)

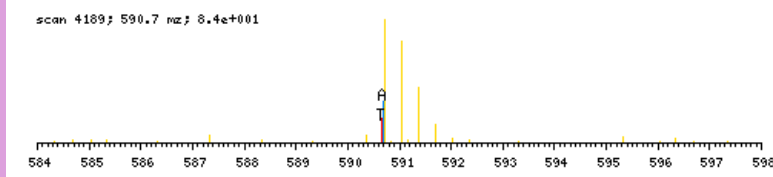

zoomed in precursor plot; T=theoretical m/z, A=acquired m/z

| b <sup>+</sup> | #  | AA | #  | y <sup>+</sup> | y <sup>2+</sup> |
|----------------|----|----|----|----------------|-----------------|
| 148.1550       | 1  | L  | 17 |                |                 |
| 235.1870       | 2  | S  | 16 | 1622.7947      | 811.9013        |
| 292.2085       | 3  | G  | 15 | 1535.7627      | 768.3852        |
| 349.2299       | 4  | G  | 14 | 1478.7412      | 739.8745        |
| 420.2670       | 5  | A  | 13 | 1421.7197      | 711.3638        |
| 548.3256       | 6  | Q  | 12 | 1350.6826      | 675.8452        |
| 635.3576       | 7  | S  | 11 | 1222.6240      | 611.8159        |
| 722.3897       | 8  | S  | 10 | 1135.5920      | 568.2999        |
| 809.4217       | 9  | S  | 9  | 1048.5600      | 524.7839        |
| 896.4537       | 10 | S  | 8  | 961.5280       | 481.2679        |
| 1058.6118      | 11 | K  | 7  | 874.4959       | 437.7519        |
| 1145.6439      | 12 | S  | 6  | 712.3378       | 356.6728        |
| 1282.7028      | 13 | H  | 5  | 625.3058       | 313.1568        |
| 1379.7555      | 14 | P  | 4  | 488.2469       | 244.6274        |
| 1466.7876      | 15 | S  | 3  | 391.1941       | 196.1010        |
| 1595.8302      | 16 | E  | 2  | 304.1621       | 152.5850        |
|                | 17 | R  | 1  | 175.1195       | 88.0637         |

N-term:+35.07 K(11):+162.16

LSDLFLDDVRR, MH+ 1382.7856, m/z 461.6000  
 H OSG40 P180811 230811-s1.09211.09211.3.dta

scan 9211; 1.5e+001

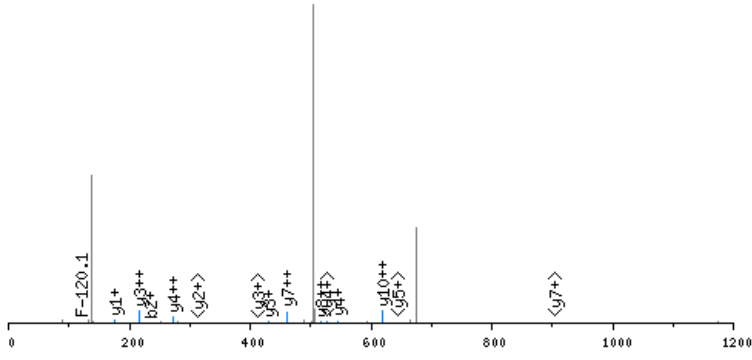

click image to zoom in; click top corners to zoom out [\[precursor±\]](#)

scan 9209; 461.6 m/z; 2.1e+001

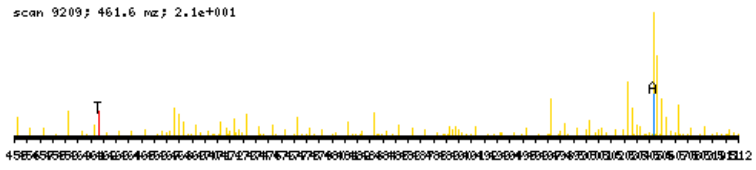

zoomed in precursor plot; T=theoretical m/z, A=acquired m/z

X-range:

-

MassTol: Y-zoom:

MassType:

AVG  MONO

Axis:

1  2

Label:

I  M  -

Ions:

a  +  2+  3+

b  +  2+  3+

c  +  2+  3+

x  +  2+  3+

y  +  2+  3+

z  +  2+  3+

hide H<sub>2</sub>O/NH<sub>3</sub>

zoom 112-122

GO

| b <sup>+</sup> | #  | AA # | y <sup>+</sup> | y <sup>2+</sup> |
|----------------|----|------|----------------|-----------------|
| 148.1550       | 1  | L 11 |                |                 |
| 235.1870       | 2  | S 10 | 1235.6384      | 618.3231        |
| 348.2711       | 3  | L 9  | 1148.6064      | 574.8071        |
| 463.2980       | 4  | D 8  | 1035.5223      | 518.2651        |
| 610.3664       | 5  | F 7  | 920.4954       | 460.7516        |
| 723.4505       | 6  | L 6  | 773.4270       | 387.2174        |
| 838.4774       | 7  | D 5  | 660.3429       | 330.6754        |
| 953.5044       | 8  | D 4  | 545.3160       | 273.1619        |
| 1052.5728      | 9  | V 3  | 430.2890       | 215.6484        |
| 1208.6739      | 10 | R 2  | 331.2206       | 166.1142        |
|                | 11 | R 1  | 175.1195       | 88.0637         |

N-term:+35.07

LSQGSPLSWEETQR, MH+ 1645.8185, m/z 549.2777  
 L OSG37 P180811 230811-s1.05307.05307.3.dta

X-range:

-

MassTol: Y-zoom:

MassType:

AVG  MONO

Axis:

1  2

Label:

I  M  -

Ions:

a  +  2+  3+

b  +  2+  3+

c  +  2+  3+

x  +  2+  3+

y  +  2+  3+

z  +  2+  3+

hide H<sub>2</sub>O/NH<sub>3</sub>

zoom 112-122

GO

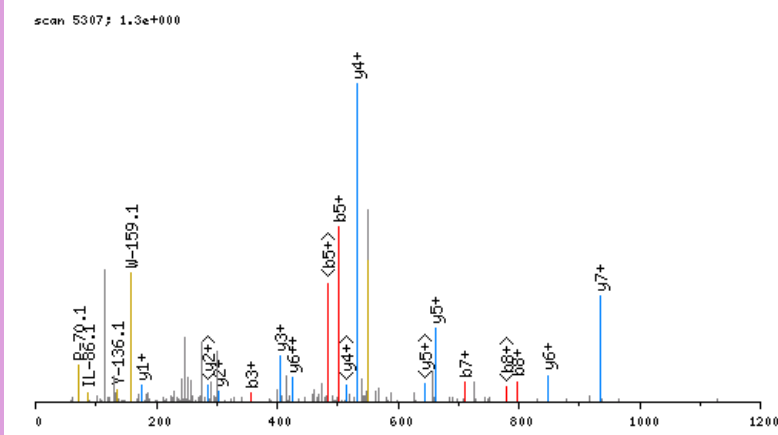

click image to zoom in; click top corners to zoom out [\[precursor±\]](#)

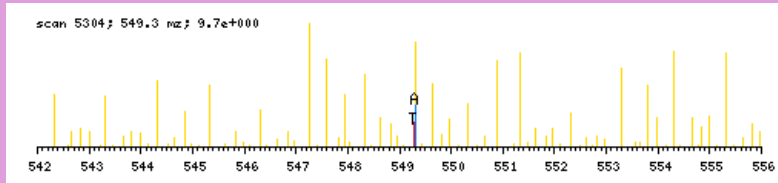

zoomed in precursor plot; T=theoretical m/z, A=acquired m/z

| b <sup>+</sup> | #  | AA # | y <sup>+</sup> | y <sup>2+</sup> |
|----------------|----|------|----------------|-----------------|
| 142.1232       | 1  | L 14 |                |                 |
| 229.1552       | 2  | S 13 | 1504.7032      | 752.8555        |
| 357.2138       | 3  | Q 12 | 1417.6712      | 709.3395        |
| 414.2352       | 4  | G 11 | 1289.6126      | 645.3102        |
| 501.2673       | 5  | S 10 | 1232.5911      | 616.7995        |
| 598.3200       | 6  | P 9  | 1145.5591      | 573.2835        |
| 711.4041       | 7  | L 8  | 1048.5063      | 524.7571        |
| 798.4361       | 8  | S 7  | 935.4223       | 468.2151        |
| 984.5154       | 9  | W 6  | 848.3903       | 424.6990        |
| 1113.5580      | 10 | E 5  | 662.3109       | 331.6594        |
| 1242.6006      | 11 | E 4  | 533.2683       | 267.1381        |
| 1343.6483      | 12 | T 3  | 404.2258       | 202.6168        |
| 1471.7069      | 13 | Q 2  | 303.1781       | 152.0930        |
|                | 14 | R 1  | 175.1195       | 88.0637         |

N-term:+29.04

LTQEEELDSGLDELSVR, MH+ 1831.9289, m/z 611.3145  
 L OSG37 P180811 230811-s1.08057.08057.3.dta

X-range:

-

MassTol: Y-zoom:

MassType:

AVG  MONO

Axis:

1  2

Label:

I  M  -

Ions:

a  +  2+  3+

b  +  2+  3+

c  +  2+  3+

x  +  2+  3+

y  +  2+  3+

z  +  2+  3+

hide H<sub>2</sub>O/NH<sub>3</sub>

zoom 112-122

GO

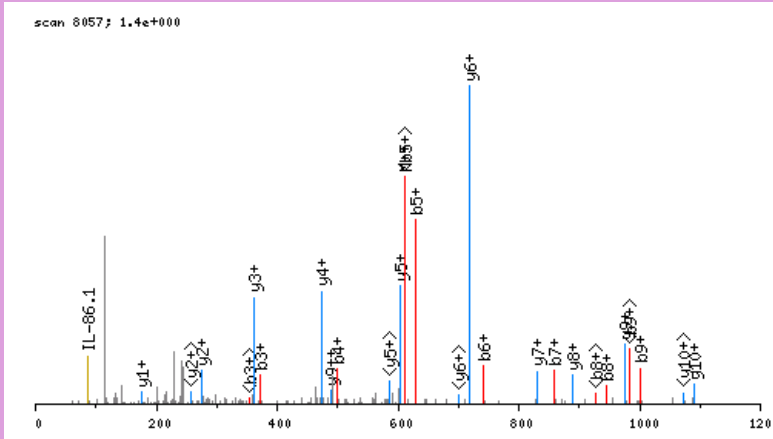

click image to zoom in; click top corners to zoom out [\[precursor±\]](#)

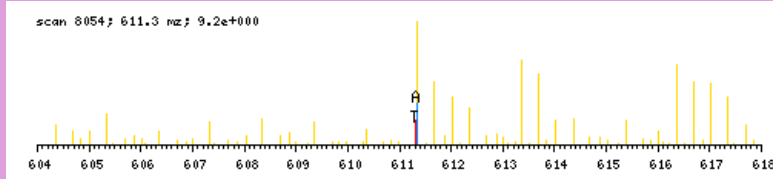

zoomed in precursor plot; T=theoretical m/z, A=acquired m/z

| b <sup>+</sup> | #  | AA # | y <sup>+</sup> | y <sup>2+</sup> |
|----------------|----|------|----------------|-----------------|
| 142.1232       | 1  | L 16 |                |                 |
| 243.1708       | 2  | T 15 | 1690.8135      | 845.9107        |
| 371.2294       | 3  | Q 14 | 1589.7659      | 795.3868        |
| 500.2720       | 4  | E 13 | 1461.7073      | 731.3576        |
| 629.3146       | 5  | E 12 | 1332.6647      | 666.8363        |
| 742.3987       | 6  | L 11 | 1203.6221      | 602.3150        |
| 857.4256       | 7  | D 10 | 1090.5380      | 545.7729        |
| 944.4576       | 8  | S 9  | 975.5111       | 488.2595        |
| 1001.4791      | 9  | G 8  | 888.4791       | 444.7434        |
| 1114.5632      | 10 | L 7  | 831.4576       | 416.2327        |
| 1229.5901      | 11 | D 6  | 718.3735       | 359.6907        |
| 1358.6327      | 12 | E 5  | 603.3466       | 302.1772        |
| 1471.7168      | 13 | L 4  | 474.3040       | 237.6559        |
| 1558.7488      | 14 | S 3  | 361.2199       | 181.1139        |
| 1657.8172      | 15 | V 2  | 274.1879       | 137.5979        |
|                | 16 | R 1  | 175.1195       | 88.0637         |

N-term:+29.04

LVVVNEEDHLR, MH+ 1437.7490, m/z 479.9212  
 L OSG40 P180811 230811-s1.05848.05848.3.dta

X-range:

-

MassTol: Y-zoom:

MassType:

AVG  MONO

Axis:

1  2

Label:

I  M  -

Ions:

a  +  2+  3+

b  +  2+  3+

c  +  2+  3+

x  +  2+  3+

y  +  2+  3+

z  +  2+  3+

hide H<sub>2</sub>O/NH<sub>3</sub>

zoom 112-122

GO

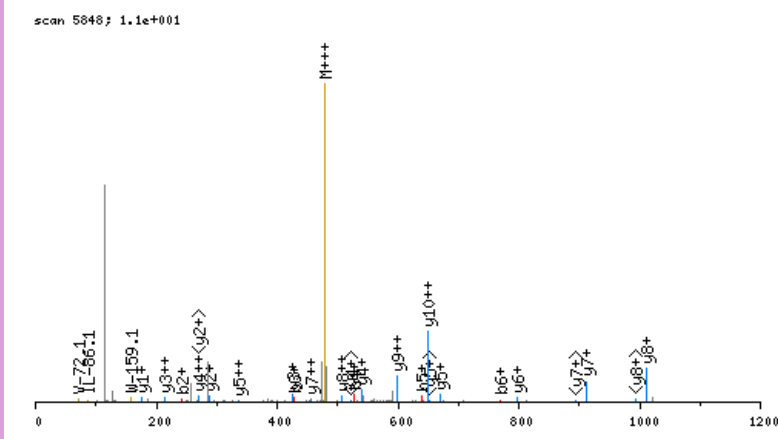

click image to zoom in; click top corners to zoom out [\[precursor±\]](#)

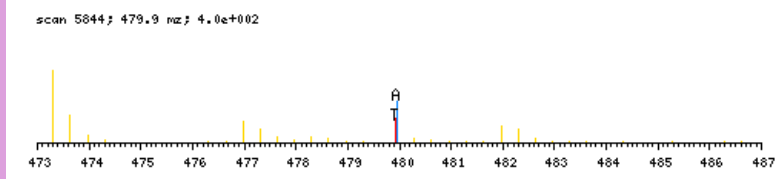

zoomed in precursor plot; T=theoretical m/z, A=acquired m/z

| b <sup>+</sup> | #  | AA # | y <sup>+</sup> | y <sup>2+</sup> |
|----------------|----|------|----------------|-----------------|
| 142.1232       | 1  | L 11 |                |                 |
| 241.1916       | 2  | V 10 | 1296.6337      | 648.8207        |
| 427.2709       | 3  | W 9  | 1197.5653      | 599.2865        |
| 526.3393       | 4  | V 8  | 1011.4859      | 506.2469        |
| 640.3822       | 5  | N 7  | 912.4175       | 456.7127        |
| 769.4248       | 6  | E 6  | 798.3746       | 399.6912        |
| 898.4674       | 7  | E 5  | 669.3320       | 335.1699        |
| 1013.4944      | 8  | D 4  | 540.2894       | 270.6486        |
| 1150.5533      | 9  | H 3  | 425.2625       | 213.1352        |
| 1263.6373      | 10 | L 2  | 288.2036       | 144.6057        |
|                | 11 | R 1  | 175.1195       | 88.0637         |

N-term:+29.04

LVYDQELLGPSDKSEALR, MH+ 2172.2188, m/z 724.7445  
 H OSG39 P180811 230811-s1.05457.05457.3.dta

X-range:

-

MassTol: Y-zoom:

MassType:

AVG  MONO

Axis:

1  2

Label:

I  M  -

Ions:

a  +  2+  3+

b  +  2+  3+

c  +  2+  3+

x  +  2+  3+

y  +  2+  3+

z  +  2+  3+

hide H<sub>2</sub>O/NH<sub>3</sub>

zoom 112-122

GO

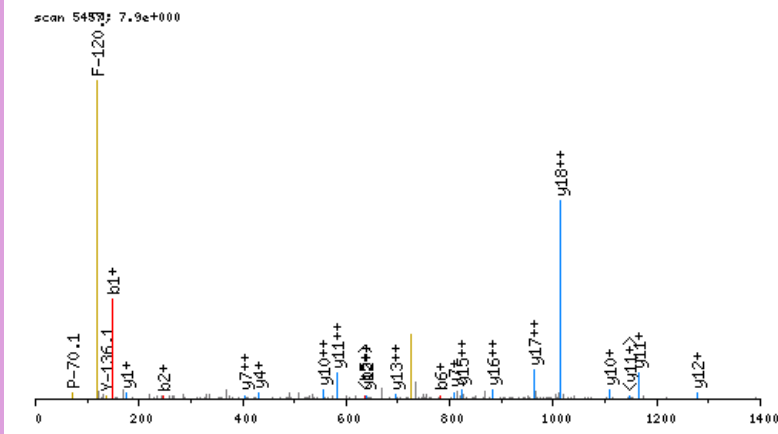

click image to zoom in; click top corners to zoom out [\[precursor±\]](#)

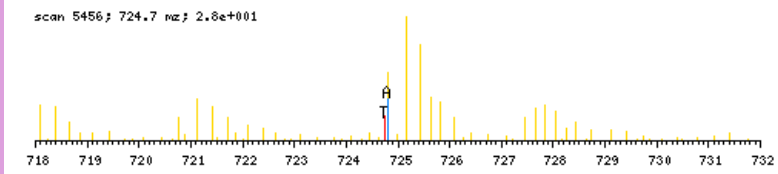

zoomed in precursor plot; T=theoretical m/z, A=acquired m/z

| b <sup>+</sup> | #  | AA | #  | y <sup>+</sup> | y <sup>2+</sup> |
|----------------|----|----|----|----------------|-----------------|
| 148.1550       | 1  | L  | 19 |                |                 |
| 247.2234       | 2  | V  | 18 | 2025.0717      | 1013.0398       |
| 410.2867       | 3  | Y  | 17 | 1926.0033      | 963.5056        |
| 525.3136       | 4  | D  | 16 | 1762.9400      | 881.9739        |
| 653.3722       | 5  | Q  | 15 | 1647.9130      | 824.4604        |
| 782.4148       | 6  | E  | 14 | 1519.8544      | 760.4311        |
| 895.4989       | 7  | L  | 13 | 1390.8118      | 695.9098        |
| 1008.5829      | 8  | L  | 12 | 1277.7278      | 639.3678        |
| 1065.6044      | 9  | G  | 11 | 1164.6437      | 582.8258        |
| 1162.6572      | 10 | P  | 10 | 1107.6222      | 554.3150        |
| 1249.6892      | 11 | S  | 9  | 1010.5695      | 505.7887        |
| 1364.7161      | 12 | D  | 8  | 923.5375       | 462.2726        |
| 1526.8742      | 13 | K  | 7  | 808.5105       | 404.7592        |
| 1613.9063      | 14 | S  | 6  | 646.3524       | 323.6801        |
| 1742.9489      | 15 | E  | 5  | 559.3204       | 280.1641        |
| 1813.9860      | 16 | A  | 4  | 430.2778       | 215.6428        |
| 1885.0231      | 17 | A  | 3  | 359.2407       | 180.1243        |
| 1998.1072      | 18 | L  | 2  | 288.2036       | 144.6057        |
|                | 19 | R  | 1  | 175.1195       | 88.0637         |

N-term:+35.07 K(13):+162.16

LVYDVLQDHR, MH+ 1291.7222, m/z 431.2456  
 H OSG40 P180811 230811-s1.05763.05763.3.dta

scan 5763; 5.2e+000

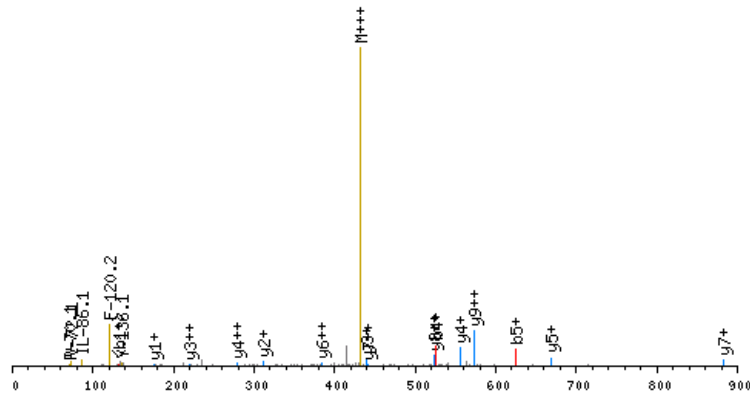

click image to zoom in; click top corners to zoom out [\[precursor±\]](#)

scan 5759; 431.2 m/z; 3.2e+001

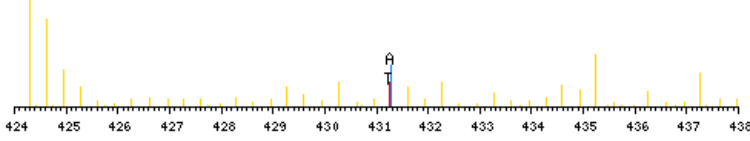

zoomed in precursor plot; T=theoretical m/z, A=acquired m/z

X-range:

-

MassTol: Y-zoom:

MassType:

AVG  MONO

Axis:

1  2

Label:

I  M  -

Ions:

a  +  2+  3+

b  +  2+  3+

c  +  2+  3+

x  +  2+  3+

y  +  2+  3+

z  +  2+  3+

hide H<sub>2</sub>O/NH<sub>3</sub>

zoom 112-122

GO

| b <sup>+</sup> | #  | AA # | y <sup>+</sup> | y <sup>2+</sup> |
|----------------|----|------|----------------|-----------------|
| 148.1550       | 1  | L 10 |                |                 |
| 247.2234       | 2  | V 9  | 1144.5751      | 572.7915        |
| 410.2867       | 3  | Y 8  | 1045.5067      | 523.2573        |
| 525.3136       | 4  | D 7  | 882.4434       | 441.7256        |
| 624.3821       | 5  | V 6  | 767.4164       | 384.2121        |
| 737.4661       | 6  | L 5  | 668.3480       | 334.6779        |
| 852.4931       | 7  | D 4  | 555.2639       | 278.1359        |
| 980.5516       | 8  | Q 3  | 440.2370       | 220.6224        |
| 1117.6106      | 9  | H 2  | 312.1784       | 156.5931        |
|                | 10 | R 1  | 175.1195       | 88.0637         |

N-term:+35.07



LYSSDDVIELTPSNFNR, MH+ 2091.0458, m/z 697.6868  
 H OSG37 P180811 230811-s1.07118.07118.3.dta

X-range:

-

MassTol: Y-zoom:

MassType:

AVG  MONO

Axis:

1  2

Label:

I  M  -

Ions:

a  +  2+  3+

b  +  2+  3+

c  +  2+  3+

x  +  2+  3+

y  +  2+  3+

z  +  2+  3+

hide H<sub>2</sub>O/NH<sub>3</sub>

zoom 112-122

GO

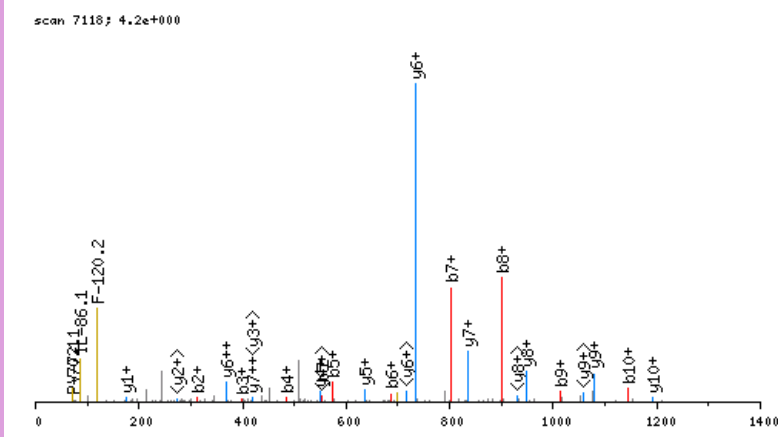

click image to zoom in; click top corners to zoom out [\[precursor±\]](#)

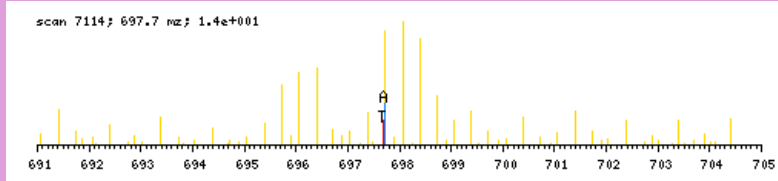

zoomed in precursor plot; T=theoretical m/z, A=acquired m/z

| b <sup>+</sup> | #  | AA | #  | y <sup>+</sup> | y <sup>2+</sup> |
|----------------|----|----|----|----------------|-----------------|
| 148.1550       | 1  | L  | 18 |                |                 |
| 311.2183       | 2  | Y  | 17 | 1943.8987      | 972.4533        |
| 398.2503       | 3  | S  | 16 | 1780.8353      | 890.9216        |
| 485.2823       | 4  | S  | 15 | 1693.8033      | 847.4056        |
| 572.3144       | 5  | S  | 14 | 1606.7713      | 803.8896        |
| 687.3413       | 6  | D  | 13 | 1519.7393      | 760.3735        |
| 802.3683       | 7  | D  | 12 | 1404.7123      | 702.8601        |
| 901.4367       | 8  | V  | 11 | 1289.6854      | 645.3466        |
| 1014.5207      | 9  | I  | 10 | 1190.6170      | 595.8124        |
| 1143.5633      | 10 | E  | 9  | 1077.5329      | 539.2704        |
| 1256.6474      | 11 | L  | 8  | 948.4903       | 474.7491        |
| 1357.6951      | 12 | T  | 7  | 835.4062       | 418.2070        |
| 1454.7478      | 13 | P  | 6  | 734.3586       | 367.6832        |
| 1541.7799      | 14 | S  | 5  | 637.3058       | 319.1568        |
| 1655.8228      | 15 | N  | 4  | 550.2738       | 275.6408        |
| 1802.8912      | 16 | F  | 3  | 436.2308       | 218.6193        |
| 1916.9341      | 17 | N  | 2  | 289.1624       | 145.0851        |
|                | 18 | R  | 1  | 175.1195       | 88.0637         |

N-term:+35.07

MASGGVPTDEEQATGLER, MH+ 1932.8973, m/z 644.9706  
 L OSG37 P180811 230811-s1.04186.04186.3.dta

X-range:

-

MassTol: Y-zoom:

MassType:

AVG  MONO

Axis:

1  2

Label:

I  M  -

Ions:

a  +  2+  3+

b  +  2+  3+

c  +  2+  3+

x  +  2+  3+

y  +  2+  3+

z  +  2+  3+

hide H<sub>2</sub>O/NH<sub>3</sub>

zoom 112-122

GO

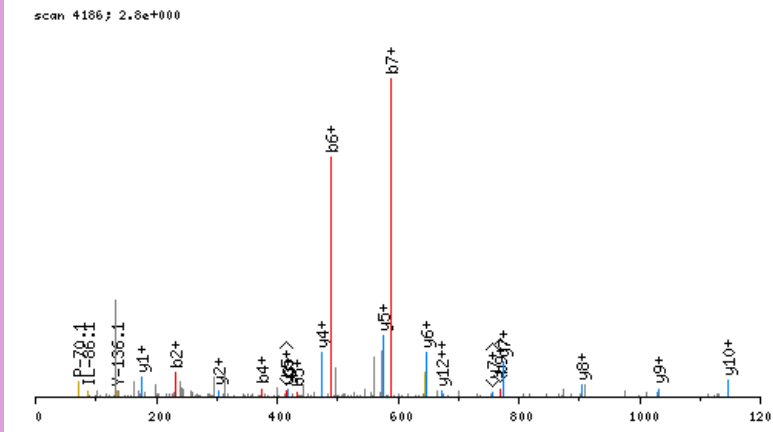

click image to zoom in; click top corners to zoom out [\[precursor±\]](#)

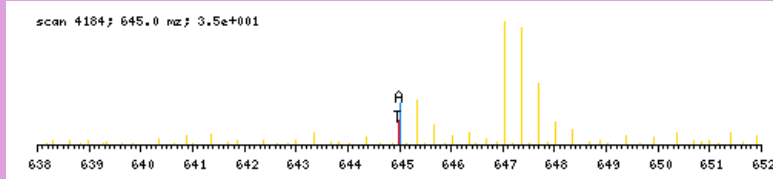

zoomed in precursor plot; T=theoretical m/z, A=acquired m/z

| b <sup>+</sup> | #  | AA # | y <sup>+</sup> | y <sup>2+</sup> |
|----------------|----|------|----------------|-----------------|
| 160.0796       | 1  | M 19 |                |                 |
| 231.1167       | 2  | A 18 | 1773.8255      | 887.4167        |
| 318.1487       | 3  | S 17 | 1702.7884      | 851.8981        |
| 375.1702       | 4  | G 16 | 1615.7564      | 808.3821        |
| 432.1917       | 5  | G 15 | 1558.7349      | 779.8714        |
| 489.2131       | 6  | G 14 | 1501.7134      | 751.3606        |
| 588.2815       | 7  | V 13 | 1444.6920      | 722.8499        |
| 685.3343       | 8  | P 12 | 1345.6236      | 673.3157        |
| 786.3820       | 9  | T 11 | 1248.5708      | 624.7893        |
| 901.4089       | 10 | D 10 | 1147.5231      | 574.2655        |
| 1030.4515      | 11 | E 9  | 1032.4962      | 516.7520        |
| 1159.4941      | 12 | E 8  | 903.4536       | 452.2307        |
| 1287.5527      | 13 | Q 7  | 774.4110       | 387.7094        |
| 1358.5898      | 14 | A 6  | 646.3524       | 323.6801        |
| 1459.6375      | 15 | T 5  | 575.3153       | 288.1616        |
| 1516.6589      | 16 | G 4  | 474.2676       | 237.6377        |
| 1629.7430      | 17 | L 3  | 417.2462       | 209.1270        |
| 1758.7856      | 18 | E 2  | 304.1621       | 152.5850        |
|                | 19 | R 1  | 175.1195       | 88.0637         |

N-term:+29.04

MEIPKETLQTAADGTR, MH+ 1816.9479, m/z 606.3208  
 L OSG39 P180811 230811-s1.04224.04224.3.dta

X-range:

-

MassTol: Y-zoom:

MassType:

AVG  MONO

Axis:

1  2

Label:

I  M  -

Ions:

a  +  2+  3+

b  +  2+  3+

c  +  2+  3+

x  +  2+  3+

y  +  2+  3+

z  +  2+  3+

hide H<sub>2</sub>O/NH<sub>3</sub>

zoom 112-122

GO

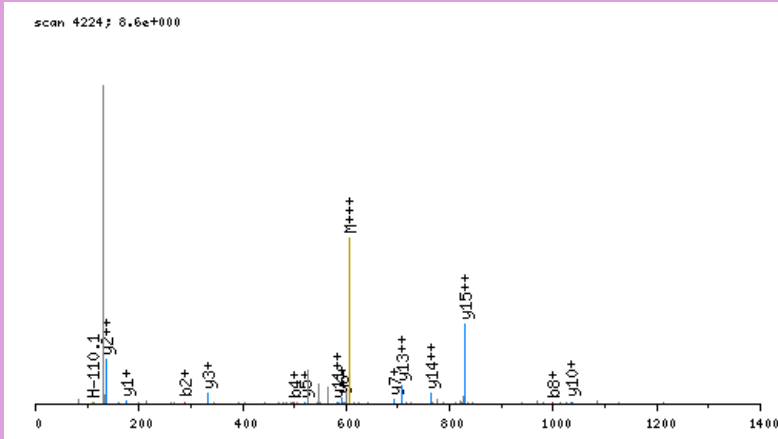

click image to zoom in; click top corners to zoom out [\[precursor±\]](#)

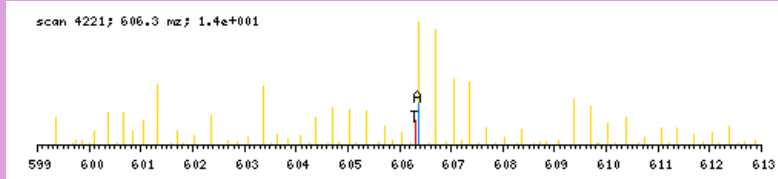

zoomed in precursor plot; T=theoretical m/z, A=acquired m/z

| b <sup>+</sup> | #  | AA # | y <sup>+</sup> | y <sup>2+</sup> |
|----------------|----|------|----------------|-----------------|
| 160.0796       | 1  | M 16 |                |                 |
| 289.1222       | 2  | E 15 | 1657.8761      | 829.4420        |
| 402.2062       | 3  | I 14 | 1528.8335      | 764.9207        |
| 499.2590       | 4  | P 13 | 1415.7495      | 708.3786        |
| 655.3853       | 5  | K 12 | 1318.6967      | 659.8523        |
| 784.4279       | 6  | E 11 | 1162.5704      | 581.7891        |
| 885.4756       | 7  | T 10 | 1033.5278      | 517.2678        |
| 998.5596       | 8  | L 9  | 932.4801       | 466.7440        |
| 1126.6182      | 9  | Q 8  | 819.3961       | 410.2019        |
| 1227.6659      | 10 | T 7  | 691.3375       | 346.1727        |
| 1298.7030      | 11 | A 6  | 590.2898       | 295.6488        |
| 1369.7401      | 12 | A 5  | 519.2527       | 260.1303        |
| 1484.7671      | 13 | D 4  | 448.2156       | 224.6117        |
| 1541.7885      | 14 | G 3  | 333.1886       | 167.0982        |
| 1642.8362      | 15 | T 2  | 276.1672       | 138.5875        |
|                | 16 | R 1  | 175.1195       | 88.0637         |

N-term:+29.04 K(5):+156.13

MEKNQLEEVPSALPR, MH+ 1809.0217, m/z 603.6787  
 H OSG39 P180811 230811-s1.04448.04448.3.dta

X-range:

-

MassTol: Y-zoom:

MassType:

AVG  MONO

Axis:

1  2

Label:

I  M  -

Ions:

a  +  2+  3+

b  +  2+  3+

c  +  2+  3+

x  +  2+  3+

y  +  2+  3+

z  +  2+  3+

hide H<sub>2</sub>O/NH<sub>3</sub>

zoom 112-122

GO

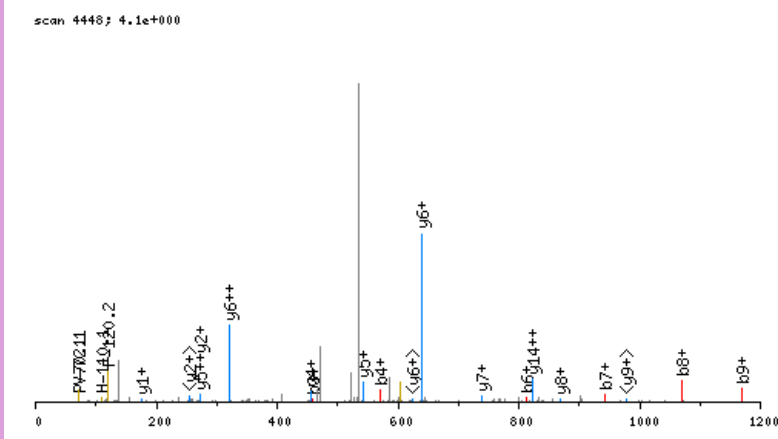

click image to zoom in; click top corners to zoom out [\[precursor±\]](#)

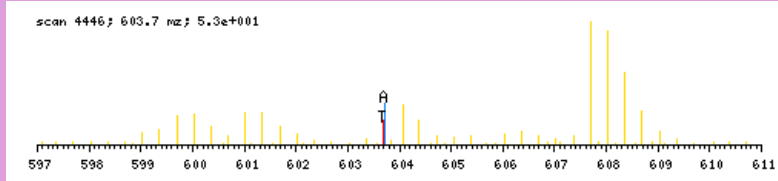

zoomed in precursor plot; T=theoretical m/z, A=acquired m/z

| b <sup>+</sup> | #  | AA | #  | y <sup>+</sup> | y <sup>2+</sup> |
|----------------|----|----|----|----------------|-----------------|
| 166.1114       | 1  | M  | 15 |                |                 |
| 295.1540       | 2  | E  | 14 | 1643.9181      | 822.4630        |
| 457.3121       | 3  | K  | 13 | 1514.8755      | 757.9417        |
| 571.3550       | 4  | N  | 12 | 1352.7174      | 676.8626        |
| 699.4136       | 5  | Q  | 11 | 1238.6745      | 619.8412        |
| 812.4976       | 6  | L  | 10 | 1110.6159      | 555.8119        |
| 941.5402       | 7  | E  | 9  | 997.5318       | 499.2698        |
| 1070.5828      | 8  | E  | 8  | 868.4892       | 434.7485        |
| 1169.6512      | 9  | V  | 7  | 739.4466       | 370.2272        |
| 1266.7040      | 10 | P  | 6  | 640.3782       | 320.6930        |
| 1353.7360      | 11 | S  | 5  | 543.3255       | 272.1666        |
| 1424.7732      | 12 | A  | 4  | 456.2934       | 228.6506        |
| 1537.8572      | 13 | L  | 3  | 385.2563       | 193.1321        |
| 1634.9100      | 14 | P  | 2  | 272.1723       | 136.5900        |
|                | 15 | R  | 1  | 175.1195       | 88.0637         |

N-term:+35.07 K(3):+162.16

MENANVLAR, MH+ 1051.5782, m/z 526.2927  
 H OSG38 P180811 230811-s1.02963.02963.2.dta

X-range:

-

MassTol: Y-zoom:

MassType:

AVG  MONO

Axis:

1  2

Label:

I  M  -

Ions:

a  +  2+  3+

b  +  2+  3+

c  +  2+  3+

x  +  2+  3+

y  +  2+  3+

z  +  2+  3+

hide H<sub>2</sub>O/NH<sub>3</sub>

zoom 112-122

GO

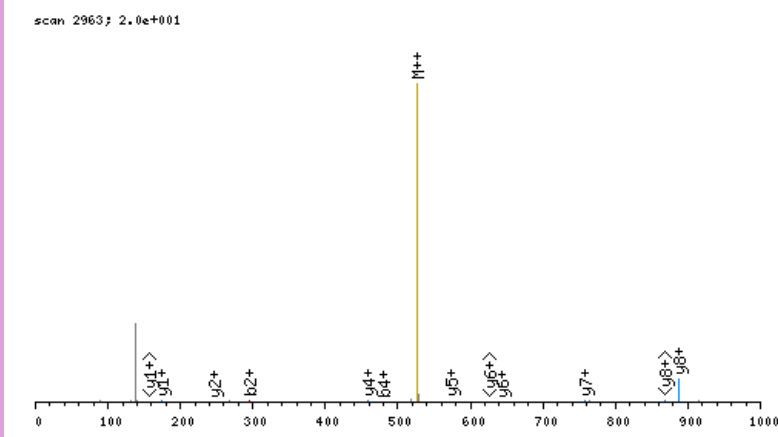

click image to zoom in; click top corners to zoom out [\[precursor±\]](#)

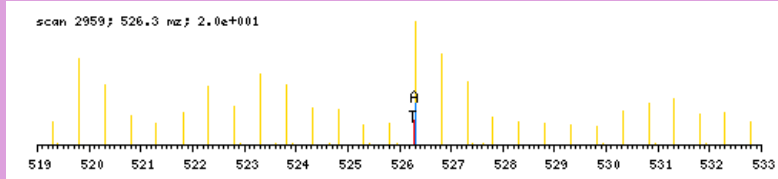

zoomed in precursor plot; T=theoretical m/z, A=acquired m/z

| b <sup>+</sup> | # | AA # | y <sup>+</sup> | y <sup>2+</sup>   |
|----------------|---|------|----------------|-------------------|
| 166.1114       | 1 | M    | 9              |                   |
| 295.1540       | 2 | E    | 8              | 886.4747 443.7412 |
| 409.1969       | 3 | N    | 7              | 757.4321 379.2199 |
| 480.2340       | 4 | A    | 6              | 643.3891 322.1985 |
| 594.2769       | 5 | N    | 5              | 572.3520 286.6799 |
| 693.3454       | 6 | V    | 4              | 458.3091 229.6585 |
| 806.4294       | 7 | L    | 3              | 359.2407 180.1243 |
| 877.4665       | 8 | A    | 2              | 246.1566 123.5822 |
|                | 9 | R    | 1              | 175.1195 88.0637  |

N-term:+35.07

MEQASKTVQDALSSVQESDIAVVAR, MH+ 2730.4620, m/z 683.3710  
 H OSG38 P180811 230811-s1.07566.07566.4.dta

scan 7566; 1.1e+000

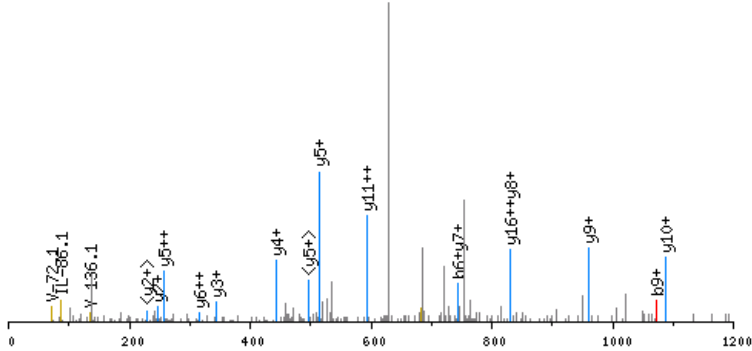

click image to zoom in; click top corners to zoom out [\[precursor±\]](#)

scan 7564; 683.4 m/z; 7.0e+000

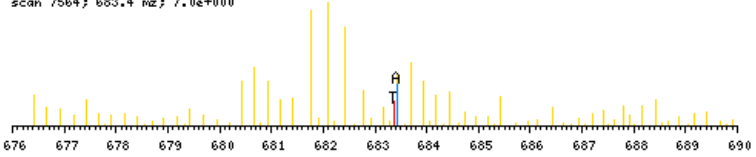

zoomed in precursor plot; T=theoretical m/z, A=acquired m/z

| b <sup>+</sup> | #  | AA # | y <sup>+</sup> | y <sup>2+</sup> |
|----------------|----|------|----------------|-----------------|
| 166.1114       | 1  | M 25 |                |                 |
| 295.1540       | 2  | E 24 | 2565.3584      | 1283.1831       |
| 423.2126       | 3  | Q 23 | 2436.3158      | 1218.6618       |
| 494.2497       | 4  | A 22 | 2308.2573      | 1154.6325       |
| 581.2817       | 5  | S 21 | 2237.2202      | 1119.1140       |
| 743.4398       | 6  | K 20 | 2150.1881      | 1075.5980       |
| 844.4875       | 7  | T 19 | 1988.0300      | 994.5189        |
| 943.5559       | 8  | V 18 | 1886.9823      | 943.9951        |
| 1071.6145      | 9  | Q 17 | 1787.9139      | 894.4609        |
| 1186.6414      | 10 | D 16 | 1659.8554      | 830.4316        |
| 1257.6785      | 11 | A 15 | 1544.8284      | 772.9181        |
| 1370.7626      | 12 | L 14 | 1473.7913      | 737.3996        |
| 1457.7946      | 13 | S 13 | 1360.7072      | 680.8575        |
| 1544.8266      | 14 | S 12 | 1273.6752      | 637.3415        |
| 1643.8951      | 15 | V 11 | 1186.6432      | 593.8255        |
| 1771.9536      | 16 | Q 10 | 1087.5748      | 544.2913        |
| 1900.9962      | 17 | E 9  | 959.5162       | 480.2620        |
| 1988.0283      | 18 | S 8  | 830.4736       | 415.7407        |
| 2103.0552      | 19 | D 7  | 743.4416       | 372.2247        |
| 2216.1393      | 20 | I 6  | 628.4146       | 314.7112        |
| 2287.1764      | 21 | A 5  | 515.3306       | 258.1692        |
| 2386.2448      | 22 | V 4  | 444.2934       | 222.6506        |
| 2485.3132      | 23 | V 3  | 345.2250       | 173.1164        |
| 2556.3503      | 24 | A 2  | 246.1566       | 123.5822        |
|                | 25 | R 1  | 175.1195       | 88.0637         |

N-term:+35.07 K(6):+162.16

X-range:

0 - 0

MassTol: Y-zoom:

0. 1.

MassType:

AVG  MONO

Axis:

1  2

Label:

I  M  -

Ions:

a  +  2+  3+

b  +  2+  3+

c  +  2+  3+

x  +  2+  3+

y  +  2+  3+

z  +  2+  3+

hide H<sub>2</sub>O/NH<sub>3</sub>

zoom 112-122

GO

MESAGIHETTYNSIMKCDIDIR, MH+ 2652.3107, m/z 663.8331  
H OSG40 P180811 230811-s1.06780.06780.4.dta

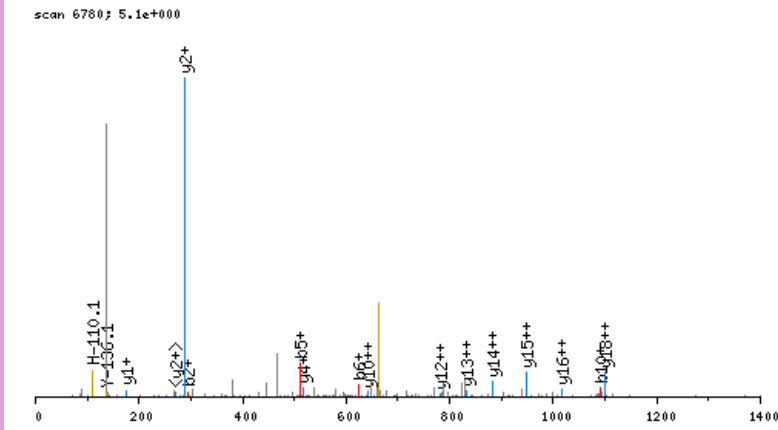

click image to zoom in; click top corners to zoom out [\[precursor±\]](#)

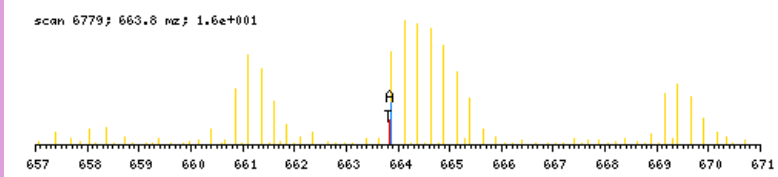

zoomed in precursor plot; T=theoretical m/z, A=acquired m/z

X-range:

-

MassTol: Y-zoom:

MassType:

AVG  MONO

Axis:

1  2

Label:

I  M  -

Ions:

a  +  2+  3+

b  +  2+  3+

c  +  2+  3+

x  +  2+  3+

y  +  2+  3+

z  +  2+  3+

hide H<sub>2</sub>O/NH<sub>3</sub>

zoom 112-122

GO

| b <sup>+</sup> | #  | AA # | y <sup>+</sup> | y <sup>2+</sup> |
|----------------|----|------|----------------|-----------------|
| 166.1114       | 1  | M 22 |                |                 |
| 295.1540       | 2  | E 21 | 2487.2072      | 1244.1075       |
| 382.1860       | 3  | S 20 | 2358.1646      | 1179.5862       |
| 453.2231       | 4  | A 19 | 2271.1326      | 1136.0702       |
| 510.2446       | 5  | G 18 | 2200.0954      | 1100.5516       |
| 623.3286       | 6  | I 17 | 2143.0740      | 1072.0409       |
| 760.3876       | 7  | H 16 | 2029.9899      | 1015.4989       |
| 889.4302       | 8  | E 15 | 1892.9310      | 946.9694        |
| 990.4778       | 9  | T 14 | 1763.8884      | 882.4481        |
| 1091.5255      | 10 | T 13 | 1662.8407      | 831.9243        |
| 1254.5888      | 11 | Y 12 | 1561.7930      | 781.4004        |
| 1368.6318      | 12 | N 11 | 1398.7297      | 699.8688        |
| 1455.6638      | 13 | S 10 | 1284.6868      | 642.8473        |
| 1568.7479      | 14 | I 9  | 1197.6548      | 599.3313        |
| 1699.7883      | 15 | M 8  | 1084.5707      | 542.7893        |
| 1861.9464      | 16 | K 7  | 953.5302       | 477.2690        |
| 2021.9770      | 17 | C 6  | 791.3721       | 396.1900        |
| 2137.0040      | 18 | D 5  | 631.3415       | 316.1747        |
| 2250.0881      | 19 | I 4  | 516.3146       | 258.6612        |
| 2365.1150      | 20 | D 3  | 403.2305       | 202.1192        |
| 2478.1991      | 21 | I 2  | 288.2036       | 144.6057        |
|                | 22 | R 1  | 175.1195       | 88.0637         |

N-term:+35.07 K(16):+162.16  
C(17):+160.03

MFDTPQESPVKSPVVR, MH+ 1870.9737, m/z 624.3294  
 L OSG39 P180811 230811-s1.03729.03729.3.dta

X-range:

-

MassTol: Y-zoom:

MassType:

AVG  MONO

Axis:

1  2

Label:

I  M  -

Ions:

a  +  2+  3+

b  +  2+  3+

c  +  2+  3+

x  +  2+  3+

y  +  2+  3+

z  +  2+  3+

hide H<sub>2</sub>O/NH<sub>3</sub>

zoom 112-122

GO

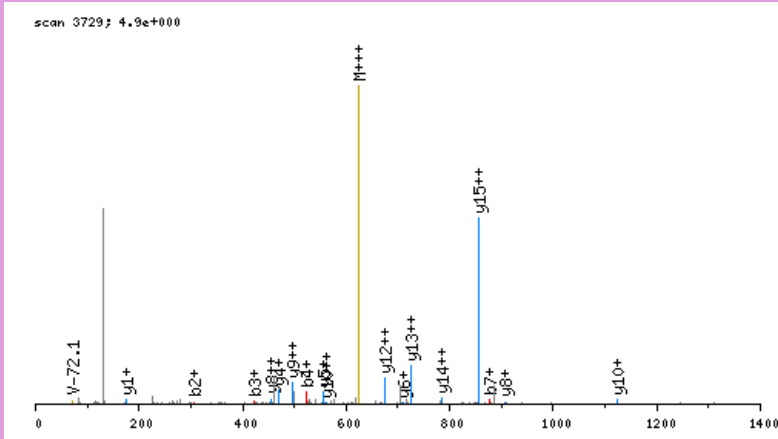

click image to zoom in; click top corners to zoom out [\[precursor±\]](#)

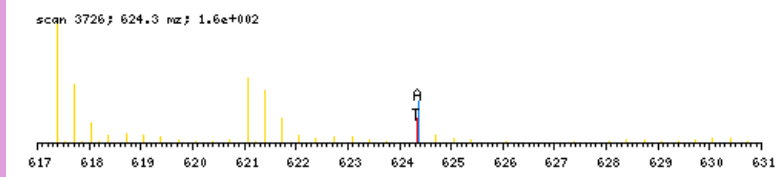

zoomed in precursor plot; T=theoretical m/z, A=acquired m/z

| b <sup>+</sup> | #  | AA # | y <sup>+</sup> | y <sup>2+</sup> |
|----------------|----|------|----------------|-----------------|
| 160.0796       | 1  | M 16 |                |                 |
| 307.1480       | 2  | F 15 | 1711.9019      | 856.4549        |
| 422.1749       | 3  | D 14 | 1564.8335      | 782.9207        |
| 523.2226       | 4  | T 13 | 1449.8066      | 725.4072        |
| 620.2754       | 5  | P 12 | 1348.7589      | 674.8834        |
| 748.3340       | 6  | Q 11 | 1251.7061      | 626.3570        |
| 877.3766       | 7  | E 10 | 1123.6476      | 562.3277        |
| 964.4086       | 8  | S 9  | 994.6050       | 497.8064        |
| 1061.4613      | 9  | P 8  | 907.5729       | 454.2904        |
| 1160.5298      | 10 | V 7  | 810.5202       | 405.7640        |
| 1316.6561      | 11 | K 6  | 711.4518       | 356.2298        |
| 1403.6881      | 12 | S 5  | 555.3255       | 278.1666        |
| 1500.7409      | 13 | P 4  | 468.2934       | 234.6506        |
| 1597.7936      | 14 | P 3  | 371.2407       | 186.1243        |
| 1696.8620      | 15 | V 2  | 274.1879       | 137.5979        |
|                | 16 | R 1  | 175.1195       | 88.0637         |

N-term:+29.04 K(11):+156.13



MHLTELYLSLPR, MH+ 1506.8566, m/z 502.9571  
 H OSG40 P180811 230811-s1.08457.08457.3.dta

X-range:

-

MassTol: Y-zoom:

MassType:

AVG  MONO

Axis:

1  2

Label:

I  M  -

Ions:

a  +  2+  3+

b  +  2+  3+

c  +  2+  3+

x  +  2+  3+

y  +  2+  3+

z  +  2+  3+

hide H<sub>2</sub>O/NH<sub>3</sub>

zoom 112-122

GO

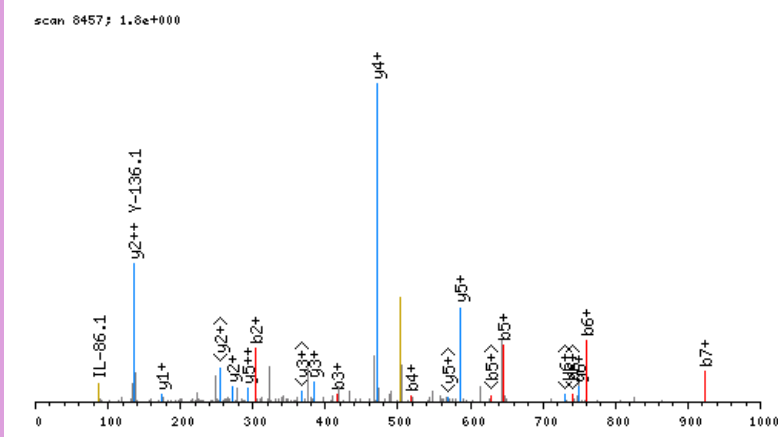

click image to zoom in; click top corners to zoom out [\[precursor±\]](#)

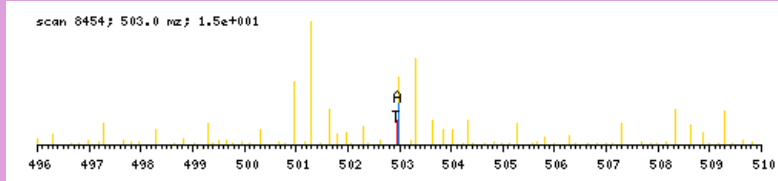

zoomed in precursor plot; T=theoretical m/z, A=acquired m/z

| b <sup>+</sup> | #  | AA # | y <sup>+</sup> | y <sup>2+</sup> |
|----------------|----|------|----------------|-----------------|
| 166.1114       | 1  | M 12 |                |                 |
| 303.1703       | 2  | H 11 | 1341.7531      | 671.3804        |
| 416.2544       | 3  | L 10 | 1204.6941      | 602.8510        |
| 517.3020       | 4  | T 9  | 1091.6101      | 546.3090        |
| 646.3446       | 5  | E 8  | 990.5624       | 495.7851        |
| 759.4287       | 6  | L 7  | 861.5198       | 431.2638        |
| 922.4920       | 7  | Y 6  | 748.4357       | 374.7218        |
| 1035.5761      | 8  | L 5  | 585.3724       | 293.1901        |
| 1122.6081      | 9  | S 4  | 472.2884       | 236.6481        |
| 1235.6922      | 10 | L 3  | 385.2563       | 193.1321        |
| 1332.7449      | 11 | P 2  | 272.1723       | 136.5900        |
|                | 12 | R 1  | 175.1195       | 88.0637         |

N-term:+35.07

MHTEAAEVLLER, MH+ 1426.7364, m/z 476.2503  
 L OSG40 P180811 230811-s1.05535.05535.3.dta

X-range:

-

MassTol: Y-zoom:

MassType:

AVG  MONO

Axis:

1  2

Label:

I  M  -

Ions:

a  +  2+  3+

b  +  2+  3+

c  +  2+  3+

x  +  2+  3+

y  +  2+  3+

z  +  2+  3+

hide H<sub>2</sub>O/NH<sub>3</sub>

zoom 112-122

GO

scan 5535; 1.9e+000

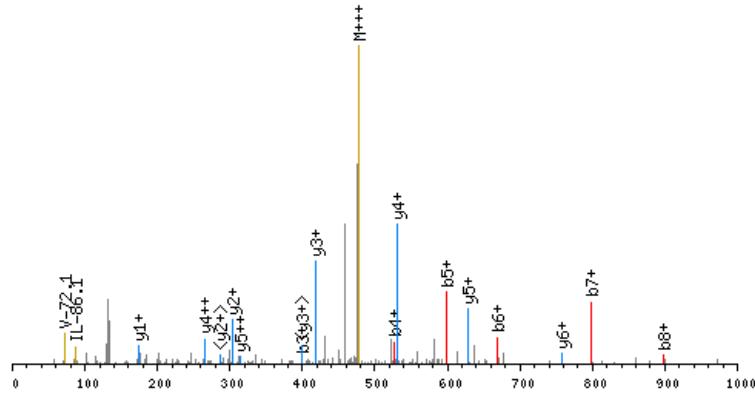

click image to zoom in; click top corners to zoom out [\[precursor±\]](#)

scan 5534; 476.3 m/z; 7.0e+001

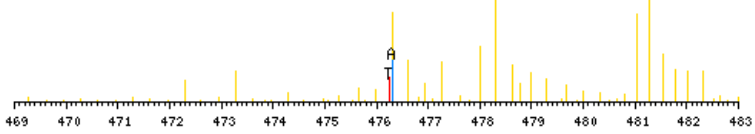

zoomed in precursor plot; T=theoretical m/z, A=acquired m/z

| b <sup>+</sup> | #  | AA # | y <sup>+</sup> | y <sup>2+</sup> |
|----------------|----|------|----------------|-----------------|
| 160.0796       | 1  | M 12 |                |                 |
| 297.1385       | 2  | H 11 | 1267.6646      | 634.3362        |
| 398.1862       | 3  | T 10 | 1130.6057      | 565.8068        |
| 527.2288       | 4  | E 9  | 1029.5580      | 515.2829        |
| 598.2659       | 5  | A 8  | 900.5155       | 450.7616        |
| 669.3030       | 6  | A 7  | 829.4783       | 415.2431        |
| 798.3456       | 7  | E 6  | 758.4412       | 379.7245        |
| 897.4140       | 8  | V 5  | 629.3986       | 315.2032        |
| 1010.4981      | 9  | L 4  | 530.3302       | 265.6690        |
| 1123.5821      | 10 | L 3  | 417.2462       | 209.1270        |
| 1252.6247      | 11 | E 2  | 304.1621       | 152.5850        |
|                | 12 | R 1  | 175.1195       | 88.0637         |

N-term:+29.04

MKVFVTGPLPAEGR, MH+ 1557.8827, m/z 519.9658  
 L OSG39 P180811 230811-s1.04852.04852.3.dta

X-range:

-

MassTol: Y-zoom:

MassType:

AVG  MONO

Axis:

1  2

Label:

I  M  -

Ions:

a  +  2+  3+

b  +  2+  3+

c  +  2+  3+

x  +  2+  3+

y  +  2+  3+

z  +  2+  3+

hide H<sub>2</sub>O/NH<sub>3</sub>

zoom 112-122

GO

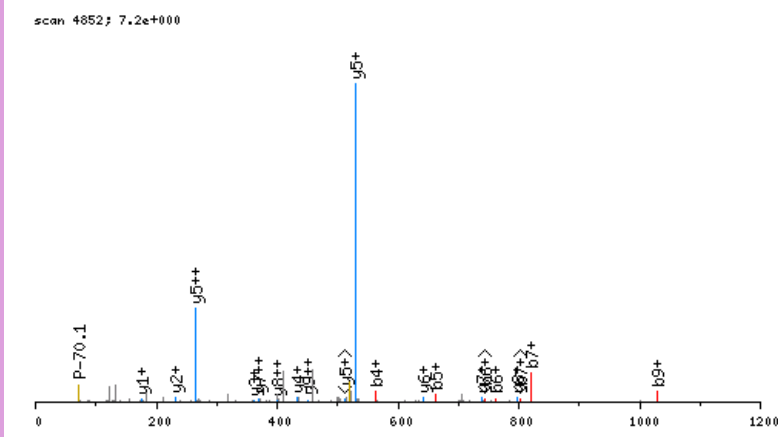

click image to zoom in; click top corners to zoom out [\[precursor±\]](#)

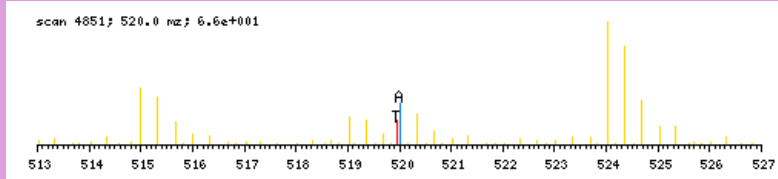

zoomed in precursor plot; T=theoretical m/z, A=acquired m/z

| b <sup>+</sup> | #  | AA # | y <sup>+</sup> | y <sup>2+</sup> |
|----------------|----|------|----------------|-----------------|
| 160.0796       | 1  | M 14 |                |                 |
| 316.2059       | 2  | K 13 | 1398.8109      | 699.9094        |
| 415.2743       | 3  | V 12 | 1242.6846      | 621.8462        |
| 562.3427       | 4  | F 11 | 1143.6162      | 572.3120        |
| 661.4111       | 5  | V 10 | 996.5478       | 498.7778        |
| 762.4588       | 6  | T 9  | 897.4794       | 449.2436        |
| 819.4803       | 7  | G 8  | 796.4317       | 398.7198        |
| 916.5330       | 8  | P 7  | 739.4103       | 370.2090        |
| 1029.6171      | 9  | L 6  | 642.3575       | 321.6827        |
| 1126.6699      | 10 | P 5  | 529.2734       | 265.1406        |
| 1197.7070      | 11 | A 4  | 432.2207       | 216.6142        |
| 1326.7496      | 12 | E 3  | 361.1836       | 181.0957        |
| 1383.7710      | 13 | G 2  | 232.1410       | 116.5744        |
|                | 14 | R 1  | 175.1195       | 88.0637         |

N-term:+29.04 K(2):+156.13

MLGAPEEADANEEGVR, MH+ 1721.8228, m/z 574.6125  
 H OSG37 P180811 230811-s1.04067.04067.3.dta

X-range:

-

MassTol: Y-zoom:

MassType:

AVG  MONO

Axis:

1  2

Label:

I  M  -

Ions:

a  +  2+  3+

b  +  2+  3+

c  +  2+  3+

x  +  2+  3+

y  +  2+  3+

z  +  2+  3+

hide H<sub>2</sub>O/NH<sub>3</sub>

zoom 112-122

GO

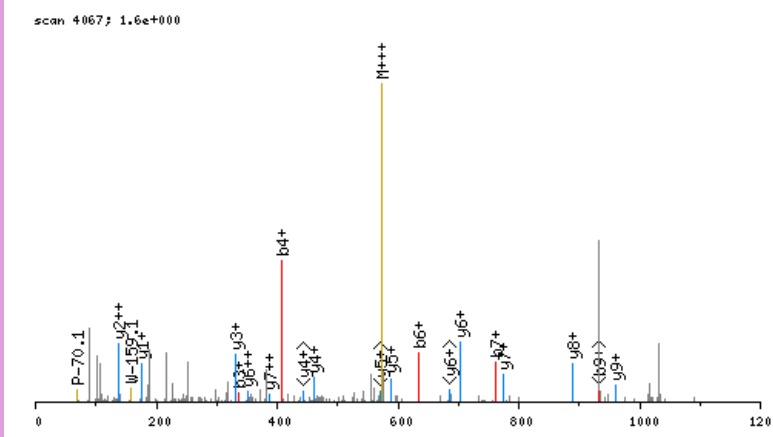

click image to zoom in; click top corners to zoom out [\[precursor±\]](#)

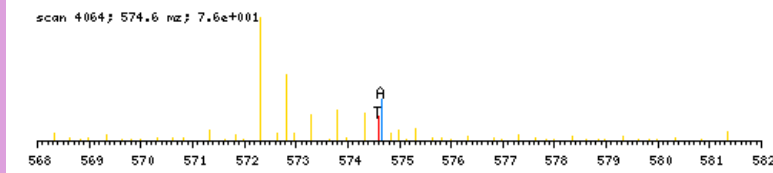

zoomed in precursor plot; T=theoretical m/z, A=acquired m/z

| b <sup>+</sup> | #  | AA # | y <sup>+</sup> | y <sup>2+</sup> |
|----------------|----|------|----------------|-----------------|
| 166.1114       | 1  | M 16 |                |                 |
| 279.1954       | 2  | L 15 | 1556.7193      | 778.8635        |
| 336.2169       | 3  | G 14 | 1443.6352      | 722.3215        |
| 407.2540       | 4  | A 13 | 1386.6137      | 693.8108        |
| 504.3068       | 5  | P 12 | 1315.5766      | 658.2922        |
| 633.3494       | 6  | E 11 | 1218.5238      | 609.7658        |
| 762.3920       | 7  | E 10 | 1089.4813      | 545.2445        |
| 833.4291       | 8  | A 9  | 960.4387       | 480.7232        |
| 948.4560       | 9  | D 8  | 889.4015       | 445.2047        |
| 1019.4931      | 10 | A 7  | 774.3746       | 387.6912        |
| 1133.5361      | 11 | N 6  | 703.3375       | 352.1727        |
| 1262.5787      | 12 | E 5  | 589.2946       | 295.1512        |
| 1391.6213      | 13 | E 4  | 460.2520       | 230.6299        |
| 1448.6427      | 14 | G 3  | 331.2094       | 166.1086        |
| 1547.7111      | 15 | V 2  | 274.1879       | 137.5979        |
|                | 16 | R 1  | 175.1195       | 88.0637         |

N-term:+35.07

MNTELAAFTKNQKDPGVLDLDR, MH+ 2332.2335, m/z 583.8138  
 L OSG40 P180811 230811-s1.06247.06247.4.dta

X-range:

-

MassTol: Y-zoom:

MassType:

AVG  MONO

Axis:

1  2

Label:

I  M  -

Ions:

a  +  2+  3+

b  +  2+  3+

c  +  2+  3+

x  +  2+  3+

y  +  2+  3+

z  +  2+  3+

hide H<sub>2</sub>O/NH<sub>3</sub>

zoom 112-122

GO

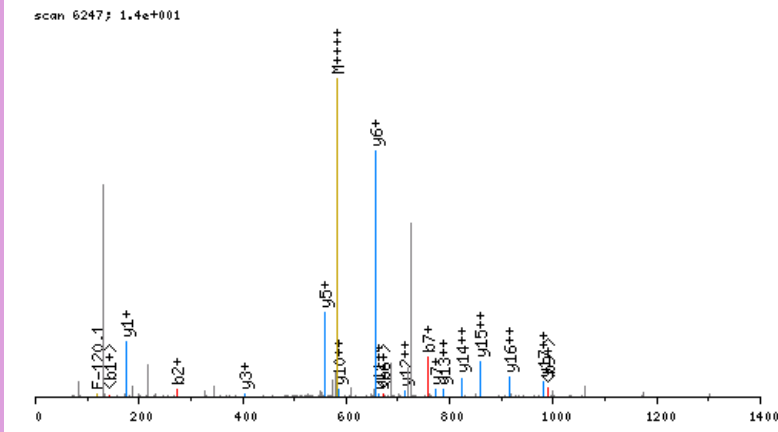

click image to zoom in; click top corners to zoom out [\[precursor±\]](#)

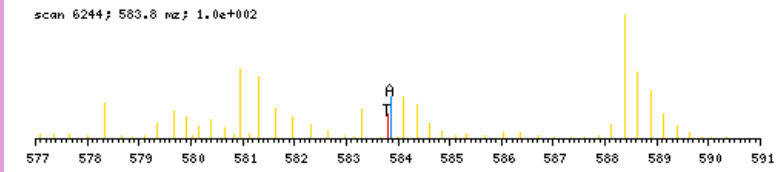

zoomed in precursor plot; T=theoretical m/z, A=acquired m/z

| b <sup>+</sup> | #  | AA | #  | y <sup>+</sup> | y <sup>2+</sup> |
|----------------|----|----|----|----------------|-----------------|
| 160.0796       | 1  | M  | 20 |                |                 |
| 274.1225       | 2  | N  | 19 | 2173.1618      | 1087.0848       |
| 375.1702       | 3  | T  | 18 | 2059.1189      | 1030.0633       |
| 504.2128       | 4  | E  | 17 | 1958.0712      | 979.5395        |
| 617.2968       | 5  | L  | 16 | 1829.0286      | 915.0182        |
| 688.3340       | 6  | A  | 15 | 1715.9445      | 858.4762        |
| 759.3711       | 7  | A  | 14 | 1644.9074      | 822.9576        |
| 906.4395       | 8  | F  | 13 | 1573.8703      | 787.4391        |
| 1007.4872      | 9  | T  | 12 | 1426.8019      | 713.9049        |
| 1163.6135      | 10 | K  | 11 | 1325.7542      | 663.3810        |
| 1277.6564      | 11 | N  | 10 | 1169.6279      | 585.3179        |
| 1405.7150      | 12 | Q  | 9  | 1055.5850      | 528.2964        |
| 1561.8413      | 13 | K  | 8  | 927.5264       | 464.2671        |
| 1676.8682      | 14 | D  | 7  | 771.4001       | 386.2040        |
| 1773.9210      | 15 | P  | 6  | 656.3731       | 328.6905        |
| 1830.9424      | 16 | G  | 5  | 559.3204       | 280.1641        |
| 1930.0109      | 17 | V  | 4  | 502.2989       | 251.6534        |
| 2043.0949      | 18 | L  | 3  | 403.2305       | 202.1192        |
| 2158.1219      | 19 | D  | 2  | 290.1464       | 145.5771        |
|                | 20 | R  | 1  | 175.1195       | 88.0637         |

N-term: +29.04 K(10): +156.13  
 K(13): +156.13

MPPPPPVSTAVQPPGAPPVR, MH+ 2117.1581, m/z 706.3909  
 L OSG36 P180811 230811-s1.04052.04052.3.dta

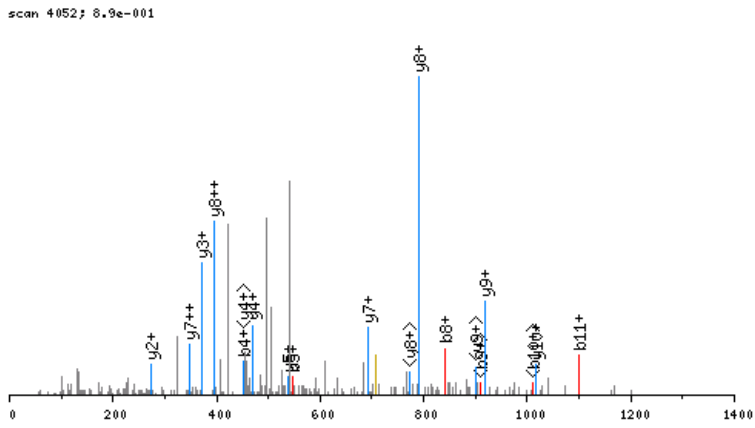

click image to zoom in; click top corners to zoom out [\[precursor±\]](#)

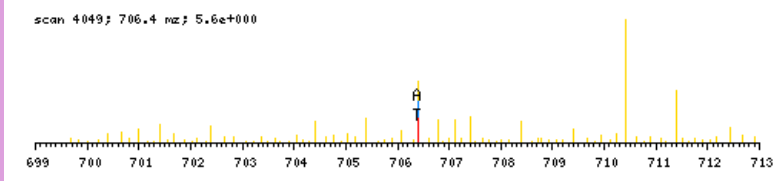

zoomed in precursor plot; T=theoretical m/z, A=acquired m/z

X-range:

-

MassTol: Y-zoom:

MassType:

AVG  MONO

Axis:

1  2

Label:

I  M  -

Ions:

a  +  2+  3+

b  +  2+  3+

c  +  2+  3+

x  +  2+  3+

y  +  2+  3+

z  +  2+  3+

hide H<sub>2</sub>O/NH<sub>3</sub>

zoom 112-122

GO

| b <sup>+</sup> | #  | AA # | y <sup>+</sup> | y <sup>2+</sup> |
|----------------|----|------|----------------|-----------------|
| 160.0796       | 1  | M 21 |                |                 |
| 257.1323       | 2  | P 20 | 1958.0864      | 979.5471        |
| 354.1851       | 3  | P 19 | 1861.0336      | 931.0207        |
| 451.2379       | 4  | P 18 | 1763.9808      | 882.4943        |
| 548.2906       | 5  | P 17 | 1666.9281      | 833.9679        |
| 645.3434       | 6  | P 16 | 1569.8753      | 785.4416        |
| 742.3962       | 7  | P 15 | 1472.8225      | 736.9152        |
| 841.4646       | 8  | V 14 | 1375.7698      | 688.3888        |
| 928.4966       | 9  | S 13 | 1276.7014      | 638.8546        |
| 1029.5443      | 10 | T 12 | 1189.6693      | 595.3386        |
| 1100.5814      | 11 | A 11 | 1088.6217      | 544.8147        |
| 1199.6498      | 12 | V 10 | 1017.5845      | 509.2962        |
| 1327.7084      | 13 | Q 9  | 918.5161       | 459.7620        |
| 1424.7612      | 14 | P 8  | 790.4575       | 395.7327        |
| 1521.8139      | 15 | P 7  | 693.4048       | 347.2063        |
| 1578.8354      | 16 | G 6  | 596.3520       | 298.6799        |
| 1649.8725      | 17 | A 5  | 539.3306       | 270.1692        |
| 1746.9253      | 18 | P 4  | 468.2934       | 234.6506        |
| 1843.9780      | 19 | P 3  | 371.2407       | 186.1243        |
| 1943.0464      | 20 | V 2  | 274.1879       | 137.5979        |
|                | 21 | R 1  | 175.1195       | 88.0637         |

N-term:+29.04

MQDPDEEALRR, MH+ 1393.6958, m/z 465.2368  
 H OSG40 P180811 230811-s1.02903.02903.3.dta

scan 2903; 1.9e+001

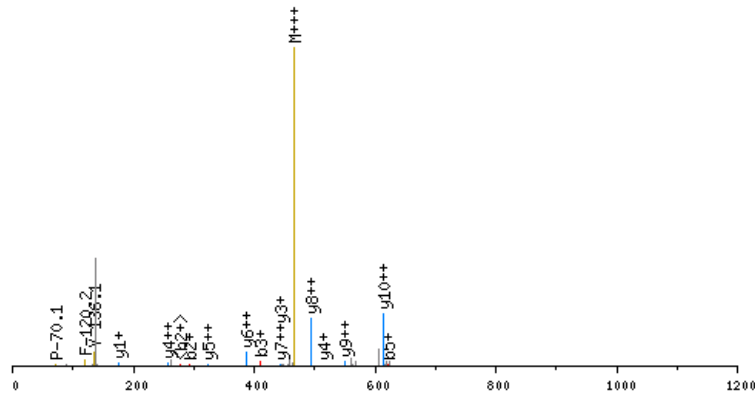

click image to zoom in; click top corners to zoom out [\[precursor±\]](#)

scan 2899; 465.2 m/z; 5.8e+001

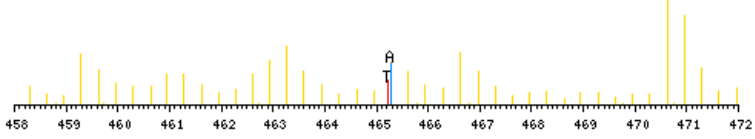

zoomed in precursor plot; T=theoretical m/z, A=acquired m/z

X-range:

-

MassTol: Y-zoom:

MassType:

AVG  MONO

Axis:

1  2

Label:

I  M  -

Ions:

a  +  2+  3+

b  +  2+  3+

c  +  2+  3+

x  +  2+  3+

y  +  2+  3+

z  +  2+  3+

hide H<sub>2</sub>O/NH<sub>3</sub>

zoom 112-122

GO

| b <sup>+</sup> | #  | AA # | y <sup>+</sup> | y <sup>2+</sup> |
|----------------|----|------|----------------|-----------------|
| 166.1114       | 1  | M    | 11             |                 |
| 294.1700       | 2  | Q    | 10             | 1228.5922       |
| 409.1969       | 3  | D    | 9              | 1100.5336       |
| 506.2497       | 4  | P    | 8              | 985.5067        |
| 621.2766       | 5  | D    | 7              | 888.4539        |
| 750.3192       | 6  | E    | 6              | 773.4270        |
| 879.3618       | 7  | E    | 5              | 644.3844        |
| 950.3989       | 8  | A    | 4              | 515.3418        |
| 1063.4830      | 9  | L    | 3              | 444.3047        |
| 1219.5841      | 10 | R    | 2              | 331.2206        |
|                | 11 | R    | 1              | 175.1195        |

N-term:+35.07

MQQVEASLQPETLR, MH+ 1657.8583, m/z 553.2910  
 L OSG37 P180811 230811-s1.05058.05058.3.dta

scan 5058; 3.3e+000

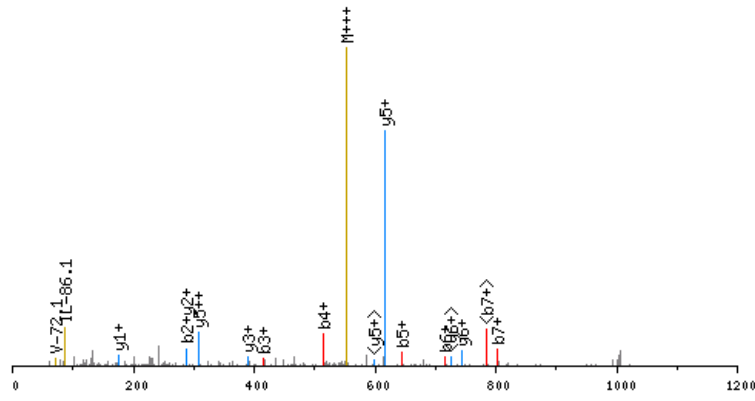

click image to zoom in; click top corners to zoom out [\[precursor±\]](#)

scan 5054; 553.3 m/z; 1.3e+001

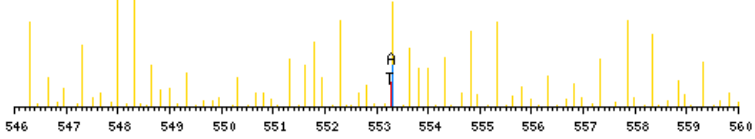

zoomed in precursor plot; T=theoretical m/z, A=acquired m/z

X-range:

-

MassTol: Y-zoom:

MassType:

AVG  MONO

Axis:

1  2

Label:

I  M  -

Ions:

a  +  2+  3+

b  +  2+  3+

c  +  2+  3+

x  +  2+  3+

y  +  2+  3+

z  +  2+  3+

hide H<sub>2</sub>O/NH<sub>3</sub>

zoom 112-122

GO

| b <sup>+</sup> | #  | AA # | y <sup>+</sup> | y <sup>2+</sup> |
|----------------|----|------|----------------|-----------------|
| 160.0796       | 1  | M 14 |                |                 |
| 288.1382       | 2  | Q 13 | 1498.7865      | 749.8972        |
| 416.1967       | 3  | Q 12 | 1370.7280      | 685.8679        |
| 515.2652       | 4  | V 11 | 1242.6694      | 621.8386        |
| 644.3077       | 5  | E 10 | 1143.6010      | 572.3044        |
| 715.3449       | 6  | A 9  | 1014.5584      | 507.7831        |
| 802.3769       | 7  | S 8  | 943.5213       | 472.2645        |
| 915.4610       | 8  | L 7  | 856.4892       | 428.7485        |
| 1043.5195      | 9  | Q 6  | 743.4052       | 372.2065        |
| 1140.5723      | 10 | P 5  | 615.3466       | 308.1772        |
| 1269.6149      | 11 | E 4  | 518.2938       | 259.6508        |
| 1370.6626      | 12 | T 3  | 389.2512       | 195.1295        |
| 1483.7466      | 13 | L 2  | 288.2036       | 144.6057        |
|                | 14 | R 1  | 175.1195       | 88.0637         |

N-term:+29.04



MSLPELQQNPLVQR, MH+ 1686.9425, m/z 562.9857  
 H OSG37 P180811 230811-s1.07593.07593.3.dta

X-range:

-

MassTol: Y-zoom:

MassType:

AVG  MONO

Axis:

1  2

Label:

I  M  -

Ions:

a  +  2+  3+

b  +  2+  3+

c  +  2+  3+

x  +  2+  3+

y  +  2+  3+

z  +  2+  3+

hide H<sub>2</sub>O/NH<sub>3</sub>

zoom 112-122

GO

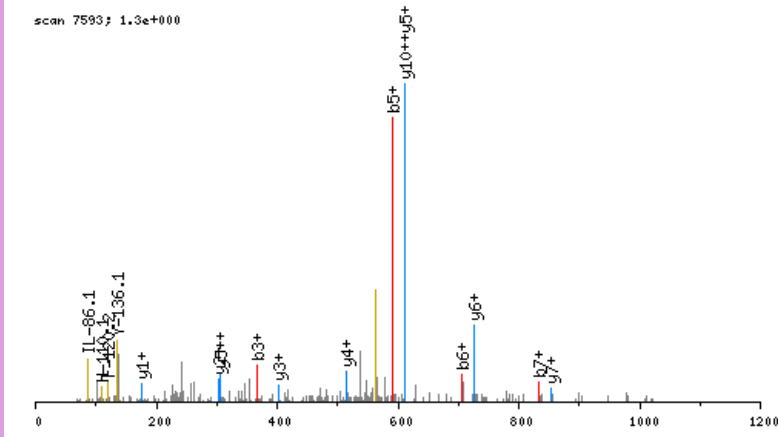

click image to zoom in; click top corners to zoom out [\[precursor±\]](#)

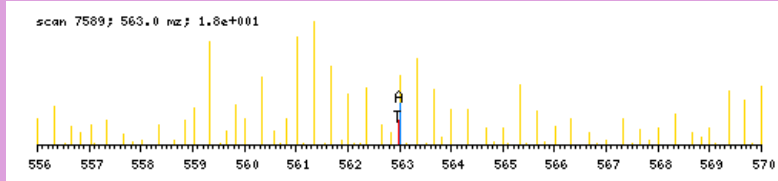

zoomed in precursor plot; T=theoretical m/z, A=acquired m/z

| b <sup>+</sup> | #  | AA # | y <sup>+</sup> | y <sup>2+</sup> |
|----------------|----|------|----------------|-----------------|
| 166.1114       | 1  | M 14 |                |                 |
| 253.1434       | 2  | S 13 | 1521.8389      | 761.4234        |
| 366.2275       | 3  | L 12 | 1434.8069      | 717.9074        |
| 463.2802       | 4  | P 11 | 1321.7228      | 661.3653        |
| 592.3228       | 5  | E 10 | 1224.6701      | 612.8389        |
| 705.4069       | 6  | L 9  | 1095.6275      | 548.3176        |
| 833.4655       | 7  | Q 8  | 982.5434       | 491.7756        |
| 961.5241       | 8  | Q 7  | 854.4848       | 427.7463        |
| 1075.5670      | 9  | N 6  | 726.4262       | 363.7170        |
| 1172.6197      | 10 | P 5  | 612.3833       | 306.6956        |
| 1285.7038      | 11 | L 4  | 515.3306       | 258.1692        |
| 1384.7722      | 12 | V 3  | 402.2465       | 201.6272        |
| 1512.8308      | 13 | Q 2  | 303.1781       | 152.0930        |
|                | 14 | R 1  | 175.1195       | 88.0637         |

N-term:+35.07

MSYGYDEKSAGVSVPGPMGPGSGPR, MH+ 2494.2383, m/z 832.0843  
 H OSG38 P180811 230811-s1.05545.05545.3.dta

scan 5545; 8.0e+000

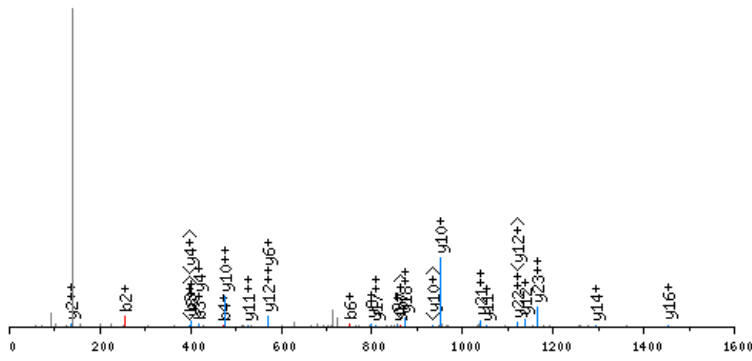

click image to zoom in; click top corners to zoom out [precursor±]

scan 5544; 832.1 m/z; 1.6e+001

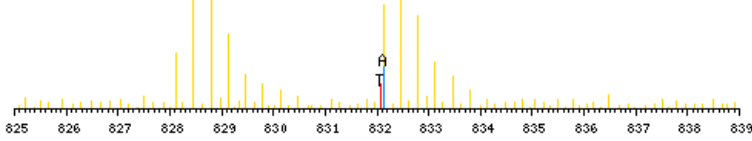

zoomed in precursor plot; T=theoretical m/z, A=acquired m/z

X-range:

-

MassTol: Y-zoom:

MassType:

AVG  MONO

Axis:

1  2

Label:

I  M  -

Ions:

a  +  2+  3+

b  +  2+  3+

c  +  2+  3+

x  +  2+  3+

y  +  2+  3+

z  +  2+  3+

hide H<sub>2</sub>O/NH<sub>3</sub>

zoom 112-122

GO

| b <sup>+</sup> | #  | AA # | y <sup>+</sup> | y <sup>2+</sup> |
|----------------|----|------|----------------|-----------------|
| 166.1114       | 1  | M 24 |                |                 |
| 253.1434       | 2  | S 23 | 2329.1347      | 1165.0713       |
| 416.2067       | 3  | Y 22 | 2242.1027      | 1121.5553       |
| 473.2282       | 4  | G 21 | 2079.0394      | 1040.0236       |
| 636.2915       | 5  | Y 20 | 2022.0179      | 1011.5129       |
| 751.3185       | 6  | D 19 | 1858.9546      | 929.9812        |
| 880.3611       | 7  | E 18 | 1743.9276      | 872.4677        |
| 1042.5192      | 8  | K 17 | 1614.8850      | 807.9464        |
| 1129.5512      | 9  | S 16 | 1452.7269      | 726.8674        |
| 1200.5883      | 10 | A 15 | 1365.6949      | 683.3514        |
| 1257.6098      | 11 | G 14 | 1294.6578      | 647.8328        |
| 1356.6782      | 12 | V 13 | 1237.6363      | 619.3221        |
| 1443.7102      | 13 | S 12 | 1138.5679      | 569.7879        |
| 1542.7786      | 14 | V 11 | 1051.5359      | 526.2718        |
| 1639.8314      | 15 | P 10 | 952.4675       | 476.7376        |
| 1696.8529      | 16 | G 9  | 855.4147       | 428.2113        |
| 1793.9056      | 17 | P 8  | 798.3932       | 399.7005        |
| 1924.9461      | 18 | M 7  | 701.3405       | 351.1741        |
| 1981.9676      | 19 | G 6  | 570.3000       | 285.6539        |
| 2079.0203      | 20 | P 5  | 513.2785       | 257.1432        |
| 2166.0524      | 21 | S 4  | 416.2258       | 208.6168        |
| 2223.0738      | 22 | G 3  | 329.1937       | 165.1008        |
| 2320.1266      | 23 | P 2  | 272.1723       | 136.5900        |
|                | 24 | R 1  | 175.1195       | 88.0637         |

N-term:+35.07 K(8):+162.16

MTDVPVDPGVVHR, MH+ 1449.7524, m/z 483.9223  
 L OSG39 P180811 230811-s1.03722.03722.3.dta

X-range:

-

MassTol: Y-zoom:

MassType:

AVG  MONO

Axis:

1  2

Label:

I  M  -

Ions:

a  +  2+  3+

b  +  2+  3+

c  +  2+  3+

x  +  2+  3+

y  +  2+  3+

z  +  2+  3+

hide H<sub>2</sub>O/NH<sub>3</sub>

zoom 112-122

GO

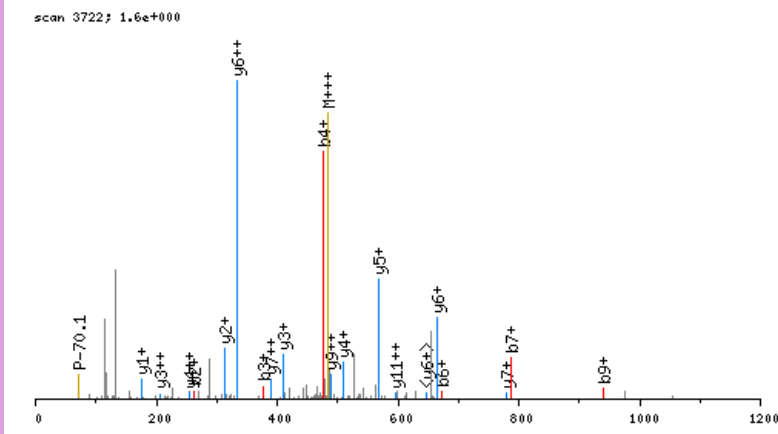

click image to zoom in; click top corners to zoom out [\[precursor±\]](#)

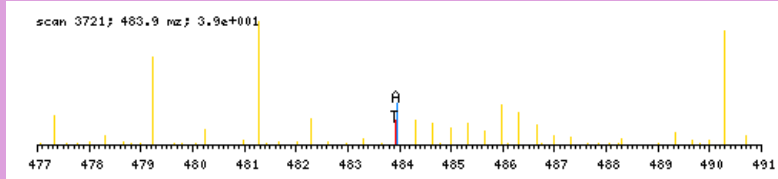

zoomed in precursor plot; T=theoretical m/z, A=acquired m/z

| b <sup>+</sup> | #  | AA # | y <sup>+</sup> | y <sup>2+</sup> |
|----------------|----|------|----------------|-----------------|
| 160.0796       | 1  | M 13 |                |                 |
| 261.1273       | 2  | T 12 | 1290.6806      | 645.8442        |
| 376.1542       | 3  | D 11 | 1189.6329      | 595.3204        |
| 475.2226       | 4  | V 10 | 1074.6060      | 537.8069        |
| 572.2754       | 5  | P 9  | 975.5376       | 488.2727        |
| 671.3438       | 6  | V 8  | 878.4848       | 439.7463        |
| 786.3707       | 7  | D 7  | 779.4164       | 390.2121        |
| 883.4235       | 8  | P 6  | 664.3895       | 332.6986        |
| 940.4450       | 9  | G 5  | 567.3367       | 284.1723        |
| 1039.5134      | 10 | V 4  | 510.3152       | 255.6615        |
| 1138.5818      | 11 | V 3  | 411.2468       | 206.1273        |
| 1275.6407      | 12 | H 2  | 312.1784       | 156.5931        |
|                | 13 | R 1  | 175.1195       | 88.0637         |

N-term:+29.04

MTGTEYMQDPDEEALR, MH+ 1913.8261, m/z 638.6135  
 L OSG37 P180811 230811-s1.05378.05378.3.dta

X-range:

-

MassTol: Y-zoom:

MassType:

AVG  MONO

Axis:

1  2

Label:

I  M  -

Ions:

a  +  2+  3+

b  +  2+  3+

c  +  2+  3+

x  +  2+  3+

y  +  2+  3+

z  +  2+  3+

hide H<sub>2</sub>O/NH<sub>3</sub>

zoom 112-122

GO

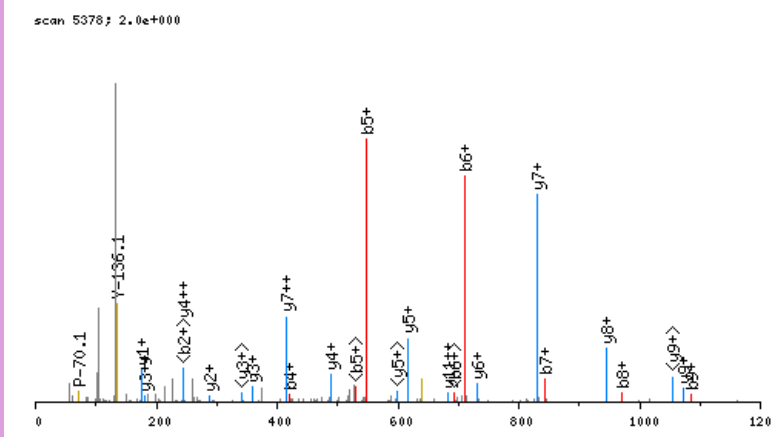

click image to zoom in; click top corners to zoom out [\[precursor±\]](#)

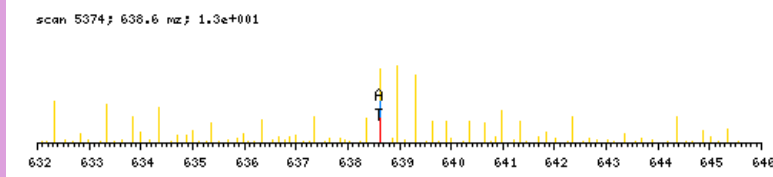

zoomed in precursor plot; T=theoretical m/z, A=acquired m/z

| b <sup>+</sup> | #  | AA # | y <sup>+</sup> | y <sup>2+</sup> |
|----------------|----|------|----------------|-----------------|
| 160.0796       | 1  | M 16 |                |                 |
| 261.1273       | 2  | T 15 | 1754.7543      | 877.8811        |
| 318.1487       | 3  | G 14 | 1653.7066      | 827.3572        |
| 419.1964       | 4  | T 13 | 1596.6852      | 798.8465        |
| 548.2390       | 5  | E 12 | 1495.6375      | 748.3227        |
| 711.3023       | 6  | Y 11 | 1366.5949      | 683.8014        |
| 842.3428       | 7  | M 10 | 1203.5316      | 602.2697        |
| 970.4014       | 8  | Q 9  | 1072.4911      | 536.7495        |
| 1085.4283      | 9  | D 8  | 944.4325       | 472.7202        |
| 1182.4811      | 10 | P 7  | 829.4056       | 415.2067        |
| 1297.5080      | 11 | D 6  | 732.3528       | 366.6803        |
| 1426.5506      | 12 | E 5  | 617.3259       | 309.1668        |
| 1555.5932      | 13 | E 4  | 488.2833       | 244.6455        |
| 1626.6303      | 14 | A 3  | 359.2407       | 180.1243        |
| 1739.7144      | 15 | L 2  | 288.2036       | 144.6057        |
|                | 16 | R 1  | 175.1195       | 88.0637         |

N-term:+29.04

MTGTEYMQDPDEEALRR, MH+ 2069.9272, m/z 690.6472  
 L OSG39 P180811 230811-s1.04108.04108.3.dta

X-range:

-

MassTol: Y-zoom:

MassType:

AVG  MONO

Axis:

1  2

Label:

I  M  -

Ions:

a  +  2+  3+

b  +  2+  3+

c  +  2+  3+

x  +  2+  3+

y  +  2+  3+

z  +  2+  3+

hide H<sub>2</sub>O/NH<sub>3</sub>

zoom 112-122

GO

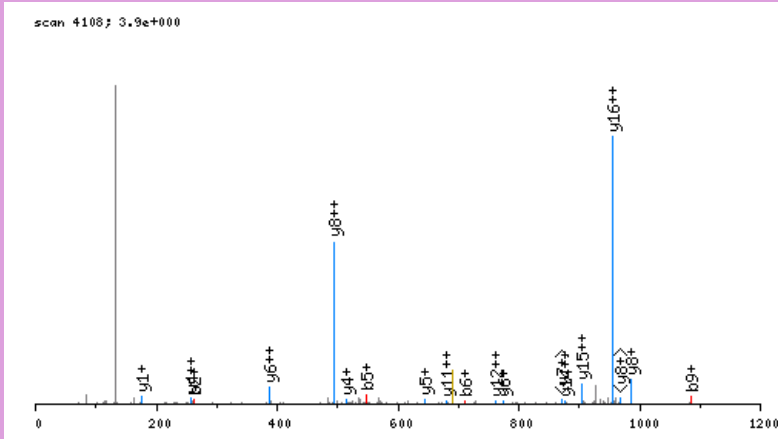

click image to zoom in; click top corners to zoom out [\[precursor±\]](#)

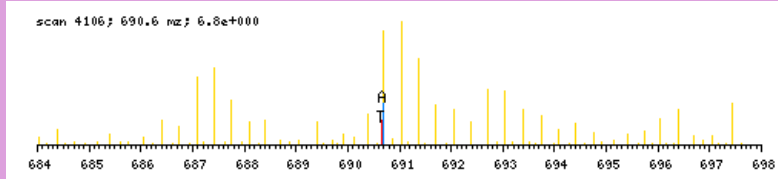

zoomed in precursor plot; T=theoretical m/z, A=acquired m/z

| b <sup>+</sup>   | #  | AA # | y <sup>+</sup>  | y <sup>2+</sup> |
|------------------|----|------|-----------------|-----------------|
| 160.0796         | 1  | M 17 |                 |                 |
| <b>261.1273</b>  | 2  | T 16 | 1910.8554       | <b>955.9316</b> |
| 318.1487         | 3  | G 15 | 1809.8078       | <b>905.4078</b> |
| 419.1964         | 4  | T 14 | 1752.7863       | <b>876.8971</b> |
| <b>548.2390</b>  | 5  | E 13 | 1651.7386       | 826.3732        |
| <b>711.3023</b>  | 6  | Y 12 | 1522.6960       | <b>761.8519</b> |
| 842.3428         | 7  | M 11 | 1359.6327       | <b>680.3203</b> |
| 970.4014         | 8  | Q 10 | 1228.5922       | 614.8000        |
| <b>1085.4283</b> | 9  | D 9  | 1100.5336       | 550.7707        |
| 1182.4811        | 10 | P 8  | <b>985.5067</b> | <b>493.2573</b> |
| 1297.5080        | 11 | D 7  | 888.4539        | 444.7309        |
| 1426.5506        | 12 | E 6  | <b>773.4270</b> | <b>387.2174</b> |
| 1555.5932        | 13 | E 5  | <b>644.3844</b> | 322.6961        |
| 1626.6303        | 14 | A 4  | <b>515.3418</b> | <b>258.1748</b> |
| 1739.7144        | 15 | L 3  | 444.3047        | 222.6563        |
| 1895.8155        | 16 | R 2  | 331.2206        | 166.1142        |
|                  | 17 | R 1  | <b>175.1195</b> | 88.0637         |

N-term:+29.04

MTPELSSAHNVIVTER, MH+ 1811.9325, m/z 604.6490  
 L OSG39 P180811 230811-s1.04085.04085.3.dta

X-range:

-

MassTol: Y-zoom:

MassType:

AVG  MONO

Axis:

1  2

Label:

I  M  -

Ions:

a  +  2+  3+

b  +  2+  3+

c  +  2+  3+

x  +  2+  3+

y  +  2+  3+

z  +  2+  3+

hide H<sub>2</sub>O/NH<sub>3</sub>

zoom 112-122

GO

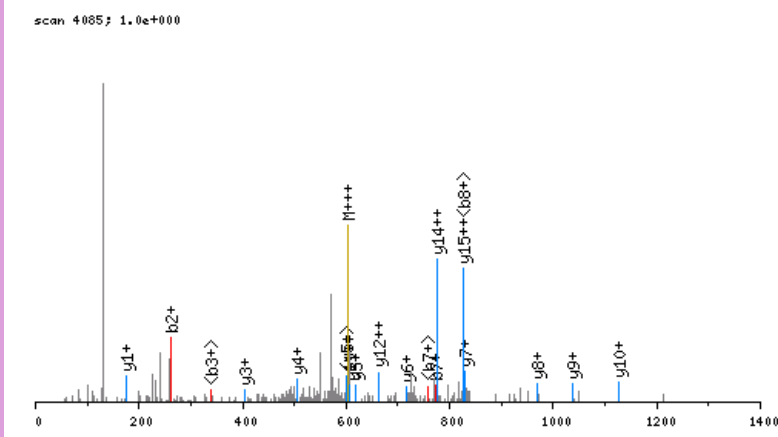

click image to zoom in; click top corners to zoom out [\[precursor±\]](#)

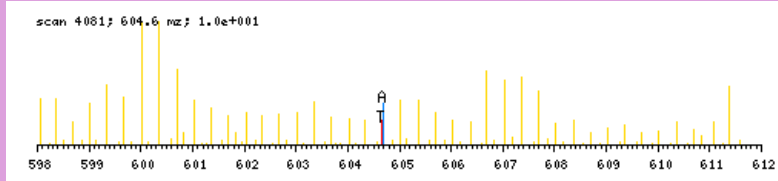

zoomed in precursor plot; T=theoretical m/z, A=acquired m/z

| b <sup>+</sup> | #  | AA # | y <sup>+</sup> | y <sup>2+</sup> |
|----------------|----|------|----------------|-----------------|
| 160.0796       | 1  | M 16 |                |                 |
| 261.1273       | 2  | T 15 | 1652.8608      | 826.9343        |
| 358.1800       | 3  | P 14 | 1551.8131      | 776.4105        |
| 487.2226       | 4  | E 13 | 1454.7603      | 727.8841        |
| 600.3067       | 5  | L 12 | 1325.7177      | 663.3628        |
| 687.3387       | 6  | S 11 | 1212.6337      | 606.8207        |
| 774.3707       | 7  | S 10 | 1125.6016      | 563.3047        |
| 845.4079       | 8  | A 9  | 1038.5696      | 519.7887        |
| 982.4668       | 9  | H 8  | 967.5325       | 484.2702        |
| 1096.5097      | 10 | N 7  | 830.4736       | 415.7407        |
| 1195.5781      | 11 | V 6  | 716.4307       | 358.7192        |
| 1308.6622      | 12 | I 5  | 617.3623       | 309.1850        |
| 1407.7306      | 13 | V 4  | 504.2782       | 252.6430        |
| 1508.7783      | 14 | T 3  | 405.2098       | 203.1088        |
| 1637.8209      | 15 | E 2  | 304.1621       | 152.5850        |
|                | 16 | R 1  | 175.1195       | 88.0637         |

N-term:+29.04

MVDNEAIYDICR, MH+ 1532.7301, m/z 511.5815  
 H OSG37 P180811 230811-s1.05672.05672.3.dta

X-range:

-

MassTol: Y-zoom:

MassType:

AVG  MONO

Axis:

1  2

Label:

I  M  -

Ions:

a  +  2+  3+

b  +  2+  3+

c  +  2+  3+

x  +  2+  3+

y  +  2+  3+

z  +  2+  3+

hide H<sub>2</sub>O/NH<sub>3</sub>

zoom 112-122

GO

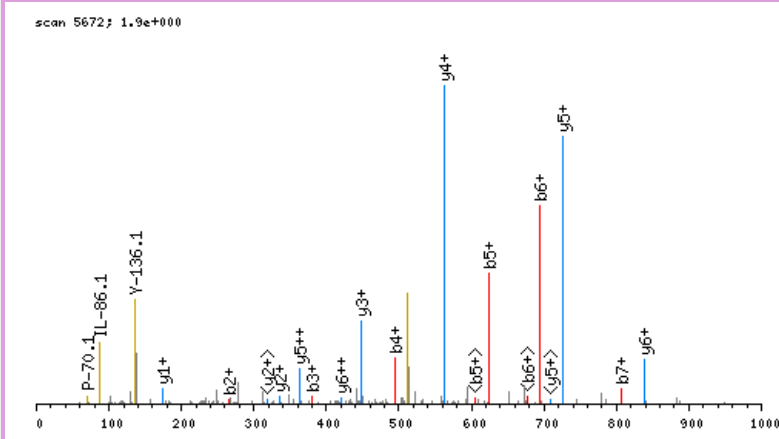

click image to zoom in; click top corners to zoom out [\[precursor±\]](#)

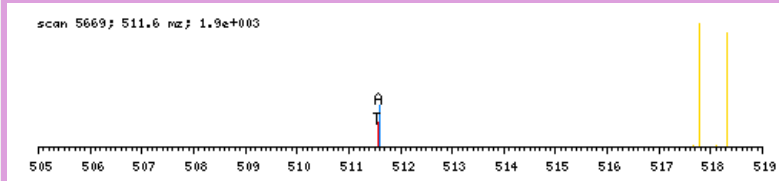

zoomed in precursor plot; T=theoretical m/z, A=acquired m/z

| b <sup>+</sup> | #  | AA # | y <sup>+</sup> | y <sup>2+</sup> |
|----------------|----|------|----------------|-----------------|
| 166.1114       | 1  | M 12 |                |                 |
| 265.1798       | 2  | V 11 | 1367.6265      | 684.3172        |
| 380.2067       | 3  | D 10 | 1268.5581      | 634.7830        |
| 494.2497       | 4  | N 9  | 1153.5311      | 577.2695        |
| 623.2923       | 5  | E 8  | 1039.4882      | 520.2480        |
| 694.3294       | 6  | A 7  | 910.4456       | 455.7267        |
| 807.4134       | 7  | I 6  | 839.4085       | 420.2082        |
| 970.4768       | 8  | Y 5  | 726.3244       | 363.6661        |
| 1085.5037      | 9  | D 4  | 563.2611       | 282.1345        |
| 1198.5878      | 10 | I 3  | 448.2342       | 224.6210        |
| 1358.6184      | 11 | C 2  | 335.1501       | 168.0790        |
|                | 12 | R 1  | 175.1195       | 88.0637         |

N-term:+35.07 C(11):+160.03

MVIENDAGDER, MH+ 1282.6161, m/z 641.8117  
 H OSG37 P180811 230811-s1.02745.02745.2.dta

X-range:

-

MassTol: Y-zoom:

MassType:

AVG  MONO

Axis:

1  2

Label:

I  M  -

Ions:

a  +  2+  3+

b  +  2+  3+

c  +  2+  3+

x  +  2+  3+

y  +  2+  3+

z  +  2+  3+

hide H<sub>2</sub>O/NH<sub>3</sub>

zoom 112-122

GO

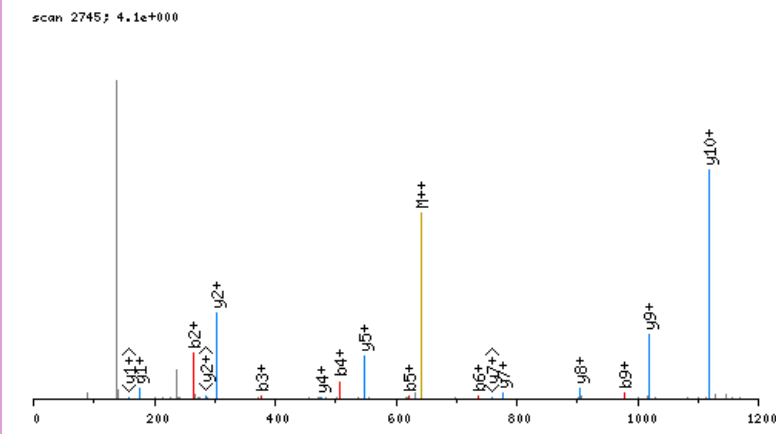

click image to zoom in; click top corners to zoom out [\[precursor±\]](#)

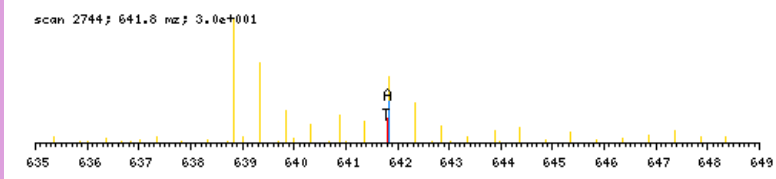

zoomed in precursor plot; T=theoretical m/z, A=acquired m/z

| b <sup>+</sup> | #  | AA # | y <sup>+</sup> | y <sup>2+</sup> |
|----------------|----|------|----------------|-----------------|
| 166.1114       | 1  | M 11 |                |                 |
| 265.1798       | 2  | V 10 | 1117.5126      | 559.2602        |
| 378.2639       | 3  | I 9  | 1018.4441      | 509.7260        |
| 507.3065       | 4  | E 8  | 905.3601       | 453.1840        |
| 621.3494       | 5  | N 7  | 776.3175       | 388.6627        |
| 736.3763       | 6  | D 6  | 662.2746       | 331.6412        |
| 807.4134       | 7  | A 5  | 547.2476       | 274.1277        |
| 864.4349       | 8  | G 4  | 476.2105       | 238.6092        |
| 979.4618       | 9  | D 3  | 419.1890       | 210.0984        |
| 1108.5044      | 10 | E 2  | 304.1621       | 152.5850        |
|                | 11 | R 1  | 175.1195       | 88.0637         |

N-term:+35.07



MWNEHLGYVLTCPNLGTGLR, MH+ 2452.2329, m/z 818.0825  
 H OSG39 P180811 230811-s1.07165.07165.3.dta

X-range:

-

MassTol: Y-zoom:

MassType:

AVG  MONO

Axis:

1  2

Label:

I  M  -

Ions:

a  +  2+  3+

b  +  2+  3+

c  +  2+  3+

x  +  2+  3+

y  +  2+  3+

z  +  2+  3+

hide H<sub>2</sub>O/NH<sub>3</sub>

zoom 112-122

GO

scan 7165; 1.5e+000

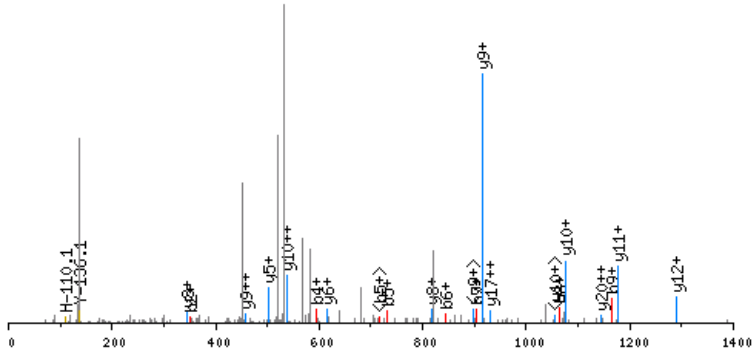

click image to zoom in; click top corners to zoom out [precursor±]

scan 7161; 818.1 m/z; 1.2e+001

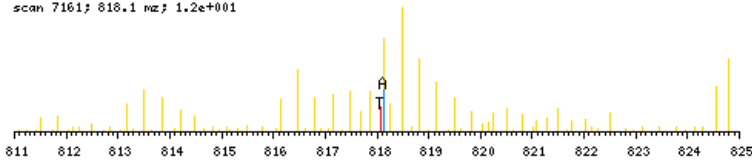

zoomed in precursor plot; T=theoretical m/z, A=acquired m/z

| b <sup>+</sup> | #  | AA | #  | y <sup>+</sup> | y <sup>2+</sup> |
|----------------|----|----|----|----------------|-----------------|
| 166.1114       | 1  | M  | 21 |                |                 |
| 352.1907       | 2  | W  | 20 | 2287.1293      | 1144.0686       |
| 466.2336       | 3  | N  | 19 | 2101.0500      | 1051.0289       |
| 595.2762       | 4  | E  | 18 | 1987.0071      | 994.0074        |
| 732.3351       | 5  | H  | 17 | 1857.9645      | 929.4862        |
| 845.4192       | 6  | L  | 16 | 1720.9056      | 860.9567        |
| 902.4407       | 7  | G  | 15 | 1607.8215      | 804.4147        |
| 1065.5040      | 8  | Y  | 14 | 1550.8000      | 775.9039        |
| 1164.5724      | 9  | V  | 13 | 1387.7367      | 694.3723        |
| 1277.6565      | 10 | L  | 12 | 1288.6683      | 644.8381        |
| 1378.7041      | 11 | T  | 11 | 1175.5842      | 588.2960        |
| 1538.7347      | 12 | C  | 10 | 1074.5366      | 537.7722        |
| 1635.7875      | 13 | P  | 9  | 914.5060       | 457.7569        |
| 1722.8195      | 14 | S  | 8  | 817.4532       | 409.2305        |
| 1836.8625      | 15 | N  | 7  | 730.4212       | 365.7145        |
| 1949.9465      | 16 | L  | 6  | 616.3782       | 308.6930        |
| 2006.9680      | 17 | G  | 5  | 503.2942       | 252.1510        |
| 2108.0157      | 18 | T  | 4  | 446.2727       | 223.6403        |
| 2165.0371      | 19 | G  | 3  | 345.2250       | 173.1164        |
| 2278.1212      | 20 | L  | 2  | 288.2036       | 144.6057        |
|                | 21 | R  | 1  | 175.1195       | 88.0637         |

N-term:+35.07 C(12):+160.03

NATEPVISFYDKR, MH+ 1607.9069, m/z 536.6405  
 H OSG40 P180811 230811-s1.05878.05878.3.dta

X-range:

-

MassTol: Y-zoom:

MassType:

AVG  MONO

Axis:

1  2

Label:

I  M  -

Ions:

a  +  2+  3+

b  +  2+  3+

c  +  2+  3+

x  +  2+  3+

y  +  2+  3+

z  +  2+  3+

hide H<sub>2</sub>O/NH<sub>3</sub>

zoom 112-122

GO

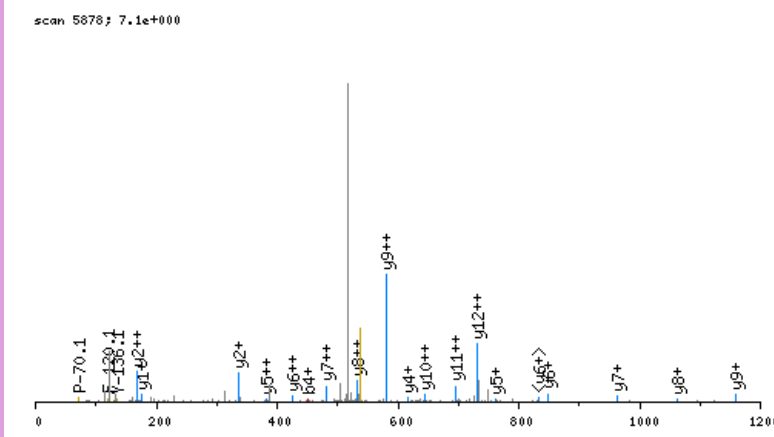

click image to zoom in; click top corners to zoom out [\[precursor±\]](#)

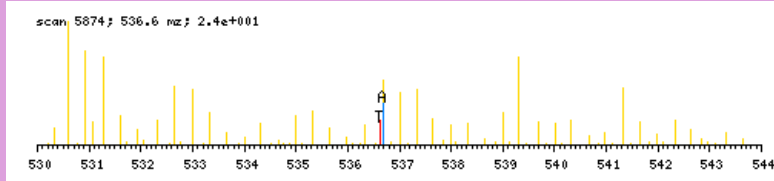

zoomed in precursor plot; T=theoretical m/z, A=acquired m/z

| b <sup>+</sup> | #  | AA # | y <sup>+</sup> | y <sup>2+</sup> |
|----------------|----|------|----------------|-----------------|
| 149.1138       | 1  | N 13 |                |                 |
| 220.1509       | 2  | A 12 | 1459.8009      | 730.4044        |
| 321.1986       | 3  | T 11 | 1388.7638      | 694.8858        |
| 450.2412       | 4  | E 10 | 1287.7161      | 644.3620        |
| 547.2940       | 5  | P 9  | 1158.6736      | 579.8407        |
| 646.3624       | 6  | V 8  | 1061.6208      | 531.3143        |
| 759.4465       | 7  | I 7  | 962.5524       | 481.7801        |
| 846.4785       | 8  | S 6  | 849.4683       | 425.2381        |
| 993.5469       | 9  | F 5  | 762.4363       | 381.7221        |
| 1156.6102      | 10 | Y 4  | 615.3679       | 308.1878        |
| 1271.6372      | 11 | D 3  | 452.3045       | 226.6562        |
| 1433.7953      | 12 | K 2  | 337.2776       | 169.1427        |
|                | 13 | R 1  | 175.1195       | 88.0637         |

N-term:+35.07 K(12):+162.16

NATLSVEPEGR, MH+ 1200.6224, m/z 600.8148  
 L OSG38 P180811 230811-s1.03023.03023.2.dta

X-range:

-

MassTol: Y-zoom:

MassType:

AVG  MONO

Axis:

1  2

Label:

I  M  -

Ions:

a  +  2+  3+

b  +  2+  3+

c  +  2+  3+

x  +  2+  3+

y  +  2+  3+

z  +  2+  3+

hide H<sub>2</sub>O/NH<sub>3</sub>

zoom 112-122

GO

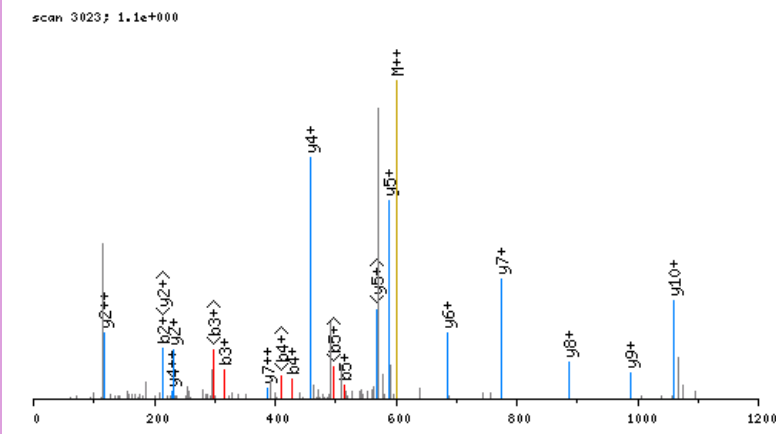

click image to zoom in; click top corners to zoom out [\[precursor±\]](#)

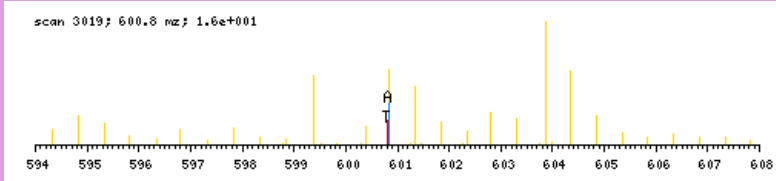

zoomed in precursor plot; T=theoretical m/z, A=acquired m/z

| b <sup>+</sup> | #  | AA # | y <sup>+</sup> | y <sup>2+</sup> |
|----------------|----|------|----------------|-----------------|
| 143.0820       | 1  | N 11 |                |                 |
| 214.1191       | 2  | A 10 | 1058.5482      | 529.7780        |
| 315.1668       | 3  | T 9  | 987.5111       | 494.2595        |
| 428.2509       | 4  | L 8  | 886.4634       | 443.7356        |
| 515.2829       | 5  | S 7  | 773.3794       | 387.1936        |
| 614.3513       | 6  | V 6  | 686.3473       | 343.6776        |
| 743.3939       | 7  | E 5  | 587.2789       | 294.1434        |
| 840.4467       | 8  | P 4  | 458.2363       | 229.6221        |
| 969.4893       | 9  | E 3  | 361.1836       | 181.0957        |
| 1026.5107      | 10 | G 2  | 232.1410       | 116.5744        |
|                | 11 | R 1  | 175.1195       | 88.0637         |

N-term:+29.04

NDVITVQTPAFAESVTEGDVR, MH+ 2276.1410, m/z 759.3852  
 L OSG37 P180811 230811-s1.07616.07616.3.dta

X-range:

-

MassTol: Y-zoom:

MassType:

AVG  MONO

Axis:

1  2

Label:

I  M  -

Ions:

a  +  2+  3+

b  +  2+  3+

c  +  2+  3+

x  +  2+  3+

y  +  2+  3+

z  +  2+  3+

hide H<sub>2</sub>O/NH<sub>3</sub>

zoom 112-122

GO

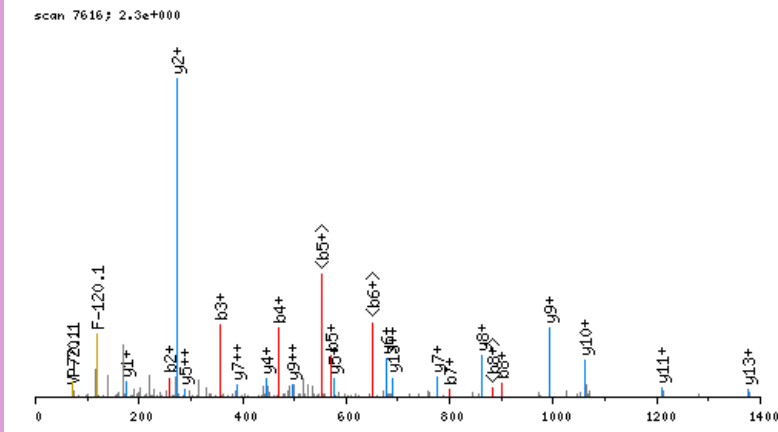

click image to zoom in; click top corners to zoom out [precursor±]

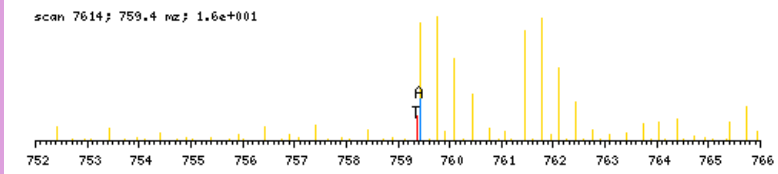

zoomed in precursor plot; T=theoretical m/z, A=acquired m/z

| b <sup>+</sup> | #  | AA | #  | y <sup>+</sup> | y <sup>2+</sup> |
|----------------|----|----|----|----------------|-----------------|
| 143.0820       | 1  | N  | 21 |                |                 |
| 258.1090       | 2  | D  | 20 | 2134.0668      | 1067.5373       |
| 357.1774       | 3  | V  | 19 | 2019.0399      | 1010.0238       |
| 470.2614       | 4  | I  | 18 | 1919.9714      | 960.4896        |
| 571.3091       | 5  | T  | 17 | 1806.8874      | 903.9476        |
| 670.3775       | 6  | V  | 16 | 1705.8397      | 853.4238        |
| 798.4361       | 7  | Q  | 15 | 1606.7713      | 803.8896        |
| 899.4838       | 8  | T  | 14 | 1478.7127      | 739.8603        |
| 996.5366       | 9  | P  | 13 | 1377.6650      | 689.3364        |
| 1067.5737      | 10 | A  | 12 | 1280.6123      | 640.8100        |
| 1214.6421      | 11 | F  | 11 | 1209.5752      | 605.2915        |
| 1285.6792      | 12 | A  | 10 | 1062.5067      | 531.7573        |
| 1414.7218      | 13 | E  | 9  | 991.4696       | 496.2387        |
| 1501.7538      | 14 | S  | 8  | 862.4270       | 431.7174        |
| 1600.8222      | 15 | V  | 7  | 775.3950       | 388.2014        |
| 1701.8699      | 16 | T  | 6  | 676.3266       | 338.6672        |
| 1830.9125      | 17 | E  | 5  | 575.2789       | 288.1434        |
| 1887.9340      | 18 | G  | 4  | 446.2363       | 223.6221        |
| 2002.9609      | 19 | D  | 3  | 389.2149       | 195.1113        |
| 2102.0293      | 20 | V  | 2  | 274.1879       | 137.5979        |
|                | 21 | R  | 1  | 175.1195       | 88.0637         |

N-term:+29.04

X-range:

-

MassTol: Y-zoom:

MassType:

AVG  MONO

Axis:

1  2

Label:

I  M  -

Ions:

a  +  2+  3+

b  +  2+  3+

c  +  2+  3+

x  +  2+  3+

y  +  2+  3+

z  +  2+  3+

hide H<sub>2</sub>O/NH<sub>3</sub>

zoom 112-122

GO

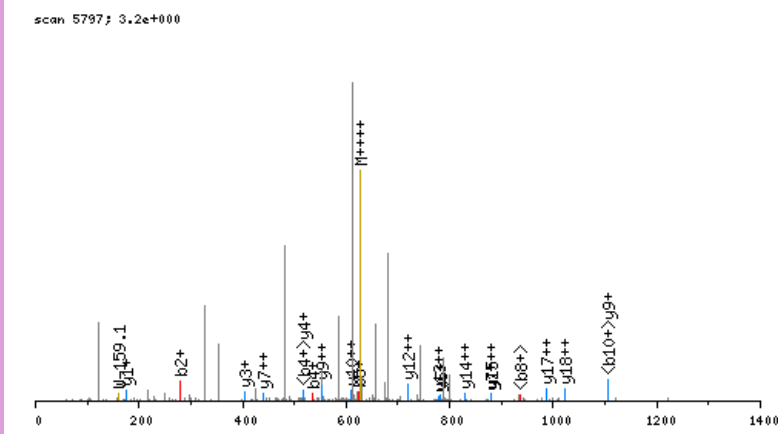

click image to zoom in; click top corners to zoom out [precursor±]

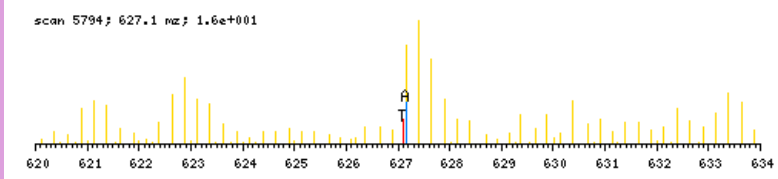

| b <sup>+</sup> | #  | AA # | y <sup>+</sup> | y <sup>2+</sup> |
|----------------|----|------|----------------|-----------------|
| 149.1138       | 1  | N 21 |                |                 |
| 278.1564       | 2  | E 20 | 2357.2626      | 1179.1352       |
| 464.2357       | 3  | W 19 | 2228.2200      | 1114.6139       |
| 535.2728       | 4  | A 18 | 2042.1406      | 1021.5742       |
| 622.3049       | 5  | S 17 | 1971.1035      | 986.0557        |
| 750.3635       | 6  | Q 16 | 1884.0715      | 942.5397        |
| 851.4111       | 7  | T 15 | 1756.0129      | 878.5104        |
| 952.4588       | 8  | T 14 | 1654.9652      | 827.9865        |
| 1067.4858      | 9  | D 13 | 1553.9176      | 777.4627        |
| 1124.5072      | 10 | G 12 | 1438.8906      | 719.9492        |
| 1286.6653      | 11 | K 11 | 1381.8692      | 691.4385        |
| 1399.7494      | 12 | L 10 | 1219.7111      | 610.3594        |
| 1496.8021      | 13 | P 9  | 1106.6270      | 553.8174        |
| 1625.8447      | 14 | E 8  | 1009.5742      | 505.2910        |
| 1724.9132      | 15 | V 7  | 880.5316       | 440.7697        |
| 1825.9608      | 16 | T 6  | 781.4632       | 391.2355        |
| 1988.1189      | 17 | K 5  | 680.4156       | 340.7117        |
| 2103.1459      | 18 | D 4  | 518.2575       | 259.6326        |
| 2202.2143      | 19 | V 3  | 403.2305       | 202.1192        |
| 2331.2569      | 20 | E 2  | 304.1621       | 152.5850        |
|                | 21 | R 1  | 175.1195       | 88.0637         |

N-term:+35.07 K(11):+162.16  
K(17):+162.16

NFGPTGIGFGLTQQVEKK, MH+ 2062.1337, m/z 688.0494  
 L OSG39 P180811 230811-s1.06204.06204.3.dta

X-range:

-

MassTol: Y-zoom:

MassType:

AVG  MONO

Axis:

1  2

Label:

I  M  -

Ions:

a  +  2+  3+

b  +  2+  3+

c  +  2+  3+

x  +  2+  3+

y  +  2+  3+

z  +  2+  3+

hide H<sub>2</sub>O/NH<sub>3</sub>

zoom 112-122

GO

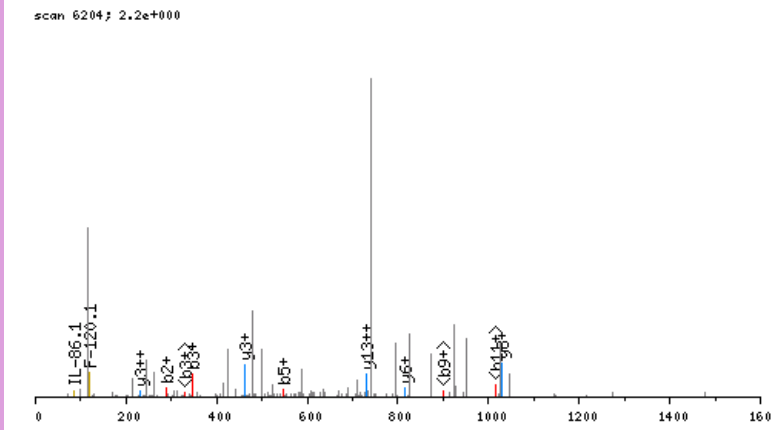

click image to zoom in; click top corners to zoom out [precursor±]

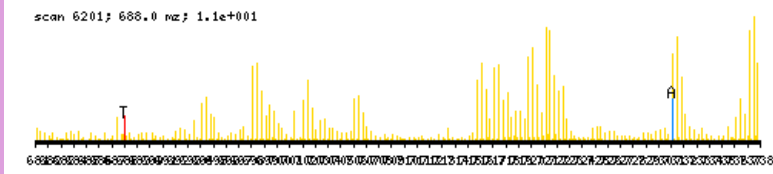

zoomed in precursor plot; T=theoretical m/z, A=acquired m/z

| b <sup>+</sup> | #  | AA | #  | y <sup>+</sup> | y <sup>2+</sup> |
|----------------|----|----|----|----------------|-----------------|
| 143.0820       | 1  | N  | 19 |                |                 |
| 290.1504       | 2  | F  | 18 | 1920.0595      | 960.5337        |
| 347.1719       | 3  | G  | 17 | 1772.9911      | 886.9995        |
| 444.2247       | 4  | P  | 16 | 1715.9697      | 858.4887        |
| 545.2723       | 5  | T  | 15 | 1618.9169      | 809.9624        |
| 602.2938       | 6  | G  | 14 | 1517.8692      | 759.4385        |
| 715.3779       | 7  | I  | 13 | 1460.8478      | 730.9278        |
| 772.3993       | 8  | G  | 12 | 1347.7637      | 674.3858        |
| 919.4678       | 9  | F  | 11 | 1290.7422      | 645.8750        |
| 976.4892       | 10 | G  | 10 | 1143.6738      | 572.3408        |
| 1033.5107      | 11 | G  | 9  | 1086.6524      | 543.8301        |
| 1146.5947      | 12 | L  | 8  | 1029.6309      | 515.3194        |
| 1247.6424      | 13 | T  | 7  | 916.5468       | 458.7773        |
| 1375.7010      | 14 | Q  | 6  | 815.4992       | 408.2535        |
| 1503.7596      | 15 | Q  | 5  | 687.4406       | 344.2242        |
| 1602.8280      | 16 | V  | 4  | 559.3820       | 280.1949        |
| 1731.8706      | 17 | E  | 3  | 460.3136       | 230.6607        |
| 1887.9969      | 18 | K  | 2  | 331.2710       | 166.1394        |
|                | 19 | K  | 1  | 175.1447       | 88.0763         |

N-term: +29.04 K(18): +156.13  
 K(19): +156.13

NIVLTQSPASLAVSLGQR, MH+ 1882.0762, m/z 628.0302  
 L OSG37 P180811 230811-s1.08081.08081.3.dta

X-range:

-

MassTol: Y-zoom:

MassType:

AVG  MONO

Axis:

1  2

Label:

I  M  -

Ions:

a  +  2+  3+

b  +  2+  3+

c  +  2+  3+

x  +  2+  3+

y  +  2+  3+

z  +  2+  3+

hide H<sub>2</sub>O/NH<sub>3</sub>

zoom 112-122

GO

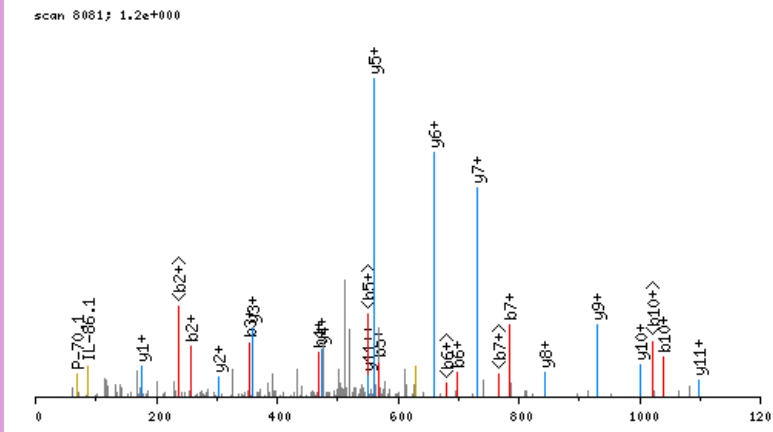

click image to zoom in; click top corners to zoom out [\[precursor±\]](#)

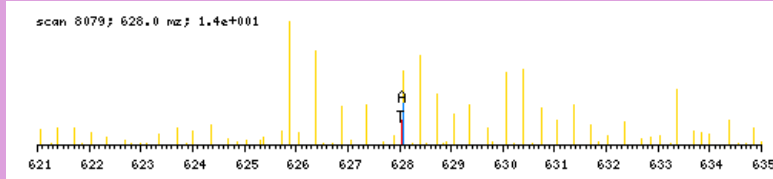

zoomed in precursor plot; T=theoretical m/z, A=acquired m/z

| b <sup>+</sup> | #  | AA # | y <sup>+</sup> | y <sup>2+</sup> |
|----------------|----|------|----------------|-----------------|
| 143.0820       | 1  | N 18 |                |                 |
| 256.1661       | 2  | I 17 | 1740.0020      | 870.5049        |
| 355.2345       | 3  | V 16 | 1626.9179      | 813.9629        |
| 468.3186       | 4  | L 15 | 1527.8495      | 764.4287        |
| 569.3662       | 5  | T 14 | 1414.7654      | 707.8866        |
| 697.4248       | 6  | Q 13 | 1313.7177      | 657.3628        |
| 784.4569       | 7  | S 12 | 1185.6592      | 593.3335        |
| 881.5096       | 8  | P 11 | 1098.6271      | 549.8175        |
| 952.5467       | 9  | A 10 | 1001.5744      | 501.2911        |
| 1039.5788      | 10 | S 9  | 930.5373       | 465.7725        |
| 1152.6628      | 11 | L 8  | 843.5052       | 422.2565        |
| 1223.6999      | 12 | A 7  | 730.4212       | 365.7145        |
| 1322.7684      | 13 | V 6  | 659.3840       | 330.1959        |
| 1409.8004      | 14 | S 5  | 560.3156       | 280.6617        |
| 1522.8844      | 15 | L 4  | 473.2836       | 237.1457        |
| 1579.9059      | 16 | G 3  | 360.1995       | 180.6037        |
| 1707.9645      | 17 | Q 2  | 303.1781       | 152.0930        |
|                | 18 | R 1  | 175.1195       | 88.0637         |

N-term:+29.04

NIVMTQSPKSMMSVGER, MH+ 2038.0135, m/z 680.0094  
 L OSG39 P180811 230811-s1.04335.04335.3.dta

X-range:

-

MassTol: Y-zoom:

MassType:

AVG  MONO

Axis:

1  2

Label:

I  M  -

Ions:

a  +  2+  3+

b  +  2+  3+

c  +  2+  3+

x  +  2+  3+

y  +  2+  3+

z  +  2+  3+

hide H<sub>2</sub>O/NH<sub>3</sub>

zoom 112-122

GO

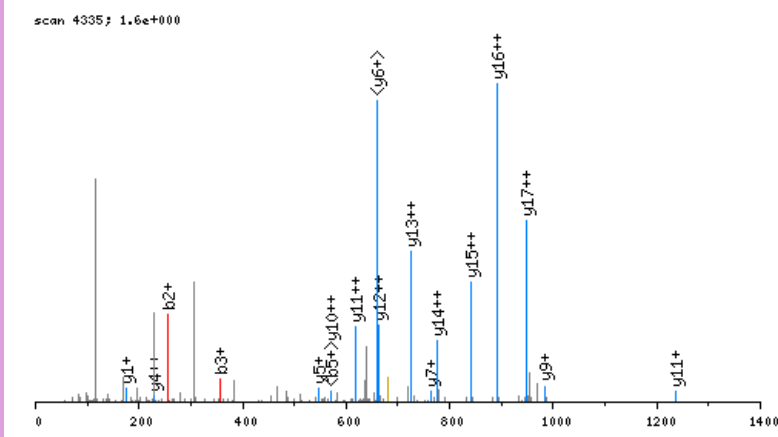

click image to zoom in; click top corners to zoom out [\[precursor±\]](#)

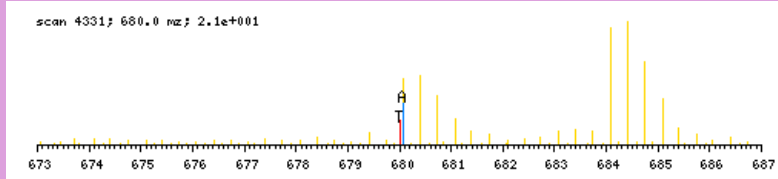

zoomed in precursor plot; T=theoretical m/z, A=acquired m/z

| b <sup>+</sup> | #  | AA # | y <sup>+</sup> | y <sup>2+</sup> |
|----------------|----|------|----------------|-----------------|
| 143.0820       | 1  | N 18 |                |                 |
| 256.1661       | 2  | I 17 | 1895.9393      | 948.4736        |
| 355.2345       | 3  | V 16 | 1782.8553      | 891.9315        |
| 486.2750       | 4  | M 15 | 1683.7869      | 842.3973        |
| 587.3227       | 5  | T 14 | 1552.7464      | 776.8771        |
| 715.3812       | 6  | Q 13 | 1451.6987      | 726.3533        |
| 802.4133       | 7  | S 12 | 1323.6401      | 662.3240        |
| 899.4660       | 8  | P 11 | 1236.6081      | 618.8080        |
| 1055.5923      | 9  | K 10 | 1139.5553      | 570.2816        |
| 1142.6244      | 10 | S 9  | 983.4290       | 492.2184        |
| 1273.6649      | 11 | M 8  | 896.3970       | 448.7024        |
| 1360.6969      | 12 | S 7  | 765.3565       | 383.1822        |
| 1491.7374      | 13 | M 6  | 678.3245       | 339.6662        |
| 1578.7694      | 14 | S 5  | 547.2840       | 274.1459        |
| 1677.8378      | 15 | V 4  | 460.2520       | 230.6299        |
| 1734.8593      | 16 | G 3  | 361.1836       | 181.0957        |
| 1863.9019      | 17 | E 2  | 304.1621       | 152.5850        |
|                | 18 | R 1  | 175.1195       | 88.0637         |

N-term:+29.04 K(9):+156.13



NKDCEVDFGEYVR, MH+ 1686.7797, m/z 562.9314  
 L OSG40 P180811 230811-s1.05787.05787.3.dta

scan 5787; 1.9e+000

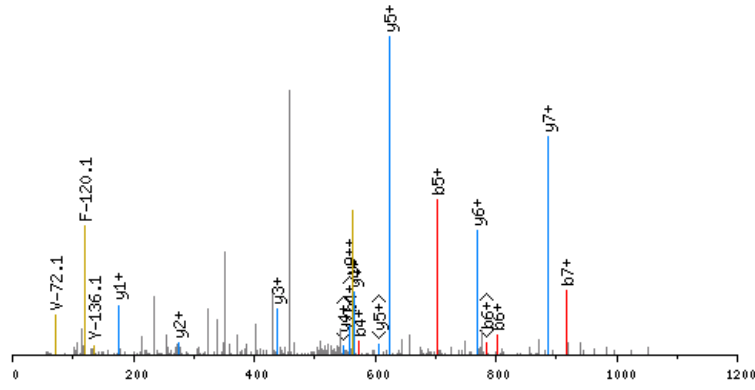

click image to zoom in; click top corners to zoom out [\[precursor±\]](#)

scan 5784; 562.9 m/z; 4.1e+001

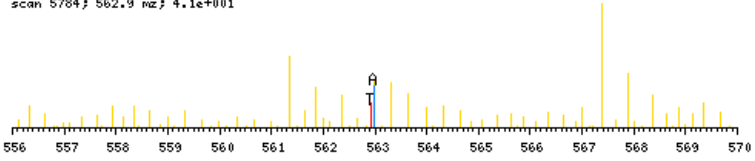

zoomed in precursor plot; T=theoretical m/z, A=acquired m/z

X-range:

-

MassTol: Y-zoom:

MassType:

AVG  MONO

Axis:

1  2

Label:

I  M  -

Ions:

a  +  2+  3+

b  +  2+  3+

c  +  2+  3+

x  +  2+  3+

y  +  2+  3+

z  +  2+  3+

hide H<sub>2</sub>O/NH<sub>3</sub>

zoom 112-122

GO

| b <sup>+</sup> | #  | AA | #  | y <sup>+</sup> | y <sup>2+</sup> |
|----------------|----|----|----|----------------|-----------------|
| 143.0820       | 1  | N  | 13 |                |                 |
| 299.2083       | 2  | K  | 12 | 1544.7055      | 772.8567        |
| 414.2353       | 3  | D  | 11 | 1388.5792      | 694.7935        |
| 574.2659       | 4  | C  | 10 | 1273.5523      | 637.2800        |
| 703.3085       | 5  | E  | 9  | 1113.5217      | 557.2647        |
| 802.3769       | 6  | V  | 8  | 984.4791       | 492.7434        |
| 917.4038       | 7  | D  | 7  | 885.4107       | 443.2092        |
| 1064.4722      | 8  | F  | 6  | 770.3837       | 385.6958        |
| 1121.4937      | 9  | G  | 5  | 623.3153       | 312.1616        |
| 1250.5363      | 10 | E  | 4  | 566.2938       | 283.6508        |
| 1413.5996      | 11 | Y  | 3  | 437.2512       | 219.1295        |
| 1512.6680      | 12 | V  | 2  | 274.1879       | 137.5979        |
|                | 13 | R  | 1  | 175.1195       | 88.0637         |

N-term:+29.04 K(2):+156.13  
 C(4):+160.03

NLLENWDTLGSIVSGLQER, MH+ 2231.1308, m/z 744.3818  
 L OSG37 P180811 230811-s1.08727.08727.3.dta

scan 8727; 1.2e+000

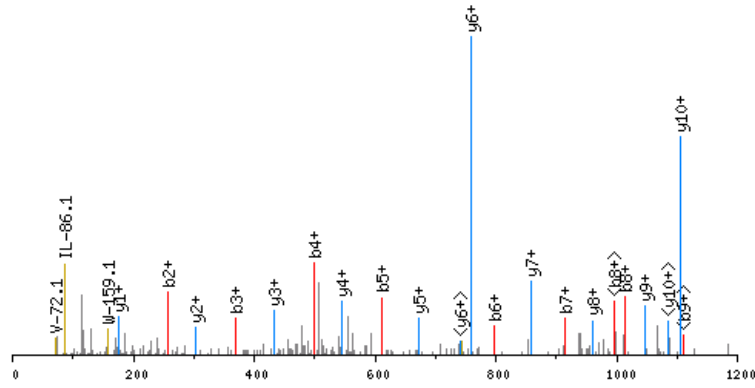

click image to zoom in; click top corners to zoom out [precursor±]

scan 8724; 744.4 m/z; 2.3e+001

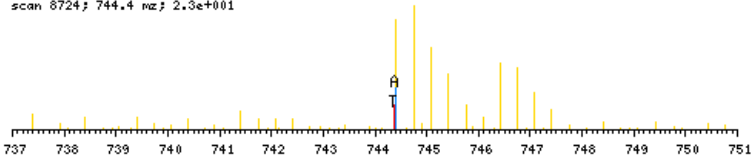

zoomed in precursor plot; T=theoretical m/z, A=acquired m/z

X-range:

0 - 0

MassTol: Y-zoom:

0. 1.

MassType:

AVG  MONO

Axis:

1  2

Label:

I  M  -

Ions:

a  +  2+  3+

b  +  2+  3+

c  +  2+  3+

x  +  2+  3+

y  +  2+  3+

z  +  2+  3+

hide H<sub>2</sub>O/NH<sub>3</sub>

zoom 112-122

GO

| b <sup>+</sup> | #  | AA | #  | y <sup>+</sup> | y <sup>2+</sup> |
|----------------|----|----|----|----------------|-----------------|
| 143.0820       | 1  | N  | 19 |                |                 |
| 256.1661       | 2  | L  | 18 | 2089.0566      | 1045.0322       |
| 369.2502       | 3  | L  | 17 | 1975.9725      | 988.4902        |
| 498.2927       | 4  | E  | 16 | 1862.8884      | 931.9481        |
| 612.3357       | 5  | N  | 15 | 1733.8459      | 867.4268        |
| 798.4150       | 6  | W  | 14 | 1619.8029      | 810.4054        |
| 913.4419       | 7  | D  | 13 | 1433.7236      | 717.3657        |
| 1014.4896      | 8  | T  | 12 | 1318.6967      | 659.8522        |
| 1127.5737      | 9  | L  | 11 | 1217.6490      | 609.3284        |
| 1184.5951      | 10 | G  | 10 | 1104.5649      | 552.7864        |
| 1271.6272      | 11 | S  | 9  | 1047.5435      | 524.2756        |
| 1372.6748      | 12 | T  | 8  | 960.5114       | 480.7596        |
| 1471.7433      | 13 | V  | 7  | 859.4638       | 430.2358        |
| 1558.7753      | 14 | S  | 6  | 760.3953       | 380.7016        |
| 1686.8339      | 15 | Q  | 5  | 673.3633       | 337.1856        |
| 1799.9179      | 16 | L  | 4  | 545.3047       | 273.1563        |
| 1927.9765      | 17 | Q  | 3  | 432.2207       | 216.6142        |
| 2057.0191      | 18 | E  | 2  | 304.1621       | 152.5850        |
|                | 19 | R  | 1  | 175.1195       | 88.0637         |

N-term:+29.04

NPSGVFHFMOQLALLMSPVKNR, MH+ 2529.3474, m/z 633.0923  
 L OSG39 P180811 230811-s1.05040.05040.4.dta

scan 5040; 2.8e+000

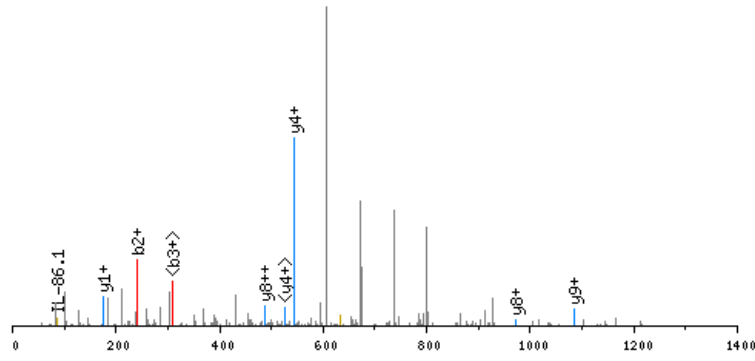

click image to zoom in; click top corners to zoom out [precursor±]

scan 5036; 633.1 m/z; 3.8e+001

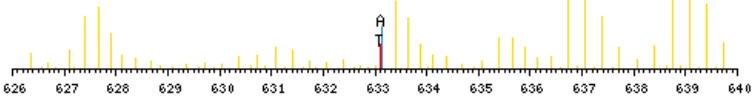

zoomed in precursor plot; T=theoretical m/z, A=acquired m/z

| b <sup>+</sup>  | #  | AA # | y <sup>+</sup>   | y <sup>2+</sup> |
|-----------------|----|------|------------------|-----------------|
| 143.0820        | 1  | N 22 |                  |                 |
| <b>240.1348</b> | 2  | P 21 | 2387.2732        | 1194.1405       |
| 327.1668        | 3  | S 20 | 2290.2205        | 1145.6141       |
| 384.1883        | 4  | G 19 | 2203.1884        | 1102.0981       |
| 483.2567        | 5  | V 18 | 2146.1670        | 1073.5874       |
| 630.3251        | 6  | F 17 | 2047.0986        | 1024.0532       |
| 767.3840        | 7  | H 16 | 1900.0301        | 950.5190        |
| 914.4524        | 8  | F 15 | 1762.9712        | 881.9895        |
| 1045.4929       | 9  | M 14 | 1615.9028        | 808.4553        |
| 1173.5515       | 10 | Q 13 | 1484.8623        | 742.9351        |
| 1260.5835       | 11 | S 12 | 1356.8038        | 678.9058        |
| 1373.6676       | 12 | L 11 | 1269.7717        | 635.3898        |
| 1444.7047       | 13 | A 10 | 1156.6877        | 578.8477        |
| 1557.7888       | 14 | L 9  | <b>1085.6505</b> | 543.3292        |
| 1670.8728       | 15 | L 8  | <b>972.5665</b>  | <b>486.7872</b> |
| 1801.9133       | 16 | M 7  | 859.4824         | 430.2451        |
| 1888.9453       | 17 | S 6  | 728.4419         | 364.7249        |
| 1985.9981       | 18 | P 5  | 641.4099         | 321.2089        |
| 2085.0665       | 19 | V 4  | <b>544.3571</b>  | 272.6825        |
| 2241.1928       | 20 | K 3  | 445.2887         | 223.1483        |
| 2355.2358       | 21 | N 2  | 289.1624         | 145.0851        |
|                 | 22 | R 1  | <b>175.1195</b>  | 88.0637         |

N-term:+29.04 K(20):+156.13

X-range:

-

MassTol: Y-zoom:

MassType:

AVG  MONO

Axis:

1  2

Label:

I  M  -

Ions:

a  +  2+  3+

b  +  2+  3+

c  +  2+  3+

x  +  2+  3+

y  +  2+  3+

z  +  2+  3+

hide H<sub>2</sub>O/NH<sub>3</sub>

zoom 112-122

GO

NPVDDICIAPR, MH+ 1453.7837, m/z 485.2661  
 L OSG40 P180811 230811-s1.05260.05260.3.dta

X-range:

-

MassTol: Y-zoom:

MassType:

AVG  MONO

Axis:

1  2

Label:

I  M  -

Ions:

a  +  2+  3+

b  +  2+  3+

c  +  2+  3+

x  +  2+  3+

y  +  2+  3+

z  +  2+  3+

hide H<sub>2</sub>O/NH<sub>3</sub>

zoom 112-122

GO

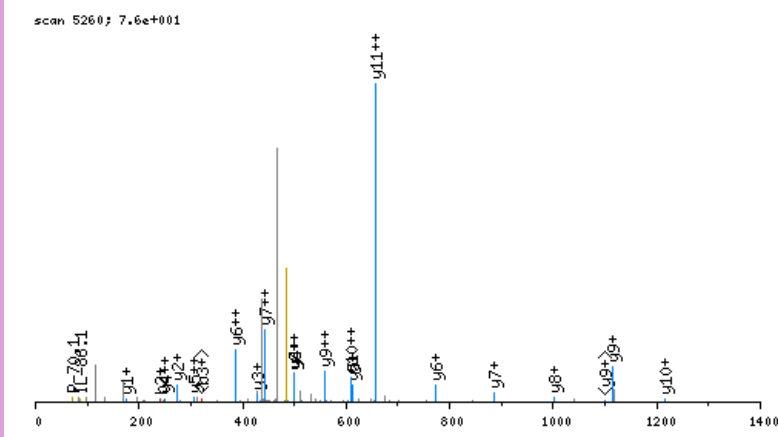

click image to zoom in; click top corners to zoom out [\[precursor±\]](#)

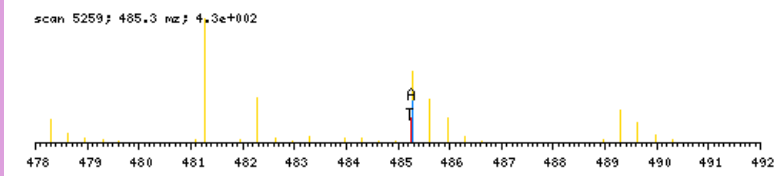

zoomed in precursor plot; T=theoretical m/z, A=acquired m/z

| b <sup>+</sup> | #  | AA # | y <sup>+</sup> | y <sup>2+</sup> |
|----------------|----|------|----------------|-----------------|
| 143.0820       | 1  | N 12 |                |                 |
| 240.1348       | 2  | P 11 | 1311.7095      | 656.3586        |
| 339.2032       | 3  | V 10 | 1214.6567      | 607.8323        |
| 454.2301       | 4  | D 9  | 1115.5883      | 558.2981        |
| 569.2571       | 5  | D 8  | 1000.5613      | 500.7846        |
| 682.3412       | 6  | I 7  | 885.5344       | 443.2711        |
| 842.3718       | 7  | C 6  | 772.4503       | 386.7291        |
| 955.4558       | 8  | I 5  | 612.4197       | 306.7138        |
| 1026.4929      | 9  | A 4  | 499.3357       | 250.1718        |
| 1182.6192      | 10 | K 3  | 428.2986       | 214.6532        |
| 1279.6720      | 11 | P 2  | 272.1723       | 136.5900        |
|                | 12 | R 1  | 175.1195       | 88.0637         |

N-term:+29.04 C(7):+160.03  
 K(10):+156.13

NSLGSVPQADVFFR, MH+ 1677.8600, m/z 559.9582  
 L OSG37 P180811 230811-s1.07231.07231.3.dta

X-range:

-

MassTol: Y-zoom:

MassType:

AVG  MONO

Axis:

1  2

Label:

I  M  -

Ions:

a  +  2+  3+

b  +  2+  3+

c  +  2+  3+

x  +  2+  3+

y  +  2+  3+

z  +  2+  3+

hide H<sub>2</sub>O/NH<sub>3</sub>

zoom 112-122

GO

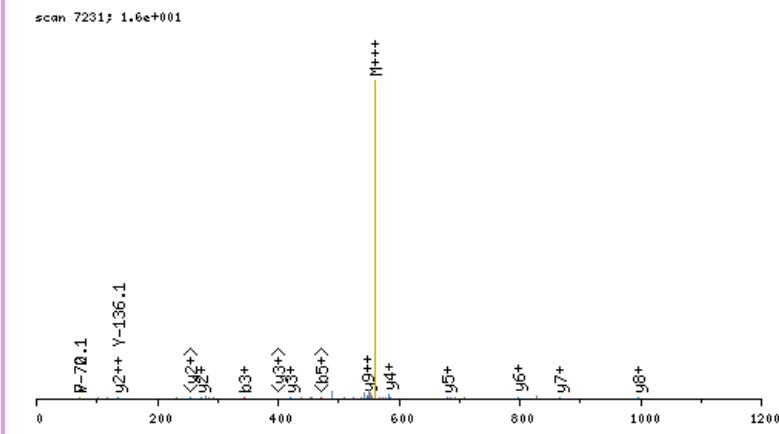

click image to zoom in; click top corners to zoom out [\[precursor±\]](#)

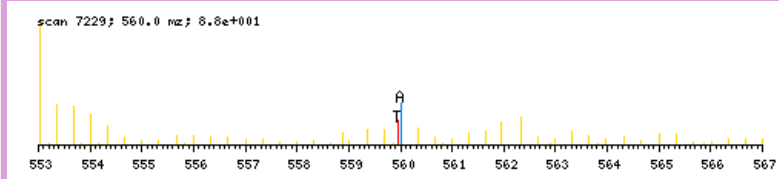

zoomed in precursor plot; T=theoretical m/z, A=acquired m/z

| b <sup>+</sup>  | #  | AA # | y <sup>+</sup>  | y <sup>2+</sup> |
|-----------------|----|------|-----------------|-----------------|
| 143.0820        | 1  | N 15 |                 |                 |
| 230.1141        | 2  | S 14 | 1535.7858       | 768.3968        |
| <b>343.1981</b> | 3  | L 13 | 1448.7538       | 724.8808        |
| 400.2196        | 4  | G 12 | 1335.6697       | 668.3388        |
| 487.2516        | 5  | S 11 | 1278.6483       | 639.8280        |
| 584.3044        | 6  | P 10 | 1191.6162       | 596.3120        |
| 683.3728        | 7  | V 9  | 1094.5635       | <b>547.7856</b> |
| 811.4314        | 8  | Q 8  | <b>995.4951</b> | 498.2514        |
| 882.4685        | 9  | A 7  | <b>867.4365</b> | 434.2222        |
| 997.4954        | 10 | D 6  | <b>796.3994</b> | 398.7036        |
| 1096.5638       | 11 | V 5  | <b>681.3724</b> | 341.1901        |
| 1259.6272       | 12 | Y 4  | <b>582.3040</b> | 291.6559        |
| 1406.6956       | 13 | F 3  | <b>419.2407</b> | 210.1243        |
| 1503.7483       | 14 | P 2  | <b>272.1723</b> | <b>136.5900</b> |
|                 | 15 | R 1  | 175.1195        | 88.0637         |

N-term:+29.04

NTDVETQPGKTVIR, MH+ 1625.9499, m/z 542.6548  
 H OSG39 P180811 230811-s1.02468.02468.3.dta

scan 2468; 6.9e+000

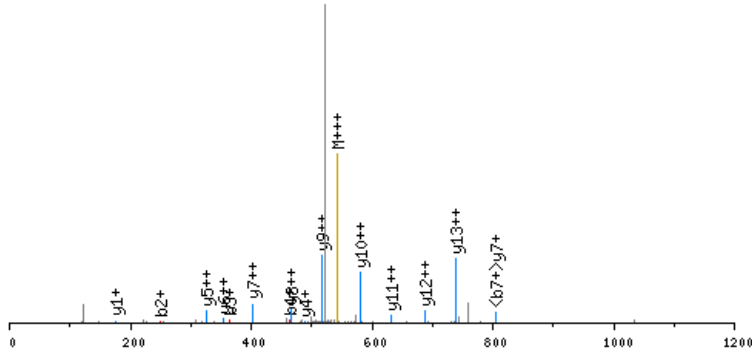

click image to zoom in; click top corners to zoom out [\[precursor±\]](#)

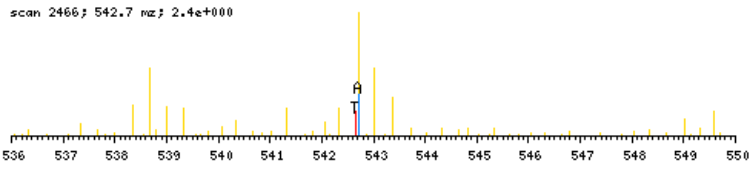

zoomed in precursor plot; T=theoretical m/z, A=acquired m/z

X-range:

-

MassTol: Y-zoom:

MassType:

AVG  MONO

Axis:

1  2

Label:

I  M  -

Ions:

a  +  2+  3+

b  +  2+  3+

c  +  2+  3+

x  +  2+  3+

y  +  2+  3+

z  +  2+  3+

hide H<sub>2</sub>O/NH<sub>3</sub>

zoom 112-122

GO

| b <sup>+</sup> | #  | AA | #  | y <sup>+</sup> | y <sup>2+</sup> |
|----------------|----|----|----|----------------|-----------------|
| 149.1138       | 1  | N  | 14 |                |                 |
| 250.1615       | 2  | T  | 13 | 1477.8439      | 739.4258        |
| 365.1884       | 3  | D  | 12 | 1376.7962      | 688.9020        |
| 464.2569       | 4  | V  | 11 | 1261.7692      | 631.3885        |
| 593.2995       | 5  | E  | 10 | 1162.7008      | 581.8543        |
| 694.3471       | 6  | T  | 9  | 1033.6582      | 517.3330        |
| 822.4057       | 7  | Q  | 8  | 932.6106       | 466.8092        |
| 919.4585       | 8  | P  | 7  | 804.5520       | 402.7799        |
| 976.4799       | 9  | G  | 6  | 707.4992       | 354.2535        |
| 1138.6380      | 10 | K  | 5  | 650.4778       | 325.7428        |
| 1239.6857      | 11 | T  | 4  | 488.3197       | 244.6637        |
| 1338.7541      | 12 | V  | 3  | 387.2720       | 194.1399        |
| 1451.8382      | 13 | I  | 2  | 288.2036       | 144.6057        |
|                | 14 | R  | 1  | 175.1195       | 88.0637         |

N-term:+35.07 K(10):+162.16

NVQDGPDFQDR, MH+ 1318.6027, m/z 659.8050  
 L OSG38 P180811 230811-s1.02961.02961.2.dta

X-range:

-

MassTol: Y-zoom:

MassType:

AVG  MONO

Axis:

1  2

Label:

I  M  -

Ions:

a  +  2+  3+

b  +  2+  3+

c  +  2+  3+

x  +  2+  3+

y  +  2+  3+

z  +  2+  3+

hide H<sub>2</sub>O/NH<sub>3</sub>

zoom 112-122

GO

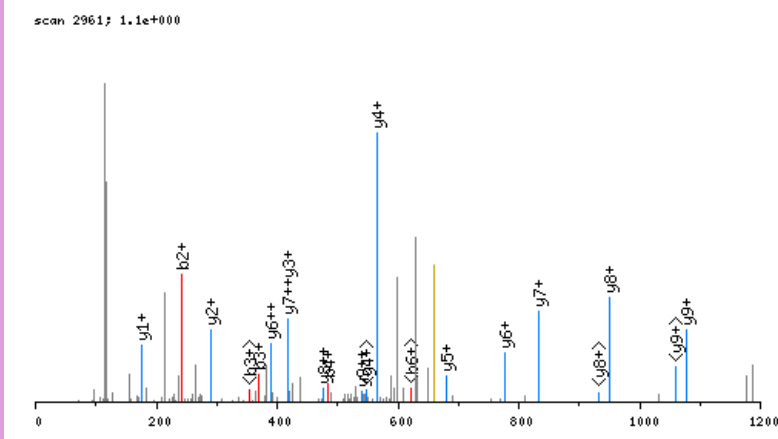

click image to zoom in; click top corners to zoom out [\[precursor±\]](#)

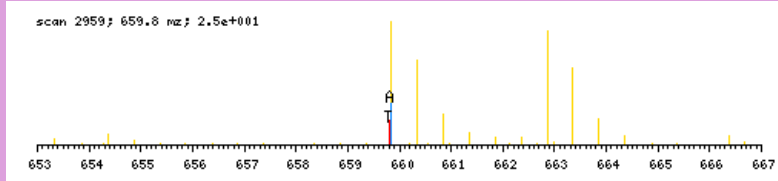

zoomed in precursor plot; T=theoretical m/z, A=acquired m/z

| b <sup>+</sup> | #  | AA # | y <sup>+</sup> | y <sup>2+</sup> |
|----------------|----|------|----------------|-----------------|
| 143.0820       | 1  | N 11 |                |                 |
| 242.1504       | 2  | V 10 | 1176.5285      | 588.7682        |
| 370.2090       | 3  | Q 9  | 1077.4601      | 539.2340        |
| 485.2360       | 4  | D 8  | 949.4015       | 475.2047        |
| 542.2574       | 5  | G 7  | 834.3746       | 417.6912        |
| 639.3102       | 6  | P 6  | 777.3531       | 389.1805        |
| 754.3371       | 7  | D 5  | 680.3004       | 340.6541        |
| 901.4055       | 8  | F 4  | 565.2734       | 283.1406        |
| 1029.4641      | 9  | Q 3  | 418.2050       | 209.6064        |
| 1144.4911      | 10 | D 2  | 290.1464       | 145.5771        |
|                | 11 | R 1  | 175.1195       | 88.0637         |

N-term:+29.04

QDFQFECIGDAETDDEISIAQLKEFAR, MH+ 3318.5476, m/z 830.3924  
 L OSG38 P180811 230811-s1.06855.06855.4.dta

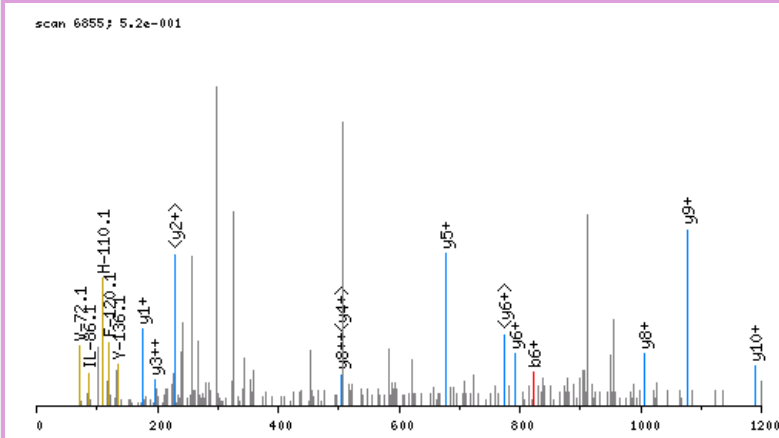

click image to zoom in; click top corners to zoom out [\[precursor±\]](#)

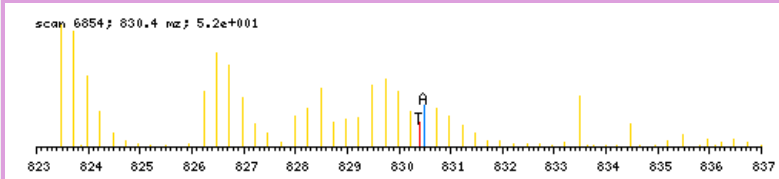

zoomed in precursor plot; T=theoretical m/z, A=acquired m/z

| b <sup>+</sup>  | #        | AA #        | y <sup>+</sup>   | y <sup>2+</sup>  |
|-----------------|----------|-------------|------------------|------------------|
| 157.0977        | 1        | Q 28        |                  |                  |
| 272.1246        | 2        | D 27        | 3162.4577        | 1581.7328        |
| 419.1930        | 3        | F 26        | 3047.4308        | 1524.2193        |
| 547.2516        | 4        | Q 25        | 2900.3624        | 1450.6851        |
| 694.3200        | 5        | F 24        | 2772.3038        | 1386.6558        |
| <b>823.3626</b> | <b>6</b> | <b>E 23</b> | <b>2625.2354</b> | <b>1313.1216</b> |
| 983.3932        | 7        | C 22        | 2496.1928        | 1248.6003        |
| 1096.4773       | 8        | I 21        | 2336.1622        | 1168.5850        |
| 1153.4987       | 9        | G 20        | 2223.0781        | 1112.0430        |
| 1268.5257       | 10       | D 19        | 2166.0567        | 1083.5322        |
| 1339.5628       | 11       | A 18        | 2051.0297        | 1026.0188        |
| 1468.6054       | 12       | E 17        | 1979.9926        | 990.5002         |
| 1569.6531       | 13       | T 16        | 1850.9500        | 925.9789         |
| 1684.6800       | 14       | D 15        | 1749.9023        | 875.4551         |
| 1799.7070       | 15       | D 14        | 1634.8754        | 817.9416         |
| 1928.7496       | 16       | E 13        | 1519.8485        | 760.4281         |
| 2041.8336       | 17       | I 12        | 1390.8059        | 695.9068         |
| 2128.8656       | 18       | S 11        | 1277.7218        | 639.3648         |
| 2241.9497       | 19       | I 10        | <b>1190.6898</b> | 595.8488         |
| 2312.9868       | 20       | A 9         | <b>1077.6057</b> | 539.3068         |
| 2441.0454       | 21       | Q 8         | <b>1006.5686</b> | <b>503.7882</b>  |
| 2528.0774       | 22       | S 7         | 878.5100         | 439.7589         |
| 2641.1615       | 23       | L 6         | <b>791.4780</b>  | 396.2429         |
| 2797.2878       | 24       | K 5         | <b>678.3939</b>  | 339.7009         |
| 2926.3304       | 25       | E 4         | 522.2676         | 261.6377         |
| 3073.3988       | 26       | F 3         | 393.2250         | <b>197.1164</b>  |
| 3144.4359       | 27       | A 2         | 246.1566         | 123.5822         |
|                 | 28       | R 1         | <b>175.1195</b>  | 88.0637          |

N-term:+29.04 C(7):+160.03  
 K(24):+156.13

X-range:

-

MassTol: Y-zoom:

MassType:

AVG  MONO

Axis:

1  2

Label:

I  M  -

Ions:

a  +  2+  3+

b  +  2+  3+

c  +  2+  3+

x  +  2+  3+

y  +  2+  3+

z  +  2+  3+

hide H<sub>2</sub>O/NH<sub>3</sub>

zoom 112-122

GO



QDPDEEALRR, MH+ 1262.6553, m/z 421.5566  
 H OSG40 P180811 230811-s1.02205.02205.3.dta

X-range:

-

MassTol: Y-zoom:

MassType:

AVG  MONO

Axis:

1  2

Label:

I  M  -

Ions:

a  +  2+  3+

b  +  2+  3+

c  +  2+  3+

x  +  2+  3+

y  +  2+  3+

z  +  2+  3+

hide H<sub>2</sub>O/NH<sub>3</sub>

zoom 112-122

GO

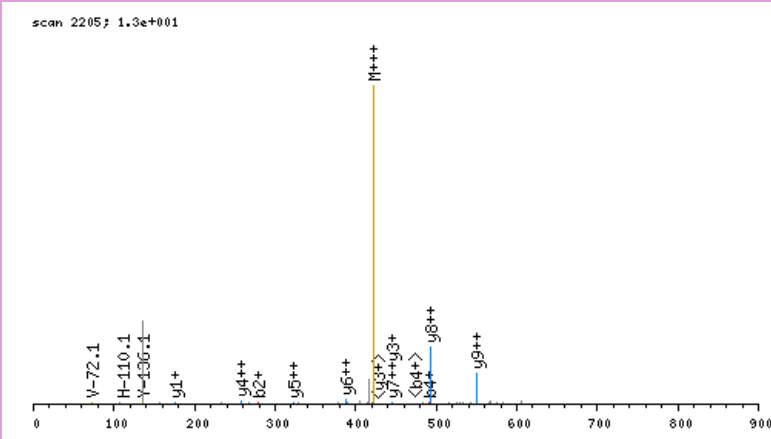

click image to zoom in; click top corners to zoom out [\[precursor±\]](#)

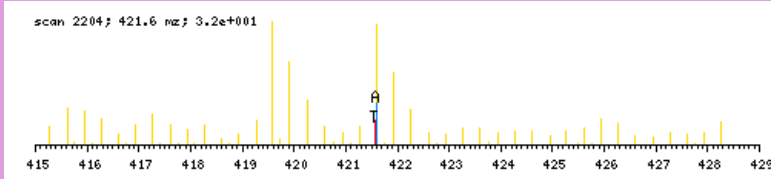

zoomed in precursor plot; T=theoretical m/z, A=acquired m/z

| b <sup>+</sup> | #  | AA # | y <sup>+</sup> | y <sup>2+</sup> |
|----------------|----|------|----------------|-----------------|
| 163.1295       | 1  | Q    | 10             |                 |
| 278.1564       | 2  | D    | 9              | 1100.5336       |
| 375.2092       | 3  | P    | 8              | 985.5067        |
| 490.2361       | 4  | D    | 7              | 888.4539        |
| 619.2787       | 5  | E    | 6              | 773.4270        |
| 748.3213       | 6  | E    | 5              | 644.3844        |
| 819.3584       | 7  | A    | 4              | 515.3418        |
| 932.4425       | 8  | L    | 3              | 444.3047        |
| 1088.5436      | 9  | R    | 2              | 331.2206        |
|                | 10 | R    | 1              | 175.1195        |

N-term:+35.07

QDVYKIGGIGTVPVGR, MH+ 1714.9856, m/z 572.3334  
 L OSG39 P180811 230811-s1.05045.05045.3.dta

X-range:

-

MassTol: Y-zoom:

MassType:

AVG  MONO

Axis:

1  2

Label:

I  M  -

Ions:

a  +  2+  3+

b  +  2+  3+

c  +  2+  3+

x  +  2+  3+

y  +  2+  3+

z  +  2+  3+

hide H<sub>2</sub>O/NH<sub>3</sub>

zoom 112-122

GO

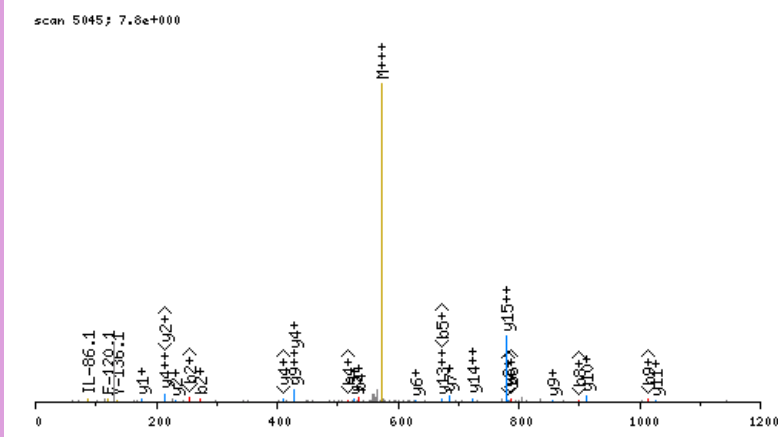

click image to zoom in; click top corners to zoom out [\[precursor±\]](#)

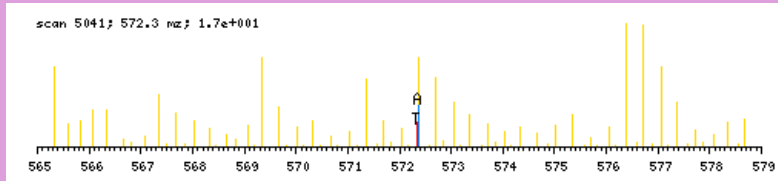

zoomed in precursor plot; T=theoretical m/z, A=acquired m/z

| b <sup>+</sup> | #  | AA # | y <sup>+</sup> | y <sup>2+</sup> |
|----------------|----|------|----------------|-----------------|
| 157.0977       | 1  | Q 16 |                |                 |
| 272.1246       | 2  | D 15 | 1558.8957      | 779.9518        |
| 371.1930       | 3  | V 14 | 1443.8688      | 722.4383        |
| 534.2564       | 4  | Y 13 | 1344.8004      | 672.9041        |
| 690.3827       | 5  | K 12 | 1181.7371      | 591.3724        |
| 803.4667       | 6  | I 11 | 1025.6108      | 513.3093        |
| 860.4882       | 7  | G 10 | 912.5267       | 456.7673        |
| 917.5097       | 8  | G 9  | 855.5052       | 428.2565        |
| 1030.5937      | 9  | I 8  | 798.4838       | 399.7458        |
| 1087.6152      | 10 | G 7  | 685.3997       | 343.2038        |
| 1188.6629      | 11 | T 6  | 628.3782       | 314.6930        |
| 1287.7313      | 12 | V 5  | 527.3306       | 264.1692        |
| 1384.7840      | 13 | P 4  | 428.2621       | 214.6350        |
| 1483.8525      | 14 | V 3  | 331.2094       | 166.1086        |
| 1540.8739      | 15 | G 2  | 232.1410       | 116.5744        |
|                | 16 | R 1  | 175.1195       | 88.0637         |

N-term:+29.04 K(5):+156.13

QEDIPEVSCIHNGLR, MH+ 1800.9126, m/z 600.9757  
 H OSG39 P180811 230811-s1.04425.04425.3.dta

X-range:

-

MassTol: Y-zoom:

MassType:

AVG  MONO

Axis:

1  2

Label:

I  M  -

Ions:

a  +  2+  3+

b  +  2+  3+

c  +  2+  3+

x  +  2+  3+

y  +  2+  3+

z  +  2+  3+

hide H<sub>2</sub>O/NH<sub>3</sub>

zoom 112-122

GO

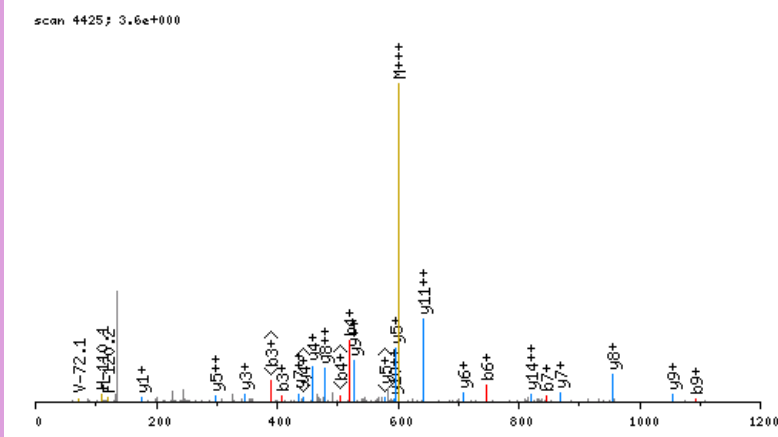

click image to zoom in; click top corners to zoom out [\[precursor±\]](#)

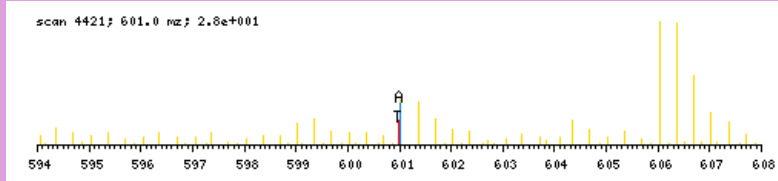

zoomed in precursor plot; T=theoretical m/z, A=acquired m/z

| b <sup>+</sup> | #  | AA # | y <sup>+</sup> | y <sup>2+</sup> |
|----------------|----|------|----------------|-----------------|
| 163.1295       | 1  | Q    | 15             |                 |
| 292.1721       | 2  | E    | 14             | 1638.7909       |
| 407.1990       | 3  | D    | 13             | 1509.7483       |
| 520.2831       | 4  | I    | 12             | 1394.7214       |
| 617.3358       | 5  | P    | 11             | 1281.6373       |
| 746.3784       | 6  | E    | 10             | 1184.5846       |
| 845.4468       | 7  | V    | 9              | 1055.5420       |
| 932.4789       | 8  | S    | 8              | 956.4736        |
| 1092.5095      | 9  | C    | 7              | 869.4415        |
| 1205.5935      | 10 | I    | 6              | 709.4109        |
| 1342.6525      | 11 | H    | 5              | 596.3269        |
| 1456.6954      | 12 | N    | 4              | 459.2680        |
| 1513.7168      | 13 | G    | 3              | 345.2250        |
| 1626.8009      | 14 | L    | 2              | 288.2036        |
|                | 15 | R    | 1              | 175.1195        |

N-term:+35.07 C(9):+160.03

QEFKEAFTVIDQNR, MH+ 1780.9234, m/z 594.3126  
 L OSG40 P180811 230811-s1.06387.06387.3.dta

X-range:

0 - 0

MassTol: Y-zoom:

0. 1.

MassType:

AVG  MONO

Axis:

1  2

Label:

I  M  -

Ions:

a  +  2+  3+

b  +  2+  3+

c  +  2+  3+

x  +  2+  3+

y  +  2+  3+

z  +  2+  3+

hide H<sub>2</sub>O/NH<sub>3</sub>

zoom 112-122

GO

scan 6387; 1.6e+001

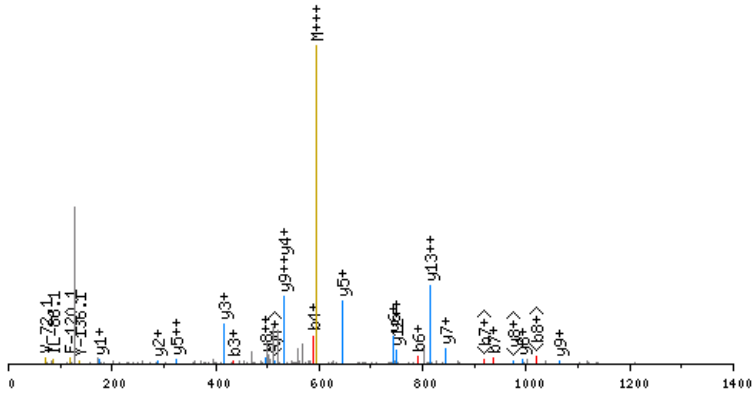

click image to zoom in; click top corners to zoom out [\[precursor±\]](#)

scan 6384; 594.3 m/z; 3.9e+001

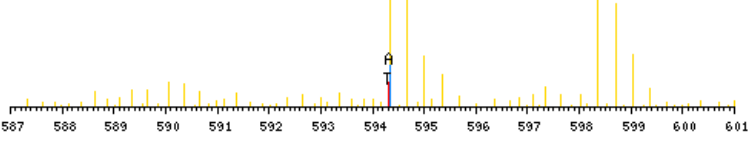

zoomed in precursor plot; T=theoretical m/z, A=acquired m/z

| b <sup>+</sup> | #  | AA # | y <sup>+</sup> | y <sup>2+</sup> |
|----------------|----|------|----------------|-----------------|
| 157.0977       | 1  | Q 14 |                |                 |
| 286.1403       | 2  | E 13 | 1624.8335      | 812.9207        |
| 433.2087       | 3  | F 12 | 1495.7909      | 748.3994        |
| 589.3350       | 4  | K 11 | 1348.7225      | 674.8652        |
| 718.3776       | 5  | E 10 | 1192.5962      | 596.8020        |
| 789.4147       | 6  | A 9  | 1063.5536      | 532.2807        |
| 936.4831       | 7  | F 8  | 992.5165       | 496.7622        |
| 1037.5308      | 8  | T 7  | 845.4481       | 423.2280        |
| 1136.5992      | 9  | V 6  | 744.4004       | 372.7041        |
| 1249.6833      | 10 | I 5  | 645.3320       | 323.1699        |
| 1364.7102      | 11 | D 4  | 532.2479       | 266.6279        |
| 1492.7688      | 12 | Q 3  | 417.2210       | 209.1144        |
| 1606.8117      | 13 | N 2  | 289.1624       | 145.0851        |
|                | 14 | R 1  | 175.1195       | 88.0637         |

N-term:+29.04 K(4):+156.13

QEGDKVIRPGVSEQAGEEMEQFGQGVK, MH+ 2899.5008, m/z 725.6307  
 H OSG40 P180811 230811-s1.06547.06547.4.dta

scan 6547; 2.1e+000

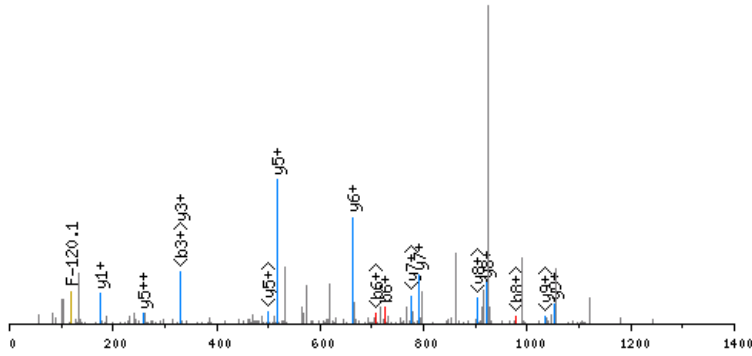

click image to zoom in; click top corners to zoom out [precursor±]

scan 6544; 725.6 m/z; 1.7e+001

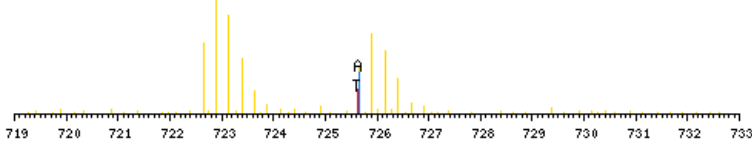

zoomed in precursor plot; T=theoretical m/z, A=acquired m/z

| b <sup>+</sup> | #  | AA # | y <sup>+</sup> | y <sup>2+</sup> |
|----------------|----|------|----------------|-----------------|
| 163.1295       | 1  | Q 26 |                |                 |
| 292.1721       | 2  | E 25 | 2737.3792      | 1369.1935       |
| 349.1935       | 3  | G 24 | 2608.3366      | 1304.6722       |
| 464.2205       | 4  | D 23 | 2551.3151      | 1276.1615       |
| 626.3786       | 5  | K 22 | 2436.2882      | 1218.6480       |
| 725.4470       | 6  | V 21 | 2274.1301      | 1137.5690       |
| 838.5311       | 7  | I 20 | 2175.0617      | 1088.0348       |
| 994.6322       | 8  | R 19 | 2061.9776      | 1031.4927       |
| 1091.6849      | 9  | P 18 | 1905.8765      | 953.4422        |
| 1148.7064      | 10 | G 17 | 1808.8237      | 904.9158        |
| 1247.7748      | 11 | V 16 | 1751.8023      | 876.4050        |
| 1334.8068      | 12 | S 15 | 1652.7339      | 826.8708        |
| 1462.8654      | 13 | Q 14 | 1565.7018      | 783.3548        |
| 1533.9025      | 14 | A 13 | 1437.6433      | 719.3255        |
| 1590.9240      | 15 | G 12 | 1366.6061      | 683.8070        |
| 1719.9666      | 16 | E 11 | 1309.5847      | 655.2963        |
| 1849.0092      | 17 | E 10 | 1180.5421      | 590.7750        |
| 1980.0497      | 18 | M 9  | 1051.4995      | 526.2537        |
| 2109.0923      | 19 | E 8  | 920.4590       | 460.7334        |
| 2237.1508      | 20 | Q 7  | 791.4164       | 396.2121        |
| 2384.2192      | 21 | F 6  | 663.3578       | 332.1828        |
| 2441.2407      | 22 | G 5  | 516.2894       | 258.6486        |
| 2569.2993      | 23 | Q 4  | 459.2680       | 230.1379        |
| 2626.3208      | 24 | G 3  | 331.2094       | 166.1086        |
| 2725.3892      | 25 | V 2  | 274.1879       | 137.5979        |
|                | 26 | R 1  | 175.1195       | 88.0637         |

N-term:+35.07 K(5):+162.16

X-range:

-

MassTol: Y-zoom:

MassType:

AVG  MONO

Axis:

1  2

Label:

I  M  -

Ions:

a  +  2+  3+

b  +  2+  3+

c  +  2+  3+

x  +  2+  3+

y  +  2+  3+

z  +  2+  3+

hide H<sub>2</sub>O/NH<sub>3</sub>

zoom 112-122

GO

QEYIYSIHTR, MH+ 1343.7172, m/z 448.5772  
 H OSG40 P180811 230811-s1.03731.03731.3.dta

scan 3731; 2.2e+001

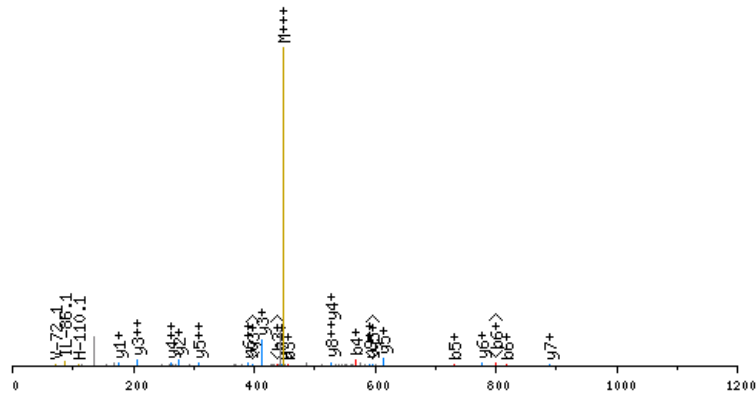

click image to zoom in; click top corners to zoom out [\[precursor±\]](#)

scan 3729; 448.6 m/z; 2.0e+001

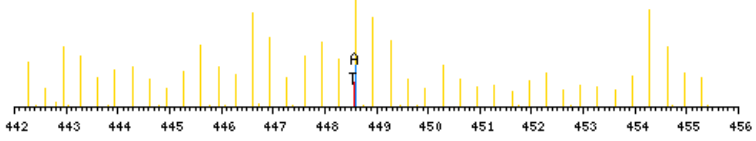

zoomed in precursor plot; T=theoretical m/z, A=acquired m/z

X-range:

-

MassTol: Y-zoom:

MassType:

AVG  MONO

Axis:

1  2

Label:

I  M  -

Ions:

a  +  2+  3+

b  +  2+  3+

c  +  2+  3+

x  +  2+  3+

y  +  2+  3+

z  +  2+  3+

hide H<sub>2</sub>O/NH<sub>3</sub>

zoom 112-122

GO

| b <sup>+</sup> | #  | AA # | y <sup>+</sup> | y <sup>2+</sup> |
|----------------|----|------|----------------|-----------------|
| 163.1295       | 1  | Q    | 10             |                 |
| 292.1721       | 2  | E    | 9              | 1181.5955       |
| 455.2354       | 3  | Y    | 8              | 1052.5529       |
| 568.3195       | 4  | I    | 7              | 889.4896        |
| 731.3828       | 5  | Y    | 6              | 776.4055        |
| 818.4148       | 6  | S    | 5              | 613.3422        |
| 931.4989       | 7  | I    | 4              | 526.3102        |
| 1068.5578      | 8  | H    | 3              | 413.2261        |
| 1169.6055      | 9  | T    | 2              | 276.1672        |
|                | 10 | R    | 1              | 175.1195        |

N-term:+35.07

QKTGTAEMSSILEER, MH+ 1735.8900, m/z 579.3015  
 L OSG40 P180811 230811-s1.05293.05293.3.dta

X-range:

-

MassTol: Y-zoom:

MassType:

AVG  MONO

Axis:

1  2

Label:

I  M  -

Ions:

a  +  2+  3+

b  +  2+  3+

c  +  2+  3+

x  +  2+  3+

y  +  2+  3+

z  +  2+  3+

hide H<sub>2</sub>O/NH<sub>3</sub>

zoom 112-122

GO

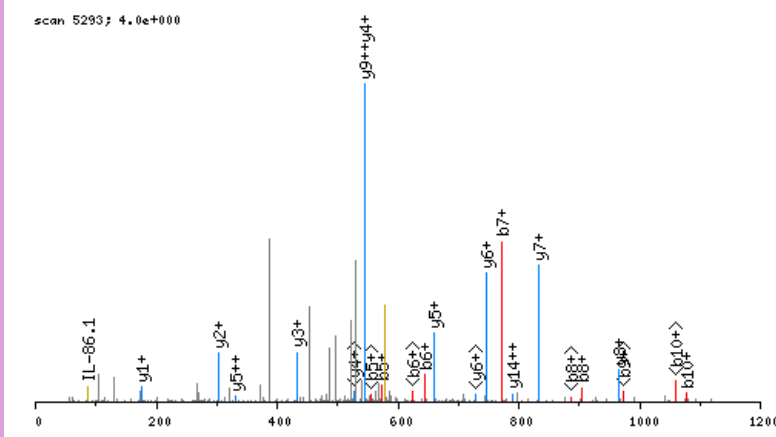

click image to zoom in; click top corners to zoom out [\[precursor±\]](#)

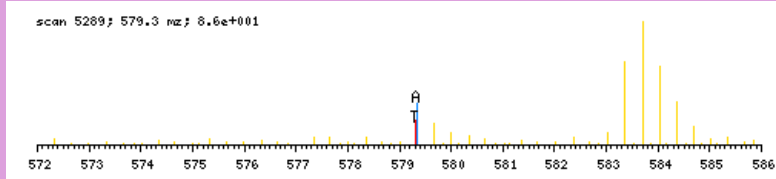

zoomed in precursor plot; T=theoretical m/z, A=acquired m/z

| b <sup>+</sup> | #  | AA # | y <sup>+</sup> | y <sup>2+</sup> |
|----------------|----|------|----------------|-----------------|
| 157.0977       | 1  | Q 15 |                |                 |
| 313.2240       | 2  | K 14 | 1579.8002      | 790.4040        |
| 414.2717       | 3  | T 13 | 1423.6739      | 712.3409        |
| 471.2931       | 4  | G 12 | 1322.6262      | 661.8170        |
| 572.3408       | 5  | T 11 | 1265.6047      | 633.3063        |
| 643.3779       | 6  | A 10 | 1164.5571      | 582.7824        |
| 772.4205       | 7  | E 9  | 1093.5199      | 547.2639        |
| 903.4610       | 8  | M 8  | 964.4774       | 482.7426        |
| 990.4930       | 9  | S 7  | 833.4369       | 417.2223        |
| 1077.5250      | 10 | S 6  | 746.4048       | 373.7063        |
| 1190.6091      | 11 | I 5  | 659.3728       | 330.1903        |
| 1303.6932      | 12 | L 4  | 546.2888       | 273.6483        |
| 1432.7358      | 13 | E 3  | 433.2047       | 217.1063        |
| 1561.7784      | 14 | E 2  | 304.1621       | 152.5850        |
|                | 15 | R 1  | 175.1195       | 88.0637         |

N-term:+29.04 K(2):+156.13

QLPPVVPVSKPGPLR, MH+ 1640.0263, m/z 547.3470  
 L OSG39 P180811 230811-s1.04849.04849.3.dta

X-range:

-

MassTol: Y-zoom:

MassType:

AVG  MONO

Axis:

1  2

Label:

I  M  -

Ions:

a  +  2+  3+

b  +  2+  3+

c  +  2+  3+

x  +  2+  3+

y  +  2+  3+

z  +  2+  3+

hide H<sub>2</sub>O/NH<sub>3</sub>

zoom 112-122

GO

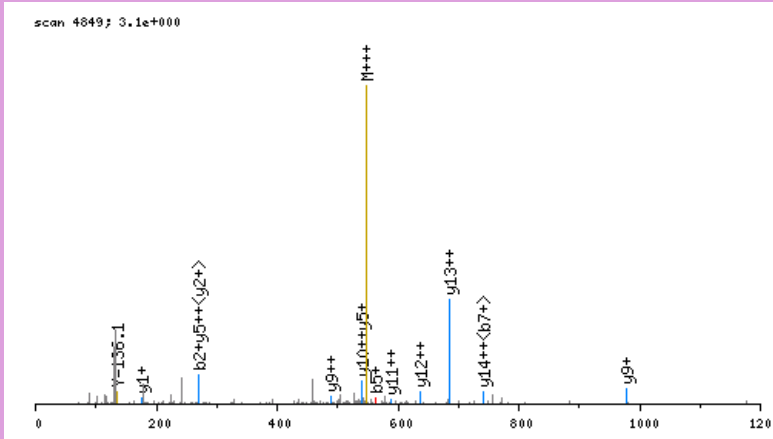

click image to zoom in; click top corners to zoom out [\[precursor±\]](#)

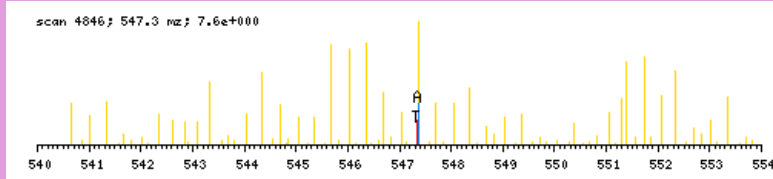

zoomed in precursor plot; T=theoretical m/z, A=acquired m/z

| b <sup>+</sup> | #  | AA # | y <sup>+</sup> | y <sup>2+</sup> |
|----------------|----|------|----------------|-----------------|
| 157.0977       | 1  | Q    | 15             |                 |
| 270.1817       | 2  | L    | 14             | 1483.9365       |
| 367.2345       | 3  | P    | 13             | 1370.8524       |
| 464.2873       | 4  | P    | 12             | 1273.7997       |
| 563.3557       | 5  | V    | 11             | 1176.7469       |
| 662.4241       | 6  | V    | 10             | 1077.6785       |
| 759.4769       | 7  | P    | 9              | 978.6101        |
| 858.5453       | 8  | V    | 8              | 881.5573        |
| 945.5773       | 9  | S    | 7              | 782.4889        |
| 1101.7036      | 10 | K    | 6              | 695.4569        |
| 1198.7564      | 11 | P    | 5              | 539.3306        |
| 1255.7778      | 12 | G    | 4              | 442.2778        |
| 1352.8306      | 13 | P    | 3              | 385.2563        |
| 1465.9147      | 14 | L    | 2              | 288.2036        |
|                | 15 | R    | 1              | 175.1195        |

N-term:+29.04 K(10):+156.13



QLVAVAYAIAGLVDSTIHTSCAFR, MH+ 2520.3284, m/z 630.8376  
 L OSG40 P180811 230811-s1.05253.05253.4.dta

X-range:

-

MassTol: Y-zoom:

MassType:

AVG  MONO

Axis:

1  2

Label:

I  M  -

Ions:

a  +  2+  3+

b  +  2+  3+

c  +  2+  3+

x  +  2+  3+

y  +  2+  3+

z  +  2+  3+

hide H<sub>2</sub>O/NH<sub>3</sub>

zoom 112-122

GO

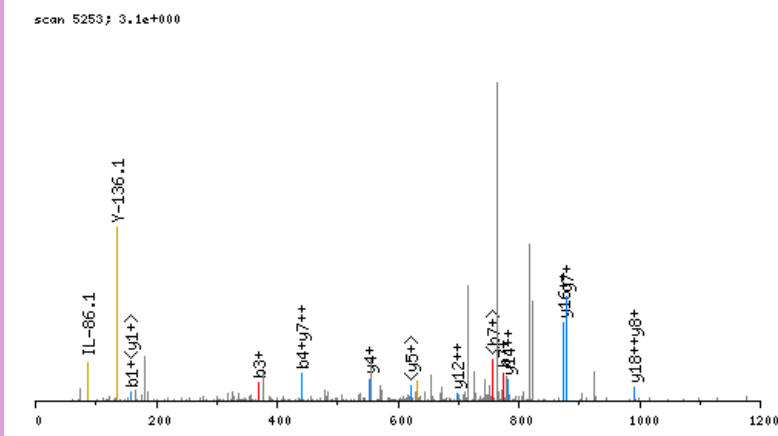

click image to zoom in; click top corners to zoom out [\[precursor±\]](#)

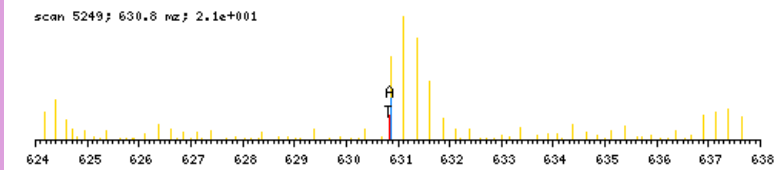

zoomed in precursor plot; T=theoretical m/z, A=acquired m/z

| b <sup>+</sup> | #  | AA # | y <sup>+</sup> | y <sup>2+</sup> |
|----------------|----|------|----------------|-----------------|
| 157.0977       | 1  | Q    | 23             |                 |
| 270.1817       | 2  | L    | 22             | 2364.2385       |
| 369.2502       | 3  | V    | 21             | 2251.1545       |
| 440.2873       | 4  | A    | 20             | 2152.0861       |
| 539.3557       | 5  | V    | 19             | 2081.0489       |
| 610.3928       | 6  | A    | 18             | 1981.9805       |
| 773.4561       | 7  | Y    | 17             | 1910.9434       |
| 844.4932       | 8  | A    | 16             | 1747.8801       |
| 957.5773       | 9  | I    | 15             | 1676.8430       |
| 1014.5988      | 10 | G    | 14             | 1563.7589       |
| 1127.6828      | 11 | L    | 13             | 1506.7374       |
| 1226.7512      | 12 | V    | 12             | 1393.6534       |
| 1341.7782      | 13 | D    | 11             | 1294.5850       |
| 1428.8102      | 14 | S    | 10             | 1179.5580       |
| 1529.8579      | 15 | T    | 9              | 1092.5260       |
| 1642.9420      | 16 | I    | 8              | 991.4783        |
| 1780.0009      | 17 | H    | 7              | 878.3942        |
| 1881.0485      | 18 | T    | 6              | 741.3353        |
| 1968.0806      | 19 | S    | 5              | 640.2877        |
| 2128.1112      | 20 | C    | 4              | 553.2556        |
| 2199.1483      | 21 | A    | 3              | 393.2250        |
| 2346.2167      | 22 | F    | 2              | 322.1879        |
|                | 23 | R    | 1              | 175.1195        |

N-term:+29.04 C(20):+160.03

QNCMSCGKCFSVTVR, MH+ 1889.8493, m/z 473.2178  
 L OSG41 P180811 230811-s1.08495.08495.4.dta

X-range:

-

MassTol: Y-zoom:

MassType:

AVG  MONO

Axis:

1  2

Label:

I  M  -

Ions:

a  +  2+  3+

b  +  2+  3+

c  +  2+  3+

x  +  2+  3+

y  +  2+  3+

z  +  2+  3+

hide H<sub>2</sub>O/NH<sub>3</sub>

zoom 112-122

GO

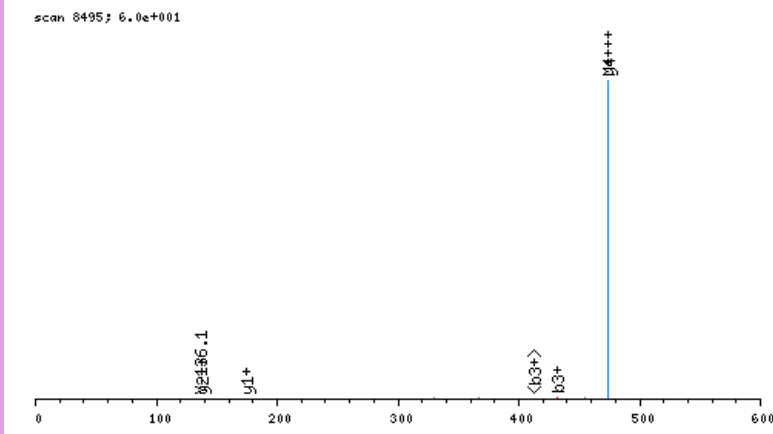

click image to zoom in; click top corners to zoom out [\[precursor±\]](#)

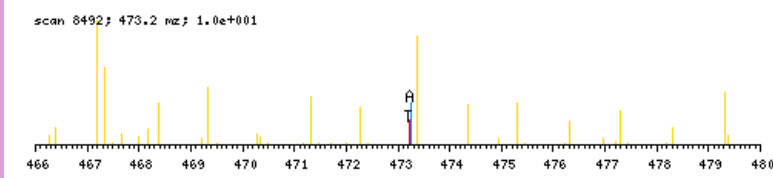

zoomed in precursor plot; T=theoretical m/z, A=acquired m/z

| b <sup>+</sup> | #  | AA # | y <sup>+</sup> | y <sup>2+</sup> |
|----------------|----|------|----------------|-----------------|
| 157.0977       | 1  | Q    | 15             |                 |
| 271.1406       | 2  | N    | 14             | 1733.7595       |
| 431.1712       | 3  | C    | 13             | 1619.7165       |
| 562.2117       | 4  | M    | 12             | 1459.6859       |
| 649.2437       | 5  | S    | 11             | 1328.6454       |
| 809.2743       | 6  | C    | 10             | 1241.6134       |
| 866.2958       | 7  | G    | 9              | 1081.5828       |
| 1022.4221      | 8  | K    | 8              | 1024.5613       |
| 1182.4527      | 9  | C    | 7              | 868.4350        |
| 1329.5211      | 10 | F    | 6              | 708.4044        |
| 1416.5531      | 11 | S    | 5              | 561.3360        |
| 1515.6215      | 12 | V    | 4              | 474.3040        |
| 1616.6692      | 13 | T    | 3              | 375.2356        |
| 1715.7376      | 14 | V    | 2              | 274.1879        |
|                | 15 | R    | 1              | 175.1195        |

N-term:+29.04 C(3):+160.03  
 C(6):+160.03 K(8):+156.13 C(9):+160.03

QPKGGSTGGAKTPLAPLAPSLGKPSR, MH+ 2585.5144, m/z 647.1340  
 L\_OSG38\_P180811\_230811-s1.07330.07330.4.dta

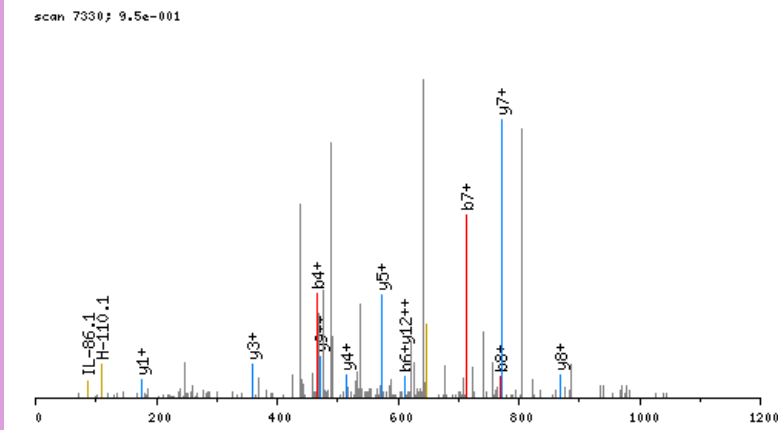

click image to zoom in; click top corners to zoom out [\[precursor±\]](#)

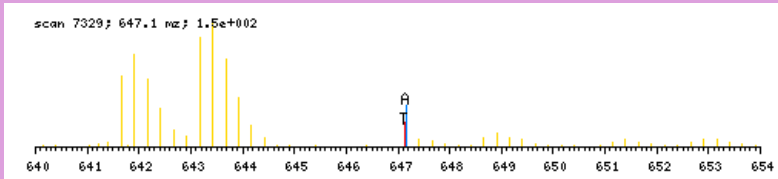

zoomed in precursor plot; T=theoretical m/z, A=acquired m/z

| b <sup>+</sup> | #  | AA | #  | y <sup>+</sup> | y <sup>2+</sup> |
|----------------|----|----|----|----------------|-----------------|
| 157.0977       | 1  | Q  | 26 |                |                 |
| 254.1504       | 2  | P  | 25 | 2429.4245      | 1215.2162       |
| 410.2767       | 3  | K  | 24 | 2332.3718      | 1166.6898       |
| 467.2982       | 4  | G  | 23 | 2176.2455      | 1088.6266       |
| 524.3197       | 5  | G  | 22 | 2119.2240      | 1060.1159       |
| 611.3517       | 6  | S  | 21 | 2062.2025      | 1031.6052       |
| 712.3994       | 7  | T  | 20 | 1975.1705      | 988.0892        |
| 769.4208       | 8  | G  | 19 | 1874.1228      | 937.5653        |
| 826.4423       | 9  | G  | 18 | 1817.1014      | 909.0546        |
| 897.4794       | 10 | A  | 17 | 1760.0799      | 880.5439        |
| 1053.6057      | 11 | K  | 16 | 1689.0428      | 845.0253        |
| 1154.6534      | 12 | T  | 15 | 1532.9165      | 766.9622        |
| 1251.7062      | 13 | P  | 14 | 1431.8688      | 716.4383        |
| 1364.7902      | 14 | L  | 13 | 1334.8160      | 667.9119        |
| 1435.8273      | 15 | A  | 12 | 1221.7320      | 611.3699        |
| 1532.8801      | 16 | P  | 11 | 1150.6949      | 575.8513        |
| 1645.9642      | 17 | L  | 10 | 1053.6421      | 527.3250        |
| 1717.0013      | 18 | A  | 9  | 940.5580       | 470.7829        |
| 1814.0540      | 19 | P  | 8  | 869.5209       | 435.2644        |
| 1901.0861      | 20 | S  | 7  | 772.4681       | 386.7380        |
| 2014.1701      | 21 | L  | 6  | 685.4361       | 343.2220        |
| 2071.1916      | 22 | G  | 5  | 572.3521       | 286.6799        |
| 2227.3179      | 23 | K  | 4  | 515.3306       | 258.1692        |
| 2324.3707      | 24 | P  | 3  | 359.2043       | 180.1061        |
| 2411.4027      | 25 | S  | 2  | 262.1515       | 131.5797        |
|                | 26 | R  | 1  | 175.1195       | 88.0637         |

N-term:+29.04 K(3):+156.13  
 K(11):+156.13 K(23):+156.13

X-range:

-

MassTol: Y-zoom:

MassType:

AVG  MONO

Axis:

1  2

Label:

I  M  -

Ions:

a  +  2+  3+

b  +  2+  3+

c  +  2+  3+

x  +  2+  3+

y  +  2+  3+

z  +  2+  3+

hide H<sub>2</sub>O/NH<sub>3</sub>

zoom 112-122

GO

QPPAPTTFSKR, MH+ 1285.7269, m/z 429.2471  
 L OSG40 P180811 230811-s1.03798.03798.3.dta

X-range:

-

MassTol: Y-zoom:

MassType:

AVG  MONO

Axis:

1  2

Label:

I  M  -

Ions:

a  +  2+  3+

b  +  2+  3+

c  +  2+  3+

x  +  2+  3+

y  +  2+  3+

z  +  2+  3+

hide H<sub>2</sub>O/NH<sub>3</sub>

zoom 112-122

GO

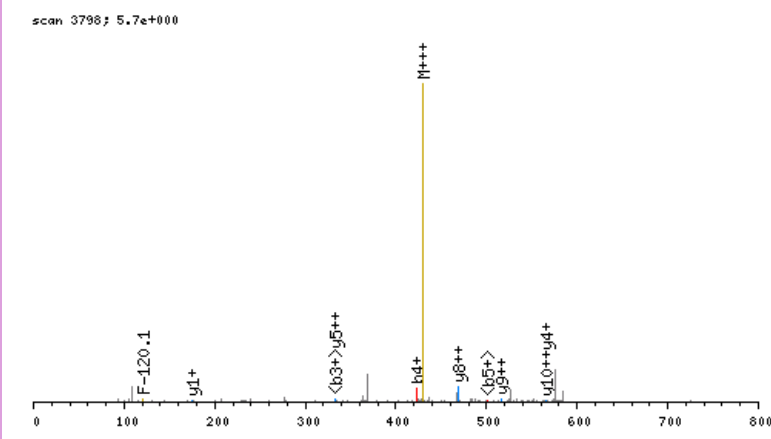

click image to zoom in; click top corners to zoom out [\[precursor±\]](#)

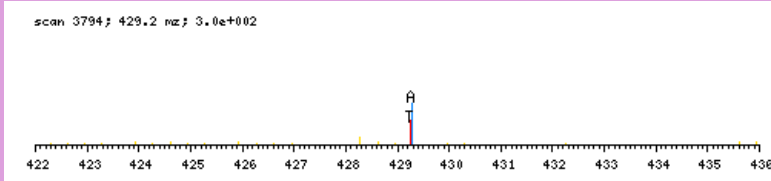

zoomed in precursor plot; T=theoretical m/z, A=acquired m/z

| b <sup>+</sup> | #  | AA # | y <sup>+</sup> | y <sup>2+</sup> |
|----------------|----|------|----------------|-----------------|
| 157.0977       | 1  | Q    | 11             |                 |
| 254.1504       | 2  | P    | 10             | 565.3224        |
| 351.2032       | 3  | P    | 9              | 516.7960        |
| 422.2403       | 4  | A    | 8              | 468.2697        |
| 519.2931       | 5  | P    | 7              | 432.7511        |
| 620.3408       | 6  | T    | 6              | 384.2247        |
| 721.3884       | 7  | T    | 5              | 333.7009        |
| 868.4569       | 8  | F    | 4              | 283.1770        |
| 955.4889       | 9  | S    | 3              | 209.6428        |
| 1111.6152      | 10 | K    | 2              | 166.1268        |
|                | 11 | R    | 1              | 88.0637         |

N-term:+29.04 K(10):+156.13

QPSPSQSSDSQVHSGVQVEGR, MH+ 2224.0594, m/z 742.0247  
 L OSG39 P180811 230811-s1.02258.02258.3.dta

X-range:

-

MassTol: Y-zoom:

MassType:

AVG  MONO

Axis:

1  2

Label:

I  M  -

Ions:

a  +  2+  3+

b  +  2+  3+

c  +  2+  3+

x  +  2+  3+

y  +  2+  3+

z  +  2+  3+

hide H<sub>2</sub>O/NH<sub>3</sub>

zoom 112-122

GO

scan 2258; 4.0e+000

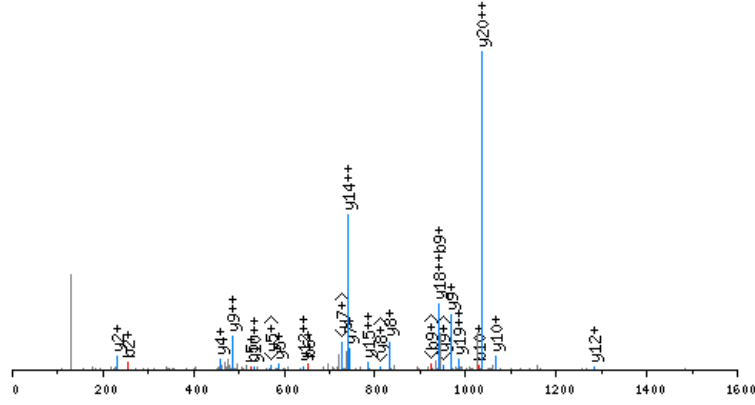

click image to zoom in; click top corners to zoom out [precursor±]

scan 2257; 742.0 mz; 6.2e+000

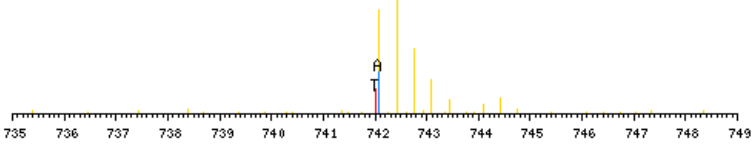

zoomed in precursor plot; T=theoretical m/z, A=acquired m/z

| b <sup>+</sup> | #  | AA | #  | y <sup>+</sup> | y <sup>2+</sup> |
|----------------|----|----|----|----------------|-----------------|
| 157.0977       | 1  | Q  | 21 |                |                 |
| 254.1504       | 2  | P  | 20 | 2067.9695      | 1034.4887       |
| 341.1825       | 3  | S  | 19 | 1970.9168      | 985.9623        |
| 438.2352       | 4  | P  | 18 | 1883.8848      | 942.4463        |
| 525.2673       | 5  | S  | 17 | 1786.8320      | 893.9199        |
| 653.3258       | 6  | Q  | 16 | 1699.8000      | 850.4039        |
| 740.3579       | 7  | S  | 15 | 1571.7414      | 786.3746        |
| 827.3899       | 8  | S  | 14 | 1484.7094      | 742.8586        |
| 942.4168       | 9  | D  | 13 | 1397.6773      | 699.3426        |
| 1029.4489      | 10 | S  | 12 | 1282.6504      | 641.8291        |
| 1157.5074      | 11 | Q  | 11 | 1195.6184      | 598.3131        |
| 1256.5759      | 12 | V  | 10 | 1067.5598      | 534.2838        |
| 1393.6348      | 13 | H  | 9  | 968.4914       | 484.7496        |
| 1480.6668      | 14 | S  | 8  | 831.4325       | 416.2201        |
| 1537.6883      | 15 | G  | 7  | 744.4004       | 372.7041        |
| 1636.7567      | 16 | V  | 6  | 687.3790       | 344.1934        |
| 1764.8153      | 17 | Q  | 5  | 588.3105       | 294.6592        |
| 1863.8837      | 18 | V  | 4  | 460.2520       | 230.6299        |
| 1992.9263      | 19 | E  | 3  | 361.1836       | 181.0957        |
| 2049.9477      | 20 | G  | 2  | 232.1410       | 116.5744        |
|                | 21 | R  | 1  | 175.1195       | 88.0637         |

N-term:+29.04

QSASGAPVLLR, MH+ 1126.6584, m/z 563.8328  
 L OSG37 P180811 230811-s1.03815.03815.2.dta

X-range:

-

MassTol: Y-zoom:

MassType:

AVG  MONO

Axis:

1  2

Label:

I  M  -

Ions:

a  +  2+  3+

b  +  2+  3+

c  +  2+  3+

x  +  2+  3+

y  +  2+  3+

z  +  2+  3+

hide H<sub>2</sub>O/NH<sub>3</sub>

zoom 112-122

GO

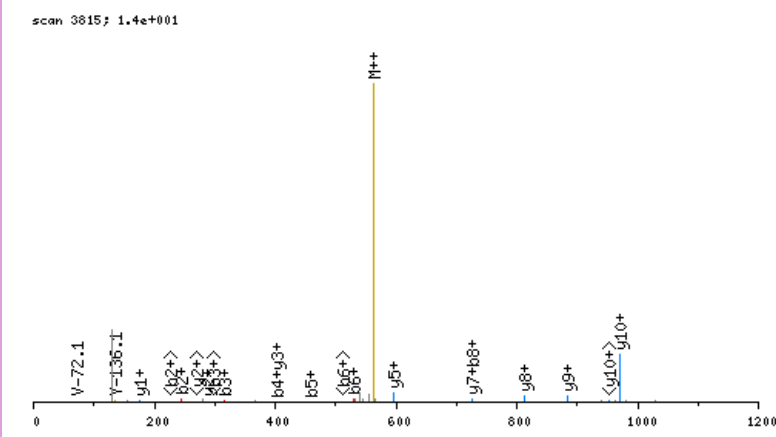

click image to zoom in; click top corners to zoom out [\[precursor±\]](#)

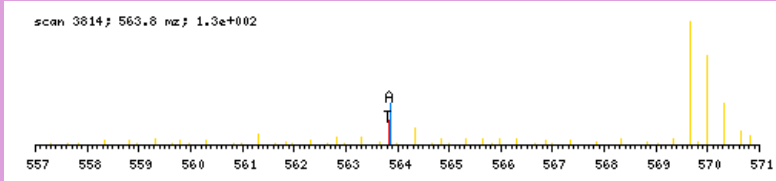

zoomed in precursor plot; T=theoretical m/z, A=acquired m/z

| b <sup>+</sup> | #  | AA # | y <sup>+</sup> | y <sup>2+</sup> |
|----------------|----|------|----------------|-----------------|
| 157.0977       | 1  | Q    | 11             |                 |
| 244.1297       | 2  | S    | 10             | 970.5686        |
| 315.1668       | 3  | A    | 9              | 883.5365        |
| 402.1988       | 4  | S    | 8              | 812.4994        |
| 459.2203       | 5  | G    | 7              | 725.4674        |
| 530.2574       | 6  | A    | 6              | 668.4459        |
| 627.3102       | 7  | P    | 5              | 597.4088        |
| 726.3786       | 8  | V    | 4              | 500.3560        |
| 839.4627       | 9  | L    | 3              | 401.2876        |
| 952.5467       | 10 | L    | 2              | 288.2036        |
|                | 11 | R    | 1              | 175.1195        |

N-term: +29.04

QSNVDELGCSHLGQSYESR, MH+ 2193.9834, m/z 731.9993  
 L OSG40 P180811 230811-s1.04692.04692.3.dta

X-range:

-

MassTol: Y-zoom:

MassType:

AVG  MONO

Axis:

1  2

Label:

I  M  -

Ions:

a  +  2+  3+

b  +  2+  3+

c  +  2+  3+

x  +  2+  3+

y  +  2+  3+

z  +  2+  3+

hide H<sub>2</sub>O/NH<sub>3</sub>

zoom 112-122

GO

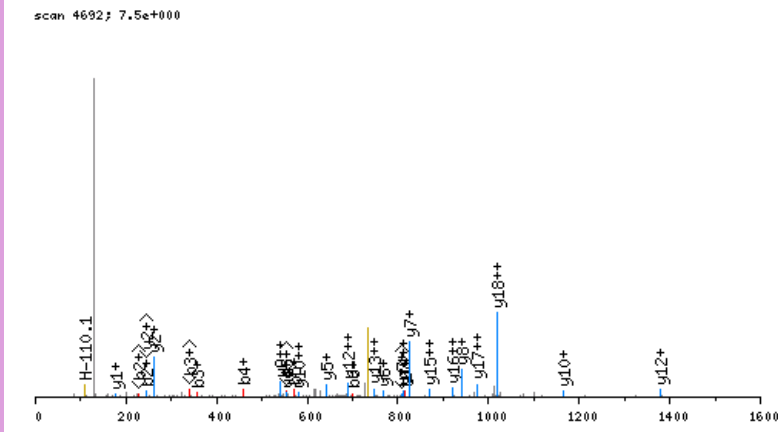

click image to zoom in; click top corners to zoom out [\[precursor±\]](#)

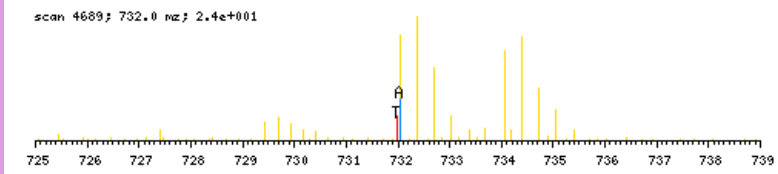

zoomed in precursor plot; T=theoretical m/z, A=acquired m/z

| b <sup>+</sup> | #  | AA | #  | y <sup>+</sup> | y <sup>2+</sup> |
|----------------|----|----|----|----------------|-----------------|
| 157.0977       | 1  | Q  | 19 |                |                 |
| 244.1297       | 2  | S  | 18 | 2037.8936      | 1019.4507       |
| 358.1726       | 3  | N  | 17 | 1950.8615      | 975.9347        |
| 457.2410       | 4  | V  | 16 | 1836.8186      | 918.9132        |
| 572.2680       | 5  | D  | 15 | 1737.7502      | 869.3790        |
| 701.3106       | 6  | E  | 14 | 1622.7232      | 811.8655        |
| 814.3946       | 7  | L  | 13 | 1493.6807      | 747.3442        |
| 871.4161       | 8  | G  | 12 | 1380.5966      | 690.8022        |
| 1031.4467      | 9  | C  | 11 | 1323.5751      | 662.2915        |
| 1118.4787      | 10 | S  | 10 | 1163.5445      | 582.2762        |
| 1255.5377      | 11 | H  | 9  | 1076.5125      | 538.7602        |
| 1368.6217      | 12 | L  | 8  | 939.4536       | 470.2307        |
| 1425.6432      | 13 | G  | 7  | 826.3695       | 413.6887        |
| 1553.7018      | 14 | Q  | 6  | 769.3481       | 385.1779        |
| 1640.7338      | 15 | S  | 5  | 641.2895       | 321.1487        |
| 1803.7971      | 16 | Y  | 4  | 554.2575       | 277.6326        |
| 1932.8397      | 17 | E  | 3  | 391.1941       | 196.1010        |
| 2019.8717      | 18 | S  | 2  | 262.1515       | 131.5797        |
|                | 19 | R  | 1  | 175.1195       | 88.0637         |

N-term:+29.04 C(9):+160.03

QSTLVIAEHANDSLAPITLNTITAAGR, MH+ 2805.5110, m/z 702.1332  
 L OSG38 P180811 230811-s1.07670.07670.4.dta

scan 7670; 8.2e-001

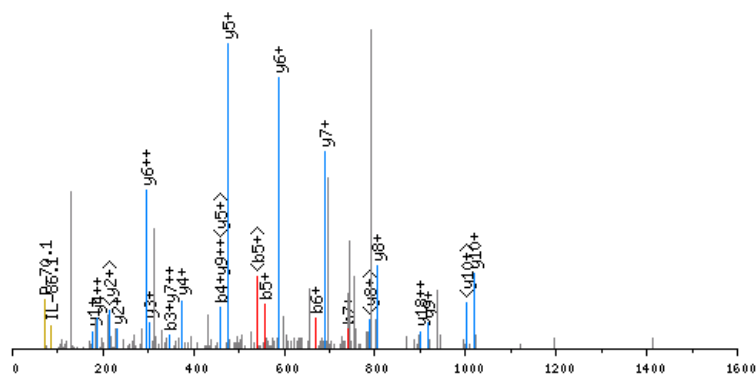

click image to zoom in; click top corners to zoom out [precursor±]

scan 7669; 702.1 m/z; 1.8e+001

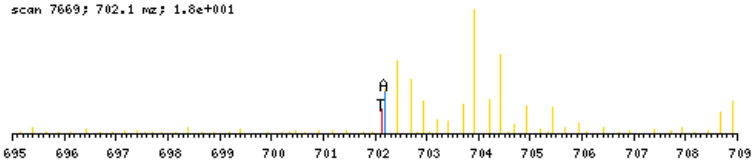

zoomed in precursor plot; T=theoretical m/z, A=acquired m/z

X-range:

-

MassTol: Y-zoom:

MassType:

AVG  MONO

Axis:

1  2

Label:

I  M  -

Ions:

a  +  2+  3+

b  +  2+  3+

c  +  2+  3+

x  +  2+  3+

y  +  2+  3+

z  +  2+  3+

hide H<sub>2</sub>O/NH<sub>3</sub>

zoom 112-122

GO

| b <sup>+</sup> | #  | AA # | y <sup>+</sup> | y <sup>2+</sup>     |
|----------------|----|------|----------------|---------------------|
| 157.0977       | 1  | Q    | 27             |                     |
| 244.1297       | 2  | S    | 26             | 2649.4212 1325.2145 |
| 345.1774       | 3  | T    | 25             | 2562.3891 1281.6985 |
| 458.2614       | 4  | L    | 24             | 2461.3415 1231.1746 |
| 557.3299       | 5  | V    | 23             | 2348.2574 1174.6326 |
| 670.4139       | 6  | I    | 22             | 2249.1890 1125.0984 |
| 741.4510       | 7  | A    | 21             | 2136.1049 1068.5564 |
| 870.4936       | 8  | E    | 20             | 2065.0678 1033.0378 |
| 1007.5525      | 9  | H    | 19             | 1936.0252 968.5165  |
| 1078.5897      | 10 | A    | 18             | 1798.9663 899.9871  |
| 1192.6326      | 11 | N    | 17             | 1727.9292 864.4685  |
| 1307.6595      | 12 | D    | 16             | 1613.8863 807.4470  |
| 1394.6916      | 13 | S    | 15             | 1498.8593 749.9336  |
| 1507.7756      | 14 | L    | 14             | 1411.8273 706.4176  |
| 1578.8127      | 15 | A    | 13             | 1298.7432 649.8755  |
| 1675.8655      | 16 | P    | 12             | 1227.7061 614.3570  |
| 1788.9496      | 17 | I    | 11             | 1130.6533 565.8306  |
| 1889.9972      | 18 | T    | 10             | 1017.5693 509.2886  |
| 2003.0813      | 19 | L    | 9              | 916.5216 458.7647   |
| 2117.1242      | 20 | N    | 8              | 803.4375 402.2227   |
| 2218.1719      | 21 | T    | 7              | 689.3946 345.2012   |
| 2331.2560      | 22 | I    | 6              | 588.3469 294.6774   |
| 2432.3037      | 23 | T    | 5              | 475.2629 238.1353   |
| 2503.3408      | 24 | A    | 4              | 374.2152 187.6115   |
| 2574.3779      | 25 | A    | 3              | 303.1781 152.0930   |
| 2631.3993      | 26 | G    | 2              | 232.1410 116.5744   |
|                | 27 | R    | 1              | 175.1195 88.0637    |

N-term:+29.04



QSVSESLKAVLLQSPPPCISQWR, MH+ 2678.4975, m/z 670.3798  
 H OSG39 P180811 230811-s1.07067.07067.4.dta

X-range:

-

MassTol: Y-zoom:

MassType:

AVG  MONO

Axis:

1  2

Label:

I  M  -

Ions:

a  +  2+  3+

b  +  2+  3+

c  +  2+  3+

x  +  2+  3+

y  +  2+  3+

z  +  2+  3+

hide H<sub>2</sub>O/NH<sub>3</sub>

zoom 112-122

GO

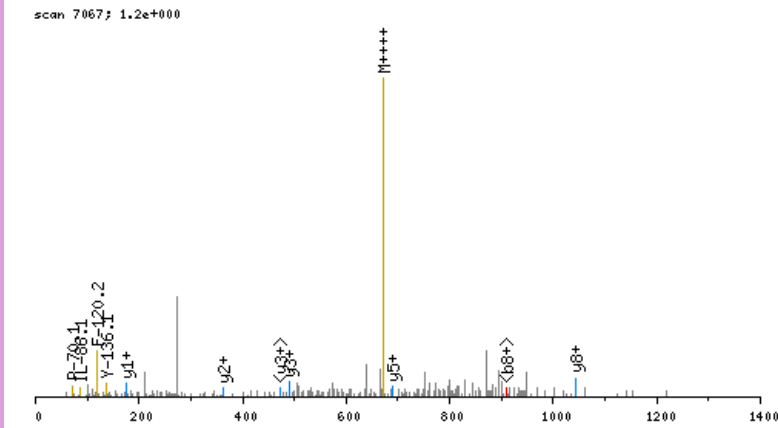

click image to zoom in; click top corners to zoom out [\[precursor±\]](#)

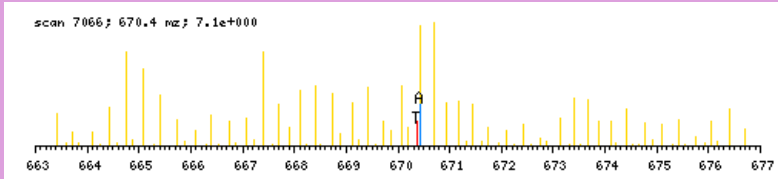

zoomed in precursor plot; T=theoretical m/z, A=acquired m/z

| b <sup>+</sup> | #  | AA # | y <sup>+</sup> | y <sup>2+</sup> |
|----------------|----|------|----------------|-----------------|
| 163.1295       | 1  | Q 23 |                |                 |
| 250.1615       | 2  | S 22 | 2516.3759      | 1258.6919       |
| 349.2299       | 3  | V 21 | 2429.3439      | 1215.1758       |
| 436.2619       | 4  | S 20 | 2330.2755      | 1165.6416       |
| 565.3045       | 5  | E 19 | 2243.2434      | 1122.1256       |
| 652.3366       | 6  | S 18 | 2114.2008      | 1057.6043       |
| 765.4206       | 7  | L 17 | 2027.1688      | 1014.0883       |
| 927.5787       | 8  | K 16 | 1914.0847      | 957.5463        |
| 998.6158       | 9  | A 15 | 1751.9266      | 876.4672        |
| 1097.6843      | 10 | V 14 | 1680.8895      | 840.9487        |
| 1210.7683      | 11 | L 13 | 1581.8211      | 791.4145        |
| 1323.8524      | 12 | L 12 | 1468.7370      | 734.8724        |
| 1451.9110      | 13 | Q 11 | 1355.6530      | 678.3304        |
| 1538.9430      | 14 | S 10 | 1227.5944      | 614.3011        |
| 1635.9958      | 15 | P 9  | 1140.5624      | 570.7851        |
| 1733.0485      | 16 | P 8  | 1043.5096      | 522.2587        |
| 1830.1013      | 17 | P 7  | 946.4568       | 473.7323        |
| 1990.1319      | 18 | C 6  | 849.4041       | 425.2060        |
| 2103.2160      | 19 | I 5  | 689.3735       | 345.1907        |
| 2190.2480      | 20 | S 4  | 576.2894       | 288.6486        |
| 2318.3066      | 21 | Q 3  | 489.2574       | 245.1326        |
| 2504.3859      | 22 | W 2  | 361.1988       | 181.1033        |
|                | 23 | R 1  | 175.1195       | 88.0637         |

N-term:+35.07 K(8):+162.16  
 C(18):+160.03

QTVAVGVKAVDK, MH+ 1429.9843, m/z 477.3329  
 H OSG39 P180811 230811-s1.03882.03882.3.dta

X-range:

-

MassTol: Y-zoom:

MassType:

AVG  MONO

Axis:

1  2

Label:

I  M  -

Ions:

a  +  2+  3+

b  +  2+  3+

c  +  2+  3+

x  +  2+  3+

y  +  2+  3+

z  +  2+  3+

hide H<sub>2</sub>O/NH<sub>3</sub>

zoom 112-122

GO

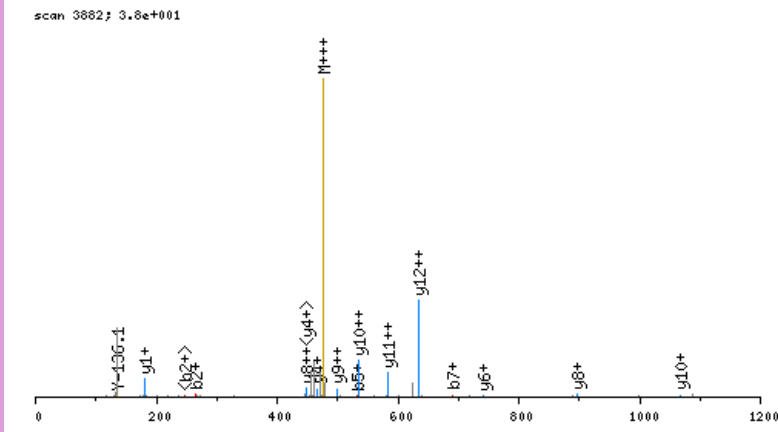

click image to zoom in; click top corners to zoom out [\[precursor±\]](#)

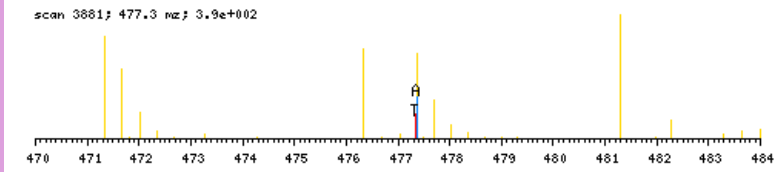

zoomed in precursor plot; T=theoretical m/z, A=acquired m/z

| b <sup>+</sup> | #  | AA | #  | y <sup>+</sup> | y <sup>2+</sup> |
|----------------|----|----|----|----------------|-----------------|
| 163.1295       | 1  | Q  | 13 |                |                 |
| 264.1772       | 2  | T  | 12 | 1267.8626      | 634.4352        |
| 363.2456       | 3  | V  | 11 | 1166.8149      | 583.9114        |
| 434.2827       | 4  | A  | 10 | 1067.7465      | 534.3772        |
| 533.3511       | 5  | V  | 9  | 996.7094       | 498.8586        |
| 590.3726       | 6  | G  | 8  | 897.6410       | 449.3244        |
| 689.4410       | 7  | V  | 7  | 840.6195       | 420.8137        |
| 802.5250       | 8  | I  | 6  | 741.5511       | 371.2795        |
| 964.6831       | 9  | K  | 5  | 628.4671       | 314.7374        |
| 1035.7203      | 10 | A  | 4  | 466.3090       | 233.6584        |
| 1134.7887      | 11 | V  | 3  | 395.2718       | 198.1398        |
| 1249.8156      | 12 | D  | 2  | 296.2034       | 148.6056        |
|                | 13 | K  | 1  | 181.1765       | 91.0922         |

N-term: +35.07 K(9): +162.16  
 K(13): +162.16

RAPAAQPPAAAAPSAVGSPAAAPR, MH+ 2187.2210, m/z 547.5607  
 H OSG39 P180811 230811-s1.02879.02879.4.dta

scan 2879; 1.8e+000

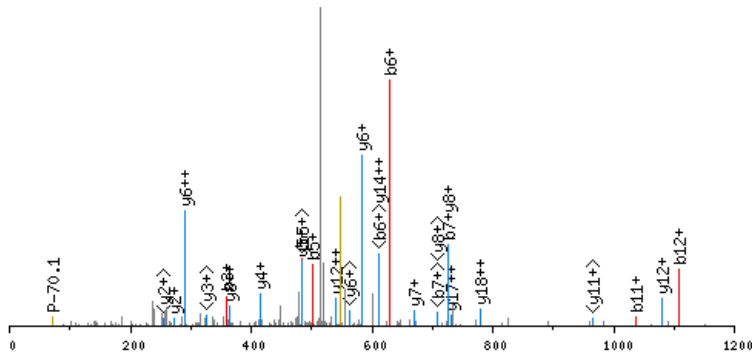

click image to zoom in; click top corners to zoom out [precursor±]

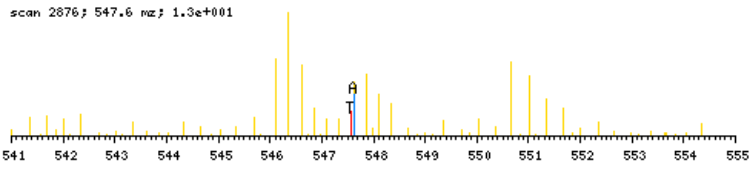

zoomed in precursor plot; T=theoretical m/z, A=acquired m/z

X-range:

-

MassTol: Y-zoom:

MassType:

AVG  MONO

Axis:

1  2

Label:

I  M  -

Ions:

a  +  2+  3+

b  +  2+  3+

c  +  2+  3+

x  +  2+  3+

y  +  2+  3+

z  +  2+  3+

hide H<sub>2</sub>O/NH<sub>3</sub>

zoom 112-122

GO

| b <sup>+</sup> | #  | AA # | y <sup>+</sup> | y <sup>2+</sup> |
|----------------|----|------|----------------|-----------------|
| 191.1720       | 1  | R 24 |                |                 |
| 262.2091       | 2  | A 23 | 1997.0568      | 999.0323        |
| 359.2619       | 3  | P 22 | 1926.0197      | 963.5138        |
| 430.2990       | 4  | A 21 | 1828.9670      | 914.9874        |
| 501.3361       | 5  | A 20 | 1757.9299      | 879.4688        |
| 629.3947       | 6  | Q 19 | 1686.8927      | 843.9503        |
| 726.4475       | 7  | P 18 | 1558.8342      | 779.9210        |
| 823.5002       | 8  | P 17 | 1461.7814      | 731.3946        |
| 894.5373       | 9  | A 16 | 1364.7286      | 682.8682        |
| 965.5744       | 10 | A 15 | 1293.6915      | 647.3497        |
| 1036.6116      | 11 | A 14 | 1222.6544      | 611.8311        |
| 1107.6487      | 12 | A 13 | 1151.6173      | 576.3126        |
| 1204.7014      | 13 | P 12 | 1080.5802      | 540.7940        |
| 1291.7335      | 14 | S 11 | 983.5274       | 492.2676        |
| 1362.7706      | 15 | A 10 | 896.4954       | 448.7516        |
| 1461.8390      | 16 | V 9  | 825.4583       | 413.2331        |
| 1518.8605      | 17 | G 8  | 726.3899       | 363.6988        |
| 1605.8925      | 18 | S 7  | 669.3684       | 335.1881        |
| 1702.9453      | 19 | P 6  | 582.3364       | 291.6721        |
| 1773.9824      | 20 | A 5  | 485.2836       | 243.1457        |
| 1845.0195      | 21 | A 4  | 414.2465       | 207.6272        |
| 1916.0566      | 22 | A 3  | 343.2094       | 172.1086        |
| 2013.1094      | 23 | P 2  | 272.1723       | 136.5900        |
|                | 24 | R 1  | 175.1195       | 88.0637         |

N-term:+35.07

RDIDNPSAEAEER, MH+ 1400.6770, m/z 467.5638  
 L OSG40 P180811 230811-s1.02006.02006.3.dta

scan 2006; 2.5e+000

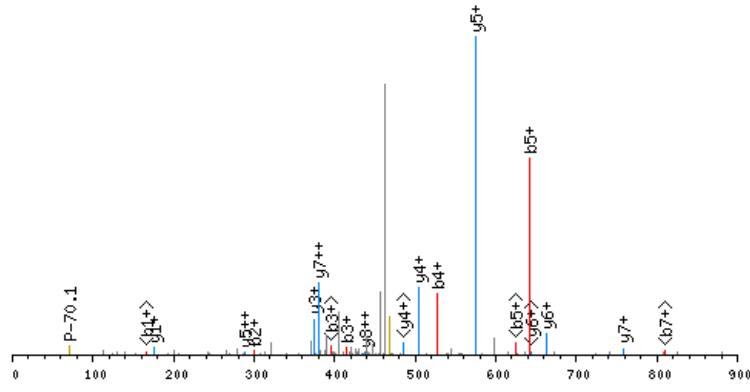

click image to zoom in; click top corners to zoom out [precursor±]

scan 2004; 467.6 m/z; 5.4e+000

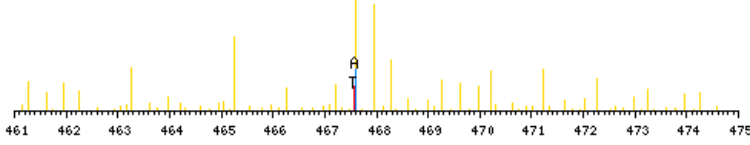

zoomed in precursor plot; T=theoretical m/z, A=acquired m/z

X-range:

-

MassTol: Y-zoom:

MassType:

AVG  MONO

Axis:

1  2

Label:

I  M  -

Ions:

a  +  2+  3+

b  +  2+  3+

c  +  2+  3+

x  +  2+  3+

y  +  2+  3+

z  +  2+  3+

hide H<sub>2</sub>O/NH<sub>3</sub>

zoom 112-122

GO

| b <sup>+</sup> | #  | AA | #  | y <sup>+</sup> | y <sup>2+</sup> |
|----------------|----|----|----|----------------|-----------------|
| 185.1402       | 1  | R  | 12 |                |                 |
| 300.1672       | 2  | D  | 11 | 1216.5446      | 608.7762        |
| 413.2512       | 3  | I  | 10 | 1101.5176      | 551.2627        |
| 528.2782       | 4  | D  | 9  | 988.4336       | 494.7207        |
| 642.3211       | 5  | N  | 8  | 873.4066       | 437.2072        |
| 739.3739       | 6  | P  | 7  | 759.3637       | 380.1858        |
| 826.4059       | 7  | S  | 6  | 662.3109       | 331.6594        |
| 897.4430       | 8  | A  | 5  | 575.2789       | 288.1434        |
| 1026.4856      | 9  | E  | 4  | 504.2418       | 252.6248        |
| 1097.5227      | 10 | A  | 3  | 375.1992       | 188.1035        |
| 1226.5653      | 11 | E  | 2  | 304.1621       | 152.5850        |
|                | 12 | R  | 1  | 175.1195       | 88.0637         |

N-term:+29.04

RDYEQAGSAAPSVFSR, MH+ 1768.8618, m/z 590.2921  
 L OSG40 P180811 230811-s1.04487.04487.3.dta

X-range:

-

MassTol: Y-zoom:

MassType:

AVG  MONO

Axis:

1  2

Label:

I  M  -

Ions:

a  +  2+  3+

b  +  2+  3+

c  +  2+  3+

x  +  2+  3+

y  +  2+  3+

z  +  2+  3+

hide H<sub>2</sub>O/NH<sub>3</sub>

zoom 112-122

GO

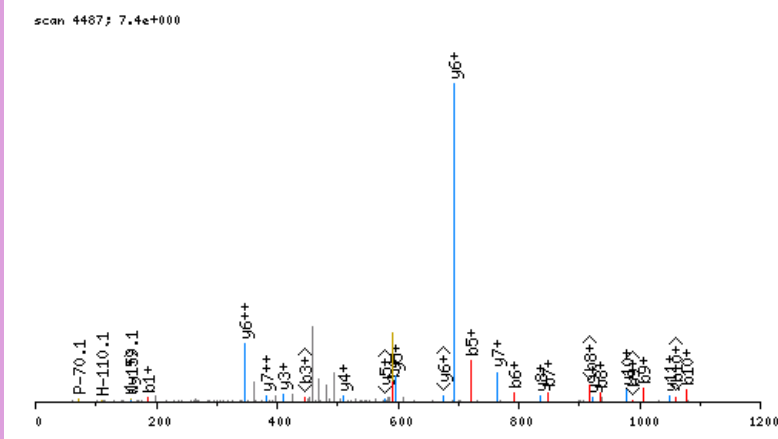

click image to zoom in; click top corners to zoom out [\[precursor±\]](#)

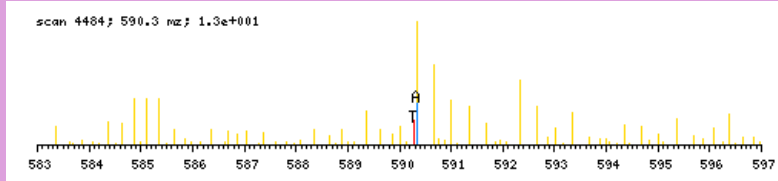

zoomed in precursor plot; T=theoretical m/z, A=acquired m/z

| b <sup>+</sup> | #  | AA # | y <sup>+</sup> | y <sup>2+</sup> |
|----------------|----|------|----------------|-----------------|
| 185.1402       | 1  | R 16 |                |                 |
| 300.1672       | 2  | D 15 | 1584.7294      | 792.8686        |
| 463.2305       | 3  | Y 14 | 1469.7025      | 735.3552        |
| 592.2731       | 4  | E 13 | 1306.6392      | 653.8235        |
| 720.3317       | 5  | Q 12 | 1177.5966      | 589.3022        |
| 791.3688       | 6  | A 11 | 1049.5380      | 525.2729        |
| 848.3902       | 7  | G 10 | 978.5009       | 489.7543        |
| 935.4223       | 8  | S 9  | 921.4794       | 461.2436        |
| 1006.4594      | 9  | A 8  | 834.4474       | 417.7276        |
| 1077.4965      | 10 | A 7  | 763.4103       | 382.2090        |
| 1174.5493      | 11 | P 6  | 692.3731       | 346.6905        |
| 1261.5813      | 12 | S 5  | 595.3204       | 298.1641        |
| 1360.6497      | 13 | V 4  | 508.2884       | 254.6481        |
| 1507.7181      | 14 | F 3  | 409.2199       | 205.1139        |
| 1594.7501      | 15 | S 2  | 262.1515       | 131.5797        |
|                | 16 | R 1  | 175.1195       | 88.0637         |

N-term:+29.04

RELEELSLEAQGIR, MH+ 1670.9077, m/z 557.6408  
 L OSG40 P180811 230811-s1.06117.06117.3.dta

X-range:

-

MassTol: Y-zoom:

MassType:

AVG  MONO

Axis:

1  2

Label:

I  M  -

Ions:

a  +  2+  3+

b  +  2+  3+

c  +  2+  3+

x  +  2+  3+

y  +  2+  3+

z  +  2+  3+

hide H<sub>2</sub>O/NH<sub>3</sub>

zoom 112-122

GO

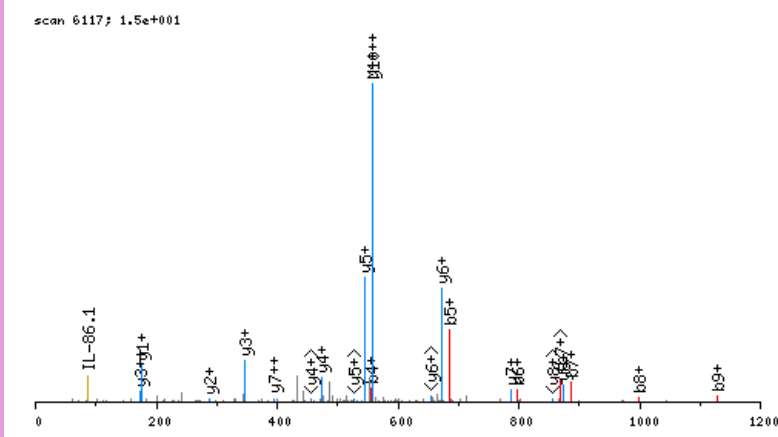

click image to zoom in; click top corners to zoom out [\[precursor±\]](#)

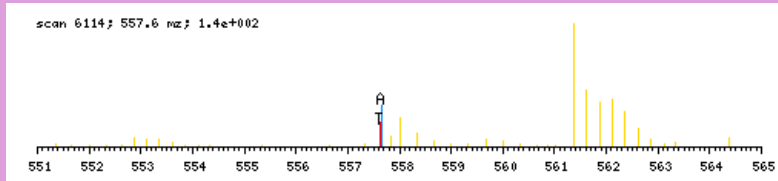

zoomed in precursor plot; T=theoretical m/z, A=acquired m/z

| b <sup>+</sup> | #  | AA # | y <sup>+</sup> | y <sup>2+</sup> |
|----------------|----|------|----------------|-----------------|
| 185.1402       | 1  | R 14 |                |                 |
| 314.1828       | 2  | E 13 | 1486.7753      | 743.8916        |
| 427.2669       | 3  | L 12 | 1357.7327      | 679.3703        |
| 556.3095       | 4  | E 11 | 1244.6487      | 622.8282        |
| 685.3521       | 5  | E 10 | 1115.6061      | 558.3069        |
| 798.4361       | 6  | L 9  | 986.5635       | 493.7856        |
| 885.4681       | 7  | S 8  | 873.4794       | 437.2436        |
| 998.5522       | 8  | L 7  | 786.4474       | 393.7276        |
| 1127.5948      | 9  | E 6  | 673.3633       | 337.1856        |
| 1198.6319      | 10 | A 5  | 544.3207       | 272.6643        |
| 1326.6905      | 11 | Q 4  | 473.2836       | 237.1457        |
| 1383.7120      | 12 | G 3  | 345.2250       | 173.1164        |
| 1496.7960      | 13 | I 2  | 288.2036       | 144.6057        |
|                | 14 | R 1  | 175.1195       | 88.0637         |

N-term:+29.04

REPLVFKAGKPVTVKIPFQSR, MH+ 2509.5387, m/z 628.1401  
 L OSG38 P180811 230811-s1.07765.07765.4.dta

scan 7765; 1.5e+001

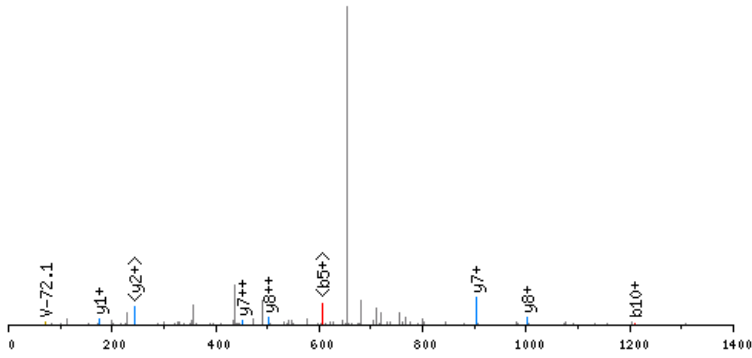

click image to zoom in; click top corners to zoom out [precursor±]

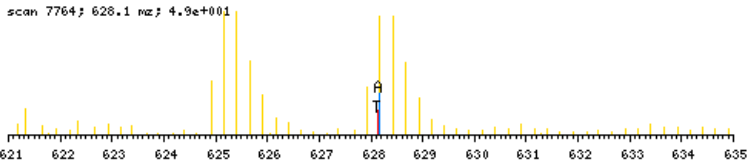

zoomed in precursor plot; T=theoretical m/z, A=acquired m/z

X-range:

0 - 0

MassTol: Y-zoom:

0. 1.

MassType:

AVG  MONO

Axis:

1  2

Label:

I  M  -

Ions:

a  +  2+  3+

b  +  2+  3+

c  +  2+  3+

x  +  2+  3+

y  +  2+  3+

z  +  2+  3+

hide H<sub>2</sub>O/NH<sub>3</sub>

zoom 112-122

GO

| b <sup>+</sup> | #  | AA | #  | y <sup>+</sup> | y <sup>2+</sup> |
|----------------|----|----|----|----------------|-----------------|
| 185.1402       | 1  | R  | 21 |                |                 |
| 314.1828       | 2  | E  | 20 | 2325.4063      | 1163.2071       |
| 411.2356       | 3  | P  | 19 | 2196.3638      | 1098.6858       |
| 524.3196       | 4  | L  | 18 | 2099.3110      | 1050.1594       |
| 623.3880       | 5  | V  | 17 | 1986.2269      | 993.6174        |
| 770.4565       | 6  | F  | 16 | 1887.1585      | 944.0832        |
| 926.5828       | 7  | K  | 15 | 1740.0901      | 870.5490        |
| 997.6199       | 8  | A  | 14 | 1583.9638      | 792.4858        |
| 1054.6413      | 9  | G  | 13 | 1512.9267      | 756.9673        |
| 1210.7676      | 10 | K  | 12 | 1455.9052      | 728.4565        |
| 1307.8204      | 11 | P  | 11 | 1299.7789      | 650.3934        |
| 1406.8888      | 12 | V  | 10 | 1202.7262      | 601.8670        |
| 1507.9365      | 13 | T  | 9  | 1103.6577      | 552.3328        |
| 1607.0049      | 14 | V  | 8  | 1002.6101      | 501.8089        |
| 1763.1312      | 15 | K  | 7  | 903.5416       | 452.2747        |
| 1876.2153      | 16 | I  | 6  | 747.4153       | 374.2116        |
| 1973.2680      | 17 | P  | 5  | 634.3313       | 317.6696        |
| 2120.3364      | 18 | F  | 4  | 537.2785       | 269.1432        |
| 2248.3950      | 19 | Q  | 3  | 390.2101       | 195.6090        |
| 2335.4271      | 20 | S  | 2  | 262.1515       | 131.5797        |
|                | 21 | R  | 1  | 175.1195       | 88.0637         |

N-term:+29.04 K(7):+156.13  
 K(10):+156.13 K(15):+156.13

RGDDGIFDDNFIEER, MH+ 1831.8675, m/z 611.2940  
 H OSG40 P180811 230811-s1.07480.07480.3.dta

X-range:

-

MassTol: Y-zoom:

MassType:

AVG  MONO

Axis:

1  2

Label:

I  M  -

Ions:

a  +  2+  3+

b  +  2+  3+

c  +  2+  3+

x  +  2+  3+

y  +  2+  3+

z  +  2+  3+

hide H<sub>2</sub>O/NH<sub>3</sub>

zoom 112-122

GO

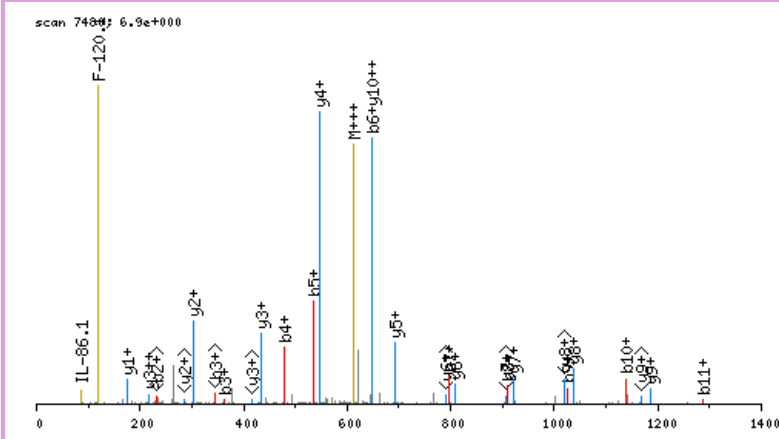

click image to zoom in; click top corners to zoom out [\[precursor±\]](#)

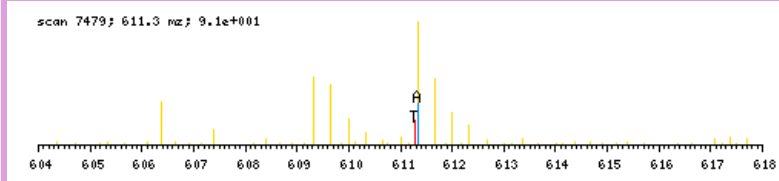

zoomed in precursor plot; T=theoretical m/z, A=acquired m/z

| b <sup>+</sup> | #  | AA # | y <sup>+</sup> | y <sup>2+</sup> |
|----------------|----|------|----------------|-----------------|
| 191.1720       | 1  | R 15 |                |                 |
| 248.1935       | 2  | G 14 | 1641.7033      | 821.3555        |
| 363.2204       | 3  | D 13 | 1584.6818      | 792.8448        |
| 478.2474       | 4  | D 12 | 1469.6549      | 735.3313        |
| 535.2688       | 5  | G 11 | 1354.6279      | 677.8179        |
| 648.3529       | 6  | I 10 | 1297.6065      | 649.3071        |
| 795.4213       | 7  | F 9  | 1184.5224      | 592.7651        |
| 910.4482       | 8  | D 8  | 1037.4540      | 519.2309        |
| 1025.4752      | 9  | D 7  | 922.4270       | 461.7174        |
| 1139.5181      | 10 | N 6  | 807.4001       | 404.2040        |
| 1286.5865      | 11 | F 5  | 693.3572       | 347.1825        |
| 1399.6706      | 12 | I 4  | 546.2888       | 273.6483        |
| 1528.7132      | 13 | E 3  | 433.2047       | 217.1063        |
| 1657.7558      | 14 | E 2  | 304.1621       | 152.5850        |
|                | 15 | R 1  | 175.1195       | 88.0637         |

N-term:+35.07



X-range:

-

MassTol: Y-zoom:

MassType:

AVG  MONO

Axis:

1  2

Label:

I  M  -

Ions:

a  +  2+  3+

b  +  2+  3+

c  +  2+  3+

x  +  2+  3+

y  +  2+  3+

z  +  2+  3+

hide H<sub>2</sub>O/NH<sub>3</sub>

zoom 112-122

GO

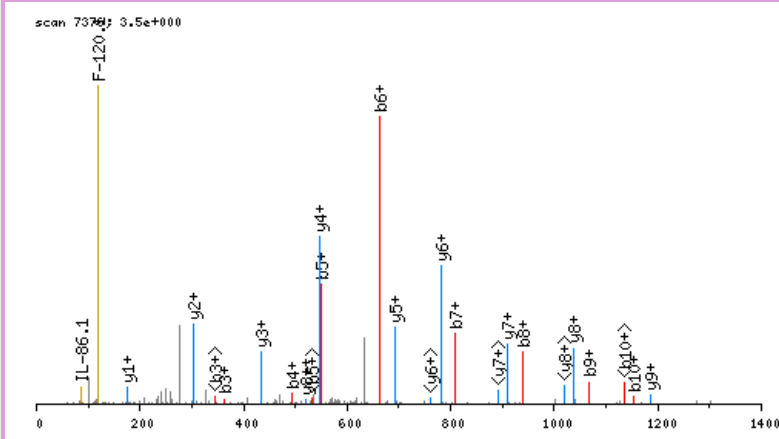

click image to zoom in; click top corners to zoom out [\[precursor±\]](#)

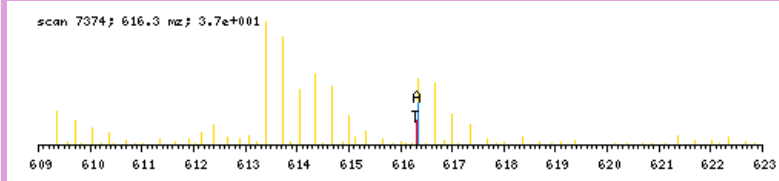

zoomed in precursor plot; T=theoretical m/z, A=acquired m/z

| b <sup>+</sup> | #  | AA # | y <sup>+</sup> | y <sup>2+</sup> |
|----------------|----|------|----------------|-----------------|
| 191.1720       | 1  | R 15 |                |                 |
| 248.1935       | 2  | G 14 | 1656.7393      | 828.8736        |
| 363.2204       | 3  | D 13 | 1599.7179      | 800.3628        |
| 492.2630       | 4  | E 12 | 1484.6909      | 742.8494        |
| 549.2845       | 5  | G 11 | 1355.6483      | 678.3281        |
| 662.3685       | 6  | I 10 | 1298.6269      | 649.8173        |
| 809.4370       | 7  | F 9  | 1185.5428      | 593.2753        |
| 938.4795       | 8  | E 8  | 1038.4744      | 519.7411        |
| 1067.5221      | 9  | E 7  | 909.4318       | 455.2198        |
| 1154.5542      | 10 | S 6  | 780.3892       | 390.6985        |
| 1301.6226      | 11 | F 5  | 693.3572       | 347.1825        |
| 1414.7066      | 12 | I 4  | 546.2888       | 273.6483        |
| 1543.7492      | 13 | E 3  | 433.2047       | 217.1063        |
| 1672.7918      | 14 | E 2  | 304.1621       | 152.5850        |
|                | 15 | R 1  | 175.1195       | 88.0637         |

N-term:+35.07

RGEAGAAGPSGPAGPR, MH+ 1435.7406, m/z 479.2517  
 L OSG38 P180811 230811-s1.02124.02124.3.dta

X-range:

-

MassTol: Y-zoom:

MassType:

AVG  MONO

Axis:

1  2

Label:

I  M  -

Ions:

a  +  2+  3+

b  +  2+  3+

c  +  2+  3+

x  +  2+  3+

y  +  2+  3+

z  +  2+  3+

hide H<sub>2</sub>O/NH<sub>3</sub>

zoom 112-122

GO

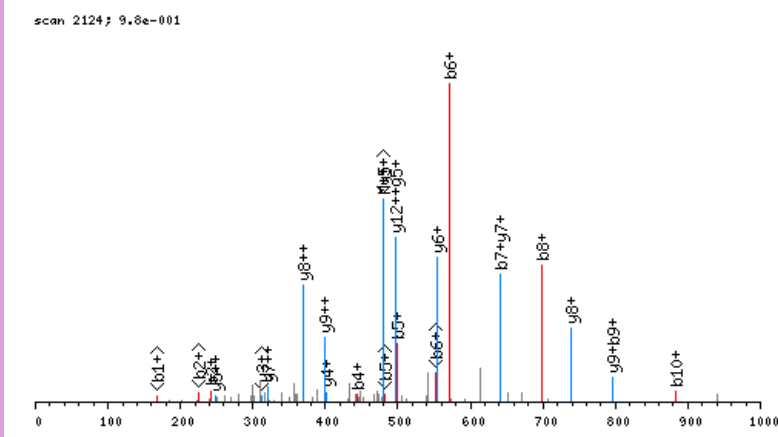

click image to zoom in; click top corners to zoom out [\[precursor±\]](#)

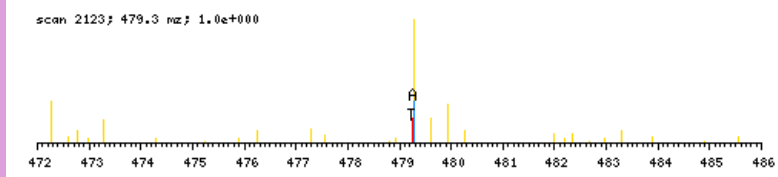

zoomed in precursor plot; T=theoretical m/z, A=acquired m/z

| b <sup>+</sup> | #  | AA # | y <sup>+</sup> | y <sup>2+</sup> |
|----------------|----|------|----------------|-----------------|
| 185.1402       | 1  | R 16 |                |                 |
| 242.1617       | 2  | G 15 | 1251.6082      | 626.3080        |
| 371.2043       | 3  | E 14 | 1194.5867      | 597.7973        |
| 442.2414       | 4  | A 13 | 1065.5441      | 533.2760        |
| 499.2628       | 5  | G 12 | 994.5070       | 497.7574        |
| 570.3000       | 6  | A 11 | 937.4856       | 469.2467        |
| 641.3371       | 7  | A 10 | 866.4484       | 433.7281        |
| 698.3585       | 8  | G 9  | 795.4113       | 398.2096        |
| 795.4113       | 9  | P 8  | 738.3899       | 369.6988        |
| 882.4433       | 10 | S 7  | 641.3371       | 321.1725        |
| 939.4648       | 11 | G 6  | 554.3051       | 277.6564        |
| 1036.5176      | 12 | P 5  | 497.2836       | 249.1457        |
| 1107.5547      | 13 | A 4  | 400.2308       | 200.6193        |
| 1164.5761      | 14 | G 3  | 329.1937       | 165.1008        |
| 1261.6289      | 15 | P 2  | 272.1723       | 136.5900        |
|                | 16 | R 1  | 175.1195       | 88.0637         |

N-term:+29.04

RLIQEALAEAEER, MH+ 1484.8073, m/z 495.6073  
 L OSG40 P180811 230811-s1.04980.04980.3.dta

X-range:

-

MassTol: Y-zoom:

MassType:

AVG  MONO

Axis:

1  2

Label:

I  M  -

Ions:

a  +  2+  3+

b  +  2+  3+

c  +  2+  3+

x  +  2+  3+

y  +  2+  3+

z  +  2+  3+

hide H<sub>2</sub>O/NH<sub>3</sub>

zoom 112-122

GO

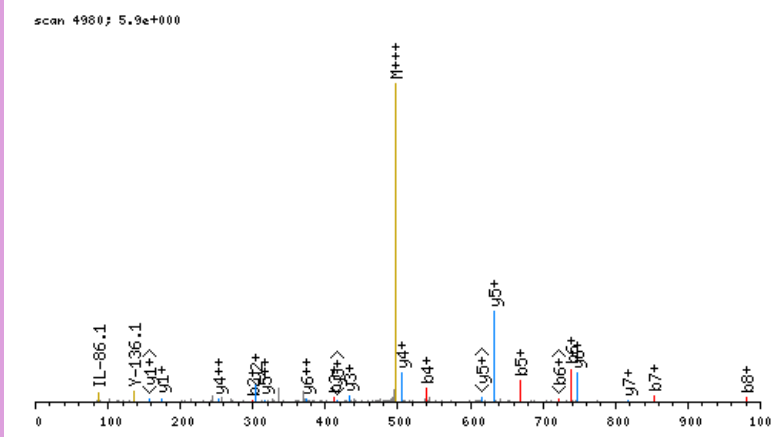

click image to zoom in; click top corners to zoom out [\[precursor±\]](#)

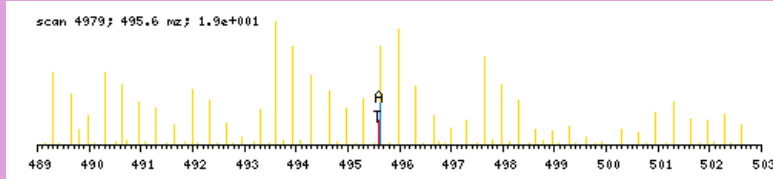

zoomed in precursor plot; T=theoretical m/z, A=acquired m/z

| b <sup>+</sup> | #  | AA # | y <sup>+</sup> | y <sup>2+</sup> |
|----------------|----|------|----------------|-----------------|
| 185.1402       | 1  | R 12 |                |                 |
| 298.2243       | 2  | L 11 | 1300.6749      | 650.8413        |
| 411.3083       | 3  | L 10 | 1187.5908      | 594.2993        |
| 539.3669       | 4  | Q 9  | 1074.5067      | 537.7573        |
| 668.4095       | 5  | E 8  | 946.4482       | 473.7280        |
| 739.4466       | 6  | A 7  | 817.4056       | 409.2067        |
| 852.5307       | 7  | L 6  | 746.3685       | 373.6881        |
| 981.5733       | 8  | E 5  | 633.2844       | 317.1461        |
| 1052.6104      | 9  | A 4  | 504.2418       | 252.6248        |
| 1181.6530      | 10 | E 3  | 433.2047       | 217.1063        |
| 1310.6956      | 11 | E 2  | 304.1621       | 152.5850        |
|                | 12 | R 1  | 175.1195       | 88.0637         |

N-term:+29.04

X-range:

-

MassTol: Y-zoom:

MassType:

AVG  MONO

Axis:

1  2

Label:

I  M  -

Ions:

a  +  2+  3+

b  +  2+  3+

c  +  2+  3+

x  +  2+  3+

y  +  2+  3+

z  +  2+  3+

hide H<sub>2</sub>O/NH<sub>3</sub>

zoom 112-122

GO

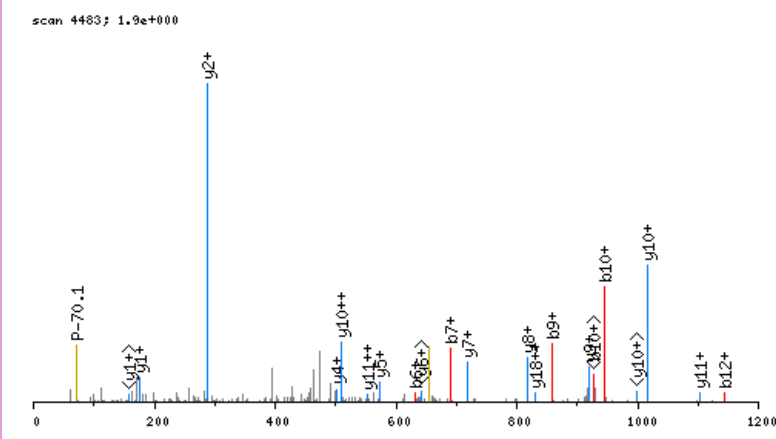

click image to zoom in; click top corners to zoom out [\[precursor±\]](#)

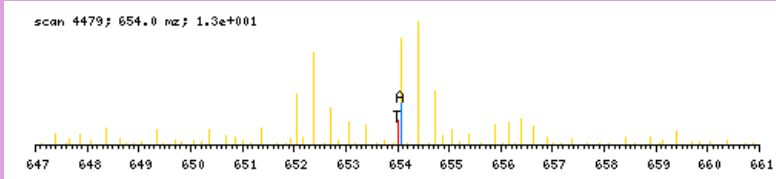

zoomed in precursor plot; T=theoretical m/z, A=acquired m/z

| b <sup>+</sup>   | #  | AA # | y <sup>+</sup>   | y <sup>2+</sup> |
|------------------|----|------|------------------|-----------------|
| 191.1720         | 1  | R 20 |                  |                 |
| 304.2561         | 2  | L 19 | 1769.9034        | 885.4556        |
| 401.3088         | 3  | P 18 | 1656.8193        | <b>828.9136</b> |
| 488.3409         | 4  | S 17 | 1559.7665        | 780.3872        |
| 545.3623         | 5  | G 16 | 1472.7345        | 736.8712        |
| <b>632.3944</b>  | 6  | S 15 | 1415.7130        | 708.3604        |
| <b>689.4158</b>  | 7  | G 14 | 1328.6810        | 664.8444        |
| 786.4686         | 8  | P 13 | 1271.6596        | 636.3337        |
| <b>857.5057</b>  | 9  | A 12 | 1174.6068        | 587.8073        |
| <b>944.5377</b>  | 10 | S 11 | <b>1103.5697</b> | <b>552.2888</b> |
| 1041.5905        | 11 | P 10 | <b>1016.5376</b> | <b>508.7727</b> |
| <b>1142.6382</b> | 12 | T 9  | <b>919.4849</b>  | 460.2464        |
| 1243.6859        | 13 | T 8  | <b>818.4372</b>  | 409.7225        |
| 1300.7073        | 14 | G 7  | <b>717.3895</b>  | 359.1987        |
| 1387.7393        | 15 | S 6  | 660.3681         | 330.6879        |
| 1458.7765        | 16 | A 5  | <b>573.3360</b>  | 287.1719        |
| 1557.8449        | 17 | V 4  | <b>502.2989</b>  | 251.6534        |
| 1672.8718        | 18 | D 3  | 403.2305         | 202.1192        |
| 1785.9559        | 19 | I 2  | <b>288.2036</b>  | 144.6057        |
|                  | 20 | R 1  | <b>175.1195</b>  | 88.0637         |

N-term:+35.07

RPLPPSPVVR, MH+ 1149.7320, m/z 383.9155  
 H OSG40 P180811 230811-s1.02641.02641.3.dta

X-range:

-

MassTol: Y-zoom:

MassType:

AVG  MONO

Axis:

1  2

Label:

I  M  -

Ions:

a  +  2+  3+

b  +  2+  3+

c  +  2+  3+

x  +  2+  3+

y  +  2+  3+

z  +  2+  3+

hide H<sub>2</sub>O/NH<sub>3</sub>

zoom 112-122

GO

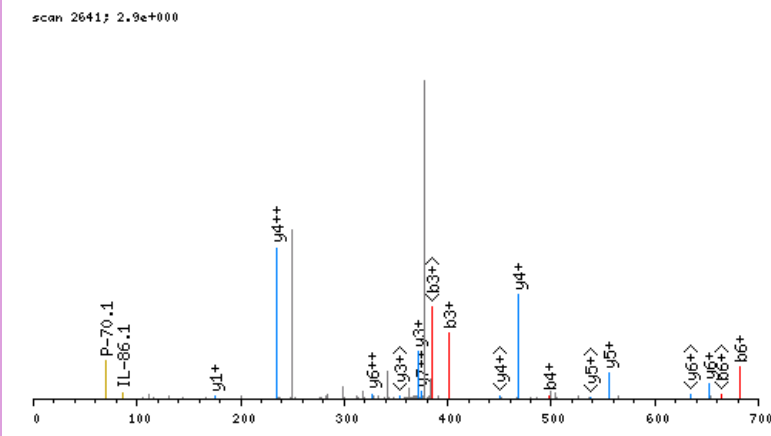

click image to zoom in; click top corners to zoom out [\[precursor±\]](#)

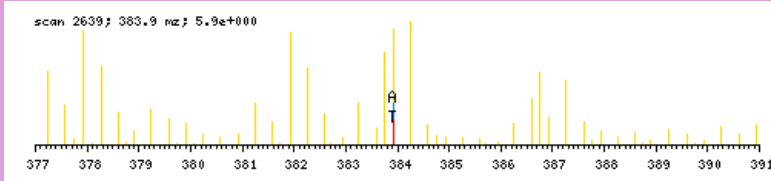

zoomed in precursor plot; T=theoretical m/z, A=acquired m/z

| b <sup>+</sup> | #  | AA | #  | y <sup>+</sup> | y <sup>2+</sup> |
|----------------|----|----|----|----------------|-----------------|
| 191.1720       | 1  | R  | 10 |                |                 |
| 288.2248       | 2  | P  | 9  | 959.5678       | 480.2878        |
| 401.3088       | 3  | L  | 8  | 862.5151       | 431.7614        |
| 498.3616       | 4  | P  | 7  | 749.4310       | 375.2194        |
| 595.4144       | 5  | P  | 6  | 652.3782       | 326.6930        |
| 682.4464       | 6  | S  | 5  | 555.3255       | 278.1666        |
| 779.4992       | 7  | P  | 4  | 468.2934       | 234.6506        |
| 876.5519       | 8  | P  | 3  | 371.2407       | 186.1243        |
| 975.6203       | 9  | V  | 2  | 274.1879       | 137.5979        |
|                | 10 | R  | 1  | 175.1195       | 88.0637         |

N-term: +35.07

RPPLGFLNPR, MH+ 1200.7429, m/z 400.9192  
 H OSG40 P180811 230811-s1.05427.05427.3.dta

X-range:

-

MassTol: Y-zoom:

MassType:

AVG  MONO

Axis:

1  2

Label:

I  M  -

Ions:

a  +  2+  3+

b  +  2+  3+

c  +  2+  3+

x  +  2+  3+

y  +  2+  3+

z  +  2+  3+

hide H<sub>2</sub>O/NH<sub>3</sub>

zoom 112-122

GO

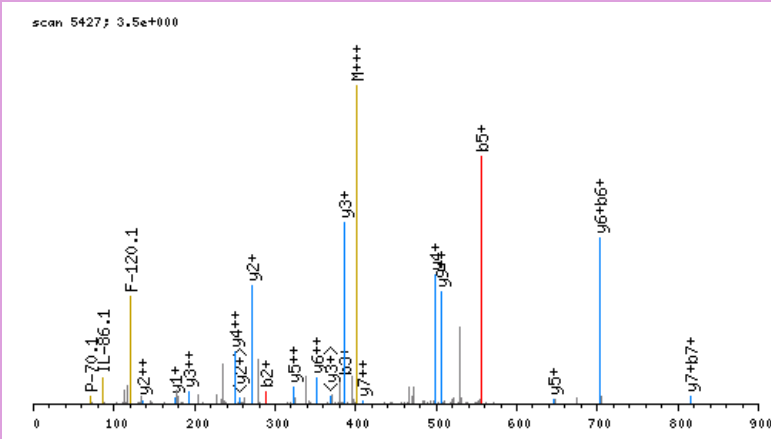

click image to zoom in; click top corners to zoom out [\[precursor±\]](#)

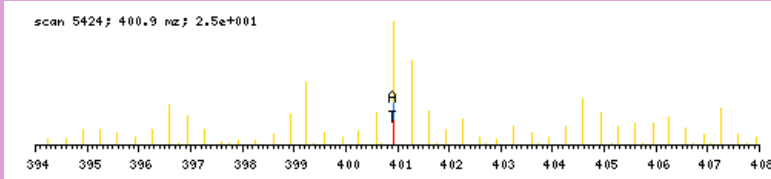

zoomed in precursor plot; T=theoretical m/z, A=acquired m/z

| b <sup>+</sup> | #  | AA # | y <sup>+</sup> | y <sup>2+</sup> |
|----------------|----|------|----------------|-----------------|
| 191.1720       | 1  | R 10 |                |                 |
| 288.2248       | 2  | P 9  | 1010.5787      | 505.7933        |
| 385.2775       | 3  | P 8  | 913.5260       | 457.2669        |
| 498.3616       | 4  | L 7  | 816.4732       | 408.7405        |
| 555.3831       | 5  | G 6  | 703.3891       | 352.1985        |
| 702.4515       | 6  | F 5  | 646.3677       | 323.6877        |
| 815.5355       | 7  | L 4  | 499.2993       | 250.1535        |
| 929.5785       | 8  | N 3  | 386.2152       | 193.6115        |
| 1026.6312      | 9  | P 2  | 272.1723       | 136.5900        |
|                | 10 | R 1  | 175.1195       | 88.0637         |

N-term:+35.07

RPPVQVYGIIEGR, MH+ 1404.8175, m/z 468.9440  
 H OSG40 P180811 230811-s1.03893.03893.3.dta

X-range:

-

MassTol: Y-zoom:

MassType:

AVG  MONO

Axis:

1  2

Label:

I  M  -

Ions:

a  +  2+  3+

b  +  2+  3+

c  +  2+  3+

x  +  2+  3+

y  +  2+  3+

z  +  2+  3+

hide H<sub>2</sub>O/NH<sub>3</sub>

zoom 112-122

GO

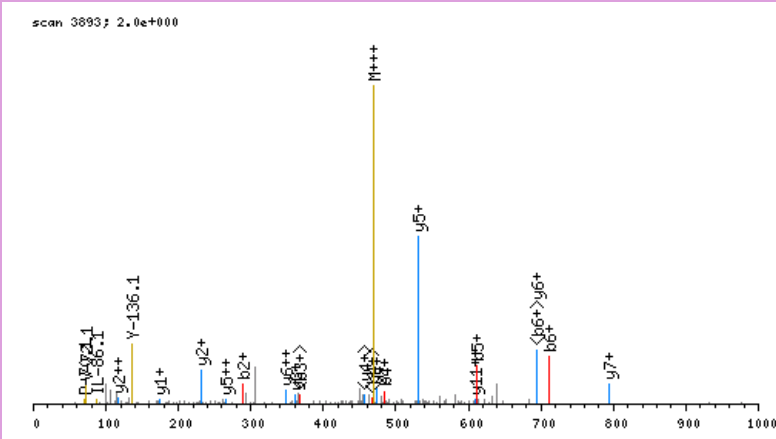

click image to zoom in; click top corners to zoom out [\[precursor±\]](#)

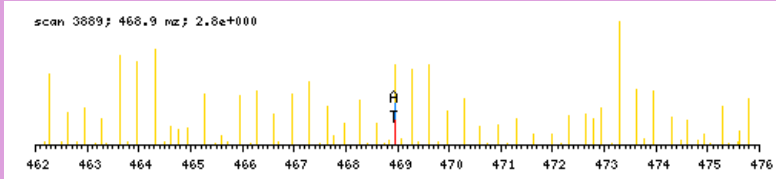

zoomed in precursor plot; T=theoretical m/z, A=acquired m/z

| b <sup>+</sup> | #  | AA # | y <sup>+</sup> | y <sup>2+</sup> |
|----------------|----|------|----------------|-----------------|
| 191.1720       | 1  | R 12 |                |                 |
| 288.2248       | 2  | P 11 | 1214.6533      | 607.8306        |
| 385.2775       | 3  | P 10 | 1117.6006      | 559.3042        |
| 484.3460       | 4  | V 9  | 1020.5478      | 510.7778        |
| 612.4045       | 5  | Q 8  | 921.4794       | 461.2436        |
| 711.4729       | 6  | V 7  | 793.4208       | 397.2143        |
| 874.5363       | 7  | Y 6  | 694.3524       | 347.6801        |
| 931.5577       | 8  | G 5  | 531.2891       | 266.1485        |
| 1044.6418      | 9  | I 4  | 474.2676       | 237.6377        |
| 1173.6844      | 10 | E 3  | 361.1836       | 181.0957        |
| 1230.7059      | 11 | G 2  | 232.1410       | 116.5744        |
|                | 12 | R 1  | 175.1195       | 88.0637         |

N-term:+35.07

RQISEDVDGPDNR, MH+ 1528.7355, m/z 510.2500  
 L OSG40 P180811 230811-s1.02180.02180.3.dta

X-range:

-

MassTol: Y-zoom:

MassType:

AVG  MONO

Axis:

1  2

Label:

I  M  -

Ions:

a  +  2+  3+

b  +  2+  3+

c  +  2+  3+

x  +  2+  3+

y  +  2+  3+

z  +  2+  3+

hide H<sub>2</sub>O/NH<sub>3</sub>

zoom 112-122

GO

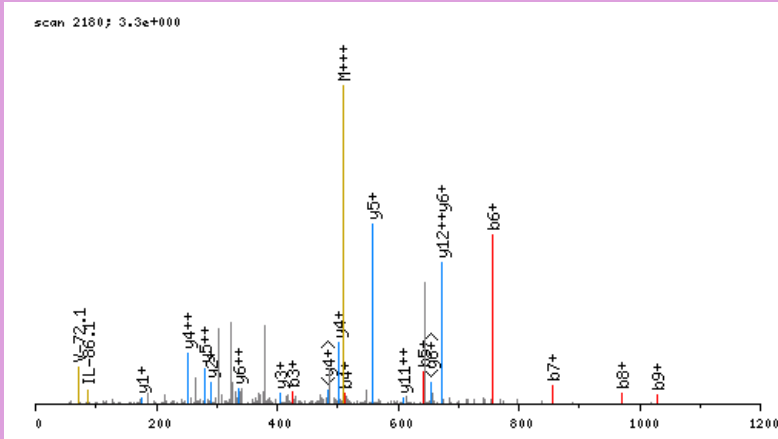

click image to zoom in; click top corners to zoom out [\[precursor±\]](#)

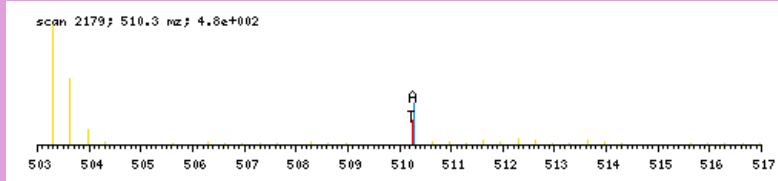

zoomed in precursor plot; T=theoretical m/z, A=acquired m/z

| b <sup>+</sup> | #  | AA # | y <sup>+</sup> | y <sup>2+</sup> |
|----------------|----|------|----------------|-----------------|
| 185.1402       | 1  | R 13 |                |                 |
| 313.1988       | 2  | Q 12 | 1344.6032      | 672.8055        |
| 426.2829       | 3  | I 11 | 1216.5446      | 608.7762        |
| 513.3149       | 4  | S 10 | 1103.4605      | 552.2342        |
| 642.3575       | 5  | E 9  | 1016.4285      | 508.7182        |
| 757.3844       | 6  | D 8  | 887.3859       | 444.1969        |
| 856.4528       | 7  | V 7  | 772.3590       | 386.6834        |
| 971.4798       | 8  | D 6  | 673.2905       | 337.1492        |
| 1028.5012      | 9  | G 5  | 558.2636       | 279.6357        |
| 1125.5540      | 10 | P 4  | 501.2421       | 251.1250        |
| 1240.5809      | 11 | D 3  | 404.1894       | 202.5986        |
| 1354.6239      | 12 | N 2  | 289.1624       | 145.0851        |
|                | 13 | R 1  | 175.1195       | 88.0637         |

N-term:+29.04



RSEDGVEGDLGETQSR, MH+ 1768.8525, m/z 590.2890  
H OSG40 P180811 230811-s1.02813.02813.3.dta

X-range:

-

MassTol: Y-zoom:

MassType:

AVG  MONO

Axis:

1  2

Label:

I  M  -

Ions:

a  +  2+  3+

b  +  2+  3+

c  +  2+  3+

x  +  2+  3+

y  +  2+  3+

z  +  2+  3+

hide H<sub>2</sub>O/NH<sub>3</sub>

zoom 112-122

GO

scan 2813; 1.9e+000

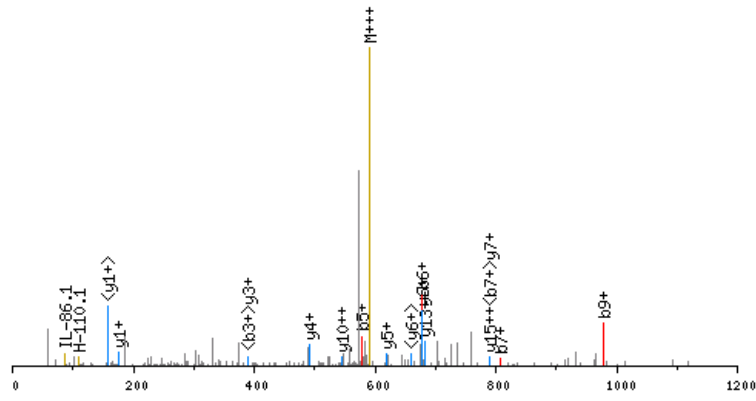

click image to zoom in; click top corners to zoom out [\[precursor±\]](#)

scan 2809; 590.3 m/z; 1.4e+001

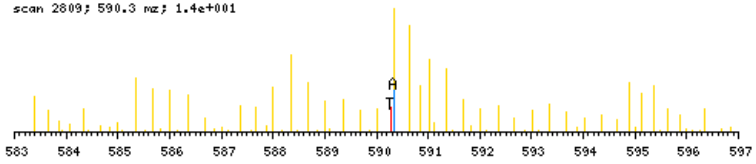

zoomed in precursor plot; T=theoretical m/z, A=acquired m/z

| b <sup>+</sup> | #  | AA # | y <sup>+</sup> | y <sup>2+</sup> |
|----------------|----|------|----------------|-----------------|
| 191.1720       | 1  | R 16 |                |                 |
| 278.2040       | 2  | S 15 | 1578.6883      | 789.8481        |
| 407.2466       | 3  | E 14 | 1491.6563      | 746.3321        |
| 522.2736       | 4  | D 13 | 1362.6137      | 681.8108        |
| 579.2950       | 5  | G 12 | 1247.5868      | 624.2973        |
| 678.3635       | 6  | V 11 | 1190.5653      | 595.7866        |
| 807.4060       | 7  | E 10 | 1091.4969      | 546.2524        |
| 864.4275       | 8  | G 9  | 962.4543       | 481.7311        |
| 979.4545       | 9  | D 8  | 905.4328       | 453.2203        |
| 1092.5385      | 10 | L 7  | 790.4059       | 395.7069        |
| 1149.5600      | 11 | G 6  | 677.3218       | 339.1648        |
| 1278.6026      | 12 | E 5  | 620.3004       | 310.6541        |
| 1379.6503      | 13 | T 4  | 491.2578       | 246.1328        |
| 1507.7088      | 14 | Q 3  | 390.2101       | 195.6090        |
| 1594.7409      | 15 | S 2  | 262.1515       | 131.5797        |
|                | 16 | R 1  | 175.1195       | 88.0637         |

N-term:+35.07

RTLPTVDWR, MH+ 1292.7175, m/z 431.5773  
 H OSG40 P180811 230811-s1.05036.05036.3.dta

X-range:

-

MassTol: Y-zoom:

MassType:

AVG  MONO

Axis:

1  2

Label:

I  M  -

Ions:

a  +  2+  3+

b  +  2+  3+

c  +  2+  3+

x  +  2+  3+

y  +  2+  3+

z  +  2+  3+

hide H<sub>2</sub>O/NH<sub>3</sub>

zoom 112-122

GO

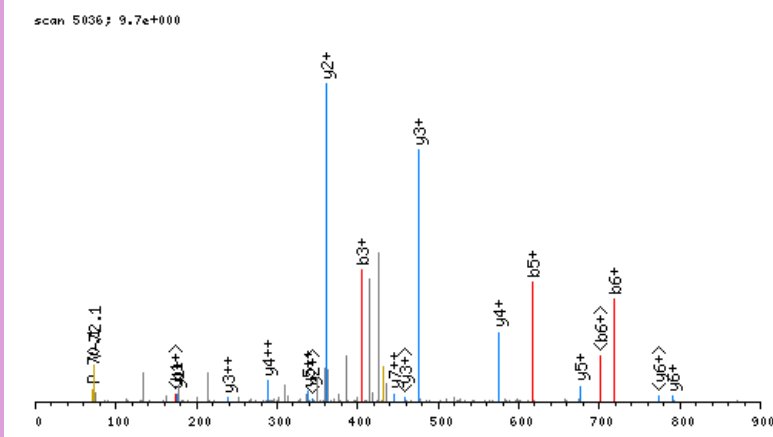

click image to zoom in; click top corners to zoom out [\[precursor±\]](#)

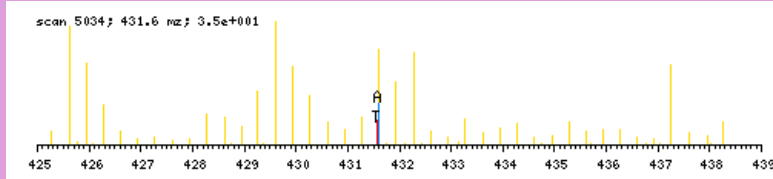

zoomed in precursor plot; T=theoretical m/z, A=acquired m/z

| b <sup>+</sup> | #  | AA # | y <sup>+</sup> | y <sup>2+</sup> |
|----------------|----|------|----------------|-----------------|
| 191.1720       | 1  | R 10 |                |                 |
| 292.2197       | 2  | T 9  | 1102.5533      | 551.7806        |
| 405.3038       | 3  | L 8  | 1001.5056      | 501.2567        |
| 502.3565       | 4  | P 7  | 888.4216       | 444.7147        |
| 617.3835       | 5  | D 6  | 791.3688       | 396.1883        |
| 718.4311       | 6  | T 5  | 676.3418       | 338.6748        |
| 817.4996       | 7  | V 4  | 575.2942       | 288.1510        |
| 932.5265       | 8  | D 3  | 476.2258       | 238.6168        |
| 1118.6058      | 9  | W 2  | 361.1988       | 181.1033        |
|                | 10 | R 1  | 175.1195       | 88.0637         |

N-term:+35.07

RVPTPNVSVVDLTCR, MH+ 1740.9430, m/z 580.9858  
 L OSG40 P180811 230811-s1.06406.06406.3.dta

X-range:

-

MassTol: Y-zoom:

MassType:

AVG  MONO

Axis:

1  2

Label:

I  M  -

Ions:

a  +  2+  3+

b  +  2+  3+

c  +  2+  3+

x  +  2+  3+

y  +  2+  3+

z  +  2+  3+

hide H<sub>2</sub>O/NH<sub>3</sub>

zoom 112-122

GO

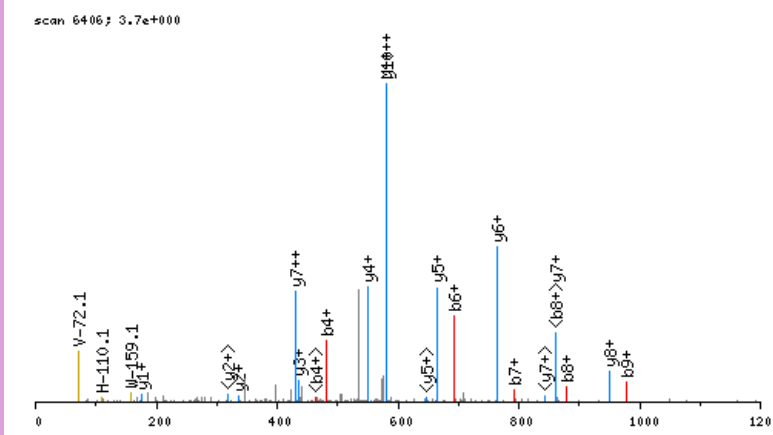

click image to zoom in; click top corners to zoom out [\[precursor±\]](#)

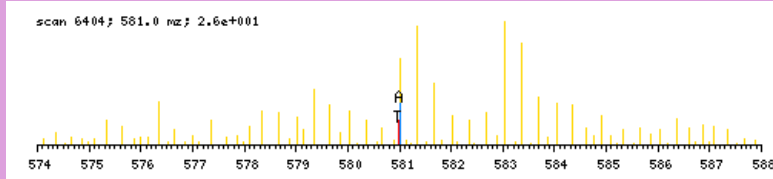

zoomed in precursor plot; T=theoretical m/z, A=acquired m/z

| b <sup>+</sup> | #  | AA # | y <sup>+</sup> | y <sup>2+</sup> |
|----------------|----|------|----------------|-----------------|
| 185.1402       | 1  | R 15 |                |                 |
| 284.2086       | 2  | V 14 | 1556.8106      | 778.9092        |
| 381.2614       | 3  | P 13 | 1457.7422      | 729.3750        |
| 482.3091       | 4  | T 12 | 1360.6894      | 680.8486        |
| 579.3618       | 5  | P 11 | 1259.6417      | 630.3248        |
| 693.4048       | 6  | N 10 | 1162.5890      | 581.7984        |
| 792.4732       | 7  | V 9  | 1048.5461      | 524.7769        |
| 879.5052       | 8  | S 8  | 949.4776       | 475.2427        |
| 978.5736       | 9  | V 7  | 862.4456       | 431.7267        |
| 1077.6420      | 10 | V 6  | 763.3772       | 382.1925        |
| 1192.6690      | 11 | D 5  | 664.3088       | 332.6583        |
| 1305.7530      | 12 | L 4  | 549.2818       | 275.1448        |
| 1406.8007      | 13 | T 3  | 436.1978       | 218.6028        |
| 1566.8313      | 14 | C 2  | 335.1501       | 168.0790        |
|                | 15 | R 1  | 175.1195       | 88.0637         |

N-term:+29.04 C(14):+160.03

SAAEGPKDPPVLP, MH+ 1489.8379, m/z 497.2841  
 L OSG39 P180811 230811-s1.02780.02780.3.dta

X-range:

-

MassTol: Y-zoom:

MassType:

AVG  MONO

Axis:

1  2

Label:

I  M  -

Ions:

a  +  2+  3+

b  +  2+  3+

c  +  2+  3+

x  +  2+  3+

y  +  2+  3+

z  +  2+  3+

hide H<sub>2</sub>O/NH<sub>3</sub>

zoom 112-122

GO

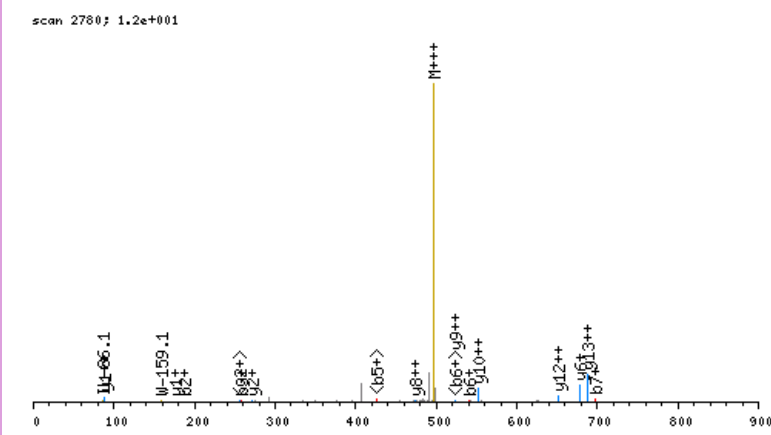

click image to zoom in; click top corners to zoom out [\[precursor±\]](#)

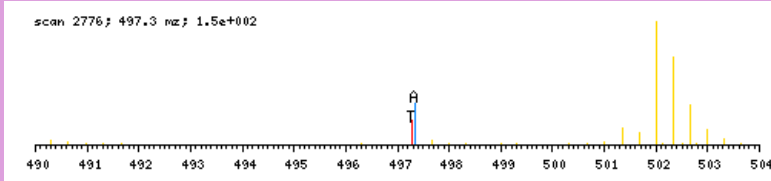

zoomed in precursor plot; T=theoretical m/z, A=acquired m/z

| b <sup>+</sup> | #  | AA # | y <sup>+</sup> | y <sup>2+</sup> |
|----------------|----|------|----------------|-----------------|
| 116.0711       | 1  | S 14 |                |                 |
| 187.1082       | 2  | A 13 | 1374.7746      | 687.8912        |
| 258.1454       | 3  | A 12 | 1303.7374      | 652.3726        |
| 387.1879       | 4  | E 11 | 1232.7003      | 616.8541        |
| 444.2094       | 5  | G 10 | 1103.6577      | 552.3328        |
| 541.2622       | 6  | P 9  | 1046.6363      | 523.8221        |
| 697.3885       | 7  | K 8  | 949.5835       | 475.2957        |
| 812.4154       | 8  | D 7  | 793.4572       | 397.2325        |
| 909.4682       | 9  | P 6  | 678.4303       | 339.7190        |
| 1006.5209      | 10 | P 5  | 581.3775       | 291.1927        |
| 1105.5894      | 11 | V 4  | 484.3247       | 242.6663        |
| 1218.6734      | 12 | L 3  | 385.2563       | 193.1321        |
| 1315.7262      | 13 | P 2  | 272.1723       | 136.5900        |
|                | 14 | R 1  | 175.1195       | 88.0637         |

N-term:+29.04 K(7):+156.13

SAALKLLEPLKYKAPCNPAYR, MH+ 2539.5747, m/z 635.6491  
H\_OSG38\_P180811\_230811-s1.07780.07780.4.dta

X-range:

-

MassTol: Y-zoom:

MassType:

AVG  MONO

Axis:

1  2

Label:

I  M  -

Ions:

a  +  2+  3+

b  +  2+  3+

c  +  2+  3+

x  +  2+  3+

y  +  2+  3+

z  +  2+  3+

hide H<sub>2</sub>O/NH<sub>3</sub>

zoom 112-122

GO

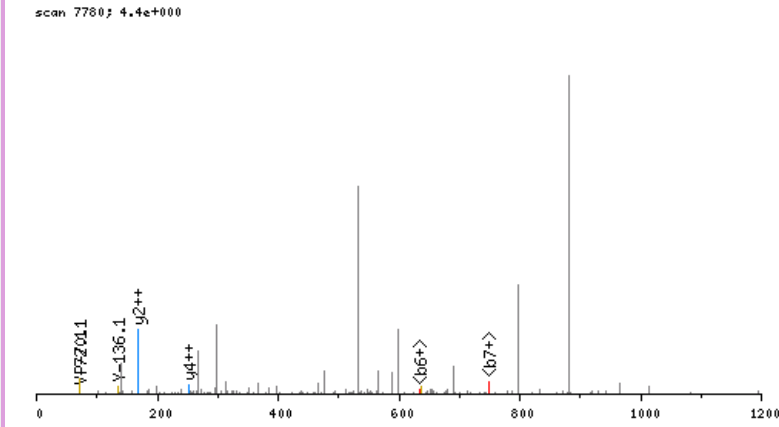

click image to zoom in; click top corners to zoom out [\[precursor±\]](#)

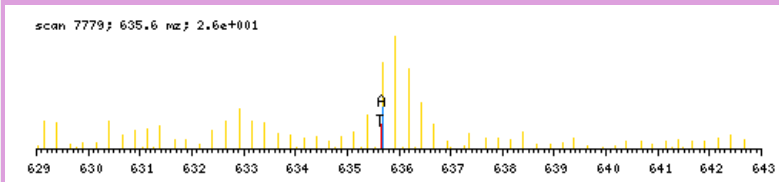

zoomed in precursor plot; T=theoretical m/z, A=acquired m/z

| b <sup>+</sup> | #  | AA | #  | y <sup>+</sup> | y <sup>2+</sup> |
|----------------|----|----|----|----------------|-----------------|
| 122.1029       | 1  | S  | 21 |                |                 |
| 193.1400       | 2  | A  | 20 | 2418.4796      | 1209.7437       |
| 264.1772       | 3  | A  | 19 | 2347.4425      | 1174.2251       |
| 377.2612       | 4  | L  | 18 | 2276.4054      | 1138.7066       |
| 539.4193       | 5  | K  | 17 | 2163.3213      | 1082.1646       |
| 652.5034       | 6  | L  | 16 | 2001.1632      | 1001.0855       |
| 765.5874       | 7  | L  | 15 | 1888.0791      | 944.5435        |
| 894.6300       | 8  | E  | 14 | 1774.9951      | 888.0014        |
| 991.6828       | 9  | P  | 13 | 1645.9525      | 823.4801        |
| 1104.7669      | 10 | L  | 12 | 1548.8997      | 774.9538        |
| 1266.9250      | 11 | K  | 11 | 1435.8156      | 718.4117        |
| 1429.9883      | 12 | Y  | 10 | 1273.6575      | 637.3327        |
| 1592.1464      | 13 | K  | 9  | 1110.5942      | 555.8010        |
| 1663.1835      | 14 | A  | 8  | 948.4361       | 474.7220        |
| 1760.2363      | 15 | P  | 7  | 877.3990       | 439.2034        |
| 1920.2669      | 16 | C  | 6  | 780.3462       | 390.6770        |
| 2034.3098      | 17 | N  | 5  | 620.3156       | 310.6617        |
| 2131.3626      | 18 | P  | 4  | 506.2727       | 253.6403        |
| 2202.3997      | 19 | A  | 3  | 409.2199       | 205.1139        |
| 2365.4630      | 20 | Y  | 2  | 338.1828       | 169.5953        |
|                | 21 | R  | 1  | 175.1195       | 88.0637         |

N-term:+35.07 K(5):+162.16  
K(11):+162.16 K(13):+162.16  
C(16):+160.03

SAAQAAAQINSNAAGKQLR, MH+ 1914.0157, m/z 638.6768  
 L OSG40 P180811 230811-s1.02168.02168.3.dta

X-range:

-

MassTol: Y-zoom:

MassType:

AVG  MONO

Axis:

1  2

Label:

I  M  -

Ions:

a  +  2+  3+

b  +  2+  3+

c  +  2+  3+

x  +  2+  3+

y  +  2+  3+

z  +  2+  3+

hide H<sub>2</sub>O/NH<sub>3</sub>

zoom 112-122

GO

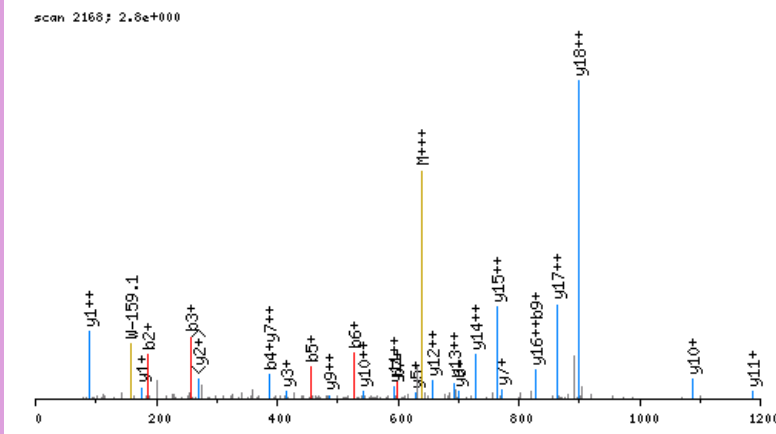

click image to zoom in; click top corners to zoom out [\[precursor±\]](#)

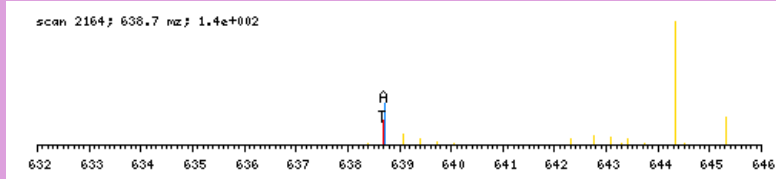

zoomed in precursor plot; T=theoretical m/z, A=acquired m/z

| b <sup>+</sup> | #  | AA | #  | y <sup>+</sup> | y <sup>2+</sup> |
|----------------|----|----|----|----------------|-----------------|
| 116.0711       | 1  | S  | 19 |                |                 |
| 187.1082       | 2  | A  | 18 | 1798.9524      | 899.9801        |
| 258.1454       | 3  | A  | 17 | 1727.9153      | 864.4616        |
| 386.2039       | 4  | Q  | 16 | 1656.8782      | 828.9430        |
| 457.2410       | 5  | A  | 15 | 1528.8196      | 764.9137        |
| 528.2782       | 6  | A  | 14 | 1457.7825      | 729.3952        |
| 599.3153       | 7  | A  | 13 | 1386.7454      | 693.8766        |
| 727.3739       | 8  | Q  | 12 | 1315.7083      | 658.3580        |
| 828.4215       | 9  | T  | 11 | 1187.6497      | 594.3288        |
| 942.4645       | 10 | N  | 10 | 1086.6020      | 543.8049        |
| 1029.4965      | 11 | S  | 9  | 972.5591       | 486.7835        |
| 1143.5394      | 12 | N  | 8  | 885.5271       | 443.2674        |
| 1214.5765      | 13 | A  | 7  | 771.4841       | 386.2460        |
| 1285.6136      | 14 | A  | 6  | 700.4470       | 350.7274        |
| 1342.6351      | 15 | G  | 5  | 629.4099       | 315.2089        |
| 1498.7614      | 16 | K  | 4  | 572.3884       | 286.6981        |
| 1626.8200      | 17 | Q  | 3  | 416.2621       | 208.6350        |
| 1739.9040      | 18 | L  | 2  | 288.2036       | 144.6057        |
|                | 19 | R  | 1  | 175.1195       | 88.0637         |

N-term:+29.04 K(16):+156.13

SAENEPPVPLVGNWRPPQPVKGR, MH+ 2580.4051, m/z 645.8567  
 L OSG40 P180811 230811-s1.07097.07097.4.dta

X-range:

-

MassTol: Y-zoom:

MassType:

AVG  MONO

Axis:

1  2

Label:

I  M  -

Ions:

a  +  2+  3+

b  +  2+  3+

c  +  2+  3+

x  +  2+  3+

y  +  2+  3+

z  +  2+  3+

hide H<sub>2</sub>O/NH<sub>3</sub>

zoom 112-122

GO

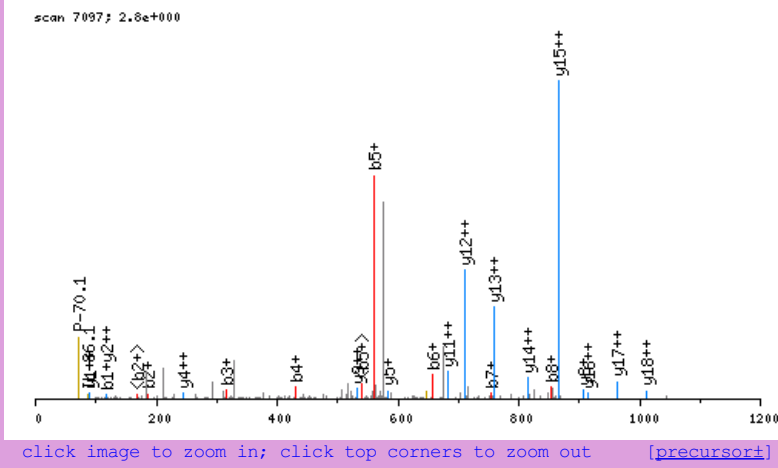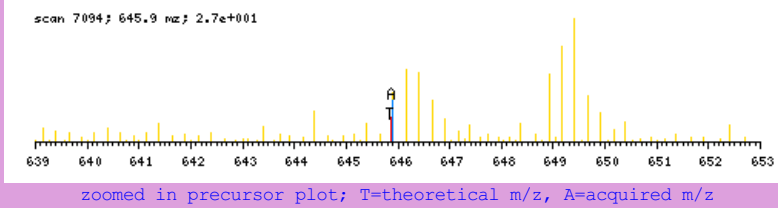

| b <sup>+</sup> | #  | AA | #  | y <sup>+</sup> | y <sup>2+</sup> |
|----------------|----|----|----|----------------|-----------------|
| 116.0711       | 1  | S  | 23 |                |                 |
| 187.1082       | 2  | A  | 22 | 2465.3418      | 1233.1748       |
| 316.1508       | 3  | E  | 21 | 2394.3047      | 1197.6562       |
| 430.1938       | 4  | N  | 20 | 2265.2621      | 1133.1349       |
| 559.2364       | 5  | E  | 19 | 2151.2191      | 1076.1135       |
| 656.2891       | 6  | P  | 18 | 2022.1765      | 1011.5922       |
| 753.3419       | 7  | P  | 17 | 1925.1238      | 963.0658        |
| 852.4103       | 8  | V  | 16 | 1828.0710      | 914.5394        |
| 949.4631       | 9  | P  | 15 | 1729.0026      | 865.0052        |
| 1062.5471      | 10 | L  | 14 | 1631.9498      | 816.4788        |
| 1161.6155      | 11 | V  | 13 | 1518.8658      | 759.9368        |
| 1218.6370      | 12 | G  | 12 | 1419.7974      | 710.4026        |
| 1332.6799      | 13 | N  | 11 | 1362.7759      | 681.8919        |
| 1518.7592      | 14 | W  | 10 | 1248.7330      | 624.8704        |
| 1674.8604      | 15 | R  | 9  | 1062.6537      | 531.8307        |
| 1771.9131      | 16 | P  | 8  | 906.5525       | 453.7802        |
| 1868.9659      | 17 | P  | 7  | 809.4998       | 405.2538        |
| 1997.0245      | 18 | Q  | 6  | 712.4470       | 356.7274        |
| 2094.0772      | 19 | P  | 5  | 584.3884       | 292.6981        |
| 2193.1456      | 20 | V  | 4  | 487.3357       | 244.1718        |
| 2349.2719      | 21 | K  | 3  | 388.2673       | 194.6375        |
| 2406.2934      | 22 | G  | 2  | 232.1410       | 116.5744        |
|                | 23 | R  | 1  | 175.1195       | 88.0637         |

N-term:+29.04 K(21):+156.13

SAGSAAAQPVVAAAIR, MH+ 1355.7283, m/z 678.3678  
 L OSG37 P180811 230811-s1.04012.04012.2.dta

X-range:

-

MassTol: Y-zoom:

MassType:

AVG  MONO

Axis:

1  2

Label:

I  M  -

Ions:

a  +  2+  3+

b  +  2+  3+

c  +  2+  3+

x  +  2+  3+

y  +  2+  3+

z  +  2+  3+

hide H<sub>2</sub>O/NH<sub>3</sub>

zoom 112-122

GO

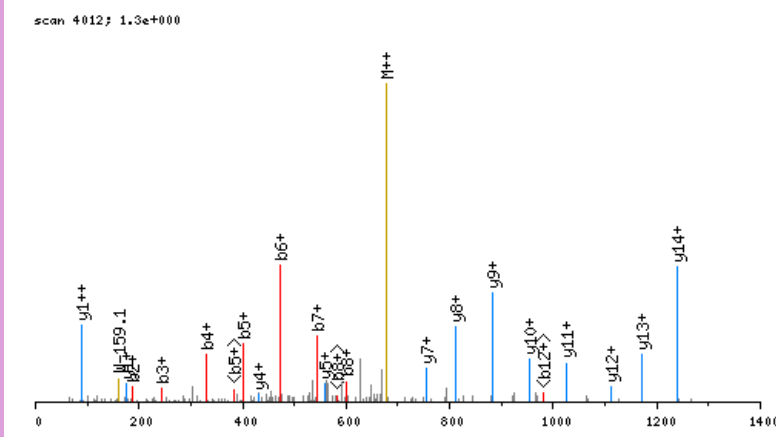

click image to zoom in; click top corners to zoom out [\[precursor±\]](#)

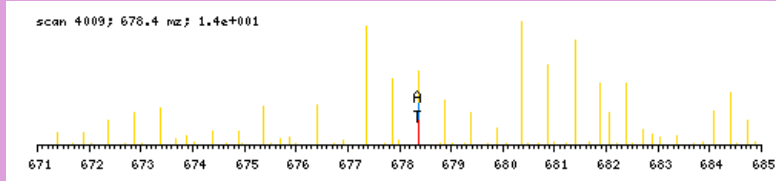

zoomed in precursor plot; T=theoretical m/z, A=acquired m/z

| b <sup>+</sup> | #  | AA # | y <sup>+</sup> | y <sup>2+</sup> |
|----------------|----|------|----------------|-----------------|
| 116.0711       | 1  | S 15 |                |                 |
| 187.1082       | 2  | A 14 | 1240.6650      | 620.8364        |
| 244.1297       | 3  | G 13 | 1169.6279      | 585.3178        |
| 331.1617       | 4  | S 12 | 1112.6064      | 556.8071        |
| 402.1988       | 5  | A 11 | 1025.5744      | 513.2911        |
| 473.2360       | 6  | A 10 | 954.5373       | 477.7725        |
| 544.2731       | 7  | A 9  | 883.5001       | 442.2540        |
| 601.2945       | 8  | G 8  | 812.4630       | 406.7354        |
| 698.3473       | 9  | P 7  | 755.4416       | 378.2247        |
| 797.4157       | 10 | V 6  | 658.3888       | 329.6983        |
| 926.4583       | 11 | E 5  | 559.3204       | 280.1641        |
| 997.4954       | 12 | A 4  | 430.2778       | 215.6428        |
| 1068.5325      | 13 | A 3  | 359.2407       | 180.1243        |
| 1181.6166      | 14 | I 2  | 288.2036       | 144.6057        |
|                | 15 | R 1  | 175.1195       | 88.0637         |

N-term:+29.04



SAGVSVPGPMGPGSPR, MH+ 1486.7900, m/z 496.2682  
 H OSG37 P180811 230811-s1.04525.04525.3.dta

scan 4525; 1.6e+001

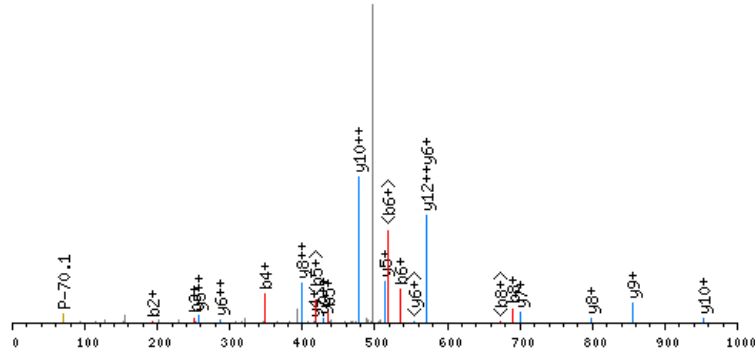

click image to zoom in; click top corners to zoom out [precursor±]

scan 4524; 496.3 m/z; 6.5e+001

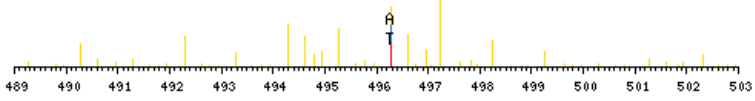

zoomed in precursor plot; T=theoretical m/z, A=acquired m/z

X-range:

-

MassTol: Y-zoom:

MassType:

AVG  MONO

Axis:

1  2

Label:

I  M  -

Ions:

a  +  2+  3+

b  +  2+  3+

c  +  2+  3+

x  +  2+  3+

y  +  2+  3+

z  +  2+  3+

hide H<sub>2</sub>O/NH<sub>3</sub>

zoom 112-122

GO

| b <sup>+</sup> | #  | AA # | y <sup>+</sup> | y <sup>2+</sup> |
|----------------|----|------|----------------|-----------------|
| 122.1029       | 1  | S 16 |                |                 |
| 193.1400       | 2  | A 15 | 1365.6949      | 683.3514        |
| 250.1615       | 3  | G 14 | 1294.6578      | 647.8328        |
| 349.2299       | 4  | V 13 | 1237.6363      | 619.3221        |
| 436.2619       | 5  | S 12 | 1138.5679      | 569.7879        |
| 535.3304       | 6  | V 11 | 1051.5359      | 526.2718        |
| 632.3831       | 7  | P 10 | 952.4675       | 476.7376        |
| 689.4046       | 8  | G 9  | 855.4147       | 428.2113        |
| 786.4574       | 9  | P 8  | 798.3932       | 399.7005        |
| 917.4978       | 10 | M 7  | 701.3405       | 351.1741        |
| 974.5193       | 11 | G 6  | 570.3000       | 285.6539        |
| 1071.5721      | 12 | P 5  | 513.2785       | 257.1432        |
| 1158.6041      | 13 | S 4  | 416.2258       | 208.6168        |
| 1215.6256      | 14 | G 3  | 329.1937       | 165.1008        |
| 1312.6783      | 15 | P 2  | 272.1723       | 136.5900        |
|                | 16 | R 1  | 175.1195       | 88.0637         |

N-term:+35.07

SAKVSDAISTQYPVVDHEFDVAVVVGAGGAGLR, MH+ 3283.7599, m/z 821.6954  
H OSG40 P180811 230811-s1.09026.09026.4.dta

scan 9026; 1.4e+000

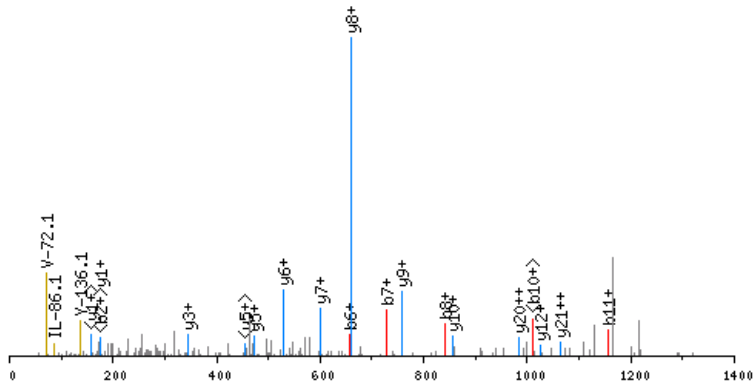

click image to zoom in; click top corners to zoom out [\[precursor±\]](#)

scan 9024; 821.7 m/z; 1.8e+001

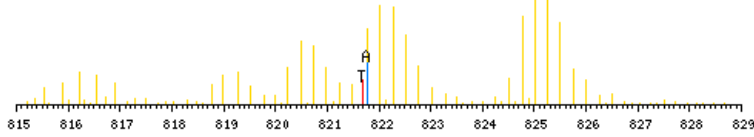

zoomed in precursor plot; T=theoretical m/z, A=acquired m/z

| b <sup>+</sup> | #  | AA | #  | y <sup>+</sup> | y <sup>2+</sup> |
|----------------|----|----|----|----------------|-----------------|
| 122.1029       | 1  | S  | 32 |                |                 |
| 193.1400       | 2  | A  | 31 | 3162.6648      | 1581.8363       |
| 355.2981       | 3  | K  | 30 | 3091.6277      | 1546.3178       |
| 454.3666       | 4  | V  | 29 | 2929.4696      | 1465.2387       |
| 541.3986       | 5  | S  | 28 | 2830.4012      | 1415.7045       |
| 656.4255       | 6  | D  | 27 | 2743.3691      | 1372.1885       |
| 727.4626       | 7  | A  | 26 | 2628.3422      | 1314.6750       |
| 840.5467       | 8  | I  | 25 | 2557.3051      | 1279.1565       |
| 927.5787       | 9  | S  | 24 | 2444.2210      | 1222.6144       |
| 1028.6264      | 10 | T  | 23 | 2357.1890      | 1179.0984       |
| 1156.6850      | 11 | Q  | 22 | 2256.1413      | 1128.5746       |
| 1319.7483      | 12 | Y  | 21 | 2128.0827      | 1064.5453       |
| 1416.8011      | 13 | P  | 20 | 1965.0194      | 983.0136        |
| 1515.8695      | 14 | V  | 19 | 1867.9666      | 934.4872        |
| 1614.9379      | 15 | V  | 18 | 1768.8982      | 884.9530        |
| 1729.9649      | 16 | D  | 17 | 1669.8298      | 835.4188        |
| 1867.0238      | 17 | H  | 16 | 1554.8029      | 777.9053        |
| 1996.0664      | 18 | E  | 15 | 1417.7440      | 709.3759        |
| 2143.1348      | 19 | F  | 14 | 1288.7014      | 644.8546        |
| 2258.1617      | 20 | D  | 13 | 1141.6329      | 571.3204        |
| 2329.1988      | 21 | A  | 12 | 1026.6060      | 513.8069        |
| 2428.2672      | 22 | V  | 11 | 955.5689       | 478.2884        |
| 2527.3357      | 23 | V  | 10 | 856.5005       | 428.7542        |
| 2626.4041      | 24 | V  | 9  | 757.4321       | 379.2199        |
| 2683.4255      | 25 | G  | 8  | 658.3636       | 329.6857        |
| 2754.4626      | 26 | A  | 7  | 601.3422       | 301.1750        |
| 2811.4841      | 27 | G  | 6  | 530.3051       | 265.6564        |
| 2868.5056      | 28 | G  | 5  | 473.2836       | 237.1457        |
| 2939.5427      | 29 | A  | 4  | 416.2621       | 208.6350        |
| 2996.5642      | 30 | G  | 3  | 345.2250       | 173.1164        |
| 3109.6482      | 31 | L  | 2  | 288.2036       | 144.6057        |
|                | 32 | R  | 1  | 175.1195       | 88.0637         |

N-term:+35.07 K(3):+162.16

X-range:

-

MassTol: Y-zoom:

MassType:

AVG  MONO

Axis:

1  2

Label:

I  M  -

Ions:

a  +  2+  3+

b  +  2+  3+

c  +  2+  3+

x  +  2+  3+

y  +  2+  3+

z  +  2+  3+

hide H<sub>2</sub>O/NH<sub>3</sub>

zoom 112-122

GO

SALAIMENANVLAR, MH+ 1506.8526, m/z 502.9557  
 H OSG37 P180811 230811-s1.07640.07640.3.dta

X-range:

-

MassTol: Y-zoom:

MassType:

AVG  MONO

Axis:

1  2

Label:

I  M  -

Ions:

a  +  2+  3+

b  +  2+  3+

c  +  2+  3+

x  +  2+  3+

y  +  2+  3+

z  +  2+  3+

hide H<sub>2</sub>O/NH<sub>3</sub>

zoom 112-122

GO

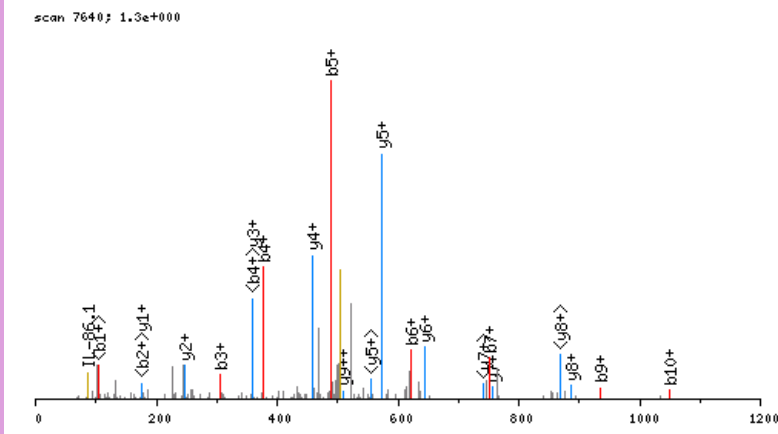

click image to zoom in; click top corners to zoom out [\[precursor±\]](#)

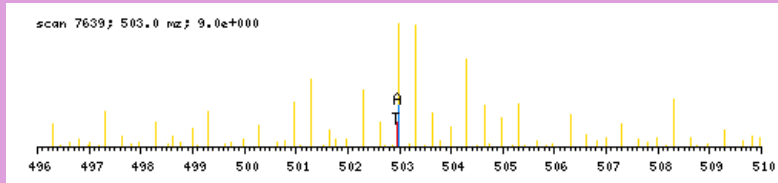

zoomed in precursor plot; T=theoretical m/z, A=acquired m/z

| b <sup>+</sup> | #  | AA # | y <sup>+</sup> | y <sup>2+</sup> |
|----------------|----|------|----------------|-----------------|
| 122.1029       | 1  | S 14 |                |                 |
| 193.1400       | 2  | A 13 | 1385.7575      | 693.3827        |
| 306.2241       | 3  | L 12 | 1314.7204      | 657.8641        |
| 377.2612       | 4  | A 11 | 1201.6363      | 601.3221        |
| 490.3453       | 5  | I 10 | 1130.5992      | 565.8035        |
| 621.3858       | 6  | M 9  | 1017.5151      | 509.2615        |
| 750.4284       | 7  | E 8  | 886.4747       | 443.7412        |
| 864.4713       | 8  | N 7  | 757.4321       | 379.2199        |
| 935.5084       | 9  | A 6  | 643.3891       | 322.1985        |
| 1049.5513      | 10 | N 5  | 572.3520       | 286.6799        |
| 1148.6197      | 11 | V 4  | 458.3091       | 229.6585        |
| 1261.7038      | 12 | L 3  | 359.2407       | 180.1243        |
| 1332.7409      | 13 | A 2  | 246.1566       | 123.5822        |
|                | 14 | R 1  | 175.1195       | 88.0637         |

N-term:+35.07

SALLILPDQGR, MH+ 1216.7477, m/z 608.8775  
 H OSG37 P180811 230811-s1.06352.06352.2.dta

X-range:

-

MassTol: Y-zoom:

MassType:

AVG  MONO

Axis:

1  2

Label:

I  M  -

Ions:

a  +  2+  3+

b  +  2+  3+

c  +  2+  3+

x  +  2+  3+

y  +  2+  3+

z  +  2+  3+

hide H<sub>2</sub>O/NH<sub>3</sub>

zoom 112-122

GO

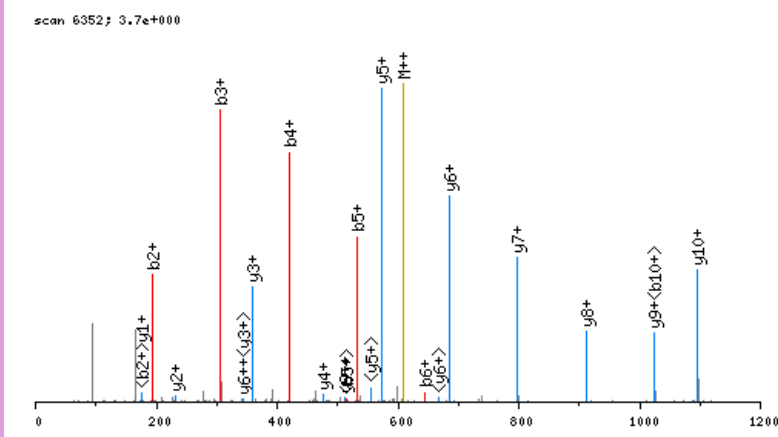

click image to zoom in; click top corners to zoom out [\[precursor±\]](#)

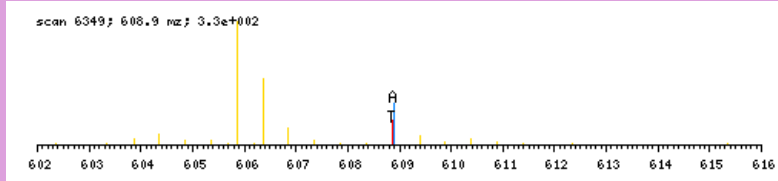

zoomed in precursor plot; T=theoretical m/z, A=acquired m/z

| b <sup>+</sup> | #  | AA # | y <sup>+</sup> | y <sup>2+</sup> |
|----------------|----|------|----------------|-----------------|
| 122.1029       | 1  | S 11 |                |                 |
| 193.1400       | 2  | A 10 | 1095.6526      | 548.3302        |
| 306.2241       | 3  | L 9  | 1024.6155      | 512.8117        |
| 419.3082       | 4  | L 8  | 911.5314       | 456.2696        |
| 532.3922       | 5  | I 7  | 798.4474       | 399.7276        |
| 645.4763       | 6  | L 6  | 685.3633       | 343.1856        |
| 742.5291       | 7  | P 5  | 572.2792       | 286.6435        |
| 857.5560       | 8  | D 4  | 475.2265       | 238.1172        |
| 985.6146       | 9  | Q 3  | 360.1995       | 180.6037        |
| 1042.6360      | 10 | G 2  | 232.1410       | 116.5744        |
|                | 11 | R 1  | 175.1195       | 88.0637         |

N-term:+35.07

SALQSINEWASQTDDGKLEPVTKDVER, MH+ 3086.6010, m/z 772.4057  
 L OSG40 P180811 230811-s1.08738.08738.4.dta

X-range:

-

MassTol: Y-zoom:

MassType:

AVG  MONO

Axis:

1  2

Label:

I  M  -

Ions:

a  +  2+  3+

b  +  2+  3+

c  +  2+  3+

x  +  2+  3+

y  +  2+  3+

z  +  2+  3+

hide H<sub>2</sub>O/NH<sub>3</sub>

zoom 112-122

GO

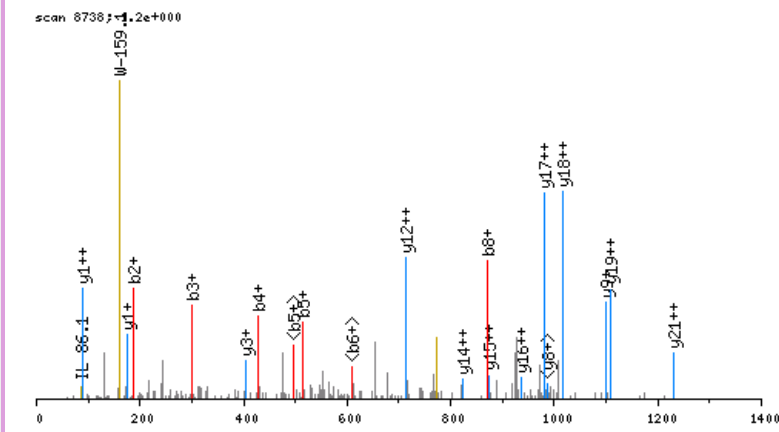

click image to zoom in; click top corners to zoom out

[\[precursor±\]](#)

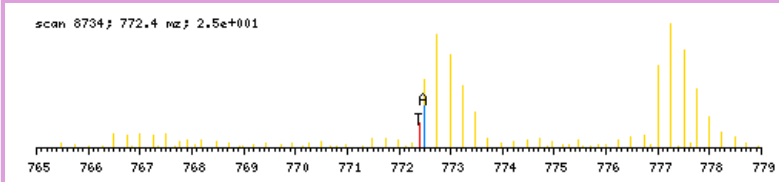

zoomed in precursor plot; T=theoretical m/z, A=acquired m/z

| b <sup>+</sup> | #  | AA # | y <sup>+</sup> | y <sup>2+</sup> |
|----------------|----|------|----------------|-----------------|
| 116.0711       | 1  | S 27 |                |                 |
| 187.1082       | 2  | A 26 | 2971.5377      | 1486.2728       |
| 300.1923       | 3  | L 25 | 2900.5006      | 1450.7542       |
| 428.2509       | 4  | Q 24 | 2787.4166      | 1394.2122       |
| 515.2829       | 5  | S 23 | 2659.3580      | 1330.1829       |
| 628.3670       | 6  | I 22 | 2572.3259      | 1286.6669       |
| 742.4099       | 7  | N 21 | 2459.2419      | 1230.1249       |
| 871.4525       | 8  | E 20 | 2345.1990      | 1173.1034       |
| 1057.5318      | 9  | W 19 | 2216.1564      | 1108.5821       |
| 1128.5689      | 10 | A 18 | 2030.0770      | 1015.5424       |
| 1215.6010      | 11 | S 17 | 1959.0399      | 980.0239        |
| 1343.6595      | 12 | Q 16 | 1872.0079      | 936.5079        |
| 1444.7072      | 13 | T 15 | 1743.9493      | 872.4786        |
| 1545.7549      | 14 | T 14 | 1642.9016      | 821.9547        |
| 1660.7818      | 15 | D 13 | 1541.8540      | 771.4309        |
| 1717.8033      | 16 | G 12 | 1426.8270      | 713.9174        |
| 1873.9296      | 17 | K 11 | 1369.8056      | 685.4067        |
| 1987.0137      | 18 | L 10 | 1213.6793      | 607.3435        |
| 2084.0664      | 19 | P 9  | 1100.5952      | 550.8015        |
| 2213.1090      | 20 | E 8  | 1003.5424      | 502.2751        |
| 2312.1774      | 21 | V 7  | 874.4998       | 437.7538        |
| 2413.2251      | 22 | T 6  | 775.4314       | 388.2196        |
| 2569.3514      | 23 | K 5  | 674.3838       | 337.6958        |
| 2684.3783      | 24 | D 4  | 518.2575       | 259.6326        |
| 2783.4468      | 25 | V 3  | 403.2305       | 202.1192        |
| 2912.4894      | 26 | E 2  | 304.1621       | 152.5850        |
|                | 27 | R 1  | 175.1195       | 88.0637         |

N-term: +29.04 K(17): +156.13  
 K(23): +156.13

SALTVPSPANSTAMVDLTNSLR, MH+ 2420.2495, m/z 605.8178  
 L OSG39 P180811 230811-s1.05680.05680.4.dta

X-range:

-

MassTol: Y-zoom:

MassType:

AVG  MONO

Axis:

1  2

Label:

I  M  -

Ions:

a  +  2+  3+

b  +  2+  3+

c  +  2+  3+

x  +  2+  3+

y  +  2+  3+

z  +  2+  3+

hide H<sub>2</sub>O/NH<sub>3</sub>

zoom 112-122

GO

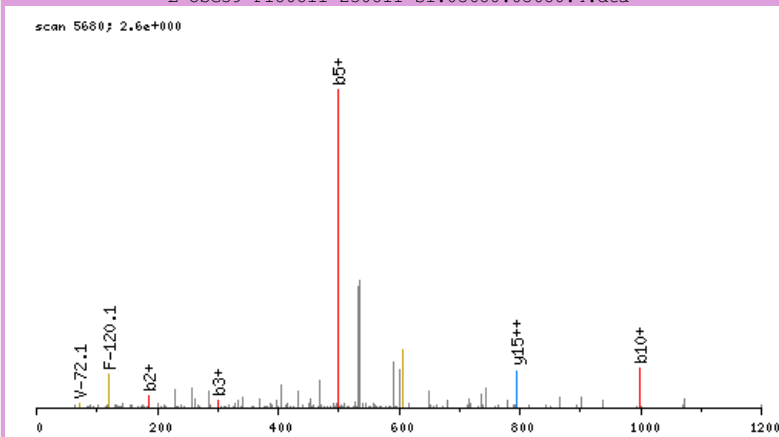

click image to zoom in; click top corners to zoom out [\[precursor±\]](#)

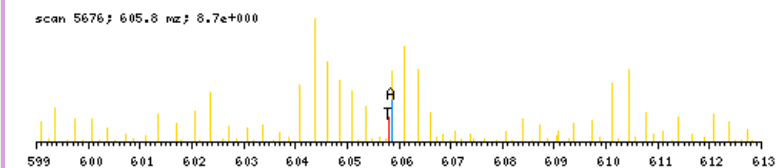

zoomed in precursor plot; T=theoretical m/z, A=acquired m/z

| b <sup>+</sup> | #  | AA | #  | y <sup>+</sup> | y <sup>2+</sup> |
|----------------|----|----|----|----------------|-----------------|
| 116.0711       | 1  | S  | 23 |                |                 |
| 187.1082       | 2  | A  | 22 | 2305.1862      | 1153.0970       |
| 300.1923       | 3  | L  | 21 | 2234.1491      | 1117.5785       |
| 401.2400       | 4  | T  | 20 | 2121.0650      | 1061.0364       |
| 500.3084       | 5  | V  | 19 | 2020.0174      | 1010.5126       |
| 597.3612       | 6  | P  | 18 | 1920.9489      | 960.9784        |
| 684.3932       | 7  | S  | 17 | 1823.8962      | 912.4520        |
| 831.4616       | 8  | F  | 16 | 1736.8641      | 868.9360        |
| 928.5144       | 9  | P  | 15 | 1589.7957      | 795.4018        |
| 999.5515       | 10 | A  | 14 | 1492.7430      | 746.8754        |
| 1113.5944      | 11 | N  | 13 | 1421.7059      | 711.3568        |
| 1200.6264      | 12 | S  | 12 | 1307.6629      | 654.3354        |
| 1301.6741      | 13 | T  | 11 | 1220.6309      | 610.8194        |
| 1372.7112      | 14 | A  | 10 | 1119.5832      | 560.2955        |
| 1503.7517      | 15 | M  | 9  | 1048.5461      | 524.7770        |
| 1602.8201      | 16 | V  | 8  | 917.5056       | 459.2567        |
| 1717.8471      | 17 | D  | 7  | 818.4372       | 409.7225        |
| 1830.9311      | 18 | L  | 6  | 703.4103       | 352.2090        |
| 1931.9788      | 19 | T  | 5  | 590.3262       | 295.6670        |
| 2046.0217      | 20 | N  | 4  | 489.2785       | 245.1432        |
| 2133.0538      | 21 | S  | 3  | 375.2356       | 188.1217        |
| 2246.1378      | 22 | L  | 2  | 288.2036       | 144.6057        |
|                | 23 | R  | 1  | 175.1195       | 88.0637         |

N-term:+29.04

SAPPKLASLKGVPEDAVETLAGSLGTR, MH+ 2865.7150, m/z 717.1842  
 H OSG40 P180811 230811-sl.09188.09188.4.dta

scan 9188; 2.4e+001

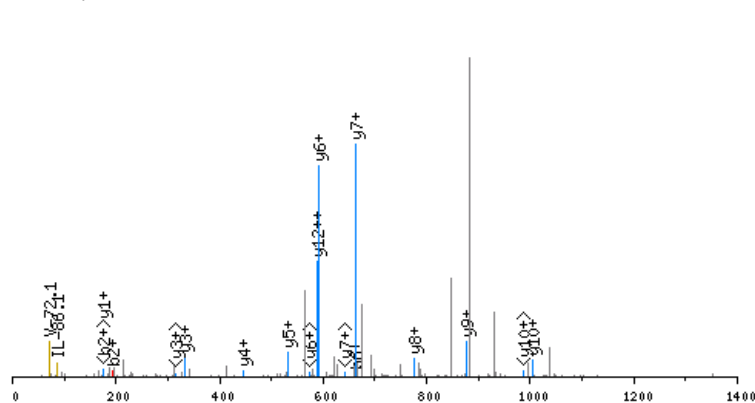

click image to zoom in; click top corners to zoom out [\[precursor±\]](#)

scan 9184; 717.2 m/z; 1.3e+002

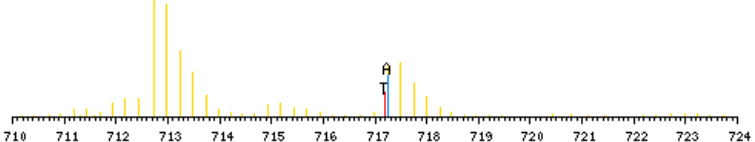

zoomed in precursor plot; T=theoretical m/z, A=acquired m/z

| b <sup>+</sup> | #  | AA | #  | y <sup>+</sup> | y <sup>2+</sup> |
|----------------|----|----|----|----------------|-----------------|
| 122.1029       | 1  | S  | 28 |                |                 |
| 193.1400       | 2  | A  | 27 | 2744.6199      | 1372.8139       |
| 290.1928       | 3  | P  | 26 | 2673.5828      | 1337.2953       |
| 387.2456       | 4  | P  | 25 | 2576.5300      | 1288.7689       |
| 549.4037       | 5  | K  | 24 | 2479.4772      | 1240.2425       |
| 662.4877       | 6  | L  | 23 | 2317.3191      | 1159.1635       |
| 733.5248       | 7  | A  | 22 | 2204.2351      | 1102.6214       |
| 820.5569       | 8  | S  | 21 | 2133.1980      | 1067.1029       |
| 933.6409       | 9  | L  | 20 | 2046.1659      | 1023.5869       |
| 1095.7990      | 10 | K  | 19 | 1933.0819      | 967.0448        |
| 1152.8205      | 11 | G  | 18 | 1770.9238      | 885.9658        |
| 1251.8889      | 12 | V  | 17 | 1713.9023      | 857.4551        |
| 1350.9573      | 13 | V  | 16 | 1614.8339      | 807.9209        |
| 1448.0101      | 14 | P  | 15 | 1515.7655      | 758.3867        |
| 1577.0527      | 15 | E  | 14 | 1418.7127      | 709.8603        |
| 1692.0796      | 16 | D  | 13 | 1289.6701      | 645.3390        |
| 1763.1167      | 17 | A  | 12 | 1174.6432      | 587.8255        |
| 1862.1852      | 18 | V  | 11 | 1103.6061      | 552.3069        |
| 1991.2278      | 19 | E  | 10 | 1004.5376      | 502.7727        |
| 2092.2754      | 20 | T  | 9  | 875.4951       | 438.2514        |
| 2205.3595      | 21 | L  | 8  | 774.4474       | 387.7276        |
| 2276.3966      | 22 | A  | 7  | 661.3633       | 331.1856        |
| 2333.4181      | 23 | G  | 6  | 590.3262       | 295.6670        |
| 2420.4501      | 24 | S  | 5  | 533.3047       | 267.1563        |
| 2533.5342      | 25 | L  | 4  | 446.2727       | 223.6403        |
| 2590.5556      | 26 | G  | 3  | 333.1886       | 167.0982        |
| 2691.6033      | 27 | T  | 2  | 276.1672       | 138.5875        |
|                | 28 | R  | 1  | 175.1195       | 88.0637         |

N-term:+35.07 K(5):+162.16  
 K(10):+162.16

X-range:

-

MassTol: Y-zoom:

MassType:

AVG  MONO

Axis:

1  2

Label:

I  M  -

Ions:

a  +  2+  3+

b  +  2+  3+

c  +  2+  3+

x  +  2+  3+

y  +  2+  3+

z  +  2+  3+

hide H<sub>2</sub>O/NH<sub>3</sub>

zoom 112-122

GO

SAPASGTPNKETAGLKVGVSSR, MH+ 2303.3419, m/z 576.5909  
 H OSG40 P180811 230811-s1.03213.03213.4.dta

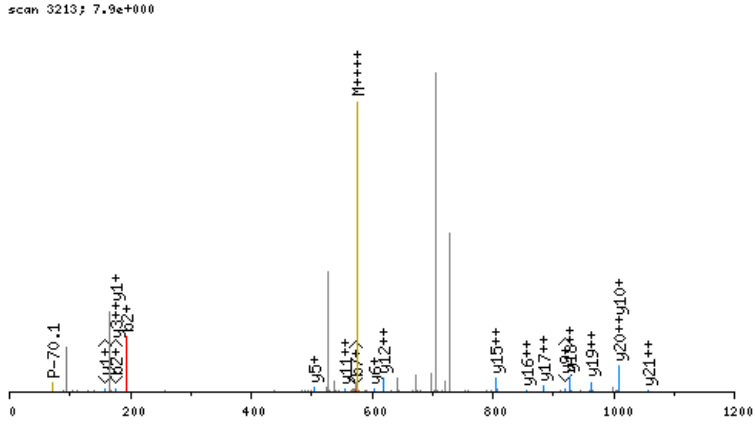

click image to zoom in; click top corners to zoom out [\[precursor±\]](#)

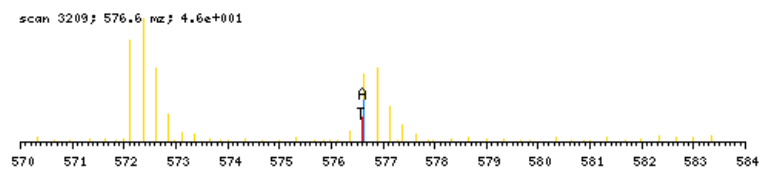

zoomed in precursor plot; T=theoretical m/z, A=acquired m/z

| b <sup>+</sup> | #  | AA | #  | y <sup>+</sup> | y <sup>2+</sup> |
|----------------|----|----|----|----------------|-----------------|
| 122.1029       | 1  | S  | 23 |                |                 |
| 193.1400       | 2  | A  | 22 | 2182.2468      | 1091.6273       |
| 290.1928       | 3  | P  | 21 | 2111.2097      | 1056.1088       |
| 377.2248       | 4  | S  | 20 | 2014.1570      | 1007.5824       |
| 448.2619       | 5  | A  | 19 | 1927.1249      | 964.0664        |
| 535.2940       | 6  | S  | 18 | 1856.0878      | 928.5478        |
| 592.3154       | 7  | G  | 17 | 1769.0558      | 885.0318        |
| 693.3631       | 8  | T  | 16 | 1712.0343      | 856.5211        |
| 790.4159       | 9  | P  | 15 | 1610.9867      | 805.9972        |
| 904.4588       | 10 | N  | 14 | 1513.9339      | 757.4709        |
| 1066.6169      | 11 | K  | 13 | 1399.8910      | 700.4494        |
| 1195.6595      | 12 | E  | 12 | 1237.7329      | 619.3703        |
| 1296.7072      | 13 | T  | 11 | 1108.6903      | 554.8490        |
| 1367.7443      | 14 | A  | 10 | 1007.6426      | 504.3252        |
| 1424.7658      | 15 | G  | 9  | 936.6055       | 468.8067        |
| 1537.8498      | 16 | L  | 8  | 879.5840       | 440.2959        |
| 1700.0079      | 17 | K  | 7  | 766.4999       | 383.7539        |
| 1799.0763      | 18 | V  | 6  | 604.3418       | 302.6748        |
| 1856.0978      | 19 | G  | 5  | 505.2734       | 253.1406        |
| 1955.1662      | 20 | V  | 4  | 448.2520       | 224.6299        |
| 2042.1982      | 21 | S  | 3  | 349.1836       | 175.0957        |
| 2129.2303      | 22 | S  | 2  | 262.1515       | 131.5797        |
|                | 23 | R  | 1  | 175.1195       | 88.0637         |

N-term:+35.07 K(11):+162.16  
 K(17):+162.16

X-range:

-

MassTol: Y-zoom:

MassType:

AVG  MONO

Axis:

1  2

Label:

I  M  -

Ions:

a  +  2+  3+

b  +  2+  3+

c  +  2+  3+

x  +  2+  3+

y  +  2+  3+

z  +  2+  3+

hide H<sub>2</sub>O/NH<sub>3</sub>

zoom 112-122

GO



SASSTNLKDVLSNLIPEQAR, MH+ 2373.4202, m/z 594.1105  
 H OSG40 P180811 230811-s1.08796.08796.4.dta

X-range:

-

MassTol: Y-zoom:

MassType:

AVG  MONO

Axis:

1  2

Label:

I  M  -

Ions:

a  +  2+  3+

b  +  2+  3+

c  +  2+  3+

x  +  2+  3+

y  +  2+  3+

z  +  2+  3+

hide H<sub>2</sub>O/NH<sub>3</sub>

zoom 112-122

GO

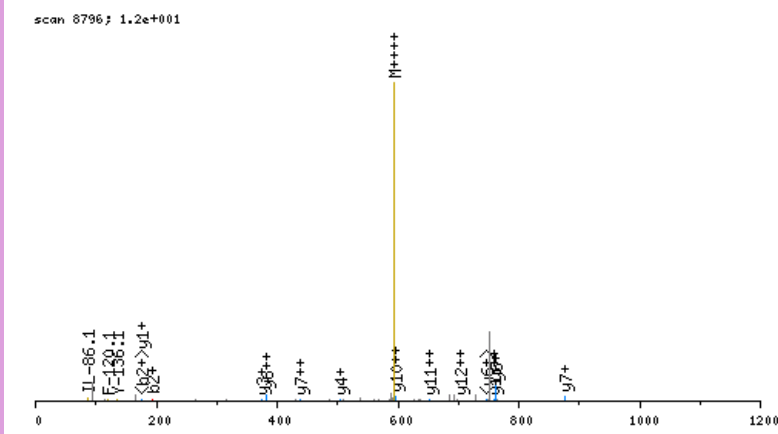

click image to zoom in; click top corners to zoom out [\[precursor±\]](#)

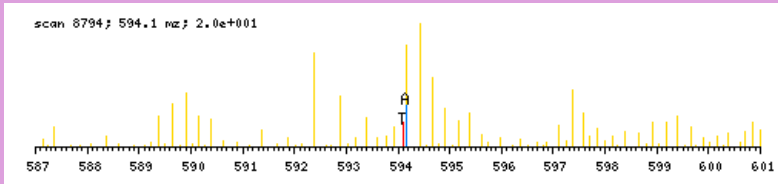

zoomed in precursor plot; T=theoretical m/z, A=acquired m/z

| b <sup>+</sup> | #  | AA # | y <sup>+</sup> | y <sup>2+</sup> |
|----------------|----|------|----------------|-----------------|
| 122.1029       | 1  | S 21 |                |                 |
| 193.1400       | 2  | A 20 | 2252.3251      | 1126.6665       |
| 280.1721       | 3  | S 19 | 2181.2880      | 1091.1479       |
| 367.2041       | 4  | S 18 | 2094.2560      | 1047.6319       |
| 468.2518       | 5  | T 17 | 2007.2239      | 1004.1159       |
| 582.2947       | 6  | N 16 | 1906.1762      | 953.5920        |
| 695.3788       | 7  | L 15 | 1792.1333      | 896.5706        |
| 857.5369       | 8  | K 14 | 1679.0493      | 840.0285        |
| 972.5638       | 9  | D 13 | 1516.8912      | 758.9495        |
| 1071.6322      | 10 | V 12 | 1401.8642      | 701.4360        |
| 1184.7163      | 11 | L 11 | 1302.7958      | 651.9018        |
| 1271.7483      | 12 | S 10 | 1189.7117      | 595.3598        |
| 1385.7912      | 13 | N 9  | 1102.6797      | 551.8438        |
| 1498.8753      | 14 | L 8  | 988.6368       | 494.8223        |
| 1611.9594      | 15 | I 7  | 875.5527       | 438.2803        |
| 1709.0121      | 16 | P 6  | 762.4686       | 381.7382        |
| 1871.1702      | 17 | K 5  | 665.4159       | 333.2119        |
| 2000.2128      | 18 | E 4  | 503.2578       | 252.1328        |
| 2128.2714      | 19 | Q 3  | 374.2152       | 187.6115        |
| 2199.3085      | 20 | A 2  | 246.1566       | 123.5822        |
|                | 21 | R 1  | 175.1195       | 88.0637         |

N-term:+35.07 K(8):+162.16  
 K(17):+162.16

SATHHKTSLPQGVK, MH+ 1586.9403, m/z 529.6516  
 H OSG40 P180811 230811-s1.02735.02735.3.dta

X-range:

-

MassTol: Y-zoom:

MassType:

AVG  MONO

Axis:

1  2

Label:

I  M  -

Ions:

a  +  2+  3+

b  +  2+  3+

c  +  2+  3+

x  +  2+  3+

y  +  2+  3+

z  +  2+  3+

hide H<sub>2</sub>O/NH<sub>3</sub>

zoom 112-122

GO

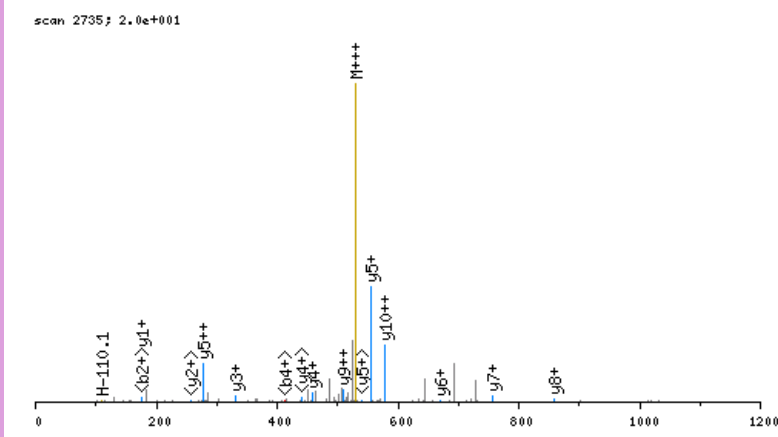

click image to zoom in; click top corners to zoom out [\[precursor±\]](#)

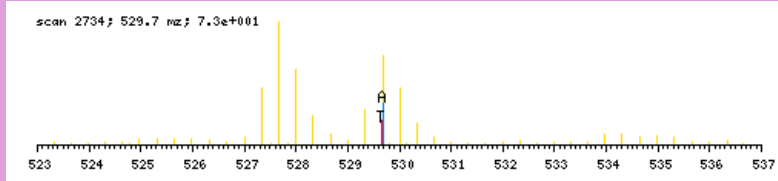

zoomed in precursor plot; T=theoretical m/z, A=acquired m/z

| b <sup>+</sup> | #  | AA # | y <sup>+</sup> | y <sup>2+</sup> |
|----------------|----|------|----------------|-----------------|
| 122.1029       | 1  | S 14 |                |                 |
| 193.1400       | 2  | A 13 | 1465.8452      | 733.4265        |
| 294.1877       | 3  | T 12 | 1394.8081      | 697.9080        |
| 431.2466       | 4  | H 11 | 1293.7604      | 647.3841        |
| 568.3055       | 5  | H 10 | 1156.7015      | 578.8547        |
| 730.4636       | 6  | K 9  | 1019.6426      | 510.3252        |
| 831.5113       | 7  | T 8  | 857.4845       | 429.2462        |
| 918.5434       | 8  | S 7  | 756.4368       | 378.7223        |
| 1031.6274      | 9  | L 6  | 669.4048       | 335.2063        |
| 1128.6802      | 10 | P 5  | 556.3207       | 278.6643        |
| 1256.7388      | 11 | Q 4  | 459.2680       | 230.1379        |
| 1313.7602      | 12 | G 3  | 331.2094       | 166.1086        |
| 1412.8286      | 13 | V 2  | 274.1879       | 137.5979        |
|                | 14 | R 1  | 175.1195       | 88.0637         |

N-term:+35.07 K(6):+162.16

SATVNGAVEGSAGTGR, MH+ 1461.7297, m/z 487.9148  
 L OSG37 P180811 230811-s1.02286.02286.3.dta

X-range:

-

MassTol: Y-zoom:

MassType:

AVG  MONO

Axis:

1  2

Label:

I  M  -

Ions:

a  +  2+  3+

b  +  2+  3+

c  +  2+  3+

x  +  2+  3+

y  +  2+  3+

z  +  2+  3+

hide H<sub>2</sub>O/NH<sub>3</sub>

zoom 112-122

GO

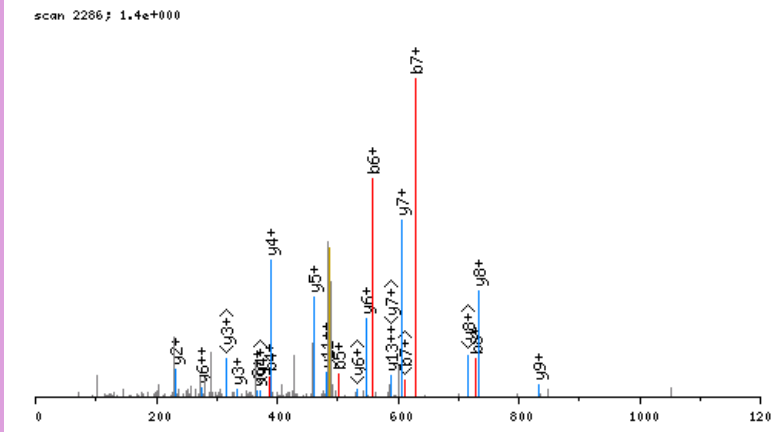

click image to zoom in; click top corners to zoom out [\[precursor±\]](#)

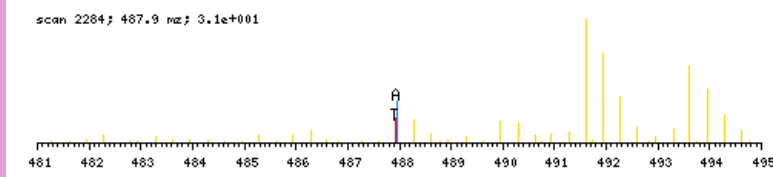

zoomed in precursor plot; T=theoretical m/z, A=acquired m/z

| b <sup>+</sup> | #  | AA # | y <sup>+</sup> | y <sup>2+</sup> |
|----------------|----|------|----------------|-----------------|
| 116.0711       | 1  | S 16 |                |                 |
| 187.1082       | 2  | A 15 | 1346.6664      | 673.8371        |
| 288.1559       | 3  | T 14 | 1275.6293      | 638.3186        |
| 387.2243       | 4  | V 13 | 1174.5816      | 587.7947        |
| 501.2673       | 5  | N 12 | 1075.5132      | 538.2605        |
| 558.2887       | 6  | G 11 | 961.4703       | 481.2391        |
| 629.3258       | 7  | A 10 | 904.4488       | 452.7283        |
| 728.3943       | 8  | V 9  | 833.4117       | 417.2098        |
| 857.4368       | 9  | E 8  | 734.3433       | 367.6756        |
| 914.4583       | 10 | G 7  | 605.3007       | 303.1543        |
| 1001.4903      | 11 | S 6  | 548.2792       | 274.6435        |
| 1072.5275      | 12 | A 5  | 461.2472       | 231.1275        |
| 1129.5489      | 13 | G 4  | 390.2101       | 195.6090        |
| 1230.5966      | 14 | T 3  | 333.1886       | 167.0982        |
| 1287.6181      | 15 | G 2  | 232.1410       | 116.5744        |
|                | 16 | R 1  | 175.1195       | 88.0637         |

N-term:+29.04

SAVLTTQ GKASDVLVQGEGR, MH+ 2072.1352, m/z 691.3832  
 L OSG39 P180811 230811-s1.03850.03850.3.dta

X-range:

-

MassTol: Y-zoom:

MassType:

AVG  MONO

Axis:

1  2

Label:

I  M  -

Ions:

a  +  2+  3+

b  +  2+  3+

c  +  2+  3+

x  +  2+  3+

y  +  2+  3+

z  +  2+  3+

hide H<sub>2</sub>O/NH<sub>3</sub>

zoom 112-122

GO

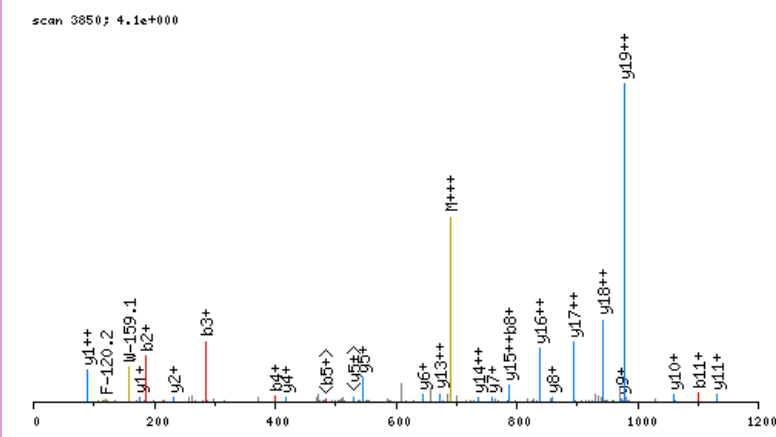

click image to zoom in; click top corners to zoom out [\[precursor±\]](#)

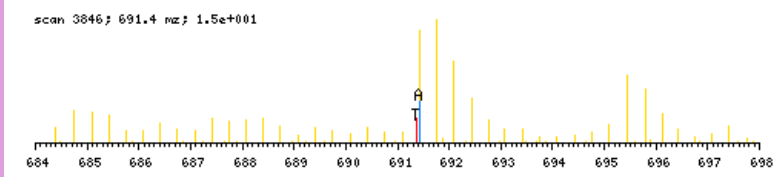

zoomed in precursor plot; T=theoretical m/z, A=acquired m/z

| b <sup>+</sup> | #  | AA # | y <sup>+</sup> | y <sup>2+</sup> |
|----------------|----|------|----------------|-----------------|
| 116.0711       | 1  | S 20 |                |                 |
| 187.1082       | 2  | A 19 | 1957.0719      | 979.0398        |
| 286.1767       | 3  | V 18 | 1886.0348      | 943.5213        |
| 399.2607       | 4  | L 17 | 1786.9663      | 893.9871        |
| 500.3084       | 5  | T 16 | 1673.8823      | 837.4450        |
| 601.3561       | 6  | T 15 | 1572.8346      | 786.9212        |
| 729.4147       | 7  | Q 14 | 1471.7869      | 736.3974        |
| 786.4361       | 8  | G 13 | 1343.7283      | 672.3681        |
| 942.5624       | 9  | K 12 | 1286.7069      | 643.8574        |
| 1013.5995      | 10 | A 11 | 1130.5806      | 565.7942        |
| 1100.6316      | 11 | S 10 | 1059.5435      | 530.2756        |
| 1215.6585      | 12 | D 9  | 972.5114       | 486.7596        |
| 1314.7269      | 13 | V 8  | 857.4845       | 429.2462        |
| 1427.8110      | 14 | L 7  | 758.4161       | 379.7120        |
| 1526.8794      | 15 | V 6  | 645.3320       | 323.1699        |
| 1654.9380      | 16 | Q 5  | 546.2636       | 273.6357        |
| 1711.9594      | 17 | G 4  | 418.2050       | 209.6064        |
| 1841.0020      | 18 | E 3  | 361.1836       | 181.0957        |
| 1898.0235      | 19 | G 2  | 232.1410       | 116.5744        |
|                | 20 | R 1  | 175.1195       | 88.0637         |

N-term:+29.04 K(9):+156.13

SAVSGPAEYLQHSIVPTMHYQDSLPR, MH+ 2917.4730, m/z 730.1237  
 H OSG40 P180811 230811-s1.08388.08388.4.dta

scan 8388; 5.3e-001

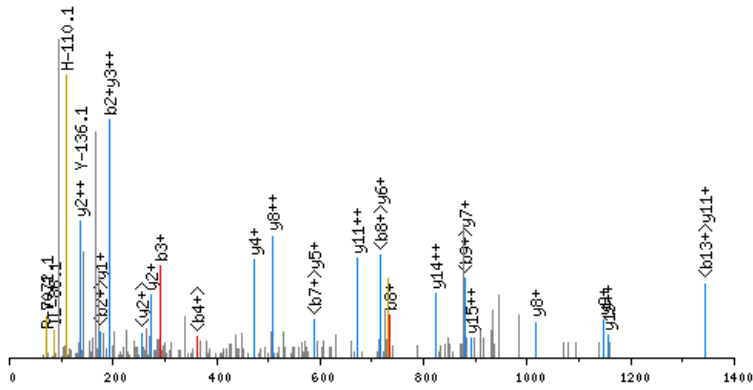

click image to zoom in; click top corners to zoom out [precursor±]

scan 8384; 730.1 m/z; 1.3e+001

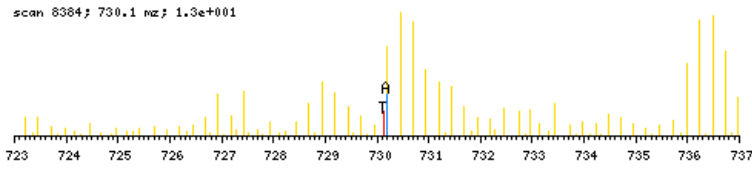

zoomed in precursor plot; T=theoretical m/z, A=acquired m/z

X-range:

-

MassTol: Y-zoom:

MassType:

AVG  MONO

Axis:

1  2

Label:

I  M  -

Ions:

a  +  2+  3+

b  +  2+  3+

c  +  2+  3+

x  +  2+  3+

y  +  2+  3+

z  +  2+  3+

hide H<sub>2</sub>O/NH<sub>3</sub>

zoom 112-122

GO

| b <sup>+</sup> | #  | AA # | y <sup>+</sup> | y <sup>2+</sup> |
|----------------|----|------|----------------|-----------------|
| 122.1029       | 1  | S 26 |                |                 |
| 193.1400       | 2  | A 25 | 2796.3779      | 1398.6929       |
| 292.2085       | 3  | V 24 | 2725.3408      | 1363.1743       |
| 379.2405       | 4  | S 23 | 2626.2724      | 1313.6401       |
| 436.2619       | 5  | G 22 | 2539.2404      | 1270.1241       |
| 533.3147       | 6  | P 21 | 2482.2189      | 1241.6134       |
| 604.3518       | 7  | A 20 | 2385.1661      | 1193.0870       |
| 733.3944       | 8  | E 19 | 2314.1290      | 1157.5684       |
| 896.4577       | 9  | Y 18 | 2185.0864      | 1093.0471       |
| 1009.5418      | 10 | L 17 | 2022.0231      | 1011.5155       |
| 1137.6004      | 11 | Q 16 | 1908.9390      | 954.9734        |
| 1274.6593      | 12 | H 15 | 1780.8805      | 890.9441        |
| 1361.6913      | 13 | S 14 | 1643.8216      | 822.4147        |
| 1474.7754      | 14 | I 13 | 1556.7895      | 778.8987        |
| 1573.8438      | 15 | V 12 | 1443.7055      | 722.3566        |
| 1670.8966      | 16 | P 11 | 1344.6370      | 672.8224        |
| 1771.9442      | 17 | T 10 | 1247.5843      | 624.2961        |
| 1902.9847      | 18 | M 9  | 1146.5366      | 573.7722        |
| 2040.0436      | 19 | H 8  | 1015.4961      | 508.2520        |
| 2203.1070      | 20 | Y 7  | 878.4372       | 439.7225        |
| 2331.1656      | 21 | Q 6  | 715.3739       | 358.1909        |
| 2446.1925      | 22 | D 5  | 587.3153       | 294.1616        |
| 2533.2245      | 23 | S 4  | 472.2884       | 236.6481        |
| 2646.3086      | 24 | L 3  | 385.2563       | 193.1321        |
| 2743.3614      | 25 | P 2  | 272.1723       | 136.5900        |
|                | 26 | R 1  | 175.1195       | 88.0637         |

N-term:+35.07

SCNLGKFKDETADGR, MH+ 1855.8496, m/z 619.2880  
 L OSG40 P180811 230811-s1.03965.03965.3.dta

scan 3965; 4.5e+000

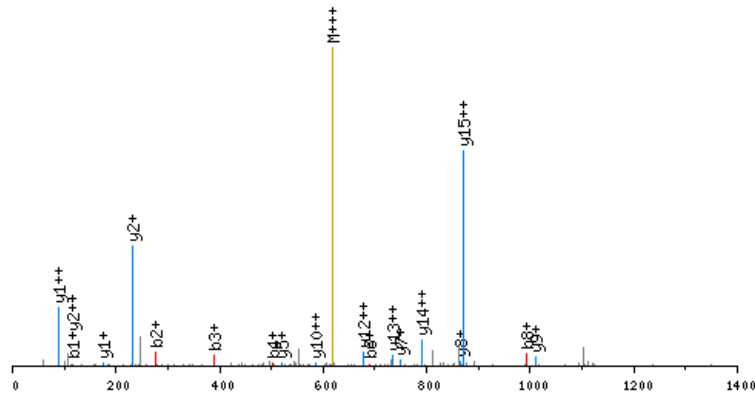

click image to zoom in; click top corners to zoom out [\[precursor±\]](#)

scan 3964; 619.3 mz; 1.3e+001

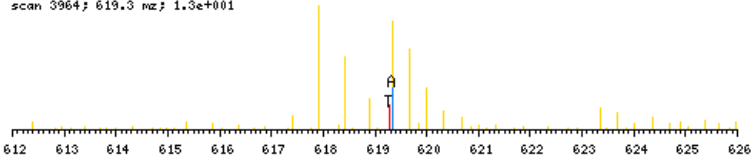

zoomed in precursor plot; T=theoretical m/z, A=acquired m/z

X-range:

-

MassTol: Y-zoom:

MassType:

AVG  MONO

Axis:

1  2

Label:

I  M  -

Ions:

a  +  2+  3+

b  +  2+  3+

c  +  2+  3+

x  +  2+  3+

y  +  2+  3+

z  +  2+  3+

hide H<sub>2</sub>O/NH<sub>3</sub>

zoom 112-122

GO

| b <sup>+</sup> | #  | AA # | y <sup>+</sup> | y <sup>2+</sup> |
|----------------|----|------|----------------|-----------------|
| 116.0711       | 1  | S 16 |                |                 |
| 276.1017       | 2  | C 15 | 1740.7863      | 870.8971        |
| 390.1447       | 3  | N 14 | 1580.7557      | 790.8818        |
| 503.2287       | 4  | L 13 | 1466.7127      | 733.8603        |
| 560.2502       | 5  | G 12 | 1353.6287      | 677.3183        |
| 689.2928       | 6  | E 11 | 1296.6072      | 648.8075        |
| 845.4191       | 7  | K 10 | 1167.5646      | 584.2862        |
| 992.4875       | 8  | F 9  | 1011.4383      | 506.2231        |
| 1107.5144      | 9  | D 8  | 864.3699       | 432.6889        |
| 1236.5570      | 10 | E 7  | 749.3430       | 375.1754        |
| 1337.6047      | 11 | T 6  | 620.3004       | 310.6541        |
| 1438.6524      | 12 | T 5  | 519.2527       | 260.1303        |
| 1509.6895      | 13 | A 4  | 418.2050       | 209.6064        |
| 1624.7164      | 14 | D 3  | 347.1679       | 174.0879        |
| 1681.7379      | 15 | G 2  | 232.1410       | 116.5744        |
|                | 16 | R 1  | 175.1195       | 88.0637         |

N-term:+29.04 C(2):+160.03  
 K(7):+156.13

SCQDSLIDYWTIHGLWPDR, MH+ 2277.0398, m/z 759.6848  
 L OSG39 P180811 230811-s1.07748.07748.3.dta

X-range:

-

MassTol: Y-zoom:

MassType:

AVG  MONO

Axis:

1  2

Label:

I  M  -

Ions:

a  +  2+  3+

b  +  2+  3+

c  +  2+  3+

x  +  2+  3+

y  +  2+  3+

z  +  2+  3+

hide H<sub>2</sub>O/NH<sub>3</sub>

zoom 112-122

GO

scan 7748; 1.2e+000

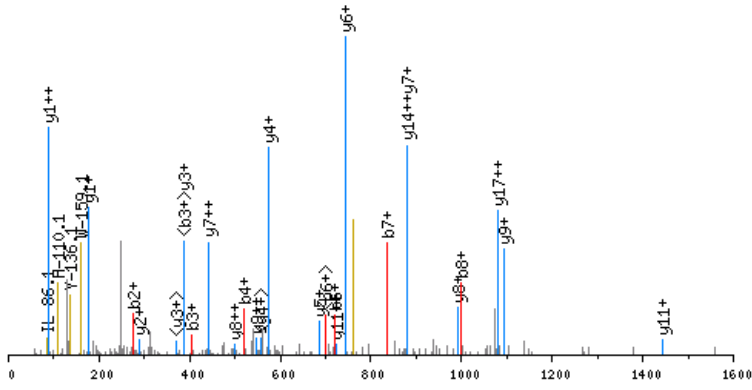

click image to zoom in; click top corners to zoom out [\[precursor±\]](#)

scan 7746; 759.7 m/z; 2.3e+001

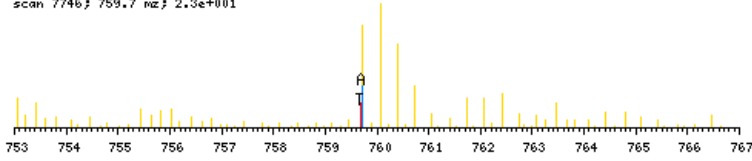

zoomed in precursor plot; T=theoretical m/z, A=acquired m/z

| b <sup>+</sup> | #  | AA | #  | y <sup>+</sup> | y <sup>2+</sup> |
|----------------|----|----|----|----------------|-----------------|
| 116.0711       | 1  | S  | 18 |                |                 |
| 276.1017       | 2  | C  | 17 | 2161.9765      | 1081.4922       |
| 404.1603       | 3  | Q  | 16 | 2001.9459      | 1001.4769       |
| 519.1872       | 4  | D  | 15 | 1873.8873      | 937.4476        |
| 606.2193       | 5  | S  | 14 | 1758.8604      | 879.9341        |
| 719.3033       | 6  | L  | 13 | 1671.8284      | 836.4181        |
| 834.3303       | 7  | D  | 12 | 1558.7443      | 779.8761        |
| 997.3936       | 8  | Y  | 11 | 1443.7173      | 722.3626        |
| 1183.4729      | 9  | W  | 10 | 1280.6540      | 640.8309        |
| 1284.5206      | 10 | T  | 9  | 1094.5747      | 547.7913        |
| 1397.6047      | 11 | I  | 8  | 993.5270       | 497.2674        |
| 1534.6636      | 12 | H  | 7  | 880.4430       | 440.7254        |
| 1591.6850      | 13 | G  | 6  | 743.3840       | 372.1959        |
| 1704.7691      | 14 | L  | 5  | 686.3626       | 343.6852        |
| 1890.8484      | 15 | W  | 4  | 573.2785       | 287.1432        |
| 1987.9012      | 16 | P  | 3  | 387.1992       | 194.1035        |
| 2102.9281      | 17 | D  | 2  | 290.1464       | 145.5771        |
|                | 18 | R  | 1  | 175.1195       | 88.0637         |

N-term:+29.04 C(2):+160.03

SCQGIQCAPGQR, MH+ 1389.6366, m/z 463.8837  
 L OSG38 P180811 230811-s1.02138.02138.3.dta

scan 2138; 4.3e+000

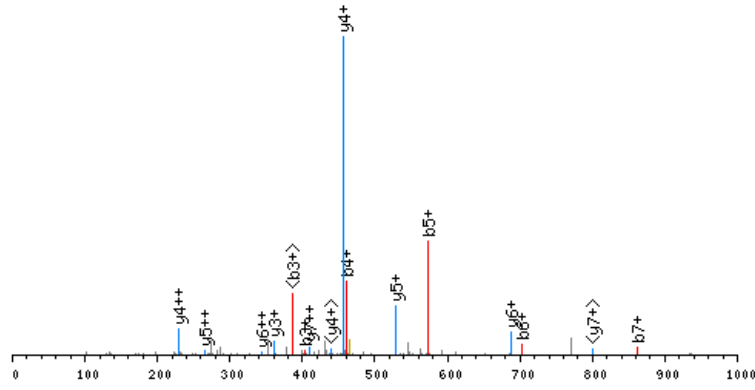

click image to zoom in; click top corners to zoom out [precursor±]

scan 2136; 463.9 m/z; 3.0e+000

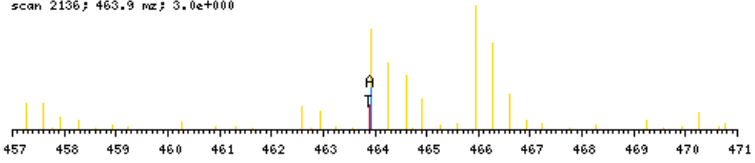

zoomed in precursor plot; T=theoretical m/z, A=acquired m/z

X-range:

-

MassTol: Y-zoom:

MassType:

AVG  MONO

Axis:

1  2

Label:

I  M  -

Ions:

a  +  2+  3+

b  +  2+  3+

c  +  2+  3+

x  +  2+  3+

y  +  2+  3+

z  +  2+  3+

hide H<sub>2</sub>O/NH<sub>3</sub>

zoom 112-122

GO

| b <sup>+</sup> | #  | AA | #  | y <sup>+</sup> | y <sup>2+</sup> |
|----------------|----|----|----|----------------|-----------------|
| 116.0711       | 1  | S  | 12 |                |                 |
| 276.1017       | 2  | C  | 11 | 1274.5733      | 637.7906        |
| 404.1603       | 3  | Q  | 10 | 1114.5427      | 557.7753        |
| 461.1818       | 4  | G  | 9  | 986.4841       | 493.7460        |
| 574.2658       | 5  | I  | 8  | 929.4627       | 465.2352        |
| 702.3244       | 6  | Q  | 7  | 816.3786       | 408.6932        |
| 862.3550       | 7  | C  | 6  | 688.3200       | 344.6639        |
| 933.3921       | 8  | A  | 5  | 528.2894       | 264.6486        |
| 1030.4449      | 9  | P  | 4  | 457.2523       | 229.1301        |
| 1087.4664      | 10 | G  | 3  | 360.1995       | 180.6037        |
| 1215.5249      | 11 | Q  | 2  | 303.1781       | 152.0930        |
|                | 12 | R  | 1  | 175.1195       | 88.0637         |

N-term:+29.04 C(2):+160.03  
 C(7):+160.03



SDAPPLTLGDIKDR, MH+ 1553.8539, m/z 518.6228  
 L OSG39 P180811 230811-s1.04094.04094.3.dta

X-range:

-

MassTol: Y-zoom:

MassType:

AVG  MONO

Axis:

1  2

Label:

I  M  -

Ions:

a  +  2+  3+

b  +  2+  3+

c  +  2+  3+

x  +  2+  3+

y  +  2+  3+

z  +  2+  3+

hide H<sub>2</sub>O/NH<sub>3</sub>

zoom 112-122

GO

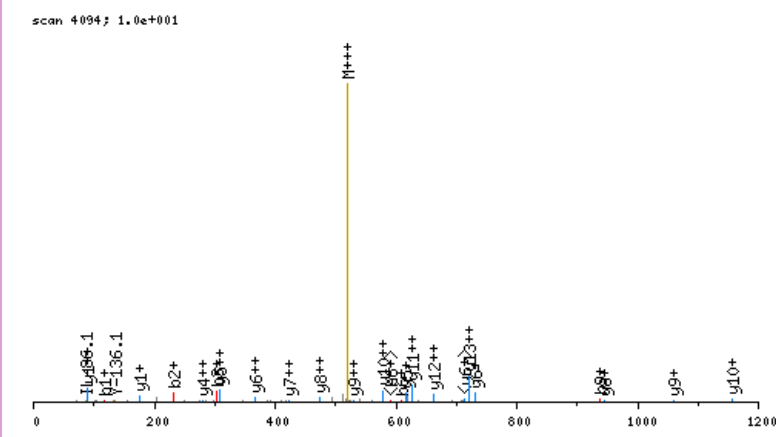

click image to zoom in; click top corners to zoom out [\[precursor±\]](#)

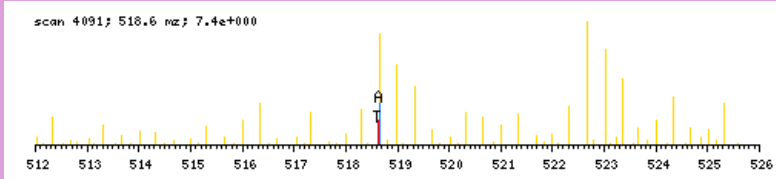

zoomed in precursor plot; T=theoretical m/z, A=acquired m/z

| b <sup>+</sup> | #  | AA # | y <sup>+</sup> | y <sup>2+</sup> |
|----------------|----|------|----------------|-----------------|
| 116.0711       | 1  | S 14 |                |                 |
| 231.0981       | 2  | D 13 | 1438.7906      | 719.8992        |
| 302.1352       | 3  | A 12 | 1323.7637      | 662.3857        |
| 399.1879       | 4  | P 11 | 1252.7265      | 626.8672        |
| 496.2407       | 5  | P 10 | 1155.6738      | 578.3408        |
| 609.3248       | 6  | L 9  | 1058.6210      | 529.8144        |
| 710.3725       | 7  | T 8  | 945.5370       | 473.2724        |
| 823.4565       | 8  | L 7  | 844.4893       | 422.7486        |
| 938.4835       | 9  | D 6  | 731.4052       | 366.2065        |
| 995.5049       | 10 | G 5  | 616.3783       | 308.6930        |
| 1108.5890      | 11 | I 4  | 559.3568       | 280.1823        |
| 1264.7153      | 12 | K 3  | 446.2727       | 223.6403        |
| 1379.7422      | 13 | D 2  | 290.1464       | 145.5771        |
|                | 14 | R 1  | 175.1195       | 88.0637         |

N-term:+29.04 K(12):+156.13

SDFSEGOAVGAHR, MH+ 1388.6558, m/z 463.5568  
 L OSG40 P180811 230811-s1.02672.02672.3.dta

X-range:

-

MassTol: Y-zoom:

MassType:

AVG  MONO

Axis:

1  2

Label:

I  M  -

Ions:

a  +  2+  3+

b  +  2+  3+

c  +  2+  3+

x  +  2+  3+

y  +  2+  3+

z  +  2+  3+

hide H<sub>2</sub>O/NH<sub>3</sub>

zoom 112-122

GO

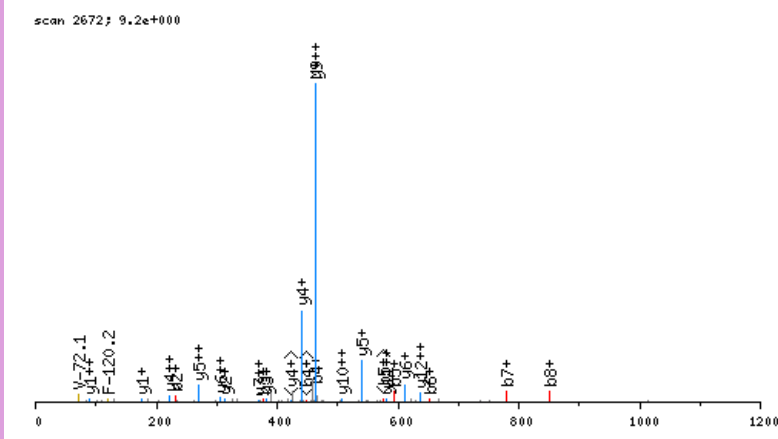

click image to zoom in; click top corners to zoom out [\[precursor±\]](#)

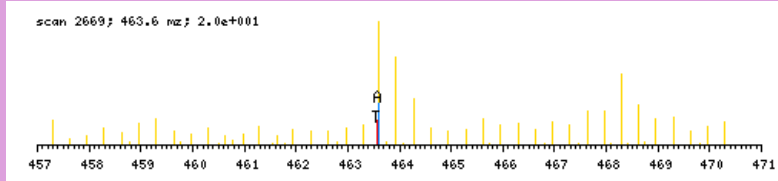

zoomed in precursor plot; T=theoretical m/z, A=acquired m/z

| b <sup>+</sup> | #  | AA # | y <sup>+</sup> | y <sup>2+</sup> |
|----------------|----|------|----------------|-----------------|
| 116.0711       | 1  | S 13 |                |                 |
| 231.0981       | 2  | D 12 | 1273.5925      | 637.3002        |
| 378.1665       | 3  | F 11 | 1158.5656      | 579.7867        |
| 465.1985       | 4  | S 10 | 1011.4972      | 506.2525        |
| 594.2411       | 5  | E 9  | 924.4652       | 462.7365        |
| 651.2626       | 6  | G 8  | 795.4226       | 398.2152        |
| 779.3211       | 7  | Q 7  | 738.4011       | 369.7045        |
| 850.3583       | 8  | A 6  | 610.3425       | 305.6752        |
| 949.4267       | 9  | V 5  | 539.3054       | 270.1566        |
| 1006.4481      | 10 | G 4  | 440.2370       | 220.6224        |
| 1077.4853      | 11 | A 3  | 383.2155       | 192.1117        |
| 1214.5442      | 12 | H 2  | 312.1784       | 156.5931        |
|                | 13 | R 1  | 175.1195       | 88.0637         |

N-term:+29.04

X-range:

-

MassTol: Y-zoom:

MassType:

AVG  MONO

Axis:

1  2

Label:

I  M  -

Ions:

a  +  2+  3+

b  +  2+  3+

c  +  2+  3+

x  +  2+  3+

y  +  2+  3+

z  +  2+  3+

hide H<sub>2</sub>O/NH<sub>3</sub>

zoom 112-122

GO

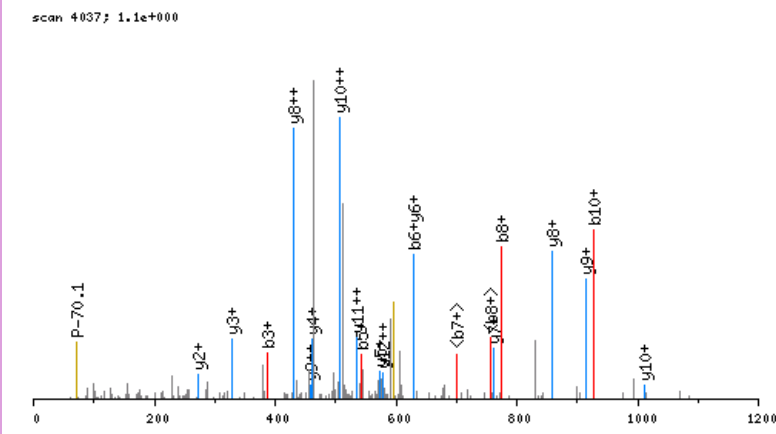

click image to zoom in; click top corners to zoom out [\[precursor±\]](#)

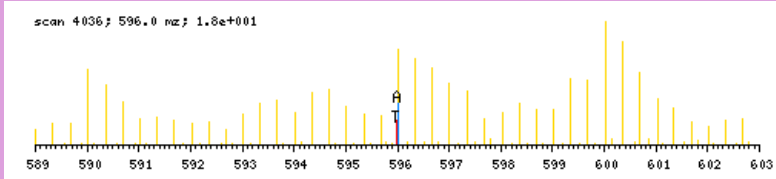

zoomed in precursor plot; T=theoretical m/z, A=acquired m/z

| b <sup>+</sup> | #  | AA # | y <sup>+</sup> | y <sup>2+</sup> |
|----------------|----|------|----------------|-----------------|
| 116.0711       | 1  | S 18 |                |                 |
| 231.0981       | 2  | D 17 | 1670.8359      | 835.9218        |
| 387.2244       | 3  | K 16 | 1555.8089      | 778.4084        |
| 444.2458       | 4  | G 15 | 1399.6826      | 700.3452        |
| 543.3142       | 5  | V 14 | 1342.6612      | 671.8345        |
| 630.3463       | 6  | S 13 | 1243.5927      | 622.3003        |
| 717.3783       | 7  | S 12 | 1156.5607      | 578.7843        |
| 774.3998       | 8  | G 11 | 1069.5287      | 535.2683        |
| 871.4525       | 9  | P 10 | 1012.5072      | 506.7575        |
| 928.4740       | 10 | G 9  | 915.4545       | 458.2311        |
| 1025.5268      | 11 | P 8  | 858.4330       | 429.7204        |
| 1156.5672      | 12 | M 7  | 761.3802       | 381.1940        |
| 1213.5887      | 13 | G 6  | 630.3397       | 315.6738        |
| 1326.6728      | 14 | L 5  | 573.3183       | 287.1631        |
| 1457.7133      | 15 | M 4  | 460.2342       | 230.6210        |
| 1514.7347      | 16 | G 3  | 329.1937       | 165.1008        |
| 1611.7875      | 17 | P 2  | 272.1723       | 136.5900        |
|                | 18 | R 1  | 175.1195       | 88.0637         |

N-term:+29.04 K(3):+156.13

SDMIVAAIQAEKNR, MH+ 1613.9321, m/z 538.6489  
 H OSG39 P180811 230811-s1.05022.05022.3.dta

scan 5022; 1.1e+001

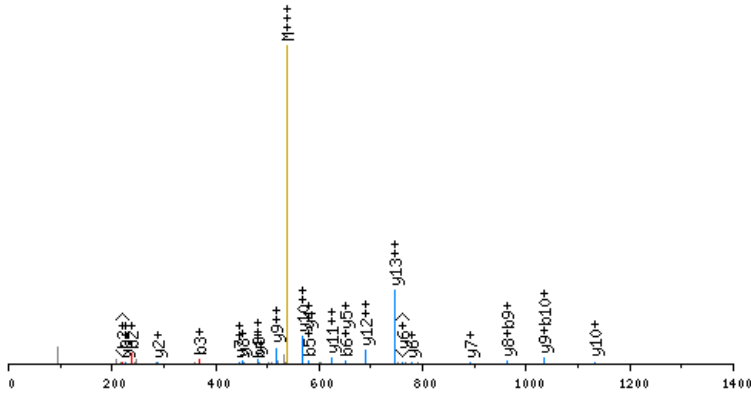

click image to zoom in; click top corners to zoom out [\[precursor±\]](#)

scan 5021; 538.6 m/z; 1.0e+001

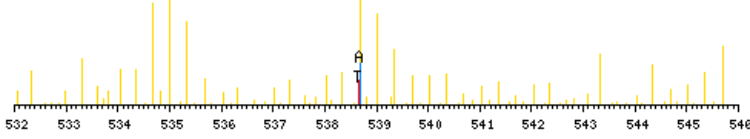

zoomed in precursor plot; T=theoretical m/z, A=acquired m/z

X-range:

-

MassTol: Y-zoom:

MassType:

AVG  MONO

Axis:

1  2

Label:

I  M  -

Ions:

a  +  2+  3+

b  +  2+  3+

c  +  2+  3+

x  +  2+  3+

y  +  2+  3+

z  +  2+  3+

hide H<sub>2</sub>O/NH<sub>3</sub>

zoom 112-122

GO

| b <sup>+</sup> | #  | AA | #  | y <sup>+</sup> | y <sup>2+</sup> |
|----------------|----|----|----|----------------|-----------------|
| 122.1029       | 1  | S  | 14 |                |                 |
| 237.1299       | 2  | D  | 13 | 1492.8370      | 746.9224        |
| 368.1704       | 3  | M  | 12 | 1377.8101      | 689.4089        |
| 481.2544       | 4  | I  | 11 | 1246.7696      | 623.8887        |
| 580.3228       | 5  | V  | 10 | 1133.6855      | 567.3467        |
| 651.3599       | 6  | A  | 9  | 1034.6171      | 517.8125        |
| 722.3971       | 7  | A  | 8  | 963.5800       | 482.2939        |
| 835.4811       | 8  | I  | 7  | 892.5429       | 446.7754        |
| 963.5397       | 9  | Q  | 6  | 779.4588       | 390.2333        |
| 1034.5768      | 10 | A  | 5  | 651.4002       | 326.2040        |
| 1163.6194      | 11 | E  | 4  | 580.3631       | 290.6855        |
| 1325.7775      | 12 | K  | 3  | 451.3205       | 226.1642        |
| 1439.8204      | 13 | N  | 2  | 289.1624       | 145.0851        |
|                | 14 | R  | 1  | 175.1195       | 88.0637         |

N-term:+35.07 K(12):+162.16

SDNQPGLIQVYEGER, MH+ 1837.9508, m/z 613.3218  
 H OSG37 P180811 230811-s1.06603.06603.3.dta

X-range:

-

MassTol: Y-zoom:

MassType:

AVG  MONO

Axis:

1  2

Label:

I  M  -

Ions:

a  +  2+  3+

b  +  2+  3+

c  +  2+  3+

x  +  2+  3+

y  +  2+  3+

z  +  2+  3+

hide H<sub>2</sub>O/NH<sub>3</sub>

zoom 112-122

GO

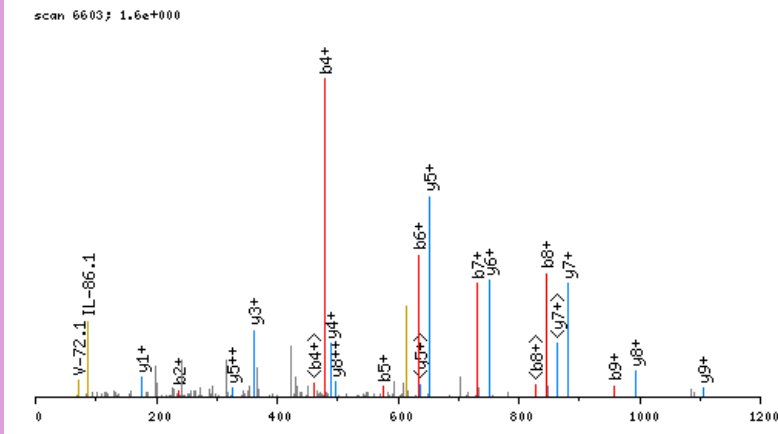

click image to zoom in; click top corners to zoom out [\[precursor±\]](#)

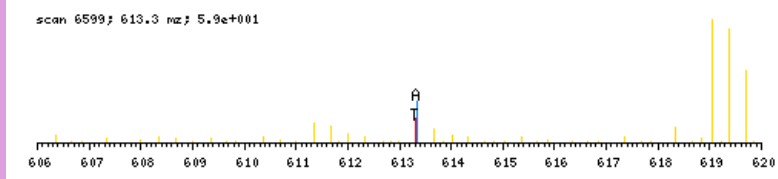

zoomed in precursor plot; T=theoretical m/z, A=acquired m/z

| b <sup>+</sup> | #  | AA # | y <sup>+</sup> | y <sup>2+</sup> |
|----------------|----|------|----------------|-----------------|
| 122.1029       | 1  | S 16 |                |                 |
| 237.1299       | 2  | D 15 | 1716.8557      | 858.9318        |
| 351.1728       | 3  | N 14 | 1601.8287      | 801.4183        |
| 479.2314       | 4  | Q 13 | 1487.7858      | 744.3968        |
| 576.2841       | 5  | P 12 | 1359.7272      | 680.3675        |
| 633.3056       | 6  | G 11 | 1262.6745      | 631.8412        |
| 732.3740       | 7  | V 10 | 1205.6530      | 603.3304        |
| 845.4581       | 8  | L 9  | 1106.5846      | 553.7962        |
| 958.5421       | 9  | I 8  | 993.5005       | 497.2542        |
| 1086.6007      | 10 | Q 7  | 880.4165       | 440.7121        |
| 1185.6691      | 11 | V 6  | 752.3579       | 376.6829        |
| 1348.7325      | 12 | Y 5  | 653.2895       | 327.1487        |
| 1477.7751      | 13 | E 4  | 490.2262       | 245.6170        |
| 1534.7965      | 14 | G 3  | 361.1836       | 181.0957        |
| 1663.8391      | 15 | E 2  | 304.1621       | 152.5850        |
|                | 16 | R 1  | 175.1195       | 88.0637         |

N-term:+35.07

SDPIPGAKPLPVPPELAPFVGR, MH+ 2310.3226, m/z 770.7790  
L OSG38 P180811 230811-s1.07887.07887.3.dta

scan 7887; 5.2e+000

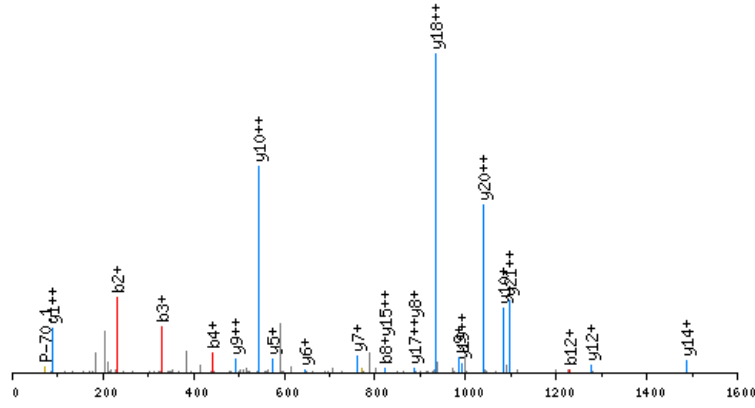

click image to zoom in; click top corners to zoom out [precursor±]

scan 7884; 770.8 mz; 2.1e+001

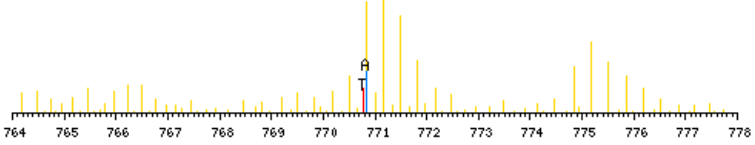

zoomed in precursor plot; T=theoretical m/z, A=acquired m/z

X-range:

-

MassTol: Y-zoom:

MassType:

AVG  MONO

Axis:

1  2

Label:

I  M  -

Ions:

a  +  2+  3+

b  +  2+  3+

c  +  2+  3+

x  +  2+  3+

y  +  2+  3+

z  +  2+  3+

hide H<sub>2</sub>O/NH<sub>3</sub>

zoom 112-122

GO

| b <sup>+</sup> | #  | AA # | y <sup>+</sup> | y <sup>2+</sup> |
|----------------|----|------|----------------|-----------------|
| 116.0711       | 1  | S 22 |                |                 |
| 231.0981       | 2  | D 21 | 2195.2593      | 1098.1335       |
| 328.1508       | 3  | P 20 | 2080.2323      | 1040.6201       |
| 441.2349       | 4  | I 19 | 1983.1796      | 992.0937        |
| 538.2877       | 5  | P 18 | 1870.0955      | 935.5517        |
| 595.3091       | 6  | G 17 | 1773.0427      | 887.0253        |
| 666.3462       | 7  | A 16 | 1716.0213      | 858.5145        |
| 822.4725       | 8  | K 15 | 1644.9842      | 822.9960        |
| 919.5253       | 9  | P 14 | 1488.8579      | 744.9328        |
| 1032.6094      | 10 | L 13 | 1391.8051      | 696.4065        |
| 1129.6621      | 11 | P 12 | 1278.7210      | 639.8644        |
| 1228.7305      | 12 | V 11 | 1181.6683      | 591.3380        |
| 1325.7833      | 13 | P 10 | 1082.5999      | 541.8038        |
| 1422.8361      | 14 | P 9  | 985.5471       | 493.2775        |
| 1551.8787      | 15 | E 8  | 888.4943       | 444.7511        |
| 1664.9627      | 16 | L 7  | 759.4517       | 380.2298        |
| 1735.9998      | 17 | A 6  | 646.3677       | 323.6877        |
| 1833.0526      | 18 | P 5  | 575.3306       | 288.1692        |
| 1980.1210      | 19 | F 4  | 478.2778       | 239.6428        |
| 2079.1894      | 20 | V 3  | 331.2094       | 166.1086        |
| 2136.2109      | 21 | G 2  | 232.1410       | 116.5744        |
|                | 22 | R 1  | 175.1195       | 88.0637         |

N-term:+29.04 K(8):+156.13

SDPQPLQEER, MH+ 1232.6335, m/z 616.8204  
 H OSG37 P180811 230811-s1.02310.02310.2.dta

X-range:

-

MassTol: Y-zoom:

MassType:

AVG  MONO

Axis:

1  2

Label:

I  M  -

Ions:

a  +  2+  3+

b  +  2+  3+

c  +  2+  3+

x  +  2+  3+

y  +  2+  3+

z  +  2+  3+

hide H<sub>2</sub>O/NH<sub>3</sub>

zoom 112-122

GO

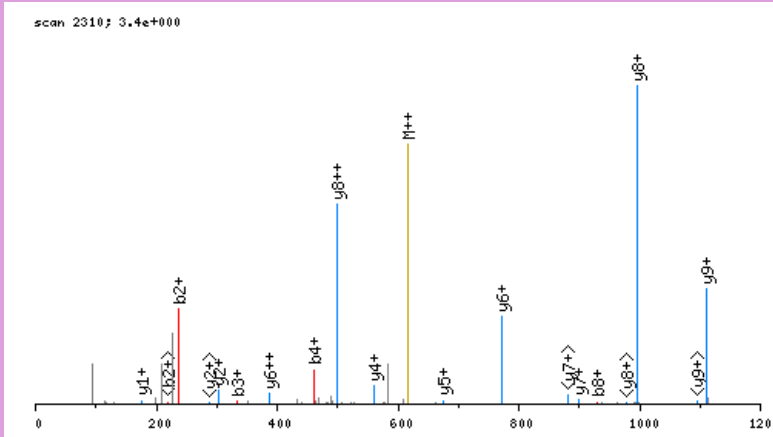

click image to zoom in; click top corners to zoom out [\[precursor±\]](#)

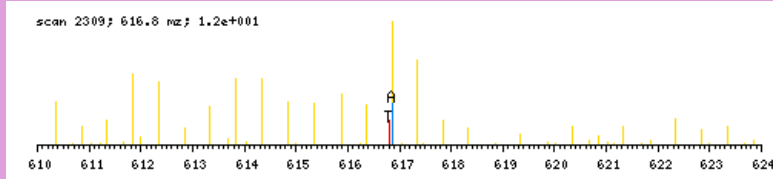

zoomed in precursor plot; T=theoretical m/z, A=acquired m/z

| b <sup>+</sup> | #  | AA # | y <sup>+</sup> | y <sup>2+</sup> |
|----------------|----|------|----------------|-----------------|
| 122.1029       | 1  | S 10 |                |                 |
| 237.1299       | 2  | D 9  | 1111.5384      | 556.2731        |
| 334.1826       | 3  | P 8  | 996.5114       | 498.7596        |
| 462.2412       | 4  | Q 7  | 899.4587       | 450.2332        |
| 559.2940       | 5  | P 6  | 771.4001       | 386.2040        |
| 672.3780       | 6  | L 5  | 674.3473       | 337.6776        |
| 800.4366       | 7  | Q 4  | 561.2633       | 281.1355        |
| 929.4792       | 8  | E 3  | 433.2047       | 217.1063        |
| 1058.5218      | 9  | E 2  | 304.1621       | 152.5850        |
|                | 10 | R 1  | 175.1195       | 88.0637         |

N-term:+35.07

SDSASAVAPLAPGSEDNFAR, MH+ 1995.9835, m/z 665.9994  
 H OSG37 P180811 230811-s1.05441.05441.3.dta

X-range:

-

MassTol: Y-zoom:

MassType:

AVG  MONO

Axis:

1  2

Label:

I  M  -

Ions:

a  +  2+  3+

b  +  2+  3+

c  +  2+  3+

x  +  2+  3+

y  +  2+  3+

z  +  2+  3+

hide H<sub>2</sub>O/NH<sub>3</sub>

zoom 112-122

GO

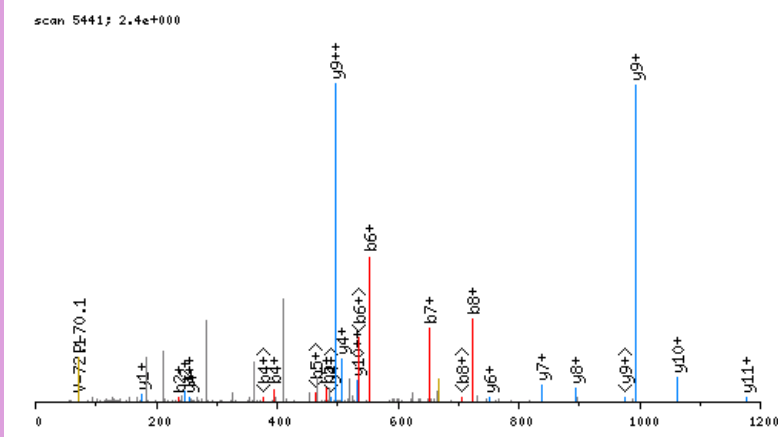

click image to zoom in; click top corners to zoom out [\[precursor±\]](#)

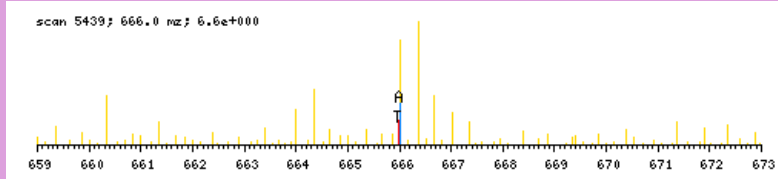

zoomed in precursor plot; T=theoretical m/z, A=acquired m/z

| b <sup>+</sup> | #  | AA # | y <sup>+</sup> | y <sup>2+</sup> |
|----------------|----|------|----------------|-----------------|
| 122.1029       | 1  | S 20 |                |                 |
| 237.1299       | 2  | D 19 | 1874.8884      | 937.9481        |
| 324.1619       | 3  | S 18 | 1759.8615      | 880.4347        |
| 395.1990       | 4  | A 17 | 1672.8295      | 836.9186        |
| 482.2310       | 5  | S 16 | 1601.7924      | 801.4001        |
| 553.2682       | 6  | A 15 | 1514.7603      | 757.8841        |
| 652.3366       | 7  | V 14 | 1443.7232      | 722.3655        |
| 723.3737       | 8  | A 13 | 1344.6548      | 672.8313        |
| 820.4264       | 9  | P 12 | 1273.6177      | 637.3128        |
| 933.5105       | 10 | L 11 | 1176.5649      | 588.7864        |
| 1004.5476      | 11 | A 10 | 1063.4809      | 532.2443        |
| 1101.6004      | 12 | P 9  | 992.4437       | 496.7258        |
| 1158.6219      | 13 | G 8  | 895.3910       | 448.1994        |
| 1245.6539      | 14 | S 7  | 838.3695       | 419.6887        |
| 1374.6965      | 15 | E 6  | 751.3375       | 376.1727        |
| 1489.7234      | 16 | D 5  | 622.2949       | 311.6514        |
| 1603.7663      | 17 | N 4  | 507.2680       | 254.1379        |
| 1750.8348      | 18 | F 3  | 393.2250       | 197.1164        |
| 1821.8719      | 19 | A 2  | 246.1566       | 123.5822        |
|                | 20 | R 1  | 175.1195       | 88.0637         |

N-term:+35.07



SDSMDTGAGSIR, MH+ 1224.5530, m/z 612.7801  
 L OSG37 P180811 230811-s1.02577.02577.2.dta

scan 2577; 3.3e+000

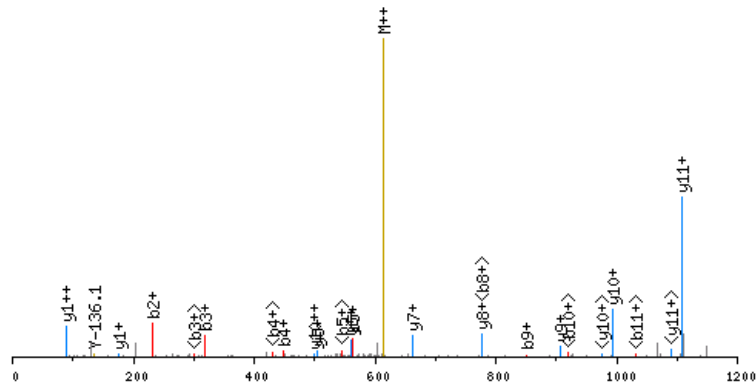

click image to zoom in; click top corners to zoom out [\[precursor±\]](#)

scan 2574; 612.8 m/z; 5.1e+001

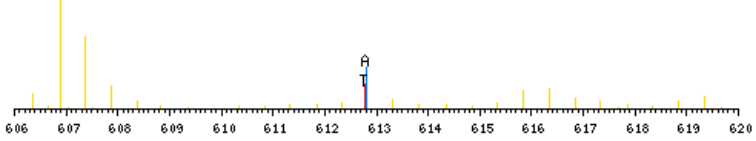

zoomed in precursor plot; T=theoretical m/z, A=acquired m/z

X-range:

-

MassTol: Y-zoom:

MassType:

AVG  MONO

Axis:

1  2

Label:

I  M  -

Ions:

a  +  2+  3+

b  +  2+  3+

c  +  2+  3+

x  +  2+  3+

y  +  2+  3+

z  +  2+  3+

hide H<sub>2</sub>O/NH<sub>3</sub>

zoom 112-122

GO

| b <sup>+</sup> | #  | AA # | y <sup>+</sup> | y <sup>2+</sup> |
|----------------|----|------|----------------|-----------------|
| 116.0711       | 1  | S 12 |                |                 |
| 231.0981       | 2  | D 11 | 1109.4897      | 555.2488        |
| 318.1301       | 3  | S 10 | 994.4628       | 497.7353        |
| 449.1706       | 4  | M 9  | 907.4307       | 454.2193        |
| 564.1975       | 5  | D 8  | 776.3903       | 388.6990        |
| 665.2452       | 6  | T 7  | 661.3633       | 331.1856        |
| 722.2667       | 7  | G 6  | 560.3156       | 280.6617        |
| 793.3038       | 8  | A 5  | 503.2942       | 252.1510        |
| 850.3252       | 9  | G 4  | 432.2571       | 216.6324        |
| 937.3573       | 10 | S 3  | 375.2356       | 188.1217        |
| 1050.4413      | 11 | I 2  | 288.2036       | 144.6057        |
|                | 12 | R 1  | 175.1195       | 88.0637         |

N-term:+29.04

SDSQVHSGVQVEAQR, MH+ 1654.8149, m/z 552.2765  
 L OSG40 P180811 230811-s1.02125.02125.3.dta

X-range:

-

MassTol: Y-zoom:

MassType:

AVG  MONO

Axis:

1  2

Label:

I  M  -

Ions:

a  +  2+  3+

b  +  2+  3+

c  +  2+  3+

x  +  2+  3+

y  +  2+  3+

z  +  2+  3+

hide H<sub>2</sub>O/NH<sub>3</sub>

zoom 112-122

GO

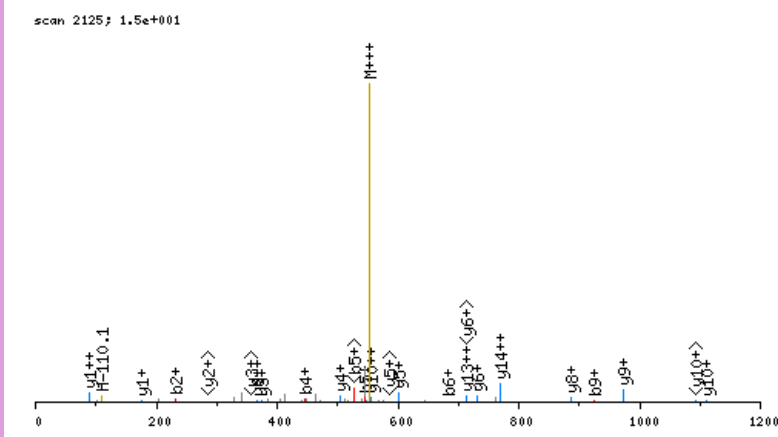

click image to zoom in; click top corners to zoom out [\[precursor±\]](#)

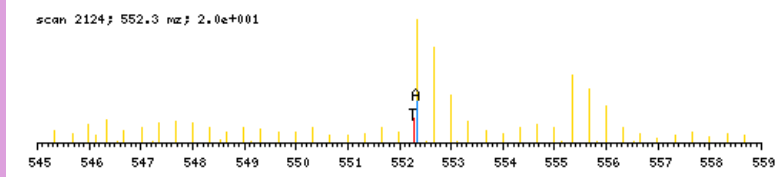

zoomed in precursor plot; T=theoretical m/z, A=acquired m/z

| b <sup>+</sup> | #  | AA | #  | y <sup>+</sup> | y <sup>2+</sup> |
|----------------|----|----|----|----------------|-----------------|
| 116.0711       | 1  | S  | 15 |                |                 |
| 231.0981       | 2  | D  | 14 | 1539.7516      | 770.3797        |
| 318.1301       | 3  | S  | 13 | 1424.7246      | 712.8662        |
| 446.1887       | 4  | Q  | 12 | 1337.6926      | 669.3502        |
| 545.2571       | 5  | V  | 11 | 1209.6340      | 605.3209        |
| 682.3160       | 6  | H  | 10 | 1110.5656      | 555.7867        |
| 769.3480       | 7  | S  | 9  | 973.5067       | 487.2573        |
| 826.3695       | 8  | G  | 8  | 886.4747       | 443.7412        |
| 925.4379       | 9  | V  | 7  | 829.4532       | 415.2305        |
| 1053.4965      | 10 | Q  | 6  | 730.3848       | 365.6963        |
| 1152.5649      | 11 | V  | 5  | 602.3262       | 301.6670        |
| 1281.6075      | 12 | E  | 4  | 503.2578       | 252.1328        |
| 1352.6446      | 13 | A  | 3  | 374.2152       | 187.6115        |
| 1480.7032      | 14 | Q  | 2  | 303.1781       | 152.0930        |
|                | 15 | R  | 1  | 175.1195       | 88.0637         |

N-term:+29.04

SDSQVHSGVQVEGR, MH+ 1512.7406, m/z 504.9184  
 L OSG40 P180811 230811-s1.02012.02012.3.dta

scan 2012; 9.5e+000

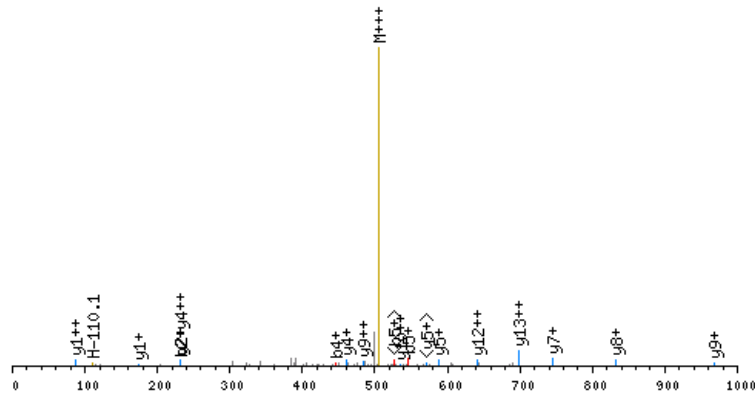

click image to zoom in; click top corners to zoom out [\[precursor±\]](#)

scan 2009; 504.9 m/z; 5.0e+000

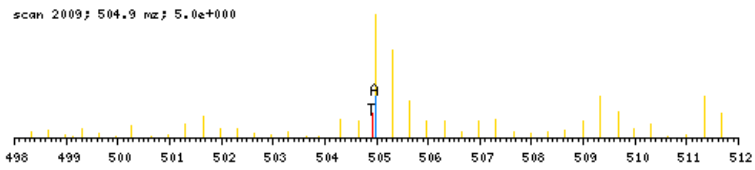

zoomed in precursor plot; T=theoretical m/z, A=acquired m/z

X-range:

-

MassTol: Y-zoom:

MassType:

AVG  MONO

Axis:

1  2

Label:

I  M  -

Ions:

a  +  2+  3+

b  +  2+  3+

c  +  2+  3+

x  +  2+  3+

y  +  2+  3+

z  +  2+  3+

hide H<sub>2</sub>O/NH<sub>3</sub>

zoom 112-122

GO

| b <sup>+</sup> | #  | AA # | y <sup>+</sup> | y <sup>2+</sup> |
|----------------|----|------|----------------|-----------------|
| 116.0711       | 1  | S 14 |                |                 |
| 231.0981       | 2  | D 13 | 1397.6773      | 699.3426        |
| 318.1301       | 3  | S 12 | 1282.6504      | 641.8291        |
| 446.1887       | 4  | Q 11 | 1195.6184      | 598.3131        |
| 545.2571       | 5  | V 10 | 1067.5598      | 534.2838        |
| 682.3160       | 6  | H 9  | 968.4914       | 484.7496        |
| 769.3480       | 7  | S 8  | 831.4325       | 416.2201        |
| 826.3695       | 8  | G 7  | 744.4004       | 372.7041        |
| 925.4379       | 9  | V 6  | 687.3790       | 344.1934        |
| 1053.4965      | 10 | Q 5  | 588.3105       | 294.6592        |
| 1152.5649      | 11 | V 4  | 460.2520       | 230.6299        |
| 1281.6075      | 12 | E 3  | 361.1836       | 181.0957        |
| 1338.6290      | 13 | G 2  | 232.1410       | 116.5744        |
|                | 14 | R 1  | 175.1195       | 88.0637         |

N-term:+29.04

SDSSSDSMDTGAGSIR, MH+ 1513.6440, m/z 505.2195  
 L OSG37 P180811 230811-s1.02640.02640.3.dta

X-range:

-

MassTol: Y-zoom:

MassType:

AVG  MONO

Axis:

1  2

Label:

I  M  -

Ions:

a  +  2+  3+

b  +  2+  3+

c  +  2+  3+

x  +  2+  3+

y  +  2+  3+

z  +  2+  3+

hide H<sub>2</sub>O/NH<sub>3</sub>

zoom 112-122

GO

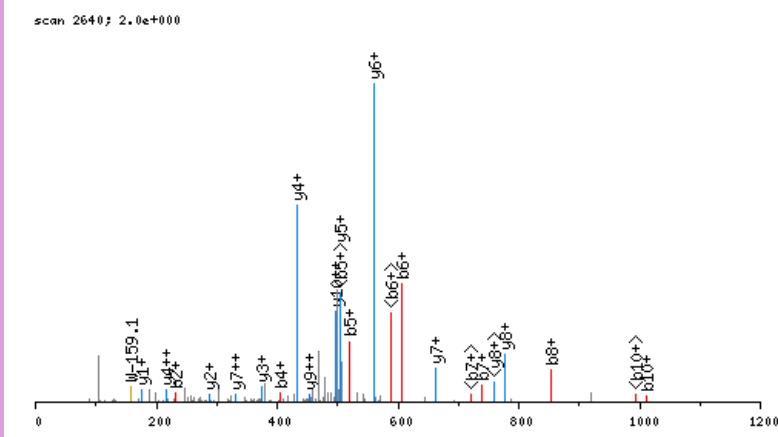

click image to zoom in; click top corners to zoom out [\[precursor±\]](#)

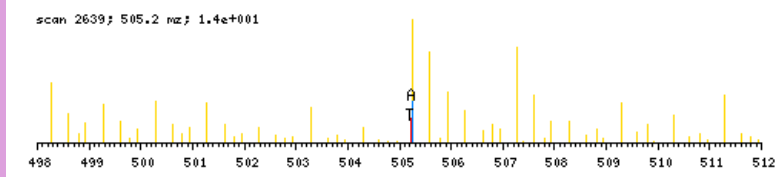

zoomed in precursor plot; T=theoretical m/z, A=acquired m/z

| b <sup>+</sup> | #  | AA # | y <sup>+</sup> | y <sup>2+</sup> |
|----------------|----|------|----------------|-----------------|
| 116.0711       | 1  | S 15 |                |                 |
| 231.0981       | 2  | D 14 | 1398.5807      | 699.7943        |
| 318.1301       | 3  | S 13 | 1283.5538      | 642.2808        |
| 405.1621       | 4  | S 12 | 1196.5217      | 598.7648        |
| 520.1891       | 5  | D 11 | 1109.4897      | 555.2488        |
| 607.2211       | 6  | S 10 | 994.4628       | 497.7353        |
| 738.2616       | 7  | M 9  | 907.4307       | 454.2193        |
| 853.2885       | 8  | D 8  | 776.3903       | 388.6990        |
| 954.3362       | 9  | T 7  | 661.3633       | 331.1856        |
| 1011.3577      | 10 | G 6  | 560.3156       | 280.6617        |
| 1082.3948      | 11 | A 5  | 503.2942       | 252.1510        |
| 1139.4162      | 12 | G 4  | 432.2571       | 216.6324        |
| 1226.4483      | 13 | S 3  | 375.2356       | 188.1217        |
| 1339.5323      | 14 | I 2  | 288.2036       | 144.6057        |
|                | 15 | R 1  | 175.1195       | 88.0637         |

N-term:+29.04

SDVLELTDENFESR, MH+ 1681.7921, m/z 841.3997  
 L OSG37 P180811 230811-s1.06930.06930.2.dta

X-range:

-

MassTol: Y-zoom:

MassType:

AVG  MONO

Axis:

1  2

Label:

I  M  -

Ions:

a  +  2+  3+

b  +  2+  3+

c  +  2+  3+

x  +  2+  3+

y  +  2+  3+

z  +  2+  3+

hide H<sub>2</sub>O/NH<sub>3</sub>

zoom 112-122

GO

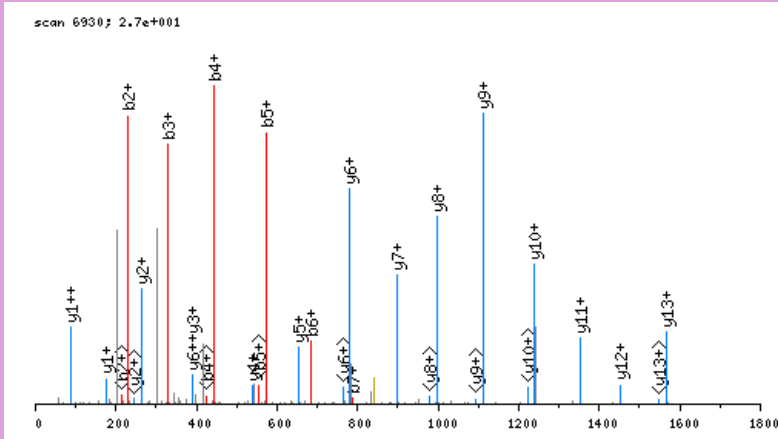

click image to zoom in; click top corners to zoom out [\[precursor±\]](#)

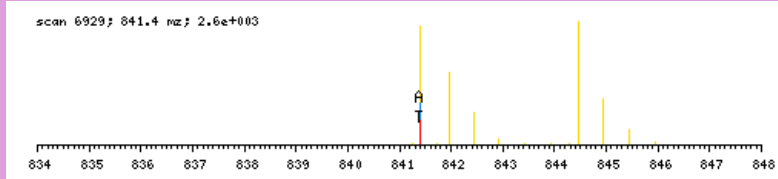

zoomed in precursor plot; T=theoretical m/z, A=acquired m/z

| b <sup>+</sup> | #  | AA # | y <sup>+</sup> | y <sup>2+</sup> |
|----------------|----|------|----------------|-----------------|
| 116.0711       | 1  | S 14 |                |                 |
| 231.0981       | 2  | D 13 | 1566.7288      | 783.8683        |
| 330.1665       | 3  | V 12 | 1451.7018      | 726.3548        |
| 443.2505       | 4  | L 11 | 1352.6334      | 676.8206        |
| 572.2931       | 5  | E 10 | 1239.5493      | 620.2786        |
| 685.3772       | 6  | L 9  | 1110.5067      | 555.7573        |
| 786.4249       | 7  | T 8  | 997.4227       | 499.2153        |
| 901.4518       | 8  | D 7  | 896.3750       | 448.6914        |
| 1030.4944      | 9  | E 6  | 781.3481       | 391.1779        |
| 1144.5373      | 10 | N 5  | 652.3055       | 326.6566        |
| 1291.6058      | 11 | F 4  | 538.2625       | 269.6352        |
| 1420.6484      | 12 | E 3  | 391.1941       | 196.1010        |
| 1507.6804      | 13 | S 2  | 262.1515       | 131.5797        |
|                | 14 | R 1  | 175.1195       | 88.0637         |

N-term:+29.04

SEAESHVSGVSMVVPSTER, MH+ 2015.9708, m/z 672.6618  
 L OSG39 P180811 230811-s1.03755.03755.3.dta

X-range:

-

MassTol: Y-zoom:

MassType:

AVG  MONO

Axis:

1  2

Label:

I  M  -

Ions:

a  +  2+  3+

b  +  2+  3+

c  +  2+  3+

x  +  2+  3+

y  +  2+  3+

z  +  2+  3+

hide H<sub>2</sub>O/NH<sub>3</sub>

zoom 112-122

GO

scan 3755; 1.9e+000

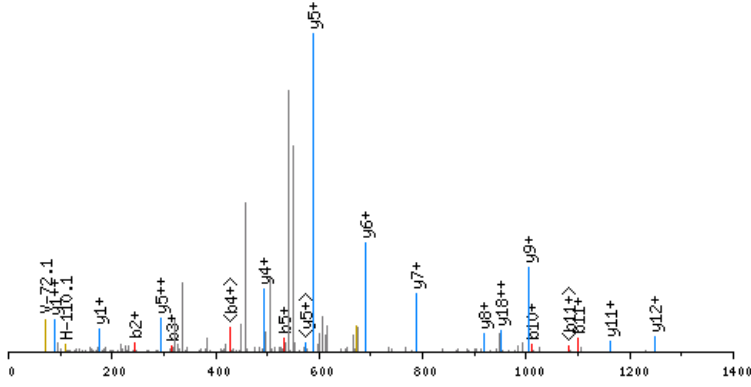

click image to zoom in; click top corners to zoom out

[precursor±]

scan 3751; 672.7 m/z; 1.6e+001

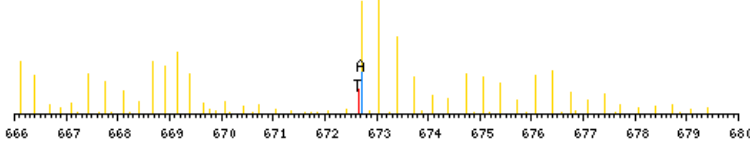

zoomed in precursor plot; T=theoretical m/z, A=acquired m/z

| b <sup>+</sup> | #  | AA # | y <sup>+</sup> | y <sup>2+</sup> |
|----------------|----|------|----------------|-----------------|
| 116.0711       | 1  | S 19 |                |                 |
| 245.1137       | 2  | E 18 | 1900.9075      | 950.9576        |
| 316.1508       | 3  | A 17 | 1771.8649      | 886.4363        |
| 445.1934       | 4  | E 16 | 1700.8278      | 850.9178        |
| 532.2255       | 5  | S 15 | 1571.7852      | 786.3965        |
| 669.2844       | 6  | H 14 | 1484.7531      | 742.8805        |
| 768.3528       | 7  | V 13 | 1347.6942      | 674.3510        |
| 855.3848       | 8  | S 12 | 1248.6258      | 624.8168        |
| 912.4063       | 9  | G 11 | 1161.5938      | 581.3008        |
| 1011.4747      | 10 | V 10 | 1104.5723      | 552.7901        |
| 1098.5067      | 11 | S 9  | 1005.5039      | 503.2559        |
| 1229.5472      | 12 | M 8  | 918.4719       | 459.7399        |
| 1328.6156      | 13 | V 7  | 787.4314       | 394.2196        |
| 1427.6840      | 14 | V 6  | 688.3630       | 344.6854        |
| 1524.7368      | 15 | P 5  | 589.2946       | 295.1512        |
| 1611.7688      | 16 | S 4  | 492.2418       | 246.6248        |
| 1712.8165      | 17 | T 3  | 405.2098       | 203.1088        |
| 1841.8591      | 18 | E 2  | 304.1621       | 152.5850        |
|                | 19 | R 1  | 175.1195       | 88.0637         |

N-term:+29.04

SEEPGEEEPAAVQTER, MH+ 1900.8565, m/z 634.2903  
 L OSG37 P180811 230811-s1.04768.04768.3.dta

X-range:

-

MassTol: Y-zoom:

MassType:

AVG  MONO

Axis:

1  2

Label:

I  M  -

Ions:

a  +  2+  3+

b  +  2+  3+

c  +  2+  3+

x  +  2+  3+

y  +  2+  3+

z  +  2+  3+

hide H<sub>2</sub>O/NH<sub>3</sub>

zoom 112-122

GO

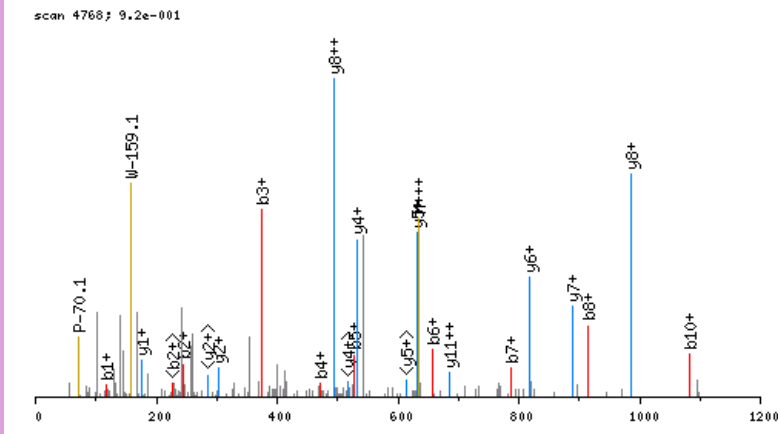

click image to zoom in; click top corners to zoom out [\[precursor±\]](#)

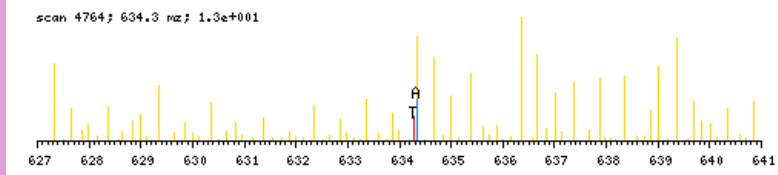

zoomed in precursor plot; T=theoretical m/z, A=acquired m/z

| b <sup>+</sup> | #  | AA # | y <sup>+</sup> | y <sup>2+</sup> |
|----------------|----|------|----------------|-----------------|
| 116.0711       | 1  | S 16 |                |                 |
| 245.1137       | 2  | E 15 | 1785.7931      | 893.4005        |
| 374.1563       | 3  | E 14 | 1656.7506      | 828.8792        |
| 471.2091       | 4  | P 13 | 1527.7080      | 764.3579        |
| 528.2305       | 5  | G 12 | 1430.6552      | 715.8315        |
| 657.2731       | 6  | E 11 | 1373.6337      | 687.3208        |
| 786.3157       | 7  | E 10 | 1244.5911      | 622.7995        |
| 915.3583       | 8  | E 9  | 1115.5485      | 558.2782        |
| 1012.4111      | 9  | P 8  | 986.5060       | 493.7569        |
| 1083.4482      | 10 | A 7  | 889.4532       | 445.2305        |
| 1269.5275      | 11 | W 6  | 818.4161       | 409.7120        |
| 1368.5959      | 12 | V 5  | 632.3368       | 316.6723        |
| 1496.6545      | 13 | Q 4  | 533.2683       | 267.1381        |
| 1597.7022      | 14 | T 3  | 405.2098       | 203.1088        |
| 1726.7448      | 15 | E 2  | 304.1621       | 152.5850        |
|                | 16 | R 1  | 175.1195       | 88.0637         |

N-term:+29.04

SEFGDSSSPATR, MH+ 1268.5759, m/z 634.7916  
 L OSG37 P180811 230811-s1.02263.02263.2.dta

X-range:

-

MassTol: Y-zoom:

MassType:

AVG  MONO

Axis:

1  2

Label:

I  M  -

Ions:

a  +  2+  3+

b  +  2+  3+

c  +  2+  3+

x  +  2+  3+

y  +  2+  3+

z  +  2+  3+

hide H<sub>2</sub>O/NH<sub>3</sub>

zoom 112-122

GO

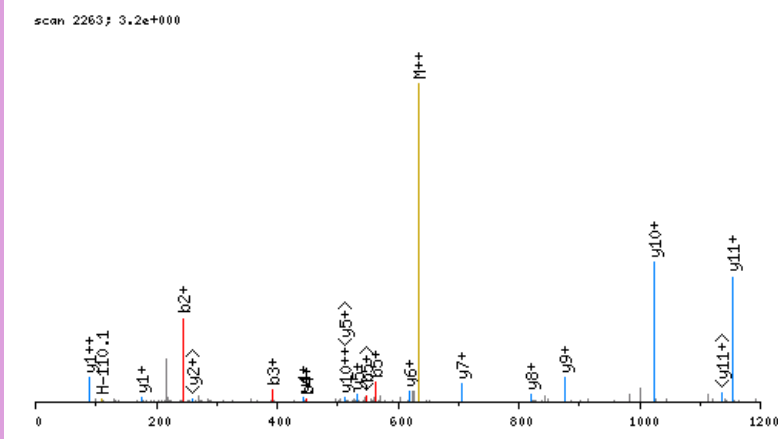

click image to zoom in; click top corners to zoom out [\[precursor±\]](#)

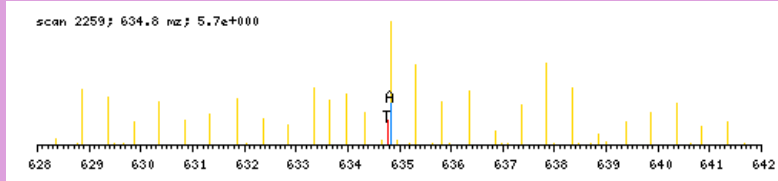

zoomed in precursor plot; T=theoretical m/z, A=acquired m/z

| b <sup>+</sup> | #  | AA # | y <sup>+</sup> | y <sup>2+</sup> |
|----------------|----|------|----------------|-----------------|
| 116.0711       | 1  | S 12 |                |                 |
| 245.1137       | 2  | E 11 | 1153.5126      | 577.2602        |
| 392.1821       | 3  | F 10 | 1024.4700      | 512.7389        |
| 449.2036       | 4  | G 9  | 877.4015       | 439.2047        |
| 564.2305       | 5  | D 8  | 820.3801       | 410.6940        |
| 651.2626       | 6  | S 7  | 705.3531       | 353.1805        |
| 738.2946       | 7  | S 6  | 618.3211       | 309.6645        |
| 825.3266       | 8  | S 5  | 531.2891       | 266.1485        |
| 922.3794       | 9  | P 4  | 444.2571       | 222.6324        |
| 993.4165       | 10 | A 3  | 347.2043       | 174.1061        |
| 1094.4642      | 11 | T 2  | 276.1672       | 138.5875        |
|                | 12 | R 1  | 175.1195       | 88.0637         |

N-term:+29.04



SEFTSSLSTKESLR, MH+ 1627.8543, m/z 543.2896  
 L OSG40 P180811 230811-s1.04697.04697.3.dta

X-range:

-

MassTol: Y-zoom:

MassType:

AVG  MONO

Axis:

1  2

Label:

I  M  -

Ions:

a  +  2+  3+

b  +  2+  3+

c  +  2+  3+

x  +  2+  3+

y  +  2+  3+

z  +  2+  3+

hide H<sub>2</sub>O/NH<sub>3</sub>

zoom 112-122

GO

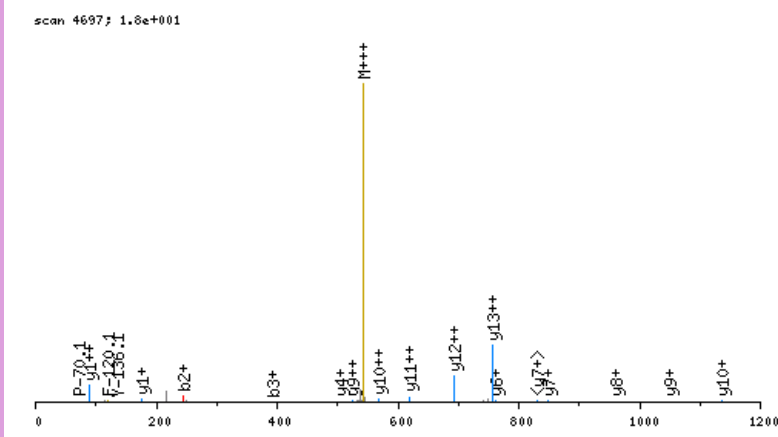

click image to zoom in; click top corners to zoom out [\[precursor±\]](#)

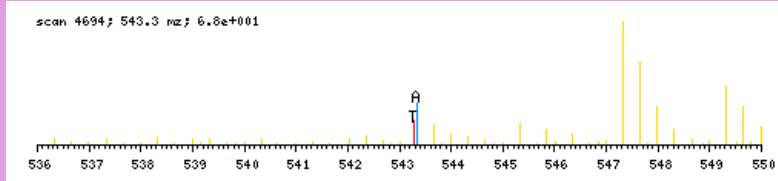

zoomed in precursor plot; T=theoretical m/z, A=acquired m/z

| b <sup>+</sup> | #  | AA # | y <sup>+</sup> | y <sup>2+</sup> |
|----------------|----|------|----------------|-----------------|
| 116.0711       | 1  | S 14 |                |                 |
| 245.1137       | 2  | E 13 | 1512.7910      | 756.8994        |
| 392.1821       | 3  | F 12 | 1383.7484      | 692.3781        |
| 493.2298       | 4  | T 11 | 1236.6800      | 618.8439        |
| 580.2618       | 5  | S 10 | 1135.6323      | 568.3201        |
| 667.2939       | 6  | S 9  | 1048.6003      | 524.8041        |
| 780.3779       | 7  | L 8  | 961.5683       | 481.2880        |
| 867.4100       | 8  | S 7  | 848.4842       | 424.7460        |
| 968.4576       | 9  | T 6  | 761.4522       | 381.2300        |
| 1124.5839      | 10 | K 5  | 660.4045       | 330.7062        |
| 1253.6265      | 11 | E 4  | 504.2782       | 252.6430        |
| 1340.6586      | 12 | S 3  | 375.2356       | 188.1217        |
| 1453.7426      | 13 | L 2  | 288.2036       | 144.6057        |
|                | 14 | R 1  | 175.1195       | 88.0637         |

N-term:+29.04 K(10):+156.13

SEIPLNLPKSLAELR, MH+ 1748.0958, m/z 583.3701  
 H OSG39 P180811 230811-s1.07279.07279.3.dta

X-range:

-

MassTol: Y-zoom:

MassType:

AVG  MONO

Axis:

1  2

Label:

I  M  -

Ions:

a  +  2+  3+

b  +  2+  3+

c  +  2+  3+

x  +  2+  3+

y  +  2+  3+

z  +  2+  3+

hide H<sub>2</sub>O/NH<sub>3</sub>

zoom 112-122

GO

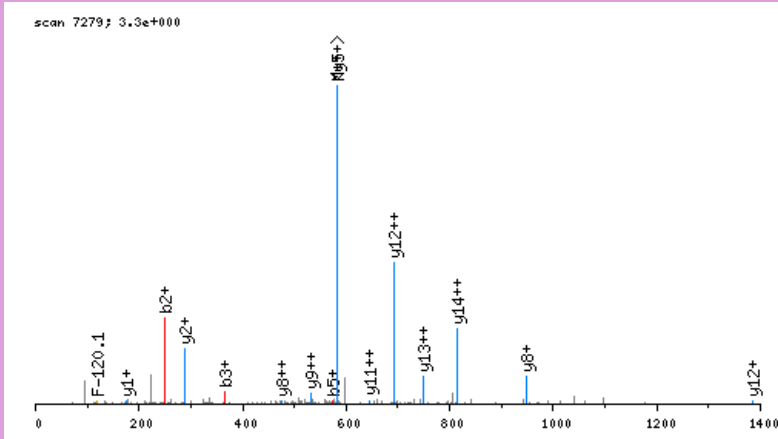

click image to zoom in; click top corners to zoom out [\[precursor±\]](#)

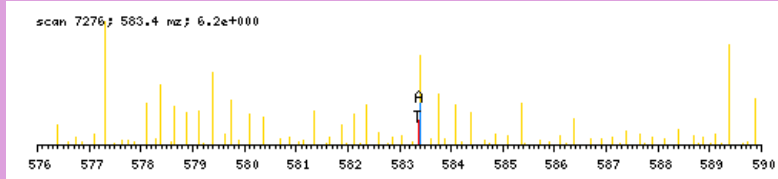

zoomed in precursor plot; T=theoretical m/z, A=acquired m/z

| b <sup>+</sup> | #  | AA | #  | y <sup>+</sup> | y <sup>2+</sup> |
|----------------|----|----|----|----------------|-----------------|
| 122.1029       | 1  | S  | 15 |                |                 |
| 251.1455       | 2  | E  | 14 | 1627.0007      | 814.0043        |
| 364.2296       | 3  | I  | 13 | 1497.9581      | 749.4830        |
| 461.2823       | 4  | P  | 12 | 1384.8740      | 692.9409        |
| 574.3664       | 5  | L  | 11 | 1287.8213      | 644.4146        |
| 688.4093       | 6  | N  | 10 | 1174.7372      | 587.8725        |
| 801.4934       | 7  | L  | 9  | 1060.6943      | 530.8511        |
| 898.5462       | 8  | P  | 8  | 947.6102       | 474.3090        |
| 1060.7043      | 9  | K  | 7  | 850.5575       | 425.7826        |
| 1147.7363      | 10 | S  | 6  | 688.3994       | 344.7036        |
| 1260.8204      | 11 | L  | 5  | 601.3673       | 301.1876        |
| 1331.8575      | 12 | A  | 4  | 488.2833       | 244.6455        |
| 1460.9001      | 13 | E  | 3  | 417.2462       | 209.1270        |
| 1573.9841      | 14 | L  | 2  | 288.2036       | 144.6057        |
|                | 15 | R  | 1  | 175.1195       | 88.0637         |

N-term:+35.07 K(9):+162.16

SEKPGPKAAEVGDDFLGDFVVGER, MH+ 2603.3358, m/z 651.5894  
 L OSG40 P180811 230811-s1.08278.08278.4.dta

X-range:

-

MassTol: Y-zoom:

MassType:

AVG  MONO

Axis:

1  2

Label:

I  M  -

Ions:

a  +  2+  3+

b  +  2+  3+

c  +  2+  3+

x  +  2+  3+

y  +  2+  3+

z  +  2+  3+

hide H<sub>2</sub>O/NH<sub>3</sub>

zoom 112-122

GO

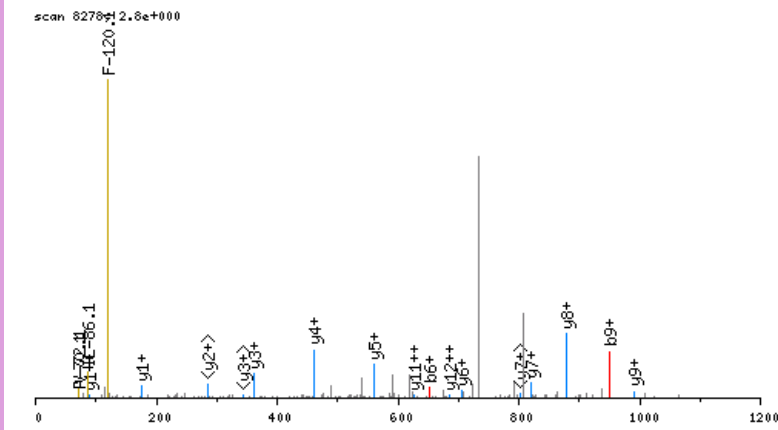

click image to zoom in; click top corners to zoom out [\[precursor±\]](#)

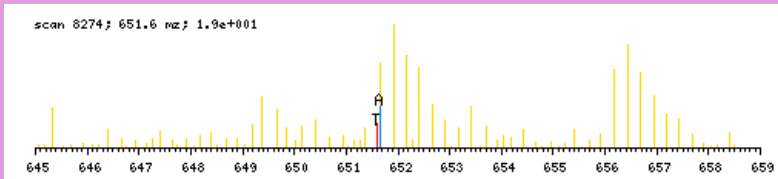

zoomed in precursor plot; T=theoretical m/z, A=acquired m/z

| b <sup>+</sup> | #  | AA # | y <sup>+</sup> | y <sup>2+</sup> |
|----------------|----|------|----------------|-----------------|
| 116.0711       | 1  | S 24 |                |                 |
| 245.1137       | 2  | E 23 | 2488.2725      | 1244.6401       |
| 401.2400       | 3  | K 22 | 2359.2299      | 1180.1188       |
| 498.2928       | 4  | P 21 | 2203.1036      | 1102.0557       |
| 555.3142       | 5  | G 20 | 2106.0508      | 1053.5293       |
| 652.3670       | 6  | P 19 | 2049.0293      | 1025.0186       |
| 808.4933       | 7  | K 18 | 1951.9766      | 976.4922        |
| 879.5304       | 8  | A 17 | 1795.8503      | 898.4290        |
| 950.5675       | 9  | A 16 | 1724.8132      | 862.9105        |
| 1079.6101      | 10 | E 15 | 1653.7760      | 827.3919        |
| 1178.6785      | 11 | V 14 | 1524.7334      | 762.8706        |
| 1235.7000      | 12 | G 13 | 1425.6650      | 713.3364        |
| 1350.7270      | 13 | D 12 | 1368.6436      | 684.8257        |
| 1465.7539      | 14 | D 11 | 1253.6166      | 627.3122        |
| 1612.8223      | 15 | F 10 | 1138.5897      | 569.7988        |
| 1725.9064      | 16 | L 9  | 991.5213       | 496.2645        |
| 1782.9278      | 17 | G 8  | 878.4372       | 439.7225        |
| 1897.9548      | 18 | D 7  | 821.4157       | 411.2118        |
| 2045.0232      | 19 | F 6  | 706.3888       | 353.6983        |
| 2144.0916      | 20 | V 5  | 559.3204       | 280.1641        |
| 2243.1600      | 21 | V 4  | 460.2520       | 230.6299        |
| 2300.1815      | 22 | G 3  | 361.1836       | 181.0957        |
| 2429.2241      | 23 | E 2  | 304.1621       | 152.5850        |
|                | 24 | R 1  | 175.1195       | 88.0637         |

N-term:+29.04 K(3):+156.13  
 K(7):+156.13

SEPAMTPSKEGTLIVR, MH+ 1771.9628, m/z 591.3258  
 L OSG39 P180811 230811-s1.03665.03665.3.dta

X-range:

-

MassTol: Y-zoom:

MassType:

AVG  MONO

Axis:

1  2

Label:

I  M  -

Ions:

a  +  2+  3+

b  +  2+  3+

c  +  2+  3+

x  +  2+  3+

y  +  2+  3+

z  +  2+  3+

hide H<sub>2</sub>O/NH<sub>3</sub>

zoom 112-122

GO

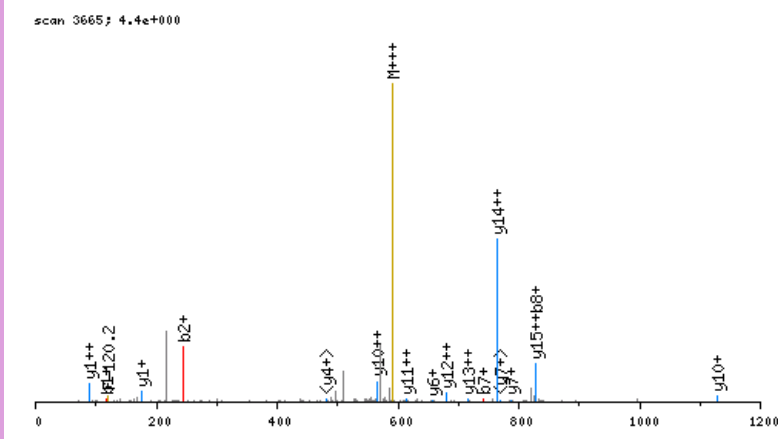

click image to zoom in; click top corners to zoom out [\[precursor±\]](#)

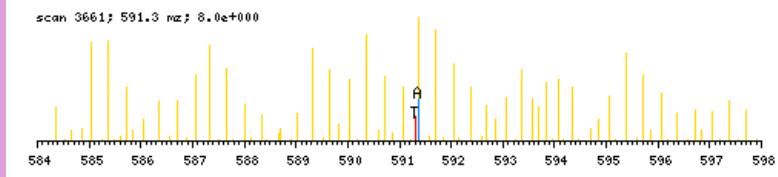

zoomed in precursor plot; T=theoretical m/z, A=acquired m/z

| b <sup>+</sup> | #  | AA # | y <sup>+</sup> | y <sup>2+</sup> |
|----------------|----|------|----------------|-----------------|
| 116.0711       | 1  | S 16 |                |                 |
| 245.1137       | 2  | E 15 | 1656.8995      | 828.9537        |
| 342.1665       | 3  | P 14 | 1527.8569      | 764.4324        |
| 413.2036       | 4  | A 13 | 1430.8041      | 715.9060        |
| 544.2441       | 5  | M 12 | 1359.7670      | 680.3874        |
| 645.2918       | 6  | T 11 | 1228.7265      | 614.8672        |
| 742.3445       | 7  | P 10 | 1127.6789      | 564.3433        |
| 829.3766       | 8  | S 9  | 1030.6261      | 515.8170        |
| 985.5029       | 9  | K 8  | 943.5941       | 472.3010        |
| 1114.5454      | 10 | E 7  | 787.4678       | 394.2378        |
| 1171.5669      | 11 | G 6  | 658.4252       | 329.7165        |
| 1272.6146      | 12 | T 5  | 601.4037       | 301.2058        |
| 1385.6987      | 13 | L 4  | 500.3560       | 250.6819        |
| 1498.7827      | 14 | I 3  | 387.2720       | 194.1399        |
| 1597.8511      | 15 | V 2  | 274.1879       | 137.5979        |
|                | 16 | R 1  | 175.1195       | 88.0637         |

N-term:+29.04 K(9):+156.13

SEPSAVTPVTPPTLLIAPR, MH+ 1968.1229, m/z 656.7125  
 H OSG36 P180811 230811-s1.04632.04632.3.dta

X-range:

-

MassTol: Y-zoom:

MassType:

AVG  MONO

Axis:

1  2

Label:

I  M  -

Ions:

a  +  2+  3+

b  +  2+  3+

c  +  2+  3+

x  +  2+  3+

y  +  2+  3+

z  +  2+  3+

hide H<sub>2</sub>O/NH<sub>3</sub>

zoom 112-122

GO

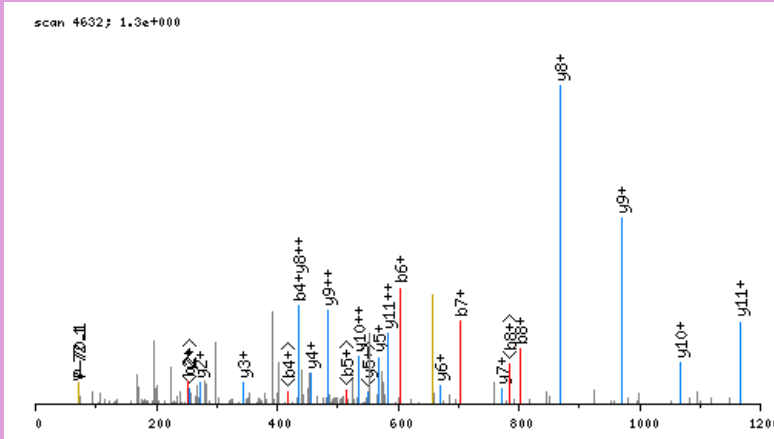

click image to zoom in; click top corners to zoom out [\[precursor±\]](#)

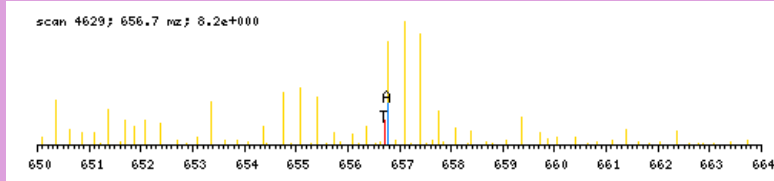

zoomed in precursor plot; T=theoretical m/z, A=acquired m/z

| b <sup>+</sup> | #  | AA # | y <sup>+</sup> | y <sup>2+</sup> |
|----------------|----|------|----------------|-----------------|
| 122.1029       | 1  | S 19 |                |                 |
| 251.1455       | 2  | E 18 | 1847.0278      | 924.0178        |
| 348.1983       | 3  | P 17 | 1717.9852      | 859.4965        |
| 435.2303       | 4  | S 16 | 1620.9325      | 810.9702        |
| 532.2831       | 5  | P 15 | 1533.9005      | 767.4541        |
| 603.3202       | 6  | A 14 | 1436.8477      | 718.9278        |
| 702.3886       | 7  | V 13 | 1365.8106      | 683.4092        |
| 803.4363       | 8  | T 12 | 1266.7422      | 633.8750        |
| 900.4890       | 9  | P 11 | 1165.6945      | 583.3512        |
| 999.5575       | 10 | V 10 | 1068.6417      | 534.8248        |
| 1100.6051      | 11 | T 9  | 969.5733       | 485.2906        |
| 1197.6579      | 12 | P 8  | 868.5256       | 434.7667        |
| 1298.7056      | 13 | T 7  | 771.4729       | 386.2403        |
| 1399.7533      | 14 | T 6  | 670.4252       | 335.7165        |
| 1512.8373      | 15 | L 5  | 569.3775       | 285.1927        |
| 1625.9214      | 16 | I 4  | 456.2934       | 228.6506        |
| 1696.9585      | 17 | A 3  | 343.2094       | 172.1086        |
| 1794.0113      | 18 | P 2  | 272.1723       | 136.5900        |
|                | 19 | R 1  | 175.1195       | 88.0637         |

N-term:+35.07

SESAQELAEGQR, MH+ 1332.6395, m/z 444.8847  
 L OSG37 P180811 230811-s1.02493.02493.3.dta

X-range:

-

MassTol: Y-zoom:

MassType:

AVG  MONO

Axis:

1  2

Label:

I  M  -

Ions:

a  +  2+  3+

b  +  2+  3+

c  +  2+  3+

x  +  2+  3+

y  +  2+  3+

z  +  2+  3+

hide H<sub>2</sub>O/NH<sub>3</sub>

zoom 112-122

GO

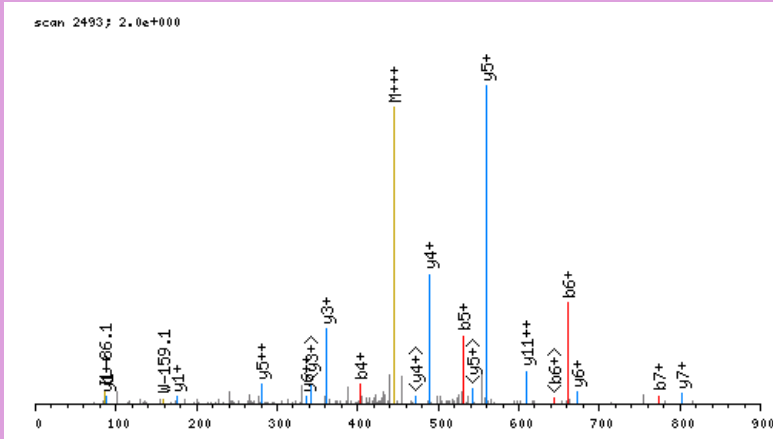

click image to zoom in; click top corners to zoom out [\[precursor±\]](#)

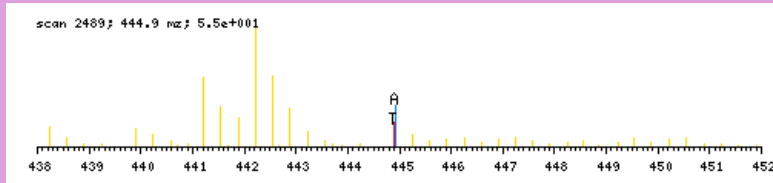

zoomed in precursor plot; T=theoretical m/z, A=acquired m/z

| b <sup>+</sup> | #  | AA # | y <sup>+</sup> | y <sup>2+</sup> |
|----------------|----|------|----------------|-----------------|
| 116.0711       | 1  | S 12 |                |                 |
| 245.1137       | 2  | E 11 | 1217.5762      | 609.2920        |
| 332.1458       | 3  | S 10 | 1088.5336      | 544.7707        |
| 403.1829       | 4  | A 9  | 1001.5016      | 501.2547        |
| 531.2414       | 5  | Q 8  | 930.4645       | 465.7362        |
| 660.2840       | 6  | E 7  | 802.4059       | 401.7069        |
| 773.3681       | 7  | L 6  | 673.3633       | 337.1856        |
| 844.4052       | 8  | A 5  | 560.2792       | 280.6435        |
| 973.4478       | 9  | E 4  | 489.2421       | 245.1250        |
| 1030.4693      | 10 | G 3  | 360.1995       | 180.6037        |
| 1158.5278      | 11 | Q 2  | 303.1781       | 152.0930        |
|                | 12 | R 1  | 175.1195       | 88.0637         |

N-term:+29.04

SEVPGAAAEGPGGSGVGLGDR, MH+ 1873.9468, m/z 625.3204  
 H OSG37 P180811 230811-s1.04423.04423.3.dta

X-range:

-

MassTol: Y-zoom:

MassType:

AVG  MONO

Axis:

1  2

Label:

I  M  -

Ions:

a  +  2+  3+

b  +  2+  3+

c  +  2+  3+

x  +  2+  3+

y  +  2+  3+

z  +  2+  3+

hide H<sub>2</sub>O/NH<sub>3</sub>

zoom 112-122

GO

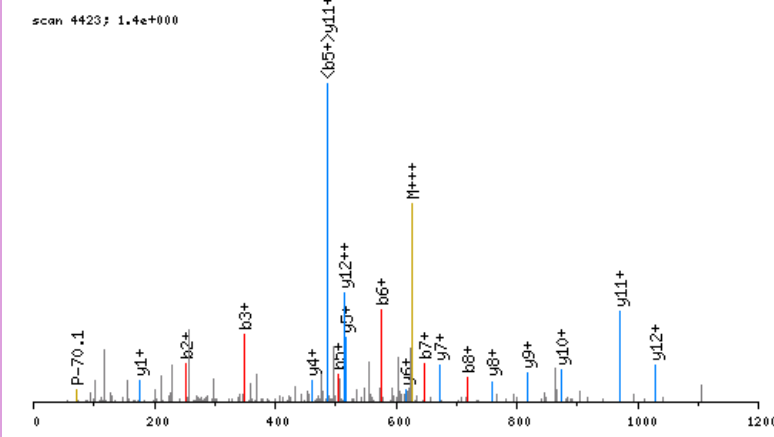

click image to zoom in; click top corners to zoom out [\[precursor±\]](#)

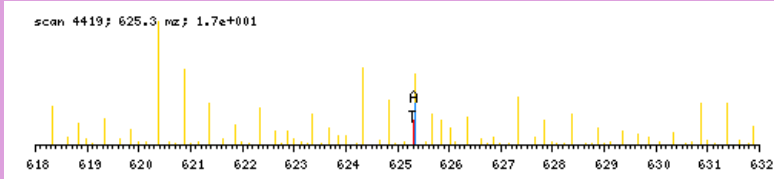

zoomed in precursor plot; T=theoretical m/z, A=acquired m/z

| b <sup>+</sup> | #  | AA # | y <sup>+</sup> | y <sup>2+</sup> |
|----------------|----|------|----------------|-----------------|
| 122.1029       | 1  | S 21 |                |                 |
| 251.1455       | 2  | E 20 | 1752.8517      | 876.9297        |
| 350.2139       | 3  | V 19 | 1623.8091      | 812.4084        |
| 447.2667       | 4  | P 18 | 1524.7407      | 762.8742        |
| 504.2882       | 5  | G 17 | 1427.6879      | 714.3479        |
| 575.3253       | 6  | A 16 | 1370.6664      | 685.8371        |
| 646.3624       | 7  | A 15 | 1299.6293      | 650.3186        |
| 717.3995       | 8  | A 14 | 1228.5922      | 614.8000        |
| 846.4421       | 9  | E 13 | 1157.5551      | 579.2815        |
| 903.4636       | 10 | G 12 | 1028.5125      | 514.7602        |
| 1000.5163      | 11 | P 11 | 971.4910       | 486.2494        |
| 1057.5378      | 12 | G 10 | 874.4383       | 437.7230        |
| 1114.5593      | 13 | G 9  | 817.4168       | 409.2123        |
| 1201.5913      | 14 | S 8  | 760.3953       | 380.7016        |
| 1258.6127      | 15 | G 7  | 673.3633       | 337.1856        |
| 1357.6812      | 16 | V 6  | 616.3418       | 308.6748        |
| 1414.7026      | 17 | G 5  | 517.2734       | 259.1406        |
| 1527.7867      | 18 | L 4  | 460.2520       | 230.6299        |
| 1584.8082      | 19 | G 3  | 347.1679       | 174.0879        |
| 1699.8351      | 20 | D 2  | 290.1464       | 145.5771        |
|                | 21 | R 1  | 175.1195       | 88.0637         |

N-term:+35.07

SEVVLSGDDEDYQR, MH+ 1645.7769, m/z 549.2638  
 H OSG37 P180811 230811-s1.03938.03938.3.dta

X-range:

-

MassTol: Y-zoom:

MassType:

AVG  MONO

Axis:

1  2

Label:

I  M  -

Ions:

a  +  2+  3+

b  +  2+  3+

c  +  2+  3+

x  +  2+  3+

y  +  2+  3+

z  +  2+  3+

hide H<sub>2</sub>O/NH<sub>3</sub>

zoom 112-122

GO

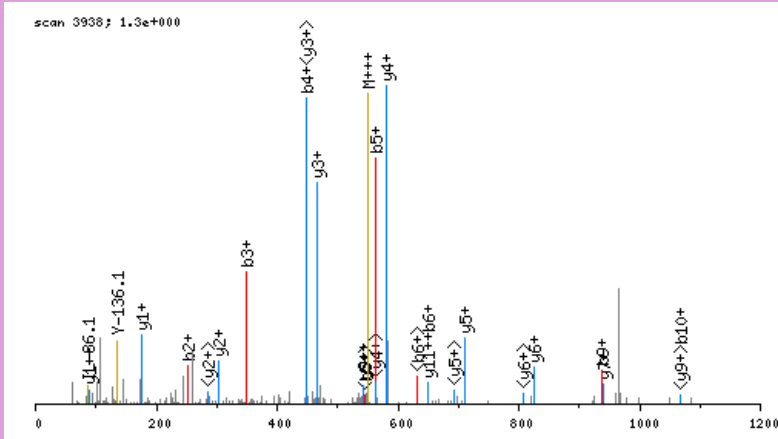

click image to zoom in; click top corners to zoom out [\[precursor±\]](#)

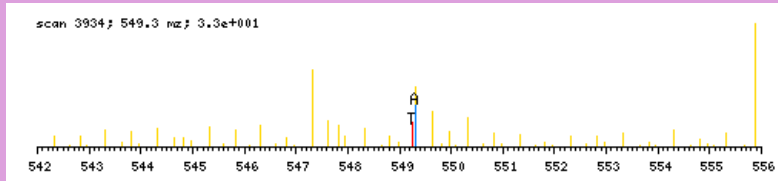

zoomed in precursor plot; T=theoretical m/z, A=acquired m/z

| b <sup>+</sup> | #  | AA # | y <sup>+</sup> | y <sup>2+</sup> |
|----------------|----|------|----------------|-----------------|
| 122.1029       | 1  | S 14 |                |                 |
| 251.1455       | 2  | E 13 | 1524.6818      | 762.8448        |
| 350.2139       | 3  | V 12 | 1395.6392      | 698.3235        |
| 449.2823       | 4  | V 11 | 1296.5708      | 648.7893        |
| 562.3664       | 5  | L 10 | 1197.5024      | 599.2551        |
| 649.3984       | 6  | S 9  | 1084.4183      | 542.7131        |
| 706.4199       | 7  | G 8  | 997.3863       | 499.1971        |
| 821.4468       | 8  | D 7  | 940.3648       | 470.6863        |
| 936.4738       | 9  | D 6  | 825.3379       | 413.1729        |
| 1065.5164      | 10 | E 5  | 710.3109       | 355.6594        |
| 1180.5433      | 11 | D 4  | 581.2683       | 291.1381        |
| 1343.6067      | 12 | Y 3  | 466.2414       | 233.6246        |
| 1471.6652      | 13 | Q 2  | 303.1781       | 152.0930        |
|                | 14 | R 1  | 175.1195       | 88.0637         |

N-term:+35.07



SFPTLKFFPASADR, MH+ 1639.8848, m/z 547.2998  
 L OSG39 P180811 230811-s1.06709.06709.3.dta

X-range:

-

MassTol: Y-zoom:

MassType:

AVG  MONO

Axis:

1  2

Label:

I  M  -

Ions:

a  +  2+  3+

b  +  2+  3+

c  +  2+  3+

x  +  2+  3+

y  +  2+  3+

z  +  2+  3+

hide H<sub>2</sub>O/NH<sub>3</sub>

zoom 112-122

GO

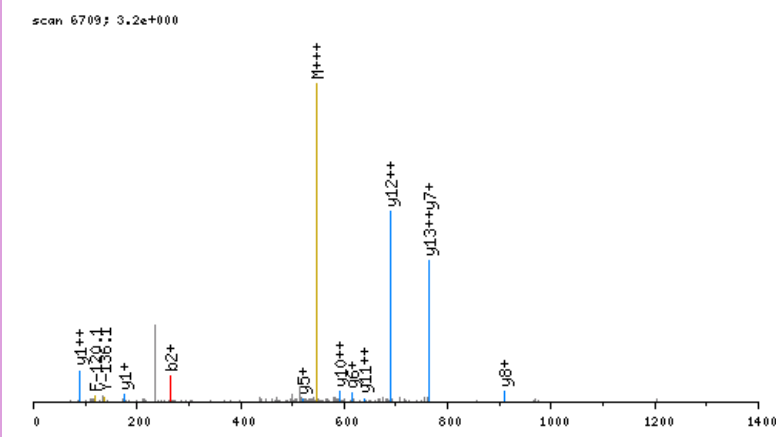

click image to zoom in; click top corners to zoom out [\[precursor±\]](#)

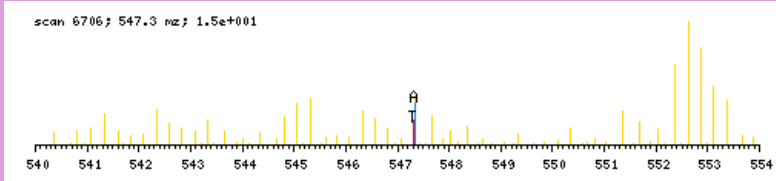

zoomed in precursor plot; T=theoretical m/z, A=acquired m/z

| b <sup>+</sup> | #  | AA # | y <sup>+</sup> | y <sup>2+</sup> |
|----------------|----|------|----------------|-----------------|
| 116.0711       | 1  | S 14 |                |                 |
| 263.1395       | 2  | F 13 | 1524.8215      | 762.9147        |
| 360.1923       | 3  | P 12 | 1377.7531      | 689.3805        |
| 461.2400       | 4  | T 11 | 1280.7003      | 640.8541        |
| 574.3240       | 5  | L 10 | 1179.6527      | 590.3302        |
| 730.4503       | 6  | K 9  | 1066.5686      | 533.7882        |
| 877.5188       | 7  | F 8  | 910.4423       | 455.7251        |
| 1024.5872      | 8  | F 7  | 763.3739       | 382.1909        |
| 1121.6399      | 9  | P 6  | 616.3055       | 308.6566        |
| 1192.6771      | 10 | A 5  | 519.2527       | 260.1303        |
| 1279.7091      | 11 | S 4  | 448.2156       | 224.6117        |
| 1350.7462      | 12 | A 3  | 361.1836       | 181.0957        |
| 1465.7731      | 13 | D 2  | 290.1464       | 145.5771        |
|                | 14 | R 1  | 175.1195       | 88.0637         |

N-term:+29.04 K(6):+156.13

SGAPIKIPVGPETLGR, MH+ 1660.0434, m/z 554.0193  
 H OSG39 P180811 230811-s1.05179.05179.3.dta

X-range:

-

MassTol: Y-zoom:

MassType:

AVG  MONO

Axis:

1  2

Label:

I  M  -

Ions:

a  +  2+  3+

b  +  2+  3+

c  +  2+  3+

x  +  2+  3+

y  +  2+  3+

z  +  2+  3+

hide H<sub>2</sub>O/NH<sub>3</sub>

zoom 112-122

GO

scan 5179; 1.3e+001

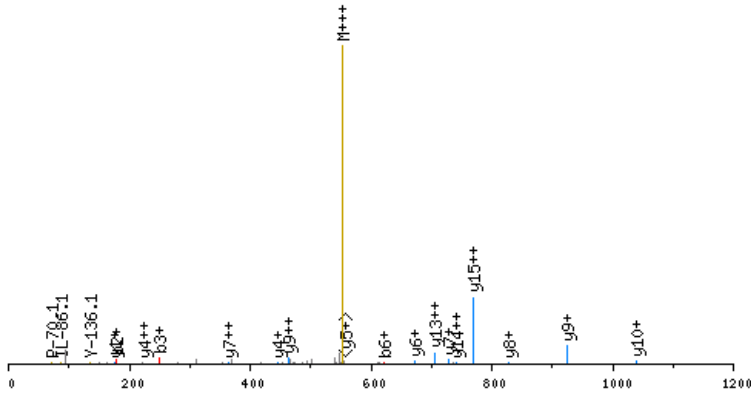

click image to zoom in; click top corners to zoom out [\[precursor±\]](#)

scan 5176; 554.0 m/z; 3.1e+001

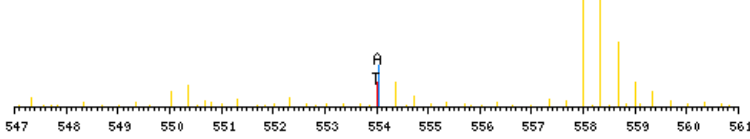

zoomed in precursor plot; T=theoretical m/z, A=acquired m/z

| b <sup>+</sup> | #  | AA # | y <sup>+</sup> | y <sup>2+</sup> |
|----------------|----|------|----------------|-----------------|
| 122.1029       | 1  | S 16 |                |                 |
| 179.1244       | 2  | G 15 | 1538.9483      | 769.9781        |
| 250.1615       | 3  | A 14 | 1481.9268      | 741.4673        |
| 347.2143       | 4  | P 13 | 1410.8897      | 705.9488        |
| 460.2983       | 5  | I 12 | 1313.8369      | 657.4224        |
| 622.4564       | 6  | K 11 | 1200.7529      | 600.8803        |
| 735.5405       | 7  | I 10 | 1038.5948      | 519.8013        |
| 832.5933       | 8  | P 9  | 925.5107       | 463.2593        |
| 931.6617       | 9  | V 8  | 828.4579       | 414.7329        |
| 988.6831       | 10 | G 7  | 729.3895       | 365.1987        |
| 1085.7359      | 11 | P 6  | 672.3681       | 336.6879        |
| 1214.7785      | 12 | E 5  | 575.3153       | 288.1616        |
| 1315.8262      | 13 | T 4  | 446.2727       | 223.6403        |
| 1428.9102      | 14 | L 3  | 345.2250       | 173.1164        |
| 1485.9317      | 15 | G 2  | 232.1410       | 116.5744        |
|                | 16 | R 1  | 175.1195       | 88.0637         |

N-term:+35.07 K(6):+162.16

SGAQIDDNIPR, MH+ 1213.6177, m/z 607.3125  
 L OSG37 P180811 230811-s1.03432.03432.2.dta

X-range:

-

MassTol: Y-zoom:

MassType:

AVG  MONO

Axis:

1  2

Label:

I  M  -

Ions:

a  +  2+  3+

b  +  2+  3+

c  +  2+  3+

x  +  2+  3+

y  +  2+  3+

z  +  2+  3+

hide H<sub>2</sub>O/NH<sub>3</sub>

zoom 112-122

GO

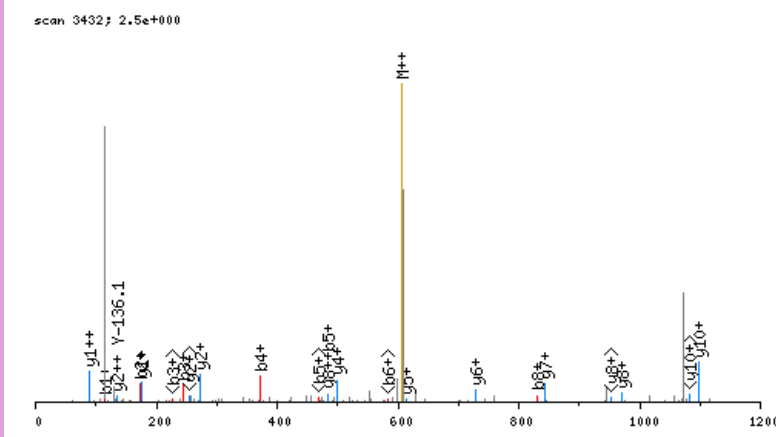

click image to zoom in; click top corners to zoom out [\[precursor±\]](#)

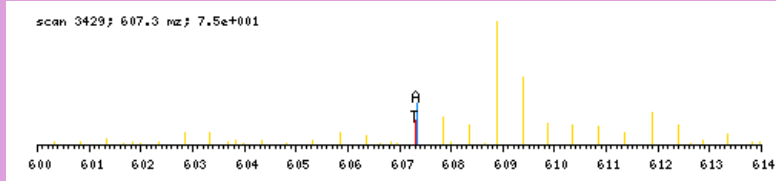

zoomed in precursor plot; T=theoretical m/z, A=acquired m/z

| b <sup>+</sup> | #  | AA # | y <sup>+</sup> | y <sup>2+</sup> |
|----------------|----|------|----------------|-----------------|
| 116.0711       | 1  | S 11 |                |                 |
| 173.0926       | 2  | G 10 | 1098.5544      | 549.7811        |
| 244.1297       | 3  | A 9  | 1041.5329      | 521.2704        |
| 372.1883       | 4  | Q 8  | 970.4958       | 485.7518        |
| 485.2723       | 5  | I 7  | 842.4372       | 421.7225        |
| 600.2993       | 6  | D 6  | 729.3531       | 365.1805        |
| 715.3262       | 7  | D 5  | 614.3262       | 307.6670        |
| 829.3692       | 8  | N 4  | 499.2993       | 250.1535        |
| 942.4532       | 9  | I 3  | 385.2563       | 193.1321        |
| 1039.5060      | 10 | P 2  | 272.1723       | 136.5900        |
|                | 11 | R 1  | 175.1195       | 88.0637         |

N-term:+29.04

SGDAAIIVDMVPGKPMCVESFSDYPLGR, MH+ 3063.5265, m/z 766.6371  
 H OSG38 P180811 230811-sl.07828.07828.4.dta

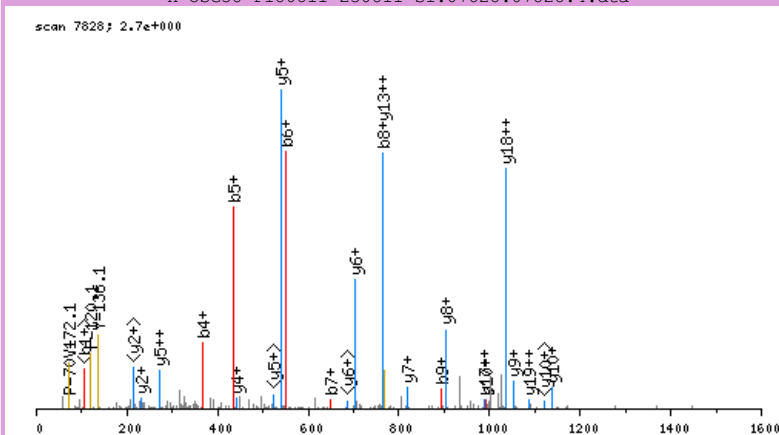

click image to zoom in; click top corners to zoom out [\[precursor±\]](#)

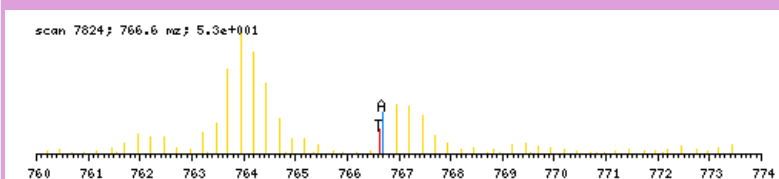

zoomed in precursor plot; T=theoretical m/z, A=acquired m/z

| b <sup>+</sup> | #  | AA # | y <sup>+</sup> | y <sup>2+</sup> |
|----------------|----|------|----------------|-----------------|
| 122.1029       | 1  | S 28 |                |                 |
| 179.1244       | 2  | G 27 | 2942.4314      | 1471.7196       |
| 294.1513       | 3  | D 26 | 2885.4100      | 1443.2089       |
| 365.1884       | 4  | A 25 | 2770.3830      | 1385.6954       |
| 436.2256       | 5  | A 24 | 2699.3459      | 1350.1769       |
| 549.3096       | 6  | I 23 | 2628.3088      | 1314.6583       |
| 648.3780       | 7  | V 22 | 2515.2247      | 1258.1163       |
| 763.4050       | 8  | D 21 | 2416.1563      | 1208.5821       |
| 894.4455       | 9  | M 20 | 2301.1294      | 1151.0686       |
| 993.5139       | 10 | V 19 | 2170.0889      | 1085.5484       |
| 1090.5666      | 11 | P 18 | 2071.0205      | 1036.0142       |
| 1147.5881      | 12 | G 17 | 1973.9677      | 987.4878        |
| 1309.7462      | 13 | K 16 | 1916.9463      | 958.9770        |
| 1406.7990      | 14 | P 15 | 1754.7882      | 877.8980        |
| 1537.8395      | 15 | M 14 | 1657.7354      | 829.3716        |
| 1697.8701      | 16 | C 13 | 1526.6949      | 763.8514        |
| 1796.9385      | 17 | V 12 | 1366.6643      | 683.8361        |
| 1925.9811      | 18 | E 11 | 1267.5959      | 634.3019        |
| 2013.0131      | 19 | S 10 | 1138.5533      | 569.7806        |
| 2160.0815      | 20 | F 9  | 1051.5213      | 526.2645        |
| 2247.1135      | 21 | S 8  | 904.4529       | 452.7303        |
| 2362.1405      | 22 | D 7  | 817.4208       | 409.2143        |
| 2525.2038      | 23 | Y 6  | 702.3939       | 351.7009        |
| 2622.2566      | 24 | P 5  | 539.3306       | 270.1692        |
| 2719.3093      | 25 | P 4  | 442.2778       | 221.6428        |
| 2832.3934      | 26 | L 3  | 345.2250       | 173.1164        |
| 2889.4149      | 27 | G 2  | 232.1410       | 116.5744        |
|                | 28 | R 1  | 175.1195       | 88.0637         |

N-term: +35.07 K(13) : +162.16  
 C(16) : +160.03

X-range:

-

MassTol: Y-zoom:

MassType:

AVG  MONO

Axis:

1  2

Label:

I  M  -

Ions:

a  +  2+  3+

b  +  2+  3+

c  +  2+  3+

x  +  2+  3+

y  +  2+  3+

z  +  2+  3+

hide H<sub>2</sub>O/NH<sub>3</sub>

zoom 112-122

GO

SGEEFWPQQSAADILSGAASR, MH+ 2164.0311, m/z 722.0152  
 L OSG37 P180811 230811-s1.08582.08582.3.dta

X-range:

-

MassTol: Y-zoom:

MassType:

AVG  MONO

Axis:

1  2

Label:

I  M  -

Ions:

a  +  2+  3+

b  +  2+  3+

c  +  2+  3+

x  +  2+  3+

y  +  2+  3+

z  +  2+  3+

hide H<sub>2</sub>O/NH<sub>3</sub>

zoom 112-122

GO

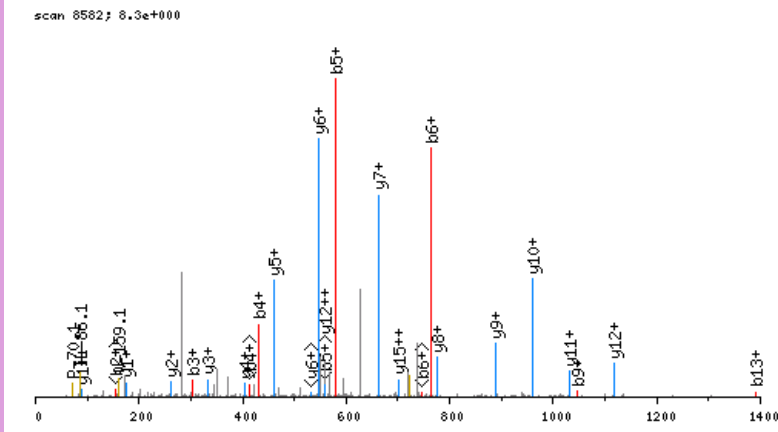

click image to zoom in; click top corners to zoom out [\[precursor±\]](#)

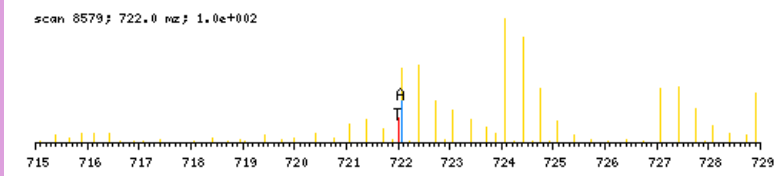

zoomed in precursor plot; T=theoretical m/z, A=acquired m/z

| b <sup>+</sup> | #  | AA # | y <sup>+</sup> | y <sup>2+</sup> |
|----------------|----|------|----------------|-----------------|
| 116.0711       | 1  | S 21 |                |                 |
| 173.0926       | 2  | G 20 | 2048.9678      | 1024.9878       |
| 302.1352       | 3  | E 19 | 1991.9463      | 996.4771        |
| 431.1778       | 4  | E 18 | 1862.9037      | 931.9558        |
| 578.2462       | 5  | F 17 | 1733.8611      | 867.4345        |
| 764.3255       | 6  | W 16 | 1586.7927      | 793.9003        |
| 861.3783       | 7  | P 15 | 1400.7134      | 700.8606        |
| 918.3997       | 8  | G 14 | 1303.6606      | 652.3342        |
| 1046.4583      | 9  | Q 13 | 1246.6392      | 623.8235        |
| 1133.4903      | 10 | S 12 | 1118.5806      | 559.7942        |
| 1204.5275      | 11 | A 11 | 1031.5485      | 516.2782        |
| 1275.5646      | 12 | A 10 | 960.5114       | 480.7596        |
| 1390.5915      | 13 | D 9  | 889.4743       | 445.2411        |
| 1503.6756      | 14 | I 8  | 774.4474       | 387.7276        |
| 1616.7596      | 15 | L 7  | 661.3633       | 331.1856        |
| 1703.7917      | 16 | S 6  | 548.2792       | 274.6435        |
| 1760.8131      | 17 | G 5  | 461.2472       | 231.1275        |
| 1831.8502      | 18 | A 4  | 404.2258       | 202.6168        |
| 1902.8874      | 19 | A 3  | 333.1886       | 167.0982        |
| 1989.9194      | 20 | S 2  | 262.1515       | 131.5797        |
|                | 21 | R 1  | 175.1195       | 88.0637         |

N-term:+29.04

SGEGNTSAAESSFSQEVAR, MH+ 1941.8790, m/z 647.9645  
 L OSG37 P180811 230811-s1.04100.04100.3.dta

X-range:

-

MassTol: Y-zoom:

MassType:

AVG  MONO

Axis:

1  2

Label:

I  M  -

Ions:

a  +  2+  3+

b  +  2+  3+

c  +  2+  3+

x  +  2+  3+

y  +  2+  3+

z  +  2+  3+

hide H<sub>2</sub>O/NH<sub>3</sub>

zoom 112-122

GO

scan 4100; 7.3e-001

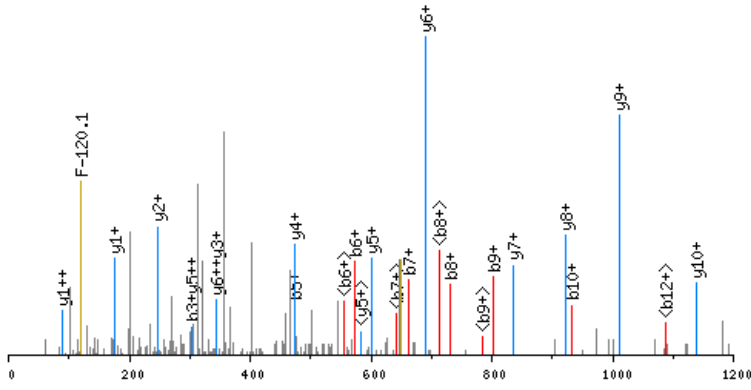

click image to zoom in; click top corners to zoom out [\[precursor±\]](#)

scan 4099; 648.0 m/z; 1.4e+001

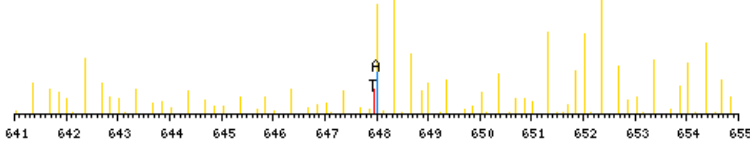

zoomed in precursor plot; T=theoretical m/z, A=acquired m/z

| b <sup>+</sup> | #  | AA # | y <sup>+</sup> | y <sup>2+</sup> |
|----------------|----|------|----------------|-----------------|
| 116.0711       | 1  | S 19 |                |                 |
| 173.0926       | 2  | G 18 | 1826.8157      | 913.9117        |
| 302.1352       | 3  | E 17 | 1769.7942      | 885.4010        |
| 359.1566       | 4  | G 16 | 1640.7516      | 820.8797        |
| 473.1996       | 5  | N 15 | 1583.7302      | 792.3690        |
| 574.2473       | 6  | T 14 | 1469.6872      | 735.3475        |
| 661.2793       | 7  | S 13 | 1368.6395      | 684.8237        |
| 732.3164       | 8  | A 12 | 1281.6075      | 641.3077        |
| 803.3535       | 9  | A 11 | 1210.5704      | 605.7891        |
| 932.3961       | 10 | E 10 | 1139.5333      | 570.2706        |
| 1019.4281      | 11 | S 9  | 1010.4907      | 505.7493        |
| 1106.4602      | 12 | S 8  | 923.4587       | 462.2332        |
| 1253.5286      | 13 | F 7  | 836.4266       | 418.7172        |
| 1340.5606      | 14 | S 6  | 689.3582       | 345.1830        |
| 1468.6192      | 15 | Q 5  | 602.3262       | 301.6670        |
| 1597.6618      | 16 | E 4  | 474.2676       | 237.6377        |
| 1696.7302      | 17 | V 3  | 345.2250       | 173.1164        |
| 1767.7673      | 18 | A 2  | 246.1566       | 123.5822        |
|                | 19 | R 1  | 175.1195       | 88.0637         |

N-term:+29.04

SGEGQEDAGELDFSGLLKR, MH+ 2076.0886, m/z 692.7010  
 H OSG39 P180811 230811-s1.06590.06590.3.dta

scan 6590; 2.2e+000

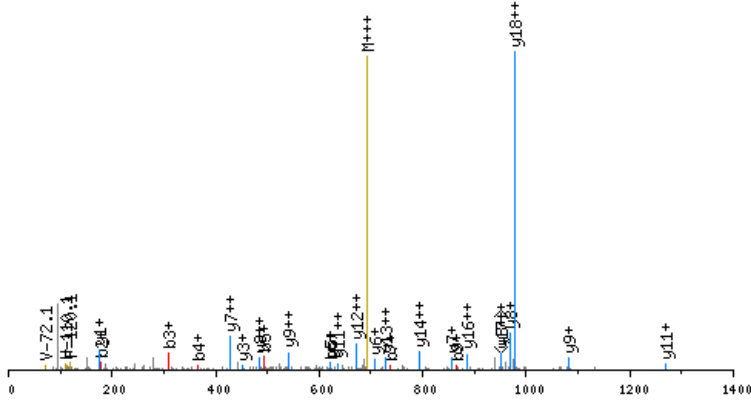

click image to zoom in; click top corners to zoom out [\[precursor±\]](#)

scan 6586; 692.7 m/z; 1.7e+001

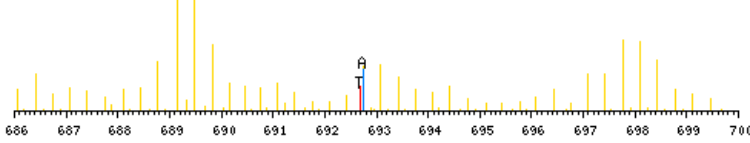

zoomed in precursor plot; T=theoretical m/z, A=acquired m/z

X-range:

-

MassTol: Y-zoom:

MassType:

AVG  MONO

Axis:

1  2

Label:

I  M  -

Ions:

a  +  2+  3+

b  +  2+  3+

c  +  2+  3+

x  +  2+  3+

y  +  2+  3+

z  +  2+  3+

hide H<sub>2</sub>O/NH<sub>3</sub>

zoom 112-122

GO

| b <sup>+</sup> | #  | AA # | y <sup>+</sup> | y <sup>2+</sup> |
|----------------|----|------|----------------|-----------------|
| 122.1029       | 1  | S 19 |                |                 |
| 179.1244       | 2  | G 18 | 1954.9934      | 978.0006        |
| 308.1670       | 3  | E 17 | 1897.9720      | 949.4899        |
| 365.1884       | 4  | G 16 | 1768.9294      | 884.9686        |
| 493.2470       | 5  | Q 15 | 1711.9079      | 856.4579        |
| 622.2896       | 6  | E 14 | 1583.8493      | 792.4286        |
| 737.3166       | 7  | D 13 | 1454.8068      | 727.9073        |
| 808.3537       | 8  | A 12 | 1339.7798      | 670.3938        |
| 865.3751       | 9  | G 11 | 1268.7427      | 634.8753        |
| 994.4177       | 10 | E 10 | 1211.7212      | 606.3645        |
| 1107.5018      | 11 | L 9  | 1082.6786      | 541.8432        |
| 1222.5287      | 12 | D 8  | 969.5946       | 485.3012        |
| 1369.5972      | 13 | F 7  | 854.5676       | 427.7877        |
| 1456.6292      | 14 | S 6  | 707.4992       | 354.2535        |
| 1513.6506      | 15 | G 5  | 620.4672       | 310.7375        |
| 1626.7347      | 16 | L 4  | 563.4457       | 282.2268        |
| 1739.8188      | 17 | L 3  | 450.3617       | 225.6847        |
| 1901.9769      | 18 | K 2  | 337.2776       | 169.1427        |
|                | 19 | R 1  | 175.1195       | 88.0637         |

N-term:+35.07 K(18):+162.16

SGETAKGDYPLEAVR, MH+ 1660.9182, m/z 554.3109  
 H OSG39 P180811 230811-s1.03188.03188.3.dta

X-range:

-

MassTol: Y-zoom:

MassType:

AVG  MONO

Axis:

1  2

Label:

I  M  -

Ions:

a  +  2+  3+

b  +  2+  3+

c  +  2+  3+

x  +  2+  3+

y  +  2+  3+

z  +  2+  3+

hide H<sub>2</sub>O/NH<sub>3</sub>

zoom 112-122

GO

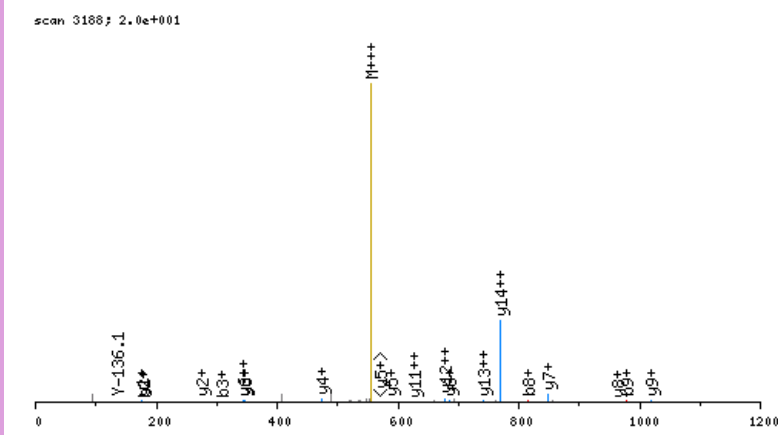

click image to zoom in; click top corners to zoom out [\[precursor±\]](#)

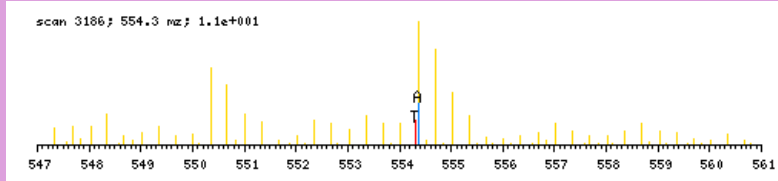

zoomed in precursor plot; T=theoretical m/z, A=acquired m/z

| b <sup>+</sup> | #  | AA # | y <sup>+</sup> | y <sup>2+</sup> |
|----------------|----|------|----------------|-----------------|
| 122.1029       | 1  | S 15 |                |                 |
| 179.1244       | 2  | G 14 | 1539.8231      | 770.4155        |
| 308.1670       | 3  | E 13 | 1482.8017      | 741.9047        |
| 409.2147       | 4  | T 12 | 1353.7591      | 677.3835        |
| 480.2518       | 5  | A 11 | 1252.7114      | 626.8596        |
| 642.4099       | 6  | K 10 | 1181.6743      | 591.3411        |
| 699.4313       | 7  | G 9  | 1019.5162      | 510.2620        |
| 814.4583       | 8  | D 8  | 962.4947       | 481.7513        |
| 977.5216       | 9  | Y 7  | 847.4678       | 424.2378        |
| 1074.5744      | 10 | P 6  | 684.4044       | 342.7061        |
| 1187.6584      | 11 | L 5  | 587.3517       | 294.1798        |
| 1316.7010      | 12 | E 4  | 474.2676       | 237.6377        |
| 1387.7381      | 13 | A 3  | 345.2250       | 173.1164        |
| 1486.8066      | 14 | V 2  | 274.1879       | 137.5979        |
|                | 15 | R 1  | 175.1195       | 88.0637         |

N-term:+35.07 K(6):+162.16



SGFIEEDELGSILKGFSSDAR, MH+ 2313.1614, m/z 771.7253  
 L OSG39 P180811 230811-s1.07922.07922.3.dta

X-range:

-

MassTol: Y-zoom:

MassType:

AVG  MONO

Axis:

1  2

Label:

I  M  -

Ions:

a  +  2+  3+

b  +  2+  3+

c  +  2+  3+

x  +  2+  3+

y  +  2+  3+

z  +  2+  3+

hide H<sub>2</sub>O/NH<sub>3</sub>

zoom 112-122

GO

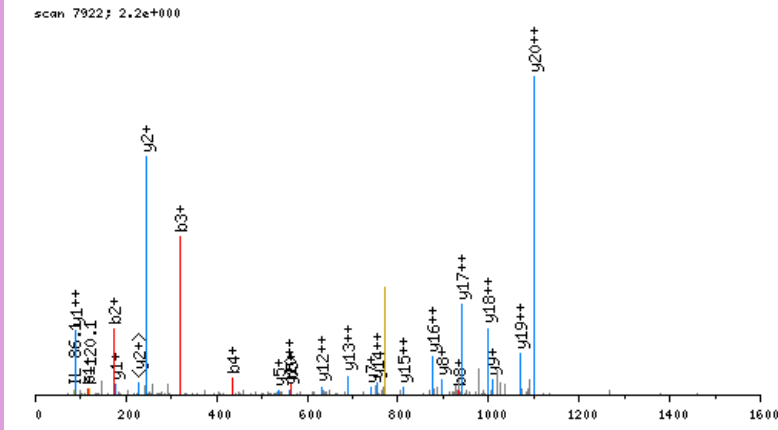

click image to zoom in; click top corners to zoom out [precursor±]

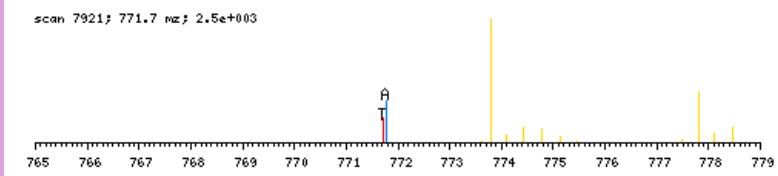

zoomed in precursor plot; T=theoretical m/z, A=acquired m/z

| b <sup>+</sup> | #  | AA # | y <sup>+</sup> | y <sup>2+</sup> |
|----------------|----|------|----------------|-----------------|
| 116.0711       | 1  | S 21 |                |                 |
| 173.0926       | 2  | G 20 | 2198.0981      | 1099.5530       |
| 320.1610       | 3  | F 19 | 2141.0767      | 1071.0423       |
| 433.2451       | 4  | I 18 | 1994.0083      | 997.5080        |
| 562.2877       | 5  | E 17 | 1880.9242      | 940.9660        |
| 691.3303       | 6  | E 16 | 1751.8816      | 876.4447        |
| 806.3572       | 7  | D 15 | 1622.8390      | 811.9234        |
| 935.3998       | 8  | E 14 | 1507.8121      | 754.4099        |
| 1048.4839      | 9  | L 13 | 1378.7695      | 689.8887        |
| 1105.5053      | 10 | G 12 | 1265.6854      | 633.3466        |
| 1192.5373      | 11 | S 11 | 1208.6639      | 604.8359        |
| 1305.6214      | 12 | I 10 | 1121.6319      | 561.3199        |
| 1418.7055      | 13 | L 9  | 1008.5479      | 504.7778        |
| 1574.8318      | 14 | K 8  | 895.4638       | 448.2358        |
| 1631.8532      | 15 | G 7  | 739.3375       | 370.1727        |
| 1778.9217      | 16 | F 6  | 682.3160       | 341.6619        |
| 1865.9537      | 17 | S 5  | 535.2476       | 268.1277        |
| 1952.9857      | 18 | S 4  | 448.2156       | 224.6117        |
| 2068.0127      | 19 | D 3  | 361.1836       | 181.0957        |
| 2139.0498      | 20 | A 2  | 246.1566       | 123.5822        |
|                | 21 | R 1  | 175.1195       | 88.0637         |

N-term:+29.04 K(14):+156.13

SGFSLSGAQIDDNIPR, MH+ 1710.8875, m/z 570.9673  
 H OSG37 P180811 230811-s1.06772.06772.3.dta

X-range:

-

MassTol: Y-zoom:

MassType:

AVG  MONO

Axis:

1  2

Label:

I  M  -

Ions:

a  +  2+  3+

b  +  2+  3+

c  +  2+  3+

x  +  2+  3+

y  +  2+  3+

z  +  2+  3+

hide H<sub>2</sub>O/NH<sub>3</sub>

zoom 112-122

GO

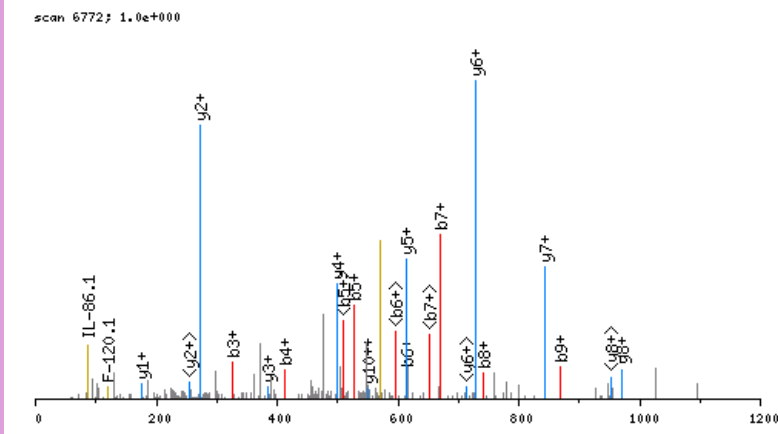

click image to zoom in; click top corners to zoom out [\[precursor±\]](#)

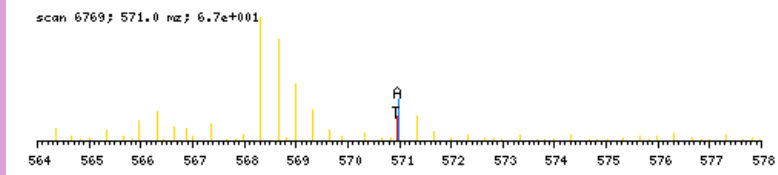

zoomed in precursor plot; T=theoretical m/z, A=acquired m/z

| b <sup>+</sup> | #  | AA # | y <sup>+</sup> | y <sup>2+</sup> |
|----------------|----|------|----------------|-----------------|
| 122.1029       | 1  | S 16 |                |                 |
| 179.1244       | 2  | G 15 | 1589.7924      | 795.4001        |
| 326.1928       | 3  | F 14 | 1532.7709      | 766.8894        |
| 413.2248       | 4  | S 13 | 1385.7025      | 693.3552        |
| 526.3089       | 5  | L 12 | 1298.6705      | 649.8391        |
| 613.3409       | 6  | S 11 | 1185.5864      | 593.2971        |
| 670.3624       | 7  | G 10 | 1098.5544      | 549.7811        |
| 741.3995       | 8  | A 9  | 1041.5329      | 521.2704        |
| 869.4581       | 9  | Q 8  | 970.4958       | 485.7518        |
| 982.5421       | 10 | I 7  | 842.4372       | 421.7225        |
| 1097.5691      | 11 | D 6  | 729.3531       | 365.1805        |
| 1212.5960      | 12 | D 5  | 614.3262       | 307.6670        |
| 1326.6390      | 13 | N 4  | 499.2993       | 250.1535        |
| 1439.7230      | 14 | I 3  | 385.2563       | 193.1321        |
| 1536.7758      | 15 | P 2  | 272.1723       | 136.5900        |
|                | 16 | R 1  | 175.1195       | 88.0637         |

N-term:+35.07

SGGGVPTDDEEQATGLER, MH+ 1736.8515, m/z 579.6220  
 H OSG37 P180811 230811-s1.03672.03672.3.dta

X-range:

-

MassTol: Y-zoom:

MassType:

AVG  MONO

Axis:

1  2

Label:

I  M  -

Ions:

a  +  2+  3+

b  +  2+  3+

c  +  2+  3+

x  +  2+  3+

y  +  2+  3+

z  +  2+  3+

hide H<sub>2</sub>O/NH<sub>3</sub>

zoom 112-122

GO

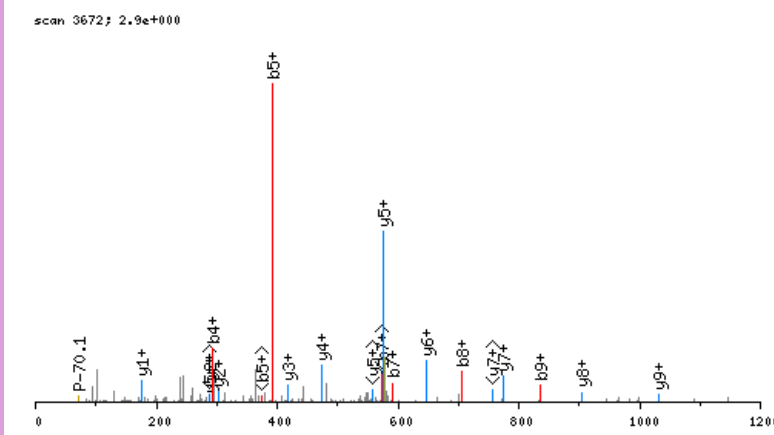

click image to zoom in; click top corners to zoom out [\[precursor±\]](#)

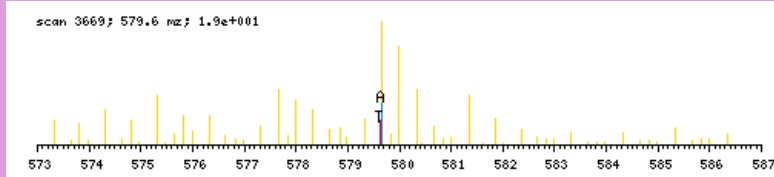

zoomed in precursor plot; T=theoretical m/z, A=acquired m/z

| b <sup>+</sup> | #  | AA # | y <sup>+</sup> | y <sup>2+</sup> |
|----------------|----|------|----------------|-----------------|
| 122.1029       | 1  | S 17 |                |                 |
| 179.1244       | 2  | G 16 | 1615.7564      | 808.3821        |
| 236.1459       | 3  | G 15 | 1558.7349      | 779.8714        |
| 293.1673       | 4  | G 14 | 1501.7134      | 751.3606        |
| 392.2357       | 5  | V 13 | 1444.6920      | 722.8499        |
| 489.2885       | 6  | P 12 | 1345.6236      | 673.3157        |
| 590.3362       | 7  | T 11 | 1248.5708      | 624.7893        |
| 705.3631       | 8  | D 10 | 1147.5231      | 574.2655        |
| 834.4057       | 9  | E 9  | 1032.4962      | 516.7520        |
| 963.4483       | 10 | E 8  | 903.4536       | 452.2307        |
| 1091.5069      | 11 | Q 7  | 774.4110       | 387.7094        |
| 1162.5440      | 12 | A 6  | 646.3524       | 323.6801        |
| 1263.5917      | 13 | T 5  | 575.3153       | 288.1616        |
| 1320.6131      | 14 | G 4  | 474.2676       | 237.6377        |
| 1433.6972      | 15 | L 3  | 417.2462       | 209.1270        |
| 1562.7398      | 16 | E 2  | 304.1621       | 152.5850        |
|                | 17 | R 1  | 175.1195       | 88.0637         |

N-term:+35.07

SGGTTMYPGIADR, MH+ 1359.6791, m/z 680.3432  
 H OSG37 P180811 230811-s1.03965.03965.2.dta

X-range:

-

MassTol: Y-zoom:

MassType:

AVG  MONO

Axis:

1  2

Label:

I  M  -

Ions:

a  +  2+  3+

b  +  2+  3+

c  +  2+  3+

x  +  2+  3+

y  +  2+  3+

z  +  2+  3+

hide H<sub>2</sub>O/NH<sub>3</sub>

zoom 112-122

GO

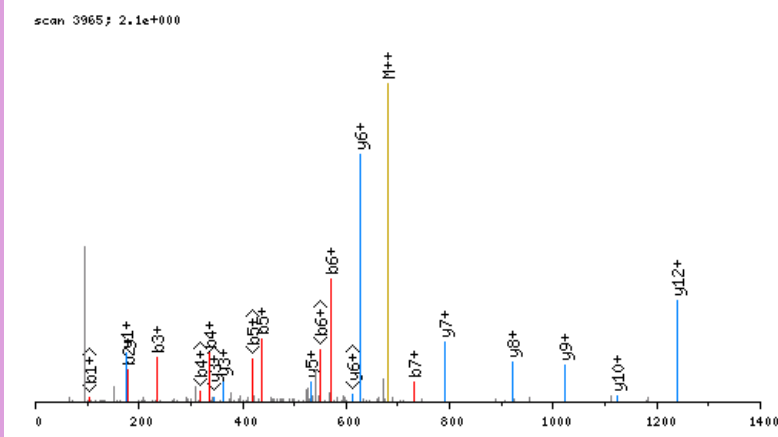

click image to zoom in; click top corners to zoom out [\[precursor±\]](#)

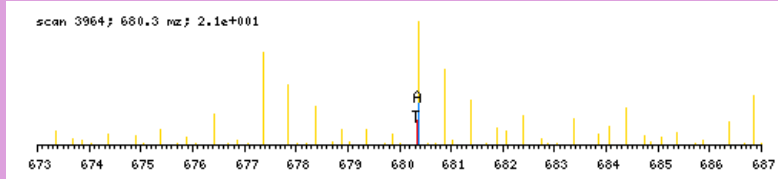

zoomed in precursor plot; T=theoretical m/z, A=acquired m/z

| b <sup>+</sup> | #  | AA # | y <sup>+</sup> | y <sup>2+</sup> |
|----------------|----|------|----------------|-----------------|
| 122.1029       | 1  | S 13 |                |                 |
| 179.1244       | 2  | G 12 | 1238.5839      | 619.7959        |
| 236.1459       | 3  | G 11 | 1181.5625      | 591.2852        |
| 337.1935       | 4  | T 10 | 1124.5410      | 562.7744        |
| 438.2412       | 5  | T 9  | 1023.4933      | 512.2506        |
| 569.2817       | 6  | M 8  | 922.4457       | 461.7267        |
| 732.3450       | 7  | Y 7  | 791.4052       | 396.2065        |
| 829.3978       | 8  | P 6  | 628.3418       | 314.6748        |
| 886.4193       | 9  | G 5  | 531.2891       | 266.1485        |
| 999.5033       | 10 | I 4  | 474.2676       | 237.6377        |
| 1070.5404      | 11 | A 3  | 361.1836       | 181.0957        |
| 1185.5674      | 12 | D 2  | 290.1464       | 145.5771        |
|                | 13 | R 1  | 175.1195       | 88.0637         |

N-term:+35.07

SGLDTYSLSGGGVPLVR, MH+ 1868.0341, m/z 623.3496  
 H OSG37 P180811 230811-s1.07638.07638.3.dta

X-range:

-

MassTol: Y-zoom:

MassType:

AVG  MONO

Axis:

1  2

Label:

I  M  -

Ions:

a  +  2+  3+

b  +  2+  3+

c  +  2+  3+

x  +  2+  3+

y  +  2+  3+

z  +  2+  3+

hide H<sub>2</sub>O/NH<sub>3</sub>

zoom 112-122

GO

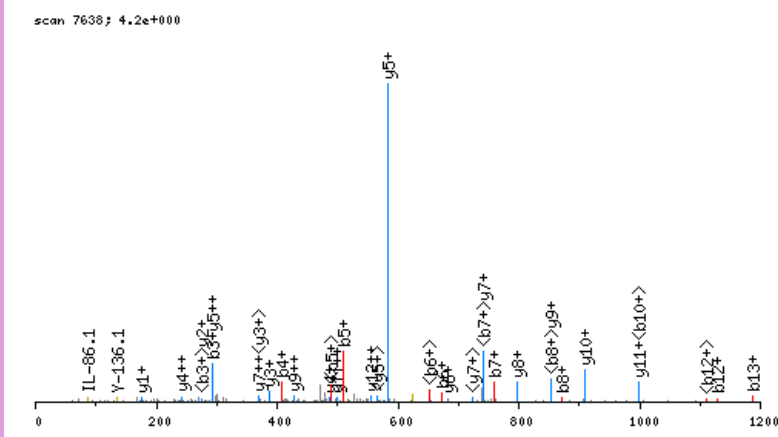

click image to zoom in; click top corners to zoom out [\[precursor±\]](#)

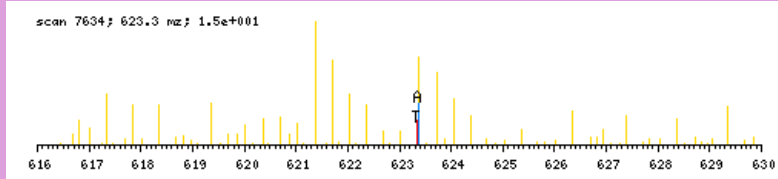

zoomed in precursor plot; T=theoretical m/z, A=acquired m/z

| b <sup>+</sup> | #  | AA # | y <sup>+</sup> | y <sup>2+</sup> |
|----------------|----|------|----------------|-----------------|
| 122.1029       | 1  | S 19 |                |                 |
| 179.1244       | 2  | G 18 | 1746.9390      | 873.9734        |
| 292.2085       | 3  | L 17 | 1689.9176      | 845.4627        |
| 407.2354       | 4  | D 16 | 1576.8335      | 788.9207        |
| 508.2831       | 5  | T 15 | 1461.8066      | 731.4072        |
| 671.3464       | 6  | Y 14 | 1360.7589      | 680.8833        |
| 758.3784       | 7  | S 13 | 1197.6955      | 599.3517        |
| 871.4625       | 8  | L 12 | 1110.6635      | 555.8357        |
| 958.4945       | 9  | S 11 | 997.5795       | 499.2936        |
| 1015.5160      | 10 | G 10 | 910.5474       | 455.7776        |
| 1072.5375      | 11 | G 9  | 853.5260       | 427.2669        |
| 1129.5589      | 12 | G 8  | 796.5045       | 398.7562        |
| 1186.5804      | 13 | G 7  | 739.4830       | 370.2454        |
| 1285.6488      | 14 | V 6  | 682.4616       | 341.7347        |
| 1382.7016      | 15 | P 5  | 583.3932       | 292.2005        |
| 1481.7700      | 16 | V 4  | 486.3404       | 243.6741        |
| 1594.8540      | 17 | L 3  | 387.2720       | 194.1399        |
| 1693.9225      | 18 | V 2  | 274.1879       | 137.5979        |
|                | 19 | R 1  | 175.1195       | 88.0637         |

N-term:+35.07

SGLVKAGFAGDDAPR, MH+ 1528.8760, m/z 510.2968  
 H OSG40 P180811 230811-s1.03660.03660.3.dta

X-range:

-

MassTol: Y-zoom:

MassType:

AVG  MONO

Axis:

1  2

Label:

I  M  -

Ions:

a  +  2+  3+

b  +  2+  3+

c  +  2+  3+

x  +  2+  3+

y  +  2+  3+

z  +  2+  3+

hide H<sub>2</sub>O/NH<sub>3</sub>

zoom 112-122

GO

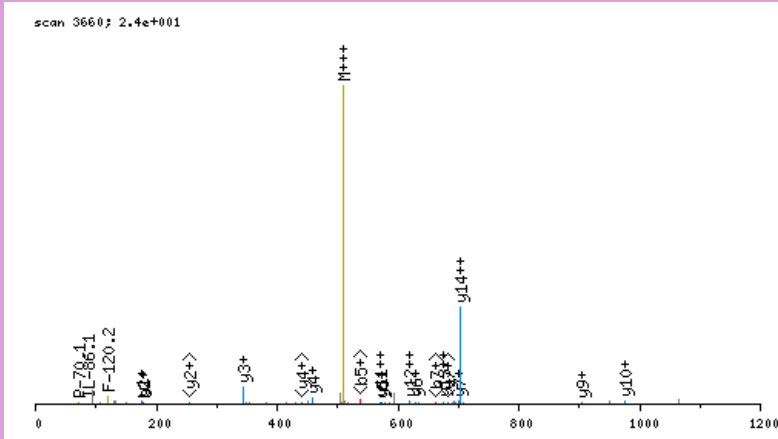

click image to zoom in; click top corners to zoom out [\[precursor±\]](#)

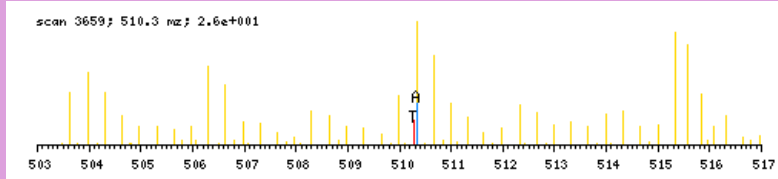

zoomed in precursor plot; T=theoretical m/z, A=acquired m/z

| b <sup>+</sup> | #  | AA | #  | y <sup>+</sup> | y <sup>2+</sup> |
|----------------|----|----|----|----------------|-----------------|
| 122.1029       | 1  | S  | 15 |                |                 |
| 179.1244       | 2  | G  | 14 | 1407.7809      | 704.3944        |
| 292.2085       | 3  | L  | 13 | 1350.7594      | 675.8836        |
| 391.2769       | 4  | V  | 12 | 1237.6753      | 619.3416        |
| 553.4350       | 5  | K  | 11 | 1138.6069      | 569.8074        |
| 624.4721       | 6  | A  | 10 | 976.4488       | 488.7283        |
| 681.4935       | 7  | G  | 9  | 905.4117       | 453.2098        |
| 828.5620       | 8  | F  | 8  | 848.3903       | 424.6990        |
| 899.5991       | 9  | A  | 7  | 701.3218       | 351.1648        |
| 956.6205       | 10 | G  | 6  | 630.2847       | 315.6463        |
| 1071.6475      | 11 | D  | 5  | 573.2633       | 287.1355        |
| 1186.6744      | 12 | D  | 4  | 458.2363       | 229.6221        |
| 1257.7115      | 13 | A  | 3  | 343.2094       | 172.1086        |
| 1354.7643      | 14 | P  | 2  | 272.1723       | 136.5900        |
|                | 15 | R  | 1  | 175.1195       | 88.0637         |

N-term:+35.07 K(5):+162.16

SGPASPTGSAVDIR, MH+ 1449.7761, m/z 725.3917  
 H OSG37 P180811 230811-s1.03336.03336.2.dta

X-range:

-

MassTol: Y-zoom:

MassType:

AVG  MONO

Axis:

1  2

Label:

I  M  -

Ions:

a  +  2+  3+

b  +  2+  3+

c  +  2+  3+

x  +  2+  3+

y  +  2+  3+

z  +  2+  3+

hide H<sub>2</sub>O/NH<sub>3</sub>

zoom 112-122

GO

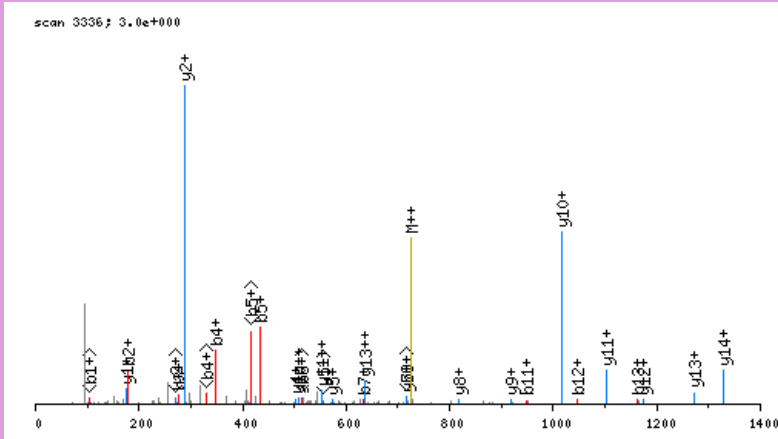

click image to zoom in; click top corners to zoom out [\[precursor±\]](#)

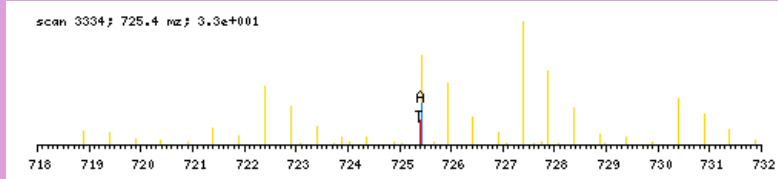

zoomed in precursor plot; T=theoretical m/z, A=acquired m/z

| b <sup>+</sup> | #  | AA # | y <sup>+</sup> | y <sup>2+</sup> |
|----------------|----|------|----------------|-----------------|
| 122.1029       | 1  | S 15 |                |                 |
| 179.1244       | 2  | G 14 | 1328.6810      | 664.8444        |
| 276.1772       | 3  | P 13 | 1271.6596      | 636.3337        |
| 347.2143       | 4  | A 12 | 1174.6068      | 587.8073        |
| 434.2463       | 5  | S 11 | 1103.5697      | 552.2888        |
| 531.2991       | 6  | P 10 | 1016.5376      | 508.7727        |
| 632.3467       | 7  | T 9  | 919.4849       | 460.2464        |
| 733.3944       | 8  | T 8  | 818.4372       | 409.7225        |
| 790.4159       | 9  | G 7  | 717.3895       | 359.1987        |
| 877.4479       | 10 | S 6  | 660.3681       | 330.6879        |
| 948.4850       | 11 | A 5  | 573.3360       | 287.1719        |
| 1047.5534      | 12 | V 4  | 502.2989       | 251.6534        |
| 1162.5804      | 13 | D 3  | 403.2305       | 202.1192        |
| 1275.6644      | 14 | I 2  | 288.2036       | 144.6057        |
|                | 15 | R 1  | 175.1195       | 88.0637         |

N-term:+35.07

SGPGPMGLMGPR, MH+ 1190.6238, m/z 595.8155  
 H OSG38 P180811 230811-s1.05137.05137.2.dta

X-range:

-

MassTol: Y-zoom:

MassType:

AVG  MONO

Axis:

1  2

Label:

I  M  -

Ions:

a  +  2+  3+

b  +  2+  3+

c  +  2+  3+

x  +  2+  3+

y  +  2+  3+

z  +  2+  3+

hide H<sub>2</sub>O/NH<sub>3</sub>

zoom 112-122

GO

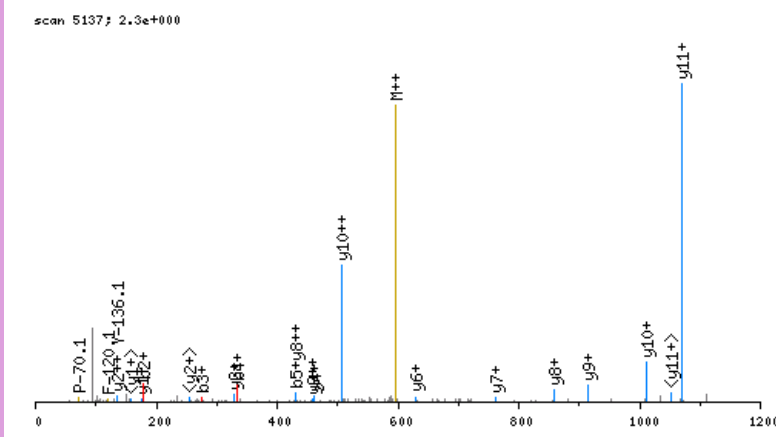

click image to zoom in; click top corners to zoom out [\[precursor±\]](#)

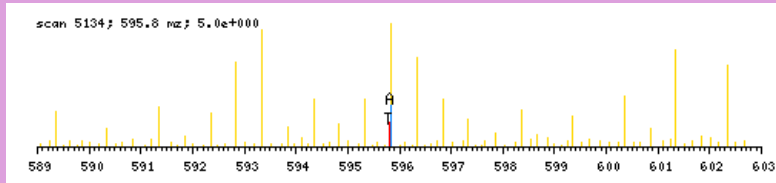

zoomed in precursor plot; T=theoretical m/z, A=acquired m/z

| b <sup>+</sup> | #  | AA # | y <sup>+</sup> | y <sup>2+</sup> |
|----------------|----|------|----------------|-----------------|
| 122.1029       | 1  | S 12 |                |                 |
| 179.1244       | 2  | G 11 | 1069.5287      | 535.2683        |
| 276.1772       | 3  | P 10 | 1012.5072      | 506.7575        |
| 333.1986       | 4  | G 9  | 915.4545       | 458.2311        |
| 430.2514       | 5  | P 8  | 858.4330       | 429.7204        |
| 561.2919       | 6  | M 7  | 761.3802       | 381.1940        |
| 618.3133       | 7  | G 6  | 630.3397       | 315.6738        |
| 731.3974       | 8  | L 5  | 573.3183       | 287.1631        |
| 862.4379       | 9  | M 4  | 460.2342       | 230.6210        |
| 919.4593       | 10 | G 3  | 329.1937       | 165.1008        |
| 1016.5121      | 11 | P 2  | 272.1723       | 136.5900        |
|                | 12 | R 1  | 175.1195       | 88.0637         |

N-term:+35.07



SGPIVTLQGNDKSTSPDPDWSSQLER, MH+ 2882.4808, m/z 721.3757  
 H OSG38 P180811 230811-s1.06286.06286.4.dta

scan 6286; 8.5e-001

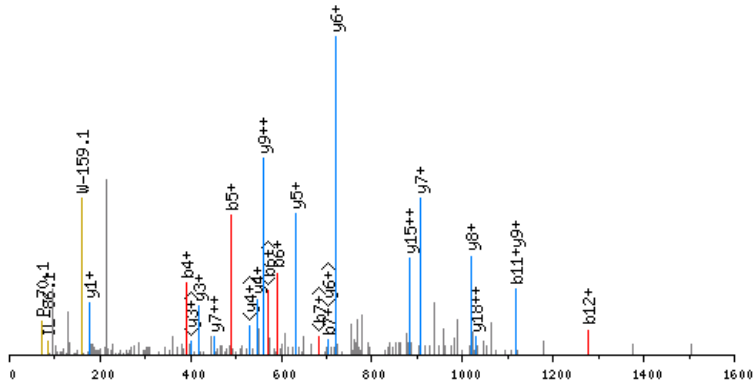

click image to zoom in; click top corners to zoom out [precursor±]

scan 6284; 721.4 m/z; 1.1e+001

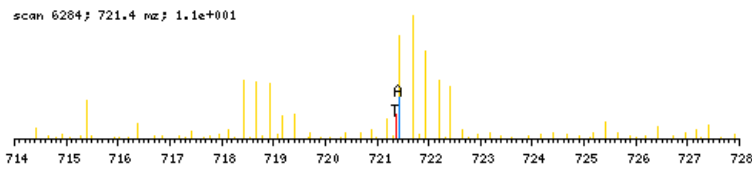

zoomed in precursor plot; T=theoretical m/z, A=acquired m/z

X-range:

-

MassTol: Y-zoom:

MassType:

AVG  MONO

Axis:

1  2

Label:

I  M  -

Ions:

a  +  2+  3+

b  +  2+  3+

c  +  2+  3+

x  +  2+  3+

y  +  2+  3+

z  +  2+  3+

hide H<sub>2</sub>O/NH<sub>3</sub>

zoom 112-122

GO

| b <sup>+</sup> | #  | AA | #  | y <sup>+</sup> | y <sup>2+</sup> |
|----------------|----|----|----|----------------|-----------------|
| 122.1029       | 1  | S  | 26 |                |                 |
| 179.1244       | 2  | G  | 25 | 2761.3857      | 1381.1968       |
| 276.1772       | 3  | P  | 24 | 2704.3643      | 1352.6860       |
| 389.2612       | 4  | I  | 23 | 2607.3115      | 1304.1597       |
| 488.3296       | 5  | V  | 22 | 2494.2274      | 1247.6176       |
| 589.3773       | 6  | T  | 21 | 2395.1590      | 1198.0834       |
| 702.4614       | 7  | L  | 20 | 2294.1113      | 1147.5596       |
| 830.5200       | 8  | Q  | 19 | 2181.0273      | 1091.0175       |
| 887.5414       | 9  | G  | 18 | 2052.9687      | 1026.9883       |
| 1001.5843      | 10 | N  | 17 | 1995.9472      | 998.4775        |
| 1116.6113      | 11 | D  | 16 | 1881.9043      | 941.4561        |
| 1278.7694      | 12 | K  | 15 | 1766.8774      | 883.9426        |
| 1365.8014      | 13 | S  | 14 | 1604.7193      | 802.8635        |
| 1466.8491      | 14 | T  | 13 | 1517.6872      | 759.3475        |
| 1553.8811      | 15 | S  | 12 | 1416.6395      | 708.8237        |
| 1650.9339      | 16 | P  | 11 | 1329.6075      | 665.3077        |
| 1765.9608      | 17 | D  | 10 | 1232.5548      | 616.7813        |
| 1863.0136      | 18 | P  | 9  | 1117.5278      | 559.2678        |
| 1978.0405      | 19 | D  | 8  | 1020.4750      | 510.7414        |
| 2164.1199      | 20 | W  | 7  | 905.4481       | 453.2280        |
| 2251.1519      | 21 | S  | 6  | 719.3688       | 360.1883        |
| 2338.1839      | 22 | S  | 5  | 632.3368       | 316.6723        |
| 2466.2425      | 23 | Q  | 4  | 545.3047       | 273.1563        |
| 2579.3265      | 24 | L  | 3  | 417.2462       | 209.1270        |
| 2708.3691      | 25 | E  | 2  | 304.1621       | 152.5850        |
|                | 26 | R  | 1  | 175.1195       | 88.0637         |

N-term: +35.07 K(12) : +162.16

SGPVVAMVWEGLNVVKTGR, MH+ 2067.2061, m/z 689.7402  
 H OSG39 P180811 230811-s1.08005.08005.3.dta

X-range:

-

MassTol: Y-zoom:

MassType:

AVG  MONO

Axis:

1  2

Label:

I  M  -

Ions:

a  +  2+  3+

b  +  2+  3+

c  +  2+  3+

x  +  2+  3+

y  +  2+  3+

z  +  2+  3+

hide H<sub>2</sub>O/NH<sub>3</sub>

zoom 112-122

GO

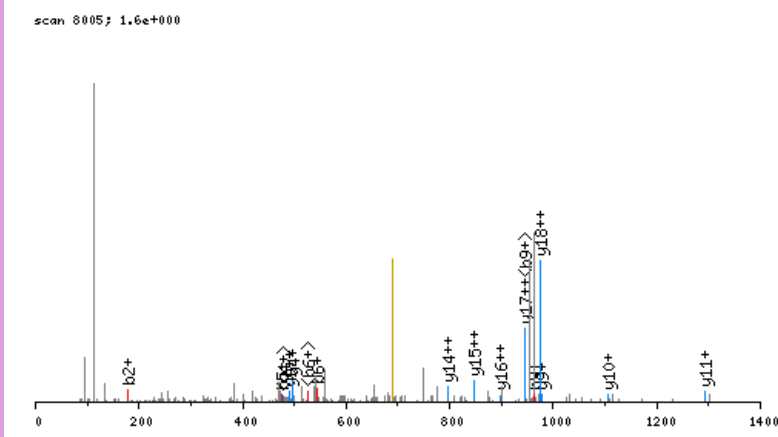

click image to zoom in; click top corners to zoom out [\[precursor±\]](#)

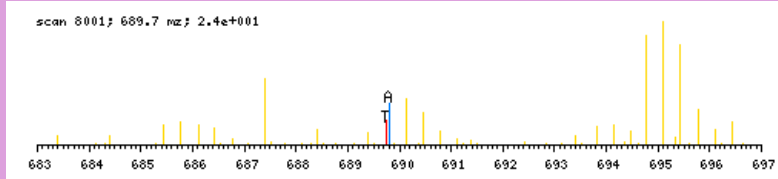

zoomed in precursor plot; T=theoretical m/z, A=acquired m/z

| b <sup>+</sup> | #  | AA | #  | y <sup>+</sup> | y <sup>2+</sup> |
|----------------|----|----|----|----------------|-----------------|
| 122.1029       | 1  | S  | 19 |                |                 |
| 179.1244       | 2  | G  | 18 | 1946.1110      | 973.5594        |
| 276.1772       | 3  | P  | 17 | 1889.0895      | 945.0487        |
| 375.2456       | 4  | V  | 16 | 1792.0368      | 896.5223        |
| 474.3140       | 5  | V  | 15 | 1692.9684      | 846.9881        |
| 545.3511       | 6  | A  | 14 | 1593.8999      | 797.4539        |
| 676.3916       | 7  | M  | 13 | 1522.8628      | 761.9353        |
| 775.4600       | 8  | V  | 12 | 1391.8223      | 696.4151        |
| 961.5393       | 9  | W  | 11 | 1292.7539      | 646.8809        |
| 1090.5819      | 10 | E  | 10 | 1106.6746      | 553.8412        |
| 1147.6034      | 11 | G  | 9  | 977.6320       | 489.3199        |
| 1260.6874      | 12 | L  | 8  | 920.6106       | 460.8092        |
| 1374.7304      | 13 | N  | 7  | 807.5265       | 404.2672        |
| 1473.7988      | 14 | V  | 6  | 693.4836       | 347.2457        |
| 1572.8672      | 15 | V  | 5  | 594.4152       | 297.7115        |
| 1735.0253      | 16 | K  | 4  | 495.3467       | 248.1773        |
| 1836.0730      | 17 | T  | 3  | 333.1886       | 167.0982        |
| 1893.0944      | 18 | G  | 2  | 232.1410       | 116.5744        |
|                | 19 | R  | 1  | 175.1195       | 88.0637         |

N-term:+35.07 K(16);+162.16

SGQPGVGPAGVR, MH+ 1206.6595, m/z 603.8334  
 L OSG38 P180811 230811-s1.02527.02527.2.dta

X-range:

-

MassTol: Y-zoom:

MassType:

AVG  MONO

Axis:

1  2

Label:

I  M  -

Ions:

a  +  2+  3+

b  +  2+  3+

c  +  2+  3+

x  +  2+  3+

y  +  2+  3+

z  +  2+  3+

hide H<sub>2</sub>O/NH<sub>3</sub>

zoom 112-122

GO

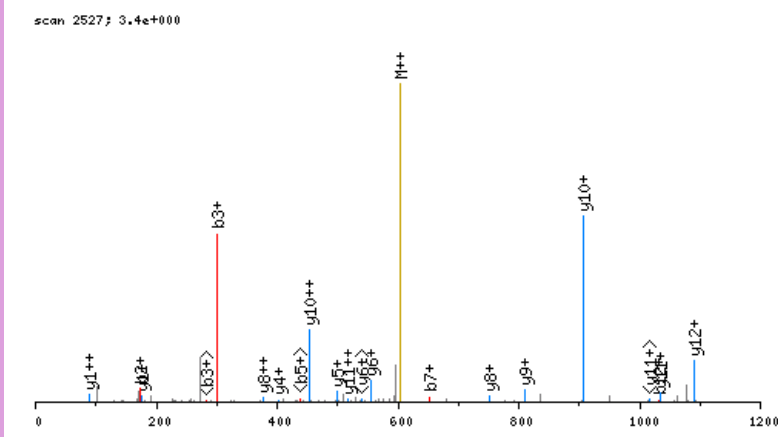

click image to zoom in; click top corners to zoom out [\[precursor±\]](#)

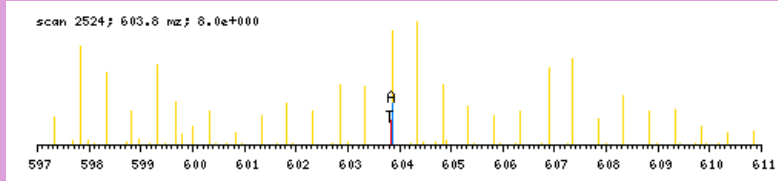

zoomed in precursor plot; T=theoretical m/z, A=acquired m/z

| b <sup>+</sup> | #  | AA # | y <sup>+</sup> | y <sup>2+</sup> |
|----------------|----|------|----------------|-----------------|
| 116.0711       | 1  | S 13 |                |                 |
| 173.0926       | 2  | G 12 | 1091.5962      | 546.3020        |
| 301.1512       | 3  | Q 11 | 1034.5747      | 517.7913        |
| 398.2039       | 4  | P 10 | 906.5161       | 453.7620        |
| 455.2254       | 5  | G 9  | 809.4634       | 405.2356        |
| 552.2782       | 6  | P 8  | 752.4419       | 376.7249        |
| 651.3466       | 7  | V 7  | 655.3891       | 328.1985        |
| 708.3680       | 8  | G 6  | 556.3207       | 278.6643        |
| 805.4208       | 9  | P 5  | 499.2993       | 250.1535        |
| 876.4579       | 10 | A 4  | 402.2465       | 201.6272        |
| 933.4794       | 11 | G 3  | 331.2094       | 166.1086        |
| 1032.5478      | 12 | V 2  | 274.1879       | 137.5979        |
|                | 13 | R 1  | 175.1195       | 88.0637         |

N-term:+29.04

SGSGVQGASAGGLAADASR, MH+ 1646.8098, m/z 549.6081  
 L OSG37 P180811 230811-s1.03137.03137.3.dta

X-range:

-

MassTol: Y-zoom:

MassType:

AVG  MONO

Axis:

1  2

Label:

I  M  -

Ions:

a  +  2+  3+

b  +  2+  3+

c  +  2+  3+

x  +  2+  3+

y  +  2+  3+

z  +  2+  3+

hide H<sub>2</sub>O/NH<sub>3</sub>

zoom 112-122

GO

scan 3137; 5.8e+000

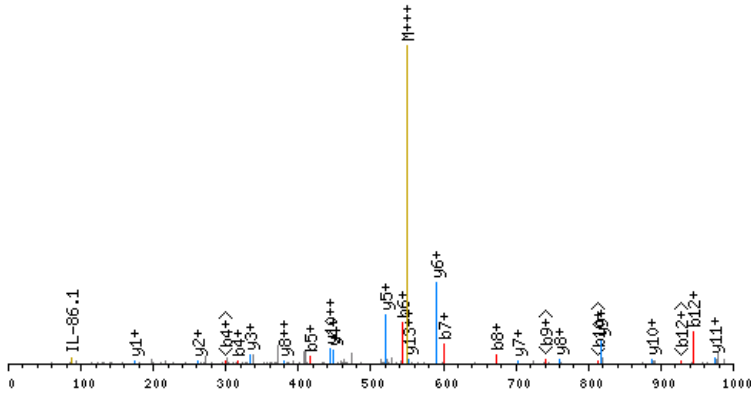

click image to zoom in; click top corners to zoom out [\[precursor±\]](#)

scan 3134; 549.6 m/z; 4.3e+002

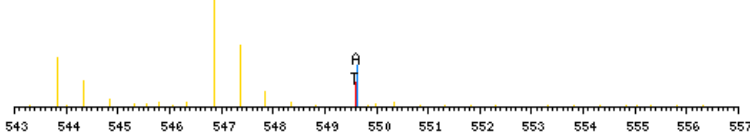

zoomed in precursor plot; T=theoretical m/z, A=acquired m/z

| b <sup>+</sup> | #  | AA # | y <sup>+</sup> | y <sup>2+</sup> |
|----------------|----|------|----------------|-----------------|
| 116.0711       | 1  | S 19 |                |                 |
| 173.0926       | 2  | G 18 | 1531.7465      | 766.3771        |
| 260.1246       | 3  | S 17 | 1474.7250      | 737.8664        |
| 317.1461       | 4  | G 16 | 1387.6930      | 694.3504        |
| 416.2145       | 5  | V 15 | 1330.6715      | 665.8397        |
| 544.2731       | 6  | Q 14 | 1231.6031      | 616.3055        |
| 601.2945       | 7  | G 13 | 1103.5445      | 552.2762        |
| 672.3317       | 8  | A 12 | 1046.5231      | 523.7654        |
| 759.3637       | 9  | S 11 | 975.4859       | 488.2469        |
| 830.4008       | 10 | A 10 | 888.4539       | 444.7309        |
| 887.4223       | 11 | G 9  | 817.4168       | 409.2123        |
| 944.4437       | 12 | G 8  | 760.3953       | 380.7016        |
| 1057.5278      | 13 | L 7  | 703.3739       | 352.1909        |
| 1128.5649      | 14 | A 6  | 590.2898       | 295.6488        |
| 1199.6020      | 15 | A 5  | 519.2527       | 260.1303        |
| 1314.6290      | 16 | D 4  | 448.2156       | 224.6117        |
| 1385.6661      | 17 | A 3  | 333.1886       | 167.0982        |
| 1472.6981      | 18 | S 2  | 262.1515       | 131.5797        |
|                | 19 | R 1  | 175.1195       | 88.0637         |

N-term:+29.04

SGSPFPASVQDPLHIWR, MH+ 1985.0457, m/z 662.3534  
 H OSG39 P180811 230811-s1.06653.06653.3.dta

X-range:

-

MassTol: Y-zoom:

MassType:

AVG  MONO

Axis:

1  2

Label:

I  M  -

Ions:

a  +  2+  3+

b  +  2+  3+

c  +  2+  3+

x  +  2+  3+

y  +  2+  3+

z  +  2+  3+

hide H<sub>2</sub>O/NH<sub>3</sub>

zoom 112-122

GO

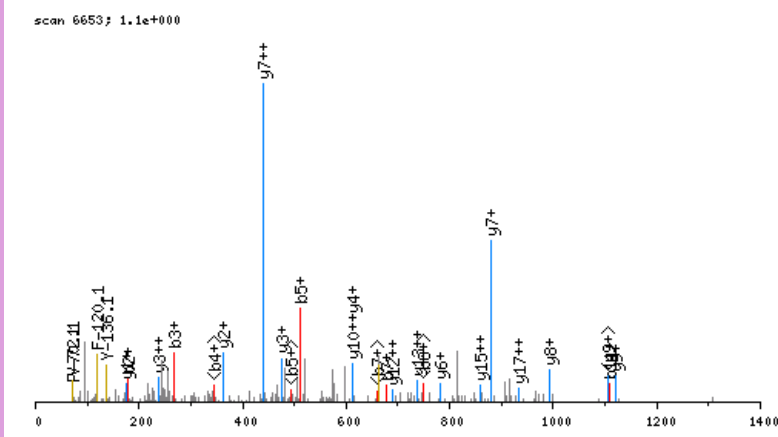

click image to zoom in; click top corners to zoom out [\[precursor±\]](#)

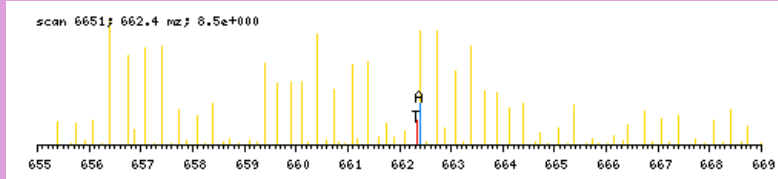

zoomed in precursor plot; T=theoretical m/z, A=acquired m/z

| b <sup>+</sup> | #  | AA # | y <sup>+</sup> | y <sup>2+</sup> |
|----------------|----|------|----------------|-----------------|
| 122.1029       | 1  | S 18 |                |                 |
| 179.1244       | 2  | G 17 | 1863.9506      | 932.4792        |
| 266.1564       | 3  | S 16 | 1806.9291      | 903.9685        |
| 363.2092       | 4  | P 15 | 1719.8971      | 860.4525        |
| 510.2776       | 5  | F 14 | 1622.8443      | 811.9261        |
| 607.3304       | 6  | P 13 | 1475.7759      | 738.3919        |
| 678.3675       | 7  | A 12 | 1378.7232      | 689.8655        |
| 765.3995       | 8  | S 11 | 1307.6860      | 654.3469        |
| 864.4679       | 9  | V 10 | 1220.6540      | 610.8309        |
| 992.5265       | 10 | Q 9  | 1121.5856      | 561.2967        |
| 1107.5534      | 11 | D 8  | 993.5270       | 497.2674        |
| 1204.6062      | 12 | P 7  | 878.5001       | 439.7540        |
| 1261.6277      | 13 | G 6  | 781.4473       | 391.2276        |
| 1374.7117      | 14 | L 5  | 724.4259       | 362.7168        |
| 1511.7706      | 15 | H 4  | 611.3418       | 306.1748        |
| 1624.8547      | 16 | I 3  | 474.2829       | 237.6454        |
| 1810.9340      | 17 | W 2  | 361.1988       | 181.1033        |
|                | 18 | R 1  | 175.1195       | 88.0637         |

N-term:+35.07

SGTPVHCPSPIR, MH+ 1341.7161, m/z 447.9102  
 H OSG40 P180811 230811-s1.02331.02331.3.dta

X-range:

-

MassTol: Y-zoom:

MassType:

AVG  MONO

Axis:

1  2

Label:

I  M  -

Ions:

a  +  2+  3+

b  +  2+  3+

c  +  2+  3+

x  +  2+  3+

y  +  2+  3+

z  +  2+  3+

hide H<sub>2</sub>O/NH<sub>3</sub>

zoom 112-122

GO

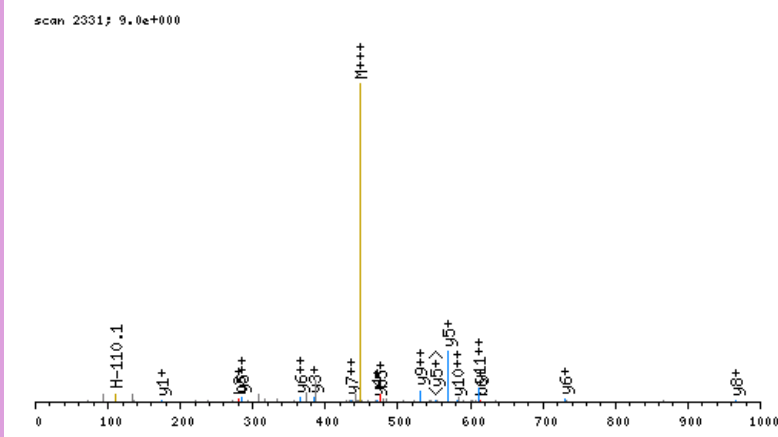

click image to zoom in; click top corners to zoom out [\[precursor±\]](#)

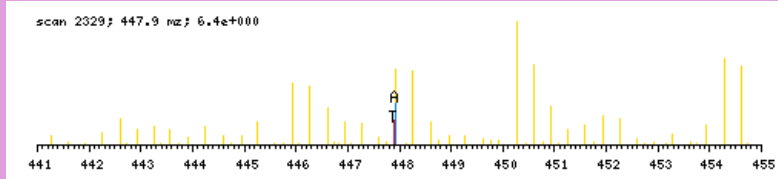

zoomed in precursor plot; T=theoretical m/z, A=acquired m/z

| b <sup>+</sup> | #  | AA # | y <sup>+</sup> | y <sup>2+</sup> |
|----------------|----|------|----------------|-----------------|
| 122.1029       | 1  | S 12 |                |                 |
| 179.1244       | 2  | G 11 | 1220.6210      | 610.8144        |
| 280.1721       | 3  | T 10 | 1163.5995      | 582.3037        |
| 377.2248       | 4  | P 9  | 1062.5518      | 531.7798        |
| 476.2932       | 5  | V 8  | 965.4990       | 483.2534        |
| 613.3522       | 6  | H 7  | 866.4306       | 433.7192        |
| 773.3828       | 7  | C 6  | 729.3717       | 365.1898        |
| 870.4355       | 8  | P 5  | 569.3411       | 285.1745        |
| 957.4676       | 9  | S 4  | 472.2884       | 236.6481        |
| 1054.5203      | 10 | P 3  | 385.2563       | 193.1321        |
| 1167.6044      | 11 | I 2  | 288.2036       | 144.6057        |
|                | 12 | R 1  | 175.1195       | 88.0637         |

N-term:+35.07 C(7):+160.03

SGVAVSDGVIKVFNDMKVR, MH+ 2105.1793, m/z 527.0503  
 L OSG40 P180811 230811-s1.08651.08651.4.dta

X-range:

-

MassTol: Y-zoom:

MassType:

AVG  MONO

Axis:

1  2

Label:

I  M  -

Ions:

a  +  2+  3+

b  +  2+  3+

c  +  2+  3+

x  +  2+  3+

y  +  2+  3+

z  +  2+  3+

hide H<sub>2</sub>O/NH<sub>3</sub>

zoom 112-122

GO

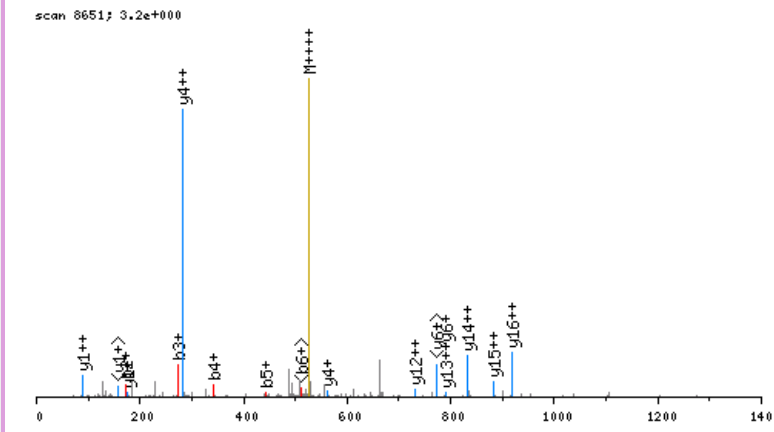

click image to zoom in; click top corners to zoom out [precursor±]

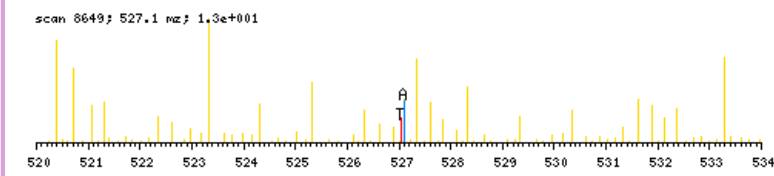

zoomed in precursor plot; T=theoretical m/z, A=acquired m/z

| b <sup>+</sup> | #  | AA | #  | y <sup>+</sup> | y <sup>2+</sup> |
|----------------|----|----|----|----------------|-----------------|
| 116.0711       | 1  | S  | 19 |                |                 |
| 173.0926       | 2  | G  | 18 | 1990.1160      | 995.5619        |
| 272.1610       | 3  | V  | 17 | 1933.0946      | 967.0512        |
| 343.1981       | 4  | A  | 16 | 1834.0261      | 917.5170        |
| 442.2665       | 5  | V  | 15 | 1762.9890      | 881.9984        |
| 529.2986       | 6  | S  | 14 | 1663.9206      | 832.4642        |
| 644.3255       | 7  | D  | 13 | 1576.8886      | 788.9482        |
| 701.3470       | 8  | G  | 12 | 1461.8616      | 731.4347        |
| 800.4154       | 9  | V  | 11 | 1404.8402      | 702.9240        |
| 913.4994       | 10 | I  | 10 | 1305.7718      | 653.3898        |
| 1069.6257      | 11 | K  | 9  | 1192.6877      | 596.8478        |
| 1168.6942      | 12 | V  | 8  | 1036.5614      | 518.7846        |
| 1315.7626      | 13 | F  | 7  | 937.4930       | 469.2504        |
| 1429.8055      | 14 | N  | 6  | 790.4246       | 395.7162        |
| 1544.8324      | 15 | D  | 5  | 676.3816       | 338.6947        |
| 1675.8729      | 16 | M  | 4  | 561.3547       | 281.1813        |
| 1831.9992      | 17 | K  | 3  | 430.3142       | 215.6610        |
| 1931.0676      | 18 | V  | 2  | 274.1879       | 137.5979        |
|                | 19 | R  | 1  | 175.1195       | 88.0637         |

N-term:+29.04 K(11):+156.13  
 K(17):+156.13

SHEIATNLGDFAIISLYR, MH+ 1941.0294, m/z 647.6813  
 H OSG40 P180811 230811-s1.09063.09063.3.dta

X-range:

-

MassTol: Y-zoom:

MassType:

AVG  MONO

Axis:

1  2

Label:

I  M  -

Ions:

a  +  2+  3+

b  +  2+  3+

c  +  2+  3+

x  +  2+  3+

y  +  2+  3+

z  +  2+  3+

hide H<sub>2</sub>O/NH<sub>3</sub>

zoom 112-122

GO

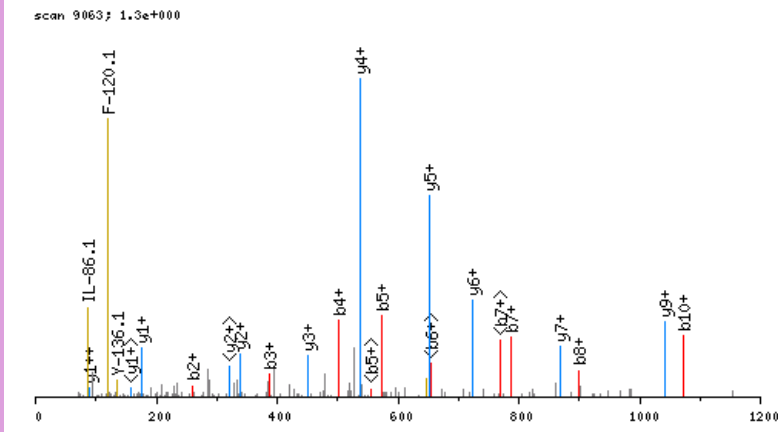

click image to zoom in; click top corners to zoom out [\[precursor±\]](#)

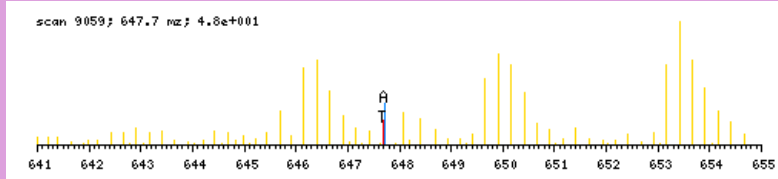

zoomed in precursor plot; T=theoretical m/z, A=acquired m/z

| b <sup>+</sup> | #  | AA # | y <sup>+</sup> | y <sup>2+</sup> |
|----------------|----|------|----------------|-----------------|
| 122.1029       | 1  | S 17 |                |                 |
| 259.1618       | 2  | H 16 | 1819.9343      | 910.4710        |
| 388.2044       | 3  | E 15 | 1682.8754      | 841.9416        |
| 501.2885       | 4  | I 14 | 1553.8328      | 777.4203        |
| 572.3256       | 5  | A 13 | 1440.7487      | 720.8783        |
| 673.3733       | 6  | T 12 | 1369.7116      | 685.3597        |
| 787.4162       | 7  | N 11 | 1268.6639      | 634.8359        |
| 900.5003       | 8  | L 10 | 1154.6210      | 577.8144        |
| 957.5217       | 9  | G 9  | 1041.5369      | 521.2724        |
| 1072.5487      | 10 | D 8  | 984.5155       | 492.7616        |
| 1219.6171      | 11 | F 7  | 869.4885       | 435.2482        |
| 1290.6542      | 12 | A 6  | 722.4201       | 361.7140        |
| 1403.7383      | 13 | I 5  | 651.3830       | 326.1954        |
| 1490.7703      | 14 | S 4  | 538.2989       | 269.6534        |
| 1603.8544      | 15 | L 3  | 451.2669       | 226.1374        |
| 1766.9177      | 16 | Y 2  | 338.1828       | 169.5953        |
|                | 17 | R 1  | 175.1195       | 88.0637         |

N-term:+35.07



SICEEFSQQADDKGCFR, MH+ 2132.9380, m/z 711.6509  
 L OSG39 P180811 230811-s1.04397.04397.3.dta

X-range:

-

MassTol: Y-zoom:

MassType:

AVG  MONO

Axis:

1  2

Label:

I  M  -

Ions:

a  +  2+  3+

b  +  2+  3+

c  +  2+  3+

x  +  2+  3+

y  +  2+  3+

z  +  2+  3+

hide H<sub>2</sub>O/NH<sub>3</sub>

zoom 112-122

GO

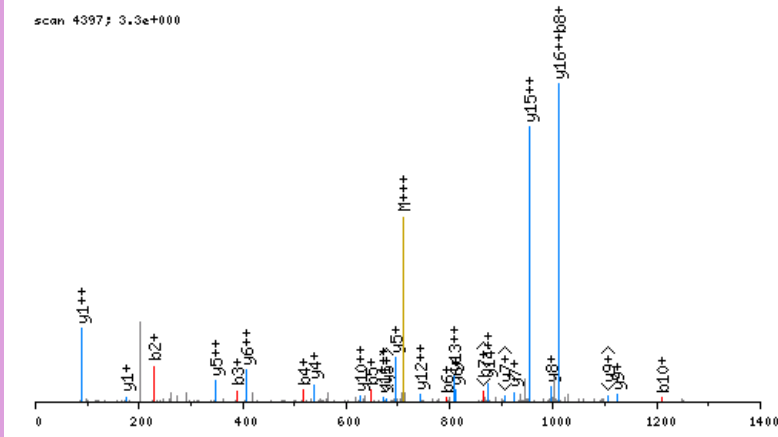

click image to zoom in; click top corners to zoom out [\[precursor±\]](#)

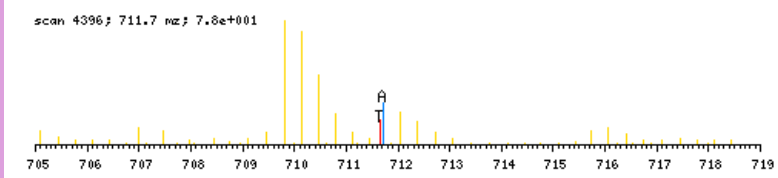

zoomed in precursor plot; T=theoretical m/z, A=acquired m/z

| b <sup>+</sup> | #  | AA | #  | y <sup>+</sup> | y <sup>2+</sup> |
|----------------|----|----|----|----------------|-----------------|
| 116.0711       | 1  | S  | 17 |                |                 |
| 229.1552       | 2  | I  | 16 | 2017.8747      | 1009.4413       |
| 389.1858       | 3  | C  | 15 | 1904.7907      | 952.8992        |
| 518.2284       | 4  | E  | 14 | 1744.7601      | 872.8839        |
| 647.2710       | 5  | E  | 13 | 1615.7175      | 808.3626        |
| 794.3394       | 6  | F  | 12 | 1486.6749      | 743.8414        |
| 881.3714       | 7  | S  | 11 | 1339.6065      | 670.3071        |
| 1009.4300      | 8  | Q  | 10 | 1252.5744      | 626.7911        |
| 1137.4886      | 9  | Q  | 9  | 1124.5159      | 562.7618        |
| 1208.5257      | 10 | A  | 8  | 996.4573       | 498.7326        |
| 1323.5526      | 11 | D  | 7  | 925.4202       | 463.2140        |
| 1438.5796      | 12 | D  | 6  | 810.3932       | 405.7005        |
| 1594.7059      | 13 | K  | 5  | 695.3663       | 348.1871        |
| 1651.7273      | 14 | G  | 4  | 539.2400       | 270.1239        |
| 1811.7579      | 15 | C  | 3  | 482.2185       | 241.6132        |
| 1958.8264      | 16 | F  | 2  | 322.1879       | 161.5979        |
|                | 17 | R  | 1  | 175.1195       | 88.0637         |

N-term:+29.04 C(3):+160.03  
 K(13):+156.13 C(15):+160.03

SIFGGAKPVDTAAR, MH+ 1457.8753, m/z 486.6299  
 H OSG39 P180811 230811-s1.03203.03203.3.dta

X-range:

-

MassTol: Y-zoom:

MassType:

AVG  MONO

Axis:

1  2

Label:

I  M  -

Ions:

a  +  2+  3+

b  +  2+  3+

c  +  2+  3+

x  +  2+  3+

y  +  2+  3+

z  +  2+  3+

hide H<sub>2</sub>O/NH<sub>3</sub>

zoom 112-122

GO

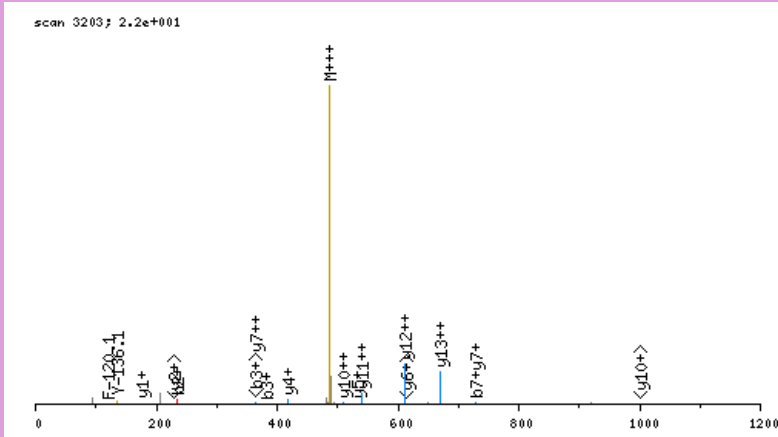

click image to zoom in; click top corners to zoom out [\[precursor±\]](#)

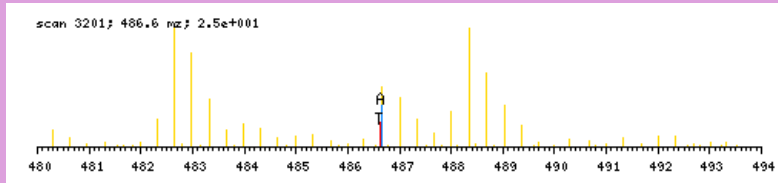

zoomed in precursor plot; T=theoretical m/z, A=acquired m/z

| b <sup>+</sup> | #  | AA # | y <sup>+</sup> | y <sup>2+</sup> |
|----------------|----|------|----------------|-----------------|
| 122.1029       | 1  | S 14 |                |                 |
| 235.1870       | 2  | I 13 | 1336.7801      | 668.8940        |
| 382.2554       | 3  | F 12 | 1223.6961      | 612.3520        |
| 439.2769       | 4  | G 11 | 1076.6277      | 538.8177        |
| 496.2983       | 5  | G 10 | 1019.6062      | 510.3070        |
| 567.3354       | 6  | A 9  | 962.5847       | 481.7963        |
| 729.4935       | 7  | K 8  | 891.5476       | 446.2777        |
| 826.5463       | 8  | P 7  | 729.3895       | 365.1987        |
| 925.6147       | 9  | V 6  | 632.3368       | 316.6723        |
| 1040.6417      | 10 | D 5  | 533.2683       | 267.1381        |
| 1141.6893      | 11 | T 4  | 418.2414       | 209.6246        |
| 1212.7265      | 12 | A 3  | 317.1937       | 159.1008        |
| 1283.7636      | 13 | A 2  | 246.1566       | 123.5822        |
|                | 14 | R 1  | 175.1195       | 88.0637         |

N-term:+35.07 K(7):+162.16

SIPFPPTTPTLGR, MH+ 1512.8426, m/z 504.9524  
 L OSG37 P180811 230811-s1.07370.07370.3.dta

X-range:

-

MassTol: Y-zoom:

MassType:

AVG  MONO

Axis:

1  2

Label:

I  M  -

Ions:

a  +  2+  3+

b  +  2+  3+

c  +  2+  3+

x  +  2+  3+

y  +  2+  3+

z  +  2+  3+

hide H<sub>2</sub>O/NH<sub>3</sub>

zoom 112-122

GO

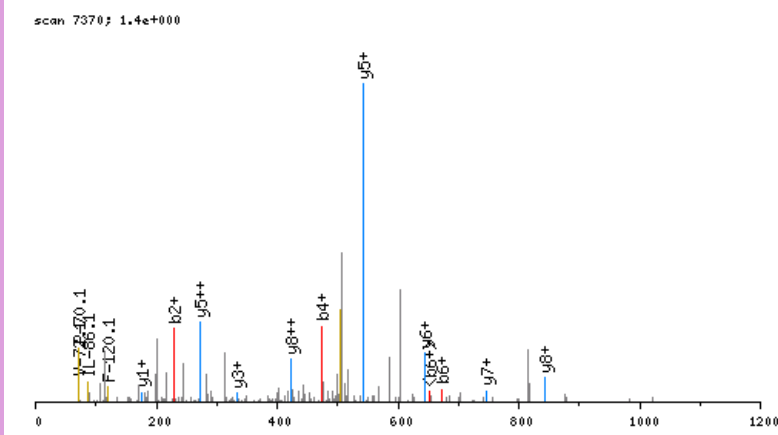

click image to zoom in; click top corners to zoom out [\[precursor±\]](#)

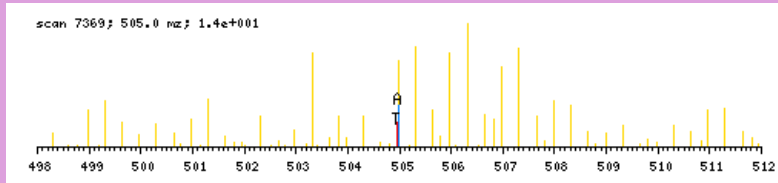

zoomed in precursor plot; T=theoretical m/z, A=acquired m/z

| b <sup>+</sup> | #  | AA # | y <sup>+</sup> | y <sup>2+</sup> |
|----------------|----|------|----------------|-----------------|
| 116.0711       | 1  | S 14 |                |                 |
| 229.1552       | 2  | I 13 | 1397.7793      | 699.3936        |
| 326.2080       | 3  | P 12 | 1284.6952      | 642.8515        |
| 473.2764       | 4  | F 11 | 1187.6424      | 594.3251        |
| 570.3291       | 5  | P 10 | 1040.5740      | 520.7909        |
| 671.3768       | 6  | T 9  | 943.5213       | 472.2645        |
| 768.4296       | 7  | P 8  | 842.4736       | 421.7407        |
| 869.4773       | 8  | T 7  | 745.4208       | 373.2143        |
| 970.5249       | 9  | T 6  | 644.3731       | 322.6905        |
| 1067.5777      | 10 | P 5  | 543.3255       | 272.1666        |
| 1180.6618      | 11 | L 4  | 446.2727       | 223.6403        |
| 1281.7094      | 12 | T 3  | 333.1886       | 167.0982        |
| 1338.7309      | 13 | G 2  | 232.1410       | 116.5744        |
|                | 14 | R 1  | 175.1195       | 88.0637         |

N-term:+29.04

SIVPALEIANAHR, MH+ 1418.8119, m/z 473.6088  
 L OSG40 P180811 230811-s1.06423.06423.3.dta

X-range:

-

MassTol: Y-zoom:

MassType:

AVG  MONO

Axis:

1  2

Label:

I  M  -

Ions:

a  +  2+  3+

b  +  2+  3+

c  +  2+  3+

x  +  2+  3+

y  +  2+  3+

z  +  2+  3+

hide H<sub>2</sub>O/NH<sub>3</sub>

zoom 112-122

GO

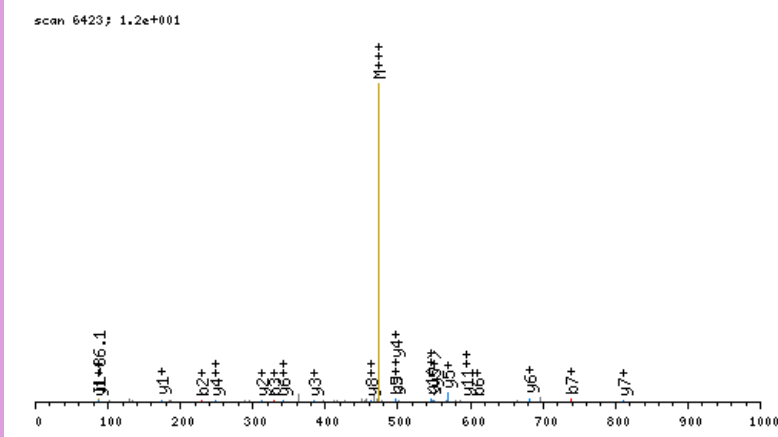

click image to zoom in; click top corners to zoom out [\[precursor±\]](#)

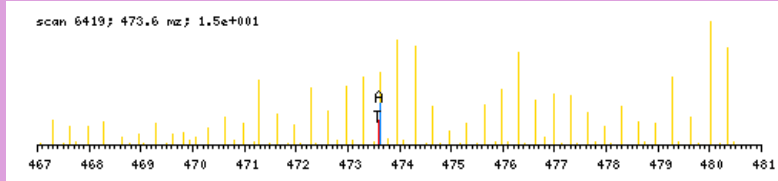

zoomed in precursor plot; T=theoretical m/z, A=acquired m/z

| b <sup>+</sup> | #  | AA # | y <sup>+</sup> | y <sup>2+</sup> |
|----------------|----|------|----------------|-----------------|
| 116.0711       | 1  | S 13 |                |                 |
| 229.1552       | 2  | I 12 | 1303.7486      | 652.3782        |
| 328.2236       | 3  | V 11 | 1190.6646      | 595.8362        |
| 425.2764       | 4  | P 10 | 1091.5962      | 546.3020        |
| 496.3135       | 5  | A 9  | 994.5434       | 497.7756        |
| 609.3975       | 6  | L 8  | 923.5063       | 462.2571        |
| 738.4401       | 7  | E 7  | 810.4222       | 405.7150        |
| 851.5242       | 8  | I 6  | 681.3796       | 341.1937        |
| 922.5613       | 9  | A 5  | 568.2956       | 284.6517        |
| 1036.6042      | 10 | N 4  | 497.2585       | 249.1331        |
| 1107.6414      | 11 | A 3  | 383.2155       | 192.1117        |
| 1244.7003      | 12 | H 2  | 312.1784       | 156.5931        |
|                | 13 | R 1  | 175.1195       | 88.0637         |

N-term:+29.04

SIVVSPILIPENQR, MH+ 1598.9693, m/z 533.6613  
 H OSG37 P180811 230811-s1.07345.07345.3.dta

X-range:

-

MassTol: Y-zoom:

MassType:

AVG  MONO

Axis:

1  2

Label:

I  M  -

Ions:

a  +  2+  3+

b  +  2+  3+

c  +  2+  3+

x  +  2+  3+

y  +  2+  3+

z  +  2+  3+

hide H<sub>2</sub>O/NH<sub>3</sub>

zoom 112-122

GO

scan 7345; 5.0e+001

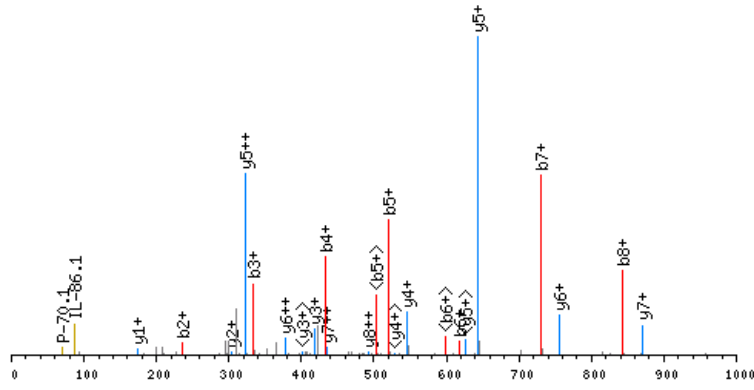

click image to zoom in; click top corners to zoom out [\[precursor±\]](#)

scan 7344; 533.7 m/z; 7.7e+002

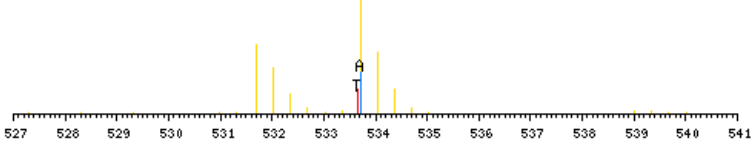

zoomed in precursor plot; T=theoretical m/z, A=acquired m/z

| b <sup>+</sup> | #  | AA # | y <sup>+</sup> | y <sup>2+</sup> |
|----------------|----|------|----------------|-----------------|
| 122.1029       | 1  | S 14 |                |                 |
| 235.1870       | 2  | I 13 | 1477.8742      | 739.4410        |
| 334.2554       | 3  | V 12 | 1364.7902      | 682.8990        |
| 433.3238       | 4  | V 11 | 1265.7218      | 633.3648        |
| 520.3558       | 5  | S 10 | 1166.6533      | 583.8306        |
| 617.4086       | 6  | P 9  | 1079.6213      | 540.3146        |
| 730.4927       | 7  | I 8  | 982.5686       | 491.7882        |
| 843.5767       | 8  | L 7  | 869.4845       | 435.2462        |
| 956.6608       | 9  | I 6  | 756.4004       | 378.7041        |
| 1053.7136      | 10 | P 5  | 643.3164       | 322.1621        |
| 1182.7562      | 11 | E 4  | 546.2636       | 273.6357        |
| 1296.7991      | 12 | N 3  | 417.2210       | 209.1144        |
| 1424.8577      | 13 | Q 2  | 303.1781       | 152.0930        |
|                | 14 | R 1  | 175.1195       | 88.0637         |

N-term:+35.07

SKDSEGSWFR, MH+ 1266.6755, m/z 422.8967  
 H OSG40 P180811 230811-s1.03366.03366.3.dta

X-range:

-

MassTol: Y-zoom:

MassType:

AVG  MONO

Axis:

1  2

Label:

I  M  -

Ions:

a  +  2+  3+

b  +  2+  3+

c  +  2+  3+

x  +  2+  3+

y  +  2+  3+

z  +  2+  3+

hide H<sub>2</sub>O/NH<sub>3</sub>

zoom 112-122

GO

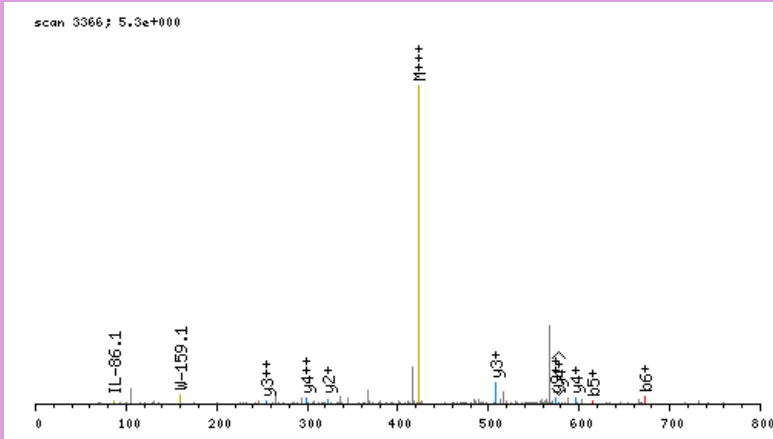

click image to zoom in; click top corners to zoom out [\[precursor±\]](#)

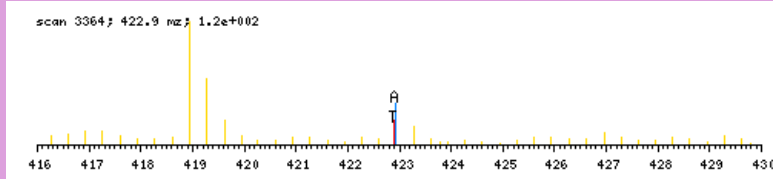

zoomed in precursor plot; T=theoretical m/z, A=acquired m/z

| b <sup>+</sup> | #  | AA # | y <sup>+</sup> | y <sup>2+</sup> |
|----------------|----|------|----------------|-----------------|
| 122.1029       | 1  | S 10 |                |                 |
| 284.2610       | 2  | K 9  | 1145.5804      | 573.2941        |
| 399.2880       | 3  | D 8  | 983.4223       | 492.2151        |
| 486.3200       | 4  | S 7  | 868.3953       | 434.7016        |
| 615.3626       | 5  | E 6  | 781.3633       | 391.1856        |
| 672.3841       | 6  | G 5  | 652.3207       | 326.6643        |
| 759.4161       | 7  | S 4  | 595.2993       | 298.1535        |
| 945.4954       | 8  | W 3  | 508.2672       | 254.6375        |
| 1092.5638      | 9  | F 2  | 322.1879       | 161.5979        |
|                | 10 | R 1  | 175.1195       | 88.0637         |

N-term:+35.07 K(2):+162.16

SKGPPDFSSDEEREPTVPLGSGASVGR, MH+ 2814.3910, m/z 704.3532  
 I OSG40 P180811 230811-s1.05627.05627.4.dta

scan 5627; 3.6e+000

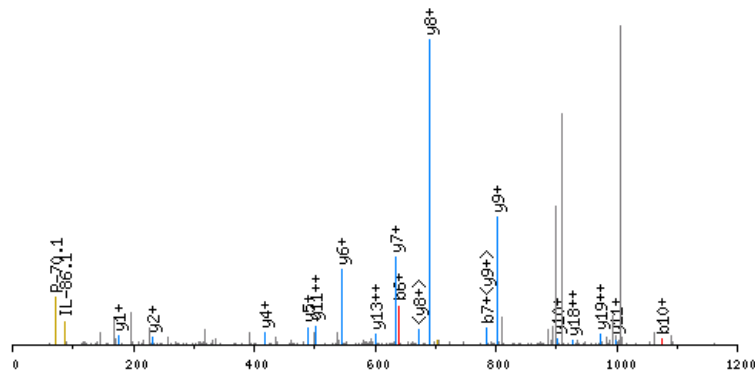

click image to zoom in; click top corners to zoom out [precursor±]

scan 5624; 704.4 m/z; 2.2e+001

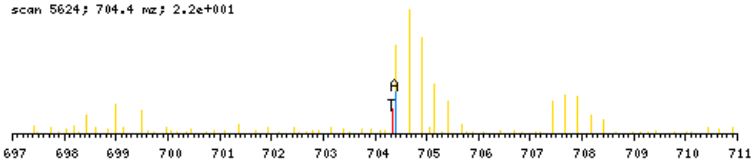

zoomed in precursor plot; T=theoretical m/z, A=acquired m/z

| b <sup>+</sup> | #  | AA # | y <sup>+</sup> | y <sup>2+</sup> |
|----------------|----|------|----------------|-----------------|
| 116.0711       | 1  | S 27 |                |                 |
| 272.1974       | 2  | K 26 | 2699.3277      | 1350.1678       |
| 329.2189       | 3  | G 25 | 2543.2014      | 1272.1046       |
| 426.2717       | 4  | P 24 | 2486.1799      | 1243.5939       |
| 523.3244       | 5  | P 23 | 2389.1272      | 1195.0675       |
| 638.3514       | 6  | D 22 | 2292.0744      | 1146.5411       |
| 785.4198       | 7  | F 21 | 2177.0475      | 1089.0276       |
| 872.4518       | 8  | S 20 | 2029.9791      | 1015.4934       |
| 959.4838       | 9  | S 19 | 1942.9470      | 971.9774        |
| 1074.5108      | 10 | D 18 | 1855.9150      | 928.4614        |
| 1203.5534      | 11 | E 17 | 1740.8881      | 870.9479        |
| 1332.5960      | 12 | E 16 | 1611.8455      | 806.4266        |
| 1488.6971      | 13 | R 15 | 1482.8029      | 741.9053        |
| 1617.7397      | 14 | E 14 | 1326.7018      | 663.8548        |
| 1714.7924      | 15 | P 13 | 1197.6592      | 599.3335        |
| 1815.8401      | 16 | T 12 | 1100.6064      | 550.8071        |
| 1912.8929      | 17 | P 11 | 999.5587       | 500.2833        |
| 2011.9613      | 18 | V 10 | 902.5060       | 451.7569        |
| 2125.0454      | 19 | L 9  | 803.4375       | 402.2227        |
| 2182.0668      | 20 | G 8  | 690.3535       | 345.6807        |
| 2269.0988      | 21 | S 7  | 633.3320       | 317.1699        |
| 2326.1203      | 22 | G 6  | 546.3000       | 273.6539        |
| 2397.1574      | 23 | A 5  | 489.2785       | 245.1432        |
| 2484.1894      | 24 | S 4  | 418.2414       | 209.6246        |
| 2583.2579      | 25 | V 3  | 331.2094       | 166.1086        |
| 2640.2793      | 26 | G 2  | 232.1410       | 116.5744        |
|                | 27 | R 1  | 175.1195       | 88.0637         |

N-term:+29.04 K(2):+156.13

X-range:

-

MassTol: Y-zoom:

MassType:

AVG  MONO

Axis:

1  2

Label:

I  M  -

Ions:

a  +  2+  3+

b  +  2+  3+

c  +  2+  3+

x  +  2+  3+

y  +  2+  3+

z  +  2+  3+

hide H<sub>2</sub>O/NH<sub>3</sub>

zoom 112-122

GO

SKLLCGLLSDR, MH+ 1317.7564, m/z 439.9236  
 L OSG40 P180811 230811-s1.06322.06322.3.dta

scan 6322; 1.7e+000

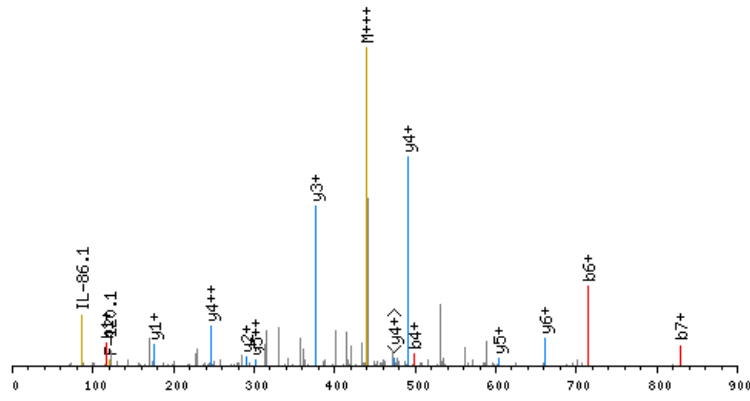

click image to zoom in; click top corners to zoom out [precursor±]

scan 6319; 439.9 m/z; 1.4e+001

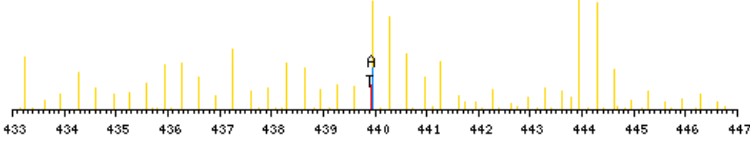

zoomed in precursor plot; T=theoretical m/z, A=acquired m/z

X-range:

-

MassTol: Y-zoom:

MassType:

AVG  MONO

Axis:

1  2

Label:

I  M  -

Ions:

a  +  2+  3+

b  +  2+  3+

c  +  2+  3+

x  +  2+  3+

y  +  2+  3+

z  +  2+  3+

hide H<sub>2</sub>O/NH<sub>3</sub>

zoom 112-122

GO

| b <sup>+</sup> | #  | AA # | y <sup>+</sup> | y <sup>2+</sup> |
|----------------|----|------|----------------|-----------------|
| 116.0711       | 1  | S 11 |                |                 |
| 272.1974       | 2  | K 10 | 1202.6931      | 601.8505        |
| 385.2815       | 3  | L 9  | 1046.5668      | 523.7873        |
| 498.3656       | 4  | L 8  | 933.4827       | 467.2453        |
| 658.3962       | 5  | C 7  | 820.3987       | 410.7032        |
| 715.4176       | 6  | G 6  | 660.3681       | 330.6879        |
| 828.5017       | 7  | L 5  | 603.3466       | 302.1772        |
| 941.5857       | 8  | L 4  | 490.2625       | 245.6352        |
| 1028.6178      | 9  | S 3  | 377.1785       | 189.0931        |
| 1143.6447      | 10 | D 2  | 290.1464       | 145.5771        |
|                | 11 | R 1  | 175.1195       | 88.0637         |

N-term:+29.04 K(2):+156.13  
 C(5):+160.03



SKPAPLTGTLEVR, MH+ 1424.8477, m/z 475.6208  
 L OSG40 P180811 230811-s1.03758.03758.3.dta

X-range:

-

MassTol: Y-zoom:

MassType:

AVG  MONO

Axis:

1  2

Label:

I  M  -

Ions:

a  +  2+  3+

b  +  2+  3+

c  +  2+  3+

x  +  2+  3+

y  +  2+  3+

z  +  2+  3+

hide H<sub>2</sub>O/NH<sub>3</sub>

zoom 112-122

GO

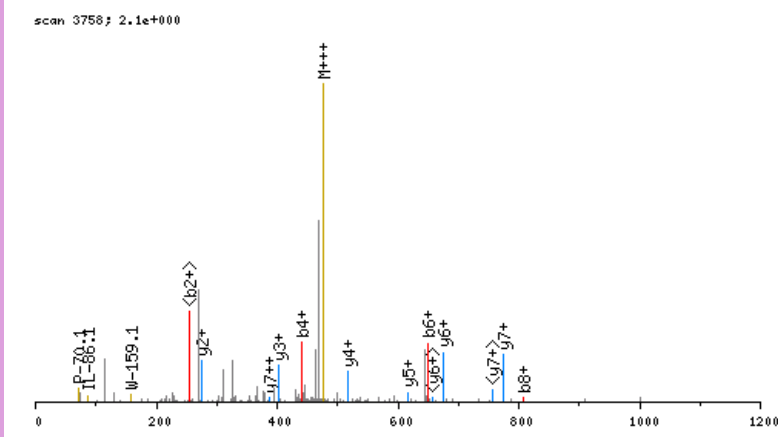

click image to zoom in; click top corners to zoom out [\[precursor±\]](#)

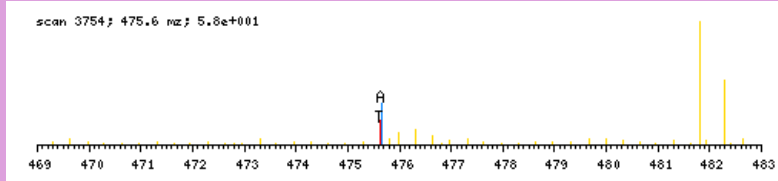

zoomed in precursor plot; T=theoretical m/z, A=acquired m/z

| b <sup>+</sup> | #  | AA # | y <sup>+</sup> | y <sup>2+</sup> |
|----------------|----|------|----------------|-----------------|
| 116.0711       | 1  | S 13 |                |                 |
| 272.1974       | 2  | K 12 | 1309.7844      | 655.3961        |
| 369.2502       | 3  | P 11 | 1153.6581      | 577.3330        |
| 440.2873       | 4  | A 10 | 1056.6053      | 528.8066        |
| 537.3401       | 5  | P 9  | 985.5682       | 493.2880        |
| 650.4241       | 6  | L 8  | 888.5155       | 444.7616        |
| 751.4718       | 7  | T 7  | 775.4314       | 388.2196        |
| 808.4933       | 8  | G 6  | 674.3837       | 337.6958        |
| 909.5410       | 9  | T 5  | 617.3623       | 309.1850        |
| 1022.6250      | 10 | L 4  | 516.3146       | 258.6612        |
| 1151.6676      | 11 | E 3  | 403.2305       | 202.1192        |
| 1250.7360      | 12 | V 2  | 274.1879       | 137.5979        |
|                | 13 | R 1  | 175.1195       | 88.0637         |

N-term:+29.04 K(2):+156.13

SKVEAANFR, MH+ 1089.6693, m/z 545.3383  
 H OSG40 P180811 230811-s1.04110.04110.2.dta

X-range:

-

MassTol: Y-zoom:

MassType:

AVG  MONO

Axis:

1  2

Label:

I  M  -

Ions:

a  +  2+  3+

b  +  2+  3+

c  +  2+  3+

x  +  2+  3+

y  +  2+  3+

z  +  2+  3+

hide H<sub>2</sub>O/NH<sub>3</sub>

zoom 112-122

GO

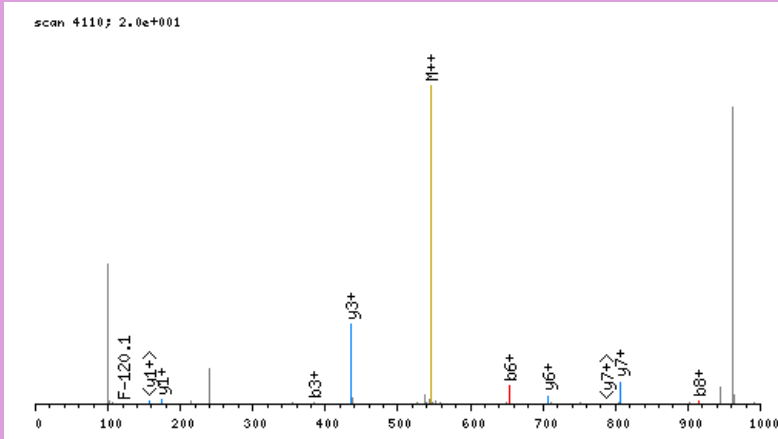

click image to zoom in; click top corners to zoom out [\[precursor±\]](#)

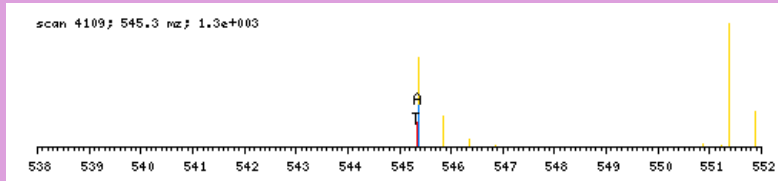

zoomed in precursor plot; T=theoretical m/z, A=acquired m/z

| b <sup>+</sup> | # | AA # | y <sup>+</sup> | y <sup>2+</sup> |
|----------------|---|------|----------------|-----------------|
| 122.1029       | 1 | S    | 9              |                 |
| 284.2610       | 2 | K    | 8              | 968.5742        |
| 383.3294       | 3 | V    | 7              | 806.4161        |
| 512.3720       | 4 | E    | 6              | 707.3477        |
| 583.4091       | 5 | A    | 5              | 578.3051        |
| 654.4463       | 6 | A    | 4              | 507.2680        |
| 768.4892       | 7 | N    | 3              | 436.2308        |
| 915.5576       | 8 | F    | 2              | 322.1879        |
|                | 9 | R    | 1              | 175.1195        |

N-term: +35.07 K(2): +162.16

SKWPEPVFGR, MH+ 1270.7584, m/z 424.2577  
 H OSG40 P180811 230811-s1.05832.05832.3.dta

X-range:

-

MassTol: Y-zoom:

MassType:

AVG  MONO

Axis:

1  2

Label:

I  M  -

Ions:

a  +  2+  3+

b  +  2+  3+

c  +  2+  3+

x  +  2+  3+

y  +  2+  3+

z  +  2+  3+

hide H<sub>2</sub>O/NH<sub>3</sub>

zoom 112-122

GO

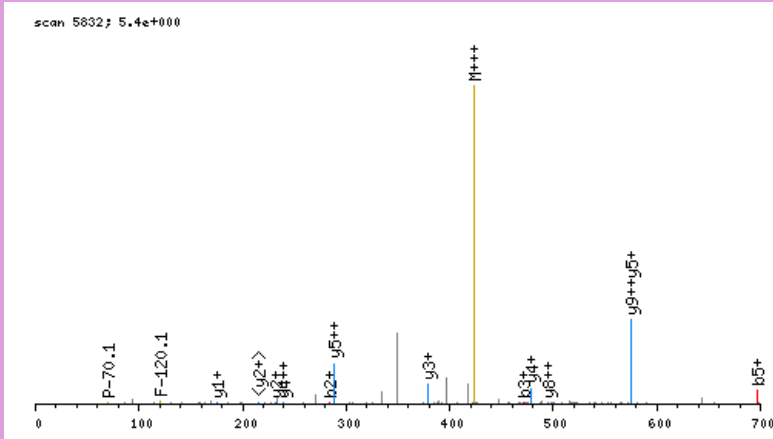

click image to zoom in; click top corners to zoom out [\[precursor±\]](#)

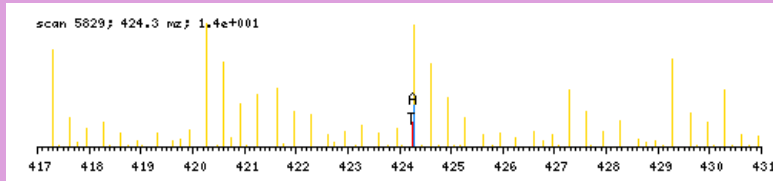

zoomed in precursor plot; T=theoretical m/z, A=acquired m/z

| b <sup>+</sup> | #  | AA # | y <sup>+</sup> | y <sup>2+</sup> |
|----------------|----|------|----------------|-----------------|
| 122.1029       | 1  | S    | 10             |                 |
| 284.2610       | 2  | K    | 9              | 1149.6633       |
| 470.3403       | 3  | W    | 8              | 987.5052        |
| 567.3931       | 4  | P    | 7              | 801.4259        |
| 696.4357       | 5  | E    | 6              | 704.3731        |
| 793.4885       | 6  | P    | 5              | 575.3306        |
| 892.5569       | 7  | V    | 4              | 478.2778        |
| 1039.6253      | 8  | F    | 3              | 379.2094        |
| 1096.6468      | 9  | G    | 2              | 232.1410        |
|                | 10 | R    | 1              | 175.1195        |

N-term:+35.07 K(2):+162.16

SLAELPKVKEAPKVGILGSGDFAR, MH+ 2325.3183, m/z 582.0850  
 L OSG40 P180811 230811-s1.07160.07160.4.dta

X-range:

-

MassTol: Y-zoom:

MassType:

AVG  MONO

Axis:

1  2

Label:

I  M  -

Ions:

a  +  2+  3+

b  +  2+  3+

c  +  2+  3+

x  +  2+  3+

y  +  2+  3+

z  +  2+  3+

hide H<sub>2</sub>O/NH<sub>3</sub>

zoom 112-122

GO

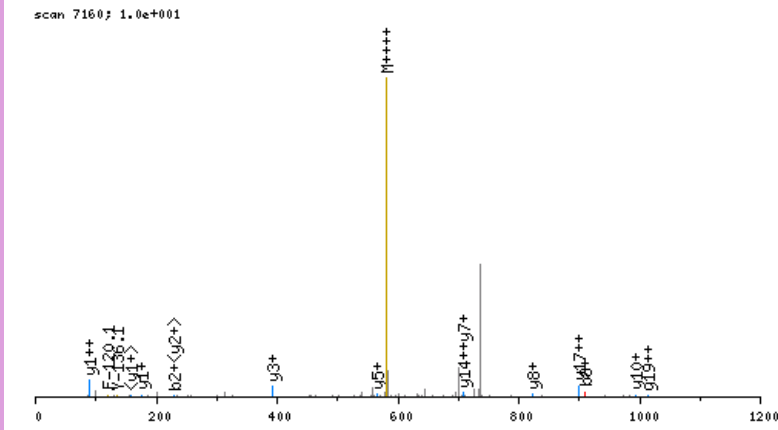

click image to zoom in; click top corners to zoom out [\[precursor±\]](#)

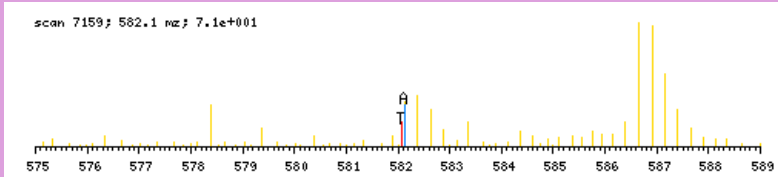

zoomed in precursor plot; T=theoretical m/z, A=acquired m/z

| b <sup>+</sup> | #  | AA | #  | y <sup>+</sup> | y <sup>2+</sup> |
|----------------|----|----|----|----------------|-----------------|
| 116.0711       | 1  | S  | 22 |                |                 |
| 229.1552       | 2  | L  | 21 | 2210.2550      | 1105.6314       |
| 300.1923       | 3  | A  | 20 | 2097.1709      | 1049.0894       |
| 429.2349       | 4  | E  | 19 | 2026.1338      | 1013.5708       |
| 528.3033       | 5  | V  | 18 | 1897.0912      | 949.0495        |
| 625.3561       | 6  | P  | 17 | 1798.0228      | 899.5153        |
| 781.4824       | 7  | K  | 16 | 1700.9700      | 850.9889        |
| 910.5250       | 8  | E  | 15 | 1544.8437      | 772.9258        |
| 981.5621       | 9  | A  | 14 | 1415.8011      | 708.4045        |
| 1078.6148      | 10 | P  | 13 | 1344.7640      | 672.8859        |
| 1234.7411      | 11 | K  | 12 | 1247.7112      | 624.3595        |
| 1333.8096      | 12 | V  | 11 | 1091.5849      | 546.2964        |
| 1390.8310      | 13 | G  | 10 | 992.5165       | 496.7622        |
| 1503.9151      | 14 | I  | 9  | 935.4951       | 468.2514        |
| 1616.9992      | 15 | L  | 8  | 822.4110       | 411.7094        |
| 1674.0206      | 16 | G  | 7  | 709.3269       | 355.1674        |
| 1761.0526      | 17 | S  | 6  | 652.3055       | 326.6566        |
| 1818.0741      | 18 | G  | 5  | 565.2734       | 283.1406        |
| 1933.1011      | 19 | D  | 4  | 508.2520       | 254.6299        |
| 2080.1695      | 20 | F  | 3  | 393.2250       | 197.1164        |
| 2151.2066      | 21 | A  | 2  | 246.1566       | 123.5822        |
|                | 22 | R  | 1  | 175.1195       | 88.0637         |

N-term:+29.04 K(7):+156.13  
 K(11):+156.13

SLEGDHSTPPSAYGSVKPYTNFDAER, MH+ 2881.3645, m/z 721.0966  
 L OSG40 P180811 230811-s1.05917.05917.4.dta

scan 5917; 3.6e+000

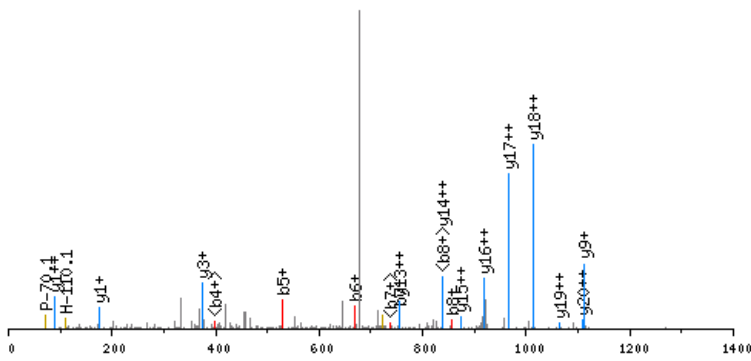

click image to zoom in; click top corners to zoom out [precursor±]

scan 5914; 721.1 m/z; 4.5e+001

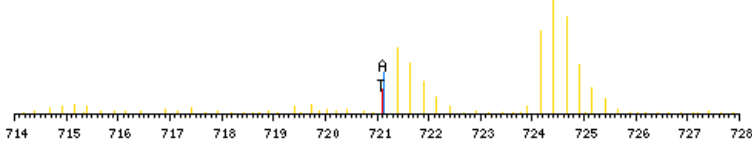

zoomed in precursor plot; T=theoretical m/z, A=acquired m/z

X-range:

-

MassTol: Y-zoom:

MassType:

AVG  MONO

Axis:

1  2

Label:

I  M  -

Ions:

a  +  2+  3+

b  +  2+  3+

c  +  2+  3+

x  +  2+  3+

y  +  2+  3+

z  +  2+  3+

hide H<sub>2</sub>O/NH<sub>3</sub>

zoom 112-122

GO

| b <sup>+</sup> | #  | AA # | y <sup>+</sup> | y <sup>2+</sup> |
|----------------|----|------|----------------|-----------------|
| 116.0711       | 1  | S 26 |                |                 |
| 229.1552       | 2  | L 25 | 2766.3012      | 1383.6545       |
| 358.1978       | 3  | E 24 | 2653.2171      | 1327.1125       |
| 415.2192       | 4  | G 23 | 2524.1745      | 1262.5912       |
| 530.2462       | 5  | D 22 | 2467.1530      | 1234.0804       |
| 667.3051       | 6  | H 21 | 2352.1261      | 1176.5670       |
| 754.3371       | 7  | S 20 | 2215.0672      | 1108.0375       |
| 855.3848       | 8  | T 19 | 2128.0351      | 1064.5215       |
| 952.4376       | 9  | P 18 | 2026.9875      | 1013.9976       |
| 1049.4903      | 10 | P 17 | 1929.9347      | 965.4713        |
| 1136.5224      | 11 | S 16 | 1832.8819      | 916.9449        |
| 1207.5595      | 12 | A 15 | 1745.8499      | 873.4289        |
| 1370.6228      | 13 | Y 14 | 1674.8128      | 837.9103        |
| 1427.6443      | 14 | G 13 | 1511.7495      | 756.3786        |
| 1514.6763      | 15 | S 12 | 1454.7280      | 727.8679        |
| 1613.7447      | 16 | V 11 | 1367.6960      | 684.3519        |
| 1769.8710      | 17 | K 10 | 1268.6276      | 634.8177        |
| 1866.9238      | 18 | P 9  | 1112.5013      | 556.7545        |
| 2029.9871      | 19 | Y 8  | 1015.4485      | 508.2282        |
| 2131.0348      | 20 | T 7  | 852.3852       | 426.6965        |
| 2245.0777      | 21 | N 6  | 751.3375       | 376.1727        |
| 2392.1461      | 22 | F 5  | 637.2946       | 319.1512        |
| 2507.1731      | 23 | D 4  | 490.2262       | 245.6170        |
| 2578.2102      | 24 | A 3  | 375.1992       | 188.1035        |
| 2707.2528      | 25 | E 2  | 304.1621       | 152.5850        |
|                | 26 | R 1  | 175.1195       | 88.0637         |

N-term:+29.04 K(17) :+156.13

SLEKSYELPDGQVITIGNER, MH+ 2316.2723, m/z 772.7623  
 H OSG39 P180811 230811-s1.06588.06588.3.dta

scan 6586; 2.5e+000

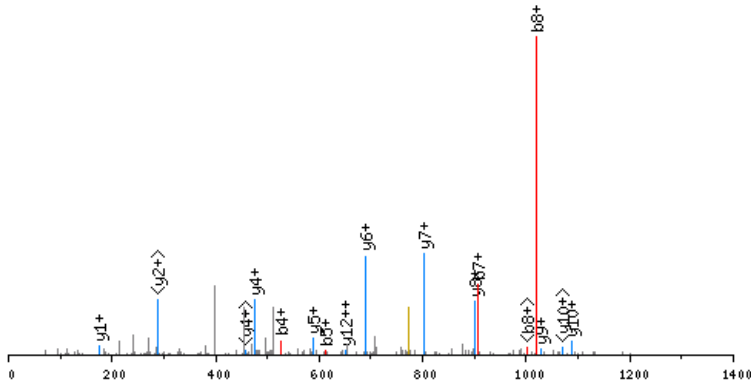

click image to zoom in; click top corners to zoom out [precursor±]

scan 6586; 772.8 m/z; 2.6e+001

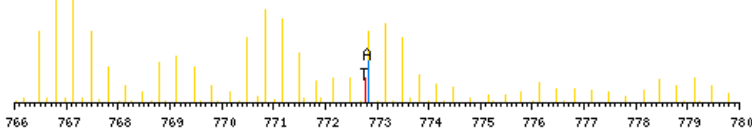

zoomed in precursor plot; T=theoretical m/z, A=acquired m/z

X-range:

-

MassTol: Y-zoom:

MassType:

AVG  MONO

Axis:

1  2

Label:

I  M  -

Ions:

a  +  2+  3+

b  +  2+  3+

c  +  2+  3+

x  +  2+  3+

y  +  2+  3+

z  +  2+  3+

hide H<sub>2</sub>O/NH<sub>3</sub>

zoom 112-122

GO

| b <sup>+</sup> | #  | AA | #  | y <sup>+</sup> | y <sup>2+</sup> |
|----------------|----|----|----|----------------|-----------------|
| 122.1029       | 1  | S  | 20 |                |                 |
| 235.1870       | 2  | L  | 19 | 2195.1772      | 1098.0925       |
| 364.2296       | 3  | E  | 18 | 2082.0932      | 1041.5505       |
| 526.3877       | 4  | K  | 17 | 1953.0506      | 977.0292        |
| 613.4197       | 5  | S  | 16 | 1790.8925      | 895.9501        |
| 776.4830       | 6  | Y  | 15 | 1703.8604      | 852.4341        |
| 905.5256       | 7  | E  | 14 | 1540.7971      | 770.9025        |
| 1018.6097      | 8  | L  | 13 | 1411.7545      | 706.3812        |
| 1115.6625      | 9  | P  | 12 | 1298.6705      | 649.8391        |
| 1230.6894      | 10 | D  | 11 | 1201.6177      | 601.3128        |
| 1287.7109      | 11 | G  | 10 | 1086.5907      | 543.7993        |
| 1415.7694      | 12 | Q  | 9  | 1029.5693      | 515.2886        |
| 1514.8379      | 13 | V  | 8  | 901.5107       | 451.2593        |
| 1627.9219      | 14 | I  | 7  | 802.4423       | 401.7251        |
| 1728.9696      | 15 | T  | 6  | 689.3582       | 345.1830        |
| 1842.0537      | 16 | I  | 5  | 588.3105       | 294.6592        |
| 1899.0751      | 17 | G  | 4  | 475.2265       | 238.1172        |
| 2013.1181      | 18 | N  | 3  | 418.2050       | 209.6064        |
| 2142.1607      | 19 | E  | 2  | 304.1621       | 152.5850        |
|                | 20 | R  | 1  | 175.1195       | 88.0637         |

N-term:+35.07 K(4):+162.16

SLFSSAENEPPVPLVGNWRPPQPVKGR, MH+ 3014.6216, m/z 754.4109  
 L OSG40 P180811 230811-s1.08671.08671.4.dta

scan 8671; 1.1e+000

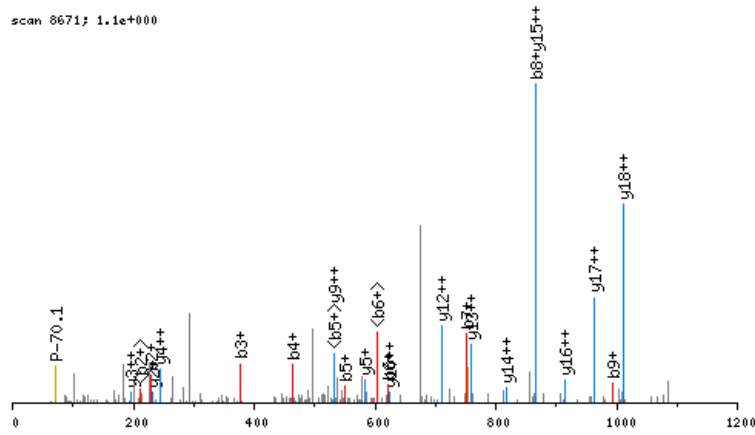

click image to zoom in; click top corners to zoom out [precursor±]

scan 8669; 754.4 m/z; 1.6e+001

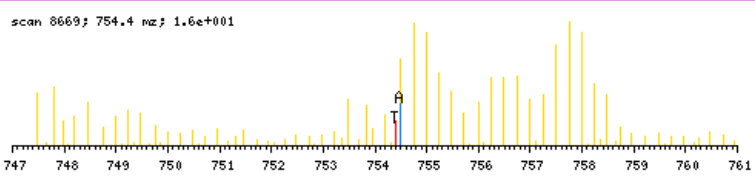

zoomed in precursor plot; T=theoretical m/z, A=acquired m/z

| b <sup>+</sup> | #  | AA | #  | y <sup>+</sup> | y <sup>2+</sup> |
|----------------|----|----|----|----------------|-----------------|
| 116.0711       | 1  | S  | 27 |                |                 |
| 229.1552       | 2  | L  | 26 | 2899.5583      | 1450.2831       |
| 376.2236       | 3  | F  | 25 | 2786.4742      | 1393.7410       |
| 463.2556       | 4  | S  | 24 | 2639.4058      | 1320.2068       |
| 550.2877       | 5  | S  | 23 | 2552.3738      | 1276.6908       |
| 621.3248       | 6  | A  | 22 | 2465.3418      | 1233.1748       |
| 750.3674       | 7  | E  | 21 | 2394.3047      | 1197.6562       |
| 864.4103       | 8  | N  | 20 | 2265.2621      | 1133.1349       |
| 993.4529       | 9  | E  | 19 | 2151.2191      | 1076.1135       |
| 1090.5057      | 10 | P  | 18 | 2022.1765      | 1011.5922       |
| 1187.5584      | 11 | P  | 17 | 1925.1238      | 963.0658        |
| 1286.6268      | 12 | V  | 16 | 1828.0710      | 914.5394        |
| 1383.6796      | 13 | P  | 15 | 1729.0026      | 865.0052        |
| 1496.7637      | 14 | L  | 14 | 1631.9498      | 816.4788        |
| 1595.8321      | 15 | V  | 13 | 1518.8658      | 759.9368        |
| 1652.8535      | 16 | G  | 12 | 1419.7974      | 710.4026        |
| 1766.8965      | 17 | N  | 11 | 1362.7759      | 681.8919        |
| 1952.9758      | 18 | W  | 10 | 1248.7330      | 624.8704        |
| 2109.0769      | 19 | R  | 9  | 1062.6537      | 531.8307        |
| 2206.1297      | 20 | P  | 8  | 906.5525       | 453.7802        |
| 2303.1824      | 21 | P  | 7  | 809.4998       | 405.2538        |
| 2431.2410      | 22 | Q  | 6  | 712.4470       | 356.7274        |
| 2528.2938      | 23 | P  | 5  | 584.3884       | 292.6981        |
| 2627.3622      | 24 | V  | 4  | 487.3357       | 244.1718        |
| 2783.4885      | 25 | K  | 3  | 388.2673       | 194.6375        |
| 2840.5099      | 26 | G  | 2  | 232.1410       | 116.5744        |
|                | 27 | R  | 1  | 175.1195       | 88.0637         |

N-term:+29.04 K(25):+156.13

X-range:

-

MassTol: Y-zoom:

MassType:

AVG  MONO

Axis:

1  2

Label:

I  M  -

Ions:

a  +  2+  3+

b  +  2+  3+

c  +  2+  3+

x  +  2+  3+

y  +  2+  3+

z  +  2+  3+

hide H<sub>2</sub>O/NH<sub>3</sub>

zoom 112-122

GO

SLGNAGNEIGR, MH+ 1115.5809, m/z 558.2941  
 L OSG38 P180811 230811-s1.02653.02653.2.dta

X-range:

-

MassTol: Y-zoom:

MassType:

AVG  MONO

Axis:

1  2

Label:

I  M  -

Ions:

a  +  2+  3+

b  +  2+  3+

c  +  2+  3+

x  +  2+  3+

y  +  2+  3+

z  +  2+  3+

hide H<sub>2</sub>O/NH<sub>3</sub>

zoom 112-122

GO

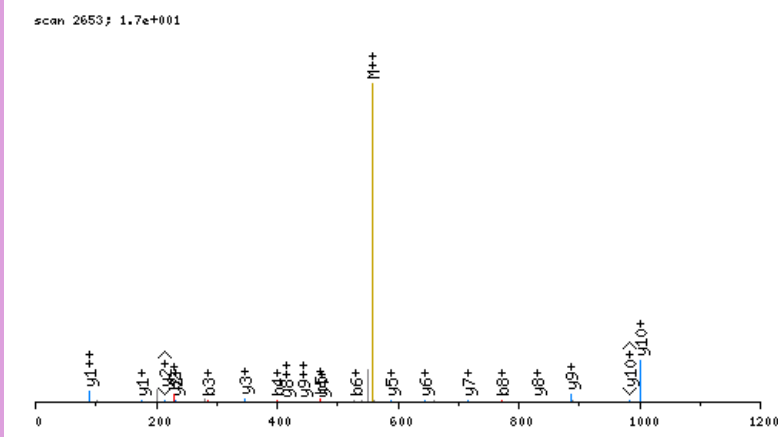

click image to zoom in; click top corners to zoom out [\[precursor±\]](#)

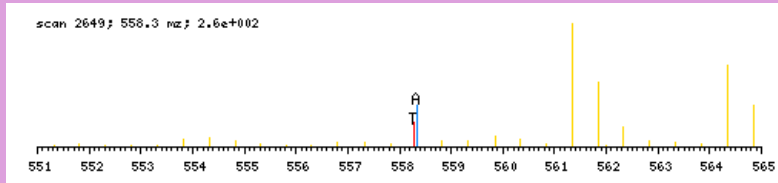

zoomed in precursor plot; T=theoretical m/z, A=acquired m/z

| b <sup>+</sup> | #  | AA # | y <sup>+</sup> | y <sup>2+</sup> |
|----------------|----|------|----------------|-----------------|
| 116.0711       | 1  | S 11 |                |                 |
| 229.1552       | 2  | L 10 | 1000.5176      | 500.7627        |
| 286.1767       | 3  | G 9  | 887.4335       | 444.2207        |
| 400.2196       | 4  | N 8  | 830.4121       | 415.7099        |
| 471.2567       | 5  | A 7  | 716.3691       | 358.6885        |
| 528.2782       | 6  | G 6  | 645.3320       | 323.1699        |
| 642.3211       | 7  | N 5  | 588.3105       | 294.6592        |
| 771.3637       | 8  | E 4  | 474.2676       | 237.6377        |
| 884.4477       | 9  | I 3  | 345.2250       | 173.1164        |
| 941.4692       | 10 | G 2  | 232.1410       | 116.5744        |
|                | 11 | R 1  | 175.1195       | 88.0637         |

N-term:+29.04



SLGTGQVIKGDQGLGMCEGEKR, MH+ 2721.4916, m/z 681.1284  
 H OSG40 P180811 230811-s1.08218.08218.4.dta

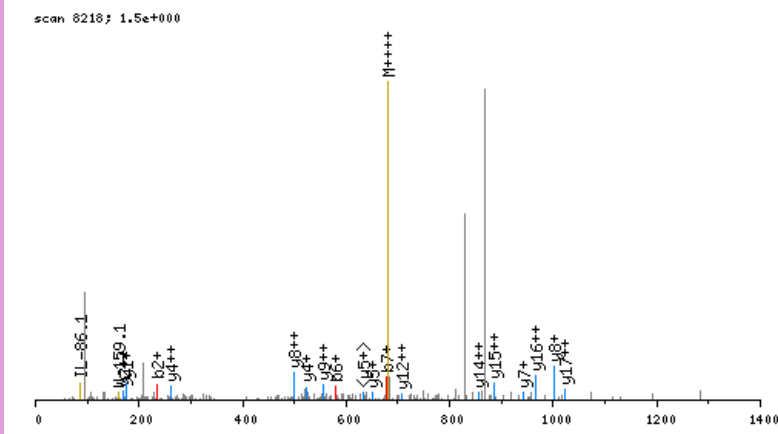

click image to zoom in; click top corners to zoom out [\[precursor±\]](#)

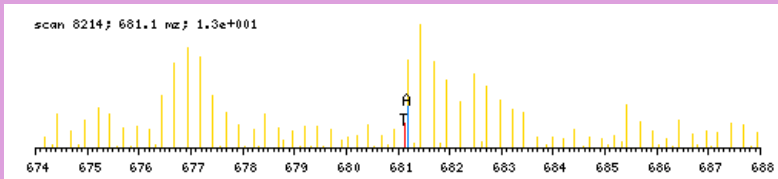

zoomed in precursor plot; T=theoretical m/z, A=acquired m/z

X-range:

-

MassTol: Y-zoom:

MassType:

AVG  MONO

Axis:

1  2

Label:

I  M  -

Ions:

a  +  2+  3+

b  +  2+  3+

c  +  2+  3+

x  +  2+  3+

y  +  2+  3+

z  +  2+  3+

hide H<sub>2</sub>O/NH<sub>3</sub>

zoom 112-122

| b <sup>+</sup>  | #  | AA       | #  | y <sup>+</sup>   | y <sup>2+</sup>  |
|-----------------|----|----------|----|------------------|------------------|
| 122.1029        | 1  | S        | 24 |                  |                  |
| <b>235.1870</b> | 2  | L        | 23 | 2600.3965        | 1300.7022        |
| 292.2085        | 3  | G        | 22 | 2487.3124        | 1244.1601        |
| 393.2561        | 4  | T        | 21 | 2430.2910        | 1215.6494        |
| 450.2776        | 5  | G        | 20 | 2329.2433        | 1165.1256        |
| <b>578.3362</b> | 6  | Q        | 19 | 2272.2218        | 1136.6148        |
| <b>677.4046</b> | 7  | V        | 18 | 2144.1633        | 1072.5855        |
| 790.4887        | 8  | I        | 17 | 2045.0949        | <b>1023.0513</b> |
| 952.6468        | 9  | <b>K</b> | 16 | 1932.0108        | <b>966.5093</b>  |
| 1009.6682       | 10 | G        | 15 | 1769.8527        | <b>885.4303</b>  |
| 1195.7475       | 11 | W        | 14 | 1712.8312        | <b>856.9195</b>  |
| 1310.7745       | 12 | D        | 13 | 1526.7519        | 763.8799         |
| 1438.8331       | 13 | Q        | 12 | 1411.7250        | <b>706.3664</b>  |
| 1495.8545       | 14 | G        | 11 | 1283.6664        | 642.3371         |
| 1608.9386       | 15 | L        | 10 | 1226.6449        | 613.8264         |
| 1722.0226       | 16 | L        | 9  | 1113.5609        | <b>557.2843</b>  |
| 1779.0441       | 17 | G        | 8  | <b>1000.4768</b> | <b>500.7423</b>  |
| 1910.0846       | 18 | M        | 7  | <b>943.4553</b>  | 472.2316         |
| 2070.1152       | 19 | <b>C</b> | 6  | 812.4149         | 406.7113         |
| 2199.1578       | 20 | E        | 5  | <b>652.3843</b>  | 326.6960         |
| 2256.1792       | 21 | G        | 4  | <b>523.3417</b>  | <b>262.1747</b>  |
| 2385.2218       | 22 | E        | 3  | 466.3202         | 233.6640         |
| 2547.3799       | 23 | <b>K</b> | 2  | 337.2776         | <b>169.1427</b>  |
|                 | 24 | R        | 1  | <b>175.1195</b>  | 88.0637          |

N-term:+35.07 K(9):+162.16  
 C(19):+160.03 K(23):+162.16

SLHLGVTSPVLR, MH+ 1306.7847, m/z 436.2664  
 L OSG40 P180811 230811-s1.06153.06153.3.dta

X-range:

-

MassTol: Y-zoom:

MassType:

AVG  MONO

Axis:

1  2

Label:

I  M  -

Ions:

a  +  2+  3+

b  +  2+  3+

c  +  2+  3+

x  +  2+  3+

y  +  2+  3+

z  +  2+  3+

hide H<sub>2</sub>O/NH<sub>3</sub>

zoom 112-122

GO

scan 6153; 3.4e+000

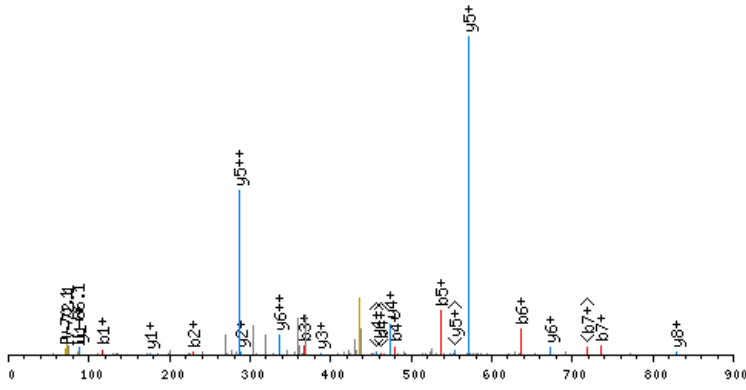

click image to zoom in; click top corners to zoom out [\[precursor±\]](#)

scan 6149; 436.3 m/z; 2.1e+001

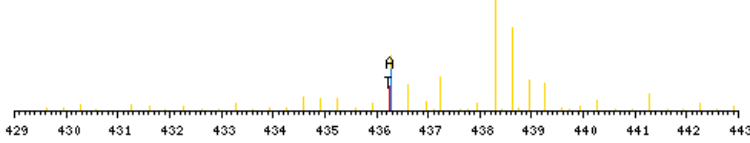

zoomed in precursor plot; T=theoretical m/z, A=acquired m/z

| b <sup>+</sup> | #  | AA # | y <sup>+</sup> | y <sup>2+</sup> |
|----------------|----|------|----------------|-----------------|
| 116.0711       | 1  | S 12 |                |                 |
| 229.1552       | 2  | L 11 | 1191.7214      | 596.3646        |
| 366.2141       | 3  | H 10 | 1078.6373      | 539.8226        |
| 479.2982       | 4  | L 9  | 941.5784       | 471.2931        |
| 536.3196       | 5  | G 8  | 828.4943       | 414.7511        |
| 635.3880       | 6  | V 7  | 771.4729       | 386.2403        |
| 736.4357       | 7  | T 6  | 672.4044       | 336.7061        |
| 833.4885       | 8  | P 5  | 571.3568       | 286.1823        |
| 920.5205       | 9  | S 4  | 474.3040       | 237.6559        |
| 1019.5889      | 10 | V 3  | 387.2720       | 194.1399        |
| 1132.6730      | 11 | L 2  | 288.2036       | 144.6057        |
|                | 12 | R 1  | 175.1195       | 88.0637         |

N-term:+29.04

SLKGVVPEDAVETLAGSLGTR, MH+ 2167.2610, m/z 723.0919  
 H OSG39 P180811 230811-s1.07628.07628.3.dta

scan 7628; 1.4e+001

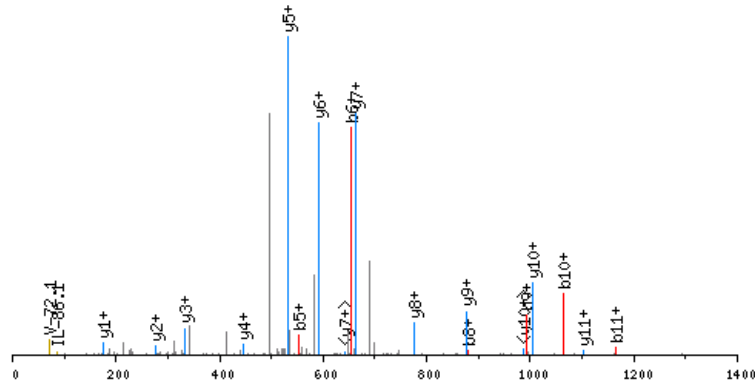

click image to zoom in; click top corners to zoom out [precursor±]

scan 7626; 723.1 m/z; 8.3e+001

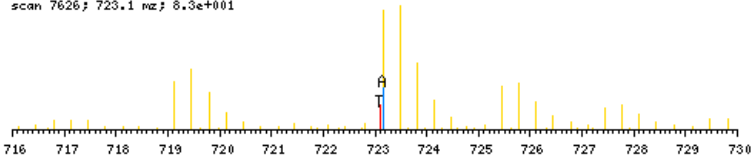

zoomed in precursor plot; T=theoretical m/z, A=acquired m/z

| b <sup>+</sup> | #  | AA # | y <sup>+</sup> | y <sup>2+</sup> |
|----------------|----|------|----------------|-----------------|
| 122.1029       | 1  | S 21 |                |                 |
| 235.1870       | 2  | L 20 | 2046.1659      | 1023.5869       |
| 397.3451       | 3  | K 19 | 1933.0819      | 967.0448        |
| 454.3666       | 4  | G 18 | 1770.9238      | 885.9658        |
| 553.4350       | 5  | V 17 | 1713.9023      | 857.4551        |
| 652.5034       | 6  | V 16 | 1614.8339      | 807.9209        |
| 749.5561       | 7  | P 15 | 1515.7655      | 758.3867        |
| 878.5987       | 8  | E 14 | 1418.7127      | 709.8603        |
| 993.6257       | 9  | D 13 | 1289.6701      | 645.3390        |
| 1064.6628      | 10 | A 12 | 1174.6432      | 587.8255        |
| 1163.7312      | 11 | V 11 | 1103.6061      | 552.3069        |
| 1292.7738      | 12 | E 10 | 1004.5376      | 502.7727        |
| 1393.8215      | 13 | T 9  | 875.4951       | 438.2514        |
| 1506.9055      | 14 | L 8  | 774.4474       | 387.7276        |
| 1577.9427      | 15 | A 7  | 661.3633       | 331.1856        |
| 1634.9641      | 16 | G 6  | 590.3262       | 295.6670        |
| 1721.9962      | 17 | S 5  | 533.3047       | 267.1563        |
| 1835.0802      | 18 | L 4  | 446.2727       | 223.6403        |
| 1892.1017      | 19 | G 3  | 333.1886       | 167.0982        |
| 1993.1494      | 20 | T 2  | 276.1672       | 138.5875        |
|                | 21 | R 1  | 175.1195       | 88.0637         |

N-term:+35.07 K(3):+162.16

X-range:

-

MassTol: Y-zoom:

MassType:

AVG  MONO

Axis:

1  2

Label:

I  M  -

Ions:

a  +  2+  3+

b  +  2+  3+

c  +  2+  3+

x  +  2+  3+

y  +  2+  3+

z  +  2+  3+

hide H<sub>2</sub>O/NH<sub>3</sub>

zoom 112-122

GO

SLLPASLLDHR, MH+ 1255.7586, m/z 419.2577  
 H OSG40 P180811 230811-s1.07123.07123.3.dta

X-range:

-

MassTol: Y-zoom:

MassType:

AVG  MONO

Axis:

1  2

Label:

I  M  -

Ions:

a  +  2+  3+

b  +  2+  3+

c  +  2+  3+

x  +  2+  3+

y  +  2+  3+

z  +  2+  3+

hide H<sub>2</sub>O/NH<sub>3</sub>

zoom 112-122

GO

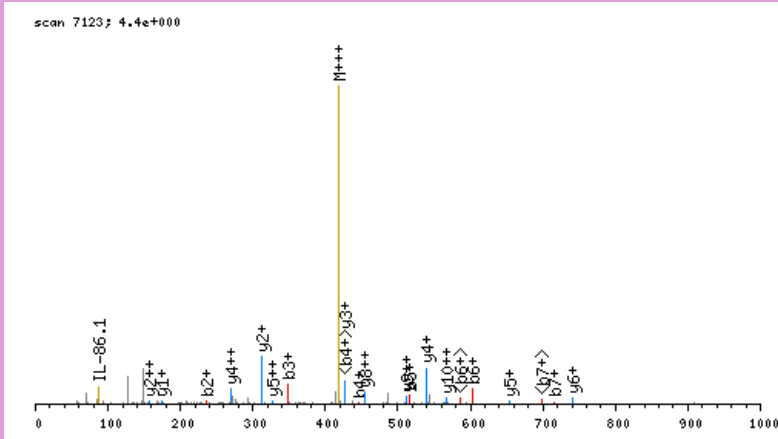

click image to zoom in; click top corners to zoom out [\[precursor±\]](#)

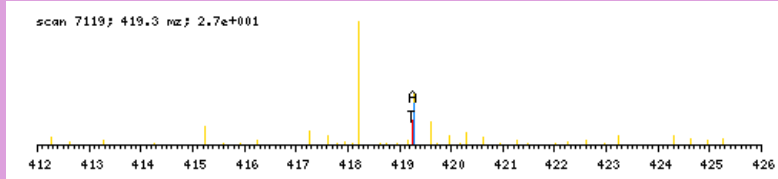

zoomed in precursor plot; T=theoretical m/z, A=acquired m/z

| b <sup>+</sup> | #  | AA # | y <sup>+</sup> | y <sup>2+</sup> |
|----------------|----|------|----------------|-----------------|
| 122.1029       | 1  | S 11 |                |                 |
| 235.1870       | 2  | L 10 | 1134.6635      | 567.8357        |
| 348.2711       | 3  | L 9  | 1021.5795      | 511.2936        |
| 445.3238       | 4  | P 8  | 908.4954       | 454.7516        |
| 516.3609       | 5  | A 7  | 811.4426       | 406.2252        |
| 603.3930       | 6  | S 6  | 740.4055       | 370.7067        |
| 716.4770       | 7  | L 5  | 653.3735       | 327.1907        |
| 829.5611       | 8  | L 4  | 540.2894       | 270.6486        |
| 944.5880       | 9  | D 3  | 427.2054       | 214.1066        |
| 1081.6469      | 10 | H 2  | 312.1784       | 156.5931        |
|                | 11 | R 1  | 175.1195       | 88.0637         |

N-term:+35.07

SLLSGEETGSLPGNYLVPIYSGR, MH+ 2443.2933, m/z 815.1026  
 H OSG36 P180811 230811-s1.06091.06091.3.dta

scan 6091; 4.9e+000

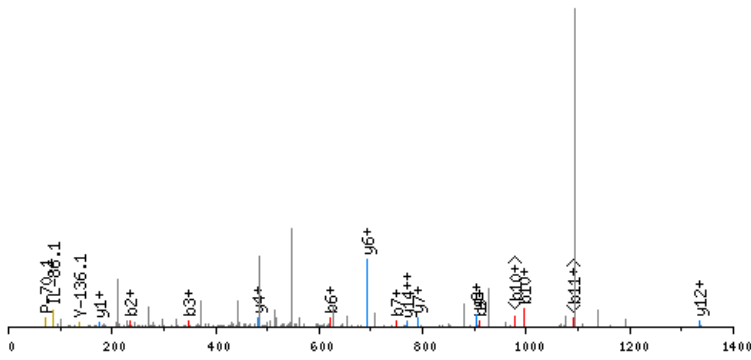

click image to zoom in; click top corners to zoom out [precursor±]

scan 6089; 815.1 m/z; 3.5e+001

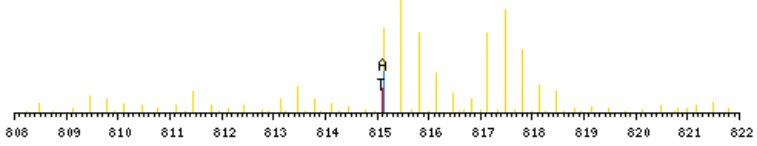

zoomed in precursor plot; T=theoretical m/z, A=acquired m/z

X-range:

-

MassTol: Y-zoom:

MassType:

AVG  MONO

Axis:

1  2

Label:

I  M  -

Ions:

a  +  2+  3+

b  +  2+  3+

c  +  2+  3+

x  +  2+  3+

y  +  2+  3+

z  +  2+  3+

hide H<sub>2</sub>O/NH<sub>3</sub>

zoom 112-122

GO

| b <sup>+</sup> | #  | AA # | y <sup>+</sup> | y <sup>2+</sup> |
|----------------|----|------|----------------|-----------------|
| 122.1029       | 1  | S 23 |                |                 |
| 235.1870       | 2  | L 22 | 2322.1982      | 1161.6030       |
| 348.2711       | 3  | L 21 | 2209.1141      | 1105.0610       |
| 435.3031       | 4  | S 20 | 2096.0300      | 1048.5189       |
| 492.3245       | 5  | G 19 | 2008.9980      | 1005.0029       |
| 621.3671       | 6  | E 18 | 1951.9765      | 976.4922        |
| 750.4097       | 7  | E 17 | 1822.9339      | 911.9709        |
| 851.4574       | 8  | T 16 | 1693.8913      | 847.4496        |
| 908.4789       | 9  | G 15 | 1592.8437      | 796.9257        |
| 995.5109       | 10 | S 14 | 1535.8222      | 768.4150        |
| 1108.5950      | 11 | L 13 | 1448.7902      | 724.8990        |
| 1205.6477      | 12 | P 12 | 1335.7061      | 668.3570        |
| 1262.6692      | 13 | G 11 | 1238.6533      | 619.8306        |
| 1376.7121      | 14 | N 10 | 1181.6319      | 591.3199        |
| 1539.7755      | 15 | Y 9  | 1067.5890      | 534.2984        |
| 1652.8595      | 16 | L 8  | 904.5256       | 452.7667        |
| 1751.9279      | 17 | V 7  | 791.4416       | 396.2247        |
| 1848.9807      | 18 | P 6  | 692.3731       | 346.6905        |
| 1962.0648      | 19 | I 5  | 595.3204       | 298.1641        |
| 2125.1281      | 20 | Y 4  | 482.2363       | 241.6221        |
| 2212.1601      | 21 | S 3  | 319.1730       | 160.0904        |
| 2269.1816      | 22 | G 2  | 232.1410       | 116.5744        |
|                | 23 | R 1  | 175.1195       | 88.0637         |

N-term:+35.07

SLPGAPTASSGTAAYPALPNR, MH+ 2027.0562, m/z 676.3569  
 L OSG36 P180811 230811-s1.04012.04012.3.dta

X-range:

-

MassTol: Y-zoom:

MassType:

AVG  MONO

Axis:

1  2

Label:

I  M  -

Ions:

a  +  2+  3+

b  +  2+  3+

c  +  2+  3+

x  +  2+  3+

y  +  2+  3+

z  +  2+  3+

hide H<sub>2</sub>O/NH<sub>3</sub>

zoom 112-122

GO

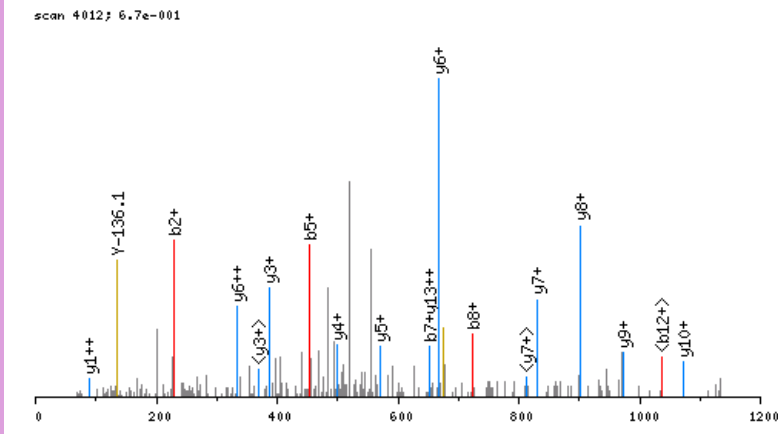

click image to zoom in; click top corners to zoom out [\[precursor±\]](#)

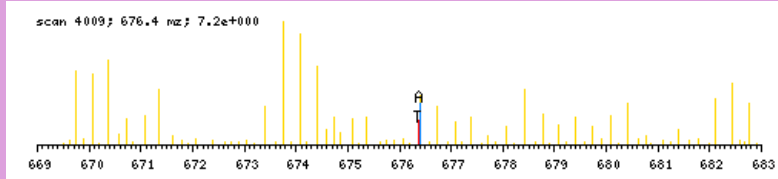

zoomed in precursor plot; T=theoretical m/z, A=acquired m/z

| b <sup>+</sup>  | #  | AA # | y <sup>+</sup>   | y <sup>2+</sup> |
|-----------------|----|------|------------------|-----------------|
| 116.0711        | 1  | S 21 |                  |                 |
| <b>229.1552</b> | 2  | L 20 | 1911.9929        | 956.5003        |
| 326.2080        | 3  | P 19 | 1798.9088        | 899.9583        |
| 383.2294        | 4  | G 18 | 1701.8560        | 851.4319        |
| <b>454.2665</b> | 5  | A 17 | 1644.8346        | 822.9212        |
| 551.3193        | 6  | P 16 | 1573.7974        | 787.4026        |
| <b>652.3670</b> | 7  | T 15 | 1476.7447        | 738.8763        |
| <b>723.4041</b> | 8  | A 14 | 1375.6970        | 688.3524        |
| 810.4361        | 9  | S 13 | 1304.6599        | <b>652.8339</b> |
| 897.4681        | 10 | S 12 | 1217.6279        | 609.3178        |
| 954.4896        | 11 | G 11 | 1130.5958        | 565.8018        |
| 1055.5373       | 12 | T 10 | <b>1073.5744</b> | 537.2911        |
| 1126.5744       | 13 | A 9  | <b>972.5267</b>  | 486.7673        |
| 1197.6115       | 14 | A 8  | <b>901.4896</b>  | 451.2487        |
| 1360.6748       | 15 | Y 7  | <b>830.4525</b>  | 415.7301        |
| 1457.7276       | 16 | P 6  | <b>667.3891</b>  | <b>334.1985</b> |
| 1528.7647       | 17 | A 5  | <b>570.3364</b>  | 285.6721        |
| 1641.8488       | 18 | L 4  | <b>499.2993</b>  | 250.1535        |
| 1738.9016       | 19 | P 3  | <b>386.2152</b>  | 193.6115        |
| 1852.9445       | 20 | N 2  | 289.1624         | 145.0851        |
|                 | 21 | R 1  | 175.1195         | <b>88.0637</b>  |

N-term:+29.04

SLPGNYLVPIYSGR, MH+ 1569.8853, m/z 785.4463  
 H OSG37 P180811 230811-s1.07641.07641.2.dta

X-range:

-

MassTol: Y-zoom:

MassType:

AVG  MONO

Axis:

1  2

Label:

I  M  -

Ions:

a  +  2+  3+

b  +  2+  3+

c  +  2+  3+

x  +  2+  3+

y  +  2+  3+

z  +  2+  3+

hide H<sub>2</sub>O/NH<sub>3</sub>

zoom 112-122

GO

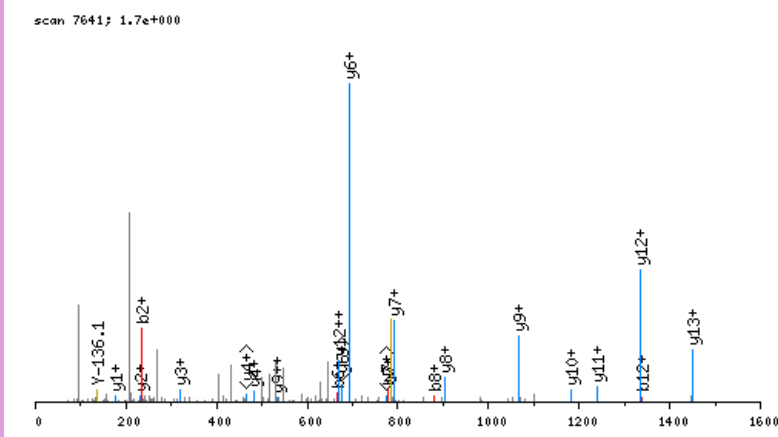

click image to zoom in; click top corners to zoom out [\[precursor±\]](#)

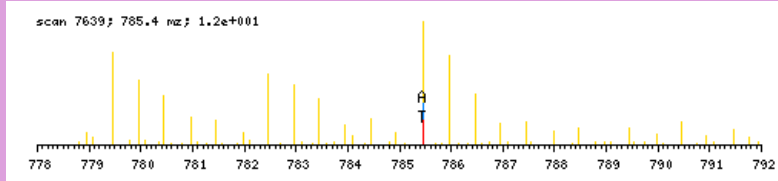

zoomed in precursor plot; T=theoretical m/z, A=acquired m/z

| b <sup>+</sup> | #  | AA # | y <sup>+</sup> | y <sup>2+</sup> |
|----------------|----|------|----------------|-----------------|
| 122.1029       | 1  | S 14 |                |                 |
| 235.1870       | 2  | L 13 | 1448.7902      | 724.8990        |
| 332.2398       | 3  | P 12 | 1335.7061      | 668.3570        |
| 389.2612       | 4  | G 11 | 1238.6533      | 619.8306        |
| 503.3041       | 5  | N 10 | 1181.6319      | 591.3199        |
| 666.3675       | 6  | Y 9  | 1067.5890      | 534.2984        |
| 779.4515       | 7  | L 8  | 904.5256       | 452.7667        |
| 878.5200       | 8  | V 7  | 791.4416       | 396.2247        |
| 975.5727       | 9  | P 6  | 692.3731       | 346.6905        |
| 1088.6568      | 10 | I 5  | 595.3204       | 298.1641        |
| 1251.7201      | 11 | Y 4  | 482.2363       | 241.6221        |
| 1338.7521      | 12 | S 3  | 319.1730       | 160.0904        |
| 1395.7736      | 13 | G 2  | 232.1410       | 116.5744        |
|                | 14 | R 1  | 175.1195       | 88.0637         |

N-term:+35.07

SLPPHQKVLPLSLPTMQAGTIAR, MH+ 2582.4493, m/z 646.3678  
 L OSG40 P180811 230811-s1.06760.06760.4.dta

scan 6760; 3.2e+000

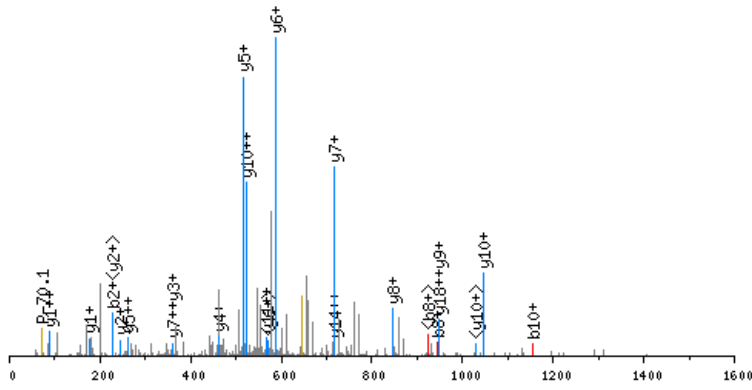

click image to zoom in; click top corners to zoom out [precursor±]

scan 6759; 646.4 m/z; 4.9e+001

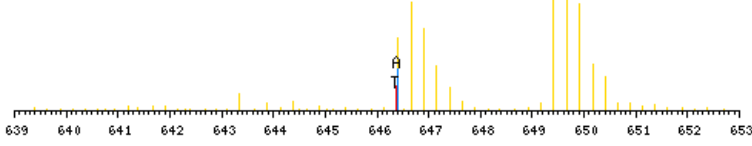

zoomed in precursor plot; T=theoretical m/z, A=acquired m/z

X-range:

-

MassTol: Y-zoom:

MassType:

AVG  MONO

Axis:

1  2

Label:

I  M  -

Ions:

a  +  2+  3+

b  +  2+  3+

c  +  2+  3+

x  +  2+  3+

y  +  2+  3+

z  +  2+  3+

hide H<sub>2</sub>O/NH<sub>3</sub>

zoom 112-122

GO

| b <sup>+</sup> | #  | AA # | y <sup>+</sup> | y <sup>2+</sup> |
|----------------|----|------|----------------|-----------------|
| 116.0711       | 1  | S 24 |                |                 |
| 229.1552       | 2  | L 23 | 2467.3859      | 1234.1969       |
| 326.2080       | 3  | P 22 | 2354.3019      | 1177.6549       |
| 423.2607       | 4  | P 21 | 2257.2491      | 1129.1285       |
| 560.3196       | 5  | H 20 | 2160.1964      | 1080.6021       |
| 688.3782       | 6  | Q 19 | 2023.1374      | 1012.0726       |
| 844.5045       | 7  | K 18 | 1895.0789      | 948.0433        |
| 943.5729       | 8  | V 17 | 1738.9526      | 869.9802        |
| 1040.6257      | 9  | P 16 | 1639.8842      | 820.4460        |
| 1153.7098      | 10 | L 15 | 1542.8314      | 771.9196        |
| 1250.7625      | 11 | P 14 | 1429.7473      | 715.3776        |
| 1337.7945      | 12 | S 13 | 1332.6946      | 666.8512        |
| 1450.8786      | 13 | L 12 | 1245.6625      | 623.3352        |
| 1537.9106      | 14 | S 11 | 1132.5785      | 566.7931        |
| 1634.9634      | 15 | P 10 | 1045.5464      | 523.2771        |
| 1736.0111      | 16 | T 9  | 948.4937       | 474.7508        |
| 1867.0516      | 17 | M 8  | 847.4460       | 424.2269        |
| 1995.1101      | 18 | Q 7  | 716.4055       | 358.7067        |
| 2066.1473      | 19 | A 6  | 588.3469       | 294.6774        |
| 2123.1687      | 20 | G 5  | 517.3098       | 259.1588        |
| 2224.2164      | 21 | T 4  | 460.2884       | 230.6481        |
| 2337.3005      | 22 | I 3  | 359.2407       | 180.1243        |
| 2408.3376      | 23 | A 2  | 246.1566       | 123.5822        |
|                | 24 | R 1  | 175.1195       | 88.0637         |

N-term:+29.04 K(7):+156.13



SLPPIQAPSHPPPQPTQPR, MH+ 2170.1773, m/z 543.2998  
 L OSG38 P180811 230811-s1.04792.04792.4.dta

X-range:

-

MassTol: Y-zoom:

MassType:

AVG  MONO

Axis:

1  2

Label:

I  M  -

Ions:

a  +  2+  3+

b  +  2+  3+

c  +  2+  3+

x  +  2+  3+

y  +  2+  3+

z  +  2+  3+

hide H<sub>2</sub>O/NH<sub>3</sub>

zoom 112-122

GO

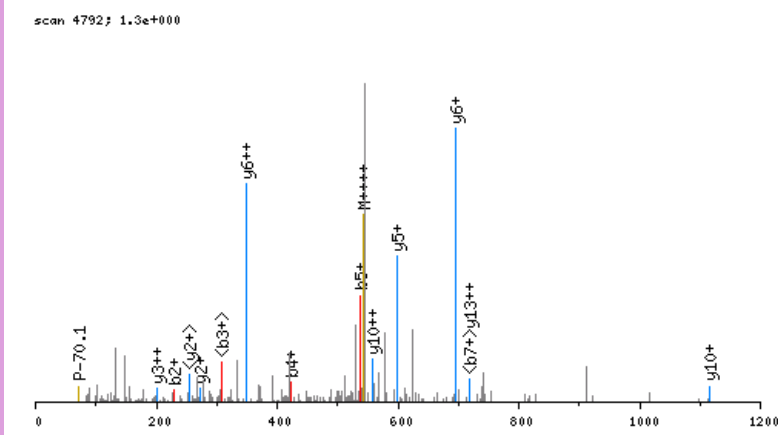

click image to zoom in; click top corners to zoom out [\[precursor±\]](#)

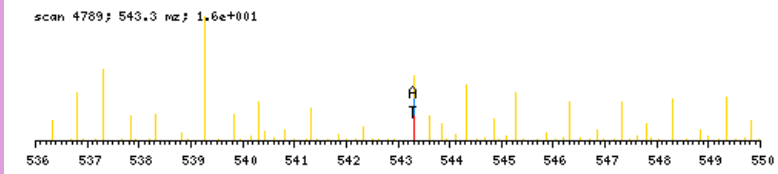

zoomed in precursor plot; T=theoretical m/z, A=acquired m/z

| b <sup>+</sup> | #  | AA | #  | y <sup>+</sup> | y <sup>2+</sup> |
|----------------|----|----|----|----------------|-----------------|
| 116.0711       | 1  | S  | 20 |                |                 |
| 229.1552       | 2  | L  | 19 | 2055.1140      | 1028.0609       |
| 326.2080       | 3  | P  | 18 | 1942.0299      | 971.5189        |
| 423.2607       | 4  | P  | 17 | 1844.9771      | 922.9925        |
| 536.3448       | 5  | I  | 16 | 1747.9244      | 874.4661        |
| 664.4034       | 6  | Q  | 15 | 1634.8403      | 817.9241        |
| 735.4405       | 7  | A  | 14 | 1506.7817      | 753.8948        |
| 832.4932       | 8  | P  | 13 | 1435.7446      | 718.3762        |
| 919.5253       | 9  | S  | 12 | 1338.6919      | 669.8498        |
| 1056.5842      | 10 | H  | 11 | 1251.6598      | 626.3338        |
| 1153.6369      | 11 | P  | 10 | 1114.6009      | 557.8044        |
| 1250.6897      | 12 | P  | 9  | 1017.5482      | 509.2780        |
| 1347.7425      | 13 | P  | 8  | 920.4954       | 460.7516        |
| 1475.8010      | 14 | Q  | 7  | 823.4426       | 412.2252        |
| 1572.8538      | 15 | P  | 6  | 695.3840       | 348.1959        |
| 1669.9066      | 16 | P  | 5  | 598.3313       | 299.6696        |
| 1770.9543      | 17 | T  | 4  | 501.2785       | 251.1432        |
| 1899.0128      | 18 | Q  | 3  | 400.2308       | 200.6193        |
| 1996.0656      | 19 | P  | 2  | 272.1723       | 136.5900        |
|                | 20 | R  | 1  | 175.1195       | 88.0637         |

N-term:+29.04

SLQMGITNKGASQAGMLAPGTR, MH+ 2144.1592, m/z 536.7953  
 H OSG39 P180811 230811-s1.03645.03645.4.dta

X-range:

-

MassTol: Y-zoom:

MassType:

AVG  MONO

Axis:

1  2

Label:

I  M  -

Ions:

a  +  2+  3+

b  +  2+  3+

c  +  2+  3+

x  +  2+  3+

y  +  2+  3+

z  +  2+  3+

hide H<sub>2</sub>O/NH<sub>3</sub>

zoom 112-122

GO

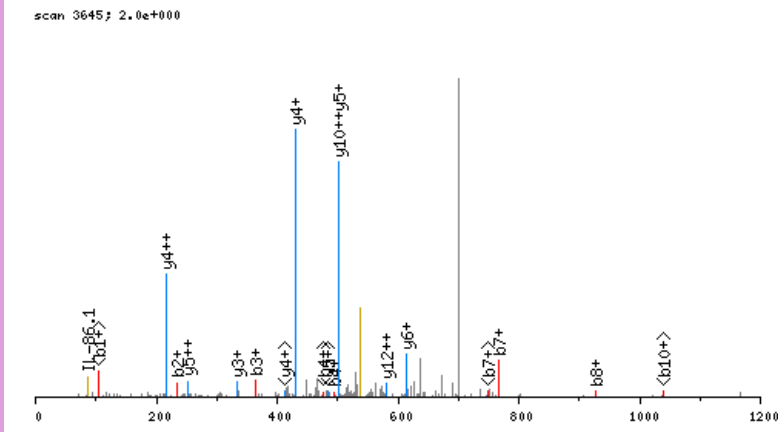

click image to zoom in; click top corners to zoom out [precursor±]

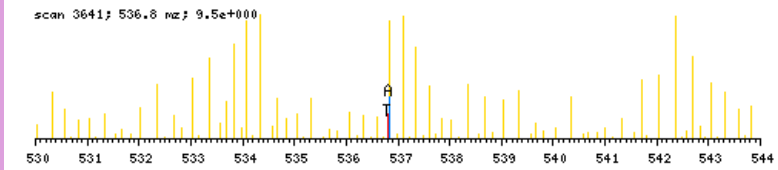

zoomed in precursor plot; T=theoretical m/z, A=acquired m/z

| b <sup>+</sup> | #  | AA | #  | y <sup>+</sup> | y <sup>2+</sup> |
|----------------|----|----|----|----------------|-----------------|
| 122.1029       | 1  | S  | 21 |                |                 |
| 235.1870       | 2  | L  | 20 | 2023.0641      | 1012.0360       |
| 363.2456       | 3  | Q  | 19 | 1909.9801      | 955.4939        |
| 494.2861       | 4  | M  | 18 | 1781.9215      | 891.4647        |
| 551.3075       | 5  | G  | 17 | 1650.8810      | 825.9444        |
| 652.3552       | 6  | T  | 16 | 1593.8595      | 797.4337        |
| 766.3981       | 7  | N  | 15 | 1492.8119      | 746.9098        |
| 928.5562       | 8  | K  | 14 | 1378.7689      | 689.8884        |
| 985.5777       | 9  | G  | 13 | 1216.6108      | 608.8093        |
| 1056.6148      | 10 | A  | 12 | 1159.5894      | 580.2986        |
| 1143.6468      | 11 | S  | 11 | 1088.5523      | 544.7800        |
| 1271.7054      | 12 | Q  | 10 | 1001.5202      | 501.2640        |
| 1342.7425      | 13 | A  | 9  | 873.4616       | 437.2347        |
| 1399.7640      | 14 | G  | 8  | 802.4245       | 401.7162        |
| 1530.8045      | 15 | M  | 7  | 745.4031       | 373.2054        |
| 1643.8885      | 16 | L  | 6  | 614.3626       | 307.6852        |
| 1714.9256      | 17 | A  | 5  | 501.2785       | 251.1432        |
| 1811.9784      | 18 | P  | 4  | 430.2414       | 215.6246        |
| 1868.9999      | 19 | G  | 3  | 333.1886       | 167.0982        |
| 1970.0476      | 20 | T  | 2  | 276.1672       | 138.5875        |
|                | 21 | R  | 1  | 175.1195       | 88.0637         |

N-term:+35.07 K(8):+162.16

SMHTEAAEVLLER, MH+ 1519.8002, m/z 507.2716  
 H OSG40 P180811 230811-s1.05818.05818.3.dta

scan 5818; 2.7e+000

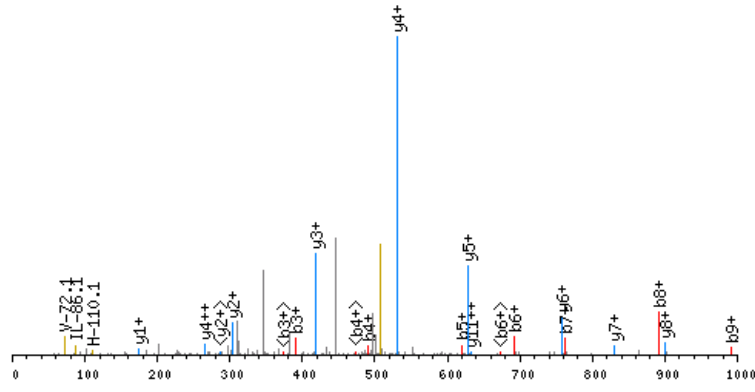

click image to zoom in; click top corners to zoom out [precursor±]

scan 5814; 507.3 m/z; 6.2e+001

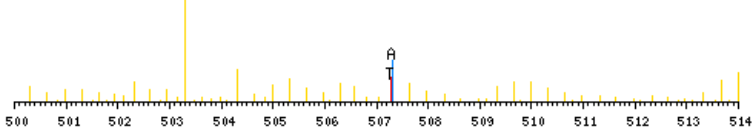

zoomed in precursor plot; T=theoretical m/z, A=acquired m/z

X-range:

-

MassTol: Y-zoom:

MassType:

AVG  MONO

Axis:

1  2

Label:

I  M  -

Ions:

a  +  2+  3+

b  +  2+  3+

c  +  2+  3+

x  +  2+  3+

y  +  2+  3+

z  +  2+  3+

hide H<sub>2</sub>O/NH<sub>3</sub>

zoom 112-122

GO

| b <sup>+</sup> | #  | AA # | y <sup>+</sup> | y <sup>2+</sup> |
|----------------|----|------|----------------|-----------------|
| 122.1029       | 1  | S 13 |                |                 |
| 253.1434       | 2  | M 12 | 1398.7051      | 699.8565        |
| 390.2023       | 3  | H 11 | 1267.6646      | 634.3362        |
| 491.2500       | 4  | T 10 | 1130.6057      | 565.8068        |
| 620.2926       | 5  | E 9  | 1029.5580      | 515.2829        |
| 691.3297       | 6  | A 8  | 900.5155       | 450.7616        |
| 762.3668       | 7  | A 7  | 829.4783       | 415.2431        |
| 891.4094       | 8  | E 6  | 758.4412       | 379.7245        |
| 990.4778       | 9  | V 5  | 629.3986       | 315.2032        |
| 1103.5619      | 10 | L 4  | 530.3302       | 265.6690        |
| 1216.6460      | 11 | L 3  | 417.2462       | 209.1270        |
| 1345.6886      | 12 | E 2  | 304.1621       | 152.5850        |
|                | 13 | R 1  | 175.1195       | 88.0637         |

N-term:+35.07

SMPPAQQQITSGQMHR, MH+ 1830.9167, m/z 610.9771  
 H OSG39 P180811 230811-s1.02722.02722.3.dta

X-range:

-

MassTol: Y-zoom:

MassType:

AVG  MONO

Axis:

1  2

Label:

I  M  -

Ions:

a  +  2+  3+

b  +  2+  3+

c  +  2+  3+

x  +  2+  3+

y  +  2+  3+

z  +  2+  3+

hide H<sub>2</sub>O/NH<sub>3</sub>

zoom 112-122

GO

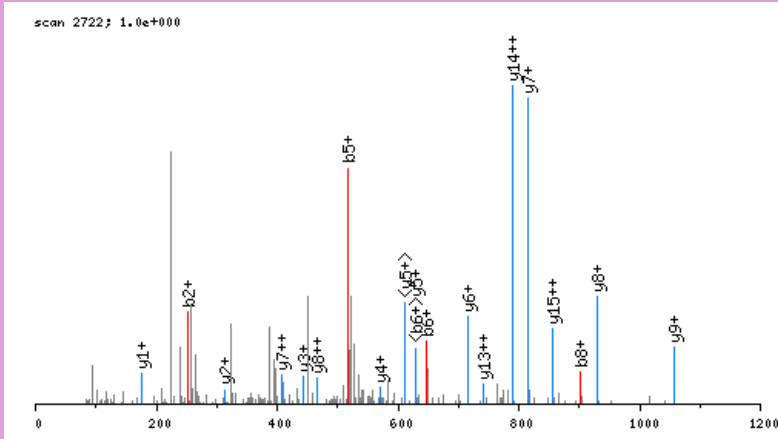

click image to zoom in; click top corners to zoom out [\[precursor±\]](#)

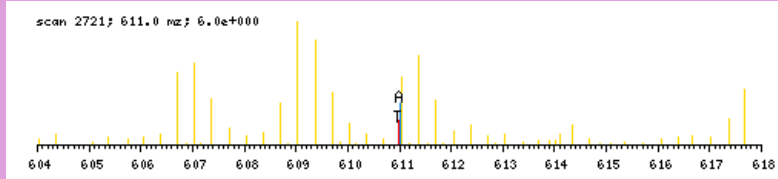

zoomed in precursor plot; T=theoretical m/z, A=acquired m/z

| b <sup>+</sup> | #  | AA # | y <sup>+</sup> | y <sup>2+</sup> |
|----------------|----|------|----------------|-----------------|
| 122.1029       | 1  | S 16 |                |                 |
| 253.1434       | 2  | M 15 | 1709.8216      | 855.4147        |
| 350.1962       | 3  | P 14 | 1578.7811      | 789.8945        |
| 447.2489       | 4  | P 13 | 1481.7283      | 741.3681        |
| 518.2861       | 5  | A 12 | 1384.6756      | 692.8417        |
| 646.3446       | 6  | Q 11 | 1313.6384      | 657.3231        |
| 774.4032       | 7  | Q 10 | 1185.5799      | 593.2938        |
| 902.4618       | 8  | Q 9  | 1057.5213      | 529.2646        |
| 1015.5459      | 9  | I 8  | 929.4627       | 465.2353        |
| 1116.5935      | 10 | T 7  | 816.3786       | 408.6932        |
| 1203.6256      | 11 | S 6  | 715.3310       | 358.1694        |
| 1260.6470      | 12 | G 5  | 628.2989       | 314.6534        |
| 1388.7056      | 13 | Q 4  | 571.2775       | 286.1426        |
| 1519.7461      | 14 | M 3  | 443.2189       | 222.1134        |
| 1656.8050      | 15 | H 2  | 312.1784       | 156.5931        |
|                | 16 | R 1  | 175.1195       | 88.0637         |

N-term:+35.07

SNAVSSLASTGLSLTKVDER, MH+ 2091.1297, m/z 697.7148  
 L OSG39 P180811 230811-s1.06555.06555.3.dta

X-range:

-

MassTol: Y-zoom:

MassType:

AVG  MONO

Axis:

1  2

Label:

I  M  -

Ions:

a  +  2+  3+

b  +  2+  3+

c  +  2+  3+

x  +  2+  3+

y  +  2+  3+

z  +  2+  3+

hide H<sub>2</sub>O/NH<sub>3</sub>

zoom 112-122

GO

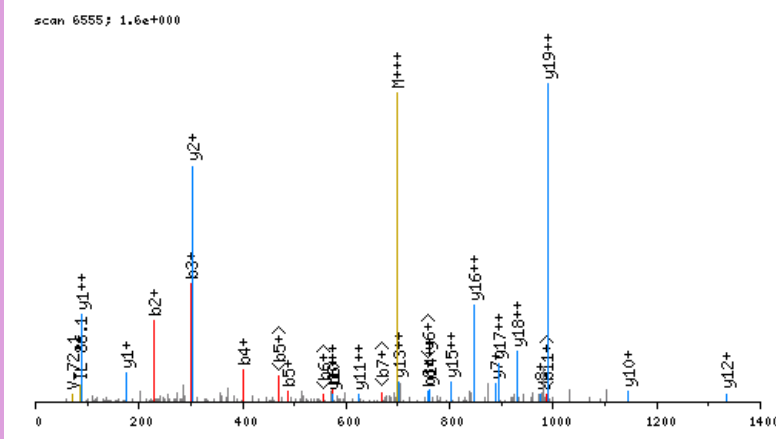

click image to zoom in; click top corners to zoom out [\[precursor±\]](#)

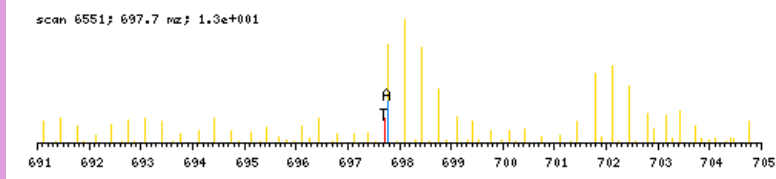

zoomed in precursor plot; T=theoretical m/z, A=acquired m/z

| b <sup>+</sup> | #  | AA # | y <sup>+</sup> | y <sup>2+</sup> |
|----------------|----|------|----------------|-----------------|
| 116.0711       | 1  | S 20 |                |                 |
| 230.1141       | 2  | N 19 | 1976.0664      | 988.5371        |
| 301.1512       | 3  | A 18 | 1862.0235      | 931.5157        |
| 400.2196       | 4  | V 17 | 1790.9864      | 895.9971        |
| 487.2516       | 5  | S 16 | 1691.9180      | 846.4629        |
| 574.2836       | 6  | S 15 | 1604.8860      | 802.9469        |
| 687.3677       | 7  | L 14 | 1517.8539      | 759.4309        |
| 758.4048       | 8  | A 13 | 1404.7699      | 702.8888        |
| 845.4368       | 9  | S 12 | 1333.7328      | 667.3703        |
| 946.4845       | 10 | T 11 | 1246.7007      | 623.8543        |
| 1003.5060      | 11 | G 10 | 1145.6530      | 573.3304        |
| 1116.5901      | 12 | L 9  | 1088.6316      | 544.8197        |
| 1203.6221      | 13 | S 8  | 975.5475       | 488.2777        |
| 1316.7061      | 14 | L 7  | 888.5155       | 444.7617        |
| 1417.7538      | 15 | T 6  | 775.4314       | 388.2196        |
| 1573.8801      | 16 | K 5  | 674.3838       | 337.6958        |
| 1672.9485      | 17 | V 4  | 518.2575       | 259.6326        |
| 1787.9755      | 18 | D 3  | 419.1890       | 210.0984        |
| 1917.0181      | 19 | E 2  | 304.1621       | 152.5850        |
|                | 20 | R 1  | 175.1195       | 88.0637         |

N-term:+29.04 K(16);+156.13

SNEEIAMATVTALR, MH+ 1533.7946, m/z 511.9364  
 L OSG37 P180811 230811-s1.06717.06717.3.dta

X-range:

-

MassTol: Y-zoom:

MassType:

AVG  MONO

Axis:

1  2

Label:

I  M  -

Ions:

a  +  2+  3+

b  +  2+  3+

c  +  2+  3+

x  +  2+  3+

y  +  2+  3+

z  +  2+  3+

hide H<sub>2</sub>O/NH<sub>3</sub>

zoom 112-122

GO

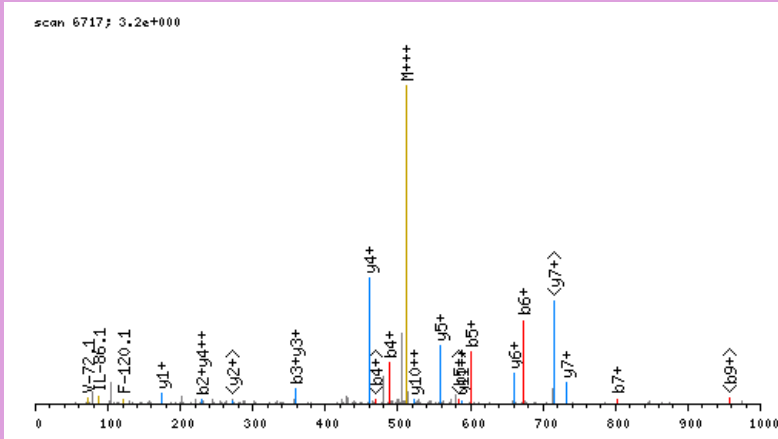

click image to zoom in; click top corners to zoom out [\[precursor±\]](#)

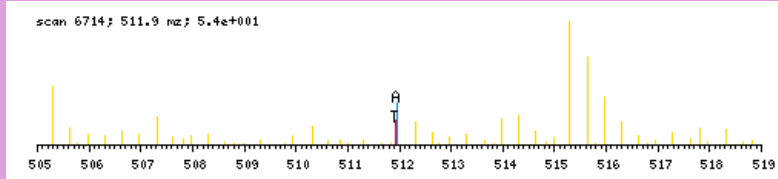

zoomed in precursor plot; T=theoretical m/z, A=acquired m/z

| b <sup>+</sup> | #  | AA # | y <sup>+</sup> | y <sup>2+</sup> |
|----------------|----|------|----------------|-----------------|
| 116.0711       | 1  | S 14 |                |                 |
| 230.1141       | 2  | N 13 | 1418.7313      | 709.8696        |
| 359.1566       | 3  | E 12 | 1304.6884      | 652.8481        |
| 488.1992       | 4  | E 11 | 1175.6458      | 588.3268        |
| 601.2833       | 5  | I 10 | 1046.6032      | 523.8055        |
| 672.3204       | 6  | A 9  | 933.5192       | 467.2635        |
| 803.3609       | 7  | M 8  | 862.4820       | 431.7449        |
| 874.3980       | 8  | A 7  | 731.4416       | 366.2247        |
| 975.4457       | 9  | T 6  | 660.4044       | 330.7061        |
| 1074.5141      | 10 | V 5  | 559.3568       | 280.1823        |
| 1175.5618      | 11 | T 4  | 460.2884       | 230.6481        |
| 1246.5989      | 12 | A 3  | 359.2407       | 180.1243        |
| 1359.6830      | 13 | L 2  | 288.2036       | 144.6057        |
|                | 14 | R 1  | 175.1195       | 88.0637         |

N-term:+29.04

SNNKDQGGYEDFVEGLR, MH+ 1983.9412, m/z 661.9853  
 L OSG40 P180811 230811-s1.06482.06482.3.dta

X-range:

-

MassTol: Y-zoom:

MassType:

AVG  MONO

Axis:

1  2

Label:

I  M  -

Ions:

a  +  2+  3+

b  +  2+  3+

c  +  2+  3+

x  +  2+  3+

y  +  2+  3+

z  +  2+  3+

hide H<sub>2</sub>O/NH<sub>3</sub>

zoom 112-122

GO

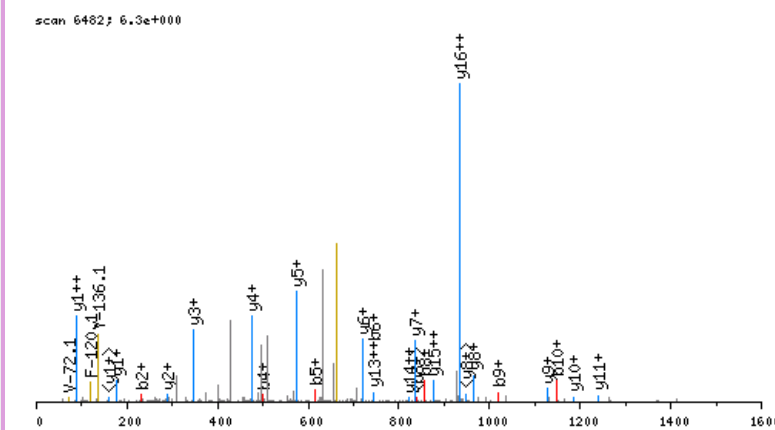

click image to zoom in; click top corners to zoom out [\[precursor±\]](#)

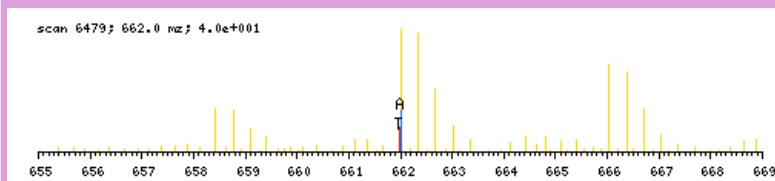

zoomed in precursor plot; T=theoretical m/z, A=acquired m/z

| b <sup>+</sup> | #  | AA # | y <sup>+</sup> | y <sup>2+</sup> |
|----------------|----|------|----------------|-----------------|
| 116.0711       | 1  | S    | 17             |                 |
| 230.1141       | 2  | N    | 16             | 1868.8779       |
| 344.1570       | 3  | N    | 15             | 1754.8350       |
| 500.2833       | 4  | K    | 14             | 1640.7921       |
| 615.3102       | 5  | D    | 13             | 1484.6658       |
| 743.3688       | 6  | Q    | 12             | 1369.6388       |
| 800.3903       | 7  | G    | 11             | 1241.5802       |
| 857.4117       | 8  | G    | 10             | 1184.5588       |
| 1020.4751      | 9  | Y    | 9              | 1127.5373       |
| 1149.5177      | 10 | E    | 8              | 964.4740        |
| 1264.5446      | 11 | D    | 7              | 835.4314        |
| 1411.6130      | 12 | F    | 6              | 720.4044        |
| 1510.6814      | 13 | V    | 5              | 573.3360        |
| 1639.7240      | 14 | E    | 4              | 474.2676        |
| 1696.7455      | 15 | G    | 3              | 345.2250        |
| 1809.8295      | 16 | L    | 2              | 288.2036        |
|                | 17 | R    | 1              | 175.1195        |

N-term:+29.04 K(4):+156.13

SNNLCLHFNPR, MH+ 1405.7222, m/z 469.2456  
 H OSG40 P180811 230811-s1.04781.04781.3.dta

scan 4781; 7.9e+000

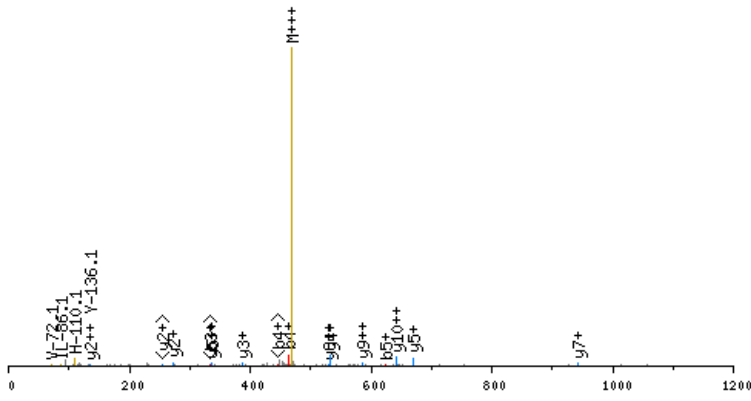

click image to zoom in; click top corners to zoom out [\[precursor±\]](#)

scan 4779; 469.2 m/z; 1.8e+001

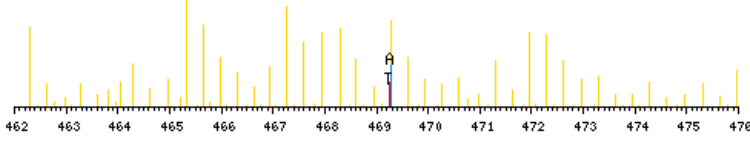

zoomed in precursor plot; T=theoretical m/z, A=acquired m/z

X-range:

-

MassTol: Y-zoom:

MassType:

AVG  MONO

Axis:

1  2

Label:

I  M  -

Ions:

a  +  2+  3+

b  +  2+  3+

c  +  2+  3+

x  +  2+  3+

y  +  2+  3+

z  +  2+  3+

hide H<sub>2</sub>O/NH<sub>3</sub>

zoom 112-122

GO

| b <sup>+</sup> | #  | AA # | y <sup>+</sup> | y <sup>2+</sup> |
|----------------|----|------|----------------|-----------------|
| 122.1029       | 1  | S 11 |                |                 |
| 236.1459       | 2  | N 10 | 1284.6271      | 642.8175        |
| 350.1888       | 3  | N 9  | 1170.5842      | 585.7960        |
| 463.2728       | 4  | L 8  | 1056.5412      | 528.7745        |
| 623.3034       | 5  | C 7  | 943.4572       | 472.2325        |
| 736.3875       | 6  | L 6  | 783.4266       | 392.2172        |
| 873.4464       | 7  | H 5  | 670.3425       | 335.6752        |
| 1020.5148      | 8  | F 4  | 533.2836       | 267.1457        |
| 1134.5578      | 9  | N 3  | 386.2152       | 193.6115        |
| 1231.6105      | 10 | P 2  | 272.1723       | 136.5900        |
|                | 11 | R 1  | 175.1195       | 88.0637         |

N-term:+35.07 C(5):+160.03



SNPGESEFDLADRLDPVEKIDR, MH+ 2528.3269, m/z 632.8372  
 H OSG40 P180811 230811-s1.07727.07727.4.dta

scan 7727; 4.4e+000

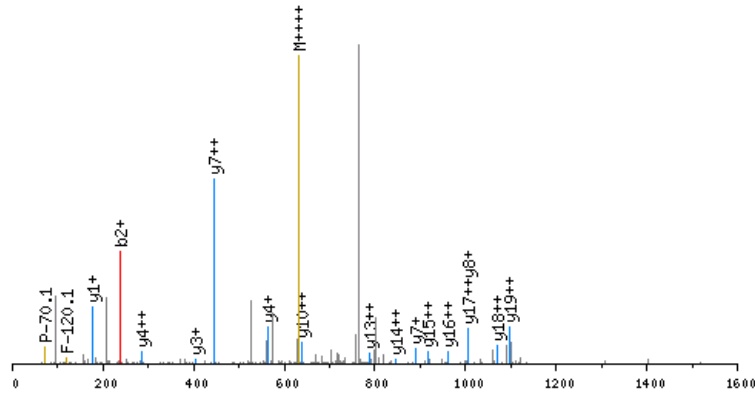

click image to zoom in; click top corners to zoom out [precursor±]

scan 7724; 632.8 mz; 2.8e+001

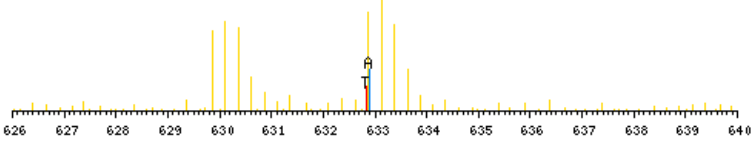

zoomed in precursor plot; T=theoretical m/z, A=acquired m/z

| b <sup>+</sup>  | #  | AA #       | y <sup>+</sup>   | y <sup>2+</sup>  |
|-----------------|----|------------|------------------|------------------|
| 122.1029        | 1  | S 22       |                  |                  |
| <b>236.1459</b> | 2  | N 21       | 2407.2318        | 1204.1198        |
| 333.1986        | 3  | P 20       | 2293.1889        | 1147.0983        |
| 390.2201        | 4  | G 19       | 2196.1361        | <b>1098.5720</b> |
| 519.2627        | 5  | E 18       | 2139.1146        | <b>1070.0612</b> |
| 606.2947        | 6  | S 17       | 2010.0720        | <b>1005.5399</b> |
| 693.3267        | 7  | S 16       | 1923.0400        | <b>962.0239</b>  |
| 840.3951        | 8  | F 15       | 1836.0080        | <b>918.5079</b>  |
| 955.4221        | 9  | D 14       | 1688.9396        | <b>844.9737</b>  |
| 1068.5062       | 10 | L 13       | 1573.9126        | <b>787.4602</b>  |
| 1139.5433       | 11 | A 12       | 1460.8286        | 730.9182         |
| 1254.5702       | 12 | D 11       | 1389.7914        | 695.3996         |
| 1410.6713       | 13 | R 10       | 1274.7645        | <b>637.8862</b>  |
| 1523.7554       | 14 | L 9        | 1118.6634        | 559.8356         |
| 1638.7823       | 15 | D 8        | <b>1005.5793</b> | 503.2936         |
| 1735.8351       | 16 | P 7        | <b>890.5524</b>  | <b>445.7801</b>  |
| 1834.9035       | 17 | V 6        | 793.4996         | 397.2537         |
| 1963.9461       | 18 | E 5        | 694.4312         | 347.7195         |
| 2126.1042       | 19 | <b>K 4</b> | <b>565.3886</b>  | <b>283.1982</b>  |
| 2239.1883       | 20 | I 3        | <b>403.2305</b>  | 202.1192         |
| 2354.2152       | 21 | D 2        | 290.1464         | 145.5771         |
|                 | 22 | R 1        | <b>175.1195</b>  | 88.0637          |

N-term:+35.07 K(19):+162.16

X-range:

-

MassTol: Y-zoom:

MassType:

AVG  MONO

Axis:

1  2

Label:

I  M  -

Ions:

a  +  2+  3+

b  +  2+  3+

c  +  2+  3+

x  +  2+  3+

y  +  2+  3+

z  +  2+  3+

hide H<sub>2</sub>O/NH<sub>3</sub>

zoom 112-122

GO

SNTDFAFSLYR, MH+ 1348.6537, m/z 674.8305  
 L OSG38 P180811 230811-s1.06708.06708.2.dta

X-range:

-

MassTol: Y-zoom:

MassType:

AVG  MONO

Axis:

1  2

Label:

I  M  -

Ions:

a  +  2+  3+

b  +  2+  3+

c  +  2+  3+

x  +  2+  3+

y  +  2+  3+

z  +  2+  3+

hide H<sub>2</sub>O/NH<sub>3</sub>

zoom 112-122

GO

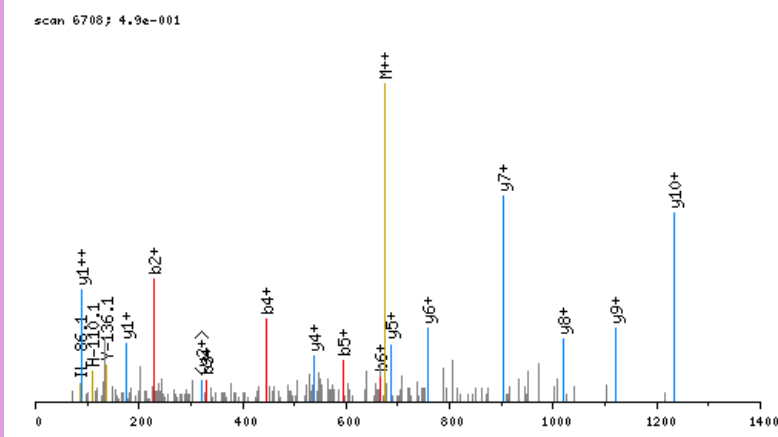

click image to zoom in; click top corners to zoom out [\[precursor±\]](#)

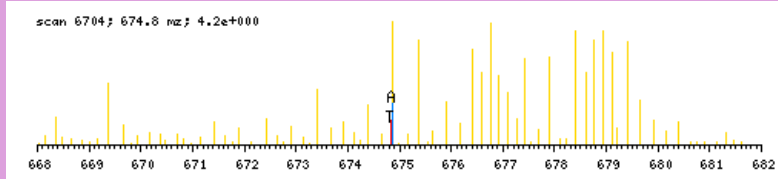

zoomed in precursor plot; T=theoretical m/z, A=acquired m/z

| b <sup>+</sup> | #  | AA # | y <sup>+</sup> | y <sup>2+</sup> |
|----------------|----|------|----------------|-----------------|
| 116.0711       | 1  | S 11 |                |                 |
| 230.1141       | 2  | N 10 | 1233.5904      | 617.2991        |
| 331.1617       | 3  | T 9  | 1119.5475      | 560.2777        |
| 446.1887       | 4  | D 8  | 1018.4998      | 509.7538        |
| 593.2571       | 5  | F 7  | 903.4729       | 452.2403        |
| 664.2942       | 6  | A 6  | 756.4044       | 378.7061        |
| 811.3626       | 7  | F 5  | 685.3673       | 343.1876        |
| 898.3946       | 8  | S 4  | 538.2989       | 269.6534        |
| 1011.4787      | 9  | L 3  | 451.2669       | 226.1374        |
| 1174.5420      | 10 | Y 2  | 338.1828       | 169.5953        |
|                | 11 | R 1  | 175.1195       | 88.0637         |

N-term:+29.04

SNTDVEIQPGKTVIR, MH+ 1712.9819, m/z 571.6655  
 H OSG39 P180811 230811-s1.02442.02442.3.dta

X-range:

-

MassTol: Y-zoom:

MassType:

AVG  MONO

Axis:

1  2

Label:

I  M  -

Ions:

a  +  2+  3+

b  +  2+  3+

c  +  2+  3+

x  +  2+  3+

y  +  2+  3+

z  +  2+  3+

hide H<sub>2</sub>O/NH<sub>3</sub>

zoom 112-122

GO

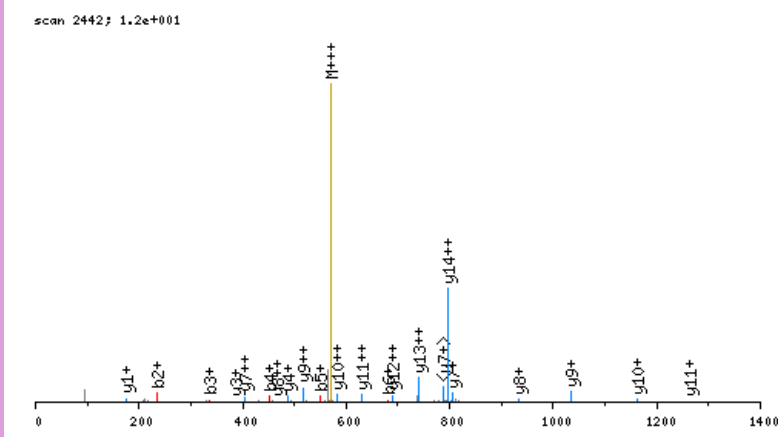

click image to zoom in; click top corners to zoom out [\[precursor±\]](#)

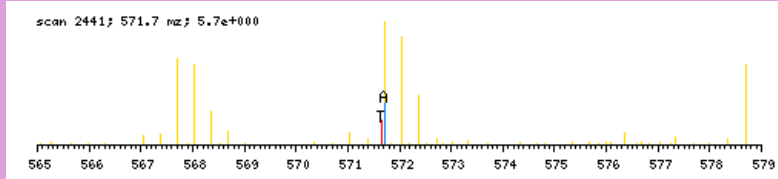

zoomed in precursor plot; T=theoretical m/z, A=acquired m/z

| b <sup>+</sup> | #  | AA # | y <sup>+</sup> | y <sup>2+</sup> |
|----------------|----|------|----------------|-----------------|
| 122.1029       | 1  | S 15 |                |                 |
| 236.1459       | 2  | N 14 | 1591.8868      | 796.4473        |
| 337.1935       | 3  | T 13 | 1477.8439      | 739.4258        |
| 452.2205       | 4  | D 12 | 1376.7962      | 688.9020        |
| 551.2889       | 5  | V 11 | 1261.7692      | 631.3885        |
| 680.3315       | 6  | E 10 | 1162.7008      | 581.8543        |
| 781.3792       | 7  | T 9  | 1033.6582      | 517.3330        |
| 909.4377       | 8  | Q 8  | 932.6106       | 466.8092        |
| 1006.4905      | 9  | P 7  | 804.5520       | 402.7799        |
| 1063.5120      | 10 | G 6  | 707.4992       | 354.2535        |
| 1225.6701      | 11 | K 5  | 650.4778       | 325.7428        |
| 1326.7177      | 12 | T 4  | 488.3197       | 244.6637        |
| 1425.7862      | 13 | V 3  | 387.2720       | 194.1399        |
| 1538.8702      | 14 | I 2  | 288.2036       | 144.6057        |
|                | 15 | R 1  | 175.1195       | 88.0637         |

N-term:+35.07 K(11):+162.16

SNVDELGCSHLGQSYESR, MH+ 2065.9248, m/z 689.3131  
 L OSG40 P180811 230811-s1.04721.04721.3.dta

X-range:

-

MassTol: Y-zoom:

MassType:

AVG  MONO

Axis:

1  2

Label:

I  M  -

Ions:

a  +  2+  3+

b  +  2+  3+

c  +  2+  3+

x  +  2+  3+

y  +  2+  3+

z  +  2+  3+

hide H<sub>2</sub>O/NH<sub>3</sub>

zoom 112-122

GO

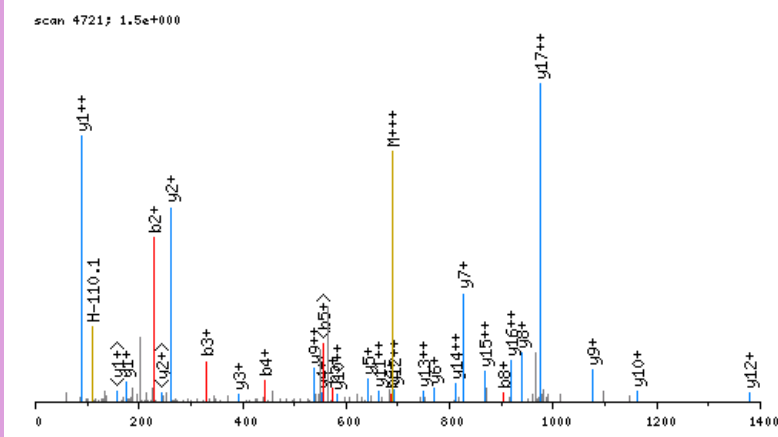

click image to zoom in; click top corners to zoom out [\[precursor±\]](#)

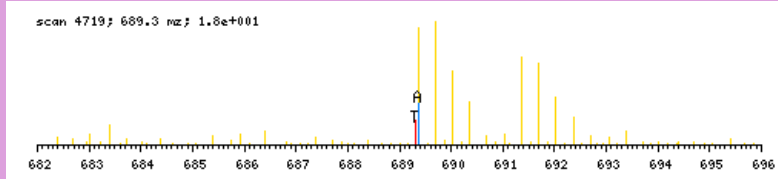

zoomed in precursor plot; T=theoretical m/z, A=acquired m/z

| b <sup>+</sup> | #  | AA # | y <sup>+</sup> | y <sup>2+</sup> |
|----------------|----|------|----------------|-----------------|
| 116.0711       | 1  | S 18 |                |                 |
| 230.1141       | 2  | N 17 | 1950.8615      | 975.9347        |
| 329.1825       | 3  | V 16 | 1836.8186      | 918.9132        |
| 444.2094       | 4  | D 15 | 1737.7502      | 869.3790        |
| 573.2520       | 5  | E 14 | 1622.7232      | 811.8655        |
| 686.3361       | 6  | L 13 | 1493.6807      | 747.3442        |
| 743.3575       | 7  | G 12 | 1380.5966      | 690.8022        |
| 903.3881       | 8  | C 11 | 1323.5751      | 662.2915        |
| 990.4202       | 9  | S 10 | 1163.5445      | 582.2762        |
| 1127.4791      | 10 | H 9  | 1076.5125      | 538.7602        |
| 1240.5631      | 11 | L 8  | 939.4536       | 470.2307        |
| 1297.5846      | 12 | G 7  | 826.3695       | 413.6887        |
| 1425.6432      | 13 | Q 6  | 769.3481       | 385.1779        |
| 1512.6752      | 14 | S 5  | 641.2895       | 321.1487        |
| 1675.7385      | 15 | Y 4  | 554.2575       | 277.6326        |
| 1804.7811      | 16 | E 3  | 391.1941       | 196.1010        |
| 1891.8132      | 17 | S 2  | 262.1515       | 131.5797        |
|                | 18 | R 1  | 175.1195       | 88.0637         |

N-term:+29.04 C(8):+160.03

SPAAEVTPSPPEPAPALEAPAR, MH+ 2183.1348, m/z 728.3831  
L OSG36 P180811 230811-s1.03833.03833.3.dta

scan 3833; 4.6e-001

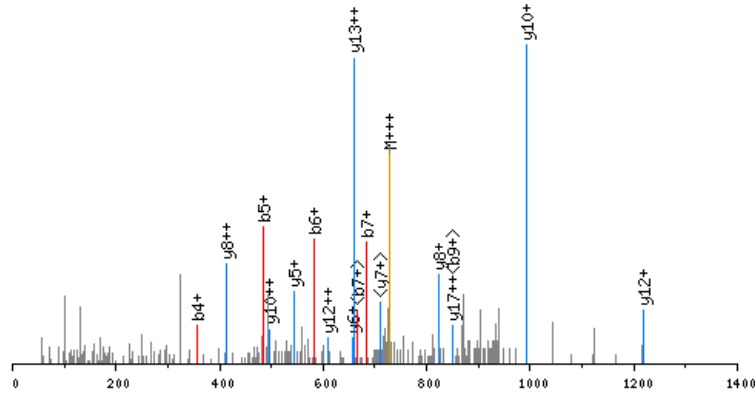

click image to zoom in; click top corners to zoom out [precursor±]

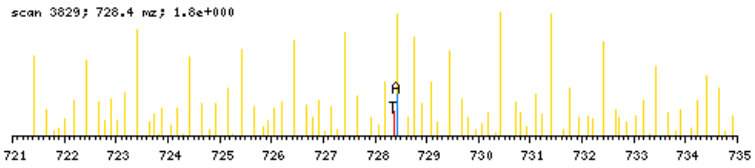

zoomed in precursor plot; T=theoretical m/z, A=acquired m/z

X-range:

-

MassTol: Y-zoom:

MassType:

AVG  MONO

Axis:

1  2

Label:

I  M  -

Ions:

a  +  2+  3+

b  +  2+  3+

c  +  2+  3+

x  +  2+  3+

y  +  2+  3+

z  +  2+  3+

hide H<sub>2</sub>O/NH<sub>3</sub>

zoom 112-122

GO

| b <sup>+</sup> | #  | AA # | y <sup>+</sup> | y <sup>2+</sup> |
|----------------|----|------|----------------|-----------------|
| 116.0711       | 1  | S 22 |                |                 |
| 213.1239       | 2  | P 21 | 2068.0715      | 1034.5397       |
| 284.1610       | 3  | A 20 | 1971.0187      | 986.0133        |
| 355.1981       | 4  | A 19 | 1899.9816      | 950.4947        |
| 484.2407       | 5  | E 18 | 1828.9445      | 914.9762        |
| 583.3091       | 6  | V 17 | 1699.9019      | 850.4549        |
| 684.3568       | 7  | T 16 | 1600.8335      | 800.9207        |
| 781.4096       | 8  | P 15 | 1499.7858      | 750.3968        |
| 868.4416       | 9  | S 14 | 1402.7331      | 701.8704        |
| 965.4944       | 10 | P 13 | 1315.7010      | 658.3544        |
| 1062.5471      | 11 | P 12 | 1218.6483      | 609.8280        |
| 1191.5897      | 12 | E 11 | 1121.5955      | 561.3017        |
| 1288.6425      | 13 | P 10 | 992.5529       | 496.7804        |
| 1359.6796      | 14 | A 9  | 895.5001       | 448.2540        |
| 1456.7324      | 15 | P 8  | 824.4630       | 412.7354        |
| 1527.7695      | 16 | A 7  | 727.4103       | 364.2090        |
| 1640.8535      | 17 | L 6  | 656.3731       | 328.6905        |
| 1769.8961      | 18 | E 5  | 543.2891       | 272.1485        |
| 1840.9332      | 19 | A 4  | 414.2465       | 207.6272        |
| 1937.9860      | 20 | P 3  | 343.2094       | 172.1086        |
| 2009.0231      | 21 | A 2  | 246.1566       | 123.5822        |
|                | 22 | R 1  | 175.1195       | 88.0637         |

N-term:+29.04

SPASHEIATNLGDFALR, MH+ 1832.9719, m/z 611.6621  
 H OSG40 P180811 230811-s1.07076.07076.3.dta

X-range:

-

MassTol: Y-zoom:

MassType:

AVG  MONO

Axis:

1  2

Label:

I  M  -

Ions:

a  +  2+  3+

b  +  2+  3+

c  +  2+  3+

x  +  2+  3+

y  +  2+  3+

z  +  2+  3+

hide H<sub>2</sub>O/NH<sub>3</sub>

zoom 112-122

GO

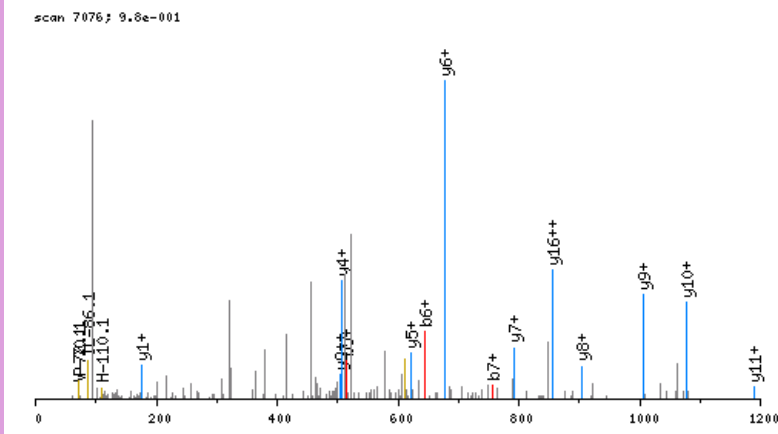

click image to zoom in; click top corners to zoom out [\[precursor±\]](#)

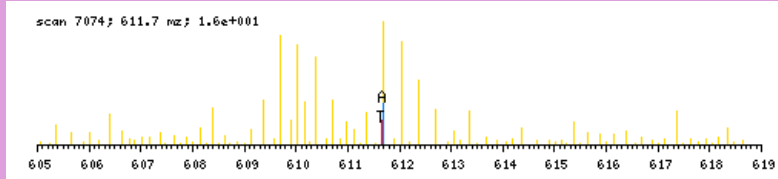

zoomed in precursor plot; T=theoretical m/z, A=acquired m/z

| b <sup>+</sup> | #  | AA # | y <sup>+</sup> | y <sup>2+</sup> |
|----------------|----|------|----------------|-----------------|
| 122.1029       | 1  | S 17 |                |                 |
| 219.1557       | 2  | P 16 | 1711.8768      | 856.4423        |
| 290.1928       | 3  | A 15 | 1614.8240      | 807.9159        |
| 377.2248       | 4  | S 14 | 1543.7869      | 772.3974        |
| 514.2837       | 5  | H 13 | 1456.7549      | 728.8813        |
| 643.3263       | 6  | E 12 | 1319.6959      | 660.3519        |
| 756.4104       | 7  | I 11 | 1190.6533      | 595.8306        |
| 827.4475       | 8  | A 10 | 1077.5693      | 539.2886        |
| 928.4952       | 9  | T 9  | 1006.5322      | 503.7700        |
| 1042.5381      | 10 | N 8  | 905.4845       | 453.2462        |
| 1155.6222      | 11 | L 7  | 791.4416       | 396.2247        |
| 1212.6437      | 12 | G 6  | 678.3575       | 339.6827        |
| 1327.6706      | 13 | D 5  | 621.3360       | 311.1719        |
| 1474.7390      | 14 | F 4  | 506.3091       | 253.6585        |
| 1545.7761      | 15 | A 3  | 359.2407       | 180.1243        |
| 1658.8602      | 16 | L 2  | 288.2036       | 144.6057        |
|                | 17 | R 1  | 175.1195       | 88.0637         |

N-term:+35.07

SPDPGLTALLSDHR, MH+ 1506.7916, m/z 502.9354  
 L OSG39 P180811 230811-s1.05574.05574.3.dta

X-range:

-

MassTol: Y-zoom:

MassType:

AVG  MONO

Axis:

1  2

Label:

I  M  -

Ions:

a  +  2+  3+

b  +  2+  3+

c  +  2+  3+

x  +  2+  3+

y  +  2+  3+

z  +  2+  3+

hide H<sub>2</sub>O/NH<sub>3</sub>

zoom 112-122

GO

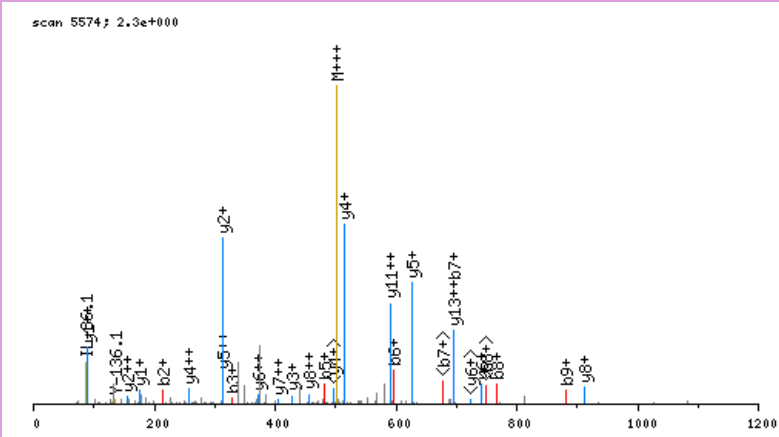

click image to zoom in; click top corners to zoom out [\[precursor±\]](#)

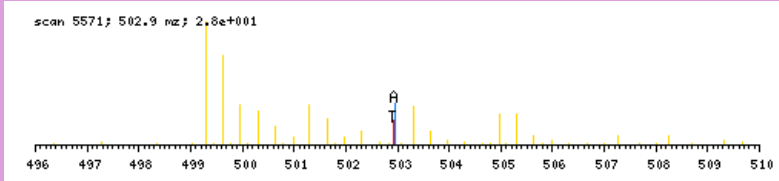

zoomed in precursor plot; T=theoretical m/z, A=acquired m/z

| b <sup>+</sup> | #  | AA # | y <sup>+</sup> | y <sup>2+</sup> |
|----------------|----|------|----------------|-----------------|
| 116.0711       | 1  | S 14 |                |                 |
| 213.1239       | 2  | P 13 | 1391.7283      | 696.3681        |
| 328.1508       | 3  | D 12 | 1294.6755      | 647.8417        |
| 425.2036       | 4  | P 11 | 1179.6486      | 590.3282        |
| 482.2251       | 5  | G 10 | 1082.5958      | 541.8018        |
| 595.3091       | 6  | L 9  | 1025.5744      | 513.2911        |
| 696.3568       | 7  | T 8  | 912.4903       | 456.7491        |
| 767.3939       | 8  | A 7  | 811.4426       | 406.2252        |
| 880.4780       | 9  | L 6  | 740.4055       | 370.7067        |
| 993.5620       | 10 | L 5  | 627.3214       | 314.1646        |
| 1080.5941      | 11 | S 4  | 514.2374       | 257.6226        |
| 1195.6210      | 12 | D 3  | 427.2054       | 214.1066        |
| 1332.6799      | 13 | H 2  | 312.1784       | 156.5931        |
|                | 14 | R 1  | 175.1195       | 88.0637         |

N-term:+29.04

SPGLPPLPSLPPR, MH+ 1361.8369, m/z 454.6171  
 H OSG37 P180811 230811-s1.07108.07108.3.dta

X-range:

-

MassTol: Y-zoom:

MassType:

AVG  MONO

Axis:

1  2

Label:

I  M  -

Ions:

a  +  2+  3+

b  +  2+  3+

c  +  2+  3+

x  +  2+  3+

y  +  2+  3+

z  +  2+  3+

hide H<sub>2</sub>O/NH<sub>3</sub>

zoom 112-122

GO

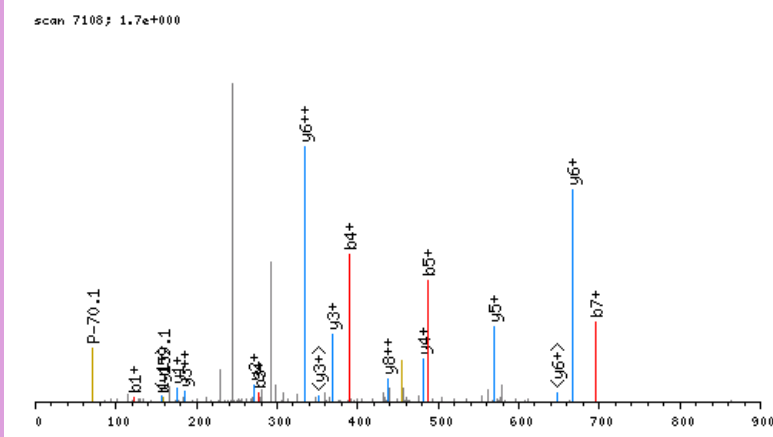

click image to zoom in; click top corners to zoom out [\[precursor±\]](#)

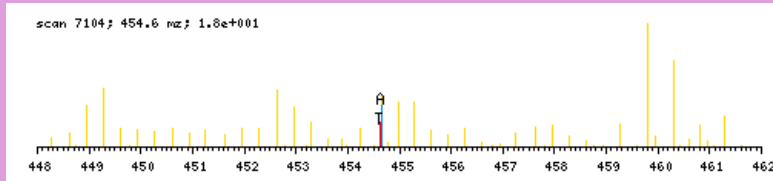

zoomed in precursor plot; T=theoretical m/z, A=acquired m/z

| b <sup>+</sup> | #  | AA # | y <sup>+</sup> | y <sup>2+</sup> |
|----------------|----|------|----------------|-----------------|
| 122.1029       | 1  | S 13 |                |                 |
| 219.1557       | 2  | P 12 | 1240.7418      | 620.8748        |
| 276.1772       | 3  | G 11 | 1143.6890      | 572.3484        |
| 389.2612       | 4  | L 10 | 1086.6675      | 543.8377        |
| 486.3140       | 5  | P 9  | 973.5835       | 487.2957        |
| 583.3667       | 6  | P 8  | 876.5307       | 438.7693        |
| 696.4508       | 7  | L 7  | 779.4779       | 390.2429        |
| 793.5036       | 8  | P 6  | 666.3939       | 333.7009        |
| 880.5356       | 9  | S 5  | 569.3411       | 285.1745        |
| 993.6197       | 10 | L 4  | 482.3091       | 241.6585        |
| 1090.6724      | 11 | P 3  | 369.2250       | 185.1164        |
| 1187.7252      | 12 | P 2  | 272.1723       | 136.5900        |
|                | 13 | R 1  | 175.1195       | 88.0637         |

N-term:+35.07



SPPPPPEPTSEGR, MH+ 1478.7703, m/z 493.5950  
 H OSG37 P180811 230811-s1.02476.02476.3.dta

X-range:

-

MassTol: Y-zoom:

MassType:

AVG  MONO

Axis:

1  2

Label:

I  M  -

Ions:

a  +  2+  3+

b  +  2+  3+

c  +  2+  3+

x  +  2+  3+

y  +  2+  3+

z  +  2+  3+

hide H<sub>2</sub>O/NH<sub>3</sub>

zoom 112-122

GO

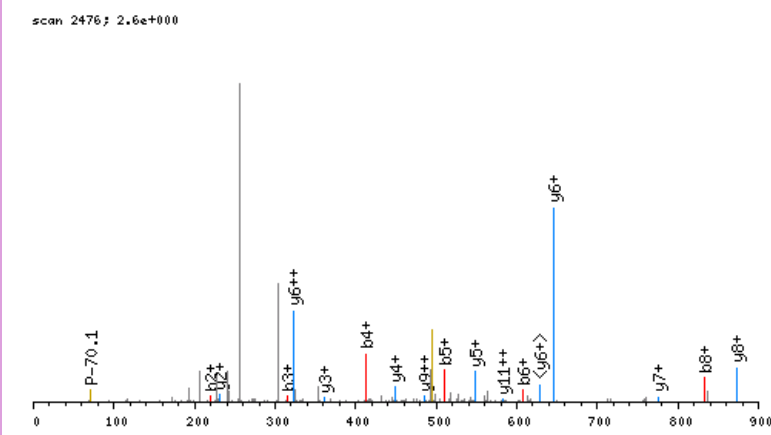

click image to zoom in; click top corners to zoom out [\[precursor±\]](#)

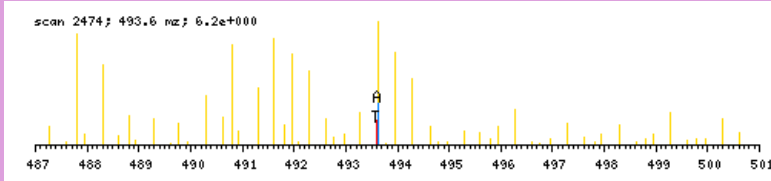

zoomed in precursor plot; T=theoretical m/z, A=acquired m/z

| b <sup>+</sup> | #  | AA # | y <sup>+</sup> | y <sup>2+</sup> |
|----------------|----|------|----------------|-----------------|
| 122.1029       | 1  | S 14 |                |                 |
| 219.1557       | 2  | P 13 | 1357.6752      | 679.3415        |
| 316.2085       | 3  | P 12 | 1260.6224      | 630.8151        |
| 413.2612       | 4  | P 11 | 1163.5697      | 582.2888        |
| 510.3140       | 5  | P 10 | 1066.5169      | 533.7624        |
| 607.3667       | 6  | P 9  | 969.4641       | 485.2360        |
| 704.4195       | 7  | P 8  | 872.4114       | 436.7096        |
| 833.4621       | 8  | E 7  | 775.3586       | 388.1832        |
| 930.5149       | 9  | P 6  | 646.3160       | 323.6619        |
| 1031.5625      | 10 | T 5  | 549.2633       | 275.1355        |
| 1118.5946      | 11 | S 4  | 448.2156       | 224.6117        |
| 1247.6372      | 12 | E 3  | 361.1836       | 181.0957        |
| 1304.6586      | 13 | G 2  | 232.1410       | 116.5744        |
|                | 14 | R 1  | 175.1195       | 88.0637         |

N-term:+35.07

SQEGHLVEEVILR, MH+ 1542.8704, m/z 514.9616  
 H OSG40 P180811 230811-s1.06458.06458.3.dta

X-range:

-

MassTol: Y-zoom:

MassType:

AVG  MONO

Axis:

1  2

Label:

I  M  -

Ions:

a  +  2+  3+

b  +  2+  3+

c  +  2+  3+

x  +  2+  3+

y  +  2+  3+

z  +  2+  3+

hide H<sub>2</sub>O/NH<sub>3</sub>

zoom 112-122

GO

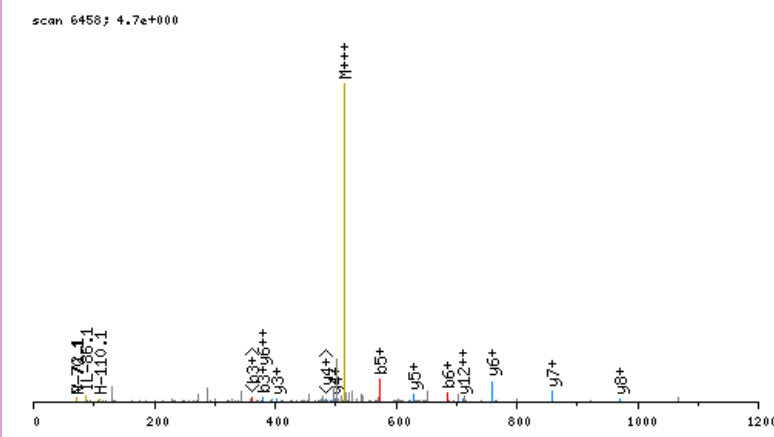

click image to zoom in; click top corners to zoom out [\[precursor±\]](#)

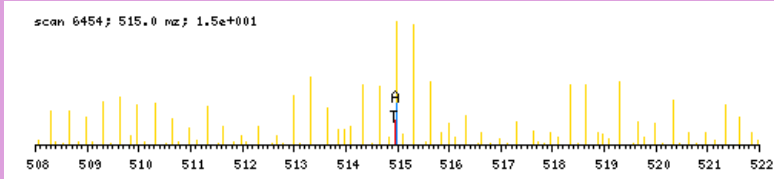

zoomed in precursor plot; T=theoretical m/z, A=acquired m/z

| b <sup>+</sup> | #  | AA # | y <sup>+</sup> | y <sup>2+</sup> |
|----------------|----|------|----------------|-----------------|
| 122.1029       | 1  | S 13 |                |                 |
| 250.1615       | 2  | Q 12 | 1421.7753      | 711.3915        |
| 379.2041       | 3  | E 11 | 1293.7167      | 647.3623        |
| 436.2256       | 4  | G 10 | 1164.6741      | 582.8410        |
| 573.2845       | 5  | H 9  | 1107.6526      | 554.3302        |
| 686.3685       | 6  | L 8  | 970.5937       | 485.8008        |
| 785.4370       | 7  | V 7  | 857.5096       | 429.2587        |
| 914.4795       | 8  | E 6  | 758.4412       | 379.7245        |
| 1043.5221      | 9  | E 5  | 629.3986       | 315.2032        |
| 1142.5906      | 10 | V 4  | 500.3560       | 250.6819        |
| 1255.6746      | 11 | I 3  | 401.2876       | 201.1477        |
| 1368.7587      | 12 | L 2  | 288.2036       | 144.6057        |
|                | 13 | R 1  | 175.1195       | 88.0637         |

N-term:+35.07

SQFQESDDADEDYGR, MH+ 1795.7471, m/z 599.2539  
 H OSG37 P180811 230811-s1.03042.03042.3.dta

X-range:

-

MassTol: Y-zoom:

MassType:

AVG  MONO

Axis:

1  2

Label:

I  M  -

Ions:

a  +  2+  3+

b  +  2+  3+

c  +  2+  3+

x  +  2+  3+

y  +  2+  3+

z  +  2+  3+

hide H<sub>2</sub>O/NH<sub>3</sub>

zoom 112-122

GO

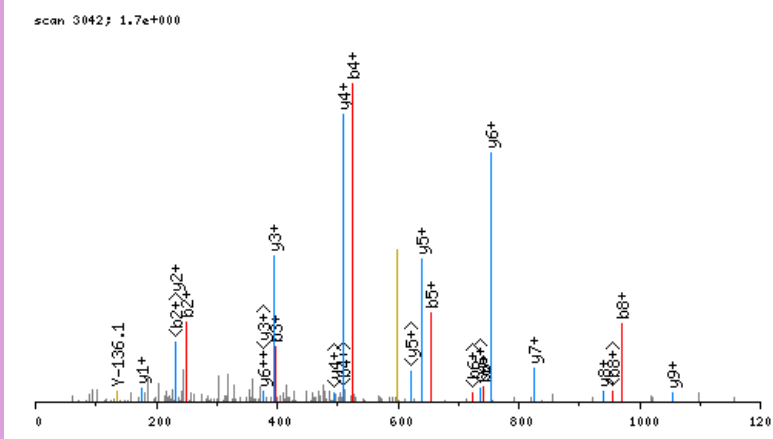

click image to zoom in; click top corners to zoom out [\[precursor±\]](#)

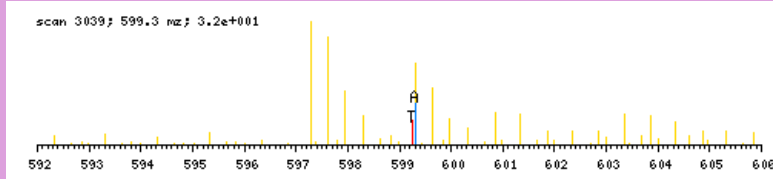

zoomed in precursor plot; T=theoretical m/z, A=acquired m/z

| b <sup>+</sup> | #  | AA # | y <sup>+</sup> | y <sup>2+</sup> |
|----------------|----|------|----------------|-----------------|
| 122.1029       | 1  | S 15 |                |                 |
| 250.1615       | 2  | Q 14 | 1674.6520      | 837.8299        |
| 397.2299       | 3  | F 13 | 1546.5934      | 773.8006        |
| 525.2885       | 4  | Q 12 | 1399.5250      | 700.2664        |
| 654.3311       | 5  | E 11 | 1271.4664      | 636.2371        |
| 741.3631       | 6  | S 10 | 1142.4238      | 571.7158        |
| 856.3901       | 7  | D 9  | 1055.3918      | 528.1998        |
| 971.4170       | 8  | D 8  | 940.3648       | 470.6863        |
| 1042.4541      | 9  | A 7  | 825.3379       | 413.1729        |
| 1157.4811      | 10 | D 6  | 754.3008       | 377.6543        |
| 1286.5237      | 11 | E 5  | 639.2738       | 320.1408        |
| 1401.5506      | 12 | D 4  | 510.2312       | 255.6195        |
| 1564.6139      | 13 | Y 3  | 395.2043       | 198.1061        |
| 1621.6354      | 14 | G 2  | 232.1410       | 116.5744        |
|                | 15 | R 1  | 175.1195       | 88.0637         |

N-term:+35.07

SQLLQEDSLNVADLSSLR, MH+ 2016.0613, m/z 672.6920  
 L OSG37 P180811 230811-s1.08417.08417.3.dta

X-range:

-

MassTol: Y-zoom:

MassType:

AVG  MONO

Axis:

1  2

Label:

I  M  -

Ions:

a  +  2+  3+

b  +  2+  3+

c  +  2+  3+

x  +  2+  3+

y  +  2+  3+

z  +  2+  3+

hide H<sub>2</sub>O/NH<sub>3</sub>

zoom 112-122

GO

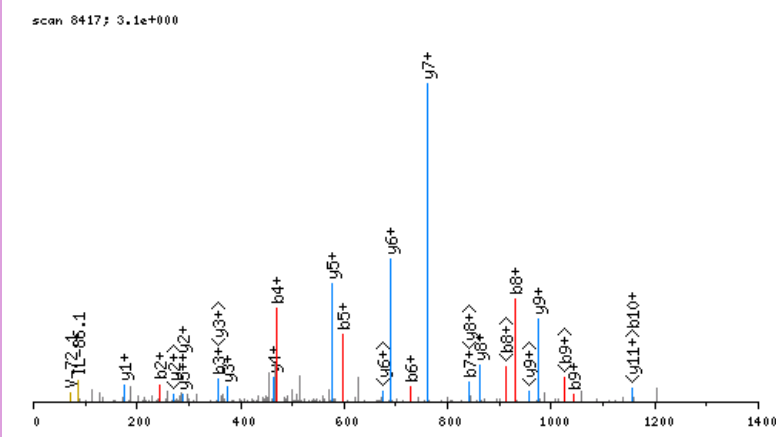

click image to zoom in; click top corners to zoom out [\[precursor±\]](#)

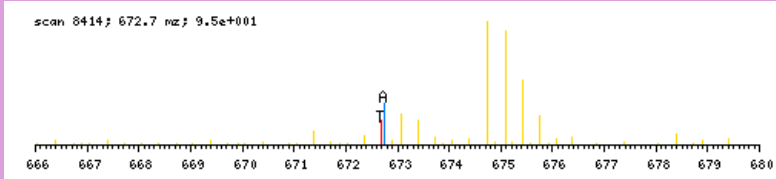

zoomed in precursor plot; T=theoretical m/z, A=acquired m/z

| b <sup>+</sup> | #  | AA # | y <sup>+</sup> | y <sup>2+</sup> |
|----------------|----|------|----------------|-----------------|
| 116.0711       | 1  | S 18 |                |                 |
| 244.1297       | 2  | Q 17 | 1900.9980      | 951.0029        |
| 357.2138       | 3  | L 16 | 1772.9394      | 886.9736        |
| 470.2978       | 4  | L 15 | 1659.8554      | 830.4316        |
| 598.3564       | 5  | Q 14 | 1546.7713      | 773.8896        |
| 727.3990       | 6  | E 13 | 1418.7127      | 709.8603        |
| 842.4259       | 7  | D 12 | 1289.6701      | 645.3390        |
| 929.4580       | 8  | S 11 | 1174.6432      | 587.8255        |
| 1042.5420      | 9  | L 10 | 1087.6111      | 544.3095        |
| 1156.5850      | 10 | N 9  | 974.5271       | 487.7675        |
| 1255.6534      | 11 | V 8  | 860.4842       | 430.7460        |
| 1326.6905      | 12 | A 7  | 761.4157       | 381.2118        |
| 1441.7174      | 13 | D 6  | 690.3786       | 345.6932        |
| 1554.8015      | 14 | L 5  | 575.3517       | 288.1798        |
| 1641.8335      | 15 | S 4  | 462.2676       | 231.6377        |
| 1728.8656      | 16 | S 3  | 375.2356       | 188.1217        |
| 1841.9496      | 17 | L 2  | 288.2036       | 144.6057        |
|                | 18 | R 1  | 175.1195       | 88.0637         |

N-term:+29.04

SQQSSSYGQQSSFR, MH+ 1610.7623, m/z 537.5923  
 H OSG38 P180811 230811-s1.02290.02290.3.dta

X-range:

-

MassTol: Y-zoom:

MassType:

AVG  MONO

Axis:

1  2

Label:

I  M  -

Ions:

a  +  2+  3+

b  +  2+  3+

c  +  2+  3+

x  +  2+  3+

y  +  2+  3+

z  +  2+  3+

hide H<sub>2</sub>O/NH<sub>3</sub>

zoom 112-122

GO

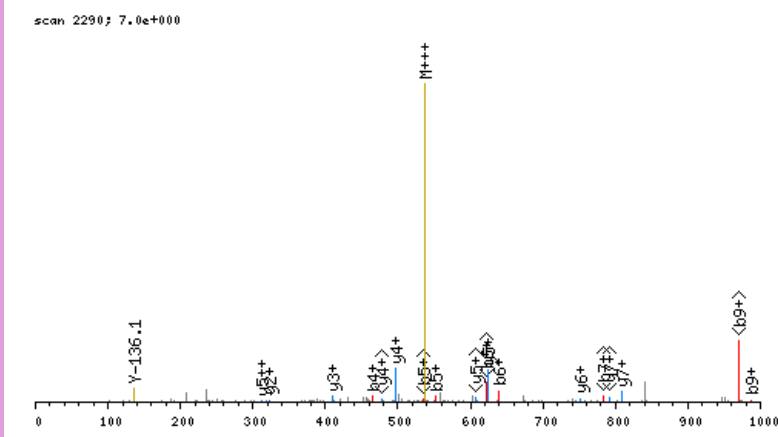

click image to zoom in; click top corners to zoom out [\[precursor±\]](#)

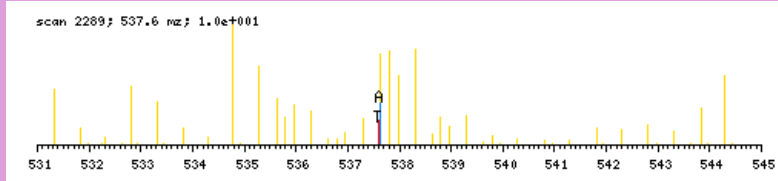

zoomed in precursor plot; T=theoretical m/z, A=acquired m/z

| b <sup>+</sup> | #  | AA # | y <sup>+</sup> | y <sup>2+</sup> |
|----------------|----|------|----------------|-----------------|
| 122.1029       | 1  | S 14 |                |                 |
| 250.1615       | 2  | Q 13 | 1489.6672      | 745.3375        |
| 378.2201       | 3  | Q 12 | 1361.6086      | 681.3082        |
| 465.2521       | 4  | S 11 | 1233.5500      | 617.2789        |
| 552.2841       | 5  | S 10 | 1146.5180      | 573.7629        |
| 639.3162       | 6  | S 9  | 1059.4859      | 530.2469        |
| 802.3795       | 7  | Y 8  | 972.4539       | 486.7309        |
| 859.4010       | 8  | G 7  | 809.3906       | 405.1992        |
| 987.4595       | 9  | Q 6  | 752.3691       | 376.6885        |
| 1115.5181      | 10 | Q 5  | 624.3105       | 312.6592        |
| 1202.5501      | 11 | S 4  | 496.2520       | 248.6299        |
| 1289.5822      | 12 | S 3  | 409.2199       | 205.1139        |
| 1436.6506      | 13 | F 2  | 322.1879       | 161.5979        |
|                | 14 | R 1  | 175.1195       | 88.0637         |

N-term:+35.07

SRGESQEVALPSR, MH+ 1449.7874, m/z 483.9340  
 H OSG40 P180811 230811-s1.02741.02741.3.dta

scan 2741; 3.9e+000

X-range:

-

MassTol: Y-zoom:

MassType:

AVG  MONO

Axis:

1  2

Label:

I  M  -

Ions:

a  +  2+  3+

b  +  2+  3+

c  +  2+  3+

x  +  2+  3+

y  +  2+  3+

z  +  2+  3+

hide H<sub>2</sub>O/NH<sub>3</sub>

zoom 112-122

GO

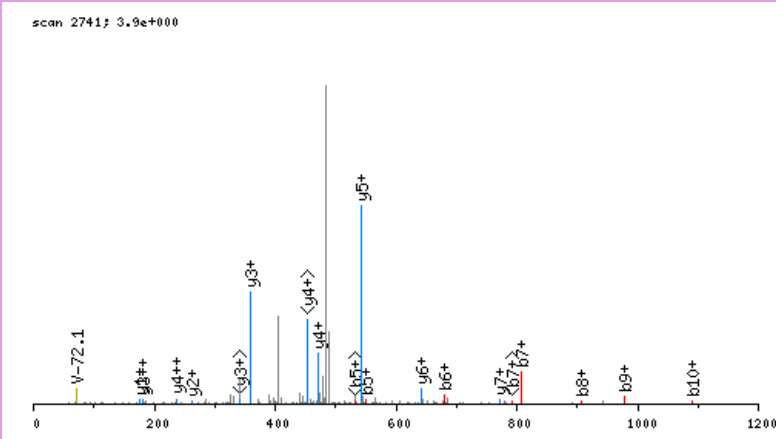

click image to zoom in; click top corners to zoom out [\[precursor±\]](#)

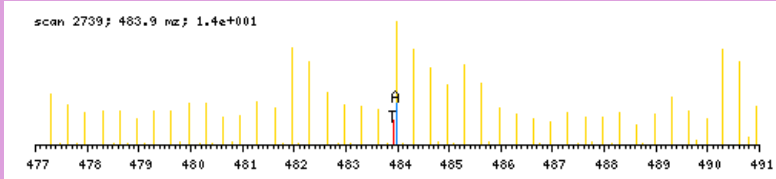

zoomed in precursor plot; T=theoretical m/z, A=acquired m/z

| b <sup>+</sup> | #  | AA # | y <sup>+</sup> | y <sup>2+</sup> |
|----------------|----|------|----------------|-----------------|
| 122.1029       | 1  | S 13 |                |                 |
| 278.2040       | 2  | R 12 | 1328.6923      | 664.8500        |
| 335.2255       | 3  | G 11 | 1172.5911      | 586.7995        |
| 464.2681       | 4  | E 10 | 1115.5697      | 558.2888        |
| 551.3001       | 5  | S 9  | 986.5271       | 493.7675        |
| 679.3587       | 6  | Q 8  | 899.4951       | 450.2514        |
| 808.4013       | 7  | E 7  | 771.4365       | 386.2222        |
| 907.4697       | 8  | V 6  | 642.3939       | 321.7009        |
| 978.5068       | 9  | A 5  | 543.3255       | 272.1666        |
| 1091.5909      | 10 | L 4  | 472.2884       | 236.6481        |
| 1188.6437      | 11 | P 3  | 359.2043       | 180.1061        |
| 1275.6757      | 12 | S 2  | 262.1515       | 131.5797        |
|                | 13 | R 1  | 175.1195       | 88.0637         |

N-term:+35.07

SSAENEPPVPLVGNWRPPQPVKGR, MH+ 2667.4371, m/z 667.6147  
 L OSG40 P180811 230811-s1.07051.07051.4.dta

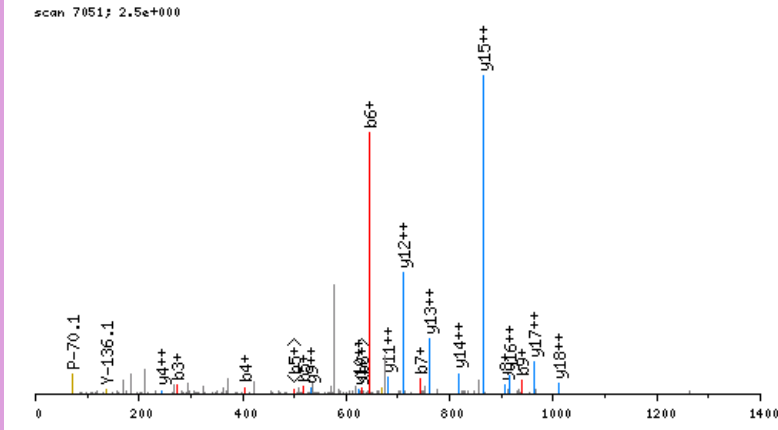

click image to zoom in; click top corners to zoom out [precursor±]

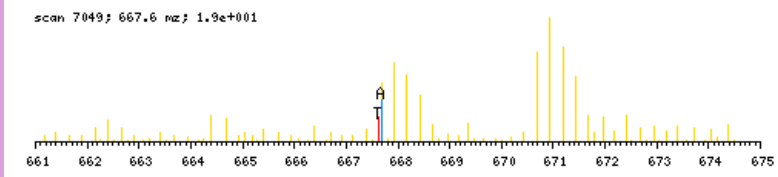

zoomed in precursor plot; T=theoretical m/z, A=acquired m/z

X-range:

-

MassTol: Y-zoom:

MassType:

AVG  MONO

Axis:

1  2

Label:

I  M  -

Ions:

a  +  2+  3+

b  +  2+  3+

c  +  2+  3+

x  +  2+  3+

y  +  2+  3+

z  +  2+  3+

hide H<sub>2</sub>O/NH<sub>3</sub>

zoom 112-122

GO

| b <sup>+</sup> | #  | AA # | y <sup>+</sup> | y <sup>2+</sup> |
|----------------|----|------|----------------|-----------------|
| 116.0711       | 1  | S 24 |                |                 |
| 203.1032       | 2  | S 23 | 2552.3738      | 1276.6908       |
| 274.1403       | 3  | A 22 | 2465.3418      | 1233.1748       |
| 403.1829       | 4  | E 21 | 2394.3047      | 1197.6562       |
| 517.2258       | 5  | N 20 | 2265.2621      | 1133.1349       |
| 646.2684       | 6  | E 19 | 2151.2191      | 1076.1135       |
| 743.3211       | 7  | P 18 | 2022.1765      | 1011.5922       |
| 840.3739       | 8  | P 17 | 1925.1238      | 963.0658        |
| 939.4423       | 9  | V 16 | 1828.0710      | 914.5394        |
| 1036.4951      | 10 | P 15 | 1729.0026      | 865.0052        |
| 1149.5792      | 11 | L 14 | 1631.9498      | 816.4788        |
| 1248.6476      | 12 | V 13 | 1518.8658      | 759.9368        |
| 1305.6690      | 13 | G 12 | 1419.7974      | 710.4026        |
| 1419.7120      | 14 | N 11 | 1362.7759      | 681.8919        |
| 1605.7913      | 15 | W 10 | 1248.7330      | 624.8704        |
| 1761.8924      | 16 | R 9  | 1062.6537      | 531.8307        |
| 1858.9451      | 17 | P 8  | 906.5525       | 453.7802        |
| 1955.9979      | 18 | P 7  | 809.4998       | 405.2538        |
| 2084.0565      | 19 | Q 6  | 712.4470       | 356.7274        |
| 2181.1093      | 20 | P 5  | 584.3884       | 292.6981        |
| 2280.1777      | 21 | V 4  | 487.3357       | 244.1718        |
| 2436.3040      | 22 | K 3  | 388.2673       | 194.6375        |
| 2493.3254      | 23 | G 2  | 232.1410       | 116.5744        |
|                | 24 | R 1  | 175.1195       | 88.0637         |

N-term:+29.04 K(22):+156.13

SSDAQWLTAEER, MH+ 1426.7026, m/z 713.8549  
 H OSG37 P180811 230811-s1.04781.04781.2.dta

X-range:

-

MassTol: Y-zoom:

MassType:

AVG  MONO

Axis:

1  2

Label:

I  M  -

Ions:

a  +  2+  3+

b  +  2+  3+

c  +  2+  3+

x  +  2+  3+

y  +  2+  3+

z  +  2+  3+

hide H<sub>2</sub>O/NH<sub>3</sub>

zoom 112-122

GO

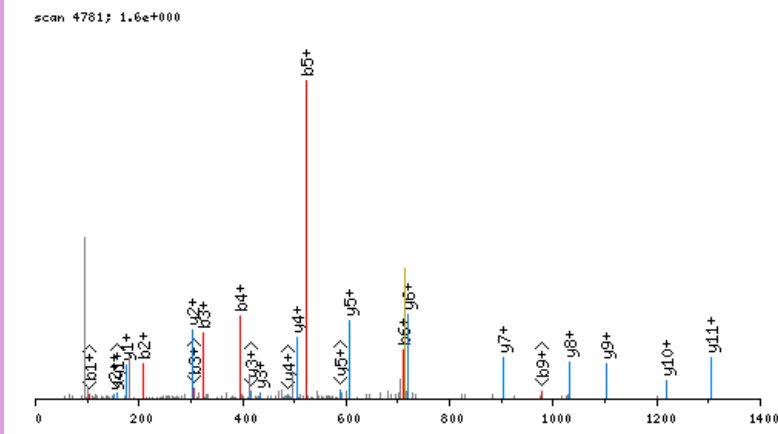

click image to zoom in; click top corners to zoom out [\[precursor±\]](#)

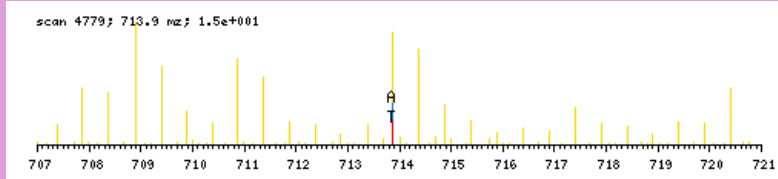

zoomed in precursor plot; T=theoretical m/z, A=acquired m/z

| b <sup>+</sup> | #  | AA # | y <sup>+</sup> | y <sup>2+</sup> |
|----------------|----|------|----------------|-----------------|
| 122.1029       | 1  | S 12 |                |                 |
| 209.1350       | 2  | S 11 | 1305.6075      | 653.3077        |
| 324.1619       | 3  | D 10 | 1218.5755      | 609.7917        |
| 395.1990       | 4  | A 9  | 1103.5485      | 552.2782        |
| 523.2576       | 5  | Q 8  | 1032.5114      | 516.7596        |
| 709.3369       | 6  | W 7  | 904.4529       | 452.7303        |
| 822.4210       | 7  | L 6  | 718.3735       | 359.6907        |
| 923.4686       | 8  | T 5  | 605.2895       | 303.1487        |
| 994.5058       | 9  | A 4  | 504.2418       | 252.6248        |
| 1123.5484      | 10 | E 3  | 433.2047       | 217.1063        |
| 1252.5909      | 11 | E 2  | 304.1621       | 152.5850        |
|                | 12 | R 1  | 175.1195       | 88.0637         |

N-term:+35.07



SSDSMDTGAGSIR, MH+ 1317.6168, m/z 659.3121  
 H OSG38 P180811 230811-s1.02437.02437.2.dta

scan 2437; 4.3e+000

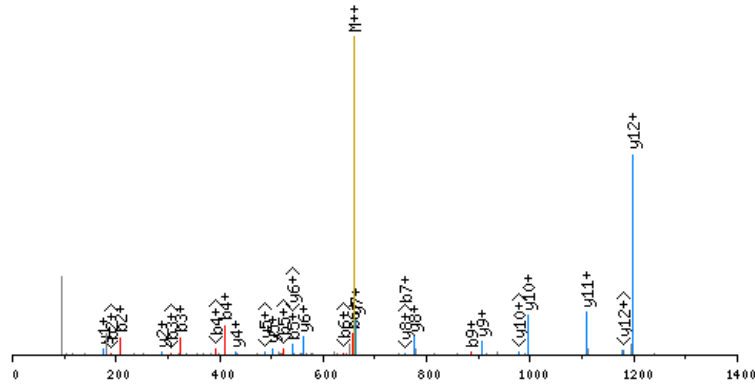

click image to zoom in; click top corners to zoom out [precursor±]

scan 2434; 659.3 m/z; 3.2e+001

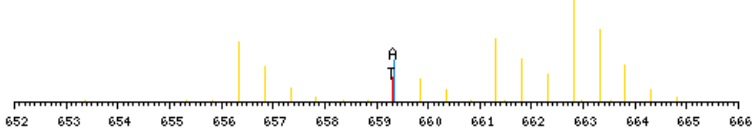

zoomed in precursor plot; T=theoretical m/z, A=acquired m/z

X-range:

-

MassTol: Y-zoom:

MassType:

AVG  MONO

Axis:

1  2

Label:

I  M  -

Ions:

a  +  2+  3+

b  +  2+  3+

c  +  2+  3+

x  +  2+  3+

y  +  2+  3+

z  +  2+  3+

hide H<sub>2</sub>O/NH<sub>3</sub>

zoom 112-122

GO

| b <sup>+</sup> | #  | AA | #  | y <sup>+</sup> | y <sup>2+</sup> |
|----------------|----|----|----|----------------|-----------------|
| 122.1029       | 1  | S  | 13 |                |                 |
| 209.1350       | 2  | S  | 12 | 1196.5217      | 598.7648        |
| 324.1619       | 3  | D  | 11 | 1109.4897      | 555.2488        |
| 411.1939       | 4  | S  | 10 | 994.4628       | 497.7353        |
| 542.2344       | 5  | M  | 9  | 907.4307       | 454.2193        |
| 657.2614       | 6  | D  | 8  | 776.3903       | 388.6990        |
| 758.3090       | 7  | T  | 7  | 661.3633       | 331.1856        |
| 815.3305       | 8  | G  | 6  | 560.3156       | 280.6617        |
| 886.3676       | 9  | A  | 5  | 503.2942       | 252.1510        |
| 943.3891       | 10 | G  | 4  | 432.2571       | 216.6324        |
| 1030.4211      | 11 | S  | 3  | 375.2356       | 188.1217        |
| 1143.5052      | 12 | I  | 2  | 288.2036       | 144.6057        |
|                | 13 | R  | 1  | 175.1195       | 88.0637         |

N-term:+35.07

SSDSQVHSGVQVEGR, MH+ 1599.7727, m/z 533.9291  
 L OSG40 P180811 230811-s1.02028.02028.3.dta

X-range:

-

MassTol: Y-zoom:

MassType:

AVG  MONO

Axis:

1  2

Label:

I  M  -

Ions:

a  +  2+  3+

b  +  2+  3+

c  +  2+  3+

x  +  2+  3+

y  +  2+  3+

z  +  2+  3+

hide H<sub>2</sub>O/NH<sub>3</sub>

zoom 112-122

GO

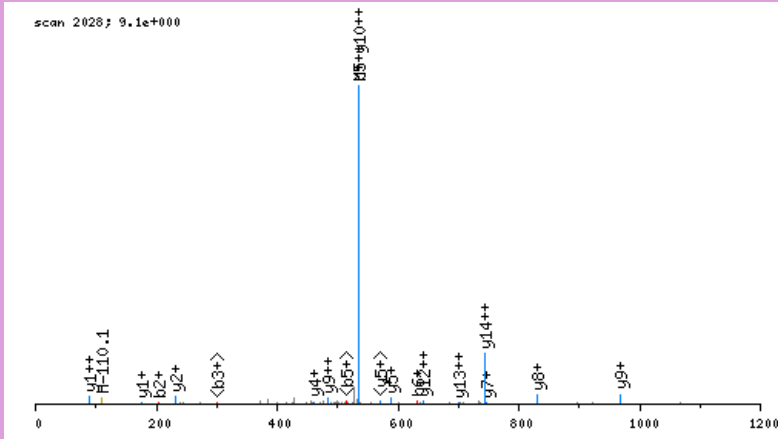

click image to zoom in; click top corners to zoom out [\[precursor±\]](#)

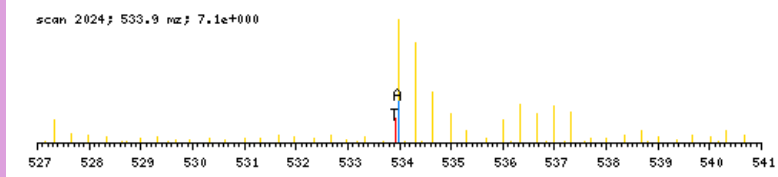

zoomed in precursor plot; T=theoretical m/z, A=acquired m/z

| b <sup>+</sup> | #  | AA # | y <sup>+</sup> | y <sup>2+</sup> |
|----------------|----|------|----------------|-----------------|
| 116.0711       | 1  | S 15 |                |                 |
| 203.1032       | 2  | S 14 | 1484.7094      | 742.8586        |
| 318.1301       | 3  | D 13 | 1397.6773      | 699.3426        |
| 405.1621       | 4  | S 12 | 1282.6504      | 641.8291        |
| 533.2207       | 5  | Q 11 | 1195.6184      | 598.3131        |
| 632.2891       | 6  | V 10 | 1067.5598      | 534.2838        |
| 769.3480       | 7  | H 9  | 968.4914       | 484.7496        |
| 856.3801       | 8  | S 8  | 831.4325       | 416.2201        |
| 913.4015       | 9  | G 7  | 744.4004       | 372.7041        |
| 1012.4699      | 10 | V 6  | 687.3790       | 344.1934        |
| 1140.5285      | 11 | Q 5  | 588.3105       | 294.6592        |
| 1239.5969      | 12 | V 4  | 460.2520       | 230.6299        |
| 1368.6395      | 13 | E 3  | 361.1836       | 181.0957        |
| 1425.6610      | 14 | G 2  | 232.1410       | 116.5744        |
|                | 15 | R 1  | 175.1195       | 88.0637         |

N-term:+29.04

SSEGEEHVVVPPQR, MH+ 1468.7032, m/z 490.2392  
 L OSG40 P180811 230811-s1.02035.02035.3.dta

scan 2035; 1.1e+001

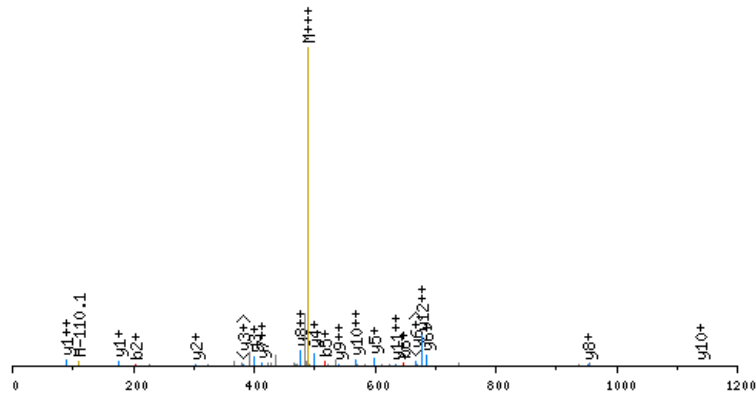

click image to zoom in; click top corners to zoom out [\[precursor±\]](#)

scan 2034; 490.2 m/z; 2.3e+001

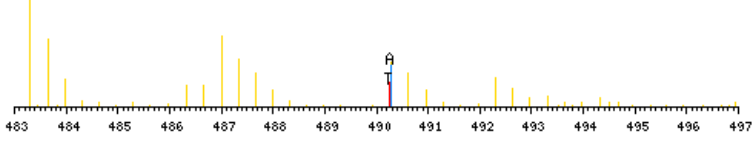

zoomed in precursor plot; T=theoretical m/z, A=acquired m/z

X-range:

-

MassTol: Y-zoom:

MassType:

AVG  MONO

Axis:

1  2

Label:

I  M  -

Ions:

a  +  2+  3+

b  +  2+  3+

c  +  2+  3+

x  +  2+  3+

y  +  2+  3+

z  +  2+  3+

hide H<sub>2</sub>O/NH<sub>3</sub>

zoom 112-122

GO

| b <sup>+</sup> | #  | AA # | y <sup>+</sup> | y <sup>2+</sup> |
|----------------|----|------|----------------|-----------------|
| 116.0711       | 1  | S 13 |                |                 |
| 203.1032       | 2  | S 12 | 1353.6399      | 677.3239        |
| 332.1458       | 3  | E 11 | 1266.6079      | 633.8078        |
| 389.1672       | 4  | G 10 | 1137.5653      | 569.2865        |
| 518.2098       | 5  | E 9  | 1080.5438      | 540.7758        |
| 647.2524       | 6  | E 8  | 951.5012       | 476.2545        |
| 784.3113       | 7  | H 7  | 822.4586       | 411.7332        |
| 871.3433       | 8  | S 6  | 685.3997       | 343.2038        |
| 970.4118       | 9  | V 5  | 598.3677       | 299.6877        |
| 1069.4802      | 10 | V 4  | 499.2993       | 250.1535        |
| 1166.5329      | 11 | P 3  | 400.2308       | 200.6193        |
| 1294.5915      | 12 | Q 2  | 303.1781       | 152.0930        |
|                | 13 | R 1  | 175.1195       | 88.0637         |

N-term:+29.04

SSEPSAVTPVPTPTLIAPR, MH+ 2055.1550, m/z 685.7232  
 H OSG36 P180811 230811-s1.04613.04613.3.dta

scan 4613; 1.3e+000

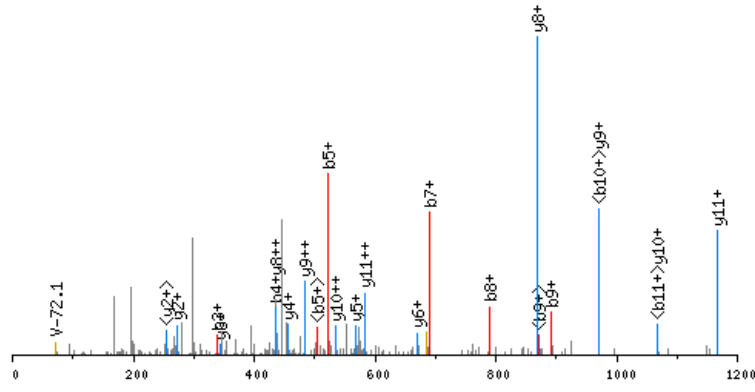

click image to zoom in; click top corners to zoom out [\[precursor±\]](#)

scan 4609; 685.7 m/z; 3.9e+000

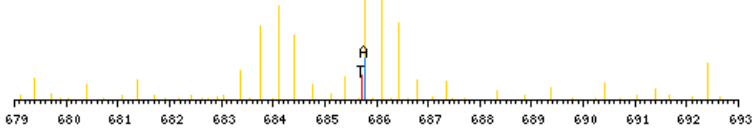

zoomed in precursor plot; T=theoretical m/z, A=acquired m/z

X-range:

-

MassTol: Y-zoom:

MassType:

AVG  MONO

Axis:

1  2

Label:

I  M  -

Ions:

a  +  2+  3+

b  +  2+  3+

c  +  2+  3+

x  +  2+  3+

y  +  2+  3+

z  +  2+  3+

hide H<sub>2</sub>O/NH<sub>3</sub>

zoom 112-122

GO

| b <sup>+</sup> | #  | AA # | y <sup>+</sup> | y <sup>2+</sup> |
|----------------|----|------|----------------|-----------------|
| 122.1029       | 1  | S 20 |                |                 |
| 209.1350       | 2  | S 19 | 1934.0599      | 967.5338        |
| 338.1776       | 3  | E 18 | 1847.0278      | 924.0178        |
| 435.2303       | 4  | P 17 | 1717.9852      | 859.4965        |
| 522.2623       | 5  | S 16 | 1620.9325      | 810.9702        |
| 619.3151       | 6  | P 15 | 1533.9005      | 767.4541        |
| 690.3522       | 7  | A 14 | 1436.8477      | 718.9278        |
| 789.4206       | 8  | V 13 | 1365.8106      | 683.4092        |
| 890.4683       | 9  | T 12 | 1266.7422      | 633.8750        |
| 987.5211       | 10 | P 11 | 1165.6945      | 583.3512        |
| 1086.5895      | 11 | V 10 | 1068.6417      | 534.8248        |
| 1187.6372      | 12 | T 9  | 969.5733       | 485.2906        |
| 1284.6899      | 13 | P 8  | 868.5256       | 434.7667        |
| 1385.7376      | 14 | T 7  | 771.4729       | 386.2403        |
| 1486.7853      | 15 | T 6  | 670.4252       | 335.7165        |
| 1599.8694      | 16 | L 5  | 569.3775       | 285.1927        |
| 1712.9534      | 17 | I 4  | 456.2934       | 228.6506        |
| 1783.9905      | 18 | A 3  | 343.2094       | 172.1086        |
| 1881.0433      | 19 | P 2  | 272.1723       | 136.5900        |
|                | 20 | R 1  | 175.1195       | 88.0637         |

N-term:+35.07

SSFGLPISEVVVVKDR, MH+ 1687.0067, m/z 563.0071  
 H OSG39 P180811 230811-s1.05542.05542.3.dta

X-range:

-

MassTol: Y-zoom:

MassType:

AVG  MONO

Axis:

1  2

Label:

I  M  -

Ions:

a  +  2+  3+

b  +  2+  3+

c  +  2+  3+

x  +  2+  3+

y  +  2+  3+

z  +  2+  3+

hide H<sub>2</sub>O/NH<sub>3</sub>

zoom 112-122

GO

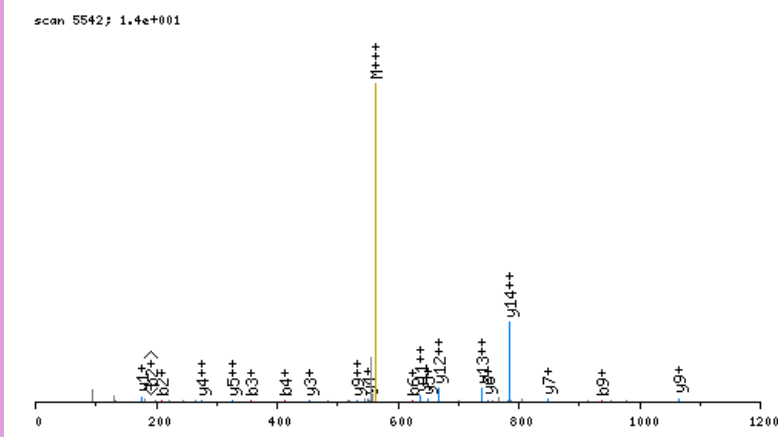

click image to zoom in; click top corners to zoom out [\[precursor±\]](#)

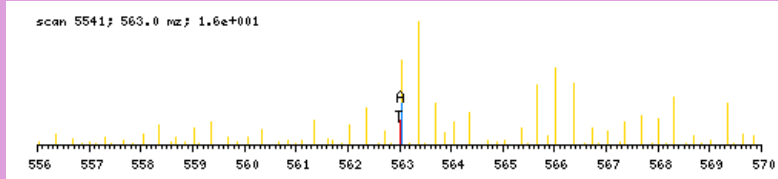

zoomed in precursor plot; T=theoretical m/z, A=acquired m/z

| b <sup>+</sup> | #  | AA # | y <sup>+</sup> | y <sup>2+</sup> |
|----------------|----|------|----------------|-----------------|
| 122.1029       | 1  | S 15 |                |                 |
| 209.1350       | 2  | S 14 | 1565.9116      | 783.4597        |
| 356.2034       | 3  | F 13 | 1478.8795      | 739.9437        |
| 413.2248       | 4  | G 12 | 1331.8111      | 666.4095        |
| 510.2776       | 5  | P 11 | 1274.7896      | 637.8987        |
| 623.3617       | 6  | I 10 | 1177.7369      | 589.3724        |
| 710.3937       | 7  | S 9  | 1064.6528      | 532.8303        |
| 839.4363       | 8  | E 8  | 977.6208       | 489.3143        |
| 938.5047       | 9  | V 7  | 848.5782       | 424.7930        |
| 1037.5731      | 10 | V 6  | 749.5098       | 375.2588        |
| 1136.6415      | 11 | V 5  | 650.4414       | 325.7246        |
| 1235.7099      | 12 | V 4  | 551.3730       | 276.1904        |
| 1397.8680      | 13 | K 3  | 452.3045       | 226.6562        |
| 1512.8950      | 14 | D 2  | 290.1464       | 145.5771        |
|                | 15 | R 1  | 175.1195       | 88.0637         |

N-term:+35.07 K(13):+162.16

SSGAIDTQQHEEVELR, MH+ 1826.8884, m/z 609.6343  
 L OSG39 P180811 230811-s1.02882.02882.3.dta

X-range:

-

MassTol: Y-zoom:

MassType:

AVG  MONO

Axis:

1  2

Label:

I  M  -

Ions:

a  +  2+  3+

b  +  2+  3+

c  +  2+  3+

x  +  2+  3+

y  +  2+  3+

z  +  2+  3+

hide H<sub>2</sub>O/NH<sub>3</sub>

zoom 112-122

GO

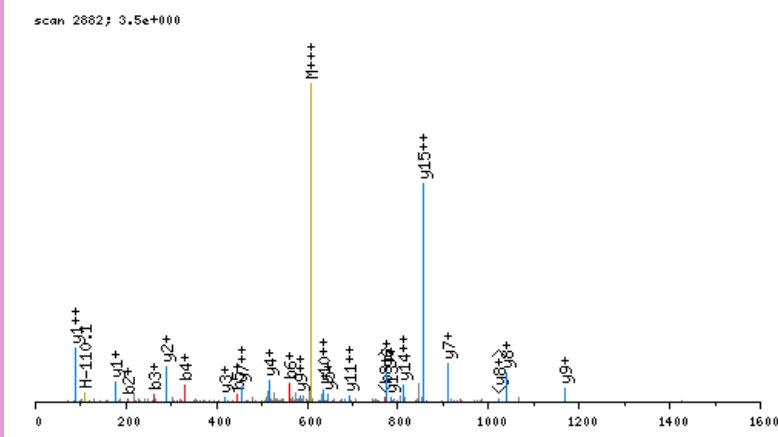

click image to zoom in; click top corners to zoom out [\[precursor±\]](#)

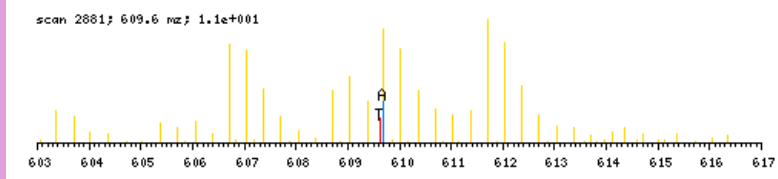

zoomed in precursor plot; T=theoretical m/z, A=acquired m/z

| b <sup>+</sup> | #  | AA # | y <sup>+</sup> | y <sup>2+</sup> |
|----------------|----|------|----------------|-----------------|
| 116.0711       | 1  | S 16 |                |                 |
| 203.1032       | 2  | S 15 | 1711.8251      | 856.4165        |
| 260.1246       | 3  | G 14 | 1624.7931      | 812.9005        |
| 331.1617       | 4  | A 13 | 1567.7716      | 784.3897        |
| 444.2458       | 5  | I 12 | 1496.7345      | 748.8712        |
| 559.2727       | 6  | D 11 | 1383.6504      | 692.3291        |
| 660.3204       | 7  | T 10 | 1268.6235      | 634.8157        |
| 788.3790       | 8  | Q 9  | 1167.5758      | 584.2918        |
| 916.4376       | 9  | Q 8  | 1039.5172      | 520.2625        |
| 1053.4965      | 10 | H 7  | 911.4587       | 456.2332        |
| 1182.5391      | 11 | E 6  | 774.3998       | 387.7038        |
| 1311.5817      | 12 | E 5  | 645.3572       | 323.1825        |
| 1410.6501      | 13 | V 4  | 516.3146       | 258.6612        |
| 1539.6927      | 14 | E 3  | 417.2462       | 209.1270        |
| 1652.7767      | 15 | L 2  | 288.2036       | 144.6057        |
|                | 16 | R 1  | 175.1195       | 88.0637         |

N-term:+29.04

SSGFSLEDPQTHSNR, MH+ 1689.7832, m/z 563.9326  
 L OSG40 P180811 230811-s1.03603.03603.3.dta

X-range:

-

MassTol: Y-zoom:

MassType:

AVG  MONO

Axis:

1  2

Label:

I  M  -

Ions:

a  +  2+  3+

b  +  2+  3+

c  +  2+  3+

x  +  2+  3+

y  +  2+  3+

z  +  2+  3+

hide H<sub>2</sub>O/NH<sub>3</sub>

zoom 112-122

GO

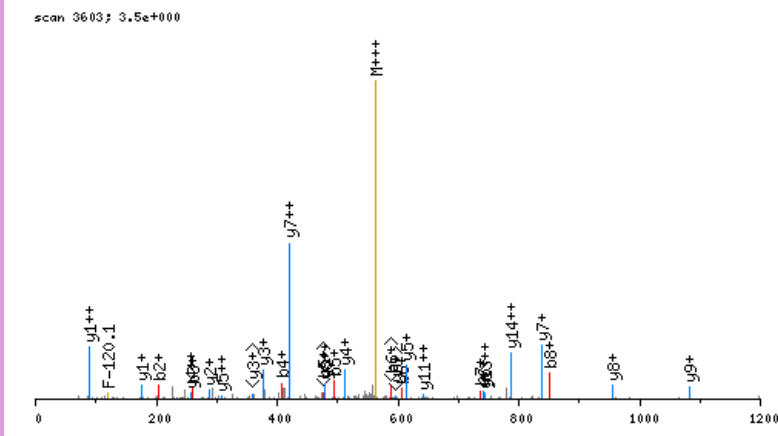

click image to zoom in; click top corners to zoom out [\[precursor±\]](#)

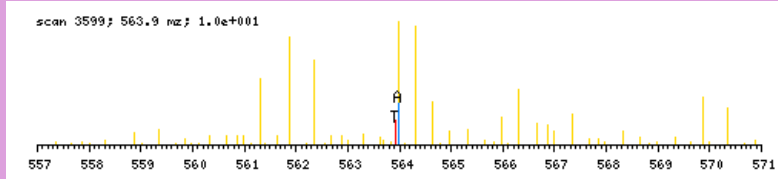

zoomed in precursor plot; T=theoretical m/z, A=acquired m/z

| b <sup>+</sup> | #  | AA # | y <sup>+</sup> | y <sup>2+</sup> |
|----------------|----|------|----------------|-----------------|
| 116.0711       | 1  | S 15 |                |                 |
| 203.1032       | 2  | S 14 | 1574.7199      | 787.8639        |
| 260.1246       | 3  | G 13 | 1487.6879      | 744.3479        |
| 407.1930       | 4  | F 12 | 1430.6664      | 715.8371        |
| 494.2251       | 5  | S 11 | 1283.5980      | 642.3029        |
| 607.3091       | 6  | L 10 | 1196.5660      | 598.7869        |
| 736.3517       | 7  | E 9  | 1083.4819      | 542.2449        |
| 851.3787       | 8  | D 8  | 954.4393       | 477.7236        |
| 948.4314       | 9  | P 7  | 839.4124       | 420.2101        |
| 1076.4900      | 10 | Q 6  | 742.3596       | 371.6837        |
| 1177.5377      | 11 | T 5  | 614.3010       | 307.6544        |
| 1314.5966      | 12 | H 4  | 513.2534       | 257.1306        |
| 1401.6286      | 13 | S 3  | 376.1945       | 188.6011        |
| 1515.6716      | 14 | N 2  | 289.1624       | 145.0851        |
|                | 15 | R 1  | 175.1195       | 88.0637         |

N-term:+29.04

SSGKDGQCPLVVEQVR, MH+ 1814.9434, m/z 605.6527  
 L OSG40 P180811 230811-s1.03673.03673.3.dta

scan 3673; 2.9e+000

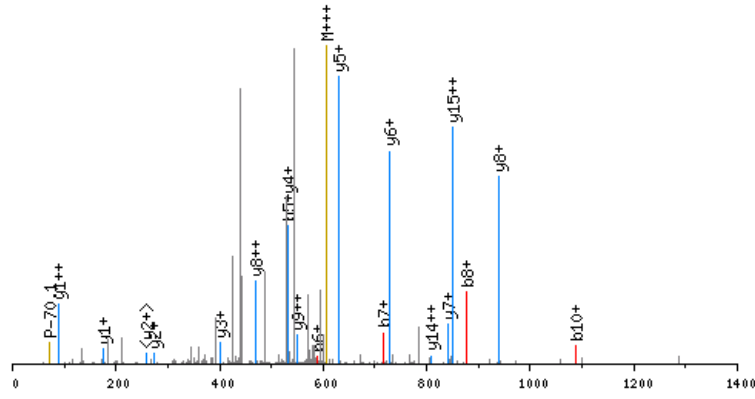

click image to zoom in; click top corners to zoom out [\[precursor±\]](#)

scan 3669; 605.7 mz; 2.2e+001

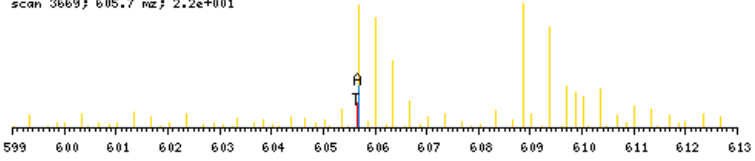

zoomed in precursor plot; T=theoretical m/z, A=acquired m/z

X-range:

-

MassTol: Y-zoom:

MassType:

AVG  MONO

Axis:

1  2

Label:

I  M  -

Ions:

a  +  2+  3+

b  +  2+  3+

c  +  2+  3+

x  +  2+  3+

y  +  2+  3+

z  +  2+  3+

hide H<sub>2</sub>O/NH<sub>3</sub>

zoom 112-122

GO

| b <sup>+</sup> | #  | AA | #  | y <sup>+</sup> | y <sup>2+</sup> |
|----------------|----|----|----|----------------|-----------------|
| 116.0711       | 1  | S  | 16 |                |                 |
| 203.1032       | 2  | S  | 15 | 1699.8801      | 850.4440        |
| 260.1246       | 3  | G  | 14 | 1612.8481      | 806.9280        |
| 416.2509       | 4  | K  | 13 | 1555.8266      | 778.4172        |
| 531.2779       | 5  | D  | 12 | 1399.7003      | 700.3541        |
| 588.2993       | 6  | G  | 11 | 1284.6734      | 642.8406        |
| 716.3579       | 7  | Q  | 10 | 1227.6519      | 614.3299        |
| 876.3885       | 8  | C  | 9  | 1099.5933      | 550.3006        |
| 973.4413       | 9  | P  | 8  | 939.5627       | 470.2853        |
| 1086.5253      | 10 | L  | 7  | 842.5100       | 421.7589        |
| 1185.5937      | 11 | V  | 6  | 729.4259       | 365.2169        |
| 1284.6622      | 12 | V  | 5  | 630.3575       | 315.6827        |
| 1413.7048      | 13 | E  | 4  | 531.2891       | 266.1485        |
| 1541.7633      | 14 | Q  | 3  | 402.2465       | 201.6272        |
| 1640.8317      | 15 | V  | 2  | 274.1879       | 137.5979        |
|                | 16 | R  | 1  | 175.1195       | 88.0637         |

N-term:+29.04 K(4):+156.13  
 C(8):+160.03



SSGPGASPETQGKANVTR, MH+ 1799.9252, m/z 600.6466  
 L OSG39 P180811 230811-s1.01985.01985.3.dta

X-range:

-

MassTol: Y-zoom:

MassType:

AVG  MONO

Axis:

1  2

Label:

I  M  -

Ions:

a  +  2+  3+

b  +  2+  3+

c  +  2+  3+

x  +  2+  3+

y  +  2+  3+

z  +  2+  3+

hide H<sub>2</sub>O/NH<sub>3</sub>

zoom 112-122

GO

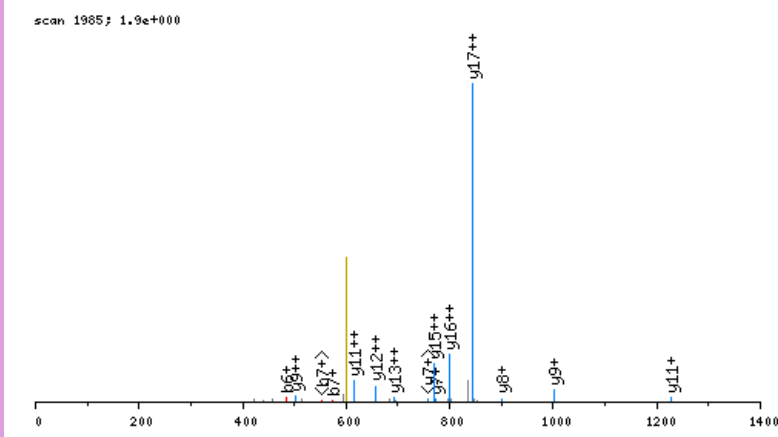

click image to zoom in; click top corners to zoom out [precursor±]

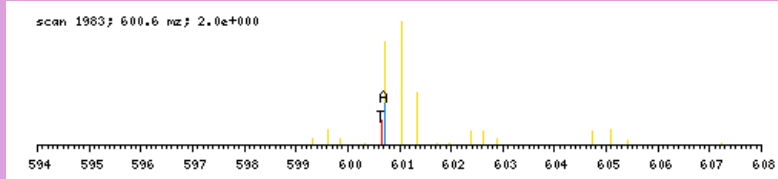

zoomed in precursor plot; T=theoretical m/z, A=acquired m/z

| b <sup>+</sup> | #  | AA | #  | y <sup>+</sup> | y <sup>2+</sup> |
|----------------|----|----|----|----------------|-----------------|
| 116.0711       | 1  | S  | 18 |                |                 |
| 203.1032       | 2  | S  | 17 | 1684.8619      | 842.9348        |
| 260.1246       | 3  | G  | 16 | 1597.8298      | 799.4188        |
| 357.1774       | 4  | P  | 15 | 1540.8084      | 770.9081        |
| 414.1988       | 5  | G  | 14 | 1443.7556      | 722.3817        |
| 485.2360       | 6  | A  | 13 | 1386.7342      | 693.8710        |
| 572.2680       | 7  | S  | 12 | 1315.6970      | 658.3524        |
| 669.3208       | 8  | P  | 11 | 1228.6650      | 614.8364        |
| 798.3633       | 9  | E  | 10 | 1131.6122      | 566.3100        |
| 899.4110       | 10 | T  | 9  | 1002.5697      | 501.7887        |
| 1027.4696      | 11 | Q  | 8  | 901.5220       | 451.2649        |
| 1084.4911      | 12 | G  | 7  | 773.4634       | 387.2356        |
| 1240.6174      | 13 | K  | 6  | 716.4419       | 358.7249        |
| 1311.6545      | 14 | A  | 5  | 560.3156       | 280.6617        |
| 1425.6974      | 15 | N  | 4  | 489.2785       | 245.1432        |
| 1524.7658      | 16 | V  | 3  | 375.2356       | 188.1217        |
| 1625.8135      | 17 | T  | 2  | 276.1672       | 138.5875        |
|                | 18 | R  | 1  | 175.1195       | 88.0637         |

N-term:+29.04 K(13):+156.13

SSGPTNASAFTEr, MH+ 1358.6764, m/z 679.8418  
 H OSG37 P180811 230811-s1.02840.02840.2.dta

X-range:

-

MassTol: Y-zoom:

MassType:

AVG  MONO

Axis:

1  2

Label:

I  M  -

Ions:

a  +  2+  3+

b  +  2+  3+

c  +  2+  3+

x  +  2+  3+

y  +  2+  3+

z  +  2+  3+

hide H<sub>2</sub>O/NH<sub>3</sub>

zoom 112-122

GO

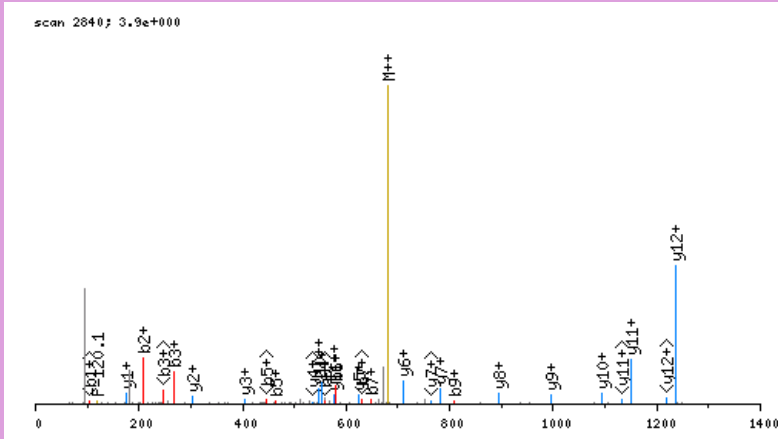

click image to zoom in; click top corners to zoom out [\[precursor±\]](#)

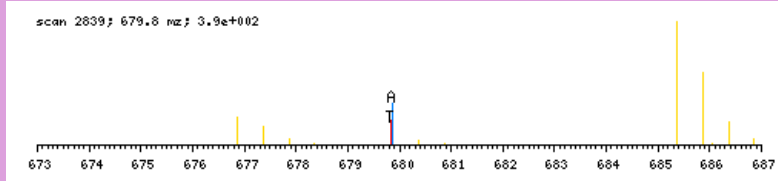

zoomed in precursor plot; T=theoretical m/z, A=acquired m/z

| b <sup>+</sup> | #  | AA # | y <sup>+</sup> | y <sup>2+</sup> |
|----------------|----|------|----------------|-----------------|
| 122.1029       | 1  | S 13 |                |                 |
| 209.1350       | 2  | S 12 | 1237.5813      | 619.2946        |
| 266.1564       | 3  | G 11 | 1150.5493      | 575.7786        |
| 363.2092       | 4  | P 10 | 1093.5278      | 547.2678        |
| 464.2569       | 5  | T 9  | 996.4750       | 498.7414        |
| 578.2998       | 6  | N 8  | 895.4274       | 448.2176        |
| 649.3369       | 7  | A 7  | 781.3844       | 391.1961        |
| 736.3689       | 8  | S 6  | 710.3473       | 355.6776        |
| 807.4060       | 9  | A 5  | 623.3153       | 312.1616        |
| 954.4745       | 10 | F 4  | 552.2782       | 276.6430        |
| 1055.5221      | 11 | T 3  | 405.2098       | 203.1088        |
| 1184.5647      | 12 | E 2  | 304.1621       | 152.5850        |
|                | 13 | R 1  | 175.1195       | 88.0637         |

N-term:+35.07

SSKLIMELTGGGR, MH+ 1416.8521, m/z 472.9555  
 H OSG40 P180811 230811-s1.06230.06230.3.dta

X-range:

-

MassTol: Y-zoom:

MassType:

AVG  MONO

Axis:

1  2

Label:

I  M  -

Ions:

a  +  2+  3+

b  +  2+  3+

c  +  2+  3+

x  +  2+  3+

y  +  2+  3+

z  +  2+  3+

hide H<sub>2</sub>O/NH<sub>3</sub>

zoom 112-122

GO

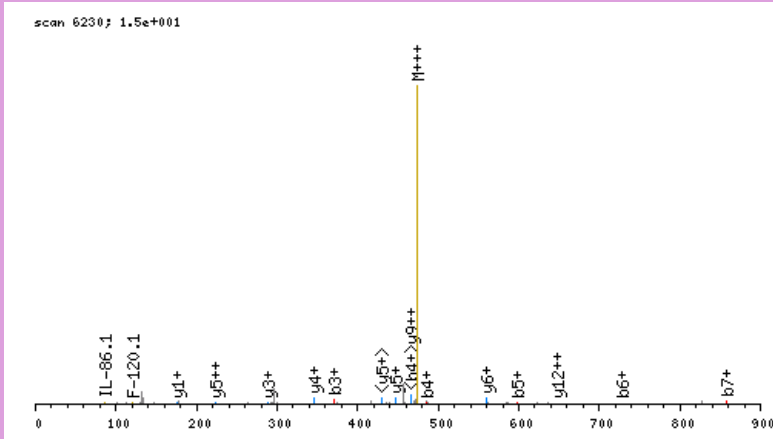

click image to zoom in; click top corners to zoom out [\[precursor±\]](#)

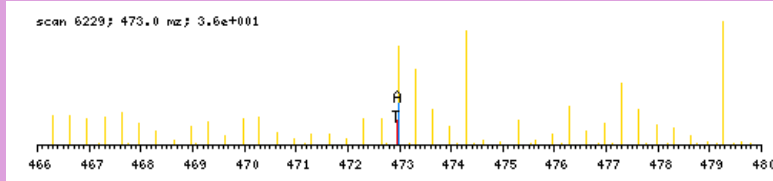

zoomed in precursor plot; T=theoretical m/z, A=acquired m/z

| b <sup>+</sup> | #  | AA # | y <sup>+</sup> | y <sup>2+</sup> |
|----------------|----|------|----------------|-----------------|
| 122.1029       | 1  | S 13 |                |                 |
| 209.1350       | 2  | S 12 | 1295.7570      | 648.3824        |
| 371.2931       | 3  | K 11 | 1208.7249      | 604.8664        |
| 484.3771       | 4  | L 10 | 1046.5668      | 523.7873        |
| 597.4612       | 5  | I 9  | 933.4828       | 467.2453        |
| 728.5017       | 6  | M 8  | 820.3987       | 410.7033        |
| 857.5443       | 7  | E 7  | 689.3582       | 345.1830        |
| 970.6283       | 8  | L 6  | 560.3156       | 280.6617        |
| 1071.6760      | 9  | T 5  | 447.2316       | 224.1197        |
| 1128.6975      | 10 | G 4  | 346.1839       | 173.5959        |
| 1185.7189      | 11 | G 3  | 289.1624       | 145.0851        |
| 1242.7404      | 12 | G 2  | 232.1410       | 116.5744        |
|                | 13 | R 1  | 175.1195       | 88.0637         |

N-term:+35.07 K(3):+162.16

SSLSDISSLLQIEPR, MH+ 1678.9439, m/z 560.3195  
 H OSG37 P180811 230811-s1.08705.08705.3.dta

X-range:

-

MassTol: Y-zoom:

MassType:

AVG  MONO

Axis:

1  2

Label:

I  M  -

Ions:

a  +  2+  3+

b  +  2+  3+

c  +  2+  3+

x  +  2+  3+

y  +  2+  3+

z  +  2+  3+

hide H<sub>2</sub>O/NH<sub>3</sub>

zoom 112-122

GO

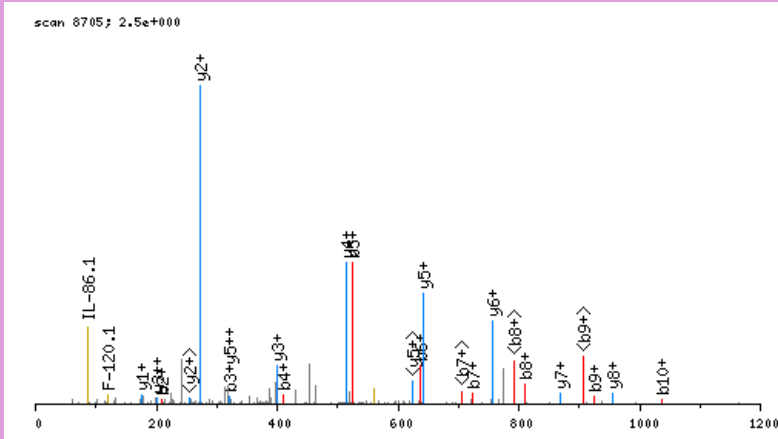

click image to zoom in; click top corners to zoom out [\[precursor±\]](#)

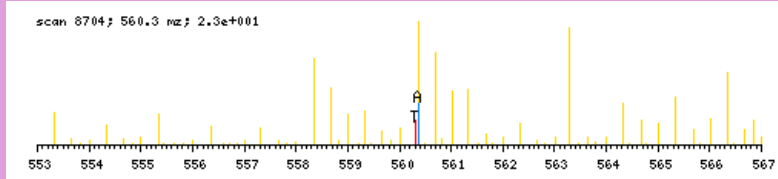

zoomed in precursor plot; T=theoretical m/z, A=acquired m/z

| b <sup>+</sup> | #  | AA # | y <sup>+</sup> | y <sup>2+</sup> |
|----------------|----|------|----------------|-----------------|
| 122.1029       | 1  | S 15 |                |                 |
| 209.1350       | 2  | S 14 | 1557.8488      | 779.4283        |
| 322.2190       | 3  | L 13 | 1470.8168      | 735.9123        |
| 409.2510       | 4  | S 12 | 1357.7327      | 679.3703        |
| 524.2780       | 5  | D 11 | 1270.7007      | 635.8543        |
| 637.3621       | 6  | I 10 | 1155.6737      | 578.3408        |
| 724.3941       | 7  | S 9  | 1042.5897      | 521.7988        |
| 811.4261       | 8  | S 8  | 955.5577       | 478.2827        |
| 924.5102       | 9  | L 7  | 868.5256       | 434.7667        |
| 1037.5942      | 10 | L 6  | 755.4416       | 378.2247        |
| 1165.6528      | 11 | Q 5  | 642.3575       | 321.6827        |
| 1278.7369      | 12 | I 4  | 514.2989       | 257.6534        |
| 1407.7795      | 13 | E 3  | 401.2149       | 201.1113        |
| 1504.8322      | 14 | P 2  | 272.1723       | 136.5900        |
|                | 15 | R 1  | 175.1195       | 88.0637         |

N-term:+35.07

SSPPASYSYTLQAPALSVTGPITANSEQIAR, MH+ 3145.6593, m/z 787.1703  
 H OSG36 P180811 230811-s1.05522.05522.4.dta

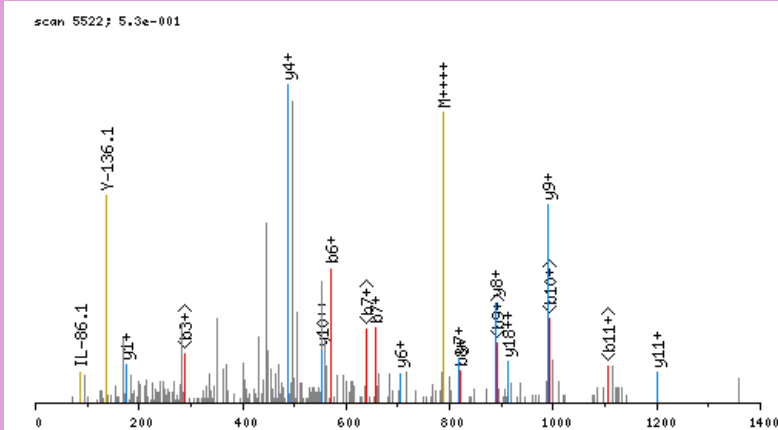

click image to zoom in; click top corners to zoom out [\[precursor±\]](#)

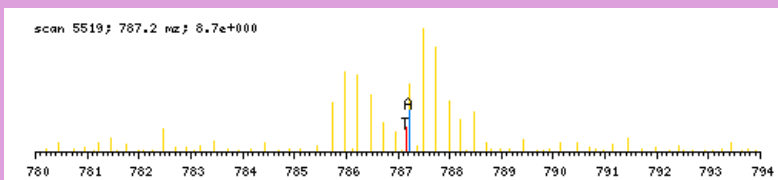

zoomed in precursor plot; T=theoretical m/z, A=acquired m/z

X-range:

-

MassTol: Y-zoom:

MassType:

AVG  MONO

Axis:

1  2

Label:

I  M  -

Ions:

a  +  2+  3+

b  +  2+  3+

c  +  2+  3+

x  +  2+  3+

y  +  2+  3+

z  +  2+  3+

hide H<sub>2</sub>O/NH<sub>3</sub>

zoom 112-122

GO

| b <sup>+</sup> | #  | AA | #  | y <sup>+</sup> | y <sup>2+</sup> |
|----------------|----|----|----|----------------|-----------------|
| 122.1029       | 1  | S  | 31 |                |                 |
| 209.1350       | 2  | S  | 30 | 3024.5642      | 1512.7860       |
| 306.1877       | 3  | P  | 29 | 2937.5322      | 1469.2700       |
| 403.2405       | 4  | P  | 28 | 2840.4794      | 1420.7436       |
| 500.2932       | 5  | P  | 27 | 2743.4266      | 1372.2172       |
| 571.3304       | 6  | A  | 26 | 2646.3739      | 1323.6909       |
| 658.3624       | 7  | S  | 25 | 2575.3368      | 1288.1723       |
| 821.4257       | 8  | Y  | 24 | 2488.3047      | 1244.6563       |
| 908.4577       | 9  | S  | 23 | 2325.2414      | 1163.1246       |
| 1009.5054      | 10 | T  | 22 | 2238.2094      | 1119.6086       |
| 1122.5895      | 11 | L  | 21 | 2137.1617      | 1069.0848       |
| 1250.6481      | 12 | Q  | 20 | 2024.0776      | 1012.5427       |
| 1321.6852      | 13 | A  | 19 | 1896.0191      | 948.5134        |
| 1418.7379      | 14 | P  | 18 | 1824.9820      | 912.9949        |
| 1489.7751      | 15 | A  | 17 | 1727.9292      | 864.4685        |
| 1602.8591      | 16 | L  | 16 | 1656.8921      | 828.9499        |
| 1689.8912      | 17 | S  | 15 | 1543.8080      | 772.4079        |
| 1788.9596      | 18 | V  | 14 | 1456.7760      | 728.8919        |
| 1890.0072      | 19 | T  | 13 | 1357.7076      | 679.3577        |
| 1947.0287      | 20 | G  | 12 | 1256.6599      | 628.8339        |
| 2044.0815      | 21 | P  | 11 | 1199.6384      | 600.3231        |
| 2157.1655      | 22 | I  | 10 | 1102.5857      | 551.7967        |
| 2258.2132      | 23 | T  | 9  | 989.5016       | 495.2547        |
| 2329.2503      | 24 | A  | 8  | 888.4539       | 444.7309        |
| 2443.2933      | 25 | N  | 7  | 817.4168       | 409.2123        |
| 2530.3253      | 26 | S  | 6  | 703.3739       | 352.1909        |
| 2659.3679      | 27 | E  | 5  | 616.3418       | 308.6748        |
| 2787.4265      | 28 | Q  | 4  | 487.2993       | 244.1535        |
| 2900.5105      | 29 | I  | 3  | 359.2407       | 180.1243        |
| 2971.5476      | 30 | A  | 2  | 246.1566       | 123.5822        |
|                | 31 | R  | 1  | 175.1195       | 88.0637         |

N-term:+35.07

SSQQTIPPSAKYGGRR, MH+ 1644.9346, m/z 548.9830  
 H OSG40 P180811 230811-s1.02240.02240.3.dta

X-range:

-

MassTol: Y-zoom:

MassType:

AVG  MONO

Axis:

1  2

Label:

I  M  -

Ions:

a  +  2+  3+

b  +  2+  3+

c  +  2+  3+

x  +  2+  3+

y  +  2+  3+

z  +  2+  3+

hide H<sub>2</sub>O/NH<sub>3</sub>

zoom 112-122

GO

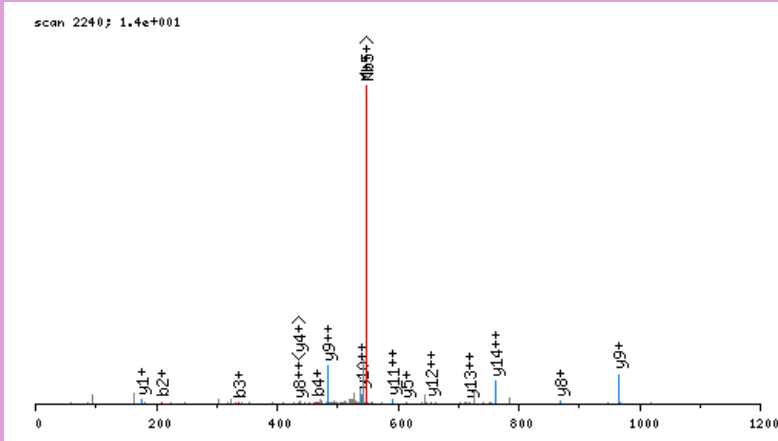

click image to zoom in; click top corners to zoom out [\[precursor±\]](#)

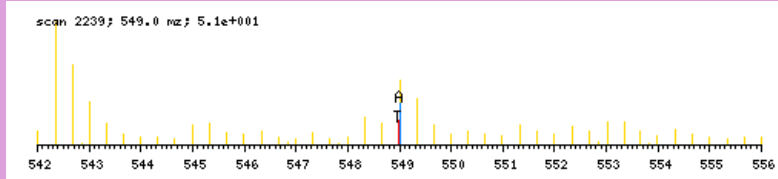

zoomed in precursor plot; T=theoretical m/z, A=acquired m/z

| b <sup>+</sup> | #  | AA # | y <sup>+</sup> | y <sup>2+</sup> |
|----------------|----|------|----------------|-----------------|
| 122.1029       | 1  | S 15 |                |                 |
| 209.1350       | 2  | S 14 | 1523.8395      | 762.4236        |
| 337.1935       | 3  | Q 13 | 1436.8074      | 718.9076        |
| 465.2521       | 4  | Q 12 | 1308.7488      | 654.8783        |
| 566.2998       | 5  | T 11 | 1180.6903      | 590.8490        |
| 679.3839       | 6  | I 10 | 1079.6426      | 540.3252        |
| 776.4366       | 7  | P 9  | 966.5585       | 483.7832        |
| 873.4894       | 8  | P 8  | 869.5058       | 435.2568        |
| 960.5214       | 9  | S 7  | 772.4530       | 386.7304        |
| 1031.5585      | 10 | A 6  | 685.4210       | 343.2144        |
| 1193.7166      | 11 | K 5  | 614.3839       | 307.6958        |
| 1356.7800      | 12 | Y 4  | 452.2258       | 226.6168        |
| 1413.8014      | 13 | G 3  | 289.1624       | 145.0851        |
| 1470.8229      | 14 | G 2  | 232.1410       | 116.5744        |
|                | 15 | R 1  | 175.1195       | 88.0637         |

N-term:+35.07 K(11):+162.16

SSSGVQVQASAGGLAASR, MH+ 1820.8738, m/z 607.6295  
 L OSG37 P180811 230811-s1.03131.03131.3.dta

X-range:

-

MassTol: Y-zoom:

MassType:

AVG  MONO

Axis:

1  2

Label:

I  M  -

Ions:

a  +  2+  3+

b  +  2+  3+

c  +  2+  3+

x  +  2+  3+

y  +  2+  3+

z  +  2+  3+

hide H<sub>2</sub>O/NH<sub>3</sub>

zoom 112-122

GO

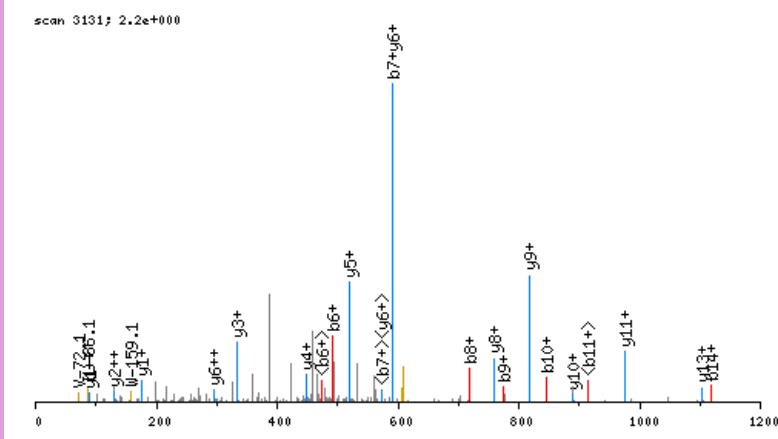

click image to zoom in; click top corners to zoom out [\[precursor±\]](#)

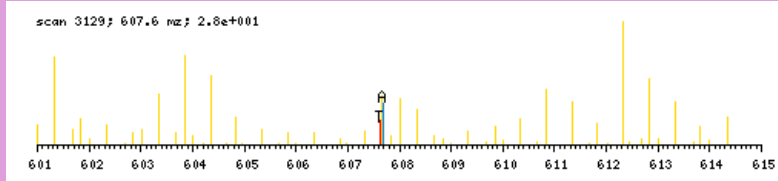

zoomed in precursor plot; T=theoretical m/z, A=acquired m/z

| b <sup>+</sup> | #  | AA # | y <sup>+</sup> | y <sup>2+</sup> |
|----------------|----|------|----------------|-----------------|
| 116.0711       | 1  | S 21 |                |                 |
| 203.1032       | 2  | S 20 | 1705.8105      | 853.4092        |
| 290.1352       | 3  | S 19 | 1618.7785      | 809.8932        |
| 347.1566       | 4  | G 18 | 1531.7465      | 766.3771        |
| 434.1887       | 5  | S 17 | 1474.7250      | 737.8664        |
| 491.2101       | 6  | G 16 | 1387.6930      | 694.3504        |
| 590.2786       | 7  | V 15 | 1330.6715      | 665.8397        |
| 718.3371       | 8  | Q 14 | 1231.6031      | 616.3055        |
| 775.3586       | 9  | G 13 | 1103.5445      | 552.2762        |
| 846.3957       | 10 | A 12 | 1046.5231      | 523.7654        |
| 933.4277       | 11 | S 11 | 975.4859       | 488.2469        |
| 1004.4649      | 12 | A 10 | 888.4539       | 444.7309        |
| 1061.4863      | 13 | G 9  | 817.4168       | 409.2123        |
| 1118.5078      | 14 | G 8  | 760.3953       | 380.7016        |
| 1231.5918      | 15 | L 7  | 703.3739       | 352.1909        |
| 1302.6290      | 16 | A 6  | 590.2898       | 295.6488        |
| 1373.6661      | 17 | A 5  | 519.2527       | 260.1303        |
| 1488.6930      | 18 | D 4  | 448.2156       | 224.6117        |
| 1559.7301      | 19 | A 3  | 333.1886       | 167.0982        |
| 1646.7622      | 20 | S 2  | 262.1515       | 131.5797        |
|                | 21 | R 1  | 175.1195       | 88.0637         |

N-term:+29.04

SSSLEKSYELPDGQVITIGNER, MH+ 2490.3364, m/z 830.7836  
 H OSG39 P180811 230811-s1.06538.06538.3.dta

scan 6538; 1.3e+000

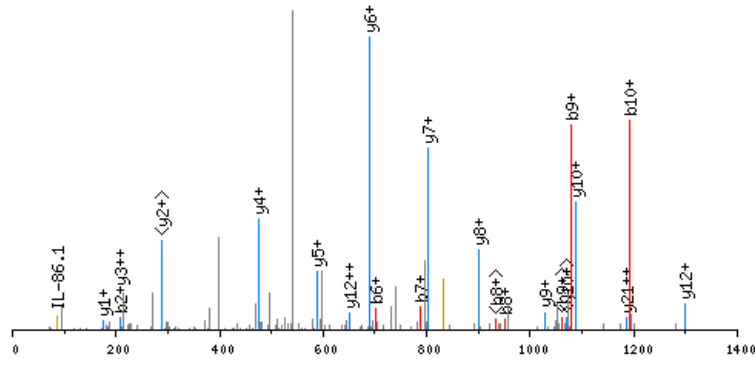

click image to zoom in; click top corners to zoom out [precursor±]

scan 6536; 830.8 mz; 1.2e+001

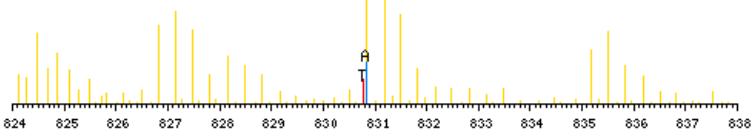

zoomed in precursor plot; T=theoretical m/z, A=acquired m/z

X-range:

-

MassTol: Y-zoom:

MassType:

AVG  MONO

Axis:

1  2

Label:

I  M  -

Ions:

a  +  2+  3+

b  +  2+  3+

c  +  2+  3+

x  +  2+  3+

y  +  2+  3+

z  +  2+  3+

hide H<sub>2</sub>O/NH<sub>3</sub>

zoom 112-122

GO

| b <sup>+</sup> | #  | AA # | y <sup>+</sup> | y <sup>2+</sup> |
|----------------|----|------|----------------|-----------------|
| 122.1029       | 1  | S 22 |                |                 |
| 209.1350       | 2  | S 21 | 2369.2413      | 1185.1246       |
| 296.1670       | 3  | S 20 | 2282.2093      | 1141.6085       |
| 409.2510       | 4  | L 19 | 2195.1772      | 1098.0925       |
| 538.2936       | 5  | E 18 | 2082.0932      | 1041.5505       |
| 700.4517       | 6  | K 17 | 1953.0506      | 977.0292        |
| 787.4838       | 7  | S 16 | 1790.8925      | 895.9501        |
| 950.5471       | 8  | Y 15 | 1703.8604      | 852.4341        |
| 1079.5897      | 9  | E 14 | 1540.7971      | 770.9025        |
| 1192.6738      | 10 | L 13 | 1411.7545      | 706.3812        |
| 1289.7265      | 11 | P 12 | 1298.6705      | 649.8391        |
| 1404.7535      | 12 | D 11 | 1201.6177      | 601.3128        |
| 1461.7749      | 13 | G 10 | 1086.5907      | 543.7993        |
| 1589.8335      | 14 | Q 9  | 1029.5693      | 515.2886        |
| 1688.9019      | 15 | V 8  | 901.5107       | 451.2593        |
| 1801.9860      | 16 | I 7  | 802.4423       | 401.7251        |
| 1903.0337      | 17 | T 6  | 689.3582       | 345.1830        |
| 2016.1177      | 18 | I 5  | 588.3105       | 294.6592        |
| 2073.1392      | 19 | G 4  | 475.2265       | 238.1172        |
| 2187.1821      | 20 | N 3  | 418.2050       | 209.6064        |
| 2316.2247      | 21 | E 2  | 304.1621       | 152.5850        |
|                | 22 | R 1  | 175.1195       | 88.0637         |

N-term:+35.07 K(6):+162.16



SSSSLEKSYELPDGQVITIGNER, MH+ 2565.3048, m/z 855.7731  
 L OSG39 P180811 230811-s1.06499.06499.3.dta

X-range:

-

MassTol: Y-zoom:

MassType:

AVG  MONO

Axis:

1  2

Label:

I  M  -

Ions:

a  +  2+  3+

b  +  2+  3+

c  +  2+  3+

x  +  2+  3+

y  +  2+  3+

z  +  2+  3+

hide H<sub>2</sub>O/NH<sub>3</sub>

zoom 112-122

GO

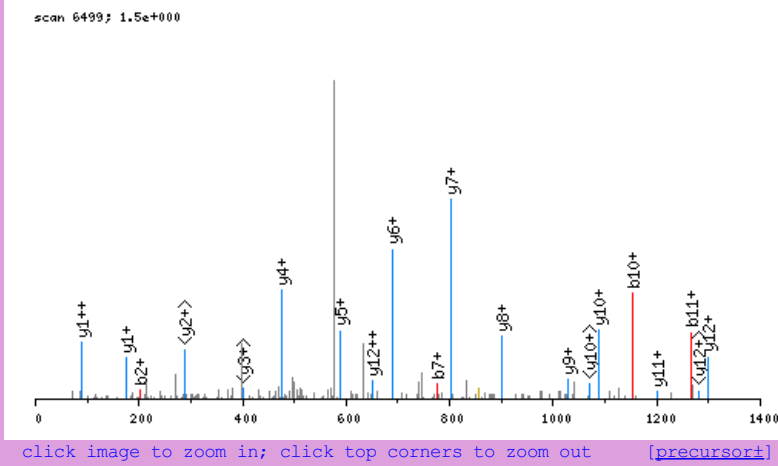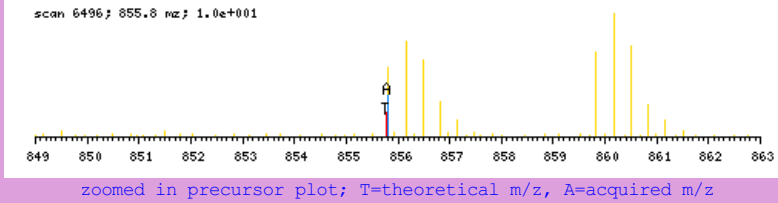

| b <sup>+</sup> | #  | AA # | y <sup>+</sup> | y <sup>2+</sup> |
|----------------|----|------|----------------|-----------------|
| 116.0711       | 1  | S 23 |                |                 |
| 203.1032       | 2  | S 22 | 2450.2415      | 1225.6247       |
| 290.1352       | 3  | S 21 | 2363.2095      | 1182.1087       |
| 377.1672       | 4  | S 20 | 2276.1775      | 1138.5926       |
| 490.2513       | 5  | L 19 | 2189.1454      | 1095.0766       |
| 619.2939       | 6  | E 18 | 2076.0614      | 1038.5346       |
| 775.4202       | 7  | K 17 | 1947.0188      | 974.0133        |
| 862.4522       | 8  | S 16 | 1790.8925      | 895.9501        |
| 1025.5155      | 9  | Y 15 | 1703.8604      | 852.4341        |
| 1154.5581      | 10 | E 14 | 1540.7971      | 770.9025        |
| 1267.6422      | 11 | L 13 | 1411.7545      | 706.3812        |
| 1364.6949      | 12 | P 12 | 1298.6705      | 649.8391        |
| 1479.7219      | 13 | D 11 | 1201.6177      | 601.3128        |
| 1536.7434      | 14 | G 10 | 1086.5907      | 543.7993        |
| 1664.8019      | 15 | Q 9  | 1029.5693      | 515.2886        |
| 1763.8703      | 16 | V 8  | 901.5107       | 451.2593        |
| 1876.9544      | 17 | I 7  | 802.4423       | 401.7251        |
| 1978.0021      | 18 | T 6  | 689.3582       | 345.1830        |
| 2091.0862      | 19 | I 5  | 588.3105       | 294.6592        |
| 2148.1076      | 20 | G 4  | 475.2265       | 238.1172        |
| 2262.1505      | 21 | N 3  | 418.2050       | 209.6064        |
| 2391.1931      | 22 | E 2  | 304.1621       | 152.5850        |
|                | 23 | R 1  | 175.1195       | 88.0637         |

N-term:+29.04 K(7):+156.13

SSTESTASGMQDEVR, MH+ 1618.7442, m/z 540.2529  
 H OSG37 P180811 230811-s1.02592.02592.3.dta

X-range:

-

MassTol: Y-zoom:

MassType:

AVG  MONO

Axis:

1  2

Label:

I  M  -

Ions:

a  +  2+  3+

b  +  2+  3+

c  +  2+  3+

x  +  2+  3+

y  +  2+  3+

z  +  2+  3+

hide H<sub>2</sub>O/NH<sub>3</sub>

zoom 112-122

GO

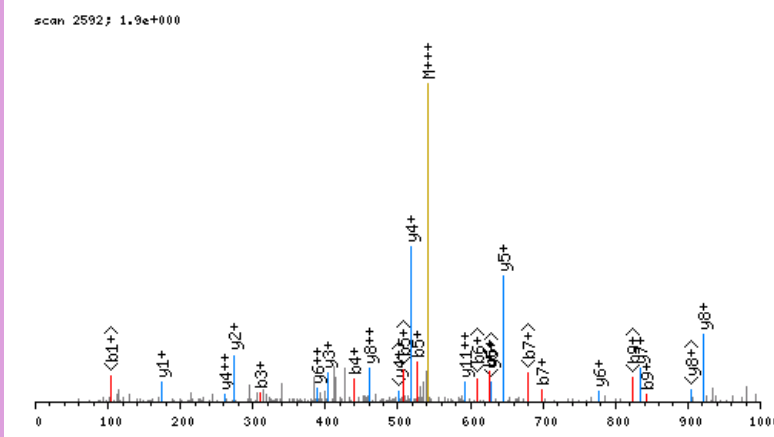

click image to zoom in; click top corners to zoom out [precursor±]

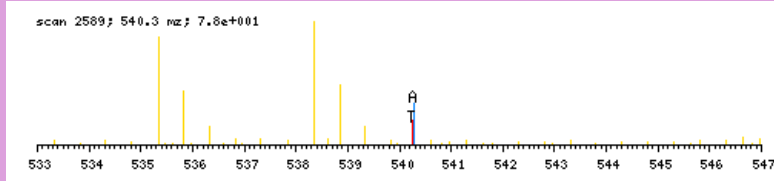

zoomed in precursor plot; T=theoretical m/z, A=acquired m/z

| b <sup>+</sup> | #  | AA # | y <sup>+</sup> | y <sup>2+</sup> |
|----------------|----|------|----------------|-----------------|
| 122.1029       | 1  | S 15 |                |                 |
| 209.1350       | 2  | S 14 | 1497.6491      | 749.3285        |
| 310.1826       | 3  | T 13 | 1410.6171      | 705.8125        |
| 439.2252       | 4  | E 12 | 1309.5694      | 655.2886        |
| 526.2573       | 5  | S 11 | 1180.5268      | 590.7673        |
| 627.3049       | 6  | T 10 | 1093.4948      | 547.2513        |
| 698.3420       | 7  | A 9  | 992.4471       | 496.7275        |
| 785.3741       | 8  | S 8  | 921.4100       | 461.2089        |
| 842.3955       | 9  | G 7  | 834.3780       | 417.6929        |
| 973.4360       | 10 | M 6  | 777.3565       | 389.1822        |
| 1101.4946      | 11 | Q 5  | 646.3160       | 323.6619        |
| 1216.5215      | 12 | D 4  | 518.2575       | 259.6326        |
| 1345.5641      | 13 | E 3  | 403.2305       | 202.1192        |
| 1444.6326      | 14 | V 2  | 274.1879       | 137.5979        |
|                | 15 | R 1  | 175.1195       | 88.0637         |

N-term:+35.07

SSTNLKDVLSNLIPEQAR, MH+ 2215.3511, m/z 554.5932  
 H OSG40 P180811 230811-s1.08826.08826.4.dta

X-range:

-

MassTol: Y-zoom:

MassType:

AVG  MONO

Axis:

1  2

Label:

I  M  -

Ions:

a  +  2+  3+

b  +  2+  3+

c  +  2+  3+

x  +  2+  3+

y  +  2+  3+

z  +  2+  3+

hide H<sub>2</sub>O/NH<sub>3</sub>

zoom 112-122

GO

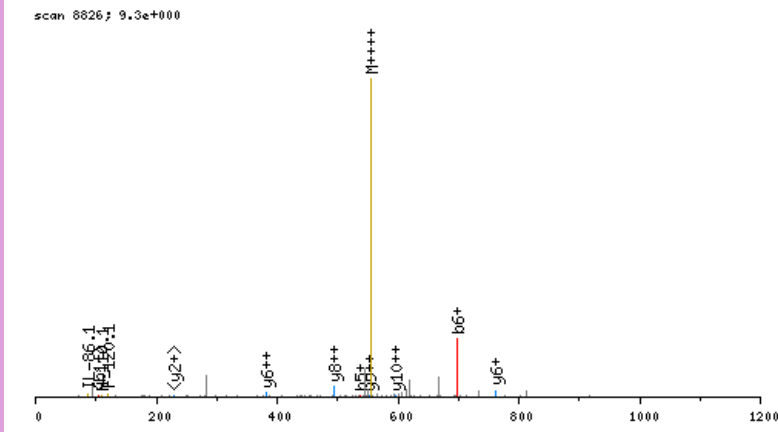

click image to zoom in; click top corners to zoom out [\[precursor±\]](#)

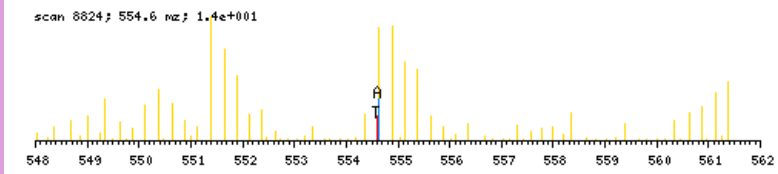

zoomed in precursor plot; T=theoretical m/z, A=acquired m/z

| b <sup>+</sup> | #  | AA | #  | y <sup>+</sup> | y <sup>2+</sup> |
|----------------|----|----|----|----------------|-----------------|
| 122.1029       | 1  | S  | 19 |                |                 |
| 209.1350       | 2  | S  | 18 | 2094.2560      | 1047.6319       |
| 310.1826       | 3  | T  | 17 | 2007.2239      | 1004.1159       |
| 424.2256       | 4  | N  | 16 | 1906.1762      | 953.5920        |
| 537.3096       | 5  | L  | 15 | 1792.1333      | 896.5706        |
| 699.4677       | 6  | K  | 14 | 1679.0493      | 840.0285        |
| 814.4947       | 7  | D  | 13 | 1516.8912      | 758.9495        |
| 913.5631       | 8  | V  | 12 | 1401.8642      | 701.4360        |
| 1026.6471      | 9  | L  | 11 | 1302.7958      | 651.9018        |
| 1113.6792      | 10 | S  | 10 | 1189.7117      | 595.3598        |
| 1227.7221      | 11 | N  | 9  | 1102.6797      | 551.8438        |
| 1340.8062      | 12 | L  | 8  | 988.6368       | 494.8223        |
| 1453.8902      | 13 | I  | 7  | 875.5527       | 438.2803        |
| 1550.9430      | 14 | P  | 6  | 762.4686       | 381.7382        |
| 1713.1011      | 15 | K  | 5  | 665.4159       | 333.2119        |
| 1842.1437      | 16 | E  | 4  | 503.2578       | 252.1328        |
| 1970.2023      | 17 | Q  | 3  | 374.2152       | 187.6115        |
| 2041.2394      | 18 | A  | 2  | 246.1566       | 123.5822        |
|                | 19 | R  | 1  | 175.1195       | 88.0637         |

N-term:+35.07 K(6):+162.16  
 K(15):+162.16

SSVEEMAAESR, MH+ 1223.5578, m/z 612.2825  
 L OSG38 P180811 230811-s1.03036.03036.2.dta

scan 3036; 4.9e+000

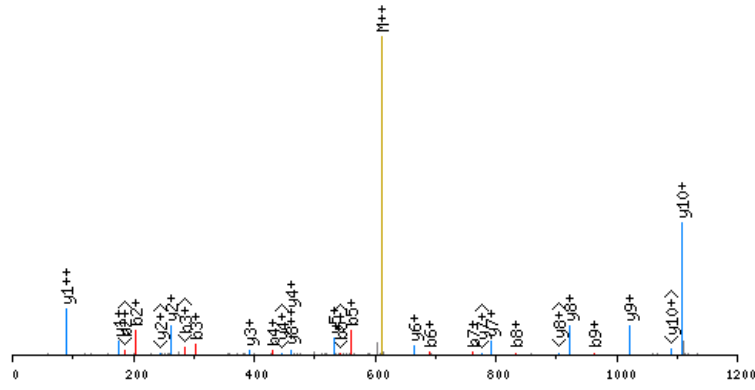

click image to zoom in; click top corners to zoom out [precursor±]

scan 3034; 612.3 m/z; 2.1e+001

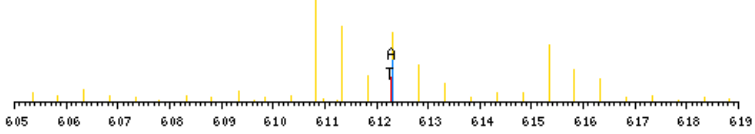

zoomed in precursor plot; T=theoretical m/z, A=acquired m/z

X-range:

-

MassTol: Y-zoom:

MassType:

AVG  MONO

Axis:

1  2

Label:

I  M  -

Ions:

a  +  2+  3+

b  +  2+  3+

c  +  2+  3+

x  +  2+  3+

y  +  2+  3+

z  +  2+  3+

hide H<sub>2</sub>O/NH<sub>3</sub>

zoom 112-122

GO

| b <sup>+</sup> | #  | AA # | y <sup>+</sup> | y <sup>2+</sup> |
|----------------|----|------|----------------|-----------------|
| 116.0711       | 1  | S 11 |                |                 |
| 203.1032       | 2  | S 10 | 1108.4945      | 554.7511        |
| 302.1716       | 3  | V 9  | 1021.4624      | 511.2351        |
| 431.2142       | 4  | E 8  | 922.3940       | 461.7009        |
| 560.2568       | 5  | E 7  | 793.3514       | 397.1796        |
| 691.2972       | 6  | M 6  | 664.3088       | 332.6583        |
| 762.3344       | 7  | A 5  | 533.2683       | 267.1381        |
| 833.3715       | 8  | A 4  | 462.2312       | 231.6195        |
| 962.4141       | 9  | E 3  | 391.1941       | 196.1010        |
| 1049.4461      | 10 | S 2  | 262.1515       | 131.5797        |
|                | 11 | R 1  | 175.1195       | 88.0637         |

N-term:+29.04

SSVETQPAAEEVR, MH+ 1365.7074, m/z 683.3573  
 H OSG37 P180811 230811-s1.02355.02355.2.dta

X-range:

-

MassTol: Y-zoom:

MassType:

AVG  MONO

Axis:

1  2

Label:

I  M  -

Ions:

a  +  2+  3+

b  +  2+  3+

c  +  2+  3+

x  +  2+  3+

y  +  2+  3+

z  +  2+  3+

hide H<sub>2</sub>O/NH<sub>3</sub>

zoom 112-122

GO

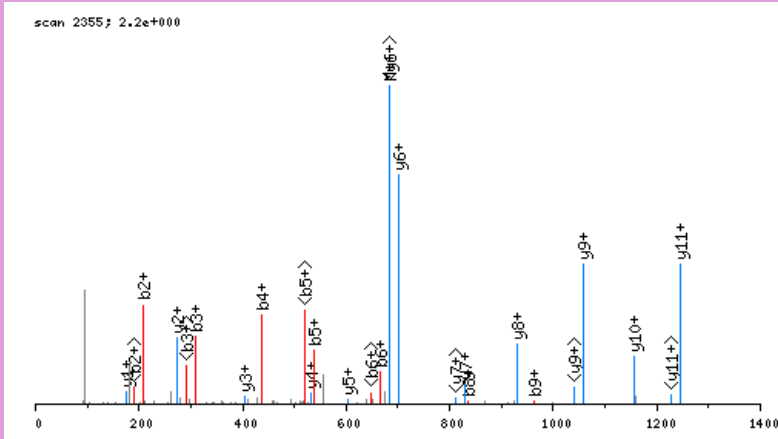

click image to zoom in; click top corners to zoom out [\[precursor±\]](#)

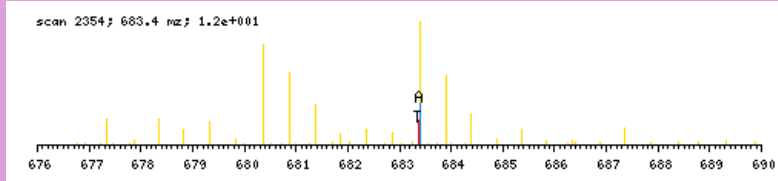

zoomed in precursor plot; T=theoretical m/z, A=acquired m/z

| b <sup>+</sup> | #  | AA # | y <sup>+</sup> | y <sup>2+</sup> |
|----------------|----|------|----------------|-----------------|
| 122.1029       | 1  | S 12 |                |                 |
| 209.1350       | 2  | S 11 | 1244.6123      | 622.8100        |
| 308.2034       | 3  | V 10 | 1157.5802      | 579.2940        |
| 437.2460       | 4  | E 9  | 1058.5118      | 529.7598        |
| 538.2936       | 5  | T 8  | 929.4692       | 465.2385        |
| 666.3522       | 6  | Q 7  | 828.4216       | 414.7147        |
| 763.4050       | 7  | P 6  | 700.3630       | 350.6854        |
| 834.4421       | 8  | A 5  | 603.3102       | 302.1590        |
| 963.4847       | 9  | E 4  | 532.2731       | 266.6405        |
| 1092.5273      | 10 | E 3  | 403.2305       | 202.1192        |
| 1191.5957      | 11 | V 2  | 274.1879       | 137.5979        |
|                | 12 | R 1  | 175.1195       | 88.0637         |

N-term:+35.07

SSWQEVTEFPVIVQR, MH+ 1838.9864, m/z 613.6670  
 H OSG37 P180811 230811-s1.08368.08368.3.dta

X-range:

-

MassTol: Y-zoom:

MassType:

AVG  MONO

Axis:

1  2

Label:

I  M  -

Ions:

a  +  2+  3+

b  +  2+  3+

c  +  2+  3+

x  +  2+  3+

y  +  2+  3+

z  +  2+  3+

hide H<sub>2</sub>O/NH<sub>3</sub>

zoom 112-122

GO

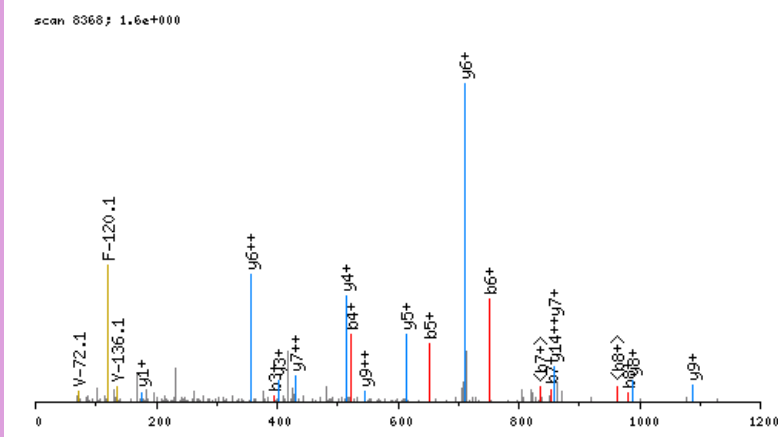

click image to zoom in; click top corners to zoom out [\[precursor±\]](#)

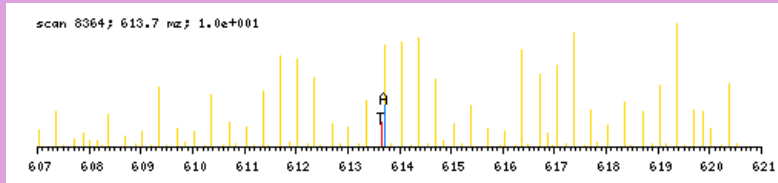

zoomed in precursor plot; T=theoretical m/z, A=acquired m/z

| b <sup>+</sup> | #  | AA | #  | y <sup>+</sup> | y <sup>2+</sup> |
|----------------|----|----|----|----------------|-----------------|
| 122.1029       | 1  | S  | 15 |                |                 |
| 209.1350       | 2  | S  | 14 | 1717.8913      | 859.4496        |
| 395.2143       | 3  | W  | 13 | 1630.8593      | 815.9336        |
| 523.2728       | 4  | Q  | 12 | 1444.7800      | 722.8939        |
| 652.3154       | 5  | E  | 11 | 1316.7214      | 658.8646        |
| 751.3839       | 6  | V  | 10 | 1187.6788      | 594.3433        |
| 852.4315       | 7  | T  | 9  | 1088.6104      | 544.8091        |
| 981.4741       | 8  | E  | 8  | 987.5627       | 494.2853        |
| 1128.5425      | 9  | F  | 7  | 858.5201       | 429.7640        |
| 1225.5953      | 10 | P  | 6  | 711.4517       | 356.2298        |
| 1324.6637      | 11 | V  | 5  | 614.3990       | 307.7034        |
| 1437.7478      | 12 | I  | 4  | 515.3306       | 258.1692        |
| 1536.8162      | 13 | V  | 3  | 402.2465       | 201.6272        |
| 1664.8748      | 14 | Q  | 2  | 303.1781       | 152.0930        |
|                | 15 | R  | 1  | 175.1195       | 88.0637         |

N-term:+35.07

SSYGGYKEPAPVSIQR, MH+ 1878.0397, m/z 626.6848  
 H OSG39 P180811 230811-s1.03485.03485.3.dta

X-range:

-

MassTol: Y-zoom:

MassType:

AVG  MONO

Axis:

1  2

Label:

I  M  -

Ions:

a  +  2+  3+

b  +  2+  3+

c  +  2+  3+

x  +  2+  3+

y  +  2+  3+

z  +  2+  3+

hide H<sub>2</sub>O/NH<sub>3</sub>

zoom 112-122

GO

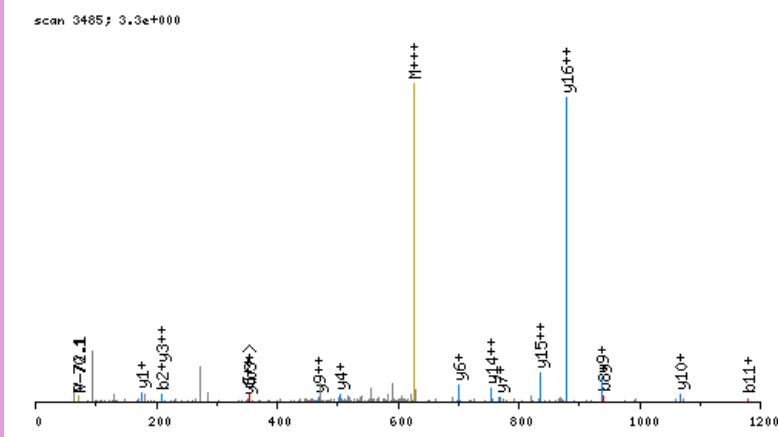

click image to zoom in; click top corners to zoom out [\[precursor±\]](#)

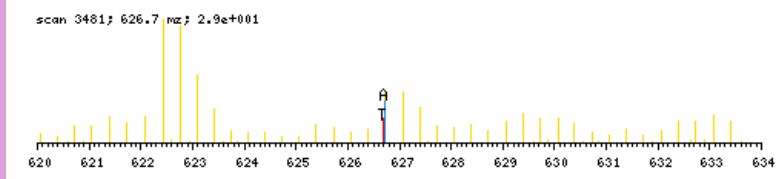

zoomed in precursor plot; T=theoretical m/z, A=acquired m/z

| b <sup>+</sup> | #  | AA | #  | y <sup>+</sup> | y <sup>2+</sup> |
|----------------|----|----|----|----------------|-----------------|
| 122.1029       | 1  | S  | 17 |                |                 |
| 209.1350       | 2  | S  | 16 | 1756.9446      | 878.9762        |
| 372.1983       | 3  | Y  | 15 | 1669.9126      | 835.4602        |
| 429.2197       | 4  | G  | 14 | 1506.8493      | 753.9286        |
| 486.2412       | 5  | G  | 13 | 1449.8278      | 725.4178        |
| 649.3045       | 6  | Y  | 12 | 1392.8064      | 696.9071        |
| 811.4626       | 7  | K  | 11 | 1229.7430      | 615.3754        |
| 940.5052       | 8  | E  | 10 | 1067.5849      | 534.2964        |
| 1037.5580      | 9  | P  | 9  | 938.5423       | 469.7751        |
| 1108.5951      | 10 | A  | 8  | 841.4896       | 421.2487        |
| 1179.6322      | 11 | A  | 7  | 770.4525       | 385.7301        |
| 1276.6850      | 12 | P  | 6  | 699.4153       | 350.2116        |
| 1375.7534      | 13 | V  | 5  | 602.3626       | 301.6852        |
| 1462.7854      | 14 | S  | 4  | 503.2942       | 252.1510        |
| 1575.8695      | 15 | I  | 3  | 416.2621       | 208.6350        |
| 1703.9281      | 16 | Q  | 2  | 303.1781       | 152.0930        |
|                | 17 | R  | 1  | 175.1195       | 88.0637         |

N-term:+35.07 K(7):+162.16

STESTASGMQDEV, MH+ 1531.7122, m/z 511.2423  
 H OSG37 P180811 230811-s1.02565.02565.3.dta

X-range:

-

MassTol: Y-zoom:

MassType:

AVG  MONO

Axis:

1  2

Label:

I  M  -

Ions:

a  +  2+  3+

b  +  2+  3+

c  +  2+  3+

x  +  2+  3+

y  +  2+  3+

z  +  2+  3+

hide H<sub>2</sub>O/NH<sub>3</sub>

zoom 112-122

GO

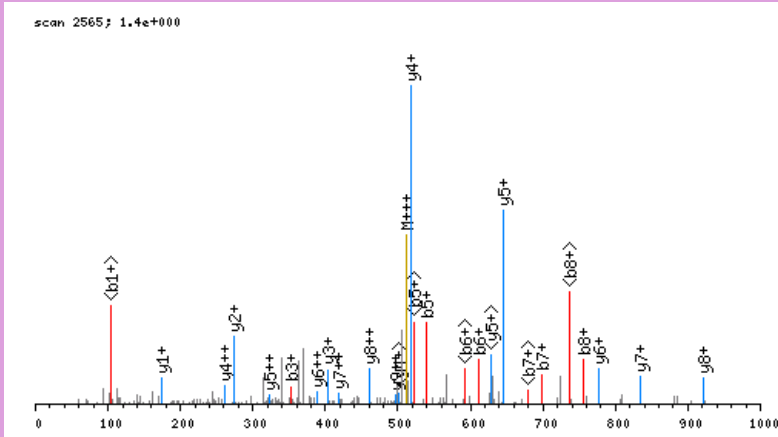

click image to zoom in; click top corners to zoom out [\[precursor±\]](#)

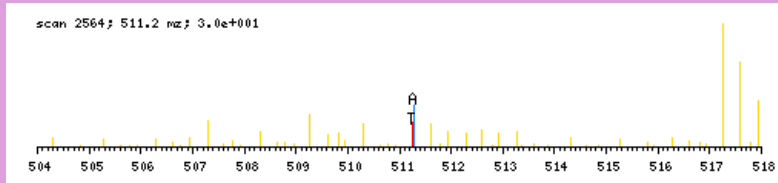

zoomed in precursor plot; T=theoretical m/z, A=acquired m/z

| b <sup>+</sup> | #  | AA # | y <sup>+</sup> | y <sup>2+</sup> |
|----------------|----|------|----------------|-----------------|
| 122.1029       | 1  | S 14 |                |                 |
| 223.1506       | 2  | T 13 | 1410.6171      | 705.8125        |
| 352.1932       | 3  | E 12 | 1309.5694      | 655.2886        |
| 439.2252       | 4  | S 11 | 1180.5268      | 590.7673        |
| 540.2729       | 5  | T 10 | 1093.4948      | 547.2513        |
| 611.3100       | 6  | A 9  | 992.4471       | 496.7275        |
| 698.3420       | 7  | S 8  | 921.4100       | 461.2089        |
| 755.3635       | 8  | G 7  | 834.3780       | 417.6929        |
| 886.4040       | 9  | M 6  | 777.3565       | 389.1822        |
| 1014.4626      | 10 | Q 5  | 646.3160       | 323.6619        |
| 1129.4895      | 11 | D 4  | 518.2575       | 259.6326        |
| 1258.5321      | 12 | E 3  | 403.2305       | 202.1192        |
| 1357.6005      | 13 | V 2  | 274.1879       | 137.5979        |
|                | 14 | R 1  | 175.1195       | 88.0637         |

N-term:+35.07



STGIYEALRLR, MH+ 1285.7216, m/z 643.3644  
 H OSG37 P180811 230811-s1.06767.06767.2.dta

X-range:

-

MassTol: Y-zoom:

MassType:

AVG  MONO

Axis:

1  2

Label:

I  M  -

Ions:

a  +  2+  3+

b  +  2+  3+

c  +  2+  3+

x  +  2+  3+

y  +  2+  3+

z  +  2+  3+

hide H<sub>2</sub>O/NH<sub>3</sub>

zoom 112-122

GO

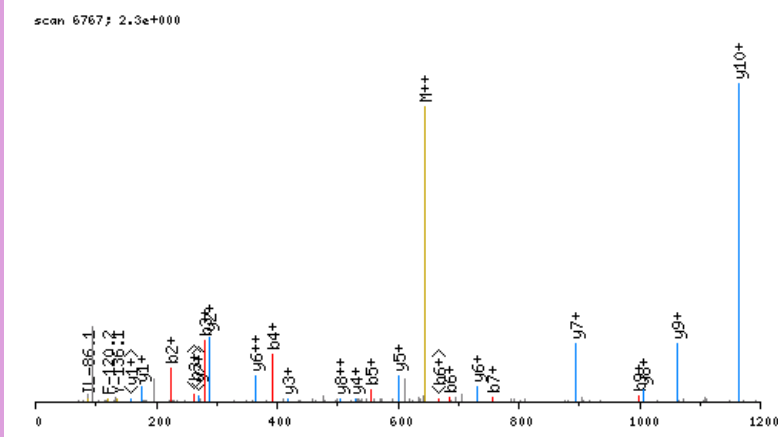

click image to zoom in; click top corners to zoom out [\[precursor±\]](#)

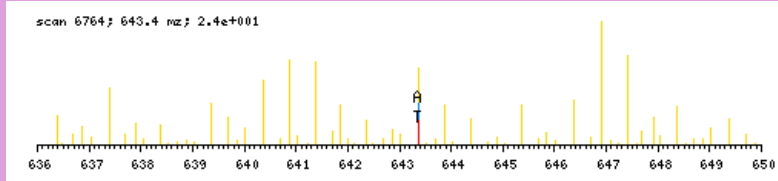

zoomed in precursor plot; T=theoretical m/z, A=acquired m/z

| b <sup>+</sup> | #  | AA # | y <sup>+</sup> | y <sup>2+</sup> |
|----------------|----|------|----------------|-----------------|
| 122.1029       | 1  | S 11 |                |                 |
| 223.1506       | 2  | T 10 | 1164.6265      | 582.8171        |
| 280.1721       | 3  | G 9  | 1063.5788      | 532.2933        |
| 393.2561       | 4  | I 8  | 1006.5573      | 503.7826        |
| 556.3195       | 5  | Y 7  | 893.4733       | 447.2405        |
| 685.3621       | 6  | E 6  | 730.4099       | 365.7089        |
| 756.3992       | 7  | A 5  | 601.3673       | 301.1876        |
| 869.4832       | 8  | L 4  | 530.3302       | 265.6690        |
| 998.5258       | 9  | E 3  | 417.2462       | 209.1270        |
| 1111.6099      | 10 | L 2  | 288.2036       | 144.6057        |
|                | 11 | R 1  | 175.1195       | 88.0637         |

N-term:+35.07

STGTFVVSQPLNYR, MH+ 1602.8704, m/z 534.9616  
 H OSG37 P180811 230811-s1.05852.05852.3.dta

X-range:

-

MassTol: Y-zoom:

MassType:

AVG  MONO

Axis:

1  2

Label:

I  M  -

Ions:

a  +  2+  3+

b  +  2+  3+

c  +  2+  3+

x  +  2+  3+

y  +  2+  3+

z  +  2+  3+

hide H<sub>2</sub>O/NH<sub>3</sub>

zoom 112-122

GO

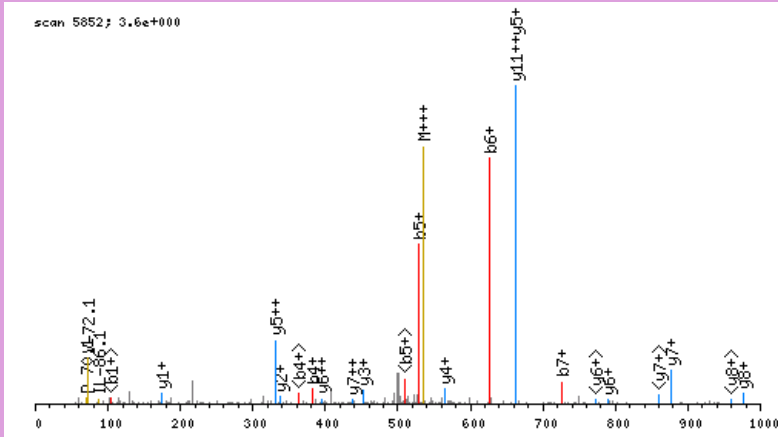

click image to zoom in; click top corners to zoom out [\[precursor±\]](#)

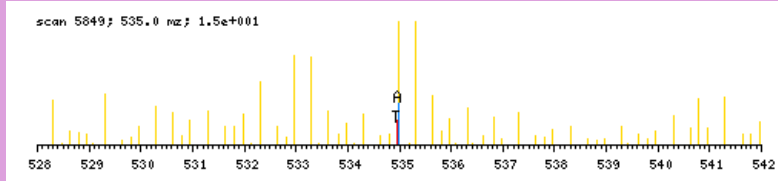

zoomed in precursor plot; T=theoretical m/z, A=acquired m/z

| b <sup>+</sup> | #  | AA # | y <sup>+</sup> | y <sup>2+</sup> |
|----------------|----|------|----------------|-----------------|
| 122.1029       | 1  | S 14 |                |                 |
| 223.1506       | 2  | T 13 | 1481.7753      | 741.3915        |
| 280.1721       | 3  | G 12 | 1380.7276      | 690.8677        |
| 381.2197       | 4  | T 11 | 1323.7061      | 662.3570        |
| 528.2882       | 5  | F 10 | 1222.6584      | 611.8331        |
| 627.3566       | 6  | V 9  | 1075.5900      | 538.2989        |
| 726.4250       | 7  | V 8  | 976.5216       | 488.7647        |
| 813.4570       | 8  | S 7  | 877.4532       | 439.2305        |
| 941.5156       | 9  | Q 6  | 790.4212       | 395.7145        |
| 1038.5684      | 10 | P 5  | 662.3626       | 331.6852        |
| 1151.6524      | 11 | L 4  | 565.3098       | 283.1588        |
| 1265.6954      | 12 | N 3  | 452.2258       | 226.6168        |
| 1428.7587      | 13 | Y 2  | 338.1828       | 169.5953        |
|                | 14 | R 1  | 175.1195       | 88.0637         |

N-term:+35.07

STLSKPAALTGTLEVR, MH+ 1712.0594, m/z 571.3580  
 H OSG39 P180811 230811-s1.04440.04440.3.dta

X-range:

-

MassTol: Y-zoom:

MassType:

AVG  MONO

Axis:

1  2

Label:

I  M  -

Ions:

a  +  2+  3+

b  +  2+  3+

c  +  2+  3+

x  +  2+  3+

y  +  2+  3+

z  +  2+  3+

hide H<sub>2</sub>O/NH<sub>3</sub>

zoom 112-122

GO

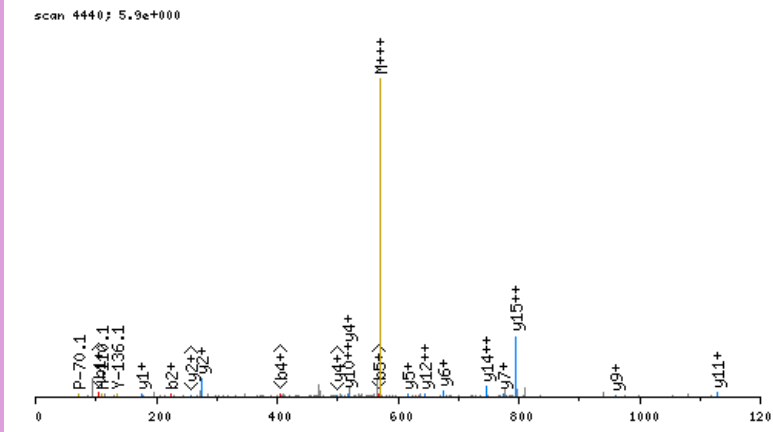

click image to zoom in; click top corners to zoom out [\[precursor±\]](#)

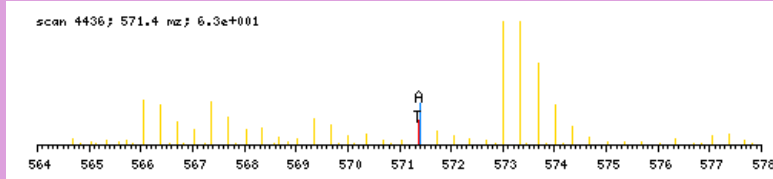

zoomed in precursor plot; T=theoretical m/z, A=acquired m/z

| b <sup>+</sup> | #  | AA # | y <sup>+</sup> | y <sup>2+</sup> |
|----------------|----|------|----------------|-----------------|
| 122.1029       | 1  | S 16 |                |                 |
| 223.1506       | 2  | T 15 | 1590.9643      | 795.9861        |
| 336.2347       | 3  | L 14 | 1489.9166      | 745.4622        |
| 423.2667       | 4  | S 13 | 1376.8326      | 688.9202        |
| 585.4248       | 5  | K 12 | 1289.8005      | 645.4042        |
| 682.4776       | 6  | P 11 | 1127.6424      | 564.3251        |
| 753.5147       | 7  | A 10 | 1030.5897      | 515.7988        |
| 824.5518       | 8  | A 9  | 959.5526       | 480.2802        |
| 937.6359       | 9  | L 8  | 888.5155       | 444.7616        |
| 1038.6835      | 10 | T 7  | 775.4314       | 388.2196        |
| 1095.7050      | 11 | G 6  | 674.3837       | 337.6958        |
| 1196.7527      | 12 | T 5  | 617.3623       | 309.1850        |
| 1309.8367      | 13 | L 4  | 516.3146       | 258.6612        |
| 1438.8793      | 14 | E 3  | 403.2305       | 202.1192        |
| 1537.9477      | 15 | V 2  | 274.1879       | 137.5979        |
|                | 16 | R 1  | 175.1195       | 88.0637         |

N-term:+35.07 K(5):+162.16

STLSKPAPLTGTLEVR, MH+ 1738.0751, m/z 580.0299  
 H OSG39 P180811 230811-s1.04313.04313.3.dta

X-range:

-

MassTol: Y-zoom:

MassType:

AVG  MONO

Axis:

1  2

Label:

I  M  -

Ions:

a  +  2+  3+

b  +  2+  3+

c  +  2+  3+

x  +  2+  3+

y  +  2+  3+

z  +  2+  3+

hide H<sub>2</sub>O/NH<sub>3</sub>

zoom 112-122

GO

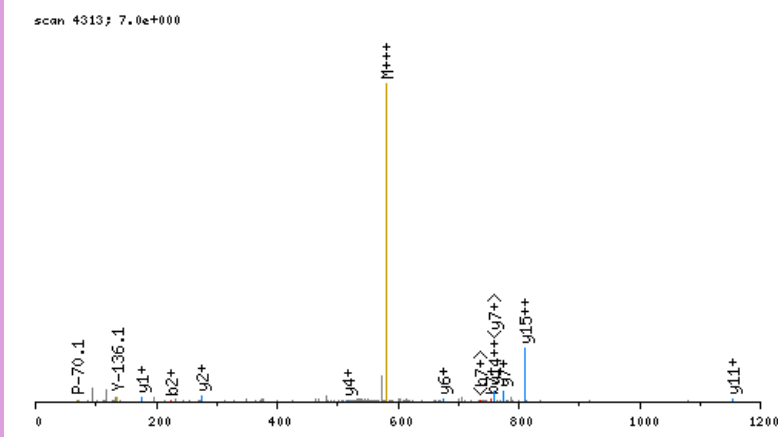

click image to zoom in; click top corners to zoom out [\[precursor±\]](#)

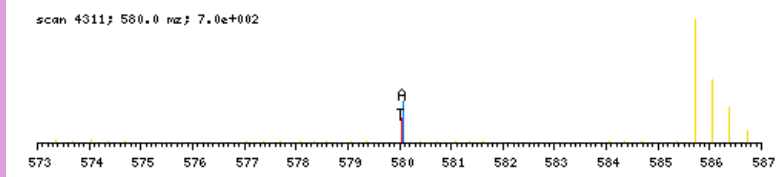

zoomed in precursor plot; T=theoretical m/z, A=acquired m/z

| b <sup>+</sup> | #  | AA # | y <sup>+</sup> | y <sup>2+</sup> |
|----------------|----|------|----------------|-----------------|
| 122.1029       | 1  | S 16 |                |                 |
| 223.1506       | 2  | T 15 | 1616.9800      | 808.9939        |
| 336.2347       | 3  | L 14 | 1515.9323      | 758.4701        |
| 423.2667       | 4  | S 13 | 1402.8482      | 701.9280        |
| 585.4248       | 5  | K 12 | 1315.8162      | 658.4120        |
| 682.4776       | 6  | P 11 | 1153.6581      | 577.3330        |
| 753.5147       | 7  | A 10 | 1056.6053      | 528.8066        |
| 850.5674       | 8  | P 9  | 985.5682       | 493.2880        |
| 963.6515       | 9  | L 8  | 888.5155       | 444.7616        |
| 1064.6992      | 10 | T 7  | 775.4314       | 388.2196        |
| 1121.7206      | 11 | G 6  | 674.3837       | 337.6958        |
| 1222.7683      | 12 | T 5  | 617.3623       | 309.1850        |
| 1335.8524      | 13 | L 4  | 516.3146       | 258.6612        |
| 1464.8950      | 14 | E 3  | 403.2305       | 202.1192        |
| 1563.9634      | 15 | V 2  | 274.1879       | 137.5979        |
|                | 16 | R 1  | 175.1195       | 88.0637         |

N-term:+35.07 K(5):+162.16

STLTDSLVCAGIISAR, MH+ 1931.1271, m/z 644.3806  
 H OSG39 P180811 230811-s1.06812.06812.3.dta

X-range:

-

MassTol: Y-zoom:

MassType:

AVG  MONO

Axis:

1  2

Label:

I  M  -

Ions:

a  +  2+  3+

b  +  2+  3+

c  +  2+  3+

x  +  2+  3+

y  +  2+  3+

z  +  2+  3+

hide H<sub>2</sub>O/NH<sub>3</sub>

zoom 112-122

GO

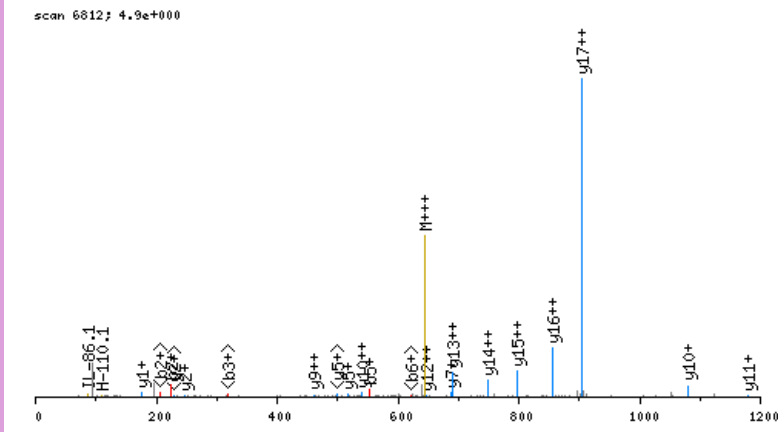

click image to zoom in; click top corners to zoom out [precursor±]

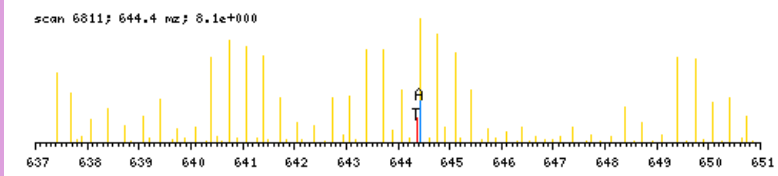

zoomed in precursor plot; T=theoretical m/z, A=acquired m/z

| b <sup>+</sup> | #  | AA # | y <sup>+</sup> | y <sup>2+</sup> |
|----------------|----|------|----------------|-----------------|
| 122.1029       | 1  | S 18 |                |                 |
| 223.1506       | 2  | T 17 | 1810.0320      | 905.5199        |
| 336.2347       | 3  | L 16 | 1708.9844      | 854.9961        |
| 437.2823       | 4  | T 15 | 1595.9003      | 798.4541        |
| 552.3093       | 5  | D 14 | 1494.8526      | 747.9302        |
| 639.3413       | 6  | S 13 | 1379.8257      | 690.4167        |
| 752.4254       | 7  | L 12 | 1292.7936      | 646.9007        |
| 851.4938       | 8  | V 11 | 1179.7096      | 590.3587        |
| 1011.5244      | 9  | C 10 | 1080.6412      | 540.8245        |
| 1173.6825      | 10 | K 9  | 920.6106       | 460.8092        |
| 1244.7196      | 11 | A 8  | 758.4525       | 379.7301        |
| 1301.7411      | 12 | G 7  | 687.4153       | 344.2116        |
| 1414.8251      | 13 | I 6  | 630.3939       | 315.7009        |
| 1527.9092      | 14 | I 5  | 517.3098       | 259.1588        |
| 1598.9463      | 15 | A 4  | 404.2258       | 202.6168        |
| 1685.9783      | 16 | S 3  | 333.1886       | 167.0982        |
| 1757.0155      | 17 | A 2  | 246.1566       | 123.5822        |
|                | 18 | R 1  | 175.1195       | 88.0637         |

N-term:+35.07 C(9):+160.03  
 K(10):+162.16

STPAPQPTAEPLAPTIVLVR, MH+ 2070.1599, m/z 690.7248  
 L OSG36 P180811 230811-s1.04742.04742.3.dta

scan 4742; 8.4e-001

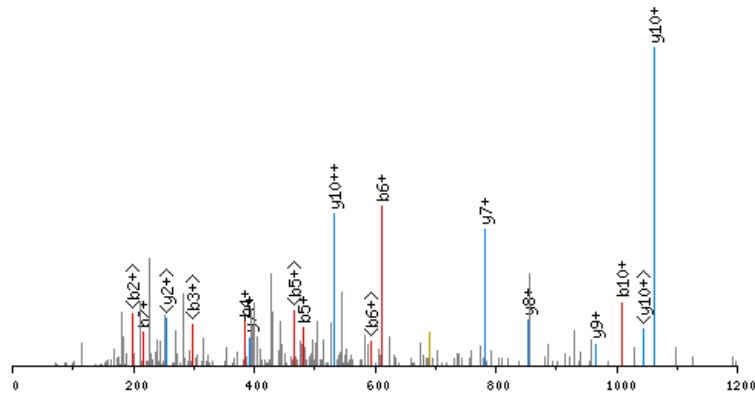

click image to zoom in; click top corners to zoom out [\[precursor±\]](#)

scan 4739; 690.7 m/z; 4.9e+000

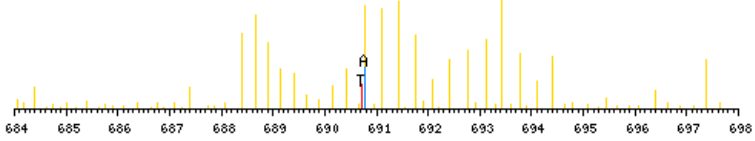

zoomed in precursor plot; T=theoretical m/z, A=acquired m/z

X-range:

-

MassTol: Y-zoom:

MassType:

AVG  MONO

Axis:

1  2

Label:

I  M  -

Ions:

a  +  2+  3+

b  +  2+  3+

c  +  2+  3+

x  +  2+  3+

y  +  2+  3+

z  +  2+  3+

hide H<sub>2</sub>O/NH<sub>3</sub>

zoom 112-122

GO

| b <sup>+</sup> | #  | AA | #  | y <sup>+</sup> | y <sup>2+</sup> |
|----------------|----|----|----|----------------|-----------------|
| 116.0711       | 1  | S  | 20 |                |                 |
| 217.1188       | 2  | T  | 19 | 1955.0966      | 978.0522        |
| 314.1716       | 3  | P  | 18 | 1854.0489      | 927.5284        |
| 385.2087       | 4  | A  | 17 | 1756.9961      | 879.0020        |
| 482.2614       | 5  | P  | 16 | 1685.9590      | 843.4834        |
| 610.3200       | 6  | Q  | 15 | 1588.9063      | 794.9570        |
| 707.3728       | 7  | P  | 14 | 1460.8477      | 730.9278        |
| 808.4205       | 8  | T  | 13 | 1363.7949      | 682.4014        |
| 879.4576       | 9  | A  | 12 | 1262.7472      | 631.8775        |
| 1008.5002      | 10 | E  | 11 | 1191.7101      | 596.3590        |
| 1105.5529      | 11 | P  | 10 | 1062.6675      | 531.8377        |
| 1218.6370      | 12 | L  | 9  | 965.6148       | 483.3113        |
| 1289.6741      | 13 | A  | 8  | 852.5307       | 426.7693        |
| 1386.7269      | 14 | P  | 7  | 781.4936       | 391.2507        |
| 1487.7746      | 15 | T  | 6  | 684.4408       | 342.7243        |
| 1586.8430      | 16 | V  | 5  | 583.3932       | 292.2005        |
| 1699.9270      | 17 | L  | 4  | 484.3247       | 242.6663        |
| 1798.9955      | 18 | V  | 3  | 371.2407       | 186.1243        |
| 1896.0482      | 19 | P  | 2  | 272.1723       | 136.5900        |
|                | 20 | R  | 1  | 175.1195       | 88.0637         |

N-term:+29.04

STPQSQFQESSPVWKLGR, MH+ 2130.1620, m/z 710.7255  
 H OSG39 P180811 230811-s1.05152.05152.3.dta

X-range:

-

MassTol: Y-zoom:

MassType:

AVG  MONO

Axis:

1  2

Label:

I  M  -

Ions:

a  +  2+  3+

b  +  2+  3+

c  +  2+  3+

x  +  2+  3+

y  +  2+  3+

z  +  2+  3+

hide H<sub>2</sub>O/NH<sub>3</sub>

zoom 112-122

GO

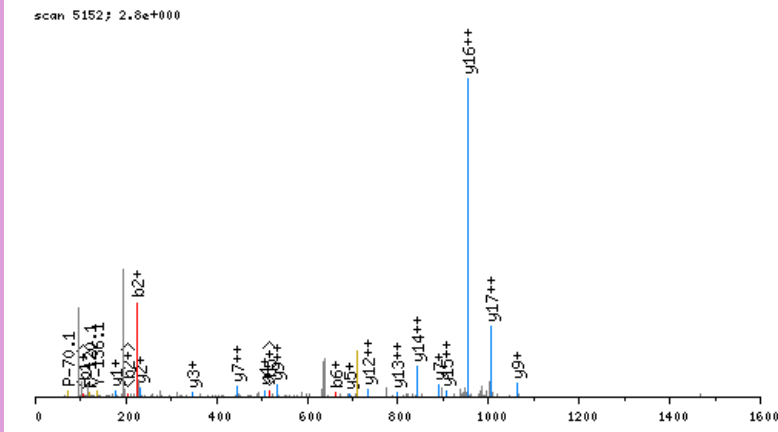

click image to zoom in; click top corners to zoom out [\[precursor±\]](#)

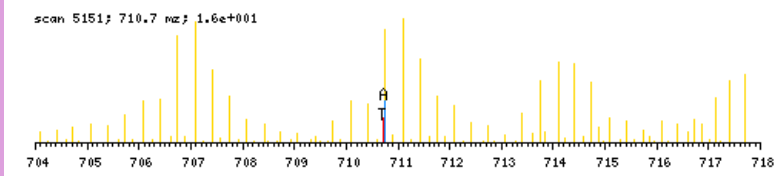

zoomed in precursor plot; T=theoretical m/z, A=acquired m/z

| b <sup>+</sup> | #  | AA | #  | y <sup>+</sup> | y <sup>2+</sup> |
|----------------|----|----|----|----------------|-----------------|
| 122.1029       | 1  | S  | 18 |                |                 |
| 223.1506       | 2  | T  | 17 | 2009.0669      | 1005.0374       |
| 320.2034       | 3  | P  | 16 | 1908.0192      | 954.5135        |
| 448.2619       | 4  | Q  | 15 | 1810.9664      | 905.9871        |
| 535.2940       | 5  | S  | 14 | 1682.9079      | 841.9578        |
| 663.3526       | 6  | Q  | 13 | 1595.8758      | 798.4418        |
| 810.4210       | 7  | F  | 12 | 1467.8173      | 734.4125        |
| 938.4795       | 8  | Q  | 11 | 1320.7488      | 660.8783        |
| 1067.5221      | 9  | E  | 10 | 1192.6903      | 596.8490        |
| 1154.5542      | 10 | S  | 9  | 1063.6477      | 532.3278        |
| 1241.5862      | 11 | S  | 8  | 976.6156       | 488.8117        |
| 1338.6390      | 12 | P  | 7  | 889.5836       | 445.2957        |
| 1437.7074      | 13 | V  | 6  | 792.5309       | 396.7693        |
| 1623.7867      | 14 | W  | 5  | 693.4624       | 347.2351        |
| 1785.9448      | 15 | K  | 4  | 507.3831       | 254.1955        |
| 1899.0289      | 16 | L  | 3  | 345.2250       | 173.1164        |
| 1956.0503      | 17 | G  | 2  | 232.1410       | 116.5744        |
|                | 18 | R  | 1  | 175.1195       | 88.0637         |

N-term:+35.07 K(15):+162.16

STQAAPQVVLNVPETQVTCLENGLR, MH+ 2758.4621, m/z 690.3710  
 H OSG36 P180811 230811-s1.05997.05997.4.dta

scan 5997; 1.7e+000

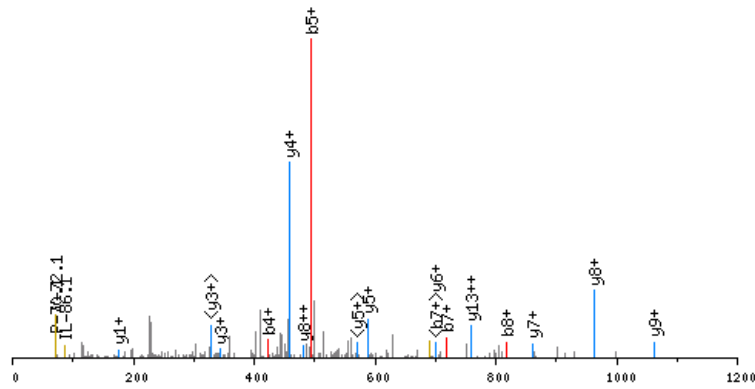

click image to zoom in; click top corners to zoom out [precursor±]

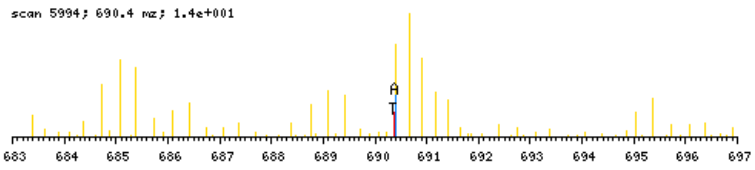

zoomed in precursor plot; T=theoretical m/z, A=acquired m/z

X-range:

0 - 0

MassTol: Y-zoom:

0. 1.

MassType:

AVG  MONO

Axis:

1  2

Label:

I  M  -

Ions:

a  +  2+  3+

b  +  2+  3+

c  +  2+  3+

x  +  2+  3+

y  +  2+  3+

z  +  2+  3+

hide H<sub>2</sub>O/NH<sub>3</sub>

zoom 112-122

GO

| b <sup>+</sup> | #  | AA | #  | y <sup>+</sup> | y <sup>2+</sup> |
|----------------|----|----|----|----------------|-----------------|
| 122.1029       | 1  | S  | 25 |                |                 |
| 223.1506       | 2  | T  | 24 | 2637.3670      | 1319.1874       |
| 351.2092       | 3  | Q  | 23 | 2536.3193      | 1268.6636       |
| 422.2463       | 4  | A  | 22 | 2408.2607      | 1204.6343       |
| 493.2834       | 5  | A  | 21 | 2337.2236      | 1169.1157       |
| 590.3362       | 6  | P  | 20 | 2266.1865      | 1133.5972       |
| 718.3948       | 7  | Q  | 19 | 2169.1337      | 1085.0708       |
| 817.4632       | 8  | V  | 18 | 2041.0752      | 1021.0415       |
| 916.5316       | 9  | V  | 17 | 1942.0067      | 971.5073        |
| 1029.6156      | 10 | L  | 16 | 1842.9383      | 921.9731        |
| 1143.6586      | 11 | N  | 15 | 1729.8543      | 865.4310        |
| 1242.7270      | 12 | V  | 14 | 1615.8113      | 808.4096        |
| 1339.7798      | 13 | P  | 13 | 1516.7429      | 758.8754        |
| 1468.8223      | 14 | E  | 12 | 1419.6902      | 710.3490        |
| 1569.8700      | 15 | T  | 11 | 1290.6476      | 645.8277        |
| 1697.9286      | 16 | Q  | 10 | 1189.5999      | 595.3039        |
| 1796.9970      | 17 | V  | 9  | 1061.5413      | 531.2746        |
| 1898.0447      | 18 | T  | 8  | 962.4729       | 481.7404        |
| 2058.0753      | 19 | C  | 7  | 861.4252       | 431.2165        |
| 2171.1594      | 20 | L  | 6  | 701.3946       | 351.2012        |
| 2300.2019      | 21 | E  | 5  | 588.3105       | 294.6592        |
| 2414.2449      | 22 | N  | 4  | 459.2680       | 230.1379        |
| 2471.2663      | 23 | G  | 3  | 345.2250       | 173.1164        |
| 2584.3504      | 24 | L  | 2  | 288.2036       | 144.6057        |
|                | 25 | R  | 1  | 175.1195       | 88.0637         |

N-term:+35.07 C(19) :+160.03



STSIGSAEKSASGEPTTGDR, MH+ 1993.9678, m/z 499.2474  
 L OSG36 P180811 230811-s1.03805.03805.4.dta

X-range:

-

MassTol: Y-zoom:

MassType:

AVG  MONO

Axis:

1  2

Label:

I  M  -

Ions:

a  +  2+  3+

b  +  2+  3+

c  +  2+  3+

x  +  2+  3+

y  +  2+  3+

z  +  2+  3+

hide H<sub>2</sub>O/NH<sub>3</sub>

zoom 112-122

GO

scan 3805; 1.1e+000

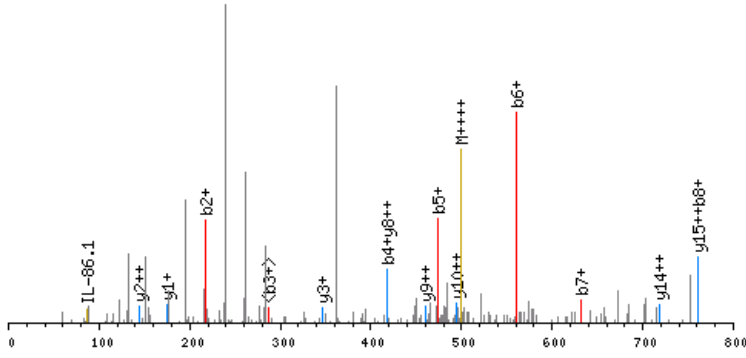

click image to zoom in; click top corners to zoom out [\[precursor±\]](#)

scan 3804; 499.2 m/z; 4.5e+001

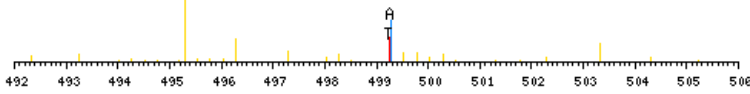

zoomed in precursor plot; T=theoretical m/z, A=acquired m/z

| b <sup>+</sup> | #  | AA # | y <sup>+</sup> | y <sup>2+</sup> |
|----------------|----|------|----------------|-----------------|
| 116.0711       | 1  | S 20 |                |                 |
| 217.1188       | 2  | T 19 | 1878.9045      | 939.9562        |
| 304.1508       | 3  | S 18 | 1777.8568      | 889.4323        |
| 417.2349       | 4  | I 17 | 1690.8248      | 845.9163        |
| 474.2564       | 5  | G 16 | 1577.7408      | 789.3743        |
| 561.2884       | 6  | S 15 | 1520.7193      | 760.8636        |
| 632.3255       | 7  | A 14 | 1433.6873      | 717.3475        |
| 761.3681       | 8  | E 13 | 1362.6501      | 681.8290        |
| 917.4944       | 9  | K 12 | 1233.6076      | 617.3077        |
| 1004.5264      | 10 | S 11 | 1077.4813      | 539.2445        |
| 1075.5635      | 11 | A 10 | 990.4492       | 495.7285        |
| 1162.5956      | 12 | S 9  | 919.4121       | 460.2100        |
| 1219.6170      | 13 | G 8  | 832.3801       | 416.6940        |
| 1348.6596      | 14 | E 7  | 775.3586       | 388.1832        |
| 1445.7124      | 15 | P 6  | 646.3160       | 323.6619        |
| 1546.7601      | 16 | T 5  | 549.2633       | 275.1355        |
| 1647.8077      | 17 | T 4  | 448.2156       | 224.6117        |
| 1704.8292      | 18 | G 3  | 347.1679       | 174.0879        |
| 1819.8562      | 19 | D 2  | 290.1464       | 145.5771        |
|                | 20 | R 1  | 175.1195       | 88.0637         |

N-term:+29.04 K(9):+156.13

SVEESVDGKVVSSR, MH+ 1533.8124, m/z 511.9423  
 L OSG40 P180811 230811-s1.03048.03048.3.dta

scan 3048; 1.3e+001

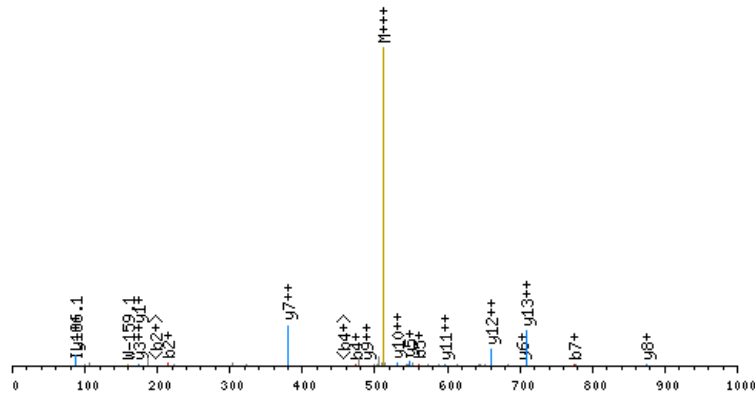

click image to zoom in; click top corners to zoom out [\[precursor±\]](#)

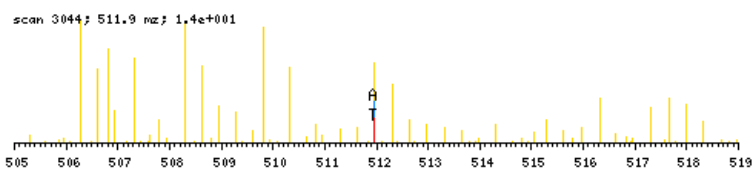

zoomed in precursor plot; T=theoretical m/z, A=acquired m/z

X-range:

-

MassTol: Y-zoom:

MassType:

AVG  MONO

Axis:

1  2

Label:

I  M  -

Ions:

a  +  2+  3+

b  +  2+  3+

c  +  2+  3+

x  +  2+  3+

y  +  2+  3+

z  +  2+  3+

hide H<sub>2</sub>O/NH<sub>3</sub>

zoom 112-122

GO

| b <sup>+</sup> | #  | AA # | y <sup>+</sup> | y <sup>2+</sup> |
|----------------|----|------|----------------|-----------------|
| 116.0711       | 1  | S 14 |                |                 |
| 215.1395       | 2  | V 13 | 1418.7491      | 709.8785        |
| 344.1821       | 3  | E 12 | 1319.6807      | 660.3443        |
| 473.2247       | 4  | E 11 | 1190.6381      | 595.8230        |
| 560.2568       | 5  | S 10 | 1061.5955      | 531.3017        |
| 659.3252       | 6  | V 9  | 974.5635       | 487.7857        |
| 774.3521       | 7  | D 8  | 875.4951       | 438.2515        |
| 831.3736       | 8  | G 7  | 760.4681       | 380.7380        |
| 987.4999       | 9  | K 6  | 703.4467       | 352.2273        |
| 1086.5683      | 10 | V 5  | 547.3204       | 274.1641        |
| 1185.6367      | 11 | V 4  | 448.2520       | 224.6299        |
| 1272.6687      | 12 | S 3  | 349.1836       | 175.0957        |
| 1359.7008      | 13 | S 2  | 262.1515       | 131.5797        |
|                | 14 | R 1  | 175.1195       | 88.0637         |

N-term:+29.04 K(9):+156.13

SVESASGETLHSPKVGQPGAAGPVSPMCPGR, MH+ 3103.5304, m/z 776.6381  
L OSG40 P180811 230811-sl.05228.05228.4.dta

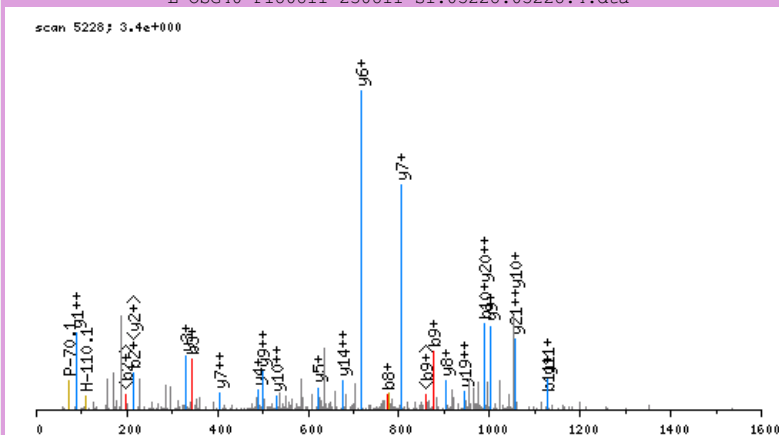

click image to zoom in; click top corners to zoom out [\[precursor±\]](#)

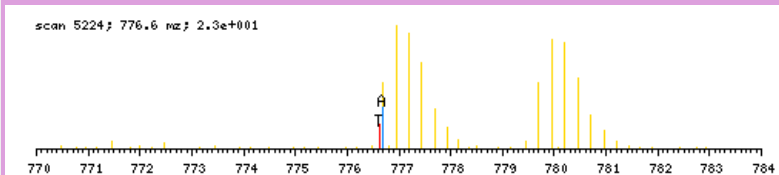

zoomed in precursor plot; T=theoretical m/z, A=acquired m/z

| b <sup>+</sup> | #  | AA # | y <sup>+</sup> | y <sup>2+</sup> |
|----------------|----|------|----------------|-----------------|
| 116.0711       | 1  | S 31 |                |                 |
| 215.1395       | 2  | V 30 | 2988.4671      | 1494.7375       |
| 344.1821       | 3  | E 29 | 2889.3987      | 1445.2033       |
| 431.2142       | 4  | S 28 | 2760.3561      | 1380.6820       |
| 502.2513       | 5  | A 27 | 2673.3241      | 1337.1660       |
| 589.2833       | 6  | S 26 | 2602.2870      | 1301.6474       |
| 646.3048       | 7  | G 25 | 2515.2550      | 1258.1314       |
| 775.3474       | 8  | E 24 | 2458.2335      | 1229.6207       |
| 876.3950       | 9  | T 23 | 2329.1909      | 1165.0994       |
| 989.4791       | 10 | L 22 | 2228.1432      | 1114.5755       |
| 1126.5380      | 11 | H 21 | 2115.0592      | 1058.0335       |
| 1213.5700      | 12 | S 20 | 1978.0002      | 989.5040        |
| 1310.6228      | 13 | P 19 | 1890.9682      | 945.9880        |
| 1466.7491      | 14 | K 18 | 1793.9155      | 897.4616        |
| 1565.8175      | 15 | V 17 | 1637.7892      | 819.3985        |
| 1622.8390      | 16 | G 16 | 1538.7207      | 769.8643        |
| 1750.8976      | 17 | Q 15 | 1481.6993      | 741.3536        |
| 1847.9503      | 18 | P 14 | 1353.6407      | 677.3243        |
| 1904.9718      | 19 | G 13 | 1256.5879      | 628.7979        |
| 1976.0089      | 20 | A 12 | 1199.5665      | 600.2871        |
| 2047.0460      | 21 | A 11 | 1128.5294      | 564.7686        |
| 2104.0675      | 22 | G 10 | 1057.4922      | 529.2500        |
| 2201.1202      | 23 | P 9  | 1000.4708      | 500.7393        |
| 2300.1887      | 24 | V 8  | 903.4180       | 452.2129        |
| 2387.2207      | 25 | S 7  | 804.3496       | 402.6787        |
| 2484.2735      | 26 | P 6  | 717.3176       | 359.1627        |
| 2615.3139      | 27 | M 5  | 620.2648       | 310.6363        |
| 2775.3445      | 28 | C 4  | 489.2243       | 245.1161        |
| 2872.3973      | 29 | P 3  | 329.1937       | 165.1008        |
| 2929.4188      | 30 | G 2  | 232.1410       | 116.5744        |
|                | 31 | R 1  | 175.1195       | 88.0637         |

N-term: +29.04 K(14): +156.13  
C(28): +160.03

X-range:

-

MassTol: Y-zoom:

MassType:

AVG  MONO

Axis:

1  2

Label:

I  M  -

Ions:

a  +  2+  3+

b  +  2+  3+

c  +  2+  3+

x  +  2+  3+

y  +  2+  3+

z  +  2+  3+

hide H<sub>2</sub>O/NH<sub>3</sub>

zoom 112-122

GO

SVGAQPPGPSGEEGKR, MH+ 1677.9196, m/z 559.9781  
 H OSG40 P180811 230811-s1.02043.02043.3.dta

scan 2043; 5.6e+000

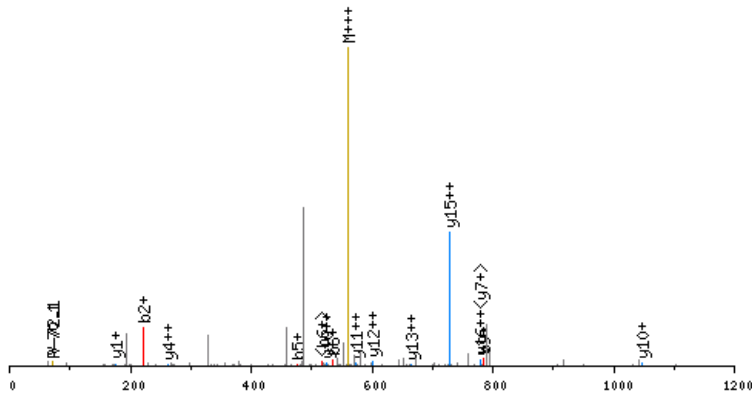

click image to zoom in; click top corners to zoom out [\[precursor±\]](#)

scan 2039; 560.0 m/z; 1.2e+001

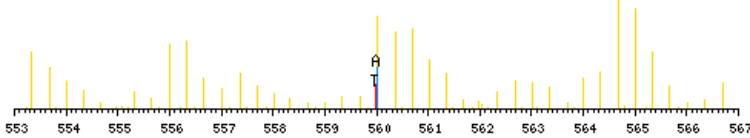

zoomed in precursor plot; T=theoretical m/z, A=acquired m/z

X-range:

-

MassTol: Y-zoom:

MassType:

AVG  MONO

Axis:

1  2

Label:

I  M  -

Ions:

a  +  2+  3+

b  +  2+  3+

c  +  2+  3+

x  +  2+  3+

y  +  2+  3+

z  +  2+  3+

hide H<sub>2</sub>O/NH<sub>3</sub>

zoom 112-122

GO

| b <sup>+</sup> | #  | AA | #  | y <sup>+</sup> | y <sup>2+</sup> |
|----------------|----|----|----|----------------|-----------------|
| 122.1029       | 1  | S  | 17 |                |                 |
| 221.1713       | 2  | V  | 16 | 1556.8245      | 778.9162        |
| 278.1928       | 3  | G  | 15 | 1457.7561      | 729.3820        |
| 349.2299       | 4  | A  | 14 | 1400.7347      | 700.8712        |
| 477.2885       | 5  | Q  | 13 | 1329.6975      | 665.3527        |
| 534.3100       | 6  | G  | 12 | 1201.6390      | 601.3234        |
| 631.3627       | 7  | P  | 11 | 1144.6175      | 572.8127        |
| 728.4155       | 8  | P  | 10 | 1047.5647      | 524.2863        |
| 785.4370       | 9  | G  | 9  | 950.5120       | 475.7599        |
| 882.4897       | 10 | P  | 8  | 893.4905       | 447.2492        |
| 969.5217       | 11 | S  | 7  | 796.4377       | 398.7228        |
| 1026.5432      | 12 | G  | 6  | 709.4057       | 355.2068        |
| 1155.5858      | 13 | E  | 5  | 652.3843       | 326.6960        |
| 1284.6284      | 14 | E  | 4  | 523.3417       | 262.1747        |
| 1341.6499      | 15 | G  | 3  | 394.2991       | 197.6534        |
| 1503.8080      | 16 | K  | 2  | 337.2776       | 169.1427        |
|                | 17 | R  | 1  | 175.1195       | 88.0637         |

N-term:+35.07 K(16):+162.16

SVIDYELIDQDAR, MH+ 1570.8177, m/z 524.2774  
 H OSG37 P180811 230811-s1.06668.06668.3.dta

X-range:

-

MassTol: Y-zoom:

MassType:

AVG  MONO

Axis:

1  2

Label:

I  M  -

Ions:

a  +  2+  3+

b  +  2+  3+

c  +  2+  3+

x  +  2+  3+

y  +  2+  3+

z  +  2+  3+

hide H<sub>2</sub>O/NH<sub>3</sub>

zoom 112-122

GO

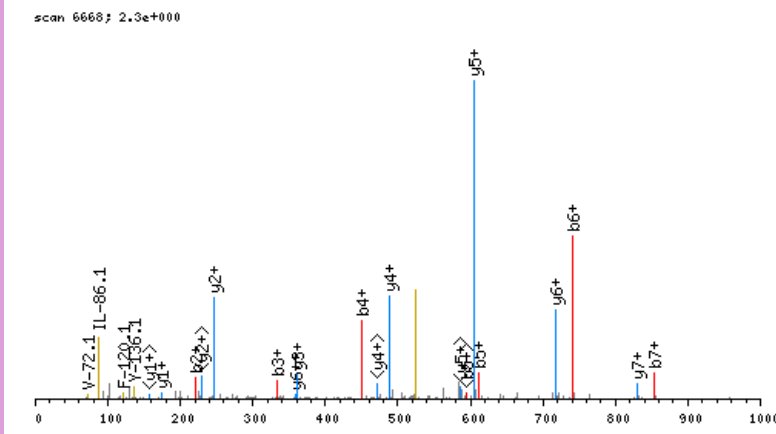

click image to zoom in; click top corners to zoom out [\[precursor±\]](#)

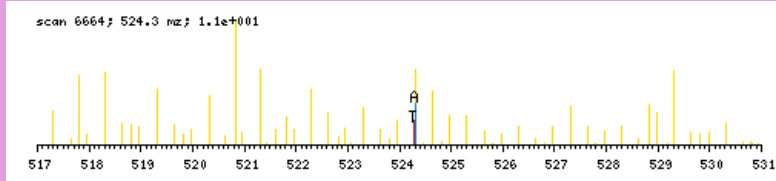

zoomed in precursor plot; T=theoretical m/z, A=acquired m/z

| b <sup>+</sup> | #  | AA # | y <sup>+</sup> | y <sup>2+</sup> |
|----------------|----|------|----------------|-----------------|
| 122.1029       | 1  | S 13 |                |                 |
| 221.1713       | 2  | V 12 | 1449.7225      | 725.3652        |
| 334.2554       | 3  | I 11 | 1350.6541      | 675.8310        |
| 449.2823       | 4  | D 10 | 1237.5701      | 619.2889        |
| 612.3457       | 5  | Y 9  | 1122.5431      | 561.7755        |
| 741.3883       | 6  | E 8  | 959.4798       | 480.2438        |
| 854.4723       | 7  | L 7  | 830.4372       | 415.7225        |
| 967.5564       | 8  | I 6  | 717.3531       | 359.1805        |
| 1082.5833      | 9  | D 5  | 604.2691       | 302.6385        |
| 1210.6419      | 10 | Q 4  | 489.2421       | 245.1250        |
| 1325.6689      | 11 | D 3  | 361.1836       | 181.0957        |
| 1396.7060      | 12 | A 2  | 246.1566       | 123.5822        |
|                | 13 | R 1  | 175.1195       | 88.0637         |

N-term:+35.07

SVIQTAVDQFAR, MH+ 1362.7381, m/z 454.9176  
 L OSG37 P180811 230811-s1.06836.06836.3.dta

X-range:

-

MassTol: Y-zoom:

MassType:

AVG  MONO

Axis:

1  2

Label:

I  M  -

Ions:

a  +  2+  3+

b  +  2+  3+

c  +  2+  3+

x  +  2+  3+

y  +  2+  3+

z  +  2+  3+

hide H<sub>2</sub>O/NH<sub>3</sub>

zoom 112-122

GO

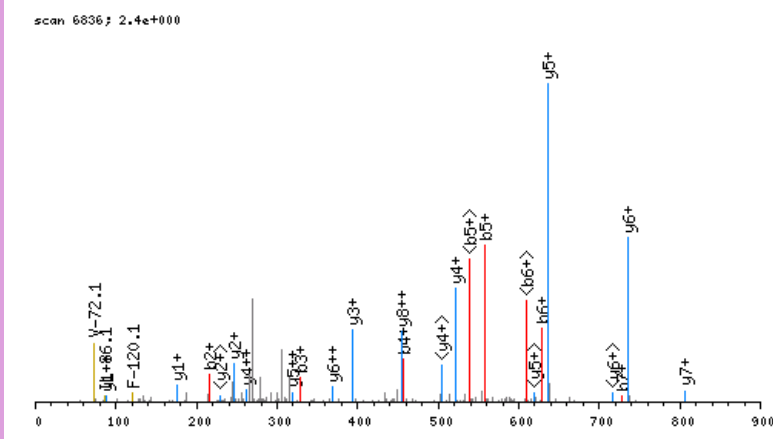

click image to zoom in; click top corners to zoom out [\[precursor±\]](#)

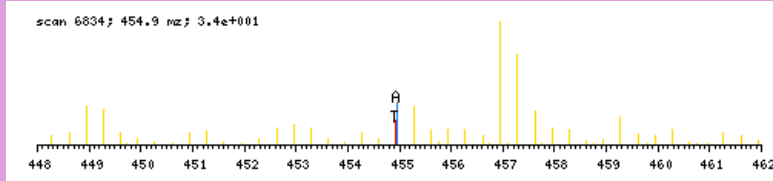

zoomed in precursor plot; T=theoretical m/z, A=acquired m/z

| b <sup>+</sup> | #  | AA # | y <sup>+</sup> | y <sup>2+</sup> |
|----------------|----|------|----------------|-----------------|
| 116.0711       | 1  | S 12 |                |                 |
| 215.1395       | 2  | V 11 | 1247.6748      | 624.3413        |
| 328.2236       | 3  | I 10 | 1148.6064      | 574.8071        |
| 456.2822       | 4  | Q 9  | 1035.5223      | 518.2651        |
| 557.3299       | 5  | T 8  | 907.4638       | 454.2358        |
| 628.3670       | 6  | A 7  | 806.4161       | 403.7120        |
| 727.4354       | 7  | V 6  | 735.3790       | 368.1934        |
| 842.4623       | 8  | D 5  | 636.3105       | 318.6592        |
| 970.5209       | 9  | Q 4  | 521.2836       | 261.1457        |
| 1117.5893      | 10 | F 3  | 393.2250       | 197.1164        |
| 1188.6264      | 11 | A 2  | 246.1566       | 123.5822        |
|                | 12 | R 1  | 175.1195       | 88.0637         |

N-term:+29.04

SVLDTNKDCEVDFGEYVR, MH+ 2202.0388, m/z 734.6845  
 L OSG39 P180811 230811-s1.05643.05643.3.dta

X-range:

-

MassTol: Y-zoom:

MassType:

AVG  MONO

Axis:

1  2

Label:

I  M  -

Ions:

a  +  2+  3+

b  +  2+  3+

c  +  2+  3+

x  +  2+  3+

y  +  2+  3+

z  +  2+  3+

hide H<sub>2</sub>O/NH<sub>3</sub>

zoom 112-122

GO

scan 5643; 3.9e+000

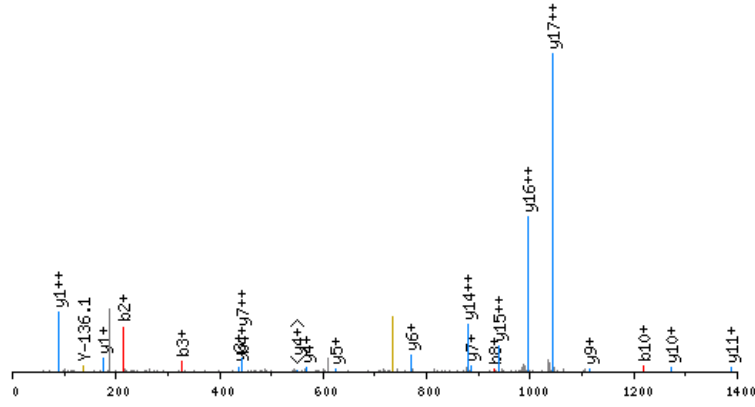

click image to zoom in; click top corners to zoom out [\[precursor±\]](#)

scan 5641; 734.7 mz; 7.0e+000

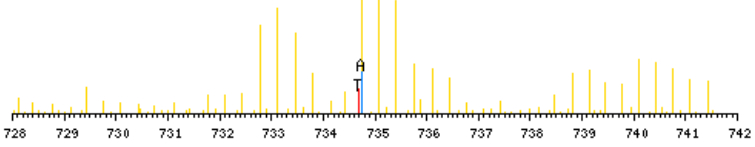

zoomed in precursor plot; T=theoretical m/z, A=acquired m/z

| b <sup>+</sup> | #  | AA # | y <sup>+</sup> | y <sup>2+</sup> |
|----------------|----|------|----------------|-----------------|
| 116.0711       | 1  | S 18 |                |                 |
| 215.1395       | 2  | V 17 | 2086.9755      | 1043.9917       |
| 328.2236       | 3  | L 16 | 1987.9071      | 994.4575        |
| 443.2505       | 4  | D 15 | 1874.8231      | 937.9154        |
| 544.2982       | 5  | T 14 | 1759.7961      | 880.4020        |
| 658.3412       | 6  | N 13 | 1658.7484      | 829.8781        |
| 814.4675       | 7  | K 12 | 1544.7055      | 772.8567        |
| 929.4944       | 8  | D 11 | 1388.5792      | 694.7935        |
| 1089.5250      | 9  | C 10 | 1273.5523      | 637.2800        |
| 1218.5676      | 10 | E 9  | 1113.5217      | 557.2647        |
| 1317.6360      | 11 | V 8  | 984.4791       | 492.7434        |
| 1432.6629      | 12 | D 7  | 885.4107       | 443.2092        |
| 1579.7314      | 13 | F 6  | 770.3837       | 385.6958        |
| 1636.7528      | 14 | G 5  | 623.3153       | 312.1616        |
| 1765.7954      | 15 | E 4  | 566.2938       | 283.6508        |
| 1928.8587      | 16 | Y 3  | 437.2512       | 219.1295        |
| 2027.9272      | 17 | V 2  | 274.1879       | 137.5979        |
|                | 18 | R 1  | 175.1195       | 88.0637         |

N-term: +29.04 K(7): +156.13  
 C(9): +160.03

SVMLQIAATELEKEESR, MH+ 1990.0531, m/z 664.0225  
 L OSG39 P180811 230811-s1.07239.07239.3.dta

X-range:

-

MassTol: Y-zoom:

MassType:

AVG  MONO

Axis:

1  2

Label:

I  M  -

Ions:

a  +  2+  3+

b  +  2+  3+

c  +  2+  3+

x  +  2+  3+

y  +  2+  3+

z  +  2+  3+

hide H<sub>2</sub>O/NH<sub>3</sub>

zoom 112-122

GO

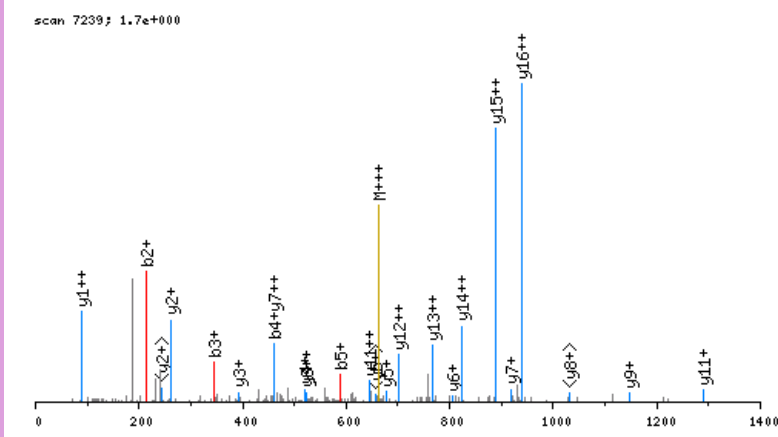

click image to zoom in; click top corners to zoom out [\[precursor±\]](#)

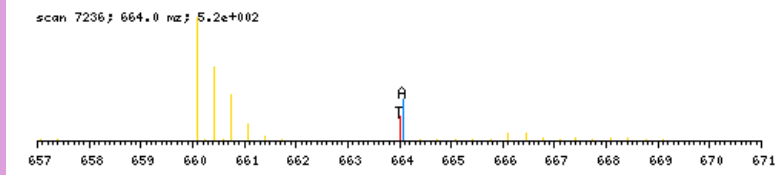

zoomed in precursor plot; T=theoretical m/z, A=acquired m/z

| b <sup>+</sup> | #  | AA | #  | y <sup>+</sup> | y <sup>2+</sup> |
|----------------|----|----|----|----------------|-----------------|
| 116.0711       | 1  | S  | 17 |                |                 |
| 215.1395       | 2  | V  | 16 | 1874.9898      | 937.9988        |
| 346.1800       | 3  | M  | 15 | 1775.9214      | 888.4646        |
| 459.2641       | 4  | L  | 14 | 1644.8809      | 822.9444        |
| 587.3227       | 5  | Q  | 13 | 1531.7968      | 766.4023        |
| 700.4067       | 6  | I  | 12 | 1403.7382      | 702.3730        |
| 771.4438       | 7  | A  | 11 | 1290.6542      | 645.8310        |
| 842.4810       | 8  | A  | 10 | 1219.6171      | 610.3124        |
| 943.5286       | 9  | T  | 9  | 1148.5799      | 574.7939        |
| 1072.5712      | 10 | E  | 8  | 1047.5323      | 524.2700        |
| 1185.6553      | 11 | L  | 7  | 918.4897       | 459.7487        |
| 1314.6979      | 12 | E  | 6  | 805.4056       | 403.2067        |
| 1470.8242      | 13 | K  | 5  | 676.3630       | 338.6854        |
| 1599.8668      | 14 | E  | 4  | 520.2367       | 260.6223        |
| 1728.9094      | 15 | E  | 3  | 391.1941       | 196.1010        |
| 1815.9414      | 16 | S  | 2  | 262.1515       | 131.5797        |
|                | 17 | R  | 1  | 175.1195       | 88.0637         |

N-term:+29.04 K(13):+156.13



SVPHGIANEDIVSR, MH+ 1527.8343, m/z 509.9496  
 H OSG40 P180811 230811-s1.04446.04446.3.dta

X-range:

-

MassTol: Y-zoom:

MassType:

AVG  MONO

Axis:

1  2

Label:

I  M  -

Ions:

a  +  2+  3+

b  +  2+  3+

c  +  2+  3+

x  +  2+  3+

y  +  2+  3+

z  +  2+  3+

hide H<sub>2</sub>O/NH<sub>3</sub>

zoom 112-122

GO

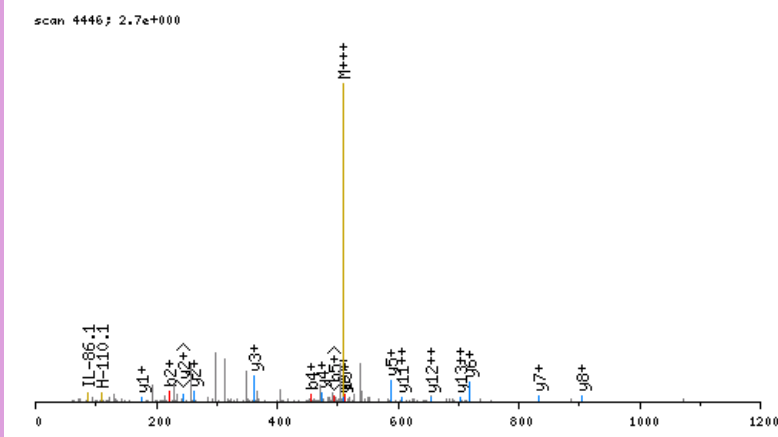

click image to zoom in; click top corners to zoom out [\[precursor±\]](#)

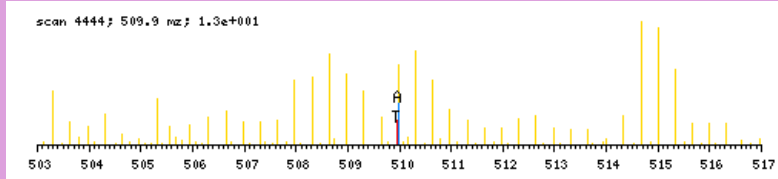

zoomed in precursor plot; T=theoretical m/z, A=acquired m/z

| b <sup>+</sup> | #  | AA # | y <sup>+</sup> | y <sup>2+</sup> |
|----------------|----|------|----------------|-----------------|
| 122.1029       | 1  | S 14 |                |                 |
| 221.1713       | 2  | V 13 | 1406.7392      | 703.8735        |
| 318.2241       | 3  | P 12 | 1307.6708      | 654.3393        |
| 455.2830       | 4  | H 11 | 1210.6180      | 605.8129        |
| 512.3045       | 5  | G 10 | 1073.5591      | 537.2835        |
| 625.3885       | 6  | I 9  | 1016.5376      | 508.7727        |
| 696.4257       | 7  | A 8  | 903.4536       | 452.2307        |
| 810.4686       | 8  | N 7  | 832.4165       | 416.7121        |
| 939.5112       | 9  | E 6  | 718.3735       | 359.6907        |
| 1054.5381      | 10 | D 5  | 589.3310       | 295.1694        |
| 1167.6222      | 11 | I 4  | 474.3040       | 237.6559        |
| 1266.6906      | 12 | V 3  | 361.2199       | 181.1139        |
| 1353.7226      | 13 | S 2  | 262.1515       | 131.5797        |
|                | 14 | R 1  | 175.1195       | 88.0637         |

N-term:+35.07

SVPLPAENVITTAGQR, MH+ 1686.9602, m/z 562.9916  
 H OSG37 P180811 230811-s1.05793.05793.3.dta

X-range:

-

MassTol: Y-zoom:

MassType:

AVG  MONO

Axis:

1  2

Label:

I  M  -

Ions:

a  +  2+  3+

b  +  2+  3+

c  +  2+  3+

x  +  2+  3+

y  +  2+  3+

z  +  2+  3+

hide H<sub>2</sub>O/NH<sub>3</sub>

zoom 112-122

GO

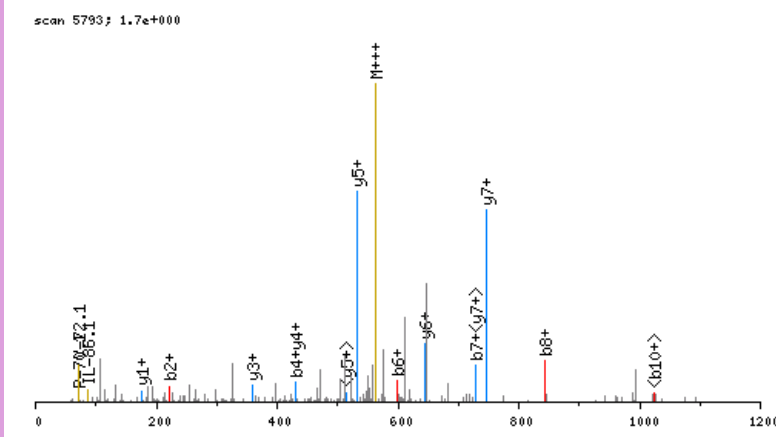

click image to zoom in; click top corners to zoom out [\[precursor±\]](#)

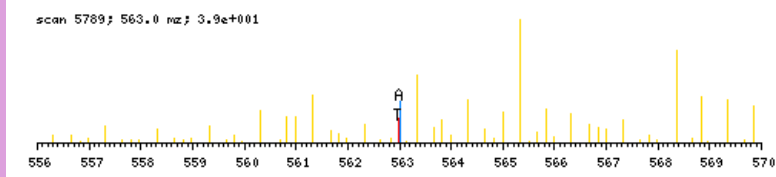

zoomed in precursor plot; T=theoretical m/z, A=acquired m/z

| b <sup>+</sup>  | #  | AA # | y <sup>+</sup>  | y <sup>2+</sup> |
|-----------------|----|------|-----------------|-----------------|
| 122.1029        | 1  | S 16 |                 |                 |
| <b>221.1713</b> | 2  | V 15 | 1565.8651       | 783.4365        |
| 318.2241        | 3  | P 14 | 1466.7967       | 733.9023        |
| <b>431.3082</b> | 4  | L 13 | 1369.7440       | 685.3759        |
| 528.3609        | 5  | P 12 | 1256.6599       | 628.8339        |
| <b>599.3980</b> | 6  | A 11 | 1159.6071       | 580.3075        |
| <b>728.4406</b> | 7  | E 10 | 1088.5700       | 544.7889        |
| <b>842.4836</b> | 8  | N 9  | 959.5274        | 480.2676        |
| 941.5520        | 9  | V 8  | 845.4845        | 423.2462        |
| 1042.5997       | 10 | T 7  | <b>746.4161</b> | 373.7120        |
| 1155.6837       | 11 | I 6  | <b>645.3684</b> | 323.1881        |
| 1256.7314       | 12 | T 5  | <b>532.2843</b> | 266.6461        |
| 1327.7685       | 13 | A 4  | <b>431.2367</b> | 216.1222        |
| 1384.7900       | 14 | G 3  | <b>360.1995</b> | 180.6037        |
| 1512.8486       | 15 | Q 2  | 303.1781        | 152.0930        |
|                 | 16 | R 1  | <b>175.1195</b> | 88.0637         |

N-term:+35.07

SVTGEQYGNPIR, MH+ 1354.7179, m/z 452.2441  
 H OSG37 P180811 230811-s1.03436.03436.3.dta

X-range:

-

MassTol: Y-zoom:

MassType:

AVG  MONO

Axis:

1  2

Label:

I  M  -

Ions:

a  +  2+  3+

b  +  2+  3+

c  +  2+  3+

x  +  2+  3+

y  +  2+  3+

z  +  2+  3+

hide H<sub>2</sub>O/NH<sub>3</sub>

zoom 112-122

GO

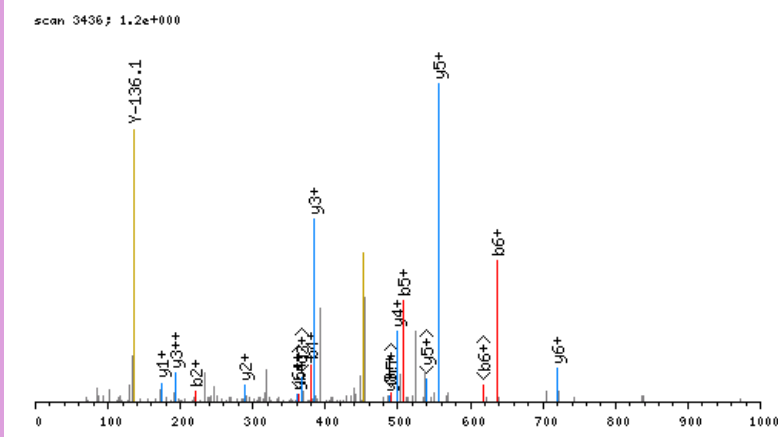

click image to zoom in; click top corners to zoom out [\[precursor±\]](#)

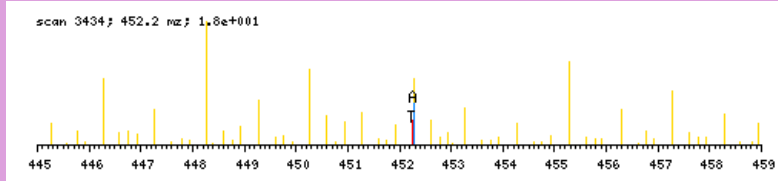

zoomed in precursor plot; T=theoretical m/z, A=acquired m/z

| b <sup>+</sup> | #  | AA # | y <sup>+</sup> | y <sup>2+</sup> |
|----------------|----|------|----------------|-----------------|
| 122.1029       | 1  | S 12 |                |                 |
| 221.1713       | 2  | V 11 | 1233.6228      | 617.3153        |
| 322.2190       | 3  | T 10 | 1134.5544      | 567.7811        |
| 379.2405       | 4  | G 9  | 1033.5067      | 517.2573        |
| 508.2831       | 5  | E 8  | 976.4852       | 488.7465        |
| 636.3417       | 6  | Q 7  | 847.4426       | 424.2252        |
| 799.4050       | 7  | Y 6  | 719.3840       | 360.1959        |
| 856.4264       | 8  | G 5  | 556.3207       | 278.6643        |
| 970.4694       | 9  | N 4  | 499.2993       | 250.1535        |
| 1067.5221      | 10 | P 3  | 385.2563       | 193.1321        |
| 1180.6062      | 11 | I 2  | 288.2036       | 144.6057        |
|                | 12 | R 1  | 175.1195       | 88.0637         |

N-term:+35.07

SVVAGGPEVTLTPER, MH+ 1545.8700, m/z 515.9615  
 H OSG37 P180811 230811-s1.05028.05028.3.dta

X-range:

-

MassTol: Y-zoom:

MassType:

AVG  MONO

Axis:

1  2

Label:

I  M  -

Ions:

a  +  2+  3+

b  +  2+  3+

c  +  2+  3+

x  +  2+  3+

y  +  2+  3+

z  +  2+  3+

hide H<sub>2</sub>O/NH<sub>3</sub>

zoom 112-122

GO

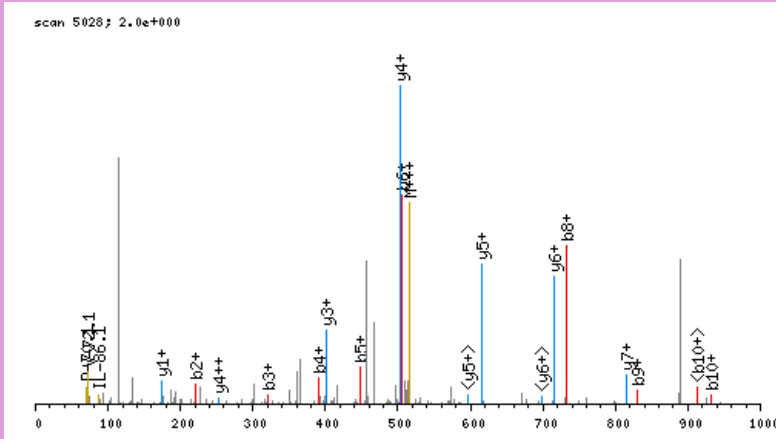

click image to zoom in; click top corners to zoom out [\[precursor±\]](#)

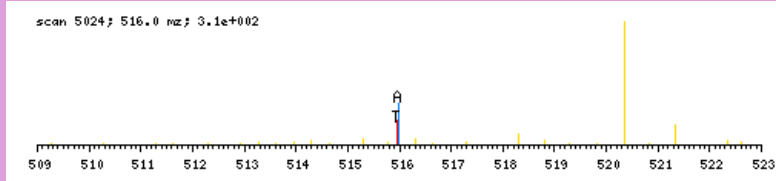

zoomed in precursor plot; T=theoretical m/z, A=acquired m/z

| b <sup>+</sup> | #  | AA # | y <sup>+</sup> | y <sup>2+</sup> |
|----------------|----|------|----------------|-----------------|
| 122.1029       | 1  | S 15 |                |                 |
| 221.1713       | 2  | V 14 | 1424.7749      | 712.8914        |
| 320.2398       | 3  | V 13 | 1325.7065      | 663.3572        |
| 391.2769       | 4  | A 12 | 1226.6381      | 613.8230        |
| 448.2983       | 5  | G 11 | 1155.6010      | 578.3044        |
| 505.3198       | 6  | G 10 | 1098.5795      | 549.7937        |
| 602.3726       | 7  | P 9  | 1041.5580      | 521.2829        |
| 731.4152       | 8  | E 8  | 944.5053       | 472.7566        |
| 830.4836       | 9  | V 7  | 815.4627       | 408.2353        |
| 931.5312       | 10 | T 6  | 716.3943       | 358.7011        |
| 1044.6153      | 11 | L 5  | 615.3466       | 308.1772        |
| 1145.6630      | 12 | T 4  | 502.2625       | 251.6352        |
| 1242.7158      | 13 | P 3  | 401.2149       | 201.1113        |
| 1371.7583      | 14 | E 2  | 304.1621       | 152.5850        |
|                | 15 | R 1  | 175.1195       | 88.0637         |

N-term:+35.07

SWQDEIAQGTWR, MH+ 1510.7502, m/z 504.2549  
 H OSG38 P180811 230811-s1.06363.06363.3.dta

X-range:

-

MassTol: Y-zoom:

MassType:

AVG  MONO

Axis:

1  2

Label:

I  M  -

Ions:

a  +  2+  3+

b  +  2+  3+

c  +  2+  3+

x  +  2+  3+

y  +  2+  3+

z  +  2+  3+

hide H<sub>2</sub>O/NH<sub>3</sub>

zoom 112-122

GO

scan 6363; 2.4e+000

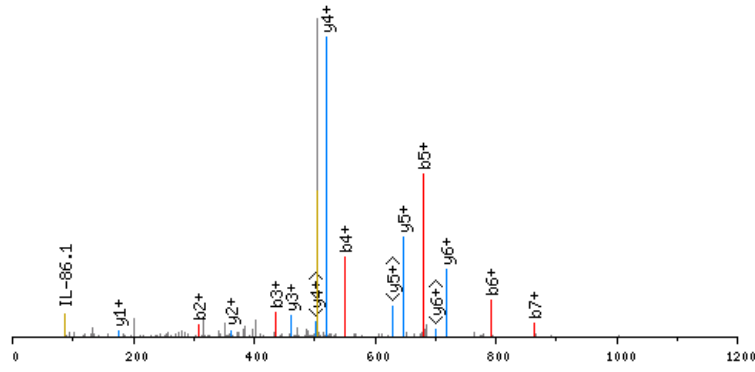

click image to zoom in; click top corners to zoom out [\[precursor±\]](#)

scan 6359; 504.3 m/z; 1.8e+001

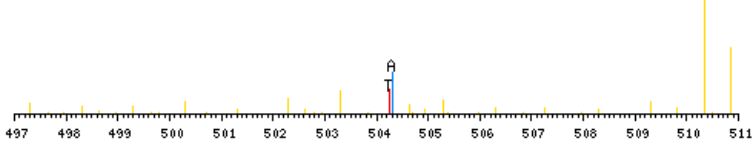

zoomed in precursor plot; T=theoretical m/z, A=acquired m/z

| b <sup>+</sup> | #  | AA # | y <sup>+</sup> | y <sup>2+</sup> |
|----------------|----|------|----------------|-----------------|
| 122.1029       | 1  | S 12 |                |                 |
| 308.1822       | 2  | W 11 | 1389.6551      | 695.3315        |
| 436.2408       | 3  | Q 10 | 1203.5758      | 602.2918        |
| 551.2678       | 4  | D 9  | 1075.5172      | 538.2625        |
| 680.3104       | 5  | E 8  | 960.4903       | 480.7491        |
| 793.3944       | 6  | I 7  | 831.4477       | 416.2278        |
| 864.4315       | 7  | A 6  | 718.3636       | 359.6857        |
| 992.4901       | 8  | Q 5  | 647.3265       | 324.1672        |
| 1049.5116      | 9  | G 4  | 519.2680       | 260.1379        |
| 1150.5593      | 10 | T 3  | 462.2465       | 231.6272        |
| 1336.6386      | 11 | W 2  | 361.1988       | 181.1033        |
|                | 12 | R 1  | 175.1195       | 88.0637         |

N-term:+35.07

SWYDNEYGYSNR, MH+ 1581.6610, m/z 527.8918  
 L OSG38 P180811 230811-s1.04730.04730.3.dta

X-range:

-

MassTol: Y-zoom:

MassType:

AVG  MONO

Axis:

1  2

Label:

I  M  -

Ions:

a  +  2+  3+

b  +  2+  3+

c  +  2+  3+

x  +  2+  3+

y  +  2+  3+

z  +  2+  3+

hide H<sub>2</sub>O/NH<sub>3</sub>

zoom 112-122

GO

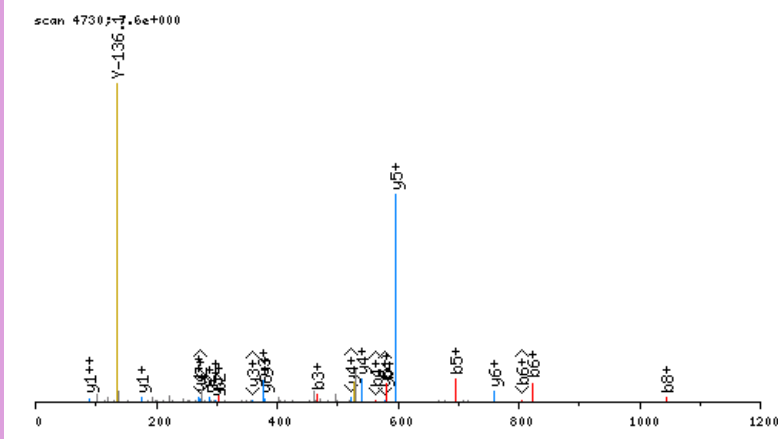

click image to zoom in; click top corners to zoom out [\[precursor±\]](#)

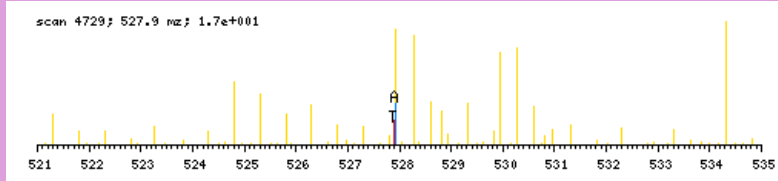

zoomed in precursor plot; T=theoretical m/z, A=acquired m/z

| b <sup>+</sup> | #  | AA # | y <sup>+</sup> | y <sup>2+</sup> |
|----------------|----|------|----------------|-----------------|
| 116.0711       | 1  | S 12 |                |                 |
| 302.1504       | 2  | W 11 | 1466.5977      | 733.8028        |
| 465.2138       | 3  | Y 10 | 1280.5184      | 640.7631        |
| 580.2407       | 4  | D 9  | 1117.4550      | 559.2314        |
| 694.2836       | 5  | N 8  | 1002.4281      | 501.7180        |
| 823.3262       | 6  | E 7  | 888.3852       | 444.6965        |
| 986.3896       | 7  | Y 6  | 759.3426       | 380.1752        |
| 1043.4110      | 8  | G 5  | 596.2792       | 298.6435        |
| 1206.4744      | 9  | Y 4  | 539.2578       | 270.1328        |
| 1293.5064      | 10 | S 3  | 376.1945       | 188.6011        |
| 1407.5493      | 11 | N 2  | 289.1624       | 145.0851        |
|                | 12 | R 1  | 175.1195       | 88.0637         |

N-term:+29.04

SYELPDGQVITIGNER, MH+ 1818.9237, m/z 606.9794  
 L OSG37 P180811 230811-s1.07626.07626.3.dta

X-range:

-

MassTol: Y-zoom:

MassType:

AVG  MONO

Axis:

1  2

Label:

I  M  -

Ions:

a  +  2+  3+

b  +  2+  3+

c  +  2+  3+

x  +  2+  3+

y  +  2+  3+

z  +  2+  3+

hide H<sub>2</sub>O/NH<sub>3</sub>

zoom 112-122

GO

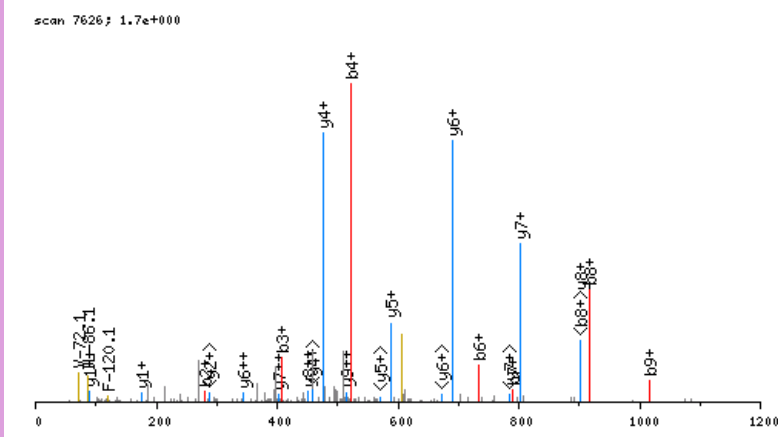

click image to zoom in; click top corners to zoom out [\[precursor±\]](#)

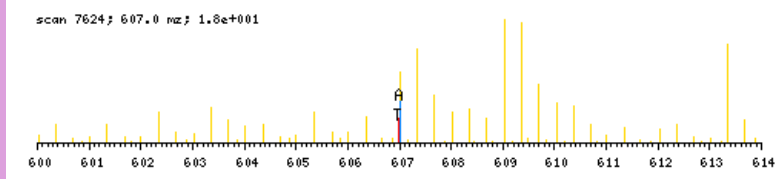

zoomed in precursor plot; T=theoretical m/z, A=acquired m/z

| b <sup>+</sup> | #  | AA # | y <sup>+</sup> | y <sup>2+</sup> |
|----------------|----|------|----------------|-----------------|
| 116.0711       | 1  | S 16 |                |                 |
| 279.1345       | 2  | Y 15 | 1703.8604      | 852.4341        |
| 408.1771       | 3  | E 14 | 1540.7971      | 770.9025        |
| 521.2611       | 4  | L 13 | 1411.7545      | 706.3812        |
| 618.3139       | 5  | P 12 | 1298.6705      | 649.8391        |
| 733.3408       | 6  | D 11 | 1201.6177      | 601.3128        |
| 790.3623       | 7  | G 10 | 1086.5907      | 543.7993        |
| 918.4209       | 8  | Q 9  | 1029.5693      | 515.2886        |
| 1017.4893      | 9  | V 8  | 901.5107       | 451.2593        |
| 1130.5733      | 10 | I 7  | 802.4423       | 401.7251        |
| 1231.6210      | 11 | T 6  | 689.3582       | 345.1830        |
| 1344.7051      | 12 | I 5  | 588.3105       | 294.6592        |
| 1401.7265      | 13 | G 4  | 475.2265       | 238.1172        |
| 1515.7695      | 14 | N 3  | 418.2050       | 209.6064        |
| 1644.8121      | 15 | E 2  | 304.1621       | 152.5850        |
|                | 16 | R 1  | 175.1195       | 88.0637         |

N-term:+29.04

SYTVFKDLFDPIIQDR, MH+ 2013.0697, m/z 671.6948  
 L OSG39 P180811 230811-s1.07917.07917.3.dta

X-range:

-

MassTol: Y-zoom:

MassType:

AVG  MONO

Axis:

1  2

Label:

I  M  -

Ions:

a  +  2+  3+

b  +  2+  3+

c  +  2+  3+

x  +  2+  3+

y  +  2+  3+

z  +  2+  3+

hide H<sub>2</sub>O/NH<sub>3</sub>

zoom 112-122

GO

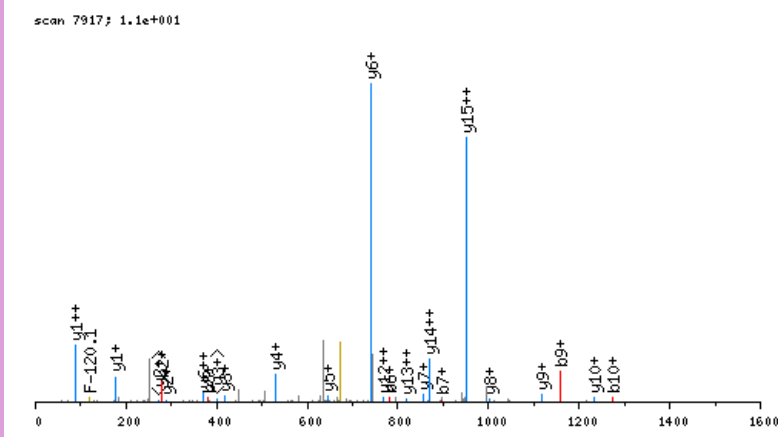

click image to zoom in; click top corners to zoom out [\[precursor±\]](#)

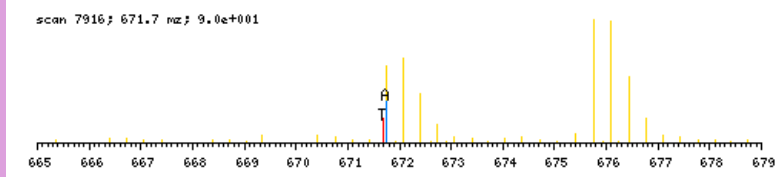

zoomed in precursor plot; T=theoretical m/z, A=acquired m/z

| b <sup>+</sup> | #  | AA # | y <sup>+</sup> | y <sup>2+</sup> |
|----------------|----|------|----------------|-----------------|
| 116.0711       | 1  | S 16 |                |                 |
| 279.1345       | 2  | Y 15 | 1898.0064      | 949.5071        |
| 380.1821       | 3  | T 14 | 1734.9431      | 867.9755        |
| 479.2505       | 4  | V 13 | 1633.8954      | 817.4516        |
| 626.3190       | 5  | F 12 | 1534.8270      | 767.9174        |
| 782.4453       | 6  | K 11 | 1387.7586      | 694.3832        |
| 897.4722       | 7  | D 10 | 1231.6323      | 616.3201        |
| 1010.5563      | 8  | L 9  | 1116.6053      | 558.8066        |
| 1157.6247      | 9  | F 8  | 1003.5213      | 502.2645        |
| 1272.6516      | 10 | D 7  | 856.4529       | 428.7303        |
| 1369.7044      | 11 | P 6  | 741.4259       | 371.2169        |
| 1482.7885      | 12 | I 5  | 644.3731       | 322.6905        |
| 1595.8725      | 13 | I 4  | 531.2891       | 266.1485        |
| 1723.9311      | 14 | Q 3  | 418.2050       | 209.6064        |
| 1838.9580      | 15 | D 2  | 290.1464       | 145.5771        |
|                | 16 | R 1  | 175.1195       | 88.0637         |

N-term:+29.04 K(6):+156.13



TAAVGAVFDISNADR, MH+ 1534.7865, m/z 512.2670  
 L OSG37 P180811 230811-s1.06435.06435.3.dta

X-range:

-

MassTol: Y-zoom:

MassType:

AVG  MONO

Axis:

1  2

Label:

I  M  -

Ions:

a  +  2+  3+

b  +  2+  3+

c  +  2+  3+

x  +  2+  3+

y  +  2+  3+

z  +  2+  3+

hide H<sub>2</sub>O/NH<sub>3</sub>

zoom 112-122

GO

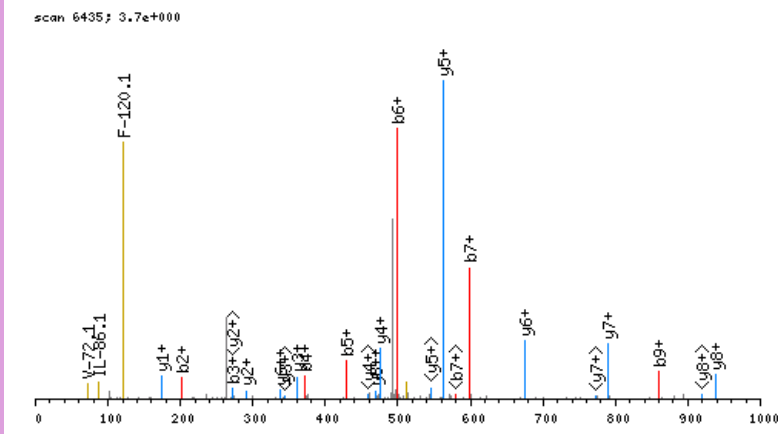

click image to zoom in; click top corners to zoom out [\[precursor±\]](#)

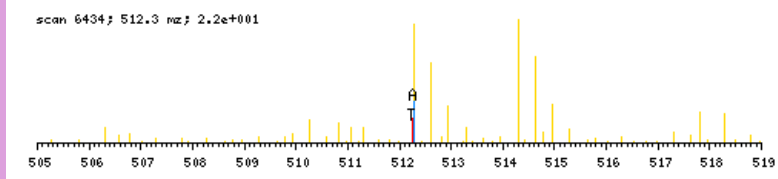

zoomed in precursor plot; T=theoretical m/z, A=acquired m/z

| b <sup>+</sup> | #  | AA # | y <sup>+</sup> | y <sup>2+</sup>    |
|----------------|----|------|----------------|--------------------|
| 130.0868       | 1  | T    | 15             |                    |
| 201.1239       | 2  | A    | 14             | 1405.7076 703.3577 |
| 272.1610       | 3  | A    | 13             | 1334.6705 667.8391 |
| 371.2294       | 4  | V    | 12             | 1263.6333 632.3206 |
| 428.2509       | 5  | G    | 11             | 1164.5649 582.7864 |
| 499.2880       | 6  | A    | 10             | 1107.5435 554.2756 |
| 598.3564       | 7  | V    | 9              | 1036.5063 518.7571 |
| 745.4248       | 8  | F    | 8              | 937.4379 469.2229  |
| 860.4518       | 9  | D    | 7              | 790.3695 395.6887  |
| 973.5358       | 10 | I    | 6              | 675.3426 338.1752  |
| 1060.5679      | 11 | S    | 5              | 562.2585 281.6332  |
| 1174.6108      | 12 | N    | 4              | 475.2265 238.1172  |
| 1245.6479      | 13 | A    | 3              | 361.1836 181.0957  |
| 1360.6748      | 14 | D    | 2              | 290.1464 145.5771  |
|                | 15 | R    | 1              | 175.1195 88.0637   |

N-term:+29.04

TAESGELHGLTIDEKFEVGVYR, MH+ 2506.3102, m/z 627.3330  
 H OSG40 P180811 230811-s1.06937.06937.4.dta

X-range:

-

MassTol: Y-zoom:

MassType:

AVG  MONO

Axis:

1  2

Label:

I  M  -

Ions:

a  +  2+  3+

b  +  2+  3+

c  +  2+  3+

x  +  2+  3+

y  +  2+  3+

z  +  2+  3+

hide H<sub>2</sub>O/NH<sub>3</sub>

zoom 112-122

GO

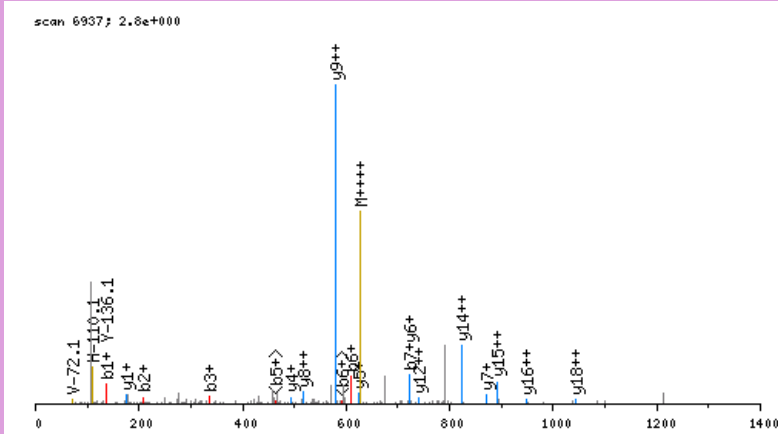

click image to zoom in; click top corners to zoom out [precursor±]

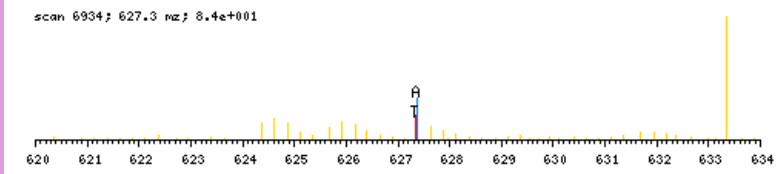

zoomed in precursor plot; T=theoretical m/z, A=acquired m/z

| b <sup>+</sup> | #  | AA | #  | y <sup>+</sup> | y <sup>2+</sup> |
|----------------|----|----|----|----------------|-----------------|
| 136.1186       | 1  | T  | 22 |                |                 |
| 207.1557       | 2  | A  | 21 | 2371.1994      | 1186.1036       |
| 336.1983       | 3  | E  | 20 | 2300.1623      | 1150.5851       |
| 423.2303       | 4  | S  | 19 | 2171.1197      | 1086.0638       |
| 480.2518       | 5  | G  | 18 | 2084.0877      | 1042.5478       |
| 609.2944       | 6  | E  | 17 | 2027.0662      | 1014.0370       |
| 722.3784       | 7  | L  | 16 | 1898.0236      | 949.5157        |
| 859.4373       | 8  | H  | 15 | 1784.9396      | 892.9737        |
| 916.4588       | 9  | G  | 14 | 1647.8806      | 824.4442        |
| 1029.5429      | 10 | L  | 13 | 1590.8592      | 795.9335        |
| 1130.5906      | 11 | T  | 12 | 1477.7751      | 739.3915        |
| 1231.6382      | 12 | T  | 11 | 1376.7274      | 688.8676        |
| 1346.6652      | 13 | D  | 10 | 1275.6798      | 638.3438        |
| 1475.7078      | 14 | E  | 9  | 1160.6528      | 580.8303        |
| 1637.8659      | 15 | K  | 8  | 1031.6102      | 516.3090        |
| 1784.9343      | 16 | F  | 7  | 869.4521       | 435.2300        |
| 1884.0027      | 17 | V  | 6  | 722.3837       | 361.6958        |
| 2013.0453      | 18 | E  | 5  | 623.3153       | 312.1616        |
| 2070.0668      | 19 | G  | 4  | 494.2727       | 247.6403        |
| 2169.1352      | 20 | V  | 3  | 437.2512       | 219.1295        |
| 2332.1985      | 21 | Y  | 2  | 338.1828       | 169.5953        |
|                | 22 | R  | 1  | 175.1195       | 88.0637         |

N-term:+35.07 K(15):+162.16

TAGDFSTTVIQNVNKAQVKIR, MH+ 2374.3459, m/z 594.3419  
 L OSG40 P180811 230811-s1.07137.07137.4.dta

X-range:

-

MassTol: Y-zoom:

MassType:

AVG  MONO

Axis:

1  2

Label:

I  M  -

Ions:

a  +  2+  3+

b  +  2+  3+

c  +  2+  3+

x  +  2+  3+

y  +  2+  3+

z  +  2+  3+

hide H<sub>2</sub>O/NH<sub>3</sub>

zoom 112-122

GO

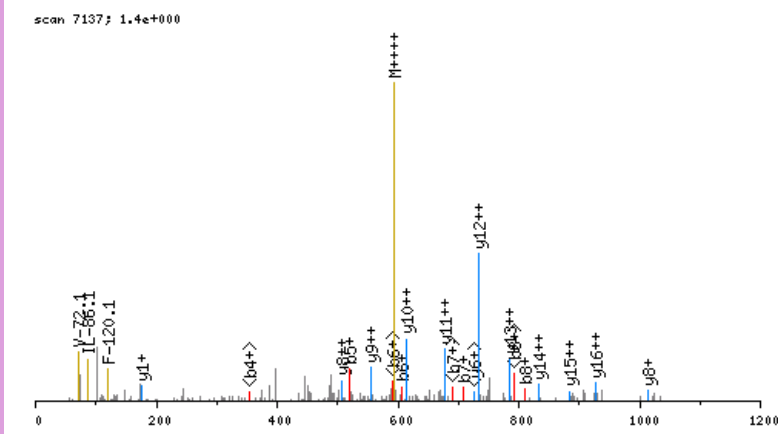

click image to zoom in; click top corners to zoom out [precursor±]

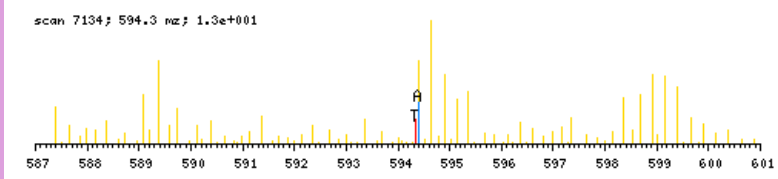

zoomed in precursor plot; T=theoretical m/z, A=acquired m/z

| b <sup>+</sup> | #  | AA | #  | y <sup>+</sup> | y <sup>2+</sup> |
|----------------|----|----|----|----------------|-----------------|
| 130.0868       | 1  | T  | 21 |                |                 |
| 201.1239       | 2  | A  | 20 | 2245.2669      | 1123.1374       |
| 258.1454       | 3  | G  | 19 | 2174.2298      | 1087.6188       |
| 373.1723       | 4  | D  | 18 | 2117.2083      | 1059.1081       |
| 520.2407       | 5  | F  | 17 | 2002.1814      | 1001.5946       |
| 607.2727       | 6  | S  | 16 | 1855.1130      | 928.0604        |
| 708.3204       | 7  | T  | 15 | 1768.0810      | 884.5444        |
| 809.3681       | 8  | T  | 14 | 1667.0333      | 834.0205        |
| 908.4365       | 9  | V  | 13 | 1565.9856      | 783.4967        |
| 1021.5206      | 10 | I  | 12 | 1466.9172      | 733.9625        |
| 1149.5792      | 11 | Q  | 11 | 1353.8331      | 677.4205        |
| 1263.6221      | 12 | N  | 10 | 1225.7745      | 613.3912        |
| 1362.6905      | 13 | V  | 9  | 1111.7316      | 556.3697        |
| 1476.7334      | 14 | N  | 8  | 1012.6632      | 506.8355        |
| 1632.8597      | 15 | K  | 7  | 898.6203       | 449.8140        |
| 1703.8968      | 16 | A  | 6  | 742.4940       | 371.7509        |
| 1831.9554      | 17 | Q  | 5  | 671.4569       | 336.2323        |
| 1931.0238      | 18 | V  | 4  | 543.3983       | 272.2031        |
| 2087.1501      | 19 | K  | 3  | 444.3299       | 222.6688        |
| 2200.2342      | 20 | I  | 2  | 288.2036       | 144.6057        |
|                | 21 | R  | 1  | 175.1195       | 88.0637         |

N-term: +29.04 K(15): +156.13  
 K(19): +156.13

TASNVSSVPLPAENVTTITAGQR, MH+ 2240.1886, m/z 747.4011  
 L OSG36 P180811 230811-s1.04283.04283.3.dta

scan 4283; 9.6e-001

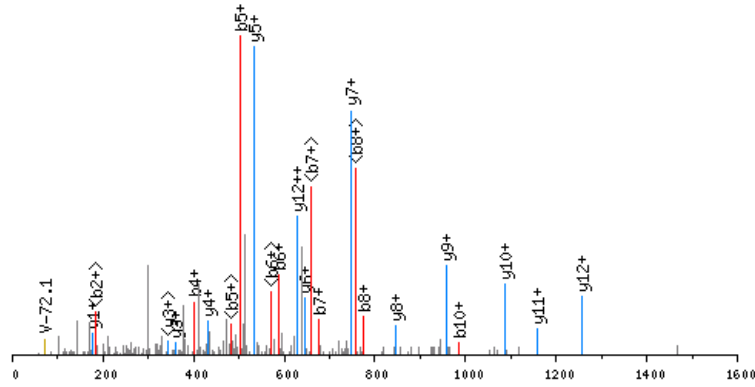

click image to zoom in; click top corners to zoom out [precursor±]

scan 4279; 747.4 mz; 6.8e+000

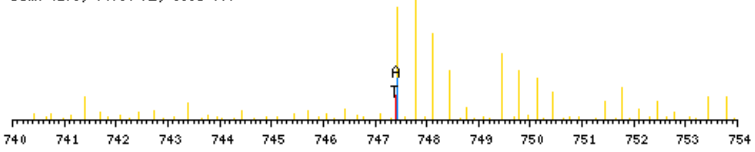

zoomed in precursor plot; T=theoretical m/z, A=acquired m/z

X-range:

-

MassTol: Y-zoom:

MassType:

AVG  MONO

Axis:

1  2

Label:

I  M  -

Ions:

a  +  2+  3+

b  +  2+  3+

c  +  2+  3+

x  +  2+  3+

y  +  2+  3+

z  +  2+  3+

hide H<sub>2</sub>O/NH<sub>3</sub>

zoom 112-122

GO

| b <sup>+</sup> | #  | AA # | y <sup>+</sup> | y <sup>2+</sup> |
|----------------|----|------|----------------|-----------------|
| 130.0868       | 1  | T 22 |                |                 |
| 201.1239       | 2  | A 21 | 2111.1097      | 1056.0587       |
| 288.1559       | 3  | S 20 | 2040.0726      | 1020.5402       |
| 402.1988       | 4  | N 19 | 1953.0405      | 977.0242        |
| 501.2673       | 5  | V 18 | 1838.9976      | 920.0027        |
| 588.2993       | 6  | S 17 | 1739.9292      | 870.4685        |
| 675.3313       | 7  | S 16 | 1652.8972      | 826.9525        |
| 774.3997       | 8  | V 15 | 1565.8651      | 783.4365        |
| 871.4525       | 9  | P 14 | 1466.7967      | 733.9023        |
| 984.5366       | 10 | L 13 | 1369.7440      | 685.3759        |
| 1081.5893      | 11 | P 12 | 1256.6599      | 628.8339        |
| 1152.6264      | 12 | A 11 | 1159.6071      | 580.3075        |
| 1281.6690      | 13 | E 10 | 1088.5700      | 544.7889        |
| 1395.7120      | 14 | N 9  | 959.5274       | 480.2676        |
| 1494.7804      | 15 | V 8  | 845.4845       | 423.2462        |
| 1595.8281      | 16 | T 7  | 746.4161       | 373.7120        |
| 1708.9121      | 17 | I 6  | 645.3684       | 323.1881        |
| 1809.9598      | 18 | T 5  | 532.2843       | 266.6461        |
| 1880.9969      | 19 | A 4  | 431.2367       | 216.1222        |
| 1938.0184      | 20 | G 3  | 360.1995       | 180.6037        |
| 2066.0769      | 21 | Q 2  | 303.1781       | 152.0930        |
|                | 22 | R 1  | 175.1195       | 88.0637         |

N-term:+29.04

TCFSTEGPNLVTR, MH+ 1509.7371, m/z 755.3722  
 L OSG37 P180811 230811-s1.04951.04951.2.dta

scan 4951; 1.5e+001

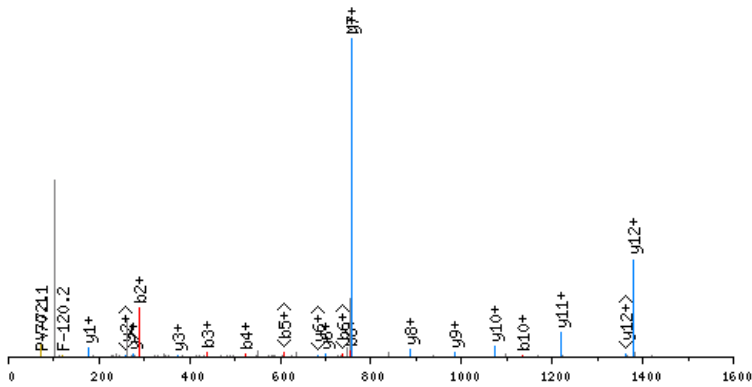

click image to zoom in; click top corners to zoom out [precursor±]

scan 4949; 755.4 m/z; 5.3e+002

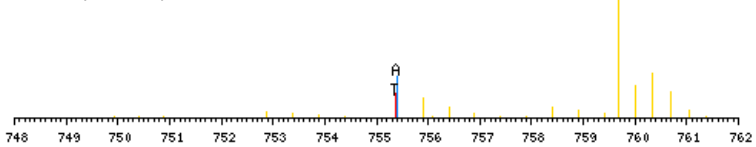

zoomed in precursor plot; T=theoretical m/z, A=acquired m/z

X-range:

0 - 0

MassTol: Y-zoom:

0. 1.

MassType:

AVG  MONO

Axis:

1  2

Label:

I  M  -

Ions:

a  +  2+  3+

b  +  2+  3+

c  +  2+  3+

x  +  2+  3+

y  +  2+  3+

z  +  2+  3+

hide H<sub>2</sub>O/NH<sub>3</sub>

zoom 112-122

GO

| b <sup>+</sup> | #  | AA # | y <sup>+</sup> | y <sup>2+</sup>    |
|----------------|----|------|----------------|--------------------|
| 130.0868       | 1  | T    | 13             |                    |
| 290.1174       | 2  | C    | 12             | 1380.6581 690.8330 |
| 437.1858       | 3  | F    | 11             | 1220.6275 610.8177 |
| 524.2178       | 4  | S    | 10             | 1073.5591 537.2835 |
| 625.2655       | 5  | T    | 9              | 986.5271 493.7675  |
| 754.3081       | 6  | E    | 8              | 885.4794 443.2436  |
| 811.3296       | 7  | G    | 7              | 756.4368 378.7223  |
| 908.3823       | 8  | P    | 6              | 699.4153 350.2116  |
| 1022.4252      | 9  | N    | 5              | 602.3626 301.6852  |
| 1135.5093      | 10 | L    | 4              | 488.3197 244.6637  |
| 1234.5777      | 11 | V    | 3              | 375.2356 188.1217  |
| 1335.6254      | 12 | T    | 2              | 276.1672 138.5875  |
|                | 13 | R    | 1              | 175.1195 88.0637   |

N-term:+29.04 C(2):+160.03

TDAEKAAVSLWGKVNSEVGGALGR, MH+ 2921.5527, m/z 731.1436  
 H OSG40 P180811 230811-s1.07905.07905.4.dta

scan 7905; 1.0e+001

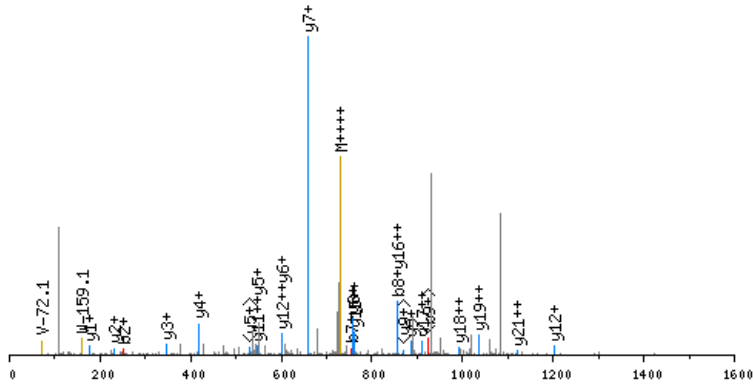

click image to zoom in; click top corners to zoom out [\[precursor±\]](#)

scan 7904; 731.1 m/z; 6.3e+001

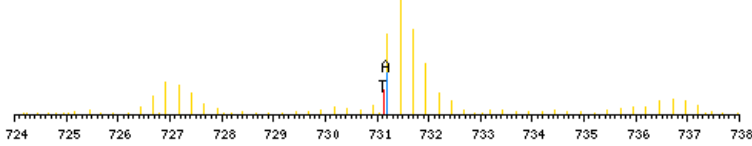

zoomed in precursor plot; T=theoretical m/z, A=acquired m/z

X-range:

-

MassTol: Y-zoom:

MassType:

AVG  MONO

Axis:

1  2

Label:

I  M  -

Ions:

a  +  2+  3+

b  +  2+  3+

c  +  2+  3+

x  +  2+  3+

y  +  2+  3+

z  +  2+  3+

hide H<sub>2</sub>O/NH<sub>3</sub>

zoom 112-122

GO

| b <sup>+</sup> | #  | AA | #  | y <sup>+</sup> | y <sup>2+</sup> |
|----------------|----|----|----|----------------|-----------------|
| 136.1186       | 1  | T  | 27 |                |                 |
| 251.1455       | 2  | D  | 26 | 2786.4419      | 1393.7249       |
| 322.1826       | 3  | A  | 25 | 2671.4150      | 1336.2114       |
| 451.2252       | 4  | E  | 24 | 2600.3779      | 1300.6929       |
| 613.3833       | 5  | K  | 23 | 2471.3353      | 1236.1716       |
| 684.4204       | 6  | A  | 22 | 2309.1772      | 1155.0925       |
| 755.4576       | 7  | A  | 21 | 2238.1401      | 1119.5740       |
| 854.5260       | 8  | V  | 20 | 2167.1030      | 1084.0554       |
| 941.5580       | 9  | S  | 19 | 2068.0346      | 1034.5212       |
| 1101.5886      | 10 | C  | 18 | 1981.0025      | 991.0052        |
| 1214.6727      | 11 | L  | 17 | 1820.9719      | 910.9899        |
| 1400.7520      | 12 | W  | 16 | 1707.8879      | 854.4478        |
| 1457.7734      | 13 | G  | 15 | 1521.8085      | 761.4082        |
| 1619.9315      | 14 | K  | 14 | 1464.7871      | 732.8975        |
| 1719.0000      | 15 | V  | 13 | 1302.6290      | 651.8184        |
| 1833.0429      | 16 | N  | 12 | 1203.5606      | 602.2842        |
| 1920.0749      | 17 | S  | 11 | 1089.5176      | 545.2627        |
| 2035.1019      | 18 | D  | 10 | 1002.4856      | 501.7467        |
| 2164.1444      | 19 | E  | 9  | 887.4587       | 444.2332        |
| 2263.2129      | 20 | V  | 8  | 758.4161       | 379.7120        |
| 2320.2343      | 21 | G  | 7  | 659.3477       | 330.1777        |
| 2377.2558      | 22 | G  | 6  | 602.3262       | 301.6670        |
| 2506.2984      | 23 | E  | 5  | 545.3047       | 273.1563        |
| 2577.3355      | 24 | A  | 4  | 416.2621       | 208.6350        |
| 2690.4196      | 25 | L  | 3  | 345.2250       | 173.1164        |
| 2747.4410      | 26 | G  | 2  | 232.1410       | 116.5744        |
|                | 27 | R  | 1  | 175.1195       | 88.0637         |

N-term:+35.07 K(5):+162.16  
 C(10):+160.03 K(14):+162.16

TDAEKSAVSCLWAKVNPDEVGGEALGR, MH+ 2961.5840, m/z 741.1515  
 H OSG40 P180811 230811-s1.08465.08465.4.dta

scan 8465; 6.5e+000

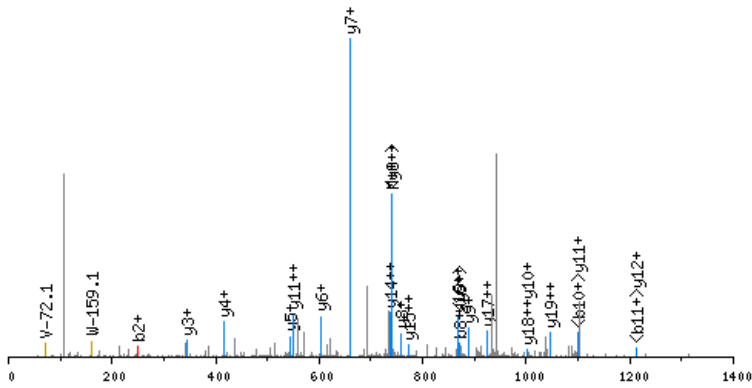

click image to zoom in; click top corners to zoom out [\[precursor±\]](#)

scan 8464; 741.2 m/z; 5.1e+001

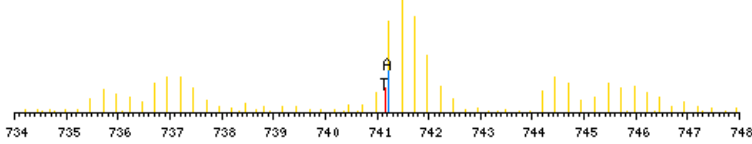

zoomed in precursor plot; T=theoretical m/z, A=acquired m/z

X-range:

-

MassTol: Y-zoom:

MassType:

AVG  MONO

Axis:

1  2

Label:

I  M  -

Ions:

a  +  2+  3+

b  +  2+  3+

c  +  2+  3+

x  +  2+  3+

y  +  2+  3+

z  +  2+  3+

hide H<sub>2</sub>O/NH<sub>3</sub>

zoom 112-122

GO

| b <sup>+</sup> | #  | AA | #  | y <sup>+</sup> | y <sup>2+</sup> |
|----------------|----|----|----|----------------|-----------------|
| 136.1186       | 1  | T  | 27 |                |                 |
| 251.1455       | 2  | D  | 26 | 2826.4732      | 1413.7405       |
| 322.1826       | 3  | A  | 25 | 2711.4463      | 1356.2271       |
| 451.2252       | 4  | E  | 24 | 2640.4092      | 1320.7085       |
| 613.3833       | 5  | K  | 23 | 2511.3666      | 1256.1872       |
| 700.4154       | 6  | S  | 22 | 2349.2085      | 1175.1082       |
| 771.4525       | 7  | A  | 21 | 2262.1765      | 1131.5921       |
| 870.5209       | 8  | V  | 20 | 2191.1394      | 1096.0736       |
| 957.5529       | 9  | S  | 19 | 2092.0709      | 1046.5394       |
| 1117.5835      | 10 | C  | 18 | 2005.0389      | 1003.0234       |
| 1230.6676      | 11 | L  | 17 | 1845.0083      | 923.0081        |
| 1416.7469      | 12 | W  | 16 | 1731.9242      | 866.4660        |
| 1487.7840      | 13 | A  | 15 | 1545.8449      | 773.4264        |
| 1649.9421      | 14 | K  | 14 | 1474.8078      | 737.9078        |
| 1749.0105      | 15 | V  | 13 | 1312.6497      | 656.8288        |
| 1863.0534      | 16 | N  | 12 | 1213.5813      | 607.2946        |
| 1960.1062      | 17 | P  | 11 | 1099.5384      | 550.2731        |
| 2075.1332      | 18 | D  | 10 | 1002.4856      | 501.7467        |
| 2204.1757      | 19 | E  | 9  | 887.4587       | 444.2332        |
| 2303.2442      | 20 | V  | 8  | 758.4161       | 379.7120        |
| 2360.2656      | 21 | G  | 7  | 659.3477       | 330.1777        |
| 2417.2871      | 22 | G  | 6  | 602.3262       | 301.6670        |
| 2546.3297      | 23 | E  | 5  | 545.3047       | 273.1563        |
| 2617.3668      | 24 | A  | 4  | 416.2621       | 208.6350        |
| 2730.4509      | 25 | L  | 3  | 345.2250       | 173.1164        |
| 2787.4723      | 26 | G  | 2  | 232.1410       | 116.5744        |
|                | 27 | R  | 1  | 175.1195       | 88.0637         |

N-term:+35.07 K(5):+162.16  
 C(10):+160.03 K(14):+162.16

TDDLGA VGGACLEDEASALR, MH+ 2047.9606, m/z 683.3250  
 L OSG37 P180811 230811-s1.07357.07357.3.dta

X-range:

-

MassTol: Y-zoom:

MassType:

AVG  MONO

Axis:

1  2

Label:

I  M  -

Ions:

a  +  2+  3+

b  +  2+  3+

c  +  2+  3+

x  +  2+  3+

y  +  2+  3+

z  +  2+  3+

hide H<sub>2</sub>O/NH<sub>3</sub>

zoom 112-122

GO

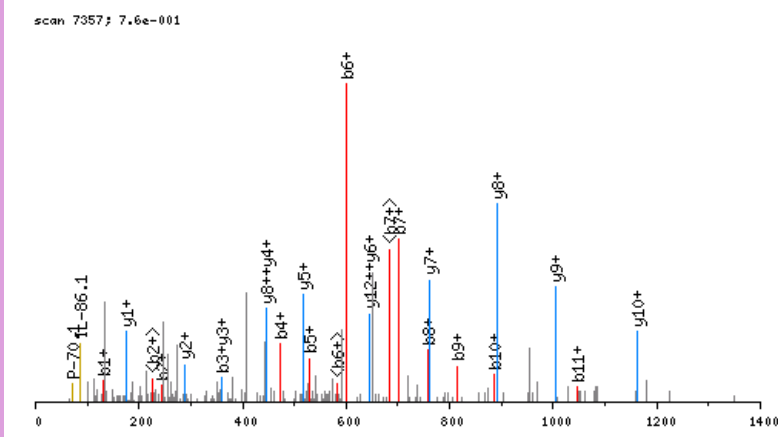

click image to zoom in; click top corners to zoom out [\[precursor±\]](#)

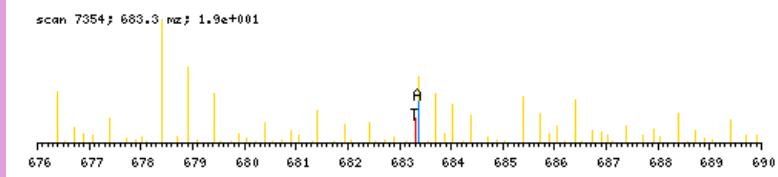

zoomed in precursor plot; T=theoretical m/z, A=acquired m/z

| b <sup>+</sup> | #  | AA # | y <sup>+</sup> | y <sup>2+</sup> |
|----------------|----|------|----------------|-----------------|
| 130.0868       | 1  | T 20 |                |                 |
| 245.1137       | 2  | D 19 | 1918.8816      | 959.9447        |
| 360.1407       | 3  | D 18 | 1803.8547      | 902.4312        |
| 473.2247       | 4  | L 17 | 1688.8277      | 844.9178        |
| 530.2462       | 5  | G 16 | 1575.7436      | 788.3757        |
| 601.2833       | 6  | A 15 | 1518.7222      | 759.8650        |
| 700.3517       | 7  | V 14 | 1447.6851      | 724.3464        |
| 757.3732       | 8  | G 13 | 1348.6167      | 674.8122        |
| 814.3946       | 9  | G 12 | 1291.5952      | 646.3015        |
| 885.4318       | 10 | A 11 | 1234.5737      | 617.7908        |
| 1045.4624      | 11 | C 10 | 1163.5366      | 582.2722        |
| 1158.5464      | 12 | L 9  | 1003.5060      | 502.2569        |
| 1287.5890      | 13 | E 8  | 890.4220       | 445.7149        |
| 1402.6160      | 14 | D 7  | 761.3794       | 381.1936        |
| 1531.6586      | 15 | E 6  | 646.3524       | 323.6801        |
| 1602.6957      | 16 | A 5  | 517.3098       | 259.1588        |
| 1689.7277      | 17 | S 4  | 446.2727       | 223.6403        |
| 1760.7648      | 18 | A 3  | 359.2407       | 180.1243        |
| 1873.8489      | 19 | L 2  | 288.2036       | 144.6057        |
|                | 20 | R 1  | 175.1195       | 88.0637         |

N-term:+29.04 C(11);+160.03



TDEAAFQKVMNSLDSNR, MH+ 1981.9653, m/z 661.3266  
 L OSG39 P180811 230811-s1.06034.06034.3.dta

X-range:

-

MassTol: Y-zoom:

MassType:

AVG  MONO

Axis:

1  2

Label:

I  M  -

Ions:

a  +  2+  3+

b  +  2+  3+

c  +  2+  3+

x  +  2+  3+

y  +  2+  3+

z  +  2+  3+

hide H<sub>2</sub>O/NH<sub>3</sub>

zoom 112-122

GO

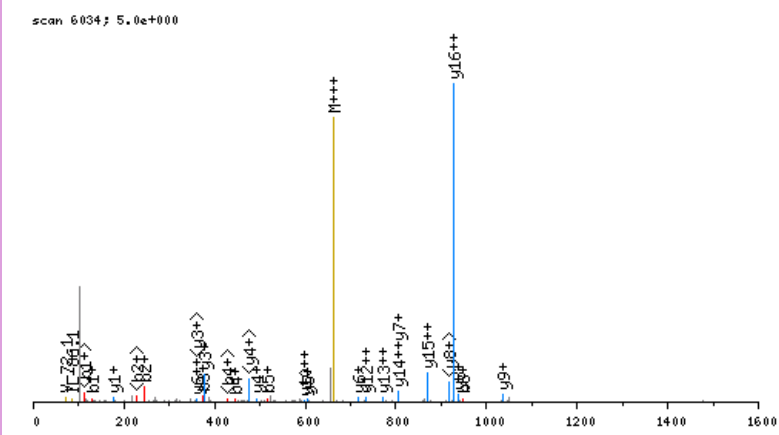

click image to zoom in; click top corners to zoom out [\[precursor±\]](#)

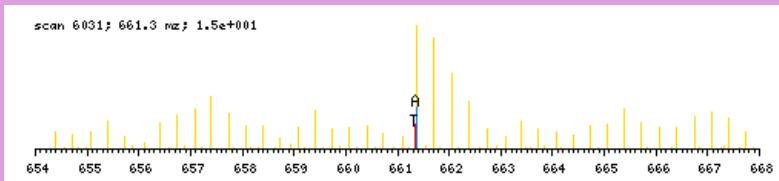

zoomed in precursor plot; T=theoretical m/z, A=acquired m/z

| b <sup>+</sup> | #  | AA | #  | y <sup>+</sup> | y <sup>2+</sup> |
|----------------|----|----|----|----------------|-----------------|
| 130.0868       | 1  | T  | 17 |                |                 |
| 245.1137       | 2  | D  | 16 | 1852.8864      | 926.9471        |
| 374.1563       | 3  | E  | 15 | 1737.8594      | 869.4336        |
| 445.1934       | 4  | A  | 14 | 1608.8168      | 804.9123        |
| 516.2305       | 5  | A  | 13 | 1537.7797      | 769.3938        |
| 663.2990       | 6  | F  | 12 | 1466.7426      | 733.8752        |
| 791.3575       | 7  | Q  | 11 | 1319.6742      | 660.3410        |
| 947.4838       | 8  | K  | 10 | 1191.6156      | 596.3117        |
| 1046.5522      | 9  | V  | 9  | 1035.4893      | 518.2486        |
| 1177.5927      | 10 | M  | 8  | 936.4209       | 468.7144        |
| 1264.6248      | 11 | S  | 7  | 805.3804       | 403.1941        |
| 1378.6677      | 12 | N  | 6  | 718.3484       | 359.6781        |
| 1491.7518      | 13 | L  | 5  | 604.3055       | 302.6566        |
| 1606.7787      | 14 | D  | 4  | 491.2214       | 246.1146        |
| 1693.8107      | 15 | S  | 3  | 376.1945       | 188.6011        |
| 1807.8537      | 16 | N  | 2  | 289.1624       | 145.0851        |
|                | 17 | R  | 1  | 175.1195       | 88.0637         |

N-term:+29.04 K(8):+156.13

TDEDSILNLLTSR, MH+ 1510.8177, m/z 504.2774  
 H OSG37 P180811 230811-s1.08693.08693.3.dta

X-range:

-

MassTol: Y-zoom:

MassType:

AVG  MONO

Axis:

1  2

Label:

I  M  -

Ions:

a  +  2+  3+

b  +  2+  3+

c  +  2+  3+

x  +  2+  3+

y  +  2+  3+

z  +  2+  3+

hide H<sub>2</sub>O/NH<sub>3</sub>

zoom 112-122

GO

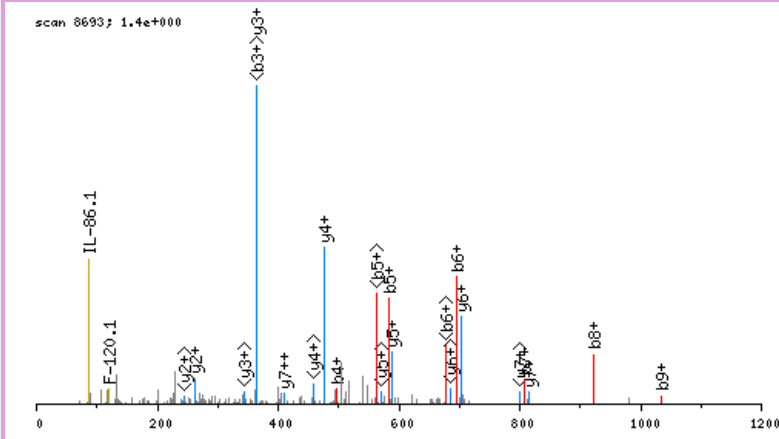

click image to zoom in; click top corners to zoom out [\[precursor±\]](#)

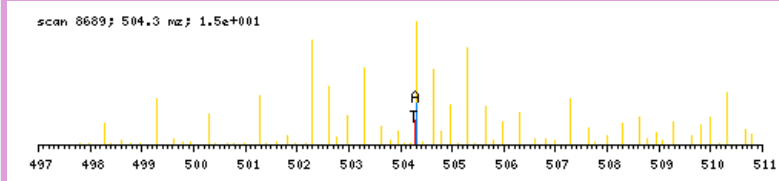

zoomed in precursor plot; T=theoretical m/z, A=acquired m/z

| b <sup>+</sup> | #  | AA # | y <sup>+</sup> | y <sup>2+</sup> |
|----------------|----|------|----------------|-----------------|
| 136.1186       | 1  | T 13 |                |                 |
| 251.1455       | 2  | D 12 | 1375.7069      | 688.3574        |
| 380.1881       | 3  | E 11 | 1260.6800      | 630.8439        |
| 495.2151       | 4  | D 10 | 1131.6374      | 566.3226        |
| 582.2471       | 5  | S 9  | 1016.6104      | 508.8091        |
| 695.3312       | 6  | I 8  | 929.5784       | 465.2931        |
| 808.4152       | 7  | L 7  | 816.4943       | 408.7511        |
| 922.4581       | 8  | N 6  | 703.4103       | 352.2090        |
| 1035.5422      | 9  | L 5  | 589.3673       | 295.1876        |
| 1148.6263      | 10 | L 4  | 476.2833       | 238.6455        |
| 1249.6739      | 11 | T 3  | 363.1992       | 182.1035        |
| 1336.7060      | 12 | S 2  | 262.1515       | 131.5797        |
|                | 13 | R 1  | 175.1195       | 88.0637         |

N-term:+35.07

TDEKFEVGVYR, MH+ 1398.7269, m/z 466.9138  
 L OSG40 P180811 230811-s1.04480.04480.3.dta

scan 4430; 1.6e+001

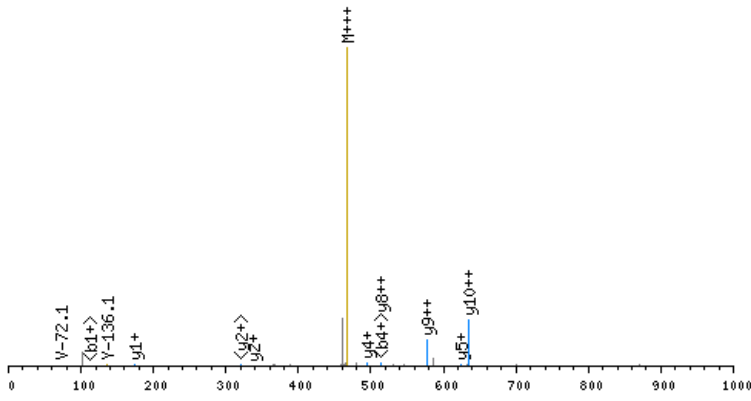

click image to zoom in; click top corners to zoom out [\[precursor±\]](#)

scan 4479; 466.9 m/z; 2.8e+001

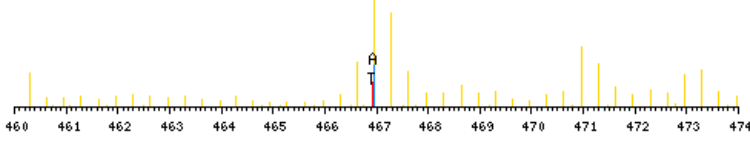

zoomed in precursor plot; T=theoretical m/z, A=acquired m/z

X-range:

-

MassTol: Y-zoom:

MassType:

AVG  MONO

Axis:

1  2

Label:

I  M  -

Ions:

a  +  2+  3+

b  +  2+  3+

c  +  2+  3+

x  +  2+  3+

y  +  2+  3+

z  +  2+  3+

hide H<sub>2</sub>O/NH<sub>3</sub>

zoom 112-122

GO

| b <sup>+</sup> | #  | AA | #  | y <sup>+</sup> | y <sup>2+</sup> |
|----------------|----|----|----|----------------|-----------------|
| 130.0868       | 1  | T  | 11 |                |                 |
| 245.1137       | 2  | D  | 10 | 1269.6480      | 635.3279        |
| 374.1563       | 3  | E  | 9  | 1154.6210      | 577.8144        |
| 530.2826       | 4  | K  | 8  | 1025.5784      | 513.2931        |
| 677.3510       | 5  | F  | 7  | 869.4521       | 435.2300        |
| 776.4194       | 6  | V  | 6  | 722.3837       | 361.6958        |
| 905.4620       | 7  | E  | 5  | 623.3153       | 312.1616        |
| 962.4835       | 8  | G  | 4  | 494.2727       | 247.6403        |
| 1061.5519      | 9  | V  | 3  | 437.2512       | 219.1295        |
| 1224.6152      | 10 | Y  | 2  | 338.1828       | 169.5953        |
|                | 11 | R  | 1  | 175.1195       | 88.0637         |

N-term:+29.04 K(4):+156.13

TDLEKDIISDTSGDFR, MH+ 1879.9925, m/z 627.3357  
 H OSG39 P180811 230811-s1.06054.06054.3.dta

X-range:

-

MassTol: Y-zoom:

MassType:

AVG  MONO

Axis:

1  2

Label:

I  M  -

Ions:

a  +  2+  3+

b  +  2+  3+

c  +  2+  3+

x  +  2+  3+

y  +  2+  3+

z  +  2+  3+

hide H<sub>2</sub>O/NH<sub>3</sub>

zoom 112-122

GO

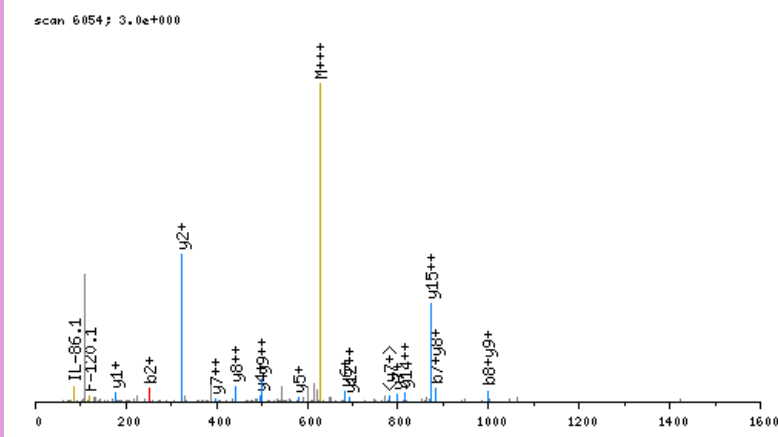

click image to zoom in; click top corners to zoom out [\[precursor±\]](#)

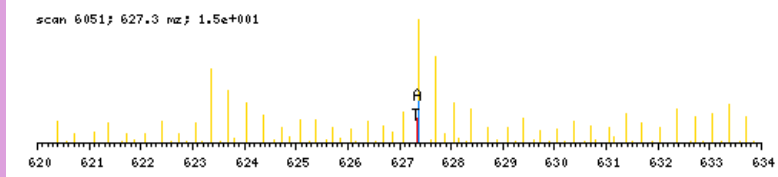

zoomed in precursor plot; T=theoretical m/z, A=acquired m/z

| b <sup>+</sup> | #  | AA # | y <sup>+</sup> | y <sup>2+</sup> |
|----------------|----|------|----------------|-----------------|
| 136.1186       | 1  | T 16 |                |                 |
| 251.1455       | 2  | D 15 | 1744.8818      | 872.9448        |
| 364.2296       | 3  | L 14 | 1629.8548      | 815.4313        |
| 493.2722       | 4  | E 13 | 1516.7708      | 758.8893        |
| 655.4303       | 5  | K 12 | 1387.7282      | 694.3680        |
| 770.4572       | 6  | D 11 | 1225.5701      | 613.2889        |
| 883.5413       | 7  | I 10 | 1110.5431      | 555.7755        |
| 996.6253       | 8  | I 9  | 997.4591       | 499.2334        |
| 1083.6574      | 9  | S 8  | 884.3750       | 442.6914        |
| 1198.6843      | 10 | D 7  | 797.3430       | 399.1754        |
| 1299.7320      | 11 | T 6  | 682.3160       | 341.6619        |
| 1386.7640      | 12 | S 5  | 581.2683       | 291.1381        |
| 1443.7855      | 13 | G 4  | 494.2363       | 247.6221        |
| 1558.8124      | 14 | D 3  | 437.2149       | 219.1113        |
| 1705.8808      | 15 | F 2  | 322.1879       | 161.5979        |
|                | 16 | R 1  | 175.1195       | 88.0637         |

N-term:+35.07 K(5):+162.16

TDLNHNELKGGDDLDPNYVLSSR, MH+ 2628.2906, m/z 657.8281  
 L OSG40 P180811 230811-s1.06497.06497.4.dta

X-range:

-

MassTol: Y-zoom:

MassType:

AVG  MONO

Axis:

1  2

Label:

I  M  -

Ions:

a  +  2+  3+

b  +  2+  3+

c  +  2+  3+

x  +  2+  3+

y  +  2+  3+

z  +  2+  3+

hide H<sub>2</sub>O/NH<sub>3</sub>

zoom 112-122

GO

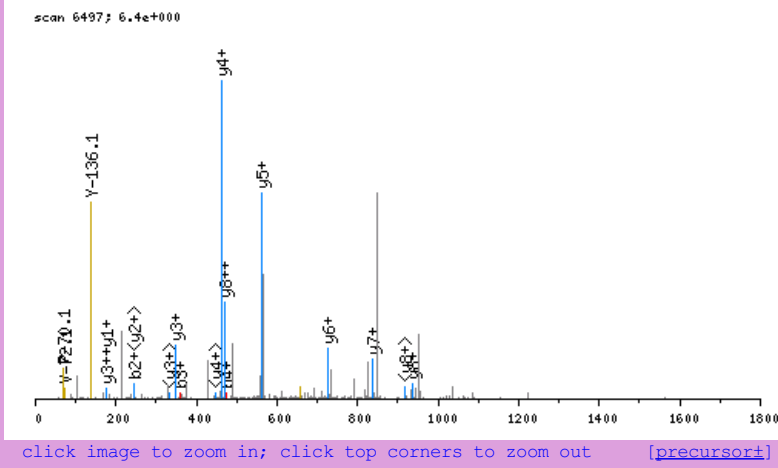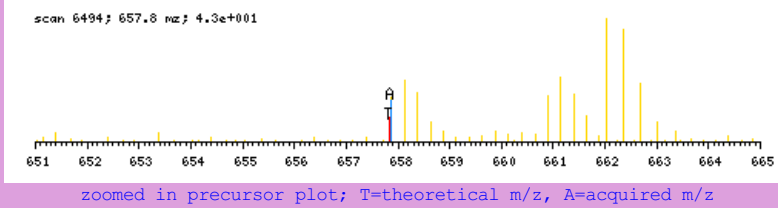

| b <sup>+</sup> | #  | AA # | y <sup>+</sup> | y <sup>2+</sup> |
|----------------|----|------|----------------|-----------------|
| 130.0868       | 1  | T 23 |                |                 |
| 245.1137       | 2  | D 22 | 2499.2116      | 1250.1097       |
| 358.1978       | 3  | L 21 | 2384.1847      | 1192.5962       |
| 472.2407       | 4  | N 20 | 2271.1006      | 1136.0542       |
| 609.2996       | 5  | H 19 | 2157.0577      | 1079.0327       |
| 738.3422       | 6  | E 18 | 2019.9988      | 1010.5033       |
| 852.3851       | 7  | N 17 | 1890.9562      | 945.9820        |
| 965.4692       | 8  | L 16 | 1776.9132      | 888.9605        |
| 1121.5955      | 9  | K 15 | 1663.8292      | 832.4185        |
| 1178.6170      | 10 | G 14 | 1507.7029      | 754.3554        |
| 1235.6384      | 11 | G 13 | 1450.6814      | 725.8446        |
| 1350.6654      | 12 | D 12 | 1393.6599      | 697.3339        |
| 1465.6923      | 13 | D 11 | 1278.6330      | 639.8204        |
| 1578.7764      | 14 | L 10 | 1163.6061      | 582.3069        |
| 1693.8033      | 15 | D 9  | 1050.5220      | 525.7649        |
| 1790.8561      | 16 | P 8  | 935.4951       | 468.2514        |
| 1904.8990      | 17 | N 7  | 838.4423       | 419.7251        |
| 2067.9624      | 18 | Y 6  | 724.3994       | 362.7036        |
| 2167.0308      | 19 | V 5  | 561.3360       | 281.1719        |
| 2280.1148      | 20 | L 4  | 462.2676       | 231.6377        |
| 2367.1469      | 21 | S 3  | 349.1836       | 175.0957        |
| 2454.1789      | 22 | S 2  | 262.1515       | 131.5797        |
|                | 23 | R 1  | 175.1195       | 88.0637         |

N-term:+29.04 K(9):+156.13

TDLQEAETIGR, MH+ 1428.8334, m/z 476.9493  
 H OSG40 P180811 230811-s1.05011.05011.3.dta

X-range:

-

MassTol: Y-zoom:

MassType:

AVG  MONO

Axis:

1  2

Label:

I  M  -

Ions:

a  +  2+  3+

b  +  2+  3+

c  +  2+  3+

x  +  2+  3+

y  +  2+  3+

z  +  2+  3+

hide H<sub>2</sub>O/NH<sub>3</sub>

zoom 112-122

GO

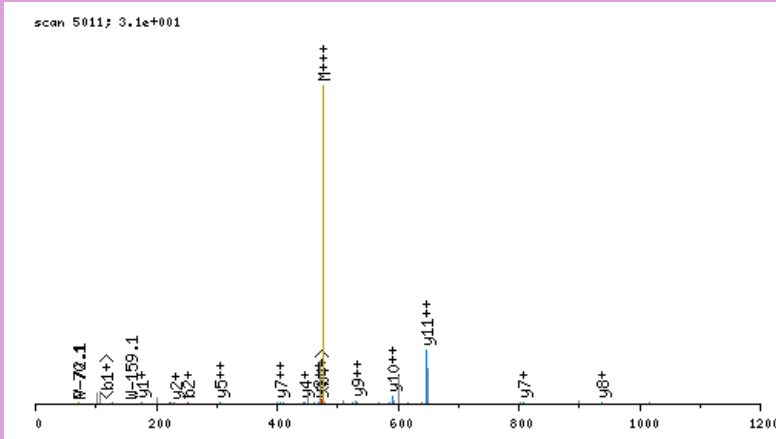

click image to zoom in; click top corners to zoom out [\[precursor±\]](#)

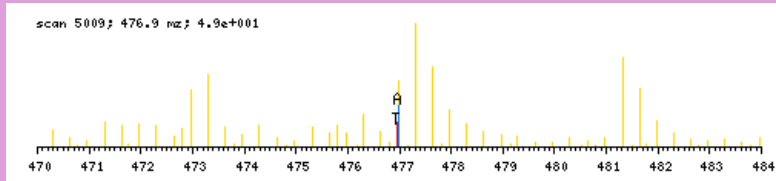

zoomed in precursor plot; T=theoretical m/z, A=acquired m/z

| b <sup>+</sup> | #  | AA # | y <sup>+</sup> | y <sup>2+</sup> |
|----------------|----|------|----------------|-----------------|
| 136.1186       | 1  | T 12 |                |                 |
| 251.1455       | 2  | D 11 | 1293.7227      | 647.3653        |
| 364.2296       | 3  | L 10 | 1178.6957      | 589.8518        |
| 492.2882       | 4  | Q 9  | 1065.6117      | 533.3098        |
| 621.3308       | 5  | E 8  | 937.5531       | 469.2805        |
| 692.3679       | 6  | A 7  | 808.5105       | 404.7592        |
| 821.4105       | 7  | E 6  | 737.4734       | 369.2406        |
| 983.5686       | 8  | K 5  | 608.4308       | 304.7193        |
| 1084.6162      | 9  | T 4  | 446.2727       | 223.6403        |
| 1197.7003      | 10 | I 3  | 345.2250       | 173.1164        |
| 1254.7218      | 11 | G 2  | 232.1410       | 116.5744        |
|                | 12 | R 1  | 175.1195       | 88.0637         |

N-term:+35.07 K(8):+162.16

TDSLVCAGIISAR, MH+ 1629.9634, m/z 543.9926  
 H OSG39 P180811 230811-s1.04488.04488.3.dta

X-range:

-

MassTol: Y-zoom:

MassType:

AVG  MONO

Axis:

1  2

Label:

I  M  -

Ions:

a  +  2+  3+

b  +  2+  3+

c  +  2+  3+

x  +  2+  3+

y  +  2+  3+

z  +  2+  3+

hide H<sub>2</sub>O/NH<sub>3</sub>

zoom 112-122

GO

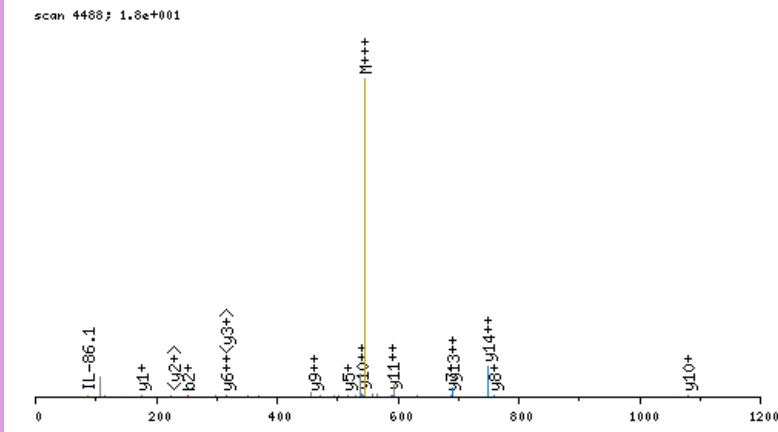

click image to zoom in; click top corners to zoom out [\[precursor±\]](#)

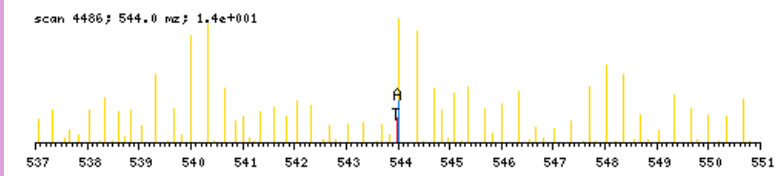

zoomed in precursor plot; T=theoretical m/z, A=acquired m/z

| b <sup>+</sup> | #  | AA # | y <sup>+</sup> | y <sup>2+</sup> |
|----------------|----|------|----------------|-----------------|
| 136.1186       | 1  | T    | 15             |                 |
| 251.1455       | 2  | D    | 14             | 1494.8526       |
| 338.1776       | 3  | S    | 13             | 1379.8257       |
| 451.2616       | 4  | L    | 12             | 1292.7936       |
| 550.3300       | 5  | V    | 11             | 1179.7096       |
| 710.3606       | 6  | C    | 10             | 1080.6412       |
| 872.5187       | 7  | K    | 9              | 920.6106        |
| 943.5558       | 8  | A    | 8              | 758.4525        |
| 1000.5773      | 9  | G    | 7              | 687.4153        |
| 1113.6614      | 10 | I    | 6              | 630.3939        |
| 1226.7454      | 11 | I    | 5              | 517.3098        |
| 1297.7825      | 12 | A    | 4              | 404.2258        |
| 1384.8146      | 13 | S    | 3              | 333.1886        |
| 1455.8517      | 14 | A    | 2              | 246.1566        |
|                | 15 | R    | 1              | 175.1195        |

N-term:+35.07 C(6):+160.03  
 K(7):+162.16

TDTEDKGEFLSEGGGVR, MH+ 1864.9565, m/z 622.3237  
 H OSG39 P180811 230811-s1.03387.03387.3.dta

X-range:

-

MassTol: Y-zoom:

MassType:

AVG  MONO

Axis:

1  2

Label:

I  M  -

Ions:

a  +  2+  3+

b  +  2+  3+

c  +  2+  3+

x  +  2+  3+

y  +  2+  3+

z  +  2+  3+

hide H<sub>2</sub>O/NH<sub>3</sub>

zoom 112-122

GO

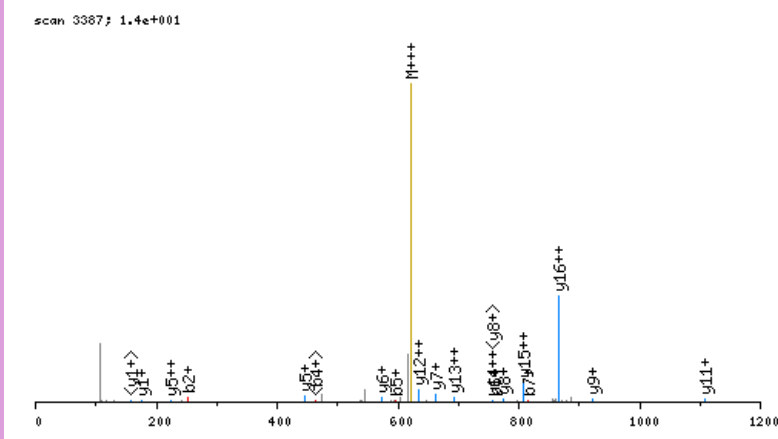

click image to zoom in; click top corners to zoom out [\[precursor±\]](#)

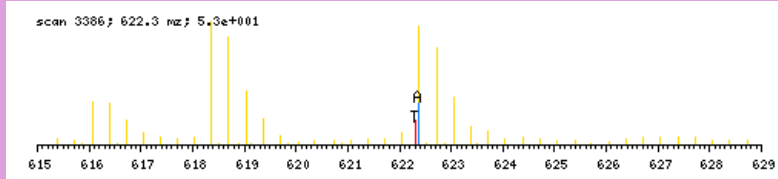

zoomed in precursor plot; T=theoretical m/z, A=acquired m/z

| b <sup>+</sup> | #  | AA | #  | y <sup>+</sup> | y <sup>2+</sup> |
|----------------|----|----|----|----------------|-----------------|
| 136.1186       | 1  | T  | 17 |                |                 |
| 251.1455       | 2  | D  | 16 | 1729.8457      | 865.4268        |
| 352.1932       | 3  | T  | 15 | 1614.8188      | 807.9133        |
| 481.2358       | 4  | E  | 14 | 1513.7711      | 757.3895        |
| 596.2627       | 5  | D  | 13 | 1384.7285      | 692.8682        |
| 758.4208       | 6  | K  | 12 | 1269.7016      | 635.3547        |
| 815.4423       | 7  | G  | 11 | 1107.5435      | 554.2756        |
| 944.4849       | 8  | E  | 10 | 1050.5220      | 525.7649        |
| 1091.5533      | 9  | F  | 9  | 921.4794       | 461.2436        |
| 1204.6374      | 10 | L  | 8  | 774.4110       | 387.7094        |
| 1291.6694      | 11 | S  | 7  | 661.3269       | 331.1674        |
| 1420.7120      | 12 | E  | 6  | 574.2949       | 287.6514        |
| 1477.7335      | 13 | G  | 5  | 445.2523       | 223.1301        |
| 1534.7549      | 14 | G  | 4  | 388.2308       | 194.6193        |
| 1591.7764      | 15 | G  | 3  | 331.2094       | 166.1086        |
| 1690.8448      | 16 | V  | 2  | 274.1879       | 137.5979        |
|                | 17 | R  | 1  | 175.1195       | 88.0637         |

N-term:+35.07 K(6):+162.16



TDVETQPGKTVIR, MH+ 1499.8433, m/z 500.6193  
 L OSG39 P180811 230811-s1.02538.02538.3.dta

scan 2538; 2.4e+001

X-range:

-

MassTol: Y-zoom:

MassType:

AVG  MONO

Axis:

1  2

Label:

I  M  -

Ions:

a  +  2+  3+

b  +  2+  3+

c  +  2+  3+

x  +  2+  3+

y  +  2+  3+

z  +  2+  3+

hide H<sub>2</sub>O/NH<sub>3</sub>

zoom 112-122

GO

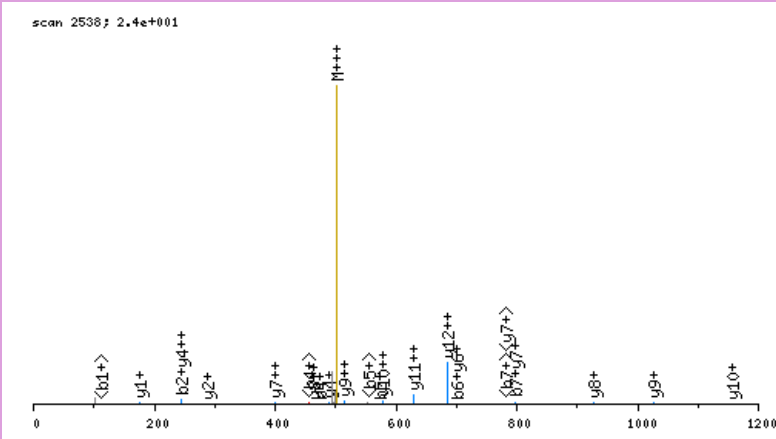

click image to zoom in; click top corners to zoom out [\[precursor±\]](#)

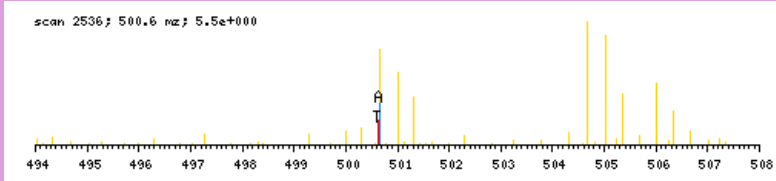

zoomed in precursor plot; T=theoretical m/z, A=acquired m/z

| b <sup>+</sup> | #  | AA # | y <sup>+</sup> | y <sup>2+</sup>    |
|----------------|----|------|----------------|--------------------|
| 130.0868       | 1  | T    | 13             |                    |
| 245.1137       | 2  | D    | 12             | 1370.7644 685.8861 |
| 344.1821       | 3  | V    | 11             | 1255.7374 628.3726 |
| 473.2247       | 4  | E    | 10             | 1156.6690 578.8384 |
| 574.2724       | 5  | T    | 9              | 1027.6264 514.3171 |
| 702.3310       | 6  | Q    | 8              | 926.5788 463.7933  |
| 799.3837       | 7  | P    | 7              | 798.5202 399.7640  |
| 856.4052       | 8  | G    | 6              | 701.4674 351.2376  |
| 1012.5315      | 9  | K    | 5              | 644.4460 322.7269  |
| 1113.5792      | 10 | T    | 4              | 488.3197 244.6637  |
| 1212.6476      | 11 | V    | 3              | 387.2720 194.1399  |
| 1325.7317      | 12 | I    | 2              | 288.2036 144.6057  |
|                | 13 | R    | 1              | 175.1195 88.0637   |

N-term:+29.04 K(9):+156.13

TDVSVDTKHKQLQGVAFPISR, MH+ 2355.2672, m/z 589.5723  
 L OSG40 P180811 230811-s1.06691.06691.4.dta

X-range:

-

MassTol: Y-zoom:

MassType:

AVG  MONO

Axis:

1  2

Label:

I  M  -

Ions:

a  +  2+  3+

b  +  2+  3+

c  +  2+  3+

x  +  2+  3+

y  +  2+  3+

z  +  2+  3+

hide H<sub>2</sub>O/NH<sub>3</sub>

zoom 112-122

GO

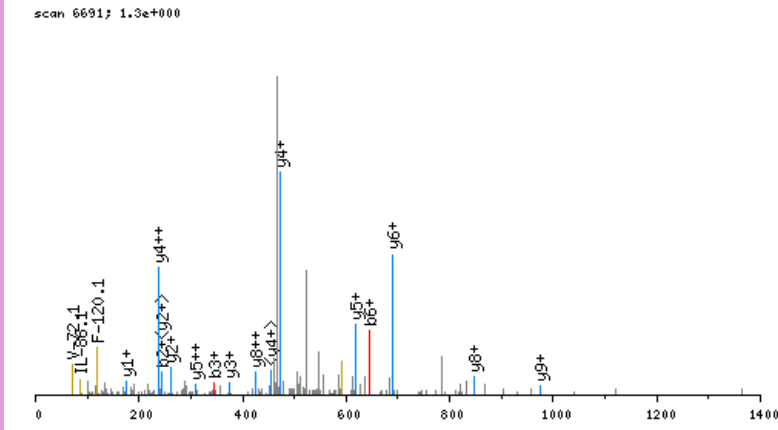

click image to zoom in; click top corners to zoom out [\[precursor±\]](#)

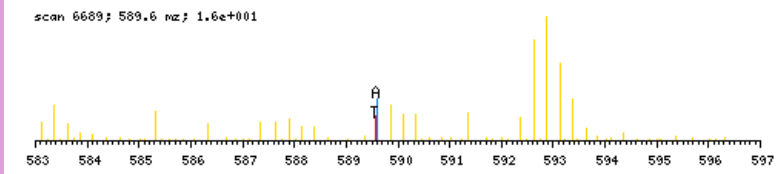

zoomed in precursor plot; T=theoretical m/z, A=acquired m/z

| b <sup>+</sup> | #  | AA | #  | y <sup>+</sup> | y <sup>2+</sup> |
|----------------|----|----|----|----------------|-----------------|
| 130.0868       | 1  | T  | 21 |                |                 |
| 245.1137       | 2  | D  | 20 | 2226.1883      | 1113.5981       |
| 344.1821       | 3  | V  | 19 | 2111.1613      | 1056.0846       |
| 431.2142       | 4  | S  | 18 | 2012.0929      | 1006.5504       |
| 530.2826       | 5  | V  | 17 | 1925.0609      | 963.0344        |
| 645.3095       | 6  | D  | 16 | 1825.9925      | 913.5002        |
| 746.3572       | 7  | T  | 15 | 1710.9656      | 855.9867        |
| 902.4835       | 8  | K  | 14 | 1609.9179      | 805.4628        |
| 1039.5424      | 9  | H  | 13 | 1453.7916      | 727.3997        |
| 1167.6010      | 10 | Q  | 12 | 1316.7327      | 658.8702        |
| 1268.6487      | 11 | T  | 11 | 1188.6741      | 594.8410        |
| 1381.7327      | 12 | L  | 10 | 1087.6264      | 544.3171        |
| 1509.7913      | 13 | Q  | 9  | 974.5423       | 487.7751        |
| 1566.8128      | 14 | G  | 8  | 846.4838       | 423.7458        |
| 1665.8812      | 15 | V  | 7  | 789.4623       | 395.2351        |
| 1736.9183      | 16 | A  | 6  | 690.3939       | 345.7009        |
| 1883.9867      | 17 | F  | 5  | 619.3568       | 310.1823        |
| 1981.0395      | 18 | P  | 4  | 472.2884       | 236.6481        |
| 2094.1235      | 19 | I  | 3  | 375.2356       | 188.1217        |
| 2181.1556      | 20 | S  | 2  | 262.1515       | 131.5797        |
|                | 21 | R  | 1  | 175.1195       | 88.0637         |

N-term:+29.04 K(8):+156.13

X-range:

-

MassTol: Y-zoom:

MassType:

AVG  MONO

Axis:

1  2

Label:

I  M  -

Ions:

a  +  2+  3+

b  +  2+  3+

c  +  2+  3+

x  +  2+  3+

y  +  2+  3+

z  +  2+  3+

hide H<sub>2</sub>O/NH<sub>3</sub>

zoom 112-122

GO

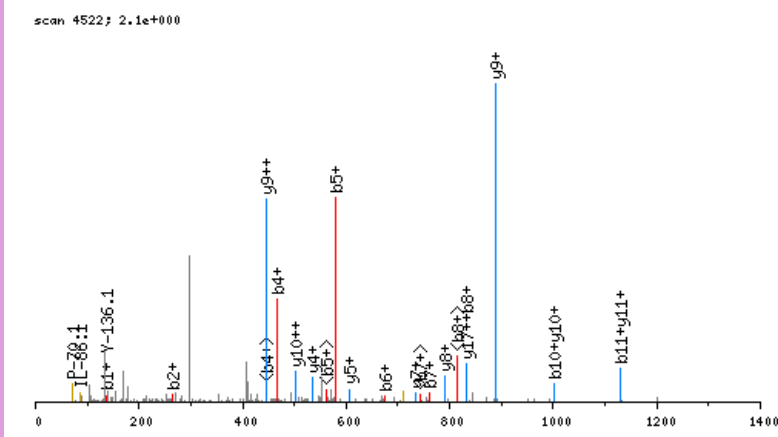

click image to zoom in; click top corners to zoom out [\[precursor±\]](#)

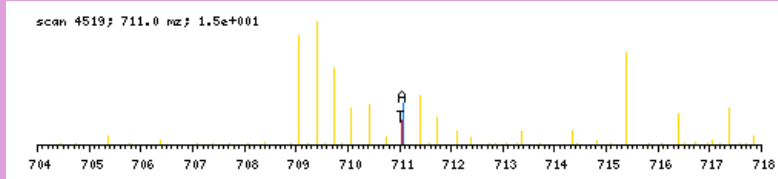

zoomed in precursor plot; T=theoretical m/z, A=acquired m/z

| b <sup>+</sup> | #  | AA | #  | y <sup>+</sup> | y <sup>2+</sup> |
|----------------|----|----|----|----------------|-----------------|
| 136.1186       | 1  | T  | 21 |                |                 |
| 265.1612       | 2  | E  | 20 | 1995.9809      | 998.4944        |
| 336.1983       | 3  | A  | 19 | 1866.9383      | 933.9731        |
| 465.2409       | 4  | E  | 18 | 1795.9012      | 898.4545        |
| 578.3249       | 5  | L  | 17 | 1666.8586      | 833.9332        |
| 675.3777       | 6  | P  | 16 | 1553.7746      | 777.3912        |
| 762.4097       | 7  | S  | 15 | 1456.7218      | 728.8648        |
| 833.4468       | 8  | A  | 14 | 1369.6898      | 685.3488        |
| 930.4996       | 9  | P  | 13 | 1298.6526      | 649.8302        |
| 1001.5367      | 10 | A  | 12 | 1201.5999      | 601.3039        |
| 1130.5793      | 11 | E  | 11 | 1130.5628      | 565.7853        |
| 1243.6634      | 12 | L  | 10 | 1001.5202      | 501.2640        |
| 1340.7161      | 13 | P  | 9  | 888.4361       | 444.7220        |
| 1397.7376      | 14 | G  | 8  | 791.3833       | 396.1956        |
| 1454.7591      | 15 | G  | 7  | 734.3619       | 367.6849        |
| 1525.7962      | 16 | A  | 6  | 677.3404       | 339.1741        |
| 1596.8333      | 17 | A  | 5  | 606.3033       | 303.6556        |
| 1756.8639      | 18 | C  | 4  | 535.2662       | 268.1370        |
| 1869.9480      | 19 | L  | 3  | 375.2356       | 188.1217        |
| 1956.9800      | 20 | S  | 2  | 262.1515       | 131.5797        |
|                | 21 | R  | 1  | 175.1195       | 88.0637         |

N-term: +35.07 C(18): +160.03

TEEDAASYVR, MH+ 1174.5804, m/z 587.7938  
 H OSG37 P180811 230811-s1.02775.02775.2.dta

scan 2775; 7.7e+000

X-range:

-

MassTol: Y-zoom:

MassType:

AVG  MONO

Axis:

1  2

Label:

I  M  -

Ions:

a  +  2+  3+

b  +  2+  3+

c  +  2+  3+

x  +  2+  3+

y  +  2+  3+

z  +  2+  3+

hide H<sub>2</sub>O/NH<sub>3</sub>

zoom 112-122

GO

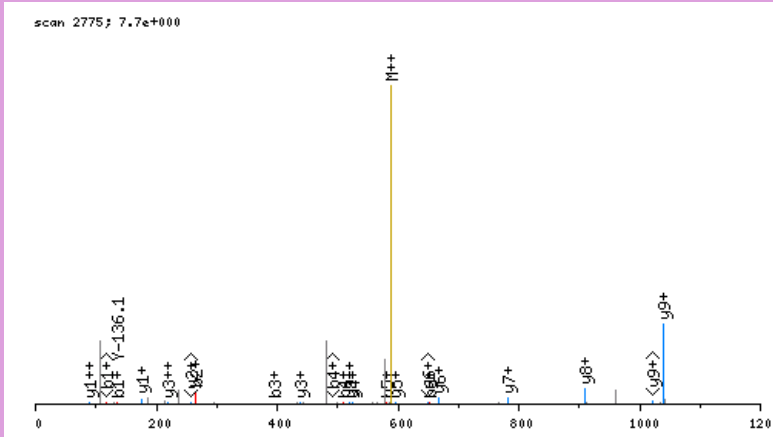

click image to zoom in; click top corners to zoom out [\[precursor±\]](#)

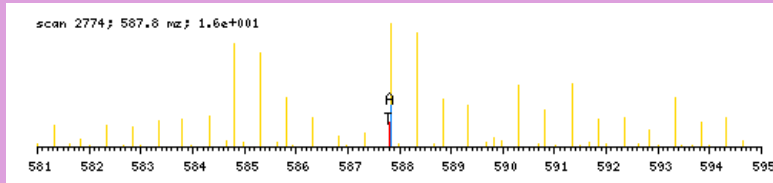

zoomed in precursor plot; T=theoretical m/z, A=acquired m/z

| b <sup>+</sup> | #  | AA # | y <sup>+</sup> | y <sup>2+</sup>    |
|----------------|----|------|----------------|--------------------|
| 136.1186       | 1  | T    | 10             |                    |
| 265.1612       | 2  | E    | 9              | 1039.4696 520.2387 |
| 394.2038       | 3  | E    | 8              | 910.4270 455.7174  |
| 509.2307       | 4  | D    | 7              | 781.3844 391.1961  |
| 580.2678       | 5  | A    | 6              | 666.3575 333.6827  |
| 651.3049       | 6  | A    | 5              | 595.3204 298.1641  |
| 738.3370       | 7  | S    | 4              | 524.2833 262.6455  |
| 901.4003       | 8  | Y    | 3              | 437.2512 219.1295  |
| 1000.4687      | 9  | V    | 2              | 274.1879 137.5979  |
|                | 10 | R    | 1              | 175.1195 88.0637   |

N-term:+35.07

TEFTPTETDTYACR, MH+ 1719.7535, m/z 573.9227  
 L OSG37 P180811 230811-s1.04457.04457.3.dta

X-range:

-

MassTol: Y-zoom:

MassType:

AVG  MONO

Axis:

1  2

Label:

I  M  -

Ions:

a  +  2+  3+

b  +  2+  3+

c  +  2+  3+

x  +  2+  3+

y  +  2+  3+

z  +  2+  3+

hide H<sub>2</sub>O/NH<sub>3</sub>

zoom 112-122

GO

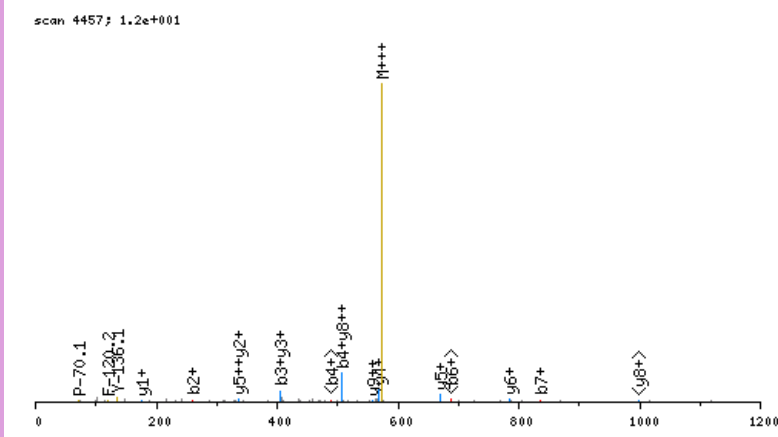

click image to zoom in; click top corners to zoom out [\[precursor±\]](#)

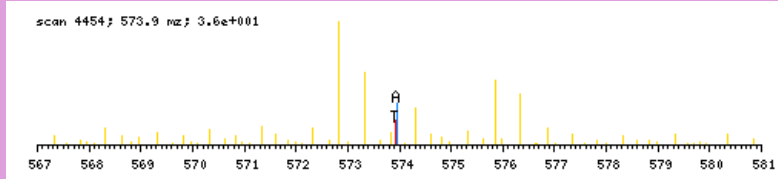

zoomed in precursor plot; T=theoretical m/z, A=acquired m/z

| b <sup>+</sup> | #  | AA # | y <sup>+</sup> | y <sup>2+</sup> |
|----------------|----|------|----------------|-----------------|
| 130.0868       | 1  | T 14 |                |                 |
| 259.1294       | 2  | E 13 | 1590.6746      | 795.8412        |
| 406.1978       | 3  | F 12 | 1461.6320      | 731.3199        |
| 507.2455       | 4  | T 11 | 1314.5636      | 657.7857        |
| 604.2982       | 5  | P 10 | 1213.5159      | 607.2619        |
| 705.3459       | 6  | T 9  | 1116.4631      | 558.7355        |
| 834.3885       | 7  | E 8  | 1015.4154      | 508.2116        |
| 935.4362       | 8  | T 7  | 886.3728       | 443.6903        |
| 1050.4631      | 9  | D 6  | 785.3252       | 393.1665        |
| 1151.5108      | 10 | T 5  | 670.2982       | 335.6530        |
| 1314.5741      | 11 | Y 4  | 569.2505       | 285.1292        |
| 1385.6112      | 12 | A 3  | 406.1872       | 203.5975        |
| 1545.6418      | 13 | C 2  | 335.1501       | 168.0790        |
|                | 14 | R 1  | 175.1195       | 88.0637         |

N-term:+29.04 C(13):+160.03

TEGAELVDSVLDVVR, MH+ 1629.8699, m/z 543.9615  
 L OSG37 P180811 230811-s1.08747.08747.3.dta

X-range:

-

MassTol: Y-zoom:

MassType:

AVG  MONO

Axis:

1  2

Label:

I  M  -

Ions:

a  +  2+  3+

b  +  2+  3+

c  +  2+  3+

x  +  2+  3+

y  +  2+  3+

z  +  2+  3+

hide H<sub>2</sub>O/NH<sub>3</sub>

zoom 112-122

GO

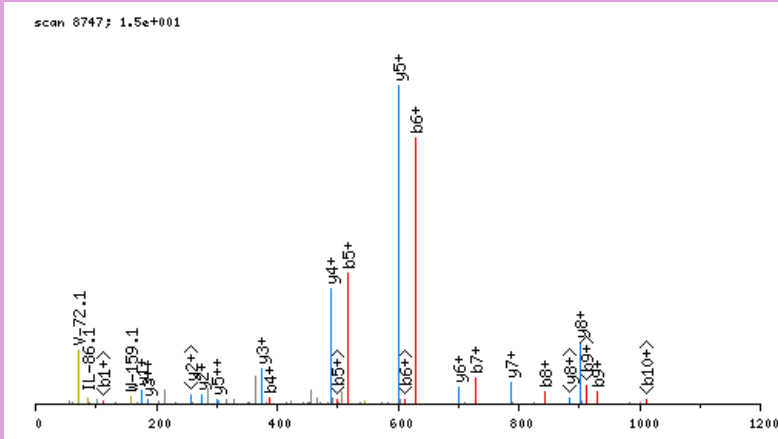

click image to zoom in; click top corners to zoom out [\[precursor±\]](#)

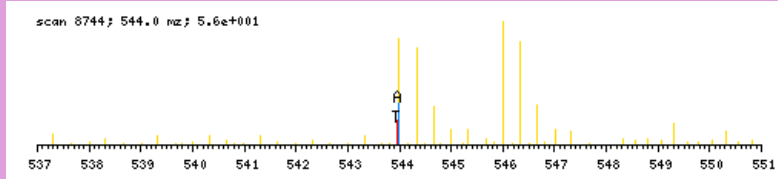

zoomed in precursor plot; T=theoretical m/z, A=acquired m/z

| b <sup>+</sup> | #  | AA | #  | y <sup>+</sup> | y <sup>2+</sup> |
|----------------|----|----|----|----------------|-----------------|
| 130.0868       | 1  | T  | 15 |                |                 |
| 259.1294       | 2  | E  | 14 | 1500.7910      | 750.8994        |
| 316.1508       | 3  | G  | 13 | 1371.7484      | 686.3781        |
| 387.1879       | 4  | A  | 12 | 1314.7269      | 657.8674        |
| 516.2305       | 5  | E  | 11 | 1243.6898      | 622.3488        |
| 629.3146       | 6  | L  | 10 | 1114.6472      | 557.8275        |
| 728.3830       | 7  | V  | 9  | 1001.5631      | 501.2855        |
| 843.4100       | 8  | D  | 8  | 902.4947       | 451.7513        |
| 930.4420       | 9  | S  | 7  | 787.4678       | 394.2378        |
| 1029.5104      | 10 | V  | 6  | 700.4357       | 350.7218        |
| 1142.5945      | 11 | L  | 5  | 601.3673       | 301.1876        |
| 1257.6214      | 12 | D  | 4  | 488.2833       | 244.6455        |
| 1356.6898      | 13 | V  | 3  | 373.2563       | 187.1321        |
| 1455.7582      | 14 | V  | 2  | 274.1879       | 137.5979        |
|                | 15 | R  | 1  | 175.1195       | 88.0637         |

N-term:+29.04

TEGPSTPSSFPAQEEHR, MH+ 1890.9046, m/z 630.9730  
 H OSG39 P180811 230811-s1.02730.02730.3.dta

X-range:

-

MassTol: Y-zoom:

MassType:

AVG  MONO

Axis:

1  2

Label:

I  M  -

Ions:

a  +  2+  3+

b  +  2+  3+

c  +  2+  3+

x  +  2+  3+

y  +  2+  3+

z  +  2+  3+

hide H<sub>2</sub>O/NH<sub>3</sub>

zoom 112-122

GO

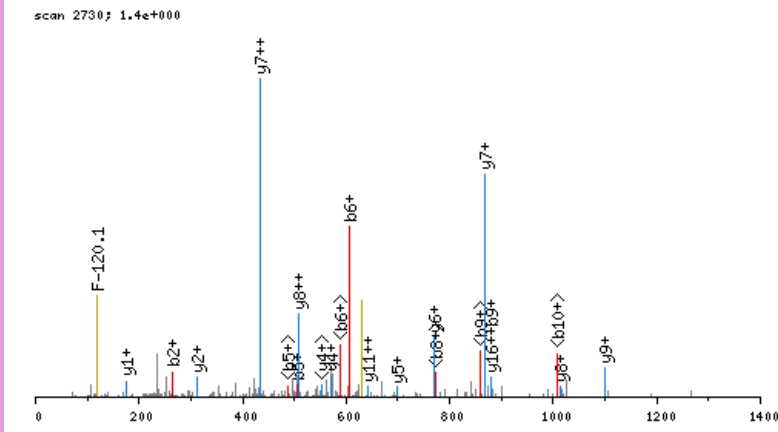

click image to zoom in; click top corners to zoom out [\[precursor±\]](#)

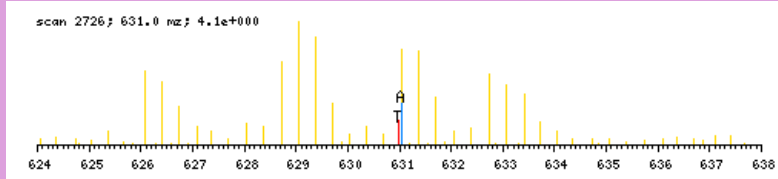

zoomed in precursor plot; T=theoretical m/z, A=acquired m/z

| b <sup>+</sup>  | #  | AA # | y <sup>+</sup>   | y <sup>2+</sup> |
|-----------------|----|------|------------------|-----------------|
| 136.1186        | 1  | T 17 |                  |                 |
| <b>265.1612</b> | 2  | E 16 | 1755.7938        | <b>878.4008</b> |
| 322.1826        | 3  | G 15 | 1626.7512        | 813.8795        |
| 419.2354        | 4  | P 14 | 1569.7298        | 785.3688        |
| <b>506.2674</b> | 5  | S 13 | 1472.6770        | 736.8424        |
| <b>607.3151</b> | 6  | T 12 | 1385.6450        | 693.3264        |
| 704.3679        | 7  | P 11 | 1284.5973        | <b>642.8026</b> |
| 791.3999        | 8  | S 10 | 1187.5445        | 594.2762        |
| <b>878.4319</b> | 9  | S 9  | <b>1100.5125</b> | 550.7602        |
| 1025.5003       | 10 | F 8  | <b>1013.4805</b> | <b>507.2441</b> |
| 1122.5531       | 11 | P 7  | <b>866.4121</b>  | <b>433.7099</b> |
| 1193.5902       | 12 | A 6  | <b>769.3593</b>  | 385.1836        |
| 1321.6488       | 13 | Q 5  | <b>698.3222</b>  | 349.6650        |
| 1450.6914       | 14 | E 4  | <b>570.2636</b>  | 285.6357        |
| 1579.7340       | 15 | E 3  | 441.2210         | 221.1144        |
| 1716.7929       | 16 | H 2  | <b>312.1784</b>  | 156.5931        |
|                 | 17 | R 1  | <b>175.1195</b>  | 88.0637         |

N-term:+35.07

TEMVALNPDFKPPADYKPPATR, MH+ 2560.4334, m/z 640.8638  
 H OSG40 P180811 230811-s1.06997.06997.4.dta

X-range:

-

MassTol: Y-zoom:

MassType:

AVG  MONO

Axis:

1  2

Label:

I  M  -

Ions:

a  +  2+  3+

b  +  2+  3+

c  +  2+  3+

x  +  2+  3+

y  +  2+  3+

z  +  2+  3+

hide H<sub>2</sub>O/NH<sub>3</sub>

zoom 112-122

GO

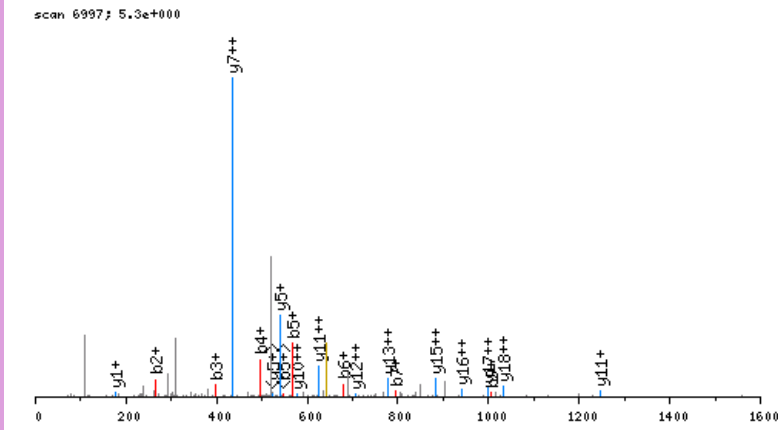

click image to zoom in; click top corners to zoom out [\[precursor±\]](#)

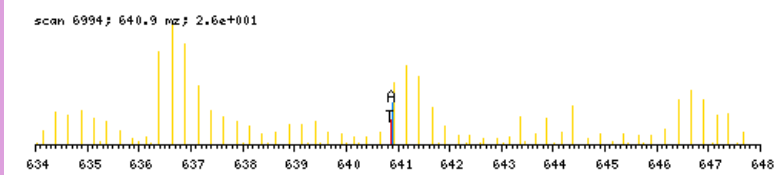

zoomed in precursor plot; T=theoretical m/z, A=acquired m/z

| b <sup>+</sup> | #  | AA | #  | y <sup>+</sup> | y <sup>2+</sup> |
|----------------|----|----|----|----------------|-----------------|
| 136.1186       | 1  | T  | 22 |                |                 |
| 265.1612       | 2  | E  | 21 | 2425.3227      | 1213.1652       |
| 396.2017       | 3  | M  | 20 | 2296.2801      | 1148.6439       |
| 495.2701       | 4  | V  | 19 | 2165.2396      | 1083.1237       |
| 566.3072       | 5  | A  | 18 | 2066.1712      | 1033.5895       |
| 679.3912       | 6  | L  | 17 | 1995.1340      | 998.0709        |
| 793.4342       | 7  | N  | 16 | 1882.0500      | 941.5289        |
| 890.4869       | 8  | P  | 15 | 1768.0071      | 884.5074        |
| 1005.5139      | 9  | D  | 14 | 1670.9543      | 835.9811        |
| 1152.5823      | 10 | F  | 13 | 1555.9273      | 778.4676        |
| 1314.7404      | 11 | K  | 12 | 1408.8589      | 704.9334        |
| 1411.7932      | 12 | P  | 11 | 1246.7008      | 623.8543        |
| 1508.8459      | 13 | P  | 10 | 1149.6481      | 575.3279        |
| 1579.8830      | 14 | A  | 9  | 1052.5953      | 526.8016        |
| 1694.9100      | 15 | D  | 8  | 981.5582       | 491.2830        |
| 1857.9733      | 16 | Y  | 7  | 866.5312       | 433.7695        |
| 2020.1314      | 17 | K  | 6  | 703.4679       | 352.2379        |
| 2117.1842      | 18 | P  | 5  | 541.3098       | 271.1588        |
| 2214.2369      | 19 | P  | 4  | 444.2571       | 222.6324        |
| 2285.2741      | 20 | A  | 3  | 347.2043       | 174.1061        |
| 2386.3217      | 21 | T  | 2  | 276.1672       | 138.5875        |
|                | 22 | R  | 1  | 175.1195       | 88.0637         |

N-term: +35.07 K(11): +162.16  
 K(17): +162.16



TEPVISFYDKR, MH+ 1410.7633, m/z 470.9260  
 L OSG40 P180811 230811-s1.05788.05788.3.dta

X-range:

-

MassTol: Y-zoom:

MassType:

AVG  MONO

Axis:

1  2

Label:

I  M  -

Ions:

a  +  2+  3+

b  +  2+  3+

c  +  2+  3+

x  +  2+  3+

y  +  2+  3+

z  +  2+  3+

hide H<sub>2</sub>O/NH<sub>3</sub>

zoom 112-122

GO

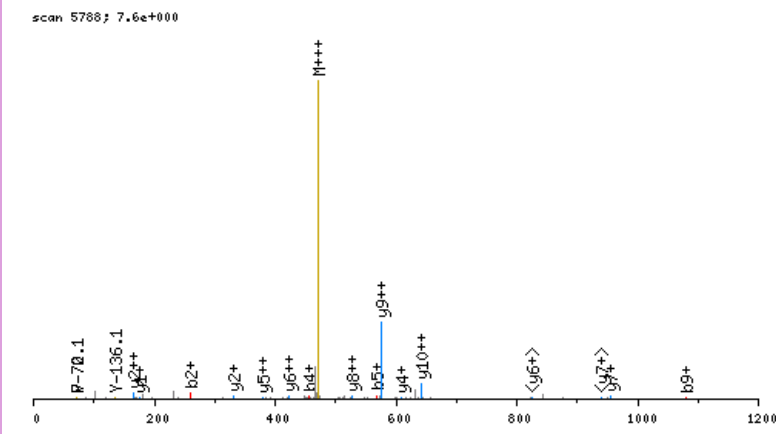

click image to zoom in; click top corners to zoom out [\[precursor±\]](#)

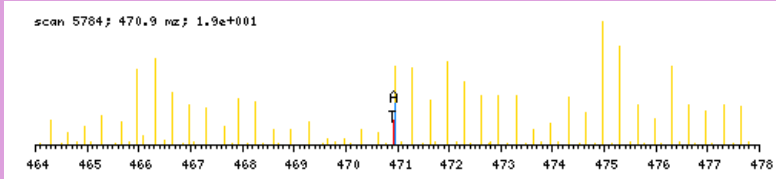

zoomed in precursor plot; T=theoretical m/z, A=acquired m/z

| b <sup>+</sup> | #  | AA # | y <sup>+</sup> | y <sup>2+</sup> |
|----------------|----|------|----------------|-----------------|
| 130.0868       | 1  | T 11 |                |                 |
| 259.1294       | 2  | E 10 | 1281.6843      | 641.3461        |
| 356.1821       | 3  | P 9  | 1152.6418      | 576.8248        |
| 455.2505       | 4  | V 8  | 1055.5890      | 528.2984        |
| 568.3346       | 5  | I 7  | 956.5206       | 478.7642        |
| 655.3666       | 6  | S 6  | 843.4365       | 422.2222        |
| 802.4351       | 7  | F 5  | 756.4045       | 378.7062        |
| 965.4984       | 8  | Y 4  | 609.3361       | 305.1719        |
| 1080.5253      | 9  | D 3  | 446.2727       | 223.6403        |
| 1236.6516      | 10 | K 2  | 331.2458       | 166.1268        |
|                | 11 | R 1  | 175.1195       | 88.0637         |

N-term:+29.04 K(10):+156.13

TETTVTETTVTETETEPENQSLIMKLR, MH+ 3008.5349, m/z 752.8892  
 L OSG38 P180811 230811-s1.06462.06462.4.dta

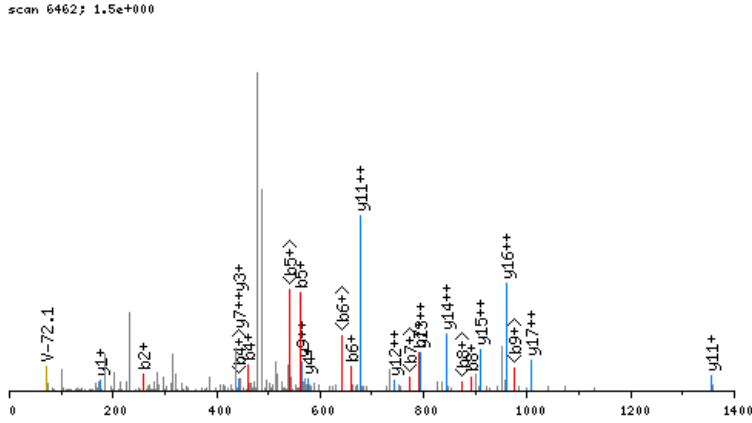

click image to zoom in; click top corners to zoom out [precursor±]

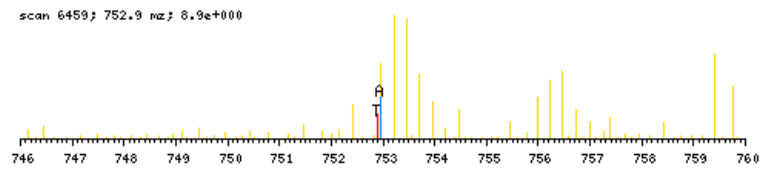

zoomed in precursor plot; T=theoretical m/z, A=acquired m/z

| b <sup>+</sup> | #  | AA # | y <sup>+</sup> | y <sup>2+</sup> |
|----------------|----|------|----------------|-----------------|
| 130.0868       | 1  | T 26 |                |                 |
| 259.1294       | 2  | E 25 | 2879.4560      | 1440.2319       |
| 360.1771       | 3  | T 24 | 2750.4134      | 1375.7106       |
| 461.2247       | 4  | T 23 | 2649.3657      | 1325.1868       |
| 560.2931       | 5  | V 22 | 2548.3180      | 1274.6629       |
| 661.3408       | 6  | T 21 | 2449.2496      | 1225.1287       |
| 790.3834       | 7  | E 20 | 2348.2020      | 1174.6049       |
| 891.4311       | 8  | T 19 | 2219.1594      | 1110.0836       |
| 992.4788       | 9  | T 18 | 2118.1117      | 1059.5598       |
| 1091.5472      | 10 | V 17 | 2017.0640      | 1009.0359       |
| 1192.5949      | 11 | T 16 | 1917.9956      | 959.5017        |
| 1321.6375      | 12 | E 15 | 1816.9479      | 908.9779        |
| 1422.6851      | 13 | T 14 | 1687.9053      | 844.4566        |
| 1523.7328      | 14 | T 13 | 1586.8576      | 793.9327        |
| 1652.7754      | 15 | E 12 | 1485.8100      | 743.4089        |
| 1749.8282      | 16 | P 11 | 1356.7674      | 678.8876        |
| 1878.8708      | 17 | E 10 | 1259.7146      | 630.3612        |
| 1992.9137      | 18 | N 9  | 1130.6720      | 565.8399        |
| 2120.9723      | 19 | Q 8  | 1016.6291      | 508.8185        |
| 2208.0043      | 20 | S 7  | 888.5705       | 444.7892        |
| 2321.0884      | 21 | L 6  | 801.5385       | 401.2732        |
| 2434.1724      | 22 | I 5  | 688.4544       | 344.7311        |
| 2565.2129      | 23 | M 4  | 575.3703       | 288.1891        |
| 2721.3392      | 24 | K 3  | 444.3299       | 222.6688        |
| 2834.4233      | 25 | L 2  | 288.2036       | 144.6057        |
|                | 26 | R 1  | 175.1195       | 88.0637         |

N-term:+29.04 K(24):+156.13

X-range:

-

MassTol: Y-zoom:

MassType:

AVG  MONO

Axis:

1  2

Label:

I  M  -

Ions:

a  +  2+  3+

b  +  2+  3+

c  +  2+  3+

x  +  2+  3+

y  +  2+  3+

z  +  2+  3+

hide H<sub>2</sub>O/NH<sub>3</sub>

zoom 112-122

GO

TEVLVTPAGVASKR, MH+ 1495.9484, m/z 499.3210  
 H OSG39 P180811 230811-s1.03500.03500.3.dta

X-range:

-

MassTol: Y-zoom:

MassType:

AVG  MONO

Axis:

1  2

Label:

I  M  -

Ions:

a  +  2+  3+

b  +  2+  3+

c  +  2+  3+

x  +  2+  3+

y  +  2+  3+

z  +  2+  3+

hide H<sub>2</sub>O/NH<sub>3</sub>

zoom 112-122

GO

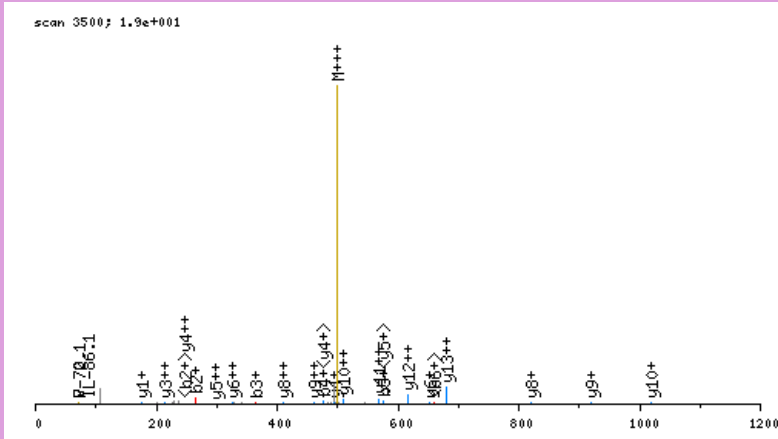

click image to zoom in; click top corners to zoom out [\[precursor±\]](#)

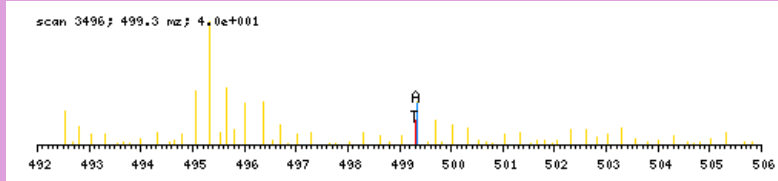

zoomed in precursor plot; T=theoretical m/z, A=acquired m/z

| b <sup>+</sup> | #  | AA # | y <sup>+</sup> | y <sup>2+</sup> |
|----------------|----|------|----------------|-----------------|
| 136.1186       | 1  | T    | 14             |                 |
| 265.1612       | 2  | E    | 13             | 1360.8377       |
| 364.2296       | 3  | V    | 12             | 1231.7951       |
| 477.3136       | 4  | L    | 11             | 1132.7267       |
| 576.3821       | 5  | V    | 10             | 1019.6426       |
| 677.4297       | 6  | T    | 9              | 920.5742        |
| 774.4825       | 7  | P    | 8              | 819.5265        |
| 845.5196       | 8  | A    | 7              | 722.4737        |
| 902.5411       | 9  | G    | 6              | 651.4366        |
| 1001.6095      | 10 | V    | 5              | 594.4152        |
| 1072.6466      | 11 | A    | 4              | 495.3467        |
| 1159.6786      | 12 | S    | 3              | 424.3096        |
| 1321.8367      | 13 | K    | 2              | 337.2776        |
|                | 14 | R    | 1              | 175.1195        |

N-term:+35.07 K(13):+162.16

TEVVCAPPTAYIDFAR, MH+ 1837.9158, m/z 613.3101  
 L OSG36 P180811 230811-s1.05302.05302.3.dta

X-range:

-

MassTol: Y-zoom:

MassType:

AVG  MONO

Axis:

1  2

Label:

I  M  -

Ions:

a  +  2+  3+

b  +  2+  3+

c  +  2+  3+

x  +  2+  3+

y  +  2+  3+

z  +  2+  3+

hide H<sub>2</sub>O/NH<sub>3</sub>

zoom 112-122

GO

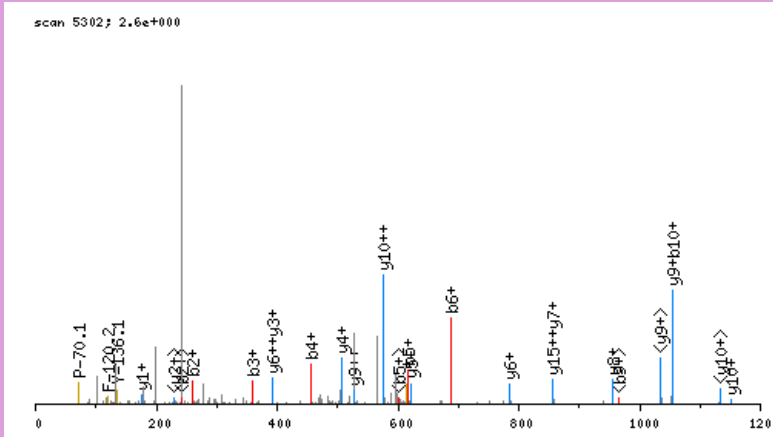

click image to zoom in; click top corners to zoom out [\[precursor±\]](#)

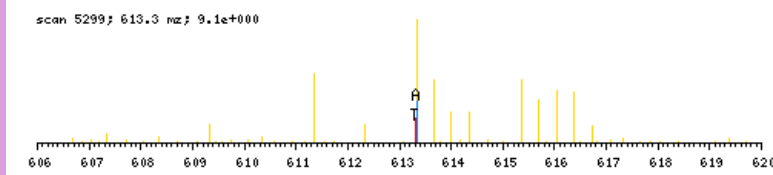

zoomed in precursor plot; T=theoretical m/z, A=acquired m/z

| b <sup>+</sup> | #  | AA # | y <sup>+</sup> | y <sup>2+</sup> |
|----------------|----|------|----------------|-----------------|
| 130.0868       | 1  | T    | 16             |                 |
| 259.1294       | 2  | E    | 15             | 1708.8368       |
| 358.1978       | 3  | V    | 14             | 790.4010        |
| 457.2662       | 4  | V    | 13             | 740.8668        |
| 617.2968       | 5  | C    | 12             | 691.3326        |
| 688.3339       | 6  | A    | 11             | 611.3173        |
| 785.3867       | 7  | P    | 10             | 575.7988        |
| 882.4394       | 8  | P    | 9              | 527.2724        |
| 983.4871       | 9  | T    | 8              | 478.7460        |
| 1054.5242      | 10 | A    | 7              | 428.2222        |
| 1217.5876      | 11 | Y    | 6              | 392.7036        |
| 1330.6716      | 12 | I    | 5              | 311.1719        |
| 1445.6986      | 13 | D    | 4              | 254.6299        |
| 1592.7670      | 14 | F    | 3              | 197.1164        |
| 1663.8041      | 15 | A    | 2              | 123.5822        |
|                | 16 | R    | 1              | 88.0637         |

N-term:+29.04 C(5):+160.03

TEYMQDPDEEALR, MH+ 1630.7483, m/z 544.2543  
 H OSG37 P180811 230811-s1.04581.04581.3.dta

X-range:

-

MassTol: Y-zoom:

MassType:

AVG  MONO

Axis:

1  2

Label:

I  M  -

Ions:

a  +  2+  3+

b  +  2+  3+

c  +  2+  3+

x  +  2+  3+

y  +  2+  3+

z  +  2+  3+

hide H<sub>2</sub>O/NH<sub>3</sub>

zoom 112-122

GO

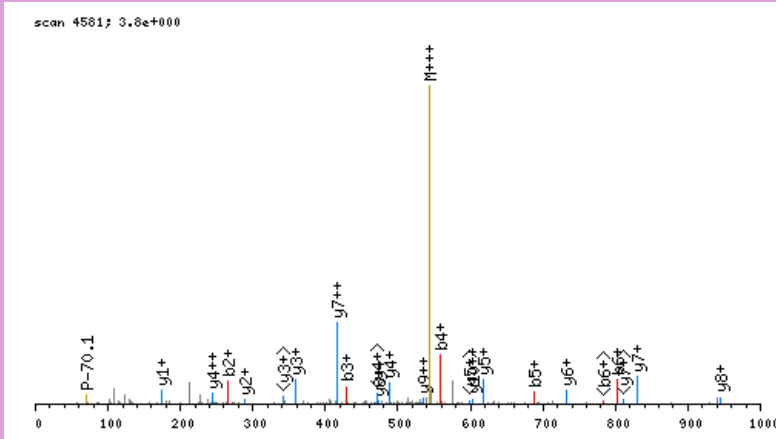

click image to zoom in; click top corners to zoom out [\[precursor±\]](#)

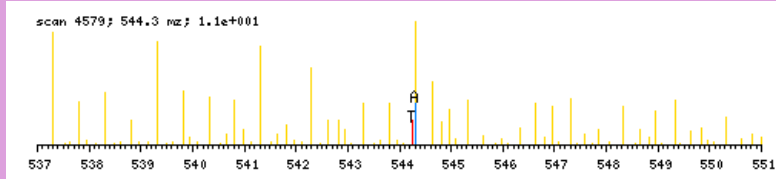

zoomed in precursor plot; T=theoretical m/z, A=acquired m/z

| b <sup>+</sup> | #  | AA # | y <sup>+</sup> | y <sup>2+</sup> |
|----------------|----|------|----------------|-----------------|
| 136.1186       | 1  | T 13 |                |                 |
| 265.1612       | 2  | E 12 | 1495.6375      | 748.3227        |
| 428.2245       | 3  | Y 11 | 1366.5949      | 683.8014        |
| 559.2650       | 4  | M 10 | 1203.5316      | 602.2697        |
| 687.3236       | 5  | Q 9  | 1072.4911      | 536.7495        |
| 802.3505       | 6  | D 8  | 944.4325       | 472.7202        |
| 899.4033       | 7  | P 7  | 829.4056       | 415.2067        |
| 1014.4302      | 8  | D 6  | 732.3528       | 366.6803        |
| 1143.4728      | 9  | E 5  | 617.3259       | 309.1668        |
| 1272.5154      | 10 | E 4  | 488.2833       | 244.6455        |
| 1343.5525      | 11 | A 3  | 359.2407       | 180.1243        |
| 1456.6366      | 12 | L 2  | 288.2036       | 144.6057        |
|                | 13 | R 1  | 175.1195       | 88.0637         |

N-term:+35.07

TEYMQDPDEEALRR, MH+ 1780.8176, m/z 594.2774  
 L OSG40 P180811 230811-s1.04521.04521.3.dta

X-range:

-

MassTol: Y-zoom:

MassType:

AVG  MONO

Axis:

1  2

Label:

I  M  -

Ions:

a  +  2+  3+

b  +  2+  3+

c  +  2+  3+

x  +  2+  3+

y  +  2+  3+

z  +  2+  3+

hide H<sub>2</sub>O/NH<sub>3</sub>

zoom 112-122

GO

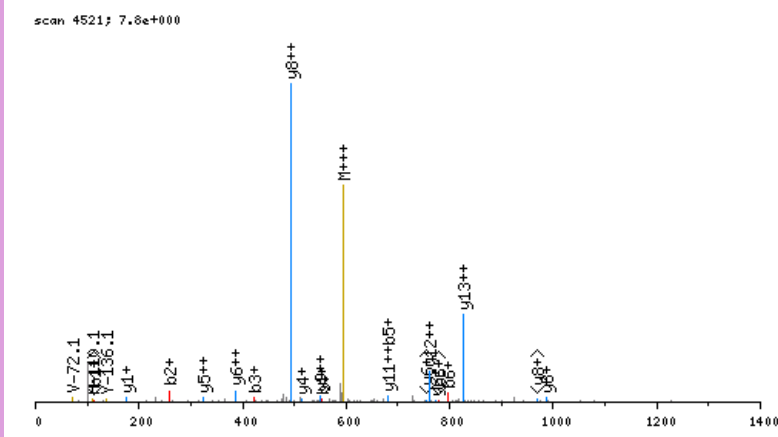

click image to zoom in; click top corners to zoom out [\[precursor±\]](#)

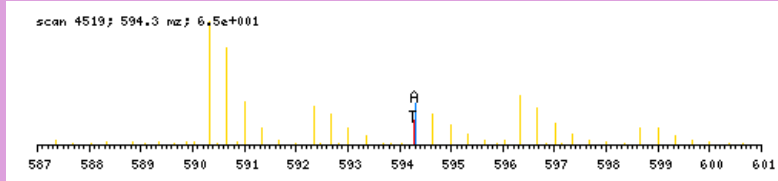

zoomed in precursor plot; T=theoretical m/z, A=acquired m/z

| b <sup>+</sup> | #  | AA | #  | y <sup>+</sup> | y <sup>2+</sup> |
|----------------|----|----|----|----------------|-----------------|
| 130.0868       | 1  | T  | 14 |                |                 |
| 259.1294       | 2  | E  | 13 | 1651.7386      | 826.3732        |
| 422.1927       | 3  | Y  | 12 | 1522.6960      | 761.8519        |
| 553.2332       | 4  | M  | 11 | 1359.6327      | 680.3203        |
| 681.2918       | 5  | Q  | 10 | 1228.5922      | 614.8000        |
| 796.3187       | 6  | D  | 9  | 1100.5336      | 550.7707        |
| 893.3715       | 7  | P  | 8  | 985.5067       | 493.2573        |
| 1008.3984      | 8  | D  | 7  | 888.4539       | 444.7309        |
| 1137.4410      | 9  | E  | 6  | 773.4270       | 387.2174        |
| 1266.4836      | 10 | E  | 5  | 644.3844       | 322.6961        |
| 1337.5207      | 11 | A  | 4  | 515.3418       | 258.1748        |
| 1450.6048      | 12 | L  | 3  | 444.3047       | 222.6563        |
| 1606.7059      | 13 | R  | 2  | 331.2206       | 166.1142        |
|                | 14 | R  | 1  | 175.1195       | 88.0637         |

N-term:+29.04

TFGKFDVEPDTYCR, MH+ 1790.8423, m/z 597.6190  
 L OSG40 P180811 230811-s1.06272.06272.3.dta

X-range:

-

MassTol: Y-zoom:

MassType:

AVG  MONO

Axis:

1  2

Label:

I  M  -

Ions:

a  +  2+  3+

b  +  2+  3+

c  +  2+  3+

x  +  2+  3+

y  +  2+  3+

z  +  2+  3+

hide H<sub>2</sub>O/NH<sub>3</sub>

zoom 112-122

GO

scan 6272; 7.4e+000

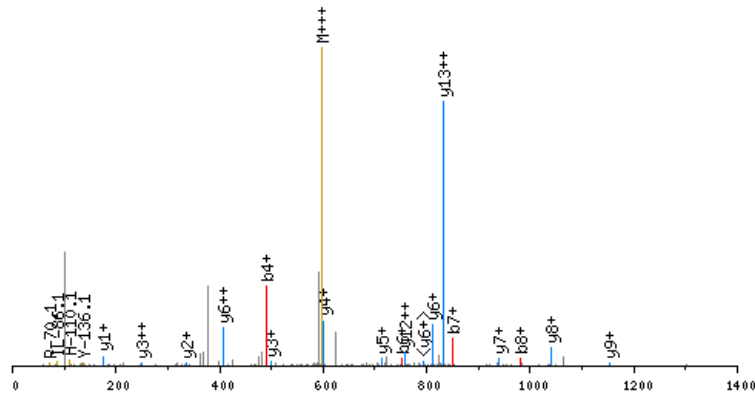

click image to zoom in; click top corners to zoom out [\[precursor±\]](#)

scan 6269; 597.6 mz; 6.1e+001

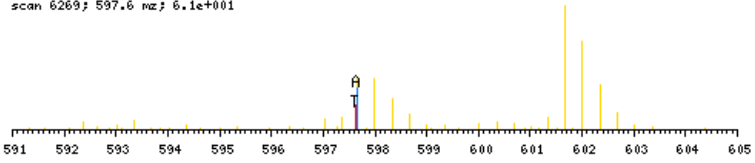

zoomed in precursor plot; T=theoretical m/z, A=acquired m/z

| b <sup>+</sup> | #  | AA # | y <sup>+</sup> | y <sup>2+</sup> |
|----------------|----|------|----------------|-----------------|
| 130.0868       | 1  | T 14 |                |                 |
| 277.1552       | 2  | F 13 | 1661.7634      | 831.3856        |
| 334.1767       | 3  | G 12 | 1514.6949      | 757.8514        |
| 490.3030       | 4  | K 11 | 1457.6735      | 729.3407        |
| 637.3714       | 5  | F 10 | 1301.5472      | 651.2775        |
| 752.3983       | 6  | D 9  | 1154.4788      | 577.7433        |
| 851.4667       | 7  | V 8  | 1039.4518      | 520.2298        |
| 980.5093       | 8  | E 7  | 940.3834       | 470.6956        |
| 1077.5621      | 9  | P 6  | 811.3408       | 406.1743        |
| 1192.5890      | 10 | D 5  | 714.2881       | 357.6479        |
| 1293.6367      | 11 | T 4  | 599.2611       | 300.1345        |
| 1456.7000      | 12 | Y 3  | 498.2134       | 249.6106        |
| 1616.7306      | 13 | C 2  | 335.1501       | 168.0790        |
|                | 14 | R 1  | 175.1195       | 88.0637         |

N-term:+29.04 K(4):+156.13  
 C(13):+160.03

TFIAIKPDGVQR, MH+ 1400.8266, m/z 467.6137  
 L OSG39 P180811 230811-s1.04000.04000.3.dta

X-range:

-

MassTol: Y-zoom:

MassType:

AVG  MONO

Axis:

1  2

Label:

I  M  -

Ions:

a  +  2+  3+

b  +  2+  3+

c  +  2+  3+

x  +  2+  3+

y  +  2+  3+

z  +  2+  3+

hide H<sub>2</sub>O/NH<sub>3</sub>

zoom 112-122

GO

scan 4000; 1.8e+001

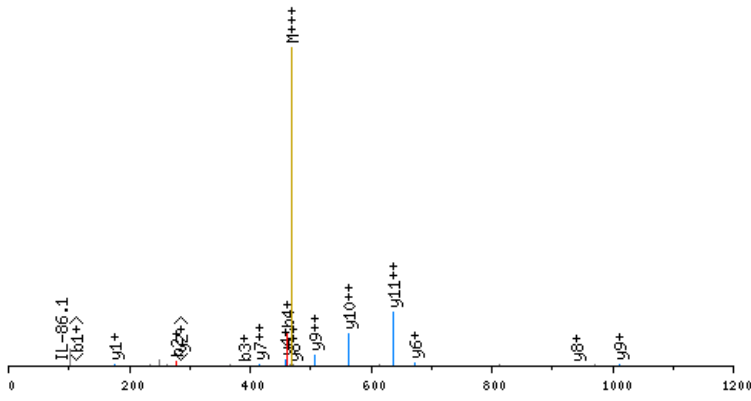

click image to zoom in; click top corners to zoom out [\[precursor±\]](#)

scan 3996; 467.6 m/z; 4.0e+001

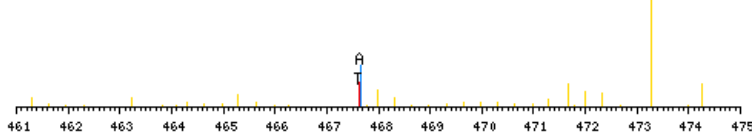

zoomed in precursor plot; T=theoretical m/z, A=acquired m/z

| b <sup>+</sup> | #  | AA | #  | y <sup>+</sup> | y <sup>2+</sup> |
|----------------|----|----|----|----------------|-----------------|
| 130.0868       | 1  | T  | 12 |                |                 |
| 277.1552       | 2  | F  | 11 | 1271.7476      | 636.3777        |
| 390.2393       | 3  | I  | 10 | 1124.6792      | 562.8435        |
| 461.2764       | 4  | A  | 9  | 1011.5951      | 506.3015        |
| 574.3604       | 5  | I  | 8  | 940.5580       | 470.7829        |
| 730.4867       | 6  | K  | 7  | 827.4740       | 414.2409        |
| 827.5395       | 7  | P  | 6  | 671.3477       | 336.1777        |
| 942.5664       | 8  | D  | 5  | 574.2949       | 287.6514        |
| 999.5879       | 9  | G  | 4  | 459.2680       | 230.1379        |
| 1098.6563      | 10 | V  | 3  | 402.2465       | 201.6272        |
| 1226.7149      | 11 | Q  | 2  | 303.1781       | 152.0930        |
|                | 12 | R  | 1  | 175.1195       | 88.0637         |

N-term:+29.04 K(6):+156.13



TFVAELKGLDPPAR, MH+ 1484.9113, m/z 495.6420  
 H OSG39 P180811 230811-s1.05352.05352.3.dta

scan 5352; 1.5e+001

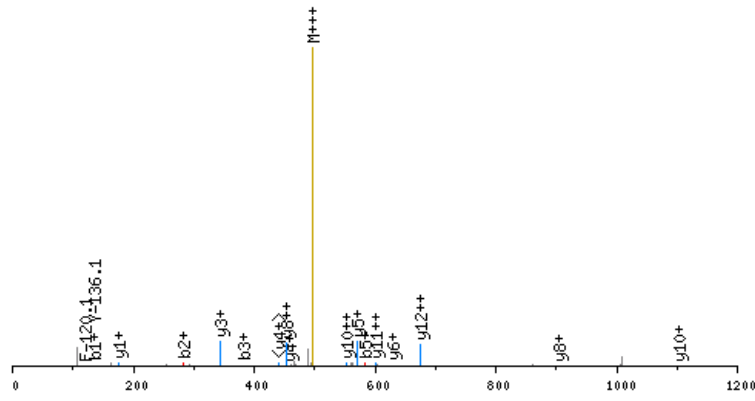

click image to zoom in; click top corners to zoom out [\[precursor±\]](#)

scan 5351; 495.6 m/z; 1.8e+001

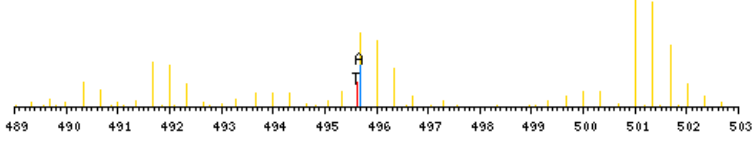

zoomed in precursor plot; T=theoretical m/z, A=acquired m/z

X-range:

-

MassTol: Y-zoom:

MassType:

AVG  MONO

Axis:

1  2

Label:

I  M  -

Ions:

a  +  2+  3+

b  +  2+  3+

c  +  2+  3+

x  +  2+  3+

y  +  2+  3+

z  +  2+  3+

hide H<sub>2</sub>O/NH<sub>3</sub>

zoom 112-122

GO

| b <sup>+</sup> | #  | AA # | y <sup>+</sup> | y <sup>2+</sup> |
|----------------|----|------|----------------|-----------------|
| 136.1186       | 1  | T    | 13             |                 |
| 283.1870       | 2  | F    | 12             | 1349.8005       |
| 382.2554       | 3  | V    | 11             | 1202.7321       |
| 453.2925       | 4  | A    | 10             | 1103.6637       |
| 582.3351       | 5  | E    | 9              | 1032.6266       |
| 695.4192       | 6  | L    | 8              | 903.5840        |
| 857.5773       | 7  | K    | 7              | 790.4999        |
| 914.5987       | 8  | G    | 6              | 628.3418        |
| 1027.6828      | 9  | L    | 5              | 571.3204        |
| 1142.7097      | 10 | D    | 4              | 458.2363        |
| 1239.7625      | 11 | P    | 3              | 343.2094        |
| 1310.7996      | 12 | A    | 2              | 246.1566        |
|                | 13 | R    | 1              | 175.1195        |

N-term:+35.07 K(7):+162.16

TGECKITLSQVGDVLR, MH+ 1831.9951, m/z 611.3366  
 L OSG39 P180811 230811-s1.05543.05543.3.dta

scan 5543; 4.7e+000

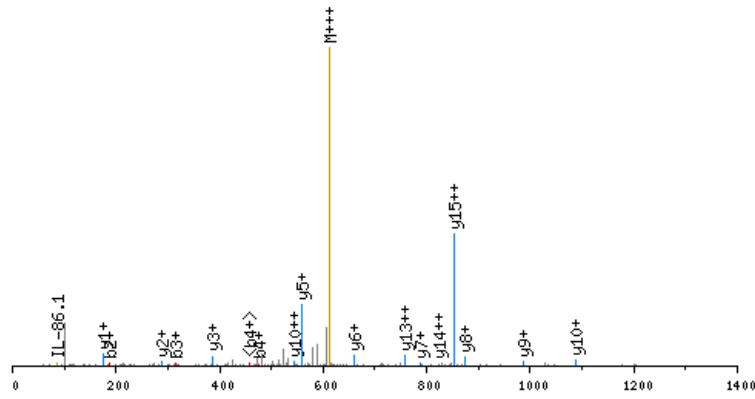

click image to zoom in; click top corners to zoom out [\[precursor±\]](#)

scan 5541; 611.3 m/z; 8.4e+000

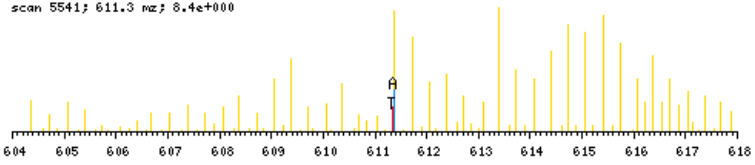

zoomed in precursor plot; T=theoretical m/z, A=acquired m/z

X-range:

-

MassTol: Y-zoom:

MassType:

AVG  MONO

Axis:

1  2

Label:

I  M  -

Ions:

a  +  2+  3+

b  +  2+  3+

c  +  2+  3+

x  +  2+  3+

y  +  2+  3+

z  +  2+  3+

hide H<sub>2</sub>O/NH<sub>3</sub>

zoom 112-122

GO

| b <sup>+</sup> | #  | AA | #  | y <sup>+</sup> | y <sup>2+</sup> |
|----------------|----|----|----|----------------|-----------------|
| 130.0868       | 1  | T  | 16 |                |                 |
| 187.1082       | 2  | G  | 15 | 1702.9162      | 851.9620        |
| 316.1508       | 3  | E  | 14 | 1645.8947      | 823.4513        |
| 476.1814       | 4  | C  | 13 | 1516.8521      | 758.9300        |
| 632.3077       | 5  | K  | 12 | 1356.8215      | 678.9147        |
| 745.3918       | 6  | I  | 11 | 1200.6952      | 600.8515        |
| 846.4395       | 7  | T  | 10 | 1087.6111      | 544.3095        |
| 959.5235       | 8  | L  | 9  | 986.5635       | 493.7856        |
| 1046.5556      | 9  | S  | 8  | 873.4794       | 437.2436        |
| 1174.6141      | 10 | Q  | 7  | 786.4474       | 393.7276        |
| 1273.6826      | 11 | V  | 6  | 658.3888       | 329.6983        |
| 1330.7040      | 12 | G  | 5  | 559.3204       | 280.1641        |
| 1445.7310      | 13 | D  | 4  | 502.2989       | 251.6534        |
| 1544.7994      | 14 | V  | 3  | 387.2720       | 194.1399        |
| 1657.8834      | 15 | L  | 2  | 288.2036       | 144.6057        |
|                | 16 | R  | 1  | 175.1195       | 88.0637         |

N-term:+29.04 C(4):+160.03  
 K(5):+156.13

TGGVDTAAVGAVFDISNADR, MH+ 1970.0043, m/z 657.3396  
 H OSG37 P180811 230811-s1.08068.08068.3.dta

X-range:

-

MassTol: Y-zoom:

MassType:

AVG  MONO

Axis:

1  2

Label:

I  M  -

Ions:

a  +  2+  3+

b  +  2+  3+

c  +  2+  3+

x  +  2+  3+

y  +  2+  3+

z  +  2+  3+

hide H<sub>2</sub>O/NH<sub>3</sub>

zoom 112-122

GO

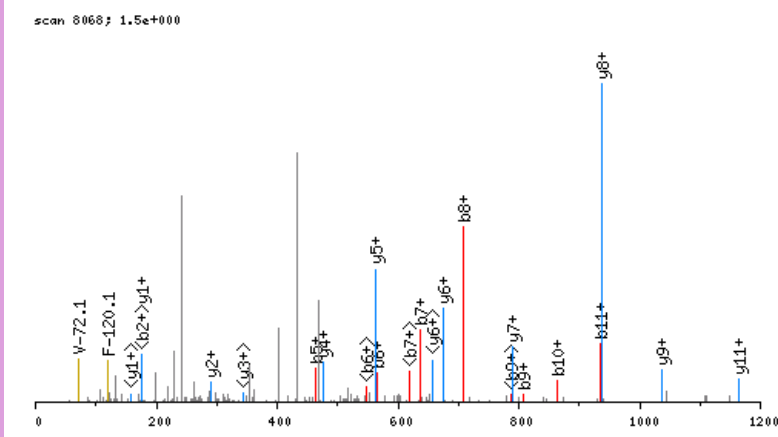

click image to zoom in; click top corners to zoom out [\[precursor±\]](#)

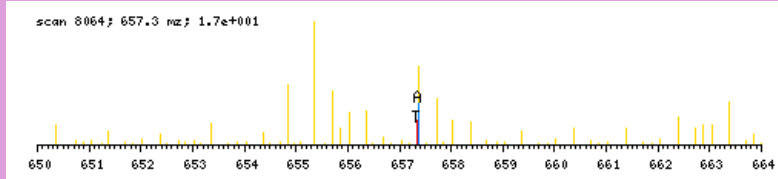

zoomed in precursor plot; T=theoretical m/z, A=acquired m/z

| b <sup>+</sup> | #  | AA # | y <sup>+</sup> | y <sup>2+</sup> |
|----------------|----|------|----------------|-----------------|
| 136.1186       | 1  | T 20 |                |                 |
| 193.1400       | 2  | G 19 | 1834.8935      | 917.9507        |
| 250.1615       | 3  | G 18 | 1777.8721      | 889.4399        |
| 349.2299       | 4  | V 17 | 1720.8506      | 860.9292        |
| 464.2569       | 5  | D 16 | 1621.7822      | 811.3950        |
| 565.3045       | 6  | T 15 | 1506.7552      | 753.8815        |
| 636.3417       | 7  | A 14 | 1405.7076      | 703.3577        |
| 707.3788       | 8  | A 13 | 1334.6705      | 667.8391        |
| 806.4472       | 9  | V 12 | 1263.6333      | 632.3206        |
| 863.4686       | 10 | G 11 | 1164.5649      | 582.7864        |
| 934.5058       | 11 | A 10 | 1107.5435      | 554.2756        |
| 1033.5742      | 12 | V 9  | 1036.5063      | 518.7571        |
| 1180.6426      | 13 | F 8  | 937.4379       | 469.2229        |
| 1295.6695      | 14 | D 7  | 790.3695       | 395.6887        |
| 1408.7536      | 15 | I 6  | 675.3426       | 338.1752        |
| 1495.7856      | 16 | S 5  | 562.2585       | 281.6332        |
| 1609.8286      | 17 | N 4  | 475.2265       | 238.1172        |
| 1680.8657      | 18 | A 3  | 361.1836       | 181.0957        |
| 1795.8926      | 19 | D 2  | 290.1464       | 145.5771        |
|                | 20 | R 1  | 175.1195       | 88.0637         |

N-term:+35.07

TGIGFGGLTQQVEKK, MH+ 1646.9482, m/z 549.6542  
 L OSG39 P180811 230811-s1.05032.05032.3.dta

scan 5032; 8.4e+000

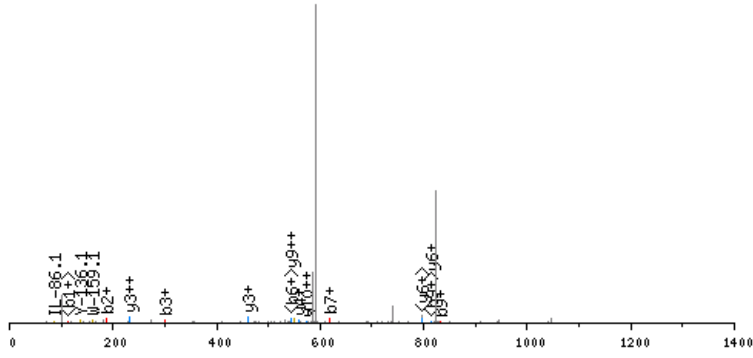

click image to zoom in; click top corners to zoom out [\[precursor±\]](#)

scan 5031; 549.7 mz; 2.5e+001

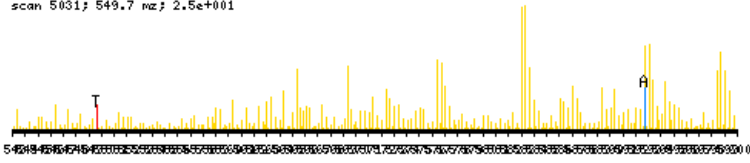

zoomed in precursor plot; T=theoretical m/z, A=acquired m/z

X-range:

-

MassTol: Y-zoom:

MassType:

AVG  MONO

Axis:

1  2

Label:

I  M  -

Ions:

a  +  2+  3+

b  +  2+  3+

c  +  2+  3+

x  +  2+  3+

y  +  2+  3+

z  +  2+  3+

hide H<sub>2</sub>O/NH<sub>3</sub>

zoom 112-122

GO

| b <sup>+</sup> | #  | AA | #  | y <sup>+</sup> | y <sup>2+</sup> |
|----------------|----|----|----|----------------|-----------------|
| 130.0868       | 1  | T  | 15 |                |                 |
| 187.1082       | 2  | G  | 14 | 1517.8692      | 759.4385        |
| 300.1923       | 3  | I  | 13 | 1460.8478      | 730.9278        |
| 357.2138       | 4  | G  | 12 | 1347.7637      | 674.3858        |
| 504.2822       | 5  | F  | 11 | 1290.7422      | 645.8750        |
| 561.3036       | 6  | G  | 10 | 1143.6738      | 572.3408        |
| 618.3251       | 7  | G  | 9  | 1086.6524      | 543.8301        |
| 731.4092       | 8  | L  | 8  | 1029.6309      | 515.3194        |
| 832.4569       | 9  | T  | 7  | 916.5468       | 458.7773        |
| 960.5154       | 10 | Q  | 6  | 815.4992       | 408.2535        |
| 1088.5740      | 11 | Q  | 5  | 687.4406       | 344.2242        |
| 1187.6424      | 12 | V  | 4  | 559.3820       | 280.1949        |
| 1316.6850      | 13 | E  | 3  | 460.3136       | 230.6607        |
| 1472.8113      | 14 | K  | 2  | 331.2710       | 166.1394        |
|                | 15 | K  | 1  | 175.1447       | 88.0763         |

N-term:+29.04 K(14):+156.13  
 K(15):+156.13

TGIYEALRLR, MH+ 1192.6577, m/z 596.8325  
 L OSG37 P180811 230811-s1.06991.06991.2.dta

X-range:

-

MassTol: Y-zoom:

MassType:

AVG  MONO

Axis:

1  2

Label:

I  M  -

Ions:

a  +  2+  3+

b  +  2+  3+

c  +  2+  3+

x  +  2+  3+

y  +  2+  3+

z  +  2+  3+

hide H<sub>2</sub>O/NH<sub>3</sub>

zoom 112-122

GO

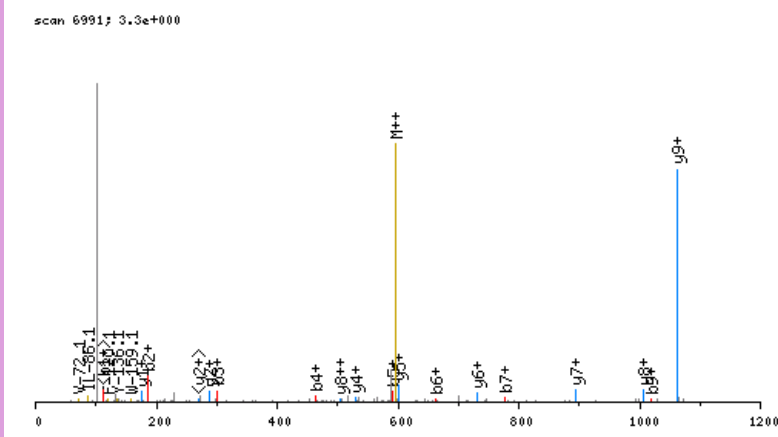

click image to zoom in; click top corners to zoom out [\[precursor±\]](#)

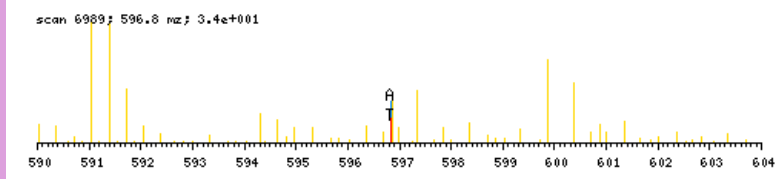

zoomed in precursor plot; T=theoretical m/z, A=acquired m/z

| b <sup>+</sup> | #  | AA | #  | y <sup>+</sup> | y <sup>2+</sup> |
|----------------|----|----|----|----------------|-----------------|
| 130.0868       | 1  | T  | 10 |                |                 |
| 187.1082       | 2  | G  | 9  | 1063.5788      | 532.2933        |
| 300.1923       | 3  | I  | 8  | 1006.5573      | 503.7826        |
| 463.2556       | 4  | Y  | 7  | 893.4733       | 447.2405        |
| 592.2982       | 5  | E  | 6  | 730.4099       | 365.7089        |
| 663.3353       | 6  | A  | 5  | 601.3673       | 301.1876        |
| 776.4194       | 7  | L  | 4  | 530.3302       | 265.6690        |
| 905.4620       | 8  | E  | 3  | 417.2462       | 209.1270        |
| 1018.5461      | 9  | L  | 2  | 288.2036       | 144.6057        |
|                | 10 | R  | 1  | 175.1195       | 88.0637         |

N-term:+29.04

TGPAGPAGPIGPAGAR, MH+ 1374.7493, m/z 687.8783  
 L OSG41 P180811 230811-s1.03803.03803.2.dta

X-range:

-

MassTol: Y-zoom:

MassType:

AVG  MONO

Axis:

1  2

Label:

I  M  -

Ions:

a  +  2+  3+

b  +  2+  3+

c  +  2+  3+

x  +  2+  3+

y  +  2+  3+

z  +  2+  3+

hide H<sub>2</sub>O/NH<sub>3</sub>

zoom 112-122

GO

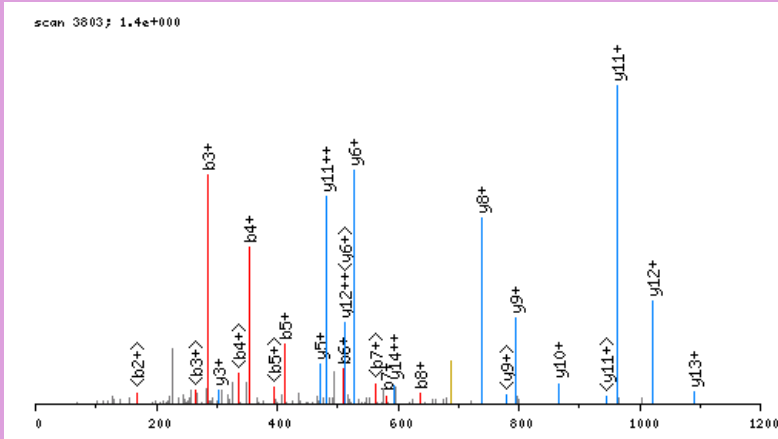

click image to zoom in; click top corners to zoom out [\[precursor±\]](#)

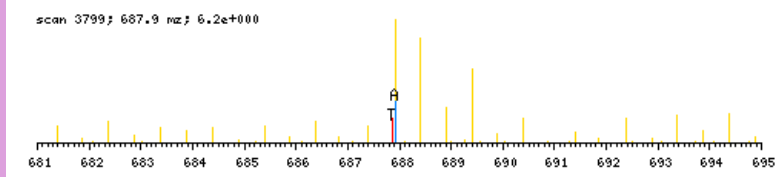

zoomed in precursor plot; T=theoretical m/z, A=acquired m/z

| b <sup>+</sup> | #  | AA # | y <sup>+</sup> | y <sup>2+</sup> |
|----------------|----|------|----------------|-----------------|
| 130.0868       | 1  | T 16 |                |                 |
| 187.1082       | 2  | G 15 | 1245.6704      | 623.3391        |
| 284.1610       | 3  | P 14 | 1188.6489      | 594.8284        |
| 355.1981       | 4  | A 13 | 1091.5962      | 546.3020        |
| 412.2196       | 5  | G 12 | 1020.5591      | 510.7834        |
| 509.2723       | 6  | P 11 | 963.5376       | 482.2727        |
| 580.3095       | 7  | A 10 | 866.4848       | 433.7463        |
| 637.3309       | 8  | G 9  | 795.4477       | 398.2278        |
| 734.3837       | 9  | P 8  | 738.4262       | 369.7170        |
| 847.4678       | 10 | I 7  | 641.3735       | 321.1907        |
| 904.4892       | 11 | G 6  | 528.2894       | 264.6486        |
| 1001.5420      | 12 | P 5  | 471.2680       | 236.1379        |
| 1072.5791      | 13 | A 4  | 374.2152       | 187.6115        |
| 1129.6006      | 14 | G 3  | 303.1781       | 152.0930        |
| 1200.6377      | 15 | A 2  | 246.1566       | 123.5822        |
|                | 16 | R 1  | 175.1195       | 88.0637         |

N-term:+29.04

TGPNLHGLFGR, MH+ 1202.6858, m/z 401.5668  
 H OSG40 P180811 230811-s1.06302.06302.3.dta

X-range:

-

MassTol: Y-zoom:

MassType:

AVG  MONO

Axis:

1  2

Label:

I  M  -

Ions:

a  +  2+  3+

b  +  2+  3+

c  +  2+  3+

x  +  2+  3+

y  +  2+  3+

z  +  2+  3+

hide H<sub>2</sub>O/NH<sub>3</sub>

zoom 112-122

GO

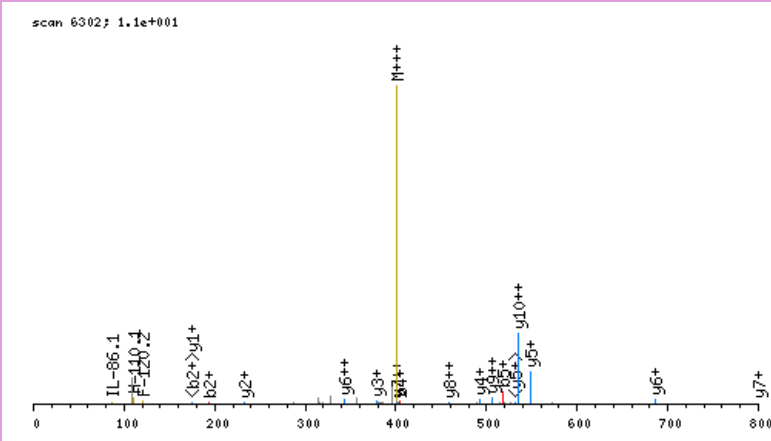

click image to zoom in; click top corners to zoom out [\[precursor±\]](#)

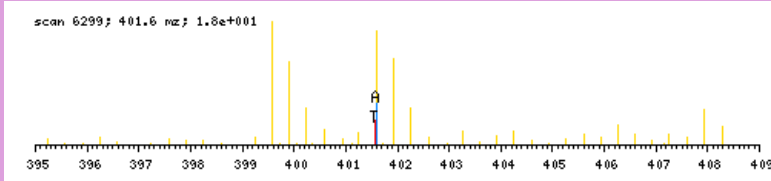

zoomed in precursor plot; T=theoretical m/z, A=acquired m/z

| b <sup>+</sup> | #  | AA # | y <sup>+</sup> | y <sup>2+</sup> |
|----------------|----|------|----------------|-----------------|
| 136.1186       | 1  | T 11 |                |                 |
| 193.1400       | 2  | G 10 | 1067.5750      | 534.2914        |
| 290.1928       | 3  | P 9  | 1010.5536      | 505.7807        |
| 404.2357       | 4  | N 8  | 913.5008       | 457.2543        |
| 517.3198       | 5  | L 7  | 799.4579       | 400.2329        |
| 654.3787       | 6  | H 6  | 686.3738       | 343.6908        |
| 711.4002       | 7  | G 5  | 549.3149       | 275.1614        |
| 824.4842       | 8  | L 4  | 492.2934       | 246.6506        |
| 971.5527       | 9  | F 3  | 379.2094       | 190.1086        |
| 1028.5741      | 10 | G 2  | 232.1410       | 116.5744        |
|                | 11 | R 1  | 175.1195       | 88.0637         |

N-term:+35.07

TGTAEMSSILEER, MH+ 1451.7052, m/z 726.3562  
 L OSG37 P180811 230811-s1.05743.05743.2.dta

X-range:

-

MassTol: Y-zoom:

MassType:

AVG  MONO

Axis:

1  2

Label:

I  M  -

Ions:

a  +  2+  3+

b  +  2+  3+

c  +  2+  3+

x  +  2+  3+

y  +  2+  3+

z  +  2+  3+

hide H<sub>2</sub>O/NH<sub>3</sub>

zoom 112-122

GO

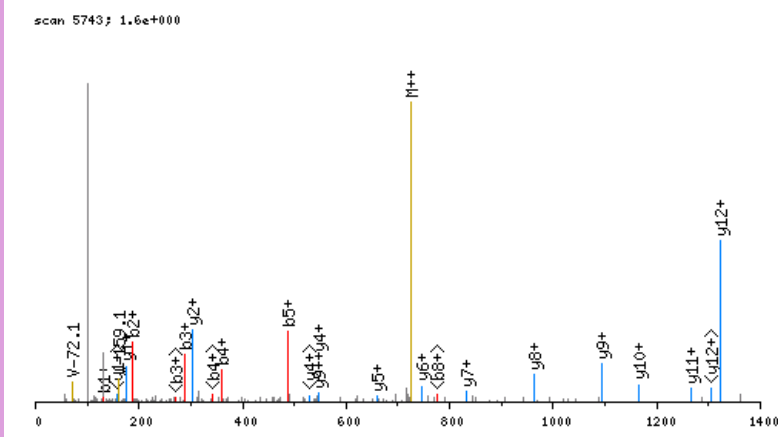

click image to zoom in; click top corners to zoom out [\[precursor±\]](#)

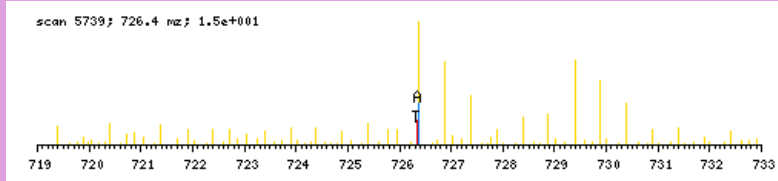

zoomed in precursor plot; T=theoretical m/z, A=acquired m/z

| b <sup>+</sup> | #  | AA # | y <sup>+</sup> | y <sup>2+</sup>    |
|----------------|----|------|----------------|--------------------|
| 130.0868       | 1  | T    | 13             |                    |
| 187.1082       | 2  | G    | 12             | 1322.6262 661.8170 |
| 288.1559       | 3  | T    | 11             | 1265.6047 633.3063 |
| 359.1930       | 4  | A    | 10             | 1164.5571 582.7824 |
| 488.2356       | 5  | E    | 9              | 1093.5199 547.2639 |
| 619.2761       | 6  | M    | 8              | 964.4774 482.7426  |
| 706.3081       | 7  | S    | 7              | 833.4369 417.2223  |
| 793.3402       | 8  | S    | 6              | 746.4048 373.7063  |
| 906.4242       | 9  | I    | 5              | 659.3728 330.1903  |
| 1019.5083      | 10 | L    | 4              | 546.2888 273.6483  |
| 1148.5509      | 11 | E    | 3              | 433.2047 217.1063  |
| 1277.5935      | 12 | E    | 2              | 304.1621 152.5850  |
|                | 13 | R    | 1              | 175.1195 88.0637   |

N-term:+29.04



TGTEAAAAATGVIGGIR, MH+ 1478.8391, m/z 493.6179  
 H OSG37 P180811 230811-s1.05020.05020.3.dta

X-range:

-

MassTol: Y-zoom:

MassType:

AVG  MONO

Axis:

1  2

Label:

I  M  -

Ions:

a  +  2+  3+

b  +  2+  3+

c  +  2+  3+

x  +  2+  3+

y  +  2+  3+

z  +  2+  3+

hide H<sub>2</sub>O/NH<sub>3</sub>

zoom 112-122

GO

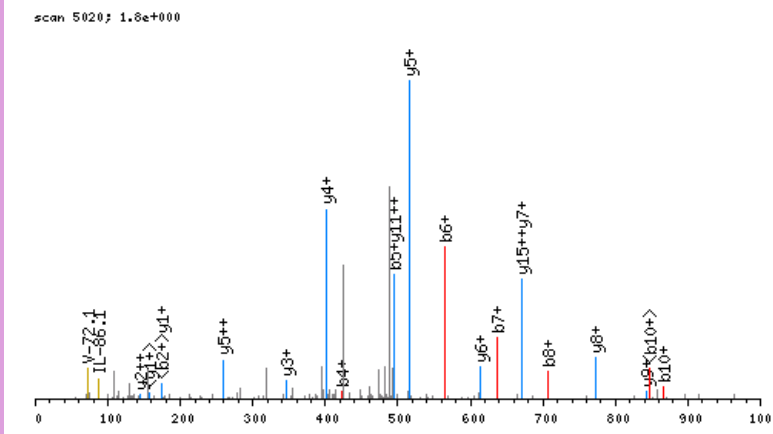

click image to zoom in; click top corners to zoom out [\[precursor±\]](#)

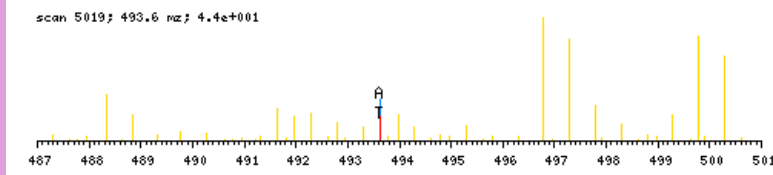

zoomed in precursor plot; T=theoretical m/z, A=acquired m/z

| b <sup>+</sup> | #  | AA # | y <sup>+</sup> | y <sup>2+</sup> |
|----------------|----|------|----------------|-----------------|
| 136.1186       | 1  | T 16 |                |                 |
| 193.1400       | 2  | G 15 | 1343.7283      | 672.3681        |
| 294.1877       | 3  | T 14 | 1286.7068      | 643.8573        |
| 423.2303       | 4  | E 13 | 1185.6592      | 593.3335        |
| 494.2674       | 5  | A 12 | 1056.6166      | 528.8122        |
| 565.3045       | 6  | A 11 | 985.5795       | 493.2936        |
| 636.3417       | 7  | A 10 | 914.5423       | 457.7751        |
| 707.3788       | 8  | A 9  | 843.5052       | 422.2565        |
| 808.4264       | 9  | T 8  | 772.4681       | 386.7380        |
| 865.4479       | 10 | G 7  | 671.4204       | 336.2141        |
| 964.5163       | 11 | V 6  | 614.3990       | 307.7034        |
| 1077.6004      | 12 | I 5  | 515.3306       | 258.1692        |
| 1134.6219      | 13 | G 4  | 402.2465       | 201.6272        |
| 1191.6433      | 14 | G 3  | 345.2250       | 173.1164        |
| 1304.7274      | 15 | I 2  | 288.2036       | 144.6057        |
|                | 16 | R 1  | 175.1195       | 88.0637         |

N-term:+35.07

THFDPSCLFPACR, MH+ 1635.7411, m/z 545.9185  
 L OSG40 P180811 230811-s1.07656.07656.3.dta

scan 7656; 7.2e+000

X-range:

-

MassTol: Y-zoom:

MassType:

AVG  MONO

Axis:

1  2

Label:

I  M  -

Ions:

a  +  2+  3+

b  +  2+  3+

c  +  2+  3+

x  +  2+  3+

y  +  2+  3+

z  +  2+  3+

hide H<sub>2</sub>O/NH<sub>3</sub>

zoom 112-122

GO

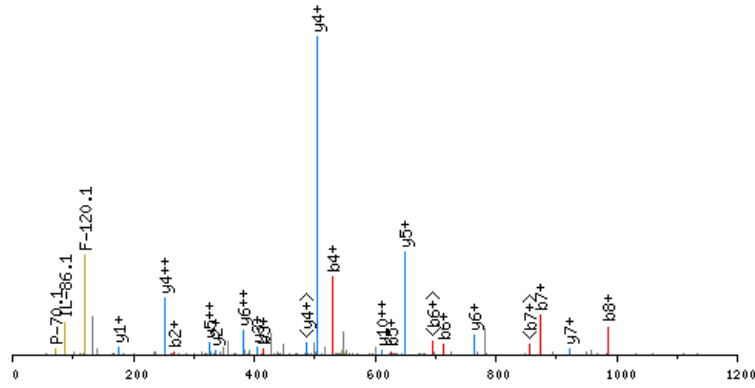

click image to zoom in; click top corners to zoom out [\[precursor±\]](#)

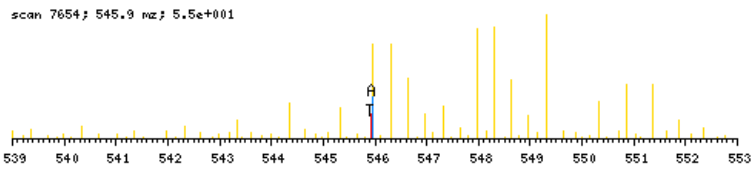

zoomed in precursor plot; T=theoretical m/z, A=acquired m/z

| b <sup>+</sup> | #  | AA # | y <sup>+</sup> | y <sup>2+</sup> |
|----------------|----|------|----------------|-----------------|
| 130.0868       | 1  | T    | 13             |                 |
| 267.1457       | 2  | H    | 12             | 1506.6621       |
| 414.2141       | 3  | F    | 11             | 1369.6032       |
| 529.2410       | 4  | D    | 10             | 1222.5348       |
| 611.7713       |    |      |                | 611.7713        |
| 626.2938       | 5  | P    | 9              | 1107.5078       |
| 713.3258       | 6  | S    | 8              | 1010.4551       |
| 505.7315       |    |      |                | 505.7315        |
| 873.3564       | 7  | C    | 7              | 923.4231        |
| 462.2154       |    |      |                | 462.2154        |
| 986.4405       | 8  | L    | 6              | 763.3925        |
| 382.2001       |    |      |                | 382.2001        |
| 1133.5089      | 9  | F    | 5              | 650.3084        |
| 325.6581       |    |      |                | 325.6581        |
| 1230.5617      | 10 | P    | 4              | 503.2400        |
| 252.1239       |    |      |                | 252.1239        |
| 1301.5988      | 11 | A    | 3              | 406.1872        |
| 203.5975       |    |      |                | 203.5975        |
| 1461.6294      | 12 | C    | 2              | 335.1501        |
| 168.0790       |    |      |                | 168.0790        |
|                | 13 | R    | 1              | 175.1195        |
| 88.0637        |    |      |                | 88.0637         |

N-term:+29.04 C(7):+160.03  
 C(12):+160.03

TIFEVLPEKADR, MH+ 1473.8317, m/z 491.9488  
 L OSG39 P180811 230811-s1.04972.04972.3.dta

scan 4972; 1.4e+001

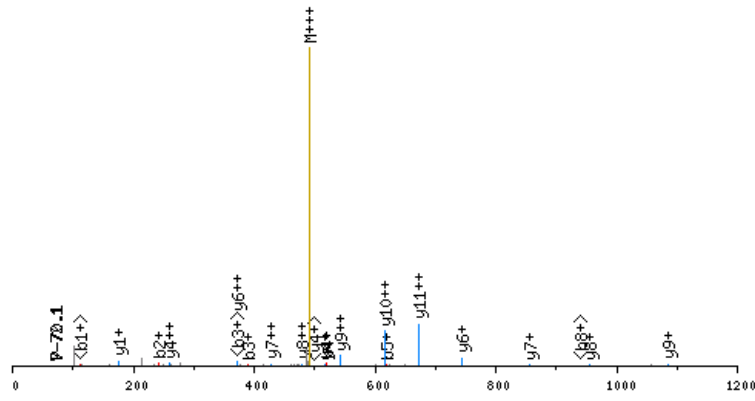

click image to zoom in; click top corners to zoom out [\[precursor±\]](#)

scan 4971; 491.9 m/z; 2.3e+001

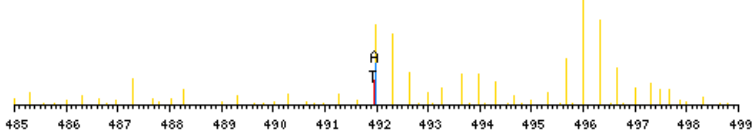

zoomed in precursor plot; T=theoretical m/z, A=acquired m/z

X-range:

-

MassTol: Y-zoom:

MassType:

AVG  MONO

Axis:

1  2

Label:

I  M  -

Ions:

a  +  2+  3+

b  +  2+  3+

c  +  2+  3+

x  +  2+  3+

y  +  2+  3+

z  +  2+  3+

hide H<sub>2</sub>O/NH<sub>3</sub>

zoom 112-122

GO

| b <sup>+</sup> | #  | AA # | y <sup>+</sup> | y <sup>2+</sup> |
|----------------|----|------|----------------|-----------------|
| 130.0868       | 1  | T    | 12             |                 |
| 243.1708       | 2  | I    | 11             | 1344.7528       |
| 390.2393       | 3  | F    | 10             | 1231.6687       |
| 519.2818       | 4  | E    | 9              | 1084.6003       |
| 618.3503       | 5  | V    | 8              | 955.5577        |
| 731.4343       | 6  | L    | 7              | 856.4893        |
| 828.4871       | 7  | P    | 6              | 743.4052        |
| 957.5297       | 8  | E    | 5              | 646.3525        |
| 1113.6560      | 9  | K    | 4              | 517.3099        |
| 1184.6931      | 10 | A    | 3              | 361.1836        |
| 1299.7200      | 11 | D    | 2              | 290.1464        |
|                | 12 | R    | 1              | 175.1195        |

N-term:+29.04 K(9):+156.13

FIGSMENVEVFTSEGKGR, MH+ 2009.0650, m/z 670.3598  
 H OSG39 P180811 230811-s1.05148.05148.3.dta

X-range:

-

MassTol: Y-zoom:

MassType:

AVG  MONO

Axis:

1  2

Label:

I  M  -

Ions:

a  +  2+  3+

b  +  2+  3+

c  +  2+  3+

x  +  2+  3+

y  +  2+  3+

z  +  2+  3+

hide H<sub>2</sub>O/NH<sub>3</sub>

zoom 112-122

GO

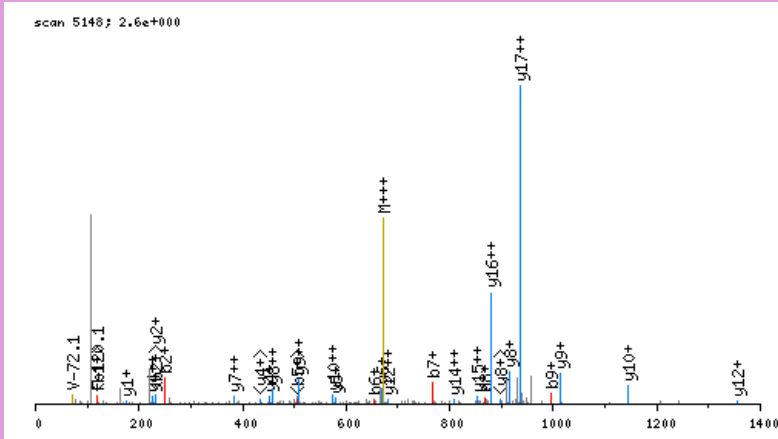

click image to zoom in; click top corners to zoom out [\[precursor±\]](#)

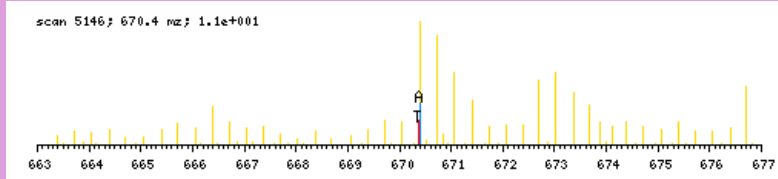

zoomed in precursor plot; T=theoretical m/z, A=acquired m/z

| b <sup>+</sup> | #  | AA # | y <sup>+</sup> | y <sup>2+</sup> |
|----------------|----|------|----------------|-----------------|
| 136.1186       | 1  | T 18 |                |                 |
| 249.2026       | 2  | I 17 | 1873.9542      | 937.4810        |
| 306.2241       | 3  | G 16 | 1760.8702      | 880.9390        |
| 393.2561       | 4  | S 15 | 1703.8487      | 852.4283        |
| 524.2966       | 5  | M 14 | 1616.8167      | 808.9122        |
| 653.3392       | 6  | E 13 | 1485.7762      | 743.3920        |
| 767.3821       | 7  | N 12 | 1356.7336      | 678.8707        |
| 866.4506       | 8  | V 11 | 1242.6907      | 621.8492        |
| 995.4931       | 9  | E 10 | 1143.6222      | 572.3150        |
| 1094.5616      | 10 | V 9  | 1014.5797      | 507.7937        |
| 1241.6300      | 11 | F 8  | 915.5112       | 458.2595        |
| 1342.6777      | 12 | T 7  | 768.4428       | 384.7253        |
| 1429.7097      | 13 | S 6  | 667.3951       | 334.2015        |
| 1558.7523      | 14 | E 5  | 580.3631       | 290.6855        |
| 1615.7737      | 15 | G 4  | 451.3205       | 226.1642        |
| 1777.9318      | 16 | K 3  | 394.2991       | 197.6534        |
| 1834.9533      | 17 | G 2  | 232.1410       | 116.5744        |
|                | 18 | R 1  | 175.1195       | 88.0637         |

N-term:+35.07 K(16):+162.16

TIGVSNFNPLQIER, MH+ 1621.9126, m/z 541.3090  
 H OSG37 P180811 230811-s1.07711.07711.3.dta

X-range:

-

MassTol: Y-zoom:

MassType:

AVG  MONO

Axis:

1  2

Label:

I  M  -

Ions:

a  +  2+  3+

b  +  2+  3+

c  +  2+  3+

x  +  2+  3+

y  +  2+  3+

z  +  2+  3+

hide H<sub>2</sub>O/NH<sub>3</sub>

zoom 112-122

GO

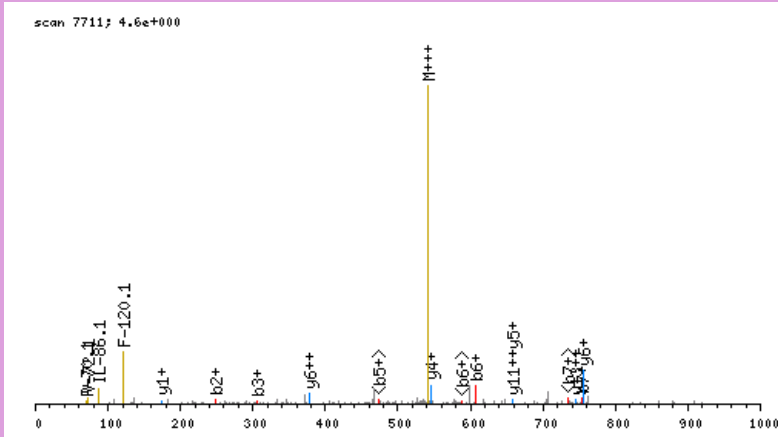

click image to zoom in; click top corners to zoom out [\[precursor±\]](#)

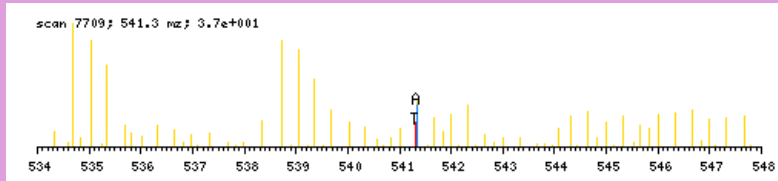

zoomed in precursor plot; T=theoretical m/z, A=acquired m/z

| b <sup>+</sup> | #  | AA # | y <sup>+</sup> | y <sup>2+</sup> |
|----------------|----|------|----------------|-----------------|
| 136.1186       | 1  | T 14 |                |                 |
| 249.2026       | 2  | I 13 | 1486.8018      | 743.9048        |
| 306.2241       | 3  | G 12 | 1373.7177      | 687.3628        |
| 405.2925       | 4  | V 11 | 1316.6963      | 658.8520        |
| 492.3245       | 5  | S 10 | 1217.6279      | 609.3178        |
| 606.3675       | 6  | N 9  | 1130.5958      | 565.8018        |
| 753.4359       | 7  | F 8  | 1016.5529      | 508.7804        |
| 867.4788       | 8  | N 7  | 869.4845       | 435.2462        |
| 964.5316       | 9  | P 6  | 755.4416       | 378.2247        |
| 1077.6156      | 10 | L 5  | 658.3888       | 329.6983        |
| 1205.6742      | 11 | Q 4  | 545.3047       | 273.1563        |
| 1318.7583      | 12 | I 3  | 417.2462       | 209.1270        |
| 1447.8009      | 13 | E 2  | 304.1621       | 152.5850        |
|                | 14 | R 1  | 175.1195       | 88.0637         |

N-term:+35.07

TIPYQPMPASSPVICAGGQDR, MH+ 2273.1058, m/z 758.3734  
 L OSG36 P180811 230811-s1.04441.04441.3.dta

X-range:

-

MassTol: Y-zoom:

MassType:

AVG  MONO

Axis:

1  2

Label:

I  M  -

Ions:

a  +  2+  3+

b  +  2+  3+

c  +  2+  3+

x  +  2+  3+

y  +  2+  3+

z  +  2+  3+

hide H<sub>2</sub>O/NH<sub>3</sub>

zoom 112-122

GO

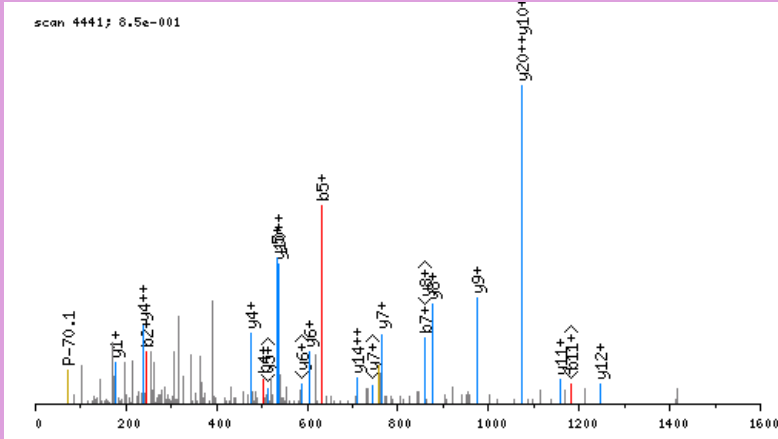

click image to zoom in; click top corners to zoom out [\[precursor±\]](#)

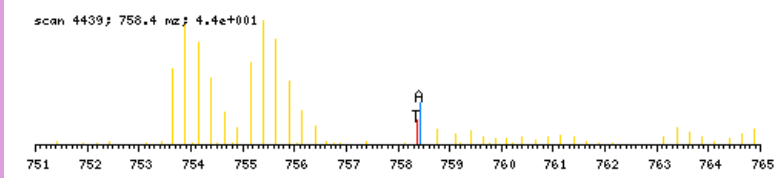

zoomed in precursor plot; T=theoretical m/z, A=acquired m/z

| b <sup>+</sup> | #  | AA # | y <sup>+</sup> | y <sup>2+</sup> |
|----------------|----|------|----------------|-----------------|
| 130.0868       | 1  | T 21 |                |                 |
| 243.1708       | 2  | I 20 | 2144.0268      | 1072.5173       |
| 340.2236       | 3  | P 19 | 2030.9428      | 1015.9753       |
| 503.2869       | 4  | Y 18 | 1933.8900      | 967.4489        |
| 631.3455       | 5  | Q 17 | 1770.8267      | 885.9172        |
| 728.3983       | 6  | P 16 | 1642.7681      | 821.8880        |
| 859.4388       | 7  | M 15 | 1545.7153      | 773.3616        |
| 956.4915       | 8  | P 14 | 1414.6748      | 707.8413        |
| 1027.5286      | 9  | A 13 | 1317.6221      | 659.3150        |
| 1114.5607      | 10 | S 12 | 1246.5850      | 623.7964        |
| 1201.5927      | 11 | S 11 | 1159.5529      | 580.2804        |
| 1298.6455      | 12 | P 10 | 1072.5209      | 536.7644        |
| 1397.7139      | 13 | V 9  | 975.4681       | 488.2380        |
| 1510.7979      | 14 | I 8  | 876.3997       | 438.7038        |
| 1670.8285      | 15 | C 7  | 763.3157       | 382.1617        |
| 1741.8657      | 16 | A 6  | 603.2851       | 302.1464        |
| 1798.8871      | 17 | G 5  | 532.2479       | 266.6279        |
| 1855.9086      | 18 | G 4  | 475.2265       | 238.1172        |
| 1983.9672      | 19 | Q 3  | 418.2050       | 209.6064        |
| 2098.9941      | 20 | D 2  | 290.1464       | 145.5771        |
|                | 21 | R 1  | 175.1195       | 88.0637         |

N-term:+29.04 C(15):+160.03

TISPLDLAKLNQVAR, MH+ 1695.0169, m/z 565.6771  
 L OSG39 P180811 230811-s1.06397.06397.3.dta

X-range:

-

MassTol: Y-zoom:

MassType:

AVG  MONO

Axis:

1  2

Label:

I  M  -

Ions:

a  +  2+  3+

b  +  2+  3+

c  +  2+  3+

x  +  2+  3+

y  +  2+  3+

z  +  2+  3+

hide H<sub>2</sub>O/NH<sub>3</sub>

zoom 112-122

GO

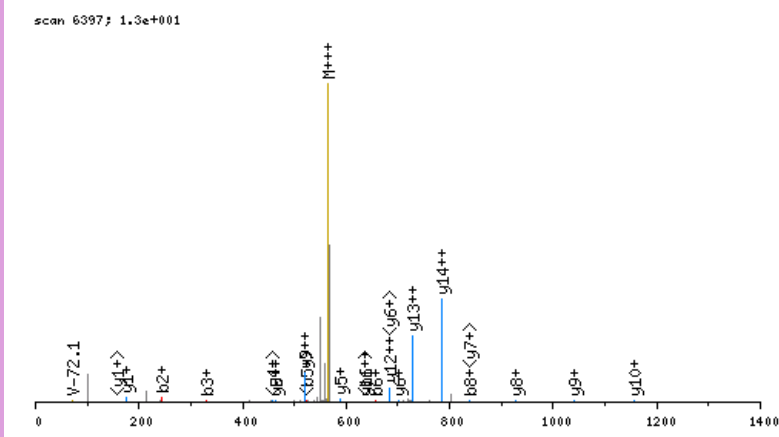

click image to zoom in; click top corners to zoom out [\[precursor±\]](#)

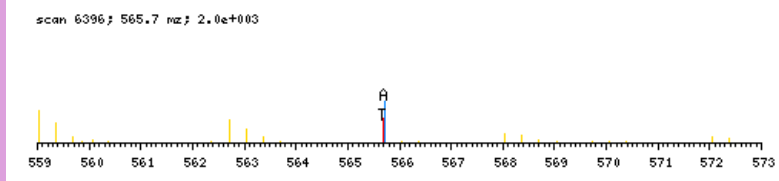

zoomed in precursor plot; T=theoretical m/z, A=acquired m/z

| b <sup>+</sup> | #  | AA # | y <sup>+</sup> | y <sup>2+</sup> |
|----------------|----|------|----------------|-----------------|
| 130.0868       | 1  | T    | 15             |                 |
| 243.1708       | 2  | I    | 14             | 1565.9379       |
| 330.2029       | 3  | S    | 13             | 1452.8539       |
| 427.2556       | 4  | P    | 12             | 1365.8218       |
| 540.3397       | 5  | L    | 11             | 1268.7691       |
| 655.3666       | 6  | D    | 10             | 1155.6850       |
| 768.4507       | 7  | L    | 9              | 1040.6581       |
| 839.4878       | 8  | A    | 8              | 927.5740        |
| 995.6141       | 9  | K    | 7              | 856.5369        |
| 1108.6982      | 10 | L    | 6              | 700.4106        |
| 1222.7411      | 11 | N    | 5              | 587.3265        |
| 1350.7997      | 12 | Q    | 4              | 473.2836        |
| 1449.8681      | 13 | V    | 3              | 345.2250        |
| 1520.9052      | 14 | A    | 2              | 246.1566        |
|                | 15 | R    | 1              | 175.1195        |

N-term:+29.04 K(9):+156.13

TKGVDEVTIVNLTNR, MH+ 1840.1180, m/z 614.0442  
 H OSG39 P180811 230811-s1.07290.07290.3.dta

X-range:

-

MassTol: Y-zoom:

MassType:

AVG  MONO

Axis:

1  2

Label:

I  M  -

Ions:

a  +  2+  3+

b  +  2+  3+

c  +  2+  3+

x  +  2+  3+

y  +  2+  3+

z  +  2+  3+

hide H<sub>2</sub>O/NH<sub>3</sub>

zoom 112-122

GO

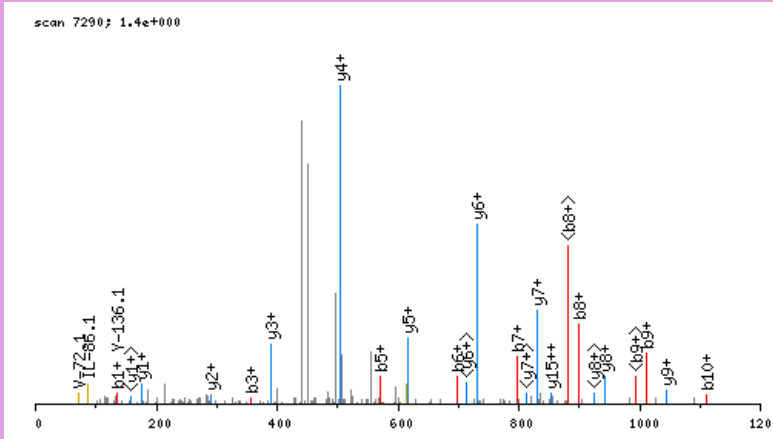

click image to zoom in; click top corners to zoom out [\[precursor±\]](#)

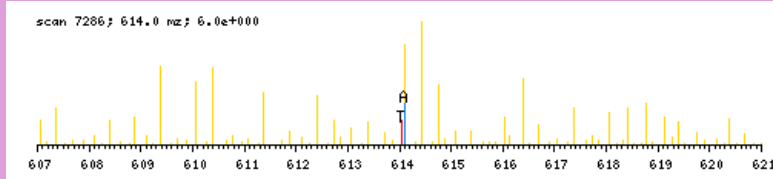

zoomed in precursor plot; T=theoretical m/z, A=acquired m/z

| b <sup>+</sup> | #  | AA # | y <sup>+</sup> | y <sup>2+</sup> |
|----------------|----|------|----------------|-----------------|
| 136.1186       | 1  | T 16 |                |                 |
| 298.2767       | 2  | K 15 | 1705.0072      | 853.0075        |
| 355.2981       | 3  | G 14 | 1542.8491      | 771.9285        |
| 454.3666       | 4  | V 13 | 1485.8277      | 743.4178        |
| 569.3935       | 5  | D 12 | 1386.7593      | 693.8835        |
| 698.4361       | 6  | E 11 | 1271.7323      | 636.3701        |
| 797.5045       | 7  | V 10 | 1142.6897      | 571.8488        |
| 898.5522       | 8  | T 9  | 1043.6213      | 522.3146        |
| 1011.6362      | 9  | I 8  | 942.5736       | 471.7907        |
| 1110.7047      | 10 | V 7  | 829.4896       | 415.2487        |
| 1224.7476      | 11 | N 6  | 730.4212       | 365.7145        |
| 1337.8317      | 12 | I 5  | 616.3782       | 308.6930        |
| 1450.9157      | 13 | L 4  | 503.2942       | 252.1510        |
| 1551.9634      | 14 | T 3  | 390.2101       | 195.6090        |
| 1666.0063      | 15 | N 2  | 289.1624       | 145.0851        |
|                | 16 | R 1  | 175.1195       | 88.0637         |

N-term:+35.07 K(2):+162.16



TKVDFDFAGEEVR, MH+ 1453.7691, m/z 485.2612  
 L OSG40 P180811 230811-s1.06010.06010.3.dta

X-range:

-

MassTol: Y-zoom:

MassType:

AVG  MONO

Axis:

1  2

Label:

I  M  -

Ions:

a  +  2+  3+

b  +  2+  3+

c  +  2+  3+

x  +  2+  3+

y  +  2+  3+

z  +  2+  3+

hide H<sub>2</sub>O/NH<sub>3</sub>

zoom 112-122

GO

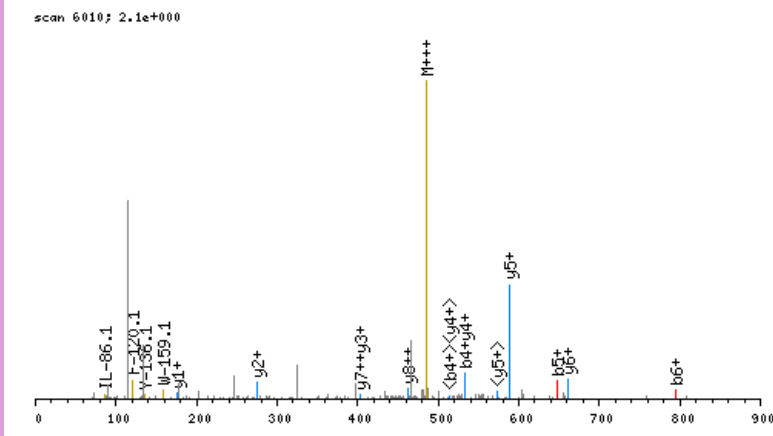

click image to zoom in; click top corners to zoom out [\[precursor±\]](#)

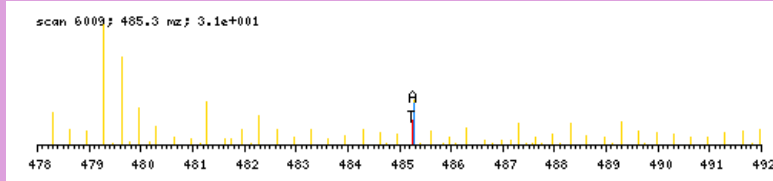

zoomed in precursor plot; T=theoretical m/z, A=acquired m/z

| b <sup>+</sup> | #  | AA # | y <sup>+</sup> | y <sup>2+</sup> |
|----------------|----|------|----------------|-----------------|
| 130.0868       | 1  | T 12 |                |                 |
| 286.2131       | 2  | K 11 | 1324.6902      | 662.8490        |
| 385.2815       | 3  | V 10 | 1168.5639      | 584.7858        |
| 532.3499       | 4  | F 9  | 1069.4954      | 535.2516        |
| 647.3768       | 5  | D 8  | 922.4270       | 461.7174        |
| 794.4453       | 6  | F 7  | 807.4001       | 404.2040        |
| 865.4824       | 7  | A 6  | 660.3317       | 330.6698        |
| 922.5038       | 8  | G 5  | 589.2946       | 295.1512        |
| 1051.5464      | 9  | E 4  | 532.2731       | 266.6405        |
| 1180.5890      | 10 | E 3  | 403.2305       | 202.1192        |
| 1279.6574      | 11 | V 2  | 274.1879       | 137.5979        |
|                | 12 | R 1  | 175.1195       | 88.0637         |

N-term:+29.04 K(2):+156.13

TLEIPGSSDPNIVPDGDFSSSLVR, MH+ 2443.2356, m/z 815.0834  
 L OSG36 P180811 230811-s1.06091.06091.3.dta

X-range:

-

MassTol: Y-zoom:

MassType:

AVG  MONO

Axis:

1  2

Label:

I  M  -

Ions:

a  +  2+  3+

b  +  2+  3+

c  +  2+  3+

x  +  2+  3+

y  +  2+  3+

z  +  2+  3+

hide H<sub>2</sub>O/NH<sub>3</sub>

zoom 112-122

GO

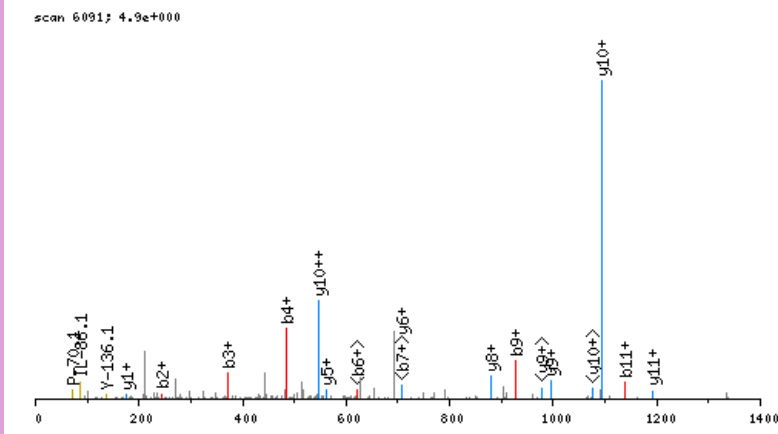

click image to zoom in; click top corners to zoom out [precursor±]

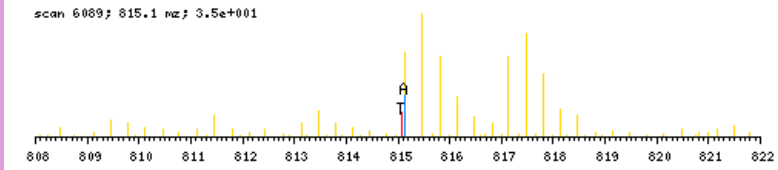

zoomed in precursor plot; T=theoretical m/z, A=acquired m/z

| b <sup>+</sup> | #  | AA # | y <sup>+</sup> | y <sup>2+</sup> |
|----------------|----|------|----------------|-----------------|
| 130.0868       | 1  | T 23 |                |                 |
| 243.1708       | 2  | L 22 | 2314.1567      | 1157.5823       |
| 372.2134       | 3  | E 21 | 2201.0726      | 1101.0402       |
| 485.2975       | 4  | I 20 | 2072.0300      | 1036.5189       |
| 582.3503       | 5  | P 19 | 1958.9460      | 979.9769        |
| 639.3717       | 6  | G 18 | 1861.8932      | 931.4505        |
| 726.4038       | 7  | S 17 | 1804.8717      | 902.9398        |
| 813.4358       | 8  | S 16 | 1717.8397      | 859.4238        |
| 928.4627       | 9  | D 15 | 1630.8077      | 815.9078        |
| 1025.5155      | 10 | P 14 | 1515.7807      | 758.3943        |
| 1139.5584      | 11 | N 13 | 1418.7280      | 709.8679        |
| 1252.6425      | 12 | I 12 | 1304.6850      | 652.8464        |
| 1351.7109      | 13 | V 11 | 1191.6010      | 596.3044        |
| 1448.7637      | 14 | P 10 | 1092.5326      | 546.7702        |
| 1563.7906      | 15 | D 9  | 995.4798       | 498.2438        |
| 1620.8121      | 16 | G 8  | 880.4529       | 440.7303        |
| 1735.8390      | 17 | D 7  | 823.4314       | 412.2196        |
| 1882.9074      | 18 | F 6  | 708.4044       | 354.7061        |
| 1969.9395      | 19 | S 5  | 561.3360       | 281.1719        |
| 2056.9715      | 20 | S 4  | 474.3040       | 237.6559        |
| 2170.0555      | 21 | L 3  | 387.2720       | 194.1399        |
| 2269.1240      | 22 | V 2  | 274.1879       | 137.5979        |
|                | 23 | R 1  | 175.1195       | 88.0637         |

N-term:+29.04

TLEQKNIAVENEVR, MH+ 1711.0026, m/z 571.0057  
 H OSG39 P180811 230811-s1.03020.03020.3.dta

X-range:

-

MassTol: Y-zoom:

MassType:

AVG  MONO

Axis:

1  2

Label:

I  M  -

Ions:

a  +  2+  3+

b  +  2+  3+

c  +  2+  3+

x  +  2+  3+

y  +  2+  3+

z  +  2+  3+

hide H<sub>2</sub>O/NH<sub>3</sub>

zoom 112-122

GO

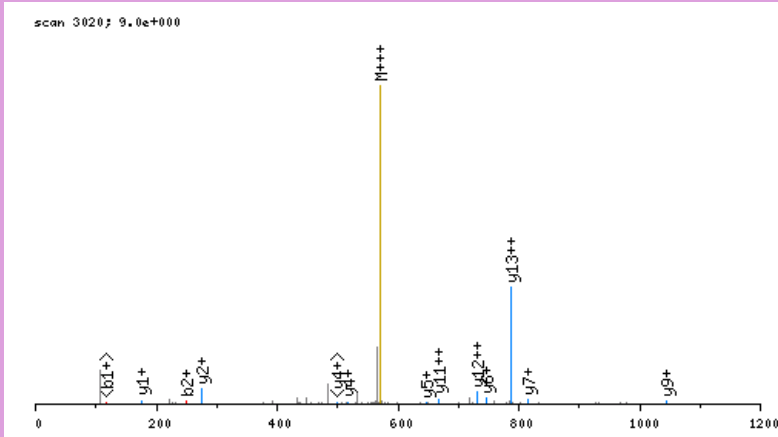

click image to zoom in; click top corners to zoom out [\[precursor±\]](#)

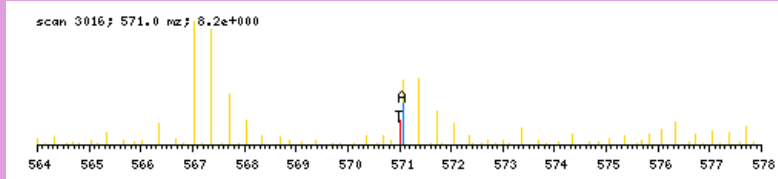

zoomed in precursor plot; T=theoretical m/z, A=acquired m/z

| b <sup>+</sup> | #  | AA # | y <sup>+</sup> | y <sup>2+</sup> |
|----------------|----|------|----------------|-----------------|
| 136.1186       | 1  | T 14 |                |                 |
| 249.2026       | 2  | L 13 | 1575.8919      | 788.4499        |
| 378.2452       | 3  | E 12 | 1462.8078      | 731.9078        |
| 506.3038       | 4  | Q 11 | 1333.7652      | 667.3865        |
| 668.4619       | 5  | K 10 | 1205.7066      | 603.3572        |
| 782.5048       | 6  | N 9  | 1043.5485      | 522.2782        |
| 895.5889       | 7  | I 8  | 929.5056       | 465.2567        |
| 966.6260       | 8  | A 7  | 816.4216       | 408.7147        |
| 1065.6944      | 9  | V 6  | 745.3844       | 373.1961        |
| 1194.7370      | 10 | E 5  | 646.3160       | 323.6619        |
| 1308.7800      | 11 | N 4  | 517.2734       | 259.1406        |
| 1437.8225      | 12 | E 3  | 403.2305       | 202.1192        |
| 1536.8910      | 13 | V 2  | 274.1879       | 137.5979        |
|                | 14 | R 1  | 175.1195       | 88.0637         |

N-term:+35.07 K(5):+162.16

TLFGDKLCAIPNLR, MH+ 1673.9412, m/z 558.6519  
 L OSG39 P180811 230811-s1.06477.06477.3.dta

scan 6477; 5.6e+000

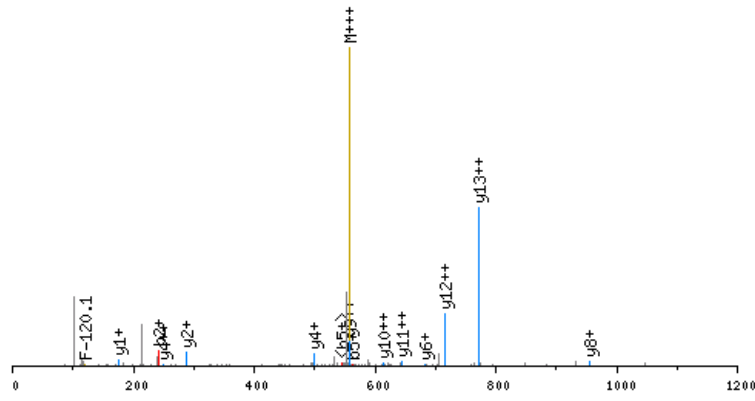

click image to zoom in; click top corners to zoom out [\[precursor±\]](#)

scan 6476; 558.7 mz; 5.6e+002

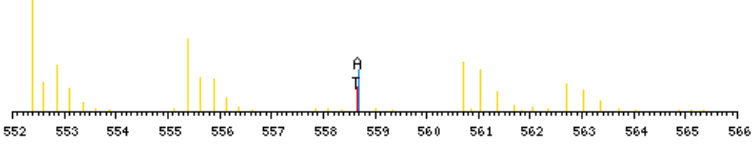

zoomed in precursor plot; T=theoretical m/z, A=acquired m/z

X-range:

-

MassTol: Y-zoom:

MassType:

AVG  MONO

Axis:

1  2

Label:

I  M  -

Ions:

a  +  2+  3+

b  +  2+  3+

c  +  2+  3+

x  +  2+  3+

y  +  2+  3+

z  +  2+  3+

hide H<sub>2</sub>O/NH<sub>3</sub>

zoom 112-122

GO

| b <sup>+</sup> | #  | AA | #  | y <sup>+</sup> | y <sup>2+</sup> |
|----------------|----|----|----|----------------|-----------------|
| 130.0868       | 1  | T  | 14 |                |                 |
| 243.1708       | 2  | L  | 13 | 1544.8623      | 772.9351        |
| 390.2393       | 3  | F  | 12 | 1431.7782      | 716.3930        |
| 447.2607       | 4  | G  | 11 | 1284.7098      | 642.8588        |
| 562.2877       | 5  | D  | 10 | 1227.6883      | 614.3481        |
| 718.4140       | 6  | K  | 9  | 1112.6614      | 556.8346        |
| 831.4980       | 7  | L  | 8  | 956.5351       | 478.7715        |
| 991.5286       | 8  | C  | 7  | 843.4510       | 422.2294        |
| 1062.5657      | 9  | A  | 6  | 683.4204       | 342.2141        |
| 1175.6498      | 10 | I  | 5  | 612.3833       | 306.6956        |
| 1272.7026      | 11 | P  | 4  | 499.2993       | 250.1535        |
| 1386.7455      | 12 | N  | 3  | 402.2465       | 201.6272        |
| 1499.8296      | 13 | L  | 2  | 288.2036       | 144.6057        |
|                | 14 | R  | 1  | 175.1195       | 88.0637         |

N-term:+29.04 K(6):+156.13  
 C(8):+160.03

TLPGSLSPPEKYL, MH+ 1599.9110, m/z 533.9752  
 L OSG39 P180811 230811-s1.04469.04469.3.dta

X-range:

-

MassTol: Y-zoom:

MassType:

AVG  MONO

Axis:

1  2

Label:

I  M  -

Ions:

a  +  2+  3+

b  +  2+  3+

c  +  2+  3+

x  +  2+  3+

y  +  2+  3+

z  +  2+  3+

hide H<sub>2</sub>O/NH<sub>3</sub>

zoom 112-122

GO

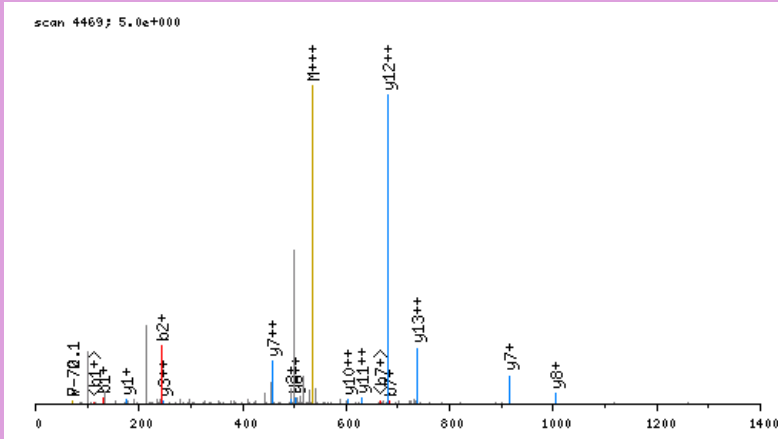

click image to zoom in; click top corners to zoom out [\[precursor±\]](#)

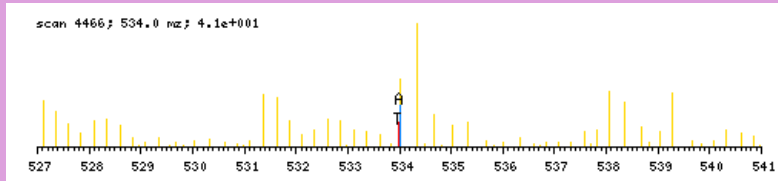

zoomed in precursor plot; T=theoretical m/z, A=acquired m/z

| b <sup>+</sup> | #  | AA # | y <sup>+</sup> | y <sup>2+</sup> |
|----------------|----|------|----------------|-----------------|
| 130.0868       | 1  | T 14 |                |                 |
| 243.1708       | 2  | L 13 | 1470.8321      | 735.9200        |
| 340.2236       | 3  | P 12 | 1357.7480      | 679.3779        |
| 397.2451       | 4  | G 11 | 1260.6952      | 630.8515        |
| 484.2771       | 5  | S 10 | 1203.6738      | 602.3408        |
| 597.3612       | 6  | L 9  | 1116.6418      | 558.8248        |
| 684.3932       | 7  | S 8  | 1003.5577      | 502.2828        |
| 781.4460       | 8  | P 7  | 916.5257       | 458.7667        |
| 878.4987       | 9  | P 6  | 819.4729       | 410.2404        |
| 977.5671       | 10 | V 5  | 722.4201       | 361.7140        |
| 1106.6097      | 11 | E 4  | 623.3517       | 312.1798        |
| 1262.7360      | 12 | K 3  | 494.3091       | 247.6585        |
| 1425.7994      | 13 | Y 2  | 338.1828       | 169.5953        |
|                | 14 | R 1  | 175.1195       | 88.0637         |

N-term:+29.04 K(12):+156.13

TLPVHFYGR, MH+ 1123.6476, m/z 375.2207  
 H OSG40 P180811 230811-s1.05455.05455.3.dta

X-range:

-

MassTol: Y-zoom:

MassType:

AVG  MONO

Axis:

1  2

Label:

I  M  -

Ions:

a  +  2+  3+

b  +  2+  3+

c  +  2+  3+

x  +  2+  3+

y  +  2+  3+

z  +  2+  3+

hide H<sub>2</sub>O/NH<sub>3</sub>

zoom 112-122

GO

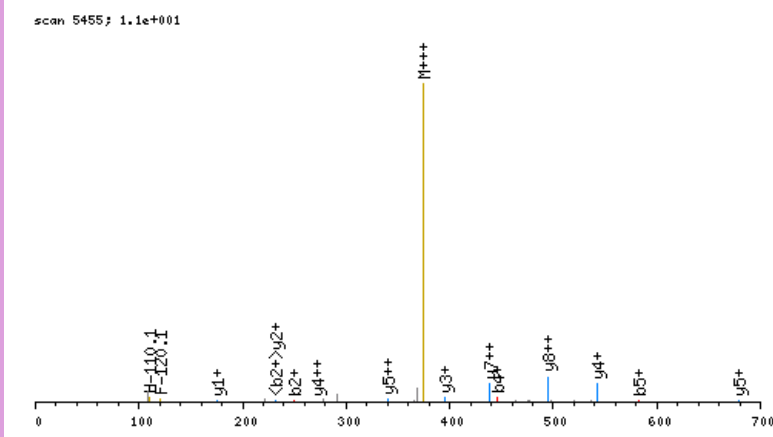

click image to zoom in; click top corners to zoom out [\[precursor±\]](#)

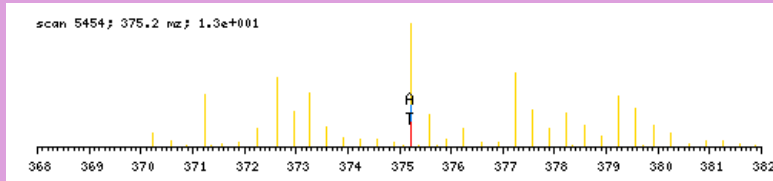

zoomed in precursor plot; T=theoretical m/z, A=acquired m/z

| b <sup>+</sup> | # | AA # | y <sup>+</sup> | y <sup>2+</sup> |
|----------------|---|------|----------------|-----------------|
| 136.1186       | 1 | T    | 9              |                 |
| 249.2026       | 2 | L    | 8              | 988.5369        |
| 346.2554       | 3 | P    | 7              | 875.4528        |
| 445.3238       | 4 | V    | 6              | 778.4000        |
| 582.3827       | 5 | H    | 5              | 679.3316        |
| 729.4511       | 6 | F    | 4              | 542.2727        |
| 892.5145       | 7 | Y    | 3              | 395.2043        |
| 949.5359       | 8 | G    | 2              | 232.1410        |
|                | 9 | R    | 1              | 175.1195        |

N-term:+35.07

TLVLTDPDAPSR, MH+ 1312.7112, m/z 656.8593  
 L OSG37 P180811 230811-s1.04846.04846.2.dta

X-range:

-

MassTol: Y-zoom:

MassType:

AVG  MONO

Axis:

1  2

Label:

I  M  -

Ions:

a  +  2+  3+

b  +  2+  3+

c  +  2+  3+

x  +  2+  3+

y  +  2+  3+

z  +  2+  3+

hide H<sub>2</sub>O/NH<sub>3</sub>

zoom 112-122

GO

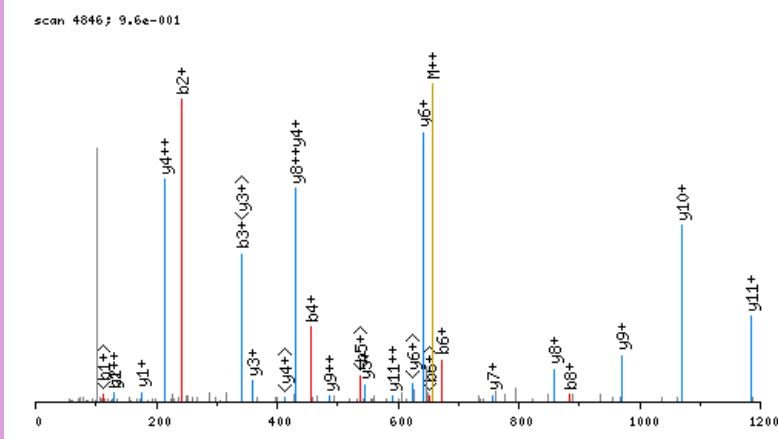

click image to zoom in; click top corners to zoom out [\[precursor±\]](#)

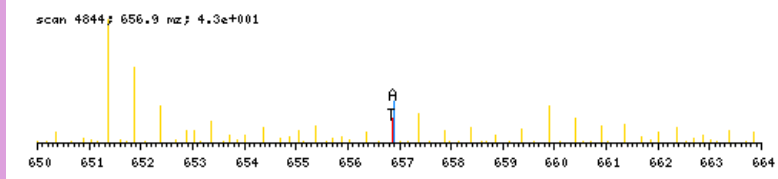

zoomed in precursor plot; T=theoretical m/z, A=acquired m/z

| b <sup>+</sup> | #  | AA # | y <sup>+</sup> | y <sup>2+</sup> |
|----------------|----|------|----------------|-----------------|
| 130.0868       | 1  | T 12 |                |                 |
| 243.1708       | 2  | L 11 | 1183.6323      | 592.3201        |
| 342.2393       | 3  | V 10 | 1070.5482      | 535.7780        |
| 455.3233       | 4  | L 9  | 971.4798       | 486.2438        |
| 556.3710       | 5  | T 8  | 858.3957       | 429.7018        |
| 671.3979       | 6  | D 7  | 757.3481       | 379.1779        |
| 768.4507       | 7  | P 6  | 642.3211       | 321.6645        |
| 883.4776       | 8  | D 5  | 545.2683       | 273.1381        |
| 954.5148       | 9  | A 4  | 430.2414       | 215.6246        |
| 1051.5675      | 10 | P 3  | 359.2043       | 180.1061        |
| 1138.5996      | 11 | S 2  | 262.1515       | 131.5797        |
|                | 12 | R 1  | 175.1195       | 88.0637         |

N-term:+29.04

TMVADTPENLR, MH+ 1280.6732, m/z 640.8403  
 H OSG37 P180811 230811-s1.03926.03926.2.dta

X-range:

-

MassTol: Y-zoom:

MassType:

AVG  MONO

Axis:

1  2

Label:

I  M  -

Ions:

a  +  2+  3+

b  +  2+  3+

c  +  2+  3+

x  +  2+  3+

y  +  2+  3+

z  +  2+  3+

hide H<sub>2</sub>O/NH<sub>3</sub>

zoom 112-122

GO

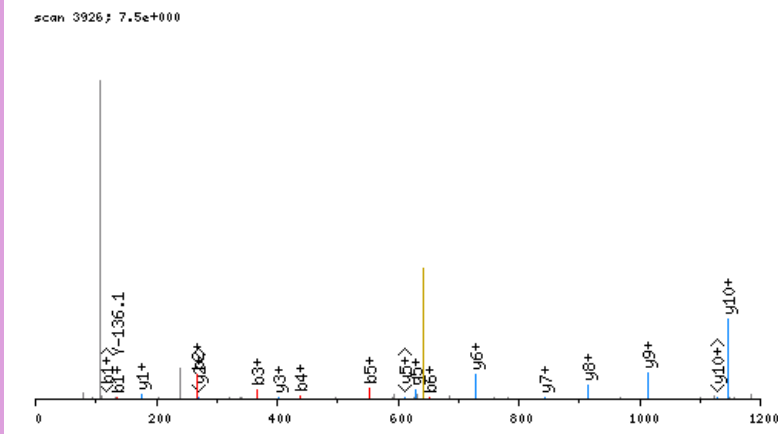

click image to zoom in; click top corners to zoom out [\[precursor±\]](#)

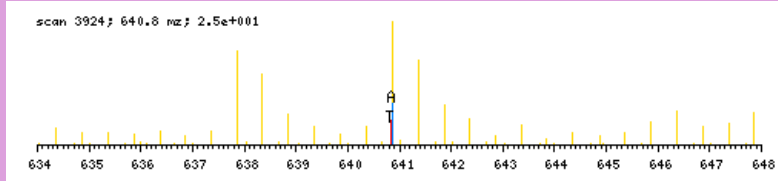

zoomed in precursor plot; T=theoretical m/z, A=acquired m/z

| b <sup>+</sup> | #  | AA # | y <sup>+</sup> | y <sup>2+</sup> |
|----------------|----|------|----------------|-----------------|
| 136.1186       | 1  | T 11 |                |                 |
| 267.1591       | 2  | M 10 | 1145.5625      | 573.2852        |
| 366.2275       | 3  | V 9  | 1014.5220      | 507.7649        |
| 437.2646       | 4  | A 8  | 915.4536       | 458.2307        |
| 552.2915       | 5  | D 7  | 844.4165       | 422.7121        |
| 653.3392       | 6  | T 6  | 729.3895       | 365.1987        |
| 750.3920       | 7  | P 5  | 628.3418       | 314.6748        |
| 879.4346       | 8  | E 4  | 531.2891       | 266.1485        |
| 993.4775       | 9  | N 3  | 402.2465       | 201.6272        |
| 1106.5616      | 10 | L 2  | 288.2036       | 144.6057        |
|                | 11 | R 1  | 175.1195       | 88.0637         |

N-term:+35.07



TNGETTQGLDGLSER, MH+ 1706.8197, m/z 569.6114  
 L OSG37 P180811 230811-s1.03916.03916.3.dta

X-range:

-

MassTol: Y-zoom:

MassType:

AVG  MONO

Axis:

1  2

Label:

I  M  -

Ions:

a  +  2+  3+

b  +  2+  3+

c  +  2+  3+

x  +  2+  3+

y  +  2+  3+

z  +  2+  3+

hide H<sub>2</sub>O/NH<sub>3</sub>

zoom 112-122

GO

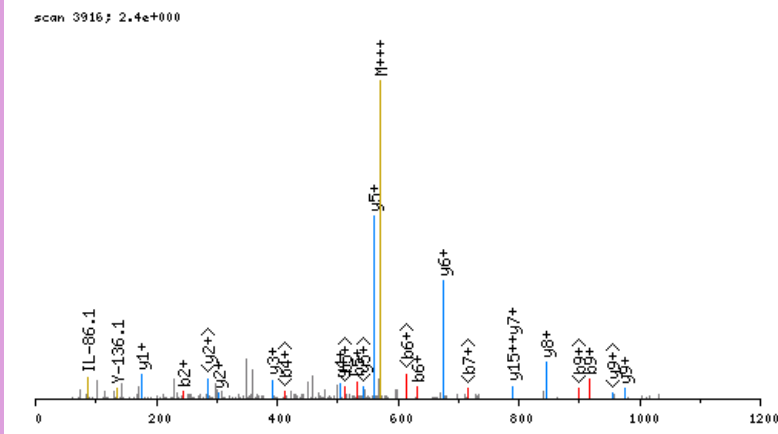

click image to zoom in; click top corners to zoom out [\[precursor±\]](#)

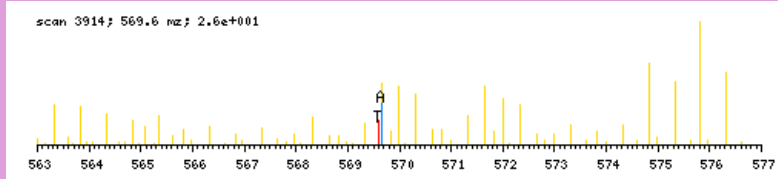

zoomed in precursor plot; T=theoretical m/z, A=acquired m/z

| b <sup>+</sup> | #  | AA # | y <sup>+</sup> | y <sup>2+</sup> |
|----------------|----|------|----------------|-----------------|
| 130.0868       | 1  | T 16 |                |                 |
| 244.1297       | 2  | N 15 | 1577.7407      | 789.3743        |
| 301.1512       | 3  | G 14 | 1463.6978      | 732.3528        |
| 430.1938       | 4  | E 13 | 1406.6763      | 703.8421        |
| 531.2414       | 5  | T 12 | 1277.6337      | 639.3208        |
| 632.2891       | 6  | T 11 | 1176.5861      | 588.7969        |
| 733.3368       | 7  | T 10 | 1075.5384      | 538.2731        |
| 861.3954       | 8  | Q 9  | 974.4907       | 487.7493        |
| 918.4168       | 9  | G 8  | 846.4321       | 423.7200        |
| 1031.5009      | 10 | L 7  | 789.4107       | 395.2092        |
| 1146.5278      | 11 | D 6  | 676.3266       | 338.6672        |
| 1203.5493      | 12 | G 5  | 561.2997       | 281.1537        |
| 1316.6334      | 13 | L 4  | 504.2782       | 252.6430        |
| 1403.6654      | 14 | S 3  | 391.1941       | 196.1010        |
| 1532.7080      | 15 | E 2  | 304.1621       | 152.5850        |
|                | 16 | R 1  | 175.1195       | 88.0637         |

N-term:+29.04

TNLGDFAIISLYR, MH+ 1397.7429, m/z 699.3751  
 L OSG37 P180811 230811-s1.08530.08530.2.dta

X-range:

-

MassTol: Y-zoom:

MassType:

AVG  MONO

Axis:

1  2

Label:

I  M  -

Ions:

a  +  2+  3+

b  +  2+  3+

c  +  2+  3+

x  +  2+  3+

y  +  2+  3+

z  +  2+  3+

hide H<sub>2</sub>O/NH<sub>3</sub>

zoom 112-122

GO

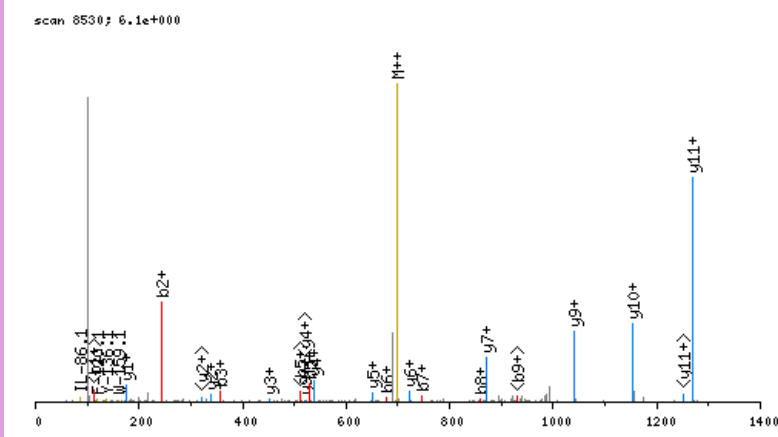

click image to zoom in; click top corners to zoom out [\[precursor±\]](#)

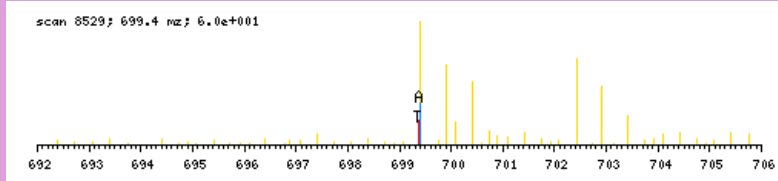

zoomed in precursor plot; T=theoretical m/z, A=acquired m/z

| b <sup>+</sup> | #  | AA # | y <sup>+</sup> | y <sup>2+</sup> |
|----------------|----|------|----------------|-----------------|
| 130.0868       | 1  | T    | 12             |                 |
| 244.1297       | 2  | N    | 11             | 1268.6639       |
| 357.2138       | 3  | L    | 10             | 1154.6210       |
| 414.2352       | 4  | G    | 9              | 1041.5369       |
| 529.2622       | 5  | D    | 8              | 984.5155        |
| 676.3306       | 6  | F    | 7              | 869.4885        |
| 747.3677       | 7  | A    | 6              | 722.4201        |
| 860.4518       | 8  | I    | 5              | 651.3830        |
| 947.4838       | 9  | S    | 4              | 538.2989        |
| 1060.5679      | 10 | L    | 3              | 451.2669        |
| 1223.6312      | 11 | Y    | 2              | 338.1828        |
|                | 12 | R    | 1              | 175.1195        |

N-term:+29.04

TNPTEVLEKR, MH+ 1254.7694, m/z 418.9280  
 H OSG40 P180811 230811-s1.03708.03708.3.dta

X-range:

-

MassTol: Y-zoom:

MassType:

AVG  MONO

Axis:

1  2

Label:

I  M  -

Ions:

a  +  2+  3+

b  +  2+  3+

c  +  2+  3+

x  +  2+  3+

y  +  2+  3+

z  +  2+  3+

hide H<sub>2</sub>O/NH<sub>3</sub>

zoom 112-122

GO

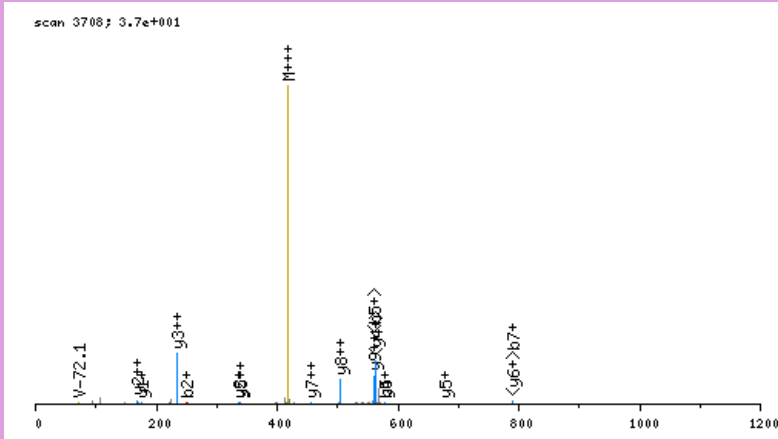

click image to zoom in; click top corners to zoom out [\[precursor±\]](#)

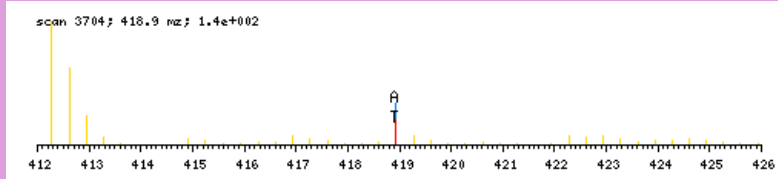

zoomed in precursor plot; T=theoretical m/z, A=acquired m/z

| b <sup>+</sup> | #  | AA # | y <sup>+</sup> | y <sup>2+</sup> |
|----------------|----|------|----------------|-----------------|
| 136.1186       | 1  | T    | 10             |                 |
| 250.1615       | 2  | N    | 9              | 1119.6586       |
| 347.2143       | 3  | P    | 8              | 1005.6157       |
| 448.2619       | 4  | T    | 7              | 908.5629        |
| 577.3045       | 5  | E    | 6              | 807.5153        |
| 676.3730       | 6  | V    | 5              | 678.4727        |
| 789.4570       | 7  | L    | 4              | 579.4043        |
| 918.4996       | 8  | E    | 3              | 466.3202        |
| 1080.6577      | 9  | K    | 2              | 337.2776        |
|                | 10 | R    | 1              | 175.1195        |

N-term:+35.07 K(9):+162.16

TPAMAQILLLLSSACLHAGNSAR, MH+ 2429.3220, m/z 608.0860  
 H OSG40 P180811 230811-s1.07687.07687.4.dta

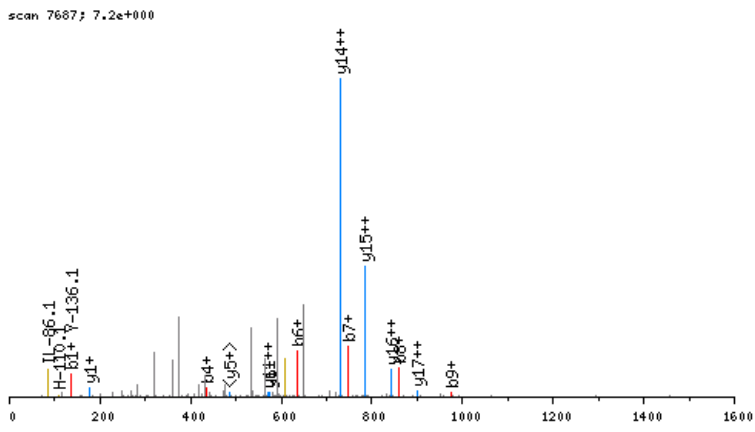

click image to zoom in; click top corners to zoom out [precursor±]

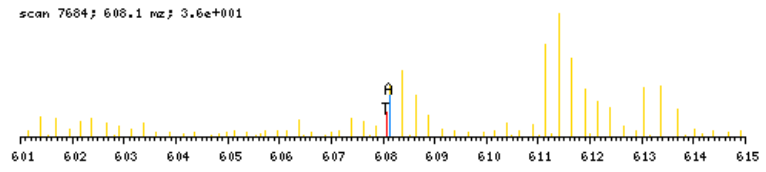

zoomed in precursor plot; T=theoretical m/z, A=acquired m/z

X-range:

-

MassTol: Y-zoom:

MassType:

AVG  MONO

Axis:

1  2

Label:

I  M  -

Ions:

a  +  2+  3+

b  +  2+  3+

c  +  2+  3+

x  +  2+  3+

y  +  2+  3+

z  +  2+  3+

hide H<sub>2</sub>O/NH<sub>3</sub>

zoom 112-122

GO

| b <sup>+</sup> | #  | AA | #  | y <sup>+</sup> | y <sup>2+</sup> |
|----------------|----|----|----|----------------|-----------------|
| 136.1186       | 1  | T  | 23 |                |                 |
| 233.1713       | 2  | P  | 22 | 2294.2113      | 1147.6095       |
| 304.2085       | 3  | A  | 21 | 2197.1585      | 1099.0832       |
| 435.2489       | 4  | M  | 20 | 2126.1214      | 1063.5646       |
| 506.2861       | 5  | A  | 19 | 1995.0809      | 998.0444        |
| 634.3446       | 6  | Q  | 18 | 1924.0438      | 962.5258        |
| 747.4287       | 7  | I  | 17 | 1795.9852      | 898.4965        |
| 860.5128       | 8  | L  | 16 | 1682.9012      | 841.9545        |
| 973.5968       | 9  | L  | 15 | 1569.8171      | 785.4125        |
| 1086.6809      | 10 | L  | 14 | 1456.7330      | 728.8704        |
| 1199.7650      | 11 | L  | 13 | 1343.6490      | 672.3284        |
| 1286.7970      | 12 | S  | 12 | 1230.5649      | 615.7864        |
| 1373.8290      | 13 | S  | 11 | 1143.5329      | 572.2703        |
| 1444.8661      | 14 | A  | 10 | 1056.5008      | 528.7543        |
| 1604.8967      | 15 | C  | 9  | 985.4637       | 493.2358        |
| 1717.9808      | 16 | L  | 8  | 825.4331       | 413.2205        |
| 1855.0397      | 17 | H  | 7  | 712.3491       | 356.6784        |
| 1926.0768      | 18 | A  | 6  | 575.2901       | 288.1490        |
| 1983.0983      | 19 | G  | 5  | 504.2530       | 252.6304        |
| 2097.1412      | 20 | N  | 4  | 447.2316       | 224.1197        |
| 2184.1732      | 21 | S  | 3  | 333.1886       | 167.0982        |
| 2255.2103      | 22 | A  | 2  | 246.1566       | 123.5822        |
|                | 23 | R  | 1  | 175.1195       | 88.0637         |

N-term:+35.07 C(15):+160.03

TPGVAADLSHIETR, MH+ 1494.7916, m/z 498.9354  
 L OSG40 P180811 230811-s1.05192.05192.3.dta

X-range:

-

MassTol: Y-zoom:

MassType:

AVG  MONO

Axis:

1  2

Label:

I  M  -

Ions:

a  +  2+  3+

b  +  2+  3+

c  +  2+  3+

x  +  2+  3+

y  +  2+  3+

z  +  2+  3+

hide H<sub>2</sub>O/NH<sub>3</sub>

zoom 112-122

GO

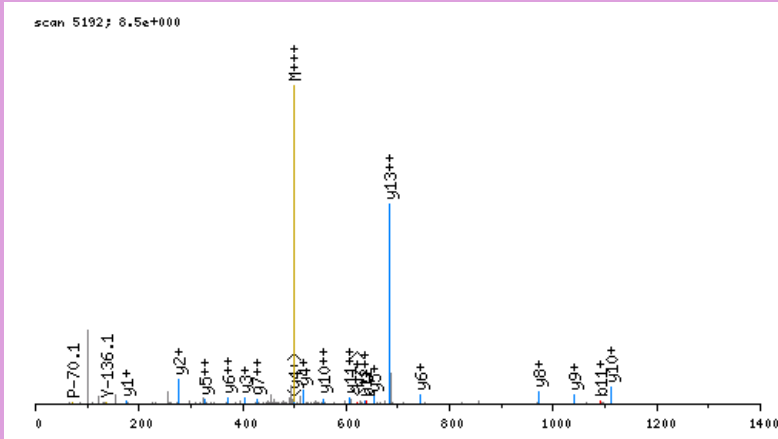

click image to zoom in; click top corners to zoom out [\[precursor±\]](#)

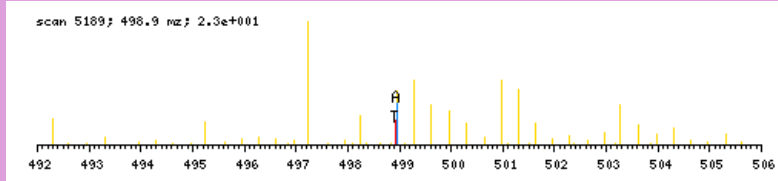

zoomed in precursor plot; T=theoretical m/z, A=acquired m/z

| b <sup>+</sup> | #  | AA # | y <sup>+</sup> | y <sup>2+</sup> |
|----------------|----|------|----------------|-----------------|
| 130.0868       | 1  | T    | 14             |                 |
| 227.1395       | 2  | P    | 13             | 1365.7127       |
| 284.1610       | 3  | G    | 12             | 1268.6599       |
| 383.2294       | 4  | V    | 11             | 1211.6384       |
| 454.2665       | 5  | A    | 10             | 1112.5700       |
| 525.3036       | 6  | A    | 9              | 1041.5329       |
| 640.3306       | 7  | D    | 8              | 970.4958        |
| 753.4147       | 8  | L    | 7              | 855.4688        |
| 840.4467       | 9  | S    | 6              | 742.3848        |
| 977.5056       | 10 | H    | 5              | 655.3527        |
| 1090.5897      | 11 | I    | 4              | 518.2938        |
| 1219.6323      | 12 | E    | 3              | 405.2098        |
| 1320.6799      | 13 | T    | 2              | 276.1672        |
|                | 14 | R    | 1              | 175.1195        |

N-term:+29.04

TPSALAIMENANVLAR, MH+ 1698.9212, m/z 566.9786  
 L OSG37 P180811 230811-s1.08483.08483.3.dta

X-range:

-

MassTol: Y-zoom:

MassType:

AVG  MONO

Axis:

1  2

Label:

I  M  -

Ions:

a  +  2+  3+

b  +  2+  3+

c  +  2+  3+

x  +  2+  3+

y  +  2+  3+

z  +  2+  3+

hide H<sub>2</sub>O/NH<sub>3</sub>

zoom 112-122

GO

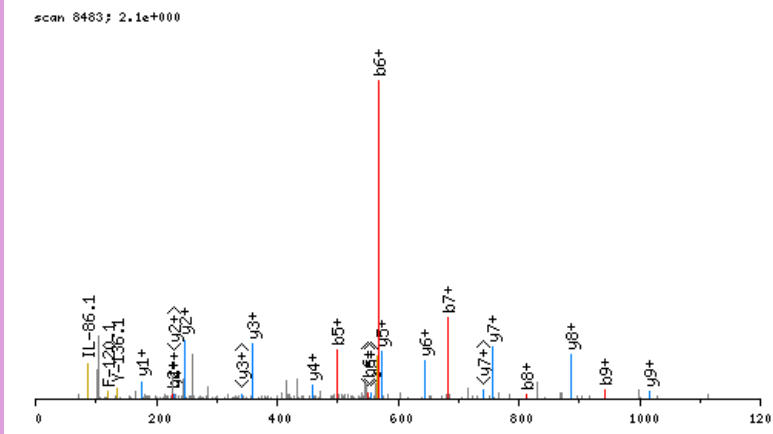

click image to zoom in; click top corners to zoom out [\[precursor±\]](#)

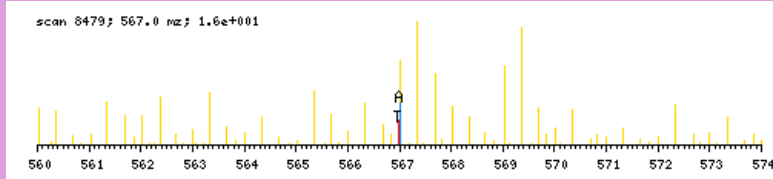

zoomed in precursor plot; T=theoretical m/z, A=acquired m/z

| b <sup>+</sup> | #  | AA # | y <sup>+</sup> | y <sup>2+</sup> |
|----------------|----|------|----------------|-----------------|
| 130.0868       | 1  | T 16 |                |                 |
| 227.1395       | 2  | P 15 | 1569.8423      | 785.4251        |
| 314.1716       | 3  | S 14 | 1472.7895      | 736.8987        |
| 385.2087       | 4  | A 13 | 1385.7575      | 693.3827        |
| 498.2927       | 5  | L 12 | 1314.7204      | 657.8641        |
| 569.3299       | 6  | A 11 | 1201.6363      | 601.3221        |
| 682.4139       | 7  | I 10 | 1130.5992      | 565.8035        |
| 813.4544       | 8  | M 9  | 1017.5151      | 509.2615        |
| 942.4970       | 9  | E 8  | 886.4747       | 443.7412        |
| 1056.5399      | 10 | N 7  | 757.4321       | 379.2199        |
| 1127.5770      | 11 | A 6  | 643.3891       | 322.1985        |
| 1241.6200      | 12 | N 5  | 572.3520       | 286.6799        |
| 1340.6884      | 13 | V 4  | 458.3091       | 229.6585        |
| 1453.7725      | 14 | L 3  | 359.2407       | 180.1243        |
| 1524.8096      | 15 | A 2  | 246.1566       | 123.5822        |
|                | 16 | R 1  | 175.1195       | 88.0637         |

N-term:+29.04

TPSVDHGFLVTR, MH+ 1356.7275, m/z 452.9140  
 L OSG40 P180811 230811-s1.04946.04946.3.dta

scan 4946; 7.5e+000

X-range:

-

MassTol: Y-zoom:

MassType:

AVG  MONO

Axis:

1  2

Label:

I  M  -

Ions:

a  +  2+  3+

b  +  2+  3+

c  +  2+  3+

x  +  2+  3+

y  +  2+  3+

z  +  2+  3+

hide H<sub>2</sub>O/NH<sub>3</sub>

zoom 112-122

GO

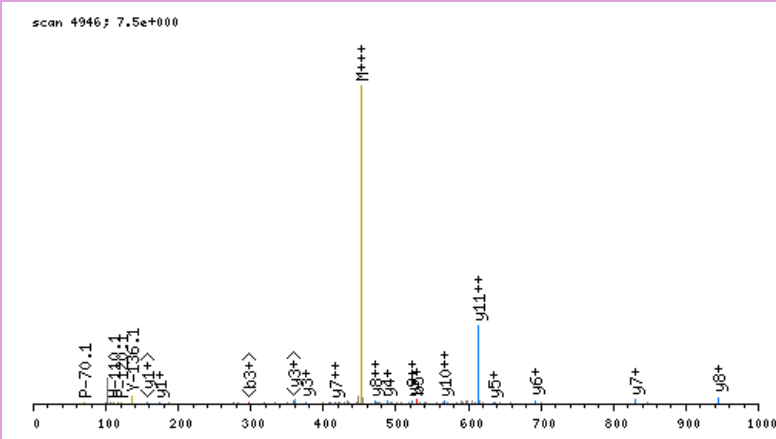

click image to zoom in; click top corners to zoom out [\[precursor±\]](#)

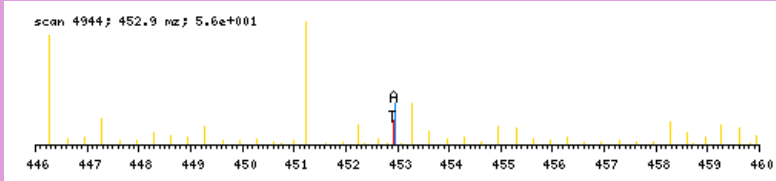

zoomed in precursor plot; T=theoretical m/z, A=acquired m/z

| b <sup>+</sup> | #  | AA # | y <sup>+</sup> | y <sup>2+</sup> |
|----------------|----|------|----------------|-----------------|
| 130.0868       | 1  | T 12 |                |                 |
| 227.1395       | 2  | P 11 | 1227.6486      | 614.3282        |
| 314.1716       | 3  | S 10 | 1130.5958      | 565.8018        |
| 413.2400       | 4  | V 9  | 1043.5638      | 522.2858        |
| 528.2669       | 5  | D 8  | 944.4954       | 472.7516        |
| 665.3258       | 6  | H 7  | 829.4684       | 415.2381        |
| 722.3473       | 7  | G 6  | 692.4095       | 346.7087        |
| 869.4157       | 8  | F 5  | 635.3881       | 318.1979        |
| 982.4998       | 9  | L 4  | 488.3197       | 244.6637        |
| 1081.5682      | 10 | V 3  | 375.2356       | 188.1217        |
| 1182.6159      | 11 | T 2  | 276.1672       | 138.5875        |
|                | 12 | R 1  | 175.1195       | 88.0637         |

N-term:+29.04

TQAYPDQKPGTSGLR, MH+ 1686.9451, m/z 562.9866  
H OSG39 P180811 230811-s1.02404.02404.3.dta

X-range:

-

MassTol: Y-zoom:

MassType:

AVG  MONO

Axis:

1  2

Label:

I  M  -

Ions:

a  +  2+  3+

b  +  2+  3+

c  +  2+  3+

x  +  2+  3+

y  +  2+  3+

z  +  2+  3+

hide H<sub>2</sub>O/NH<sub>3</sub>

zoom 112-122

GO

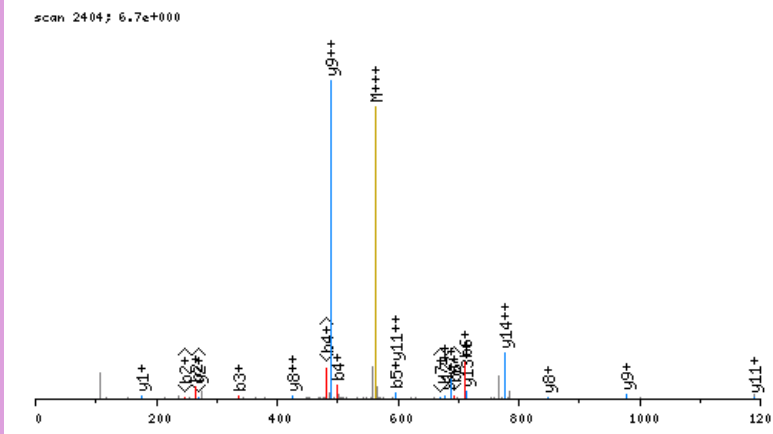

click image to zoom in; click top corners to zoom out [\[precursor±\]](#)

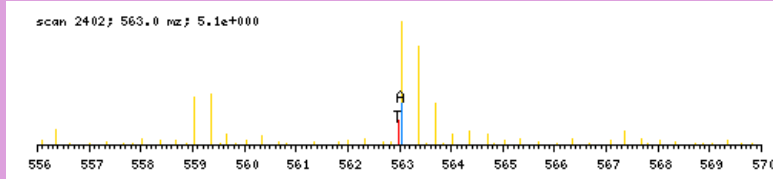

zoomed in precursor plot; T=theoretical m/z, A=acquired m/z

| b <sup>+</sup> | #  | AA | #  | y <sup>+</sup> | y <sup>2+</sup> |
|----------------|----|----|----|----------------|-----------------|
| 136.1186       | 1  | T  | 15 |                |                 |
| 264.1772       | 2  | Q  | 14 | 1551.8344      | 776.4211        |
| 335.2143       | 3  | A  | 13 | 1423.7758      | 712.3918        |
| 498.2776       | 4  | Y  | 12 | 1352.7387      | 676.8733        |
| 595.3304       | 5  | P  | 11 | 1189.6753      | 595.3416        |
| 710.3573       | 6  | D  | 10 | 1092.6226      | 546.8152        |
| 838.4159       | 7  | Q  | 9  | 977.5956       | 489.3017        |
| 1000.5740      | 8  | K  | 8  | 849.5371       | 425.2724        |
| 1097.6267      | 9  | P  | 7  | 687.3790       | 344.1934        |
| 1154.6482      | 10 | G  | 6  | 590.3262       | 295.6670        |
| 1255.6959      | 11 | T  | 5  | 533.3047       | 267.1563        |
| 1342.7279      | 12 | S  | 4  | 432.2571       | 216.6324        |
| 1399.7494      | 13 | G  | 3  | 345.2250       | 173.1164        |
| 1512.8334      | 14 | L  | 2  | 288.2036       | 144.6057        |
|                | 15 | R  | 1  | 175.1195       | 88.0637         |

N-term:+35.07 K(8):+162.16



TQKAPQVSTPTLVEAAR, MH+ 1865.1132, m/z 622.3759  
H OSG39 P180811 230811-s1.03502.03502.3.dta

X-range:

-

MassTol: Y-zoom:

MassType:

AVG  MONO

Axis:

1  2

Label:

I  M  -

Ions:

a  +  2+  3+

b  +  2+  3+

c  +  2+  3+

x  +  2+  3+

y  +  2+  3+

z  +  2+  3+

hide H<sub>2</sub>O/NH<sub>3</sub>

zoom 112-122

GO

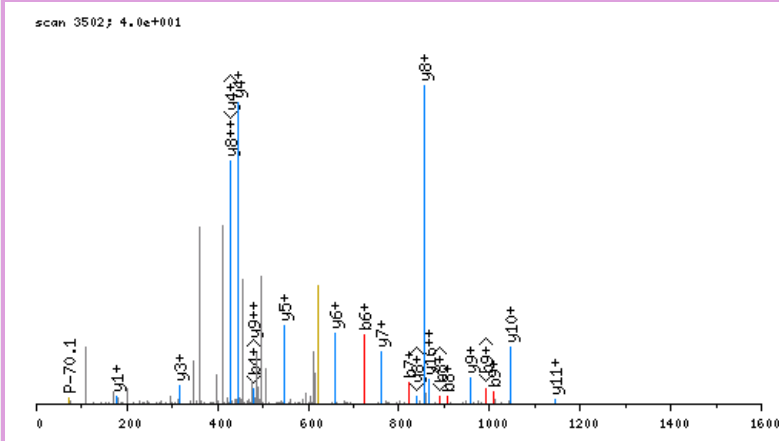

click image to zoom in; click top corners to zoom out [\[precursor±\]](#)

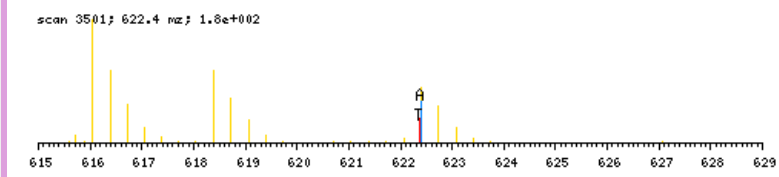

zoomed in precursor plot; T=theoretical m/z, A=acquired m/z

| b <sup>+</sup> | #  | AA | #  | y <sup>+</sup> | y <sup>2+</sup> |
|----------------|----|----|----|----------------|-----------------|
| 136.1186       | 1  | T  | 17 |                |                 |
| 264.1772       | 2  | Q  | 16 | 1730.0025      | 865.5052        |
| 426.3353       | 3  | K  | 15 | 1601.9439      | 801.4759        |
| 497.3724       | 4  | A  | 14 | 1439.7858      | 720.3968        |
| 594.4251       | 5  | P  | 13 | 1368.7487      | 684.8783        |
| 722.4837       | 6  | Q  | 12 | 1271.6959      | 636.3519        |
| 821.5521       | 7  | V  | 11 | 1143.6374      | 572.3226        |
| 908.5842       | 8  | S  | 10 | 1044.5689      | 522.7884        |
| 1009.6318      | 9  | T  | 9  | 957.5369       | 479.2724        |
| 1106.6846      | 10 | P  | 8  | 856.4892       | 428.7485        |
| 1207.7323      | 11 | T  | 7  | 759.4365       | 380.2222        |
| 1320.8163      | 12 | L  | 6  | 658.3888       | 329.6983        |
| 1419.8848      | 13 | V  | 5  | 545.3047       | 273.1563        |
| 1548.9273      | 14 | E  | 4  | 446.2363       | 223.6221        |
| 1619.9645      | 15 | A  | 3  | 317.1937       | 159.1008        |
| 1691.0016      | 16 | A  | 2  | 246.1566       | 123.5822        |
|                | 17 | R  | 1  | 175.1195       | 88.0637         |

N-term:+35.07 K(3):+162.16

TQKFSNEEIAMATVTALR, MH+ 2078.1592, m/z 693.3913  
 H OSG39 P180811 230811-s1.06057.06057.3.dta

X-range:

-

MassTol: Y-zoom:

MassType:

AVG  MONO

Axis:

1  2

Label:

I  M  -

Ions:

a  +  2+  3+

b  +  2+  3+

c  +  2+  3+

x  +  2+  3+

y  +  2+  3+

z  +  2+  3+

hide H<sub>2</sub>O/NH<sub>3</sub>

zoom 112-122

GO

scan 6057; 8.1e+000

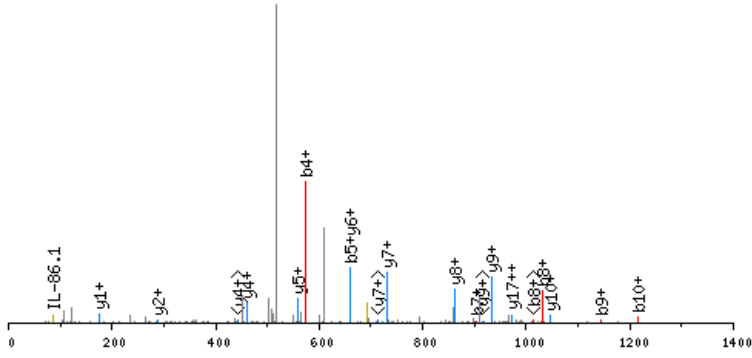

click image to zoom in; click top corners to zoom out [\[precursor±\]](#)

scan 6056; 693.4 m/z; 2.1e+001

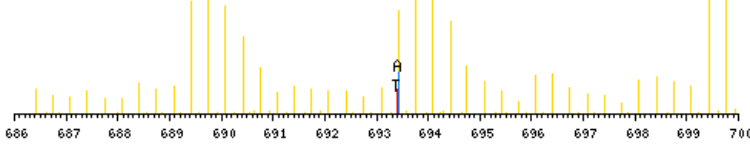

zoomed in precursor plot; T=theoretical m/z, A=acquired m/z

| b <sup>+</sup> | #  | AA # | y <sup>+</sup> | y <sup>2+</sup> |
|----------------|----|------|----------------|-----------------|
| 136.1186       | 1  | T 18 |                |                 |
| 264.1772       | 2  | Q 17 | 1943.0485      | 972.0281        |
| 426.3353       | 3  | K 16 | 1814.9899      | 907.9989        |
| 573.4037       | 4  | F 15 | 1652.8318      | 826.9198        |
| 660.4357       | 5  | S 14 | 1505.7634      | 753.3856        |
| 774.4786       | 6  | N 13 | 1418.7313      | 709.8696        |
| 903.5212       | 7  | E 12 | 1304.6884      | 652.8481        |
| 1032.5638      | 8  | E 11 | 1175.6458      | 588.3268        |
| 1145.6479      | 9  | I 10 | 1046.6032      | 523.8055        |
| 1216.6850      | 10 | A 9  | 933.5192       | 467.2635        |
| 1347.7255      | 11 | M 8  | 862.4820       | 431.7449        |
| 1418.7626      | 12 | A 7  | 731.4416       | 366.2247        |
| 1519.8103      | 13 | T 6  | 660.4044       | 330.7061        |
| 1618.8787      | 14 | V 5  | 559.3568       | 280.1823        |
| 1719.9264      | 15 | T 4  | 460.2884       | 230.6481        |
| 1790.9635      | 16 | A 3  | 359.2407       | 180.1243        |
| 1904.0475      | 17 | L 2  | 288.2036       | 144.6057        |
|                | 18 | R 1  | 175.1195       | 88.0637         |

N-term:+35.07 K(3):+162.16

TQLSQLSTR, MH+ 1061.5955, m/z 531.3014  
 L OSG38 P180811 230811-s1.03061.03061.2.dta

scan 3061; 1.5e+001

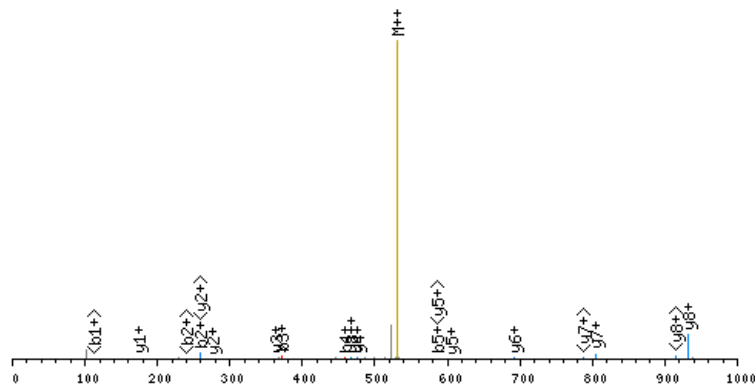

click image to zoom in; click top corners to zoom out [precursor±]

scan 3059; 531.3 m/z; 1.3e+001

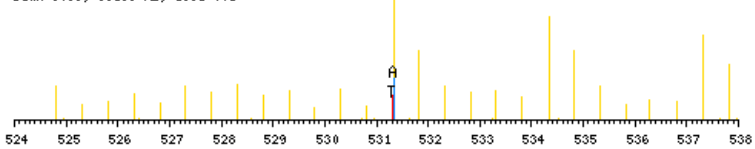

zoomed in precursor plot; T=theoretical m/z, A=acquired m/z

X-range:

-

MassTol: Y-zoom:

MassType:

AVG  MONO

Axis:

1  2

Label:

I  M  -

Ions:

a  +  2+  3+

b  +  2+  3+

c  +  2+  3+

x  +  2+  3+

y  +  2+  3+

z  +  2+  3+

hide H<sub>2</sub>O/NH<sub>3</sub>

zoom 112-122

GO

| b <sup>+</sup> | # | AA # | y <sup>+</sup> | y <sup>2+</sup>   |
|----------------|---|------|----------------|-------------------|
| 130.0868       | 1 | T    | 9              |                   |
| 258.1454       | 2 | Q    | 8              | 932.5165 466.7622 |
| 371.2294       | 3 | L    | 7              | 804.4579 402.7329 |
| 458.2614       | 4 | S    | 6              | 691.3739 346.1909 |
| 586.3200       | 5 | Q    | 5              | 604.3418 302.6748 |
| 699.4041       | 6 | L    | 4              | 476.2833 238.6455 |
| 786.4361       | 7 | S    | 3              | 363.1992 182.1035 |
| 887.4838       | 8 | T    | 2              | 276.1672 138.5875 |
|                | 9 | R    | 1              | 175.1195 88.0637  |

N-term:+29.04

TQVEGDEEAALLER, MH+ 1587.7866, m/z 794.3969  
 L OSG37 P180811 230811-s1.05136.05136.2.dta

X-range:

-

MassTol: Y-zoom:

MassType:

AVG  MONO

Axis:

1  2

Label:

I  M  -

Ions:

a  +  2+  3+

b  +  2+  3+

c  +  2+  3+

x  +  2+  3+

y  +  2+  3+

z  +  2+  3+

hide H<sub>2</sub>O/NH<sub>3</sub>

zoom 112-122

GO

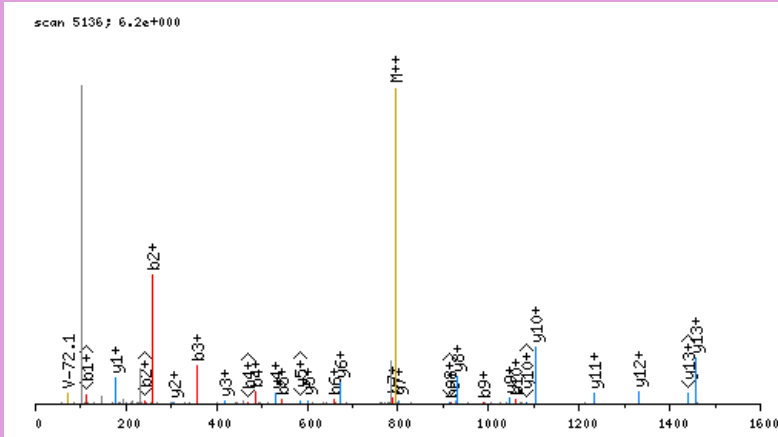

click image to zoom in; click top corners to zoom out [\[precursor±\]](#)

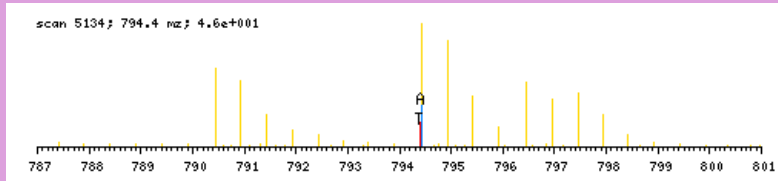

zoomed in precursor plot; T=theoretical m/z, A=acquired m/z

| b <sup>+</sup> | #  | AA | #  | y <sup>+</sup> | y <sup>2+</sup> |
|----------------|----|----|----|----------------|-----------------|
| 130.0868       | 1  | T  | 14 |                |                 |
| 258.1454       | 2  | Q  | 13 | 1458.7076      | 729.8577        |
| 357.2138       | 3  | V  | 12 | 1330.6490      | 665.8284        |
| 486.2564       | 4  | E  | 11 | 1231.5806      | 616.2942        |
| 543.2778       | 5  | G  | 10 | 1102.5380      | 551.7729        |
| 658.3048       | 6  | D  | 9  | 1045.5166      | 523.2622        |
| 787.3474       | 7  | E  | 8  | 930.4896       | 465.7487        |
| 916.3900       | 8  | E  | 7  | 801.4470       | 401.2274        |
| 987.4271       | 9  | A  | 6  | 672.4044       | 336.7061        |
| 1058.4642      | 10 | A  | 5  | 601.3673       | 301.1876        |
| 1171.5482      | 11 | L  | 4  | 530.3302       | 265.6690        |
| 1284.6323      | 12 | L  | 3  | 417.2462       | 209.1270        |
| 1413.6749      | 13 | E  | 2  | 304.1621       | 152.5850        |
|                | 14 | R  | 1  | 175.1195       | 88.0637         |

N-term:+29.04

TSCISTPAQVTCNR, MH+ 1622.7629, m/z 541.5925  
 L OSG37 P180811 230811-s1.03213.03213.3.dta

X-range:

-

MassTol: Y-zoom:

MassType:

AVG  MONO

Axis:

1  2

Label:

I  M  -

Ions:

a  +  2+  3+

b  +  2+  3+

c  +  2+  3+

x  +  2+  3+

y  +  2+  3+

z  +  2+  3+

hide H<sub>2</sub>O/NH<sub>3</sub>

zoom 112-122

GO

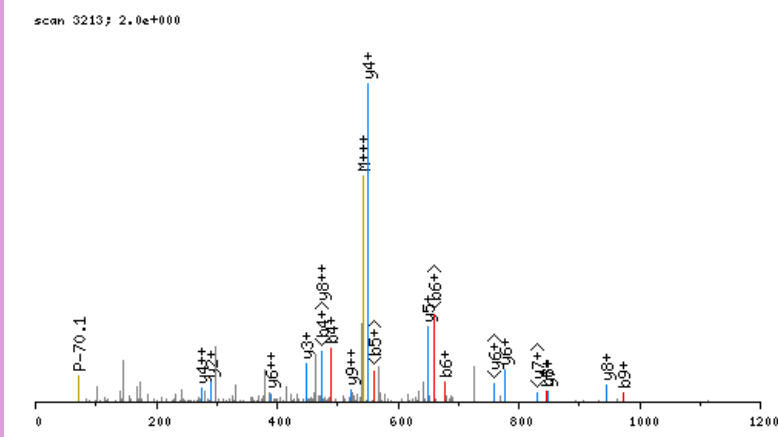

click image to zoom in; click top corners to zoom out [\[precursor±\]](#)

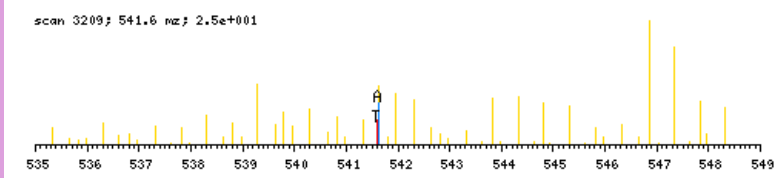

zoomed in precursor plot; T=theoretical m/z, A=acquired m/z

| b <sup>+</sup> | #  | AA # | y <sup>+</sup> | y <sup>2+</sup> |
|----------------|----|------|----------------|-----------------|
| 130.0868       | 1  | T 14 |                |                 |
| 217.1188       | 2  | S 13 | 1493.6840      | 747.3459        |
| 377.1494       | 3  | C 12 | 1406.6519      | 703.8299        |
| 490.2335       | 4  | I 11 | 1246.6213      | 623.8146        |
| 577.2655       | 5  | S 10 | 1133.5373      | 567.2726        |
| 678.3132       | 6  | T 9  | 1046.5053      | 523.7565        |
| 775.3659       | 7  | P 8  | 945.4576       | 473.2327        |
| 846.4031       | 8  | A 7  | 848.4048       | 424.7063        |
| 974.4616       | 9  | Q 6  | 777.3677       | 389.1878        |
| 1073.5300      | 10 | V 5  | 649.3091       | 325.1585        |
| 1174.5777      | 11 | T 4  | 550.2407       | 275.6243        |
| 1334.6083      | 12 | C 3  | 449.1930       | 225.1004        |
| 1448.6513      | 13 | N 2  | 289.1624       | 145.0851        |
|                | 14 | R 1  | 175.1195       | 88.0637         |

N-term:+29.04 C(3):+160.03  
 C(12):+160.03

TSDQDAKVVVAEPQAQR, MH+ 1798.9299, m/z 600.3148  
 L OSG39 P180811 230811-s1.02220.02220.3.dta

scan 2220; 7.1e+000

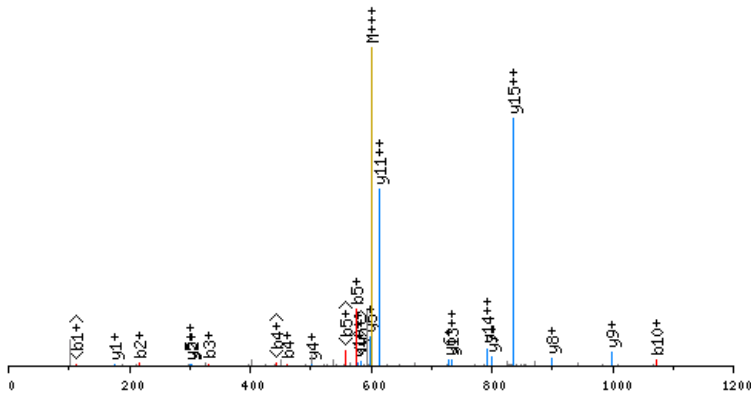

click image to zoom in; click top corners to zoom out [\[precursor±\]](#)

scan 2217; 600.3 m/z; 4.6e+000

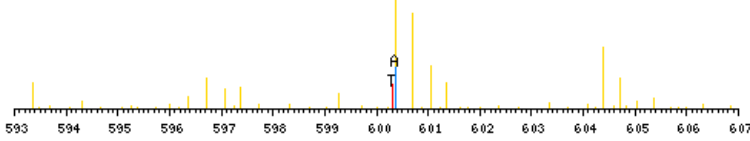

zoomed in precursor plot; T=theoretical m/z, A=acquired m/z

X-range:

-

MassTol: Y-zoom:

MassType:

AVG  MONO

Axis:

1  2

Label:

I  M  -

Ions:

a  +  2+  3+

b  +  2+  3+

c  +  2+  3+

x  +  2+  3+

y  +  2+  3+

z  +  2+  3+

hide H<sub>2</sub>O/NH<sub>3</sub>

zoom 112-122

GO

| b <sup>+</sup> | #  | AA | #  | y <sup>+</sup> | y <sup>2+</sup> |
|----------------|----|----|----|----------------|-----------------|
| 130.0868       | 1  | T  | 16 |                |                 |
| 217.1188       | 2  | S  | 15 | 1669.8510      | 835.4294        |
| 332.1458       | 3  | D  | 14 | 1582.8189      | 791.9134        |
| 460.2043       | 4  | Q  | 13 | 1467.7920      | 734.3999        |
| 575.2313       | 5  | D  | 12 | 1339.7334      | 670.3706        |
| 646.2684       | 6  | A  | 11 | 1224.7065      | 612.8572        |
| 802.3947       | 7  | K  | 10 | 1153.6694      | 577.3386        |
| 901.4631       | 8  | V  | 9  | 997.5431       | 499.2754        |
| 1000.5315      | 9  | V  | 8  | 898.4747       | 449.7412        |
| 1071.5686      | 10 | A  | 7  | 799.4062       | 400.2070        |
| 1200.6112      | 11 | E  | 6  | 728.3691       | 364.6885        |
| 1297.6640      | 12 | P  | 5  | 599.3265       | 300.1672        |
| 1425.7226      | 13 | Q  | 4  | 502.2738       | 251.6408        |
| 1496.7597      | 14 | A  | 3  | 374.2152       | 187.6115        |
| 1624.8183      | 15 | Q  | 2  | 303.1781       | 152.0930        |
|                | 16 | R  | 1  | 175.1195       | 88.0637         |

N-term:+29.04 K(7):+156.13

TSGGHPLEFLR, MH+ 1241.6642, m/z 414.5596  
 L OSG40 P180811 230811-s1.05141.05141.3.dta

X-range:

-

MassTol: Y-zoom:

MassType:

AVG  MONO

Axis:

1  2

Label:

I  M  -

Ions:

a  +  2+  3+

b  +  2+  3+

c  +  2+  3+

x  +  2+  3+

y  +  2+  3+

z  +  2+  3+

hide H<sub>2</sub>O/NH<sub>3</sub>

zoom 112-122

GO

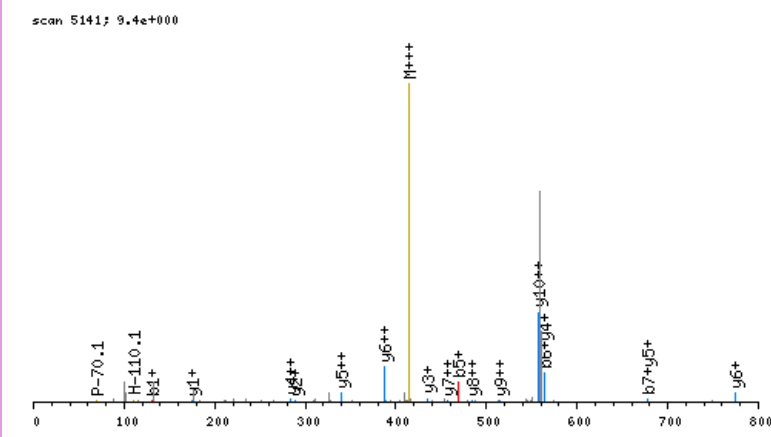

click image to zoom in; click top corners to zoom out [\[precursor±\]](#)

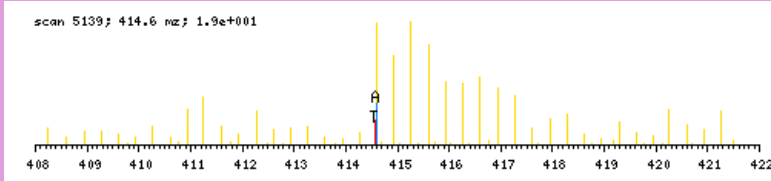

zoomed in precursor plot; T=theoretical m/z, A=acquired m/z

| b <sup>+</sup> | #  | AA # | y <sup>+</sup> | y <sup>2+</sup> |
|----------------|----|------|----------------|-----------------|
| 130.0868       | 1  | T    | 11             |                 |
| 217.1188       | 2  | S    | 10             | 556.7965        |
| 274.1403       | 3  | G    | 9              | 513.2805        |
| 331.1617       | 4  | G    | 8              | 484.7698        |
| 468.2206       | 5  | H    | 7              | 456.2591        |
| 565.2734       | 6  | P    | 6              | 387.7296        |
| 678.3575       | 7  | L    | 5              | 339.2032        |
| 807.4001       | 8  | E    | 4              | 282.6612        |
| 954.4685       | 9  | F    | 3              | 218.1399        |
| 1067.5525      | 10 | L    | 2              | 144.6057        |
|                | 11 | R    | 1              | 88.0637         |

N-term:+29.04

TSLAIDTIINQKR, MH+ 1540.9699, m/z 514.3281  
 H OSG39 P180811 230811-s1.05208.05208.3.dta

X-range:

-

MassTol: Y-zoom:

MassType:

AVG  MONO

Axis:

1  2

Label:

I  M  -

Ions:

a  +  2+  3+

b  +  2+  3+

c  +  2+  3+

x  +  2+  3+

y  +  2+  3+

z  +  2+  3+

hide H<sub>2</sub>O/NH<sub>3</sub>

zoom 112-122

GO

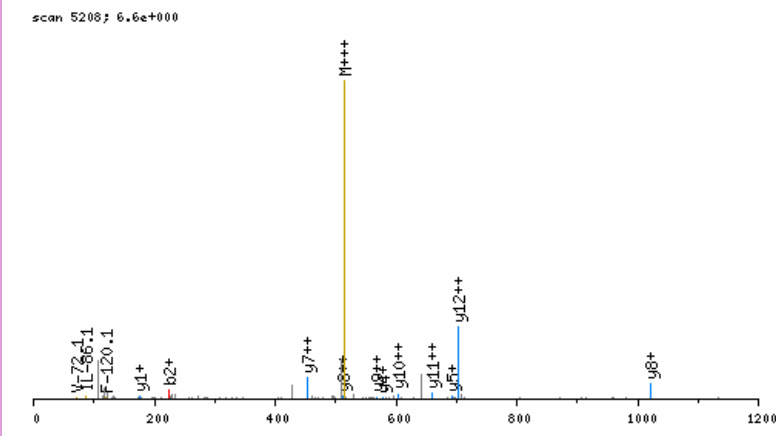

click image to zoom in; click top corners to zoom out [\[precursor±\]](#)

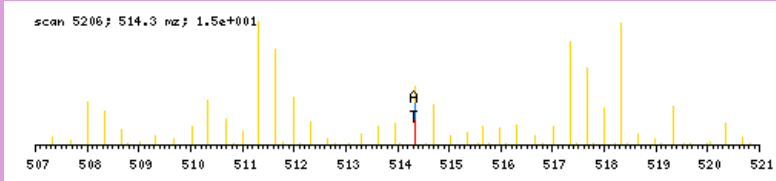

zoomed in precursor plot; T=theoretical m/z, A=acquired m/z

| b <sup>+</sup> | #  | AA # | y <sup>+</sup> | y <sup>2+</sup> |
|----------------|----|------|----------------|-----------------|
| 136.1186       | 1  | T    | 13             |                 |
| 223.1506       | 2  | S    | 12             | 1405.8591       |
| 336.2347       | 3  | I    | 11             | 1318.8271       |
| 407.2718       | 4  | A    | 10             | 1205.7430       |
| 520.3558       | 5  | I    | 9              | 1134.7059       |
| 635.3828       | 6  | D    | 8              | 1021.6219       |
| 736.4305       | 7  | T    | 7              | 906.5949        |
| 849.5145       | 8  | I    | 6              | 805.5472        |
| 962.5986       | 9  | I    | 5              | 692.4632        |
| 1076.6415      | 10 | N    | 4              | 579.3791        |
| 1204.7001      | 11 | Q    | 3              | 465.3362        |
| 1366.8582      | 12 | K    | 2              | 337.2776        |
|                | 13 | R    | 1              | 175.1195        |

N-term:+35.07 K(12):+162.16



TSSMGLPKQVKIVEVGPR, MH+ 2111.2263, m/z 528.5620  
 L OSG40 P180811 230811-s1.05791.05791.4.dta

scan 5791; 1.2e+001

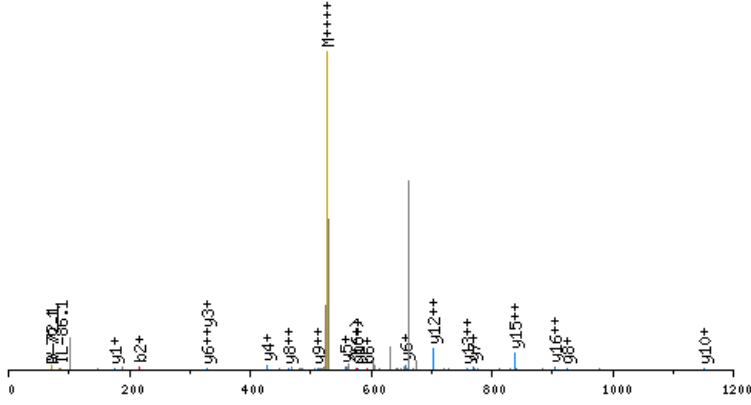

click image to zoom in; click top corners to zoom out [\[precursor±\]](#)

scan 5789; 528.6 mz; 1.3e+002

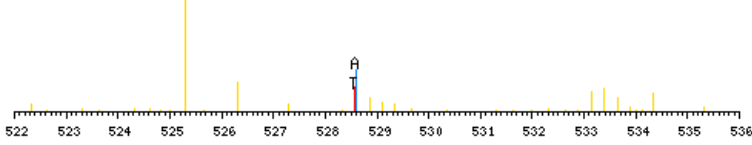

zoomed in precursor plot; T=theoretical m/z, A=acquired m/z

X-range:

-

MassTol: Y-zoom:

MassType:

AVG  MONO

Axis:

1  2

Label:

I  M  -

Ions:

a  +  2+  3+

b  +  2+  3+

c  +  2+  3+

x  +  2+  3+

y  +  2+  3+

z  +  2+  3+

hide H<sub>2</sub>O/NH<sub>3</sub>

zoom 112-122

GO

| b <sup>+</sup> | #  | AA | #  | y <sup>+</sup> | y <sup>2+</sup> |
|----------------|----|----|----|----------------|-----------------|
| 130.0868       | 1  | T  | 19 |                |                 |
| 217.1188       | 2  | S  | 18 | 1982.1473      | 991.5776        |
| 304.1508       | 3  | S  | 17 | 1895.1153      | 948.0616        |
| 435.1913       | 4  | M  | 16 | 1808.0833      | 904.5455        |
| 492.2128       | 5  | G  | 15 | 1677.0428      | 839.0253        |
| 593.2605       | 6  | T  | 14 | 1620.0213      | 810.5146        |
| 706.3445       | 7  | L  | 13 | 1518.9736      | 759.9907        |
| 803.3973       | 8  | P  | 12 | 1405.8896      | 703.4487        |
| 959.5236       | 9  | K  | 11 | 1308.8368      | 654.9223        |
| 1087.5822      | 10 | Q  | 10 | 1152.7105      | 576.8592        |
| 1186.6506      | 11 | V  | 9  | 1024.6519      | 512.8299        |
| 1342.7769      | 12 | K  | 8  | 925.5835       | 463.2957        |
| 1455.8609      | 13 | I  | 7  | 769.4572       | 385.2325        |
| 1554.9294      | 14 | V  | 6  | 656.3731       | 328.6905        |
| 1683.9720      | 15 | E  | 5  | 557.3047       | 279.1563        |
| 1783.0404      | 16 | V  | 4  | 428.2621       | 214.6350        |
| 1840.0618      | 17 | G  | 3  | 329.1937       | 165.1008        |
| 1937.1146      | 18 | P  | 2  | 272.1723       | 136.5900        |
|                | 19 | R  | 1  | 175.1195       | 88.0637         |

N-term:+29.04 K(9):+156.13  
 K(12):+156.13

TSSYSALSEPSR, MH+ 1312.6385, m/z 656.8229  
 L OSG37 P180811 230811-s1.02971.02971.2.dta

X-range:

-

MassTol: Y-zoom:

MassType:

AVG  MONO

Axis:

1  2

Label:

I  M  -

Ions:

a  +  2+  3+

b  +  2+  3+

c  +  2+  3+

x  +  2+  3+

y  +  2+  3+

z  +  2+  3+

hide H<sub>2</sub>O/NH<sub>3</sub>

zoom 112-122

GO

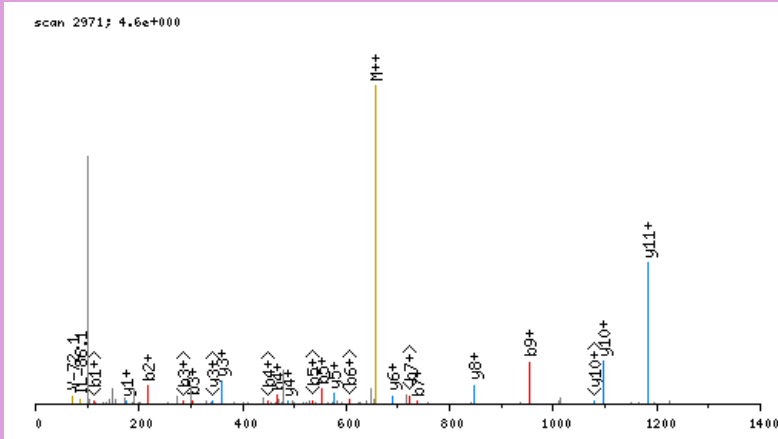

click image to zoom in; click top corners to zoom out [\[precursor±\]](#)

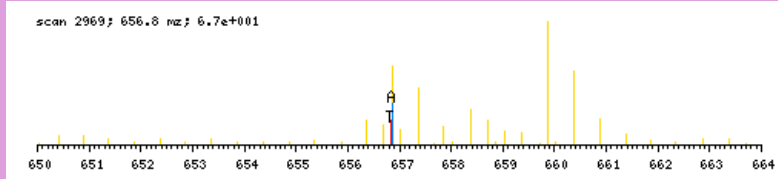

zoomed in precursor plot; T=theoretical m/z, A=acquired m/z

| b <sup>+</sup> | #  | AA # | y <sup>+</sup> | y <sup>2+</sup> |
|----------------|----|------|----------------|-----------------|
| 130.0868       | 1  | T 12 |                |                 |
| 217.1188       | 2  | S 11 | 1183.5595      | 592.2837        |
| 304.1508       | 3  | S 10 | 1096.5275      | 548.7677        |
| 467.2142       | 4  | Y 9  | 1009.4954      | 505.2516        |
| 554.2462       | 5  | S 8  | 846.4321       | 423.7200        |
| 625.2833       | 6  | A 7  | 759.4001       | 380.2040        |
| 738.3674       | 7  | L 6  | 688.3630       | 344.6854        |
| 825.3994       | 8  | S 5  | 575.2789       | 288.1434        |
| 954.4420       | 9  | E 4  | 488.2469       | 244.6274        |
| 1051.4948      | 10 | P 3  | 359.2043       | 180.1061        |
| 1138.5268      | 11 | S 2  | 262.1515       | 131.5797        |
|                | 12 | R 1  | 175.1195       | 88.0637         |

N-term:+29.04

TFNVQDGPDFQDR, MH+ 1667.7665, m/z 556.5937  
 L OSG37 P180811 230811-s1.05571.05571.3.dta

X-range:

-

MassTol: Y-zoom:

MassType:

AVG  MONO

Axis:

1  2

Label:

I  M  -

Ions:

a  +  2+  3+

b  +  2+  3+

c  +  2+  3+

x  +  2+  3+

y  +  2+  3+

z  +  2+  3+

hide H<sub>2</sub>O/NH<sub>3</sub>

zoom 112-122

GO

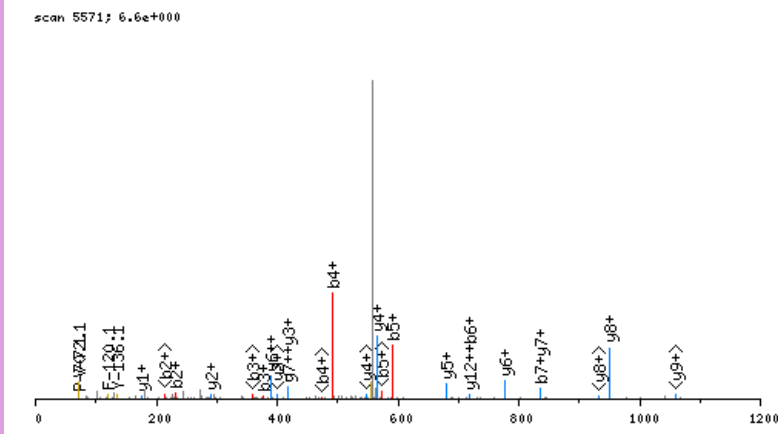

click image to zoom in; click top corners to zoom out [\[precursor±\]](#)

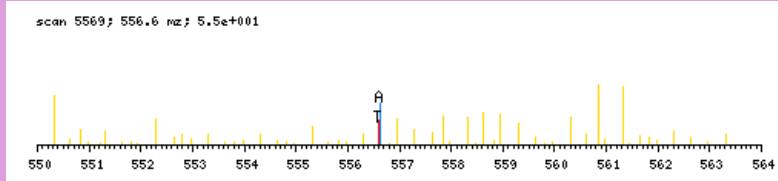

zoomed in precursor plot; T=theoretical m/z, A=acquired m/z

| b <sup>+</sup> | #  | AA | #  | y <sup>+</sup> | y <sup>2+</sup> |
|----------------|----|----|----|----------------|-----------------|
| 130.0868       | 1  | T  | 14 |                |                 |
| 231.1345       | 2  | T  | 13 | 1538.6876      | 769.8477        |
| 378.2029       | 3  | F  | 12 | 1437.6399      | 719.3239        |
| 492.2458       | 4  | N  | 11 | 1290.5715      | 645.7896        |
| 591.3142       | 5  | V  | 10 | 1176.5285      | 588.7682        |
| 719.3728       | 6  | Q  | 9  | 1077.4601      | 539.2340        |
| 834.3997       | 7  | D  | 8  | 949.4015       | 475.2047        |
| 891.4212       | 8  | G  | 7  | 834.3746       | 417.6912        |
| 988.4740       | 9  | P  | 6  | 777.3531       | 389.1805        |
| 1103.5009      | 10 | D  | 5  | 680.3004       | 340.6541        |
| 1250.5693      | 11 | F  | 4  | 565.2734       | 283.1406        |
| 1378.6279      | 12 | Q  | 3  | 418.2050       | 209.6064        |
| 1493.6548      | 13 | D  | 2  | 290.1464       | 145.5771        |
|                | 14 | R  | 1  | 175.1195       | 88.0637         |

N-term:+29.04

TTIAGVVYKDGIVLGADTR, MH+ 2017.1970, m/z 673.0705  
 H OSG39 P180811 230811-s1.06193.06193.3.dta

X-range:

-

MassTol: Y-zoom:

MassType:

AVG  MONO

Axis:

1  2

Label:

I  M  -

Ions:

a  +  2+  3+

b  +  2+  3+

c  +  2+  3+

x  +  2+  3+

y  +  2+  3+

z  +  2+  3+

hide H<sub>2</sub>O/NH<sub>3</sub>

zoom 112-122

GO

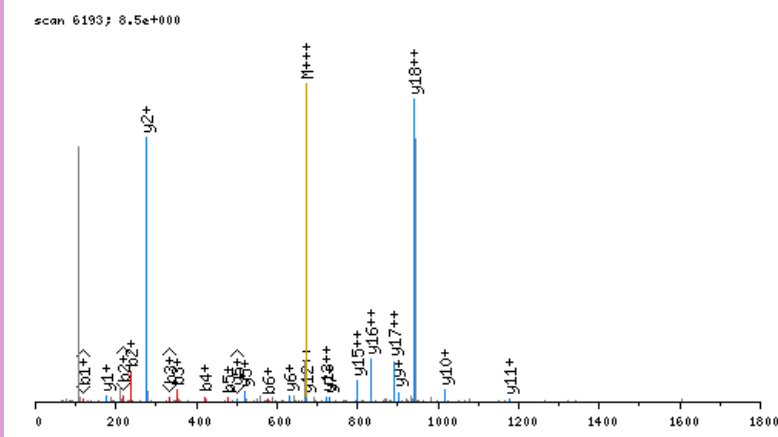

click image to zoom in; click top corners to zoom out [\[precursor±\]](#)

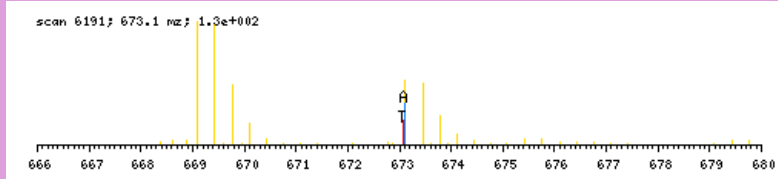

zoomed in precursor plot; T=theoretical m/z, A=acquired m/z

| b <sup>+</sup> | #  | AA | #  | y <sup>+</sup> | y <sup>2+</sup> |
|----------------|----|----|----|----------------|-----------------|
| 136.1186       | 1  | T  | 19 |                |                 |
| 237.1663       | 2  | T  | 18 | 1882.0862      | 941.5470        |
| 350.2503       | 3  | I  | 17 | 1781.0385      | 891.0232        |
| 421.2874       | 4  | A  | 16 | 1667.9545      | 834.4812        |
| 478.3089       | 5  | G  | 15 | 1596.9174      | 798.9626        |
| 577.3773       | 6  | V  | 14 | 1539.8959      | 770.4519        |
| 676.4457       | 7  | V  | 13 | 1440.8275      | 720.9177        |
| 839.5091       | 8  | Y  | 12 | 1341.7591      | 671.3835        |
| 1001.6672      | 9  | K  | 11 | 1178.6957      | 589.8518        |
| 1116.6941      | 10 | D  | 10 | 1016.5376      | 508.7727        |
| 1173.7156      | 11 | G  | 9  | 901.5107       | 451.2593        |
| 1286.7996      | 12 | I  | 8  | 844.4892       | 422.7485        |
| 1385.8680      | 13 | V  | 7  | 731.4052       | 366.2065        |
| 1498.9521      | 14 | L  | 6  | 632.3368       | 316.6723        |
| 1555.9736      | 15 | G  | 5  | 519.2527       | 260.1303        |
| 1627.0107      | 16 | A  | 4  | 462.2312       | 231.6195        |
| 1742.0376      | 17 | D  | 3  | 391.1941       | 196.1010        |
| 1843.0853      | 18 | T  | 2  | 276.1672       | 138.5875        |
|                | 19 | R  | 1  | 175.1195       | 88.0637         |

N-term:+35.07 K(9):+162.16

TTIFEVLPEKADR, MH+ 1574.8794, m/z 525.6313  
 L OSG39 P180811 230811-s1.06040.06040.3.dta

X-range:

-

MassTol: Y-zoom:

MassType:

AVG  MONO

Axis:

1  2

Label:

I  M  -

Ions:

a  +  2+  3+

b  +  2+  3+

c  +  2+  3+

x  +  2+  3+

y  +  2+  3+

z  +  2+  3+

hide H<sub>2</sub>O/NH<sub>3</sub>

zoom 112-122

GO

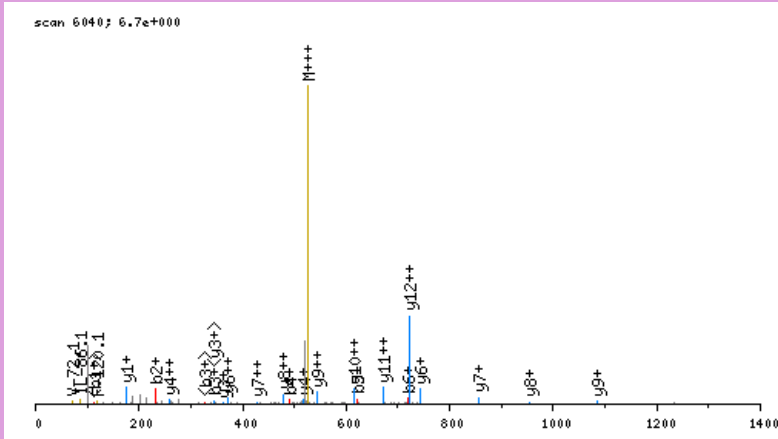

click image to zoom in; click top corners to zoom out [\[precursor±\]](#)

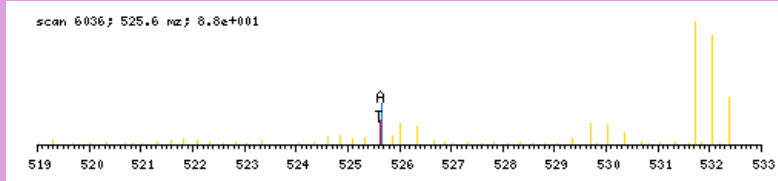

zoomed in precursor plot; T=theoretical m/z, A=acquired m/z

| b <sup>+</sup> | #  | AA # | y <sup>+</sup> | y <sup>2+</sup> |
|----------------|----|------|----------------|-----------------|
| 130.0868       | 1  | T 13 |                |                 |
| 231.1345       | 2  | T 12 | 1445.8004      | 723.4041        |
| 344.2185       | 3  | I 11 | 1344.7528      | 672.8803        |
| 491.2869       | 4  | F 10 | 1231.6687      | 616.3383        |
| 620.3295       | 5  | E 9  | 1084.6003      | 542.8041        |
| 719.3979       | 6  | V 8  | 955.5577       | 478.2828        |
| 832.4820       | 7  | L 7  | 856.4893       | 428.7486        |
| 929.5348       | 8  | P 6  | 743.4052       | 372.2065        |
| 1058.5774      | 9  | E 5  | 646.3525       | 323.6801        |
| 1214.7037      | 10 | K 4  | 517.3099       | 259.1588        |
| 1285.7408      | 11 | A 3  | 361.1836       | 181.0957        |
| 1400.7677      | 12 | D 2  | 290.1464       | 145.5771        |
|                | 13 | R 1  | 175.1195       | 88.0637         |

N-term:+29.04 K(10):+156.13

TTLESTPESASAR, MH+ 1377.6861, m/z 689.3467  
 L OSG37 P180811 230811-s1.02578.02578.2.dta

X-range:

-

MassTol: Y-zoom:

MassType:

AVG  MONO

Axis:

1  2

Label:

I  M  -

Ions:

a  +  2+  3+

b  +  2+  3+

c  +  2+  3+

x  +  2+  3+

y  +  2+  3+

z  +  2+  3+

hide H<sub>2</sub>O/NH<sub>3</sub>

zoom 112-122

GO

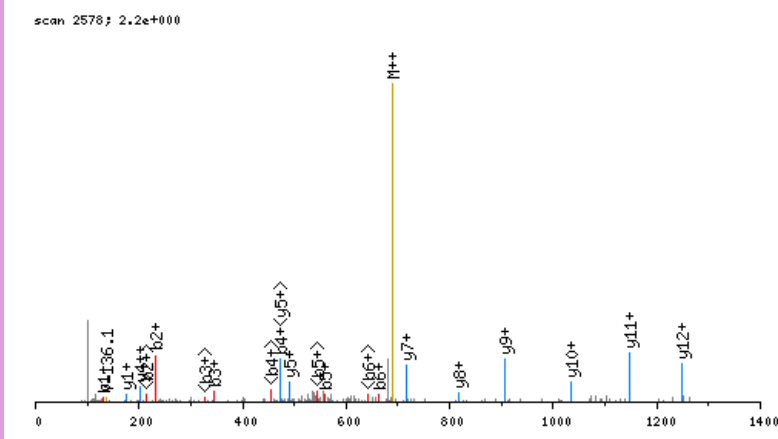

click image to zoom in; click top corners to zoom out [\[precursor±\]](#)

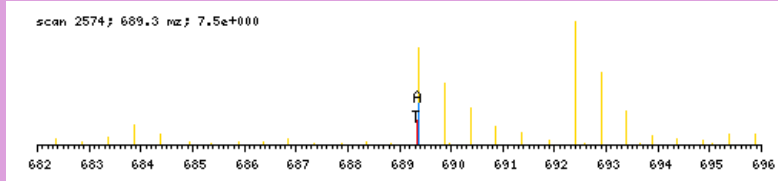

zoomed in precursor plot; T=theoretical m/z, A=acquired m/z

| b <sup>+</sup> | #  | AA # | y <sup>+</sup> | y <sup>2+</sup> |
|----------------|----|------|----------------|-----------------|
| 130.0868       | 1  | T 13 |                |                 |
| 231.1345       | 2  | T 12 | 1248.6072      | 624.8075        |
| 344.2185       | 3  | L 11 | 1147.5595      | 574.2837        |
| 473.2611       | 4  | E 10 | 1034.4754      | 517.7416        |
| 560.2931       | 5  | S 9  | 905.4328       | 453.2203        |
| 661.3408       | 6  | T 8  | 818.4008       | 409.7043        |
| 758.3936       | 7  | P 7  | 717.3531       | 359.1805        |
| 887.4362       | 8  | E 6  | 620.3004       | 310.6541        |
| 974.4682       | 9  | S 5  | 491.2578       | 246.1328        |
| 1045.5053      | 10 | A 4  | 404.2258       | 202.6168        |
| 1132.5373      | 11 | S 3  | 333.1886       | 167.0982        |
| 1203.5745      | 12 | A 2  | 246.1566       | 123.5822        |
|                | 13 | R 1  | 175.1195       | 88.0637         |

N-term:+29.04

TTQGLDGLSER, MH+ 1210.6491, m/z 605.8282  
 H OSG38 P180811 230811-s1.03335.03335.2.dta

X-range:

-

MassTol: Y-zoom:

MassType:

AVG  MONO

Axis:

1  2

Label:

I  M  -

Ions:

a  +  2+  3+

b  +  2+  3+

c  +  2+  3+

x  +  2+  3+

y  +  2+  3+

z  +  2+  3+

hide H<sub>2</sub>O/NH<sub>3</sub>

zoom 112-122

GO

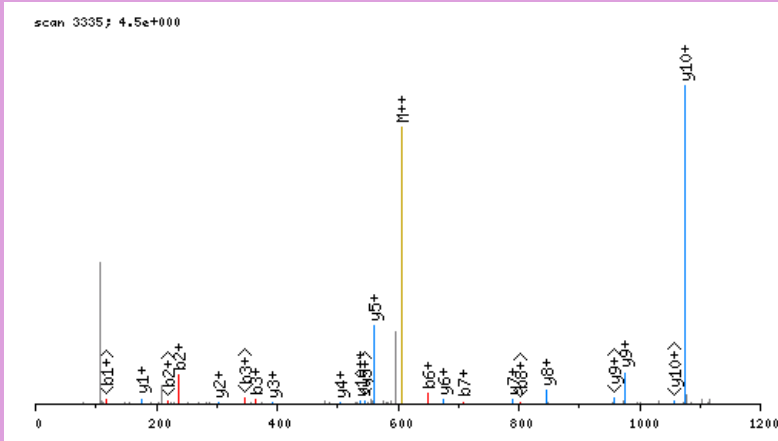

click image to zoom in; click top corners to zoom out [\[precursor±\]](#)

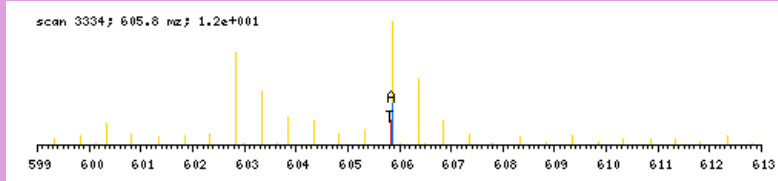

zoomed in precursor plot; T=theoretical m/z, A=acquired m/z

| b <sup>+</sup> | #  | AA # | y <sup>+</sup> | y <sup>2+</sup>    |
|----------------|----|------|----------------|--------------------|
| 136.1186       | 1  | T    | 11             |                    |
| 237.1663       | 2  | T    | 10             | 1075.5384 538.2731 |
| 365.2248       | 3  | Q    | 9              | 974.4907 487.7493  |
| 422.2463       | 4  | G    | 8              | 846.4321 423.7200  |
| 535.3304       | 5  | L    | 7              | 789.4107 395.2092  |
| 650.3573       | 6  | D    | 6              | 676.3266 338.6672  |
| 707.3788       | 7  | G    | 5              | 561.2997 281.1537  |
| 820.4628       | 8  | L    | 4              | 504.2782 252.6430  |
| 907.4949       | 9  | S    | 3              | 391.1941 196.1010  |
| 1036.5375      | 10 | E    | 2              | 304.1621 152.5850  |
|                | 11 | R    | 1              | 175.1195 88.0637   |

N-term:+35.07

TTSGGHPLEFLR, MH+ 1342.7119, m/z 448.2422  
 L OSG40 P180811 230811-s1.05166.05166.3.dta

X-range:

-

MassTol: Y-zoom:

MassType:

AVG  MONO

Axis:

1  2

Label:

I  M  -

Ions:

a  +  2+  3+

b  +  2+  3+

c  +  2+  3+

x  +  2+  3+

y  +  2+  3+

z  +  2+  3+

hide H<sub>2</sub>O/NH<sub>3</sub>

zoom 112-122

GO

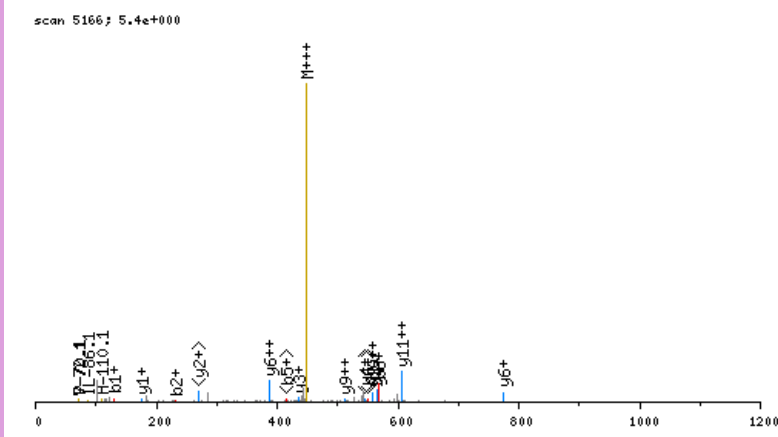

click image to zoom in; click top corners to zoom out [\[precursor±\]](#)

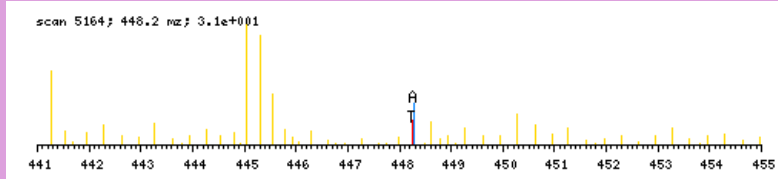

zoomed in precursor plot; T=theoretical m/z, A=acquired m/z

| b <sup>+</sup> | #  | AA | #  | y <sup>+</sup> | y <sup>2+</sup> |
|----------------|----|----|----|----------------|-----------------|
| 130.0868       | 1  | T  | 12 |                |                 |
| 231.1345       | 2  | T  | 11 | 1213.6329      | 607.3204        |
| 318.1665       | 3  | S  | 10 | 1112.5853      | 556.7965        |
| 375.1879       | 4  | G  | 9  | 1025.5532      | 513.2805        |
| 432.2094       | 5  | G  | 8  | 968.5318       | 484.7698        |
| 569.2683       | 6  | H  | 7  | 911.5103       | 456.2591        |
| 666.3211       | 7  | P  | 6  | 774.4514       | 387.7296        |
| 779.4052       | 8  | L  | 5  | 677.3986       | 339.2032        |
| 908.4477       | 9  | E  | 4  | 564.3146       | 282.6612        |
| 1055.5162      | 10 | F  | 3  | 435.2720       | 218.1399        |
| 1168.6002      | 11 | L  | 2  | 288.2036       | 144.6057        |
|                | 12 | R  | 1  | 175.1195       | 88.0637         |

N-term:+29.04



TTTQGLDGLSER, MH+ 1311.6968, m/z 656.3520  
 H OSG38 P180811 230811-s1.03613.03613.2.dta

X-range:

-

MassTol: Y-zoom:

MassType:

AVG  MONO

Axis:

1  2

Label:

I  M  -

Ions:

a  +  2+  3+

b  +  2+  3+

c  +  2+  3+

x  +  2+  3+

y  +  2+  3+

z  +  2+  3+

hide H<sub>2</sub>O/NH<sub>3</sub>

zoom 112-122

GO

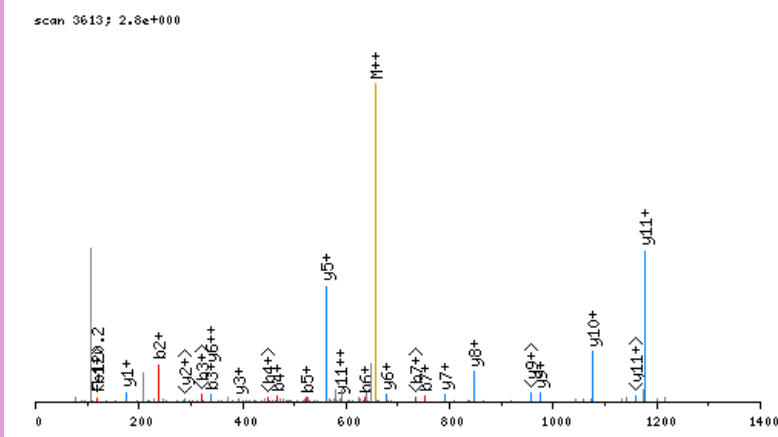

click image to zoom in; click top corners to zoom out [\[precursor±\]](#)

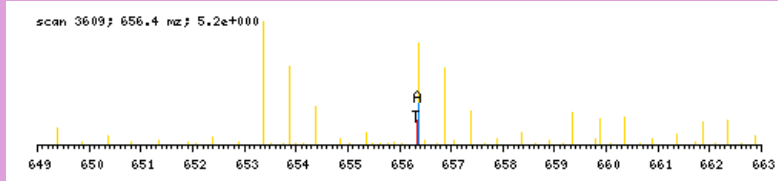

zoomed in precursor plot; T=theoretical m/z, A=acquired m/z

| b <sup>+</sup> | #  | AA # | y <sup>+</sup> | y <sup>2+</sup> |
|----------------|----|------|----------------|-----------------|
| 136.1186       | 1  | T 12 |                |                 |
| 237.1663       | 2  | T 11 | 1176.5861      | 588.7969        |
| 338.2139       | 3  | T 10 | 1075.5384      | 538.2731        |
| 466.2725       | 4  | Q 9  | 974.4907       | 487.7493        |
| 523.2940       | 5  | G 8  | 846.4321       | 423.7200        |
| 636.3780       | 6  | L 7  | 789.4107       | 395.2092        |
| 751.4050       | 7  | D 6  | 676.3266       | 338.6672        |
| 808.4264       | 8  | G 5  | 561.2997       | 281.1537        |
| 921.5105       | 9  | L 4  | 504.2782       | 252.6430        |
| 1008.5425      | 10 | S 3  | 391.1941       | 196.1010        |
| 1137.5851      | 11 | E 2  | 304.1621       | 152.5850        |
|                | 12 | R 1  | 175.1195       | 88.0637         |

N-term:+35.07

TVATPLNQVANPNSAIFGGAR, MH+ 2132.1676, m/z 711.3941  
H OSG37 P180811 230811-s1.07338.07338.3.dta

scan 7338; 7.8e-001

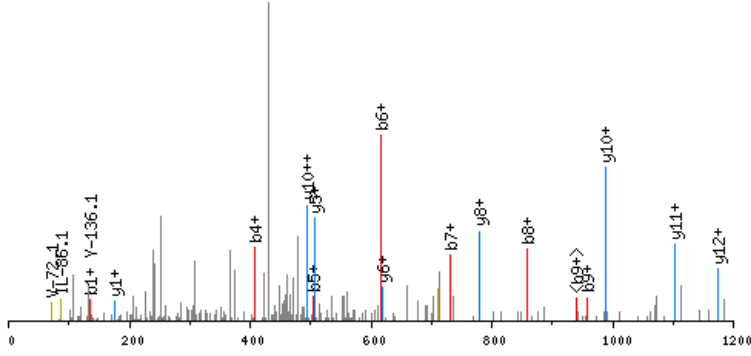

click image to zoom in; click top corners to zoom out [precursor±]

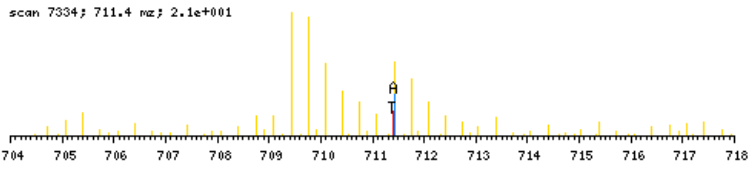

zoomed in precursor plot; T=theoretical m/z, A=acquired m/z

X-range:

-

MassTol: Y-zoom:

MassType:

AVG  MONO

Axis:

1  2

Label:

I  M  -

Ions:

a  +  2+  3+

b  +  2+  3+

c  +  2+  3+

x  +  2+  3+

y  +  2+  3+

z  +  2+  3+

hide H<sub>2</sub>O/NH<sub>3</sub>

zoom 112-122

GO

| b <sup>+</sup> | #  | AA | #  | y <sup>+</sup> | y <sup>2+</sup> |
|----------------|----|----|----|----------------|-----------------|
| 136.1186       | 1  | T  | 21 |                |                 |
| 235.1870       | 2  | V  | 20 | 1997.0568      | 999.0323        |
| 306.2241       | 3  | A  | 19 | 1897.9884      | 949.4981        |
| 407.2718       | 4  | T  | 18 | 1826.9513      | 913.9796        |
| 504.3245       | 5  | P  | 17 | 1725.9036      | 863.4557        |
| 617.4086       | 6  | L  | 16 | 1628.8509      | 814.9294        |
| 731.4515       | 7  | N  | 15 | 1515.7668      | 758.3873        |
| 859.5101       | 8  | Q  | 14 | 1401.7239      | 701.3659        |
| 958.5785       | 9  | V  | 13 | 1273.6653      | 637.3366        |
| 1029.6156      | 10 | A  | 12 | 1174.5969      | 587.8024        |
| 1143.6586      | 11 | N  | 11 | 1103.5598      | 552.2838        |
| 1240.7113      | 12 | P  | 10 | 989.5169       | 495.2623        |
| 1354.7543      | 13 | N  | 9  | 892.4641       | 446.7360        |
| 1441.7863      | 14 | S  | 8  | 778.4212       | 389.7145        |
| 1512.8234      | 15 | A  | 7  | 691.3891       | 346.1985        |
| 1625.9075      | 16 | I  | 6  | 620.3520       | 310.6799        |
| 1772.9759      | 17 | F  | 5  | 507.2680       | 254.1379        |
| 1829.9973      | 18 | G  | 4  | 360.1995       | 180.6037        |
| 1887.0188      | 19 | G  | 3  | 303.1781       | 152.0930        |
| 1958.0559      | 20 | A  | 2  | 246.1566       | 123.5822        |
|                | 21 | R  | 1  | 175.1195       | 88.0637         |

N-term:+35.07

TVEGDVNTDPWAGYR, MH+ 1707.7978, m/z 569.9375  
 L OSG37 P180811 230811-s1.05736.05736.3.dta

X-range:

-

MassTol: Y-zoom:

MassType:

AVG  MONO

Axis:

1  2

Label:

I  M  -

Ions:

a  +  2+  3+

b  +  2+  3+

c  +  2+  3+

x  +  2+  3+

y  +  2+  3+

z  +  2+  3+

hide H<sub>2</sub>O/NH<sub>3</sub>

zoom 112-122

GO

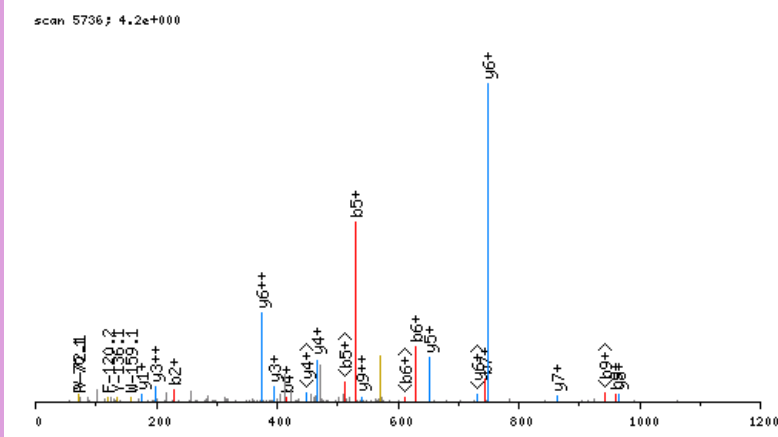

click image to zoom in; click top corners to zoom out [\[precursor±\]](#)

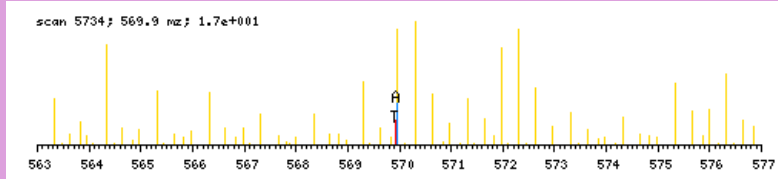

zoomed in precursor plot; T=theoretical m/z, A=acquired m/z

| b <sup>+</sup> | #  | AA | #  | y <sup>+</sup> | y <sup>2+</sup> |
|----------------|----|----|----|----------------|-----------------|
| 130.0868       | 1  | T  | 15 |                |                 |
| 229.1552       | 2  | V  | 14 | 1578.7189      | 789.8633        |
| 358.1978       | 3  | E  | 13 | 1479.6504      | 740.3291        |
| 415.2192       | 4  | G  | 12 | 1350.6079      | 675.8078        |
| 530.2462       | 5  | D  | 11 | 1293.5864      | 647.2971        |
| 629.3146       | 6  | V  | 10 | 1178.5594      | 589.7836        |
| 743.3575       | 7  | N  | 9  | 1079.4910      | 540.2494        |
| 844.4052       | 8  | T  | 8  | 965.4481       | 483.2280        |
| 959.4322       | 9  | D  | 7  | 864.4004       | 432.7041        |
| 1056.4849      | 10 | P  | 6  | 749.3735       | 375.1907        |
| 1242.5642      | 11 | W  | 5  | 652.3207       | 326.6643        |
| 1313.6013      | 12 | A  | 4  | 466.2414       | 233.6246        |
| 1370.6228      | 13 | G  | 3  | 395.2043       | 198.1061        |
| 1533.6861      | 14 | Y  | 2  | 338.1828       | 169.5953        |
|                | 15 | R  | 1  | 175.1195       | 88.0637         |

N-term:+29.04

TVEGPPPKDTGIAR, MH+ 1493.8328, m/z 498.6158  
 L OSG39 P180811 230811-s1.02351.02351.3.dta

X-range:

-

MassTol: Y-zoom:

MassType:

AVG  MONO

Axis:

1  2

Label:

I  M  -

Ions:

a  +  2+  3+

b  +  2+  3+

c  +  2+  3+

x  +  2+  3+

y  +  2+  3+

z  +  2+  3+

hide H<sub>2</sub>O/NH<sub>3</sub>

zoom 112-122

GO

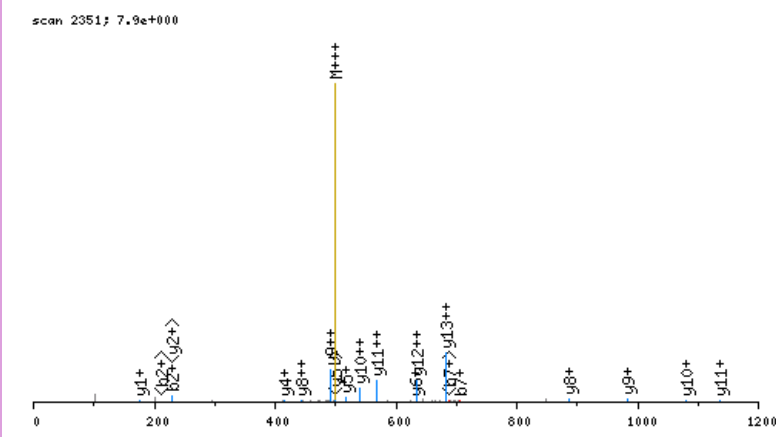

click image to zoom in; click top corners to zoom out [\[precursor±\]](#)

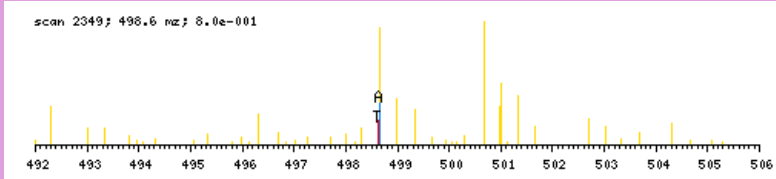

zoomed in precursor plot; T=theoretical m/z, A=acquired m/z

| b <sup>+</sup> | #  | AA # | y <sup>+</sup> | y <sup>2+</sup> |
|----------------|----|------|----------------|-----------------|
| 130.0868       | 1  | T 14 |                |                 |
| 229.1552       | 2  | V 13 | 1364.7538      | 682.8808        |
| 358.1978       | 3  | E 12 | 1265.6854      | 633.3466        |
| 415.2192       | 4  | G 11 | 1136.6428      | 568.8253        |
| 512.2720       | 5  | P 10 | 1079.6214      | 540.3146        |
| 609.3248       | 6  | P 9  | 982.5686       | 491.7882        |
| 706.3775       | 7  | P 8  | 885.5158       | 443.2618        |
| 862.5038       | 8  | K 7  | 788.4631       | 394.7354        |
| 977.5308       | 9  | D 6  | 632.3368       | 316.6723        |
| 1078.5785      | 10 | T 5  | 517.3098       | 259.1588        |
| 1135.5999      | 11 | G 4  | 416.2621       | 208.6350        |
| 1248.6840      | 12 | I 3  | 359.2407       | 180.1243        |
| 1319.7211      | 13 | A 2  | 246.1566       | 123.5822        |
|                | 14 | R 1  | 175.1195       | 88.0637         |

N-term:+29.04 K(8):+156.13

TVFKDLFDPIIQDR, MH+ 1762.9744, m/z 588.3296  
 L OSG39 P180811 230811-s1.07688.07688.3.dta

scan 7688; 1.9e+001

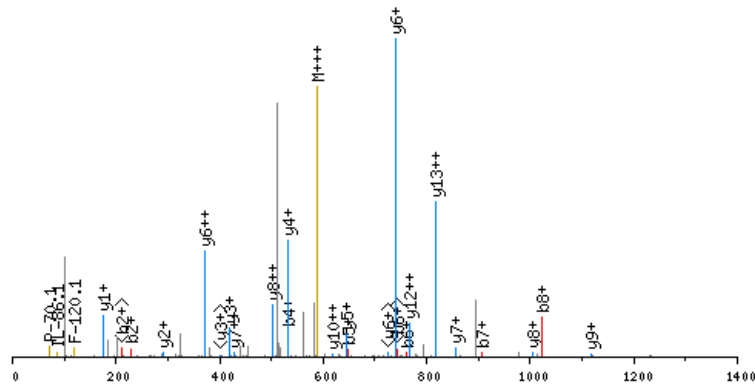

click image to zoom in; click top corners to zoom out [\[precursor±\]](#)

scan 7686; 588.3 m/z; 8.6e+001

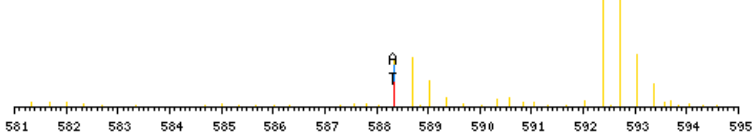

zoomed in precursor plot; T=theoretical m/z, A=acquired m/z

X-range:

-

MassTol: Y-zoom:

MassType:

AVG  MONO

Axis:

1  2

Label:

I  M  -

Ions:

a  +  2+  3+

b  +  2+  3+

c  +  2+  3+

x  +  2+  3+

y  +  2+  3+

z  +  2+  3+

hide H<sub>2</sub>O/NH<sub>3</sub>

zoom 112-122

GO

| b <sup>+</sup> | #  | AA # | y <sup>+</sup> | y <sup>2+</sup> |
|----------------|----|------|----------------|-----------------|
| 130.0868       | 1  | T 14 |                |                 |
| 229.1552       | 2  | V 13 | 1633.8954      | 817.4516        |
| 376.2236       | 3  | F 12 | 1534.8270      | 767.9174        |
| 532.3499       | 4  | K 11 | 1387.7586      | 694.3832        |
| 647.3768       | 5  | D 10 | 1231.6323      | 616.3201        |
| 760.4609       | 6  | L 9  | 1116.6053      | 558.8066        |
| 907.5293       | 7  | F 8  | 1003.5213      | 502.2645        |
| 1022.5563      | 8  | D 7  | 856.4529       | 428.7303        |
| 1119.6090      | 9  | P 6  | 741.4259       | 371.2169        |
| 1232.6931      | 10 | I 5  | 644.3731       | 322.6905        |
| 1345.7772      | 11 | I 4  | 531.2891       | 266.1485        |
| 1473.8357      | 12 | Q 3  | 418.2050       | 209.6064        |
| 1588.8627      | 13 | D 2  | 290.1464       | 145.5771        |
|                | 14 | R 1  | 175.1195       | 88.0637         |

N-term:+29.04 K(4):+156.13

TVGVAVALDCR, MH+ 1095.6044, m/z 548.3058  
 H OSG38 P180811 230811-s1.03536.03536.2.dta

X-range:

-

MassTol: Y-zoom:

MassType:

AVG  MONO

Axis:

1  2

Label:

I  M  -

Ions:

a  +  2+  3+

b  +  2+  3+

c  +  2+  3+

x  +  2+  3+

y  +  2+  3+

z  +  2+  3+

hide H<sub>2</sub>O/NH<sub>3</sub>

zoom 112-122

GO

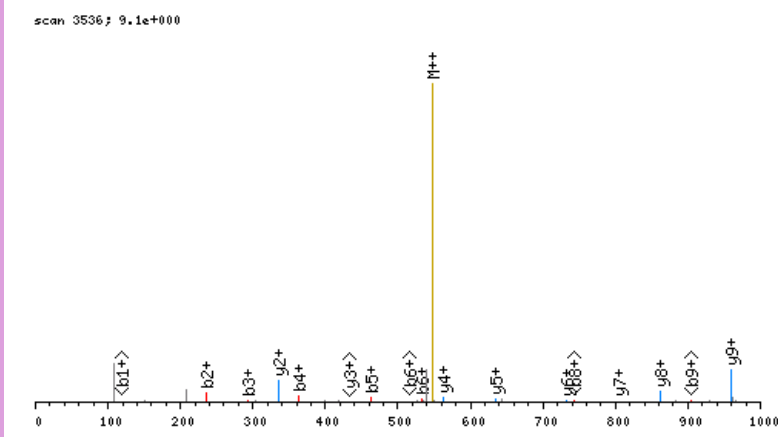

click image to zoom in; click top corners to zoom out [\[precursor±\]](#)

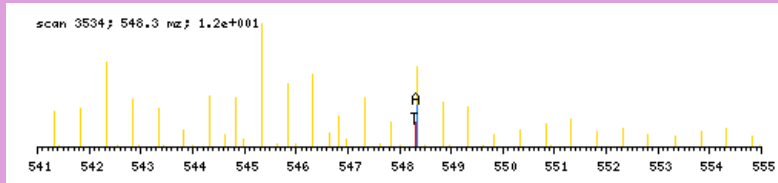

zoomed in precursor plot; T=theoretical m/z, A=acquired m/z

| b <sup>+</sup> | #  | AA | #  | y <sup>+</sup> | y <sup>2+</sup> |
|----------------|----|----|----|----------------|-----------------|
| 136.1186       | 1  | T  | 10 |                |                 |
| 235.1870       | 2  | V  | 9  | 960.4936       | 480.7507        |
| 292.2085       | 3  | G  | 8  | 861.4252       | 431.2165        |
| 363.2456       | 4  | A  | 7  | 804.4037       | 402.7058        |
| 462.3140       | 5  | V  | 6  | 733.3666       | 367.1872        |
| 533.3511       | 6  | A  | 5  | 634.2982       | 317.6530        |
| 646.4352       | 7  | L  | 4  | 563.2611       | 282.1345        |
| 761.4621       | 8  | D  | 3  | 450.1770       | 225.5924        |
| 921.4927       | 9  | C  | 2  | 335.1501       | 168.0790        |
|                | 10 | R  | 1  | 175.1195       | 88.0637         |

N-term:+35.07 C(9):+160.03

TVGCVAGDEESYTVFKDLFDPIIQDR, MH+ 3030.4770, m/z 758.3747  
 L\_OSG38\_P180811\_230811-s1.08151.08151.4.dta

scan 8151; 9.3e-001

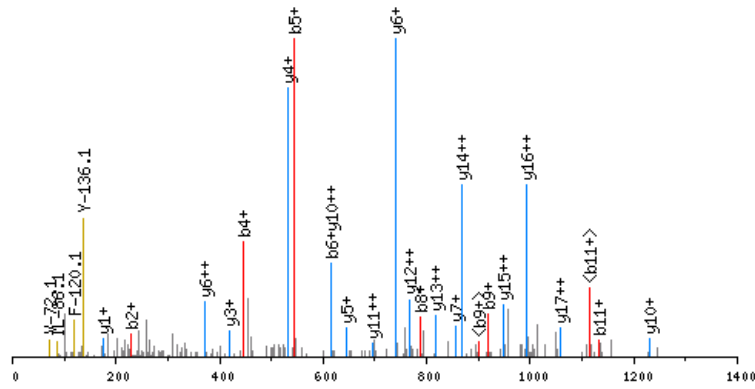

click image to zoom in; click top corners to zoom out [precursor±]

scan 8149; 758.4 m/z; 2.4e+001

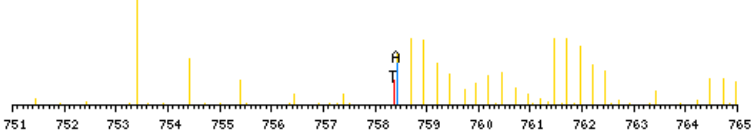

zoomed in precursor plot; T=theoretical m/z, A=acquired m/z

X-range:

-

MassTol: Y-zoom:

MassType:

AVG  MONO

Axis:

1  2

Label:

I  M  -

Ions:

a  +  2+  3+

b  +  2+  3+

c  +  2+  3+

x  +  2+  3+

y  +  2+  3+

z  +  2+  3+

hide H<sub>2</sub>O/NH<sub>3</sub>

zoom 112-122

GO

| b <sup>+</sup> | #  | AA # | y <sup>+</sup> | y <sup>2+</sup> |
|----------------|----|------|----------------|-----------------|
| 130.0868       | 1  | T 26 |                |                 |
| 229.1552       | 2  | V 25 | 2901.3980      | 1451.2029       |
| 286.1767       | 3  | G 24 | 2802.3296      | 1401.6687       |
| 446.2073       | 4  | C 23 | 2745.3082      | 1373.1580       |
| 545.2757       | 5  | V 22 | 2585.2776      | 1293.1427       |
| 616.3128       | 6  | A 21 | 2486.2091      | 1243.6085       |
| 673.3342       | 7  | G 20 | 2415.1720      | 1208.0899       |
| 788.3612       | 8  | D 19 | 2358.1506      | 1179.5792       |
| 917.4038       | 9  | E 18 | 2243.1236      | 1122.0657       |
| 1046.4464      | 10 | E 17 | 2114.0810      | 1057.5444       |
| 1133.4784      | 11 | S 16 | 1985.0384      | 993.0231        |
| 1296.5417      | 12 | Y 15 | 1898.0064      | 949.5071        |
| 1397.5894      | 13 | T 14 | 1734.9431      | 867.9755        |
| 1496.6578      | 14 | V 13 | 1633.8954      | 817.4516        |
| 1643.7262      | 15 | F 12 | 1534.8270      | 767.9174        |
| 1799.8525      | 16 | K 11 | 1387.7586      | 694.3832        |
| 1914.8795      | 17 | D 10 | 1231.6323      | 616.3201        |
| 2027.9635      | 18 | L 9  | 1116.6053      | 558.8066        |
| 2175.0320      | 19 | F 8  | 1003.5213      | 502.2645        |
| 2290.0589      | 20 | D 7  | 856.4529       | 428.7303        |
| 2387.1117      | 21 | P 6  | 741.4259       | 371.2169        |
| 2500.1957      | 22 | I 5  | 644.3731       | 322.6905        |
| 2613.2798      | 23 | I 4  | 531.2891       | 266.1485        |
| 2741.3384      | 24 | Q 3  | 418.2050       | 209.6064        |
| 2856.3653      | 25 | D 2  | 290.1464       | 145.5771        |
|                | 26 | R 1  | 175.1195       | 88.0637         |

N-term:+29.04 C(4):+160.03  
 K(16):+156.13

TVHNLVLFDR, MH+ 1311.7273, m/z 437.9140  
 H OSG40 P180811 230811-s1.06047.06047.3.dta

X-range:

-

MassTol: Y-zoom:

MassType:

AVG  MONO

Axis:

1  2

Label:

I  M  -

Ions:

a  +  2+  3+

b  +  2+  3+

c  +  2+  3+

x  +  2+  3+

y  +  2+  3+

z  +  2+  3+

hide H<sub>2</sub>O/NH<sub>3</sub>

zoom 112-122

GO

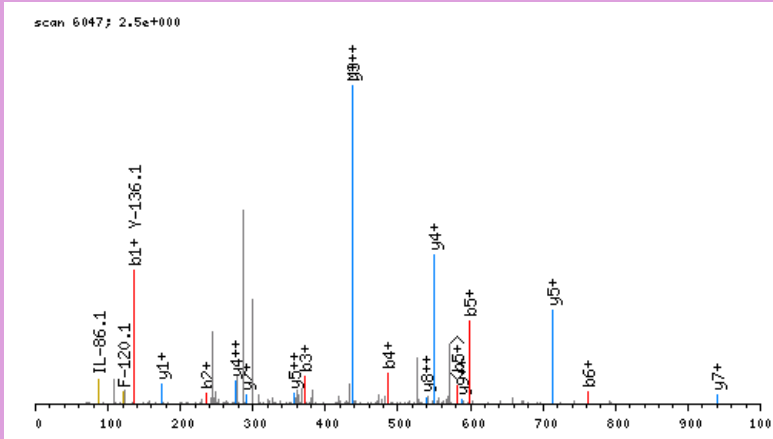

click image to zoom in; click top corners to zoom out [\[precursor±\]](#)

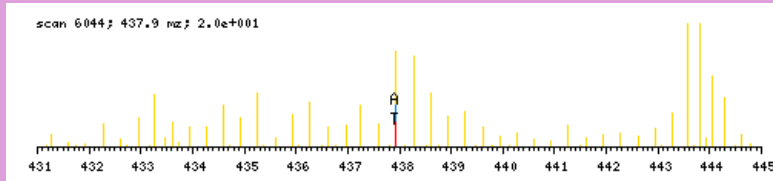

zoomed in precursor plot; T=theoretical m/z, A=acquired m/z

| b <sup>+</sup> | #  | AA # | y <sup>+</sup> | y <sup>2+</sup> |
|----------------|----|------|----------------|-----------------|
| 136.1186       | 1  | T    | 10             |                 |
| 235.1870       | 2  | V    | 9              | 1176.6166       |
| 372.2459       | 3  | H    | 8              | 1077.5482       |
| 486.2888       | 4  | N    | 7              | 940.4892        |
| 599.3729       | 5  | L    | 6              | 826.4463        |
| 762.4362       | 6  | Y    | 5              | 713.3623        |
| 875.5203       | 7  | L    | 4              | 550.2989        |
| 1022.5887      | 8  | F    | 3              | 437.2149        |
| 1137.6156      | 9  | D    | 2              | 290.1464        |
|                | 10 | R    | 1              | 175.1195        |

N-term:+35.07



TVIQEVKTSNVAR, MH+ 1512.9386, m/z 504.9844  
 H OSG39 P180811 230811-s1.02558.02558.3.dta

X-range:

-

MassTol: Y-zoom:

MassType:

AVG  MONO

Axis:

1  2

Label:

I  M  -

Ions:

a  +  2+  3+

b  +  2+  3+

c  +  2+  3+

x  +  2+  3+

y  +  2+  3+

z  +  2+  3+

hide H<sub>2</sub>O/NH<sub>3</sub>

zoom 112-122

GO

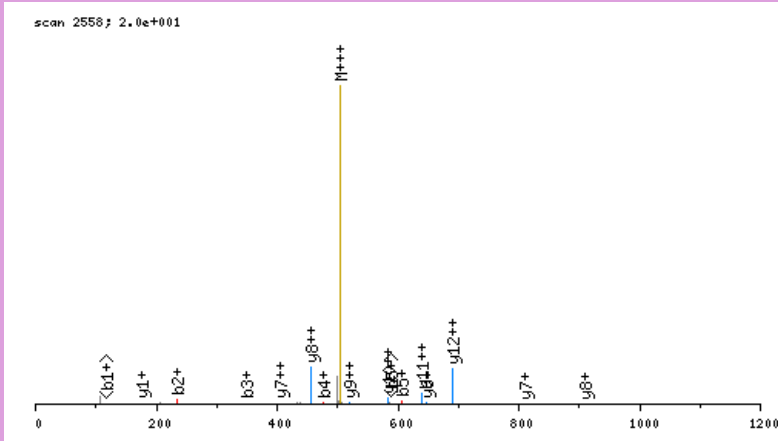

click image to zoom in; click top corners to zoom out [\[precursor±\]](#)

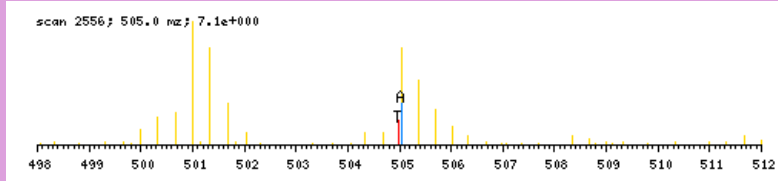

zoomed in precursor plot; T=theoretical m/z, A=acquired m/z

| b <sup>+</sup> | #  | AA # | y <sup>+</sup> | y <sup>2+</sup> |
|----------------|----|------|----------------|-----------------|
| 136.1186       | 1  | T    | 13             |                 |
| 235.1870       | 2  | V    | 12             | 1377.8278       |
| 348.2711       | 3  | I    | 11             | 1278.7594       |
| 476.3296       | 4  | Q    | 10             | 1165.6753       |
| 605.3722       | 5  | E    | 9              | 1037.6168       |
| 704.4406       | 6  | V    | 8              | 908.5742        |
| 866.5987       | 7  | K    | 7              | 809.5058        |
| 967.6464       | 8  | T    | 6              | 647.3477        |
| 1054.6784      | 9  | S    | 5              | 546.3000        |
| 1168.7214      | 10 | N    | 4              | 459.2680        |
| 1267.7898      | 11 | V    | 3              | 345.2250        |
| 1338.8269      | 12 | A    | 2              | 246.1566        |
|                | 13 | R    | 1              | 175.1195        |

N-term:+35.07 K(7):+162.16

TVKTTVFSCNLGEKFDETTADGR, MH+ 2660.3242, m/z 665.8365  
 L OSG40 P180811 230811-s1.06358.06358.4.dta

X-range:

-

MassTol: Y-zoom:

MassType:

AVG  MONO

Axis:

1  2

Label:

I  M  -

Ions:

a  +  2+  3+

b  +  2+  3+

c  +  2+  3+

x  +  2+  3+

y  +  2+  3+

z  +  2+  3+

hide H<sub>2</sub>O/NH<sub>3</sub>

zoom 112-122

GO

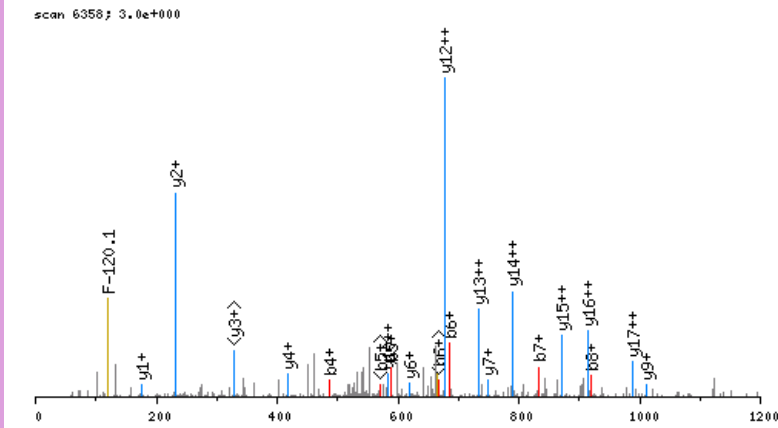

click image to zoom in; click top corners to zoom out [\[precursor±\]](#)

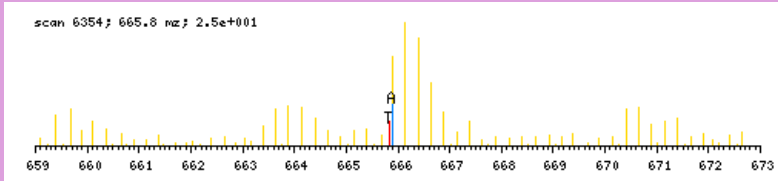

zoomed in precursor plot; T=theoretical m/z, A=acquired m/z

| b <sup>+</sup> | #  | AA | #  | y <sup>+</sup> | y <sup>2+</sup> |
|----------------|----|----|----|----------------|-----------------|
| 130.0868       | 1  | T  | 23 |                |                 |
| 229.1552       | 2  | V  | 22 | 2531.2452      | 1266.1265       |
| 385.2815       | 3  | K  | 21 | 2432.1768      | 1216.5923       |
| 486.3292       | 4  | T  | 20 | 2276.0505      | 1138.5292       |
| 587.3768       | 5  | T  | 19 | 2175.0028      | 1088.0053       |
| 686.4453       | 6  | V  | 18 | 2073.9551      | 1037.4815       |
| 833.5137       | 7  | F  | 17 | 1974.8867      | 987.9473        |
| 920.5457       | 8  | S  | 16 | 1827.8183      | 914.4131        |
| 1080.5763      | 9  | C  | 15 | 1740.7863      | 870.8971        |
| 1194.6192      | 10 | N  | 14 | 1580.7557      | 790.8818        |
| 1307.7033      | 11 | L  | 13 | 1466.7127      | 733.8603        |
| 1364.7248      | 12 | G  | 12 | 1353.6287      | 677.3183        |
| 1493.7674      | 13 | E  | 11 | 1296.6072      | 648.8075        |
| 1649.8937      | 14 | K  | 10 | 1167.5646      | 584.2862        |
| 1796.9621      | 15 | F  | 9  | 1011.4383      | 506.2231        |
| 1911.9890      | 16 | D  | 8  | 864.3699       | 432.6889        |
| 2041.0316      | 17 | E  | 7  | 749.3430       | 375.1754        |
| 2142.0793      | 18 | T  | 6  | 620.3004       | 310.6541        |
| 2243.1270      | 19 | T  | 5  | 519.2527       | 260.1303        |
| 2314.1641      | 20 | A  | 4  | 418.2050       | 209.6064        |
| 2429.1910      | 21 | D  | 3  | 347.1679       | 174.0879        |
| 2486.2125      | 22 | G  | 2  | 232.1410       | 116.5744        |
|                | 23 | R  | 1  | 175.1195       | 88.0637         |

N-term:+29.04 K(3):+156.13  
 C(9):+160.03 K(14):+156.13

TVLPEEVHSR, MH+ 1200.6800, m/z 400.8982  
 H OSG40 P180811 230811-s1.02963.02963.3.dta

scan 2963; 9.0e+000

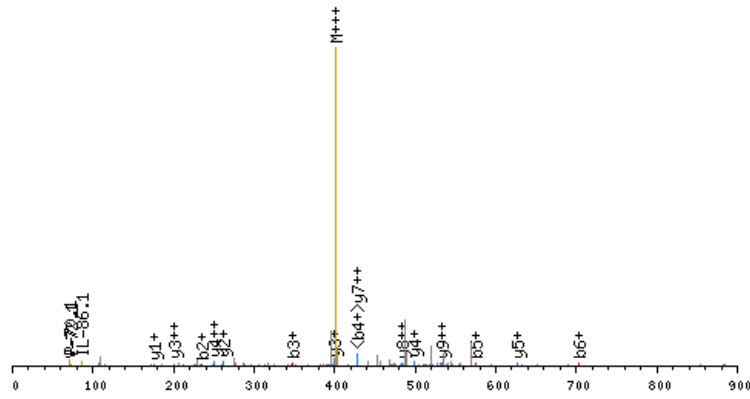

click image to zoom in; click top corners to zoom out [\[precursor±\]](#)

scan 2959; 400.9 m/z; 1.3e+001

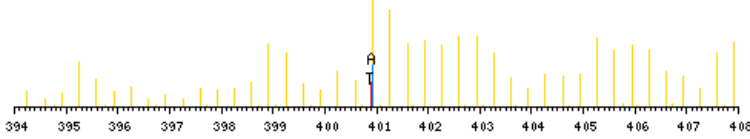

zoomed in precursor plot; T=theoretical m/z, A=acquired m/z

X-range:

-

MassTol: Y-zoom:

MassType:

AVG  MONO

Axis:

1  2

Label:

I  M  -

Ions:

a  +  2+  3+

b  +  2+  3+

c  +  2+  3+

x  +  2+  3+

y  +  2+  3+

z  +  2+  3+

hide H<sub>2</sub>O/NH<sub>3</sub>

zoom 112-122

GO

| b <sup>+</sup> | #  | AA # | y <sup>+</sup> | y <sup>2+</sup> |
|----------------|----|------|----------------|-----------------|
| 136.1186       | 1  | T    | 10             |                 |
| 235.1870       | 2  | V    | 9              | 1065.5693       |
| 348.2711       | 3  | L    | 8              | 966.5009        |
| 445.3238       | 4  | P    | 7              | 853.4168        |
| 574.3664       | 5  | E    | 6              | 756.3640        |
| 703.4090       | 6  | E    | 5              | 627.3214        |
| 802.4774       | 7  | V    | 4              | 498.2789        |
| 939.5363       | 8  | H    | 3              | 399.2104        |
| 1026.5684      | 9  | S    | 2              | 262.1515        |
|                | 10 | R    | 1              | 175.1195        |

N-term:+35.07

TVLSGGTTMYPGIADR, MH+ 1672.8792, m/z 558.2979  
 H OSG37 P180811 230811-s1.05755.05755.3.dta

X-range:

-

MassTol: Y-zoom:

MassType:

AVG  MONO

Axis:

1  2

Label:

I  M  -

Ions:

a  +  2+  3+

b  +  2+  3+

c  +  2+  3+

x  +  2+  3+

y  +  2+  3+

z  +  2+  3+

hide H<sub>2</sub>O/NH<sub>3</sub>

zoom 112-122

GO

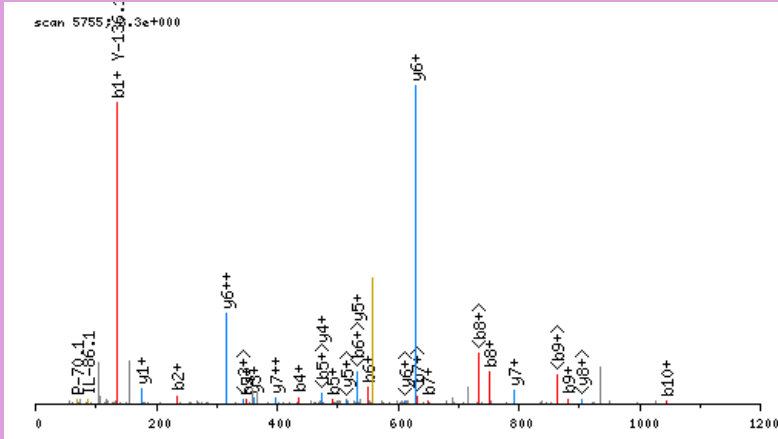

click image to zoom in; click top corners to zoom out [\[precursor±\]](#)

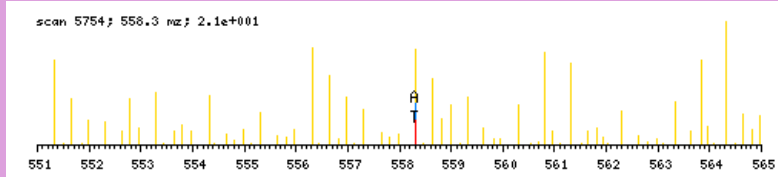

zoomed in precursor plot; T=theoretical m/z, A=acquired m/z

| b <sup>+</sup> | #  | AA # | y <sup>+</sup> | y <sup>2+</sup> |
|----------------|----|------|----------------|-----------------|
| 136.1186       | 1  | T 16 |                |                 |
| 235.1870       | 2  | V 15 | 1537.7685      | 769.3881        |
| 348.2711       | 3  | L 14 | 1438.7000      | 719.8539        |
| 435.3031       | 4  | S 13 | 1325.6160      | 663.3119        |
| 492.3245       | 5  | G 12 | 1238.5839      | 619.7959        |
| 549.3460       | 6  | G 11 | 1181.5625      | 591.2852        |
| 650.3937       | 7  | T 10 | 1124.5410      | 562.7744        |
| 751.4414       | 8  | T 9  | 1023.4933      | 512.2506        |
| 882.4819       | 9  | M 8  | 922.4457       | 461.7267        |
| 1045.5452      | 10 | Y 7  | 791.4052       | 396.2065        |
| 1142.5979      | 11 | P 6  | 628.3418       | 314.6748        |
| 1199.6194      | 12 | G 5  | 531.2891       | 266.1485        |
| 1312.7035      | 13 | I 4  | 474.2676       | 237.6377        |
| 1383.7406      | 14 | A 3  | 361.1836       | 181.0957        |
| 1498.7675      | 15 | D 2  | 290.1464       | 145.5771        |
|                | 16 | R 1  | 175.1195       | 88.0637         |

N-term:+35.07

TVPIEAVTSKTSNIR, MH+ 1671.9645, m/z 557.9930  
 L OSG39 P180811 230811-s1.03973.03973.3.dta

X-range:

-

MassTol: Y-zoom:

MassType:

AVG  MONO

Axis:

1  2

Label:

I  M  -

Ions:

a  +  2+  3+

b  +  2+  3+

c  +  2+  3+

x  +  2+  3+

y  +  2+  3+

z  +  2+  3+

hide H<sub>2</sub>O/NH<sub>3</sub>

zoom 112-122

GO

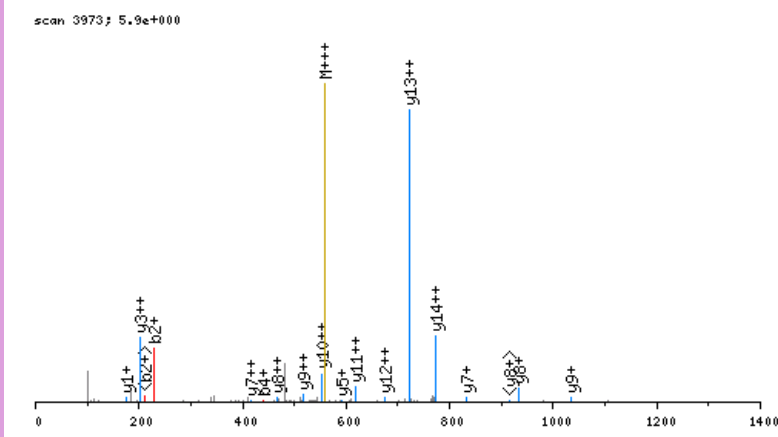

click image to zoom in; click top corners to zoom out [\[precursor±\]](#)

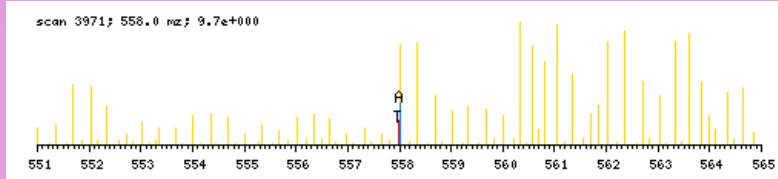

zoomed in precursor plot; T=theoretical m/z, A=acquired m/z

| b <sup>+</sup> | #  | AA # | y <sup>+</sup> | y <sup>2+</sup> |
|----------------|----|------|----------------|-----------------|
| 130.0868       | 1  | T    | 15             |                 |
| 229.1552       | 2  | V    | 14             | 1542.8856       |
| 326.2080       | 3  | P    | 13             | 1443.8172       |
| 439.2920       | 4  | I    | 12             | 1346.7644       |
| 568.3346       | 5  | E    | 11             | 1233.6803       |
| 639.3717       | 6  | A    | 10             | 1104.6377       |
| 738.4401       | 7  | V    | 9              | 1033.6006       |
| 839.4878       | 8  | T    | 8              | 934.5322        |
| 926.5198       | 9  | S    | 7              | 833.4845        |
| 1082.6461      | 10 | K    | 6              | 746.4525        |
| 1183.6938      | 11 | T    | 5              | 590.3262        |
| 1270.7259      | 12 | S    | 4              | 489.2785        |
| 1384.7688      | 13 | N    | 3              | 402.2465        |
| 1497.8528      | 14 | I    | 2              | 288.2036        |
|                | 15 | R    | 1              | 175.1195        |

N-term:+29.04 K(10):+156.13

TVPQTHNAR, MH+ 1057.5966, m/z 529.3020  
 H OSG37 P180811 230811-s1.03865.03865.2.dta

X-range:

-

MassTol: Y-zoom:

MassType:

AVG  MONO

Axis:

1  2

Label:

I  M  -

Ions:

a  +  2+  3+

b  +  2+  3+

c  +  2+  3+

x  +  2+  3+

y  +  2+  3+

z  +  2+  3+

hide H<sub>2</sub>O/NH<sub>3</sub>

zoom 112-122

GO

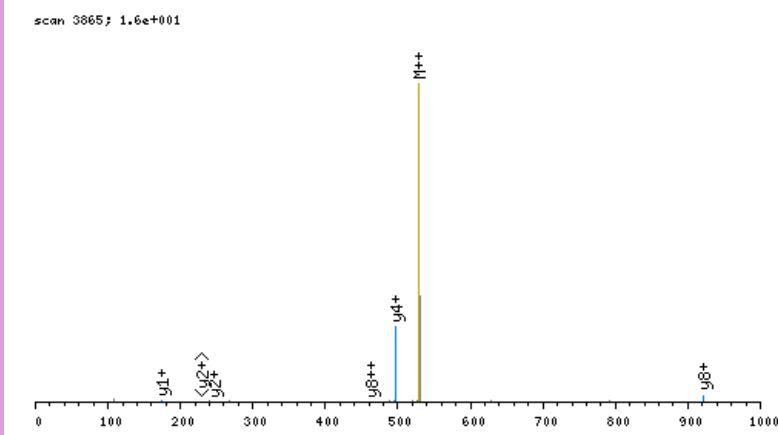

click image to zoom in; click top corners to zoom out [\[precursor±\]](#)

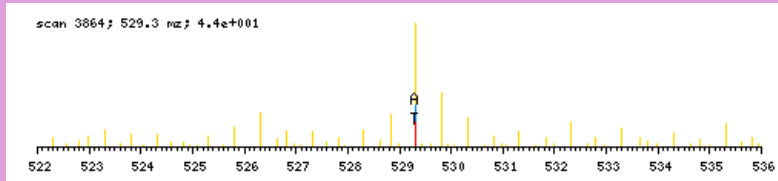

zoomed in precursor plot; T=theoretical m/z, A=acquired m/z

| b <sup>+</sup> | # | AA # | y <sup>+</sup> | y <sup>2+</sup>   |
|----------------|---|------|----------------|-------------------|
| 136.1186       | 1 | T    | 9              |                   |
| 235.1870       | 2 | V    | 8              | 922.4859 461.7469 |
| 332.2398       | 3 | P    | 7              | 823.4175 412.2126 |
| 460.2983       | 4 | Q    | 6              | 726.3647 363.6863 |
| 561.3460       | 5 | T    | 5              | 598.3061 299.6570 |
| 698.4049       | 6 | H    | 4              | 497.2585 249.1331 |
| 812.4479       | 7 | N    | 3              | 360.1995 180.6037 |
| 883.4850       | 8 | A    | 2              | 246.1566 123.5822 |
|                | 9 | R    | 1              | 175.1195 88.0637  |

N-term:+35.07

TVSLHLGVTPSVLR, MH+ 1512.9326, m/z 504.9824  
 H OSG39 P180811 230811-s1.05672.05672.3.dta

X-range:

-

MassTol: Y-zoom:

MassType:

AVG  MONO

Axis:

1  2

Label:

I  M  -

Ions:

a  +  2+  3+

b  +  2+  3+

c  +  2+  3+

x  +  2+  3+

y  +  2+  3+

z  +  2+  3+

hide H<sub>2</sub>O/NH<sub>3</sub>

zoom 112-122

GO

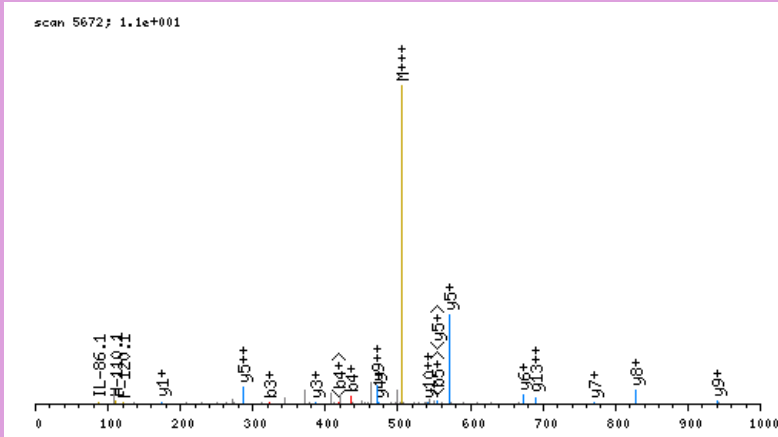

click image to zoom in; click top corners to zoom out [\[precursor±\]](#)

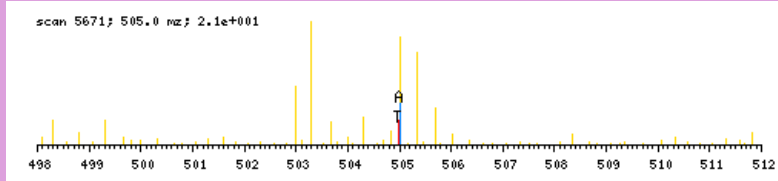

zoomed in precursor plot; T=theoretical m/z, A=acquired m/z

| b <sup>+</sup> | #  | AA # | y <sup>+</sup> | y <sup>2+</sup> |
|----------------|----|------|----------------|-----------------|
| 136.1186       | 1  | T 14 |                |                 |
| 235.1870       | 2  | V 13 | 1377.8218      | 689.4148        |
| 322.2190       | 3  | S 12 | 1278.7534      | 639.8806        |
| 435.3031       | 4  | L 11 | 1191.7214      | 596.3646        |
| 572.3620       | 5  | H 10 | 1078.6373      | 539.8226        |
| 685.4461       | 6  | L 9  | 941.5784       | 471.2931        |
| 742.4675       | 7  | G 8  | 828.4943       | 414.7511        |
| 841.5359       | 8  | V 7  | 771.4729       | 386.2403        |
| 942.5836       | 9  | T 6  | 672.4044       | 336.7061        |
| 1039.6364      | 10 | P 5  | 571.3568       | 286.1823        |
| 1126.6684      | 11 | S 4  | 474.3040       | 237.6559        |
| 1225.7368      | 12 | V 3  | 387.2720       | 194.1399        |
| 1338.8209      | 13 | L 2  | 288.2036       | 144.6057        |
|                | 14 | R 1  | 175.1195       | 88.0637         |

N-term:+35.07

TWKFVEGLPINDFSR, MH+ 1864.9962, m/z 622.3369  
 L OSG40 P180811 230811-s1.09123.09123.3.dta

X-range:

-

MassTol: Y-zoom:

MassType:

AVG  MONO

Axis:

1  2

Label:

I  M  -

Ions:

a  +  2+  3+

b  +  2+  3+

c  +  2+  3+

x  +  2+  3+

y  +  2+  3+

z  +  2+  3+

hide H<sub>2</sub>O/NH<sub>3</sub>

zoom 112-122

GO

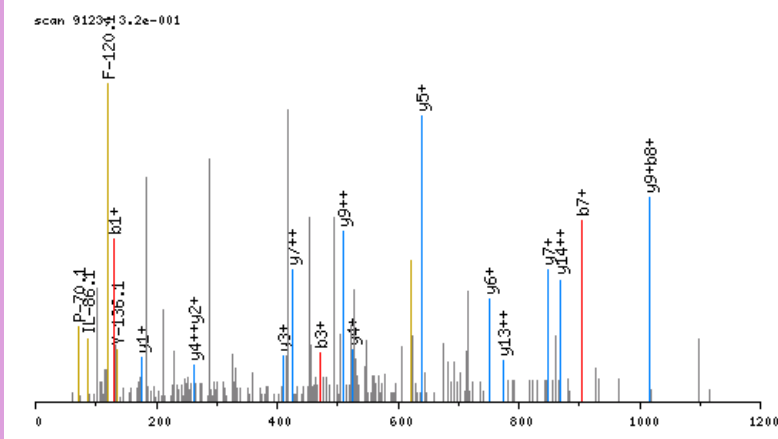

click image to zoom in; click top corners to zoom out [\[precursor±\]](#)

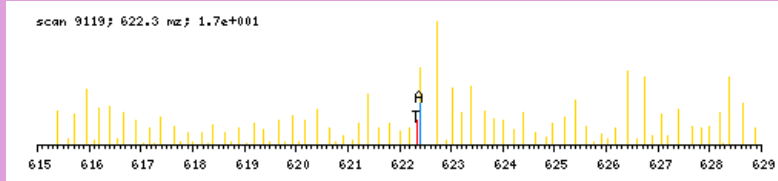

zoomed in precursor plot; T=theoretical m/z, A=acquired m/z

| b <sup>+</sup> | #  | AA | #  | y <sup>+</sup> | y <sup>2+</sup> |
|----------------|----|----|----|----------------|-----------------|
| 130.0868       | 1  | T  | 15 |                |                 |
| 316.1661       | 2  | W  | 14 | 1735.9172      | 868.4625        |
| 472.2924       | 3  | K  | 13 | 1549.8379      | 775.4229        |
| 619.3608       | 4  | F  | 12 | 1393.7116      | 697.3597        |
| 718.4292       | 5  | V  | 11 | 1246.6432      | 623.8255        |
| 847.4718       | 6  | E  | 10 | 1147.5748      | 574.2913        |
| 904.4933       | 7  | G  | 9  | 1018.5322      | 509.7700        |
| 1017.5773      | 8  | L  | 8  | 961.5107       | 481.2593        |
| 1114.6301      | 9  | P  | 7  | 848.4266       | 424.7172        |
| 1227.7142      | 10 | I  | 6  | 751.3739       | 376.1909        |
| 1341.7571      | 11 | N  | 5  | 638.2898       | 319.6488        |
| 1456.7840      | 12 | D  | 4  | 524.2469       | 262.6274        |
| 1603.8525      | 13 | F  | 3  | 409.2199       | 205.1139        |
| 1690.8845      | 14 | S  | 2  | 262.1515       | 131.5797        |
|                | 15 | R  | 1  | 175.1195       | 88.0637         |

N-term:+29.04 K(3):+156.13



TWVVLGHSER, MH+ 1217.6855, m/z 406.5667  
 H OSG40 P180811 230811-s1.05186.05186.3.dta

X-range:

-

MassTol: Y-zoom:

MassType:

AVG  MONO

Axis:

1  2

Label:

I  M  -

Ions:

a  +  2+  3+

b  +  2+  3+

c  +  2+  3+

x  +  2+  3+

y  +  2+  3+

z  +  2+  3+

hide H<sub>2</sub>O/NH<sub>3</sub>

zoom 112-122

GO

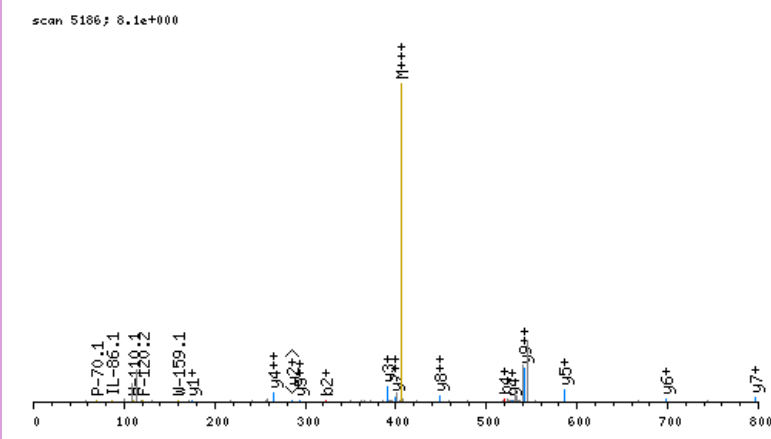

click image to zoom in; click top corners to zoom out [\[precursor±\]](#)

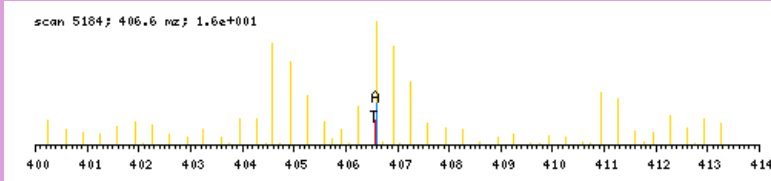

zoomed in precursor plot; T=theoretical m/z, A=acquired m/z

| b <sup>+</sup> | #  | AA # | y <sup>+</sup> | y <sup>2+</sup> |
|----------------|----|------|----------------|-----------------|
| 136.1186       | 1  | T    | 10             |                 |
| 322.1979       | 2  | W    | 9              | 1082.5747       |
| 421.2663       | 3  | V    | 8              | 896.4954        |
| 520.3347       | 4  | V    | 7              | 797.4270        |
| 633.4188       | 5  | L    | 6              | 698.3586        |
| 690.4402       | 6  | G    | 5              | 585.2745        |
| 827.4992       | 7  | H    | 4              | 528.2530        |
| 914.5312       | 8  | S    | 3              | 391.1941        |
| 1043.5738      | 9  | E    | 2              | 304.1621        |
|                | 10 | R    | 1              | 175.1195        |

N-term:+35.07

TYYNATEPVISFYDKR, MH+ 2035.0813, m/z 679.0319  
 H OSG39 P180811 230811-s1.05924.05924.3.dta

X-range:

-

MassTol: Y-zoom:

MassType:

AVG  MONO

Axis:

1  2

Label:

I  M  -

Ions:

a  +  2+  3+

b  +  2+  3+

c  +  2+  3+

x  +  2+  3+

y  +  2+  3+

z  +  2+  3+

hide H<sub>2</sub>O/NH<sub>3</sub>

zoom 112-122

GO

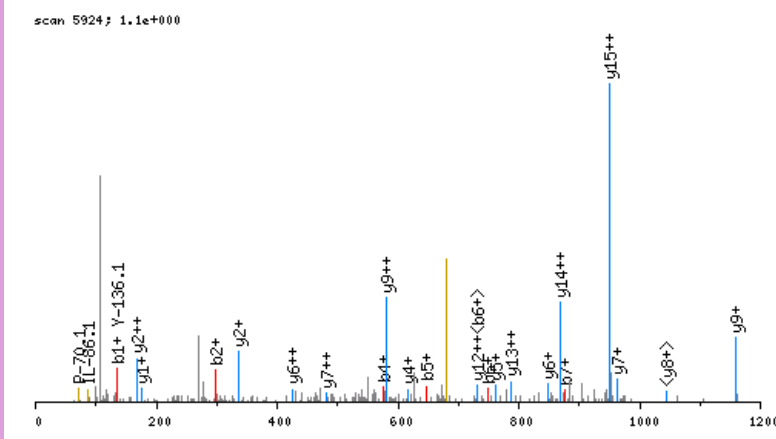

click image to zoom in; click top corners to zoom out [\[precursor±\]](#)

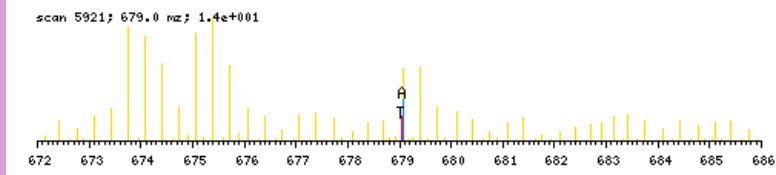

zoomed in precursor plot; T=theoretical m/z, A=acquired m/z

| b <sup>+</sup> | #  | AA # | y <sup>+</sup> | y <sup>2+</sup> |
|----------------|----|------|----------------|-----------------|
| 136.1186       | 1  | T 16 |                |                 |
| 299.1819       | 2  | Y 15 | 1899.9705      | 950.4892        |
| 462.2452       | 3  | Y 14 | 1736.9072      | 868.9575        |
| 576.2882       | 4  | N 13 | 1573.8439      | 787.4258        |
| 647.3253       | 5  | A 12 | 1459.8009      | 730.4044        |
| 748.3730       | 6  | T 11 | 1388.7638      | 694.8858        |
| 877.4155       | 7  | E 10 | 1287.7161      | 644.3620        |
| 974.4683       | 8  | P 9  | 1158.6736      | 579.8407        |
| 1073.5367      | 9  | V 8  | 1061.6208      | 531.3143        |
| 1186.6208      | 10 | I 7  | 962.5524       | 481.7801        |
| 1273.6528      | 11 | S 6  | 849.4683       | 425.2381        |
| 1420.7212      | 12 | F 5  | 762.4363       | 381.7221        |
| 1583.7846      | 13 | Y 4  | 615.3679       | 308.1878        |
| 1698.8115      | 14 | D 3  | 452.3045       | 226.6562        |
| 1860.9696      | 15 | K 2  | 337.2776       | 169.1427        |
|                | 16 | R 1  | 175.1195       | 88.0637         |

N-term:+35.07 K(15):+162.16

VAAAPSPSHEAKGLVISPEGLSPAVR, MH+ 2556.4150, m/z 639.8592  
 L OSG40 P180811 230811-s1.05962.05962.4.dta

scan 5962; 1.9e+001

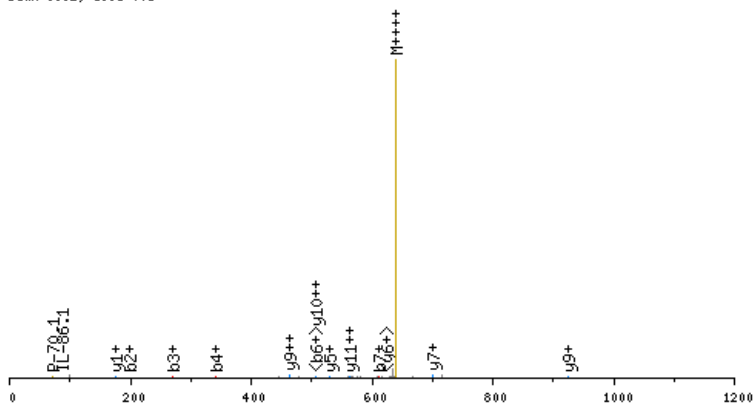

click image to zoom in; click top corners to zoom out [precursor±]

scan 5959; 639.9 m/z; 1.3e+001

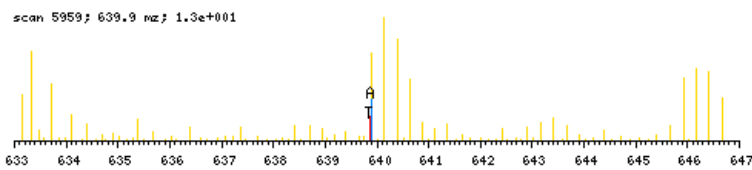

zoomed in precursor plot; T=theoretical m/z, A=acquired m/z

X-range:

-

MassTol: Y-zoom:

MassType:

AVG  MONO

Axis:

1  2

Label:

I  M  -

Ions:

a  +  2+  3+

b  +  2+  3+

c  +  2+  3+

x  +  2+  3+

y  +  2+  3+

z  +  2+  3+

hide H<sub>2</sub>O/NH<sub>3</sub>

zoom 112-122

GO

| b <sup>+</sup> | #  | AA # | y <sup>+</sup> | y <sup>2+</sup> |
|----------------|----|------|----------------|-----------------|
| 128.1075       | 1  | V    | 26             |                 |
| 199.1446       | 2  | A    | 25             | 2429.3153       |
| 270.1817       | 3  | A    | 24             | 2358.2782       |
| 341.2189       | 4  | A    | 23             | 2287.2411       |
| 428.2509       | 5  | S    | 22             | 2216.2039       |
| 525.3036       | 6  | P    | 21             | 2129.1719       |
| 612.3357       | 7  | S    | 20             | 2032.1192       |
| 749.3946       | 8  | H    | 19             | 1945.0871       |
| 878.4372       | 9  | E    | 18             | 1808.0282       |
| 949.4743       | 10 | A    | 17             | 1678.9856       |
| 1105.6006      | 11 | K    | 16             | 1607.9485       |
| 1162.6221      | 12 | G    | 15             | 1451.8222       |
| 1219.6435      | 13 | G    | 14             | 1394.8007       |
| 1332.7276      | 14 | L    | 13             | 1337.7793       |
| 1431.7960      | 15 | V    | 12             | 1224.6952       |
| 1544.8801      | 16 | I    | 11             | 1125.6268       |
| 1631.9121      | 17 | S    | 10             | 1012.5427       |
| 1728.9649      | 18 | P    | 9              | 925.5107        |
| 1858.0074      | 19 | E    | 8              | 828.4579        |
| 1915.0289      | 20 | G    | 7              | 699.4153        |
| 2028.1130      | 21 | L    | 6              | 642.3939        |
| 2115.1450      | 22 | S    | 5              | 529.3098        |
| 2212.1978      | 23 | P    | 4              | 442.2778        |
| 2283.2349      | 24 | A    | 3              | 345.2250        |
| 2382.3033      | 25 | V    | 2              | 274.1879        |
|                | 26 | R    | 1              | 175.1195        |

N-term: +29.04 K(11): +156.13

VAEQADLEQAFSPSPDCVDR, MH+ 2377.0617, m/z 793.0254  
 L OSG36 P180811 230811-s1.04360.04360.3.dta

X-range:

-

MassTol: Y-zoom:

MassType:

AVG  MONO

Axis:

1  2

Label:

I  M  -

Ions:

a  +  2+  3+

b  +  2+  3+

c  +  2+  3+

x  +  2+  3+

y  +  2+  3+

z  +  2+  3+

hide H<sub>2</sub>O/NH<sub>3</sub>

zoom 112-122

GO

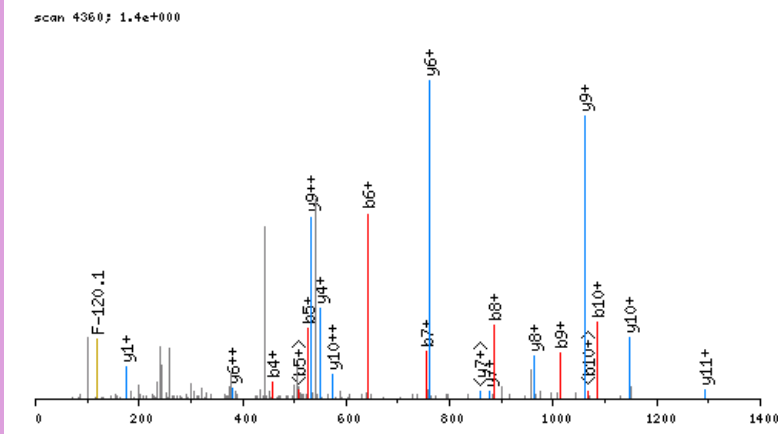

click image to zoom in; click top corners to zoom out [precursor±]

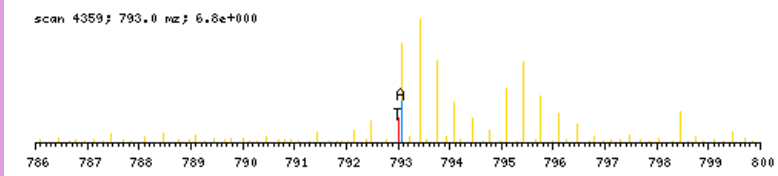

zoomed in precursor plot; T=theoretical m/z, A=acquired m/z

| b <sup>+</sup> | #  | AA # | y <sup>+</sup> | y <sup>2+</sup> |
|----------------|----|------|----------------|-----------------|
| 128.1075       | 1  | V    | 21             |                 |
| 199.1446       | 2  | A    | 20             | 2249.9620       |
| 328.1872       | 3  | E    | 19             | 2178.9249       |
| 456.2458       | 4  | Q    | 18             | 2049.8823       |
| 527.2829       | 5  | A    | 17             | 1921.8237       |
| 642.3099       | 6  | D    | 16             | 1850.7866       |
| 755.3939       | 7  | L    | 15             | 1735.7597       |
| 884.4365       | 8  | E    | 14             | 1622.6756       |
| 1012.4951      | 9  | Q    | 13             | 1493.6330       |
| 1083.5322      | 10 | A    | 12             | 1365.5745       |
| 1230.6006      | 11 | F    | 11             | 1294.5373       |
| 1317.6326      | 12 | S    | 10             | 1147.4689       |
| 1414.6854      | 13 | P    | 9              | 1060.4369       |
| 1501.7174      | 14 | S    | 8              | 963.3841        |
| 1616.7444      | 15 | D    | 7              | 876.3521        |
| 1713.7971      | 16 | P    | 6              | 761.3252        |
| 1828.8241      | 17 | D    | 5              | 664.2724        |
| 1988.8547      | 18 | C    | 4              | 549.2455        |
| 2087.9231      | 19 | V    | 3              | 389.2149        |
| 2202.9500      | 20 | D    | 2              | 290.1464        |
|                | 21 | R    | 1              | 175.1195        |

N-term:+29.04 C(18):+160.03

VANKIVEEAENIVVTTGVVR, MH+ 2184.2240, m/z 546.8115  
 L OSG39 P180811 230811-s1.06389.06389.4.dta

X-range:

-

MassTol: Y-zoom:

MassType:

AVG  MONO

Axis:

1  2

Label:

I  M  -

Ions:

a  +  2+  3+

b  +  2+  3+

c  +  2+  3+

x  +  2+  3+

y  +  2+  3+

z  +  2+  3+

hide H<sub>2</sub>O/NH<sub>3</sub>

zoom 112-122

GO

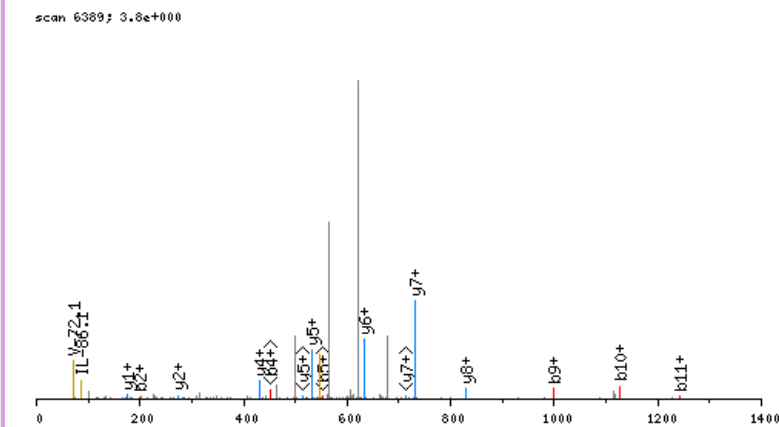

click image to zoom in; click top corners to zoom out [precursor±]

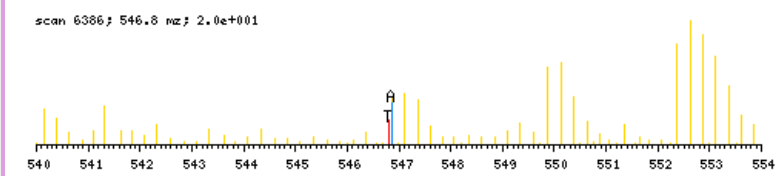

zoomed in precursor plot; T=theoretical m/z, A=acquired m/z

| b <sup>+</sup> | #  | AA | #  | y <sup>+</sup> | y <sup>2+</sup> |
|----------------|----|----|----|----------------|-----------------|
| 128.1075       | 1  | V  | 20 |                |                 |
| 199.1446       | 2  | A  | 19 | 2057.1243      | 1029.0661       |
| 313.1876       | 3  | N  | 18 | 1986.0872      | 993.5475        |
| 469.3139       | 4  | K  | 17 | 1872.0443      | 936.5260        |
| 570.3615       | 5  | T  | 16 | 1715.9180      | 858.4629        |
| 669.4299       | 6  | V  | 15 | 1614.8703      | 807.9391        |
| 798.4725       | 7  | E  | 14 | 1515.8019      | 758.4048        |
| 927.5151       | 8  | E  | 13 | 1386.7593      | 693.8835        |
| 998.5522       | 9  | A  | 12 | 1257.7167      | 629.3623        |
| 1127.5948      | 10 | E  | 11 | 1186.6796      | 593.8437        |
| 1241.6378      | 11 | N  | 10 | 1057.6370      | 529.3224        |
| 1354.7218      | 12 | I  | 9  | 943.5940       | 472.3009        |
| 1453.7902      | 13 | V  | 8  | 830.5100       | 415.7589        |
| 1552.8587      | 14 | V  | 7  | 731.4416       | 366.2247        |
| 1653.9063      | 15 | T  | 6  | 632.3731       | 316.6905        |
| 1754.9540      | 16 | T  | 5  | 531.3255       | 266.1666        |
| 1811.9755      | 17 | G  | 4  | 430.2778       | 215.6428        |
| 1911.0439      | 18 | V  | 3  | 373.2563       | 187.1321        |
| 2010.1123      | 19 | V  | 2  | 274.1879       | 137.5979        |
|                | 20 | R  | 1  | 175.1195       | 88.0637         |

N-term:+29.04 K(4):+156.13

VANSPANADYQER, MH+ 1468.7244, m/z 490.2463  
 H OSG37 P180811 230811-s1.02186.02186.3.dta

X-range:

-

MassTol: Y-zoom:

MassType:

AVG  MONO

Axis:

1  2

Label:

I  M  -

Ions:

a  +  2+  3+

b  +  2+  3+

c  +  2+  3+

x  +  2+  3+

y  +  2+  3+

z  +  2+  3+

hide H<sub>2</sub>O/NH<sub>3</sub>

zoom 112-122

GO

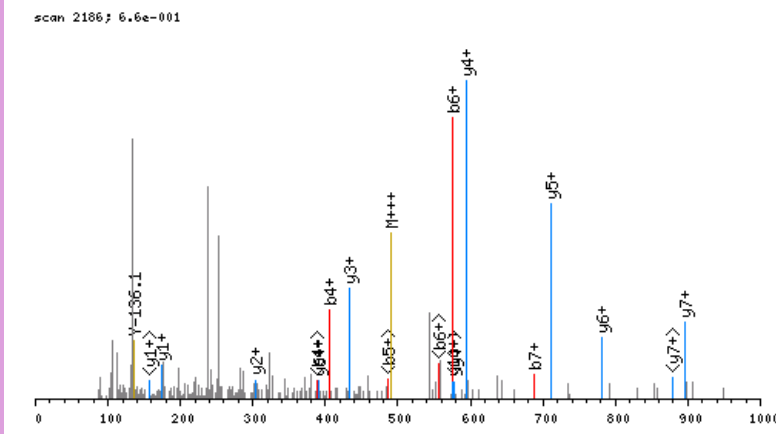

click image to zoom in; click top corners to zoom out [\[precursor±\]](#)

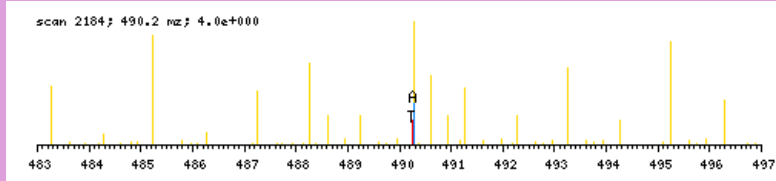

zoomed in precursor plot; T=theoretical m/z, A=acquired m/z

| b <sup>+</sup> | #  | AA # | y <sup>+</sup> | y <sup>2+</sup> |
|----------------|----|------|----------------|-----------------|
| 134.1393       | 1  | V 13 |                |                 |
| 205.1764       | 2  | A 12 | 1335.5929      | 668.3004        |
| 319.2194       | 3  | N 11 | 1264.5558      | 632.7818        |
| 406.2514       | 4  | S 10 | 1150.5129      | 575.7604        |
| 503.3041       | 5  | P 9  | 1063.4809      | 532.2443        |
| 574.3413       | 6  | A 8  | 966.4281       | 483.7180        |
| 688.3842       | 7  | N 7  | 895.3910       | 448.1994        |
| 759.4213       | 8  | A 6  | 781.3481       | 391.1779        |
| 874.4482       | 9  | D 5  | 710.3109       | 355.6594        |
| 1037.5116      | 10 | Y 4  | 595.2840       | 298.1459        |
| 1165.5702      | 11 | Q 3  | 432.2207       | 216.6142        |
| 1294.6127      | 12 | E 2  | 304.1621       | 152.5850        |
|                | 13 | R 1  | 175.1195       | 88.0637         |

N-term:+35.07

VAPTISSPVCQEQLVEAGR, MH+ 2069.0700, m/z 690.3615  
 L OSG36 P180811 230811-s1.04156.04156.3.dta

X-range:

-

MassTol: Y-zoom:

MassType:

AVG  MONO

Axis:

1  2

Label:

I  M  -

Ions:

a  +  2+  3+

b  +  2+  3+

c  +  2+  3+

x  +  2+  3+

y  +  2+  3+

z  +  2+  3+

hide H<sub>2</sub>O/NH<sub>3</sub>

zoom 112-122

GO

scan 4156; 9.6e-001

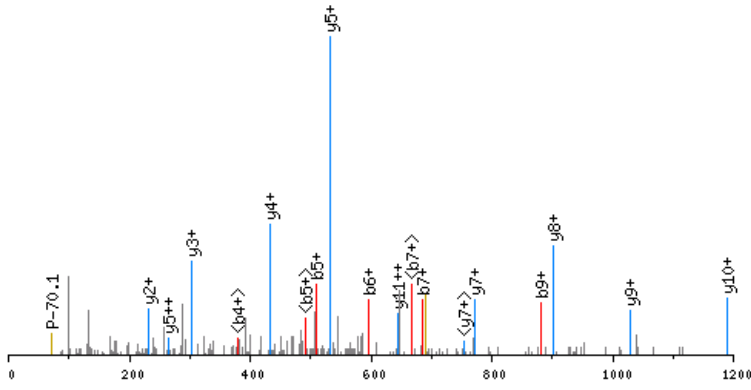

click image to zoom in; click top corners to zoom out [\[precursor±\]](#)

scan 4154; 690.4 m/z; 2.2e+000

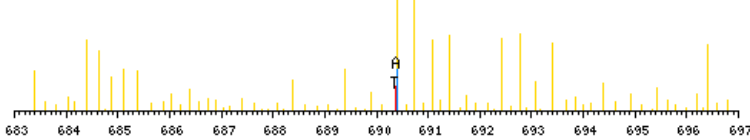

zoomed in precursor plot; T=theoretical m/z, A=acquired m/z

| b <sup>+</sup> | #  | AA # | y <sup>+</sup> | y <sup>2+</sup> |
|----------------|----|------|----------------|-----------------|
| 128.1075       | 1  | V 19 |                |                 |
| 199.1446       | 2  | A 18 | 1941.9704      | 971.4891        |
| 296.1974       | 3  | P 17 | 1870.9332      | 935.9705        |
| 397.2451       | 4  | T 16 | 1773.8805      | 887.4441        |
| 510.3291       | 5  | I 15 | 1672.8328      | 836.9203        |
| 597.3612       | 6  | S 14 | 1559.7487      | 780.3783        |
| 684.3932       | 7  | S 13 | 1472.7167      | 736.8623        |
| 781.4460       | 8  | P 12 | 1385.6847      | 693.3463        |
| 880.5144       | 9  | V 11 | 1288.6319      | 644.8199        |
| 1040.5450      | 10 | C 10 | 1189.5635      | 595.2857        |
| 1168.6035      | 11 | Q 9  | 1029.5329      | 515.2704        |
| 1297.6461      | 12 | E 8  | 901.4743       | 451.2411        |
| 1425.7047      | 13 | Q 7  | 772.4317       | 386.7198        |
| 1538.7888      | 14 | L 6  | 644.3731       | 322.6905        |
| 1637.8572      | 15 | V 5  | 531.2891       | 266.1485        |
| 1766.8998      | 16 | E 4  | 432.2207       | 216.6142        |
| 1837.9369      | 17 | A 3  | 303.1781       | 152.0930        |
| 1894.9584      | 18 | G 2  | 232.1410       | 116.5744        |
|                | 19 | R 1  | 175.1195       | 88.0637         |

N-term:+29.04 C(10):+160.03

VAQPGDTIFGKIIR, MH+ 1640.0172, m/z 547.3439  
 H OSG39 P180811 230811-s1.05880.05880.3.dta

X-range:

-

MassTol: Y-zoom:

MassType:

AVG  MONO

Axis:

1  2

Label:

I  M  -

Ions:

a  +  2+  3+

b  +  2+  3+

c  +  2+  3+

x  +  2+  3+

y  +  2+  3+

z  +  2+  3+

hide H<sub>2</sub>O/NH<sub>3</sub>

zoom 112-122

GO

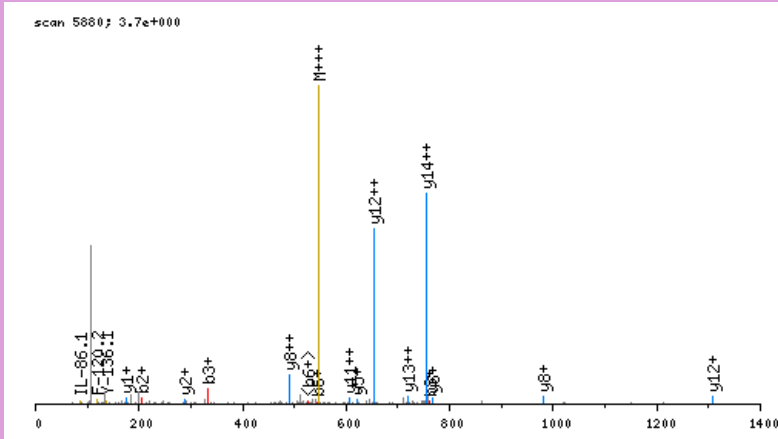

click image to zoom in; click top corners to zoom out [\[precursor±\]](#)

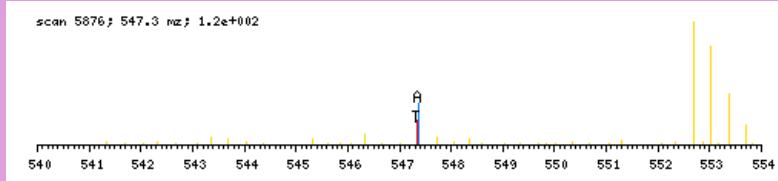

zoomed in precursor plot; T=theoretical m/z, A=acquired m/z

| b <sup>+</sup> | #  | AA # | y <sup>+</sup> | y <sup>2+</sup> |
|----------------|----|------|----------------|-----------------|
| 134.1393       | 1  | V 15 |                |                 |
| 205.1764       | 2  | A 14 | 1506.8857      | 753.9467        |
| 333.2350       | 3  | Q 13 | 1435.8486      | 718.4282        |
| 430.2878       | 4  | P 12 | 1307.7900      | 654.3989        |
| 487.3092       | 5  | G 11 | 1210.7372      | 605.8725        |
| 544.3307       | 6  | G 10 | 1153.7158      | 577.3618        |
| 659.3576       | 7  | D 9  | 1096.6943      | 548.8511        |
| 760.4053       | 8  | T 8  | 981.6673       | 491.3376        |
| 873.4894       | 9  | I 7  | 880.6197       | 440.8137        |
| 1020.5578      | 10 | F 6  | 767.5356       | 384.2717        |
| 1077.5793      | 11 | G 5  | 620.4672       | 310.7375        |
| 1239.7374      | 12 | K 4  | 563.4457       | 282.2268        |
| 1352.8214      | 13 | I 3  | 401.2876       | 201.1477        |
| 1465.9055      | 14 | I 2  | 288.2036       | 144.6057        |
|                | 15 | R 1  | 175.1195       | 88.0637         |

N-term:+35.07 K(12):+162.16



VAVMHGETEGTVPGNALVVDPEKPFRR, MH+ 2805.4609, m/z 702.1207  
 L OSG40 P180811 230811-s1.07116.07116.4.dta

scan 7116; 2.2e+000

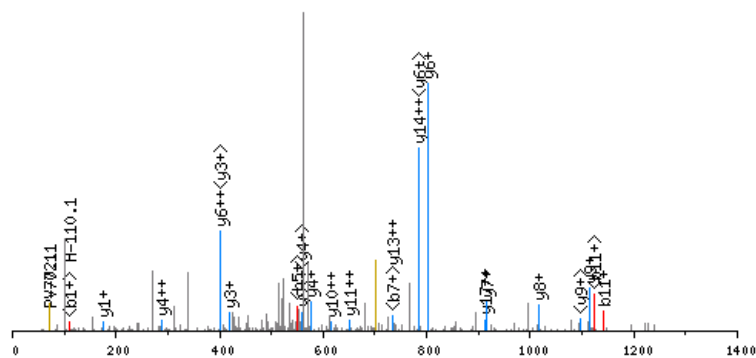

click image to zoom in; click top corners to zoom out [precursor±]

scan 7114; 702.1 mz; 2.4e+001

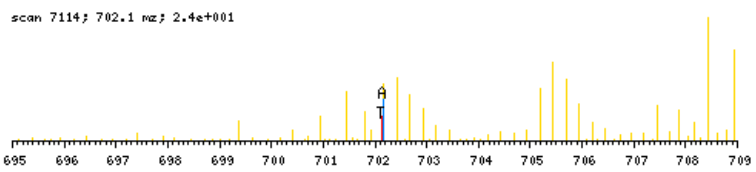

zoomed in precursor plot; T=theoretical m/z, A=acquired m/z

X-range:

-

MassTol: Y-zoom:

MassType:

AVG  MONO

Axis:

1  2

Label:

I  M  -

Ions:

a  +  2+  3+

b  +  2+  3+

c  +  2+  3+

x  +  2+  3+

y  +  2+  3+

z  +  2+  3+

hide H<sub>2</sub>O/NH<sub>3</sub>

zoom 112-122

GO

| b <sup>+</sup> | #  | AA # | y <sup>+</sup> | y <sup>2+</sup> |
|----------------|----|------|----------------|-----------------|
| 128.1075       | 1  | V    | 26             |                 |
| 199.1446       | 2  | A    | 25             | 2678.3612       |
| 298.2130       | 3  | V    | 24             | 2607.3241       |
| 429.2535       | 4  | M    | 23             | 2508.2557       |
| 566.3124       | 5  | H    | 22             | 2377.2152       |
| 623.3339       | 6  | G    | 21             | 2240.1563       |
| 752.3765       | 7  | E    | 20             | 2183.1349       |
| 853.4242       | 8  | T    | 19             | 2054.0923       |
| 982.4668       | 9  | E    | 18             | 1953.0446       |
| 1039.4882      | 10 | G    | 17             | 1824.0020       |
| 1140.5359      | 11 | T    | 16             | 1766.9805       |
| 1239.6043      | 12 | V    | 15             | 1665.9329       |
| 1336.6571      | 13 | P    | 14             | 1566.8644       |
| 1393.6786      | 14 | G    | 13             | 1469.8117       |
| 1507.7215      | 15 | N    | 12             | 1412.7902       |
| 1578.7586      | 16 | A    | 11             | 1298.7473       |
| 1691.8427      | 17 | L    | 10             | 1227.7102       |
| 1790.9111      | 18 | V    | 9              | 1114.6261       |
| 1889.9795      | 19 | V    | 8              | 1015.5577       |
| 2005.0064      | 20 | D    | 7              | 916.4893        |
| 2102.0592      | 21 | P    | 6              | 801.4623        |
| 2231.1018      | 22 | E    | 5              | 704.4096        |
| 2387.2281      | 23 | K    | 4              | 575.3670        |
| 2484.2808      | 24 | P    | 3              | 419.2407        |
| 2631.3493      | 25 | F    | 2              | 322.1879        |
|                | 26 | R    | 1              | 175.1195        |

N-term:+29.04 K(23):+156.13

VAYDEEEEDYGPAGPNSYSGSAGTAVGAYDAPR, MH+ 3393.4671, m/z 849.1222  
 L OSG36 P180811 230811-s1.04181.04181.4.dta

X-range:

-

MassTol: Y-zoom:

MassType:

AVG  MONO

Axis:

1  2

Label:

I  M  -

Ions:

a  +  2+  3+

b  +  2+  3+

c  +  2+  3+

x  +  2+  3+

y  +  2+  3+

z  +  2+  3+

hide H<sub>2</sub>O/NH<sub>3</sub>

zoom 112-122

GO

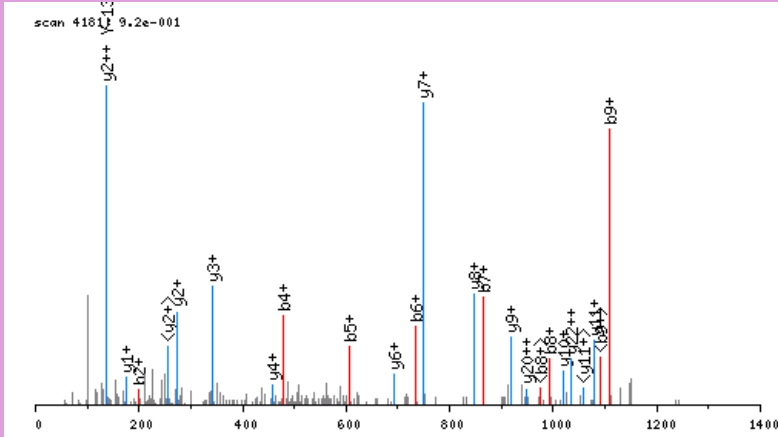

click image to zoom in; click top corners to zoom out [\[precursor±\]](#)

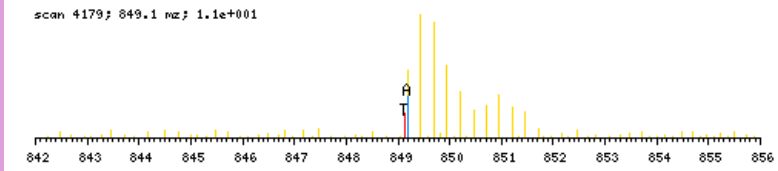

zoomed in precursor plot; T=theoretical m/z, A=acquired m/z

| b <sup>+</sup> | #  | AA | #  | y <sup>+</sup> | y <sup>2+</sup> |
|----------------|----|----|----|----------------|-----------------|
| 128.1075       | 1  | V  | 33 |                |                 |
| 199.1446       | 2  | A  | 32 | 3266.3674      | 1633.6876       |
| 362.2080       | 3  | Y  | 31 | 3195.3303      | 1598.1691       |
| 477.2349       | 4  | D  | 30 | 3032.2670      | 1516.6374       |
| 606.2775       | 5  | E  | 29 | 2917.2400      | 1459.1239       |
| 735.3201       | 6  | E  | 28 | 2788.1974      | 1394.6026       |
| 864.3627       | 7  | E  | 27 | 2659.1548      | 1330.0813       |
| 993.4053       | 8  | E  | 26 | 2530.1123      | 1265.5600       |
| 1108.4322      | 9  | D  | 25 | 2401.0697      | 1201.0387       |
| 1271.4955      | 10 | Y  | 24 | 2286.0427      | 1143.5253       |
| 1328.5170      | 11 | G  | 23 | 2122.9794      | 1061.9936       |
| 1425.5698      | 12 | P  | 22 | 2065.9579      | 1033.4829       |
| 1496.6069      | 13 | A  | 21 | 1968.9052      | 984.9565        |
| 1553.6283      | 14 | G  | 20 | 1897.8680      | 949.4379        |
| 1650.6811      | 15 | P  | 19 | 1840.8466      | 920.9272        |
| 1764.7240      | 16 | N  | 18 | 1743.7938      | 872.4008        |
| 1851.7561      | 17 | S  | 17 | 1629.7509      | 815.3794        |
| 2014.8194      | 18 | Y  | 16 | 1542.7189      | 771.8633        |
| 2101.8514      | 19 | S  | 15 | 1379.6555      | 690.3317        |
| 2158.8729      | 20 | G  | 14 | 1292.6235      | 646.8157        |
| 2245.9049      | 21 | S  | 13 | 1235.6020      | 618.3049        |
| 2316.9420      | 22 | A  | 12 | 1148.5700      | 574.7889        |
| 2373.9635      | 23 | G  | 11 | 1077.5329      | 539.2704        |
| 2475.0112      | 24 | T  | 10 | 1020.5114      | 510.7596        |
| 2546.0483      | 25 | A  | 9  | 919.4638       | 460.2358        |
| 2645.1167      | 26 | V  | 8  | 848.4266       | 424.7172        |
| 2702.1382      | 27 | G  | 7  | 749.3582       | 375.1830        |
| 2773.1753      | 28 | A  | 6  | 692.3368       | 346.6723        |
| 2936.2386      | 29 | Y  | 5  | 621.2997       | 311.1537        |
| 3051.2656      | 30 | D  | 4  | 458.2363       | 229.6221        |
| 3122.3027      | 31 | A  | 3  | 343.2094       | 172.1086        |
| 3219.3554      | 32 | P  | 2  | 272.1723       | 136.5900        |
|                | 33 | R  | 1  | 175.1195       | 88.0637         |

N-term:+29.04

VDAYALCDALGRPAVGVGGGEWR, MH+ 2417.2035, m/z 605.0563  
 L OSG41 P180811 230811-s1.08803.08803.4.dta

X-range:

-

MassTol: Y-zoom:

MassType:

AVG  MONO

Axis:

1  2

Label:

I  M  -

Ions:

a  +  2+  3+

b  +  2+  3+

c  +  2+  3+

x  +  2+  3+

y  +  2+  3+

z  +  2+  3+

hide H<sub>2</sub>O/NH<sub>3</sub>

zoom 112-122

GO

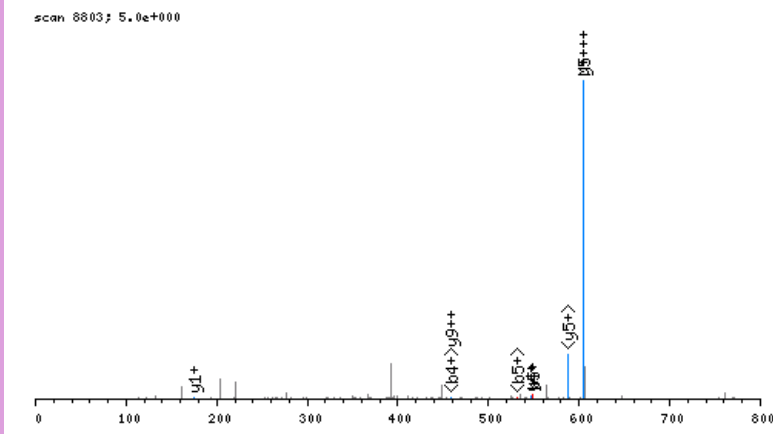

click image to zoom in; click top corners to zoom out [precursor±]

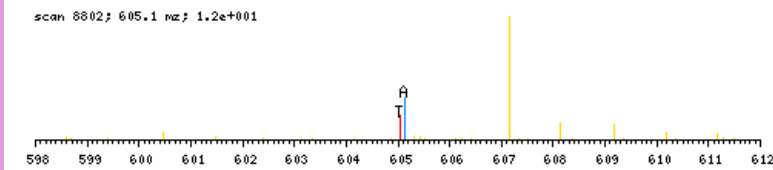

zoomed in precursor plot; T=theoretical m/z, A=acquired m/z

| b <sup>+</sup> | #  | AA # | y <sup>+</sup> | y <sup>2+</sup> |
|----------------|----|------|----------------|-----------------|
| 128.1075       | 1  | V 23 |                |                 |
| 243.1345       | 2  | D 22 | 2290.1038      | 1145.5558       |
| 314.1716       | 3  | A 21 | 2175.0769      | 1088.0424       |
| 477.2349       | 4  | Y 20 | 2104.0398      | 1052.5238       |
| 548.2720       | 5  | A 19 | 1940.9764      | 970.9921        |
| 661.3561       | 6  | L 18 | 1869.9393      | 935.4736        |
| 821.3867       | 7  | C 17 | 1756.8553      | 878.9315        |
| 936.4136       | 8  | D 16 | 1596.8247      | 798.9162        |
| 1007.4507      | 9  | A 15 | 1481.7977      | 741.4028        |
| 1120.5348      | 10 | L 14 | 1410.7606      | 705.8842        |
| 1177.5563      | 11 | G 13 | 1297.6765      | 649.3422        |
| 1333.6574      | 12 | R 12 | 1240.6551      | 620.8315        |
| 1430.7101      | 13 | P 11 | 1084.5540      | 542.7809        |
| 1501.7473      | 14 | A 10 | 987.5012       | 494.2545        |
| 1600.8157      | 15 | V 9  | 916.4641       | 458.7360        |
| 1657.8371      | 16 | G 8  | 817.3957       | 409.2018        |
| 1756.9055      | 17 | V 7  | 760.3742       | 380.6910        |
| 1813.9270      | 18 | G 6  | 661.3058       | 331.1568        |
| 1870.9485      | 19 | G 5  | 604.2843       | 302.6461        |
| 1927.9699      | 20 | G 4  | 547.2629       | 274.1353        |
| 2057.0125      | 21 | E 3  | 490.2414       | 245.6246        |
| 2243.0918      | 22 | W 2  | 361.1988       | 181.1033        |
|                | 23 | R 1  | 175.1195       | 88.0637         |

N-term:+29.04 C(7):+160.03

VDCSEYLALSKR, MH+ 1508.8419, m/z 503.6188  
 H OSG40 P180811 230811-s1.05147.05147.3.dta

scan 5147; 1.1e+001

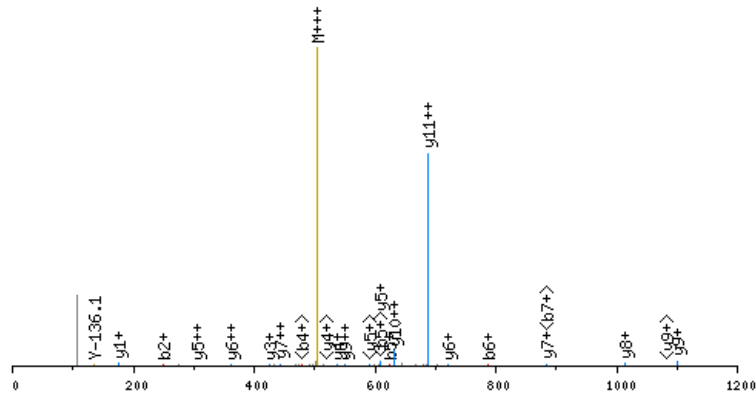

click image to zoom in; click top corners to zoom out [\[precursor±\]](#)

scan 5144; 503.6 m/z; 1.3e+001

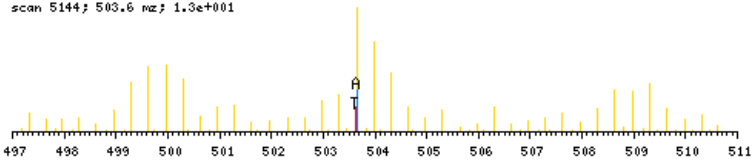

zoomed in precursor plot; T=theoretical m/z, A=acquired m/z

X-range:

-

MassTol: Y-zoom:

MassType:

AVG  MONO

Axis:

1  2

Label:

I  M  -

Ions:

a  +  2+  3+

b  +  2+  3+

c  +  2+  3+

x  +  2+  3+

y  +  2+  3+

z  +  2+  3+

hide H<sub>2</sub>O/NH<sub>3</sub>

zoom 112-122

GO

| b <sup>+</sup> | #  | AA | #  | y <sup>+</sup> | y <sup>2+</sup> |
|----------------|----|----|----|----------------|-----------------|
| 134.1393       | 1  | V  | 12 |                |                 |
| 249.1663       | 2  | D  | 11 | 1375.7104      | 688.3591        |
| 409.1969       | 3  | C  | 10 | 1260.6834      | 630.8456        |
| 496.2289       | 4  | S  | 9  | 1100.6528      | 550.8303        |
| 625.2715       | 5  | E  | 8  | 1013.6208      | 507.3143        |
| 788.3348       | 6  | Y  | 7  | 884.5782       | 442.7930        |
| 901.4189       | 7  | L  | 6  | 721.5149       | 361.2613        |
| 972.4560       | 8  | A  | 5  | 608.4308       | 304.7193        |
| 1085.5400      | 9  | L  | 4  | 537.3937       | 269.2008        |
| 1172.5721      | 10 | S  | 3  | 424.3096       | 212.6587        |
| 1334.7302      | 11 | K  | 2  | 337.2776       | 169.1427        |
|                | 12 | R  | 1  | 175.1195       | 88.0637         |

N-term: +35.07 C(3): +160.03  
 K(11): +162.16

VDEYDPTIEDSYR, MH+ 1629.7284, m/z 543.9143  
 L OSG37 P180811 230811-s1.04873.04873.3.dta

X-range:

-

MassTol: Y-zoom:

MassType:

AVG  MONO

Axis:

1  2

Label:

I  M  -

Ions:

a  +  2+  3+

b  +  2+  3+

c  +  2+  3+

x  +  2+  3+

y  +  2+  3+

z  +  2+  3+

hide H<sub>2</sub>O/NH<sub>3</sub>

zoom 112-122

GO

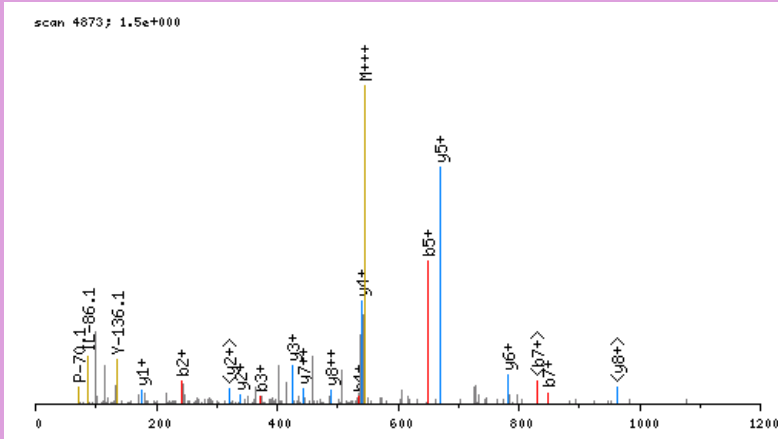

click image to zoom in; click top corners to zoom out [\[precursor±\]](#)

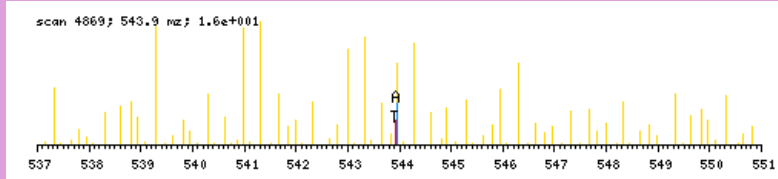

zoomed in precursor plot; T=theoretical m/z, A=acquired m/z

| b <sup>+</sup> | #  | AA # | y <sup>+</sup> | y <sup>2+</sup> |
|----------------|----|------|----------------|-----------------|
| 128.1075       | 1  | V 13 |                |                 |
| 243.1345       | 2  | D 12 | 1502.6287      | 751.8183        |
| 372.1771       | 3  | E 11 | 1387.6018      | 694.3048        |
| 535.2404       | 4  | Y 10 | 1258.5592      | 629.7835        |
| 650.2673       | 5  | D 9  | 1095.4958      | 548.2518        |
| 747.3201       | 6  | P 8  | 980.4689       | 490.7384        |
| 848.3678       | 7  | T 7  | 883.4161       | 442.2120        |
| 961.4518       | 8  | I 6  | 782.3685       | 391.6881        |
| 1090.4944      | 9  | E 5  | 669.2844       | 335.1461        |
| 1205.5214      | 10 | D 4  | 540.2418       | 270.6248        |
| 1292.5534      | 11 | S 3  | 425.2149       | 213.1113        |
| 1455.6167      | 12 | Y 2  | 338.1828       | 169.5953        |
|                | 13 | R 1  | 175.1195       | 88.0637         |

N-term:+29.04

VDLEPTVIDEVR, MH+ 1418.7955, m/z 709.9014  
 H OSG37 P180811 230811-s1.06750.06750.2.dta

X-range:

-

MassTol: Y-zoom:

MassType:

AVG  MONO

Axis:

1  2

Label:

I  M  -

Ions:

a  +  2+  3+

b  +  2+  3+

c  +  2+  3+

x  +  2+  3+

y  +  2+  3+

z  +  2+  3+

hide H<sub>2</sub>O/NH<sub>3</sub>

zoom 112-122

GO

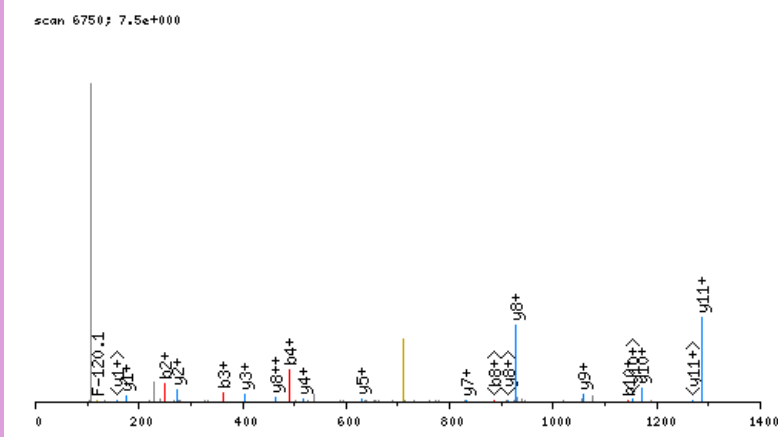

click image to zoom in; click top corners to zoom out [\[precursor±\]](#)

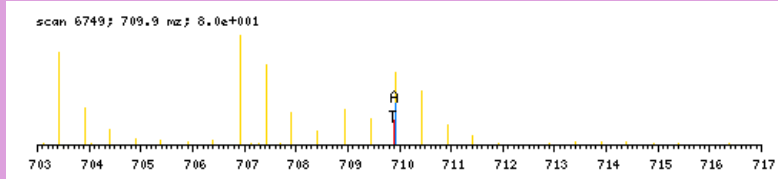

zoomed in precursor plot; T=theoretical m/z, A=acquired m/z

| b <sup>+</sup> | #  | AA # | y <sup>+</sup> | y <sup>2+</sup> |
|----------------|----|------|----------------|-----------------|
| 134.1393       | 1  | V 12 |                |                 |
| 249.1663       | 2  | D 11 | 1285.6640      | 643.3359        |
| 362.2503       | 3  | L 10 | 1170.6370      | 585.8224        |
| 491.2929       | 4  | E 9  | 1057.5530      | 529.2804        |
| 588.3457       | 5  | P 8  | 928.5104       | 464.7591        |
| 689.3934       | 6  | T 7  | 831.4576       | 416.2327        |
| 788.4618       | 7  | V 6  | 730.4099       | 365.7089        |
| 901.5458       | 8  | I 5  | 631.3415       | 316.1747        |
| 1016.5728      | 9  | D 4  | 518.2575       | 259.6326        |
| 1145.6154      | 10 | E 3  | 403.2305       | 202.1192        |
| 1244.6838      | 11 | V 2  | 274.1879       | 137.5979        |
|                | 12 | R 1  | 175.1195       | 88.0637         |

N-term:+35.07

VDSASPVYQAVIKTQSKPEDEADEWAR, MH+ 3121.6542, m/z 781.1690  
 H OSG40 P180811 230811-s1.07171.07171.4.dta

X-range:

-

MassTol: Y-zoom:

MassType:

AVG  MONO

Axis:

1  2

Label:

I  M  -

Ions:

a  +  2+  3+

b  +  2+  3+

c  +  2+  3+

x  +  2+  3+

y  +  2+  3+

z  +  2+  3+

hide H<sub>2</sub>O/NH<sub>3</sub>

zoom 112-122

GO

scan 7171; 7.7e+000

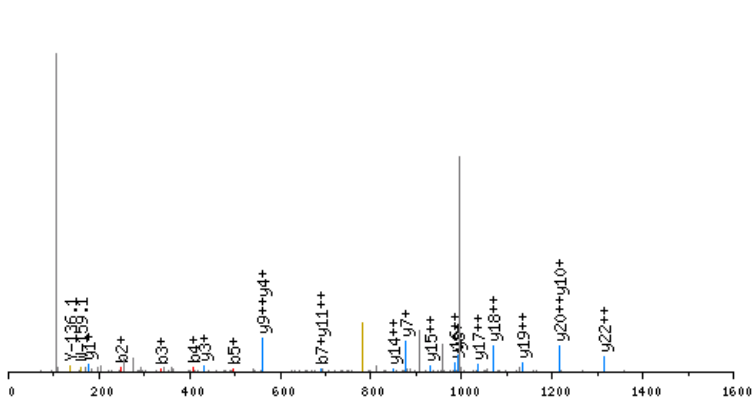

click image to zoom in; click top corners to zoom out

[\[precursor±\]](#)

scan 7169; 781.2 m/z; 4.1e+001

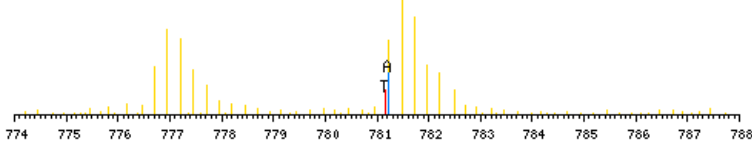

zoomed in precursor plot; T=theoretical m/z, A=acquired m/z

| b <sup>+</sup> | #  | AA # | y <sup>+</sup> | y <sup>2+</sup> |
|----------------|----|------|----------------|-----------------|
| 134.1393       | 1  | V    | 27             |                 |
| 249.1663       | 2  | D    | 26             | 2988.5227       |
| 336.1983       | 3  | S    | 25             | 2873.4958       |
| 407.2354       | 4  | A    | 24             | 2786.4638       |
| 494.2674       | 5  | S    | 23             | 2715.4267       |
| 591.3202       | 6  | P    | 22             | 2628.3946       |
| 690.3886       | 7  | V    | 21             | 2531.3419       |
| 853.4519       | 8  | Y    | 20             | 2432.2735       |
| 981.5105       | 9  | Q    | 19             | 2269.2101       |
| 1052.5476      | 10 | A    | 18             | 2141.1515       |
| 1151.6160      | 11 | V    | 17             | 2070.1144       |
| 1264.7001      | 12 | I    | 16             | 1971.0460       |
| 1426.8582      | 13 | K    | 15             | 1857.9620       |
| 1527.9059      | 14 | T    | 14             | 1695.8039       |
| 1655.9645      | 15 | Q    | 13             | 1594.7562       |
| 1742.9965      | 16 | S    | 12             | 1466.6976       |
| 1905.1546      | 17 | K    | 11             | 1379.6656       |
| 2002.2074      | 18 | P    | 10             | 1217.5075       |
| 2131.2499      | 19 | E    | 9              | 1120.4547       |
| 2246.2769      | 20 | D    | 8              | 991.4121        |
| 2375.3195      | 21 | E    | 7              | 876.3852        |
| 2446.3566      | 22 | A    | 6              | 747.3426        |
| 2561.3835      | 23 | D    | 5              | 676.3055        |
| 2690.4261      | 24 | E    | 4              | 561.2785        |
| 2876.5054      | 25 | W    | 3              | 432.2359        |
| 2947.5426      | 26 | A    | 2              | 246.1566        |
|                | 27 | R    | 1              | 175.1195        |

N-term: +35.07 K(13) : +162.16  
 K(17) : +162.16

VDTAAVGAVFDISNADR, MH+ 1754.9137, m/z 585.6427  
 H OSG37 P180811 230811-s1.07657.07657.3.dta

X-range:

-

MassTol: Y-zoom:

MassType:

AVG  MONO

Axis:

1  2

Label:

I  M  -

Ions:

a  +  2+  3+

b  +  2+  3+

c  +  2+  3+

x  +  2+  3+

y  +  2+  3+

z  +  2+  3+

hide H<sub>2</sub>O/NH<sub>3</sub>

zoom 112-122

GO

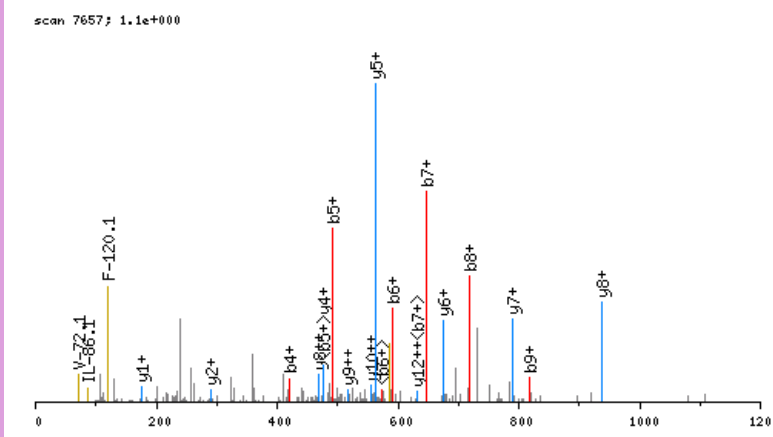

click image to zoom in; click top corners to zoom out [\[precursor±\]](#)

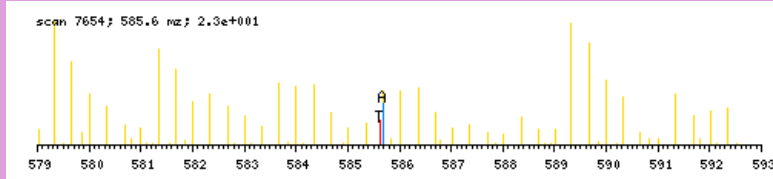

zoomed in precursor plot; T=theoretical m/z, A=acquired m/z

| b <sup>+</sup> | #  | AA # | y <sup>+</sup> | y <sup>2+</sup> |
|----------------|----|------|----------------|-----------------|
| 134.1393       | 1  | V 17 |                |                 |
| 249.1663       | 2  | D 16 | 1621.7822      | 811.3950        |
| 350.2139       | 3  | T 15 | 1506.7552      | 753.8815        |
| 421.2510       | 4  | A 14 | 1405.7076      | 703.3577        |
| 492.2882       | 5  | A 13 | 1334.6705      | 667.8391        |
| 591.3566       | 6  | V 12 | 1263.6333      | 632.3206        |
| 648.3780       | 7  | G 11 | 1164.5649      | 582.7864        |
| 719.4152       | 8  | A 10 | 1107.5435      | 554.2756        |
| 818.4836       | 9  | V 9  | 1036.5063      | 518.7571        |
| 965.5520       | 10 | F 8  | 937.4379       | 469.2229        |
| 1080.5789      | 11 | D 7  | 790.3695       | 395.6887        |
| 1193.6630      | 12 | I 6  | 675.3426       | 338.1752        |
| 1280.6950      | 13 | S 5  | 562.2585       | 281.6332        |
| 1394.7379      | 14 | N 4  | 475.2265       | 238.1172        |
| 1465.7751      | 15 | A 3  | 361.1836       | 181.0957        |
| 1580.8020      | 16 | D 2  | 290.1464       | 145.5771        |
|                | 17 | R 1  | 175.1195       | 88.0637         |

N-term:+35.07



VDVPAADLSDQVPDPTDSETR, MH+ 2158.0151, m/z 720.0099  
 L OSG36 P180811 230811-s1.04046.04046.3.dta

X-range:

-

MassTol: Y-zoom:

MassType:

AVG  MONO

Axis:

1  2

Label:

I  M  -

Ions:

a  +  2+  3+

b  +  2+  3+

c  +  2+  3+

x  +  2+  3+

y  +  2+  3+

z  +  2+  3+

hide H<sub>2</sub>O/NH<sub>3</sub>

zoom 112-122

GO

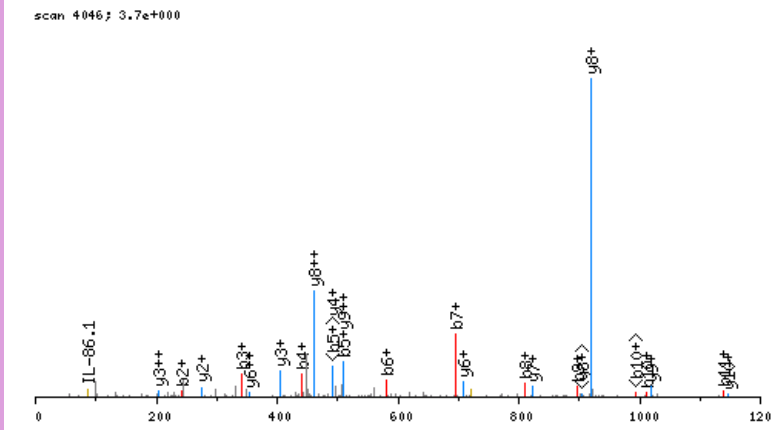

click image to zoom in; click top corners to zoom out [\[precursor±\]](#)

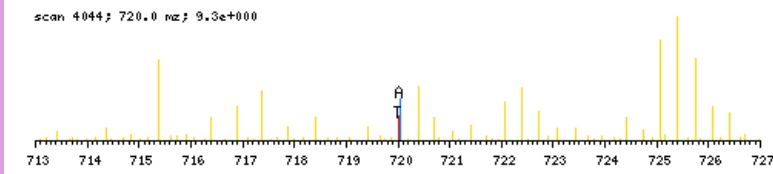

zoomed in precursor plot; T=theoretical m/z, A=acquired m/z

| b <sup>+</sup> | #  | AA # | y <sup>+</sup> | y <sup>2+</sup> |
|----------------|----|------|----------------|-----------------|
| 128.1075       | 1  | V 20 |                |                 |
| 243.1345       | 2  | D 19 | 2030.9154      | 1015.9616       |
| 342.2029       | 3  | V 18 | 1915.8885      | 958.4482        |
| 439.2556       | 4  | P 17 | 1816.8201      | 908.9140        |
| 510.2927       | 5  | A 16 | 1719.7673      | 860.3876        |
| 581.3299       | 6  | A 15 | 1648.7302      | 824.8690        |
| 696.3568       | 7  | D 14 | 1577.6931      | 789.3505        |
| 809.4409       | 8  | L 13 | 1462.6662      | 731.8370        |
| 896.4729       | 9  | S 12 | 1349.5821      | 675.2950        |
| 1011.4998      | 10 | D 11 | 1262.5501      | 631.7789        |
| 1139.5584      | 11 | Q 10 | 1147.5231      | 574.2655        |
| 1238.6268      | 12 | V 9  | 1019.4645      | 510.2362        |
| 1335.6796      | 13 | P 8  | 920.3961       | 460.7020        |
| 1450.7065      | 14 | D 7  | 823.3434       | 412.1756        |
| 1551.7542      | 15 | T 6  | 708.3164       | 354.6621        |
| 1666.7812      | 16 | D 5  | 607.2687       | 304.1383        |
| 1753.8132      | 17 | S 4  | 492.2418       | 246.6248        |
| 1882.8558      | 18 | E 3  | 405.2098       | 203.1088        |
| 1983.9035      | 19 | T 2  | 276.1672       | 138.5875        |
|                | 20 | R 1  | 175.1195       | 88.0637         |

N-term:+29.04

VEGELYCETHAR, MH+ 1491.6901, m/z 497.9016  
 L OSG40 P180811 230811-s1.02821.02821.3.dta

X-range:

-

MassTol: Y-zoom:

MassType:

AVG  MONO

Axis:

1  2

Label:

I  M  -

Ions:

a  +  2+  3+

b  +  2+  3+

c  +  2+  3+

x  +  2+  3+

y  +  2+  3+

z  +  2+  3+

hide H<sub>2</sub>O/NH<sub>3</sub>

zoom 112-122

GO

scan 2821; 1.6e+001

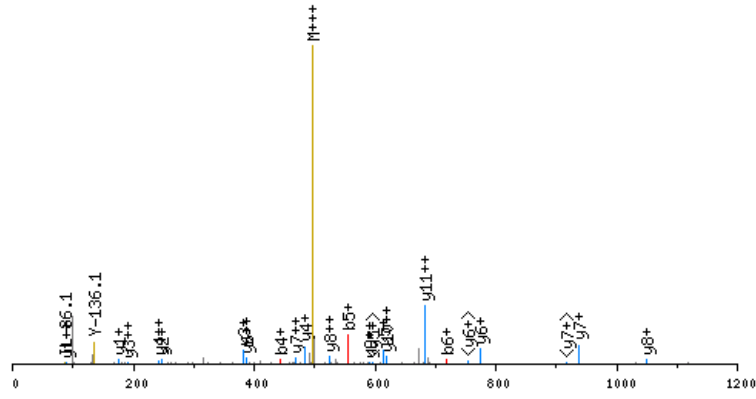

click image to zoom in; click top corners to zoom out [\[precursor±\]](#)

scan 2819; 497.9 m/z; 1.1e+002

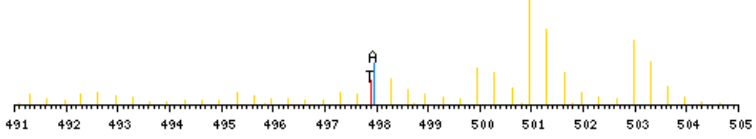

zoomed in precursor plot; T=theoretical m/z, A=acquired m/z

| b <sup>+</sup> | #  | AA # | y <sup>+</sup> | y <sup>2+</sup> |
|----------------|----|------|----------------|-----------------|
| 128.1075       | 1  | V 12 |                |                 |
| 257.1501       | 2  | E 11 | 1364.5904      | 682.7991        |
| 314.1716       | 3  | G 10 | 1235.5478      | 618.2778        |
| 443.2142       | 4  | E 9  | 1178.5264      | 589.7671        |
| 556.2982       | 5  | L 8  | 1049.4838      | 525.2458        |
| 719.3616       | 6  | Y 7  | 936.3997       | 468.7038        |
| 879.3922       | 7  | C 6  | 773.3364       | 387.1721        |
| 1008.4347      | 8  | E 5  | 613.3058       | 307.1568        |
| 1109.4824      | 9  | T 4  | 484.2632       | 242.6355        |
| 1246.5413      | 10 | H 3  | 383.2155       | 192.1117        |
| 1317.5785      | 11 | A 2  | 246.1566       | 123.5822        |
|                | 12 | R 1  | 175.1195       | 88.0637         |

N-term:+29.04 C(7):+160.03

VELDLHSYDLGIENR, MH+ 1800.9132, m/z 600.9759  
 L OSG39 P180811 230811-s1.06582.06582.3.dta

X-range:

-

MassTol: Y-zoom:

MassType:

AVG  MONO

Axis:

1  2

Label:

I  M  -

Ions:

a  +  2+  3+

b  +  2+  3+

c  +  2+  3+

x  +  2+  3+

y  +  2+  3+

z  +  2+  3+

hide H<sub>2</sub>O/NH<sub>3</sub>

zoom 112-122

GO

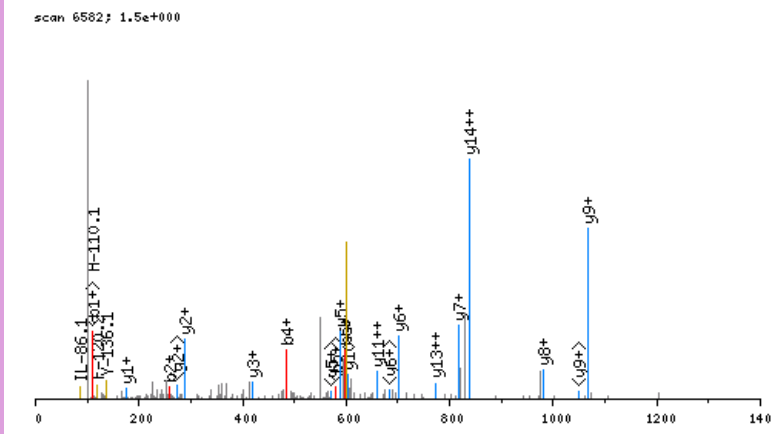

click image to zoom in; click top corners to zoom out [\[precursor±\]](#)

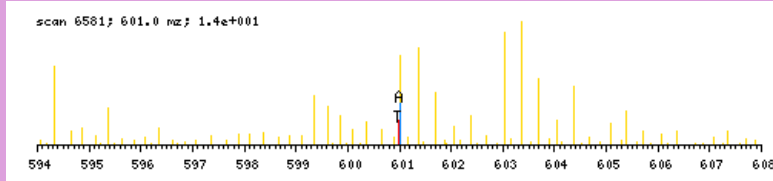

zoomed in precursor plot; T=theoretical m/z, A=acquired m/z

| b <sup>+</sup> | #  | AA # | y <sup>+</sup> | y <sup>2+</sup> |
|----------------|----|------|----------------|-----------------|
| 128.1075       | 1  | V 15 |                |                 |
| 257.1501       | 2  | E 14 | 1673.8135      | 837.4107        |
| 370.2342       | 3  | L 13 | 1544.7709      | 772.8894        |
| 485.2611       | 4  | D 12 | 1431.6868      | 716.3473        |
| 598.3452       | 5  | L 11 | 1316.6599      | 658.8339        |
| 735.4041       | 6  | H 10 | 1203.5758      | 602.2918        |
| 822.4361       | 7  | S 9  | 1066.5169      | 533.7624        |
| 985.4994       | 8  | Y 8  | 979.4849       | 490.2464        |
| 1100.5264      | 9  | D 7  | 816.4216       | 408.7147        |
| 1213.6105      | 10 | L 6  | 701.3946       | 351.2012        |
| 1270.6319      | 11 | G 5  | 588.3105       | 294.6592        |
| 1383.7160      | 12 | I 4  | 531.2891       | 266.1485        |
| 1512.7586      | 13 | E 3  | 418.2050       | 209.6064        |
| 1626.8015      | 14 | N 2  | 289.1624       | 145.0851        |
|                | 15 | R 1  | 175.1195       | 88.0637         |

N-term:+29.04

VESMVTATEVAPPPPPVEVPIR, MH+ 2343.2634, m/z 586.5713  
L OSG36 P180811 230811-s1.05237.05237.4.dta

X-range:

-

MassTol: Y-zoom:

MassType:

AVG  MONO

Axis:

1  2

Label:

I  M  -

Ions:

a  +  2+  3+

b  +  2+  3+

c  +  2+  3+

x  +  2+  3+

y  +  2+  3+

z  +  2+  3+

hide H<sub>2</sub>O/NH<sub>3</sub>

zoom 112-122

GO

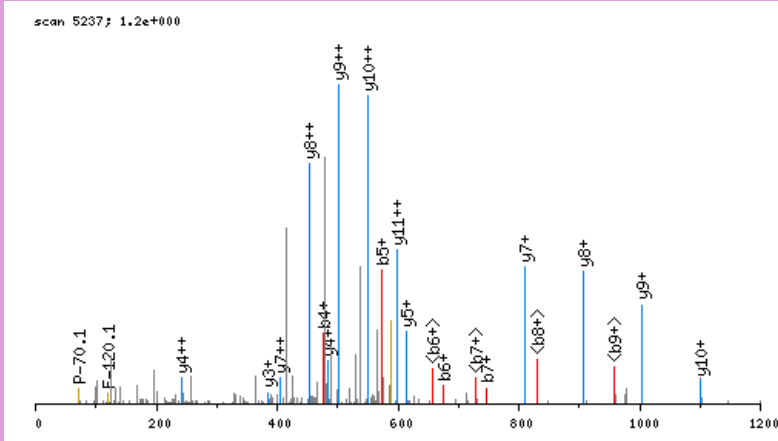

click image to zoom in; click top corners to zoom out [precursor±]

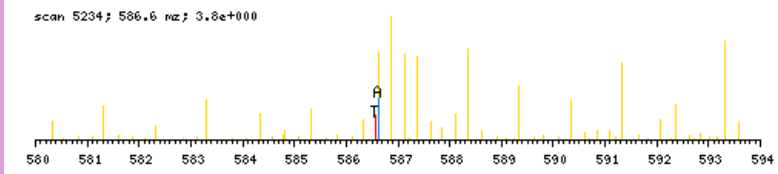

zoomed in precursor plot; T=theoretical m/z, A=acquired m/z

| b <sup>+</sup> | #  | AA # | y <sup>+</sup> | y <sup>2+</sup> |
|----------------|----|------|----------------|-----------------|
| 128.1075       | 1  | V 22 |                |                 |
| 257.1501       | 2  | E 21 | 2216.1637      | 1108.5858       |
| 344.1821       | 3  | S 20 | 2087.1211      | 1044.0645       |
| 475.2226       | 4  | M 19 | 2000.0891      | 1000.5484       |
| 574.2910       | 5  | V 18 | 1869.0486      | 935.0282        |
| 675.3387       | 6  | T 17 | 1769.9802      | 885.4940        |
| 746.3758       | 7  | A 16 | 1668.9325      | 834.9702        |
| 847.4235       | 8  | T 15 | 1597.8954      | 799.4516        |
| 976.4661       | 9  | E 14 | 1496.8477      | 748.9278        |
| 1075.5345      | 10 | V 13 | 1367.8051      | 684.4065        |
| 1146.5716      | 11 | A 12 | 1268.7367      | 634.8723        |
| 1243.6244      | 12 | P 11 | 1197.6996      | 599.3537        |
| 1340.6772      | 13 | P 10 | 1100.6468      | 550.8273        |
| 1437.7299      | 14 | P 9  | 1003.5940      | 502.3009        |
| 1534.7827      | 15 | P 8  | 906.5413       | 453.7746        |
| 1631.8354      | 16 | P 7  | 809.4885       | 405.2482        |
| 1730.9039      | 17 | V 6  | 712.4357       | 356.7218        |
| 1859.9465      | 18 | E 5  | 613.3673       | 307.1876        |
| 1959.0149      | 19 | V 4  | 484.3247       | 242.6663        |
| 2056.0676      | 20 | P 3  | 385.2563       | 193.1321        |
| 2169.1517      | 21 | I 2  | 288.2036       | 144.6057        |
|                | 22 | R 1  | 175.1195       | 88.0637         |

N-term:+29.04

VEVEYPENAILDLTR, MH+ 1788.9383, m/z 596.9843  
 L OSG37 P180811 230811-s1.08578.08578.3.dta

scan 8578; 1.2e+000

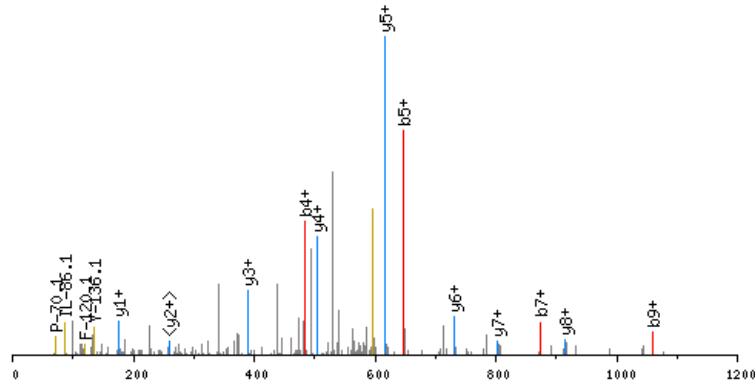

click image to zoom in; click top corners to zoom out [\[precursor±\]](#)

scan 8574; 597.0 m/z; 3.0e+001

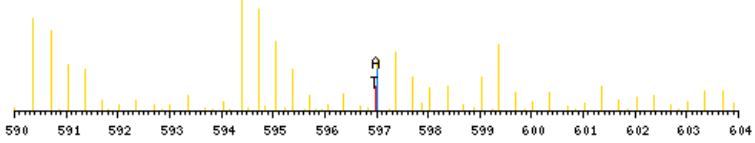

zoomed in precursor plot; T=theoretical m/z, A=acquired m/z

X-range:

-

MassTol: Y-zoom:

MassType:

AVG  MONO

Axis:

1  2

Label:

I  M  -

Ions:

a  +  2+  3+

b  +  2+  3+

c  +  2+  3+

x  +  2+  3+

y  +  2+  3+

z  +  2+  3+

hide H<sub>2</sub>O/NH<sub>3</sub>

zoom 112-122

GO

| b <sup>+</sup> | #  | AA | #  | y <sup>+</sup> | y <sup>2+</sup> |
|----------------|----|----|----|----------------|-----------------|
| 128.1075       | 1  | V  | 15 |                |                 |
| 257.1501       | 2  | E  | 14 | 1661.8386      | 831.4232        |
| 356.2185       | 3  | V  | 13 | 1532.7960      | 766.9019        |
| 485.2611       | 4  | E  | 12 | 1433.7276      | 717.3677        |
| 648.3244       | 5  | Y  | 11 | 1304.6850      | 652.8464        |
| 745.3772       | 6  | P  | 10 | 1141.6217      | 571.3148        |
| 874.4198       | 7  | E  | 9  | 1044.5689      | 522.7884        |
| 988.4627       | 8  | N  | 8  | 915.5264       | 458.2671        |
| 1059.4998      | 9  | A  | 7  | 801.4834       | 401.2456        |
| 1172.5839      | 10 | I  | 6  | 730.4463       | 365.7271        |
| 1285.6680      | 11 | L  | 5  | 617.3623       | 309.1850        |
| 1400.6949      | 12 | D  | 4  | 504.2782       | 252.6430        |
| 1513.7790      | 13 | L  | 3  | 389.2512       | 195.1295        |
| 1614.8267      | 14 | T  | 2  | 276.1672       | 138.5875        |
|                | 15 | R  | 1  | 175.1195       | 88.0637         |

N-term:+29.04

VEVGPEDEVEGAER, MH+ 1528.7131, m/z 764.8602  
 L OSG37 P180811 230811-s1.03682.03682.2.dta

X-range:

-

MassTol: Y-zoom:

MassType:

AVG  MONO

Axis:

1  2

Label:

I  M  -

Ions:

a  +  2+  3+

b  +  2+  3+

c  +  2+  3+

x  +  2+  3+

y  +  2+  3+

z  +  2+  3+

hide H<sub>2</sub>O/NH<sub>3</sub>

zoom 112-122

GO

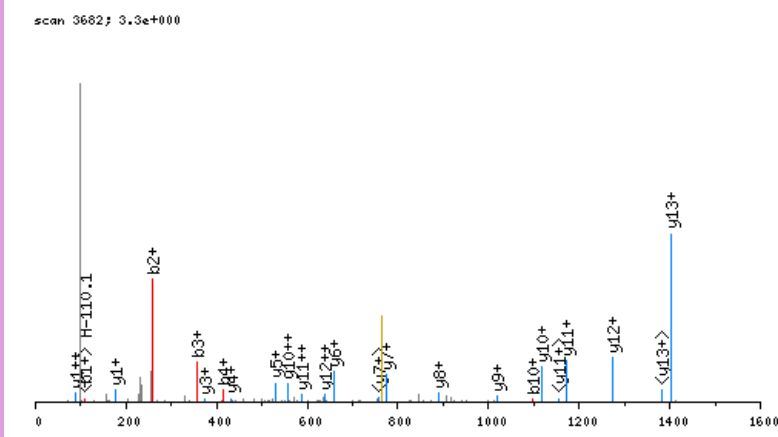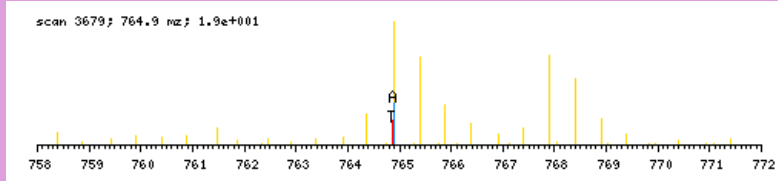

| b <sup>+</sup> | #  | AA # | y <sup>+</sup> | y <sup>2+</sup> |
|----------------|----|------|----------------|-----------------|
| 128.1075       | 1  | V 14 |                |                 |
| 257.1501       | 2  | E 13 | 1401.6134      | 701.3106        |
| 356.2185       | 3  | V 12 | 1272.5708      | 636.7893        |
| 413.2400       | 4  | G 11 | 1173.5024      | 587.2551        |
| 510.2927       | 5  | P 10 | 1116.4809      | 558.7444        |
| 639.3353       | 6  | E 9  | 1019.4282      | 510.2180        |
| 754.3623       | 7  | D 8  | 890.3856       | 445.6967        |
| 869.3892       | 8  | D 7  | 775.3586       | 388.1832        |
| 998.4318       | 9  | E 6  | 660.3317       | 330.6698        |
| 1097.5002      | 10 | V 5  | 531.2891       | 266.1485        |
| 1154.5217      | 11 | G 4  | 432.2207       | 216.6142        |
| 1225.5588      | 12 | A 3  | 375.1992       | 188.1035        |
| 1354.6014      | 13 | E 2  | 304.1621       | 152.5850        |
|                | 14 | R 1  | 175.1195       | 88.0637         |

N-term:+29.04

VFKDLFDPIQDR, MH+ 1673.9903, m/z 558.6683  
 H OSG39 P180811 230811-s1.07117.07117.3.dta

scan 7117; 2.5e+000

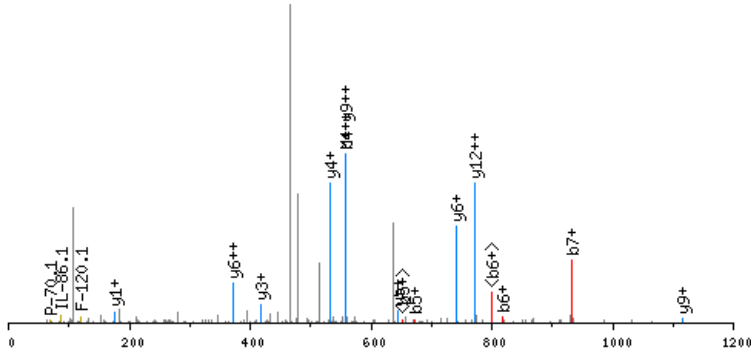

click image to zoom in; click top corners to zoom out [\[precursor±\]](#)

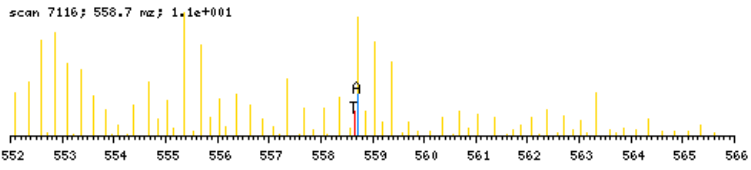

zoomed in precursor plot; T=theoretical m/z, A=acquired m/z

X-range:

-

MassTol: Y-zoom:

MassType:

AVG  MONO

Axis:

1  2

Label:

I  M  -

Ions:

a  +  2+  3+

b  +  2+  3+

c  +  2+  3+

x  +  2+  3+

y  +  2+  3+

z  +  2+  3+

hide H<sub>2</sub>O/NH<sub>3</sub>

zoom 112-122

GO

| b <sup>+</sup> | #  | AA | #  | y <sup>+</sup> | y <sup>2+</sup> |
|----------------|----|----|----|----------------|-----------------|
| 134.1393       | 1  | V  | 13 |                |                 |
| 281.2077       | 2  | F  | 12 | 1540.8588      | 770.9333        |
| 443.3658       | 3  | K  | 11 | 1393.7904      | 697.3991        |
| 558.3928       | 4  | D  | 10 | 1231.6323      | 616.3201        |
| 671.4768       | 5  | L  | 9  | 1116.6053      | 558.8066        |
| 818.5452       | 6  | F  | 8  | 1003.5213      | 502.2645        |
| 933.5722       | 7  | D  | 7  | 856.4529       | 428.7303        |
| 1030.6250      | 8  | P  | 6  | 741.4259       | 371.2169        |
| 1143.7090      | 9  | I  | 5  | 644.3731       | 322.6905        |
| 1256.7931      | 10 | I  | 4  | 531.2891       | 266.1485        |
| 1384.8517      | 11 | Q  | 3  | 418.2050       | 209.6064        |
| 1499.8786      | 12 | D  | 2  | 290.1464       | 145.5771        |
|                | 13 | R  | 1  | 175.1195       | 88.0637         |

N-term:+35.07 K(3):+162.16

VGAVQPVLGMPPMPQAPR, MH+ 1873.0192, m/z 625.0112  
 L OSG36 P180811 230811-s1.03723.03723.3.dta

X-range:

-

MassTol: Y-zoom:

MassType:

AVG  MONO

Axis:

1  2

Label:

I  M  -

Ions:

a  +  2+  3+

b  +  2+  3+

c  +  2+  3+

x  +  2+  3+

y  +  2+  3+

z  +  2+  3+

hide H<sub>2</sub>O/NH<sub>3</sub>

zoom 112-122

GO

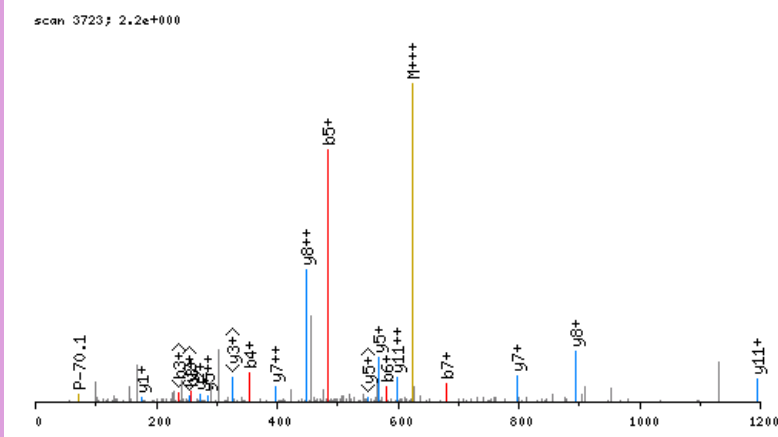

click image to zoom in; click top corners to zoom out [\[precursor±\]](#)

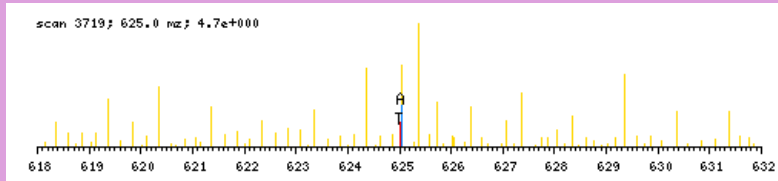

zoomed in precursor plot; T=theoretical m/z, A=acquired m/z

| b <sup>+</sup> | #  | AA # | y <sup>+</sup> | y <sup>2+</sup> |
|----------------|----|------|----------------|-----------------|
| 128.1075       | 1  | V 18 |                |                 |
| 185.1290       | 2  | G 17 | 1745.9195      | 873.4637        |
| 256.1661       | 3  | A 16 | 1688.8980      | 844.9529        |
| 355.2345       | 4  | V 15 | 1617.8609      | 809.4344        |
| 483.2931       | 5  | Q 14 | 1518.7925      | 759.9002        |
| 580.3458       | 6  | P 13 | 1390.7339      | 695.8709        |
| 679.4143       | 7  | V 12 | 1293.6812      | 647.3445        |
| 792.4983       | 8  | L 11 | 1194.6127      | 597.8103        |
| 849.5198       | 9  | G 10 | 1081.5287      | 541.2683        |
| 980.5603       | 10 | M 9  | 1024.5072      | 512.7575        |
| 1077.6130      | 11 | P 8  | 893.4667       | 447.2373        |
| 1174.6658      | 12 | P 7  | 796.4140       | 398.7109        |
| 1305.7063      | 13 | M 6  | 699.3612       | 350.1845        |
| 1402.7590      | 14 | P 5  | 568.3207       | 284.6643        |
| 1530.8176      | 15 | Q 4  | 471.2680       | 236.1379        |
| 1601.8547      | 16 | A 3  | 343.2094       | 172.1086        |
| 1698.9075      | 17 | P 2  | 272.1723       | 136.5900        |
|                | 18 | R 1  | 175.1195       | 88.0637         |

N-term:+29.04



VGAVQPVPGMPPMQAPR, MH+ 1863.0197, m/z 621.6781  
 H OSG36 P180811 230811-s1.04537.04537.3.dta

X-range:

-

MassTol: Y-zoom:

MassType:

AVG  MONO

Axis:

1  2

Label:

I  M  -

Ions:

a  +  2+  3+

b  +  2+  3+

c  +  2+  3+

x  +  2+  3+

y  +  2+  3+

z  +  2+  3+

hide H<sub>2</sub>O/NH<sub>3</sub>

zoom 112-122

GO

scan 4537; 3.2e+000

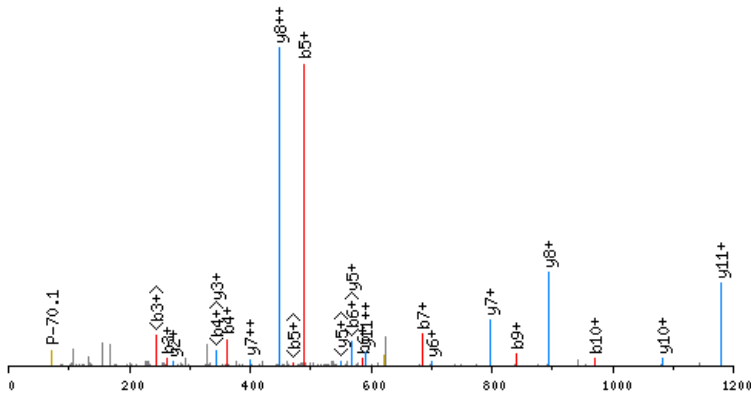

click image to zoom in; click top corners to zoom out [\[precursor±\]](#)

scan 4534; 621.7 m/z; 6.7e+000

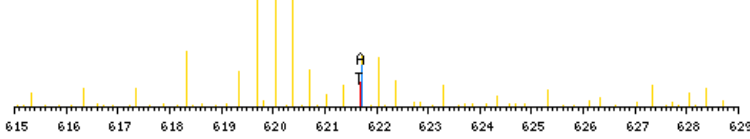

zoomed in precursor plot; T=theoretical m/z, A=acquired m/z

| b <sup>+</sup> | #  | AA # | y <sup>+</sup> | y <sup>2+</sup> |
|----------------|----|------|----------------|-----------------|
| 134.1393       | 1  | V 18 |                |                 |
| 191.1608       | 2  | G 17 | 1729.8882      | 865.4480        |
| 262.1979       | 3  | A 16 | 1672.8667      | 836.9373        |
| 361.2663       | 4  | V 15 | 1601.8296      | 801.4187        |
| 489.3249       | 5  | Q 14 | 1502.7612      | 751.8845        |
| 586.3776       | 6  | P 13 | 1374.7026      | 687.8552        |
| 685.4461       | 7  | V 12 | 1277.6499      | 639.3288        |
| 782.4988       | 8  | P 11 | 1178.5814      | 589.7946        |
| 839.5203       | 9  | G 10 | 1081.5287      | 541.2683        |
| 970.5608       | 10 | M 9  | 1024.5072      | 512.7575        |
| 1067.6135      | 11 | P 8  | 893.4667       | 447.2373        |
| 1164.6663      | 12 | P 7  | 796.4140       | 398.7109        |
| 1295.7068      | 13 | M 6  | 699.3612       | 350.1845        |
| 1392.7595      | 14 | P 5  | 568.3207       | 284.6643        |
| 1520.8181      | 15 | Q 4  | 471.2680       | 236.1379        |
| 1591.8552      | 16 | A 3  | 343.2094       | 172.1086        |
| 1688.9080      | 17 | P 2  | 272.1723       | 136.5900        |
|                | 18 | R 1  | 175.1195       | 88.0637         |

N-term:+35.07

VGEGMEEGEGFSEAR, MH+ 1560.7064, m/z 780.8568  
 H OSG37 P180811 230811-s1.04068.04068.2.dta

X-range:

-

MassTol: Y-zoom:

MassType:

AVG  MONO

Axis:

1  2

Label:

I  M  -

Ions:

a  +  2+  3+

b  +  2+  3+

c  +  2+  3+

x  +  2+  3+

y  +  2+  3+

z  +  2+  3+

hide H<sub>2</sub>O/NH<sub>3</sub>

zoom 112-122

GO

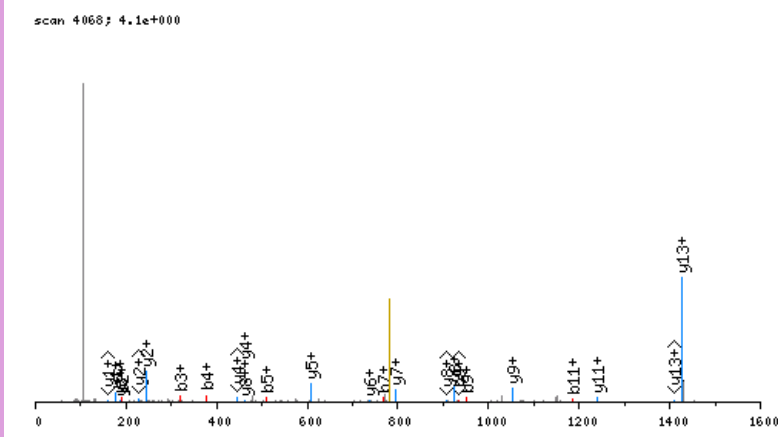

click image to zoom in; click top corners to zoom out [\[precursor±\]](#)

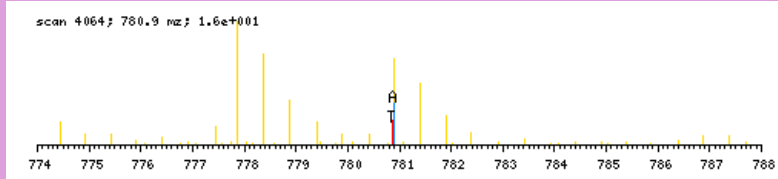

zoomed in precursor plot; T=theoretical m/z, A=acquired m/z

| b <sup>+</sup> | #  | AA # | y <sup>+</sup> | y <sup>2+</sup> |
|----------------|----|------|----------------|-----------------|
| 134.1393       | 1  | V 14 |                |                 |
| 191.1608       | 2  | G 13 | 1427.5749      | 714.2914        |
| 320.2034       | 3  | E 12 | 1370.5534      | 685.7806        |
| 377.2248       | 4  | G 11 | 1241.5108      | 621.2593        |
| 508.2653       | 5  | M 10 | 1184.4894      | 592.7486        |
| 637.3079       | 6  | E 9  | 1053.4489      | 527.2284        |
| 766.3505       | 7  | E 8  | 924.4063       | 462.7071        |
| 823.3720       | 8  | G 7  | 795.3637       | 398.1858        |
| 952.4146       | 9  | E 6  | 738.3422       | 369.6750        |
| 1099.4830      | 10 | F 5  | 609.2997       | 305.1537        |
| 1186.5150      | 11 | S 4  | 462.2312       | 231.6195        |
| 1315.5576      | 12 | E 3  | 375.1992       | 188.1035        |
| 1386.5947      | 13 | A 2  | 246.1566       | 123.5822        |
|                | 14 | R 1  | 175.1195       | 88.0637         |

N-term:+35.07

VGQPGAAGPVSPMCPGR, MH+ 1671.8522, m/z 557.9556  
 H OSG37 P180811 230811-s1.03878.03878.3.dta

X-range:

-

MassTol: Y-zoom:

MassType:

AVG  MONO

Axis:

1  2

Label:

I  M  -

Ions:

a  +  2+  3+

b  +  2+  3+

c  +  2+  3+

x  +  2+  3+

y  +  2+  3+

z  +  2+  3+

hide H<sub>2</sub>O/NH<sub>3</sub>

zoom 112-122

GO

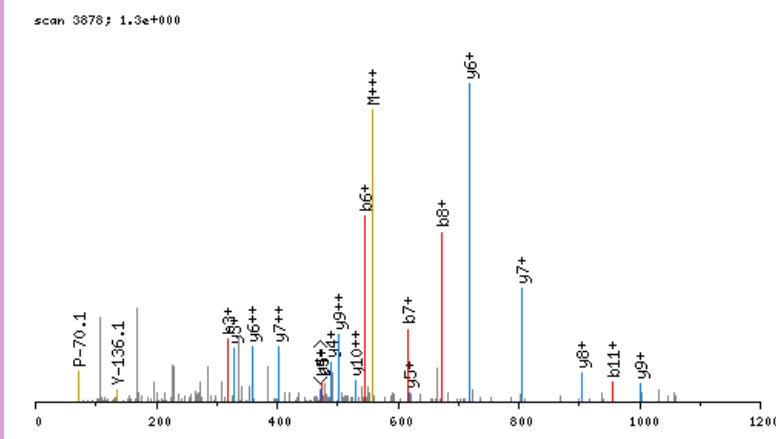

click image to zoom in; click top corners to zoom out [\[precursor±\]](#)

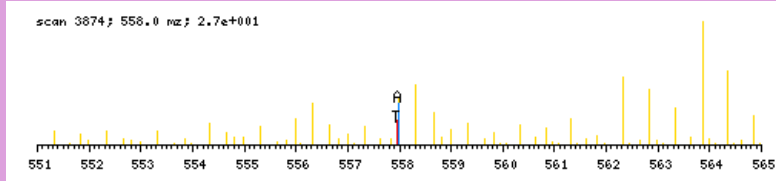

zoomed in precursor plot; T=theoretical m/z, A=acquired m/z

| b <sup>+</sup> | #  | AA # | y <sup>+</sup> | y <sup>2+</sup> |
|----------------|----|------|----------------|-----------------|
| 134.1393       | 1  | V 17 |                |                 |
| 191.1608       | 2  | G 16 | 1538.7207      | 769.8643        |
| 319.2194       | 3  | Q 15 | 1481.6993      | 741.3536        |
| 416.2721       | 4  | P 14 | 1353.6407      | 677.3243        |
| 473.2936       | 5  | G 13 | 1256.5879      | 628.7979        |
| 544.3307       | 6  | A 12 | 1199.5665      | 600.2871        |
| 615.3678       | 7  | A 11 | 1128.5294      | 564.7686        |
| 672.3893       | 8  | G 10 | 1057.4922      | 529.2500        |
| 769.4420       | 9  | P 9  | 1000.4708      | 500.7393        |
| 868.5105       | 10 | V 8  | 903.4180       | 452.2129        |
| 955.5425       | 11 | S 7  | 804.3496       | 402.6787        |
| 1052.5952      | 12 | P 6  | 717.3176       | 359.1627        |
| 1183.6357      | 13 | M 5  | 620.2648       | 310.6363        |
| 1343.6663      | 14 | C 4  | 489.2243       | 245.1161        |
| 1440.7191      | 15 | P 3  | 329.1937       | 165.1008        |
| 1497.7406      | 16 | G 2  | 232.1410       | 116.5744        |
|                | 17 | R 1  | 175.1195       | 88.0637         |

N-term:+35.07 C(14):+160.03

VGVKPVGSDPDFQPELSGAGSR, MH+ 2255.1672, m/z 752.3939  
 L OSG39 P180811 230811-s1.04569.04569.3.dta

scan 4569; 3.4e+000

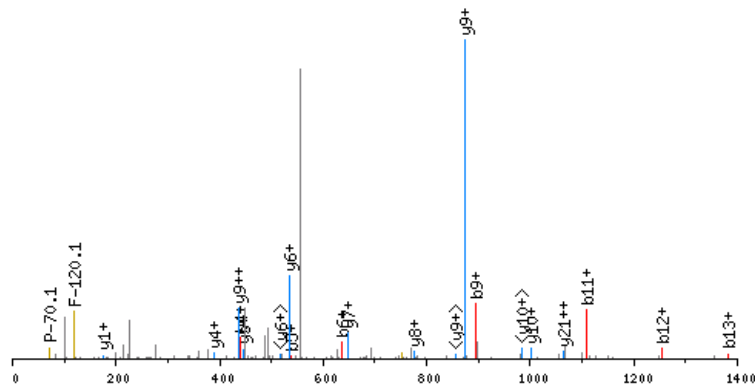

click image to zoom in; click top corners to zoom out [precursor±]

scan 4566; 752.4 mz; 2.1e+002

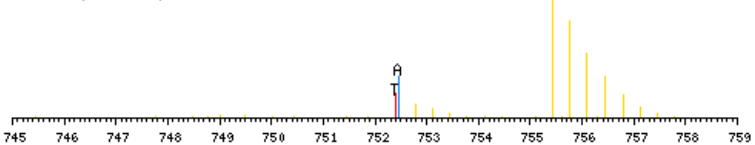

zoomed in precursor plot; T=theoretical m/z, A=acquired m/z

X-range:

0 - 0

MassTol: Y-zoom:

0. 1.

MassType:

AVG  MONO

Axis:

1  2

Label:

I  M  -

Ions:

a  +  2+  3+

b  +  2+  3+

c  +  2+  3+

x  +  2+  3+

y  +  2+  3+

z  +  2+  3+

hide H<sub>2</sub>O/NH<sub>3</sub>

zoom 112-122

GO

| b <sup>+</sup> | #  | AA # | y <sup>+</sup> | y <sup>2+</sup> |
|----------------|----|------|----------------|-----------------|
| 128.1075       | 1  | V 22 |                |                 |
| 185.1290       | 2  | G 21 | 2128.0675      | 1064.5377       |
| 284.1974       | 3  | V 20 | 2071.0460      | 1036.0269       |
| 440.3237       | 4  | K 19 | 1971.9776      | 986.4927        |
| 537.3765       | 5  | P 18 | 1815.8513      | 908.4296        |
| 636.4449       | 6  | V 17 | 1718.7986      | 859.9032        |
| 693.4663       | 7  | G 16 | 1619.7302      | 810.3690        |
| 780.4984       | 8  | S 15 | 1562.7087      | 781.8583        |
| 895.5253       | 9  | D 14 | 1475.6767      | 738.3422        |
| 992.5781       | 10 | P 13 | 1360.6497      | 680.8288        |
| 1107.6050      | 11 | D 12 | 1263.5970      | 632.3024        |
| 1254.6734      | 12 | F 11 | 1148.5700      | 574.7889        |
| 1382.7320      | 13 | Q 10 | 1001.5016      | 501.2547        |
| 1479.7848      | 14 | P 9  | 873.4430       | 437.2254        |
| 1608.8274      | 15 | E 8  | 776.3903       | 388.6990        |
| 1721.9114      | 16 | L 7  | 647.3477       | 324.1777        |
| 1808.9435      | 17 | S 6  | 534.2636       | 267.6357        |
| 1865.9649      | 18 | G 5  | 447.2316       | 224.1197        |
| 1937.0020      | 19 | A 4  | 390.2101       | 195.6090        |
| 1994.0235      | 20 | G 3  | 319.1730       | 160.0904        |
| 2081.0555      | 21 | S 2  | 262.1515       | 131.5797        |
|                | 22 | R 1  | 175.1195       | 88.0637         |

N-term:+29.04 K(4):+156.13

VGVPTEGTALTLNR, MH+ 1455.8171, m/z 485.9439  
 L OSG37 P180811 230811-s1.05542.05542.3.dta

X-range:

-

MassTol: Y-zoom:

MassType:

AVG  MONO

Axis:

1  2

Label:

I  M  -

Ions:

a  +  2+  3+

b  +  2+  3+

c  +  2+  3+

x  +  2+  3+

y  +  2+  3+

z  +  2+  3+

hide H<sub>2</sub>O/NH<sub>3</sub>

zoom 112-122

GO

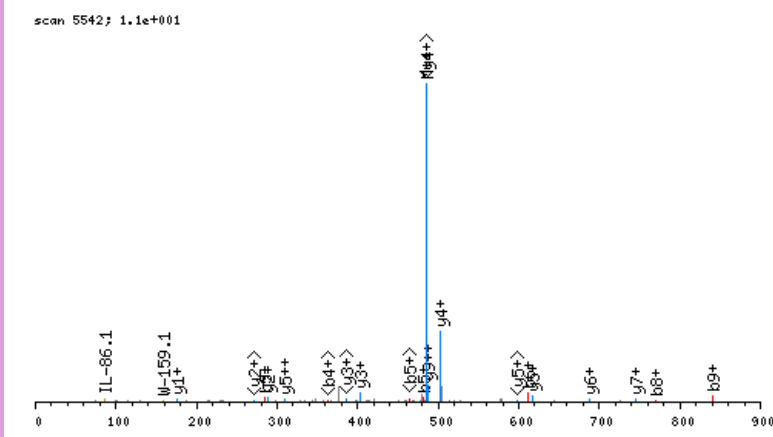

click image to zoom in; click top corners to zoom out [\[precursor±\]](#)

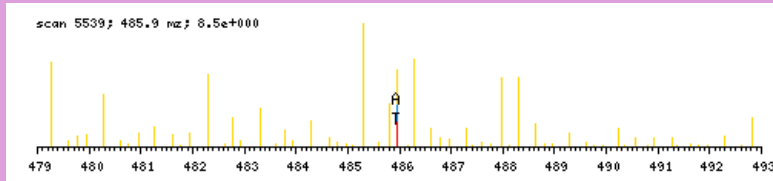

zoomed in precursor plot; T=theoretical m/z, A=acquired m/z

| b <sup>+</sup> | #  | AA # | y <sup>+</sup> | y <sup>2+</sup> |
|----------------|----|------|----------------|-----------------|
| 128.1075       | 1  | V 14 |                |                 |
| 185.1290       | 2  | G 13 | 1328.7174      | 664.8626        |
| 284.1974       | 3  | V 12 | 1271.6959      | 636.3519        |
| 381.2502       | 4  | P 11 | 1172.6275      | 586.8177        |
| 482.2978       | 5  | T 10 | 1075.5748      | 538.2913        |
| 611.3404       | 6  | E 9  | 974.5271       | 487.7675        |
| 712.3881       | 7  | T 8  | 845.4845       | 423.2462        |
| 769.4096       | 8  | G 7  | 744.4368       | 372.7223        |
| 840.4467       | 9  | A 6  | 687.4153       | 344.2116        |
| 953.5307       | 10 | L 5  | 616.3782       | 308.6930        |
| 1054.5784      | 11 | T 4  | 503.2942       | 252.1510        |
| 1167.6625      | 12 | L 3  | 402.2465       | 201.6272        |
| 1281.7054      | 13 | N 2  | 289.1624       | 145.0851        |
|                | 14 | R 1  | 175.1195       | 88.0637         |

N-term:+29.04

VISQHQSLGNIR, MH+ 1492.8600, m/z 498.2915  
 L OSG40 P180811 230811-s1.04777.04777.3.dta

X-range:

-

MassTol: Y-zoom:

MassType:

AVG  MONO

Axis:

1  2

Label:

I  M  -

Ions:

a  +  2+  3+

b  +  2+  3+

c  +  2+  3+

x  +  2+  3+

y  +  2+  3+

z  +  2+  3+

hide H<sub>2</sub>O/NH<sub>3</sub>

zoom 112-122

GO

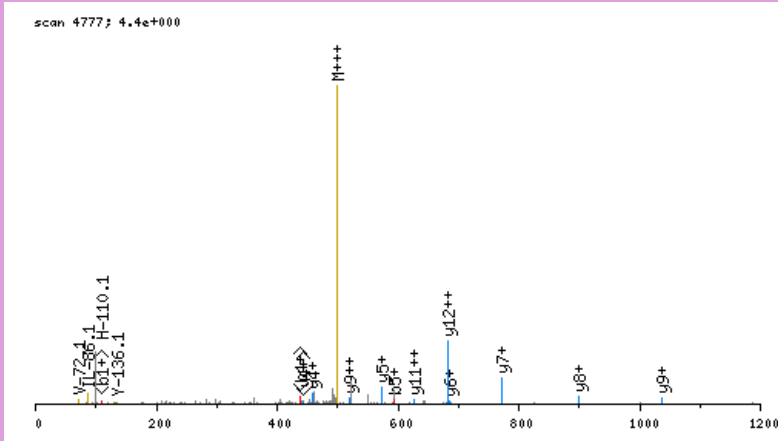

click image to zoom in; click top corners to zoom out [\[precursor±\]](#)

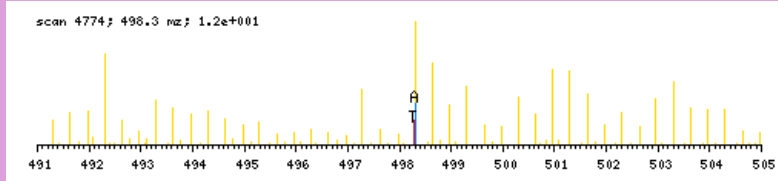

zoomed in precursor plot; T=theoretical m/z, A=acquired m/z

| b <sup>+</sup> | #  | AA # | y <sup>+</sup> | y <sup>2+</sup> |
|----------------|----|------|----------------|-----------------|
| 128.1075       | 1  | V 13 |                |                 |
| 241.1916       | 2  | I 12 | 1365.7603      | 683.3840        |
| 328.2236       | 3  | S 11 | 1252.6762      | 626.8420        |
| 456.2822       | 4  | Q 10 | 1165.6442      | 583.3260        |
| 593.3411       | 5  | H 9  | 1037.5856      | 519.2967        |
| 721.3997       | 6  | Q 8  | 900.5267       | 450.7673        |
| 808.4317       | 7  | S 7  | 772.4681       | 386.7380        |
| 921.5158       | 8  | L 6  | 685.4361       | 343.2220        |
| 1034.5998      | 9  | L 5  | 572.3520       | 286.6799        |
| 1091.6213      | 10 | G 4  | 459.2680       | 230.1379        |
| 1205.6642      | 11 | N 3  | 402.2465       | 201.6272        |
| 1318.7483      | 12 | I 2  | 288.2036       | 144.6057        |
|                | 13 | R 1  | 175.1195       | 88.0637         |

N-term:+29.04

VKGEYDVTVPR, MH+ 1318.7371, m/z 440.2505  
 L OSG40 P180811 230811-s1.03335.03335.3.dta

X-range:

-

MassTol: Y-zoom:

MassType:

AVG  MONO

Axis:

1  2

Label:

I  M  -

Ions:

a  +  2+  3+

b  +  2+  3+

c  +  2+  3+

x  +  2+  3+

y  +  2+  3+

z  +  2+  3+

hide H<sub>2</sub>O/NH<sub>3</sub>

zoom 112-122

GO

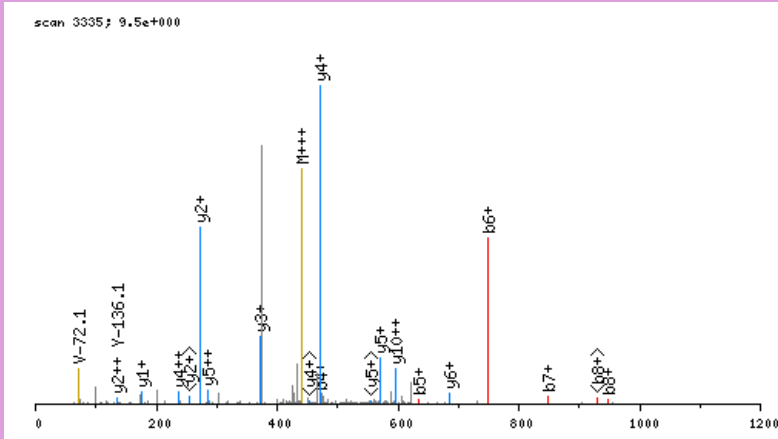

click image to zoom in; click top corners to zoom out [\[precursor±\]](#)

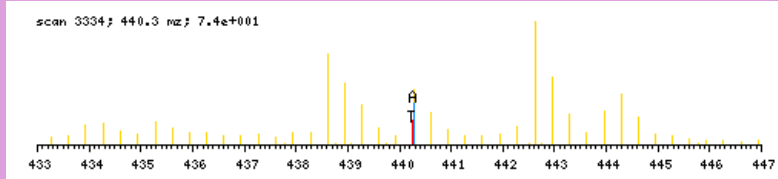

zoomed in precursor plot; T=theoretical m/z, A=acquired m/z

| b <sup>+</sup> | #  | AA # | y <sup>+</sup> | y <sup>2+</sup> |
|----------------|----|------|----------------|-----------------|
| 128.1075       | 1  | V    | 11             |                 |
| 284.2338       | 2  | K    | 10             | 596.3226        |
| 341.2553       | 3  | G    | 9              | 518.2595        |
| 470.2979       | 4  | E    | 8              | 489.7487        |
| 633.3612       | 5  | Y    | 7              | 425.2274        |
| 748.3881       | 6  | D    | 6              | 343.6958        |
| 847.4566       | 7  | V    | 5              | 286.1823        |
| 948.5042       | 8  | T    | 4              | 236.6481        |
| 1047.5726      | 9  | V    | 3              | 186.1243        |
| 1144.6254      | 10 | P    | 2              | 136.5900        |
|                | 11 | R    | 1              | 88.0637         |

N-term:+29.04 K(2):+156.13

VKLTAELIEQAQYTNVAVR, MH+ 2174.2185, m/z 544.3101  
 L OSG39 P180811 230811-s1.07623.07623.4.dta

scan 7623; 1.8e+000

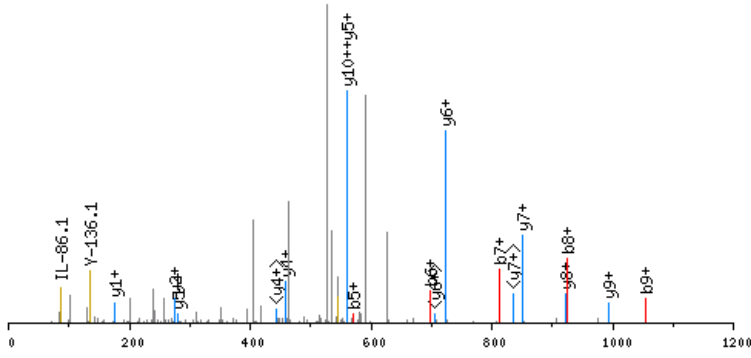

click image to zoom in; click top corners to zoom out [precursor±]

scan 7621; 544.3 nz; 1.7e+001

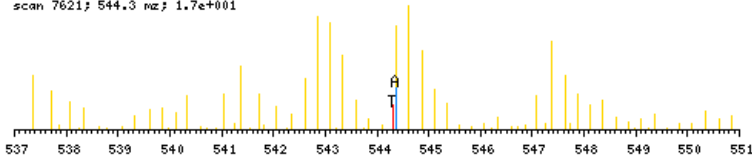

zoomed in precursor plot; T=theoretical m/z, A=acquired m/z

X-range:

-

MassTol: Y-zoom:

MassType:

AVG  MONO

Axis:

1  2

Label:

I  M  -

Ions:

a  +  2+  3+

b  +  2+  3+

c  +  2+  3+

x  +  2+  3+

y  +  2+  3+

z  +  2+  3+

hide H<sub>2</sub>O/NH<sub>3</sub>

zoom 112-122

GO

| b <sup>+</sup> | #  | AA # | y <sup>+</sup> | y <sup>2+</sup> |
|----------------|----|------|----------------|-----------------|
| 128.1075       | 1  | V 19 |                |                 |
| 284.2338       | 2  | K 18 | 2047.1188      | 1024.0633       |
| 397.3179       | 3  | L 17 | 1890.9925      | 946.0002        |
| 498.3656       | 4  | T 16 | 1777.9085      | 889.4581        |
| 569.4027       | 5  | A 15 | 1676.8608      | 838.9343        |
| 698.4453       | 6  | E 14 | 1605.8237      | 803.4157        |
| 811.5293       | 7  | L 13 | 1476.7811      | 738.8944        |
| 924.6134       | 8  | I 12 | 1363.6970      | 682.3524        |
| 1053.6560      | 9  | E 11 | 1250.6129      | 625.8104        |
| 1181.7146      | 10 | Q 10 | 1121.5703      | 561.2891        |
| 1252.7517      | 11 | A 9  | 993.5118       | 497.2598        |
| 1323.7888      | 12 | A 8  | 922.4747       | 461.7412        |
| 1451.8474      | 13 | Q 7  | 851.4375       | 426.2227        |
| 1614.9107      | 14 | Y 6  | 723.3790       | 362.1934        |
| 1715.9584      | 15 | T 5  | 560.3156       | 280.6617        |
| 1830.0013      | 16 | N 4  | 459.2680       | 230.1379        |
| 1901.0384      | 17 | A 3  | 345.2250       | 173.1164        |
| 2000.1068      | 18 | V 2  | 274.1879       | 137.5979        |
|                | 19 | R 1  | 175.1195       | 88.0637         |

N-term:+29.04 K(2):+156.13



VKLIVESGGGLVQPGGSLR, MH+ 1809.0598, m/z 603.6915  
 L OSG39 P180811 230811-s1.04908.04908.3.dta

X-range:

-

MassTol: Y-zoom:

MassType:

AVG  MONO

Axis:

1  2

Label:

I  M  -

Ions:

a  +  2+  3+

b  +  2+  3+

c  +  2+  3+

x  +  2+  3+

y  +  2+  3+

z  +  2+  3+

hide H<sub>2</sub>O/NH<sub>3</sub>

zoom 112-122

GO

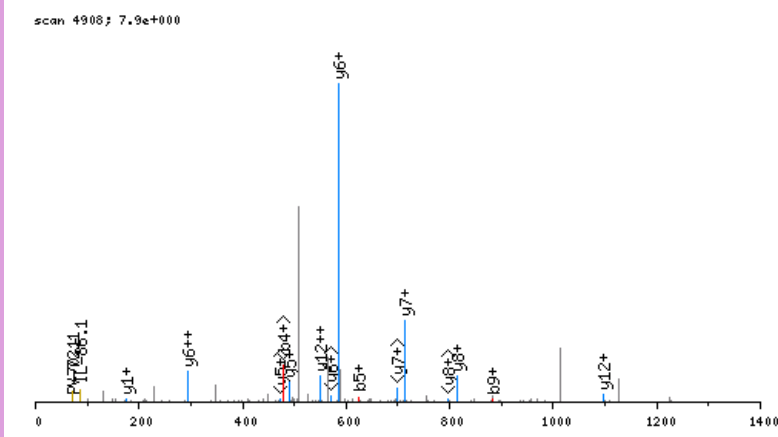

click image to zoom in; click top corners to zoom out [\[precursor±\]](#)

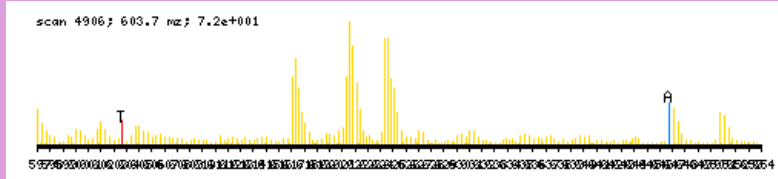

zoomed in precursor plot; T=theoretical m/z, A=acquired m/z

| b <sup>+</sup> | #  | AA # | y <sup>+</sup> | y <sup>2+</sup> |
|----------------|----|------|----------------|-----------------|
| 128.1075       | 1  | V 18 |                |                 |
| 284.2338       | 2  | K 17 | 1681.9601      | 841.4840        |
| 397.3179       | 3  | L 16 | 1525.8338      | 763.4208        |
| 496.3863       | 4  | V 15 | 1412.7498      | 706.8788        |
| 625.4289       | 5  | E 14 | 1313.6814      | 657.3446        |
| 712.4609       | 6  | S 13 | 1184.6388      | 592.8233        |
| 769.4824       | 7  | G 12 | 1097.6067      | 549.3073        |
| 826.5038       | 8  | G 11 | 1040.5853      | 520.7965        |
| 883.5253       | 9  | G 10 | 983.5638       | 492.2858        |
| 996.6094       | 10 | L 9  | 926.5423       | 463.7751        |
| 1095.6778      | 11 | V 8  | 813.4583       | 407.2331        |
| 1223.7364      | 12 | Q 7  | 714.3899       | 357.6988        |
| 1320.7891      | 13 | P 6  | 586.3313       | 293.6696        |
| 1377.8106      | 14 | G 5  | 489.2785       | 245.1432        |
| 1434.8321      | 15 | G 4  | 432.2571       | 216.6324        |
| 1521.8641      | 16 | S 3  | 375.2356       | 188.1217        |
| 1634.9481      | 17 | L 2  | 288.2036       | 144.6057        |
|                | 18 | R 1  | 175.1195       | 88.0637         |

N-term:+29.04 K(2):+156.13

VKNLGFGGGSEKKEEGGTSDPAAAKGMTR, MH+ 3178.7904, m/z 795.4530  
 H OSG40 P180811 230811-s1.09128.09128.4.dta

scan 9128; 4.8e+000

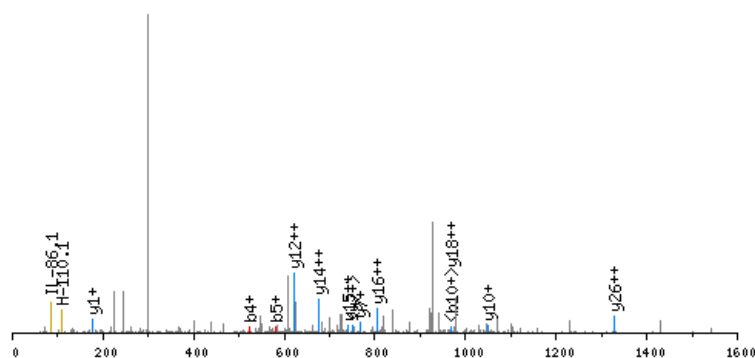

click image to zoom in; click top corners to zoom out [precursor±]

scan 9124; 795.5 nz; 3.0e+001

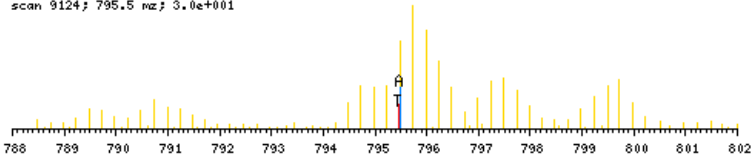

zoomed in precursor plot; T=theoretical m/z, A=acquired m/z

| b <sup>+</sup> | #  | AA | #  | y <sup>+</sup> | y <sup>2+</sup> |
|----------------|----|----|----|----------------|-----------------|
| 134.1393       | 1  | V  | 30 |                |                 |
| 296.2974       | 2  | K  | 29 | 3045.6589      | 1523.3333       |
| 410.3403       | 3  | N  | 28 | 2883.5008      | 1442.2543       |
| 523.4244       | 4  | L  | 27 | 2769.4578      | 1385.2328       |
| 580.4459       | 5  | G  | 26 | 2656.3738      | 1328.6908       |
| 727.5143       | 6  | F  | 25 | 2599.3523      | 1300.1801       |
| 784.5357       | 7  | G  | 24 | 2452.2839      | 1226.6459       |
| 841.5572       | 8  | G  | 23 | 2395.2624      | 1198.1351       |
| 898.5787       | 9  | G  | 22 | 2338.2410      | 1169.6244       |
| 985.6107       | 10 | S  | 21 | 2281.2195      | 1141.1137       |
| 1114.6533      | 11 | E  | 20 | 2194.1875      | 1097.5977       |
| 1243.6959      | 12 | E  | 19 | 2065.1449      | 1033.0764       |
| 1405.8540      | 13 | K  | 18 | 1936.1023      | 968.5551        |
| 1568.0121      | 14 | K  | 17 | 1773.9442      | 887.4760        |
| 1697.0547      | 15 | E  | 16 | 1611.7861      | 806.3970        |
| 1826.0973      | 16 | E  | 15 | 1482.7435      | 741.8757        |
| 1883.1187      | 17 | G  | 14 | 1353.7009      | 677.3544        |
| 1940.1402      | 18 | G  | 13 | 1296.6794      | 648.8436        |
| 2041.1879      | 19 | T  | 12 | 1239.6580      | 620.3329        |
| 2128.2199      | 20 | S  | 11 | 1138.6103      | 569.8091        |
| 2243.2469      | 21 | D  | 10 | 1051.5783      | 526.2931        |
| 2340.2996      | 22 | P  | 9  | 936.5513       | 468.7796        |
| 2411.3367      | 23 | A  | 8  | 839.4986       | 420.2532        |
| 2482.3738      | 24 | A  | 7  | 768.4615       | 384.7346        |
| 2553.4110      | 25 | A  | 6  | 697.4243       | 349.2161        |
| 2715.5691      | 26 | K  | 5  | 626.3872       | 313.6975        |
| 2772.5905      | 27 | G  | 4  | 464.2291       | 232.6185        |
| 2903.6310      | 28 | M  | 3  | 407.2077       | 204.1077        |
| 3004.6787      | 29 | T  | 2  | 276.1672       | 138.5875        |
|                | 30 | R  | 1  | 175.1195       | 88.0637         |

N-term:+35.07 K(2):+162.16  
 K(13):+162.16 K(14):+162.16  
 K(26):+162.16

X-range:

-

MassTol: Y-zoom:

MassType:

AVG  MONO

Axis:

1  2

Label:

I  M  -

Ions:

a  +  2+  3+

b  +  2+  3+

c  +  2+  3+

x  +  2+  3+

y  +  2+  3+

z  +  2+  3+

hide H<sub>2</sub>O/NH<sub>3</sub>

zoom 112-122

GO

VLASEPEIIPKGIK, MH+ 1476.9426, m/z 492.9857  
 H OSG39 P180811 230811-s1.03928.03928.3.dta

X-range:

-

MassTol: Y-zoom:

MassType:

AVG  MONO

Axis:

1  2

Label:

I  M  -

Ions:

a  +  2+  3+

b  +  2+  3+

c  +  2+  3+

x  +  2+  3+

y  +  2+  3+

z  +  2+  3+

hide H<sub>2</sub>O/NH<sub>3</sub>

zoom 112-122

GO

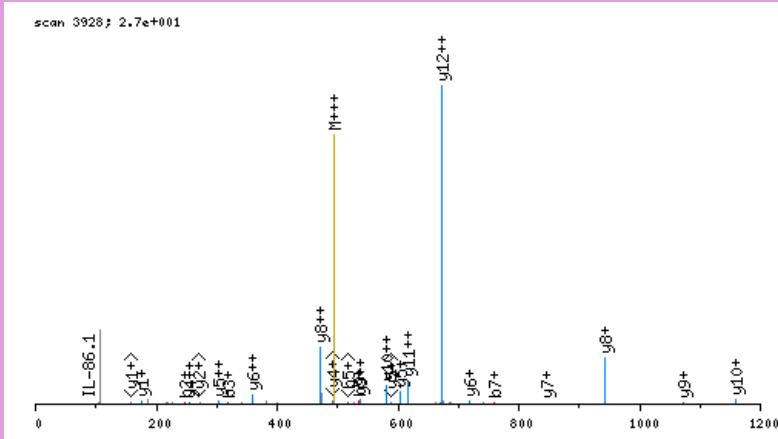

click image to zoom in; click top corners to zoom out [\[precursor±\]](#)

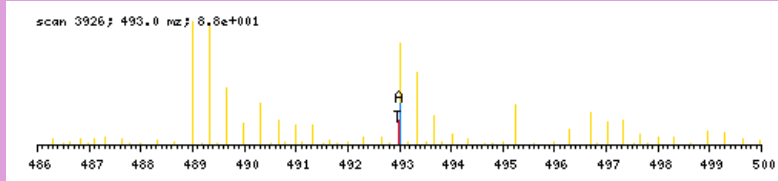

zoomed in precursor plot; T=theoretical m/z, A=acquired m/z

| b <sup>+</sup> | #  | AA # | y <sup>+</sup> | y <sup>2+</sup>    |
|----------------|----|------|----------------|--------------------|
| 134.1393       | 1  | V    | 13             |                    |
| 247.2234       | 2  | L    | 12             | 1343.8111 672.4095 |
| 318.2605       | 3  | A    | 11             | 1230.7270 615.8674 |
| 405.2925       | 4  | S    | 10             | 1159.6899 580.3489 |
| 534.3351       | 5  | E    | 9              | 1072.6579 536.8329 |
| 631.3879       | 6  | P    | 8              | 943.6153 472.3116  |
| 760.4305       | 7  | E    | 7              | 846.5625 423.7852  |
| 873.5145       | 8  | I    | 6              | 717.5200 359.2639  |
| 970.5673       | 9  | P    | 5              | 604.4359 302.7219  |
| 1132.7254      | 10 | K    | 4              | 507.3831 254.1955  |
| 1189.7469      | 11 | G    | 3              | 345.2250 173.1164  |
| 1302.8309      | 12 | I    | 2              | 288.2036 144.6057  |
|                | 13 | R    | 1              | 175.1195 88.0637   |

N-term:+35.07 K(10):+162.16

VLDDGGEVDLDLGNRYER, MH+ 1906.9034, m/z 636.3060  
 L OSG37 P180811 230811-s1.07070.07070.3.dta

X-range:

-

MassTol: Y-zoom:

MassType:

AVG  MONO

Axis:

1  2

Label:

I  M  -

Ions:

a  +  2+  3+

b  +  2+  3+

c  +  2+  3+

x  +  2+  3+

y  +  2+  3+

z  +  2+  3+

hide H<sub>2</sub>O/NH<sub>3</sub>

zoom 112-122

GO

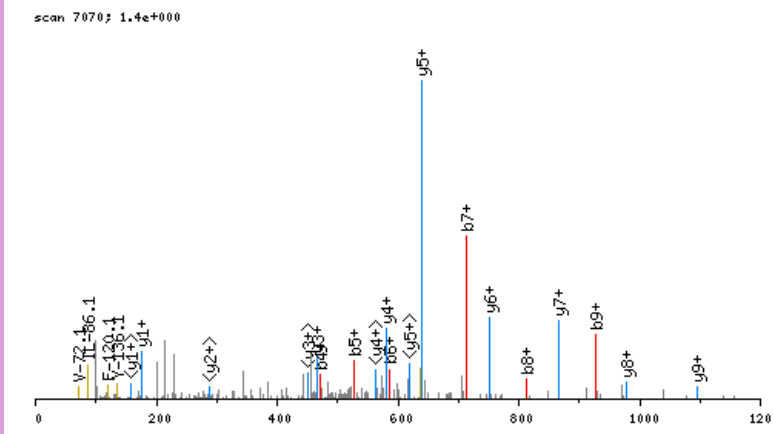

click image to zoom in; click top corners to zoom out [\[precursor±\]](#)

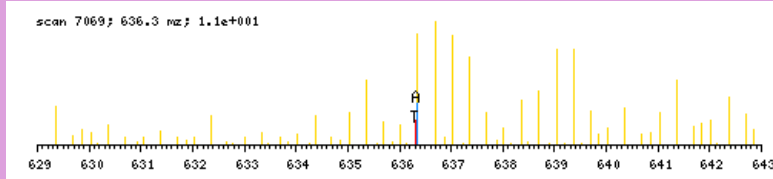

zoomed in precursor plot; T=theoretical m/z, A=acquired m/z

| b <sup>+</sup> | #  | AA # | y <sup>+</sup> | y <sup>2+</sup> |
|----------------|----|------|----------------|-----------------|
| 128.1075       | 1  | V 17 |                |                 |
| 241.1916       | 2  | L 16 | 1779.8037      | 890.4058        |
| 356.2185       | 3  | D 15 | 1666.7196      | 833.8637        |
| 471.2455       | 4  | D 14 | 1551.6927      | 776.3503        |
| 528.2669       | 5  | G 13 | 1436.6658      | 718.8368        |
| 585.2884       | 6  | G 12 | 1379.6443      | 690.3261        |
| 714.3310       | 7  | E 11 | 1322.6228      | 661.8153        |
| 813.3994       | 8  | V 10 | 1193.5802      | 597.2940        |
| 928.4263       | 9  | D 9  | 1094.5118      | 547.7598        |
| 1041.5104      | 10 | L 8  | 979.4849       | 490.2464        |
| 1156.5373      | 11 | D 7  | 866.4008       | 433.7043        |
| 1269.6214      | 12 | L 6  | 751.3739       | 376.1909        |
| 1326.6429      | 13 | G 5  | 638.2898       | 319.6488        |
| 1440.6858      | 14 | N 4  | 581.2683       | 291.1381        |
| 1603.7491      | 15 | Y 3  | 467.2254       | 234.1166        |
| 1732.7917      | 16 | E 2  | 304.1621       | 152.5850        |
|                | 17 | R 1  | 175.1195       | 88.0637         |

N-term:+29.04

VLDSDGVTHTNVPIYEGYALPHAIRM, MH+ 2852.4405, m/z 713.8656  
 L OSG40 P180811 230811-s1.08175.08175.4.dta

scan 8175; 1.1e+001

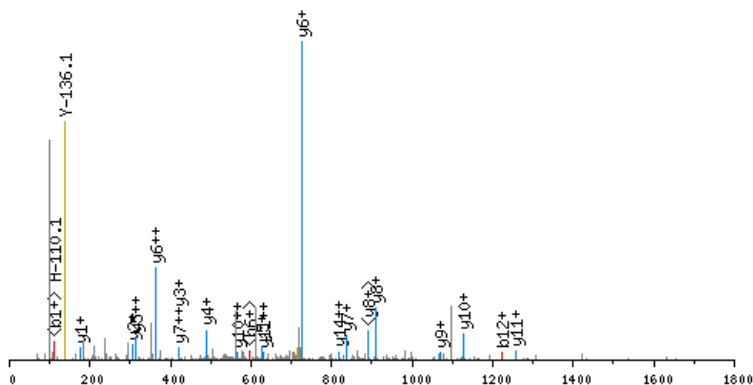

click image to zoom in; click top corners to zoom out [precursor+]

scan 8174; 713.9 mz; 1.0e+002

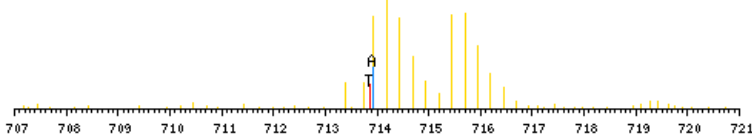

zoomed in precursor plot; T=theoretical m/z, A=acquired m/z

X-range:

-

MassTol: Y-zoom:

MassType:

AVG  MONO

Axis:

1  2

Label:

I  M  -

Ions:

a  +  2+  3+

b  +  2+  3+

c  +  2+  3+

x  +  2+  3+

y  +  2+  3+

z  +  2+  3+

hide H<sub>2</sub>O/NH<sub>3</sub>

zoom 112-122

GO

| b <sup>+</sup> | #  | AA # | y <sup>+</sup> | y <sup>2+</sup> |
|----------------|----|------|----------------|-----------------|
| 128.1075       | 1  | V 26 |                |                 |
| 241.1916       | 2  | L 25 | 2725.3408      | 1363.1743       |
| 356.2185       | 3  | D 24 | 2612.2567      | 1306.6323       |
| 443.2505       | 4  | S 23 | 2497.2298      | 1249.1188       |
| 500.2720       | 5  | G 22 | 2410.1978      | 1205.6028       |
| 615.2990       | 6  | D 21 | 2353.1763      | 1177.0921       |
| 672.3204       | 7  | G 20 | 2238.1494      | 1119.5786       |
| 771.3888       | 8  | V 19 | 2181.1279      | 1091.0679       |
| 872.4365       | 9  | T 18 | 2082.0595      | 1041.5337       |
| 1009.4954      | 10 | H 17 | 1981.0118      | 991.0098        |
| 1123.5384      | 11 | N 16 | 1843.9529      | 922.4804        |
| 1222.6068      | 12 | V 15 | 1729.9100      | 865.4589        |
| 1319.6595      | 13 | P 14 | 1630.8416      | 815.9247        |
| 1432.7436      | 14 | I 13 | 1533.7888      | 767.3983        |
| 1595.8069      | 15 | Y 12 | 1420.7047      | 710.8563        |
| 1724.8495      | 16 | E 11 | 1257.6414      | 629.3246        |
| 1781.8710      | 17 | G 10 | 1128.5988      | 564.8033        |
| 1944.9343      | 18 | Y 9  | 1071.5773      | 536.2926        |
| 2015.9714      | 19 | A 8  | 908.5140       | 454.7609        |
| 2129.0555      | 20 | L 7  | 837.4769       | 419.2424        |
| 2226.1082      | 21 | P 6  | 724.3928       | 362.7003        |
| 2363.1672      | 22 | H 5  | 627.3401       | 314.1740        |
| 2434.2043      | 23 | A 4  | 490.2812       | 245.6445        |
| 2547.2883      | 24 | I 3  | 419.2440       | 210.1259        |
| 2678.3288      | 25 | M 2  | 306.1600       | 153.5839        |
|                | 26 | R 1  | 175.1195       | 88.0637         |

N-term:+29.04

VLESTMVCDNSEYMR, MH+ 1966.9136, m/z 656.3094  
 H OSG37 P180811 230811-s1.06020.06020.3.dta

X-range:

-

MassTol: Y-zoom:

MassType:

AVG  MONO

Axis:

1  2

Label:

I  M  -

Ions:

a  +  2+  3+

b  +  2+  3+

c  +  2+  3+

x  +  2+  3+

y  +  2+  3+

z  +  2+  3+

hide H<sub>2</sub>O/NH<sub>3</sub>

zoom 112-122

GO

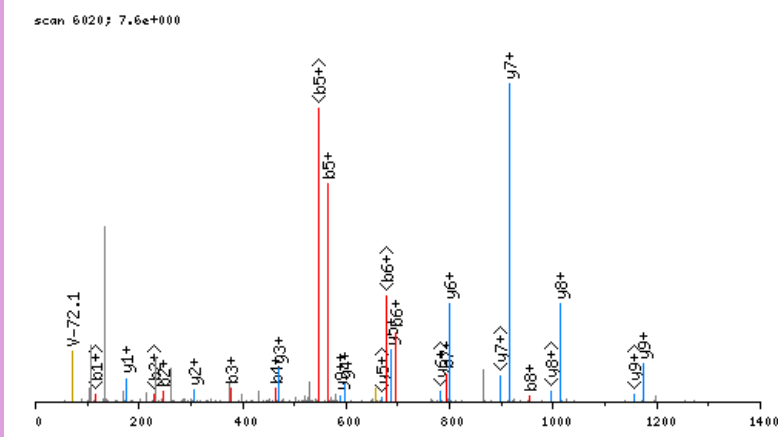

click image to zoom in; click top corners to zoom out [\[precursor±\]](#)

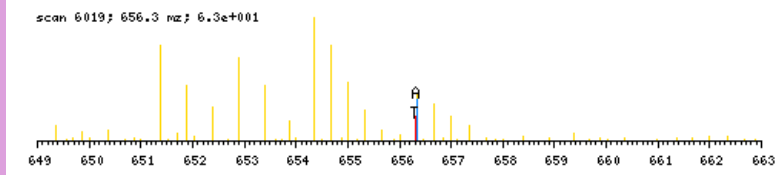

zoomed in precursor plot; T=theoretical m/z, A=acquired m/z

| b <sup>+</sup> | #  | AA # | y <sup>+</sup> | y <sup>2+</sup> |
|----------------|----|------|----------------|-----------------|
| 134.1393       | 1  | V 16 |                |                 |
| 247.2234       | 2  | L 15 | 1833.7821      | 917.3950        |
| 376.2660       | 3  | E 14 | 1720.6980      | 860.8529        |
| 463.2980       | 4  | S 13 | 1591.6554      | 796.3316        |
| 564.3457       | 5  | T 12 | 1504.6234      | 752.8156        |
| 695.3862       | 6  | M 11 | 1403.5757      | 702.2918        |
| 794.4546       | 7  | V 10 | 1272.5352      | 636.7715        |
| 954.4852       | 8  | C 9  | 1173.4668      | 587.2373        |
| 1053.5536      | 9  | V 8  | 1013.4362      | 507.2220        |
| 1168.5805      | 10 | D 7  | 914.3678       | 457.6878        |
| 1282.6235      | 11 | N 6  | 799.3409       | 400.1743        |
| 1369.6555      | 12 | S 5  | 685.2979       | 343.1529        |
| 1498.6981      | 13 | E 4  | 598.2659       | 299.6369        |
| 1661.7614      | 14 | Y 3  | 469.2233       | 235.1156        |
| 1792.8019      | 15 | M 2  | 306.1600       | 153.5839        |
|                | 16 | R 1  | 175.1195       | 88.0637         |

N-term:+35.07 C(8):+160.03

VLPGESEGEPLTPALGEAAR, MH+ 2108.0875, m/z 703.3674  
 L OSG36 P180811 230811-s1.04423.04423.3.dta

X-range:

-

MassTol: Y-zoom:

MassType:

AVG  MONO

Axis:

1  2

Label:

I  M  -

Ions:

a  +  2+  3+

b  +  2+  3+

c  +  2+  3+

x  +  2+  3+

y  +  2+  3+

z  +  2+  3+

hide H<sub>2</sub>O/NH<sub>3</sub>

zoom 112-122

GO

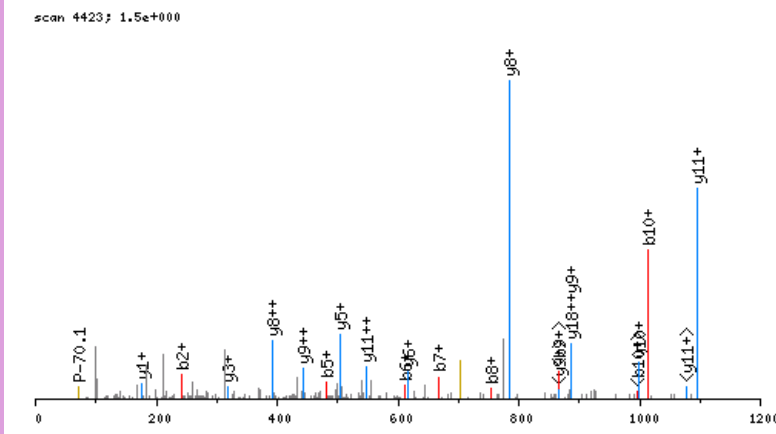

click image to zoom in; click top corners to zoom out [\[precursor±\]](#)

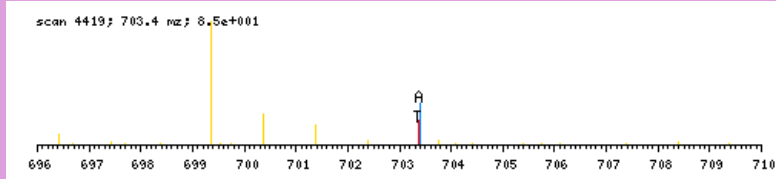

zoomed in precursor plot; T=theoretical m/z, A=acquired m/z

| b <sup>+</sup> | #  | AA # | y <sup>+</sup> | y <sup>2+</sup> |
|----------------|----|------|----------------|-----------------|
| 128.1075       | 1  | V 21 |                |                 |
| 241.1916       | 2  | L 20 | 1980.9878      | 990.9978        |
| 338.2443       | 3  | P 19 | 1867.9038      | 934.4558        |
| 395.2658       | 4  | G 18 | 1770.8510      | 885.9294        |
| 482.2978       | 5  | S 17 | 1713.8295      | 857.4187        |
| 611.3404       | 6  | E 16 | 1626.7975      | 813.9027        |
| 668.3619       | 7  | G 15 | 1497.7549      | 749.3814        |
| 755.3939       | 8  | S 14 | 1440.7334      | 720.8706        |
| 884.4365       | 9  | E 13 | 1353.7014      | 677.3546        |
| 1013.4791      | 10 | E 12 | 1224.6588      | 612.8333        |
| 1110.5319      | 11 | P 11 | 1095.6162      | 548.3120        |
| 1223.6159      | 12 | L 10 | 998.5635       | 499.7856        |
| 1324.6636      | 13 | T 9  | 885.4794       | 443.2436        |
| 1421.7164      | 14 | P 8  | 784.4317       | 392.7198        |
| 1492.7535      | 15 | A 7  | 687.3790       | 344.1934        |
| 1605.8376      | 16 | L 6  | 616.3418       | 308.6748        |
| 1662.8590      | 17 | G 5  | 503.2578       | 252.1328        |
| 1791.9016      | 18 | E 4  | 446.2363       | 223.6221        |
| 1862.9387      | 19 | A 3  | 317.1937       | 159.1008        |
| 1933.9758      | 20 | A 2  | 246.1566       | 123.5822        |
|                | 21 | R 1  | 175.1195       | 88.0637         |

N-term:+29.04

VLQEIILESDGKGPDKPSGFR, MH+ 2370.2669, m/z 593.3222  
 L OSG40 P180811 230811-s1.05640.05640.4.dta

X-range:

0 - 0

MassTol: Y-zoom:

0. 1.

MassType:

AVG  MONO

Axis:

1  2

Label:

I  M  -

Ions:

a  +  2+  3+

b  +  2+  3+

c  +  2+  3+

x  +  2+  3+

y  +  2+  3+

z  +  2+  3+

hide H<sub>2</sub>O/NH<sub>3</sub>

zoom 112-122

GO

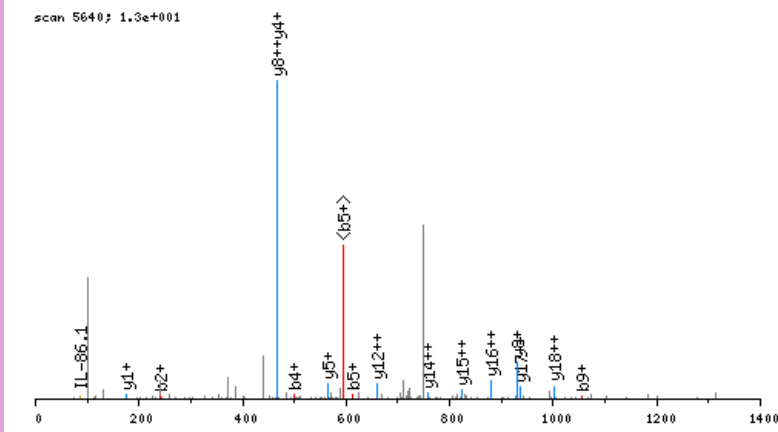

click image to zoom in; click top corners to zoom out [precursor±]

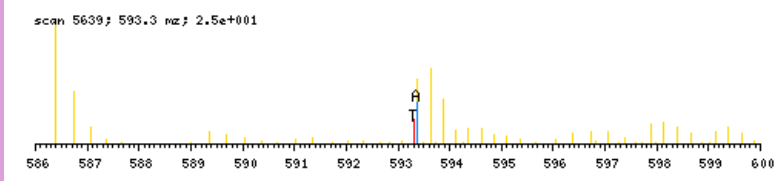

zoomed in precursor plot; T=theoretical m/z, A=acquired m/z

| b <sup>+</sup> | #  | AA | #  | y <sup>+</sup> | y <sup>2+</sup> |
|----------------|----|----|----|----------------|-----------------|
| 128.1075       | 1  | V  | 21 |                |                 |
| 241.1916       | 2  | L  | 20 | 2243.1673      | 1122.0875       |
| 369.2502       | 3  | Q  | 19 | 2130.0832      | 1065.5455       |
| 498.2927       | 4  | E  | 18 | 2002.0246      | 1001.5162       |
| 611.3768       | 5  | I  | 17 | 1872.9820      | 936.9949        |
| 724.4609       | 6  | L  | 16 | 1759.8980      | 880.4529        |
| 853.5035       | 7  | E  | 15 | 1646.8139      | 823.9109        |
| 940.5355       | 8  | S  | 14 | 1517.7713      | 759.3896        |
| 1055.5624      | 9  | D  | 13 | 1430.7393      | 715.8736        |
| 1112.5839      | 10 | G  | 12 | 1315.7123      | 658.3601        |
| 1268.7102      | 11 | K  | 11 | 1258.6909      | 629.8493        |
| 1325.7317      | 12 | G  | 10 | 1102.5646      | 551.7862        |
| 1440.7586      | 13 | D  | 9  | 1045.5431      | 523.2755        |
| 1537.8114      | 14 | P  | 8  | 930.5162       | 465.7620        |
| 1651.8543      | 15 | N  | 7  | 833.4634       | 417.2356        |
| 1807.9806      | 16 | K  | 6  | 719.4205       | 360.2141        |
| 1905.0334      | 17 | P  | 5  | 563.2942       | 282.1510        |
| 1992.0654      | 18 | S  | 4  | 466.2414       | 233.6246        |
| 2049.0869      | 19 | G  | 3  | 379.2094       | 190.1086        |
| 2196.1553      | 20 | F  | 2  | 322.1879       | 161.5979        |
|                | 21 | R  | 1  | 175.1195       | 88.0637         |

N-term: +29.04 K(11): +156.13  
 K(16): +156.13



VLSEVCGQDITTKHMLPTVLR, MH+ 2453.3260, m/z 614.0870  
 L OSG40 P180811 230811-s1.07201.07201.4.dta

X-range:

0 - 0

MassTol: Y-zoom:

0. 1.

MassType:

AVG  MONO

Axis:

1  2

Label:

I  M  -

Ions:

a  +  2+  3+

b  +  2+  3+

c  +  2+  3+

x  +  2+  3+

y  +  2+  3+

z  +  2+  3+

hide H<sub>2</sub>O/NH<sub>3</sub>

zoom 112-122

GO

scan 7201; 2.4e+000

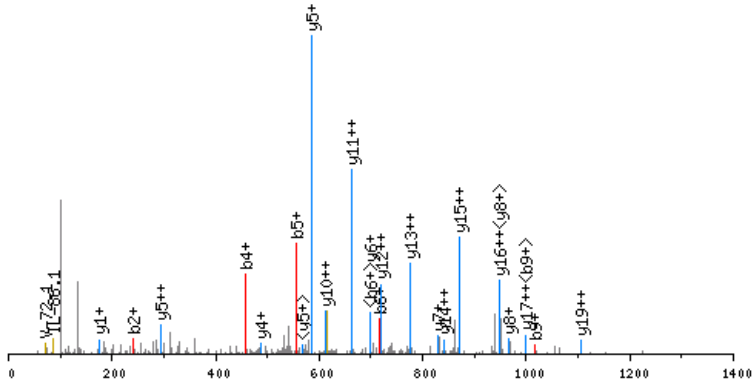

click image to zoom in; click top corners to zoom out [precursor±]

scan 7199; 614.1 m/z; 2.6e+001

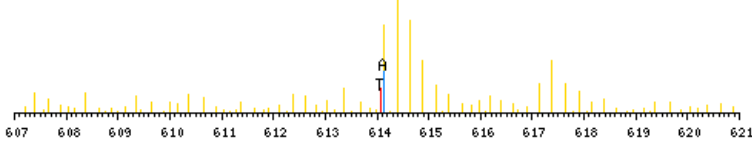

zoomed in precursor plot; T=theoretical m/z, A=acquired m/z

| b <sup>+</sup> | #  | AA # | y <sup>+</sup> | y <sup>2+</sup> |
|----------------|----|------|----------------|-----------------|
| 128.1075       | 1  | V 21 |                |                 |
| 241.1916       | 2  | L 20 | 2326.2263      | 1163.6171       |
| 328.2236       | 3  | S 19 | 2213.1422      | 1107.0750       |
| 457.2662       | 4  | E 18 | 2126.1102      | 1063.5590       |
| 556.3346       | 5  | V 17 | 1997.0676      | 999.0377        |
| 716.3652       | 6  | C 16 | 1897.9992      | 949.5035        |
| 773.3867       | 7  | G 15 | 1737.9686      | 869.4882        |
| 901.4453       | 8  | Q 14 | 1680.9471      | 840.9775        |
| 1016.4722      | 9  | D 13 | 1552.8885      | 776.9482        |
| 1129.5563      | 10 | I 12 | 1437.8616      | 719.4347        |
| 1230.6039      | 11 | T 11 | 1324.7775      | 662.8927        |
| 1331.6516      | 12 | T 10 | 1223.7299      | 612.3688        |
| 1487.7779      | 13 | K 9  | 1122.6822      | 561.8450        |
| 1624.8368      | 14 | H 8  | 966.5559       | 483.7819        |
| 1755.8773      | 15 | M 7  | 829.4970       | 415.2524        |
| 1868.9614      | 16 | L 6  | 698.4565       | 349.7322        |
| 1966.0141      | 17 | P 5  | 585.3724       | 293.1901        |
| 2067.0618      | 18 | T 4  | 488.3197       | 244.6637        |
| 2166.1302      | 19 | V 3  | 387.2720       | 194.1399        |
| 2279.2143      | 20 | L 2  | 288.2036       | 144.6057        |
|                | 21 | R 1  | 175.1195       | 88.0637         |

N-term:+29.04 C(6):+160.03  
 K(13):+156.13

VLSNEPAASAAEEVEDDALVR, MH+ 2348.1681, m/z 783.3942  
H OSG36 P180811 230811-s1.04911.04911.3.dta

scan 4911; 1.3e+000

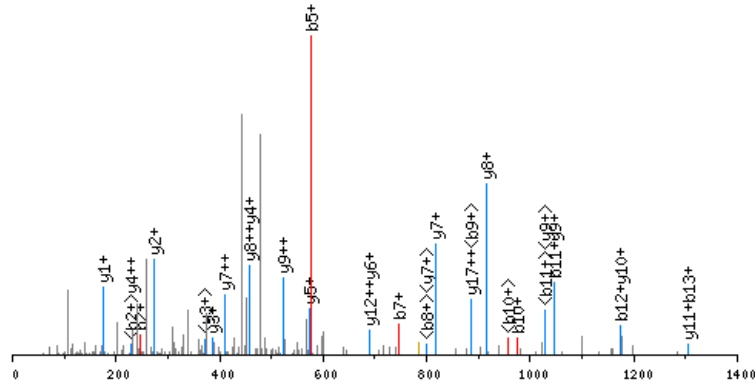

click image to zoom in; click top corners to zoom out [precursor±]

scan 4909; 783.4 mz; 1.2e+001

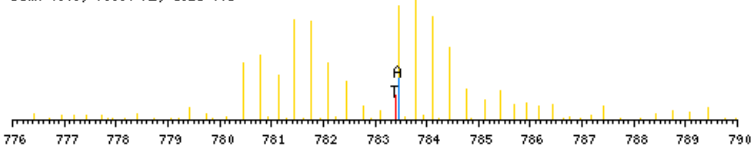

zoomed in precursor plot; T=theoretical m/z, A=acquired m/z

X-range:

-

MassTol: Y-zoom:

MassType:

AVG  MONO

Axis:

1  2

Label:

I  M  -

Ions:

a  +  2+  3+

b  +  2+  3+

c  +  2+  3+

x  +  2+  3+

y  +  2+  3+

z  +  2+  3+

hide H<sub>2</sub>O/NH<sub>3</sub>

zoom 112-122

GO

| b <sup>+</sup> | #  | AA # | y <sup>+</sup> | y <sup>2+</sup> |
|----------------|----|------|----------------|-----------------|
| 134.1393       | 1  | V 22 |                |                 |
| 247.2234       | 2  | L 21 | 2215.0366      | 1108.0222       |
| 334.2554       | 3  | S 20 | 2101.9526      | 1051.4802       |
| 448.2983       | 4  | N 19 | 2014.9205      | 1007.9642       |
| 577.3409       | 5  | E 18 | 1900.8776      | 950.9427        |
| 674.3937       | 6  | P 17 | 1771.8350      | 886.4214        |
| 745.4308       | 7  | A 16 | 1674.7822      | 837.8950        |
| 816.4679       | 8  | A 15 | 1603.7451      | 802.3765        |
| 903.4999       | 9  | S 14 | 1532.7080      | 766.8579        |
| 974.5371       | 10 | A 13 | 1445.6760      | 723.3419        |
| 1045.5742      | 11 | A 12 | 1374.6389      | 687.8234        |
| 1174.6168      | 12 | E 11 | 1303.6018      | 652.3048        |
| 1303.6594      | 13 | E 10 | 1174.5592      | 587.7835        |
| 1432.7020      | 14 | E 9  | 1045.5166      | 523.2622        |
| 1531.7704      | 15 | V 8  | 916.4740       | 458.7409        |
| 1660.8130      | 16 | E 7  | 817.4056       | 409.2067        |
| 1775.8399      | 17 | D 6  | 688.3630       | 344.6854        |
| 1890.8668      | 18 | D 5  | 573.3360       | 287.1719        |
| 1961.9040      | 19 | A 4  | 458.3091       | 229.6585        |
| 2074.9880      | 20 | L 3  | 387.2720       | 194.1399        |
| 2174.0564      | 21 | V 2  | 274.1879       | 137.5979        |
|                | 22 | R 1  | 175.1195       | 88.0637         |

N-term:+35.07

VLTPSNLGTGLR, MH+ 1421.7998, m/z 474.6048  
 H OSG37 P180811 230811-s1.04922.04922.3.dta

X-range:

-

MassTol: Y-zoom:

MassType:

AVG  MONO

Axis:

1  2

Label:

I  M  -

Ions:

a  +  2+  3+

b  +  2+  3+

c  +  2+  3+

x  +  2+  3+

y  +  2+  3+

z  +  2+  3+

hide H<sub>2</sub>O/NH<sub>3</sub>

zoom 112-122

GO

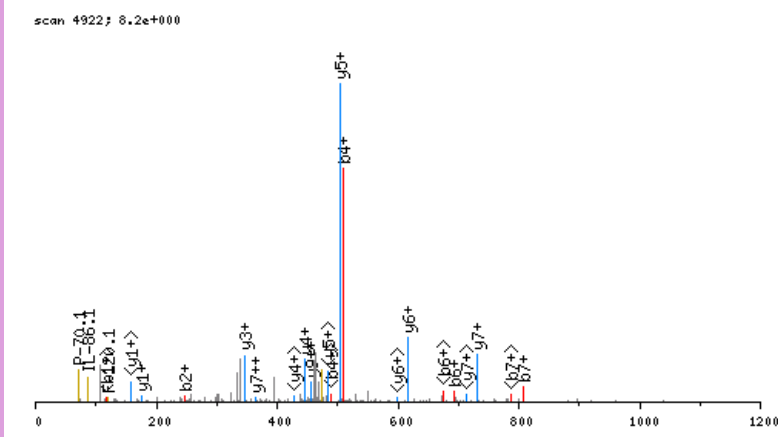

click image to zoom in; click top corners to zoom out [\[precursor±\]](#)

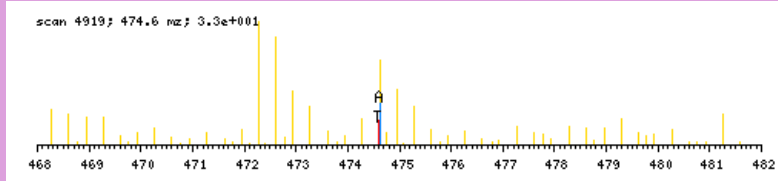

zoomed in precursor plot; T=theoretical m/z, A=acquired m/z

| b <sup>+</sup> | #  | AA # | y <sup>+</sup> | y <sup>2+</sup> |
|----------------|----|------|----------------|-----------------|
| 134.1393       | 1  | V 13 |                |                 |
| 247.2234       | 2  | L 12 | 1288.6683      | 644.8381        |
| 348.2711       | 3  | T 11 | 1175.5842      | 588.2960        |
| 508.3017       | 4  | C 10 | 1074.5366      | 537.7722        |
| 605.3544       | 5  | P 9  | 914.5060       | 457.7569        |
| 692.3864       | 6  | S 8  | 817.4532       | 409.2305        |
| 806.4294       | 7  | N 7  | 730.4212       | 365.7145        |
| 919.5134       | 8  | L 6  | 616.3782       | 308.6930        |
| 976.5349       | 9  | G 5  | 503.2942       | 252.1510        |
| 1077.5826      | 10 | T 4  | 446.2727       | 223.6403        |
| 1134.6040      | 11 | G 3  | 345.2250       | 173.1164        |
| 1247.6881      | 12 | L 2  | 288.2036       | 144.6057        |
|                | 13 | R 1  | 175.1195       | 88.0637         |

N-term:+35.07 C(4):+160.03

VLTDPDLYNKLR, MH+ 1399.8949, m/z 467.3032  
 H OSG40 P180811 230811-s1.06100.06100.3.dta

X-range:

-

MassTol: Y-zoom:

MassType:

AVG  MONO

Axis:

1  2

Label:

I  M  -

Ions:

a  +  2+  3+

b  +  2+  3+

c  +  2+  3+

x  +  2+  3+

y  +  2+  3+

z  +  2+  3+

hide H<sub>2</sub>O/NH<sub>3</sub>

zoom 112-122

GO

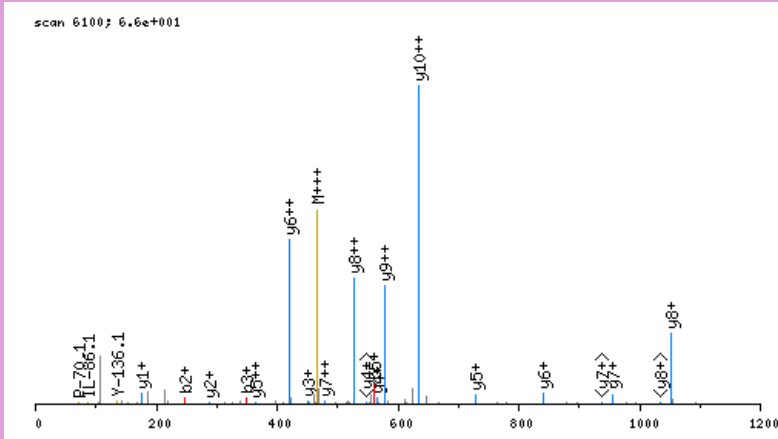

click image to zoom in; click top corners to zoom out [\[precursor±\]](#)

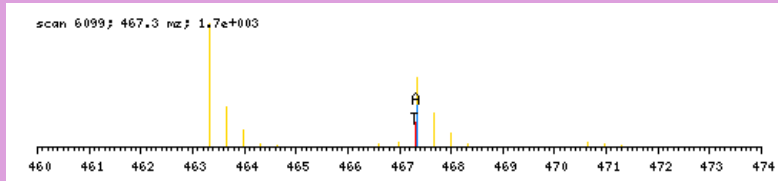

zoomed in precursor plot; T=theoretical m/z, A=acquired m/z

| b <sup>+</sup> | #  | AA # | y <sup>+</sup> | y <sup>2+</sup>    |
|----------------|----|------|----------------|--------------------|
| 134.1393       | 1  | V    | 11             |                    |
| 247.2234       | 2  | L    | 10             | 1266.7634 633.8856 |
| 348.2711       | 3  | T    | 9              | 1153.6794 577.3436 |
| 445.3238       | 4  | P    | 8              | 1052.6317 526.8198 |
| 560.3508       | 5  | D    | 7              | 955.5789 478.2934  |
| 673.4348       | 6  | L    | 6              | 840.5520 420.7799  |
| 836.4982       | 7  | Y    | 5              | 727.4679 364.2379  |
| 950.5411       | 8  | N    | 4              | 564.4046 282.7062  |
| 1112.6992      | 9  | K    | 3              | 450.3617 225.6847  |
| 1225.7832      | 10 | L    | 2              | 288.2036 144.6057  |
|                | 11 | R    | 1              | 175.1195 88.0637   |

N-term:+35.07 K(9):+162.16

VMLETLSQSPQGR, MH+ 1473.7735, m/z 491.9294  
 L OSG37 P180811 230811-s1.04775.04775.3.dta

scan 4775; 2.2e+000

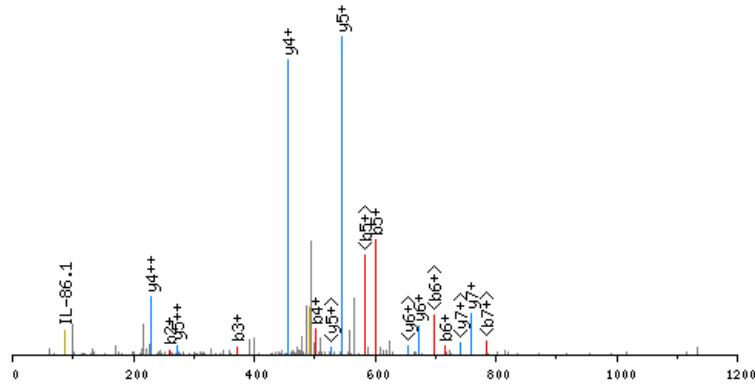

click image to zoom in; click top corners to zoom out [\[precursor±\]](#)

scan 4774; 491.9 m/z; 2.0e+002

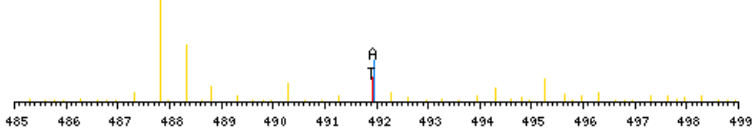

zoomed in precursor plot; T=theoretical m/z, A=acquired m/z

X-range:

-

MassTol: Y-zoom:

MassType:

AVG  MONO

Axis:

1  2

Label:

I  M  -

Ions:

a  +  2+  3+

b  +  2+  3+

c  +  2+  3+

x  +  2+  3+

y  +  2+  3+

z  +  2+  3+

hide H<sub>2</sub>O/NH<sub>3</sub>

zoom 112-122

GO

| b <sup>+</sup> | #  | AA # | y <sup>+</sup> | y <sup>2+</sup> |
|----------------|----|------|----------------|-----------------|
| 128.1075       | 1  | V 13 |                |                 |
| 259.1480       | 2  | M 12 | 1346.6738      | 673.8408        |
| 372.2321       | 3  | L 11 | 1215.6333      | 608.3206        |
| 501.2747       | 4  | E 10 | 1102.5493      | 551.7786        |
| 602.3223       | 5  | T 9  | 973.5067       | 487.2573        |
| 715.4064       | 6  | L 8  | 872.4590       | 436.7334        |
| 802.4384       | 7  | S 7  | 759.3749       | 380.1914        |
| 930.4970       | 8  | Q 6  | 672.3429       | 336.6754        |
| 1017.5290      | 9  | S 5  | 544.2843       | 272.6461        |
| 1114.5818      | 10 | P 4  | 457.2523       | 229.1301        |
| 1242.6404      | 11 | Q 3  | 360.1995       | 180.6037        |
| 1299.6618      | 12 | G 2  | 232.1410       | 116.5744        |
|                | 13 | R 1  | 175.1195       | 88.0637         |

N-term:+29.04

VNAIQVGPVPPRQLVEELQSRYSR, MH+ 2577.4265, m/z 645.1121  
 L OSG38 P180811 230811-s1.06382.06382.4.dta

scan 6382; 2.2e+000

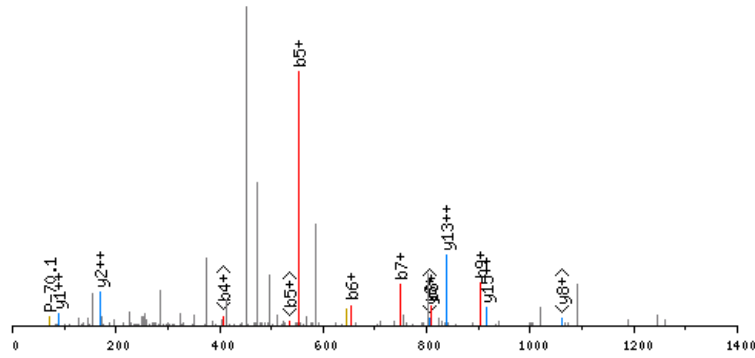

click image to zoom in; click top corners to zoom out [precursor±]

scan 6379; 645.1 mz; 9.0e+000

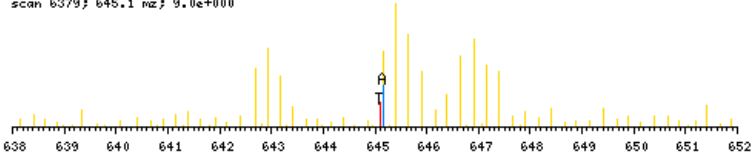

zoomed in precursor plot; T=theoretical m/z, A=acquired m/z

| b <sup>+</sup> | #  | AA # | y <sup>+</sup> | y <sup>2+</sup> |
|----------------|----|------|----------------|-----------------|
| 128.1075       | 1  | V 22 |                |                 |
| 242.1504       | 2  | N 21 | 2450.3268      | 1225.6673       |
| 313.1876       | 3  | A 20 | 2336.2839      | 1168.6459       |
| 426.2716       | 4  | I 19 | 2265.2468      | 1133.1273       |
| 554.3302       | 5  | Q 18 | 2152.1627      | 1076.5853       |
| 653.3986       | 6  | V 17 | 2024.1041      | 1012.5560       |
| 750.4514       | 7  | P 16 | 1925.0357      | 963.0218        |
| 807.4728       | 8  | G 15 | 1827.9830      | 914.4954        |
| 904.5256       | 9  | P 14 | 1770.9615      | 885.9847        |
| 1001.5784      | 10 | P 13 | 1673.9087      | 837.4583        |
| 1157.6795      | 11 | R 12 | 1576.8560      | 788.9319        |
| 1285.7381      | 12 | Q 11 | 1420.7549      | 710.8813        |
| 1398.8221      | 13 | L 10 | 1292.6963      | 646.8520        |
| 1497.8905      | 14 | V 9  | 1179.6122      | 590.3100        |
| 1626.9331      | 15 | E 8  | 1080.5438      | 540.7758        |
| 1755.9757      | 16 | E 7  | 951.5012       | 476.2545        |
| 1869.0598      | 17 | L 6  | 822.4586       | 411.7332        |
| 1997.1184      | 18 | Q 5  | 709.3745       | 355.1912        |
| 2084.1504      | 19 | S 4  | 581.3160       | 291.1619        |
| 2240.2515      | 20 | R 3  | 494.2839       | 247.6459        |
| 2403.3148      | 21 | Y 2  | 338.1828       | 169.5953        |
|                | 22 | R 1  | 175.1195       | 88.0637         |

N-term:+29.04

X-range:

0 - 0

MassTol: Y-zoom:

0. 1.

MassType:

AVG  MONO

Axis:

1  2

Label:

I  M  -

Ions:

a  +  2+  3+

b  +  2+  3+

c  +  2+  3+

x  +  2+  3+

y  +  2+  3+

z  +  2+  3+

hide H<sub>2</sub>O/NH<sub>3</sub>

zoom 112-122

GO

VNDPQPEHPLR, MH+ 1329.6915, m/z 443.9020  
 L OSG40 P180811 230811-s1.02220.02220.3.dta

X-range:

-

MassTol: Y-zoom:

MassType:

AVG  MONO

Axis:

1  2

Label:

I  M  -

Ions:

a  +  2+  3+

b  +  2+  3+

c  +  2+  3+

x  +  2+  3+

y  +  2+  3+

z  +  2+  3+

hide H<sub>2</sub>O/NH<sub>3</sub>

zoom 112-122

GO

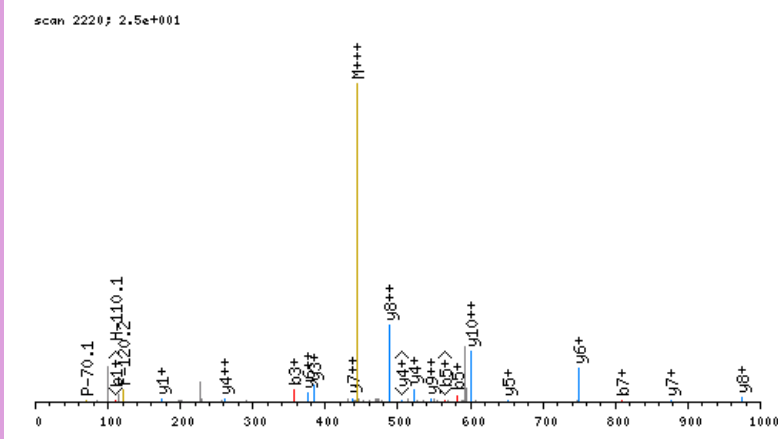

click image to zoom in; click top corners to zoom out [\[precursor±\]](#)

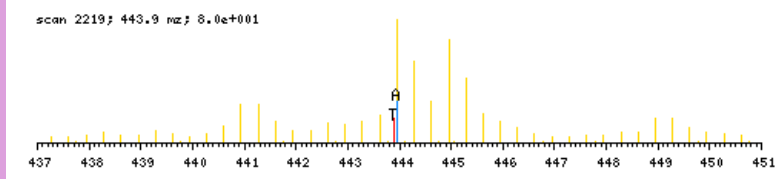

zoomed in precursor plot; T=theoretical m/z, A=acquired m/z

| b <sup>+</sup> | #  | AA # | y <sup>+</sup> | y <sup>2+</sup> |
|----------------|----|------|----------------|-----------------|
| 128.1075       | 1  | V 11 |                |                 |
| 242.1504       | 2  | N 10 | 1202.5918      | 601.7998        |
| 357.1774       | 3  | D 9  | 1088.5489      | 544.7784        |
| 454.2301       | 4  | P 8  | 973.5219       | 487.2649        |
| 582.2887       | 5  | Q 7  | 876.4692       | 438.7385        |
| 679.3415       | 6  | P 6  | 748.4106       | 374.7092        |
| 808.3841       | 7  | E 5  | 651.3578       | 326.1828        |
| 945.4430       | 8  | H 4  | 522.3152       | 261.6615        |
| 1042.4958      | 9  | P 3  | 385.2563       | 193.1321        |
| 1155.5798      | 10 | L 2  | 288.2036       | 144.6057        |
|                | 11 | R 1  | 175.1195       | 88.0637         |

N-term:+29.04

X-range:

-

MassTol: Y-zoom:

MassType:

AVG  MONO

Axis:

1  2

Label:

I  M  -

Ions:

a  +  2+  3+

b  +  2+  3+

c  +  2+  3+

x  +  2+  3+

y  +  2+  3+

z  +  2+  3+

hide H<sub>2</sub>O/NH<sub>3</sub>

zoom 112-122

GO

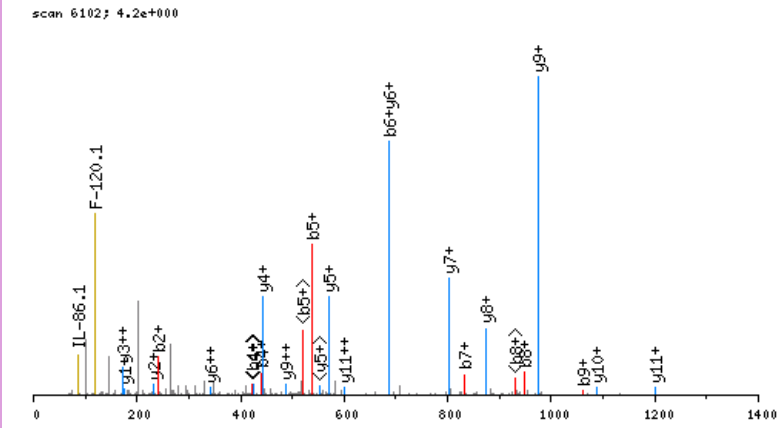

click image to zoom in; click top corners to zoom out [\[precursor±\]](#)

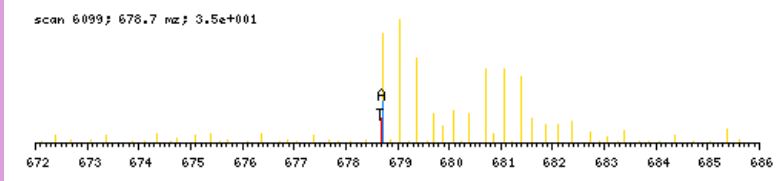

zoomed in precursor plot; T=theoretical m/z, A=acquired m/z

| b <sup>+</sup>   | #        | AA #        | y <sup>+</sup>   | y <sup>2+</sup> |
|------------------|----------|-------------|------------------|-----------------|
| 128.1075         | 1        | V 18        |                  |                 |
| <b>242.1504</b>  | <b>2</b> | <b>N 17</b> | 1906.9187        | 953.9633        |
| 339.2032         | 3        | P 16        | 1792.8758        | 896.9418        |
| <b>440.2509</b>  | <b>4</b> | <b>T 15</b> | 1695.8230        | 848.4154        |
| <b>539.3193</b>  | <b>5</b> | <b>V 14</b> | 1594.7753        | 797.8916        |
| <b>686.3877</b>  | <b>6</b> | <b>F 13</b> | 1495.7069        | 748.3574        |
| <b>833.4561</b>  | <b>7</b> | <b>F 12</b> | 1348.6385        | 674.8232        |
| <b>948.4831</b>  | <b>8</b> | <b>D 11</b> | <b>1201.5701</b> | <b>601.2889</b> |
| <b>1061.5671</b> | <b>9</b> | <b>I 10</b> | <b>1086.5431</b> | 543.7755        |
| 1162.6148        | 10       | T 9         | 973.4591         | <b>487.2334</b> |
| 1233.6519        | 11       | A 8         | <b>872.4114</b>  | 436.7096        |
| 1348.6789        | 12       | D 7         | <b>801.3743</b>  | 401.1910        |
| 1463.7058        | 13       | D 6         | <b>686.3473</b>  | <b>343.6776</b> |
| 1592.7484        | 14       | E 5         | <b>571.3204</b>  | 286.1641        |
| 1689.8012        | 15       | P 4         | <b>442.2778</b>  | 221.6428        |
| 1802.8852        | 16       | L 3         | 345.2250         | <b>173.1164</b> |
| 1859.9067        | 17       | G 2         | <b>232.1410</b>  | 116.5744        |
|                  | 18       | R 1         | <b>175.1195</b>  | 88.0637         |

N-term:+29.04



VNTEPLFLTKTDICKLSR, MH+ 2237.3428, m/z 560.0911  
 H OSG40 P180811 230811-s1.07308.07308.4.dta

X-range:

-

MassTol: Y-zoom:

MassType:

AVG  MONO

Axis:

1  2

Label:

I  M  -

Ions:

a  +  2+  3+

b  +  2+  3+

c  +  2+  3+

x  +  2+  3+

y  +  2+  3+

z  +  2+  3+

hide H<sub>2</sub>O/NH<sub>3</sub>

zoom 112-122

GO

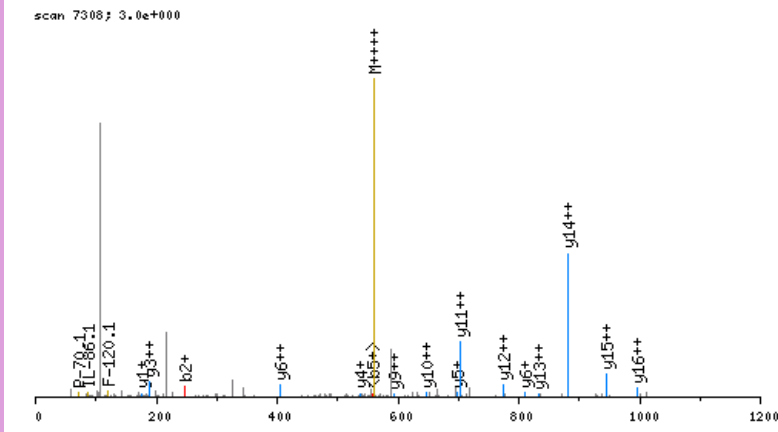

click image to zoom in; click top corners to zoom out [\[precursor±\]](#)

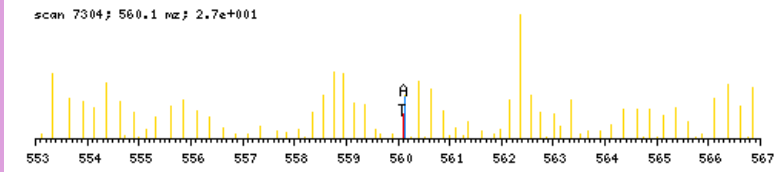

zoomed in precursor plot; T=theoretical m/z, A=acquired m/z

| b <sup>+</sup>  | #  | AA # | y <sup>+</sup>  | y <sup>2+</sup> |
|-----------------|----|------|-----------------|-----------------|
| 134.1393        | 1  | V 18 |                 |                 |
| <b>248.1822</b> | 2  | N 17 | 2104.2113       | 1052.6095       |
| 349.2299        | 3  | T 16 | 1990.1683       | <b>995.5881</b> |
| 478.2725        | 4  | E 15 | 1889.1207       | <b>945.0642</b> |
| 575.3253        | 5  | P 14 | 1760.0781       | <b>880.5429</b> |
| 688.4093        | 6  | L 13 | 1663.0253       | <b>832.0166</b> |
| 835.4778        | 7  | F 12 | 1549.9412       | <b>775.4745</b> |
| 948.5618        | 8  | L 11 | 1402.8728       | <b>701.9403</b> |
| 1049.6095       | 9  | T 10 | 1289.7888       | <b>645.3983</b> |
| 1211.7676       | 10 | K 9  | 1188.7411       | <b>594.8745</b> |
| 1312.8153       | 11 | T 8  | 1026.5830       | 513.7954        |
| 1427.8422       | 12 | D 7  | 925.5353        | 463.2716        |
| 1540.9263       | 13 | I 6  | <b>810.5084</b> | <b>405.7581</b> |
| 1700.9569       | 14 | C 5  | <b>697.4243</b> | 349.2161        |
| 1863.1150       | 15 | K 4  | <b>537.3937</b> | 269.2008        |
| 1976.1990       | 16 | L 3  | 375.2356        | <b>188.1217</b> |
| 2063.2311       | 17 | S 2  | 262.1515        | 131.5797        |
|                 | 18 | R 1  | <b>175.1195</b> | 88.0637         |

N-term: +35.07 K(10) : +162.16  
 C(14) : +160.03 K(15) : +162.16

VPTPNVSVVDLTCR, MH+ 1584.8419, m/z 528.9521  
 L OSG37 P180811 230811-s1.06486.06486.3.dta

X-range:

-

MassTol: Y-zoom:

MassType:

AVG  MONO

Axis:

1  2

Label:

I  M  -

Ions:

a  +  2+  3+

b  +  2+  3+

c  +  2+  3+

x  +  2+  3+

y  +  2+  3+

z  +  2+  3+

hide H<sub>2</sub>O/NH<sub>3</sub>

zoom 112-122

GO

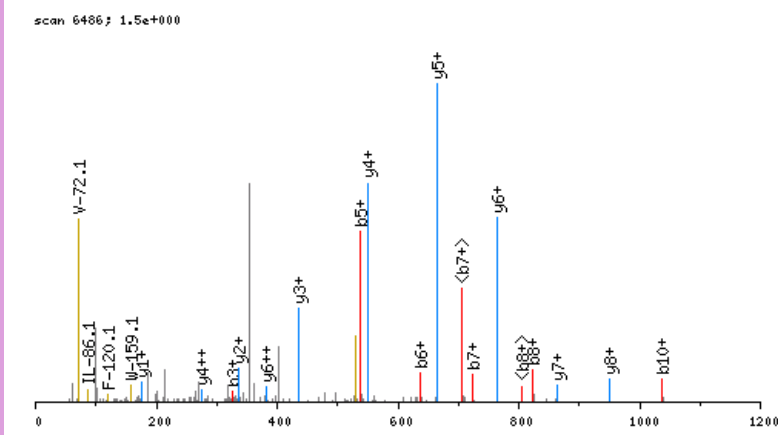

click image to zoom in; click top corners to zoom out [\[precursor±\]](#)

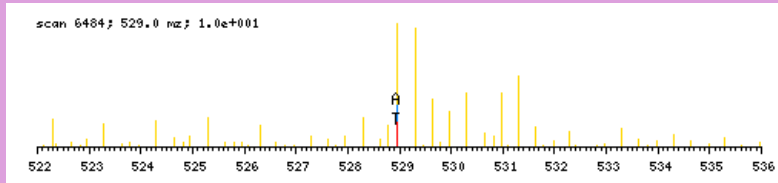

zoomed in precursor plot; T=theoretical m/z, A=acquired m/z

| b <sup>+</sup> | #  | AA # | y <sup>+</sup> | y <sup>2+</sup> |
|----------------|----|------|----------------|-----------------|
| 128.1075       | 1  | V 14 |                |                 |
| 225.1603       | 2  | P 13 | 1457.7422      | 729.3750        |
| 326.2080       | 3  | T 12 | 1360.6894      | 680.8486        |
| 423.2607       | 4  | P 11 | 1259.6417      | 630.3248        |
| 537.3036       | 5  | N 10 | 1162.5890      | 581.7984        |
| 636.3721       | 6  | V 9  | 1048.5461      | 524.7769        |
| 723.4041       | 7  | S 8  | 949.4776       | 475.2427        |
| 822.4725       | 8  | V 7  | 862.4456       | 431.7267        |
| 921.5409       | 9  | V 6  | 763.3772       | 382.1925        |
| 1036.5679      | 10 | D 5  | 664.3088       | 332.6583        |
| 1149.6519      | 11 | L 4  | 549.2818       | 275.1448        |
| 1250.6996      | 12 | T 3  | 436.1978       | 218.6028        |
| 1410.7302      | 13 | C 2  | 335.1501       | 168.0790        |
|                | 14 | R 1  | 175.1195       | 88.0637         |

N-term:+29.04 C(13):+160.03

VQAWYMEDESTADPR, MH+ 1702.7959, m/z 568.2701  
 H OSG37 P180811 230811-s1.05541.05541.3.dta

X-range:

-

MassTol: Y-zoom:

MassType:

AVG  MONO

Axis:

1  2

Label:

I  M  -

Ions:

a  +  2+  3+

b  +  2+  3+

c  +  2+  3+

x  +  2+  3+

y  +  2+  3+

z  +  2+  3+

hide H<sub>2</sub>O/NH<sub>3</sub>

zoom 112-122

GO

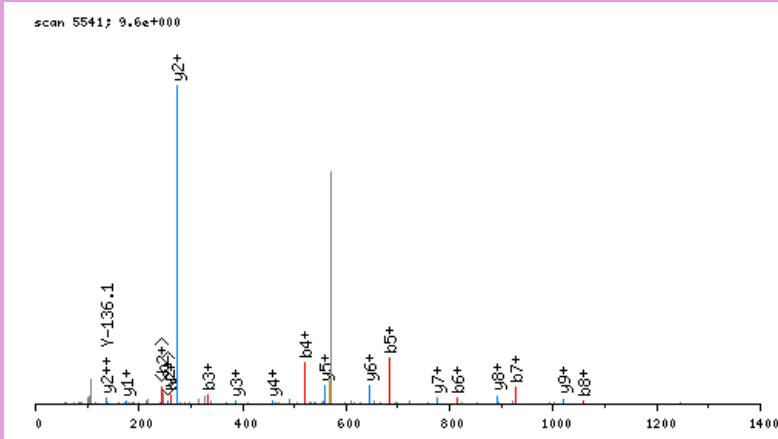

click image to zoom in; click top corners to zoom out [\[precursor±\]](#)

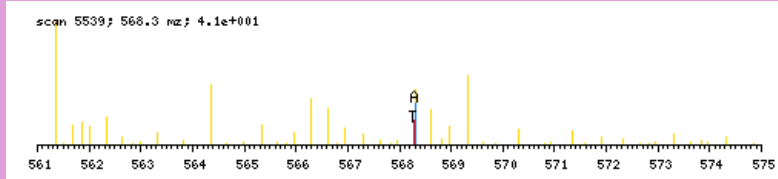

zoomed in precursor plot; T=theoretical m/z, A=acquired m/z

| b <sup>+</sup> | #  | AA # | y <sup>+</sup> | y <sup>2+</sup> |
|----------------|----|------|----------------|-----------------|
| 134.1393       | 1  | V 14 |                |                 |
| 262.1979       | 2  | Q 13 | 1569.6644      | 785.3361        |
| 333.2350       | 3  | A 12 | 1441.6058      | 721.3068        |
| 519.3143       | 4  | W 11 | 1370.5687      | 685.7883        |
| 682.3776       | 5  | Y 10 | 1184.4894      | 592.7486        |
| 813.4181       | 6  | M 9  | 1021.4260      | 511.2169        |
| 928.4451       | 7  | D 8  | 890.3856       | 445.6967        |
| 1057.4877      | 8  | E 7  | 775.3586       | 388.1832        |
| 1144.5197      | 9  | S 6  | 646.3160       | 323.6619        |
| 1245.5674      | 10 | T 5  | 559.2840       | 280.1459        |
| 1316.6045      | 11 | A 4  | 458.2363       | 229.6221        |
| 1431.6314      | 12 | D 3  | 387.1992       | 194.1035        |
| 1528.6842      | 13 | P 2  | 272.1723       | 136.5900        |
|                | 14 | R 1  | 175.1195       | 88.0637         |

N-term:+35.07

VQLQQSGAELVK, MH+ 1355.7899, m/z 452.6015  
 L OSG37 P180811 230811-s1.04750.04750.3.dta

scan 4750; 6.1e+000

X-range:

-

MassTol: Y-zoom:

MassType:

AVG  MONO

Axis:

1  2

Label:

I  M  -

Ions:

a  +  2+  3+

b  +  2+  3+

c  +  2+  3+

x  +  2+  3+

y  +  2+  3+

z  +  2+  3+

hide H<sub>2</sub>O/NH<sub>3</sub>

zoom 112-122

GO

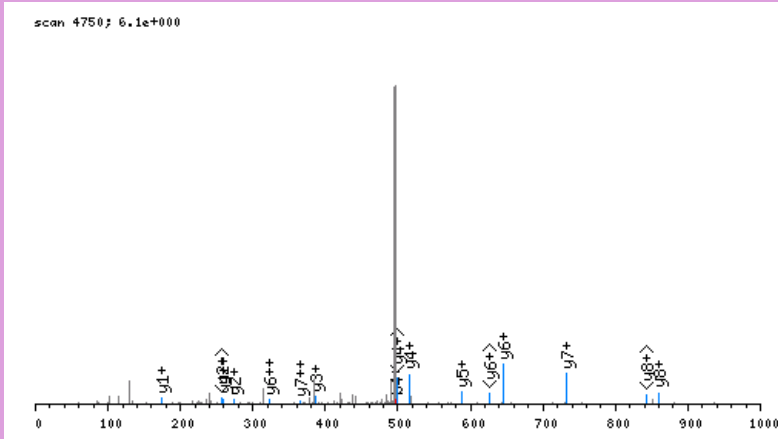

click image to zoom in; click top corners to zoom out [\[precursor±\]](#)

scan 4749; 452.6 m/z; 3.0e+002

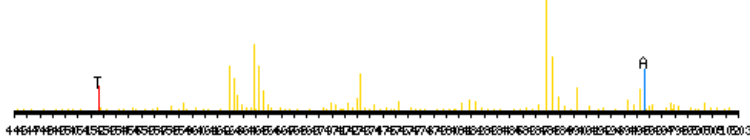

zoomed in precursor plot; T=theoretical m/z, A=acquired m/z

| b <sup>+</sup> | #  | AA # | y <sup>+</sup> | y <sup>2+</sup> |
|----------------|----|------|----------------|-----------------|
| 128.1075       | 1  | V 12 |                |                 |
| 256.1661       | 2  | Q 11 | 1228.6902      | 614.8490        |
| 369.2502       | 3  | L 10 | 1100.6316      | 550.8197        |
| 497.3087       | 4  | Q 9  | 987.5475       | 494.2777        |
| 625.3673       | 5  | Q 8  | 859.4889       | 430.2484        |
| 712.3993       | 6  | S 7  | 731.4304       | 366.2191        |
| 769.4208       | 7  | G 6  | 644.3983       | 322.7031        |
| 840.4579       | 8  | A 5  | 587.3769       | 294.1923        |
| 969.5005       | 9  | E 4  | 516.3398       | 258.6738        |
| 1082.5846      | 10 | L 3  | 387.2972       | 194.1525        |
| 1181.6530      | 11 | V 2  | 274.2131       | 137.6105        |
|                | 12 | K 1  | 175.1447       | 88.0763         |

N-term:+29.04 K(12):+156.13

VRAPQVYILPPPAEQLSR, MH+ 2068.2131, m/z 690.0759  
 H OSG39 P180811 230811-s1.05922.05922.3.dta

X-range:

-

MassTol: Y-zoom:

MassType:

AVG  MONO

Axis:

1  2

Label:

I  M  -

Ions:

a  +  2+  3+

b  +  2+  3+

c  +  2+  3+

x  +  2+  3+

y  +  2+  3+

z  +  2+  3+

hide H<sub>2</sub>O/NH<sub>3</sub>

zoom 112-122

GO

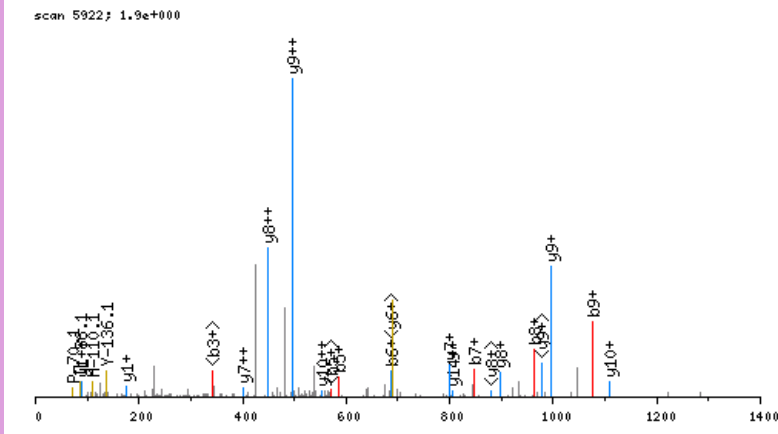

click image to zoom in; click top corners to zoom out [\[precursor±\]](#)

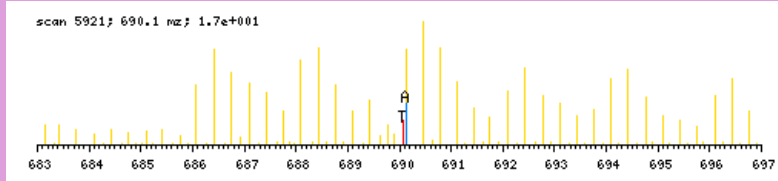

zoomed in precursor plot; T=theoretical m/z, A=acquired m/z

| b <sup>+</sup> | #  | AA # | y <sup>+</sup> | y <sup>2+</sup> |
|----------------|----|------|----------------|-----------------|
| 134.1393       | 1  | V 18 |                |                 |
| 290.2404       | 2  | R 17 | 1935.0816      | 968.0447        |
| 361.2775       | 3  | A 16 | 1778.9805      | 889.9942        |
| 458.3303       | 4  | P 15 | 1707.9434      | 854.4756        |
| 586.3889       | 5  | Q 14 | 1610.8906      | 805.9492        |
| 685.4573       | 6  | V 13 | 1482.8320      | 741.9199        |
| 848.5206       | 7  | Y 12 | 1383.7636      | 692.3857        |
| 961.6047       | 8  | I 11 | 1220.7003      | 610.8541        |
| 1074.6888      | 9  | L 10 | 1107.6162      | 554.3120        |
| 1171.7415      | 10 | P 9  | 994.5322       | 497.7700        |
| 1268.7943      | 11 | P 8  | 897.4794       | 449.2436        |
| 1365.8470      | 12 | P 7  | 800.4266       | 400.7172        |
| 1436.8842      | 13 | A 6  | 703.3739       | 352.1909        |
| 1565.9267      | 14 | E 5  | 632.3368       | 316.6723        |
| 1693.9853      | 15 | Q 4  | 503.2942       | 252.1510        |
| 1807.0694      | 16 | L 3  | 375.2356       | 188.1217        |
| 1894.1014      | 17 | S 2  | 262.1515       | 131.5797        |
|                | 18 | R 1  | 175.1195       | 88.0637         |

N-term:+35.07

VRDNQSGSLLFIGR, MH+ 1595.9081, m/z 532.6409  
 H OSG40 P180811 230811-s1.06091.06091.3.dta

scan 6091; 4.6e+000

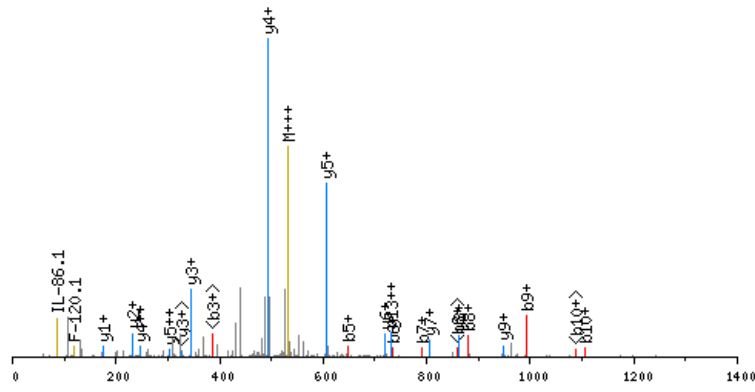

click image to zoom in; click top corners to zoom out [\[precursor±\]](#)

scan 6089; 532.6 m/z; 4.5e+001

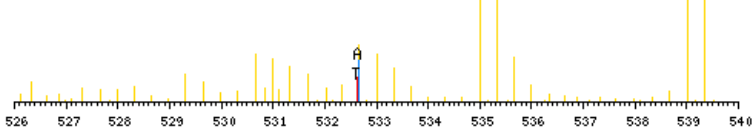

zoomed in precursor plot; T=theoretical m/z, A=acquired m/z

X-range:

-

MassTol: Y-zoom:

MassType:

AVG  MONO

Axis:

1  2

Label:

I  M  -

Ions:

a  +  2+  3+

b  +  2+  3+

c  +  2+  3+

x  +  2+  3+

y  +  2+  3+

z  +  2+  3+

hide H<sub>2</sub>O/NH<sub>3</sub>

zoom 112-122

GO

| b <sup>+</sup> | #  | AA # | y <sup>+</sup> | y <sup>2+</sup> |
|----------------|----|------|----------------|-----------------|
| 134.1393       | 1  | V 14 |                |                 |
| 290.2404       | 2  | R 13 | 1462.7767      | 731.8922        |
| 405.2674       | 3  | D 12 | 1306.6755      | 653.8417        |
| 519.3103       | 4  | N 11 | 1191.6486      | 596.3282        |
| 647.3689       | 5  | Q 10 | 1077.6057      | 539.3067        |
| 734.4009       | 6  | S 9  | 949.5471       | 475.2775        |
| 791.4224       | 7  | G 8  | 862.5151       | 431.7614        |
| 878.4544       | 8  | S 7  | 805.4936       | 403.2507        |
| 991.5385       | 9  | L 6  | 718.4616       | 359.7347        |
| 1104.6225      | 10 | L 5  | 605.3775       | 303.1927        |
| 1251.6909      | 11 | F 4  | 492.2934       | 246.6506        |
| 1364.7750      | 12 | I 3  | 345.2250       | 173.1164        |
| 1421.7965      | 13 | G 2  | 232.1410       | 116.5744        |
|                | 14 | R 1  | 175.1195       | 88.0637         |

N-term:+35.07

VREGDVLTLLESER, MH+ 1643.8968, m/z 548.6371  
 L OSG40 P180811 230811-s1.08295.08295.3.dta

X-range:

-

MassTol: Y-zoom:

MassType:

AVG  MONO

Axis:

1  2

Label:

I  M  -

Ions:

a  +  2+  3+

b  +  2+  3+

c  +  2+  3+

x  +  2+  3+

y  +  2+  3+

z  +  2+  3+

hide H<sub>2</sub>O/NH<sub>3</sub>

zoom 112-122

GO

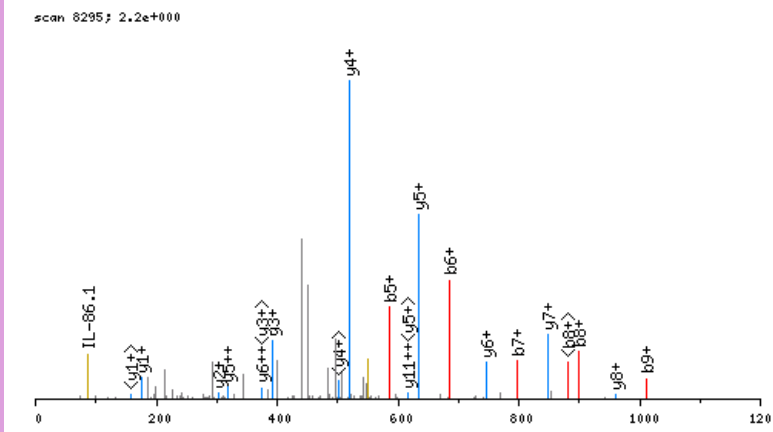

click image to zoom in; click top corners to zoom out [\[precursor±\]](#)

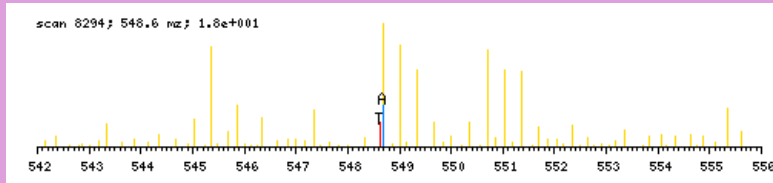

zoomed in precursor plot; T=theoretical m/z, A=acquired m/z

| b <sup>+</sup> | #  | AA # | y <sup>+</sup> | y <sup>2+</sup> |
|----------------|----|------|----------------|-----------------|
| 128.1075       | 1  | V 14 |                |                 |
| 284.2086       | 2  | R 13 | 1516.7971      | 758.9025        |
| 413.2512       | 3  | E 12 | 1360.6960      | 680.8519        |
| 470.2727       | 4  | G 11 | 1231.6534      | 616.3306        |
| 585.2996       | 5  | D 10 | 1174.6319      | 587.8199        |
| 684.3680       | 6  | V 9  | 1059.6050      | 530.3064        |
| 797.4521       | 7  | L 8  | 960.5366       | 480.7722        |
| 898.4998       | 8  | T 7  | 847.4525       | 424.2302        |
| 1011.5838      | 9  | L 6  | 746.4048       | 373.7063        |
| 1124.6679      | 10 | L 5  | 633.3208       | 317.1643        |
| 1253.7105      | 11 | E 4  | 520.2367       | 260.6223        |
| 1340.7425      | 12 | S 3  | 391.1941       | 196.1010        |
| 1469.7851      | 13 | E 2  | 304.1621       | 152.5850        |
|                | 14 | R 1  | 175.1195       | 88.0637         |

N-term:+29.04

VRPPVQVYGIEGR, MH+ 1497.8541, m/z 499.9562  
 L OSG40 P180811 230811-s1.05341.05341.3.dta

X-range:

-

MassTol: Y-zoom:

MassType:

AVG  MONO

Axis:

1  2

Label:

I  M  -

Ions:

a  +  2+  3+

b  +  2+  3+

c  +  2+  3+

x  +  2+  3+

y  +  2+  3+

z  +  2+  3+

hide H<sub>2</sub>O/NH<sub>3</sub>

zoom 112-122

GO

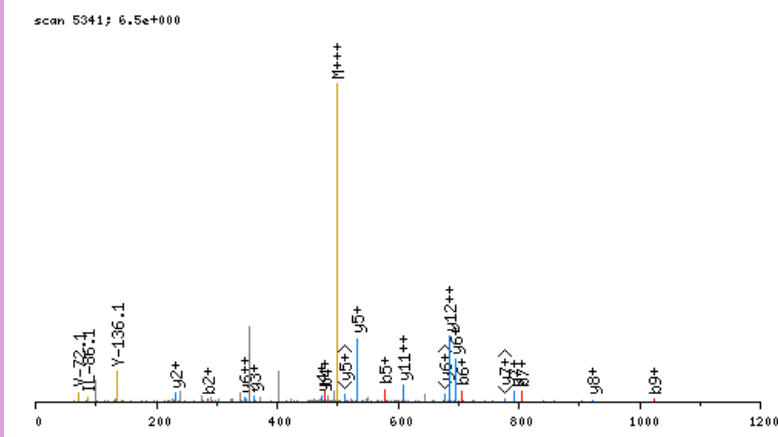

click image to zoom in; click top corners to zoom out [\[precursor±\]](#)

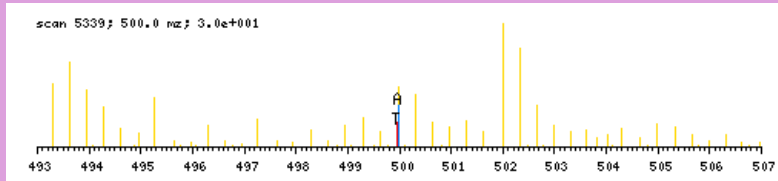

zoomed in precursor plot; T=theoretical m/z, A=acquired m/z

| b <sup>+</sup> | #  | AA # | y <sup>+</sup> | y <sup>2+</sup> |
|----------------|----|------|----------------|-----------------|
| 128.1075       | 1  | V 13 |                |                 |
| 284.2086       | 2  | R 12 | 1370.7545      | 685.8811        |
| 381.2614       | 3  | P 11 | 1214.6533      | 607.8306        |
| 478.3142       | 4  | P 10 | 1117.6006      | 559.3042        |
| 577.3826       | 5  | V 9  | 1020.5478      | 510.7778        |
| 705.4411       | 6  | Q 8  | 921.4794       | 461.2436        |
| 804.5096       | 7  | V 7  | 793.4208       | 397.2143        |
| 967.5729       | 8  | Y 6  | 694.3524       | 347.6801        |
| 1024.5944      | 9  | G 5  | 531.2891       | 266.1485        |
| 1137.6784      | 10 | I 4  | 474.2676       | 237.6377        |
| 1266.7210      | 11 | E 3  | 361.1836       | 181.0957        |
| 1323.7425      | 12 | G 2  | 232.1410       | 116.5744        |
|                | 13 | R 1  | 175.1195       | 88.0637         |

N-term:+29.04



VSDAISTQYPPVVDHEFDVAVVVGAGGAGLR, MH+ 2963.5327, m/z 741.6386  
H OSG38 P180811 230811-s1.07810.07810.4.dta

scan 7810; 7.2e+000

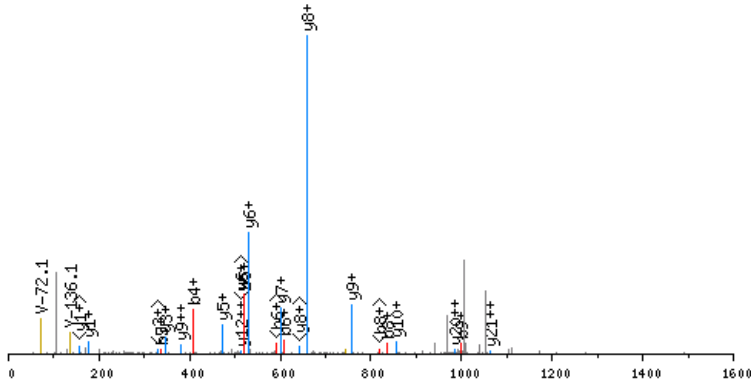

click image to zoom in; click top corners to zoom out [precursor±]

scan 7809; 741.6 m/z; 3.5e+001

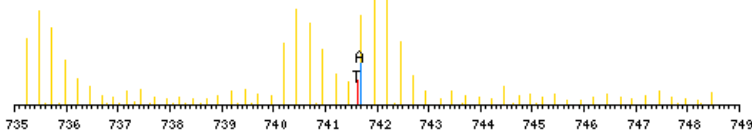

zoomed in precursor plot; T=theoretical m/z, A=acquired m/z

X-range:

0 - 0

MassTol: Y-zoom:

0. 1.

MassType:

AVG  MONO

Axis:

1  2

Label:

I  M  -

Ions:

a  +  2+  3+

b  +  2+  3+

c  +  2+  3+

x  +  2+  3+

y  +  2+  3+

z  +  2+  3+

hide H<sub>2</sub>O/NH<sub>3</sub>

zoom 112-122

GO

| b <sup>+</sup> | #  | AA # | y <sup>+</sup> | y <sup>2+</sup> |
|----------------|----|------|----------------|-----------------|
| 134.1393       | 1  | V 29 |                |                 |
| 221.1713       | 2  | S 28 | 2830.4012      | 1415.7045       |
| 336.1983       | 3  | D 27 | 2743.3691      | 1372.1885       |
| 407.2354       | 4  | A 26 | 2628.3422      | 1314.6750       |
| 520.3195       | 5  | I 25 | 2557.3051      | 1279.1565       |
| 607.3515       | 6  | S 24 | 2444.2210      | 1222.6144       |
| 708.3992       | 7  | T 23 | 2357.1890      | 1179.0984       |
| 836.4577       | 8  | Q 22 | 2256.1413      | 1128.5746       |
| 999.5211       | 9  | Y 21 | 2128.0827      | 1064.5453       |
| 1096.5738      | 10 | P 20 | 1965.0194      | 983.0136        |
| 1195.6423      | 11 | V 19 | 1867.9666      | 934.4872        |
| 1294.7107      | 12 | V 18 | 1768.8982      | 884.9530        |
| 1409.7376      | 13 | D 17 | 1669.8298      | 835.4188        |
| 1546.7965      | 14 | H 16 | 1554.8029      | 777.9053        |
| 1675.8391      | 15 | E 15 | 1417.7440      | 709.3759        |
| 1822.9075      | 16 | F 14 | 1288.7014      | 644.8546        |
| 1937.9345      | 17 | D 13 | 1141.6329      | 571.3204        |
| 2008.9716      | 18 | A 12 | 1026.6060      | 513.8069        |
| 2108.0400      | 19 | V 11 | 955.5689       | 478.2884        |
| 2207.1084      | 20 | V 10 | 856.5005       | 428.7542        |
| 2306.1768      | 21 | V 9  | 757.4321       | 379.2199        |
| 2363.1983      | 22 | G 8  | 658.3636       | 329.6857        |
| 2434.2354      | 23 | A 7  | 601.3422       | 301.1750        |
| 2491.2569      | 24 | G 6  | 530.3051       | 265.6564        |
| 2548.2783      | 25 | G 5  | 473.2836       | 237.1457        |
| 2619.3154      | 26 | A 4  | 416.2621       | 208.6350        |
| 2676.3369      | 27 | G 3  | 345.2250       | 173.1164        |
| 2789.4210      | 28 | L 2  | 288.2036       | 144.6057        |
|                | 29 | R 1  | 175.1195       | 88.0637         |

N-term:+35.07

VSDLSTADGFSASYR, MH+ 1708.8606, m/z 570.2917  
H OSG37 P180811 230811-s1.06245.06245.3.dta

X-range:

-

MassTol: Y-zoom:

MassType:

AVG  MONO

Axis:

1  2

Label:

I  M  -

Ions:

a  +  2+  3+

b  +  2+  3+

c  +  2+  3+

x  +  2+  3+

y  +  2+  3+

z  +  2+  3+

hide H<sub>2</sub>O/NH<sub>3</sub>

zoom 112-122

GO

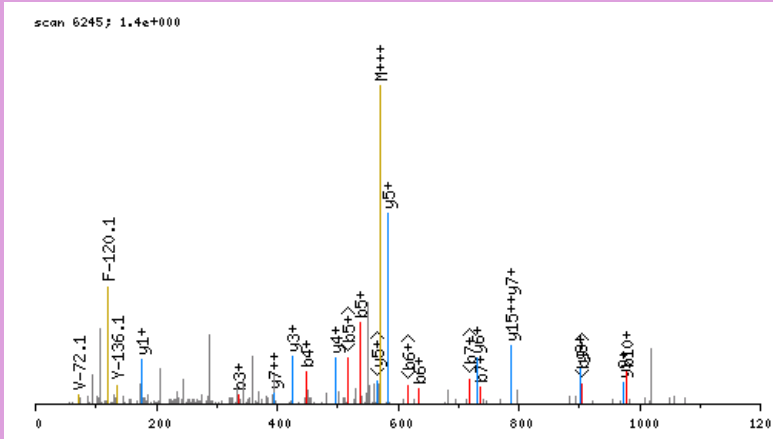

click image to zoom in; click top corners to zoom out [\[precursor±\]](#)

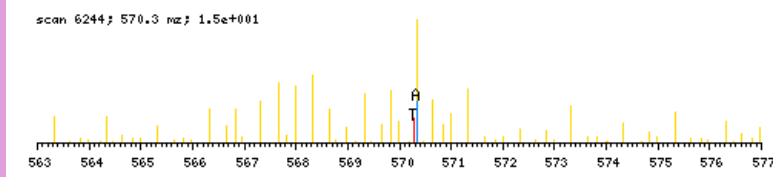

zoomed in precursor plot; T=theoretical m/z, A=acquired m/z

| b <sup>+</sup> | #  | AA # | y <sup>+</sup> | y <sup>2+</sup> |
|----------------|----|------|----------------|-----------------|
| 134.1393       | 1  | V    | 16             |                 |
| 221.1713       | 2  | S    | 15             | 1575.7291       |
| 336.1983       | 3  | D    | 14             | 1488.6971       |
| 449.2823       | 4  | L    | 13             | 1373.6701       |
| 536.3144       | 5  | S    | 12             | 1260.5861       |
| 635.3828       | 6  | V    | 11             | 1173.5540       |
| 736.4305       | 7  | T    | 10             | 1074.4856       |
| 807.4676       | 8  | A    | 9              | 973.4379        |
| 922.4945       | 9  | D    | 8              | 902.4008        |
| 979.5160       | 10 | G    | 7              | 787.3739        |
| 1126.5844      | 11 | F    | 6              | 730.3524        |
| 1213.6164      | 12 | S    | 5              | 583.2840        |
| 1284.6535      | 13 | A    | 4              | 496.2520        |
| 1371.6856      | 14 | S    | 3              | 425.2149        |
| 1534.7489      | 15 | Y    | 2              | 338.1828        |
|                | 16 | R    | 1              | 175.1195        |

N-term:+35.07

VSDNELQELSTQGSR, MH+ 1696.8566, m/z 566.2904  
 H OSG37 P180811 230811-s1.04862.04862.3.dta

X-range:

-

MassTol: Y-zoom:

MassType:

AVG  MONO

Axis:

1  2

Label:

I  M  -

Ions:

a  +  2+  3+

b  +  2+  3+

c  +  2+  3+

x  +  2+  3+

y  +  2+  3+

z  +  2+  3+

hide H<sub>2</sub>O/NH<sub>3</sub>

zoom 112-122

GO

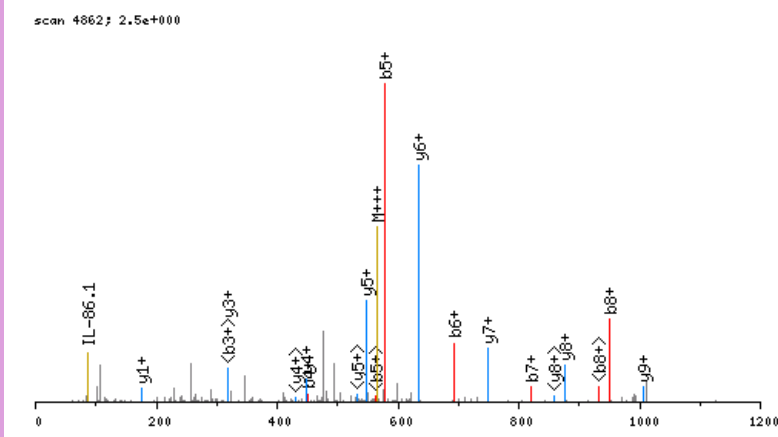

click image to zoom in; click top corners to zoom out [\[precursor±\]](#)

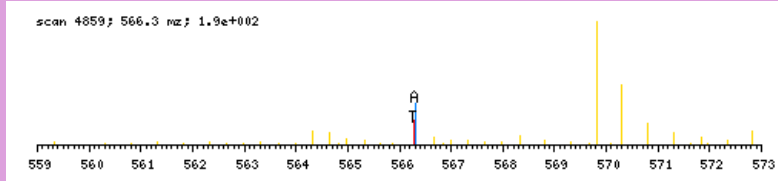

zoomed in precursor plot; T=theoretical m/z, A=acquired m/z

| b <sup>+</sup> | #  | AA # | y <sup>+</sup> | y <sup>2+</sup> |
|----------------|----|------|----------------|-----------------|
| 134.1393       | 1  | V    | 15             |                 |
| 221.1713       | 2  | S    | 14             | 1563.7251       |
| 336.1983       | 3  | D    | 13             | 1476.6930       |
| 450.2412       | 4  | N    | 12             | 1361.6661       |
| 579.2838       | 5  | E    | 11             | 1247.6232       |
| 692.3679       | 6  | L    | 10             | 1118.5806       |
| 820.4264       | 7  | Q    | 9              | 1005.4965       |
| 949.4690       | 8  | E    | 8              | 877.4379        |
| 1062.5531      | 9  | L    | 7              | 748.3953        |
| 1149.5851      | 10 | S    | 6              | 635.3113        |
| 1250.6328      | 11 | T    | 5              | 548.2792        |
| 1378.6914      | 12 | Q    | 4              | 447.2316        |
| 1435.7129      | 13 | G    | 3              | 319.1730        |
| 1522.7449      | 14 | S    | 2              | 262.1515        |
|                | 15 | R    | 1              | 175.1195        |

N-term:+35.07

VSDSSDSMDTGAGSIR, MH+ 1612.7124, m/z 806.8599  
 L OSG37 P180811 230811-s1.02967.02967.2.dta

X-range:

-

MassTol: Y-zoom:

MassType:

AVG  MONO

Axis:

1  2

Label:

I  M  -

Ions:

a  +  2+  3+

b  +  2+  3+

c  +  2+  3+

x  +  2+  3+

y  +  2+  3+

z  +  2+  3+

hide H<sub>2</sub>O/NH<sub>3</sub>

zoom 112-122

GO

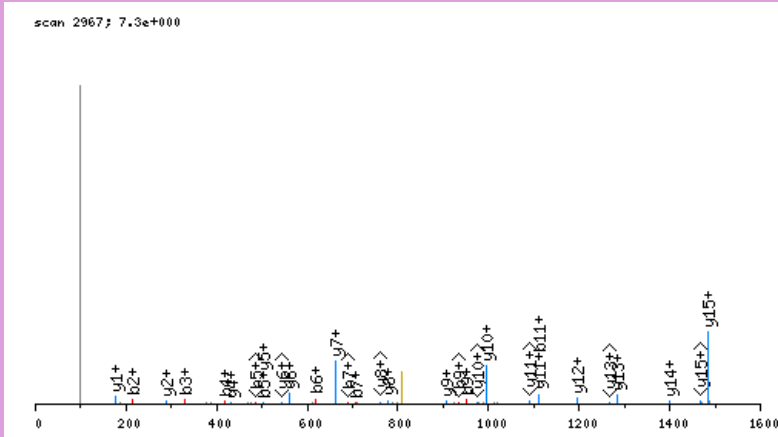

click image to zoom in; click top corners to zoom out [\[precursor±\]](#)

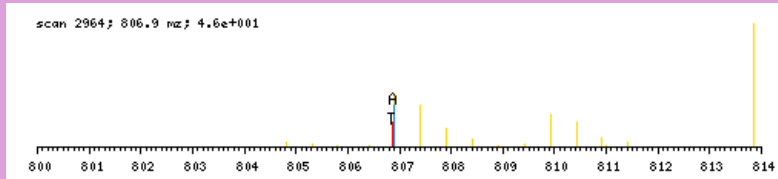

zoomed in precursor plot; T=theoretical m/z, A=acquired m/z

| b <sup>+</sup> | #  | AA # | y <sup>+</sup> | y <sup>2+</sup> |
|----------------|----|------|----------------|-----------------|
| 128.1075       | 1  | V 16 |                |                 |
| 215.1395       | 2  | S 15 | 1485.6127      | 743.3103        |
| 330.1665       | 3  | D 14 | 1398.5807      | 699.7943        |
| 417.1985       | 4  | S 13 | 1283.5538      | 642.2808        |
| 504.2305       | 5  | S 12 | 1196.5217      | 598.7648        |
| 619.2575       | 6  | D 11 | 1109.4897      | 555.2488        |
| 706.2895       | 7  | S 10 | 994.4628       | 497.7353        |
| 837.3300       | 8  | M 9  | 907.4307       | 454.2193        |
| 952.3569       | 9  | D 8  | 776.3903       | 388.6990        |
| 1053.4046      | 10 | T 7  | 661.3633       | 331.1856        |
| 1110.4261      | 11 | G 6  | 560.3156       | 280.6617        |
| 1181.4632      | 12 | A 5  | 503.2942       | 252.1510        |
| 1238.4847      | 13 | G 4  | 432.2571       | 216.6324        |
| 1325.5167      | 14 | S 3  | 375.2356       | 188.1217        |
| 1438.6008      | 15 | I 2  | 288.2036       | 144.6057        |
|                | 16 | R 1  | 175.1195       | 88.0637         |

N-term:+29.04

VSEGSAAAMAGESMAQR, MH+ 1680.7685, m/z 560.9277  
 L OSG37 P180811 230811-s1.04440.04440.3.dta

X-range:

-

MassTol: Y-zoom:

MassType:

AVG  MONO

Axis:

1  2

Label:

I  M  -

Ions:

a  +  2+  3+

b  +  2+  3+

c  +  2+  3+

x  +  2+  3+

y  +  2+  3+

z  +  2+  3+

hide H<sub>2</sub>O/NH<sub>3</sub>

zoom 112-122

GO

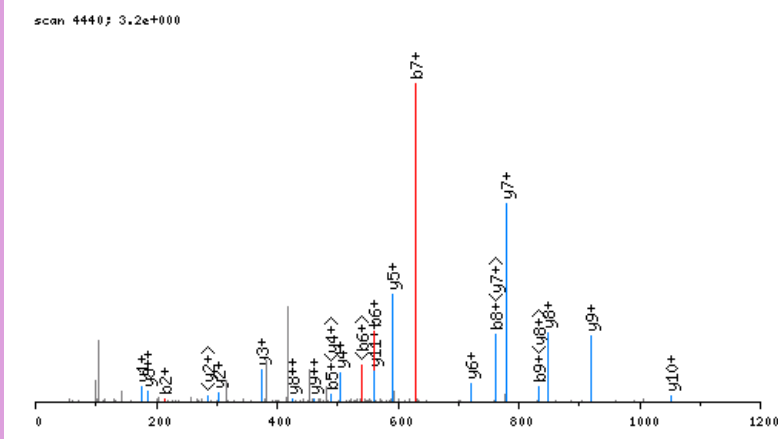

click image to zoom in; click top corners to zoom out [\[precursor±\]](#)

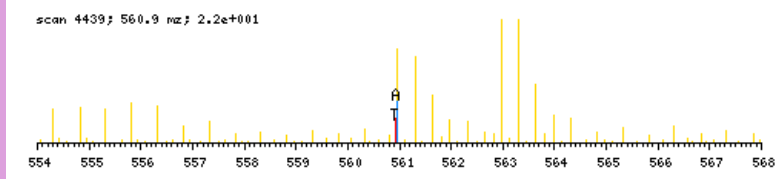

zoomed in precursor plot; T=theoretical m/z, A=acquired m/z

| b <sup>+</sup> | #  | AA # | y <sup>+</sup> | y <sup>2+</sup> |
|----------------|----|------|----------------|-----------------|
| 128.1075       | 1  | V 17 |                |                 |
| 215.1395       | 2  | S 16 | 1553.6688      | 777.3383        |
| 344.1821       | 3  | E 15 | 1466.6368      | 733.8223        |
| 401.2036       | 4  | G 14 | 1337.5942      | 669.3010        |
| 488.2356       | 5  | S 13 | 1280.5727      | 640.7903        |
| 559.2727       | 6  | A 12 | 1193.5407      | 597.2743        |
| 630.3099       | 7  | A 11 | 1122.5036      | 561.7557        |
| 761.3503       | 8  | M 10 | 1051.4665      | 526.2371        |
| 832.3875       | 9  | A 9  | 920.4260       | 460.7169        |
| 903.4246       | 10 | A 8  | 849.3889       | 425.1984        |
| 960.4460       | 11 | G 7  | 778.3518       | 389.6798        |
| 1089.4886      | 12 | E 6  | 721.3303       | 361.1691        |
| 1176.5207      | 13 | S 5  | 592.2877       | 296.6478        |
| 1307.5611      | 14 | M 4  | 505.2557       | 253.1318        |
| 1378.5983      | 15 | A 3  | 374.2152       | 187.6115        |
| 1506.6568      | 16 | Q 2  | 303.1781       | 152.0930        |
|                | 17 | R 1  | 175.1195       | 88.0637         |

N-term:+29.04

VSGEHMDLTTCPPLAAGGQEKLR, MH+ 2554.2757, m/z 639.3244  
L OSG40 P180811 230811-s1.05685.05685.4.dta

X-range:

-

MassTol: Y-zoom:

MassType:

AVG  MONO

Axis:

1  2

Label:

I  M  -

Ions:

a  +  2+  3+

b  +  2+  3+

c  +  2+  3+

x  +  2+  3+

y  +  2+  3+

z  +  2+  3+

hide H<sub>2</sub>O/NH<sub>3</sub>

zoom 112-122

GO

scan 5685; 2.7e+000

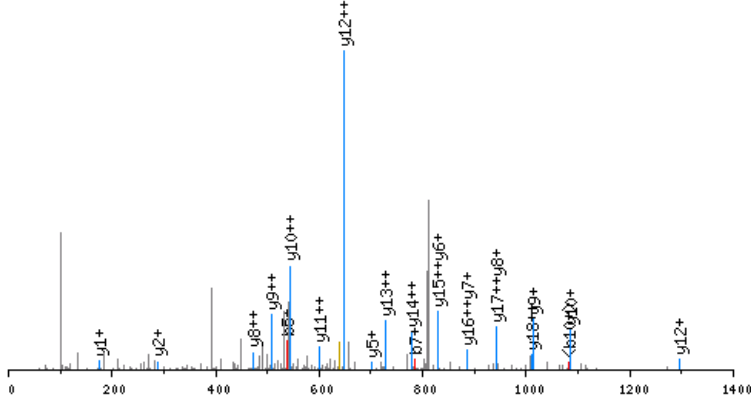

click image to zoom in; click top corners to zoom out [\[precursor±\]](#)

scan 5684; 639.3 m/z; 2.3e+001

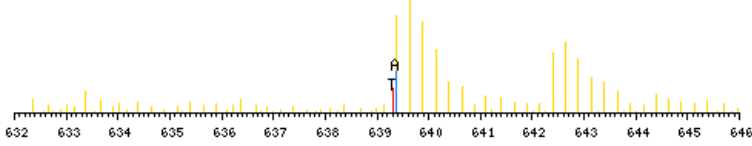

zoomed in precursor plot; T=theoretical m/z, A=acquired m/z

| b <sup>+</sup> | #  | AA # | y <sup>+</sup> | y <sup>2+</sup> |
|----------------|----|------|----------------|-----------------|
| 128.1075       | 1  | V 23 |                |                 |
| 215.1395       | 2  | S 22 | 2427.1760      | 1214.0919       |
| 272.1610       | 3  | G 21 | 2340.1440      | 1170.5759       |
| 401.2036       | 4  | E 20 | 2283.1225      | 1142.0652       |
| 538.2625       | 5  | H 19 | 2154.0800      | 1077.5439       |
| 669.3030       | 6  | M 18 | 2017.0210      | 1009.0144       |
| 784.3299       | 7  | D 17 | 1885.9806      | 943.4942        |
| 897.4140       | 8  | L 16 | 1770.9536      | 885.9807        |
| 998.4617       | 9  | T 15 | 1657.8696      | 829.4387        |
| 1099.5094      | 10 | T 14 | 1556.8219      | 778.9148        |
| 1259.5400      | 11 | C 13 | 1455.7742      | 728.3910        |
| 1356.5927      | 12 | P 12 | 1295.7436      | 648.3757        |
| 1469.6768      | 13 | L 11 | 1198.6908      | 599.8493        |
| 1540.7139      | 14 | A 10 | 1085.6068      | 543.3073        |
| 1611.7510      | 15 | A 9  | 1014.5697      | 507.7887        |
| 1668.7725      | 16 | G 8  | 943.5325       | 472.2702        |
| 1725.7939      | 17 | G 7  | 886.5111       | 443.7595        |
| 1853.8525      | 18 | Q 6  | 829.4896       | 415.2487        |
| 1981.9111      | 19 | Q 5  | 701.4310       | 351.2194        |
| 2110.9537      | 20 | E 4  | 573.3725       | 287.1901        |
| 2267.0800      | 21 | K 3  | 444.3299       | 222.6688        |
| 2380.1641      | 22 | L 2  | 288.2036       | 144.6057        |
|                | 23 | R 1  | 175.1195       | 88.0637         |

N-term:+29.04 C(11):+160.03  
K(21):+156.13

VSITPAEVGVLVGKDR, MH+ 1708.0645, m/z 570.0264  
 H OSG39 P180811 230811-s1.06093.06093.3.dta

X-range:

-

MassTol: Y-zoom:

MassType:

AVG  MONO

Axis:

1  2

Label:

I  M  -

Ions:

a  +  2+  3+

b  +  2+  3+

c  +  2+  3+

x  +  2+  3+

y  +  2+  3+

z  +  2+  3+

hide H<sub>2</sub>O/NH<sub>3</sub>

zoom 112-122

GO

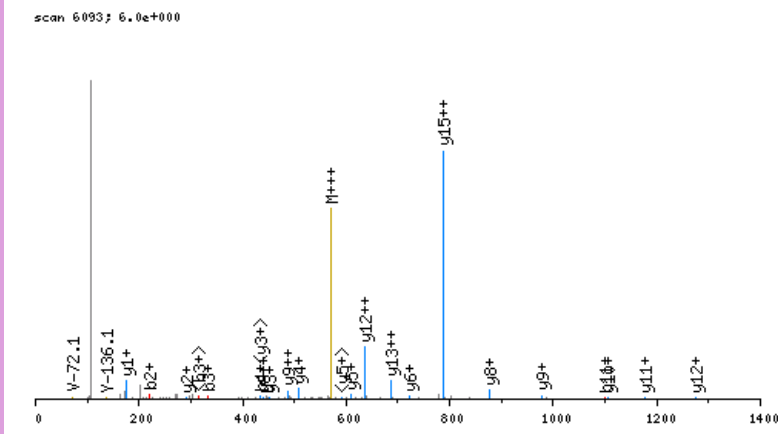

click image to zoom in; click top corners to zoom out [\[precursor±\]](#)

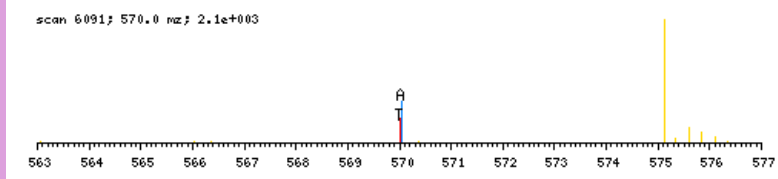

zoomed in precursor plot; T=theoretical m/z, A=acquired m/z

| b <sup>+</sup> | #  | AA # | y <sup>+</sup> | y <sup>2+</sup> |
|----------------|----|------|----------------|-----------------|
| 134.1393       | 1  | V    | 16             |                 |
| 221.1713       | 2  | S    | 15             | 1574.9330       |
| 334.2554       | 3  | I    | 14             | 1487.9010       |
| 435.3031       | 4  | T    | 13             | 1374.8169       |
| 532.3558       | 5  | P    | 12             | 1273.7692       |
| 603.3930       | 6  | A    | 11             | 1176.7165       |
| 732.4356       | 7  | E    | 10             | 1105.6794       |
| 831.5040       | 8  | V    | 9              | 976.6368        |
| 888.5254       | 9  | G    | 8              | 877.5684        |
| 987.5938       | 10 | V    | 7              | 820.5469        |
| 1100.6779      | 11 | L    | 6              | 721.4785        |
| 1199.7463      | 12 | V    | 5              | 608.3944        |
| 1256.7678      | 13 | G    | 4              | 509.3260        |
| 1418.9259      | 14 | K    | 3              | 452.3045        |
| 1533.9528      | 15 | D    | 2              | 290.1464        |
|                | 16 | R    | 1              | 175.1195        |

N-term:+35.07 K(14):+162.16

VSNELLEAFSQFGPIER, MH+ 2093.0555, m/z 698.3567  
 L OSG37 P180811 230811-s1.08816.08816.3.dta

X-range:

-

MassTol: Y-zoom:

MassType:

AVG  MONO

Axis:

1  2

Label:

I  M  -

Ions:

a  +  2+  3+

b  +  2+  3+

c  +  2+  3+

x  +  2+  3+

y  +  2+  3+

z  +  2+  3+

hide H<sub>2</sub>O/NH<sub>3</sub>

zoom 112-122

GO

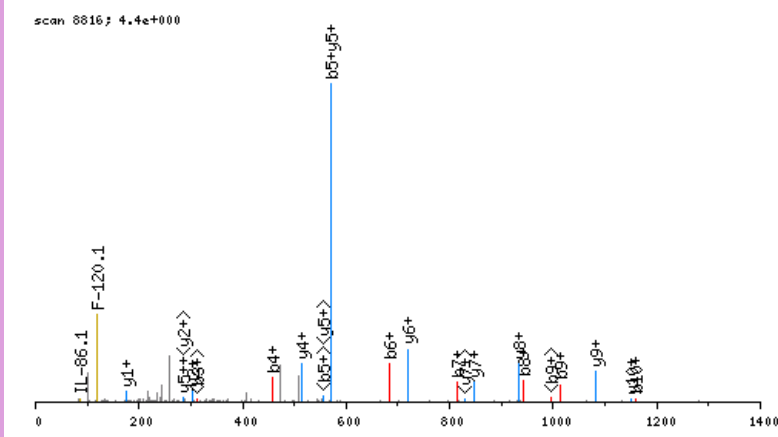

click image to zoom in; click top corners to zoom out [\[precursor±\]](#)

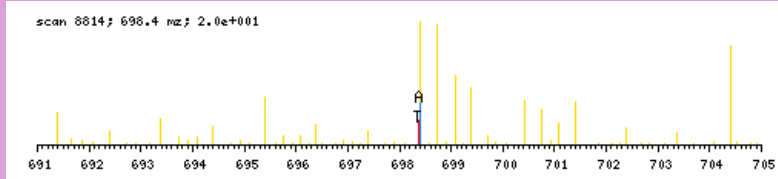

zoomed in precursor plot; T=theoretical m/z, A=acquired m/z

| b <sup>+</sup> | #  | AA # | y <sup>+</sup> | y <sup>2+</sup> |
|----------------|----|------|----------------|-----------------|
| 128.1075       | 1  | V 18 |                |                 |
| 215.1395       | 2  | S 17 | 1965.9558      | 983.4818        |
| 329.1825       | 3  | N 16 | 1878.9238      | 939.9658        |
| 458.2251       | 4  | E 15 | 1764.8808      | 882.9443        |
| 571.3091       | 5  | L 14 | 1635.8382      | 818.4230        |
| 684.3932       | 6  | L 13 | 1522.7542      | 761.8810        |
| 813.4358       | 7  | E 12 | 1409.6701      | 705.3390        |
| 942.4784       | 8  | E 11 | 1280.6275      | 640.8177        |
| 1013.5155      | 9  | A 10 | 1151.5849      | 576.2964        |
| 1160.5839      | 10 | F 9  | 1080.5478      | 540.7778        |
| 1247.6159      | 11 | S 8  | 933.4794       | 467.2436        |
| 1375.6745      | 12 | Q 7  | 846.4474       | 423.7276        |
| 1522.7429      | 13 | F 6  | 718.3888       | 359.6983        |
| 1579.7644      | 14 | G 5  | 571.3204       | 286.1641        |
| 1676.8172      | 15 | P 4  | 514.2989       | 257.6534        |
| 1789.9012      | 16 | I 3  | 417.2462       | 209.1270        |
| 1918.9438      | 17 | E 2  | 304.1621       | 152.5850        |
|                | 18 | R 1  | 175.1195       | 88.0637         |

N-term:+29.04



VSSELQIQSFVPECP, MH+ 2153.0760, m/z 718.3635  
 H OSG37 P180811 230811-s1.06562.06562.3.dta

X-range:

-

MassTol: Y-zoom:

MassType:

AVG  MONO

Axis:

1  2

Label:

I  M  -

Ions:

a  +  2+  3+

b  +  2+  3+

c  +  2+  3+

x  +  2+  3+

y  +  2+  3+

z  +  2+  3+

hide H<sub>2</sub>O/NH<sub>3</sub>

zoom 112-122

GO

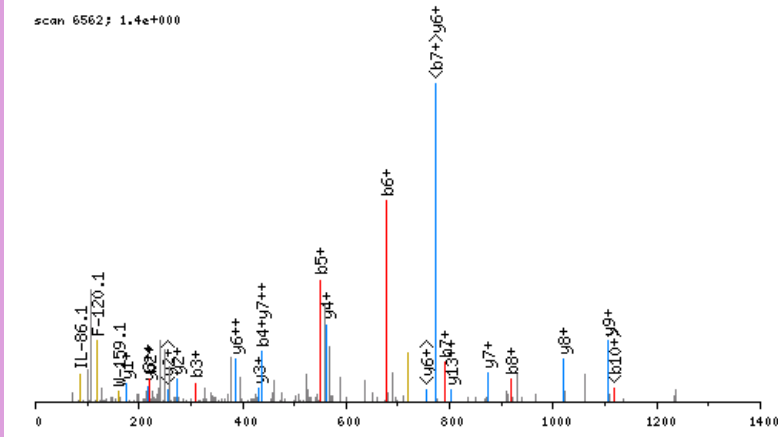

click image to zoom in; click top corners to zoom out [\[precursor±\]](#)

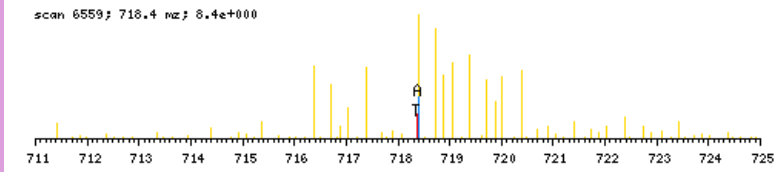

zoomed in precursor plot; T=theoretical m/z, A=acquired m/z

| b <sup>+</sup> | #  | AA # | y <sup>+</sup> | y <sup>2+</sup> |
|----------------|----|------|----------------|-----------------|
| 134.1393       | 1  | V    | 18             |                 |
| 221.1713       | 2  | S    | 17             | 2019.9445       |
| 308.2034       | 3  | S    | 16             | 1932.9125       |
| 437.2460       | 4  | E    | 15             | 1845.8805       |
| 550.3300       | 5  | L    | 14             | 1716.8379       |
| 678.3886       | 6  | Q    | 13             | 1603.7538       |
| 791.4727       | 7  | I    | 12             | 1475.6952       |
| 919.5312       | 8  | Q    | 11             | 1362.6112       |
| 1047.5898      | 9  | Q    | 10             | 1234.5526       |
| 1134.6219      | 10 | S    | 9              | 1106.4940       |
| 1281.6903      | 11 | F    | 8              | 1019.4620       |
| 1380.7587      | 12 | V    | 7              | 872.3936        |
| 1477.8114      | 13 | P    | 6              | 773.3252        |
| 1592.8384      | 14 | D    | 5              | 676.2724        |
| 1721.8810      | 15 | E    | 4              | 561.2455        |
| 1881.9116      | 16 | C    | 3              | 432.2029        |
| 1978.9643      | 17 | P    | 2              | 272.1723        |
|                | 18 | R    | 1              | 175.1195        |

N-term:+35.07 C(16) :+160.03

VSSGPTNASAFTER, MH+ 1451.7130, m/z 726.3601  
 L OSG37 P180811 230811-s1.03243.03243.2.dta

X-range:

-

MassTol: Y-zoom:

MassType:

AVG  MONO

Axis:

1  2

Label:

I  M  -

Ions:

a  +  2+  3+

b  +  2+  3+

c  +  2+  3+

x  +  2+  3+

y  +  2+  3+

z  +  2+  3+

hide H<sub>2</sub>O/NH<sub>3</sub>

zoom 112-122

GO

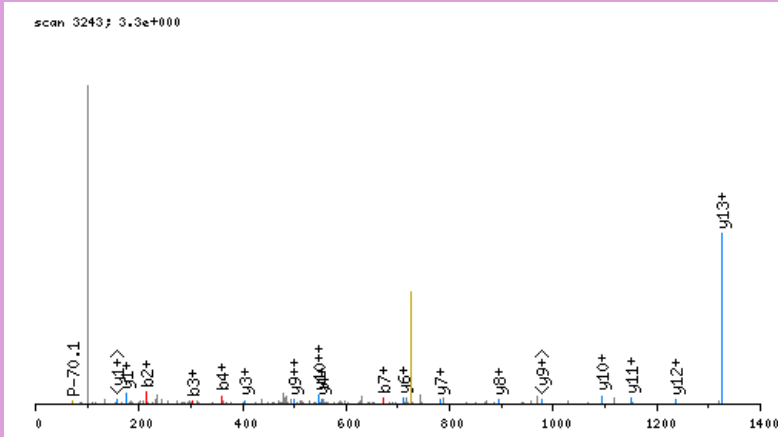

click image to zoom in; click top corners to zoom out [\[precursor±\]](#)

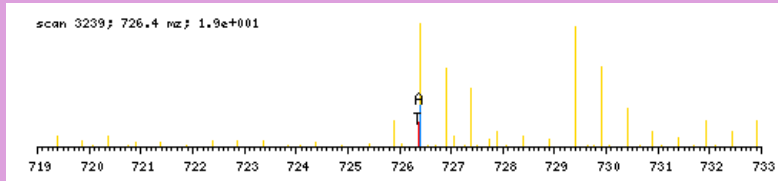

zoomed in precursor plot; T=theoretical m/z, A=acquired m/z

| b <sup>+</sup> | #  | AA # | y <sup>+</sup> | y <sup>2+</sup> |
|----------------|----|------|----------------|-----------------|
| 128.1075       | 1  | V 14 |                |                 |
| 215.1395       | 2  | S 13 | 1324.6133      | 662.8106        |
| 302.1716       | 3  | S 12 | 1237.5813      | 619.2946        |
| 359.1930       | 4  | G 11 | 1150.5493      | 575.7786        |
| 456.2458       | 5  | P 10 | 1093.5278      | 547.2678        |
| 557.2935       | 6  | T 9  | 996.4750       | 498.7414        |
| 671.3364       | 7  | N 8  | 895.4274       | 448.2176        |
| 742.3735       | 8  | A 7  | 781.3844       | 391.1961        |
| 829.4055       | 9  | S 6  | 710.3473       | 355.6776        |
| 900.4427       | 10 | A 5  | 623.3153       | 312.1616        |
| 1047.5111      | 11 | F 4  | 552.2782       | 276.6430        |
| 1148.5588      | 12 | T 3  | 405.2098       | 203.1088        |
| 1277.6013      | 13 | E 2  | 304.1621       | 152.5850        |
|                | 14 | R 1  | 175.1195       | 88.0637         |

N-term:+29.04

VIAAAPAMEPGPSVSPGFSR, MH+ 1906.9696, m/z 636.3281  
 L OSG41 P180811 230811-s1.05882.05882.3.dta

X-range:

-

MassTol: Y-zoom:

MassType:

AVG  MONO

Axis:

1  2

Label:

I  M  -

Ions:

a  +  2+  3+

b  +  2+  3+

c  +  2+  3+

x  +  2+  3+

y  +  2+  3+

z  +  2+  3+

hide H<sub>2</sub>O/NH<sub>3</sub>

zoom 112-122

GO

scan 5882; 1.9e+000

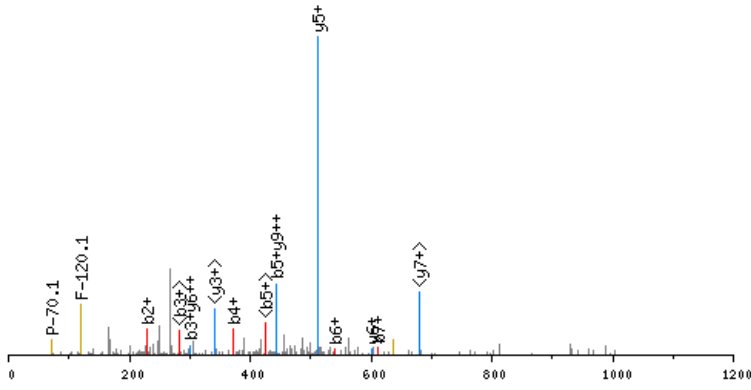

click image to zoom in; click top corners to zoom out [\[precursor±\]](#)

scan 5879; 636.3 m/z; 2.5e+002

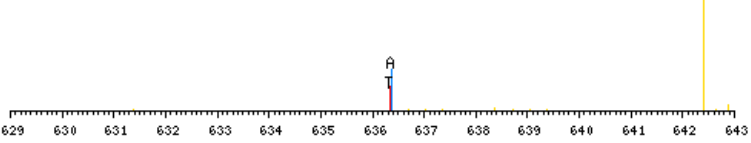

zoomed in precursor plot; T=theoretical m/z, A=acquired m/z

| b <sup>+</sup> | #  | AA # | y <sup>+</sup> | y <sup>2+</sup> |
|----------------|----|------|----------------|-----------------|
| 128.1075       | 1  | V 20 |                |                 |
| 229.1552       | 2  | T 19 | 1779.8700      | 890.4389        |
| 300.1923       | 3  | A 18 | 1678.8223      | 839.9151        |
| 371.2294       | 4  | A 17 | 1607.7852      | 804.3965        |
| 442.2665       | 5  | A 16 | 1536.7481      | 768.8779        |
| 539.3193       | 6  | P 15 | 1465.7109      | 733.3594        |
| 610.3564       | 7  | A 14 | 1368.6582      | 684.8330        |
| 741.3969       | 8  | M 13 | 1297.6211      | 649.3144        |
| 870.4395       | 9  | E 12 | 1166.5806      | 583.7942        |
| 967.4923       | 10 | P 11 | 1037.5380      | 519.2729        |
| 1024.5137      | 11 | G 10 | 940.4852       | 470.7465        |
| 1121.5665      | 12 | P 9  | 883.4638       | 442.2358        |
| 1208.5985      | 13 | S 8  | 786.4110       | 393.7094        |
| 1307.6669      | 14 | V 7  | 699.3790       | 350.1934        |
| 1394.6990      | 15 | S 6  | 600.3105       | 300.6592        |
| 1491.7517      | 16 | P 5  | 513.2785       | 257.1432        |
| 1548.7732      | 17 | G 4  | 416.2258       | 208.6168        |
| 1645.8259      | 18 | P 3  | 359.2043       | 180.1061        |
| 1732.8580      | 19 | S 2  | 262.1515       | 131.5797        |
|                | 20 | R 1  | 175.1195       | 88.0637         |

N-term:+29.04

VTDVDDVQPIASLPGVAR, MH+ 1977.0657, m/z 659.6934  
 L OSG36 P180811 230811-s1.05063.05063.3.dta

X-range:

-

MassTol: Y-zoom:

MassType:

AVG  MONO

Axis:

1  2

Label:

I  M  -

Ions:

a  +  2+  3+

b  +  2+  3+

c  +  2+  3+

x  +  2+  3+

y  +  2+  3+

z  +  2+  3+

hide H<sub>2</sub>O/NH<sub>3</sub>

zoom 112-122

GO

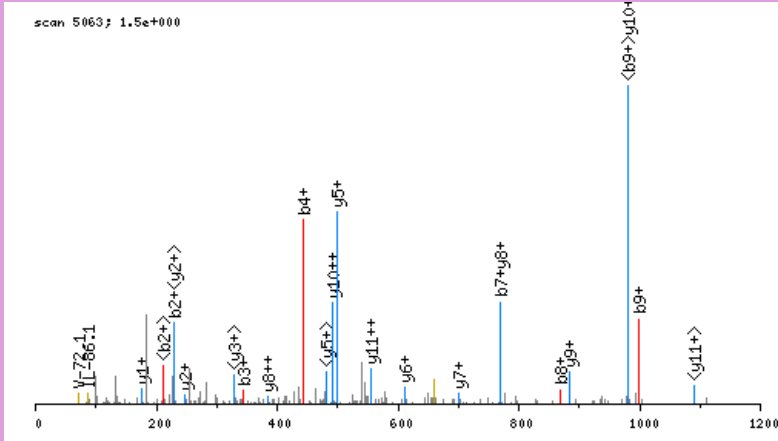

click image to zoom in; click top corners to zoom out [\[precursor±\]](#)

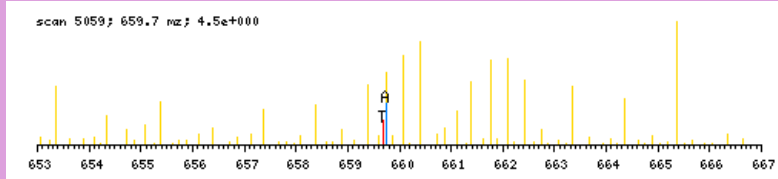

zoomed in precursor plot; T=theoretical m/z, A=acquired m/z

| b <sup>+</sup> | #  | AA # | y <sup>+</sup> | y <sup>2+</sup> |
|----------------|----|------|----------------|-----------------|
| 128.1075       | 1  | V 19 |                |                 |
| 229.1552       | 2  | T 18 | 1849.9660      | 925.4869        |
| 344.1821       | 3  | D 17 | 1748.9183      | 874.9631        |
| 443.2505       | 4  | V 16 | 1633.8913      | 817.4496        |
| 540.3033       | 5  | P 15 | 1534.8229      | 767.9154        |
| 655.3303       | 6  | D 14 | 1437.7702      | 719.3890        |
| 770.3572       | 7  | D 13 | 1322.7432      | 661.8755        |
| 869.4256       | 8  | V 12 | 1207.7163      | 604.3621        |
| 997.4842       | 9  | Q 11 | 1108.6479      | 554.8278        |
| 1094.5370      | 10 | P 10 | 980.5893       | 490.7986        |
| 1207.6210      | 11 | I 9  | 883.5365       | 442.2722        |
| 1278.6581      | 12 | A 8  | 770.4525       | 385.7301        |
| 1365.6902      | 13 | S 7  | 699.4153       | 350.2116        |
| 1478.7742      | 14 | L 6  | 612.3833       | 306.6956        |
| 1575.8270      | 15 | P 5  | 499.2993       | 250.1535        |
| 1632.8485      | 16 | G 4  | 402.2465       | 201.6272        |
| 1731.9169      | 17 | V 3  | 345.2250       | 173.1164        |
| 1802.9540      | 18 | A 2  | 246.1566       | 123.5822        |
|                | 19 | R 1  | 175.1195       | 88.0637         |

N-term:+29.04

VTEQEIEAIGKTLVDPKQPLQAR, MH+ 2647.5035, m/z 662.6313  
 L OSG40 P180811 230811-s1.09142.09142.4.dta

X-range:

-

MassTol: Y-zoom:

MassType:

AVG  MONO

Axis:

1  2

Label:

I  M  -

Ions:

a  +  2+  3+

b  +  2+  3+

c  +  2+  3+

x  +  2+  3+

y  +  2+  3+

z  +  2+  3+

hide H<sub>2</sub>O/NH<sub>3</sub>

zoom 112-122

GO

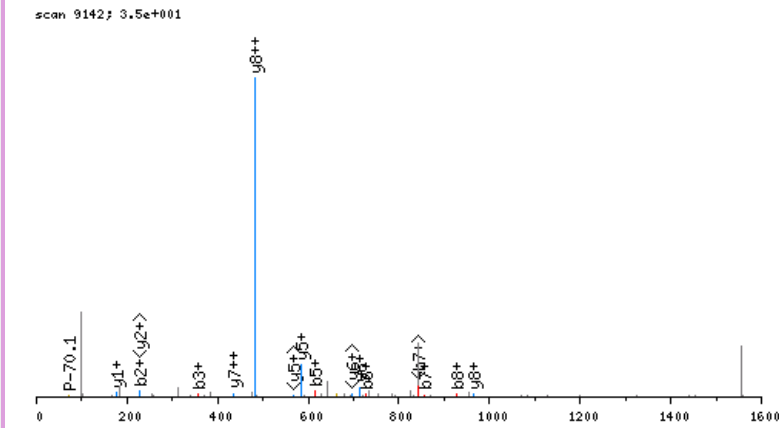

click image to zoom in; click top corners to zoom out [\[precursor±\]](#)

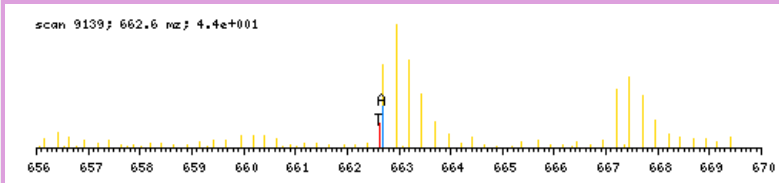

zoomed in precursor plot; T=theoretical m/z, A=acquired m/z

| b <sup>+</sup> | #  | AA # | y <sup>+</sup> | y <sup>2+</sup> |
|----------------|----|------|----------------|-----------------|
| 128.1075       | 1  | V 23 |                |                 |
| 229.1552       | 2  | T 22 | 2520.4038      | 1260.7058       |
| 358.1978       | 3  | E 21 | 2419.3561      | 1210.1820       |
| 486.2564       | 4  | Q 20 | 2290.3135      | 1145.6607       |
| 615.2990       | 5  | E 19 | 2162.2550      | 1081.6314       |
| 728.3830       | 6  | I 18 | 2033.2124      | 1017.1101       |
| 857.4256       | 7  | E 17 | 1920.1283      | 960.5681        |
| 928.4627       | 8  | A 16 | 1791.0857      | 896.0468        |
| 1041.5468      | 9  | I 15 | 1720.0486      | 860.5282        |
| 1098.5683      | 10 | G 14 | 1606.9645      | 803.9862        |
| 1254.6946      | 11 | K 13 | 1549.9431      | 775.4754        |
| 1355.7422      | 12 | T 12 | 1393.8168      | 697.4123        |
| 1468.8263      | 13 | L 11 | 1292.7691      | 646.8885        |
| 1567.8947      | 14 | V 10 | 1179.6850      | 590.3464        |
| 1682.9217      | 15 | D 9  | 1080.6166      | 540.8122        |
| 1779.9744      | 16 | P 8  | 965.5897       | 483.2987        |
| 1936.1007      | 17 | K 7  | 868.5369       | 434.7724        |
| 2064.1593      | 18 | Q 6  | 712.4106       | 356.7092        |
| 2161.2121      | 19 | P 5  | 584.3520       | 292.6799        |
| 2274.2961      | 20 | L 4  | 487.2993       | 244.1535        |
| 2402.3547      | 21 | Q 3  | 374.2152       | 187.6115        |
| 2473.3918      | 22 | A 2  | 246.1566       | 123.5822        |
|                | 23 | R 1  | 175.1195       | 88.0637         |

N-term:+29.04 K(11):+156.13  
 K(17):+156.13

VTLTDLQAEKTIGR, MH+ 1742.0336, m/z 581.3494  
 H OSG39 P180811 230811-s1.06394.06394.3.dta

X-range:

-

MassTol: Y-zoom:

MassType:

AVG  MONO

Axis:

1  2

Label:

I  M  -

Ions:

a  +  2+  3+

b  +  2+  3+

c  +  2+  3+

x  +  2+  3+

y  +  2+  3+

z  +  2+  3+

hide H<sub>2</sub>O/NH<sub>3</sub>

zoom 112-122

GO

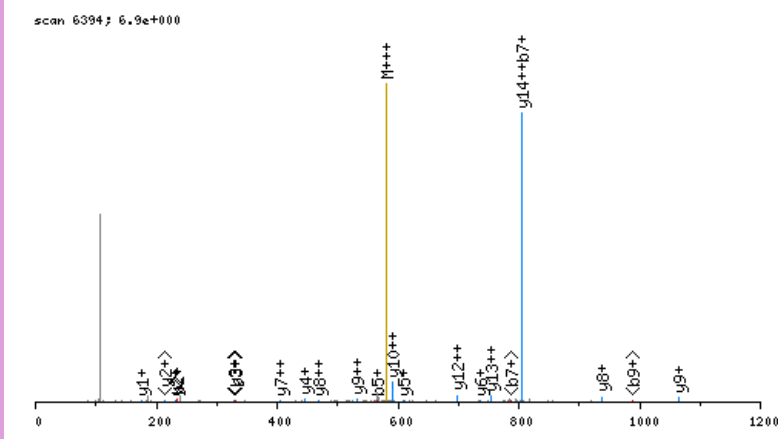

click image to zoom in; click top corners to zoom out [\[precursor±\]](#)

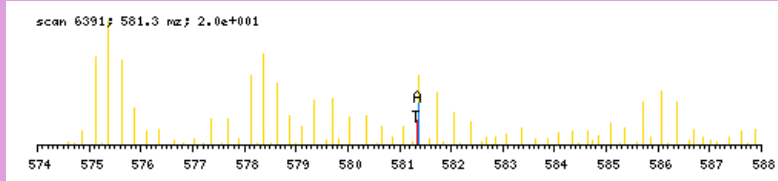

zoomed in precursor plot; T=theoretical m/z, A=acquired m/z

| b <sup>+</sup> | #  | AA # | y <sup>+</sup> | y <sup>2+</sup> |
|----------------|----|------|----------------|-----------------|
| 134.1393       | 1  | V    | 15             |                 |
| 235.1870       | 2  | T    | 14             | 804.9550        |
| 348.2711       | 3  | L    | 13             | 754.4311        |
| 449.3187       | 4  | T    | 12             | 697.8891        |
| 564.3457       | 5  | D    | 11             | 647.3653        |
| 677.4297       | 6  | L    | 10             | 589.8518        |
| 805.4883       | 7  | Q    | 9              | 533.3098        |
| 934.5309       | 8  | E    | 8              | 469.2805        |
| 1005.5680      | 9  | A    | 7              | 404.7592        |
| 1134.6106      | 10 | E    | 6              | 369.2406        |
| 1296.7687      | 11 | K    | 5              | 304.7193        |
| 1397.8164      | 12 | T    | 4              | 223.6403        |
| 1510.9005      | 13 | I    | 3              | 173.1164        |
| 1567.9219      | 14 | G    | 2              | 116.5744        |
|                | 15 | R    | 1              | 88.0637         |

N-term:+35.07 K(11):+162.16

VVANS PANADYQER, MH+ 1567.7928, m/z 523.2691  
 H OSG37 P180811 230811-s1.02560.02560.3.dta

X-range:

-

MassTol: Y-zoom:

MassType:

AVG  MONO

Axis:

1  2

Label:

I  M  -

Ions:

a  +  2+  3+

b  +  2+  3+

c  +  2+  3+

x  +  2+  3+

y  +  2+  3+

z  +  2+  3+

hide H<sub>2</sub>O/NH<sub>3</sub>

zoom 112-122

GO

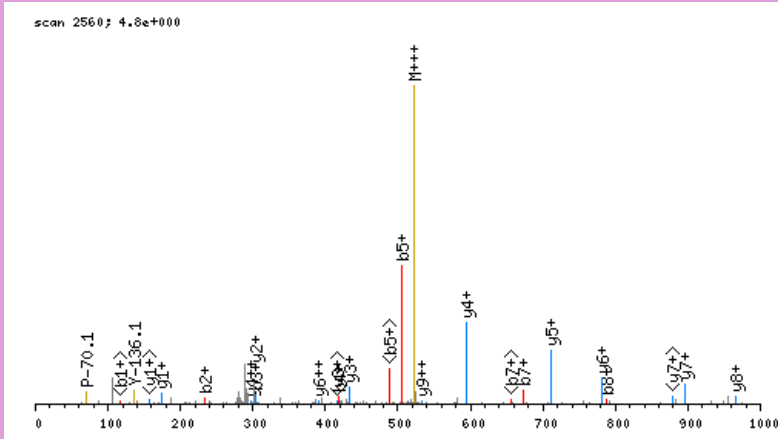

click image to zoom in; click top corners to zoom out [\[precursor±\]](#)

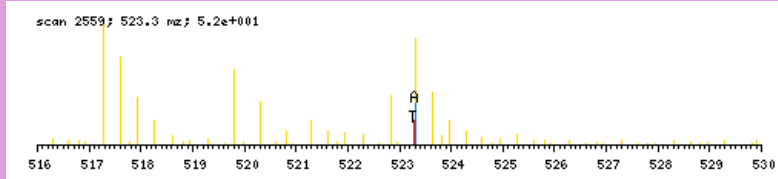

zoomed in precursor plot; T=theoretical m/z, A=acquired m/z

| b <sup>+</sup> | #  | AA # | y <sup>+</sup> | y <sup>2+</sup> |
|----------------|----|------|----------------|-----------------|
| 134.1393       | 1  | V 14 |                |                 |
| 233.2077       | 2  | V 13 | 1434.6613      | 717.8346        |
| 304.2448       | 3  | A 12 | 1335.5929      | 668.3004        |
| 418.2878       | 4  | N 11 | 1264.5558      | 632.7818        |
| 505.3198       | 5  | S 10 | 1150.5129      | 575.7604        |
| 602.3726       | 6  | P 9  | 1063.4809      | 532.2443        |
| 673.4097       | 7  | A 8  | 966.4281       | 483.7180        |
| 787.4526       | 8  | N 7  | 895.3910       | 448.1994        |
| 858.4897       | 9  | A 6  | 781.3481       | 391.1779        |
| 973.5167       | 10 | D 5  | 710.3109       | 355.6594        |
| 1136.5800      | 11 | Y 4  | 595.2840       | 298.1459        |
| 1264.6386      | 12 | Q 3  | 432.2207       | 216.6142        |
| 1393.6812      | 13 | E 2  | 304.1621       | 152.5850        |
|                | 14 | R 1  | 175.1195       | 88.0637         |

N-term:+35.07

VVAPTISSPVCQEQLVEAGR, MH+ 2174.1703, m/z 725.3949  
 H OSG36 P180811 230811-s1.04445.04445.3.dta

X-range:

-

MassTol: Y-zoom:

MassType:

AVG  MONO

Axis:

1  2

Label:

I  M  -

Ions:

a  +  2+  3+

b  +  2+  3+

c  +  2+  3+

x  +  2+  3+

y  +  2+  3+

z  +  2+  3+

hide H<sub>2</sub>O/NH<sub>3</sub>

zoom 112-122

GO

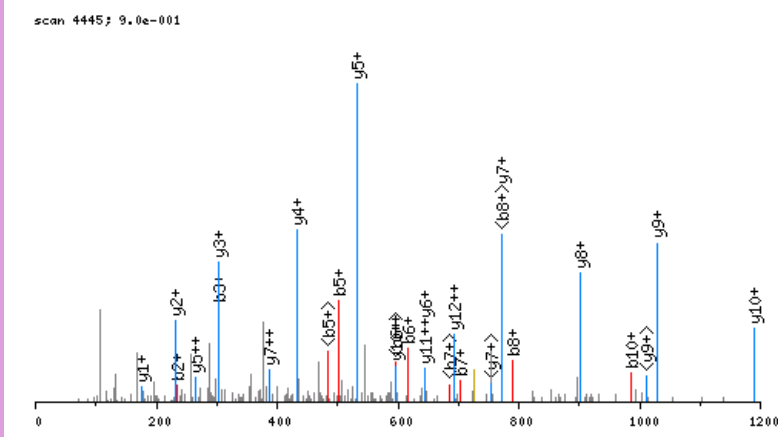

click image to zoom in; click top corners to zoom out [\[precursor±\]](#)

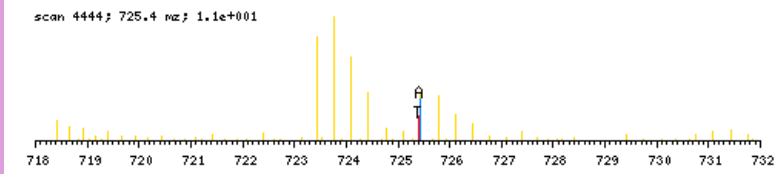

zoomed in precursor plot; T=theoretical m/z, A=acquired m/z

| b <sup>+</sup> | #  | AA # | y <sup>+</sup> | y <sup>2+</sup>     |
|----------------|----|------|----------------|---------------------|
| 134.1393       | 1  | V    | 20             |                     |
| 233.2077       | 2  | V    | 19             | 2041.0388 1021.0233 |
| 304.2448       | 3  | A    | 18             | 1941.9704 971.4891  |
| 401.2976       | 4  | P    | 17             | 1870.9332 935.9705  |
| 502.3453       | 5  | T    | 16             | 1773.8805 887.4441  |
| 615.4293       | 6  | I    | 15             | 1672.8328 836.9203  |
| 702.4614       | 7  | S    | 14             | 1559.7487 780.3783  |
| 789.4934       | 8  | S    | 13             | 1472.7167 736.8623  |
| 886.5462       | 9  | P    | 12             | 1385.6847 693.3463  |
| 985.6146       | 10 | V    | 11             | 1288.6319 644.8199  |
| 1145.6452      | 11 | C    | 10             | 1189.5635 595.2857  |
| 1273.7038      | 12 | Q    | 9              | 1029.5329 515.2704  |
| 1402.7464      | 13 | E    | 8              | 901.4743 451.2411   |
| 1530.8049      | 14 | Q    | 7              | 772.4317 386.7198   |
| 1643.8890      | 15 | L    | 6              | 644.3731 322.6905   |
| 1742.9574      | 16 | V    | 5              | 531.2891 266.1485   |
| 1872.0000      | 17 | E    | 4              | 432.2207 216.6142   |
| 1943.0371      | 18 | A    | 3              | 303.1781 152.0930   |
| 2000.0586      | 19 | G    | 2              | 232.1410 116.5744   |
|                | 20 | R    | 1              | 175.1195 88.0637    |

N-term:+35.07 C(11):+160.03



VVDLSDQVAPTDIEEGMR, MH+ 2001.9803, m/z 667.9983  
 L OSG36 P180811 230811-s1.04756.04756.3.dta

X-range:

-

MassTol: Y-zoom:

MassType:

AVG  MONO

Axis:

1  2

Label:

I  M  -

Ions:

a  +  2+  3+

b  +  2+  3+

c  +  2+  3+

x  +  2+  3+

y  +  2+  3+

z  +  2+  3+

hide H<sub>2</sub>O/NH<sub>3</sub>

zoom 112-122

GO

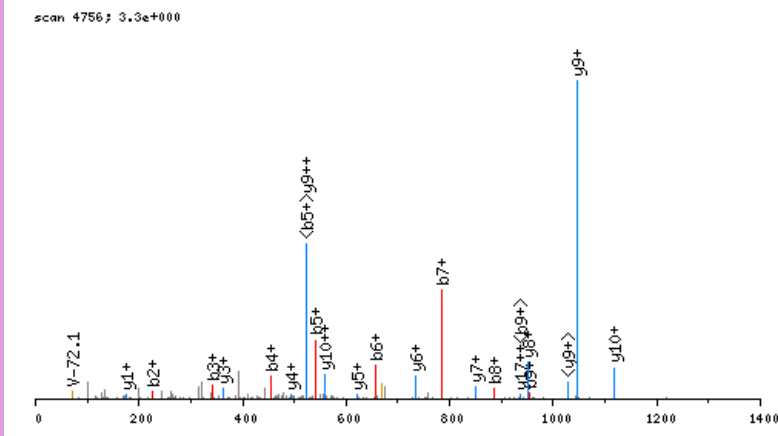

click image to zoom in; click top corners to zoom out [\[precursor±\]](#)

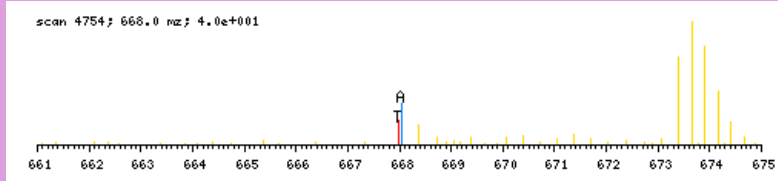

zoomed in precursor plot; T=theoretical m/z, A=acquired m/z

| b <sup>+</sup> | #  | AA # | y <sup>+</sup> | y <sup>2+</sup> |
|----------------|----|------|----------------|-----------------|
| 128.1075       | 1  | V 18 |                |                 |
| 227.1759       | 2  | V 17 | 1874.8806      | 937.9442        |
| 342.2029       | 3  | D 16 | 1775.8122      | 888.4100        |
| 455.2869       | 4  | L 15 | 1660.7852      | 830.8965        |
| 542.3190       | 5  | S 14 | 1547.7012      | 774.3545        |
| 657.3459       | 6  | D 13 | 1460.6691      | 730.8385        |
| 785.4045       | 7  | Q 12 | 1345.6422      | 673.3250        |
| 884.4729       | 8  | V 11 | 1217.5836      | 609.2957        |
| 955.5100       | 9  | A 10 | 1118.5152      | 559.7615        |
| 1052.5628      | 10 | P 9  | 1047.4781      | 524.2430        |
| 1153.6105      | 11 | T 8  | 950.4253       | 475.7166        |
| 1268.6374      | 12 | D 7  | 849.3776       | 425.1927        |
| 1381.7215      | 13 | I 6  | 734.3507       | 367.6793        |
| 1510.7641      | 14 | E 5  | 621.2666       | 311.1372        |
| 1639.8066      | 15 | E 4  | 492.2240       | 246.6159        |
| 1696.8281      | 16 | G 3  | 363.1814       | 182.0946        |
| 1827.8686      | 17 | M 2  | 306.1600       | 153.5839        |
|                | 18 | R 1  | 175.1195       | 88.0637         |

N-term:+29.04

VVDSDTVQAHTVR, MH+ 1460.7921, m/z 487.6022  
 H OSG40 P180811 230811-s1.02685.02685.3.dta

scan 2685; 1.3e+001

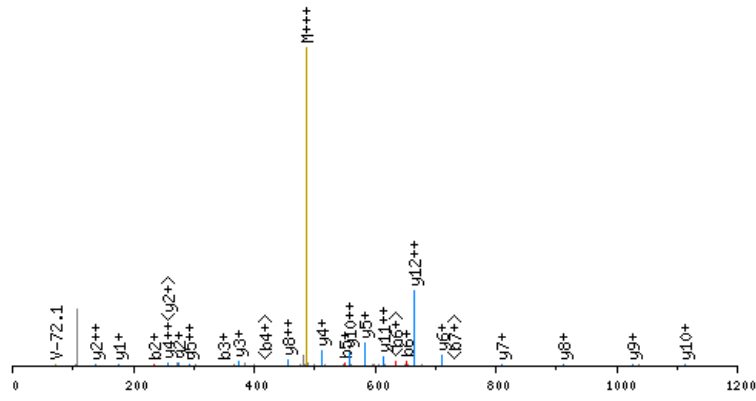

click image to zoom in; click top corners to zoom out [\[precursor±\]](#)

scan 2684; 487.6 m/z; 3.0e+001

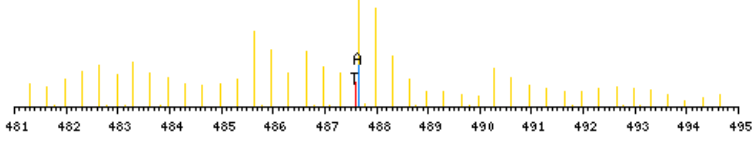

zoomed in precursor plot; T=theoretical m/z, A=acquired m/z

X-range:

-

MassTol: Y-zoom:

MassType:

AVG  MONO

Axis:

1  2

Label:

I  M  -

Ions:

a  +  2+  3+

b  +  2+  3+

c  +  2+  3+

x  +  2+  3+

y  +  2+  3+

z  +  2+  3+

hide H<sub>2</sub>O/NH<sub>3</sub>

zoom 112-122

GO

| b <sup>+</sup> | #  | AA # | y <sup>+</sup> | y <sup>2+</sup> |
|----------------|----|------|----------------|-----------------|
| 134.1393       | 1  | V 13 |                |                 |
| 233.2077       | 2  | V 12 | 1327.6606      | 664.3342        |
| 348.2347       | 3  | D 11 | 1228.5922      | 614.8000        |
| 435.2667       | 4  | S 10 | 1113.5653      | 557.2865        |
| 550.2936       | 5  | D 9  | 1026.5332      | 513.7705        |
| 651.3413       | 6  | T 8  | 911.5063       | 456.2571        |
| 750.4097       | 7  | V 7  | 810.4586       | 405.7332        |
| 878.4683       | 8  | Q 6  | 711.3902       | 356.1990        |
| 949.5054       | 9  | A 5  | 583.3316       | 292.1697        |
| 1086.5643      | 10 | H 4  | 512.2945       | 256.6512        |
| 1187.6120      | 11 | T 3  | 375.2356       | 188.1217        |
| 1286.6804      | 12 | V 2  | 274.1879       | 137.5979        |
|                | 13 | R 1  | 175.1195       | 88.0637         |

N-term:+35.07

VVENDQGEVVR, MH+ 1271.6595, m/z 636.3334  
 L OSG38 P180811 230811-s1.02218.02218.2.dta

X-range:

-

MassTol: Y-zoom:

MassType:

AVG  MONO

Axis:

1  2

Label:

I  M  -

Ions:

a  +  2+  3+

b  +  2+  3+

c  +  2+  3+

x  +  2+  3+

y  +  2+  3+

z  +  2+  3+

hide H<sub>2</sub>O/NH<sub>3</sub>

zoom 112-122

GO

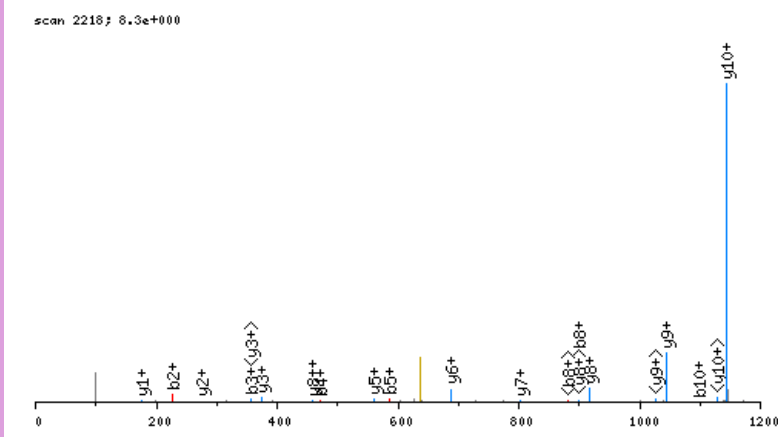

click image to zoom in; click top corners to zoom out [\[precursor±\]](#)

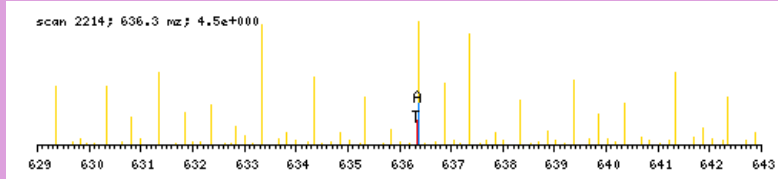

zoomed in precursor plot; T=theoretical m/z, A=acquired m/z

| b <sup>+</sup> | #  | AA # | y <sup>+</sup> | y <sup>2+</sup> |
|----------------|----|------|----------------|-----------------|
| 128.1075       | 1  | V 11 |                |                 |
| 227.1759       | 2  | V 10 | 1144.5598      | 572.7838        |
| 356.2185       | 3  | E 9  | 1045.4914      | 523.2496        |
| 470.2614       | 4  | N 8  | 916.4488       | 458.7283        |
| 585.2884       | 5  | D 7  | 802.4059       | 401.7069        |
| 713.3470       | 6  | Q 6  | 687.3790       | 344.1934        |
| 770.3684       | 7  | G 5  | 559.3204       | 280.1641        |
| 899.4110       | 8  | E 4  | 502.2989       | 251.6534        |
| 998.4794       | 9  | V 3  | 373.2563       | 187.1321        |
| 1097.5479      | 10 | V 2  | 274.1879       | 137.5979        |
|                | 11 | R 1  | 175.1195       | 88.0637         |

N-term:+29.04

VVMTQTPLSLPLVSLGDAQASISCR, MH+ 2493.3268, m/z 831.7805  
 H OSG36 P180811 230811-s1.06131.06131.3.dta

X-range:

-

MassTol: Y-zoom:

MassType:

AVG  MONO

Axis:

1  2

Label:

I  M  -

Ions:

a  +  2+  3+

b  +  2+  3+

c  +  2+  3+

x  +  2+  3+

y  +  2+  3+

z  +  2+  3+

hide H<sub>2</sub>O/NH<sub>3</sub>

zoom 112-122

GO

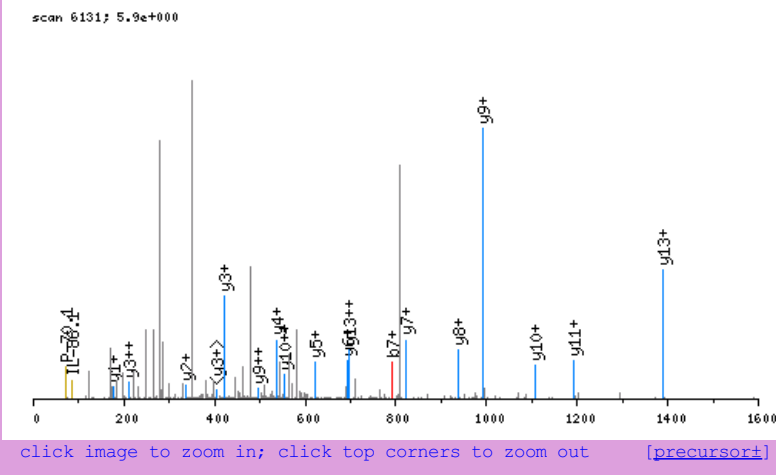

click image to zoom in; click top corners to zoom out [precursor±]

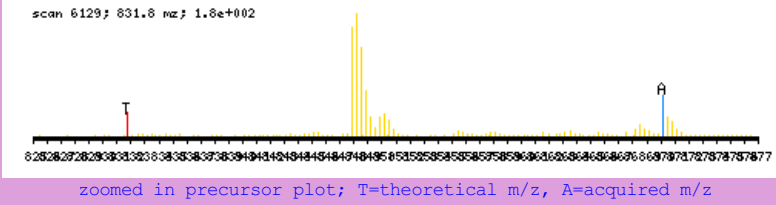

zoomed in precursor plot; T=theoretical m/z, A=acquired m/z

| b <sup>+</sup> | #  | AA # | y <sup>+</sup> | y <sup>2+</sup> |
|----------------|----|------|----------------|-----------------|
| 134.1393       | 1  | V 23 |                |                 |
| 233.2077       | 2  | V 22 | 2360.1953      | 1180.6016       |
| 364.2482       | 3  | M 21 | 2261.1269      | 1131.0674       |
| 465.2959       | 4  | T 20 | 2130.0864      | 1065.5471       |
| 593.3545       | 5  | Q 19 | 2029.0388      | 1015.0233       |
| 694.4021       | 6  | T 18 | 1900.9802      | 950.9940        |
| 791.4549       | 7  | P 17 | 1799.9325      | 900.4702        |
| 904.5390       | 8  | L 16 | 1702.8797      | 851.9438        |
| 991.5710       | 9  | S 15 | 1589.7957      | 795.4018        |
| 1104.6551      | 10 | L 14 | 1502.7637      | 751.8857        |
| 1201.7078      | 11 | P 13 | 1389.6796      | 695.3437        |
| 1300.7762      | 12 | V 12 | 1292.6268      | 646.8173        |
| 1387.8083      | 13 | S 11 | 1193.5584      | 597.2831        |
| 1500.8923      | 14 | L 10 | 1106.5264      | 553.7671        |
| 1557.9138      | 15 | G 9  | 993.4423       | 497.2251        |
| 1672.9407      | 16 | D 8  | 936.4209       | 468.7143        |
| 1800.9993      | 17 | Q 7  | 821.3939       | 411.2009        |
| 1872.0364      | 18 | A 6  | 693.3353       | 347.1716        |
| 1959.0685      | 19 | S 5  | 622.2982       | 311.6530        |
| 2072.1525      | 20 | I 4  | 535.2662       | 268.1370        |
| 2159.1846      | 21 | S 3  | 422.1821       | 211.5950        |
| 2319.2152      | 22 | C 2  | 335.1501       | 168.0790        |
|                | 23 | R 1  | 175.1195       | 88.0637         |

N-term:+35.07 C(22):+160.03

VWVNEEDHLR, MH+ 1330.6967, m/z 444.2371  
 H OSG40 P180811 230811-s1.03818.03818.3.dta

X-range:

-

MassTol: Y-zoom:

MassType:

AVG  MONO

Axis:

1  2

Label:

I  M  -

Ions:

a  +  2+  3+

b  +  2+  3+

c  +  2+  3+

x  +  2+  3+

y  +  2+  3+

z  +  2+  3+

hide H<sub>2</sub>O/NH<sub>3</sub>

zoom 112-122

GO

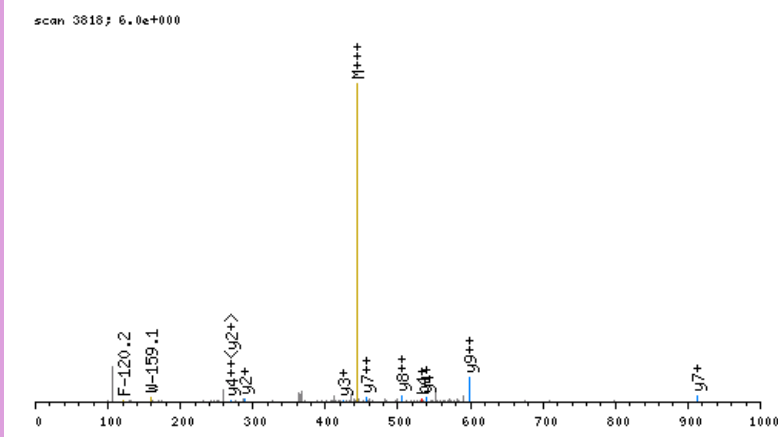

click image to zoom in; click top corners to zoom out [\[precursor±\]](#)

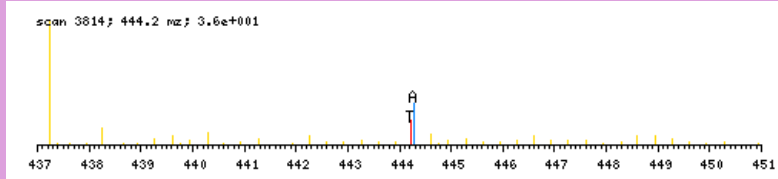

zoomed in precursor plot; T=theoretical m/z, A=acquired m/z

| b <sup>+</sup> | #  | AA # | y <sup>+</sup> | y <sup>2+</sup> |
|----------------|----|------|----------------|-----------------|
| 134.1393       | 1  | V    | 10             |                 |
| 320.2186       | 2  | W    | 9              | 1197.5653       |
| 419.2870       | 3  | V    | 8              | 1011.4859       |
| 533.3300       | 4  | N    | 7              | 912.4175        |
| 662.3726       | 5  | E    | 6              | 798.3746        |
| 791.4152       | 6  | E    | 5              | 669.3320        |
| 906.4421       | 7  | D    | 4              | 540.2894        |
| 1043.5010      | 8  | H    | 3              | 425.2625        |
| 1156.5851      | 9  | L    | 2              | 288.2036        |
|                | 10 | R    | 1              | 175.1195        |

N-term:+35.07

VYILPPPAEQLSR, MH+ 1516.8951, m/z 506.3032  
 H OSG37 P180811 230811-s1.06857.06857.3.dta

X-range:

-

MassTol: Y-zoom:

MassType:

AVG  MONO

Axis:

1  2

Label:

I  M  -

Ions:

a  +  2+  3+

b  +  2+  3+

c  +  2+  3+

x  +  2+  3+

y  +  2+  3+

z  +  2+  3+

hide H<sub>2</sub>O/NH<sub>3</sub>

zoom 112-122

GO

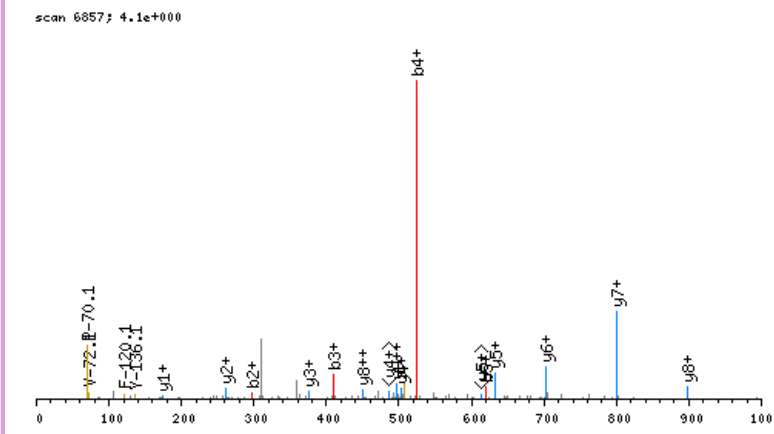

click image to zoom in; click top corners to zoom out [\[precursor±\]](#)

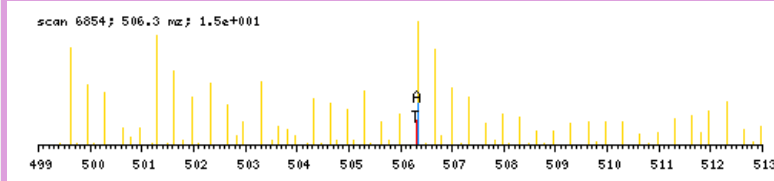

zoomed in precursor plot; T=theoretical m/z, A=acquired m/z

| b <sup>+</sup> | #  | AA # | y <sup>+</sup> | y <sup>2+</sup>    |
|----------------|----|------|----------------|--------------------|
| 134.1393       | 1  | V    | 13             |                    |
| 297.2026       | 2  | Y    | 12             | 1383.7636 692.3857 |
| 410.2867       | 3  | I    | 11             | 1220.7003 610.8541 |
| 523.3708       | 4  | L    | 10             | 1107.6162 554.3120 |
| 620.4235       | 5  | P    | 9              | 994.5322 497.7700  |
| 717.4763       | 6  | P    | 8              | 897.4794 449.2436  |
| 814.5291       | 7  | P    | 7              | 800.4266 400.7172  |
| 885.5662       | 8  | A    | 6              | 703.3739 352.1909  |
| 1014.6088      | 9  | E    | 5              | 632.3368 316.6723  |
| 1142.6673      | 10 | Q    | 4              | 503.2942 252.1510  |
| 1255.7514      | 11 | L    | 3              | 375.2356 188.1217  |
| 1342.7834      | 12 | S    | 2              | 262.1515 131.5797  |
|                | 13 | R    | 1              | 175.1195 88.0637   |

N-term:+35.07

WEAADLGNEER, MH+ 1317.6075, m/z 659.3074  
 L OSG38 P180811 230811-s1.04432.04432.2.dta

X-range:

-

MassTol: Y-zoom:

MassType:

AVG  MONO

Axis:

1  2

Label:

I  M  -

Ions:

a  +  2+  3+

b  +  2+  3+

c  +  2+  3+

x  +  2+  3+

y  +  2+  3+

z  +  2+  3+

hide H<sub>2</sub>O/NH<sub>3</sub>

zoom 112-122

GO

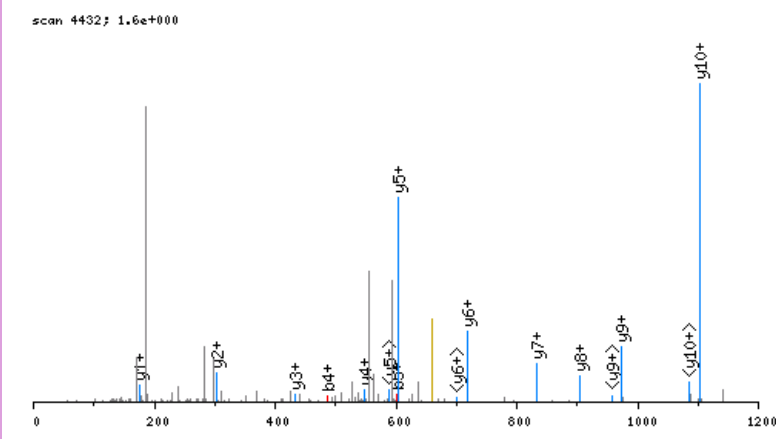

click image to zoom in; click top corners to zoom out [\[precursor±\]](#)

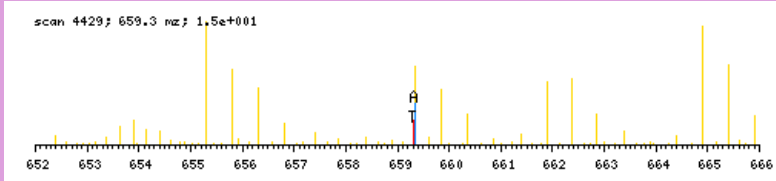

zoomed in precursor plot; T=theoretical m/z, A=acquired m/z

| b <sup>+</sup> | #  | AA # | y <sup>+</sup> | y <sup>2+</sup> |
|----------------|----|------|----------------|-----------------|
| 215.1184       | 1  | W 11 |                |                 |
| 344.1610       | 2  | E 10 | 1103.4969      | 552.2524        |
| 415.1981       | 3  | A 9  | 974.4543       | 487.7311        |
| 486.2352       | 4  | A 8  | 903.4172       | 452.2125        |
| 601.2622       | 5  | D 7  | 832.3801       | 416.6940        |
| 714.3462       | 6  | L 6  | 717.3531       | 359.1805        |
| 771.3677       | 7  | G 5  | 604.2691       | 302.6385        |
| 885.4106       | 8  | N 4  | 547.2476       | 274.1277        |
| 1014.4532      | 9  | E 3  | 433.2047       | 217.1063        |
| 1143.4958      | 10 | E 2  | 304.1621       | 152.5850        |
|                | 11 | R 1  | 175.1195       | 88.0637         |

N-term:+29.04

WGKVNSEVVGGEALGR, MH+ 1741.9509, m/z 581.3218  
 H OSG40 P180811 230811-s1.07975.07975.3.dta

X-range:

-

MassTol: Y-zoom:

MassType:

AVG  MONO

Axis:

1  2

Label:

I  M  -

Ions:

a  +  2+  3+

b  +  2+  3+

c  +  2+  3+

x  +  2+  3+

y  +  2+  3+

z  +  2+  3+

hide H<sub>2</sub>O/NH<sub>3</sub>

zoom 112-122

GO

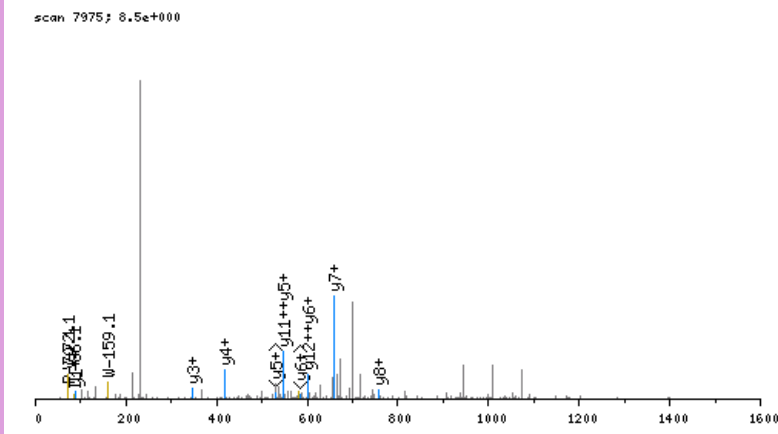

click image to zoom in; click top corners to zoom out [\[precursor±\]](#)

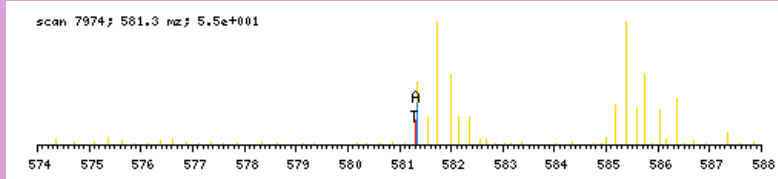

zoomed in precursor plot; T=theoretical m/z, A=acquired m/z

| b <sup>+</sup> | #  | AA # | y <sup>+</sup> | y <sup>2+</sup> |
|----------------|----|------|----------------|-----------------|
| 221.1502       | 1  | W 16 |                |                 |
| 278.1717       | 2  | G 15 | 1521.8085      | 761.4082        |
| 440.3298       | 3  | K 14 | 1464.7871      | 732.8975        |
| 539.3982       | 4  | V 13 | 1302.6290      | 651.8184        |
| 653.4411       | 5  | N 12 | 1203.5606      | 602.2842        |
| 740.4731       | 6  | S 11 | 1089.5176      | 545.2627        |
| 855.5001       | 7  | D 10 | 1002.4856      | 501.7467        |
| 984.5427       | 8  | E 9  | 887.4587       | 444.2332        |
| 1083.6111      | 9  | V 8  | 758.4161       | 379.7120        |
| 1140.6326      | 10 | G 7  | 659.3477       | 330.1777        |
| 1197.6540      | 11 | G 6  | 602.3262       | 301.6670        |
| 1326.6966      | 12 | E 5  | 545.3047       | 273.1563        |
| 1397.7337      | 13 | A 4  | 416.2621       | 208.6350        |
| 1510.8178      | 14 | L 3  | 345.2250       | 173.1164        |
| 1567.8393      | 15 | G 2  | 232.1410       | 116.5744        |
|                | 16 | R 1  | 175.1195       | 88.0637         |

N-term:+35.07 K(3):+162.16



WVFEEDIGGR, MH+ 1241.6378, m/z 621.3226  
 H OSG38 P180811 230811-s1.06317.06317.2.dta

X-range:

-

MassTol: Y-zoom:

MassType:

AVG  MONO

Axis:

1  2

Label:

I  M  -

Ions:

a  +  2+  3+

b  +  2+  3+

c  +  2+  3+

x  +  2+  3+

y  +  2+  3+

z  +  2+  3+

hide H<sub>2</sub>O/NH<sub>3</sub>

zoom 112-122

GO

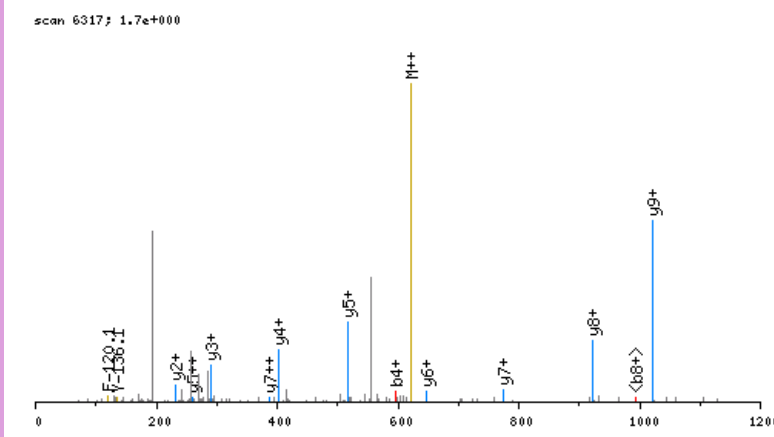

click image to zoom in; click top corners to zoom out [\[precursor±\]](#)

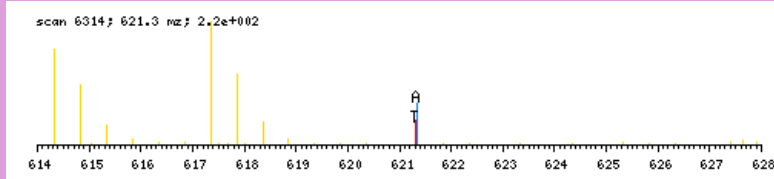

zoomed in precursor plot; T=theoretical m/z, A=acquired m/z

| b <sup>+</sup> | #  | AA # | y <sup>+</sup> | y <sup>2+</sup> |
|----------------|----|------|----------------|-----------------|
| 221.1502       | 1  | W 10 |                |                 |
| 320.2186       | 2  | V 9  | 1021.4954      | 511.2516        |
| 467.2870       | 3  | F 8  | 922.4270       | 461.7174        |
| 596.3296       | 4  | E 7  | 775.3586       | 388.1832        |
| 725.3722       | 5  | E 6  | 646.3160       | 323.6619        |
| 840.3992       | 6  | D 5  | 517.2734       | 259.1406        |
| 953.4832       | 7  | I 4  | 402.2465       | 201.6272        |
| 1010.5047      | 8  | G 3  | 289.1624       | 145.0851        |
| 1067.5262      | 9  | G 2  | 232.1410       | 116.5744        |
|                | 10 | R 1  | 175.1195       | 88.0637         |

N-term:+35.07

WYDNEYGYSNR, MH+ 1494.6290, m/z 498.8812  
 L OSG38 P180811 230811-s1.04013.04013.3.dta

X-range:

-

MassTol: Y-zoom:

MassType:

AVG  MONO

Axis:

1  2

Label:

I  M  -

Ions:

a  +  2+  3+

b  +  2+  3+

c  +  2+  3+

x  +  2+  3+

y  +  2+  3+

z  +  2+  3+

hide H<sub>2</sub>O/NH<sub>3</sub>

zoom 112-122

GO

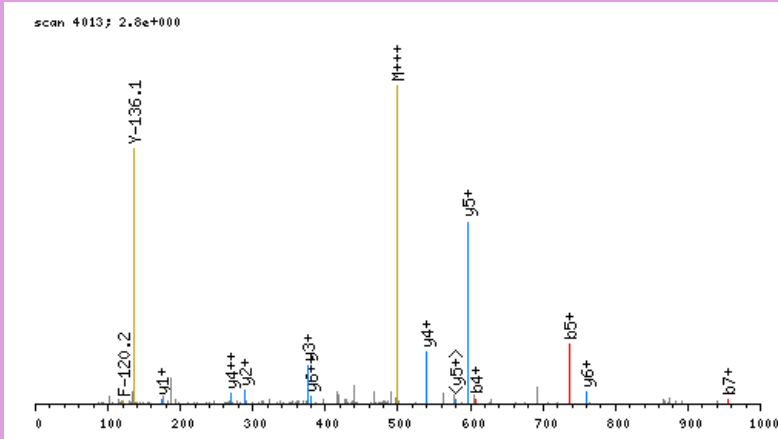

click image to zoom in; click top corners to zoom out [\[precursor±\]](#)

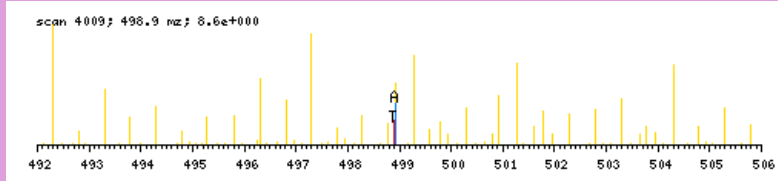

zoomed in precursor plot; T=theoretical m/z, A=acquired m/z

| b <sup>+</sup> | #  | AA # | y <sup>+</sup> | y <sup>2+</sup> |
|----------------|----|------|----------------|-----------------|
| 215.1184       | 1  | W 11 |                |                 |
| 378.1817       | 2  | Y 10 | 1280.5184      | 640.7631        |
| 493.2087       | 3  | D 9  | 1117.4550      | 559.2314        |
| 607.2516       | 4  | N 8  | 1002.4281      | 501.7180        |
| 736.2942       | 5  | E 7  | 888.3852       | 444.6965        |
| 899.3575       | 6  | Y 6  | 759.3426       | 380.1752        |
| 956.3790       | 7  | G 5  | 596.2792       | 298.6435        |
| 1119.4423      | 8  | Y 4  | 539.2578       | 270.1328        |
| 1206.4744      | 9  | S 3  | 376.1945       | 188.6011        |
| 1320.5173      | 10 | N 2  | 289.1624       | 145.0851        |
|                | 11 | R 1  | 175.1195       | 88.0637         |

N-term:+29.04

YDLADQLHAAVGASR, MH+ 1614.8240, m/z 538.9462  
 L OSG39 P180811 230811-s1.05820.05820.3.dta

X-range:

-

MassTol: Y-zoom:

MassType:

AVG  MONO

Axis:

1  2

Label:

I  M  -

Ions:

a  +  2+  3+

b  +  2+  3+

c  +  2+  3+

x  +  2+  3+

y  +  2+  3+

z  +  2+  3+

hide H<sub>2</sub>O/NH<sub>3</sub>

zoom 112-122

GO

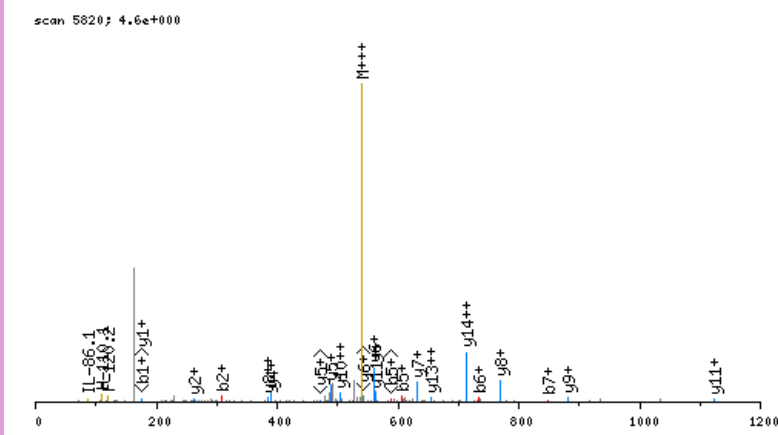

click image to zoom in; click top corners to zoom out [\[precursor±\]](#)

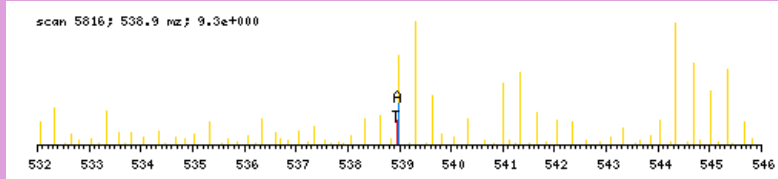

zoomed in precursor plot; T=theoretical m/z, A=acquired m/z

| b <sup>+</sup> | #  | AA | #  | y <sup>+</sup> | y <sup>2+</sup> |
|----------------|----|----|----|----------------|-----------------|
| 192.1024       | 1  | Y  | 15 |                |                 |
| 307.1294       | 2  | D  | 14 | 1423.7294      | 712.3686        |
| 420.2134       | 3  | L  | 13 | 1308.7024      | 654.8551        |
| 491.2505       | 4  | A  | 12 | 1195.6184      | 598.3131        |
| 606.2775       | 5  | D  | 11 | 1124.5812      | 562.7945        |
| 734.3361       | 6  | Q  | 10 | 1009.5543      | 505.2811        |
| 847.4201       | 7  | L  | 9  | 881.4957       | 441.2518        |
| 984.4790       | 8  | H  | 8  | 768.4117       | 384.7097        |
| 1055.5162      | 9  | A  | 7  | 631.3527       | 316.1803        |
| 1126.5533      | 10 | A  | 6  | 560.3156       | 280.6617        |
| 1225.6217      | 11 | V  | 5  | 489.2785       | 245.1432        |
| 1282.6432      | 12 | G  | 4  | 390.2101       | 195.6090        |
| 1353.6803      | 13 | A  | 3  | 333.1886       | 167.0982        |
| 1440.7123      | 14 | S  | 2  | 262.1515       | 131.5797        |
|                | 15 | R  | 1  | 175.1195       | 88.0637         |

N-term:+29.04

YDPAGGEDPLGAVHLR, MH+ 1694.8502, m/z 565.6216  
 L OSG39 P180811 230811-s1.05488.05488.3.dta

X-range:

-

MassTol: Y-zoom:

MassType:

AVG  MONO

Axis:

1  2

Label:

I  M  -

Ions:

a  +  2+  3+

b  +  2+  3+

c  +  2+  3+

x  +  2+  3+

y  +  2+  3+

z  +  2+  3+

hide H<sub>2</sub>O/NH<sub>3</sub>

zoom 112-122

GO

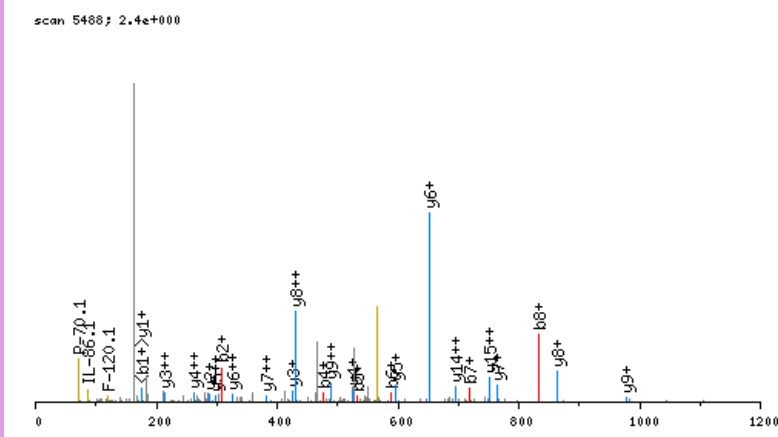

click image to zoom in; click top corners to zoom out [\[precursor±\]](#)

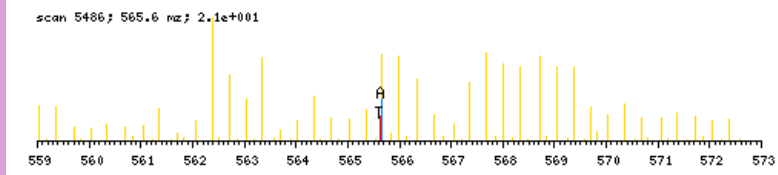

zoomed in precursor plot; T=theoretical m/z, A=acquired m/z

| b <sup>+</sup> | #  | AA # | y <sup>+</sup> | y <sup>2+</sup> |
|----------------|----|------|----------------|-----------------|
| 192.1024       | 1  | Y    | 16             |                 |
| 307.1294       | 2  | D    | 15             | 1503.7556       |
| 404.1821       | 3  | P    | 14             | 1388.7286       |
| 475.2192       | 4  | A    | 13             | 1291.6759       |
| 532.2407       | 5  | G    | 12             | 1220.6388       |
| 589.2622       | 6  | G    | 11             | 1163.6173       |
| 718.3048       | 7  | E    | 10             | 1106.5958       |
| 833.3317       | 8  | D    | 9              | 977.5532        |
| 930.3845       | 9  | P    | 8              | 862.5263        |
| 1043.4685      | 10 | L    | 7              | 765.4735        |
| 1100.4900      | 11 | G    | 6              | 652.3895        |
| 1171.5271      | 12 | A    | 5              | 595.3680        |
| 1270.5955      | 13 | V    | 4              | 524.3309        |
| 1407.6544      | 14 | H    | 3              | 425.2625        |
| 1520.7385      | 15 | L    | 2              | 288.2036        |
|                | 16 | R    | 1              | 175.1195        |

N-term:+29.04

YEKPTQTEAPQVTGPIEVPVVR, MH+ 2405.3716, m/z 602.0984  
 H OSG38 P180811 230811-s1.05873.05873.4.dta

scan 5873; 2.1e+000

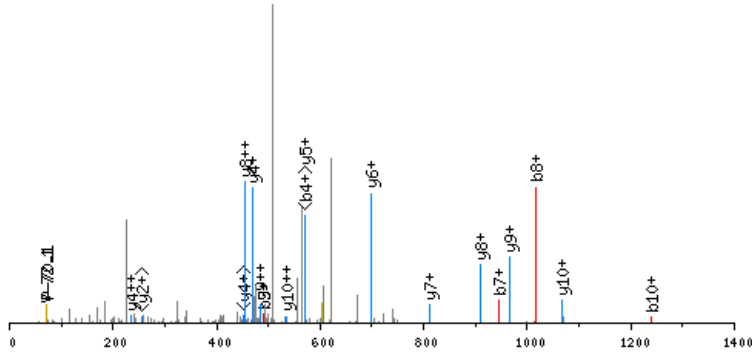

click image to zoom in; click top corners to zoom out [\[precursor±\]](#)

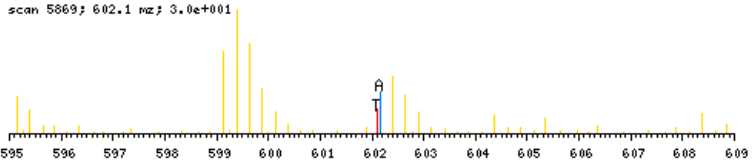

zoomed in precursor plot; T=theoretical m/z, A=acquired m/z

X-range:

-

MassTol: Y-zoom:

MassType:

AVG  MONO

Axis:

1  2

Label:

I  M  -

Ions:

a  +  2+  3+

b  +  2+  3+

c  +  2+  3+

x  +  2+  3+

y  +  2+  3+

z  +  2+  3+

hide H<sub>2</sub>O/NH<sub>3</sub>

zoom 112-122

GO

| b <sup>+</sup> | #  | AA | #  | y <sup>+</sup> | y <sup>2+</sup> |
|----------------|----|----|----|----------------|-----------------|
| 198.1342       | 1  | Y  | 21 |                |                 |
| 327.1768       | 2  | E  | 20 | 2208.2452      | 1104.6265       |
| 489.3349       | 3  | K  | 19 | 2079.2027      | 1040.1052       |
| 586.3877       | 4  | P  | 18 | 1917.0446      | 959.0262        |
| 714.4463       | 5  | Q  | 17 | 1819.9918      | 910.4998        |
| 815.4939       | 6  | T  | 16 | 1691.9332      | 846.4705        |
| 944.5365       | 7  | E  | 15 | 1590.8855      | 795.9467        |
| 1015.5736      | 8  | A  | 14 | 1461.8429      | 731.4254        |
| 1112.6264      | 9  | P  | 13 | 1390.8058      | 695.9068        |
| 1240.6850      | 10 | Q  | 12 | 1293.7531      | 647.3804        |
| 1339.7534      | 11 | V  | 11 | 1165.6945      | 583.3512        |
| 1440.8011      | 12 | T  | 10 | 1066.6261      | 533.8169        |
| 1497.8225      | 13 | G  | 9  | 965.5784       | 483.2931        |
| 1594.8753      | 14 | P  | 8  | 908.5569       | 454.7824        |
| 1707.9594      | 15 | I  | 7  | 811.5042       | 406.2560        |
| 1837.0020      | 16 | E  | 6  | 698.4201       | 349.7140        |
| 1936.0704      | 17 | V  | 5  | 569.3775       | 285.1927        |
| 2033.1231      | 18 | P  | 4  | 470.3091       | 235.6585        |
| 2132.1916      | 19 | V  | 3  | 373.2563       | 187.1321        |
| 2231.2600      | 20 | V  | 2  | 274.1879       | 137.5979        |
|                | 21 | R  | 1  | 175.1195       | 88.0637         |

N-term:+35.07 K(3):+162.16

YELPDGQVITIGNER, MH+ 1737.9235, m/z 579.9794  
 H OSG37 P180811 230811-s1.07172.07172.3.dta

X-range:

-

MassTol: Y-zoom:

MassType:

AVG  MONO

Axis:

1  2

Label:

I  M  -

Ions:

a  +  2+  3+

b  +  2+  3+

c  +  2+  3+

x  +  2+  3+

y  +  2+  3+

z  +  2+  3+

hide H<sub>2</sub>O/NH<sub>3</sub>

zoom 112-122

GO

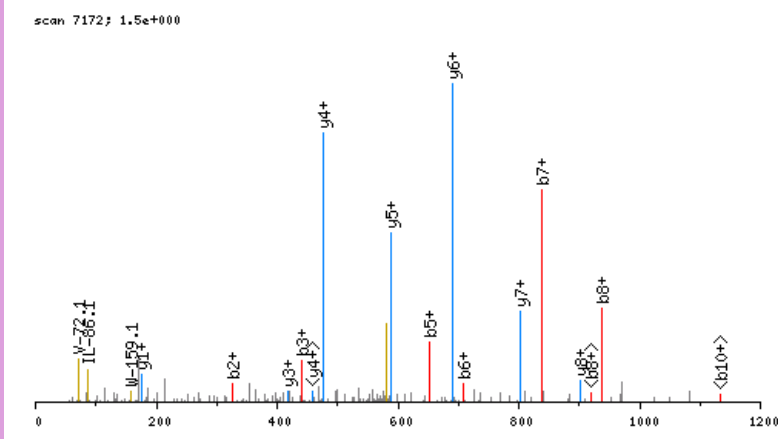

click image to zoom in; click top corners to zoom out [\[precursor±\]](#)

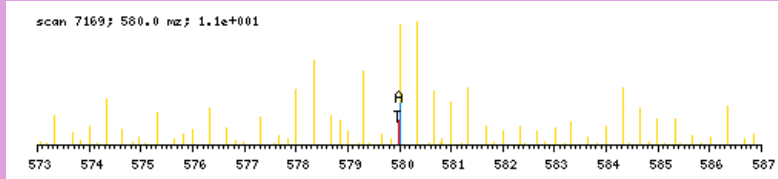

zoomed in precursor plot; T=theoretical m/z, A=acquired m/z

| b <sup>+</sup> | #  | AA # | y <sup>+</sup> | y <sup>2+</sup>    |
|----------------|----|------|----------------|--------------------|
| 198.1342       | 1  | Y    | 15             |                    |
| 327.1768       | 2  | E    | 14             | 1540.7971 770.9025 |
| 440.2609       | 3  | L    | 13             | 1411.7545 706.3812 |
| 537.3136       | 4  | P    | 12             | 1298.6705 649.8391 |
| 652.3406       | 5  | D    | 11             | 1201.6177 601.3128 |
| 709.3621       | 6  | G    | 10             | 1086.5907 543.7993 |
| 837.4206       | 7  | Q    | 9              | 1029.5693 515.2886 |
| 936.4890       | 8  | V    | 8              | 901.5107 451.2593  |
| 1049.5731      | 9  | I    | 7              | 802.4423 401.7251  |
| 1150.6208      | 10 | T    | 6              | 689.3582 345.1830  |
| 1263.7049      | 11 | I    | 5              | 588.3105 294.6592  |
| 1320.7263      | 12 | G    | 4              | 475.2265 238.1172  |
| 1434.7692      | 13 | N    | 3              | 418.2050 209.6064  |
| 1563.8118      | 14 | E    | 2              | 304.1621 152.5850  |
|                | 15 | R    | 1              | 175.1195 88.0637   |

N-term:+35.07

YEPQGGSGYDYSYAGGR, MH+ 1854.7935, m/z 618.9360  
 L OSG37 P180811 230811-s1.04076.04076.3.dta

X-range:

-

MassTol: Y-zoom:

MassType:

AVG  MONO

Axis:

1  2

Label:

I  M  -

Ions:

a  +  2+  3+

b  +  2+  3+

c  +  2+  3+

x  +  2+  3+

y  +  2+  3+

z  +  2+  3+

hide H<sub>2</sub>O/NH<sub>3</sub>

zoom 112-122

GO

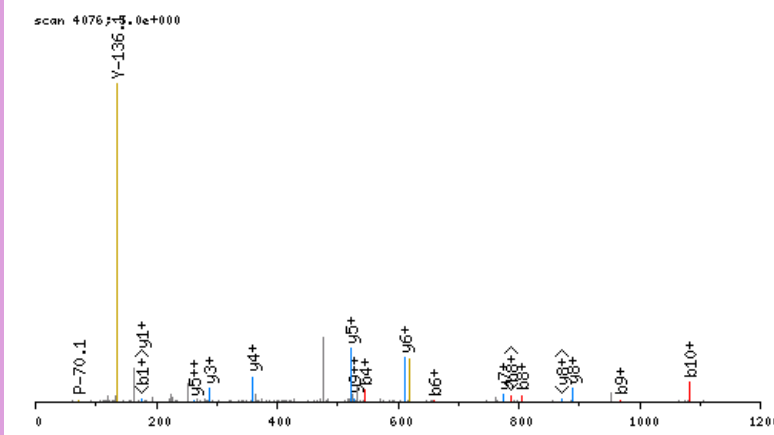

click image to zoom in; click top corners to zoom out [\[precursor±\]](#)

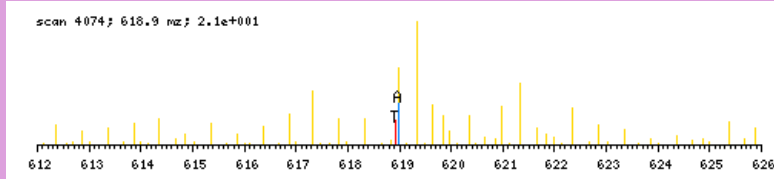

zoomed in precursor plot; T=theoretical m/z, A=acquired m/z

| b <sup>+</sup> | #  | AA # | y <sup>+</sup> | y <sup>2+</sup> |
|----------------|----|------|----------------|-----------------|
| 192.1024       | 1  | Y 17 |                |                 |
| 321.1450       | 2  | E 16 | 1663.6989      | 832.3533        |
| 418.1978       | 3  | P 15 | 1534.6563      | 767.8320        |
| 546.2564       | 4  | Q 14 | 1437.6035      | 719.3057        |
| 603.2778       | 5  | G 13 | 1309.5449      | 655.2764        |
| 660.2993       | 6  | G 12 | 1252.5235      | 626.7656        |
| 747.3313       | 7  | S 11 | 1195.5020      | 598.2549        |
| 804.3528       | 8  | G 10 | 1108.4700      | 554.7389        |
| 967.4161       | 9  | Y 9  | 1051.4485      | 526.2282        |
| 1082.4431      | 10 | D 8  | 888.3852       | 444.6965        |
| 1245.5064      | 11 | Y 7  | 773.3582       | 387.1830        |
| 1332.5384      | 12 | S 6  | 610.2949       | 305.6514        |
| 1495.6017      | 13 | Y 5  | 523.2629       | 262.1353        |
| 1566.6389      | 14 | A 4  | 360.1995       | 180.6037        |
| 1623.6603      | 15 | G 3  | 289.1624       | 145.0851        |
| 1680.6818      | 16 | G 2  | 232.1410       | 116.5744        |
|                | 17 | R 1  | 175.1195       | 88.0637         |

N-term:+29.04

YFKEQFLDGDWATNR, MH+ 1958.0084, m/z 653.3410  
 H OSG40 P180811 230811-s1.07305.07305.3.dta

X-range:

-

MassTol: Y-zoom:

MassType:

AVG  MONO

Axis:

1  2

Label:

I  M  -

Ions:

a  +  2+  3+

b  +  2+  3+

c  +  2+  3+

x  +  2+  3+

y  +  2+  3+

z  +  2+  3+

hide H<sub>2</sub>O/NH<sub>3</sub>

zoom 112-122

GO

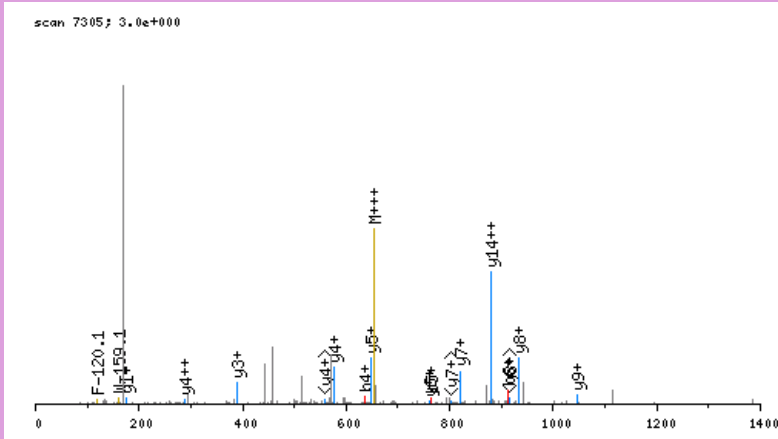

click image to zoom in; click top corners to zoom out [\[precursor±\]](#)

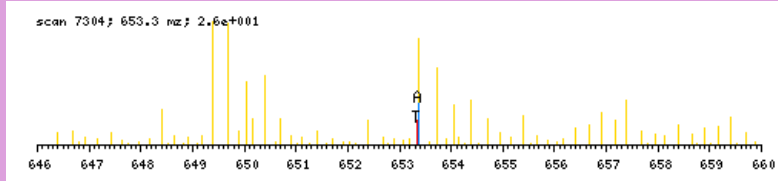

zoomed in precursor plot; T=theoretical m/z, A=acquired m/z

| b <sup>+</sup> | #  | AA # | y <sup>+</sup> | y <sup>2+</sup> |
|----------------|----|------|----------------|-----------------|
| 198.1342       | 1  | Y 15 |                |                 |
| 345.2026       | 2  | F 14 | 1760.8820      | 880.9449        |
| 507.3607       | 3  | K 13 | 1613.8136      | 807.4107        |
| 636.4033       | 4  | E 12 | 1451.6555      | 726.3317        |
| 764.4619       | 5  | Q 11 | 1322.6129      | 661.8104        |
| 911.5303       | 6  | F 10 | 1194.5544      | 597.7811        |
| 1024.6144      | 7  | L 9  | 1047.4859      | 524.2469        |
| 1139.6413      | 8  | D 8  | 934.4019       | 467.7049        |
| 1196.6628      | 9  | G 7  | 819.3749       | 410.1914        |
| 1311.6897      | 10 | D 6  | 762.3535       | 381.6807        |
| 1382.7269      | 11 | A 5  | 647.3265       | 324.1672        |
| 1568.8062      | 12 | W 4  | 576.2894       | 288.6486        |
| 1669.8538      | 13 | T 3  | 390.2101       | 195.6090        |
| 1783.8968      | 14 | N 2  | 289.1624       | 145.0851        |
|                | 15 | R 1  | 175.1195       | 88.0637         |

N-term:+35.07 K(3):+162.16



YGIDNLLHYNR, MH+ 1520.7497, m/z 507.5881  
 L OSG40 P180811 230811-s1.06433.06433.3.dta

X-range:

-

MassTol: Y-zoom:

MassType:

AVG  MONO

Axis:

1  2

Label:

I  M  -

Ions:

a  +  2+  3+

b  +  2+  3+

c  +  2+  3+

x  +  2+  3+

y  +  2+  3+

z  +  2+  3+

hide H<sub>2</sub>O/NH<sub>3</sub>

zoom 112-122

GO

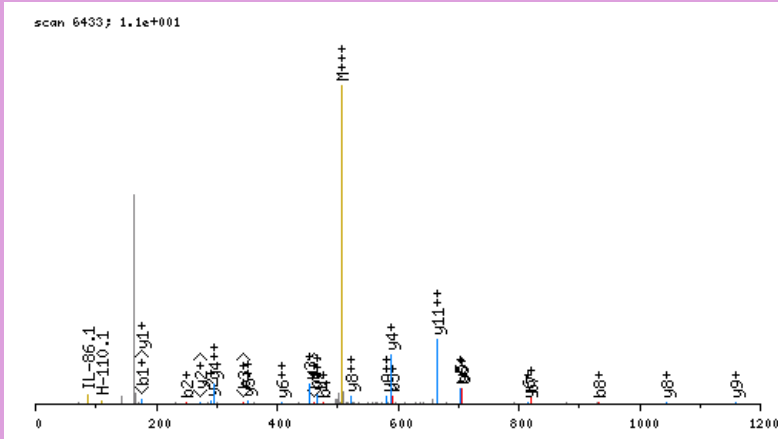

click image to zoom in; click top corners to zoom out [\[precursor±\]](#)

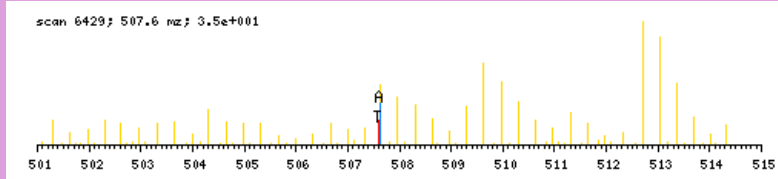

zoomed in precursor plot; T=theoretical m/z, A=acquired m/z

| b <sup>+</sup> | #  | AA # | y <sup>+</sup> | y <sup>2+</sup> |
|----------------|----|------|----------------|-----------------|
| 192.1024       | 1  | Y 12 |                |                 |
| 249.1239       | 2  | G 11 | 1329.6551      | 665.3315        |
| 362.2080       | 3  | I 10 | 1272.6337      | 636.8207        |
| 477.2349       | 4  | D 9  | 1159.5496      | 580.2787        |
| 592.2618       | 5  | D 8  | 1044.5227      | 522.7652        |
| 706.3048       | 6  | N 7  | 929.4957       | 465.2518        |
| 819.3888       | 7  | L 6  | 815.4528       | 408.2303        |
| 932.4729       | 8  | L 5  | 702.3687       | 351.6883        |
| 1069.5318      | 9  | H 4  | 589.2847       | 295.1462        |
| 1232.5951      | 10 | Y 3  | 452.2258       | 226.6168        |
| 1346.6381      | 11 | N 2  | 289.1624       | 145.0851        |
|                | 12 | R 1  | 175.1195       | 88.0637         |

N-term:+29.04

YGYDEKSAGVSPGPMGPGSQR, MH+ 2276.1658, m/z 759.3934  
H OSG38 P180811 230811-s1.06437.06437.3.dta

scan 6437; 4.1e+000

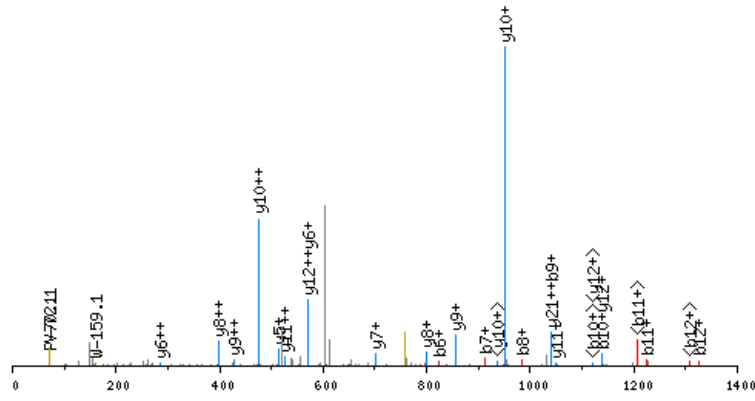

click image to zoom in; click top corners to zoom out [precursor±]

scan 6434; 759.4 m/z; 1.3e+001

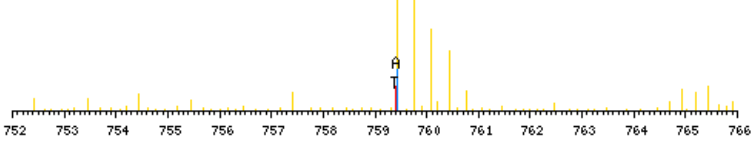

zoomed in precursor plot; T=theoretical m/z, A=acquired m/z

X-range:

-

MassTol: Y-zoom:

MassType:

AVG  MONO

Axis:

1  2

Label:

I  M  -

Ions:

a  +  2+  3+

b  +  2+  3+

c  +  2+  3+

x  +  2+  3+

y  +  2+  3+

z  +  2+  3+

hide H<sub>2</sub>O/NH<sub>3</sub>

zoom 112-122

GO

| b <sup>+</sup> | #  | AA # | y <sup>+</sup> | y <sup>2+</sup> |
|----------------|----|------|----------------|-----------------|
| 198.1342       | 1  | Y    | 22             |                 |
| 255.1557       | 2  | G    | 21             | 2079.0394       |
| 418.2190       | 3  | Y    | 20             | 2022.0179       |
| 533.2460       | 4  | D    | 19             | 1858.9546       |
| 662.2886       | 5  | E    | 18             | 1743.9276       |
| 824.4467       | 6  | K    | 17             | 1614.8850       |
| 911.4787       | 7  | S    | 16             | 1452.7269       |
| 982.5158       | 8  | A    | 15             | 1365.6949       |
| 1039.5373      | 9  | G    | 14             | 1294.6578       |
| 1138.6057      | 10 | V    | 13             | 1237.6363       |
| 1225.6377      | 11 | S    | 12             | 1138.5679       |
| 1324.7061      | 12 | V    | 11             | 1051.5359       |
| 1421.7589      | 13 | P    | 10             | 952.4675        |
| 1478.7803      | 14 | G    | 9              | 855.4147        |
| 1575.8331      | 15 | P    | 8              | 798.3932        |
| 1706.8736      | 16 | M    | 7              | 701.3405        |
| 1763.8951      | 17 | G    | 6              | 570.3000        |
| 1860.9478      | 18 | P    | 5              | 513.2785        |
| 1947.9799      | 19 | S    | 4              | 416.2258        |
| 2005.0013      | 20 | G    | 3              | 329.1937        |
| 2102.0541      | 21 | P    | 2              | 272.1723        |
|                | 22 | R    | 1              | 175.1195        |

N-term:+35.07 K(6):+162.16

YGYTHLSTGDLRL, MH+ 1529.8176, m/z 510.6107  
 H OSG40 P180811 230811-s1.06133.06133.3.dta

X-range:

-

MassTol: Y-zoom:

MassType:

AVG  MONO

Axis:

1  2

Label:

I  M  -

Ions:

a  +  2+  3+

b  +  2+  3+

c  +  2+  3+

x  +  2+  3+

y  +  2+  3+

z  +  2+  3+

hide H<sub>2</sub>O/NH<sub>3</sub>

zoom 112-122

GO

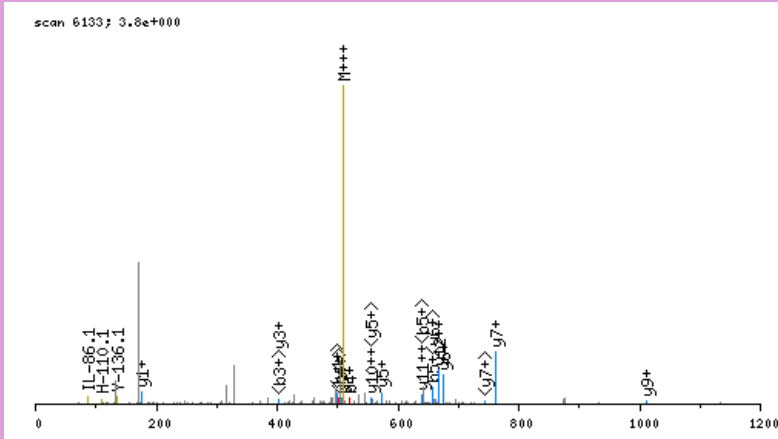

click image to zoom in; click top corners to zoom out [\[precursor±\]](#)

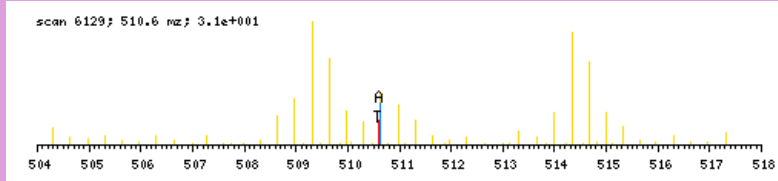

zoomed in precursor plot; T=theoretical m/z, A=acquired m/z

| b <sup>+</sup> | #  | AA # | y <sup>+</sup> | y <sup>2+</sup> |
|----------------|----|------|----------------|-----------------|
| 198.1342       | 1  | Y 13 |                |                 |
| 255.1557       | 2  | G 12 | 1332.6912      | 666.8495        |
| 418.2190       | 3  | Y 11 | 1275.6697      | 638.3388        |
| 519.2667       | 4  | T 10 | 1112.6064      | 556.8071        |
| 656.3256       | 5  | H 9  | 1011.5587      | 506.2833        |
| 769.4097       | 6  | L 8  | 874.4998       | 437.7538        |
| 856.4417       | 7  | S 7  | 761.4157       | 381.2118        |
| 957.4894       | 8  | T 6  | 674.3837       | 337.6958        |
| 1014.5108      | 9  | G 5  | 573.3360       | 287.1719        |
| 1129.5378      | 10 | D 4  | 516.3146       | 258.6612        |
| 1242.6219      | 11 | L 3  | 401.2876       | 201.1477        |
| 1355.7059      | 12 | L 2  | 288.2036       | 144.6057        |
|                | 13 | R 1  | 175.1195       | 88.0637         |

N-term:+35.07

YKEDVSPGTAIGKTPPEMLR, MH+ 2176.1688, m/z 544.7977  
 L OSG40 P180811 230811-s1.05598.05598.4.dta

scan 5598; 1.8e+000

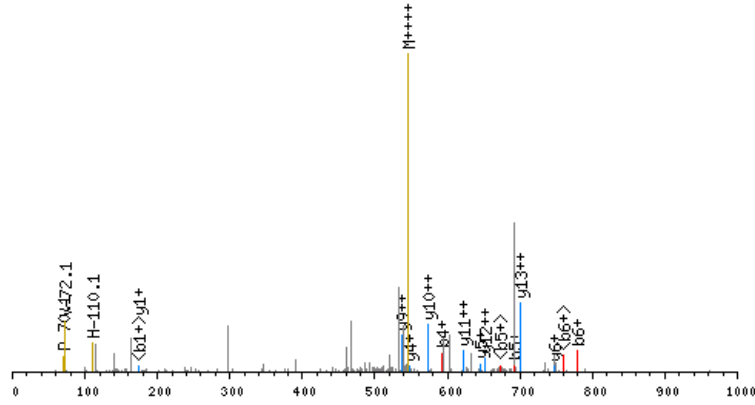

click image to zoom in; click top corners to zoom out [precursor±]

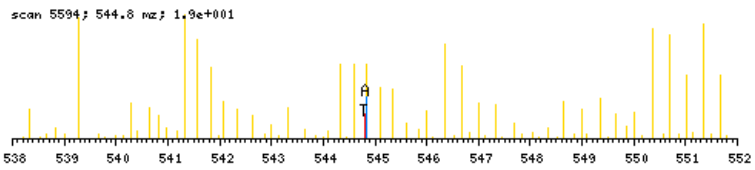

zoomed in precursor plot; T=theoretical m/z, A=acquired m/z

X-range:

-

MassTol: Y-zoom:

MassType:

AVG  MONO

Axis:

1  2

Label:

I  M  -

Ions:

a  +  2+  3+

b  +  2+  3+

c  +  2+  3+

x  +  2+  3+

y  +  2+  3+

z  +  2+  3+

hide H<sub>2</sub>O/NH<sub>3</sub>

zoom 112-122

GO

| b <sup>+</sup> | #  | AA | #  | y <sup>+</sup> | y <sup>2+</sup> |
|----------------|----|----|----|----------------|-----------------|
| 192.1024       | 1  | Y  | 19 |                |                 |
| 348.2287       | 2  | K  | 18 | 1985.0742      | 993.0410        |
| 477.2713       | 3  | E  | 17 | 1828.9479      | 914.9779        |
| 592.2983       | 4  | D  | 16 | 1699.9053      | 850.4566        |
| 691.3667       | 5  | V  | 15 | 1584.8784      | 792.9431        |
| 778.3987       | 6  | S  | 14 | 1485.8100      | 743.4089        |
| 875.4515       | 7  | P  | 13 | 1398.7779      | 699.8929        |
| 932.4729       | 8  | G  | 12 | 1301.7252      | 651.3665        |
| 1033.5206      | 9  | T  | 11 | 1244.7037      | 622.8558        |
| 1104.5577      | 10 | A  | 10 | 1143.6560      | 572.3319        |
| 1217.6418      | 11 | I  | 9  | 1072.6189      | 536.8134        |
| 1274.6633      | 12 | G  | 8  | 959.5348       | 480.2713        |
| 1430.7896      | 13 | K  | 7  | 902.5134       | 451.7606        |
| 1531.8372      | 14 | T  | 6  | 746.3871       | 373.6975        |
| 1628.8900      | 15 | P  | 5  | 645.3394       | 323.1736        |
| 1757.9326      | 16 | E  | 4  | 548.2866       | 274.6472        |
| 1888.9731      | 17 | M  | 3  | 419.2440       | 210.1259        |
| 2002.0571      | 18 | L  | 2  | 288.2036       | 144.6057        |
|                | 19 | R  | 1  | 175.1195       | 88.0637         |

N-term:+29.04 K(2):+156.13  
 K(13):+156.13

YKEPAAPVSIQR, MH+ 1414.8058, m/z 472.2735  
 L OSG40 P180811 230811-s1.03326.03326.3.dta

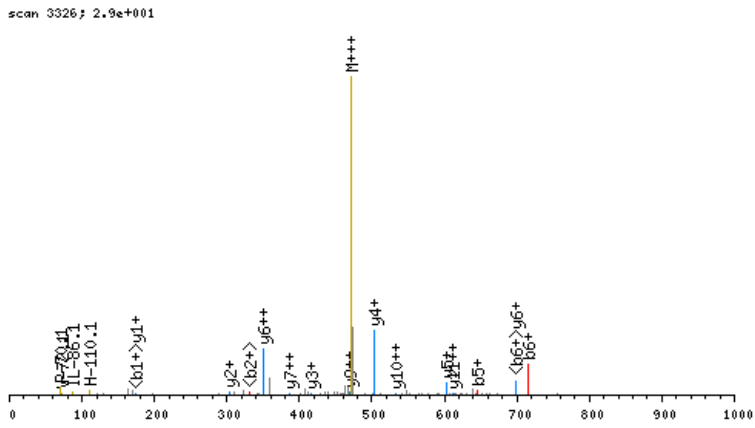

click image to zoom in; click top corners to zoom out [\[precursor±\]](#)

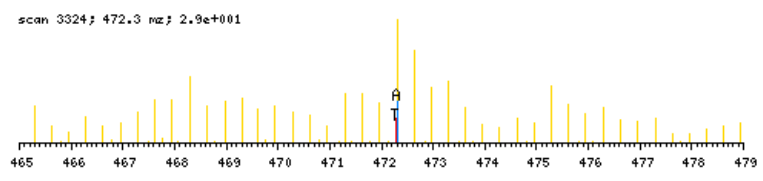

zoomed in precursor plot; T=theoretical m/z, A=acquired m/z

- X-range:  -
- MassTol: Y-zoom:
- MassType:  AVG  MONO
- Axis:  1  2
- Label:  I  M  -
- Ions:
- a  +  2+  3+
- b  +  2+  3+
- c  +  2+  3+
- x  +  2+  3+
- y  +  2+  3+
- z  +  2+  3+
- hide H<sub>2</sub>O/NH<sub>3</sub>
- zoom 112-122
- 

| b <sup>+</sup> | #  | AA | #  | y <sup>+</sup> | y <sup>2+</sup> |
|----------------|----|----|----|----------------|-----------------|
| 192.1024       | 1  | Y  | 12 |                |                 |
| 348.2287       | 2  | K  | 11 | 1223.7112      | 612.3595        |
| 477.2713       | 3  | E  | 10 | 1067.5849      | 534.2964        |
| 574.3241       | 4  | P  | 9  | 938.5423       | 469.7751        |
| 645.3612       | 5  | A  | 8  | 841.4896       | 421.2487        |
| 716.3983       | 6  | A  | 7  | 770.4525       | 385.7301        |
| 813.4511       | 7  | P  | 6  | 699.4153       | 350.2116        |
| 912.5195       | 8  | V  | 5  | 602.3626       | 301.6852        |
| 999.5515       | 9  | S  | 4  | 503.2942       | 252.1510        |
| 1112.6356      | 10 | I  | 3  | 416.2621       | 208.6350        |
| 1240.6942      | 11 | Q  | 2  | 303.1781       | 152.0930        |
|                | 12 | R  | 1  | 175.1195       | 88.0637         |

N-term:+29.04 K(2):+156.13

YLPSQVTEMFNQGR, MH+ 1697.8321, m/z 566.6155  
 L OSG37 P180811 230811-s1.07770.07770.3.dta

X-range:

-

MassTol: Y-zoom:

MassType:

AVG  MONO

Axis:

1  2

Label:

I  M  -

Ions:

a  +  2+  3+

b  +  2+  3+

c  +  2+  3+

x  +  2+  3+

y  +  2+  3+

z  +  2+  3+

hide H<sub>2</sub>O/NH<sub>3</sub>

zoom 112-122

GO

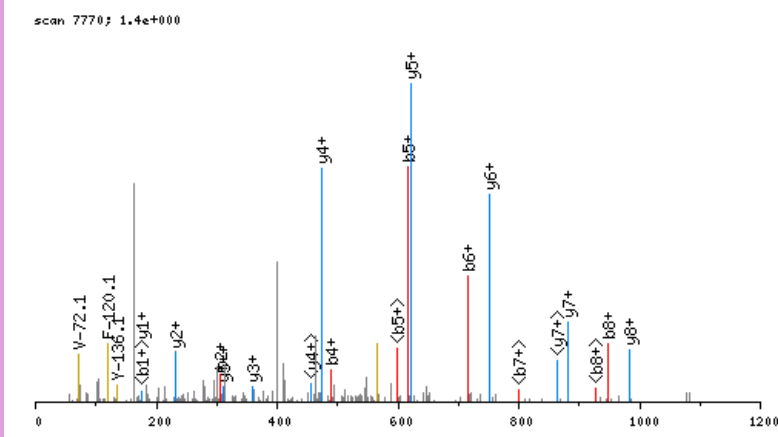

click image to zoom in; click top corners to zoom out [\[precursor±\]](#)

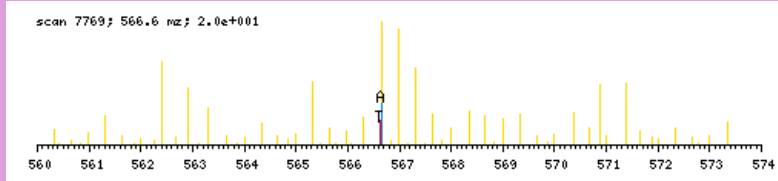

zoomed in precursor plot; T=theoretical m/z, A=acquired m/z

| b <sup>+</sup> | #  | AA # | y <sup>+</sup> | y <sup>2+</sup> |
|----------------|----|------|----------------|-----------------|
| 192.1024       | 1  | Y 14 |                |                 |
| 305.1865       | 2  | L 13 | 1506.7375      | 753.8727        |
| 402.2393       | 3  | P 12 | 1393.6534      | 697.3306        |
| 489.2713       | 4  | S 11 | 1296.6007      | 648.8042        |
| 617.3299       | 5  | Q 10 | 1209.5686      | 605.2882        |
| 716.3983       | 6  | V 9  | 1081.5101      | 541.2589        |
| 817.4460       | 7  | T 8  | 982.4416       | 491.7247        |
| 946.4885       | 8  | E 7  | 881.3940       | 441.2009        |
| 1077.5290      | 9  | M 6  | 752.3514       | 376.6796        |
| 1224.5974      | 10 | F 5  | 621.3109       | 311.1594        |
| 1338.6404      | 11 | N 4  | 474.2425       | 237.6251        |
| 1466.6990      | 12 | Q 3  | 360.1995       | 180.6037        |
| 1523.7204      | 13 | G 2  | 232.1410       | 116.5744        |
|                | 14 | R 1  | 175.1195       | 88.0637         |

N-term:+29.04

YMEKNQLEEVPSALPR, MH+ 1960.0214, m/z 654.0120  
 L OSG39 P180811 230811-s1.04742.04742.3.dta

X-range:

-

MassTol: Y-zoom:

MassType:

AVG  MONO

Axis:

1  2

Label:

I  M  -

Ions:

a  +  2+  3+

b  +  2+  3+

c  +  2+  3+

x  +  2+  3+

y  +  2+  3+

z  +  2+  3+

hide H<sub>2</sub>O/NH<sub>3</sub>

zoom 112-122

GO

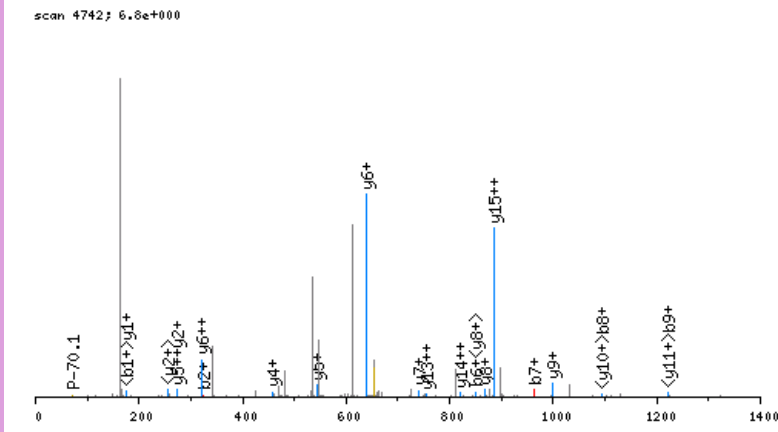

click image to zoom in; click top corners to zoom out [\[precursor±\]](#)

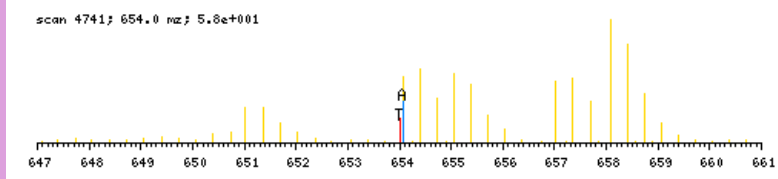

zoomed in precursor plot; T=theoretical m/z, A=acquired m/z

| b <sup>+</sup> | #  | AA # | y <sup>+</sup> | y <sup>2+</sup> |
|----------------|----|------|----------------|-----------------|
| 192.1024       | 1  | Y 16 |                |                 |
| 323.1429       | 2  | M 15 | 1768.9268      | 884.9673        |
| 452.1855       | 3  | E 14 | 1637.8863      | 819.4471        |
| 608.3118       | 4  | K 13 | 1508.8437      | 754.9258        |
| 722.3547       | 5  | N 12 | 1352.7174      | 676.8626        |
| 850.4133       | 6  | Q 11 | 1238.6745      | 619.8412        |
| 963.4974       | 7  | L 10 | 1110.6159      | 555.8119        |
| 1092.5400      | 8  | E 9  | 997.5318       | 499.2698        |
| 1221.5826      | 9  | E 8  | 868.4892       | 434.7485        |
| 1320.6510      | 10 | V 7  | 739.4466       | 370.2272        |
| 1417.7037      | 11 | P 6  | 640.3782       | 320.6930        |
| 1504.7358      | 12 | S 5  | 543.3255       | 272.1666        |
| 1575.7729      | 13 | A 4  | 456.2934       | 228.6506        |
| 1688.8569      | 14 | L 3  | 385.2563       | 193.1321        |
| 1785.9097      | 15 | P 2  | 272.1723       | 136.5900        |
|                | 16 | R 1  | 175.1195       | 88.0637         |

N-term:+29.04 K(4):+156.13

YNLDPQEGGECALMR, MH+ 1786.8316, m/z 596.2820  
 H OSG37 P180811 230811-s1.05822.05822.3.dta

X-range:

-

MassTol: Y-zoom:

MassType:

AVG  MONO

Axis:

1  2

Label:

I  M  -

Ions:

a  +  2+  3+

b  +  2+  3+

c  +  2+  3+

x  +  2+  3+

y  +  2+  3+

z  +  2+  3+

hide H<sub>2</sub>O/NH<sub>3</sub>

zoom 112-122

GO

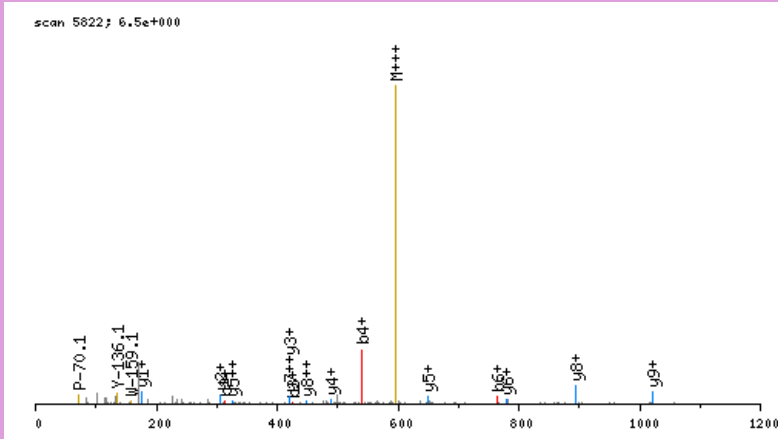

click image to zoom in; click top corners to zoom out [\[precursor±\]](#)

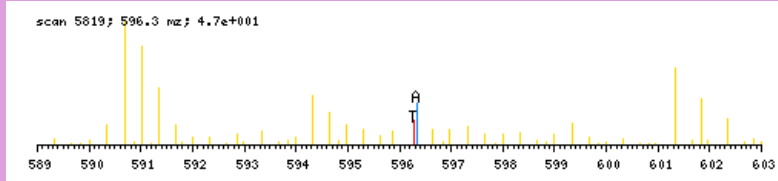

zoomed in precursor plot; T=theoretical m/z, A=acquired m/z

| b <sup>+</sup> | #  | AA | #  | y <sup>+</sup> | y <sup>2+</sup> |
|----------------|----|----|----|----------------|-----------------|
| 198.1342       | 1  | Y  | 15 |                |                 |
| 312.1772       | 2  | N  | 14 | 1589.7052      | 795.3565        |
| 425.2612       | 3  | L  | 13 | 1475.6622      | 738.3350        |
| 540.2882       | 4  | D  | 12 | 1362.5782      | 681.7930        |
| 637.3409       | 5  | P  | 11 | 1247.5512      | 624.2795        |
| 765.3995       | 6  | Q  | 10 | 1150.4985      | 575.7531        |
| 894.4421       | 7  | E  | 9  | 1022.4399      | 511.7239        |
| 951.4636       | 8  | G  | 8  | 893.3973       | 447.2026        |
| 1008.4850      | 9  | G  | 7  | 836.3758       | 418.6918        |
| 1137.5276      | 10 | E  | 6  | 779.3544       | 390.1811        |
| 1297.5582      | 11 | C  | 5  | 650.3118       | 325.6598        |
| 1368.5953      | 12 | A  | 4  | 490.2812       | 245.6445        |
| 1481.6794      | 13 | L  | 3  | 419.2440       | 210.1259        |
| 1612.7199      | 14 | M  | 2  | 306.1600       | 153.5839        |
|                | 15 | R  | 1  | 175.1195       | 88.0637         |

N-term:+35.07 C(11):+160.03



YPVGPPIYPPGSAVLVEGGYDAGAR, MH+ 2433.2454, m/z 811.7533  
 L OSG36 P180811 230811-s1.05768.05768.3.dta

scan 5768; 1.9e+000

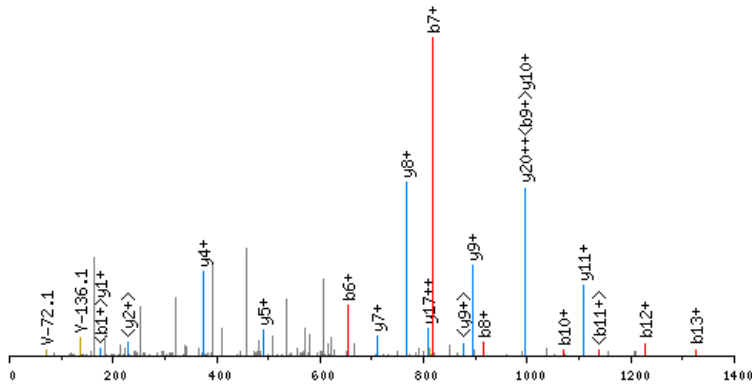

click image to zoom in; click top corners to zoom out [\[precursor±\]](#)

scan 5764; 811.8 mz; 9.4e+000

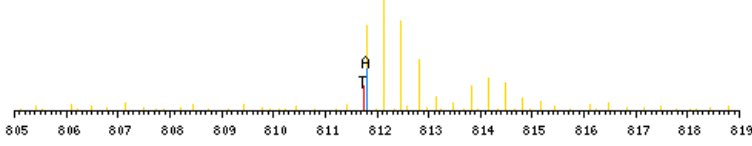

zoomed in precursor plot; T=theoretical m/z, A=acquired m/z

X-range:

-

MassTol: Y-zoom:

MassType:

AVG  MONO

Axis:

1  2

Label:

I  M  -

Ions:

a  +  2+  3+

b  +  2+  3+

c  +  2+  3+

x  +  2+  3+

y  +  2+  3+

z  +  2+  3+

hide H<sub>2</sub>O/NH<sub>3</sub>

zoom 112-122

GO

| b <sup>+</sup> | #  | AA # | y <sup>+</sup> | y <sup>2+</sup> |
|----------------|----|------|----------------|-----------------|
| 192.1024       | 1  | Y 24 |                |                 |
| 289.1552       | 2  | P 23 | 2242.1508      | 1121.5793       |
| 388.2236       | 3  | V 22 | 2145.0980      | 1073.0529       |
| 445.2451       | 4  | G 21 | 2046.0296      | 1023.5187       |
| 542.2978       | 5  | P 20 | 1989.0082      | 995.0080        |
| 655.3819       | 6  | I 19 | 1891.9554      | 946.4816        |
| 818.4452       | 7  | Y 18 | 1778.8713      | 889.9396        |
| 915.4980       | 8  | P 17 | 1615.8080      | 808.4079        |
| 1012.5508      | 9  | P 16 | 1518.7552      | 759.8815        |
| 1069.5722      | 10 | G 15 | 1421.7025      | 711.3552        |
| 1156.6042      | 11 | S 14 | 1364.6810      | 682.8444        |
| 1227.6414      | 12 | A 13 | 1277.6490      | 639.3284        |
| 1326.7098      | 13 | V 12 | 1206.6119      | 603.8099        |
| 1439.7938      | 14 | L 11 | 1107.5435      | 554.2756        |
| 1538.8623      | 15 | V 10 | 994.4594       | 497.7336        |
| 1667.9048      | 16 | E 9  | 895.3910       | 448.1994        |
| 1724.9263      | 17 | G 8  | 766.3484       | 383.6781        |
| 1781.9478      | 18 | G 7  | 709.3269       | 355.1674        |
| 1945.0111      | 19 | Y 6  | 652.3055       | 326.6566        |
| 2060.0380      | 20 | D 5  | 489.2421       | 245.1250        |
| 2131.0752      | 21 | A 4  | 374.2152       | 187.6115        |
| 2188.0966      | 22 | G 3  | 303.1781       | 152.0930        |
| 2259.1337      | 23 | A 2  | 246.1566       | 123.5822        |
|                | 24 | R 1  | 175.1195       | 88.0637         |

N-term:+29.04

YQQPSLLAAPLGLADHR, MH+ 1949.0608, m/z 650.3585  
 L OSG39 P180811 230811-s1.06573.06573.3.dta

X-range:

-

MassTol: Y-zoom:

MassType:

AVG  MONO

Axis:

1  2

Label:

I  M  -

Ions:

a  +  2+  3+

b  +  2+  3+

c  +  2+  3+

x  +  2+  3+

y  +  2+  3+

z  +  2+  3+

hide H<sub>2</sub>O/NH<sub>3</sub>

zoom 112-122

GO

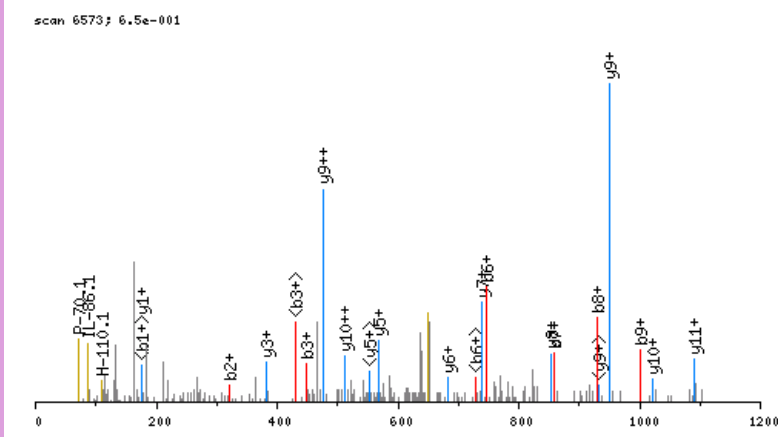

click image to zoom in; click top corners to zoom out [\[precursor±\]](#)

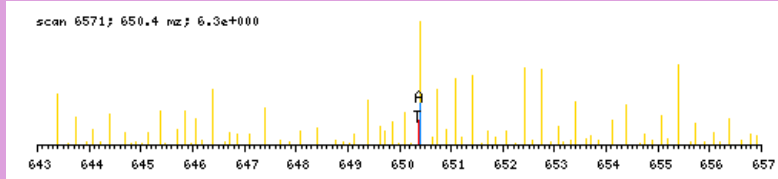

zoomed in precursor plot; T=theoretical m/z, A=acquired m/z

| b <sup>+</sup> | #  | AA | #  | y <sup>+</sup> | y <sup>2+</sup> |
|----------------|----|----|----|----------------|-----------------|
| 192.1024       | 1  | Y  | 18 |                |                 |
| 320.1610       | 2  | Q  | 17 | 1757.9662      | 879.4870        |
| 448.2196       | 3  | Q  | 16 | 1629.9077      | 815.4577        |
| 545.2723       | 4  | P  | 15 | 1501.8491      | 751.4285        |
| 632.3044       | 5  | S  | 14 | 1404.7963      | 702.9021        |
| 745.3884       | 6  | L  | 13 | 1317.7643      | 659.3861        |
| 858.4725       | 7  | L  | 12 | 1204.6802      | 602.8440        |
| 929.5096       | 8  | A  | 11 | 1091.5962      | 546.3020        |
| 1000.5467      | 9  | A  | 10 | 1020.5591      | 510.7834        |
| 1097.5995      | 10 | P  | 9  | 949.5219       | 475.2649        |
| 1210.6836      | 11 | L  | 8  | 852.4692       | 426.7385        |
| 1267.7050      | 12 | G  | 7  | 739.3851       | 370.1965        |
| 1380.7891      | 13 | L  | 6  | 682.3636       | 341.6857        |
| 1451.8262      | 14 | A  | 5  | 569.2796       | 285.1437        |
| 1566.8531      | 15 | D  | 4  | 498.2425       | 249.6251        |
| 1637.8903      | 16 | A  | 3  | 383.2155       | 192.1117        |
| 1774.9492      | 17 | H  | 2  | 312.1784       | 156.5931        |
|                | 18 | R  | 1  | 175.1195       | 88.0637         |

N-term:+29.04

YSDKGVSSGPGMGLMGPR, MH+ 1948.9625, m/z 650.3257  
 L OSG39 P180811 230811-s1.04790.04790.3.dta

X-range:

-

MassTol: Y-zoom:

MassType:

AVG  MONO

Axis:

1  2

Label:

I  M  -

Ions:

a  +  2+  3+

b  +  2+  3+

c  +  2+  3+

x  +  2+  3+

y  +  2+  3+

z  +  2+  3+

hide H<sub>2</sub>O/NH<sub>3</sub>

zoom 112-122

GO

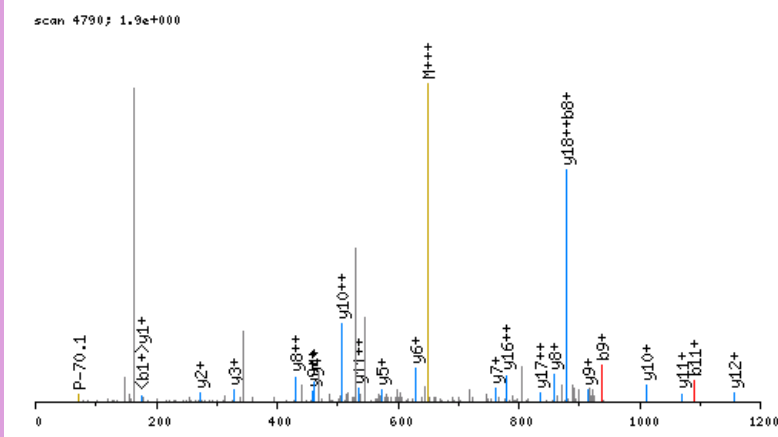

click image to zoom in; click top corners to zoom out [\[precursor±\]](#)

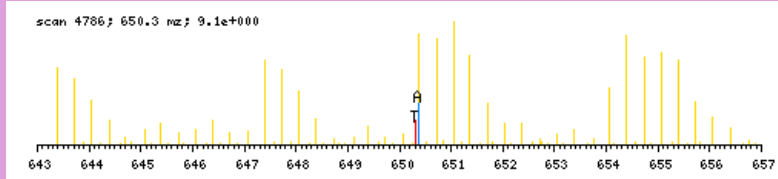

zoomed in precursor plot; T=theoretical m/z, A=acquired m/z

| b <sup>+</sup> | #  | AA # | y <sup>+</sup> | y <sup>2+</sup> |
|----------------|----|------|----------------|-----------------|
| 192.1024       | 1  | Y    | 19             |                 |
| 279.1345       | 2  | S    | 18             | 879.4379        |
| 394.1614       | 3  | D    | 17             | 835.9218        |
| 550.2877       | 4  | K    | 16             | 778.4084        |
| 607.3092       | 5  | G    | 15             | 700.3452        |
| 706.3776       | 6  | V    | 14             | 671.8345        |
| 793.4096       | 7  | S    | 13             | 622.3003        |
| 880.4416       | 8  | S    | 12             | 578.7843        |
| 937.4631       | 9  | G    | 11             | 535.2683        |
| 1034.5159      | 10 | P    | 10             | 506.7575        |
| 1091.5373      | 11 | G    | 9              | 458.2311        |
| 1188.5901      | 12 | P    | 8              | 429.7204        |
| 1319.6306      | 13 | M    | 7              | 381.1940        |
| 1376.6520      | 14 | G    | 6              | 315.6738        |
| 1489.7361      | 15 | L    | 5              | 287.1631        |
| 1620.7766      | 16 | M    | 4              | 230.6210        |
| 1677.7981      | 17 | G    | 3              | 165.1008        |
| 1774.8508      | 18 | P    | 2              | 136.5900        |
|                | 19 | R    | 1              | 88.0637         |

N-term:+29.04 K(4):+156.13

YSLLPASLLDHR, MH+ 1412.7901, m/z 471.6016  
 L OSG39 P180811 230811-s1.06570.06570.3.dta

X-range:

-

MassTol: Y-zoom:

MassType:

AVG  MONO

Axis:

1  2

Label:

I  M  -

Ions:

a  +  2+  3+

b  +  2+  3+

c  +  2+  3+

x  +  2+  3+

y  +  2+  3+

z  +  2+  3+

hide H<sub>2</sub>O/NH<sub>3</sub>

zoom 112-122

GO

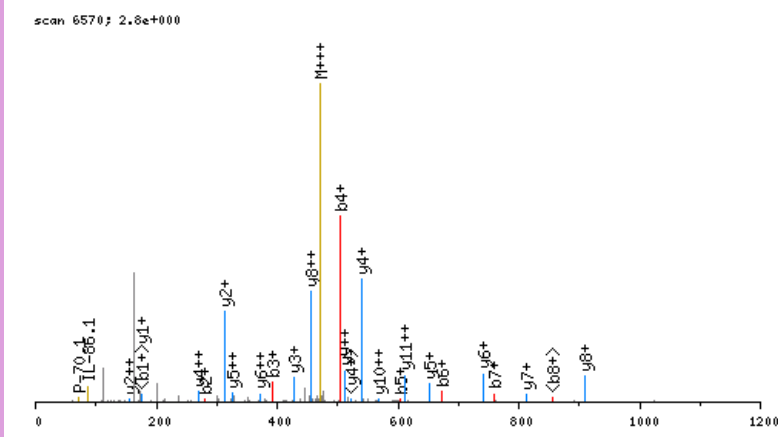

click image to zoom in; click top corners to zoom out [\[precursor±\]](#)

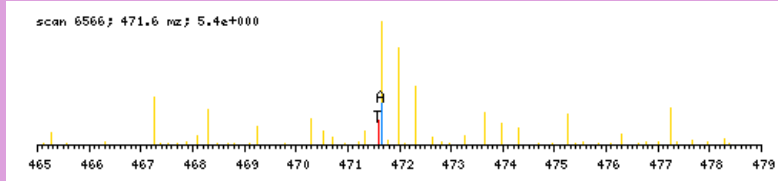

zoomed in precursor plot; T=theoretical m/z, A=acquired m/z

| b <sup>+</sup> | #  | AA | #  | y <sup>+</sup> | y <sup>2+</sup> |
|----------------|----|----|----|----------------|-----------------|
| 192.1024       | 1  | Y  | 12 |                |                 |
| 279.1345       | 2  | S  | 11 | 1221.6955      | 611.3517        |
| 392.2185       | 3  | L  | 10 | 1134.6635      | 567.8357        |
| 505.3026       | 4  | L  | 9  | 1021.5795      | 511.2936        |
| 602.3553       | 5  | P  | 8  | 908.4954       | 454.7516        |
| 673.3925       | 6  | A  | 7  | 811.4426       | 406.2252        |
| 760.4245       | 7  | S  | 6  | 740.4055       | 370.7067        |
| 873.5086       | 8  | L  | 5  | 653.3735       | 327.1907        |
| 986.5926       | 9  | L  | 4  | 540.2894       | 270.6486        |
| 1101.6196      | 10 | D  | 3  | 427.2054       | 214.1066        |
| 1238.6785      | 11 | H  | 2  | 312.1784       | 156.5931        |
|                | 12 | R  | 1  | 175.1195       | 88.0637         |

N-term:+29.04

YSSSDVIELTPSNFNR, MH+ 1977.9618, m/z 659.9921  
 H OSG37 P180811 230811-s1.06780.06780.3.dta

X-range:

-

MassTol: Y-zoom:

MassType:

AVG  MONO

Axis:

1  2

Label:

I  M  -

Ions:

a  +  2+  3+

b  +  2+  3+

c  +  2+  3+

x  +  2+  3+

y  +  2+  3+

z  +  2+  3+

hide H<sub>2</sub>O/NH<sub>3</sub>

zoom 112-122

GO

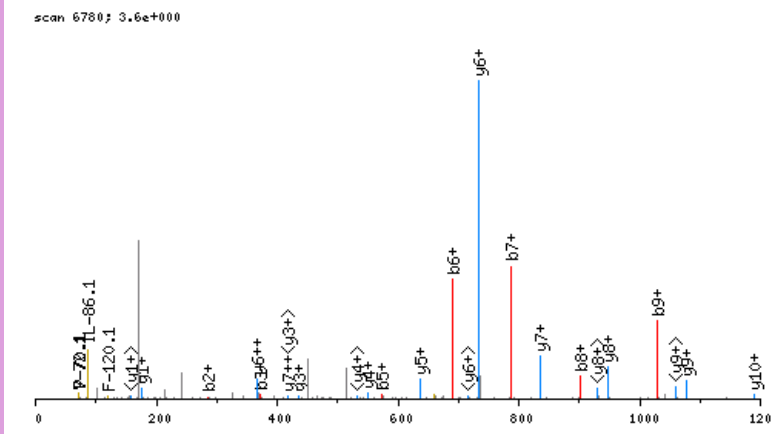

click image to zoom in; click top corners to zoom out [\[precursor±\]](#)

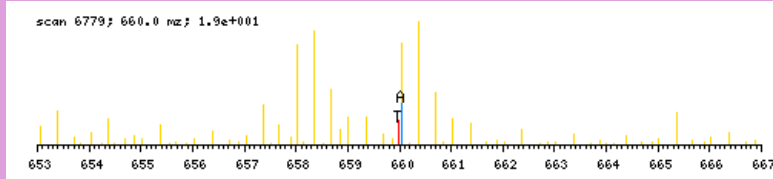

zoomed in precursor plot; T=theoretical m/z, A=acquired m/z

| b <sup>+</sup> | #  | AA | #  | y <sup>+</sup> | y <sup>2+</sup> |
|----------------|----|----|----|----------------|-----------------|
| 198.1342       | 1  | Y  | 17 |                |                 |
| 285.1663       | 2  | S  | 16 | 1780.8353      | 890.9216        |
| 372.1983       | 3  | S  | 15 | 1693.8033      | 847.4056        |
| 459.2303       | 4  | S  | 14 | 1606.7713      | 803.8896        |
| 574.2573       | 5  | D  | 13 | 1519.7393      | 760.3735        |
| 689.2842       | 6  | D  | 12 | 1404.7123      | 702.8601        |
| 788.3526       | 7  | V  | 11 | 1289.6854      | 645.3466        |
| 901.4367       | 8  | I  | 10 | 1190.6170      | 595.8124        |
| 1030.4793      | 9  | E  | 9  | 1077.5329      | 539.2704        |
| 1143.5633      | 10 | L  | 8  | 948.4903       | 474.7491        |
| 1244.6110      | 11 | T  | 7  | 835.4062       | 418.2070        |
| 1341.6638      | 12 | P  | 6  | 734.3586       | 367.6832        |
| 1428.6958      | 13 | S  | 5  | 637.3058       | 319.1568        |
| 1542.7387      | 14 | N  | 4  | 550.2738       | 275.6408        |
| 1689.8071      | 15 | F  | 3  | 436.2308       | 218.6193        |
| 1803.8501      | 16 | N  | 2  | 289.1624       | 145.0851        |
|                | 17 | R  | 1  | 175.1195       | 88.0637         |

N-term:+35.07

YSTSNIQDALHGQLR, MH+ 1736.9143, m/z 579.6430  
 H OSG40 P180811 230811-s1.06257.06257.3.dta

X-range:

-

MassTol: Y-zoom:

MassType:

AVG  MONO

Axis:

1  2

Label:

I  M  -

Ions:

a  +  2+  3+

b  +  2+  3+

c  +  2+  3+

x  +  2+  3+

y  +  2+  3+

z  +  2+  3+

hide H<sub>2</sub>O/NH<sub>3</sub>

zoom 112-122

GO

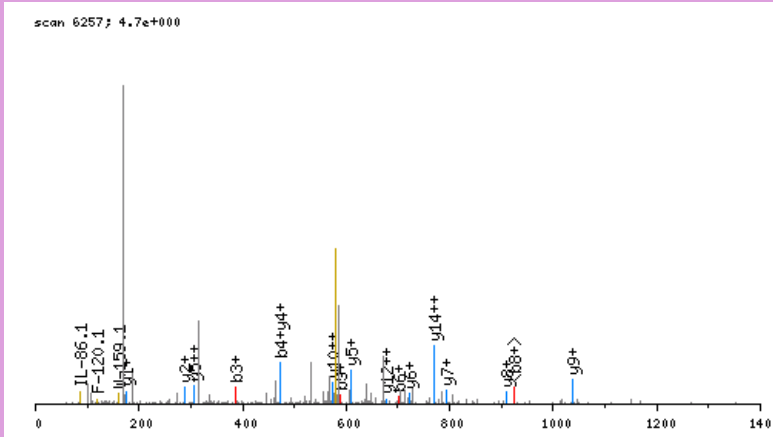

click image to zoom in; click top corners to zoom out [\[precursor±\]](#)

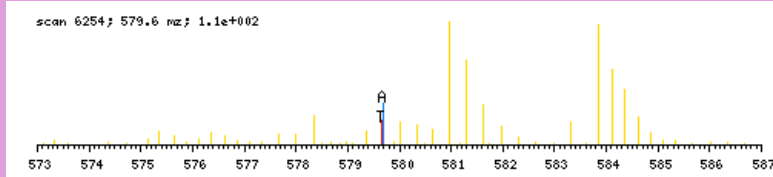

zoomed in precursor plot; T=theoretical m/z, A=acquired m/z

| b <sup>+</sup> | #  | AA | #  | y <sup>+</sup> | y <sup>2+</sup> |
|----------------|----|----|----|----------------|-----------------|
| 198.1342       | 1  | Y  | 15 |                |                 |
| 285.1663       | 2  | S  | 14 | 1539.7879      | 770.3979        |
| 386.2139       | 3  | T  | 13 | 1452.7559      | 726.8819        |
| 473.2460       | 4  | S  | 12 | 1351.7082      | 676.3580        |
| 587.2889       | 5  | N  | 11 | 1264.6762      | 632.8420        |
| 700.3730       | 6  | I  | 10 | 1150.6333      | 575.8206        |
| 828.4315       | 7  | Q  | 9  | 1037.5492      | 519.2785        |
| 943.4585       | 8  | D  | 8  | 909.4906       | 455.2492        |
| 1014.4956      | 9  | A  | 7  | 794.4637       | 397.7358        |
| 1127.5797      | 10 | L  | 6  | 723.4266       | 362.2172        |
| 1264.6386      | 11 | H  | 5  | 610.3425       | 305.6752        |
| 1321.6600      | 12 | G  | 4  | 473.2836       | 237.1457        |
| 1449.7186      | 13 | Q  | 3  | 416.2621       | 208.6350        |
| 1562.8027      | 14 | L  | 2  | 288.2036       | 144.6057        |
|                | 15 | R  | 1  | 175.1195       | 88.0637         |

N-term:+35.07

YSVLQATPTAKDEGR, MH+ 1691.8968, m/z 564.6371  
 L OSG39 P180811 230811-s1.03143.03143.3.dta

X-range:

-

MassTol: Y-zoom:

MassType:

AVG  MONO

Axis:

1  2

Label:

I  M  -

Ions:

a  +  2+  3+

b  +  2+  3+

c  +  2+  3+

x  +  2+  3+

y  +  2+  3+

z  +  2+  3+

hide H<sub>2</sub>O/NH<sub>3</sub>

zoom 112-122

GO

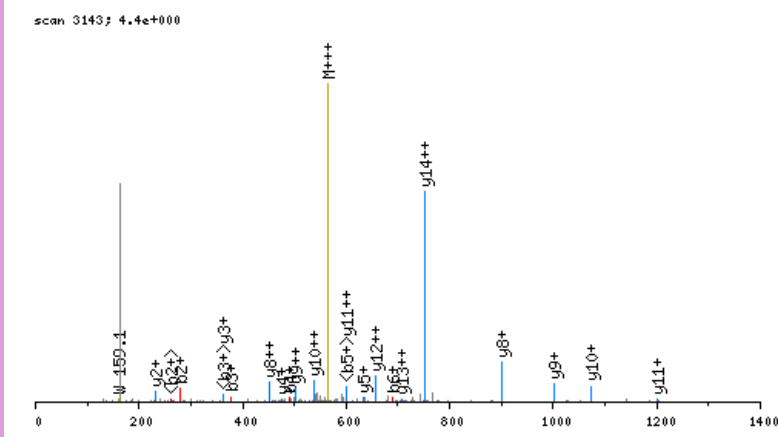

click image to zoom in; click top corners to zoom out [\[precursor±\]](#)

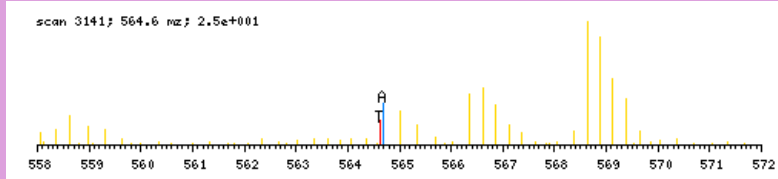

zoomed in precursor plot; T=theoretical m/z, A=acquired m/z

| b <sup>+</sup> | #  | AA | #  | y <sup>+</sup> | y <sup>2+</sup> |
|----------------|----|----|----|----------------|-----------------|
| 192.1024       | 1  | Y  | 15 |                |                 |
| 279.1345       | 2  | S  | 14 | 1500.8022      | 750.9050        |
| 378.2029       | 3  | V  | 13 | 1413.7702      | 707.3890        |
| 491.2869       | 4  | L  | 12 | 1314.7018      | 657.8548        |
| 619.3455       | 5  | Q  | 11 | 1201.6177      | 601.3128        |
| 690.3826       | 6  | A  | 10 | 1073.5591      | 537.2835        |
| 791.4303       | 7  | T  | 9  | 1002.5220      | 501.7649        |
| 888.4831       | 8  | P  | 8  | 901.4744       | 451.2411        |
| 989.5307       | 9  | T  | 7  | 804.4216       | 402.7147        |
| 1060.5679      | 10 | A  | 6  | 703.3739       | 352.1909        |
| 1216.6942      | 11 | K  | 5  | 632.3368       | 316.6723        |
| 1331.7211      | 12 | D  | 4  | 476.2105       | 238.6092        |
| 1460.7637      | 13 | E  | 3  | 361.1836       | 181.0957        |
| 1517.7852      | 14 | G  | 2  | 232.1410       | 116.5744        |
|                | 15 | R  | 1  | 175.1195       | 88.0637         |

N-term:+29.04 K(11):+156.13

YTEGAEIVDSVLDVVR, MH+ 1792.9332, m/z 598.3159  
 L OSG37 P180811 230811-s1.08812.08812.3.dta

scan 8812; 1.9e+000

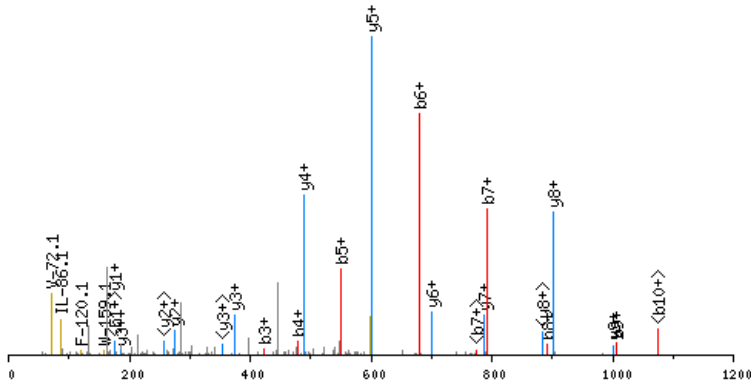

click image to zoom in; click top corners to zoom out [\[precursor±\]](#)

scan 8809; 598.3 m/z; 1.4e+001

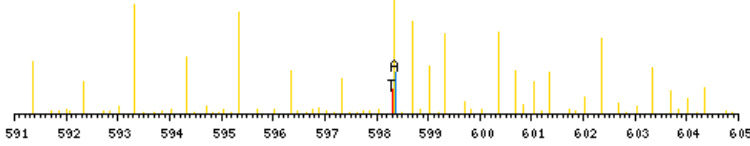

zoomed in precursor plot; T=theoretical m/z, A=acquired m/z

X-range:

-

MassTol: Y-zoom:

MassType:

AVG  MONO

Axis:

1  2

Label:

I  M  -

Ions:

a  +  2+  3+

b  +  2+  3+

c  +  2+  3+

x  +  2+  3+

y  +  2+  3+

z  +  2+  3+

hide H<sub>2</sub>O/NH<sub>3</sub>

zoom 112-122

GO

| b <sup>+</sup> | #  | AA # | y <sup>+</sup> | y <sup>2+</sup> |
|----------------|----|------|----------------|-----------------|
| 192.1024       | 1  | Y 16 |                |                 |
| 293.1501       | 2  | T 15 | 1601.8386      | 801.4232        |
| 422.1927       | 3  | E 14 | 1500.7910      | 750.8994        |
| 479.2142       | 4  | G 13 | 1371.7484      | 686.3781        |
| 550.2513       | 5  | A 12 | 1314.7269      | 657.8674        |
| 679.2939       | 6  | E 11 | 1243.6898      | 622.3488        |
| 792.3779       | 7  | L 10 | 1114.6472      | 557.8275        |
| 891.4463       | 8  | V 9  | 1001.5631      | 501.2855        |
| 1006.4733      | 9  | D 8  | 902.4947       | 451.7513        |
| 1093.5053      | 10 | S 7  | 787.4678       | 394.2378        |
| 1192.5737      | 11 | V 6  | 700.4357       | 350.7218        |
| 1305.6578      | 12 | L 5  | 601.3673       | 301.1876        |
| 1420.6847      | 13 | D 4  | 488.2833       | 244.6455        |
| 1519.7532      | 14 | V 3  | 373.2563       | 187.1321        |
| 1618.8216      | 15 | V 2  | 274.1879       | 137.5979        |
|                | 16 | R 1  | 175.1195       | 88.0637         |

N-term:+29.04



YTPEPNGMASEEVTEKER, MH+ 2122.9967, m/z 708.3371  
 L OSG39 P180811 230811-s1.03159.03159.3.dta

X-range:

-

MassTol: Y-zoom:

MassType:

AVG  MONO

Axis:

1  2

Label:

I  M  -

Ions:

a  +  2+  3+

b  +  2+  3+

c  +  2+  3+

x  +  2+  3+

y  +  2+  3+

z  +  2+  3+

hide H<sub>2</sub>O/NH<sub>3</sub>

zoom 112-122

GO

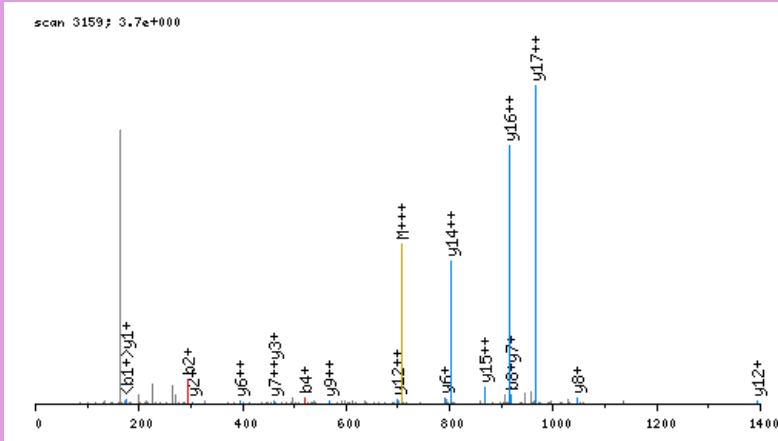

click image to zoom in; click top corners to zoom out [\[precursor±\]](#)

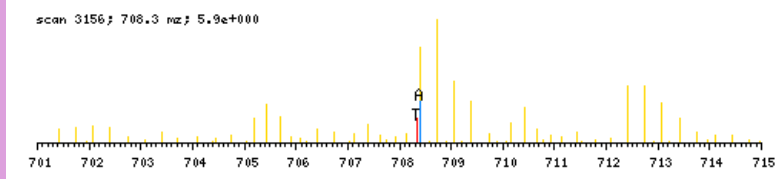

zoomed in precursor plot; T=theoretical m/z, A=acquired m/z

| b <sup>+</sup> | #  | AA # | y <sup>+</sup> | y <sup>2+</sup> |
|----------------|----|------|----------------|-----------------|
| 192.1024       | 1  | Y 18 |                |                 |
| 293.1501       | 2  | T 17 | 1931.9021      | 966.4550        |
| 390.2029       | 3  | P 16 | 1830.8544      | 915.9311        |
| 519.2455       | 4  | E 15 | 1733.8016      | 867.4047        |
| 616.2982       | 5  | P 14 | 1604.7590      | 802.8834        |
| 730.3412       | 6  | N 13 | 1507.7063      | 754.3571        |
| 787.3626       | 7  | G 12 | 1393.6634      | 697.3356        |
| 918.4031       | 8  | M 11 | 1336.6419      | 668.8249        |
| 989.4402       | 9  | A 10 | 1205.6014      | 603.3046        |
| 1076.4722      | 10 | S 9  | 1134.5643      | 567.7861        |
| 1205.5148      | 11 | E 8  | 1047.5323      | 524.2700        |
| 1334.5574      | 12 | E 7  | 918.4897       | 459.7487        |
| 1433.6258      | 13 | V 6  | 789.4471       | 395.2275        |
| 1534.6735      | 14 | T 5  | 690.3787       | 345.6932        |
| 1663.7161      | 15 | E 4  | 589.3310       | 295.1694        |
| 1819.8424      | 16 | K 3  | 460.2884       | 230.6481        |
| 1948.8850      | 17 | E 2  | 304.1621       | 152.5850        |
|                | 18 | R 1  | 175.1195       | 88.0637         |

N-term:+29.04 K(16):+156.13

YVDAGAETMTQR, MH+ 1375.6740, m/z 459.2295  
 H OSG37 P180811 230811-s1.02800.02800.3.dta

X-range:

-

MassTol: Y-zoom:

MassType:

AVG  MONO

Axis:

1  2

Label:

I  M  -

Ions:

a  +  2+  3+

b  +  2+  3+

c  +  2+  3+

x  +  2+  3+

y  +  2+  3+

z  +  2+  3+

hide H<sub>2</sub>O/NH<sub>3</sub>

zoom 112-122

GO

scan 2800; 2.4e+000

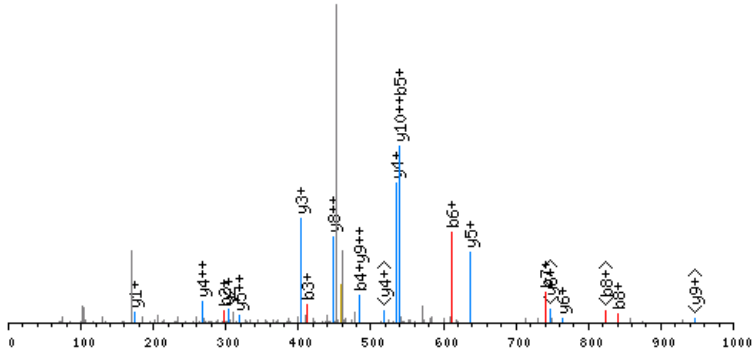

click image to zoom in; click top corners to zoom out [\[precursor±\]](#)

scan 2799; 459.2 m/z; 2.1e+001

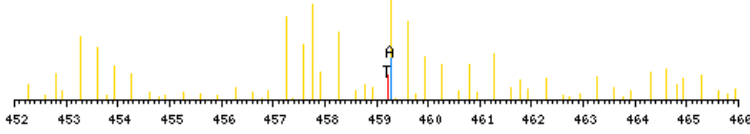

zoomed in precursor plot; T=theoretical m/z, A=acquired m/z

| b <sup>+</sup> | #  | AA # | y <sup>+</sup> | y <sup>2+</sup> |
|----------------|----|------|----------------|-----------------|
| 198.1342       | 1  | Y 12 |                |                 |
| 297.2026       | 2  | V 11 | 1178.5476      | 589.7777        |
| 412.2296       | 3  | D 10 | 1079.4791      | 540.2435        |
| 483.2667       | 4  | A 9  | 964.4522       | 482.7300        |
| 540.2882       | 5  | G 8  | 893.4151       | 447.2115        |
| 611.3253       | 6  | A 7  | 836.3936       | 418.7007        |
| 740.3679       | 7  | E 6  | 765.3565       | 383.1822        |
| 841.4155       | 8  | T 5  | 636.3139       | 318.6609        |
| 972.4560       | 9  | M 4  | 535.2662       | 268.1370        |
| 1073.5037      | 10 | T 3  | 404.2258       | 202.6168        |
| 1201.5623      | 11 | Q 2  | 303.1781       | 152.0930        |
|                | 12 | R 1  | 175.1195       | 88.0637         |

N-term:+35.07

YVGEEMEEGEFSEAR, MH+ 1717.7379, m/z 859.3726  
 L OSG37 P180811 230811-s1.04743.04743.2.dta

X-range:

-

MassTol: Y-zoom:

MassType:

AVG  MONO

Axis:

1  2

Label:

I  M  -

Ions:

a  +  2+  3+

b  +  2+  3+

c  +  2+  3+

x  +  2+  3+

y  +  2+  3+

z  +  2+  3+

hide H<sub>2</sub>O/NH<sub>3</sub>

zoom 112-122

GO

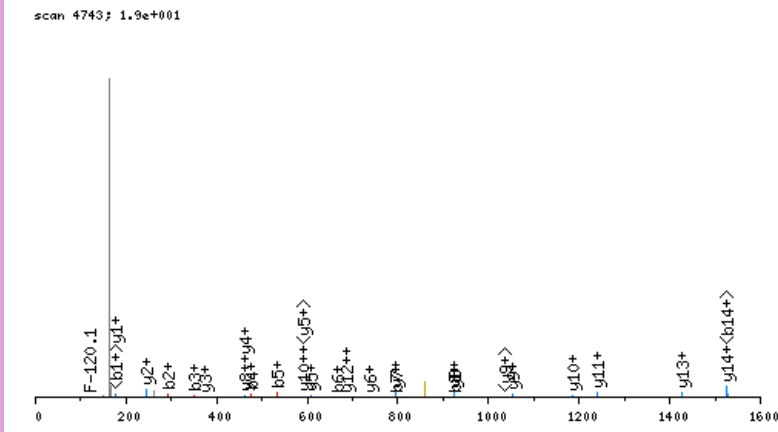

click image to zoom in; click top corners to zoom out [\[precursor±\]](#)

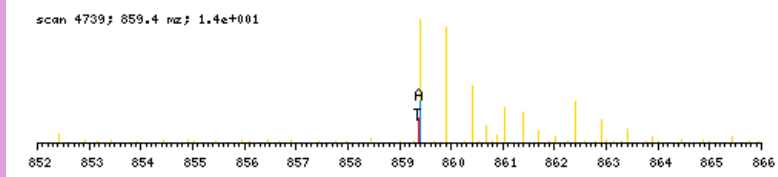

zoomed in precursor plot; T=theoretical m/z, A=acquired m/z

| b <sup>+</sup> | #  | AA # | y <sup>+</sup> | y <sup>2+</sup> |
|----------------|----|------|----------------|-----------------|
| 192.1024       | 1  | Y    | 15             |                 |
| 291.1708       | 2  | V    | 14             | 1526.6433       |
| 348.1923       | 3  | G    | 13             | 1427.5749       |
| 477.2349       | 4  | E    | 12             | 1370.5534       |
| 534.2564       | 5  | G    | 11             | 1241.5108       |
| 665.2968       | 6  | M    | 10             | 1184.4894       |
| 794.3394       | 7  | E    | 9              | 1053.4489       |
| 923.3820       | 8  | E    | 8              | 924.4063        |
| 980.4035       | 9  | G    | 7              | 795.3637        |
| 1109.4461      | 10 | E    | 6              | 738.3422        |
| 1256.5145      | 11 | F    | 5              | 609.2997        |
| 1343.5465      | 12 | S    | 4              | 462.2312        |
| 1472.5891      | 13 | E    | 3              | 375.1992        |
| 1543.6262      | 14 | A    | 2              | 246.1566        |
|                | 15 | R    | 1              | 175.1195        |

N-term:+29.04

YVSPEDLEAQLQSDER, MH+ 1912.9352, m/z 638.3166  
 H OSG37 P180811 230811-s1.06941.06941.3.dta

X-range:

-

MassTol: Y-zoom:

MassType:

AVG  MONO

Axis:

1  2

Label:

I  M  -

Ions:

a  +  2+  3+

b  +  2+  3+

c  +  2+  3+

x  +  2+  3+

y  +  2+  3+

z  +  2+  3+

hide H<sub>2</sub>O/NH<sub>3</sub>

zoom 112-122

GO

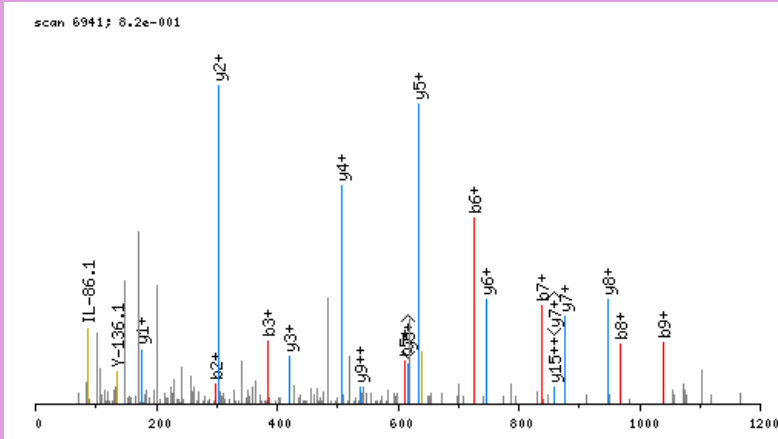

click image to zoom in; click top corners to zoom out [\[precursor±\]](#)

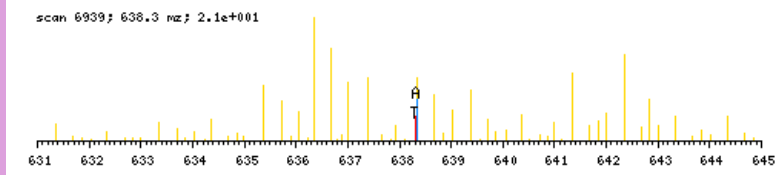

zoomed in precursor plot; T=theoretical m/z, A=acquired m/z

| b <sup>+</sup> | #  | AA # | y <sup>+</sup> | y <sup>2+</sup> |
|----------------|----|------|----------------|-----------------|
| 198.1342       | 1  | Y 16 |                |                 |
| 297.2026       | 2  | V 15 | 1715.8088      | 858.4083        |
| 384.2347       | 3  | S 14 | 1616.7404      | 808.8741        |
| 481.2874       | 4  | P 13 | 1529.7084      | 765.3581        |
| 610.3300       | 5  | E 12 | 1432.6556      | 716.8317        |
| 725.3570       | 6  | D 11 | 1303.6130      | 652.3104        |
| 838.4410       | 7  | L 10 | 1188.5861      | 594.7969        |
| 967.4836       | 8  | E 9  | 1075.5020      | 538.2549        |
| 1038.5207      | 9  | A 8  | 946.4594       | 473.7336        |
| 1166.5793      | 10 | Q 7  | 875.4223       | 438.2151        |
| 1279.6634      | 11 | L 6  | 747.3637       | 374.1858        |
| 1407.7220      | 12 | Q 5  | 634.2796       | 317.6437        |
| 1494.7540      | 13 | S 4  | 506.2211       | 253.6144        |
| 1609.7809      | 14 | D 3  | 419.1890       | 210.0984        |
| 1738.8235      | 15 | E 2  | 304.1621       | 152.5850        |
|                | 16 | R 1  | 175.1195       | 88.0637         |

N-term:+35.07

YVTIIDAPGHR, MH+ 1275.7273, m/z 425.9140  
 H OSG40 P180811 230811-s1.03941.03941.3.dta

X-range:

-

MassTol: Y-zoom:

MassType:

AVG  MONO

Axis:

1  2

Label:

I  M  -

Ions:

a  +  2+  3+

b  +  2+  3+

c  +  2+  3+

x  +  2+  3+

y  +  2+  3+

z  +  2+  3+

hide H<sub>2</sub>O/NH<sub>3</sub>

zoom 112-122

GO

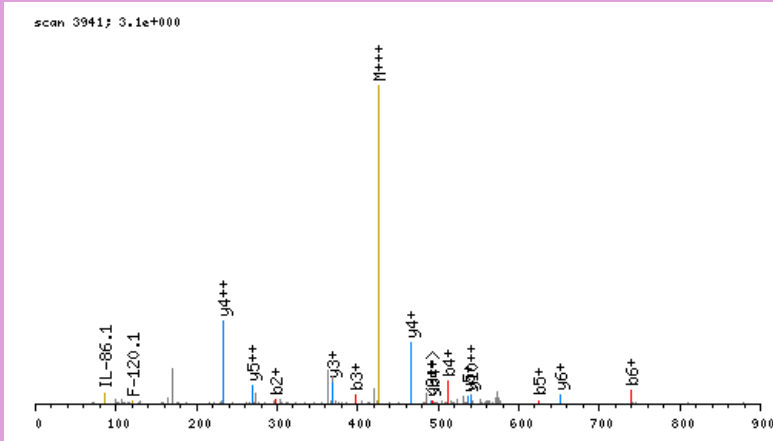

click image to zoom in; click top corners to zoom out [\[precursor±\]](#)

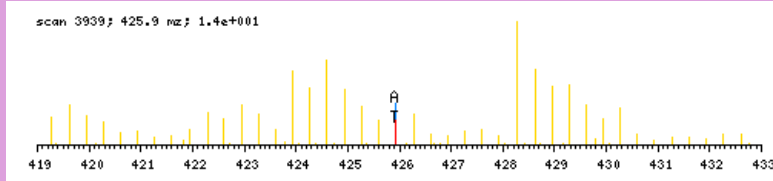

zoomed in precursor plot; T=theoretical m/z, A=acquired m/z

| b <sup>+</sup> | #  | AA # | y <sup>+</sup> | y <sup>2+</sup> |
|----------------|----|------|----------------|-----------------|
| 198.1342       | 1  | Y    | 11             |                 |
| 297.2026       | 2  | V    | 10             | 1078.6009       |
| 398.2503       | 3  | T    | 9              | 979.5325        |
| 511.3344       | 4  | I    | 8              | 878.4848        |
| 624.4184       | 5  | I    | 7              | 765.4008        |
| 739.4454       | 6  | D    | 6              | 652.3167        |
| 810.4825       | 7  | A    | 5              | 537.2898        |
| 907.5353       | 8  | P    | 4              | 466.2526        |
| 964.5567       | 9  | G    | 3              | 369.1999        |
| 1101.6156      | 10 | H    | 2              | 312.1784        |
|                | 11 | R    | 1              | 175.1195        |

N-term:+35.07

YYSMKGAGTDDSTLVR, MH+ 1819.8900, m/z 607.3015  
 L OSG39 P180811 230811-s1.03329.03329.3.dta

X-range:

-

MassTol: Y-zoom:

MassType:

AVG  MONO

Axis:

1  2

Label:

I  M  -

Ions:

a  +  2+  3+

b  +  2+  3+

c  +  2+  3+

x  +  2+  3+

y  +  2+  3+

z  +  2+  3+

hide H<sub>2</sub>O/NH<sub>3</sub>

zoom 112-122

GO

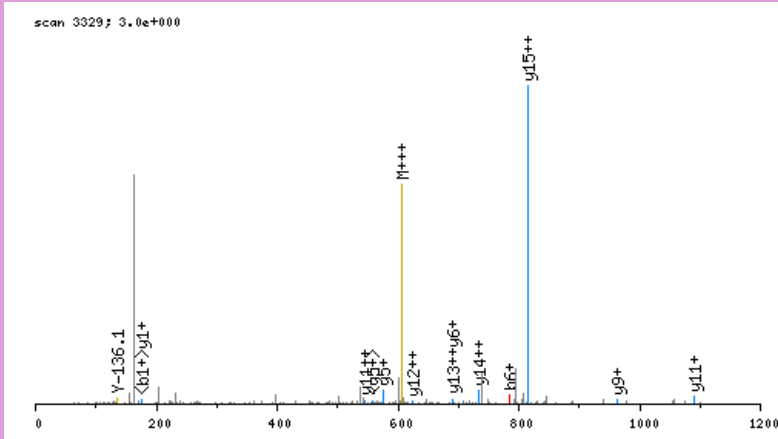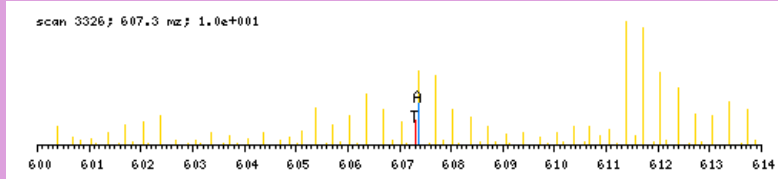

| b <sup>+</sup> | #  | AA # | y <sup>+</sup> | y <sup>2+</sup> |
|----------------|----|------|----------------|-----------------|
| 192.1024       | 1  | Y    | 16             |                 |
| 355.1658       | 2  | Y    | 15             | 1628.7954       |
| 442.1978       | 3  | S    | 14             | 1465.7321       |
| 573.2383       | 4  | M    | 13             | 1378.7001       |
| 729.3646       | 5  | K    | 12             | 1247.6596       |
| 786.3860       | 6  | G    | 11             | 1091.5333       |
| 857.4231       | 7  | A    | 10             | 1034.5118       |
| 914.4446       | 8  | G    | 9              | 963.4747        |
| 1015.4923      | 9  | T    | 8              | 906.4533        |
| 1130.5192      | 10 | D    | 7              | 805.4056        |
| 1245.5462      | 11 | D    | 6              | 690.3786        |
| 1332.5782      | 12 | S    | 5              | 575.3517        |
| 1433.6259      | 13 | T    | 4              | 488.3197        |
| 1546.7099      | 14 | L    | 3              | 387.2720        |
| 1645.7784      | 15 | V    | 2              | 274.1879        |
|                | 16 | R    | 1              | 175.1195        |

N-term:+29.04 K(5):+156.13
