# Supplementary material
Source: PubMed Central journal article supplement (PMC3591655)
Supplement: supp_M112.017962_mcp.M112.017962-25.pdf [file supp_M112.017962_mcp.M112.017962-25.pdf]

AAAAAAAAAAGAAGGR, MH+ 1240.6398, m/z 620.8236  
 L OSG41 P180811 230811-s1.05205.05205.2.dta

X-range:

-

MassTol: Y-zoom:

MassType:

AVG  MONO

Axis:

1  2

Label:

I  M  -

Ions:

a  +  2+  3+

b  +  2+  3+

c  +  2+  3+

x  +  2+  3+

y  +  2+  3+

z  +  2+  3+

hide H<sub>2</sub>O/NH<sub>3</sub>

zoom 112-122

GO

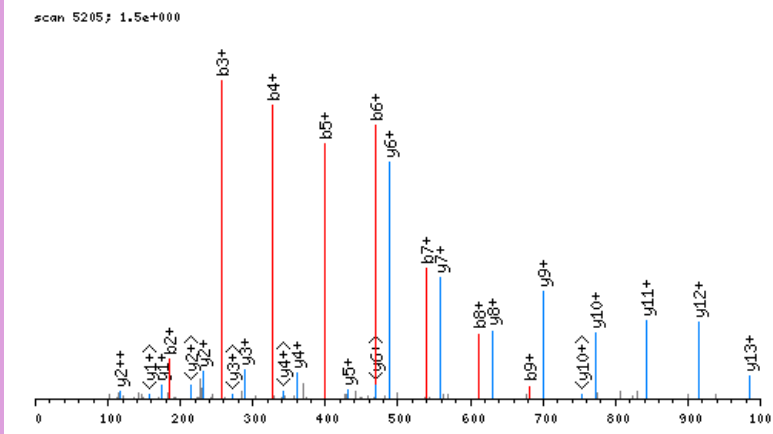

click image to zoom in; click top corners to zoom out [\[precursor±\]](#)

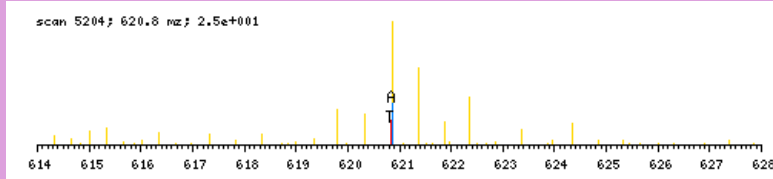

zoomed in precursor plot; T=theoretical m/z, A=acquired m/z

| b <sup>+</sup> | #  | AA # | y <sup>+</sup> | y <sup>2+</sup> |
|----------------|----|------|----------------|-----------------|
| 114.0555       | 1  | A 16 |                |                 |
| 185.0926       | 2  | A 15 | 1127.5921      | 564.3000        |
| 256.1297       | 3  | A 14 | 1056.5550      | 528.7814        |
| 327.1669       | 4  | A 13 | 985.5179       | 493.2629        |
| 398.2040       | 5  | A 12 | 914.4808       | 457.7443        |
| 469.2411       | 6  | A 11 | 843.4437       | 422.2258        |
| 540.2782       | 7  | A 10 | 772.4066       | 386.7072        |
| 611.3153       | 8  | A 9  | 701.3695       | 351.1886        |
| 682.3524       | 9  | A 8  | 630.3323       | 315.6701        |
| 753.3895       | 10 | A 7  | 559.2952       | 280.1515        |
| 810.4110       | 11 | G 6  | 488.2581       | 244.6330        |
| 881.4481       | 12 | A 5  | 431.2367       | 216.1222        |
| 952.4852       | 13 | A 4  | 360.1995       | 180.6037        |
| 1009.5067      | 14 | G 3  | 289.1624       | 145.0851        |
| 1066.5282      | 15 | G 2  | 232.1410       | 116.5744        |
|                | 16 | R 1  | 175.1195       | 88.0637         |

N-term:+43.02

AAAAAAAAAGAAGGR, MH+ 1169.6027, m/z 585.3050  
 L OSG41 P180811 230811-s1.04705.04705.2.dta

X-range:

-

MassTol: Y-zoom:

MassType:

AVG  MONO

Axis:

1  2

Label:

I  M  -

Ions:

a  +  2+  3+

b  +  2+  3+

c  +  2+  3+

x  +  2+  3+

y  +  2+  3+

z  +  2+  3+

hide H<sub>2</sub>O/NH<sub>3</sub>

zoom 112-122

GO

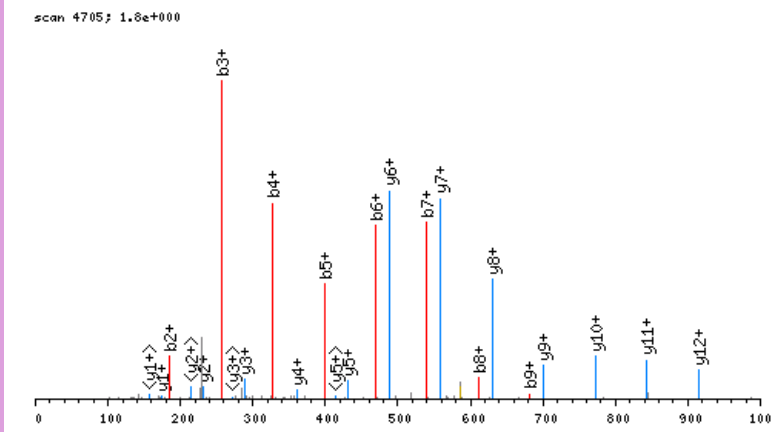

click image to zoom in; click top corners to zoom out [\[precursor±\]](#)

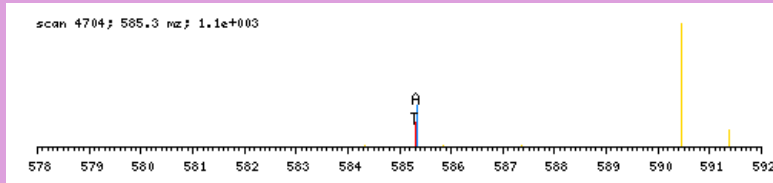

zoomed in precursor plot; T=theoretical m/z, A=acquired m/z

| b <sup>+</sup> | #  | AA | #  | y <sup>+</sup> | y <sup>2+</sup> |
|----------------|----|----|----|----------------|-----------------|
| 114.0555       | 1  | A  | 15 |                |                 |
| 185.0926       | 2  | A  | 14 | 1056.5550      | 528.7814        |
| 256.1297       | 3  | A  | 13 | 985.5179       | 493.2629        |
| 327.1669       | 4  | A  | 12 | 914.4808       | 457.7443        |
| 398.2040       | 5  | A  | 11 | 843.4437       | 422.2258        |
| 469.2411       | 6  | A  | 10 | 772.4066       | 386.7072        |
| 540.2782       | 7  | A  | 9  | 701.3695       | 351.1886        |
| 611.3153       | 8  | A  | 8  | 630.3323       | 315.6701        |
| 682.3524       | 9  | A  | 7  | 559.2952       | 280.1515        |
| 739.3739       | 10 | G  | 6  | 488.2581       | 244.6330        |
| 810.4110       | 11 | A  | 5  | 431.2367       | 216.1222        |
| 881.4481       | 12 | A  | 4  | 360.1995       | 180.6037        |
| 938.4696       | 13 | G  | 3  | 289.1624       | 145.0851        |
| 995.4910       | 14 | G  | 2  | 232.1410       | 116.5744        |
|                | 15 | R  | 1  | 175.1195       | 88.0637         |

N-term:+43.02

AAAAAAGAAGRGSGPGR, MH+ 1765.9170, m/z 589.3105  
 L OSG37 P180811 230811-s1.05507.05507.3.dta

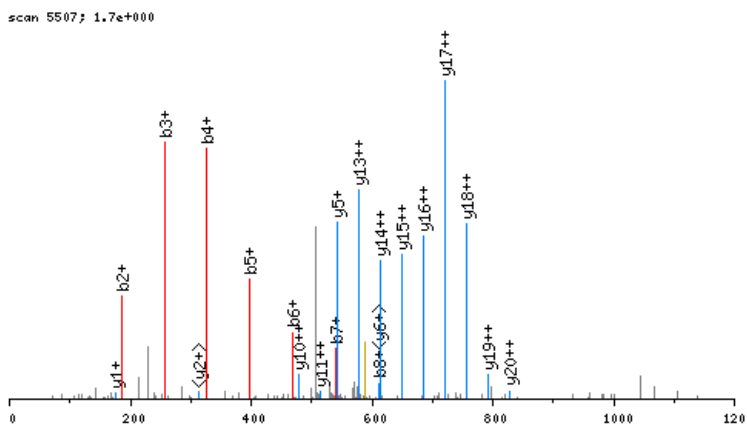

click image to zoom in; click top corners to zoom out [\[precursor±\]](#)

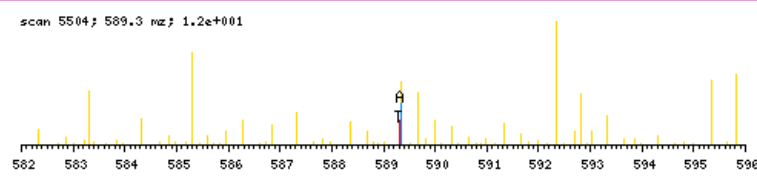

zoomed in precursor plot; T=theoretical m/z, A=acquired m/z

X-range:

-

MassTol: Y-zoom:

MassType:

AVG  MONO

Axis:

1  2

Label:

I  M  -

Ions:

a  +  2+  3+

b  +  2+  3+

c  +  2+  3+

x  +  2+  3+

y  +  2+  3+

z  +  2+  3+

hide H<sub>2</sub>O/NH<sub>3</sub>

zoom 112-122

GO

| b <sup>+</sup> | #  | AA | #  | y <sup>+</sup> | y <sup>2+</sup> |
|----------------|----|----|----|----------------|-----------------|
| 114.0555       | 1  | A  | 21 |                |                 |
| 185.0926       | 2  | A  | 20 | 1652.8693      | 826.9386        |
| 256.1297       | 3  | A  | 19 | 1581.8322      | 791.4200        |
| 327.1669       | 4  | A  | 18 | 1510.7951      | 755.9015        |
| 398.2040       | 5  | A  | 17 | 1439.7580      | 720.3829        |
| 469.2411       | 6  | A  | 16 | 1368.7209      | 684.8643        |
| 540.2782       | 7  | A  | 15 | 1297.6838      | 649.3458        |
| 611.3153       | 8  | A  | 14 | 1226.6466      | 613.8272        |
| 668.3368       | 9  | G  | 13 | 1155.6095      | 578.3087        |
| 739.3739       | 10 | A  | 12 | 1098.5881      | 549.7979        |
| 810.4110       | 11 | A  | 11 | 1027.5509      | 514.2794        |
| 867.4325       | 12 | G  | 10 | 956.5138       | 478.7608        |
| 924.4539       | 13 | G  | 9  | 899.4924       | 450.2501        |
| 1080.5550      | 14 | R  | 8  | 842.4709       | 421.7394        |
| 1137.5765      | 15 | G  | 7  | 686.3698       | 343.6888        |
| 1224.6085      | 16 | S  | 6  | 629.3483       | 315.1781        |
| 1281.6300      | 17 | G  | 5  | 542.3163       | 271.6621        |
| 1378.6828      | 18 | P  | 4  | 485.2948       | 243.1513        |
| 1435.7042      | 19 | G  | 3  | 388.2421       | 194.6250        |
| 1591.8053      | 20 | R  | 2  | 331.2206       | 166.1142        |
|                | 21 | R  | 1  | 175.1195       | 88.0637         |

N-term:+43.02

AAAAAAAAEPYPASGTTKR, MH+ 1779.9454, m/z 593.9866  
 L OSG37 P180811 230811-s1.05700.05700.3.dta

scan 5700; 1.3e+001

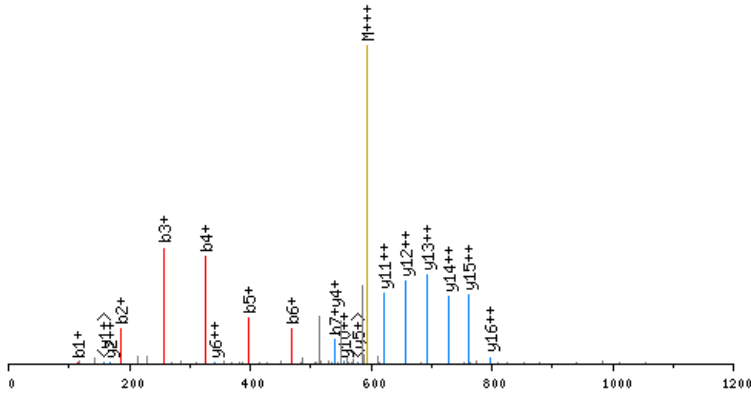

click image to zoom in; click top corners to zoom out [precursor±]

scan 5699; 594.0 m/z; 5.0e+002

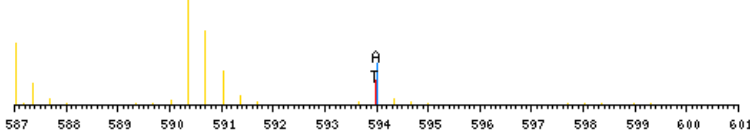

zoomed in precursor plot; T=theoretical m/z, A=acquired m/z

X-range:

-

MassTol: Y-zoom:

MassType:

AVG  MONO

Axis:

1  2

Label:

I  M  -

Ions:

a  +  2+  3+

b  +  2+  3+

c  +  2+  3+

x  +  2+  3+

y  +  2+  3+

z  +  2+  3+

hide H<sub>2</sub>O/NH<sub>3</sub>

zoom 112-122

GO

| b <sup>+</sup> | #  | AA # | y <sup>+</sup> | y <sup>2+</sup> |
|----------------|----|------|----------------|-----------------|
| 114.0555       | 1  | A 18 |                |                 |
| 185.0926       | 2  | A 17 | 1666.8977      | 833.9528        |
| 256.1297       | 3  | A 16 | 1595.8606      | 798.4342        |
| 327.1669       | 4  | A 15 | 1524.8235      | 762.9156        |
| 398.2040       | 5  | A 14 | 1453.7864      | 727.3971        |
| 469.2411       | 6  | A 13 | 1382.7492      | 691.8785        |
| 540.2782       | 7  | A 12 | 1311.7121      | 656.3600        |
| 669.3208       | 8  | E 11 | 1240.6750      | 620.8414        |
| 766.3736       | 9  | P 10 | 1111.6324      | 556.3201        |
| 929.4369       | 10 | Y 9  | 1014.5797      | 507.7937        |
| 1026.4896      | 11 | P 8  | 851.5163       | 426.2621        |
| 1097.5268      | 12 | A 7  | 754.4636       | 377.7357        |
| 1184.5588      | 13 | S 6  | 683.4264       | 342.2171        |
| 1241.5803      | 14 | G 5  | 596.3944       | 298.7011        |
| 1342.6279      | 15 | T 4  | 539.3730       | 270.1904        |
| 1443.6756      | 16 | T 3  | 438.3253       | 219.6666        |
| 1605.8337      | 17 | K 2  | 337.2776       | 169.1427        |
|                | 18 | R 1  | 175.1195       | 88.0637         |

N-term:+43.02 K(17):+162.16



AAAAAAPGGGGGEPR, MH+ 1251.6082, m/z 626.3077  
 L OSG41 P180811 230811-s1.02481.02481.2.dta

X-range:

-

MassTol: Y-zoom:

MassType:

AVG  MONO

Axis:

1  2

Label:

I  M  -

Ions:

a  +  2+  3+

b  +  2+  3+

c  +  2+  3+

x  +  2+  3+

y  +  2+  3+

z  +  2+  3+

hide H<sub>2</sub>O/NH<sub>3</sub>

zoom 112-122

GO

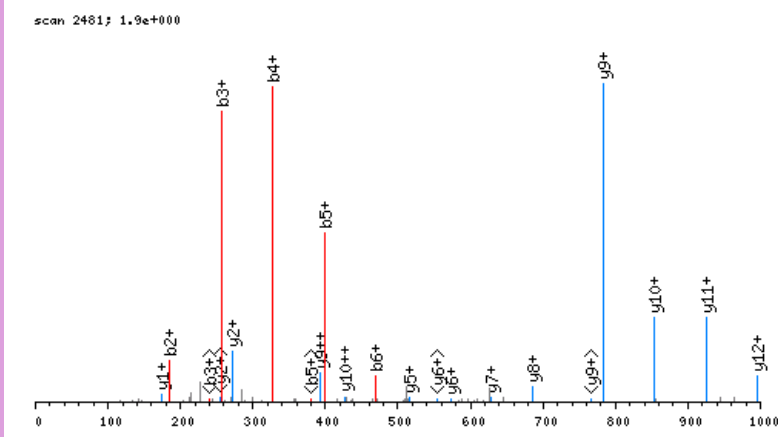

click image to zoom in; click top corners to zoom out [\[precursor±\]](#)

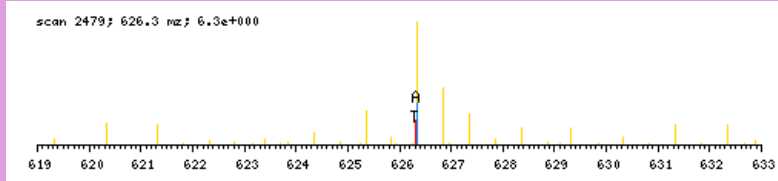

zoomed in precursor plot; T=theoretical m/z, A=acquired m/z

| b <sup>+</sup> | #  | AA | #  | y <sup>+</sup> | y <sup>2+</sup> |
|----------------|----|----|----|----------------|-----------------|
| 114.0555       | 1  | A  | 15 |                |                 |
| 185.0926       | 2  | A  | 14 | 1138.5605      | 569.7842        |
| 256.1297       | 3  | A  | 13 | 1067.5234      | 534.2656        |
| 327.1669       | 4  | A  | 12 | 996.4863       | 498.7471        |
| 398.2040       | 5  | A  | 11 | 925.4492       | 463.2285        |
| 469.2411       | 6  | A  | 10 | 854.4121       | 427.7099        |
| 566.2938       | 7  | P  | 9  | 783.3749       | 392.1914        |
| 623.3153       | 8  | G  | 8  | 686.3222       | 343.6650        |
| 680.3368       | 9  | G  | 7  | 629.3007       | 315.1543        |
| 737.3582       | 10 | G  | 6  | 572.2792       | 286.6435        |
| 794.3797       | 11 | G  | 5  | 515.2578       | 258.1328        |
| 851.4012       | 12 | G  | 4  | 458.2363       | 229.6221        |
| 980.4438       | 13 | E  | 3  | 401.2149       | 201.1113        |
| 1077.4965      | 14 | P  | 2  | 272.1723       | 136.5900        |
|                | 15 | R  | 1  | 175.1195       | 88.0637         |

N-term:+43.02

AAAAAAGVAGAGR, MH+ 998.5383, m/z 499.7728  
 L OSG41 P180811 230811-s1.04096.04096.2.dta

X-range:

-

MassTol: Y-zoom:

MassType:

AVG  MONO

Axis:

1  2

Label:

I  M  -

Ions:

a  +  2+  3+

b  +  2+  3+

c  +  2+  3+

x  +  2+  3+

y  +  2+  3+

z  +  2+  3+

hide H<sub>2</sub>O/NH<sub>3</sub>

zoom 112-122

GO

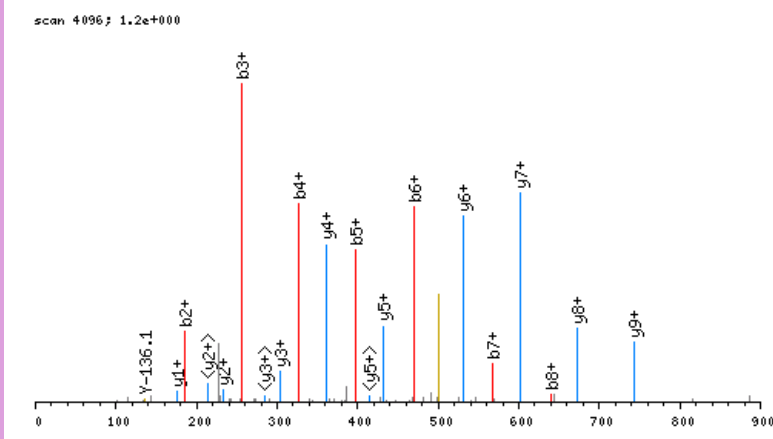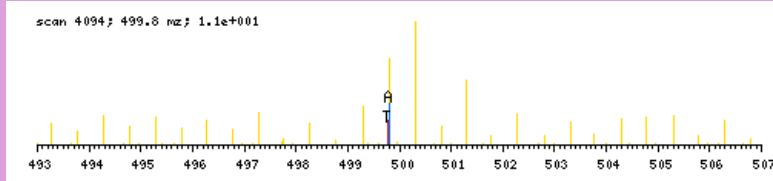

| b <sup>+</sup> | #  | AA | #  | y <sup>+</sup> | y <sup>2+</sup> |
|----------------|----|----|----|----------------|-----------------|
| 114.0555       | 1  | A  | 12 |                |                 |
| 185.0926       | 2  | A  | 11 | 885.4906       | 443.2492        |
| 256.1297       | 3  | A  | 10 | 814.4535       | 407.7307        |
| 327.1669       | 4  | A  | 9  | 743.4164       | 372.2121        |
| 398.2040       | 5  | A  | 8  | 672.3793       | 336.6936        |
| 469.2411       | 6  | A  | 7  | 601.3422       | 301.1750        |
| 568.3095       | 7  | V  | 6  | 530.3051       | 265.6564        |
| 639.3466       | 8  | A  | 5  | 431.2367       | 216.1222        |
| 696.3681       | 9  | G  | 4  | 360.1995       | 180.6037        |
| 767.4052       | 10 | A  | 3  | 303.1781       | 152.0930        |
| 824.4267       | 11 | G  | 2  | 232.1410       | 116.5744        |
|                | 12 | R  | 1  | 175.1195       | 88.0637         |

N-term:+43.02

AAAAAGPASSQR, MH+ 1099.5496, m/z 550.2784  
 L OSG41 P180811 230811-s1.02221.02221.2.dta

X-range:

-

MassTol: Y-zoom:

MassType:

AVG  MONO

Axis:

1  2

Label:

I  M  -

Ions:

a  +  2+  3+

b  +  2+  3+

c  +  2+  3+

x  +  2+  3+

y  +  2+  3+

z  +  2+  3+

hide H<sub>2</sub>O/NH<sub>3</sub>

zoom 112-122

GO

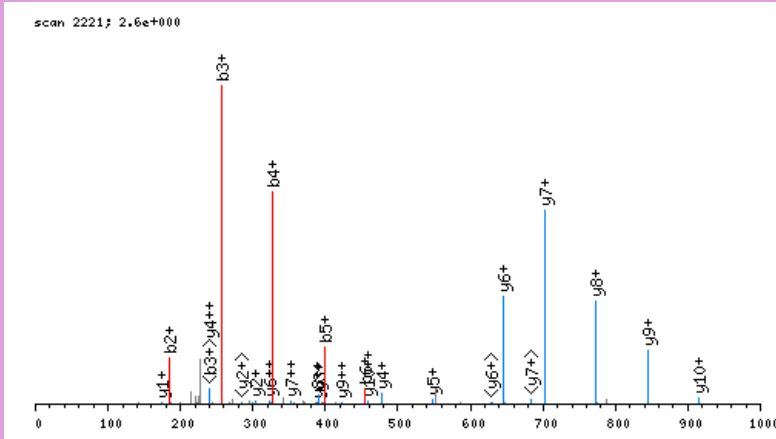

click image to zoom in; click top corners to zoom out [\[precursor±\]](#)

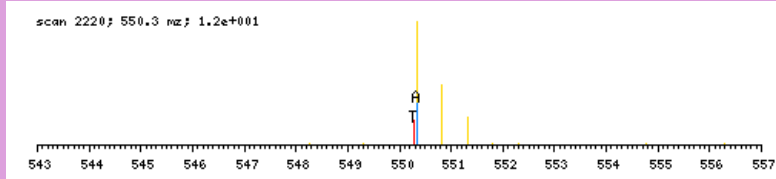

zoomed in precursor plot; T-theoretical m/z, A-acquired m/z

| b <sup>+</sup> | #  | AA # | y <sup>+</sup> | y <sup>2+</sup>   |
|----------------|----|------|----------------|-------------------|
| 114.0555       | 1  | A    | 12             |                   |
| 185.0926       | 2  | A    | 11             | 986.5019 493.7549 |
| 256.1297       | 3  | A    | 10             | 915.4648 458.2363 |
| 327.1669       | 4  | A    | 9              | 844.4277 422.7178 |
| 398.2040       | 5  | A    | 8              | 773.3906 387.1992 |
| 455.2254       | 6  | G    | 7              | 702.3535 351.6807 |
| 552.2782       | 7  | P    | 6              | 645.3320 323.1699 |
| 623.3153       | 8  | A    | 5              | 548.2792 274.6435 |
| 710.3473       | 9  | S    | 4              | 477.2421 239.1250 |
| 797.3794       | 10 | S    | 3              | 390.2101 195.6090 |
| 925.4379       | 11 | Q    | 2              | 303.1781 152.0930 |
|                | 12 | R    | 1              | 175.1195 88.0637  |

N-term:+43.02

AAAAAGPEMVR, MH+ 1085.5414, m/z 543.2743  
 L OSG41 P180811 230811-s1.03667.03667.2.dta

X-range:

-

MassTol: Y-zoom:

MassType:

AVG  MONO

Axis:

1  2

Label:

I  M  -

Ions:

a  +  2+  3+

b  +  2+  3+

c  +  2+  3+

x  +  2+  3+

y  +  2+  3+

z  +  2+  3+

hide H<sub>2</sub>O/NH<sub>3</sub>

zoom 112-122

GO

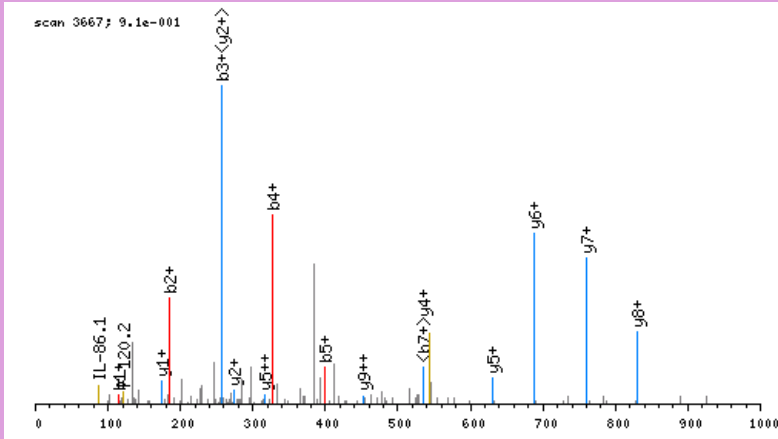

click image to zoom in; click top corners to zoom out [\[precursor±\]](#)

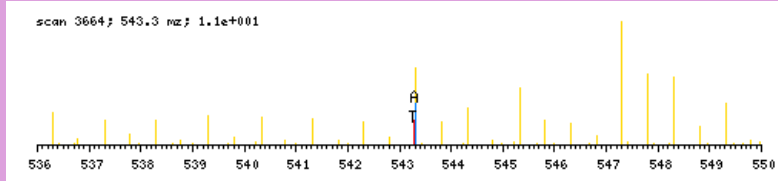

zoomed in precursor plot; T=theoretical m/z, A=acquired m/z

| b <sup>+</sup> | #  | AA | #  | y <sup>+</sup> | y <sup>2+</sup> |
|----------------|----|----|----|----------------|-----------------|
| 114.0555       | 1  | A  | 11 |                |                 |
| 185.0926       | 2  | A  | 10 | 972.4937       | 486.7508        |
| 256.1297       | 3  | A  | 9  | 901.4566       | 451.2322        |
| 327.1669       | 4  | A  | 8  | 830.4194       | 415.7136        |
| 398.2040       | 5  | A  | 7  | 759.3823       | 380.1951        |
| 455.2254       | 6  | G  | 6  | 688.3452       | 344.6765        |
| 552.2782       | 7  | P  | 5  | 631.3238       | 316.1658        |
| 681.3208       | 8  | E  | 4  | 534.2710       | 267.6394        |
| 812.3613       | 9  | M  | 3  | 405.2284       | 203.1181        |
| 911.4297       | 10 | V  | 2  | 274.1879       | 137.5979        |
|                | 11 | R  | 1  | 175.1195       | 88.0637         |

N-term:+43.02

AAAAASGAGGVAVAGAGGAGPAGR, MH+ 1836.9317, m/z 612.9821  
 L OSG41 P180811 230811-s1.04248.04248.3.dta

X-range:

-

MassTol: Y-zoom:

MassType:

AVG  MONO

Axis:

1  2

Label:

I  M  -

Ions:

a  +  2+  3+

b  +  2+  3+

c  +  2+  3+

x  +  2+  3+

y  +  2+  3+

z  +  2+  3+

hide H<sub>2</sub>O/NH<sub>3</sub>

zoom 112-122

GO

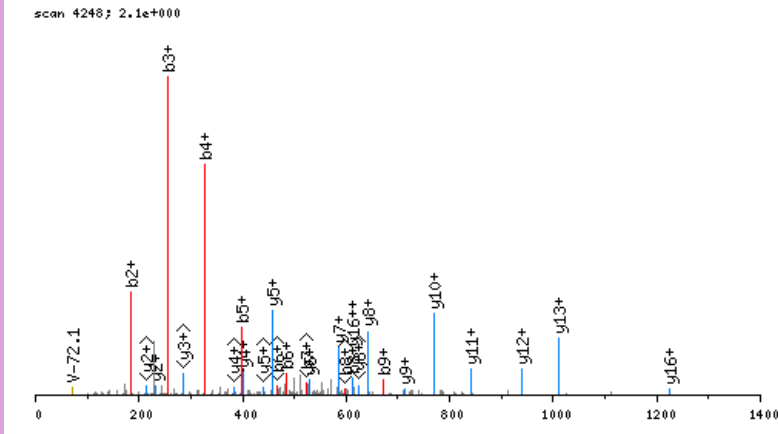

click image to zoom in; click top corners to zoom out [precursor±]

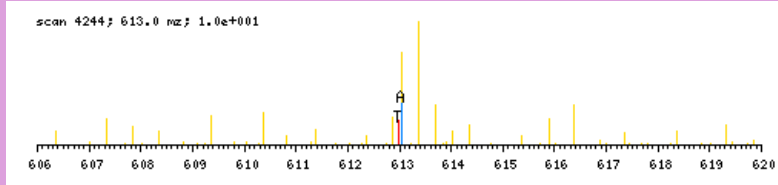

zoomed in precursor plot; T=theoretical m/z, A=acquired m/z

| b <sup>+</sup> | #  | AA # | y <sup>+</sup> | y <sup>2+</sup> |
|----------------|----|------|----------------|-----------------|
| 114.0555       | 1  | A 24 |                |                 |
| 185.0926       | 2  | A 23 | 1723.8840      | 862.4459        |
| 256.1297       | 3  | A 22 | 1652.8469      | 826.9273        |
| 327.1669       | 4  | A 21 | 1581.8097      | 791.4088        |
| 398.2040       | 5  | A 20 | 1510.7726      | 755.8902        |
| 485.2360       | 6  | S 19 | 1439.7355      | 720.3717        |
| 542.2575       | 7  | G 18 | 1352.7035      | 676.8557        |
| 613.2946       | 8  | A 17 | 1295.6820      | 648.3449        |
| 670.3160       | 9  | G 16 | 1224.6449      | 612.8264        |
| 727.3375       | 10 | G 15 | 1167.6234      | 584.3156        |
| 826.4059       | 11 | V 14 | 1110.6020      | 555.8049        |
| 897.4430       | 12 | A 13 | 1011.5336      | 506.2707        |
| 996.5114       | 13 | V 12 | 940.4965       | 470.7521        |
| 1067.5486      | 14 | A 11 | 841.4280       | 421.2179        |
| 1124.5700      | 15 | G 10 | 770.3909       | 385.6994        |
| 1195.6071      | 16 | A 9  | 713.3695       | 357.1886        |
| 1252.6286      | 17 | G 8  | 642.3323       | 321.6701        |
| 1309.6501      | 18 | G 7  | 585.3109       | 293.1594        |
| 1380.6872      | 19 | A 6  | 528.2894       | 264.6486        |
| 1437.7086      | 20 | G 5  | 457.2523       | 229.1301        |
| 1534.7614      | 21 | P 4  | 400.2308       | 200.6193        |
| 1605.7985      | 22 | A 3  | 303.1781       | 152.0930        |
| 1662.8200      | 23 | G 2  | 232.1410       | 116.5744        |
|                | 24 | R 1  | 175.1195       | 88.0637         |

N-term:+43.02

AAAAATAATKNGGGSGR, MH+ 1564.8256, m/z 522.2801  
 L OSG37 P180811 230811-s1.02615.02615.3.dta

X-range:

-

MassTol: Y-zoom:

MassType:

AVG  MONO

Axis:

1  2

Label:

I  M  -

Ions:

a  +  2+  3+

b  +  2+  3+

c  +  2+  3+

x  +  2+  3+

y  +  2+  3+

z  +  2+  3+

hide H<sub>2</sub>O/NH<sub>3</sub>

zoom 112-122

GO

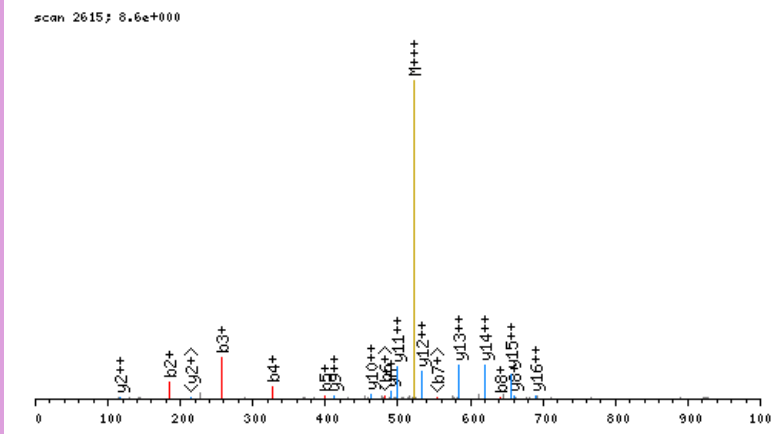

click image to zoom in; click top corners to zoom out [\[precursor±\]](#)

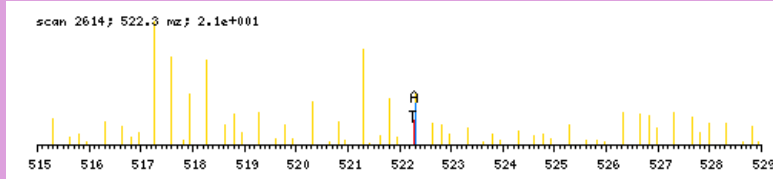

zoomed in precursor plot; T=theoretical m/z, A=acquired m/z

| b <sup>+</sup> | #  | AA # | y <sup>+</sup> | y <sup>2+</sup> |
|----------------|----|------|----------------|-----------------|
| 114.0555       | 1  | A 18 |                |                 |
| 185.0926       | 2  | A 17 | 1451.7779      | 726.3929        |
| 256.1297       | 3  | A 16 | 1380.7408      | 690.8743        |
| 327.1669       | 4  | A 15 | 1309.7037      | 655.3558        |
| 398.2040       | 5  | A 14 | 1238.6666      | 619.8372        |
| 499.2516       | 6  | T 13 | 1167.6295      | 584.3186        |
| 570.2888       | 7  | A 12 | 1066.5818      | 533.7948        |
| 641.3259       | 8  | A 11 | 995.5447       | 498.2762        |
| 742.3736       | 9  | T 10 | 924.5076       | 462.7577        |
| 904.5317       | 10 | K 9  | 823.4599       | 412.2339        |
| 961.5531       | 11 | G 8  | 661.3018       | 331.1548        |
| 1075.5960      | 12 | N 7  | 604.2803       | 302.6441        |
| 1132.6175      | 13 | G 6  | 490.2374       | 245.6226        |
| 1189.6390      | 14 | G 5  | 433.2159       | 217.1119        |
| 1246.6604      | 15 | G 4  | 376.1945       | 188.6011        |
| 1333.6925      | 16 | S 3  | 319.1730       | 160.0904        |
| 1390.7139      | 17 | G 2  | 232.1410       | 116.5744        |
|                | 18 | R 1  | 175.1195       | 88.0637         |

N-term:+43.02 K(10):+162.16

AAAAGAVVASAASGPAEGKKITELR, MH+ 2406.3993, m/z 602.3553  
 L OSG38 P180811 230811-s1.06637.06637.4.dta

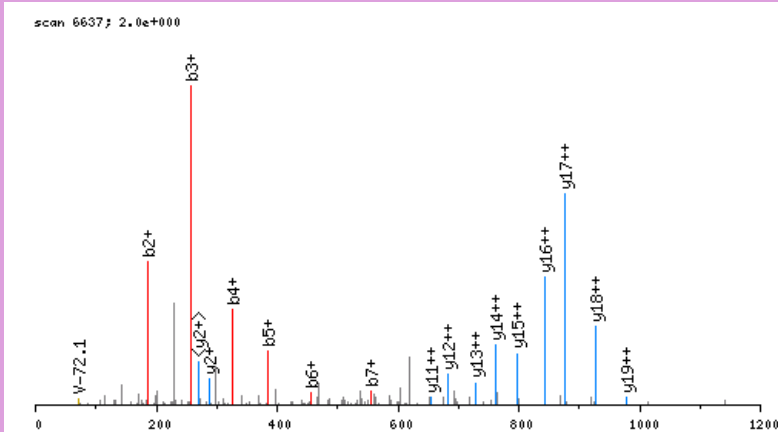

click image to zoom in; click top corners to zoom out [\[precursor±\]](#)

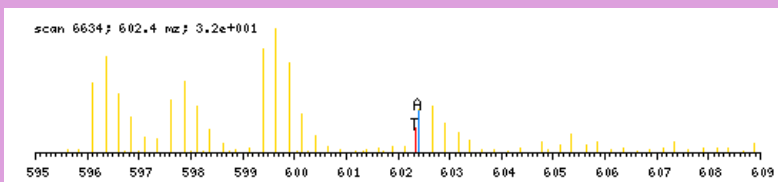

zoomed in precursor plot; T=theoretical m/z, A=acquired m/z

| b <sup>+</sup> | #  | AA # | y <sup>+</sup> | y <sup>2+</sup> |
|----------------|----|------|----------------|-----------------|
| 114.0555       | 1  | A 25 |                |                 |
| 185.0926       | 2  | A 24 | 2293.3516      | 1147.1797       |
| 256.1297       | 3  | A 23 | 2222.3145      | 1111.6612       |
| 327.1669       | 4  | A 22 | 2151.2774      | 1076.1426       |
| 384.1883       | 5  | G 21 | 2080.2403      | 1040.6241       |
| 455.2254       | 6  | A 20 | 2023.2188      | 1012.1133       |
| 554.2938       | 7  | V 19 | 1952.1817      | 976.5948        |
| 653.3623       | 8  | V 18 | 1853.1133      | 927.0606        |
| 724.3994       | 9  | A 17 | 1754.0449      | 877.5264        |
| 811.4314       | 10 | S 16 | 1683.0078      | 842.0078        |
| 882.4685       | 11 | A 15 | 1595.9758      | 798.4918        |
| 953.5056       | 12 | A 14 | 1524.9386      | 762.9732        |
| 1040.5377      | 13 | S 13 | 1453.9015      | 727.4547        |
| 1097.5591      | 14 | G 12 | 1366.8695      | 683.9387        |
| 1194.6119      | 15 | P 11 | 1309.8480      | 655.4279        |
| 1265.6490      | 16 | A 10 | 1212.7953      | 606.9015        |
| 1394.6916      | 17 | E 9  | 1141.7582      | 571.3830        |
| 1451.7131      | 18 | G 8  | 1012.7156      | 506.8617        |
| 1613.8712      | 19 | K 7  | 955.6941       | 478.3510        |
| 1776.0293      | 20 | K 6  | 793.5360       | 397.2719        |
| 1889.1133      | 21 | I 5  | 631.3779       | 316.1929        |
| 1990.1610      | 22 | T 4  | 518.2938       | 259.6508        |
| 2119.2036      | 23 | E 3  | 417.2462       | 209.1270        |
| 2232.2877      | 24 | L 2  | 288.2036       | 144.6057        |
|                | 25 | R 1  | 175.1195       | 88.0637         |

N-term:+43.02 K(19) :+162.16  
 K(20) :+162.16

X-range:

0 - 0

MassTol: Y-zoom:

0. 1.

MassType:

AVG  MONO

Axis:

1  2

Label:

I  M  -

Ions:

a  +  2+  3+

b  +  2+  3+

c  +  2+  3+

x  +  2+  3+

y  +  2+  3+

z  +  2+  3+

hide H<sub>2</sub>O/NH<sub>3</sub>

zoom 112-122

GO

AAAAVVEFOR, MH+ 1103.5849, m/z 552.2961  
 L OSG41 P180811 230811-s1.05460.05460.2.dta

X-range:

-

MassTol: Y-zoom:

MassType:

AVG  MONO

Axis:

1  2

Label:

I  M  -

Ions:

a  +  2+  3+

b  +  2+  3+

c  +  2+  3+

x  +  2+  3+

y  +  2+  3+

z  +  2+  3+

hide H<sub>2</sub>O/NH<sub>3</sub>

zoom 112-122

GO

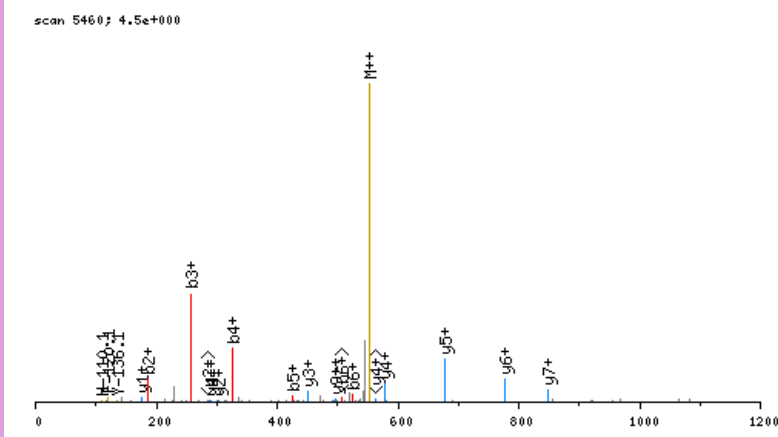

click image to zoom in; click top corners to zoom out [\[precursor±\]](#)

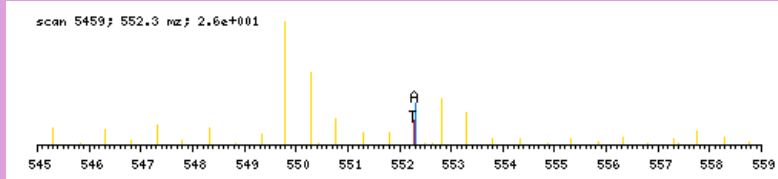

zoomed in precursor plot; T=theoretical m/z, A=acquired m/z

| b <sup>+</sup> | #  | AA # | y <sup>+</sup> | y <sup>2+</sup> |
|----------------|----|------|----------------|-----------------|
| 114.0555       | 1  | A    | 10             |                 |
| 185.0926       | 2  | A    | 9              | 990.5373        |
| 256.1297       | 3  | A    | 8              | 460.2540        |
| 327.1669       | 4  | A    | 7              | 424.7354        |
| 426.2353       | 5  | V    | 6              | 389.2169        |
| 525.3037       | 6  | V    | 5              | 339.6827        |
| 654.3463       | 7  | E    | 4              | 290.1485        |
| 801.4147       | 8  | F    | 3              | 225.6272        |
| 929.4733       | 9  | Q    | 2              | 152.0930        |
|                | 10 | R    | 1              | 88.0637         |

N-term: +43.02



AAAEEGCGVGVEDDR, MH+ 1576.6549, m/z 788.8311  
 L OSG41 P180811 230811-s1.03237.03237.2.dta

X-range:

-

MassTol: Y-zoom:

MassType:

AVG  MONO

Axis:

1  2

Label:

I  M  -

Ions:

a  +  2+  3+

b  +  2+  3+

c  +  2+  3+

x  +  2+  3+

y  +  2+  3+

z  +  2+  3+

hide H<sub>2</sub>O/NH<sub>3</sub>

zoom 112-122

GO

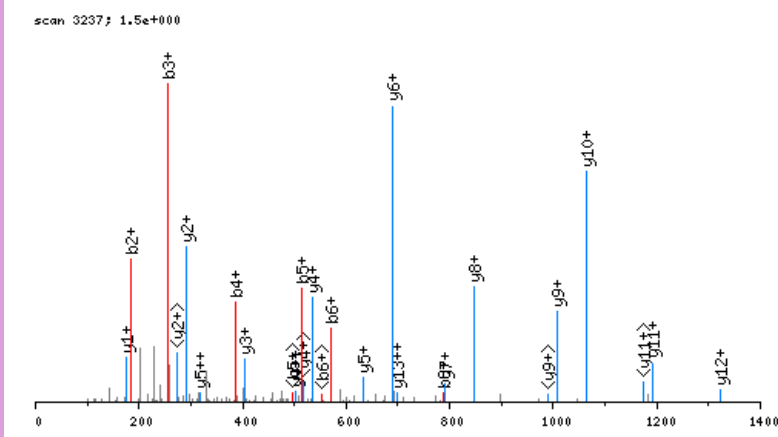

click image to zoom in; click top corners to zoom out [\[precursor±\]](#)

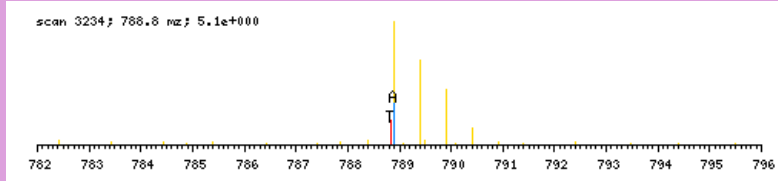

zoomed in precursor plot; T=theoretical m/z, A=acquired m/z

| b <sup>+</sup> | #  | AA | #  | y <sup>+</sup> | y <sup>2+</sup> |
|----------------|----|----|----|----------------|-----------------|
| 114.0555       | 1  | A  | 15 |                |                 |
| 185.0926       | 2  | A  | 14 | 1463.6072      | 732.3075        |
| 256.1297       | 3  | A  | 13 | 1392.5701      | 696.7890        |
| 385.1723       | 4  | E  | 12 | 1321.5330      | 661.2704        |
| 514.2149       | 5  | E  | 11 | 1192.4904      | 596.7491        |
| 571.2364       | 6  | G  | 10 | 1063.4478      | 532.2278        |
| 731.2670       | 7  | C  | 9  | 1006.4263      | 503.7171        |
| 788.2885       | 8  | G  | 8  | 846.3957       | 423.7018        |
| 887.3569       | 9  | V  | 7  | 789.3743       | 395.1910        |
| 944.3783       | 10 | G  | 6  | 690.3059       | 345.6568        |
| 1043.4467      | 11 | V  | 5  | 633.2844       | 317.1461        |
| 1172.4893      | 12 | E  | 4  | 534.2160       | 267.6119        |
| 1287.5163      | 13 | D  | 3  | 405.1734       | 203.0906        |
| 1402.5432      | 14 | D  | 2  | 290.1464       | 145.5771        |
|                | 15 | R  | 1  | 175.1195       | 88.0637         |

N-term:+43.02 C(7):+160.03

AAAGGGAAAAAGR, MH+ 1013.5128, m/z 507.2601  
 L OSG41 P180811 230811-s1.02249.02249.2.dta

X-range:

-

MassTol: Y-zoom:

MassType:

AVG  MONO

Axis:

1  2

Label:

I  M  -

Ions:

a  +  2+  3+

b  +  2+  3+

c  +  2+  3+

x  +  2+  3+

y  +  2+  3+

z  +  2+  3+

hide H<sub>2</sub>O/NH<sub>3</sub>

zoom 112-122

GO

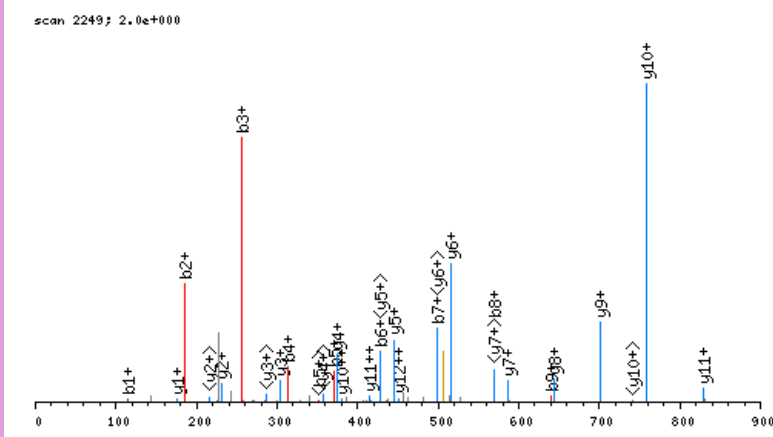

click image to zoom in; click top corners to zoom out [\[precursor±\]](#)

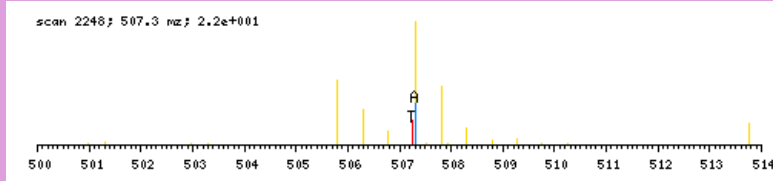

zoomed in precursor plot; T=theoretical m/z, A=acquired m/z

| b <sup>+</sup> | #  | AA | #  | y <sup>+</sup> | y <sup>2+</sup> |
|----------------|----|----|----|----------------|-----------------|
| 114.0555       | 1  | A  | 13 |                |                 |
| 185.0926       | 2  | A  | 12 | 900.4652       | 450.7365        |
| 256.1297       | 3  | A  | 11 | 829.4280       | 415.2179        |
| 313.1512       | 4  | G  | 10 | 758.3909       | 379.6994        |
| 370.1727       | 5  | G  | 9  | 701.3695       | 351.1886        |
| 427.1941       | 6  | G  | 8  | 644.3480       | 322.6779        |
| 498.2312       | 7  | A  | 7  | 587.3265       | 294.1672        |
| 569.2684       | 8  | A  | 6  | 516.2894       | 258.6486        |
| 640.3055       | 9  | A  | 5  | 445.2523       | 223.1301        |
| 711.3426       | 10 | A  | 4  | 374.2152       | 187.6115        |
| 782.3797       | 11 | A  | 3  | 303.1781       | 152.0930        |
| 839.4012       | 12 | G  | 2  | 232.1410       | 116.5744        |
|                | 13 | R  | 1  | 175.1195       | 88.0637         |

N-term:+43.02

AAAGSAAVSGAGTPVAGPTGR, MH+ 1767.8990, m/z 589.9712  
 L OSG41 P180811 230811-s1.03835.03835.3.dta

X-range:

-

MassTol: Y-zoom:

MassType:

AVG  MONO

Axis:

1  2

Label:

I  M  -

Ions:

a  +  2+  3+

b  +  2+  3+

c  +  2+  3+

x  +  2+  3+

y  +  2+  3+

z  +  2+  3+

hide H<sub>2</sub>O/NH<sub>3</sub>

zoom 112-122

GO

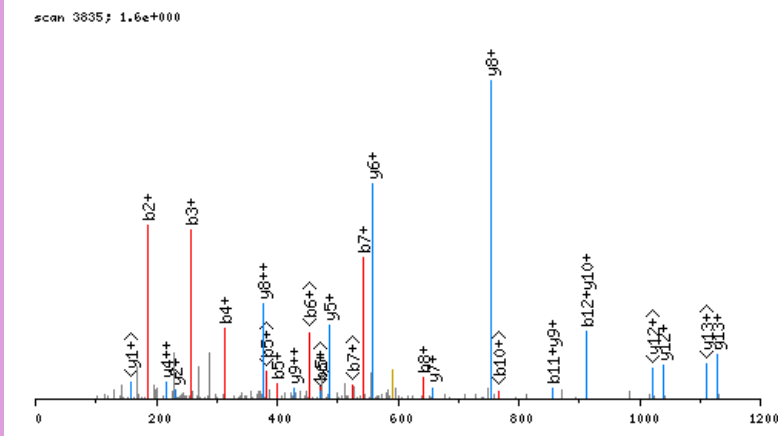

click image to zoom in; click top corners to zoom out [\[precursor±\]](#)

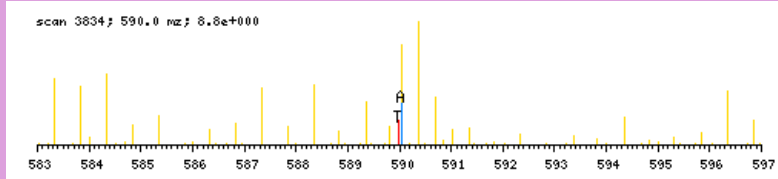

zoomed in precursor plot; T=theoretical m/z, A=acquired m/z

| b <sup>+</sup> | #  | AA # | y <sup>+</sup> | y <sup>2+</sup> |
|----------------|----|------|----------------|-----------------|
| 114.0555       | 1  | A 21 |                |                 |
| 185.0926       | 2  | A 20 | 1654.8513      | 827.9295        |
| 256.1297       | 3  | A 19 | 1583.8142      | 792.4110        |
| 313.1512       | 4  | G 18 | 1512.7770      | 756.8924        |
| 400.1832       | 5  | S 17 | 1455.7556      | 728.3817        |
| 471.2203       | 6  | A 16 | 1368.7236      | 684.8657        |
| 542.2575       | 7  | A 15 | 1297.6864      | 649.3471        |
| 641.3259       | 8  | V 14 | 1226.6493      | 613.8286        |
| 728.3579       | 9  | S 13 | 1127.5809      | 564.2944        |
| 785.3794       | 10 | G 12 | 1040.5489      | 520.7784        |
| 856.4165       | 11 | A 11 | 983.5274       | 492.2676        |
| 913.4379       | 12 | G 10 | 912.4903       | 456.7491        |
| 1014.4856      | 13 | T 9  | 855.4688       | 428.2383        |
| 1111.5384      | 14 | P 8  | 754.4212       | 377.7145        |
| 1210.6068      | 15 | V 7  | 657.3684       | 329.1881        |
| 1281.6439      | 16 | A 6  | 558.3000       | 279.6539        |
| 1338.6654      | 17 | G 5  | 487.2629       | 244.1353        |
| 1435.7181      | 18 | P 4  | 430.2414       | 215.6246        |
| 1536.7658      | 19 | T 3  | 333.1886       | 167.0982        |
| 1593.7873      | 20 | G 2  | 232.1410       | 116.5744        |
|                | 21 | R 1  | 175.1195       | 88.0637         |

N-term:+43.02

AAAKDGCGLTAAGNGR, MH+ 1688.8026, m/z 563.6057  
 L OSG37 P180811 230811-s1.03023.03023.3.dta

X-range:

-

MassTol: Y-zoom:

MassType:

AVG  MONO

Axis:

1  2

Label:

I  M  -

Ions:

a  +  2+  3+

b  +  2+  3+

c  +  2+  3+

x  +  2+  3+

y  +  2+  3+

z  +  2+  3+

hide H<sub>2</sub>O/NH<sub>3</sub>

zoom 112-122

GO

scan 3023; 2.0e+000

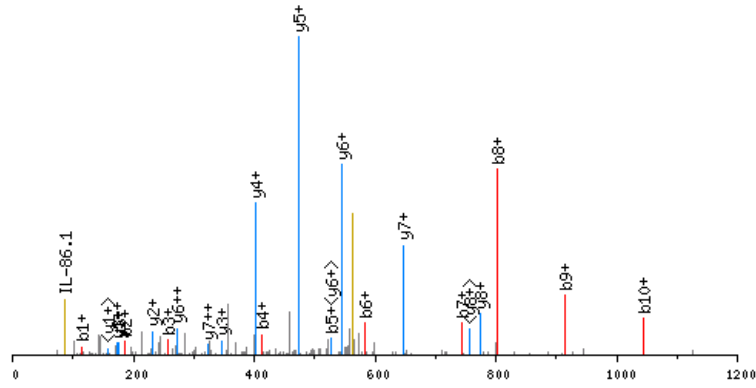

click image to zoom in; click top corners to zoom out [\[precursor±\]](#)

scan 3019; 563.6 nz; 1.5e+001

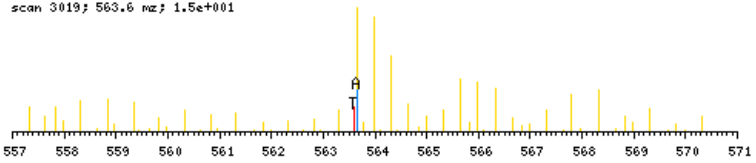

zoomed in precursor plot; T=theoretical m/z, A=acquired m/z

| b <sup>+</sup> | #  | AA # | y <sup>+</sup> | y <sup>2+</sup> |
|----------------|----|------|----------------|-----------------|
| 114.0555       | 1  | A    | 17             |                 |
| 185.0926       | 2  | A    | 16             | 1575.7549       |
| 256.1297       | 3  | A    | 15             | 1504.7178       |
| 412.2560       | 4  | K    | 14             | 1433.6807       |
| 527.2830       | 5  | D    | 13             | 1277.5544       |
| 584.3044       | 6  | G    | 12             | 1162.5274       |
| 744.3350       | 7  | C    | 11             | 1105.5060       |
| 801.3565       | 8  | G    | 10             | 945.4754        |
| 914.4406       | 9  | L    | 9              | 888.4539        |
| 1043.4832      | 10 | E    | 8              | 775.3699        |
| 1144.5308      | 11 | T    | 7              | 646.3273        |
| 1215.5680      | 12 | A    | 6              | 545.2796        |
| 1286.6051      | 13 | A    | 5              | 474.2425        |
| 1343.6265      | 14 | G    | 4              | 403.2054        |
| 1457.6695      | 15 | N    | 3              | 346.1839        |
| 1514.6909      | 16 | G    | 2              | 232.1410        |
|                | 17 | R    | 1              | 175.1195        |

N-term:+43.02 K(4):+156.13  
 C(7):+160.03

AAAMDVDTPSGTNSGAGKKR, MH+ 2044.0770, m/z 682.0305  
 L OSG40 P180811 230811-s1.03127.03127.3.dta

X-range:

-

MassTol: Y-zoom:

MassType:

AVG  MONO

Axis:

1  2

Label:

I  M  -

Ions:

a  +  2+  3+

b  +  2+  3+

c  +  2+  3+

x  +  2+  3+

y  +  2+  3+

z  +  2+  3+

hide H<sub>2</sub>O/NH<sub>3</sub>

zoom 112-122

GO

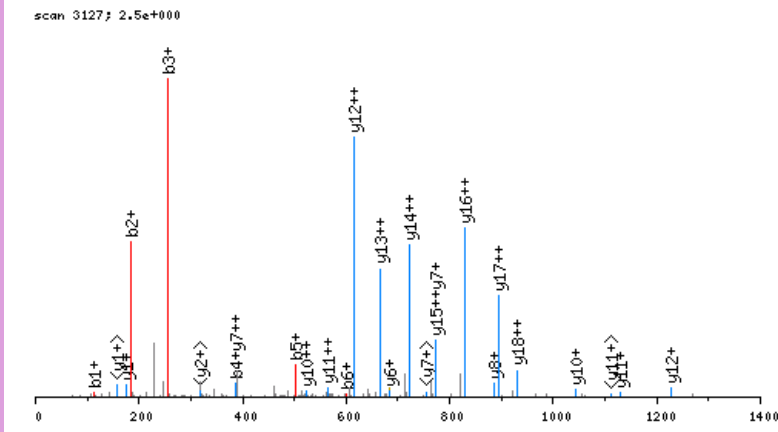

click image to zoom in; click top corners to zoom out [\[precursor±\]](#)

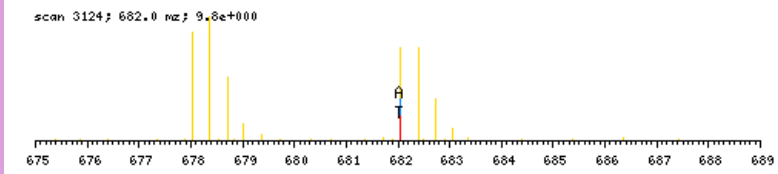

zoomed in precursor plot; T=theoretical m/z, A=acquired m/z

| b <sup>+</sup> | #  | AA | #  | y <sup>+</sup> | y <sup>2+</sup> |
|----------------|----|----|----|----------------|-----------------|
| 114.0555       | 1  | A  | 20 |                |                 |
| 185.0926       | 2  | A  | 19 | 1931.0293      | 966.0186        |
| 256.1297       | 3  | A  | 18 | 1859.9922      | 930.5000        |
| 387.1702       | 4  | M  | 17 | 1788.9551      | 894.9815        |
| 502.1972       | 5  | D  | 16 | 1657.9146      | 829.4612        |
| 601.2656       | 6  | V  | 15 | 1542.8877      | 771.9477        |
| 716.2925       | 7  | D  | 14 | 1443.8193      | 722.4135        |
| 817.3402       | 8  | T  | 13 | 1328.7923      | 664.9001        |
| 914.3930       | 9  | P  | 12 | 1227.7446      | 614.3762        |
| 1001.4250      | 10 | S  | 11 | 1130.6919      | 565.8498        |
| 1058.4465      | 11 | G  | 10 | 1043.6598      | 522.3338        |
| 1159.4941      | 12 | T  | 9  | 986.6384       | 493.8231        |
| 1273.5371      | 13 | N  | 8  | 885.5907       | 443.2993        |
| 1360.5691      | 14 | S  | 7  | 771.5478       | 386.2778        |
| 1417.5906      | 15 | G  | 6  | 684.5157       | 342.7618        |
| 1488.6277      | 16 | A  | 5  | 627.4943       | 314.2511        |
| 1545.6491      | 17 | G  | 4  | 556.4572       | 278.7325        |
| 1707.8072      | 18 | K  | 3  | 499.4357       | 250.2218        |
| 1869.9653      | 19 | K  | 2  | 337.2776       | 169.1427        |
|                | 20 | R  | 1  | 175.1195       | 88.0637         |

N-term:+43.02 K(18):+162.16  
 K(19):+162.16

AAAQAVEEMR, MH+ 1117.5312, m/z 559.2692  
 L OSG41 P180811 230811-s1.04741.04741.2.dta

X-range:

-

MassTol: Y-zoom:

MassType:

AVG  MONO

Axis:

1  2

Label:

I  M  -

Ions:

a  +  2+  3+

b  +  2+  3+

c  +  2+  3+

x  +  2+  3+

y  +  2+  3+

z  +  2+  3+

hide H<sub>2</sub>O/NH<sub>3</sub>

zoom 112-122

GO

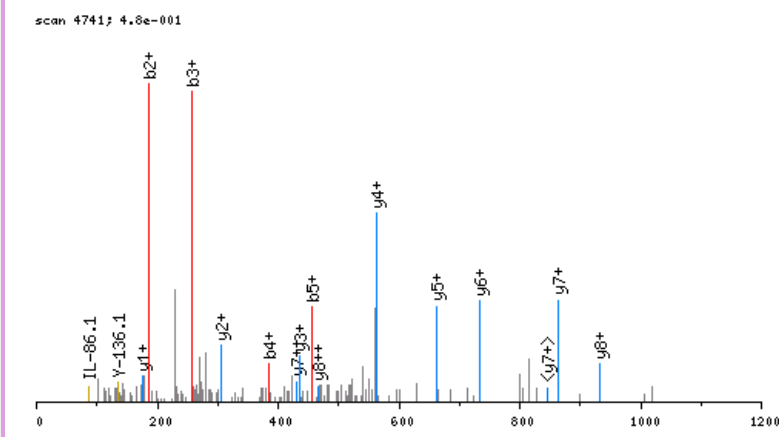

click image to zoom in; click top corners to zoom out [\[precursor±\]](#)

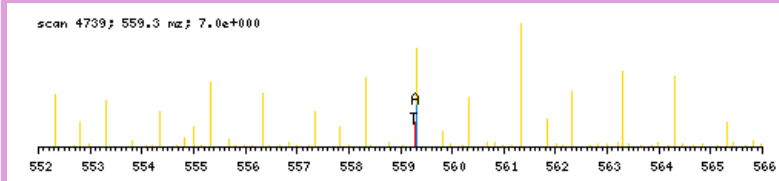

zoomed in precursor plot; T=theoretical m/z, A=acquired m/z

| b <sup>+</sup> | #  | AA | #  | y <sup>+</sup> | y <sup>2+</sup> |
|----------------|----|----|----|----------------|-----------------|
| 114.0555       | 1  | A  | 10 |                |                 |
| 185.0926       | 2  | A  | 9  | 1004.4835      | 502.7457        |
| 256.1297       | 3  | A  | 8  | 933.4464       | 467.2271        |
| 384.1883       | 4  | Q  | 7  | 862.4093       | 431.7086        |
| 455.2254       | 5  | A  | 6  | 734.3507       | 367.6793        |
| 554.2938       | 6  | V  | 5  | 663.3136       | 332.1607        |
| 683.3364       | 7  | E  | 4  | 564.2452       | 282.6265        |
| 812.3790       | 8  | E  | 3  | 435.2026       | 218.1052        |
| 943.4195       | 9  | M  | 2  | 306.1600       | 153.5839        |
|                | 10 | R  | 1  | 175.1195       | 88.0637         |

N-term:+43.02

AAASGYTDLR, MH+ 1066.5169, m/z 533.7621  
 L OSG41 P180811 230811-s1.03821.03821.2.dta

X-range:

-

MassTol: Y-zoom:

MassType:

AVG  MONO

Axis:

1  2

Label:

I  M  -

Ions:

a  +  2+  3+

b  +  2+  3+

c  +  2+  3+

x  +  2+  3+

y  +  2+  3+

z  +  2+  3+

hide H<sub>2</sub>O/NH<sub>3</sub>

zoom 112-122

GO

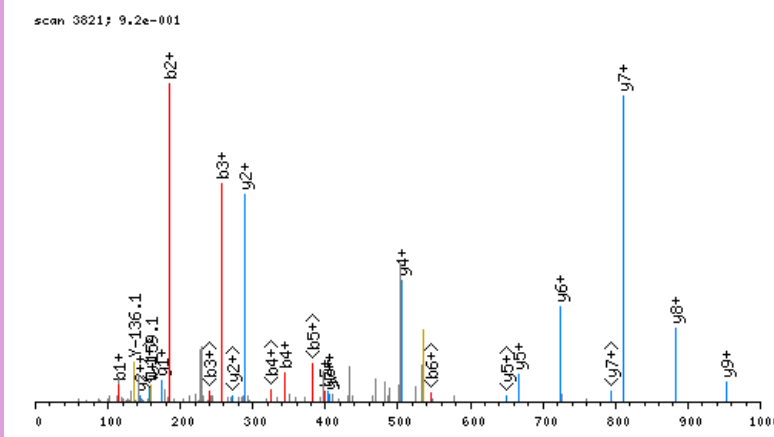

click image to zoom in; click top corners to zoom out [\[precursor±\]](#)

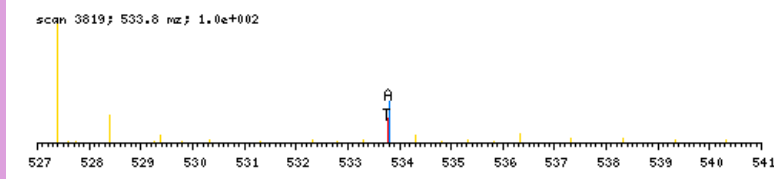

zoomed in precursor plot; T=theoretical m/z, A=acquired m/z

| b <sup>+</sup> | #  | AA | #  | y <sup>+</sup> | y <sup>2+</sup> |
|----------------|----|----|----|----------------|-----------------|
| 114.0555       | 1  | A  | 10 |                |                 |
| 185.0926       | 2  | A  | 9  | 953.4692       | 477.2385        |
| 256.1297       | 3  | A  | 8  | 882.4321       | 441.7200        |
| 343.1618       | 4  | S  | 7  | 811.3950       | 406.2014        |
| 400.1832       | 5  | G  | 6  | 724.3630       | 362.6854        |
| 563.2466       | 6  | Y  | 5  | 667.3415       | 334.1747        |
| 664.2942       | 7  | T  | 4  | 504.2782       | 252.6430        |
| 779.3212       | 8  | D  | 3  | 403.2305       | 202.1192        |
| 892.4052       | 9  | L  | 2  | 288.2036       | 144.6057        |
|                | 10 | R  | 1  | 175.1195       | 88.0637         |

N-term:+43.02

AAATASSALKR, MH+ 1116.6377, m/z 558.8225  
 L OSG37 P180811 230811-s1.03128.03128.2.dta

scan 3128; 1.9e+001

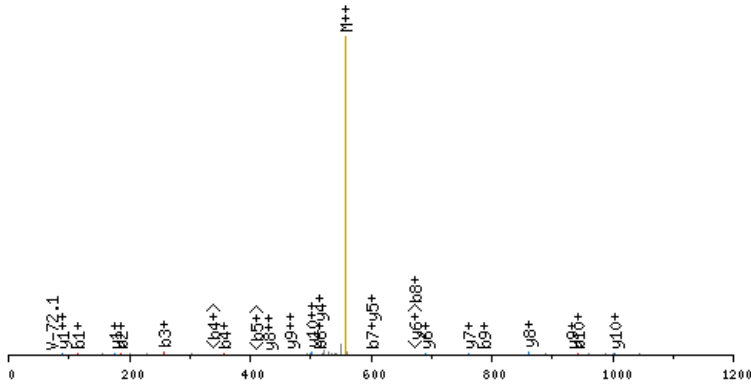

click image to zoom in; click top corners to zoom out [\[precursor±\]](#)

scan 3124; 558.8 m/z; 1.8e+001

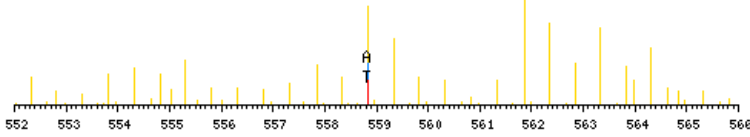

zoomed in precursor plot; T=theoretical m/z, A=acquired m/z

X-range:

-

MassTol: Y-zoom:

MassType:

AVG  MONO

Axis:

1  2

Label:

I  M  -

Ions:

a  +  2+  3+

b  +  2+  3+

c  +  2+  3+

x  +  2+  3+

y  +  2+  3+

z  +  2+  3+

hide H<sub>2</sub>O/NH<sub>3</sub>

zoom 112-122

GO

| b <sup>+</sup> | #  | AA | #  | y <sup>+</sup> | y <sup>2+</sup> |
|----------------|----|----|----|----------------|-----------------|
| 114.0555       | 1  | A  | 11 |                |                 |
| 185.0926       | 2  | A  | 10 | 1003.5901      | 502.2989        |
| 256.1297       | 3  | A  | 9  | 932.5529       | 466.7804        |
| 357.1774       | 4  | T  | 8  | 861.5158       | 431.2618        |
| 428.2145       | 5  | A  | 7  | 760.4681       | 380.7380        |
| 515.2466       | 6  | S  | 6  | 689.4310       | 345.2194        |
| 602.2786       | 7  | S  | 5  | 602.3990       | 301.7034        |
| 673.3157       | 8  | A  | 4  | 515.3670       | 258.1874        |
| 786.3998       | 9  | L  | 3  | 444.3299       | 222.6688        |
| 942.5261       | 10 | K  | 2  | 331.2458       | 166.1268        |
|                | 11 | R  | 1  | 175.1195       | 88.0637         |

N-term:+43.02 K(10):+156.13



AAATLSFGPER, MH+ 1161.5904, m/z 581.2988  
 L OSG41 P180811 230811-s1.05478.05478.2.dta

X-range:

-

MassTol: Y-zoom:

MassType:

AVG  MONO

Axis:

1  2

Label:

I  M  -

Ions:

a  +  2+  3+

b  +  2+  3+

c  +  2+  3+

x  +  2+  3+

y  +  2+  3+

z  +  2+  3+

hide H<sub>2</sub>O/NH<sub>3</sub>

zoom 112-122

GO

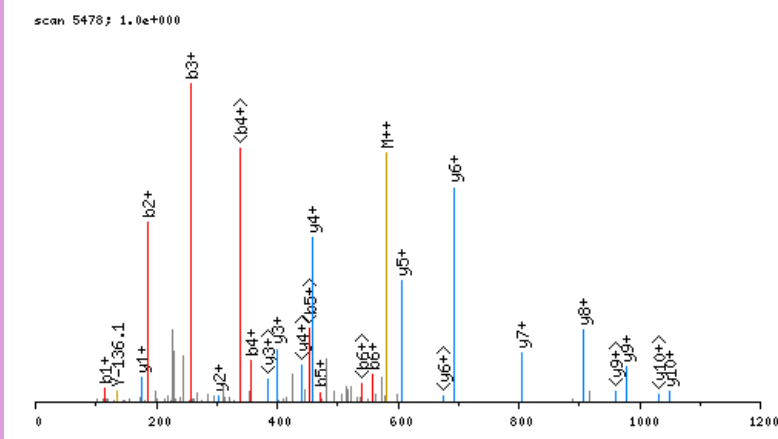

click image to zoom in; click top corners to zoom out [\[precursor±\]](#)

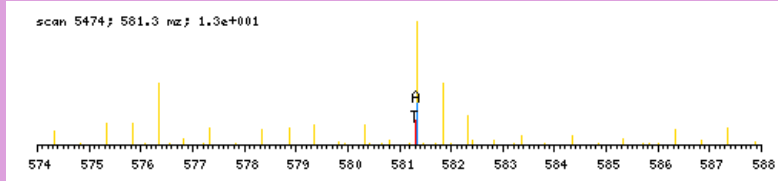

zoomed in precursor plot; T=theoretical m/z, A=acquired m/z

| b <sup>+</sup> | #  | AA | #  | y <sup>+</sup> | y <sup>2+</sup> |
|----------------|----|----|----|----------------|-----------------|
| 114.0555       | 1  | A  | 11 |                |                 |
| 185.0926       | 2  | A  | 10 | 1048.5427      | 524.7753        |
| 256.1297       | 3  | A  | 9  | 977.5056       | 489.2567        |
| 357.1774       | 4  | T  | 8  | 906.4685       | 453.7382        |
| 470.2615       | 5  | L  | 7  | 805.4208       | 403.2143        |
| 557.2935       | 6  | S  | 6  | 692.3368       | 346.6723        |
| 704.3619       | 7  | F  | 5  | 605.3047       | 303.1563        |
| 761.3834       | 8  | G  | 4  | 458.2363       | 229.6221        |
| 858.4362       | 9  | P  | 3  | 401.2149       | 201.1113        |
| 987.4787       | 10 | E  | 2  | 304.1621       | 152.5850        |
|                | 11 | R  | 1  | 175.1195       | 88.0637         |

N-term:+43.02

AAATPTETPAPEGSGLGMDAR, MH+ 2041.9501, m/z 681.3215  
 L OSG41 P180811 230811-s1.04663.04663.3.dta

X-range:

-

MassTol: Y-zoom:

MassType:

AVG  MONO

Axis:

1  2

Label:

I  M  -

Ions:

a  +  2+  3+

b  +  2+  3+

c  +  2+  3+

x  +  2+  3+

y  +  2+  3+

z  +  2+  3+

hide H<sub>2</sub>O/NH<sub>3</sub>

zoom 112-122

GO

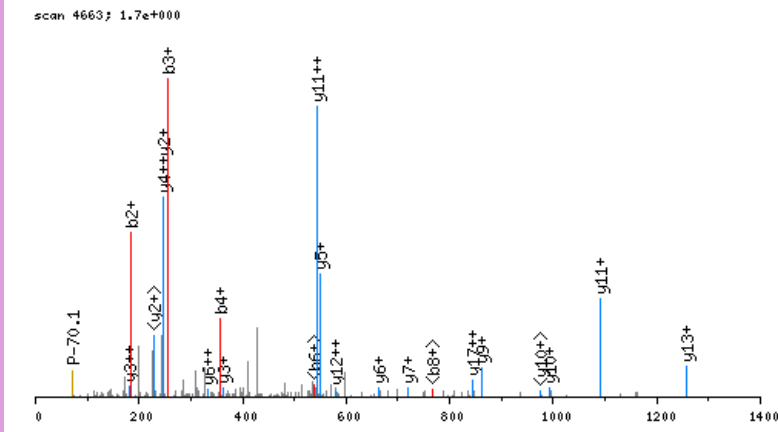

click image to zoom in; click top corners to zoom out [\[precursor±\]](#)

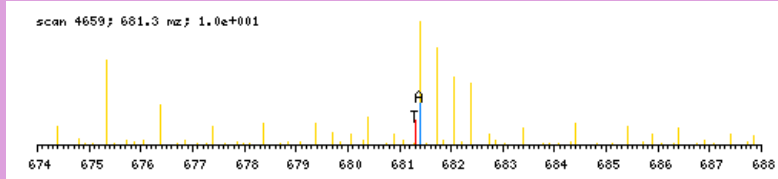

zoomed in precursor plot; T=theoretical m/z, A=acquired m/z

| b <sup>+</sup> | #  | AA # | y <sup>+</sup> | y <sup>2+</sup> |
|----------------|----|------|----------------|-----------------|
| 114.0555       | 1  | A 21 |                |                 |
| 185.0926       | 2  | A 20 | 1928.9024      | 964.9551        |
| 256.1297       | 3  | A 19 | 1857.8653      | 929.4365        |
| 357.1774       | 4  | T 18 | 1786.8282      | 893.9180        |
| 454.2302       | 5  | P 17 | 1685.7805      | 843.3941        |
| 555.2779       | 6  | T 16 | 1588.7277      | 794.8678        |
| 684.3205       | 7  | E 15 | 1487.6800      | 744.3439        |
| 785.3681       | 8  | T 14 | 1358.6374      | 679.8226        |
| 882.4209       | 9  | P 13 | 1257.5898      | 629.2988        |
| 953.4580       | 10 | A 12 | 1160.5370      | 580.7724        |
| 1050.5108      | 11 | P 11 | 1089.4999      | 545.2539        |
| 1179.5534      | 12 | E 10 | 992.4471       | 496.7275        |
| 1236.5748      | 13 | G 9  | 863.4045       | 432.2062        |
| 1323.6069      | 14 | S 8  | 806.3831       | 403.6954        |
| 1380.6283      | 15 | G 7  | 719.3510       | 360.1794        |
| 1493.7124      | 16 | L 6  | 662.3296       | 331.6687        |
| 1550.7339      | 17 | G 5  | 549.2455       | 275.1267        |
| 1681.7743      | 18 | M 4  | 492.2240       | 246.6159        |
| 1796.8013      | 19 | D 3  | 361.1836       | 181.0957        |
| 1867.8384      | 20 | A 2  | 246.1566       | 123.5822        |
|                | 21 | R 1  | 175.1195       | 88.0637         |

N-term:+43.02

AAAVAVAAASR, MH+ 999.5587, m/z 500.2830  
 L OSG41 P180811 230811-s1.04735.04735.2.dta

X-range:

-

MassTol: Y-zoom:

MassType:

AVG  MONO

Axis:

1  2

Label:

I  M  -

Ions:

a  +  2+  3+

b  +  2+  3+

c  +  2+  3+

x  +  2+  3+

y  +  2+  3+

z  +  2+  3+

hide H<sub>2</sub>O/NH<sub>3</sub>

zoom 112-122

GO

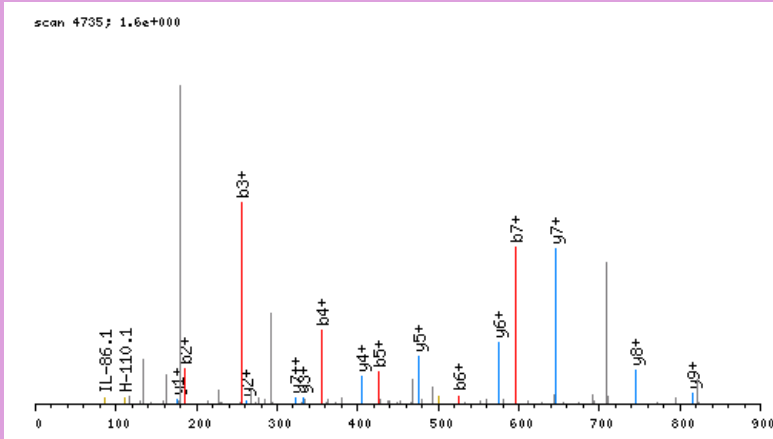

click image to zoom in; click top corners to zoom out [\[precursor±\]](#)

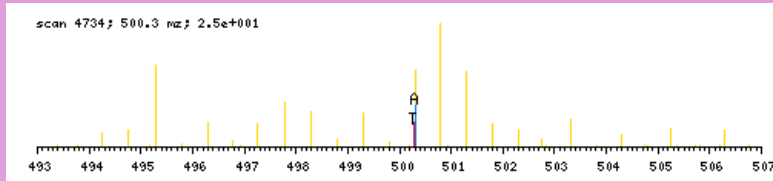

zoomed in precursor plot; T=theoretical m/z, A=acquired m/z

| b <sup>+</sup> | #  | AA | #  | y <sup>+</sup> | y <sup>2+</sup> |
|----------------|----|----|----|----------------|-----------------|
| 114.0555       | 1  | A  | 11 |                |                 |
| 185.0926       | 2  | A  | 10 | 886.5110       | 443.7594        |
| 256.1297       | 3  | A  | 9  | 815.4739       | 408.2409        |
| 355.1982       | 4  | V  | 8  | 744.4368       | 372.7223        |
| 426.2353       | 5  | A  | 7  | 645.3684       | 323.1881        |
| 525.3037       | 6  | V  | 6  | 574.3313       | 287.6696        |
| 596.3408       | 7  | A  | 5  | 475.2629       | 238.1353        |
| 667.3779       | 8  | A  | 4  | 404.2258       | 202.6168        |
| 738.4150       | 9  | A  | 3  | 333.1886       | 167.0982        |
| 825.4471       | 10 | S  | 2  | 262.1515       | 131.5797        |
|                | 11 | R  | 1  | 175.1195       | 88.0637         |

N-term:+43.02

AAAVPQR, MH+ 754.4212, m/z 377.7142  
 L OSG41 P180811 230811-s1.02304.02304.2.dta

X-range:

-

MassTol: Y-zoom:

MassType:

AVG  MONO

Axis:

1  2

Label:

I  M  -

Ions:

a  +  2+  3+

b  +  2+  3+

c  +  2+  3+

x  +  2+  3+

y  +  2+  3+

z  +  2+  3+

hide H<sub>2</sub>O/NH<sub>3</sub>

zoom 112-122

GO

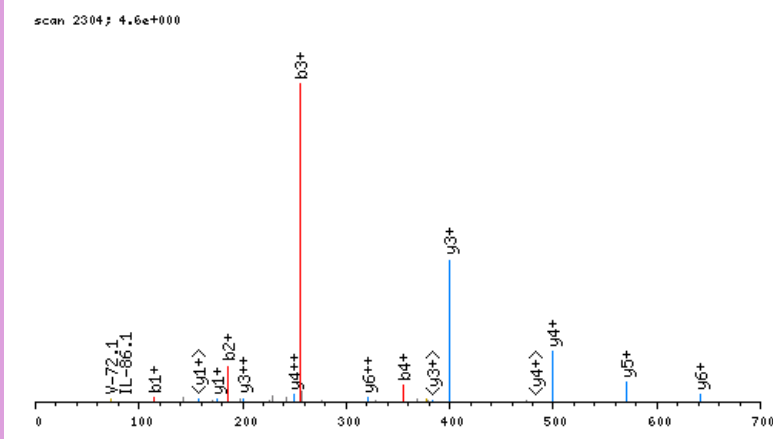

click image to zoom in; click top corners to zoom out [\[precursor±\]](#)

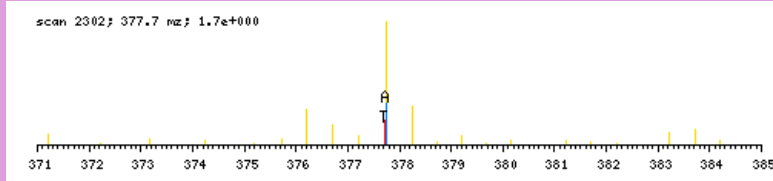

zoomed in precursor plot; T=theoretical m/z, A=acquired m/z

| b <sup>+</sup> | # | AA # | y <sup>+</sup> | y <sup>2+</sup>   |
|----------------|---|------|----------------|-------------------|
| 114.0555       | 1 | A    | 7              |                   |
| 185.0926       | 2 | A    | 6              | 641.3735 321.1907 |
| 256.1297       | 3 | A    | 5              | 570.3364 285.6721 |
| 355.1982       | 4 | V    | 4              | 499.2993 250.1535 |
| 452.2509       | 5 | P    | 3              | 400.2308 200.6193 |
| 580.3095       | 6 | Q    | 2              | 303.1781 152.0930 |
|                | 7 | R    | 1              | 175.1195 88.0637  |

N-term:+43.02

AAAVVEEAAAAGDVQR, MH+ 1498.7502, m/z 749.8787  
 L OSG41 P180811 230811-s1.06221.06221.2.dta

X-range:

-

MassTol: Y-zoom:

MassType:

AVG  MONO

Axis:

1  2

Label:

I  M  -

Ions:

a  +  2+  3+

b  +  2+  3+

c  +  2+  3+

x  +  2+  3+

y  +  2+  3+

z  +  2+  3+

hide H<sub>2</sub>O/NH<sub>3</sub>

zoom 112-122

GO

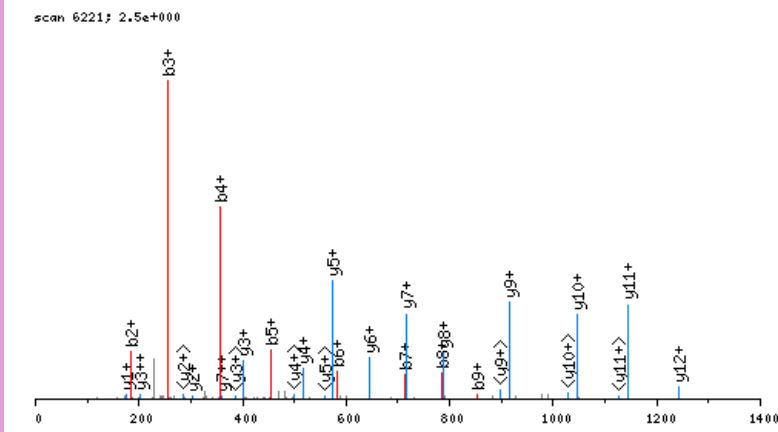

click image to zoom in; click top corners to zoom out [\[precursor±\]](#)

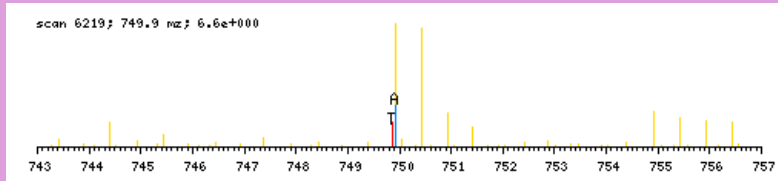

zoomed in precursor plot; T=theoretical m/z, A=acquired m/z

| b <sup>+</sup> | #  | AA # | y <sup>+</sup> | y <sup>2+</sup> |
|----------------|----|------|----------------|-----------------|
| 114.0555       | 1  | A 15 |                |                 |
| 185.0926       | 2  | A 14 | 1385.7025      | 693.3552        |
| 256.1297       | 3  | A 13 | 1314.6654      | 657.8366        |
| 355.1982       | 4  | V 12 | 1243.6283      | 622.3180        |
| 454.2666       | 5  | V 11 | 1144.5598      | 572.7838        |
| 583.3092       | 6  | E 10 | 1045.4914      | 523.2496        |
| 712.3518       | 7  | E 9  | 916.4488       | 458.7283        |
| 783.3889       | 8  | A 8  | 787.4062       | 394.2070        |
| 854.4260       | 9  | A 7  | 716.3691       | 358.6885        |
| 925.4631       | 10 | A 6  | 645.3320       | 323.1699        |
| 982.4846       | 11 | G 5  | 574.2949       | 287.6514        |
| 1097.5115      | 12 | D 4  | 517.2734       | 259.1406        |
| 1196.5799      | 13 | V 3  | 402.2465       | 201.6272        |
| 1324.6385      | 14 | Q 2  | 303.1781       | 152.0930        |
|                | 15 | R 1  | 175.1195       | 88.0637         |

N-term:+43.02

AADIEQVFR, MH+ 1090.5533, m/z 545.7803  
 L OSG41 P180811 230811-s1.06977.06977.2.dta

X-range:

-

MassTol: Y-zoom:

MassType:

AVG  MONO

Axis:

1  2

Label:

I  M  -

Ions:

a  +  2+  3+

b  +  2+  3+

c  +  2+  3+

x  +  2+  3+

y  +  2+  3+

z  +  2+  3+

hide H<sub>2</sub>O/NH<sub>3</sub>

zoom 112-122

GO

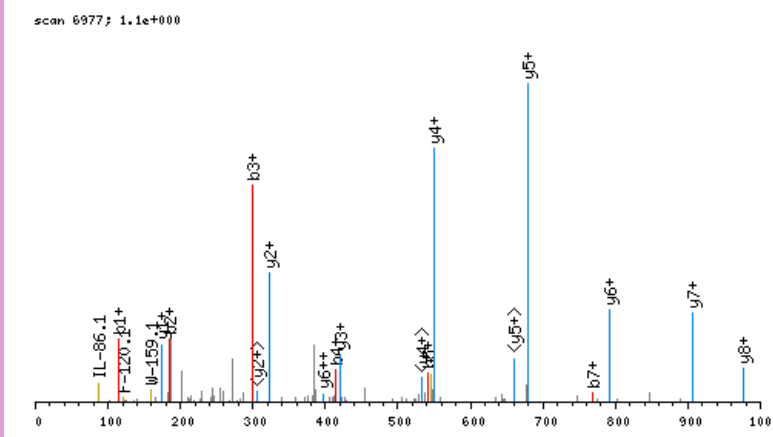

click image to zoom in; click top corners to zoom out [\[precursor±\]](#)

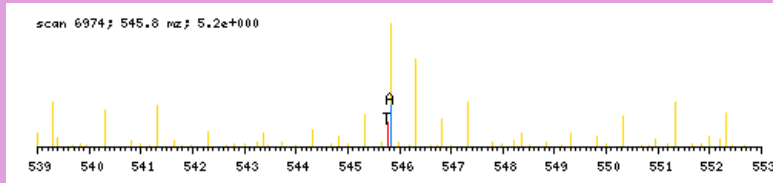

zoomed in precursor plot; T=theoretical m/z, A=acquired m/z

| b <sup>+</sup> | # | AA # | y <sup>+</sup> | y <sup>2+</sup> |
|----------------|---|------|----------------|-----------------|
| 114.0555       | 1 | A 9  |                |                 |
| 185.0926       | 2 | A 8  | 977.5056       | 489.2567        |
| 300.1196       | 3 | D 7  | 906.4685       | 453.7382        |
| 413.2036       | 4 | I 6  | 791.4416       | 396.2247        |
| 542.2462       | 5 | E 5  | 678.3575       | 339.6827        |
| 670.3048       | 6 | Q 4  | 549.3149       | 275.1614        |
| 769.3732       | 7 | V 3  | 421.2563       | 211.1321        |
| 916.4416       | 8 | F 2  | 322.1879       | 161.5979        |
|                | 9 | R 1  | 175.1195       | 88.0637         |

N-term:+43.02

AADISQWAGPLCLQEVDPEPPQHALR, MH+ 2843.3786, m/z 948.4644  
 L OSG37 P180811 230811-s1.08650.08650.3.dta

scan 8650; 5.0e+001

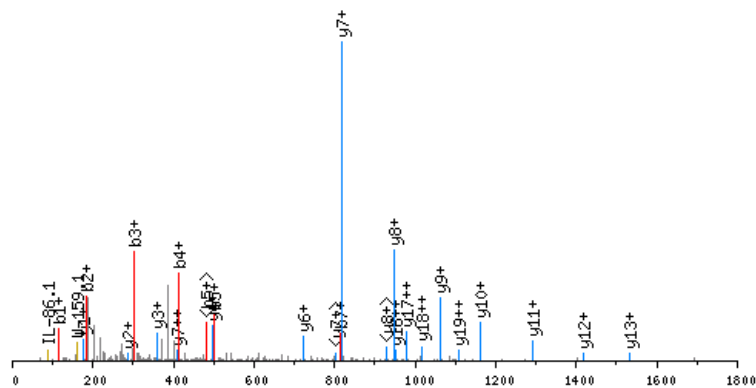

click image to zoom in; click top corners to zoom out [precursor±]

scan 8649; 948.5 m/z; 2.0e+002

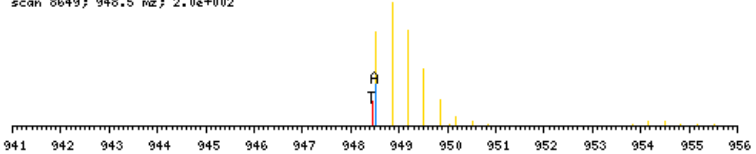

zoomed in precursor plot; T=theoretical m/z, A=acquired m/z

X-range:

0 - 0

MassTol: Y-zoom:

0. 1.

MassType:

AVG  MONO

Axis:

1  2

Label:

I  M  -

Ions:

a  +  2+  3+

b  +  2+  3+

c  +  2+  3+

x  +  2+  3+

y  +  2+  3+

z  +  2+  3+

hide H<sub>2</sub>O/NH<sub>3</sub>

zoom 112-122

GO

| b <sup>+</sup> | #  | AA | #  | y <sup>+</sup> | y <sup>2+</sup> |
|----------------|----|----|----|----------------|-----------------|
| 114.0555       | 1  | A  | 25 |                |                 |
| 185.0926       | 2  | A  | 24 | 2730.3309      | 1365.6694       |
| 300.1196       | 3  | D  | 23 | 2659.2938      | 1330.1508       |
| 413.2036       | 4  | I  | 22 | 2544.2669      | 1272.6373       |
| 500.2357       | 5  | S  | 21 | 2431.1828      | 1216.0953       |
| 628.2942       | 6  | Q  | 20 | 2344.1508      | 1172.5793       |
| 814.3736       | 7  | W  | 19 | 2216.0922      | 1108.5500       |
| 885.4107       | 8  | A  | 18 | 2030.0129      | 1015.5104       |
| 942.4321       | 9  | G  | 17 | 1958.9758      | 979.9918        |
| 1039.4849      | 10 | P  | 16 | 1901.9543      | 951.4811        |
| 1152.5690      | 11 | L  | 15 | 1804.9015      | 902.9547        |
| 1312.5996      | 12 | C  | 14 | 1691.8175      | 846.4127        |
| 1425.6836      | 13 | L  | 13 | 1531.7869      | 766.3974        |
| 1553.7422      | 14 | Q  | 12 | 1418.7028      | 709.8553        |
| 1682.7848      | 15 | E  | 11 | 1290.6442      | 645.8260        |
| 1781.8532      | 16 | V  | 10 | 1161.6016      | 581.3047        |
| 1896.8802      | 17 | D  | 9  | 1062.5332      | 531.7705        |
| 2025.9227      | 18 | E  | 8  | 947.5063       | 474.2571        |
| 2122.9755      | 19 | P  | 7  | 818.4637       | 409.7358        |
| 2220.0283      | 20 | P  | 6  | 721.4109       | 361.2094        |
| 2348.0868      | 21 | Q  | 5  | 624.3582       | 312.6830        |
| 2485.1458      | 22 | H  | 4  | 496.2996       | 248.6537        |
| 2556.1829      | 23 | A  | 3  | 359.2407       | 180.1243        |
| 2669.2669      | 24 | L  | 2  | 288.2036       | 144.6057        |
|                | 25 | R  | 1  | 175.1195       | 88.0637         |

N-term:+43.02 C(12):+160.03

AEEATLTVR, MH+ 1102.5744, m/z 551.7909  
 L OSG41 P180811 230811-s1.04102.04102.2.dta

X-range:

-

MassTol: Y-zoom:

MassType:

AVG  MONO

Axis:

1  2

Label:

I  M  -

Ions:

a  +  2+  3+

b  +  2+  3+

c  +  2+  3+

x  +  2+  3+

y  +  2+  3+

z  +  2+  3+

hide H<sub>2</sub>O/NH<sub>3</sub>

zoom 112-122

GO

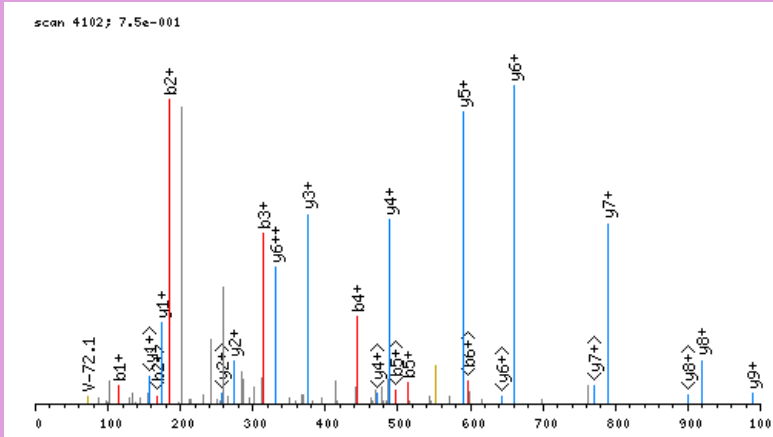

click image to zoom in; click top corners to zoom out [\[precursor±\]](#)

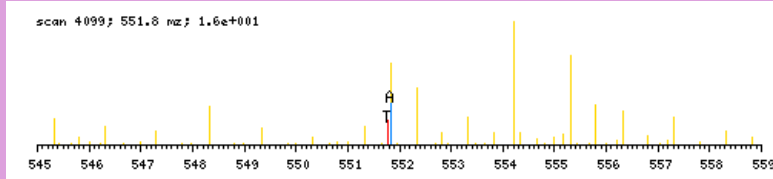

zoomed in precursor plot; T=theoretical m/z, A=acquired m/z

| b <sup>+</sup> | #  | AA | #  | y <sup>+</sup> | y <sup>2+</sup> |
|----------------|----|----|----|----------------|-----------------|
| 114.0555       | 1  | A  | 10 |                |                 |
| 185.0926       | 2  | A  | 9  | 989.5267       | 495.2673        |
| 314.1352       | 3  | E  | 8  | 918.4896       | 459.7487        |
| 443.1778       | 4  | E  | 7  | 789.4470       | 395.2274        |
| 514.2149       | 5  | A  | 6  | 660.4044       | 330.7061        |
| 615.2626       | 6  | T  | 5  | 589.3673       | 295.1876        |
| 728.3467       | 7  | L  | 4  | 488.3197       | 244.6637        |
| 829.3943       | 8  | T  | 3  | 375.2356       | 188.1217        |
| 928.4628       | 9  | V  | 2  | 274.1879       | 137.5979        |
|                | 10 | R  | 1  | 175.1195       | 88.0637         |

N-term: +43.02



AAEENLEVAR, MH+ 1143.5646, m/z 572.2859  
 L OSG41 P180811 230811-s1.03791.03791.2.dta

X-range:

-

MassTol: Y-zoom:

MassType:

AVG  MONO

Axis:

1  2

Label:

I  M  -

Ions:

a  +  2+  3+

b  +  2+  3+

c  +  2+  3+

x  +  2+  3+

y  +  2+  3+

z  +  2+  3+

hide H<sub>2</sub>O/NH<sub>3</sub>

zoom 112-122

GO

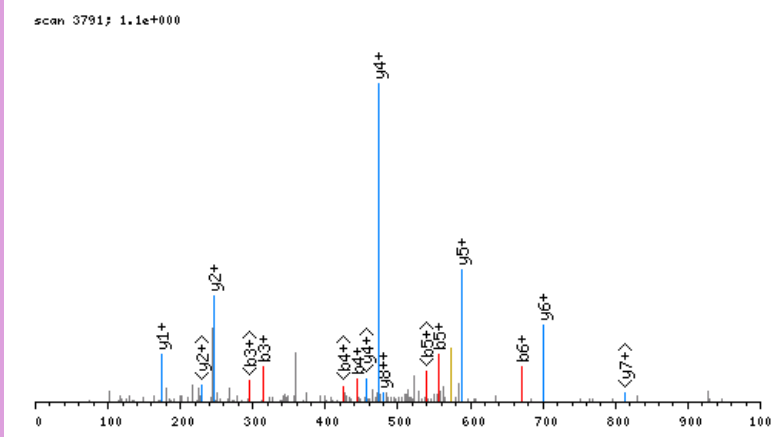

click image to zoom in; click top corners to zoom out [\[precursor±\]](#)

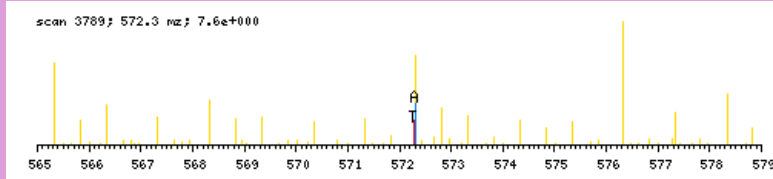

zoomed in precursor plot; T=theoretical m/z, A=acquired m/z

| b <sup>+</sup> | #  | AA | #  | y <sup>+</sup> | y <sup>2+</sup> |
|----------------|----|----|----|----------------|-----------------|
| 114.0555       | 1  | A  | 10 |                |                 |
| 185.0926       | 2  | A  | 9  | 1030.5169      | 515.7624        |
| 314.1352       | 3  | E  | 8  | 959.4798       | 480.2438        |
| 443.1778       | 4  | E  | 7  | 830.4372       | 415.7225        |
| 557.2207       | 5  | N  | 6  | 701.3946       | 351.2012        |
| 670.3048       | 6  | L  | 5  | 587.3517       | 294.1798        |
| 799.3474       | 7  | E  | 4  | 474.2676       | 237.6377        |
| 898.4158       | 8  | V  | 3  | 345.2250       | 173.1164        |
| 969.4529       | 9  | A  | 2  | 246.1566       | 123.5822        |
|                | 10 | R  | 1  | 175.1195       | 88.0637         |

N-term:+43.02

AAGAAAAALAFLNQESR, MH+ 1602.8240, m/z 801.9156  
 L OSG41 P180811 230811-s1.07503.07503.2.dta

X-range:

-

MassTol: Y-zoom:

MassType:

AVG  MONO

Axis:

1  2

Label:

I  M  -

Ions:

a  +  2+  3+

b  +  2+  3+

c  +  2+  3+

x  +  2+  3+

y  +  2+  3+

z  +  2+  3+

hide H<sub>2</sub>O/NH<sub>3</sub>

zoom 112-122

GO

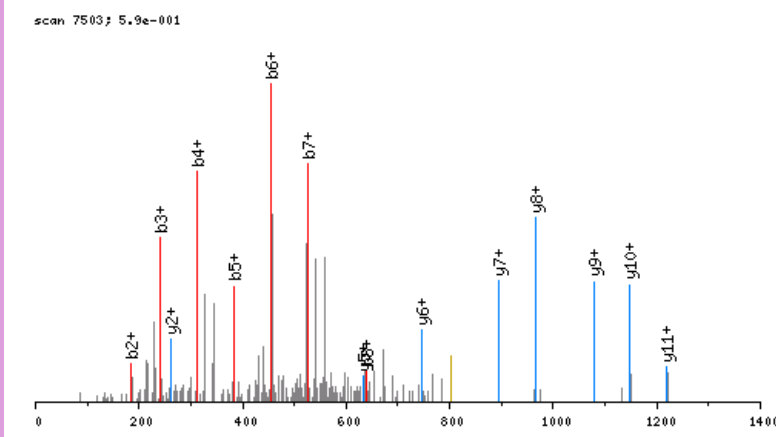

click image to zoom in; click top corners to zoom out [\[precursor±\]](#)

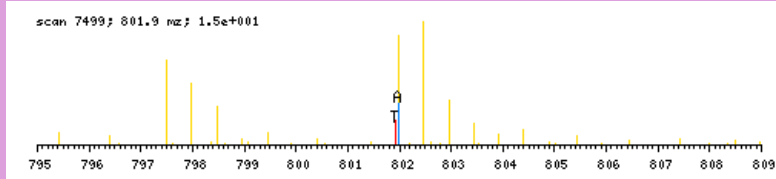

zoomed in precursor plot; T=theoretical m/z, A=acquired m/z

| b <sup>+</sup> | #  | AA # | y <sup>+</sup> | y <sup>2+</sup> |
|----------------|----|------|----------------|-----------------|
| 114.0555       | 1  | A 16 |                |                 |
| 185.0926       | 2  | A 15 | 1489.7763      | 745.3921        |
| 242.1141       | 3  | G 14 | 1418.7392      | 709.8735        |
| 313.1512       | 4  | A 13 | 1361.7177      | 681.3628        |
| 384.1883       | 5  | A 12 | 1290.6806      | 645.8442        |
| 455.2254       | 6  | A 11 | 1219.6435      | 610.3257        |
| 526.2625       | 7  | A 10 | 1148.6064      | 574.8071        |
| 639.3466       | 8  | L 9  | 1077.5693      | 539.2886        |
| 710.3837       | 9  | A 8  | 964.4852       | 482.7465        |
| 857.4521       | 10 | F 7  | 893.4481       | 447.2280        |
| 970.5362       | 11 | L 6  | 746.3797       | 373.6938        |
| 1084.5791      | 12 | N 5  | 633.2956       | 317.1517        |
| 1212.6377      | 13 | Q 4  | 519.2527       | 260.1303        |
| 1341.6803      | 14 | E 3  | 391.1941       | 196.1010        |
| 1428.7123      | 15 | S 2  | 262.1515       | 131.5797        |
|                | 16 | R 1  | 175.1195       | 88.0637         |

N-term:+43.02

AAGDGDVKLSTLGGESGGDGSPGGAGATAAR, MH+ 2879.3832, m/z 960.4659  
 L OSG36 P180811 230811-s1.03597.03597.3.dta

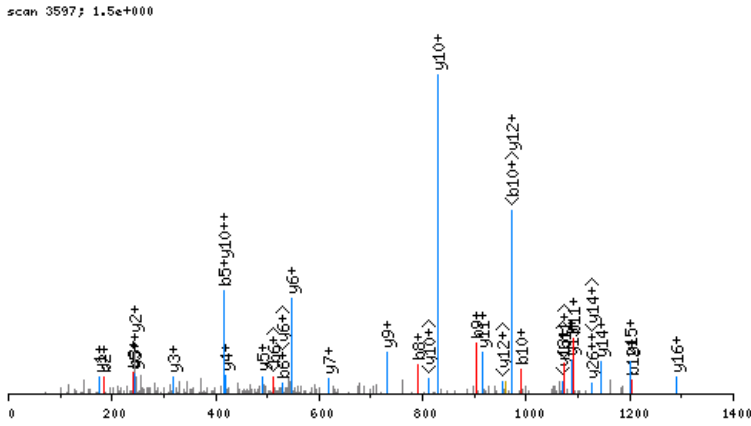

click image to zoom in; click top corners to zoom out [\[precursor±\]](#)

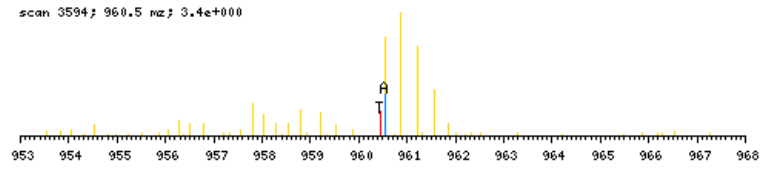

zoomed in precursor plot; T=theoretical m/z, A=acquired m/z

| b <sup>+</sup> | #  | AA | #  | y <sup>+</sup> | y <sup>2+</sup> |
|----------------|----|----|----|----------------|-----------------|
| 114.0555       | 1  | A  | 33 |                |                 |
| 185.0926       | 2  | A  | 32 | 2766.3355      | 1383.6716       |
| 242.1141       | 3  | G  | 31 | 2695.2984      | 1348.1531       |
| 357.1410       | 4  | D  | 30 | 2638.2769      | 1319.6424       |
| 414.1625       | 5  | G  | 29 | 2523.2499      | 1262.1289       |
| 529.1894       | 6  | D  | 28 | 2466.2285      | 1233.6182       |
| 628.2579       | 7  | V  | 27 | 2351.2015      | 1176.1047       |
| 790.4160       | 8  | K  | 26 | 2252.1331      | 1126.5705       |
| 903.5000       | 9  | L  | 25 | 2089.9750      | 1045.4914       |
| 990.5320       | 10 | S  | 24 | 1976.8910      | 988.9494        |
| 1091.5797      | 11 | T  | 23 | 1889.8589      | 945.4334        |
| 1204.6638      | 12 | L  | 22 | 1788.8113      | 894.9095        |
| 1261.6853      | 13 | G  | 21 | 1675.7272      | 838.3675        |
| 1348.7173      | 14 | S  | 20 | 1618.7057      | 809.8568        |
| 1405.7387      | 15 | G  | 19 | 1531.6737      | 766.3408        |
| 1462.7602      | 16 | G  | 18 | 1474.6522      | 737.8300        |
| 1591.8028      | 17 | E  | 17 | 1417.6308      | 709.3193        |
| 1678.8348      | 18 | S  | 16 | 1288.5882      | 644.7980        |
| 1735.8563      | 19 | G  | 15 | 1201.5562      | 601.2820        |
| 1792.8778      | 20 | G  | 14 | 1144.5347      | 572.7713        |
| 1907.9047      | 21 | D  | 13 | 1087.5132      | 544.2605        |
| 1964.9262      | 22 | G  | 12 | 972.4863       | 486.7471        |
| 2051.9582      | 23 | S  | 11 | 915.4648       | 458.2363        |
| 2149.0110      | 24 | P  | 10 | 828.4328       | 414.7203        |
| 2206.0324      | 25 | G  | 9  | 731.3800       | 366.1939        |
| 2263.0539      | 26 | G  | 8  | 674.3586       | 337.6832        |
| 2334.0910      | 27 | A  | 7  | 617.3371       | 309.1725        |
| 2391.1125      | 28 | G  | 6  | 546.3000       | 273.6539        |
| 2462.1496      | 29 | A  | 5  | 489.2785       | 245.1432        |
| 2563.1973      | 30 | T  | 4  | 418.2414       | 209.6246        |
| 2634.2344      | 31 | A  | 3  | 317.1937       | 159.1008        |
| 2705.2715      | 32 | A  | 2  | 246.1566       | 123.5822        |
|                | 33 | R  | 1  | 175.1195       | 88.0637         |

N-term:+43.02 K(8):+162.16

X-range:

-

MassTol: Y-zoom:

MassType:

AVG  MONO

Axis:

1  2

Label:

I  M  -

Ions:

a  +  2+  3+

b  +  2+  3+

c  +  2+  3+

x  +  2+  3+

y  +  2+  3+

z  +  2+  3+

hide H<sub>2</sub>O/NH<sub>3</sub>

zoom 112-122

GO

AAGESMAQR, MH+ 962.4366, m/z 481.7219  
 L OSG41 P180811 230811-s1.02290.02290.2.dta

X-range:

-

MassTol: Y-zoom:

MassType:

AVG  MONO

Axis:

1  2

Label:

I  M  -

Ions:

a  +  2+  3+

b  +  2+  3+

c  +  2+  3+

x  +  2+  3+

y  +  2+  3+

z  +  2+  3+

hide H<sub>2</sub>O/NH<sub>3</sub>

zoom 112-122

GO

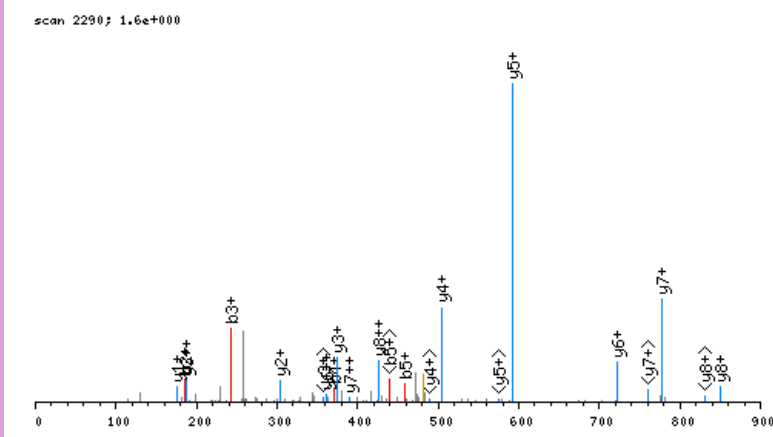

click image to zoom in; click top corners to zoom out [\[precursor±\]](#)

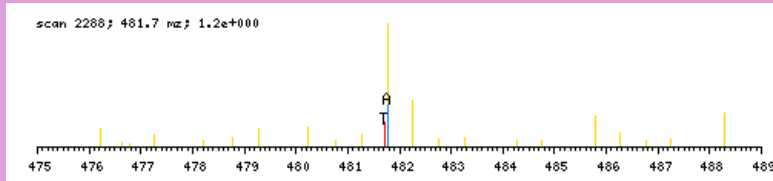

zoomed in precursor plot; T=theoretical m/z, A=acquired m/z

| b <sup>+</sup> | # | AA # | y <sup>+</sup> | y <sup>2+</sup>   |
|----------------|---|------|----------------|-------------------|
| 114.0555       | 1 | A    | 9              |                   |
| 185.0926       | 2 | A    | 8              | 849.3889 425.1984 |
| 242.1141       | 3 | G    | 7              | 778.3518 389.6798 |
| 371.1567       | 4 | E    | 6              | 721.3303 361.1691 |
| 458.1887       | 5 | S    | 5              | 592.2877 296.6478 |
| 589.2292       | 6 | M    | 4              | 505.2557 253.1318 |
| 660.2663       | 7 | A    | 3              | 374.2152 187.6115 |
| 788.3249       | 8 | Q    | 2              | 303.1781 152.0930 |
|                | 9 | R    | 1              | 175.1195 88.0637  |

N-term:+43.02

AAGFKTVEPLEYYR, MH+ 1713.8852, m/z 571.9666  
 L OSG37 P180811 230811-s1.07347.07347.3.dta

X-range:

-

MassTol: Y-zoom:

MassType:

AVG  MONO

Axis:

1  2

Label:

I  M  -

Ions:

a  +  2+  3+

b  +  2+  3+

c  +  2+  3+

x  +  2+  3+

y  +  2+  3+

z  +  2+  3+

hide H<sub>2</sub>O/NH<sub>3</sub>

zoom 112-122

GO

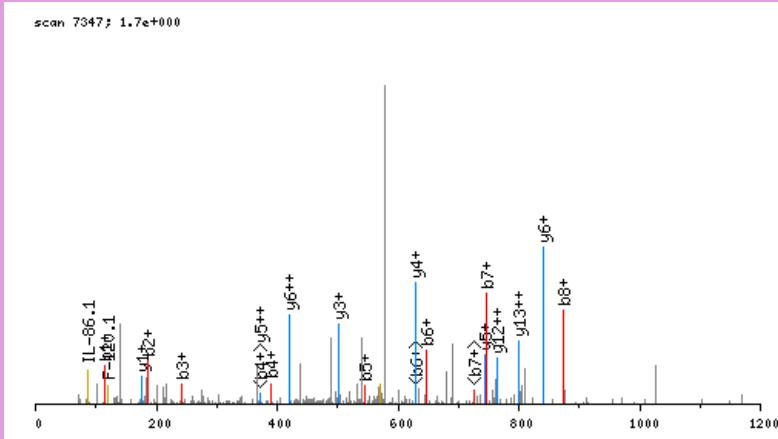

click image to zoom in; click top corners to zoom out [\[precursor±\]](#)

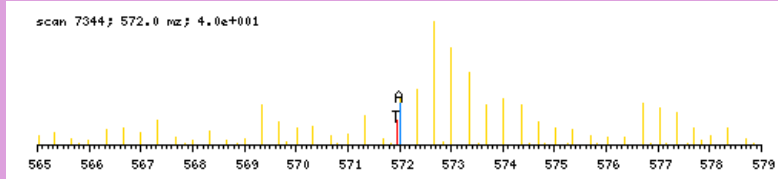

zoomed in precursor plot; T=theoretical m/z, A=acquired m/z

| b <sup>+</sup> | #  | AA # | y <sup>+</sup> | y <sup>2+</sup> |
|----------------|----|------|----------------|-----------------|
| 114.0555       | 1  | A 14 |                |                 |
| 185.0926       | 2  | A 13 | 1600.8376      | 800.9227        |
| 242.1141       | 3  | G 12 | 1529.8004      | 765.4041        |
| 389.1825       | 4  | F 11 | 1472.7790      | 736.8934        |
| 545.3088       | 5  | K 10 | 1325.7106      | 663.3592        |
| 646.3565       | 6  | T 9  | 1169.5843      | 585.2960        |
| 745.4249       | 7  | V 8  | 1068.5366      | 534.7722        |
| 874.4675       | 8  | E 7  | 969.4682       | 485.2380        |
| 971.5203       | 9  | P 6  | 840.4256       | 420.7167        |
| 1084.6043      | 10 | L 5  | 743.3728       | 372.1903        |
| 1213.6469      | 11 | E 4  | 630.2888       | 315.6483        |
| 1376.7102      | 12 | Y 3  | 501.2462       | 251.1270        |
| 1539.7736      | 13 | Y 2  | 338.1828       | 169.5953        |
|                | 14 | R 1  | 175.1195       | 88.0637         |

N-term:+43.02 K(5):+156.13

AAGGAVVAPECR, MH+ 1270.6214, m/z 635.8143  
 L OSG41 P180811 230811-s1.03340.03340.2.dta

X-range:

-

MassTol: Y-zoom:

MassType:

AVG  MONO

Axis:

1  2

Label:

I  M  -

Ions:

a  +  2+  3+

b  +  2+  3+

c  +  2+  3+

x  +  2+  3+

y  +  2+  3+

z  +  2+  3+

hide H<sub>2</sub>O/NH<sub>3</sub>

zoom 112-122

GO

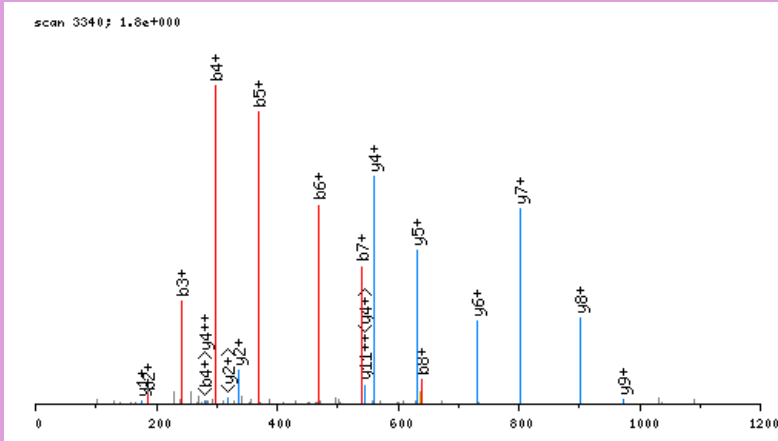

click image to zoom in; click top corners to zoom out [\[precursor±\]](#)

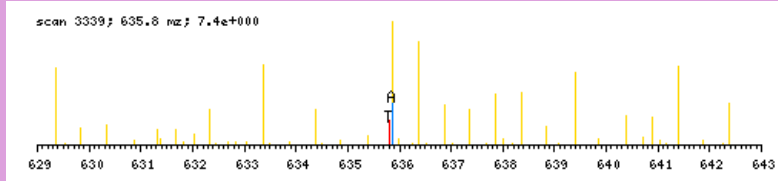

zoomed in precursor plot; T=theoretical m/z, A=acquired m/z

| b <sup>+</sup> | #  | AA # | y <sup>+</sup> | y <sup>2+</sup> |
|----------------|----|------|----------------|-----------------|
| 114.0555       | 1  | A 13 |                |                 |
| 185.0926       | 2  | A 12 | 1157.5737      | 579.2907        |
| 242.1141       | 3  | G 11 | 1086.5366      | 543.7722        |
| 299.1356       | 4  | G 10 | 1029.5151      | 515.2615        |
| 370.1727       | 5  | A 9  | 972.4936       | 486.7507        |
| 469.2411       | 6  | V 8  | 901.4565       | 451.2322        |
| 540.2782       | 7  | A 7  | 802.3881       | 401.6980        |
| 639.3466       | 8  | V 6  | 731.3510       | 366.1794        |
| 710.3837       | 9  | A 5  | 632.2826       | 316.6452        |
| 807.4365       | 10 | P 4  | 561.2455       | 281.1266        |
| 936.4791       | 11 | E 3  | 464.1927       | 232.6003        |
| 1096.5097      | 12 | C 2  | 335.1501       | 168.0790        |
|                | 13 | R 1  | 175.1195       | 88.0637         |

N-term:+43.02 C(12):+160.03

AAGTLTYYPENWR, MH+ 1583.7494, m/z 792.3784  
 L OSG41 P180811 230811-s1.06591.06591.2.dta

X-range:

-

MassTol: Y-zoom:

MassType:

AVG  MONO

Axis:

1  2

Label:

I  M  -

Ions:

a  +  2+  3+

b  +  2+  3+

c  +  2+  3+

x  +  2+  3+

y  +  2+  3+

z  +  2+  3+

hide H<sub>2</sub>O/NH<sub>3</sub>

zoom 112-122

GO

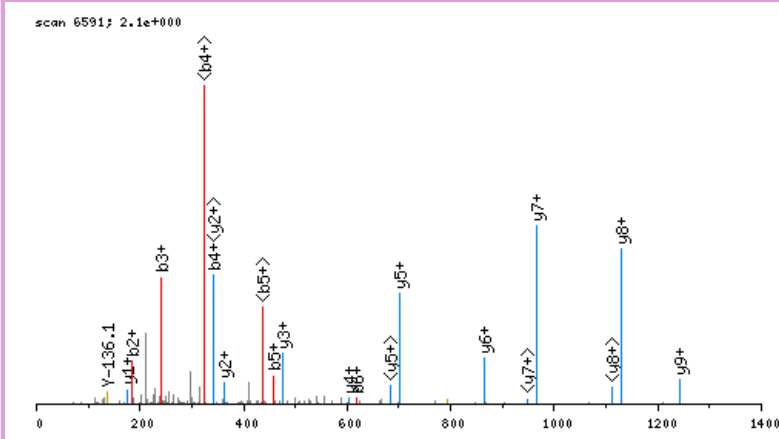

click image to zoom in; click top corners to zoom out [\[precursor±\]](#)

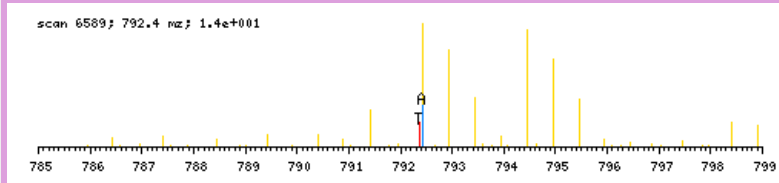

zoomed in precursor plot; T=theoretical m/z, A=acquired m/z

| b <sup>+</sup> | #  | AA # | y <sup>+</sup> | y <sup>2+</sup> |
|----------------|----|------|----------------|-----------------|
| 114.0555       | 1  | A 13 |                |                 |
| 185.0926       | 2  | A 12 | 1470.7018      | 735.8548        |
| 242.1141       | 3  | G 11 | 1399.6646      | 700.3362        |
| 343.1618       | 4  | T 10 | 1342.6432      | 671.8255        |
| 456.2458       | 5  | L 9  | 1241.5955      | 621.3017        |
| 619.3092       | 6  | Y 8  | 1128.5114      | 564.7596        |
| 720.3568       | 7  | T 7  | 965.4481       | 483.2280        |
| 883.4202       | 8  | Y 6  | 864.4004       | 432.7041        |
| 980.4729       | 9  | P 5  | 701.3371       | 351.1725        |
| 1109.5155      | 10 | E 4  | 604.2843       | 302.6461        |
| 1223.5585      | 11 | N 3  | 475.2417       | 238.1248        |
| 1409.6378      | 12 | W 2  | 361.1988       | 181.1033        |
|                | 13 | R 1  | 175.1195       | 88.0637         |

N-term:+43.02

AAGTSNYWEDLR, MH+ 1424.6446, m/z 712.8260  
 L OSG41 P180811 230811-s1.06137.06137.2.dta

X-range:

-

MassTol: Y-zoom:

MassType:

AVG  MONO

Axis:

1  2

Label:

I  M  -

Ions:

a  +  2+  3+

b  +  2+  3+

c  +  2+  3+

x  +  2+  3+

y  +  2+  3+

z  +  2+  3+

hide H<sub>2</sub>O/NH<sub>3</sub>

zoom 112-122

GO

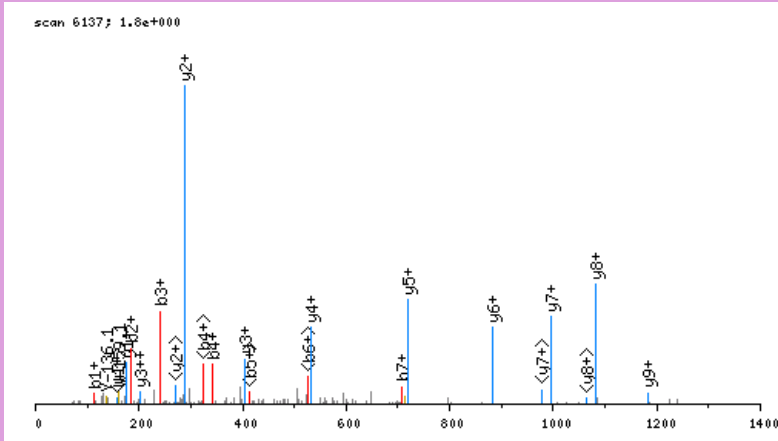

click image to zoom in; click top corners to zoom out [\[precursor±\]](#)

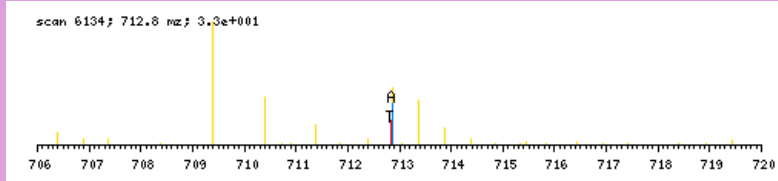

zoomed in precursor plot; T=theoretical m/z, A=acquired m/z

| b <sup>+</sup> | #  | AA # | y <sup>+</sup> | y <sup>2+</sup> |
|----------------|----|------|----------------|-----------------|
| 114.0555       | 1  | A 12 |                |                 |
| 185.0926       | 2  | A 11 | 1311.5970      | 656.3024        |
| 242.1141       | 3  | G 10 | 1240.5598      | 620.7838        |
| 343.1618       | 4  | T 9  | 1183.5384      | 592.2731        |
| 430.1938       | 5  | S 8  | 1082.4907      | 541.7493        |
| 544.2367       | 6  | N 7  | 995.4587       | 498.2332        |
| 707.3001       | 7  | Y 6  | 881.4157       | 441.2118        |
| 893.3794       | 8  | W 5  | 718.3524       | 359.6801        |
| 1022.4220      | 9  | E 4  | 532.2731       | 266.6405        |
| 1137.4489      | 10 | D 3  | 403.2305       | 202.1192        |
| 1250.5330      | 11 | L 2  | 288.2036       | 144.6057        |
|                | 12 | R 1  | 175.1195       | 88.0637         |

N-term:+43.02



AAKPKLYYFNGR, MH+ 1525.8532, m/z 509.2892  
 L OSG40 P180811 230811-s1.05163.05163.3.dta

X-range:

-

MassTol: Y-zoom:

MassType:

AVG  MONO

Axis:

1  2

Label:

I  M  -

Ions:

a  +  2+  3+

b  +  2+  3+

c  +  2+  3+

x  +  2+  3+

y  +  2+  3+

z  +  2+  3+

hide H<sub>2</sub>O/NH<sub>3</sub>

zoom 112-122

GO

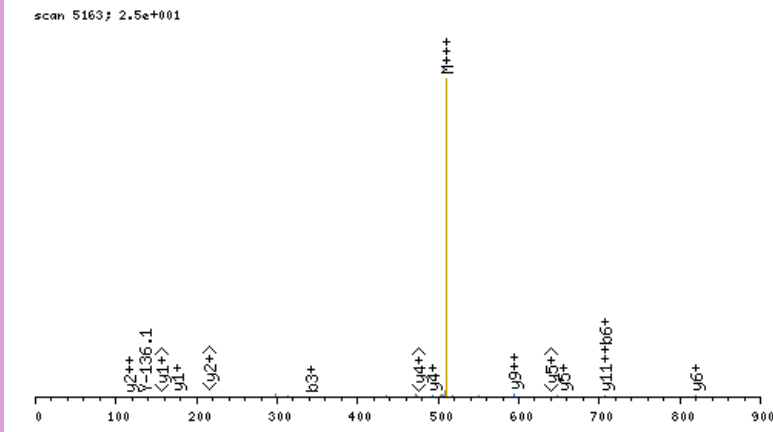

click image to zoom in; click top corners to zoom out [\[precursor±\]](#)

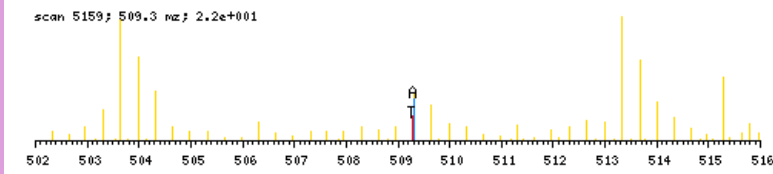

zoomed in precursor plot; T=theoretical m/z, A=acquired m/z

| b <sup>+</sup> | #  | AA # | y <sup>+</sup> | y <sup>2+</sup> |
|----------------|----|------|----------------|-----------------|
| 114.0555       | 1  | A    | 12             |                 |
| 185.0926       | 2  | A    | 11             | 1412.8055       |
| 341.2189       | 3  | K    | 10             | 1341.7684       |
| 438.2717       | 4  | P    | 9              | 1185.6421       |
| 594.3980       | 5  | K    | 8              | 1088.5893       |
| 707.4821       | 6  | L    | 7              | 932.4630        |
| 870.5454       | 7  | Y    | 6              | 819.3790        |
| 1033.6087      | 8  | Y    | 5              | 656.3156        |
| 1180.6771      | 9  | F    | 4              | 493.2523        |
| 1294.7201      | 10 | N    | 3              | 346.1839        |
| 1351.7415      | 11 | G    | 2              | 232.1410        |
|                | 12 | R    | 1              | 175.1195        |

N-term:+43.02 K(3):+156.13  
 K(5):+156.13

AALGEPVR, MH+ 854.4736, m/z 427.7404  
 L OSG41 P180811 230811-s1.03523.03523.2.dta

scan 3523; 4.6e+000

X-range:

-

MassTol: Y-zoom:

MassType:

AVG  MONO

Axis:

1  2

Label:

I  M  -

Ions:

a  +  2+  3+

b  +  2+  3+

c  +  2+  3+

x  +  2+  3+

y  +  2+  3+

z  +  2+  3+

hide H<sub>2</sub>O/NH<sub>3</sub>

zoom 112-122

GO

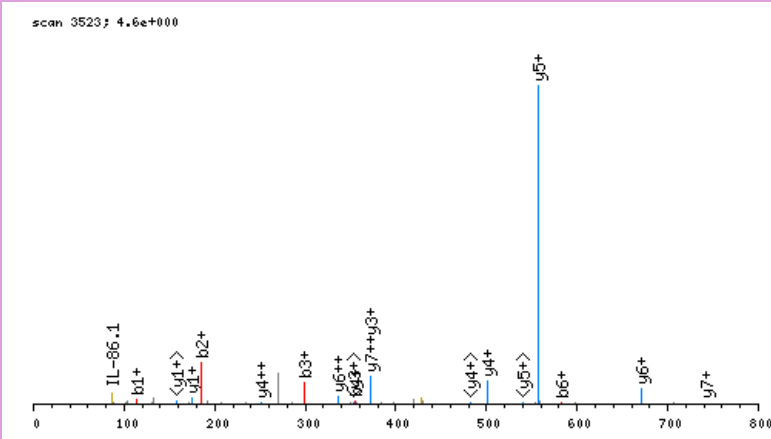

click image to zoom in; click top corners to zoom out [\[precursor±\]](#)

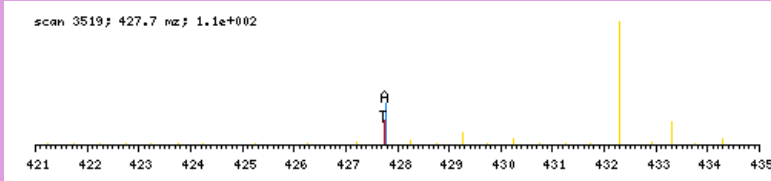

zoomed in precursor plot; T=theoretical m/z, A=acquired m/z

| b <sup>+</sup> | # | AA # | y <sup>+</sup> | y <sup>2+</sup>   |
|----------------|---|------|----------------|-------------------|
| 114.0555       | 1 | A    | 8              |                   |
| 185.0926       | 2 | A    | 7              | 741.4259 371.2169 |
| 298.1767       | 3 | L    | 6              | 670.3888 335.6983 |
| 355.1982       | 4 | G    | 5              | 557.3047 279.1563 |
| 484.2407       | 5 | E    | 4              | 500.2833 250.6455 |
| 581.2935       | 6 | P    | 3              | 371.2407 186.1243 |
| 680.3619       | 7 | V    | 2              | 274.1879 137.5979 |
|                | 8 | R    | 1              | 175.1195 88.0637  |

N-term:+43.02

AALGSSSQNVTEYVVR, MH+ 1722.8663, m/z 574.9603  
 L OSG41 P180811 230811-s1.05985.05985.3.dta

X-range:

-

MassTol: Y-zoom:

MassType:

AVG  MONO

Axis:

1  2

Label:

I  M  -

Ions:

a  +  2+  3+

b  +  2+  3+

c  +  2+  3+

x  +  2+  3+

y  +  2+  3+

z  +  2+  3+

hide H<sub>2</sub>O/NH<sub>3</sub>

zoom 112-122

GO

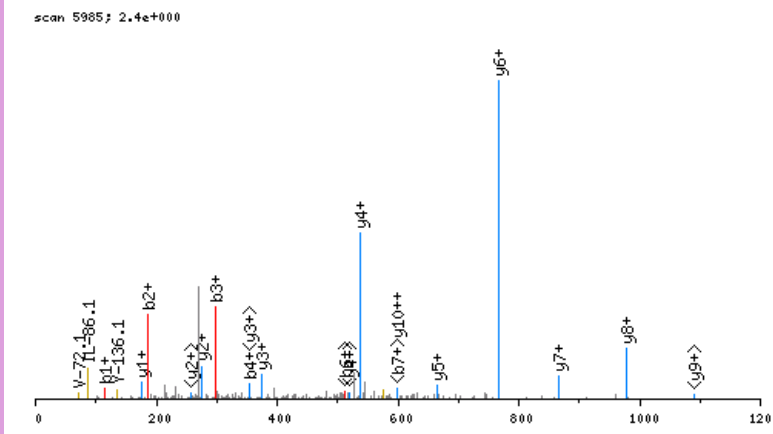

click image to zoom in; click top corners to zoom out [\[precursor±\]](#)

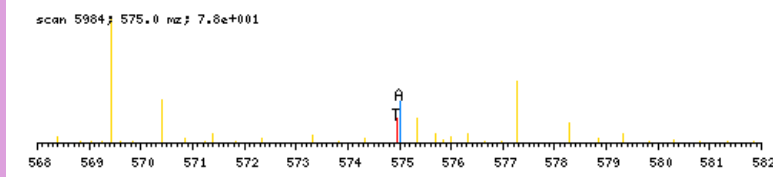

zoomed in precursor plot; T=theoretical m/z, A=acquired m/z

| b <sup>+</sup> | #  | AA # | y <sup>+</sup>  | y <sup>2+</sup> |
|----------------|----|------|-----------------|-----------------|
| 114.0555       | 1  | A 16 |                 |                 |
| 185.0926       | 2  | A 15 | 1609.8186       | 805.4132        |
| 298.1767       | 3  | L 14 | 1538.7815       | 769.8946        |
| 355.1982       | 4  | G 13 | 1425.6974       | 713.3526        |
| 442.2302       | 5  | S 12 | 1368.6759       | 684.8419        |
| 529.2622       | 6  | S 11 | 1281.6439       | 641.3259        |
| 616.2942       | 7  | S 10 | 1194.6119       | <b>597.8099</b> |
| 744.3528       | 8  | Q 9  | 1107.5798       | 554.2938        |
| 858.3957       | 9  | N 8  | <b>979.5213</b> | 490.2645        |
| 957.4642       | 10 | V 7  | <b>865.4783</b> | 433.2431        |
| 1058.5118      | 11 | T 6  | <b>766.4099</b> | 383.7089        |
| 1187.5544      | 12 | E 5  | <b>665.3623</b> | 333.1850        |
| 1350.6178      | 13 | Y 4  | <b>536.3197</b> | 268.6637        |
| 1449.6862      | 14 | V 3  | <b>373.2563</b> | 187.1321        |
| 1548.7546      | 15 | V 2  | <b>274.1879</b> | 137.5979        |
|                | 16 | R 1  | <b>175.1195</b> | 88.0637         |

N-term:+43.02

AALTAEHFVALQSLKASSKDVVVR, MH+ 2664.5725, m/z 666.8986  
 L OSG40 P180811 230811-s1.09453.09453.4.dta

scan 9453; 8.9e-001

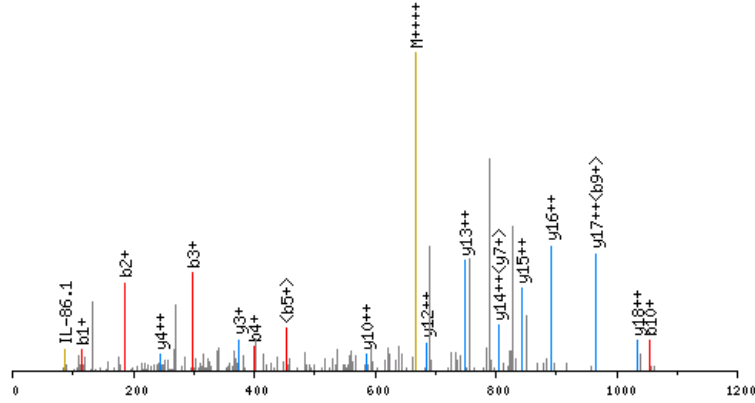

click image to zoom in; click top corners to zoom out [\[precursor±\]](#)

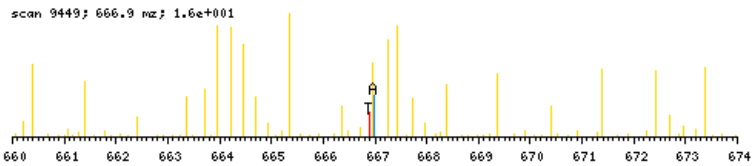

zoomed in precursor plot; T=theoretical m/z, A=acquired m/z

X-range:

-

MassTol: Y-zoom:

MassType:

AVG  MONO

Axis:

1  2

Label:

I  M  -

Ions:

a  +  2+  3+

b  +  2+  3+

c  +  2+  3+

x  +  2+  3+

y  +  2+  3+

z  +  2+  3+

hide H<sub>2</sub>O/NH<sub>3</sub>

zoom 112-122

GO

| b <sup>+</sup> | #  | AA # | y <sup>+</sup> | y <sup>2+</sup> |
|----------------|----|------|----------------|-----------------|
| 114.0555       | 1  | A 24 |                |                 |
| 185.0926       | 2  | A 23 | 2551.5249      | 1276.2663       |
| 298.1767       | 3  | L 22 | 2480.4877      | 1240.7478       |
| 399.2244       | 4  | T 21 | 2367.4037      | 1184.2058       |
| 470.2615       | 5  | A 20 | 2266.3560      | 1133.6819       |
| 599.3041       | 6  | E 19 | 2195.3189      | 1098.1634       |
| 736.3630       | 7  | H 18 | 2066.2763      | 1033.6421       |
| 883.4314       | 8  | F 17 | 1929.2174      | 965.1126        |
| 982.4998       | 9  | V 16 | 1782.1490      | 891.5784        |
| 1053.5369      | 10 | A 15 | 1683.0806      | 842.0442        |
| 1166.6210      | 11 | L 14 | 1612.0434      | 806.5256        |
| 1294.6796      | 12 | Q 13 | 1498.9594      | 749.9836        |
| 1381.7116      | 13 | S 12 | 1370.9008      | 685.9543        |
| 1494.7957      | 14 | L 11 | 1283.8688      | 642.4383        |
| 1607.8797      | 15 | L 10 | 1170.7847      | 585.8963        |
| 1770.0378      | 16 | K 9  | 1057.7006      | 529.3542        |
| 1841.0749      | 17 | A 8  | 895.5425       | 448.2752        |
| 1928.1070      | 18 | S 7  | 824.5054       | 412.7566        |
| 2015.1390      | 19 | S 6  | 737.4734       | 369.2406        |
| 2177.2971      | 20 | K 5  | 650.4414       | 325.7246        |
| 2292.3240      | 21 | D 4  | 488.2833       | 244.6455        |
| 2391.3925      | 22 | V 3  | 373.2563       | 187.1321        |
| 2490.4609      | 23 | V 2  | 274.1879       | 137.5979        |
|                | 24 | R 1  | 175.1195       | 88.0637         |

N-term:+43.02 K(16):+162.16  
 K(20):+162.16

AALVVSETAEPGSR, MH+ 1428.7335, m/z 714.8704  
 L OSG41 P180811 230811-s1.05438.05438.2.dta

X-range:

-

MassTol: Y-zoom:

MassType:

AVG  MONO

Axis:

1  2

Label:

I  M  -

Ions:

a  +  2+  3+

b  +  2+  3+

c  +  2+  3+

x  +  2+  3+

y  +  2+  3+

z  +  2+  3+

hide H<sub>2</sub>O/NH<sub>3</sub>

zoom 112-122

GO

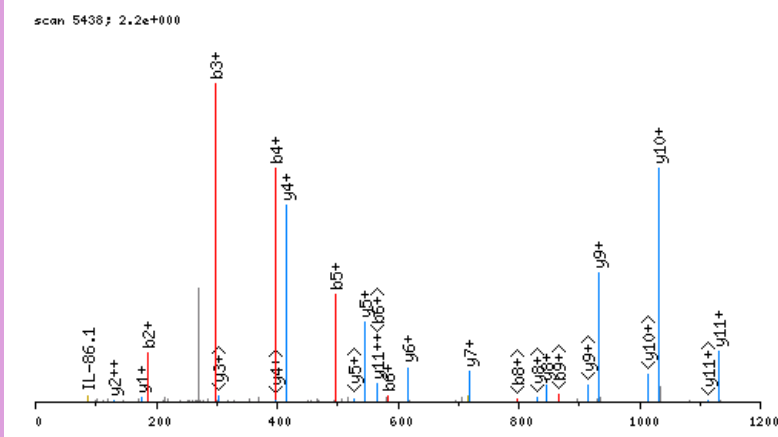

click image to zoom in; click top corners to zoom out [\[precursor±\]](#)

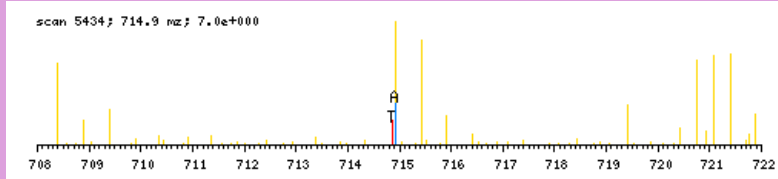

zoomed in precursor plot; T=theoretical m/z, A=acquired m/z

| b <sup>+</sup> | #  | AA # | y <sup>+</sup> | y <sup>2+</sup> |
|----------------|----|------|----------------|-----------------|
| 114.0555       | 1  | A 14 |                |                 |
| 185.0926       | 2  | A 13 | 1315.6858      | 658.3468        |
| 298.1767       | 3  | L 12 | 1244.6487      | 622.8282        |
| 397.2451       | 4  | V 11 | 1131.5646      | 566.2862        |
| 496.3135       | 5  | V 10 | 1032.4962      | 516.7520        |
| 583.3455       | 6  | S 9  | 933.4278       | 467.2178        |
| 712.3881       | 7  | E 8  | 846.3957       | 423.7018        |
| 813.4358       | 8  | T 7  | 717.3531       | 359.1805        |
| 884.4729       | 9  | A 6  | 616.3055       | 308.6566        |
| 1013.5155      | 10 | E 5  | 545.2683       | 273.1381        |
| 1110.5683      | 11 | P 4  | 416.2258       | 208.6168        |
| 1167.5898      | 12 | G 3  | 319.1730       | 160.0904        |
| 1254.6218      | 13 | S 2  | 262.1515       | 131.5797        |
|                | 14 | R 1  | 175.1195       | 88.0637         |

N-term:+43.02

AALYGGVEGGTR, MH+ 1249.6177, m/z 625.3125  
 L OSG41 P180811 230811-s1.04537.04537.2.dta

X-range:

-

MassTol: Y-zoom:

MassType:

AVG  MONO

Axis:

1  2

Label:

I  M  -

Ions:

a  +  2+  3+

b  +  2+  3+

c  +  2+  3+

x  +  2+  3+

y  +  2+  3+

z  +  2+  3+

hide H<sub>2</sub>O/NH<sub>3</sub>

zoom 112-122

GO

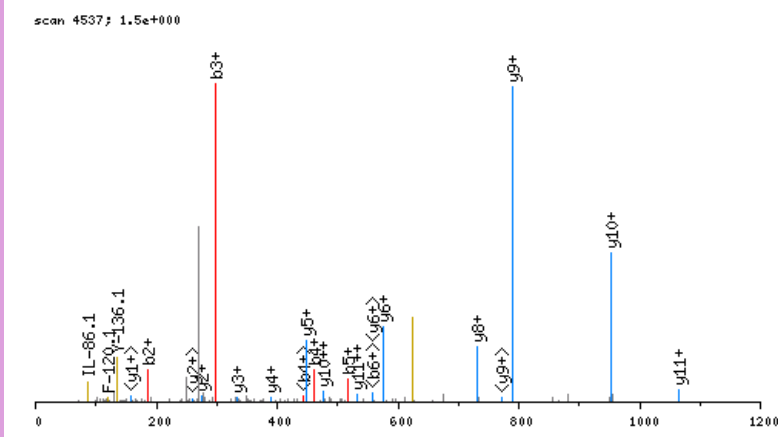

click image to zoom in; click top corners to zoom out [\[precursor±\]](#)

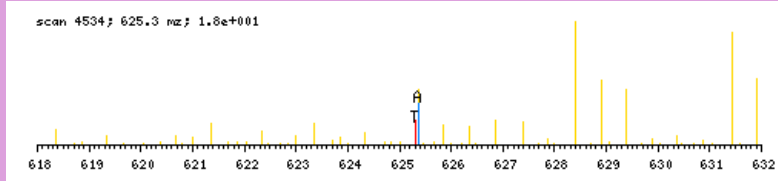

zoomed in precursor plot; T=theoretical m/z, A=acquired m/z

| b <sup>+</sup> | #  | AA # | y <sup>+</sup> | y <sup>2+</sup> |
|----------------|----|------|----------------|-----------------|
| 114.0555       | 1  | A 13 |                |                 |
| 185.0926       | 2  | A 12 | 1136.5700      | 568.7889        |
| 298.1767       | 3  | L 11 | 1065.5329      | 533.2704        |
| 461.2400       | 4  | Y 10 | 952.4488       | 476.7283        |
| 518.2615       | 5  | G 9  | 789.3855       | 395.1967        |
| 575.2829       | 6  | G 8  | 732.3640       | 366.6859        |
| 674.3514       | 7  | V 7  | 675.3426       | 338.1752        |
| 803.3940       | 8  | E 6  | 576.2742       | 288.6410        |
| 860.4154       | 9  | G 5  | 447.2316       | 224.1197        |
| 917.4369       | 10 | G 4  | 390.2101       | 195.6090        |
| 974.4583       | 11 | G 3  | 333.1886       | 167.0982        |
| 1075.5060      | 12 | T 2  | 276.1672       | 138.5875        |
|                | 13 | R 1  | 175.1195       | 88.0637         |

N-term:+43.02

AAMAVGGAGGSR, MH+ 1046.5053, m/z 523.7563  
 L OSG41 P180811 230811-s1.03022.03022.2.dta

X-range:

-

MassTol: Y-zoom:

MassType:

AVG  MONO

Axis:

1  2

Label:

I  M  -

Ions:

a  +  2+  3+

b  +  2+  3+

c  +  2+  3+

x  +  2+  3+

y  +  2+  3+

z  +  2+  3+

hide H<sub>2</sub>O/NH<sub>3</sub>

zoom 112-122

GO

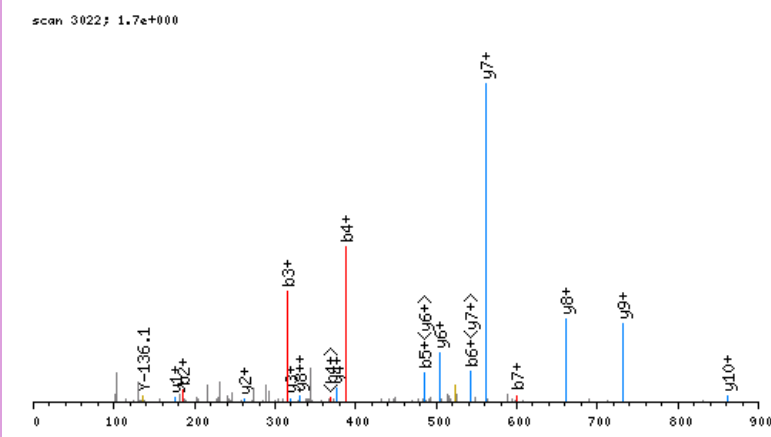

click image to zoom in; click top corners to zoom out [\[precursor±\]](#)

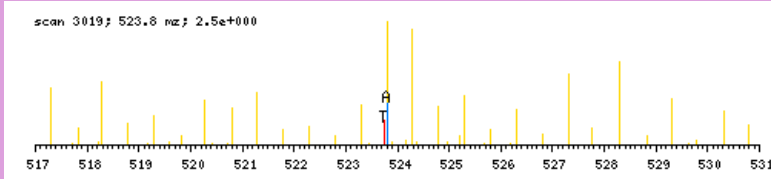

zoomed in precursor plot; T=theoretical m/z, A=acquired m/z

| b <sup>+</sup> | #  | AA | #  | y <sup>+</sup> | y <sup>2+</sup> |
|----------------|----|----|----|----------------|-----------------|
| 114.0555       | 1  | A  | 12 |                |                 |
| 185.0926       | 2  | A  | 11 | 933.4576       | 467.2327        |
| 316.1331       | 3  | M  | 10 | 862.4205       | 431.7142        |
| 387.1702       | 4  | A  | 9  | 731.3800       | 366.1939        |
| 486.2386       | 5  | V  | 8  | 660.3429       | 330.6754        |
| 543.2601       | 6  | G  | 7  | 561.2745       | 281.1412        |
| 600.2816       | 7  | G  | 6  | 504.2530       | 252.6304        |
| 671.3187       | 8  | A  | 5  | 447.2316       | 224.1197        |
| 728.3401       | 9  | G  | 4  | 376.1945       | 188.6011        |
| 785.3616       | 10 | G  | 3  | 319.1730       | 160.0904        |
| 872.3936       | 11 | S  | 2  | 262.1515       | 131.5797        |
|                | 12 | R  | 1  | 175.1195       | 88.0637         |

N-term:+43.02

AANATMATSGSAR, MH+ 1250.5799, m/z 625.7936  
 L OSG41 P180811 230811-s1.02545.02545.2.dta

X-range:

-

MassTol: Y-zoom:

MassType:

AVG  MONO

Axis:

1  2

Label:

I  M  -

Ions:

a  +  2+  3+

b  +  2+  3+

c  +  2+  3+

x  +  2+  3+

y  +  2+  3+

z  +  2+  3+

hide H<sub>2</sub>O/NH<sub>3</sub>

zoom 112-122

GO

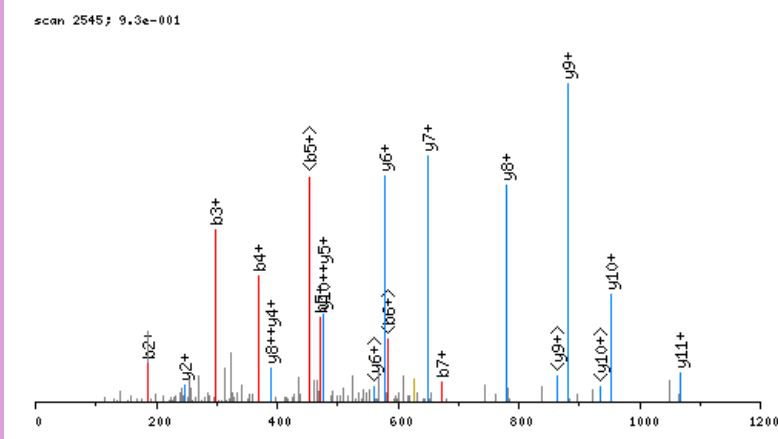

click image to zoom in; click top corners to zoom out [\[precursor±\]](#)

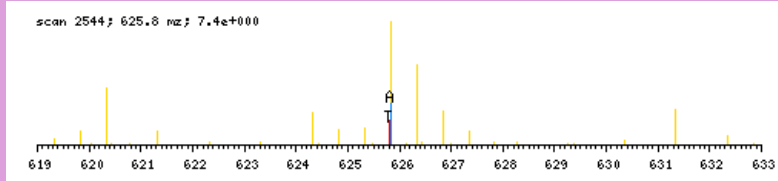

zoomed in precursor plot; T=theoretical m/z, A=acquired m/z

| b <sup>+</sup> | #  | AA # | y <sup>+</sup> | y <sup>2+</sup> |
|----------------|----|------|----------------|-----------------|
| 114.0555       | 1  | A 13 |                |                 |
| 185.0926       | 2  | A 12 | 1137.5322      | 569.2700        |
| 299.1356       | 3  | N 11 | 1066.4951      | 533.7515        |
| 370.1727       | 4  | A 10 | 952.4522       | 476.7300        |
| 471.2203       | 5  | T 9  | 881.4151       | 441.2115        |
| 602.2608       | 6  | M 8  | 780.3674       | 390.6876        |
| 673.2979       | 7  | A 7  | 649.3269       | 325.1674        |
| 774.3456       | 8  | T 6  | 578.2898       | 289.6488        |
| 861.3777       | 9  | S 5  | 477.2421       | 239.1250        |
| 918.3991       | 10 | G 4  | 390.2101       | 195.6090        |
| 1005.4311      | 11 | S 3  | 333.1886       | 167.0982        |
| 1076.4683      | 12 | A 2  | 246.1566       | 123.5822        |
|                | 13 | R 1  | 175.1195       | 88.0637         |

N-term:+43.02



AANATTPNSQLLPLELVKICIGSR, MH+ 2638.3874, m/z 880.1340  
 L OSG36 P180811 230811-s1.06251.06251.3.dta

scan 6251; 2.5e+001

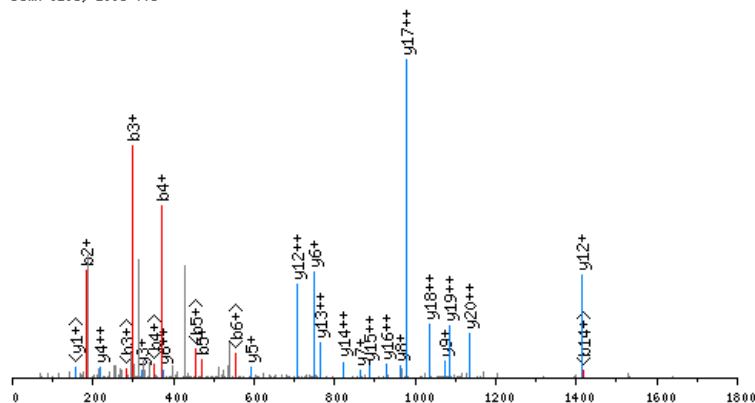

click image to zoom in; click top corners to zoom out [\[precursor±\]](#)

scan 6249; 880.1 m/z; 2.1e+002

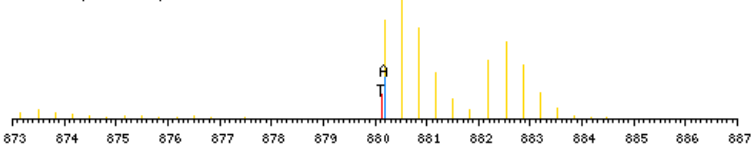

zoomed in precursor plot; T=theoretical m/z, A=acquired m/z

X-range:

-

MassTol: Y-zoom:

MassType:

AVG  MONO

Axis:

1  2

Label:

I  M  -

Ions:

a  +  2+  3+

b  +  2+  3+

c  +  2+  3+

x  +  2+  3+

y  +  2+  3+

z  +  2+  3+

hide H<sub>2</sub>O/NH<sub>3</sub>

zoom 112-122

GO

| b <sup>+</sup> | #  | AA # | y <sup>+</sup> | y <sup>2+</sup> |
|----------------|----|------|----------------|-----------------|
| 114.0555       | 1  | A 24 |                |                 |
| 185.0926       | 2  | A 23 | 2525.3397      | 1263.1738       |
| 299.1356       | 3  | N 22 | 2454.3026      | 1227.6552       |
| 370.1727       | 4  | A 21 | 2340.2597      | 1170.6338       |
| 471.2203       | 5  | T 20 | 2269.2226      | 1135.1152       |
| 572.2680       | 6  | T 19 | 2168.1749      | 1084.5914       |
| 686.3110       | 7  | N 18 | 2067.1272      | 1034.0675       |
| 783.3637       | 8  | P 17 | 1953.0843      | 977.0461        |
| 870.3957       | 9  | S 16 | 1856.0315      | 928.5197        |
| 998.4543       | 10 | Q 15 | 1768.9995      | 885.0037        |
| 1111.5384      | 11 | L 14 | 1640.9409      | 820.9744        |
| 1224.6225      | 12 | L 13 | 1527.8569      | 764.4323        |
| 1321.6752      | 13 | P 12 | 1414.7728      | 707.8903        |
| 1434.7593      | 14 | L 11 | 1317.7200      | 659.3639        |
| 1563.8019      | 15 | E 10 | 1204.6360      | 602.8219        |
| 1676.8859      | 16 | L 9  | 1075.5934      | 538.3006        |
| 1775.9544      | 17 | V 8  | 962.5093       | 481.7586        |
| 1890.9813      | 18 | D 7  | 863.4409       | 432.2244        |
| 2047.1076      | 19 | K 6  | 748.4140       | 374.7109        |
| 2207.1382      | 20 | C 5  | 592.2877       | 296.6477        |
| 2320.2223      | 21 | I 4  | 432.2571       | 216.6324        |
| 2377.2437      | 22 | G 3  | 319.1730       | 160.0904        |
| 2464.2757      | 23 | S 2  | 262.1515       | 131.5797        |
|                | 24 | R 1  | 175.1195       | 88.0637         |

N-term:+43.02 K(19) :+156.13  
 C(20) :+160.03

AAPAAPAAGETGPDAR, MH+ 1464.7083, m/z 732.8578  
 L OSG41 P180811 230811-s1.02838.02838.2.dta

X-range:

-

MassTol: Y-zoom:

MassType:

AVG  MONO

Axis:

1  2

Label:

I  M  -

Ions:

a  +  2+  3+

b  +  2+  3+

c  +  2+  3+

x  +  2+  3+

y  +  2+  3+

z  +  2+  3+

hide H<sub>2</sub>O/NH<sub>3</sub>

zoom 112-122

GO

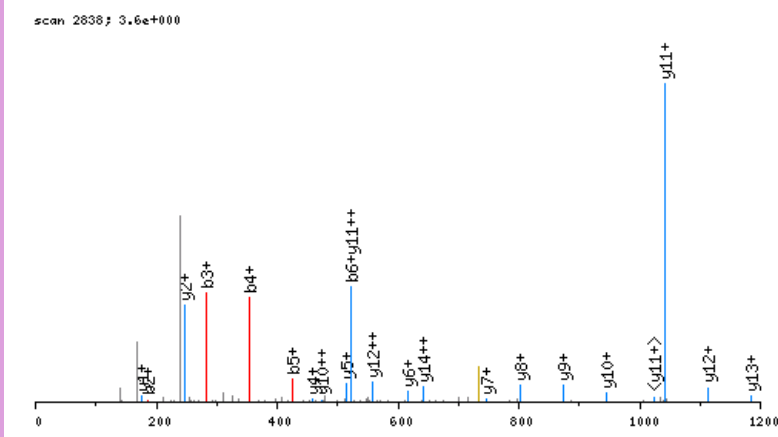

click image to zoom in; click top corners to zoom out [\[precursor±\]](#)

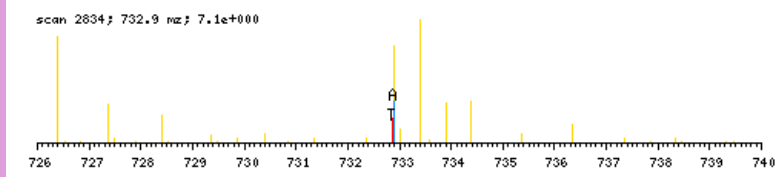

zoomed in precursor plot; T=theoretical m/z, A=acquired m/z

| b <sup>+</sup> | #  | AA # | y <sup>+</sup> | y <sup>2+</sup> |
|----------------|----|------|----------------|-----------------|
| 114.0555       | 1  | A 16 |                |                 |
| 185.0926       | 2  | A 15 | 1351.6606      | 676.3342        |
| 282.1454       | 3  | P 14 | 1280.6235      | 640.8157        |
| 353.1825       | 4  | A 13 | 1183.5707      | 592.2893        |
| 424.2196       | 5  | A 12 | 1112.5336      | 556.7707        |
| 521.2724       | 6  | P 11 | 1041.4965      | 521.2522        |
| 592.3095       | 7  | A 10 | 944.4437       | 472.7258        |
| 663.3466       | 8  | A 9  | 873.4066       | 437.2072        |
| 720.3681       | 9  | G 8  | 802.3695       | 401.6887        |
| 849.4107       | 10 | E 7  | 745.3481       | 373.1779        |
| 950.4583       | 11 | T 6  | 616.3055       | 308.6566        |
| 1007.4798      | 12 | G 5  | 515.2578       | 258.1328        |
| 1104.5326      | 13 | P 4  | 458.2363       | 229.6221        |
| 1219.5595      | 14 | D 3  | 361.1836       | 181.0957        |
| 1290.5966      | 15 | A 2  | 246.1566       | 123.5822        |
|                | 16 | R 1  | 175.1195       | 88.0637         |

N-term:+43.02

AAPAGGGGSAVSVLAPNGR, MH+ 1650.8564, m/z 550.9570  
 L OSG41 P180811 230811-s1.04801.04801.3.dta

X-range:

-

MassTol: Y-zoom:

MassType:

AVG  MONO

Axis:

1  2

Label:

I  M  -

Ions:

a  +  2+  3+

b  +  2+  3+

c  +  2+  3+

x  +  2+  3+

y  +  2+  3+

z  +  2+  3+

hide H<sub>2</sub>O/NH<sub>3</sub>

zoom 112-122

GO

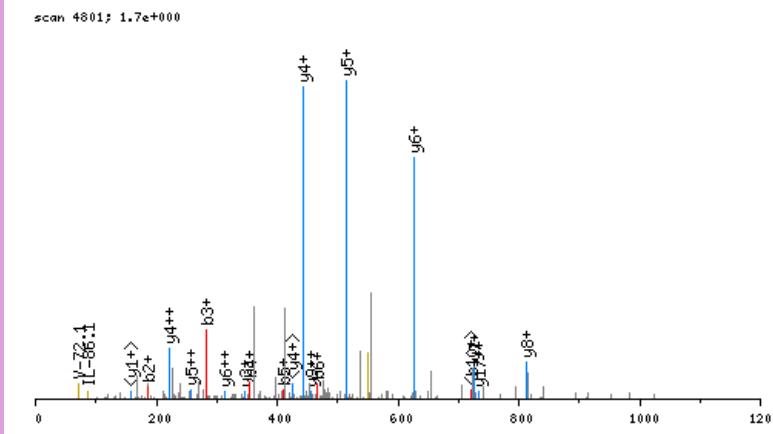

click image to zoom in; click top corners to zoom out [\[precursor±\]](#)

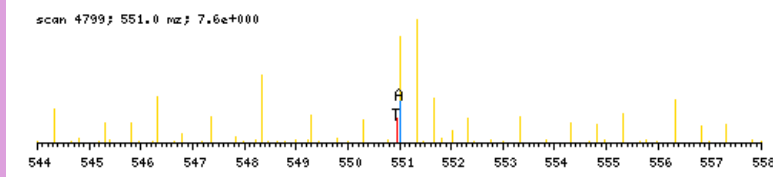

zoomed in precursor plot; T=theoretical m/z, A=acquired m/z

| b <sup>+</sup> | #  | AA # | y <sup>+</sup> | y <sup>2+</sup> |
|----------------|----|------|----------------|-----------------|
| 114.0555       | 1  | A 19 |                |                 |
| 185.0926       | 2  | A 18 | 1537.8087      | 769.4083        |
| 282.1454       | 3  | P 17 | 1466.7716      | 733.8897        |
| 353.1825       | 4  | A 16 | 1369.7188      | 685.3633        |
| 410.2040       | 5  | G 15 | 1298.6817      | 649.8448        |
| 467.2254       | 6  | G 14 | 1241.6602      | 621.3340        |
| 524.2469       | 7  | G 13 | 1184.6388      | 592.8233        |
| 581.2684       | 8  | G 12 | 1127.6173      | 564.3126        |
| 668.3004       | 9  | S 11 | 1070.5958      | 535.8018        |
| 739.3375       | 10 | A 10 | 983.5638       | 492.2858        |
| 838.4059       | 11 | V 9  | 912.5267       | 456.7673        |
| 925.4379       | 12 | S 8  | 813.4583       | 407.2331        |
| 1024.5064      | 13 | V 7  | 726.4262       | 363.7170        |
| 1137.5904      | 14 | L 6  | 627.3578       | 314.1828        |
| 1208.6275      | 15 | A 5  | 514.2738       | 257.6408        |
| 1305.6803      | 16 | P 4  | 443.2367       | 222.1222        |
| 1419.7232      | 17 | N 3  | 346.1839       | 173.5959        |
| 1476.7447      | 18 | G 2  | 232.1410       | 116.5744        |
|                | 19 | R 1  | 175.1195       | 88.0637         |

N-term:+43.02

X-range:

-

MassTol: Y-zoom:

MassType:

AVG  MONO

Axis:

1  2

Label:

I  M  -

Ions:

a  +  2+  3+

b  +  2+  3+

c  +  2+  3+

x  +  2+  3+

y  +  2+  3+

z  +  2+  3+

hide H<sub>2</sub>O/NH<sub>3</sub>

zoom 112-122

GO

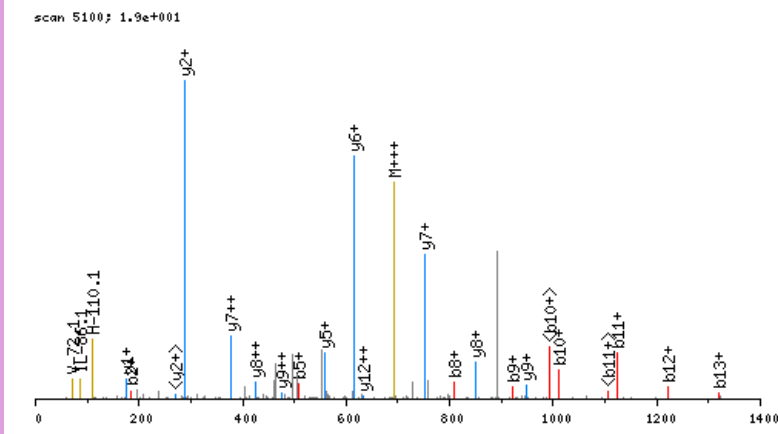

click image to zoom in; click top corners to zoom out [\[precursor±\]](#)

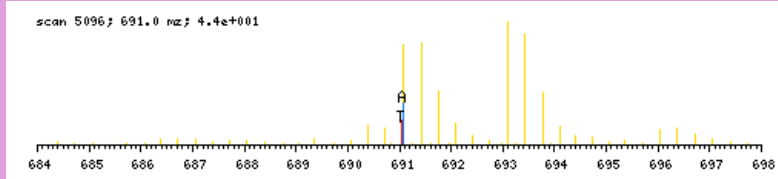

zoomed in precursor plot; T=theoretical m/z, A=acquired m/z

| b <sup>+</sup> | #  | AA # | y <sup>+</sup> | y <sup>2+</sup> |
|----------------|----|------|----------------|-----------------|
| 114.0555       | 1  | A 20 |                |                 |
| 185.0926       | 2  | A 19 | 1958.0824      | 979.5451        |
| 282.1454       | 3  | P 18 | 1887.0453      | 944.0265        |
| 353.1825       | 4  | A 17 | 1789.9925      | 895.5002        |
| 509.3088       | 5  | K 16 | 1718.9554      | 859.9816        |
| 566.3303       | 6  | G 15 | 1562.8291      | 781.9185        |
| 695.3729       | 7  | E 14 | 1505.8076      | 753.4077        |
| 809.4158       | 8  | N 13 | 1376.7650      | 688.8864        |
| 922.4999       | 9  | L 12 | 1262.7221      | 631.8650        |
| 1009.5319      | 10 | S 11 | 1149.6380      | 575.3229        |
| 1122.6159      | 11 | L 10 | 1062.6060      | 531.8069        |
| 1221.6844      | 12 | V 9  | 949.5219       | 475.2649        |
| 1320.7528      | 13 | V 8  | 850.4535       | 425.7307        |
| 1457.8117      | 14 | H 7  | 751.3851       | 376.1965        |
| 1514.8331      | 15 | G 6  | 614.3262       | 307.6670        |
| 1611.8859      | 16 | P 5  | 557.3047       | 279.1563        |
| 1668.9074      | 17 | G 4  | 460.2520       | 230.6299        |
| 1783.9343      | 18 | D 3  | 403.2305       | 202.1192        |
| 1897.0184      | 19 | I 2  | 288.2036       | 144.6057        |
|                | 20 | R 1  | 175.1195       | 88.0637         |

N-term:+43.02 K(5):+156.13

AAPEdVAALQAEITR, MH+ 1596.8233, m/z 798.9153  
 L OSG41 P180811 230811-s1.07071.07071.2.dta

X-range:

-

MassTol: Y-zoom:

MassType:

AVG  MONO

Axis:

1  2

Label:

I  M  -

Ions:

a  +  2+  3+

b  +  2+  3+

c  +  2+  3+

x  +  2+  3+

y  +  2+  3+

z  +  2+  3+

hide H<sub>2</sub>O/NH<sub>3</sub>

zoom 112-122

GO

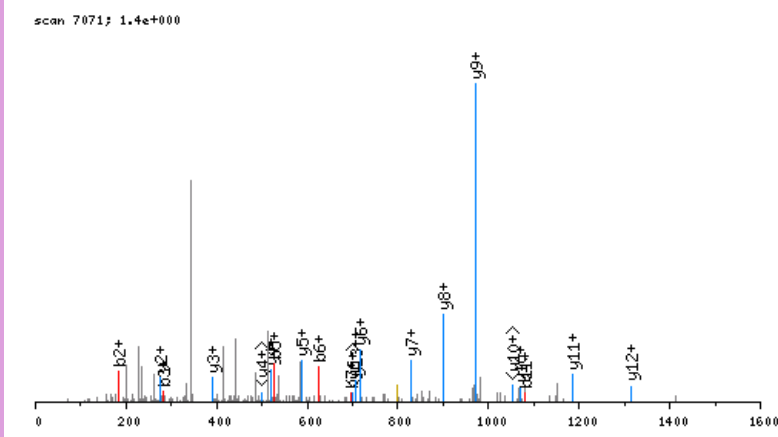

click image to zoom in; click top corners to zoom out [\[precursor±\]](#)

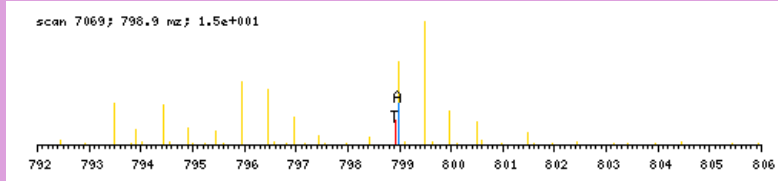

zoomed in precursor plot; T=theoretical m/z, A=acquired m/z

| b <sup>+</sup> | #  | AA # | y <sup>+</sup> | y <sup>2+</sup> |
|----------------|----|------|----------------|-----------------|
| 114.0555       | 1  | A 15 |                |                 |
| 185.0926       | 2  | A 14 | 1483.7756      | 742.3917        |
| 282.1454       | 3  | P 13 | 1412.7385      | 706.8732        |
| 411.1880       | 4  | E 12 | 1315.6858      | 658.3468        |
| 526.2149       | 5  | D 11 | 1186.6432      | 593.8255        |
| 625.2833       | 6  | V 10 | 1071.6162      | 536.3120        |
| 696.3205       | 7  | A 9  | 972.5478       | 486.7778        |
| 767.3576       | 8  | A 8  | 901.5107       | 451.2593        |
| 880.4416       | 9  | L 7  | 830.4736       | 415.7407        |
| 1008.5002      | 10 | Q 6  | 717.3895       | 359.1987        |
| 1079.5373      | 11 | A 5  | 589.3310       | 295.1694        |
| 1208.5799      | 12 | E 4  | 518.2938       | 259.6508        |
| 1321.6640      | 13 | I 3  | 389.2512       | 195.1295        |
| 1422.7117      | 14 | T 2  | 276.1672       | 138.5875        |
|                | 15 | R 1  | 175.1195       | 88.0637         |

N-term:+43.02

AAPPGEYFVSGVQVSCR, MH+ 1853.8492, m/z 618.6212  
 L OSG41 P180811 230811-s1.05863.05863.3.dta

X-range:

-

MassTol: Y-zoom:

MassType:

AVG  MONO

Axis:

1  2

Label:

I  M  -

Ions:

a  +  2+  3+

b  +  2+  3+

c  +  2+  3+

x  +  2+  3+

y  +  2+  3+

z  +  2+  3+

hide H<sub>2</sub>O/NH<sub>3</sub>

zoom 112-122

GO

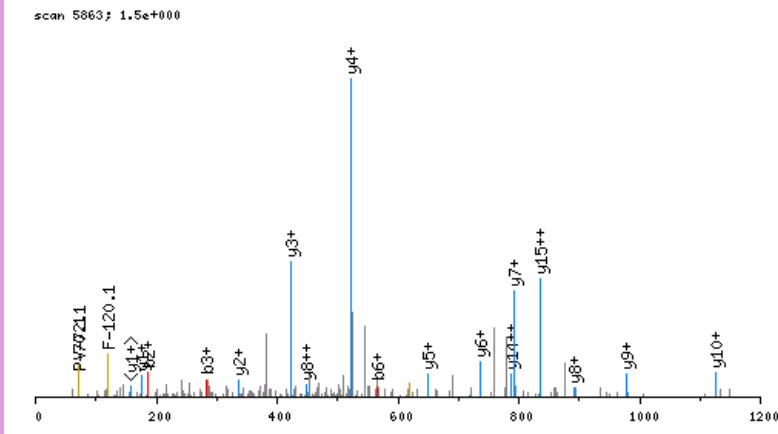

click image to zoom in; click top corners to zoom out [\[precursor±\]](#)

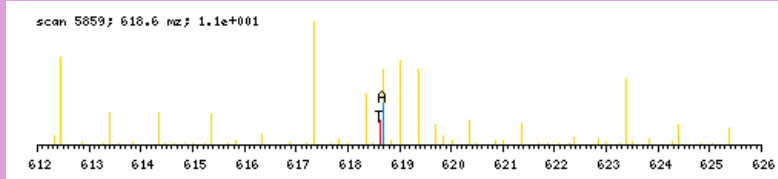

zoomed in precursor plot; T=theoretical m/z, A=acquired m/z

| b <sup>+</sup> | #  | AA # | y <sup>+</sup> | y <sup>2+</sup> |
|----------------|----|------|----------------|-----------------|
| 114.0555       | 1  | A 17 |                |                 |
| 185.0926       | 2  | A 16 | 1740.8015      | 870.9047        |
| 282.1454       | 3  | P 15 | 1669.7644      | 835.3861        |
| 379.1982       | 4  | P 14 | 1572.7116      | 786.8597        |
| 436.2196       | 5  | G 13 | 1475.6589      | 738.3333        |
| 565.2622       | 6  | E 12 | 1418.6374      | 709.8226        |
| 728.3255       | 7  | Y 11 | 1289.5948      | 645.3013        |
| 875.3940       | 8  | F 10 | 1126.5315      | 563.7696        |
| 962.4260       | 9  | S 9  | 979.4631       | 490.2354        |
| 1061.4944      | 10 | V 8  | 892.4310       | 446.7194        |
| 1118.5159      | 11 | G 7  | 793.3626       | 397.1852        |
| 1205.5479      | 12 | S 6  | 736.3411       | 368.6745        |
| 1333.6065      | 13 | Q 5  | 649.3091       | 325.1585        |
| 1432.6749      | 14 | V 4  | 521.2505       | 261.1292        |
| 1519.7069      | 15 | S 3  | 422.1821       | 211.5950        |
| 1679.7375      | 16 | C 2  | 335.1501       | 168.0790        |
|                | 17 | R 1  | 175.1195       | 88.0637         |

N-term:+43.02 C(16):+160.03

AAPQDVHVR, MH+ 1034.5383, m/z 517.7728  
 L OSG38 P180811 230811-s1.02555.02555.2.dta

X-range:

-

MassTol: Y-zoom:

MassType:

AVG  MONO

Axis:

1  2

Label:

I  M  -

Ions:

a  +  2+  3+

b  +  2+  3+

c  +  2+  3+

x  +  2+  3+

y  +  2+  3+

z  +  2+  3+

hide H<sub>2</sub>O/NH<sub>3</sub>

zoom 112-122

GO

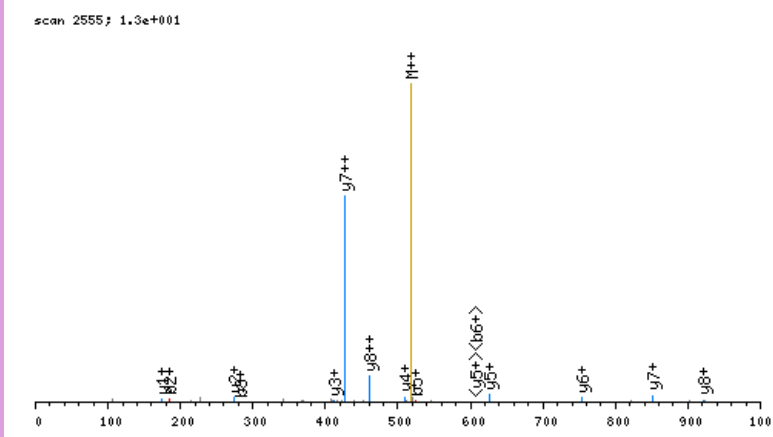

click image to zoom in; click top corners to zoom out [\[precursor±\]](#)

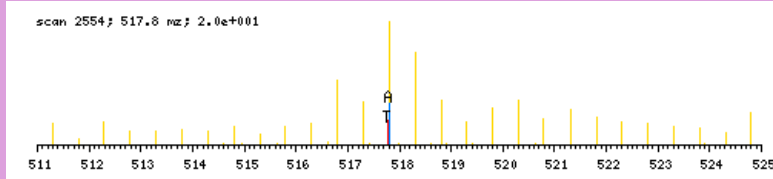

zoomed in precursor plot; T=theoretical m/z, A=acquired m/z

| b <sup>+</sup> | # | AA # | y <sup>+</sup> | y <sup>2+</sup> |
|----------------|---|------|----------------|-----------------|
| 114.0555       | 1 | A    | 9              |                 |
| 185.0926       | 2 | A    | 8              | 921.4906        |
| 282.1454       | 3 | P    | 7              | 850.4535        |
| 410.2040       | 4 | Q    | 6              | 753.4008        |
| 525.2309       | 5 | D    | 5              | 625.3422        |
| 624.2993       | 6 | V    | 4              | 510.3152        |
| 761.3582       | 7 | H    | 3              | 411.2468        |
| 860.4267       | 8 | V    | 2              | 274.1879        |
|                | 9 | R    | 1              | 175.1195        |

N-term:+43.02

AAPQLFR, MH+ 844.4681, m/z 422.7377  
 L OSG41 P180811 230811-s1.05225.05225.2.dta

X-range:

-

MassTol: Y-zoom:

MassType:

AVG  MONO

Axis:

1  2

Label:

I  M  -

Ions:

a  +  2+  3+

b  +  2+  3+

c  +  2+  3+

x  +  2+  3+

y  +  2+  3+

z  +  2+  3+

hide H<sub>2</sub>O/NH<sub>3</sub>

zoom 112-122

GO

scan 5225; 7.4e+000

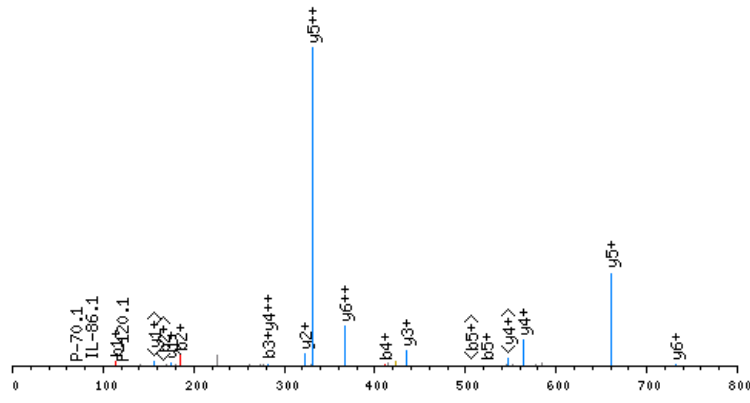

click image to zoom in; click top corners to zoom out [\[precursor±\]](#)

scan 5224; 422.7 m/z; 3.1e+001

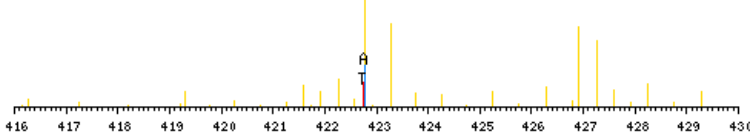

zoomed in precursor plot; T=theoretical m/z, A=acquired m/z

| b <sup>+</sup> | # | AA # | y <sup>+</sup> | y <sup>2+</sup>   |
|----------------|---|------|----------------|-------------------|
| 114.0555       | 1 | A    | 7              |                   |
| 185.0926       | 2 | A    | 6              | 731.4204 366.2141 |
| 282.1454       | 3 | P    | 5              | 660.3833 330.6956 |
| 410.2040       | 4 | Q    | 4              | 563.3306 282.1692 |
| 523.2880       | 5 | L    | 3              | 435.2720 218.1399 |
| 670.3564       | 6 | F    | 2              | 322.1879 161.5979 |
|                | 7 | R    | 1              | 175.1195 88.0637  |

N-term:+43.02



AAPSEPAGEFPR, MH+ 1141.5642, m/z 571.2857  
 L OSG41 P180811 230811-s1.04121.04121.2.dta

X-range:

-

MassTol: Y-zoom:

MassType:

AVG  MONO

Axis:

1  2

Label:

I  M  -

Ions:

a  +  2+  3+

b  +  2+  3+

c  +  2+  3+

x  +  2+  3+

y  +  2+  3+

z  +  2+  3+

hide H<sub>2</sub>O/NH<sub>3</sub>

zoom 112-122

GO

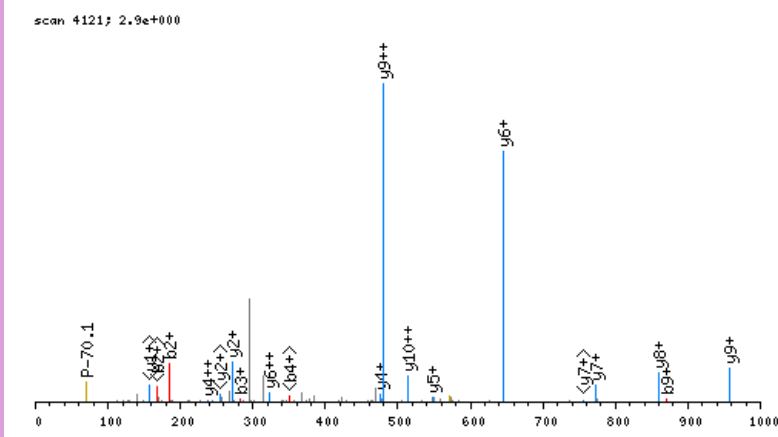

click image to zoom in; click top corners to zoom out [\[precursor±\]](#)

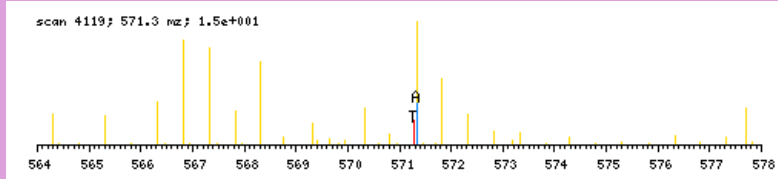

zoomed in precursor plot; T=theoretical m/z, A=acquired m/z

| b <sup>+</sup> | #  | AA | #  | y <sup>+</sup> | y <sup>2+</sup> |
|----------------|----|----|----|----------------|-----------------|
| 114.0555       | 1  | A  | 11 |                |                 |
| 185.0926       | 2  | A  | 10 | 1028.5165      | 514.7622        |
| 282.1454       | 3  | P  | 9  | 957.4794       | 479.2436        |
| 369.1774       | 4  | S  | 8  | 860.4266       | 430.7172        |
| 498.2200       | 5  | E  | 7  | 773.3946       | 387.2012        |
| 595.2728       | 6  | P  | 6  | 644.3520       | 322.6799        |
| 666.3099       | 7  | A  | 5  | 547.2993       | 274.1535        |
| 723.3314       | 8  | G  | 4  | 476.2621       | 238.6350        |
| 870.3998       | 9  | F  | 3  | 419.2407       | 210.1243        |
| 967.4525       | 10 | P  | 2  | 272.1723       | 136.5900        |
|                | 11 | R  | 1  | 175.1195       | 88.0637         |

N-term:+43.02

AAQALAAQAVASR, MH+ 1269.6915, m/z 635.3494  
 L OSG41 P180811 230811-s1.05430.05430.2.dta

X-range:

-

MassTol: Y-zoom:

MassType:

AVG  MONO

Axis:

1  2

Label:

I  M  -

Ions:

a  +  2+  3+

b  +  2+  3+

c  +  2+  3+

x  +  2+  3+

y  +  2+  3+

z  +  2+  3+

hide H<sub>2</sub>O/NH<sub>3</sub>

zoom 112-122

GO

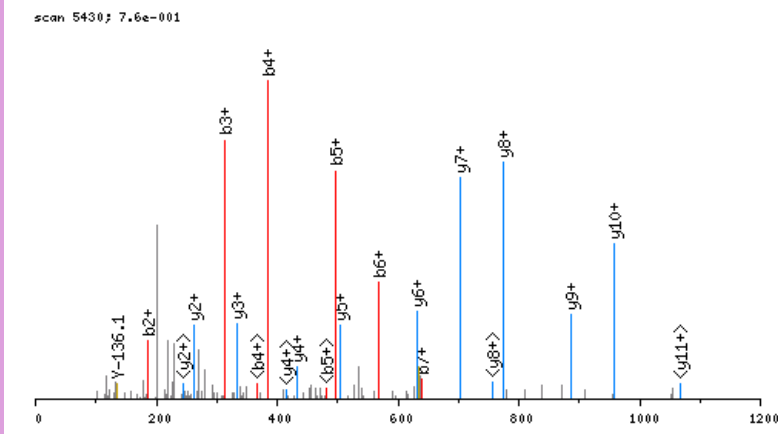

click image to zoom in; click top corners to zoom out [\[precursor±\]](#)

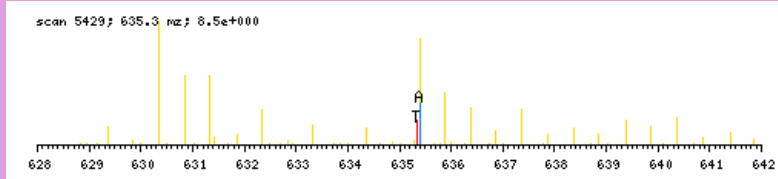

zoomed in precursor plot; T=theoretical m/z, A=acquired m/z

| b <sup>+</sup> | #  | AA # | y <sup>+</sup> | y <sup>2+</sup> |
|----------------|----|------|----------------|-----------------|
| 114.0555       | 1  | A 13 |                |                 |
| 185.0926       | 2  | A 12 | 1156.6438      | 578.8258        |
| 313.1512       | 3  | Q 11 | 1085.6067      | 543.3073        |
| 384.1883       | 4  | A 10 | 957.5482       | 479.2780        |
| 497.2724       | 5  | L 9  | 886.5110       | 443.7594        |
| 568.3095       | 6  | A 8  | 773.4270       | 387.2174        |
| 639.3466       | 7  | A 7  | 702.3899       | 351.6988        |
| 767.4052       | 8  | Q 6  | 631.3527       | 316.1803        |
| 838.4423       | 9  | A 5  | 503.2942       | 252.1510        |
| 937.5107       | 10 | V 4  | 432.2571       | 216.6324        |
| 1008.5478      | 11 | A 3  | 333.1886       | 167.0982        |
| 1095.5799      | 12 | S 2  | 262.1515       | 131.5797        |
|                | 13 | R 1  | 175.1195       | 88.0637         |

N-term:+43.02

AAQAVSLLR, MH+ 970.5686, m/z 485.7879  
 L OSG41 P180811 230811-s1.06092.06092.2.dta

X-range:

-

MassTol: Y-zoom:

MassType:

AVG  MONO

Axis:

1  2

Label:

I  M  -

Ions:

a  +  2+  3+

b  +  2+  3+

c  +  2+  3+

x  +  2+  3+

y  +  2+  3+

z  +  2+  3+

hide H<sub>2</sub>O/NH<sub>3</sub>

zoom 112-122

GO

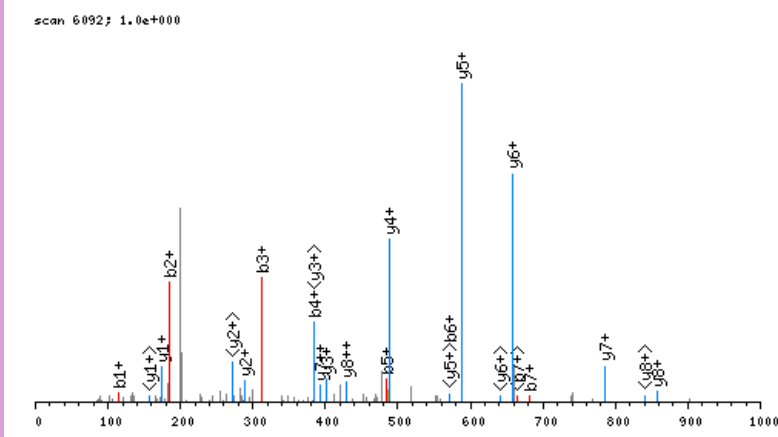

click image to zoom in; click top corners to zoom out [\[precursor±\]](#)

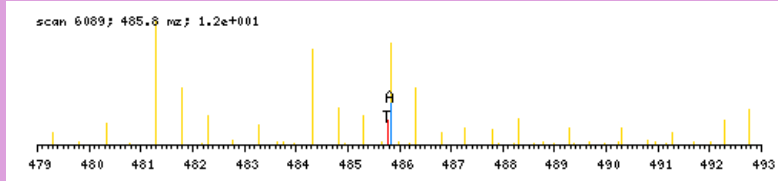

zoomed in precursor plot; T=theoretical m/z, A=acquired m/z

| b <sup>+</sup> | # | AA # | y <sup>+</sup> | y <sup>2+</sup> |
|----------------|---|------|----------------|-----------------|
| 114.0555       | 1 | A 9  |                |                 |
| 185.0926       | 2 | A 8  | 857.5209       | 429.2644        |
| 313.1512       | 3 | Q 7  | 786.4838       | 393.7458        |
| 384.1883       | 4 | A 6  | 658.4252       | 329.7165        |
| 483.2567       | 5 | V 5  | 587.3881       | 294.1979        |
| 570.2888       | 6 | S 4  | 488.3197       | 244.6637        |
| 683.3728       | 7 | L 3  | 401.2876       | 201.1477        |
| 796.4569       | 8 | L 2  | 288.2036       | 144.6057        |
|                | 9 | R 1  | 175.1195       | 88.0637         |

N-term:+43.02

AAQVAPAAASSLGNPPPPSELKKAEEQQQR, MH+ 3136.6756, m/z 784.9243  
 L OSG38 P180811 230811-s1.05586.05586.4.dta

scan 5586; 2.7e+000

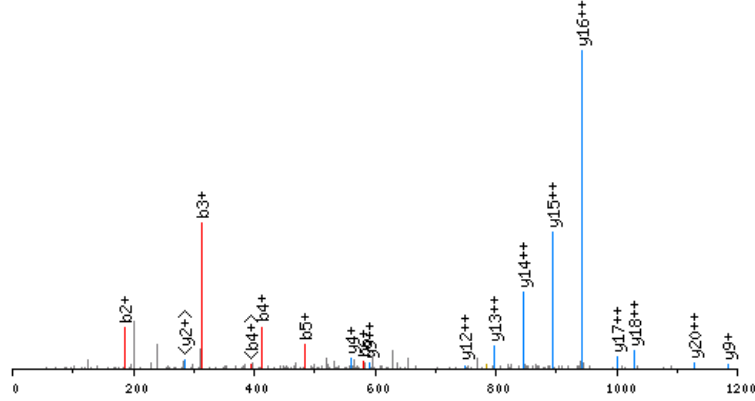

click image to zoom in; click top corners to zoom out [\[precursor±\]](#)

scan 5584; 784.9 m/z; 9.7e+000

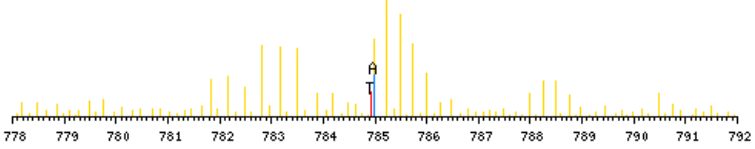

zoomed in precursor plot; T=theoretical m/z, A=acquired m/z

| b <sup>+</sup> | #  | AA | #  | y <sup>+</sup> | y <sup>2+</sup> |
|----------------|----|----|----|----------------|-----------------|
| 114.0555       | 1  | A  | 30 |                |                 |
| 185.0926       | 2  | A  | 29 | 3023.6279      | 1512.3179       |
| 313.1512       | 3  | Q  | 28 | 2952.5908      | 1476.7993       |
| 412.2196       | 4  | V  | 27 | 2824.5322      | 1412.7700       |
| 483.2567       | 5  | A  | 26 | 2725.4638      | 1363.2358       |
| 580.3095       | 6  | P  | 25 | 2654.4267      | 1327.7172       |
| 651.3466       | 7  | A  | 24 | 2557.3739      | 1279.1909       |
| 722.3837       | 8  | A  | 23 | 2486.3368      | 1243.6723       |
| 793.4208       | 9  | A  | 22 | 2415.2997      | 1208.1537       |
| 880.4529       | 10 | S  | 21 | 2344.2626      | 1172.6352       |
| 967.4849       | 11 | S  | 20 | 2257.2305      | 1129.1192       |
| 1080.5690      | 12 | L  | 19 | 2170.1985      | 1085.6032       |
| 1137.5904      | 13 | G  | 18 | 2057.1144      | 1029.0611       |
| 1251.6334      | 14 | N  | 17 | 2000.0930      | 1000.5504       |
| 1348.6861      | 15 | P  | 16 | 1886.0500      | 943.5289        |
| 1445.7389      | 16 | P  | 15 | 1788.9973      | 895.0026        |
| 1542.7916      | 17 | P  | 14 | 1691.9445      | 846.4762        |
| 1639.8444      | 18 | P  | 13 | 1594.8918      | 797.9498        |
| 1736.8972      | 19 | P  | 12 | 1497.8390      | 749.4234        |
| 1823.9292      | 20 | S  | 11 | 1400.7862      | 700.8970        |
| 1952.9718      | 21 | E  | 10 | 1313.7542      | 657.3810        |
| 2066.0559      | 22 | L  | 9  | 1184.7116      | 592.8597        |
| 2222.1822      | 23 | K  | 8  | 1071.6275      | 536.3177        |
| 2378.3085      | 24 | K  | 7  | 915.5012       | 458.2545        |
| 2449.3456      | 25 | A  | 6  | 759.3749       | 380.1914        |
| 2578.3882      | 26 | E  | 5  | 688.3378       | 344.6728        |
| 2706.4467      | 27 | Q  | 4  | 559.2952       | 280.1515        |
| 2834.5053      | 28 | Q  | 3  | 431.2367       | 216.1222        |
| 2962.5639      | 29 | Q  | 2  | 303.1781       | 152.0930        |
|                | 30 | R  | 1  | 175.1195       | 88.0637         |

N-term: +43.02 K(23) : +156.13  
 K(24) : +156.13

X-range:

-

MassTol: Y-zoom:

MassType:

AVG  MONO

Axis:

1  2

Label:

I  M  -

Ions:

a  +  2+  3+

b  +  2+  3+

c  +  2+  3+

x  +  2+  3+

y  +  2+  3+

z  +  2+  3+

hide H<sub>2</sub>O/NH<sub>3</sub>

zoom 112-122

GO

AASEDELLLP, MH+ 1255.6534, m/z 628.3303  
 L OSG41 P180811 230811-s1.06123.06123.2.dta

X-range:

-

MassTol: Y-zoom:

MassType:

AVG  MONO

Axis:

1  2

Label:

I  M  -

Ions:

a  +  2+  3+

b  +  2+  3+

c  +  2+  3+

x  +  2+  3+

y  +  2+  3+

z  +  2+  3+

hide H<sub>2</sub>O/NH<sub>3</sub>

zoom 112-122

GO

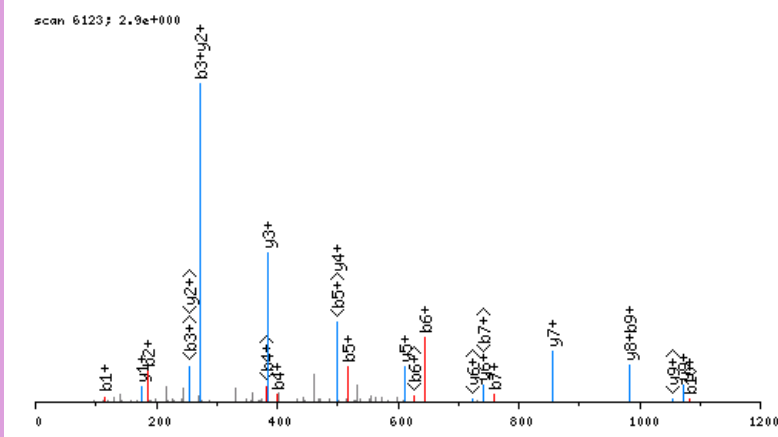

click image to zoom in; click top corners to zoom out [\[precursor±\]](#)

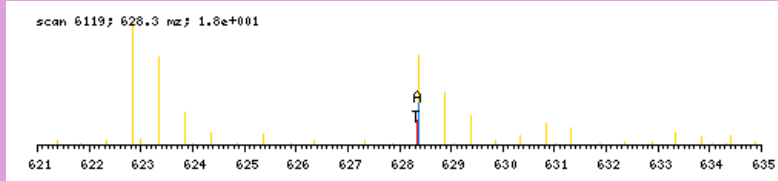

zoomed in precursor plot; T=theoretical m/z, A=acquired m/z

| b <sup>+</sup> | #  | AA # | y <sup>+</sup> | y <sup>2+</sup> |
|----------------|----|------|----------------|-----------------|
| 114.0555       | 1  | A 11 |                |                 |
| 185.0926       | 2  | A 10 | 1142.6057      | 571.8068        |
| 272.1247       | 3  | S 9  | 1071.5686      | 536.2882        |
| 401.1672       | 4  | E 8  | 984.5366       | 492.7722        |
| 516.1942       | 5  | D 7  | 855.4940       | 428.2509        |
| 645.2368       | 6  | E 6  | 740.4670       | 370.7374        |
| 758.3208       | 7  | L 5  | 611.4245       | 306.2161        |
| 871.4049       | 8  | L 4  | 498.3404       | 249.6741        |
| 984.4890       | 9  | L 3  | 385.2563       | 193.1321        |
| 1081.5417      | 10 | P 2  | 272.1723       | 136.5900        |
|                | 11 | R 1  | 175.1195       | 88.0637         |

N-term:+43.02

AASGDPGSAESYR, MH+ 1309.5661, m/z 655.2867  
 L OSG41 P180811 230811-s1.02611.02611.2.dta

X-range:

-

MassTol: Y-zoom:

MassType:

AVG  MONO

Axis:

1  2

Label:

I  M  -

Ions:

a  +  2+  3+

b  +  2+  3+

c  +  2+  3+

x  +  2+  3+

y  +  2+  3+

z  +  2+  3+

hide H<sub>2</sub>O/NH<sub>3</sub>

zoom 112-122

GO

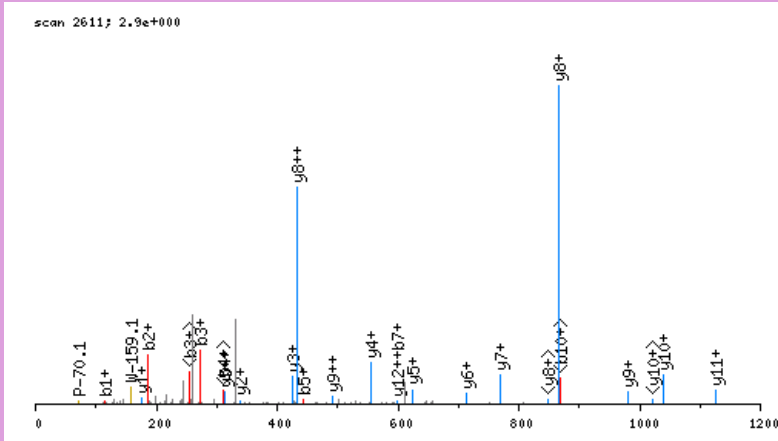

click image to zoom in; click top corners to zoom out [\[precursor±\]](#)

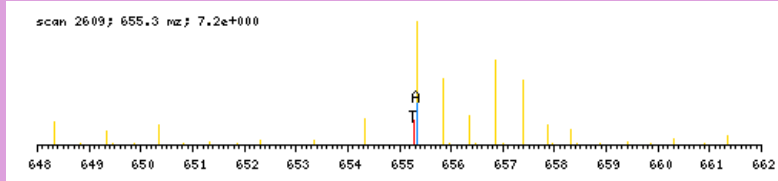

zoomed in precursor plot; T=theoretical m/z, A=acquired m/z

| b <sup>+</sup> | #  | AA # | y <sup>+</sup> | y <sup>2+</sup> |
|----------------|----|------|----------------|-----------------|
| 114.0555       | 1  | A 13 |                |                 |
| 185.0926       | 2  | A 12 | 1196.5184      | 598.7631        |
| 272.1247       | 3  | S 11 | 1125.4813      | 563.2445        |
| 329.1461       | 4  | G 10 | 1038.4492      | 519.7285        |
| 444.1731       | 5  | D 9  | 981.4278       | 491.2178        |
| 541.2258       | 6  | P 8  | 866.4008       | 433.7043        |
| 598.2473       | 7  | G 7  | 769.3481       | 385.1779        |
| 685.2793       | 8  | S 6  | 712.3266       | 356.6672        |
| 756.3164       | 9  | A 5  | 625.2946       | 313.1512        |
| 885.3590       | 10 | E 4  | 554.2575       | 277.6326        |
| 972.3911       | 11 | S 3  | 425.2149       | 213.1113        |
| 1135.4544      | 12 | Y 2  | 338.1828       | 169.5953        |
|                | 13 | R 1  | 175.1195       | 88.0637         |

N-term:+43.02

AASKVKQDMPPPGGYGPIDYKR, MH+ 2519.4182, m/z 630.6100  
 L OSG40 P180811 230811-s1.05663.05663.4.dta

X-range:

0 - 0

MassTol: Y-zoom:

0. 1.

MassType:

AVG  MONO

Axis:

1  2

Label:

I  M  -

Ions:

a  +  2+  3+

b  +  2+  3+

c  +  2+  3+

x  +  2+  3+

y  +  2+  3+

z  +  2+  3+

hide H<sub>2</sub>O/NH<sub>3</sub>

zoom 112-122

GO

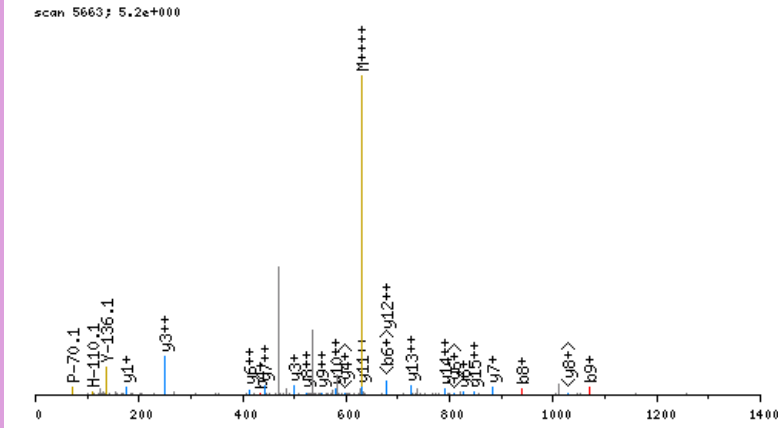

click image to zoom in; click top corners to zoom out [precursor±]

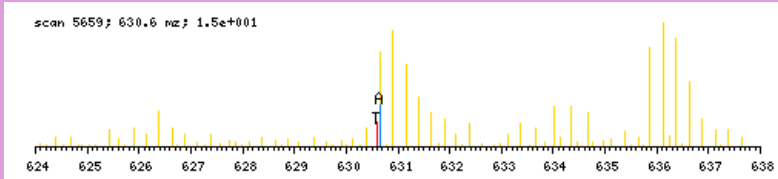

zoomed in precursor plot; T=theoretical m/z, A=acquired m/z

| b <sup>+</sup> | #  | AA | #  | y <sup>+</sup> | y <sup>2+</sup> |
|----------------|----|----|----|----------------|-----------------|
| 114.0555       | 1  | A  | 22 |                |                 |
| 185.0926       | 2  | A  | 21 | 2406.3705      | 1203.6891       |
| 272.1247       | 3  | S  | 20 | 2335.3334      | 1168.1706       |
| 434.2828       | 4  | K  | 19 | 2248.3013      | 1124.6546       |
| 533.3512       | 5  | V  | 18 | 2086.1432      | 1043.5755       |
| 695.5093       | 6  | K  | 17 | 1987.0748      | 994.0413        |
| 823.5678       | 7  | Q  | 16 | 1824.9167      | 912.9623        |
| 938.5948       | 8  | D  | 15 | 1696.8581      | 848.9330        |
| 1069.6353      | 9  | M  | 14 | 1581.8312      | 791.4195        |
| 1166.6880      | 10 | P  | 13 | 1450.7907      | 725.8993        |
| 1263.7408      | 11 | P  | 12 | 1353.7379      | 677.3729        |
| 1360.7936      | 12 | P  | 11 | 1256.6852      | 628.8465        |
| 1417.8150      | 13 | G  | 10 | 1159.6324      | 580.3201        |
| 1474.8365      | 14 | G  | 9  | 1102.6110      | 551.8094        |
| 1637.8998      | 15 | Y  | 8  | 1045.5895      | 523.2987        |
| 1694.9213      | 16 | G  | 7  | 882.5262       | 441.7670        |
| 1791.9741      | 17 | P  | 6  | 825.5047       | 413.2563        |
| 1905.0581      | 18 | I  | 5  | 728.4519       | 364.7299        |
| 2020.0851      | 19 | D  | 4  | 615.3679       | 308.1878        |
| 2183.1484      | 20 | Y  | 3  | 500.3409       | 250.6744        |
| 2345.3065      | 21 | K  | 2  | 337.2776       | 169.1427        |
|                | 22 | R  | 1  | 175.1195       | 88.0637         |

N-term:+43.02 K(4):+162.16  
 K(6):+162.16 K(21):+162.16

AASPSKTEIQTIQIFKR, MH+ 1787.0704, m/z 596.3616  
 L OSG39 P180811 230811-s1.04907.04907.3.dta

scan 4907; 1.6e+001

X-range:

-

MassTol: Y-zoom:

MassType:

AVG  MONO

Axis:

1  2

Label:

I  M  -

Ions:

a  +  2+  3+

b  +  2+  3+

c  +  2+  3+

x  +  2+  3+

y  +  2+  3+

z  +  2+  3+

hide H<sub>2</sub>O/NH<sub>3</sub>

zoom 112-122

GO

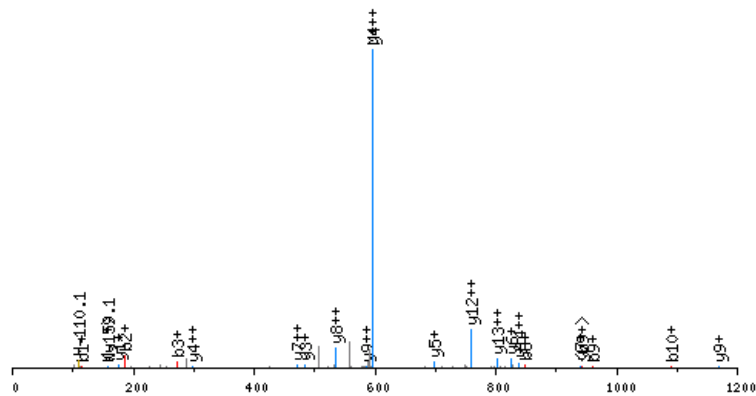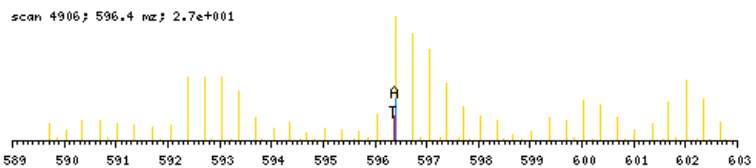

| b <sup>+</sup> | #  | AA # | y <sup>+</sup> | y <sup>2+</sup> |
|----------------|----|------|----------------|-----------------|
| 114.0555       | 1  | A    | 15             |                 |
| 185.0926       | 2  | A    | 14             | 1674.0227       |
| 272.1247       | 3  | S    | 13             | 1602.9856       |
| 369.1774       | 4  | P    | 12             | 1515.9536       |
| 456.2094       | 5  | S    | 11             | 1418.9008       |
| 618.3675       | 6  | K    | 10             | 1331.8688       |
| 719.4152       | 7  | T    | 9              | 1169.7107       |
| 848.4578       | 8  | E    | 8              | 1068.6630       |
| 961.5419       | 9  | I    | 7              | 939.6204        |
| 1089.6005      | 10 | Q    | 6              | 826.5363        |
| 1190.6481      | 11 | T    | 5              | 698.4778        |
| 1303.7322      | 12 | I    | 4              | 597.4301        |
| 1450.8006      | 13 | F    | 3              | 484.3460        |
| 1612.9587      | 14 | K    | 2              | 337.2776        |
|                | 15 | R    | 1              | 175.1195        |

N-term:+43.02 K(6):+162.16  
 K(14):+162.16



AASTDIAGLEESFR, MH+ 1508.7233, m/z 754.8653  
 L OSG41 P180811 230811-s1.06688.06688.2.dta

X-range:

-

MassTol: Y-zoom:

MassType:

AVG  MONO

Axis:

1  2

Label:

I  M  -

Ions:

a  +  2+  3+

b  +  2+  3+

c  +  2+  3+

x  +  2+  3+

y  +  2+  3+

z  +  2+  3+

hide H<sub>2</sub>O/NH<sub>3</sub>

zoom 112-122

GO

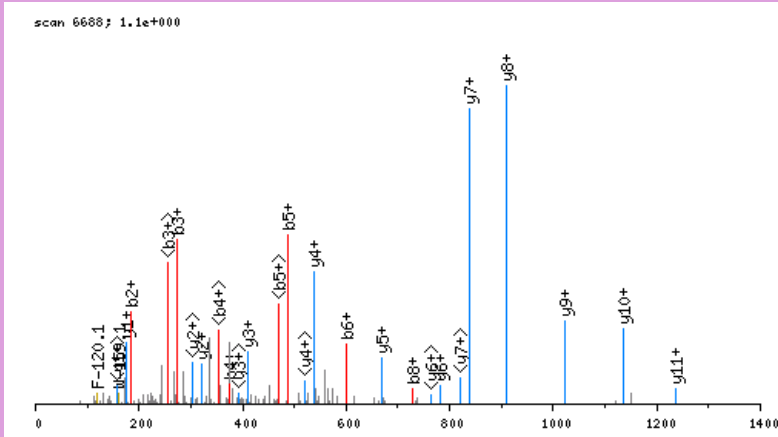

click image to zoom in; click top corners to zoom out [\[precursor±\]](#)

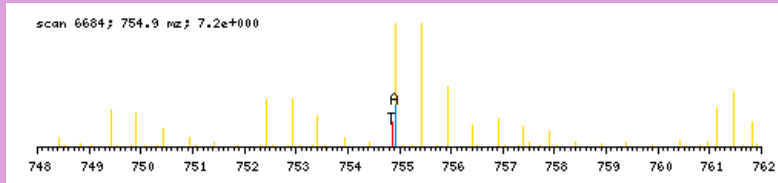

zoomed in precursor plot; T=theoretical m/z, A=acquired m/z

| b <sup>+</sup> | #  | AA # | y <sup>+</sup> | y <sup>2+</sup> |
|----------------|----|------|----------------|-----------------|
| 114.0555       | 1  | A 14 |                |                 |
| 185.0926       | 2  | A 13 | 1395.6756      | 698.3417        |
| 272.1247       | 3  | S 12 | 1324.6385      | 662.8232        |
| 373.1723       | 4  | T 11 | 1237.6065      | 619.3071        |
| 488.1993       | 5  | D 10 | 1136.5588      | 568.7833        |
| 601.2833       | 6  | I 9  | 1021.5318      | 511.2698        |
| 672.3205       | 7  | A 8  | 908.4478       | 454.7278        |
| 729.3419       | 8  | G 7  | 837.4107       | 419.2092        |
| 842.4260       | 9  | L 6  | 780.3892       | 390.6985        |
| 971.4686       | 10 | E 5  | 667.3051       | 334.1565        |
| 1100.5112      | 11 | E 4  | 538.2625       | 269.6352        |
| 1187.5432      | 12 | S 3  | 409.2199       | 205.1139        |
| 1334.6116      | 13 | F 2  | 322.1879       | 161.5979        |
|                | 14 | R 1  | 175.1195       | 88.0637         |

N-term:+43.02

AATAAEVAASGSGEAR, MH+ 1460.6981, m/z 730.8527  
 L OSG41 P180811 230811-s1.04018.04018.2.dta

X-range:

-

MassTol: Y-zoom:

MassType:

AVG  MONO

Axis:

1  2

Label:

I  M  -

Ions:

a  +  2+  3+

b  +  2+  3+

c  +  2+  3+

x  +  2+  3+

y  +  2+  3+

z  +  2+  3+

hide H<sub>2</sub>O/NH<sub>3</sub>

zoom 112-122

GO

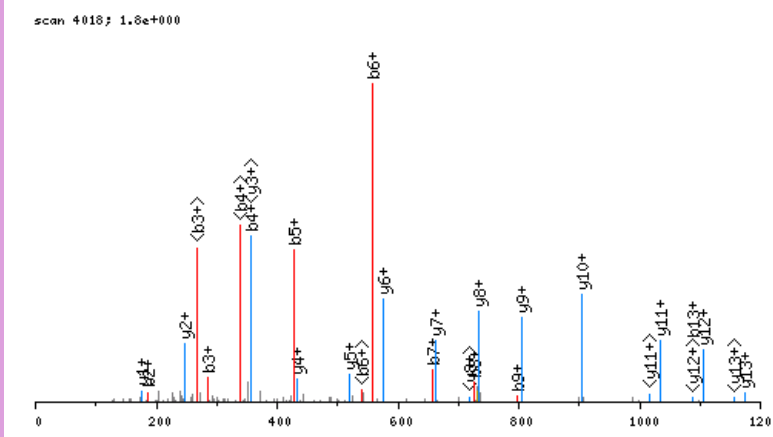

click image to zoom in; click top corners to zoom out [\[precursor±\]](#)

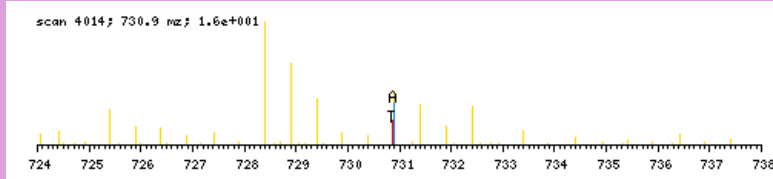

zoomed in precursor plot; T=theoretical m/z, A=acquired m/z

| b <sup>+</sup> | #  | AA # | y <sup>+</sup> | y <sup>2+</sup> |
|----------------|----|------|----------------|-----------------|
| 114.0555       | 1  | A 16 |                |                 |
| 185.0926       | 2  | A 15 | 1347.6504      | 674.3291        |
| 286.1403       | 3  | T 14 | 1276.6133      | 638.8106        |
| 357.1774       | 4  | A 13 | 1175.5657      | 588.2867        |
| 428.2145       | 5  | A 12 | 1104.5285      | 552.7682        |
| 557.2571       | 6  | E 11 | 1033.4914      | 517.2496        |
| 656.3255       | 7  | V 10 | 904.4488       | 452.7283        |
| 727.3627       | 8  | A 9  | 805.3804       | 403.1941        |
| 798.3998       | 9  | A 8  | 734.3433       | 367.6756        |
| 885.4318       | 10 | S 7  | 663.3062       | 332.1570        |
| 942.4533       | 11 | G 6  | 576.2742       | 288.6410        |
| 1029.4853      | 12 | S 5  | 519.2527       | 260.1303        |
| 1086.5068      | 13 | G 4  | 432.2207       | 216.6142        |
| 1215.5493      | 14 | E 3  | 375.1992       | 188.1035        |
| 1286.5865      | 15 | A 2  | 246.1566       | 123.5822        |
|                | 16 | R 1  | 175.1195       | 88.0637         |

N-term:+43.02

AATAAVPGAAAGR, MH+ 1125.6017, m/z 563.3045  
 L OSG41 P180811 230811-s1.03140.03140.2.dta

X-range:

-

MassTol: Y-zoom:

MassType:

AVG  MONO

Axis:

1  2

Label:

I  M  -

Ions:

a  +  2+  3+

b  +  2+  3+

c  +  2+  3+

x  +  2+  3+

y  +  2+  3+

z  +  2+  3+

hide H<sub>2</sub>O/NH<sub>3</sub>

zoom 112-122

GO

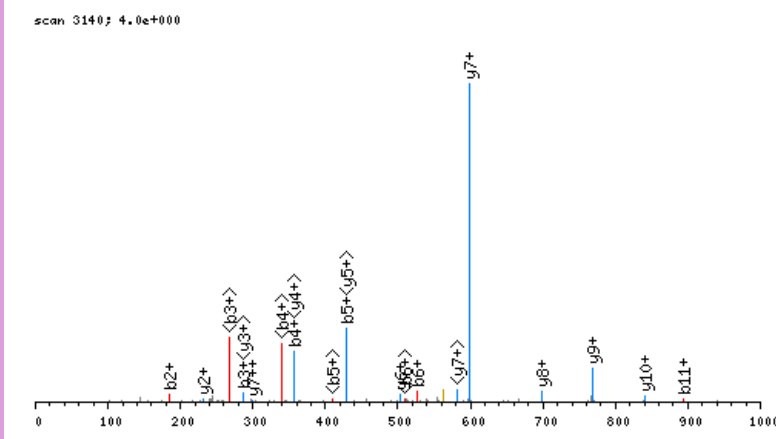

click image to zoom in; click top corners to zoom out [\[precursor±\]](#)

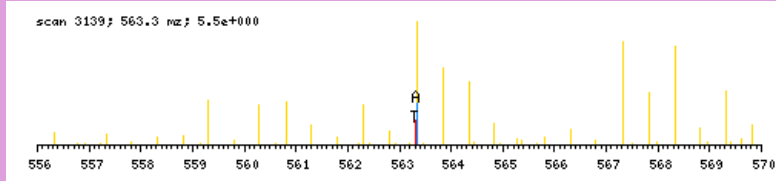

zoomed in precursor plot; T=theoretical m/z, A=acquired m/z

| b <sup>+</sup> | #  | AA | #  | y <sup>+</sup> | y <sup>2+</sup> |
|----------------|----|----|----|----------------|-----------------|
| 114.0555       | 1  | A  | 13 |                |                 |
| 185.0926       | 2  | A  | 12 | 1012.5540      | 506.7809        |
| 286.1403       | 3  | T  | 11 | 941.5169       | 471.2623        |
| 357.1774       | 4  | A  | 10 | 840.4692       | 420.7385        |
| 428.2145       | 5  | A  | 9  | 769.4321       | 385.2199        |
| 527.2829       | 6  | V  | 8  | 698.3949       | 349.7014        |
| 624.3357       | 7  | P  | 7  | 599.3265       | 300.1672        |
| 681.3572       | 8  | G  | 6  | 502.2738       | 251.6408        |
| 752.3943       | 9  | A  | 5  | 445.2523       | 223.1301        |
| 823.4314       | 10 | A  | 4  | 374.2152       | 187.6115        |
| 894.4685       | 11 | A  | 3  | 303.1781       | 152.0930        |
| 951.4900       | 12 | G  | 2  | 232.1410       | 116.5744        |
|                | 13 | R  | 1  | 175.1195       | 88.0637         |

N-term:+43.02

AATFFGEVVKAPCR, MH+ 1622.8365, m/z 541.6170  
 L OSG37 P180811 230811-s1.08420.08420.3.dta

X-range:

-

MassTol: Y-zoom:

MassType:

AVG  MONO

Axis:

1  2

Label:

I  M  -

Ions:

a  +  2+  3+

b  +  2+  3+

c  +  2+  3+

x  +  2+  3+

y  +  2+  3+

z  +  2+  3+

hide H<sub>2</sub>O/NH<sub>3</sub>

zoom 112-122

GO

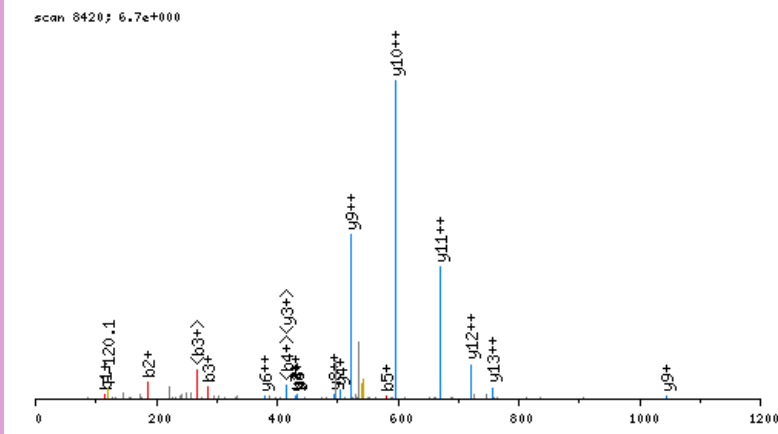

click image to zoom in; click top corners to zoom out [\[precursor±\]](#)

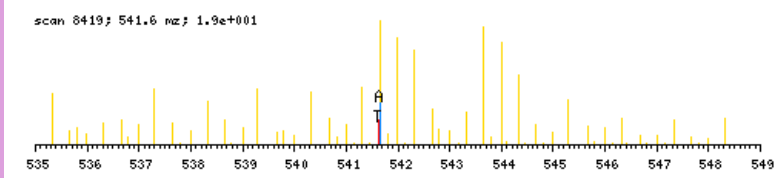

zoomed in precursor plot; T=theoretical m/z, A=acquired m/z

| b <sup>+</sup> | #  | AA # | y <sup>+</sup> | y <sup>2+</sup> |
|----------------|----|------|----------------|-----------------|
| 114.0555       | 1  | A    | 14             |                 |
| 185.0926       | 2  | A    | 13             | 1509.7888       |
| 286.1403       | 3  | T    | 12             | 1438.7517       |
| 433.2087       | 4  | F    | 11             | 1337.7040       |
| 580.2771       | 5  | F    | 10             | 1190.6356       |
| 637.2986       | 6  | G    | 9              | 1043.5672       |
| 766.3412       | 7  | E    | 8              | 986.5457        |
| 865.4096       | 8  | V    | 7              | 857.5031        |
| 964.4780       | 9  | V    | 6              | 758.4347        |
| 1120.6043      | 10 | K    | 5              | 659.3663        |
| 1191.6414      | 11 | A    | 4              | 503.2400        |
| 1288.6942      | 12 | P    | 3              | 432.2029        |
| 1448.7248      | 13 | C    | 2              | 335.1501        |
|                | 14 | R    | 1              | 175.1195        |

N-term:+43.02 K(10):+156.13  
 C(13):+160.03

AATTGSGVKVPR, MH+ 1219.7223, m/z 610.3648  
 L OSG37 P180811 230811-s1.02820.02820.2.dta

X-range:

-

MassTol: Y-zoom:

MassType:

AVG  MONO

Axis:

1  2

Label:

I  M  -

Ions:

a  +  2+  3+

b  +  2+  3+

c  +  2+  3+

x  +  2+  3+

y  +  2+  3+

z  +  2+  3+

hide H<sub>2</sub>O/NH<sub>3</sub>

zoom 112-122

GO

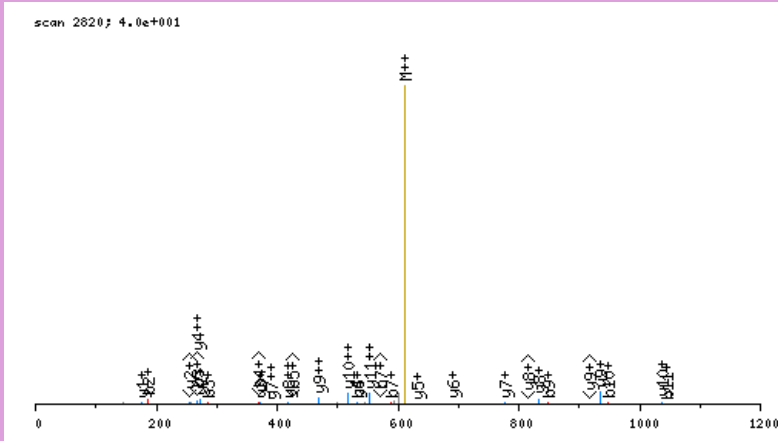

click image to zoom in; click top corners to zoom out [\[precursor±\]](#)

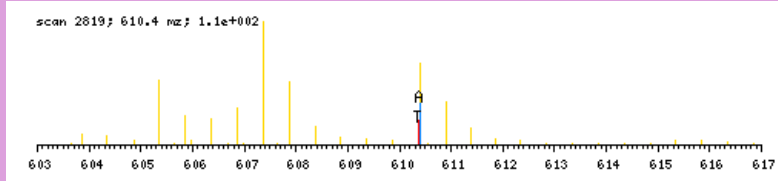

zoomed in precursor plot; T=theoretical m/z, A=acquired m/z

| b <sup>+</sup> | #  | AA # | y <sup>+</sup> | y <sup>2+</sup> |
|----------------|----|------|----------------|-----------------|
| 114.0555       | 1  | A 12 |                |                 |
| 185.0926       | 2  | A 11 | 1106.6746      | 553.8412        |
| 286.1403       | 3  | T 10 | 1035.6375      | 518.3227        |
| 387.1880       | 4  | T 9  | 934.5898       | 467.7988        |
| 444.2094       | 5  | G 8  | 833.5421       | 417.2750        |
| 531.2415       | 6  | S 7  | 776.5207       | 388.7643        |
| 588.2629       | 7  | G 6  | 689.4887       | 345.2482        |
| 687.3314       | 8  | V 5  | 632.4672       | 316.7375        |
| 849.4895       | 9  | K 4  | 533.3988       | 267.2033        |
| 948.5579       | 10 | V 3  | 371.2407       | 186.1243        |
| 1045.6106      | 11 | P 2  | 272.1723       | 136.5900        |
|                | 12 | R 1  | 175.1195       | 88.0637         |

N-term:+43.02 K(9):+162.16

AAVGSPGSLESAPR, MH+ 1340.6810, m/z 670.8442  
 L OSG41 P180811 230811-s1.03975.03975.2.dta

X-range:

-

MassTol: Y-zoom:

MassType:

AVG  MONO

Axis:

1  2

Label:

I  M  -

Ions:

a  +  2+  3+

b  +  2+  3+

c  +  2+  3+

x  +  2+  3+

y  +  2+  3+

z  +  2+  3+

hide H<sub>2</sub>O/NH<sub>3</sub>

zoom 112-122

GO

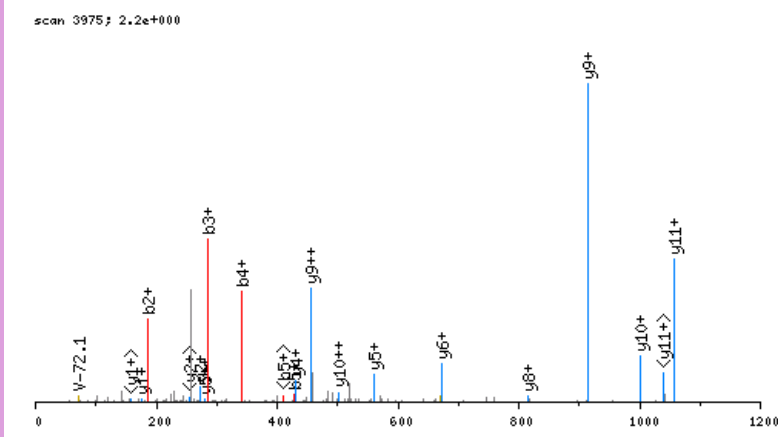

click image to zoom in; click top corners to zoom out [\[precursor±\]](#)

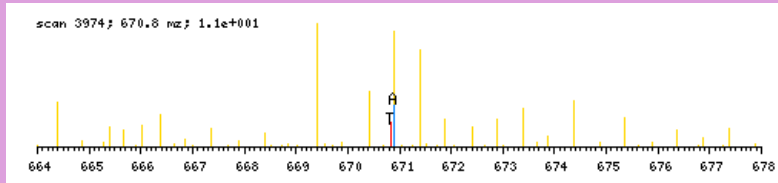

zoomed in precursor plot; T=theoretical m/z, A=acquired m/z

| b <sup>+</sup> | #  | AA # | y <sup>+</sup> | y <sup>2+</sup> |
|----------------|----|------|----------------|-----------------|
| 114.0555       | 1  | A 14 |                |                 |
| 185.0926       | 2  | A 13 | 1227.6333      | 614.3206        |
| 284.1610       | 3  | V 12 | 1156.5962      | 578.8020        |
| 341.1825       | 4  | G 11 | 1057.5278      | 529.2678        |
| 428.2145       | 5  | S 10 | 1000.5063      | 500.7571        |
| 525.2673       | 6  | P 9  | 913.4743       | 457.2411        |
| 582.2888       | 7  | G 8  | 816.4216       | 408.7147        |
| 669.3208       | 8  | S 7  | 759.4001       | 380.2040        |
| 782.4049       | 9  | L 6  | 672.3681       | 336.6879        |
| 911.4474       | 10 | E 5  | 559.2840       | 280.1459        |
| 998.4795       | 11 | S 4  | 430.2414       | 215.6246        |
| 1069.5166      | 12 | A 3  | 343.2094       | 172.1086        |
| 1166.5694      | 13 | P 2  | 272.1723       | 136.5900        |
|                | 14 | R 1  | 175.1195       | 88.0637         |

N-term:+43.02

AAVKTLNPKAEVAR, MH+ 1578.0016, m/z 526.6720  
 L OSG39 P180811 230811-s1.03192.03192.3.dta

X-range:

-

MassTol: Y-zoom:

MassType:

AVG  MONO

Axis:

1  2

Label:

I  M  -

Ions:

a  +  2+  3+

b  +  2+  3+

c  +  2+  3+

x  +  2+  3+

y  +  2+  3+

z  +  2+  3+

hide H<sub>2</sub>O/NH<sub>3</sub>

zoom 112-122

GO

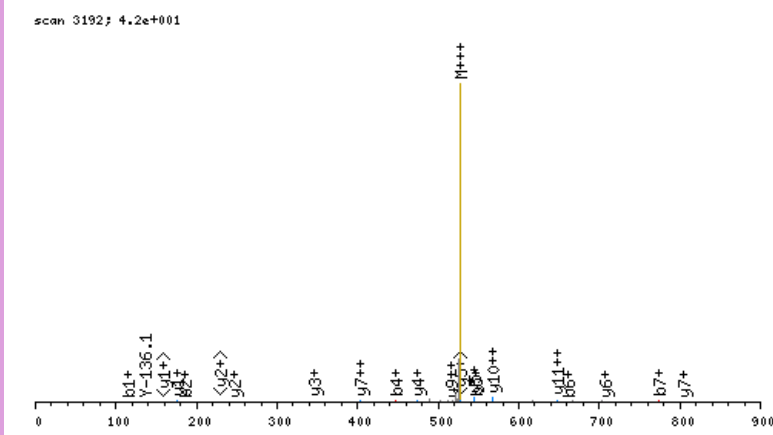

click image to zoom in; click top corners to zoom out [\[precursor±\]](#)

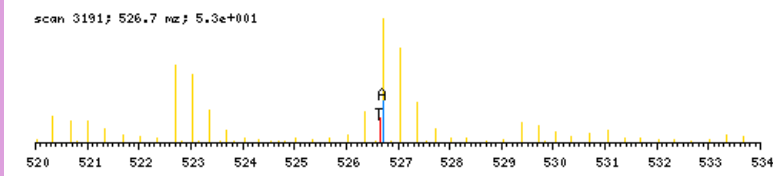

zoomed in precursor plot; T=theoretical m/z, A=acquired m/z

| b <sup>+</sup> | #  | AA # | y <sup>+</sup> | y <sup>2+</sup> |
|----------------|----|------|----------------|-----------------|
| 114.0555       | 1  | A 14 |                |                 |
| 185.0926       | 2  | A 13 | 1464.9539      | 732.9809        |
| 284.1610       | 3  | V 12 | 1393.9168      | 697.4623        |
| 446.3191       | 4  | K 11 | 1294.8484      | 647.9281        |
| 547.3668       | 5  | T 10 | 1132.6903      | 566.8490        |
| 660.4509       | 6  | L 9  | 1031.6426      | 516.3252        |
| 774.4938       | 7  | N 8  | 918.5585       | 459.7832        |
| 871.5466       | 8  | P 7  | 804.5156       | 402.7617        |
| 1033.7047      | 9  | K 6  | 707.4628       | 354.2353        |
| 1104.7418      | 10 | A 5  | 545.3047       | 273.1563        |
| 1233.7844      | 11 | E 4  | 474.2676       | 237.6377        |
| 1332.8528      | 12 | V 3  | 345.2250       | 173.1164        |
| 1403.8899      | 13 | A 2  | 246.1566       | 123.5822        |
|                | 14 | R 1  | 175.1195       | 88.0637         |

N-term:+43.02 K(4):+162.16  
 K(9):+162.16

AAVPSAVHLPR, MH+ 1159.6588, m/z 580.3330  
 L OSG37 P180811 230811-s1.05261.05261.2.dta

X-range:

-

MassTol: Y-zoom:

MassType:

AVG  MONO

Axis:

1  2

Label:

I  M  -

Ions:

a  +  2+  3+

b  +  2+  3+

c  +  2+  3+

x  +  2+  3+

y  +  2+  3+

z  +  2+  3+

hide H<sub>2</sub>O/NH<sub>3</sub>

zoom 112-122

GO

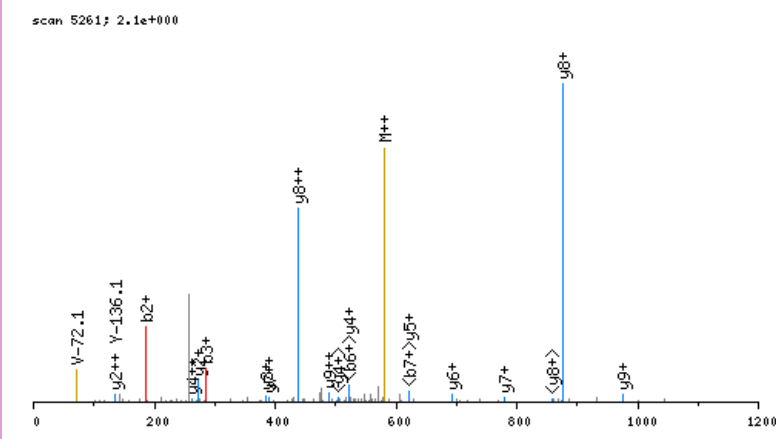

click image to zoom in; click top corners to zoom out [\[precursor±\]](#)

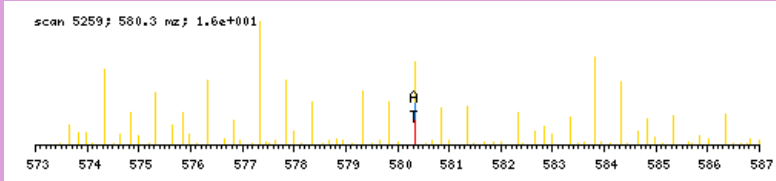

zoomed in precursor plot; T=theoretical m/z, A=acquired m/z

| b <sup>+</sup> | #  | AA | #  | y <sup>+</sup> | y <sup>2+</sup> |
|----------------|----|----|----|----------------|-----------------|
| 114.0555       | 1  | A  | 11 |                |                 |
| 185.0926       | 2  | A  | 10 | 1046.6111      | 523.8095        |
| 284.1610       | 3  | V  | 9  | 975.5740       | 488.2909        |
| 381.2138       | 4  | P  | 8  | 876.5056       | 438.7567        |
| 468.2458       | 5  | S  | 7  | 779.4528       | 390.2303        |
| 539.2829       | 6  | A  | 6  | 692.4208       | 346.7143        |
| 638.3514       | 7  | V  | 5  | 621.3837       | 311.1957        |
| 775.4103       | 8  | H  | 4  | 522.3152       | 261.6615        |
| 888.4943       | 9  | L  | 3  | 385.2563       | 193.1321        |
| 985.5471       | 10 | P  | 2  | 272.1723       | 136.5900        |
|                | 11 | R  | 1  | 175.1195       | 88.0637         |

N-term:+43.02



AAVTEVVVPADGAEARPLAAEELAAQKR, MH+ 2908.5957, m/z 727.9044  
 L\_OSG38\_P180811\_230811-s1.06967.06967.4.dta

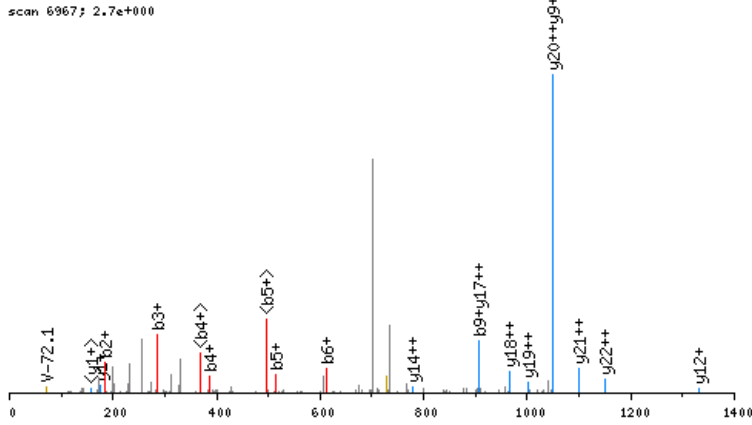

click image to zoom in; click top corners to zoom out [precursor±]

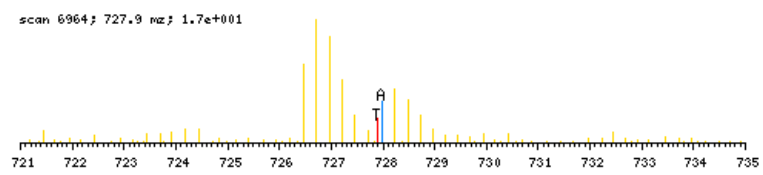

zoomed in precursor plot; T=theoretical m/z, A=acquired m/z

| b <sup>+</sup> | #  | AA # | y <sup>+</sup> | y <sup>2+</sup> |
|----------------|----|------|----------------|-----------------|
| 114.0555       | 1  | A 28 |                |                 |
| 185.0926       | 2  | A 27 | 2795.5480      | 1398.2779       |
| 284.1610       | 3  | V 26 | 2724.5109      | 1362.7593       |
| 385.2087       | 4  | T 25 | 2625.4424      | 1313.2251       |
| 514.2513       | 5  | E 24 | 2524.3948      | 1262.7013       |
| 613.3197       | 6  | V 23 | 2395.3522      | 1198.1800       |
| 712.3881       | 7  | V 22 | 2296.2838      | 1148.6458       |
| 811.4566       | 8  | V 21 | 2197.2153      | 1099.1116       |
| 908.5093       | 9  | P 20 | 2098.1469      | 1049.5774       |
| 979.5464       | 10 | A 19 | 2001.0942      | 1001.0510       |
| 1094.5734      | 11 | D 18 | 1930.0571      | 965.5324        |
| 1151.5948      | 12 | G 17 | 1815.0301      | 908.0190        |
| 1222.6320      | 13 | A 16 | 1758.0086      | 879.5082        |
| 1351.6745      | 14 | E 15 | 1686.9715      | 843.9897        |
| 1422.7117      | 15 | A 14 | 1557.9289      | 779.4684        |
| 1578.8128      | 16 | R 13 | 1486.8918      | 743.9498        |
| 1675.8655      | 17 | P 12 | 1330.7907      | 665.8993        |
| 1788.9496      | 18 | L 11 | 1233.7379      | 617.3729        |
| 1859.9867      | 19 | A 10 | 1120.6539      | 560.8309        |
| 1931.0238      | 20 | A 9  | 1049.6168      | 525.3123        |
| 2060.0664      | 21 | E 8  | 978.5797       | 489.7937        |
| 2189.1090      | 22 | E 7  | 849.5371       | 425.2724        |
| 2302.1931      | 23 | L 6  | 720.4945       | 360.7511        |
| 2373.2302      | 24 | A 5  | 607.4104       | 304.2091        |
| 2444.2673      | 25 | A 4  | 536.3733       | 268.6906        |
| 2572.3259      | 26 | Q 3  | 465.3362       | 233.1720        |
| 2734.4840      | 27 | K 2  | 337.2776       | 169.1427        |
|                | 28 | R 1  | 175.1195       | 88.0637         |

N-term:+43.02 K(27) :+162.16

X-range:

0 - 0

MassTol: Y-zoom:

0. 1.

MassType:

AVG  MONO

Axis:

1  2

Label:

I  M  -

Ions:

a  +  2+  3+

b  +  2+  3+

c  +  2+  3+

x  +  2+  3+

y  +  2+  3+

z  +  2+  3+

hide H<sub>2</sub>O/NH<sub>3</sub>

zoom 112-122

GO

AAVTVNSAKR, MH+ 1086.6272, m/z 543.8172  
 L OSG37 P180811 230811-s1.02306.02306.2.dta

scan 2306; 4.5e+001

X-range:

-

MassTol: Y-zoom:

MassType:

AVG  MONO

Axis:

1  2

Label:

I  M  -

Ions:

a  +  2+  3+

b  +  2+  3+

c  +  2+  3+

x  +  2+  3+

y  +  2+  3+

z  +  2+  3+

hide H<sub>2</sub>O/NH<sub>3</sub>

zoom 112-122

GO

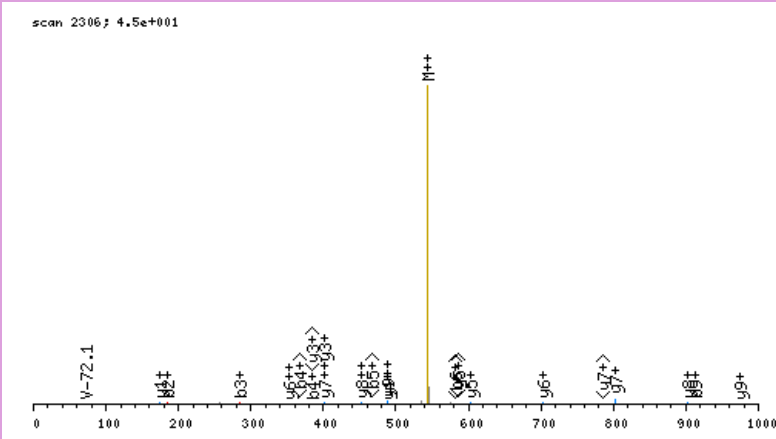

click image to zoom in; click top corners to zoom out [\[precursor±\]](#)

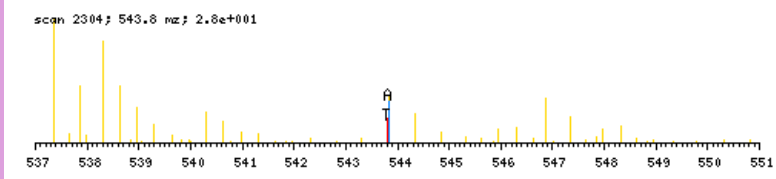

zoomed in precursor plot; T=theoretical m/z, A=acquired m/z

| b <sup>+</sup> | #  | AA | #  | y <sup>+</sup> | y <sup>2+</sup> |
|----------------|----|----|----|----------------|-----------------|
| 114.0555       | 1  | A  | 10 |                |                 |
| 185.0926       | 2  | A  | 9  | 973.5795       | 487.2937        |
| 284.1610       | 3  | V  | 8  | 902.5424       | 451.7751        |
| 385.2087       | 4  | T  | 7  | 803.4740       | 402.2409        |
| 484.2771       | 5  | V  | 6  | 702.4263       | 351.7171        |
| 598.3201       | 6  | N  | 5  | 603.3579       | 302.1828        |
| 685.3521       | 7  | S  | 4  | 489.3149       | 245.1614        |
| 756.3892       | 8  | A  | 3  | 402.2829       | 201.6454        |
| 912.5155       | 9  | K  | 2  | 331.2458       | 166.1268        |
|                | 10 | R  | 1  | 175.1195       | 88.0637         |

N-term:+43.02 K(9):+156.13

AAYKLVLIR, MH+ 1116.7145, m/z 558.8609  
 L OSG38 P180811 230811-s1.06787.06787.2.dta

X-range:

-

MassTol: Y-zoom:

MassType:

AVG  MONO

Axis:

1  2

Label:

I  M  -

Ions:

a  +  2+  3+

b  +  2+  3+

c  +  2+  3+

x  +  2+  3+

y  +  2+  3+

z  +  2+  3+

hide H<sub>2</sub>O/NH<sub>3</sub>

zoom 112-122

GO

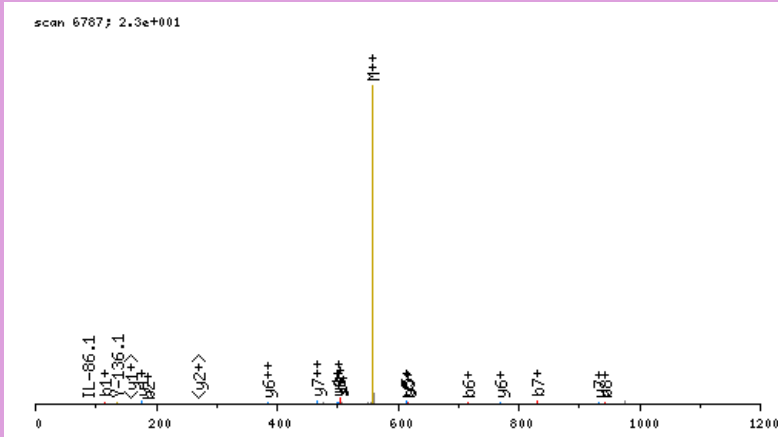

click image to zoom in; click top corners to zoom out [\[precursor±\]](#)

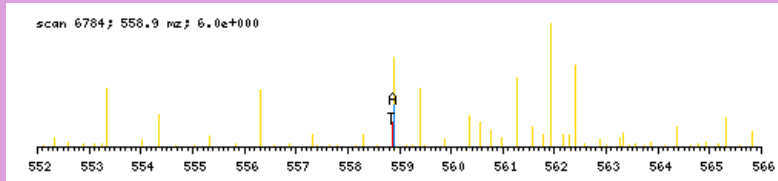

zoomed in precursor plot; T=theoretical m/z, A=acquired m/z

| b <sup>+</sup> | # | AA # | y <sup>+</sup> | y <sup>2+</sup> |
|----------------|---|------|----------------|-----------------|
| 114.0555       | 1 | A 9  |                |                 |
| 185.0926       | 2 | A 8  | 1003.6668      | 502.3373        |
| 348.1560       | 3 | Y 7  | 932.6297       | 466.8188        |
| 504.2823       | 4 | K 6  | 769.5664       | 385.2871        |
| 617.3663       | 5 | L 5  | 613.4401       | 307.2240        |
| 716.4347       | 6 | V 4  | 500.3560       | 250.6819        |
| 829.5188       | 7 | L 3  | 401.2876       | 201.1477        |
| 942.6029       | 8 | I 2  | 288.2036       | 144.6057        |
|                | 9 | R 1  | 175.1195       | 88.0637         |

N-term:+43.02 K(4):+156.13

ACCLSEEAKEAR, MH+ 1499.7046, m/z 750.3559  
 L OSG37 P180811 230811-s1.03895.03895.2.dta

scan 3895; 6.2e+000

X-range:

-

MassTol: Y-zoom:

MassType:

AVG  MONO

Axis:

1  2

Label:

I  M  -

Ions:

a  +  2+  3+

b  +  2+  3+

c  +  2+  3+

x  +  2+  3+

y  +  2+  3+

z  +  2+  3+

hide H<sub>2</sub>O/NH<sub>3</sub>

zoom 112-122

GO

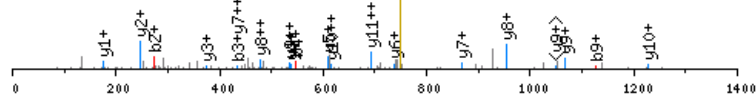

click image to zoom in; click top corners to zoom out [\[precursor±\]](#)

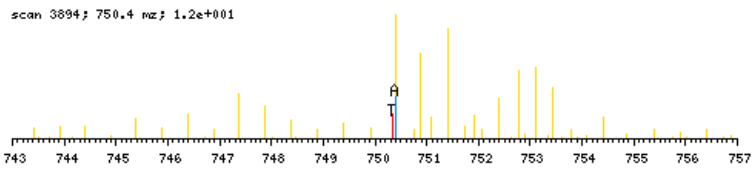

zoomed in precursor plot; T=theoretical m/z, A=acquired m/z

| b <sup>+</sup> | #  | AA # | y <sup>+</sup> | y <sup>2+</sup> |
|----------------|----|------|----------------|-----------------|
| 114.0555       | 1  | A    | 12             |                 |
| 274.0861       | 2  | C    | 11             | 1386.6569       |
| 434.1167       | 3  | C    | 10             | 1226.6263       |
| 547.2008       | 4  | L    | 9              | 1066.5957       |
| 634.2328       | 5  | S    | 8              | 953.5116        |
| 763.2754       | 6  | E    | 7              | 866.4796        |
| 892.3180       | 7  | E    | 6              | 737.4370        |
| 963.3551       | 8  | A    | 5              | 608.3944        |
| 1125.5132      | 9  | K    | 4              | 537.3573        |
| 1254.5558      | 10 | E    | 3              | 375.1992        |
| 1325.5929      | 11 | A    | 2              | 246.1566        |
|                | 12 | R    | 1              | 175.1195        |

N-term:+43.02 C(2):+160.03  
 C(3):+160.03 K(9):+162.16

ACGLVASNLNLKPGECKLQVR, MH+ 2309.3110, m/z 1155.1591  
 L OSG39 P180811 230811-s1.06257.06257.2.dta

X-range:

-

MassTol: Y-zoom:

MassType:

AVG  MONO

Axis:

1  2

Label:

I  M  -

Ions:

a  +  2+  3+

b  +  2+  3+

c  +  2+  3+

x  +  2+  3+

y  +  2+  3+

z  +  2+  3+

hide H<sub>2</sub>O/NH<sub>3</sub>

zoom 112-122

GO

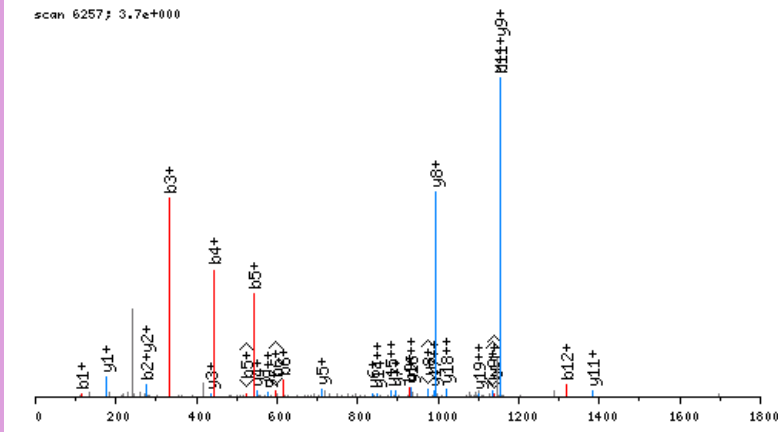

click image to zoom in; click top corners to zoom out [\[precursor±\]](#)

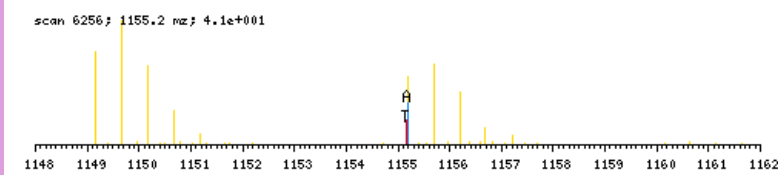

zoomed in precursor plot; T=theoretical m/z, A=acquired m/z

| b <sup>+</sup> | #  | AA | #  | y <sup>+</sup> | y <sup>2+</sup> |
|----------------|----|----|----|----------------|-----------------|
| 114.0555       | 1  | A  | 20 |                |                 |
| 274.0861       | 2  | C  | 19 | 2196.2633      | 1098.6355       |
| 331.1076       | 3  | G  | 18 | 2036.2327      | 1018.6202       |
| 444.1916       | 4  | L  | 17 | 1979.2112      | 990.1095        |
| 543.2601       | 5  | V  | 16 | 1866.1271      | 933.5675        |
| 614.2972       | 6  | A  | 15 | 1767.0587      | 884.0333        |
| 701.3292       | 7  | S  | 14 | 1696.0216      | 848.5147        |
| 815.3721       | 8  | N  | 13 | 1608.9896      | 804.9987        |
| 928.4562       | 9  | L  | 12 | 1494.9467      | 747.9772        |
| 1042.4991      | 10 | N  | 11 | 1381.8626      | 691.4352        |
| 1155.5832      | 11 | L  | 10 | 1267.8197      | 634.4137        |
| 1317.7413      | 12 | K  | 9  | 1154.7356      | 577.8717        |
| 1414.7940      | 13 | P  | 8  | 992.5775       | 496.7927        |
| 1471.8155      | 14 | G  | 7  | 895.5247       | 448.2663        |
| 1600.8581      | 15 | E  | 6  | 838.5033       | 419.7555        |
| 1760.8887      | 16 | C  | 5  | 709.4607       | 355.2343        |
| 1873.9728      | 17 | L  | 4  | 549.4301       | 275.2190        |
| 2036.1309      | 18 | K  | 3  | 436.3460       | 218.6769        |
| 2135.1993      | 19 | V  | 2  | 274.1879       | 137.5979        |
|                | 20 | R  | 1  | 175.1195       | 88.0637         |

N-term:+43.02 C(2):+160.03  
 K(12):+162.16 C(16):+160.03  
 K(18):+162.16

ACKMGKQEMVR, MH+ 1447.7860, m/z 724.3966  
 L OSG36 P180811 230811-s1.06163.06163.2.dta

scan 6163; 5.8e-001

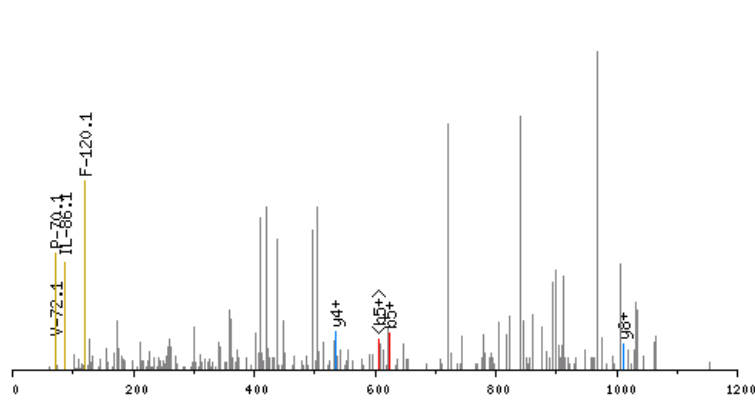

click image to zoom in; click top corners to zoom out [precursor±]

scan 6159; 724.4 m/z; 2.0e+001

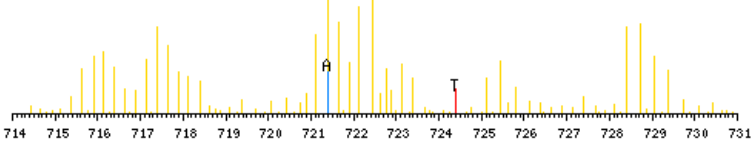

zoomed in precursor plot; T=theoretical m/z, A=acquired m/z

X-range:

-

MassTol: Y-zoom:

MassType:

AVG  MONO

Axis:

1  2

Label:

I  M  -

Ions:

a  +  2+  3+

b  +  2+  3+

c  +  2+  3+

x  +  2+  3+

y  +  2+  3+

z  +  2+  3+

hide H<sub>2</sub>O/NH<sub>3</sub>

zoom 112-122

GO

| b <sup>+</sup> | #  | AA # | y <sup>+</sup> | y <sup>2+</sup> |
|----------------|----|------|----------------|-----------------|
| 114.0555       | 1  | A 11 |                |                 |
| 274.0861       | 2  | C 10 | 1334.7383      | 667.8731        |
| 436.2442       | 3  | K 9  | 1174.7077      | 587.8578        |
| 567.2847       | 4  | M 8  | 1012.5496      | 506.7787        |
| 624.3062       | 5  | G 7  | 881.5091       | 441.2585        |
| 786.4643       | 6  | K 6  | 824.4877       | 412.7477        |
| 914.5228       | 7  | Q 5  | 662.3296       | 331.6687        |
| 1043.5654      | 8  | E 4  | 534.2710       | 267.6394        |
| 1174.6059      | 9  | M 3  | 405.2284       | 203.1181        |
| 1273.6743      | 10 | V 2  | 274.1879       | 137.5979        |
|                | 11 | R 1  | 175.1195       | 88.0637         |

N-term:+43.02 C(2):+160.03  
 K(3):+162.16 K(6):+162.16

A meta-analysis of mass spectrometry data for the protein ADAAASPVGKR. The scan shown is 2230, with a relative intensity of 2.1e+001. The precursor ion is at m/z 556.8064, and the main peak is at m/z 556.8069. The data file is L OSG37 P180811 230811-s1.02230.02230.2.dta.

X-range:

-

MassTol: Y-zoom:

MassType:

AVG  MONO

Axis:

1  2

Label:

I  M  -

Ions:

a  +  2+  3+

b  +  2+  3+

c  +  2+  3+

x  +  2+  3+

y  +  2+  3+

z  +  2+  3+

hide H<sub>2</sub>O/NH<sub>3</sub>

zoom 112-122

GO

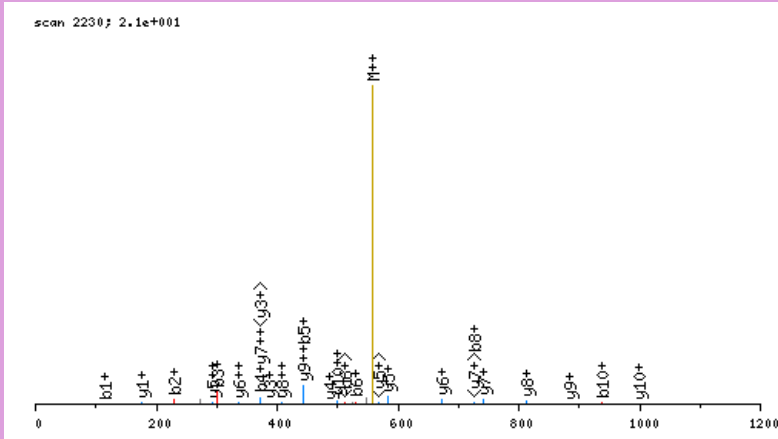

click image to zoom in; click top corners to zoom out [\[precursor±\]](#)

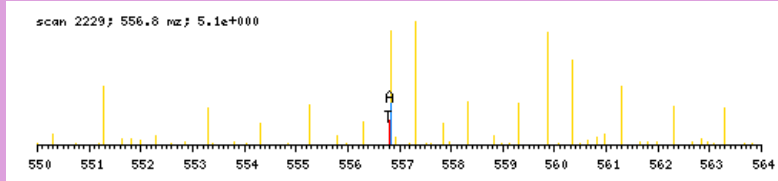

zoomed in precursor plot; T=theoretical m/z, A=acquired m/z

| b <sup>+</sup> | #  | AA | #  | y <sup>+</sup> | y <sup>2+</sup> |
|----------------|----|----|----|----------------|-----------------|
| 114.0555       | 1  | A  | 11 |                |                 |
| 229.0825       | 2  | D  | 10 | 999.5588       | 500.2833        |
| 300.1196       | 3  | A  | 9  | 884.5318       | 442.7698        |
| 371.1567       | 4  | A  | 8  | 813.4947       | 407.2513        |
| 442.1938       | 5  | A  | 7  | 742.4576       | 371.7327        |
| 529.2258       | 6  | S  | 6  | 671.4205       | 336.2141        |
| 626.2786       | 7  | P  | 5  | 584.3884       | 292.6981        |
| 725.3470       | 8  | V  | 4  | 487.3357       | 244.1718        |
| 782.3685       | 9  | G  | 3  | 388.2673       | 194.6375        |
| 938.4948       | 10 | K  | 2  | 331.2458       | 166.1268        |
|                | 11 | R  | 1  | 175.1195       | 88.0637         |

N-term:+43.02 K(10):+156.13

ADDVDQQQTINTVVEEPLDLIR, MH+ 2442.1636, m/z 814.7261  
 L OSG41 P180811 230811-s1.07166.07166.3.dta

X-range:

-

MassTol: Y-zoom:

MassType:

AVG  MONO

Axis:

1  2

Label:

I  M  -

Ions:

a  +  2+  3+

b  +  2+  3+

c  +  2+  3+

x  +  2+  3+

y  +  2+  3+

z  +  2+  3+

hide H<sub>2</sub>O/NH<sub>3</sub>

zoom 112-122

GO

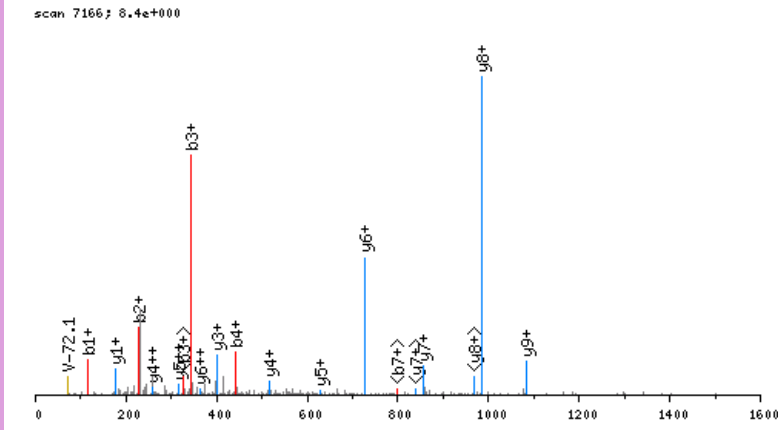

click image to zoom in; click top corners to zoom out [\[precursor±\]](#)

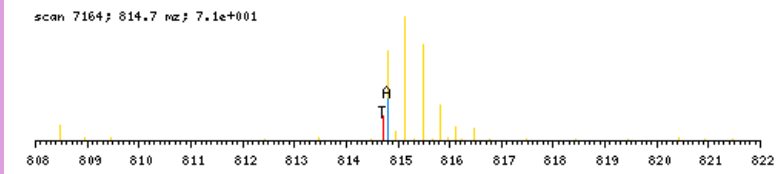

zoomed in precursor plot; T=theoretical m/z, A=acquired m/z

| b <sup>+</sup> | #  | AA # | y <sup>+</sup> | y <sup>2+</sup> |
|----------------|----|------|----------------|-----------------|
| 114.0555       | 1  | A 21 |                |                 |
| 229.0825       | 2  | D 20 | 2329.1159      | 1165.0619       |
| 344.1094       | 3  | D 19 | 2214.0890      | 1107.5484       |
| 443.1778       | 4  | V 18 | 2099.0621      | 1050.0349       |
| 558.2048       | 5  | D 17 | 1999.9936      | 1000.5007       |
| 686.2633       | 6  | Q 16 | 1884.9667      | 942.9873        |
| 814.3219       | 7  | Q 15 | 1756.9081      | 878.9580        |
| 942.3805       | 8  | Q 14 | 1628.8495      | 814.9287        |
| 1043.4282      | 9  | T 13 | 1500.7910      | 750.8994        |
| 1144.4758      | 10 | T 12 | 1399.7433      | 700.3756        |
| 1258.5188      | 11 | N 11 | 1298.6956      | 649.8517        |
| 1359.5665      | 12 | T 10 | 1184.6527      | 592.8303        |
| 1458.6349      | 13 | V 9  | 1083.6050      | 542.3064        |
| 1587.6775      | 14 | E 8  | 984.5366       | 492.7722        |
| 1716.7201      | 15 | E 7  | 855.4940       | 428.2509        |
| 1813.7728      | 16 | P 6  | 726.4514       | 363.7296        |
| 1926.8569      | 17 | L 5  | 629.3986       | 315.2032        |
| 2041.8838      | 18 | D 4  | 516.3146       | 258.6612        |
| 2154.9679      | 19 | L 3  | 401.2876       | 201.1477        |
| 2268.0520      | 20 | I 2  | 288.2036       | 144.6057        |
|                | 21 | R 1  | 175.1195       | 88.0637         |

N-term:+43.02



ADEALAGLDEGALR, MH+ 1442.7127, m/z 721.8600  
 L OSG41 P180811 230811-s1.06775.06775.2.dta

X-range:

-

MassTol: Y-zoom:

MassType:

AVG  MONO

Axis:

1  2

Label:

I  M  -

Ions:

a  +  2+  3+

b  +  2+  3+

c  +  2+  3+

x  +  2+  3+

y  +  2+  3+

z  +  2+  3+

hide H<sub>2</sub>O/NH<sub>3</sub>

zoom 112-122

GO

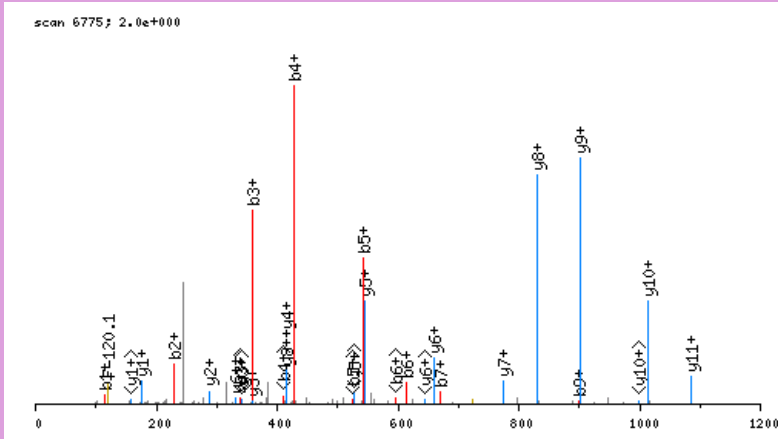

click image to zoom in; click top corners to zoom out [\[precursor±\]](#)

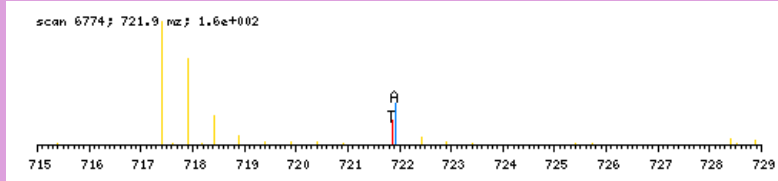

zoomed in precursor plot; T=theoretical m/z, A=acquired m/z

| b <sup>+</sup> | #  | AA # | y <sup>+</sup> | y <sup>2+</sup> |
|----------------|----|------|----------------|-----------------|
| 114.0555       | 1  | A 14 |                |                 |
| 229.0825       | 2  | D 13 | 1329.6650      | 665.3364        |
| 358.1251       | 3  | E 12 | 1214.6381      | 607.8230        |
| 429.1622       | 4  | A 11 | 1085.5955      | 543.3017        |
| 542.2462       | 5  | L 10 | 1014.5584      | 507.7831        |
| 613.2833       | 6  | A 9  | 901.4743       | 451.2411        |
| 670.3048       | 7  | G 8  | 830.4372       | 415.7225        |
| 783.3889       | 8  | L 7  | 773.4157       | 387.2118        |
| 898.4158       | 9  | D 6  | 660.3317       | 330.6698        |
| 1027.4584      | 10 | E 5  | 545.3047       | 273.1563        |
| 1084.4799      | 11 | G 4  | 416.2621       | 208.6350        |
| 1155.5170      | 12 | A 3  | 359.2407       | 180.1243        |
| 1268.6010      | 13 | L 2  | 288.2036       | 144.6057        |
|                | 14 | R 1  | 175.1195       | 88.0637         |

N-term:+43.02

X-range:

-

MassTol: Y-zoom:

MassType:

AVG  MONO

Axis:

1  2

Label:

I  M  -

Ions:

a  +  2+  3+

b  +  2+  3+

c  +  2+  3+

x  +  2+  3+

y  +  2+  3+

z  +  2+  3+

hide H<sub>2</sub>O/NH<sub>3</sub>

zoom 112-122

GO

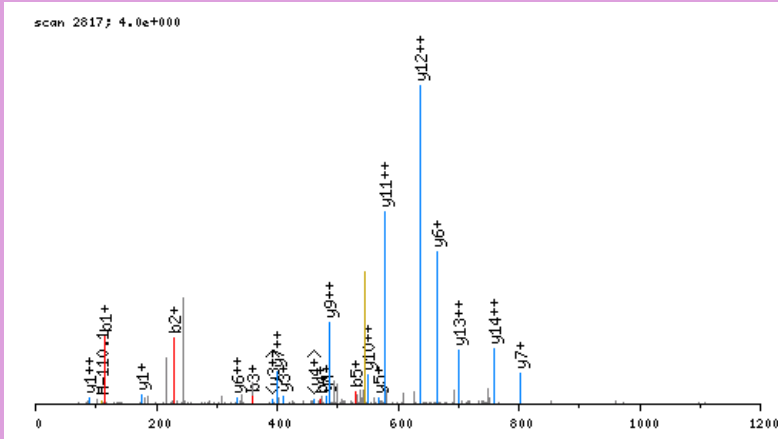

click image to zoom in; click top corners to zoom out [\[precursor±\]](#)

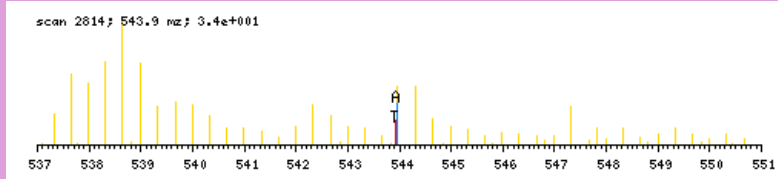

zoomed in precursor plot; T=theoretical m/z, A=acquired m/z

| b <sup>+</sup> | #  | AA # | y <sup>+</sup> | y <sup>2+</sup> |
|----------------|----|------|----------------|-----------------|
| 114.0555       | 1  | A 15 |                |                 |
| 229.0825       | 2  | D 14 | 1516.6781      | 758.8429        |
| 358.1251       | 3  | E 13 | 1401.6511      | 701.3295        |
| 473.1520       | 4  | D 12 | 1272.6085      | 636.8082        |
| 530.1735       | 5  | G 11 | 1157.5816      | 579.2947        |
| 659.2160       | 6  | E 10 | 1100.5601      | 550.7840        |
| 716.2375       | 7  | G 9  | 971.5175       | 486.2627        |
| 829.3216       | 8  | I 8  | 914.4961       | 457.7519        |
| 966.3805       | 9  | H 7  | 801.4120       | 401.2099        |
| 1063.4333      | 10 | P 6  | 664.3531       | 332.6805        |
| 1150.4653      | 11 | S 5  | 567.3003       | 284.1541        |
| 1221.5024      | 12 | A 4  | 480.2683       | 240.6381        |
| 1318.5552      | 13 | P 3  | 409.2312       | 205.1195        |
| 1455.6141      | 14 | H 2  | 312.1784       | 156.5931        |
|                | 15 | R 1  | 175.1195       | 88.0637         |

N-term:+43.02

ADEEKLPPGWEKR, MH+ 1652.8649, m/z 551.6265  
 L OSG39 P180811 230811-s1.03687.03687.3.dta

X-range:

-

MassTol: Y-zoom:

MassType:

AVG  MONO

Axis:

1  2

Label:

I  M  -

Ions:

a  +  2+  3+

b  +  2+  3+

c  +  2+  3+

x  +  2+  3+

y  +  2+  3+

z  +  2+  3+

hide H<sub>2</sub>O/NH<sub>3</sub>

zoom 112-122

GO

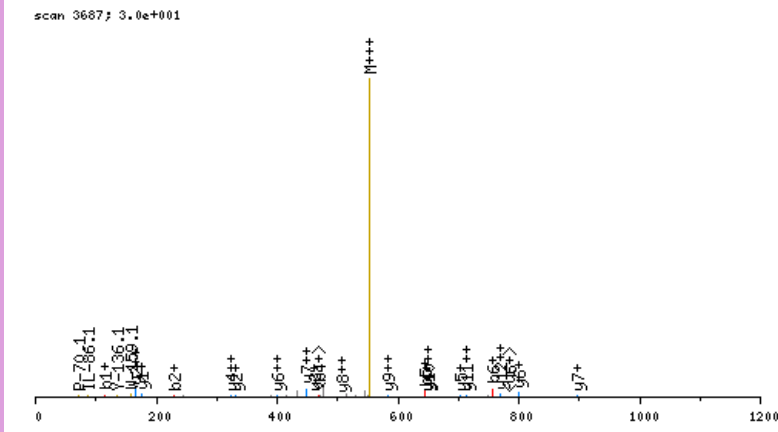

click image to zoom in; click top corners to zoom out [\[precursor±\]](#)

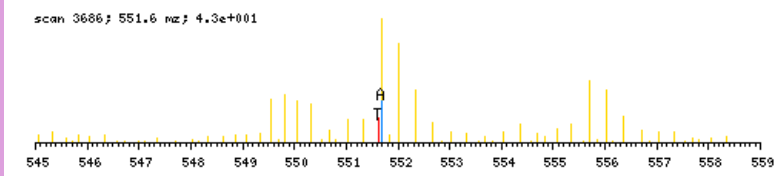

zoomed in precursor plot; T=theoretical m/z, A=acquired m/z

| b <sup>+</sup> | #  | AA # | y <sup>+</sup> | y <sup>2+</sup> |
|----------------|----|------|----------------|-----------------|
| 114.0555       | 1  | A    | 13             |                 |
| 229.0825       | 2  | D    | 12             | 1539.8172       |
| 358.1251       | 3  | E    | 11             | 1424.7902       |
| 487.1676       | 4  | E    | 10             | 1295.7477       |
| 643.2939       | 5  | K    | 9              | 1166.7051       |
| 756.3780       | 6  | L    | 8              | 1010.5788       |
| 853.4308       | 7  | P    | 7              | 897.4947        |
| 950.4835       | 8  | P    | 6              | 800.4419        |
| 1007.5050      | 9  | G    | 5              | 703.3892        |
| 1193.5843      | 10 | W    | 4              | 646.3677        |
| 1322.6269      | 11 | E    | 3              | 460.2884        |
| 1478.7532      | 12 | K    | 2              | 331.2458        |
|                | 13 | R    | 1              | 175.1195        |

N-term: +43.02 K(5): +156.13  
 K(12): +156.13

ADEIAKAQVAQPGGDTIFGKIIR, MH+ 2496.3827, m/z 624.8511  
 L OSG38 P180811 230811-s1.07745.07745.4.dta

X-range:

-

MassTol: Y-zoom:

MassType:

AVG  MONO

Axis:

1  2

Label:

I  M  -

Ions:

a  +  2+  3+

b  +  2+  3+

c  +  2+  3+

x  +  2+  3+

y  +  2+  3+

z  +  2+  3+

hide H<sub>2</sub>O/NH<sub>3</sub>

zoom 112-122

GO

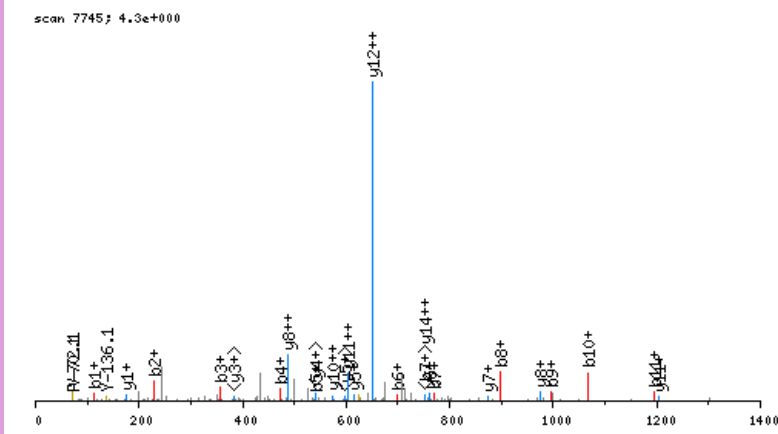

click image to zoom in; click top corners to zoom out [\[precursor±\]](#)

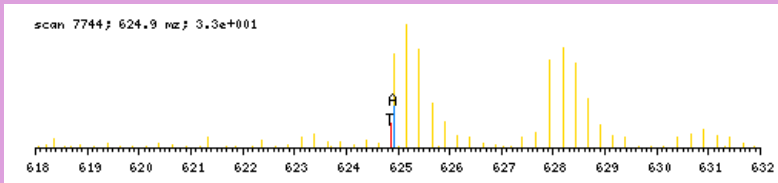

zoomed in precursor plot; T=theoretical m/z, A=acquired m/z

| b <sup>+</sup> | #  | AA # | y <sup>+</sup> | y <sup>2+</sup> |
|----------------|----|------|----------------|-----------------|
| 114.0555       | 1  | A 23 |                |                 |
| 229.0825       | 2  | D 22 | 2383.3350      | 1192.1714       |
| 358.1251       | 3  | E 21 | 2268.3081      | 1134.6579       |
| 471.2091       | 4  | I 20 | 2139.2655      | 1070.1366       |
| 542.2462       | 5  | A 19 | 2026.1814      | 1013.5946       |
| 698.3725       | 6  | K 18 | 1955.1443      | 978.0761        |
| 769.4096       | 7  | A 17 | 1799.0180      | 900.0129        |
| 897.4682       | 8  | Q 16 | 1727.9809      | 864.4943        |
| 996.5366       | 9  | V 15 | 1599.9223      | 800.4651        |
| 1067.5737      | 10 | A 14 | 1500.8539      | 750.9308        |
| 1195.6323      | 11 | Q 13 | 1429.8168      | 715.4123        |
| 1292.6851      | 12 | P 12 | 1301.7582      | 651.3830        |
| 1349.7066      | 13 | G 11 | 1204.7054      | 602.8566        |
| 1406.7280      | 14 | G 10 | 1147.6840      | 574.3459        |
| 1521.7550      | 15 | D 9  | 1090.6625      | 545.8352        |
| 1622.8026      | 16 | T 8  | 975.6355       | 488.3217        |
| 1735.8867      | 17 | I 7  | 874.5879       | 437.7978        |
| 1882.9551      | 18 | F 6  | 761.5038       | 381.2558        |
| 1939.9766      | 19 | G 5  | 614.4354       | 307.7216        |
| 2096.1029      | 20 | K 4  | 557.4139       | 279.2109        |
| 2209.1869      | 21 | I 3  | 401.2876       | 201.1477        |
| 2322.2710      | 22 | I 2  | 288.2036       | 144.6057        |
|                | 23 | R 1  | 175.1195       | 88.0637         |

N-term:+43.02 K(6):+156.13  
 K(20):+156.13

ADEVTEKQVYDAHTKEIDLVR, MH+ 2671.3580, m/z 668.5950  
 L OSG40 P180811 230811-s1.06498.06498.4.dta

X-range:

-

MassTol: Y-zoom:

MassType:

AVG  MONO

Axis:

1  2

Label:

I  M  -

Ions:

a  +  2+  3+

b  +  2+  3+

c  +  2+  3+

x  +  2+  3+

y  +  2+  3+

z  +  2+  3+

hide H<sub>2</sub>O/NH<sub>3</sub>

zoom 112-122

GO

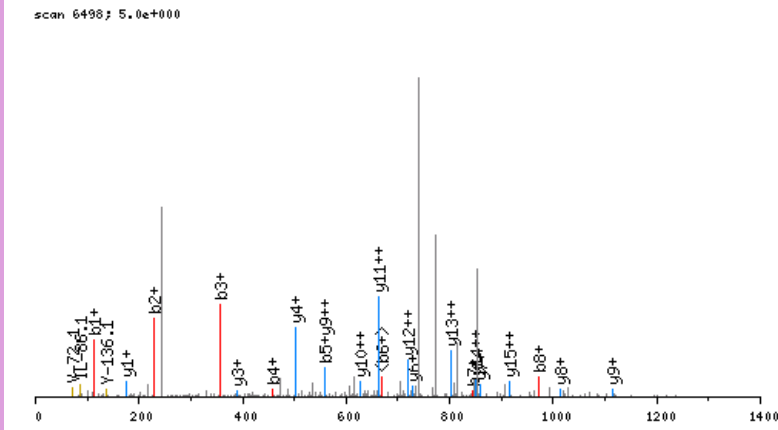

click image to zoom in; click top corners to zoom out [\[precursor±\]](#)

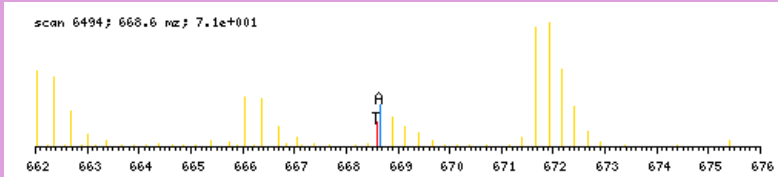

zoomed in precursor plot; T=theoretical m/z, A=acquired m/z

| b <sup>+</sup> | #  | AA # | y <sup>+</sup> | y <sup>2+</sup> |
|----------------|----|------|----------------|-----------------|
| 114.0555       | 1  | A 22 |                |                 |
| 229.0825       | 2  | D 21 | 2558.3103      | 1279.6591       |
| 358.1251       | 3  | E 20 | 2443.2834      | 1222.1456       |
| 457.1935       | 4  | V 19 | 2314.2408      | 1157.6243       |
| 558.2411       | 5  | T 18 | 2215.1723      | 1108.0901       |
| 687.2837       | 6  | E 17 | 2114.1247      | 1057.5662       |
| 843.4100       | 7  | K 16 | 1985.0821      | 993.0449        |
| 971.4686       | 8  | Q 15 | 1828.9558      | 914.9818        |
| 1070.5370      | 9  | V 14 | 1700.8972      | 850.9525        |
| 1233.6004      | 10 | Y 13 | 1601.8288      | 801.4183        |
| 1348.6273      | 11 | D 12 | 1438.7655      | 719.8866        |
| 1419.6644      | 12 | A 11 | 1323.7385      | 662.3732        |
| 1556.7233      | 13 | H 10 | 1252.7014      | 626.8546        |
| 1657.7710      | 14 | T 9  | 1115.6425      | 558.3252        |
| 1813.8973      | 15 | K 8  | 1014.5948      | 507.8013        |
| 1942.9399      | 16 | E 7  | 858.4685       | 429.7382        |
| 2056.0240      | 17 | I 6  | 729.4259       | 365.2169        |
| 2171.0509      | 18 | D 5  | 616.3418       | 308.6748        |
| 2284.1350      | 19 | L 4  | 501.3149       | 251.1614        |
| 2383.2034      | 20 | V 3  | 388.2308       | 194.6193        |
| 2497.2463      | 21 | N 2  | 289.1624       | 145.0851        |
|                | 22 | R 1  | 175.1195       | 88.0637         |

N-term:+43.02 K(7):+156.13  
 K(15):+156.13

ADFDTYDDR, MH+ 1159.4544, m/z 580.2308  
 L OSG41 P180811 230811-s1.04211.04211.2.dta

X-range:

-

MassTol: Y-zoom:

MassType:

AVG  MONO

Axis:

1  2

Label:

I  M  -

Ions:

a  +  2+  3+

b  +  2+  3+

c  +  2+  3+

x  +  2+  3+

y  +  2+  3+

z  +  2+  3+

hide H<sub>2</sub>O/NH<sub>3</sub>

zoom 112-122

GO

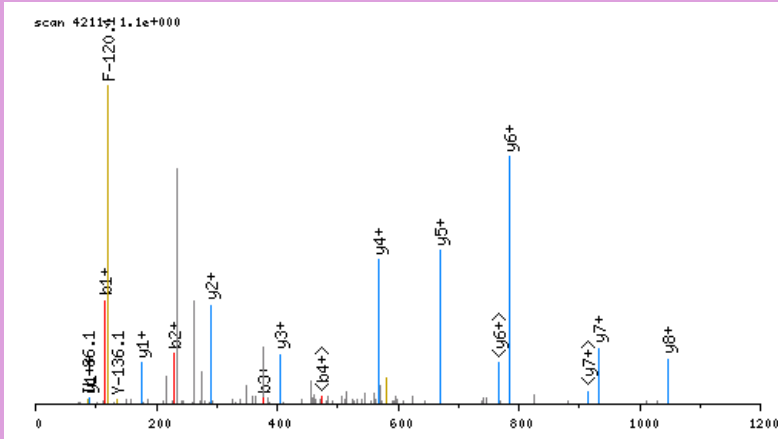

click image to zoom in; click top corners to zoom out [\[precursor±\]](#)

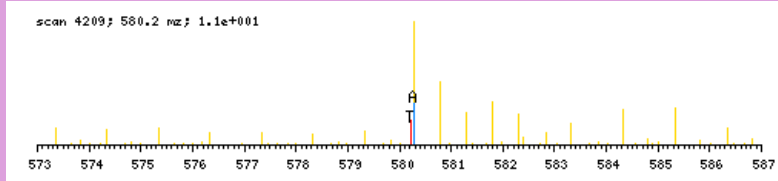

zoomed in precursor plot; T=theoretical m/z, A=acquired m/z

| b <sup>+</sup> | # | AA # | y <sup>+</sup> | y <sup>2+</sup> |
|----------------|---|------|----------------|-----------------|
| 114.0555       | 1 | A 9  |                |                 |
| 229.0825       | 2 | D 8  | 1046.4067      | 523.7073        |
| 376.1509       | 3 | F 7  | 931.3798       | 466.1938        |
| 491.1778       | 4 | D 6  | 784.3113       | 392.6596        |
| 592.2255       | 5 | T 5  | 669.2844       | 335.1461        |
| 755.2888       | 6 | Y 4  | 568.2367       | 284.6223        |
| 870.3158       | 7 | D 3  | 405.1734       | 203.0906        |
| 985.3427       | 8 | D 2  | 290.1464       | 145.5771        |
|                | 9 | R 1  | 175.1195       | 88.0637         |

N-term:+43.02

ADFLKGLPVYKNSNFSR, MH+ 2054.1076, m/z 685.3740  
 L OSG39 P180811 230811-s1.07644.07644.3.dta

scan 7644; 1.2e+001

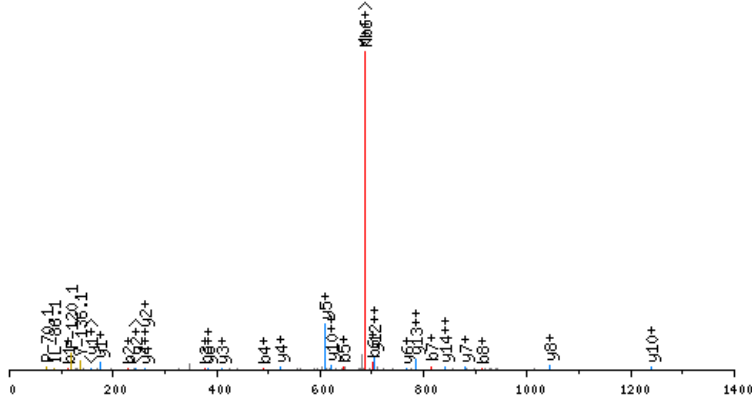

click image to zoom in; click top corners to zoom out [precursor±]

scan 7641; 685.4 nz; 3.6e+001

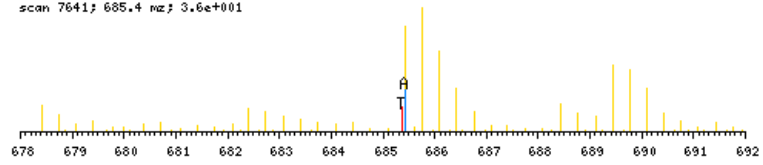

zoomed in precursor plot; T=theoretical m/z, A=acquired m/z

X-range:

-

MassTol: Y-zoom:

MassType:

AVG  MONO

Axis:

1  2

Label:

I  M  -

Ions:

a  +  2+  3+

b  +  2+  3+

c  +  2+  3+

x  +  2+  3+

y  +  2+  3+

z  +  2+  3+

hide H<sub>2</sub>O/NH<sub>3</sub>

zoom 112-122

GO

| b <sup>+</sup> | #  | AA | #  | y <sup>+</sup> | y <sup>2+</sup> |
|----------------|----|----|----|----------------|-----------------|
| 114.0555       | 1  | A  | 17 |                |                 |
| 229.0825       | 2  | D  | 16 | 1941.0599      | 971.0339        |
| 376.1509       | 3  | F  | 15 | 1826.0329      | 913.5204        |
| 489.2349       | 4  | L  | 14 | 1678.9645      | 839.9862        |
| 645.3612       | 5  | K  | 13 | 1565.8805      | 783.4441        |
| 702.3827       | 6  | G  | 12 | 1409.7542      | 705.3810        |
| 815.4668       | 7  | L  | 11 | 1352.7327      | 676.8703        |
| 912.5195       | 8  | P  | 10 | 1239.6486      | 620.3282        |
| 1011.5879      | 9  | V  | 9  | 1142.5959      | 571.8018        |
| 1174.6513      | 10 | Y  | 8  | 1043.5275      | 522.2676        |
| 1288.6942      | 11 | N  | 7  | 880.4641       | 440.7360        |
| 1444.8205      | 12 | K  | 6  | 766.4212       | 383.7145        |
| 1531.8525      | 13 | S  | 5  | 610.2949       | 305.6514        |
| 1645.8955      | 14 | N  | 4  | 523.2629       | 262.1353        |
| 1792.9639      | 15 | F  | 3  | 409.2199       | 205.1139        |
| 1879.9959      | 16 | S  | 2  | 262.1515       | 131.5797        |
|                | 17 | R  | 1  | 175.1195       | 88.0637         |

N-term:+43.02 K(5):+156.13  
 K(12):+156.13

ADGELNVDSLIIR, MH+ 1444.7284, m/z 722.8678  
 L OSG41 P180811 230811-s1.06965.06965.2.dta

X-range:

-

MassTol: Y-zoom:

MassType:

AVG  MONO

Axis:

1  2

Label:

I  M  -

Ions:

a  +  2+  3+

b  +  2+  3+

c  +  2+  3+

x  +  2+  3+

y  +  2+  3+

z  +  2+  3+

hide H<sub>2</sub>O/NH<sub>3</sub>

zoom 112-122

GO

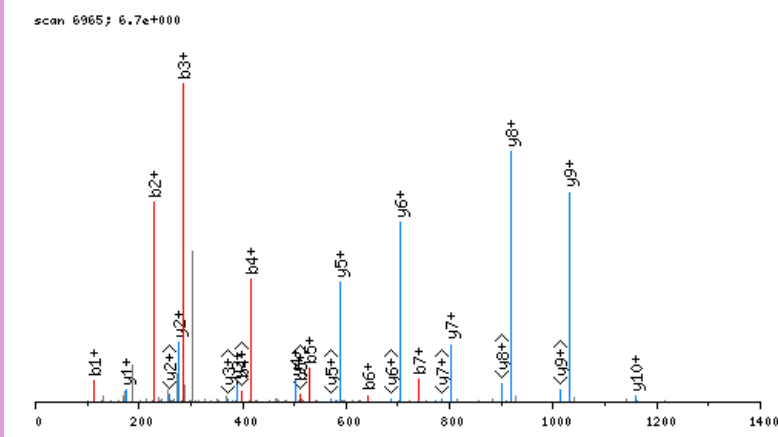

click image to zoom in; click top corners to zoom out [\[precursor±\]](#)

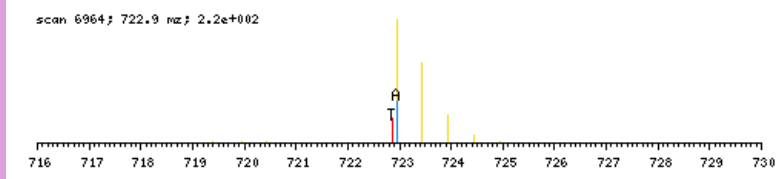

zoomed in precursor plot; T=theoretical m/z, A=acquired m/z

| b <sup>+</sup> | #  | AA # | y <sup>+</sup> | y <sup>2+</sup> |
|----------------|----|------|----------------|-----------------|
| 114.0555       | 1  | A 13 |                |                 |
| 229.0825       | 2  | D 12 | 1331.6807      | 666.3443        |
| 286.1039       | 3  | G 11 | 1216.6537      | 608.8308        |
| 415.1465       | 4  | E 10 | 1159.6323      | 580.3201        |
| 528.2306       | 5  | L 9  | 1030.5897      | 515.7988        |
| 642.2735       | 6  | N 8  | 917.5056       | 459.2567        |
| 741.3419       | 7  | V 7  | 803.4627       | 402.2353        |
| 856.3689       | 8  | D 6  | 704.3943       | 352.7011        |
| 943.4009       | 9  | S 5  | 589.3673       | 295.1876        |
| 1056.4850      | 10 | L 4  | 502.3353       | 251.6716        |
| 1169.5690      | 11 | I 3  | 389.2512       | 195.1295        |
| 1270.6167      | 12 | T 2  | 276.1672       | 138.5875        |
|                | 13 | R 1  | 175.1195       | 88.0637         |

N-term:+43.02



ADGGAASQDESSAAAAAADSR, MH+ 1991.8543, m/z 664.6229  
 L OSG41 P180811 230811-s1.03660.03660.3.dta

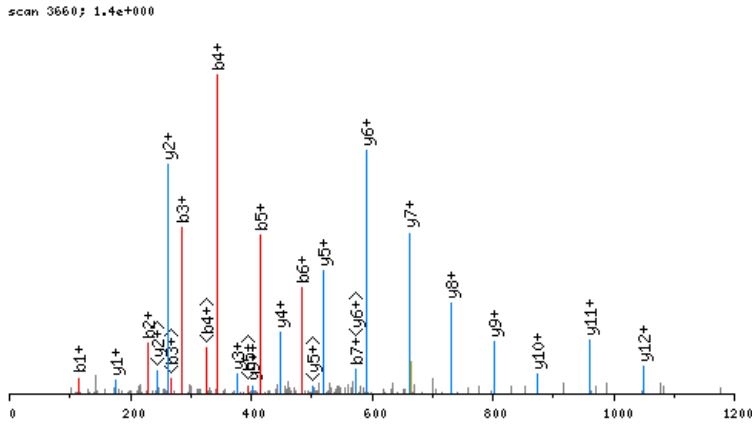

click image to zoom in; click top corners to zoom out [\[precursor±\]](#)

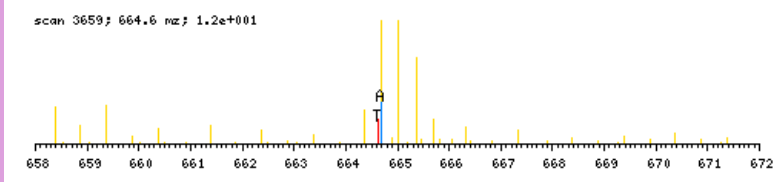

zoomed in precursor plot; T=theoretical m/z, A=acquired m/z

X-range:

-

MassTol: Y-zoom:

MassType:

AVG  MONO

Axis:

1  2

Label:

I  M  -

Ions:

a  +  2+  3+

b  +  2+  3+

c  +  2+  3+

x  +  2+  3+

y  +  2+  3+

z  +  2+  3+

hide H<sub>2</sub>O/NH<sub>3</sub>

zoom 112-122

GO

| b <sup>+</sup> | #  | AA # | y <sup>+</sup> | y <sup>2+</sup> |
|----------------|----|------|----------------|-----------------|
| 114.0555       | 1  | A 22 |                |                 |
| 229.0825       | 2  | D 21 | 1878.8066      | 939.9072        |
| 286.1039       | 3  | G 20 | 1763.7796      | 882.3937        |
| 343.1254       | 4  | G 19 | 1706.7582      | 853.8830        |
| 414.1625       | 5  | A 18 | 1649.7367      | 825.3723        |
| 485.1996       | 6  | A 17 | 1578.6996      | 789.8537        |
| 572.2316       | 7  | S 16 | 1507.6625      | 754.3351        |
| 700.2902       | 8  | Q 15 | 1420.6304      | 710.8191        |
| 815.3172       | 9  | D 14 | 1292.5719      | 646.7898        |
| 944.3598       | 10 | E 13 | 1177.5449      | 589.2764        |
| 1031.3918      | 11 | S 12 | 1048.5023      | 524.7551        |
| 1118.4238      | 12 | S 11 | 961.4703       | 481.2391        |
| 1189.4609      | 13 | A 10 | 874.4383       | 437.7230        |
| 1260.4980      | 14 | A 9  | 803.4012       | 402.2045        |
| 1331.5352      | 15 | A 8  | 732.3640       | 366.6859        |
| 1402.5723      | 16 | A 7  | 661.3269       | 331.1674        |
| 1473.6094      | 17 | A 6  | 590.2898       | 295.6488        |
| 1544.6465      | 18 | A 5  | 519.2527       | 260.1303        |
| 1615.6836      | 19 | A 4  | 448.2156       | 224.6117        |
| 1730.7106      | 20 | D 3  | 377.1785       | 189.0931        |
| 1817.7426      | 21 | S 2  | 262.1515       | 131.5797        |
|                | 22 | R 1  | 175.1195       | 88.0637         |

N-term:+43.02

ADGGGSPFLGR, MH+ 1075.5173, m/z 538.2623  
 L OSG41 P180811 230811-s1.04593.04593.2.dta

X-range:

-

MassTol: Y-zoom:

MassType:

AVG  MONO

Axis:

1  2

Label:

I  M  -

Ions:

a  +  2+  3+

b  +  2+  3+

c  +  2+  3+

x  +  2+  3+

y  +  2+  3+

z  +  2+  3+

hide H<sub>2</sub>O/NH<sub>3</sub>

zoom 112-122

GO

scan 4593; 6.7e-001

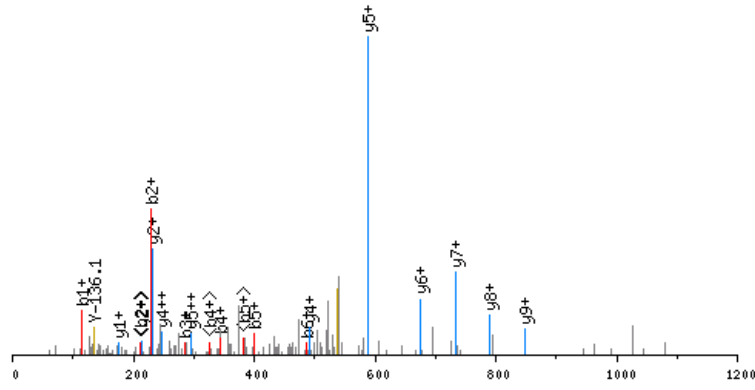

click image to zoom in; click top corners to zoom out [\[precursor±\]](#)

scan 4589; 538.3 m/z; 3.1e+001

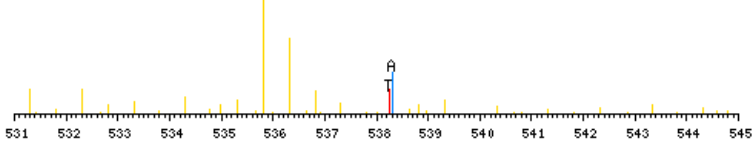

zoomed in precursor plot; T=theoretical m/z, A=acquired m/z

| b <sup>+</sup> | #  | AA | #  | y <sup>+</sup> | y <sup>2+</sup> |
|----------------|----|----|----|----------------|-----------------|
| 114.0555       | 1  | A  | 11 |                |                 |
| 229.0825       | 2  | D  | 10 | 962.4696       | 481.7387        |
| 286.1039       | 3  | G  | 9  | 847.4426       | 424.2252        |
| 343.1254       | 4  | G  | 8  | 790.4212       | 395.7145        |
| 400.1468       | 5  | G  | 7  | 733.3997       | 367.2038        |
| 487.1789       | 6  | S  | 6  | 676.3782       | 338.6930        |
| 584.2316       | 7  | P  | 5  | 589.3462       | 295.1770        |
| 731.3001       | 8  | F  | 4  | 492.2934       | 246.6506        |
| 844.3841       | 9  | L  | 3  | 345.2250       | 173.1164        |
| 901.4056       | 10 | G  | 2  | 232.1410       | 116.5744        |
|                | 11 | R  | 1  | 175.1195       | 88.0637         |

N-term:+43.02

ADIDKLNIDSIIQR, MH+ 1689.9600, m/z 563.9915  
 L OSG37 P180811 230811-s1.08525.08525.3.dta

X-range:

-

MassTol: Y-zoom:

MassType:

AVG  MONO

Axis:

1  2

Label:

I  M  -

Ions:

a  +  2+  3+

b  +  2+  3+

c  +  2+  3+

x  +  2+  3+

y  +  2+  3+

z  +  2+  3+

hide H<sub>2</sub>O/NH<sub>3</sub>

zoom 112-122

GO

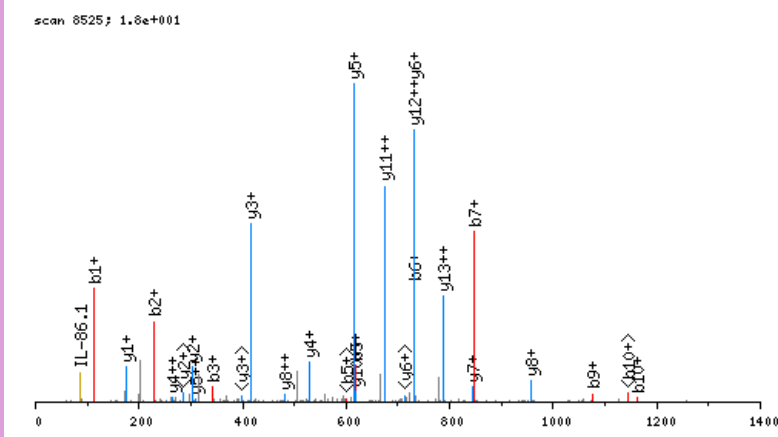

click image to zoom in; click top corners to zoom out [\[precursor±\]](#)

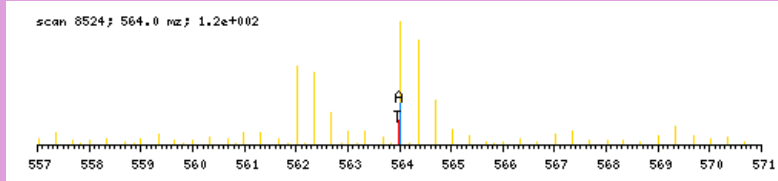

zoomed in precursor plot; T=theoretical m/z, A=acquired m/z

| b <sup>+</sup> | #  | AA # | y <sup>+</sup> | y <sup>2+</sup> |
|----------------|----|------|----------------|-----------------|
| 114.0555       | 1  | A 14 |                |                 |
| 229.0825       | 2  | D 13 | 1576.9123      | 788.9601        |
| 342.1665       | 3  | I 12 | 1461.8853      | 731.4466        |
| 457.1935       | 4  | D 11 | 1348.8013      | 674.9046        |
| 619.3516       | 5  | K 10 | 1233.7743      | 617.3911        |
| 732.4356       | 6  | L 9  | 1071.6162      | 536.3120        |
| 846.4786       | 7  | N 8  | 958.5322       | 479.7700        |
| 959.5626       | 8  | I 7  | 844.4892       | 422.7485        |
| 1074.5896      | 9  | D 6  | 731.4052       | 366.2065        |
| 1161.6216      | 10 | S 5  | 616.3782       | 308.6930        |
| 1274.7057      | 11 | I 4  | 529.3462       | 265.1770        |
| 1387.7897      | 12 | I 3  | 416.2621       | 208.6350        |
| 1515.8483      | 13 | Q 2  | 303.1781       | 152.0930        |
|                | 14 | R 1  | 175.1195       | 88.0637         |

N-term:+43.02 K(5):+162.16

ADISQWAGPLCLQEVDEPPQHALR, MH+ 2772.3415, m/z 924.7854  
 L OSG36 P180811 230811-s1.06141.06141.3.dta

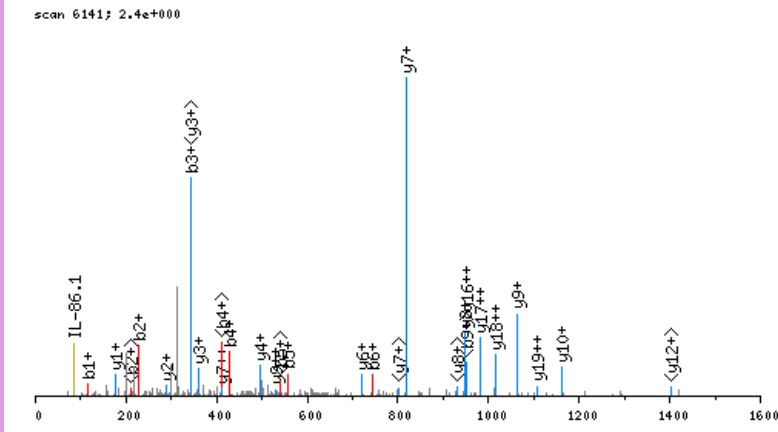

click image to zoom in; click top corners to zoom out [precursor±]

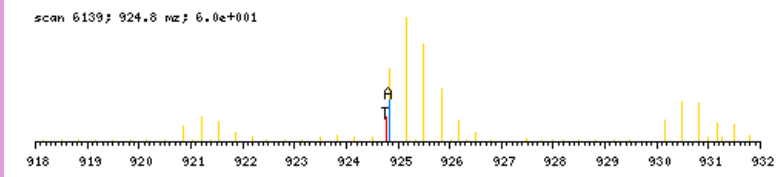

zoomed in precursor plot; T=theoretical m/z, A=acquired m/z

X-range:

0 - 0

MassTol: Y-zoom:

0. 1.

MassType:

AVG  MONO

Axis:

1  2

Label:

I  M  -

Ions:

a  +  2+  3+

b  +  2+  3+

c  +  2+  3+

x  +  2+  3+

y  +  2+  3+

z  +  2+  3+

hide H<sub>2</sub>O/NH<sub>3</sub>

zoom 112-122

GO

| b <sup>+</sup> | #  | AA # | y <sup>+</sup> | y <sup>2+</sup> |
|----------------|----|------|----------------|-----------------|
| 114.0555       | 1  | A 24 |                |                 |
| 229.0825       | 2  | D 23 | 2659.2938      | 1330.1508       |
| 342.1665       | 3  | I 22 | 2544.2669      | 1272.6373       |
| 429.1985       | 4  | S 21 | 2431.1828      | 1216.0953       |
| 557.2571       | 5  | Q 20 | 2344.1508      | 1172.5793       |
| 743.3364       | 6  | W 19 | 2216.0922      | 1108.5500       |
| 814.3736       | 7  | A 18 | 2030.0129      | 1015.5104       |
| 871.3950       | 8  | G 17 | 1958.9758      | 979.9918        |
| 968.4478       | 9  | P 16 | 1901.9543      | 951.4811        |
| 1081.5318      | 10 | L 15 | 1804.9015      | 902.9547        |
| 1241.5624      | 11 | C 14 | 1691.8175      | 846.4127        |
| 1354.6465      | 12 | L 13 | 1531.7869      | 766.3974        |
| 1482.7051      | 13 | Q 12 | 1418.7028      | 709.8553        |
| 1611.7477      | 14 | E 11 | 1290.6442      | 645.8260        |
| 1710.8161      | 15 | V 10 | 1161.6016      | 581.3047        |
| 1825.8430      | 16 | D 9  | 1062.5332      | 531.7705        |
| 1954.8856      | 17 | E 8  | 947.5063       | 474.2571        |
| 2051.9384      | 18 | P 7  | 818.4637       | 409.7358        |
| 2148.9912      | 19 | P 6  | 721.4109       | 361.2094        |
| 2277.0497      | 20 | Q 5  | 624.3582       | 312.6830        |
| 2414.1086      | 21 | H 4  | 496.2996       | 248.6537        |
| 2485.1458      | 22 | A 3  | 359.2407       | 180.1243        |
| 2598.2298      | 23 | L 2  | 288.2036       | 144.6057        |
|                | 24 | R 1  | 175.1195       | 88.0637         |

N-term:+43.02 C(11):+160.03

ADKEAAFDDAVEER, MH+ 1635.7503, m/z 818.3788  
 L OSG37 P180811 230811-s1.04958.04958.2.dta

X-range:

-

MassTol: Y-zoom:

MassType:

AVG  MONO

Axis:

1  2

Label:

I  M  -

Ions:

a  +  2+  3+

b  +  2+  3+

c  +  2+  3+

x  +  2+  3+

y  +  2+  3+

z  +  2+  3+

hide H<sub>2</sub>O/NH<sub>3</sub>

zoom 112-122

GO

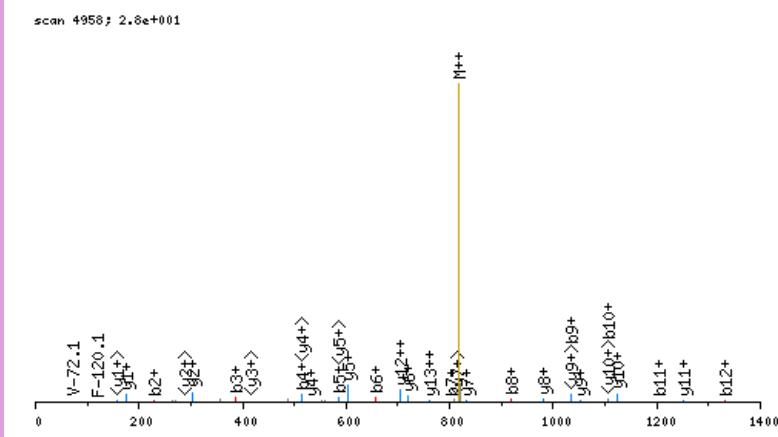

click image to zoom in; click top corners to zoom out [\[precursor±\]](#)

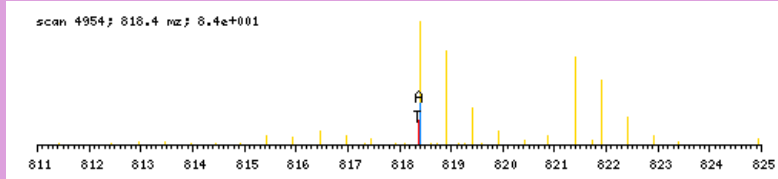

zoomed in precursor plot; T=theoretical m/z, A=acquired m/z

| b <sup>+</sup> | #  | AA # | y <sup>+</sup> | y <sup>2+</sup> |
|----------------|----|------|----------------|-----------------|
| 114.0555       | 1  | A 14 |                |                 |
| 229.0825       | 2  | D 13 | 1522.7026      | 761.8552        |
| 385.2088       | 3  | K 12 | 1407.6756      | 704.3417        |
| 514.2514       | 4  | E 11 | 1251.5493      | 626.2786        |
| 585.2885       | 5  | A 10 | 1122.5067      | 561.7573        |
| 656.3256       | 6  | A 9  | 1051.4696      | 526.2387        |
| 803.3940       | 7  | F 8  | 980.4325       | 490.7202        |
| 918.4209       | 8  | D 7  | 833.3641       | 417.1860        |
| 1033.4479      | 9  | D 6  | 718.3372       | 359.6725        |
| 1104.4850      | 10 | A 5  | 603.3102       | 302.1590        |
| 1203.5534      | 11 | V 4  | 532.2731       | 266.6405        |
| 1332.5960      | 12 | E 3  | 433.2047       | 217.1063        |
| 1461.6386      | 13 | E 2  | 304.1621       | 152.5850        |
|                | 14 | R 1  | 175.1195       | 88.0637         |

N-term:+43.02 K(3):+156.13

ADKMDMSLDDIIKLNR, MH+ 1976.0197, m/z 659.3448  
 L OSG39 P180811 230811-s1.07712.07712.3.dta

X-range:

-

MassTol: Y-zoom:

MassType:

AVG  MONO

Axis:

1  2

Label:

I  M  -

Ions:

a  +  2+  3+

b  +  2+  3+

c  +  2+  3+

x  +  2+  3+

y  +  2+  3+

z  +  2+  3+

hide H<sub>2</sub>O/NH<sub>3</sub>

zoom 112-122

GO

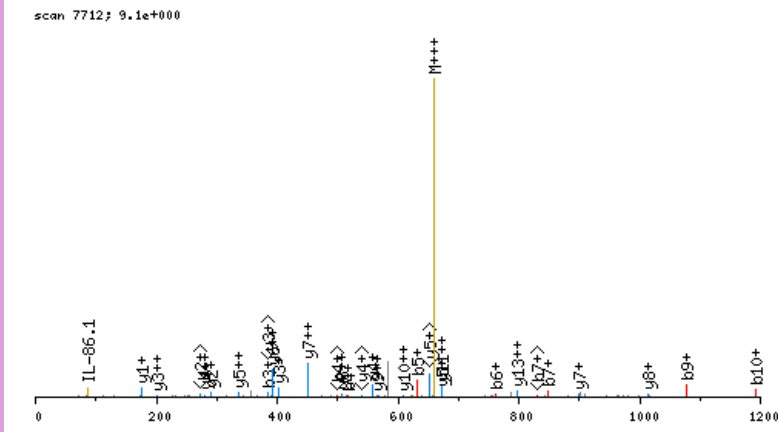

click image to zoom in; click top corners to zoom out [\[precursor±\]](#)

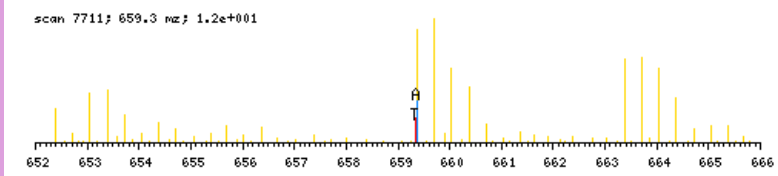

zoomed in precursor plot; T=theoretical m/z, A=acquired m/z

| b <sup>+</sup> | #  | AA # | y <sup>+</sup> | y <sup>2+</sup> |
|----------------|----|------|----------------|-----------------|
| 114.0555       | 1  | A 16 |                |                 |
| 229.0825       | 2  | D 15 | 1862.9721      | 931.9899        |
| 385.2088       | 3  | K 14 | 1747.9451      | 874.4765        |
| 516.2492       | 4  | M 13 | 1591.8188      | 796.4133        |
| 631.2762       | 5  | D 12 | 1460.7783      | 730.8931        |
| 762.3167       | 6  | M 11 | 1345.7514      | 673.3796        |
| 849.3487       | 7  | S 10 | 1214.7109      | 607.8594        |
| 962.4328       | 8  | L 9  | 1127.6789      | 564.3433        |
| 1077.4597      | 9  | D 8  | 1014.5948      | 507.8013        |
| 1192.4866      | 10 | D 7  | 899.5679       | 450.2878        |
| 1305.5707      | 11 | I 6  | 784.5409       | 392.7744        |
| 1418.6548      | 12 | I 5  | 671.4569       | 336.2323        |
| 1574.7811      | 13 | K 4  | 558.3728       | 279.6903        |
| 1687.8651      | 14 | L 3  | 402.2465       | 201.6272        |
| 1801.9081      | 15 | N 2  | 289.1624       | 145.0851        |
|                | 16 | R 1  | 175.1195       | 88.0637         |

N-term:+43.02 K(3):+156.13  
 K(13):+156.13

ADLEEQLSDEEKVR, MH+ 1736.8767, m/z 579.6304  
 L OSG37 P180811 230811-s1.06402.06402.3.dta

X-range:

-

MassTol: Y-zoom:

MassType:

AVG  MONO

Axis:

1  2

Label:

I  M  -

Ions:

a  +  2+  3+

b  +  2+  3+

c  +  2+  3+

x  +  2+  3+

y  +  2+  3+

z  +  2+  3+

hide H<sub>2</sub>O/NH<sub>3</sub>

zoom 112-122

GO

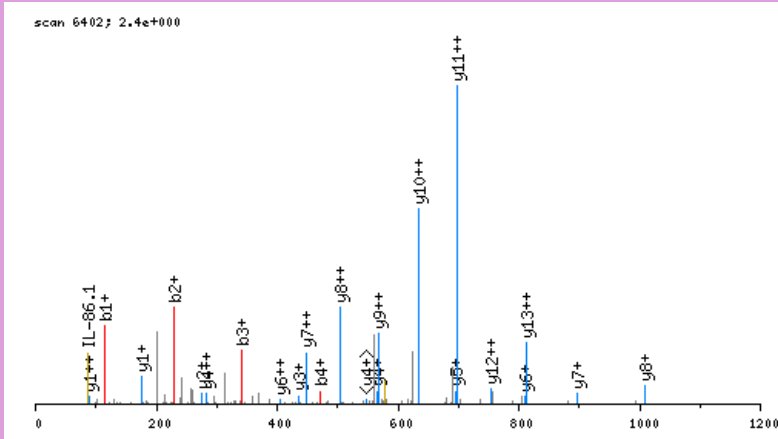

click image to zoom in; click top corners to zoom out [\[precursor±\]](#)

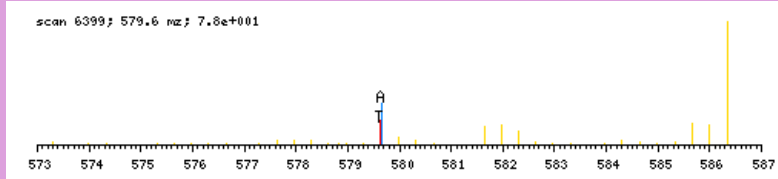

zoomed in precursor plot; T=theoretical m/z, A=acquired m/z

| b <sup>+</sup> | #  | AA # | y <sup>+</sup> | y <sup>2+</sup> |
|----------------|----|------|----------------|-----------------|
| 114.0555       | 1  | A 14 |                |                 |
| 229.0825       | 2  | D 13 | 1623.8290      | 812.4184        |
| 342.1665       | 3  | L 12 | 1508.8021      | 754.9049        |
| 471.2091       | 4  | E 11 | 1395.7180      | 698.3629        |
| 600.2517       | 5  | E 10 | 1266.6754      | 633.8416        |
| 728.3103       | 6  | Q 9  | 1137.6328      | 569.3203        |
| 841.3943       | 7  | L 8  | 1009.5742      | 505.2910        |
| 928.4264       | 8  | S 7  | 896.4902       | 448.7490        |
| 1043.4533      | 9  | D 6  | 809.4581       | 405.2330        |
| 1172.4959      | 10 | E 5  | 694.4312       | 347.7195        |
| 1301.5385      | 11 | E 4  | 565.3886       | 283.1982        |
| 1463.6966      | 12 | K 3  | 436.3460       | 218.6769        |
| 1562.7650      | 13 | V 2  | 274.1879       | 137.5979        |
|                | 14 | R 1  | 175.1195       | 88.0637         |

N-term:+43.02 K(12):+162.16

ADLPPPEEEK, MH+ 1200.6213, m/z 600.8143  
 L OSG37 P180811 230811-s1.02811.02811.2.dta

X-range:

-

MassTol: Y-zoom:

MassType:

AVG  MONO

Axis:

1  2

Label:

I  M  -

Ions:

a  +  2+  3+

b  +  2+  3+

c  +  2+  3+

x  +  2+  3+

y  +  2+  3+

z  +  2+  3+

hide H<sub>2</sub>O/NH<sub>3</sub>

zoom 112-122

GO

scan 2811; 1.9e+001

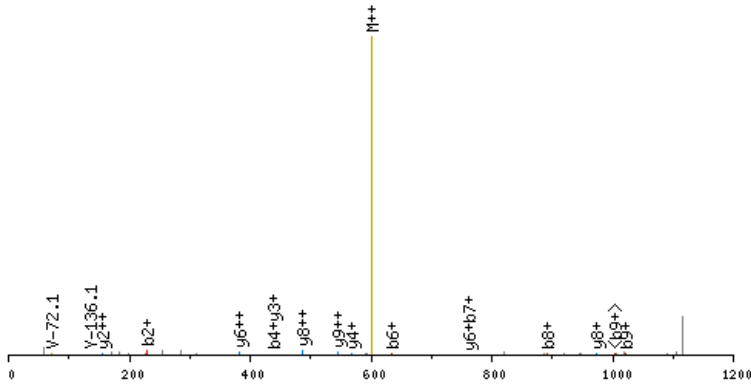

click image to zoom in; click top corners to zoom out [\[precursor±\]](#)

scan 2809; 600.8 m/z; 8.8e+001

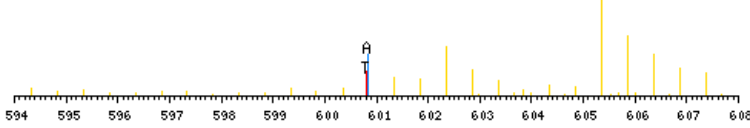

zoomed in precursor plot; T=theoretical m/z, A=acquired m/z

| b <sup>+</sup> | #  | AA # | y <sup>+</sup> | y <sup>2+</sup> |
|----------------|----|------|----------------|-----------------|
| 114.0555       | 1  | A 10 |                |                 |
| 229.0825       | 2  | D 9  | 1087.5736      | 544.2907        |
| 342.1665       | 3  | L 8  | 972.5466       | 486.7772        |
| 439.2193       | 4  | P 7  | 859.4626       | 430.2352        |
| 536.2720       | 5  | P 6  | 762.4098       | 381.7088        |
| 633.3248       | 6  | P 5  | 665.3570       | 333.1824        |
| 762.3674       | 7  | E 4  | 568.3043       | 284.6560        |
| 891.4100       | 8  | E 3  | 439.2617       | 220.1348        |
| 1020.4526      | 9  | E 2  | 310.2191       | 155.6135        |
|                | 10 | K 1  | 181.1765       | 91.0922         |

N-term:+43.02 K(10):+162.16



ADLSLVDALTEPPPEIEGEIKR, MH+ 2462.3031, m/z 821.4392  
L OSG37 P180811 230811-s1.08847.08847.3.dta

X-range:

-

MassTol: Y-zoom:

MassType:

AVG  MONO

Axis:

1  2

Label:

I  M  -

Ions:

a  +  2+  3+

b  +  2+  3+

c  +  2+  3+

x  +  2+  3+

y  +  2+  3+

z  +  2+  3+

hide H<sub>2</sub>O/NH<sub>3</sub>

zoom 112-122

GO

scan 8847; 2.5e+000

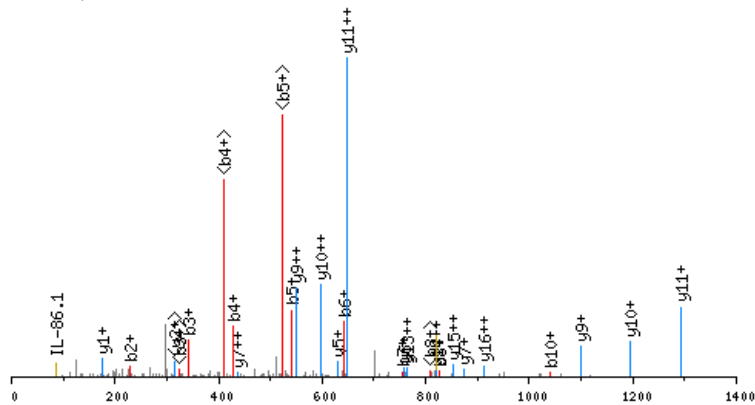

click image to zoom in; click top corners to zoom out [precursor±]

scan 8844; 821.4 mz; 1.5e+001

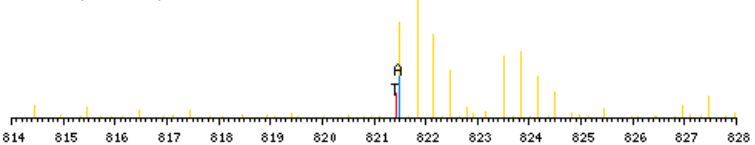

zoomed in precursor plot; T=theoretical m/z, A=acquired m/z

| b <sup>+</sup> | #  | AA | #  | y <sup>+</sup> | y <sup>2+</sup> |
|----------------|----|----|----|----------------|-----------------|
| 114.0555       | 1  | A  | 22 |                |                 |
| 229.0825       | 2  | D  | 21 | 2349.2554      | 1175.1316       |
| 342.1665       | 3  | L  | 20 | 2234.2284      | 1117.6181       |
| 429.1985       | 4  | S  | 19 | 2121.1444      | 1061.0761       |
| 542.2826       | 5  | L  | 18 | 2034.1123      | 1017.5601       |
| 641.3510       | 6  | V  | 17 | 1921.0283      | 961.0180        |
| 756.3780       | 7  | D  | 16 | 1821.9599      | 911.4838        |
| 827.4151       | 8  | A  | 15 | 1706.9329      | 853.9704        |
| 940.4991       | 9  | L  | 14 | 1635.8958      | 818.4518        |
| 1041.5468      | 10 | T  | 13 | 1522.8117      | 761.9098        |
| 1170.5894      | 11 | E  | 12 | 1421.7641      | 711.3859        |
| 1267.6422      | 12 | P  | 11 | 1292.7215      | 646.8646        |
| 1364.6949      | 13 | P  | 10 | 1195.6687      | 598.3383        |
| 1461.7477      | 14 | P  | 9  | 1098.6159      | 549.8119        |
| 1590.7903      | 15 | E  | 8  | 1001.5632      | 501.2855        |
| 1703.8744      | 16 | I  | 7  | 872.5206       | 436.7642        |
| 1832.9170      | 17 | E  | 6  | 759.4365       | 380.2222        |
| 1889.9384      | 18 | G  | 5  | 630.3939       | 315.7009        |
| 2018.9810      | 19 | E  | 4  | 573.3725       | 287.1901        |
| 2132.0651      | 20 | I  | 3  | 444.3299       | 222.6688        |
| 2288.1914      | 21 | K  | 2  | 331.2458       | 166.1268        |
|                | 22 | R  | 1  | 175.1195       | 88.0637         |

N-term:+43.02 K(21):+156.13

ADMQLNVER, MH+ 1117.5312, m/z 559.2692  
 L OSG41 P180811 230811-s1.04907.04907.2.dta

X-range:

-

MassTol: Y-zoom:

MassType:

AVG  MONO

Axis:

1  2

Label:

I  M  -

Ions:

a  +  2+  3+

b  +  2+  3+

c  +  2+  3+

x  +  2+  3+

y  +  2+  3+

z  +  2+  3+

hide H<sub>2</sub>O/NH<sub>3</sub>

zoom 112-122

GO

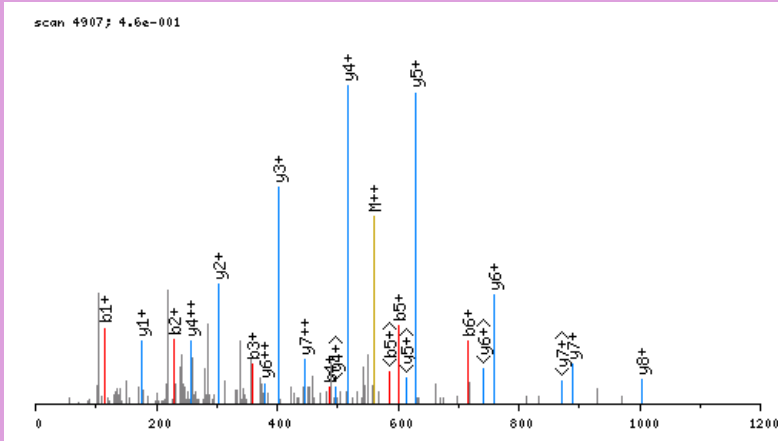

click image to zoom in; click top corners to zoom out [\[precursor±\]](#)

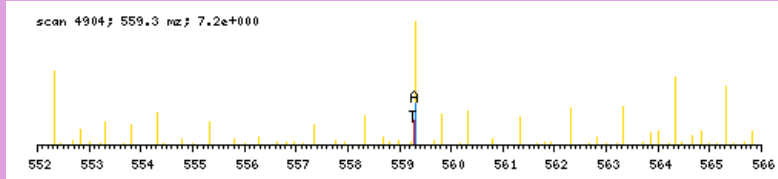

zoomed in precursor plot; T=theoretical m/z, A=acquired m/z

| b <sup>+</sup> | # | AA # | y <sup>+</sup> | y <sup>2+</sup>    |
|----------------|---|------|----------------|--------------------|
| 114.0555       | 1 | A    | 9              |                    |
| 229.0825       | 2 | D    | 8              | 1004.4835 502.7457 |
| 360.1229       | 3 | M    | 7              | 889.4566 445.2322  |
| 488.1815       | 4 | Q    | 6              | 758.4161 379.7120  |
| 602.2244       | 5 | N    | 5              | 630.3575 315.6827  |
| 715.3085       | 6 | L    | 4              | 516.3146 258.6612  |
| 814.3769       | 7 | V    | 3              | 403.2305 202.1192  |
| 943.4195       | 8 | E    | 2              | 304.1621 152.5850  |
|                | 9 | R    | 1              | 175.1195 88.0637   |

N-term:+43.02

ADNAFSFR, MH+ 969.4430, m/z 485.2252  
 L OSG41 P180811 230811-s1.05253.05253.2.dta

X-range:

-

MassTol: Y-zoom:

MassType:

AVG  MONO

Axis:

1  2

Label:

I  M  -

Ions:

a  +  2+  3+

b  +  2+  3+

c  +  2+  3+

x  +  2+  3+

y  +  2+  3+

z  +  2+  3+

hide H<sub>2</sub>O/NH<sub>3</sub>

zoom 112-122

GO

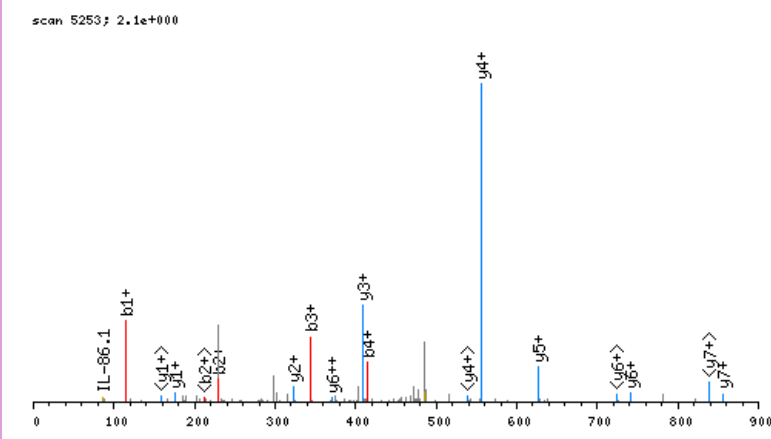

click image to zoom in; click top corners to zoom out [\[precursor±\]](#)

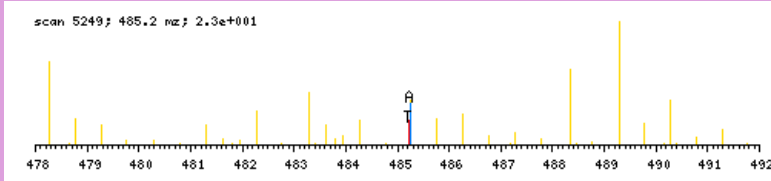

zoomed in precursor plot; T=theoretical m/z, A=acquired m/z

| b <sup>+</sup> | # | AA # | y <sup>+</sup> | y <sup>2+</sup> |
|----------------|---|------|----------------|-----------------|
| 114.0555       | 1 | A 8  |                |                 |
| 229.0825       | 2 | D 7  | 856.3953       | 428.7016        |
| 343.1254       | 3 | N 6  | 741.3684       | 371.1881        |
| 414.1625       | 4 | A 5  | 627.3255       | 314.1666        |
| 561.2309       | 5 | F 4  | 556.2884       | 278.6481        |
| 648.2629       | 6 | S 3  | 409.2199       | 205.1139        |
| 795.3314       | 7 | F 2  | 322.1879       | 161.5979        |
|                | 8 | R 1  | 175.1195       | 88.0637         |

N-term:+43.02

ADNPVLELLLR, MH+ 1294.7371, m/z 647.8722  
 L OSG41 P180811 230811-s1.07763.07763.2.dta

X-range:

-

MassTol: Y-zoom:

MassType:

AVG  MONO

Axis:

1  2

Label:

I  M  -

Ions:

a  +  2+  3+

b  +  2+  3+

c  +  2+  3+

x  +  2+  3+

y  +  2+  3+

z  +  2+  3+

hide H<sub>2</sub>O/NH<sub>3</sub>

zoom 112-122

GO

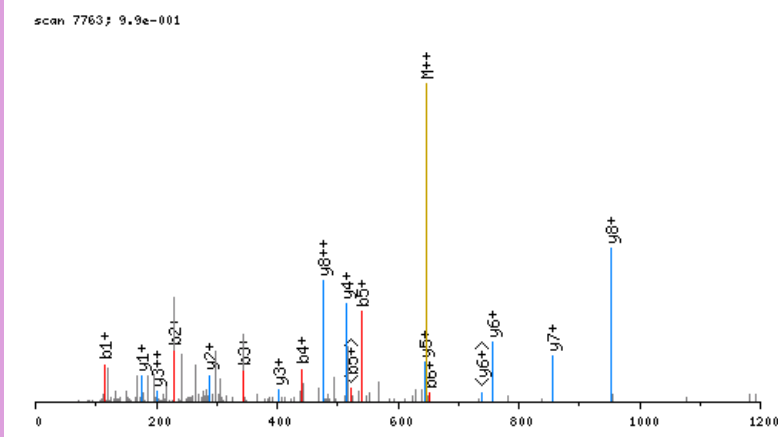

click image to zoom in; click top corners to zoom out [\[precursor±\]](#)

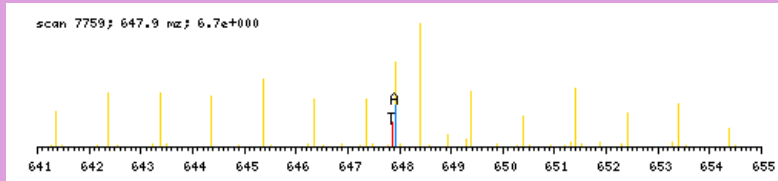

zoomed in precursor plot; T=theoretical m/z, A=acquired m/z

| b <sup>+</sup> | #  | AA # | y <sup>+</sup> | y <sup>2+</sup> |
|----------------|----|------|----------------|-----------------|
| 114.0555       | 1  | A 11 |                |                 |
| 229.0825       | 2  | D 10 | 1181.6894      | 591.3486        |
| 343.1254       | 3  | N 9  | 1066.6625      | 533.8351        |
| 440.1781       | 4  | P 8  | 952.6195       | 476.8137        |
| 539.2466       | 5  | V 7  | 855.5668       | 428.2873        |
| 652.3306       | 6  | L 6  | 756.4983       | 378.7531        |
| 781.3732       | 7  | E 5  | 643.4143       | 322.2111        |
| 894.4573       | 8  | L 4  | 514.3717       | 257.6898        |
| 1007.5413      | 9  | L 3  | 401.2876       | 201.1477        |
| 1120.6254      | 10 | L 2  | 288.2036       | 144.6057        |
|                | 11 | R 1  | 175.1195       | 88.0637         |

N-term:+43.02

ADPEPWSQIGR, MH+ 1384.6497, m/z 692.8285  
 L OSG41 P180811 230811-s1.05887.05887.2.dta

X-range:

-

MassTol: Y-zoom:

MassType:

AVG  MONO

Axis:

1  2

Label:

I  M  -

Ions:

a  +  2+  3+

b  +  2+  3+

c  +  2+  3+

x  +  2+  3+

y  +  2+  3+

z  +  2+  3+

hide H<sub>2</sub>O/NH<sub>3</sub>

zoom 112-122

GO

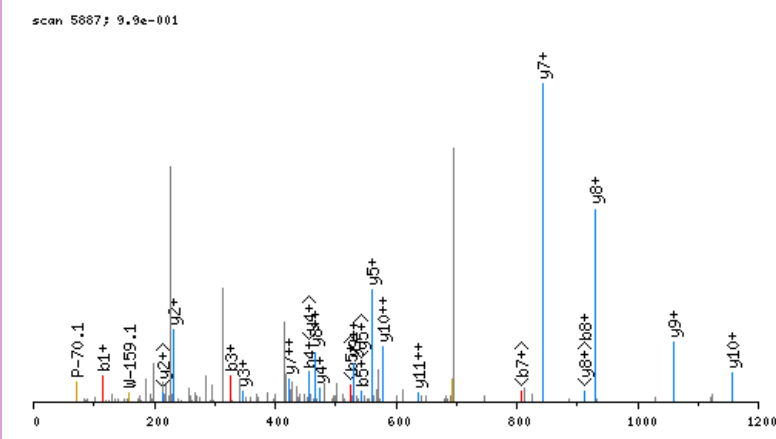

click image to zoom in; click top corners to zoom out [\[precursor±\]](#)

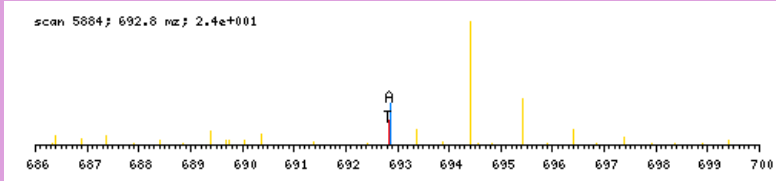

zoomed in precursor plot; T=theoretical m/z, A=acquired m/z

| b <sup>+</sup> | #  | AA # | y <sup>+</sup> | y <sup>2+</sup> |
|----------------|----|------|----------------|-----------------|
| 114.0555       | 1  | A 12 |                |                 |
| 229.0825       | 2  | D 11 | 1271.6020      | 636.3049        |
| 326.1352       | 3  | P 10 | 1156.5751      | 578.7915        |
| 455.1778       | 4  | E 9  | 1059.5223      | 530.2651        |
| 542.2098       | 5  | S 8  | 930.4797       | 465.7438        |
| 639.2626       | 6  | P 7  | 843.4477       | 422.2278        |
| 825.3419       | 7  | W 6  | 746.3949       | 373.7014        |
| 912.3739       | 8  | S 5  | 560.3156       | 280.6617        |
| 1040.4325      | 9  | Q 4  | 473.2836       | 237.1457        |
| 1153.5166      | 10 | I 3  | 345.2250       | 173.1164        |
| 1210.5381      | 11 | G 2  | 232.1410       | 116.5744        |
|                | 12 | R 1  | 175.1195       | 88.0637         |

N-term:+43.02

ADQGAMAAADIAR, MH+ 1302.6112, m/z 651.8093  
 L OSG41 P180811 230811-s1.04670.04670.2.dta

X-range:

-

MassTol: Y-zoom:

MassType:

AVG  MONO

Axis:

1  2

Label:

I  M  -

Ions:

a  +  2+  3+

b  +  2+  3+

c  +  2+  3+

x  +  2+  3+

y  +  2+  3+

z  +  2+  3+

hide H<sub>2</sub>O/NH<sub>3</sub>

zoom 112-122

GO

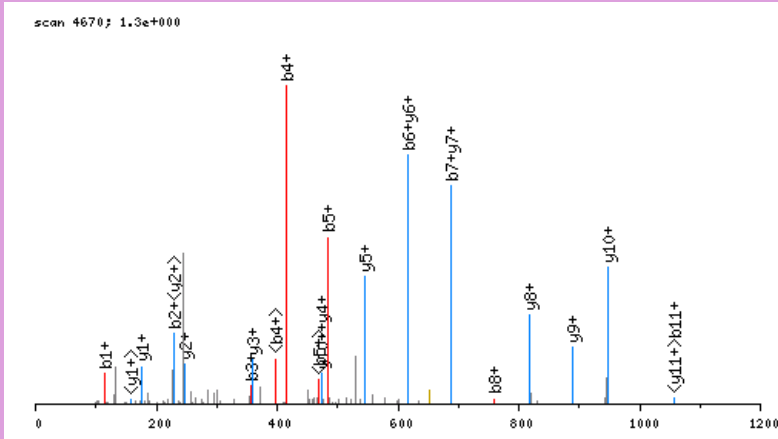

click image to zoom in; click top corners to zoom out [\[precursor±\]](#)

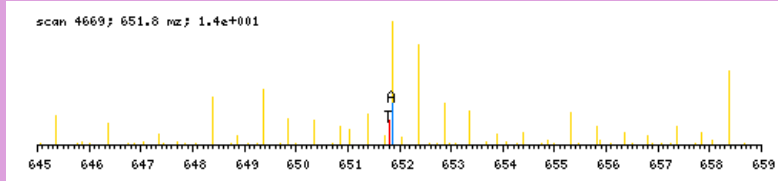

zoomed in precursor plot; T=theoretical m/z, A=acquired m/z

| b <sup>+</sup> | #  | AA # | y <sup>+</sup> | y <sup>2+</sup> |
|----------------|----|------|----------------|-----------------|
| 114.0555       | 1  | A 13 |                |                 |
| 229.0825       | 2  | D 12 | 1189.5635      | 595.2857        |
| 357.1410       | 3  | Q 11 | 1074.5366      | 537.7722        |
| 414.1625       | 4  | G 10 | 946.4780       | 473.7429        |
| 485.1996       | 5  | A 9  | 889.4566       | 445.2322        |
| 616.2401       | 6  | M 8  | 818.4194       | 409.7136        |
| 687.2772       | 7  | A 7  | 687.3790       | 344.1934        |
| 758.3143       | 8  | A 6  | 616.3418       | 308.6748        |
| 829.3514       | 9  | A 5  | 545.3047       | 273.1563        |
| 944.3784       | 10 | D 4  | 474.2676       | 237.6377        |
| 1057.4624      | 11 | I 3  | 359.2407       | 180.1243        |
| 1128.4996      | 12 | A 2  | 246.1566       | 123.5822        |
|                | 13 | R 1  | 175.1195       | 88.0637         |

N-term:+43.02

ADSGPAGGAALAAPAPGPGSGSTGPR, MH+ 2189.0587, m/z 730.3578  
 L OSG41 P180811 230811-s1.04226.04226.3.dta

scan 4226; 5.7e+000

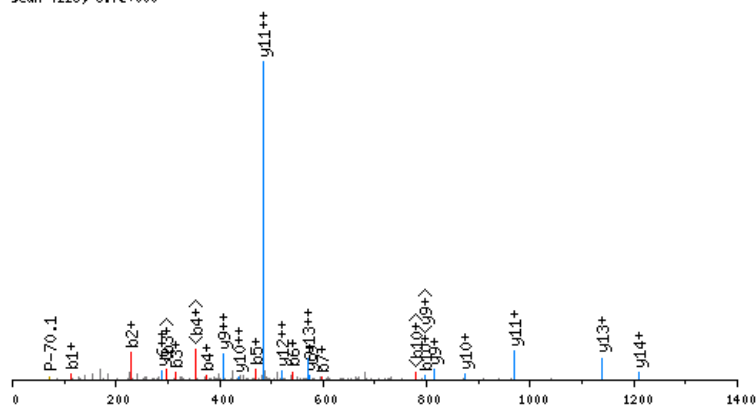

click image to zoom in; click top corners to zoom out [precursor±]

scan 4224; 730.4 mz; 1.3e+001

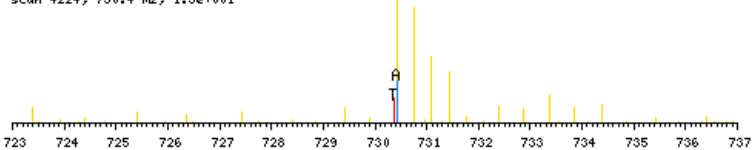

zoomed in precursor plot; T=theoretical m/z, A=acquired m/z

X-range:

-

MassTol: Y-zoom:

MassType:

AVG  MONO

Axis:

1  2

Label:

I  M  -

Ions:

a  +  2+  3+

b  +  2+  3+

c  +  2+  3+

x  +  2+  3+

y  +  2+  3+

z  +  2+  3+

hide H<sub>2</sub>O/NH<sub>3</sub>

zoom 112-122

GO

| b <sup>+</sup> | #  | AA # | y <sup>+</sup> | y <sup>2+</sup> |
|----------------|----|------|----------------|-----------------|
| 114.0555       | 1  | A 26 |                |                 |
| 229.0825       | 2  | D 25 | 2076.0110      | 1038.5094       |
| 316.1145       | 3  | S 24 | 1960.9841      | 980.9960        |
| 373.1359       | 4  | G 23 | 1873.9520      | 937.4799        |
| 470.1887       | 5  | P 22 | 1816.9306      | 908.9692        |
| 541.2258       | 6  | A 21 | 1719.8778      | 860.4428        |
| 598.2473       | 7  | G 20 | 1648.8407      | 824.9243        |
| 655.2688       | 8  | G 19 | 1591.8192      | 796.4135        |
| 726.3059       | 9  | A 18 | 1534.7978      | 767.9028        |
| 797.3430       | 10 | A 17 | 1463.7607      | 732.3842        |
| 910.4270       | 11 | L 16 | 1392.7236      | 696.8657        |
| 981.4642       | 12 | A 15 | 1279.6395      | 640.3237        |
| 1052.5013      | 13 | A 14 | 1208.6024      | 604.8051        |
| 1149.5540      | 14 | P 13 | 1137.5653      | 569.2865        |
| 1220.5912      | 15 | A 12 | 1040.5125      | 520.7602        |
| 1317.6439      | 16 | P 11 | 969.4754       | 485.2416        |
| 1374.6654      | 17 | G 10 | 872.4226       | 436.7152        |
| 1471.7181      | 18 | P 9  | 815.4012       | 408.2045        |
| 1528.7396      | 19 | G 8  | 718.3484       | 359.6781        |
| 1615.7716      | 20 | S 7  | 661.3269       | 331.1674        |
| 1672.7931      | 21 | G 6  | 574.2949       | 287.6514        |
| 1759.8251      | 22 | S 5  | 517.2734       | 259.1406        |
| 1860.8728      | 23 | T 4  | 430.2414       | 215.6246        |
| 1917.8943      | 24 | G 3  | 329.1937       | 165.1008        |
| 2014.9470      | 25 | P 2  | 272.1723       | 136.5900        |
|                | 26 | R 1  | 175.1195       | 88.0637         |

N-term:+43.02

ADTAPQLKR, MH+ 1075.6324, m/z 538.3199  
 L OSG38 P180811 230811-s1.02505.02505.2.dta

X-range:

-

MassTol: Y-zoom:

MassType:

AVG  MONO

Axis:

1  2

Label:

I  M  -

Ions:

a  +  2+  3+

b  +  2+  3+

c  +  2+  3+

x  +  2+  3+

y  +  2+  3+

z  +  2+  3+

hide H<sub>2</sub>O/NH<sub>3</sub>

zoom 112-122

GO

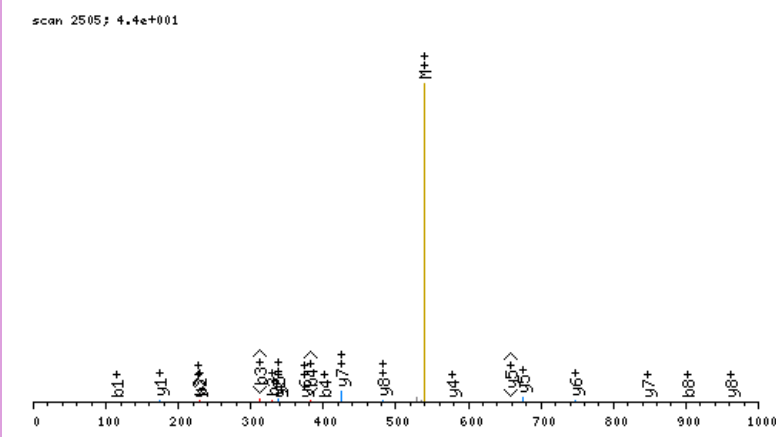

click image to zoom in; click top corners to zoom out [\[precursor±\]](#)

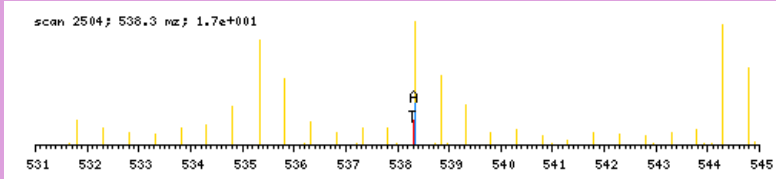

zoomed in precursor plot; T=theoretical m/z, A=acquired m/z

| b <sup>+</sup> | # | AA # | y <sup>+</sup> | y <sup>2+</sup>   |
|----------------|---|------|----------------|-------------------|
| 114.0555       | 1 | A    | 9              |                   |
| 229.0825       | 2 | D    | 8              | 962.5847 481.7963 |
| 330.1301       | 3 | T    | 7              | 847.5578 424.2828 |
| 401.1672       | 4 | A    | 6              | 746.5101 373.7590 |
| 498.2200       | 5 | P    | 5              | 675.4730 338.2404 |
| 626.2786       | 6 | Q    | 4              | 578.4202 289.7140 |
| 739.3627       | 7 | L    | 3              | 450.3617 225.6847 |
| 901.5208       | 8 | K    | 2              | 337.2776 169.1427 |
|                | 9 | R    | 1              | 175.1195 88.0637  |

N-term:+43.02 K(8):+162.16



ADTFLEHMCR, MH+ 1321.5669, m/z 661.2871  
 L OSG38 P180811 230811-s1.06711.06711.2.dta

scan 6711; 5.7e-001

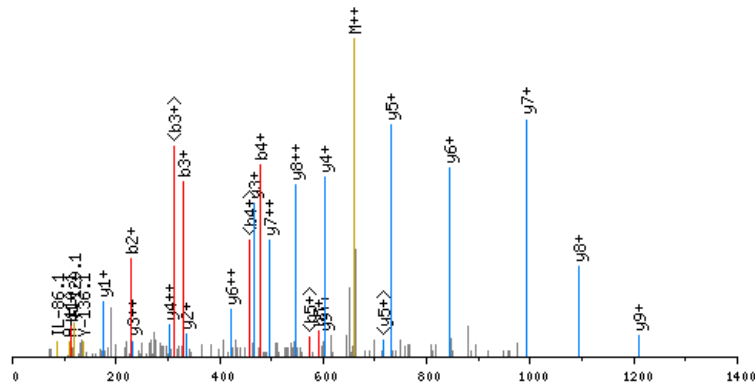

click image to zoom in; click top corners to zoom out [\[precursor±\]](#)

scan 6709; 661.3 m/z; 6.2e+000

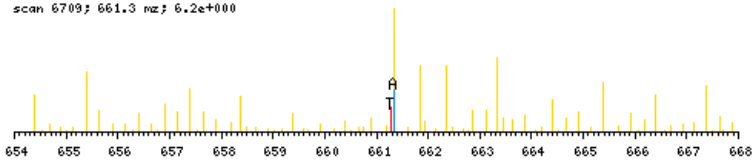

zoomed in precursor plot; T=theoretical m/z, A=acquired m/z

X-range:

-

MassTol: Y-zoom:

MassType:

AVG  MONO

Axis:

1  2

Label:

I  M  -

Ions:

a  +  2+  3+

b  +  2+  3+

c  +  2+  3+

x  +  2+  3+

y  +  2+  3+

z  +  2+  3+

hide H<sub>2</sub>O/NH<sub>3</sub>

zoom 112-122

GO

| b <sup>+</sup> | #  | AA | #  | y <sup>+</sup> | y <sup>2+</sup> |
|----------------|----|----|----|----------------|-----------------|
| 114.0555       | 1  | A  | 10 |                |                 |
| 229.0825       | 2  | D  | 9  | 1208.5192      | 604.7635        |
| 330.1301       | 3  | T  | 8  | 1093.4922      | 547.2500        |
| 477.1985       | 4  | F  | 7  | 992.4446       | 496.7262        |
| 590.2826       | 5  | L  | 6  | 845.3762       | 423.1920        |
| 719.3252       | 6  | E  | 5  | 732.2921       | 366.6500        |
| 856.3841       | 7  | H  | 4  | 603.2495       | 302.1287        |
| 987.4246       | 8  | M  | 3  | 466.1906       | 233.5992        |
| 1147.4552      | 9  | C  | 2  | 335.1501       | 168.0790        |
|                | 10 | R  | 1  | 175.1195       | 88.0637         |

N-term:+43.02 C(9):+160.03

ADTPSVYETR, MH+ 1180.5486, m/z 590.7779  
 L OSG41 P180811 230811-s1.03371.03371.2.dta

X-range:

-

MassTol: Y-zoom:

MassType:

AVG  MONO

Axis:

1  2

Label:

I  M  -

Ions:

a  +  2+  3+

b  +  2+  3+

c  +  2+  3+

x  +  2+  3+

y  +  2+  3+

z  +  2+  3+

hide H<sub>2</sub>O/NH<sub>3</sub>

zoom 112-122

GO

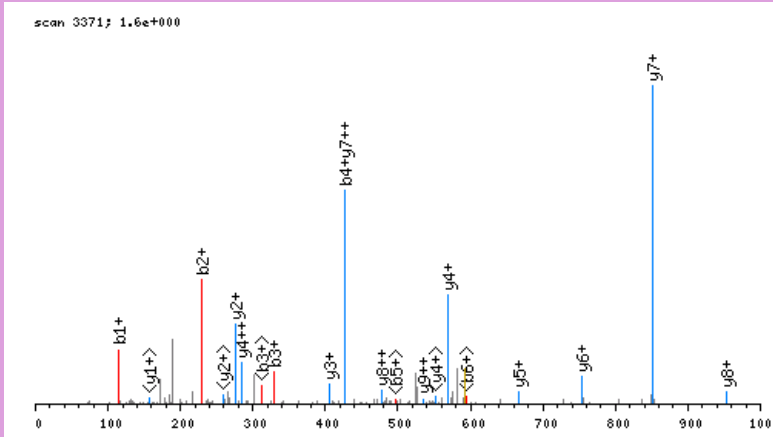

click image to zoom in; click top corners to zoom out [\[precursor±\]](#)

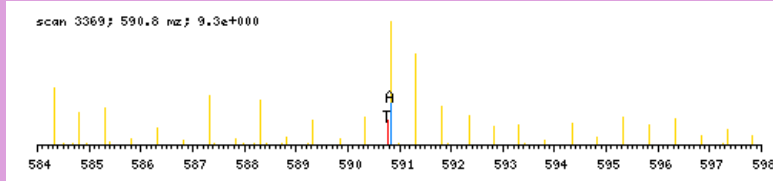

zoomed in precursor plot; T=theoretical m/z, A=acquired m/z

| b <sup>+</sup> | #  | AA # | y <sup>+</sup> | y <sup>2+</sup> |
|----------------|----|------|----------------|-----------------|
| 114.0555       | 1  | A    | 10             |                 |
| 229.0825       | 2  | D    | 9              | 1067.5009       |
| 330.1301       | 3  | T    | 8              | 952.4740        |
| 427.1829       | 4  | P    | 7              | 851.4263        |
| 514.2149       | 5  | S    | 6              | 754.3735        |
| 613.2833       | 6  | V    | 5              | 667.3415        |
| 776.3467       | 7  | Y    | 4              | 568.2731        |
| 905.3893       | 8  | E    | 3              | 405.2098        |
| 1006.4369      | 9  | T    | 2              | 276.1672        |
|                | 10 | R    | 1              | 175.1195        |

N-term:+43.02

ADTQYILPNDIGVSSLDLDCR, MH+ 2179.0341, m/z 727.0162  
 L OSG41 P180811 230811-s1.07180.07180.3.dta

X-range:

-

MassTol: Y-zoom:

MassType:

AVG  MONO

Axis:

1  2

Label:

I  M  -

Ions:

a  +  2+  3+

b  +  2+  3+

c  +  2+  3+

x  +  2+  3+

y  +  2+  3+

z  +  2+  3+

hide H<sub>2</sub>O/NH<sub>3</sub>

zoom 112-122

GO

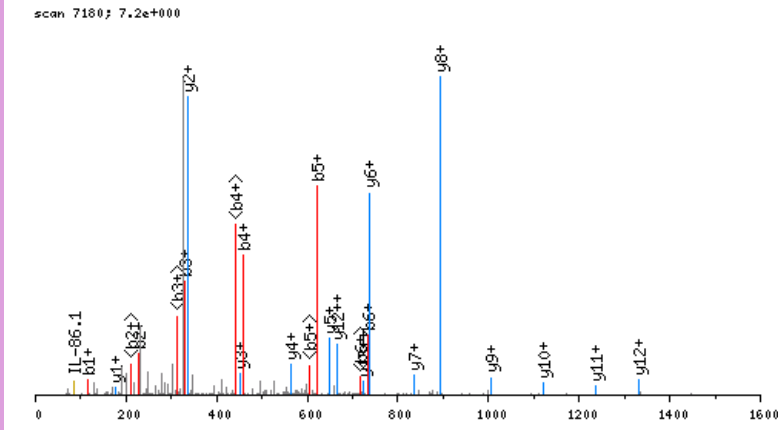

click image to zoom in; click top corners to zoom out [\[precursor±\]](#)

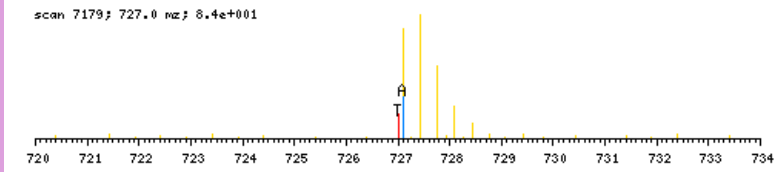

zoomed in precursor plot; T=theoretical m/z, A=acquired m/z

| b <sup>+</sup> | #  | AA | #  | y <sup>+</sup> | y <sup>2+</sup> |
|----------------|----|----|----|----------------|-----------------|
| 114.0555       | 1  | A  | 19 |                |                 |
| 229.0825       | 2  | D  | 18 | 2065.9864      | 1033.4971       |
| 330.1301       | 3  | T  | 17 | 1950.9595      | 975.9836        |
| 458.1887       | 4  | Q  | 16 | 1849.9118      | 925.4598        |
| 621.2520       | 5  | Y  | 15 | 1721.8532      | 861.4305        |
| 734.3361       | 6  | I  | 14 | 1558.7899      | 779.8988        |
| 847.4202       | 7  | L  | 13 | 1445.7058      | 723.3568        |
| 944.4729       | 8  | P  | 12 | 1332.6217      | 666.8148        |
| 1058.5159      | 9  | N  | 11 | 1235.5690      | 618.2884        |
| 1173.5428      | 10 | D  | 10 | 1121.5260      | 561.2669        |
| 1286.6269      | 11 | I  | 9  | 1006.4991      | 503.7535        |
| 1343.6483      | 12 | G  | 8  | 893.4150       | 447.2114        |
| 1442.7167      | 13 | V  | 7  | 836.3936       | 418.7007        |
| 1529.7488      | 14 | S  | 6  | 737.3252       | 369.1665        |
| 1616.7808      | 15 | S  | 5  | 650.2931       | 325.6505        |
| 1729.8649      | 16 | L  | 4  | 563.2611       | 282.1345        |
| 1844.8918      | 17 | D  | 3  | 450.1770       | 225.5924        |
| 2004.9224      | 18 | C  | 2  | 335.1501       | 168.0790        |
|                | 19 | R  | 1  | 175.1195       | 88.0637         |

N-term:+43.02 C(18):+160.03

ADTYAVVQKR, MH+ 1220.6640, m/z 610.8356  
 L OSG37 P180811 230811-s1.03525.03525.2.dta

X-range:

-

MassTol: Y-zoom:

MassType:

AVG  MONO

Axis:

1  2

Label:

I  M  -

Ions:

a  +  2+  3+

b  +  2+  3+

c  +  2+  3+

x  +  2+  3+

y  +  2+  3+

z  +  2+  3+

hide H<sub>2</sub>O/NH<sub>3</sub>

zoom 112-122

GO

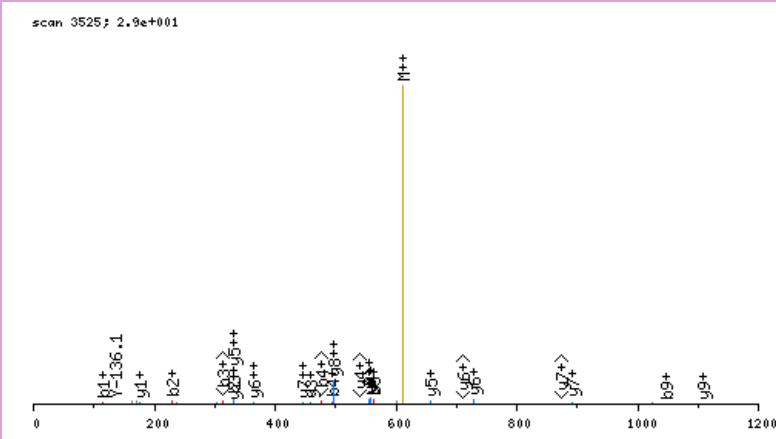

click image to zoom in; click top corners to zoom out [\[precursor±\]](#)

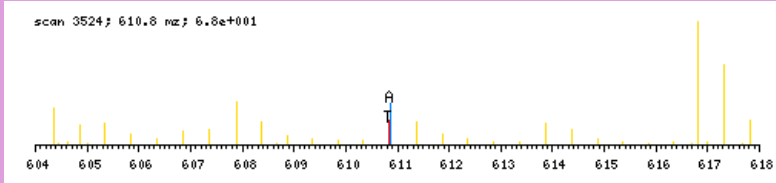

zoomed in precursor plot; T=theoretical m/z, A=acquired m/z

| b <sup>+</sup> | #  | AA # | y <sup>+</sup> | y <sup>2+</sup>    |
|----------------|----|------|----------------|--------------------|
| 114.0555       | 1  | A    | 10             |                    |
| 229.0825       | 2  | D    | 9              | 1107.6163 554.3120 |
| 330.1301       | 3  | T    | 8              | 992.5893 496.7986  |
| 493.1935       | 4  | Y    | 7              | 891.5416 446.2747  |
| 564.2306       | 5  | A    | 6              | 728.4783 364.7431  |
| 663.2990       | 6  | V    | 5              | 657.4412 329.2245  |
| 762.3674       | 7  | V    | 4              | 558.3728 279.6903  |
| 890.4260       | 8  | Q    | 3              | 459.3044 230.1561  |
| 1046.5523      | 9  | K    | 2              | 331.2458 166.1268  |
|                | 10 | R    | 1              | 175.1195 88.0637   |

N-term:+43.02 K(9):+156.13

ADYSTVPPSSGSAGGGGGVVNDAFKDALQR, MH+ 3104.4925, m/z 776.8786  
 L OSG36 P180811 230811-s1.05386.05386.4.dta

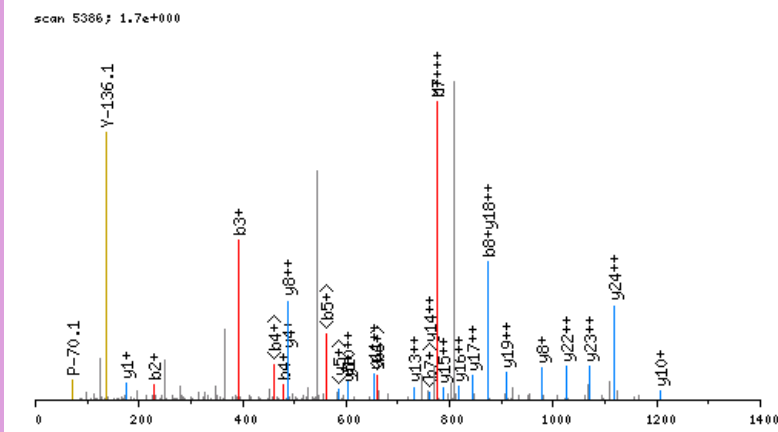

click image to zoom in; click top corners to zoom out [\[precursor±\]](#)

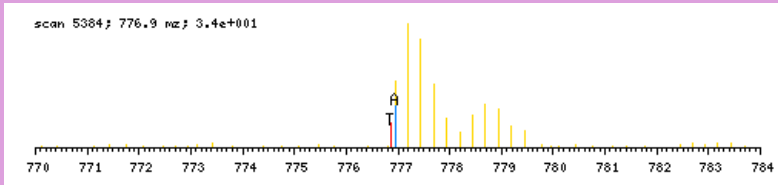

zoomed in precursor plot; T=theoretical m/z, A=acquired m/z

| b <sup>+</sup> | #  | AA | #  | y <sup>+</sup> | y <sup>2+</sup> |
|----------------|----|----|----|----------------|-----------------|
| 114.0555       | 1  | A  | 32 |                |                 |
| 229.0825       | 2  | D  | 31 | 2991.4449      | 1496.2263       |
| 392.1458       | 3  | Y  | 30 | 2876.4179      | 1438.7129       |
| 479.1778       | 4  | S  | 29 | 2713.3546      | 1357.1812       |
| 580.2255       | 5  | T  | 28 | 2626.3226      | 1313.6652       |
| 679.2939       | 6  | V  | 27 | 2525.2749      | 1263.1414       |
| 776.3467       | 7  | P  | 26 | 2426.2065      | 1213.6071       |
| 873.3994       | 8  | P  | 25 | 2329.1537      | 1165.0808       |
| 970.4522       | 9  | P  | 24 | 2232.1009      | 1116.5544       |
| 1057.4842      | 10 | S  | 23 | 2135.0482      | 1068.0280       |
| 1144.5163      | 11 | S  | 22 | 2048.0161      | 1024.5120       |
| 1201.5377      | 12 | G  | 21 | 1960.9841      | 980.9960        |
| 1288.5697      | 13 | S  | 20 | 1903.9627      | 952.4852        |
| 1359.6069      | 14 | A  | 19 | 1816.9306      | 908.9692        |
| 1416.6283      | 15 | G  | 18 | 1745.8935      | 873.4507        |
| 1473.6498      | 16 | G  | 17 | 1688.8720      | 844.9399        |
| 1530.6713      | 17 | G  | 16 | 1631.8506      | 816.4292        |
| 1587.6927      | 18 | G  | 15 | 1574.8291      | 787.9185        |
| 1644.7142      | 19 | G  | 14 | 1517.8077      | 759.4077        |
| 1701.7356      | 20 | G  | 13 | 1460.7862      | 730.8970        |
| 1800.8041      | 21 | V  | 12 | 1403.7647      | 702.3863        |
| 1899.8725      | 22 | V  | 11 | 1304.6963      | 652.8521        |
| 2013.9154      | 23 | N  | 10 | 1205.6279      | 603.3179        |
| 2128.9423      | 24 | D  | 9  | 1091.5850      | 546.2964        |
| 2199.9795      | 25 | A  | 8  | 976.5580       | 488.7829        |
| 2347.0479      | 26 | F  | 7  | 905.5209       | 453.2644        |
| 2503.1742      | 27 | K  | 6  | 758.4525       | 379.7302        |
| 2618.2011      | 28 | D  | 5  | 602.3262       | 301.6670        |
| 2689.2382      | 29 | A  | 4  | 487.2993       | 244.1535        |
| 2802.3223      | 30 | L  | 3  | 416.2621       | 208.6350        |
| 2930.3809      | 31 | Q  | 2  | 303.1781       | 152.0930        |
|                | 32 | R  | 1  | 175.1195       | 88.0637         |

N-term:+43.02 K(27):+156.13

X-range:

-

MassTol: Y-zoom:

MassType:

AVG  MONO

Axis:

1  2

Label:

I  M  -

Ions:

a  +  2+  3+

b  +  2+  3+

c  +  2+  3+

x  +  2+  3+

y  +  2+  3+

z  +  2+  3+

hide H<sub>2</sub>O/NH<sub>3</sub>

zoom 112-122

GO

AEAAIDPR, MH+ 884.4478, m/z 442.7275  
 L OSG41 P180811 230811-s1.03220.03220.2.dta

scan 3220; 4.9e+000

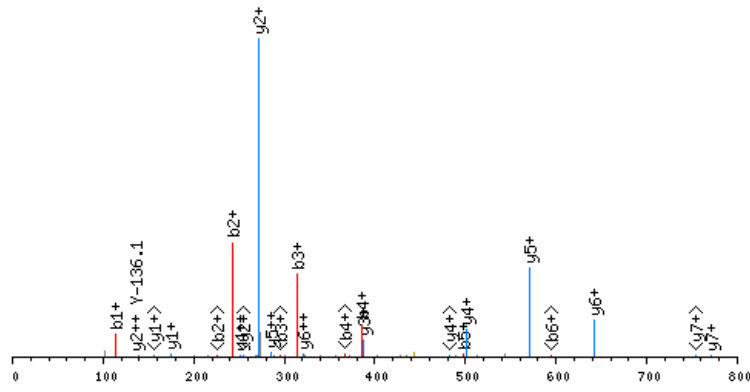

click image to zoom in; click top corners to zoom out [\[precursor±\]](#)

scan 3219; 442.7 m/z; 4.2e+001

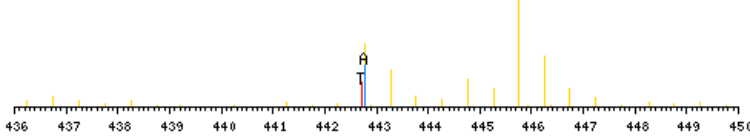

zoomed in precursor plot; T=theoretical m/z, A=acquired m/z

X-range:

-

MassTol: Y-zoom:

MassType:

AVG  MONO

Axis:

1  2

Label:

I  M  -

Ions:

a  +  2+  3+

b  +  2+  3+

c  +  2+  3+

x  +  2+  3+

y  +  2+  3+

z  +  2+  3+

hide H<sub>2</sub>O/NH<sub>3</sub>

zoom 112-122

GO

| b <sup>+</sup> | # | AA # | y <sup>+</sup> | y <sup>2+</sup> |
|----------------|---|------|----------------|-----------------|
| 114.0555       | 1 | A 8  |                |                 |
| 243.0981       | 2 | E 7  | 771.4001       | 386.2040        |
| 314.1352       | 3 | A 6  | 642.3575       | 321.6827        |
| 385.1723       | 4 | A 5  | 571.3204       | 286.1641        |
| 498.2564       | 5 | I 4  | 500.2833       | 250.6455        |
| 613.2833       | 6 | D 3  | 387.1992       | 194.1035        |
| 710.3361       | 7 | P 2  | 272.1723       | 136.5900        |
|                | 8 | R 1  | 175.1195       | 88.0637         |

N-term:+43.02

AEAEAAQLKEEGNR, MH+ 1591.8140, m/z 531.2762  
 L OSG37 P180811 230811-s1.03990.03990.3.dta

X-range:

-

MassTol: Y-zoom:

MassType:

AVG  MONO

Axis:

1  2

Label:

I  M  -

Ions:

a  +  2+  3+

b  +  2+  3+

c  +  2+  3+

x  +  2+  3+

y  +  2+  3+

z  +  2+  3+

hide H<sub>2</sub>O/NH<sub>3</sub>

zoom 112-122

GO

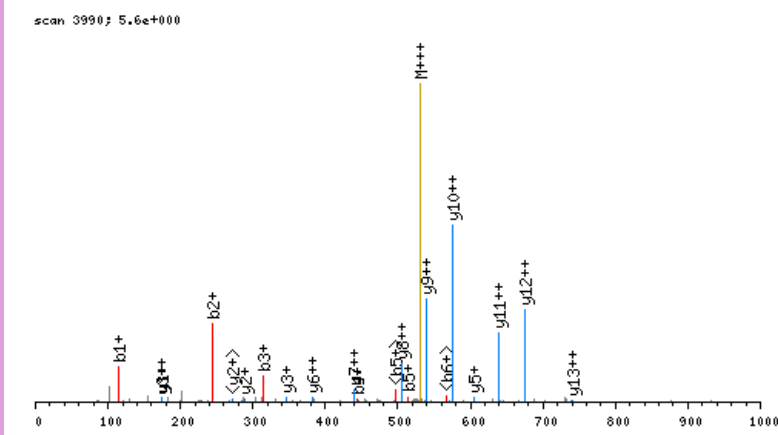

click image to zoom in; click top corners to zoom out [\[precursor±\]](#)

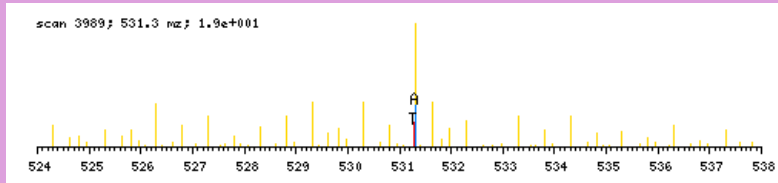

zoomed in precursor plot; T=theoretical m/z, A=acquired m/z

| b <sup>+</sup> | #  | AA # | y <sup>+</sup> | y <sup>2+</sup> |
|----------------|----|------|----------------|-----------------|
| 114.0555       | 1  | A 14 |                |                 |
| 243.0981       | 2  | E 13 | 1478.7663      | 739.8871        |
| 314.1352       | 3  | A 12 | 1349.7238      | 675.3658        |
| 443.1778       | 4  | E 11 | 1278.6866      | 639.8472        |
| 514.2149       | 5  | A 10 | 1149.6440      | 575.3259        |
| 585.2520       | 6  | A 9  | 1078.6069      | 539.8074        |
| 713.3106       | 7  | Q 8  | 1007.5698      | 504.2888        |
| 826.3947       | 8  | L 7  | 879.5112       | 440.2595        |
| 988.5528       | 9  | K 6  | 766.4272       | 383.7175        |
| 1117.5954      | 10 | E 5  | 604.2691       | 302.6385        |
| 1246.6380      | 11 | E 4  | 475.2265       | 238.1172        |
| 1303.6594      | 12 | G 3  | 346.1839       | 173.5959        |
| 1417.7024      | 13 | N 2  | 289.1624       | 145.0851        |
|                | 14 | R 1  | 175.1195       | 88.0637         |

N-term:+43.02 K(9):+162.16

AEAPQVVETDPDFEPLPR, MH+ 2051.9926, m/z 684.6690  
 L OSG41 P180811 230811-s1.06632.06632.3.dta

X-range:

-

MassTol: Y-zoom:

MassType:

AVG  MONO

Axis:

1  2

Label:

I  M  -

Ions:

a  +  2+  3+

b  +  2+  3+

c  +  2+  3+

x  +  2+  3+

y  +  2+  3+

z  +  2+  3+

hide H<sub>2</sub>O/NH<sub>3</sub>

zoom 112-122

GO

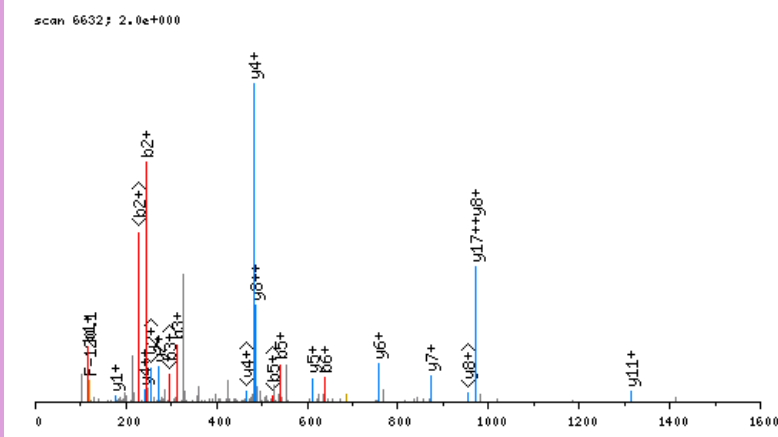

click image to zoom in; click top corners to zoom out [\[precursor±\]](#)

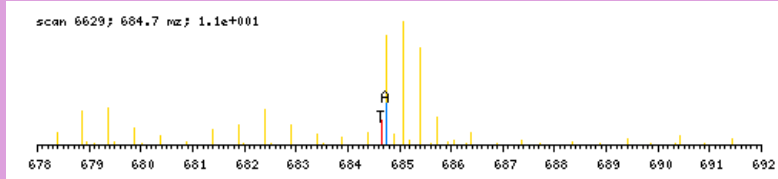

zoomed in precursor plot; T=theoretical m/z, A=acquired m/z

| b <sup>+</sup> | #  | AA | #  | y <sup>+</sup> | y <sup>2+</sup> |
|----------------|----|----|----|----------------|-----------------|
| 114.0555       | 1  | A  | 18 |                |                 |
| 243.0981       | 2  | E  | 17 | 1938.9449      | 969.9764        |
| 314.1352       | 3  | A  | 16 | 1809.9023      | 905.4551        |
| 411.1880       | 4  | P  | 15 | 1738.8652      | 869.9365        |
| 539.2466       | 5  | Q  | 14 | 1641.8124      | 821.4101        |
| 638.3150       | 6  | V  | 13 | 1513.7538      | 757.3808        |
| 737.3834       | 7  | V  | 12 | 1414.6854      | 707.8466        |
| 866.4260       | 8  | E  | 11 | 1315.6170      | 658.3124        |
| 967.4737       | 9  | T  | 10 | 1186.5744      | 593.7911        |
| 1082.5006      | 10 | D  | 9  | 1085.5267      | 543.2673        |
| 1179.5534      | 11 | P  | 8  | 970.4998       | 485.7538        |
| 1294.5803      | 12 | D  | 7  | 873.4470       | 437.2274        |
| 1441.6487      | 13 | F  | 6  | 758.4201       | 379.7140        |
| 1570.6913      | 14 | E  | 5  | 611.3517       | 306.1798        |
| 1667.7441      | 15 | P  | 4  | 482.3091       | 241.6585        |
| 1780.8281      | 16 | L  | 3  | 385.2563       | 193.1321        |
| 1877.8809      | 17 | P  | 2  | 272.1723       | 136.5900        |
|                | 18 | R  | 1  | 175.1195       | 88.0637         |

N-term:+43.02



AEFPSKVSTR, MH+ 1191.6374, m/z 596.3223  
 L OSG37 P180811 230811-s1.03727.03727.2.dta

X-range:

-

MassTol: Y-zoom:

MassType:

AVG  MONO

Axis:

1  2

Label:

I  M  -

Ions:

a  +  2+  3+

b  +  2+  3+

c  +  2+  3+

x  +  2+  3+

y  +  2+  3+

z  +  2+  3+

hide H<sub>2</sub>O/NH<sub>3</sub>

zoom 112-122

GO

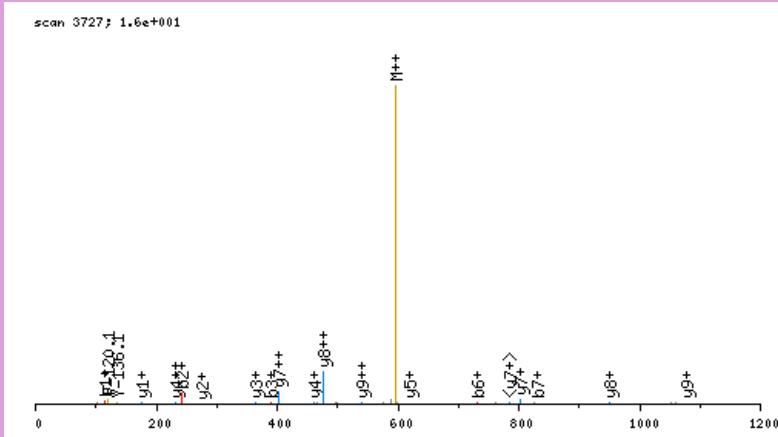

click image to zoom in; click top corners to zoom out [\[precursor±\]](#)

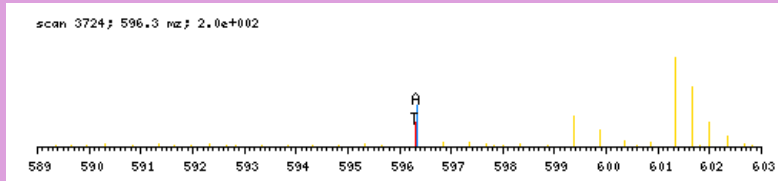

zoomed in precursor plot; T=theoretical m/z, A=acquired m/z

| b <sup>+</sup> | #  | AA # | y <sup>+</sup> | y <sup>2+</sup>    |
|----------------|----|------|----------------|--------------------|
| 114.0555       | 1  | A    | 10             |                    |
| 243.0981       | 2  | E    | 9              | 1078.5897 539.7988 |
| 390.1665       | 3  | F    | 8              | 949.5471 475.2775  |
| 487.2193       | 4  | P    | 7              | 802.4787 401.7433  |
| 574.2513       | 5  | S    | 6              | 705.4260 353.2169  |
| 730.3776       | 6  | K    | 5              | 618.3939 309.7009  |
| 829.4460       | 7  | V    | 4              | 462.2676 231.6377  |
| 916.4781       | 8  | S    | 3              | 363.1992 182.1035  |
| 1017.5257      | 9  | T    | 2              | 276.1672 138.5875  |
|                | 10 | R    | 1              | 175.1195 88.0637   |

N-term:+43.02 K(6):+156.13

AEGEDVGWWR, MH+ 1246.5493, m/z 623.7783  
 L OSG41 P180811 230811-s1.06418.06418.2.dta

X-range:

-

MassTol: Y-zoom:

MassType:

AVG  MONO

Axis:

1  2

Label:

I  M  -

Ions:

a  +  2+  3+

b  +  2+  3+

c  +  2+  3+

x  +  2+  3+

y  +  2+  3+

z  +  2+  3+

hide H<sub>2</sub>O/NH<sub>3</sub>

zoom 112-122

GO

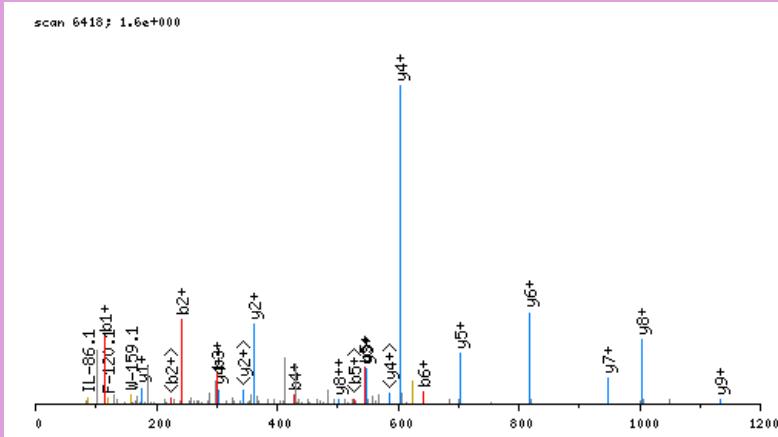

click image to zoom in; click top corners to zoom out [\[precursor±\]](#)

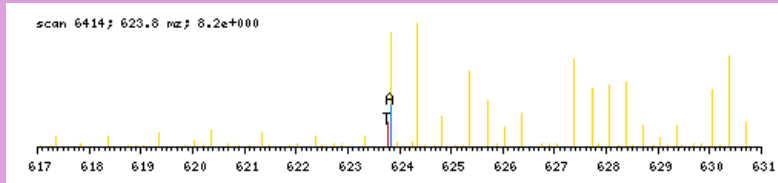

zoomed in precursor plot; T=theoretical m/z, A=acquired m/z

| b <sup>+</sup> | #  | AA # | y <sup>+</sup> | y <sup>2+</sup>    |
|----------------|----|------|----------------|--------------------|
| 114.0555       | 1  | A    | 10             |                    |
| 243.0981       | 2  | E    | 9              | 1133.5016 567.2547 |
| 300.1196       | 3  | G    | 8              | 1004.4590 502.7334 |
| 429.1622       | 4  | E    | 7              | 947.4375 474.2227  |
| 544.1891       | 5  | D    | 6              | 818.3949 409.7014  |
| 643.2575       | 6  | V    | 5              | 703.3680 352.1879  |
| 700.2790       | 7  | G    | 4              | 604.2996 302.6537  |
| 886.3583       | 8  | W    | 3              | 547.2781 274.1430  |
| 1072.4376      | 9  | W    | 2              | 361.1988 181.1033  |
|                | 10 | R    | 1              | 175.1195 88.0637   |

N-term:+43.02

AEGGAADLDTOR, MH+ 1245.5711, m/z 623.2892  
 L OSG41 P180811 230811-s1.02931.02931.2.dta

X-range:

-

MassTol: Y-zoom:

MassType:

AVG  MONO

Axis:

1  2

Label:

I  M  -

Ions:

a  +  2+  3+

b  +  2+  3+

c  +  2+  3+

x  +  2+  3+

y  +  2+  3+

z  +  2+  3+

hide H<sub>2</sub>O/NH<sub>3</sub>

zoom 112-122

GO

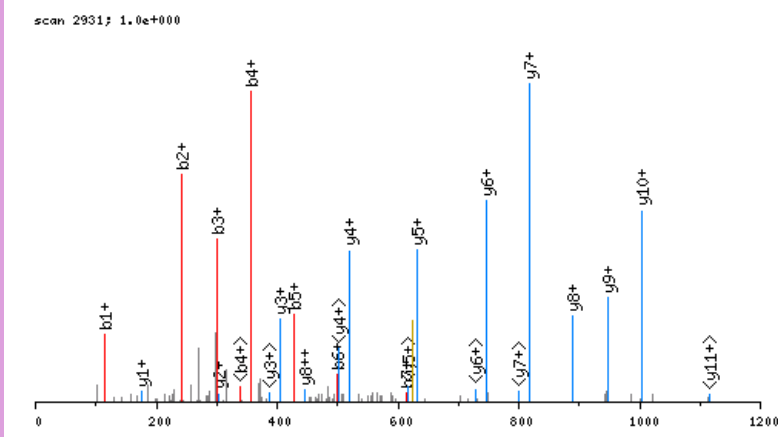

click image to zoom in; click top corners to zoom out [\[precursor±\]](#)

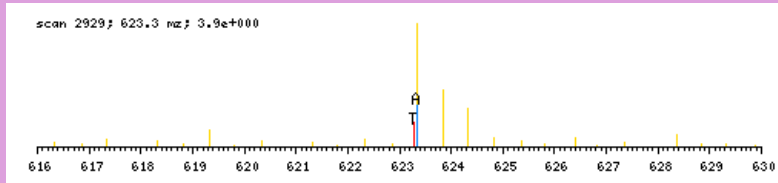

zoomed in precursor plot; T=theoretical m/z, A=acquired m/z

| b <sup>+</sup> | #  | AA # | y <sup>+</sup> | y <sup>2+</sup> |
|----------------|----|------|----------------|-----------------|
| 114.0555       | 1  | A 12 |                |                 |
| 243.0981       | 2  | E 11 | 1132.5235      | 566.7656        |
| 300.1196       | 3  | G 10 | 1003.4809      | 502.2443        |
| 357.1410       | 4  | G 9  | 946.4594       | 473.7336        |
| 428.1781       | 5  | A 8  | 889.4379       | 445.2229        |
| 499.2153       | 6  | A 7  | 818.4008       | 409.7043        |
| 614.2422       | 7  | D 6  | 747.3637       | 374.1858        |
| 727.3263       | 8  | L 5  | 632.3368       | 316.6723        |
| 842.3532       | 9  | D 4  | 519.2527       | 260.1303        |
| 943.4009       | 10 | T 3  | 404.2258       | 202.6168        |
| 1071.4595      | 11 | Q 2  | 303.1781       | 152.0930        |
|                | 12 | R 1  | 175.1195       | 88.0637         |

N-term:+43.02

AEGGQAQQPPQLGPGAAAR, MH+ 1973.9793, m/z 658.6646  
 L OSG41 P180811 230811-s1.03595.03595.3.dta

X-range:

-

MassTol: Y-zoom:

MassType:

AVG  MONO

Axis:

1  2

Label:

I  M  -

Ions:

a  +  2+  3+

b  +  2+  3+

c  +  2+  3+

x  +  2+  3+

y  +  2+  3+

z  +  2+  3+

hide H<sub>2</sub>O/NH<sub>3</sub>

zoom 112-122

GO

scan 3595; 5.6e+000

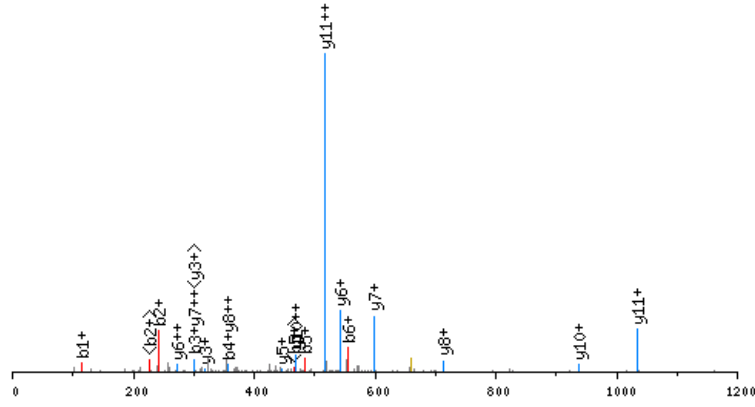

click image to zoom in; click top corners to zoom out [\[precursor±\]](#)

scan 3594; 658.7 m/z; 1.5e+001

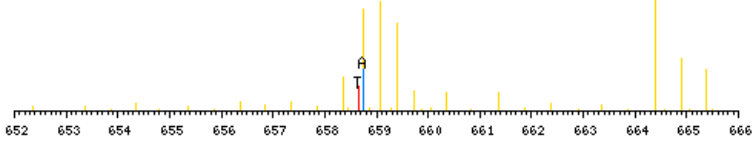

zoomed in precursor plot; T=theoretical m/z, A=acquired m/z

| b <sup>+</sup> | #  | AA | #  | y <sup>+</sup> | y <sup>2+</sup> |
|----------------|----|----|----|----------------|-----------------|
| 114.0555       | 1  | A  | 20 |                |                 |
| 243.0981       | 2  | E  | 19 | 1860.9316      | 930.9697        |
| 300.1196       | 3  | G  | 18 | 1731.8891      | 866.4484        |
| 357.1410       | 4  | G  | 17 | 1674.8676      | 837.9377        |
| 485.1996       | 5  | Q  | 16 | 1617.8461      | 809.4270        |
| 556.2367       | 6  | A  | 15 | 1489.7875      | 745.3977        |
| 684.2953       | 7  | Q  | 14 | 1418.7504      | 709.8791        |
| 812.3539       | 8  | Q  | 13 | 1290.6919      | 645.8498        |
| 940.4125       | 9  | Q  | 12 | 1162.6333      | 581.8206        |
| 1037.4652      | 10 | P  | 11 | 1034.5747      | 517.7913        |
| 1134.5180      | 11 | P  | 10 | 937.5219       | 469.2649        |
| 1262.5766      | 12 | Q  | 9  | 840.4692       | 420.7385        |
| 1375.6606      | 13 | L  | 8  | 712.4106       | 356.7092        |
| 1432.6821      | 14 | G  | 7  | 599.3265       | 300.1672        |
| 1529.7349      | 15 | P  | 6  | 542.3051       | 271.6564        |
| 1586.7563      | 16 | G  | 5  | 445.2523       | 223.1301        |
| 1657.7934      | 17 | A  | 4  | 388.2308       | 194.6193        |
| 1728.8305      | 18 | A  | 3  | 317.1937       | 159.1008        |
| 1799.8677      | 19 | A  | 2  | 246.1566       | 123.5822        |
|                | 20 | R  | 1  | 175.1195       | 88.0637         |

N-term:+43.02

AEGTAVLR, MH+ 858.4685, m/z 429.7379  
 L OSG41 P180811 230811-s1.03291.03291.2.dta

X-range:

-

MassTol: Y-zoom:

MassType:

AVG  MONO

Axis:

1  2

Label:

I  M  -

Ions:

a  +  2+  3+

b  +  2+  3+

c  +  2+  3+

x  +  2+  3+

y  +  2+  3+

z  +  2+  3+

hide H<sub>2</sub>O/NH<sub>3</sub>

zoom 112-122

GO

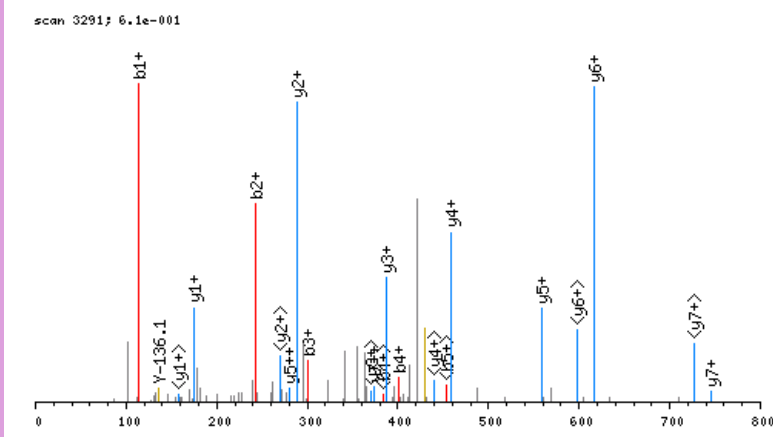

click image to zoom in; click top corners to zoom out [\[precursor±\]](#)

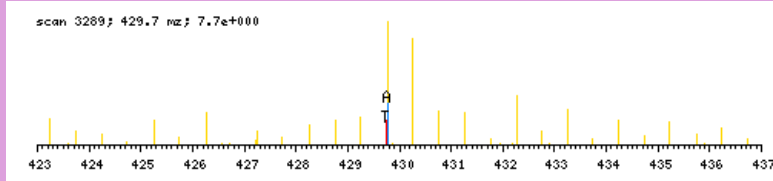

zoomed in precursor plot; T=theoretical m/z, A=acquired m/z

| b <sup>+</sup> | # | AA # | y <sup>+</sup> | y <sup>2+</sup> |
|----------------|---|------|----------------|-----------------|
| 114.0555       | 1 | A 8  |                |                 |
| 243.0981       | 2 | E 7  | 745.4208       | 373.2143        |
| 300.1196       | 3 | G 6  | 616.3782       | 308.6930        |
| 401.1672       | 4 | T 5  | 559.3568       | 280.1823        |
| 472.2044       | 5 | A 4  | 458.3091       | 229.6585        |
| 571.2728       | 6 | V 3  | 387.2720       | 194.1399        |
| 684.3568       | 7 | L 2  | 288.2036       | 144.6057        |
|                | 8 | R 1  | 175.1195       | 88.0637         |

N-term:+43.02

AEKTQKSVKIAPGAVVCVESEIR, MH+ 2643.5604, m/z 661.6456  
 L OSG40 P180811 230811-s1.06266.06266.4.dta

scan 6266; 4.2e+000

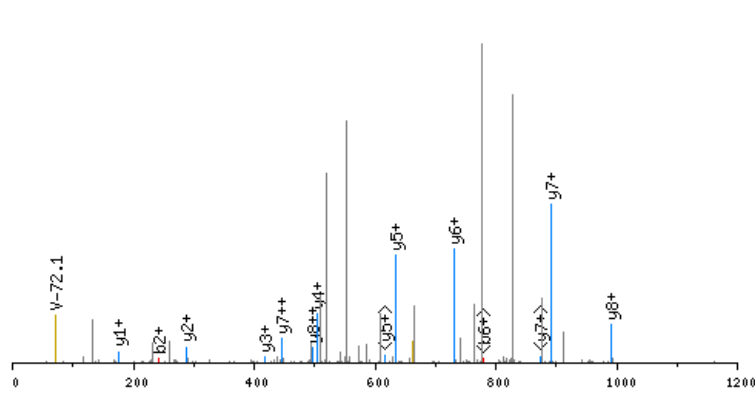

click image to zoom in; click top corners to zoom out [\[precursor±\]](#)

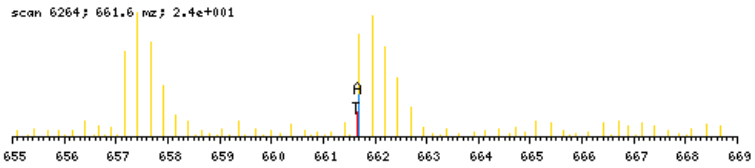

zoomed in precursor plot; T=theoretical m/z, A=acquired m/z

| b <sup>+</sup>  | #  | AA # | y <sup>+</sup>  | y <sup>2+</sup> |
|-----------------|----|------|-----------------|-----------------|
| 114.0555        | 1  | A 23 |                 |                 |
| <b>243.0981</b> | 2  | E 22 | 2530.5127       | 1265.7603       |
| 405.2562        | 3  | K 21 | 2401.4701       | 1201.2390       |
| 506.3039        | 4  | T 20 | 2239.3120       | 1120.1599       |
| 634.3625        | 5  | Q 19 | 2138.2644       | 1069.6361       |
| 796.5206        | 6  | K 18 | 2010.2058       | 1005.6068       |
| 883.5526        | 7  | S 17 | 1848.0477       | 924.5278        |
| 982.6210        | 8  | V 16 | 1761.0157       | 881.0117        |
| 1144.7791       | 9  | K 15 | 1661.9472       | 831.4775        |
| 1257.8632       | 10 | I 14 | 1499.7891       | 750.3985        |
| 1328.9003       | 11 | A 13 | 1386.7051       | 693.8565        |
| 1425.9530       | 12 | P 12 | 1315.6680       | 658.3379        |
| 1482.9745       | 13 | G 11 | 1218.6152       | 609.8115        |
| 1554.0116       | 14 | A 10 | 1161.5937       | 581.3008        |
| 1653.0800       | 15 | V 9  | 1090.5566       | 545.7822        |
| 1752.1485       | 16 | V 8  | <b>991.4882</b> | <b>496.2480</b> |
| 1912.1791       | 17 | C 7  | <b>892.4198</b> | <b>446.7138</b> |
| 2011.2475       | 18 | V 6  | <b>732.3892</b> | 366.6985        |
| 2140.2901       | 19 | E 5  | <b>633.3208</b> | 317.1643        |
| 2227.3221       | 20 | S 4  | <b>504.2782</b> | 252.6430        |
| 2356.3647       | 21 | E 3  | <b>417.2462</b> | 209.1270        |
| 2469.4487       | 22 | I 2  | <b>288.2036</b> | 144.6057        |
|                 | 23 | R 1  | <b>175.1195</b> | 88.0637         |

N-term:+43.02 K(3):+162.16  
 K(6):+162.16 K(9):+162.16  
 C(17):+160.03

X-range:

-

MassTol: Y-zoom:

MassType:

AVG  MONO

Axis:

1  2

Label:

I  M  -

Ions:

a  +  2+  3+

b  +  2+  3+

c  +  2+  3+

x  +  2+  3+

y  +  2+  3+

z  +  2+  3+

hide H<sub>2</sub>O/NH<sub>3</sub>

zoom 112-122

GO

AELEEVTLDGKPLQALR, MH+ 1958.1023, m/z 653.3723  
 L OSG36 P180811 230811-s1.06005.06005.3.dta

X-range:

-

MassTol: Y-zoom:

MassType:

AVG  MONO

Axis:

1  2

Label:

I  M  -

Ions:

a  +  2+  3+

b  +  2+  3+

c  +  2+  3+

x  +  2+  3+

y  +  2+  3+

z  +  2+  3+

hide H<sub>2</sub>O/NH<sub>3</sub>

zoom 112-122

GO

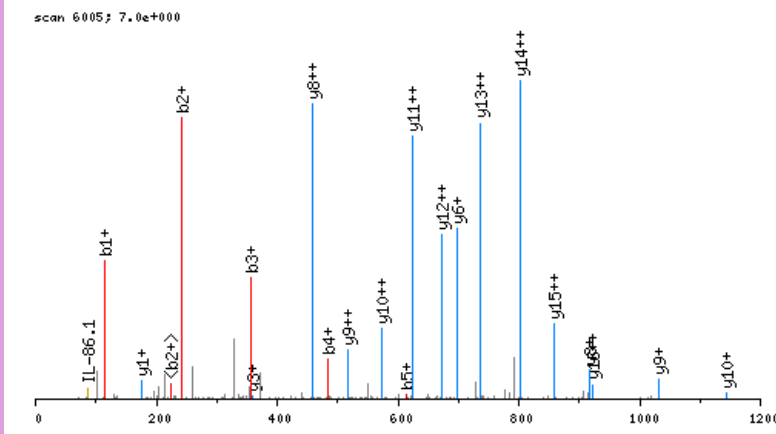

click image to zoom in; click top corners to zoom out [\[precursor±\]](#)

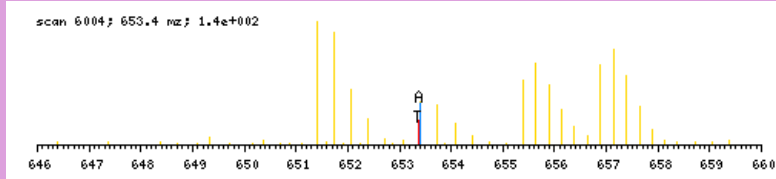

zoomed in precursor plot; T=theoretical m/z, A=acquired m/z

| b <sup>+</sup> | #  | AA # | y <sup>+</sup> | y <sup>2+</sup> |
|----------------|----|------|----------------|-----------------|
| 114.0555       | 1  | A 17 |                |                 |
| 243.0981       | 2  | E 16 | 1845.0546      | 923.0312        |
| 356.1822       | 3  | L 15 | 1716.0120      | 858.5099        |
| 485.2248       | 4  | E 14 | 1602.9279      | 801.9679        |
| 614.2674       | 5  | E 13 | 1473.8853      | 737.4466        |
| 713.3358       | 6  | V 12 | 1344.8427      | 672.9253        |
| 814.3834       | 7  | T 11 | 1245.7743      | 623.3911        |
| 927.4675       | 8  | L 10 | 1144.7267      | 572.8672        |
| 1042.4945      | 9  | D 9  | 1031.6426      | 516.3252        |
| 1099.5159      | 10 | G 8  | 916.6156       | 458.8117        |
| 1261.6740      | 11 | K 7  | 859.5942       | 430.3010        |
| 1358.7268      | 12 | P 6  | 697.4361       | 349.2220        |
| 1471.8108      | 13 | L 5  | 600.3833       | 300.6956        |
| 1599.8694      | 14 | Q 4  | 487.2993       | 244.1535        |
| 1670.9065      | 15 | A 3  | 359.2407       | 180.1243        |
| 1783.9906      | 16 | L 2  | 288.2036       | 144.6057        |
|                | 17 | R 1  | 175.1195       | 88.0637         |

N-term:+43.02 K(11):+162.16

AELQEVQITEEKPLLPQTPEAKEAELAAAR, MH+ 3499.9173, m/z 875.7348  
 L OSG37 P180811 230811-sl.07708.07708.4.dta

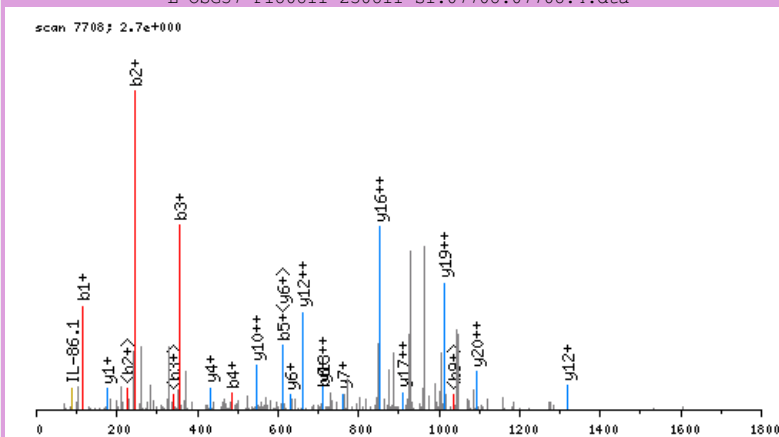

click image to zoom in; click top corners to zoom out [\[precursor±\]](#)

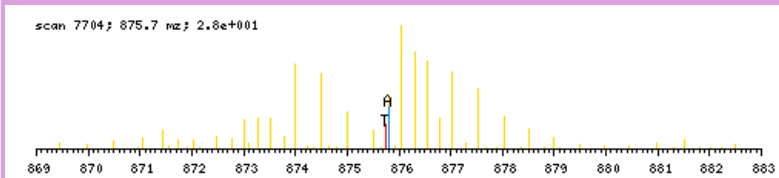

zoomed in precursor plot; T=theoretical m/z, A=acquired m/z

X-range:

-

MassTol: Y-zoom:

MassType:

AVG  MONO

Axis:

1  2

Label:

I  M  -

Ions:

a  +  2+  3+

b  +  2+  3+

c  +  2+  3+

x  +  2+  3+

y  +  2+  3+

z  +  2+  3+

hide H<sub>2</sub>O/NH<sub>3</sub>

zoom 112-122

GO

| b <sup>+</sup> | #  | AA | #  | y <sup>+</sup> | y <sup>2+</sup> |
|----------------|----|----|----|----------------|-----------------|
| 114.0555       | 1  | A  | 31 |                |                 |
| 243.0981       | 2  | E  | 30 | 3386.8696      | 1693.9387       |
| 356.1822       | 3  | L  | 29 | 3257.8270      | 1629.4174       |
| 484.2407       | 4  | Q  | 28 | 3144.7429      | 1572.8754       |
| 613.2833       | 5  | E  | 27 | 3016.6843      | 1508.8461       |
| 712.3518       | 6  | V  | 26 | 2887.6417      | 1444.3248       |
| 840.4103       | 7  | Q  | 25 | 2788.5733      | 1394.7906       |
| 953.4944       | 8  | I  | 24 | 2660.5147      | 1330.7613       |
| 1054.5421      | 9  | T  | 23 | 2547.4307      | 1274.2193       |
| 1183.5847      | 10 | E  | 22 | 2446.3830      | 1223.6954       |
| 1312.6273      | 11 | E  | 21 | 2317.3404      | 1159.1741       |
| 1474.7854      | 12 | K  | 20 | 2188.2978      | 1094.6528       |
| 1571.8381      | 13 | P  | 19 | 2026.1397      | 1013.5738       |
| 1684.9222      | 14 | L  | 18 | 1929.0870      | 965.0474        |
| 1798.0063      | 15 | L  | 17 | 1816.0029      | 908.5054        |
| 1895.0590      | 16 | P  | 16 | 1702.9188      | 851.9633        |
| 1952.0805      | 17 | G  | 15 | 1605.8661      | 803.4369        |
| 2080.1391      | 18 | Q  | 14 | 1548.8446      | 774.9262        |
| 2181.1867      | 19 | T  | 13 | 1420.7860      | 710.8969        |
| 2278.2395      | 20 | P  | 12 | 1319.7383      | 660.3731        |
| 2407.2821      | 21 | E  | 11 | 1222.6856      | 611.8467        |
| 2508.3298      | 22 | T  | 10 | 1093.6430      | 547.3254        |
| 2579.3669      | 23 | A  | 9  | 992.5953       | 496.8016        |
| 2741.5250      | 24 | K  | 8  | 921.5582       | 461.2830        |
| 2870.5676      | 25 | E  | 7  | 759.4001       | 380.2040        |
| 2941.6047      | 26 | A  | 6  | 630.3575       | 315.6827        |
| 3070.6473      | 27 | E  | 5  | 559.3204       | 280.1641        |
| 3183.7314      | 28 | L  | 4  | 430.2778       | 215.6428        |
| 3254.7685      | 29 | A  | 3  | 317.1937       | 159.1008        |
| 3325.8056      | 30 | A  | 2  | 246.1566       | 123.5822        |
|                | 31 | R  | 1  | 175.1195       | 88.0637         |

N-term:+43.02 K(12):+162.16  
 K(24):+162.16



AELVQGQSAPVGMKAEGFVDALHR, MH+ 2580.3245, m/z 645.8366  
 L OSG38 P180811 230811-s1.07555.07555.4.dta

scan 7555; 2.8e+000

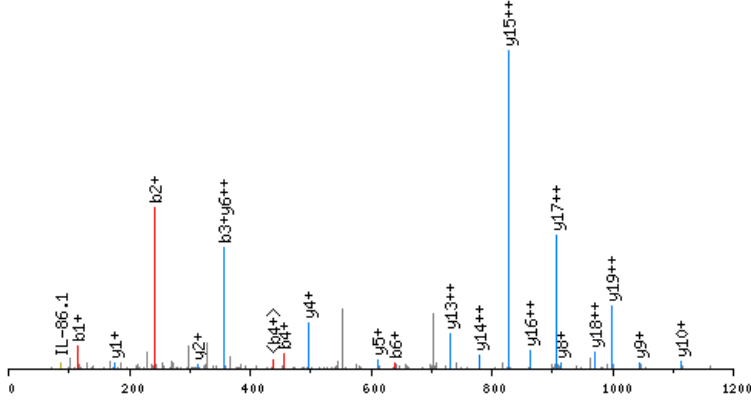

click image to zoom in; click top corners to zoom out [precursor±]

scan 7554; 645.8 mz; 8.4e+000

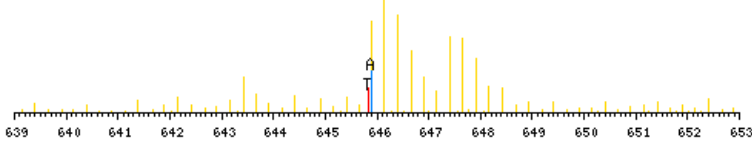

zoomed in precursor plot; T=theoretical m/z, A=acquired m/z

X-range:

-

MassTol: Y-zoom:

MassType:

AVG  MONO

Axis:

1  2

Label:

I  M  -

Ions:

a  +  2+  3+

b  +  2+  3+

c  +  2+  3+

x  +  2+  3+

y  +  2+  3+

z  +  2+  3+

hide H<sub>2</sub>O/NH<sub>3</sub>

zoom 112-122

GO

| b <sup>+</sup> | #  | AA # | y <sup>+</sup> | y <sup>2+</sup> |
|----------------|----|------|----------------|-----------------|
| 114.0555       | 1  | A 24 |                |                 |
| 243.0981       | 2  | E 23 | 2467.2768      | 1234.1423       |
| 356.1822       | 3  | L 22 | 2338.2342      | 1169.6210       |
| 455.2506       | 4  | V 21 | 2225.1501      | 1113.0790       |
| 583.3092       | 5  | Q 20 | 2126.0817      | 1063.5448       |
| 640.3306       | 6  | G 19 | 1998.0231      | 999.5155        |
| 768.3892       | 7  | Q 18 | 1941.0017      | 971.0048        |
| 855.4212       | 8  | S 17 | 1812.9431      | 906.9755        |
| 926.4583       | 9  | A 16 | 1725.9111      | 863.4594        |
| 1023.5111      | 10 | P 15 | 1654.8740      | 827.9409        |
| 1122.5795      | 11 | V 14 | 1557.8212      | 779.4145        |
| 1179.6010      | 12 | G 13 | 1458.7528      | 729.8803        |
| 1310.6415      | 13 | M 12 | 1401.7313      | 701.3696        |
| 1466.7678      | 14 | K 11 | 1270.6908      | 635.8493        |
| 1537.8049      | 15 | A 10 | 1114.5645      | 557.7862        |
| 1666.8475      | 16 | E 9  | 1043.5274      | 522.2676        |
| 1723.8689      | 17 | G 8  | 914.4848       | 457.7463        |
| 1870.9374      | 18 | F 7  | 857.4634       | 429.2356        |
| 1970.0058      | 19 | V 6  | 710.3949       | 355.7014        |
| 2085.0327      | 20 | D 5  | 611.3265       | 306.1672        |
| 2156.0698      | 21 | A 4  | 496.2996       | 248.6537        |
| 2269.1539      | 22 | L 3  | 425.2625       | 213.1352        |
| 2406.2128      | 23 | H 2  | 312.1784       | 156.5931        |
|                | 24 | R 1  | 175.1195       | 88.0637         |

N-term:+43.02 K(14):+156.13

X-range:

-

MassTol: Y-zoom:

MassType:

AVG  MONO

Axis:

1  2

Label:

I  M  -

Ions:

a  +  2+  3+

b  +  2+  3+

c  +  2+  3+

x  +  2+  3+

y  +  2+  3+

z  +  2+  3+

hide H<sub>2</sub>O/NH<sub>3</sub>

zoom 112-122

GO

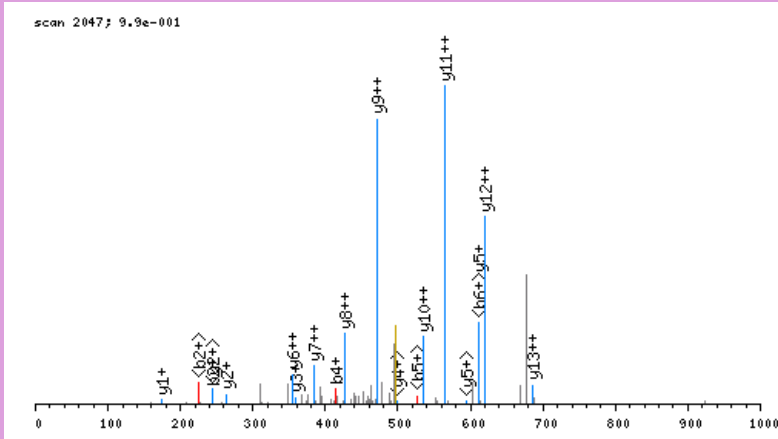

click image to zoom in; click top corners to zoom out [\[precursor±\]](#)

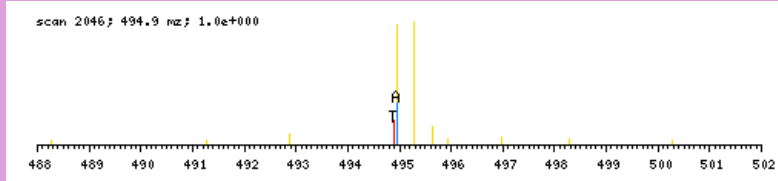

zoomed in precursor plot; T=theoretical m/z, A=acquired m/z

| b <sup>+</sup> | #  | AA # | y <sup>+</sup> | y <sup>2+</sup> |
|----------------|----|------|----------------|-----------------|
| 114.0555       | 1  | A 14 |                |                 |
| 243.0981       | 2  | E 13 | 1369.6460      | 685.3269        |
| 357.1410       | 3  | N 12 | 1240.6034      | 620.8056        |
| 414.1625       | 4  | G 11 | 1126.5605      | 563.7842        |
| 543.2051       | 5  | E 10 | 1069.5390      | 535.2734        |
| 630.2371       | 6  | S 9  | 940.4965       | 470.7521        |
| 717.2691       | 7  | S 8  | 853.4644       | 427.2361        |
| 774.2906       | 8  | G 7  | 766.4324       | 383.7201        |
| 871.3434       | 9  | P 6  | 709.4109       | 355.2094        |
| 968.3961       | 10 | P 5  | 612.3582       | 306.6830        |
| 1124.4973      | 11 | R 4  | 515.3054       | 258.1566        |
| 1221.5500      | 12 | P 3  | 359.2043       | 180.1061        |
| 1308.5820      | 13 | S 2  | 262.1515       | 131.5797        |
|                | 14 | R 1  | 175.1195       | 88.0637         |

N-term:+43.02

AENHCELLPPAPSGLGAGLGGGLCR, MH+ 2545.2291, m/z 849.0812  
 L OSG36 P180811 230811-s1.05596.05596.3.dta

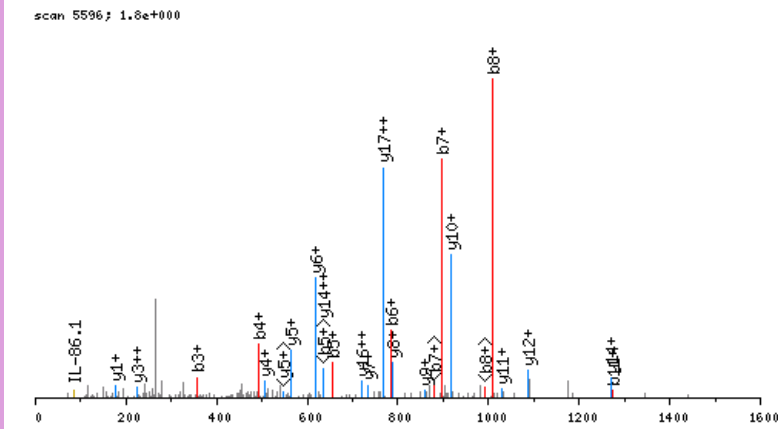

click image to zoom in; click top corners to zoom out [\[precursor±\]](#)

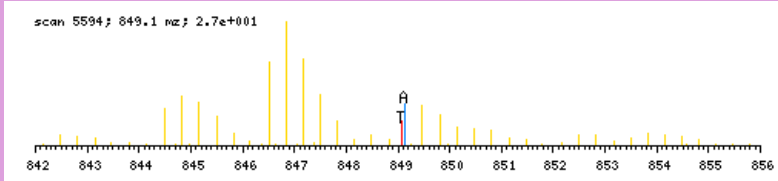

zoomed in precursor plot; T=theoretical m/z, A=acquired m/z

| b <sup>+</sup> | #  | AA # | y <sup>+</sup>   | y <sup>2+</sup> |
|----------------|----|------|------------------|-----------------|
| 114.0555       | 1  | A 25 |                  |                 |
| 243.0981       | 2  | E 24 | 2432.1814        | 1216.5946       |
| 357.1410       | 3  | N 23 | 2303.1388        | 1152.0733       |
| 494.1999       | 4  | H 22 | 2189.0959        | 1095.0518       |
| 654.2305       | 5  | C 21 | 2052.0369        | 1026.5224       |
| 783.2731       | 6  | E 20 | 1892.0063        | 946.5071        |
| 896.3572       | 7  | L 19 | 1762.9638        | 881.9858        |
| 1009.4413      | 8  | L 18 | 1649.8797        | 825.4438        |
| 1106.4940      | 9  | P 17 | 1536.7956        | <b>768.9017</b> |
| 1203.5468      | 10 | P 16 | 1439.7429        | <b>720.3753</b> |
| 1274.5839      | 11 | A 15 | 1342.6901        | 671.8490        |
| 1371.6367      | 12 | P 14 | <b>1271.6530</b> | <b>636.3304</b> |
| 1458.6687      | 13 | S 13 | 1174.6002        | 587.8040        |
| 1515.6902      | 14 | G 12 | <b>1087.5682</b> | 544.2880        |
| 1628.7742      | 15 | L 11 | <b>1030.5467</b> | 515.7773        |
| 1685.7957      | 16 | G 10 | <b>917.4627</b>  | 459.2352        |
| 1756.8328      | 17 | A 9  | <b>860.4412</b>  | 430.7245        |
| 1813.8543      | 18 | G 8  | <b>789.4041</b>  | 395.2060        |
| 1926.9383      | 19 | L 7  | <b>732.3826</b>  | 366.6952        |
| 1983.9598      | 20 | G 6  | <b>619.2986</b>  | 310.1532        |
| 2040.9813      | 21 | G 5  | <b>562.2771</b>  | 281.6425        |
| 2098.0027      | 22 | G 4  | <b>505.2556</b>  | 253.1317        |
| 2211.0868      | 23 | L 3  | 448.2342         | <b>224.6210</b> |
| 2371.1174      | 24 | C 2  | 335.1501         | 168.0790        |
|                | 25 | R 1  | <b>175.1195</b>  | 88.0637         |

N-term:+43.02 C(5):+160.03  
 C(24):+160.03

X-range:

-

MassTol: Y-zoom:

MassType:

AVG  MONO

Axis:

1  2

Label:

I  M  -

Ions:

a  +  2+  3+

b  +  2+  3+

c  +  2+  3+

x  +  2+  3+

y  +  2+  3+

z  +  2+  3+

hide H<sub>2</sub>O/NH<sub>3</sub>

zoom 112-122

GO

AENLLDGPNNPKR, MH+ 1490.7968, m/z 745.9020  
 L OSG37 P180811 230811-s1.05283.05283.2.dta

X-range:

-

MassTol: Y-zoom:

MassType:

AVG  MONO

Axis:

1  2

Label:

I  M  -

Ions:

a  +  2+  3+

b  +  2+  3+

c  +  2+  3+

x  +  2+  3+

y  +  2+  3+

z  +  2+  3+

hide H<sub>2</sub>O/NH<sub>3</sub>

zoom 112-122

GO

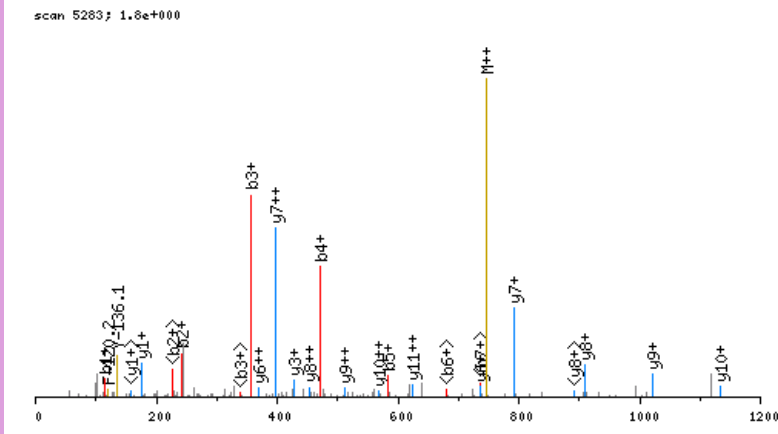

click image to zoom in; click top corners to zoom out [\[precursor±\]](#)

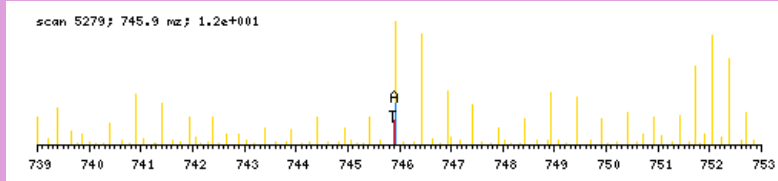

zoomed in precursor plot; T=theoretical m/z, A=acquired m/z

| b <sup>+</sup> | #  | AA # | y <sup>+</sup> | y <sup>2+</sup> |
|----------------|----|------|----------------|-----------------|
| 114.0555       | 1  | A 13 |                |                 |
| 243.0981       | 2  | E 12 | 1377.7491      | 689.3785        |
| 357.1410       | 3  | N 11 | 1248.7065      | 624.8572        |
| 470.2251       | 4  | L 10 | 1134.6636      | 567.8357        |
| 583.3092       | 5  | L 9  | 1021.5795      | 511.2937        |
| 698.3361       | 6  | D 8  | 908.4954       | 454.7516        |
| 755.3576       | 7  | G 7  | 793.4685       | 397.2382        |
| 852.4103       | 8  | P 6  | 736.4470       | 368.7274        |
| 949.4631       | 9  | P 5  | 639.3943       | 320.2010        |
| 1063.5060      | 10 | N 4  | 542.3415       | 271.6747        |
| 1160.5588      | 11 | P 3  | 428.2986       | 214.6532        |
| 1316.6851      | 12 | K 2  | 331.2458       | 166.1268        |
|                | 13 | R 1  | 175.1195       | 88.0637         |

N-term:+43.02 K(12):+156.13

X-range:

-

MassTol: Y-zoom:

MassType:

AVG  MONO

Axis:

1  2

Label:

I  M  -

Ions:

a  +  2+  3+

b  +  2+  3+

c  +  2+  3+

x  +  2+  3+

y  +  2+  3+

z  +  2+  3+

hide H<sub>2</sub>O/NH<sub>3</sub>

zoom 112-122

GO

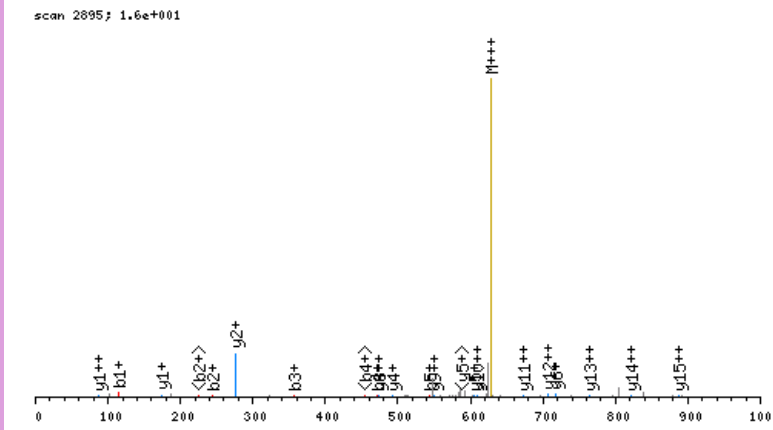

click image to zoom in; click top corners to zoom out [\[precursor±\]](#)

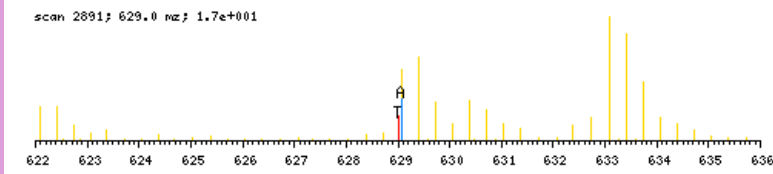

zoomed in precursor plot; T=theoretical m/z, A=acquired m/z

| b <sup>+</sup> | #  | AA # | y <sup>+</sup> | y <sup>2+</sup> |
|----------------|----|------|----------------|-----------------|
| 114.0555       | 1  | A 16 |                |                 |
| 243.0981       | 2  | E 15 | 1771.9667      | 886.4873        |
| 357.1410       | 3  | N 14 | 1642.9241      | 821.9660        |
| 471.1840       | 4  | N 13 | 1528.8812      | 764.9445        |
| 542.2211       | 5  | A 12 | 1414.8383      | 707.9230        |
| 670.2797       | 6  | Q 11 | 1343.8011      | 672.4045        |
| 784.3226       | 7  | N 10 | 1215.7426      | 608.3752        |
| 940.4489       | 8  | K 9  | 1101.6996      | 551.3537        |
| 1011.4860      | 9  | A 8  | 945.5733       | 473.2906        |
| 1167.6123      | 10 | K 7  | 874.5362       | 437.7720        |
| 1280.6964      | 11 | L 6  | 718.4099       | 359.7089        |
| 1393.7804      | 12 | I 5  | 605.3259       | 303.1668        |
| 1480.8125      | 13 | S 4  | 492.2418       | 246.6248        |
| 1609.8550      | 14 | E 3  | 405.2098       | 203.1088        |
| 1710.9027      | 15 | T 2  | 276.1672       | 138.5875        |
|                | 16 | R 1  | 175.1195       | 88.0637         |

N-term:+43.02 K(8):+156.13  
 K(10):+156.13

AENPGLNHR, MH+ 1178.5554, m/z 589.7814  
 L OSG38 P180811 230811-s1.02220.02220.2.dta

X-range:

-

MassTol: Y-zoom:

MassType:

AVG  MONO

Axis:

1  2

Label:

I  M  -

Ions:

a  +  2+  3+

b  +  2+  3+

c  +  2+  3+

x  +  2+  3+

y  +  2+  3+

z  +  2+  3+

hide H<sub>2</sub>O/NH<sub>3</sub>

zoom 112-122

GO

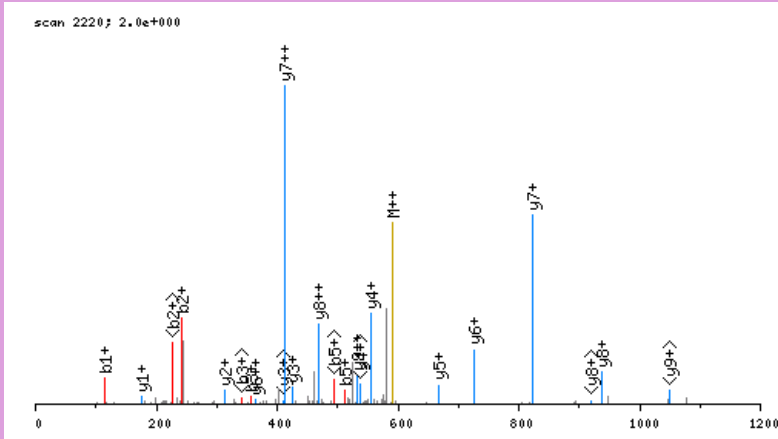

click image to zoom in; click top corners to zoom out [\[precursor±\]](#)

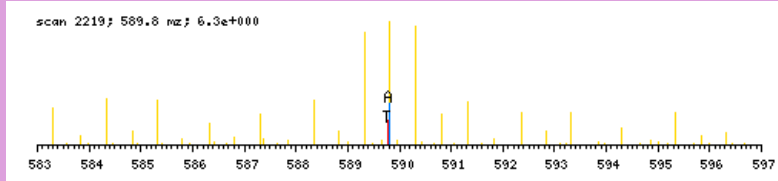

zoomed in precursor plot; T=theoretical m/z, A=acquired m/z

| b <sup>+</sup> | #  | AA # | y <sup>+</sup> | y <sup>2+</sup> |
|----------------|----|------|----------------|-----------------|
| 114.0555       | 1  | A    | 10             |                 |
| 243.0981       | 2  | E    | 9              | 1065.5077       |
| 357.1410       | 3  | N    | 8              | 936.4652        |
| 454.1938       | 4  | P    | 7              | 822.4222        |
| 511.2153       | 5  | G    | 6              | 725.3695        |
| 624.2993       | 6  | L    | 5              | 668.3480        |
| 753.3419       | 7  | E    | 4              | 555.2639        |
| 867.3848       | 8  | N    | 3              | 426.2213        |
| 1004.4438      | 9  | H    | 2              | 312.1784        |
|                | 10 | R    | 1              | 175.1195        |

N-term:+43.02

X-range:

-

MassTol: Y-zoom:

MassType:

AVG  MONO

Axis:

1  2

Label:

I  M  -

Ions:

a  +  2+  3+

b  +  2+  3+

c  +  2+  3+

x  +  2+  3+

y  +  2+  3+

z  +  2+  3+

hide H<sub>2</sub>O/NH<sub>3</sub>

zoom 112-122

GO

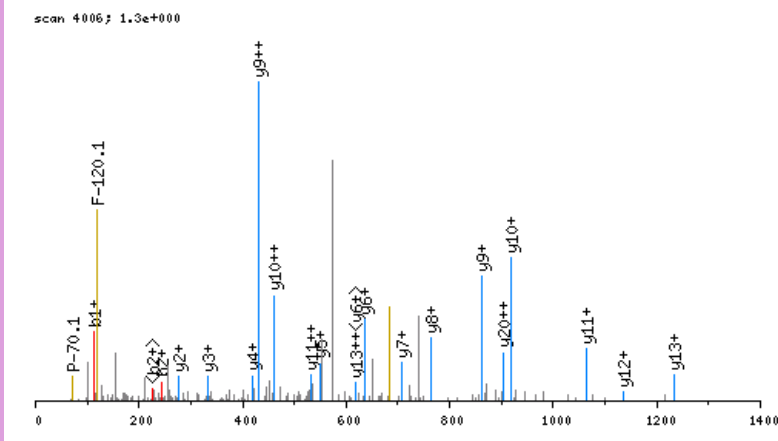

click image to zoom in; click top corners to zoom out [\[precursor±\]](#)

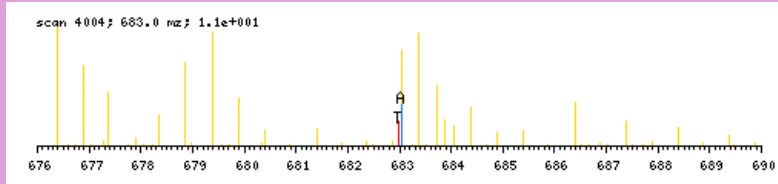

zoomed in precursor plot; T=theoretical m/z, A=acquired m/z

| b <sup>+</sup> | #  | AA # | y <sup>+</sup> | y <sup>2+</sup> |
|----------------|----|------|----------------|-----------------|
| 114.0555       | 1  | A 22 |                |                 |
| 243.0981       | 2  | E 21 | 1933.8528      | 967.4303        |
| 340.1509       | 3  | P 20 | 1804.8102      | 902.9090        |
| 397.1723       | 4  | G 19 | 1707.7574      | 854.3826        |
| 498.2200       | 5  | T 18 | 1650.7360      | 825.8719        |
| 555.2415       | 6  | G 17 | 1549.6883      | 775.3481        |
| 642.2735       | 7  | S 16 | 1492.6668      | 746.8373        |
| 699.2950       | 8  | G 15 | 1405.6348      | 703.3213        |
| 814.3219       | 9  | D 14 | 1348.6133      | 674.8106        |
| 911.3747       | 10 | P 13 | 1233.5864      | 617.2971        |
| 982.4118       | 11 | A 12 | 1136.5336      | 568.7707        |
| 1129.4802      | 12 | F 11 | 1065.4965      | 533.2522        |
| 1186.5017      | 13 | G 10 | 918.4281       | 459.7180        |
| 1283.5544      | 14 | P 9  | 861.4066       | 431.2072        |
| 1340.5759      | 15 | G 8  | 764.3539       | 382.6808        |
| 1411.6130      | 16 | A 7  | 707.3324       | 354.1701        |
| 1498.6450      | 17 | S 6  | 636.2953       | 318.6516        |
| 1627.6876      | 18 | E 5  | 549.2633       | 275.1355        |
| 1714.7197      | 19 | S 4  | 420.2207       | 210.6142        |
| 1771.7411      | 20 | G 3  | 333.1886       | 167.0982        |
| 1872.7888      | 21 | T 2  | 276.1672       | 138.5875        |
|                | 22 | R 1  | 175.1195       | 88.0637         |

N-term:+43.02

AEPWGNELASAAAR, MH+ 1484.7134, m/z 742.8603  
 L OSG41 P180811 230811-s1.06333.06333.2.dta

X-range:

-

MassTol: Y-zoom:

MassType:

AVG  MONO

Axis:

1  2

Label:

I  M  -

Ions:

a  +  2+  3+

b  +  2+  3+

c  +  2+  3+

x  +  2+  3+

y  +  2+  3+

z  +  2+  3+

hide H<sub>2</sub>O/NH<sub>3</sub>

zoom 112-122

GO

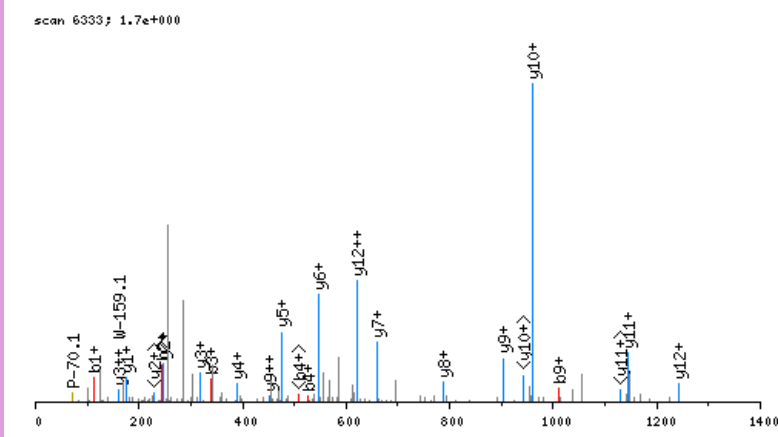

click image to zoom in; click top corners to zoom out [\[precursor±\]](#)

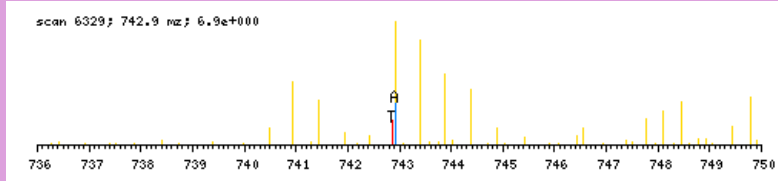

zoomed in precursor plot; T=theoretical m/z, A=acquired m/z

| b <sup>+</sup> | #  | AA # | y <sup>+</sup> | y <sup>2+</sup> |
|----------------|----|------|----------------|-----------------|
| 114.0555       | 1  | A 14 |                |                 |
| 243.0981       | 2  | E 13 | 1371.6657      | 686.3368        |
| 340.1509       | 3  | P 12 | 1242.6231      | 621.8155        |
| 526.2302       | 4  | W 11 | 1145.5703      | 573.2891        |
| 583.2516       | 5  | G 10 | 959.4910       | 480.2494        |
| 697.2946       | 6  | N 9  | 902.4696       | 451.7387        |
| 826.3372       | 7  | E 8  | 788.4266       | 394.7172        |
| 939.4212       | 8  | L 7  | 659.3840       | 330.1959        |
| 1010.4583      | 9  | A 6  | 546.3000       | 273.6539        |
| 1097.4904      | 10 | S 5  | 475.2629       | 238.1353        |
| 1168.5275      | 11 | A 4  | 388.2308       | 194.6193        |
| 1239.5646      | 12 | A 3  | 317.1937       | 159.1008        |
| 1310.6017      | 13 | A 2  | 246.1566       | 123.5822        |
|                | 14 | R 1  | 175.1195       | 88.0637         |

N-term:+43.02



AEQVALSR, MH+ 915.4900, m/z 458.2486  
 L OSG41 P180811 230811-s1.03360.03360.2.dta

X-range:

-

MassTol: Y-zoom:

MassType:

AVG  MONO

Axis:

1  2

Label:

I  M  -

Ions:

a  +  2+  3+

b  +  2+  3+

c  +  2+  3+

x  +  2+  3+

y  +  2+  3+

z  +  2+  3+

hide H<sub>2</sub>O/NH<sub>3</sub>

zoom 112-122

GO

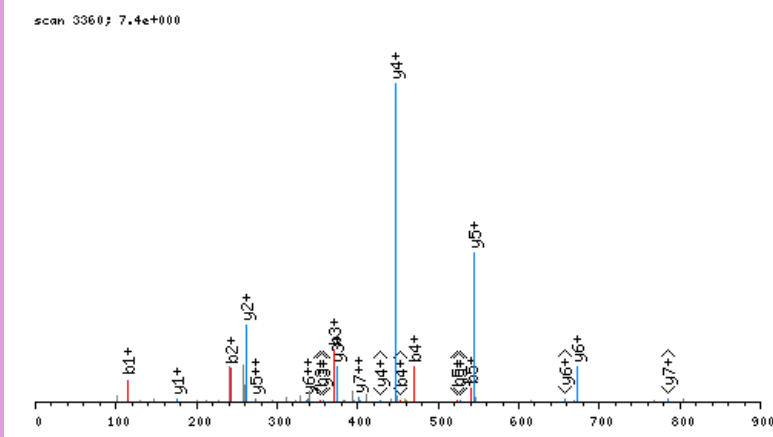

click image to zoom in; click top corners to zoom out [\[precursor±\]](#)

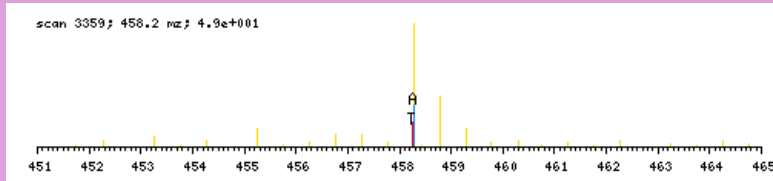

zoomed in precursor plot; T=theoretical m/z, A=acquired m/z

| b <sup>+</sup> | # | AA # | y <sup>+</sup> | y <sup>2+</sup> |
|----------------|---|------|----------------|-----------------|
| 114.0555       | 1 | A 8  |                |                 |
| 243.0981       | 2 | E 7  | 802.4423       | 401.7251        |
| 371.1567       | 3 | Q 6  | 673.3997       | 337.2038        |
| 470.2251       | 4 | V 5  | 545.3411       | 273.1745        |
| 541.2622       | 5 | A 4  | 446.2727       | 223.6403        |
| 654.3463       | 6 | L 3  | 375.2356       | 188.1217        |
| 741.3783       | 7 | S 2  | 262.1515       | 131.5797        |
|                | 8 | R 1  | 175.1195       | 88.0637         |

N-term:+43.02

AERPEDLNLPNAVITR, MH+ 1849.9772, m/z 617.3306  
 L OSG37 P180811 230811-s1.06716.06716.3.dta

X-range:

-

MassTol: Y-zoom:

MassType:

AVG  MONO

Axis:

1  2

Label:

I  M  -

Ions:

a  +  2+  3+

b  +  2+  3+

c  +  2+  3+

x  +  2+  3+

y  +  2+  3+

z  +  2+  3+

hide H<sub>2</sub>O/NH<sub>3</sub>

zoom 112-122

GO

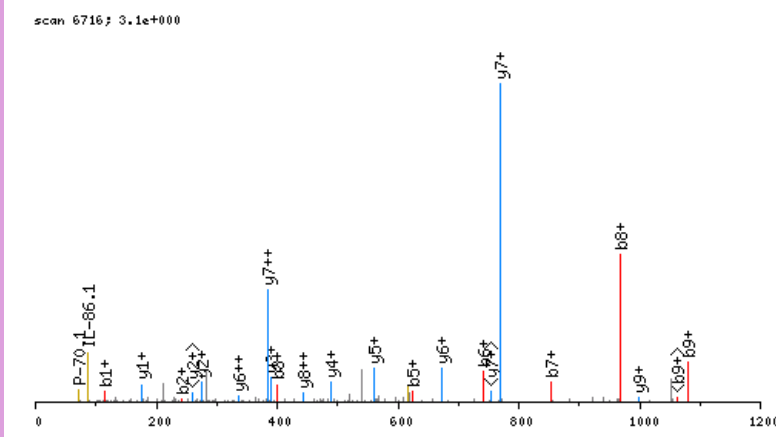

click image to zoom in; click top corners to zoom out [\[precursor±\]](#)

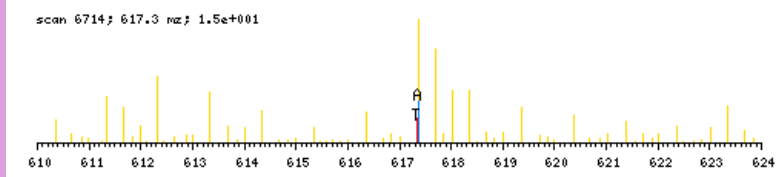

zoomed in precursor plot; T=theoretical m/z, A=acquired m/z

| b <sup>+</sup> | #  | AA # | y <sup>+</sup> | y <sup>2+</sup> |
|----------------|----|------|----------------|-----------------|
| 114.0555       | 1  | A 16 |                |                 |
| 243.0981       | 2  | E 15 | 1736.9295      | 868.9687        |
| 399.1992       | 3  | R 14 | 1607.8869      | 804.4474        |
| 496.2520       | 4  | P 13 | 1451.7858      | 726.3968        |
| 625.2946       | 5  | E 12 | 1354.7331      | 677.8704        |
| 740.3215       | 6  | D 11 | 1225.6905      | 613.3491        |
| 853.4056       | 7  | L 10 | 1110.6635      | 555.8357        |
| 967.4485       | 8  | N 9  | 997.5795       | 499.2936        |
| 1080.5326      | 9  | L 8  | 883.5365       | 442.2722        |
| 1177.5853      | 10 | P 7  | 770.4525       | 385.7301        |
| 1291.6283      | 11 | N 6  | 673.3997       | 337.2038        |
| 1362.6654      | 12 | A 5  | 559.3568       | 280.1823        |
| 1461.7338      | 13 | V 4  | 488.3197       | 244.6637        |
| 1574.8179      | 14 | I 3  | 389.2512       | 195.1295        |
| 1675.8655      | 15 | T 2  | 276.1672       | 138.5875        |
|                | 16 | R 1  | 175.1195       | 88.0637         |

N-term:+43.02

AESDWDTVTVLR, MH+ 1433.6913, m/z 717.3493  
 L OSG41 P180811 230811-s1.06840.06840.2.dta

X-range:

-

MassTol: Y-zoom:

MassType:

AVG  MONO

Axis:

1  2

Label:

I  M  -

Ions:

a  +  2+  3+

b  +  2+  3+

c  +  2+  3+

x  +  2+  3+

y  +  2+  3+

z  +  2+  3+

hide H<sub>2</sub>O/NH<sub>3</sub>

zoom 112-122

GO

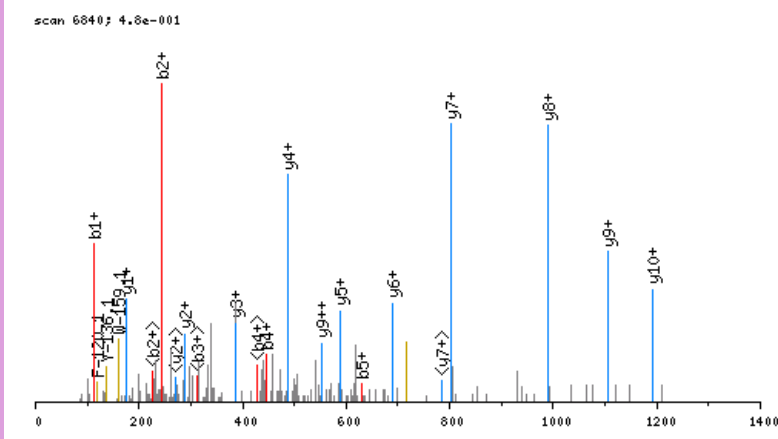

click image to zoom in; click top corners to zoom out [\[precursor±\]](#)

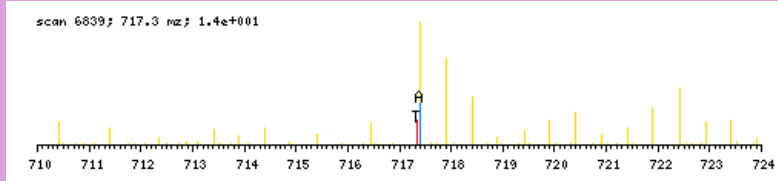

zoomed in precursor plot; T=theoretical m/z, A=acquired m/z

| b <sup>+</sup> | #  | AA # | y <sup>+</sup> | y <sup>2+</sup> |
|----------------|----|------|----------------|-----------------|
| 114.0555       | 1  | A 12 |                |                 |
| 243.0981       | 2  | E 11 | 1320.6436      | 660.8257        |
| 330.1301       | 3  | S 10 | 1191.6010      | 596.3044        |
| 445.1571       | 4  | D 9  | 1104.5689      | 552.7884        |
| 631.2364       | 5  | W 8  | 989.5420       | 495.2749        |
| 746.2633       | 6  | D 7  | 803.4627       | 402.2353        |
| 847.3110       | 7  | T 6  | 688.4357       | 344.7218        |
| 946.3794       | 8  | V 5  | 587.3881       | 294.1979        |
| 1047.4271      | 9  | T 4  | 488.3197       | 244.6637        |
| 1146.4955      | 10 | V 3  | 387.2720       | 194.1399        |
| 1259.5796      | 11 | L 2  | 288.2036       | 144.6057        |
|                | 12 | R 1  | 175.1195       | 88.0637         |

N-term:+43.02

AESNEEVAVLVQR, MH+ 1485.7549, m/z 743.3811  
 L OSG41 P180811 230811-s1.05488.05488.2.dta

X-range:

-

MassTol: Y-zoom:

MassType:

AVG  MONO

Axis:

1  2

Label:

I  M  -

Ions:

a  +  2+  3+

b  +  2+  3+

c  +  2+  3+

x  +  2+  3+

y  +  2+  3+

z  +  2+  3+

hide H<sub>2</sub>O/NH<sub>3</sub>

zoom 112-122

GO

scan 5488; 1.2e+000

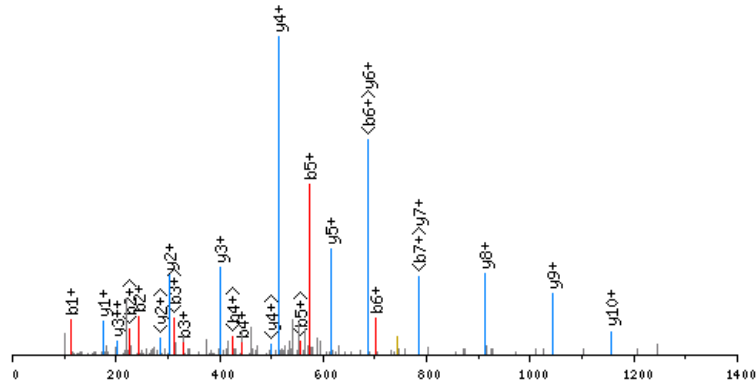

click image to zoom in; click top corners to zoom out [\[precursor±\]](#)

scan 5484; 743.4 m/z; 9.9e+000

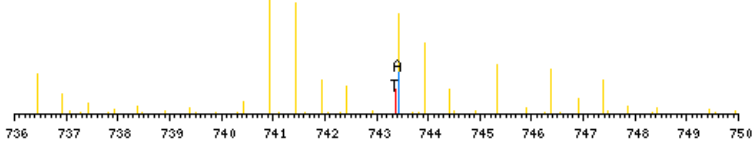

zoomed in precursor plot; T=theoretical m/z, A=acquired m/z

| b <sup>+</sup> | #  | AA # | y <sup>+</sup> | y <sup>2+</sup> |
|----------------|----|------|----------------|-----------------|
| 114.0555       | 1  | A 13 |                |                 |
| 243.0981       | 2  | E 12 | 1372.7072      | 686.8575        |
| 330.1301       | 3  | S 11 | 1243.6646      | 622.3362        |
| 444.1731       | 4  | N 10 | 1156.6326      | 578.8202        |
| 573.2157       | 5  | E 9  | 1042.5897      | 521.7988        |
| 702.2582       | 6  | E 8  | 913.5471       | 457.2775        |
| 801.3267       | 7  | V 7  | 784.5045       | 392.7562        |
| 872.3638       | 8  | A 6  | 685.4361       | 343.2220        |
| 971.4322       | 9  | V 5  | 614.3990       | 307.7034        |
| 1084.5163      | 10 | L 4  | 515.3306       | 258.1692        |
| 1183.5847      | 11 | V 3  | 402.2465       | 201.6272        |
| 1311.6432      | 12 | Q 2  | 303.1781       | 152.0930        |
|                | 13 | R 1  | 175.1195       | 88.0637         |

N-term:+43.02

AESPAFLSAKDEGSFAYLTIKDR, MH+ 2614.3405, m/z 872.1184  
 L OSG38 P180811 230811-s1.07667.07667.3.dta

X-range:

-

MassTol: Y-zoom:

MassType:

AVG  MONO

Axis:

1  2

Label:

I  M  -

Ions:

a  +  2+  3+

b  +  2+  3+

c  +  2+  3+

x  +  2+  3+

y  +  2+  3+

z  +  2+  3+

hide H<sub>2</sub>O/NH<sub>3</sub>

zoom 112-122

GO

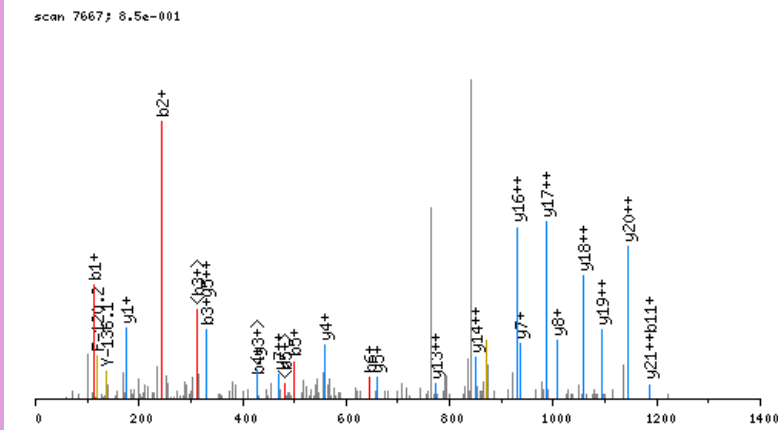

click image to zoom in; click top corners to zoom out

[\[precursor±\]](#)

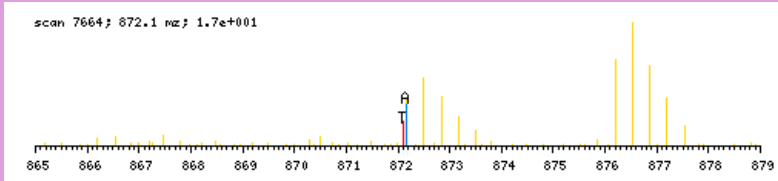

zoomed in precursor plot; T=theoretical m/z, A=acquired m/z

| b <sup>+</sup> | #  | AA # | y <sup>+</sup> | y <sup>2+</sup> |
|----------------|----|------|----------------|-----------------|
| 114.0555       | 1  | A 23 |                |                 |
| 243.0981       | 2  | E 22 | 2501.2929      | 1251.1503       |
| 330.1301       | 3  | S 21 | 2372.2503      | 1186.6290       |
| 427.1829       | 4  | P 20 | 2285.2182      | 1143.1130       |
| 498.2200       | 5  | A 19 | 2188.1655      | 1094.5866       |
| 645.2884       | 6  | F 18 | 2117.1284      | 1059.0681       |
| 758.3725       | 7  | L 17 | 1970.0599      | 985.5339        |
| 845.4045       | 8  | S 16 | 1856.9759      | 928.9919        |
| 916.4416       | 9  | A 15 | 1769.9438      | 885.4758        |
| 1072.5679      | 10 | K 14 | 1698.9067      | 849.9573        |
| 1187.5949      | 11 | D 13 | 1542.7804      | 771.8941        |
| 1316.6375      | 12 | E 12 | 1427.7535      | 714.3807        |
| 1373.6589      | 13 | G 11 | 1298.7109      | 649.8594        |
| 1460.6910      | 14 | S 10 | 1241.6894      | 621.3486        |
| 1607.7594      | 15 | F 9  | 1154.6574      | 577.8326        |
| 1678.7965      | 16 | A 8  | 1007.5890      | 504.2984        |
| 1841.8598      | 17 | Y 7  | 936.5519       | 468.7799        |
| 1954.9439      | 18 | L 6  | 773.4886       | 387.2482        |
| 2055.9916      | 19 | T 5  | 660.4045       | 330.7062        |
| 2169.0756      | 20 | I 4  | 559.3568       | 280.1823        |
| 2325.2019      | 21 | K 3  | 446.2727       | 223.6403        |
| 2440.2289      | 22 | D 2  | 290.1464       | 145.5771        |
|                | 23 | R 1  | 175.1195       | 88.0637         |

N-term:+43.02 K(10):+156.13  
 K(21):+156.13

AESPAPGAAAESCQEER, MH+ 1987.8303, m/z 663.2816  
 L OSG41 P180811 230811-s1.02897.02897.3.dta

X-range:

-

MassTol: Y-zoom:

MassType:

AVG  MONO

Axis:

1  2

Label:

I  M  -

Ions:

a  +  2+  3+

b  +  2+  3+

c  +  2+  3+

x  +  2+  3+

y  +  2+  3+

z  +  2+  3+

hide H<sub>2</sub>O/NH<sub>3</sub>

zoom 112-122

GO

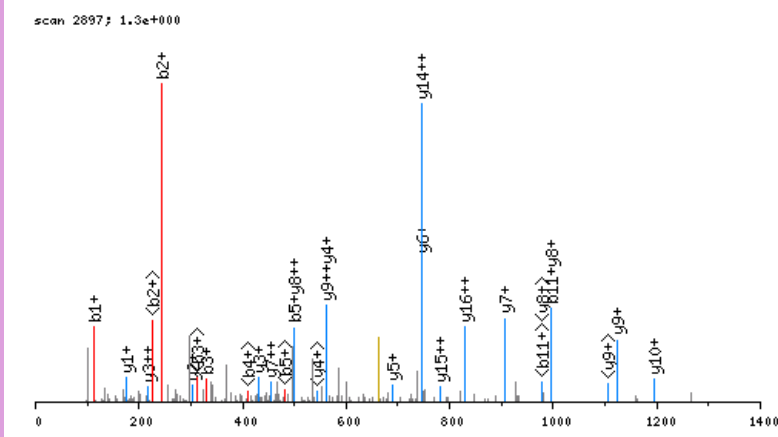

click image to zoom in; click top corners to zoom out [\[precursor±\]](#)

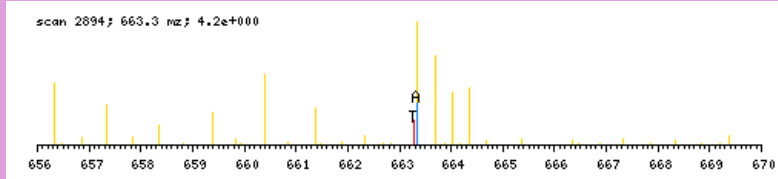

zoomed in precursor plot; T=theoretical m/z, A=acquired m/z

| b <sup>+</sup> | #  | AA # | y <sup>+</sup> | y <sup>2+</sup> |
|----------------|----|------|----------------|-----------------|
| 114.0555       | 1  | A 19 |                |                 |
| 243.0981       | 2  | E 18 | 1874.7826      | 937.8952        |
| 330.1301       | 3  | S 17 | 1745.7400      | 873.3739        |
| 427.1829       | 4  | P 16 | 1658.7080      | 829.8579        |
| 498.2200       | 5  | A 15 | 1561.6552      | 781.3315        |
| 595.2728       | 6  | P 14 | 1490.6181      | 745.8130        |
| 652.2942       | 7  | G 13 | 1393.5653      | 697.2866        |
| 723.3314       | 8  | A 12 | 1336.5439      | 668.7759        |
| 794.3685       | 9  | A 11 | 1265.5068      | 633.2573        |
| 865.4056       | 10 | A 10 | 1194.4697      | 597.7387        |
| 994.4482       | 11 | E 9  | 1123.4325      | 562.2202        |
| 1081.4802      | 12 | S 8  | 994.3899       | 497.6989        |
| 1241.5108      | 13 | C 7  | 907.3579       | 454.1829        |
| 1298.5323      | 14 | G 6  | 747.3273       | 374.1676        |
| 1427.5749      | 15 | E 5  | 690.3059       | 345.6568        |
| 1556.6175      | 16 | E 4  | 561.2633       | 281.1355        |
| 1684.6760      | 17 | Q 3  | 432.2207       | 216.6142        |
| 1813.7186      | 18 | E 2  | 304.1621       | 152.5850        |
|                | 19 | R 1  | 175.1195       | 88.0637         |

N-term:+43.02 C(13):+160.03

AESSELSASSPAR, MH+ 1420.6556, m/z 710.8314  
 L OSG41 P180811 230811-s1.02921.02921.2.dta

X-range:

-

MassTol: Y-zoom:

MassType:

AVG  MONO

Axis:

1  2

Label:

I  M  -

Ions:

a  +  2+  3+

b  +  2+  3+

c  +  2+  3+

x  +  2+  3+

y  +  2+  3+

z  +  2+  3+

hide H<sub>2</sub>O/NH<sub>3</sub>

zoom 112-122

GO

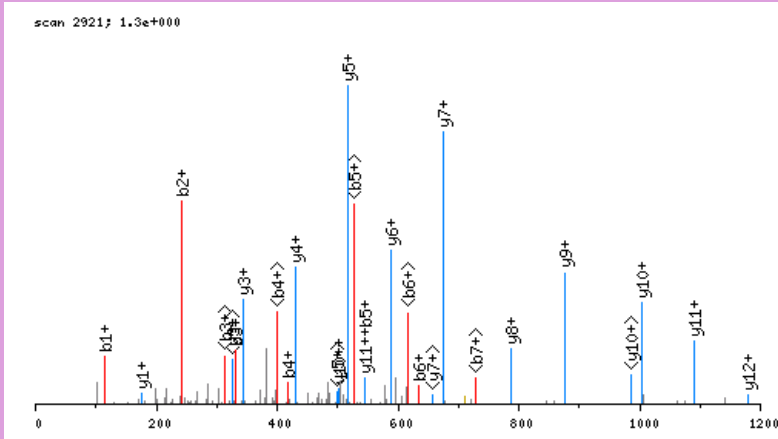

click image to zoom in; click top corners to zoom out [\[precursor±\]](#)

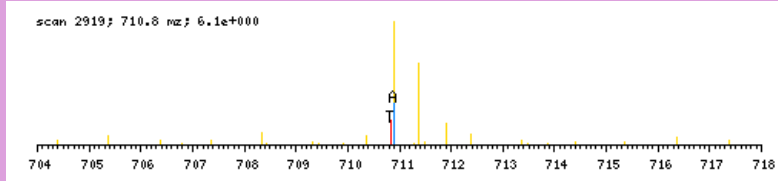

zoomed in precursor plot; T=theoretical m/z, A=acquired m/z

| b <sup>+</sup> | #  | AA # | y <sup>+</sup> | y <sup>2+</sup> |
|----------------|----|------|----------------|-----------------|
| 114.0555       | 1  | A 14 |                |                 |
| 243.0981       | 2  | E 13 | 1307.6079      | 654.3079        |
| 330.1301       | 3  | S 12 | 1178.5653      | 589.7866        |
| 417.1622       | 4  | S 11 | 1091.5333      | 546.2706        |
| 546.2048       | 5  | E 10 | 1004.5013      | 502.7545        |
| 633.2368       | 6  | S 9  | 875.4587       | 438.2332        |
| 746.3208       | 7  | L 8  | 788.4266       | 394.7172        |
| 833.3529       | 8  | S 7  | 675.3426       | 338.1752        |
| 904.3900       | 9  | A 6  | 588.3105       | 294.6592        |
| 991.4220       | 10 | S 5  | 517.2734       | 259.1406        |
| 1078.4540      | 11 | S 4  | 430.2414       | 215.6246        |
| 1175.5068      | 12 | P 3  | 343.2094       | 172.1086        |
| 1246.5439      | 13 | A 2  | 246.1566       | 123.5822        |
|                | 14 | R 1  | 175.1195       | 88.0637         |

N-term:+43.02

AETAAESGGGDSGVGACER, MH+ 1879.7728, m/z 627.2624  
 L OSG41 P180811 230811-s1.02711.02711.3.dta

X-range:

-

MassTol: Y-zoom:

MassType:

AVG  MONO

Axis:

1  2

Label:

I  M  -

Ions:

a  +  2+  3+

b  +  2+  3+

c  +  2+  3+

x  +  2+  3+

y  +  2+  3+

z  +  2+  3+

hide H<sub>2</sub>O/NH<sub>3</sub>

zoom 112-122

GO

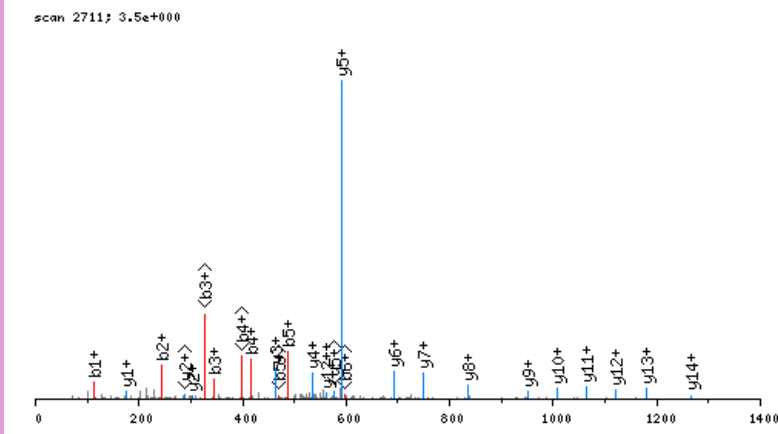

click image to zoom in; click top corners to zoom out [\[precursor±\]](#)

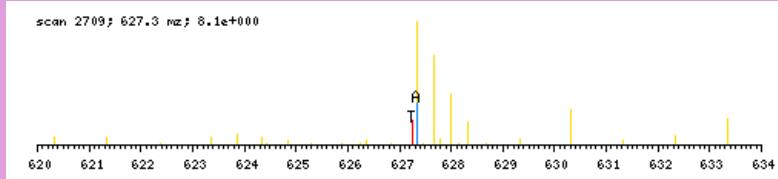

zoomed in precursor plot; T=theoretical m/z, A=acquired m/z

| b <sup>+</sup> | #  | AA # | y <sup>+</sup> | y <sup>2+</sup> |
|----------------|----|------|----------------|-----------------|
| 114.0555       | 1  | A 20 |                |                 |
| 243.0981       | 2  | E 19 | 1766.7251      | 883.8665        |
| 344.1458       | 3  | T 18 | 1637.6825      | 819.3452        |
| 415.1829       | 4  | A 17 | 1536.6348      | 768.8213        |
| 486.2200       | 5  | A 16 | 1465.5977      | 733.3028        |
| 615.2626       | 6  | E 15 | 1394.5606      | 697.7842        |
| 702.2946       | 7  | S 14 | 1265.5180      | 633.2629        |
| 759.3161       | 8  | G 13 | 1178.4860      | 589.7469        |
| 816.3376       | 9  | G 12 | 1121.4645      | 561.2362        |
| 873.3590       | 10 | G 11 | 1064.4430      | 532.7254        |
| 930.3805       | 11 | G 10 | 1007.4216      | 504.2147        |
| 1045.4074      | 12 | D 9  | 950.4001       | 475.7040        |
| 1132.4395      | 13 | S 8  | 835.3732       | 418.1905        |
| 1189.4609      | 14 | G 7  | 748.3411       | 374.6745        |
| 1288.5293      | 15 | V 6  | 691.3197       | 346.1638        |
| 1345.5508      | 16 | G 5  | 592.2513       | 296.6295        |
| 1416.5879      | 17 | A 4  | 535.2298       | 268.1188        |
| 1576.6185      | 18 | C 3  | 464.1927       | 232.6003        |
| 1705.6611      | 19 | E 2  | 304.1621       | 152.5850        |
|                | 20 | R 1  | 175.1195       | 88.0637         |

N-term:+43.02 C(18);+160.03



AETLSGLGDASAAGAAVSSAASETGTR, MH+ 2521.2018, m/z 841.0721  
 L\_OSG41\_P180811\_230811-s1.07160.07160.3.dta

X-range:

-

MassTol: Y-zoom:

MassType:

AVG  MONO

Axis:

1  2

Label:

I  M  -

Ions:

a  +  2+  3+

b  +  2+  3+

c  +  2+  3+

x  +  2+  3+

y  +  2+  3+

z  +  2+  3+

hide H<sub>2</sub>O/NH<sub>3</sub>

zoom 112-122

GO

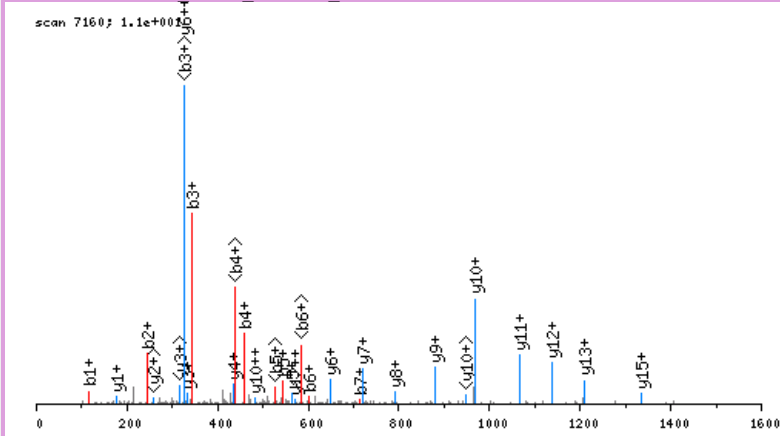

click image to zoom in; click top corners to zoom out [precursor±]

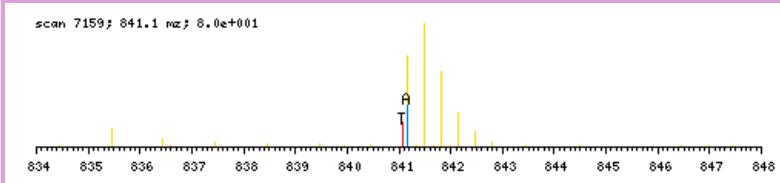

zoomed in precursor plot; T=theoretical m/z, A=acquired m/z

| b <sup>+</sup> | #  | AA # | y <sup>+</sup> | y <sup>2+</sup> |
|----------------|----|------|----------------|-----------------|
| 114.0555       | 1  | A 28 |                |                 |
| 243.0981       | 2  | E 27 | 2408.1541      | 1204.5810       |
| 344.1458       | 3  | T 26 | 2279.1115      | 1140.0597       |
| 457.2298       | 4  | L 25 | 2178.0638      | 1089.5358       |
| 544.2619       | 5  | S 24 | 2064.9798      | 1032.9938       |
| 601.2833       | 6  | G 23 | 1977.9478      | 989.4778        |
| 714.3674       | 7  | L 22 | 1920.9263      | 960.9671        |
| 771.3889       | 8  | G 21 | 1807.8422      | 904.4250        |
| 886.4158       | 9  | D 20 | 1750.8208      | 875.9143        |
| 957.4529       | 10 | A 19 | 1635.7938      | 818.4008        |
| 1044.4850      | 11 | S 18 | 1564.7567      | 782.8823        |
| 1115.5221      | 12 | A 17 | 1477.7247      | 739.3662        |
| 1186.5592      | 13 | A 16 | 1406.6876      | 703.8477        |
| 1243.5806      | 14 | G 15 | 1335.6504      | 668.3291        |
| 1314.6178      | 15 | A 14 | 1278.6290      | 639.8184        |
| 1385.6549      | 16 | A 13 | 1207.5919      | 604.2998        |
| 1456.6920      | 17 | A 12 | 1136.5548      | 568.7813        |
| 1555.7604      | 18 | V 11 | 1065.5176      | 533.2627        |
| 1642.7924      | 19 | S 10 | 966.4492       | 483.7285        |
| 1729.8245      | 20 | S 9  | 879.4172       | 440.2125        |
| 1800.8616      | 21 | A 8  | 792.3852       | 396.6965        |
| 1871.8987      | 22 | A 7  | 721.3481       | 361.1779        |
| 1958.9307      | 23 | S 6  | 650.3109       | 325.6594        |
| 2087.9733      | 24 | E 5  | 563.2789       | 282.1434        |
| 2189.0210      | 25 | T 4  | 434.2363       | 217.6221        |
| 2246.0424      | 26 | G 3  | 333.1886       | 167.0982        |
| 2347.0901      | 27 | T 2  | 276.1672       | 138.5875        |
|                | 28 | R 1  | 175.1195       | 88.0637         |

N-term:+43.02

AEVEETLKR, MH+ 1144.6214, m/z 572.8144  
 L OSG37 P180811 230811-s1.04330.04330.2.dta

X-range:

-

MassTol: Y-zoom:

MassType:

AVG  MONO

Axis:

1  2

Label:

I  M  -

Ions:

a  +  2+  3+

b  +  2+  3+

c  +  2+  3+

x  +  2+  3+

y  +  2+  3+

z  +  2+  3+

hide H<sub>2</sub>O/NH<sub>3</sub>

zoom 112-122

GO

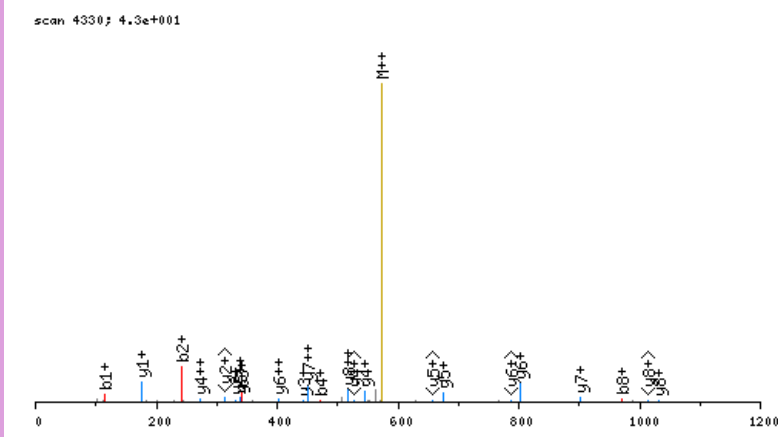

click image to zoom in; click top corners to zoom out [\[precursor±\]](#)

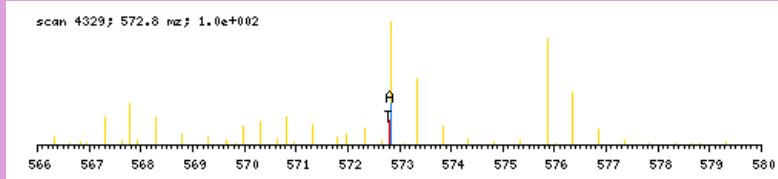

zoomed in precursor plot; T=theoretical m/z, A=acquired m/z

| b <sup>+</sup> | # | AA # | y <sup>+</sup> | y <sup>2+</sup>    |
|----------------|---|------|----------------|--------------------|
| 114.0555       | 1 | A    | 9              |                    |
| 243.0981       | 2 | E    | 8              | 1031.5737 516.2908 |
| 342.1665       | 3 | V    | 7              | 902.5311 451.7695  |
| 471.2091       | 4 | E    | 6              | 803.4627 402.2353  |
| 600.2517       | 5 | E    | 5              | 674.4201 337.7140  |
| 701.2994       | 6 | T    | 4              | 545.3775 273.1927  |
| 814.3834       | 7 | L    | 3              | 444.3299 222.6688  |
| 970.5097       | 8 | K    | 2              | 331.2458 166.1268  |
|                | 9 | R    | 1              | 175.1195 88.0637   |

N-term:+43.02 K(8):+156.13

AEVGEIIEGCR, MH+ 1274.6050, m/z 637.8062  
 L OSG41 P180811 230811-s1.06291.06291.2.dta

X-range:

-

MassTol: Y-zoom:

MassType:

AVG  MONO

Axis:

1  2

Label:

I  M  -

Ions:

a  +  2+  3+

b  +  2+  3+

c  +  2+  3+

x  +  2+  3+

y  +  2+  3+

z  +  2+  3+

hide H<sub>2</sub>O/NH<sub>3</sub>

zoom 112-122

GO

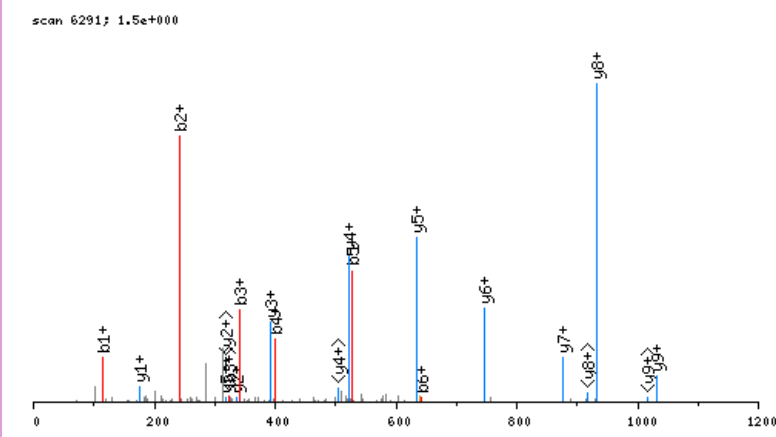

click image to zoom in; click top corners to zoom out [\[precursor±\]](#)

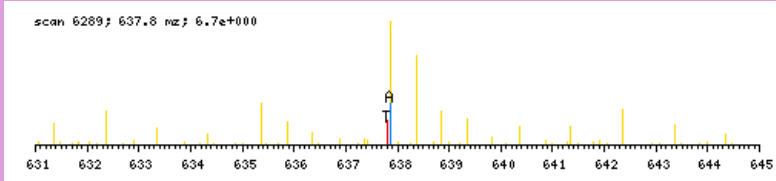

zoomed in precursor plot; T=theoretical m/z, A=acquired m/z

| b <sup>+</sup> | #  | AA # | y <sup>+</sup> | y <sup>2+</sup> |
|----------------|----|------|----------------|-----------------|
| 114.0555       | 1  | A 11 |                |                 |
| 243.0981       | 2  | E 10 | 1161.5573      | 581.2826        |
| 342.1665       | 3  | V 9  | 1032.5148      | 516.7613        |
| 399.1880       | 4  | G 8  | 933.4463       | 467.2271        |
| 528.2306       | 5  | E 7  | 876.4249       | 438.7164        |
| 641.3146       | 6  | I 6  | 747.3823       | 374.1951        |
| 754.3987       | 7  | I 5  | 634.2982       | 317.6530        |
| 883.4413       | 8  | E 4  | 521.2142       | 261.1110        |
| 940.4628       | 9  | G 3  | 392.1716       | 196.5897        |
| 1100.4934      | 10 | C 2  | 335.1501       | 168.0790        |
|                | 11 | R 1  | 175.1195       | 88.0637         |

N-term:+43.02 C(10):+160.03

AFASEDNVYHSSNAVYR, MH+ 1971.8837, m/z 657.9661  
 L OSG37 P180811 230811-s1.05502.05502.3.dta

X-range:

-

MassTol: Y-zoom:

MassType:

AVG  MONO

Axis:

1  2

Label:

I  M  -

Ions:

a  +  2+  3+

b  +  2+  3+

c  +  2+  3+

x  +  2+  3+

y  +  2+  3+

z  +  2+  3+

hide H<sub>2</sub>O/NH<sub>3</sub>

zoom 112-122

GO

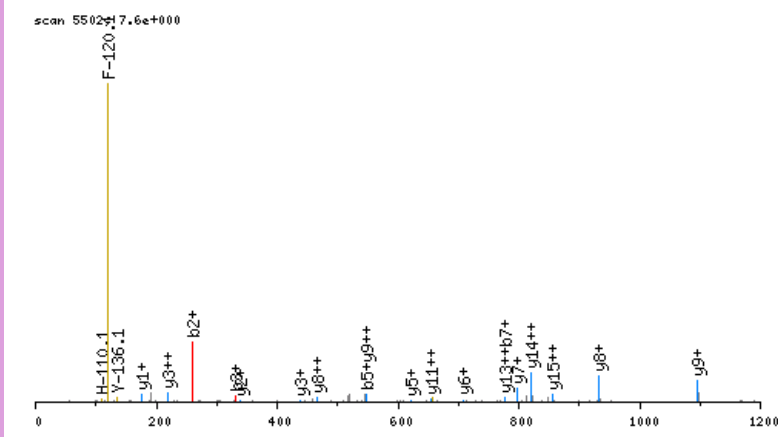

click image to zoom in; click top corners to zoom out [\[precursor±\]](#)

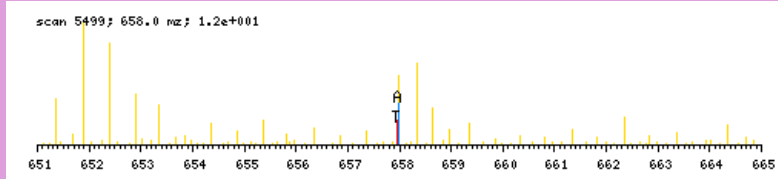

zoomed in precursor plot; T=theoretical m/z, A=acquired m/z

| b <sup>+</sup> | #  | AA # | y <sup>+</sup> | y <sup>2+</sup> |
|----------------|----|------|----------------|-----------------|
| 114.0555       | 1  | A 17 |                |                 |
| 261.1239       | 2  | F 16 | 1858.8360      | 929.9219        |
| 332.1610       | 3  | A 15 | 1711.7676      | 856.3877        |
| 419.1931       | 4  | S 14 | 1640.7305      | 820.8692        |
| 548.2357       | 5  | E 13 | 1553.6985      | 777.3531        |
| 663.2626       | 6  | D 12 | 1424.6559      | 712.8318        |
| 777.3055       | 7  | N 11 | 1309.6289      | 655.3184        |
| 876.3739       | 8  | V 10 | 1195.5860      | 598.2969        |
| 1039.4373      | 9  | Y 9  | 1096.5176      | 548.7627        |
| 1176.4962      | 10 | H 8  | 933.4543       | 467.2310        |
| 1263.5282      | 11 | S 7  | 796.3953       | 398.7016        |
| 1350.5602      | 12 | S 6  | 709.3633       | 355.1856        |
| 1464.6032      | 13 | N 5  | 622.3313       | 311.6696        |
| 1535.6403      | 14 | A 4  | 508.2884       | 254.6481        |
| 1634.7087      | 15 | V 3  | 437.2512       | 219.1295        |
| 1797.7720      | 16 | Y 2  | 338.1828       | 169.5953        |
|                | 17 | R 1  | 175.1195       | 88.0637         |

N-term:+43.02

AFCAPPAYLTHQQKVLK, MH+ 2070.0959, m/z 690.7035  
 L OSG39 P180811 230811-s1.05459.05459.3.dta

X-range:

-

MassTol: Y-zoom:

MassType:

AVG  MONO

Axis:

1  2

Label:

I  M  -

Ions:

a  +  2+  3+

b  +  2+  3+

c  +  2+  3+

x  +  2+  3+

y  +  2+  3+

z  +  2+  3+

hide H<sub>2</sub>O/NH<sub>3</sub>

zoom 112-122

GO

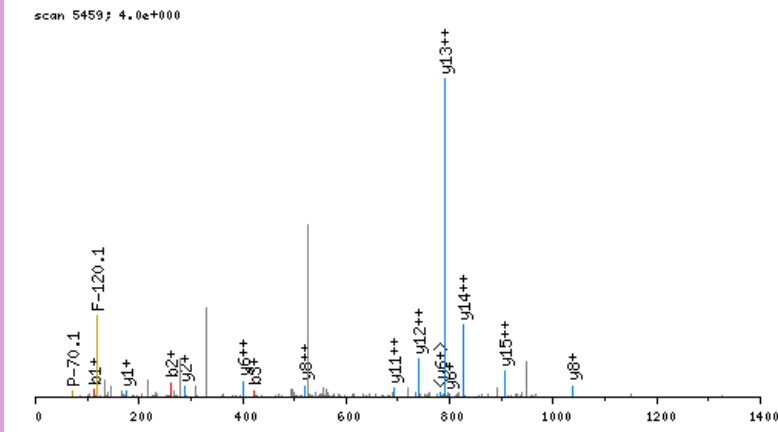

click image to zoom in; click top corners to zoom out [\[precursor±\]](#)

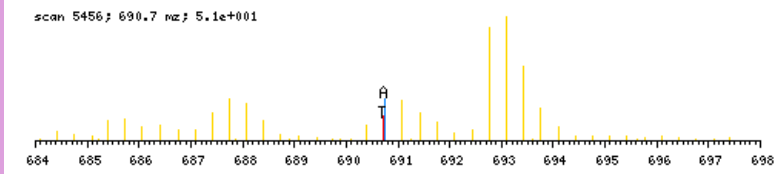

zoomed in precursor plot; T=theoretical m/z, A=acquired m/z

| b <sup>+</sup> | #  | AA | #  | y <sup>+</sup> | y <sup>2+</sup> |
|----------------|----|----|----|----------------|-----------------|
| 114.0555       | 1  | A  | 17 |                |                 |
| 261.1239       | 2  | F  | 16 | 1957.0482      | 979.0280        |
| 421.1545       | 3  | C  | 15 | 1809.9798      | 905.4938        |
| 492.1916       | 4  | A  | 14 | 1649.9492      | 825.4785        |
| 589.2444       | 5  | P  | 13 | 1578.9121      | 789.9599        |
| 686.2972       | 6  | P  | 12 | 1481.8593      | 741.4336        |
| 757.3343       | 7  | A  | 11 | 1384.8065      | 692.9072        |
| 920.3976       | 8  | Y  | 10 | 1313.7694      | 657.3886        |
| 1033.4817      | 9  | L  | 9  | 1150.7061      | 575.8570        |
| 1134.5294      | 10 | T  | 8  | 1037.6220      | 519.3149        |
| 1271.5883      | 11 | H  | 7  | 936.5743       | 468.7911        |
| 1399.6468      | 12 | Q  | 6  | 799.5154       | 400.2616        |
| 1527.7054      | 13 | Q  | 5  | 671.4569       | 336.2323        |
| 1683.8317      | 14 | K  | 4  | 543.3983       | 272.2031        |
| 1782.9001      | 15 | V  | 3  | 387.2720       | 194.1399        |
| 1895.9842      | 16 | L  | 2  | 288.2036       | 144.6057        |
|                | 17 | R  | 1  | 175.1195       | 88.0637         |

N-term:+43.02 C(3):+160.03  
 K(14):+156.13

AFKDTGKTPVEPEVAIHR, MH+ 2105.2032, m/z 527.0563  
 L OSG40 P180811 230811-s1.05282.05282.4.dta

X-range:

-

MassTol: Y-zoom:

MassType:

AVG  MONO

Axis:

1  2

Label:

I  M  -

Ions:

a  +  2+  3+

b  +  2+  3+

c  +  2+  3+

x  +  2+  3+

y  +  2+  3+

z  +  2+  3+

hide H<sub>2</sub>O/NH<sub>3</sub>

zoom 112-122

GO

scan 5282; 6.2e+000

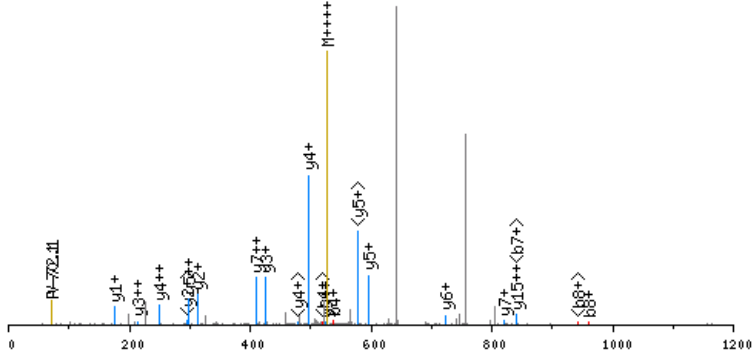

click image to zoom in; click top corners to zoom out [\[precursor±\]](#)

scan 5279; 527.1 m/z; 1.7e+001

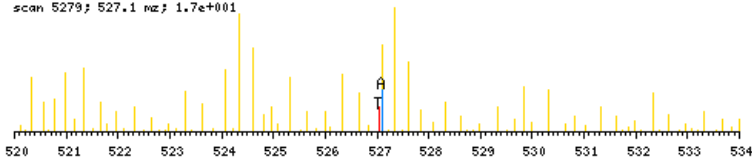

zoomed in precursor plot; T=theoretical m/z, A=acquired m/z

| b <sup>+</sup> | #  | AA # | y <sup>+</sup> | y <sup>2+</sup> |
|----------------|----|------|----------------|-----------------|
| 114.0555       | 1  | A 18 |                |                 |
| 261.1239       | 2  | F 17 | 1992.1555      | 996.5817        |
| 423.2820       | 3  | K 16 | 1845.0871      | 923.0475        |
| 538.3090       | 4  | D 15 | 1682.9290      | 841.9684        |
| 639.3566       | 5  | T 14 | 1567.9021      | 784.4549        |
| 696.3781       | 6  | G 13 | 1466.8544      | 733.9311        |
| 858.5362       | 7  | K 12 | 1409.8329      | 705.4204        |
| 959.5839       | 8  | T 11 | 1247.6748      | 624.3413        |
| 1056.6367      | 9  | P 10 | 1146.6271      | 573.8175        |
| 1155.7051      | 10 | V 9  | 1049.5744      | 525.2911        |
| 1284.7477      | 11 | E 8  | 950.5060       | 475.7569        |
| 1381.8004      | 12 | P 7  | 821.4634       | 411.2356        |
| 1510.8430      | 13 | E 6  | 724.4106       | 362.7092        |
| 1609.9114      | 14 | V 5  | 595.3680       | 298.1879        |
| 1680.9485      | 15 | A 4  | 496.2996       | 248.6537        |
| 1794.0326      | 16 | I 3  | 425.2625       | 213.1352        |
| 1931.0915      | 17 | H 2  | 312.1784       | 156.5931        |
|                | 18 | R 1  | 175.1195       | 88.0637         |

N-term:+43.02 K(3):+162.16  
 K(7):+162.16

AFSQVQLDDNHVNR, MH+ 2030.9142, m/z 677.6429  
 L OSG37 P180811 230811-s1.07307.07307.3.dta

X-range:

-

MassTol: Y-zoom:

MassType:

AVG  MONO

Axis:

1  2

Label:

I  M  -

Ions:

a  +  2+  3+

b  +  2+  3+

c  +  2+  3+

x  +  2+  3+

y  +  2+  3+

z  +  2+  3+

hide H<sub>2</sub>O/NH<sub>3</sub>

zoom 112-122

GO

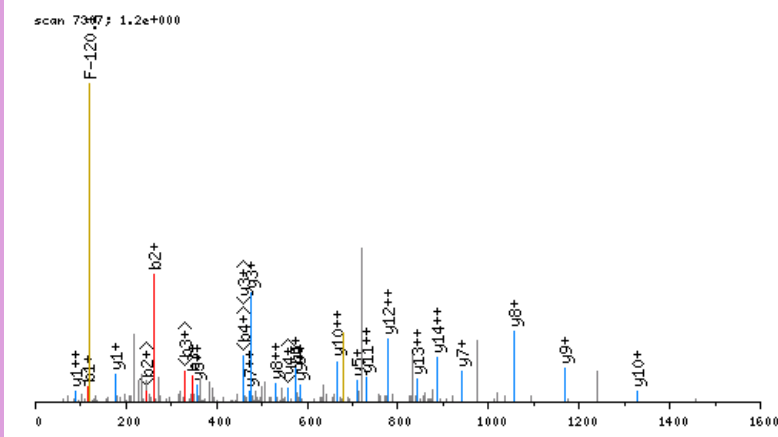

click image to zoom in; click top corners to zoom out [\[precursor±\]](#)

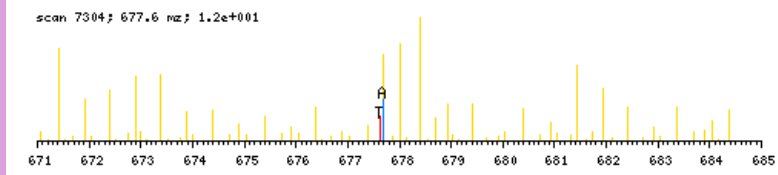

zoomed in precursor plot; T=theoretical m/z, A=acquired m/z

| b <sup>+</sup> | #  | AA # | y <sup>+</sup> | y <sup>2+</sup> |
|----------------|----|------|----------------|-----------------|
| 114.0555       | 1  | A 16 |                |                 |
| 261.1239       | 2  | F 15 | 1917.8666      | 959.4372        |
| 348.1560       | 3  | S 14 | 1770.7981      | 885.9030        |
| 476.2145       | 4  | Q 13 | 1683.7661      | 842.3870        |
| 575.2829       | 5  | V 12 | 1555.7075      | 778.3577        |
| 703.3415       | 6  | Q 11 | 1456.6391      | 728.8235        |
| 863.3721       | 7  | C 10 | 1328.5805      | 664.7942        |
| 976.4562       | 8  | L 9  | 1168.5499      | 584.7789        |
| 1091.4831      | 9  | D 8  | 1055.4659      | 528.2369        |
| 1206.5101      | 10 | D 7  | 940.4389       | 470.7234        |
| 1320.5530      | 11 | N 6  | 825.4120       | 413.2099        |
| 1457.6119      | 12 | H 5  | 711.3691       | 356.1884        |
| 1556.6803      | 13 | V 4  | 574.3102       | 287.6590        |
| 1670.7233      | 14 | N 3  | 475.2417       | 238.1248        |
| 1856.8026      | 15 | W 2  | 361.1988       | 181.1033        |
|                | 16 | R 1  | 175.1195       | 88.0637         |

N-term:+43.02 C(7):+160.03

AGAACCFSDQFR, MH+ 1560.6211, m/z 520.8785  
 L OSG41 P180811 230811-s1.05106.05106.3.dta

X-range:

-

MassTol: Y-zoom:

MassType:

AVG  MONO

Axis:

1  2

Label:

I  M  -

Ions:

a  +  2+  3+

b  +  2+  3+

c  +  2+  3+

x  +  2+  3+

y  +  2+  3+

z  +  2+  3+

hide H<sub>2</sub>O/NH<sub>3</sub>

zoom 112-122

GO

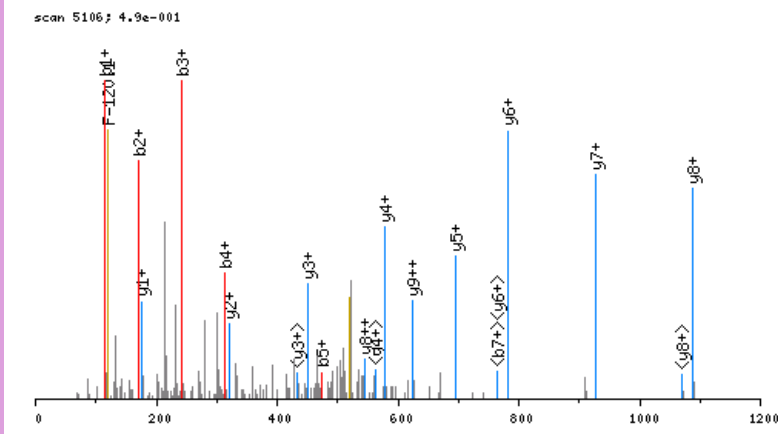

click image to zoom in; click top corners to zoom out [\[precursor±\]](#)

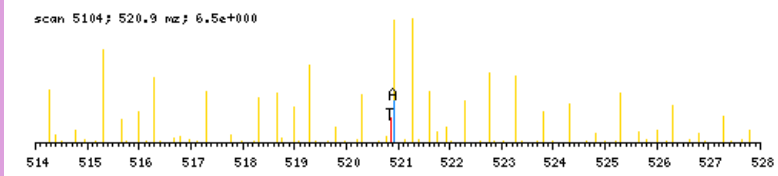

zoomed in precursor plot; T=theoretical m/z, A=acquired m/z

| b <sup>+</sup> | #  | AA | #  | y <sup>+</sup> | y <sup>2+</sup> |
|----------------|----|----|----|----------------|-----------------|
| 114.0555       | 1  | A  | 13 |                |                 |
| 171.0770       | 2  | G  | 12 | 1447.5734      | 724.2906        |
| 242.1141       | 3  | A  | 11 | 1390.5519      | 695.7799        |
| 313.1512       | 4  | A  | 10 | 1319.5148      | 660.2613        |
| 473.1818       | 5  | C  | 9  | 1248.4777      | 624.7427        |
| 633.2124       | 6  | C  | 8  | 1088.4471      | 544.7274        |
| 780.2808       | 7  | F  | 7  | 928.4165       | 464.7121        |
| 867.3128       | 8  | S  | 6  | 781.3481       | 391.1779        |
| 982.3398       | 9  | D  | 5  | 694.3160       | 347.6619        |
| 1111.3824      | 10 | E  | 4  | 579.2891       | 290.1485        |
| 1239.4410      | 11 | Q  | 3  | 450.2465       | 225.6272        |
| 1386.5094      | 12 | F  | 2  | 322.1879       | 161.5979        |
|                | 13 | R  | 1  | 175.1195       | 88.0637         |

N-term:+43.02 C(5):+160.03  
 C(6):+160.03



AGARPGVHALQLEPPTVVETLR, MH+ 2353.2992, m/z 785.1046  
 L OSG38 P180811 230811-s1.06871.06871.3.dta

scan 6871; 1.7e+000

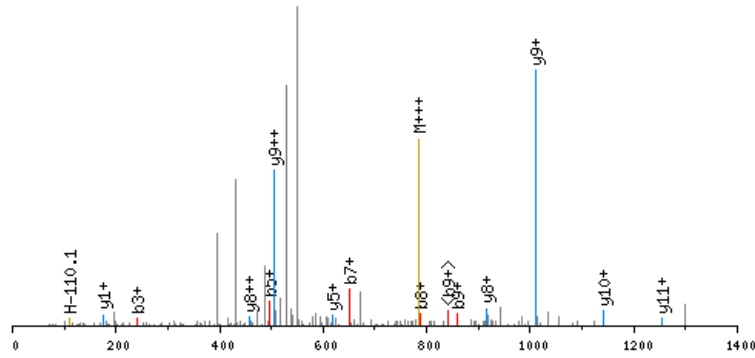

click image to zoom in; click top corners to zoom out [precursor±]

scan 6869; 785.1 m/z; 9.3e+000

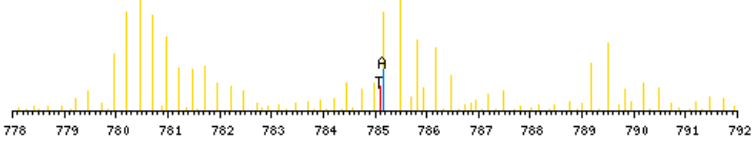

zoomed in precursor plot; T=theoretical m/z, A=acquired m/z

| b <sup>+</sup> | #  | AA # | y <sup>+</sup> | y <sup>2+</sup> |
|----------------|----|------|----------------|-----------------|
| 114.0555       | 1  | A 22 |                |                 |
| 171.0770       | 2  | G 21 | 2240.2515      | 1120.6297       |
| 242.1141       | 3  | A 20 | 2183.2301      | 1092.1189       |
| 398.2152       | 4  | R 19 | 2112.1929      | 1056.6004       |
| 495.2680       | 5  | P 18 | 1956.0918      | 978.5498        |
| 552.2894       | 6  | G 17 | 1859.0391      | 930.0234        |
| 651.3578       | 7  | V 16 | 1802.0176      | 901.5127        |
| 788.4168       | 8  | H 15 | 1702.9492      | 851.9785        |
| 859.4539       | 9  | A 14 | 1565.8903      | 783.4491        |
| 972.5379       | 10 | L 13 | 1494.8532      | 747.9305        |
| 1100.5965      | 11 | Q 12 | 1381.7691      | 691.3885        |
| 1213.6806      | 12 | L 11 | 1253.7105      | 627.3592        |
| 1342.7232      | 13 | E 10 | 1140.6265      | 570.8171        |
| 1439.7759      | 14 | P 9  | 1011.5839      | 506.2958        |
| 1536.8287      | 15 | P 8  | 914.5311       | 457.7695        |
| 1637.8764      | 16 | T 7  | 817.4783       | 409.2431        |
| 1736.9448      | 17 | V 6  | 716.4307       | 358.7192        |
| 1836.0132      | 18 | V 5  | 617.3623       | 309.1850        |
| 1965.0558      | 19 | E 4  | 518.2938       | 259.6508        |
| 2066.1035      | 20 | T 3  | 389.2512       | 195.1295        |
| 2179.1875      | 21 | L 2  | 288.2036       | 144.6057        |
|                | 22 | R 1  | 175.1195       | 88.0637         |

N-term:+43.02

X-range:

-

MassTol: Y-zoom:

MassType:

AVG  MONO

Axis:

1  2

Label:

I  M  -

Ions:

a  +  2+  3+

b  +  2+  3+

c  +  2+  3+

x  +  2+  3+

y  +  2+  3+

z  +  2+  3+

hide H<sub>2</sub>O/NH<sub>3</sub>

zoom 112-122

GO

AGDAVQSEPR, MH+ 1071.5071, m/z 536.2572  
 L OSG41 P180811 230811-s1.02374.02374.2.dta

X-range:

-

MassTol: Y-zoom:

MassType:

AVG  MONO

Axis:

1  2

Label:

I  M  -

Ions:

a  +  2+  3+

b  +  2+  3+

c  +  2+  3+

x  +  2+  3+

y  +  2+  3+

z  +  2+  3+

hide H<sub>2</sub>O/NH<sub>3</sub>

zoom 112-122

GO

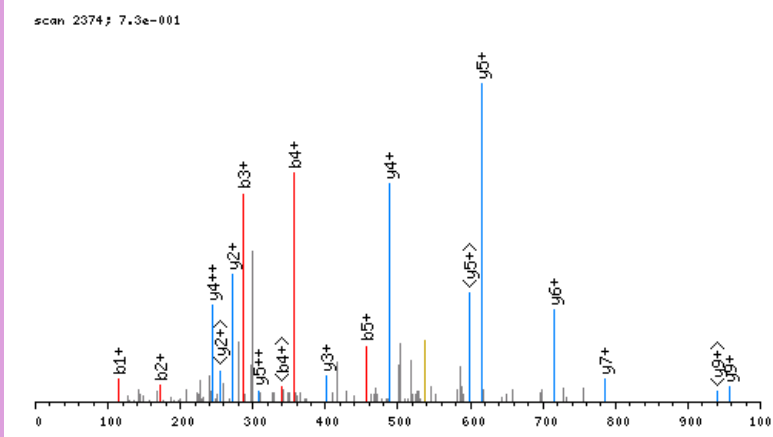

click image to zoom in; click top corners to zoom out [\[precursor±\]](#)

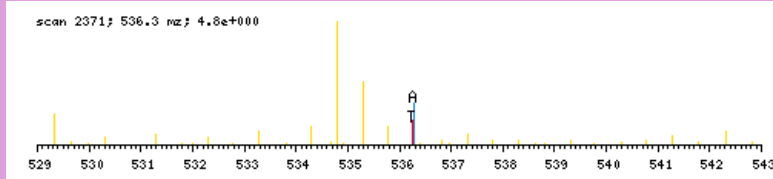

zoomed in precursor plot; T=theoretical m/z, A=acquired m/z

| b <sup>+</sup> | #  | AA | #  | y <sup>+</sup> | y <sup>2+</sup> |
|----------------|----|----|----|----------------|-----------------|
| 114.0555       | 1  | A  | 10 |                |                 |
| 171.0770       | 2  | G  | 9  | 958.4594       | 479.7336        |
| 286.1039       | 3  | D  | 8  | 901.4379       | 451.2229        |
| 357.1410       | 4  | A  | 7  | 786.4110       | 393.7094        |
| 456.2094       | 5  | V  | 6  | 715.3739       | 358.1909        |
| 584.2680       | 6  | Q  | 5  | 616.3055       | 308.6566        |
| 671.3001       | 7  | S  | 4  | 488.2469       | 244.6274        |
| 800.3426       | 8  | E  | 3  | 401.2149       | 201.1113        |
| 897.3954       | 9  | P  | 2  | 272.1723       | 136.5900        |
|                | 10 | R  | 1  | 175.1195       | 88.0637         |

N-term:+43.02

AGEGLGQQGASATAAPETR, MH+ 1813.8681, m/z 605.2942  
 L OSG41 P180811 230811-s1.03345.03345.3.dta

X-range:

-

MassTol: Y-zoom:

MassType:

AVG  MONO

Axis:

1  2

Label:

I  M  -

Ions:

a  +  2+  3+

b  +  2+  3+

c  +  2+  3+

x  +  2+  3+

y  +  2+  3+

z  +  2+  3+

hide H<sub>2</sub>O/NH<sub>3</sub>

zoom 112-122

GO

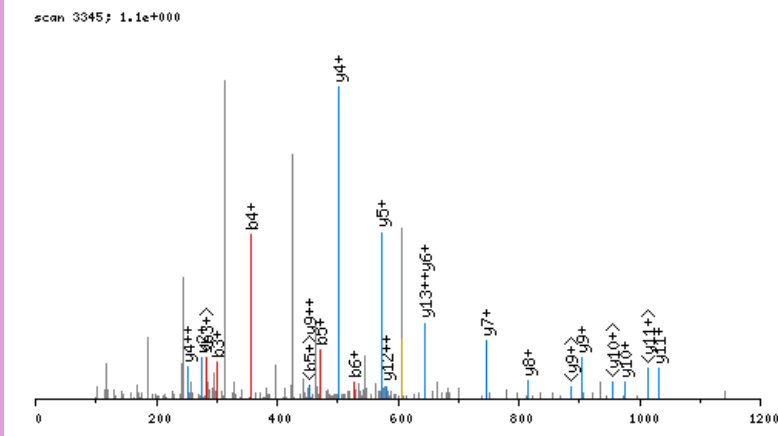

click image to zoom in; click top corners to zoom out [\[precursor±\]](#)

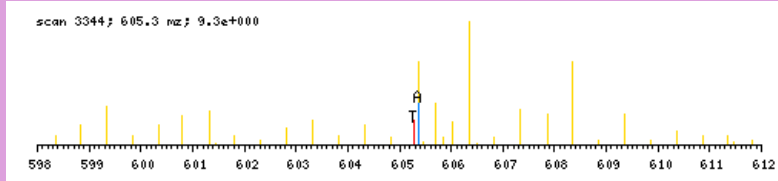

zoomed in precursor plot; T=theoretical m/z, A=acquired m/z

| b <sup>+</sup> | #  | AA # | y <sup>+</sup>   | y <sup>2+</sup> |
|----------------|----|------|------------------|-----------------|
| 114.0555       | 1  | A 19 |                  |                 |
| 171.0770       | 2  | G 18 | 1700.8204        | 850.9141        |
| 300.1196       | 3  | E 17 | 1643.7989        | 822.4034        |
| 357.1410       | 4  | G 16 | 1514.7563        | 757.8821        |
| 470.2251       | 5  | L 15 | 1457.7348        | 729.3713        |
| 527.2466       | 6  | G 14 | 1344.6508        | 672.8293        |
| 655.3051       | 7  | Q 13 | 1287.6293        | <b>644.3186</b> |
| 783.3637       | 8  | Q 12 | 1159.5707        | <b>580.2893</b> |
| 840.3852       | 9  | G 11 | <b>1031.5122</b> | 516.2600        |
| 911.4223       | 10 | A 10 | <b>974.4907</b>  | 487.7493        |
| 998.4543       | 11 | S 9  | <b>903.4536</b>  | <b>452.2307</b> |
| 1069.4914      | 12 | A 8  | <b>816.4216</b>  | 408.7147        |
| 1170.5391      | 13 | T 7  | <b>745.3844</b>  | 373.1961        |
| 1241.5762      | 14 | A 6  | <b>644.3368</b>  | 322.6723        |
| 1312.6133      | 15 | A 5  | <b>573.2997</b>  | 287.1537        |
| 1409.6661      | 16 | P 4  | <b>502.2625</b>  | <b>251.6352</b> |
| 1538.7087      | 17 | E 3  | 405.2098         | 203.1088        |
| 1639.7564      | 18 | T 2  | <b>276.1672</b>  | 138.5875        |
|                | 19 | R 1  | 175.1195         | 88.0637         |

N-term:+43.02

AGGEAGVTLGQPILSR, MH+ 1591.8193, m/z 531.2779  
 L OSG37 P180811 230811-s1.04857.04857.3.dta

X-range:

-

MassTol: Y-zoom:

MassType:

AVG  MONO

Axis:

1  2

Label:

I  M  -

Ions:

a  +  2+  3+

b  +  2+  3+

c  +  2+  3+

x  +  2+  3+

y  +  2+  3+

z  +  2+  3+

hide H<sub>2</sub>O/NH<sub>3</sub>

zoom 112-122

GO

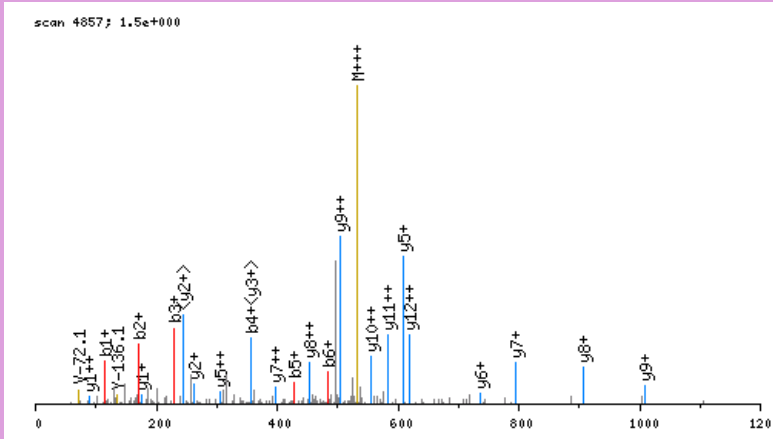

click image to zoom in; click top corners to zoom out [\[precursor±\]](#)

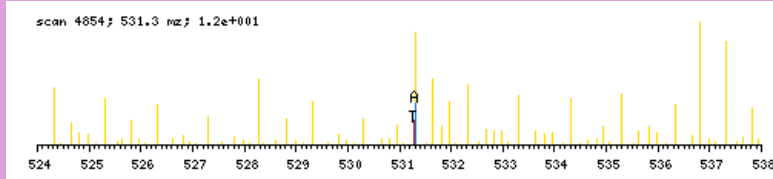

zoomed in precursor plot; T=theoretical m/z, A=acquired m/z

| b <sup>+</sup> | #  | AA # | y <sup>+</sup> | y <sup>2+</sup> |
|----------------|----|------|----------------|-----------------|
| 114.0555       | 1  | A 16 |                |                 |
| 171.0770       | 2  | G 15 | 1478.7716      | 739.8897        |
| 228.0984       | 3  | G 14 | 1421.7501      | 711.3790        |
| 357.1410       | 4  | E 13 | 1364.7286      | 682.8682        |
| 428.1781       | 5  | A 12 | 1235.6860      | 618.3469        |
| 485.1996       | 6  | G 11 | 1164.6489      | 582.8284        |
| 584.2680       | 7  | V 10 | 1107.6275      | 554.3176        |
| 685.3157       | 8  | T 9  | 1008.5591      | 504.7834        |
| 798.3998       | 9  | L 8  | 907.5114       | 454.2596        |
| 855.4212       | 10 | G 7  | 794.4273       | 397.7176        |
| 983.4798       | 11 | Q 6  | 737.4058       | 369.2068        |
| 1080.5326      | 12 | P 5  | 609.3473       | 305.1775        |
| 1217.5915      | 13 | H 4  | 512.2945       | 256.6512        |
| 1330.6755      | 14 | L 3  | 375.2356       | 188.1217        |
| 1417.7076      | 15 | S 2  | 262.1515       | 131.5797        |
|                | 16 | R 1  | 175.1195       | 88.0637         |

N-term:+43.02

AGGEGGVTLGQPILSR, MH+ 1577.8036, m/z 526.6061  
 L OSG37 P180811 230811-s1.04690.04690.3.dta

X-range:

-

MassTol: Y-zoom:

MassType:

AVG  MONO

Axis:

1  2

Label:

I  M  -

Ions:

a  +  2+  3+

b  +  2+  3+

c  +  2+  3+

x  +  2+  3+

y  +  2+  3+

z  +  2+  3+

hide H<sub>2</sub>O/NH<sub>3</sub>

zoom 112-122

GO

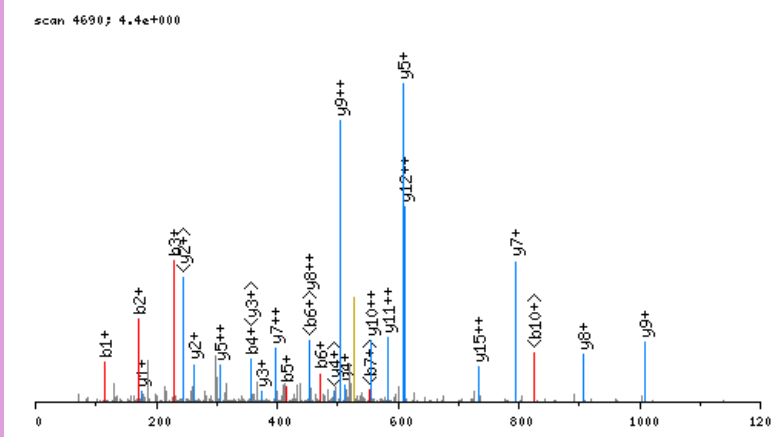

click image to zoom in; click top corners to zoom out [\[precursor±\]](#)

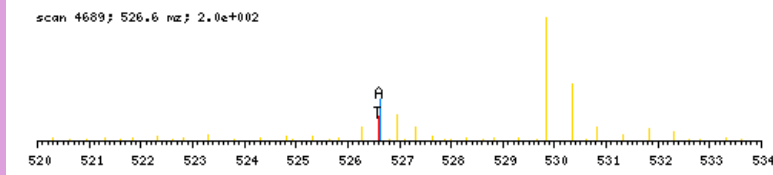

zoomed in precursor plot; T=theoretical m/z, A=acquired m/z

| b <sup>+</sup> | #  | AA # | y <sup>+</sup> | y <sup>2+</sup> |
|----------------|----|------|----------------|-----------------|
| 114.0555       | 1  | A 16 |                |                 |
| 171.0770       | 2  | G 15 | 1464.7559      | 732.8819        |
| 228.0984       | 3  | G 14 | 1407.7345      | 704.3711        |
| 357.1410       | 4  | E 13 | 1350.7130      | 675.8604        |
| 414.1625       | 5  | G 12 | 1221.6704      | 611.3391        |
| 471.1840       | 6  | G 11 | 1164.6489      | 582.8284        |
| 570.2524       | 7  | V 10 | 1107.6275      | 554.3176        |
| 671.3001       | 8  | T 9  | 1008.5591      | 504.7834        |
| 784.3841       | 9  | L 8  | 907.5114       | 454.2596        |
| 841.4056       | 10 | G 7  | 794.4273       | 397.7176        |
| 969.4642       | 11 | Q 6  | 737.4058       | 369.2068        |
| 1066.5169      | 12 | P 5  | 609.3473       | 305.1775        |
| 1203.5758      | 13 | H 4  | 512.2945       | 256.6512        |
| 1316.6599      | 14 | L 3  | 375.2356       | 188.1217        |
| 1403.6919      | 15 | S 2  | 262.1515       | 131.5797        |
|                | 16 | R 1  | 175.1195       | 88.0637         |

N-term:+43.02

AGKKVCIVGSGNWGSAIAKIVGSNAGR, MH+ 2801.6309, m/z 701.1632  
L OSG40 P180811 230811-s1.08800.08800.4.dta

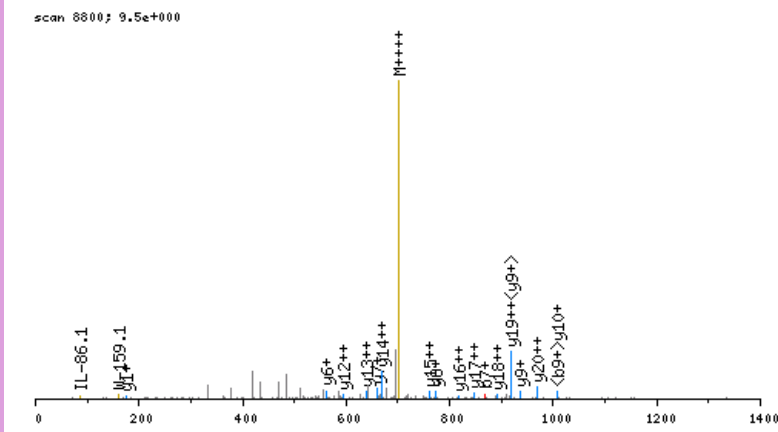

click image to zoom in; click top corners to zoom out [precursor±]

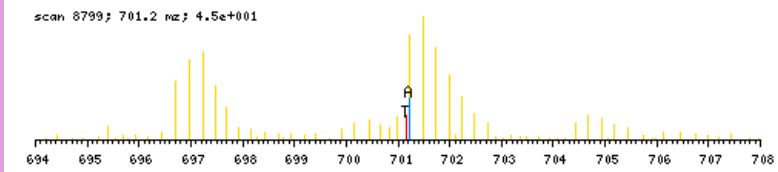

zoomed in precursor plot; T=theoretical m/z, A=acquired m/z

| b <sup>+</sup> | #  | AA # | y <sup>+</sup> | y <sup>2+</sup> |
|----------------|----|------|----------------|-----------------|
| 114.0555       | 1  | A 27 |                |                 |
| 171.0770       | 2  | G 26 | 2688.5832      | 1344.7955       |
| 333.2351       | 3  | K 25 | 2631.5617      | 1316.2848       |
| 495.3932       | 4  | K 24 | 2469.4036      | 1235.2057       |
| 594.4616       | 5  | V 23 | 2307.2455      | 1154.1267       |
| 754.4922       | 6  | C 22 | 2208.1771      | 1104.5925       |
| 867.5763       | 7  | I 21 | 2048.1465      | 1024.5772       |
| 966.6447       | 8  | V 20 | 1935.0625      | 968.0351        |
| 1023.6661      | 9  | G 19 | 1835.9941      | 918.5009        |
| 1110.6982      | 10 | S 18 | 1778.9726      | 889.9902        |
| 1167.7196      | 11 | G 17 | 1691.9406      | 846.4742        |
| 1281.7626      | 12 | N 16 | 1634.9191      | 817.9635        |
| 1467.8419      | 13 | W 15 | 1520.8762      | 760.9420        |
| 1524.8633      | 14 | G 14 | 1334.7969      | 667.9023        |
| 1611.8954      | 15 | S 13 | 1277.7754      | 639.3916        |
| 1682.9325      | 16 | A 12 | 1190.7434      | 595.8756        |
| 1796.0165      | 17 | I 11 | 1119.7063      | 560.3570        |
| 1867.0536      | 18 | A 10 | 1006.6222      | 503.8150        |
| 2029.2117      | 19 | K 9  | 935.5851       | 468.2965        |
| 2142.2958      | 20 | I 8  | 773.4270       | 387.2174        |
| 2241.3642      | 21 | V 7  | 660.3429       | 330.6754        |
| 2298.3857      | 22 | G 6  | 561.2745       | 281.1412        |
| 2385.4177      | 23 | S 5  | 504.2530       | 252.6304        |
| 2499.4606      | 24 | N 4  | 417.2210       | 209.1144        |
| 2570.4978      | 25 | A 3  | 303.1781       | 152.0930        |
| 2627.5192      | 26 | G 2  | 232.1410       | 116.5744        |
|                | 27 | R 1  | 175.1195       | 88.0637         |

N-term:+43.02 K(3):+162.16  
K(4):+162.16 C(6):+160.03  
K(19):+162.16

X-range:

-

MassTol: Y-zoom:

MassType:

AVG  MONO

Axis:

1  2

Label:

I  M  -

Ions:

a  +  2+  3+

b  +  2+  3+

c  +  2+  3+

x  +  2+  3+

y  +  2+  3+

z  +  2+  3+

hide H<sub>2</sub>O/NH<sub>3</sub>

zoom 112-122

GO

AGKPVLYHYFDGR, MH+ 1429.7593, m/z 477.2579  
 L OSG40 P180811 230811-s1.05933.05933.3.dta

X-range:

-

MassTol: Y-zoom:

MassType:

AVG  MONO

Axis:

1  2

Label:

I  M  -

Ions:

a  +  2+  3+

b  +  2+  3+

c  +  2+  3+

x  +  2+  3+

y  +  2+  3+

z  +  2+  3+

hide H<sub>2</sub>O/NH<sub>3</sub>

zoom 112-122

GO

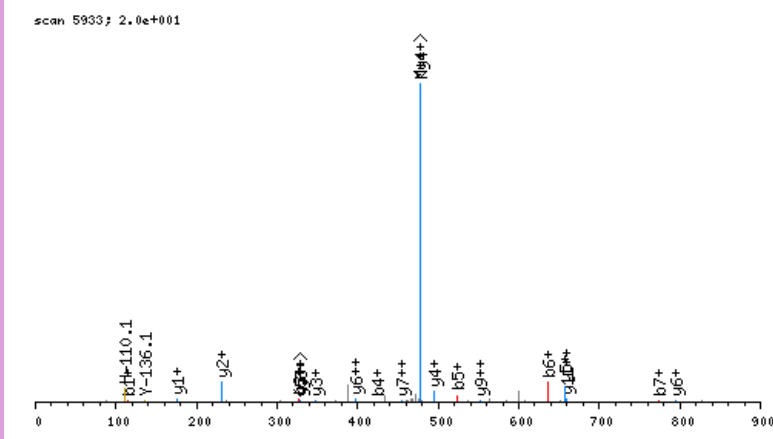

click image to zoom in; click top corners to zoom out [\[precursor±\]](#)

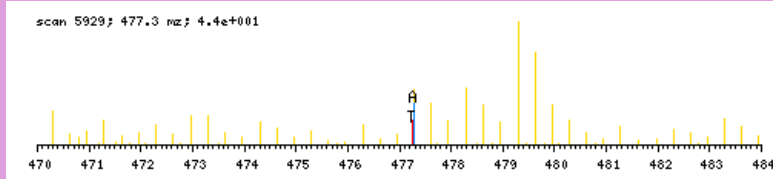

zoomed in precursor plot; T=theoretical m/z, A=acquired m/z

| b <sup>+</sup> | #  | AA # | y <sup>+</sup> | y <sup>2+</sup> |
|----------------|----|------|----------------|-----------------|
| 114.0555       | 1  | A 12 |                |                 |
| 171.0770       | 2  | G 11 | 1316.7116      | 658.8597        |
| 327.2033       | 3  | K 10 | 1259.6901      | 630.3490        |
| 424.2560       | 4  | P 9  | 1103.5638      | 552.2858        |
| 523.3245       | 5  | V 8  | 1006.5110      | 503.7594        |
| 636.4085       | 6  | L 7  | 907.4426       | 454.2252        |
| 773.4674       | 7  | H 6  | 794.3586       | 397.6832        |
| 936.5308       | 8  | Y 5  | 657.2997       | 329.1537        |
| 1083.5992      | 9  | F 4  | 494.2363       | 247.6221        |
| 1198.6261      | 10 | D 3  | 347.1679       | 174.0879        |
| 1255.6476      | 11 | G 2  | 232.1410       | 116.5744        |
|                | 12 | R 1  | 175.1195       | 88.0637         |

N-term:+43.02 K(3):+156.13

AGKPVLYHFNAR, MH+ 1448.8227, m/z 483.6124  
 L OSG40 P180811 230811-s1.05391.05391.3.dta

X-range:

-

MassTol: Y-zoom:

MassType:

AVG  MONO

Axis:

1  2

Label:

I  M  -

Ions:

a  +  2+  3+

b  +  2+  3+

c  +  2+  3+

x  +  2+  3+

y  +  2+  3+

z  +  2+  3+

hide H<sub>2</sub>O/NH<sub>3</sub>

zoom 112-122

GO

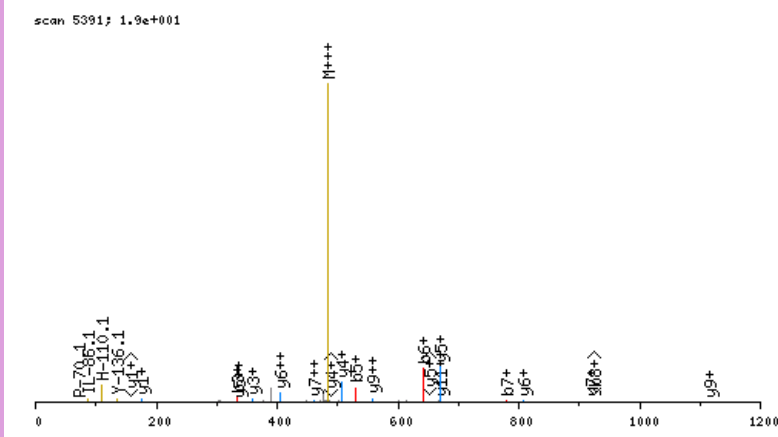

click image to zoom in; click top corners to zoom out [\[precursor±\]](#)

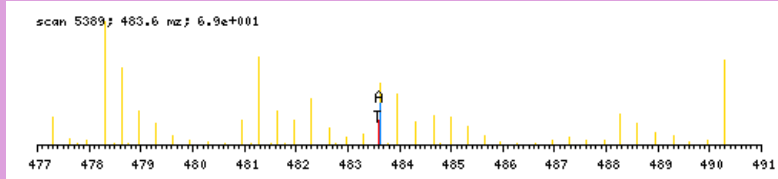

zoomed in precursor plot; T=theoretical m/z, A=acquired m/z

| b <sup>+</sup> | #  | AA # | y <sup>+</sup> | y <sup>2+</sup> |
|----------------|----|------|----------------|-----------------|
| 114.0555       | 1  | A 12 |                |                 |
| 171.0770       | 2  | G 11 | 1335.7750      | 668.3914        |
| 333.2351       | 3  | K 10 | 1278.7535      | 639.8807        |
| 430.2878       | 4  | P 9  | 1116.5954      | 558.8016        |
| 529.3563       | 5  | V 8  | 1019.5427      | 510.2752        |
| 642.4403       | 6  | L 7  | 920.4743       | 460.7410        |
| 779.4992       | 7  | H 6  | 807.3902       | 404.1990        |
| 942.5626       | 8  | Y 5  | 670.3313       | 335.6696        |
| 1089.6310      | 9  | F 4  | 507.2680       | 254.1379        |
| 1203.6739      | 10 | N 3  | 360.1995       | 180.6037        |
| 1274.7110      | 11 | A 2  | 246.1566       | 123.5822        |
|                | 12 | R 1  | 175.1195       | 88.0637         |

N-term:+43.02 K(3):+162.16



AGLGHPSAFGR, MH+ 1111.5649, m/z 556.2861  
 L OSG38 P180811 230811-s1.04125.04125.2.dta

scan 4125; 1.3e+001

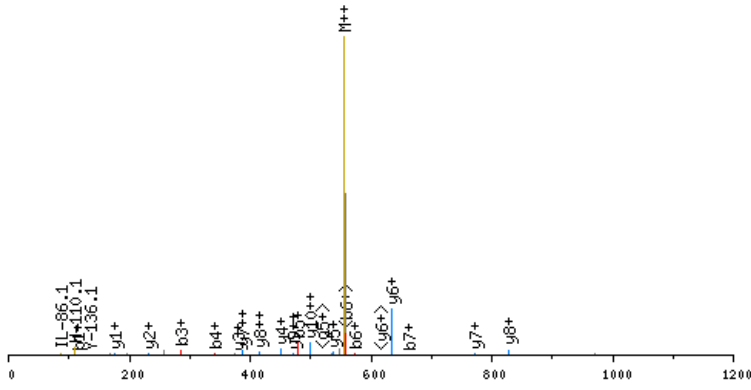

click image to zoom in; click top corners to zoom out [\[precursor±\]](#)

scan 4124; 556.3 m/z; 1.5e+001

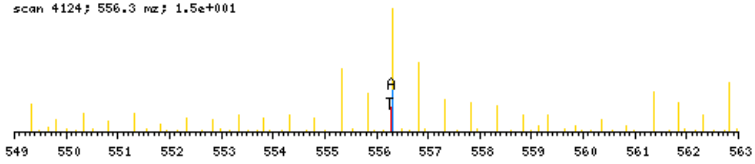

zoomed in precursor plot; T=theoretical m/z, A=acquired m/z

X-range:

-

MassTol: Y-zoom:

MassType:

AVG  MONO

Axis:

1  2

Label:

I  M  -

Ions:

a  +  2+  3+

b  +  2+  3+

c  +  2+  3+

x  +  2+  3+

y  +  2+  3+

z  +  2+  3+

hide H<sub>2</sub>O/NH<sub>3</sub>

zoom 112-122

GO

| b <sup>+</sup> | #  | AA # | y <sup>+</sup> | y <sup>2+</sup>   |
|----------------|----|------|----------------|-------------------|
| 114.0555       | 1  | A    | 11             |                   |
| 171.0770       | 2  | G    | 10             | 998.5172 499.7625 |
| 284.1610       | 3  | L    | 9              | 941.4957 471.2518 |
| 341.1825       | 4  | G    | 8              | 828.4117 414.7097 |
| 478.2414       | 5  | H    | 7              | 771.3902 386.1990 |
| 575.2942       | 6  | P    | 6              | 634.3313 317.6696 |
| 662.3262       | 7  | S    | 5              | 537.2785 269.1432 |
| 733.3633       | 8  | A    | 4              | 450.2465 225.6272 |
| 880.4317       | 9  | F    | 3              | 379.2094 190.1086 |
| 937.4532       | 10 | G    | 2              | 232.1410 116.5744 |
|                | 11 | R    | 1              | 175.1195 88.0637  |

N-term:+43.02

AGLLKTTGLVGLAVCDTPHER, MH+ 2434.3492, m/z 609.3428  
 L OSG40 P180811 230811-s1.08955.08955.4.dta

X-range:

-

MassTol: Y-zoom:

MassType:

AVG  MONO

Axis:

1  2

Label:

I  M  -

Ions:

a  +  2+  3+

b  +  2+  3+

c  +  2+  3+

x  +  2+  3+

y  +  2+  3+

z  +  2+  3+

hide H<sub>2</sub>O/NH<sub>3</sub>

zoom 112-122

GO

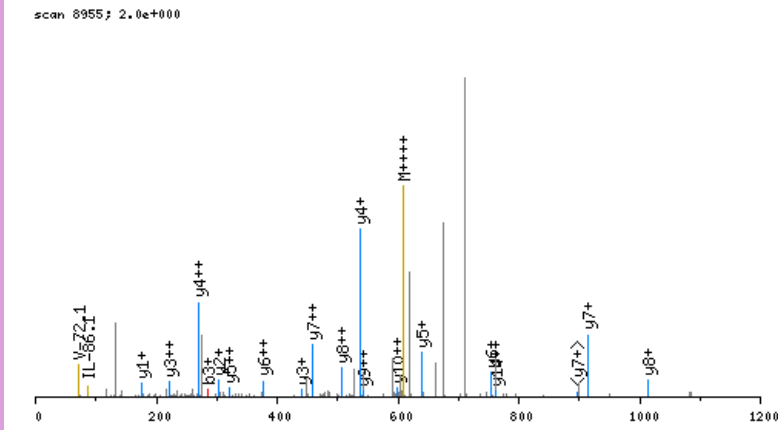

click image to zoom in; click top corners to zoom out [\[precursor±\]](#)

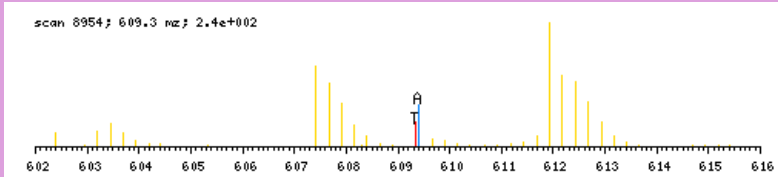

zoomed in precursor plot; T=theoretical m/z, A=acquired m/z

| b <sup>+</sup> | #  | AA | #  | y <sup>+</sup> | y <sup>2+</sup> |
|----------------|----|----|----|----------------|-----------------|
| 114.0555       | 1  | A  | 22 |                |                 |
| 171.0770       | 2  | G  | 21 | 2321.3015      | 1161.1547       |
| 284.1610       | 3  | L  | 20 | 2264.2801      | 1132.6439       |
| 397.2451       | 4  | L  | 19 | 2151.1960      | 1076.1019       |
| 553.3714       | 5  | K  | 18 | 2038.1119      | 1019.5599       |
| 709.4977       | 6  | K  | 17 | 1881.9856      | 941.4967        |
| 810.5454       | 7  | T  | 16 | 1725.8593      | 863.4336        |
| 911.5931       | 8  | T  | 15 | 1624.8117      | 812.9097        |
| 968.6145       | 9  | G  | 14 | 1523.7640      | 762.3859        |
| 1081.6986      | 10 | L  | 13 | 1466.7425      | 733.8752        |
| 1180.7670      | 11 | V  | 12 | 1353.6585      | 677.3331        |
| 1237.7885      | 12 | G  | 11 | 1254.5900      | 627.7989        |
| 1350.8725      | 13 | L  | 10 | 1197.5686      | 599.2882        |
| 1421.9096      | 14 | A  | 9  | 1084.4845      | 542.7462        |
| 1520.9781      | 15 | V  | 8  | 1013.4474      | 507.2276        |
| 1681.0087      | 16 | C  | 7  | 914.3790       | 457.6934        |
| 1796.0356      | 17 | D  | 6  | 754.3484       | 377.6781        |
| 1897.0833      | 18 | T  | 5  | 639.3214       | 320.1646        |
| 1994.1360      | 19 | P  | 4  | 538.2738       | 269.6408        |
| 2131.1950      | 20 | H  | 3  | 441.2210       | 221.1144        |
| 2260.2376      | 21 | E  | 2  | 304.1621       | 152.5850        |
|                | 22 | R  | 1  | 175.1195       | 88.0637         |

N-term:+43.02 K(5):+156.13  
 K(6):+156.13 C(16):+160.03

AGLNSLEAVKR, MH+ 1227.7062, m/z 614.3567  
 L OSG38 P180811 230811-s1.05138.05138.2.dta

X-range:

-

MassTol: Y-zoom:

MassType:

AVG  MONO

Axis:

1  2

Label:

I  M  -

Ions:

a  +  2+  3+

b  +  2+  3+

c  +  2+  3+

x  +  2+  3+

y  +  2+  3+

z  +  2+  3+

hide H<sub>2</sub>O/NH<sub>3</sub>

zoom 112-122

GO

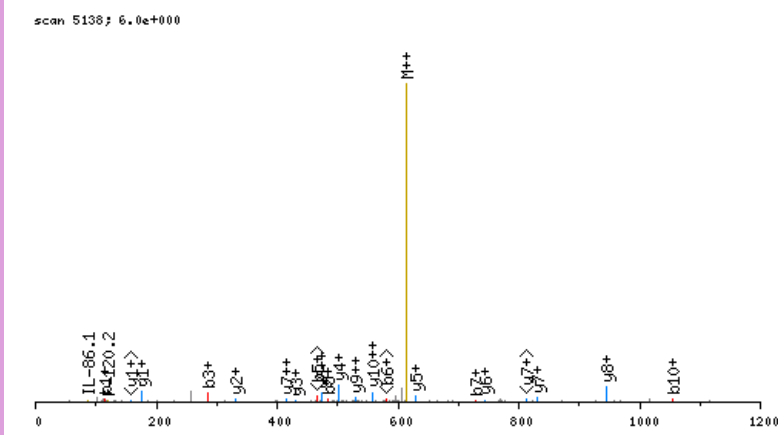

click image to zoom in; click top corners to zoom out [\[precursor±\]](#)

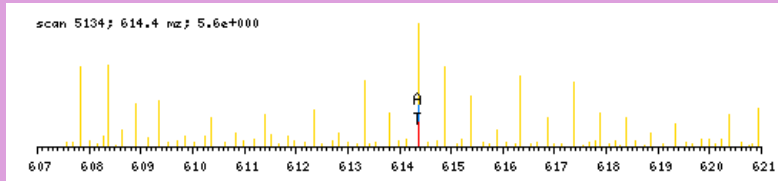

zoomed in precursor plot; T=theoretical m/z, A=acquired m/z

| b <sup>+</sup> | #  | AA # | y <sup>+</sup> | y <sup>2+</sup>    |
|----------------|----|------|----------------|--------------------|
| 114.0555       | 1  | A    | 11             |                    |
| 171.0770       | 2  | G    | 10             | 1114.6585 557.8331 |
| 284.1610       | 3  | L    | 9              | 1057.6370 529.3224 |
| 398.2040       | 4  | N    | 8              | 944.5529 472.7804  |
| 485.2360       | 5  | S    | 7              | 830.5100 415.7589  |
| 598.3201       | 6  | L    | 6              | 743.4780 372.2429  |
| 727.3627       | 7  | E    | 5              | 630.3939 315.7009  |
| 798.3998       | 8  | A    | 4              | 501.3513 251.1796  |
| 897.4682       | 9  | V    | 3              | 430.3142 215.6610  |
| 1053.5945      | 10 | K    | 2              | 331.2458 166.1268  |
|                | 11 | R    | 1              | 175.1195 88.0637   |

N-term:+43.02 K(10):+156.13

AGNKVPPALASHQPDR, MH+ 1733.9511, m/z 578.6552  
 L OSG39 P180811 230811-s1.02868.02868.3.dta

X-range:

-

MassTol: Y-zoom:

MassType:

AVG  MONO

Axis:

1  2

Label:

I  M  -

Ions:

a  +  2+  3+

b  +  2+  3+

c  +  2+  3+

x  +  2+  3+

y  +  2+  3+

z  +  2+  3+

hide H<sub>2</sub>O/NH<sub>3</sub>

zoom 112-122

GO

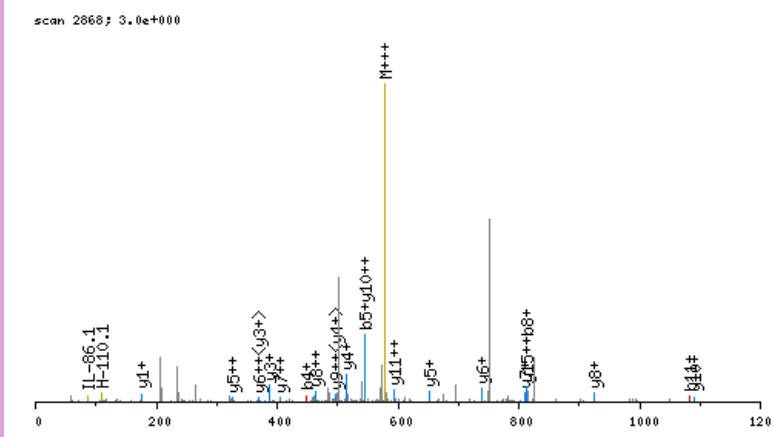

click image to zoom in; click top corners to zoom out [\[precursor±\]](#)

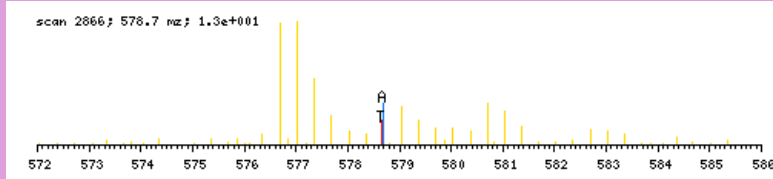

zoomed in precursor plot; T=theoretical m/z, A=acquired m/z

| b <sup>+</sup> | #  | AA | #  | y <sup>+</sup> | y <sup>2+</sup> |
|----------------|----|----|----|----------------|-----------------|
| 114.0555       | 1  | A  | 16 |                |                 |
| 171.0770       | 2  | G  | 15 | 1620.9035      | 810.9556        |
| 285.1199       | 3  | N  | 14 | 1563.8820      | 782.4449        |
| 447.2780       | 4  | K  | 13 | 1449.8391      | 725.4234        |
| 546.3464       | 5  | V  | 12 | 1287.6810      | 644.3444        |
| 643.3992       | 6  | P  | 11 | 1188.6125      | 594.8102        |
| 740.4519       | 7  | P  | 10 | 1091.5598      | 546.2838        |
| 811.4891       | 8  | A  | 9  | 994.5070       | 497.7574        |
| 924.5731       | 9  | L  | 8  | 923.4699       | 462.2389        |
| 995.6102       | 10 | A  | 7  | 810.3858       | 405.6968        |
| 1082.6423      | 11 | S  | 6  | 739.3487       | 370.1783        |
| 1219.7012      | 12 | H  | 5  | 652.3167       | 326.6623        |
| 1347.7598      | 13 | Q  | 4  | 515.2578       | 258.1328        |
| 1444.8125      | 14 | P  | 3  | 387.1992       | 194.1035        |
| 1559.8395      | 15 | D  | 2  | 290.1464       | 145.5771        |
|                | 16 | R  | 1  | 175.1195       | 88.0637         |

N-term:+43.02 K(4):+162.16

AGPGPGALESPR, MH+ 1221.6228, m/z 611.3150  
 L OSG41 P180811 230811-s1.03768.03768.2.dta

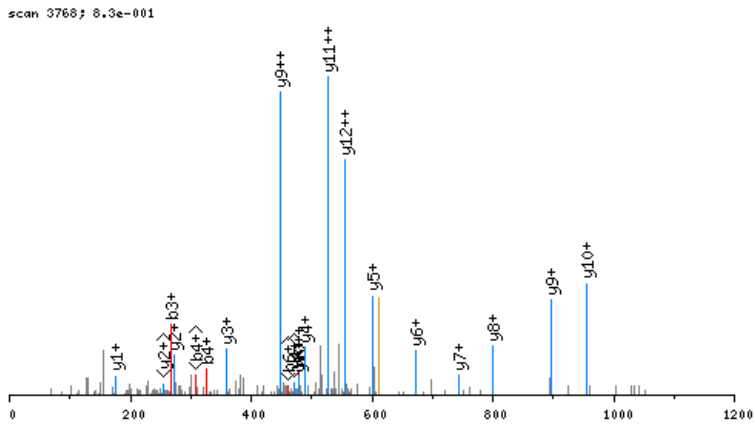

click image to zoom in; click top corners to zoom out [\[precursor±\]](#)

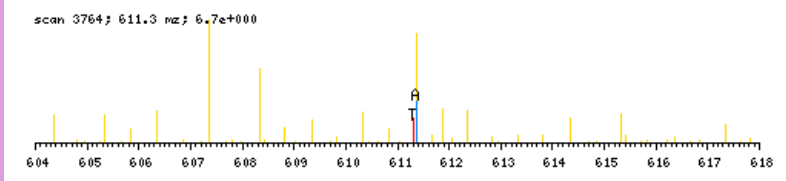

zoomed in precursor plot; T=theoretical m/z, A=acquired m/z

X-range:

-

MassTol: Y-zoom:

MassType:

AVG  MONO

Axis:

1  2

Label:

I  M  -

Ions:

a  +  2+  3+

b  +  2+  3+

c  +  2+  3+

x  +  2+  3+

y  +  2+  3+

z  +  2+  3+

hide H<sub>2</sub>O/NH<sub>3</sub>

zoom 112-122

GO

| b <sup>+</sup> | #  | AA # | y <sup>+</sup> | y <sup>2+</sup> |
|----------------|----|------|----------------|-----------------|
| 114.0555       | 1  | A 13 |                |                 |
| 171.0770       | 2  | G 12 | 1108.5751      | 554.7915        |
| 268.1297       | 3  | P 11 | 1051.5536      | 526.2807        |
| 325.1512       | 4  | G 10 | 954.5009       | 477.7543        |
| 422.2040       | 5  | P 9  | 897.4794       | 449.2436        |
| 479.2254       | 6  | G 8  | 800.4266       | 400.7172        |
| 550.2625       | 7  | A 7  | 743.4052       | 372.2065        |
| 621.2997       | 8  | A 6  | 672.3681       | 336.6879        |
| 734.3837       | 9  | L 5  | 601.3310       | 301.1694        |
| 863.4263       | 10 | E 4  | 488.2469       | 244.6274        |
| 950.4583       | 11 | S 3  | 359.2043       | 180.1061        |
| 1047.5111      | 12 | P 2  | 272.1723       | 136.5900        |
|                | 13 | R 1  | 175.1195       | 88.0637         |

N-term:+43.02

AGSSAEQAADYR, MH+ 1267.5555, m/z 634.2814  
 L OSG41 P180811 230811-s1.02865.02865.2.dta

X-range:

-

MassTol: Y-zoom:

MassType:

AVG  MONO

Axis:

1  2

Label:

I  M  -

Ions:

a  +  2+  3+

b  +  2+  3+

c  +  2+  3+

x  +  2+  3+

y  +  2+  3+

z  +  2+  3+

hide H<sub>2</sub>O/NH<sub>3</sub>

zoom 112-122

GO

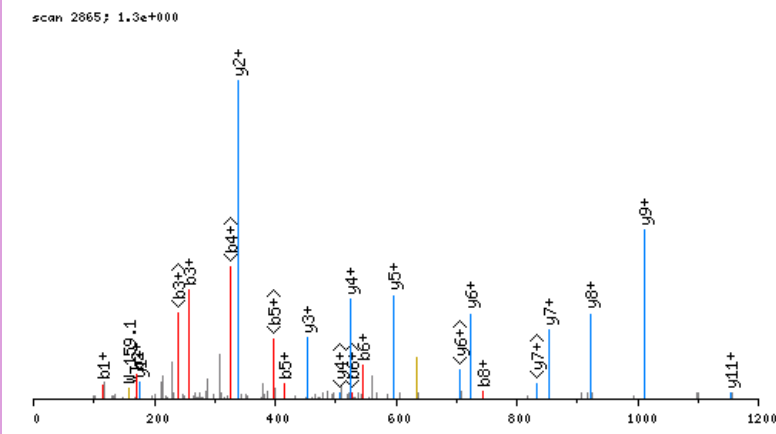

click image to zoom in; click top corners to zoom out [\[precursor±\]](#)

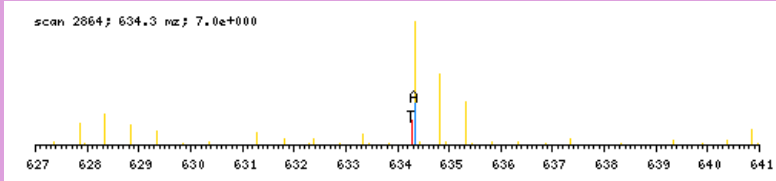

zoomed in precursor plot; T=theoretical m/z, A=acquired m/z

| b <sup>+</sup> | #  | AA # | y <sup>+</sup> | y <sup>2+</sup> |
|----------------|----|------|----------------|-----------------|
| 114.0555       | 1  | A 12 |                |                 |
| 171.0770       | 2  | G 11 | 1154.5078      | 577.7578        |
| 258.1090       | 3  | S 10 | 1097.4863      | 549.2471        |
| 345.1410       | 4  | S 9  | 1010.4543      | 505.7311        |
| 416.1781       | 5  | A 8  | 923.4223       | 462.2151        |
| 545.2207       | 6  | E 7  | 852.3852       | 426.6965        |
| 673.2793       | 7  | Q 6  | 723.3426       | 362.1752        |
| 744.3164       | 8  | A 5  | 595.2840       | 298.1459        |
| 815.3535       | 9  | A 4  | 524.2469       | 262.6274        |
| 930.3805       | 10 | D 3  | 453.2098       | 227.1088        |
| 1093.4438      | 11 | Y 2  | 338.1828       | 169.5953        |
|                | 12 | R 1  | 175.1195       | 88.0637         |

N-term:+43.02

X-range:

0 - 0

MassTol: Y-zoom:

0. 1.

MassType:

AVG  MONO

Axis:

1  2

Label:

I  M  -

Ions:

a  +  2+  3+

b  +  2+  3+

c  +  2+  3+

x  +  2+  3+

y  +  2+  3+

z  +  2+  3+

hide H<sub>2</sub>O/NH<sub>3</sub>

zoom 112-122

GO

AGSVADSDAVVKLDDGHLNNSLGSPVQADVYFPR, MH+ 3583.7669, m/z 896.6972  
L OSG38 P180811 230811-s1.07782.07782.4.dta

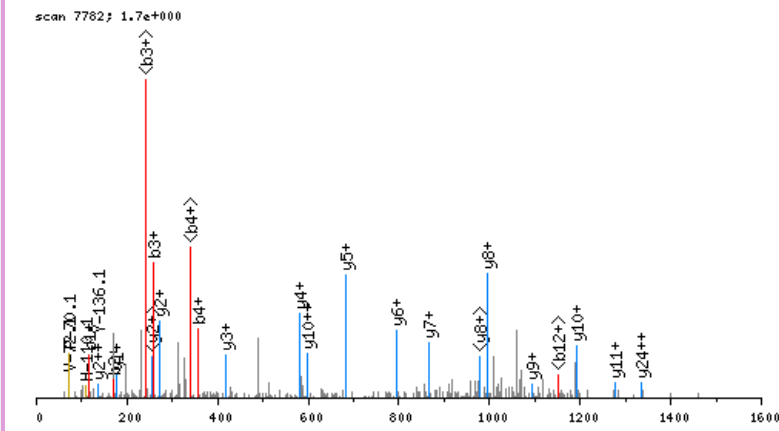

click image to zoom in; click top corners to zoom out

[precursor±]

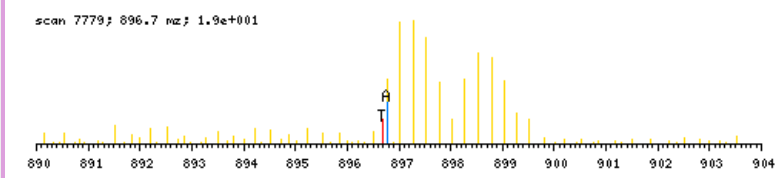

zoomed in precursor plot; T=theoretical m/z, A=acquired m/z

| b <sup>+</sup> | #  | AA | #  | y <sup>+</sup> | y <sup>2+</sup> |
|----------------|----|----|----|----------------|-----------------|
| 114.0555       | 1  | A  | 34 |                |                 |
| 171.0770       | 2  | G  | 33 | 3470.7192      | 1735.8635       |
| 258.1090       | 3  | S  | 32 | 3413.6978      | 1707.3528       |
| 357.1774       | 4  | V  | 31 | 3326.6657      | 1663.8368       |
| 428.2145       | 5  | A  | 30 | 3227.5973      | 1614.3026       |
| 543.2415       | 6  | D  | 29 | 3156.5602      | 1578.7840       |
| 630.2735       | 7  | S  | 28 | 3041.5333      | 1521.2706       |
| 745.3004       | 8  | D  | 27 | 2954.5012      | 1477.7545       |
| 816.3376       | 9  | A  | 26 | 2839.4743      | 1420.2411       |
| 915.4060       | 10 | V  | 25 | 2768.4372      | 1384.7225       |
| 1014.4744      | 11 | V  | 24 | 2669.3688      | 1335.1883       |
| 1170.6007      | 12 | K  | 23 | 2570.3004      | 1285.6541       |
| 1283.6848      | 13 | L  | 22 | 2414.1741      | 1207.5909       |
| 1398.7117      | 14 | D  | 21 | 2301.0900      | 1151.0489       |
| 1513.7386      | 15 | D  | 20 | 2186.0631      | 1093.5354       |
| 1570.7601      | 16 | G  | 19 | 2071.0361      | 1036.0220       |
| 1707.8190      | 17 | H  | 18 | 2014.0146      | 1007.5112       |
| 1820.9031      | 18 | L  | 17 | 1876.9557      | 938.9818        |
| 1934.9460      | 19 | N  | 16 | 1763.8717      | 882.4397        |
| 2048.9889      | 20 | N  | 15 | 1649.8287      | 825.4183        |
| 2136.0210      | 21 | S  | 14 | 1535.7858      | 768.3968        |
| 2249.1050      | 22 | L  | 13 | 1448.7538      | 724.8808        |
| 2306.1265      | 23 | G  | 12 | 1335.6697      | 668.3388        |
| 2393.1585      | 24 | S  | 11 | 1278.6483      | 639.8280        |
| 2490.2113      | 25 | P  | 10 | 1191.6162      | 596.3120        |
| 2589.2797      | 26 | V  | 9  | 1094.5635      | 547.7856        |
| 2717.3383      | 27 | Q  | 8  | 995.4951       | 498.2514        |
| 2788.3754      | 28 | A  | 7  | 867.4365       | 434.2222        |
| 2903.4023      | 29 | D  | 6  | 796.3994       | 398.7036        |
| 3002.4707      | 30 | V  | 5  | 681.3724       | 341.1901        |
| 3165.5341      | 31 | Y  | 4  | 582.3040       | 291.6559        |
| 3312.6025      | 32 | F  | 3  | 419.2407       | 210.1243        |
| 3409.6553      | 33 | P  | 2  | 272.1723       | 136.5900        |
|                | 34 | R  | 1  | 175.1195       | 88.0637         |

N-term:+43.02 K(12) :+156.13

AGTTTIEAVKR, MH+ 1222.7220, m/z 611.8646  
 L OSG37 P180811 230811-s1.03366.03366.2.dta

X-range:

-

MassTol: Y-zoom:

MassType:

AVG  MONO

Axis:

1  2

Label:

I  M  -

Ions:

a  +  2+  3+

b  +  2+  3+

c  +  2+  3+

x  +  2+  3+

y  +  2+  3+

z  +  2+  3+

hide H<sub>2</sub>O/NH<sub>3</sub>

zoom 112-122

GO

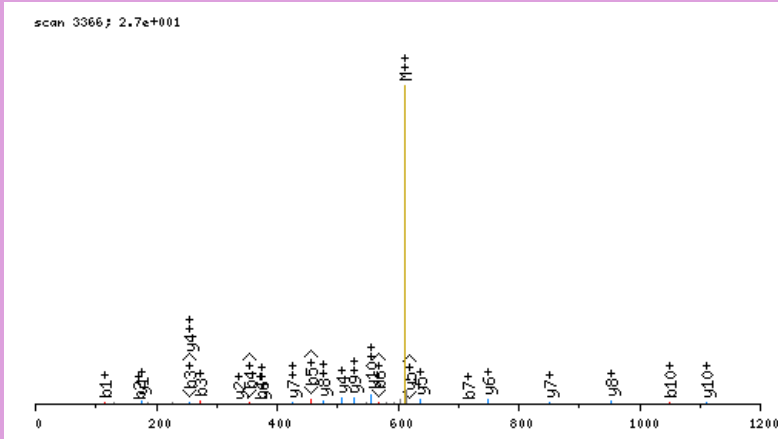

click image to zoom in; click top corners to zoom out [\[precursor±\]](#)

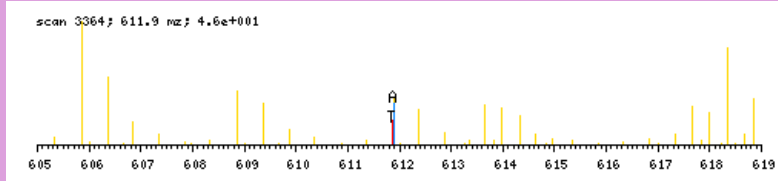

zoomed in precursor plot; T=theoretical m/z, A=acquired m/z

| b <sup>+</sup> | #  | AA # | y <sup>+</sup> | y <sup>2+</sup> |
|----------------|----|------|----------------|-----------------|
| 114.0555       | 1  | A 11 |                |                 |
| 171.0770       | 2  | G 10 | 1109.6743      | 555.3411        |
| 272.1247       | 3  | T 9  | 1052.6528      | 526.8303        |
| 373.1723       | 4  | T 8  | 951.6051       | 476.3065        |
| 474.2200       | 5  | T 7  | 850.5575       | 425.7826        |
| 587.3041       | 6  | I 6  | 749.5098       | 375.2588        |
| 716.3467       | 7  | E 5  | 636.4257       | 318.7168        |
| 787.3838       | 8  | A 4  | 507.3831       | 254.1955        |
| 886.4522       | 9  | V 3  | 436.3460       | 218.6769        |
| 1048.6103      | 10 | K 2  | 337.2776       | 169.1427        |
|                | 11 | R 1  | 175.1195       | 88.0637         |

N-term:+43.02 K(10):+162.16



AGVDQHEGTIQVQGQNLFFR, MH+ 2286.1267, m/z 762.7138  
 L OSG36 P180811 230811-s1.05317.05317.3.dta

scan 5317; 8.5e-001

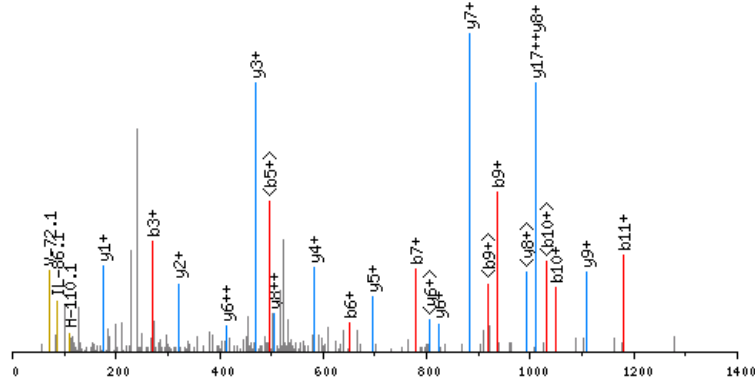

click image to zoom in; click top corners to zoom out [precursor±]

scan 5314; 762.7 m/z; 8.5e+000

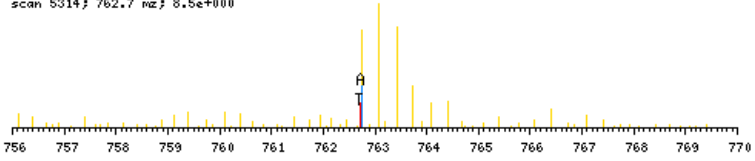

zoomed in precursor plot; T=theoretical m/z, A=acquired m/z

X-range:

-

MassTol: Y-zoom:

MassType:

AVG  MONO

Axis:

1  2

Label:

I  M  -

Ions:

a  +  2+  3+

b  +  2+  3+

c  +  2+  3+

x  +  2+  3+

y  +  2+  3+

z  +  2+  3+

hide H<sub>2</sub>O/NH<sub>3</sub>

zoom 112-122

GO

| b <sup>+</sup> | #  | AA # | y <sup>+</sup> | y <sup>2+</sup> |
|----------------|----|------|----------------|-----------------|
| 114.0555       | 1  | A 20 |                |                 |
| 171.0770       | 2  | G 19 | 2173.0790      | 1087.0434       |
| 270.1454       | 3  | V 18 | 2116.0576      | 1058.5327       |
| 385.1723       | 4  | D 17 | 2016.9892      | 1008.9985       |
| 513.2309       | 5  | Q 16 | 1901.9622      | 951.4850        |
| 650.2898       | 6  | H 15 | 1773.9036      | 887.4557        |
| 779.3324       | 7  | E 14 | 1636.8447      | 818.9263        |
| 836.3539       | 8  | G 13 | 1507.8021      | 754.4050        |
| 937.4016       | 9  | T 12 | 1450.7807      | 725.8942        |
| 1050.4856      | 10 | I 11 | 1349.7330      | 675.3704        |
| 1178.5442      | 11 | Q 10 | 1236.6489      | 618.8284        |
| 1277.6126      | 12 | V 9  | 1108.5904      | 554.7991        |
| 1405.6712      | 13 | Q 8  | 1009.5219      | 505.2649        |
| 1462.6927      | 14 | G 7  | 881.4634       | 441.2356        |
| 1590.7512      | 15 | Q 6  | 824.4419       | 412.7249        |
| 1704.7942      | 16 | N 5  | 696.3833       | 348.6956        |
| 1817.8782      | 17 | L 4  | 582.3404       | 291.6741        |
| 1964.9466      | 18 | F 3  | 469.2563       | 235.1321        |
| 2112.0151      | 19 | F 2  | 322.1879       | 161.5979        |
|                | 20 | R 1  | 175.1195       | 88.0637         |

N-term:+43.02

AGVRPDNVAEUVVAGAR, MH+ 1622.8615, m/z 541.6253  
 L OSG37 P180811 230811-s1.06275.06275.3.dta

X-range:

-

MassTol: Y-zoom:

MassType:

AVG  MONO

Axis:

1  2

Label:

I  M  -

Ions:

a  +  2+  3+

b  +  2+  3+

c  +  2+  3+

x  +  2+  3+

y  +  2+  3+

z  +  2+  3+

hide H<sub>2</sub>O/NH<sub>3</sub>

zoom 112-122

GO

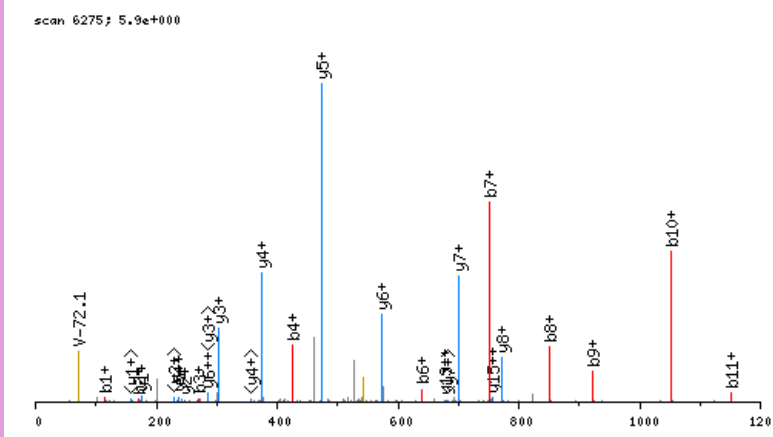

click image to zoom in; click top corners to zoom out [\[precursor±\]](#)

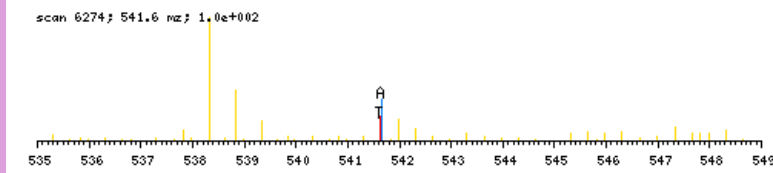

zoomed in precursor plot; T=theoretical m/z, A=acquired m/z

| b <sup>+</sup> | #  | AA # | y <sup>+</sup> | y <sup>2+</sup> |
|----------------|----|------|----------------|-----------------|
| 114.0555       | 1  | A 16 |                |                 |
| 171.0770       | 2  | G 15 | 1509.8138      | 755.4108        |
| 270.1454       | 3  | V 14 | 1452.7923      | 726.9001        |
| 426.2465       | 4  | R 13 | 1353.7239      | 677.3659        |
| 523.2993       | 5  | P 12 | 1197.6228      | 599.3153        |
| 638.3262       | 6  | D 11 | 1100.5700      | 550.7889        |
| 752.3691       | 7  | N 10 | 985.5431       | 493.2754        |
| 851.4376       | 8  | V 9  | 871.5001       | 436.2540        |
| 922.4747       | 9  | A 8  | 772.4317       | 386.7198        |
| 1051.5173      | 10 | E 7  | 701.3946       | 351.2012        |
| 1150.5857      | 11 | V 6  | 572.3520       | 286.6799        |
| 1249.6541      | 12 | V 5  | 473.2836       | 237.1457        |
| 1320.6912      | 13 | A 4  | 374.2152       | 187.6115        |
| 1377.7127      | 14 | G 3  | 303.1781       | 152.0930        |
| 1448.7498      | 15 | A 2  | 246.1566       | 123.5822        |
|                | 16 | R 1  | 175.1195       | 88.0637         |

N-term:+43.02

AHIFVYGTKLR, MH+ 1374.7898, m/z 458.9348  
 L OSG40 P180811 230811-s1.06313.06313.3.dta

scan 6313; 1.1e+001

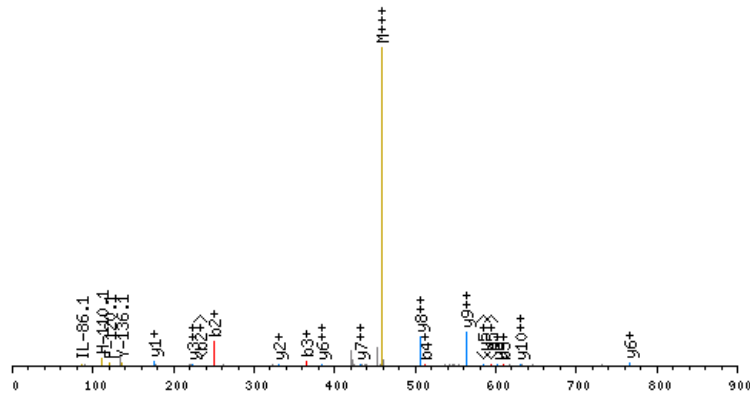

click image to zoom in; click top corners to zoom out [\[precursor±\]](#)

scan 6309; 458.9 m/z; 2.4e+001

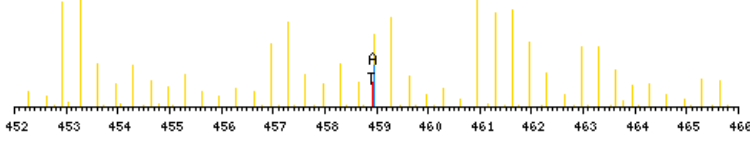

zoomed in precursor plot; T=theoretical m/z, A=acquired m/z

X-range:

-

MassTol: Y-zoom:

MassType:

AVG  MONO

Axis:

1  2

Label:

I  M  -

Ions:

a  +  2+  3+

b  +  2+  3+

c  +  2+  3+

x  +  2+  3+

y  +  2+  3+

z  +  2+  3+

hide H<sub>2</sub>O/NH<sub>3</sub>

zoom 112-122

GO

| b <sup>+</sup> | #  | AA # | y <sup>+</sup> | y <sup>2+</sup> |
|----------------|----|------|----------------|-----------------|
| 114.0555       | 1  | A 11 |                |                 |
| 251.1144       | 2  | H 10 | 1261.7421      | 631.3750        |
| 364.1985       | 3  | I 9  | 1124.6832      | 562.8455        |
| 511.2669       | 4  | F 8  | 1011.5992      | 506.3035        |
| 610.3353       | 5  | V 7  | 864.5307       | 432.7693        |
| 773.3986       | 6  | Y 6  | 765.4623       | 383.2351        |
| 830.4201       | 7  | G 5  | 602.3990       | 301.7034        |
| 931.4678       | 8  | T 4  | 545.3775       | 273.1927        |
| 1044.5519      | 9  | L 3  | 444.3299       | 222.6688        |
| 1200.6782      | 10 | K 2  | 331.2458       | 166.1268        |
|                | 11 | R 1  | 175.1195       | 88.0637         |

N-term:+43.02 K(10):+156.13

AKIAQGAMYR, MH+ 1184.6674, m/z 592.8374  
 L OSG37 P180811 230811-s1.03930.03930.2.dta

scan 3930; 6.2e+001

X-range:

-

MassTol: Y-zoom:

MassType:

AVG  MONO

Axis:

1  2

Label:

I  M  -

Ions:

a  +  2+  3+

b  +  2+  3+

c  +  2+  3+

x  +  2+  3+

y  +  2+  3+

z  +  2+  3+

hide H<sub>2</sub>O/NH<sub>3</sub>

zoom 112-122

GO

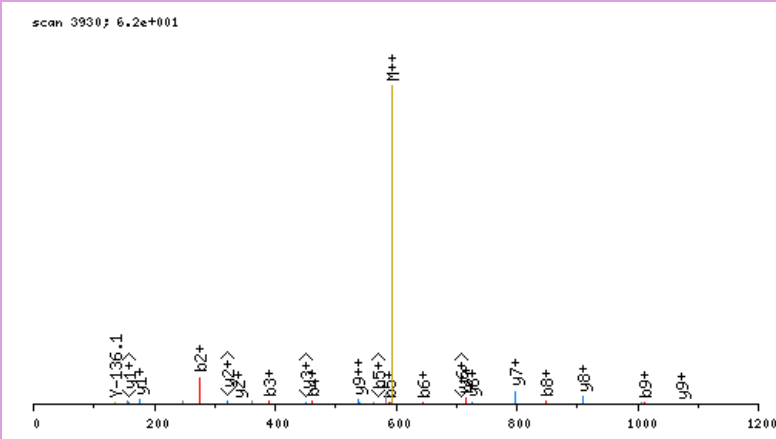

click image to zoom in; click top corners to zoom out [\[precursor±\]](#)

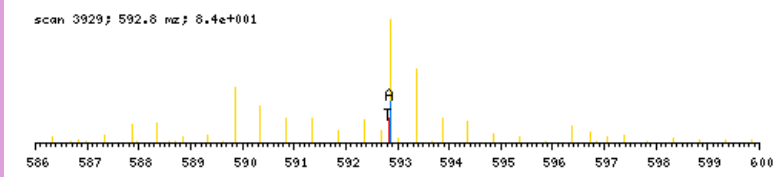

zoomed in precursor plot; T=theoretical m/z, A=acquired m/z

| b <sup>+</sup> | #  | AA # | y <sup>+</sup> | y <sup>2+</sup> |
|----------------|----|------|----------------|-----------------|
| 114.0555       | 1  | A 10 |                |                 |
| 276.2136       | 2  | K 9  | 1071.6197      | 536.3138        |
| 389.2977       | 3  | I 8  | 909.4616       | 455.2347        |
| 460.3348       | 4  | A 7  | 796.3776       | 398.6927        |
| 588.3934       | 5  | Q 6  | 725.3405       | 363.1741        |
| 645.4148       | 6  | G 5  | 597.2819       | 299.1449        |
| 716.4519       | 7  | A 4  | 540.2604       | 270.6341        |
| 847.4924       | 8  | M 3  | 469.2233       | 235.1156        |
| 1010.5558      | 9  | Y 2  | 338.1828       | 169.5953        |
|                | 10 | R 1  | 175.1195       | 88.0637         |

N-term:+43.02 K(2):+162.16

AKNGSEADIDESLYSR, MH+ 1824.8616, m/z 608.9587  
 L OSG37 P180811 230811-s1.04667.04667.3.dta

X-range:

-

MassTol: Y-zoom:

MassType:

AVG  MONO

Axis:

1  2

Label:

I  M  -

Ions:

a  +  2+  3+

b  +  2+  3+

c  +  2+  3+

x  +  2+  3+

y  +  2+  3+

z  +  2+  3+

hide H<sub>2</sub>O/NH<sub>3</sub>

zoom 112-122

GO

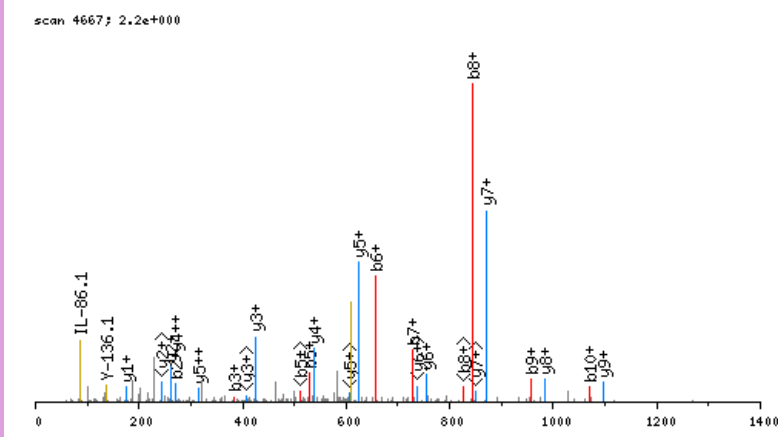

click image to zoom in; click top corners to zoom out [\[precursor±\]](#)

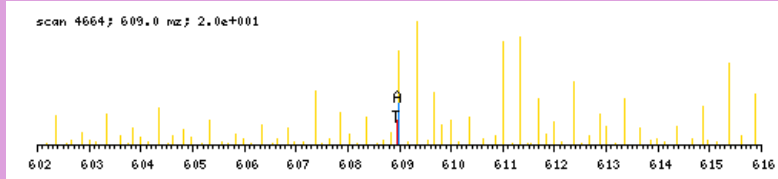

zoomed in precursor plot; T=theoretical m/z, A=acquired m/z

| b <sup>+</sup> | #  | AA | #  | y <sup>+</sup> | y <sup>2+</sup> |
|----------------|----|----|----|----------------|-----------------|
| 114.0555       | 1  | A  | 16 |                |                 |
| 270.1818       | 2  | K  | 15 | 1711.8139      | 856.4109        |
| 384.2247       | 3  | N  | 14 | 1555.6876      | 778.3477        |
| 441.2462       | 4  | G  | 13 | 1441.6447      | 721.3263        |
| 528.2782       | 5  | S  | 12 | 1384.6232      | 692.8155        |
| 657.3208       | 6  | E  | 11 | 1297.5912      | 649.2995        |
| 728.3579       | 7  | A  | 10 | 1168.5486      | 584.7782        |
| 843.3849       | 8  | D  | 9  | 1097.5115      | 549.2597        |
| 956.4689       | 9  | I  | 8  | 982.4846       | 491.7462        |
| 1071.4959      | 10 | D  | 7  | 869.4005       | 435.2042        |
| 1200.5385      | 11 | E  | 6  | 754.3735       | 377.6907        |
| 1287.5705      | 12 | S  | 5  | 625.3310       | 313.1694        |
| 1400.6546      | 13 | L  | 4  | 538.2989       | 269.6534        |
| 1563.7179      | 14 | Y  | 3  | 425.2149       | 213.1113        |
| 1650.7499      | 15 | S  | 2  | 262.1515       | 131.5797        |
|                | 16 | R  | 1  | 175.1195       | 88.0637         |

N-term:+43.02 K(2):+156.13

AKTEEMVQTEEMETPR, MH+ 1978.9102, m/z 660.3083  
 L OSG37 P180811 230811-s1.04928.04928.3.dta

X-range:

-

MassTol: Y-zoom:

MassType:

AVG  MONO

Axis:

1  2

Label:

I  M  -

Ions:

a  +  2+  3+

b  +  2+  3+

c  +  2+  3+

x  +  2+  3+

y  +  2+  3+

z  +  2+  3+

hide H<sub>2</sub>O/NH<sub>3</sub>

zoom 112-122

GO

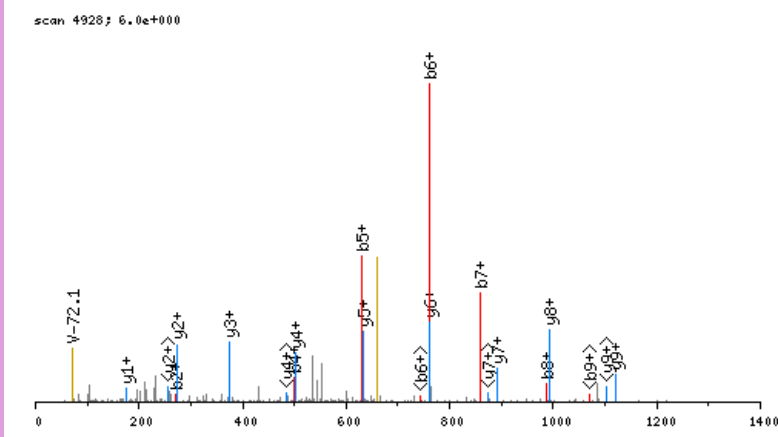

click image to zoom in; click top corners to zoom out [\[precursor±\]](#)

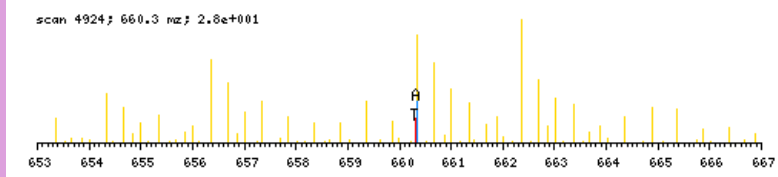

zoomed in precursor plot; T=theoretical m/z, A=acquired m/z

| b <sup>+</sup> | #  | AA # | y <sup>+</sup> | y <sup>2+</sup> |
|----------------|----|------|----------------|-----------------|
| 114.0555       | 1  | A 16 |                |                 |
| 270.1818       | 2  | K 15 | 1865.8625      | 933.4352        |
| 371.2295       | 3  | T 14 | 1709.7362      | 855.3720        |
| 500.2721       | 4  | E 13 | 1608.6885      | 804.8482        |
| 629.3147       | 5  | E 12 | 1479.6460      | 740.3269        |
| 760.3552       | 6  | M 11 | 1350.6034      | 675.8056        |
| 859.4236       | 7  | V 10 | 1219.5629      | 610.2854        |
| 987.4822       | 8  | Q 9  | 1120.4945      | 560.7511        |
| 1088.5298      | 9  | T 8  | 992.4359       | 496.7219        |
| 1217.5724      | 10 | E 7  | 891.3882       | 446.1980        |
| 1346.6150      | 11 | E 6  | 762.3456       | 381.6767        |
| 1477.6555      | 12 | M 5  | 633.3030       | 317.1554        |
| 1606.6981      | 13 | E 4  | 502.2625       | 251.6352        |
| 1707.7458      | 14 | T 3  | 373.2199       | 187.1139        |
| 1804.7985      | 15 | P 2  | 272.1723       | 136.5900        |
|                | 16 | R 1  | 175.1195       | 88.0637         |

N-term:+43.02 K(2):+156.13

AKVAKDLNPGVQKMSLGQQQSAR, MH+ 2598.5251, m/z 650.3867  
 L OSG40 P180811 230811-s1.05271.05271.4.dta

X-range:

-

MassTol: Y-zoom:

MassType:

AVG  MONO

Axis:

1  2

Label:

I  M  -

Ions:

a  +  2+  3+

b  +  2+  3+

c  +  2+  3+

x  +  2+  3+

y  +  2+  3+

z  +  2+  3+

hide H<sub>2</sub>O/NH<sub>3</sub>

zoom 112-122

GO

scan 5271; 1.6e+001

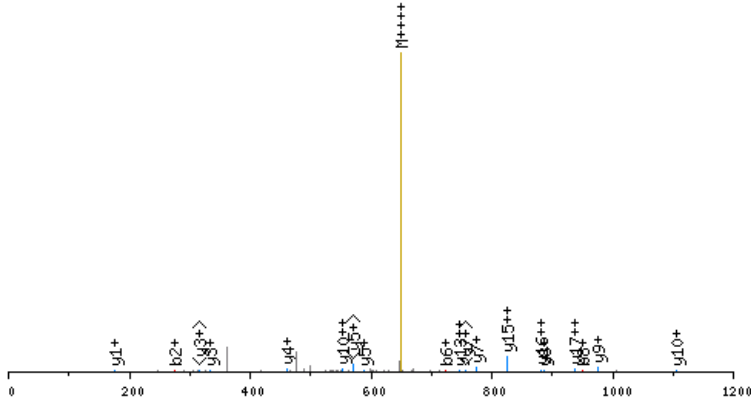

click image to zoom in; click top corners to zoom out [\[precursor±\]](#)

scan 5269; 650.4 m/z; 2.7e+001

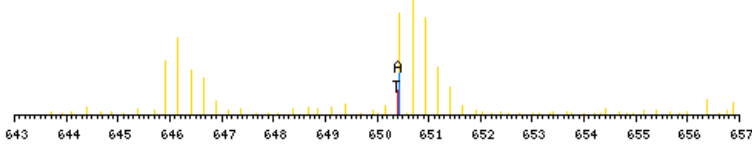

zoomed in precursor plot; T=theoretical m/z, A=acquired m/z

| b <sup>+</sup> | #  | AA | #  | y <sup>+</sup> | y <sup>2+</sup> |
|----------------|----|----|----|----------------|-----------------|
| 114.0555       | 1  | A  | 23 |                |                 |
| 276.2136       | 2  | K  | 22 | 2485.4774      | 1243.2426       |
| 375.2820       | 3  | V  | 21 | 2323.3193      | 1162.1636       |
| 446.3191       | 4  | A  | 20 | 2224.2509      | 1112.6294       |
| 608.4772       | 5  | K  | 19 | 2153.2138      | 1077.1108       |
| 723.5042       | 6  | D  | 18 | 1991.0557      | 996.0317        |
| 836.5882       | 7  | L  | 17 | 1876.0287      | 938.5183        |
| 950.6312       | 8  | N  | 16 | 1762.9447      | 881.9762        |
| 1047.6839      | 9  | P  | 15 | 1648.9017      | 824.9548        |
| 1104.7054      | 10 | G  | 14 | 1551.8490      | 776.4284        |
| 1203.7738      | 11 | V  | 13 | 1494.8275      | 747.9177        |
| 1331.8324      | 12 | Q  | 12 | 1395.7591      | 698.3835        |
| 1493.9905      | 13 | K  | 11 | 1267.7005      | 634.3542        |
| 1625.0310      | 14 | M  | 10 | 1105.5424      | 553.2751        |
| 1712.0630      | 15 | S  | 9  | 974.5019       | 487.7549        |
| 1825.1471      | 16 | L  | 8  | 887.4699       | 444.2389        |
| 1882.1685      | 17 | G  | 7  | 774.3858       | 387.6968        |
| 2010.2271      | 18 | Q  | 6  | 717.3644       | 359.1861        |
| 2138.2857      | 19 | Q  | 5  | 589.3058       | 295.1568        |
| 2266.3443      | 20 | Q  | 4  | 461.2472       | 231.1275        |
| 2353.3763      | 21 | S  | 3  | 333.1886       | 167.0982        |
| 2424.4134      | 22 | A  | 2  | 246.1566       | 123.5822        |
|                | 23 | R  | 1  | 175.1195       | 88.0637         |

N-term:+43.02 K(2):+162.16  
 K(5):+162.16 K(13):+162.16

AKVEQVLSLEPQHELKFR, MH+ 2249.2659, m/z 563.0719  
 L OSG40 P180811 230811-s1.07880.07880.4.dta

X-range:

-

MassTol: Y-zoom:

MassType:

AVG  MONO

Axis:

1  2

Label:

I  M  -

Ions:

a  +  2+  3+

b  +  2+  3+

c  +  2+  3+

x  +  2+  3+

y  +  2+  3+

z  +  2+  3+

hide H<sub>2</sub>O/NH<sub>3</sub>

zoom 112-122

GO

scan 7880; 1.2e+001

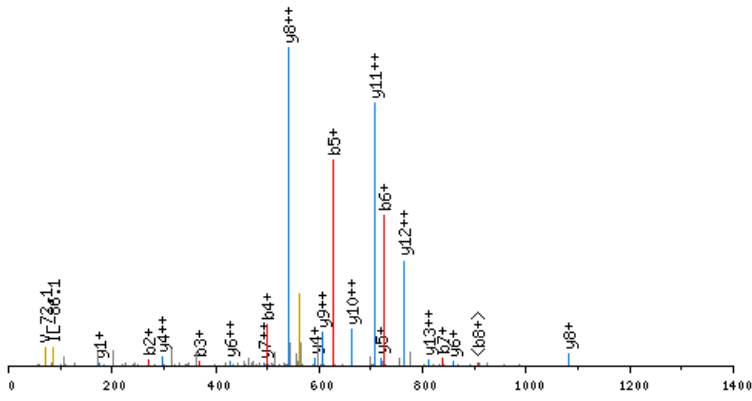

click image to zoom in; click top corners to zoom out [\[precursor±\]](#)

scan 7879; 563.1 m/z; 1.9e+003

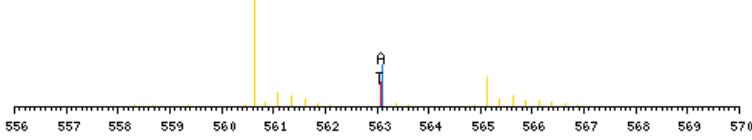

zoomed in precursor plot; T=theoretical m/z, A=acquired m/z

| b <sup>+</sup> | #  | AA # | y <sup>+</sup> | y <sup>2+</sup> |
|----------------|----|------|----------------|-----------------|
| 114.0555       | 1  | A 18 |                |                 |
| 270.1818       | 2  | K 17 | 2136.2182      | 1068.6130       |
| 369.2502       | 3  | V 16 | 1980.0919      | 990.5498        |
| 498.2928       | 4  | E 15 | 1881.0235      | 941.0156        |
| 626.3514       | 5  | Q 14 | 1751.9809      | 876.4943        |
| 725.4198       | 6  | V 13 | 1623.9223      | 812.4651        |
| 838.5039       | 7  | L 12 | 1524.8539      | 762.9308        |
| 925.5359       | 8  | S 11 | 1411.7698      | 706.3888        |
| 1038.6200      | 9  | L 10 | 1324.7378      | 662.8728        |
| 1167.6626      | 10 | E 9  | 1211.6537      | 606.3308        |
| 1264.7153      | 11 | P 8  | 1082.6111      | 541.8095        |
| 1392.7739      | 12 | Q 7  | 985.5584       | 493.2831        |
| 1529.8328      | 13 | H 6  | 857.4998       | 429.2538        |
| 1658.8754      | 14 | E 5  | 720.4409       | 360.7243        |
| 1771.9595      | 15 | L 4  | 591.3983       | 296.2031        |
| 1928.0858      | 16 | K 3  | 478.3142       | 239.6610        |
| 2075.1542      | 17 | F 2  | 322.1879       | 161.5979        |
|                | 18 | R 1  | 175.1195       | 88.0637         |

N-term: +43.02 K(2): +156.13  
 K(16): +156.13



ALDGPEQMELEEGKAGSGLR, MH+ 2163.0816, m/z 721.6987  
 L OSG37 P180811 230811-s1.06623.06623.3.dta

X-range:

-

MassTol: Y-zoom:

MassType:

AVG  MONO

Axis:

1  2

Label:

I  M  -

Ions:

a  +  2+  3+

b  +  2+  3+

c  +  2+  3+

x  +  2+  3+

y  +  2+  3+

z  +  2+  3+

hide H<sub>2</sub>O/NH<sub>3</sub>

zoom 112-122

GO

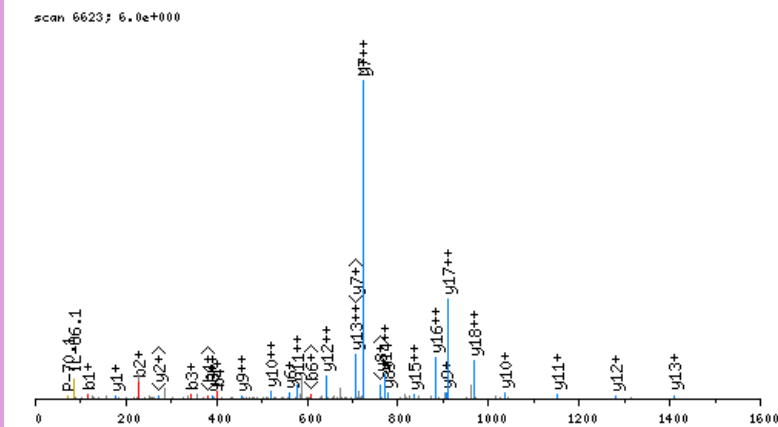

click image to zoom in; click top corners to zoom out [\[precursor±\]](#)

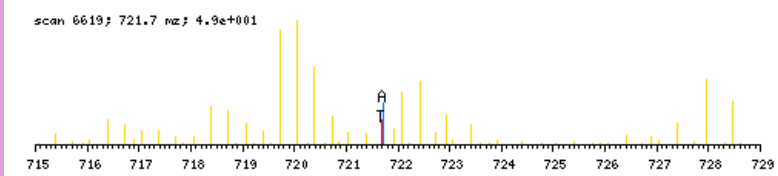

zoomed in precursor plot; T=theoretical m/z, A=acquired m/z

| b <sup>+</sup> | #  | AA # | y <sup>+</sup> | y <sup>2+</sup> |
|----------------|----|------|----------------|-----------------|
| 114.0555       | 1  | A 20 |                |                 |
| 227.1396       | 2  | L 19 | 2050.0339      | 1025.5209       |
| 342.1665       | 3  | D 18 | 1936.9499      | 968.9788        |
| 399.1880       | 4  | G 17 | 1821.9229      | 911.4654        |
| 496.2407       | 5  | P 16 | 1764.9015      | 882.9546        |
| 625.2833       | 6  | E 15 | 1667.8487      | 834.4283        |
| 753.3419       | 7  | Q 14 | 1538.8061      | 769.9070        |
| 884.3824       | 8  | M 13 | 1410.7475      | 705.8777        |
| 1013.4250      | 9  | E 12 | 1279.7070      | 640.3574        |
| 1126.5091      | 10 | L 11 | 1150.6644      | 575.8361        |
| 1255.5517      | 11 | E 10 | 1037.5804      | 519.2941        |
| 1384.5942      | 12 | E 9  | 908.5378       | 454.7728        |
| 1441.6157      | 13 | G 8  | 779.4952       | 390.2515        |
| 1603.7738      | 14 | K 7  | 722.4737       | 361.7408        |
| 1674.8109      | 15 | A 6  | 560.3156       | 280.6617        |
| 1731.8324      | 16 | G 5  | 489.2785       | 245.1432        |
| 1818.8644      | 17 | S 4  | 432.2571       | 216.6324        |
| 1875.8859      | 18 | G 3  | 345.2250       | 173.1164        |
| 1988.9699      | 19 | L 2  | 288.2036       | 144.6057        |
|                | 20 | R 1  | 175.1195       | 88.0637         |

N-term:+43.02 K(14):+162.16

X-range:

-

MassTol: Y-zoom:

MassType:

AVG  MONO

Axis:

1  2

Label:

I  M  -

Ions:

a  +  2+  3+

b  +  2+  3+

c  +  2+  3+

x  +  2+  3+

y  +  2+  3+

z  +  2+  3+

hide H<sub>2</sub>O/NH<sub>3</sub>

zoom 112-122

GO

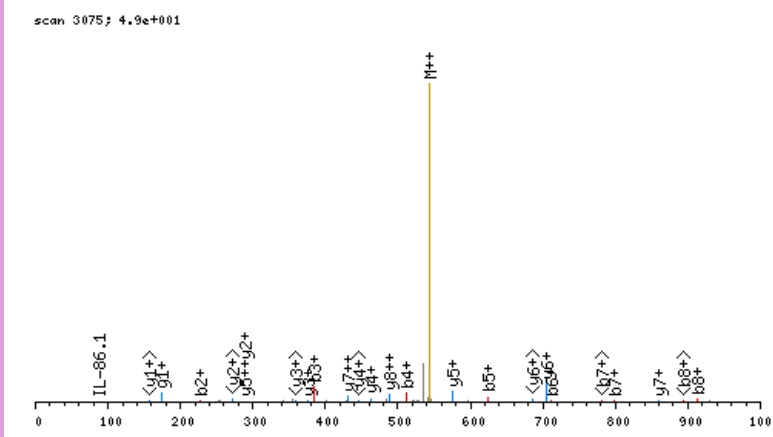

click image to zoom in; click top corners to zoom out [\[precursor±\]](#)

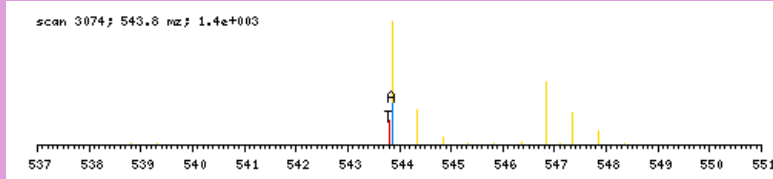

zoomed in precursor plot; T=theoretical m/z, A=acquired m/z

| b <sup>+</sup> | # | AA # | y <sup>+</sup> | y <sup>2+</sup> |
|----------------|---|------|----------------|-----------------|
| 114.0555       | 1 | A    | 9              |                 |
| 227.1396       | 2 | L    | 8              | 973.5795        |
| 383.2659       | 3 | K    | 7              | 860.4954        |
| 511.3245       | 4 | Q    | 6              | 704.3691        |
| 624.4085       | 5 | I    | 5              | 576.3105        |
| 711.4405       | 6 | S    | 4              | 463.2265        |
| 798.4726       | 7 | S    | 3              | 376.1945        |
| 912.5155       | 8 | N    | 2              | 289.1624        |
|                | 9 | R    | 1              | 175.1195        |

N-term:+43.02 K(3):+156.13

ALLAEHLKPLPADR, MH+ 1733.0538, m/z 578.3561  
 L OSG39 P180811 230811-s1.07695.07695.3.dta

X-range:

-

MassTol: Y-zoom:

MassType:

AVG  MONO

Axis:

1  2

Label:

I  M  -

Ions:

a  +  2+  3+

b  +  2+  3+

c  +  2+  3+

x  +  2+  3+

y  +  2+  3+

z  +  2+  3+

hide H<sub>2</sub>O/NH<sub>3</sub>

zoom 112-122

GO

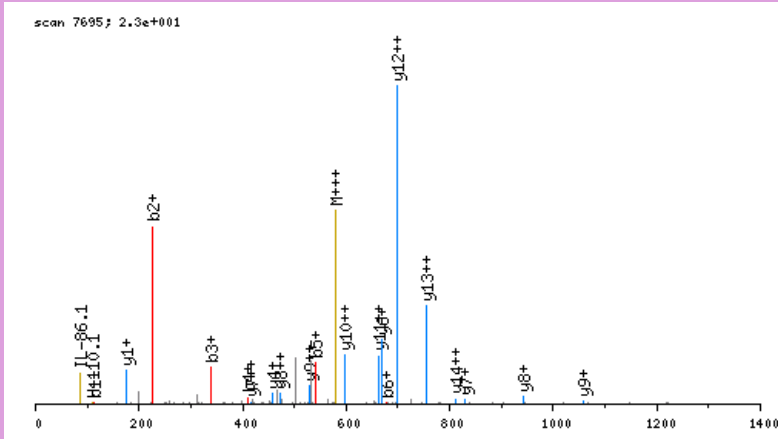

click image to zoom in; click top corners to zoom out [\[precursor±\]](#)

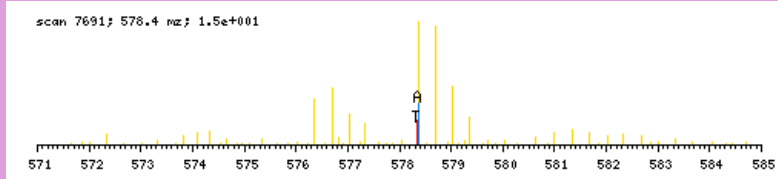

zoomed in precursor plot; T=theoretical m/z, A=acquired m/z

| b <sup>+</sup> | #  | AA # | y <sup>+</sup> | y <sup>2+</sup> |
|----------------|----|------|----------------|-----------------|
| 114.0555       | 1  | A 15 |                |                 |
| 227.1396       | 2  | L 14 | 1620.0061      | 810.5070        |
| 340.2236       | 3  | L 13 | 1506.9221      | 753.9649        |
| 411.2608       | 4  | A 12 | 1393.8380      | 697.4229        |
| 540.3033       | 5  | E 11 | 1322.8009      | 661.9044        |
| 677.3623       | 6  | H 10 | 1193.7583      | 597.3831        |
| 790.4463       | 7  | L 9  | 1056.6994      | 528.8536        |
| 903.5304       | 8  | L 8  | 943.6153       | 472.3116        |
| 1065.6885      | 9  | K 7  | 830.5312       | 415.7695        |
| 1162.7413      | 10 | P 6  | 668.3731       | 334.6905        |
| 1275.8253      | 11 | L 5  | 571.3204       | 286.1641        |
| 1372.8781      | 12 | P 4  | 458.2363       | 229.6221        |
| 1443.9152      | 13 | A 3  | 361.1836       | 181.0957        |
| 1558.9421      | 14 | D 2  | 290.1464       | 145.5771        |
|                | 15 | R 1  | 175.1195       | 88.0637         |

N-term:+43.02 K(9):+162.16

ALQALHSSGVGLR, MH+ 1350.7494, m/z 675.8783  
 L OSG37 P180811 230811-s1.06266.06266.2.dta

X-range:

-

MassTol: Y-zoom:

MassType:

AVG  MONO

Axis:

1  2

Label:

I  M  -

Ions:

a  +  2+  3+

b  +  2+  3+

c  +  2+  3+

x  +  2+  3+

y  +  2+  3+

z  +  2+  3+

hide H<sub>2</sub>O/NH<sub>3</sub>

zoom 112-122

GO

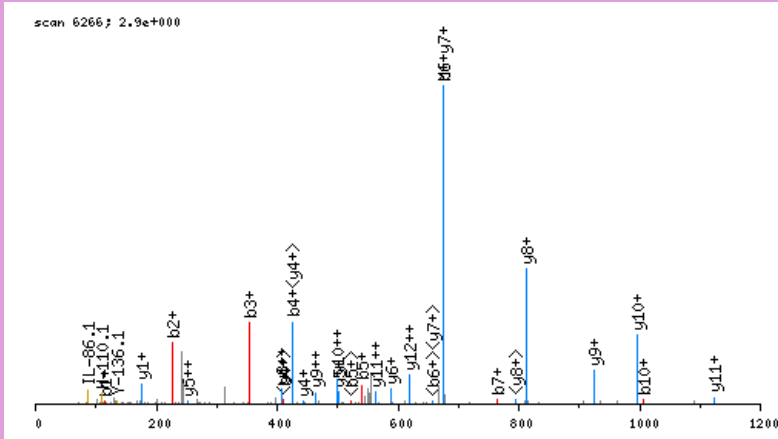

click image to zoom in; click top corners to zoom out [\[precursor±\]](#)

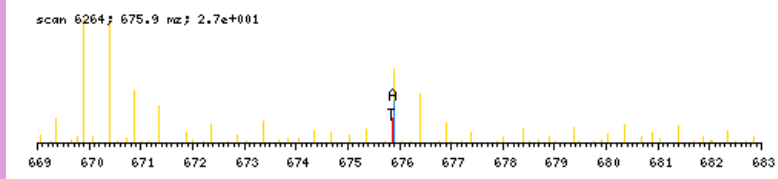

zoomed in precursor plot; T=theoretical m/z, A=acquired m/z

| b <sup>+</sup> | #  | AA # | y <sup>+</sup> | y <sup>2+</sup> |
|----------------|----|------|----------------|-----------------|
| 114.0555       | 1  | A 13 |                |                 |
| 227.1396       | 2  | L 12 | 1237.7017      | 619.3548        |
| 355.1982       | 3  | Q 11 | 1124.6176      | 562.8127        |
| 426.2353       | 4  | A 10 | 996.5591       | 498.7834        |
| 539.3193       | 5  | L 9  | 925.5219       | 463.2649        |
| 676.3782       | 6  | H 8  | 812.4379       | 406.7228        |
| 763.4103       | 7  | S 7  | 675.3790       | 338.1934        |
| 850.4423       | 8  | S 6  | 588.3469       | 294.6774        |
| 907.4638       | 9  | G 5  | 501.3149       | 251.1614        |
| 1006.5322      | 10 | V 4  | 444.2934       | 222.6506        |
| 1063.5536      | 11 | G 3  | 345.2250       | 173.1164        |
| 1176.6377      | 12 | L 2  | 288.2036       | 144.6057        |
|                | 13 | R 1  | 175.1195       | 88.0637         |

N-term:+43.02

AMNLSGRR, MH+ 946.4893, m/z 473.7483  
 L OSG38 P180811 230811-s1.03092.03092.2.dta

X-range:

-

MassTol: Y-zoom:

MassType:

AVG  MONO

Axis:

1  2

Label:

I  M  -

Ions:

a  +  2+  3+

b  +  2+  3+

c  +  2+  3+

x  +  2+  3+

y  +  2+  3+

z  +  2+  3+

hide H<sub>2</sub>O/NH<sub>3</sub>

zoom 112-122

GO

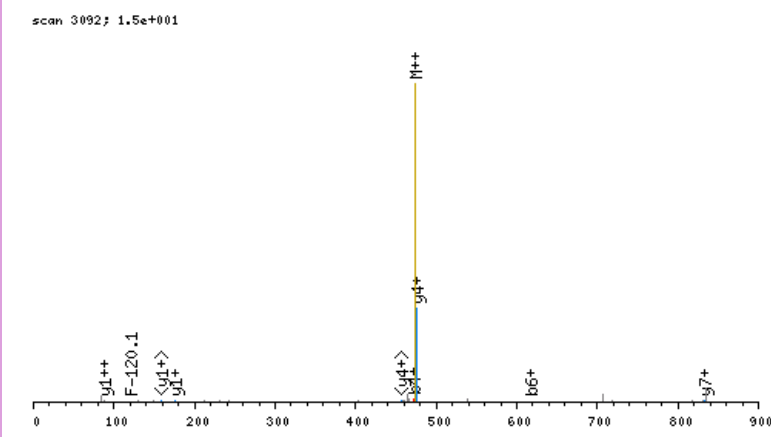

click image to zoom in; click top corners to zoom out [\[precursor±\]](#)

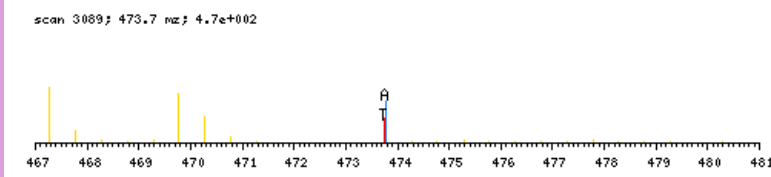

zoomed in precursor plot; T=theoretical m/z, A=acquired m/z

| b <sup>+</sup> | # | AA # | y <sup>+</sup> | y <sup>2+</sup> |
|----------------|---|------|----------------|-----------------|
| 114.0555       | 1 | A 8  |                |                 |
| 245.0960       | 2 | M 7  | 833.4416       | 417.2247        |
| 359.1389       | 3 | N 6  | 702.4011       | 351.7045        |
| 472.2230       | 4 | L 5  | 588.3582       | 294.6830        |
| 559.2550       | 5 | S 4  | 475.2741       | 238.1410        |
| 616.2765       | 6 | G 3  | 388.2421       | 194.6250        |
| 772.3776       | 7 | R 2  | 331.2206       | 166.1142        |
|                | 8 | R 1  | 175.1195       | 88.0637         |

N-term:+43.02

AMQKIFAR, MH+ 1040.6139, m/z 520.8106  
 L OSG37 P180811 230811-s1.05820.05820.2.dta

scan 5820; 4.1e+001

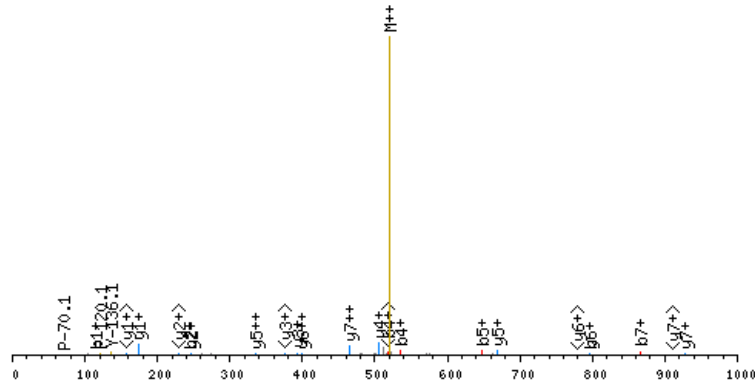

click image to zoom in; click top corners to zoom out [\[precursor±\]](#)

scan 5819; 520.8 m/z; 4.5e+002

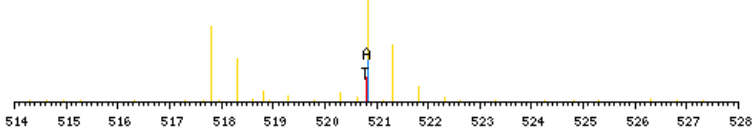

zoomed in precursor plot; T=theoretical m/z, A=acquired m/z

X-range:

-

MassTol: Y-zoom:

MassType:

AVG  MONO

Axis:

1  2

Label:

I  M  -

Ions:

a  +  2+  3+

b  +  2+  3+

c  +  2+  3+

x  +  2+  3+

y  +  2+  3+

z  +  2+  3+

hide H<sub>2</sub>O/NH<sub>3</sub>

zoom 112-122

GO

| b <sup>+</sup> | # | AA # | y <sup>+</sup> | y <sup>2+</sup> |
|----------------|---|------|----------------|-----------------|
| 114.0555       | 1 | A 8  |                |                 |
| 245.0960       | 2 | M 7  | 927.5663       | 464.2870        |
| 373.1546       | 3 | Q 6  | 796.5258       | 398.7668        |
| 535.3127       | 4 | K 5  | 668.4672       | 334.7375        |
| 648.3967       | 5 | I 4  | 506.3091       | 253.6585        |
| 795.4652       | 6 | F 3  | 393.2250       | 197.1164        |
| 866.5023       | 7 | A 2  | 246.1566       | 123.5822        |
|                | 8 | R 1  | 175.1195       | 88.0637         |

N-term:+43.02 K(4):+162.16

AMVSEFLKQAR, MH+ 1349.7252, m/z 675.3662  
 L OSG37 P180811 230811-s1.08450.08450.2.dta

X-range:

-

MassTol: Y-zoom:

MassType:

AVG  MONO

Axis:

1  2

Label:

I  M  -

Ions:

a  +  2+  3+

b  +  2+  3+

c  +  2+  3+

x  +  2+  3+

y  +  2+  3+

z  +  2+  3+

hide H<sub>2</sub>O/NH<sub>3</sub>

zoom 112-122

GO

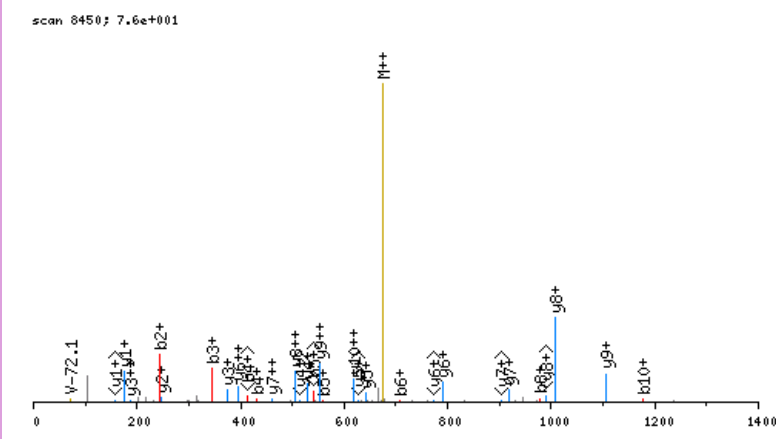

click image to zoom in; click top corners to zoom out [\[precursor±\]](#)

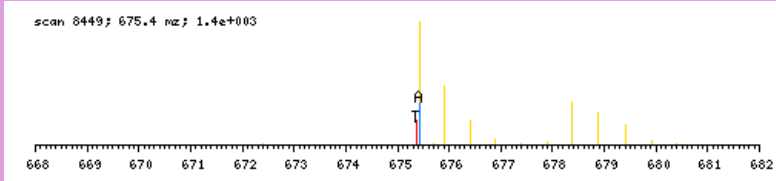

zoomed in precursor plot; T=theoretical m/z, A=acquired m/z

| b <sup>+</sup> | #  | AA # | y <sup>+</sup> | y <sup>2+</sup> |
|----------------|----|------|----------------|-----------------|
| 114.0555       | 1  | A 11 |                |                 |
| 245.0960       | 2  | M 10 | 1236.6775      | 618.8427        |
| 344.1644       | 3  | V 9  | 1105.6370      | 553.3224        |
| 431.1964       | 4  | S 8  | 1006.5686      | 503.7882        |
| 560.2390       | 5  | E 7  | 919.5366       | 460.2722        |
| 707.3074       | 6  | F 6  | 790.4940       | 395.7509        |
| 820.3915       | 7  | L 5  | 643.4256       | 322.2167        |
| 976.5178       | 8  | K 4  | 530.3415       | 265.6747        |
| 1104.5764      | 9  | Q 3  | 374.2152       | 187.6115        |
| 1175.6135      | 10 | A 2  | 246.1566       | 123.5822        |
|                | 11 | R 1  | 175.1195       | 88.0637         |

N-term:+43.02 K(8):+156.13

ANEVQVLPSPKGR, MH+ 1577.9016, m/z 526.6387  
 L OSG37 P180811 230811-s1.06278.06278.3.dta

X-range:

-

MassTol: Y-zoom:

MassType:

AVG  MONO

Axis:

1  2

Label:

I  M  -

Ions:

a  +  2+  3+

b  +  2+  3+

c  +  2+  3+

x  +  2+  3+

y  +  2+  3+

z  +  2+  3+

hide H<sub>2</sub>O/NH<sub>3</sub>

zoom 112-122

GO

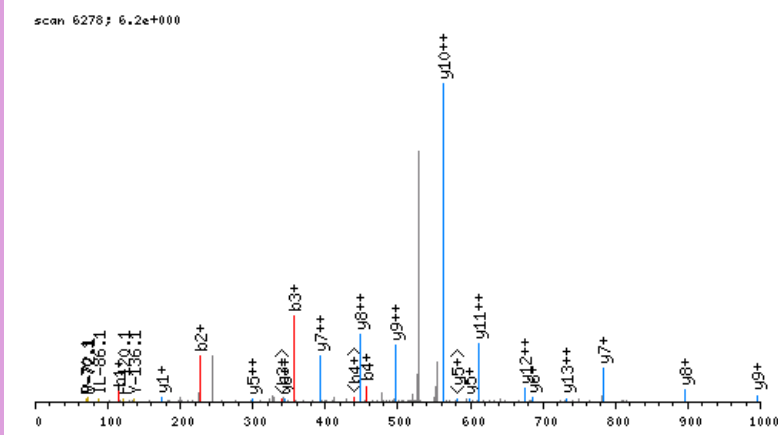

click image to zoom in; click top corners to zoom out [\[precursor±\]](#)

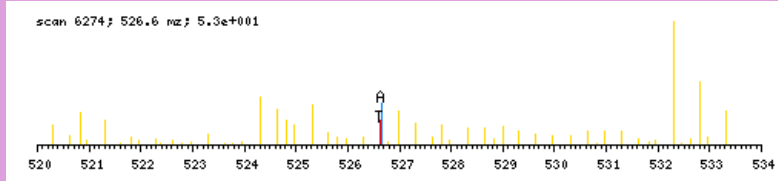

zoomed in precursor plot; T=theoretical m/z, A=acquired m/z

| b <sup>+</sup> | #  | AA # | y <sup>+</sup> | y <sup>2+</sup> |
|----------------|----|------|----------------|-----------------|
| 114.0555       | 1  | A 14 |                |                 |
| 228.0984       | 2  | N 13 | 1464.8539      | 732.9308        |
| 357.1410       | 3  | E 12 | 1350.8109      | 675.9094        |
| 456.2094       | 4  | V 11 | 1221.7684      | 611.3881        |
| 584.2680       | 5  | Q 10 | 1122.6999      | 561.8539        |
| 683.3364       | 6  | V 9  | 994.6414       | 497.8246        |
| 796.4205       | 7  | L 8  | 895.5729       | 448.2904        |
| 893.4733       | 8  | P 7  | 782.4889       | 391.7484        |
| 980.5053       | 9  | S 6  | 685.4361       | 343.2220        |
| 1077.5581      | 10 | P 5  | 598.4041       | 299.7060        |
| 1190.6421      | 11 | L 4  | 501.3513       | 251.1796        |
| 1346.7684      | 12 | K 3  | 388.2673       | 194.6375        |
| 1403.7899      | 13 | G 2  | 232.1410       | 116.5744        |
|                | 14 | R 1  | 175.1195       | 88.0637         |

N-term:+43.02 K(12):+156.13



ANHAPFETDISTLTR, MH+ 1714.8400, m/z 572.2849  
 L OSG37 P180811 230811-s1.06847.06847.3.dta

X-range:

-

MassTol: Y-zoom:

MassType:

AVG  MONO

Axis:

1  2

Label:

I  M  -

Ions:

a  +  2+  3+

b  +  2+  3+

c  +  2+  3+

x  +  2+  3+

y  +  2+  3+

z  +  2+  3+

hide H<sub>2</sub>O/NH<sub>3</sub>

zoom 112-122

GO

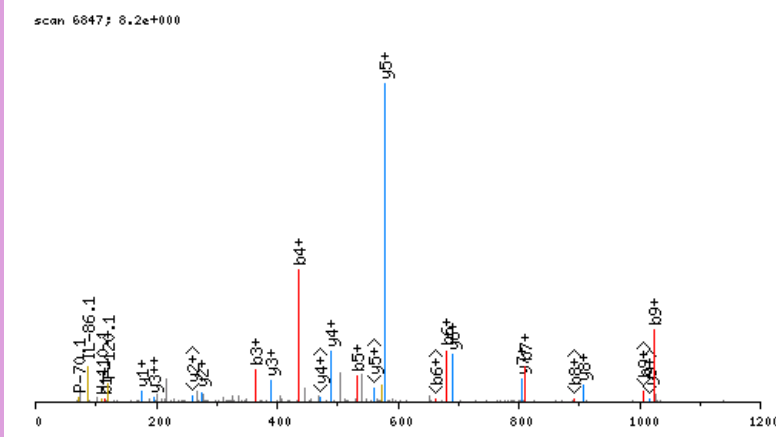

click image to zoom in; click top corners to zoom out [\[precursor±\]](#)

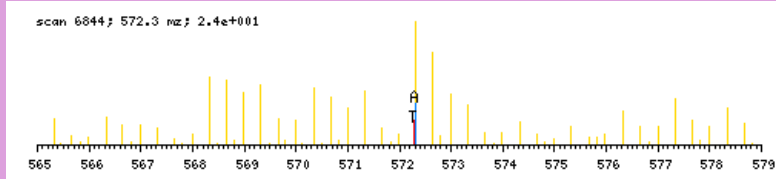

zoomed in precursor plot; T=theoretical m/z, A=acquired m/z

| b <sup>+</sup> | #  | AA # | y <sup>+</sup> | y <sup>2+</sup> |
|----------------|----|------|----------------|-----------------|
| 114.0555       | 1  | A 15 |                |                 |
| 228.0984       | 2  | N 14 | 1601.7924      | 801.4001        |
| 365.1574       | 3  | H 13 | 1487.7494      | 744.3786        |
| 436.1945       | 4  | A 12 | 1350.6905      | 675.8492        |
| 533.2472       | 5  | P 11 | 1279.6534      | 640.3306        |
| 680.3156       | 6  | F 10 | 1182.6006      | 591.8042        |
| 809.3582       | 7  | E 9  | 1035.5322      | 518.2700        |
| 910.4059       | 8  | T 8  | 906.4896       | 453.7487        |
| 1025.4329      | 9  | D 7  | 805.4420       | 403.2249        |
| 1138.5169      | 10 | I 6  | 690.4150       | 345.7114        |
| 1225.5490      | 11 | S 5  | 577.3310       | 289.1694        |
| 1326.5966      | 12 | T 4  | 490.2989       | 245.6534        |
| 1439.6807      | 13 | L 3  | 389.2512       | 195.1295        |
| 1540.7284      | 14 | T 2  | 276.1672       | 138.5875        |
|                | 15 | R 1  | 175.1195       | 88.0637         |

N-term:+43.02

ANKAPSQMER, MH+ 1207.6318, m/z 604.3195  
 L OSG37 P180811 230811-s1.02097.02097.2.dta

X-range:

-

MassTol: Y-zoom:

MassType:

AVG  MONO

Axis:

1  2

Label:

I  M  -

Ions:

a  +  2+  3+

b  +  2+  3+

c  +  2+  3+

x  +  2+  3+

y  +  2+  3+

z  +  2+  3+

hide H<sub>2</sub>O/NH<sub>3</sub>

zoom 112-122

GO

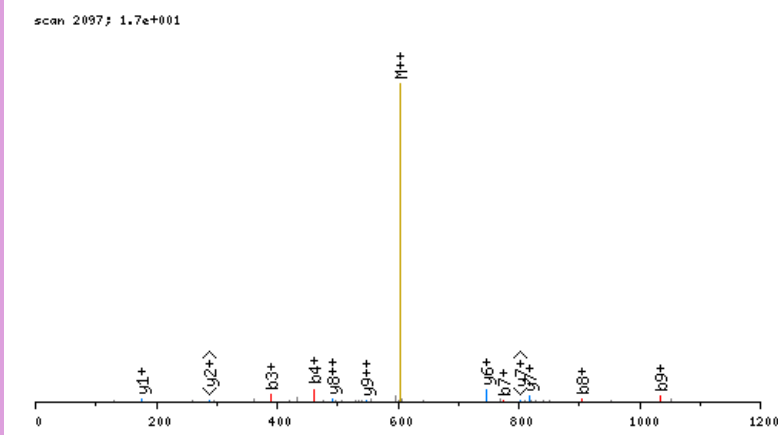

click image to zoom in; click top corners to zoom out [\[precursor±\]](#)

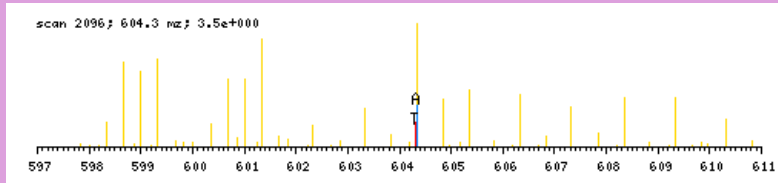

zoomed in precursor plot; T=theoretical m/z, A=acquired m/z

| b <sup>+</sup> | #  | AA # | y <sup>+</sup> | y <sup>2+</sup> |
|----------------|----|------|----------------|-----------------|
| 114.0555       | 1  | A 10 |                |                 |
| 228.0984       | 2  | N 9  | 1094.5841      | 547.7960        |
| 390.2565       | 3  | K 8  | 980.5412       | 490.7745        |
| 461.2937       | 4  | A 7  | 818.3831       | 409.6954        |
| 558.3464       | 5  | P 6  | 747.3459       | 374.1769        |
| 645.3784       | 6  | S 5  | 650.2932       | 325.6505        |
| 773.4370       | 7  | Q 4  | 563.2612       | 282.1345        |
| 904.4775       | 8  | M 3  | 435.2026       | 218.1052        |
| 1033.5201      | 9  | E 2  | 304.1621       | 152.5850        |
|                | 10 | R 1  | 175.1195       | 88.0637         |

N-term:+43.02 K(3):+162.16

ANKGPSYGMSR, MH+ 1243.6318, m/z 622.3195  
 L OSG37 P180811 230811-s1.02460.02460.2.dta

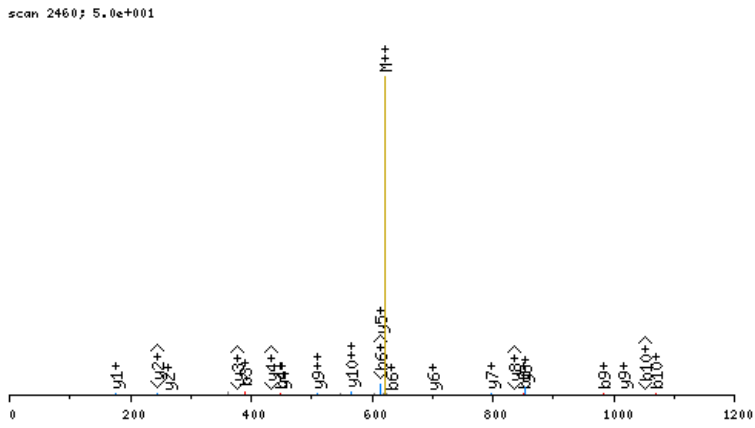

click image to zoom in; click top corners to zoom out [\[precursor±\]](#)

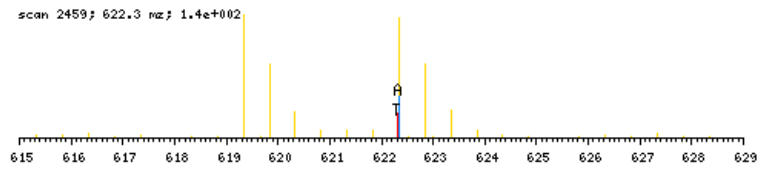

zoomed in precursor plot; T=theoretical m/z, A=acquired m/z

X-range:

-

MassTol: Y-zoom:

MassType:

AVG  MONO

Axis:

1  2

Label:

I  M  -

Ions:

a  +  2+  3+

b  +  2+  3+

c  +  2+  3+

x  +  2+  3+

y  +  2+  3+

z  +  2+  3+

hide H<sub>2</sub>O/NH<sub>3</sub>

zoom 112-122

GO

| b <sup>+</sup> | #  | AA # | y <sup>+</sup> | y <sup>2+</sup> |
|----------------|----|------|----------------|-----------------|
| 114.0555       | 1  | A    | 11             |                 |
| 228.0984       | 2  | N    | 10             | 1130.5841       |
| 390.2565       | 3  | K    | 9              | 1016.5412       |
| 447.2780       | 4  | G    | 8              | 854.3831        |
| 544.3308       | 5  | P    | 7              | 797.3616        |
| 631.3628       | 6  | S    | 6              | 700.3088        |
| 794.4261       | 7  | Y    | 5              | 613.2768        |
| 851.4476       | 8  | G    | 4              | 450.2135        |
| 982.4881       | 9  | M    | 3              | 393.1920        |
| 1069.5201      | 10 | S    | 2              | 262.1515        |
|                | 11 | R    | 1              | 175.1195        |

N-term:+43.02 K(3):+162.16

ANSANTNTVPKLYR, MH+ 1618.8553, m/z 540.2900  
 L OSG37 P180811 230811-s1.04260.04260.3.dta

X-range:

-

MassTol: Y-zoom:

MassType:

AVG  MONO

Axis:

1  2

Label:

I  M  -

Ions:

a  +  2+  3+

b  +  2+  3+

c  +  2+  3+

x  +  2+  3+

y  +  2+  3+

z  +  2+  3+

hide H<sub>2</sub>O/NH<sub>3</sub>

zoom 112-122

GO

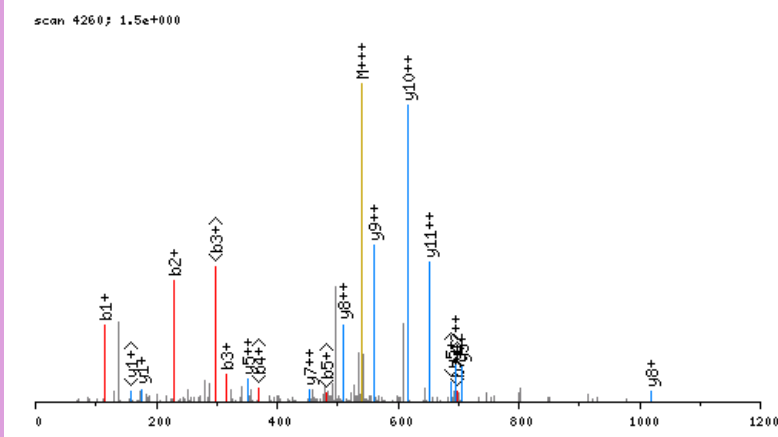

click image to zoom in; click top corners to zoom out [\[precursor±\]](#)

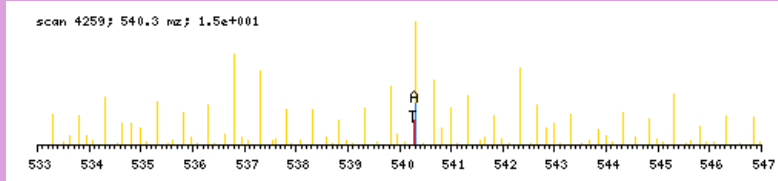

zoomed in precursor plot; T=theoretical m/z, A=acquired m/z

| b <sup>+</sup> | #  | AA # | y <sup>+</sup> | y <sup>2+</sup> |
|----------------|----|------|----------------|-----------------|
| 114.0555       | 1  | A 14 |                |                 |
| 228.0984       | 2  | N 13 | 1505.8077      | 753.4077        |
| 315.1305       | 3  | S 12 | 1391.7647      | 696.3863        |
| 386.1676       | 4  | A 11 | 1304.7327      | 652.8703        |
| 500.2105       | 5  | N 10 | 1233.6956      | 617.3517        |
| 601.2582       | 6  | T 9  | 1119.6527      | 560.3302        |
| 715.3011       | 7  | N 8  | 1018.6050      | 509.8064        |
| 816.3488       | 8  | T 7  | 904.5620       | 452.7849        |
| 915.4172       | 9  | V 6  | 803.5144       | 402.2611        |
| 1012.4700      | 10 | P 5  | 704.4460       | 352.7269        |
| 1168.5963      | 11 | K 4  | 607.3932       | 304.2005        |
| 1281.6803      | 12 | L 3  | 451.2669       | 226.1374        |
| 1444.7437      | 13 | Y 2  | 338.1828       | 169.5953        |
|                | 14 | R 1  | 175.1195       | 88.0637         |

N-term:+43.02 K(11):+156.13

ANVADTKLYDILGVPPGASENELKKAYR, MH+ 3158.7103, m/z 790.4330  
 L OSG40 P180811 230811-sl.08980.08980.4.dta

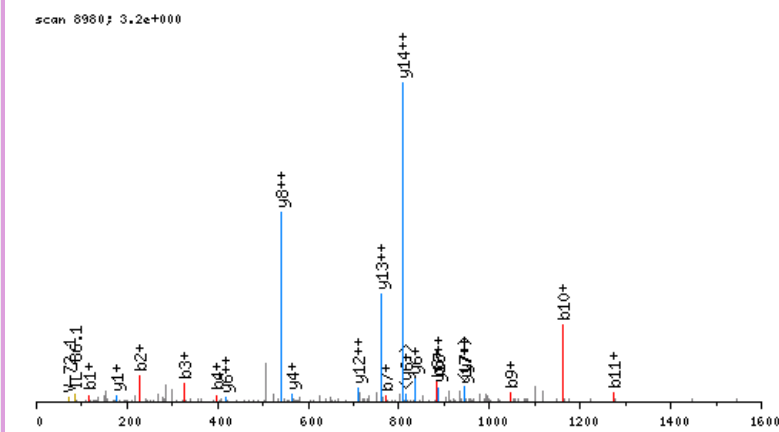

click image to zoom in; click top corners to zoom out [\[precursor±\]](#)

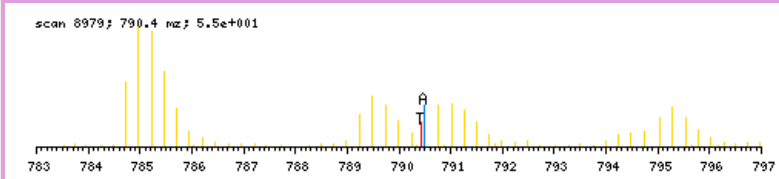

zoomed in precursor plot; T=theoretical m/z, A=acquired m/z

| b <sup>+</sup> | #  | AA # | y <sup>+</sup> | y <sup>2+</sup> |
|----------------|----|------|----------------|-----------------|
| 114.0555       | 1  | A 28 |                |                 |
| 228.0984       | 2  | N 27 | 3045.6626      | 1523.3352       |
| 327.1669       | 3  | V 26 | 2931.6196      | 1466.3137       |
| 398.2040       | 4  | A 25 | 2832.5512      | 1416.7795       |
| 513.2309       | 5  | D 24 | 2761.5141      | 1381.2610       |
| 614.2786       | 6  | T 23 | 2646.4872      | 1323.7475       |
| 770.4049       | 7  | K 22 | 2545.4395      | 1273.2237       |
| 883.4890       | 8  | L 21 | 2389.3132      | 1195.1605       |
| 1046.5523      | 9  | Y 20 | 2276.2291      | 1138.6185       |
| 1161.5792      | 10 | D 19 | 2113.1658      | 1057.0868       |
| 1274.6633      | 11 | I 18 | 1998.1389      | 999.5733        |
| 1387.7474      | 12 | L 17 | 1885.0548      | 943.0313        |
| 1444.7688      | 13 | G 16 | 1771.9707      | 886.4893        |
| 1543.8372      | 14 | V 15 | 1714.9493      | 857.9785        |
| 1640.8900      | 15 | P 14 | 1615.8809      | 808.4443        |
| 1737.9428      | 16 | P 13 | 1518.8281      | 759.9180        |
| 1794.9642      | 17 | G 12 | 1421.7753      | 711.3916        |
| 1866.0013      | 18 | A 11 | 1364.7539      | 682.8808        |
| 1953.0334      | 19 | S 10 | 1293.7167      | 647.3623        |
| 2082.0760      | 20 | E 9  | 1206.6847      | 603.8463        |
| 2196.1189      | 21 | N 8  | 1077.6421      | 539.3250        |
| 2325.1615      | 22 | E 7  | 963.5992       | 482.3035        |
| 2438.2455      | 23 | L 6  | 834.5566       | 417.7822        |
| 2594.3718      | 24 | K 5  | 721.4725       | 361.2402        |
| 2750.4981      | 25 | K 4  | 565.3462       | 283.1770        |
| 2821.5353      | 26 | A 3  | 409.2199       | 205.1139        |
| 2984.5986      | 27 | Y 2  | 338.1828       | 169.5953        |
|                | 28 | R 1  | 175.1195       | 88.0637         |

N-term:+43.02 K(7):+156.13  
 K(24):+156.13 K(25):+156.13

X-range:

-

MassTol: Y-zoom:

MassType:

AVG  MONO

Axis:

1  2

Label:

I  M  -

Ions:

a  +  2+  3+

b  +  2+  3+

c  +  2+  3+

x  +  2+  3+

y  +  2+  3+

z  +  2+  3+

hide H<sub>2</sub>O/NH<sub>3</sub>

zoom 112-122

GO

APKVSDSVEQLR, MH+ 1398.7593, m/z 466.9246  
 L OSG40 P180811 230811-s1.03216.03216.3.dta

X-range:

-

MassTol: Y-zoom:

MassType:

AVG  MONO

Axis:

1  2

Label:

I  M  -

Ions:

a  +  2+  3+

b  +  2+  3+

c  +  2+  3+

x  +  2+  3+

y  +  2+  3+

z  +  2+  3+

hide H<sub>2</sub>O/NH<sub>3</sub>

zoom 112-122

GO

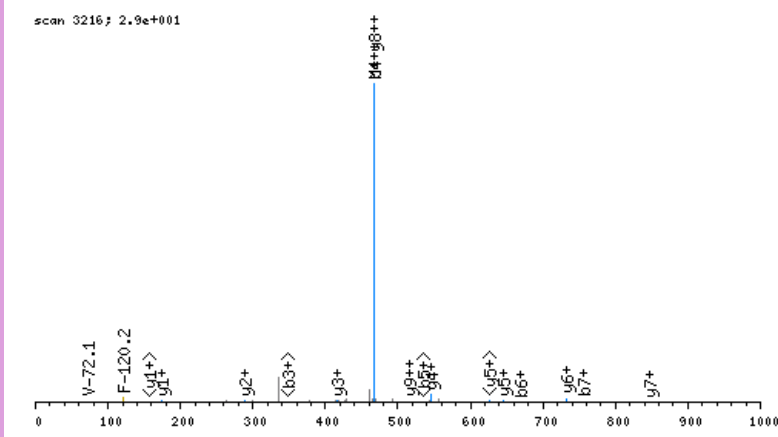

click image to zoom in; click top corners to zoom out [\[precursor±\]](#)

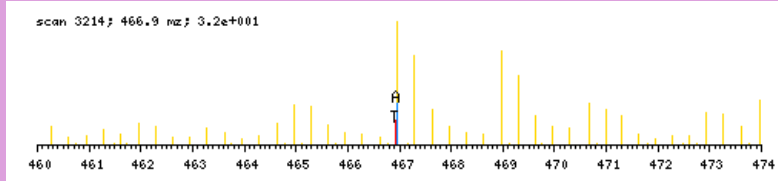

zoomed in precursor plot; T=theoretical m/z, A=acquired m/z

| b <sup>+</sup> | #  | AA # | y <sup>+</sup> | y <sup>2+</sup> |
|----------------|----|------|----------------|-----------------|
| 114.0555       | 1  | A 12 |                |                 |
| 211.1083       | 2  | P 11 | 1285.7116      | 643.3597        |
| 367.2346       | 3  | K 10 | 1188.6589      | 594.8333        |
| 466.3030       | 4  | V 9  | 1032.5326      | 516.7702        |
| 553.3350       | 5  | S 8  | 933.4641       | 467.2360        |
| 668.3620       | 6  | D 7  | 846.4321       | 423.7200        |
| 755.3940       | 7  | S 6  | 731.4052       | 366.2065        |
| 854.4624       | 8  | V 5  | 644.3731       | 322.6905        |
| 983.5050       | 9  | E 4  | 545.3047       | 273.1563        |
| 1111.5636      | 10 | Q 3  | 416.2621       | 208.6350        |
| 1224.6476      | 11 | L 2  | 288.2036       | 144.6057        |
|                | 12 | R 1  | 175.1195       | 88.0637         |

N-term:+43.02 K(3):+156.13

AQALSEEEFQR, MH+ 1349.6337, m/z 675.3205  
 L OSG41 P180811 230811-s1.04966.04966.2.dta

X-range:

-

MassTol: Y-zoom:

MassType:

AVG  MONO

Axis:

1  2

Label:

I  M  -

Ions:

a  +  2+  3+

b  +  2+  3+

c  +  2+  3+

x  +  2+  3+

y  +  2+  3+

z  +  2+  3+

hide H<sub>2</sub>O/NH<sub>3</sub>

zoom 112-122

GO

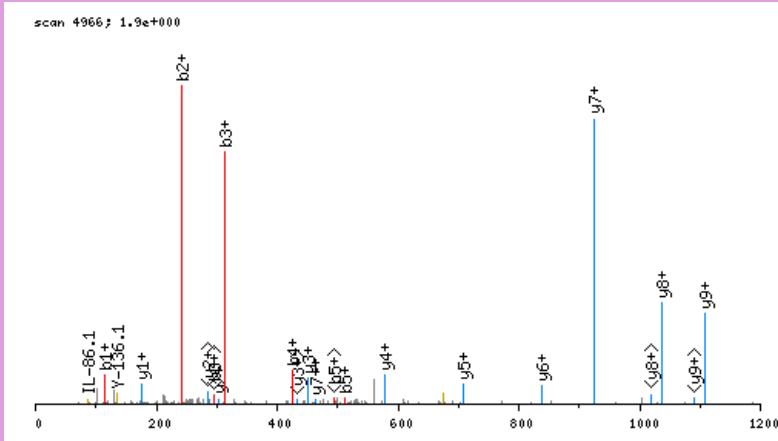

click image to zoom in; click top corners to zoom out [\[precursor±\]](#)

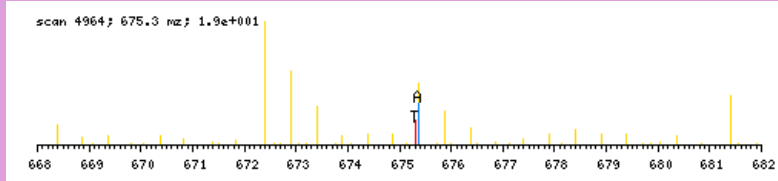

zoomed in precursor plot; T=theoretical m/z, A=acquired m/z

| b <sup>+</sup> | #  | AA # | y <sup>+</sup> | y <sup>2+</sup> |
|----------------|----|------|----------------|-----------------|
| 114.0555       | 1  | A 11 |                |                 |
| 242.1141       | 2  | Q 10 | 1236.5861      | 618.7969        |
| 313.1512       | 3  | A 9  | 1108.5275      | 554.7677        |
| 426.2353       | 4  | L 8  | 1037.4904      | 519.2491        |
| 513.2673       | 5  | S 7  | 924.4063       | 462.7071        |
| 642.3099       | 6  | E 6  | 837.3743       | 419.1910        |
| 771.3525       | 7  | E 5  | 708.3317       | 354.6698        |
| 900.3951       | 8  | E 4  | 579.2891       | 290.1485        |
| 1047.4635      | 9  | F 3  | 450.2465       | 225.6272        |
| 1175.5221      | 10 | Q 2  | 303.1781       | 152.0930        |
|                | 11 | R 1  | 175.1195       | 88.0637         |

N-term:+43.02

AQAPAKCPSYPGSGDGEMGKLR, MH+ 2387.2124, m/z 796.4090  
 L OSG39 P180811 230811-s1.03589.03589.3.dta

X-range:

-

MassTol: Y-zoom:

MassType:

AVG  MONO

Axis:

1  2

Label:

I  M  -

Ions:

a  +  2+  3+

b  +  2+  3+

c  +  2+  3+

x  +  2+  3+

y  +  2+  3+

z  +  2+  3+

hide H<sub>2</sub>O/NH<sub>3</sub>

zoom 112-122

GO

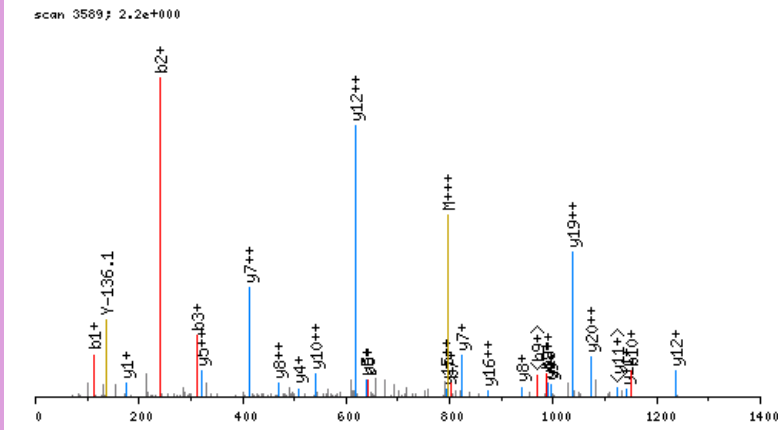

click image to zoom in; click top corners to zoom out [\[precursor±\]](#)

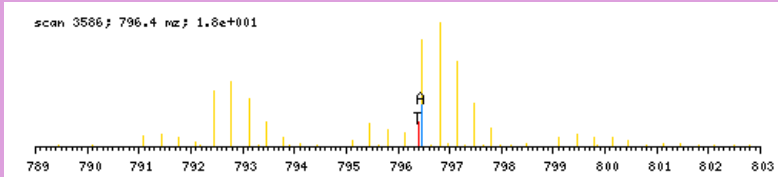

zoomed in precursor plot; T=theoretical m/z, A=acquired m/z

| b <sup>+</sup> | #  | AA | #  | y <sup>+</sup> | y <sup>2+</sup> |
|----------------|----|----|----|----------------|-----------------|
| 114.0555       | 1  | A  | 22 |                |                 |
| 242.1141       | 2  | Q  | 21 | 2274.1647      | 1137.5863       |
| 313.1512       | 3  | A  | 20 | 2146.1061      | 1073.5570       |
| 410.2040       | 4  | P  | 19 | 2075.0690      | 1038.0384       |
| 481.2411       | 5  | A  | 18 | 1978.0163      | 989.5120        |
| 643.3992       | 6  | K  | 17 | 1906.9792      | 953.9935        |
| 803.4298       | 7  | C  | 16 | 1744.8211      | 872.9144        |
| 900.4825       | 8  | P  | 15 | 1584.7905      | 792.8991        |
| 987.5146       | 9  | S  | 14 | 1487.7377      | 744.3728        |
| 1150.5779      | 10 | Y  | 13 | 1400.7057      | 700.8567        |
| 1247.6307      | 11 | P  | 12 | 1237.6423      | 619.3251        |
| 1304.6521      | 12 | G  | 11 | 1140.5896      | 570.7987        |
| 1391.6842      | 13 | S  | 10 | 1083.5681      | 542.2880        |
| 1448.7056      | 14 | G  | 9  | 996.5361       | 498.7720        |
| 1563.7326      | 15 | D  | 8  | 939.5146       | 470.2612        |
| 1620.7540      | 16 | G  | 7  | 824.4877       | 412.7477        |
| 1749.7966      | 17 | E  | 6  | 767.4662       | 384.2370        |
| 1880.8371      | 18 | M  | 5  | 638.4236       | 319.7157        |
| 1937.8586      | 19 | G  | 4  | 507.3831       | 254.1955        |
| 2100.0167      | 20 | K  | 3  | 450.3617       | 225.6847        |
| 2213.1007      | 21 | L  | 2  | 288.2036       | 144.6057        |
|                | 22 | R  | 1  | 175.1195       | 88.0637         |

N-term:+43.02 K(6):+162.16  
 C(7):+160.03 K(20):+162.16



AQAPTIVIVTQPGFVR, MH+ 1625.9015, m/z 542.6387  
 L OSG41 P180811 230811-s1.06265.06265.3.dta

X-range:

-

MassTol: Y-zoom:

MassType:

AVG  MONO

Axis:

1  2

Label:

I  M  -

Ions:

a  +  2+  3+

b  +  2+  3+

c  +  2+  3+

x  +  2+  3+

y  +  2+  3+

z  +  2+  3+

hide H<sub>2</sub>O/NH<sub>3</sub>

zoom 112-122

GO

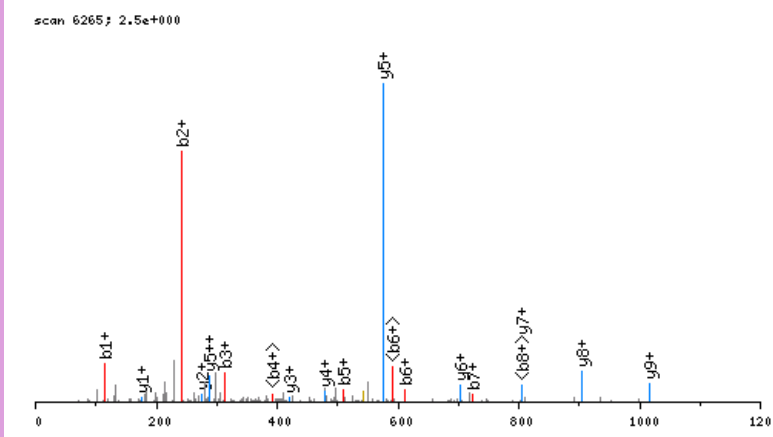

click image to zoom in; click top corners to zoom out [\[precursor±\]](#)

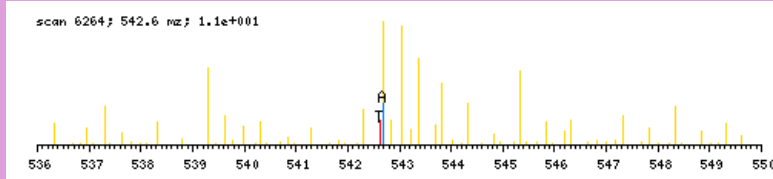

zoomed in precursor plot; T=theoretical m/z, A=acquired m/z

| b <sup>+</sup> | #  | AA # | y <sup>+</sup> | y <sup>2+</sup> |
|----------------|----|------|----------------|-----------------|
| 114.0555       | 1  | A 15 |                |                 |
| 242.1141       | 2  | Q 14 | 1512.8538      | 756.9308        |
| 313.1512       | 3  | A 13 | 1384.7953      | 692.9015        |
| 410.2040       | 4  | P 12 | 1313.7581      | 657.3830        |
| 511.2516       | 5  | T 11 | 1216.7054      | 608.8566        |
| 610.3201       | 6  | V 10 | 1115.6577      | 558.3328        |
| 723.4041       | 7  | I 9  | 1016.5893      | 508.7986        |
| 822.4725       | 8  | V 8  | 903.5052       | 452.2565        |
| 923.5202       | 9  | T 7  | 804.4368       | 402.7223        |
| 1051.5788      | 10 | Q 6  | 703.3891       | 352.1985        |
| 1148.6316      | 11 | P 5  | 575.3306       | 288.1692        |
| 1205.6530      | 12 | G 4  | 478.2778       | 239.6428        |
| 1352.7214      | 13 | F 3  | 421.2563       | 211.1321        |
| 1451.7899      | 14 | V 2  | 274.1879       | 137.5979        |
|                | 15 | R 1  | 175.1195       | 88.0637         |

N-term:+43.02

AQDGVELEKSVR, MH+ 1400.7386, m/z 700.8729  
 L OSG37 P180811 230811-s1.04277.04277.2.dta

X-range:

-

MassTol: Y-zoom:

MassType:

AVG  MONO

Axis:

1  2

Label:

I  M  -

Ions:

a  +  2+  3+

b  +  2+  3+

c  +  2+  3+

x  +  2+  3+

y  +  2+  3+

z  +  2+  3+

hide H<sub>2</sub>O/NH<sub>3</sub>

zoom 112-122

GO

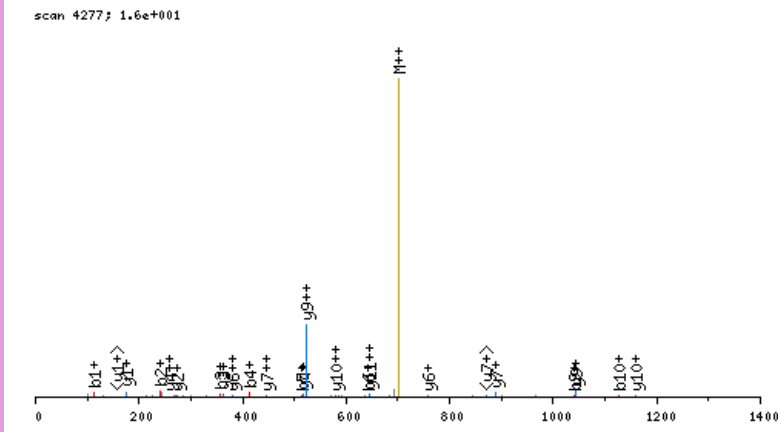

click image to zoom in; click top corners to zoom out [\[precursor±\]](#)

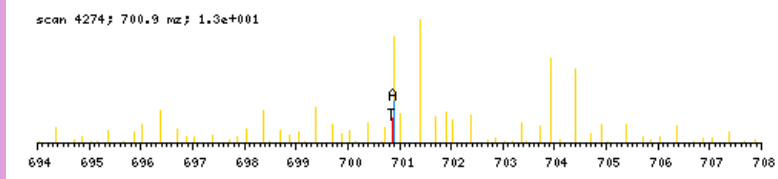

zoomed in precursor plot; T=theoretical m/z, A=acquired m/z

| b <sup>+</sup> | #  | AA # | y <sup>+</sup> | y <sup>2+</sup> |
|----------------|----|------|----------------|-----------------|
| 114.0555       | 1  | A 12 |                |                 |
| 242.1141       | 2  | Q 11 | 1287.6909      | 644.3494        |
| 357.1410       | 3  | D 10 | 1159.6323      | 580.3201        |
| 414.1625       | 4  | G 9  | 1044.6054      | 522.8066        |
| 513.2309       | 5  | V 8  | 987.5839       | 494.2959        |
| 642.2735       | 6  | E 7  | 888.5155       | 444.7617        |
| 755.3576       | 7  | L 6  | 759.4729       | 380.2404        |
| 884.4002       | 8  | E 5  | 646.3888       | 323.6983        |
| 1040.5265      | 9  | K 4  | 517.3462       | 259.1770        |
| 1127.5585      | 10 | S 3  | 361.2199       | 181.1139        |
| 1226.6269      | 11 | V 2  | 274.1879       | 137.5979        |
|                | 12 | R 1  | 175.1195       | 88.0637         |

N-term:+43.02 K(9):+156.13

AQDLSEKELLR, MH+ 1371.7484, m/z 686.3778  
 L OSG37 P180811 230811-s1.05437.05437.2.dta

X-range:

-

MassTol: Y-zoom:

MassType:

AVG  MONO

Axis:

1  2

Label:

I  M  -

Ions:

a  +  2+  3+

b  +  2+  3+

c  +  2+  3+

x  +  2+  3+

y  +  2+  3+

z  +  2+  3+

hide H<sub>2</sub>O/NH<sub>3</sub>

zoom 112-122

GO

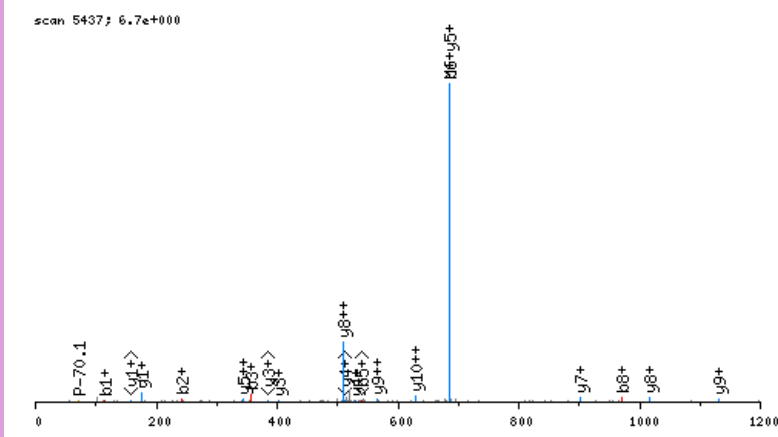

click image to zoom in; click top corners to zoom out [\[precursor±\]](#)

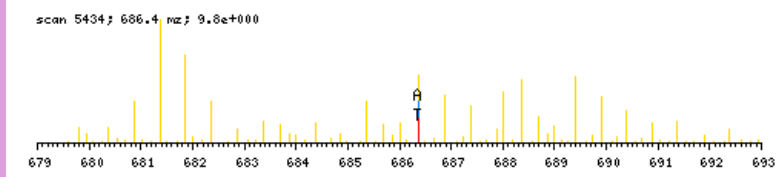

zoomed in precursor plot; T=theoretical m/z, A=acquired m/z

| b <sup>+</sup> | #  | AA # | y <sup>+</sup> | y <sup>2+</sup> |
|----------------|----|------|----------------|-----------------|
| 114.0555       | 1  | A 11 |                |                 |
| 242.1141       | 2  | Q 10 | 1258.7007      | 629.8543        |
| 357.1410       | 3  | D 9  | 1130.6422      | 565.8250        |
| 470.2251       | 4  | L 8  | 1015.6152      | 508.3115        |
| 557.2571       | 5  | S 7  | 902.5311       | 451.7695        |
| 686.2997       | 6  | E 6  | 815.4991       | 408.2535        |
| 842.4260       | 7  | K 5  | 686.4565       | 343.7322        |
| 971.4686       | 8  | E 4  | 530.3302       | 265.6690        |
| 1084.5527      | 9  | L 3  | 401.2876       | 201.1477        |
| 1197.6367      | 10 | L 2  | 288.2036       | 144.6057        |
|                | 11 | R 1  | 175.1195       | 88.0637         |

N-term:+43.02 K(7):+156.13

AQDQGEKENPMR, MH+ 1478.7122, m/z 739.8597  
 L OSG37 P180811 230811-s1.02255.02255.2.dta

X-range:

-

MassTol: Y-zoom:

MassType:

AVG  MONO

Axis:

1  2

Label:

I  M  -

Ions:

a  +  2+  3+

b  +  2+  3+

c  +  2+  3+

x  +  2+  3+

y  +  2+  3+

z  +  2+  3+

hide H<sub>2</sub>O/NH<sub>3</sub>

zoom 112-122

GO

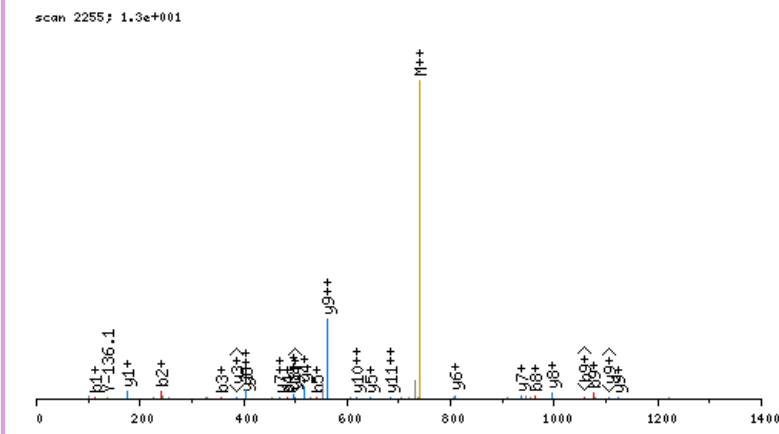

click image to zoom in; click top corners to zoom out [\[precursor±\]](#)

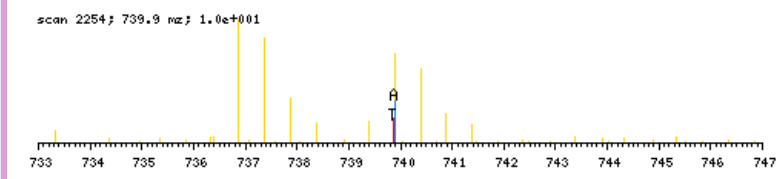

zoomed in precursor plot; T=theoretical m/z, A=acquired m/z

| b <sup>+</sup> | #  | AA # | y <sup>+</sup> | y <sup>2+</sup> |
|----------------|----|------|----------------|-----------------|
| 114.0555       | 1  | A 12 |                |                 |
| 242.1141       | 2  | Q 11 | 1365.6645      | 683.3362        |
| 357.1410       | 3  | D 10 | 1237.6059      | 619.3069        |
| 485.1996       | 4  | Q 9  | 1122.5790      | 561.7934        |
| 542.2211       | 5  | G 8  | 994.5204       | 497.7641        |
| 671.2637       | 6  | E 7  | 937.4990       | 469.2534        |
| 833.4218       | 7  | K 6  | 808.4564       | 404.7321        |
| 962.4644       | 8  | E 5  | 646.2983       | 323.6530        |
| 1076.5073      | 9  | N 4  | 517.2557       | 259.1318        |
| 1173.5601      | 10 | P 3  | 403.2127       | 202.1103        |
| 1304.6005      | 11 | M 2  | 306.1600       | 153.5839        |
|                | 12 | R 1  | 175.1195       | 88.0637         |

N-term:+43.02 K(7):+162.16

AQELQHPEFAR, MH+ 1367.6708, m/z 684.3390  
 L OSG37 P180811 230811-s1.04770.04770.2.dta

X-range:

-

MassTol: Y-zoom:

MassType:

AVG  MONO

Axis:

1  2

Label:

I  M  -

Ions:

a  +  2+  3+

b  +  2+  3+

c  +  2+  3+

x  +  2+  3+

y  +  2+  3+

z  +  2+  3+

hide H<sub>2</sub>O/NH<sub>3</sub>

zoom 112-122

GO

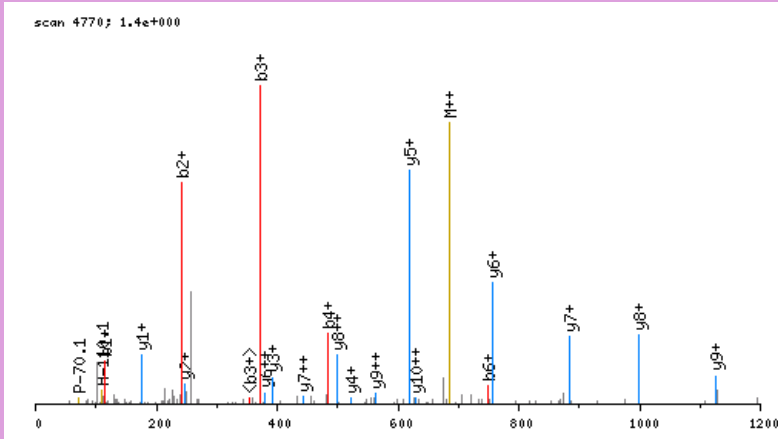

click image to zoom in; click top corners to zoom out [\[precursor±\]](#)

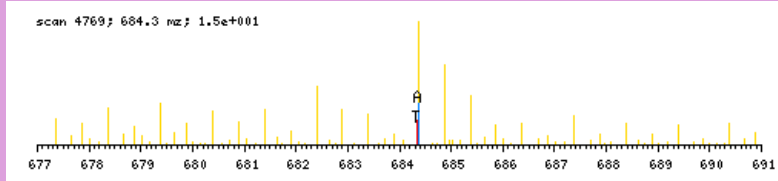

zoomed in precursor plot; T=theoretical m/z, A=acquired m/z

| b <sup>+</sup> | #  | AA # | y <sup>+</sup> | y <sup>2+</sup> |
|----------------|----|------|----------------|-----------------|
| 114.0555       | 1  | A 11 |                |                 |
| 242.1141       | 2  | Q 10 | 1254.6231      | 627.8155        |
| 371.1567       | 3  | E 9  | 1126.5645      | 563.7862        |
| 484.2407       | 4  | L 8  | 997.5219       | 499.2649        |
| 612.2993       | 5  | Q 7  | 884.4379       | 442.7228        |
| 749.3582       | 6  | H 6  | 756.3793       | 378.6936        |
| 846.4110       | 7  | P 5  | 619.3204       | 310.1641        |
| 975.4536       | 8  | E 4  | 522.2676       | 261.6377        |
| 1122.5220      | 9  | F 3  | 393.2250       | 197.1164        |
| 1193.5591      | 10 | A 2  | 246.1566       | 123.5822        |
|                | 11 | R 1  | 175.1195       | 88.0637         |

N-term:+43.02

AQERPSCAVEPEHVQR, MH+ 1934.9142, m/z 645.6429  
 L OSG39 P180811 230811-s1.02418.02418.3.dta

X-range:

-

MassTol: Y-zoom:

MassType:

AVG  MONO

Axis:

1  2

Label:

I  M  -

Ions:

a  +  2+  3+

b  +  2+  3+

c  +  2+  3+

x  +  2+  3+

y  +  2+  3+

z  +  2+  3+

hide H<sub>2</sub>O/NH<sub>3</sub>

zoom 112-122

GO

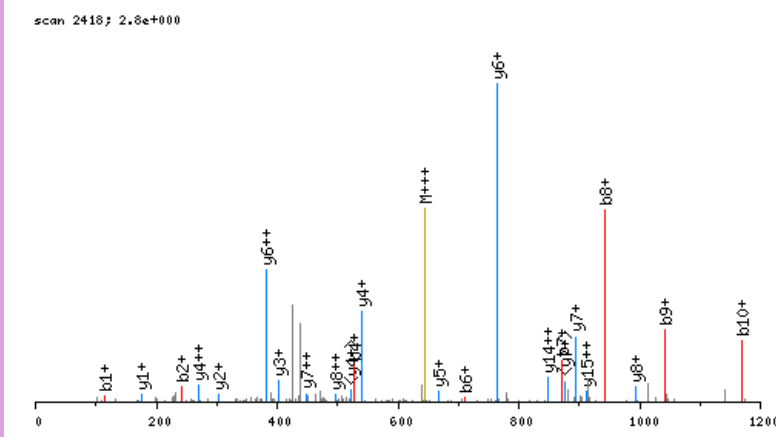

click image to zoom in; click top corners to zoom out [\[precursor±\]](#)

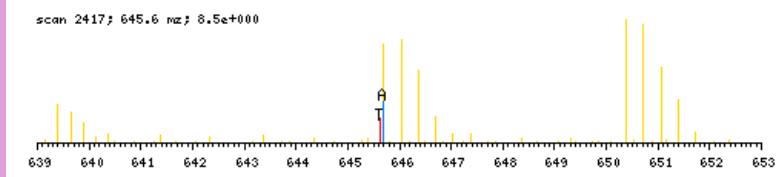

zoomed in precursor plot; T=theoretical m/z, A=acquired m/z

| b <sup>+</sup> | #  | AA # | y <sup>+</sup> | y <sup>2+</sup> |
|----------------|----|------|----------------|-----------------|
| 114.0555       | 1  | A 16 |                |                 |
| 242.1141       | 2  | Q 15 | 1821.8666      | 911.4372        |
| 371.1567       | 3  | E 14 | 1693.8080      | 847.4079        |
| 527.2578       | 4  | R 13 | 1564.7654      | 782.8866        |
| 624.3106       | 5  | P 12 | 1408.6643      | 704.8360        |
| 711.3426       | 6  | S 11 | 1311.6115      | 656.3097        |
| 871.3732       | 7  | C 10 | 1224.5795      | 612.7937        |
| 942.4103       | 8  | A 9  | 1064.5489      | 532.7784        |
| 1041.4787      | 9  | V 8  | 993.5118       | 497.2598        |
| 1170.5213      | 10 | E 7  | 894.4434       | 447.7256        |
| 1267.5741      | 11 | P 6  | 765.4008       | 383.2043        |
| 1396.6167      | 12 | E 5  | 668.3480       | 334.6779        |
| 1533.6756      | 13 | H 4  | 539.3054       | 270.1566        |
| 1632.7440      | 14 | V 3  | 402.2465       | 201.6272        |
| 1760.8026      | 15 | Q 2  | 303.1781       | 152.0930        |
|                | 16 | R 1  | 175.1195       | 88.0637         |

N-term:+43.02 C(7):+160.03

AQEVSEYLSQNPR, MH+ 1562.7451, m/z 781.8762  
 L OSG41 P180811 230811-s1.06262.06262.2.dta

X-range:

-

MassTol: Y-zoom:

MassType:

AVG  MONO

Axis:

1  2

Label:

I  M  -

Ions:

a  +  2+  3+

b  +  2+  3+

c  +  2+  3+

x  +  2+  3+

y  +  2+  3+

z  +  2+  3+

hide H<sub>2</sub>O/NH<sub>3</sub>

zoom 112-122

GO

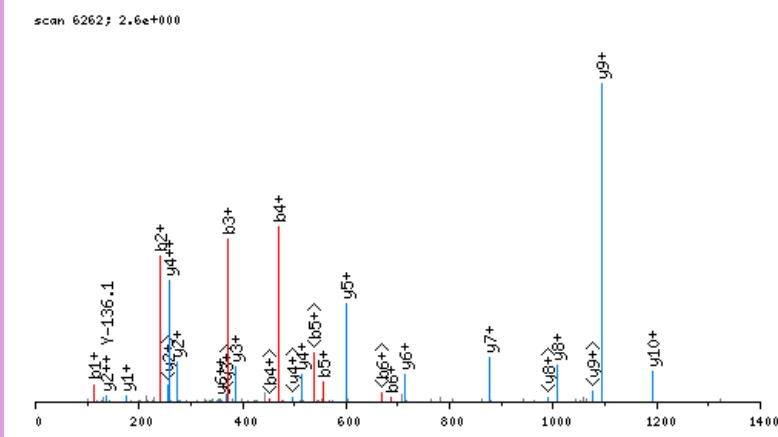

click image to zoom in; click top corners to zoom out [\[precursor±\]](#)

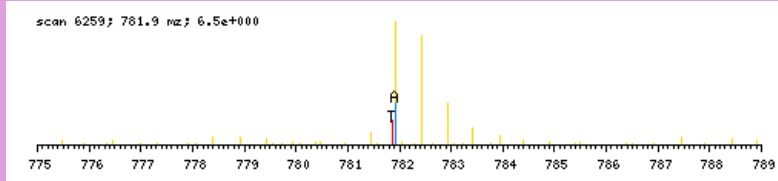

zoomed in precursor plot; T=theoretical m/z, A=acquired m/z

| b <sup>+</sup> | #  | AA # | y <sup>+</sup> | y <sup>2+</sup> |
|----------------|----|------|----------------|-----------------|
| 114.0555       | 1  | A 13 |                |                 |
| 242.1141       | 2  | Q 12 | 1449.6974      | 725.3526        |
| 371.1567       | 3  | E 11 | 1321.6388      | 661.3233        |
| 470.2251       | 4  | V 10 | 1192.5962      | 596.8020        |
| 557.2571       | 5  | S 9  | 1093.5278      | 547.2678        |
| 686.2997       | 6  | E 8  | 1006.4958      | 503.7518        |
| 849.3630       | 7  | Y 7  | 877.4532       | 439.2305        |
| 962.4471       | 8  | L 6  | 714.3899       | 357.6988        |
| 1049.4791      | 9  | S 5  | 601.3058       | 301.1568        |
| 1177.5377      | 10 | Q 4  | 514.2738       | 257.6408        |
| 1291.5806      | 11 | N 3  | 386.2152       | 193.6115        |
| 1388.6334      | 12 | P 2  | 272.1723       | 136.5900        |
|                | 13 | R 1  | 175.1195       | 88.0637         |

N-term:+43.02

AQGSHQIDFQVLHDLR, MH+ 1905.9571, m/z 635.9906  
 L OSG39 P180811 230811-s1.06097.06097.3.dta

X-range:

-

MassTol: Y-zoom:

MassType:

AVG  MONO

Axis:

1  2

Label:

I  M  -

Ions:

a  +  2+  3+

b  +  2+  3+

c  +  2+  3+

x  +  2+  3+

y  +  2+  3+

z  +  2+  3+

hide H<sub>2</sub>O/NH<sub>3</sub>

zoom 112-122

GO

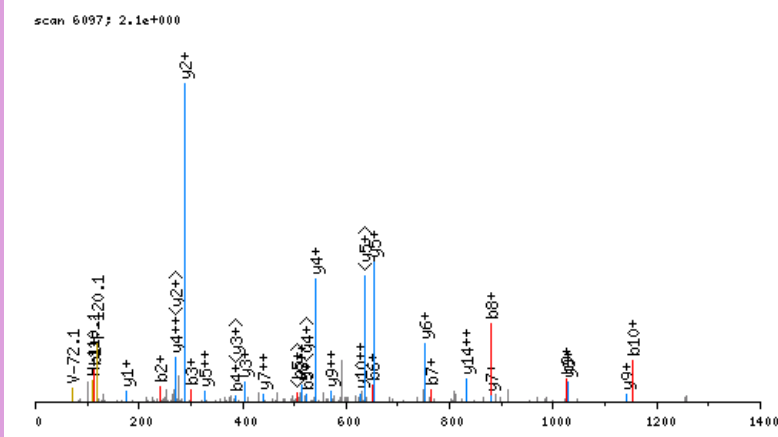

click image to zoom in; click top corners to zoom out [\[precursor±\]](#)

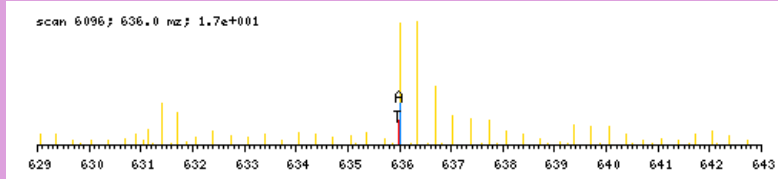

zoomed in precursor plot; T=theoretical m/z, A=acquired m/z

| b <sup>+</sup> | #  | AA # | y <sup>+</sup> | y <sup>2+</sup> |
|----------------|----|------|----------------|-----------------|
| 114.0555       | 1  | A 16 |                |                 |
| 242.1141       | 2  | Q 15 | 1792.9095      | 896.9586        |
| 299.1356       | 3  | G 14 | 1664.8509      | 832.9294        |
| 386.1676       | 4  | S 13 | 1607.8294      | 804.4186        |
| 523.2265       | 5  | H 12 | 1520.7974      | 760.9026        |
| 651.2851       | 6  | Q 11 | 1383.7385      | 692.3731        |
| 764.3691       | 7  | I 10 | 1255.6799      | 628.3439        |
| 879.3961       | 8  | D 9  | 1142.5958      | 571.8018        |
| 1026.4645      | 9  | F 8  | 1027.5689      | 514.2884        |
| 1154.5231      | 10 | Q 7  | 880.5005       | 440.7542        |
| 1253.5915      | 11 | V 6  | 752.4419       | 376.7249        |
| 1366.6755      | 12 | L 5  | 653.3735       | 327.1907        |
| 1503.7345      | 13 | H 4  | 540.2894       | 270.6486        |
| 1618.7614      | 14 | D 3  | 403.2305       | 202.1192        |
| 1731.8455      | 15 | L 2  | 288.2036       | 144.6057        |
|                | 16 | R 1  | 175.1195       | 88.0637         |

N-term:+43.02



AQKPDGGAGLR, MH+ 1139.6173, m/z 570.3123  
 L OSG37 P180811 230811-s1.02155.02155.2.dta

scan 2155; 9.3e+001

X-range:

-

MassTol: Y-zoom:

MassType:

AVG  MONO

Axis:

1  2

Label:

I  M  -

Ions:

a  +  2+  3+

b  +  2+  3+

c  +  2+  3+

x  +  2+  3+

y  +  2+  3+

z  +  2+  3+

hide H<sub>2</sub>O/NH<sub>3</sub>

zoom 112-122

GO

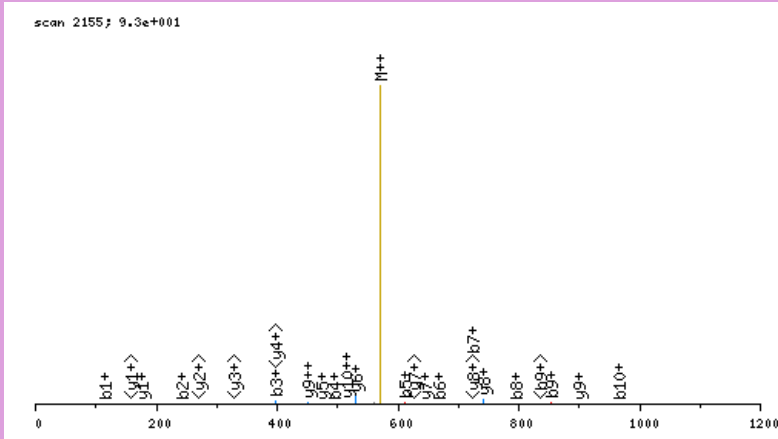

click image to zoom in; click top corners to zoom out [\[precursor±\]](#)

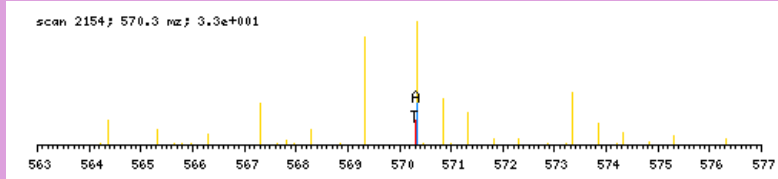

zoomed in precursor plot; T=theoretical m/z, A=acquired m/z

| b <sup>+</sup> | #  | AA | #  | y <sup>+</sup> | y <sup>2+</sup> |
|----------------|----|----|----|----------------|-----------------|
| 114.0555       | 1  | A  | 11 |                |                 |
| 242.1141       | 2  | Q  | 10 | 1026.5697      | 513.7887        |
| 398.2404       | 3  | K  | 9  | 898.5111       | 449.7595        |
| 495.2932       | 4  | P  | 8  | 742.3848       | 371.6963        |
| 610.3201       | 5  | D  | 7  | 645.3320       | 323.1699        |
| 667.3416       | 6  | G  | 6  | 530.3051       | 265.6564        |
| 724.3630       | 7  | G  | 5  | 473.2836       | 237.1457        |
| 795.4001       | 8  | A  | 4  | 416.2621       | 208.6350        |
| 852.4216       | 9  | G  | 3  | 345.2250       | 173.1164        |
| 965.5057       | 10 | L  | 2  | 288.2036       | 144.6057        |
|                | 11 | R  | 1  | 175.1195       | 88.0637         |

N-term:+43.02 K(3):+156.13

AQNLKDLAGR, MH+ 1161.6804, m/z 581.3439  
 L OSG37 P180811 230811-s1.04660.04660.2.dta

X-range:

-

MassTol: Y-zoom:

MassType:

AVG  MONO

Axis:

1  2

Label:

I  M  -

Ions:

a  +  2+  3+

b  +  2+  3+

c  +  2+  3+

x  +  2+  3+

y  +  2+  3+

z  +  2+  3+

hide H<sub>2</sub>O/NH<sub>3</sub>

zoom 112-122

GO

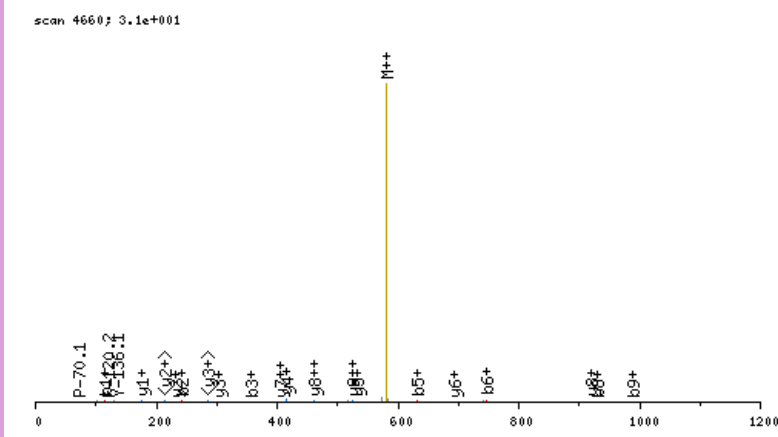

click image to zoom in; click top corners to zoom out [\[precursor±\]](#)

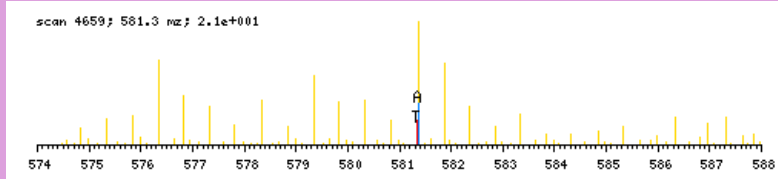

zoomed in precursor plot; T=theoretical m/z, A=acquired m/z

| b <sup>+</sup> | #  | AA | #  | y <sup>+</sup> | y <sup>2+</sup> |
|----------------|----|----|----|----------------|-----------------|
| 114.0555       | 1  | A  | 10 |                |                 |
| 242.1141       | 2  | Q  | 9  | 1048.6328      | 524.8203        |
| 356.1570       | 3  | N  | 8  | 920.5742       | 460.7910        |
| 469.2411       | 4  | L  | 7  | 806.5312       | 403.7695        |
| 631.3992       | 5  | K  | 6  | 693.4472       | 347.2275        |
| 746.4261       | 6  | D  | 5  | 531.2891       | 266.1485        |
| 859.5102       | 7  | L  | 4  | 416.2621       | 208.6350        |
| 930.5473       | 8  | A  | 3  | 303.1781       | 152.0930        |
| 987.5688       | 9  | G  | 2  | 232.1410       | 116.5744        |
|                | 10 | R  | 1  | 175.1195       | 88.0637         |

N-term:+43.02 K(5):+162.16

AQPGPAPQPDVSLQQR, MH+ 1730.8826, m/z 577.6324  
 L OSG41 P180811 230811-s1.04097.04097.3.dta

X-range:

-

MassTol: Y-zoom:

MassType:

AVG  MONO

Axis:

1  2

Label:

I  M  -

Ions:

a  +  2+  3+

b  +  2+  3+

c  +  2+  3+

x  +  2+  3+

y  +  2+  3+

z  +  2+  3+

hide H<sub>2</sub>O/NH<sub>3</sub>

zoom 112-122

GO

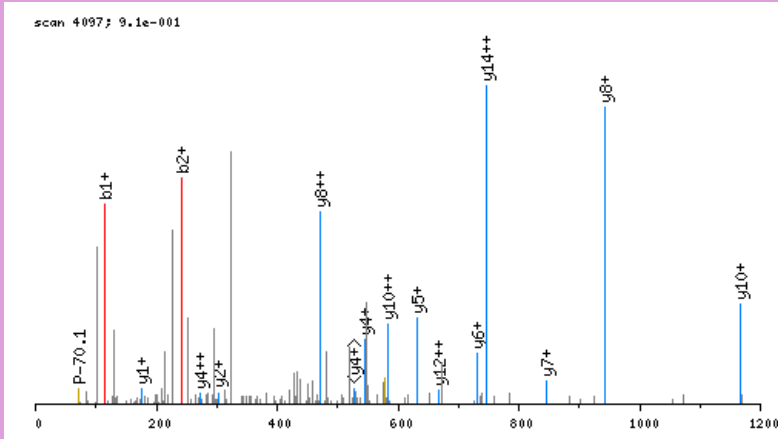

click image to zoom in; click top corners to zoom out [\[precursor±\]](#)

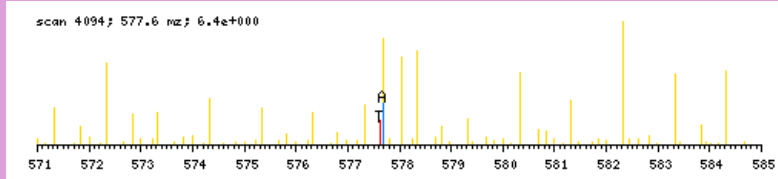

zoomed in precursor plot; T=theoretical m/z, A=acquired m/z

| b <sup>+</sup> | #  | AA # | y <sup>+</sup> | y <sup>2+</sup> |
|----------------|----|------|----------------|-----------------|
| 114.0555       | 1  | A 16 |                |                 |
| 242.1141       | 2  | Q 15 | 1617.8349      | 809.4214        |
| 339.1669       | 3  | P 14 | 1489.7763      | 745.3921        |
| 396.1883       | 4  | G 13 | 1392.7236      | 696.8657        |
| 493.2411       | 5  | P 12 | 1335.7021      | 668.3550        |
| 564.2782       | 6  | A 11 | 1238.6493      | 619.8286        |
| 661.3310       | 7  | P 10 | 1167.6122      | 584.3100        |
| 789.3895       | 8  | Q 9  | 1070.5594      | 535.7836        |
| 886.4423       | 9  | P 8  | 942.5009       | 471.7543        |
| 1001.4692      | 10 | D 7  | 845.4481       | 423.2280        |
| 1100.5377      | 11 | V 6  | 730.4212       | 365.7145        |
| 1187.5697      | 12 | S 5  | 631.3527       | 316.1803        |
| 1300.6538      | 13 | L 4  | 544.3207       | 272.6643        |
| 1428.7123      | 14 | Q 3  | 431.2367       | 216.1222        |
| 1556.7709      | 15 | Q 2  | 303.1781       | 152.0930        |
|                | 16 | R 1  | 175.1195       | 88.0637         |

N-term:+43.02

AQPKNLEGYVGFANLPNQVYR, MH+ 2454.2994, m/z 818.7713  
 L OSG37 P180811 230811-s1.08383.08383.3.dta

X-range:

-

MassTol: Y-zoom:

MassType:

AVG  MONO

Axis:

1  2

Label:

I  M  -

Ions:

a  +  2+  3+

b  +  2+  3+

c  +  2+  3+

x  +  2+  3+

y  +  2+  3+

z  +  2+  3+

hide H<sub>2</sub>O/NH<sub>3</sub>

zoom 112-122

GO

scan 8383; 2.6e+000

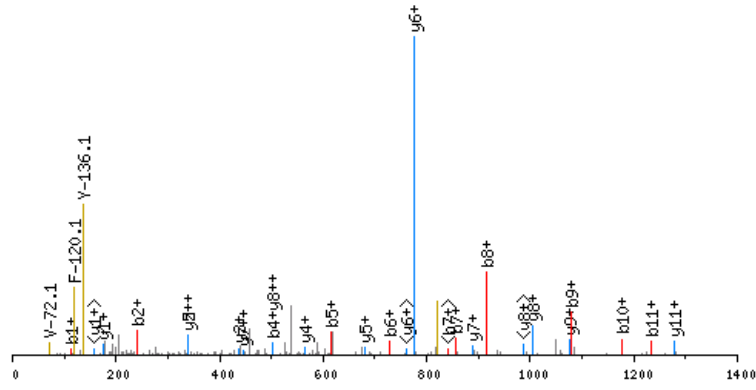

click image to zoom in; click top corners to zoom out [\[precursor±\]](#)

scan 8379; 818.8 m/z; 1.8e+001

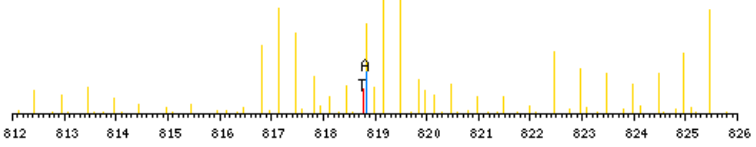

zoomed in precursor plot; T=theoretical m/z, A=acquired m/z

| b <sup>+</sup> | #  | AA # | y <sup>+</sup> | y <sup>2+</sup> |
|----------------|----|------|----------------|-----------------|
| 114.0555       | 1  | A 21 |                |                 |
| 242.1141       | 2  | Q 20 | 2341.2517      | 1171.1298       |
| 339.1669       | 3  | P 19 | 2213.1931      | 1107.1005       |
| 501.3250       | 4  | K 18 | 2116.1404      | 1058.5741       |
| 615.3679       | 5  | N 17 | 1953.9823      | 977.4951        |
| 728.4519       | 6  | L 16 | 1839.9394      | 920.4736        |
| 857.4945       | 7  | E 15 | 1726.8553      | 863.9316        |
| 914.5160       | 8  | G 14 | 1597.8127      | 799.4103        |
| 1077.5793      | 9  | Y 13 | 1540.7912      | 770.8995        |
| 1176.6477      | 10 | V 12 | 1377.7279      | 689.3679        |
| 1233.6692      | 11 | G 11 | 1278.6595      | 639.8337        |
| 1380.7376      | 12 | F 10 | 1221.6380      | 611.3229        |
| 1451.7747      | 13 | A 9  | 1074.5696      | 537.7887        |
| 1565.8177      | 14 | N 8  | 1003.5325      | 502.2702        |
| 1678.9017      | 15 | L 7  | 889.4896       | 445.2487        |
| 1775.9545      | 16 | P 6  | 776.4055       | 388.7067        |
| 1889.9974      | 17 | N 5  | 679.3527       | 340.1803        |
| 2018.0560      | 18 | Q 4  | 565.3098       | 283.1588        |
| 2117.1244      | 19 | V 3  | 437.2512       | 219.1295        |
| 2280.1877      | 20 | Y 2  | 338.1828       | 169.5953        |
|                | 21 | R 1  | 175.1195       | 88.0637         |

N-term:+43.02 K(4):+162.16

AQWNQLQLDTR, MH+ 1542.7665, m/z 771.8869  
 L OSG41 P180811 230811-s1.06238.06238.2.dta

X-range:

-

MassTol: Y-zoom:

MassType:

AVG  MONO

Axis:

1  2

Label:

I  M  -

Ions:

a  +  2+  3+

b  +  2+  3+

c  +  2+  3+

x  +  2+  3+

y  +  2+  3+

z  +  2+  3+

hide H<sub>2</sub>O/NH<sub>3</sub>

zoom 112-122

GO

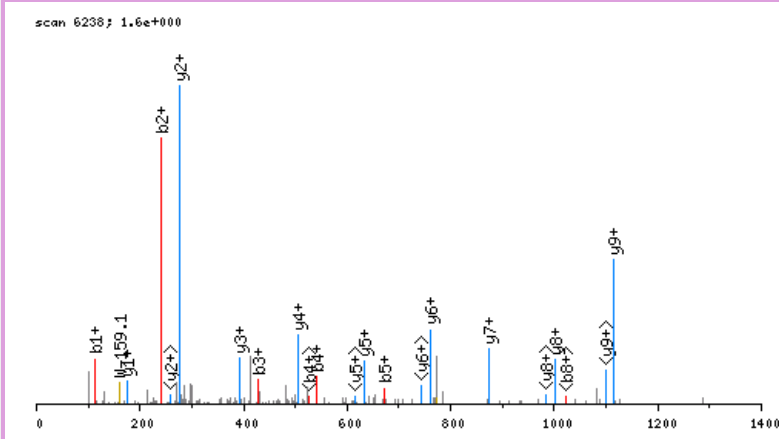

click image to zoom in; click top corners to zoom out [\[precursor±\]](#)

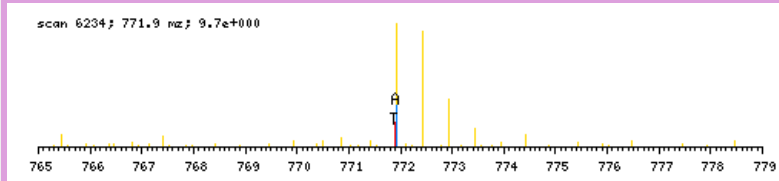

zoomed in precursor plot; T=theoretical m/z, A=acquired m/z

| b <sup>+</sup> | #  | AA | #  | y <sup>+</sup> | y <sup>2+</sup> |
|----------------|----|----|----|----------------|-----------------|
| 114.0555       | 1  | A  | 12 |                |                 |
| 242.1141       | 2  | Q  | 11 | 1429.7188      | 715.3633        |
| 428.1934       | 3  | W  | 10 | 1301.6602      | 651.3340        |
| 542.2363       | 4  | N  | 9  | 1115.5809      | 558.2944        |
| 670.2949       | 5  | Q  | 8  | 1001.5380      | 501.2729        |
| 783.3790       | 6  | L  | 7  | 873.4794       | 437.2436        |
| 911.4376       | 7  | Q  | 6  | 760.3953       | 380.7016        |
| 1039.4961      | 8  | Q  | 5  | 632.3368       | 316.6723        |
| 1152.5802      | 9  | L  | 4  | 504.2782       | 252.6430        |
| 1267.6071      | 10 | D  | 3  | 391.1941       | 196.1010        |
| 1368.6548      | 11 | T  | 2  | 276.1672       | 138.5875        |
|                | 12 | R  | 1  | 175.1195       | 88.0637         |

N-term:+43.02

ASALEQFVNSVR, MH+ 1362.7018, m/z 681.8545  
 L OSG41 P180811 230811-s1.07535.07535.2.dta

X-range:

-

MassTol: Y-zoom:

MassType:

AVG  MONO

Axis:

1  2

Label:

I  M  -

Ions:

a  +  2+  3+

b  +  2+  3+

c  +  2+  3+

x  +  2+  3+

y  +  2+  3+

z  +  2+  3+

hide H<sub>2</sub>O/NH<sub>3</sub>

zoom 112-122

GO

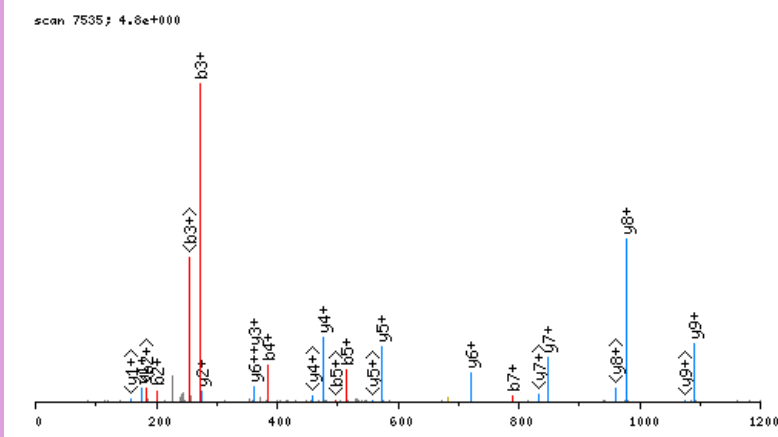

click image to zoom in; click top corners to zoom out [\[precursor±\]](#)

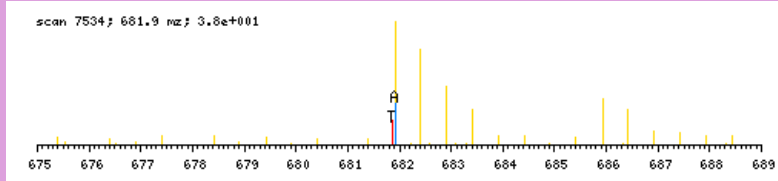

zoomed in precursor plot; T=theoretical m/z, A=acquired m/z

| b <sup>+</sup> | #  | AA # | y <sup>+</sup> | y <sup>2+</sup> |
|----------------|----|------|----------------|-----------------|
| 114.0555       | 1  | A 12 |                |                 |
| 201.0875       | 2  | S 11 | 1249.6541      | 625.3310        |
| 272.1247       | 3  | A 10 | 1162.6220      | 581.8149        |
| 385.2087       | 4  | L 9  | 1091.5849      | 546.2964        |
| 514.2513       | 5  | E 8  | 978.5009       | 489.7543        |
| 642.3099       | 6  | Q 7  | 849.4583       | 425.2331        |
| 789.3783       | 7  | F 6  | 721.3997       | 361.2038        |
| 888.4467       | 8  | V 5  | 574.3313       | 287.6696        |
| 1002.4896      | 9  | N 4  | 475.2629       | 238.1353        |
| 1089.5217      | 10 | S 3  | 361.2199       | 181.1139        |
| 1188.5901      | 11 | V 2  | 274.1879       | 137.5979        |
|                | 12 | R 1  | 175.1195       | 88.0637         |

N-term:+43.02

ASAMAGAGPAPGLPVAGGPPVPGVGVGIPGKSGEER, MH+ 3240.7264, m/z 810.9370  
 L OSG36 P180811 230811-s1.05586.05586.4.dta

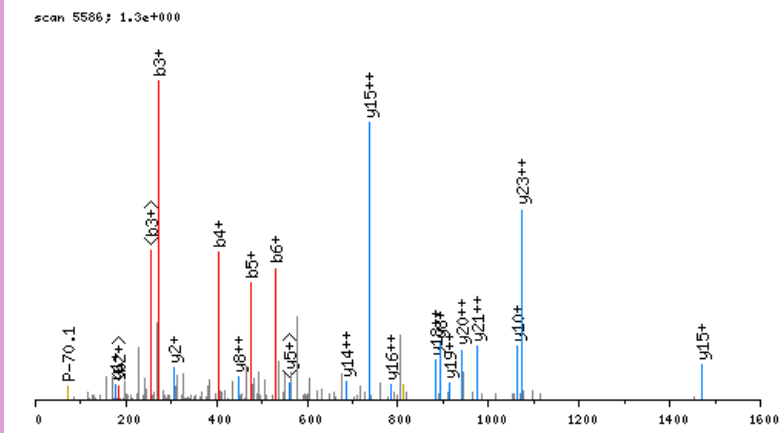

click image to zoom in; click top corners to zoom out [\[precursor±\]](#)

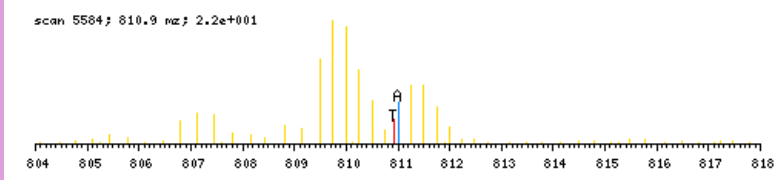

zoomed in precursor plot; T=theoretical m/z, A=acquired m/z

| b <sup>+</sup> | #  | AA | #  | y <sup>+</sup> | y <sup>2+</sup> |
|----------------|----|----|----|----------------|-----------------|
| 114.0555       | 1  | A  | 36 |                |                 |
| 201.0875       | 2  | S  | 35 | 3127.6787      | 1564.3432       |
| 272.1247       | 3  | A  | 34 | 3040.6466      | 1520.8272       |
| 403.1651       | 4  | M  | 33 | 2969.6095      | 1485.3087       |
| 474.2023       | 5  | A  | 32 | 2838.5690      | 1419.7884       |
| 531.2237       | 6  | G  | 31 | 2767.5319      | 1384.2699       |
| 602.2608       | 7  | A  | 30 | 2710.5105      | 1355.7591       |
| 659.2823       | 8  | G  | 29 | 2639.4733      | 1320.2406       |
| 756.3351       | 9  | P  | 28 | 2582.4519      | 1291.7299       |
| 827.3722       | 10 | A  | 27 | 2485.3991      | 1243.2035       |
| 924.4249       | 11 | P  | 26 | 2414.3620      | 1207.6849       |
| 981.4464       | 12 | G  | 25 | 2317.3092      | 1159.1585       |
| 1094.5305      | 13 | L  | 24 | 2260.2878      | 1130.6478       |
| 1191.5832      | 14 | P  | 23 | 2147.2037      | 1074.1058       |
| 1290.6516      | 15 | V  | 22 | 2050.1510      | 1025.5794       |
| 1361.6888      | 16 | A  | 21 | 1951.0825      | 976.0452        |
| 1418.7102      | 17 | G  | 20 | 1880.0454      | 940.5266        |
| 1475.7317      | 18 | G  | 19 | 1823.0240      | 912.0159        |
| 1572.7844      | 19 | P  | 18 | 1766.0025      | 883.5052        |
| 1671.8529      | 20 | V  | 17 | 1668.9497      | 834.9788        |
| 1770.9213      | 21 | V  | 16 | 1569.8813      | 785.4446        |
| 1867.9740      | 22 | P  | 15 | 1470.8129      | 735.9104        |
| 1924.9955      | 23 | G  | 14 | 1373.7601      | 687.3840        |
| 2022.0483      | 24 | P  | 13 | 1316.7387      | 658.8733        |
| 2079.0697      | 25 | G  | 12 | 1219.6859      | 610.3469        |
| 2178.1381      | 26 | V  | 11 | 1162.6644      | 581.8361        |
| 2235.1596      | 27 | G  | 10 | 1063.5960      | 532.3019        |
| 2348.2437      | 28 | I  | 9  | 1006.5746      | 503.7912        |
| 2445.2964      | 29 | P  | 8  | 893.4905       | 447.2492        |
| 2502.3179      | 30 | G  | 7  | 796.4377       | 398.7228        |
| 2664.4760      | 31 | K  | 6  | 739.4163       | 370.2121        |
| 2751.5080      | 32 | S  | 5  | 577.2582       | 289.1330        |
| 2808.5295      | 33 | G  | 4  | 490.2262       | 245.6170        |
| 2937.5721      | 34 | E  | 3  | 433.2047       | 217.1063        |
| 3066.6147      | 35 | E  | 2  | 304.1621       | 152.5850        |
|                | 36 | R  | 1  | 175.1195       | 88.0637         |

N-term:+43.02 K(31):+162.16

X-range:

-

MassTol: Y-zoom:

MassType:

AVG  MONO

Axis:

1  2

Label:

I  M  -

Ions:

a  +  2+  3+

b  +  2+  3+

c  +  2+  3+

x  +  2+  3+

y  +  2+  3+

z  +  2+  3+

hide H<sub>2</sub>O/NH<sub>3</sub>

zoom 112-122

GO

ASASEPPASPR, MH+ 1111.5384, m/z 556.2728  
 L OSG41 P180811 230811-s1.02303.02303.2.dta

X-range:

-

MassTol: Y-zoom:

MassType:

AVG  MONO

Axis:

1  2

Label:

I  M  -

Ions:

a  +  2+  3+

b  +  2+  3+

c  +  2+  3+

x  +  2+  3+

y  +  2+  3+

z  +  2+  3+

hide H<sub>2</sub>O/NH<sub>3</sub>

zoom 112-122

GO

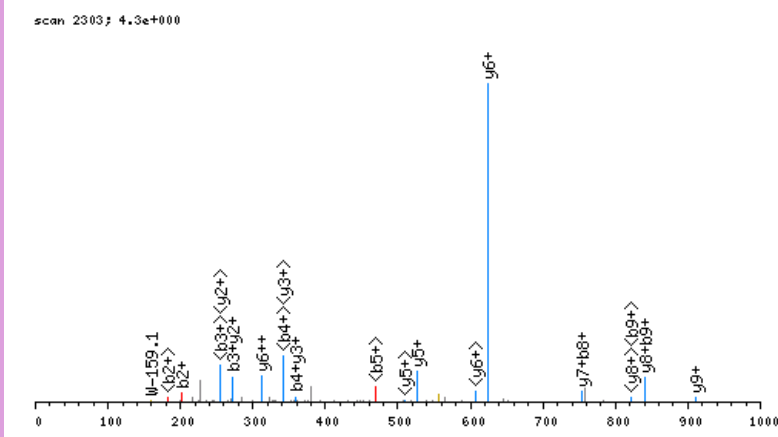

click image to zoom in; click top corners to zoom out [\[precursor±\]](#)

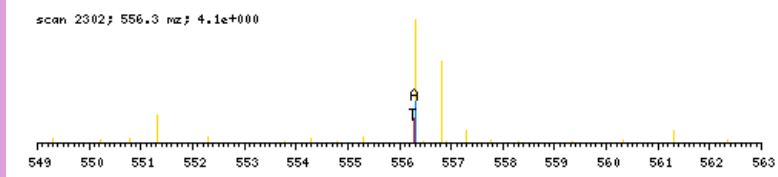

zoomed in precursor plot; T=theoretical m/z, A=acquired m/z

| b <sup>+</sup> | #  | AA # | y <sup>+</sup> | y <sup>2+</sup>   |
|----------------|----|------|----------------|-------------------|
| 114.0555       | 1  | A    | 11             |                   |
| 201.0875       | 2  | S    | 10             | 998.4907 499.7493 |
| 272.1247       | 3  | A    | 9              | 911.4587 456.2332 |
| 359.1567       | 4  | S    | 8              | 840.4216 420.7147 |
| 488.1993       | 5  | E    | 7              | 753.3895 377.1987 |
| 585.2520       | 6  | P    | 6              | 624.3469 312.6774 |
| 682.3048       | 7  | P    | 5              | 527.2942 264.1510 |
| 753.3419       | 8  | A    | 4              | 430.2414 215.6246 |
| 840.3739       | 9  | S    | 3              | 359.2043 180.1061 |
| 937.4267       | 10 | P    | 2              | 272.1723 136.5900 |
|                | 11 | R    | 1              | 175.1195 88.0637  |

N-term:+43.02



ASASYHISNLLKMTSSDKDFR, MH+ 2610.3511, m/z 653.3432  
 L OSG40 P180811 230811-s1.09120.09120.4.dta

X-range:

-

MassTol: Y-zoom:

MassType:

AVG  MONO

Axis:

1  2

Label:

I  M  -

Ions:

a  +  2+  3+

b  +  2+  3+

c  +  2+  3+

x  +  2+  3+

y  +  2+  3+

z  +  2+  3+

hide H<sub>2</sub>O/NH<sub>3</sub>

zoom 112-122

GO

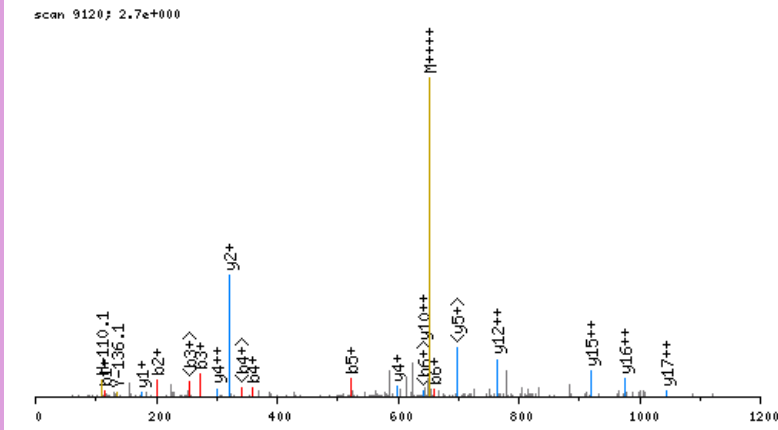

click image to zoom in; click top corners to zoom out [\[precursor±\]](#)

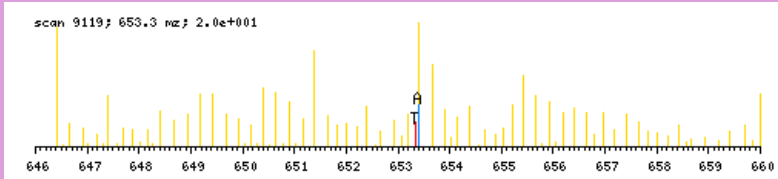

zoomed in precursor plot; T=theoretical m/z, A=acquired m/z

| b <sup>+</sup> | #  | AA | #  | y <sup>+</sup> | y <sup>2+</sup> |
|----------------|----|----|----|----------------|-----------------|
| 114.0555       | 1  | A  | 22 |                |                 |
| 201.0875       | 2  | S  | 21 | 2497.3034      | 1249.1556       |
| 272.1247       | 3  | A  | 20 | 2410.2713      | 1205.6396       |
| 359.1567       | 4  | S  | 19 | 2339.2342      | 1170.1210       |
| 522.2200       | 5  | Y  | 18 | 2252.2022      | 1126.6050       |
| 659.2789       | 6  | H  | 17 | 2089.1389      | 1045.0733       |
| 772.3630       | 7  | I  | 16 | 1952.0800      | 976.5439        |
| 859.3950       | 8  | S  | 15 | 1838.9959      | 920.0019        |
| 973.4379       | 9  | N  | 14 | 1751.9639      | 876.4858        |
| 1086.5220      | 10 | L  | 13 | 1637.9209      | 819.4644        |
| 1199.6061      | 11 | L  | 12 | 1524.8369      | 762.9224        |
| 1328.6487      | 12 | E  | 11 | 1411.7528      | 706.3803        |
| 1490.8068      | 13 | K  | 10 | 1282.7102      | 641.8590        |
| 1621.8473      | 14 | M  | 9  | 1120.5521      | 560.7800        |
| 1722.8949      | 15 | T  | 8  | 989.5116       | 495.2597        |
| 1809.9270      | 16 | S  | 7  | 888.4640       | 444.7359        |
| 1896.9590      | 17 | S  | 6  | 801.4319       | 401.2199        |
| 2011.9859      | 18 | D  | 5  | 714.3999       | 357.7039        |
| 2174.1440      | 19 | K  | 4  | 599.3730       | 300.1904        |
| 2289.1710      | 20 | D  | 3  | 437.2149       | 219.1113        |
| 2436.2394      | 21 | F  | 2  | 322.1879       | 161.5979        |
|                | 22 | R  | 1  | 175.1195       | 88.0637         |

N-term:+43.02 K(13):+162.16  
 K(19):+162.16

ASAVSPANLPAVLLQPR, MH+ 1745.9914, m/z 582.6687  
 L OSG41 P180811 230811-s1.07381.07381.3.dta

X-range:

-

MassTol: Y-zoom:

MassType:

AVG  MONO

Axis:

1  2

Label:

I  M  -

Ions:

a  +  2+  3+

b  +  2+  3+

c  +  2+  3+

x  +  2+  3+

y  +  2+  3+

z  +  2+  3+

hide H<sub>2</sub>O/NH<sub>3</sub>

zoom 112-122

GO

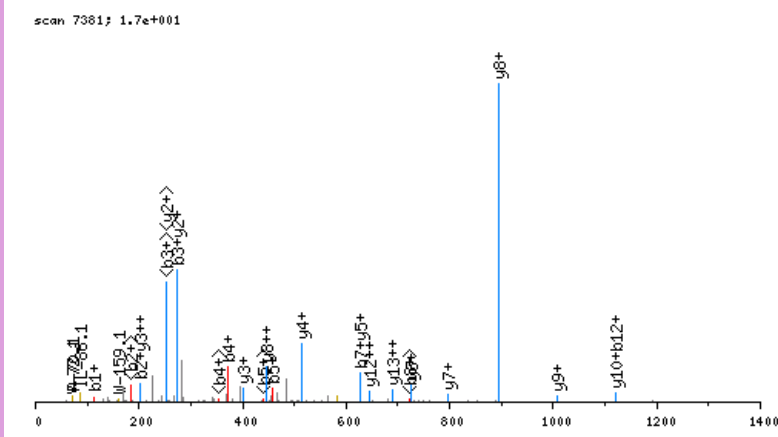

click image to zoom in; click top corners to zoom out [\[precursor±\]](#)

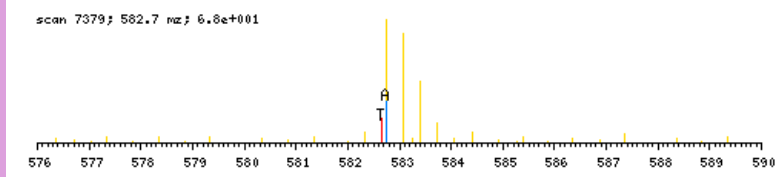

zoomed in precursor plot; T=theoretical m/z, A=acquired m/z

| b <sup>+</sup> | #  | AA # | y <sup>+</sup> | y <sup>2+</sup> |
|----------------|----|------|----------------|-----------------|
| 114.0555       | 1  | A 17 |                |                 |
| 201.0875       | 2  | S 16 | 1632.9437      | 816.9758        |
| 272.1247       | 3  | A 15 | 1545.9117      | 773.4598        |
| 371.1931       | 4  | V 14 | 1474.8746      | 737.9412        |
| 458.2251       | 5  | S 13 | 1375.8062      | 688.4070        |
| 555.2779       | 6  | P 12 | 1288.7741      | 644.8910        |
| 626.3150       | 7  | A 11 | 1191.7214      | 596.3646        |
| 740.3579       | 8  | N 10 | 1120.6843      | 560.8460        |
| 853.4420       | 9  | L 9  | 1006.6413      | 503.8246        |
| 950.4947       | 10 | P 8  | 893.5573       | 447.2825        |
| 1021.5318      | 11 | A 7  | 796.5045       | 398.7562        |
| 1120.6003      | 12 | V 6  | 725.4674       | 363.2376        |
| 1233.6843      | 13 | L 5  | 626.3990       | 313.7034        |
| 1346.7684      | 14 | L 4  | 513.3149       | 257.1614        |
| 1474.8270      | 15 | Q 3  | 400.2308       | 200.6193        |
| 1571.8797      | 16 | P 2  | 272.1723       | 136.5900        |
|                | 17 | R 1  | 175.1195       | 88.0637         |

N-term:+43.02

X-range:

-

MassTol: Y-zoom:

MassType:

AVG  MONO

Axis:

1  2

Label:

I  M  -

Ions:

a  +  2+  3+

b  +  2+  3+

c  +  2+  3+

x  +  2+  3+

y  +  2+  3+

z  +  2+  3+

hide H<sub>2</sub>O/NH<sub>3</sub>

zoom 112-122

GO

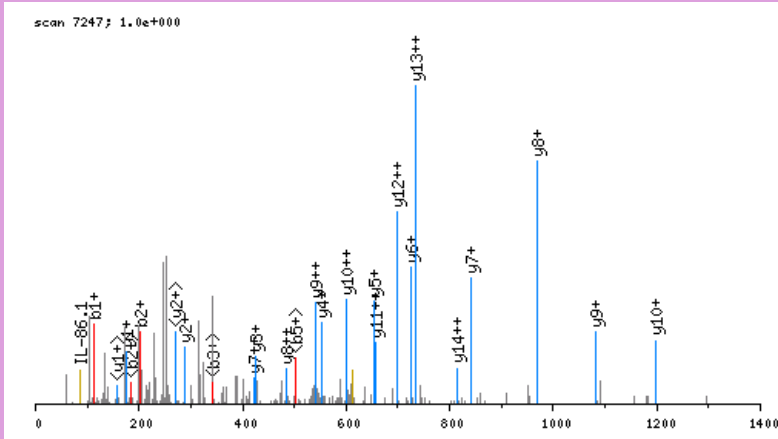

click image to zoom in; click top corners to zoom out [\[precursor±\]](#)

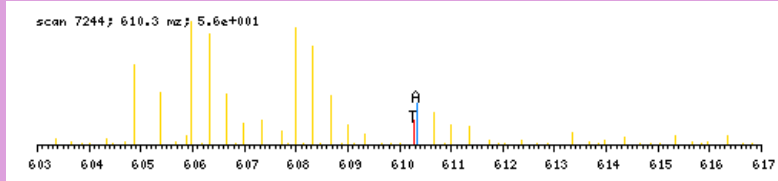

zoomed in precursor plot; T=theoretical m/z, A=acquired m/z

| b <sup>+</sup> | #  | AA # | y <sup>+</sup> | y <sup>2+</sup> |
|----------------|----|------|----------------|-----------------|
| 114.0555       | 1  | A 16 |                |                 |
| 201.0875       | 2  | S 15 | 1715.8022      | 858.4050        |
| 361.1181       | 3  | C 14 | 1628.7702      | 814.8890        |
| 432.1553       | 4  | A 13 | 1468.7396      | 734.8737        |
| 519.1873       | 5  | S 12 | 1397.7025      | 699.3552        |
| 632.2713       | 6  | I 11 | 1310.6705      | 655.8391        |
| 747.2983       | 7  | D 10 | 1197.5864      | 599.2971        |
| 860.3824       | 8  | I 9  | 1082.5594      | 541.7836        |
| 989.4249       | 9  | E 8  | 969.4754       | 485.2416        |
| 1104.4519      | 10 | D 7  | 840.4328       | 420.7203        |
| 1175.4890      | 11 | A 6  | 725.4058       | 363.2068        |
| 1276.5367      | 12 | T 5  | 654.3687       | 327.6883        |
| 1404.5953      | 13 | Q 4  | 553.3211       | 277.1644        |
| 1541.6542      | 14 | H 3  | 425.2625       | 213.1352        |
| 1654.7382      | 15 | L 2  | 288.2036       | 144.6057        |
|                | 16 | R 1  | 175.1195       | 88.0637         |

N-term:+43.02 C(3):+160.03

ASCDEIKEHPR, MH+ 1417.6958, m/z 473.2368  
 L OSG40 P180811 230811-s1.02171.02171.3.dta

X-range:

-

MassTol: Y-zoom:

MassType:

AVG  MONO

Axis:

1  2

Label:

I  M  -

Ions:

a  +  2+  3+

b  +  2+  3+

c  +  2+  3+

x  +  2+  3+

y  +  2+  3+

z  +  2+  3+

hide H<sub>2</sub>O/NH<sub>3</sub>

zoom 112-122

GO

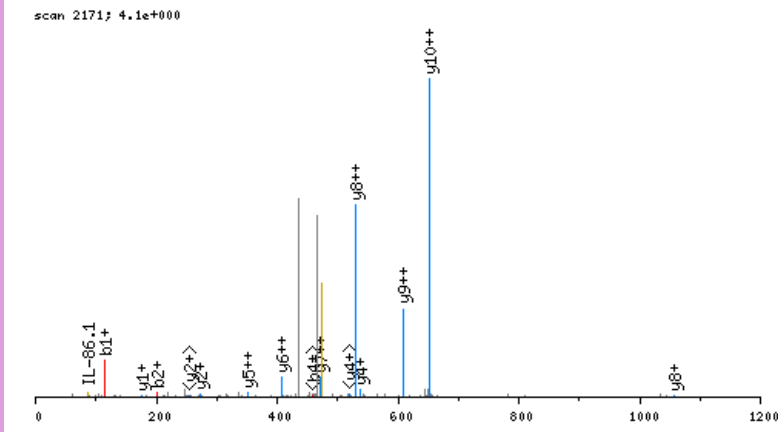

click image to zoom in; click top corners to zoom out [\[precursor±\]](#)

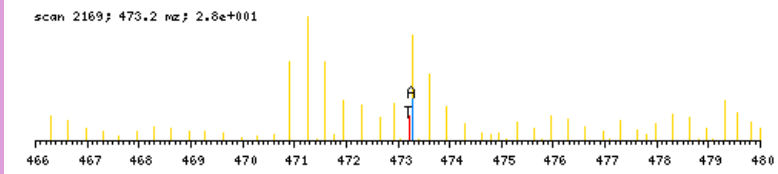

zoomed in precursor plot; T=theoretical m/z, A=acquired m/z

| b <sup>+</sup> | #  | AA # | y <sup>+</sup> | y <sup>2+</sup> |
|----------------|----|------|----------------|-----------------|
| 114.0555       | 1  | A    | 11             |                 |
| 201.0875       | 2  | S    | 10             | 1304.6481       |
| 361.1181       | 3  | C    | 9              | 1217.6161       |
| 476.1451       | 4  | D    | 8              | 1057.5855       |
| 605.1877       | 5  | E    | 7              | 942.5585        |
| 718.2717       | 6  | I    | 6              | 813.5159        |
| 880.4298       | 7  | K    | 5              | 700.4319        |
| 1009.4724      | 8  | E    | 4              | 538.2738        |
| 1146.5313      | 9  | H    | 3              | 409.2312        |
| 1243.5841      | 10 | P    | 2              | 272.1723        |
|                | 11 | R    | 1              | 175.1195        |

N-term:+43.02 C(3):+160.03  
 K(7):+162.16

X-range:

-

MassTol: Y-zoom:

MassType:

AVG  MONO

Axis:

1  2

Label:

I  M  -

Ions:

a  +  2+  3+

b  +  2+  3+

c  +  2+  3+

x  +  2+  3+

y  +  2+  3+

z  +  2+  3+

hide H<sub>2</sub>O/NH<sub>3</sub>

zoom 112-122

GO

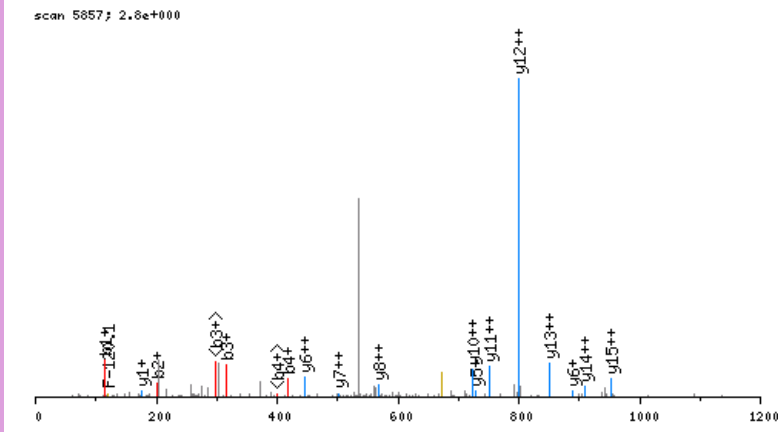

click image to zoom in; click top corners to zoom out [\[precursor±\]](#)

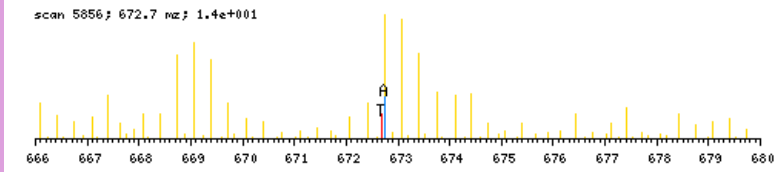

zoomed in precursor plot; T=theoretical m/z, A=acquired m/z

| b <sup>+</sup> | #  | AA | #  | y <sup>+</sup> | y <sup>2+</sup> |
|----------------|----|----|----|----------------|-----------------|
| 114.0555       | 1  | A  | 16 |                |                 |
| 201.0875       | 2  | S  | 15 | 1903.0061      | 952.0069        |
| 316.1145       | 3  | D  | 14 | 1815.9740      | 908.4909        |
| 417.1622       | 4  | T  | 13 | 1700.9471      | 850.9775        |
| 514.2149       | 5  | P  | 12 | 1599.8994      | 800.4536        |
| 571.2364       | 6  | G  | 11 | 1502.8467      | 751.9272        |
| 718.3048       | 7  | F  | 10 | 1445.8252      | 723.4165        |
| 881.3681       | 8  | Y  | 9  | 1298.7568      | 649.8823        |
| 1012.4086      | 9  | M  | 8  | 1135.6934      | 568.3506        |
| 1127.4356      | 10 | D  | 7  | 1004.6530      | 502.8304        |
| 1289.5937      | 11 | K  | 6  | 889.6260       | 445.3169        |
| 1402.6777      | 12 | L  | 5  | 727.4679       | 364.2379        |
| 1516.7207      | 13 | N  | 4  | 614.3839       | 307.6958        |
| 1678.8788      | 14 | K  | 3  | 500.3409       | 250.6744        |
| 1841.9421      | 15 | Y  | 2  | 338.1828       | 169.5953        |
|                | 16 | R  | 1  | 175.1195       | 88.0637         |

N-term:+43.02 K(11):+162.16  
 K(14):+162.16

ASEAGGIGGGGGGKIR, MH+ 1470.7665, m/z 490.9270  
 L OSG37 P180811 230811-s1.02863.02863.3.dta

X-range:

-

MassTol: Y-zoom:

MassType:

AVG  MONO

Axis:

1  2

Label:

I  M  -

Ions:

a  +  2+  3+

b  +  2+  3+

c  +  2+  3+

x  +  2+  3+

y  +  2+  3+

z  +  2+  3+

hide H<sub>2</sub>O/NH<sub>3</sub>

zoom 112-122

GO

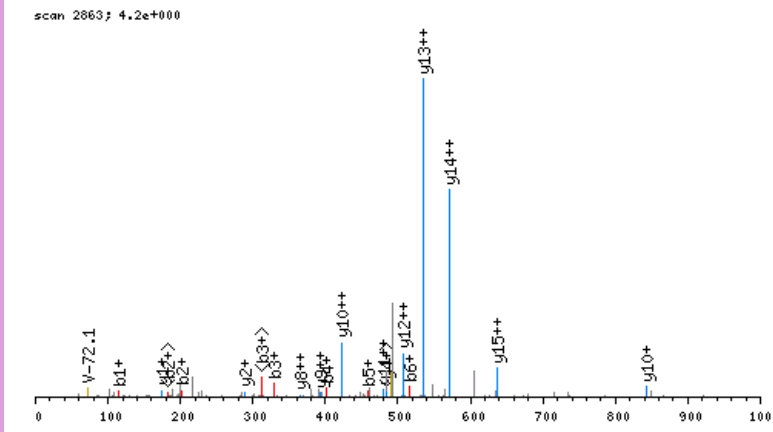

click image to zoom in; click top corners to zoom out [\[precursor±\]](#)

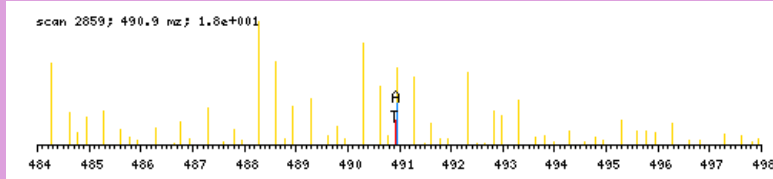

zoomed in precursor plot; T=theoretical m/z, A=acquired m/z

| b <sup>+</sup> | #  | AA | #  | y <sup>+</sup> | y <sup>2+</sup> |
|----------------|----|----|----|----------------|-----------------|
| 114.0555       | 1  | A  | 17 |                |                 |
| 201.0875       | 2  | S  | 16 | 1357.7188      | 679.3633        |
| 330.1301       | 3  | E  | 15 | 1270.6868      | 635.8473        |
| 401.1672       | 4  | A  | 14 | 1141.6442      | 571.3260        |
| 458.1887       | 5  | G  | 13 | 1070.6071      | 535.8075        |
| 515.2102       | 6  | G  | 12 | 1013.5856      | 507.2967        |
| 628.2942       | 7  | I  | 11 | 956.5642       | 478.7860        |
| 685.3157       | 8  | G  | 10 | 843.4801       | 422.2440        |
| 742.3372       | 9  | G  | 9  | 786.4586       | 393.7332        |
| 799.3586       | 10 | G  | 8  | 729.4372       | 365.2225        |
| 856.3801       | 11 | G  | 7  | 672.4157       | 336.7118        |
| 913.4016       | 12 | G  | 6  | 615.3943       | 308.2010        |
| 970.4230       | 13 | G  | 5  | 558.3728       | 279.6903        |
| 1027.4445      | 14 | G  | 4  | 501.3513       | 251.1796        |
| 1183.5708      | 15 | K  | 3  | 444.3299       | 222.6688        |
| 1296.6549      | 16 | I  | 2  | 288.2036       | 144.6057        |
|                | 17 | R  | 1  | 175.1195       | 88.0637         |

N-term:+43.02 K(15):+156.13

ASESGKLWGR, MH+ 1223.6597, m/z 612.3335  
 L OSG38 P180811 230811-s1.04287.04287.2.dta

X-range:

-

MassTol: Y-zoom:

MassType:

AVG  MONO

Axis:

1  2

Label:

I  M  -

Ions:

a  +  2+  3+

b  +  2+  3+

c  +  2+  3+

x  +  2+  3+

y  +  2+  3+

z  +  2+  3+

hide H<sub>2</sub>O/NH<sub>3</sub>

zoom 112-122

GO

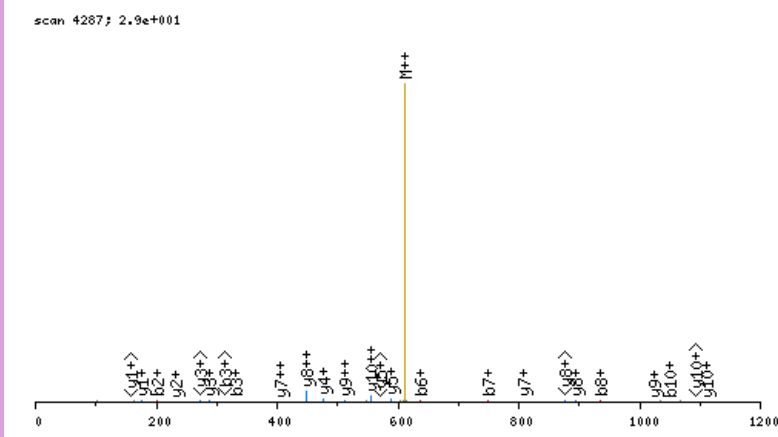

click image to zoom in; click top corners to zoom out [\[precursor±\]](#)

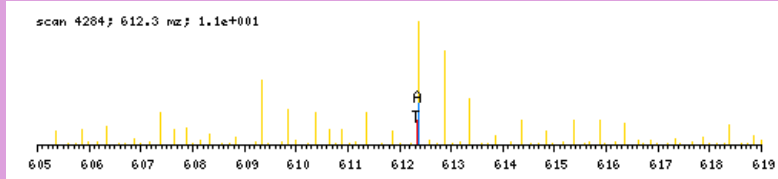

zoomed in precursor plot; T=theoretical m/z, A=acquired m/z

| b <sup>+</sup> | #  | AA # | y <sup>+</sup> | y <sup>2+</sup> |
|----------------|----|------|----------------|-----------------|
| 114.0555       | 1  | A 11 |                |                 |
| 201.0875       | 2  | S 10 | 1110.6120      | 555.8099        |
| 330.1301       | 3  | E 9  | 1023.5800      | 512.2939        |
| 417.1622       | 4  | S 8  | 894.5374       | 447.7726        |
| 474.1836       | 5  | G 7  | 807.5054       | 404.2566        |
| 636.3417       | 6  | K 6  | 750.4839       | 375.7459        |
| 749.4258       | 7  | L 5  | 588.3258       | 294.6668        |
| 935.5051       | 8  | W 4  | 475.2417       | 238.1248        |
| 992.5266       | 9  | G 3  | 289.1624       | 145.0851        |
| 1049.5480      | 10 | G 2  | 232.1410       | 116.5744        |
|                | 11 | R 1  | 175.1195       | 88.0637         |

N-term:+43.02 K(6):+162.16

ASESSPLLAYR, MH+ 1235.6272, m/z 618.3172  
 L OSG41 P180811 230811-s1.05412.05412.2.dta

X-range:

-

MassTol: Y-zoom:

MassType:

AVG  MONO

Axis:

1  2

Label:

I  M  -

Ions:

a  +  2+  3+

b  +  2+  3+

c  +  2+  3+

x  +  2+  3+

y  +  2+  3+

z  +  2+  3+

hide H<sub>2</sub>O/NH<sub>3</sub>

zoom 112-122

GO

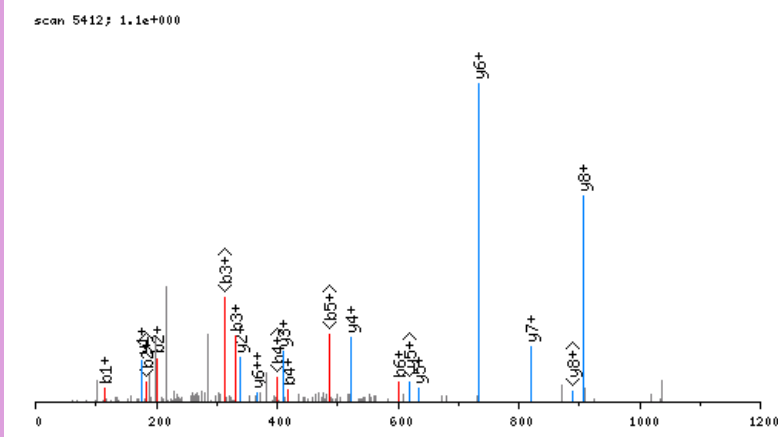

click image to zoom in; click top corners to zoom out [\[precursor±\]](#)

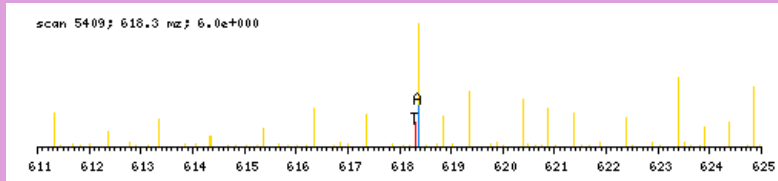

zoomed in precursor plot; T=theoretical m/z, A=acquired m/z

| b <sup>+</sup> | #  | AA # | y <sup>+</sup> | y <sup>2+</sup> |
|----------------|----|------|----------------|-----------------|
| 114.0555       | 1  | A 11 |                |                 |
| 201.0875       | 2  | S 10 | 1122.5795      | 561.7937        |
| 330.1301       | 3  | E 9  | 1035.5475      | 518.2777        |
| 417.1622       | 4  | S 8  | 906.5049       | 453.7564        |
| 504.1942       | 5  | S 7  | 819.4729       | 410.2403        |
| 601.2470       | 6  | P 6  | 732.4408       | 366.7243        |
| 714.3310       | 7  | L 5  | 635.3881       | 318.1979        |
| 827.4151       | 8  | L 4  | 522.3040       | 261.6559        |
| 898.4522       | 9  | A 3  | 409.2199       | 205.1139        |
| 1061.5155      | 10 | Y 2  | 338.1828       | 169.5953        |
|                | 11 | R 1  | 175.1195       | 88.0637         |

N-term:+43.02



ASGCKIGPSILNSDLANLGAELR, MH+ 2586.3019, m/z 862.7722  
 L OSG36 P180811 230811-s1.06093.06093.3.dta

scan 6093; 1.2e+001

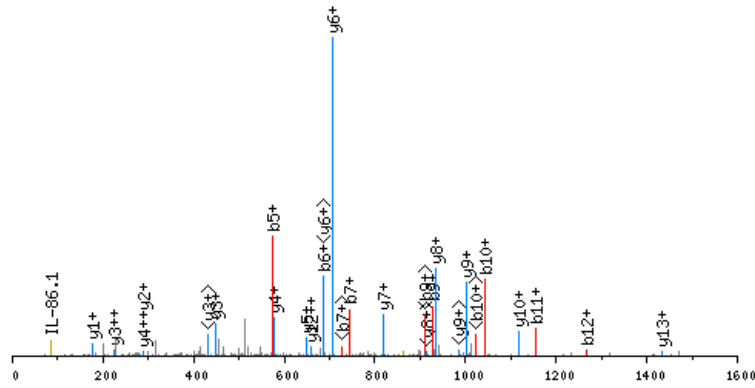

click image to zoom in; click top corners to zoom out [\[precursor±\]](#)

scan 6093; 862.8 mz; 2.6e+001

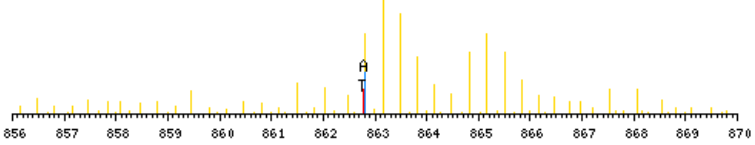

zoomed in precursor plot; T=theoretical m/z, A=acquired m/z

X-range:

-

MassTol: Y-zoom:

MassType:  
 AVG  MONO

Axis:

1  2

Label:

I  M  -

Ions:

a  +  2+  3+

b  +  2+  3+

c  +  2+  3+

x  +  2+  3+

y  +  2+  3+

z  +  2+  3+

hide H<sub>2</sub>O/NH<sub>3</sub>

zoom 112-122

GO

| b <sup>+</sup> | #  | AA # | y <sup>+</sup> | y <sup>2+</sup> |
|----------------|----|------|----------------|-----------------|
| 114.0555       | 1  | A 24 |                |                 |
| 201.0875       | 2  | S 23 | 2473.2542      | 1237.1310       |
| 258.1090       | 3  | G 22 | 2386.2222      | 1193.6150       |
| 418.1396       | 4  | C 21 | 2329.2008      | 1165.1043       |
| 574.2659       | 5  | K 20 | 2169.1702      | 1085.0890       |
| 687.3500       | 6  | I 19 | 2013.0439      | 1007.0258       |
| 744.3714       | 7  | G 18 | 1899.9598      | 950.4838        |
| 841.4242       | 8  | P 17 | 1842.9383      | 921.9731        |
| 928.4562       | 9  | S 16 | 1745.8856      | 873.4467        |
| 1041.5403      | 10 | I 15 | 1658.8535      | 829.9307        |
| 1154.6244      | 11 | L 14 | 1545.7695      | 773.3886        |
| 1268.6673      | 12 | N 13 | 1432.6854      | 716.8466        |
| 1355.6993      | 13 | S 12 | 1318.6425      | 659.8252        |
| 1470.7263      | 14 | D 11 | 1231.6104      | 616.3091        |
| 1583.8103      | 15 | L 10 | 1116.5835      | 558.7957        |
| 1654.8474      | 16 | A 9  | 1003.4994      | 502.2536        |
| 1768.8904      | 17 | N 8  | 932.4623       | 466.7351        |
| 1881.9744      | 18 | L 7  | 818.4194       | 409.7136        |
| 1938.9959      | 19 | G 6  | 705.3353       | 353.1716        |
| 2010.0330      | 20 | A 5  | 648.3139       | 324.6608        |
| 2139.0756      | 21 | E 4  | 577.2768       | 289.1423        |
| 2299.1062      | 22 | C 3  | 448.2342       | 224.6210        |
| 2412.1903      | 23 | L 2  | 288.2036       | 144.6057        |
|                | 24 | R 1  | 175.1195       | 88.0637         |

N-term:+43.02 C(4):+160.03  
 K(5):+156.13 C(22):+160.03

ASGNAQIGKSAPDFTATAVVDGAFKEIKLSDYR, MH+ 3553.8544, m/z 889.2190  
 L OSG39 P180811 230811-s1.07850.07850.4.dta

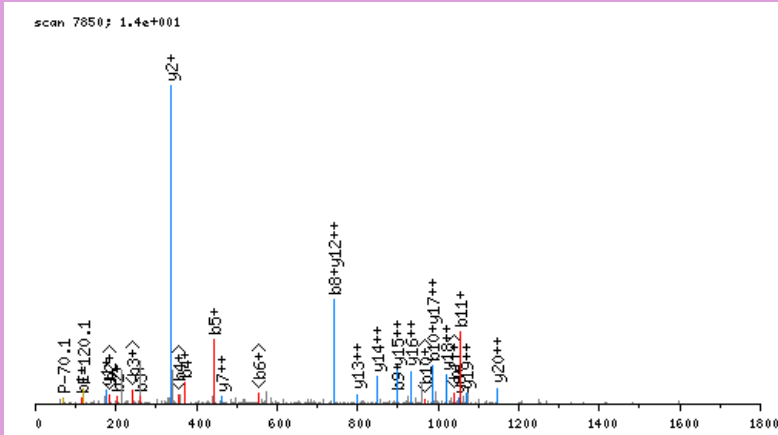

click image to zoom in; click top corners to zoom out [\[precursor±\]](#)

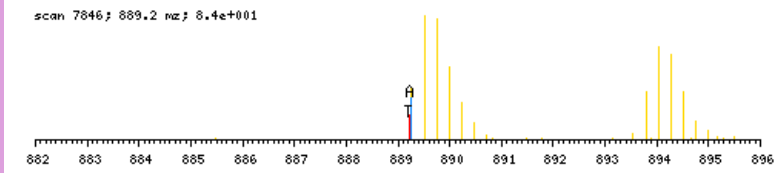

zoomed in precursor plot; T=theoretical m/z, A=acquired m/z

X-range:

-

MassTol: Y-zoom:

MassType:

AVG  MONO

Axis:

1  2

Label:

I  M  -

Ions:

a  +  2+  3+

b  +  2+  3+

c  +  2+  3+

x  +  2+  3+

y  +  2+  3+

z  +  2+  3+

hide H<sub>2</sub>O/NH<sub>3</sub>

zoom 112-122

GO

| b <sup>+</sup> | #  | AA | #  | y <sup>+</sup> | y <sup>2+</sup> |
|----------------|----|----|----|----------------|-----------------|
| 114.0555       | 1  | A  | 33 |                |                 |
| 201.0875       | 2  | S  | 32 | 3440.8067      | 1720.9072       |
| 258.1090       | 3  | G  | 31 | 3353.7746      | 1677.3912       |
| 372.1519       | 4  | N  | 30 | 3296.7532      | 1648.8805       |
| 443.1890       | 5  | A  | 29 | 3182.7103      | 1591.8590       |
| 571.2476       | 6  | Q  | 28 | 3111.6731      | 1556.3405       |
| 684.3317       | 7  | I  | 27 | 2983.6146      | 1492.3112       |
| 741.3532       | 8  | G  | 26 | 2870.5305      | 1435.7692       |
| 897.4795       | 9  | K  | 25 | 2813.5090      | 1407.2584       |
| 984.5115       | 10 | S  | 24 | 2657.3827      | 1329.1953       |
| 1055.5486      | 11 | A  | 23 | 2570.3507      | 1285.6793       |
| 1152.6014      | 12 | P  | 22 | 2499.3136      | 1250.1607       |
| 1267.6283      | 13 | D  | 21 | 2402.2608      | 1201.6343       |
| 1414.6967      | 14 | F  | 20 | 2287.2339      | 1144.1209       |
| 1515.7444      | 15 | T  | 19 | 2140.1655      | 1070.5866       |
| 1586.7815      | 16 | A  | 18 | 2039.1178      | 1020.0628       |
| 1687.8292      | 17 | T  | 17 | 1968.0807      | 984.5443        |
| 1758.8663      | 18 | A  | 16 | 1867.0330      | 934.0204        |
| 1857.9347      | 19 | V  | 15 | 1795.9959      | 898.5019        |
| 1957.0031      | 20 | V  | 14 | 1696.9275      | 848.9676        |
| 2072.0301      | 21 | D  | 13 | 1597.8591      | 799.4334        |
| 2129.0515      | 22 | G  | 12 | 1482.8321      | 741.9200        |
| 2200.0886      | 23 | A  | 11 | 1425.8106      | 713.4092        |
| 2347.1571      | 24 | F  | 10 | 1354.7735      | 677.8907        |
| 2503.2834      | 25 | K  | 9  | 1207.7051      | 604.3565        |
| 2632.3260      | 26 | E  | 8  | 1051.5788      | 526.2933        |
| 2745.4100      | 27 | I  | 7  | 922.5362       | 461.7720        |
| 2901.5363      | 28 | K  | 6  | 809.4522       | 405.2300        |
| 3014.6204      | 29 | L  | 5  | 653.3259       | 327.1668        |
| 3101.6524      | 30 | S  | 4  | 540.2418       | 270.6248        |
| 3216.6794      | 31 | D  | 3  | 453.2098       | 227.1088        |
| 3379.7427      | 32 | Y  | 2  | 338.1828       | 169.5953        |
|                | 33 | R  | 1  | 175.1195       | 88.0637         |

N-term:+43.02 K(9):+156.13  
 K(25):+156.13 K(28):+156.13

ASGRPEELWEAVVGAER, MH+ 1968.9779, m/z 656.9975  
 L OSG37 P180811 230811-s1.08761.08761.3.dta

X-range:

-

MassTol: Y-zoom:

MassType:

AVG  MONO

Axis:

1  2

Label:

I  M  -

Ions:

a  +  2+  3+

b  +  2+  3+

c  +  2+  3+

x  +  2+  3+

y  +  2+  3+

z  +  2+  3+

hide H<sub>2</sub>O/NH<sub>3</sub>

zoom 112-122

GO

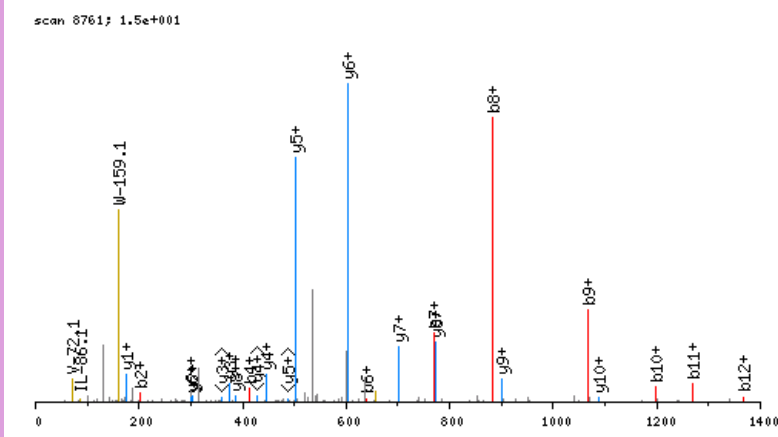

click image to zoom in; click top corners to zoom out [\[precursor±\]](#)

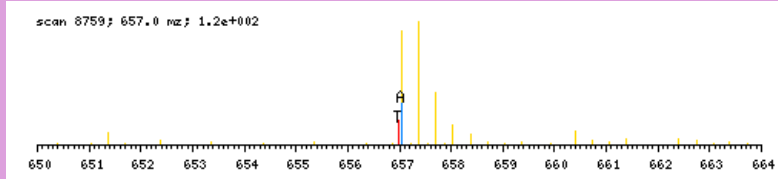

zoomed in precursor plot; T=theoretical m/z, A=acquired m/z

| b <sup>+</sup> | #  | AA # | y <sup>+</sup> | y <sup>2+</sup> |
|----------------|----|------|----------------|-----------------|
| 114.0555       | 1  | A 18 |                |                 |
| 201.0875       | 2  | S 17 | 1855.9303      | 928.4690        |
| 258.1090       | 3  | G 16 | 1768.8982      | 884.9530        |
| 414.2101       | 4  | R 15 | 1711.8768      | 856.4423        |
| 511.2629       | 5  | P 14 | 1555.7756      | 778.3917        |
| 640.3055       | 6  | E 13 | 1458.7229      | 729.8654        |
| 769.3481       | 7  | E 12 | 1329.6803      | 665.3441        |
| 882.4321       | 8  | L 11 | 1200.6377      | 600.8228        |
| 1068.5114      | 9  | W 10 | 1087.5536      | 544.2807        |
| 1197.5540      | 10 | E 9  | 901.4743       | 451.2411        |
| 1268.5912      | 11 | A 8  | 772.4317       | 386.7198        |
| 1367.6596      | 12 | V 7  | 701.3946       | 351.2012        |
| 1466.7280      | 13 | V 6  | 602.3262       | 301.6670        |
| 1523.7494      | 14 | G 5  | 503.2578       | 252.1328        |
| 1594.7866      | 15 | A 4  | 446.2363       | 223.6221        |
| 1665.8237      | 16 | A 3  | 375.1992       | 188.1035        |
| 1794.8663      | 17 | E 2  | 304.1621       | 152.5850        |
|                | 18 | R 1  | 175.1195       | 88.0637         |

N-term:+43.02

ASGSMATSEEEER, MH+ 1296.5378, m/z 648.7725  
 L OSG41 P180811 230811-s1.02425.02425.2.dta

X-range:

-

MassTol: Y-zoom:

MassType:

AVG  MONO

Axis:

1  2

Label:

I  M  -

Ions:

a  +  2+  3+

b  +  2+  3+

c  +  2+  3+

x  +  2+  3+

y  +  2+  3+

z  +  2+  3+

hide H<sub>2</sub>O/NH<sub>3</sub>

zoom 112-122

GO

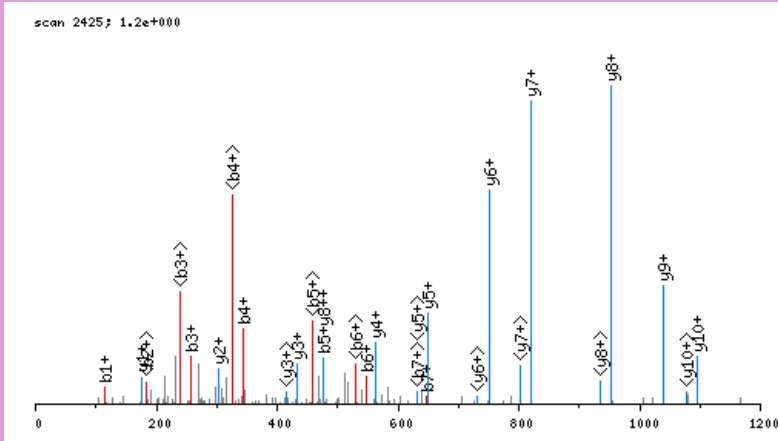

click image to zoom in; click top corners to zoom out [\[precursor±\]](#)

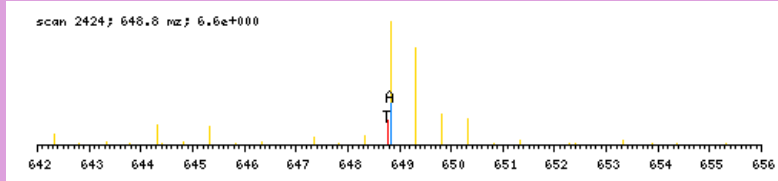

zoomed in precursor plot; T=theoretical m/z, A=acquired m/z

| b <sup>+</sup> | #  | AA # | y <sup>+</sup> | y <sup>2+</sup> |
|----------------|----|------|----------------|-----------------|
| 114.0555       | 1  | A 12 |                |                 |
| 201.0875       | 2  | S 11 | 1183.4901      | 592.2490        |
| 258.1090       | 3  | G 10 | 1096.4581      | 548.7330        |
| 345.1410       | 4  | S 9  | 1039.4366      | 520.2222        |
| 476.1815       | 5  | M 8  | 952.4046       | 476.7062        |
| 547.2186       | 6  | A 7  | 821.3641       | 411.1860        |
| 648.2663       | 7  | T 6  | 750.3270       | 375.6674        |
| 735.2983       | 8  | S 5  | 649.2793       | 325.1436        |
| 864.3409       | 9  | E 4  | 562.2473       | 281.6276        |
| 993.3835       | 10 | E 3  | 433.2047       | 217.1063        |
| 1122.4261      | 11 | E 2  | 304.1621       | 152.5850        |
|                | 12 | R 1  | 175.1195       | 88.0637         |

N-term:+43.02

X-range:  -

MassTol: Y-zoom:

MassType:  AVG  MONO

Axis:  1  2

Label:  I  M  -

Ions:

a  +  2+  3+

b  +  2+  3+

c  +  2+  3+

x  +  2+  3+

y  +  2+  3+

z  +  2+  3+

hide H<sub>2</sub>O/NH<sub>3</sub>

zoom 112-122

ASGSPPSQPPPASGSGYVPGSVSAAFVTCPNEKVAKIAR, MH+ 4053.0392, m/z 1014.0153  
L OSG38 P180811 230811-s1.06658.06658.4.dta

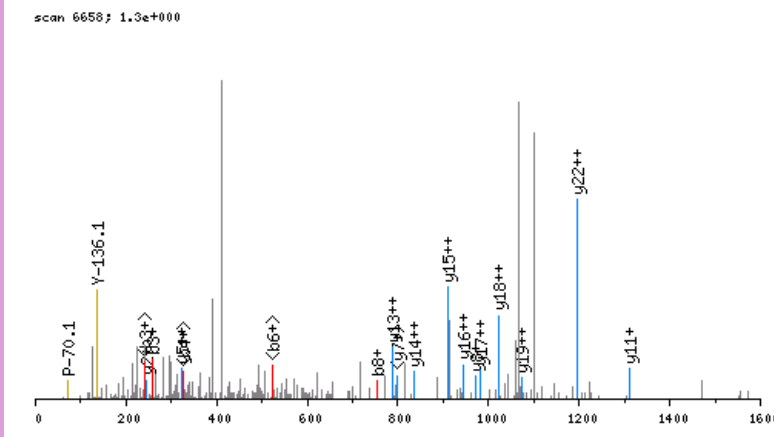

click image to zoom in; click top corners to zoom out [precursor±]

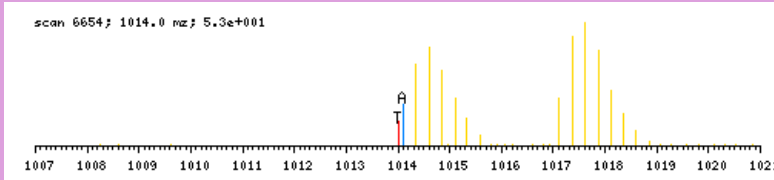

zoomed in precursor plot; T=theoretical m/z, A=acquired m/z

| b <sup>+</sup> | #  | AA | #  | y <sup>+</sup> | y <sup>2+</sup> |
|----------------|----|----|----|----------------|-----------------|
| 114.0555       | 1  | A  | 40 |                |                 |
| 201.0875       | 2  | S  | 39 | 3939.9915      | 1970.4997       |
| 258.1090       | 3  | G  | 38 | 3852.9595      | 1926.9836       |
| 345.1410       | 4  | S  | 37 | 3795.9380      | 1898.4729       |
| 442.1938       | 5  | P  | 36 | 3708.9060      | 1854.9569       |
| 539.2466       | 6  | P  | 35 | 3611.8532      | 1806.4305       |
| 626.2786       | 7  | S  | 34 | 3514.8005      | 1757.9041       |
| 754.3372       | 8  | Q  | 33 | 3427.7684      | 1714.3881       |
| 851.3899       | 9  | P  | 32 | 3299.7098      | 1650.3588       |
| 948.4427       | 10 | P  | 31 | 3202.6571      | 1601.8325       |
| 1045.4955      | 11 | P  | 30 | 3105.6043      | 1553.3061       |
| 1116.5326      | 12 | A  | 29 | 3008.5516      | 1504.7797       |
| 1203.5646      | 13 | S  | 28 | 2937.5144      | 1469.2611       |
| 1260.5861      | 14 | G  | 27 | 2850.4824      | 1425.7451       |
| 1347.6181      | 15 | S  | 26 | 2793.4610      | 1397.2344       |
| 1404.6396      | 16 | G  | 25 | 2706.4289      | 1353.7184       |
| 1567.7029      | 17 | Y  | 24 | 2649.4075      | 1325.2076       |
| 1666.7713      | 18 | Y  | 23 | 2486.3441      | 1243.6760       |
| 1763.8241      | 19 | P  | 22 | 2387.2757      | 1194.1418       |
| 1820.8455      | 20 | G  | 21 | 2290.2230      | 1145.6154       |
| 1907.8776      | 21 | S  | 20 | 2233.2015      | 1117.1047       |
| 2006.9460      | 22 | V  | 19 | 2146.1695      | 1073.5886       |
| 2093.9780      | 23 | S  | 18 | 2047.1010      | 1024.0544       |
| 2165.0151      | 24 | A  | 17 | 1960.0690      | 980.5384        |
| 2236.0522      | 25 | A  | 16 | 1889.0319      | 945.0199        |
| 2383.1206      | 26 | F  | 15 | 1817.9948      | 909.5013        |
| 2482.1891      | 27 | V  | 14 | 1670.9264      | 835.9671        |
| 2583.2367      | 28 | T  | 13 | 1571.8580      | 786.4329        |
| 2743.2673      | 29 | C  | 12 | 1470.8103      | 735.9091        |
| 2840.3201      | 30 | P  | 11 | 1310.7797      | 655.8938        |
| 2954.3630      | 31 | N  | 10 | 1213.7269      | 607.3674        |
| 3083.4056      | 32 | E  | 9  | 1099.6840      | 550.3459        |
| 3239.5319      | 33 | K  | 8  | 970.6414       | 485.8246        |
| 3338.6003      | 34 | V  | 7  | 814.5151       | 407.7615        |
| 3409.6374      | 35 | A  | 6  | 715.4467       | 358.2273        |
| 3565.7637      | 36 | K  | 5  | 644.4096       | 322.7087        |
| 3694.8063      | 37 | E  | 4  | 488.2833       | 244.6455        |
| 3807.8904      | 38 | I  | 3  | 359.2407       | 180.1243        |
| 3878.9275      | 39 | A  | 2  | 246.1566       | 123.5822        |
|                | 40 | R  | 1  | 175.1195       | 88.0637         |

N-term:+43.02 C(29) :+160.03  
K(33) :+156.13 K(36) :+156.13

ASGVAVSDGVIKVFNDMKVR, MH+ 2190.1957, m/z 730.7368  
 L OSG38 P180811 230811-s1.07936.07936.3.dta

X-range:

-

MassTol: Y-zoom:

MassType:

AVG  MONO

Axis:

1  2

Label:

I  M  -

Ions:

a  +  2+  3+

b  +  2+  3+

c  +  2+  3+

x  +  2+  3+

y  +  2+  3+

z  +  2+  3+

hide H<sub>2</sub>O/NH<sub>3</sub>

zoom 112-122

GO

scan 7936; 6.3e+000

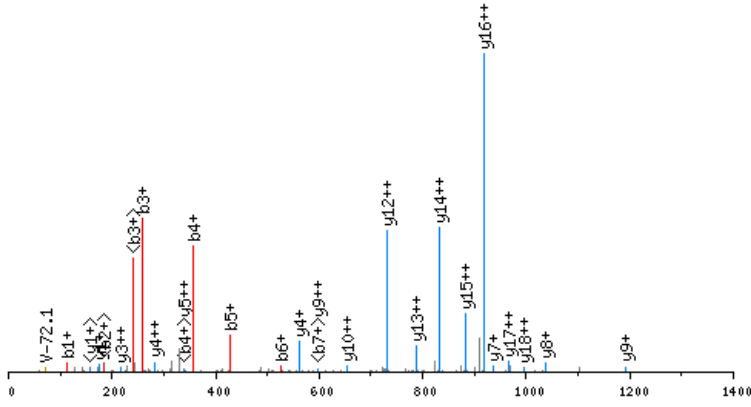

click image to zoom in; click top corners to zoom out [\[precursor±\]](#)

scan 7934; 730.7 mz; 2.1e+001

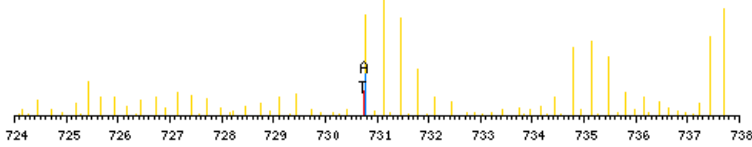

zoomed in precursor plot; T=theoretical m/z, A=acquired m/z

| b <sup>+</sup> | #  | AA | #  | y <sup>+</sup> | y <sup>2+</sup> |
|----------------|----|----|----|----------------|-----------------|
| 114.0555       | 1  | A  | 20 |                |                 |
| 201.0875       | 2  | S  | 19 | 2077.1480      | 1039.0779       |
| 258.1090       | 3  | G  | 18 | 1990.1160      | 995.5619        |
| 357.1774       | 4  | V  | 17 | 1933.0946      | 967.0512        |
| 428.2145       | 5  | A  | 16 | 1834.0261      | 917.5170        |
| 527.2829       | 6  | V  | 15 | 1762.9890      | 881.9984        |
| 614.3150       | 7  | S  | 14 | 1663.9206      | 832.4642        |
| 729.3419       | 8  | D  | 13 | 1576.8886      | 788.9482        |
| 786.3634       | 9  | G  | 12 | 1461.8616      | 731.4347        |
| 885.4318       | 10 | V  | 11 | 1404.8402      | 702.9240        |
| 998.5159       | 11 | I  | 10 | 1305.7718      | 653.3898        |
| 1154.6422      | 12 | K  | 9  | 1192.6877      | 596.8478        |
| 1253.7106      | 13 | V  | 8  | 1036.5614      | 518.7846        |
| 1400.7790      | 14 | F  | 7  | 937.4930       | 469.2504        |
| 1514.8219      | 15 | N  | 6  | 790.4246       | 395.7162        |
| 1629.8489      | 16 | D  | 5  | 676.3816       | 338.6947        |
| 1760.8893      | 17 | M  | 4  | 561.3547       | 281.1813        |
| 1917.0156      | 18 | K  | 3  | 430.3142       | 215.6610        |
| 2016.0841      | 19 | V  | 2  | 274.1879       | 137.5979        |
|                | 20 | R  | 1  | 175.1195       | 88.0637         |

N-term:+43.02 K(12):+156.13  
 K(18):+156.13

ASGVQVADEVCR, MH+ 1332.6218, m/z 666.8145  
 L OSG41 P180811 230811-s1.04362.04362.2.dta

X-range:

-

MassTol: Y-zoom:

MassType:

AVG  MONO

Axis:

1  2

Label:

I  M  -

Ions:

a  +  2+  3+

b  +  2+  3+

c  +  2+  3+

x  +  2+  3+

y  +  2+  3+

z  +  2+  3+

hide H<sub>2</sub>O/NH<sub>3</sub>

zoom 112-122

GO

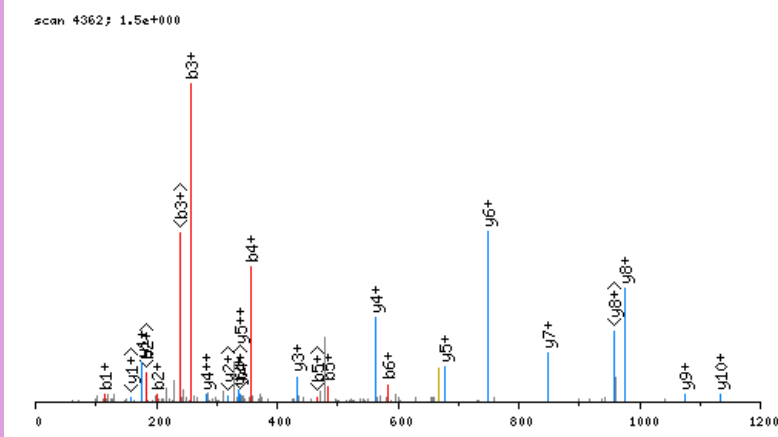

click image to zoom in; click top corners to zoom out [\[precursor±\]](#)

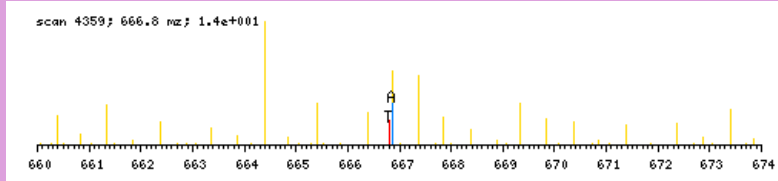

zoomed in precursor plot; T=theoretical m/z, A=acquired m/z

| b <sup>+</sup> | #  | AA # | y <sup>+</sup> | y <sup>2+</sup> |
|----------------|----|------|----------------|-----------------|
| 114.0555       | 1  | A 12 |                |                 |
| 201.0875       | 2  | S 11 | 1219.5741      | 610.2909        |
| 258.1090       | 3  | G 10 | 1132.5420      | 566.7749        |
| 357.1774       | 4  | V 9  | 1075.5206      | 538.2642        |
| 485.2360       | 5  | Q 8  | 976.4522       | 488.7300        |
| 584.3044       | 6  | V 7  | 848.3936       | 424.7007        |
| 655.3415       | 7  | A 6  | 749.3252       | 375.1665        |
| 770.3685       | 8  | D 5  | 678.2881       | 339.6479        |
| 899.4111       | 9  | E 4  | 563.2611       | 282.1345        |
| 998.4795       | 10 | V 3  | 434.2185       | 217.6132        |
| 1158.5101      | 11 | C 2  | 335.1501       | 168.0790        |
|                | 12 | R 1  | 175.1195       | 88.0637         |

N-term:+43.02 C(11):+160.03

ASGVIVNDEVIKVFNDMKVR, MH+ 2331.3019, m/z 777.7722  
 L OSG40 P180811 230811-s1.09380.09380.3.dta

X-range:

-

MassTol: Y-zoom:

MassType:

AVG  MONO

Axis:

1  2

Label:

I  M  -

Ions:

a  +  2+  3+

b  +  2+  3+

c  +  2+  3+

x  +  2+  3+

y  +  2+  3+

z  +  2+  3+

hide H<sub>2</sub>O/NH<sub>3</sub>

zoom 112-122

GO

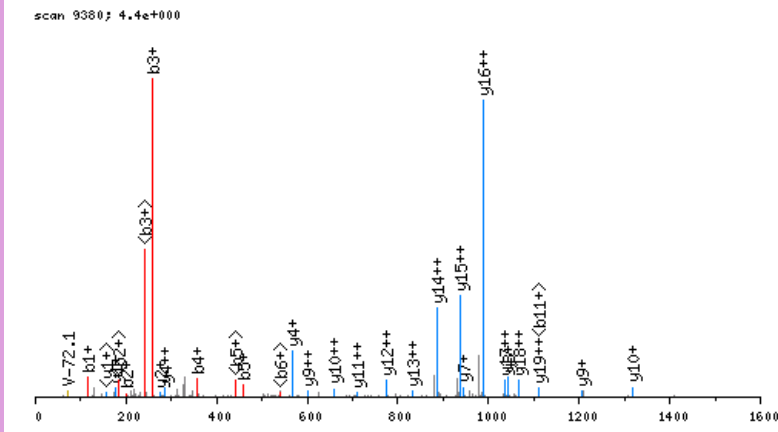

click image to zoom in; click top corners to zoom out [\[precursor±\]](#)

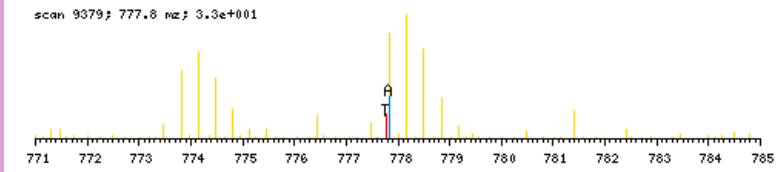

zoomed in precursor plot; T=theoretical m/z, A=acquired m/z

| b <sup>+</sup> | #  | AA | #  | y <sup>+</sup> | y <sup>2+</sup> |
|----------------|----|----|----|----------------|-----------------|
| 114.0555       | 1  | A  | 20 |                |                 |
| 201.0875       | 2  | S  | 19 | 2218.2542      | 1109.6310       |
| 258.1090       | 3  | G  | 18 | 2131.2222      | 1066.1150       |
| 357.1774       | 4  | V  | 17 | 2074.2007      | 1037.6043       |
| 458.2251       | 5  | T  | 16 | 1975.1323      | 988.0701        |
| 557.2935       | 6  | V  | 15 | 1874.0847      | 937.5462        |
| 671.3364       | 7  | N  | 14 | 1775.0162      | 888.0120        |
| 786.3634       | 8  | D  | 13 | 1660.9733      | 830.9906        |
| 915.4060       | 9  | E  | 12 | 1545.9464      | 773.4771        |
| 1014.4744      | 10 | V  | 11 | 1416.9038      | 708.9558        |
| 1127.5585      | 11 | I  | 10 | 1317.8354      | 659.4216        |
| 1289.7166      | 12 | K  | 9  | 1204.7513      | 602.8796        |
| 1388.7850      | 13 | V  | 8  | 1042.5932      | 521.8005        |
| 1535.8534      | 14 | F  | 7  | 943.5248       | 472.2663        |
| 1649.8963      | 15 | N  | 6  | 796.4564       | 398.7321        |
| 1764.9233      | 16 | D  | 5  | 682.4134       | 341.7106        |
| 1895.9637      | 17 | M  | 4  | 567.3865       | 284.1972        |
| 2058.1218      | 18 | K  | 3  | 436.3460       | 218.6769        |
| 2157.1903      | 19 | V  | 2  | 274.1879       | 137.5979        |
|                | 20 | R  | 1  | 175.1195       | 88.0637         |

N-term:+43.02 K(12):+162.16  
 K(18):+162.16



ASKEMFEDTVEER, MH+ 1646.7796, m/z 823.8935  
 L OSG37 P180811 230811-s1.05435.05435.2.dta

X-range:

-

MassTol: Y-zoom:

MassType:

AVG  MONO

Axis:

1  2

Label:

I  M  -

Ions:

a  +  2+  3+

b  +  2+  3+

c  +  2+  3+

x  +  2+  3+

y  +  2+  3+

z  +  2+  3+

hide H<sub>2</sub>O/NH<sub>3</sub>

zoom 112-122

GO

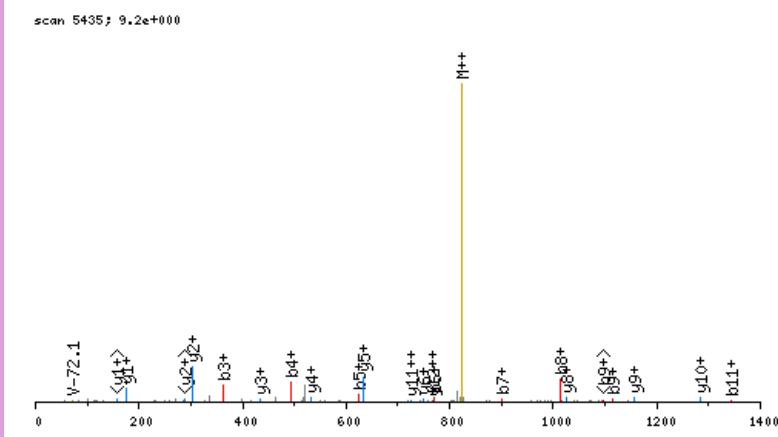

click image to zoom in; click top corners to zoom out [\[precursor±\]](#)

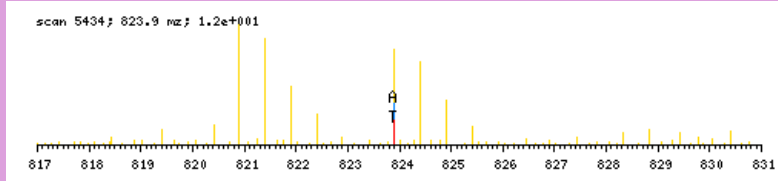

zoomed in precursor plot; T=theoretical m/z, A=acquired m/z

| b <sup>+</sup> | #  | AA # | y <sup>+</sup> | y <sup>2+</sup> |
|----------------|----|------|----------------|-----------------|
| 114.0555       | 1  | A 13 |                |                 |
| 201.0875       | 2  | S 12 | 1533.7319      | 767.3699        |
| 363.2456       | 3  | K 11 | 1446.6999      | 723.8539        |
| 492.2882       | 4  | E 10 | 1284.5418      | 642.7748        |
| 623.3287       | 5  | M 9  | 1155.4992      | 578.2535        |
| 770.3971       | 6  | F 8  | 1024.4587      | 512.7333        |
| 899.4397       | 7  | E 7  | 877.3903       | 439.1991        |
| 1014.4667      | 8  | D 6  | 748.3477       | 374.6778        |
| 1115.5143      | 9  | T 5  | 633.3208       | 317.1643        |
| 1214.5828      | 10 | V 4  | 532.2731       | 266.6405        |
| 1343.6254      | 11 | E 3  | 433.2047       | 217.1063        |
| 1472.6679      | 12 | E 2  | 304.1621       | 152.5850        |
|                | 13 | R 1  | 175.1195       | 88.0637         |

N-term:+43.02 K(3):+162.16

ASLKDLEGKWR, MH+ 1400.7903, m/z 700.8988  
 L OSG40 P180811 230811-s1.06911.06911.2.dta

scan 6911; 4.7e+001

X-range:

-

MassTol: Y-zoom:

MassType:

AVG  MONO

Axis:

1  2

Label:

I  M  -

Ions:

a  +  2+  3+

b  +  2+  3+

c  +  2+  3+

x  +  2+  3+

y  +  2+  3+

z  +  2+  3+

hide H<sub>2</sub>O/NH<sub>3</sub>

zoom 112-122

GO

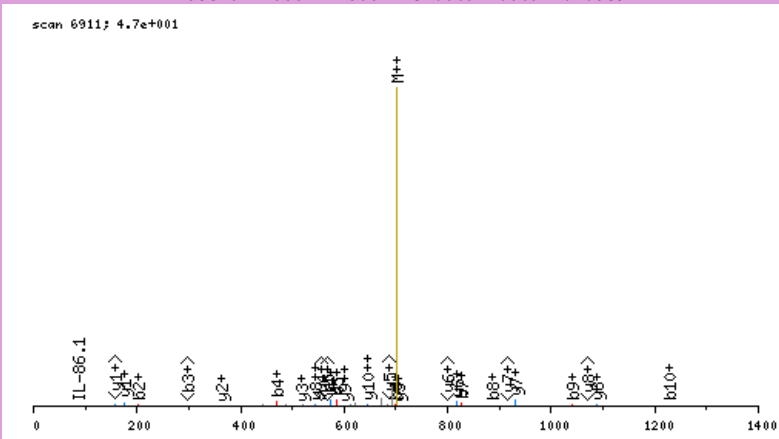

click image to zoom in; click top corners to zoom out [precursor±]

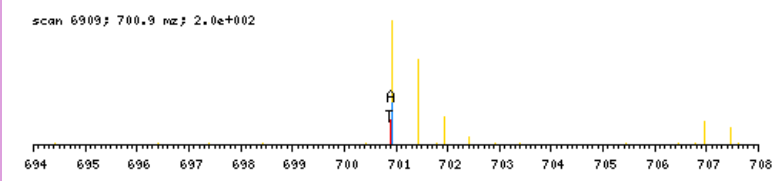

zoomed in precursor plot; T=theoretical m/z, A=acquired m/z

| b <sup>+</sup> | #  | AA # | y <sup>+</sup> | y <sup>2+</sup>    |
|----------------|----|------|----------------|--------------------|
| 114.0555       | 1  | A    | 11             |                    |
| 201.0875       | 2  | S    | 10             | 1287.7426 644.3752 |
| 314.1716       | 3  | L    | 9              | 1200.7105 600.8592 |
| 470.2979       | 4  | K    | 8              | 1087.6265 544.3172 |
| 585.3248       | 5  | D    | 7              | 931.5002 466.2540  |
| 698.4089       | 6  | L    | 6              | 816.4732 408.7405  |
| 827.4515       | 7  | E    | 5              | 703.3892 352.1985  |
| 884.4730       | 8  | G    | 4              | 574.3466 287.6772  |
| 1040.5993      | 9  | K    | 3              | 517.3251 259.1665  |
| 1226.6786      | 10 | W    | 2              | 361.1988 181.1033  |
|                | 11 | R    | 1              | 175.1195 88.0637   |

N-term:+43.02 K(4):+156.13  
 K(9):+156.13

X-range:

-

MassTol: Y-zoom:

MassType:

AVG  MONO

Axis:

1  2

Label:

I  M  -

Ions:

a  +  2+  3+

b  +  2+  3+

c  +  2+  3+

x  +  2+  3+

y  +  2+  3+

z  +  2+  3+

hide H<sub>2</sub>O/NH<sub>3</sub>

zoom 112-122

GO

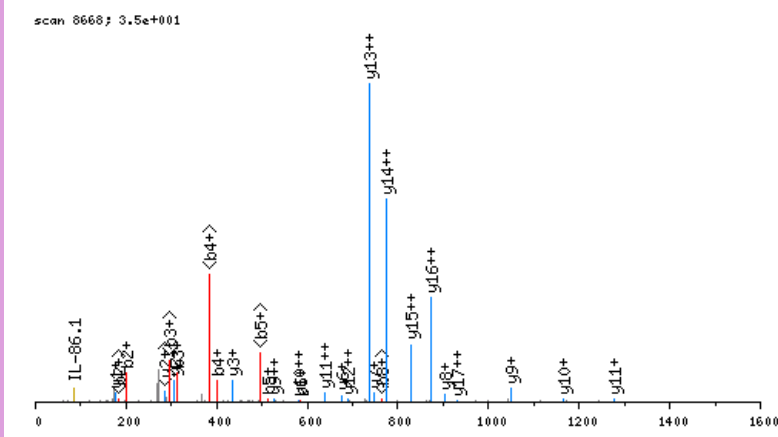

click image to zoom in; click top corners to zoom out [\[precursor±\]](#)

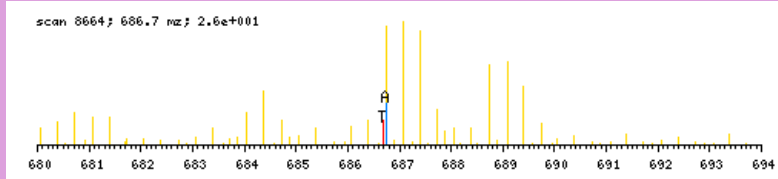

zoomed in precursor plot; T=theoretical m/z, A=acquired m/z

| b <sup>+</sup> | #  | AA # | y <sup>+</sup> | y <sup>2+</sup> |
|----------------|----|------|----------------|-----------------|
| 114.0555       | 1  | A 19 |                |                 |
| 201.0875       | 2  | S 18 | 1945.0395      | 973.0237        |
| 314.1716       | 3  | L 17 | 1858.0075      | 929.5077        |
| 401.2036       | 4  | S 16 | 1744.9234      | 872.9656        |
| 514.2877       | 5  | L 15 | 1657.8914      | 829.4496        |
| 585.3248       | 6  | A 14 | 1544.8073      | 772.9076        |
| 682.3776       | 7  | P 13 | 1473.7702      | 737.3890        |
| 781.4460       | 8  | V 12 | 1376.7174      | 688.8626        |
| 895.4889       | 9  | N 11 | 1277.6490      | 639.3284        |
| 1008.5730      | 10 | I 10 | 1163.6061      | 582.3070        |
| 1155.6414      | 11 | F 9  | 1050.5220      | 525.7649        |
| 1311.7677      | 12 | K 8  | 903.4536       | 452.2307        |
| 1382.8048      | 13 | A 7  | 747.3273       | 374.1676        |
| 1439.8263      | 14 | G 6  | 676.2902       | 338.6490        |
| 1510.8634      | 15 | A 5  | 619.2687       | 310.1383        |
| 1625.8903      | 16 | D 4  | 548.2316       | 274.6197        |
| 1754.9329      | 17 | E 3  | 433.2047       | 217.1063        |
| 1883.9755      | 18 | E 2  | 304.1621       | 152.5850        |
|                | 19 | R 1  | 175.1195       | 88.0637         |

N-term:+43.02 K(12):+156.13

ASNFKKTMASSAQR, MH+ 1725.8959, m/z 575.9701  
 L OSG39 P180811 230811-s1.02493.02493.3.dta

X-range:

-

MassTol: Y-zoom:

MassType:

AVG  MONO

Axis:

1  2

Label:

I  M  -

Ions:

a  +  2+  3+

b  +  2+  3+

c  +  2+  3+

x  +  2+  3+

y  +  2+  3+

z  +  2+  3+

hide H<sub>2</sub>O/NH<sub>3</sub>

zoom 112-122

GO

scan 2493; 6.4e+001

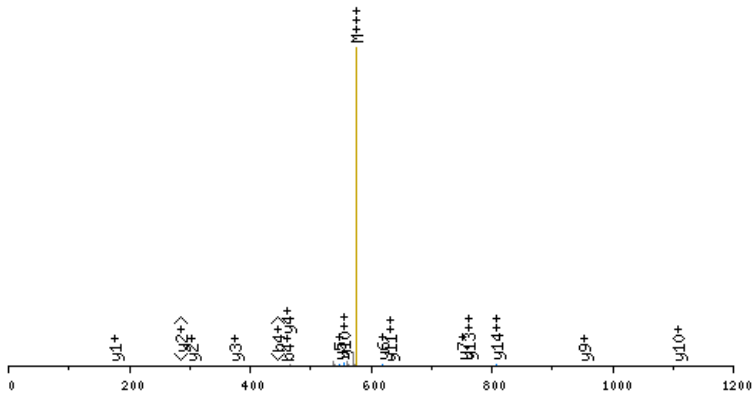

click image to zoom in; click top corners to zoom out [\[precursor±\]](#)

scan 2491; 576.0 nz; 5.5e+000

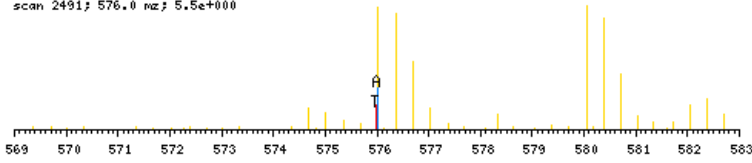

zoomed in precursor plot; T=theoretical m/z, A=acquired m/z

| b <sup>+</sup> | #  | AA | #  | y <sup>+</sup> | y <sup>2+</sup> |
|----------------|----|----|----|----------------|-----------------|
| 114.0555       | 1  | A  | 15 |                |                 |
| 201.0875       | 2  | S  | 14 | 1612.8482      | 806.9280        |
| 315.1305       | 3  | N  | 13 | 1525.8161      | 763.4120        |
| 462.1989       | 4  | F  | 12 | 1411.7732      | 706.3905        |
| 618.3252       | 5  | K  | 11 | 1264.7048      | 632.8563        |
| 774.4515       | 6  | K  | 10 | 1108.5785      | 554.7932        |
| 875.4992       | 7  | T  | 9  | 952.4522       | 476.7300        |
| 976.5468       | 8  | T  | 8  | 851.4045       | 426.2062        |
| 1107.5873      | 9  | M  | 7  | 750.3568       | 375.6823        |
| 1178.6244      | 10 | A  | 6  | 619.3164       | 310.1621        |
| 1265.6565      | 11 | S  | 5  | 548.2792       | 274.6435        |
| 1352.6885      | 12 | S  | 4  | 461.2472       | 231.1275        |
| 1423.7256      | 13 | A  | 3  | 374.2152       | 187.6115        |
| 1551.7842      | 14 | Q  | 2  | 303.1781       | 152.0930        |
|                | 15 | R  | 1  | 175.1195       | 88.0637         |

N-term:+43.02 K(5):+156.13  
 K(6):+156.13

ASNNTASIAQAR, MH+ 1245.6188, m/z 623.3130  
 L OSG41 P180811 230811-s1.02766.02766.2.dta

scan 2766; 2.4e+000

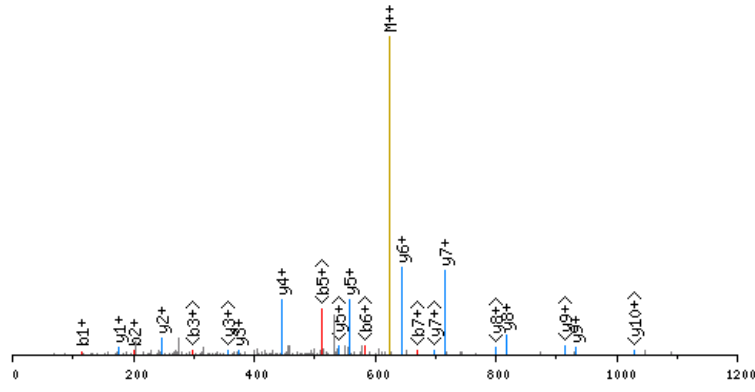

click image to zoom in; click top corners to zoom out [\[precursor±\]](#)

scan 2764; 623.3 m/z; 5.9e+000

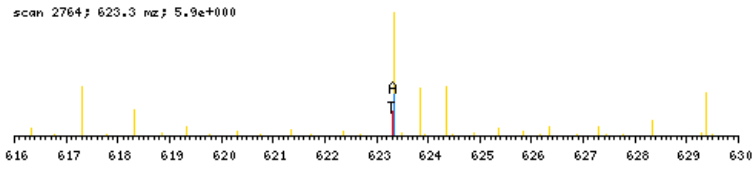

zoomed in precursor plot; T=theoretical m/z, A=acquired m/z

X-range:

-

MassTol: Y-zoom:

MassType:

AVG  MONO

Axis:

1  2

Label:

I  M  -

Ions:

a  +  2+  3+

b  +  2+  3+

c  +  2+  3+

x  +  2+  3+

y  +  2+  3+

z  +  2+  3+

hide H<sub>2</sub>O/NH<sub>3</sub>

zoom 112-122

GO

| b <sup>+</sup> | #  | AA | #  | y <sup>+</sup> | y <sup>2+</sup> |
|----------------|----|----|----|----------------|-----------------|
| 114.0555       | 1  | A  | 12 |                |                 |
| 201.0875       | 2  | S  | 11 | 1132.5711      | 566.7894        |
| 315.1305       | 3  | N  | 10 | 1045.5390      | 523.2734        |
| 429.1734       | 4  | N  | 9  | 931.4961       | 466.2520        |
| 530.2211       | 5  | T  | 8  | 817.4532       | 409.2305        |
| 601.2582       | 6  | A  | 7  | 716.4055       | 358.7067        |
| 688.2902       | 7  | S  | 6  | 645.3684       | 323.1881        |
| 801.3743       | 8  | I  | 5  | 558.3364       | 279.6721        |
| 872.4114       | 9  | A  | 4  | 445.2523       | 223.1301        |
| 1000.4700      | 10 | Q  | 3  | 374.2152       | 187.6115        |
| 1071.5071      | 11 | A  | 2  | 246.1566       | 123.5822        |
|                | 12 | R  | 1  | 175.1195       | 88.0637         |

N-term:+43.02

ASNPDRGEILLTELQGDSR, MH+ 2113.0526, m/z 705.0224  
 L OSG37 P180811 230811-s1.07551.07551.3.dta

X-range:

-

MassTol: Y-zoom:

MassType:

AVG  MONO

Axis:

1  2

Label:

I  M  -

Ions:

a  +  2+  3+

b  +  2+  3+

c  +  2+  3+

x  +  2+  3+

y  +  2+  3+

z  +  2+  3+

hide H<sub>2</sub>O/NH<sub>3</sub>

zoom 112-122

GO

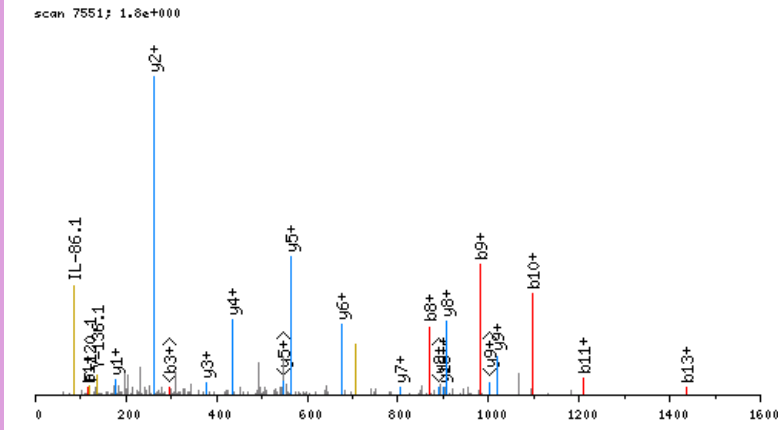

click image to zoom in; click top corners to zoom out [precursor±]

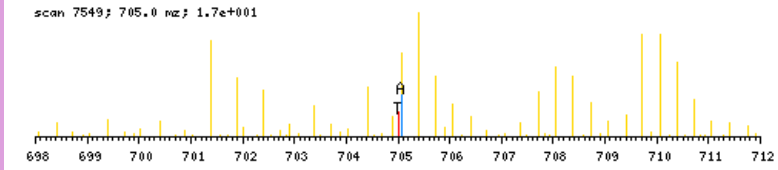

zoomed in precursor plot; T=theoretical m/z, A=acquired m/z

| b <sup>+</sup> | #  | AA | #  | y <sup>+</sup> | y <sup>2+</sup> |
|----------------|----|----|----|----------------|-----------------|
| 114.0555       | 1  | A  | 19 |                |                 |
| 201.0875       | 2  | S  | 18 | 2000.0049      | 1000.5063       |
| 315.1305       | 3  | N  | 17 | 1912.9728      | 956.9903        |
| 412.1832       | 4  | P  | 16 | 1798.9299      | 899.9689        |
| 527.2102       | 5  | D  | 15 | 1701.8772      | 851.4425        |
| 683.3113       | 6  | R  | 14 | 1586.8502      | 793.9290        |
| 740.3328       | 7  | G  | 13 | 1430.7491      | 715.8785        |
| 869.3753       | 8  | E  | 12 | 1373.7276      | 687.3677        |
| 982.4594       | 9  | I  | 11 | 1244.6850      | 622.8464        |
| 1095.5435      | 10 | L  | 10 | 1131.6010      | 566.3044        |
| 1208.6275      | 11 | L  | 9  | 1018.5169      | 509.7624        |
| 1309.6752      | 12 | T  | 8  | 905.4328       | 453.2203        |
| 1438.7178      | 13 | E  | 7  | 804.3852       | 402.6965        |
| 1551.8019      | 14 | L  | 6  | 675.3426       | 338.1752        |
| 1679.8604      | 15 | Q  | 5  | 562.2585       | 281.6332        |
| 1736.8819      | 16 | G  | 4  | 434.1999       | 217.6039        |
| 1851.9089      | 17 | D  | 3  | 377.1785       | 189.0931        |
| 1938.9409      | 18 | S  | 2  | 262.1515       | 131.5797        |
|                | 19 | R  | 1  | 175.1195       | 88.0637         |

N-term:+43.02

ASPAAGGVVIVGSLIGR, MH+ 1622.9230, m/z 811.9651  
 L OSG41 P180811 230811-s1.07095.07095.2.dta

X-range:

-

MassTol: Y-zoom:

MassType:

AVG  MONO

Axis:

1  2

Label:

I  M  -

Ions:

a  +  2+  3+

b  +  2+  3+

c  +  2+  3+

x  +  2+  3+

y  +  2+  3+

z  +  2+  3+

hide H<sub>2</sub>O/NH<sub>3</sub>

zoom 112-122

GO

scan 7095; 1.2e+000

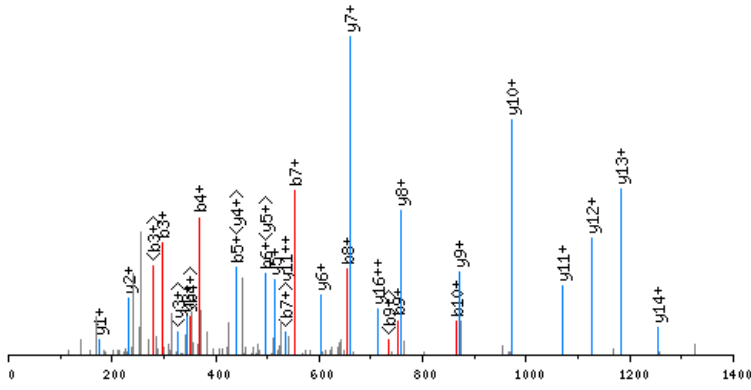

click image to zoom in; click top corners to zoom out [\[precursor±\]](#)

scan 7094; 812.0 m/z; 4.2e+001

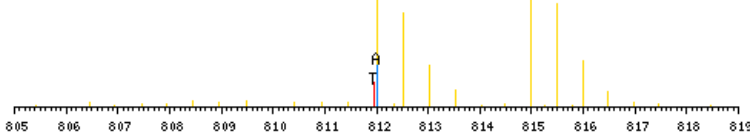

zoomed in precursor plot; T=theoretical m/z, A=acquired m/z

| b <sup>+</sup> | #  | AA # | y <sup>+</sup> | y <sup>2+</sup> |
|----------------|----|------|----------------|-----------------|
| 114.0555       | 1  | A 18 |                |                 |
| 201.0875       | 2  | S 17 | 1509.8753      | 755.4416        |
| 298.1403       | 3  | P 16 | 1422.8433      | 711.9255        |
| 369.1774       | 4  | A 15 | 1325.7905      | 663.3992        |
| 440.2145       | 5  | A 14 | 1254.7534      | 627.8806        |
| 497.2360       | 6  | G 13 | 1183.7163      | 592.3621        |
| 554.2575       | 7  | G 12 | 1126.6948      | 563.8513        |
| 653.3259       | 8  | V 11 | 1069.6734      | 535.3406        |
| 752.3943       | 9  | V 10 | 970.6049       | 485.8064        |
| 865.4784       | 10 | I 9  | 871.5365       | 436.2722        |
| 964.5468       | 11 | V 8  | 758.4525       | 379.7301        |
| 1021.5682      | 12 | G 7  | 659.3840       | 330.1959        |
| 1108.6003      | 13 | S 6  | 602.3626       | 301.6852        |
| 1165.6217      | 14 | G 5  | 515.3306       | 258.1692        |
| 1278.7058      | 15 | L 4  | 458.3091       | 229.6585        |
| 1391.7899      | 16 | I 3  | 345.2250       | 173.1164        |
| 1448.8113      | 17 | G 2  | 232.1410       | 116.5744        |
|                | 18 | R 1  | 175.1195       | 88.0637         |

N-term:+43.02

ASQSQGIQQLLQAEKR, MH+ 1855.0038, m/z 619.0061  
 L OSG37 P180811 230811-s1.06560.06560.3.dta

X-range:

-

MassTol: Y-zoom:

MassType:

AVG  MONO

Axis:

1  2

Label:

I  M  -

Ions:

a  +  2+  3+

b  +  2+  3+

c  +  2+  3+

x  +  2+  3+

y  +  2+  3+

z  +  2+  3+

hide H<sub>2</sub>O/NH<sub>3</sub>

zoom 112-122

GO

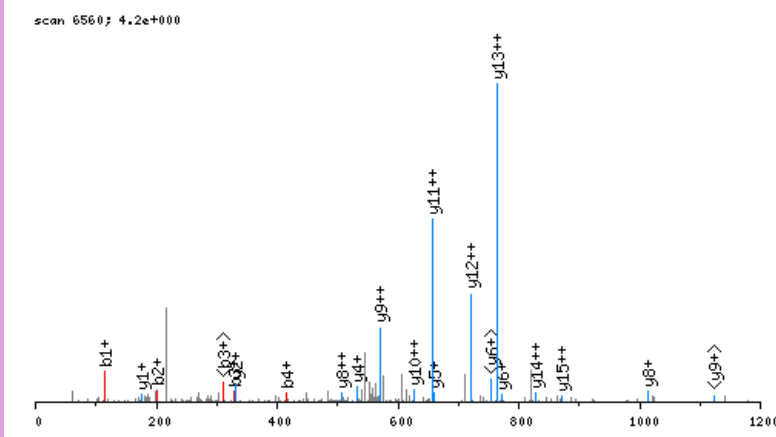

click image to zoom in; click top corners to zoom out [\[precursor±\]](#)

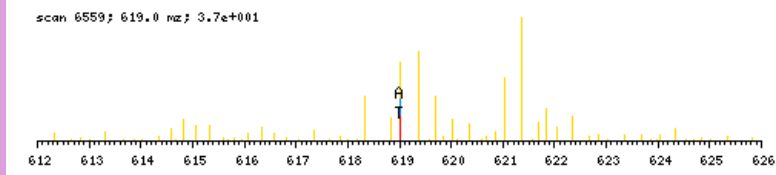

zoomed in precursor plot; T=theoretical m/z, A=acquired m/z

| b <sup>+</sup> | #  | AA | #  | y <sup>+</sup> | y <sup>2+</sup> |
|----------------|----|----|----|----------------|-----------------|
| 114.0555       | 1  | A  | 16 |                |                 |
| 201.0875       | 2  | S  | 15 | 1741.9561      | 871.4820        |
| 329.1461       | 3  | Q  | 14 | 1654.9241      | 827.9660        |
| 416.1781       | 4  | S  | 13 | 1526.8655      | 763.9367        |
| 544.2367       | 5  | Q  | 12 | 1439.8335      | 720.4206        |
| 601.2582       | 6  | G  | 11 | 1311.7749      | 656.3914        |
| 714.3423       | 7  | I  | 10 | 1254.7534      | 627.8806        |
| 842.4008       | 8  | Q  | 9  | 1141.6694      | 571.3386        |
| 970.4594       | 9  | Q  | 8  | 1013.6108      | 507.3093        |
| 1083.5435      | 10 | L  | 7  | 885.5522       | 443.2800        |
| 1196.6275      | 11 | L  | 6  | 772.4681       | 386.7380        |
| 1324.6861      | 12 | Q  | 5  | 659.3841       | 330.1960        |
| 1395.7232      | 13 | A  | 4  | 531.3255       | 266.1667        |
| 1524.7658      | 14 | E  | 3  | 460.2884       | 230.6481        |
| 1680.8921      | 15 | K  | 2  | 331.2458       | 166.1268        |
|                | 16 | R  | 1  | 175.1195       | 88.0637         |

N-term:+43.02 K(15):+156.13



ASSAQSSTGGSGGPAVPTVQR, MH+ 1872.9052, m/z 624.9732  
 L OSG41 P180811 230811-s1.03335.03335.3.dta

X-range:

-

MassTol: Y-zoom:

MassType:

AVG  MONO

Axis:

1  2

Label:

I  M  -

Ions:

a  +  2+  3+

b  +  2+  3+

c  +  2+  3+

x  +  2+  3+

y  +  2+  3+

z  +  2+  3+

hide H<sub>2</sub>O/NH<sub>3</sub>

zoom 112-122

GO

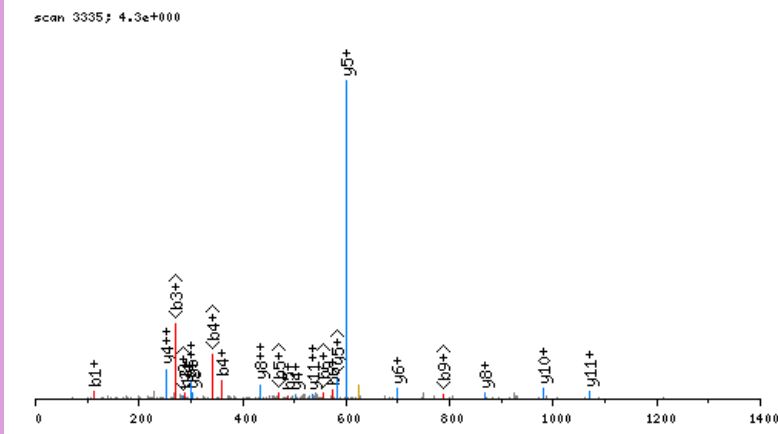

click image to zoom in; click top corners to zoom out [\[precursor±\]](#)

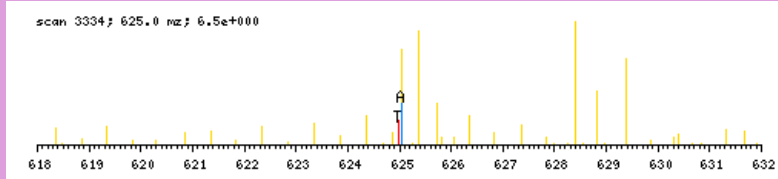

zoomed in precursor plot; T=theoretical m/z, A=acquired m/z

| b <sup>+</sup> | #  | AA | #  | y <sup>+</sup> | y <sup>2+</sup> |
|----------------|----|----|----|----------------|-----------------|
| 114.0555       | 1  | A  | 20 |                |                 |
| 201.0875       | 2  | S  | 19 | 1759.8575      | 880.4327        |
| 288.1196       | 3  | S  | 18 | 1672.8255      | 836.9166        |
| 359.1567       | 4  | A  | 17 | 1585.7934      | 793.4006        |
| 487.2153       | 5  | Q  | 16 | 1514.7563      | 757.8821        |
| 574.2473       | 6  | S  | 15 | 1386.6977      | 693.8528        |
| 661.2793       | 7  | S  | 14 | 1299.6657      | 650.3368        |
| 718.3008       | 8  | G  | 13 | 1212.6337      | 606.8207        |
| 805.3328       | 9  | S  | 12 | 1155.6122      | 578.3100        |
| 892.3648       | 10 | S  | 11 | 1068.5802      | 534.7940        |
| 949.3863       | 11 | G  | 10 | 981.5482       | 491.2780        |
| 1006.4078      | 12 | G  | 9  | 924.5267       | 462.7673        |
| 1103.4605      | 13 | P  | 8  | 867.5052       | 434.2565        |
| 1174.4976      | 14 | A  | 7  | 770.4525       | 385.7301        |
| 1273.5661      | 15 | V  | 6  | 699.4153       | 350.2116        |
| 1370.6188      | 16 | P  | 5  | 600.3469       | 300.6774        |
| 1471.6665      | 17 | T  | 4  | 503.2942       | 252.1510        |
| 1570.7349      | 18 | V  | 3  | 402.2465       | 201.6272        |
| 1698.7935      | 19 | Q  | 2  | 303.1781       | 152.0930        |
|                | 20 | R  | 1  | 175.1195       | 88.0637         |

N-term:+43.02

ASSDIQVKELEKR, MH+ 1600.8911, m/z 534.3019  
 L OSG40 P180811 230811-s1.04537.04537.3.dta

X-range:

-

MassTol: Y-zoom:

MassType:

AVG  MONO

Axis:

1  2

Label:

I  M  -

Ions:

a  +  2+  3+

b  +  2+  3+

c  +  2+  3+

x  +  2+  3+

y  +  2+  3+

z  +  2+  3+

hide H<sub>2</sub>O/NH<sub>3</sub>

zoom 112-122

GO

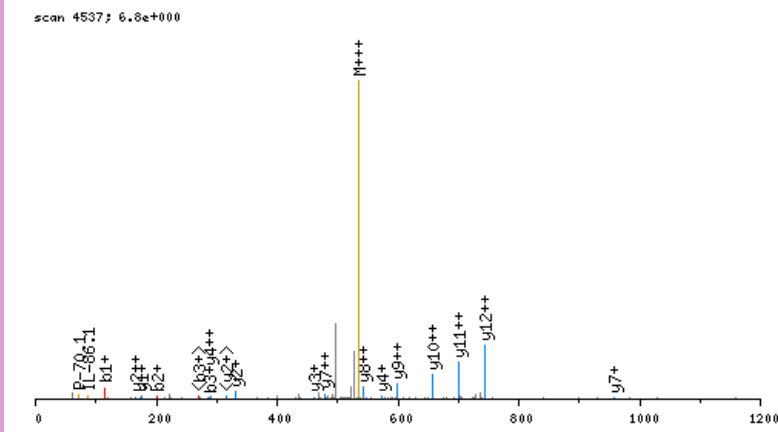

click image to zoom in; click top corners to zoom out [\[precursor±\]](#)

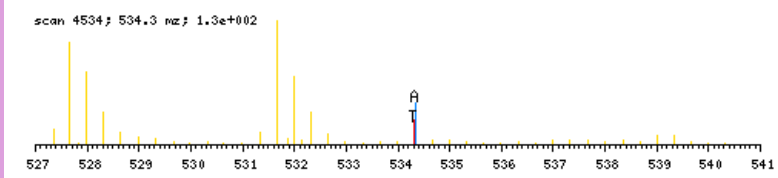

zoomed in precursor plot; T=theoretical m/z, A=acquired m/z

| b <sup>+</sup> | #  | AA # | y <sup>+</sup> | y <sup>2+</sup> |
|----------------|----|------|----------------|-----------------|
| 114.0555       | 1  | A    | 13             |                 |
| 201.0875       | 2  | S    | 12             | 1487.8434       |
| 288.1196       | 3  | S    | 11             | 1400.8114       |
| 403.1465       | 4  | D    | 10             | 1313.7793       |
| 516.2306       | 5  | I    | 9              | 1198.7524       |
| 644.2892       | 6  | Q    | 8              | 1085.6683       |
| 743.3576       | 7  | V    | 7              | 957.6098        |
| 899.4839       | 8  | K    | 6              | 858.5414        |
| 1028.5265      | 9  | E    | 5              | 702.4151        |
| 1141.6105      | 10 | L    | 4              | 573.3725        |
| 1270.6531      | 11 | E    | 3              | 460.2884        |
| 1426.7794      | 12 | K    | 2              | 331.2458        |
|                | 13 | R    | 1              | 175.1195        |

N-term:+43.02 K(8):+156.13  
 K(12):+156.13

ASSHTVLMR, MH+ 1043.5308, m/z 522.2690  
 L OSG37 P180811 230811-s1.03105.03105.2.dta

X-range:

-

MassTol: Y-zoom:

MassType:

AVG  MONO

Axis:

1  2

Label:

I  M  -

Ions:

a  +  2+  3+

b  +  2+  3+

c  +  2+  3+

x  +  2+  3+

y  +  2+  3+

z  +  2+  3+

hide H<sub>2</sub>O/NH<sub>3</sub>

zoom 112-122

GO

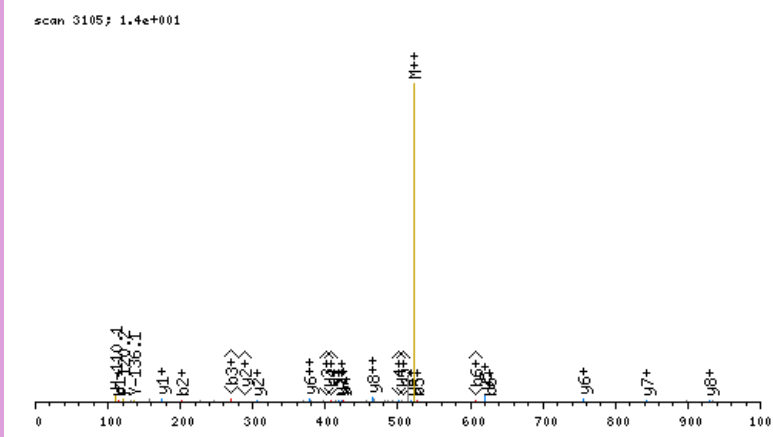

click image to zoom in; click top corners to zoom out [\[precursor±\]](#)

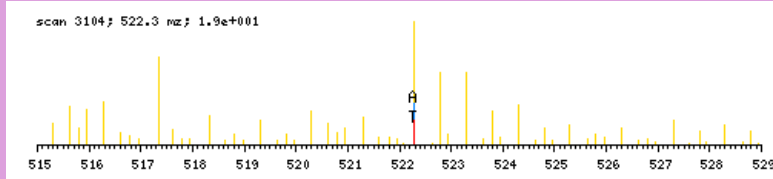

zoomed in precursor plot; T=theoretical m/z, A=acquired m/z

| b <sup>+</sup> | # | AA # | y <sup>+</sup> | y <sup>2+</sup>   |
|----------------|---|------|----------------|-------------------|
| 114.0555       | 1 | A    | 9              |                   |
| 201.0875       | 2 | S    | 8              | 930.4831 465.7455 |
| 288.1196       | 3 | S    | 7              | 843.4511 422.2295 |
| 425.1785       | 4 | H    | 6              | 756.4191 378.7134 |
| 526.2262       | 5 | T    | 5              | 619.3601 310.1840 |
| 625.2946       | 6 | V    | 4              | 518.3125 259.6601 |
| 738.3786       | 7 | L    | 3              | 419.2440 210.1259 |
| 869.4191       | 8 | M    | 2              | 306.1600 153.5839 |
|                | 9 | R    | 1              | 175.1195 88.0637  |

N-term:+43.02

ASSKKVTLVLSLR, MH+ 1473.9005, m/z 491.9717  
 L OSG39 P180811 230811-s1.03767.03767.3.dta

X-range:

-

MassTol: Y-zoom:

MassType:

AVG  MONO

Axis:

1  2

Label:

I  M  -

Ions:

a  +  2+  3+

b  +  2+  3+

c  +  2+  3+

x  +  2+  3+

y  +  2+  3+

z  +  2+  3+

hide H<sub>2</sub>O/NH<sub>3</sub>

zoom 112-122

GO

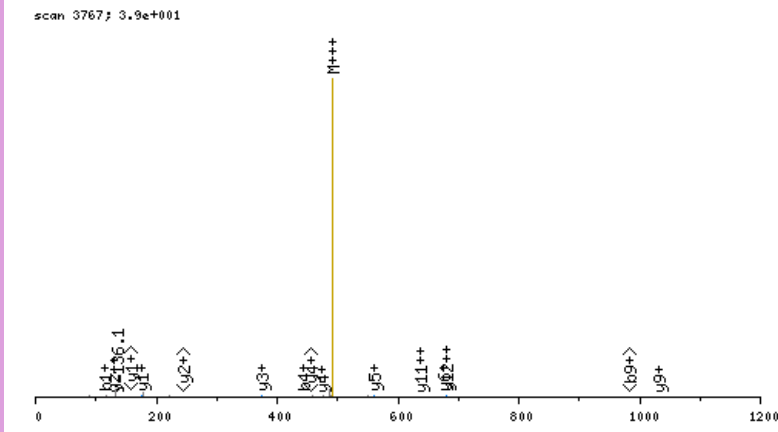

click image to zoom in; click top corners to zoom out [\[precursor±\]](#)

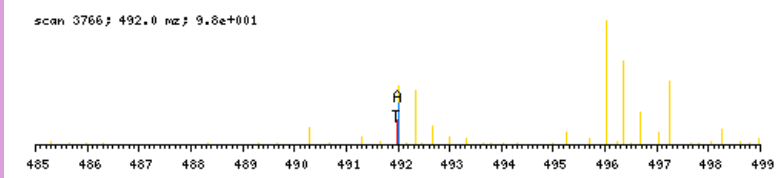

zoomed in precursor plot; T=theoretical m/z, A=acquired m/z

| b <sup>+</sup> | #  | AA | #  | y <sup>+</sup> | y <sup>2+</sup> |
|----------------|----|----|----|----------------|-----------------|
| 114.0555       | 1  | A  | 13 |                |                 |
| 201.0875       | 2  | S  | 12 | 1360.8528      | 680.9303        |
| 288.1196       | 3  | S  | 11 | 1273.8208      | 637.4143        |
| 444.2459       | 4  | K  | 10 | 1186.7888      | 593.8983        |
| 600.3722       | 5  | K  | 9  | 1030.6625      | 515.8352        |
| 699.4406       | 6  | V  | 8  | 874.5362       | 437.7720        |
| 800.4883       | 7  | T  | 7  | 775.4678       | 388.2378        |
| 913.5723       | 8  | L  | 6  | 674.4201       | 337.7140        |
| 1000.6044      | 9  | S  | 5  | 561.3360       | 281.1719        |
| 1099.6728      | 10 | V  | 4  | 474.3040       | 237.6559        |
| 1212.7568      | 11 | L  | 3  | 375.2356       | 188.1217        |
| 1299.7889      | 12 | S  | 2  | 262.1515       | 131.5797        |
|                | 13 | R  | 1  | 175.1195       | 88.0637         |

N-term:+43.02 K(4):+156.13  
 K(5):+156.13

ASSPQGLDNPALLR, MH+ 1480.7760, m/z 494.2635  
 L OSG41 P180811 230811-s1.05483.05483.3.dta

X-range:

-

MassTol: Y-zoom:

MassType:

AVG  MONO

Axis:

1  2

Label:

I  M  -

Ions:

a  +  2+  3+

b  +  2+  3+

c  +  2+  3+

x  +  2+  3+

y  +  2+  3+

z  +  2+  3+

hide H<sub>2</sub>O/NH<sub>3</sub>

zoom 112-122

GO

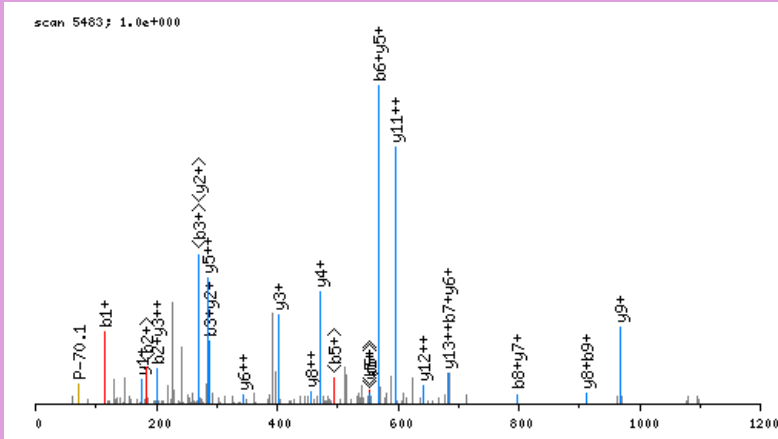

click image to zoom in; click top corners to zoom out [\[precursor±\]](#)

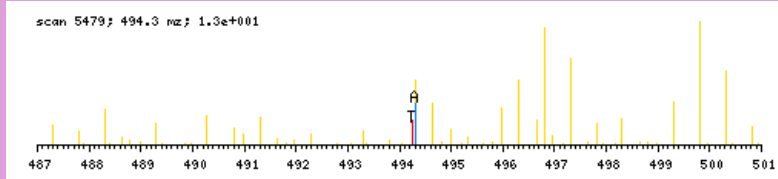

zoomed in precursor plot; T=theoretical m/z, A=acquired m/z

| b <sup>+</sup> | #  | AA # | y <sup>+</sup> | y <sup>2+</sup> |
|----------------|----|------|----------------|-----------------|
| 114.0555       | 1  | A 14 |                |                 |
| 201.0875       | 2  | S 13 | 1367.7283      | 684.3681        |
| 288.1196       | 3  | S 12 | 1280.6963      | 640.8520        |
| 385.1723       | 4  | P 11 | 1193.6642      | 597.3360        |
| 513.2309       | 5  | Q 10 | 1096.6115      | 548.8097        |
| 570.2524       | 6  | G 9  | 968.5529       | 484.7804        |
| 683.3364       | 7  | L 8  | 911.5314       | 456.2696        |
| 798.3634       | 8  | D 7  | 798.4474       | 399.7276        |
| 912.4063       | 9  | N 6  | 683.4204       | 342.2141        |
| 1009.4591      | 10 | P 5  | 569.3775       | 285.1927        |
| 1080.4962      | 11 | A 4  | 472.3247       | 236.6663        |
| 1193.5803      | 12 | L 3  | 401.2876       | 201.1477        |
| 1306.6643      | 13 | L 2  | 288.2036       | 144.6057        |
|                | 14 | R 1  | 175.1195       | 88.0637         |

N-term:+43.02

ASSSGNDDDLTIPR, MH+ 1489.6771, m/z 745.3422  
 L OSG41 P180811 230811-s1.04328.04328.2.dta

X-range:

-

MassTol: Y-zoom:

MassType:

AVG  MONO

Axis:

1  2

Label:

I  M  -

Ions:

a  +  2+  3+

b  +  2+  3+

c  +  2+  3+

x  +  2+  3+

y  +  2+  3+

z  +  2+  3+

hide H<sub>2</sub>O/NH<sub>3</sub>

zoom 112-122

GO

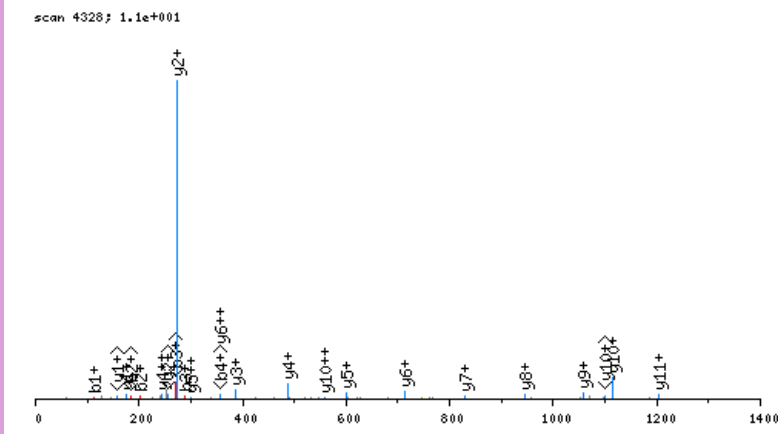

click image to zoom in; click top corners to zoom out [\[precursor±\]](#)

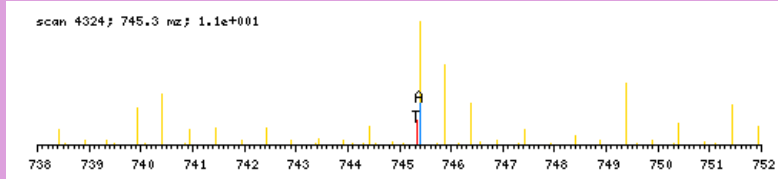

zoomed in precursor plot; T=theoretical m/z, A=acquired m/z

| b <sup>+</sup> | #  | AA # | y <sup>+</sup> | y <sup>2+</sup> |
|----------------|----|------|----------------|-----------------|
| 114.0555       | 1  | A 14 |                |                 |
| 201.0875       | 2  | S 13 | 1376.6294      | 688.8186        |
| 288.1196       | 3  | S 12 | 1289.5973      | 645.3026        |
| 375.1516       | 4  | S 11 | 1202.5653      | 601.7866        |
| 432.1731       | 5  | G 10 | 1115.5333      | 558.2706        |
| 546.2160       | 6  | N 9  | 1058.5118      | 529.7598        |
| 661.2429       | 7  | D 8  | 944.4689       | 472.7384        |
| 776.2699       | 8  | D 7  | 829.4420       | 415.2249        |
| 891.2968       | 9  | D 6  | 714.4150       | 357.7114        |
| 1004.3809      | 10 | L 5  | 599.3881       | 300.1979        |
| 1105.4286      | 11 | T 4  | 486.3040       | 243.6559        |
| 1218.5126      | 12 | I 3  | 385.2563       | 193.1321        |
| 1315.5654      | 13 | P 2  | 272.1723       | 136.5900        |
|                | 14 | R 1  | 175.1195       | 88.0637         |

N-term:+43.02

ASYYEILDVPR, MH+ 1367.6847, m/z 684.3460  
 L OSG41 P180811 230811-s1.07215.07215.2.dta

X-range:

-

MassTol: Y-zoom:

MassType:

AVG  MONO

Axis:

1  2

Label:

I  M  -

Ions:

a  +  2+  3+

b  +  2+  3+

c  +  2+  3+

x  +  2+  3+

y  +  2+  3+

z  +  2+  3+

hide H<sub>2</sub>O/NH<sub>3</sub>

zoom 112-122

GO

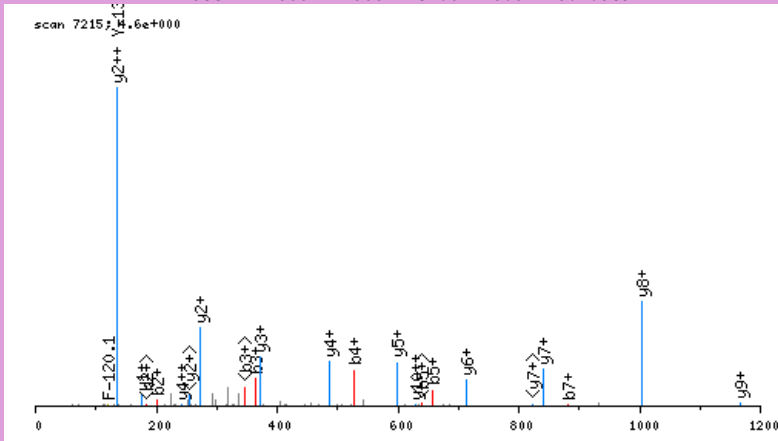

click image to zoom in; click top corners to zoom out [\[precursor±\]](#)

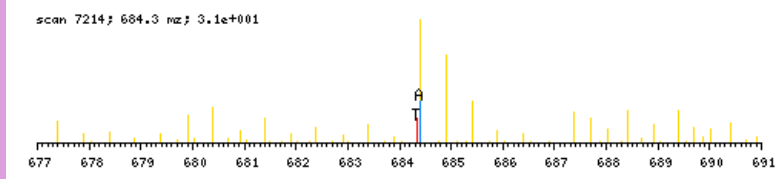

zoomed in precursor plot; T=theoretical m/z, A=acquired m/z

| b <sup>+</sup> | #  | AA # | y <sup>+</sup> | y <sup>2+</sup> |
|----------------|----|------|----------------|-----------------|
| 114.0555       | 1  | A 11 |                |                 |
| 201.0875       | 2  | S 10 | 1254.6370      | 627.8224        |
| 364.1509       | 3  | Y 9  | 1167.6050      | 584.3064        |
| 527.2142       | 4  | Y 8  | 1004.5417      | 502.7747        |
| 656.2568       | 5  | E 7  | 841.4783       | 421.2431        |
| 769.3409       | 6  | I 6  | 712.4357       | 356.7218        |
| 882.4249       | 7  | L 5  | 599.3517       | 300.1798        |
| 997.4519       | 8  | D 4  | 486.2676       | 243.6377        |
| 1096.5203      | 9  | V 3  | 371.2407       | 186.1243        |
| 1193.5730      | 10 | P 2  | 272.1723       | 136.5900        |
|                | 11 | R 1  | 175.1195       | 88.0637         |

N-term:+43.02

ATATPVQQQR, MH+ 1141.5966, m/z 571.3019  
 L OSG41 P180811 230811-s1.02315.02315.2.dta

X-range:

-

MassTol: Y-zoom:

MassType:

AVG  MONO

Axis:

1  2

Label:

I  M  -

Ions:

a  +  2+  3+

b  +  2+  3+

c  +  2+  3+

x  +  2+  3+

y  +  2+  3+

z  +  2+  3+

hide H<sub>2</sub>O/NH<sub>3</sub>

zoom 112-122

GO

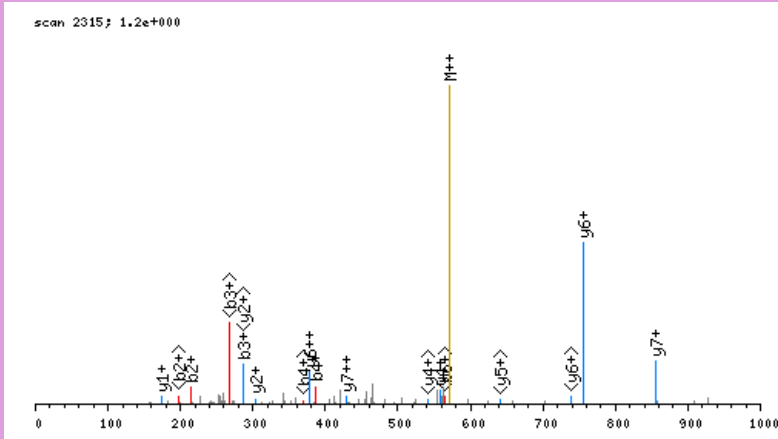

click image to zoom in; click top corners to zoom out [\[precursor±\]](#)

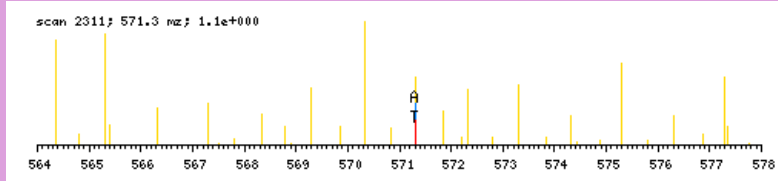

zoomed in precursor plot; T=theoretical m/z, A=acquired m/z

| b <sup>+</sup> | #  | AA | #  | y <sup>+</sup> | y <sup>2+</sup> |
|----------------|----|----|----|----------------|-----------------|
| 114.0555       | 1  | A  | 10 |                |                 |
| 215.1032       | 2  | T  | 9  | 1028.5489      | 514.7784        |
| 286.1403       | 3  | A  | 8  | 927.5012       | 464.2545        |
| 387.1880       | 4  | T  | 7  | 856.4641       | 428.7360        |
| 484.2407       | 5  | P  | 6  | 755.4164       | 378.2121        |
| 583.3092       | 6  | V  | 5  | 658.3636       | 329.6857        |
| 711.3677       | 7  | Q  | 4  | 559.2952       | 280.1515        |
| 839.4263       | 8  | Q  | 3  | 431.2367       | 216.1222        |
| 967.4849       | 9  | Q  | 2  | 303.1781       | 152.0930        |
|                | 10 | R  | 1  | 175.1195       | 88.0637         |

N-term:+43.02



ATDDKSSPTLDSANDLPR, MH+ 1972.9464, m/z 658.3203  
 L OSG36 P180811 230811-s1.03410.03410.3.dta

X-range:

-

MassTol: Y-zoom:

MassType:

AVG  MONO

Axis:

1  2

Label:

I  M  -

Ions:

a  +  2+  3+

b  +  2+  3+

c  +  2+  3+

x  +  2+  3+

y  +  2+  3+

z  +  2+  3+

hide H<sub>2</sub>O/NH<sub>3</sub>

zoom 112-122

GO

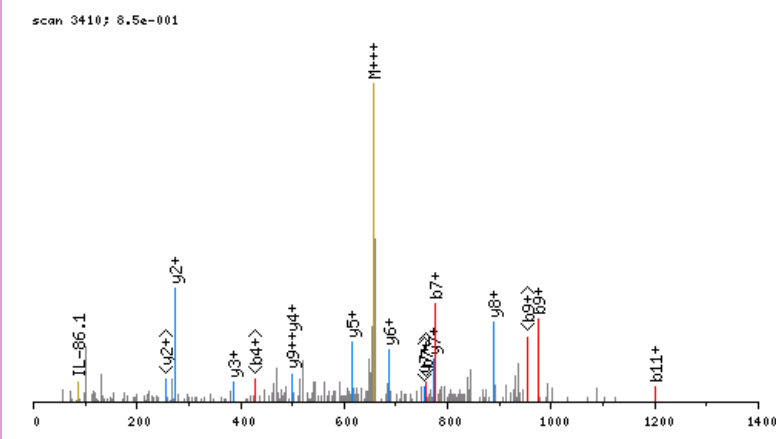

click image to zoom in; click top corners to zoom out [\[precursor±\]](#)

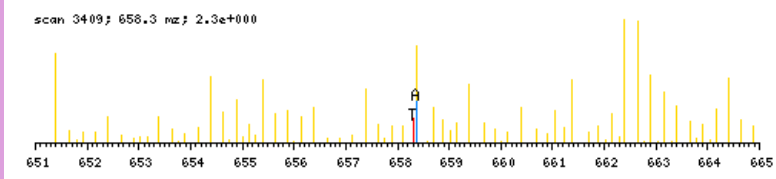

zoomed in precursor plot; T=theoretical m/z, A=acquired m/z

| b <sup>+</sup> | #  | AA # | y <sup>+</sup> | y <sup>2+</sup> |
|----------------|----|------|----------------|-----------------|
| 114.0555       | 1  | A 18 |                |                 |
| 215.1032       | 2  | T 17 | 1859.8987      | 930.4533        |
| 330.1301       | 3  | D 16 | 1758.8510      | 879.9294        |
| 445.1571       | 4  | D 15 | 1643.8241      | 822.4160        |
| 601.2834       | 5  | K 14 | 1528.7971      | 764.9025        |
| 688.3154       | 6  | S 13 | 1372.6708      | 686.8393        |
| 775.3474       | 7  | S 12 | 1285.6388      | 643.3233        |
| 872.4002       | 8  | P 11 | 1198.6068      | 599.8073        |
| 973.4479       | 9  | T 10 | 1101.5540      | 551.2809        |
| 1086.5319      | 10 | L 9  | 1000.5063      | 500.7571        |
| 1201.5589      | 11 | D 8  | 887.4223       | 444.2151        |
| 1288.5909      | 12 | S 7  | 772.3953       | 386.7016        |
| 1359.6280      | 13 | A 6  | 685.3633       | 343.1856        |
| 1473.6710      | 14 | N 5  | 614.3262       | 307.6670        |
| 1588.6979      | 15 | D 4  | 500.2833       | 250.6455        |
| 1701.7820      | 16 | L 3  | 385.2563       | 193.1321        |
| 1798.8347      | 17 | P 2  | 272.1723       | 136.5900        |
|                | 18 | R 1  | 175.1195       | 88.0637         |

N-term:+43.02 K(5):+156.13

ATDELASKLSR, MH+ 1260.6800, m/z 630.8436  
 L OSG37 P180811 230811-s1.04955.04955.2.dta

scan 4955; 5.0e+001

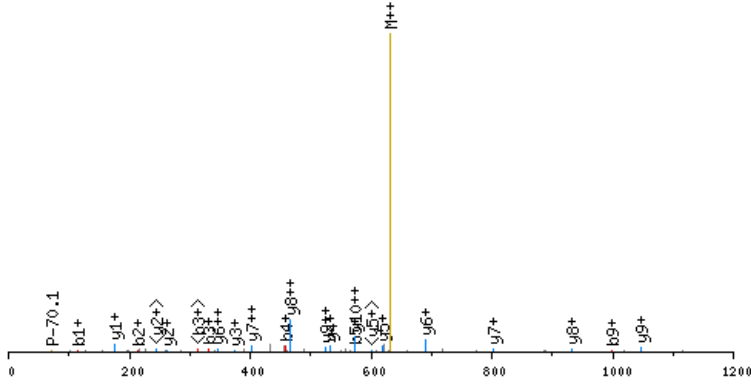

click image to zoom in; click top corners to zoom out [\[precursor±\]](#)

scan 4954; 630.8 m/z; 1.1e+002

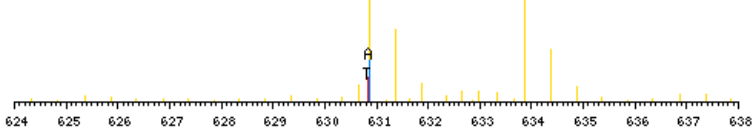

zoomed in precursor plot; T=theoretical m/z, A=acquired m/z

X-range:

-

MassTol: Y-zoom:

MassType:

AVG  MONO

Axis:

1  2

Label:

I  M  -

Ions:

a  +  2+  3+

b  +  2+  3+

c  +  2+  3+

x  +  2+  3+

y  +  2+  3+

z  +  2+  3+

hide H<sub>2</sub>O/NH<sub>3</sub>

zoom 112-122

GO

| b <sup>+</sup> | #  | AA # | y <sup>+</sup> | y <sup>2+</sup>    |
|----------------|----|------|----------------|--------------------|
| 114.0555       | 1  | A    | 11             |                    |
| 215.1032       | 2  | T    | 10             | 1147.6323 574.3201 |
| 330.1301       | 3  | D    | 9              | 1046.5846 523.7962 |
| 459.1727       | 4  | E    | 8              | 931.5577 466.2828  |
| 572.2568       | 5  | L    | 7              | 802.5151 401.7615  |
| 643.2939       | 6  | A    | 6              | 689.4310 345.2194  |
| 730.3259       | 7  | S    | 5              | 618.3939 309.7009  |
| 886.4522       | 8  | K    | 4              | 531.3619 266.1849  |
| 999.5363       | 9  | L    | 3              | 375.2356 188.1217  |
| 1086.5683      | 10 | S    | 2              | 262.1515 131.5797  |
|                | 11 | R    | 1              | 175.1195 88.0637   |

N-term:+43.02 K(8):+156.13

ATDISESSGADCKGDTKNSAKLDADYPLR, MH+ 3229.6383, m/z 808.1650  
 L OSG40 P180811 230811-s1.05616.05616.4.dta

scan 5616; 5.7e+000

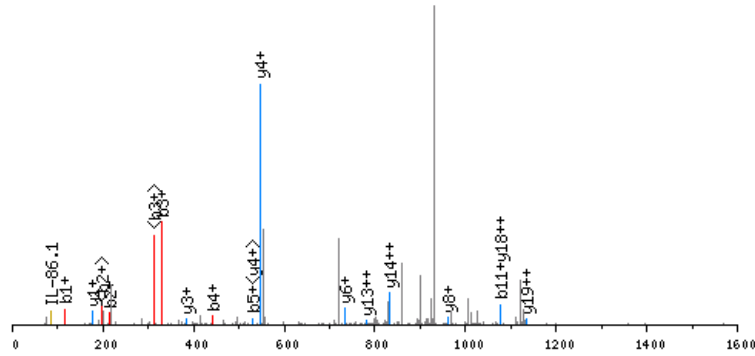

click image to zoom in; click top corners to zoom out [precursor±]

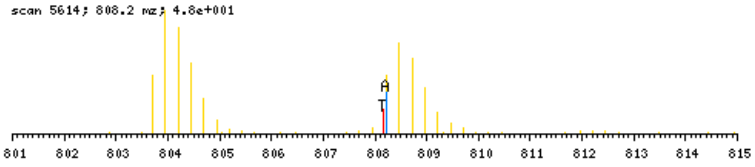

zoomed in precursor plot; T=theoretical m/z, A=acquired m/z

| b <sup>+</sup> | #  | AA | #  | y <sup>+</sup> | y <sup>2+</sup> |
|----------------|----|----|----|----------------|-----------------|
| 114.0555       | 1  | A  | 29 |                |                 |
| 215.1032       | 2  | T  | 28 | 3116.5907      | 1558.7992       |
| 330.1301       | 3  | D  | 27 | 3015.5430      | 1508.2754       |
| 443.2142       | 4  | I  | 26 | 2900.5160      | 1450.7619       |
| 530.2462       | 5  | S  | 25 | 2787.4320      | 1394.2199       |
| 659.2888       | 6  | E  | 24 | 2700.3999      | 1350.7039       |
| 746.3208       | 7  | S  | 23 | 2571.3574      | 1286.1826       |
| 833.3529       | 8  | S  | 22 | 2484.3253      | 1242.6666       |
| 890.3743       | 9  | G  | 21 | 2397.2933      | 1199.1506       |
| 961.4115       | 10 | A  | 20 | 2340.2718      | 1170.6398       |
| 1076.4384      | 11 | D  | 19 | 2269.2347      | 1135.1213       |
| 1236.4690      | 12 | C  | 18 | 2154.2078      | 1077.6078       |
| 1398.6271      | 13 | K  | 17 | 1994.1772      | 997.5925        |
| 1455.6486      | 14 | G  | 16 | 1832.0191      | 916.5135        |
| 1570.6755      | 15 | D  | 15 | 1774.9976      | 888.0027        |
| 1671.7232      | 16 | T  | 14 | 1659.9707      | 830.4892        |
| 1833.8813      | 17 | K  | 13 | 1558.9230      | 779.9654        |
| 1947.9242      | 18 | N  | 12 | 1396.7649      | 698.8864        |
| 2034.9562      | 19 | S  | 11 | 1282.7220      | 641.8649        |
| 2105.9934      | 20 | A  | 10 | 1195.6899      | 598.3489        |
| 2268.1515      | 21 | K  | 9  | 1124.6528      | 562.8303        |
| 2381.2355      | 22 | L  | 8  | 962.4947       | 481.7513        |
| 2496.2625      | 23 | D  | 7  | 849.4107       | 425.2092        |
| 2567.2996      | 24 | A  | 6  | 734.3837       | 367.6958        |
| 2682.3265      | 25 | D  | 5  | 663.3466       | 332.1772        |
| 2845.3898      | 26 | Y  | 4  | 548.3197       | 274.6637        |
| 2942.4426      | 27 | P  | 3  | 385.2563       | 193.1321        |
| 3055.5267      | 28 | L  | 2  | 288.2036       | 144.6057        |
|                | 29 | R  | 1  | 175.1195       | 88.0637         |

N-term:+43.02 C(12):+160.03  
 K(13):+162.16 K(17):+162.16  
 K(21):+162.16

X-range:

0 - 0

MassTol: Y-zoom:

0. 1.

MassType:

AVG  MONO

Axis:

1  2

Label:

I  M  -

Ions:

a  +  2+  3+

b  +  2+  3+

c  +  2+  3+

x  +  2+  3+

y  +  2+  3+

z  +  2+  3+

hide H<sub>2</sub>O/NH<sub>3</sub>

zoom 112-122

GO

ATEGDVELELETETSGPERPPEKPR, MH+ 2842.4171, m/z 948.1439  
 L OSG39 P180811 230811-s1.05618.05618.3.dta

scan 5618; 1.2e+000

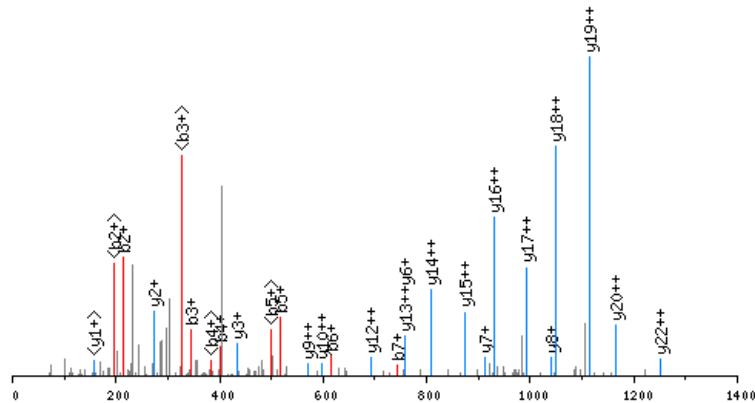

click image to zoom in; click top corners to zoom out [precursor±]

scan 5616; 948.1 m/z; 7.5e+001

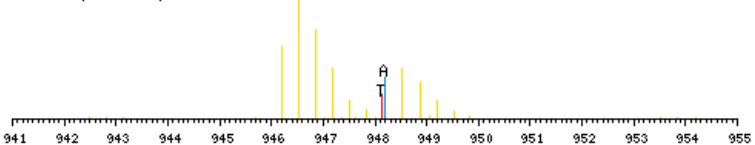

zoomed in precursor plot; T=theoretical m/z, A=acquired m/z

X-range:

-

MassTol: Y-zoom:

MassType:

AVG  MONO

Axis:

1  2

Label:

I  M  -

Ions:

a  +  2+  3+

b  +  2+  3+

c  +  2+  3+

x  +  2+  3+

y  +  2+  3+

z  +  2+  3+

hide H<sub>2</sub>O/NH<sub>3</sub>

zoom 112-122

GO

| b <sup>+</sup> | #  | AA | #  | y <sup>+</sup> | y <sup>2+</sup> |
|----------------|----|----|----|----------------|-----------------|
| 114.0555       | 1  | A  | 25 |                |                 |
| 215.1032       | 2  | T  | 24 | 2729.3694      | 1365.1886       |
| 344.1458       | 3  | E  | 23 | 2628.3217      | 1314.6648       |
| 401.1672       | 4  | G  | 22 | 2499.2791      | 1250.1435       |
| 516.1942       | 5  | D  | 21 | 2442.2577      | 1221.6327       |
| 615.2626       | 6  | V  | 20 | 2327.2307      | 1164.1193       |
| 744.3052       | 7  | E  | 19 | 2228.1623      | 1114.5851       |
| 857.3893       | 8  | L  | 18 | 2099.1197      | 1050.0638       |
| 986.4319       | 9  | E  | 17 | 1986.0356      | 993.5217        |
| 1099.5159      | 10 | L  | 16 | 1856.9931      | 929.0004        |
| 1228.5585      | 11 | E  | 15 | 1743.9090      | 872.4584        |
| 1329.6062      | 12 | T  | 14 | 1614.8664      | 807.9371        |
| 1458.6488      | 13 | E  | 13 | 1513.8187      | 757.4133        |
| 1559.6965      | 14 | T  | 12 | 1384.7761      | 692.8920        |
| 1646.7285      | 15 | S  | 11 | 1283.7284      | 642.3681        |
| 1703.7500      | 16 | G  | 10 | 1196.6964      | 598.8521        |
| 1800.8027      | 17 | P  | 9  | 1139.6750      | 570.3414        |
| 1929.8453      | 18 | E  | 8  | 1042.6222      | 521.8150        |
| 2085.9464      | 19 | R  | 7  | 913.5796       | 457.2937        |
| 2182.9992      | 20 | P  | 6  | 757.4785       | 379.2432        |
| 2280.0520      | 21 | P  | 5  | 660.4257       | 330.7168        |
| 2409.0945      | 22 | E  | 4  | 563.3730       | 282.1904        |
| 2571.2526      | 23 | K  | 3  | 434.3304       | 217.6691        |
| 2668.3054      | 24 | P  | 2  | 272.1723       | 136.5900        |
|                | 25 | R  | 1  | 175.1195       | 88.0637         |

N-term:+43.02 K(23):+162.16

ATEGMILTNDHDIQIR, MH+ 1777.8656, m/z 593.2934  
 L OSG40 P180811 230811-s1.05295.05295.3.dta

X-range:

-

MassTol: Y-zoom:

MassType:

AVG  MONO

Axis:

1  2

Label:

I  M  -

Ions:

a  +  2+  3+

b  +  2+  3+

c  +  2+  3+

x  +  2+  3+

y  +  2+  3+

z  +  2+  3+

hide H<sub>2</sub>O/NH<sub>3</sub>

zoom 112-122

GO

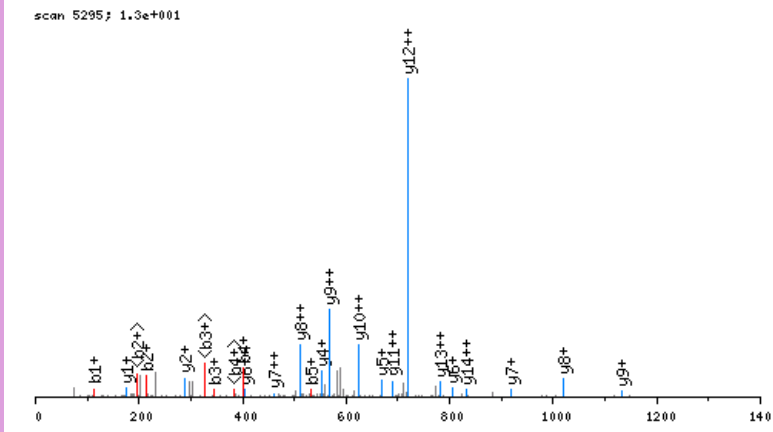

click image to zoom in; click top corners to zoom out [\[precursor±\]](#)

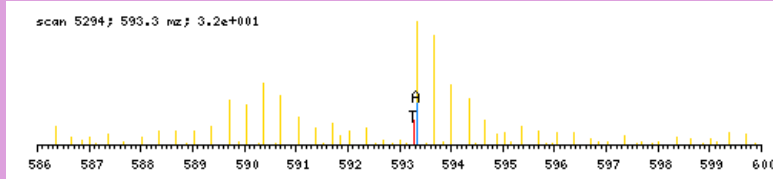

zoomed in precursor plot; T=theoretical m/z, A=acquired m/z

| b <sup>+</sup> | #  | AA | #  | y <sup>+</sup> | y <sup>2+</sup> |
|----------------|----|----|----|----------------|-----------------|
| 114.0555       | 1  | A  | 15 |                |                 |
| 215.1032       | 2  | T  | 14 | 1664.8179      | 832.9128        |
| 344.1458       | 3  | E  | 13 | 1563.7702      | 782.3890        |
| 401.1672       | 4  | G  | 12 | 1434.7276      | 717.8677        |
| 532.2077       | 5  | M  | 11 | 1377.7061      | 689.3570        |
| 645.2918       | 6  | I  | 10 | 1246.6656      | 623.8367        |
| 758.3759       | 7  | L  | 9  | 1133.5816      | 567.2947        |
| 859.4235       | 8  | T  | 8  | 1020.4975      | 510.7527        |
| 973.4665       | 9  | N  | 7  | 919.4498       | 460.2288        |
| 1110.5254      | 10 | H  | 6  | 805.4069       | 403.2074        |
| 1225.5523      | 11 | D  | 5  | 668.3480       | 334.6779        |
| 1362.6112      | 12 | H  | 4  | 553.3211       | 277.1644        |
| 1490.6698      | 13 | Q  | 3  | 416.2621       | 208.6350        |
| 1603.7539      | 14 | I  | 2  | 288.2036       | 144.6057        |
|                | 15 | R  | 1  | 175.1195       | 88.0637         |

N-term:+43.02

ATESGSDSQLR, MH+ 1192.5446, m/z 596.7759  
 L OSG41 P180811 230811-s1.02320.02320.2.dta

X-range:

-

MassTol: Y-zoom:

MassType:

AVG  MONO

Axis:

1  2

Label:

I  M  -

Ions:

a  +  2+  3+

b  +  2+  3+

c  +  2+  3+

x  +  2+  3+

y  +  2+  3+

z  +  2+  3+

hide H<sub>2</sub>O/NH<sub>3</sub>

zoom 112-122

GO

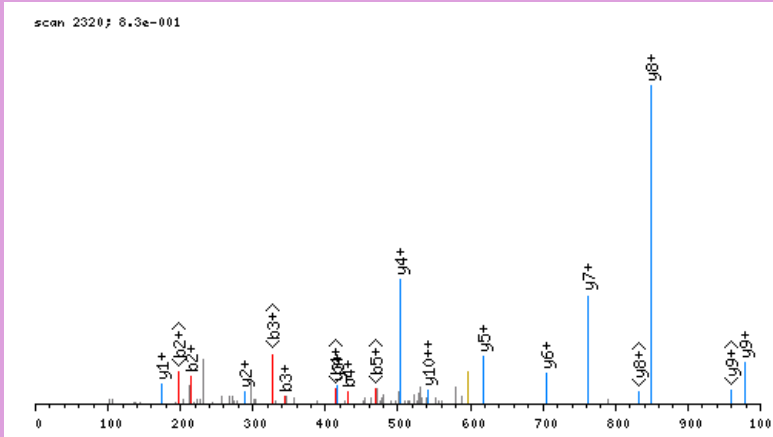

click image to zoom in; click top corners to zoom out [\[precursor±\]](#)

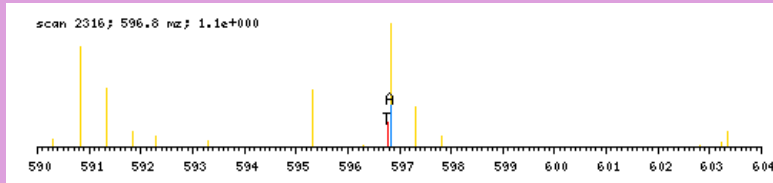

zoomed in precursor plot; T=theoretical m/z, A=acquired m/z

| b <sup>+</sup> | #  | AA # | y <sup>+</sup> | y <sup>2+</sup> |
|----------------|----|------|----------------|-----------------|
| 114.0555       | 1  | A 11 |                |                 |
| 215.1032       | 2  | T 10 | 1079.4969      | 540.2524        |
| 344.1458       | 3  | E 9  | 978.4492       | 489.7285        |
| 431.1778       | 4  | S 8  | 849.4066       | 425.2072        |
| 488.1993       | 5  | G 7  | 762.3746       | 381.6912        |
| 575.2313       | 6  | S 6  | 705.3531       | 353.1805        |
| 690.2582       | 7  | D 5  | 618.3211       | 309.6645        |
| 777.2903       | 8  | S 4  | 503.2942       | 252.1510        |
| 905.3489       | 9  | Q 3  | 416.2621       | 208.6350        |
| 1018.4329      | 10 | L 2  | 288.2036       | 144.6057        |
|                | 11 | R 1  | 175.1195       | 88.0637         |

N-term:+43.02

ATESSPLTHVLDTASGLPAQGLCLR, MH+ 2737.3830, m/z 913.1325  
L OSG36 P180811 230811-s1.06008.06008.3.dta

scan 6008; 3.6e+000

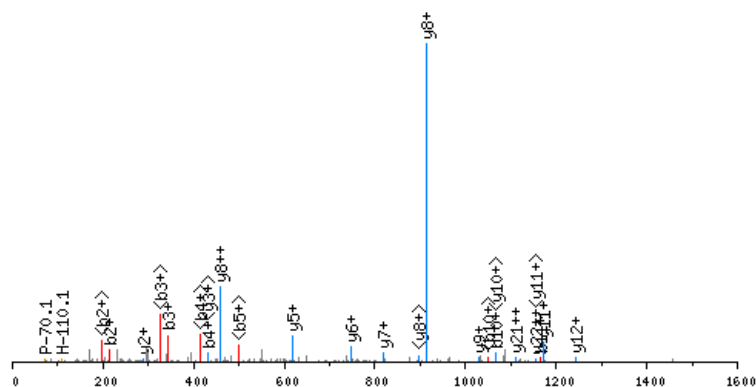

click image to zoom in; click top corners to zoom out [precursor±]

scan 6004; 913.1 m/z; 4.0e+001

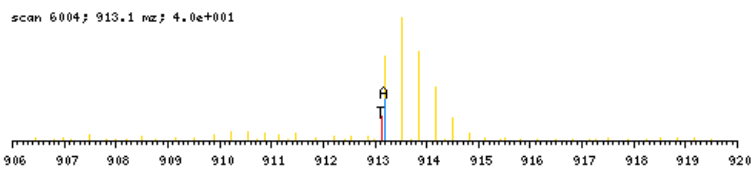

zoomed in precursor plot; T=theoretical m/z, A=acquired m/z

| b <sup>+</sup> | #  | AA # | y <sup>+</sup> | y <sup>2+</sup> |
|----------------|----|------|----------------|-----------------|
| 114.0555       | 1  | A 26 |                |                 |
| 215.1032       | 2  | T 25 | 2624.3353      | 1312.6716       |
| 344.1458       | 3  | E 24 | 2523.2877      | 1262.1477       |
| 431.1778       | 4  | S 23 | 2394.2451      | 1197.6264       |
| 518.2098       | 5  | S 22 | 2307.2130      | 1154.1104       |
| 615.2626       | 6  | P 21 | 2220.1810      | 1110.5944       |
| 728.3467       | 7  | L 20 | 2123.1283      | 1062.0680       |
| 829.3943       | 8  | T 19 | 2010.0442      | 1005.5260       |
| 930.4420       | 9  | T 18 | 1908.9965      | 955.0022        |
| 1067.5009      | 10 | H 17 | 1807.9488      | 904.4783        |
| 1166.5694      | 11 | V 16 | 1670.8899      | 835.9489        |
| 1279.6534      | 12 | L 15 | 1571.8215      | 786.4147        |
| 1394.6804      | 13 | D 14 | 1458.7374      | 729.8726        |
| 1495.7280      | 14 | T 13 | 1343.7105      | 672.3592        |
| 1566.7652      | 15 | A 12 | 1242.6628      | 621.8353        |
| 1653.7972      | 16 | S 11 | 1171.6257      | 586.3168        |
| 1710.8186      | 17 | G 10 | 1084.5937      | 542.8008        |
| 1823.9027      | 18 | L 9  | 1027.5722      | 514.2900        |
| 1920.9555      | 19 | P 8  | 914.4881       | 457.7480        |
| 1991.9926      | 20 | A 7  | 817.4354       | 409.2216        |
| 2120.0512      | 21 | Q 6  | 746.3983       | 373.7030        |
| 2177.0726      | 22 | G 5  | 618.3397       | 309.6738        |
| 2290.1567      | 23 | L 4  | 561.3182       | 281.1630        |
| 2450.1873      | 24 | C 3  | 448.2342       | 224.6210        |
| 2563.2714      | 25 | L 2  | 288.2036       | 144.6057        |
|                | 26 | R 1  | 175.1195       | 88.0637         |

N-term:+43.02 C(24):+160.03

X-range:

-

MassTol: Y-zoom:

MassType:

AVG  MONO

Axis:

1  2

Label:

I  M  -

Ions:

a  +  2+  3+

b  +  2+  3+

c  +  2+  3+

x  +  2+  3+

y  +  2+  3+

z  +  2+  3+

hide H<sub>2</sub>O/NH<sub>3</sub>

zoom 112-122

GO

ATGANATPLDFPSKKR, MH+ 1784.0343, m/z 595.3496  
 L OSG40 P180811 230811-s1.04920.04920.3.dta

X-range:

-

MassTol: Y-zoom:

MassType:

AVG  MONO

Axis:

1  2

Label:

I  M  -

Ions:

a  +  2+  3+

b  +  2+  3+

c  +  2+  3+

x  +  2+  3+

y  +  2+  3+

z  +  2+  3+

hide H<sub>2</sub>O/NH<sub>3</sub>

zoom 112-122

GO

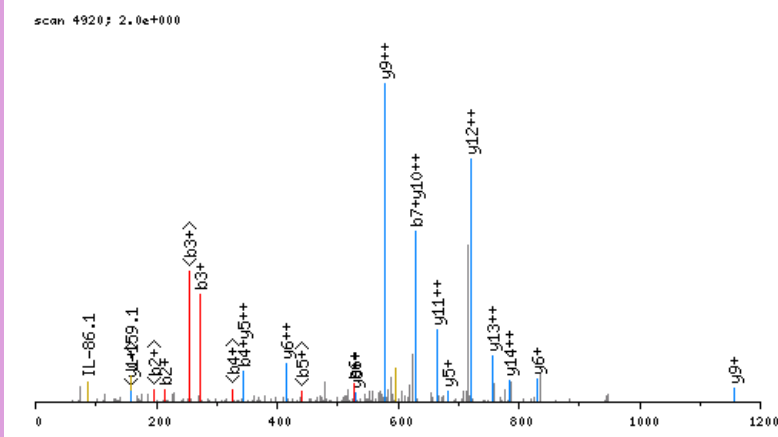

click image to zoom in; click top corners to zoom out [\[precursor±\]](#)

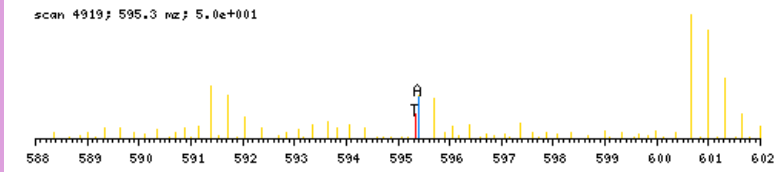

zoomed in precursor plot; T=theoretical m/z, A=acquired m/z

| b <sup>+</sup> | #  | AA | #  | y <sup>+</sup> | y <sup>2+</sup> |
|----------------|----|----|----|----------------|-----------------|
| 114.0555       | 1  | A  | 16 |                |                 |
| 215.1032       | 2  | T  | 15 | 1670.9867      | 835.9972        |
| 272.1247       | 3  | G  | 14 | 1569.9390      | 785.4734        |
| 343.1618       | 4  | A  | 13 | 1512.9175      | 756.9627        |
| 457.2047       | 5  | N  | 12 | 1441.8804      | 721.4441        |
| 528.2418       | 6  | A  | 11 | 1327.8375      | 664.4226        |
| 629.2895       | 7  | T  | 10 | 1256.8004      | 628.9041        |
| 726.3423       | 8  | P  | 9  | 1155.7527      | 578.3803        |
| 839.4263       | 9  | L  | 8  | 1058.6999      | 529.8539        |
| 954.4533       | 10 | D  | 7  | 945.6159       | 473.3118        |
| 1101.5217      | 11 | F  | 6  | 830.5889       | 415.7984        |
| 1198.5744      | 12 | P  | 5  | 683.5205       | 342.2642        |
| 1285.6065      | 13 | S  | 4  | 586.4677       | 293.7378        |
| 1447.7646      | 14 | K  | 3  | 499.4357       | 250.2218        |
| 1609.9227      | 15 | K  | 2  | 337.2776       | 169.1427        |
|                | 16 | R  | 1  | 175.1195       | 88.0637         |

N-term:+43.02 K(14):+162.16  
 K(15):+162.16



ATGQKLMR, MH+ 980.5776, m/z 490.7924  
 L OSG37 P180811 230811-s1.02450.02450.2.dta

scan 2450; 2.2e+001

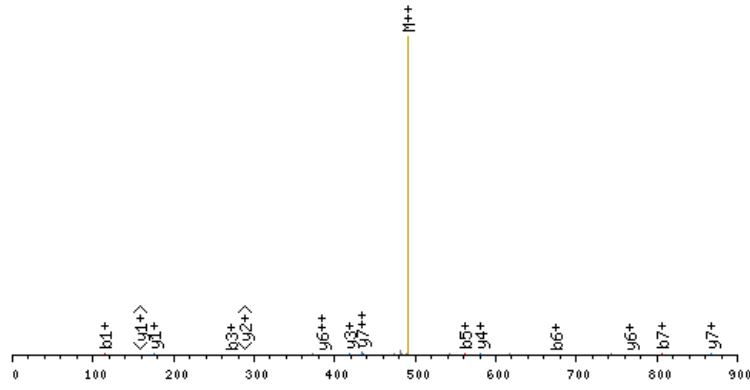

click image to zoom in; click top corners to zoom out [\[precursor±\]](#)

scan 2449; 490.8 m/z; 9.5e+000

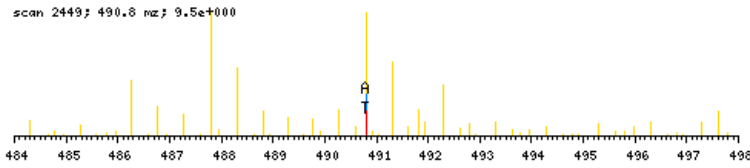

zoomed in precursor plot; T=theoretical m/z, A=acquired m/z

X-range:

-

MassTol: Y-zoom:

MassType:

AVG  MONO

Axis:

1  2

Label:

I  M  -

Ions:

a  +  2+  3+

b  +  2+  3+

c  +  2+  3+

x  +  2+  3+

y  +  2+  3+

z  +  2+  3+

hide H<sub>2</sub>O/NH<sub>3</sub>

zoom 112-122

GO

| b <sup>+</sup> | # | AA # | y <sup>+</sup> | y <sup>2+</sup> |
|----------------|---|------|----------------|-----------------|
| 114.0555       | 1 | A    | 8              |                 |
| 215.1032       | 2 | T    | 7              | 867.5299        |
| 272.1247       | 3 | G    | 6              | 766.4822        |
| 400.1832       | 4 | Q    | 5              | 709.4607        |
| 562.3413       | 5 | K    | 4              | 581.4021        |
| 675.4254       | 6 | L    | 3              | 419.2440        |
| 806.4659       | 7 | M    | 2              | 306.1600        |
|                | 8 | R    | 1              | 175.1195        |

N-term:+43.02 K(5):+162.16

ATIATMPVPETR, MH+ 1328.6884, m/z 664.8478  
 L OSG41 P180811 230811-s1.05420.05420.2.dta

X-range:

-

MassTol: Y-zoom:

MassType:

AVG  MONO

Axis:

1  2

Label:

I  M  -

Ions:

a  +  2+  3+

b  +  2+  3+

c  +  2+  3+

x  +  2+  3+

y  +  2+  3+

z  +  2+  3+

hide H<sub>2</sub>O/NH<sub>3</sub>

zoom 112-122

GO

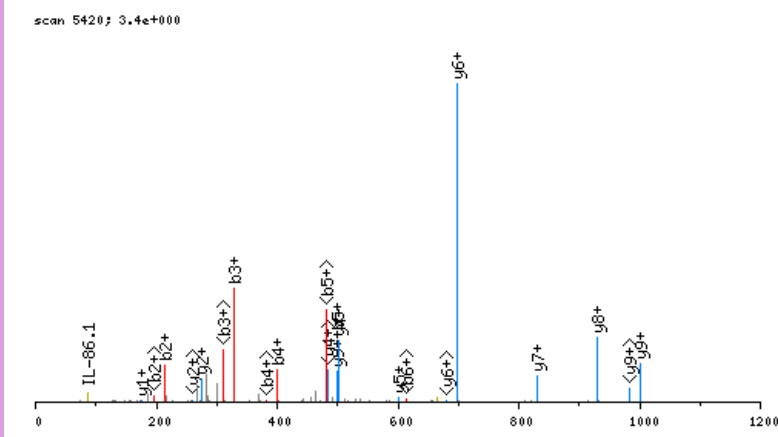

click image to zoom in; click top corners to zoom out [\[precursor±\]](#)

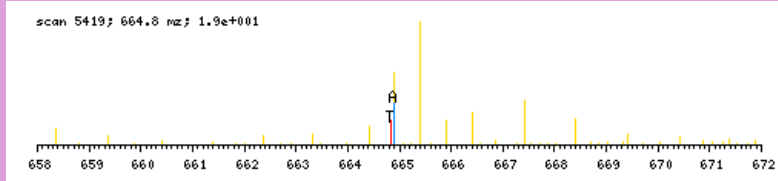

zoomed in precursor plot; T=theoretical m/z, A=acquired m/z

| b <sup>+</sup> | #  | AA # | y <sup>+</sup> | y <sup>2+</sup> |
|----------------|----|------|----------------|-----------------|
| 114.0555       | 1  | A 12 |                |                 |
| 215.1032       | 2  | T 11 | 1215.6407      | 608.3243        |
| 328.1873       | 3  | I 10 | 1114.5931      | 557.8004        |
| 399.2244       | 4  | A 9  | 1001.5090      | 501.2584        |
| 500.2720       | 5  | T 8  | 930.4719       | 465.7399        |
| 631.3125       | 6  | M 7  | 829.4242       | 415.2160        |
| 728.3653       | 7  | P 6  | 698.3837       | 349.6958        |
| 827.4337       | 8  | V 5  | 601.3310       | 301.1694        |
| 924.4865       | 9  | P 4  | 502.2625       | 251.6352        |
| 1053.5291      | 10 | E 3  | 405.2098       | 203.1088        |
| 1154.5767      | 11 | T 2  | 276.1672       | 138.5875        |
|                | 12 | R 1  | 175.1195       | 88.0637         |

N-term:+43.02

ATIGPSGLHPGER, MH+ 1333.6864, m/z 667.3469  
 L OSG37 P180811 230811-s1.04203.04203.2.dta

X-range:

-

MassTol: Y-zoom:

MassType:

AVG  MONO

Axis:

1  2

Label:

I  M  -

Ions:

a  +  2+  3+

b  +  2+  3+

c  +  2+  3+

x  +  2+  3+

y  +  2+  3+

z  +  2+  3+

hide H<sub>2</sub>O/NH<sub>3</sub>

zoom 112-122

GO

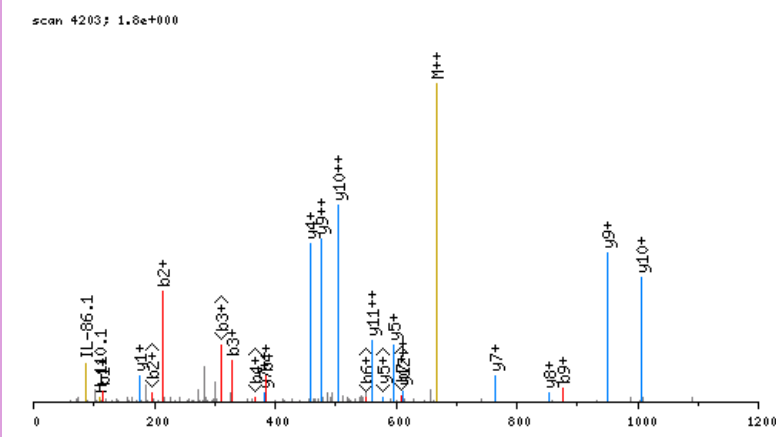

click image to zoom in; click top corners to zoom out [\[precursor±\]](#)

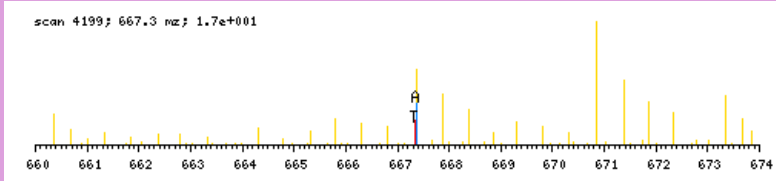

zoomed in precursor plot; T=theoretical m/z, A=acquired m/z

| b <sup>+</sup> | #  | AA # | y <sup>+</sup> | y <sup>2+</sup> |
|----------------|----|------|----------------|-----------------|
| 114.0555       | 1  | A 13 |                |                 |
| 215.1032       | 2  | T 12 | 1220.6388      | 610.8233        |
| 328.1873       | 3  | I 11 | 1119.5911      | 560.2995        |
| 385.2087       | 4  | G 10 | 1006.5070      | 503.7574        |
| 482.2615       | 5  | P 9  | 949.4856       | 475.2467        |
| 569.2935       | 6  | S 8  | 852.4328       | 426.7203        |
| 626.3150       | 7  | G 7  | 765.4008       | 383.2043        |
| 739.3990       | 8  | L 6  | 708.3793       | 354.6936        |
| 876.4580       | 9  | H 5  | 595.2952       | 298.1515        |
| 973.5107       | 10 | P 4  | 458.2363       | 229.6221        |
| 1030.5322      | 11 | G 3  | 361.1836       | 181.0957        |
| 1159.5748      | 12 | E 2  | 304.1621       | 152.5850        |
|                | 13 | R 1  | 175.1195       | 88.0637         |

N-term:+43.02

ATKCTKCGPGYSTPLEAMKGP, MH+ 2536.2726, m/z 634.8236  
 L OSG40 P180811 230811-sl.04850.04850.4.dta

X-range:

-

MassTol: Y-zoom:

MassType:

AVG  MONO

Axis:

1  2

Label:

I  M  -

Ions:

a  +  2+  3+

b  +  2+  3+

c  +  2+  3+

x  +  2+  3+

y  +  2+  3+

z  +  2+  3+

hide H<sub>2</sub>O/NH<sub>3</sub>

zoom 112-122

GO

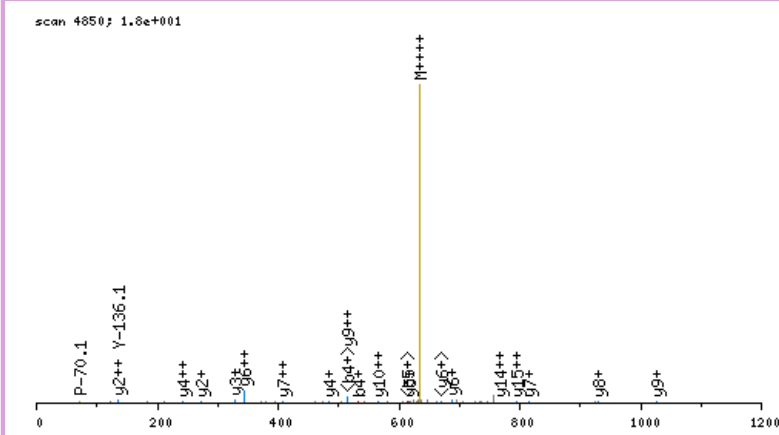

click image to zoom in; click top corners to zoom out [\[precursor±\]](#)

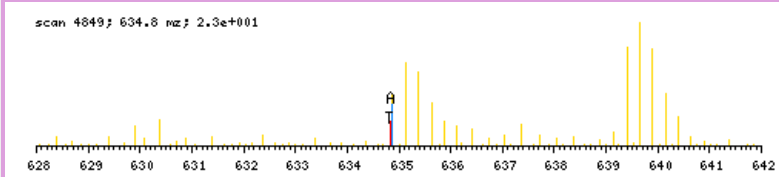

zoomed in precursor plot; T=theoretical m/z, A=acquired m/z

| b <sup>+</sup> | #  | AA # | y <sup>+</sup> | y <sup>2+</sup> |
|----------------|----|------|----------------|-----------------|
| 114.0555       | 1  | A 22 |                |                 |
| 215.1032       | 2  | T 21 | 2423.2249      | 1212.1164       |
| 371.2295       | 3  | K 20 | 2322.1773      | 1161.5925       |
| 531.2601       | 4  | C 19 | 2166.0510      | 1083.5294       |
| 632.3078       | 5  | T 18 | 2006.0204      | 1003.5141       |
| 788.4341       | 6  | K 17 | 1904.9727      | 952.9902        |
| 948.4647       | 7  | C 16 | 1748.8464      | 874.9271        |
| 1005.4861      | 8  | G 15 | 1588.8158      | 794.9118        |
| 1102.5389      | 9  | P 14 | 1531.7943      | 766.4011        |
| 1159.5604      | 10 | G 13 | 1434.7415      | 717.8747        |
| 1322.6237      | 11 | Y 12 | 1377.7201      | 689.3640        |
| 1409.6557      | 12 | S 11 | 1214.6568      | 607.8323        |
| 1510.7034      | 13 | T 10 | 1127.6247      | 564.3163        |
| 1607.7562      | 14 | P 9  | 1026.5770      | 513.7924        |
| 1720.8402      | 15 | L 8  | 929.5243       | 465.2661        |
| 1849.8828      | 16 | E 7  | 816.4402       | 408.7240        |
| 1920.9199      | 17 | A 6  | 687.3976       | 344.2027        |
| 2051.9604      | 18 | M 5  | 616.3605       | 308.6842        |
| 2208.0867      | 19 | K 4  | 485.3200       | 243.1639        |
| 2265.1082      | 20 | G 3  | 329.1937       | 165.1008        |
| 2362.1609      | 21 | P 2  | 272.1723       | 136.5900        |
|                | 22 | R 1  | 175.1195       | 88.0637         |

N-term:+43.02 K(3):+156.13  
 C(4):+160.03 K(6):+156.13 C(7):+160.03  
 K(19):+156.13

ATLCLFDMGTLTAPR, MH+ 1823.8671, m/z 608.6272  
 L OSG41 P180811 230811-s1.07515.07515.3.dta

X-range:

-

MassTol: Y-zoom:

MassType:

AVG  MONO

Axis:

1  2

Label:

I  M  -

Ions:

a  +  2+  3+

b  +  2+  3+

c  +  2+  3+

x  +  2+  3+

y  +  2+  3+

z  +  2+  3+

hide H<sub>2</sub>O/NH<sub>3</sub>

zoom 112-122

GO

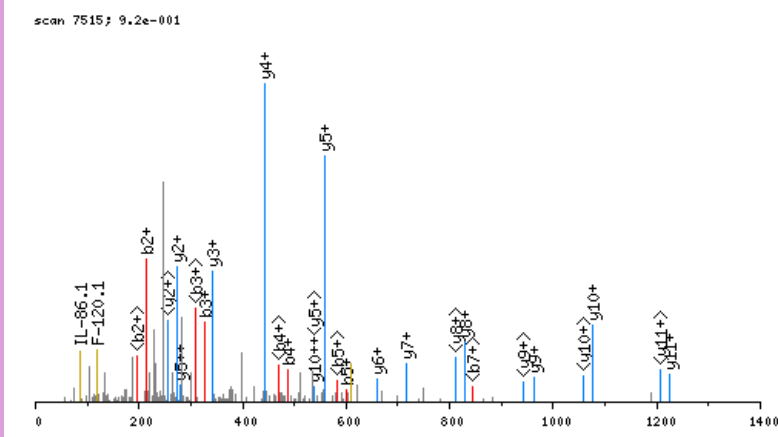

click image to zoom in; click top corners to zoom out [\[precursor±\]](#)

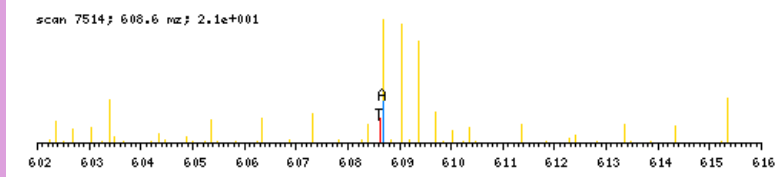

zoomed in precursor plot; T=theoretical m/z, A=acquired m/z

| b <sup>+</sup> | #  | AA # | y <sup>+</sup> | y <sup>2+</sup> |
|----------------|----|------|----------------|-----------------|
| 114.0555       | 1  | A 16 |                |                 |
| 215.1032       | 2  | T 15 | 1710.8195      | 855.9136        |
| 328.1873       | 3  | L 14 | 1609.7718      | 805.3898        |
| 488.2179       | 4  | C 13 | 1496.6877      | 748.8478        |
| 601.3019       | 5  | L 12 | 1336.6571      | 668.8325        |
| 748.3703       | 6  | F 11 | 1223.5730      | 612.2904        |
| 863.3973       | 7  | D 10 | 1076.5046      | 538.7562        |
| 994.4378       | 8  | M 9  | 961.4777       | 481.2428        |
| 1109.4647      | 9  | D 8  | 830.4372       | 415.7225        |
| 1166.4862      | 10 | G 7  | 715.4103       | 358.2090        |
| 1267.5338      | 11 | T 6  | 658.3888       | 329.6983        |
| 1380.6179      | 12 | L 5  | 557.3411       | 279.1745        |
| 1481.6656      | 13 | T 4  | 444.2571       | 222.6324        |
| 1552.7027      | 14 | A 3  | 343.2094       | 172.1086        |
| 1649.7555      | 15 | P 2  | 272.1723       | 136.5900        |
|                | 16 | R 1  | 175.1195       | 88.0637         |

N-term:+43.02 C(4):+160.03

ATNDAVLKR, MH+ 1063.6324, m/z 532.3199  
 L OSG38 P180811 230811-s1.02585.02585.2.dta

X-range:

-

MassTol: Y-zoom:

MassType:

AVG  MONO

Axis:

1  2

Label:

I  M  -

Ions:

a  +  2+  3+

b  +  2+  3+

c  +  2+  3+

x  +  2+  3+

y  +  2+  3+

z  +  2+  3+

hide H<sub>2</sub>O/NH<sub>3</sub>

zoom 112-122

GO

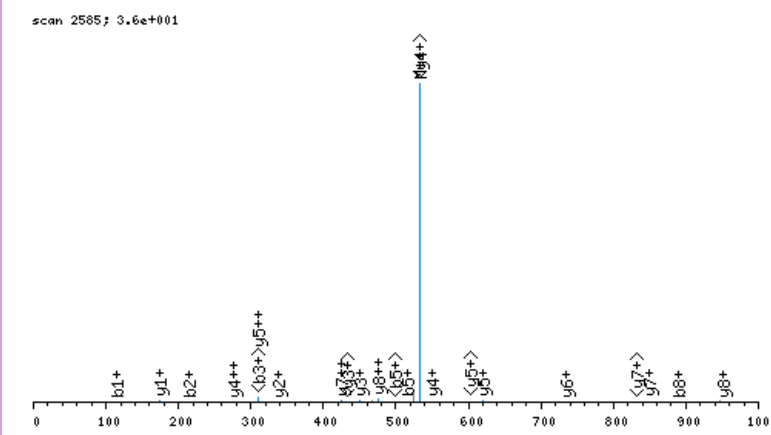

click image to zoom in; click top corners to zoom out [\[precursor±\]](#)

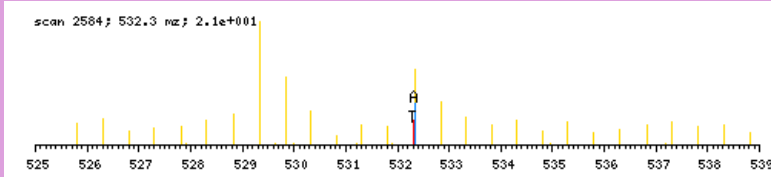

zoomed in precursor plot; T=theoretical m/z, A=acquired m/z

| b <sup>+</sup> | # | AA # | y <sup>+</sup> | y <sup>2+</sup>   |
|----------------|---|------|----------------|-------------------|
| 114.0555       | 1 | A    | 9              |                   |
| 215.1032       | 2 | T    | 8              | 950.5847 475.7963 |
| 329.1461       | 3 | N    | 7              | 849.5371 425.2724 |
| 444.1731       | 4 | D    | 6              | 735.4941 368.2510 |
| 515.2102       | 5 | A    | 5              | 620.4672 310.7375 |
| 614.2786       | 6 | V    | 4              | 549.4301 275.2190 |
| 727.3627       | 7 | L    | 3              | 450.3617 225.6847 |
| 889.5208       | 8 | K    | 2              | 337.2776 169.1427 |
|                | 9 | R    | 1              | 175.1195 88.0637  |

N-term:+43.02 K(8):+162.16

ATPDSLALFTGLGLSENKAR, MH+ 2137.1718, m/z 713.0621  
L OSG37 P180811 230811-s1.08766.08766.3.dta

scan 8766; 2.7e+000

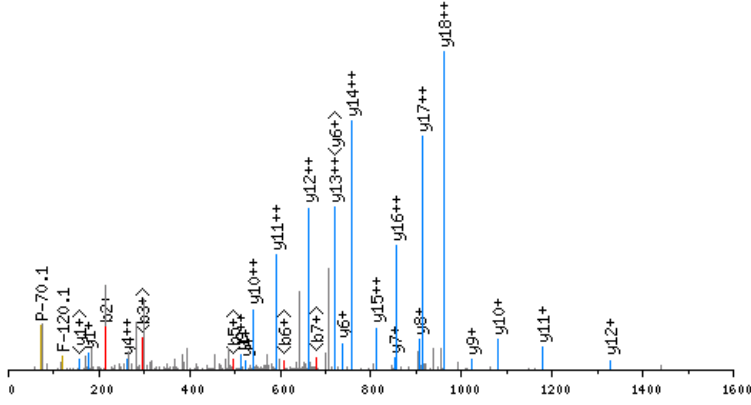

click image to zoom in; click top corners to zoom out [precursor±]

scan 8764; 713.1 m/z; 5.3e+001

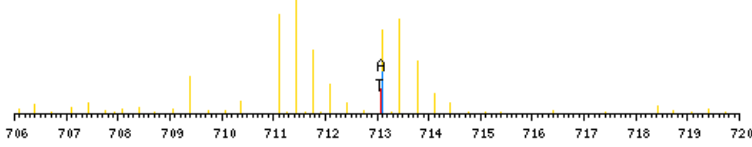

zoomed in precursor plot; T=theoretical m/z, A=acquired m/z

X-range:

0 - 0

MassTol: Y-zoom:

0. 1.

MassType:

AVG  MONO

Axis:

1  2

Label:

I  M  -

Ions:

a  +  2+  3+

b  +  2+  3+

c  +  2+  3+

x  +  2+  3+

y  +  2+  3+

z  +  2+  3+

hide H<sub>2</sub>O/NH<sub>3</sub>

zoom 112-122

GO

| b <sup>+</sup> | #  | AA # | y <sup>+</sup> | y <sup>2+</sup> |
|----------------|----|------|----------------|-----------------|
| 114.0555       | 1  | A 20 |                |                 |
| 215.1032       | 2  | T 19 | 2024.1241      | 1012.5659       |
| 312.1560       | 3  | P 18 | 1923.0764      | 962.0421        |
| 427.1829       | 4  | D 17 | 1826.0236      | 913.5157        |
| 514.2149       | 5  | S 16 | 1710.9967      | 856.0023        |
| 627.2990       | 6  | L 15 | 1623.9647      | 812.4862        |
| 698.3361       | 7  | A 14 | 1510.8806      | 755.9442        |
| 811.4202       | 8  | L 13 | 1439.8435      | 720.4257        |
| 958.4886       | 9  | F 12 | 1326.7594      | 663.8836        |
| 1059.5363      | 10 | T 11 | 1179.6910      | 590.3494        |
| 1116.5577      | 11 | G 10 | 1078.6433      | 539.8256        |
| 1229.6418      | 12 | L 9  | 1021.6219      | 511.3148        |
| 1286.6633      | 13 | G 8  | 908.5378       | 454.7728        |
| 1399.7473      | 14 | L 7  | 851.5163       | 426.2621        |
| 1486.7793      | 15 | S 6  | 738.4323       | 369.7200        |
| 1615.8219      | 16 | E 5  | 651.4002       | 326.2040        |
| 1729.8649      | 17 | N 4  | 522.3576       | 261.6827        |
| 1892.0230      | 18 | K 3  | 408.3147       | 204.6613        |
| 1963.0601      | 19 | A 2  | 246.1566       | 123.5822        |
|                | 20 | R 1  | 175.1195       | 88.0637         |

N-term:+43.02 K(18) :+162.16

ATPEASGSGEKVEGSEPSVTYYR, MH+ 2471.1579, m/z 824.3908  
 L OSG36 P180811 230811-s1.03377.03377.3.dta

X-range:

-

MassTol: Y-zoom:

MassType:

AVG  MONO

Axis:

1  2

Label:

I  M  -

Ions:

a  +  2+  3+

b  +  2+  3+

c  +  2+  3+

x  +  2+  3+

y  +  2+  3+

z  +  2+  3+

hide H<sub>2</sub>O/NH<sub>3</sub>

zoom 112-122

GO

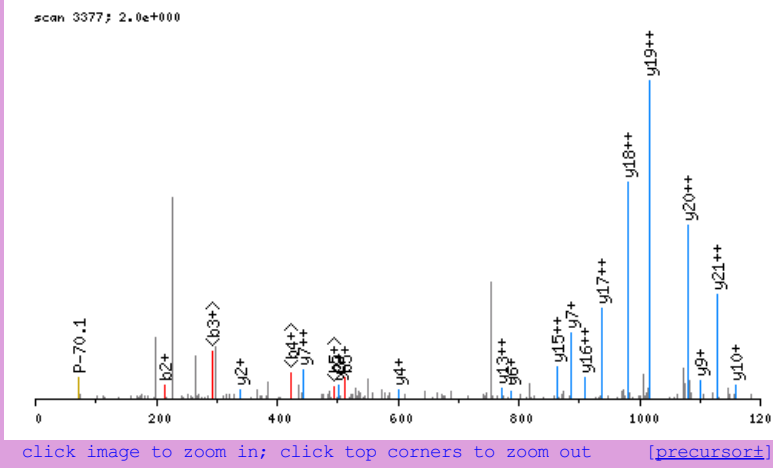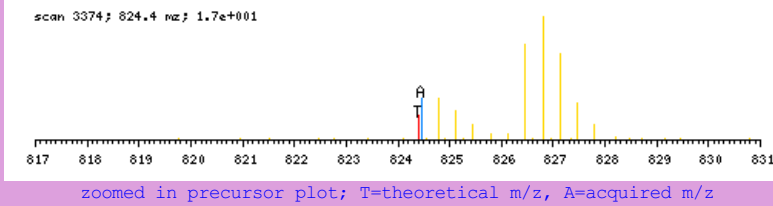

| b <sup>+</sup> | #  | AA | #  | y <sup>+</sup> | y <sup>2+</sup> |
|----------------|----|----|----|----------------|-----------------|
| 114.0555       | 1  | A  | 23 |                |                 |
| 215.1032       | 2  | T  | 22 | 2358.1102      | 1179.5590       |
| 312.1560       | 3  | P  | 21 | 2257.0625      | 1129.0352       |
| 441.1985       | 4  | E  | 20 | 2160.0097      | 1080.5088       |
| 512.2357       | 5  | A  | 19 | 2030.9671      | 1015.9875       |
| 599.2677       | 6  | S  | 18 | 1959.9300      | 980.4689        |
| 656.2892       | 7  | G  | 17 | 1872.8980      | 936.9529        |
| 743.3212       | 8  | S  | 16 | 1815.8765      | 908.4422        |
| 800.3426       | 9  | G  | 15 | 1728.8445      | 864.9262        |
| 929.3852       | 10 | E  | 14 | 1671.8230      | 836.4154        |
| 1085.5115      | 11 | K  | 13 | 1542.7804      | 771.8941        |
| 1184.5800      | 12 | V  | 12 | 1386.6541      | 693.8310        |
| 1313.6225      | 13 | E  | 11 | 1287.5857      | 644.2968        |
| 1370.6440      | 14 | G  | 10 | 1158.5431      | 579.7755        |
| 1457.6760      | 15 | S  | 9  | 1101.5217      | 551.2647        |
| 1586.7186      | 16 | E  | 8  | 1014.4896      | 507.7487        |
| 1683.7714      | 17 | P  | 7  | 885.4470       | 443.2274        |
| 1770.8034      | 18 | S  | 6  | 788.3943       | 394.7011        |
| 1869.8718      | 19 | V  | 5  | 701.3623       | 351.1850        |
| 1970.9195      | 20 | T  | 4  | 602.2938       | 301.6508        |
| 2133.9828      | 21 | Y  | 3  | 501.2462       | 251.1270        |
| 2297.0462      | 22 | Y  | 2  | 338.1828       | 169.5953        |
|                | 23 | R  | 1  | 175.1195       | 88.0637         |

N-term:+43.02 K(11):+156.13



ATQVEPLLPGAPLLQAEHGLAR, MH+ 2523.3571, m/z 841.7906  
L OSG36 P180811 230811-s1.06146.06146.3.dta

X-range:

-

MassTol: Y-zoom:

MassType:

AVG  MONO

Axis:

1  2

Label:

I  M  -

Ions:

a  +  2+  3+

b  +  2+  3+

c  +  2+  3+

x  +  2+  3+

y  +  2+  3+

z  +  2+  3+

hide H<sub>2</sub>O/NH<sub>3</sub>

zoom 112-122

GO

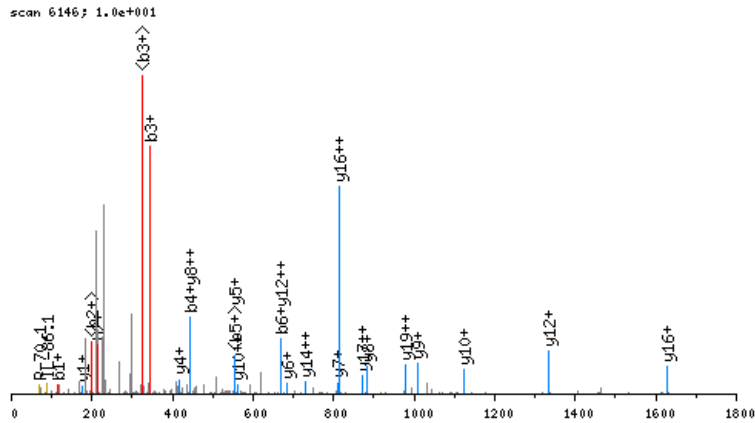

click image to zoom in; click top corners to zoom out [precursor+]

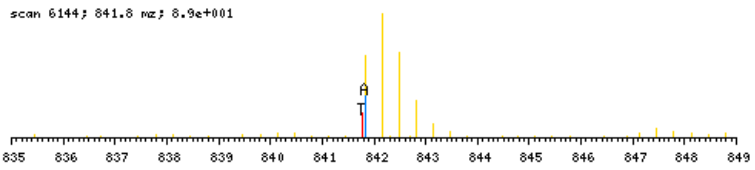

zoomed in precursor plot; T=theoretical m/z, A=acquired m/z

| b <sup>+</sup> | #  | AA # | y <sup>+</sup> | y <sup>2+</sup> |
|----------------|----|------|----------------|-----------------|
| 114.0555       | 1  | A 24 |                |                 |
| 215.1032       | 2  | T 23 | 2410.3094      | 1205.6586       |
| 343.1618       | 3  | Q 22 | 2309.2618      | 1155.1348       |
| 442.2302       | 4  | V 21 | 2181.2032      | 1091.1055       |
| 571.2728       | 5  | E 20 | 2082.1348      | 1041.5713       |
| 668.3255       | 6  | P 19 | 1953.0922      | 977.0500        |
| 781.4096       | 7  | L 18 | 1856.0394      | 928.5236        |
| 894.4937       | 8  | L 17 | 1742.9553      | 871.9816        |
| 991.5464       | 9  | P 16 | 1629.8713      | 815.4396        |
| 1062.5835      | 10 | A 15 | 1532.8185      | 766.9132        |
| 1119.6050      | 11 | G 14 | 1461.7814      | 731.3946        |
| 1190.6421      | 12 | A 13 | 1404.7599      | 702.8839        |
| 1287.6949      | 13 | P 12 | 1333.7228      | 667.3653        |
| 1400.7790      | 14 | L 11 | 1236.6701      | 618.8389        |
| 1513.8630      | 15 | L 10 | 1123.5860      | 562.2969        |
| 1641.9216      | 16 | Q 9  | 1010.5019      | 505.7549        |
| 1712.9587      | 17 | A 8  | 882.4434       | 441.7256        |
| 1842.0013      | 18 | E 7  | 811.4062       | 406.2070        |
| 1971.0439      | 19 | E 6  | 682.3636       | 341.6857        |
| 2108.1028      | 20 | H 5  | 553.3211       | 277.1644        |
| 2165.1243      | 21 | G 4  | 416.2621       | 208.6350        |
| 2278.2083      | 22 | L 3  | 359.2407       | 180.1243        |
| 2349.2454      | 23 | A 2  | 246.1566       | 123.5822        |
|                | 24 | R 1  | 175.1195       | 88.0637         |

N-term:+43.02

ATSLGSNTYNR, MH+ 1225.5813, m/z 613.2943  
 L OSG41 P180811 230811-s1.03181.03181.2.dta

X-range:

-

MassTol: Y-zoom:

MassType:

AVG  MONO

Axis:

1  2

Label:

I  M  -

Ions:

a  +  2+  3+

b  +  2+  3+

c  +  2+  3+

x  +  2+  3+

y  +  2+  3+

z  +  2+  3+

hide H<sub>2</sub>O/NH<sub>3</sub>

zoom 112-122

GO

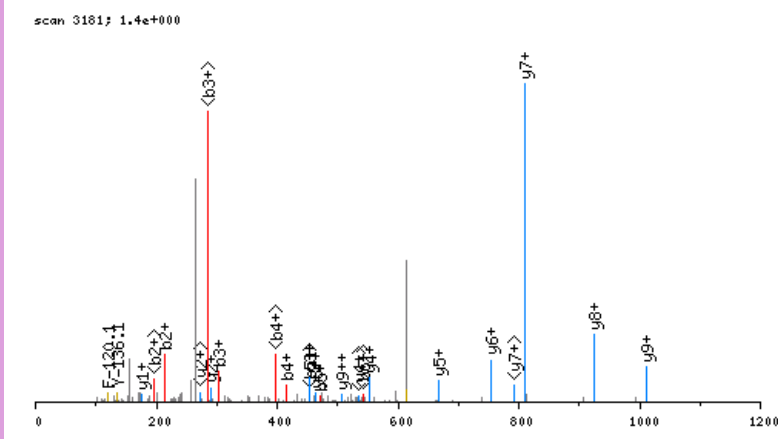

click image to zoom in; click top corners to zoom out [\[precursor±\]](#)

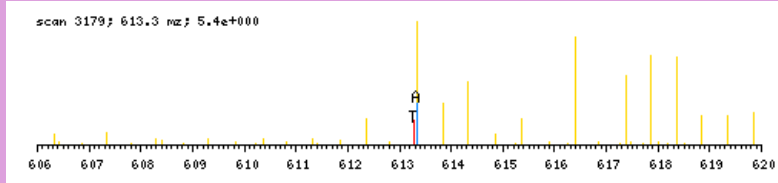

zoomed in precursor plot; T=theoretical m/z, A=acquired m/z

| b <sup>+</sup> | #  | AA # | y <sup>+</sup> | y <sup>2+</sup> |
|----------------|----|------|----------------|-----------------|
| 114.0555       | 1  | A 11 |                |                 |
| 215.1032       | 2  | T 10 | 1112.5336      | 556.7707        |
| 302.1352       | 3  | S 9  | 1011.4859      | 506.2469        |
| 415.2193       | 4  | L 8  | 924.4539       | 462.7309        |
| 472.2407       | 5  | G 7  | 811.3699       | 406.1888        |
| 559.2728       | 6  | S 6  | 754.3484       | 377.6781        |
| 673.3157       | 7  | N 5  | 667.3164       | 334.1621        |
| 774.3634       | 8  | T 4  | 553.2734       | 277.1406        |
| 937.4267       | 9  | Y 3  | 452.2258       | 226.6168        |
| 1051.4696      | 10 | N 2  | 289.1624       | 145.0851        |
|                | 11 | R 1  | 175.1195       | 88.0637         |

N-term:+43.02

ATSSSEVLLIVKKVR, MH+ 1770.0741, m/z 590.6962  
 L OSG39 P180811 230811-s1.06838.06838.3.dta

scan 6836; 1.5e+000

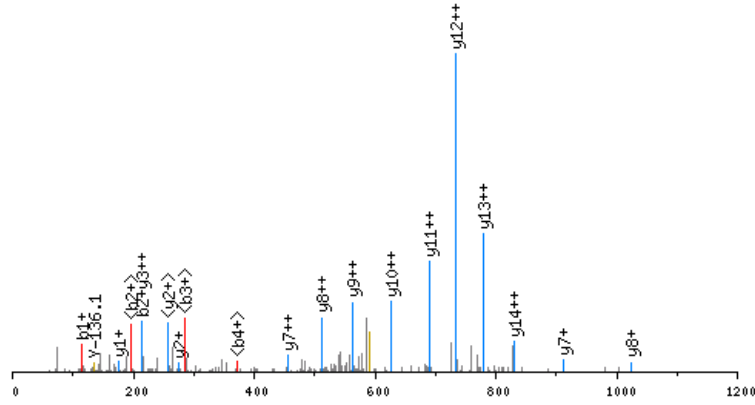

click image to zoom in; click top corners to zoom out [precursor±]

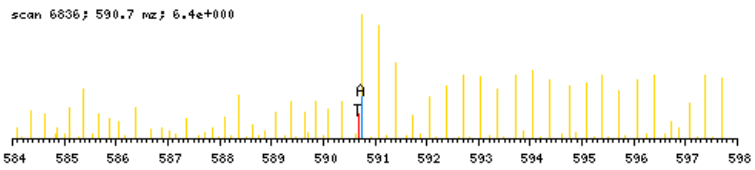

zoomed in precursor plot; T=theoretical m/z, A=acquired m/z

X-range:

-

MassTol: Y-zoom:

MassType:

AVG  MONO

Axis:

1  2

Label:

I  M  -

Ions:

a  +  2+  3+

b  +  2+  3+

c  +  2+  3+

x  +  2+  3+

y  +  2+  3+

z  +  2+  3+

hide H<sub>2</sub>O/NH<sub>3</sub>

zoom 112-122

GO

| b <sup>+</sup> | #  | AA | #  | y <sup>+</sup> | y <sup>2+</sup> |
|----------------|----|----|----|----------------|-----------------|
| 114.0555       | 1  | A  | 15 |                |                 |
| 215.1032       | 2  | T  | 14 | 1657.0265      | 829.0171        |
| 302.1352       | 3  | S  | 13 | 1555.9788      | 778.4933        |
| 389.1672       | 4  | S  | 12 | 1468.9467      | 734.9773        |
| 518.2098       | 5  | E  | 11 | 1381.9147      | 691.4613        |
| 647.2524       | 6  | E  | 10 | 1252.8721      | 626.9400        |
| 746.3208       | 7  | V  | 9  | 1123.8295      | 562.4187        |
| 859.4049       | 8  | L  | 8  | 1024.7611      | 512.8845        |
| 972.4890       | 9  | L  | 7  | 911.6771       | 456.3424        |
| 1085.5730      | 10 | I  | 6  | 798.5930       | 399.8004        |
| 1184.6415      | 11 | V  | 5  | 685.5089       | 343.2584        |
| 1340.7678      | 12 | K  | 4  | 586.4405       | 293.7242        |
| 1496.8941      | 13 | K  | 3  | 430.3142       | 215.6610        |
| 1595.9625      | 14 | V  | 2  | 274.1879       | 137.5979        |
|                | 15 | R  | 1  | 175.1195       | 88.0637         |

N-term:+43.02 K(12):+156.13  
 K(13):+156.13

ATTAQQSPQPVAGKR, MH+ 1609.8662, m/z 537.2936  
 L OSG37 P180811 230811-s1.02181.02181.3.dta

X-range:

-

MassTol: Y-zoom:

MassType:

AVG  MONO

Axis:

1  2

Label:

I  M  -

Ions:

a  +  2+  3+

b  +  2+  3+

c  +  2+  3+

x  +  2+  3+

y  +  2+  3+

z  +  2+  3+

hide H<sub>2</sub>O/NH<sub>3</sub>

zoom 112-122

GO

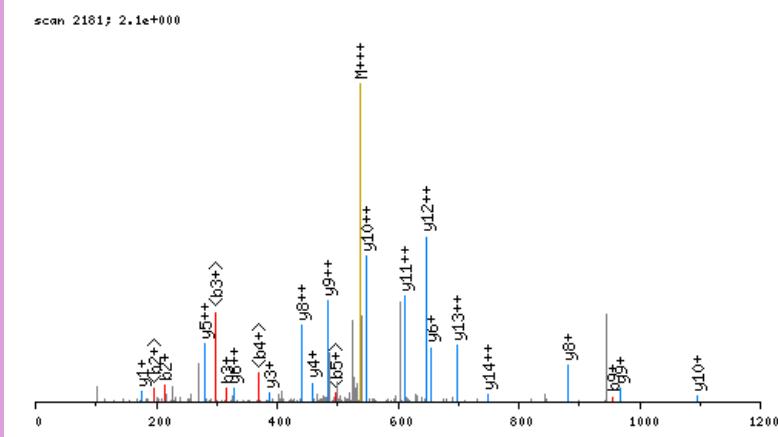

click image to zoom in; click top corners to zoom out [\[precursor±\]](#)

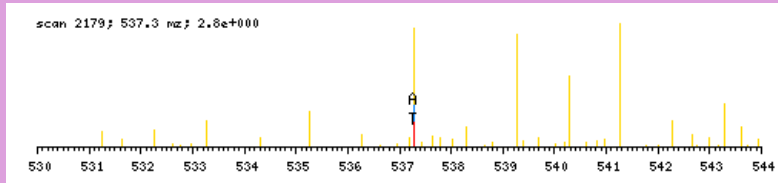

zoomed in precursor plot; T=theoretical m/z, A=acquired m/z

| b <sup>+</sup> | #  | AA | #  | y <sup>+</sup> | y <sup>2+</sup> |
|----------------|----|----|----|----------------|-----------------|
| 114.0555       | 1  | A  | 15 |                |                 |
| 215.1032       | 2  | T  | 14 | 1496.8186      | 748.9132        |
| 316.1509       | 3  | T  | 13 | 1395.7709      | 698.3893        |
| 387.1880       | 4  | A  | 12 | 1294.7232      | 647.8655        |
| 515.2466       | 5  | Q  | 11 | 1223.6861      | 612.3470        |
| 643.3051       | 6  | Q  | 10 | 1095.6275      | 548.3177        |
| 730.3372       | 7  | S  | 9  | 967.5689       | 484.2884        |
| 827.3899       | 8  | P  | 8  | 880.5369       | 440.7724        |
| 955.4485       | 9  | Q  | 7  | 783.4841       | 392.2460        |
| 1052.5013      | 10 | P  | 6  | 655.4256       | 328.2167        |
| 1151.5697      | 11 | V  | 5  | 558.3728       | 279.6903        |
| 1222.6068      | 12 | A  | 4  | 459.3044       | 230.1561        |
| 1279.6283      | 13 | G  | 3  | 388.2673       | 194.6375        |
| 1435.7546      | 14 | K  | 2  | 331.2458       | 166.1268        |
|                | 15 | R  | 1  | 175.1195       | 88.0637         |

N-term:+43.02 K(14):+156.13

ATTEFLQTSSTFGGSSTR, MH+ 1790.8561, m/z 597.6235  
 L OSG41 P180811 230811-s1.06583.06583.3.dta

X-range:

-

MassTol: Y-zoom:

MassType:

AVG  MONO

Axis:

1  2

Label:

I  M  -

Ions:

a  +  2+  3+

b  +  2+  3+

c  +  2+  3+

x  +  2+  3+

y  +  2+  3+

z  +  2+  3+

hide H<sub>2</sub>O/NH<sub>3</sub>

zoom 112-122

GO

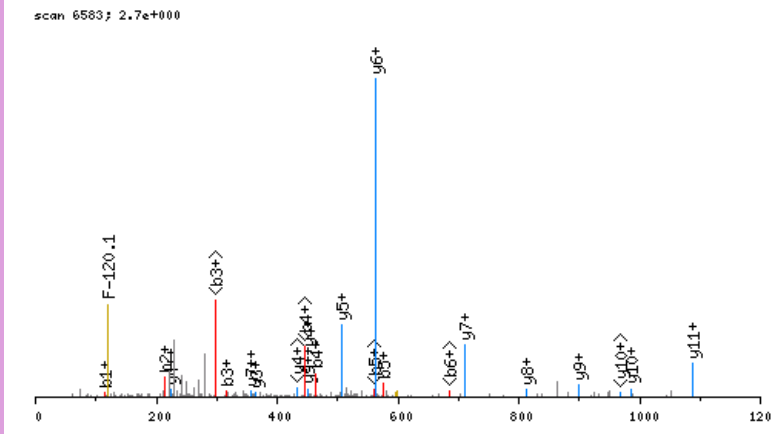

click image to zoom in; click top corners to zoom out [\[precursor±\]](#)

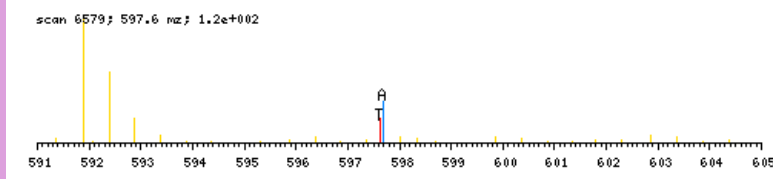

zoomed in precursor plot; T=theoretical m/z, A=acquired m/z

| b <sup>+</sup> | #  | AA # | y <sup>+</sup> | y <sup>2+</sup> |
|----------------|----|------|----------------|-----------------|
| 114.0555       | 1  | A 17 |                |                 |
| 215.1032       | 2  | T 16 | 1677.8084      | 839.4081        |
| 316.1509       | 3  | T 15 | 1576.7607      | 788.8843        |
| 463.2193       | 4  | F 14 | 1475.7130      | 738.3604        |
| 576.3033       | 5  | L 13 | 1328.6446      | 664.8262        |
| 704.3619       | 6  | Q 12 | 1215.5606      | 608.2842        |
| 805.4096       | 7  | T 11 | 1087.5020      | 544.2549        |
| 892.4416       | 8  | S 10 | 986.4543       | 493.7311        |
| 979.4737       | 9  | S 9  | 899.4223       | 450.2151        |
| 1080.5213      | 10 | T 8  | 812.3903       | 406.6990        |
| 1227.5898      | 11 | F 7  | 711.3426       | 356.1752        |
| 1284.6112      | 12 | G 6  | 564.2742       | 282.6410        |
| 1341.6327      | 13 | G 5  | 507.2527       | 254.1303        |
| 1428.6647      | 14 | S 4  | 450.2312       | 225.6195        |
| 1515.6967      | 15 | S 3  | 363.1992       | 182.1035        |
| 1616.7444      | 16 | T 2  | 276.1672       | 138.5875        |
|                | 17 | R 1  | 175.1195       | 88.0637         |

N-term:+43.02

ATVAATTKVPEIR, MH+ 1426.8270, m/z 713.9171  
 L OSG37 P180811 230811-s1.05056.05056.2.dta

X-range:

-

MassTol: Y-zoom:

MassType:

AVG  MONO

Axis:

1  2

Label:

I  M  -

Ions:

a  +  2+  3+

b  +  2+  3+

c  +  2+  3+

x  +  2+  3+

y  +  2+  3+

z  +  2+  3+

hide H<sub>2</sub>O/NH<sub>3</sub>

zoom 112-122

GO

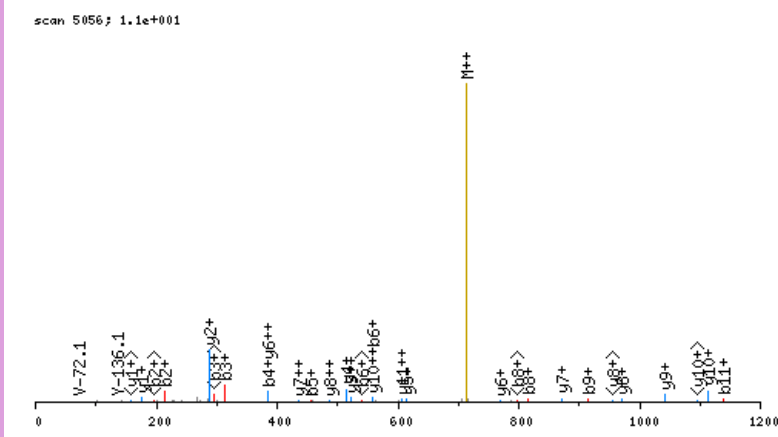

click image to zoom in; click top corners to zoom out [\[precursor±\]](#)

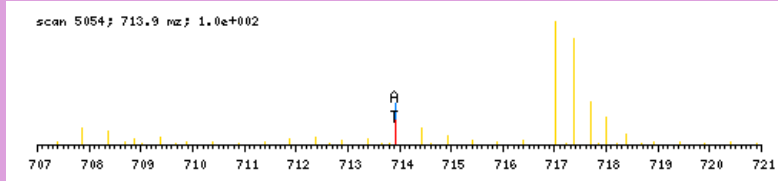

zoomed in precursor plot; T=theoretical m/z, A=acquired m/z

| b <sup>+</sup> | #  | AA # | y <sup>+</sup> | y <sup>2+</sup> |
|----------------|----|------|----------------|-----------------|
| 114.0555       | 1  | A 13 |                |                 |
| 215.1032       | 2  | T 12 | 1313.7793      | 657.3936        |
| 314.1716       | 3  | V 11 | 1212.7316      | 606.8697        |
| 385.2087       | 4  | A 10 | 1113.6632      | 557.3355        |
| 456.2458       | 5  | A 9  | 1042.6261      | 521.8170        |
| 557.2935       | 6  | T 8  | 971.5890       | 486.2984        |
| 658.3412       | 7  | T 7  | 870.5413       | 435.7746        |
| 814.4675       | 8  | K 6  | 769.4936       | 385.2507        |
| 913.5359       | 9  | V 5  | 613.3673       | 307.1876        |
| 1010.5887      | 10 | P 4  | 514.2989       | 257.6534        |
| 1139.6313      | 11 | E 3  | 417.2462       | 209.1270        |
| 1252.7153      | 12 | I 2  | 288.2036       | 144.6057        |
|                | 13 | R 1  | 175.1195       | 88.0637         |

N-term:+43.02 K(8):+156.13

ATVDLEKLR, MH+ 1120.6790, m/z 560.8432  
 L OSG37 P180811 230811-s1.05556.05556.2.dta

X-range:

-

MassTol: Y-zoom:

MassType:

AVG  MONO

Axis:

1  2

Label:

I  M  -

Ions:

a  +  2+  3+

b  +  2+  3+

c  +  2+  3+

x  +  2+  3+

y  +  2+  3+

z  +  2+  3+

hide H<sub>2</sub>O/NH<sub>3</sub>

zoom 112-122

GO

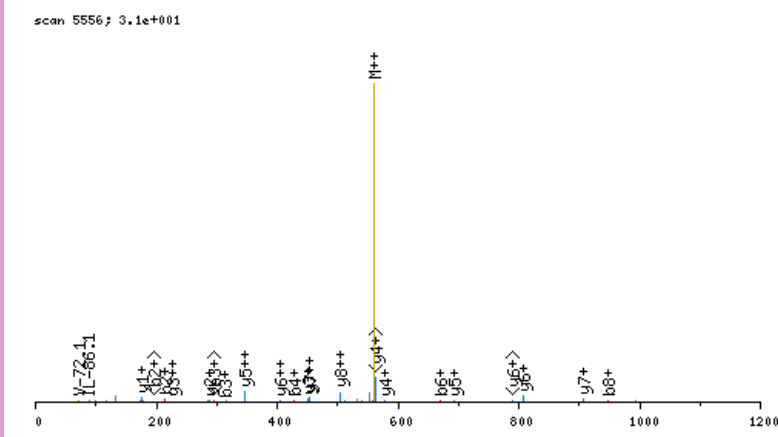

click image to zoom in; click top corners to zoom out [\[precursor±\]](#)

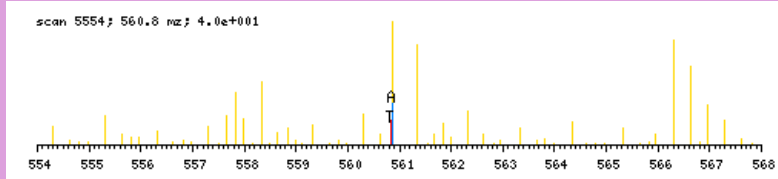

zoomed in precursor plot; T=theoretical m/z, A=acquired m/z

| b <sup>+</sup> | # | AA # | y <sup>+</sup> | y <sup>2+</sup> |
|----------------|---|------|----------------|-----------------|
| 114.0555       | 1 | A    | 9              |                 |
| 215.1032       | 2 | T    | 8              | 1007.6314       |
| 314.1716       | 3 | V    | 7              | 906.5837        |
| 429.1985       | 4 | D    | 6              | 807.5153        |
| 542.2826       | 5 | L    | 5              | 692.4883        |
| 671.3252       | 6 | E    | 4              | 579.4043        |
| 833.4833       | 7 | K    | 3              | 450.3617        |
| 946.5674       | 8 | L    | 2              | 288.2036        |
|                | 9 | R    | 1              | 175.1195        |

N-term:+43.02 K(7):+162.16

AVAAAAAATAMSAAGGGGASAAR, MH+ 1873.9190, m/z 625.3112  
 L OSG41 P180811 230811-s1.07110.07110.3.dta

X-range:

-

MassTol: Y-zoom:

MassType:

AVG  MONO

Axis:

1  2

Label:

I  M  -

Ions:

a  +  2+  3+

b  +  2+  3+

c  +  2+  3+

x  +  2+  3+

y  +  2+  3+

z  +  2+  3+

hide H<sub>2</sub>O/NH<sub>3</sub>

zoom 112-122

GO

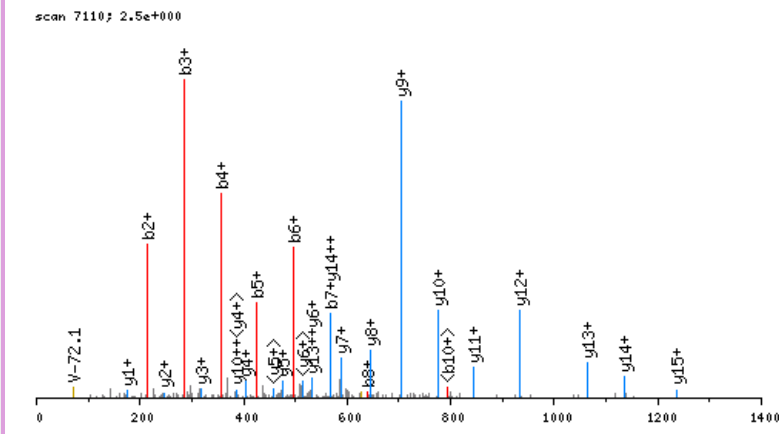

click image to zoom in; click top corners to zoom out [\[precursor±\]](#)

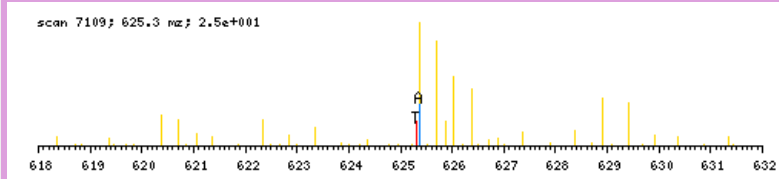

zoomed in precursor plot; T=theoretical m/z, A=acquired m/z

| b <sup>+</sup> | #  | AA # | y <sup>+</sup> | y <sup>2+</sup> |
|----------------|----|------|----------------|-----------------|
| 114.0555       | 1  | A 23 |                |                 |
| 213.1239       | 2  | V 22 | 1760.8714      | 880.9396        |
| 284.1610       | 3  | A 21 | 1661.8029      | 831.4054        |
| 355.1982       | 4  | A 20 | 1590.7658      | 795.8868        |
| 426.2353       | 5  | A 19 | 1519.7287      | 760.3683        |
| 497.2724       | 6  | A 18 | 1448.6916      | 724.8497        |
| 568.3095       | 7  | A 17 | 1377.6545      | 689.3312        |
| 639.3466       | 8  | A 16 | 1306.6174      | 653.8126        |
| 740.3943       | 9  | T 15 | 1235.5803      | 618.2940        |
| 811.4314       | 10 | A 14 | 1134.5326      | 567.7702        |
| 942.4719       | 11 | M 13 | 1063.4955      | 532.2516        |
| 1029.5039      | 12 | S 12 | 932.4550       | 466.7314        |
| 1100.5410      | 13 | A 11 | 845.4230       | 423.2154        |
| 1171.5781      | 14 | A 10 | 774.3858       | 387.6968        |
| 1228.5996      | 15 | G 9  | 703.3487       | 352.1783        |
| 1285.6211      | 16 | G 8  | 646.3273       | 323.6675        |
| 1342.6425      | 17 | G 7  | 589.3058       | 295.1568        |
| 1399.6640      | 18 | G 6  | 532.2843       | 266.6461        |
| 1470.7011      | 19 | A 5  | 475.2629       | 238.1353        |
| 1557.7331      | 20 | S 4  | 404.2258       | 202.6168        |
| 1628.7703      | 21 | A 3  | 317.1937       | 159.1008        |
| 1699.8074      | 22 | A 2  | 246.1566       | 123.5822        |
|                | 23 | R 1  | 175.1195       | 88.0637         |

N-term:+43.02



AVAAAAVAAPAGGGGAR, MH+ 1379.7395, m/z 690.3734  
 L OSG41 P180811 230811-s1.04127.04127.2.dta

X-range:

-

MassTol: Y-zoom:

MassType:

AVG  MONO

Axis:

1  2

Label:

I  M  -

Ions:

a  +  2+  3+

b  +  2+  3+

c  +  2+  3+

x  +  2+  3+

y  +  2+  3+

z  +  2+  3+

hide H<sub>2</sub>O/NH<sub>3</sub>

zoom 112-122

GO

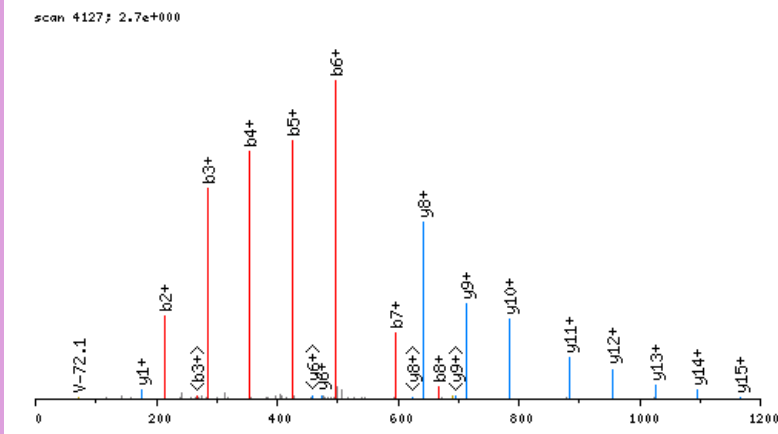

click image to zoom in; click top corners to zoom out [\[precursor±\]](#)

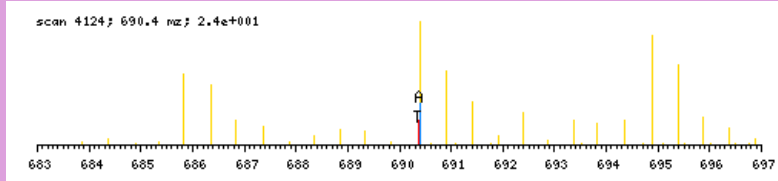

zoomed in precursor plot; T=theoretical m/z, A=acquired m/z

| b <sup>+</sup> | #  | AA # | y <sup>+</sup> | y <sup>2+</sup> |
|----------------|----|------|----------------|-----------------|
| 114.0555       | 1  | A 17 |                |                 |
| 213.1239       | 2  | V 16 | 1266.6919      | 633.8498        |
| 284.1610       | 3  | A 15 | 1167.6234      | 584.3156        |
| 355.1982       | 4  | A 14 | 1096.5863      | 548.7971        |
| 426.2353       | 5  | A 13 | 1025.5492      | 513.2785        |
| 497.2724       | 6  | A 12 | 954.5121       | 477.7600        |
| 596.3408       | 7  | V 11 | 883.4750       | 442.2414        |
| 667.3779       | 8  | A 10 | 784.4066       | 392.7072        |
| 738.4150       | 9  | A 9  | 713.3695       | 357.1886        |
| 835.4678       | 10 | P 8  | 642.3323       | 321.6701        |
| 906.5049       | 11 | A 7  | 545.2796       | 273.1437        |
| 963.5264       | 12 | G 6  | 474.2425       | 237.6251        |
| 1020.5478      | 13 | G 5  | 417.2210       | 209.1144        |
| 1077.5693      | 14 | G 4  | 360.1995       | 180.6037        |
| 1134.5908      | 15 | G 3  | 303.1781       | 152.0930        |
| 1205.6279      | 16 | A 2  | 246.1566       | 123.5822        |
|                | 17 | R 1  | 175.1195       | 88.0637         |

N-term:+43.02

AVDGGCGDTGDWEGR, MH+ 1593.6239, m/z 797.3156  
 L OSG41 P180811 230811-s1.03933.03933.2.dta

X-range:

-

MassTol: Y-zoom:

MassType:

AVG  MONO

Axis:

1  2

Label:

I  M  -

Ions:

a  +  2+  3+

b  +  2+  3+

c  +  2+  3+

x  +  2+  3+

y  +  2+  3+

z  +  2+  3+

hide H<sub>2</sub>O/NH<sub>3</sub>

zoom 112-122

GO

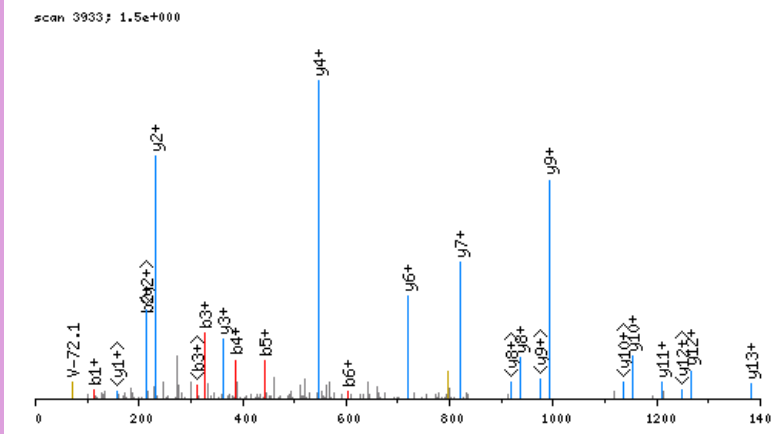

click image to zoom in; click top corners to zoom out [\[precursor±\]](#)

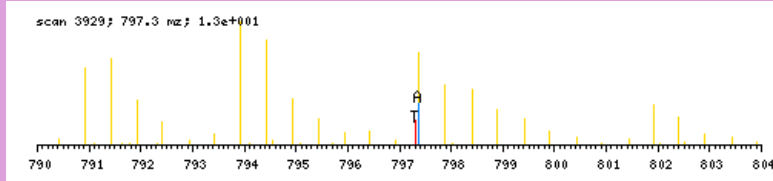

zoomed in precursor plot; T=theoretical m/z, A=acquired m/z

| b <sup>+</sup> | #  | AA # | y <sup>+</sup> | y <sup>2+</sup> |
|----------------|----|------|----------------|-----------------|
| 114.0555       | 1  | A 15 |                |                 |
| 213.1239       | 2  | V 14 | 1480.5762      | 740.7920        |
| 328.1509       | 3  | D 13 | 1381.5078      | 691.2578        |
| 385.1723       | 4  | G 12 | 1266.4809      | 633.7444        |
| 442.1938       | 5  | G 11 | 1209.4594      | 605.2336        |
| 602.2244       | 6  | C 10 | 1152.4380      | 576.7229        |
| 659.2459       | 7  | G 9  | 992.4074       | 496.7076        |
| 774.2728       | 8  | D 8  | 935.3859       | 468.1969        |
| 875.3205       | 9  | T 7  | 820.3590       | 410.6834        |
| 932.3419       | 10 | G 6  | 719.3113       | 360.1596        |
| 1047.3689      | 11 | D 5  | 662.2898       | 331.6488        |
| 1233.4482      | 12 | W 4  | 547.2629       | 274.1353        |
| 1362.4908      | 13 | E 3  | 361.1836       | 181.0957        |
| 1419.5123      | 14 | G 2  | 232.1410       | 116.5744        |
|                | 15 | R 1  | 175.1195       | 88.0637         |

N-term:+43.02 C(6):+160.03

AVEELQSIKR, MH+ 1361.8217, m/z 681.4145  
L OSG37 P180811 230811-s1.08393.08393.2.dta

scan 8393; 5.8e+000

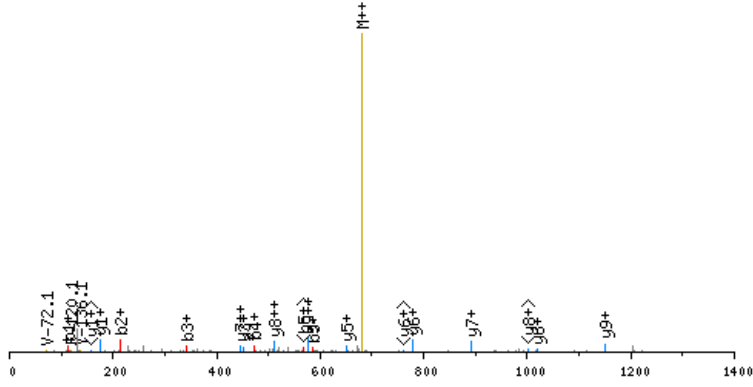

click image to zoom in; click top corners to zoom out [precursor±]

scan 8389; 681.4 m/z; 2.6e+001

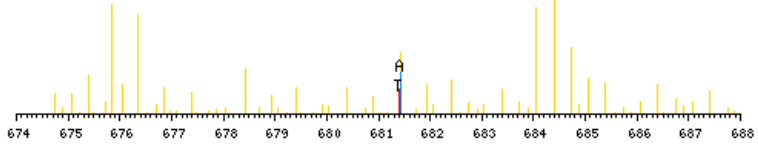

zoomed in precursor plot; T=theoretical m/z, A=acquired m/z

X-range:

0 - 0

MassTol: Y-zoom:

0. 1.

MassType:

AVG  MONO

Axis:

1  2

Label:

I  M  -

Ions:

a  +  2+  3+

b  +  2+  3+

c  +  2+  3+

x  +  2+  3+

y  +  2+  3+

z  +  2+  3+

hide H<sub>2</sub>O/NH<sub>3</sub>

zoom 112-122

GO

| b <sup>+</sup> | #  | AA # | y <sup>+</sup> | y <sup>2+</sup> |
|----------------|----|------|----------------|-----------------|
| 114.0555       | 1  | A 11 |                |                 |
| 213.1239       | 2  | V 10 | 1248.7740      | 624.8909        |
| 342.1665       | 3  | E 9  | 1149.7056      | 575.3567        |
| 471.2091       | 4  | E 8  | 1020.6630      | 510.8354        |
| 584.2932       | 5  | L 7  | 891.6204       | 446.3141        |
| 712.3518       | 6  | Q 6  | 778.5363       | 389.7721        |
| 799.3838       | 7  | S 5  | 650.4778       | 325.7428        |
| 912.4678       | 8  | I 4  | 563.4457       | 282.2268        |
| 1025.5519      | 9  | I 3  | 450.3617       | 225.6847        |
| 1187.7100      | 10 | K 2  | 337.2776       | 169.1427        |
|                | 11 | R 1  | 175.1195       | 88.0637         |

N-term:+43.02 K(10):+162.16

AVFPWHSR, MH+ 1041.5270, m/z 521.2672  
 L OSG38 P180811 230811-s1.06108.06108.2.dta

scan 6108; 6.0e+000

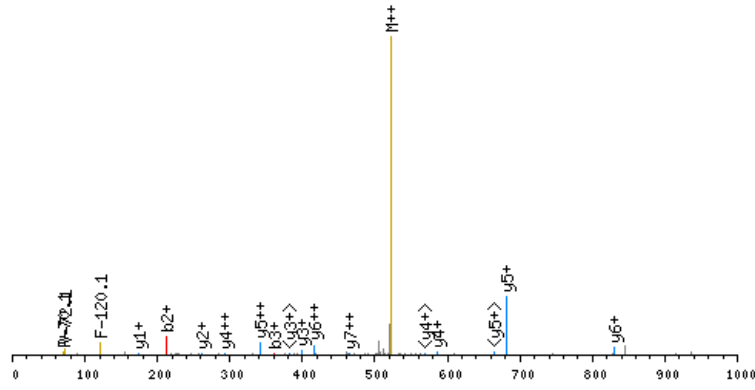

click image to zoom in; click top corners to zoom out [\[precursor±\]](#)

scan 6104; 521.3 m/z; 1.0e+001

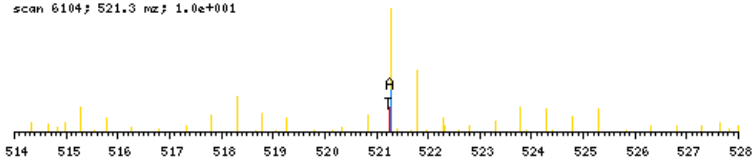

zoomed in precursor plot; T=theoretical m/z, A=acquired m/z

X-range:

-

MassTol: Y-zoom:

MassType:

AVG  MONO

Axis:

1  2

Label:

I  M  -

Ions:

a  +  2+  3+

b  +  2+  3+

c  +  2+  3+

x  +  2+  3+

y  +  2+  3+

z  +  2+  3+

hide H<sub>2</sub>O/NH<sub>3</sub>

zoom 112-122

GO

| b <sup>+</sup> | # | AA # | y <sup>+</sup> | y <sup>2+</sup> |
|----------------|---|------|----------------|-----------------|
| 114.0555       | 1 | A    | 8              |                 |
| 213.1239       | 2 | V    | 7              | 928.4793        |
| 360.1923       | 3 | F    | 6              | 829.4109        |
| 457.2451       | 4 | P    | 5              | 682.3425        |
| 643.3244       | 5 | W    | 4              | 585.2898        |
| 780.3833       | 6 | H    | 3              | 399.2104        |
| 867.4154       | 7 | S    | 2              | 262.1515        |
|                | 8 | R    | 1              | 175.1195        |

N-term:+43.02

AVNVYSTSVTSDNLSR, MH+ 1754.8561, m/z 877.9317  
 L OSG41 P180811 230811-s1.05273.05273.2.dta

X-range:

-

MassTol: Y-zoom:

MassType:

AVG  MONO

Axis:

1  2

Label:

I  M  -

Ions:

a  +  2+  3+

b  +  2+  3+

c  +  2+  3+

x  +  2+  3+

y  +  2+  3+

z  +  2+  3+

hide H<sub>2</sub>O/NH<sub>3</sub>

zoom 112-122

GO

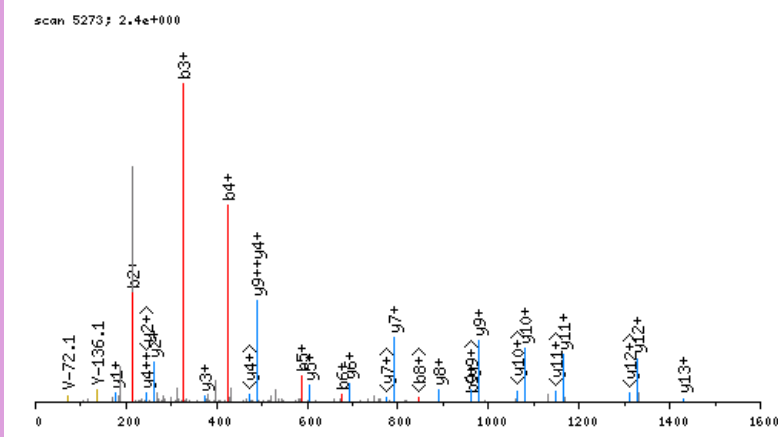

click image to zoom in; click top corners to zoom out [\[precursor±\]](#)

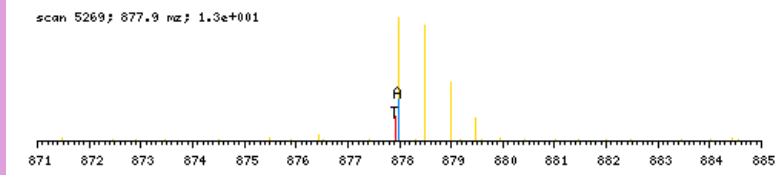

zoomed in precursor plot; T=theoretical m/z, A=acquired m/z

| b <sup>+</sup> | #  | AA # | y <sup>+</sup> | y <sup>2+</sup> |
|----------------|----|------|----------------|-----------------|
| 114.0555       | 1  | A 16 |                |                 |
| 213.1239       | 2  | V 15 | 1641.8084      | 821.4081        |
| 327.1669       | 3  | N 14 | 1542.7400      | 771.8739        |
| 426.2353       | 4  | V 13 | 1428.6971      | 714.8524        |
| 589.2986       | 5  | Y 12 | 1329.6286      | 665.3182        |
| 676.3306       | 6  | S 11 | 1166.5653      | 583.7866        |
| 777.3783       | 7  | T 10 | 1079.5333      | 540.2706        |
| 864.4103       | 8  | S 9  | 978.4856       | 489.7467        |
| 963.4787       | 9  | V 8  | 891.4536       | 446.2307        |
| 1064.5264      | 10 | T 7  | 792.3852       | 396.6965        |
| 1151.5585      | 11 | S 6  | 691.3375       | 346.1727        |
| 1266.5854      | 12 | D 5  | 604.3055       | 302.6566        |
| 1380.6283      | 13 | N 4  | 489.2785       | 245.1432        |
| 1493.7124      | 14 | L 3  | 375.2356       | 188.1217        |
| 1580.7444      | 15 | S 2  | 262.1515       | 131.5797        |
|                | 16 | R 1  | 175.1195       | 88.0637         |

N-term:+43.02

AVPPTYADLGKSAR, MH+ 1521.8490, m/z 761.4281  
 L OSG37 P180811 230811-s1.05200.05200.2.dta

X-range:

-

MassTol: Y-zoom:

MassType:

AVG  MONO

Axis:

1  2

Label:

I  M  -

Ions:

a  +  2+  3+

b  +  2+  3+

c  +  2+  3+

x  +  2+  3+

y  +  2+  3+

z  +  2+  3+

hide H<sub>2</sub>O/NH<sub>3</sub>

zoom 112-122

GO

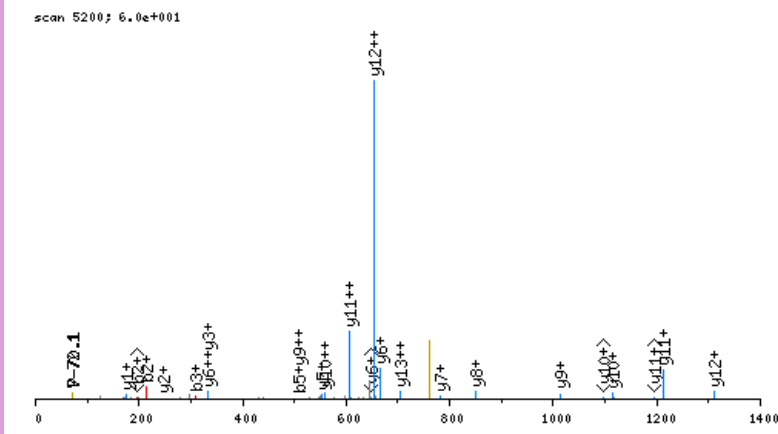

click image to zoom in; click top corners to zoom out [\[precursor±\]](#)

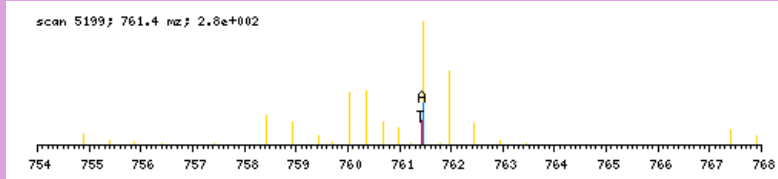

zoomed in precursor plot; T=theoretical m/z, A=acquired m/z

| b <sup>+</sup> | #  | AA # | y <sup>+</sup> | y <sup>2+</sup> |
|----------------|----|------|----------------|-----------------|
| 114.0555       | 1  | A 14 |                |                 |
| 213.1239       | 2  | V 13 | 1408.8013      | 704.9046        |
| 310.1767       | 3  | P 12 | 1309.7329      | 655.3703        |
| 407.2295       | 4  | P 11 | 1212.6801      | 606.8440        |
| 508.2771       | 5  | T 10 | 1115.6273      | 558.3176        |
| 671.3405       | 6  | Y 9  | 1014.5797      | 507.7937        |
| 742.3776       | 7  | A 8  | 851.5163       | 426.2621        |
| 857.4045       | 8  | D 7  | 780.4792       | 390.7435        |
| 970.4886       | 9  | L 6  | 665.4523       | 333.2300        |
| 1027.5100      | 10 | G 5  | 552.3682       | 276.6880        |
| 1189.6681      | 11 | K 4  | 495.3467       | 248.1773        |
| 1276.7002      | 12 | S 3  | 333.1886       | 167.0982        |
| 1347.7373      | 13 | A 2  | 246.1566       | 123.5822        |
|                | 14 | R 1  | 175.1195       | 88.0637         |

N-term:+43.02 K(11):+162.16

AVSTGVKVPK, MH+ 1083.6527, m/z 542.3300  
 L OSG37 P180811 230811-s1.03440.03440.2.dta

X-range:

-

MassTol: Y-zoom:

MassType:

AVG  MONO

Axis:

1  2

Label:

I  M  -

Ions:

a  +  2+  3+

b  +  2+  3+

c  +  2+  3+

x  +  2+  3+

y  +  2+  3+

z  +  2+  3+

hide H<sub>2</sub>O/NH<sub>3</sub>

zoom 112-122

GO

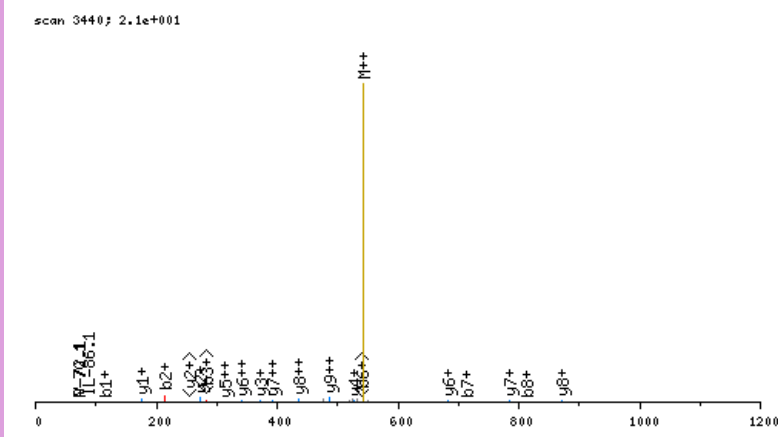

click image to zoom in; click top corners to zoom out [\[precursor±\]](#)

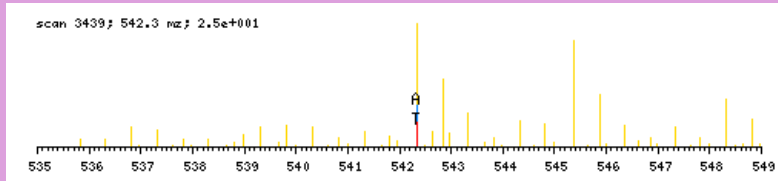

zoomed in precursor plot; T=theoretical m/z, A=acquired m/z

| b <sup>+</sup> | #  | AA | #  | y <sup>+</sup> | y <sup>2+</sup> |
|----------------|----|----|----|----------------|-----------------|
| 114.0555       | 1  | A  | 10 |                |                 |
| 213.1239       | 2  | V  | 9  | 970.6050       | 485.8064        |
| 300.1560       | 3  | S  | 8  | 871.5366       | 436.2722        |
| 401.2036       | 4  | T  | 7  | 784.5045       | 392.7562        |
| 458.2251       | 5  | G  | 6  | 683.4569       | 342.2323        |
| 557.2935       | 6  | V  | 5  | 626.4354       | 313.7216        |
| 713.4198       | 7  | K  | 4  | 527.3670       | 264.1874        |
| 812.4882       | 8  | V  | 3  | 371.2407       | 186.1243        |
| 909.5410       | 9  | P  | 2  | 272.1723       | 136.5900        |
|                | 10 | R  | 1  | 175.1195       | 88.0637         |

N-term:+43.02 K(7):+156.13

X-range:

-

MassTol: Y-zoom:

MassType:

AVG  MONO

Axis:

1  2

Label:

I  M  -

Ions:

a  +  2+  3+

b  +  2+  3+

c  +  2+  3+

x  +  2+  3+

y  +  2+  3+

z  +  2+  3+

hide H<sub>2</sub>O/NH<sub>3</sub>

zoom 112-122

GO

scan 6910; 3.4e+001

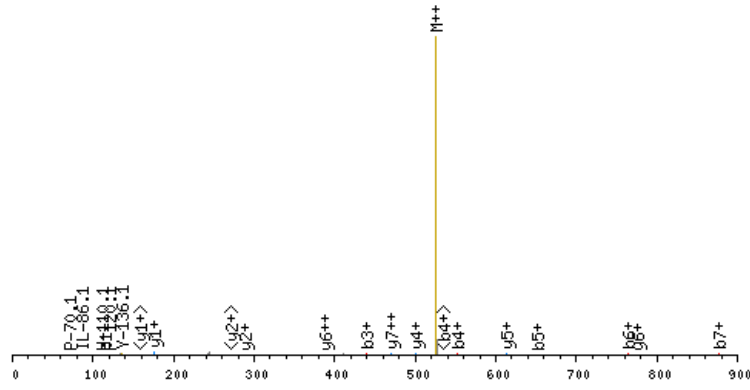

click image to zoom in; click top corners to zoom out [\[precursor±\]](#)

scan 6909; 526.4 m/z; 1.4e+001

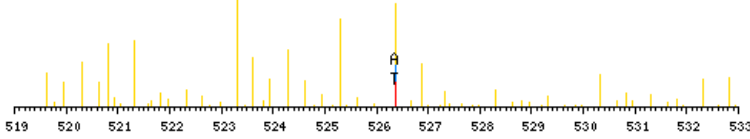

zoomed in precursor plot; T=theoretical m/z, A=acquired m/z

| b <sup>+</sup> | # | AA # | y <sup>+</sup> | y <sup>2+</sup> |
|----------------|---|------|----------------|-----------------|
| 114.0555       | 1 | A    | 8              |                 |
| 277.1188       | 2 | Y    | 7              | 938.6615        |
| 439.2769       | 3 | K    | 6              | 775.5982        |
| 552.3610       | 4 | L    | 5              | 613.4401        |
| 651.4294       | 5 | V    | 4              | 500.3560        |
| 764.5135       | 6 | L    | 3              | 401.2876        |
| 877.5975       | 7 | I    | 2              | 288.2036        |
|                | 8 | R    | 1              | 175.1195        |

N-term:+43.02 K(3):+162.16



CGKIFAR, MH+ 927.5298, m/z 464.2686  
 L OSG38 P180811 230811-s1.05606.05606.2.dta

scan 5606; 2.5e+001

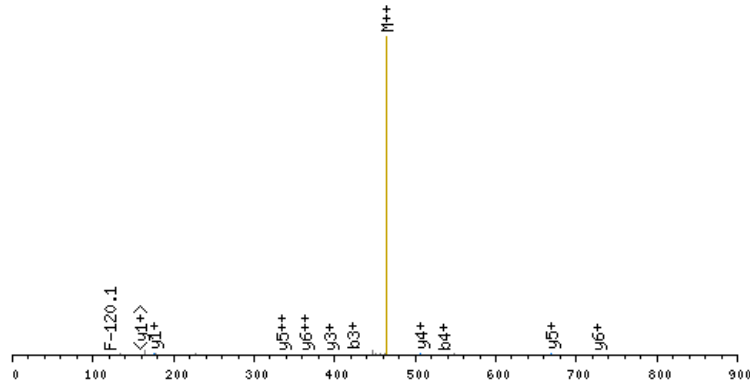

click image to zoom in; click top corners to zoom out [\[precursor±\]](#)

scan 5604; 464.3 mz; 2.1e+001

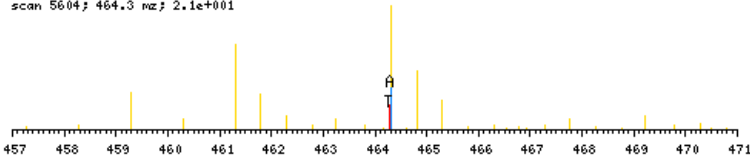

zoomed in precursor plot; T=theoretical m/z, A=acquired m/z

X-range:

-

MassTol: Y-zoom:

MassType:

AVG  MONO

Axis:

1  2

Label:

I  M  -

Ions:

a  +  2+  3+

b  +  2+  3+

c  +  2+  3+

x  +  2+  3+

y  +  2+  3+

z  +  2+  3+

hide H<sub>2</sub>O/NH<sub>3</sub>

zoom 112-122

GO

| b <sup>+</sup> | # | AA # | y <sup>+</sup> | y <sup>2+</sup> |
|----------------|---|------|----------------|-----------------|
| 203.0490       | 1 | C    | 7              |                 |
| 260.0705       | 2 | G    | 6              | 725.4887        |
| 422.2286       | 3 | K    | 5              | 668.4672        |
| 535.3126       | 4 | I    | 4              | 506.3091        |
| 682.3810       | 5 | F    | 3              | 393.2250        |
| 753.4182       | 6 | A    | 2              | 246.1566        |
|                | 7 | R    | 1              | 175.1195        |

N-term:+43.02 C(1):+160.03  
 K(3):+162.16

X-range:

-

MassTol: Y-zoom:

MassType:

AVG  MONO

Axis:

1  2

Label:

I  M  -

Ions:

a  +  2+  3+

b  +  2+  3+

c  +  2+  3+

x  +  2+  3+

y  +  2+  3+

z  +  2+  3+

hide H<sub>2</sub>O/NH<sub>3</sub>

zoom 112-122

GO

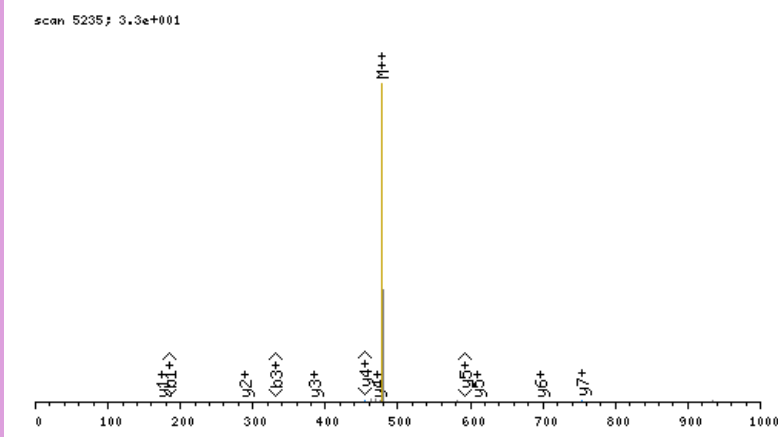

click image to zoom in; click top corners to zoom out [\[precursor±\]](#)

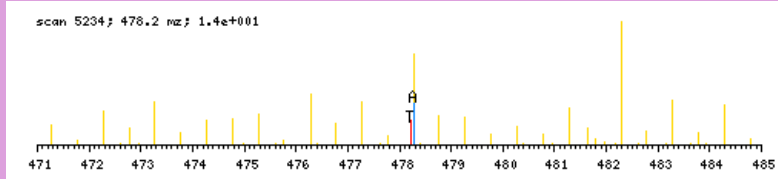

zoomed in precursor plot; T=theoretical m/z, A=acquired m/z

| b <sup>+</sup> | # | AA # | y <sup>+</sup> | y <sup>2+</sup>   |
|----------------|---|------|----------------|-------------------|
| 203.0490       | 1 | C    | 8              |                   |
| 260.0705       | 2 | G    | 7              | 753.4008 377.2043 |
| 347.1025       | 3 | S    | 6              | 696.3793 348.6936 |
| 484.1614       | 4 | H    | 5              | 609.3473 305.1775 |
| 571.1934       | 5 | S    | 4              | 472.2884 236.6481 |
| 668.2462       | 6 | P    | 3              | 385.2563 193.1321 |
| 781.3303       | 7 | L    | 2              | 288.2036 144.6057 |
|                | 8 | R    | 1              | 175.1195 88.0637  |

N-term:+43.02 C(1):+160.03

CLPLKPSLQACNKR, MH+ 1795.0358, m/z 599.0168  
 L OSG39 P180811 230811-s1.04789.04789.3.dta

scan 4789; 2.3e+000

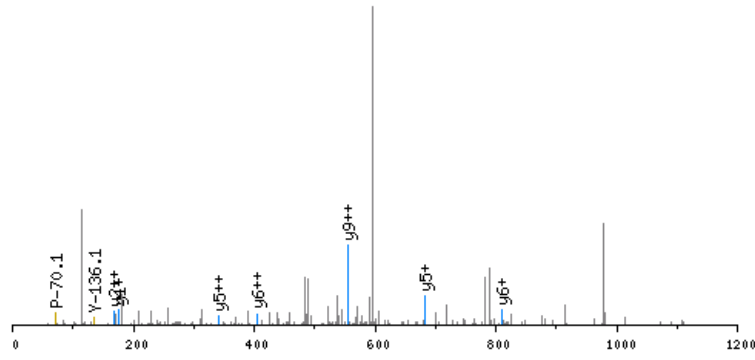

click image to zoom in; click top corners to zoom out [\[precursor±\]](#)

scan 4786; 599.0 mz; 2.1e+001

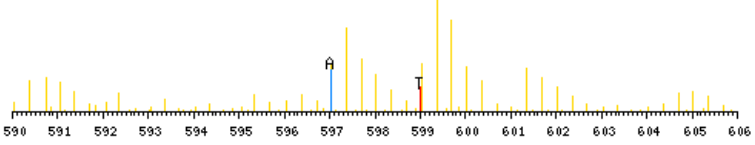

zoomed in precursor plot; T=theoretical m/z, A=acquired m/z

X-range:

-

MassTol: Y-zoom:

MassType:

AVG  MONO

Axis:

1  2

Label:

I  M  -

Ions:

a  +  2+  3+

b  +  2+  3+

c  +  2+  3+

x  +  2+  3+

y  +  2+  3+

z  +  2+  3+

hide H<sub>2</sub>O/NH<sub>3</sub>

zoom 112-122

GO

| b <sup>+</sup> | #  | AA | #  | y <sup>+</sup> | y <sup>2+</sup> |
|----------------|----|----|----|----------------|-----------------|
| 203.0490       | 1  | C  | 14 |                |                 |
| 316.1331       | 2  | L  | 13 | 1592.9947      | 797.0012        |
| 413.1858       | 3  | P  | 12 | 1479.9106      | 740.4592        |
| 526.2699       | 4  | L  | 11 | 1382.8578      | 691.9328        |
| 688.4280       | 5  | K  | 10 | 1269.7738      | 635.3908        |
| 785.4808       | 6  | P  | 9  | 1107.6157      | 554.3118        |
| 872.5128       | 7  | S  | 8  | 1010.5629      | 505.7854        |
| 985.5968       | 8  | L  | 7  | 923.5309       | 462.2694        |
| 1113.6554      | 9  | Q  | 6  | 810.4468       | 405.7273        |
| 1184.6925      | 10 | A  | 5  | 682.3882       | 341.6980        |
| 1344.7231      | 11 | C  | 4  | 611.3511       | 306.1795        |
| 1458.7661      | 12 | N  | 3  | 451.3205       | 226.1642        |
| 1620.9242      | 13 | K  | 2  | 337.2776       | 169.1427        |
|                | 14 | R  | 1  | 175.1195       | 88.0637         |

N-term:+43.02 C(1):+160.03  
 K(5):+162.16 C(11):+160.03  
 K(13):+162.16

DAATLTYDTLR, MH+ 1281.6327, m/z 641.3200  
 L OSG41 P180811 230811-s1.07126.07126.2.dta

X-range:

-

MassTol: Y-zoom:

MassType:

AVG  MONO

Axis:

1  2

Label:

I  M  -

Ions:

a  +  2+  3+

b  +  2+  3+

c  +  2+  3+

x  +  2+  3+

y  +  2+  3+

z  +  2+  3+

hide H<sub>2</sub>O/NH<sub>3</sub>

zoom 112-122

GO

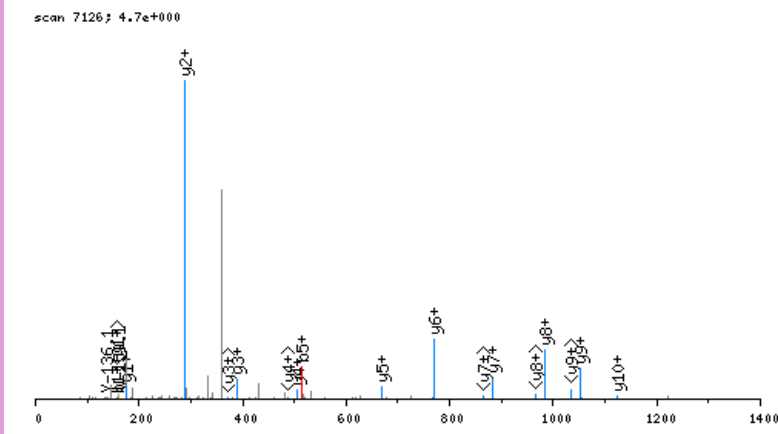

click image to zoom in; click top corners to zoom out [\[precursor±\]](#)

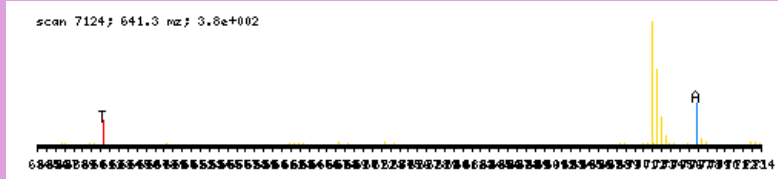

zoomed in precursor plot; T=theoretical m/z, A=acquired m/z

| b <sup>+</sup> | #  | AA # | y <sup>+</sup> | y <sup>2+</sup> |
|----------------|----|------|----------------|-----------------|
| 158.0453       | 1  | D 11 |                |                 |
| 229.0825       | 2  | A 10 | 1124.5952      | 562.8015        |
| 300.1196       | 3  | A 9  | 1053.5580      | 527.2829        |
| 401.1672       | 4  | T 8  | 982.5209       | 491.7644        |
| 514.2513       | 5  | L 7  | 881.4733       | 441.2405        |
| 615.2990       | 6  | T 6  | 768.3892       | 384.6985        |
| 778.3623       | 7  | Y 5  | 667.3415       | 334.1747        |
| 893.3893       | 8  | D 4  | 504.2782       | 252.6430        |
| 994.4369       | 9  | T 3  | 389.2512       | 195.1295        |
| 1107.5210      | 10 | L 2  | 288.2036       | 144.6057        |
|                | 11 | R 1  | 175.1195       | 88.0637         |

N-term:+43.02

DAGFFR, MH+ 754.3524, m/z 377.6799  
 L OSG41 P180811 230811-s1.06501.06501.2.dta

X-range:

-

MassTol: Y-zoom:

MassType:

AVG  MONO

Axis:

1  2

Label:

I  M  -

Ions:

a  +  2+  3+

b  +  2+  3+

c  +  2+  3+

x  +  2+  3+

y  +  2+  3+

z  +  2+  3+

hide H<sub>2</sub>O/NH<sub>3</sub>

zoom 112-122

GO

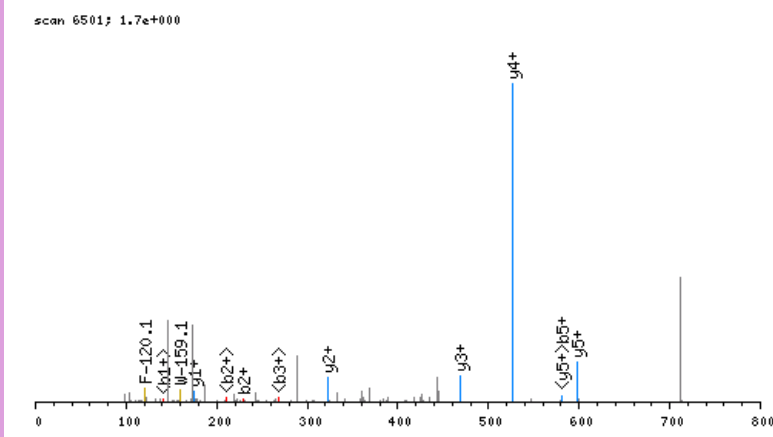

click image to zoom in; click top corners to zoom out [\[precursor±\]](#)

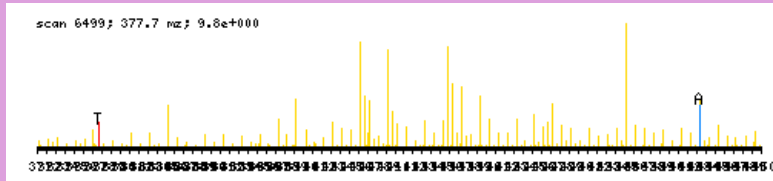

zoomed in precursor plot; T=theoretical m/z, A=acquired m/z

| b <sup>+</sup> | # | AA # | y <sup>+</sup> | y <sup>2+</sup>   |
|----------------|---|------|----------------|-------------------|
| 158.0453       | 1 | D    | 6              |                   |
| 229.0825       | 2 | A    | 5              | 597.3149 299.1614 |
| 286.1039       | 3 | G    | 4              | 526.2778 263.6428 |
| 433.1723       | 4 | F    | 3              | 469.2563 235.1321 |
| 580.2407       | 5 | F    | 2              | 322.1879 161.5979 |
|                | 6 | R    | 1              | 175.1195 88.0637  |

N-term:+43.02

DAQSSAKVNSR, MH+ 1232.6236, m/z 616.8154  
 L OSG37 P180811 230811-s1.02251.02251.2.dta

X-range:

-

MassTol: Y-zoom:

MassType:

AVG  MONO

Axis:

1  2

Label:

I  M  -

Ions:

a  +  2+  3+

b  +  2+  3+

c  +  2+  3+

x  +  2+  3+

y  +  2+  3+

z  +  2+  3+

hide H<sub>2</sub>O/NH<sub>3</sub>

zoom 112-122

GO

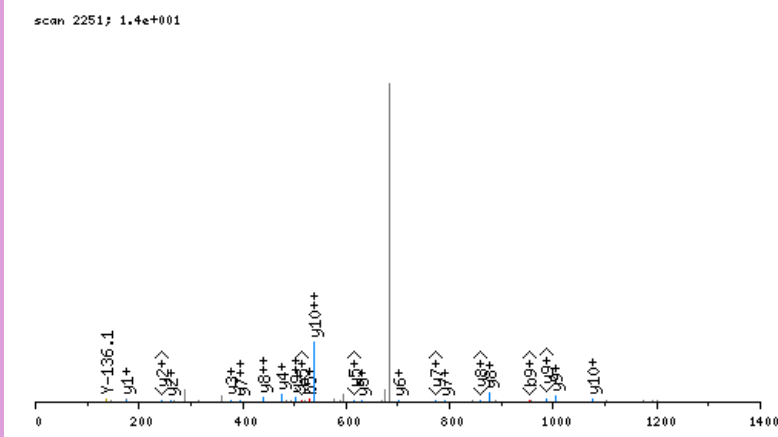

click image to zoom in; click top corners to zoom out [\[precursor±\]](#)

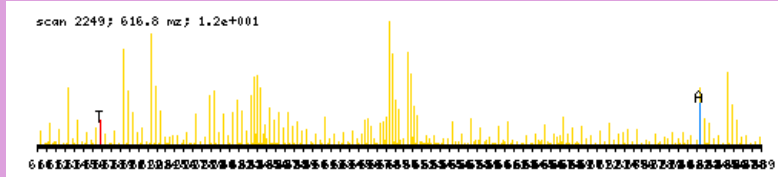

zoomed in precursor plot; T=theoretical m/z, A=acquired m/z

| b <sup>+</sup> | #  | AA # | y <sup>+</sup> | y <sup>2+</sup> |
|----------------|----|------|----------------|-----------------|
| 158.0453       | 1  | D 11 |                |                 |
| 229.0825       | 2  | A 10 | 1075.5860      | 538.2969        |
| 357.1410       | 3  | Q 9  | 1004.5489      | 502.7784        |
| 444.1731       | 4  | S 8  | 876.4903       | 438.7491        |
| 531.2051       | 5  | S 7  | 789.4583       | 395.2331        |
| 602.2422       | 6  | A 6  | 702.4263       | 351.7171        |
| 758.3685       | 7  | K 5  | 631.3892       | 316.1985        |
| 857.4369       | 8  | V 4  | 475.2629       | 238.1353        |
| 971.4798       | 9  | N 3  | 376.1945       | 188.6011        |
| 1058.5119      | 10 | S 2  | 262.1515       | 131.5797        |
|                | 11 | R 1  | 175.1195       | 88.0637         |

N-term:+43.02 K(7):+156.13

DDDIAALVVDNNGSGMCKAGFAGDDAPR, MH+ 2807.2616, m/z 936.4254  
 L OSG36 P180811 230811-s1.06047.06047.3.dta

X-range:

-

MassTol: Y-zoom:

MassType:

AVG  MONO

Axis:

1  2

Label:

I  M  -

Ions:

a  +  2+  3+

b  +  2+  3+

c  +  2+  3+

x  +  2+  3+

y  +  2+  3+

z  +  2+  3+

hide H<sub>2</sub>O/NH<sub>3</sub>

zoom 112-122

GO

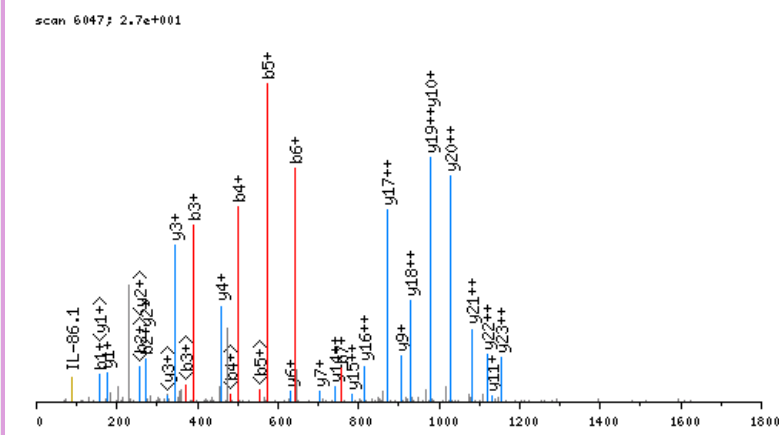

click image to zoom in; click top corners to zoom out [\[precursor±\]](#)

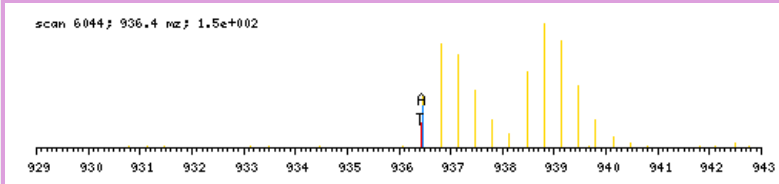

zoomed in precursor plot; T=theoretical m/z, A=acquired m/z

| b <sup>+</sup> | #  | AA | #  | y <sup>+</sup> | y <sup>2+</sup> |
|----------------|----|----|----|----------------|-----------------|
| 158.0453       | 1  | D  | 27 |                |                 |
| 273.0723       | 2  | D  | 26 | 2650.2241      | 1325.6160       |
| 388.0992       | 3  | D  | 25 | 2535.1972      | 1268.1025       |
| 501.1833       | 4  | I  | 24 | 2420.1702      | 1210.5890       |
| 572.2204       | 5  | A  | 23 | 2307.0862      | 1154.0470       |
| 643.2575       | 6  | A  | 22 | 2236.0491      | 1118.5284       |
| 756.3416       | 7  | L  | 21 | 2165.0119      | 1083.0099       |
| 855.4100       | 8  | V  | 20 | 2051.9279      | 1026.4678       |
| 954.4784       | 9  | V  | 19 | 1952.8595      | 976.9336        |
| 1069.5054      | 10 | D  | 18 | 1853.7910      | 927.3994        |
| 1183.5483      | 11 | N  | 17 | 1738.7641      | 869.8860        |
| 1240.5697      | 12 | G  | 16 | 1624.7212      | 812.8645        |
| 1327.6018      | 13 | S  | 15 | 1567.6997      | 784.3538        |
| 1384.6232      | 14 | G  | 14 | 1480.6677      | 740.8378        |
| 1515.6637      | 15 | M  | 13 | 1423.6462      | 712.3270        |
| 1675.6943      | 16 | C  | 12 | 1292.6057      | 646.8068        |
| 1831.8206      | 17 | K  | 11 | 1132.5751      | 566.7915        |
| 1902.8577      | 18 | A  | 10 | 976.4488       | 488.7283        |
| 1959.8792      | 19 | G  | 9  | 905.4117       | 453.2098        |
| 2106.9476      | 20 | F  | 8  | 848.3903       | 424.6990        |
| 2177.9847      | 21 | A  | 7  | 701.3218       | 351.1648        |
| 2235.0062      | 22 | G  | 6  | 630.2847       | 315.6463        |
| 2350.0331      | 23 | D  | 5  | 573.2633       | 287.1355        |
| 2465.0601      | 24 | D  | 4  | 458.2363       | 229.6221        |
| 2536.0972      | 25 | A  | 3  | 343.2094       | 172.1086        |
| 2633.1500      | 26 | P  | 2  | 272.1723       | 136.5900        |
|                | 27 | R  | 1  | 175.1195       | 88.0637         |

N-term: +43.02 C(16) : +160.03  
 K(17) : +156.13

DDIFTQCR, MH+ 1096.4733, m/z 548.7403  
 L OSG41 P180811 230811-s1.06460.06460.2.dta

X-range:

-

MassTol: Y-zoom:

MassType:

AVG  MONO

Axis:

1  2

Label:

I  M  -

Ions:

a  +  2+  3+

b  +  2+  3+

c  +  2+  3+

x  +  2+  3+

y  +  2+  3+

z  +  2+  3+

hide H<sub>2</sub>O/NH<sub>3</sub>

zoom 112-122

GO

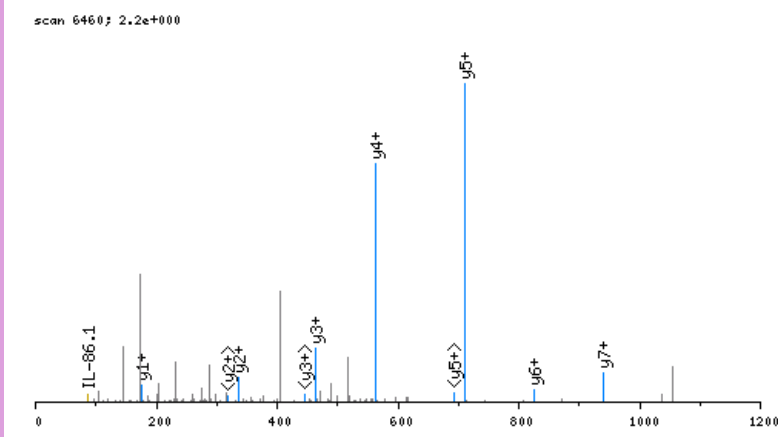

click image to zoom in; click top corners to zoom out [\[precursor±\]](#)

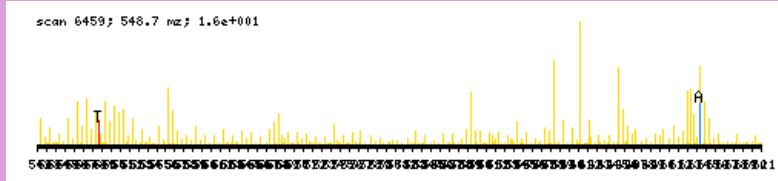

zoomed in precursor plot; T=theoretical m/z, A=acquired m/z

| b <sup>+</sup> | # | AA # | y <sup>+</sup> | y <sup>2+</sup> |
|----------------|---|------|----------------|-----------------|
| 158.0453       | 1 | D 8  |                |                 |
| 273.0723       | 2 | D 7  | 939.4358       | 470.2218        |
| 386.1564       | 3 | I 6  | 824.4088       | 412.7083        |
| 533.2248       | 4 | F 5  | 711.3248       | 356.1663        |
| 634.2724       | 5 | T 4  | 564.2564       | 282.6321        |
| 762.3310       | 6 | Q 3  | 463.2087       | 232.1083        |
| 922.3616       | 7 | C 2  | 335.1501       | 168.0790        |
|                | 8 | R 1  | 175.1195       | 88.0637         |

N-term:+43.02 C(7):+160.03



DDREDLVYQAKLAEQAER, MH+ 2225.1263, m/z 742.3803  
 L OSG39 P180811 230811-s1.05794.05794.3.dta

scan 5794; 1.5e+001

X-range:

-

MassTol: Y-zoom:

MassType:

AVG  MONO

Axis:

1  2

Label:

I  M  -

Ions:

a  +  2+  3+

b  +  2+  3+

c  +  2+  3+

x  +  2+  3+

y  +  2+  3+

z  +  2+  3+

hide H<sub>2</sub>O/NH<sub>3</sub>

zoom 112-122

GO

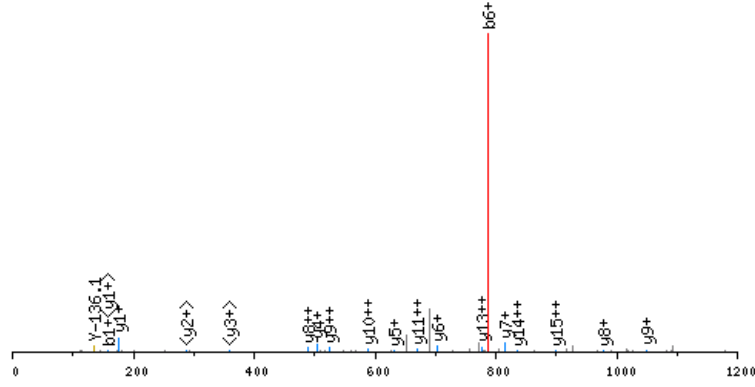

click image to zoom in; click top corners to zoom out [\[precursor±\]](#)

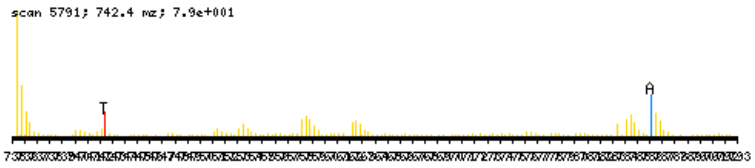

zoomed in precursor plot; T=theoretical m/z, A=acquired m/z

| b <sup>+</sup> | #  | AA # | y <sup>+</sup> | y <sup>2+</sup> |
|----------------|----|------|----------------|-----------------|
| 158.0453       | 1  | D 18 |                |                 |
| 273.0723       | 2  | D 17 | 2068.0887      | 1034.5483       |
| 429.1734       | 3  | R 16 | 1953.0618      | 977.0348        |
| 558.2160       | 4  | E 15 | 1796.9607      | 898.9843        |
| 673.2429       | 5  | D 14 | 1667.9181      | 834.4630        |
| 786.3270       | 6  | L 13 | 1552.8912      | 776.9495        |
| 885.3954       | 7  | V 12 | 1439.8071      | 720.4075        |
| 1048.4587      | 8  | Y 11 | 1340.7387      | 670.8733        |
| 1176.5173      | 9  | Q 10 | 1177.6753      | 589.3416        |
| 1247.5544      | 10 | A 9  | 1049.6168      | 525.3123        |
| 1409.7125      | 11 | K 8  | 978.5797       | 489.7937        |
| 1522.7966      | 12 | L 7  | 816.4216       | 408.7147        |
| 1593.8337      | 13 | A 6  | 703.3375       | 352.1727        |
| 1722.8763      | 14 | E 5  | 632.3004       | 316.6541        |
| 1850.9349      | 15 | Q 4  | 503.2578       | 252.1328        |
| 1921.9720      | 16 | A 3  | 375.1992       | 188.1035        |
| 2051.0146      | 17 | E 2  | 304.1621       | 152.5850        |
|                | 18 | R 1  | 175.1195       | 88.0637         |

N-term:+43.02 K(11) :+162.16

DEDETTALVCDNNGSLVKAGFAGDDAPR, MH+ 2956.3694, m/z 986.1280  
L OSG36 P180811 230811-sl.05385.05385.3.dta

X-range:

-

MassTol: Y-zoom:

MassType:

AVG  MONO

Axis:

1  2

Label:

I  M  -

Ions:

a  +  2+  3+

b  +  2+  3+

c  +  2+  3+

x  +  2+  3+

y  +  2+  3+

z  +  2+  3+

hide H<sub>2</sub>O/NH<sub>3</sub>

zoom 112-122

GO

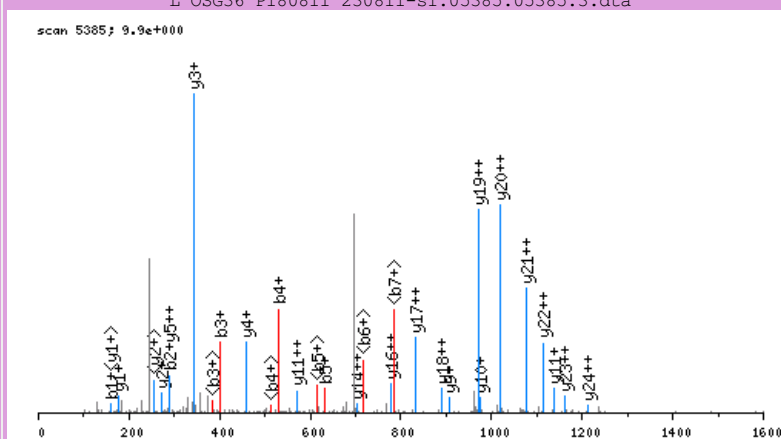

click image to zoom in; click top corners to zoom out [\[precursor±\]](#)

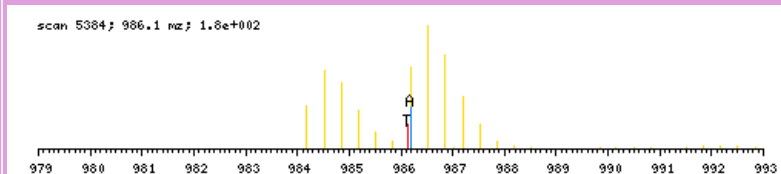

zoomed in precursor plot; T=theoretical m/z, A=acquired m/z

| b <sup>+</sup> | #  | AA # | y <sup>+</sup> | y <sup>2+</sup> |
|----------------|----|------|----------------|-----------------|
| 158.0453       | 1  | D 28 |                |                 |
| 287.0879       | 2  | E 27 | 2799.3319      | 1400.1699       |
| 402.1149       | 3  | D 26 | 2670.2893      | 1335.6486       |
| 531.1575       | 4  | E 25 | 2555.2624      | 1278.1351       |
| 632.2052       | 5  | T 24 | 2426.2198      | 1213.6138       |
| 733.2528       | 6  | T 23 | 2325.1721      | 1163.0900       |
| 804.2899       | 7  | A 22 | 2224.1244      | 1112.5661       |
| 917.3740       | 8  | L 21 | 2153.0873      | 1077.0476       |
| 1016.4424      | 9  | V 20 | 2040.0033      | 1020.5055       |
| 1176.4730      | 10 | C 19 | 1940.9348      | 970.9713        |
| 1291.5000      | 11 | D 18 | 1780.9042      | 890.9560        |
| 1405.5429      | 12 | N 17 | 1665.8773      | 833.4426        |
| 1462.5644      | 13 | G 16 | 1551.8344      | 776.4211        |
| 1549.5964      | 14 | S 15 | 1494.8129      | 747.9104        |
| 1606.6178      | 15 | G 14 | 1407.7809      | 704.3944        |
| 1719.7019      | 16 | L 13 | 1350.7594      | 675.8836        |
| 1818.7703      | 17 | V 12 | 1237.6753      | 619.3416        |
| 1980.9284      | 18 | K 11 | 1138.6069      | 569.8074        |
| 2051.9655      | 19 | A 10 | 976.4488       | 488.7283        |
| 2108.9870      | 20 | G 9  | 905.4117       | 453.2098        |
| 2256.0554      | 21 | F 8  | 848.3903       | 424.6990        |
| 2327.0925      | 22 | A 7  | 701.3218       | 351.1648        |
| 2384.1140      | 23 | G 6  | 630.2847       | 315.6463        |
| 2499.1409      | 24 | D 5  | 573.2633       | 287.1355        |
| 2614.1679      | 25 | D 4  | 458.2363       | 229.6221        |
| 2685.2050      | 26 | A 3  | 343.2094       | 172.1086        |
| 2782.2578      | 27 | P 2  | 272.1723       | 136.5900        |
|                | 28 | R 1  | 175.1195       | 88.0637         |

N-term: +43.02 C(10) : +160.03  
K(18) : +162.16

DEKVVYTDK, MH+ 1101.5641, m/z 551.2857  
 L OSG38 P180811 230811-s1.02685.02685.2.dta

X-range:

-

MassTol: Y-zoom:

MassType:

AVG  MONO

Axis:

1  2

Label:

I  M  -

Ions:

a  +  2+  3+

b  +  2+  3+

c  +  2+  3+

x  +  2+  3+

y  +  2+  3+

z  +  2+  3+

hide H<sub>2</sub>O/NH<sub>3</sub>

zoom 112-122

GO

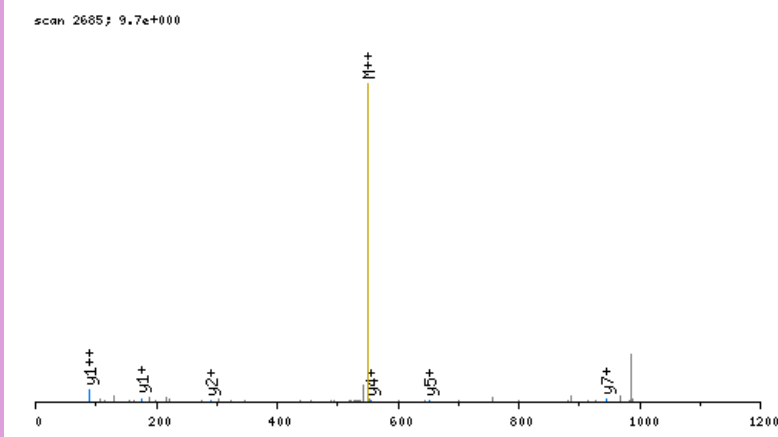

click image to zoom in; click top corners to zoom out [\[precursor±\]](#)

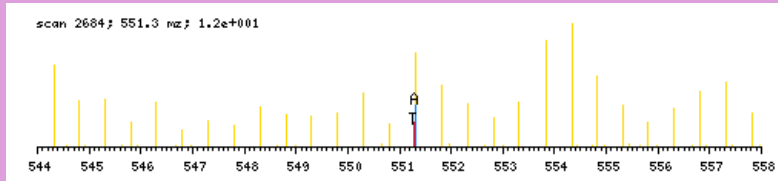

zoomed in precursor plot; T=theoretical m/z, A=acquired m/z

| b <sup>+</sup> | # | AA # | y <sup>+</sup> | y <sup>2+</sup> |
|----------------|---|------|----------------|-----------------|
| 158.0453       | 1 | D 8  |                |                 |
| 287.0879       | 2 | E 7  | 944.5266       | 472.7672        |
| 449.2460       | 3 | K 6  | 815.4840       | 408.2459        |
| 548.3145       | 4 | V 5  | 653.3259       | 327.1668        |
| 711.3778       | 5 | Y 4  | 554.2575       | 277.6326        |
| 812.4255       | 6 | T 3  | 391.1941       | 196.1010        |
| 927.4524       | 7 | D 2  | 290.1464       | 145.5771        |
|                | 8 | R 1  | 175.1195       | 88.0637         |

N-term:+43.02 K(3):+162.16

DETSPLVSPER, MH+ 1271.6119, m/z 636.3096  
 L OSG41 P180811 230811-s1.05085.05085.2.dta

X-range:

-

MassTol: Y-zoom:

MassType:

AVG  MONO

Axis:

1  2

Label:

I  M  -

Ions:

a  +  2+  3+

b  +  2+  3+

c  +  2+  3+

x  +  2+  3+

y  +  2+  3+

z  +  2+  3+

hide H<sub>2</sub>O/NH<sub>3</sub>

zoom 112-122

GO

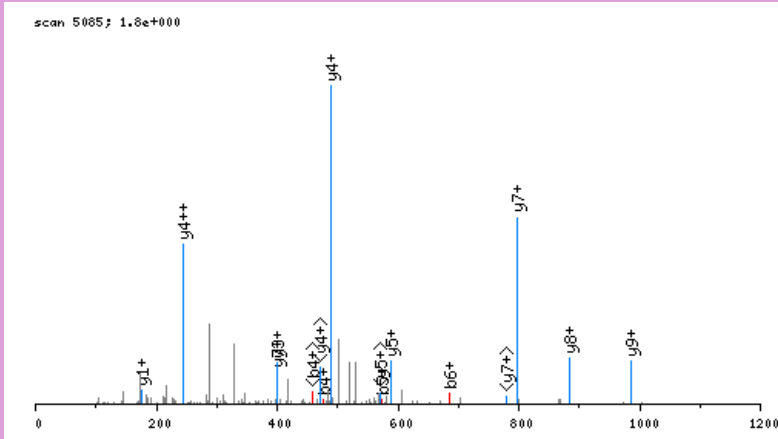

click image to zoom in; click top corners to zoom out [\[precursor±\]](#)

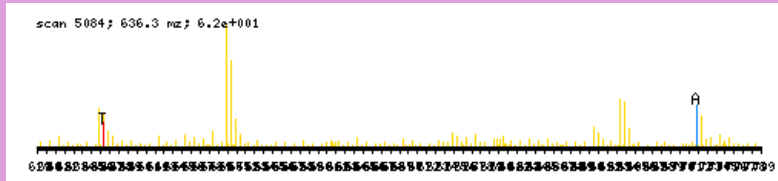

zoomed in precursor plot; T=theoretical m/z, A=acquired m/z

| b <sup>+</sup> | #  | AA # | y <sup>+</sup> | y <sup>2+</sup> |
|----------------|----|------|----------------|-----------------|
| 158.0453       | 1  | D 11 |                |                 |
| 287.0879       | 2  | E 10 | 1114.5744      | 557.7911        |
| 388.1356       | 3  | T 9  | 985.5318       | 493.2698        |
| 475.1676       | 4  | S 8  | 884.4842       | 442.7460        |
| 572.2204       | 5  | P 7  | 797.4521       | 399.2300        |
| 685.3045       | 6  | L 6  | 700.3994       | 350.7036        |
| 784.3729       | 7  | V 5  | 587.3153       | 294.1616        |
| 871.4049       | 8  | S 4  | 488.2469       | 244.6274        |
| 968.4577       | 9  | P 3  | 401.2149       | 201.1113        |
| 1097.5003      | 10 | E 2  | 304.1621       | 152.5850        |
|                | 11 | R 1  | 175.1195       | 88.0637         |

N-term:+43.02

DFSKLPK, MH+ 944.6094, m/z 472.8083  
L OSG37 P180811 230811-s1.06260.06260.2.dta

scan 6260; 3.5e+001

X-range:

-

MassTol: Y-zoom:

MassType:

AVG  MONO

Axis:

1  2

Label:

I  M  -

Ions:

a  +  2+  3+

b  +  2+  3+

c  +  2+  3+

x  +  2+  3+

y  +  2+  3+

z  +  2+  3+

hide H<sub>2</sub>O/NH<sub>3</sub>

zoom 112-122

GO

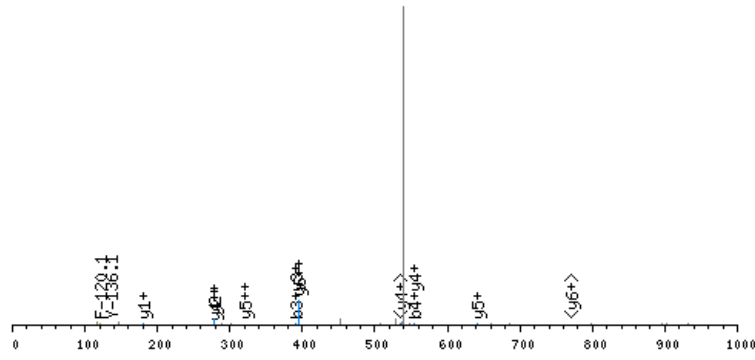

click image to zoom in; click top corners to zoom out [\[precursor±\]](#)

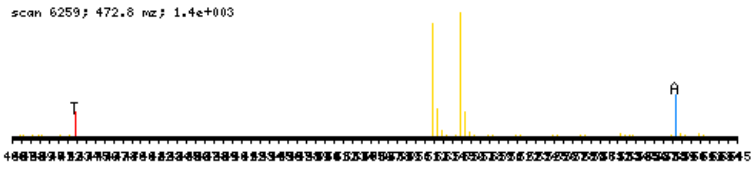

zoomed in precursor plot; T=theoretical m/z, A=acquired m/z

| b <sup>+</sup> | # | AA # | y <sup>+</sup> | y <sup>2+</sup> |
|----------------|---|------|----------------|-----------------|
| 158.0453       | 1 | D    | 7              |                 |
| 305.1138       | 2 | F    | 6              | 787.5719        |
| 392.1458       | 3 | S    | 5              | 640.5034        |
| 554.3039       | 4 | K    | 4              | 553.4714        |
| 667.3879       | 5 | L    | 3              | 391.3133        |
| 764.4407       | 6 | P    | 2              | 278.2293        |
|                | 7 | K    | 1              | 181.1765        |

N-term:+43.02 K(4):+162.16  
K(7):+162.16

DFSKLPKIR, MH+ 1201.7310, m/z 401.2485  
 L OSG40 P180811 230811-s1.07545.07545.3.dta

X-range:

-

MassTol: Y-zoom:

MassType:

AVG  MONO

Axis:

1  2

Label:

I  M  -

Ions:

a  +  2+  3+

b  +  2+  3+

c  +  2+  3+

x  +  2+  3+

y  +  2+  3+

z  +  2+  3+

hide H<sub>2</sub>O/NH<sub>3</sub>

zoom 112-122

GO

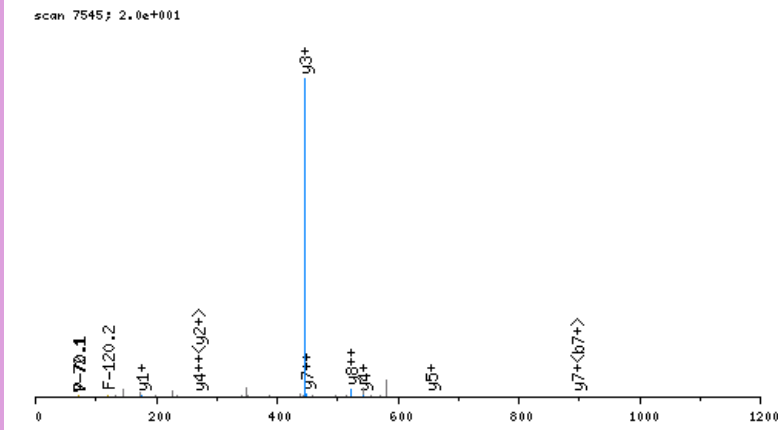

click image to zoom in; click top corners to zoom out [\[precursor±\]](#)

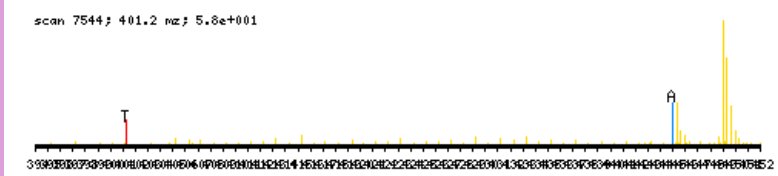

zoomed in precursor plot; T=theoretical m/z, A=acquired m/z

| b <sup>+</sup> | # | AA # | y <sup>+</sup> | y <sup>2+</sup> |
|----------------|---|------|----------------|-----------------|
| 158.0453       | 1 | D    | 9              |                 |
| 305.1138       | 2 | F    | 8              | 1044.6934       |
| 392.1458       | 3 | S    | 7              | 897.6250        |
| 548.2721       | 4 | K    | 6              | 810.5930        |
| 661.3561       | 5 | L    | 5              | 654.4667        |
| 758.4089       | 6 | P    | 4              | 541.3826        |
| 914.5352       | 7 | K    | 3              | 444.3299        |
| 1027.6193      | 8 | I    | 2              | 288.2036        |
|                | 9 | R    | 1              | 175.1195        |

N-term:+43.02 K(4):+156.13  
 K(7):+156.13

DGAAGPGEPAHETLQTLR, MH+ 2134.0165, m/z 712.0104  
 L OSG37 P180811 230811-s1.06422.06422.3.dta

X-range:

-

MassTol: Y-zoom:

MassType:

AVG  MONO

Axis:

1  2

Label:

I  M  -

Ions:

a  +  2+  3+

b  +  2+  3+

c  +  2+  3+

x  +  2+  3+

y  +  2+  3+

z  +  2+  3+

hide H<sub>2</sub>O/NH<sub>3</sub>

zoom 112-122

GO

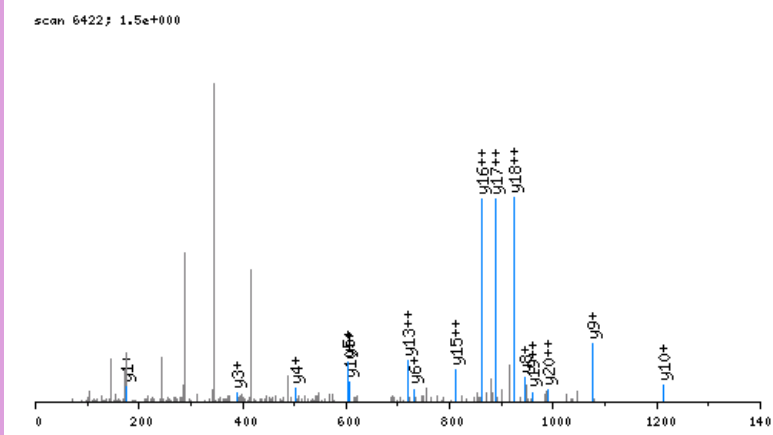

click image to zoom in; click top corners to zoom out [\[precursor±\]](#)

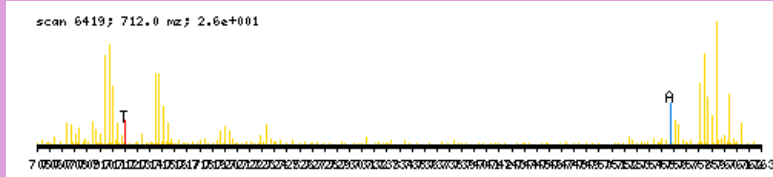

zoomed in precursor plot; T=theoretical m/z, A=acquired m/z

| b <sup>+</sup> | #  | AA # | y <sup>+</sup> | y <sup>2+</sup> |
|----------------|----|------|----------------|-----------------|
| 158.0453       | 1  | D 21 |                |                 |
| 215.0668       | 2  | G 20 | 1976.9790      | 988.9934        |
| 286.1039       | 3  | A 19 | 1919.9575      | 960.4827        |
| 357.1410       | 4  | A 18 | 1848.9204      | 924.9641        |
| 414.1625       | 5  | G 17 | 1777.8833      | 889.4456        |
| 511.2153       | 6  | P 16 | 1720.8618      | 860.9348        |
| 568.2367       | 7  | G 15 | 1623.8091      | 812.4084        |
| 697.2793       | 8  | E 14 | 1566.7876      | 783.8977        |
| 754.3008       | 9  | G 13 | 1437.7450      | 719.3764        |
| 851.3535       | 10 | P 12 | 1380.7236      | 690.8657        |
| 922.3907       | 11 | A 11 | 1283.6708      | 642.3393        |
| 1059.4496      | 12 | H 10 | 1212.6337      | 606.8207        |
| 1188.4922      | 13 | E 9  | 1075.5748      | 538.2913        |
| 1289.5398      | 14 | T 8  | 946.5322       | 473.7700        |
| 1402.6239      | 15 | L 7  | 845.4845       | 423.2462        |
| 1530.6825      | 16 | Q 6  | 732.4004       | 366.7041        |
| 1631.7302      | 17 | T 5  | 604.3418       | 302.6748        |
| 1744.8142      | 18 | L 4  | 503.2942       | 252.1510        |
| 1831.8463      | 19 | S 3  | 390.2101       | 195.6090        |
| 1959.9048      | 20 | Q 2  | 303.1781       | 152.0930        |
|                | 21 | R 1  | 175.1195       | 88.0637         |

N-term:+43.02

DGEDDSNLVIKKR, MH+ 1586.8391, m/z 529.6179  
 L OSG40 P180811 230811-s1.04965.04965.3.dta

X-range:

-

MassTol: Y-zoom:

MassType:

AVG  MONO

Axis:

1  2

Label:

I  M  -

Ions:

a  +  2+  3+

b  +  2+  3+

c  +  2+  3+

x  +  2+  3+

y  +  2+  3+

z  +  2+  3+

hide H<sub>2</sub>O/NH<sub>3</sub>

zoom 112-122

GO

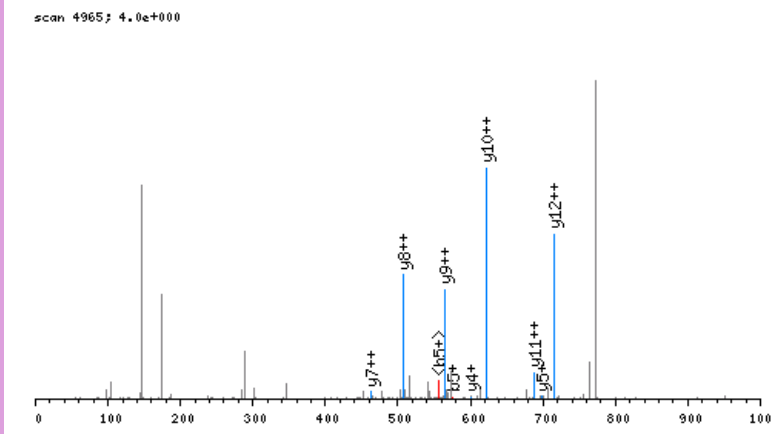

click image to zoom in; click top corners to zoom out [\[precursor±\]](#)

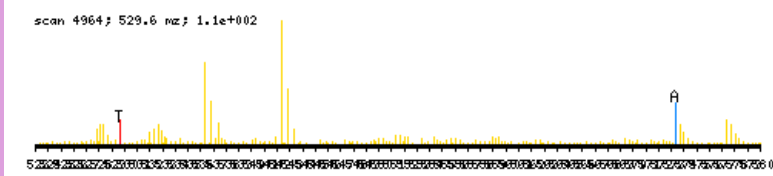

zoomed in precursor plot; T=theoretical m/z, A=acquired m/z

| b <sup>+</sup> | #  | AA | #  | y <sup>+</sup> | y <sup>2+</sup> |
|----------------|----|----|----|----------------|-----------------|
| 158.0453       | 1  | D  | 13 |                |                 |
| 215.0668       | 2  | G  | 12 | 1429.8015      | 715.4047        |
| 344.1094       | 3  | E  | 11 | 1372.7801      | 686.8940        |
| 459.1363       | 4  | D  | 10 | 1243.7375      | 622.3727        |
| 574.1633       | 5  | D  | 9  | 1128.7105      | 564.8592        |
| 661.1953       | 6  | S  | 8  | 1013.6836      | 507.3457        |
| 775.2382       | 7  | N  | 7  | 926.6516       | 463.8297        |
| 888.3223       | 8  | L  | 6  | 812.6086       | 406.8082        |
| 987.3907       | 9  | V  | 5  | 699.5246       | 350.2662        |
| 1100.4748      | 10 | I  | 4  | 600.4562       | 300.7320        |
| 1256.6011      | 11 | K  | 3  | 487.3721       | 244.1900        |
| 1412.7274      | 12 | K  | 2  | 331.2458       | 166.1268        |
|                | 13 | R  | 1  | 175.1195       | 88.0637         |

N-term:+43.02 K(11):+156.13  
 K(12):+156.13



DGIVPDIAVGTRK, MH+ 1416.8275, m/z 708.9174  
 L OSG37 P180811 230811-s1.07522.07522.2.dta

X-range:

-

MassTol: Y-zoom:

MassType:

AVG  MONO

Axis:

1  2

Label:

I  M  -

Ions:

a  +  2+  3+

b  +  2+  3+

c  +  2+  3+

x  +  2+  3+

y  +  2+  3+

z  +  2+  3+

hide H<sub>2</sub>O/NH<sub>3</sub>

zoom 112-122

GO

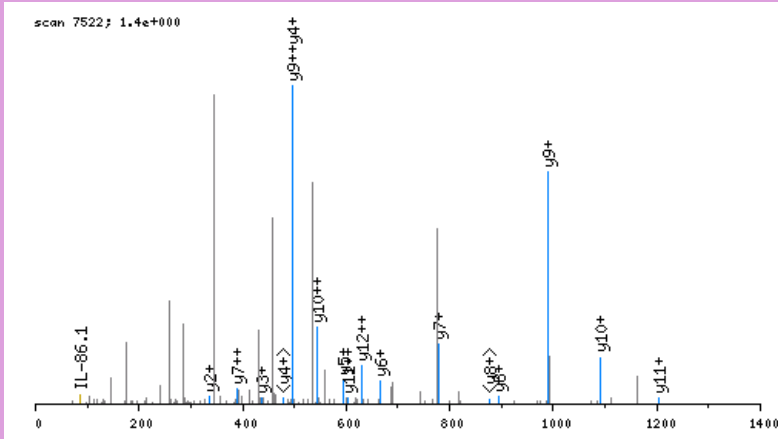

click image to zoom in; click top corners to zoom out [\[precursor±\]](#)

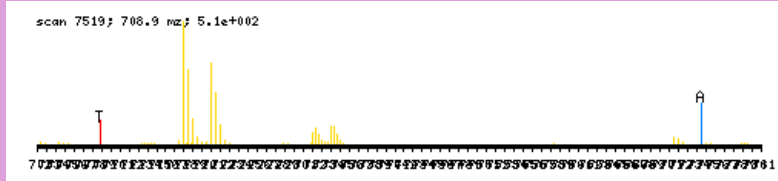

zoomed in precursor plot; T=theoretical m/z, A=acquired m/z

| b <sup>+</sup> | #  | AA # | y <sup>+</sup> | y <sup>2+</sup>    |
|----------------|----|------|----------------|--------------------|
| 158.0453       | 1  | D    | 13             |                    |
| 215.0668       | 2  | G    | 12             | 1259.7900 630.3989 |
| 328.1509       | 3  | I    | 11             | 1202.7685 601.8882 |
| 427.2193       | 4  | V    | 10             | 1089.6845 545.3461 |
| 524.2720       | 5  | P    | 9              | 990.6160 495.8119  |
| 639.2990       | 6  | D    | 8              | 893.5633 447.2856  |
| 752.3831       | 7  | I    | 7              | 778.5363 389.7721  |
| 823.4202       | 8  | A    | 6              | 665.4523 333.2300  |
| 922.4886       | 9  | V    | 5              | 594.4152 297.7115  |
| 979.5100       | 10 | G    | 4              | 495.3467 248.1773  |
| 1080.5577      | 11 | T    | 3              | 438.3253 219.6666  |
| 1242.7158      | 12 | K    | 2              | 337.2776 169.1427  |
|                | 13 | R    | 1              | 175.1195 88.0637   |

N-term:+43.02 K(12):+162.16

DGLVAQCSAR, MH+ 1118.5264, m/z 559.7668  
 L OSG41 P180811 230811-s1.04860.04860.2.dta

X-range:

-

MassTol: Y-zoom:

MassType:

AVG  MONO

Axis:

1  2

Label:

I  M  -

Ions:

a  +  2+  3+

b  +  2+  3+

c  +  2+  3+

x  +  2+  3+

y  +  2+  3+

z  +  2+  3+

hide H<sub>2</sub>O/NH<sub>3</sub>

zoom 112-122

GO

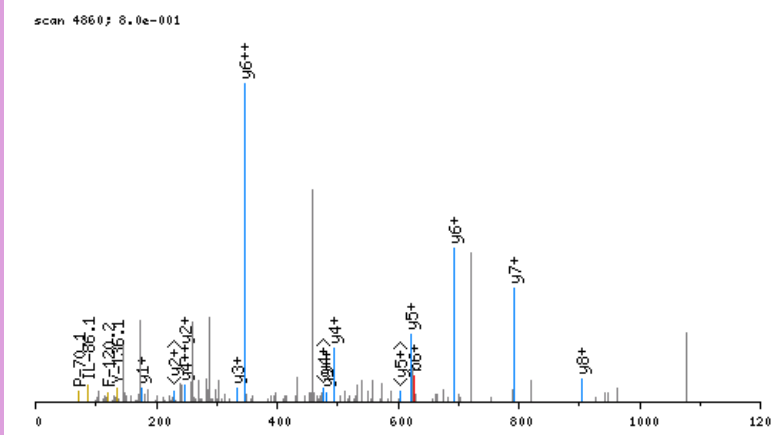

click image to zoom in; click top corners to zoom out [\[precursor±\]](#)

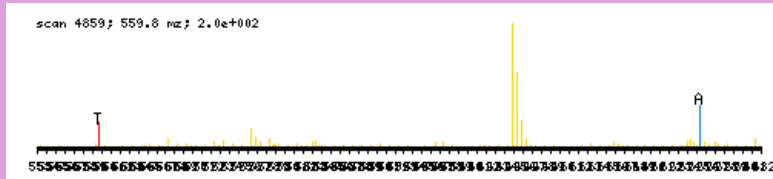

zoomed in precursor plot; T=theoretical m/z, A=acquired m/z

| b <sup>+</sup> | #  | AA | #  | y <sup>+</sup> | y <sup>2+</sup> |
|----------------|----|----|----|----------------|-----------------|
| 158.0453       | 1  | D  | 10 |                |                 |
| 215.0668       | 2  | G  | 9  | 961.4889       | 481.2484        |
| 328.1509       | 3  | L  | 8  | 904.4674       | 452.7376        |
| 427.2193       | 4  | V  | 7  | 791.3833       | 396.1956        |
| 498.2564       | 5  | A  | 6  | 692.3149       | 346.6614        |
| 626.3150       | 6  | Q  | 5  | 621.2778       | 311.1428        |
| 786.3456       | 7  | C  | 4  | 493.2192       | 247.1135        |
| 873.3776       | 8  | S  | 3  | 333.1886       | 167.0982        |
| 944.4147       | 9  | A  | 2  | 246.1566       | 123.5822        |
|                | 10 | R  | 1  | 175.1195       | 88.0637         |

N-term:+43.02 C(7):+160.03

DGSEDDPTIFSAR, MH+ 1451.6291, m/z 726.3182  
 L OSG41 P180811 230811-s1.06036.06036.2.dta

X-range:

-

MassTol: Y-zoom:

MassType:

AVG  MONO

Axis:

1  2

Label:

I  M  -

Ions:

a  +  2+  3+

b  +  2+  3+

c  +  2+  3+

x  +  2+  3+

y  +  2+  3+

z  +  2+  3+

hide H<sub>2</sub>O/NH<sub>3</sub>

zoom 112-122

GO

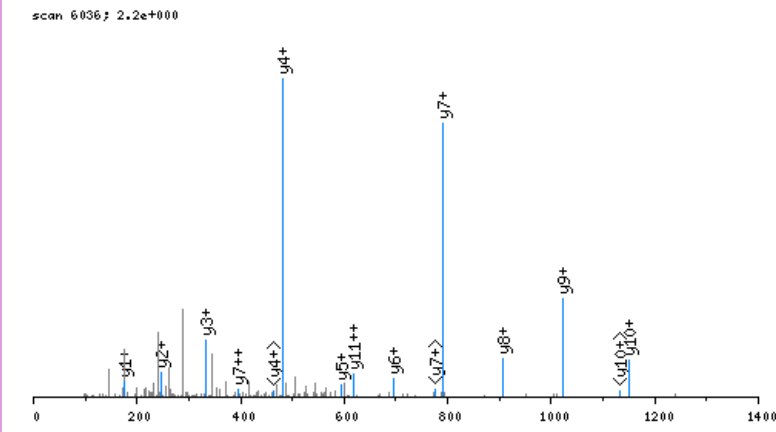

click image to zoom in; click top corners to zoom out [\[precursor±\]](#)

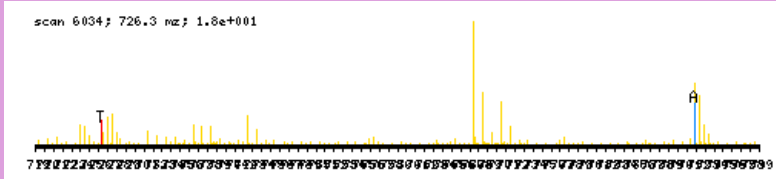

zoomed in precursor plot; T=theoretical m/z, A=acquired m/z

| b <sup>+</sup> | #  | AA # | y <sup>+</sup>   | y <sup>2+</sup> |
|----------------|----|------|------------------|-----------------|
| 158.0453       | 1  | D 13 |                  |                 |
| 215.0668       | 2  | G 12 | 1294.5915        | 647.7997        |
| 302.0988       | 3  | S 11 | 1237.5701        | <b>619.2889</b> |
| 431.1414       | 4  | E 10 | <b>1150.5380</b> | 575.7729        |
| 546.1684       | 5  | D 9  | <b>1021.4954</b> | 511.2516        |
| 661.1953       | 6  | D 8  | <b>906.4685</b>  | 453.7382        |
| 758.2481       | 7  | P 7  | <b>791.4416</b>  | <b>396.2247</b> |
| 859.2958       | 8  | T 6  | <b>694.3888</b>  | 347.6983        |
| 972.3798       | 9  | I 5  | <b>593.3411</b>  | 297.1745        |
| 1119.4482      | 10 | F 4  | <b>480.2571</b>  | 240.6324        |
| 1206.4803      | 11 | S 3  | <b>333.1886</b>  | 167.0982        |
| 1277.5174      | 12 | A 2  | <b>246.1566</b>  | 123.5822        |
|                | 13 | R 1  | <b>175.1195</b>  | 88.0637         |

N-term:+43.02

DIAIHHPWIR, MH+ 1299.6962, m/z 433.9036  
 L OSG40 P180811 230811-s1.07660.07660.3.dta

X-range:

-

MassTol: Y-zoom:

MassType:

AVG  MONO

Axis:

1  2

Label:

I  M  -

Ions:

a  +  2+  3+

b  +  2+  3+

c  +  2+  3+

x  +  2+  3+

y  +  2+  3+

z  +  2+  3+

hide H<sub>2</sub>O/NH<sub>3</sub>

zoom 112-122

GO

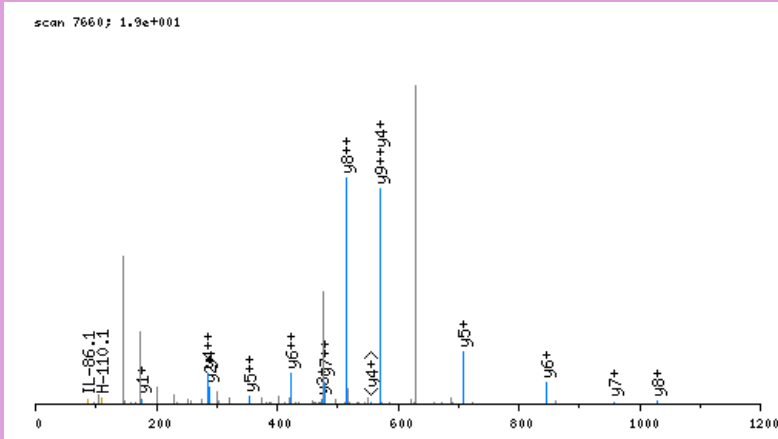

click image to zoom in; click top corners to zoom out [\[precursor±\]](#)

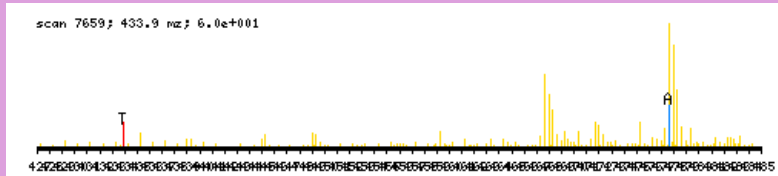

zoomed in precursor plot; T=theoretical m/z, A=acquired m/z

| b <sup>+</sup> | #  | AA # | y <sup>+</sup> | y <sup>2+</sup> |
|----------------|----|------|----------------|-----------------|
| 158.0453       | 1  | D 10 |                |                 |
| 271.1294       | 2  | I 9  | 1142.6587      | 571.8333        |
| 342.1665       | 3  | A 8  | 1029.5746      | 515.2912        |
| 455.2506       | 4  | I 7  | 958.5375       | 479.7727        |
| 592.3095       | 5  | H 6  | 845.4535       | 423.2306        |
| 729.3684       | 6  | H 5  | 708.3946       | 354.7012        |
| 826.4212       | 7  | P 4  | 571.3356       | 286.1717        |
| 1012.5005      | 8  | W 3  | 474.2829       | 237.6454        |
| 1125.5845      | 9  | I 2  | 288.2036       | 144.6057        |
|                | 10 | R 1  | 175.1195       | 88.0637         |

N-term:+43.02

DILKSEILR, MH+ 1156.6942, m/z 578.8507  
 L OSG37 P180811 230811-s1.08667.08667.2.dta

scan 8667; 2.1e+001

X-range:

-

MassTol: Y-zoom:

MassType:

AVG  MONO

Axis:

1  2

Label:

I  M  -

Ions:

a  +  2+  3+

b  +  2+  3+

c  +  2+  3+

x  +  2+  3+

y  +  2+  3+

z  +  2+  3+

hide H<sub>2</sub>O/NH<sub>3</sub>

zoom 112-122

GO

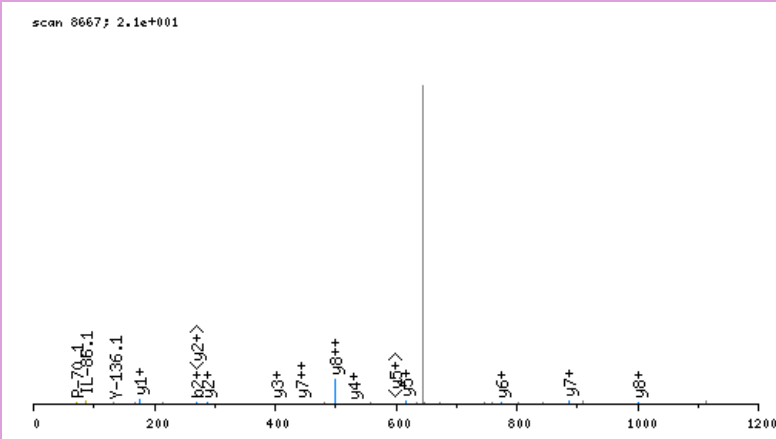

click image to zoom in; click top corners to zoom out [\[precursor±\]](#)

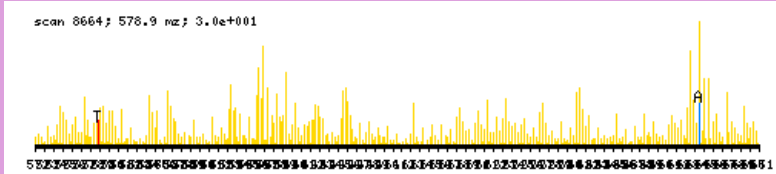

zoomed in precursor plot; T=theoretical m/z, A=acquired m/z

| b <sup>+</sup> | # | AA # | y <sup>+</sup> | y <sup>2+</sup> |
|----------------|---|------|----------------|-----------------|
| 158.0453       | 1 | D    | 9              |                 |
| 271.1294       | 2 | I    | 8              | 999.6567        |
| 384.2135       | 3 | L    | 7              | 886.5726        |
| 540.3398       | 4 | K    | 6              | 773.4886        |
| 627.3718       | 5 | S    | 5              | 617.3623        |
| 756.4144       | 6 | E    | 4              | 530.3302        |
| 869.4985       | 7 | I    | 3              | 401.2876        |
| 982.5825       | 8 | L    | 2              | 288.2036        |
|                | 9 | R    | 1              | 175.1195        |

N-term:+43.02 K(4):+156.13

DKNELVQKAKLAEQAER, MH+ 2114.2671, m/z 705.4272  
 L OSG40 P180811 230811-s1.06121.06121.3.dta

scan 6121; 2.0e+001

X-range:

-

MassTol: Y-zoom:

MassType:

AVG  MONO

Axis:

1  2

Label:

I  M  -

Ions:

a  +  2+  3+

b  +  2+  3+

c  +  2+  3+

x  +  2+  3+

y  +  2+  3+

z  +  2+  3+

hide H<sub>2</sub>O/NH<sub>3</sub>

zoom 112-122

GO

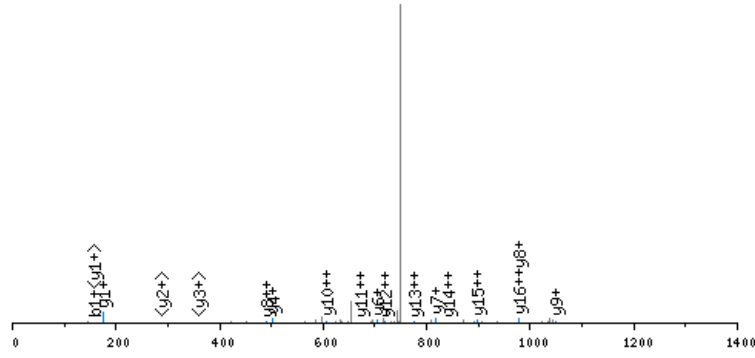

click image to zoom in; click top corners to zoom out [\[precursor±\]](#)

scan 6119; 705.4 nz; 4.7e+001

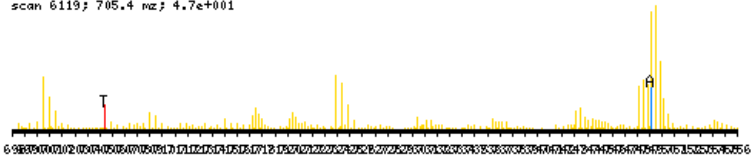

zoomed in precursor plot; T=theoretical m/z, A=acquired m/z

| b <sup>+</sup> | #  | AA # | y <sup>+</sup> | y <sup>2+</sup> |
|----------------|----|------|----------------|-----------------|
| 158.0453       | 1  | D 17 |                |                 |
| 320.2034       | 2  | K 16 | 1957.2295      | 979.1187        |
| 434.2464       | 3  | N 15 | 1795.0714      | 898.0396        |
| 563.2890       | 4  | E 14 | 1681.0285      | 841.0182        |
| 676.3730       | 5  | L 13 | 1551.9859      | 776.4969        |
| 775.4414       | 6  | V 12 | 1438.9019      | 719.9548        |
| 903.5000       | 7  | Q 11 | 1339.8334      | 670.4206        |
| 1065.6581      | 8  | K 10 | 1211.7749      | 606.3913        |
| 1136.6952      | 9  | A 9  | 1049.6168      | 525.3123        |
| 1298.8533      | 10 | K 8  | 978.5797       | 489.7937        |
| 1411.9374      | 11 | L 7  | 816.4216       | 408.7147        |
| 1482.9745      | 12 | A 6  | 703.3375       | 352.1727        |
| 1612.0171      | 13 | E 5  | 632.3004       | 316.6541        |
| 1740.0757      | 14 | Q 4  | 503.2578       | 252.1328        |
| 1811.1128      | 15 | A 3  | 375.1992       | 188.1035        |
| 1940.1554      | 16 | E 2  | 304.1621       | 152.5850        |
|                | 17 | R 1  | 175.1195       | 88.0637         |

N-term:+43.02 K(2):+162.16  
 K(8):+162.16 K(10):+162.16

DKVCAVFGGSR, MH+ 1271.6630, m/z 636.3352  
 L OSG37 P180811 230811-s1.07205.07205.2.dta

X-range:

-

MassTol: Y-zoom:

MassType:

AVG  MONO

Axis:

1  2

Label:

I  M  -

Ions:

a  +  2+  3+

b  +  2+  3+

c  +  2+  3+

x  +  2+  3+

y  +  2+  3+

z  +  2+  3+

hide H<sub>2</sub>O/NH<sub>3</sub>

zoom 112-122

GO

scan 7205; 1.2e+001

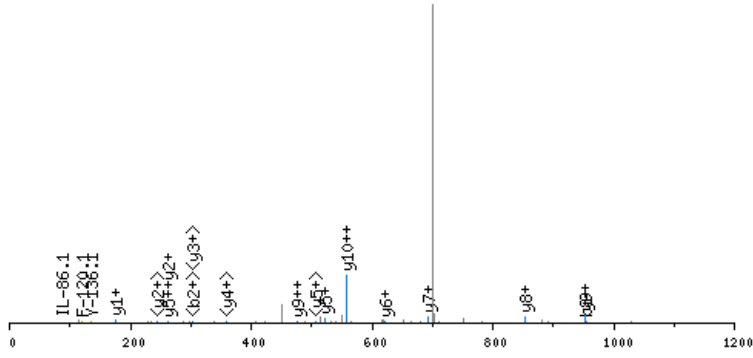

click image to zoom in; click top corners to zoom out [\[precursor±\]](#)

scan 7204; 636.3 m/z; 6.0e+001

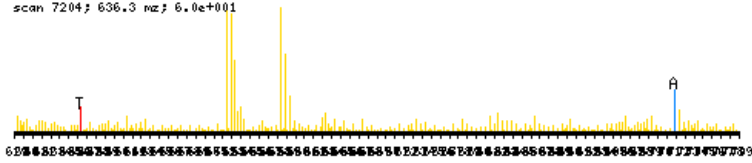

zoomed in precursor plot; T=theoretical m/z, A=acquired m/z

| b <sup>+</sup> | #  | AA # | y <sup>+</sup> | y <sup>2+</sup>    |
|----------------|----|------|----------------|--------------------|
| 158.0453       | 1  | D    | 11             |                    |
| 320.2034       | 2  | K    | 10             | 1114.6255 557.8167 |
| 419.2719       | 3  | V    | 9              | 952.4674 476.7376  |
| 579.3025       | 4  | C    | 8              | 853.3990 427.2034  |
| 650.3396       | 5  | A    | 7              | 693.3684 347.1881  |
| 749.4080       | 6  | V    | 6              | 622.3313 311.6696  |
| 896.4764       | 7  | F    | 5              | 523.2629 262.1353  |
| 953.4979       | 8  | G    | 4              | 376.1945 188.6011  |
| 1010.5193      | 9  | G    | 3              | 319.1730 160.0904  |
| 1097.5514      | 10 | S    | 2              | 262.1515 131.5797  |
|                | 11 | R    | 1              | 175.1195 88.0637   |

N-term:+43.02 K(2):+162.16  
 C(4):+160.03

DLEAVCKR, MH+ 1060.5461, m/z 530.7767  
 L OSG38 P180811 230811-s1.05201.05201.2.dta

scan 5201; 1.1e+001

X-range:

-

MassTol: Y-zoom:

MassType:

AVG  MONO

Axis:

1  2

Label:

I  M  -

Ions:

a  +  2+  3+

b  +  2+  3+

c  +  2+  3+

x  +  2+  3+

y  +  2+  3+

z  +  2+  3+

hide H<sub>2</sub>O/NH<sub>3</sub>

zoom 112-122

GO

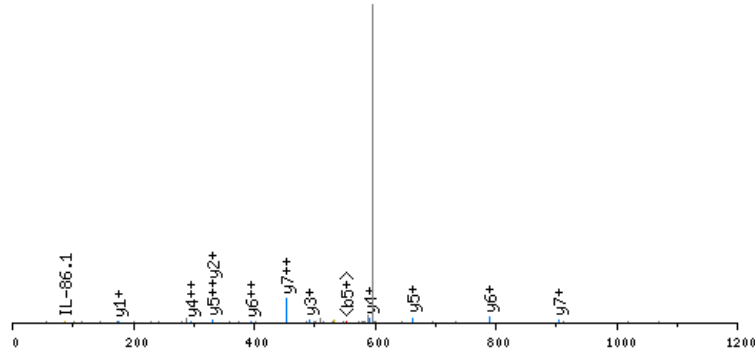

click image to zoom in; click top corners to zoom out [\[precursor±\]](#)

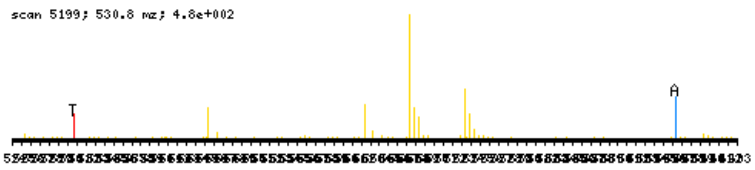

zoomed in precursor plot; T=theoretical m/z, A=acquired m/z

| b <sup>+</sup> | # | AA # | y <sup>+</sup> | y <sup>2+</sup>   |
|----------------|---|------|----------------|-------------------|
| 158.0453       | 1 | D    | 8              |                   |
| 271.1294       | 2 | L    | 7              | 903.5086 452.2582 |
| 400.1720       | 3 | E    | 6              | 790.4245 395.7162 |
| 471.2091       | 4 | A    | 5              | 661.3819 331.1949 |
| 570.2775       | 5 | V    | 4              | 590.3448 295.6763 |
| 730.3081       | 6 | C    | 3              | 491.2764 246.1421 |
| 886.4344       | 7 | K    | 2              | 331.2458 166.1268 |
|                | 8 | R    | 1              | 175.1195 88.0637  |

N-term:+43.02 C(6):+160.03  
 K(7):+156.13



DLGTAESTR, MH+ 991.4696, m/z 496.2385  
 L OSG41 P180811 230811-s1.04111.04111.2.dta

X-range:

-

MassTol: Y-zoom:

MassType:

AVG  MONO

Axis:

1  2

Label:

I  M  -

Ions:

a  +  2+  3+

b  +  2+  3+

c  +  2+  3+

x  +  2+  3+

y  +  2+  3+

z  +  2+  3+

hide H<sub>2</sub>O/NH<sub>3</sub>

zoom 112-122

GO

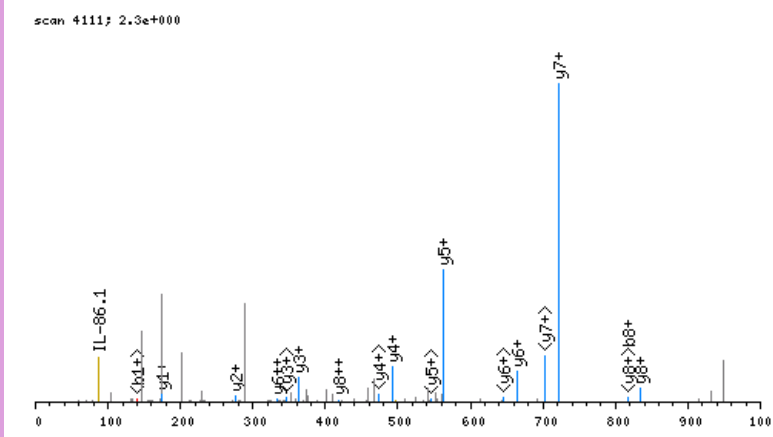

click image to zoom in; click top corners to zoom out [\[precursor±\]](#)

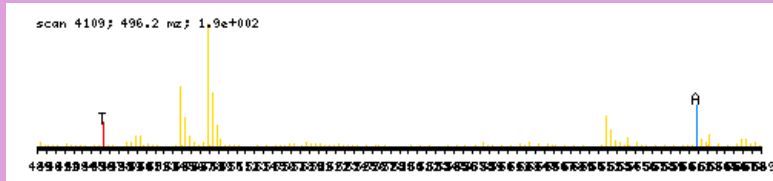

zoomed in precursor plot; T=theoretical m/z, A=acquired m/z

| b <sup>+</sup> | # | AA # | y <sup>+</sup> | y <sup>2+</sup>   |
|----------------|---|------|----------------|-------------------|
| 158.0453       | 1 | D    | 9              |                   |
| 271.1294       | 2 | L    | 8              | 834.4321 417.7200 |
| 328.1509       | 3 | G    | 7              | 721.3481 361.1779 |
| 429.1985       | 4 | T    | 6              | 664.3266 332.6672 |
| 500.2357       | 5 | A    | 5              | 563.2789 282.1434 |
| 629.2783       | 6 | E    | 4              | 492.2418 246.6248 |
| 716.3103       | 7 | S    | 3              | 363.1992 182.1035 |
| 817.3580       | 8 | T    | 2              | 276.1672 138.5875 |
|                | 9 | R    | 1              | 175.1195 88.0637  |

N-term:+43.02

DLLFGR, MH+ 762.4150, m/z 381.7112  
 L OSG41 P180811 230811-s1.07527.07527.2.dta

X-range:

-

MassTol: Y-zoom:

MassType:

AVG  MONO

Axis:

1  2

Label:

I  M  -

Ions:

a  +  2+  3+

b  +  2+  3+

c  +  2+  3+

x  +  2+  3+

y  +  2+  3+

z  +  2+  3+

hide H<sub>2</sub>O/NH<sub>3</sub>

zoom 112-122

GO

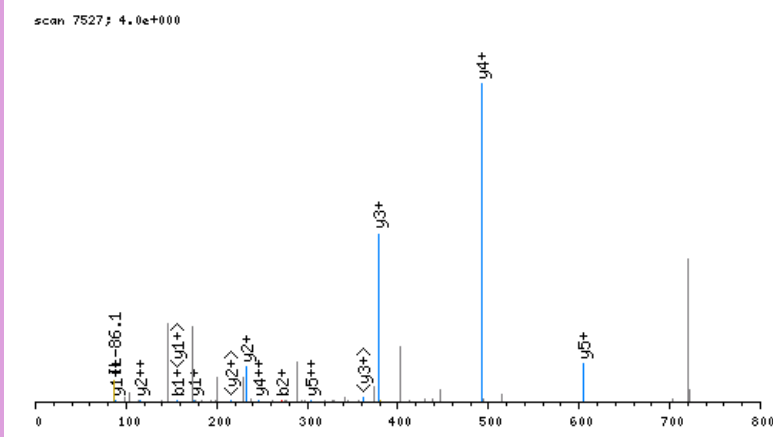

click image to zoom in; click top corners to zoom out [\[precursor±\]](#)

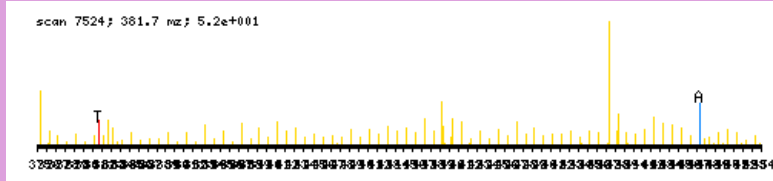

zoomed in precursor plot; T=theoretical m/z, A=acquired m/z

| b <sup>+</sup> | # | AA # | y <sup>+</sup> | y <sup>2+</sup>   |
|----------------|---|------|----------------|-------------------|
| 158.0453       | 1 | D    | 6              |                   |
| 271.1294       | 2 | L    | 5              | 605.3775 303.1927 |
| 384.2135       | 3 | L    | 4              | 492.2934 246.6506 |
| 531.2819       | 4 | F    | 3              | 379.2094 190.1086 |
| 588.3033       | 5 | G    | 2              | 232.1410 116.5744 |
|                | 6 | R    | 1              | 175.1195 88.0637  |

N-term:+43.02

DMDDDEMDPNYAR, MH+ 1628.5845, m/z 407.9016  
 L OSG40 P180811 230811-s1.04278.04278.4.dta

X-range:

-

MassTol: Y-zoom:

MassType:

AVG  MONO

Axis:

1  2

Label:

I  M  -

Ions:

a  +  2+  3+

b  +  2+  3+

c  +  2+  3+

x  +  2+  3+

y  +  2+  3+

z  +  2+  3+

hide H<sub>2</sub>O/NH<sub>3</sub>

zoom 112-122

GO

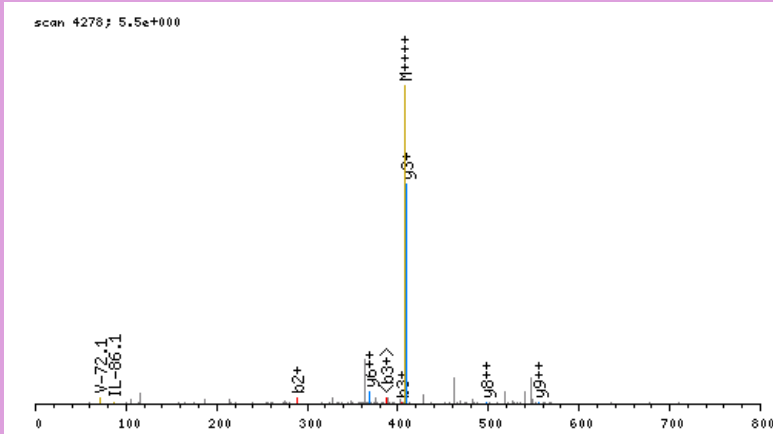

click image to zoom in; click top corners to zoom out [\[precursor±\]](#)

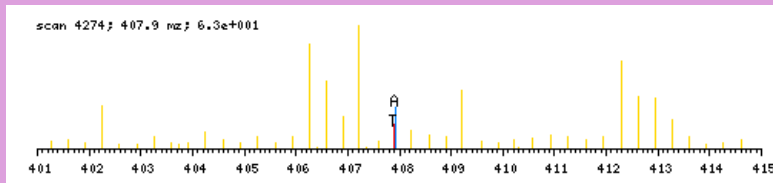

zoomed in precursor plot; T=theoretical m/z, A=acquired m/z

| b <sup>+</sup> | #  | AA # | y <sup>+</sup> | y <sup>2+</sup> |
|----------------|----|------|----------------|-----------------|
| 158.0453       | 1  | D 13 |                |                 |
| 289.0858       | 2  | M 12 | 1471.5470      | 736.2774        |
| 404.1128       | 3  | D 11 | 1340.5065      | 670.7572        |
| 519.1397       | 4  | D 10 | 1225.4795      | 613.2437        |
| 634.1667       | 5  | D 9  | 1110.4526      | 555.7302        |
| 763.2093       | 6  | E 8  | 995.4257       | 498.2167        |
| 894.2497       | 7  | M 7  | 866.3831       | 433.6954        |
| 1009.2767      | 8  | D 6  | 735.3426       | 368.1752        |
| 1106.3294      | 9  | P 5  | 620.3156       | 310.6617        |
| 1220.3724      | 10 | N 4  | 523.2629       | 262.1353        |
| 1383.4357      | 11 | Y 3  | 409.2199       | 205.1139        |
| 1454.4728      | 12 | A 2  | 246.1566       | 123.5822        |
|                | 13 | R 1  | 175.1195       | 88.0637         |

N-term:+43.02

DMGNQHPSISR, MH+ 1283.5803, m/z 642.2938  
 L OSG37 P180811 230811-s1.04065.04065.2.dta

X-range:

-

MassTol: Y-zoom:

MassType:

AVG  MONO

Axis:

1  2

Label:

I  M  -

Ions:

a  +  2+  3+

b  +  2+  3+

c  +  2+  3+

x  +  2+  3+

y  +  2+  3+

z  +  2+  3+

hide H<sub>2</sub>O/NH<sub>3</sub>

zoom 112-122

GO

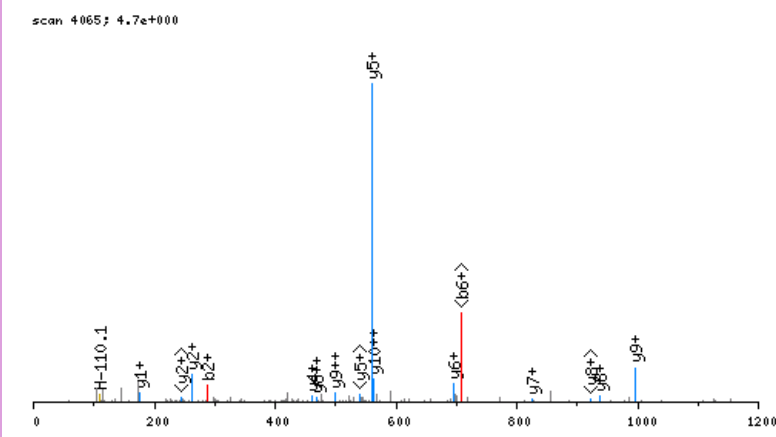

click image to zoom in; click top corners to zoom out [\[precursor±\]](#)

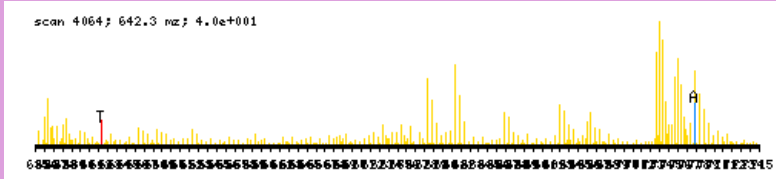

zoomed in precursor plot; T=theoretical m/z, A=acquired m/z

| b <sup>+</sup>  | #  | AA # | y <sup>+</sup> | y <sup>2+</sup> |
|-----------------|----|------|----------------|-----------------|
| 158.0453        | 1  | D 11 |                |                 |
| <b>289.0858</b> | 2  | M 10 | 1126.5428      | <b>563.7753</b> |
| 346.1073        | 3  | G 9  | 995.5023       | 498.2550        |
| 460.1502        | 4  | N 8  | 938.4808       | 469.7443        |
| 588.2088        | 5  | Q 7  | 824.4379       | 412.7228        |
| 725.2677        | 6  | H 6  | 696.3793       | 348.6936        |
| 822.3205        | 7  | P 5  | 559.3204       | 280.1641        |
| 909.3525        | 8  | S 4  | 462.2676       | 231.6377        |
| 1022.4366       | 9  | I 3  | 375.2356       | 188.1217        |
| 1109.4686       | 10 | S 2  | 262.1515       | 131.5797        |
|                 | 11 | R 1  | 175.1195       | 88.0637         |

N-term:+43.02

DNSGKQAEAMALLAEAER, MH+ 1973.9603, m/z 658.6583  
 L OSG37 P180811 230811-s1.08256.08256.3.dta

X-range:

-

MassTol: Y-zoom:

MassType:

AVG  MONO

Axis:

1  2

Label:

I  M  -

Ions:

a  +  2+  3+

b  +  2+  3+

c  +  2+  3+

x  +  2+  3+

y  +  2+  3+

z  +  2+  3+

hide H<sub>2</sub>O/NH<sub>3</sub>

zoom 112-122

GO

scan 8256; 1.5e+000

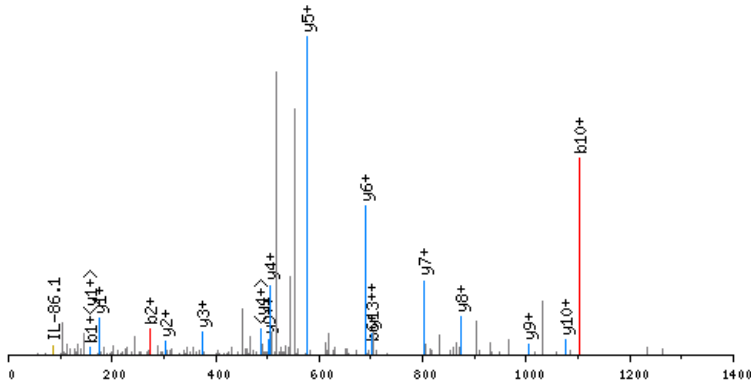

click image to zoom in; click top corners to zoom out [\[precursor±\]](#)

scan 8254; 658.7 m/z; 1.1e+002

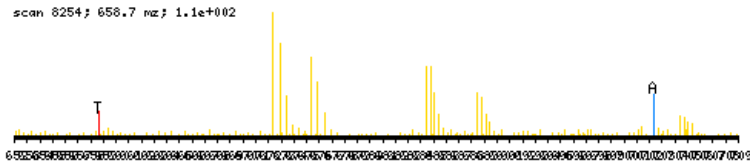

zoomed in precursor plot; T=theoretical m/z, A=acquired m/z

| b <sup>+</sup> | #  | AA # | y <sup>+</sup> | y <sup>2+</sup> |
|----------------|----|------|----------------|-----------------|
| 158.0453       | 1  | D 18 |                |                 |
| 272.0883       | 2  | N 17 | 1816.9228      | 908.9653        |
| 359.1203       | 3  | S 16 | 1702.8798      | 851.9438        |
| 416.1418       | 4  | G 15 | 1615.8478      | 808.4278        |
| 572.2681       | 5  | K 14 | 1558.8263      | 779.9171        |
| 700.3266       | 6  | Q 13 | 1402.7000      | 701.8539        |
| 771.3638       | 7  | A 12 | 1274.6415      | 637.8246        |
| 900.4063       | 8  | E 11 | 1203.6043      | 602.3061        |
| 971.4435       | 9  | A 10 | 1074.5618      | 537.7848        |
| 1102.4839      | 10 | M 9  | 1003.5246      | 502.2662        |
| 1173.5211      | 11 | A 8  | 872.4842       | 436.7460        |
| 1286.6051      | 12 | L 7  | 801.4470       | 401.2274        |
| 1399.6892      | 13 | L 6  | 688.3630       | 344.6854        |
| 1470.7263      | 14 | A 5  | 575.2789       | 288.1434        |
| 1599.7689      | 15 | E 4  | 504.2418       | 252.6248        |
| 1670.8060      | 16 | A 3  | 375.1992       | 188.1035        |
| 1799.8486      | 17 | E 2  | 304.1621       | 152.5850        |
|                | 18 | R 1  | 175.1195       | 88.0637         |

N-term:+43.02 K(5):+156.13

DPNTIIEALR, MH+ 1183.6323, m/z 592.3198  
 L OSG41 P180811 230811-s1.07510.07510.2.dta

X-range:

-

MassTol: Y-zoom:

MassType:

AVG  MONO

Axis:

1  2

Label:

I  M  -

Ions:

a  +  2+  3+

b  +  2+  3+

c  +  2+  3+

x  +  2+  3+

y  +  2+  3+

z  +  2+  3+

hide H<sub>2</sub>O/NH<sub>3</sub>

zoom 112-122

GO

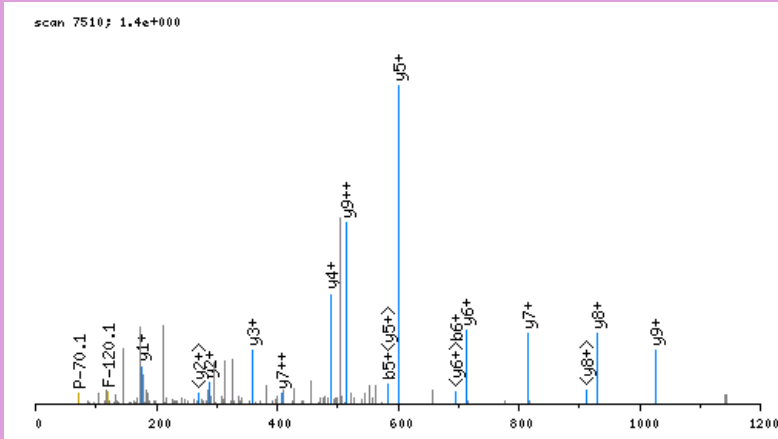

click image to zoom in; click top corners to zoom out [\[precursor±\]](#)

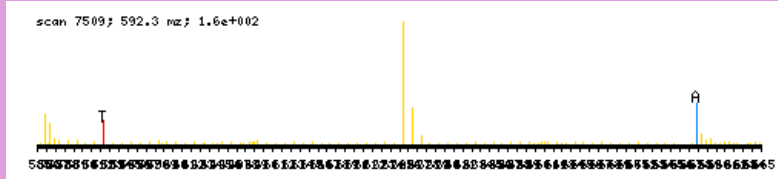

zoomed in precursor plot; T=theoretical m/z, A=acquired m/z

| b <sup>+</sup> | #  | AA # | y <sup>+</sup> | y <sup>2+</sup>    |
|----------------|----|------|----------------|--------------------|
| 158.0453       | 1  | D    | 10             |                    |
| 255.0981       | 2  | P    | 9              | 1026.5948 513.8013 |
| 369.1410       | 3  | N    | 8              | 929.5420 465.2749  |
| 470.1887       | 4  | T    | 7              | 815.4991 408.2535  |
| 583.2728       | 5  | I    | 6              | 714.4514 357.7296  |
| 696.3568       | 6  | I    | 5              | 601.3673 301.1876  |
| 825.3994       | 7  | E    | 4              | 488.2833 244.6455  |
| 896.4365       | 8  | A    | 3              | 359.2407 180.1243  |
| 1009.5206      | 9  | L    | 2              | 288.2036 144.6057  |
|                | 10 | R    | 1              | 175.1195 88.0637   |

N-term:+43.02

DPSGVKLVLETAEDIQER, MH+ 1955.9926, m/z 652.6691  
 L OSG36 P180811 230811-s1.05721.05721.3.dta

X-range:

-

MassTol: Y-zoom:

MassType:

AVG  MONO

Axis:

1  2

Label:

I  M  -

Ions:

a  +  2+  3+

b  +  2+  3+

c  +  2+  3+

x  +  2+  3+

y  +  2+  3+

z  +  2+  3+

hide H<sub>2</sub>O/NH<sub>3</sub>

zoom 112-122

GO

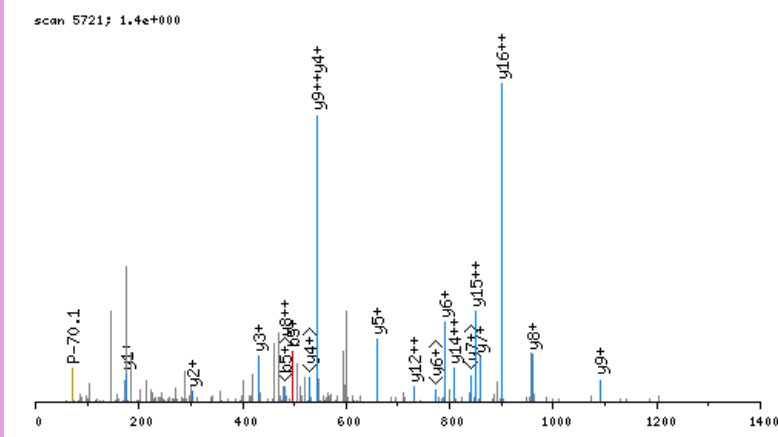

click image to zoom in; click top corners to zoom out [\[precursor±\]](#)

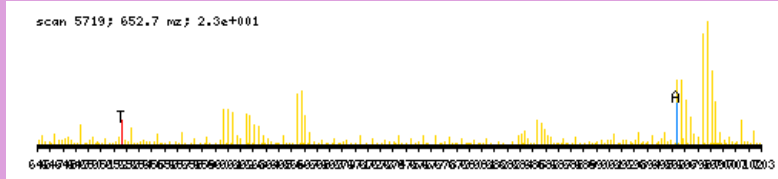

zoomed in precursor plot; T=theoretical m/z, A=acquired m/z

| b <sup>+</sup> | #  | AA # | y <sup>+</sup> | y <sup>2+</sup> |
|----------------|----|------|----------------|-----------------|
| 158.0453       | 1  | D 17 |                |                 |
| 255.0981       | 2  | P 16 | 1798.9551      | 899.9815        |
| 342.1301       | 3  | S 15 | 1701.9023      | 851.4551        |
| 399.1516       | 4  | G 14 | 1614.8703      | 807.9391        |
| 498.2200       | 5  | V 13 | 1557.8488      | 779.4283        |
| 654.3463       | 6  | K 12 | 1458.7804      | 729.8941        |
| 753.4147       | 7  | V 11 | 1302.6541      | 651.8310        |
| 866.4988       | 8  | L 10 | 1203.5857      | 602.2968        |
| 995.5414       | 9  | E 9  | 1090.5017      | 545.7547        |
| 1096.5891      | 10 | T 8  | 961.4591       | 481.2334        |
| 1167.6262      | 11 | A 7  | 860.4114       | 430.7096        |
| 1296.6688      | 12 | E 6  | 789.3743       | 395.1910        |
| 1411.6957      | 13 | D 5  | 660.3317       | 330.6698        |
| 1524.7798      | 14 | I 4  | 545.3047       | 273.1563        |
| 1652.8384      | 15 | Q 3  | 432.2207       | 216.6142        |
| 1781.8809      | 16 | E 2  | 304.1621       | 152.5850        |
|                | 17 | R 1  | 175.1195       | 88.0637         |

N-term:+43.02 K(6):+156.13

DPSWATQESEAVAQKVLRL, MH+ 2086.0457, m/z 696.0201  
 L OSG36 P180811 230811-s1.06286.06286.3.dta

X-range:

-

MassTol: Y-zoom:

MassType:

AVG  MONO

Axis:

1  2

Label:

I  M  -

Ions:

a  +  2+  3+

b  +  2+  3+

c  +  2+  3+

x  +  2+  3+

y  +  2+  3+

z  +  2+  3+

hide H<sub>2</sub>O/NH<sub>3</sub>

zoom 112-122

GO

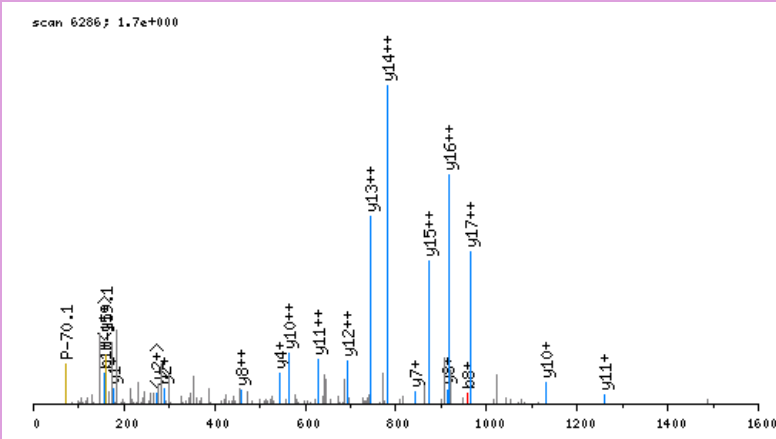

click image to zoom in; click top corners to zoom out [\[precursor±\]](#)

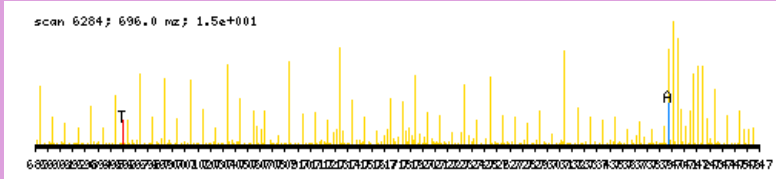

zoomed in precursor plot; T=theoretical m/z, A=acquired m/z

| b <sup>+</sup> | #  | AA # | y <sup>+</sup> | y <sup>2+</sup> |
|----------------|----|------|----------------|-----------------|
| 158.0453       | 1  | D 18 |                |                 |
| 255.0981       | 2  | P 17 | 1929.0082      | 965.0080        |
| 342.1301       | 3  | S 16 | 1831.9554      | 916.4816        |
| 528.2094       | 4  | W 15 | 1744.9234      | 872.9656        |
| 599.2466       | 5  | A 14 | 1558.8441      | 779.9260        |
| 700.2942       | 6  | T 13 | 1487.8070      | 744.4074        |
| 828.3528       | 7  | Q 12 | 1386.7593      | 693.8836        |
| 957.3954       | 8  | E 11 | 1258.7007      | 629.8543        |
| 1044.4274      | 9  | S 10 | 1129.6581      | 565.3330        |
| 1173.4700      | 10 | E 9  | 1042.6261      | 521.8170        |
| 1244.5071      | 11 | A 8  | 913.5835       | 457.2957        |
| 1343.5756      | 12 | V 7  | 842.5464       | 421.7771        |
| 1414.6127      | 13 | A 6  | 743.4780       | 372.2429        |
| 1543.6553      | 14 | E 5  | 672.4409       | 336.7243        |
| 1699.7816      | 15 | K 4  | 543.3983       | 272.2031        |
| 1798.8500      | 16 | V 3  | 387.2720       | 194.1399        |
| 1911.9340      | 17 | L 2  | 288.2036       | 144.6057        |
|                | 18 | R 1  | 175.1195       | 88.0637         |

N-term:+43.02 K(15):+156.13



DSASQDINLNSPNKGVLSDFMTDVPVDPGVVHR, MH+ 3599.7864, m/z 900.7021  
L OSG38 P180811 230811-s1.07983.07983.4.dta

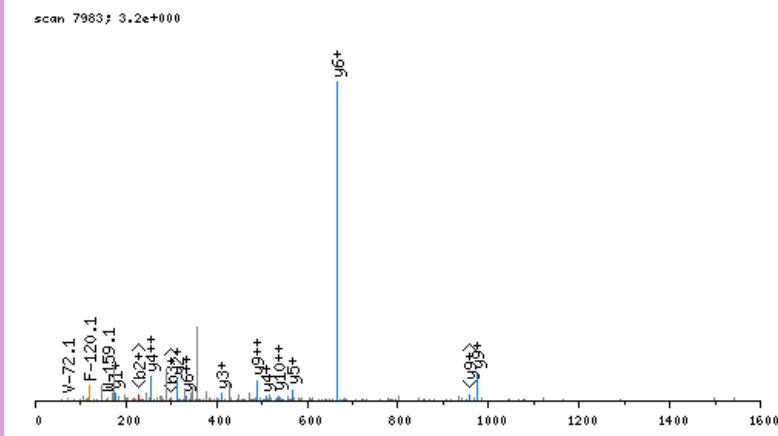

click image to zoom in; click top corners to zoom out [\[precursor±\]](#)

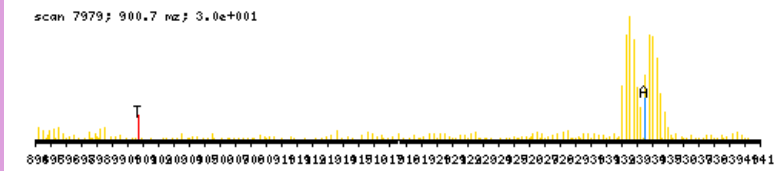

zoomed in precursor plot; T=theoretical m/z, A=acquired m/z

| b <sup>+</sup> | #  | AA # | y <sup>+</sup> | y <sup>2+</sup> |
|----------------|----|------|----------------|-----------------|
| 158.0453       | 1  | D 33 |                |                 |
| 245.0774       | 2  | S 32 | 3442.7489      | 1721.8784       |
| 316.1145       | 3  | A 31 | 3355.7169      | 1678.3624       |
| 403.1465       | 4  | S 30 | 3284.6798      | 1642.8438       |
| 531.2051       | 5  | Q 29 | 3197.6478      | 1599.3278       |
| 646.2320       | 6  | D 28 | 3069.5892      | 1535.2985       |
| 759.3161       | 7  | I 27 | 2954.5622      | 1477.7850       |
| 873.3590       | 8  | N 26 | 2841.4782      | 1421.2430       |
| 986.4431       | 9  | L 25 | 2727.4352      | 1364.2215       |
| 1100.4860      | 10 | N 24 | 2614.3512      | 1307.6795       |
| 1187.5180      | 11 | S 23 | 2500.3083      | 1250.6580       |
| 1284.5708      | 12 | P 22 | 2413.2762      | 1207.1420       |
| 1398.6137      | 13 | N 21 | 2316.2235      | 1158.6156       |
| 1560.7718      | 14 | K 20 | 2202.1805      | 1101.5942       |
| 1617.7933      | 15 | G 19 | 2040.0224      | 1020.5151       |
| 1716.8617      | 16 | V 18 | 1983.0010      | 992.0044        |
| 1829.9458      | 17 | L 17 | 1883.9326      | 942.4702        |
| 1916.9778      | 18 | S 16 | 1770.8485      | 885.9282        |
| 2032.0048      | 19 | D 15 | 1683.8165      | 842.4121        |
| 2179.0732      | 20 | F 14 | 1568.7895      | 784.8987        |
| 2310.1136      | 21 | M 13 | 1421.7211      | 711.3645        |
| 2411.1613      | 22 | T 12 | 1290.6806      | 645.8442        |
| 2526.1883      | 23 | D 11 | 1189.6329      | 595.3204        |
| 2625.2567      | 24 | V 10 | 1074.6060      | 537.8069        |
| 2722.3094      | 25 | P 9  | 975.5376       | 488.2727        |
| 2821.3779      | 26 | V 8  | 878.4848       | 439.7463        |
| 2936.4048      | 27 | D 7  | 779.4164       | 390.2121        |
| 3033.4576      | 28 | P 6  | 664.3895       | 332.6986        |
| 3090.4790      | 29 | G 5  | 567.3367       | 284.1723        |
| 3189.5474      | 30 | V 4  | 510.3152       | 255.6615        |
| 3288.6159      | 31 | V 3  | 411.2468       | 206.1273        |
| 3425.6748      | 32 | H 2  | 312.1784       | 156.5931        |
|                | 33 | R 1  | 175.1195       | 88.0637         |

N-term:+43.02 K(14):+162.16

X-range:

-

MassTol: Y-zoom:

MassType:

AVG  MONO

Axis:

1  2

Label:

I  M  -

Ions:

a  +  2+  3+

b  +  2+  3+

c  +  2+  3+

x  +  2+  3+

y  +  2+  3+

z  +  2+  3+

hide H<sub>2</sub>O/NH<sub>3</sub>

zoom 112-122

GO

DSEAFQHAR, MH+ 1102.4918, m/z 551.7495  
 L OSG38 P180811 230811-s1.04098.04098.2.dta

scan 4098; 1.2e+000

X-range:

-

MassTol: Y-zoom:

MassType:

AVG  MONO

Axis:

1  2

Label:

I  M  -

Ions:

a  +  2+  3+

b  +  2+  3+

c  +  2+  3+

x  +  2+  3+

y  +  2+  3+

z  +  2+  3+

hide H<sub>2</sub>O/NH<sub>3</sub>

zoom 112-122

GO

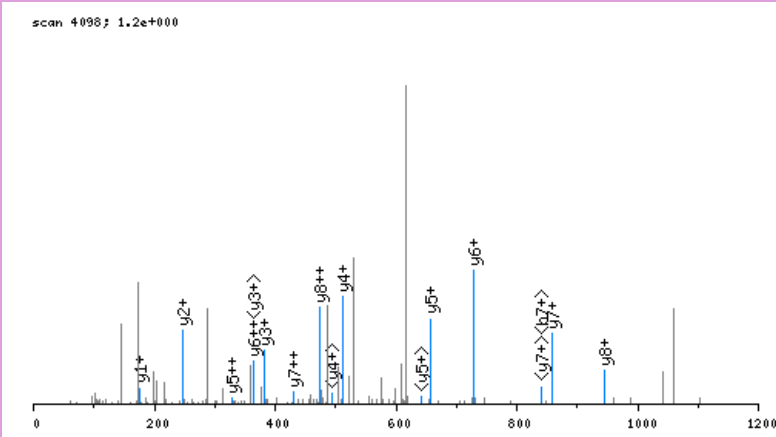

click image to zoom in; click top corners to zoom out [\[precursor±\]](#)

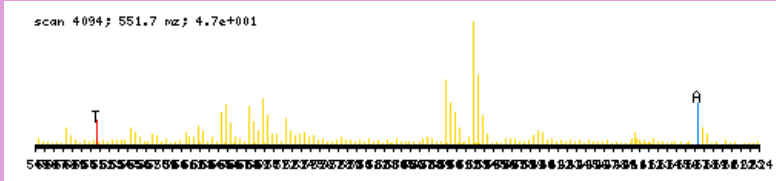

zoomed in precursor plot; T=theoretical m/z, A=acquired m/z

| b <sup>+</sup> | # | AA # | y <sup>+</sup> | y <sup>2+</sup>   |
|----------------|---|------|----------------|-------------------|
| 158.0453       | 1 | D    | 9              |                   |
| 245.0774       | 2 | S    | 8              | 945.4543 473.2310 |
| 374.1200       | 3 | E    | 7              | 858.4222 429.7150 |
| 445.1571       | 4 | A    | 6              | 729.3796 365.1937 |
| 592.2255       | 5 | F    | 5              | 658.3425 329.6752 |
| 720.2841       | 6 | Q    | 4              | 511.2741 256.1410 |
| 857.3430       | 7 | H    | 3              | 383.2155 192.1117 |
| 928.3801       | 8 | A    | 2              | 246.1566 123.5822 |
|                | 9 | R    | 1              | 175.1195 88.0637  |

N-term:+43.02

DSSAVITQISKEEAR, MH+ 1703.8816, m/z 568.6321  
 L OSG37 P180811 230811-s1.07305.07305.3.dta

X-range:

-

MassTol: Y-zoom:

MassType:

AVG  MONO

Axis:

1  2

Label:

I  M  -

Ions:

a  +  2+  3+

b  +  2+  3+

c  +  2+  3+

x  +  2+  3+

y  +  2+  3+

z  +  2+  3+

hide H<sub>2</sub>O/NH<sub>3</sub>

zoom 112-122

GO

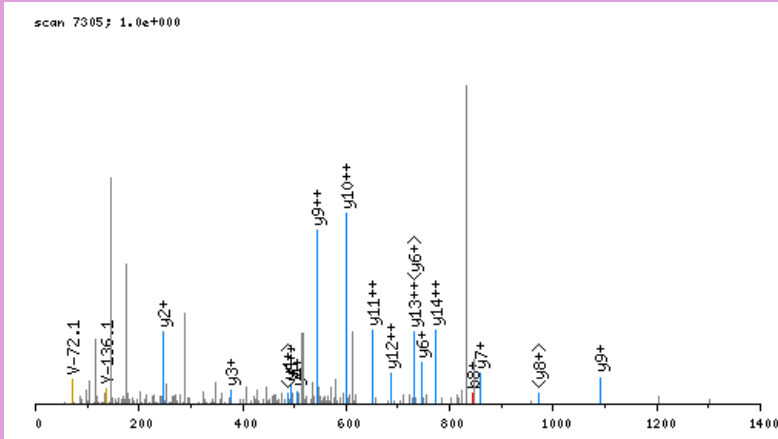

click image to zoom in; click top corners to zoom out [\[precursor±\]](#)

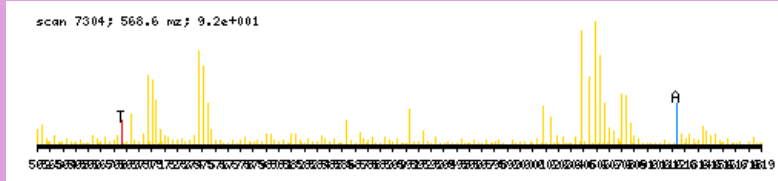

zoomed in precursor plot; T=theoretical m/z, A=acquired m/z

| b <sup>+</sup> | #  | AA # | y <sup>+</sup> | y <sup>2+</sup> |
|----------------|----|------|----------------|-----------------|
| 158.0453       | 1  | D    | 15             |                 |
| 245.0774       | 2  | S    | 14             | 1546.8441       |
| 332.1094       | 3  | S    | 13             | 1459.8121       |
| 403.1465       | 4  | A    | 12             | 1372.7800       |
| 502.2149       | 5  | V    | 11             | 1301.7429       |
| 615.2990       | 6  | I    | 10             | 1202.6745       |
| 716.3467       | 7  | T    | 9              | 1089.5904       |
| 844.4052       | 8  | Q    | 8              | 988.5428        |
| 957.4893       | 9  | I    | 7              | 860.4842        |
| 1044.5213      | 10 | S    | 6              | 747.4001        |
| 1200.6476      | 11 | K    | 5              | 660.3681        |
| 1329.6902      | 12 | E    | 4              | 504.2418        |
| 1458.7328      | 13 | E    | 3              | 375.1992        |
| 1529.7699      | 14 | A    | 2              | 246.1566        |
|                | 15 | R    | 1              | 175.1195        |

N-term:+43.02 K(11):+156.13

DVSGQETDWR, MH+ 1234.5340, m/z 617.7707  
 L OSG41 P180811 230811-s1.05108.05108.2.dta

X-range:

-

MassTol: Y-zoom:

MassType:

AVG  MONO

Axis:

1  2

Label:

I  M  -

Ions:

a  +  2+  3+

b  +  2+  3+

c  +  2+  3+

x  +  2+  3+

y  +  2+  3+

z  +  2+  3+

hide H<sub>2</sub>O/NH<sub>3</sub>

zoom 112-122

GO

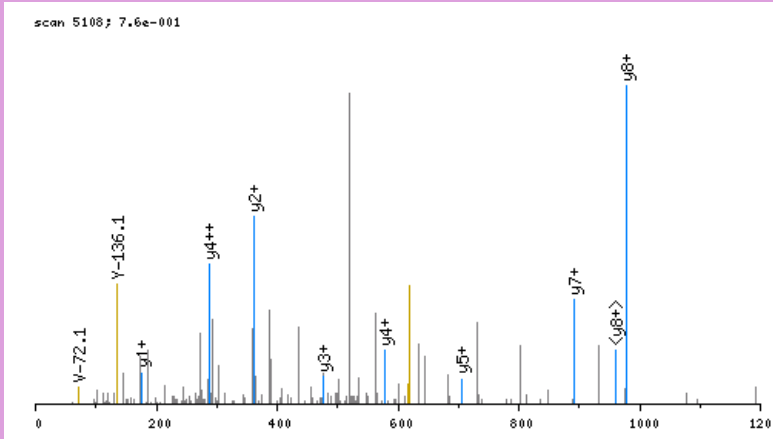

click image to zoom in; click top corners to zoom out [\[precursor±\]](#)

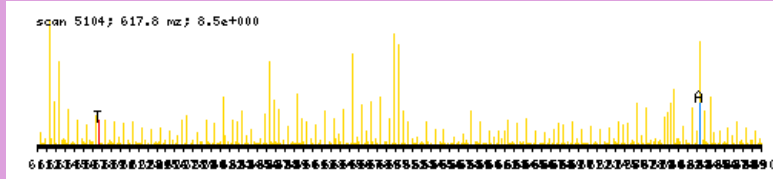

zoomed in precursor plot; T=theoretical m/z, A=acquired m/z

| b <sup>+</sup> | #  | AA # | y <sup>+</sup> | y <sup>2+</sup> |
|----------------|----|------|----------------|-----------------|
| 158.0453       | 1  | D 10 |                |                 |
| 257.1138       | 2  | V 9  | 1077.4965      | 539.2522        |
| 344.1458       | 3  | S 8  | 978.4281       | 489.7180        |
| 401.1672       | 4  | G 7  | 891.3961       | 446.2019        |
| 529.2258       | 5  | Q 6  | 834.3746       | 417.6912        |
| 658.2684       | 6  | E 5  | 706.3160       | 353.6619        |
| 759.3161       | 7  | T 4  | 577.2734       | 289.1406        |
| 874.3430       | 8  | D 3  | 476.2258       | 238.6168        |
| 1060.4224      | 9  | W 2  | 361.1988       | 181.1033        |
|                | 10 | R 1  | 175.1195       | 88.0637         |

N-term:+43.02

DWLMGKSK, MH+ 1074.6295, m/z 537.8184  
 L OSG37 P180811 230811-s1.08227.08227.2.dta

X-range:

-

MassTol: Y-zoom:

MassType:

AVG  MONO

Axis:

1  2

Label:

I  M  -

Ions:

a  +  2+  3+

b  +  2+  3+

c  +  2+  3+

x  +  2+  3+

y  +  2+  3+

z  +  2+  3+

hide H<sub>2</sub>O/NH<sub>3</sub>

zoom 112-122

GO

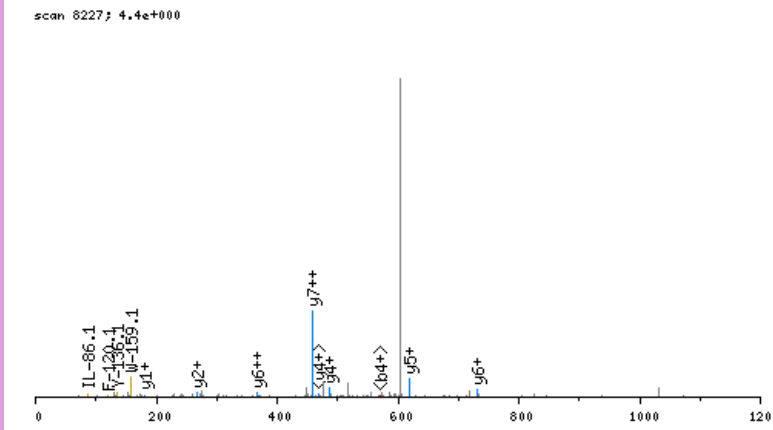

click image to zoom in; click top corners to zoom out [\[precursor±\]](#)

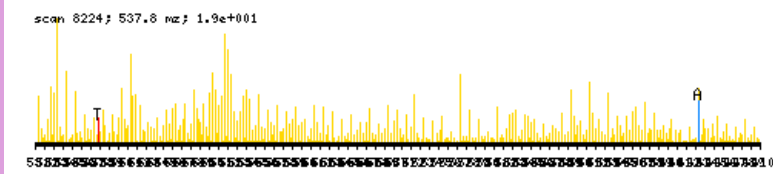

zoomed in precursor plot; T=theoretical m/z, A=acquired m/z

| b <sup>+</sup> | # | AA # | y <sup>+</sup> | y <sup>2+</sup> |
|----------------|---|------|----------------|-----------------|
| 158.0453       | 1 | D    | 8              |                 |
| 344.1247       | 2 | W    | 7              | 917.5919        |
| 457.2087       | 3 | L    | 6              | 731.5126        |
| 588.2492       | 4 | M    | 5              | 618.4286        |
| 645.2707       | 5 | G    | 4              | 487.3881        |
| 807.4288       | 6 | K    | 3              | 430.3666        |
| 894.4608       | 7 | S    | 2              | 268.2085        |
|                | 8 | K    | 1              | 181.1765        |

N-term:+43.02 K(6):+162.16  
 K(8):+162.16

DYLTFFTGKSGR, MH+ 1421.7489, m/z 711.3781  
 L OSG37 P180811 230811-s1.08402.08402.2.dta

X-range:

-

MassTol: Y-zoom:

MassType:

AVG  MONO

Axis:

1  2

Label:

I  M  -

Ions:

a  +  2+  3+

b  +  2+  3+

c  +  2+  3+

x  +  2+  3+

y  +  2+  3+

z  +  2+  3+

hide H<sub>2</sub>O/NH<sub>3</sub>

zoom 112-122

GO

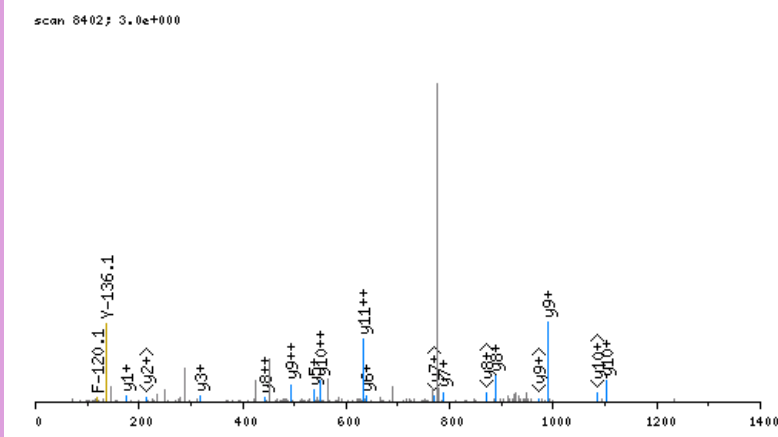

click image to zoom in; click top corners to zoom out [\[precursor±\]](#)

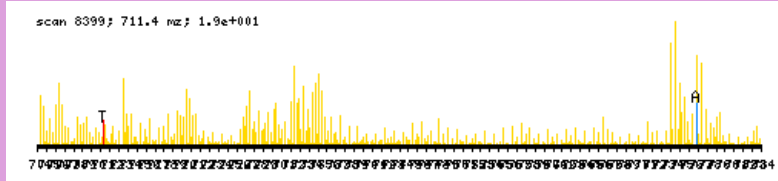

zoomed in precursor plot; T=theoretical m/z, A=acquired m/z

| b <sup>+</sup> | #  | AA # | y <sup>+</sup> | y <sup>2+</sup> |
|----------------|----|------|----------------|-----------------|
| 158.0453       | 1  | D 12 |                |                 |
| 321.1087       | 2  | Y 11 | 1264.7114      | 632.8596        |
| 434.1927       | 3  | L 10 | 1101.6481      | 551.3279        |
| 535.2404       | 4  | T 9  | 988.5640       | 494.7859        |
| 636.2881       | 5  | T 8  | 887.5163       | 444.2621        |
| 783.3565       | 6  | F 7  | 786.4686       | 393.7382        |
| 884.4042       | 7  | T 6  | 639.4002       | 320.2040        |
| 941.4256       | 8  | G 5  | 538.3526       | 269.6802        |
| 1103.5837      | 9  | K 4  | 481.3311       | 241.1695        |
| 1190.6158      | 10 | S 3  | 319.1730       | 160.0904        |
| 1247.6372      | 11 | G 2  | 232.1410       | 116.5744        |
|                | 12 | R 1  | 175.1195       | 88.0637         |

N-term:+43.02 K(9):+162.16

EAHHSKSTEECLSYFGVSETTGLTPDQVKR, MH+ 3437.7171, m/z 860.1847  
 L OSG40 P180811 230811-sl.07730.07730.4.dta

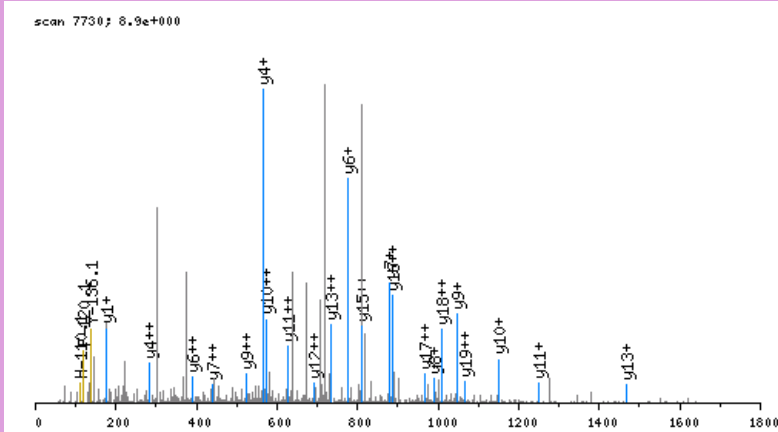

click image to zoom in; click top corners to zoom out [\[precursor±\]](#)

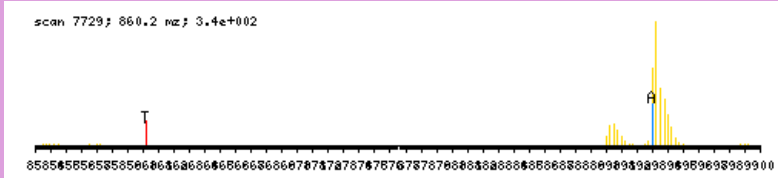

zoomed in precursor plot; T=theoretical m/z, A=acquired m/z

X-range:

-

MassTol: Y-zoom:

MassType:

AVG  MONO

Axis:

1  2

Label:

I  M  -

Ions:

a  +  2+  3+

b  +  2+  3+

c  +  2+  3+

x  +  2+  3+

y  +  2+  3+

z  +  2+  3+

hide H<sub>2</sub>O/NH<sub>3</sub>

zoom 112-122

GO

| b <sup>+</sup> | #  | AA | #  | y <sup>+</sup> | y <sup>2+</sup> |
|----------------|----|----|----|----------------|-----------------|
| 172.0610       | 1  | E  | 30 |                |                 |
| 243.0981       | 2  | A  | 29 | 3266.6640      | 1633.8359       |
| 314.1352       | 3  | A  | 28 | 3195.6268      | 1598.3173       |
| 451.1941       | 4  | H  | 27 | 3124.5897      | 1562.7988       |
| 538.2262       | 5  | S  | 26 | 2987.5308      | 1494.2693       |
| 700.3843       | 6  | K  | 25 | 2900.4988      | 1450.7533       |
| 787.4163       | 7  | S  | 24 | 2738.3407      | 1369.6743       |
| 888.4640       | 8  | T  | 23 | 2651.3087      | 1326.1582       |
| 1017.5066      | 9  | E  | 22 | 2550.2610      | 1275.6344       |
| 1146.5492      | 10 | E  | 21 | 2421.2184      | 1211.1131       |
| 1306.5798      | 11 | C  | 20 | 2292.1758      | 1146.5918       |
| 1419.6638      | 12 | L  | 19 | 2132.1452      | 1066.5765       |
| 1506.6958      | 13 | S  | 18 | 2019.0611      | 1010.0345       |
| 1669.7592      | 14 | Y  | 17 | 1932.0291      | 966.5185        |
| 1816.8276      | 15 | F  | 16 | 1768.9658      | 884.9868        |
| 1873.8491      | 16 | G  | 15 | 1621.8974      | 811.4526        |
| 1972.9175      | 17 | V  | 14 | 1564.8759      | 782.9419        |
| 2059.9495      | 18 | S  | 13 | 1465.8075      | 733.4077        |
| 2188.9921      | 19 | E  | 12 | 1378.7755      | 689.8916        |
| 2290.0398      | 20 | T  | 11 | 1249.7329      | 625.3703        |
| 2391.0874      | 21 | T  | 10 | 1148.6852      | 574.8465        |
| 2448.1089      | 22 | G  | 9  | 1047.6375      | 524.3227        |
| 2561.1930      | 23 | L  | 8  | 990.6160       | 495.8119        |
| 2662.2407      | 24 | T  | 7  | 877.5320       | 439.2699        |
| 2759.2934      | 25 | P  | 6  | 776.4843       | 388.7461        |
| 2874.3204      | 26 | D  | 5  | 679.4315       | 340.2197        |
| 3002.3789      | 27 | Q  | 4  | 564.4046       | 282.7062        |
| 3101.4474      | 28 | V  | 3  | 436.3460       | 218.6769        |
| 3263.6055      | 29 | K  | 2  | 337.2776       | 169.1427        |
|                | 30 | R  | 1  | 175.1195       | 88.0637         |

N-term:+43.02 K(6):+162.16  
 C(11):+160.03 K(29):+162.16

EAALADGEPDR, MH+ 1185.5388, m/z 593.2730  
 L OSG41 P180811 230811-s1.05033.05033.2.dta

X-range:

-

MassTol: Y-zoom:

MassType:

AVG  MONO

Axis:

1  2

Label:

I  M  -

Ions:

a  +  2+  3+

b  +  2+  3+

c  +  2+  3+

x  +  2+  3+

y  +  2+  3+

z  +  2+  3+

hide H<sub>2</sub>O/NH<sub>3</sub>

zoom 112-122

GO

scan 5033; 9.2e-001

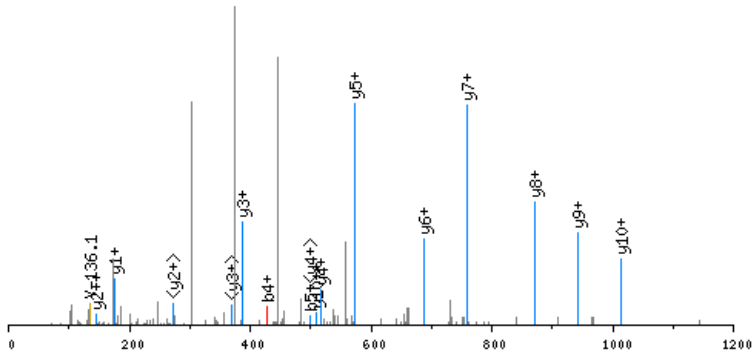

click image to zoom in; click top corners to zoom out [\[precursor±\]](#)

scan 5029; 593.3 m/z; 6.5e+001

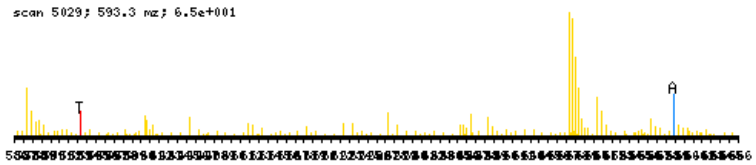

zoomed in precursor plot; T=theoretical m/z, A=acquired m/z

| b <sup>+</sup> | #  | AA # | y <sup>+</sup> | y <sup>2+</sup> |
|----------------|----|------|----------------|-----------------|
| 172.0610       | 1  | E 11 |                |                 |
| 243.0981       | 2  | A 10 | 1014.4856      | 507.7467        |
| 314.1352       | 3  | A 9  | 943.4485       | 472.2282        |
| 427.2193       | 4  | L 8  | 872.4114       | 436.7096        |
| 498.2564       | 5  | A 7  | 759.3273       | 380.1676        |
| 613.2833       | 6  | D 6  | 688.2902       | 344.6490        |
| 670.3048       | 7  | G 5  | 573.2633       | 287.1355        |
| 799.3474       | 8  | E 4  | 516.2418       | 258.6248        |
| 896.4002       | 9  | P 3  | 387.1992       | 194.1035        |
| 1011.4271      | 10 | D 2  | 290.1464       | 145.5771        |
|                | 11 | R 1  | 175.1195       | 88.0637         |

N-term:+43.02



EAANCSLR, MH+ 962.4365, m/z 481.7219  
 L OSG41 P180811 230811-s1.03631.03631.2.dta

X-range:

-

MassTol: Y-zoom:

MassType:

AVG  MONO

Axis:

1  2

Label:

I  M  -

Ions:

a  +  2+  3+

b  +  2+  3+

c  +  2+  3+

x  +  2+  3+

y  +  2+  3+

z  +  2+  3+

hide H<sub>2</sub>O/NH<sub>3</sub>

zoom 112-122

GO

scan 3631; 1.1e+000

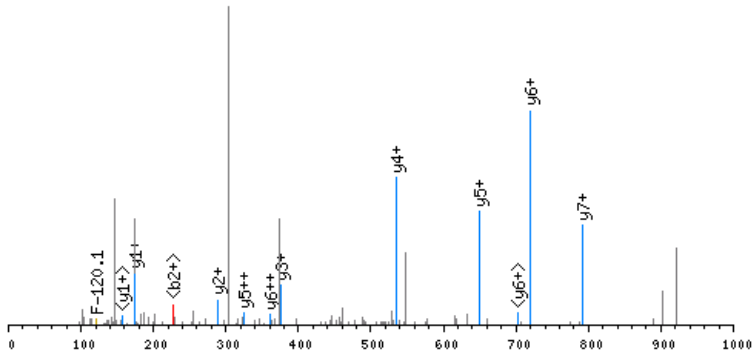

click image to zoom in; click top corners to zoom out [\[precursor±\]](#)

scan 3629; 481.7 m/z; 3.2e+001

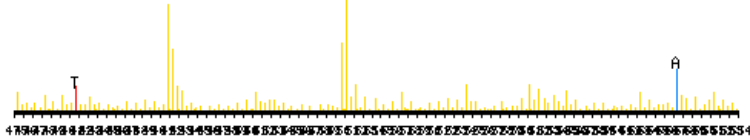

zoomed in precursor plot; T=theoretical m/z, A=acquired m/z

| b <sup>+</sup> | # | AA # | y <sup>+</sup> | y <sup>2+</sup> |
|----------------|---|------|----------------|-----------------|
| 172.0610       | 1 | E 8  |                |                 |
| 243.0981       | 2 | A 7  | 791.3833       | 396.1956        |
| 314.1352       | 3 | A 6  | 720.3462       | 360.6770        |
| 428.1781       | 4 | N 5  | 649.3091       | 325.1585        |
| 588.2087       | 5 | C 4  | 535.2662       | 268.1370        |
| 675.2408       | 6 | S 3  | 375.2356       | 188.1217        |
| 788.3248       | 7 | L 2  | 288.2036       | 144.6057        |
|                | 8 | R 1  | 175.1195       | 88.0637         |

N-term:+43.02 C(5):+160.03

EAGGLGCAVCVLTGASR, MH+ 1719.8157, m/z 573.9434  
 L OSG41 P180811 230811-s1.07380.07380.3.dta

X-range:

-

MassTol: Y-zoom:

MassType:

AVG  MONO

Axis:

1  2

Label:

I  M  -

Ions:

a  +  2+  3+

b  +  2+  3+

c  +  2+  3+

x  +  2+  3+

y  +  2+  3+

z  +  2+  3+

hide H<sub>2</sub>O/NH<sub>3</sub>

zoom 112-122

GO

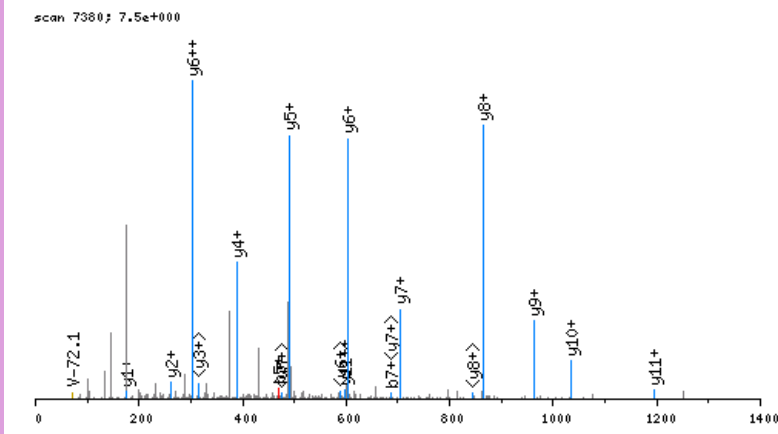

click image to zoom in; click top corners to zoom out [precursor±]

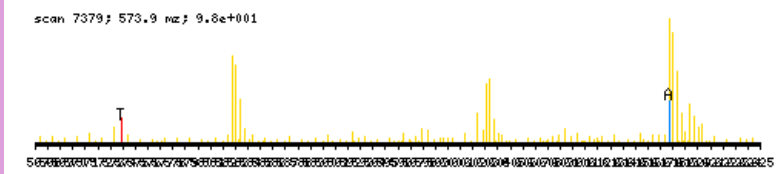

zoomed in precursor plot; T=theoretical m/z, A=acquired m/z

| b <sup>+</sup> | #  | AA | #  | y <sup>+</sup> | y <sup>2+</sup> |
|----------------|----|----|----|----------------|-----------------|
| 172.0610       | 1  | E  | 17 |                |                 |
| 243.0981       | 2  | A  | 16 | 1548.7626      | 774.8852        |
| 300.1196       | 3  | G  | 15 | 1477.7254      | 739.3666        |
| 357.1410       | 4  | G  | 14 | 1420.7040      | 710.8559        |
| 470.2251       | 5  | L  | 13 | 1363.6825      | 682.3452        |
| 527.2466       | 6  | G  | 12 | 1250.5985      | 625.8031        |
| 687.2772       | 7  | C  | 11 | 1193.5770      | 597.2924        |
| 758.3143       | 8  | A  | 10 | 1033.5464      | 517.2771        |
| 857.3827       | 9  | V  | 9  | 962.5093       | 481.7586        |
| 1017.4133      | 10 | C  | 8  | 863.4409       | 432.2243        |
| 1116.4817      | 11 | V  | 7  | 703.4103       | 352.2090        |
| 1229.5658      | 12 | L  | 6  | 604.3418       | 302.6748        |
| 1330.6134      | 13 | T  | 5  | 491.2578       | 246.1328        |
| 1387.6349      | 14 | G  | 4  | 390.2101       | 195.6090        |
| 1458.6720      | 15 | A  | 3  | 333.1886       | 167.0982        |
| 1545.7041      | 16 | S  | 2  | 262.1515       | 131.5797        |
|                | 17 | R  | 1  | 175.1195       | 88.0637         |

N-term:+43.02 C(7):+160.03  
 C(10):+160.03

EAHPETKQR, MH+ 1171.6284, m/z 586.3178  
 L OSG39 P180811 230811-s1.04802.04802.2.dta

X-range:

-

MassTol: Y-zoom:

MassType:

AVG  MONO

Axis:

1  2

Label:

I  M  -

Ions:

a  +  2+  3+

b  +  2+  3+

c  +  2+  3+

x  +  2+  3+

y  +  2+  3+

z  +  2+  3+

hide H<sub>2</sub>O/NH<sub>3</sub>

zoom 112-122

GO

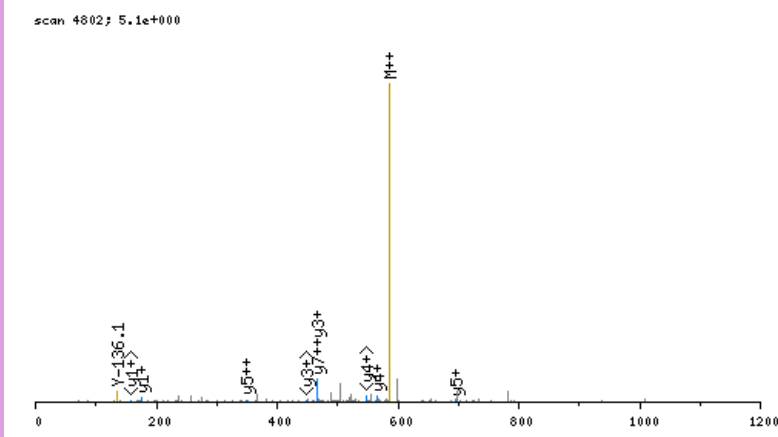

click image to zoom in; click top corners to zoom out [\[precursor±\]](#)

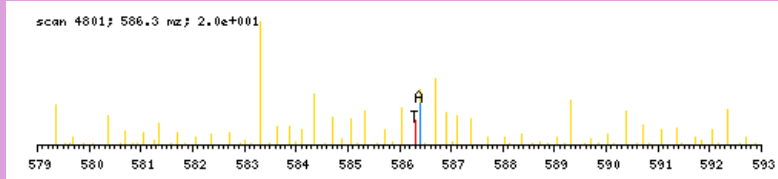

zoomed in precursor plot; T=theoretical m/z, A=acquired m/z

| b <sup>+</sup> | # | AA # | y <sup>+</sup> | y <sup>2+</sup> |
|----------------|---|------|----------------|-----------------|
| 172.0610       | 1 | E 9  |                |                 |
| 243.0981       | 2 | A 8  | 1000.5752      | 500.7915        |
| 380.1570       | 3 | H 7  | 929.5381       | 465.2730        |
| 477.2098       | 4 | P 6  | 792.4792       | 396.7435        |
| 606.2524       | 5 | E 5  | 695.4264       | 348.2171        |
| 707.3001       | 6 | T 4  | 566.3839       | 283.6958        |
| 869.4582       | 7 | K 3  | 465.3362       | 233.1720        |
| 997.5167       | 8 | Q 2  | 303.1781       | 152.0930        |
|                | 9 | R 1  | 175.1195       | 88.0637         |

N-term:+43.02 K(7):+162.16

EAKGGTVKAASGFNATEDAQTLLR, MH+ 2420.2422, m/z 807.4189  
 L OSG39 P180811 230811-s1.04413.04413.3.cta

scan 4413; 7.2e+000

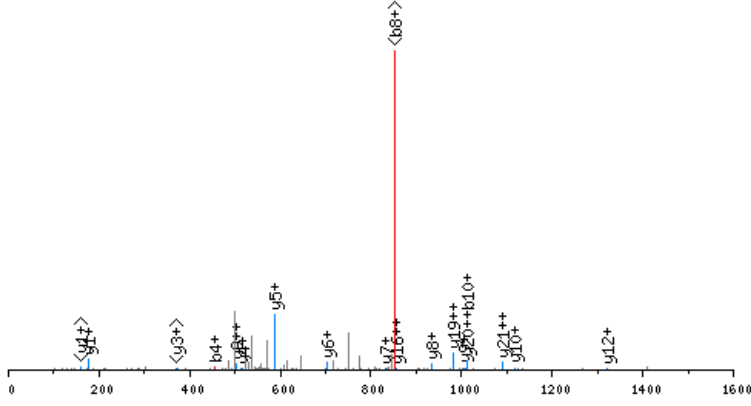

click image to zoom in; click top corners to zoom out [\[precursor±\]](#)

scan 4411; 807.4 Hz; 6.0e+001

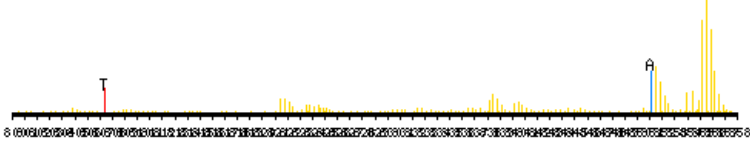

zoomed in precursor plot; T=theoretical m/z, A=acquired m/z

X-range:

-

MassTol: Y-zoom:

MassType:

AVG  MONO

Axis:

1  2

Label:

I  M  -

Ions:

a  +  2+  3+

b  +  2+  3+

c  +  2+  3+

x  +  2+  3+

y  +  2+  3+

z  +  2+  3+

hide H<sub>2</sub>O/NH<sub>3</sub>

zoom 112-122

GO

| b <sup>+</sup> | #  | AA | #  | y <sup>+</sup> | y <sup>2+</sup> |
|----------------|----|----|----|----------------|-----------------|
| 172.0610       | 1  | E  | 23 |                |                 |
| 243.0981       | 2  | A  | 22 | 2249.1891      | 1125.0984       |
| 399.2244       | 3  | K  | 21 | 2178.1519      | 1089.5799       |
| 456.2459       | 4  | G  | 20 | 2022.0256      | 1011.5167       |
| 513.2673       | 5  | G  | 19 | 1965.0042      | 983.0060        |
| 614.3150       | 6  | T  | 18 | 1907.9827      | 954.4953        |
| 713.3834       | 7  | V  | 17 | 1806.9350      | 903.9714        |
| 869.5097       | 8  | K  | 16 | 1707.8666      | 854.4372        |
| 940.5468       | 9  | A  | 15 | 1551.7403      | 776.3741        |
| 1011.5840      | 10 | A  | 14 | 1480.7032      | 740.8555        |
| 1098.6160      | 11 | S  | 13 | 1409.6661      | 705.3370        |
| 1155.6374      | 12 | G  | 12 | 1322.6341      | 661.8209        |
| 1302.7059      | 13 | F  | 11 | 1265.6126      | 633.3102        |
| 1416.7488      | 14 | N  | 10 | 1118.5442      | 559.7760        |
| 1487.7859      | 15 | A  | 9  | 1004.5013      | 502.7545        |
| 1588.8336      | 16 | T  | 8  | 933.4641       | 467.2360        |
| 1717.8762      | 17 | E  | 7  | 832.4165       | 416.7121        |
| 1832.9031      | 18 | D  | 6  | 703.3739       | 352.1909        |
| 1903.9402      | 19 | A  | 5  | 588.3469       | 294.6774        |
| 2031.9988      | 20 | Q  | 4  | 517.3098       | 259.1588        |
| 2133.0465      | 21 | T  | 3  | 389.2512       | 195.1295        |
| 2246.1306      | 22 | L  | 2  | 288.2036       | 144.6057        |
|                | 23 | R  | 1  | 175.1195       | 88.0637         |

N-term:+43.02 K(3):+156.13  
 K(8):+156.13

EANHLLQLNGLPAVR, MH+ 1686.9291, m/z 562.9812  
 L OSG37 P180811 230811-s1.07593.07593.3.dta

X-range:

-

MassTol: Y-zoom:

MassType:

AVG  MONO

Axis:

1  2

Label:

I  M  -

Ions:

a  +  2+  3+

b  +  2+  3+

c  +  2+  3+

x  +  2+  3+

y  +  2+  3+

z  +  2+  3+

hide H<sub>2</sub>O/NH<sub>3</sub>

zoom 112-122

GO

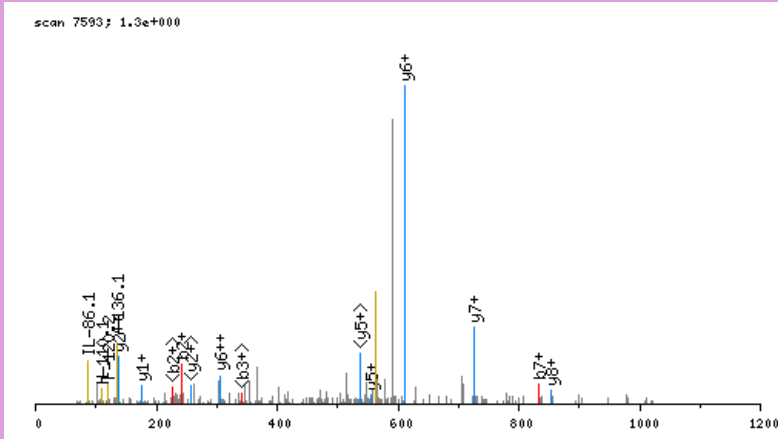

click image to zoom in; click top corners to zoom out [\[precursor±\]](#)

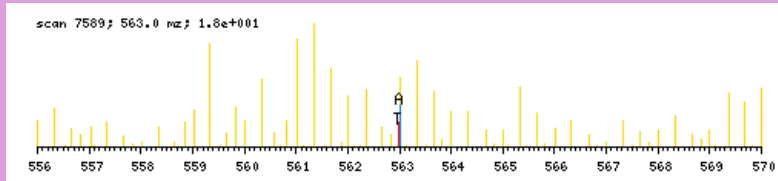

zoomed in precursor plot; T=theoretical m/z, A=acquired m/z

| b <sup>+</sup>  | #  | AA # | y <sup>+</sup>  | y <sup>2+</sup> |
|-----------------|----|------|-----------------|-----------------|
| 172.0610        | 1  | E 15 |                 |                 |
| <b>243.0981</b> | 2  | A 14 | 1515.8760       | 758.4419        |
| 357.1410        | 3  | N 13 | 1444.8389       | 722.9233        |
| 494.1999        | 4  | H 12 | 1330.7959       | 665.9019        |
| 607.2840        | 5  | L 11 | 1193.7370       | 597.3724        |
| 720.3681        | 6  | L 10 | 1080.6530       | 540.8304        |
| <b>833.4521</b> | 7  | L 9  | 967.5689        | 484.2884        |
| 961.5107        | 8  | Q 8  | <b>854.4848</b> | 427.7463        |
| 1075.5536       | 9  | N 7  | <b>726.4262</b> | 363.7170        |
| 1132.5751       | 10 | G 6  | <b>612.3833</b> | <b>306.6956</b> |
| 1245.6592       | 11 | L 5  | <b>555.3619</b> | 278.1848        |
| 1342.7119       | 12 | P 4  | 442.2778        | 221.6428        |
| 1413.7490       | 13 | A 3  | 345.2250        | 173.1164        |
| 1512.8175       | 14 | V 2  | 274.1879        | <b>137.5979</b> |
|                 | 15 | R 1  | <b>175.1195</b> | 88.0637         |

N-term:+43.02

EAPELGPGLVER, MH+ 1308.6800, m/z 654.8436  
 L OSG41 P180811 230811-s1.06606.06606.2.dta

X-range:

-

MassTol: Y-zoom:

MassType:

AVG  MONO

Axis:

1  2

Label:

I  M  -

Ions:

a  +  2+  3+

b  +  2+  3+

c  +  2+  3+

x  +  2+  3+

y  +  2+  3+

z  +  2+  3+

hide H<sub>2</sub>O/NH<sub>3</sub>

zoom 112-122

GO

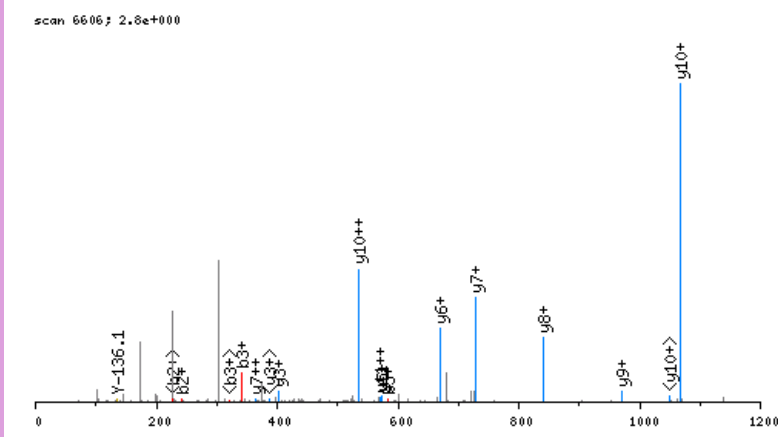

click image to zoom in; click top corners to zoom out [\[precursor±\]](#)

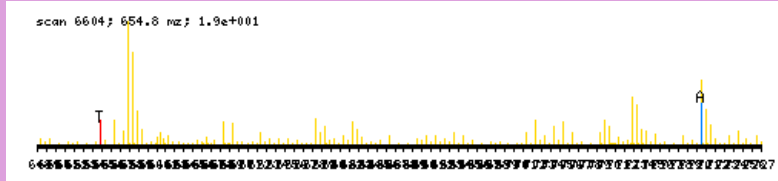

zoomed in precursor plot; T=theoretical m/z, A=acquired m/z

| b <sup>+</sup> | #  | AA # | y <sup>+</sup> | y <sup>2+</sup> |
|----------------|----|------|----------------|-----------------|
| 172.0610       | 1  | E 12 |                |                 |
| 243.0981       | 2  | A 11 | 1137.6268      | 569.3173        |
| 340.1509       | 3  | P 10 | 1066.5897      | 533.7988        |
| 469.1935       | 4  | E 9  | 969.5369       | 485.2724        |
| 582.2775       | 5  | L 8  | 840.4943       | 420.7511        |
| 639.2990       | 6  | G 7  | 727.4103       | 364.2090        |
| 736.3518       | 7  | P 6  | 670.3888       | 335.6983        |
| 793.3732       | 8  | G 5  | 573.3360       | 287.1719        |
| 906.4573       | 9  | L 4  | 516.3146       | 258.6612        |
| 1005.5257      | 10 | V 3  | 403.2305       | 202.1192        |
| 1134.5683      | 11 | E 2  | 304.1621       | 152.5850        |
|                | 12 | R 1  | 175.1195       | 88.0637         |

N-term:+43.02

EATGVLPFVR, MH+ 1130.6210, m/z 565.8141  
 L OSG41 P180811 230811-s1.07358.07358.2.dta

X-range:

-

MassTol: Y-zoom:

MassType:

AVG  MONO

Axis:

1  2

Label:

I  M  -

Ions:

a  +  2+  3+

b  +  2+  3+

c  +  2+  3+

x  +  2+  3+

y  +  2+  3+

z  +  2+  3+

hide H<sub>2</sub>O/NH<sub>3</sub>

zoom 112-122

GO

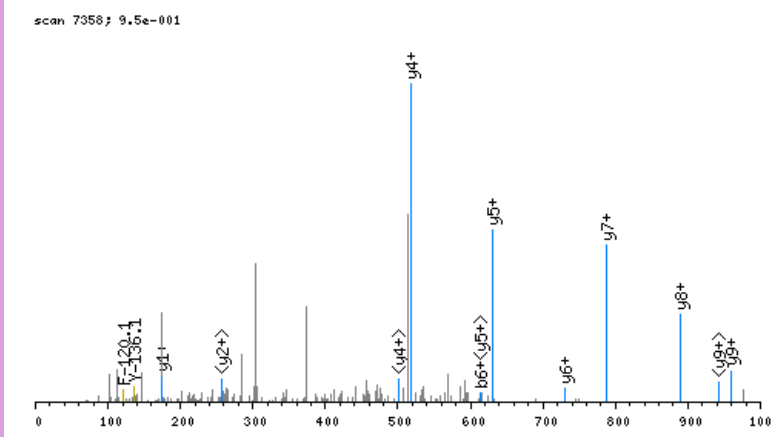

click image to zoom in; click top corners to zoom out [\[precursor±\]](#)

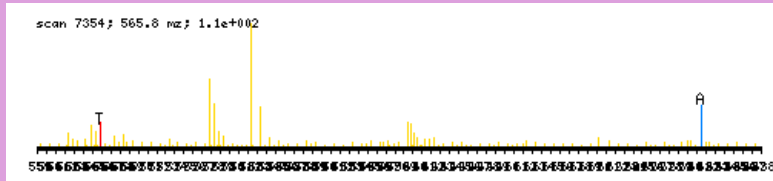

zoomed in precursor plot; T=theoretical m/z, A=acquired m/z

| b <sup>+</sup> | #  | AA | #  | y <sup>+</sup> | y <sup>2+</sup> |
|----------------|----|----|----|----------------|-----------------|
| 172.0610       | 1  | E  | 10 |                |                 |
| 243.0981       | 2  | A  | 9  | 959.5678       | 480.2878        |
| 344.1458       | 3  | T  | 8  | 888.5307       | 444.7693        |
| 401.1672       | 4  | G  | 7  | 787.4830       | 394.2454        |
| 500.2357       | 5  | V  | 6  | 730.4616       | 365.7347        |
| 613.3197       | 6  | L  | 5  | 631.3932       | 316.2005        |
| 710.3725       | 7  | P  | 4  | 518.3091       | 259.6585        |
| 857.4409       | 8  | F  | 3  | 421.2563       | 211.1321        |
| 956.5093       | 9  | V  | 2  | 274.1879       | 137.5979        |
|                | 10 | R  | 1  | 175.1195       | 88.0637         |

N-term: +43.02

EATLNLEPSGR, MH+ 1228.6174, m/z 614.8123  
 L OSG41 P180811 230811-s1.05917.05917.2.dta

scan 5917; 1.2e+000

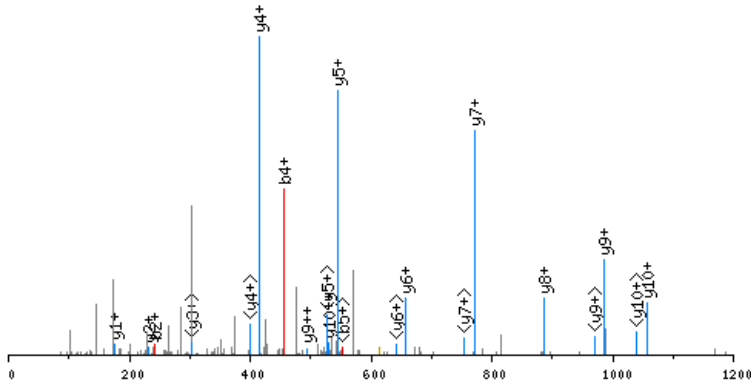

click image to zoom in; click top corners to zoom out [\[precursor±\]](#)

scan 5914; 614.8 m/z; 4.9e+002

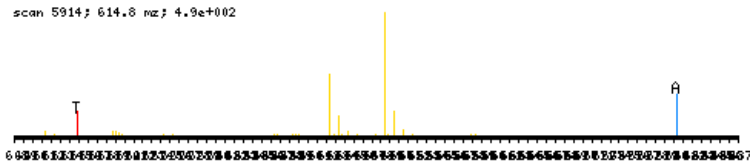

zoomed in precursor plot; T=theoretical m/z, A=acquired m/z

X-range:

-

MassTol: Y-zoom:

MassType:

AVG  MONO

Axis:

1  2

Label:

I  M  -

Ions:

a  +  2+  3+

b  +  2+  3+

c  +  2+  3+

x  +  2+  3+

y  +  2+  3+

z  +  2+  3+

hide H<sub>2</sub>O/NH<sub>3</sub>

zoom 112-122

GO

| b <sup>+</sup> | #  | AA # | y <sup>+</sup> | y <sup>2+</sup> |
|----------------|----|------|----------------|-----------------|
| 172.0610       | 1  | E 11 |                |                 |
| 243.0981       | 2  | A 10 | 1057.5642      | 529.2860        |
| 344.1458       | 3  | T 9  | 986.5271       | 493.7675        |
| 457.2298       | 4  | L 8  | 885.4794       | 443.2436        |
| 571.2728       | 5  | N 7  | 772.3953       | 386.7016        |
| 684.3568       | 6  | L 6  | 658.3524       | 329.6801        |
| 813.3994       | 7  | E 5  | 545.2683       | 273.1381        |
| 910.4522       | 8  | P 4  | 416.2258       | 208.6168        |
| 997.4842       | 9  | S 3  | 319.1730       | 160.0904        |
| 1054.5057      | 10 | G 2  | 232.1410       | 116.5744        |
|                | 11 | R 1  | 175.1195       | 88.0637         |

N-term:+43.02



EDEMPKTLVYVGNLSR, MH+ 1821.9057, m/z 607.9734  
 L OSG37 P180811 230811-s1.07632.07632.3.dta

X-range:

-

MassTol: Y-zoom:

MassType:

AVG  MONO

Axis:

1  2

Label:

I  M  -

Ions:

a  +  2+  3+

b  +  2+  3+

c  +  2+  3+

x  +  2+  3+

y  +  2+  3+

z  +  2+  3+

hide H<sub>2</sub>O/NH<sub>3</sub>

zoom 112-122

GO

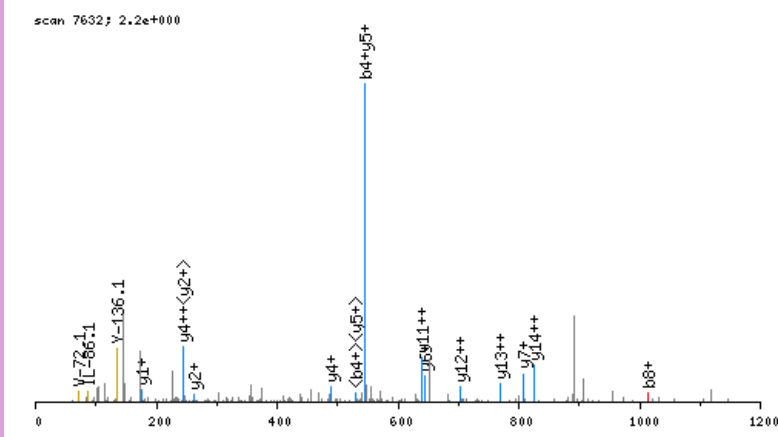

click image to zoom in; click top corners to zoom out [\[precursor±\]](#)

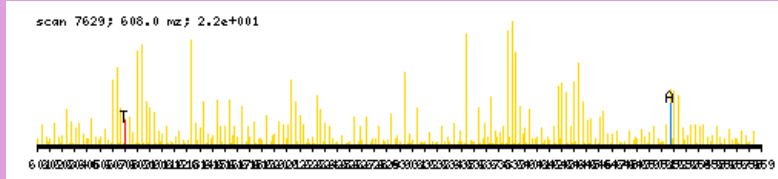

zoomed in precursor plot; T=theoretical m/z, A=acquired m/z

| b <sup>+</sup> | #  | AA # | y <sup>+</sup> | y <sup>2+</sup> |
|----------------|----|------|----------------|-----------------|
| 172.0610       | 1  | E 15 |                |                 |
| 287.0879       | 2  | D 14 | 1650.8526      | 825.9302        |
| 416.1305       | 3  | E 13 | 1535.8256      | 768.4167        |
| 547.1710       | 4  | M 12 | 1406.7830      | 703.8954        |
| 644.2238       | 5  | P 11 | 1275.7425      | 638.3752        |
| 800.3501       | 6  | K 10 | 1178.6898      | 589.8488        |
| 901.3978       | 7  | T 9  | 1022.5635      | 511.7856        |
| 1014.4818      | 8  | L 8  | 921.5158       | 461.2618        |
| 1177.5451      | 9  | Y 7  | 808.4317       | 404.7198        |
| 1276.6136      | 10 | V 6  | 645.3684       | 323.1881        |
| 1333.6350      | 11 | G 5  | 546.3000       | 273.6539        |
| 1447.6780      | 12 | N 4  | 489.2785       | 245.1432        |
| 1560.7620      | 13 | L 3  | 375.2356       | 188.1217        |
| 1647.7940      | 14 | S 2  | 262.1515       | 131.5797        |
|                | 15 | R 1  | 175.1195       | 88.0637         |

N-term:+43.02 K(6):+156.13

EDIMQLPKAR, MH+ 1270.6830, m/z 635.8451  
 L OSG37 P180811 230811-s1.07498.07498.2.dta

X-range:

-

MassTol: Y-zoom:

MassType:

AVG  MONO

Axis:

1  2

Label:

I  M  -

Ions:

a  +  2+  3+

b  +  2+  3+

c  +  2+  3+

x  +  2+  3+

y  +  2+  3+

z  +  2+  3+

hide H<sub>2</sub>O/NH<sub>3</sub>

zoom 112-122

GO

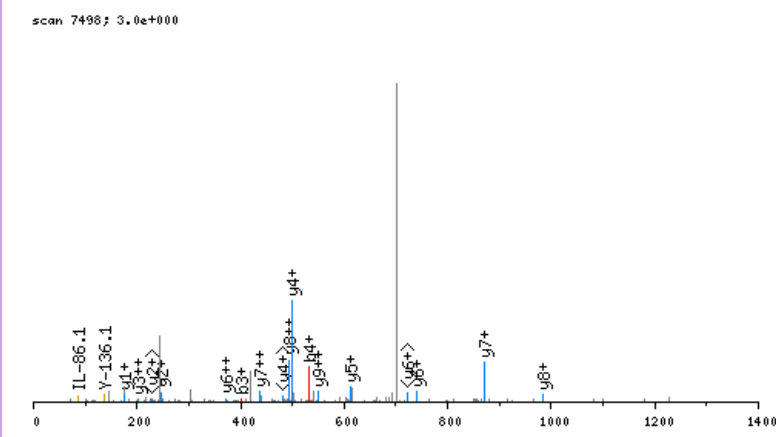

click image to zoom in; click top corners to zoom out [\[precursor±\]](#)

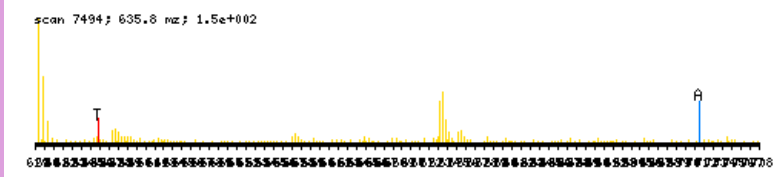

zoomed in precursor plot; T=theoretical m/z, A=acquired m/z

| b <sup>+</sup> | #  | AA # | y <sup>+</sup> | y <sup>2+</sup> |
|----------------|----|------|----------------|-----------------|
| 172.0610       | 1  | E 10 |                |                 |
| 287.0879       | 2  | D 9  | 1099.6298      | 550.3188        |
| 400.1720       | 3  | I 8  | 984.6029       | 492.8053        |
| 531.2125       | 4  | M 7  | 871.5188       | 436.2633        |
| 659.2711       | 5  | Q 6  | 740.4783       | 370.7431        |
| 772.3551       | 6  | L 5  | 612.4197       | 306.7138        |
| 869.4079       | 7  | P 4  | 499.3357       | 250.1718        |
| 1025.5342      | 8  | K 3  | 402.2829       | 201.6454        |
| 1096.5713      | 9  | A 2  | 246.1566       | 123.5822        |
|                | 10 | R 1  | 175.1195       | 88.0637         |

N-term:+43.02 K(8):+156.13

EDKPLVSK, MH+ 1112.6568, m/z 556.8320  
 L OSG37 P180811 230811-s1.04376.04376.2.dta

scan 4376; 1.2e+001

X-range:

-

MassTol: Y-zoom:

MassType:

AVG  MONO

Axis:

1  2

Label:

I  M  -

Ions:

a  +  2+  3+

b  +  2+  3+

c  +  2+  3+

x  +  2+  3+

y  +  2+  3+

z  +  2+  3+

hide H<sub>2</sub>O/NH<sub>3</sub>

zoom 112-122

GO

click image to zoom in; click top corners to zoom out [\[precursor±\]](#)

scan 4374; 556.8 mz; 1.3e+003

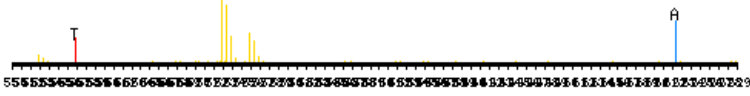

zoomed in precursor plot; T=theoretical m/z, A=acquired m/z

| b <sup>+</sup> | # | AA # | y <sup>+</sup> | y <sup>2+</sup> |
|----------------|---|------|----------------|-----------------|
| 172.0610       | 1 | E    | 9              |                 |
| 287.0879       | 2 | D    | 8              | 941.6036        |
| 443.2142       | 3 | K    | 7              | 826.5767        |
| 540.2670       | 4 | P    | 6              | 670.4504        |
| 653.3511       | 5 | L    | 5              | 573.3976        |
| 752.4195       | 6 | V    | 4              | 460.3135        |
| 851.4879       | 7 | V    | 3              | 361.2451        |
| 938.5199       | 8 | S    | 2              | 262.1767        |
|                | 9 | K    | 1              | 175.1447        |

N-term:+43.02 K(3):+156.13  
 K(9):+156.13

EDMIELATGRR, MH+ 1332.6582, m/z 444.8909  
 L OSG38 P180811 230811-s1.02451.02451.3.dta

scan 2451; 4.9e+000

X-range:

-

MassTol: Y-zoom:

MassType:

AVG  MONO

Axis:

1  2

Label:

I  M  -

Ions:

a  +  2+  3+

b  +  2+  3+

c  +  2+  3+

x  +  2+  3+

y  +  2+  3+

z  +  2+  3+

hide H<sub>2</sub>O/NH<sub>3</sub>

zoom 112-122

GO

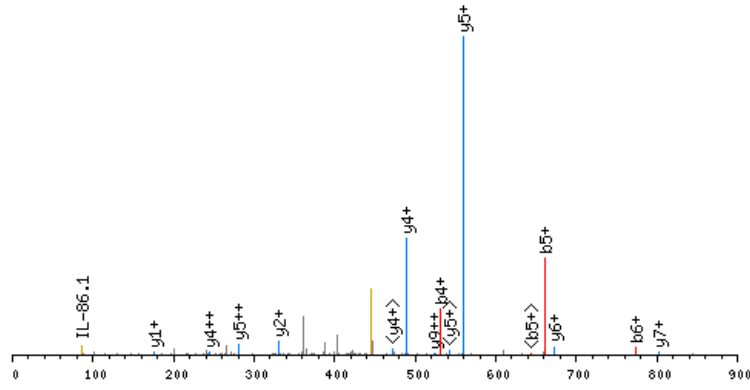

click image to zoom in; click top corners to zoom out [\[precursor±\]](#)

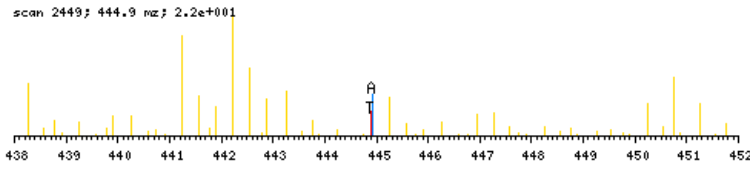

zoomed in precursor plot; T=theoretical m/z, A=acquired m/z

| b <sup>+</sup> | #  | AA # | y <sup>+</sup> | y <sup>2+</sup> |
|----------------|----|------|----------------|-----------------|
| 172.0610       | 1  | E 11 |                |                 |
| 287.0879       | 2  | D 10 | 1161.6050      | 581.3064        |
| 418.1284       | 3  | M 9  | 1046.5781      | 523.7929        |
| 531.2125       | 4  | I 8  | 915.5376       | 458.2727        |
| 660.2551       | 5  | E 7  | 802.4535       | 401.7307        |
| 773.3391       | 6  | L 6  | 673.4109       | 337.2094        |
| 844.3763       | 7  | A 5  | 560.3269       | 280.6673        |
| 945.4239       | 8  | T 4  | 489.2898       | 245.1488        |
| 1002.4454      | 9  | G 3  | 388.2421       | 194.6250        |
| 1158.5465      | 10 | R 2  | 331.2206       | 166.1142        |
|                | 11 | R 1  | 175.1195       | 88.0637         |

N-term:+43.02

EDPGEDTSIHR, MH+ 1297.5661, m/z 649.2867  
 L OSG37 P180811 230811-s1.03536.03536.2.dta

X-range:

-

MassTol: Y-zoom:

MassType:

AVG  MONO

Axis:

1  2

Label:

I  M  -

Ions:

a  +  2+  3+

b  +  2+  3+

c  +  2+  3+

x  +  2+  3+

y  +  2+  3+

z  +  2+  3+

hide H<sub>2</sub>O/NH<sub>3</sub>

zoom 112-122

GO

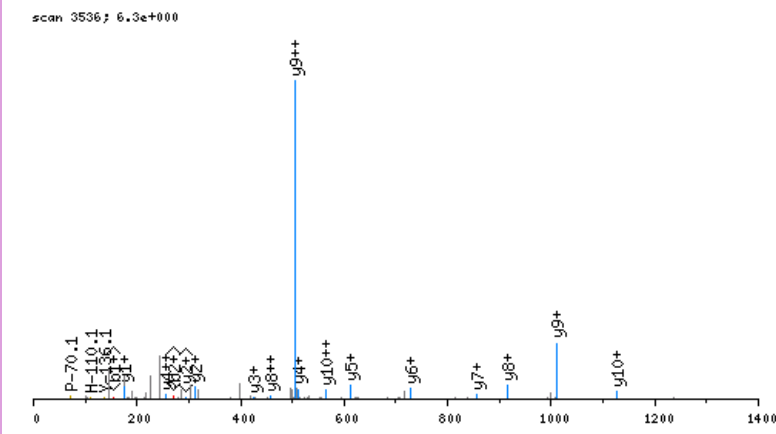

click image to zoom in; click top corners to zoom out [\[precursor±\]](#)

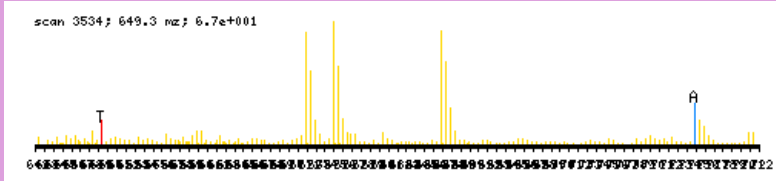

zoomed in precursor plot; T=theoretical m/z, A=acquired m/z

| b <sup>+</sup> | #  | AA # | y <sup>+</sup> | y <sup>2+</sup> |
|----------------|----|------|----------------|-----------------|
| 172.0610       | 1  | E 11 |                |                 |
| 287.0879       | 2  | D 10 | 1126.5129      | 563.7604        |
| 384.1407       | 3  | P 9  | 1011.4859      | 506.2469        |
| 441.1622       | 4  | G 8  | 914.4332       | 457.7205        |
| 570.2048       | 5  | E 7  | 857.4117       | 429.2098        |
| 685.2317       | 6  | D 6  | 728.3691       | 364.6885        |
| 786.2794       | 7  | T 5  | 613.3422       | 307.1750        |
| 873.3114       | 8  | S 4  | 512.2945       | 256.6512        |
| 986.3955       | 9  | I 3  | 425.2625       | 213.1352        |
| 1123.4544      | 10 | H 2  | 312.1784       | 156.5931        |
|                | 11 | R 1  | 175.1195       | 88.0637         |

N-term:+43.02

EDVQETDTSQKDKSPASHEIATNLGDFAIISLYR, MH+ 3735.7626, m/z 934.6961  
L OSG39 P180811 230811-s1.07677.07677.4.dta

scan 7677; 2.3e+001

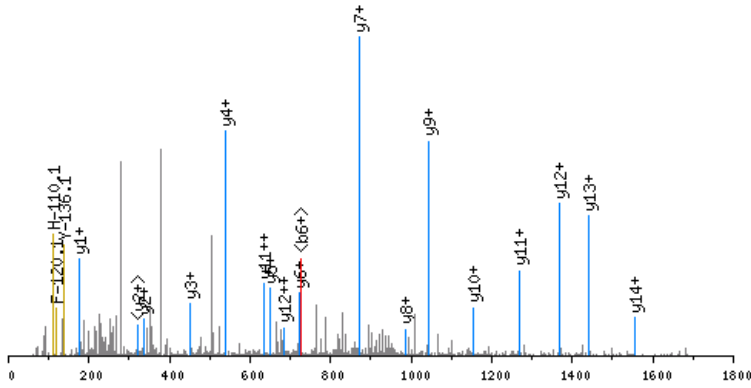

click image to zoom in; click top corners to zoom out [\[precursor±\]](#)

scan 7676; 934.7 m/z; 2.2e+003

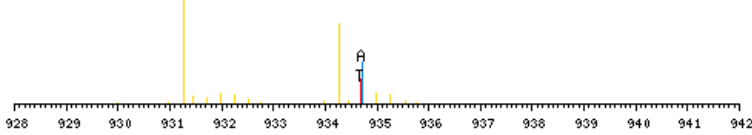

zoomed in precursor plot; T=theoretical m/z, A=acquired m/z

X-range:

-

MassTol: Y-zoom:

MassType:

AVG  MONO

Axis:

1  2

Label:

I  M  -

Ions:

a  +  2+  3+

b  +  2+  3+

c  +  2+  3+

x  +  2+  3+

y  +  2+  3+

z  +  2+  3+

hide H<sub>2</sub>O/NH<sub>3</sub>

zoom 112-122

GO

| b <sup>+</sup> | #  | AA | #  | y <sup>+</sup> | y <sup>2+</sup> |
|----------------|----|----|----|----------------|-----------------|
| 172.0610       | 1  | E  | 33 |                |                 |
| 287.0879       | 2  | D  | 32 | 3564.7095      | 1782.8586       |
| 386.1564       | 3  | V  | 31 | 3449.6825      | 1725.3452       |
| 514.2149       | 4  | Q  | 30 | 3350.6141      | 1675.8110       |
| 643.2575       | 5  | E  | 29 | 3222.5555      | 1611.7817       |
| 744.3052       | 6  | T  | 28 | 3093.5129      | 1547.2604       |
| 859.3321       | 7  | D  | 27 | 2992.4653      | 1496.7365       |
| 960.3798       | 8  | T  | 26 | 2877.4383      | 1439.2231       |
| 1047.4118      | 9  | S  | 25 | 2776.3906      | 1388.6992       |
| 1175.4704      | 10 | Q  | 24 | 2689.3586      | 1345.1832       |
| 1331.5967      | 11 | K  | 23 | 2561.3000      | 1281.1539       |
| 1446.6237      | 12 | D  | 22 | 2405.1737      | 1203.0908       |
| 1574.6822      | 13 | Q  | 21 | 2290.1468      | 1145.5773       |
| 1661.7143      | 14 | S  | 20 | 2162.0882      | 1081.5480       |
| 1758.7670      | 15 | P  | 19 | 2075.0562      | 1038.0320       |
| 1829.8042      | 16 | A  | 18 | 1978.0034      | 989.5056        |
| 1916.8362      | 17 | S  | 17 | 1906.9663      | 953.9871        |
| 2053.8951      | 18 | H  | 16 | 1819.9343      | 910.4710        |
| 2182.9377      | 19 | E  | 15 | 1682.8754      | 841.9416        |
| 2296.0218      | 20 | I  | 14 | 1553.8328      | 777.4203        |
| 2367.0589      | 21 | A  | 13 | 1440.7487      | 720.8783        |
| 2468.1065      | 22 | T  | 12 | 1369.7116      | 685.3597        |
| 2582.1495      | 23 | N  | 11 | 1268.6639      | 634.8359        |
| 2695.2335      | 24 | L  | 10 | 1154.6210      | 577.8144        |
| 2752.2550      | 25 | G  | 9  | 1041.5369      | 521.2724        |
| 2867.2819      | 26 | D  | 8  | 984.5155       | 492.7616        |
| 3014.3504      | 27 | F  | 7  | 869.4885       | 435.2482        |
| 3085.3875      | 28 | A  | 6  | 722.4201       | 361.7140        |
| 3198.4715      | 29 | I  | 5  | 651.3830       | 326.1954        |
| 3285.5036      | 30 | S  | 4  | 538.2989       | 269.6534        |
| 3398.5876      | 31 | L  | 3  | 451.2669       | 226.1374        |
| 3561.6510      | 32 | Y  | 2  | 338.1828       | 169.5953        |
|                | 33 | R  | 1  | 175.1195       | 88.0637         |

N-term:+43.02 K(11):+156.13

EDVTLHIVER, MH+ 1252.6538, m/z 626.8305  
 L OSG37 P180811 230811-s1.07387.07387.2.dta

X-range:

-

MassTol: Y-zoom:

MassType:

AVG  MONO

Axis:

1  2

Label:

I  M  -

Ions:

a  +  2+  3+

b  +  2+  3+

c  +  2+  3+

x  +  2+  3+

y  +  2+  3+

z  +  2+  3+

hide H<sub>2</sub>O/NH<sub>3</sub>

zoom 112-122

GO

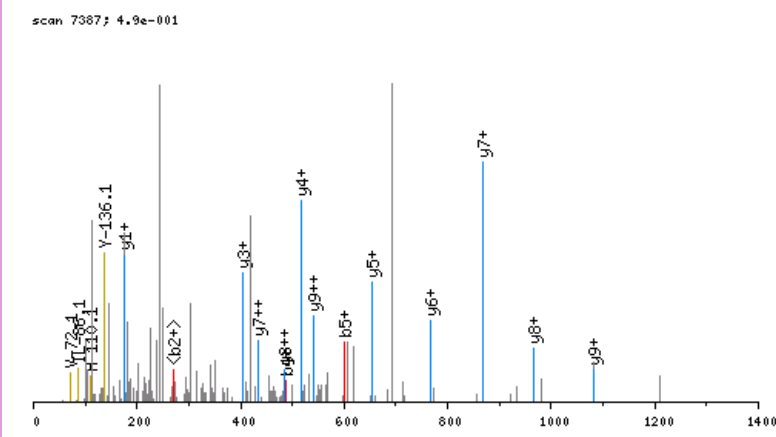

click image to zoom in; click top corners to zoom out [\[precursor±\]](#)

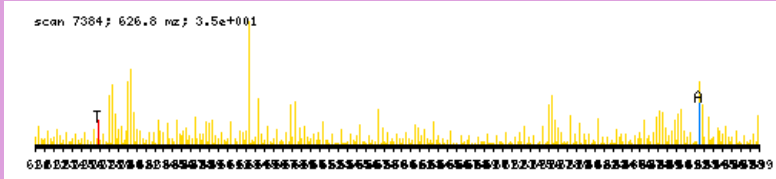

zoomed in precursor plot; T=theoretical m/z, A=acquired m/z

| b <sup>+</sup> | #  | AA # | y <sup>+</sup> | y <sup>2+</sup> |
|----------------|----|------|----------------|-----------------|
| 172.0610       | 1  | E 10 |                |                 |
| 287.0879       | 2  | D 9  | 1081.6006      | 541.3042        |
| 386.1564       | 3  | V 8  | 966.5736       | 483.7907        |
| 487.2040       | 4  | T 7  | 867.5052       | 434.2565        |
| 600.2881       | 5  | L 6  | 766.4575       | 383.7327        |
| 737.3470       | 6  | H 5  | 653.3735       | 327.1907        |
| 850.4311       | 7  | I 4  | 516.3146       | 258.6612        |
| 949.4995       | 8  | V 3  | 403.2305       | 202.1192        |
| 1078.5421      | 9  | E 2  | 304.1621       | 152.5850        |
|                | 10 | R 1  | 175.1195       | 88.0637         |

N-term:+43.02

EDVTLHIVERPYSGFDPASSEGEPTQGEAR, MH+ 3412.5933, m/z 853.9038  
L OSG38 P180811 230811-s1.07747.07747.4.dta

scan 7747; 2.6e+000

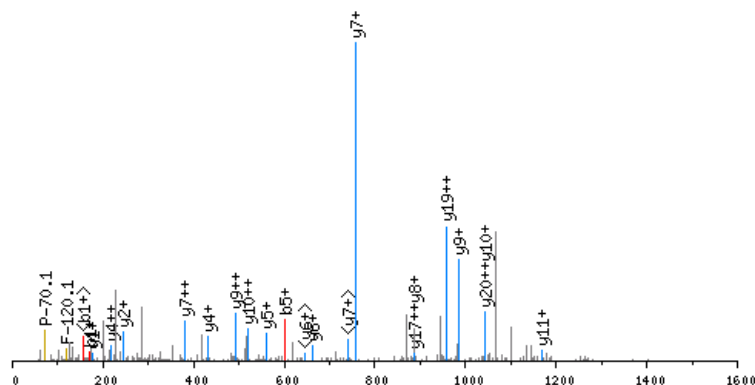

click image to zoom in; click top corners to zoom out [\[precursor±\]](#)

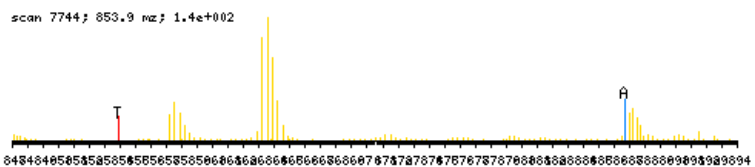

zoomed in precursor plot; T=theoretical m/z, A=acquired m/z

| b <sup>+</sup> | #  | AA | #  | y <sup>+</sup> | y <sup>2+</sup> |
|----------------|----|----|----|----------------|-----------------|
| 172.0610       | 1  | E  | 31 |                |                 |
| 287.0879       | 2  | D  | 30 | 3241.5402      | 1621.2740       |
| 386.1564       | 3  | V  | 29 | 3126.5132      | 1563.7605       |
| 487.2040       | 4  | T  | 28 | 3027.4448      | 1514.2263       |
| 600.2881       | 5  | L  | 27 | 2926.3971      | 1463.7025       |
| 737.3470       | 6  | H  | 26 | 2813.3131      | 1407.1605       |
| 850.4311       | 7  | I  | 25 | 2676.2542      | 1338.6310       |
| 949.4995       | 8  | V  | 24 | 2563.1701      | 1282.0890       |
| 1078.5421      | 9  | E  | 23 | 2464.1017      | 1232.5548       |
| 1234.6432      | 10 | R  | 22 | 2335.0591      | 1168.0335       |
| 1331.6960      | 11 | P  | 21 | 2178.9580      | 1089.9829       |
| 1494.7593      | 12 | Y  | 20 | 2081.9052      | 1041.4565       |
| 1581.7913      | 13 | S  | 19 | 1918.8419      | 959.9249        |
| 1638.8128      | 14 | G  | 18 | 1831.8099      | 916.4088        |
| 1785.8812      | 15 | F  | 17 | 1774.7884      | 887.8981        |
| 1882.9339      | 16 | P  | 16 | 1627.7200      | 814.3639        |
| 1997.9609      | 17 | D  | 15 | 1530.6672      | 765.8375        |
| 2068.9980      | 18 | A  | 14 | 1415.6403      | 708.3241        |
| 2156.0300      | 19 | S  | 13 | 1344.6032      | 672.8055        |
| 2243.0621      | 20 | S  | 12 | 1257.5711      | 629.2895        |
| 2372.1047      | 21 | E  | 11 | 1170.5391      | 585.7735        |
| 2429.1261      | 22 | G  | 10 | 1041.4965      | 521.2522        |
| 2526.1789      | 23 | P  | 9  | 984.4750       | 492.7414        |
| 2655.2215      | 24 | E  | 8  | 887.4223       | 444.2151        |
| 2752.2742      | 25 | P  | 7  | 758.3797       | 379.6938        |
| 2853.3219      | 26 | T  | 6  | 661.3269       | 331.1674        |
| 2981.3805      | 27 | Q  | 5  | 560.2792       | 280.6435        |
| 3038.4020      | 28 | G  | 4  | 432.2207       | 216.6142        |
| 3167.4446      | 29 | E  | 3  | 375.1992       | 188.1035        |
| 3238.4817      | 30 | A  | 2  | 246.1566       | 123.5822        |
|                | 31 | R  | 1  | 175.1195       | 88.0637         |

N-term:+43.02

X-range:

-

MassTol: Y-zoom:

MassType:

AVG  MONO

Axis:

1  2

Label:

I  M  -

Ions:

a  +  2+  3+

b  +  2+  3+

c  +  2+  3+

x  +  2+  3+

y  +  2+  3+

z  +  2+  3+

hide H<sub>2</sub>O/NH<sub>3</sub>

zoom 112-122

GO



EDYLQDCR, MH+ 1140.4631, m/z 570.7352  
 L OSG41 P180811 230811-s1.05521.05521.2.dta

X-range:

-

MassTol: Y-zoom:

MassType:

AVG  MONO

Axis:

1  2

Label:

I  M  -

Ions:

a  +  2+  3+

b  +  2+  3+

c  +  2+  3+

x  +  2+  3+

y  +  2+  3+

z  +  2+  3+

hide H<sub>2</sub>O/NH<sub>3</sub>

zoom 112-122

GO

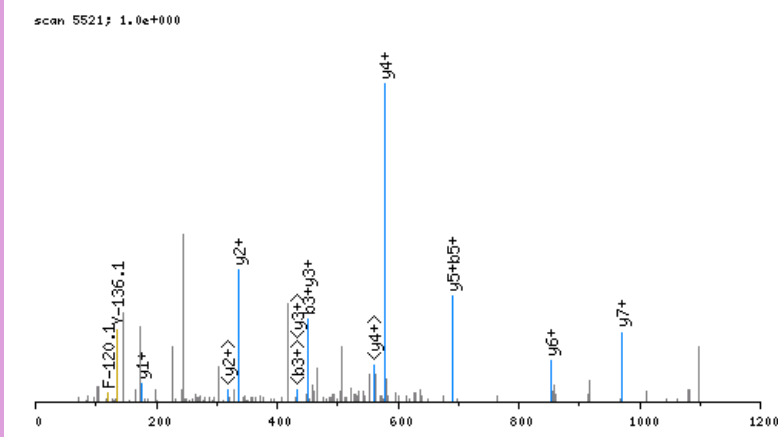

click image to zoom in; click top corners to zoom out [\[precursor±\]](#)

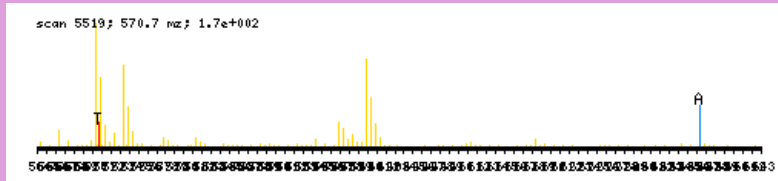

zoomed in precursor plot; T=theoretical m/z, A=acquired m/z

| b <sup>+</sup> | # | AA # | y <sup>+</sup> | y <sup>2+</sup> |
|----------------|---|------|----------------|-----------------|
| 172.0610       | 1 | E 8  |                |                 |
| 287.0879       | 2 | D 7  | 969.4100       | 485.2089        |
| 450.1513       | 3 | Y 6  | 854.3830       | 427.6954        |
| 563.2353       | 4 | L 5  | 691.3197       | 346.1638        |
| 691.2939       | 5 | Q 4  | 578.2356       | 289.6217        |
| 806.3208       | 6 | D 3  | 450.1770       | 225.5924        |
| 966.3514       | 7 | C 2  | 335.1501       | 168.0790        |
|                | 8 | R 1  | 175.1195       | 88.0637         |

N-term:+43.02 C(7):+160.03

EEAELVKGR, MH+ 1100.5952, m/z 550.8012  
 L OSG37 P180811 230811-s1.04940.04940.2.dta

scan 4940; 6.7e+001

X-range:

-

MassTol: Y-zoom:

MassType:

AVG  MONO

Axis:

1  2

Label:

I  M  -

Ions:

a  +  2+  3+

b  +  2+  3+

c  +  2+  3+

x  +  2+  3+

y  +  2+  3+

z  +  2+  3+

hide H<sub>2</sub>O/NH<sub>3</sub>

zoom 112-122

GO

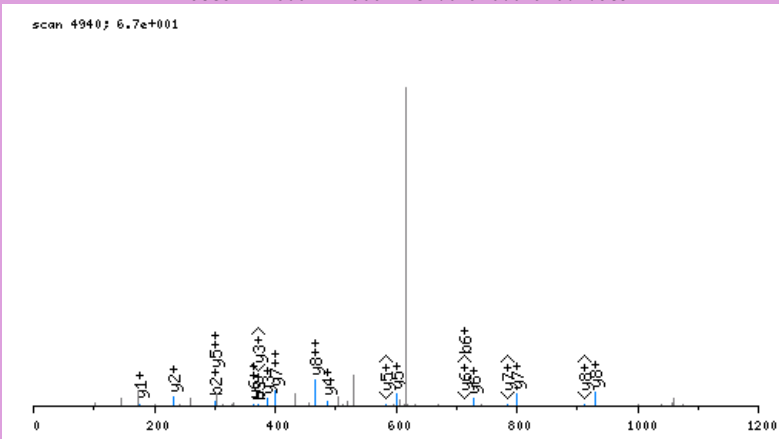

click image to zoom in; click top corners to zoom out [\[precursor±\]](#)

scan 4939; 550.8 m/z; 2.2e+002

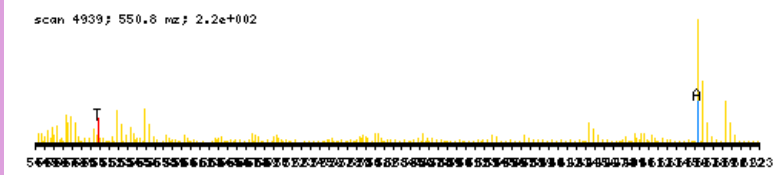

zoomed in precursor plot; T=theoretical m/z, A=acquired m/z

| b <sup>+</sup> | # | AA # | y <sup>+</sup> | y <sup>2+</sup> |
|----------------|---|------|----------------|-----------------|
| 172.0610       | 1 | E 9  |                |                 |
| 301.1036       | 2 | E 8  | 929.5420       | 465.2749        |
| 372.1407       | 3 | A 7  | 800.4994       | 400.7536        |
| 501.1833       | 4 | E 6  | 729.4623       | 365.2351        |
| 614.2674       | 5 | L 5  | 600.4197       | 300.7138        |
| 713.3358       | 6 | V 4  | 487.3357       | 244.1718        |
| 869.4621       | 7 | K 3  | 388.2673       | 194.6375        |
| 926.4835       | 8 | G 2  | 232.1410       | 116.5744        |
|                | 9 | R 1  | 175.1195       | 88.0637         |

N-term:+43.02 K(7):+156.13

EEAPHGCPGADSAQAGR, MH+ 1751.7407, m/z 584.5851  
 L OSG37 P180811 230811-s1.03057.03057.3.dta

X-range:

-

MassTol: Y-zoom:

MassType:

AVG  MONO

Axis:

1  2

Label:

I  M  -

Ions:

a  +  2+  3+

b  +  2+  3+

c  +  2+  3+

x  +  2+  3+

y  +  2+  3+

z  +  2+  3+

hide H<sub>2</sub>O/NH<sub>3</sub>

zoom 112-122

GO

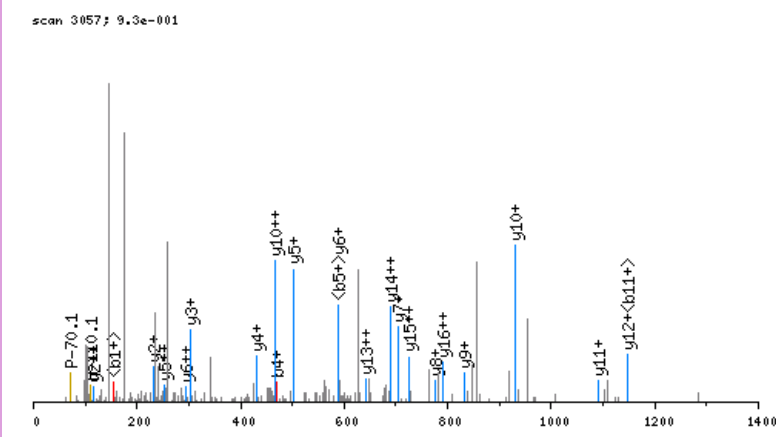

click image to zoom in; click top corners to zoom out [\[precursor±\]](#)

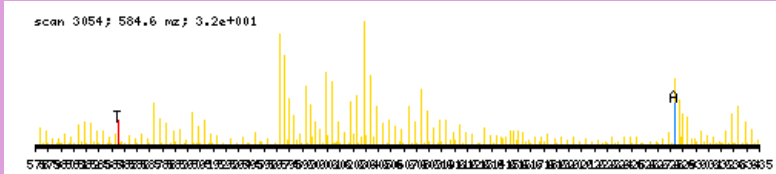

zoomed in precursor plot; T=theoretical m/z, A=acquired m/z

| b <sup>+</sup> | #  | AA # | y <sup>+</sup> | y <sup>2+</sup> |
|----------------|----|------|----------------|-----------------|
| 172.0610       | 1  | E 17 |                |                 |
| 301.1036       | 2  | E 16 | 1580.6875      | 790.8477        |
| 372.1407       | 3  | A 15 | 1451.6449      | 726.3264        |
| 469.1935       | 4  | P 14 | 1380.6078      | 690.8078        |
| 606.2524       | 5  | H 13 | 1283.5551      | 642.2814        |
| 663.2738       | 6  | G 12 | 1146.4961      | 573.7520        |
| 823.3044       | 7  | C 11 | 1089.4747      | 545.2413        |
| 920.3572       | 8  | P 10 | 929.4441       | 465.2260        |
| 977.3787       | 9  | G 9  | 832.3913       | 416.6996        |
| 1048.4158      | 10 | A 8  | 775.3699       | 388.1888        |
| 1163.4427      | 11 | D 7  | 704.3327       | 352.6703        |
| 1250.4748      | 12 | S 6  | 589.3058       | 295.1568        |
| 1321.5119      | 13 | A 5  | 502.2738       | 251.6408        |
| 1449.5704      | 14 | Q 4  | 431.2367       | 216.1222        |
| 1520.6076      | 15 | A 3  | 303.1781       | 152.0930        |
| 1577.6290      | 16 | G 2  | 232.1410       | 116.5744        |
|                | 17 | R 1  | 175.1195       | 88.0637         |

N-term:+43.02 C(7):+160.03

EEASGSAGNDR, MH+ 1134.4663, m/z 567.7368  
 L OSG41 P180811 230811-s1.02401.02401.2.dta

X-range:

-

MassTol: Y-zoom:

MassType:

AVG  MONO

Axis:

1  2

Label:

I  M  -

Ions:

a  +  2+  3+

b  +  2+  3+

c  +  2+  3+

x  +  2+  3+

y  +  2+  3+

z  +  2+  3+

hide H<sub>2</sub>O/NH<sub>3</sub>

zoom 112-122

GO

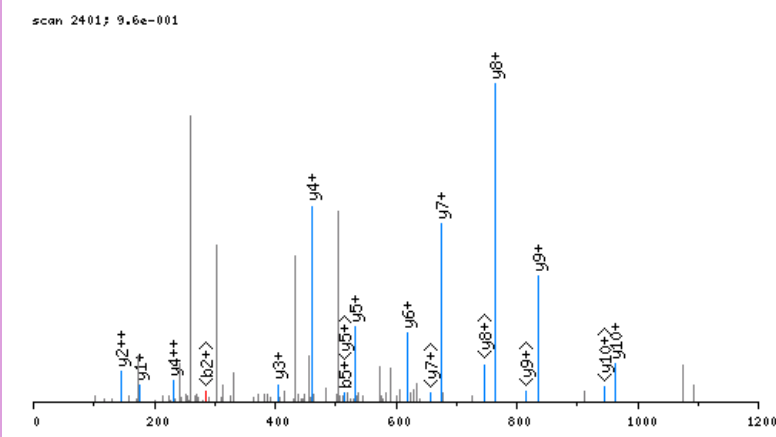

click image to zoom in; click top corners to zoom out [\[precursor±\]](#)

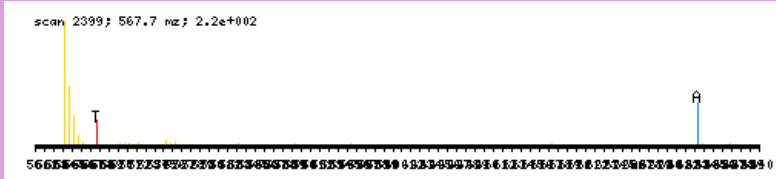

zoomed in precursor plot; T=theoretical m/z, A=acquired m/z

| b <sup>+</sup> | #  | AA | #  | y <sup>+</sup> | y <sup>2+</sup> |
|----------------|----|----|----|----------------|-----------------|
| 172.0610       | 1  | E  | 11 |                |                 |
| 301.1036       | 2  | E  | 10 | 963.4132       | 482.2105        |
| 372.1407       | 3  | A  | 9  | 834.3706       | 417.6892        |
| 459.1727       | 4  | S  | 8  | 763.3335       | 382.1706        |
| 516.1942       | 5  | G  | 7  | 676.3014       | 338.6546        |
| 603.2262       | 6  | S  | 6  | 619.2800       | 310.1439        |
| 674.2633       | 7  | A  | 5  | 532.2479       | 266.6279        |
| 731.2848       | 8  | G  | 4  | 461.2108       | 231.1093        |
| 845.3277       | 9  | N  | 3  | 404.1894       | 202.5986        |
| 960.3547       | 10 | D  | 2  | 290.1464       | 145.5771        |
|                | 11 | R  | 1  | 175.1195       | 88.0637         |

N-term:+43.02

EEEDSTALVCDNGLCKAGFAGDDAPR, MH+ 3011.2998, m/z 753.5804  
L OSG36 P180811 230811-sl.04420.04420.4.dta

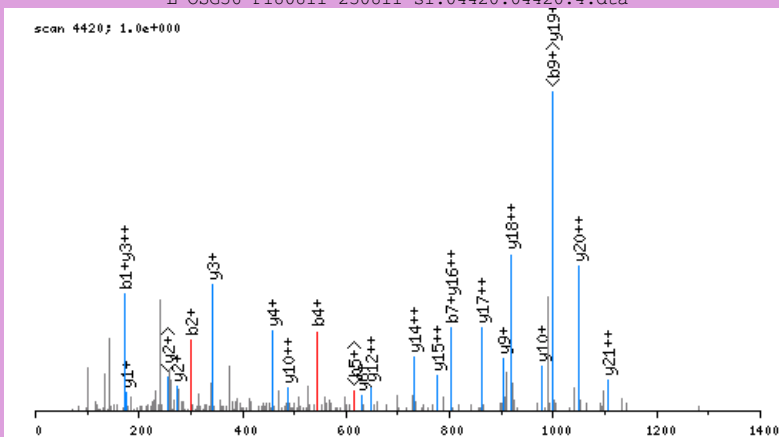

click image to zoom in; click top corners to zoom out [\[precursor±\]](#)

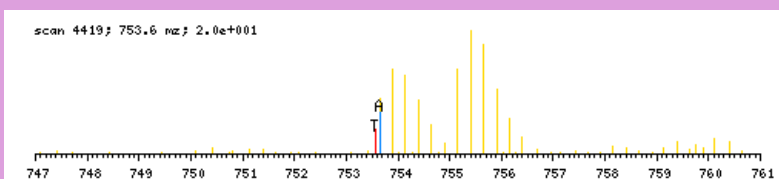

zoomed in precursor plot; T=theoretical m/z, A=acquired m/z

| b <sup>+</sup> | #  | AA # | y <sup>+</sup> | y <sup>2+</sup> |
|----------------|----|------|----------------|-----------------|
| 172.0610       | 1  | E 28 |                |                 |
| 301.1036       | 2  | E 27 | 2840.2467      | 1420.6272       |
| 430.1462       | 3  | E 26 | 2711.2041      | 1356.1059       |
| 545.1731       | 4  | D 25 | 2582.1615      | 1291.5846       |
| 632.2052       | 5  | S 24 | 2467.1345      | 1234.0712       |
| 733.2528       | 6  | T 23 | 2380.1025      | 1190.5552       |
| 804.2899       | 7  | A 22 | 2279.0548      | 1140.0313       |
| 917.3740       | 8  | L 21 | 2208.0177      | 1104.5128       |
| 1016.4424      | 9  | V 20 | 2094.9336      | 1047.9707       |
| 1176.4730      | 10 | C 19 | 1995.8652      | 998.4365        |
| 1291.5000      | 11 | D 18 | 1835.8346      | 918.4212        |
| 1405.5429      | 12 | N 17 | 1720.8077      | 860.9078        |
| 1462.5644      | 13 | G 16 | 1606.7648      | 803.8863        |
| 1549.5964      | 14 | S 15 | 1549.7433      | 775.3756        |
| 1606.6178      | 15 | G 14 | 1462.7113      | 731.8595        |
| 1719.7019      | 16 | L 13 | 1405.6898      | 703.3488        |
| 1879.7325      | 17 | C 12 | 1292.6057      | 646.8068        |
| 2035.8588      | 18 | K 11 | 1132.5751      | 566.7915        |
| 2106.8959      | 19 | A 10 | 976.4488       | 488.7283        |
| 2163.9174      | 20 | G 9  | 905.4117       | 453.2098        |
| 2310.9858      | 21 | F 8  | 848.3903       | 424.6990        |
| 2382.0229      | 22 | A 7  | 701.3218       | 351.1648        |
| 2439.0444      | 23 | G 6  | 630.2847       | 315.6463        |
| 2554.0713      | 24 | D 5  | 573.2633       | 287.1355        |
| 2669.0983      | 25 | D 4  | 458.2363       | 229.6221        |
| 2740.1354      | 26 | A 3  | 343.2094       | 172.1086        |
| 2837.1881      | 27 | P 2  | 272.1723       | 136.5900        |
|                | 28 | R 1  | 175.1195       | 88.0637         |

N-term:+43.02 C(10):+160.03  
C(17):+160.03 K(18):+156.13

X-range:

-

MassTol: Y-zoom:

MassType:

AVG  MONO

Axis:

1  2

Label:

I  M  -

Ions:

a  +  2+  3+

b  +  2+  3+

c  +  2+  3+

x  +  2+  3+

y  +  2+  3+

z  +  2+  3+

hide H<sub>2</sub>O/NH<sub>3</sub>

zoom 112-122

GO

EEEIAALVIDNGSGMCKAGFAGDDAPR, MH+ 2869.3560, m/z 957.1235  
L OSG36 P180811 230811-s1.06235.06235.3.dta

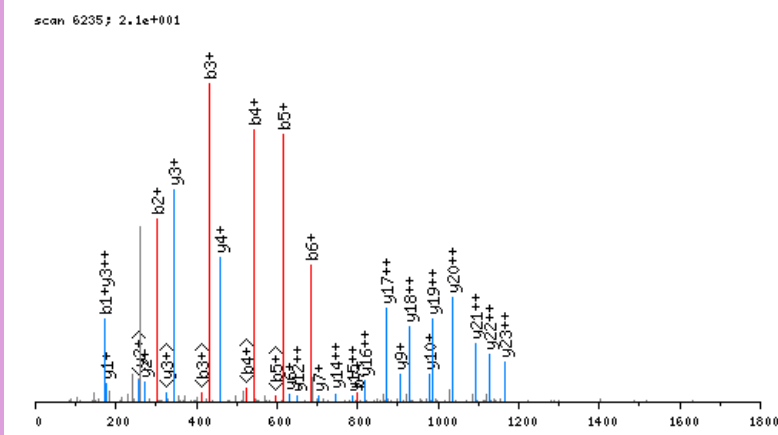

click image to zoom in; click top corners to zoom out [\[precursor±\]](#)

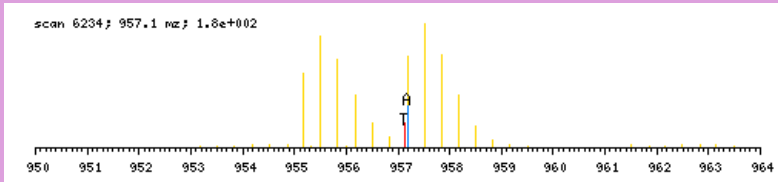

zoomed in precursor plot; T=theoretical m/z, A=acquired m/z

X-range:

-

MassTol: Y-zoom:

MassType:

AVG  MONO

Axis:

1  2

Label:

I  M  -

Ions:

a  +  2+  3+

b  +  2+  3+

c  +  2+  3+

x  +  2+  3+

y  +  2+  3+

z  +  2+  3+

hide H<sub>2</sub>O/NH<sub>3</sub>

zoom 112-122

GO

| b <sup>+</sup> | #  | AA # | y <sup>+</sup> | y <sup>2+</sup> |
|----------------|----|------|----------------|-----------------|
| 172.0610       | 1  | E 27 |                |                 |
| 301.1036       | 2  | E 26 | 2698.3029      | 1349.6553       |
| 430.1462       | 3  | E 25 | 2569.2603      | 1285.1340       |
| 543.2302       | 4  | I 24 | 2440.2177      | 1220.6128       |
| 614.2674       | 5  | A 23 | 2327.1336      | 1164.0707       |
| 685.3045       | 6  | A 22 | 2256.0965      | 1128.5522       |
| 798.3885       | 7  | L 21 | 2185.0594      | 1093.0336       |
| 897.4569       | 8  | V 20 | 2071.9753      | 1036.4916       |
| 1010.5410      | 9  | I 19 | 1972.9069      | 986.9574        |
| 1125.5680      | 10 | D 18 | 1859.8228      | 930.4153        |
| 1239.6109      | 11 | N 17 | 1744.7959      | 872.9019        |
| 1296.6323      | 12 | G 16 | 1630.7530      | 815.8804        |
| 1383.6644      | 13 | S 15 | 1573.7315      | 787.3697        |
| 1440.6858      | 14 | G 14 | 1486.6995      | 743.8537        |
| 1571.7263      | 15 | M 13 | 1429.6780      | 715.3429        |
| 1731.7569      | 16 | C 12 | 1298.6375      | 649.8227        |
| 1893.9150      | 17 | K 11 | 1138.6069      | 569.8074        |
| 1964.9521      | 18 | A 10 | 976.4488       | 488.7283        |
| 2021.9736      | 19 | G 9  | 905.4117       | 453.2098        |
| 2169.0420      | 20 | F 8  | 848.3903       | 424.6990        |
| 2240.0791      | 21 | A 7  | 701.3218       | 351.1648        |
| 2297.1006      | 22 | G 6  | 630.2847       | 315.6463        |
| 2412.1275      | 23 | D 5  | 573.2633       | 287.1355        |
| 2527.1545      | 24 | D 4  | 458.2363       | 229.6221        |
| 2598.1916      | 25 | A 3  | 343.2094       | 172.1086        |
| 2695.2444      | 26 | P 2  | 272.1723       | 136.5900        |
|                | 27 | R 1  | 175.1195       | 88.0637         |

N-term: +43.02 C(16) : +160.03  
K(17) : +162.16

EESIKEGSEKPR, MH+ 1615.8180, m/z 539.2775  
 L OSG39 P180811 230811-s1.02657.02657.3.dta

X-range:

-

MassTol: Y-zoom:

MassType:

AVG  MONO

Axis:

1  2

Label:

I  M  -

Ions:

a  +  2+  3+

b  +  2+  3+

c  +  2+  3+

x  +  2+  3+

y  +  2+  3+

z  +  2+  3+

hide H<sub>2</sub>O/NH<sub>3</sub>

zoom 112-122

GO

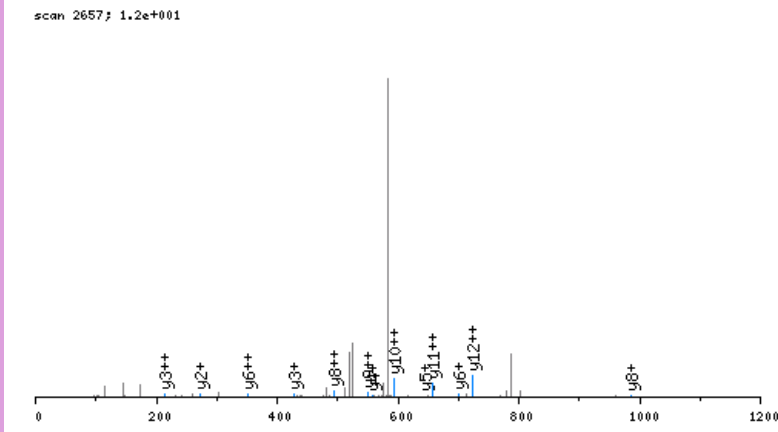

click image to zoom in; click top corners to zoom out [\[precursor±\]](#)

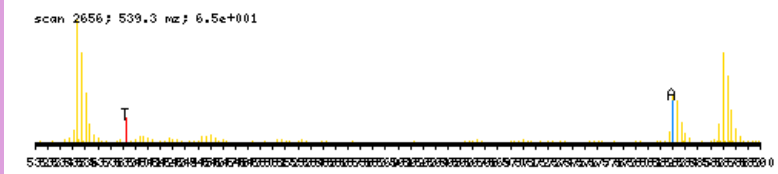

zoomed in precursor plot; T=theoretical m/z, A=acquired m/z

| b <sup>+</sup> | #  | AA # | y <sup>+</sup> | y <sup>2+</sup> |
|----------------|----|------|----------------|-----------------|
| 172.0610       | 1  | E 13 |                |                 |
| 301.1036       | 2  | E 12 | 1444.7648      | 722.8863        |
| 430.1462       | 3  | E 11 | 1315.7222      | 658.3650        |
| 517.1782       | 4  | S 10 | 1186.6796      | 593.8437        |
| 630.2623       | 5  | I 9  | 1099.6476      | 550.3277        |
| 786.3886       | 6  | K 8  | 986.5635       | 493.7857        |
| 915.4312       | 7  | E 7  | 830.4372       | 415.7225        |
| 972.4526       | 8  | G 6  | 701.3946       | 351.2012        |
| 1059.4847      | 9  | S 5  | 644.3732       | 322.6905        |
| 1188.5273      | 10 | E 4  | 557.3412       | 279.1745        |
| 1344.6536      | 11 | K 3  | 428.2986       | 214.6532        |
| 1441.7063      | 12 | P 2  | 272.1723       | 136.5900        |
|                | 13 | R 1  | 175.1195       | 88.0637         |

N-term:+43.02 K(6):+156.13  
 K(11):+156.13

EEGPAVGTLSR, MH+ 1157.5803, m/z 579.2938  
 L OSG41 P180811 230811-s1.04786.04786.2.dta

X-range:

-

MassTol: Y-zoom:

MassType:

AVG  MONO

Axis:

1  2

Label:

I  M  -

Ions:

a  +  2+  3+

b  +  2+  3+

c  +  2+  3+

x  +  2+  3+

y  +  2+  3+

z  +  2+  3+

hide H<sub>2</sub>O/NH<sub>3</sub>

zoom 112-122

GO

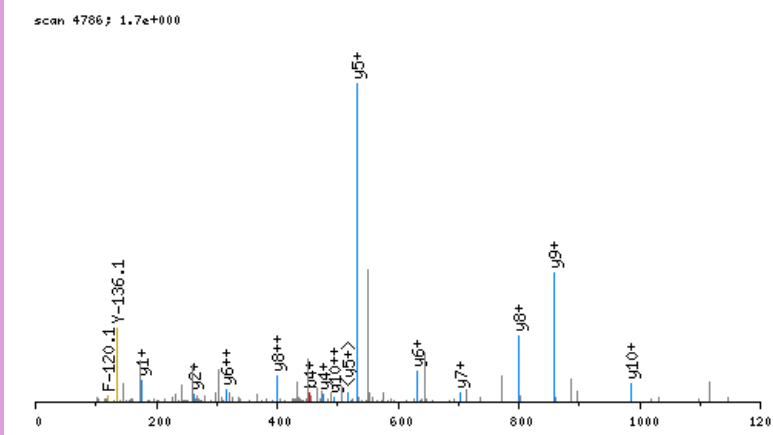

click image to zoom in; click top corners to zoom out [\[precursor±\]](#)

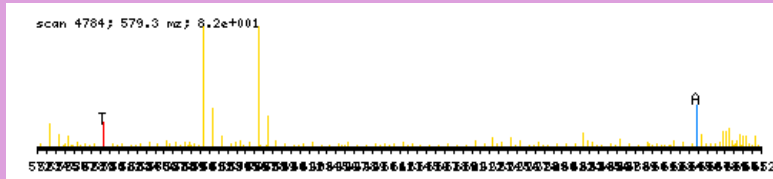

zoomed in precursor plot; T=theoretical m/z, A=acquired m/z

| b <sup>+</sup> | #  | AA | #  | y <sup>+</sup> | y <sup>2+</sup> |
|----------------|----|----|----|----------------|-----------------|
| 172.0610       | 1  | E  | 11 |                |                 |
| 301.1036       | 2  | E  | 10 | 986.5271       | 493.7675        |
| 358.1251       | 3  | G  | 9  | 857.4845       | 429.2462        |
| 455.1778       | 4  | P  | 8  | 800.4630       | 400.7354        |
| 526.2149       | 5  | A  | 7  | 703.4103       | 352.2090        |
| 625.2833       | 6  | V  | 6  | 632.3731       | 316.6905        |
| 682.3048       | 7  | G  | 5  | 533.3047       | 267.1563        |
| 783.3525       | 8  | T  | 4  | 476.2833       | 238.6455        |
| 896.4365       | 9  | L  | 3  | 375.2356       | 188.1217        |
| 983.4686       | 10 | S  | 2  | 262.1515       | 131.5797        |
|                | 11 | R  | 1  | 175.1195       | 88.0637         |

N-term:+43.02



EELGAAASGAGGGGGGEEHGGGR, MH+ 2038.8815, m/z 680.2987  
 L OSG37 P180811 230811-s1.05303.05303.3.dta

X-range:

-

MassTol: Y-zoom:

MassType:

AVG  MONO

Axis:

1  2

Label:

I  M  -

Ions:

a  +  2+  3+

b  +  2+  3+

c  +  2+  3+

x  +  2+  3+

y  +  2+  3+

z  +  2+  3+

hide H<sub>2</sub>O/NH<sub>3</sub>

zoom 112-122

GO

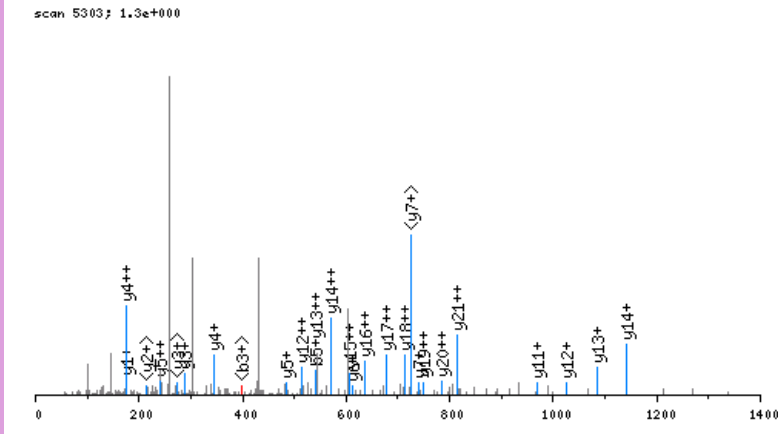

click image to zoom in; click top corners to zoom out [precursor±]

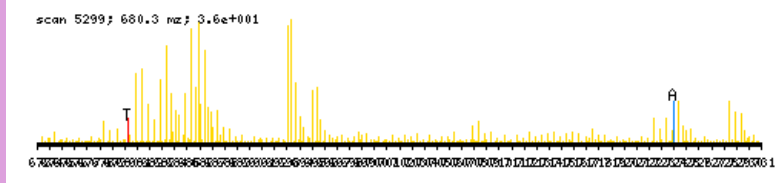

zoomed in precursor plot; T=theoretical m/z, A=acquired m/z

| b <sup>+</sup> | #  | AA # | y <sup>+</sup> | y <sup>2+</sup> |
|----------------|----|------|----------------|-----------------|
| 172.0610       | 1  | E 24 |                |                 |
| 301.1036       | 2  | E 23 | 1867.8283      | 934.4181        |
| 414.1877       | 3  | L 22 | 1738.7857      | 869.8968        |
| 471.2091       | 4  | G 21 | 1625.7016      | 813.3547        |
| 542.2462       | 5  | A 20 | 1568.6802      | 784.8440        |
| 613.2833       | 6  | A 19 | 1497.6431      | 749.3254        |
| 684.3205       | 7  | A 18 | 1426.6060      | 713.8069        |
| 771.3525       | 8  | S 17 | 1355.5688      | 678.2883        |
| 828.3739       | 9  | G 16 | 1268.5368      | 634.7723        |
| 899.4111       | 10 | A 15 | 1211.5154      | 606.2616        |
| 956.4325       | 11 | G 14 | 1140.4782      | 570.7430        |
| 1013.4540      | 12 | G 13 | 1083.4568      | 542.2323        |
| 1070.4755      | 13 | G 12 | 1026.4353      | 513.7216        |
| 1127.4969      | 14 | G 11 | 969.4138       | 485.2108        |
| 1184.5184      | 15 | G 10 | 912.3924       | 456.7001        |
| 1241.5398      | 16 | G 9  | 855.3709       | 428.1894        |
| 1298.5613      | 17 | G 8  | 798.3495       | 399.6786        |
| 1427.6039      | 18 | E 7  | 741.3280       | 371.1679        |
| 1556.6465      | 19 | E 6  | 612.2854       | 306.6466        |
| 1693.7054      | 20 | H 5  | 483.2428       | 242.1253        |
| 1750.7269      | 21 | G 4  | 346.1839       | 173.5959        |
| 1807.7483      | 22 | G 3  | 289.1624       | 145.0851        |
| 1864.7698      | 23 | G 2  | 232.1410       | 116.5744        |
|                | 24 | R 1  | 175.1195       | 88.0637         |

N-term:+43.02

EELSADEIRR, MH+ 1259.6232, m/z 630.3152  
 L OSG37 P180811 230811-s1.05688.05688.2.dta

scan 5688; 4.1e+000

X-range:

-

MassTol: Y-zoom:

MassType:

AVG  MONO

Axis:

1  2

Label:

I  M  -

Ions:

a  +  2+  3+

b  +  2+  3+

c  +  2+  3+

x  +  2+  3+

y  +  2+  3+

z  +  2+  3+

hide H<sub>2</sub>O/NH<sub>3</sub>

zoom 112-122

GO

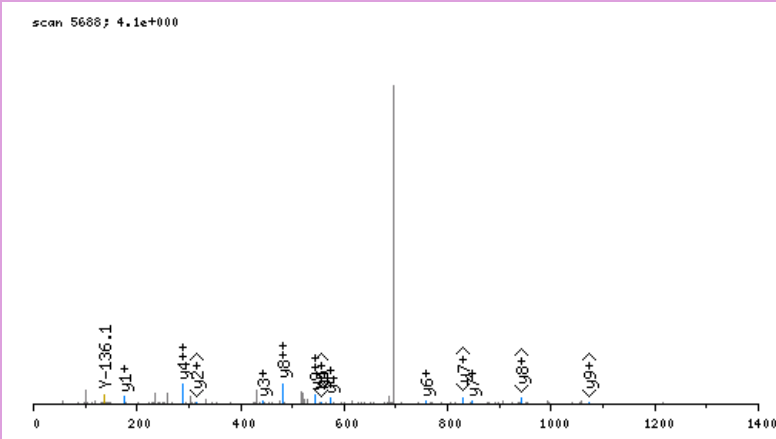

click image to zoom in; click top corners to zoom out [\[precursor±\]](#)

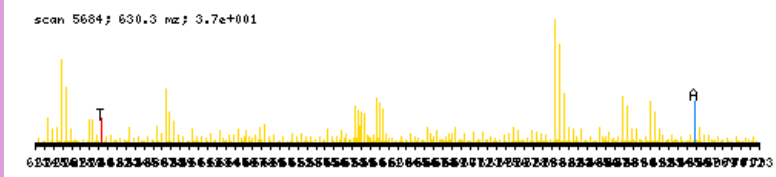

zoomed in precursor plot; T=theoretical m/z, A=acquired m/z

| b <sup>+</sup> | #  | AA # | y <sup>+</sup> | y <sup>2+</sup> |
|----------------|----|------|----------------|-----------------|
| 172.0610       | 1  | E 10 |                |                 |
| 301.1036       | 2  | E 9  | 1088.5700      | 544.7889        |
| 414.1877       | 3  | L 8  | 959.5274       | 480.2676        |
| 501.2197       | 4  | S 7  | 846.4434       | 423.7256        |
| 572.2568       | 5  | A 6  | 759.4113       | 380.2096        |
| 687.2837       | 6  | D 5  | 688.3742       | 344.6910        |
| 816.3263       | 7  | E 4  | 573.3473       | 287.1775        |
| 929.4104       | 8  | I 3  | 444.3047       | 222.6563        |
| 1085.5115      | 9  | R 2  | 331.2206       | 166.1142        |
|                | 10 | R 1  | 175.1195       | 88.0637         |

N-term:+43.02

EERPSETNSNVDSQAQPSVAQLAGR, MH+ 2671.2560, m/z 668.5694  
 L OSG36 P180811 230811-s1.03882.03882.4.dta

scan 3882; 6.5e-001

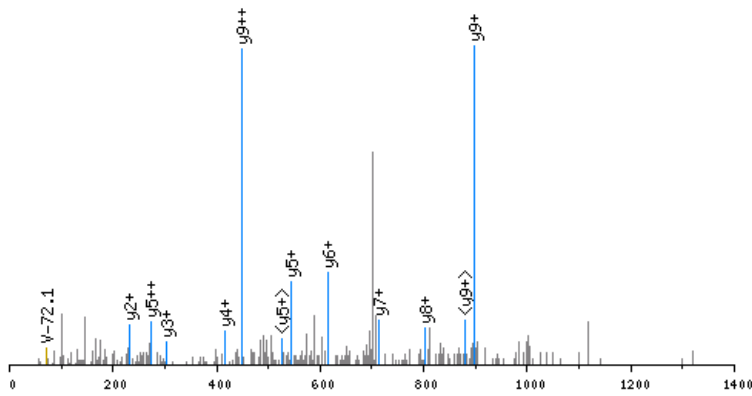

click image to zoom in; click top corners to zoom out [precursor±]

scan 3879; 668.6 m/z; 5.6e+000

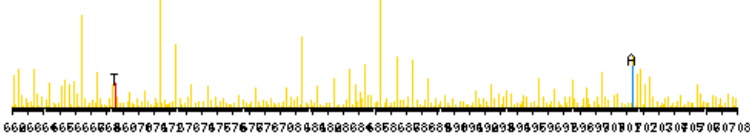

zoomed in precursor plot; T=theoretical m/z, A=acquired m/z

X-range:

-

MassTol: Y-zoom:

MassType:

AVG  MONO

Axis:

1  2

Label:

I  M  -

Ions:

a  +  2+  3+

b  +  2+  3+

c  +  2+  3+

x  +  2+  3+

y  +  2+  3+

z  +  2+  3+

hide H<sub>2</sub>O/NH<sub>3</sub>

zoom 112-122

GO

| b <sup>+</sup> | #  | AA # | y <sup>+</sup> | y <sup>2+</sup> |
|----------------|----|------|----------------|-----------------|
| 172.0610       | 1  | E 25 |                |                 |
| 301.1036       | 2  | E 24 | 2500.2028      | 1250.6053       |
| 457.2047       | 3  | R 23 | 2371.1602      | 1186.0840       |
| 554.2575       | 4  | P 22 | 2215.0591      | 1108.0335       |
| 641.2895       | 5  | S 21 | 2118.0063      | 1059.5071       |
| 770.3321       | 6  | E 20 | 2030.9743      | 1015.9911       |
| 871.3798       | 7  | T 19 | 1901.9317      | 951.4698        |
| 985.4227       | 8  | N 18 | 1800.8840      | 900.9459        |
| 1072.4547      | 9  | S 17 | 1686.8411      | 843.9245        |
| 1186.4976      | 10 | N 16 | 1599.8091      | 800.4084        |
| 1285.5661      | 11 | V 15 | 1485.7661      | 743.3870        |
| 1400.5930      | 12 | D 14 | 1386.6977      | 693.8528        |
| 1487.6250      | 13 | S 13 | 1271.6708      | 636.3393        |
| 1574.6571      | 14 | S 12 | 1184.6388      | 592.8233        |
| 1645.6942      | 15 | A 11 | 1097.6067      | 549.3073        |
| 1773.7527      | 16 | Q 10 | 1026.5696      | 513.7887        |
| 1870.8055      | 17 | P 9  | 898.5110       | 449.7594        |
| 1957.8375      | 18 | S 8  | 801.4583       | 401.2331        |
| 2056.9060      | 19 | V 7  | 714.4262       | 357.7170        |
| 2127.9431      | 20 | A 6  | 615.3578       | 308.1828        |
| 2256.0016      | 21 | Q 5  | 544.3207       | 272.6643        |
| 2369.0857      | 22 | L 4  | 416.2621       | 208.6350        |
| 2440.1228      | 23 | A 3  | 303.1781       | 152.0930        |
| 2497.1443      | 24 | G 2  | 232.1410       | 116.5744        |
|                | 25 | R 1  | 175.1195       | 88.0637         |

N-term:+43.02

EESEYESVLCVKPEVHVYR, MH+ 2428.1919, m/z 810.0688  
 L OSG39 P180811 230811-s1.06834.06834.3.dta

X-range:

-

MassTol: Y-zoom:

MassType:

AVG  MONO

Axis:

1  2

Label:

I  M  -

Ions:

a  +  2+  3+

b  +  2+  3+

c  +  2+  3+

x  +  2+  3+

y  +  2+  3+

z  +  2+  3+

hide H<sub>2</sub>O/NH<sub>3</sub>

zoom 112-122

GO

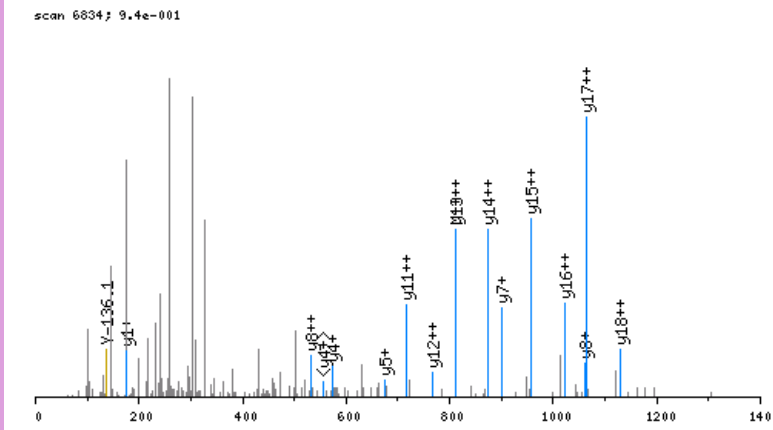

click image to zoom in; click top corners to zoom out [\[precursor±\]](#)

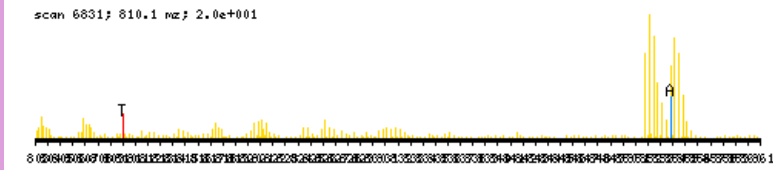

zoomed in precursor plot; T=theoretical m/z, A=acquired m/z

| b <sup>+</sup> | #  | AA | #  | y <sup>+</sup> | y <sup>2+</sup> |
|----------------|----|----|----|----------------|-----------------|
| 172.0610       | 1  | E  | 19 |                |                 |
| 301.1036       | 2  | E  | 18 | 2257.1387      | 1129.0733       |
| 388.1356       | 3  | S  | 17 | 2128.0961      | 1064.5520       |
| 517.1782       | 4  | E  | 16 | 2041.0641      | 1021.0359       |
| 680.2415       | 5  | Y  | 15 | 1912.0215      | 956.5146        |
| 809.2841       | 6  | E  | 14 | 1748.9581      | 874.9830        |
| 896.3162       | 7  | S  | 13 | 1619.9155      | 810.4617        |
| 995.3846       | 8  | V  | 12 | 1532.8835      | 766.9457        |
| 1108.4686      | 9  | L  | 11 | 1433.8151      | 717.4115        |
| 1268.4992      | 10 | C  | 10 | 1320.7310      | 660.8694        |
| 1367.5676      | 11 | V  | 9  | 1160.7004      | 580.8541        |
| 1529.7257      | 12 | K  | 8  | 1061.6320      | 531.3199        |
| 1626.7785      | 13 | P  | 7  | 899.4739       | 450.2409        |
| 1755.8211      | 14 | E  | 6  | 802.4212       | 401.7145        |
| 1854.8895      | 15 | V  | 5  | 673.3786       | 337.1932        |
| 1991.9484      | 16 | H  | 4  | 574.3102       | 287.6590        |
| 2091.0168      | 17 | V  | 3  | 437.2512       | 219.1295        |
| 2254.0802      | 18 | Y  | 2  | 338.1828       | 169.5953        |
|                | 19 | R  | 1  | 175.1195       | 88.0637         |

N-term: +43.02 C(10): +160.03  
 K(12): +162.16

EFAELIKTPR, MH+ 1279.7475, m/z 640.3774  
 L OSG37 P180811 230811-s1.08637.08637.2.dta

X-range:

-

MassTol: Y-zoom:

MassType:

AVG  MONO

Axis:

1  2

Label:

I  M  -

Ions:

a  +  2+  3+

b  +  2+  3+

c  +  2+  3+

x  +  2+  3+

y  +  2+  3+

z  +  2+  3+

hide H<sub>2</sub>O/NH<sub>3</sub>

zoom 112-122

GO

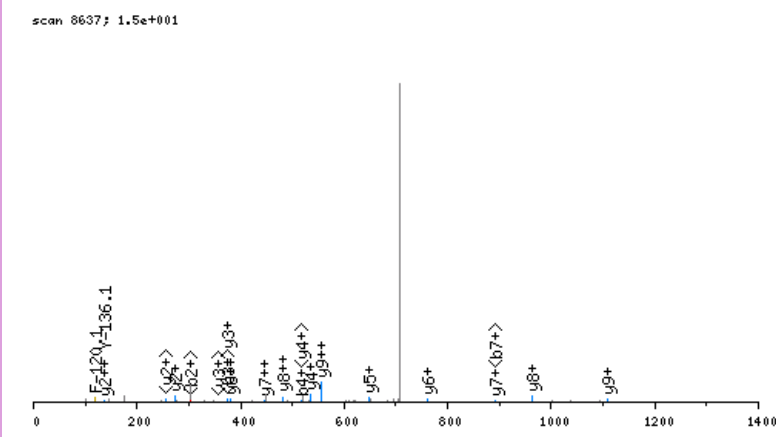

click image to zoom in; click top corners to zoom out [\[precursor±\]](#)

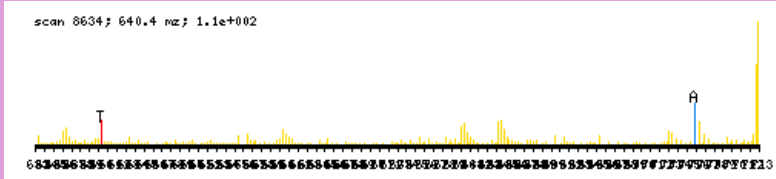

zoomed in precursor plot; T=theoretical m/z, A=acquired m/z

| b <sup>+</sup> | #  | AA # | y <sup>+</sup> | y <sup>2+</sup> |
|----------------|----|------|----------------|-----------------|
| 172.0610       | 1  | E 10 |                |                 |
| 319.1294       | 2  | F 9  | 1108.6943      | 554.8511        |
| 390.1665       | 3  | A 8  | 961.6259       | 481.3169        |
| 519.2091       | 4  | E 7  | 890.5888       | 445.7983        |
| 632.2932       | 5  | L 6  | 761.5462       | 381.2770        |
| 745.3772       | 6  | I 5  | 648.4621       | 324.7350        |
| 907.5353       | 7  | K 4  | 535.3780       | 268.1929        |
| 1008.5830      | 8  | T 3  | 373.2199       | 187.1139        |
| 1105.6358      | 9  | P 2  | 272.1723       | 136.5900        |
|                | 10 | R 1  | 175.1195       | 88.0637         |

N-term:+43.02 K(7):+162.16

EFPDLGAHCSEPCQR, MH+ 1931.8015, m/z 644.6054  
 L OSG37 P180811 230811-s1.06726.06726.3.dta

X-range:

-

MassTol: Y-zoom:

MassType:

AVG  MONO

Axis:

1  2

Label:

I  M  -

Ions:

a  +  2+  3+

b  +  2+  3+

c  +  2+  3+

x  +  2+  3+

y  +  2+  3+

z  +  2+  3+

hide H<sub>2</sub>O/NH<sub>3</sub>

zoom 112-122

GO

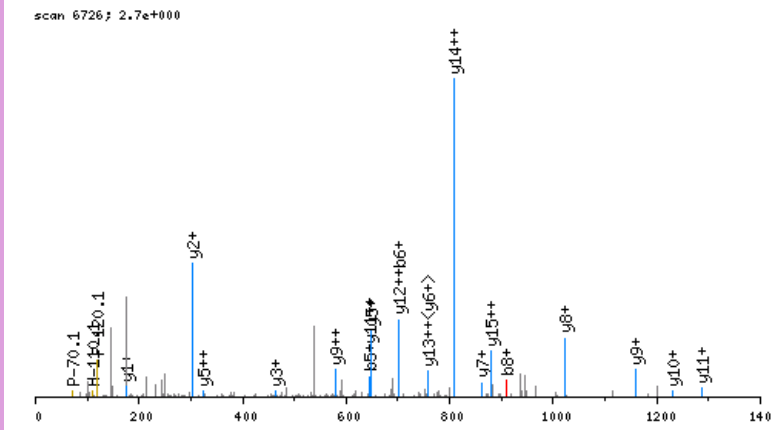

click image to zoom in; click top corners to zoom out [\[precursor±\]](#)

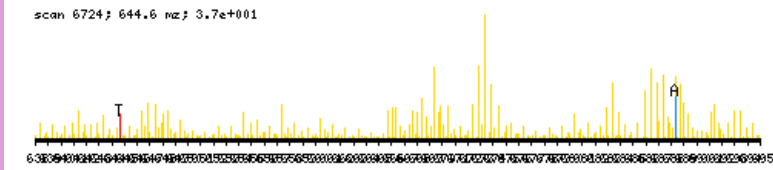

zoomed in precursor plot; T=theoretical m/z, A=acquired m/z

| b <sup>+</sup> | #  | AA # | y <sup>+</sup> | y <sup>2+</sup> |
|----------------|----|------|----------------|-----------------|
| 172.0610       | 1  | E 16 |                |                 |
| 319.1294       | 2  | F 15 | 1760.7484      | 880.8781        |
| 416.1822       | 3  | P 14 | 1613.6800      | 807.3439        |
| 531.2091       | 4  | D 13 | 1516.6272      | 758.8175        |
| 644.2932       | 5  | L 12 | 1401.6002      | 701.3040        |
| 701.3146       | 6  | G 11 | 1288.5162      | 644.7620        |
| 772.3518       | 7  | A 10 | 1231.4947      | 616.2513        |
| 909.4107       | 8  | H 9  | 1160.4576      | 580.7327        |
| 1069.4413      | 9  | C 8  | 1023.3987      | 512.2033        |
| 1156.4733      | 10 | S 7  | 863.3681       | 432.1880        |
| 1285.5159      | 11 | E 6  | 776.3361       | 388.6719        |
| 1382.5687      | 12 | P 5  | 647.2935       | 324.1506        |
| 1469.6007      | 13 | S 4  | 550.2407       | 275.6243        |
| 1629.6313      | 14 | C 3  | 463.2087       | 232.1083        |
| 1757.6899      | 15 | Q 2  | 303.1781       | 152.0930        |
|                | 16 | R 1  | 175.1195       | 88.0637         |

N-term:+43.02 C(9):+160.03  
 C(14):+160.03

EGDGPAAATAPQYQPVCPTR, MH+ 2056.9398, m/z 686.3181  
 L OSG41 P180811 230811-s1.04873.04873.3.dta

X-range:

-

MassTol: Y-zoom:

MassType:

AVG  MONO

Axis:

1  2

Label:

I  M  -

Ions:

a  +  2+  3+

b  +  2+  3+

c  +  2+  3+

x  +  2+  3+

y  +  2+  3+

z  +  2+  3+

hide H<sub>2</sub>O/NH<sub>3</sub>

zoom 112-122

GO

scan 4873; 2.2e+000

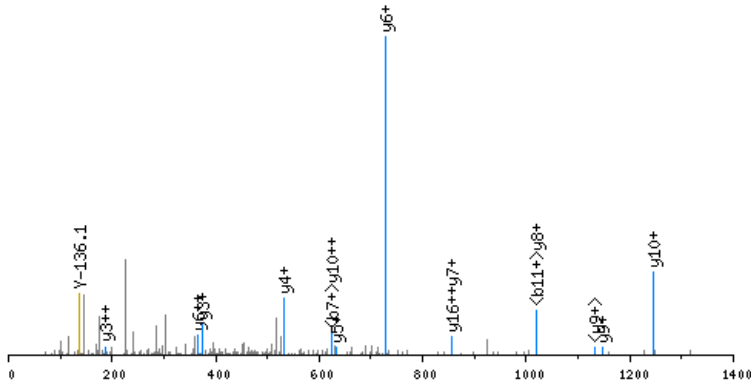

click image to zoom in; click top corners to zoom out [\[precursor±\]](#)

scan 4869; 686.3 m/z; 2.0e+001

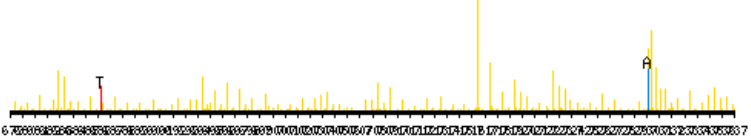

zoomed in precursor plot; T=theoretical m/z, A=acquired m/z

| b <sup>+</sup> | #  | AA # | y <sup>+</sup>   | y <sup>2+</sup> |
|----------------|----|------|------------------|-----------------|
| 172.0610       | 1  | E 19 |                  |                 |
| 229.0825       | 2  | G 18 | 1885.8866        | 943.4472        |
| 344.1094       | 3  | D 17 | 1828.8652        | 914.9365        |
| 401.1309       | 4  | G 16 | 1713.8382        | <b>857.4230</b> |
| 498.1836       | 5  | P 15 | 1656.8168        | 828.9123        |
| 569.2207       | 6  | A 14 | 1559.7640        | 780.3859        |
| 640.2579       | 7  | A 13 | 1488.7269        | 744.8673        |
| 741.3055       | 8  | T 12 | 1417.6898        | 709.3488        |
| 812.3426       | 9  | A 11 | 1316.6421        | 658.8250        |
| 909.3954       | 10 | P 10 | <b>1245.6050</b> | <b>623.3064</b> |
| 1037.4540      | 11 | Q 9  | <b>1148.5522</b> | 574.7800        |
| 1200.5173      | 12 | Y 8  | <b>1020.4936</b> | 510.7507        |
| 1328.5759      | 13 | Q 7  | <b>857.4303</b>  | 429.2191        |
| 1425.6287      | 14 | P 6  | <b>729.3717</b>  | <b>365.1898</b> |
| 1524.6971      | 15 | V 5  | <b>632.3190</b>  | 316.6634        |
| 1684.7277      | 16 | C 4  | <b>533.2505</b>  | 267.1292        |
| 1781.7804      | 17 | P 3  | <b>373.2199</b>  | <b>187.1139</b> |
| 1882.8281      | 18 | T 2  | 276.1672         | 138.5875        |
|                | 19 | R 1  | 175.1195         | 88.0637         |

N-term:+43.02 C(16):+160.03

EGEAVEAIVEESETFIKGR, MH+ 2448.2511, m/z 816.7552  
 L OSG38 P180811 230811-s1.08257.08257.3.dta

X-range:

0 - 0

MassTol: Y-zoom:

0. 1.

MassType:

AVG  MONO

Axis:

1  2

Label:

I  M  -

Ions:

a  +  2+  3+

b  +  2+  3+

c  +  2+  3+

x  +  2+  3+

y  +  2+  3+

z  +  2+  3+

hide H<sub>2</sub>O/NH<sub>3</sub>

zoom 112-122

GO

scan 8257; 2.1e+000

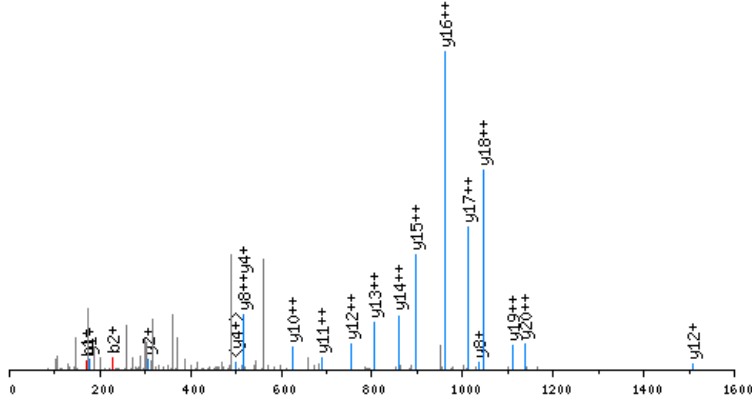

click image to zoom in; click top corners to zoom out [precursor±]

scan 8254; 816.8 m/z; 8.2e+000

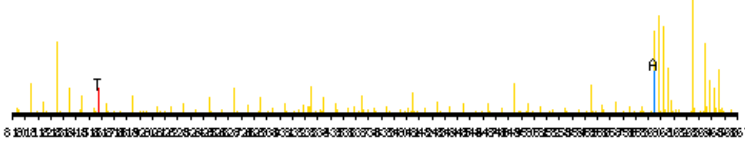

zoomed in precursor plot; T=theoretical m/z, A=acquired m/z

| b <sup>+</sup> | #  | AA # | y <sup>+</sup> | y <sup>2+</sup> |
|----------------|----|------|----------------|-----------------|
| 172.0610       | 1  | E 21 |                |                 |
| 229.0825       | 2  | G 20 | 2277.1979      | 1139.1029       |
| 358.1251       | 3  | E 19 | 2220.1764      | 1110.5921       |
| 429.1622       | 4  | A 18 | 2091.1338      | 1046.0708       |
| 528.2306       | 5  | V 17 | 2020.0967      | 1010.5523       |
| 657.2732       | 6  | E 16 | 1921.0283      | 961.0181        |
| 728.3103       | 7  | A 15 | 1791.9857      | 896.4968        |
| 841.3943       | 8  | I 14 | 1720.9486      | 860.9782        |
| 940.4628       | 9  | V 13 | 1607.8645      | 804.4362        |
| 1069.5054      | 10 | E 12 | 1508.7961      | 754.9020        |
| 1198.5479      | 11 | E 11 | 1379.7535      | 690.3807        |
| 1285.5800      | 12 | S 10 | 1250.7109      | 625.8594        |
| 1414.6226      | 13 | E 9  | 1163.6789      | 582.3434        |
| 1515.6702      | 14 | T 8  | 1034.6363      | 517.8221        |
| 1662.7387      | 15 | F 7  | 933.5886       | 467.2982        |
| 1775.8227      | 16 | I 6  | 786.5202       | 393.7640        |
| 1931.9490      | 17 | K 5  | 673.4362       | 337.2220        |
| 1988.9705      | 18 | G 4  | 517.3099       | 259.1588        |
| 2145.0968      | 19 | K 3  | 460.2884       | 230.6481        |
| 2274.1394      | 20 | E 2  | 304.1621       | 152.5850        |
|                | 21 | R 1  | 175.1195       | 88.0637         |

N-term: +43.02 K(17): +156.13  
 K(19): +156.13



EGPLSVFGDR, MH+ 1118.5482, m/z 559.7777  
 L OSG41 P180811 230811-s1.07373.07373.2.dta

scan 7373; 8.8e-001

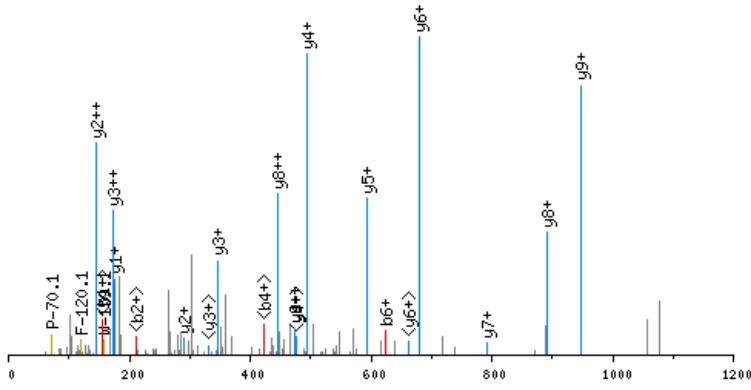

click image to zoom in; click top corners to zoom out [\[precursor±\]](#)

scan 7369; 559.8 m/z; 2.8e+001

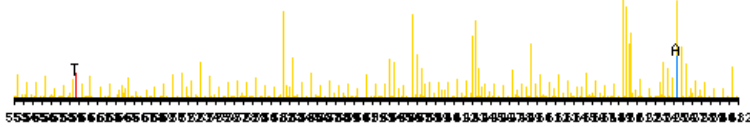

zoomed in precursor plot; T=theoretical m/z, A=acquired m/z

X-range:

-

MassTol: Y-zoom:

MassType:

AVG  MONO

Axis:

1  2

Label:

I  M  -

Ions:

a  +  2+  3+

b  +  2+  3+

c  +  2+  3+

x  +  2+  3+

y  +  2+  3+

z  +  2+  3+

hide H<sub>2</sub>O/NH<sub>3</sub>

zoom 112-122

GO

| b <sup>+</sup> | #  | AA | #  | y <sup>+</sup> | y <sup>2+</sup> |
|----------------|----|----|----|----------------|-----------------|
| 172.0610       | 1  | E  | 10 |                |                 |
| 229.0825       | 2  | G  | 9  | 947.4951       | 474.2514        |
| 326.1352       | 3  | P  | 8  | 890.4736       | 445.7407        |
| 439.2193       | 4  | L  | 7  | 793.4208       | 397.2143        |
| 526.2513       | 5  | S  | 6  | 680.3368       | 340.6723        |
| 625.3197       | 6  | V  | 5  | 593.3047       | 297.1563        |
| 772.3881       | 7  | F  | 4  | 494.2363       | 247.6221        |
| 829.4096       | 8  | G  | 3  | 347.1679       | 174.0879        |
| 944.4365       | 9  | D  | 2  | 290.1464       | 145.5771        |
|                | 10 | R  | 1  | 175.1195       | 88.0637         |

N-term:+43.02

EIGEISR, MH+ 946.4846, m/z 473.7459  
 L OSG41 P180811 230811-s1.05292.05292.2.dta

scan 5292; 1.2e+000

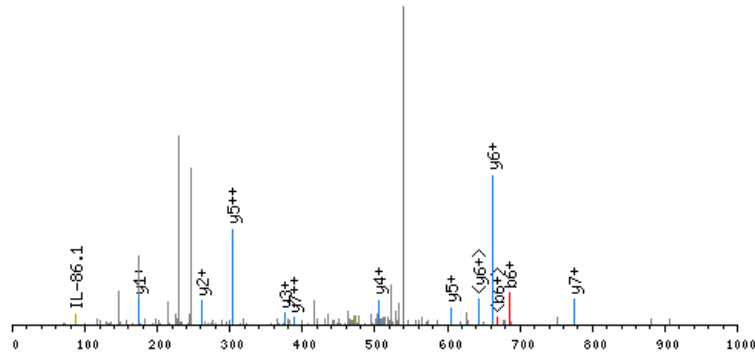

click image to zoom in; click top corners to zoom out [\[precursor±\]](#)

scan 5289; 473.7 m/z; 1.4e+002

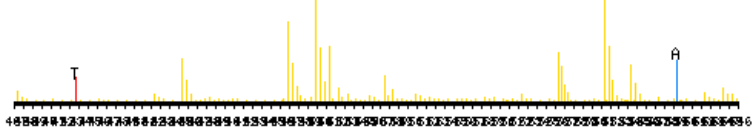

zoomed in precursor plot; T=theoretical m/z, A=acquired m/z

X-range:

-

MassTol: Y-zoom:

MassType:

AVG  MONO

Axis:

1  2

Label:

I  M  -

Ions:

a  +  2+  3+

b  +  2+  3+

c  +  2+  3+

x  +  2+  3+

y  +  2+  3+

z  +  2+  3+

hide H<sub>2</sub>O/NH<sub>3</sub>

zoom 112-122

GO

| b <sup>+</sup> | # | AA # | y <sup>+</sup> | y <sup>2+</sup> |
|----------------|---|------|----------------|-----------------|
| 172.0610       | 1 | E 8  |                |                 |
| 285.1451       | 2 | I 7  | 775.4314       | 388.2196        |
| 342.1665       | 3 | G 6  | 662.3473       | 331.6776        |
| 443.2142       | 4 | T 5  | 605.3259       | 303.1668        |
| 572.2568       | 5 | E 4  | 504.2782       | 252.6430        |
| 685.3409       | 6 | I 3  | 375.2356       | 188.1217        |
| 772.3729       | 7 | S 2  | 262.1515       | 131.5797        |
|                | 8 | R 1  | 175.1195       | 88.0637         |

N-term:+43.02

EIPPTHYAASR, MH+ 1283.6384, m/z 642.3229  
 L OSG37 P180811 230811-s1.05031.05031.2.dta

X-range:

-

MassTol: Y-zoom:

MassType:

AVG  MONO

Axis:

1  2

Label:

I  M  -

Ions:

a  +  2+  3+

b  +  2+  3+

c  +  2+  3+

x  +  2+  3+

y  +  2+  3+

z  +  2+  3+

hide H<sub>2</sub>O/NH<sub>3</sub>

zoom 112-122

GO

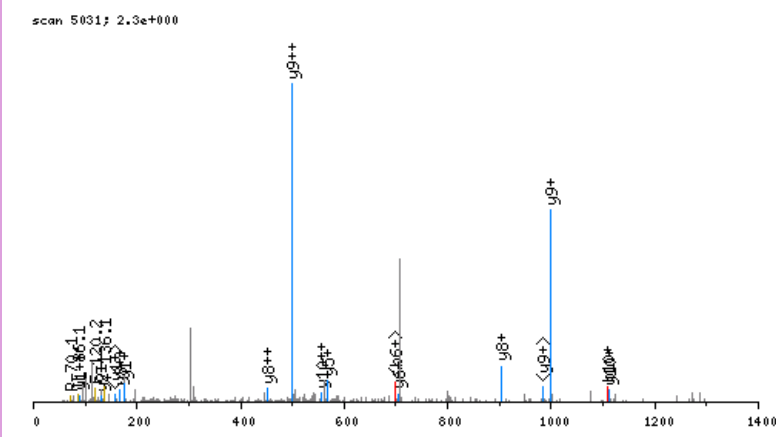

click image to zoom in; click top corners to zoom out [\[precursor±\]](#)

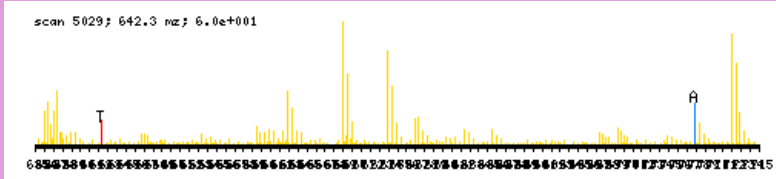

zoomed in precursor plot; T=theoretical m/z, A=acquired m/z

| b <sup>+</sup> | #  | AA # | y <sup>+</sup> | y <sup>2+</sup> |
|----------------|----|------|----------------|-----------------|
| 172.0610       | 1  | E 11 |                |                 |
| 285.1451       | 2  | I 10 | 1112.5853      | 556.7965        |
| 382.1978       | 3  | P 9  | 999.5012       | 500.2545        |
| 479.2506       | 4  | P 8  | 902.4484       | 451.7281        |
| 580.2983       | 5  | T 7  | 805.3957       | 403.2018        |
| 717.3572       | 6  | H 6  | 704.3480       | 352.6779        |
| 880.4205       | 7  | Y 5  | 567.2891       | 284.1485        |
| 951.4576       | 8  | A 4  | 404.2258       | 202.6168        |
| 1022.4947      | 9  | A 3  | 333.1886       | 167.0982        |
| 1109.5268      | 10 | S 2  | 262.1515       | 131.5797        |
|                | 11 | R 1  | 175.1195       | 88.0637         |

N-term:+43.02

EIQSGPQPGSPGR, MH+ 1351.6606, m/z 676.3340  
 L OSG41 P180811 230811-s1.03901.03901.2.dta

X-range:

-

MassTol: Y-zoom:

MassType:

AVG  MONO

Axis:

1  2

Label:

I  M  -

Ions:

a  +  2+  3+

b  +  2+  3+

c  +  2+  3+

x  +  2+  3+

y  +  2+  3+

z  +  2+  3+

hide H<sub>2</sub>O/NH<sub>3</sub>

zoom 112-122

GO

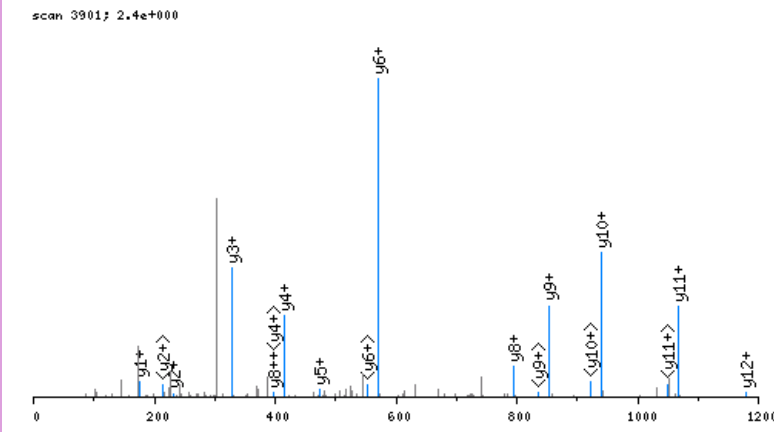

click image to zoom in; click top corners to zoom out [\[precursor±\]](#)

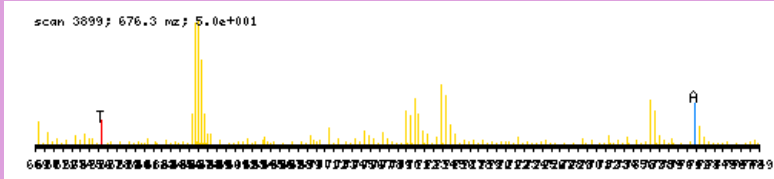

zoomed in precursor plot; T=theoretical m/z, A=acquired m/z

| b <sup>+</sup> | #  | AA # | y <sup>+</sup> | y <sup>2+</sup> |
|----------------|----|------|----------------|-----------------|
| 172.0610       | 1  | E 13 |                |                 |
| 285.1451       | 2  | I 12 | 1180.6075      | 590.8076        |
| 413.2036       | 3  | Q 11 | 1067.5234      | 534.2656        |
| 500.2357       | 4  | S 10 | 939.4648       | 470.2363        |
| 557.2571       | 5  | G 9  | 852.4328       | 426.7203        |
| 654.3099       | 6  | P 8  | 795.4113       | 398.2096        |
| 782.3685       | 7  | Q 7  | 698.3586       | 349.6832        |
| 879.4212       | 8  | P 6  | 570.3000       | 285.6539        |
| 936.4427       | 9  | G 5  | 473.2472       | 237.1275        |
| 1023.4747      | 10 | S 4  | 416.2258       | 208.6168        |
| 1120.5275      | 11 | P 3  | 329.1937       | 165.1008        |
| 1177.5490      | 12 | G 2  | 232.1410       | 116.5744        |
|                | 13 | R 1  | 175.1195       | 88.0637         |

N-term:+43.02

EKDSLRSR, MH+ 910.5058, m/z 455.7566  
 L OSG38 P180811 230811-s1.02562.02562.2.dta

scan 2562; 2.2e+001

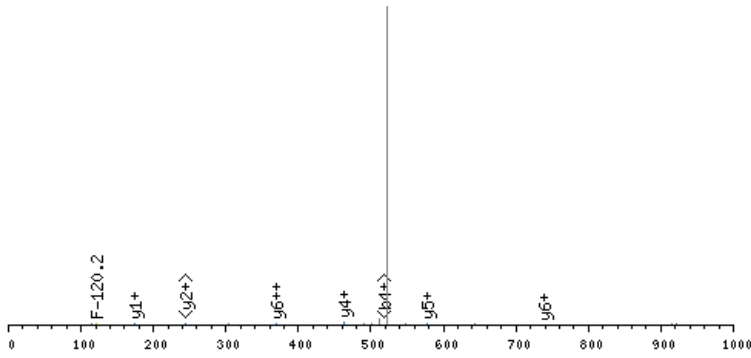

click image to zoom in; click top corners to zoom out [\[precursor±\]](#)

scan 2559; 455.8 m/z; 1.5e+001

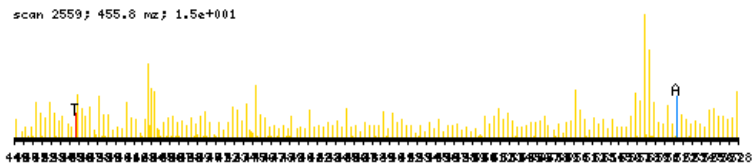

zoomed in precursor plot; T=theoretical m/z, A=acquired m/z

X-range:

-

MassTol: Y-zoom:

MassType:

AVG  MONO

Axis:

1  2

Label:

I  M  -

Ions:

a  +  2+  3+

b  +  2+  3+

c  +  2+  3+

x  +  2+  3+

y  +  2+  3+

z  +  2+  3+

hide H<sub>2</sub>O/NH<sub>3</sub>

zoom 112-122

GO

| b <sup>+</sup> | # | AA # | y <sup>+</sup> | y <sup>2+</sup> |
|----------------|---|------|----------------|-----------------|
| 172.0610       | 1 | E 7  |                |                 |
| 334.2191       | 2 | K 6  | 739.4527       | 370.2302        |
| 449.2460       | 3 | D 5  | 577.2946       | 289.1512        |
| 536.2781       | 4 | S 4  | 462.2676       | 231.6377        |
| 649.3621       | 5 | L 3  | 375.2356       | 188.1217        |
| 736.3942       | 6 | S 2  | 262.1515       | 131.5797        |
|                | 7 | R 1  | 175.1195       | 88.0637         |

N-term:+43.02 K(2):+162.16

EKEETTR, MH+ 1091.5221, m/z 546.2647  
 L OSG37 P180811 230811-s1.02125.02125.2.dta

X-range:

-

MassTol: Y-zoom:

MassType:

AVG  MONO

Axis:

1  2

Label:

I  M  -

Ions:

a  +  2+  3+

b  +  2+  3+

c  +  2+  3+

x  +  2+  3+

y  +  2+  3+

z  +  2+  3+

hide H<sub>2</sub>O/NH<sub>3</sub>

zoom 112-122

GO

scan 2125; 2.3e+001

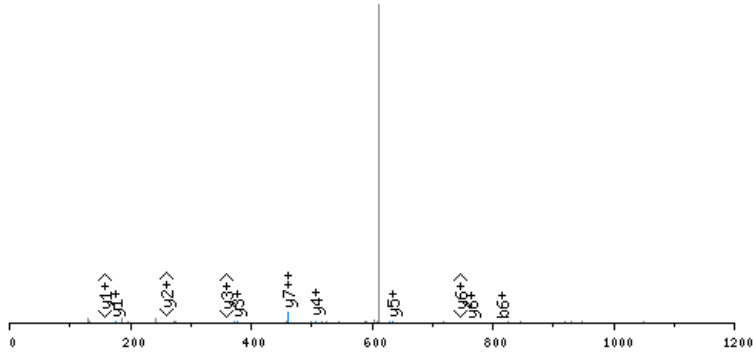

click image to zoom in; click top corners to zoom out [\[precursor±\]](#)

scan 2124; 546.3 m/z; 8.7e+000

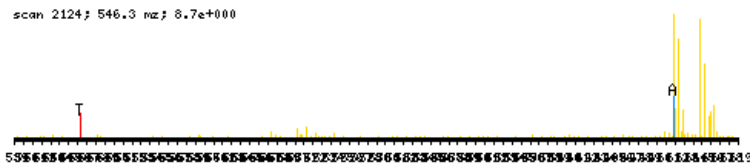

zoomed in precursor plot; T=theoretical m/z, A=acquired m/z

| b <sup>+</sup> | # | AA # | y <sup>+</sup> | y <sup>2+</sup> |
|----------------|---|------|----------------|-----------------|
| 172.0610       | 1 | E 8  |                |                 |
| 328.1873       | 2 | K 7  | 920.4689       | 460.7384        |
| 457.2299       | 3 | E 6  | 764.3426       | 382.6752        |
| 586.2725       | 4 | E 5  | 635.3000       | 318.1539        |
| 715.3151       | 5 | E 4  | 506.2575       | 253.6326        |
| 816.3628       | 6 | T 3  | 377.2149       | 189.1113        |
| 917.4104       | 7 | T 2  | 276.1672       | 138.5875        |
|                | 8 | R 1  | 175.1195       | 88.0637         |

N-term:+43.02 K(2) :+156.13

EKPAASTEPEQGSR, MH+ 1433.7449, m/z 478.5865  
 L OSG37 P180811 230811-s1.02396.02396.3.dta

X-range:

-

MassTol: Y-zoom:

MassType:

AVG  MONO

Axis:

1  2

Label:

I  M  -

Ions:

a  +  2+  3+

b  +  2+  3+

c  +  2+  3+

x  +  2+  3+

y  +  2+  3+

z  +  2+  3+

hide H<sub>2</sub>O/NH<sub>3</sub>

zoom 112-122

GO

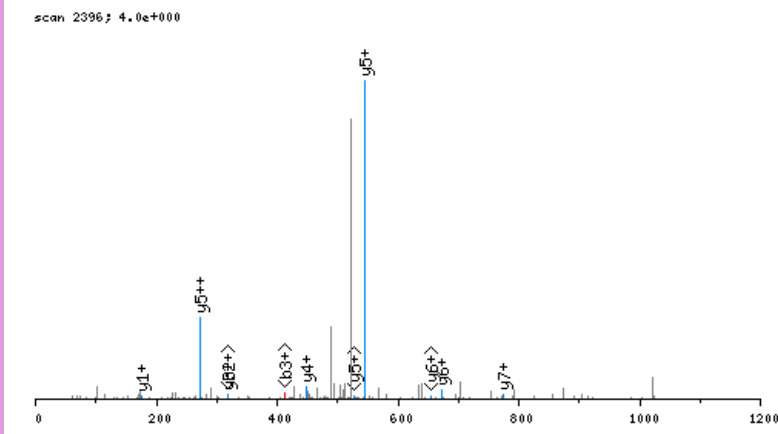

click image to zoom in; click top corners to zoom out [\[precursor±\]](#)

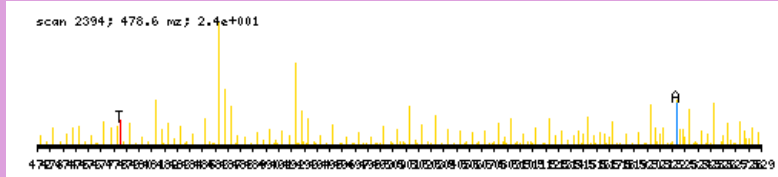

zoomed in precursor plot; T=theoretical m/z, A=acquired m/z

| b <sup>+</sup> | #  | AA # | y <sup>+</sup> | y <sup>2+</sup> |
|----------------|----|------|----------------|-----------------|
| 172.0610       | 1  | E 13 |                |                 |
| 334.2191       | 2  | K 12 | 1262.6917      | 631.8498        |
| 431.2719       | 3  | P 11 | 1100.5336      | 550.7707        |
| 502.3090       | 4  | A 10 | 1003.4809      | 502.2443        |
| 573.3461       | 5  | A 9  | 932.4437       | 466.7258        |
| 660.3781       | 6  | S 8  | 861.4066       | 431.2072        |
| 761.4258       | 7  | T 7  | 774.3746       | 387.6912        |
| 890.4684       | 8  | E 6  | 673.3269       | 337.1674        |
| 987.5211       | 9  | P 5  | 544.2843       | 272.6461        |
| 1115.5797      | 10 | Q 4  | 447.2316       | 224.1197        |
| 1172.6012      | 11 | G 3  | 319.1730       | 160.0904        |
| 1259.6332      | 12 | S 2  | 262.1515       | 131.5797        |
|                | 13 | R 1  | 175.1195       | 88.0637         |

N-term:+43.02 K(2):+162.16

EKPAASTEPPQGSRPALGR, MH+ 1928.0414, m/z 643.3520  
 L OSG39 P180811 230811-s1.02874.02874.3.dta

scan 2874; 2.0e+001

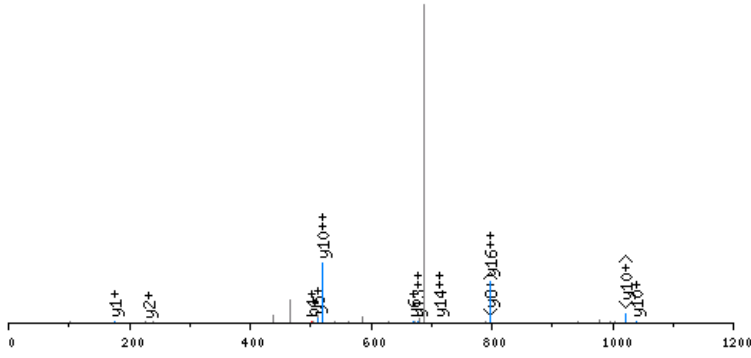

click image to zoom in; click top corners to zoom out [\[precursor±\]](#)

scan 2871; 643.4 m/z; 1.5e+001

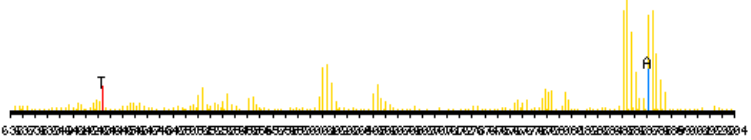

zoomed in precursor plot; T=theoretical m/z, A=acquired m/z

X-range:

-

MassTol: Y-zoom:

MassType:

AVG  MONO

Axis:

1  2

Label:

I  M  -

Ions:

a  +  2+  3+

b  +  2+  3+

c  +  2+  3+

x  +  2+  3+

y  +  2+  3+

z  +  2+  3+

hide H<sub>2</sub>O/NH<sub>3</sub>

zoom 112-122

GO

| b <sup>+</sup> | #  | AA # | y <sup>+</sup> | y <sup>2+</sup> |
|----------------|----|------|----------------|-----------------|
| 172.0610       | 1  | E 18 |                |                 |
| 334.2191       | 2  | K 17 | 1756.9882      | 878.9980        |
| 431.2719       | 3  | P 16 | 1594.8301      | 797.9190        |
| 502.3090       | 4  | A 15 | 1497.7774      | 749.3926        |
| 573.3461       | 5  | A 14 | 1426.7403      | 713.8740        |
| 660.3781       | 6  | S 13 | 1355.7032      | 678.3555        |
| 761.4258       | 7  | T 12 | 1268.6711      | 634.8395        |
| 890.4684       | 8  | E 11 | 1167.6234      | 584.3156        |
| 987.5211       | 9  | P 10 | 1038.5809      | 519.7943        |
| 1115.5797      | 10 | Q 9  | 941.5281       | 471.2680        |
| 1172.6012      | 11 | G 8  | 813.4695       | 407.2387        |
| 1259.6332      | 12 | S 7  | 756.4480       | 378.7279        |
| 1415.7343      | 13 | R 6  | 669.4160       | 335.2119        |
| 1512.7871      | 14 | P 5  | 513.3149       | 257.1614        |
| 1583.8242      | 15 | A 4  | 416.2621       | 208.6350        |
| 1696.9083      | 16 | L 3  | 345.2250       | 173.1164        |
| 1753.9297      | 17 | G 2  | 232.1410       | 116.5744        |
|                | 18 | R 1  | 175.1195       | 88.0637         |

N-term:+43.02 K(2):+162.16



EKTELIQK, MH+ 1098.7047, m/z 549.8560  
 L OSG37 P180811 230811-s1.04240.04240.2.dta

scan 4240; 3.0e+001

X-range:

-

MassTol: Y-zoom:

MassType:

AVG  MONO

Axis:

1  2

Label:

I  M  -

Ions:

a  +  2+  3+

b  +  2+  3+

c  +  2+  3+

x  +  2+  3+

y  +  2+  3+

z  +  2+  3+

hide H<sub>2</sub>O/NH<sub>3</sub>

zoom 112-122

GO

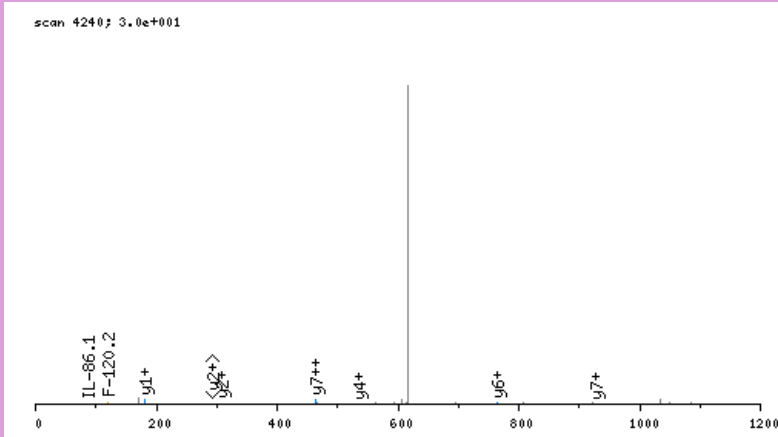

click image to zoom in; click top corners to zoom out [\[precursor±\]](#)

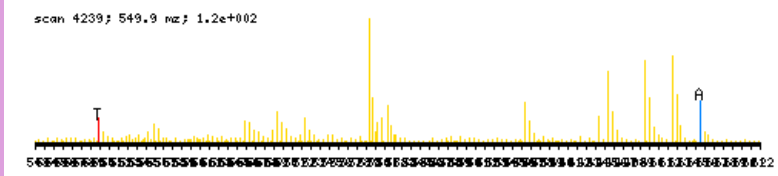

zoomed in precursor plot; T=theoretical m/z, A=acquired m/z

| b <sup>+</sup> | # | AA # | y <sup>+</sup> | y <sup>2+</sup>   |
|----------------|---|------|----------------|-------------------|
| 172.0610       | 1 | E    | 8              |                   |
| 334.2191       | 2 | K    | 7              | 927.6516 464.3297 |
| 435.2668       | 3 | T    | 6              | 765.4935 383.2506 |
| 564.3094       | 4 | E    | 5              | 664.4458 332.7268 |
| 677.3934       | 5 | L    | 4              | 535.4032 268.2055 |
| 790.4775       | 6 | I    | 3              | 422.3191 211.6635 |
| 918.5361       | 7 | Q    | 2              | 309.2351 155.1214 |
|                | 8 | K    | 1              | 181.1765 91.0922  |

N-term:+43.02 K(2):+162.16  
 K(8):+162.16

EKTELIQKAK, MH+ 1331.8999, m/z 444.6382  
 L OSG39 P180811 230811-s1.03202.03202.3.dta

scan 3202; 6.6e+001

X-range:

-

MassTol: Y-zoom:

MassType:

AVG  MONO

Axis:

1  2

Label:

I  M  -

Ions:

a  +  2+  3+

b  +  2+  3+

c  +  2+  3+

x  +  2+  3+

y  +  2+  3+

z  +  2+  3+

hide H<sub>2</sub>O/NH<sub>3</sub>

zoom 112-122

GO

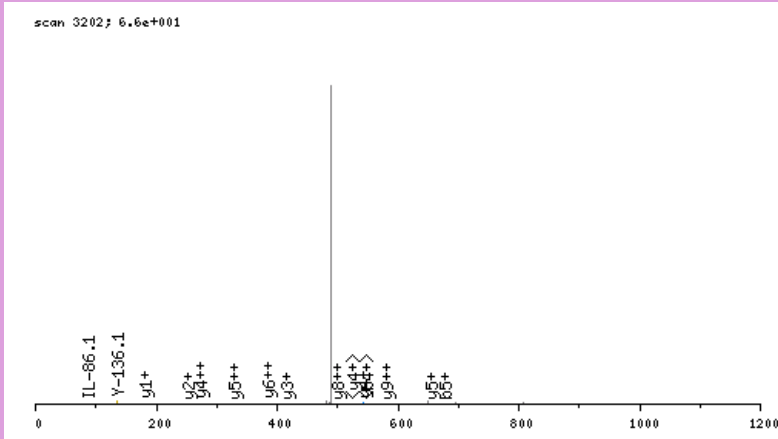

click image to zoom in; click top corners to zoom out [\[precursor±\]](#)

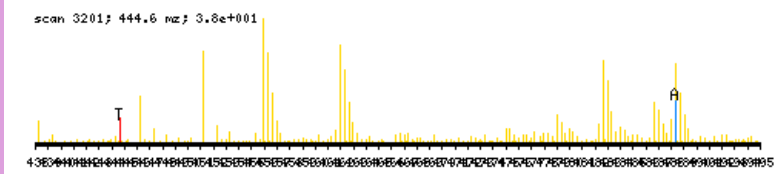

zoomed in precursor plot; T=theoretical m/z, A=acquired m/z

| b <sup>+</sup> | #  | AA | #  | y <sup>+</sup> | y <sup>2+</sup> |
|----------------|----|----|----|----------------|-----------------|
| 172.0610       | 1  | E  | 10 |                |                 |
| 334.2191       | 2  | K  | 9  | 1160.8468      | 580.9273        |
| 435.2668       | 3  | T  | 8  | 998.6887       | 499.8483        |
| 564.3094       | 4  | E  | 7  | 897.6410       | 449.3244        |
| 677.3934       | 5  | L  | 6  | 768.5984       | 384.8031        |
| 790.4775       | 6  | I  | 5  | 655.5143       | 328.2611        |
| 918.5361       | 7  | Q  | 4  | 542.4303       | 271.7191        |
| 1080.6942      | 8  | K  | 3  | 414.3717       | 207.6898        |
| 1151.7313      | 9  | A  | 2  | 252.2136       | 126.6107        |
|                | 10 | K  | 1  | 181.1765       | 91.0922         |

N-term:+43.02 K(2):+162.16  
 K(8):+162.16 K(10):+162.16

EKTELIQKAKLAEQAER, MH+ 2111.2077, m/z 528.5574  
 L OSG40 P180811 230811-s1.06051.06051.4.dta

X-range:

-

MassTol: Y-zoom:

MassType:

AVG  MONO

Axis:

1  2

Label:

I  M  -

Ions:

a  +  2+  3+

b  +  2+  3+

c  +  2+  3+

x  +  2+  3+

y  +  2+  3+

z  +  2+  3+

hide H<sub>2</sub>O/NH<sub>3</sub>

zoom 112-122

GO

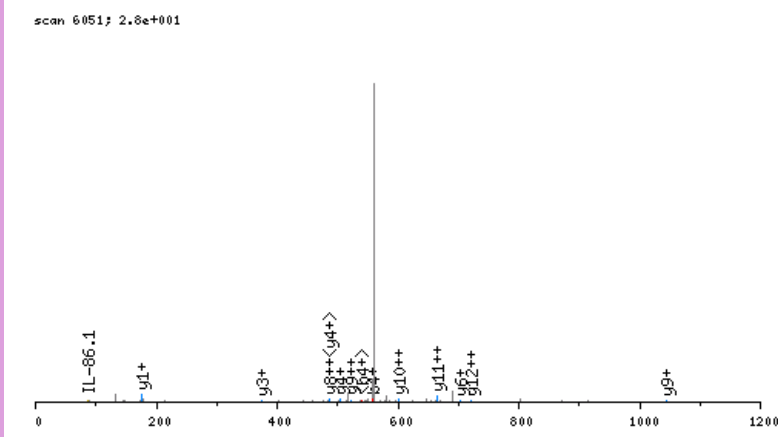

click image to zoom in; click top corners to zoom out [\[precursor±\]](#)

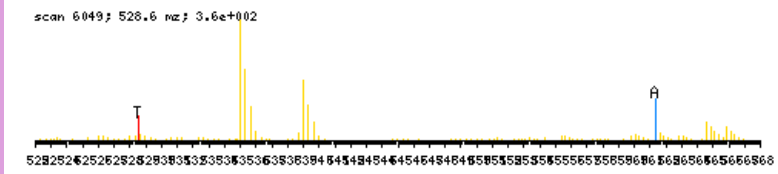

zoomed in precursor plot; T=theoretical m/z, A=acquired m/z

| b <sup>+</sup> | #  | AA | #  | y <sup>+</sup> | y <sup>2+</sup> |
|----------------|----|----|----|----------------|-----------------|
| 172.0610       | 1  | E  | 17 |                |                 |
| 328.1873       | 2  | K  | 16 | 1940.1545      | 970.5812        |
| 429.2350       | 3  | T  | 15 | 1784.0282      | 892.5180        |
| 558.2776       | 4  | E  | 14 | 1682.9806      | 841.9942        |
| 671.3616       | 5  | L  | 13 | 1553.9380      | 777.4729        |
| 784.4457       | 6  | I  | 12 | 1440.8539      | 720.9309        |
| 912.5043       | 7  | Q  | 11 | 1327.7698      | 664.3888        |
| 1068.6306      | 8  | K  | 10 | 1199.7113      | 600.3595        |
| 1139.6677      | 9  | A  | 9  | 1043.5850      | 522.2964        |
| 1295.7940      | 10 | K  | 8  | 972.5479       | 486.7778        |
| 1408.8780      | 11 | L  | 7  | 816.4216       | 408.7147        |
| 1479.9152      | 12 | A  | 6  | 703.3375       | 352.1727        |
| 1608.9578      | 13 | E  | 5  | 632.3004       | 316.6541        |
| 1737.0163      | 14 | Q  | 4  | 503.2578       | 252.1328        |
| 1808.0534      | 15 | A  | 3  | 375.1992       | 188.1035        |
| 1937.0960      | 16 | E  | 2  | 304.1621       | 152.5850        |
|                | 17 | R  | 1  | 175.1195       | 88.0637         |

N-term:+43.02 K(2):+156.13  
 K(8):+156.13 K(10):+156.13

EKTLETVPLER, MH+ 1390.8006, m/z 695.9039  
 L OSG37 P180811 230811-s1.06606.06606.2.dta

X-range:

-

MassTol: Y-zoom:

MassType:

AVG  MONO

Axis:

1  2

Label:

I  M  -

Ions:

a  +  2+  3+

b  +  2+  3+

c  +  2+  3+

x  +  2+  3+

y  +  2+  3+

z  +  2+  3+

hide H<sub>2</sub>O/NH<sub>3</sub>

zoom 112-122

GO

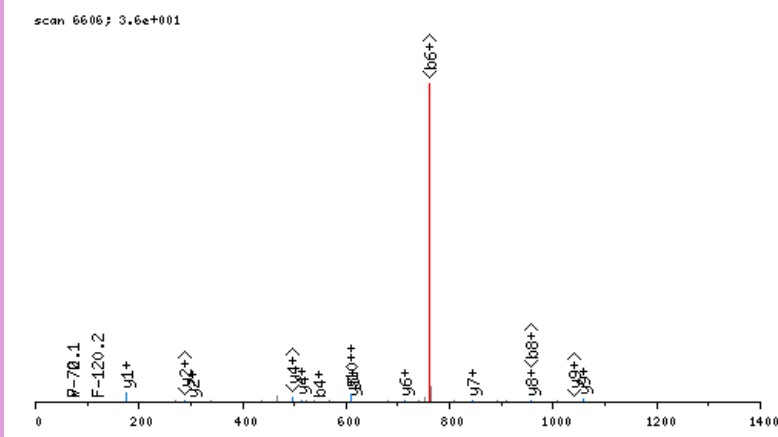

click image to zoom in; click top corners to zoom out [\[precursor±\]](#)

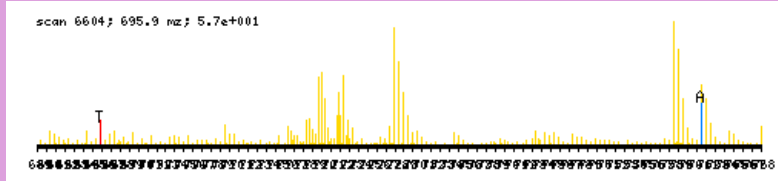

zoomed in precursor plot; T=theoretical m/z, A=acquired m/z

| b <sup>+</sup> | #  | AA # | y <sup>+</sup> | y <sup>2+</sup> |
|----------------|----|------|----------------|-----------------|
| 172.0610       | 1  | E 11 |                |                 |
| 334.2191       | 2  | K 10 | 1219.7474      | 610.3776        |
| 435.2668       | 3  | T 9  | 1057.5893      | 529.2986        |
| 548.3508       | 4  | L 8  | 956.5417       | 478.7747        |
| 677.3934       | 5  | E 7  | 843.4576       | 422.2327        |
| 778.4411       | 6  | T 6  | 714.4150       | 357.7114        |
| 877.5095       | 7  | V 5  | 613.3673       | 307.1876        |
| 974.5623       | 8  | P 4  | 514.2989       | 257.6534        |
| 1087.6463      | 9  | L 3  | 417.2462       | 209.1270        |
| 1216.6889      | 10 | E 2  | 304.1621       | 152.5850        |
|                | 11 | R 1  | 175.1195       | 88.0637         |

N-term:+43.02 K(2):+162.16

EKVPGDMEIER, MH+ 1372.6783, m/z 686.8428  
 L OSG37 P180811 230811-s1.05686.05686.2.dta

scan 5686; 5.2e+000

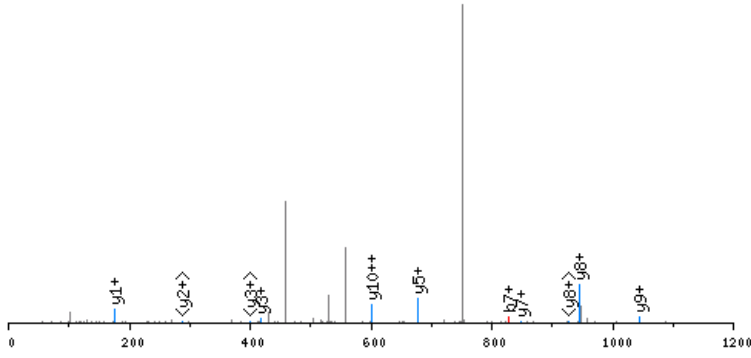

click image to zoom in; click top corners to zoom out [precursor±]

scan 5684; 686.8 m/z; 3.7e+001

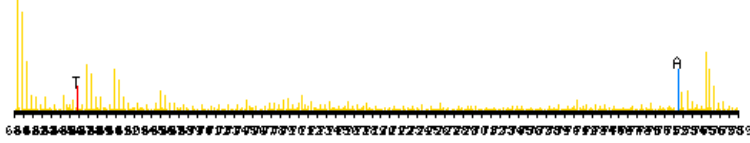

zoomed in precursor plot; T=theoretical m/z, A=acquired m/z

X-range:

-

MassTol: Y-zoom:

MassType:

AVG  MONO

Axis:

1  2

Label:

I  M  -

Ions:

a  +  2+  3+

b  +  2+  3+

c  +  2+  3+

x  +  2+  3+

y  +  2+  3+

z  +  2+  3+

hide H<sub>2</sub>O/NH<sub>3</sub>

zoom 112-122

GO

| b <sup>+</sup> | #  | AA # | y <sup>+</sup> | y <sup>2+</sup> |
|----------------|----|------|----------------|-----------------|
| 172.0610       | 1  | E 11 |                |                 |
| 328.1873       | 2  | K 10 | 1201.6251      | 601.3165        |
| 427.2557       | 3  | V 9  | 1045.4988      | 523.2533        |
| 524.3085       | 4  | P 8  | 946.4304       | 473.7191        |
| 581.3299       | 5  | G 7  | 849.3776       | 425.1927        |
| 696.3569       | 6  | D 6  | 792.3562       | 396.6820        |
| 827.3974       | 7  | M 5  | 677.3292       | 339.1685        |
| 956.4400       | 8  | E 4  | 546.2888       | 273.6483        |
| 1069.5240      | 9  | I 3  | 417.2462       | 209.1270        |
| 1198.5666      | 10 | E 2  | 304.1621       | 152.5850        |
|                | 11 | R 1  | 175.1195       | 88.0637         |

N-term:+43.02 K(2):+156.13

EKVPGDMEIERR, MH+ 1534.8112, m/z 512.2753  
 L OSG40 P180811 230811-s1.05586.05586.3.dta

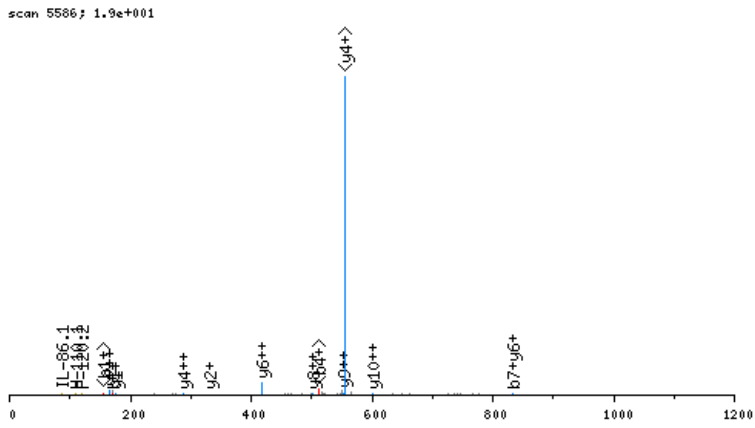

click image to zoom in; click top corners to zoom out [\[precursor±\]](#)

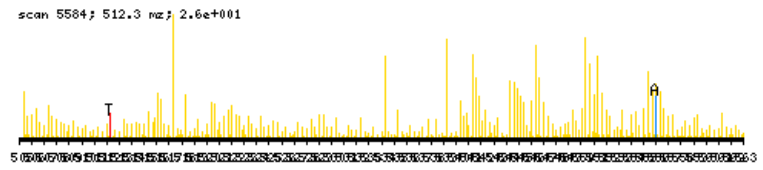

zoomed in precursor plot; T=theoretical m/z, A=acquired m/z

X-range:

-

MassTol: Y-zoom:

MassType:

AVG  MONO

Axis:

1  2

Label:

I  M  -

Ions:

a  +  2+  3+

b  +  2+  3+

c  +  2+  3+

x  +  2+  3+

y  +  2+  3+

z  +  2+  3+

hide H<sub>2</sub>O/NH<sub>3</sub>

zoom 112-122

GO

| b <sup>+</sup> | #  | AA # | y <sup>+</sup> | y <sup>2+</sup> |
|----------------|----|------|----------------|-----------------|
| 172.0610       | 1  | E 12 |                |                 |
| 334.2191       | 2  | K 11 | 1363.7580      | 682.3829        |
| 433.2875       | 3  | V 10 | 1201.5999      | 601.3039        |
| 530.3403       | 4  | P 9  | 1102.5315      | 551.7697        |
| 587.3617       | 5  | G 8  | 1005.4788      | 503.2433        |
| 702.3887       | 6  | D 7  | 948.4573       | 474.7326        |
| 833.4292       | 7  | M 6  | 833.4303       | 417.2191        |
| 962.4718       | 8  | E 5  | 702.3899       | 351.6988        |
| 1075.5558      | 9  | I 4  | 573.3473       | 287.1775        |
| 1204.5984      | 10 | E 3  | 460.2632       | 230.6355        |
| 1360.6995      | 11 | R 2  | 331.2206       | 166.1142        |
|                | 12 | R 1  | 175.1195       | 88.0637         |

N-term:+43.02 K(2):+162.16

ELGELLYNKSEYIETASGNKVSRR, MH+ 2710.4576, m/z 904.1574  
L OSG38 P180811 230811-s1.07990.07990.3.dta

X-range:

-

MassTol: Y-zoom:

MassType:

AVG  MONO

Axis:

1  2

Label:

I  M  -

Ions:

a  +  2+  3+

b  +  2+  3+

c  +  2+  3+

x  +  2+  3+

y  +  2+  3+

z  +  2+  3+

hide H<sub>2</sub>O/NH<sub>3</sub>

zoom 112-122

GO

scan 7990; 2.5e+000

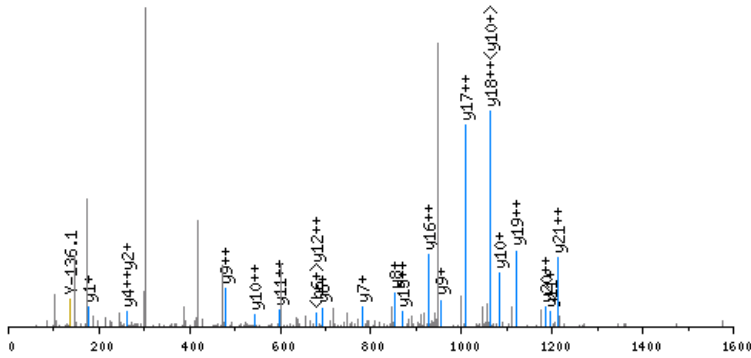

click image to zoom in; click top corners to zoom out [\[precursor±\]](#)

scan 7989; 904.2 m/z; 3.4e+001

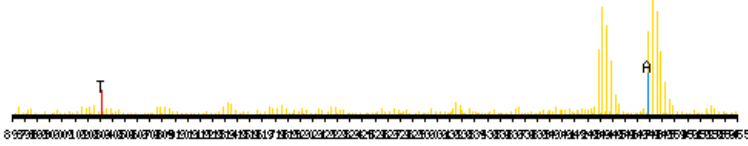

zoomed in precursor plot; T=theoretical m/z, A=acquired m/z

| b <sup>+</sup> | #  | AA # | y <sup>+</sup> | y <sup>2+</sup> |
|----------------|----|------|----------------|-----------------|
| 172.0610       | 1  | E 23 |                |                 |
| 285.1451       | 2  | L 22 | 2539.4045      | 1270.2061       |
| 342.1665       | 3  | G 21 | 2426.3204      | 1213.6641       |
| 471.2091       | 4  | E 20 | 2369.2989      | 1185.1534       |
| 584.2932       | 5  | L 19 | 2240.2563      | 1120.6321       |
| 697.3772       | 6  | L 18 | 2127.1723      | 1064.0901       |
| 860.4406       | 7  | Y 17 | 2014.0882      | 1007.5480       |
| 974.4835       | 8  | N 16 | 1851.0249      | 926.0164        |
| 1136.6416      | 9  | K 15 | 1736.9820      | 868.9949        |
| 1223.6736      | 10 | S 14 | 1574.8239      | 787.9158        |
| 1352.7162      | 11 | E 13 | 1487.7918      | 744.3998        |
| 1515.7795      | 12 | Y 12 | 1358.7492      | 679.8785        |
| 1628.8636      | 13 | I 11 | 1195.6859      | 598.3469        |
| 1757.9062      | 14 | E 10 | 1082.6018      | 541.8048        |
| 1858.9539      | 15 | T 9  | 953.5593       | 477.2835        |
| 1929.9910      | 16 | A 8  | 852.5116       | 426.7597        |
| 2017.0230      | 17 | S 7  | 781.4745       | 391.2411        |
| 2074.0445      | 18 | G 6  | 694.4424       | 347.7251        |
| 2188.0874      | 19 | N 5  | 637.4210       | 319.2144        |
| 2350.2455      | 20 | K 4  | 523.3780       | 262.1929        |
| 2449.3139      | 21 | V 3  | 361.2199       | 181.1139        |
| 2536.3460      | 22 | S 2  | 262.1515       | 131.5797        |
|                | 23 | R 1  | 175.1195       | 88.0637         |

N-term:+43.02 K(9):+162.16  
K(20):+162.16

ELSADYLR, MH+ 1008.5002, m/z 504.7537  
 L OSG41 P180811 230811-s1.06645.06645.2.dta

scan 6645; 2.1e+000

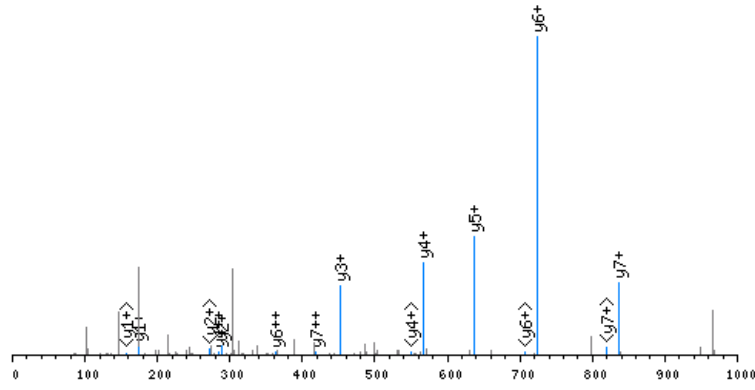

click image to zoom in; click top corners to zoom out [\[precursor±\]](#)

scan 6644; 504.8 m/z; 5.1e+002

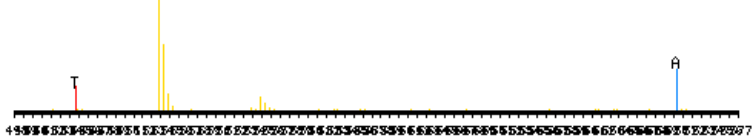

zoomed in precursor plot; T=theoretical m/z, A=acquired m/z

X-range:

-

MassTol: Y-zoom:

MassType:

AVG  MONO

Axis:

1  2

Label:

I  M  -

Ions:

a  +  2+  3+

b  +  2+  3+

c  +  2+  3+

x  +  2+  3+

y  +  2+  3+

z  +  2+  3+

hide H<sub>2</sub>O/NH<sub>3</sub>

zoom 112-122

GO

| b <sup>+</sup> | # | AA # | y <sup>+</sup> | y <sup>2+</sup> |
|----------------|---|------|----------------|-----------------|
| 172.0610       | 1 | E 8  |                |                 |
| 285.1451       | 2 | L 7  | 837.4470       | 419.2274        |
| 372.1771       | 3 | S 6  | 724.3630       | 362.6854        |
| 443.2142       | 4 | A 5  | 637.3310       | 319.1694        |
| 558.2411       | 5 | D 4  | 566.2938       | 283.6508        |
| 721.3045       | 6 | Y 3  | 451.2669       | 226.1374        |
| 834.3885       | 7 | L 2  | 288.2036       | 144.6057        |
|                | 8 | R 1  | 175.1195       | 88.0637         |

N-term:+43.02



ELSESVQR, MH+ 989.4904, m/z 495.2488  
 L OSG41 P180811 230811-s1.04572.04572.2.dta

X-range:

-

MassTol: Y-zoom:

MassType:

AVG  MONO

Axis:

1  2

Label:

I  M  -

Ions:

a  +  2+  3+

b  +  2+  3+

c  +  2+  3+

x  +  2+  3+

y  +  2+  3+

z  +  2+  3+

hide H<sub>2</sub>O/NH<sub>3</sub>

zoom 112-122

GO

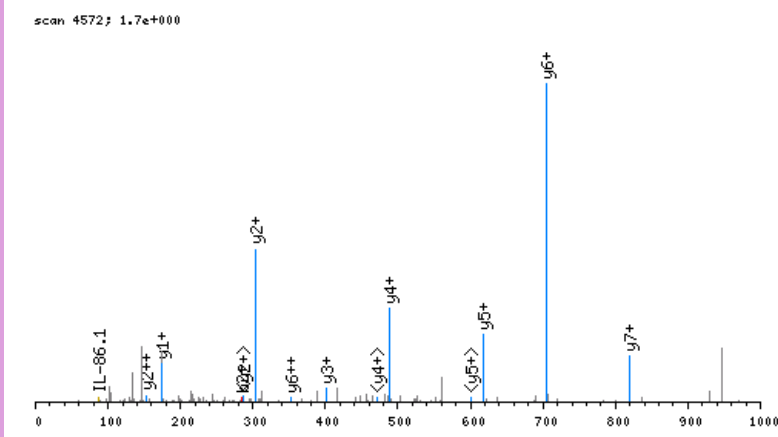

click image to zoom in; click top corners to zoom out [\[precursor±\]](#)

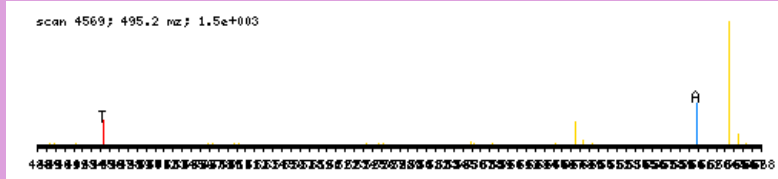

zoomed in precursor plot; T=theoretical m/z, A=acquired m/z

| b <sup>+</sup> | # | AA # | y <sup>+</sup> | y <sup>2+</sup> |
|----------------|---|------|----------------|-----------------|
| 172.0610       | 1 | E 8  |                |                 |
| 285.1451       | 2 | L 7  | 818.4372       | 409.7225        |
| 372.1771       | 3 | S 6  | 705.3531       | 353.1805        |
| 501.2197       | 4 | E 5  | 618.3211       | 309.6645        |
| 588.2517       | 5 | S 4  | 489.2785       | 245.1432        |
| 687.3201       | 6 | V 3  | 402.2465       | 201.6272        |
| 815.3787       | 7 | Q 2  | 303.1781       | 152.0930        |
|                | 8 | R 1  | 175.1195       | 88.0637         |

N-term:+43.02

ELSGEYVGCDEPQR, MH+ 1737.7390, m/z 579.9178  
 L OSG41 P180811 230811-s1.05556.05556.3.dta

X-range:

-

MassTol: Y-zoom:

MassType:

AVG  MONO

Axis:

1  2

Label:

I  M  -

Ions:

a  +  2+  3+

b  +  2+  3+

c  +  2+  3+

x  +  2+  3+

y  +  2+  3+

z  +  2+  3+

hide H<sub>2</sub>O/NH<sub>3</sub>

zoom 112-122

GO

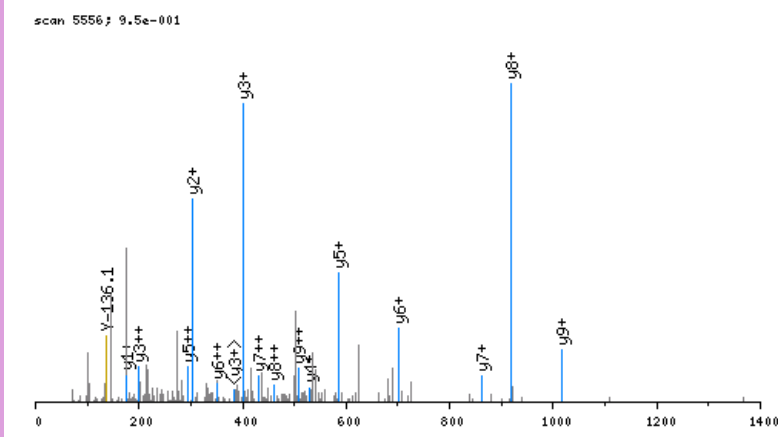

click image to zoom in; click top corners to zoom out [\[precursor±\]](#)

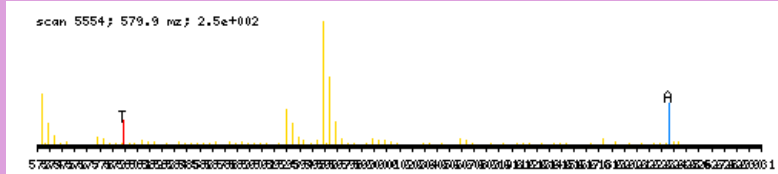

zoomed in precursor plot; T=theoretical m/z, A=acquired m/z

| b <sup>+</sup> | #  | AA # | y <sup>+</sup> | y <sup>2+</sup> |
|----------------|----|------|----------------|-----------------|
| 172.0610       | 1  | E 15 |                |                 |
| 285.1451       | 2  | L 14 | 1566.6858      | 783.8468        |
| 372.1771       | 3  | S 13 | 1453.6017      | 727.3048        |
| 429.1985       | 4  | G 12 | 1366.5697      | 683.7888        |
| 558.2411       | 5  | E 11 | 1309.5482      | 655.2780        |
| 721.3045       | 6  | Y 10 | 1180.5056      | 590.7567        |
| 820.3729       | 7  | V 9  | 1017.4423      | 509.2251        |
| 877.3943       | 8  | G 8  | 918.3739       | 459.6909        |
| 1037.4249      | 9  | C 7  | 861.3524       | 431.1801        |
| 1152.4519      | 10 | D 6  | 701.3218       | 351.1648        |
| 1209.4734      | 11 | G 5  | 586.2949       | 293.6514        |
| 1338.5159      | 12 | E 4  | 529.2734       | 265.1406        |
| 1435.5687      | 13 | P 3  | 400.2308       | 200.6193        |
| 1563.6273      | 14 | Q 2  | 303.1781       | 152.0930        |
|                | 15 | R 1  | 175.1195       | 88.0637         |

N-term:+43.02 C(9):+160.03

ELVEVLKR, MH+ 1061.6783, m/z 531.3428  
 L OSG37 P180811 230811-s1.08630.08630.2.dta

scan 8630; 6.8e+001

X-range:

-

MassTol: Y-zoom:

MassType:

AVG  MONO

Axis:

1  2

Label:

I  M  -

Ions:

a  +  2+  3+

b  +  2+  3+

c  +  2+  3+

x  +  2+  3+

y  +  2+  3+

z  +  2+  3+

hide H<sub>2</sub>O/NH<sub>3</sub>

zoom 112-122

GO

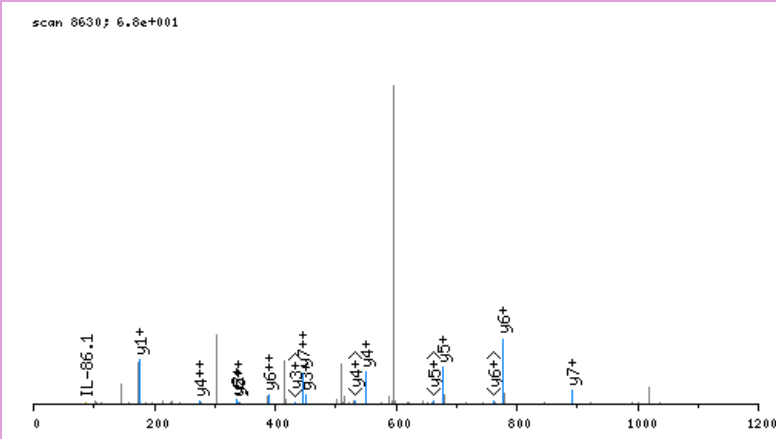

click image to zoom in; click top corners to zoom out [\[precursor±\]](#)

scan 8629; 531.3 m/z; 3.0e+002

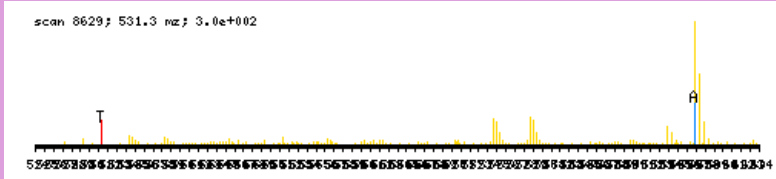

zoomed in precursor plot; T=theoretical m/z, A=acquired m/z

| b <sup>+</sup> | # | AA # | y <sup>+</sup> | y <sup>2+</sup> |
|----------------|---|------|----------------|-----------------|
| 172.0610       | 1 | E 8  |                |                 |
| 285.1451       | 2 | L 7  | 890.6251       | 445.8165        |
| 384.2135       | 3 | V 6  | 777.5411       | 389.2745        |
| 513.2561       | 4 | E 5  | 678.4727       | 339.7402        |
| 612.3245       | 5 | V 4  | 549.4301       | 275.2190        |
| 725.4085       | 6 | L 3  | 450.3617       | 225.6847        |
| 887.5666       | 7 | K 2  | 337.2776       | 169.1427        |
|                | 8 | R 1  | 175.1195       | 88.0637         |

N-term:+43.02 K(7) :+162.16

EMELDSEGR, MH+ 1107.4628, m/z 554.2351  
 L OSG41 P180811 230811-s1.05211.05211.2.dta

X-range:

-

MassTol: Y-zoom:

MassType:

AVG  MONO

Axis:

1  2

Label:

I  M  -

Ions:

a  +  2+  3+

b  +  2+  3+

c  +  2+  3+

x  +  2+  3+

y  +  2+  3+

z  +  2+  3+

hide H<sub>2</sub>O/NH<sub>3</sub>

zoom 112-122

GO

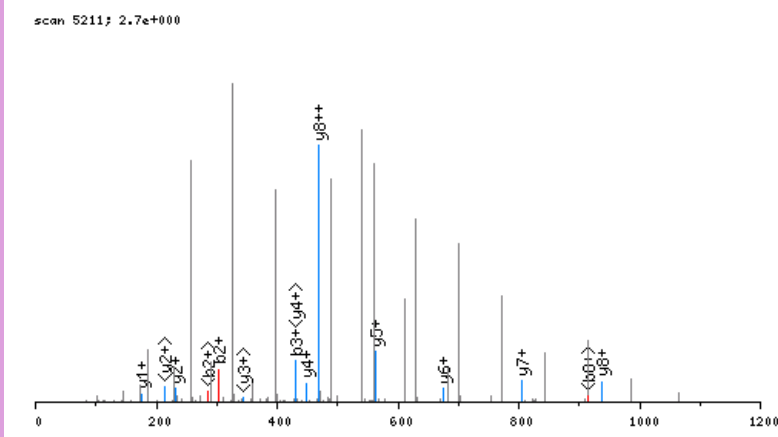

click image to zoom in; click top corners to zoom out [\[precursor±\]](#)

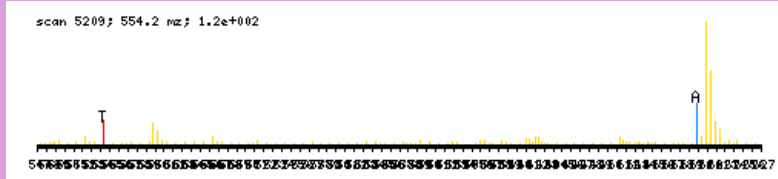

zoomed in precursor plot; T=theoretical m/z, A=acquired m/z

| b <sup>+</sup> | # | AA # | y <sup>+</sup> | y <sup>2+</sup> |
|----------------|---|------|----------------|-----------------|
| 172.0610       | 1 | E 9  |                |                 |
| 303.1015       | 2 | M 8  | 936.4097       | 468.7087        |
| 432.1441       | 3 | E 7  | 805.3692       | 403.1885        |
| 545.2281       | 4 | L 6  | 676.3266       | 338.6672        |
| 660.2551       | 5 | D 5  | 563.2425       | 282.1252        |
| 747.2871       | 6 | S 4  | 448.2156       | 224.6117        |
| 876.3297       | 7 | E 3  | 361.1836       | 181.0957        |
| 933.3512       | 8 | G 2  | 232.1410       | 116.5744        |
|                | 9 | R 1  | 175.1195       | 88.0637         |

N-term:+43.02

EMTSTSLKR, MH+ 1122.5829, m/z 561.7951  
 L OSG37 P180811 230811-s1.04320.04320.2.dta

X-range:

-

MassTol: Y-zoom:

MassType:

AVG  MONO

Axis:

1  2

Label:

I  M  -

Ions:

a  +  2+  3+

b  +  2+  3+

c  +  2+  3+

x  +  2+  3+

y  +  2+  3+

z  +  2+  3+

hide H<sub>2</sub>O/NH<sub>3</sub>

zoom 112-122

GO

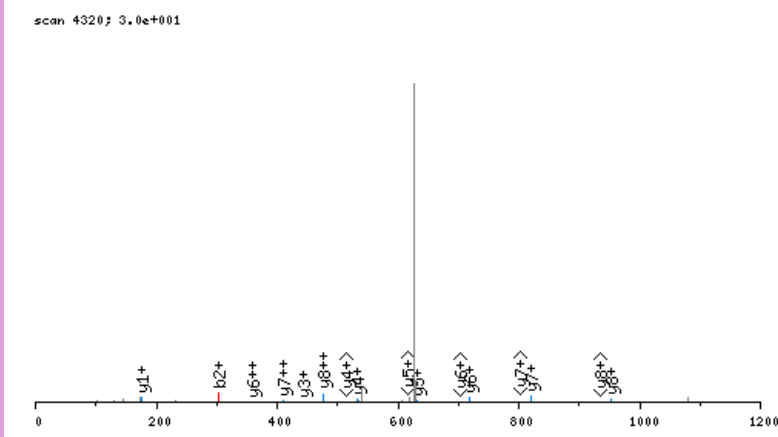

click image to zoom in; click top corners to zoom out [\[precursor±\]](#)

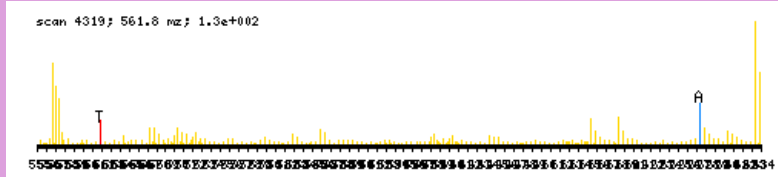

zoomed in precursor plot; T=theoretical m/z, A=acquired m/z

| b <sup>+</sup> | # | AA # | y <sup>+</sup> | y <sup>2+</sup>   |
|----------------|---|------|----------------|-------------------|
| 172.0610       | 1 | E    | 9              |                   |
| 303.1015       | 2 | M    | 8              | 951.5298 476.2688 |
| 404.1492       | 3 | T    | 7              | 820.4893 410.7486 |
| 491.1812       | 4 | S    | 6              | 719.4416 360.2247 |
| 592.2289       | 5 | T    | 5              | 632.4096 316.7087 |
| 679.2609       | 6 | S    | 4              | 531.3619 266.1849 |
| 792.3450       | 7 | L    | 3              | 444.3299 222.6688 |
| 948.4713       | 8 | K    | 2              | 331.2458 166.1268 |
|                | 9 | R    | 1              | 175.1195 88.0637  |

N-term:+43.02 K(8):+156.13

ENEYKR, MH+ 914.4796, m/z 457.7434  
 L OSG38 P180811 230811-s1.02385.02385.2.dta

X-range:

-

MassTol: Y-zoom:

MassType:

AVG  MONO

Axis:

1  2

Label:

I  M  -

Ions:

a  +  2+  3+

b  +  2+  3+

c  +  2+  3+

x  +  2+  3+

y  +  2+  3+

z  +  2+  3+

hide H<sub>2</sub>O/NH<sub>3</sub>

zoom 112-122

GO

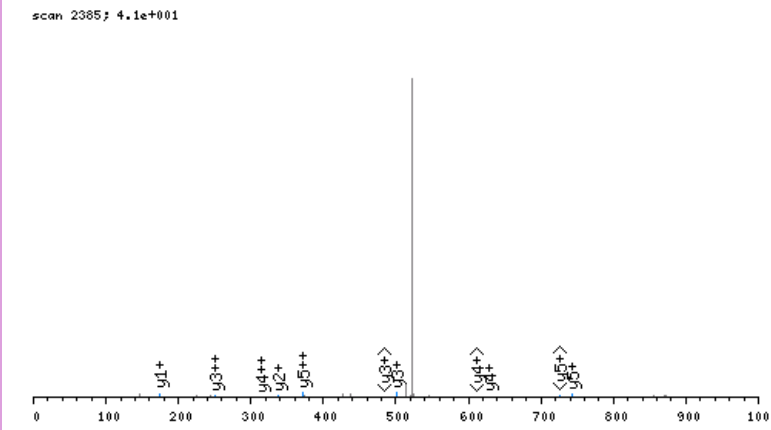

click image to zoom in; click top corners to zoom out [\[precursor±\]](#)

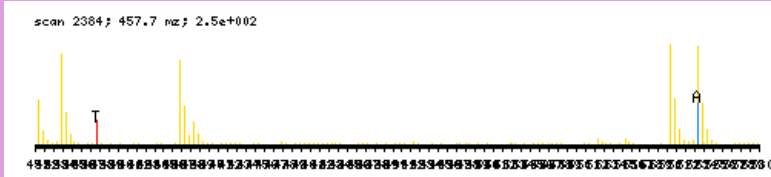

zoomed in precursor plot; T=theoretical m/z, A=acquired m/z

| b <sup>+</sup> | # | AA # | y <sup>+</sup> | y <sup>2+</sup> |
|----------------|---|------|----------------|-----------------|
| 172.0610       | 1 | E 6  |                |                 |
| 286.1039       | 2 | N 5  | 743.4264       | 372.2171        |
| 415.1465       | 3 | E 4  | 629.3835       | 315.1957        |
| 578.2098       | 4 | Y 3  | 500.3409       | 250.6744        |
| 740.3679       | 5 | K 2  | 337.2776       | 169.1427        |
|                | 6 | R 1  | 175.1195       | 88.0637         |

N-term:+43.02 K(5):+162.16

ENQLTKSVEER, MH+ 1408.7496, m/z 704.8785  
 L OSG37 P180811 230811-s1.05168.05168.2.dta

X-range:

-

MassTol: Y-zoom:

MassType:

AVG  MONO

Axis:

1  2

Label:

I  M  -

Ions:

a  +  2+  3+

b  +  2+  3+

c  +  2+  3+

x  +  2+  3+

y  +  2+  3+

z  +  2+  3+

hide H<sub>2</sub>O/NH<sub>3</sub>

zoom 112-122

GO

scan 5168; 1.3e+001

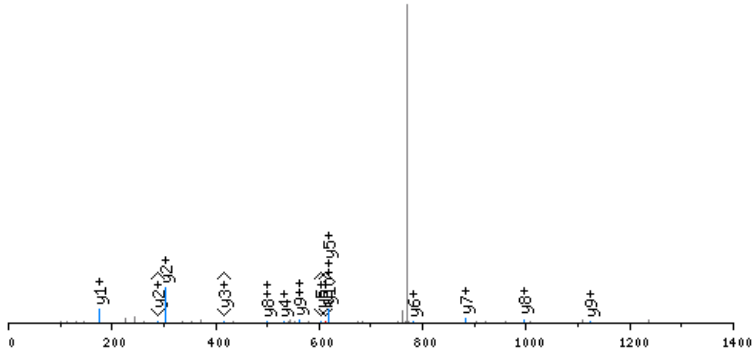

click image to zoom in; click top corners to zoom out [\[precursor±\]](#)

scan 5164; 704.9 m/z; 3.8e+002

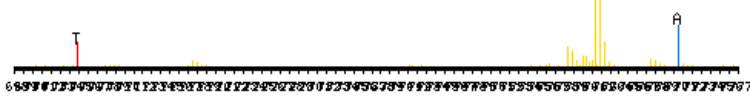

zoomed in precursor plot; T=theoretical m/z, A=acquired m/z

| b <sup>+</sup> | #  | AA # | y <sup>+</sup> | y <sup>2+</sup>    |
|----------------|----|------|----------------|--------------------|
| 172.0610       | 1  | E    | 11             |                    |
| 286.1039       | 2  | N    | 10             | 1237.6965 619.3522 |
| 414.1625       | 3  | Q    | 9              | 1123.6535 562.3307 |
| 527.2466       | 4  | L    | 8              | 995.5950 498.3014  |
| 628.2942       | 5  | T    | 7              | 882.5109 441.7594  |
| 790.4523       | 6  | K    | 6              | 781.4632 391.2355  |
| 877.4844       | 7  | S    | 5              | 619.3051 310.1565  |
| 976.5528       | 8  | V    | 4              | 532.2731 266.6405  |
| 1105.5954      | 9  | E    | 3              | 433.2047 217.1063  |
| 1234.6380      | 10 | E    | 2              | 304.1621 152.5850  |
|                | 11 | R    | 1              | 175.1195 88.0637   |

N-term:+43.02 K(6):+162.16

EPAMPEPETLEAR, MH+ 1414.6524, m/z 707.8299  
 L OSG41 P180811 230811-s1.05717.05717.2.dta

X-range:

-

MassTol: Y-zoom:

MassType:

AVG  MONO

Axis:

1  2

Label:

I  M  -

Ions:

a  +  2+  3+

b  +  2+  3+

c  +  2+  3+

x  +  2+  3+

y  +  2+  3+

z  +  2+  3+

hide H<sub>2</sub>O/NH<sub>3</sub>

zoom 112-122

GO

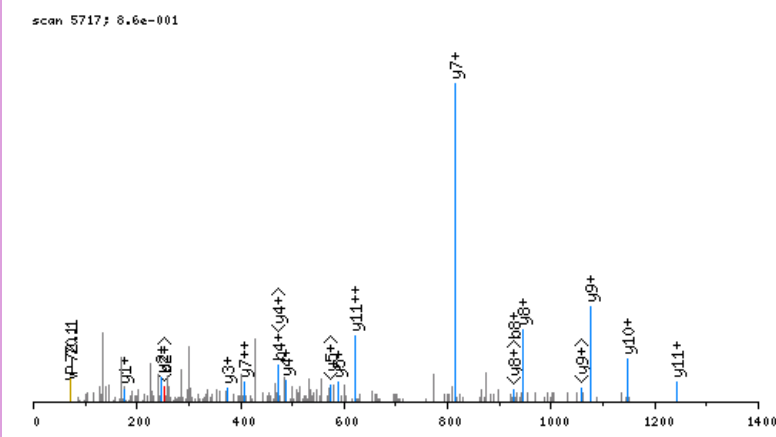

click image to zoom in; click top corners to zoom out [\[precursor±\]](#)

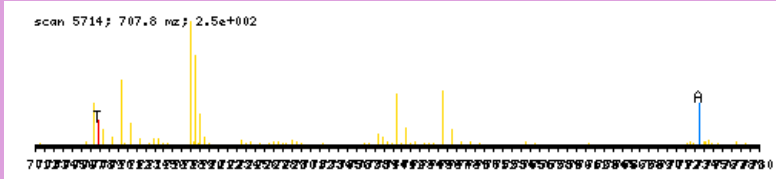

zoomed in precursor plot; T=theoretical m/z, A=acquired m/z

| b <sup>+</sup> | #  | AA # | y <sup>+</sup> | y <sup>2+</sup> |
|----------------|----|------|----------------|-----------------|
| 172.0610       | 1  | E 12 |                |                 |
| 269.1138       | 2  | P 11 | 1243.5993      | 622.3035        |
| 340.1509       | 3  | A 10 | 1146.5465      | 573.7772        |
| 471.1914       | 4  | M 9  | 1075.5094      | 538.2586        |
| 600.2339       | 5  | E 8  | 944.4689       | 472.7384        |
| 697.2867       | 6  | P 7  | 815.4263       | 408.2171        |
| 826.3293       | 7  | E 6  | 718.3735       | 359.6907        |
| 927.3770       | 8  | T 5  | 589.3310       | 295.1694        |
| 1040.4610      | 9  | L 4  | 488.2833       | 244.6455        |
| 1169.5036      | 10 | E 3  | 375.1992       | 188.1035        |
| 1240.5408      | 11 | A 2  | 246.1566       | 123.5822        |
|                | 12 | R 1  | 175.1195       | 88.0637         |

N-term:+43.02



EPDIIR, MH+ 784.4205, m/z 392.7139  
 L OSG41 P180811 230811-s1.05202.05202.2.dta

X-range:

-

MassTol: Y-zoom:

MassType:

AVG  MONO

Axis:

1  2

Label:

I  M  -

Ions:

a  +  2+  3+

b  +  2+  3+

c  +  2+  3+

x  +  2+  3+

y  +  2+  3+

z  +  2+  3+

hide H<sub>2</sub>O/NH<sub>3</sub>

zoom 112-122

GO

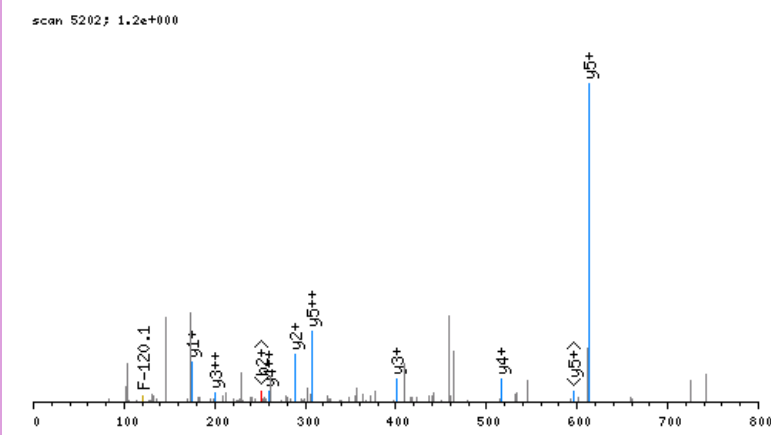

click image to zoom in; click top corners to zoom out [\[precursor±\]](#)

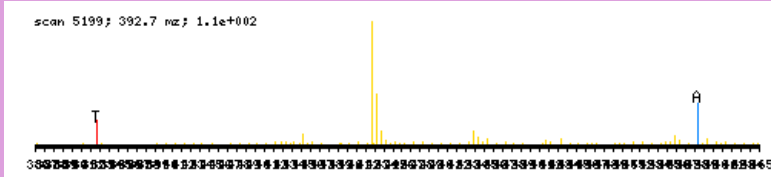

zoomed in precursor plot; T=theoretical m/z, A=acquired m/z

| b <sup>+</sup> | # | AA # | y <sup>+</sup> | y <sup>2+</sup> |
|----------------|---|------|----------------|-----------------|
| 172.0610       | 1 | E 6  |                |                 |
| 269.1138       | 2 | P 5  | 613.3673       | 307.1876        |
| 384.1407       | 3 | D 4  | 516.3146       | 258.6612        |
| 497.2248       | 4 | I 3  | 401.2876       | 201.1477        |
| 610.3088       | 5 | I 2  | 288.2036       | 144.6057        |
|                | 6 | R 1  | 175.1195       | 88.0637         |

N-term:+43.02

EPGPAAPSSGAPR, MH+ 1235.6021, m/z 618.3047  
 L OSG41 P180811 230811-s1.03242.03242.2.dta

X-range:

-

MassTol: Y-zoom:

MassType:

AVG  MONO

Axis:

1  2

Label:

I  M  -

Ions:

a  +  2+  3+

b  +  2+  3+

c  +  2+  3+

x  +  2+  3+

y  +  2+  3+

z  +  2+  3+

hide H<sub>2</sub>O/NH<sub>3</sub>

zoom 112-122

GO

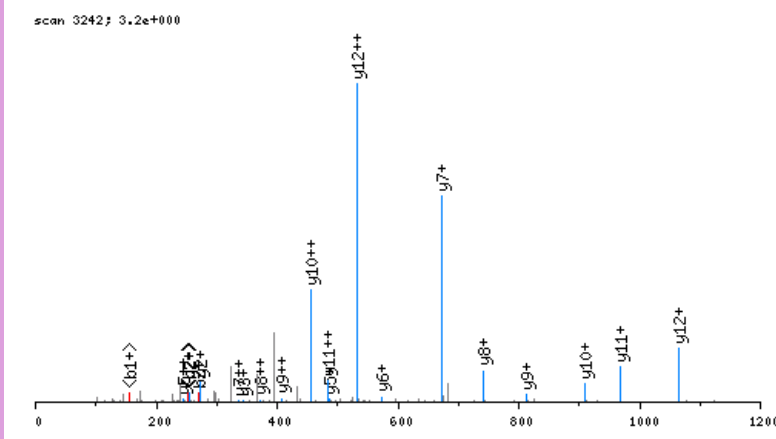

click image to zoom in; click top corners to zoom out [\[precursor±\]](#)

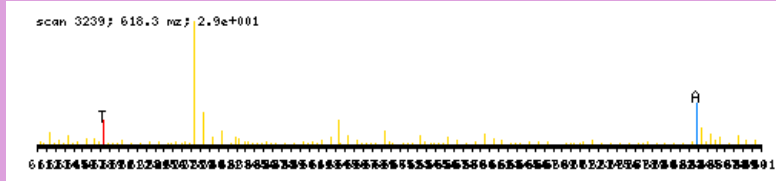

zoomed in precursor plot; T=theoretical m/z, A=acquired m/z

| b <sup>+</sup> | #  | AA # | y <sup>+</sup> | y <sup>2+</sup>    |
|----------------|----|------|----------------|--------------------|
| 172.0610       | 1  | E    | 13             |                    |
| 269.1138       | 2  | P    | 12             | 1064.5489 532.7784 |
| 326.1352       | 3  | G    | 11             | 967.4961 484.2520  |
| 423.1880       | 4  | P    | 10             | 910.4747 455.7412  |
| 494.2251       | 5  | A    | 9              | 813.4219 407.2149  |
| 565.2622       | 6  | A    | 8              | 742.3848 371.6963  |
| 662.3150       | 7  | P    | 7              | 671.3477 336.1777  |
| 749.3470       | 8  | S    | 6              | 574.2949 287.6514  |
| 836.3790       | 9  | S    | 5              | 487.2629 244.1353  |
| 893.4005       | 10 | G    | 4              | 400.2308 200.6193  |
| 964.4376       | 11 | A    | 3              | 343.2094 172.1086  |
| 1061.4904      | 12 | P    | 2              | 272.1723 136.5900  |
|                | 13 | R    | 1              | 175.1195 88.0637   |

N-term:+43.02

EPGPAAPSSGAPRRAR, MH+ 1559.7930, m/z 520.6025  
 L OSG37 P180811 230811-s1.03318.03318.3.dta

X-range:

-

MassTol: Y-zoom:

MassType:

AVG  MONO

Axis:

1  2

Label:

I  M  -

Ions:

a  +  2+  3+

b  +  2+  3+

c  +  2+  3+

x  +  2+  3+

y  +  2+  3+

z  +  2+  3+

hide H<sub>2</sub>O/NH<sub>3</sub>

zoom 112-122

GO

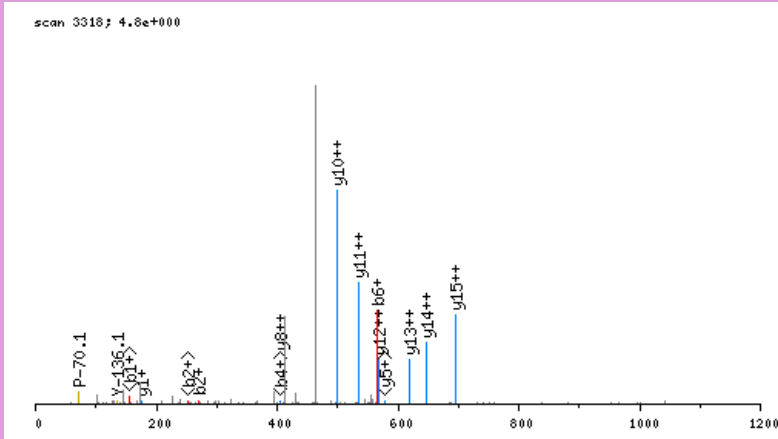

click image to zoom in; click top corners to zoom out [\[precursor±\]](#)

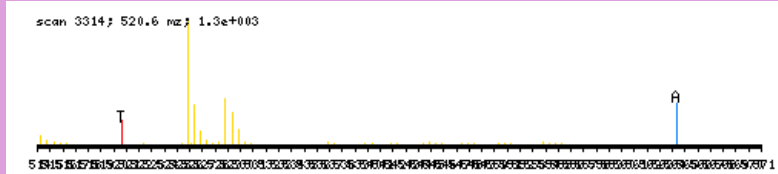

zoomed in precursor plot; T=theoretical m/z, A=acquired m/z

| b <sup>+</sup> | #  | AA # | y <sup>+</sup> | y <sup>2+</sup> |
|----------------|----|------|----------------|-----------------|
| 172.0610       | 1  | E 16 |                |                 |
| 269.1138       | 2  | P 15 | 1388.7399      | 694.8738        |
| 326.1352       | 3  | G 14 | 1291.6871      | 646.3475        |
| 423.1880       | 4  | P 13 | 1234.6656      | 617.8367        |
| 494.2251       | 5  | A 12 | 1137.6129      | 569.3104        |
| 565.2622       | 6  | A 11 | 1066.5758      | 533.7918        |
| 662.3150       | 7  | P 10 | 995.5387       | 498.2732        |
| 749.3470       | 8  | S 9  | 898.4859       | 449.7469        |
| 836.3790       | 9  | S 8  | 811.4539       | 406.2308        |
| 893.4005       | 10 | G 7  | 724.4218       | 362.7148        |
| 964.4376       | 11 | A 6  | 667.4004       | 334.2041        |
| 1061.4904      | 12 | P 5  | 596.3633       | 298.6855        |
| 1217.5915      | 13 | R 4  | 499.3105       | 250.1592        |
| 1314.6442      | 14 | P 3  | 343.2094       | 172.1086        |
| 1385.6814      | 15 | A 2  | 246.1566       | 123.5822        |
|                | 16 | R 1  | 175.1195       | 88.0637         |

N-term:+43.02

EPGPDGPAAPGPAAIR, MH+ 1514.7603, m/z 505.5916  
 L OSG41 P180811 230811-s1.04911.04911.3.dta

X-range:

-

MassTol: Y-zoom:

MassType:

AVG  MONO

Axis:

1  2

Label:

I  M  -

Ions:

a  +  2+  3+

b  +  2+  3+

c  +  2+  3+

x  +  2+  3+

y  +  2+  3+

z  +  2+  3+

hide H<sub>2</sub>O/NH<sub>3</sub>

zoom 112-122

GO

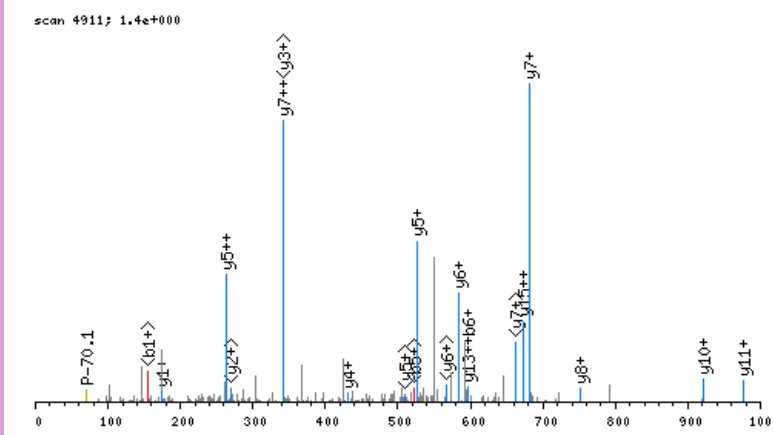

click image to zoom in; click top corners to zoom out [\[precursor±\]](#)

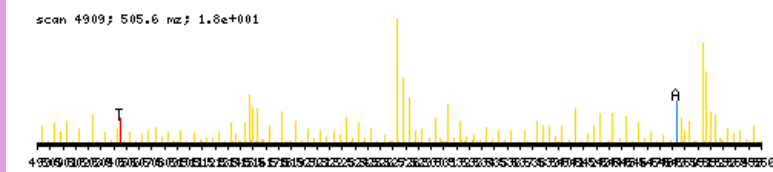

zoomed in precursor plot; T=theoretical m/z, A=acquired m/z

| b <sup>+</sup> | #  | AA # | y <sup>+</sup> | y <sup>2+</sup> |
|----------------|----|------|----------------|-----------------|
| 172.0610       | 1  | E 16 |                |                 |
| 269.1138       | 2  | P 15 | 1343.7072      | 672.3575        |
| 326.1352       | 3  | G 14 | 1246.6544      | 623.8311        |
| 423.1880       | 4  | P 13 | 1189.6329      | 595.3204        |
| 538.2149       | 5  | D 12 | 1092.5802      | 546.7940        |
| 595.2364       | 6  | G 11 | 977.5532       | 489.2805        |
| 692.2892       | 7  | P 10 | 920.5318       | 460.7698        |
| 763.3263       | 8  | A 9  | 823.4790       | 412.2434        |
| 834.3634       | 9  | A 8  | 752.4419       | 376.7249        |
| 931.4161       | 10 | P 7  | 681.4048       | 341.2063        |
| 988.4376       | 11 | G 6  | 584.3520       | 292.6799        |
| 1085.4904      | 12 | P 5  | 527.3306       | 264.1692        |
| 1156.5275      | 13 | A 4  | 430.2778       | 215.6428        |
| 1227.5646      | 14 | A 3  | 359.2407       | 180.1243        |
| 1340.6487      | 15 | I 2  | 288.2036       | 144.6057        |
|                | 16 | R 1  | 175.1195       | 88.0637         |

N-term:+43.02

EPKAPCPAAVPSEER, MH+ 1707.8376, m/z 569.9507  
 L OSG36 P180811 230811-s1.03311.03311.3.dta

X-range:

-

MassTol: Y-zoom:

MassType:

AVG  MONO

Axis:

1  2

Label:

I  M  -

Ions:

a  +  2+  3+

b  +  2+  3+

c  +  2+  3+

x  +  2+  3+

y  +  2+  3+

z  +  2+  3+

hide H<sub>2</sub>O/NH<sub>3</sub>

zoom 112-122

GO

scan 3311; 1.9e+000

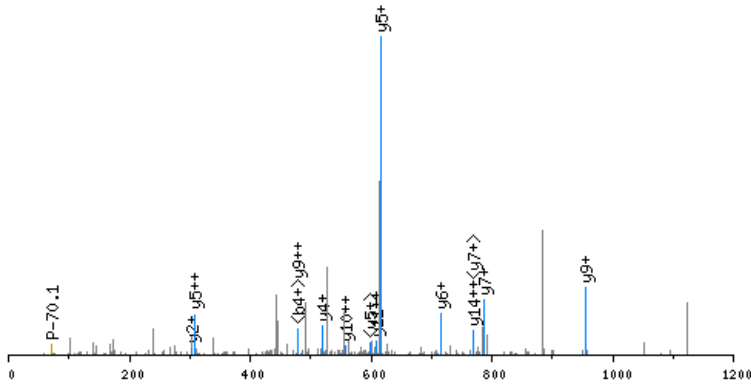

click image to zoom in; click top corners to zoom out [\[precursor±\]](#)

scan 3309; 570.0 nz; 9.5e+000

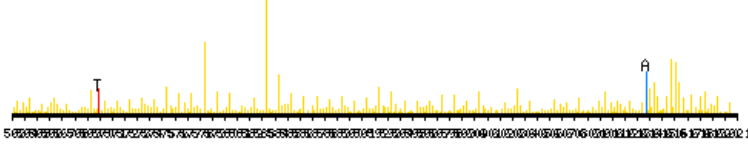

zoomed in precursor plot; T=theoretical m/z, A=acquired m/z

| b <sup>+</sup> | #  | AA | #  | y <sup>+</sup> | y <sup>2+</sup> |
|----------------|----|----|----|----------------|-----------------|
| 172.0610       | 1  | E  | 15 |                |                 |
| 269.1138       | 2  | P  | 14 | 1536.7844      | 768.8961        |
| 425.2401       | 3  | K  | 13 | 1439.7317      | 720.3697        |
| 496.2772       | 4  | A  | 12 | 1283.6054      | 642.3066        |
| 593.3299       | 5  | P  | 11 | 1212.5682      | 606.7880        |
| 753.3605       | 6  | C  | 10 | 1115.5155      | 558.2617        |
| 850.4133       | 7  | P  | 9  | 955.4849       | 478.2464        |
| 921.4504       | 8  | A  | 8  | 858.4321       | 429.7200        |
| 992.4875       | 9  | A  | 7  | 787.3950       | 394.2014        |
| 1091.5559      | 10 | V  | 6  | 716.3579       | 358.6829        |
| 1188.6087      | 11 | P  | 5  | 617.2895       | 309.1487        |
| 1275.6407      | 12 | S  | 4  | 520.2367       | 260.6223        |
| 1404.6833      | 13 | E  | 3  | 433.2047       | 217.1063        |
| 1533.7259      | 14 | E  | 2  | 304.1621       | 152.5850        |
|                | 15 | R  | 1  | 175.1195       | 88.0637         |

N-term:+43.02 K(3):+156.13  
 C(6):+160.03

EPLYQQTNKQVQEIQSHMGR, MH+ 2490.2624, m/z 623.3211  
 L OSG39 P180811 230811-s1.07392.07392.4.dta

scan 7392; 6.2e-001

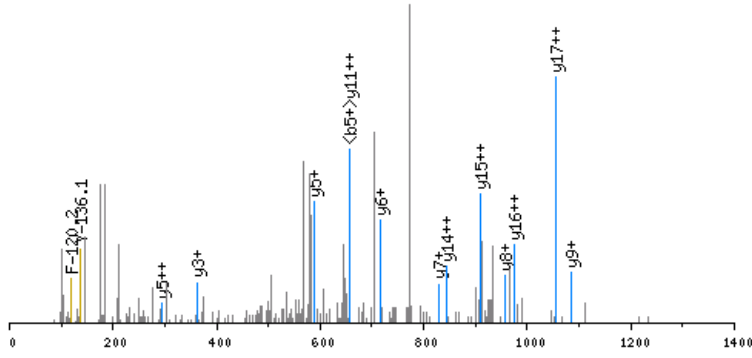

click image to zoom in; click top corners to zoom out [precursor±]

scan 7391; 623.3 m/z; 1.4e+001

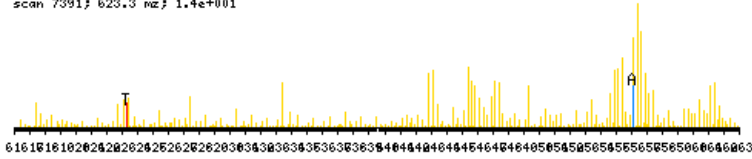

zoomed in precursor plot; T=theoretical m/z, A=acquired m/z

X-range:

-

MassTol: Y-zoom:

MassType:

AVG  MONO

Axis:

1  2

Label:

I  M  -

Ions:

a  +  2+  3+

b  +  2+  3+

c  +  2+  3+

x  +  2+  3+

y  +  2+  3+

z  +  2+  3+

hide H<sub>2</sub>O/NH<sub>3</sub>

zoom 112-122

GO

| b <sup>+</sup> | #  | AA | #  | y <sup>+</sup> | y <sup>2+</sup> |
|----------------|----|----|----|----------------|-----------------|
| 172.0610       | 1  | E  | 20 |                |                 |
| 269.1138       | 2  | P  | 19 | 2319.2092      | 1160.1085       |
| 382.1978       | 3  | L  | 18 | 2222.1564      | 1111.5821       |
| 545.2611       | 4  | Y  | 17 | 2109.0724      | 1055.0401       |
| 673.3197       | 5  | Q  | 16 | 1946.0091      | 973.5084        |
| 801.3783       | 6  | Q  | 15 | 1817.9505      | 909.4792        |
| 902.4260       | 7  | T  | 14 | 1689.8919      | 845.4499        |
| 1016.4689      | 8  | N  | 13 | 1588.8442      | 794.9260        |
| 1178.6270      | 9  | K  | 12 | 1474.8013      | 737.9046        |
| 1306.6856      | 10 | Q  | 11 | 1312.6432      | 656.8255        |
| 1405.7540      | 11 | V  | 10 | 1184.5846      | 592.7962        |
| 1533.8126      | 12 | Q  | 9  | 1085.5162      | 543.2620        |
| 1662.8552      | 13 | E  | 8  | 957.4576       | 479.2327        |
| 1775.9392      | 14 | I  | 7  | 828.4150       | 414.7114        |
| 1903.9978      | 15 | Q  | 6  | 715.3310       | 358.1694        |
| 1991.0298      | 16 | S  | 5  | 587.2724       | 294.1401        |
| 2128.0888      | 17 | H  | 4  | 500.2404       | 250.6241        |
| 2259.1292      | 18 | M  | 3  | 363.1814       | 182.0946        |
| 2316.1507      | 19 | G  | 2  | 232.1410       | 116.5744        |
|                | 20 | R  | 1  | 175.1195       | 88.0637         |

N-term:+43.02 K(9):+162.16

EPSGGGLGPR, MH+ 1025.5016, m/z 513.2544  
 L OSG41 P180811 230811-s1.03697.03697.2.dta

X-range:

-

MassTol: Y-zoom:

MassType:

AVG  MONO

Axis:

1  2

Label:

I  M  -

Ions:

a  +  2+  3+

b  +  2+  3+

c  +  2+  3+

x  +  2+  3+

y  +  2+  3+

z  +  2+  3+

hide H<sub>2</sub>O/NH<sub>3</sub>

zoom 112-122

GO

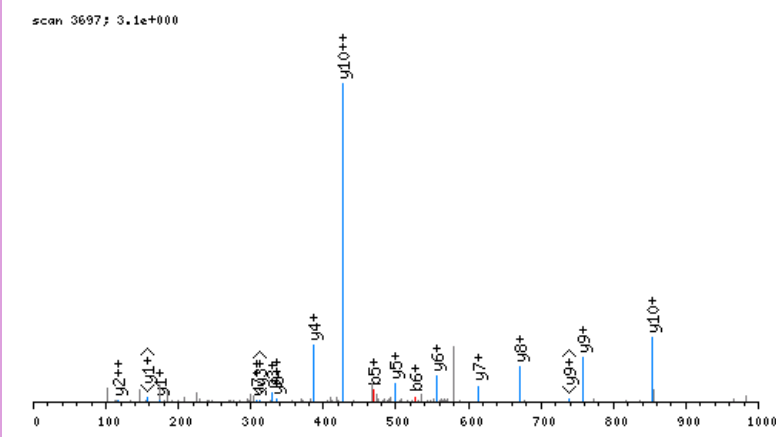

click image to zoom in; click top corners to zoom out [\[precursor±\]](#)

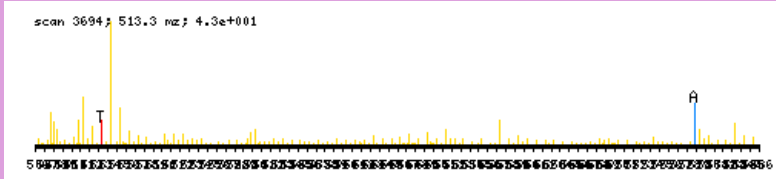

zoomed in precursor plot; T=theoretical m/z, A=acquired m/z

| b <sup>+</sup> | #  | AA | #  | y <sup>+</sup> | y <sup>2+</sup> |
|----------------|----|----|----|----------------|-----------------|
| 172.0610       | 1  | E  | 11 |                |                 |
| 269.1138       | 2  | P  | 10 | 854.4484       | 427.7281        |
| 356.1458       | 3  | S  | 9  | 757.3957       | 379.2018        |
| 413.1672       | 4  | G  | 8  | 670.3636       | 335.6857        |
| 470.1887       | 5  | G  | 7  | 613.3422       | 307.1750        |
| 527.2102       | 6  | G  | 6  | 556.3207       | 278.6643        |
| 640.2942       | 7  | L  | 5  | 499.2993       | 250.1535        |
| 697.3157       | 8  | G  | 4  | 386.2152       | 193.6115        |
| 794.3685       | 9  | P  | 3  | 329.1937       | 165.1008        |
| 851.3899       | 10 | G  | 2  | 232.1410       | 116.5744        |
|                | 11 | R  | 1  | 175.1195       | 88.0637         |

N-term:+43.02

EPSPDAEEAHTVR, MH+ 1479.6716, m/z 740.3394  
 L OSG37 P180811 230811-s1.03573.03573.2.dta

X-range:

-

MassTol: Y-zoom:

MassType:

AVG  MONO

Axis:

1  2

Label:

I  M  -

Ions:

a  +  2+  3+

b  +  2+  3+

c  +  2+  3+

x  +  2+  3+

y  +  2+  3+

z  +  2+  3+

hide H<sub>2</sub>O/NH<sub>3</sub>

zoom 112-122

GO

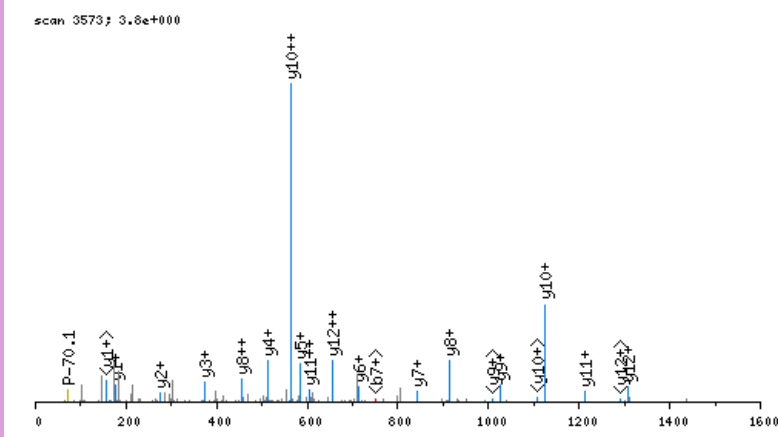

click image to zoom in; click top corners to zoom out [\[precursor±\]](#)

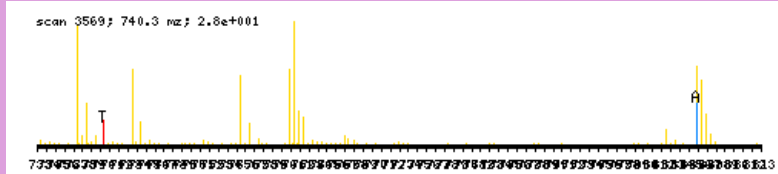

zoomed in precursor plot; T=theoretical m/z, A=acquired m/z

| b <sup>+</sup> | #  | AA # | y <sup>+</sup> | y <sup>2+</sup> |
|----------------|----|------|----------------|-----------------|
| 172.0610       | 1  | E 13 |                |                 |
| 269.1138       | 2  | P 12 | 1308.6184      | 654.8131        |
| 356.1458       | 3  | S 11 | 1211.5657      | 606.2867        |
| 453.1985       | 4  | P 10 | 1124.5336      | 562.7707        |
| 568.2255       | 5  | D 9  | 1027.4809      | 514.2443        |
| 639.2626       | 6  | A 8  | 912.4539       | 456.7309        |
| 768.3052       | 7  | E 7  | 841.4168       | 421.2123        |
| 897.3478       | 8  | E 6  | 712.3742       | 356.6910        |
| 968.3849       | 9  | A 5  | 583.3316       | 292.1697        |
| 1105.4438      | 10 | H 4  | 512.2945       | 256.6512        |
| 1206.4915      | 11 | T 3  | 375.2356       | 188.1217        |
| 1305.5599      | 12 | V 2  | 274.1879       | 137.5979        |
|                | 13 | R 1  | 175.1195       | 88.0637         |

N-term:+43.02



EQAVHGESKR, MH+ 1216.6499, m/z 406.2215  
 L OSG40 P180811 230811-s1.02246.02246.3.dta

X-range:

-

MassTol: Y-zoom:

MassType:

AVG  MONO

Axis:

1  2

Label:

I  M  -

Ions:

a  +  2+  3+

b  +  2+  3+

c  +  2+  3+

x  +  2+  3+

y  +  2+  3+

z  +  2+  3+

hide H<sub>2</sub>O/NH<sub>3</sub>

zoom 112-122

GO

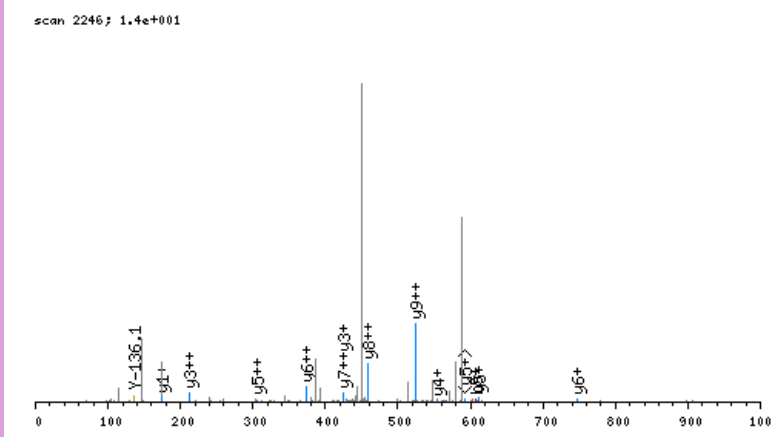

click image to zoom in; click top corners to zoom out [\[precursor±\]](#)

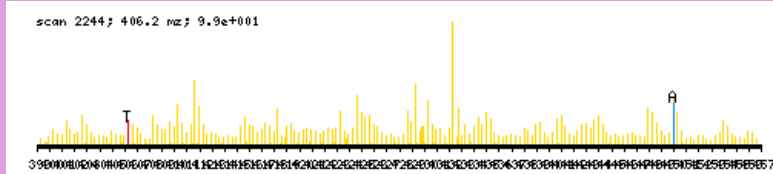

zoomed in precursor plot; T=theoretical m/z, A=acquired m/z

| b <sup>+</sup> | #  | AA # | y <sup>+</sup> | y <sup>2+</sup> |
|----------------|----|------|----------------|-----------------|
| 172.0610       | 1  | E 10 |                |                 |
| 300.1196       | 2  | Q 9  | 1045.5967      | 523.3023        |
| 371.1567       | 3  | A 8  | 917.5381       | 459.2730        |
| 470.2251       | 4  | V 7  | 846.5010       | 423.7544        |
| 607.2840       | 5  | H 6  | 747.4326       | 374.2202        |
| 664.3055       | 6  | G 5  | 610.3737       | 305.6908        |
| 793.3481       | 7  | E 4  | 553.3522       | 277.1800        |
| 880.3801       | 8  | S 3  | 424.3096       | 212.6587        |
| 1042.5382      | 9  | K 2  | 337.2776       | 169.1427        |
|                | 10 | R 1  | 175.1195       | 88.0637         |

N-term:+43.02 K(9):+162.16

EQTETLTR, MH+ 1019.5009, m/z 510.2541  
 L OSG41 P180811 230811-s1.03887.03887.2.dta

scan 3887; 5.6e-001

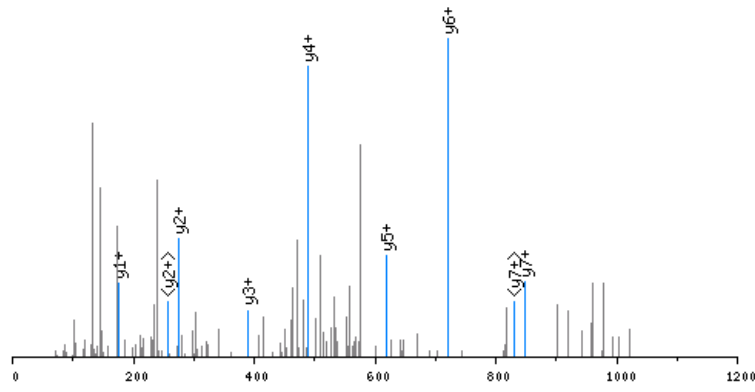

click image to zoom in; click top corners to zoom out [\[precursor±\]](#)

scan 3884; 510.3 m/z; 4.2e+001

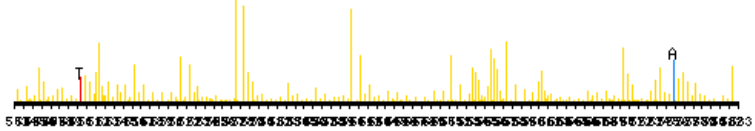

zoomed in precursor plot; T=theoretical m/z, A=acquired m/z

X-range:

-

MassTol: Y-zoom:

MassType:

AVG  MONO

Axis:

1  2

Label:

I  M  -

Ions:

a  +  2+  3+

b  +  2+  3+

c  +  2+  3+

x  +  2+  3+

y  +  2+  3+

z  +  2+  3+

hide H<sub>2</sub>O/NH<sub>3</sub>

zoom 112-122

GO

| b <sup>+</sup> | # | AA # | y <sup>+</sup> | y <sup>2+</sup> |
|----------------|---|------|----------------|-----------------|
| 172.0610       | 1 | E 8  |                |                 |
| 300.1196       | 2 | Q 7  | 848.4478       | 424.7278        |
| 401.1672       | 3 | T 6  | 720.3892       | 360.6985        |
| 530.2098       | 4 | E 5  | 619.3415       | 310.1747        |
| 631.2575       | 5 | T 4  | 490.2989       | 245.6534        |
| 744.3416       | 6 | L 3  | 389.2512       | 195.1295        |
| 845.3893       | 7 | T 2  | 276.1672       | 138.5875        |
|                | 8 | R 1  | 175.1195       | 88.0637         |

N-term:+43.02

ESEMSDPQLQEEER, MH+ 1716.7387, m/z 572.9177  
 L OSG41 P180811 230811-s1.05120.05120.3.dta

X-range:

-

MassTol: Y-zoom:

MassType:

AVG  MONO

Axis:

1  2

Label:

I  M  -

Ions:

a  +  2+  3+

b  +  2+  3+

c  +  2+  3+

x  +  2+  3+

y  +  2+  3+

z  +  2+  3+

hide H<sub>2</sub>O/NH<sub>3</sub>

zoom 112-122

GO

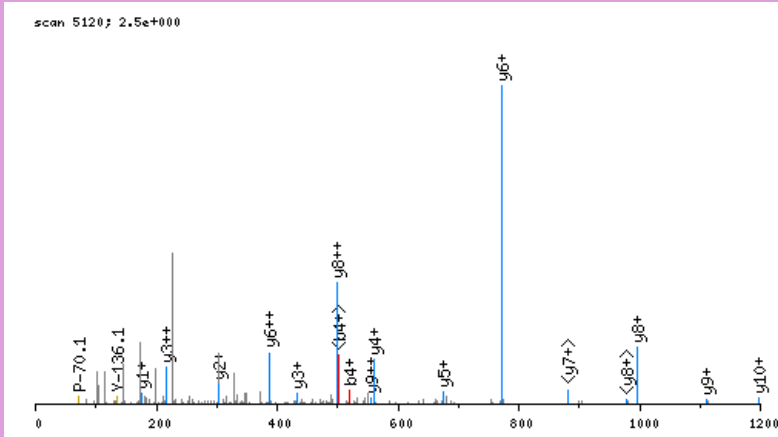

click image to zoom in; click top corners to zoom out [\[precursor±\]](#)

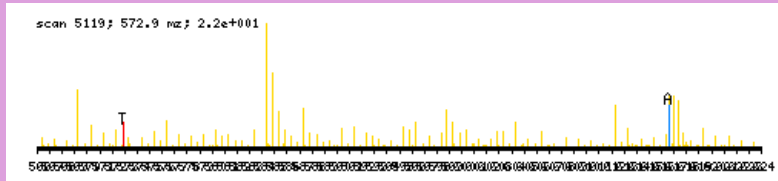

zoomed in precursor plot; T=theoretical m/z, A=acquired m/z

| b <sup>+</sup> | #  | AA # | y <sup>+</sup> | y <sup>2+</sup> |
|----------------|----|------|----------------|-----------------|
| 172.0610       | 1  | E 14 |                |                 |
| 259.0930       | 2  | S 13 | 1545.6855      | 773.3467        |
| 388.1356       | 3  | E 12 | 1458.6535      | 729.8307        |
| 519.1761       | 4  | M 11 | 1329.6109      | 665.3094        |
| 606.2081       | 5  | S 10 | 1198.5704      | 599.7891        |
| 721.2351       | 6  | D 9  | 1111.5384      | 556.2731        |
| 818.2878       | 7  | P 8  | 996.5114       | 498.7596        |
| 946.3464       | 8  | Q 7  | 899.4587       | 450.2332        |
| 1043.3992      | 9  | P 6  | 771.4001       | 386.2040        |
| 1156.4832      | 10 | L 5  | 674.3473       | 337.6776        |
| 1284.5418      | 11 | Q 4  | 561.2633       | 281.1355        |
| 1413.5844      | 12 | E 3  | 433.2047       | 217.1063        |
| 1542.6270      | 13 | E 2  | 304.1621       | 152.5850        |
|                | 14 | R 1  | 175.1195       | 88.0637         |

N-term:+43.02

ESEQMLEGQTQVAENPHSEYGLTDSVER, MH+ 3205.4232, m/z 802.1112  
 L\_OSG36\_P180811\_230811-s1.05095.05095.4.dta

scan 5095; 6.2e-001

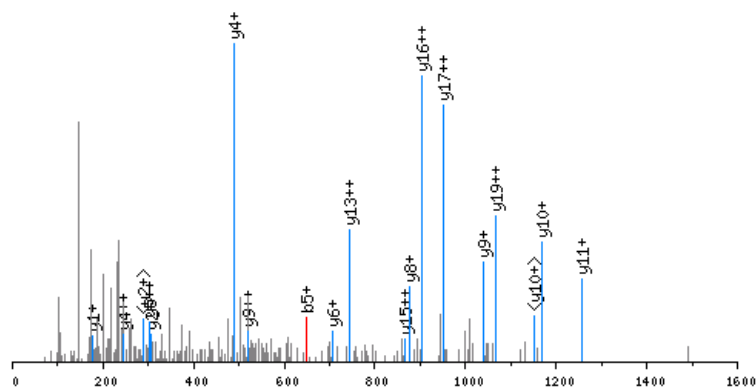

click image to zoom in; click top corners to zoom out [precursor±]

scan 5094; 802.1 m/z; 2.5e+001

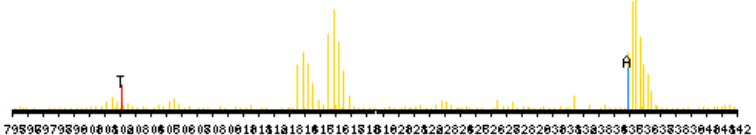

zoomed in precursor plot; T=theoretical m/z, A=acquired m/z

X-range:

-

MassTol: Y-zoom:

MassType:

AVG  MONO

Axis:

1  2

Label:

I  M  -

Ions:

a  +  2+  3+

b  +  2+  3+

c  +  2+  3+

x  +  2+  3+

y  +  2+  3+

z  +  2+  3+

hide H<sub>2</sub>O/NH<sub>3</sub>

zoom 112-122

GO

| b <sup>+</sup> | #  | AA # | y <sup>+</sup> | y <sup>2+</sup> |
|----------------|----|------|----------------|-----------------|
| 172.0610       | 1  | E 28 |                |                 |
| 259.0930       | 2  | S 27 | 3034.3700      | 1517.6889       |
| 388.1356       | 3  | E 26 | 2947.3380      | 1474.1729       |
| 516.1942       | 4  | Q 25 | 2818.2954      | 1409.6516       |
| 647.2347       | 5  | M 24 | 2690.2368      | 1345.6223       |
| 760.3187       | 6  | L 23 | 2559.1963      | 1280.1021       |
| 889.3613       | 7  | E 22 | 2446.1123      | 1223.5600       |
| 946.3828       | 8  | G 21 | 2317.0697      | 1159.0387       |
| 1074.4414      | 9  | Q 20 | 2260.0482      | 1130.5280       |
| 1175.4891      | 10 | T 19 | 2131.9896      | 1066.4987       |
| 1303.5476      | 11 | Q 18 | 2030.9419      | 1015.9749       |
| 1402.6160      | 12 | V 17 | 1902.8834      | 951.9456        |
| 1473.6532      | 13 | A 16 | 1803.8149      | 902.4114        |
| 1602.6958      | 14 | E 15 | 1732.7778      | 866.8928        |
| 1716.7387      | 15 | N 14 | 1603.7352      | 802.3715        |
| 1813.7914      | 16 | P 13 | 1489.6923      | 745.3501        |
| 1950.8504      | 17 | H 12 | 1392.6395      | 696.8237        |
| 2037.8824      | 18 | S 11 | 1255.5806      | 628.2942        |
| 2166.9250      | 19 | E 10 | 1168.5486      | 584.7782        |
| 2329.9883      | 20 | Y 9  | 1039.5060      | 520.2569        |
| 2387.0098      | 21 | G 8  | 876.4427       | 438.7253        |
| 2500.0938      | 22 | L 7  | 819.4212       | 410.2145        |
| 2601.1415      | 23 | T 6  | 706.3372       | 353.6725        |
| 2716.1685      | 24 | D 5  | 605.2895       | 303.1487        |
| 2803.2005      | 25 | S 4  | 490.2625       | 245.6352        |
| 2902.2689      | 26 | V 3  | 403.2305       | 202.1192        |
| 3031.3115      | 27 | E 2  | 304.1621       | 152.5850        |
|                | 28 | R 1  | 175.1195       | 88.0637         |

N-term:+43.02

ESFTNDR, MH+ 910.3907, m/z 455.6990  
 L OSG41 P180811 230811-s1.04446.04446.2.dta

X-range:

-

MassTol: Y-zoom:

MassType:

AVG  MONO

Axis:

1  2

Label:

I  M  -

Ions:

a  +  2+  3+

b  +  2+  3+

c  +  2+  3+

x  +  2+  3+

y  +  2+  3+

z  +  2+  3+

hide H<sub>2</sub>O/NH<sub>3</sub>

zoom 112-122

GO

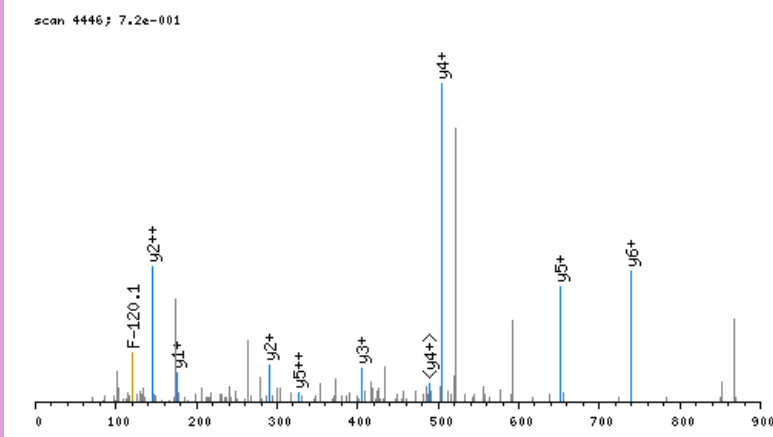

click image to zoom in; click top corners to zoom out [\[precursor±\]](#)

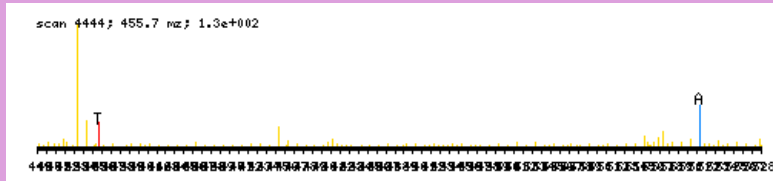

zoomed in precursor plot; T=theoretical m/z, A=acquired m/z

| b <sup>+</sup> | # | AA # | y <sup>+</sup> | y <sup>2+</sup> |
|----------------|---|------|----------------|-----------------|
| 172.0610       | 1 | E 7  |                |                 |
| 259.0930       | 2 | S 6  | 739.3375       | 370.1727        |
| 406.1614       | 3 | F 5  | 652.3055       | 326.6566        |
| 507.2091       | 4 | T 4  | 505.2370       | 253.1224        |
| 621.2520       | 5 | N 3  | 404.1894       | 202.5986        |
| 736.2790       | 6 | D 2  | 290.1464       | 145.5771        |
|                | 7 | R 1  | 175.1195       | 88.0637         |

N-term:+43.02

ESSTSSSGSALGAVDPQLQHFIEVETQKQR, MH+ 3286.6192, m/z 822.4103  
 L OSG38 P180811 230811-s1.07910.07910.4.dta

scan 7910; 2.1e+001

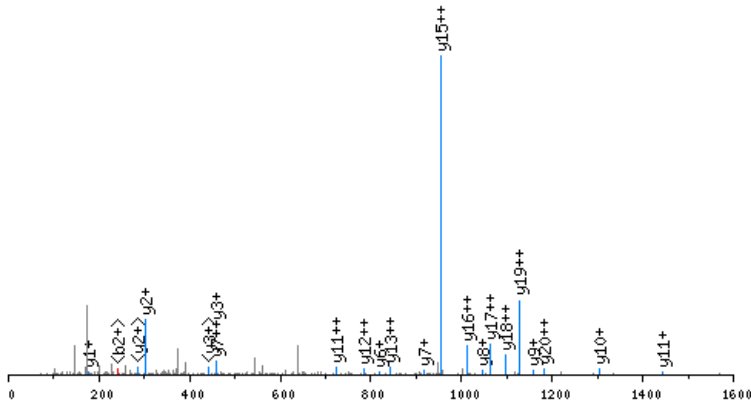

click image to zoom in; click top corners to zoom out [\[precursor±\]](#)

scan 7909; 822.4 m/z; 1.3e+002

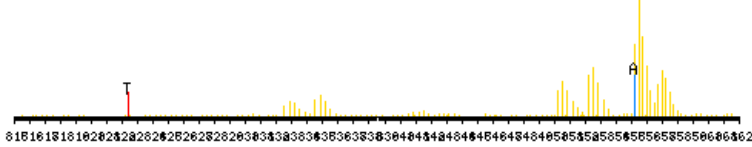

zoomed in precursor plot; T=theoretical m/z, A=acquired m/z

X-range:

-

MassTol: Y-zoom:

MassType:

AVG  MONO

Axis:

1  2

Label:

I  M  -

Ions:

a  +  2+  3+

b  +  2+  3+

c  +  2+  3+

x  +  2+  3+

y  +  2+  3+

z  +  2+  3+

hide H<sub>2</sub>O/NH<sub>3</sub>

zoom 112-122

GO

| b <sup>+</sup> | #  | AA | #  | y <sup>+</sup> | y <sup>2+</sup> |
|----------------|----|----|----|----------------|-----------------|
| 172.0610       | 1  | E  | 30 |                |                 |
| 259.0930       | 2  | S  | 29 | 3115.5660      | 1558.2869       |
| 346.1251       | 3  | S  | 28 | 3028.5340      | 1514.7709       |
| 447.1727       | 4  | T  | 27 | 2941.5020      | 1471.2549       |
| 534.2048       | 5  | S  | 26 | 2840.4543      | 1420.7311       |
| 621.2368       | 6  | S  | 25 | 2753.4223      | 1377.2150       |
| 708.2688       | 7  | S  | 24 | 2666.3902      | 1333.6990       |
| 765.2903       | 8  | G  | 23 | 2579.3582      | 1290.1830       |
| 852.3223       | 9  | S  | 22 | 2522.3367      | 1261.6723       |
| 923.3594       | 10 | A  | 21 | 2435.3047      | 1218.1563       |
| 1036.4435      | 11 | L  | 20 | 2364.2676      | 1182.6377       |
| 1093.4649      | 12 | G  | 19 | 2251.1835      | 1126.0957       |
| 1164.5021      | 13 | A  | 18 | 2194.1621      | 1097.5850       |
| 1263.5705      | 14 | V  | 17 | 2123.1250      | 1062.0664       |
| 1378.5974      | 15 | D  | 16 | 2024.0566      | 1012.5322       |
| 1475.6502      | 16 | P  | 15 | 1909.0296      | 955.0187        |
| 1603.7088      | 17 | Q  | 14 | 1811.9768      | 906.4923        |
| 1716.7928      | 18 | L  | 13 | 1683.9183      | 842.4630        |
| 1844.8514      | 19 | Q  | 12 | 1570.8342      | 785.9210        |
| 1981.9103      | 20 | H  | 11 | 1442.7756      | 721.8917        |
| 2128.9787      | 21 | F  | 10 | 1305.7167      | 653.3623        |
| 2242.0628      | 22 | I  | 9  | 1158.6483      | 579.8281        |
| 2371.1054      | 23 | E  | 8  | 1045.5642      | 523.2860        |
| 2470.1738      | 24 | V  | 7  | 916.5216       | 458.7647        |
| 2599.2164      | 25 | E  | 6  | 817.4532       | 409.2305        |
| 2700.2641      | 26 | T  | 5  | 688.4106       | 344.7092        |
| 2828.3226      | 27 | Q  | 4  | 587.3630       | 294.1854        |
| 2984.4489      | 28 | K  | 3  | 459.3044       | 230.1561        |
| 3112.5075      | 29 | Q  | 2  | 303.1781       | 152.0930        |
|                | 30 | R  | 1  | 175.1195       | 88.0637         |

N-term:+43.02 K(28):+156.13

ESTFSSPAEAAALQR, MH+ 1535.7342, m/z 512.5829  
 L OSG41 P180811 230811-s1.06296.06296.3.dta

X-range:

-

MassTol: Y-zoom:

MassType:

AVG  MONO

Axis:

1  2

Label:

I  M  -

Ions:

a  +  2+  3+

b  +  2+  3+

c  +  2+  3+

x  +  2+  3+

y  +  2+  3+

z  +  2+  3+

hide H<sub>2</sub>O/NH<sub>3</sub>

zoom 112-122

GO

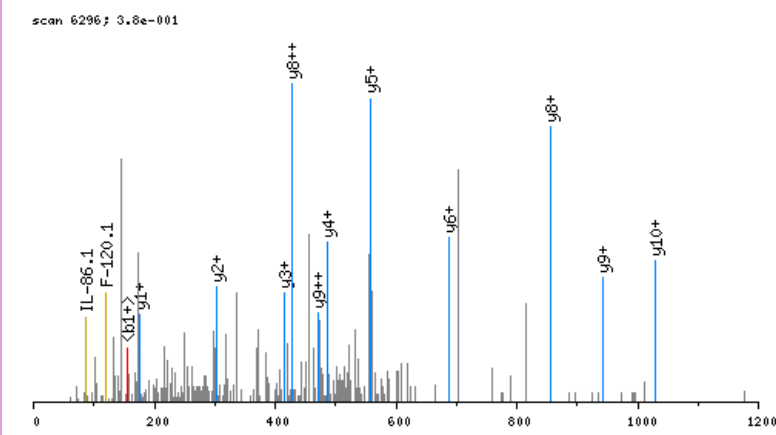

click image to zoom in; click top corners to zoom out [\[precursor±\]](#)

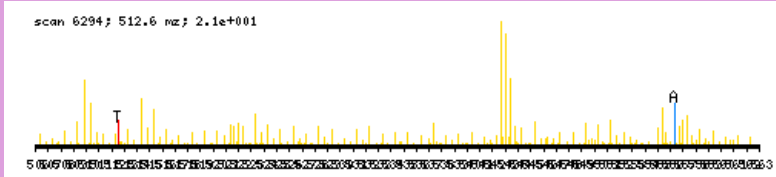

zoomed in precursor plot; T=theoretical m/z, A=acquired m/z

| b <sup>+</sup> | #  | AA # | y <sup>+</sup> | y <sup>2+</sup> |
|----------------|----|------|----------------|-----------------|
| 172.0610       | 1  | E 14 |                |                 |
| 259.0930       | 2  | S 13 | 1364.6810      | 682.8444        |
| 360.1407       | 3  | T 12 | 1277.6490      | 639.3284        |
| 507.2091       | 4  | F 11 | 1176.6013      | 588.8046        |
| 594.2411       | 5  | S 10 | 1029.5329      | 515.2704        |
| 681.2732       | 6  | S 9  | 942.5009       | 471.7543        |
| 778.3259       | 7  | P 8  | 855.4688       | 428.2383        |
| 849.3630       | 8  | A 7  | 758.4161       | 379.7120        |
| 978.4056       | 9  | E 6  | 687.3790       | 344.1934        |
| 1049.4428      | 10 | A 5  | 558.3364       | 279.6721        |
| 1120.4799      | 11 | A 4  | 487.2993       | 244.1535        |
| 1233.5639      | 12 | L 3  | 416.2621       | 208.6350        |
| 1361.6225      | 13 | Q 2  | 303.1781       | 152.0930        |
|                | 14 | R 1  | 175.1195       | 88.0637         |

N-term:+43.02

ETGPAPLVAPPR, MH+ 1246.6796, m/z 623.8434  
 L OSG41 P180811 230811-s1.05563.05563.2.dta

X-range:

-

MassTol: Y-zoom:

MassType:

AVG  MONO

Axis:

1  2

Label:

I  M  -

Ions:

a  +  2+  3+

b  +  2+  3+

c  +  2+  3+

x  +  2+  3+

y  +  2+  3+

z  +  2+  3+

hide H<sub>2</sub>O/NH<sub>3</sub>

zoom 112-122

GO

scan 5563; 1.5e+000

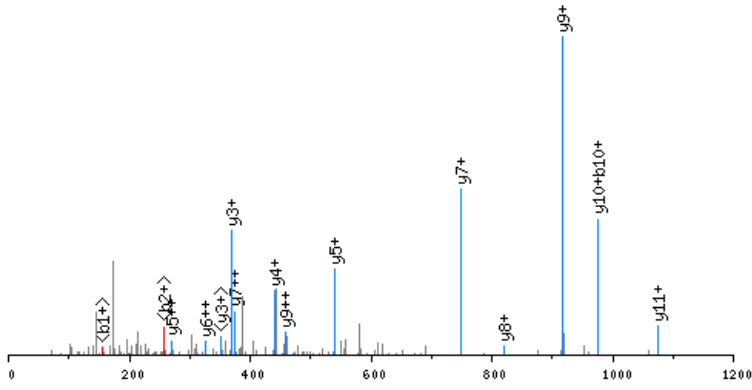

click image to zoom in; click top corners to zoom out [\[precursor±\]](#)

scan 5559; 623.8 m/z; 6.9e+001

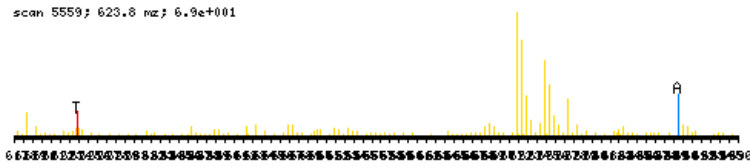

zoomed in precursor plot; T=theoretical m/z, A=acquired m/z

| b <sup>+</sup> | #  | AA # | y <sup>+</sup> | y <sup>2+</sup> |
|----------------|----|------|----------------|-----------------|
| 172.0610       | 1  | E 12 |                |                 |
| 273.1087       | 2  | T 11 | 1075.6264      | 538.3171        |
| 330.1301       | 3  | G 10 | 974.5787       | 487.7933        |
| 427.1829       | 4  | P 9  | 917.5573       | 459.2825        |
| 498.2200       | 5  | A 8  | 820.5045       | 410.7562        |
| 595.2728       | 6  | P 7  | 749.4674       | 375.2376        |
| 708.3568       | 7  | L 6  | 652.4146       | 326.7112        |
| 807.4253       | 8  | V 5  | 539.3306       | 270.1692        |
| 878.4624       | 9  | A 4  | 440.2621       | 220.6350        |
| 975.5151       | 10 | P 3  | 369.2250       | 185.1164        |
| 1072.5679      | 11 | P 2  | 272.1723       | 136.5900        |
|                | 12 | R 1  | 175.1195       | 88.0637         |

N-term:+43.02



ETILEQQR, MH+ 1058.5482, m/z 529.7777  
 L OSG41 P180811 230811-s1.06088.06088.2.dta

X-range:

-

MassTol: Y-zoom:

MassType:

AVG  MONO

Axis:

1  2

Label:

I  M  -

Ions:

a  +  2+  3+

b  +  2+  3+

c  +  2+  3+

x  +  2+  3+

y  +  2+  3+

z  +  2+  3+

hide H<sub>2</sub>O/NH<sub>3</sub>

zoom 112-122

GO

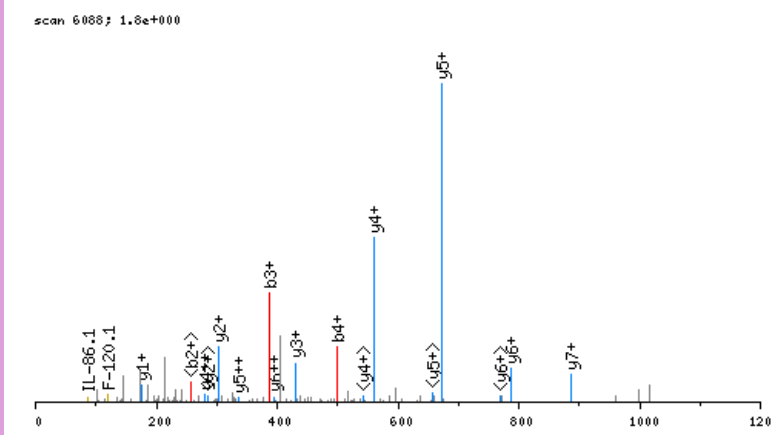

click image to zoom in; click top corners to zoom out [\[precursor±\]](#)

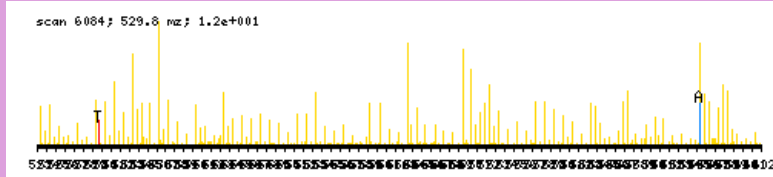

zoomed in precursor plot; T=theoretical m/z, A=acquired m/z

| b <sup>+</sup> | # | AA # | y <sup>+</sup> | y <sup>2+</sup> |
|----------------|---|------|----------------|-----------------|
| 172.0610       | 1 | E 8  |                |                 |
| 273.1087       | 2 | T 7  | 887.4951       | 444.2514        |
| 386.1927       | 3 | I 6  | 786.4474       | 393.7276        |
| 499.2768       | 4 | L 5  | 673.3633       | 337.1856        |
| 628.3194       | 5 | E 4  | 560.2792       | 280.6435        |
| 756.3780       | 6 | Q 3  | 431.2367       | 216.1222        |
| 884.4365       | 7 | Q 2  | 303.1781       | 152.0930        |
|                | 8 | R 1  | 175.1195       | 88.0637         |

N-term:+43.02

ETLLKR, MH+ 835.5466, m/z 418.2769  
 L OSG38 P180811 230811-s1.05747.05747.2.dta

scan 5747; 2.7e+001

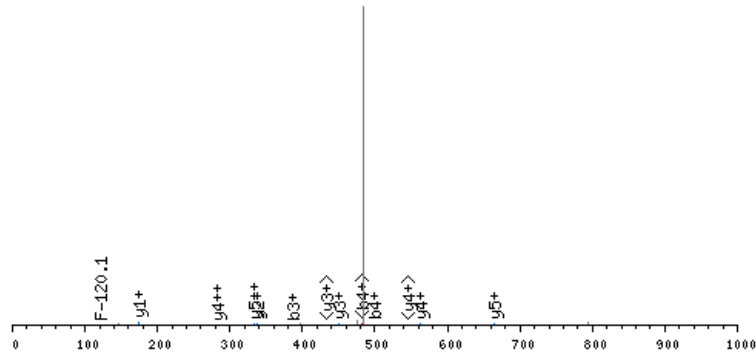

click image to zoom in; click top corners to zoom out [\[precursor±\]](#)

scan 5744; 418.3 m/z; 2.4e+001

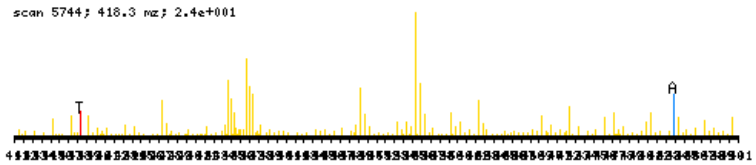

zoomed in precursor plot; T=theoretical m/z, A=acquired m/z

X-range:

-

MassTol: Y-zoom:

MassType:

AVG  MONO

Axis:

1  2

Label:

I  M  -

Ions:

a  +  2+  3+

b  +  2+  3+

c  +  2+  3+

x  +  2+  3+

y  +  2+  3+

z  +  2+  3+

hide H<sub>2</sub>O/NH<sub>3</sub>

zoom 112-122

GO

| b <sup>+</sup> | # | AA # | y <sup>+</sup> | y <sup>2+</sup>   |
|----------------|---|------|----------------|-------------------|
| 172.0610       | 1 | E    | 6              |                   |
| 273.1087       | 2 | T    | 5              | 664.4934 332.7506 |
| 386.1927       | 3 | L    | 4              | 563.4457 282.2268 |
| 499.2768       | 4 | L    | 3              | 450.3617 225.6847 |
| 661.4349       | 5 | K    | 2              | 337.2776 169.1427 |
|                | 6 | R    | 1              | 175.1195 88.0637  |

N-term:+43.02 K(5):+162.16

ETPKPR, MH+ 797.4522, m/z 399.2297  
 L OSG38 P180811 230811-s1.02268.02268.2.dta

X-range:

-

MassTol: Y-zoom:

MassType:

AVG  MONO

Axis:

1  2

Label:

I  M  -

Ions:

a  +  2+  3+

b  +  2+  3+

c  +  2+  3+

x  +  2+  3+

y  +  2+  3+

z  +  2+  3+

hide H<sub>2</sub>O/NH<sub>3</sub>

zoom 112-122

GO

scan 2268; 1.7e+001

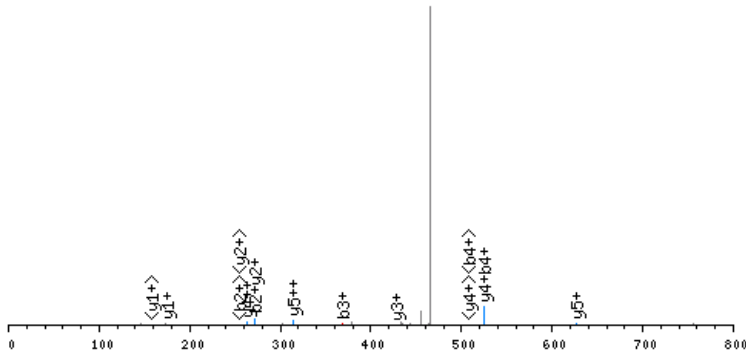

click image to zoom in; click top corners to zoom out [\[precursor±\]](#)

scan 2264; 399.2 m/z; 4.2e+000

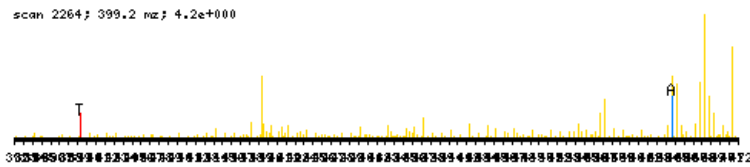

zoomed in precursor plot; T=theoretical m/z, A=acquired m/z

| b <sup>+</sup> | # | AA # | y <sup>+</sup> | y <sup>2+</sup>   |
|----------------|---|------|----------------|-------------------|
| 172.0610       | 1 | E    | 6              |                   |
| 273.1087       | 2 | T    | 5              | 626.3990 313.7034 |
| 370.1614       | 3 | P    | 4              | 525.3513 263.1796 |
| 526.2877       | 4 | K    | 3              | 428.2986 214.6532 |
| 623.3405       | 5 | P    | 2              | 272.1723 136.5900 |
|                | 6 | R    | 1              | 175.1195 88.0637  |

N-term:+43.02 K(4):+156.13

ETPLDVLSR, MH+ 1071.5686, m/z 536.2880  
 L OSG41 P180811 230811-s1.07326.07326.2.dta

X-range:

-

MassTol: Y-zoom:

MassType:

AVG  MONO

Axis:

1  2

Label:

I  M  -

Ions:

a  +  2+  3+

b  +  2+  3+

c  +  2+  3+

x  +  2+  3+

y  +  2+  3+

z  +  2+  3+

hide H<sub>2</sub>O/NH<sub>3</sub>

zoom 112-122

GO

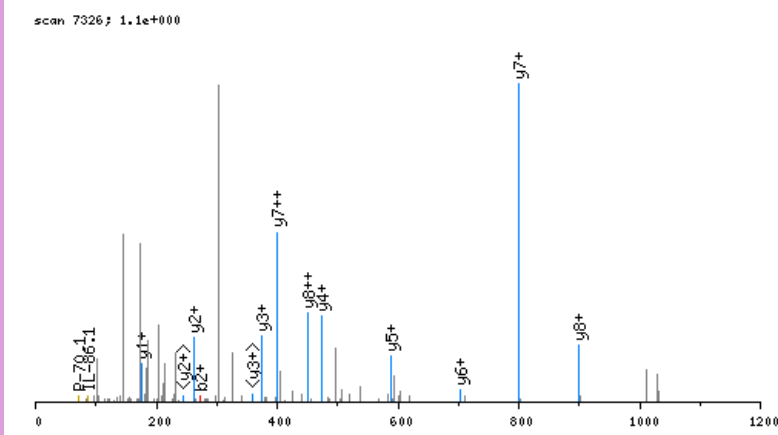

click image to zoom in; click top corners to zoom out [\[precursor±\]](#)

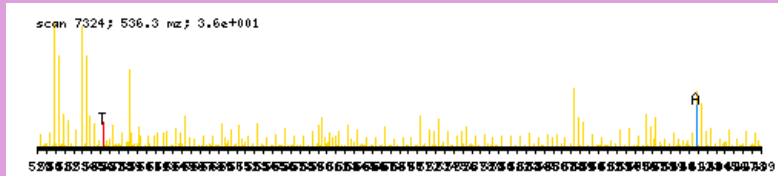

zoomed in precursor plot; T=theoretical m/z, A=acquired m/z

| b <sup>+</sup> | # | AA # | y <sup>+</sup> | y <sup>2+</sup> |
|----------------|---|------|----------------|-----------------|
| 172.0610       | 1 | E 9  |                |                 |
| 273.1087       | 2 | T 8  | 900.5155       | 450.7616        |
| 370.1614       | 3 | P 7  | 799.4678       | 400.2378        |
| 483.2455       | 4 | L 6  | 702.4150       | 351.7114        |
| 598.2724       | 5 | D 5  | 589.3310       | 295.1694        |
| 697.3409       | 6 | V 4  | 474.3040       | 237.6559        |
| 810.4249       | 7 | L 3  | 375.2356       | 188.1217        |
| 897.4569       | 8 | S 2  | 262.1515       | 131.5797        |
|                | 9 | R 1  | 175.1195       | 88.0637         |

N-term:+43.02

EVHELFR, MH+ 971.4951, m/z 486.2512  
 L OSG38 P180811 230811-s1.06431.06431.2.dta

X-range:

-

MassTol: Y-zoom:

MassType:

AVG  MONO

Axis:

1  2

Label:

I  M  -

Ions:

a  +  2+  3+

b  +  2+  3+

c  +  2+  3+

x  +  2+  3+

y  +  2+  3+

z  +  2+  3+

hide H<sub>2</sub>O/NH<sub>3</sub>

zoom 112-122

GO

scan 6431; 5.4e+000

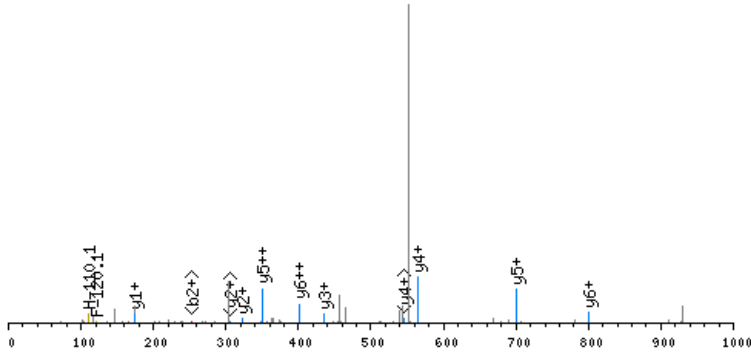

click image to zoom in; click top corners to zoom out [\[precursor±\]](#)

scan 6429; 486.3 m/z; 8.6e+001

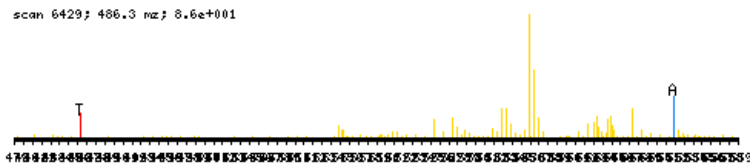

zoomed in precursor plot; T=theoretical m/z, A=acquired m/z

| b <sup>+</sup> | # | AA # | y <sup>+</sup> | y <sup>2+</sup> |
|----------------|---|------|----------------|-----------------|
| 172.0610       | 1 | E 7  |                |                 |
| 271.1294       | 2 | V 6  | 800.4419       | 400.7249        |
| 408.1883       | 3 | H 5  | 701.3735       | 351.1907        |
| 537.2309       | 4 | E 4  | 564.3146       | 282.6612        |
| 650.3150       | 5 | L 3  | 435.2720       | 218.1399        |
| 797.3834       | 6 | F 2  | 322.1879       | 161.5979        |
|                | 7 | R 1  | 175.1195       | 88.0637         |

N-term:+43.02

EVKPPPGRPQPDSDGR, MH+ 1692.9246, m/z 564.9797  
 L OSG39 P180811 230811-s1.02828.02828.3.dta

X-range:

-

MassTol: Y-zoom:

MassType:

AVG  MONO

Axis:

1  2

Label:

I  M  -

Ions:

a  +  2+  3+

b  +  2+  3+

c  +  2+  3+

x  +  2+  3+

y  +  2+  3+

z  +  2+  3+

hide H<sub>2</sub>O/NH<sub>3</sub>

zoom 112-122

GO

scan 2828; 3.1e+001

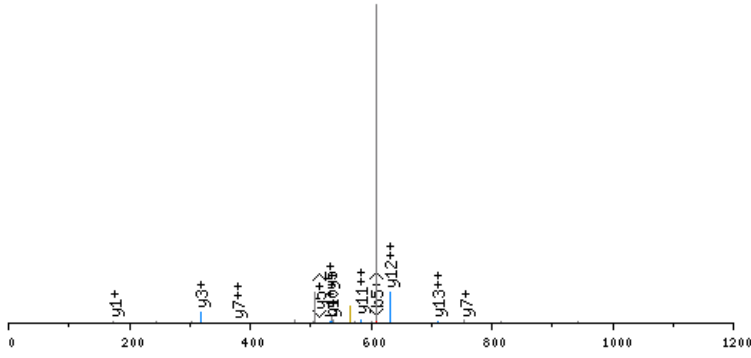

click image to zoom in; click top corners to zoom out [\[precursor±\]](#)

scan 2826; 565.0 m/z; 7.8e+001

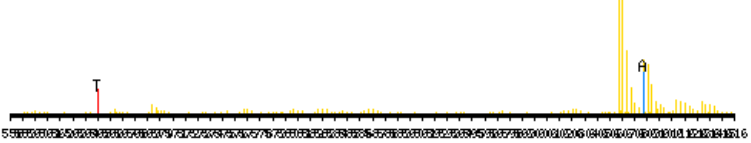

zoomed in precursor plot; T=theoretical m/z, A=acquired m/z

| b <sup>+</sup> | #  | AA | #  | y <sup>+</sup> | y <sup>2+</sup> |
|----------------|----|----|----|----------------|-----------------|
| 172.0610       | 1  | E  | 15 |                |                 |
| 271.1294       | 2  | V  | 14 | 1521.8714      | 761.4396        |
| 433.2875       | 3  | K  | 13 | 1422.8030      | 711.9054        |
| 530.3403       | 4  | P  | 12 | 1260.6449      | 630.8264        |
| 627.3930       | 5  | P  | 11 | 1163.5921      | 582.3000        |
| 724.4458       | 6  | P  | 10 | 1066.5394      | 533.7736        |
| 781.4673       | 7  | G  | 9  | 969.4866       | 485.2472        |
| 937.5684       | 8  | R  | 8  | 912.4652       | 456.7365        |
| 1034.6211      | 9  | P  | 7  | 756.3640       | 378.6859        |
| 1162.6797      | 10 | Q  | 6  | 659.3113       | 330.1596        |
| 1259.7325      | 11 | P  | 5  | 531.2527       | 266.1303        |
| 1374.7594      | 12 | D  | 4  | 434.1999       | 217.6039        |
| 1461.7915      | 13 | S  | 3  | 319.1730       | 160.0904        |
| 1518.8129      | 14 | G  | 2  | 232.1410       | 116.5744        |
|                | 15 | R  | 1  | 175.1195       | 88.0637         |

N-term:+43.02 K(3):+162.16

EVKVVESSGGGLVQPGGSLR, MH+ 1938.0661, m/z 646.6935  
 L OSG39 P180811 230811-s1.04908.04908.3.dta

X-range:

-

MassTol: Y-zoom:

MassType:

AVG  MONO

Axis:

1  2

Label:

I  M  -

Ions:

a  +  2+  3+

b  +  2+  3+

c  +  2+  3+

x  +  2+  3+

y  +  2+  3+

z  +  2+  3+

hide H<sub>2</sub>O/NH<sub>3</sub>

zoom 112-122

GO

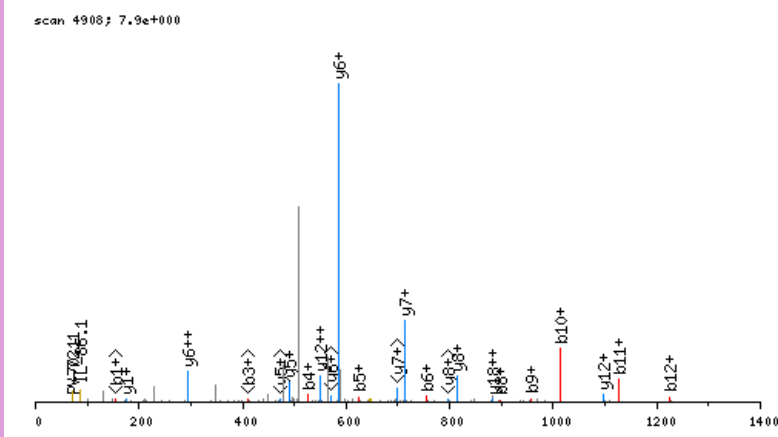

click image to zoom in; click top corners to zoom out [\[precursor±\]](#)

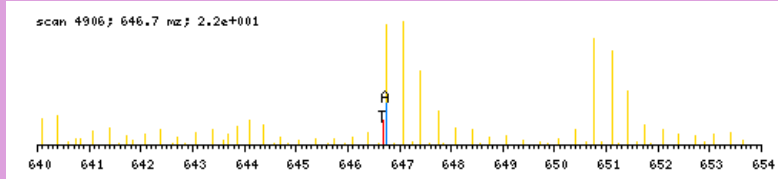

zoomed in precursor plot; T=theoretical m/z, A=acquired m/z

| b <sup>+</sup> | #  | AA | #  | y <sup>+</sup> | y <sup>2+</sup> |
|----------------|----|----|----|----------------|-----------------|
| 172.0610       | 1  | E  | 19 |                |                 |
| 271.1294       | 2  | V  | 18 | 1767.0129      | 884.0104        |
| 427.2557       | 3  | K  | 17 | 1667.9445      | 834.4762        |
| 526.3241       | 4  | V  | 16 | 1511.8182      | 756.4130        |
| 625.3925       | 5  | V  | 15 | 1412.7498      | 706.8788        |
| 754.4351       | 6  | E  | 14 | 1313.6814      | 657.3446        |
| 841.4672       | 7  | S  | 13 | 1184.6388      | 592.8233        |
| 898.4886       | 8  | G  | 12 | 1097.6067      | 549.3073        |
| 955.5101       | 9  | G  | 11 | 1040.5853      | 520.7965        |
| 1012.5315      | 10 | G  | 10 | 983.5638       | 492.2858        |
| 1125.6156      | 11 | L  | 9  | 926.5423       | 463.7751        |
| 1224.6840      | 12 | V  | 8  | 813.4583       | 407.2331        |
| 1352.7426      | 13 | Q  | 7  | 714.3899       | 357.6988        |
| 1449.7954      | 14 | P  | 6  | 586.3313       | 293.6696        |
| 1506.8168      | 15 | G  | 5  | 489.2785       | 245.1432        |
| 1563.8383      | 16 | G  | 4  | 432.2571       | 216.6324        |
| 1650.8703      | 17 | S  | 3  | 375.2356       | 188.1217        |
| 1763.9544      | 18 | L  | 2  | 288.2036       | 144.6057        |
|                | 19 | R  | 1  | 175.1195       | 88.0637         |

N-term:+43.02 K(3):+156.13

EVLATDTASQQER, MH+ 1489.7135, m/z 745.3604  
 L OSG41 P180811 230811-s1.05630.05630.2.dta

X-range:

-

MassTol: Y-zoom:

MassType:

AVG  MONO

Axis:

1  2

Label:

I  M  -

Ions:

a  +  2+  3+

b  +  2+  3+

c  +  2+  3+

x  +  2+  3+

y  +  2+  3+

z  +  2+  3+

hide H<sub>2</sub>O/NH<sub>3</sub>

zoom 112-122

GO

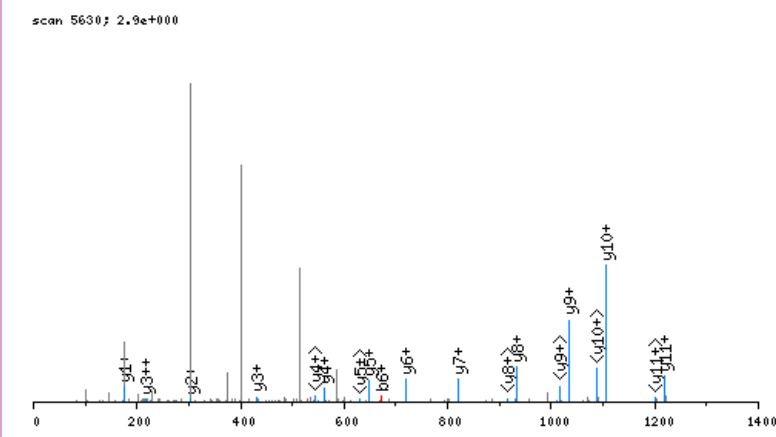

click image to zoom in; click top corners to zoom out [\[precursor±\]](#)

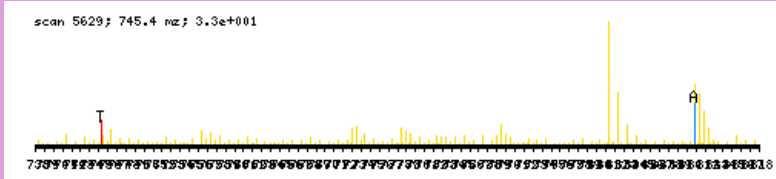

zoomed in precursor plot; T=theoretical m/z, A=acquired m/z

| b <sup>+</sup> | #  | AA # | y <sup>+</sup> | y <sup>2+</sup> |
|----------------|----|------|----------------|-----------------|
| 172.0610       | 1  | E 13 |                |                 |
| 271.1294       | 2  | V 12 | 1318.6603      | 659.8341        |
| 384.2135       | 3  | L 11 | 1219.5919      | 610.2998        |
| 455.2506       | 4  | A 10 | 1106.5078      | 553.7578        |
| 556.2983       | 5  | T 9  | 1035.4707      | 518.2393        |
| 671.3252       | 6  | D 8  | 934.4230       | 467.7154        |
| 772.3729       | 7  | T 7  | 819.3961       | 410.2019        |
| 843.4100       | 8  | A 6  | 718.3484       | 359.6781        |
| 930.4420       | 9  | S 5  | 647.3113       | 324.1596        |
| 1058.5006      | 10 | Q 4  | 560.2792       | 280.6435        |
| 1186.5592      | 11 | Q 3  | 432.2207       | 216.6142        |
| 1315.6018      | 12 | E 2  | 304.1621       | 152.5850        |
|                | 13 | R 1  | 175.1195       | 88.0637         |

N-term:+43.02



EVSQAASGTDGVR, MH+ 1318.6239, m/z 659.8156  
 L OSG41 P180811 230811-s1.04032.04032.2.dta

X-range:

-

MassTol: Y-zoom:

MassType:

AVG  MONO

Axis:

1  2

Label:

I  M  -

Ions:

a  +  2+  3+

b  +  2+  3+

c  +  2+  3+

x  +  2+  3+

y  +  2+  3+

z  +  2+  3+

hide H<sub>2</sub>O/NH<sub>3</sub>

zoom 112-122

GO

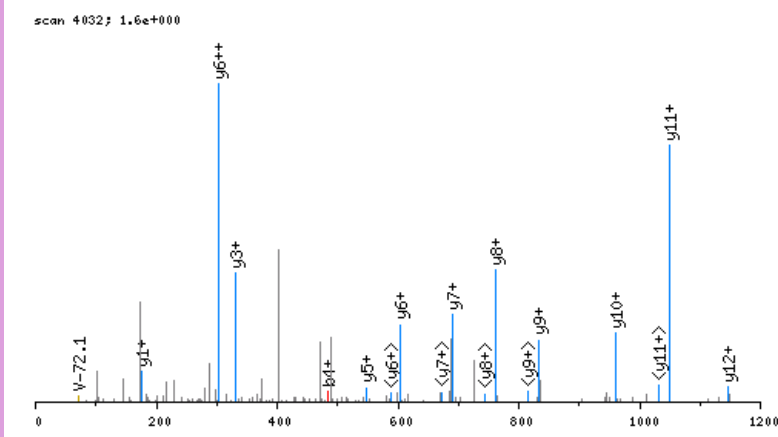

click image to zoom in; click top corners to zoom out [\[precursor±\]](#)

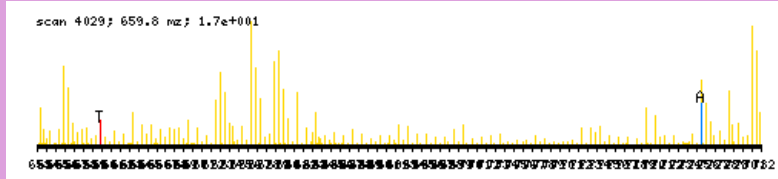

zoomed in precursor plot; T=theoretical m/z, A=acquired m/z

| b <sup>+</sup> | #  | AA # | y <sup>+</sup> | y <sup>2+</sup> |
|----------------|----|------|----------------|-----------------|
| 172.0610       | 1  | E 13 |                |                 |
| 271.1294       | 2  | V 12 | 1147.5707      | 574.2893        |
| 358.1614       | 3  | S 11 | 1048.5023      | 524.7551        |
| 486.2200       | 4  | Q 10 | 961.4703       | 481.2391        |
| 557.2571       | 5  | A 9  | 833.4117       | 417.2098        |
| 628.2942       | 6  | A 8  | 762.3746       | 381.6912        |
| 715.3263       | 7  | S 7  | 691.3375       | 346.1727        |
| 772.3477       | 8  | G 6  | 604.3055       | 302.6566        |
| 873.3954       | 9  | T 5  | 547.2840       | 274.1459        |
| 988.4224       | 10 | D 4  | 446.2363       | 223.6221        |
| 1045.4438      | 11 | G 3  | 331.2094       | 166.1086        |
| 1144.5122      | 12 | V 2  | 274.1879       | 137.5979        |
|                | 13 | R 1  | 175.1195       | 88.0637         |

N-term:+43.02

FADKLPKIQDR, MH+ 1428.8216, m/z 476.9454  
 L OSG40 P180811 230811-s1.07090.07090.3.dta

scan 7090; 2.6e+001

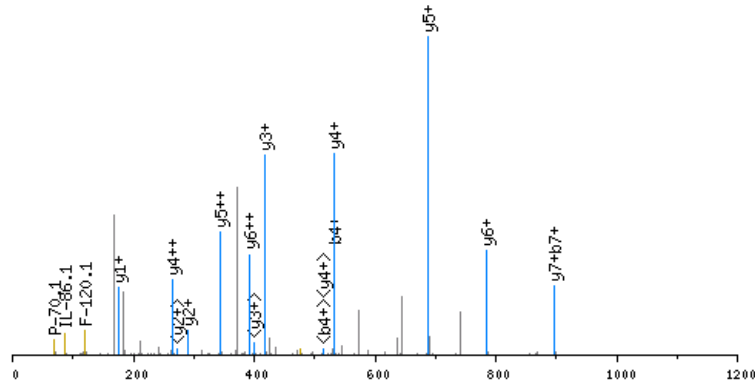

click image to zoom in; click top corners to zoom out [precursor±]

scan 7089; 476.9 m/z; 1.1e+003

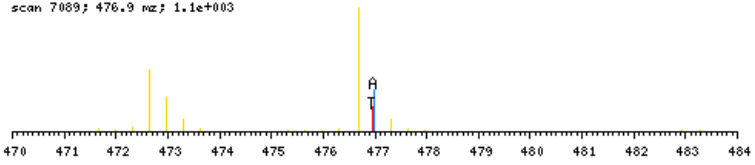

zoomed in precursor plot; T=theoretical m/z, A=acquired m/z

X-range:

-

MassTol: Y-zoom:

MassType:

AVG  MONO

Axis:

1  2

Label:

I  M  -

Ions:

a  +  2+  3+

b  +  2+  3+

c  +  2+  3+

x  +  2+  3+

y  +  2+  3+

z  +  2+  3+

hide H<sub>2</sub>O/NH<sub>3</sub>

zoom 112-122

GO

| b <sup>+</sup> | #  | AA | #  | y <sup>+</sup> | y <sup>2+</sup> |
|----------------|----|----|----|----------------|-----------------|
| 190.0868       | 1  | F  | 11 |                |                 |
| 261.1239       | 2  | A  | 10 | 1239.7426      | 620.3752        |
| 376.1509       | 3  | D  | 9  | 1168.7055      | 584.8566        |
| 532.2772       | 4  | K  | 8  | 1053.6785      | 527.3432        |
| 645.3612       | 5  | L  | 7  | 897.5522       | 449.2800        |
| 742.4140       | 6  | P  | 6  | 784.4681       | 392.7380        |
| 898.5403       | 7  | K  | 5  | 687.4154       | 344.2116        |
| 1011.6244      | 8  | I  | 4  | 531.2891       | 266.1485        |
| 1139.6829      | 9  | Q  | 3  | 418.2050       | 209.6064        |
| 1254.7099      | 10 | D  | 2  | 290.1464       | 145.5771        |
|                | 11 | R  | 1  | 175.1195       | 88.0637         |

N-term:+43.02 K(4):+156.13  
 K(7):+156.13

FAKAFR, MH+ 815.4992, m/z 408.2533  
 L OSG38 P180811 230811-s1.06036.06036.2.dta

X-range:

-

MassTol: Y-zoom:

MassType:

AVG  MONO

Axis:

1  2

Label:

I  M  -

Ions:

a  +  2+  3+

b  +  2+  3+

c  +  2+  3+

x  +  2+  3+

y  +  2+  3+

z  +  2+  3+

hide H<sub>2</sub>O/NH<sub>3</sub>

zoom 112-122

GO

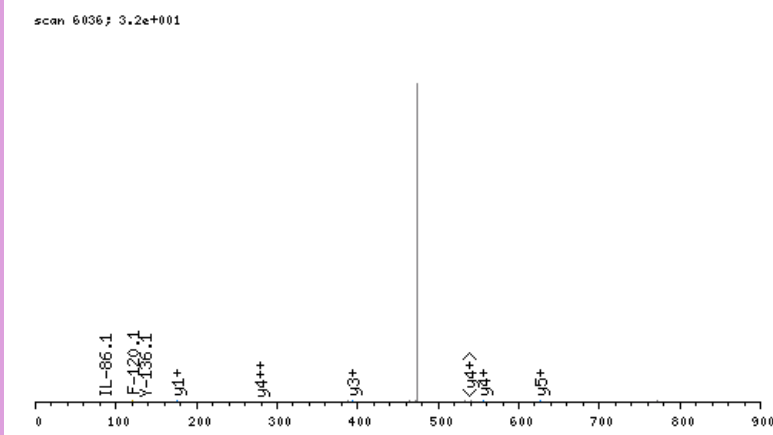

click image to zoom in; click top corners to zoom out [\[precursor±\]](#)

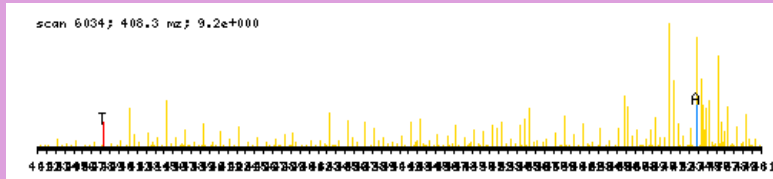

zoomed in precursor plot; T=theoretical m/z, A=acquired m/z

| b <sup>+</sup> | # | AA # | y <sup>+</sup> | y <sup>2+</sup> |
|----------------|---|------|----------------|-----------------|
| 190.0868       | 1 | F 6  |                |                 |
| 261.1239       | 2 | A 5  | 626.4202       | 313.7140        |
| 423.2820       | 3 | K 4  | 555.3831       | 278.1955        |
| 494.3191       | 4 | A 3  | 393.2250       | 197.1164        |
| 641.3876       | 5 | F 2  | 322.1879       | 161.5979        |
|                | 6 | R 1  | 175.1195       | 88.0637         |

N-term:+43.02 K(3):+162.16

FAKGKGSVPSDQAR, MH+ 1685.9612, m/z 562.6586  
 L OSG39 P180811 230811-s1.03063.03063.3.dta

X-range:

-

MassTol: Y-zoom:

MassType:

AVG  MONO

Axis:

1  2

Label:

I  M  -

Ions:

a  +  2+  3+

b  +  2+  3+

c  +  2+  3+

x  +  2+  3+

y  +  2+  3+

z  +  2+  3+

hide H<sub>2</sub>O/NH<sub>3</sub>

zoom 112-122

GO

scan 3063; 1.0e+001

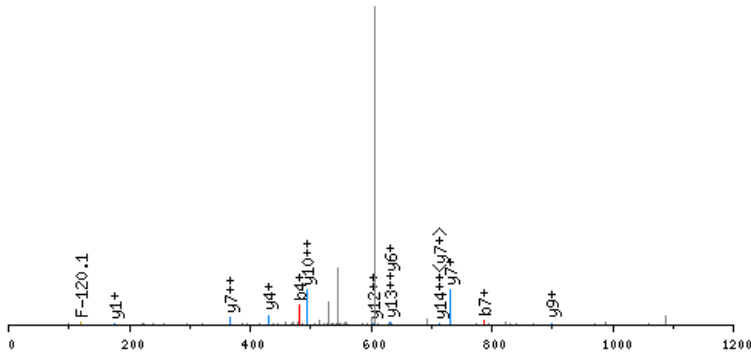

click image to zoom in; click top corners to zoom out [\[precursor±\]](#)

scan 3061; 562.7 mz; 2.6e+001

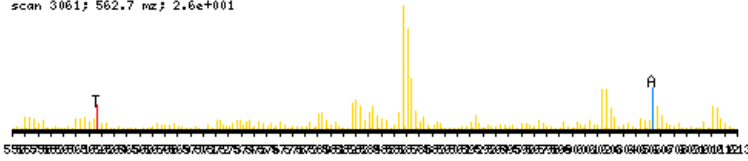

zoomed in precursor plot; T=theoretical m/z, A=acquired m/z

| b <sup>+</sup> | #  | AA | #  | y <sup>+</sup> | y <sup>2+</sup> |
|----------------|----|----|----|----------------|-----------------|
| 190.0868       | 1  | F  | 16 |                |                 |
| 261.1239       | 2  | A  | 15 | 1496.8822      | 748.9450        |
| 423.2820       | 3  | K  | 14 | 1425.8451      | 713.4264        |
| 480.3035       | 4  | G  | 13 | 1263.6870      | 632.3474        |
| 642.4616       | 5  | K  | 12 | 1206.6655      | 603.8367        |
| 699.4831       | 6  | G  | 11 | 1044.5074      | 522.7576        |
| 786.5151       | 7  | S  | 10 | 987.4859       | 494.2469        |
| 857.5522       | 8  | A  | 9  | 900.4539       | 450.7309        |
| 956.6206       | 9  | V  | 8  | 829.4168       | 415.2123        |
| 1053.6734      | 10 | P  | 7  | 730.3484       | 365.6781        |
| 1140.7054      | 11 | S  | 6  | 633.2956       | 317.1517        |
| 1255.7323      | 12 | D  | 5  | 546.2636       | 273.6357        |
| 1312.7538      | 13 | G  | 4  | 431.2367       | 216.1222        |
| 1440.8124      | 14 | Q  | 3  | 374.2152       | 187.6115        |
| 1511.8495      | 15 | A  | 2  | 246.1566       | 123.5822        |
|                | 16 | R  | 1  | 175.1195       | 88.0637         |

N-term:+43.02 K(3):+162.16  
 K(5):+162.16

FNVESVER, MH+ 1021.4955, m/z 511.2514  
 L OSG41 P180811 230811-s1.06222.06222.2.dta

X-range:

-

MassTol: Y-zoom:

MassType:

AVG  MONO

Axis:

1  2

Label:

I  M  -

Ions:

a  +  2+  3+

b  +  2+  3+

c  +  2+  3+

x  +  2+  3+

y  +  2+  3+

z  +  2+  3+

hide H<sub>2</sub>O/NH<sub>3</sub>

zoom 112-122

GO

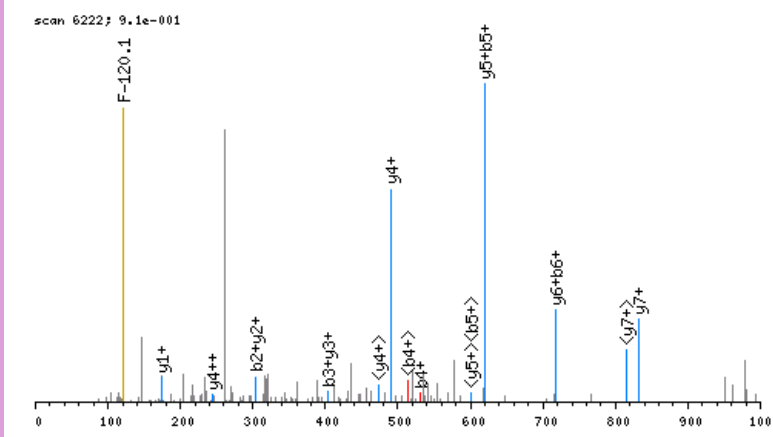

click image to zoom in; click top corners to zoom out [\[precursor±\]](#)

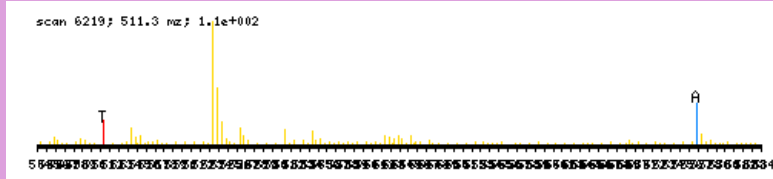

zoomed in precursor plot; T=theoretical m/z, A=acquired m/z

| b <sup>+</sup> | # | AA # | y <sup>+</sup> | y <sup>2+</sup> |
|----------------|---|------|----------------|-----------------|
| 190.0868       | 1 | F    | 8              |                 |
| 304.1297       | 2 | N    | 7              | 832.4165        |
| 403.1982       | 3 | V    | 6              | 718.3735        |
| 532.2407       | 4 | E    | 5              | 619.3051        |
| 619.2728       | 5 | S    | 4              | 490.2625        |
| 718.3412       | 6 | V    | 3              | 403.2305        |
| 847.3838       | 7 | E    | 2              | 304.1621        |
|                | 8 | R    | 1              | 175.1195        |

N-term:+43.02

FQGADSQAGKSGSR, MH+ 1465.7036, m/z 733.3554  
 L OSG37 P180811 230811-s1.03471.03471.2.dta

scan 3471; 8.8e+000

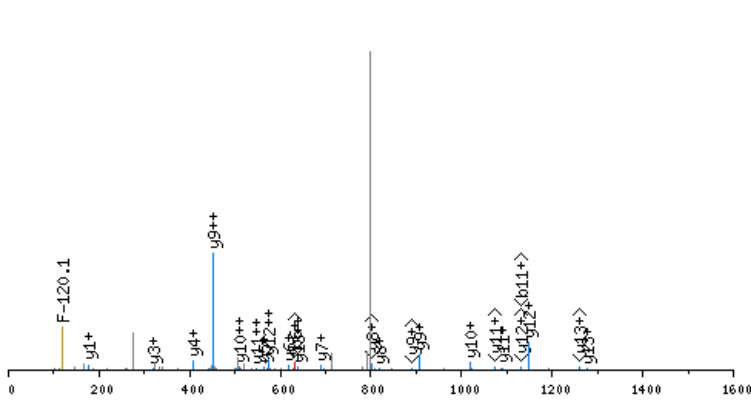

click image to zoom in; click top corners to zoom out [\[precursor±\]](#)

scan 3469; 733.4 m/z; 1.3e+002

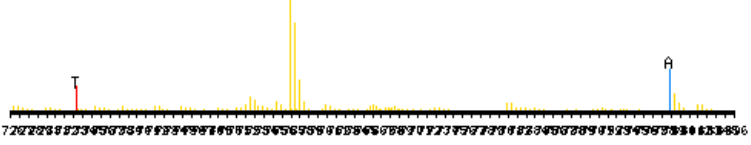

zoomed in precursor plot; T=theoretical m/z, A=acquired m/z

X-range:

-

MassTol: Y-zoom:

MassType:

AVG  MONO

Axis:

1  2

Label:

I  M  -

Ions:

a  +  2+  3+

b  +  2+  3+

c  +  2+  3+

x  +  2+  3+

y  +  2+  3+

z  +  2+  3+

hide H<sub>2</sub>O/NH<sub>3</sub>

zoom 112-122

GO

| b <sup>+</sup> | #  | AA | #  | y <sup>+</sup> | y <sup>2+</sup> |
|----------------|----|----|----|----------------|-----------------|
| 190.0868       | 1  | F  | 14 |                |                 |
| 318.1454       | 2  | Q  | 13 | 1276.6246      | 638.8162        |
| 375.1669       | 3  | G  | 12 | 1148.5660      | 574.7869        |
| 446.2040       | 4  | A  | 11 | 1091.5446      | 546.2762        |
| 561.2309       | 5  | D  | 10 | 1020.5074      | 510.7576        |
| 648.2629       | 6  | S  | 9  | 905.4805       | 453.2442        |
| 776.3215       | 7  | Q  | 8  | 818.4485       | 409.7282        |
| 847.3586       | 8  | A  | 7  | 690.3899       | 345.6989        |
| 904.3801       | 9  | G  | 6  | 619.3528       | 310.1803        |
| 1060.5064      | 10 | K  | 5  | 562.3313       | 281.6696        |
| 1147.5384      | 11 | S  | 4  | 406.2050       | 203.6064        |
| 1204.5599      | 12 | G  | 3  | 319.1730       | 160.0904        |
| 1291.5919      | 13 | S  | 2  | 262.1515       | 131.5797        |
|                | 14 | R  | 1  | 175.1195       | 88.0637         |

N-term:+43.02 K(10):+156.13

FSEQAAQR, MH+ 978.4645, m/z 489.7359  
 L OSG41 P180811 230811-s1.04086.04086.2.dta

X-range:

-

MassTol: Y-zoom:

MassType:

AVG  MONO

Axis:

1  2

Label:

I  M  -

Ions:

a  +  2+  3+

b  +  2+  3+

c  +  2+  3+

x  +  2+  3+

y  +  2+  3+

z  +  2+  3+

hide H<sub>2</sub>O/NH<sub>3</sub>

zoom 112-122

GO

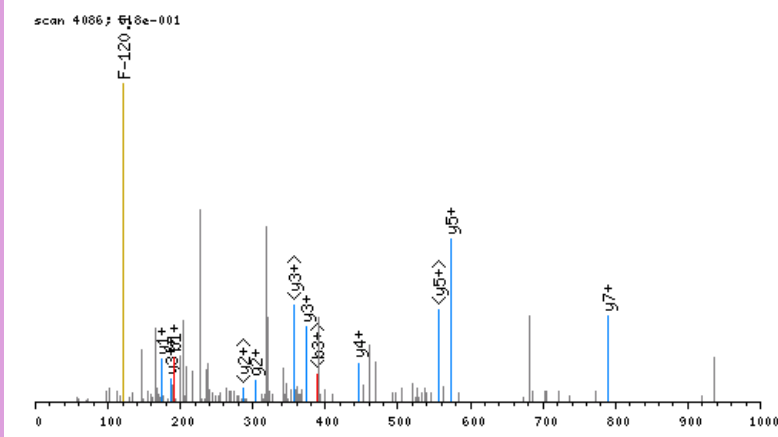

click image to zoom in; click top corners to zoom out [\[precursor±\]](#)

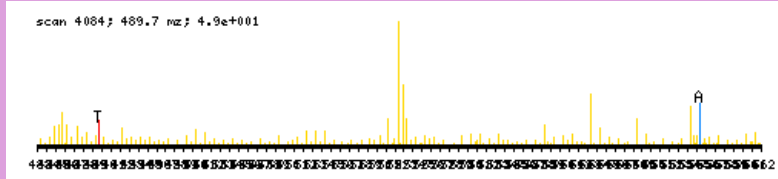

zoomed in precursor plot; T=theoretical m/z, A=acquired m/z

| b <sup>+</sup> | # | AA # | y <sup>+</sup> | y <sup>2+</sup> |
|----------------|---|------|----------------|-----------------|
| 190.0868       | 1 | F 8  |                |                 |
| 277.1188       | 2 | S 7  | 789.3855       | 395.1967        |
| 406.1614       | 3 | E 6  | 702.3535       | 351.6807        |
| 534.2200       | 4 | Q 5  | 573.3109       | 287.1594        |
| 605.2571       | 5 | A 4  | 445.2523       | 223.1301        |
| 676.2942       | 6 | A 3  | 374.2152       | 187.6115        |
| 804.3528       | 7 | Q 2  | 303.1781       | 152.0930        |
|                | 8 | R 1  | 175.1195       | 88.0637         |

N-term:+43.02

FSWVSKDAR, MH+ 1171.6324, m/z 586.3199  
 L OSG37 P180811 230811-s1.07820.07820.2.dta

X-range:

-

MassTol: Y-zoom:

MassType:

AVG  MONO

Axis:

1  2

Label:

I  M  -

Ions:

a  +  2+  3+

b  +  2+  3+

c  +  2+  3+

x  +  2+  3+

y  +  2+  3+

z  +  2+  3+

hide H<sub>2</sub>O/NH<sub>3</sub>

zoom 112-122

GO

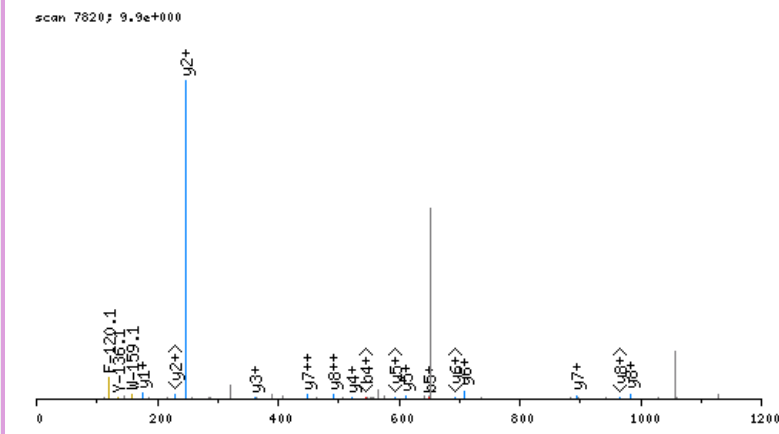

click image to zoom in; click top corners to zoom out [\[precursor±\]](#)

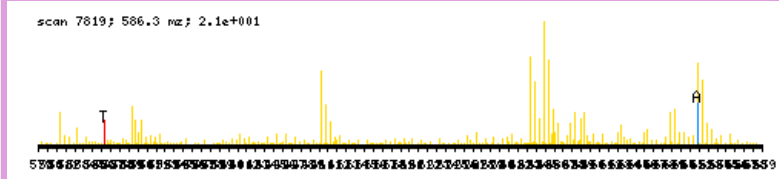

zoomed in precursor plot; T=theoretical m/z, A=acquired m/z

| b <sup>+</sup> | # | AA # | y <sup>+</sup> | y <sup>2+</sup>   |
|----------------|---|------|----------------|-------------------|
| 190.0868       | 1 | F    | 9              |                   |
| 277.1188       | 2 | S    | 8              | 982.5534 491.7806 |
| 463.1982       | 3 | W    | 7              | 895.5214 448.2646 |
| 562.2666       | 4 | V    | 6              | 709.4421 355.2250 |
| 649.2986       | 5 | S    | 5              | 610.3737 305.6908 |
| 811.4567       | 6 | K    | 4              | 523.3417 262.1747 |
| 926.4836       | 7 | D    | 3              | 361.1836 181.0957 |
| 997.5208       | 8 | A    | 2              | 246.1566 123.5822 |
|                | 9 | R    | 1              | 175.1195 88.0637  |

N-term:+43.02 K(6):+162.16



FVQEEKIFAGKVLK, MH+ 1762.0268, m/z 588.0138  
 L OSG39 P180811 230811-s1.07763.07763.3.dta

X-range:

-

MassTol: Y-zoom:

MassType:

AVG  MONO

Axis:

1  2

Label:

I  M  -

Ions:

a  +  2+  3+

b  +  2+  3+

c  +  2+  3+

x  +  2+  3+

y  +  2+  3+

z  +  2+  3+

hide H<sub>2</sub>O/NH<sub>3</sub>

zoom 112-122

GO

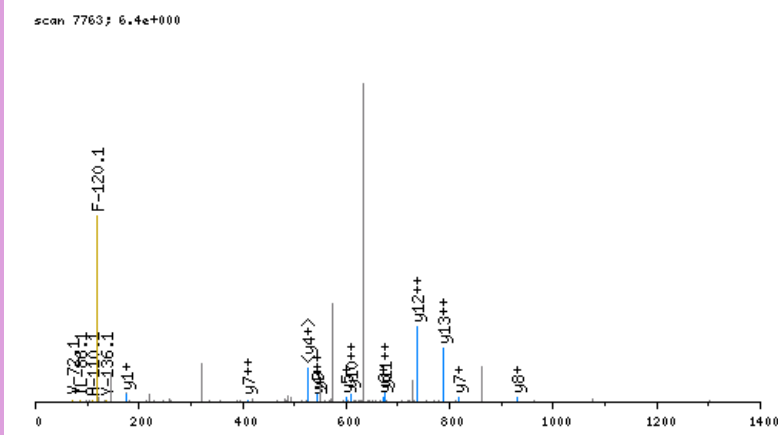

click image to zoom in; click top corners to zoom out [\[precursor±\]](#)

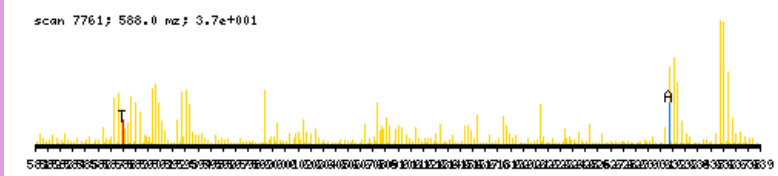

zoomed in precursor plot; T=theoretical m/z, A=acquired m/z

| b <sup>+</sup> | #  | AA | #  | y <sup>+</sup> | y <sup>2+</sup> |
|----------------|----|----|----|----------------|-----------------|
| 190.0868       | 1  | F  | 14 |                |                 |
| 289.1552       | 2  | V  | 13 | 1572.9478      | 786.9778        |
| 417.2138       | 3  | Q  | 12 | 1473.8794      | 737.4436        |
| 546.2564       | 4  | E  | 11 | 1345.8208      | 673.4143        |
| 675.2990       | 5  | E  | 10 | 1216.7782      | 608.8930        |
| 831.4253       | 6  | K  | 9  | 1087.7356      | 544.3717        |
| 944.5094       | 7  | I  | 8  | 931.6093       | 466.3086        |
| 1091.5778      | 8  | F  | 7  | 818.5253       | 409.7665        |
| 1162.6149      | 9  | A  | 6  | 671.4569       | 336.2323        |
| 1219.6363      | 10 | G  | 5  | 600.4197       | 300.7138        |
| 1375.7626      | 11 | K  | 4  | 543.3983       | 272.2031        |
| 1474.8311      | 12 | V  | 3  | 387.2720       | 194.1399        |
| 1587.9151      | 13 | L  | 2  | 288.2036       | 144.6057        |
|                | 14 | R  | 1  | 175.1195       | 88.0637         |

N-term:+43.02 K(6):+156.13  
 K(11):+156.13

GAGGALFVHR, MH+ 1026.5485, m/z 513.7779  
 L OSG38 P180811 230811-s1.04696.04696.2.dta

X-range:

-

MassTol: Y-zoom:

MassType:

AVG  MONO

Axis:

1  2

Label:

I  M  -

Ions:

a  +  2+  3+

b  +  2+  3+

c  +  2+  3+

x  +  2+  3+

y  +  2+  3+

z  +  2+  3+

hide H<sub>2</sub>O/NH<sub>3</sub>

zoom 112-122

GO

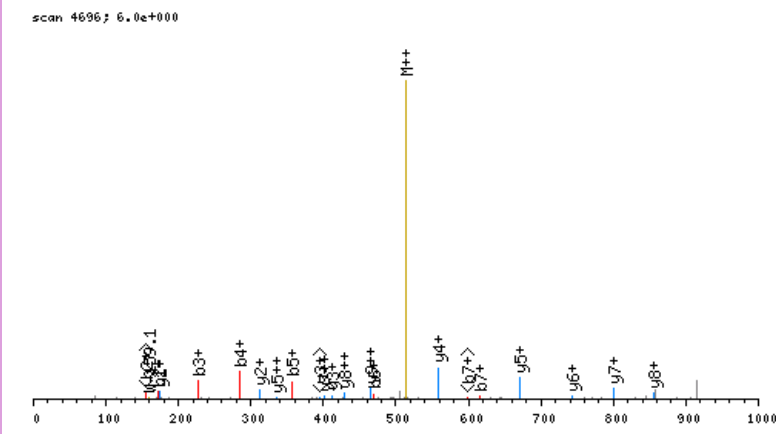

click image to zoom in; click top corners to zoom out [\[precursor±\]](#)

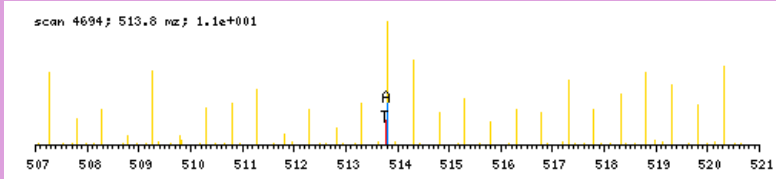

zoomed in precursor plot; T=theoretical m/z, A=acquired m/z

| b <sup>+</sup> | #  | AA | #  | y <sup>+</sup> | y <sup>2+</sup> |
|----------------|----|----|----|----------------|-----------------|
| 100.0399       | 1  | G  | 10 |                |                 |
| 171.0770       | 2  | A  | 9  | 927.5165       | 464.2621        |
| 228.0984       | 3  | G  | 8  | 856.4793       | 428.7436        |
| 285.1199       | 4  | G  | 7  | 799.4579       | 400.2329        |
| 356.1570       | 5  | A  | 6  | 742.4364       | 371.7221        |
| 469.2411       | 6  | L  | 5  | 671.3993       | 336.2036        |
| 616.3095       | 7  | F  | 4  | 558.3152       | 279.6615        |
| 715.3779       | 8  | V  | 3  | 411.2468       | 206.1273        |
| 852.4368       | 9  | H  | 2  | 312.1784       | 156.5931        |
|                | 10 | R  | 1  | 175.1195       | 88.0637         |

N-term:+43.02

GAVTDDEVIR, MH+ 1116.5537, m/z 558.7805  
 L OSG41 P180811 230811-s1.03950.03950.2.dta

X-range:

-

MassTol: Y-zoom:

MassType:

AVG  MONO

Axis:

1  2

Label:

I  M  -

Ions:

a  +  2+  3+

b  +  2+  3+

c  +  2+  3+

x  +  2+  3+

y  +  2+  3+

z  +  2+  3+

hide H<sub>2</sub>O/NH<sub>3</sub>

zoom 112-122

GO

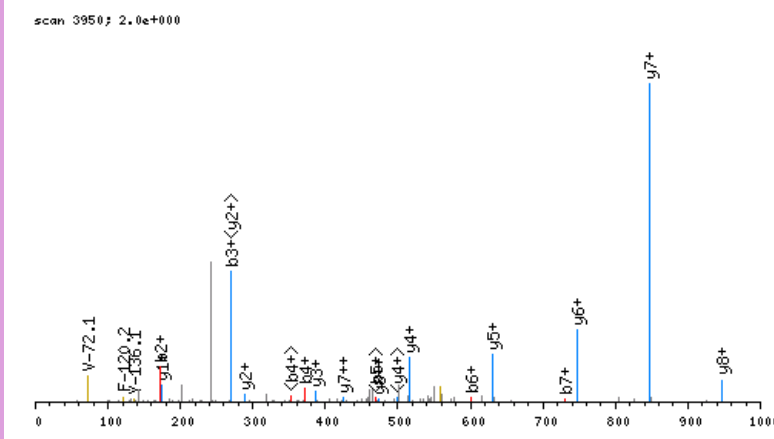

click image to zoom in; click top corners to zoom out [\[precursor±\]](#)

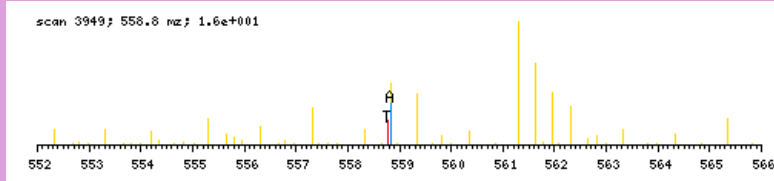

zoomed in precursor plot; T=theoretical m/z, A=acquired m/z

| b <sup>+</sup> | #  | AA | #  | y <sup>+</sup> | y <sup>2+</sup> |
|----------------|----|----|----|----------------|-----------------|
| 100.0399       | 1  | G  | 10 |                |                 |
| 171.0770       | 2  | A  | 9  | 1017.5217      | 509.2647        |
| 270.1454       | 3  | V  | 8  | 946.4846       | 473.7462        |
| 371.1931       | 4  | T  | 7  | 847.4161       | 424.2120        |
| 486.2200       | 5  | D  | 6  | 746.3685       | 373.6881        |
| 601.2470       | 6  | D  | 5  | 631.3415       | 316.1747        |
| 730.2895       | 7  | E  | 4  | 516.3146       | 258.6612        |
| 829.3580       | 8  | V  | 3  | 387.2720       | 194.1399        |
| 942.4420       | 9  | I  | 2  | 288.2036       | 144.6057        |
|                | 10 | R  | 1  | 175.1195       | 88.0637         |

N-term:+43.02

GDLPLNINIQEPR, MH+ 1520.8073, m/z 760.9073  
 L OSG41 P180811 230811-s1.07002.07002.2.dta

X-range:

-

MassTol: Y-zoom:

MassType:

AVG  MONO

Axis:

1  2

Label:

I  M  -

Ions:

a  +  2+  3+

b  +  2+  3+

c  +  2+  3+

x  +  2+  3+

y  +  2+  3+

z  +  2+  3+

hide H<sub>2</sub>O/NH<sub>3</sub>

zoom 112-122

GO

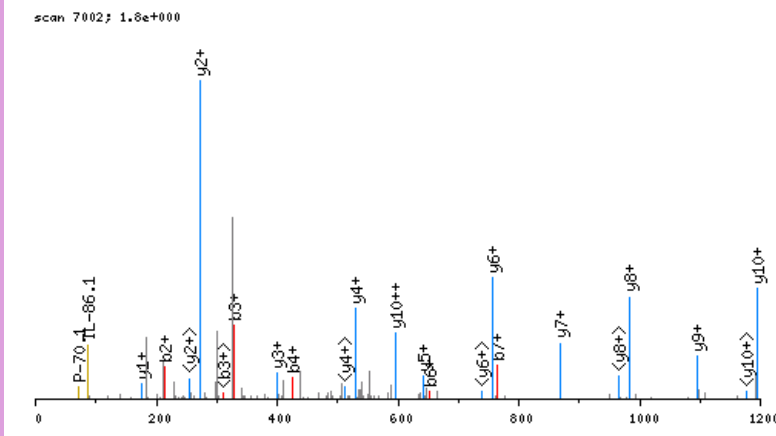

click image to zoom in; click top corners to zoom out [\[precursor±\]](#)

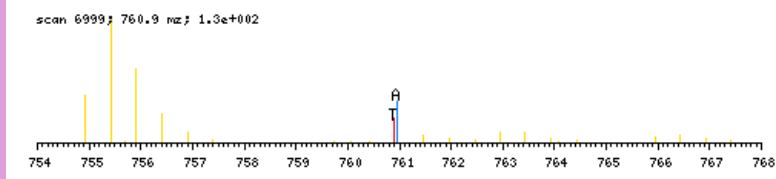

zoomed in precursor plot; T=theoretical m/z, A=acquired m/z

| b <sup>+</sup> | #  | AA # | y <sup>+</sup> | y <sup>2+</sup> |
|----------------|----|------|----------------|-----------------|
| 100.0399       | 1  | G 13 |                |                 |
| 215.0668       | 2  | D 12 | 1421.7753      | 711.3915        |
| 328.1509       | 3  | L 11 | 1306.7483      | 653.8781        |
| 425.2036       | 4  | P 10 | 1193.6642      | 597.3360        |
| 538.2877       | 5  | L 9  | 1096.6115      | 548.8097        |
| 652.3306       | 6  | N 8  | 983.5274       | 492.2676        |
| 765.4147       | 7  | I 7  | 869.4845       | 435.2462        |
| 879.4576       | 8  | N 6  | 756.4004       | 378.7041        |
| 992.5417       | 9  | I 5  | 642.3575       | 321.6827        |
| 1120.6003      | 10 | Q 4  | 529.2734       | 265.1406        |
| 1249.6429      | 11 | E 3  | 401.2149       | 201.1113        |
| 1346.6956      | 12 | P 2  | 272.1723       | 136.5900        |
|                | 13 | R 1  | 175.1195       | 88.0637         |

N-term:+43.02

GDLSHIER, MH+ 968.4801, m/z 484.7437  
 L OSG38 P180811 230811-s1.04225.04225.2.dta

X-range:

-

MassTol: Y-zoom:

MassType:

AVG  MONO

Axis:

1  2

Label:

I  M  -

Ions:

a  +  2+  3+

b  +  2+  3+

c  +  2+  3+

x  +  2+  3+

y  +  2+  3+

z  +  2+  3+

hide H<sub>2</sub>O/NH<sub>3</sub>

zoom 112-122

GO

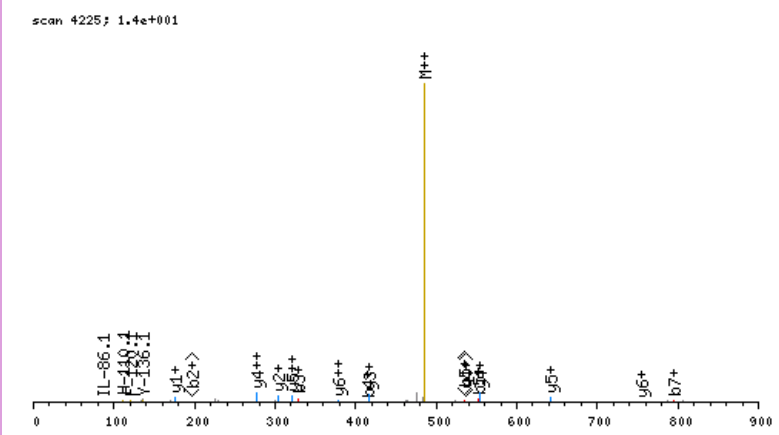

click image to zoom in; click top corners to zoom out [\[precursor±\]](#)

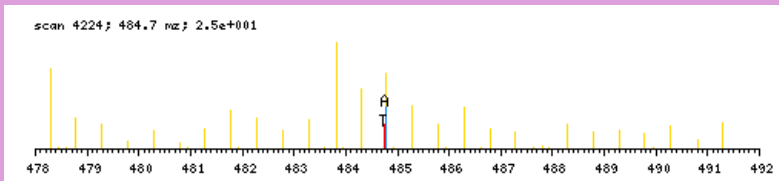

zoomed in precursor plot; T=theoretical m/z, A=acquired m/z

| b <sup>+</sup> | # | AA # | y <sup>+</sup> | y <sup>2+</sup> |
|----------------|---|------|----------------|-----------------|
| 100.0399       | 1 | G 8  |                |                 |
| 215.0668       | 2 | D 7  | 869.4481       | 435.2280        |
| 328.1509       | 3 | L 6  | 754.4212       | 377.7145        |
| 415.1829       | 4 | S 5  | 641.3371       | 321.1725        |
| 552.2418       | 5 | H 4  | 554.3051       | 277.6564        |
| 665.3259       | 6 | I 3  | 417.2462       | 209.1270        |
| 794.3685       | 7 | E 2  | 304.1621       | 152.5850        |
|                | 8 | R 1  | 175.1195       | 88.0637         |

N-term:+43.02

GEQPIFTTR, MH+ 1090.5533, m/z 545.7803  
 L OSG41 P180811 230811-s1.04393.04393.2.dta

scan 4393; 1.6e+000

X-range:

-

MassTol: Y-zoom:

MassType:

AVG  MONO

Axis:

1  2

Label:

I  M  -

Ions:

a  +  2+  3+

b  +  2+  3+

c  +  2+  3+

x  +  2+  3+

y  +  2+  3+

z  +  2+  3+

hide H<sub>2</sub>O/NH<sub>3</sub>

zoom 112-122

GO

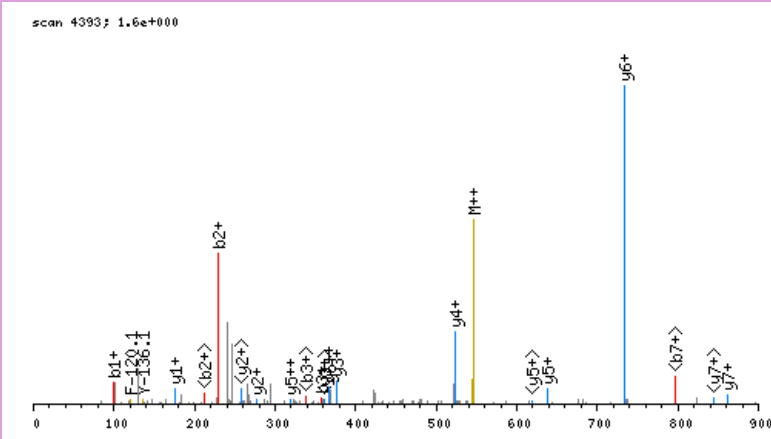

click image to zoom in; click top corners to zoom out [\[precursor±\]](#)

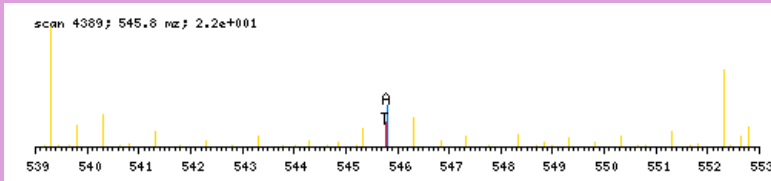

zoomed in precursor plot; T=theoretical m/z, A=acquired m/z

| b <sup>+</sup> | # | AA # | y <sup>+</sup> | y <sup>2+</sup> |
|----------------|---|------|----------------|-----------------|
| 100.0399       | 1 | G    | 9              |                 |
| 229.0825       | 2 | E    | 8              | 991.5213        |
| 357.1410       | 3 | Q    | 7              | 862.4787        |
| 454.1938       | 4 | P    | 6              | 734.4201        |
| 567.2779       | 5 | I    | 5              | 637.3673        |
| 714.3463       | 6 | F    | 4              | 524.2833        |
| 815.3940       | 7 | T    | 3              | 377.2149        |
| 916.4416       | 8 | T    | 2              | 276.1672        |
|                | 9 | R    | 1              | 175.1195        |

N-term:+43.02

GEVAGGAAPGPPR, MH+ 1177.5966, m/z 589.3019  
 L OSG41 P180811 230811-s1.02946.02946.2.dta

X-range:

-

MassTol: Y-zoom:

MassType:

AVG  MONO

Axis:

1  2

Label:

I  M  -

Ions:

a  +  2+  3+

b  +  2+  3+

c  +  2+  3+

x  +  2+  3+

y  +  2+  3+

z  +  2+  3+

hide H<sub>2</sub>O/NH<sub>3</sub>

zoom 112-122

GO

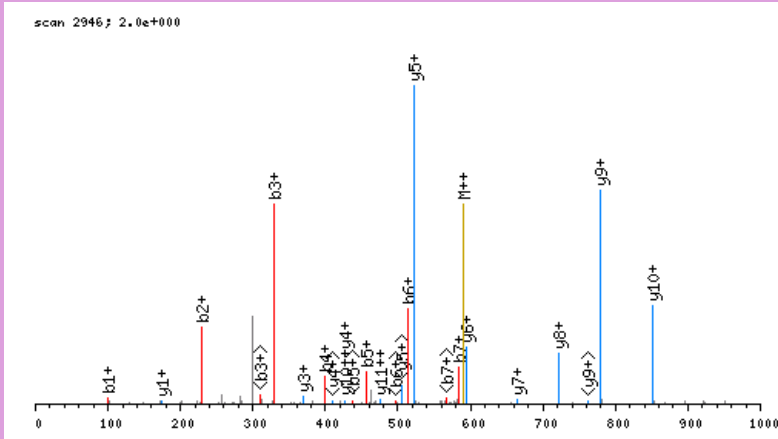

click image to zoom in; click top corners to zoom out [\[precursor±\]](#)

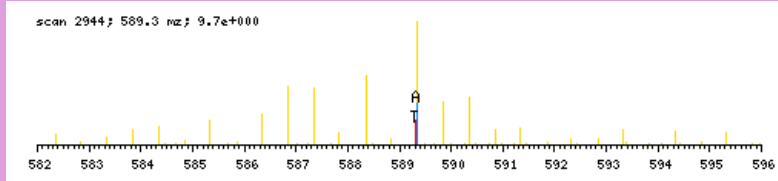

zoomed in precursor plot; T=theoretical m/z, A=acquired m/z

| b <sup>+</sup> | #  | AA # | y <sup>+</sup> | y <sup>2+</sup> |
|----------------|----|------|----------------|-----------------|
| 100.0399       | 1  | G 13 |                |                 |
| 229.0825       | 2  | E 12 | 1078.5645      | 539.7862        |
| 328.1509       | 3  | V 11 | 949.5219       | 475.2649        |
| 399.1880       | 4  | A 10 | 850.4535       | 425.7307        |
| 456.2094       | 5  | G 9  | 779.4164       | 390.2121        |
| 513.2309       | 6  | G 8  | 722.3949       | 361.7014        |
| 584.2680       | 7  | A 7  | 665.3735       | 333.1907        |
| 655.3051       | 8  | A 6  | 594.3364       | 297.6721        |
| 752.3579       | 9  | P 5  | 523.2993       | 262.1535        |
| 809.3794       | 10 | G 4  | 426.2465       | 213.6272        |
| 906.4321       | 11 | P 3  | 369.2250       | 185.1164        |
| 1003.4849      | 12 | P 2  | 272.1723       | 136.5900        |
|                | 13 | R 1  | 175.1195       | 88.0637         |

N-term:+43.02

GNSVFPILNTLQR, MH+ 1500.8175, m/z 500.9440  
 L OSG40 P180811 230811-s1.04175.04175.3.dta

X-range:

-

MassTol: Y-zoom:

MassType:

AVG  MONO

Axis:

1  2

Label:

I  M  -

Ions:

a  +  2+  3+

b  +  2+  3+

c  +  2+  3+

x  +  2+  3+

y  +  2+  3+

z  +  2+  3+

hide H<sub>2</sub>O/NH<sub>3</sub>

zoom 112-122

GO

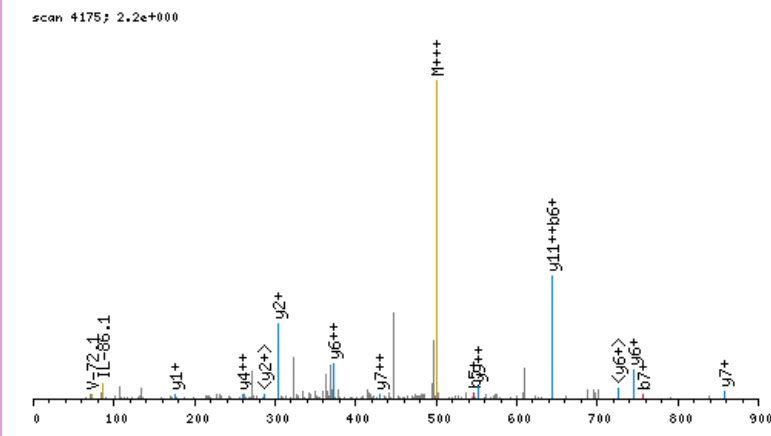

click image to zoom in; click top corners to zoom out [\[precursor±\]](#)

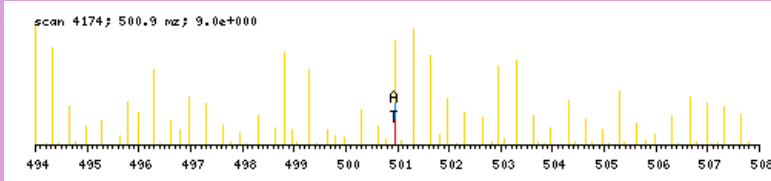

zoomed in precursor plot; T=theoretical m/z, A=acquired m/z

| b <sup>+</sup>  | #  | AA # | y <sup>+</sup>  | y <sup>2+</sup> |
|-----------------|----|------|-----------------|-----------------|
| 100.0399        | 1  | G 13 |                 |                 |
| 214.0828        | 2  | N 12 | 1401.7854       | 701.3966        |
| 301.1148        | 3  | S 11 | 1287.7425       | <b>644.3752</b> |
| 400.1832        | 4  | V 10 | 1200.7105       | 600.8591        |
| <b>547.2516</b> | 5  | F 9  | 1101.6421       | <b>551.3249</b> |
| <b>644.3044</b> | 6  | P 8  | 954.5736        | 477.7907        |
| <b>757.3885</b> | 7  | I 7  | <b>857.5209</b> | <b>429.2644</b> |
| 870.4725        | 8  | L 6  | <b>744.4368</b> | <b>372.7223</b> |
| 984.5155        | 9  | N 5  | 631.3527        | 316.1803        |
| 1085.5631       | 10 | T 4  | 517.3098        | <b>259.1588</b> |
| 1198.6472       | 11 | L 3  | 416.2621        | 208.6350        |
| 1326.7058       | 12 | Q 2  | <b>303.1781</b> | 152.0930        |
|                 | 13 | R 1  | <b>175.1195</b> | 88.0637         |

N-term:+43.02



GRVKAAAREGSR, MH+ 1327.7559, m/z 443.2568  
 L OSG37 P180811 230811-s1.02666.02666.3.dta

X-range:

-

MassTol: Y-zoom:

MassType:

AVG  MONO

Axis:

1  2

Label:

I  M  -

Ions:

a  +  2+  3+

b  +  2+  3+

c  +  2+  3+

x  +  2+  3+

y  +  2+  3+

z  +  2+  3+

hide H<sub>2</sub>O/NH<sub>3</sub>

zoom 112-122

GO

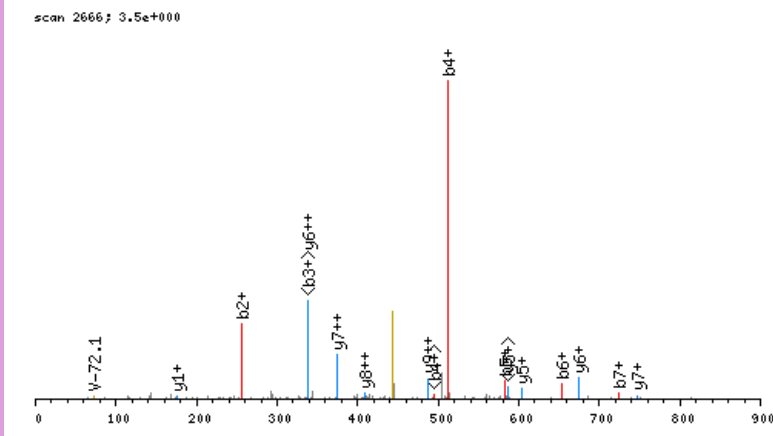

click image to zoom in; click top corners to zoom out [\[precursor±\]](#)

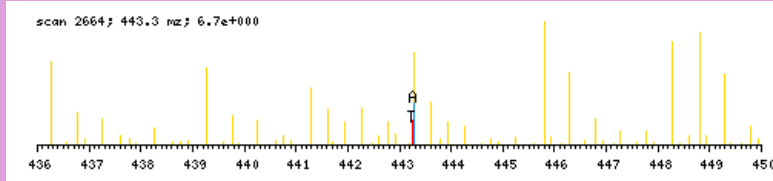

zoomed in precursor plot; T=theoretical m/z, A=acquired m/z

| b <sup>+</sup> | #  | AA # | y <sup>+</sup> | y <sup>2+</sup> |
|----------------|----|------|----------------|-----------------|
| 100.0399       | 1  | G 12 |                |                 |
| 256.1410       | 2  | R 11 | 1228.7239      | 614.8658        |
| 355.2094       | 3  | V 10 | 1072.6228      | 536.8153        |
| 511.3357       | 4  | K 9  | 973.5543       | 487.2811        |
| 582.3728       | 5  | A 8  | 817.4280       | 409.2179        |
| 653.4099       | 6  | A 7  | 746.3909       | 373.6994        |
| 724.4470       | 7  | A 6  | 675.3538       | 338.1808        |
| 880.5481       | 8  | R 5  | 604.3167       | 302.6623        |
| 1009.5907      | 9  | E 4  | 448.2156       | 224.6117        |
| 1066.6122      | 10 | G 3  | 319.1730       | 160.0904        |
| 1153.6442      | 11 | S 2  | 262.1515       | 131.5797        |
|                | 12 | R 1  | 175.1195       | 88.0637         |

N-term:+43.02 K(4):+156.13

GITALVYHEDMTATR, MH+ 1606.7535, m/z 803.8804  
 L OSG37 P180811 230811-s1.05076.05076.2.dta

X-range:

-

MassTol: Y-zoom:

MassType:

AVG  MONO

Axis:

1  2

Label:

I  M  -

Ions:

a  +  2+  3+

b  +  2+  3+

c  +  2+  3+

x  +  2+  3+

y  +  2+  3+

z  +  2+  3+

hide H<sub>2</sub>O/NH<sub>3</sub>

zoom 112-122

GO

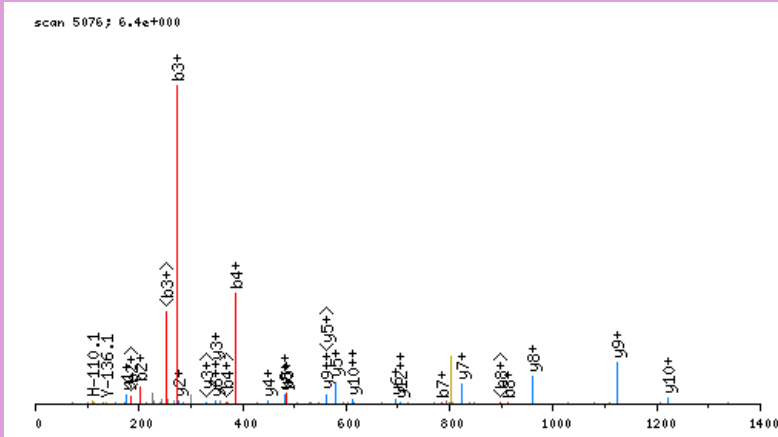

click image to zoom in; click top corners to zoom out [\[precursor±\]](#)

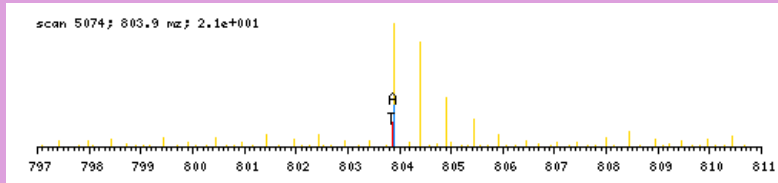

zoomed in precursor plot; T=theoretical m/z, A=acquired m/z

| b <sup>+</sup> | #  | AA # | y <sup>+</sup> | y <sup>2+</sup> |
|----------------|----|------|----------------|-----------------|
| 100.0399       | 1  | G 14 |                |                 |
| 201.0875       | 2  | T 13 | 1507.7215      | 754.3647        |
| 272.1247       | 3  | A 12 | 1406.6738      | 703.8408        |
| 385.2087       | 4  | L 11 | 1335.6367      | 668.3223        |
| 484.2771       | 5  | V 10 | 1222.5526      | 611.7802        |
| 647.3405       | 6  | Y 9  | 1123.4842      | 562.2460        |
| 784.3994       | 7  | H 8  | 960.4209       | 480.7144        |
| 913.4420       | 8  | E 7  | 823.3620       | 412.1849        |
| 1028.4689      | 9  | D 6  | 694.3194       | 347.6636        |
| 1159.5094      | 10 | M 5  | 579.2925       | 290.1501        |
| 1260.5571      | 11 | T 4  | 448.2520       | 224.6299        |
| 1331.5942      | 12 | A 3  | 347.2043       | 174.1061        |
| 1432.6419      | 13 | T 2  | 276.1672       | 138.5875        |
|                | 14 | R 1  | 175.1195       | 88.0637         |

N-term:+43.02

GTGGVDTAAVGAVFDISNADR, MH+ 2034.9732, m/z 678.9959  
 L OSG37 P180811 230811-s1.08195.08195.3.dta

X-range:

-

MassTol: Y-zoom:

MassType:

AVG  MONO

Axis:

1  2

Label:

I  M  -

Ions:

a  +  2+  3+

b  +  2+  3+

c  +  2+  3+

x  +  2+  3+

y  +  2+  3+

z  +  2+  3+

hide H<sub>2</sub>O/NH<sub>3</sub>

zoom 112-122

GO

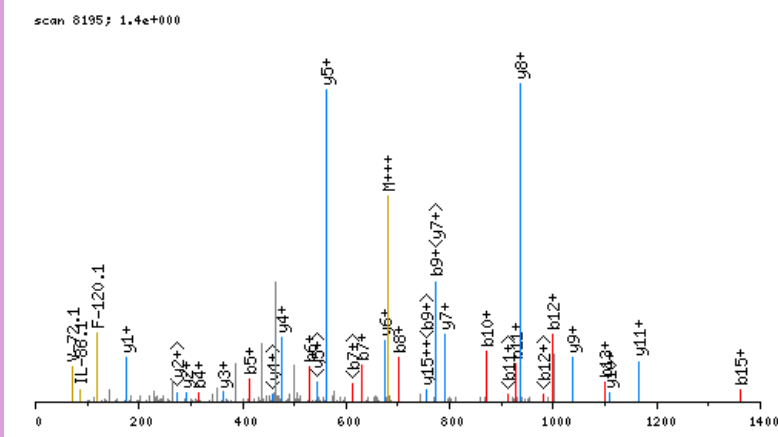

click image to zoom in; click top corners to zoom out [\[precursor±\]](#)

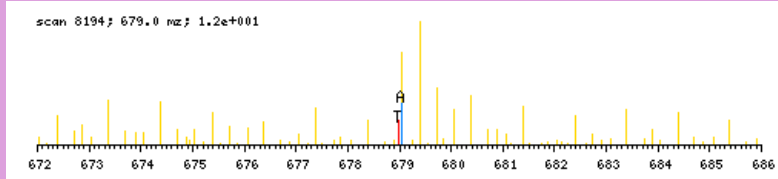

zoomed in precursor plot; T=theoretical m/z, A=acquired m/z

| b <sup>+</sup> | #  | AA # | y <sup>+</sup> | y <sup>2+</sup> |
|----------------|----|------|----------------|-----------------|
| 100.0399       | 1  | G 21 |                |                 |
| 201.0875       | 2  | T 20 | 1935.9412      | 968.4745        |
| 258.1090       | 3  | G 19 | 1834.8935      | 917.9507        |
| 315.1305       | 4  | G 18 | 1777.8721      | 889.4399        |
| 414.1989       | 5  | V 17 | 1720.8506      | 860.9292        |
| 529.2258       | 6  | D 16 | 1621.7822      | 811.3950        |
| 630.2735       | 7  | T 15 | 1506.7552      | <b>753.8815</b> |
| 701.3106       | 8  | A 14 | 1405.7076      | 703.3577        |
| 772.3477       | 9  | A 13 | 1334.6705      | 667.8391        |
| 871.4161       | 10 | V 12 | 1263.6333      | 632.3206        |
| 928.4376       | 11 | G 11 | 1164.5649      | 582.7864        |
| 999.4747       | 12 | A 10 | 1107.5435      | 554.2756        |
| 1098.5431      | 13 | V 9  | 1036.5063      | 518.7571        |
| 1245.6116      | 14 | F 8  | 937.4379       | 469.2229        |
| 1360.6385      | 15 | D 7  | 790.3695       | 395.6887        |
| 1473.7226      | 16 | I 6  | 675.3426       | 338.1752        |
| 1560.7546      | 17 | S 5  | 562.2585       | 281.6332        |
| 1674.7975      | 18 | N 4  | 475.2265       | 238.1172        |
| 1745.8346      | 19 | A 3  | 361.1836       | 181.0957        |
| 1860.8616      | 20 | D 2  | 290.1464       | 145.5771        |
|                | 21 | R 1  | 175.1195       | 88.0637         |

N-term:+43.02

GTLPKQVKIVEVGPR, MH+ 1731.1170, m/z 577.7105  
 L OSG39 P180811 230811-s1.04718.04718.3.dta

X-range:

-

MassTol: Y-zoom:

MassType:

AVG  MONO

Axis:

1  2

Label:

I  M  -

Ions:

a  +  2+  3+

b  +  2+  3+

c  +  2+  3+

x  +  2+  3+

y  +  2+  3+

z  +  2+  3+

hide H<sub>2</sub>O/NH<sub>3</sub>

zoom 112-122

GO

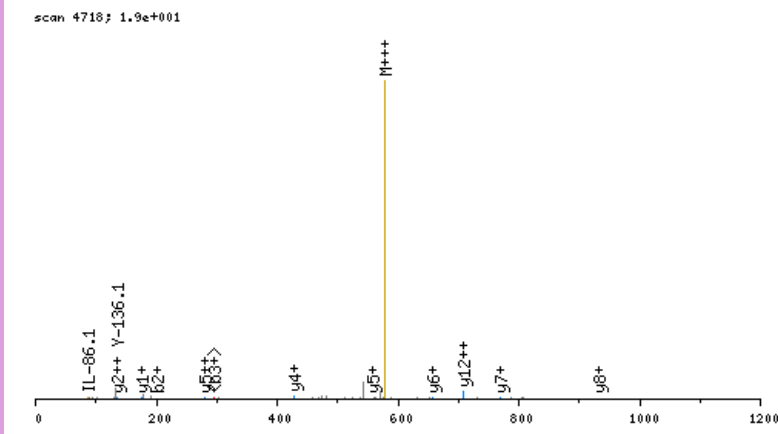

click image to zoom in; click top corners to zoom out [\[precursor±\]](#)

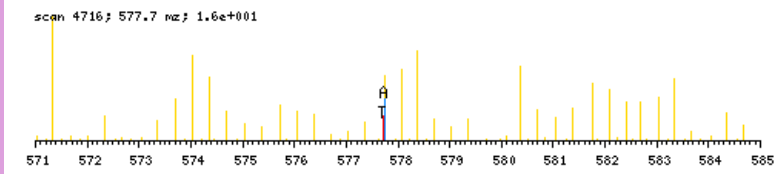

zoomed in precursor plot; T=theoretical m/z, A=acquired m/z

| b <sup>+</sup> | #  | AA # | y <sup>+</sup> | y <sup>2+</sup> |
|----------------|----|------|----------------|-----------------|
| 100.0399       | 1  | G 15 |                |                 |
| 201.0875       | 2  | T 14 | 1632.0849      | 816.5464        |
| 314.1716       | 3  | L 13 | 1531.0372      | 766.0225        |
| 411.2244       | 4  | P 12 | 1417.9532      | 709.4805        |
| 573.3825       | 5  | K 11 | 1320.9004      | 660.9541        |
| 701.4410       | 6  | Q 10 | 1158.7423      | 579.8751        |
| 800.5095       | 7  | V 9  | 1030.6837      | 515.8458        |
| 962.6676       | 8  | K 8  | 931.6153       | 466.3116        |
| 1075.7516      | 9  | I 7  | 769.4572       | 385.2325        |
| 1174.8200      | 10 | V 6  | 656.3731       | 328.6905        |
| 1303.8626      | 11 | E 5  | 557.3047       | 279.1563        |
| 1402.9310      | 12 | V 4  | 428.2621       | 214.6350        |
| 1459.9525      | 13 | G 3  | 329.1937       | 165.1008        |
| 1557.0053      | 14 | P 2  | 272.1723       | 136.5900        |
|                | 15 | R 1  | 175.1195       | 88.0637         |

N-term:+43.02 K(5):+162.16  
 K(8):+162.16

HSLATAAPVPTALAQVDR, MH+ 1859.9979, m/z 620.6708  
 L OSG36 P180811 230811-s1.05290.05290.3.dta

scan 5290; 2.0e+000

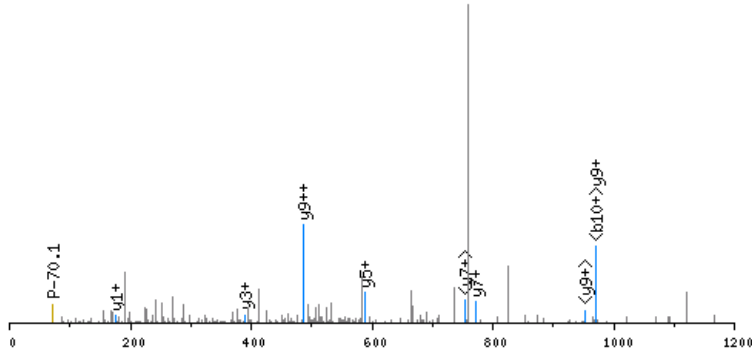

click image to zoom in; click top corners to zoom out [\[precursor±\]](#)

scan 5289; 620.7 m/z; 1.4e+001

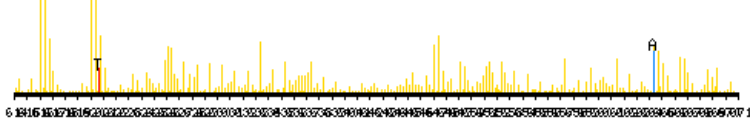

zoomed in precursor plot; T=theoretical m/z, A=acquired m/z

X-range:

-

MassTol: Y-zoom:

MassType:

AVG  MONO

Axis:

1  2

Label:

I  M  -

Ions:

a  +  2+  3+

b  +  2+  3+

c  +  2+  3+

x  +  2+  3+

y  +  2+  3+

z  +  2+  3+

hide H<sub>2</sub>O/NH<sub>3</sub>

zoom 112-122

GO

| b <sup>+</sup> | #  | AA # | y <sup>+</sup>  | y <sup>2+</sup> |
|----------------|----|------|-----------------|-----------------|
| 180.0773       | 1  | H 18 |                 |                 |
| 267.1093       | 2  | S 17 | 1680.9285       | 840.9681        |
| 380.1934       | 3  | L 16 | 1593.8964       | 797.4521        |
| 451.2305       | 4  | A 15 | 1480.8124       | 740.9101        |
| 552.2782       | 5  | T 14 | 1409.7753       | 705.3915        |
| 623.3153       | 6  | A 13 | 1308.7276       | 654.8677        |
| 694.3524       | 7  | A 12 | 1237.6905       | 619.3491        |
| 791.4052       | 8  | P 11 | 1166.6533       | 583.8306        |
| 890.4736       | 9  | V 10 | 1069.6006       | 535.3042        |
| 987.5264       | 10 | P 9  | <b>970.5322</b> | <b>485.7700</b> |
| 1088.5740      | 11 | T 8  | 873.4794        | 437.2436        |
| 1159.6112      | 12 | A 7  | <b>772.4317</b> | 386.7198        |
| 1272.6952      | 13 | L 6  | 701.3946        | 351.2012        |
| 1343.7323      | 14 | A 5  | <b>588.3105</b> | 294.6592        |
| 1471.7909      | 15 | Q 4  | 517.2734        | 259.1406        |
| 1570.8593      | 16 | V 3  | <b>389.2149</b> | 195.1113        |
| 1685.8863      | 17 | D 2  | 290.1464        | 145.5771        |
|                | 18 | R 1  | <b>175.1195</b> | 88.0637         |

N-term:+43.02

HVTSSVVGYPKFKAPPTGASQKK, MH+ 2592.5827, m/z 648.9011  
 L OSG40 P180811 230811-s1.07057.07057.4.dta

scan 7057; 6.8e-001

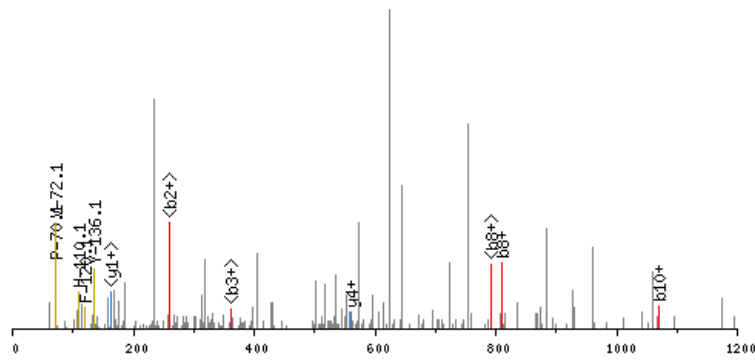

click image to zoom in; click top corners to zoom out [\[precursor±\]](#)

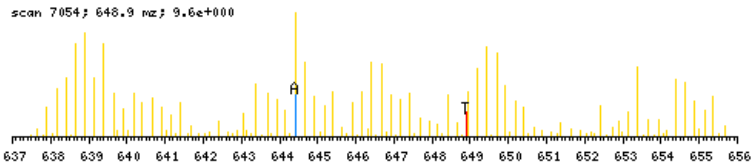

zoomed in precursor plot; T=theoretical m/z, A=acquired m/z

| b <sup>+</sup> | #  | AA # | y <sup>+</sup> | y <sup>2+</sup> |
|----------------|----|------|----------------|-----------------|
| 180.0773       | 1  | H 23 |                |                 |
| 279.1457       | 2  | V 22 | 2413.5132      | 1207.2605       |
| 380.1934       | 3  | T 21 | 2314.4448      | 1157.7263       |
| 467.2254       | 4  | S 20 | 2213.3971      | 1107.2025       |
| 554.2575       | 5  | S 19 | 2126.3651      | 1063.6865       |
| 653.3259       | 6  | V 18 | 2039.3331      | 1020.1705       |
| 752.3943       | 7  | V 17 | 1940.2647      | 970.6363        |
| 809.4158       | 8  | G 16 | 1841.1963      | 921.1020        |
| 972.4791       | 9  | Y 15 | 1784.1748      | 892.5913        |
| 1069.5318      | 10 | P 14 | 1621.1115      | 811.0596        |
| 1231.6899      | 11 | K 13 | 1524.0587      | 762.5333        |
| 1378.7584      | 12 | F 12 | 1361.9006      | 681.4542        |
| 1540.9165      | 13 | K 11 | 1214.8322      | 607.9200        |
| 1611.9536      | 14 | A 10 | 1052.6741      | 526.8410        |
| 1709.0063      | 15 | P 9  | 981.6370       | 491.3224        |
| 1806.0591      | 16 | P 8  | 884.5842       | 442.7960        |
| 1907.1068      | 17 | T 7  | 787.5315       | 394.2696        |
| 1964.1282      | 18 | G 6  | 686.4838       | 343.7458        |
| 2035.1654      | 19 | A 5  | 629.4623       | 315.2351        |
| 2122.1974      | 20 | S 4  | 558.4252       | 279.7165        |
| 2250.2560      | 21 | Q 3  | 471.3932       | 236.2005        |
| 2412.4141      | 22 | K 2  | 343.3346       | 172.1712        |
|                | 23 | K 1  | 181.1765       | 91.0922         |

N-term:+43.02 K(11):+162.16  
 K(13):+162.16 K(22):+162.16  
 K(23):+162.16

X-range:

-

MassTol: Y-zoom:

MassType:

AVG  MONO

Axis:

1  2

Label:

I  M  -

Ions:

a  +  2+  3+

b  +  2+  3+

c  +  2+  3+

x  +  2+  3+

y  +  2+  3+

z  +  2+  3+

hide H<sub>2</sub>O/NH<sub>3</sub>

zoom 112-122

GO

IQMTQSTSSLSASLGDR, MH+ 1823.8809, m/z 608.6318  
 L OSG36 P180811 230811-s1.04520.04520.3.dta

X-range:

-

MassTol: Y-zoom:

MassType:

AVG  MONO

Axis:

1  2

Label:

I  M  -

Ions:

a  +  2+  3+

b  +  2+  3+

c  +  2+  3+

x  +  2+  3+

y  +  2+  3+

z  +  2+  3+

hide H<sub>2</sub>O/NH<sub>3</sub>

zoom 112-122

GO

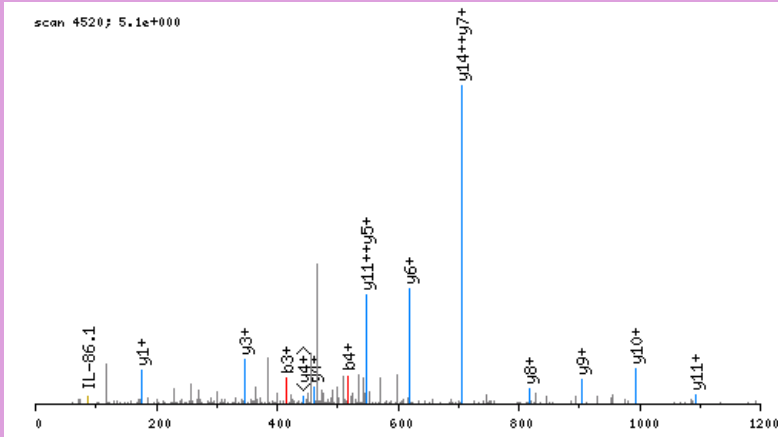

click image to zoom in; click top corners to zoom out [\[precursor±\]](#)

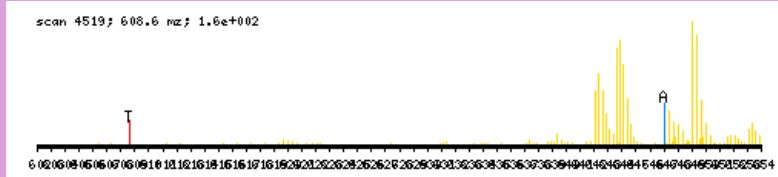

zoomed in precursor plot; T=theoretical m/z, A=acquired m/z

| b <sup>+</sup> | #  | AA | #  | y <sup>+</sup> | y <sup>2+</sup> |
|----------------|----|----|----|----------------|-----------------|
| 156.1025       | 1  | I  | 17 |                |                 |
| 284.1610       | 2  | Q  | 16 | 1668.7863      | 834.8971        |
| 415.2015       | 3  | M  | 15 | 1540.7277      | 770.8678        |
| 516.2492       | 4  | T  | 14 | 1409.6872      | 705.3475        |
| 644.3078       | 5  | Q  | 13 | 1308.6395      | 654.8237        |
| 731.3398       | 6  | S  | 12 | 1180.5810      | 590.7944        |
| 832.3875       | 7  | T  | 11 | 1093.5489      | 547.2784        |
| 919.4195       | 8  | S  | 10 | 992.5013       | 496.7545        |
| 1006.4515      | 9  | S  | 9  | 905.4692       | 453.2385        |
| 1119.5356      | 10 | L  | 8  | 818.4372       | 409.7225        |
| 1206.5676      | 11 | S  | 7  | 705.3531       | 353.1805        |
| 1277.6048      | 12 | A  | 6  | 618.3211       | 309.6645        |
| 1364.6368      | 13 | S  | 5  | 547.2840       | 274.1459        |
| 1477.7208      | 14 | L  | 4  | 460.2520       | 230.6299        |
| 1534.7423      | 15 | G  | 3  | 347.1679       | 174.0879        |
| 1649.7693      | 16 | D  | 2  | 290.1464       | 145.5771        |
|                | 17 | R  | 1  | 175.1195       | 88.0637         |

N-term:+43.02

KAGLAGTR, MH+ 849.5371, m/z 425.2722  
 L OSG38 P180811 230811-s1.03112.03112.2.dta

X-range:

-

MassTol: Y-zoom:

MassType:

AVG  MONO

Axis:

1  2

Label:

I  M  -

Ions:

a  +  2+  3+

b  +  2+  3+

c  +  2+  3+

x  +  2+  3+

y  +  2+  3+

z  +  2+  3+

hide H<sub>2</sub>O/NH<sub>3</sub>

zoom 112-122

GO

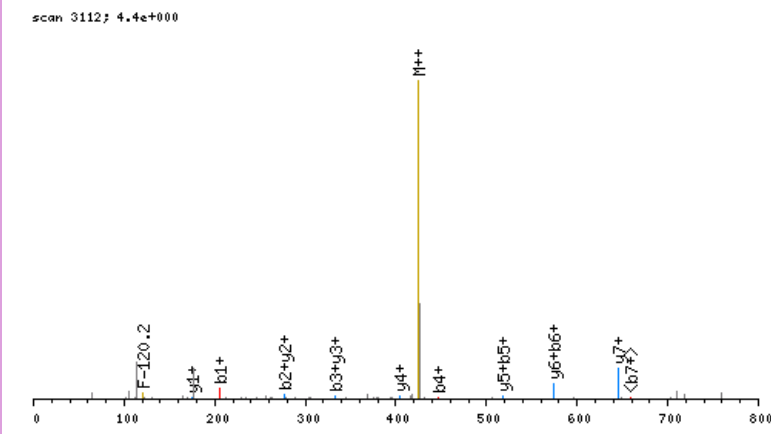

click image to zoom in; click top corners to zoom out [\[precursor±\]](#)

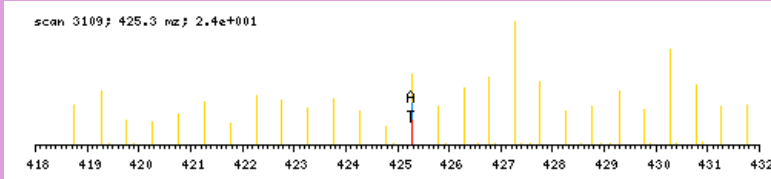

zoomed in precursor plot; T=theoretical m/z, A=acquired m/z

| b <sup>+</sup> | # | AA # | y <sup>+</sup> | y <sup>2+</sup>   |
|----------------|---|------|----------------|-------------------|
| 205.1765       | 1 | K    | 8              |                   |
| 276.2136       | 2 | A    | 7              | 645.3684 323.1881 |
| 333.2351       | 3 | G    | 6              | 574.3313 287.6696 |
| 446.3191       | 4 | L    | 5              | 517.3098 259.1588 |
| 517.3563       | 5 | A    | 4              | 404.2258 202.6168 |
| 574.3777       | 6 | G    | 3              | 333.1886 167.0982 |
| 675.4254       | 7 | T    | 2              | 276.1672 138.5875 |
|                | 8 | R    | 1              | 175.1195 88.0637  |

N-term:+43.02 K(1):+162.16



KDLFDPIIQDR, MH+ 1435.8010, m/z 479.2718  
 L OSG38 P180811 230811-s1.07385.07385.3.dta

scan 7385; 4.0e+000

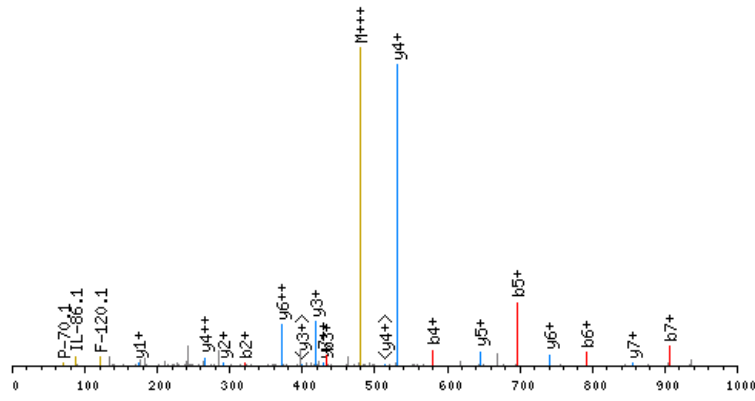

click image to zoom in; click top corners to zoom out [\[precursor±\]](#)

scan 7384; 479.3 m/z; 6.2e+000

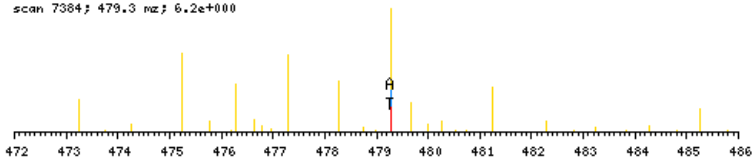

zoomed in precursor plot; T=theoretical m/z, A=acquired m/z

X-range:

-

MassTol: Y-zoom:

MassType:

AVG  MONO

Axis:

1  2

Label:

I  M  -

Ions:

a  +  2+  3+

b  +  2+  3+

c  +  2+  3+

x  +  2+  3+

y  +  2+  3+

z  +  2+  3+

hide H<sub>2</sub>O/NH<sub>3</sub>

zoom 112-122

GO

| b <sup>+</sup> | #  | AA # | y <sup>+</sup> | y <sup>2+</sup> |
|----------------|----|------|----------------|-----------------|
| 205.1765       | 1  | K 11 |                |                 |
| 320.2034       | 2  | D 10 | 1231.6323      | 616.3201        |
| 433.2875       | 3  | L 9  | 1116.6053      | 558.8066        |
| 580.3559       | 4  | F 8  | 1003.5213      | 502.2645        |
| 695.3829       | 5  | D 7  | 856.4529       | 428.7303        |
| 792.4356       | 6  | P 6  | 741.4259       | 371.2169        |
| 905.5197       | 7  | I 5  | 644.3731       | 322.6905        |
| 1018.6038      | 8  | I 4  | 531.2891       | 266.1485        |
| 1146.6623      | 9  | Q 3  | 418.2050       | 209.6064        |
| 1261.6893      | 10 | D 2  | 290.1464       | 145.5771        |
|                | 11 | R 1  | 175.1195       | 88.0637         |

N-term:+43.02 K(1):+162.16

KGELELAELKTR, MH+ 1496.9325, m/z 499.6490  
 L OSG40 P180811 230811-s1.04981.04981.3.dta

scan 4981; 7.9e-001

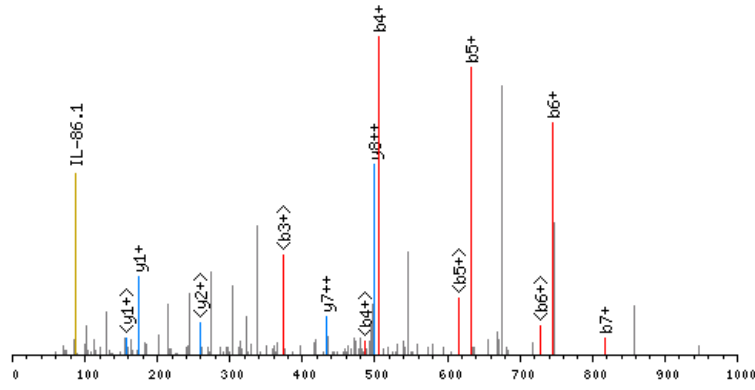

click image to zoom in; click top corners to zoom out [precursor±]

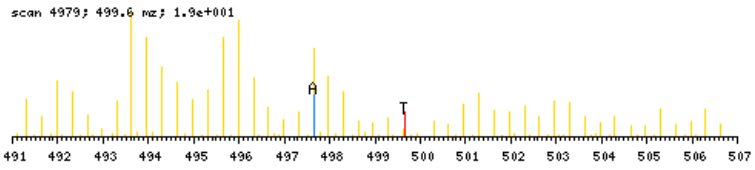

zoomed in precursor plot; T=theoretical m/z, A=acquired m/z

X-range:

-

MassTol: Y-zoom:

MassType:

AVG  MONO

Axis:

1  2

Label:

I  M  -

Ions:

a  +  2+  3+

b  +  2+  3+

c  +  2+  3+

x  +  2+  3+

y  +  2+  3+

z  +  2+  3+

hide H<sub>2</sub>O/NH<sub>3</sub>

zoom 112-122

GO

| b <sup>+</sup> | #  | AA | #  | y <sup>+</sup> | y <sup>2+</sup> |
|----------------|----|----|----|----------------|-----------------|
| 205.1765       | 1  | K  | 12 |                |                 |
| 262.1980       | 2  | G  | 11 | 1292.7638      | 646.8858        |
| 391.2406       | 3  | E  | 10 | 1235.7424      | 618.3751        |
| 504.3246       | 4  | L  | 9  | 1106.6998      | 553.8538        |
| 633.3672       | 5  | E  | 8  | 993.6157       | 497.3118        |
| 746.4513       | 6  | L  | 7  | 864.5731       | 432.7905        |
| 817.4884       | 7  | A  | 6  | 751.4891       | 376.2484        |
| 946.5310       | 8  | E  | 5  | 680.4519       | 340.7299        |
| 1059.6150      | 9  | L  | 4  | 551.4093       | 276.2086        |
| 1221.7731      | 10 | K  | 3  | 438.3253       | 219.6666        |
| 1322.8208      | 11 | T  | 2  | 276.1672       | 138.5875        |
|                | 12 | R  | 1  | 175.1195       | 88.0637         |

N-term:+43.02 K(1):+162.16  
 K(10):+162.16

KKVAVVR, MH+ 909.6886, m/z 455.3480  
 L OSG40 P180811 230811-s1.03852.03852.2.dta

scan 3852; 1.7e+000

X-range:

-

MassTol: Y-zoom:

MassType:

AVG  MONO

Axis:

1  2

Label:

I  M  -

Ions:

a  +  2+  3+

b  +  2+  3+

c  +  2+  3+

x  +  2+  3+

y  +  2+  3+

z  +  2+  3+

hide H<sub>2</sub>O/NH<sub>3</sub>

zoom 112-122

GO

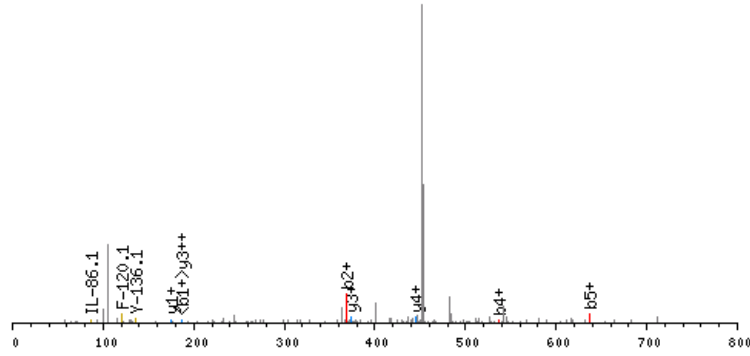

click image to zoom in; click top corners to zoom out [precursor±]

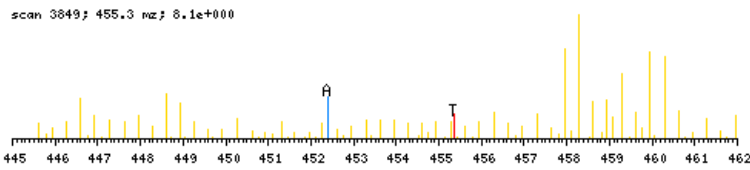

zoomed in precursor plot; T=theoretical m/z, A=acquired m/z

| b <sup>+</sup> | # | AA # | y <sup>+</sup> | y <sup>2+</sup>   |
|----------------|---|------|----------------|-------------------|
| 205.1765       | 1 | K    | 7              |                   |
| 367.3346       | 2 | K    | 6              | 705.5200 353.2639 |
| 466.4030       | 3 | V    | 5              | 543.3619 272.1848 |
| 537.4401       | 4 | A    | 4              | 444.2934 222.6506 |
| 636.5085       | 5 | V    | 3              | 373.2563 187.1321 |
| 735.5770       | 6 | V    | 2              | 274.1879 137.5979 |
|                | 7 | R    | 1              | 175.1195 88.0637  |

N-term:+43.02 K(1):+162.16  
 K(2):+162.16

KLNFSGLR, MH+ 1004.5893, m/z 502.7983  
 L OSG37 P180811 230811-s1.06865.06865.2.dta

scan 6865; 2.1e+001

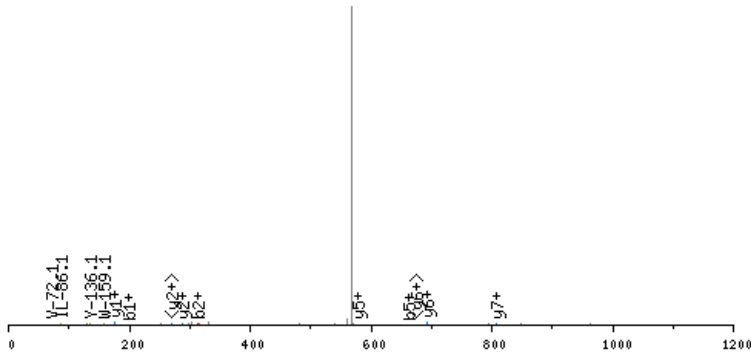

click image to zoom in; click top corners to zoom out [\[precursor±\]](#)

scan 6864; 502.8 m/z; 3.7e+002

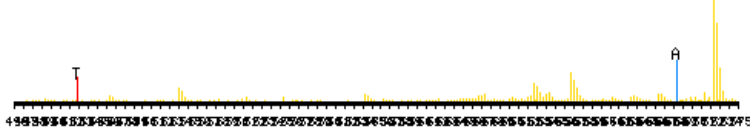

zoomed in precursor plot; T=theoretical m/z, A=acquired m/z

X-range:

-

MassTol: Y-zoom:

MassType:

AVG  MONO

Axis:

1  2

Label:

I  M  -

Ions:

a  +  2+  3+

b  +  2+  3+

c  +  2+  3+

x  +  2+  3+

y  +  2+  3+

z  +  2+  3+

hide H<sub>2</sub>O/NH<sub>3</sub>

zoom 112-122

GO

| b <sup>+</sup> | # | AA # | y <sup>+</sup> | y <sup>2+</sup> |
|----------------|---|------|----------------|-----------------|
| 199.1447       | 1 | K    | 8              |                 |
| 312.2288       | 2 | L    | 7              | 806.4525        |
| 426.2717       | 3 | N    | 6              | 693.3684        |
| 573.3401       | 4 | F    | 5              | 579.3255        |
| 660.3721       | 5 | S    | 4              | 432.2571        |
| 717.3936       | 6 | G    | 3              | 345.2250        |
| 830.4777       | 7 | L    | 2              | 288.2036        |
|                | 8 | R    | 1              | 175.1195        |

N-term:+43.02 K(1):+156.13

KNKEMDIDESLYSR, MH+ 1825.9007, m/z 609.3051  
 L OSG36 P180811 230811-s1.03583.03583.3.dta

scan 3583; 1.9e+000

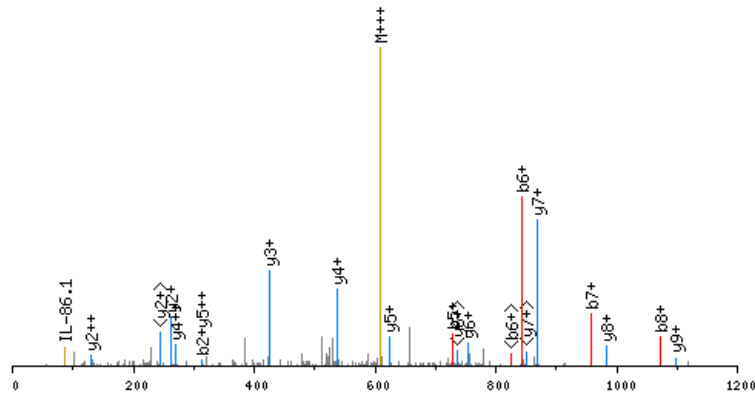

click image to zoom in; click top corners to zoom out [\[precursor±\]](#)

scan 3579; 609.3 mz; 3.7e+000

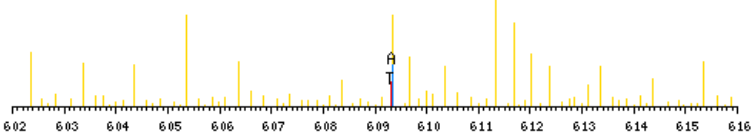

zoomed in precursor plot; T=theoretical m/z, A=acquired m/z

X-range:

-

MassTol: Y-zoom:

MassType:

AVG  MONO

Axis:

1  2

Label:

I  M  -

Ions:

a  +  2+  3+

b  +  2+  3+

c  +  2+  3+

x  +  2+  3+

y  +  2+  3+

z  +  2+  3+

hide H<sub>2</sub>O/NH<sub>3</sub>

zoom 112-122

GO

| b <sup>+</sup> | #  | AA # | y <sup>+</sup> | y <sup>2+</sup> |
|----------------|----|------|----------------|-----------------|
| 199.1447       | 1  | K 14 |                |                 |
| 313.1876       | 2  | N 13 | 1627.7638      | 814.3858        |
| 469.3139       | 3  | K 12 | 1513.7209      | 757.3643        |
| 598.3565       | 4  | E 11 | 1357.5946      | 679.3012        |
| 729.3970       | 5  | M 10 | 1228.5520      | 614.7799        |
| 844.4239       | 6  | D 9  | 1097.5115      | 549.2597        |
| 957.5080       | 7  | I 8  | 982.4846       | 491.7462        |
| 1072.5350      | 8  | D 7  | 869.4005       | 435.2042        |
| 1201.5775      | 9  | E 6  | 754.3735       | 377.6907        |
| 1288.6096      | 10 | S 5  | 625.3310       | 313.1694        |
| 1401.6936      | 11 | L 4  | 538.2989       | 269.6534        |
| 1564.7570      | 12 | Y 3  | 425.2149       | 213.1113        |
| 1651.7890      | 13 | S 2  | 262.1515       | 131.5797        |
|                | 14 | R 1  | 175.1195       | 88.0637         |

N-term:+43.02 K(1):+156.13  
 K(3):+156.13

KPPASIFAR, MH+ 1056.6206, m/z 528.8140  
 L OSG37 P180811 230811-s1.03415.03415.2.dta

scan 3415; 4.3e+001

X-range:

-

MassTol: Y-zoom:

MassType:

AVG  MONO

Axis:

1  2

Label:

I  M  -

Ions:

a  +  2+  3+

b  +  2+  3+

c  +  2+  3+

x  +  2+  3+

y  +  2+  3+

z  +  2+  3+

hide H<sub>2</sub>O/NH<sub>3</sub>

zoom 112-122

GO

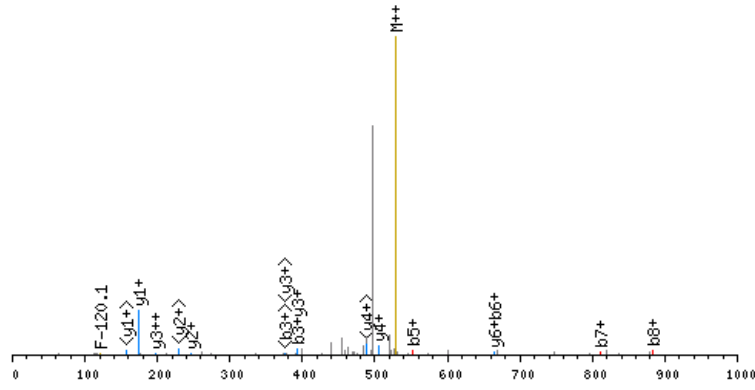

click image to zoom in; click top corners to zoom out [\[precursor±\]](#)

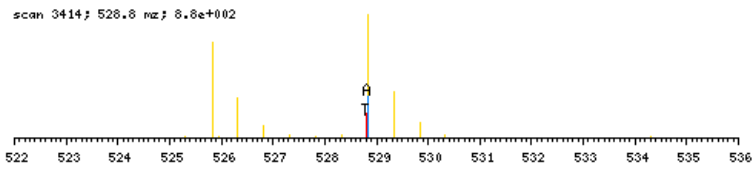

zoomed in precursor plot; T=theoretical m/z, A=acquired m/z

| b <sup>+</sup> | # | AA # | y <sup>+</sup> | y <sup>2+</sup>   |
|----------------|---|------|----------------|-------------------|
| 199.1447       | 1 | K    | 9              |                   |
| 296.1975       | 2 | P    | 8              | 858.4838 429.7458 |
| 393.2502       | 3 | P    | 7              | 761.4310 381.2194 |
| 464.2873       | 4 | A    | 6              | 664.3782 332.6930 |
| 551.3194       | 5 | S    | 5              | 593.3411 297.1745 |
| 664.4034       | 6 | I    | 4              | 506.3091 253.6585 |
| 811.4718       | 7 | F    | 3              | 393.2250 197.1164 |
| 882.5090       | 8 | A    | 2              | 246.1566 123.5822 |
|                | 9 | R    | 1              | 175.1195 88.0637  |

N-term:+43.02 K(1):+156.13

KQPKNLEGYVGFANLPNQVYR, MH+ 2545.4204, m/z 849.1450  
 L OSG39 P180811 230811-s1.06749.06749.3.dta

X-range:

0 - 0

MassTol: Y-zoom:

0. 1.

MassType:

AVG  MONO

Axis:

1  2

Label:

I  M  -

Ions:

a  +  2+  3+

b  +  2+  3+

c  +  2+  3+

x  +  2+  3+

y  +  2+  3+

z  +  2+  3+

hide H<sub>2</sub>O/NH<sub>3</sub>

zoom 112-122

GO

scan 6749; 5.1e+000

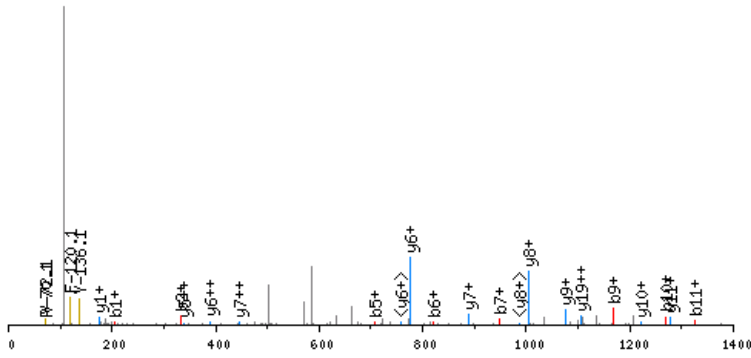

click image to zoom in; click top corners to zoom out

[precursor±]

scan 6746; 849.1 m/z; 2.3e+001

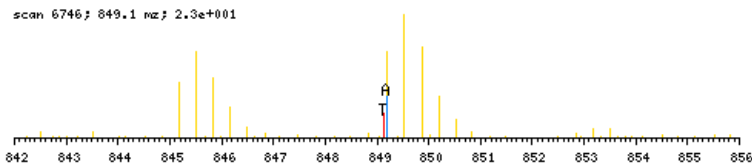

zoomed in precursor plot; T=theoretical m/z, A=acquired m/z

| b <sup>+</sup> | #  | AA | #  | y <sup>+</sup> | y <sup>2+</sup> |
|----------------|----|----|----|----------------|-----------------|
| 205.1765       | 1  | K  | 21 |                |                 |
| 333.2351       | 2  | Q  | 20 | 2341.2517      | 1171.1298       |
| 430.2878       | 3  | P  | 19 | 2213.1931      | 1107.1005       |
| 592.4459       | 4  | K  | 18 | 2116.1404      | 1058.5741       |
| 706.4889       | 5  | N  | 17 | 1953.9823      | 977.4951        |
| 819.5729       | 6  | L  | 16 | 1839.9394      | 920.4736        |
| 948.6155       | 7  | E  | 15 | 1726.8553      | 863.9316        |
| 1005.6370      | 8  | G  | 14 | 1597.8127      | 799.4103        |
| 1168.7003      | 9  | Y  | 13 | 1540.7912      | 770.8995        |
| 1267.7687      | 10 | V  | 12 | 1377.7279      | 689.3679        |
| 1324.7902      | 11 | G  | 11 | 1278.6595      | 639.8337        |
| 1471.8586      | 12 | F  | 10 | 1221.6380      | 611.3229        |
| 1542.8957      | 13 | A  | 9  | 1074.5696      | 537.7887        |
| 1656.9387      | 14 | N  | 8  | 1003.5325      | 502.2702        |
| 1770.0227      | 15 | L  | 7  | 889.4896       | 445.2487        |
| 1867.0755      | 16 | P  | 6  | 776.4055       | 388.7067        |
| 1981.1184      | 17 | N  | 5  | 679.3527       | 340.1803        |
| 2109.1770      | 18 | Q  | 4  | 565.3098       | 283.1588        |
| 2208.2454      | 19 | V  | 3  | 437.2512       | 219.1295        |
| 2371.3087      | 20 | Y  | 2  | 338.1828       | 169.5953        |
|                | 21 | R  | 1  | 175.1195       | 88.0637         |

N-term:+43.02 K(1):+162.16  
 K(4):+162.16

LADELGGLWENSR, MH+ 1501.7287, m/z 501.2478  
 L OSG37 P180811 230811-s1.02108.02108.3.dta

X-range:

-

MassTol: Y-zoom:

MassType:

AVG  MONO

Axis:

1  2

Label:

I  M  -

Ions:

a  +  2+  3+

b  +  2+  3+

c  +  2+  3+

x  +  2+  3+

y  +  2+  3+

z  +  2+  3+

hide H<sub>2</sub>O/NH<sub>3</sub>

zoom 112-122

GO

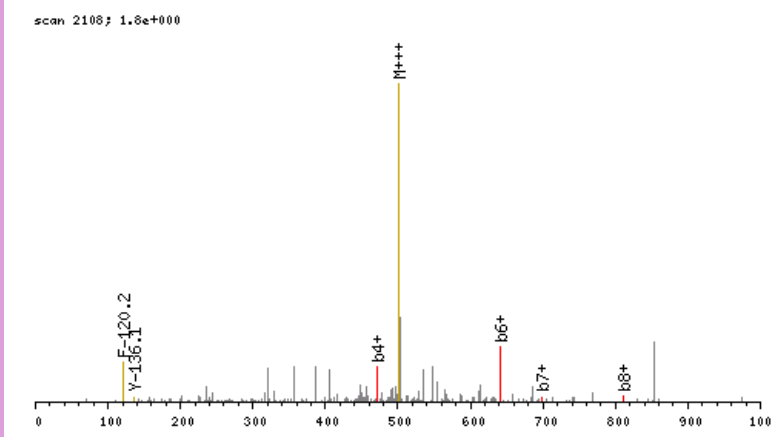

click image to zoom in; click top corners to zoom out [\[precursor±\]](#)

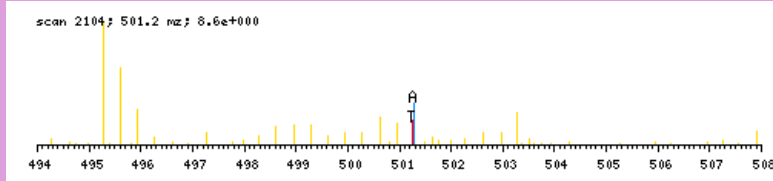

zoomed in precursor plot; T=theoretical m/z, A=acquired m/z

| b <sup>+</sup> | #  | AA # | y <sup>+</sup> | y <sup>2+</sup> |
|----------------|----|------|----------------|-----------------|
| 156.1025       | 1  | L 13 |                |                 |
| 227.1396       | 2  | A 12 | 1346.6341      | 673.8209        |
| 342.1665       | 3  | D 11 | 1275.5970      | 638.3024        |
| 471.2091       | 4  | E 10 | 1160.5700      | 580.7889        |
| 584.2932       | 5  | L 9  | 1031.5274      | 516.2676        |
| 641.3146       | 6  | G 8  | 918.4434       | 459.7256        |
| 698.3361       | 7  | G 7  | 861.4219       | 431.2149        |
| 811.4202       | 8  | L 6  | 804.4004       | 402.7041        |
| 997.4995       | 9  | W 5  | 691.3164       | 346.1621        |
| 1126.5421      | 10 | E 4  | 505.2370       | 253.1224        |
| 1240.5850      | 11 | N 3  | 376.1945       | 188.6011        |
| 1327.6170      | 12 | S 2  | 262.1515       | 131.5797        |
|                | 13 | R 1  | 175.1195       | 88.0637         |

N-term:+43.02



LGGLGKLAEEGLAHR, MH+ 1538.9231, m/z 513.6459  
 L OSG39 P180811 230811-s1.07717.07717.3.dta

X-range:

-

MassTol: Y-zoom:

MassType:

AVG  MONO

Axis:

1  2

Label:

I  M  -

Ions:

a  +  2+  3+

b  +  2+  3+

c  +  2+  3+

x  +  2+  3+

y  +  2+  3+

z  +  2+  3+

hide H<sub>2</sub>O/NH<sub>3</sub>

zoom 112-122

GO

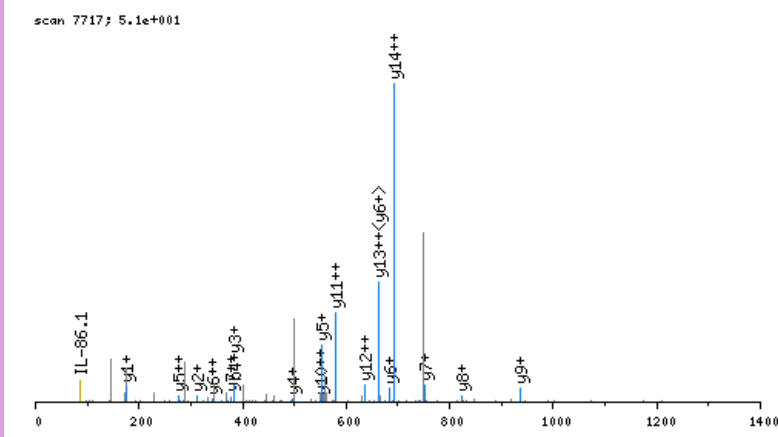

click image to zoom in; click top corners to zoom out [\[precursor±\]](#)

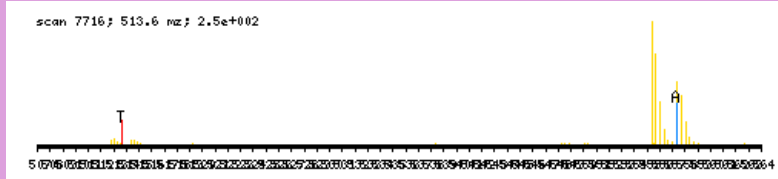

zoomed in precursor plot; T=theoretical m/z, A=acquired m/z

| b <sup>+</sup> | #  | AA # | y <sup>+</sup> | y <sup>2+</sup> |
|----------------|----|------|----------------|-----------------|
| 156.1025       | 1  | L 15 |                |                 |
| 213.1239       | 2  | G 14 | 1383.8285      | 692.4182        |
| 270.1454       | 3  | G 13 | 1326.8070      | 663.9074        |
| 383.2295       | 4  | L 12 | 1269.7856      | 635.3967        |
| 440.2509       | 5  | G 11 | 1156.7015      | 578.8547        |
| 602.4090       | 6  | K 10 | 1099.6800      | 550.3439        |
| 715.4931       | 7  | L 9  | 937.5219       | 469.2649        |
| 786.5302       | 8  | A 8  | 824.4379       | 412.7228        |
| 857.5673       | 9  | A 7  | 753.4008       | 377.2043        |
| 986.6099       | 10 | E 6  | 682.3636       | 341.6857        |
| 1043.6314      | 11 | G 5  | 553.3211       | 277.1644        |
| 1156.7154      | 12 | L 4  | 496.2996       | 248.6537        |
| 1227.7525      | 13 | A 3  | 383.2155       | 192.1117        |
| 1364.8115      | 14 | H 2  | 312.1784       | 156.5931        |
|                | 15 | R 1  | 175.1195       | 88.0637         |

N-term:+43.02 K(6):+162.16

LGSFGKAER, MH+ 1040.5953, m/z 520.8013  
 L OSG37 P180811 230811-s1.05038.05038.2.dta

X-range:

-

MassTol: Y-zoom:

MassType:

AVG  MONO

Axis:

1  2

Label:

I  M  -

Ions:

a  +  2+  3+

b  +  2+  3+

c  +  2+  3+

x  +  2+  3+

y  +  2+  3+

z  +  2+  3+

hide H<sub>2</sub>O/NH<sub>3</sub>

zoom 112-122

GO

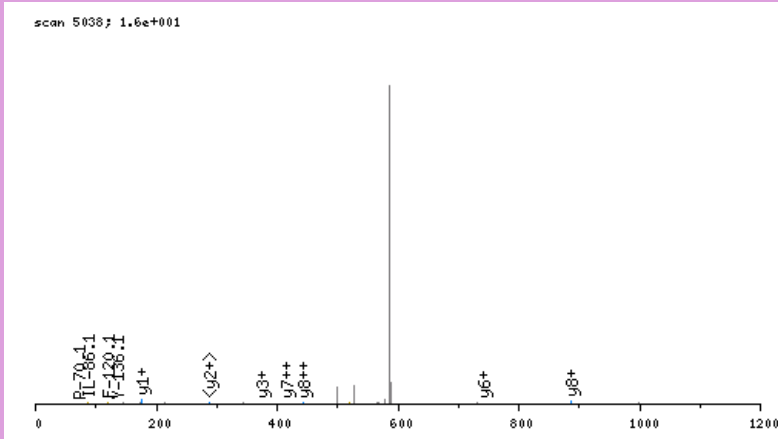

click image to zoom in; click top corners to zoom out [\[precursor±\]](#)

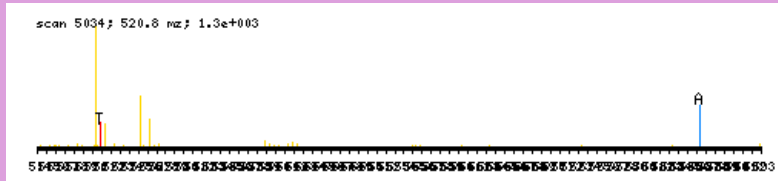

zoomed in precursor plot; T=theoretical m/z, A=acquired m/z

| b <sup>+</sup> | # | AA # | y <sup>+</sup> | y <sup>2+</sup> |
|----------------|---|------|----------------|-----------------|
| 156.1025       | 1 | L 9  |                |                 |
| 213.1239       | 2 | G 8  | 885.5007       | 443.2543        |
| 300.1560       | 3 | S 7  | 828.4792       | 414.7435        |
| 357.1774       | 4 | G 6  | 741.4472       | 371.2275        |
| 504.2458       | 5 | F 5  | 684.4257       | 342.7168        |
| 666.4039       | 6 | K 4  | 537.3573       | 269.1826        |
| 737.4410       | 7 | A 3  | 375.1992       | 188.1035        |
| 866.4836       | 8 | E 2  | 304.1621       | 152.5850        |
|                | 9 | R 1  | 175.1195       | 88.0637         |

N-term:+43.02 K(6):+162.16

LKPQPPQOTSQPQQPPPTQQAVAR, MH+ 2720.4484, m/z 680.8676  
 L OSG36 P180811 230811-s1.03378.03378.4.dta

scan 3378; 2.2e+000

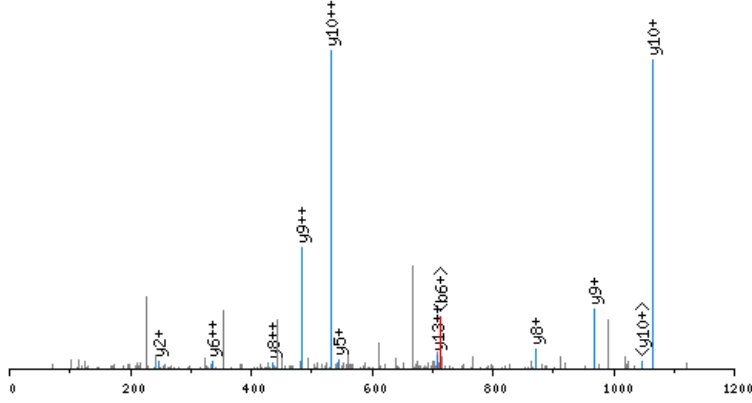

click image to zoom in; click top corners to zoom out [precursor±]

scan 3374; 680.9 m/z; 1.2e+001

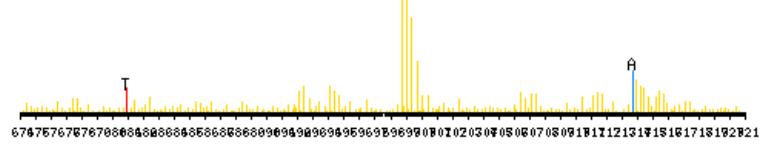

zoomed in precursor plot; T=theoretical m/z, A=acquired m/z

X-range:

-

MassTol: Y-zoom:

MassType:

AVG  MONO

Axis:

1  2

Label:

I  M  -

Ions:

a  +  2+  3+

b  +  2+  3+

c  +  2+  3+

x  +  2+  3+

y  +  2+  3+

z  +  2+  3+

hide H<sub>2</sub>O/NH<sub>3</sub>

zoom 112-122

GO

| b <sup>+</sup> | #  | AA # | y <sup>+</sup> | y <sup>2+</sup> |
|----------------|----|------|----------------|-----------------|
| 156.1025       | 1  | L 24 |                |                 |
| 312.2288       | 2  | K 23 | 2565.3538      | 1283.1808       |
| 409.2815       | 3  | P 22 | 2409.2275      | 1205.1177       |
| 537.3401       | 4  | Q 21 | 2312.1747      | 1156.5913       |
| 634.3929       | 5  | P 20 | 2184.1162      | 1092.5620       |
| 731.4456       | 6  | P 19 | 2087.0634      | 1044.0356       |
| 859.5042       | 7  | Q 18 | 1990.0106      | 995.5092        |
| 987.5628       | 8  | Q 17 | 1861.9520      | 931.4799        |
| 1088.6105      | 9  | T 16 | 1733.8935      | 867.4506        |
| 1175.6425      | 10 | S 15 | 1632.8458      | 816.9268        |
| 1303.7011      | 11 | Q 14 | 1545.8138      | 773.4108        |
| 1400.7538      | 12 | P 13 | 1417.7552      | 709.3815        |
| 1528.8124      | 13 | Q 12 | 1320.7024      | 660.8551        |
| 1656.8710      | 14 | Q 11 | 1192.6438      | 596.8258        |
| 1753.9238      | 15 | P 10 | 1064.5853      | 532.7965        |
| 1850.9765      | 16 | P 9  | 967.5325       | 484.2702        |
| 1948.0293      | 17 | P 8  | 870.4797       | 435.7438        |
| 2049.0770      | 18 | T 7  | 773.4270       | 387.2174        |
| 2177.1355      | 19 | Q 6  | 672.3793       | 336.6936        |
| 2305.1941      | 20 | Q 5  | 544.3207       | 272.6643        |
| 2376.2312      | 21 | A 4  | 416.2621       | 208.6350        |
| 2475.2996      | 22 | V 3  | 345.2250       | 173.1164        |
| 2546.3368      | 23 | A 2  | 246.1566       | 123.5822        |
|                | 24 | R 1  | 175.1195       | 88.0637         |

N-term:+43.02 K(2):+156.13

LNMWKVR, MH+ 1022.6034, m/z 511.8053  
 L OSG37 P180811 230811-s1.07901.07901.2.dta

scan 7901; 9.2e+000

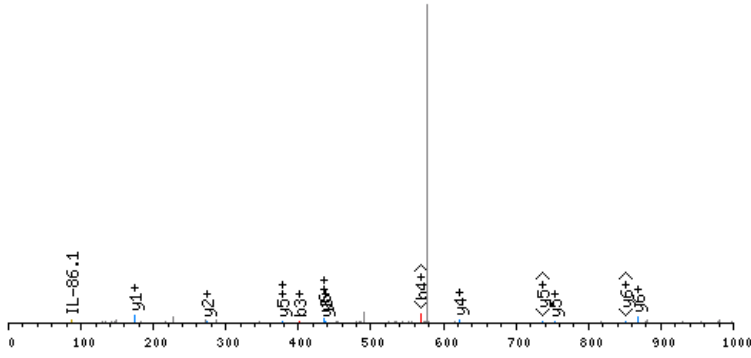

scan 7899; 511.8 m/z; 1.9e+002

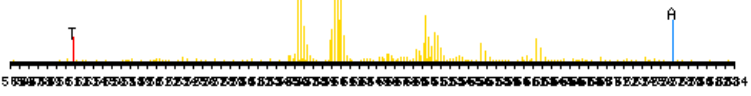

zoomed in precursor plot; T=theoretical m/z, A=acquired m/z

X-range:

-

MassTol: Y-zoom:

MassType:

AVG  MONO

Axis:

1  2

Label:

I  M  -

Ions:

a  +  2+  3+

b  +  2+  3+

c  +  2+  3+

x  +  2+  3+

y  +  2+  3+

z  +  2+  3+

hide H<sub>2</sub>O/NH<sub>3</sub>

zoom 112-122

GO

| b <sup>+</sup> | # | AA # | y <sup>+</sup> | y <sup>2+</sup>   |
|----------------|---|------|----------------|-------------------|
| 156.1025       | 1 | L    | 7              |                   |
| 270.1454       | 2 | N    | 6              | 867.5087 434.2583 |
| 401.1859       | 3 | M    | 5              | 753.4658 377.2368 |
| 587.2652       | 4 | W    | 4              | 622.4253 311.7166 |
| 749.4233       | 5 | K    | 3              | 436.3460 218.6769 |
| 848.4917       | 6 | V    | 2              | 274.1879 137.5979 |
|                | 7 | R    | 1              | 175.1195 88.0637  |

N-term:+43.02 K(5):+162.16

LSEAEPR, MH+ 972.4638, m/z 486.7356  
 L OSG41 P180811 230811-s1.04368.04368.2.dta

scan 4368; 5.2e-001

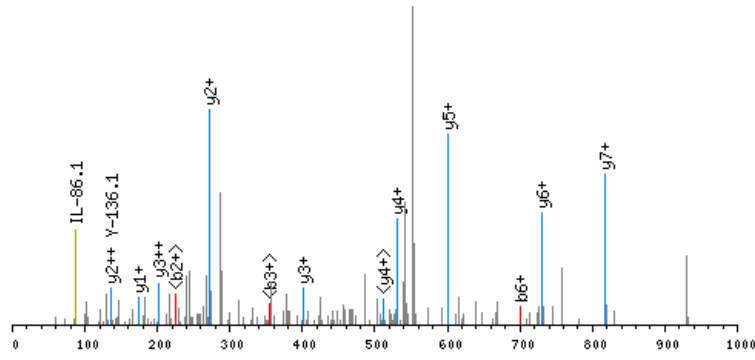

click image to zoom in; click top corners to zoom out [precursor±]

scan 4364; 486.7 m/z; 5.8e+001

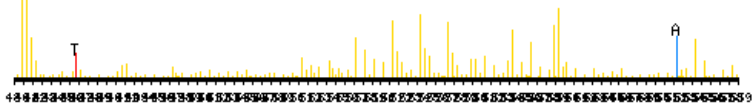

zoomed in precursor plot; T=theoretical m/z, A=acquired m/z

X-range:

-

MassTol: Y-zoom:

MassType:

AVG  MONO

Axis:

1  2

Label:

I  M  -

Ions:

a  +  2+  3+

b  +  2+  3+

c  +  2+  3+

x  +  2+  3+

y  +  2+  3+

z  +  2+  3+

hide H<sub>2</sub>O/NH<sub>3</sub>

zoom 112-122

GO

| b <sup>+</sup> | # | AA # | y <sup>+</sup> | y <sup>2+</sup> |
|----------------|---|------|----------------|-----------------|
| 156.1025       | 1 | L 8  |                |                 |
| 243.1345       | 2 | S 7  | 817.3692       | 409.1885        |
| 372.1771       | 3 | E 6  | 730.3372       | 365.6725        |
| 443.2142       | 4 | A 5  | 601.2946       | 301.1512        |
| 572.2568       | 5 | E 4  | 530.2575       | 265.6326        |
| 701.2994       | 6 | E 3  | 401.2149       | 201.1113        |
| 798.3521       | 7 | P 2  | 272.1723       | 136.5900        |
|                | 8 | R 1  | 175.1195       | 88.0637         |

N-term:+43.02

LSFQYPDVYR, MH+ 1329.6479, m/z 665.3276  
 L OSG41 P180811 230811-s1.07367.07367.2.dta

scan 7367; 1.8e+000

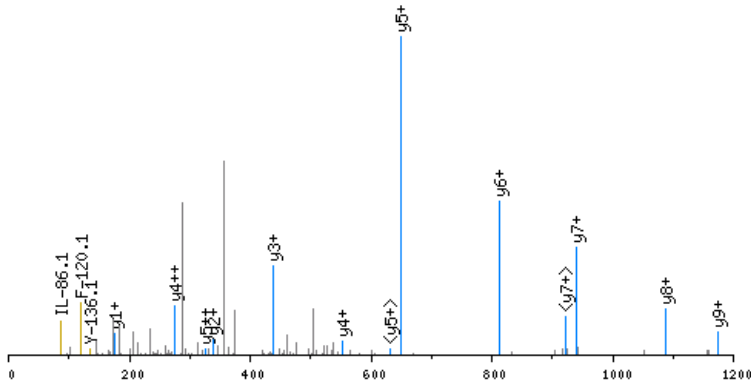

click image to zoom in; click top corners to zoom out [\[precursor±\]](#)

scan 7364; 665.3 m/z; 1.9e+001

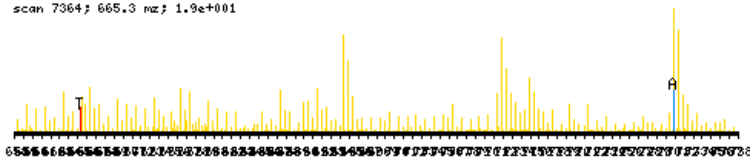

zoomed in precursor plot; T=theoretical m/z, A=acquired m/z

X-range:

-

MassTol: Y-zoom:

MassType:

AVG  MONO

Axis:

1  2

Label:

I  M  -

Ions:

a  +  2+  3+

b  +  2+  3+

c  +  2+  3+

x  +  2+  3+

y  +  2+  3+

z  +  2+  3+

hide H<sub>2</sub>O/NH<sub>3</sub>

zoom 112-122

GO

| b <sup>+</sup> | #  | AA # | y <sup>+</sup> | y <sup>2+</sup> |
|----------------|----|------|----------------|-----------------|
| 156.1025       | 1  | L    | 10             |                 |
| 243.1345       | 2  | S    | 9              | 1174.5533       |
| 390.2029       | 3  | F    | 8              | 1087.5213       |
| 518.2615       | 4  | Q    | 7              | 940.4529        |
| 681.3248       | 5  | Y    | 6              | 812.3943        |
| 778.3776       | 6  | P    | 5              | 649.3310        |
| 893.4045       | 7  | D    | 4              | 552.2782        |
| 992.4729       | 8  | V    | 3              | 437.2512        |
| 1155.5363      | 9  | Y    | 2              | 338.1828        |
|                | 10 | R    | 1              | 175.1195        |

N-term:+43.02

LYLGHNYVTAIR, MH+ 1461.7854, m/z 487.9333  
 L OSG38 P180811 230811-s1.07271.07271.3.dta

X-range:

-

MassTol: Y-zoom:

MassType:

AVG  MONO

Axis:

1  2

Label:

I  M  -

Ions:

a  +  2+  3+

b  +  2+  3+

c  +  2+  3+

x  +  2+  3+

y  +  2+  3+

z  +  2+  3+

hide H<sub>2</sub>O/NH<sub>3</sub>

zoom 112-122

GO

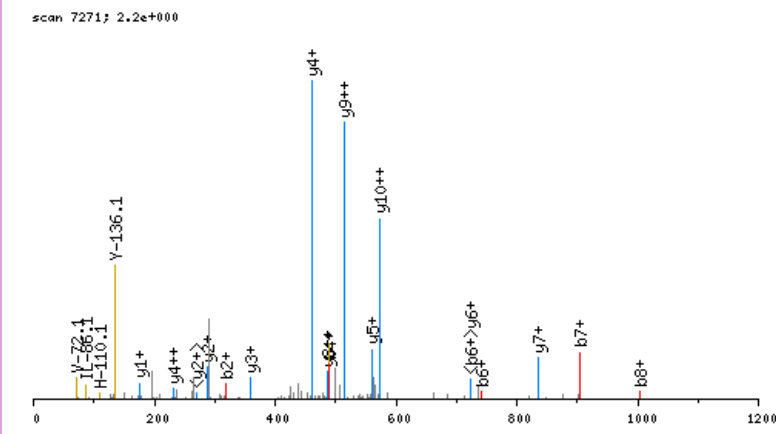

click image to zoom in; click top corners to zoom out [\[precursor±\]](#)

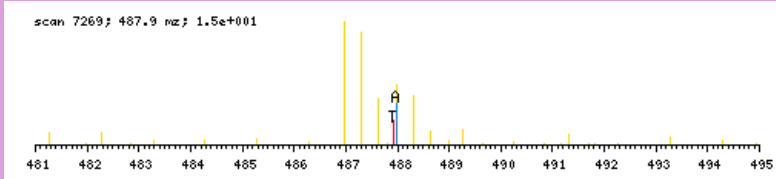

zoomed in precursor plot; T=theoretical m/z, A=acquired m/z

| b <sup>+</sup> | #  | AA # | y <sup>+</sup> | y <sup>2+</sup> |
|----------------|----|------|----------------|-----------------|
| 156.1025       | 1  | L 12 |                |                 |
| 319.1658       | 2  | Y 11 | 1306.6908      | 653.8493        |
| 432.2499       | 3  | L 10 | 1143.6275      | 572.3176        |
| 489.2713       | 4  | G 9  | 1030.5434      | 515.7756        |
| 626.3302       | 5  | H 8  | 973.5219       | 487.2649        |
| 740.3732       | 6  | N 7  | 836.4630       | 418.7354        |
| 903.4365       | 7  | Y 6  | 722.4201       | 361.7140        |
| 1002.5049      | 8  | V 5  | 559.3568       | 280.1823        |
| 1103.5526      | 9  | T 4  | 460.2884       | 230.6481        |
| 1174.5897      | 10 | A 3  | 359.2407       | 180.1243        |
| 1287.6738      | 11 | I 2  | 288.2036       | 144.6057        |
|                | 12 | R 1  | 175.1195       | 88.0637         |

N-term:+43.02

MDAVLSDFVR, MH+ 1194.5829, m/z 597.7951  
 L OSG41 P180811 230811-s1.07570.07570.2.dta

X-range:

-

MassTol: Y-zoom:

MassType:

AVG  MONO

Axis:

1  2

Label:

I  M  -

Ions:

a  +  2+  3+

b  +  2+  3+

c  +  2+  3+

x  +  2+  3+

y  +  2+  3+

z  +  2+  3+

hide H<sub>2</sub>O/NH<sub>3</sub>

zoom 112-122

GO

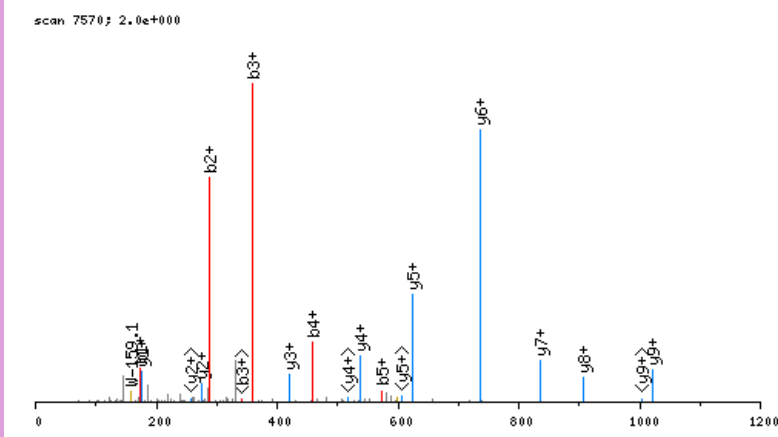

click image to zoom in; click top corners to zoom out [\[precursor±\]](#)

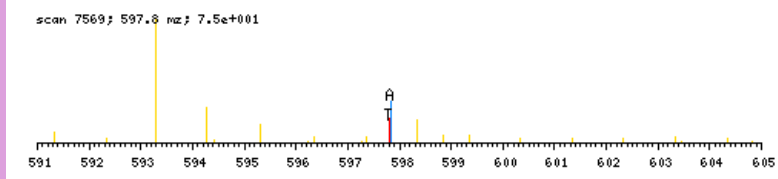

zoomed in precursor plot; T=theoretical m/z, A=acquired m/z

| b <sup>+</sup> | #  | AA # | y <sup>+</sup> | y <sup>2+</sup> |
|----------------|----|------|----------------|-----------------|
| 174.0589       | 1  | M    | 10             |                 |
| 289.0858       | 2  | D    | 9              | 1021.5318       |
| 360.1229       | 3  | A    | 8              | 906.5049        |
| 459.1914       | 4  | V    | 7              | 835.4678        |
| 572.2754       | 5  | L    | 6              | 736.3994        |
| 659.3074       | 6  | S    | 5              | 623.3153        |
| 774.3344       | 7  | D    | 4              | 536.2833        |
| 921.4028       | 8  | F    | 3              | 421.2563        |
| 1020.4712      | 9  | V    | 2              | 274.1879        |
|                | 10 | R    | 1              | 175.1195        |

N-term:+43.02



MDFNVKLAADAGTFLSR, MH+ 2094.1695, m/z 698.7280  
 L OSG39 P180811 230811-s1.08003.08003.3.dta

scan 8003; 1.2e+001

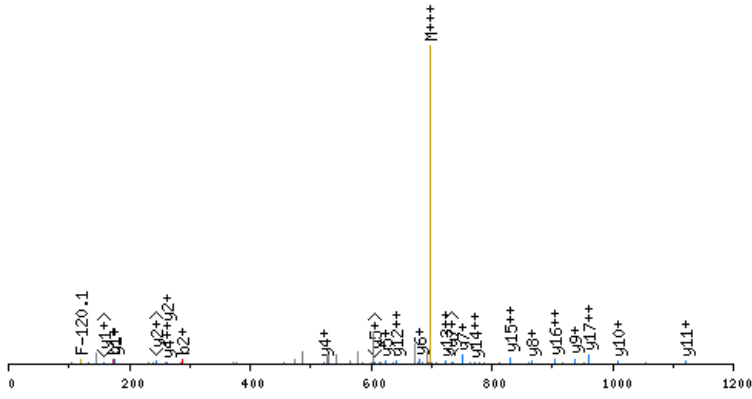

click image to zoom in; click top corners to zoom out [precursor±]

scan 8001; 698.7 m/z; 2.4e+001

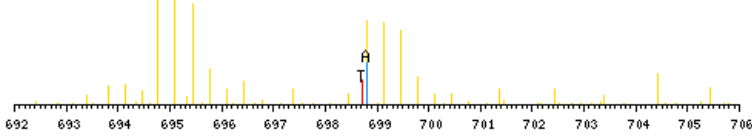

zoomed in precursor plot; T=theoretical m/z, A=acquired m/z

X-range:

-

MassTol: Y-zoom:

MassType:

AVG  MONO

Axis:

1  2

Label:

I  M  -

Ions:

a  +  2+  3+

b  +  2+  3+

c  +  2+  3+

x  +  2+  3+

y  +  2+  3+

z  +  2+  3+

hide H<sub>2</sub>O/NH<sub>3</sub>

zoom 112-122

GO

| b <sup>+</sup> | #  | AA | #  | y <sup>+</sup> | y <sup>2+</sup> |
|----------------|----|----|----|----------------|-----------------|
| 174.0589       | 1  | M  | 18 |                |                 |
| 289.0858       | 2  | D  | 17 | 1921.1184      | 961.0631        |
| 436.1542       | 3  | F  | 16 | 1806.0915      | 903.5496        |
| 550.1972       | 4  | N  | 15 | 1659.0230      | 830.0154        |
| 649.2656       | 5  | V  | 14 | 1544.9801      | 772.9940        |
| 811.4237       | 6  | K  | 13 | 1445.9117      | 723.4598        |
| 973.5818       | 7  | K  | 12 | 1283.7536      | 642.3807        |
| 1086.6658      | 8  | L  | 11 | 1121.5955      | 561.3017        |
| 1157.7030      | 9  | A  | 10 | 1008.5114      | 504.7596        |
| 1228.7401      | 10 | A  | 9  | 937.4743       | 469.2411        |
| 1343.7670      | 11 | D  | 8  | 866.4372       | 433.7225        |
| 1414.8041      | 12 | A  | 7  | 751.4103       | 376.2090        |
| 1471.8256      | 13 | G  | 6  | 680.3731       | 340.6905        |
| 1572.8733      | 14 | T  | 5  | 623.3517       | 312.1798        |
| 1719.9417      | 15 | F  | 4  | 522.3040       | 261.6559        |
| 1833.0258      | 16 | L  | 3  | 375.2356       | 188.1217        |
| 1920.0578      | 17 | S  | 2  | 262.1515       | 131.5797        |
|                | 18 | R  | 1  | 175.1195       | 88.0637         |

N-term:+43.02 K(6):+162.16  
 K(7):+162.16

MDGEKPVDAEEKR, MH+ 1700.8802, m/z 567.6316  
 L OSG39 P180811 230811-s1.02378.02378.3.dta

X-range:

-

MassTol: Y-zoom:

MassType:

AVG  MONO

Axis:

1  2

Label:

I  M  -

Ions:

a  +  2+  3+

b  +  2+  3+

c  +  2+  3+

x  +  2+  3+

y  +  2+  3+

z  +  2+  3+

hide H<sub>2</sub>O/NH<sub>3</sub>

zoom 112-122

GO

scan 2378; 1.6e+001

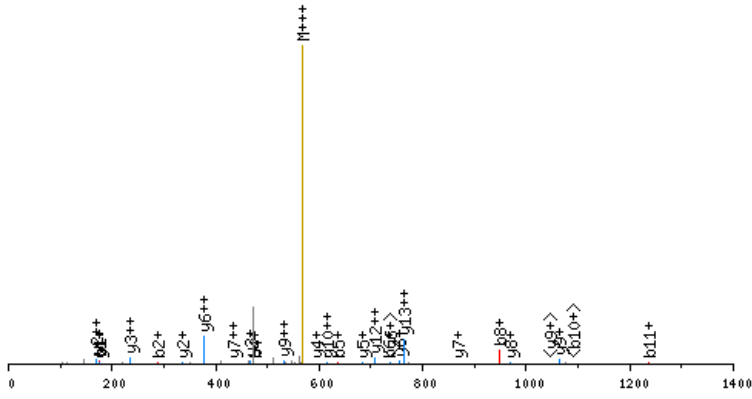

click image to zoom in; click top corners to zoom out [\[precursor±\]](#)

scan 2377; 567.6 m/z; 3.7e+000

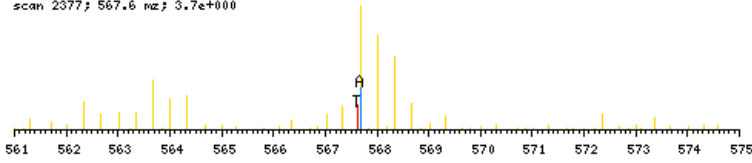

zoomed in precursor plot; T=theoretical m/z, A=acquired m/z

| b <sup>+</sup> | #  | AA # | y <sup>+</sup> | y <sup>2+</sup> |
|----------------|----|------|----------------|-----------------|
| 174.0589       | 1  | M    | 14             |                 |
| 289.0858       | 2  | D    | 13             | 1527.8292       |
| 346.1073       | 3  | G    | 12             | 1412.8022       |
| 475.1499       | 4  | E    | 11             | 1355.7807       |
| 637.3080       | 5  | K    | 10             | 1226.7382       |
| 734.3607       | 6  | P    | 9              | 1064.5801       |
| 833.4292       | 7  | V    | 8              | 967.5273        |
| 948.4561       | 8  | D    | 7              | 868.4589        |
| 1019.4932      | 9  | A    | 6              | 753.4319        |
| 1106.5252      | 10 | S    | 5              | 682.3948        |
| 1235.5678      | 11 | E    | 4              | 595.3628        |
| 1364.6104      | 12 | E    | 3              | 466.3202        |
| 1526.7685      | 13 | K    | 2              | 337.2776        |
|                | 14 | R    | 1              | 175.1195        |

N-term:+43.02 K(5):+162.16  
 K(13):+162.16

MDLVKSHLMYAVR, MH+ 1638.8924, m/z 546.9690  
 L OSG39 P180811 230811-s1.07388.07388.3.dta

X-range:

-

MassTol: Y-zoom:

MassType:

AVG  MONO

Axis:

1  2

Label:

I  M  -

Ions:

a  +  2+  3+

b  +  2+  3+

c  +  2+  3+

x  +  2+  3+

y  +  2+  3+

z  +  2+  3+

hide H<sub>2</sub>O/NH<sub>3</sub>

zoom 112-122

GO

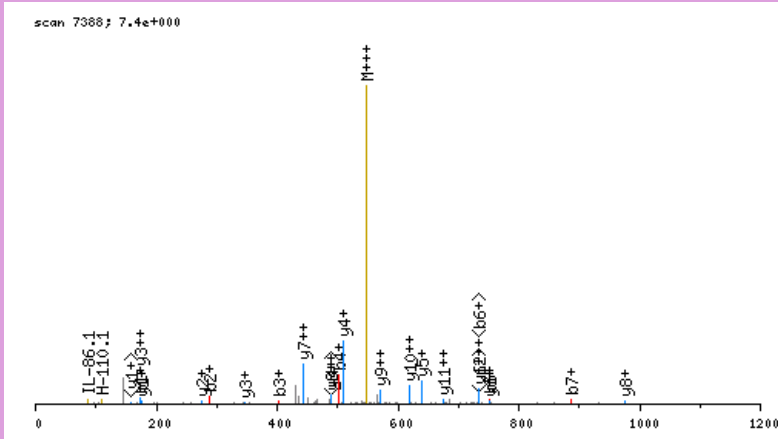

click image to zoom in; click top corners to zoom out [\[precursor±\]](#)

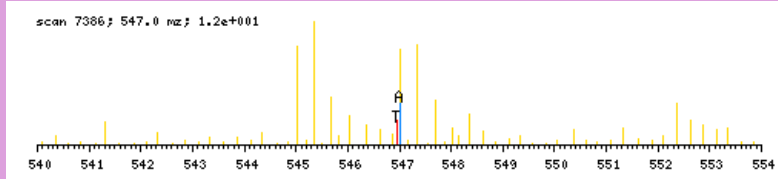

zoomed in precursor plot; T-theoretical m/z, A-acquired m/z

| b <sup>+</sup> | #  | AA # | y <sup>+</sup> | y <sup>2+</sup> |
|----------------|----|------|----------------|-----------------|
| 174.0589       | 1  | M    | 13             |                 |
| 289.0858       | 2  | D    | 12             | 1465.8414       |
| 402.1699       | 3  | L    | 11             | 1350.8144       |
| 501.2383       | 4  | V    | 10             | 1237.7304       |
| 663.3964       | 5  | K    | 9              | 1138.6619       |
| 750.4284       | 6  | S    | 8              | 976.5038        |
| 887.4873       | 7  | H    | 7              | 889.4718        |
| 1000.5714      | 8  | L    | 6              | 752.4129        |
| 1131.6119      | 9  | M    | 5              | 639.3288        |
| 1294.6752      | 10 | Y    | 4              | 508.2884        |
| 1365.7123      | 11 | A    | 3              | 345.2250        |
| 1464.7808      | 12 | V    | 2              | 274.1879        |
|                | 13 | R    | 1              | 175.1195        |

N-term:+43.02 K(5):+162.16

MDSAEELLAPLR, MH+ 1386.6939, m/z 693.8506  
 L OSG41 P180811 230811-s1.07440.07440.2.dta

X-range:

-

MassTol: Y-zoom:

MassType:

AVG  MONO

Axis:

1  2

Label:

I  M  -

Ions:

a  +  2+  3+

b  +  2+  3+

c  +  2+  3+

x  +  2+  3+

y  +  2+  3+

z  +  2+  3+

hide H<sub>2</sub>O/NH<sub>3</sub>

zoom 112-122

GO

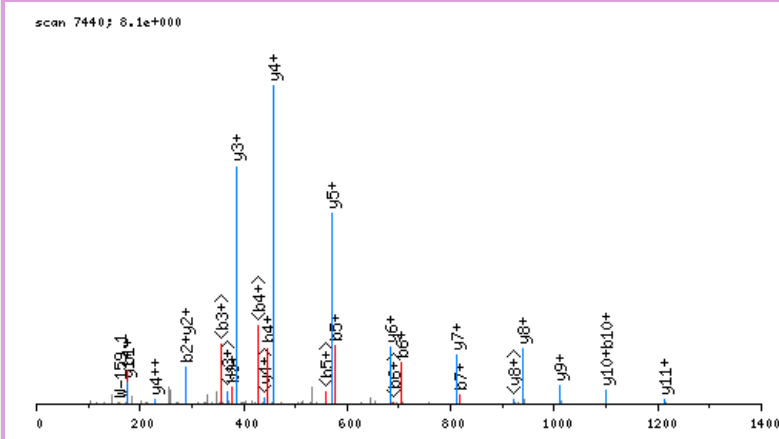

click image to zoom in; click top corners to zoom out [\[precursor±\]](#)

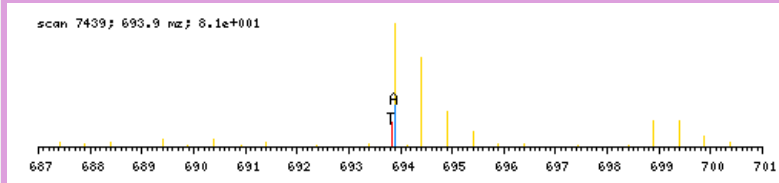

zoomed in precursor plot; T=theoretical m/z, A=acquired m/z

| b <sup>+</sup> | #  | AA # | y <sup>+</sup> | y <sup>2+</sup> |
|----------------|----|------|----------------|-----------------|
| 174.0589       | 1  | M 12 |                |                 |
| 289.0858       | 2  | D 11 | 1213.6428      | 607.3253        |
| 376.1179       | 3  | S 10 | 1098.6159      | 549.8119        |
| 447.1550       | 4  | A 9  | 1011.5839      | 506.2958        |
| 576.1976       | 5  | E 8  | 940.5468       | 470.7773        |
| 705.2402       | 6  | E 7  | 811.5042       | 406.2560        |
| 818.3242       | 7  | L 6  | 682.4616       | 341.7347        |
| 931.4083       | 8  | L 5  | 569.3775       | 285.1927        |
| 1002.4454      | 9  | A 4  | 456.2934       | 228.6506        |
| 1099.4982      | 10 | P 3  | 385.2563       | 193.1321        |
| 1212.5822      | 11 | L 2  | 288.2036       | 144.6057        |
|                | 12 | R 1  | 175.1195       | 88.0637         |

N-term:+43.02

MDTGAGSIR, MH+ 949.4413, m/z 475.2243  
 L OSG41 P180811 230811-s1.03257.03257.2.dta

X-range:

-

MassTol: Y-zoom:

MassType:

AVG  MONO

Axis:

1  2

Label:

I  M  -

Ions:

a  +  2+  3+

b  +  2+  3+

c  +  2+  3+

x  +  2+  3+

y  +  2+  3+

z  +  2+  3+

hide H<sub>2</sub>O/NH<sub>3</sub>

zoom 112-122

GO

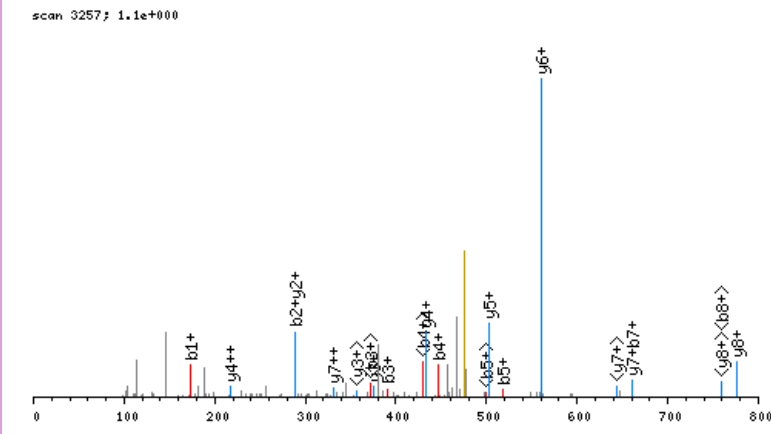

click image to zoom in; click top corners to zoom out [\[precursor±\]](#)

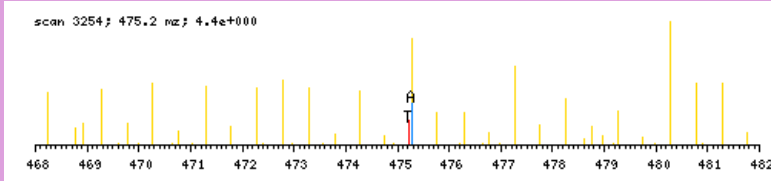

zoomed in precursor plot; T=theoretical m/z, A=acquired m/z

| b <sup>+</sup> | # | AA # | y <sup>+</sup> | y <sup>2+</sup>   |
|----------------|---|------|----------------|-------------------|
| 174.0589       | 1 | M    | 9              |                   |
| 289.0858       | 2 | D    | 8              | 776.3903 388.6990 |
| 390.1335       | 3 | T    | 7              | 661.3633 331.1856 |
| 447.1550       | 4 | G    | 6              | 560.3156 280.6617 |
| 518.1921       | 5 | A    | 5              | 503.2942 252.1510 |
| 575.2135       | 6 | G    | 4              | 432.2571 216.6324 |
| 662.2456       | 7 | S    | 3              | 375.2356 188.1217 |
| 775.3296       | 8 | I    | 2              | 288.2036 144.6057 |
|                | 9 | R    | 1              | 175.1195 88.0637  |

N-term:+43.02

MEAADVFHR, MH+ 1117.5101, m/z 559.2587  
 L OSG37 P180811 230811-s1.05920.05920.2.dta

X-range:

-

MassTol: Y-zoom:

MassType:

AVG  MONO

Axis:

1  2

Label:

I  M  -

Ions:

a  +  2+  3+

b  +  2+  3+

c  +  2+  3+

x  +  2+  3+

y  +  2+  3+

z  +  2+  3+

hide H<sub>2</sub>O/NH<sub>3</sub>

zoom 112-122

GO

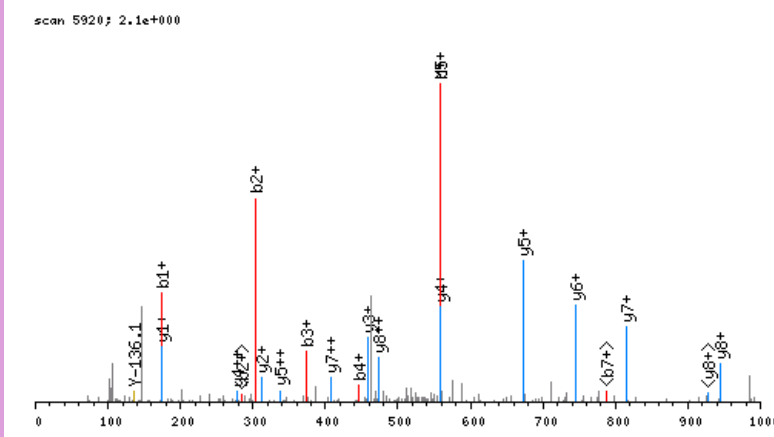

click image to zoom in; click top corners to zoom out [\[precursor±\]](#)

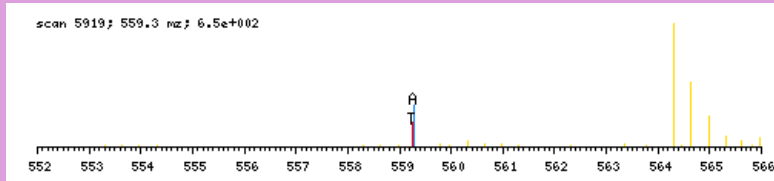

zoomed in precursor plot; T=theoretical m/z, A=acquired m/z

| b <sup>+</sup> | # | AA # | y <sup>+</sup> | y <sup>2+</sup> |
|----------------|---|------|----------------|-----------------|
| 174.0589       | 1 | M    | 9              |                 |
| 303.1015       | 2 | E    | 8              | 944.4590        |
| 374.1386       | 3 | A    | 7              | 815.4164        |
| 445.1757       | 4 | A    | 6              | 744.3793        |
| 560.2026       | 5 | D    | 5              | 673.3422        |
| 659.2711       | 6 | V    | 4              | 558.3152        |
| 806.3395       | 7 | F    | 3              | 459.2468        |
| 943.3984       | 8 | H    | 2              | 312.1784        |
|                | 9 | R    | 1              | 175.1195        |

N-term:+43.02

MEEGSVKMFLR, MH+ 1402.7287, m/z 701.8680  
 L OSG37 P180811 230811-s1.07386.07386.2.dta

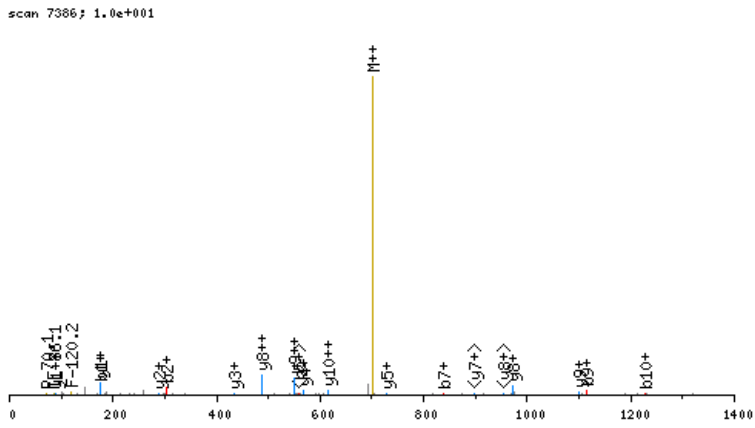

click image to zoom in; click top corners to zoom out [\[precursor±\]](#)

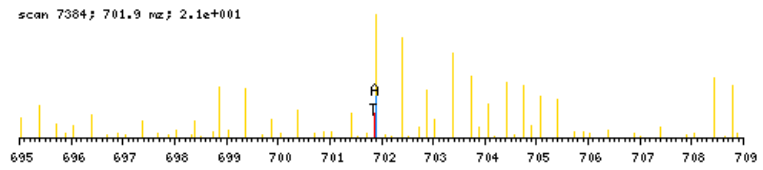

zoomed in precursor plot; T=theoretical m/z, A=acquired m/z

X-range:

-

MassTol: Y-zoom:

MassType:

AVG  MONO

Axis:

1  2

Label:

I  M  -

Ions:

a  +  2+  3+

b  +  2+  3+

c  +  2+  3+

x  +  2+  3+

y  +  2+  3+

z  +  2+  3+

hide H<sub>2</sub>O/NH<sub>3</sub>

zoom 112-122

GO

| b <sup>+</sup> | #  | AA # | y <sup>+</sup> | y <sup>2+</sup>    |
|----------------|----|------|----------------|--------------------|
| 174.0589       | 1  | M    | 11             |                    |
| 303.1015       | 2  | E    | 10             | 1229.6777 615.3427 |
| 432.1441       | 3  | E    | 9              | 1100.6351 550.8214 |
| 489.1655       | 4  | G    | 8              | 971.5925 486.3001  |
| 576.1976       | 5  | S    | 7              | 914.5710 457.7894  |
| 675.2660       | 6  | V    | 6              | 827.5390 414.2734  |
| 837.4241       | 7  | K    | 5              | 728.4706 364.7392  |
| 968.4646       | 8  | M    | 4              | 566.3125 283.6601  |
| 1115.5330      | 9  | F    | 3              | 435.2720 218.1399  |
| 1228.6170      | 10 | L    | 2              | 288.2036 144.6057  |
|                | 11 | R    | 1              | 175.1195 88.0637   |

N-term:+43.02 K(7):+162.16

MEGTMGPEAVQR, MH+ 1476.6463, m/z 738.8268  
 L OSG41 P180811 230811-s1.04478.04478.2.dta

X-range:

-

MassTol: Y-zoom:

MassType:

AVG  MONO

Axis:

1  2

Label:

I  M  -

Ions:

a  +  2+  3+

b  +  2+  3+

c  +  2+  3+

x  +  2+  3+

y  +  2+  3+

z  +  2+  3+

hide H<sub>2</sub>O/NH<sub>3</sub>

zoom 112-122

GO

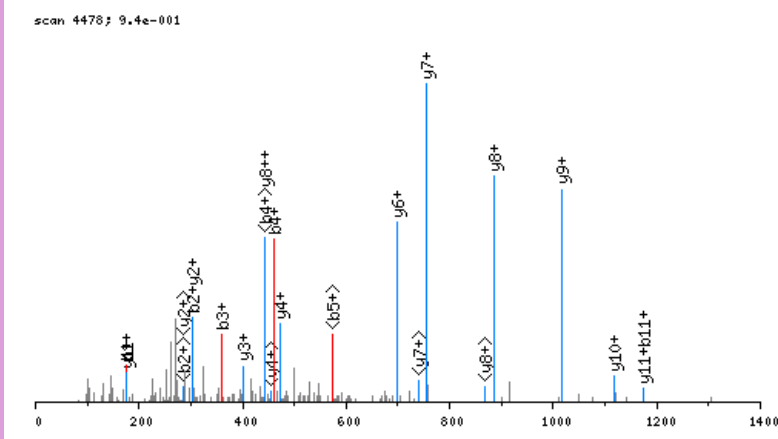

click image to zoom in; click top corners to zoom out [\[precursor±\]](#)

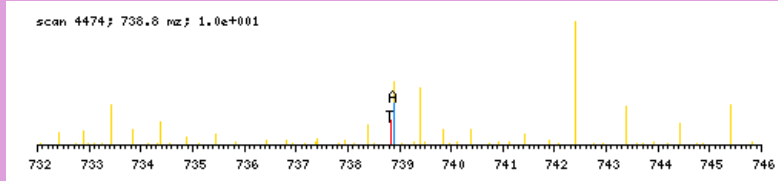

zoomed in precursor plot; T=theoretical m/z, A=acquired m/z

| b <sup>+</sup> | #  | AA # | y <sup>+</sup> | y <sup>2+</sup> |
|----------------|----|------|----------------|-----------------|
| 174.0589       | 1  | M 13 |                |                 |
| 303.1015       | 2  | E 12 | 1303.5952      | 652.3015        |
| 360.1229       | 3  | G 11 | 1174.5526      | 587.7802        |
| 461.1706       | 4  | T 10 | 1117.5312      | 559.2695        |
| 592.2111       | 5  | M 9  | 1016.4835      | 508.7457        |
| 721.2537       | 6  | E 8  | 885.4430       | 443.2254        |
| 778.2752       | 7  | G 7  | 756.4004       | 378.7041        |
| 875.3279       | 8  | P 6  | 699.3790       | 350.1934        |
| 1004.3705      | 9  | E 5  | 602.3262       | 301.6670        |
| 1075.4076      | 10 | A 4  | 473.2836       | 237.1457        |
| 1174.4760      | 11 | V 3  | 402.2465       | 201.6272        |
| 1302.5346      | 12 | Q 2  | 303.1781       | 152.0930        |
|                | 13 | R 1  | 175.1195       | 88.0637         |

N-term:+43.02



MEGYSEASLLR, MH+ 1426.6524, m/z 713.8299  
 L OSG41 P180811 230811-s1.06472.06472.2.dta

X-range:

-

MassTol: Y-zoom:

MassType:

AVG  MONO

Axis:

1  2

Label:

I  M  -

Ions:

a  +  2+  3+

b  +  2+  3+

c  +  2+  3+

x  +  2+  3+

y  +  2+  3+

z  +  2+  3+

hide H<sub>2</sub>O/NH<sub>3</sub>

zoom 112-122

GO

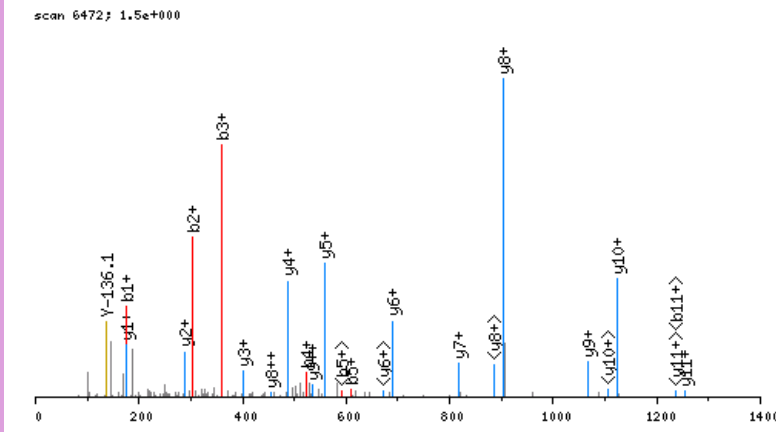

click image to zoom in; click top corners to zoom out [\[precursor±\]](#)

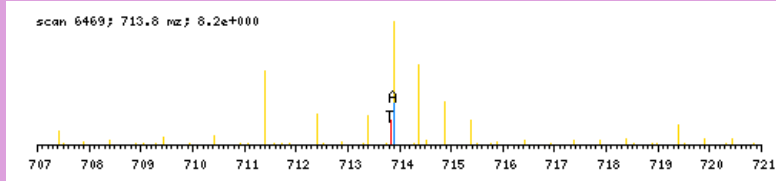

zoomed in precursor plot; T=theoretical m/z, A=acquired m/z

| b <sup>+</sup> | #  | AA # | y <sup>+</sup> | y <sup>2+</sup> |
|----------------|----|------|----------------|-----------------|
| 174.0589       | 1  | M 12 |                |                 |
| 303.1015       | 2  | E 11 | 1253.6014      | 627.3046        |
| 360.1229       | 3  | G 10 | 1124.5588      | 562.7833        |
| 523.1863       | 4  | Y 9  | 1067.5373      | 534.2726        |
| 610.2183       | 5  | S 8  | 904.4740       | 452.7409        |
| 739.2609       | 6  | E 7  | 817.4420       | 409.2249        |
| 868.3035       | 7  | E 6  | 688.3994       | 344.7036        |
| 939.3406       | 8  | A 5  | 559.3568       | 280.1823        |
| 1026.3726      | 9  | S 4  | 488.3197       | 244.6637        |
| 1139.4567      | 10 | L 3  | 401.2876       | 201.1477        |
| 1252.5408      | 11 | L 2  | 288.2036       | 144.6057        |
|                | 12 | R 1  | 175.1195       | 88.0637         |

N-term:+43.02

MEKPSPLLVGR, MH+ 1296.7350, m/z 648.8711  
 L OSG37 P180811 230811-s1.05503.05503.2.dta

scan 5503; 1.5e+001

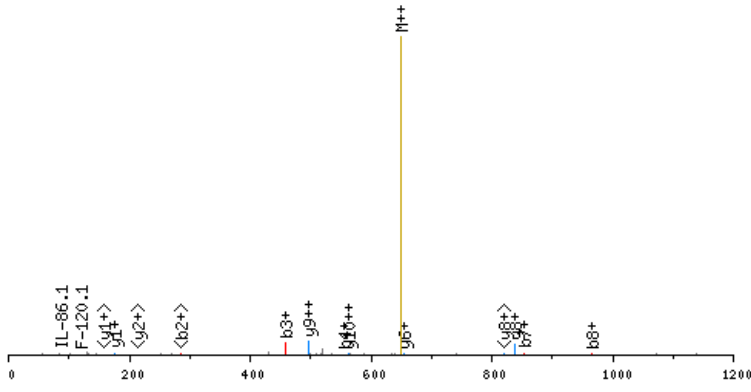

click image to zoom in; click top corners to zoom out [\[precursor±\]](#)

scan 5499; 648.9 m/z; 1.2e+001

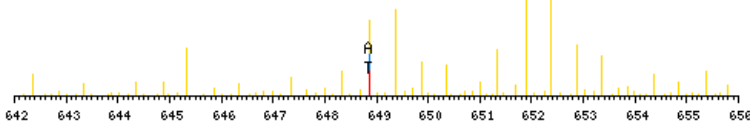

zoomed in precursor plot; T=theoretical m/z, A=acquired m/z

X-range:

-

MassTol: Y-zoom:

MassType:

AVG  MONO

Axis:

1  2

Label:

I  M  -

Ions:

a  +  2+  3+

b  +  2+  3+

c  +  2+  3+

x  +  2+  3+

y  +  2+  3+

z  +  2+  3+

hide H<sub>2</sub>O/NH<sub>3</sub>

zoom 112-122

GO

| b <sup>+</sup> | #  | AA # | y <sup>+</sup> | y <sup>2+</sup> |
|----------------|----|------|----------------|-----------------|
| 174.0589       | 1  | M    | 11             |                 |
| 303.1015       | 2  | E    | 10             | 1123.6840       |
| 459.2278       | 3  | K    | 9              | 994.6414        |
| 556.2805       | 4  | P    | 8              | 838.5151        |
| 643.3126       | 5  | S    | 7              | 741.4623        |
| 740.3653       | 6  | P    | 6              | 654.4303        |
| 853.4494       | 7  | L    | 5              | 557.3775        |
| 966.5335       | 8  | L    | 4              | 444.2934        |
| 1065.6019      | 9  | V    | 3              | 331.2094        |
| 1122.6233      | 10 | G    | 2              | 232.1410        |
|                | 11 | R    | 1              | 175.1195        |

N-term:+43.02 K(3):+156.13

MEMLPDITGKALMFAKR, MH+ 2095.0755, m/z 699.0300  
 L OSG39 P180811 230811-s1.07310.07310.3.dta

X-range:

-

MassTol: Y-zoom:

MassType:

AVG  MONO

Axis:

1  2

Label:

I  M  -

Ions:

a  +  2+  3+

b  +  2+  3+

c  +  2+  3+

x  +  2+  3+

y  +  2+  3+

z  +  2+  3+

hide H<sub>2</sub>O/NH<sub>3</sub>

zoom 112-122

GO

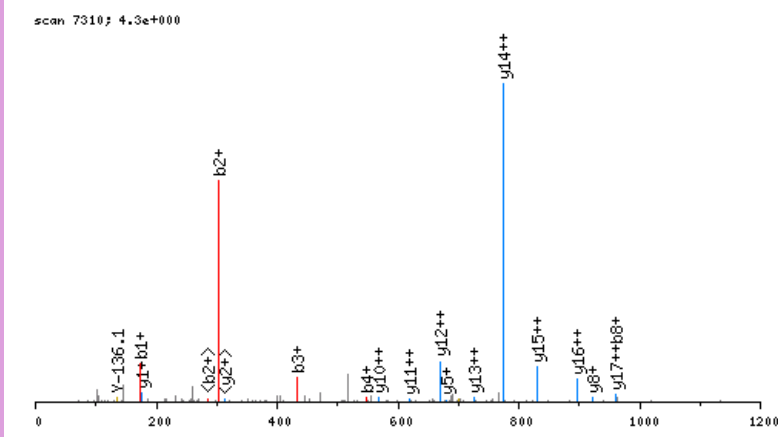

click image to zoom in; click top corners to zoom out [\[precursor±\]](#)

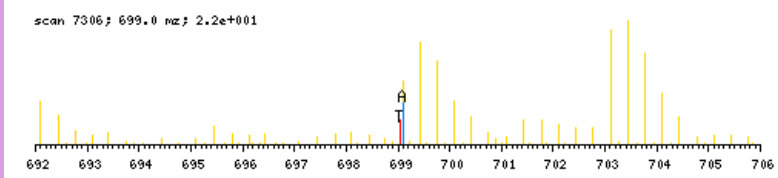

zoomed in precursor plot; T=theoretical m/z, A=acquired m/z

| b <sup>+</sup> | #  | AA | #  | y <sup>+</sup> | y <sup>2+</sup> |
|----------------|----|----|----|----------------|-----------------|
| 174.0589       | 1  | M  | 18 |                |                 |
| 303.1015       | 2  | E  | 17 | 1922.0244      | 961.5161        |
| 434.1420       | 3  | M  | 16 | 1792.9818      | 896.9948        |
| 547.2260       | 4  | L  | 15 | 1661.9413      | 831.4746        |
| 644.2788       | 5  | P  | 14 | 1548.8573      | 774.9326        |
| 759.3057       | 6  | D  | 13 | 1451.8045      | 726.4062        |
| 860.3534       | 7  | T  | 12 | 1336.7776      | 668.8927        |
| 961.4011       | 8  | T  | 11 | 1235.7299      | 618.3689        |
| 1018.4226      | 9  | G  | 10 | 1134.6822      | 567.8450        |
| 1174.5489      | 10 | K  | 9  | 1077.6608      | 539.3343        |
| 1231.5703      | 11 | G  | 8  | 921.5345       | 461.2711        |
| 1302.6074      | 12 | A  | 7  | 864.5130       | 432.7604        |
| 1415.6915      | 13 | L  | 6  | 793.4759       | 397.2419        |
| 1546.7320      | 14 | M  | 5  | 680.3918       | 340.6998        |
| 1693.8004      | 15 | F  | 4  | 549.3513       | 275.1796        |
| 1764.8375      | 16 | A  | 3  | 402.2829       | 201.6454        |
| 1920.9638      | 17 | K  | 2  | 331.2458       | 166.1268        |
|                | 18 | R  | 1  | 175.1195       | 88.0637         |

N-term: +43.02 K(10): +156.13  
 K(17): +156.13

MENCLGDSR, MH+ 1123.4512, m/z 562.2292  
 L OSG41 P180811 230811-s1.03441.03441.2.dta

X-range:

-

MassTol: Y-zoom:

MassType:

AVG  MONO

Axis:

1  2

Label:

I  M  -

Ions:

a  +  2+  3+

b  +  2+  3+

c  +  2+  3+

x  +  2+  3+

y  +  2+  3+

z  +  2+  3+

hide H<sub>2</sub>O/NH<sub>3</sub>

zoom 112-122

GO

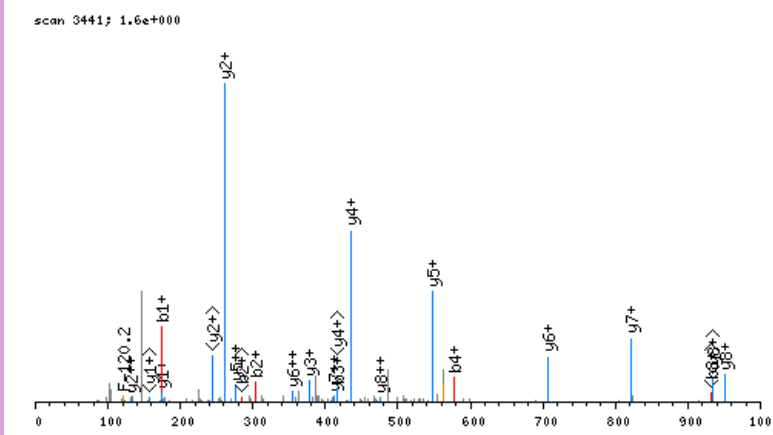

click image to zoom in; click top corners to zoom out [\[precursor±\]](#)

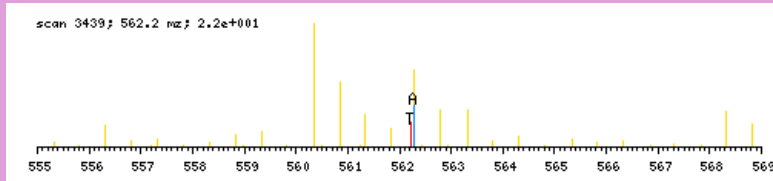

zoomed in precursor plot; T=theoretical m/z, A=acquired m/z

| b <sup>+</sup> | # | AA # | y <sup>+</sup> | y <sup>2+</sup> |
|----------------|---|------|----------------|-----------------|
| 174.0589       | 1 | M    | 9              |                 |
| 303.1015       | 2 | E    | 8              | 950.4001        |
| 417.1444       | 3 | N    | 7              | 821.3575        |
| 577.1750       | 4 | C    | 6              | 707.3146        |
| 690.2591       | 5 | L    | 5              | 547.2840        |
| 747.2805       | 6 | G    | 4              | 434.1999        |
| 862.3075       | 7 | D    | 3              | 377.1785        |
| 949.3395       | 8 | S    | 2              | 262.1515        |
|                | 9 | R    | 1              | 175.1195        |

N-term:+43.02 C(4):+160.03

MENLFLVLR, MH+ 1191.6196, m/z 596.3134  
 L OSG41 P180811 230811-s1.07597.07597.2.dta

X-range:

-

MassTol: Y-zoom:

MassType:

AVG  MONO

Axis:

1  2

Label:

I  M  -

Ions:

a  +  2+  3+

b  +  2+  3+

c  +  2+  3+

x  +  2+  3+

y  +  2+  3+

z  +  2+  3+

hide H<sub>2</sub>O/NH<sub>3</sub>

zoom 112-122

GO

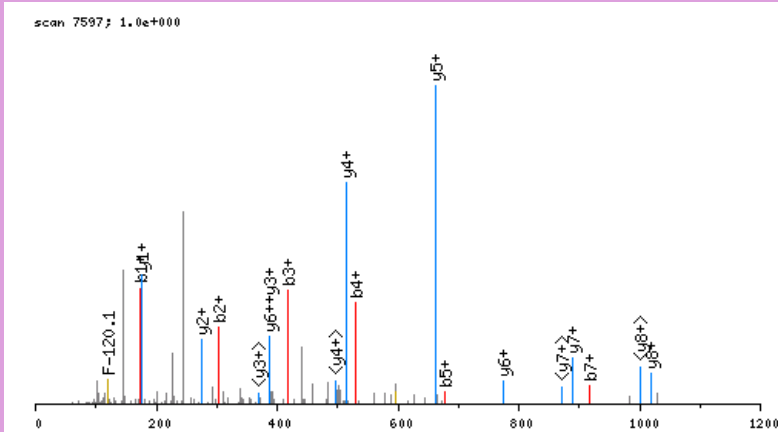

click image to zoom in; click top corners to zoom out [\[precursor±\]](#)

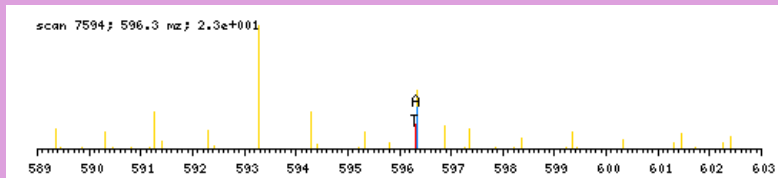

zoomed in precursor plot; T=theoretical m/z, A=acquired m/z

| b <sup>+</sup> | # | AA | # | y <sup>+</sup> | y <sup>2+</sup> |
|----------------|---|----|---|----------------|-----------------|
| 174.0589       | 1 | M  | 9 |                |                 |
| 303.1015       | 2 | E  | 8 | 1018.5686      | 509.7882        |
| 417.1444       | 3 | N  | 7 | 889.5260       | 445.2669        |
| 530.2285       | 4 | L  | 6 | 775.4830       | 388.2454        |
| 677.2969       | 5 | F  | 5 | 662.3990       | 331.7034        |
| 805.3555       | 6 | Q  | 4 | 515.3306       | 258.1692        |
| 918.4395       | 7 | L  | 3 | 387.2720       | 194.1399        |
| 1017.5079      | 8 | V  | 2 | 274.1879       | 137.5979        |
|                | 9 | R  | 1 | 175.1195       | 88.0637         |

N-term: +43.02

MENVEVFTSEGKGR, MH+ 1658.8272, m/z 829.9173  
 L OSG37 P180811 230811-s1.06587.06587.2.dta

X-range:

-

MassTol: Y-zoom:

MassType:

AVG  MONO

Axis:

1  2

Label:

I  M  -

Ions:

a  +  2+  3+

b  +  2+  3+

c  +  2+  3+

x  +  2+  3+

y  +  2+  3+

z  +  2+  3+

hide H<sub>2</sub>O/NH<sub>3</sub>

zoom 112-122

GO

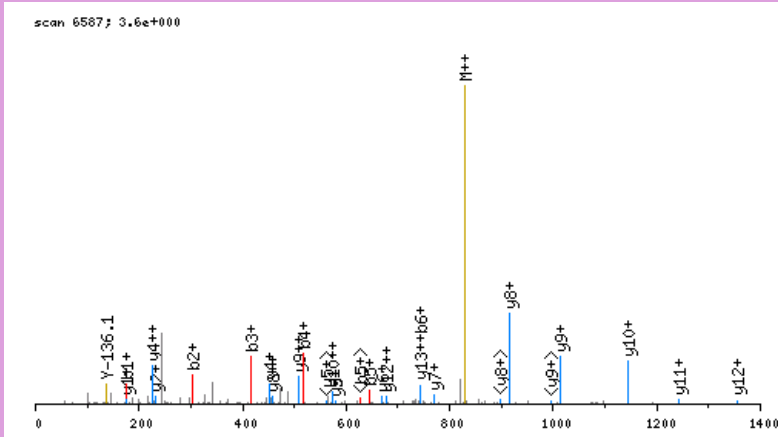

click image to zoom in; click top corners to zoom out [\[precursor±\]](#)

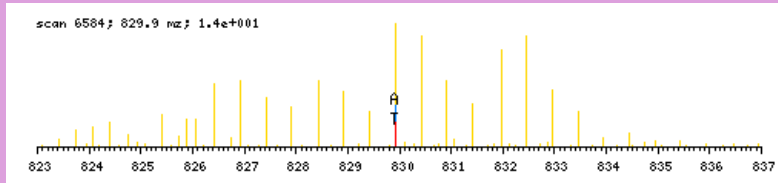

zoomed in precursor plot; T=theoretical m/z, A=acquired m/z

| b <sup>+</sup> | #  | AA # | y <sup>+</sup> | y <sup>2+</sup> |
|----------------|----|------|----------------|-----------------|
| 174.0589       | 1  | M 14 |                |                 |
| 303.1015       | 2  | E 13 | 1485.7762      | 743.3920        |
| 417.1444       | 3  | N 12 | 1356.7336      | 678.8707        |
| 516.2128       | 4  | V 11 | 1242.6907      | 621.8492        |
| 645.2554       | 5  | E 10 | 1143.6222      | 572.3150        |
| 744.3238       | 6  | V 9  | 1014.5797      | 507.7937        |
| 891.3922       | 7  | F 8  | 915.5112       | 458.2595        |
| 992.4399       | 8  | T 7  | 768.4428       | 384.7253        |
| 1079.4719      | 9  | S 6  | 667.3951       | 334.2015        |
| 1208.5145      | 10 | E 5  | 580.3631       | 290.6855        |
| 1265.5360      | 11 | G 4  | 451.3205       | 226.1642        |
| 1427.6941      | 12 | K 3  | 394.2991       | 197.6534        |
| 1484.7156      | 13 | G 2  | 232.1410       | 116.5744        |
|                | 14 | R 1  | 175.1195       | 88.0637         |

N-term:+43.02 K(12):+162.16

MEPETLEAR, MH+ 1117.5200, m/z 559.2636  
 L OSG41 P180811 230811-s1.04360.04360.2.dta

X-range:

-

MassTol: Y-zoom:

MassType:

AVG  MONO

Axis:

1  2

Label:

I  M  -

Ions:

a  +  2+  3+

b  +  2+  3+

c  +  2+  3+

x  +  2+  3+

y  +  2+  3+

z  +  2+  3+

hide H<sub>2</sub>O/NH<sub>3</sub>

zoom 112-122

GO

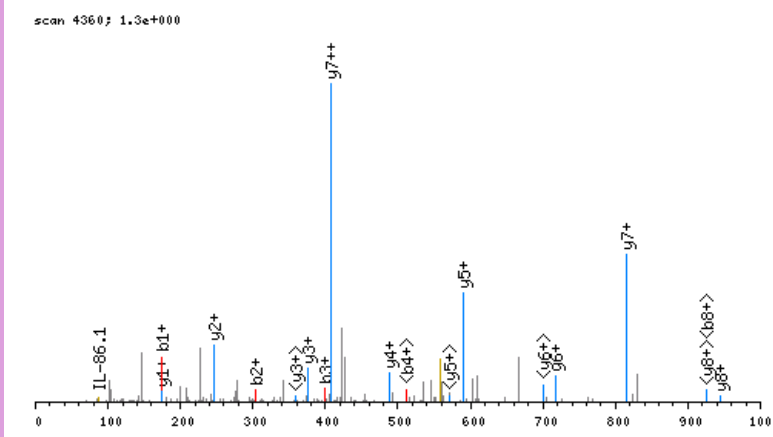

click image to zoom in; click top corners to zoom out [\[precursor±\]](#)

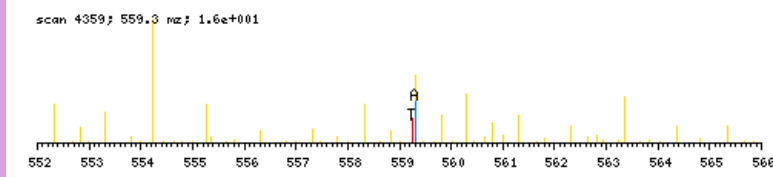

zoomed in precursor plot; T=theoretical m/z, A=acquired m/z

| b <sup>+</sup> | # | AA # | y <sup>+</sup> | y <sup>2+</sup> |
|----------------|---|------|----------------|-----------------|
| 174.0589       | 1 | M    | 9              |                 |
| 303.1015       | 2 | E    | 8              | 944.4689        |
| 400.1542       | 3 | P    | 7              | 815.4263        |
| 529.1968       | 4 | E    | 6              | 718.3735        |
| 630.2445       | 5 | T    | 5              | 589.3310        |
| 743.3286       | 6 | L    | 4              | 488.2833        |
| 872.3712       | 7 | E    | 3              | 375.1992        |
| 943.4083       | 8 | A    | 2              | 246.1566        |
|                | 9 | R    | 1              | 175.1195        |

N-term:+43.02

MEYTEGISQR, MH+ 1255.5629, m/z 628.2851  
 L OSG41 P180811 230811-s1.04828.04828.2.dta

scan 4828; 4.5e-001

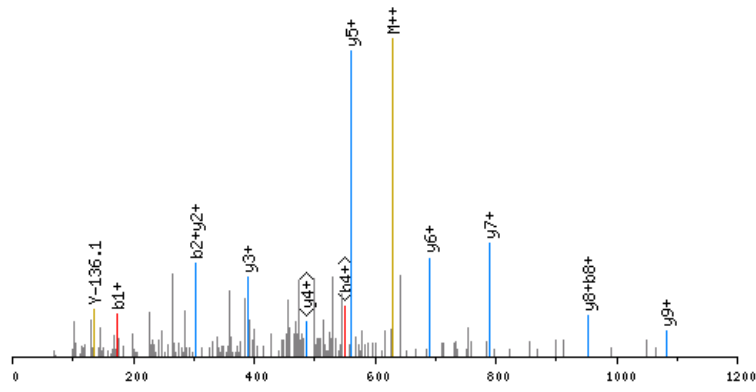

click image to zoom in; click top corners to zoom out [\[precursor±\]](#)

scan 4824; 628.3 m/z; 5.2e+000

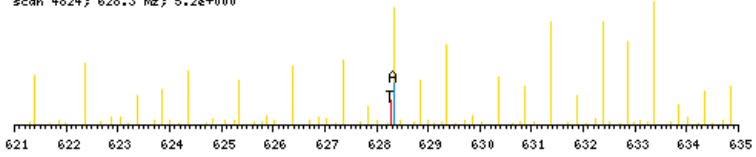

zoomed in precursor plot; T=theoretical m/z, A=acquired m/z

X-range:

-

MassTol: Y-zoom:

MassType:

AVG  MONO

Axis:

1  2

Label:

I  M  -

Ions:

a  +  2+  3+

b  +  2+  3+

c  +  2+  3+

x  +  2+  3+

y  +  2+  3+

z  +  2+  3+

hide H<sub>2</sub>O/NH<sub>3</sub>

zoom 112-122

GO

| b <sup>+</sup> | #  | AA # | y <sup>+</sup> | y <sup>2+</sup> |
|----------------|----|------|----------------|-----------------|
| 174.0589       | 1  | M    | 10             |                 |
| 303.1015       | 2  | E    | 9              | 1082.5118       |
| 466.1648       | 3  | Y    | 8              | 953.4692        |
| 567.2125       | 4  | T    | 7              | 790.4059        |
| 696.2551       | 5  | E    | 6              | 689.3582        |
| 753.2765       | 6  | G    | 5              | 560.3156        |
| 866.3606       | 7  | I    | 4              | 503.2942        |
| 953.3926       | 8  | S    | 3              | 390.2101        |
| 1081.4512      | 9  | Q    | 2              | 303.1781        |
|                | 10 | R    | 1              | 175.1195        |

N-term:+43.02



MKVFVTGPLPAEGR, MH+ 1571.8620, m/z 524.6255  
 L OSG37 P180811 230811-s1.07463.07463.3.dta

X-range:

-

MassTol: Y-zoom:

MassType:

AVG  MONO

Axis:

1  2

Label:

I  M  -

Ions:

a  +  2+  3+

b  +  2+  3+

c  +  2+  3+

x  +  2+  3+

y  +  2+  3+

z  +  2+  3+

hide H<sub>2</sub>O/NH<sub>3</sub>

zoom 112-122

GO

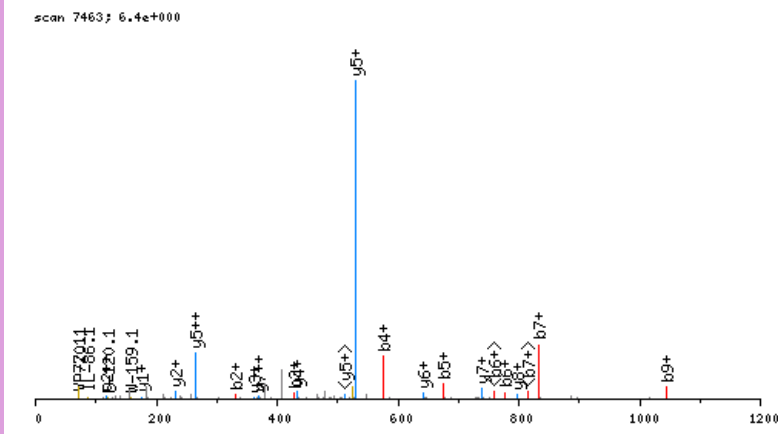

click image to zoom in; click top corners to zoom out [\[precursor±\]](#)

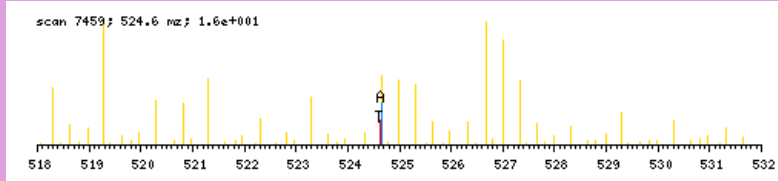

zoomed in precursor plot; T=theoretical m/z, A=acquired m/z

| b <sup>+</sup> | #  | AA # | y <sup>+</sup> | y <sup>2+</sup> |
|----------------|----|------|----------------|-----------------|
| 174.0589       | 1  | M 14 |                |                 |
| 330.1852       | 2  | K 13 | 1398.8109      | 699.9094        |
| 429.2536       | 3  | V 12 | 1242.6846      | 621.8462        |
| 576.3220       | 4  | F 11 | 1143.6162      | 572.3120        |
| 675.3904       | 5  | V 10 | 996.5478       | 498.7778        |
| 776.4381       | 6  | T 9  | 897.4794       | 449.2436        |
| 833.4596       | 7  | G 8  | 796.4317       | 398.7198        |
| 930.5123       | 8  | P 7  | 739.4103       | 370.2090        |
| 1043.5964      | 9  | L 6  | 642.3575       | 321.6827        |
| 1140.6492      | 10 | P 5  | 529.2734       | 265.1406        |
| 1211.6863      | 11 | A 4  | 432.2207       | 216.6142        |
| 1340.7289      | 12 | E 3  | 361.1836       | 181.0957        |
| 1397.7503      | 13 | G 2  | 232.1410       | 116.5744        |
|                | 14 | R 1  | 175.1195       | 88.0637         |

N-term:+43.02 K(2):+156.13

MLGAEKGEGFVVKVR, MH+ 1618.8627, m/z 809.9350  
 L OSG37 P180811 230811-s1.07520.07520.2.dta

scan 7520; 5.1e+000

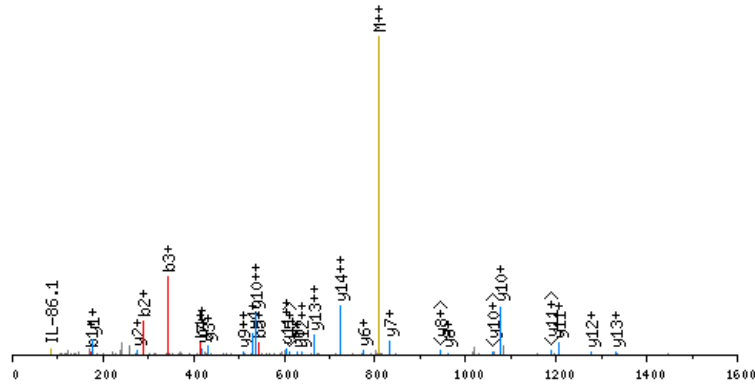

click image to zoom in; click top corners to zoom out [\[precursor±\]](#)

scan 7519; 809.9 m/z; 1.3e+001

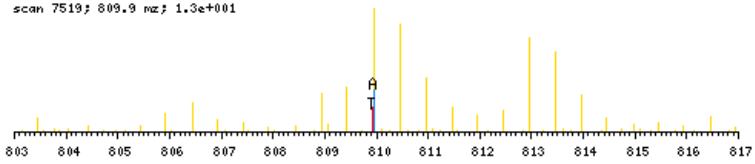

zoomed in precursor plot; T=theoretical m/z, A=acquired m/z

X-range:

-

MassTol: Y-zoom:

MassType:

AVG  MONO

Axis:

1  2

Label:

I  M  -

Ions:

a  +  2+  3+

b  +  2+  3+

c  +  2+  3+

x  +  2+  3+

y  +  2+  3+

z  +  2+  3+

hide H<sub>2</sub>O/NH<sub>3</sub>

zoom 112-122

GO

| b <sup>+</sup> | #  | AA | #  | y <sup>+</sup> | y <sup>2+</sup> |
|----------------|----|----|----|----------------|-----------------|
| 174.0589       | 1  | M  | 15 |                |                 |
| 287.1429       | 2  | L  | 14 | 1445.8117      | 723.4098        |
| 344.1644       | 3  | G  | 13 | 1332.7276      | 666.8677        |
| 415.2015       | 4  | A  | 12 | 1275.7061      | 638.3570        |
| 544.2441       | 5  | E  | 11 | 1204.6690      | 602.8384        |
| 601.2656       | 6  | G  | 10 | 1075.6264      | 538.3171        |
| 658.2870       | 7  | G  | 9  | 1018.6050      | 509.8064        |
| 787.3296       | 8  | E  | 8  | 961.5835       | 481.2957        |
| 844.3511       | 9  | G  | 7  | 832.5409       | 416.7744        |
| 991.4195       | 10 | F  | 6  | 775.5195       | 388.2636        |
| 1090.4879      | 11 | V  | 5  | 628.4510       | 314.7294        |
| 1189.5563      | 12 | V  | 4  | 529.3826       | 265.1952        |
| 1345.6826      | 13 | K  | 3  | 430.3142       | 215.6610        |
| 1444.7511      | 14 | V  | 2  | 274.1879       | 137.5979        |
|                | 15 | R  | 1  | 175.1195       | 88.0637         |

N-term:+43.02 K(13):+156.13

MLGPEGGEGYVVKLR, MH+ 1674.8889, m/z 558.9678  
 L OSG37 P180811 230811-s1.07406.07406.3.dta

X-range:

-

MassTol: Y-zoom:

MassType:

AVG  MONO

Axis:

1  2

Label:

I  M  -

Ions:

a  +  2+  3+

b  +  2+  3+

c  +  2+  3+

x  +  2+  3+

y  +  2+  3+

z  +  2+  3+

hide H<sub>2</sub>O/NH<sub>3</sub>

zoom 112-122

GO

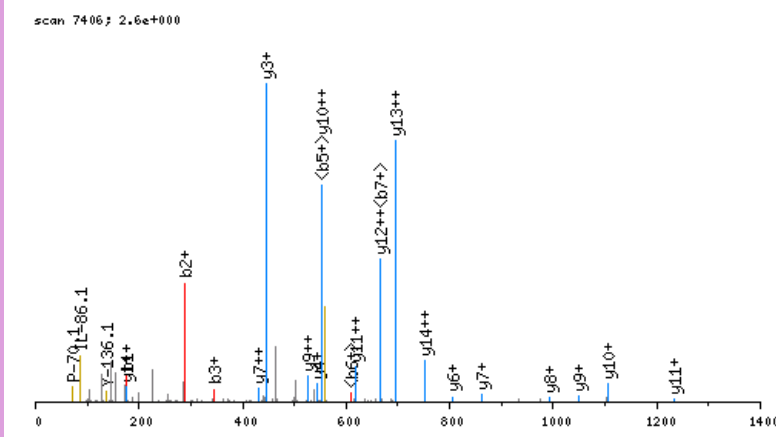

click image to zoom in; click top corners to zoom out [\[precursor±\]](#)

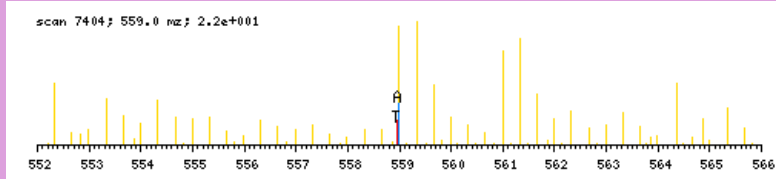

zoomed in precursor plot; T=theoretical m/z, A=acquired m/z

| b <sup>+</sup> | #  | AA # | y <sup>+</sup> | y <sup>2+</sup> |
|----------------|----|------|----------------|-----------------|
| 174.0589       | 1  | M 15 |                |                 |
| 287.1429       | 2  | L 14 | 1501.8379      | 751.4229        |
| 344.1644       | 3  | G 13 | 1388.7538      | 694.8808        |
| 441.2172       | 4  | P 12 | 1331.7324      | 666.3701        |
| 570.2598       | 5  | E 11 | 1234.6796      | 617.8437        |
| 627.2812       | 6  | G 10 | 1105.6370      | 553.3224        |
| 684.3027       | 7  | G 9  | 1048.6155      | 524.8117        |
| 813.3453       | 8  | E 8  | 991.5941       | 496.3010        |
| 870.3668       | 9  | G 7  | 862.5515       | 431.7797        |
| 1033.4301      | 10 | Y 6  | 805.5300       | 403.2689        |
| 1132.4985      | 11 | V 5  | 642.4667       | 321.7373        |
| 1231.5669      | 12 | V 4  | 543.3983       | 272.2031        |
| 1387.6932      | 13 | K 3  | 444.3299       | 222.6688        |
| 1500.7773      | 14 | L 2  | 288.2036       | 144.6057        |
|                | 15 | R 1  | 175.1195       | 88.0637         |

N-term:+43.02 K(13):+156.13

MLSTEGR, MH+ 835.3984, m/z 418.2028  
 L OSG41 P180811 230811-s1.04691.04691.2.dta

X-range:

-

MassTol: Y-zoom:

MassType:

AVG  MONO

Axis:

1  2

Label:

I  M  -

Ions:

a  +  2+  3+

b  +  2+  3+

c  +  2+  3+

x  +  2+  3+

y  +  2+  3+

z  +  2+  3+

hide H<sub>2</sub>O/NH<sub>3</sub>

zoom 112-122

GO

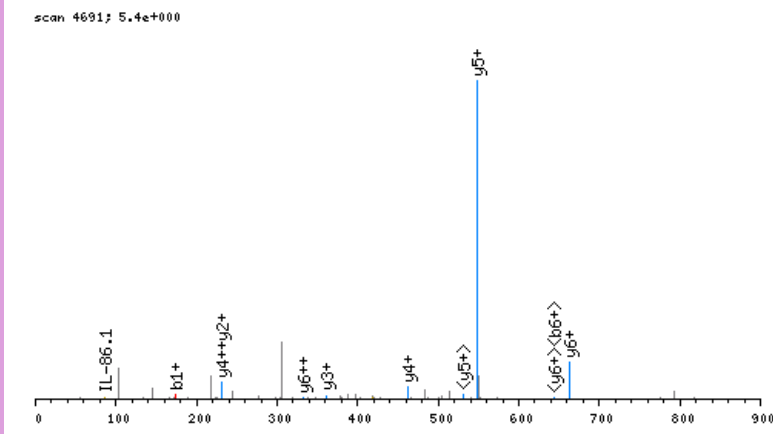

click image to zoom in; click top corners to zoom out [\[precursor±\]](#)

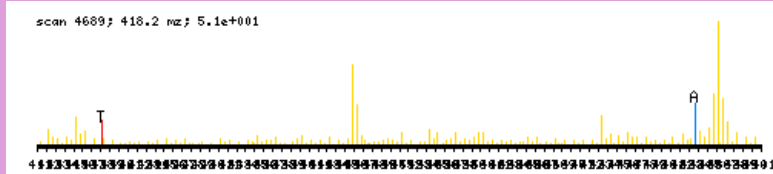

zoomed in precursor plot; T=theoretical m/z, A=acquired m/z

| b <sup>+</sup> | # | AA # | y <sup>+</sup> | y <sup>2+</sup>   |
|----------------|---|------|----------------|-------------------|
| 174.0589       | 1 | M    | 7              |                   |
| 287.1429       | 2 | L    | 6              | 662.3473 331.6776 |
| 374.1750       | 3 | S    | 5              | 549.2633 275.1355 |
| 475.2227       | 4 | T    | 4              | 462.2312 231.6195 |
| 604.2652       | 5 | E    | 3              | 361.1836 181.0957 |
| 661.2867       | 6 | G    | 2              | 232.1410 116.5744 |
|                | 7 | R    | 1              | 175.1195 88.0637  |

N-term:+43.02

MMAAAAER, MH+ 892.4021, m/z 446.7047  
 L OSG41 P180811 230811-s1.05316.05316.2.dta

scan 5316; 5.5e-001

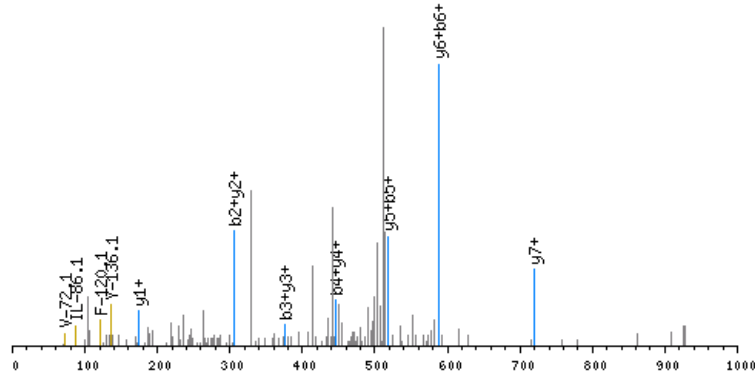

click image to zoom in; click top corners to zoom out [\[precursor±\]](#)

scan 5314; 446.7 m/z; 9.7e+001

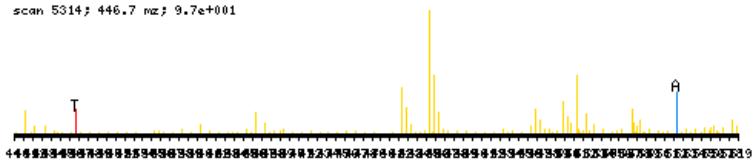

zoomed in precursor plot; T=theoretical m/z, A=acquired m/z

X-range:

-

MassTol: Y-zoom:

MassType:

AVG  MONO

Axis:

1  2

Label:

I  M  -

Ions:

a  +  2+  3+

b  +  2+  3+

c  +  2+  3+

x  +  2+  3+

y  +  2+  3+

z  +  2+  3+

hide H<sub>2</sub>O/NH<sub>3</sub>

zoom 112-122

GO

| b <sup>+</sup> | # | AA # | y <sup>+</sup> | y <sup>2+</sup> |
|----------------|---|------|----------------|-----------------|
| 174.0589       | 1 | M 8  |                |                 |
| 305.0994       | 2 | M 7  | 719.3510       | 360.1794        |
| 376.1365       | 3 | A 6  | 588.3105       | 294.6592        |
| 447.1736       | 4 | A 5  | 517.2734       | 259.1406        |
| 518.2107       | 5 | A 4  | 446.2363       | 223.6221        |
| 589.2478       | 6 | A 3  | 375.1992       | 188.1035        |
| 718.2904       | 7 | E 2  | 304.1621       | 152.5850        |
|                | 8 | R 1  | 175.1195       | 88.0637         |

N-term:+43.02

MNTEQSQNTIVSR, MH+ 1549.7281, m/z 517.2475  
 L OSG41 P180811 230811-s1.03611.03611.3.dta

scan 3611; 1.2e+000

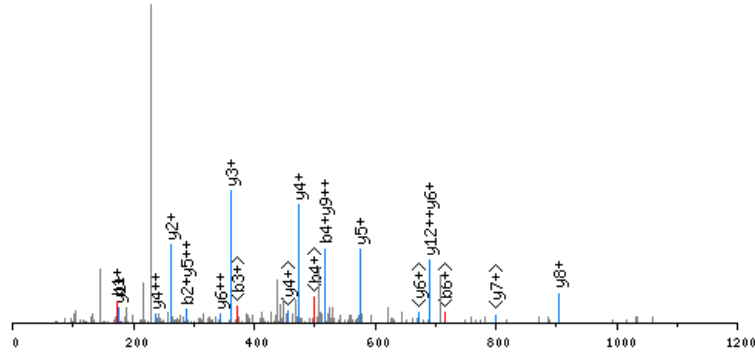

click image to zoom in; click top corners to zoom out [\[precursor±\]](#)

scan 3609; 517.2 m/z; 4.1e+001

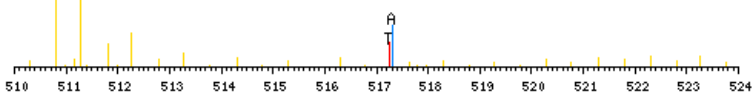

zoomed in precursor plot; T=theoretical m/z, A=acquired m/z

X-range:

-

MassTol: Y-zoom:

MassType:

AVG  MONO

Axis:

1  2

Label:

I  M  -

Ions:

a  +  2+  3+

b  +  2+  3+

c  +  2+  3+

x  +  2+  3+

y  +  2+  3+

z  +  2+  3+

hide H<sub>2</sub>O/NH<sub>3</sub>

zoom 112-122

GO

| b <sup>+</sup> | #  | AA # | y <sup>+</sup> | y <sup>2+</sup> |
|----------------|----|------|----------------|-----------------|
| 174.0589       | 1  | M 13 |                |                 |
| 288.1018       | 2  | N 12 | 1376.6770      | 688.8424        |
| 389.1495       | 3  | T 11 | 1262.6341      | 631.8209        |
| 518.1921       | 4  | E 10 | 1161.5864      | 581.2971        |
| 646.2507       | 5  | Q 9  | 1032.5438      | 516.7758        |
| 733.2827       | 6  | S 8  | 904.4852       | 452.7465        |
| 861.3413       | 7  | Q 7  | 817.4532       | 409.2305        |
| 975.3842       | 8  | N 6  | 689.3946       | 345.2012        |
| 1076.4319      | 9  | T 5  | 575.3517       | 288.1798        |
| 1189.5159      | 10 | I 4  | 474.3040       | 237.6559        |
| 1288.5844      | 11 | V 3  | 361.2199       | 181.1139        |
| 1375.6164      | 12 | S 2  | 262.1515       | 131.5797        |
|                | 13 | R 1  | 175.1195       | 88.0637         |

N-term:+43.02

MQKIFAR, MH+ 963.5450, m/z 482.2762  
 L OSG37 P180811 230811-s1.05346.05346.2.dta

X-range:

-

MassTol: Y-zoom:

MassType:

AVG  MONO

Axis:

1  2

Label:

I  M  -

Ions:

a  +  2+  3+

b  +  2+  3+

c  +  2+  3+

x  +  2+  3+

y  +  2+  3+

z  +  2+  3+

hide H<sub>2</sub>O/NH<sub>3</sub>

zoom 112-122

GO

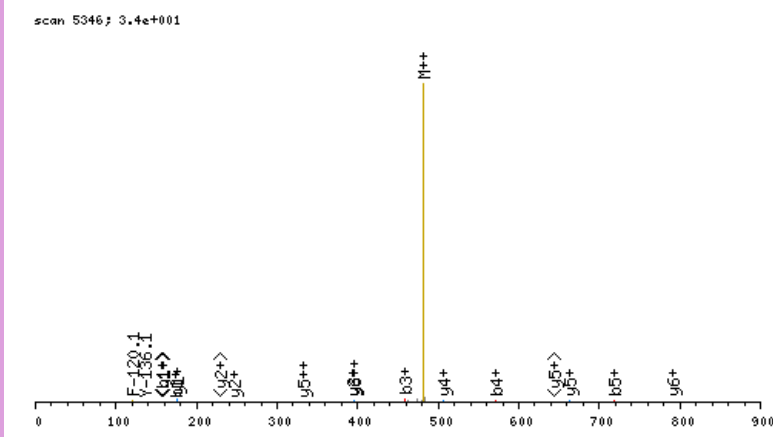

click image to zoom in; click top corners to zoom out [\[precursor±\]](#)

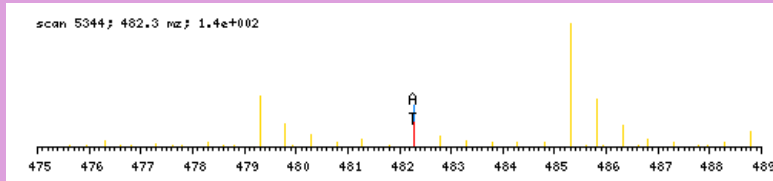

zoomed in precursor plot; T=theoretical m/z, A=acquired m/z

| b <sup>+</sup> | # | AA # | y <sup>+</sup> | y <sup>2+</sup>   |
|----------------|---|------|----------------|-------------------|
| 174.0589       | 1 | M    | 7              |                   |
| 302.1175       | 2 | Q    | 6              | 790.4940 395.7509 |
| 458.2438       | 3 | K    | 5              | 662.4354 331.7216 |
| 571.3278       | 4 | I    | 4              | 506.3091 253.6585 |
| 718.3962       | 5 | F    | 3              | 393.2250 197.1164 |
| 789.4334       | 6 | A    | 2              | 246.1566 123.5822 |
|                | 7 | R    | 1              | 175.1195 88.0637  |

N-term:+43.02 K(3):+156.13

MSYGYDEKSAGVSVPGPMGPGSPR, MH+ 2496.1540, m/z 832.7228  
 L OSG36 P180811 230811-s1.04358.04358.3.dta

scan 4358; 4.7e+000

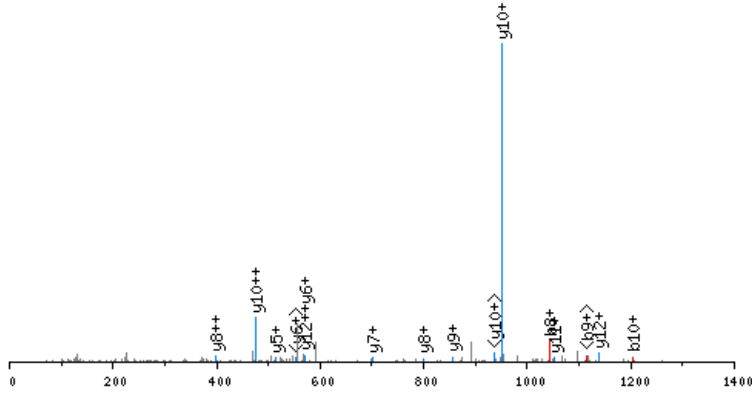

click image to zoom in; click top corners to zoom out [precursor±]

scan 4354; 832.7 mz; 4.7e+000

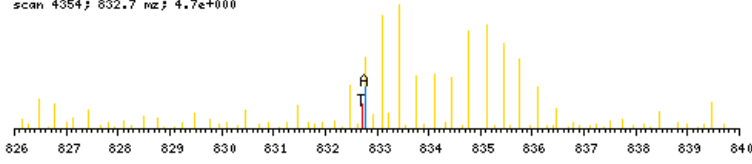

zoomed in precursor plot; T=theoretical m/z, A=acquired m/z

X-range:

-

MassTol: Y-zoom:

MassType:

AVG  MONO

Axis:

1  2

Label:

I  M  -

Ions:

a  +  2+  3+

b  +  2+  3+

c  +  2+  3+

x  +  2+  3+

y  +  2+  3+

z  +  2+  3+

hide H<sub>2</sub>O/NH<sub>3</sub>

zoom 112-122

GO

| b <sup>+</sup> | #  | AA # | y <sup>+</sup> | y <sup>2+</sup> |
|----------------|----|------|----------------|-----------------|
| 174.0589       | 1  | M 24 |                |                 |
| 261.0909       | 2  | S 23 | 2323.1029      | 1162.0554       |
| 424.1542       | 3  | Y 22 | 2236.0709      | 1118.5394       |
| 481.1757       | 4  | G 21 | 2073.0076      | 1037.0077       |
| 644.2390       | 5  | Y 20 | 2015.9861      | 1008.4970       |
| 759.2660       | 6  | D 19 | 1852.9228      | 926.9653        |
| 888.3086       | 7  | E 18 | 1737.8958      | 869.4518        |
| 1044.4349      | 8  | K 17 | 1608.8532      | 804.9305        |
| 1131.4669      | 9  | S 16 | 1452.7269      | 726.8674        |
| 1202.5040      | 10 | A 15 | 1365.6949      | 683.3514        |
| 1259.5255      | 11 | G 14 | 1294.6578      | 647.8328        |
| 1358.5939      | 12 | V 13 | 1237.6363      | 619.3221        |
| 1445.6259      | 13 | S 12 | 1138.5679      | 569.7879        |
| 1544.6943      | 14 | V 11 | 1051.5359      | 526.2718        |
| 1641.7471      | 15 | P 10 | 952.4675       | 476.7376        |
| 1698.7686      | 16 | G 9  | 855.4147       | 428.2113        |
| 1795.8213      | 17 | P 8  | 798.3932       | 399.7005        |
| 1926.8618      | 18 | M 7  | 701.3405       | 351.1741        |
| 1983.8833      | 19 | G 6  | 570.3000       | 285.6539        |
| 2080.9360      | 20 | P 5  | 513.2785       | 257.1432        |
| 2167.9681      | 21 | S 4  | 416.2258       | 208.6168        |
| 2224.9895      | 22 | G 3  | 329.1937       | 165.1008        |
| 2322.0423      | 23 | P 2  | 272.1723       | 136.5900        |
|                | 24 | R 1  | 175.1195       | 88.0637         |

N-term:+43.02 K(8):+156.13



MTEEHTDLEAR, MH+ 1373.6007, m/z 687.3040  
 L OSG37 P180811 230811-s1.04675.04675.2.dta

X-range:

-

MassTol: Y-zoom:

MassType:

AVG  MONO

Axis:

1  2

Label:

I  M  -

Ions:

a  +  2+  3+

b  +  2+  3+

c  +  2+  3+

x  +  2+  3+

y  +  2+  3+

z  +  2+  3+

hide H<sub>2</sub>O/NH<sub>3</sub>

zoom 112-122

GO

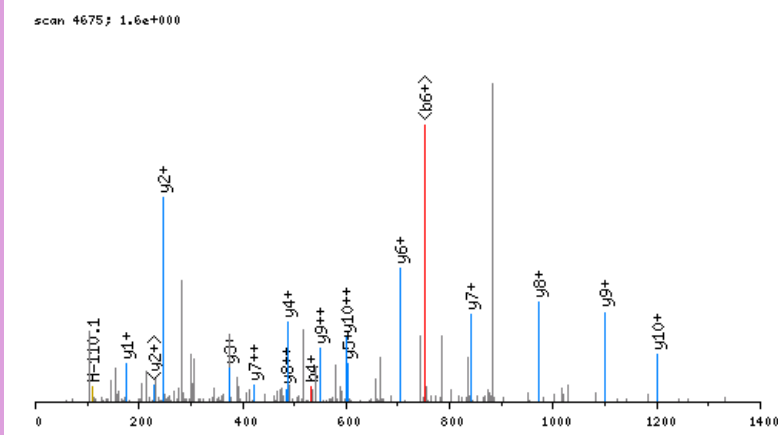

click image to zoom in; click top corners to zoom out [\[precursor±\]](#)

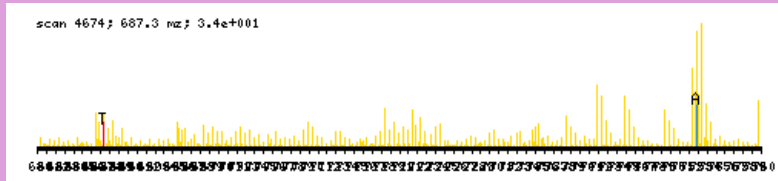

zoomed in precursor plot; T=theoretical m/z, A=acquired m/z

| b <sup>+</sup> | #  | AA # | y <sup>+</sup> | y <sup>2+</sup> |
|----------------|----|------|----------------|-----------------|
| 174.0589       | 1  | M 11 |                |                 |
| 275.1066       | 2  | T 10 | 1200.5497      | 600.7787        |
| 404.1492       | 3  | E 9  | 1099.5020      | 550.2549        |
| 533.1917       | 4  | E 8  | 970.4594       | 485.7336        |
| 670.2507       | 5  | H 7  | 841.4168       | 421.2123        |
| 771.2983       | 6  | T 6  | 704.3579       | 352.6829        |
| 886.3253       | 7  | D 5  | 603.3102       | 302.1590        |
| 999.4093       | 8  | L 4  | 488.2833       | 244.6455        |
| 1128.4519      | 9  | E 3  | 375.1992       | 188.1035        |
| 1199.4891      | 10 | A 2  | 246.1566       | 123.5822        |
|                | 11 | R 1  | 175.1195       | 88.0637         |

N-term:+43.02

NAGSDPVVIVSAAR, MH+ 1397.7389, m/z 699.3731  
 L OSG41 P180811 230811-s1.06138.06138.2.dta

X-range:

-

MassTol: Y-zoom:

MassType:

AVG  MONO

Axis:

1  2

Label:

I  M  -

Ions:

a  +  2+  3+

b  +  2+  3+

c  +  2+  3+

x  +  2+  3+

y  +  2+  3+

z  +  2+  3+

hide H<sub>2</sub>O/NH<sub>3</sub>

zoom 112-122

GO

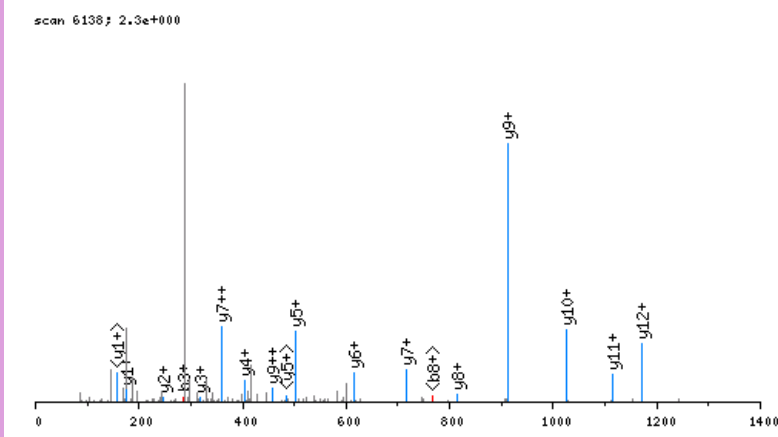

click image to zoom in; click top corners to zoom out [\[precursor±\]](#)

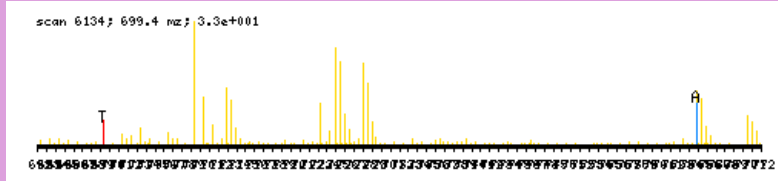

zoomed in precursor plot; T=theoretical m/z, A=acquired m/z

| b <sup>+</sup> | #  | AA # | y <sup>+</sup> | y <sup>2+</sup> |
|----------------|----|------|----------------|-----------------|
| 157.0613       | 1  | N 14 |                |                 |
| 228.0984       | 2  | A 13 | 1241.6854      | 621.3466        |
| 285.1199       | 3  | G 12 | 1170.6483      | 585.8280        |
| 372.1519       | 4  | S 11 | 1113.6268      | 557.3173        |
| 487.1789       | 5  | D 10 | 1026.5948      | 513.8013        |
| 584.2316       | 6  | P 9  | 911.5678       | 456.2878        |
| 683.3001       | 7  | V 8  | 814.5151       | 407.7614        |
| 782.3685       | 8  | V 7  | 715.4466       | 358.2272        |
| 895.4525       | 9  | I 6  | 616.3782       | 308.6930        |
| 994.5209       | 10 | V 5  | 503.2942       | 252.1510        |
| 1081.5530      | 11 | S 4  | 404.2258       | 202.6168        |
| 1152.5901      | 12 | A 3  | 317.1937       | 159.1008        |
| 1223.6272      | 13 | A 2  | 246.1566       | 123.5822        |
|                | 14 | R 1  | 175.1195       | 88.0637         |

N-term:+43.02

NGPLHPR, MH+ 832.4430, m/z 416.7251  
 L OSG38 P180811 230811-s1.03383.03383.2.dta

scan 3383; 8.2e+000

X-range:

-

MassTol: Y-zoom:

MassType:

AVG  MONO

Axis:

1  2

Label:

I  M  -

Ions:

a  +  2+  3+

b  +  2+  3+

c  +  2+  3+

x  +  2+  3+

y  +  2+  3+

z  +  2+  3+

hide H<sub>2</sub>O/NH<sub>3</sub>

zoom 112-122

GO

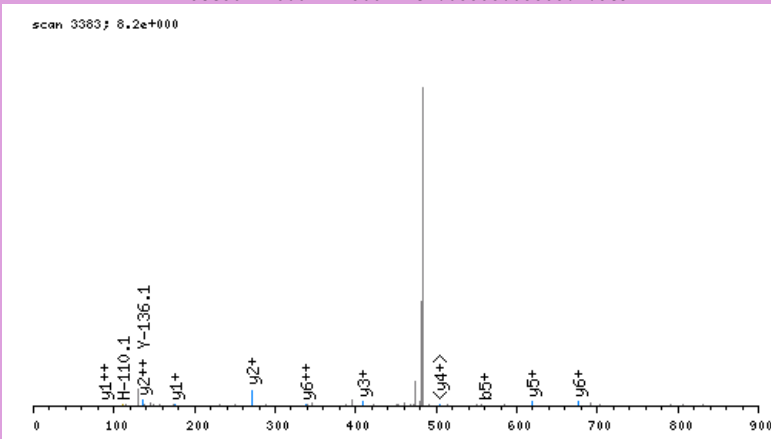

click image to zoom in; click top corners to zoom out [\[precursor±\]](#)

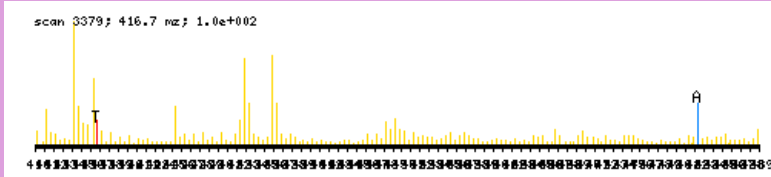

zoomed in precursor plot; T=theoretical m/z, A=acquired m/z

| b <sup>+</sup> | # | AA # | y <sup>+</sup> | y <sup>2+</sup>   |
|----------------|---|------|----------------|-------------------|
| 157.0613       | 1 | N    | 7              |                   |
| 214.0828       | 2 | G    | 6              | 676.3895 338.6986 |
| 311.1356       | 3 | P    | 5              | 619.3680 310.1879 |
| 424.2196       | 4 | L    | 4              | 522.3152 261.6615 |
| 561.2785       | 5 | H    | 3              | 409.2312 205.1195 |
| 658.3313       | 6 | P    | 2              | 272.1723 136.5900 |
|                | 7 | R    | 1              | 175.1195 88.0637  |

N-term:+43.02

NHDFQALALESR, MH+ 1442.7028, m/z 481.5725  
 L OSG37 P180811 230811-s1.07017.07017.3.dta

X-range:

-

MassTol: Y-zoom:

MassType:

AVG  MONO

Axis:

1  2

Label:

I  M  -

Ions:

a  +  2+  3+

b  +  2+  3+

c  +  2+  3+

x  +  2+  3+

y  +  2+  3+

z  +  2+  3+

hide H<sub>2</sub>O/NH<sub>3</sub>

zoom 112-122

GO

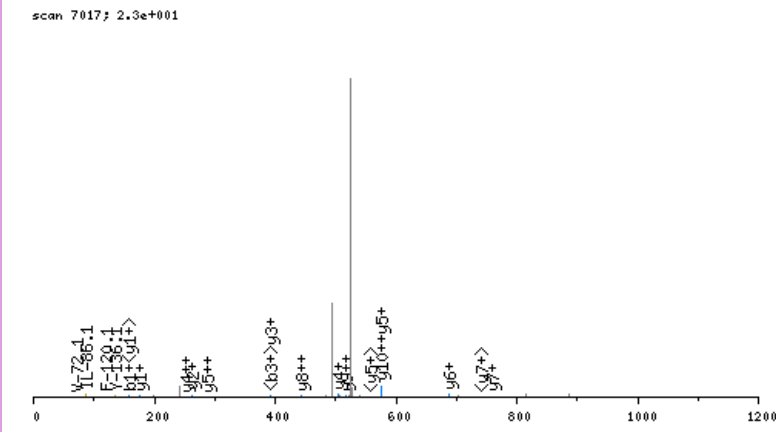

click image to zoom in; click top corners to zoom out [\[precursor±\]](#)

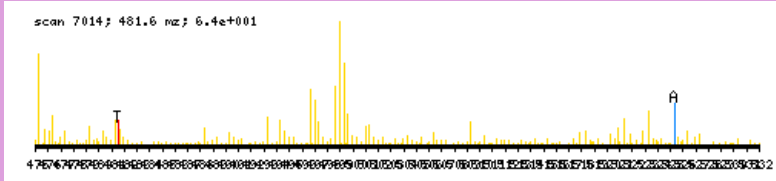

zoomed in precursor plot; T=theoretical m/z, A=acquired m/z

| b <sup>+</sup> | #  | AA # | y <sup>+</sup> | y <sup>2+</sup> |
|----------------|----|------|----------------|-----------------|
| 157.0613       | 1  | N 12 |                |                 |
| 294.1202       | 2  | H 11 | 1286.6493      | 643.8286        |
| 409.1472       | 3  | D 10 | 1149.5904      | 575.2991        |
| 556.2156       | 4  | F 9  | 1034.5635      | 517.7856        |
| 684.2742       | 5  | Q 8  | 887.4951       | 444.2514        |
| 755.3113       | 6  | A 7  | 759.4365       | 380.2222        |
| 868.3954       | 7  | L 6  | 688.3994       | 344.7036        |
| 939.4325       | 8  | A 5  | 575.3153       | 288.1616        |
| 1052.5165      | 9  | L 4  | 504.2782       | 252.6430        |
| 1181.5591      | 10 | E 3  | 391.1941       | 196.1010        |
| 1268.5912      | 11 | S 2  | 262.1515       | 131.5797        |
|                | 12 | R 1  | 175.1195       | 88.0637         |

N-term:+43.02

NHTSQAFITAASGGQPPNYER, MH+ 2288.0696, m/z 763.3614  
 L OSG37 P180811 230811-s1.06381.06381.3.dta

scan 6381; 5.1e+000

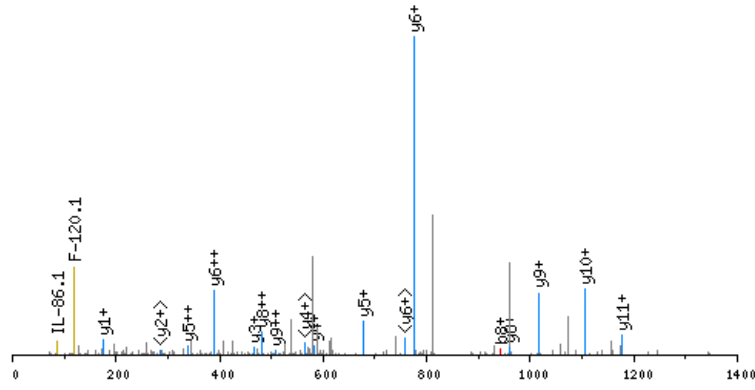

click image to zoom in; click top corners to zoom out [precursor±]

scan 6379; 763.4 m/z; 2.5e+001

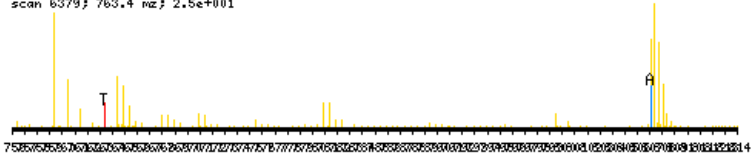

zoomed in precursor plot; T=theoretical m/z, A=acquired m/z

X-range:

-

MassTol: Y-zoom:

MassType:

AVG  MONO

Axis:

1  2

Label:

I  M  -

Ions:

a  +  2+  3+

b  +  2+  3+

c  +  2+  3+

x  +  2+  3+

y  +  2+  3+

z  +  2+  3+

hide H<sub>2</sub>O/NH<sub>3</sub>

zoom 112-122

GO

| b <sup>+</sup> | #  | AA # | y <sup>+</sup> | y <sup>2+</sup> |
|----------------|----|------|----------------|-----------------|
| 157.0613       | 1  | N 21 |                |                 |
| 294.1202       | 2  | H 20 | 2132.0161      | 1066.5120       |
| 395.1679       | 3  | T 19 | 1994.9572      | 997.9825        |
| 482.1999       | 4  | S 18 | 1893.9095      | 947.4587        |
| 610.2585       | 5  | Q 17 | 1806.8775      | 903.9427        |
| 681.2956       | 6  | A 16 | 1678.8189      | 839.9134        |
| 828.3641       | 7  | F 15 | 1607.7818      | 804.3948        |
| 941.4481       | 8  | I 14 | 1460.7134      | 730.8606        |
| 1042.4958      | 9  | T 13 | 1347.6293      | 674.3186        |
| 1113.5329      | 10 | A 12 | 1246.5816      | 623.7947        |
| 1184.5700      | 11 | A 11 | 1175.5445      | 588.2762        |
| 1271.6021      | 12 | S 10 | 1104.5074      | 552.7576        |
| 1328.6235      | 13 | G 9  | 1017.4754      | 509.2416        |
| 1385.6450      | 14 | G 8  | 960.4539       | 480.7309        |
| 1513.7036      | 15 | Q 7  | 903.4325       | 452.2201        |
| 1610.7563      | 16 | P 6  | 775.3739       | 388.1909        |
| 1707.8091      | 17 | P 5  | 678.3211       | 339.6645        |
| 1821.8520      | 18 | N 4  | 581.2683       | 291.1381        |
| 1984.9153      | 19 | Y 3  | 467.2254       | 234.1166        |
| 2113.9579      | 20 | E 2  | 304.1621       | 152.5850        |
|                | 21 | R 1  | 175.1195       | 88.0637         |

N-term:+43.02

NILAPVRR, MH+ 980.6005, m/z 490.8039  
 L OSG38 P180811 230811-s1.06116.06116.2.dta

X-range:

-

MassTol: Y-zoom:

MassType:

AVG  MONO

Axis:

1  2

Label:

I  M  -

Ions:

a  +  2+  3+

b  +  2+  3+

c  +  2+  3+

x  +  2+  3+

y  +  2+  3+

z  +  2+  3+

hide H<sub>2</sub>O/NH<sub>3</sub>

zoom 112-122

GO

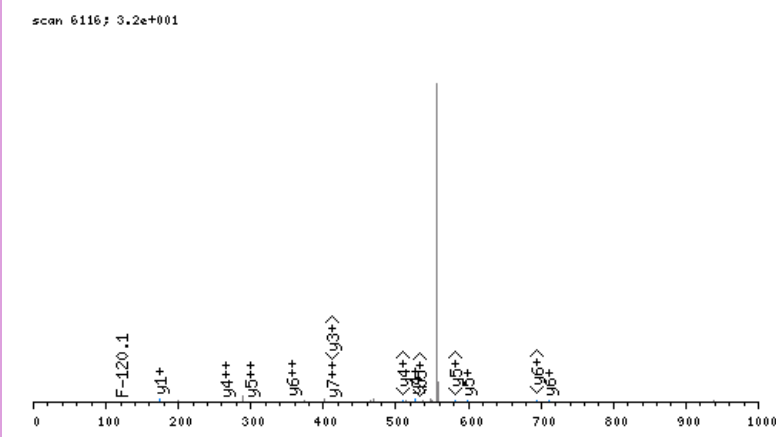

click image to zoom in; click top corners to zoom out [\[precursor±\]](#)

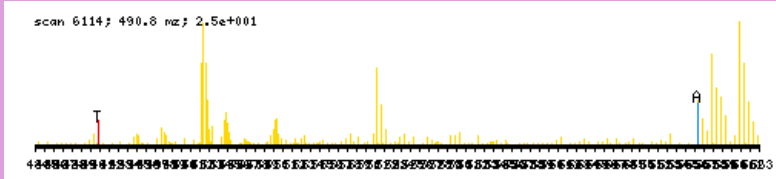

zoomed in precursor plot; T=theoretical m/z, A=acquired m/z

| b <sup>+</sup> | # | AA # | y <sup>+</sup> | y <sup>2+</sup> |
|----------------|---|------|----------------|-----------------|
| 157.0613       | 1 | N 8  |                |                 |
| 270.1454       | 2 | I 7  | 824.5470       | 412.7774        |
| 383.2295       | 3 | L 6  | 711.4630       | 356.2354        |
| 454.2666       | 4 | A 5  | 598.3789       | 299.6934        |
| 551.3193       | 5 | P 4  | 527.3418       | 264.1748        |
| 650.3877       | 6 | V 3  | 430.2890       | 215.6484        |
| 806.4889       | 7 | R 2  | 331.2206       | 166.1142        |
|                | 8 | R 1  | 175.1195       | 88.0637         |

N-term:+43.02

NKAPQPTGPPPAR, MH+ 1406.7969, m/z 469.6038  
 L OSG37 P180811 230811-s1.03008.03008.3.dta

X-range:

-

MassTol: Y-zoom:

MassType:

AVG  MONO

Axis:

1  2

Label:

I  M  -

Ions:

a  +  2+  3+

b  +  2+  3+

c  +  2+  3+

x  +  2+  3+

y  +  2+  3+

z  +  2+  3+

hide H<sub>2</sub>O/NH<sub>3</sub>

zoom 112-122

GO

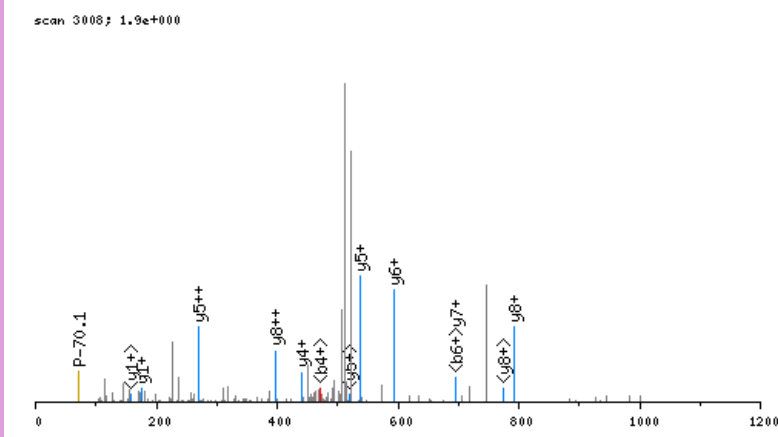

click image to zoom in; click top corners to zoom out [\[precursor±\]](#)

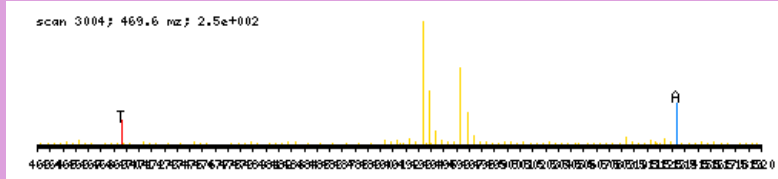

zoomed in precursor plot; T=theoretical m/z, A=acquired m/z

| b <sup>+</sup> | #  | AA # | y <sup>+</sup> | y <sup>2+</sup> |
|----------------|----|------|----------------|-----------------|
| 157.0613       | 1  | N 13 |                |                 |
| 319.2194       | 2  | K 12 | 1250.7434      | 625.8756        |
| 390.2565       | 3  | A 11 | 1088.5853      | 544.7965        |
| 487.3093       | 4  | P 10 | 1017.5482      | 509.2780        |
| 615.3679       | 5  | Q 9  | 920.4954       | 460.7516        |
| 712.4206       | 6  | P 8  | 792.4368       | 396.7223        |
| 813.4683       | 7  | T 7  | 695.3840       | 348.1959        |
| 870.4898       | 8  | G 6  | 594.3364       | 297.6721        |
| 967.5426       | 9  | P 5  | 537.3149       | 269.1614        |
| 1064.5953      | 10 | P 4  | 440.2621       | 220.6350        |
| 1161.6481      | 11 | P 3  | 343.2094       | 172.1086        |
| 1232.6852      | 12 | A 2  | 246.1566       | 123.5822        |
|                | 13 | R 1  | 175.1195       | 88.0637         |

N-term:+43.02 K(2):+162.16

NKGFIVTR, MH+ 1133.6319, m/z 567.3196  
 L OSG41 P180811 230811-s1.02542.02542.2.dta

X-range:

-

MassTol: Y-zoom:

MassType:

AVG  MONO

Axis:

1  2

Label:

I  M  -

Ions:

a  +  2+  3+

b  +  2+  3+

c  +  2+  3+

x  +  2+  3+

y  +  2+  3+

z  +  2+  3+

hide H<sub>2</sub>O/NH<sub>3</sub>

zoom 112-122

GO

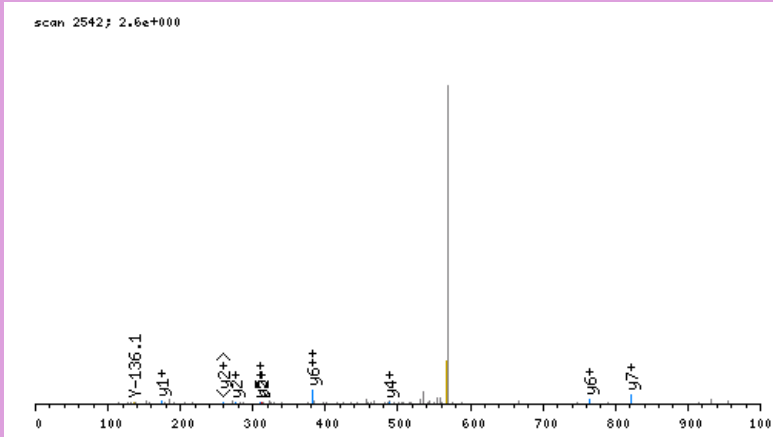

click image to zoom in; click top corners to zoom out [\[precursor±\]](#)

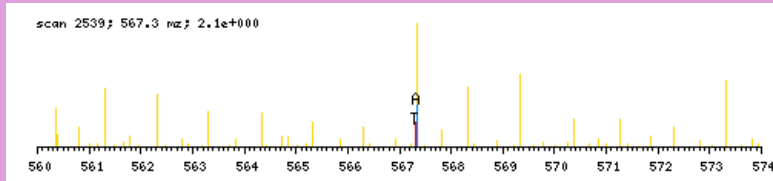

zoomed in precursor plot; T=theoretical m/z, A=acquired m/z

| b <sup>+</sup> | # | AA # | y <sup>+</sup> | y <sup>2+</sup>   |
|----------------|---|------|----------------|-------------------|
| 157.0613       | 1 | N    | 9              |                   |
| 313.1876       | 2 | K    | 8              | 977.5784 489.2931 |
| 370.2091       | 3 | G    | 7              | 821.4521 411.2300 |
| 517.2775       | 4 | F    | 6              | 764.4307 382.7192 |
| 646.3201       | 5 | E    | 5              | 617.3623 309.1850 |
| 759.4042       | 6 | I    | 4              | 488.3197 244.6637 |
| 858.4726       | 7 | V    | 3              | 375.2356 188.1217 |
| 959.5203       | 8 | T    | 2              | 276.1672 138.5875 |
|                | 9 | R    | 1              | 175.1195 88.0637  |

N-term:+43.02 K(2):+156.13



NNQKQKPTLSGQR, MH+ 1737.0044, m/z 579.6730  
 L OSG39 P180811 230811-s1.02209.02209.3.dta

X-range:

-

MassTol: Y-zoom:

MassType:

AVG  MONO

Axis:

1  2

Label:

I  M  -

Ions:

a  +  2+  3+

b  +  2+  3+

c  +  2+  3+

x  +  2+  3+

y  +  2+  3+

z  +  2+  3+

hide H<sub>2</sub>O/NH<sub>3</sub>

zoom 112-122

GO

scan 2209; 1.8e+001

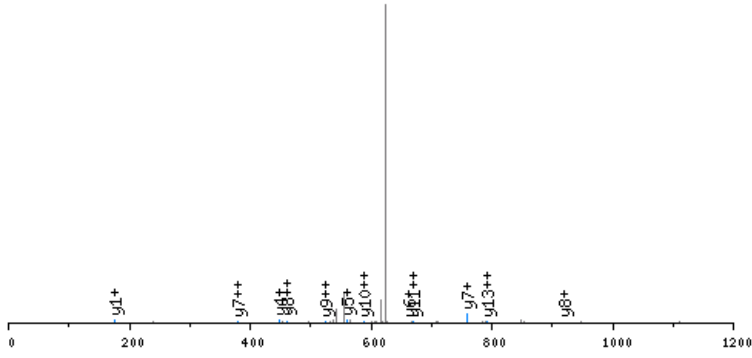

click image to zoom in; click top corners to zoom out [\[precursor±\]](#)

scan 2207; 579.7 mz; 2.4e+000

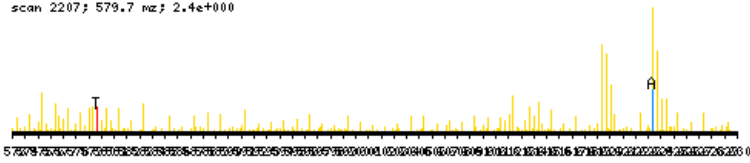

zoomed in precursor plot; T=theoretical m/z, A=acquired m/z

| b <sup>+</sup> | #  | AA | #  | y <sup>+</sup> | y <sup>2+</sup> |
|----------------|----|----|----|----------------|-----------------|
| 157.0613       | 1  | N  | 14 |                |                 |
| 271.1043       | 2  | N  | 13 | 1580.9509      | 790.9794        |
| 399.1628       | 3  | Q  | 12 | 1466.9080      | 733.9579        |
| 561.3209       | 4  | K  | 11 | 1338.8494      | 669.9286        |
| 689.3795       | 5  | Q  | 10 | 1176.6913      | 588.8496        |
| 817.4381       | 6  | Q  | 9  | 1048.6328      | 524.8203        |
| 979.5962       | 7  | K  | 8  | 920.5742       | 460.7910        |
| 1076.6490      | 8  | P  | 7  | 758.4161       | 379.7120        |
| 1177.6966      | 9  | T  | 6  | 661.3633       | 331.1856        |
| 1290.7807      | 10 | L  | 5  | 560.3156       | 280.6617        |
| 1377.8127      | 11 | S  | 4  | 447.2316       | 224.1197        |
| 1434.8342      | 12 | G  | 3  | 360.1995       | 180.6037        |
| 1562.8928      | 13 | Q  | 2  | 303.1781       | 152.0930        |
|                | 14 | R  | 1  | 175.1195       | 88.0637         |

N-term:+43.02 K(4):+162.16  
 K(7):+162.16

NQEKLAKLQAQVR, MH+ 1623.9547, m/z 541.9898  
 L OSG39 P180811 230811-s1.04277.04277.3.dta

X-range:

-

MassTol: Y-zoom:

MassType:

AVG  MONO

Axis:

1  2

Label:

I  M  -

Ions:

a  +  2+  3+

b  +  2+  3+

c  +  2+  3+

x  +  2+  3+

y  +  2+  3+

z  +  2+  3+

hide H<sub>2</sub>O/NH<sub>3</sub>

zoom 112-122

GO

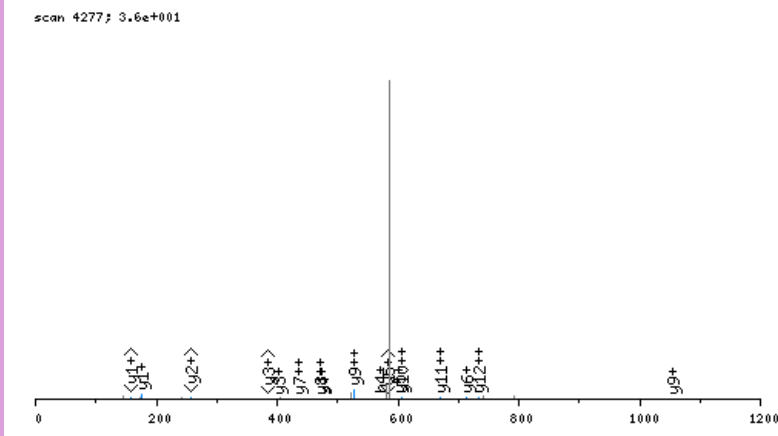

click image to zoom in; click top corners to zoom out [\[precursor±\]](#)

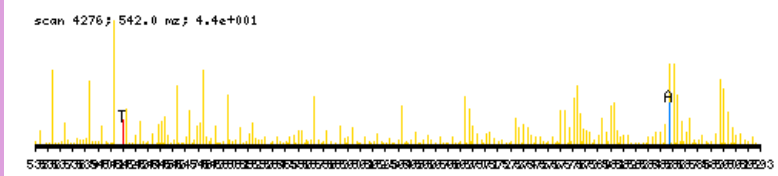

zoomed in precursor plot; T=theoretical m/z, A=acquired m/z

| b <sup>+</sup> | #  | AA | #  | y <sup>+</sup> | y <sup>2+</sup> |
|----------------|----|----|----|----------------|-----------------|
| 157.0613       | 1  | N  | 13 |                |                 |
| 285.1199       | 2  | Q  | 12 | 1467.9012      | 734.4545        |
| 414.1625       | 3  | E  | 11 | 1339.8426      | 670.4252        |
| 570.2888       | 4  | K  | 10 | 1210.8000      | 605.9039        |
| 683.3729       | 5  | L  | 9  | 1054.6737      | 527.8408        |
| 754.4100       | 6  | A  | 8  | 941.5897       | 471.2987        |
| 910.5363       | 7  | K  | 7  | 870.5525       | 435.7802        |
| 1023.6203      | 8  | L  | 6  | 714.4262       | 357.7170        |
| 1151.6789      | 9  | Q  | 5  | 601.3422       | 301.1750        |
| 1222.7160      | 10 | A  | 4  | 473.2836       | 237.1457        |
| 1350.7746      | 11 | Q  | 3  | 402.2465       | 201.6272        |
| 1449.8430      | 12 | V  | 2  | 274.1879       | 137.5979        |
|                | 13 | R  | 1  | 175.1195       | 88.0637         |

N-term:+43.02 K(4):+156.13  
 K(7):+156.13

NRPAPVEISYENMR, MH+ 1717.8332, m/z 573.2826  
 L OSG37 P180811 230811-s1.06022.06022.3.dta

X-range:

-

MassTol: Y-zoom:

MassType:

AVG  MONO

Axis:

1  2

Label:

I  M  -

Ions:

a  +  2+  3+

b  +  2+  3+

c  +  2+  3+

x  +  2+  3+

y  +  2+  3+

z  +  2+  3+

hide H<sub>2</sub>O/NH<sub>3</sub>

zoom 112-122

GO

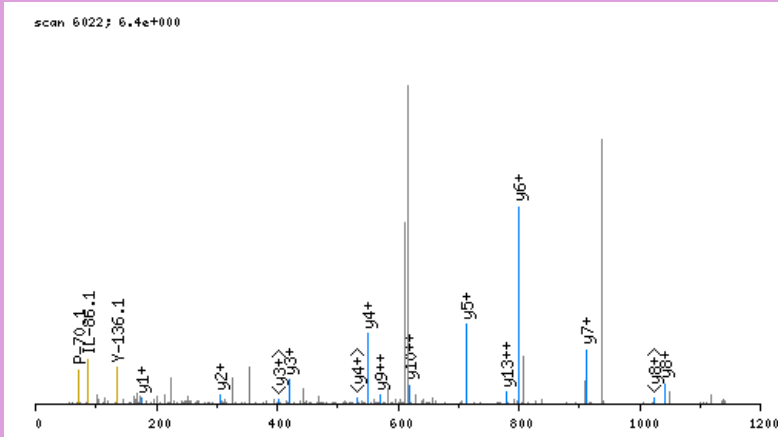

click image to zoom in; click top corners to zoom out [\[precursor±\]](#)

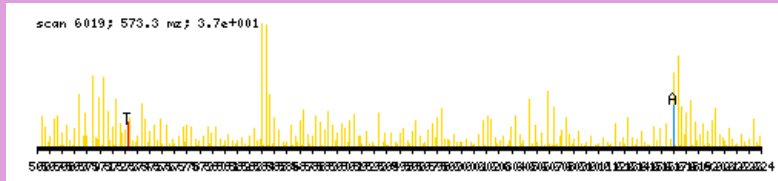

zoomed in precursor plot; T=theoretical m/z, A=acquired m/z

| b <sup>+</sup> | #  | AA # | y <sup>+</sup> | y <sup>2+</sup> |
|----------------|----|------|----------------|-----------------|
| 157.0613       | 1  | N 14 |                |                 |
| 313.1624       | 2  | R 13 | 1561.7797      | 781.3938        |
| 410.2152       | 3  | P 12 | 1405.6786      | 703.3432        |
| 481.2523       | 4  | A 11 | 1308.6258      | 654.8168        |
| 578.3051       | 5  | P 10 | 1237.5887      | 619.2983        |
| 677.3735       | 6  | V 9  | 1140.5359      | 570.7719        |
| 806.4161       | 7  | E 8  | 1041.4675      | 521.2377        |
| 919.5002       | 8  | I 7  | 912.4249       | 456.7164        |
| 1006.5322      | 9  | S 6  | 799.3409       | 400.1743        |
| 1169.5955      | 10 | Y 5  | 712.3088       | 356.6583        |
| 1298.6381      | 11 | E 4  | 549.2455       | 275.1267        |
| 1412.6810      | 12 | N 3  | 420.2029       | 210.6054        |
| 1543.7215      | 13 | M 2  | 306.1600       | 153.5839        |
|                | 14 | R 1  | 175.1195       | 88.0637         |

N-term:+43.02

NSVGGEACTDMKR, MH+ 1437.6466, m/z 719.3269  
 L OSG37 P180811 230811-s1.04202.04202.2.dta

scan 4202; 4.0e+000

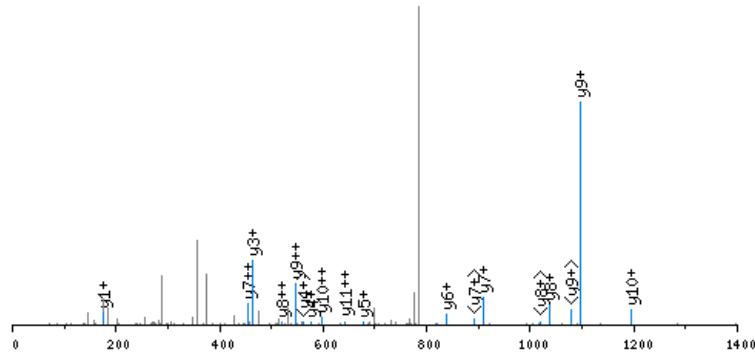

click image to zoom in; click top corners to zoom out [precursor±]

scan 4199; 719.3 m/z; 1.5e+001

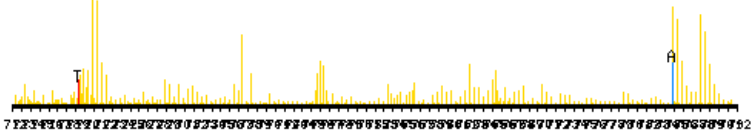

zoomed in precursor plot; T=theoretical m/z, A=acquired m/z

X-range:

-

MassTol: Y-zoom:

MassType:

AVG  MONO

Axis:

1  2

Label:

I  M  -

Ions:

a  +  2+  3+

b  +  2+  3+

c  +  2+  3+

x  +  2+  3+

y  +  2+  3+

z  +  2+  3+

hide H<sub>2</sub>O/NH<sub>3</sub>

zoom 112-122

GO

| b <sup>+</sup> | #  | AA | #  | y <sup>+</sup> | y <sup>2+</sup> |
|----------------|----|----|----|----------------|-----------------|
| 157.0613       | 1  | N  | 12 |                |                 |
| 244.0934       | 2  | S  | 11 | 1281.5931      | 641.3005        |
| 343.1618       | 3  | V  | 10 | 1194.5611      | 597.7845        |
| 400.1832       | 4  | G  | 9  | 1095.4927      | 548.2503        |
| 529.2258       | 5  | E  | 8  | 1038.4712      | 519.7395        |
| 600.2629       | 6  | A  | 7  | 909.4286       | 455.2182        |
| 760.2935       | 7  | C  | 6  | 838.3915       | 419.6997        |
| 861.3412       | 8  | T  | 5  | 678.3609       | 339.6844        |
| 976.3682       | 9  | D  | 4  | 577.3132       | 289.1605        |
| 1107.4086      | 10 | M  | 3  | 462.2863       | 231.6471        |
| 1263.5349      | 11 | K  | 2  | 331.2458       | 166.1268        |
|                | 12 | R  | 1  | 175.1195       | 88.0637         |

N-term:+43.02 C(7):+160.03  
 K(11):+156.13

NVEHEVNLLVEEIH<sup>+</sup>R, MH<sup>+</sup> 1871.9616, m/z 624.6587  
 L OSG39 P180811 230811-s1.07962.07962.3.dta

X-range:

-

MassTol: Y-zoom:

MassType:

AVG  MONO

Axis:

1  2

Label:

I  M  -

Ions:

a  +  2+  3+

b  +  2+  3+

c  +  2+  3+

x  +  2+  3+

y  +  2+  3+

z  +  2+  3+

hide H<sub>2</sub>O/NH<sub>3</sub>

zoom 112-122

GO

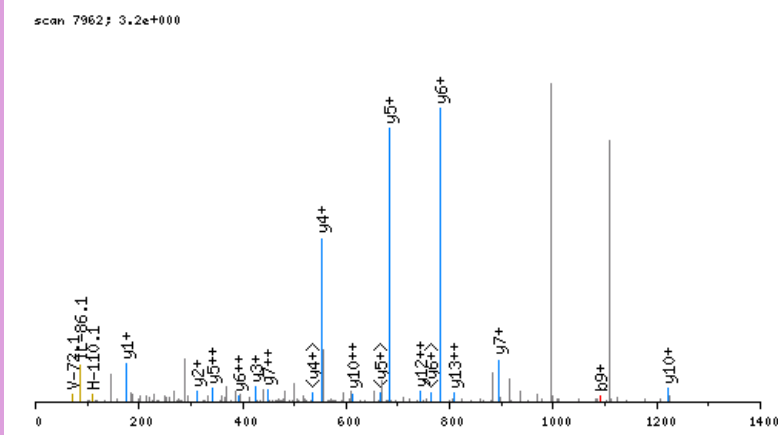

click image to zoom in; click top corners to zoom out [\[precursor±\]](#)

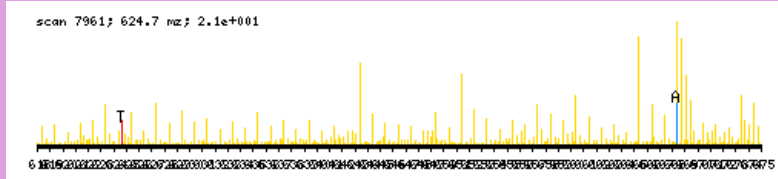

zoomed in precursor plot; T=theoretical m/z, A=acquired m/z

| b <sup>+</sup> | #  | AA # | y <sup>+</sup> | y <sup>2+</sup> |
|----------------|----|------|----------------|-----------------|
| 157.0613       | 1  | N 15 |                |                 |
| 256.1297       | 2  | V 14 | 1715.9081      | 858.4579        |
| 385.1723       | 3  | E 13 | 1616.8396      | 808.9237        |
| 522.2312       | 4  | H 12 | 1487.7971      | 744.4024        |
| 651.2738       | 5  | E 11 | 1350.7381      | 675.8730        |
| 750.3423       | 6  | V 10 | 1221.6955      | 611.3517        |
| 864.3852       | 7  | N 9  | 1122.6271      | 561.8175        |
| 977.4692       | 8  | L 8  | 1008.5842      | 504.7960        |
| 1090.5533      | 9  | L 7  | 895.5001       | 448.2540        |
| 1189.6217      | 10 | V 6  | 782.4161       | 391.7120        |
| 1318.6643      | 11 | E 5  | 683.3477       | 342.1777        |
| 1447.7069      | 12 | E 4  | 554.3051       | 277.6564        |
| 1560.7910      | 13 | I 3  | 425.2625       | 213.1352        |
| 1697.8499      | 14 | H 2  | 312.1784       | 156.5931        |
|                | 15 | R 1  | 175.1195       | 88.0637         |

N-term:+43.02

NVNDLKQR, MH+ 1056.5802, m/z 528.7938  
 L OSG38 P180811 230811-s1.04210.04210.2.dta

X-range:

-

MassTol: Y-zoom:

MassType:

AVG  MONO

Axis:

1  2

Label:

I  M  -

Ions:

a  +  2+  3+

b  +  2+  3+

c  +  2+  3+

x  +  2+  3+

y  +  2+  3+

z  +  2+  3+

hide H<sub>2</sub>O/NH<sub>3</sub>

zoom 112-122

GO

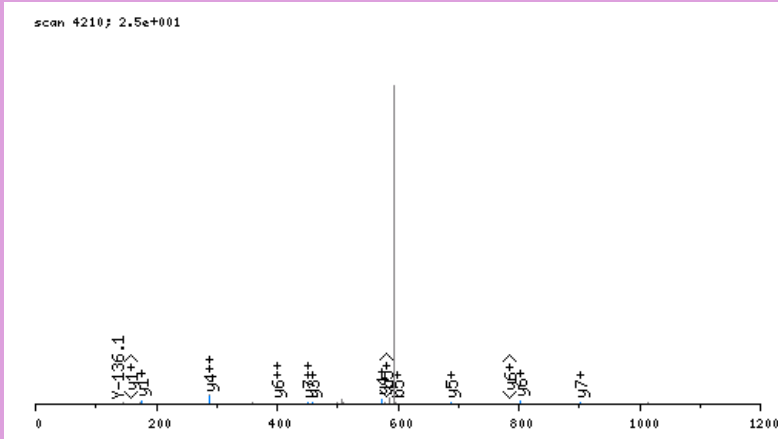

click image to zoom in; click top corners to zoom out [\[precursor±\]](#)

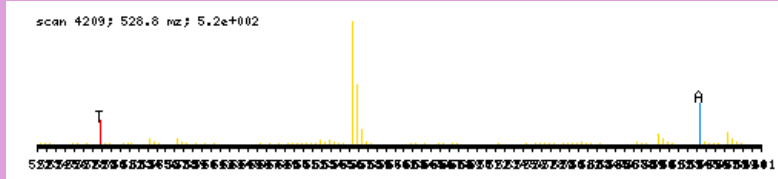

zoomed in precursor plot; T=theoretical m/z, A=acquired m/z

| b <sup>+</sup> | # | AA # | y <sup>+</sup> | y <sup>2+</sup>   |
|----------------|---|------|----------------|-------------------|
| 157.0613       | 1 | N    | 8              |                   |
| 256.1297       | 2 | V    | 7              | 900.5267 450.7673 |
| 370.1727       | 3 | N    | 6              | 801.4583 401.2331 |
| 485.1996       | 4 | D    | 5              | 687.4154 344.2116 |
| 598.2837       | 5 | L    | 4              | 572.3884 286.6981 |
| 754.4100       | 6 | K    | 3              | 459.3044 230.1561 |
| 882.4686       | 7 | Q    | 2              | 303.1781 152.0930 |
|                | 8 | R    | 1              | 175.1195 88.0637  |

N-term:+43.02 K(6):+156.13

NYYEQWGK, MH+ 1157.5268, m/z 579.2670  
 L OSG41 P180811 230811-s1.04636.04636.2.dta

scan 4636; 9.2e-001

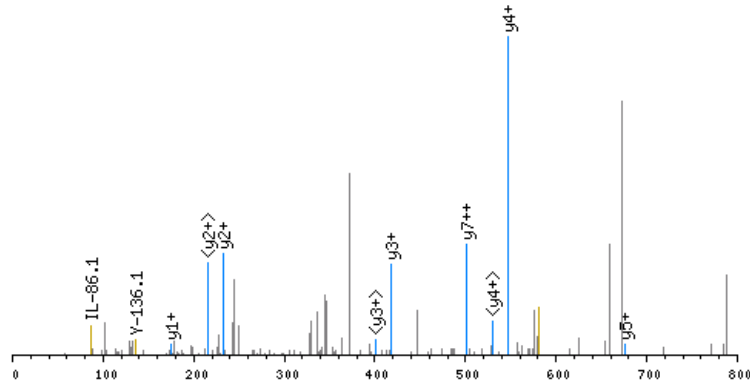

click image to zoom in; click top corners to zoom out [\[precursor±\]](#)

scan 4634; 579.3 m/z; 1.9e+001

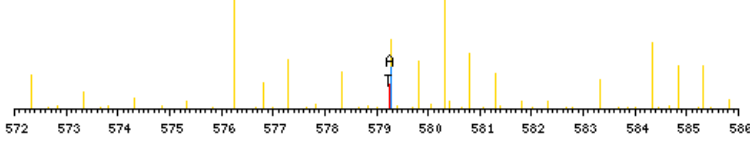

zoomed in precursor plot; T=theoretical m/z, A=acquired m/z

X-range:

-

MassTol: Y-zoom:

MassType:

AVG  MONO

Axis:

1  2

Label:

I  M  -

Ions:

a  +  2+  3+

b  +  2+  3+

c  +  2+  3+

x  +  2+  3+

y  +  2+  3+

z  +  2+  3+

hide H<sub>2</sub>O/NH<sub>3</sub>

zoom 112-122

GO

| b <sup>+</sup> | # | AA # | y <sup>+</sup> | y <sup>2+</sup> |
|----------------|---|------|----------------|-----------------|
| 157.0613       | 1 | N 8  |                |                 |
| 320.1247       | 2 | Y 7  | 1001.4733      | 501.2406        |
| 483.1880       | 3 | Y 6  | 838.4100       | 419.7089        |
| 612.2306       | 4 | E 5  | 675.3466       | 338.1772        |
| 740.2892       | 5 | Q 4  | 546.3040       | 273.6559        |
| 926.3685       | 6 | W 3  | 418.2455       | 209.6266        |
| 983.3899       | 7 | G 2  | 232.1662       | 116.5870        |
|                | 8 | K 1  | 175.1447       | 88.0763         |

N-term:+43.02 K(8):+156.13

QDAENVAVPEAAEER, MH+ 1669.7669, m/z 835.3871  
 L OSG41 P180811 230811-s1.05192.05192.2.dta

X-range:

-

MassTol: Y-zoom:

MassType:

AVG  MONO

Axis:

1  2

Label:

I  M  -

Ions:

a  +  2+  3+

b  +  2+  3+

c  +  2+  3+

x  +  2+  3+

y  +  2+  3+

z  +  2+  3+

hide H<sub>2</sub>O/NH<sub>3</sub>

zoom 112-122

GO

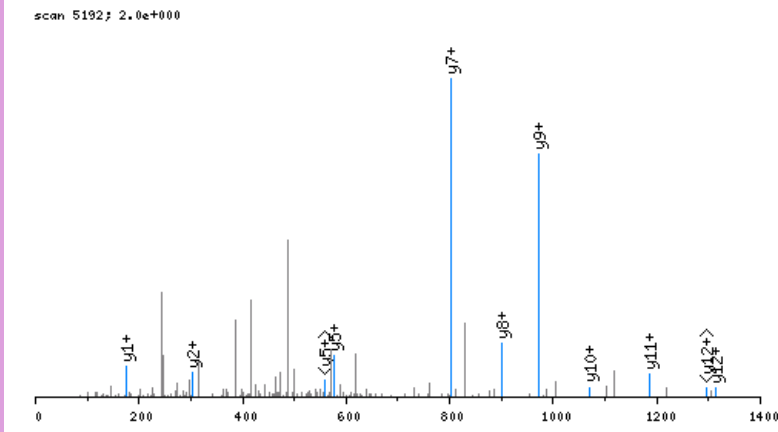

click image to zoom in; click top corners to zoom out [precursor±]

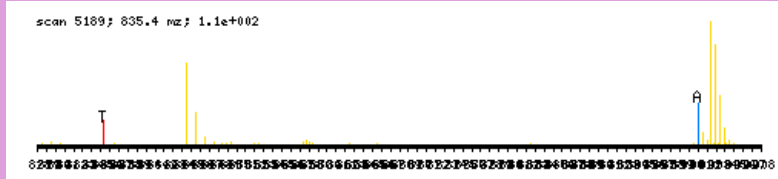

zoomed in precursor plot; T=theoretical m/z, A=acquired m/z

| b <sup>+</sup> | #  | AA # | y <sup>+</sup> | y <sup>2+</sup> |
|----------------|----|------|----------------|-----------------|
| 171.0770       | 1  | Q 15 |                |                 |
| 286.1039       | 2  | D 14 | 1499.6978      | 750.3528        |
| 357.1410       | 3  | A 13 | 1384.6708      | 692.8393        |
| 486.1836       | 4  | E 12 | 1313.6337      | 657.3208        |
| 600.2266       | 5  | N 11 | 1184.5911      | 592.7995        |
| 699.2950       | 6  | V 10 | 1070.5482      | 535.7780        |
| 770.3321       | 7  | A 9  | 971.4798       | 486.2438        |
| 869.4005       | 8  | V 8  | 900.4427       | 450.7253        |
| 966.4533       | 9  | P 7  | 801.3743       | 401.1910        |
| 1095.4959      | 10 | E 6  | 704.3215       | 352.6647        |
| 1166.5330      | 11 | A 5  | 575.2789       | 288.1434        |
| 1237.5701      | 12 | A 4  | 504.2418       | 252.6248        |
| 1366.6127      | 13 | E 3  | 433.2047       | 217.1063        |
| 1495.6553      | 14 | E 2  | 304.1621       | 152.5850        |
|                | 15 | R 1  | 175.1195       | 88.0637         |

N-term:+43.02



QEGDKVIHPGVSQAGEEMEYFGQGVK, MH+ 2888.4061, m/z 722.8570  
 L OSG40 P180811 230811-s1.06876.06876.4.dta

scan 6876; 3.8e+000

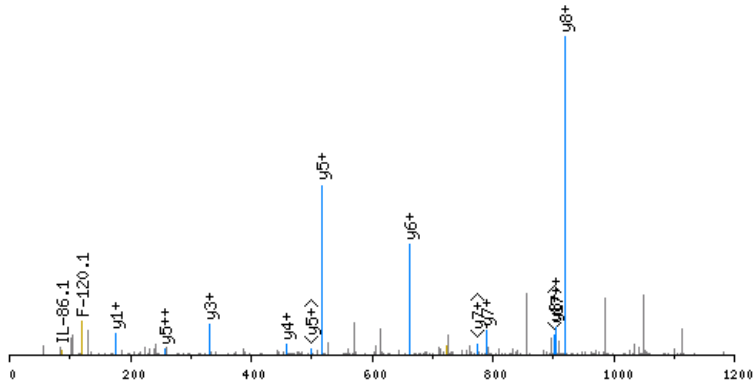

click image to zoom in; click top corners to zoom out [precursor±]

scan 6874; 722.9 m/z; 2.1e+001

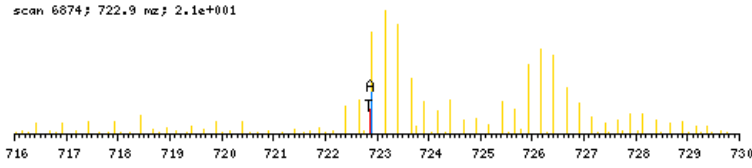

zoomed in precursor plot; T=theoretical m/z, A=acquired m/z

| b <sup>+</sup> | #  | AA # | y <sup>+</sup> | y <sup>2+</sup> |
|----------------|----|------|----------------|-----------------|
| 171.0770       | 1  | Q 26 |                |                 |
| 300.1196       | 2  | E 25 | 2718.3370      | 1359.6724       |
| 357.1410       | 3  | G 24 | 2589.2944      | 1295.1511       |
| 472.1680       | 4  | D 23 | 2532.2729      | 1266.6404       |
| 634.3261       | 5  | K 22 | 2417.2460      | 1209.1269       |
| 733.3945       | 6  | V 21 | 2255.0879      | 1128.0479       |
| 846.4786       | 7  | I 20 | 2156.0195      | 1078.5137       |
| 983.5375       | 8  | H 19 | 2042.9354      | 1021.9716       |
| 1080.5902      | 9  | P 18 | 1905.8765      | 953.4422        |
| 1137.6117      | 10 | G 17 | 1808.8237      | 904.9158        |
| 1236.6801      | 11 | V 16 | 1751.8023      | 876.4050        |
| 1323.7121      | 12 | S 15 | 1652.7339      | 826.8708        |
| 1451.7707      | 13 | Q 14 | 1565.7018      | 783.3548        |
| 1522.8078      | 14 | A 13 | 1437.6433      | 719.3255        |
| 1579.8293      | 15 | G 12 | 1366.6061      | 683.8070        |
| 1708.8719      | 16 | E 11 | 1309.5847      | 655.2963        |
| 1837.9145      | 17 | E 10 | 1180.5421      | 590.7750        |
| 1968.9550      | 18 | M 9  | 1051.4995      | 526.2537        |
| 2097.9976      | 19 | E 8  | 920.4590       | 460.7334        |
| 2226.0561      | 20 | Q 7  | 791.4164       | 396.2121        |
| 2373.1245      | 21 | F 6  | 663.3578       | 332.1828        |
| 2430.1460      | 22 | G 5  | 516.2894       | 258.6486        |
| 2558.2046      | 23 | Q 4  | 459.2680       | 230.1379        |
| 2615.2261      | 24 | G 3  | 331.2094       | 166.1086        |
| 2714.2945      | 25 | V 2  | 274.1879       | 137.5979        |
|                | 26 | R 1  | 175.1195       | 88.0637         |

N-term:+43.02 K(5):+162.16

X-range:

-

MassTol: Y-zoom:

MassType:

AVG  MONO

Axis:

1  2

Label:

I  M  -

Ions:

a  +  2+  3+

b  +  2+  3+

c  +  2+  3+

x  +  2+  3+

y  +  2+  3+

z  +  2+  3+

hide H<sub>2</sub>O/NH<sub>3</sub>

zoom 112-122

GO

QLLLTADDR, MH+ 1086.5795, m/z 543.7934  
 L OSG37 P180811 230811-s1.05208.05208.2.dta

scan 5208; 1.2e+001

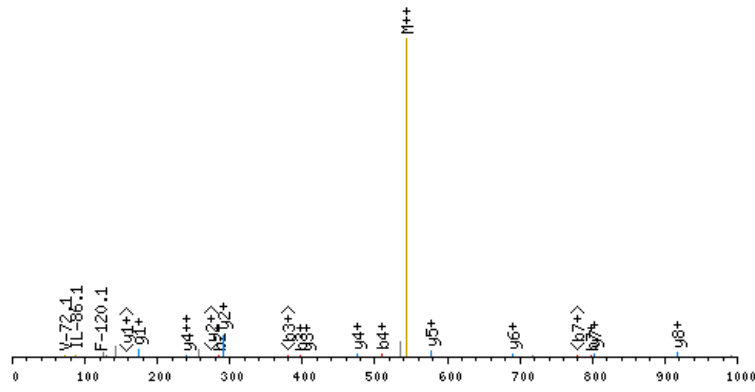

click image to zoom in; click top corners to zoom out [\[precursor±\]](#)

scan 5204; 543.8 m/z; 3.0e+001

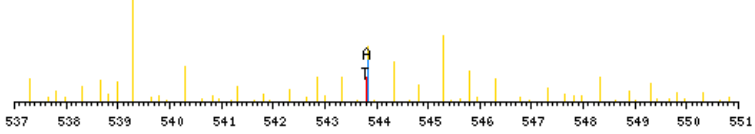

zoomed in precursor plot; T=theoretical m/z, A=acquired m/z

X-range:

-

MassTol: Y-zoom:

MassType:

AVG  MONO

Axis:

1  2

Label:

I  M  -

Ions:

a  +  2+  3+

b  +  2+  3+

c  +  2+  3+

x  +  2+  3+

y  +  2+  3+

z  +  2+  3+

hide H<sub>2</sub>O/NH<sub>3</sub>

zoom 112-122

GO

| b <sup>+</sup> | # | AA # | y <sup>+</sup> | y <sup>2+</sup>   |
|----------------|---|------|----------------|-------------------|
| 171.0770       | 1 | Q    | 9              |                   |
| 284.1610       | 2 | L    | 8              | 916.5104 458.7591 |
| 397.2451       | 3 | L    | 7              | 803.4263 402.2171 |
| 510.3292       | 4 | L    | 6              | 690.3422 345.6750 |
| 611.3768       | 5 | T    | 5              | 577.2582 289.1330 |
| 682.4140       | 6 | A    | 4              | 476.2105 238.6092 |
| 797.4409       | 7 | D    | 3              | 405.1734 203.0906 |
| 912.4678       | 8 | D    | 2              | 290.1464 145.5771 |
|                | 9 | R    | 1              | 175.1195 88.0637  |

N-term:+43.02

QNDAGEFVDLYVPR, MH+ 1664.7920, m/z 555.6022  
 L OSG41 P180811 230811-s1.07335.07335.3.dta

X-range:

-

MassTol: Y-zoom:

MassType:

AVG  MONO

Axis:

1  2

Label:

I  M  -

Ions:

a  +  2+  3+

b  +  2+  3+

c  +  2+  3+

x  +  2+  3+

y  +  2+  3+

z  +  2+  3+

hide H<sub>2</sub>O/NH<sub>3</sub>

zoom 112-122

GO

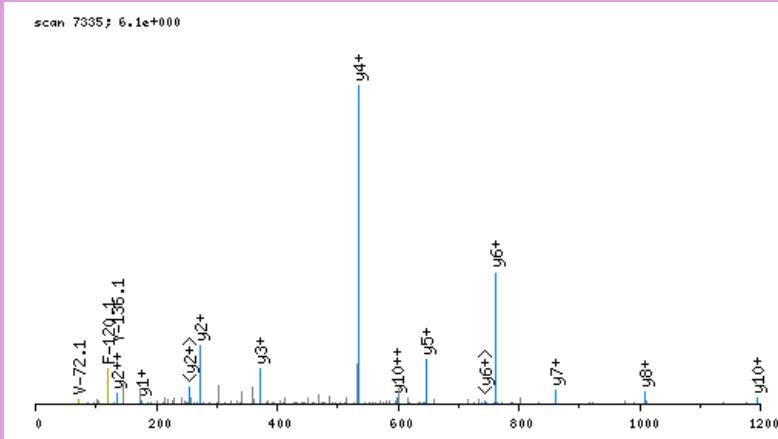

click image to zoom in; click top corners to zoom out [\[precursor±\]](#)

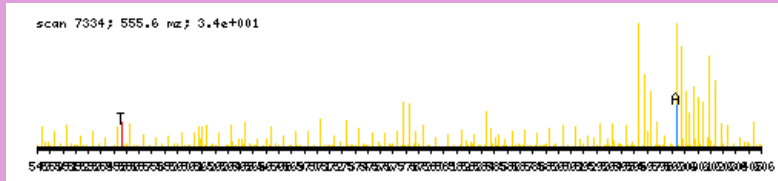

zoomed in precursor plot; T=theoretical m/z, A=acquired m/z

| b <sup>+</sup> | #  | AA # | y <sup>+</sup> | y <sup>2+</sup> |
|----------------|----|------|----------------|-----------------|
| 171.0770       | 1  | Q 14 |                |                 |
| 285.1199       | 2  | N 13 | 1494.7229      | 747.8654        |
| 400.1468       | 3  | D 12 | 1380.6800      | 690.8439        |
| 471.1840       | 4  | A 11 | 1265.6530      | 633.3304        |
| 528.2054       | 5  | G 10 | 1194.6159      | 597.8119        |
| 657.2480       | 6  | E 9  | 1137.5944      | 569.3011        |
| 804.3164       | 7  | F 8  | 1008.5518      | 504.7798        |
| 903.3848       | 8  | V 7  | 861.4834       | 431.2456        |
| 1018.4118      | 9  | D 6  | 762.4150       | 381.7114        |
| 1131.4959      | 10 | L 5  | 647.3881       | 324.1979        |
| 1294.5592      | 11 | Y 4  | 534.3040       | 267.6559        |
| 1393.6276      | 12 | V 3  | 371.2407       | 186.1243        |
| 1490.6804      | 13 | P 2  | 272.1723       | 136.5900        |
|                | 14 | R 1  | 175.1195       | 88.0637         |

N-term:+43.02

QNVTEYVVR, MH+ 1149.5904, m/z 575.2988  
 L OSG41 P180811 230811-s1.05980.05980.2.dta

X-range:

-

MassTol: Y-zoom:

MassType:

AVG  MONO

Axis:

1  2

Label:

I  M  -

Ions:

a  +  2+  3+

b  +  2+  3+

c  +  2+  3+

x  +  2+  3+

y  +  2+  3+

z  +  2+  3+

hide H<sub>2</sub>O/NH<sub>3</sub>

zoom 112-122

GO

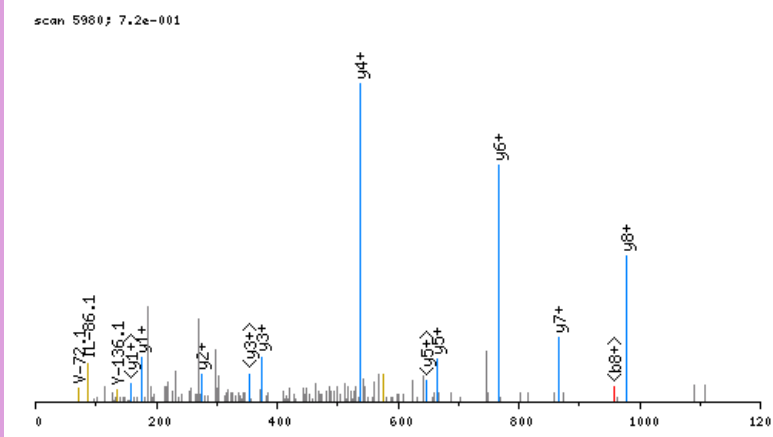

click image to zoom in; click top corners to zoom out [\[precursor±\]](#)

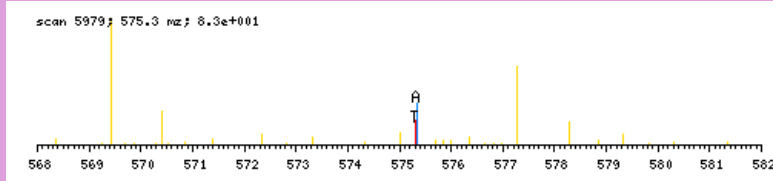

zoomed in precursor plot; T=theoretical m/z, A=acquired m/z

| b <sup>+</sup> | # | AA # | y <sup>+</sup> | y <sup>2+</sup> |
|----------------|---|------|----------------|-----------------|
| 171.0770       | 1 | Q    | 9              |                 |
| 285.1199       | 2 | N    | 8              | 979.5213        |
| 384.1883       | 3 | V    | 7              | 865.4783        |
| 485.2360       | 4 | T    | 6              | 766.4099        |
| 614.2786       | 5 | E    | 5              | 665.3623        |
| 777.3419       | 6 | Y    | 4              | 536.3197        |
| 876.4103       | 7 | V    | 3              | 373.2563        |
| 975.4787       | 8 | V    | 2              | 274.1879        |
|                | 9 | R    | 1              | 175.1195        |

N-term:+43.02

QPASAKWYDR, MH+ 1297.6754, m/z 649.3413  
 L OSG37 P180811 230811-s1.04982.04982.2.dta

X-range:

-

MassTol: Y-zoom:

MassType:

AVG  MONO

Axis:

1  2

Label:

I  M  -

Ions:

a  +  2+  3+

b  +  2+  3+

c  +  2+  3+

x  +  2+  3+

y  +  2+  3+

z  +  2+  3+

hide H<sub>2</sub>O/NH<sub>3</sub>

zoom 112-122

GO

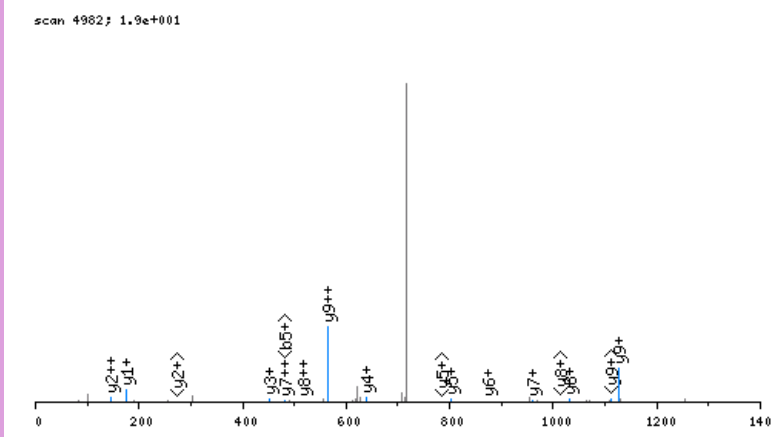

click image to zoom in; click top corners to zoom out [\[precursor±\]](#)

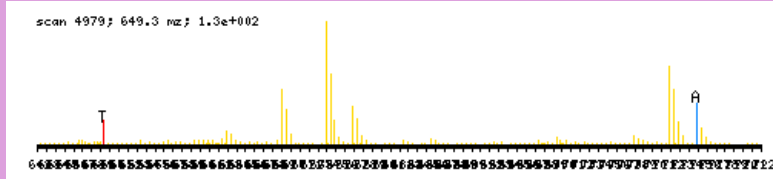

zoomed in precursor plot; T=theoretical m/z, A=acquired m/z

| b <sup>+</sup> | #  | AA # | y <sup>+</sup> | y <sup>2+</sup>    |
|----------------|----|------|----------------|--------------------|
| 171.0770       | 1  | Q    | 10             |                    |
| 268.1297       | 2  | P    | 9              | 1127.6062 564.3070 |
| 339.1669       | 3  | A    | 8              | 1030.5534 515.7806 |
| 426.1989       | 4  | S    | 7              | 959.5163 480.2621  |
| 497.2360       | 5  | A    | 6              | 872.4843 436.7461  |
| 659.3941       | 6  | K    | 5              | 801.4472 401.2275  |
| 845.4734       | 7  | W    | 4              | 639.2891 320.1485  |
| 1008.5367      | 8  | Y    | 3              | 453.2098 227.1088  |
| 1123.5637      | 9  | D    | 2              | 290.1464 145.5771  |
|                | 10 | R    | 1              | 175.1195 88.0637   |

N-term:+43.02 K(6):+162.16

QSAPLEQPAKRPR, MH+ 1547.8658, m/z 516.6268  
 L OSG40 P180811 230811-s1.03296.03296.3.dta

X-range:

-

MassTol: Y-zoom:

MassType:

AVG  MONO

Axis:

1  2

Label:

I  M  -

Ions:

a  +  2+  3+

b  +  2+  3+

c  +  2+  3+

x  +  2+  3+

y  +  2+  3+

z  +  2+  3+

hide H<sub>2</sub>O/NH<sub>3</sub>

zoom 112-122

GO

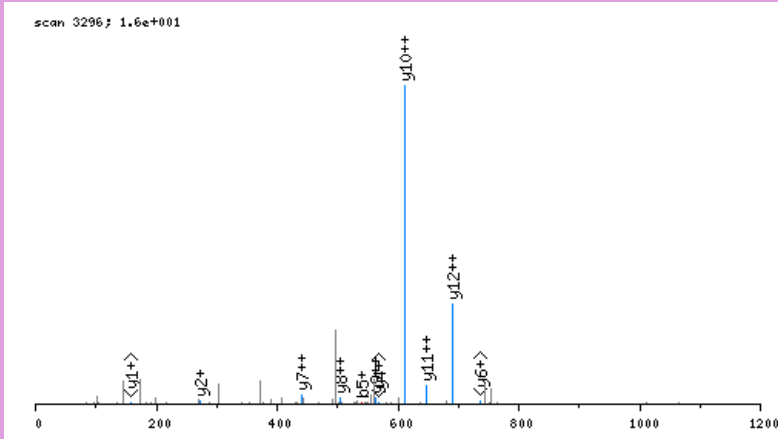

click image to zoom in; click top corners to zoom out [\[precursor±\]](#)

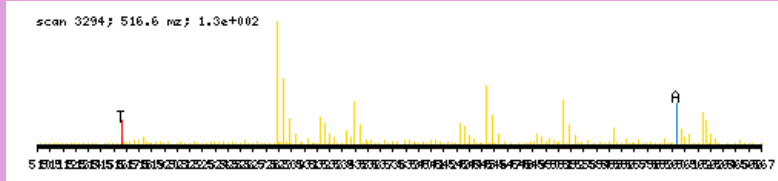

zoomed in precursor plot; T=theoretical m/z, A=acquired m/z

| b <sup>+</sup> | #  | AA # | y <sup>+</sup> | y <sup>2+</sup> |
|----------------|----|------|----------------|-----------------|
| 171.0770       | 1  | Q    | 13             |                 |
| 258.1090       | 2  | S    | 12             | 1377.7967       |
| 329.1461       | 3  | A    | 11             | 1290.7647       |
| 426.1989       | 4  | P    | 10             | 1219.7276       |
| 539.2829       | 5  | L    | 9              | 1122.6748       |
| 668.3255       | 6  | E    | 8              | 1009.5907       |
| 796.3841       | 7  | Q    | 7              | 880.5481        |
| 893.4369       | 8  | P    | 6              | 752.4896        |
| 964.4740       | 9  | A    | 5              | 655.4368        |
| 1120.6003      | 10 | K    | 4              | 584.3997        |
| 1276.7014      | 11 | R    | 3              | 428.2734        |
| 1373.7542      | 12 | P    | 2              | 272.1723        |
|                | 13 | R    | 1              | 175.1195        |

N-term:+43.02 K(10):+156.13

QSPAVLR, MH+ 812.4630, m/z 406.7352  
 L OSG41 P180811 230811-s1.04473.04473.2.dta

scan 4473; 1.3e+000

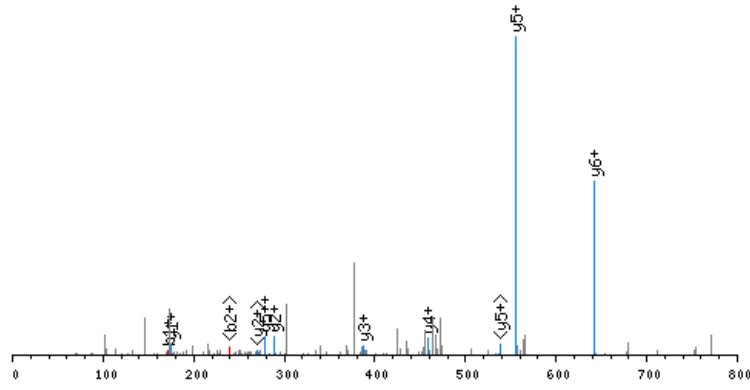

click image to zoom in; click top corners to zoom out [\[precursor±\]](#)

scan 4469; 406.7 m/z; 4.2e+002

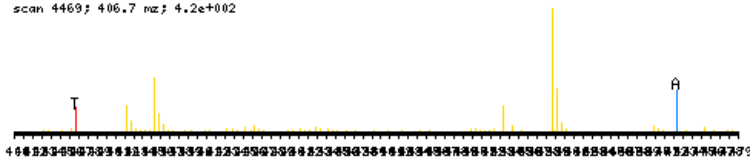

zoomed in precursor plot; T=theoretical m/z, A=acquired m/z

| b <sup>+</sup> | # | AA # | y <sup>+</sup> | y <sup>2+</sup>   |
|----------------|---|------|----------------|-------------------|
| 171.0770       | 1 | Q    | 7              |                   |
| 258.1090       | 2 | S    | 6              | 642.3939 321.7009 |
| 355.1618       | 3 | P    | 5              | 555.3619 278.1848 |
| 426.1989       | 4 | A    | 4              | 458.3091 229.6585 |
| 525.2673       | 5 | V    | 3              | 387.2720 194.1399 |
| 638.3514       | 6 | L    | 2              | 288.2036 144.6057 |
|                | 7 | R    | 1              | 175.1195 88.0637  |

N-term:+43.02

X-range:

-

MassTol: Y-zoom:

MassType:

AVG  MONO

Axis:

1  2

Label:

I  M  -

Ions:

a  +  2+  3+

b  +  2+  3+

c  +  2+  3+

x  +  2+  3+

y  +  2+  3+

z  +  2+  3+

hide H<sub>2</sub>O/NH<sub>3</sub>

zoom 112-122

GO

QTAHTGLSHTADGADGQTSR, MH+ 2052.9335, m/z 684.9827  
 L OSG39 P180811 230811-s1.02637.02637.3.dta

X-range:

-

MassTol: Y-zoom:

MassType:

AVG  MONO

Axis:

1  2

Label:

I  M  -

Ions:

a  +  2+  3+

b  +  2+  3+

c  +  2+  3+

x  +  2+  3+

y  +  2+  3+

z  +  2+  3+

hide H<sub>2</sub>O/NH<sub>3</sub>

zoom 112-122

GO

scan 2637; 1.2e+000

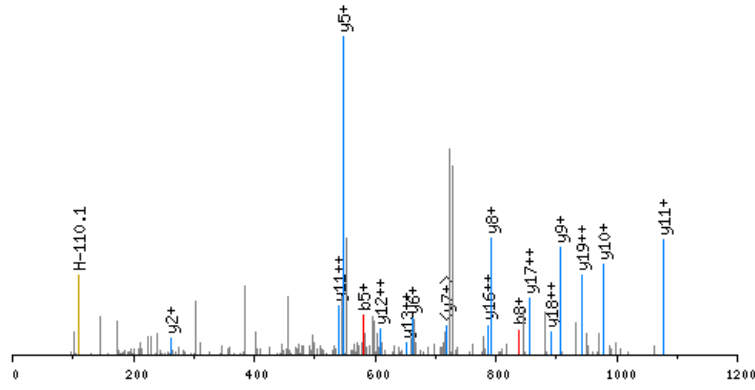

click image to zoom in; click top corners to zoom out [\[precursor±\]](#)

scan 2636; 685.0 m/z; 1.2e+001

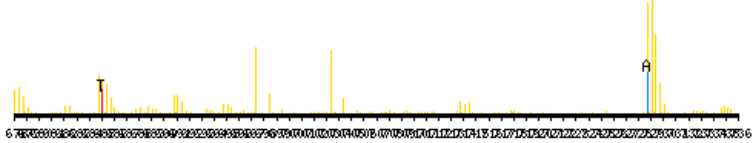

zoomed in precursor plot; T=theoretical m/z, A=acquired m/z

| b <sup>+</sup> | #  | AA | #  | y <sup>+</sup> | y <sup>2+</sup> |
|----------------|----|----|----|----------------|-----------------|
| 171.0770       | 1  | Q  | 20 |                |                 |
| 272.1247       | 2  | T  | 19 | 1882.8644      | 941.9361        |
| 343.1618       | 3  | A  | 18 | 1781.8167      | 891.4123        |
| 480.2207       | 4  | H  | 17 | 1710.7796      | 855.8937        |
| 581.2684       | 5  | T  | 16 | 1573.7207      | 787.3642        |
| 638.2898       | 6  | G  | 15 | 1472.6730      | 736.8404        |
| 751.3739       | 7  | L  | 14 | 1415.6515      | 708.3297        |
| 838.4059       | 8  | S  | 13 | 1302.5674      | 651.7876        |
| 975.4648       | 9  | H  | 12 | 1215.5354      | 608.2716        |
| 1076.5125      | 10 | T  | 11 | 1078.4765      | 539.7422        |
| 1147.5496      | 11 | A  | 10 | 977.4288       | 489.2183        |
| 1262.5766      | 12 | D  | 9  | 906.3917       | 453.6998        |
| 1319.5980      | 13 | G  | 8  | 791.3648       | 396.1863        |
| 1390.6351      | 14 | A  | 7  | 734.3433       | 367.6756        |
| 1505.6621      | 15 | D  | 6  | 663.3062       | 332.1570        |
| 1562.6835      | 16 | G  | 5  | 548.2792       | 274.6435        |
| 1690.7421      | 17 | Q  | 4  | 491.2578       | 246.1328        |
| 1791.7898      | 18 | T  | 3  | 363.1992       | 182.1035        |
| 1878.8218      | 19 | S  | 2  | 262.1515       | 131.5797        |
|                | 20 | R  | 1  | 175.1195       | 88.0637         |

N-term:+43.02



SAAEEVDGLGVVVRPHYGSVLDNER, MH+ 2611.2752, m/z 871.0966  
 L OSG39 P180811 230811-s1.06099.06099.3.dta

scan 6099; 6.1e+000

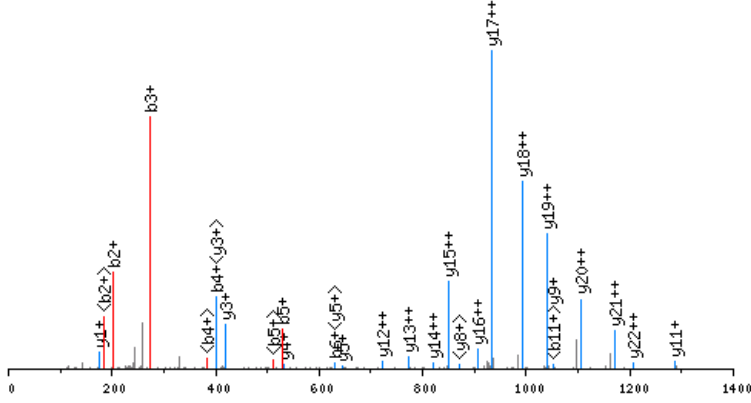

click image to zoom in; click top corners to zoom out [precursor±]

scan 6096; 871.1 m/z; 3.3e+001

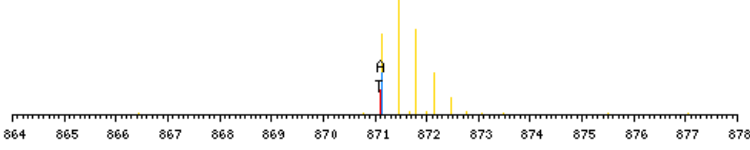

zoomed in precursor plot; T=theoretical m/z, A=acquired m/z

X-range:

-

MassTol: Y-zoom:

MassType:

AVG  MONO

Axis:

1  2

Label:

I  M  -

Ions:

a  +  2+  3+

b  +  2+  3+

c  +  2+  3+

x  +  2+  3+

y  +  2+  3+

z  +  2+  3+

hide H<sub>2</sub>O/NH<sub>3</sub>

zoom 112-122

GO

| b <sup>+</sup> | #  | AA # | y <sup>+</sup> | y <sup>2+</sup> |
|----------------|----|------|----------------|-----------------|
| 130.0504       | 1  | S 24 |                |                 |
| 201.0875       | 2  | A 23 | 2482.2326      | 1241.6202       |
| 272.1247       | 3  | A 22 | 2411.1955      | 1206.1017       |
| 401.1672       | 4  | E 21 | 2340.1584      | 1170.5831       |
| 530.2098       | 5  | E 20 | 2211.1158      | 1106.0618       |
| 629.2783       | 6  | V 19 | 2082.0732      | 1041.5405       |
| 744.3052       | 7  | D 18 | 1983.0048      | 992.0063        |
| 801.3267       | 8  | G 17 | 1867.9779      | 934.4928        |
| 914.4107       | 9  | L 16 | 1810.9564      | 905.9821        |
| 971.4322       | 10 | G 15 | 1697.8723      | 849.4401        |
| 1070.5006      | 11 | V 14 | 1640.8509      | 820.9294        |
| 1169.5690      | 12 | V 13 | 1541.7825      | 771.3951        |
| 1325.6701      | 13 | R 12 | 1442.7140      | 721.8609        |
| 1422.7229      | 14 | P 11 | 1286.6129      | 643.8104        |
| 1559.7818      | 15 | H 10 | 1189.5602      | 595.2840        |
| 1722.8451      | 16 | Y 9  | 1052.5013      | 526.7545        |
| 1779.8666      | 17 | G 8  | 889.4379       | 445.2229        |
| 1866.8986      | 18 | S 7  | 832.4165       | 416.7121        |
| 1965.9670      | 19 | V 6  | 745.3844       | 373.1961        |
| 2079.0511      | 20 | L 5  | 646.3160       | 323.6619        |
| 2194.0780      | 21 | D 4  | 533.2320       | 267.1199        |
| 2308.1210      | 22 | N 3  | 418.2050       | 209.6064        |
| 2437.1636      | 23 | E 2  | 304.1621       | 152.5850        |
|                | 24 | R 1  | 175.1195       | 88.0637         |

N-term:+43.02

SAAETGSEPSQGAGPSEATLHSLR, MH+ 2382.1173, m/z 794.7106  
 L OSG37 P180811 230811-s1.04691.04691.3.dta

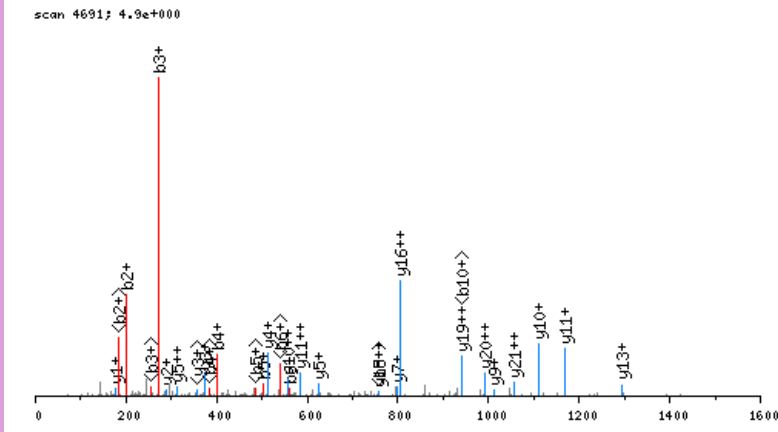

click image to zoom in; click top corners to zoom out [precursor±]

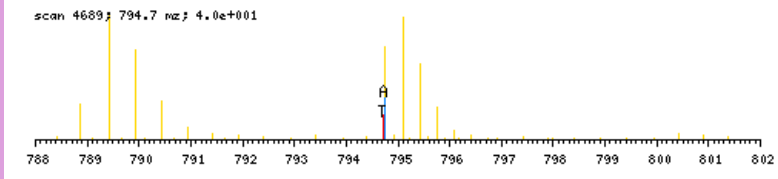

zoomed in precursor plot; T=theoretical m/z, A=acquired m/z

| b <sup>+</sup> | #  | AA # | y <sup>+</sup> | y <sup>2+</sup> |
|----------------|----|------|----------------|-----------------|
| 130.0504       | 1  | S 24 |                |                 |
| 201.0875       | 2  | A 23 | 2253.0747      | 1127.0413       |
| 272.1247       | 3  | A 22 | 2182.0376      | 1091.5227       |
| 401.1672       | 4  | E 21 | 2111.0005      | 1056.0042       |
| 502.2149       | 5  | T 20 | 1981.9579      | 991.4829        |
| 559.2364       | 6  | G 19 | 1880.9102      | 940.9590        |
| 646.2684       | 7  | S 18 | 1823.8888      | 912.4483        |
| 775.3110       | 8  | E 17 | 1736.8568      | 868.9323        |
| 872.3638       | 9  | P 16 | 1607.8142      | 804.4110        |
| 959.3958       | 10 | S 15 | 1510.7614      | 755.8846        |
| 1087.4544      | 11 | Q 14 | 1423.7294      | 712.3686        |
| 1144.4758      | 12 | G 13 | 1295.6708      | 648.3393        |
| 1215.5130      | 13 | A 12 | 1238.6493      | 619.8286        |
| 1272.5344      | 14 | G 11 | 1167.6122      | 584.3100        |
| 1369.5872      | 15 | P 10 | 1110.5907      | 555.7993        |
| 1456.6192      | 16 | S 9  | 1013.5380      | 507.2729        |
| 1585.6618      | 17 | E 8  | 926.5060       | 463.7569        |
| 1656.6989      | 18 | A 7  | 797.4634       | 399.2356        |
| 1757.7466      | 19 | T 6  | 726.4262       | 363.7170        |
| 1870.8307      | 20 | L 5  | 625.3786       | 313.1932        |
| 2007.8896      | 21 | H 4  | 512.2945       | 256.6512        |
| 2094.9216      | 22 | S 3  | 375.2356       | 188.1217        |
| 2208.0057      | 23 | L 2  | 288.2036       | 144.6057        |
|                | 24 | R 1  | 175.1195       | 88.0637         |

N-term:+43.02

X-range:

-

MassTol: Y-zoom:

MassType:

AVG  MONO

Axis:

1  2

Label:

I  M  -

Ions:

a  +  2+  3+

b  +  2+  3+

c  +  2+  3+

x  +  2+  3+

y  +  2+  3+

z  +  2+  3+

hide H<sub>2</sub>O/NH<sub>3</sub>

zoom 112-122

GO

SADAAAGEPLPR, MH+ 1196.5912, m/z 598.7992  
 L OSG41 P180811 230811-s1.03382.03382.2.dta

X-range:

-

MassTol: Y-zoom:

MassType:

AVG  MONO

Axis:

1  2

Label:

I  M  -

Ions:

a  +  2+  3+

b  +  2+  3+

c  +  2+  3+

x  +  2+  3+

y  +  2+  3+

z  +  2+  3+

hide H<sub>2</sub>O/NH<sub>3</sub>

zoom 112-122

GO

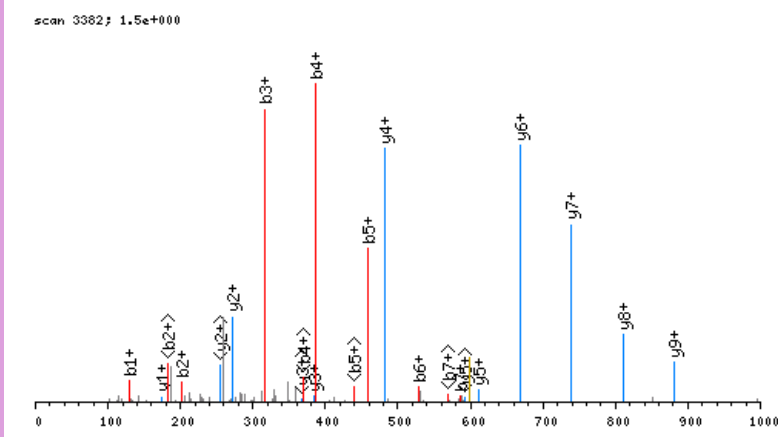

click image to zoom in; click top corners to zoom out [\[precursor±\]](#)

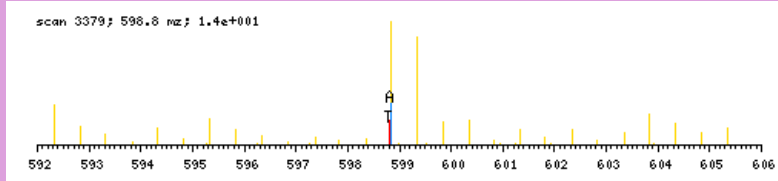

zoomed in precursor plot; T=theoretical m/z, A=acquired m/z

| b <sup>+</sup> | #  | AA # | y <sup>+</sup> | y <sup>2+</sup> |
|----------------|----|------|----------------|-----------------|
| 130.0504       | 1  | S 12 |                |                 |
| 201.0875       | 2  | A 11 | 1067.5485      | 534.2782        |
| 316.1145       | 3  | D 10 | 996.5114       | 498.7596        |
| 387.1516       | 4  | A 9  | 881.4845       | 441.2462        |
| 458.1887       | 5  | A 8  | 810.4474       | 405.7276        |
| 529.2258       | 6  | A 7  | 739.4103       | 370.2090        |
| 586.2473       | 7  | G 6  | 668.3731       | 334.6905        |
| 715.2899       | 8  | E 5  | 611.3517       | 306.1798        |
| 812.3426       | 9  | P 4  | 482.3091       | 241.6585        |
| 925.4267       | 10 | L 3  | 385.2563       | 193.1321        |
| 1022.4795      | 11 | P 2  | 272.1723       | 136.5900        |
|                | 12 | R 1  | 175.1195       | 88.0637         |

N-term:+43.02

SAFNLLHLVTKSQPVAPR, MH+ 2048.1657, m/z 683.3934  
 L OSG39 P180811 230811-s1.07718.07718.3.dta

X-range:

-

MassTol: Y-zoom:

MassType:

AVG  MONO

Axis:

1  2

Label:

I  M  -

Ions:

a  +  2+  3+

b  +  2+  3+

c  +  2+  3+

x  +  2+  3+

y  +  2+  3+

z  +  2+  3+

hide H<sub>2</sub>O/NH<sub>3</sub>

zoom 112-122

GO

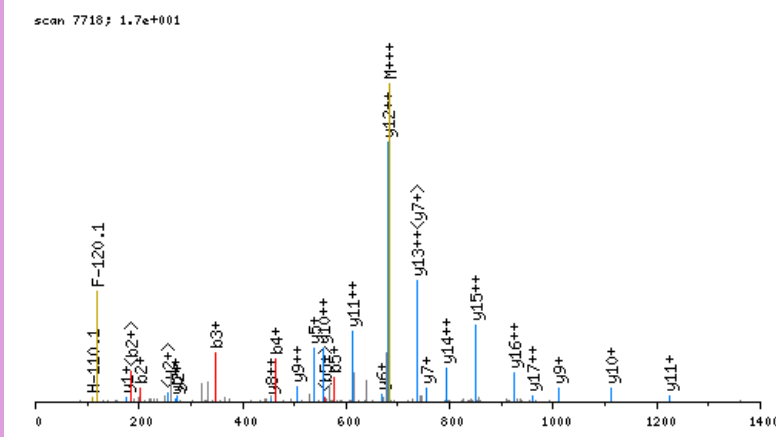

click image to zoom in; click top corners to zoom out [\[precursor±\]](#)

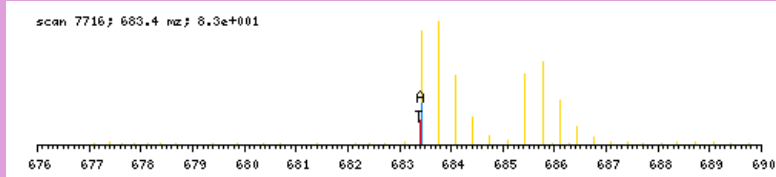

zoomed in precursor plot; T=theoretical m/z, A=acquired m/z

| b <sup>+</sup> | #  | AA # | y <sup>+</sup> | y <sup>2+</sup> |
|----------------|----|------|----------------|-----------------|
| 130.0504       | 1  | S 18 |                |                 |
| 201.0875       | 2  | A 17 | 1919.1231      | 960.0655        |
| 348.1560       | 3  | F 16 | 1848.0860      | 924.5469        |
| 462.1989       | 4  | N 15 | 1701.0176      | 851.0127        |
| 575.2829       | 5  | L 14 | 1586.9747      | 793.9912        |
| 688.3670       | 6  | L 13 | 1473.8906      | 737.4492        |
| 825.4259       | 7  | H 12 | 1360.8065      | 680.9072        |
| 938.5100       | 8  | L 11 | 1223.7476      | 612.3777        |
| 1037.5784      | 9  | V 10 | 1110.6636      | 555.8357        |
| 1138.6261      | 10 | T 9  | 1011.5951      | 506.3015        |
| 1294.7524      | 11 | K 8  | 910.5475       | 455.7776        |
| 1381.7844      | 12 | S 7  | 754.4212       | 377.7145        |
| 1509.8430      | 13 | Q 6  | 667.3891       | 334.1985        |
| 1606.8957      | 14 | P 5  | 539.3306       | 270.1692        |
| 1705.9642      | 15 | V 4  | 442.2778       | 221.6428        |
| 1777.0013      | 16 | A 3  | 343.2094       | 172.1086        |
| 1874.0540      | 17 | P 2  | 272.1723       | 136.5900        |
|                | 18 | R 1  | 175.1195       | 88.0637         |

N-term:+43.02 K(11):+156.13

SAGGDFGNPLR, MH+ 1132.5387, m/z 566.7730  
 L OSG41 P180811 230811-s1.04715.04715.2.dta

X-range:

-

MassTol: Y-zoom:

MassType:

AVG  MONO

Axis:

1  2

Label:

I  M  -

Ions:

a  +  2+  3+

b  +  2+  3+

c  +  2+  3+

x  +  2+  3+

y  +  2+  3+

z  +  2+  3+

hide H<sub>2</sub>O/NH<sub>3</sub>

zoom 112-122

GO

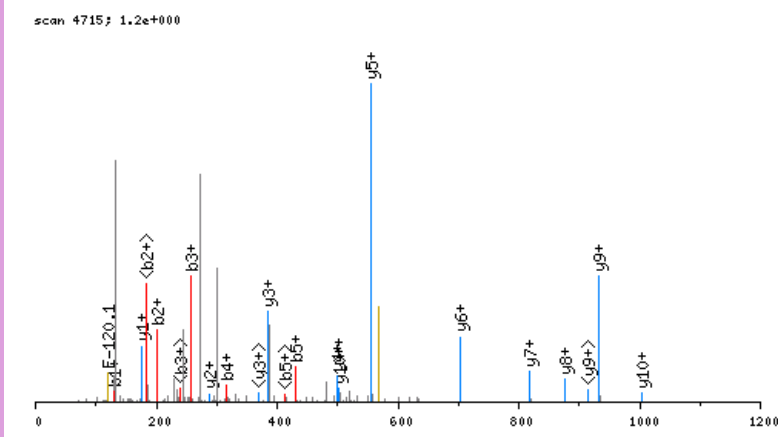

click image to zoom in; click top corners to zoom out [\[precursor±\]](#)

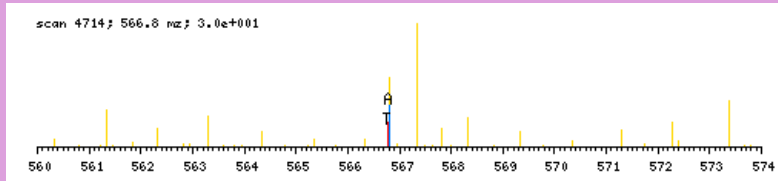

zoomed in precursor plot; T=theoretical m/z, A=acquired m/z

| b <sup>+</sup> | #  | AA | #  | y <sup>+</sup> | y <sup>2+</sup> |
|----------------|----|----|----|----------------|-----------------|
| 130.0504       | 1  | S  | 11 |                |                 |
| 201.0875       | 2  | A  | 10 | 1003.4961      | 502.2520        |
| 258.1090       | 3  | G  | 9  | 932.4590       | 466.7334        |
| 315.1305       | 4  | G  | 8  | 875.4375       | 438.2227        |
| 430.1574       | 5  | D  | 7  | 818.4161       | 409.7120        |
| 577.2258       | 6  | F  | 6  | 703.3891       | 352.1985        |
| 634.2473       | 7  | G  | 5  | 556.3207       | 278.6643        |
| 748.2902       | 8  | N  | 4  | 499.2993       | 250.1535        |
| 845.3430       | 9  | P  | 3  | 385.2563       | 193.1321        |
| 958.4270       | 10 | L  | 2  | 288.2036       | 144.6057        |
|                | 11 | R  | 1  | 175.1195       | 88.0637         |

N-term:+43.02

SAHLQWVVVR, MH+ 1268.6574, m/z 634.8323  
 L OSG37 P180811 230811-s1.06671.06671.2.dta

X-range:

-

MassTol: Y-zoom:

MassType:

AVG  MONO

Axis:

1  2

Label:

I  M  -

Ions:

a  +  2+  3+

b  +  2+  3+

c  +  2+  3+

x  +  2+  3+

y  +  2+  3+

z  +  2+  3+

hide H<sub>2</sub>O/NH<sub>3</sub>

zoom 112-122

GO

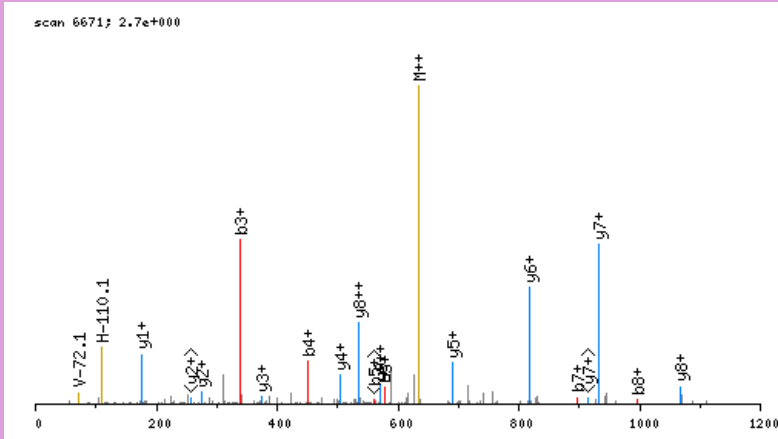

click image to zoom in; click top corners to zoom out [\[precursor±\]](#)

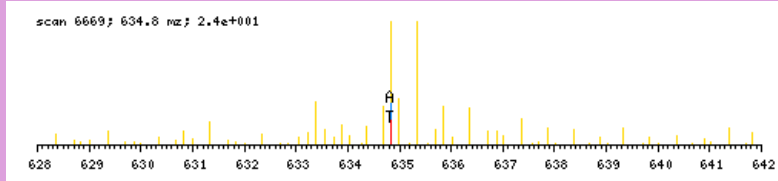

zoomed in precursor plot; T=theoretical m/z, A=acquired m/z

| b <sup>+</sup> | #  | AA # | y <sup>+</sup> | y <sup>2+</sup> |
|----------------|----|------|----------------|-----------------|
| 130.0504       | 1  | S    | 10             |                 |
| 201.0875       | 2  | A    | 9              | 1139.6148       |
| 338.1465       | 3  | H    | 8              | 1068.5777       |
| 451.2305       | 4  | L    | 7              | 931.5188        |
| 579.2891       | 5  | Q    | 6              | 818.4347        |
| 765.3684       | 6  | W    | 5              | 690.3761        |
| 896.4089       | 7  | M    | 4              | 504.2968        |
| 995.4773       | 8  | V    | 3              | 373.2563        |
| 1094.5457      | 9  | V    | 2              | 274.1879        |
|                | 10 | R    | 1              | 175.1195        |

N-term:+43.02

SAKAISEQTGKELLYKYICTTSAIQNR, MH+ 3217.7991, m/z 805.2052  
 L OSG40 P180811 230811-s1.09163.09163.4.dta

scan 9163; 2.6e+001

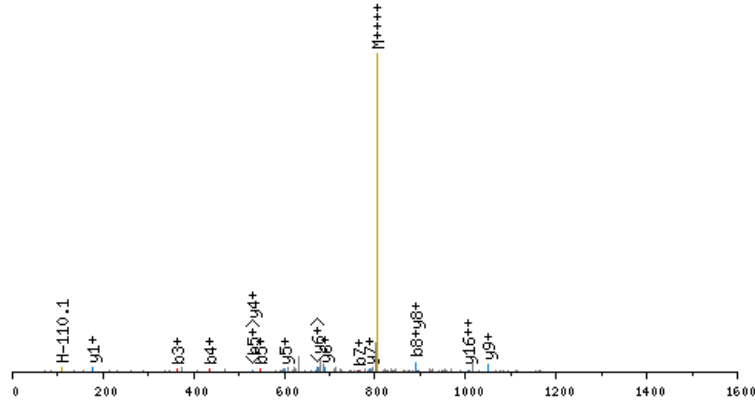

click image to zoom in; click top corners to zoom out [precursor±]

scan 9159; 805.2 m/z; 4.0e+001

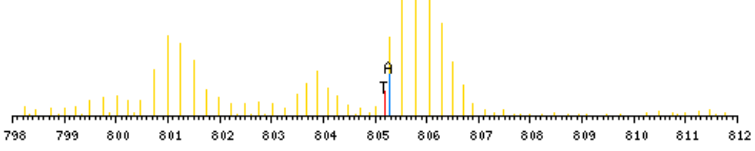

zoomed in precursor plot; T=theoretical m/z, A=acquired m/z

X-range:

-

MassTol: Y-zoom:

MassType:

AVG  MONO

Axis:

1  2

Label:

I  M  -

Ions:

a  +  2+  3+

b  +  2+  3+

c  +  2+  3+

x  +  2+  3+

y  +  2+  3+

z  +  2+  3+

hide H<sub>2</sub>O/NH<sub>3</sub>

zoom 112-122

GO

| b <sup>+</sup> | #  | AA | #  | y <sup>+</sup> | y <sup>2+</sup> |
|----------------|----|----|----|----------------|-----------------|
| 130.0504       | 1  | S  | 27 |                |                 |
| 201.0875       | 2  | A  | 26 | 3088.7565      | 1544.8822       |
| 363.2456       | 3  | K  | 25 | 3017.7194      | 1509.3636       |
| 434.2828       | 4  | A  | 24 | 2855.5613      | 1428.2846       |
| 547.3668       | 5  | I  | 23 | 2784.5242      | 1392.7660       |
| 634.3988       | 6  | S  | 22 | 2671.4402      | 1336.2240       |
| 763.4414       | 7  | E  | 21 | 2584.4081      | 1292.7080       |
| 891.5000       | 8  | Q  | 20 | 2455.3655      | 1228.1867       |
| 992.5477       | 9  | T  | 19 | 2327.3070      | 1164.1574       |
| 1049.5692      | 10 | G  | 18 | 2226.2593      | 1113.6336       |
| 1211.7273      | 11 | K  | 17 | 2169.2378      | 1085.1228       |
| 1340.7699      | 12 | E  | 16 | 2007.0797      | 1004.0438       |
| 1453.8539      | 13 | L  | 15 | 1878.0371      | 939.5225        |
| 1566.9380      | 14 | L  | 14 | 1764.9531      | 882.9804        |
| 1730.0013      | 15 | Y  | 13 | 1651.8690      | 826.4384        |
| 1892.1594      | 16 | K  | 12 | 1488.8057      | 744.9067        |
| 2055.2227      | 17 | Y  | 11 | 1326.6476      | 663.8277        |
| 2168.3068      | 18 | I  | 10 | 1163.5842      | 582.2960        |
| 2328.3374      | 19 | C  | 9  | 1050.5002      | 525.7540        |
| 2429.3851      | 20 | T  | 8  | 890.4696       | 445.7387        |
| 2530.4328      | 21 | T  | 7  | 789.4219       | 395.2149        |
| 2617.4648      | 22 | S  | 6  | 688.3742       | 344.6910        |
| 2688.5019      | 23 | A  | 5  | 601.3422       | 301.1750        |
| 2801.5860      | 24 | I  | 4  | 530.3051       | 265.6564        |
| 2929.6445      | 25 | Q  | 3  | 417.2210       | 209.1144        |
| 3043.6875      | 26 | N  | 2  | 289.1624       | 145.0851        |
|                | 27 | R  | 1  | 175.1195       | 88.0637         |

N-term:+43.02 K(3):+162.16  
 K(11):+162.16 K(16):+162.16  
 C(19):+160.03

X-range:

-

MassTol: Y-zoom:

MassType:

AVG  MONO

Axis:

1  2

Label:

I  M  -

Ions:

a  +  2+  3+

b  +  2+  3+

c  +  2+  3+

x  +  2+  3+

y  +  2+  3+

z  +  2+  3+

hide H<sub>2</sub>O/NH<sub>3</sub>

zoom 112-122

GO

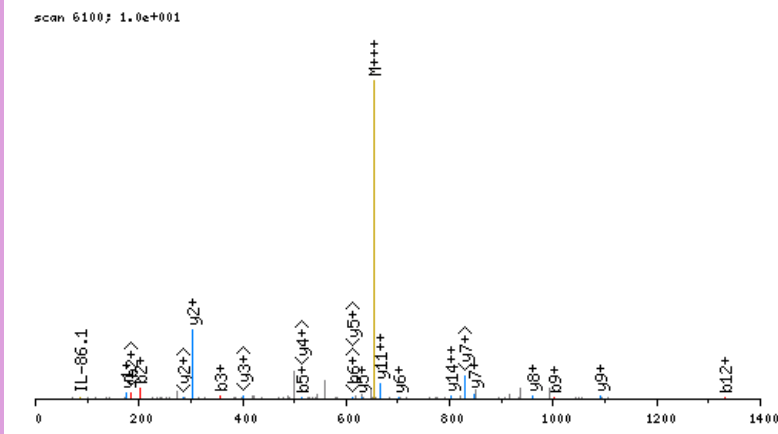

click image to zoom in; click top corners to zoom out [\[precursor±\]](#)

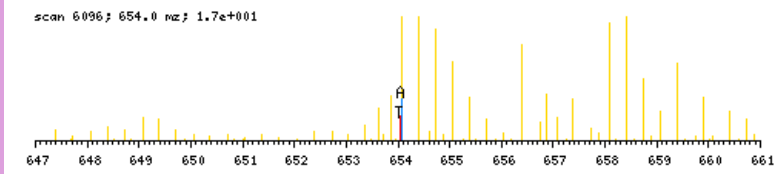

zoomed in precursor plot; T=theoretical m/z, A=acquired m/z

| b <sup>+</sup> | #  | AA | #  | y <sup>+</sup> | y <sup>2+</sup> |
|----------------|----|----|----|----------------|-----------------|
| 130.0504       | 1  | S  | 17 |                |                 |
| 201.0875       | 2  | A  | 16 | 1831.0330      | 916.0204        |
| 357.2138       | 3  | K  | 15 | 1759.9959      | 880.5019        |
| 444.2459       | 4  | S  | 14 | 1603.8696      | 802.4387        |
| 515.2830       | 5  | A  | 13 | 1516.8376      | 758.9227        |
| 628.3670       | 6  | I  | 12 | 1445.8004      | 723.4041        |
| 715.3991       | 7  | S  | 11 | 1332.7164      | 666.8621        |
| 871.5254       | 8  | K  | 10 | 1245.6843      | 623.3461        |
| 1000.5680      | 9  | E  | 9  | 1089.5580      | 545.2829        |
| 1113.6520      | 10 | I  | 8  | 960.5155       | 480.7616        |
| 1260.7204      | 11 | F  | 7  | 847.4314       | 424.2196        |
| 1331.7576      | 12 | A  | 6  | 700.3630       | 350.6854        |
| 1428.8103      | 13 | P  | 5  | 629.3259       | 315.1668        |
| 1541.8944      | 14 | L  | 4  | 532.2731       | 266.6405        |
| 1656.9213      | 15 | D  | 3  | 419.1890       | 210.0984        |
| 1785.9639      | 16 | E  | 2  | 304.1621       | 152.5850        |
|                | 17 | R  | 1  | 175.1195       | 88.0637         |

N-term:+43.02 K(3):+156.13  
 K(8):+156.13



SALKAVFQYIDENQDR, MH+ 1973.0193, m/z 658.3446  
 L OSG37 P180811 230811-s1.08846.08846.3.dta

X-range:

-

MassTol: Y-zoom:

MassType:

AVG  MONO

Axis:

1  2

Label:

I  M  -

Ions:

a  +  2+  3+

b  +  2+  3+

c  +  2+  3+

x  +  2+  3+

y  +  2+  3+

z  +  2+  3+

hide H<sub>2</sub>O/NH<sub>3</sub>

zoom 112-122

GO

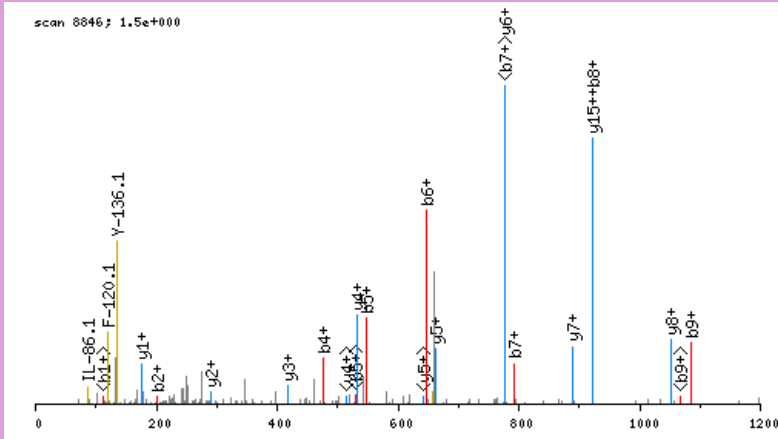

click image to zoom in; click top corners to zoom out [\[precursor±\]](#)

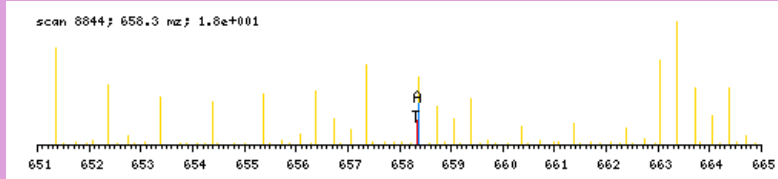

zoomed in precursor plot; T=theoretical m/z, A=acquired m/z

| b <sup>+</sup> | #  | AA # | y <sup>+</sup> | y <sup>2+</sup> |
|----------------|----|------|----------------|-----------------|
| 130.0504       | 1  | S 16 |                |                 |
| 201.0875       | 2  | A 15 | 1843.9767      | 922.4922        |
| 314.1716       | 3  | L 14 | 1772.9396      | 886.9737        |
| 476.3297       | 4  | K 13 | 1659.8555      | 830.4317        |
| 547.3668       | 5  | A 12 | 1497.6974      | 749.3526        |
| 646.4352       | 6  | V 11 | 1426.6603      | 713.8341        |
| 793.5036       | 7  | F 10 | 1327.5919      | 664.2998        |
| 921.5622       | 8  | Q 9  | 1180.5235      | 590.7656        |
| 1084.6256      | 9  | Y 8  | 1052.4649      | 526.7364        |
| 1197.7096      | 10 | I 7  | 889.4015       | 445.2047        |
| 1312.7366      | 11 | D 6  | 776.3175       | 388.6627        |
| 1441.7792      | 12 | E 5  | 661.2905       | 331.1492        |
| 1555.8221      | 13 | N 4  | 532.2479       | 266.6279        |
| 1683.8807      | 14 | Q 3  | 418.2050       | 209.6064        |
| 1798.9076      | 15 | D 2  | 290.1464       | 145.5771        |
|                | 16 | R 1  | 175.1195       | 88.0637         |

N-term:+43.02 K(4):+162.16

SALLEQKEQQER, MH+ 1534.8290, m/z 512.2812  
 L OSG37 P180811 230811-s1.04261.04261.3.dta

X-range:

-

MassTol: Y-zoom:

MassType:

AVG  MONO

Axis:

1  2

Label:

I  M  -

Ions:

a  +  2+  3+

b  +  2+  3+

c  +  2+  3+

x  +  2+  3+

y  +  2+  3+

z  +  2+  3+

hide H<sub>2</sub>O/NH<sub>3</sub>

zoom 112-122

GO

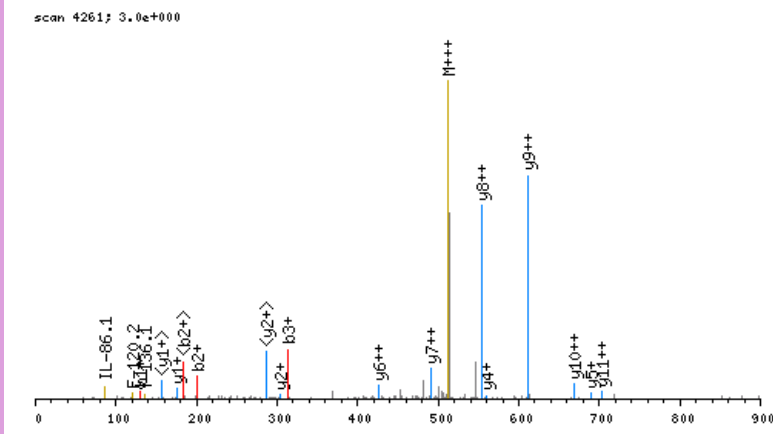

click image to zoom in; click top corners to zoom out [\[precursor±\]](#)

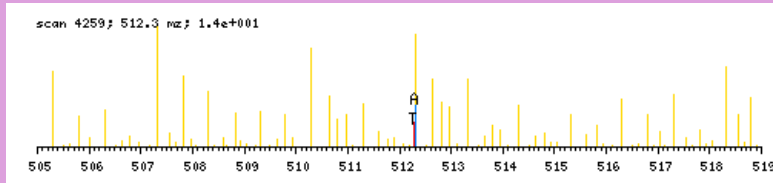

zoomed in precursor plot; T=theoretical m/z, A=acquired m/z

| b <sup>+</sup> | #  | AA # | y <sup>+</sup> | y <sup>2+</sup> |
|----------------|----|------|----------------|-----------------|
| 130.0504       | 1  | S 12 |                |                 |
| 201.0875       | 2  | A 11 | 1405.7864      | 703.3971        |
| 314.1716       | 3  | L 10 | 1334.7492      | 667.8785        |
| 427.2557       | 4  | L 9  | 1221.6652      | 611.3365        |
| 556.2983       | 5  | E 8  | 1108.5811      | 554.7945        |
| 684.3568       | 6  | Q 7  | 979.5385       | 490.2732        |
| 846.5149       | 7  | K 6  | 851.4799       | 426.2439        |
| 975.5575       | 8  | E 5  | 689.3218       | 345.1648        |
| 1103.6161      | 9  | Q 4  | 560.2792       | 280.6435        |
| 1231.6747      | 10 | Q 3  | 432.2207       | 216.6142        |
| 1360.7173      | 11 | E 2  | 304.1621       | 152.5850        |
|                | 12 | R 1  | 175.1195       | 88.0637         |

N-term:+43.02 K(7):+162.16

SAMEAADVFHR, MH+ 1275.5792, m/z 638.2932  
 L OSG37 P180811 230811-s1.06055.06055.2.dta

X-range:

-

MassTol: Y-zoom:

MassType:

AVG  MONO

Axis:

1  2

Label:

I  M  -

Ions:

a  +  2+  3+

b  +  2+  3+

c  +  2+  3+

x  +  2+  3+

y  +  2+  3+

z  +  2+  3+

hide H<sub>2</sub>O/NH<sub>3</sub>

zoom 112-122

GO

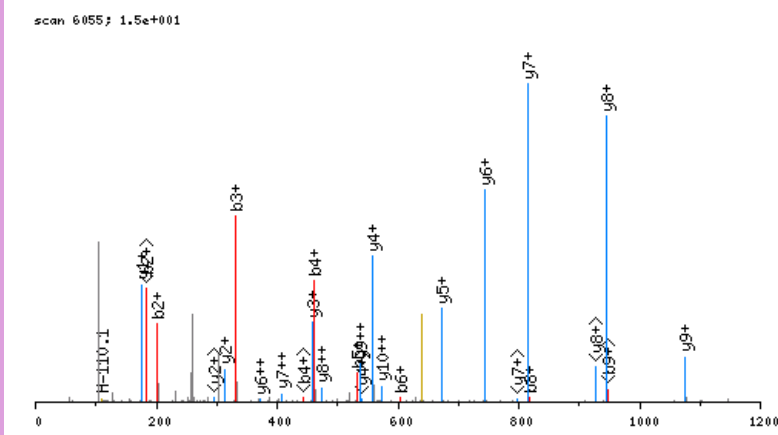

click image to zoom in; click top corners to zoom out [\[precursor±\]](#)

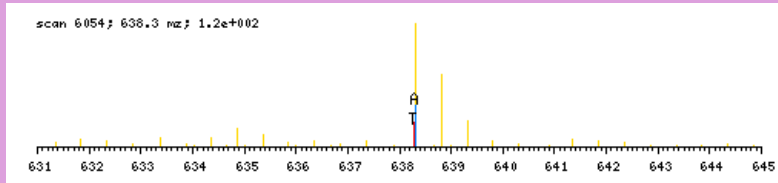

zoomed in precursor plot; T=theoretical m/z, A=acquired m/z

| b <sup>+</sup> | #  | AA # | y <sup>+</sup> | y <sup>2+</sup> |
|----------------|----|------|----------------|-----------------|
| 130.0504       | 1  | S 11 |                |                 |
| 201.0875       | 2  | A 10 | 1146.5366      | 573.7722        |
| 332.1280       | 3  | M 9  | 1075.4995      | 538.2537        |
| 461.1706       | 4  | E 8  | 944.4590       | 472.7334        |
| 532.2077       | 5  | A 7  | 815.4164       | 408.2121        |
| 603.2448       | 6  | A 6  | 744.3793       | 372.6936        |
| 718.2718       | 7  | D 5  | 673.3422       | 337.1750        |
| 817.3402       | 8  | V 4  | 558.3152       | 279.6615        |
| 964.4086       | 9  | F 3  | 459.2468       | 230.1273        |
| 1101.4675      | 10 | H 2  | 312.1784       | 156.5931        |
|                | 11 | R 1  | 175.1195       | 88.0637         |

N-term:+43.02

SAPAGSPHPAAGAR, MH+ 1288.6398, m/z 644.8236  
L OSG37 P180811 230811-s1.02017.02017.2.dta

scan 2017; 4.0e+000

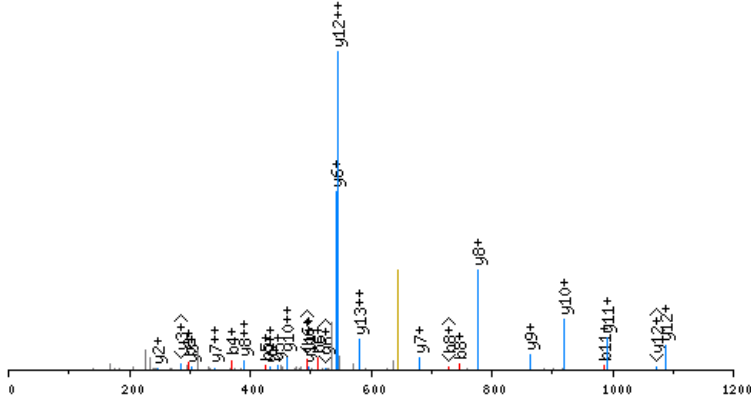

click image to zoom in; click top corners to zoom out [precursor±]

scan 2016; 644.8 m/z; 4.7e+000

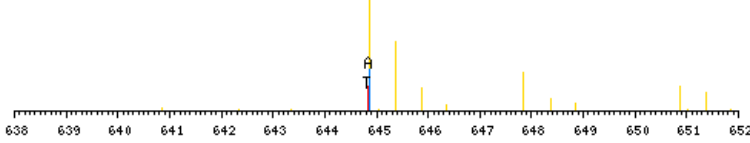

zoomed in precursor plot; T=theoretical m/z, A=acquired m/z

X-range:

0 - 0

MassTol: Y-zoom:

0. 1.

MassType:

AVG  MONO

Axis:

1  2

Label:

I  M  -

Ions:

a  +  2+  3+

b  +  2+  3+

c  +  2+  3+

x  +  2+  3+

y  +  2+  3+

z  +  2+  3+

hide H<sub>2</sub>O/NH<sub>3</sub>

zoom 112-122

GO

| b <sup>+</sup> | #  | AA # | y <sup>+</sup> | y <sup>2+</sup> |
|----------------|----|------|----------------|-----------------|
| 130.0504       | 1  | S 14 |                |                 |
| 201.0875       | 2  | A 13 | 1159.5972      | 580.3025        |
| 298.1403       | 3  | P 12 | 1088.5601      | 544.7840        |
| 369.1774       | 4  | A 11 | 991.5074       | 496.2576        |
| 426.1989       | 5  | G 10 | 920.4702       | 460.7390        |
| 513.2309       | 6  | S 9  | 863.4488       | 432.2283        |
| 610.2837       | 7  | P 8  | 776.4167       | 388.7123        |
| 747.3426       | 8  | H 7  | 679.3640       | 340.1859        |
| 844.3954       | 9  | P 6  | 542.3051       | 271.6564        |
| 915.4325       | 10 | A 5  | 445.2523       | 223.1301        |
| 986.4696       | 11 | A 4  | 374.2152       | 187.6115        |
| 1043.4910      | 12 | G 3  | 303.1781       | 152.0930        |
| 1114.5282      | 13 | A 2  | 246.1566       | 123.5822        |
|                | 14 | R 1  | 175.1195       | 88.0637         |

N-term:+43.02

SAPMPAVVPAAR, MH+ 1208.6462, m/z 604.8267  
 L OSG41 P180811 230811-s1.04806.04806.2.dta

X-range:

-

MassTol: Y-zoom:

MassType:

AVG  MONO

Axis:

1  2

Label:

I  M  -

Ions:

a  +  2+  3+

b  +  2+  3+

c  +  2+  3+

x  +  2+  3+

y  +  2+  3+

z  +  2+  3+

hide H<sub>2</sub>O/NH<sub>3</sub>

zoom 112-122

GO

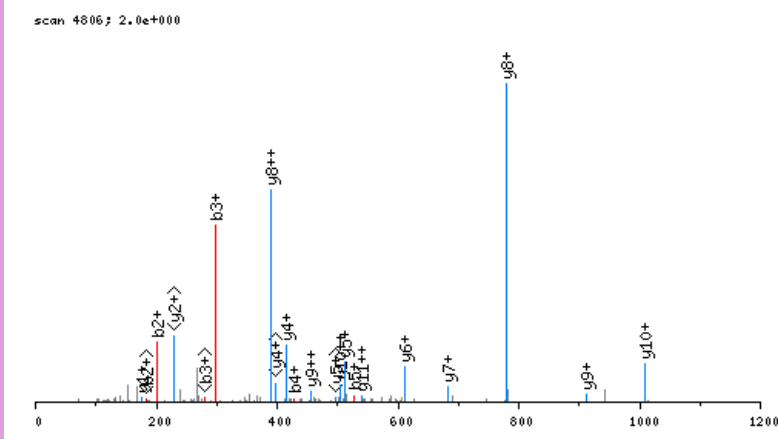

click image to zoom in; click top corners to zoom out [\[precursor±\]](#)

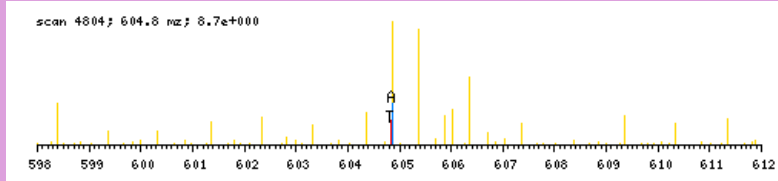

zoomed in precursor plot; T=theoretical m/z, A=acquired m/z

| b <sup>+</sup> | #  | AA # | y <sup>+</sup> | y <sup>2+</sup> |
|----------------|----|------|----------------|-----------------|
| 130.0504       | 1  | S 12 |                |                 |
| 201.0875       | 2  | A 11 | 1079.6036      | 540.3057        |
| 298.1403       | 3  | P 10 | 1008.5664      | 504.7871        |
| 429.1808       | 4  | M 9  | 911.5137       | 456.2608        |
| 526.2336       | 5  | P 8  | 780.4732       | 390.7405        |
| 597.2707       | 6  | A 7  | 683.4204       | 342.2141        |
| 696.3391       | 7  | V 6  | 612.3833       | 306.6956        |
| 795.4075       | 8  | V 5  | 513.3149       | 257.1614        |
| 892.4603       | 9  | P 4  | 414.2465       | 207.6272        |
| 963.4974       | 10 | A 3  | 317.1937       | 159.1008        |
| 1034.5345      | 11 | A 2  | 246.1566       | 123.5822        |
|                | 12 | R 1  | 175.1195       | 88.0637         |

N-term:+43.02

SASVSVISIR, MH+ 1046.5846, m/z 523.7959  
 L OSG41 P180811 230811-s1.05355.05355.2.dta

X-range:

-

MassTol: Y-zoom:

MassType:

AVG  MONO

Axis:

1  2

Label:

I  M  -

Ions:

a  +  2+  3+

b  +  2+  3+

c  +  2+  3+

x  +  2+  3+

y  +  2+  3+

z  +  2+  3+

hide H<sub>2</sub>O/NH<sub>3</sub>

zoom 112-122

GO

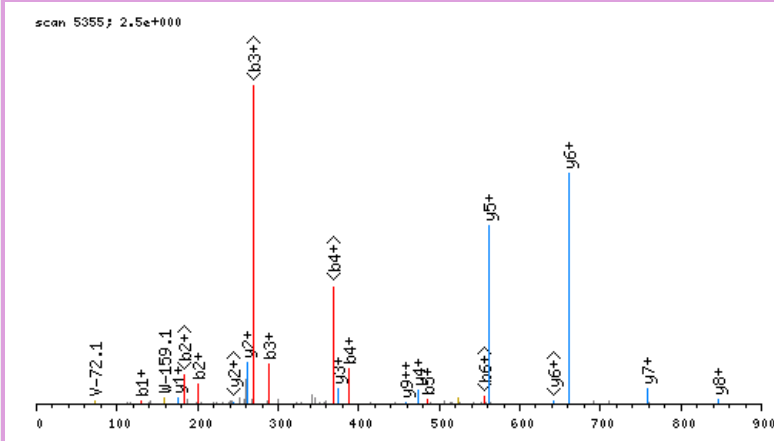

click image to zoom in; click top corners to zoom out [\[precursor±\]](#)

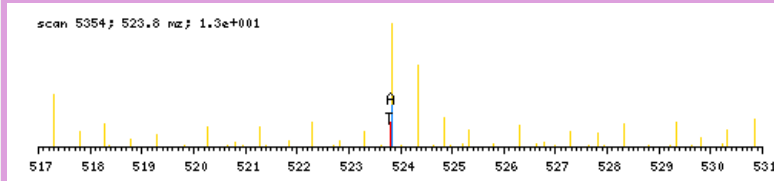

zoomed in precursor plot; T=theoretical m/z, A=acquired m/z

| b <sup>+</sup> | #  | AA | #  | y <sup>+</sup> | y <sup>2+</sup> |
|----------------|----|----|----|----------------|-----------------|
| 130.0504       | 1  | S  | 10 |                |                 |
| 201.0875       | 2  | A  | 9  | 917.5420       | 459.2749        |
| 288.1196       | 3  | S  | 8  | 846.5049       | 423.7564        |
| 387.1880       | 4  | V  | 7  | 759.4729       | 380.2403        |
| 486.2564       | 5  | V  | 6  | 660.4044       | 330.7061        |
| 573.2884       | 6  | S  | 5  | 561.3360       | 281.1719        |
| 672.3568       | 7  | V  | 4  | 474.3040       | 237.6559        |
| 785.4409       | 8  | I  | 3  | 375.2356       | 188.1217        |
| 872.4729       | 9  | S  | 2  | 262.1515       | 131.5797        |
|                | 10 | R  | 1  | 175.1195       | 88.0637         |

N-term: +43.02

SATQHKTSLPQGVK, MH+ 1585.8875, m/z 529.3007  
 L OSG40 P180811 230811-s1.02601.02601.3.dta

X-range:

-

MassTol: Y-zoom:

MassType:

AVG  MONO

Axis:

1  2

Label:

I  M  -

Ions:

a  +  2+  3+

b  +  2+  3+

c  +  2+  3+

x  +  2+  3+

y  +  2+  3+

z  +  2+  3+

hide H<sub>2</sub>O/NH<sub>3</sub>

zoom 112-122

GO

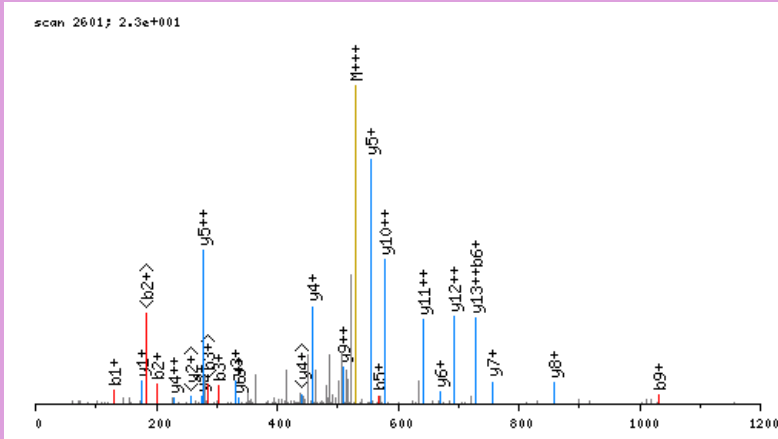

click image to zoom in; click top corners to zoom out [\[precursor±\]](#)

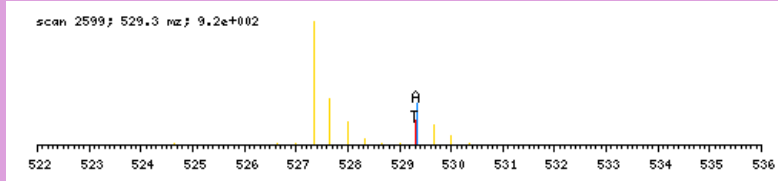

zoomed in precursor plot; T=theoretical m/z, A=acquired m/z

| b <sup>+</sup> | #  | AA # | y <sup>+</sup> | y <sup>2+</sup> |
|----------------|----|------|----------------|-----------------|
| 130.0504       | 1  | S 14 |                |                 |
| 201.0875       | 2  | A 13 | 1456.8449      | 728.9263        |
| 302.1352       | 3  | T 12 | 1385.8078      | 693.4078        |
| 430.1938       | 4  | Q 11 | 1284.7601      | 642.8840        |
| 567.2527       | 5  | H 10 | 1156.7015      | 578.8547        |
| 729.4108       | 6  | K 9  | 1019.6426      | 510.3252        |
| 830.4585       | 7  | T 8  | 857.4845       | 429.2462        |
| 917.4905       | 8  | S 7  | 756.4368       | 378.7223        |
| 1030.5746      | 9  | L 6  | 669.4048       | 335.2063        |
| 1127.6273      | 10 | P 5  | 556.3207       | 278.6643        |
| 1255.6859      | 11 | Q 4  | 459.2680       | 230.1379        |
| 1312.7074      | 12 | G 3  | 331.2094       | 166.1086        |
| 1411.7758      | 13 | V 2  | 274.1879       | 137.5979        |
|                | 14 | R 1  | 175.1195       | 88.0637         |

N-term:+43.02 K(6):+162.16

SCTDYGSRTKSKKASR, MH+ 1976.1084, m/z 659.3743  
 L OSG40 P180811 230811-s1.11310.11310.3.dta

X-range:

-

MassTol: Y-zoom:

MassType:

AVG  MONO

Axis:

1  2

Label:

I  M  -

Ions:

a  +  2+  3+

b  +  2+  3+

c  +  2+  3+

x  +  2+  3+

y  +  2+  3+

z  +  2+  3+

hide H<sub>2</sub>O/NH<sub>3</sub>

zoom 112-122

GO

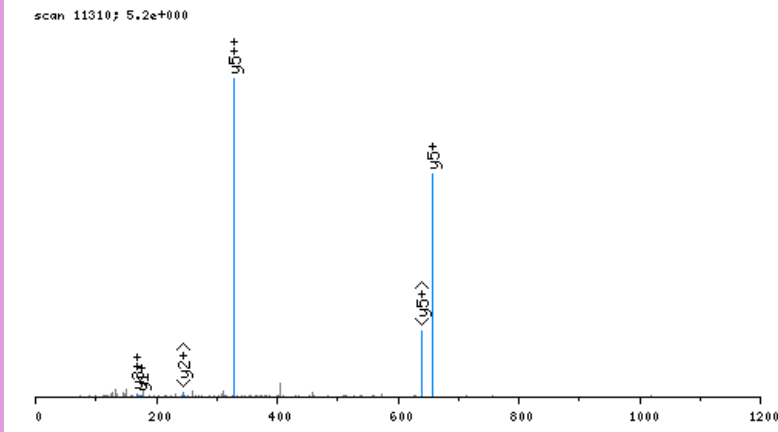

click image to zoom in; click top corners to zoom out [\[precursor±\]](#)

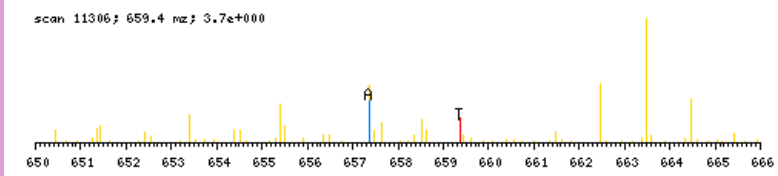

zoomed in precursor plot; T=theoretical m/z, A=acquired m/z

| b <sup>+</sup> | #  | AA # | y <sup>+</sup> | y <sup>2+</sup> |
|----------------|----|------|----------------|-----------------|
| 130.0504       | 1  | S 16 |                |                 |
| 290.0810       | 2  | C 15 | 1847.0658      | 924.0368        |
| 391.1287       | 3  | T 14 | 1687.0352      | 844.0215        |
| 506.1557       | 4  | D 13 | 1585.9875      | 793.4977        |
| 669.2190       | 5  | Y 12 | 1470.9606      | 735.9842        |
| 726.2404       | 6  | G 11 | 1307.8973      | 654.4525        |
| 813.2725       | 7  | S 10 | 1250.8758      | 625.9418        |
| 969.3736       | 8  | R 9  | 1163.8438      | 582.4258        |
| 1070.4213      | 9  | T 8  | 1007.7426      | 504.3752        |
| 1232.5794      | 10 | K 7  | 906.6950       | 453.8514        |
| 1319.6114      | 11 | S 6  | 744.5369       | 372.7723        |
| 1481.7695      | 12 | K 5  | 657.5048       | 329.2563        |
| 1643.9276      | 13 | K 4  | 495.3467       | 248.1773        |
| 1714.9647      | 14 | A 3  | 333.1886       | 167.0982        |
| 1801.9967      | 15 | S 2  | 262.1515       | 131.5797        |
|                | 16 | R 1  | 175.1195       | 88.0637         |

N-term:+43.02 C(2):+160.03  
 K(10):+162.16 K(12):+162.16  
 K(13):+162.16



X-range:

-

MassTol: Y-zoom:

MassType:

AVG  MONO

Axis:

1  2

Label:

I  M  -

Ions:

a  +  2+  3+

b  +  2+  3+

c  +  2+  3+

x  +  2+  3+

y  +  2+  3+

z  +  2+  3+

hide H<sub>2</sub>O/NH<sub>3</sub>

zoom 112-122

GO

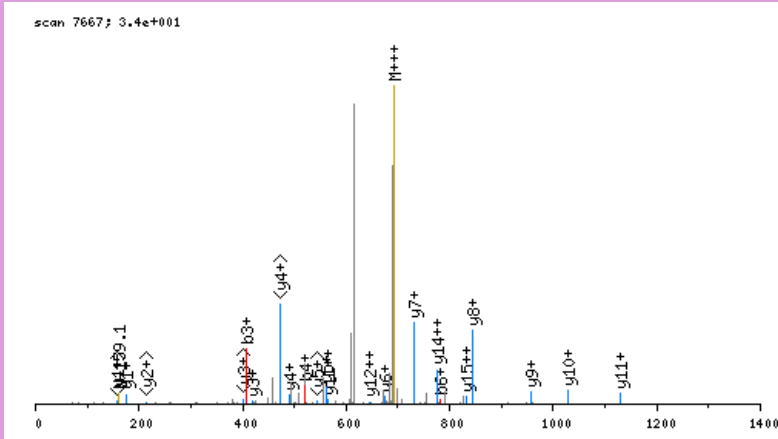

click image to zoom in; click top corners to zoom out [precursor±]

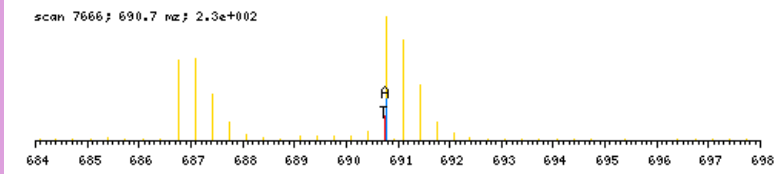

zoomed in precursor plot; T=theoretical m/z, A=acquired m/z

| b <sup>+</sup> | #  | AA | #  | y <sup>+</sup> | y <sup>2+</sup> |
|----------------|----|----|----|----------------|-----------------|
| 130.0504       | 1  | S  | 18 |                |                 |
| 245.0774       | 2  | D  | 17 | 1941.1599      | 971.0838        |
| 407.2355       | 3  | K  | 16 | 1826.1329      | 913.5704        |
| 520.3195       | 4  | L  | 15 | 1663.9748      | 832.4913        |
| 617.3723       | 5  | P  | 14 | 1550.8908      | 775.9493        |
| 780.4356       | 6  | Y  | 13 | 1453.8380      | 727.4229        |
| 942.5937       | 7  | K  | 12 | 1290.7747      | 645.8912        |
| 1041.6621      | 8  | V  | 11 | 1128.6166      | 564.8122        |
| 1112.6993      | 9  | A  | 10 | 1029.5482      | 515.2780        |
| 1227.7262      | 10 | D  | 9  | 958.5110       | 479.7594        |
| 1340.8103      | 11 | I  | 8  | 843.4841       | 422.2460        |
| 1397.8317      | 12 | G  | 7  | 730.4000       | 365.7039        |
| 1510.9158      | 13 | L  | 6  | 673.3786       | 337.1932        |
| 1581.9529      | 14 | A  | 5  | 560.2945       | 280.6512        |
| 1652.9900      | 15 | A  | 4  | 489.2574       | 245.1326        |
| 1839.0693      | 16 | W  | 3  | 418.2203       | 209.6141        |
| 1896.0908      | 17 | G  | 2  | 232.1410       | 116.5744        |
|                | 18 | R  | 1  | 175.1195       | 88.0637         |

N-term:+43.02 K(3):+162.16  
 K(7):+162.16

SDNGELEDKPPAPPVR, MH+ 1796.9243, m/z 599.6463  
 L OSG37 P180811 230811-s1.04173.04173.3.dta

X-range:

-

MassTol: Y-zoom:

MassType:

AVG  MONO

Axis:

1  2

Label:

I  M  -

Ions:

a  +  2+  3+

b  +  2+  3+

c  +  2+  3+

x  +  2+  3+

y  +  2+  3+

z  +  2+  3+

hide H<sub>2</sub>O/NH<sub>3</sub>

zoom 112-122

GO

scan 4173; 3.7e+000

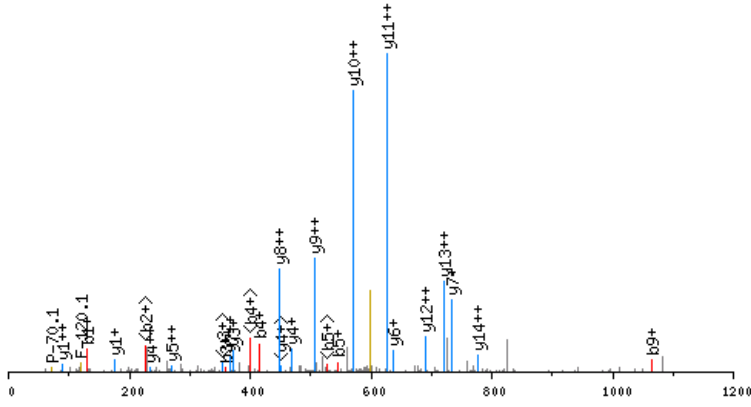

click image to zoom in; click top corners to zoom out [\[precursor±\]](#)

scan 4169; 599.6 m/z; 7.5e+001

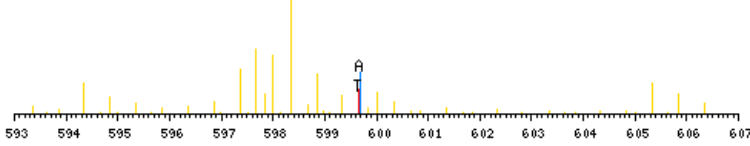

zoomed in precursor plot; T=theoretical m/z, A=acquired m/z

| b <sup>+</sup> | #  | AA # | y <sup>+</sup> | y <sup>2+</sup> |
|----------------|----|------|----------------|-----------------|
| 130.0504       | 1  | S 16 |                |                 |
| 245.0774       | 2  | D 15 | 1667.8817      | 834.4448        |
| 359.1203       | 3  | N 14 | 1552.8548      | 776.9313        |
| 416.1418       | 4  | G 13 | 1438.8118      | 719.9098        |
| 545.1844       | 5  | E 12 | 1381.7904      | 691.3991        |
| 658.2684       | 6  | L 11 | 1252.7478      | 626.8778        |
| 787.3110       | 7  | E 10 | 1139.6637      | 570.3358        |
| 902.3380       | 8  | D 9  | 1010.6211      | 505.8145        |
| 1064.4961      | 9  | K 8  | 895.5942       | 448.3010        |
| 1161.5488      | 10 | P 7  | 733.4361       | 367.2220        |
| 1258.6016      | 11 | P 6  | 636.3833       | 318.6956        |
| 1329.6387      | 12 | A 5  | 539.3306       | 270.1692        |
| 1426.6915      | 13 | P 4  | 468.2934       | 234.6506        |
| 1523.7442      | 14 | P 3  | 371.2407       | 186.1243        |
| 1622.8126      | 15 | V 2  | 274.1879       | 137.5979        |
|                | 16 | R 1  | 175.1195       | 88.0637         |

N-term:+43.02 K(9):+162.16

SDSEKLNLDISIIGR, MH+ 1622.8814, m/z 811.9443  
 L OSG37 P180811 230811-s1.07585.07585.2.dta

scan 7585; 2.1e+001

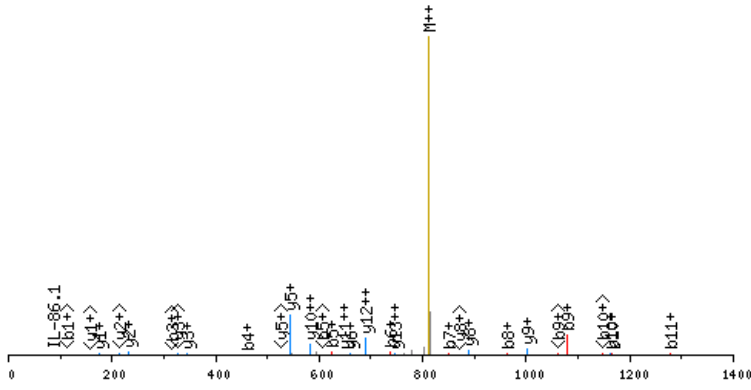

click image to zoom in; click top corners to zoom out [\[precursor±\]](#)

scan 7584; 811.9 m/z; 1.7e+001

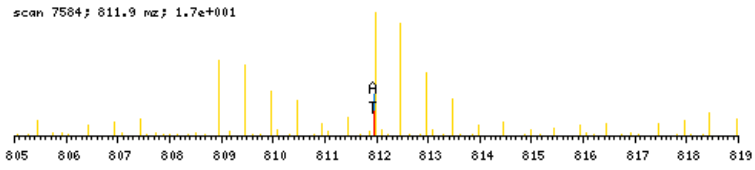

zoomed in precursor plot; T=theoretical m/z, A=acquired m/z

X-range:

-

MassTol: Y-zoom:

MassType:

AVG  MONO

Axis:

1  2

Label:

I  M  -

Ions:

a  +  2+  3+

b  +  2+  3+

c  +  2+  3+

x  +  2+  3+

y  +  2+  3+

z  +  2+  3+

hide H<sub>2</sub>O/NH<sub>3</sub>

zoom 112-122

GO

| b <sup>+</sup> | #  | AA # | y <sup>+</sup> | y <sup>2+</sup> |
|----------------|----|------|----------------|-----------------|
| 130.0504       | 1  | S 14 |                |                 |
| 245.0774       | 2  | D 13 | 1493.8388      | 747.4233        |
| 332.1094       | 3  | S 12 | 1378.8118      | 689.9098        |
| 461.1520       | 4  | E 11 | 1291.7798      | 646.3938        |
| 623.3101       | 5  | K 10 | 1162.7372      | 581.8725        |
| 736.3942       | 6  | L 9  | 1000.5791      | 500.7935        |
| 850.4371       | 7  | N 8  | 887.4951       | 444.2514        |
| 963.5211       | 8  | L 7  | 773.4521       | 387.2300        |
| 1078.5481      | 9  | D 6  | 660.3681       | 330.6879        |
| 1165.5801      | 10 | S 5  | 545.3411       | 273.1745        |
| 1278.6642      | 11 | I 4  | 458.3091       | 229.6585        |
| 1391.7482      | 12 | I 3  | 345.2250       | 173.1164        |
| 1448.7697      | 13 | G 2  | 232.1410       | 116.5744        |
|                | 14 | R 1  | 175.1195       | 88.0637         |

N-term:+43.02 K(5):+162.16

SDSLDNEEKPPAPPLR, MH+ 1840.9505, m/z 614.3217  
 L OSG36 P180811 230811-s1.03485.03485.3.dta

scan 3485; 7.9e-001

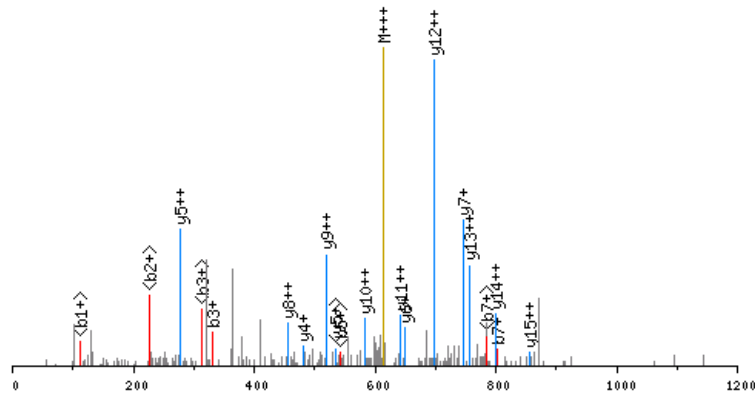

click image to zoom in; click top corners to zoom out [\[precursor±\]](#)

scan 3484; 614.3 m/z; 1.8e+000

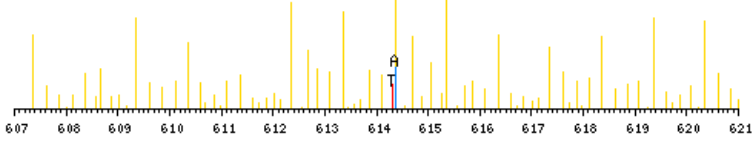

zoomed in precursor plot; T=theoretical m/z, A=acquired m/z

X-range:

-

MassTol: Y-zoom:

MassType:

AVG  MONO

Axis:

1  2

Label:

I  M  -

Ions:

a  +  2+  3+

b  +  2+  3+

c  +  2+  3+

x  +  2+  3+

y  +  2+  3+

z  +  2+  3+

hide H<sub>2</sub>O/NH<sub>3</sub>

zoom 112-122

GO

| b <sup>+</sup> | #  | AA # | y <sup>+</sup> | y <sup>2+</sup> |
|----------------|----|------|----------------|-----------------|
| 130.0504       | 1  | S 16 |                |                 |
| 245.0774       | 2  | D 15 | 1711.9079      | 856.4579        |
| 332.1094       | 3  | S 14 | 1596.8810      | 798.9444        |
| 445.1935       | 4  | L 13 | 1509.8490      | 755.4284        |
| 560.2204       | 5  | D 12 | 1396.7649      | 698.8864        |
| 674.2633       | 6  | N 11 | 1281.7379      | 641.3729        |
| 803.3059       | 7  | E 10 | 1167.6950      | 584.3514        |
| 932.3485       | 8  | E 9  | 1038.6524      | 519.8301        |
| 1094.5066      | 9  | K 8  | 909.6098       | 455.3088        |
| 1191.5594      | 10 | P 7  | 747.4517       | 374.2298        |
| 1288.6121      | 11 | P 6  | 650.3990       | 325.7034        |
| 1359.6493      | 12 | A 5  | 553.3462       | 277.1770        |
| 1456.7020      | 13 | P 4  | 482.3091       | 241.6585        |
| 1553.7548      | 14 | P 3  | 385.2563       | 193.1321        |
| 1666.8389      | 15 | L 2  | 288.2036       | 144.6057        |
|                | 16 | R 1  | 175.1195       | 88.0637         |

N-term:+43.02 K(9):+162.16

SDSLVVCEVDPELKETLR, MH+ 2159.0906, m/z 720.3684  
 L OSG37 P180811 230811-s1.08345.08345.3.dta

X-range:

-

MassTol: Y-zoom:

MassType:

AVG  MONO

Axis:

1  2

Label:

I  M  -

Ions:

a  +  2+  3+

b  +  2+  3+

c  +  2+  3+

x  +  2+  3+

y  +  2+  3+

z  +  2+  3+

hide H<sub>2</sub>O/NH<sub>3</sub>

zoom 112-122

GO

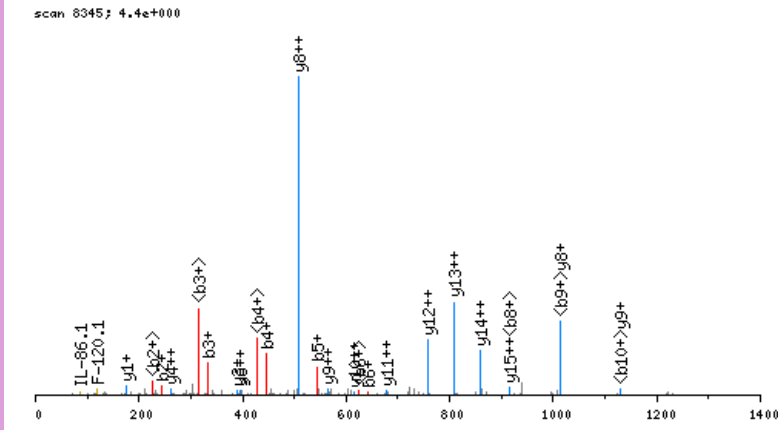

click image to zoom in; click top corners to zoom out [\[precursor±\]](#)

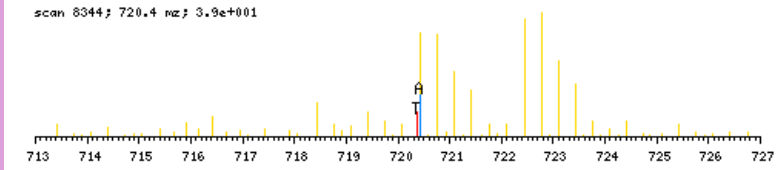

zoomed in precursor plot; T=theoretical m/z, A=acquired m/z

| b <sup>+</sup> | #  | AA # | y <sup>+</sup> | y <sup>2+</sup> |
|----------------|----|------|----------------|-----------------|
| 130.0504       | 1  | S 18 |                |                 |
| 245.0774       | 2  | D 17 | 2030.0480      | 1015.5279       |
| 332.1094       | 3  | S 16 | 1915.0210      | 958.0144        |
| 445.1935       | 4  | L 15 | 1827.9890      | 914.4984        |
| 544.2619       | 5  | V 14 | 1714.9049      | 857.9564        |
| 643.3303       | 6  | V 13 | 1615.8365      | 808.4222        |
| 803.3609       | 7  | C 12 | 1516.7681      | 758.8880        |
| 932.4035       | 8  | E 11 | 1356.7375      | 678.8727        |
| 1031.4719      | 9  | V 10 | 1227.6949      | 614.3514        |
| 1146.4988      | 10 | D 9  | 1128.6265      | 564.8172        |
| 1243.5516      | 11 | P 8  | 1013.5996      | 507.3037        |
| 1372.5942      | 12 | E 7  | 916.5468       | 458.7773        |
| 1485.6783      | 13 | L 6  | 787.5042       | 394.2560        |
| 1641.8046      | 14 | K 5  | 674.4201       | 337.7140        |
| 1770.8472      | 15 | E 4  | 518.2938       | 259.6508        |
| 1871.8948      | 16 | T 3  | 389.2512       | 195.1295        |
| 1984.9789      | 17 | L 2  | 288.2036       | 144.6057        |
|                | 18 | R 1  | 175.1195       | 88.0637         |

N-term: +43.02 C(7): +160.03  
 K(14): +156.13

SDSMDTGAGSIR, MH+ 1238.5323, m/z 619.7698  
 L OSG41 P180811 230811-s1.03141.03141.2.dta

X-range:

-

MassTol: Y-zoom:

MassType:

AVG  MONO

Axis:

1  2

Label:

I  M  -

Ions:

a  +  2+  3+

b  +  2+  3+

c  +  2+  3+

x  +  2+  3+

y  +  2+  3+

z  +  2+  3+

hide H<sub>2</sub>O/NH<sub>3</sub>

zoom 112-122

GO

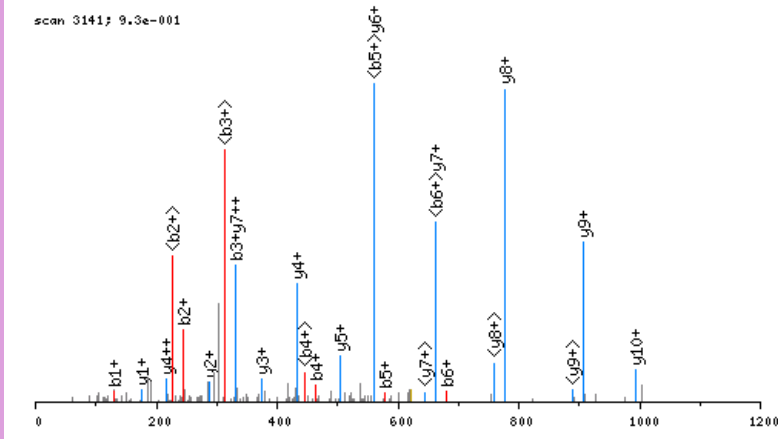

click image to zoom in; click top corners to zoom out [\[precursor±\]](#)

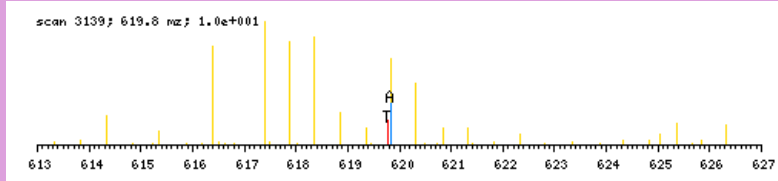

zoomed in precursor plot; T=theoretical m/z, A=acquired m/z

| b <sup>+</sup> | #  | AA # | y <sup>+</sup> | y <sup>2+</sup> |
|----------------|----|------|----------------|-----------------|
| 130.0504       | 1  | S 12 |                |                 |
| 245.0774       | 2  | D 11 | 1109.4897      | 555.2488        |
| 332.1094       | 3  | S 10 | 994.4628       | 497.7353        |
| 463.1499       | 4  | M 9  | 907.4307       | 454.2193        |
| 578.1768       | 5  | D 8  | 776.3903       | 388.6990        |
| 679.2245       | 6  | T 7  | 661.3633       | 331.1856        |
| 736.2460       | 7  | G 6  | 560.3156       | 280.6617        |
| 807.2831       | 8  | A 5  | 503.2942       | 252.1510        |
| 864.3045       | 9  | G 4  | 432.2571       | 216.6324        |
| 951.3366       | 10 | S 3  | 375.2356       | 188.1217        |
| 1064.4206      | 11 | I 2  | 288.2036       | 144.6057        |
|                | 12 | R 1  | 175.1195       | 88.0637         |

N-term:+43.02

SDSMESKTQQVVPEDEECLMSGTR, MH+ 2932.3438, m/z 978.1195  
L OSG36 P180811 230811-s1.04886.04886.3.dta

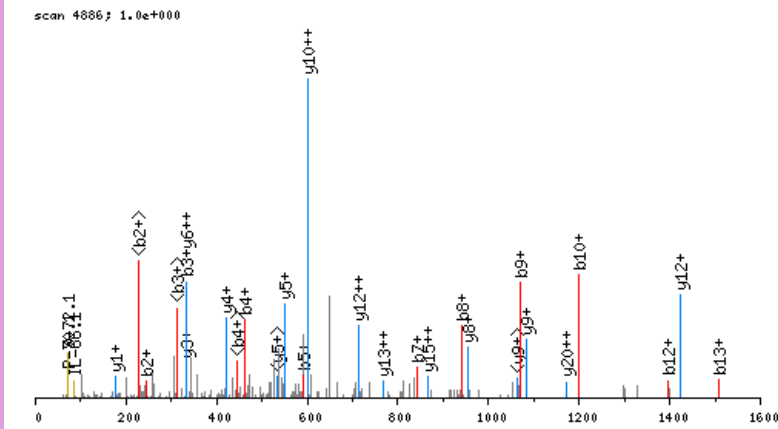

click image to zoom in; click top corners to zoom out [\[precursor±\]](#)

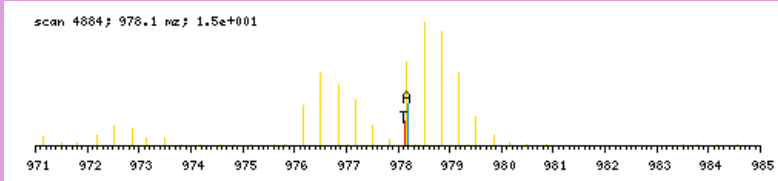

zoomed in precursor plot; T=theoretical m/z, A=acquired m/z

X-range:

-

MassTol: Y-zoom:

MassType:

AVG  MONO

Axis:

1  2

Label:

I  M  -

Ions:

a  +  2+  3+

b  +  2+  3+

c  +  2+  3+

x  +  2+  3+

y  +  2+  3+

z  +  2+  3+

hide H<sub>2</sub>O/NH<sub>3</sub>

zoom 112-122

GO

| b <sup>+</sup> | #  | AA | #  | y <sup>+</sup> | y <sup>2+</sup> |
|----------------|----|----|----|----------------|-----------------|
| 130.0504       | 1  | S  | 25 |                |                 |
| 245.0774       | 2  | D  | 24 | 2803.3012      | 1402.1545       |
| 332.1094       | 3  | S  | 23 | 2688.2743      | 1344.6410       |
| 463.1499       | 4  | M  | 22 | 2601.2422      | 1301.1250       |
| 592.1925       | 5  | E  | 21 | 2470.2018      | 1235.6048       |
| 679.2245       | 6  | S  | 20 | 2341.1592      | 1171.0835       |
| 841.3826       | 7  | K  | 19 | 2254.1271      | 1127.5675       |
| 942.4303       | 8  | T  | 18 | 2091.9690      | 1046.4884       |
| 1070.4889      | 9  | Q  | 17 | 1990.9214      | 995.9646        |
| 1198.5474      | 10 | Q  | 16 | 1862.8628      | 931.9353        |
| 1297.6159      | 11 | V  | 15 | 1734.8042      | 867.9060        |
| 1396.6843      | 12 | V  | 14 | 1635.7358      | 818.3718        |
| 1509.7683      | 13 | I  | 13 | 1536.6674      | 768.8376        |
| 1606.8211      | 14 | P  | 12 | 1423.5833      | 712.2956        |
| 1735.8637      | 15 | E  | 11 | 1326.5305      | 663.7692        |
| 1850.8906      | 16 | D  | 10 | 1197.4879      | 599.2479        |
| 1979.9332      | 17 | E  | 9  | 1082.4610      | 541.7344        |
| 2108.9758      | 18 | E  | 8  | 953.4184       | 477.2131        |
| 2269.0064      | 19 | C  | 7  | 824.3758       | 412.6918        |
| 2382.0905      | 20 | L  | 6  | 664.3452       | 332.6765        |
| 2513.1310      | 21 | M  | 5  | 551.2612       | 276.1345        |
| 2600.1630      | 22 | S  | 4  | 420.2207       | 210.6142        |
| 2657.1845      | 23 | G  | 3  | 333.1886       | 167.0982        |
| 2758.2321      | 24 | T  | 2  | 276.1672       | 138.5875        |
|                | 25 | R  | 1  | 175.1195       | 88.0637         |

N-term:+43.02 K(7):+162.16  
C(19):+160.03

SDSSDSMDTGAGSIR, MH+ 1527.6233, m/z 764.3153  
 L OSG41 P180811 230811-s1.03112.03112.2.dta

X-range:

-

MassTol: Y-zoom:

MassType:

AVG  MONO

Axis:

1  2

Label:

I  M  -

Ions:

a  +  2+  3+

b  +  2+  3+

c  +  2+  3+

x  +  2+  3+

y  +  2+  3+

z  +  2+  3+

hide H<sub>2</sub>O/NH<sub>3</sub>

zoom 112-122

GO

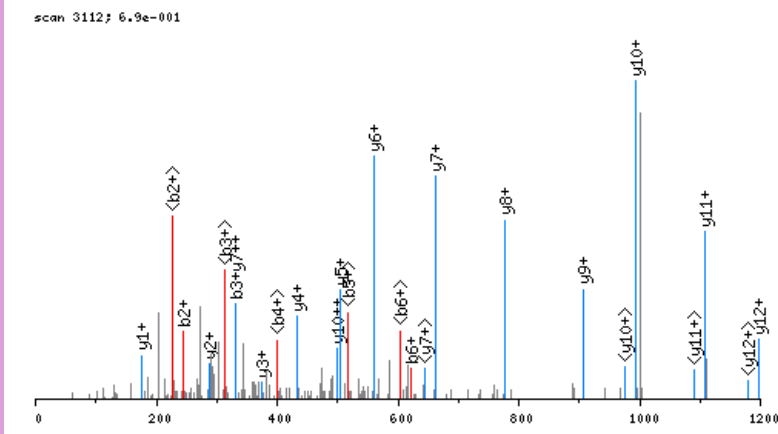

click image to zoom in; click top corners to zoom out [\[precursor±\]](#)

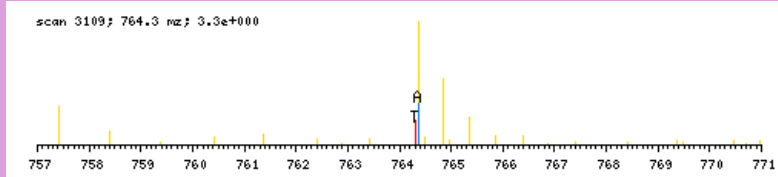

zoomed in precursor plot; T=theoretical m/z, A=acquired m/z

| b <sup>+</sup> | #  | AA # | y <sup>+</sup> | y <sup>2+</sup> |
|----------------|----|------|----------------|-----------------|
| 130.0504       | 1  | S 15 |                |                 |
| 245.0774       | 2  | D 14 | 1398.5807      | 699.7943        |
| 332.1094       | 3  | S 13 | 1283.5538      | 642.2808        |
| 419.1414       | 4  | S 12 | 1196.5217      | 598.7648        |
| 534.1684       | 5  | D 11 | 1109.4897      | 555.2488        |
| 621.2004       | 6  | S 10 | 994.4628       | 497.7353        |
| 752.2409       | 7  | M 9  | 907.4307       | 454.2193        |
| 867.2678       | 8  | D 8  | 776.3903       | 388.6990        |
| 968.3155       | 9  | T 7  | 661.3633       | 331.1856        |
| 1025.3370      | 10 | G 6  | 560.3156       | 280.6617        |
| 1096.3741      | 11 | A 5  | 503.2942       | 252.1510        |
| 1153.3955      | 12 | G 4  | 432.2571       | 216.6324        |
| 1240.4276      | 13 | S 3  | 375.2356       | 188.1217        |
| 1353.5116      | 14 | I 2  | 288.2036       | 144.6057        |
|                | 15 | R 1  | 175.1195       | 88.0637         |

N-term:+43.02



SDTPASTFGGR, MH+ 1137.5177, m/z 569.2625  
 L OSG41 P180811 230811-s1.03451.03451.2.dta

X-range:

-

MassTol: Y-zoom:

MassType:

AVG  MONO

Axis:

1  2

Label:

I  M  -

Ions:

a  +  2+  3+

b  +  2+  3+

c  +  2+  3+

x  +  2+  3+

y  +  2+  3+

z  +  2+  3+

hide H<sub>2</sub>O/NH<sub>3</sub>

zoom 112-122

GO

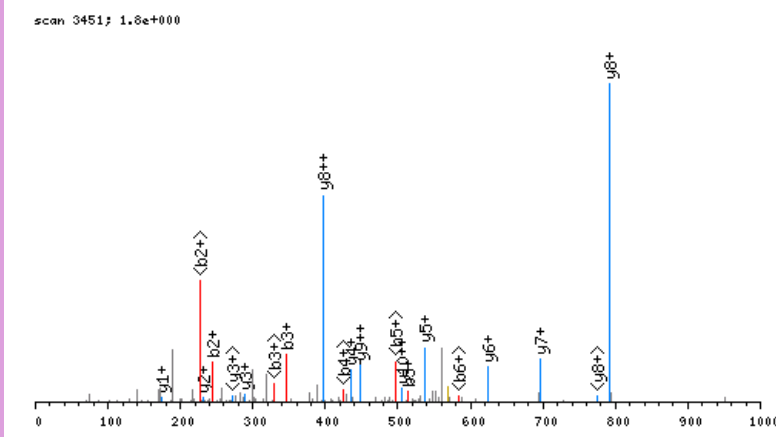

click image to zoom in; click top corners to zoom out [\[precursor±\]](#)

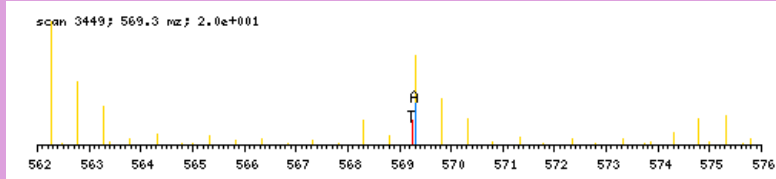

zoomed in precursor plot; T=theoretical m/z, A=acquired m/z

| b <sup>+</sup> | #  | AA | #  | y <sup>+</sup> | y <sup>2+</sup> |
|----------------|----|----|----|----------------|-----------------|
| 130.0504       | 1  | S  | 11 |                |                 |
| 245.0774       | 2  | D  | 10 | 1008.4750      | 504.7414        |
| 346.1251       | 3  | T  | 9  | 893.4481       | 447.2280        |
| 443.1778       | 4  | P  | 8  | 792.4004       | 396.7041        |
| 514.2149       | 5  | A  | 7  | 695.3477       | 348.1777        |
| 601.2470       | 6  | S  | 6  | 624.3105       | 312.6592        |
| 702.2946       | 7  | T  | 5  | 537.2785       | 269.1432        |
| 849.3630       | 8  | F  | 4  | 436.2308       | 218.6193        |
| 906.3845       | 9  | G  | 3  | 289.1624       | 145.0851        |
| 963.4060       | 10 | G  | 2  | 232.1410       | 116.5744        |
|                | 11 | R  | 1  | 175.1195       | 88.0637         |

N-term:+43.02

SEAFDCAKCNESLYGR, MH+ 1982.8800, m/z 661.6315  
 L OSG37 P180811 230811-s1.05388.05388.3.dta

X-range:

-

MassTol: Y-zoom:

MassType:

AVG  MONO

Axis:

1  2

Label:

I  M  -

Ions:

a  +  2+  3+

b  +  2+  3+

c  +  2+  3+

x  +  2+  3+

y  +  2+  3+

z  +  2+  3+

hide H<sub>2</sub>O/NH<sub>3</sub>

zoom 112-122

GO

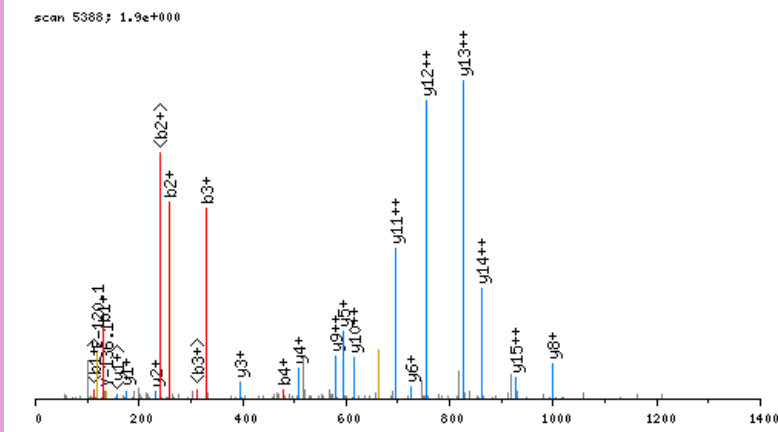

click image to zoom in; click top corners to zoom out [\[precursor±\]](#)

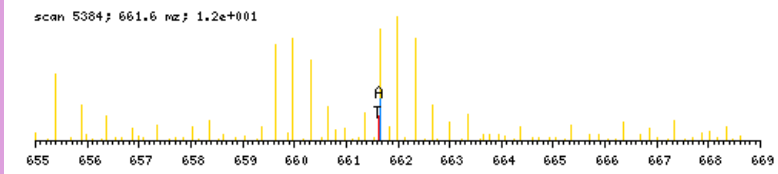

zoomed in precursor plot; T=theoretical m/z, A=acquired m/z

| b <sup>+</sup> | #  | AA | #  | y <sup>+</sup> | y <sup>2+</sup> |
|----------------|----|----|----|----------------|-----------------|
| 130.0504       | 1  | S  | 16 |                |                 |
| 259.0930       | 2  | E  | 15 | 1853.8374      | 927.4226        |
| 330.1301       | 3  | A  | 14 | 1724.7948      | 862.9013        |
| 477.1985       | 4  | F  | 13 | 1653.7577      | 827.3828        |
| 592.2255       | 5  | D  | 12 | 1506.6893      | 753.8485        |
| 752.2561       | 6  | C  | 11 | 1391.6623      | 696.3351        |
| 823.2932       | 7  | A  | 10 | 1231.6317      | 616.3198        |
| 985.4513       | 8  | K  | 9  | 1160.5946      | 580.8012        |
| 1145.4819      | 9  | C  | 8  | 998.4365       | 499.7222        |
| 1259.5248      | 10 | N  | 7  | 838.4059       | 419.7069        |
| 1388.5674      | 11 | E  | 6  | 724.3630       | 362.6854        |
| 1475.5995      | 12 | S  | 5  | 595.3204       | 298.1641        |
| 1588.6835      | 13 | L  | 4  | 508.2884       | 254.6481        |
| 1751.7468      | 14 | Y  | 3  | 395.2043       | 198.1061        |
| 1808.7683      | 15 | G  | 2  | 232.1410       | 116.5744        |
|                | 16 | R  | 1  | 175.1195       | 88.0637         |

N-term:+43.02 C(6):+160.03  
 K(8):+162.16 C(9):+160.03

SEDSSALPWSINR, MH+ 1503.7080, m/z 752.3576  
 L OSG41 P180811 230811-s1.06328.06328.2.dta

X-range:

-

MassTol: Y-zoom:

MassType:

AVG  MONO

Axis:

1  2

Label:

I  M  -

Ions:

a  +  2+  3+

b  +  2+  3+

c  +  2+  3+

x  +  2+  3+

y  +  2+  3+

z  +  2+  3+

hide H<sub>2</sub>O/NH<sub>3</sub>

zoom 112-122

GO

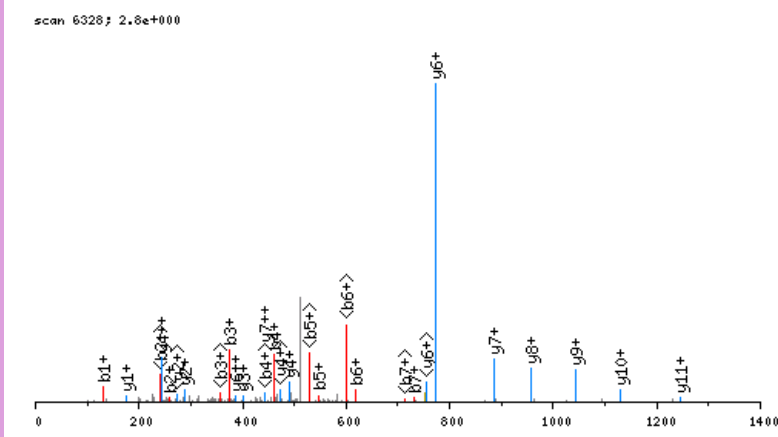

click image to zoom in; click top corners to zoom out [\[precursor±\]](#)

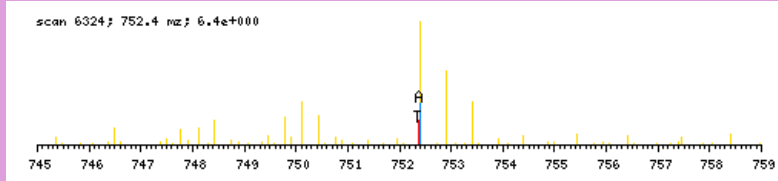

zoomed in precursor plot; T=theoretical m/z, A=acquired m/z

| b <sup>+</sup> | #  | AA # | y <sup>+</sup> | y <sup>2+</sup> |
|----------------|----|------|----------------|-----------------|
| 130.0504       | 1  | S 13 |                |                 |
| 259.0930       | 2  | E 12 | 1374.6654      | 687.8366        |
| 374.1200       | 3  | D 11 | 1245.6228      | 623.3153        |
| 461.1520       | 4  | S 10 | 1130.5958      | 565.8018        |
| 548.1840       | 5  | S 9  | 1043.5638      | 522.2858        |
| 619.2211       | 6  | A 8  | 956.5318       | 478.7698        |
| 732.3052       | 7  | L 7  | 885.4947       | 443.2512        |
| 829.3580       | 8  | P 6  | 772.4106       | 386.7092        |
| 1015.4373      | 9  | W 5  | 675.3578       | 338.1828        |
| 1102.4693      | 10 | S 4  | 489.2785       | 245.1432        |
| 1215.5534      | 11 | I 3  | 402.2465       | 201.6272        |
| 1329.5963      | 12 | N 2  | 289.1624       | 145.0851        |
|                | 13 | R 1  | 175.1195       | 88.0637         |

N-term:+43.02

SEGDSVGDVSVHGKPSVVYR, MH+ 2044.9940, m/z 682.3362  
 L OSG39 P180811 230811-s1.03113.03113.3.dta

X-range:

-

MassTol: Y-zoom:

MassType:

AVG  MONO

Axis:

1  2

Label:

I  M  -

Ions:

a  +  2+  3+

b  +  2+  3+

c  +  2+  3+

x  +  2+  3+

y  +  2+  3+

z  +  2+  3+

hide H<sub>2</sub>O/NH<sub>3</sub>

zoom 112-122

GO

scan 3113; 3.1e+000

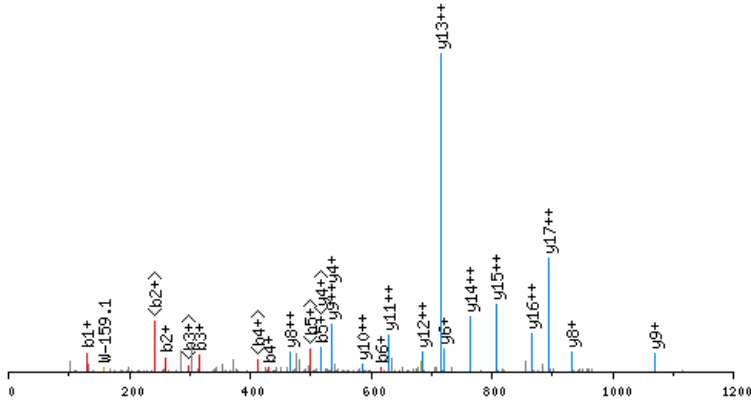

click image to zoom in; click top corners to zoom out [\[precursor±\]](#)

scan 3111; 682.3 m/z; 4.8e+001

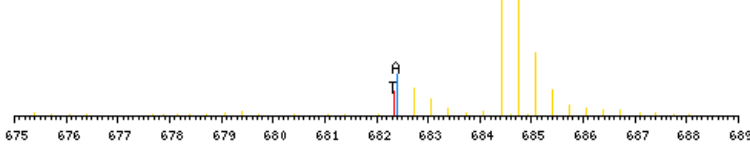

zoomed in precursor plot; T=theoretical m/z, A=acquired m/z

| b <sup>+</sup> | #  | AA # | y <sup>+</sup> | y <sup>2+</sup> |
|----------------|----|------|----------------|-----------------|
| 130.0504       | 1  | S 19 |                |                 |
| 259.0930       | 2  | E 18 | 1915.9514      | 958.4796        |
| 316.1145       | 3  | G 17 | 1786.9088      | 893.9583        |
| 431.1414       | 4  | D 16 | 1729.8874      | 865.4476        |
| 518.1735       | 5  | S 15 | 1614.8604      | 807.9341        |
| 617.2419       | 6  | V 14 | 1527.8284      | 764.4181        |
| 674.2633       | 7  | G 13 | 1428.7600      | 714.8839        |
| 789.2903       | 8  | D 12 | 1371.7385      | 686.3732        |
| 876.3223       | 9  | S 11 | 1256.7116      | 628.8597        |
| 975.3907       | 10 | V 10 | 1169.6795      | 585.3437        |
| 1112.4496      | 11 | H 9  | 1070.6111      | 535.8095        |
| 1169.4711      | 12 | G 8  | 933.5522       | 467.2800        |
| 1325.5974      | 13 | K 7  | 876.5307       | 438.7693        |
| 1422.6502      | 14 | P 6  | 720.4044       | 360.7061        |
| 1509.6822      | 15 | S 5  | 623.3517       | 312.1798        |
| 1608.7506      | 16 | V 4  | 536.3197       | 268.6637        |
| 1707.8190      | 17 | V 3  | 437.2512       | 219.1295        |
| 1870.8823      | 18 | Y 2  | 338.1828       | 169.5953        |
|                | 19 | R 1  | 175.1195       | 88.0637         |

N-term:+43.02 K(13):+156.13

SEKFDCHYCR, MH+ 1471.6098, m/z 491.2081  
 L OSG40 P180811 230811-s1.02873.02873.3.dta

scan 2873; 3.6e+001

X-range:

-

MassTol: Y-zoom:

MassType:

AVG  MONO

Axis:

1  2

Label:

I  M  -

Ions:

a  +  2+  3+

b  +  2+  3+

c  +  2+  3+

x  +  2+  3+

y  +  2+  3+

z  +  2+  3+

hide H<sub>2</sub>O/NH<sub>3</sub>

zoom 112-122

GO

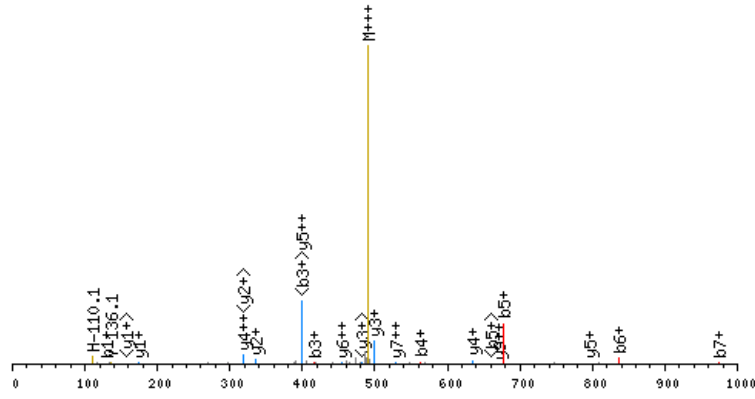

click image to zoom in; click top corners to zoom out [precursor±]

scan 2869; 491.2 mz; 5.5e+001

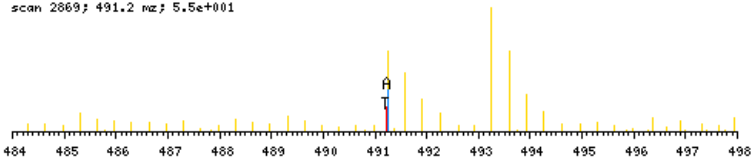

zoomed in precursor plot; T=theoretical m/z, A=acquired m/z

| b <sup>+</sup> | #  | AA # | y <sup>+</sup> | y <sup>2+</sup> |
|----------------|----|------|----------------|-----------------|
| 130.0504       | 1  | S    | 10             |                 |
| 259.0930       | 2  | E    | 9              | 1342.5672       |
| 415.2193       | 3  | K    | 8              | 1213.5246       |
| 562.2877       | 4  | F    | 7              | 1057.3983       |
| 677.3147       | 5  | D    | 6              | 910.3299        |
| 837.3453       | 6  | C    | 5              | 795.3029        |
| 974.4042       | 7  | H    | 4              | 635.2723        |
| 1137.4675      | 8  | Y    | 3              | 498.2134        |
| 1297.4981      | 9  | C    | 2              | 335.1501        |
|                | 10 | R    | 1              | 175.1195        |

N-term:+43.02 K(3):+156.13  
 C(6):+160.03 C(9):+160.03



SELEQLRQEAQLR, MH+ 1770.8986, m/z 590.9711  
 L OSG37 P180811 230811-s1.08270.08270.3.dta

scan 8270; 1.9e+000

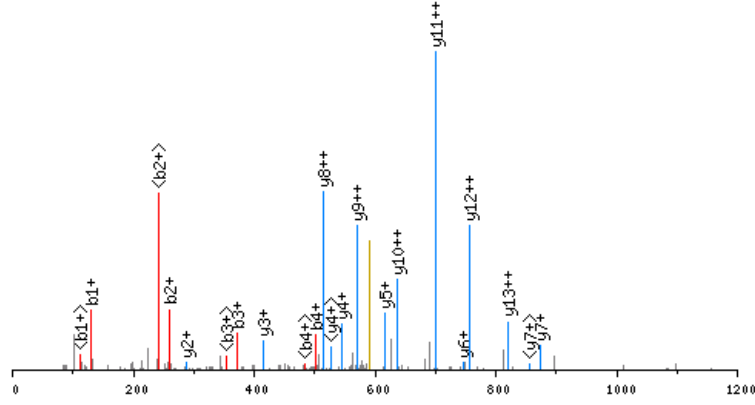

click image to zoom in; click top corners to zoom out [\[precursor±\]](#)

scan 8269; 591.0 m/z; 1.6e+001

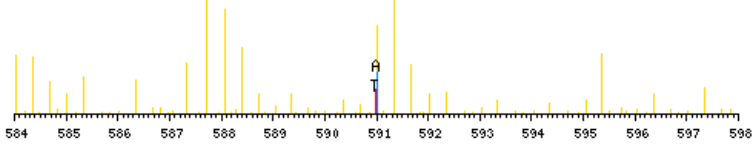

zoomed in precursor plot; T=theoretical m/z, A=acquired m/z

X-range:

-

MassTol: Y-zoom:

MassType:

AVG  MONO

Axis:

1  2

Label:

I  M  -

Ions:

a  +  2+  3+

b  +  2+  3+

c  +  2+  3+

x  +  2+  3+

y  +  2+  3+

z  +  2+  3+

hide H<sub>2</sub>O/NH<sub>3</sub>

zoom 112-122

GO

| b <sup>+</sup> | #  | AA # | y <sup>+</sup> | y <sup>2+</sup> |
|----------------|----|------|----------------|-----------------|
| 130.0504       | 1  | S 14 |                |                 |
| 259.0930       | 2  | E 13 | 1641.8560      | 821.4319        |
| 372.1771       | 3  | L 12 | 1512.8134      | 756.9106        |
| 501.2197       | 4  | E 11 | 1399.7294      | 700.3686        |
| 629.2783       | 5  | Q 10 | 1270.6868      | 635.8473        |
| 742.3623       | 6  | L 9  | 1142.6282      | 571.8180        |
| 898.4634       | 7  | R 8  | 1029.5441      | 515.2760        |
| 1026.5220      | 8  | Q 7  | 873.4430       | 437.2254        |
| 1155.5646      | 9  | E 6  | 745.3844       | 373.1961        |
| 1226.6017      | 10 | A 5  | 616.3418       | 308.6748        |
| 1355.6443      | 11 | E 4  | 545.3047       | 273.1563        |
| 1483.7029      | 12 | Q 3  | 416.2621       | 208.6350        |
| 1596.7870      | 13 | L 2  | 288.2036       | 144.6057        |
|                | 14 | R 1  | 175.1195       | 88.0637         |

N-term:+43.02

SEPELKLVAR, MH+ 1211.7000, m/z 606.3536  
 L OSG37 P180811 230811-s1.05096.05096.2.dta

X-range:

-

MassTol: Y-zoom:

MassType:

AVG  MONO

Axis:

1  2

Label:

I  M  -

Ions:

a  +  2+  3+

b  +  2+  3+

c  +  2+  3+

x  +  2+  3+

y  +  2+  3+

z  +  2+  3+

hide H<sub>2</sub>O/NH<sub>3</sub>

zoom 112-122

GO

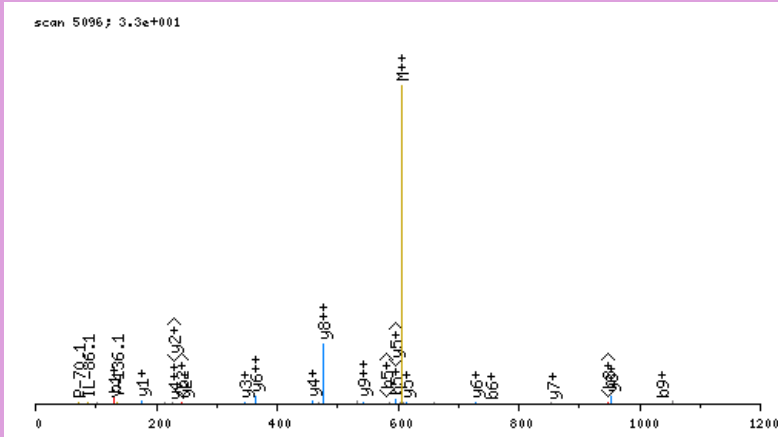

click image to zoom in; click top corners to zoom out [\[precursor±\]](#)

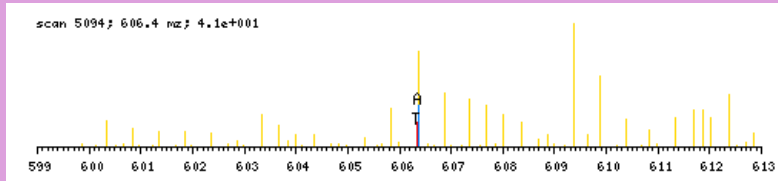

zoomed in precursor plot; T=theoretical m/z, A=acquired m/z

| b <sup>+</sup> | #  | AA # | y <sup>+</sup> | y <sup>2+</sup> |
|----------------|----|------|----------------|-----------------|
| 130.0504       | 1  | S 10 |                |                 |
| 259.0930       | 2  | E 9  | 1082.6574      | 541.8326        |
| 356.1458       | 3  | P 8  | 953.6148       | 477.3113        |
| 485.1884       | 4  | E 7  | 856.5620       | 428.7849        |
| 598.2724       | 5  | L 6  | 727.5195       | 364.2636        |
| 754.3987       | 6  | K 5  | 614.4354       | 307.7216        |
| 867.4828       | 7  | L 4  | 458.3091       | 229.6585        |
| 966.5512       | 8  | V 3  | 345.2250       | 173.1164        |
| 1037.5883      | 9  | A 2  | 246.1566       | 123.5822        |
|                | 10 | R 1  | 175.1195       | 88.0637         |

N-term:+43.02 K(6):+156.13



SEPGGGEDGSAGLEVSQVAVLQKHLR, MH+ 3265.6877, m/z 817.1774  
L OSG38 P180811 230811-s1.07833.07833.4.dta

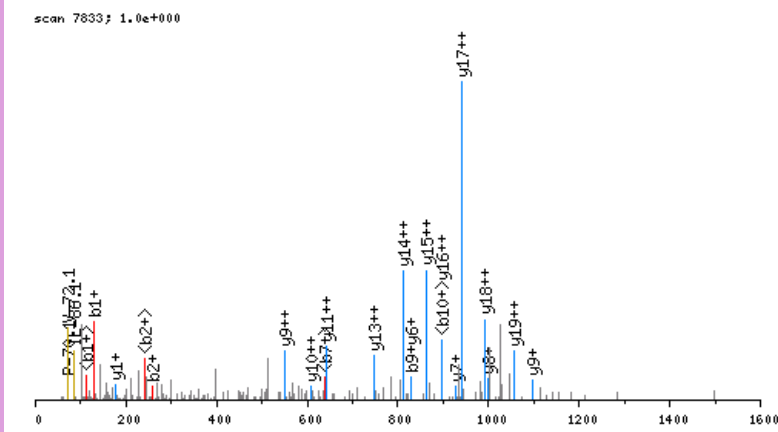

click image to zoom in; click top corners to zoom out [\[precursor±\]](#)

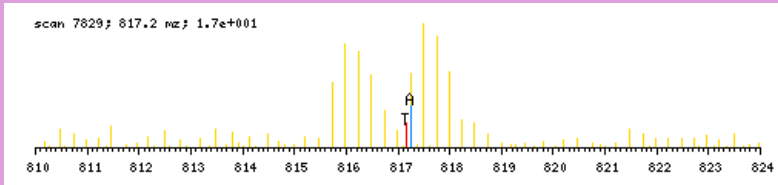

zoomed in precursor plot; T=theoretical m/z, A=acquired m/z

| b <sup>+</sup> | #  | AA | #  | y <sup>+</sup> | y <sup>2+</sup> |
|----------------|----|----|----|----------------|-----------------|
| 130.0504       | 1  | S  | 32 |                |                 |
| 259.0930       | 2  | E  | 31 | 3136.6451      | 1568.8265       |
| 356.1458       | 3  | P  | 30 | 3007.6025      | 1504.3052       |
| 413.1672       | 4  | G  | 29 | 2910.5498      | 1455.7788       |
| 470.1887       | 5  | G  | 28 | 2853.5283      | 1427.2681       |
| 527.2102       | 6  | G  | 27 | 2796.5068      | 1398.7573       |
| 656.2528       | 7  | E  | 26 | 2739.4854      | 1370.2466       |
| 771.2797       | 8  | D  | 25 | 2610.4428      | 1305.7253       |
| 828.3012       | 9  | G  | 24 | 2495.4158      | 1248.2118       |
| 915.3332       | 10 | S  | 23 | 2438.3944      | 1219.7011       |
| 986.3703       | 11 | A  | 22 | 2351.3623      | 1176.1851       |
| 1043.3918      | 12 | G  | 21 | 2280.3252      | 1140.6665       |
| 1156.4758      | 13 | L  | 20 | 2223.3038      | 1112.1558       |
| 1285.5184      | 14 | E  | 19 | 2110.2197      | 1055.6138       |
| 1384.5869      | 15 | V  | 18 | 1981.1771      | 991.0925        |
| 1471.6189      | 16 | S  | 17 | 1882.1087      | 941.5583        |
| 1542.6560      | 17 | A  | 16 | 1795.0767      | 898.0422        |
| 1641.7244      | 18 | V  | 15 | 1724.0395      | 862.5237        |
| 1769.7830      | 19 | Q  | 14 | 1624.9711      | 812.9895        |
| 1883.8259      | 20 | N  | 13 | 1496.9126      | 748.9602        |
| 1982.8943      | 21 | V  | 12 | 1382.8696      | 691.9387        |
| 2053.9314      | 22 | A  | 11 | 1283.8012      | 642.4045        |
| 2168.9584      | 23 | D  | 10 | 1212.7641      | 606.8860        |
| 2268.0268      | 24 | V  | 9  | 1097.7372      | 549.3725        |
| 2339.0639      | 25 | A  | 8  | 998.6687       | 499.8383        |
| 2438.1323      | 26 | V  | 7  | 927.6316       | 464.3197        |
| 2551.2164      | 27 | L  | 6  | 828.5632       | 414.7855        |
| 2679.2750      | 28 | Q  | 5  | 715.4792       | 358.2435        |
| 2841.4331      | 29 | K  | 4  | 587.4206       | 294.2142        |
| 2978.4920      | 30 | H  | 3  | 425.2625       | 213.1352        |
| 3091.5760      | 31 | L  | 2  | 288.2036       | 144.6057        |
|                | 32 | R  | 1  | 175.1195       | 88.0637         |

N-term:+43.02 K(29):+162.16

X-range:

-

MassTol: Y-zoom:

MassType:

AVG  MONO

Axis:

1  2

Label:

I  M  -

Ions:

a  +  2+  3+

b  +  2+  3+

c  +  2+  3+

x  +  2+  3+

y  +  2+  3+

z  +  2+  3+

hide H<sub>2</sub>O/NH<sub>3</sub>

zoom 112-122

GO

SESLVVCDVAEDLVEKLR, MH+ 2131.0957, m/z 711.0367  
 L OSG37 P180811 230811-s1.09040.09040.3.dta

X-range:

-

MassTol: Y-zoom:

MassType:

AVG  MONO

Axis:

1  2

Label:

I  M  -

Ions:

a  +  2+  3+

b  +  2+  3+

c  +  2+  3+

x  +  2+  3+

y  +  2+  3+

z  +  2+  3+

hide H<sub>2</sub>O/NH<sub>3</sub>

zoom 112-122

GO

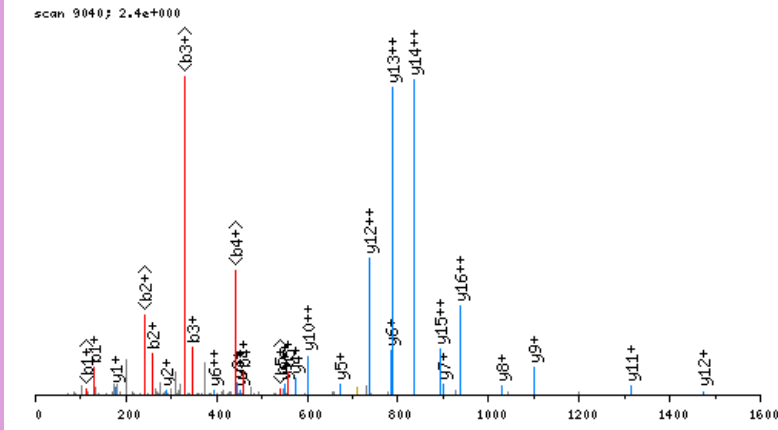

click image to zoom in; click top corners to zoom out [precursor±]

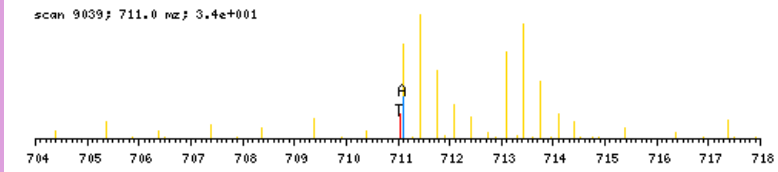

zoomed in precursor plot; T=theoretical m/z, A=acquired m/z

| b <sup>+</sup> | #  | AA | #  | y <sup>+</sup> | y <sup>2+</sup> |
|----------------|----|----|----|----------------|-----------------|
| 130.0504       | 1  | S  | 18 |                |                 |
| 259.0930       | 2  | E  | 17 | 2002.0531      | 1001.5304       |
| 346.1251       | 3  | S  | 16 | 1873.0105      | 937.0091        |
| 459.2091       | 4  | L  | 15 | 1785.9784      | 893.4931        |
| 558.2775       | 5  | V  | 14 | 1672.8944      | 836.9511        |
| 657.3459       | 6  | V  | 13 | 1573.8260      | 787.4169        |
| 817.3765       | 7  | C  | 12 | 1474.7575      | 737.8827        |
| 932.4035       | 8  | D  | 11 | 1314.7269      | 657.8674        |
| 1031.4719      | 9  | V  | 10 | 1199.7000      | 600.3539        |
| 1102.5090      | 10 | A  | 9  | 1100.6316      | 550.8197        |
| 1231.5516      | 11 | E  | 8  | 1029.5945      | 515.3011        |
| 1346.5785      | 12 | D  | 7  | 900.5519       | 450.7799        |
| 1459.6626      | 13 | L  | 6  | 785.5249       | 393.2664        |
| 1558.7310      | 14 | V  | 5  | 672.4409       | 336.7243        |
| 1687.7736      | 15 | E  | 4  | 573.3725       | 287.1901        |
| 1843.8999      | 16 | K  | 3  | 444.3299       | 222.6688        |
| 1956.9840      | 17 | L  | 2  | 288.2036       | 144.6057        |
|                | 18 | R  | 1  | 175.1195       | 88.0637         |

N-term:+43.02 C (7):+160.03  
 K (16):+156.13

SETVICSSR, MH+ 1080.4995, m/z 540.7534  
 L OSG41 P180811 230811-s1.03000.03000.2.dta

X-range:

-

MassTol: Y-zoom:

MassType:

AVG  MONO

Axis:

1  2

Label:

I  M  -

Ions:

a  +  2+  3+

b  +  2+  3+

c  +  2+  3+

x  +  2+  3+

y  +  2+  3+

z  +  2+  3+

hide H<sub>2</sub>O/NH<sub>3</sub>

zoom 112-122

GO

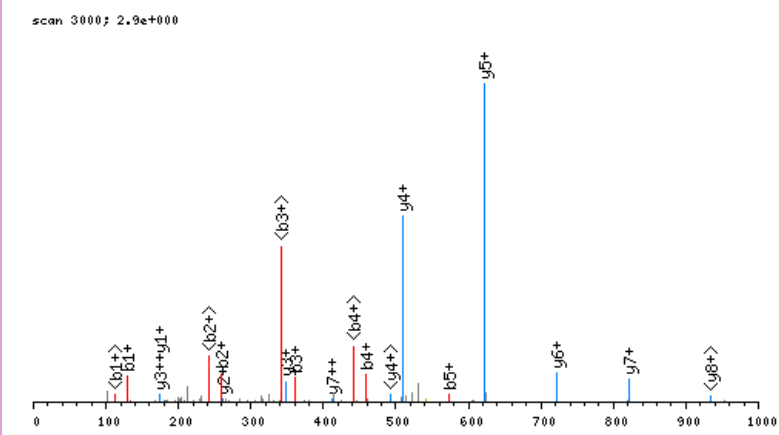

click image to zoom in; click top corners to zoom out [\[precursor±\]](#)

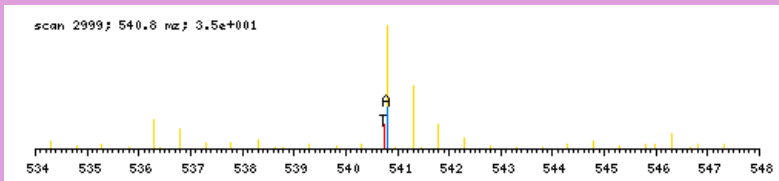

zoomed in precursor plot; T=theoretical m/z, A=acquired m/z

| b <sup>+</sup> | # | AA # | y <sup>+</sup> | y <sup>2+</sup> |
|----------------|---|------|----------------|-----------------|
| 130.0504       | 1 | S    | 9              |                 |
| 259.0930       | 2 | E    | 8              | 951.4569        |
| 360.1407       | 3 | T    | 7              | 822.4143        |
| 459.2091       | 4 | V    | 6              | 721.3666        |
| 572.2932       | 5 | I    | 5              | 622.2982        |
| 732.3238       | 6 | C    | 4              | 509.2142        |
| 819.3558       | 7 | S    | 3              | 349.1836        |
| 906.3878       | 8 | S    | 2              | 262.1515        |
|                | 9 | R    | 1              | 175.1195        |

N-term:+43.02 C(6):+160.03

SFLKSFPPPGSADGLR, MH+ 1745.9227, m/z 582.6457  
 L OSG37 P180811 230811-s1.08063.08063.3.dta

X-range:

-

MassTol: Y-zoom:

MassType:

AVG  MONO

Axis:

1  2

Label:

I  M  -

Ions:

a  +  2+  3+

b  +  2+  3+

c  +  2+  3+

x  +  2+  3+

y  +  2+  3+

z  +  2+  3+

hide H<sub>2</sub>O/NH<sub>3</sub>

zoom 112-122

GO

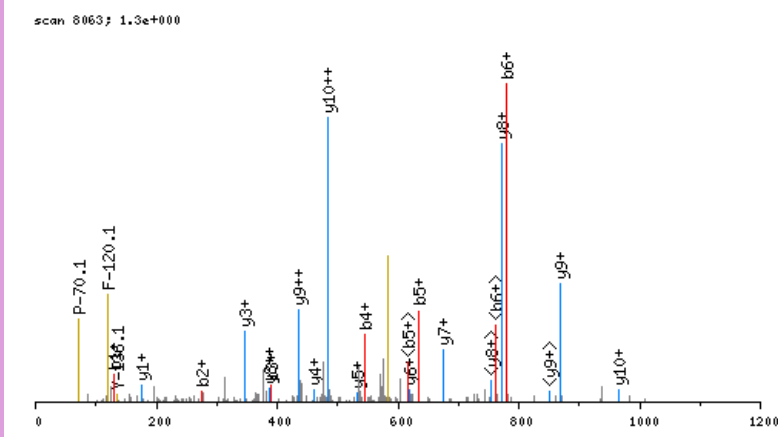

click image to zoom in; click top corners to zoom out [\[precursor±\]](#)

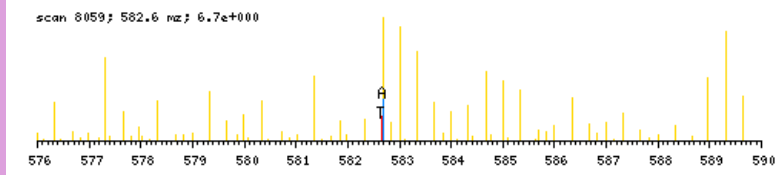

zoomed in precursor plot; T=theoretical m/z, A=acquired m/z

| b <sup>+</sup> | #  | AA # | y <sup>+</sup> | y <sup>2+</sup> |
|----------------|----|------|----------------|-----------------|
| 130.0504       | 1  | S 16 |                |                 |
| 277.1188       | 2  | F 15 | 1616.8801      | 808.9440        |
| 390.2029       | 3  | L 14 | 1469.8117      | 735.4098        |
| 546.3292       | 4  | K 13 | 1356.7276      | 678.8677        |
| 633.3612       | 5  | S 12 | 1200.6013      | 600.8046        |
| 780.4296       | 6  | F 11 | 1113.5693      | 557.2886        |
| 877.4824       | 7  | P 10 | 966.5009       | 483.7543        |
| 974.5352       | 8  | P 9  | 869.4481       | 435.2280        |
| 1071.5879      | 9  | P 8  | 772.3953       | 386.7016        |
| 1128.6094      | 10 | G 7  | 675.3426       | 338.1752        |
| 1215.6414      | 11 | S 6  | 618.3211       | 309.6645        |
| 1286.6785      | 12 | A 5  | 531.2891       | 266.1485        |
| 1401.7055      | 13 | D 4  | 460.2520       | 230.6299        |
| 1458.7270      | 14 | G 3  | 345.2250       | 173.1164        |
| 1571.8110      | 15 | L 2  | 288.2036       | 144.6057        |
|                | 16 | R 1  | 175.1195       | 88.0637         |

N-term:+43.02 K(4):+156.13

X-range:

-

MassTol: Y-zoom:

MassType:

AVG  MONO

Axis:

1  2

Label:

I  M  -

Ions:

a  +  2+  3+

b  +  2+  3+

c  +  2+  3+

x  +  2+  3+

y  +  2+  3+

z  +  2+  3+

hide H<sub>2</sub>O/NH<sub>3</sub>

zoom 112-122

GO

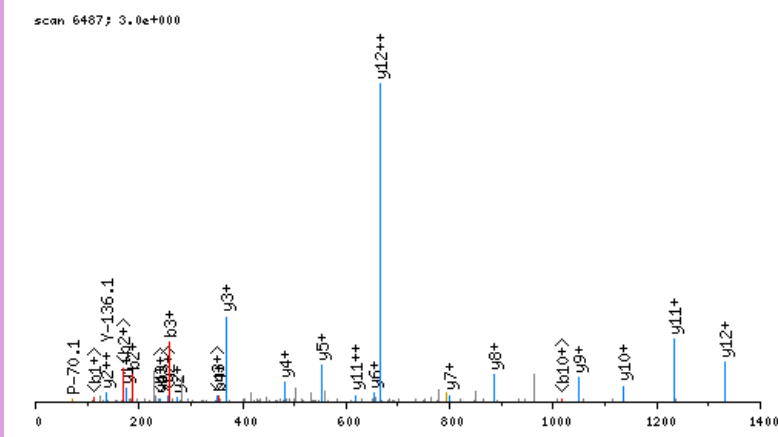

click image to zoom in; click top corners to zoom out [\[precursor±\]](#)

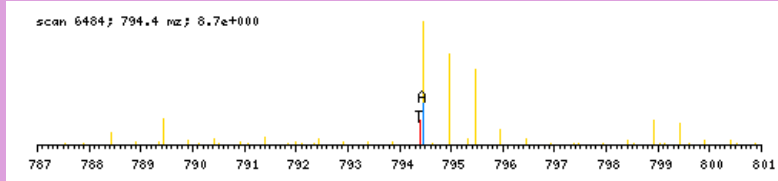

zoomed in precursor plot; T=theoretical m/z, A=acquired m/z

| b <sup>+</sup> | #  | AA # | y <sup>+</sup> | y <sup>2+</sup> |
|----------------|----|------|----------------|-----------------|
| 130.0504       | 1  | S 15 |                |                 |
| 187.0719       | 2  | G 14 | 1458.7745      | 729.8912        |
| 258.1090       | 3  | A 13 | 1401.7531      | 701.3804        |
| 355.1618       | 4  | P 12 | 1330.7159      | 665.8619        |
| 452.2145       | 5  | P 11 | 1233.6632      | 617.3355        |
| 539.2466       | 6  | S 10 | 1136.6104      | 568.8091        |
| 702.3099       | 7  | Y 9  | 1049.5784      | 525.2931        |
| 789.3419       | 8  | S 8  | 886.5151       | 443.7614        |
| 936.4103       | 9  | F 7  | 799.4830       | 400.2454        |
| 1035.4787      | 10 | V 6  | 652.4146       | 326.7112        |
| 1106.5159      | 11 | A 5  | 553.3462       | 277.1770        |
| 1219.5999      | 12 | L 4  | 482.3091       | 241.6585        |
| 1316.6527      | 13 | P 3  | 369.2250       | 185.1164        |
| 1413.7055      | 14 | P 2  | 272.1723       | 136.5900        |
|                | 15 | R 1  | 175.1195       | 88.0637         |

N-term:+43.02

SGEDEQQEQTI AEDLVVTKYKMGDDIANR, MH+ 3334.6750, m/z 834.4242  
 L OSG38 P180811 230811-s1.07730.07730.4.dta

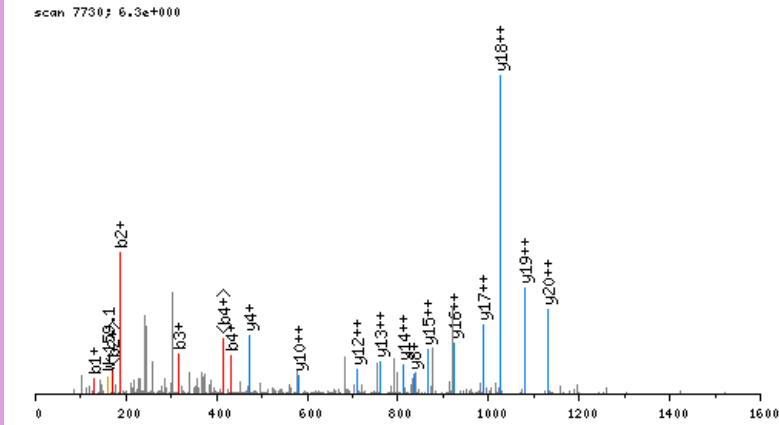

click image to zoom in; click top corners to zoom out [\[precursor±\]](#)

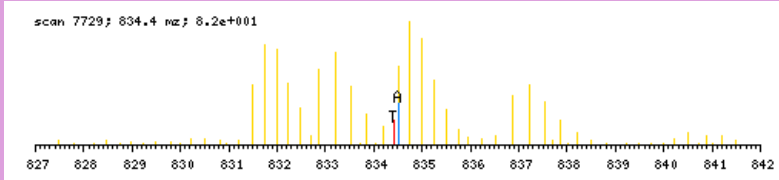

zoomed in precursor plot; T=theoretical m/z, A=acquired m/z

X-range:

-

MassTol: Y-zoom:

MassType:

AVG  MONO

Axis:

1  2

Label:

I  M  -

Ions:

a  +  2+  3+

b  +  2+  3+

c  +  2+  3+

x  +  2+  3+

y  +  2+  3+

z  +  2+  3+

hide H<sub>2</sub>O/NH<sub>3</sub>

zoom 112-122

GO

| b <sup>+</sup> | #  | AA | #  | y <sup>+</sup> | y <sup>2+</sup> |
|----------------|----|----|----|----------------|-----------------|
| 130.0504       | 1  | S  | 29 |                |                 |
| 187.0719       | 2  | G  | 28 | 3205.6324      | 1603.3201       |
| 316.1145       | 3  | E  | 27 | 3148.6109      | 1574.8094       |
| 431.1414       | 4  | D  | 26 | 3019.5683      | 1510.2881       |
| 560.1840       | 5  | E  | 25 | 2904.5414      | 1452.7746       |
| 688.2426       | 6  | Q  | 24 | 2775.4988      | 1388.2533       |
| 816.3012       | 7  | Q  | 23 | 2647.4402      | 1324.2240       |
| 945.3438       | 8  | E  | 22 | 2519.3816      | 1260.1947       |
| 1073.4023      | 9  | Q  | 21 | 2390.3390      | 1195.6734       |
| 1174.4500      | 10 | T  | 20 | 2262.2805      | 1131.6441       |
| 1287.5341      | 11 | I  | 19 | 2161.2328      | 1081.1203       |
| 1358.5712      | 12 | A  | 18 | 2048.1487      | 1024.5783       |
| 1487.6138      | 13 | E  | 17 | 1977.1116      | 989.0597        |
| 1602.6407      | 14 | D  | 16 | 1848.0690      | 924.5384        |
| 1715.7248      | 15 | L  | 15 | 1733.0421      | 867.0249        |
| 1814.7932      | 16 | V  | 14 | 1619.9580      | 810.4829        |
| 1913.8616      | 17 | V  | 13 | 1520.8896      | 760.9487        |
| 2014.9093      | 18 | T  | 12 | 1421.8212      | 711.4145        |
| 2177.0674      | 19 | K  | 11 | 1320.7735      | 660.8907        |
| 2340.1307      | 20 | Y  | 10 | 1158.6154      | 579.8116        |
| 2502.2888      | 21 | K  | 9  | 995.5521       | 498.2799        |
| 2633.3293      | 22 | M  | 8  | 833.3940       | 417.2009        |
| 2690.3508      | 23 | G  | 7  | 702.3535       | 351.6807        |
| 2747.3723      | 24 | G  | 6  | 645.3320       | 323.1699        |
| 2862.3992      | 25 | D  | 5  | 588.3105       | 294.6592        |
| 2975.4833      | 26 | I  | 4  | 473.2836       | 237.1457        |
| 3046.5204      | 27 | A  | 3  | 360.1995       | 180.6037        |
| 3160.5633      | 28 | N  | 2  | 289.1624       | 145.0851        |
|                | 29 | R  | 1  | 175.1195       | 88.0637         |

N-term: +43.02 K(19): +162.16  
 K(21): +162.16

SGEDGPAAGPGAAAAAAR, MH+ 1680.7942, m/z 560.9362  
 L OSG41 P180811 230811-s1.03890.03890.3.dta

scan 3890; 5.4e-001

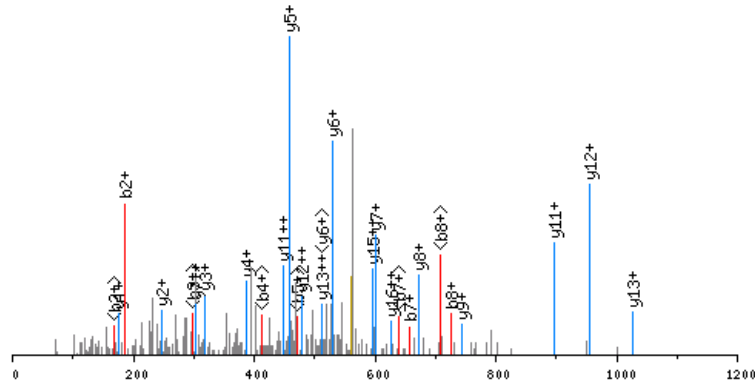

click image to zoom in; click top corners to zoom out [precursor±]

scan 3889; 560.9 m/z; 2.8e+001

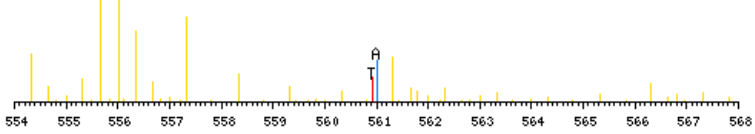

zoomed in precursor plot; T=theoretical m/z, A=acquired m/z

X-range:

-

MassTol: Y-zoom:

MassType:

AVG  MONO

Axis:

1  2

Label:

I  M  -

Ions:

a  +  2+  3+

b  +  2+  3+

c  +  2+  3+

x  +  2+  3+

y  +  2+  3+

z  +  2+  3+

hide H<sub>2</sub>O/NH<sub>3</sub>

zoom 112-122

GO

| b <sup>+</sup> | #  | AA # | y <sup>+</sup> | y <sup>2+</sup> |
|----------------|----|------|----------------|-----------------|
| 130.0504       | 1  | S 20 |                |                 |
| 187.0719       | 2  | G 19 | 1551.7516      | 776.3797        |
| 316.1145       | 3  | E 18 | 1494.7301      | 747.8690        |
| 431.1414       | 4  | D 17 | 1365.6875      | 683.3477        |
| 488.1629       | 5  | G 16 | 1250.6606      | 625.8342        |
| 585.2157       | 6  | P 15 | 1193.6391      | 597.3235        |
| 656.2528       | 7  | A 14 | 1096.5863      | 548.7971        |
| 727.2899       | 8  | A 13 | 1025.5492      | 513.2785        |
| 784.3113       | 9  | G 12 | 954.5121       | 477.7600        |
| 881.3641       | 10 | P 11 | 897.4906       | 449.2492        |
| 938.3856       | 11 | G 10 | 800.4379       | 400.7228        |
| 1009.4227      | 12 | A 9  | 743.4164       | 372.2121        |
| 1080.4598      | 13 | A 8  | 672.3793       | 336.6936        |
| 1151.4969      | 14 | A 7  | 601.3422       | 301.1750        |
| 1222.5340      | 15 | A 6  | 530.3051       | 265.6564        |
| 1293.5711      | 16 | A 5  | 459.2680       | 230.1379        |
| 1364.6083      | 17 | A 4  | 388.2308       | 194.6193        |
| 1435.6454      | 18 | A 3  | 317.1937       | 159.1008        |
| 1506.6825      | 19 | A 2  | 246.1566       | 123.5822        |
|                | 20 | R 1  | 175.1195       | 88.0637         |

N-term:+43.02

SGEGENPASKPTPVQDVQGDGR, MH+ 2301.1172, m/z 767.7106  
 L OSG36 P180811 230811-s1.02825.02825.3.dta

scan 2825; 2.9e+000

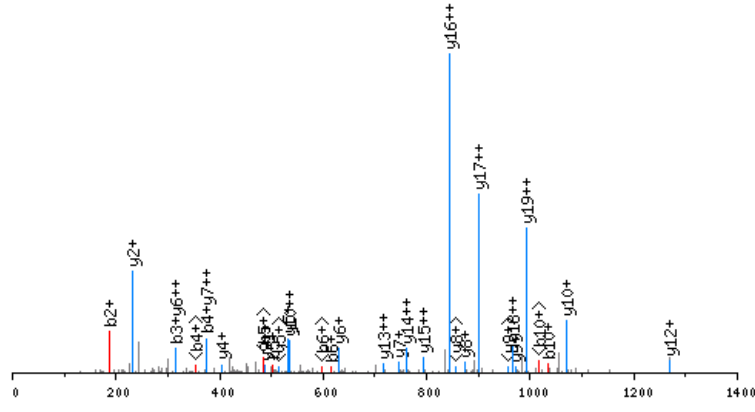

click image to zoom in; click top corners to zoom out [precursor±]

scan 2822; 767.7 mz; 2.6e+000

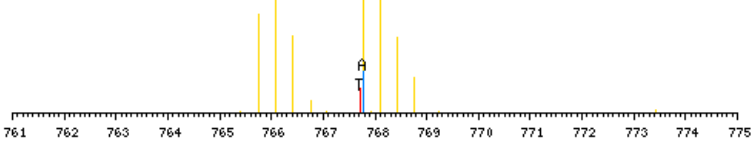

zoomed in precursor plot; T=theoretical m/z, A=acquired m/z

| b <sup>+</sup> | #  | AA | #  | y <sup>+</sup> | y <sup>2+</sup> |
|----------------|----|----|----|----------------|-----------------|
| 130.0504       | 1  | S  | 22 |                |                 |
| 187.0719       | 2  | G  | 21 | 2172.0746      | 1086.5412       |
| 316.1145       | 3  | E  | 20 | 2115.0531      | 1058.0305       |
| 373.1359       | 4  | G  | 19 | 1986.0105      | 993.5092        |
| 502.1785       | 5  | E  | 18 | 1928.9890      | 964.9984        |
| 616.2215       | 6  | N  | 17 | 1799.9464      | 900.4771        |
| 713.2742       | 7  | P  | 16 | 1685.9035      | 843.4557        |
| 784.3113       | 8  | A  | 15 | 1588.8507      | 794.9293        |
| 871.3434       | 9  | S  | 14 | 1517.8136      | 759.4107        |
| 1033.5015      | 10 | K  | 13 | 1430.7816      | 715.8947        |
| 1130.5542      | 11 | P  | 12 | 1268.6235      | 634.8157        |
| 1231.6019      | 12 | T  | 11 | 1171.5707      | 586.2893        |
| 1328.6547      | 13 | P  | 10 | 1070.5231      | 535.7654        |
| 1427.7231      | 14 | V  | 9  | 973.4703       | 487.2391        |
| 1555.7817      | 15 | Q  | 8  | 874.4019       | 437.7049        |
| 1670.8086      | 16 | D  | 7  | 746.3433       | 373.6756        |
| 1769.8770      | 17 | V  | 6  | 631.3164       | 316.1621        |
| 1897.9356      | 18 | Q  | 5  | 532.2479       | 266.6279        |
| 1954.9571      | 19 | G  | 4  | 404.1894       | 202.5986        |
| 2069.9840      | 20 | D  | 3  | 347.1679       | 174.0879        |
| 2127.0055      | 21 | G  | 2  | 232.1410       | 116.5744        |
|                | 22 | R  | 1  | 175.1195       | 88.0637         |

N-term:+43.02 K(10):+162.16

X-range:

-

MassTol: Y-zoom:

MassType:

AVG  MONO

Axis:

1  2

Label:

I  M  -

Ions:

a  +  2+  3+

b  +  2+  3+

c  +  2+  3+

x  +  2+  3+

y  +  2+  3+

z  +  2+  3+

hide H<sub>2</sub>O/NH<sub>3</sub>

zoom 112-122

GO



SGGEVVCSGWLR, MH+ 1348.6319, m/z 674.8196  
 L OSG41 P180811 230811-s1.05967.05967.2.dta

X-range:

-

MassTol: Y-zoom:

MassType:

AVG  MONO

Axis:

1  2

Label:

I  M  -

Ions:

a  +  2+  3+

b  +  2+  3+

c  +  2+  3+

x  +  2+  3+

y  +  2+  3+

z  +  2+  3+

hide H<sub>2</sub>O/NH<sub>3</sub>

zoom 112-122

GO

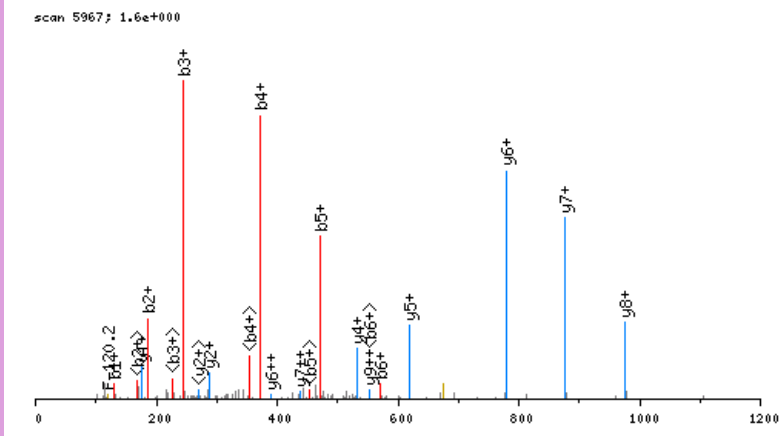

click image to zoom in; click top corners to zoom out [\[precursor±\]](#)

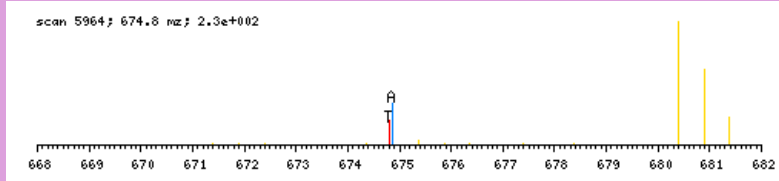

zoomed in precursor plot; T=theoretical m/z, A=acquired m/z

| b <sup>+</sup> | #  | AA | #  | y <sup>+</sup> | y <sup>2+</sup> |
|----------------|----|----|----|----------------|-----------------|
| 130.0504       | 1  | S  | 12 |                |                 |
| 187.0719       | 2  | G  | 11 | 1219.5893      | 610.2986        |
| 244.0934       | 3  | G  | 10 | 1162.5679      | 581.7878        |
| 373.1359       | 4  | E  | 9  | 1105.5464      | 553.2771        |
| 472.2044       | 5  | V  | 8  | 976.5038       | 488.7558        |
| 571.2728       | 6  | V  | 7  | 877.4354       | 439.2216        |
| 731.3034       | 7  | C  | 6  | 778.3670       | 389.6874        |
| 818.3354       | 8  | S  | 5  | 618.3364       | 309.6721        |
| 875.3569       | 9  | G  | 4  | 531.3043       | 266.1561        |
| 1061.4362      | 10 | W  | 3  | 474.2829       | 237.6454        |
| 1174.5202      | 11 | L  | 2  | 288.2036       | 144.6057        |
|                | 12 | R  | 1  | 175.1195       | 88.0637         |

N-term:+43.02 C(7):+160.03

SGGKYVDSEGHLYTVPIR, MH+ 2048.0453, m/z 683.3533  
 L OSG39 P180811 230811-s1.04697.04697.3.dta

X-range:

-

MassTol: Y-zoom:

MassType:

AVG  MONO

Axis:

1  2

Label:

I  M  -

Ions:

a  +  2+  3+

b  +  2+  3+

c  +  2+  3+

x  +  2+  3+

y  +  2+  3+

z  +  2+  3+

hide H<sub>2</sub>O/NH<sub>3</sub>

zoom 112-122

GO

scan 4697; 6.9e+000

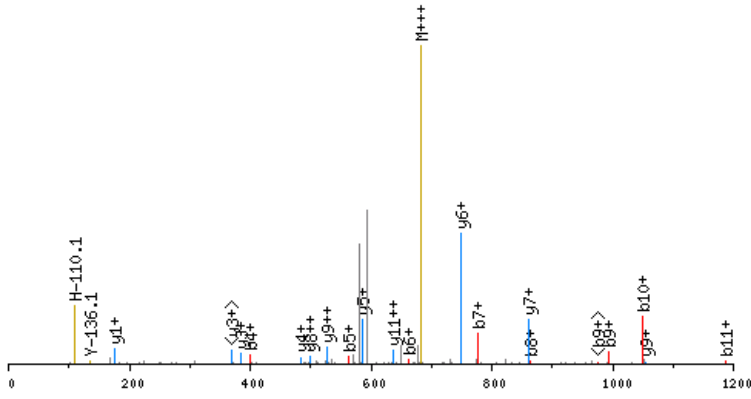

click image to zoom in; click top corners to zoom out

[precursor±]

scan 4696; 683.4 m/z; 5.3e+001

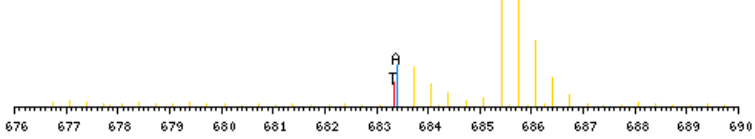

zoomed in precursor plot; T=theoretical m/z, A=acquired m/z

| b <sup>+</sup> | #  | AA # | y <sup>+</sup> | y <sup>2+</sup> |
|----------------|----|------|----------------|-----------------|
| 130.0504       | 1  | S 18 |                |                 |
| 187.0719       | 2  | G 17 | 1919.0027      | 960.0053        |
| 244.0934       | 3  | G 16 | 1861.9813      | 931.4945        |
| 400.2197       | 4  | K 15 | 1804.9598      | 902.9838        |
| 563.2830       | 5  | Y 14 | 1648.8335      | 824.9207        |
| 662.3514       | 6  | V 13 | 1485.7702      | 743.3890        |
| 777.3783       | 7  | D 12 | 1386.7018      | 693.8548        |
| 864.4104       | 8  | S 11 | 1271.6748      | 636.3413        |
| 993.4530       | 9  | E 10 | 1184.6428      | 592.8253        |
| 1050.4744      | 10 | G 9  | 1055.6002      | 528.3040        |
| 1187.5333      | 11 | H 8  | 998.5787       | 499.7933        |
| 1300.6174      | 12 | L 7  | 861.5198       | 431.2638        |
| 1463.6807      | 13 | Y 6  | 748.4357       | 374.7218        |
| 1564.7284      | 14 | T 5  | 585.3724       | 293.1901        |
| 1663.7968      | 15 | V 4  | 484.3247       | 242.6663        |
| 1760.8496      | 16 | P 3  | 385.2563       | 193.1321        |
| 1873.9337      | 17 | I 2  | 288.2036       | 144.6057        |
|                | 18 | R 1  | 175.1195       | 88.0637         |

N-term:+43.02 K(4):+156.13

SGLLKALR, MH+ 984.6206, m/z 492.8140  
 L OSG37 P180811 230811-s1.05561.05561.2.dta

scan 5561; 3.0e+001

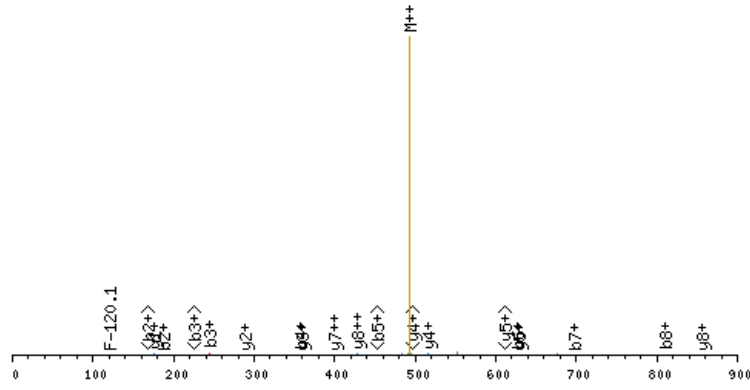

click image to zoom in; click top corners to zoom out [\[precursor±\]](#)

scan 5559; 492.8 m/z; 5.2e+000

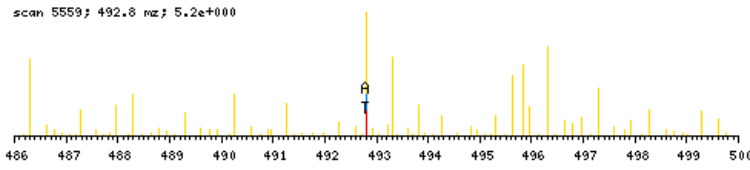

zoomed in precursor plot; T=theoretical m/z, A=acquired m/z

X-range:

-

MassTol: Y-zoom:

MassType:

AVG  MONO

Axis:

1  2

Label:

I  M  -

Ions:

a  +  2+  3+

b  +  2+  3+

c  +  2+  3+

x  +  2+  3+

y  +  2+  3+

z  +  2+  3+

hide H<sub>2</sub>O/NH<sub>3</sub>

zoom 112-122

GO

| b <sup>+</sup> | # | AA # | y <sup>+</sup> | y <sup>2+</sup>   |
|----------------|---|------|----------------|-------------------|
| 130.0504       | 1 | S    | 9              |                   |
| 187.0719       | 2 | G    | 8              | 855.5780 428.2929 |
| 244.0934       | 3 | G    | 7              | 798.5566 399.7822 |
| 357.1774       | 4 | L    | 6              | 741.5351 371.2715 |
| 470.2615       | 5 | L    | 5              | 628.4510 314.7294 |
| 626.3878       | 6 | K    | 4              | 515.3670 258.1874 |
| 697.4249       | 7 | A    | 3              | 359.2407 180.1243 |
| 810.5090       | 8 | L    | 2              | 288.2036 144.6057 |
|                | 9 | R    | 1              | 175.1195 88.0637  |

N-term:+43.02 K(6):+156.13

SGGSTMYPGIADR, MH+ 1353.6109, m/z 677.3091  
 L OSG37 P180811 230811-s1.03970.03970.2.dta

X-range:

-

MassTol: Y-zoom:

MassType:

AVG  MONO

Axis:

1  2

Label:

I  M  -

Ions:

a  +  2+  3+

b  +  2+  3+

c  +  2+  3+

x  +  2+  3+

y  +  2+  3+

z  +  2+  3+

hide H<sub>2</sub>O/NH<sub>3</sub>

zoom 112-122

GO

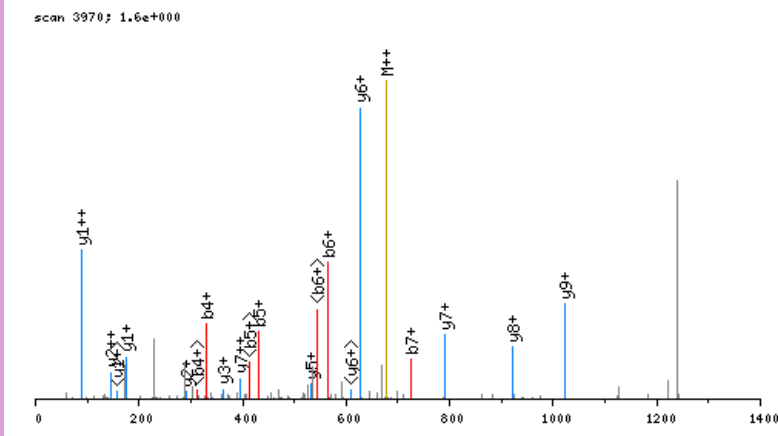

click image to zoom in; click top corners to zoom out [\[precursor±\]](#)

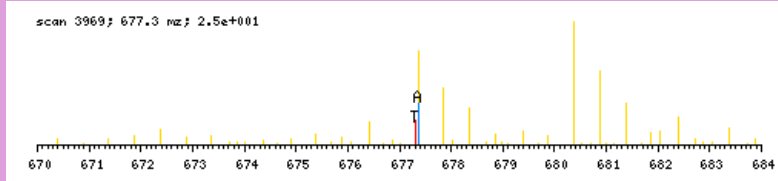

zoomed in precursor plot; T=theoretical m/z, A=acquired m/z

| b <sup>+</sup> | #  | AA # | y <sup>+</sup> | y <sup>2+</sup> |
|----------------|----|------|----------------|-----------------|
| 130.0504       | 1  | S 13 |                |                 |
| 187.0719       | 2  | G 12 | 1224.5683      | 612.7881        |
| 244.0934       | 3  | G 11 | 1167.5468      | 584.2773        |
| 331.1254       | 4  | S 10 | 1110.5254      | 555.7666        |
| 432.1731       | 5  | T 9  | 1023.4933      | 512.2506        |
| 563.2135       | 6  | M 8  | 922.4457       | 461.7267        |
| 726.2769       | 7  | Y 7  | 791.4052       | 396.2065        |
| 823.3296       | 8  | P 6  | 628.3418       | 314.6748        |
| 880.3511       | 9  | G 5  | 531.2891       | 266.1485        |
| 993.4352       | 10 | I 4  | 474.2676       | 237.6377        |
| 1064.4723      | 11 | A 3  | 361.1836       | 181.0957        |
| 1179.4992      | 12 | D 2  | 290.1464       | 145.5771        |
|                | 13 | R 1  | 175.1195       | 88.0637         |

N-term:+43.02

SGGYAEVGR, MH+ 937.4379, m/z 469.2226  
 L OSG38 P180811 230811-s1.04161.04161.2.dta

X-range:

-

MassTol: Y-zoom:

MassType:

AVG  MONO

Axis:

1  2

Label:

I  M  -

Ions:

a  +  2+  3+

b  +  2+  3+

c  +  2+  3+

x  +  2+  3+

y  +  2+  3+

z  +  2+  3+

hide H<sub>2</sub>O/NH<sub>3</sub>

zoom 112-122

GO

scan 4161; 3.0e+000

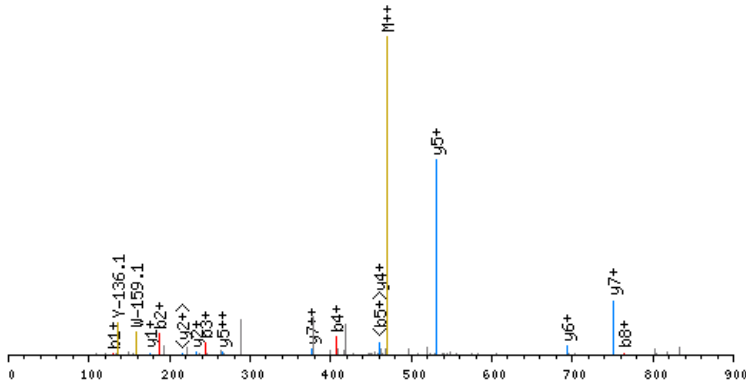

click image to zoom in; click top corners to zoom out [\[precursor±\]](#)

scan 4159; 469.2 m/z; 4.4e+001

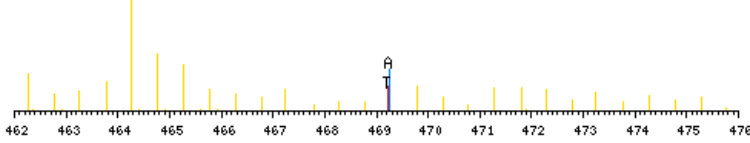

zoomed in precursor plot; T=theoretical m/z, A=acquired m/z

| b <sup>+</sup> | # | AA # | y <sup>+</sup> | y <sup>2+</sup> |
|----------------|---|------|----------------|-----------------|
| 130.0504       | 1 | S    | 9              |                 |
| 187.0719       | 2 | G    | 8              | 808.3953        |
| 244.0934       | 3 | G    | 7              | 751.3739        |
| 407.1567       | 4 | Y    | 6              | 694.3524        |
| 478.1938       | 5 | A    | 5              | 531.2891        |
| 607.2364       | 6 | E    | 4              | 460.2520        |
| 706.3048       | 7 | V    | 3              | 331.2094        |
| 763.3263       | 8 | G    | 2              | 232.1410        |
|                | 9 | R    | 1              | 175.1195        |

N-term:+43.02

SGSKYKPAPLATLPSTLDPAEYDVSPETR, MH+ 3200.7004, m/z 800.9306  
 L OSG38 P180811 230811-s1.07327.07327.4.dta

scan 7327; 7.5e-001

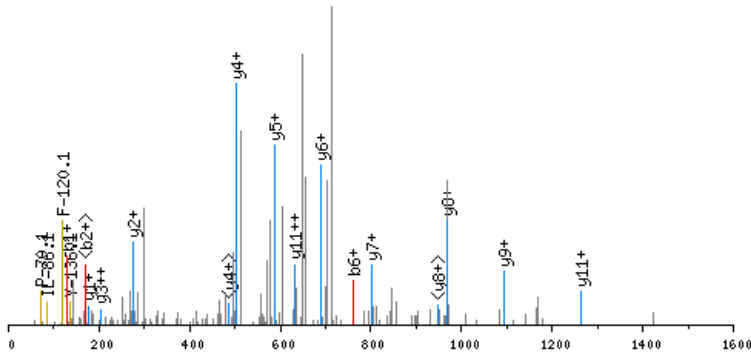

click image to zoom in; click top corners to zoom out [\[precursor±\]](#)

scan 7324; 800.9 m/z; 1.1e+001

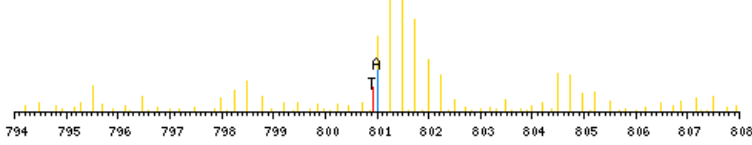

zoomed in precursor plot; T=theoretical m/z, A=acquired m/z

| b <sup>+</sup> | #  | AA | #  | y <sup>+</sup> | y <sup>2+</sup> |
|----------------|----|----|----|----------------|-----------------|
| 130.0504       | 1  | S  | 29 |                |                 |
| 187.0719       | 2  | G  | 28 | 3071.6578      | 1536.3328       |
| 274.1039       | 3  | S  | 27 | 3014.6363      | 1507.8221       |
| 436.2620       | 4  | K  | 26 | 2927.6043      | 1464.3061       |
| 599.3253       | 5  | Y  | 25 | 2765.4462      | 1383.2270       |
| 761.4834       | 6  | K  | 24 | 2602.3829      | 1301.6953       |
| 858.5362       | 7  | P  | 23 | 2440.2248      | 1220.6163       |
| 929.5733       | 8  | A  | 22 | 2343.1720      | 1172.0899       |
| 1026.6261      | 9  | P  | 21 | 2272.1349      | 1136.5714       |
| 1139.7102      | 10 | L  | 20 | 2175.0821      | 1088.0450       |
| 1210.7473      | 11 | A  | 19 | 2061.9981      | 1031.5029       |
| 1311.7949      | 12 | T  | 18 | 1990.9609      | 995.9844        |
| 1424.8790      | 13 | L  | 17 | 1889.9133      | 945.4605        |
| 1521.9318      | 14 | P  | 16 | 1776.8292      | 888.9185        |
| 1608.9638      | 15 | S  | 15 | 1679.7764      | 840.3921        |
| 1710.0115      | 16 | T  | 14 | 1592.7444      | 796.8761        |
| 1823.0955      | 17 | L  | 13 | 1491.6967      | 746.3523        |
| 1938.1225      | 18 | D  | 12 | 1378.6127      | 689.8102        |
| 2035.1753      | 19 | P  | 11 | 1263.5857      | 632.2968        |
| 2106.2124      | 20 | A  | 10 | 1166.5330      | 583.7704        |
| 2235.2550      | 21 | E  | 9  | 1095.4958      | 548.2518        |
| 2398.3183      | 22 | Y  | 8  | 966.4533       | 483.7305        |
| 2513.3452      | 23 | D  | 7  | 803.3899       | 402.1989        |
| 2612.4136      | 24 | V  | 6  | 688.3630       | 344.6854        |
| 2699.4457      | 25 | S  | 5  | 589.2946       | 295.1512        |
| 2796.4984      | 26 | P  | 4  | 502.2625       | 251.6352        |
| 2925.5410      | 27 | E  | 3  | 405.2098       | 203.1088        |
| 3026.5887      | 28 | T  | 2  | 276.1672       | 138.5875        |
|                | 29 | R  | 1  | 175.1195       | 88.0637         |

N-term:+43.02 K(4):+162.16  
 K(6):+162.16

X-range:

-

MassTol: Y-zoom:

MassType:

AVG  MONO

Axis:

1  2

Label:

I  M  -

Ions:

a  +  2+  3+

b  +  2+  3+

c  +  2+  3+

x  +  2+  3+

y  +  2+  3+

z  +  2+  3+

hide H<sub>2</sub>O/NH<sub>3</sub>

zoom 112-122

GO

SGSSSVAAMKKVQQLR, MH+ 1886.1170, m/z 629.3772  
 L OSG39 P180811 230811-s1.05770.05770.3.dta

scan 5770; 4.3e+000

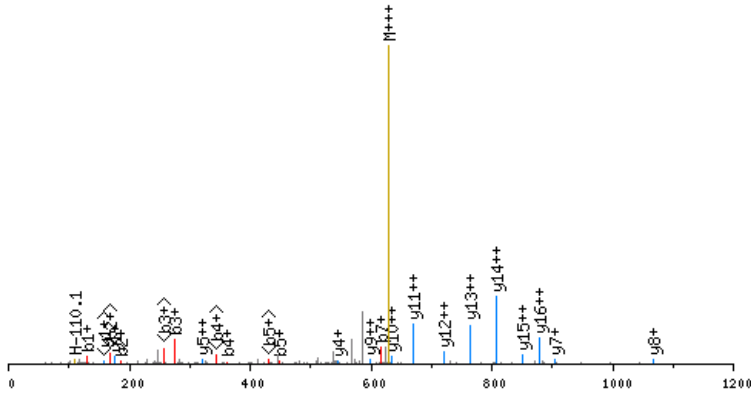

click image to zoom in; click top corners to zoom out [precursor±]

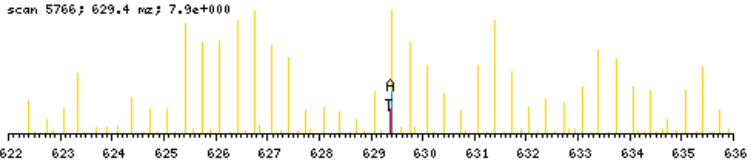

zoomed in precursor plot; T=theoretical m/z, A=acquired m/z

X-range:

-

MassTol: Y-zoom:

MassType:

AVG  MONO

Axis:

1  2

Label:

I  M  -

Ions:

a  +  2+  3+

b  +  2+  3+

c  +  2+  3+

x  +  2+  3+

y  +  2+  3+

z  +  2+  3+

hide H<sub>2</sub>O/NH<sub>3</sub>

zoom 112-122

GO

| b <sup>+</sup> | #  | AA | #  | y <sup>+</sup> | y <sup>2+</sup> |
|----------------|----|----|----|----------------|-----------------|
| 130.0504       | 1  | S  | 17 |                |                 |
| 187.0719       | 2  | G  | 16 | 1757.0744      | 879.0411        |
| 274.1039       | 3  | S  | 15 | 1700.0530      | 850.5304        |
| 361.1359       | 4  | S  | 14 | 1613.0209      | 807.0144        |
| 448.1680       | 5  | S  | 13 | 1525.9889      | 763.4984        |
| 547.2364       | 6  | V  | 12 | 1438.9569      | 719.9823        |
| 618.2735       | 7  | A  | 11 | 1339.8885      | 670.4481        |
| 689.3106       | 8  | A  | 10 | 1268.8513      | 634.9296        |
| 820.3511       | 9  | M  | 9  | 1197.8142      | 599.4110        |
| 982.5092       | 10 | K  | 8  | 1066.7737      | 533.8908        |
| 1144.6673      | 11 | K  | 7  | 904.6156       | 452.8117        |
| 1243.7357      | 12 | V  | 6  | 742.4575       | 371.7327        |
| 1342.8041      | 13 | V  | 5  | 643.3891       | 322.1985        |
| 1470.8627      | 14 | Q  | 4  | 544.3207       | 272.6643        |
| 1598.9213      | 15 | Q  | 3  | 416.2621       | 208.6350        |
| 1712.0054      | 16 | L  | 2  | 288.2036       | 144.6057        |
|                | 17 | R  | 1  | 175.1195       | 88.0637         |

N-term:+43.02 K(10):+162.16  
 K(11):+162.16

SGYTPDEKLR, MH+ 1241.6590, m/z 621.3332  
 L OSG38 P180811 230811-s1.03346.03346.2.dta

scan 3346; 6.3e+000

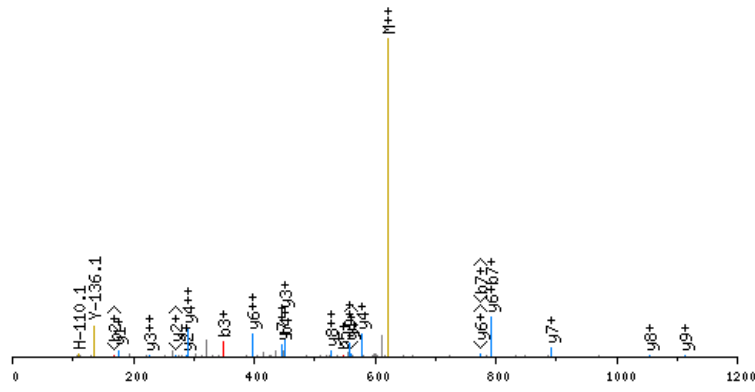

click image to zoom in; click top corners to zoom out [\[precursor±\]](#)

scan 3344; 621.3 m/z; 1.8e+001

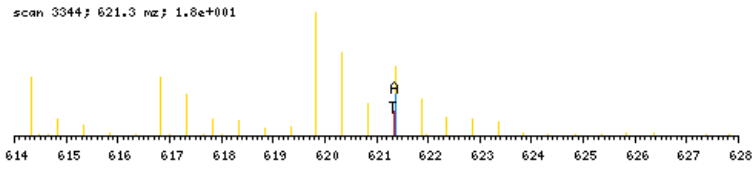

zoomed in precursor plot; T=theoretical m/z, A=acquired m/z

X-range:

-

MassTol: Y-zoom:

MassType:

AVG  MONO

Axis:

1  2

Label:

I  M  -

Ions:

a  +  2+  3+

b  +  2+  3+

c  +  2+  3+

x  +  2+  3+

y  +  2+  3+

z  +  2+  3+

hide H<sub>2</sub>O/NH<sub>3</sub>

zoom 112-122

GO

| b <sup>+</sup> | #  | AA # | y <sup>+</sup> | y <sup>2+</sup>    |
|----------------|----|------|----------------|--------------------|
| 130.0504       | 1  | S    | 10             |                    |
| 187.0719       | 2  | G    | 9              | 1112.6164 556.8121 |
| 350.1352       | 3  | Y    | 8              | 1055.5950 528.3014 |
| 451.1829       | 4  | T    | 7              | 892.5316 446.7697  |
| 548.2357       | 5  | P    | 6              | 791.4840 396.2459  |
| 663.2626       | 6  | D    | 5              | 694.4312 347.7195  |
| 792.3052       | 7  | E    | 4              | 579.4043 290.2060  |
| 954.4633       | 8  | K    | 3              | 450.3617 225.6847  |
| 1067.5474      | 9  | L    | 2              | 288.2036 144.6057  |
|                | 10 | R    | 1              | 175.1195 88.0637   |

N-term:+43.02 K(8):+162.16



SHGFTKEEVAEFQAAFNR, MH+ 2138.0307, m/z 535.2631  
 L OSG40 P180811 230811-s1.08161.08161.4.dta

X-range:

-

MassTol: Y-zoom:

MassType:

AVG  MONO

Axis:

1  2

Label:

I  M  -

Ions:

a  +  2+  3+

b  +  2+  3+

c  +  2+  3+

x  +  2+  3+

y  +  2+  3+

z  +  2+  3+

hide H<sub>2</sub>O/NH<sub>3</sub>

zoom 112-122

GO

scan 8161; 3.7e+000

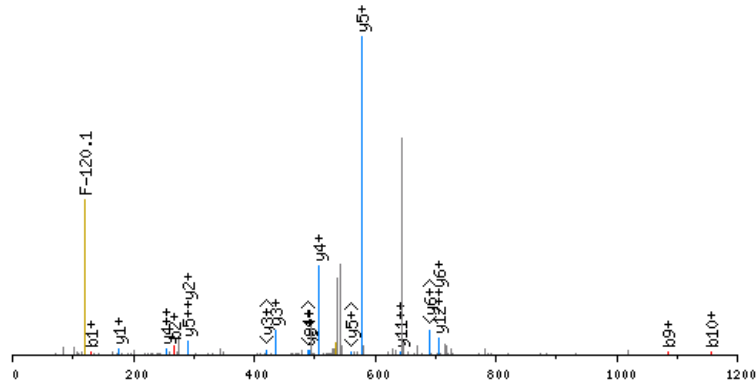

click image to zoom in; click top corners to zoom out [\[precursor±\]](#)

scan 8159; 535.3 mz; 2.0e+001

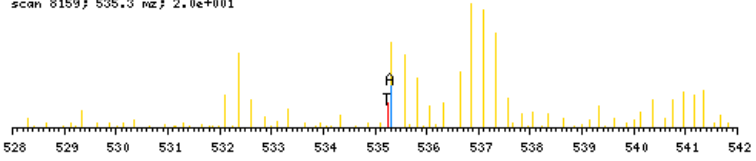

zoomed in precursor plot; T=theoretical m/z, A=acquired m/z

| b <sup>+</sup> | #  | AA # | y <sup>+</sup> | y <sup>2+</sup> |
|----------------|----|------|----------------|-----------------|
| 130.0504       | 1  | S 18 |                |                 |
| 267.1093       | 2  | H 17 | 2008.9881      | 1004.9980       |
| 324.1308       | 3  | G 16 | 1871.9292      | 936.4685        |
| 471.1992       | 4  | F 15 | 1814.9078      | 907.9578        |
| 572.2469       | 5  | T 14 | 1667.8393      | 834.4236        |
| 728.3732       | 6  | K 13 | 1566.7917      | 783.8997        |
| 857.4158       | 7  | E 12 | 1410.6654      | 705.8366        |
| 986.4584       | 8  | E 11 | 1281.6228      | 641.3153        |
| 1085.5268      | 9  | V 10 | 1152.5802      | 576.7940        |
| 1156.5639      | 10 | A 9  | 1053.5118      | 527.2598        |
| 1285.6065      | 11 | E 8  | 982.4747       | 491.7412        |
| 1432.6749      | 12 | F 7  | 853.4321       | 427.2199        |
| 1560.7335      | 13 | Q 6  | 706.3636       | 353.6857        |
| 1631.7706      | 14 | A 5  | 578.3051       | 289.6564        |
| 1702.8077      | 15 | A 4  | 507.2680       | 254.1379        |
| 1849.8761      | 16 | F 3  | 436.2308       | 218.6193        |
| 1963.9191      | 17 | N 2  | 289.1624       | 145.0851        |
|                | 18 | R 1  | 175.1195       | 88.0637         |

N-term:+43.02 K(6):+156.13

SHPSWLPPKSTGEPLGHVPAR, MH+ 2320.2203, m/z 580.8105  
 L OSG40 P180811 230811-s1.05750.05750.4.dta

X-range:

-

MassTol: Y-zoom:

MassType:

AVG  MONO

Axis:

1  2

Label:

I  M  -

Ions:

a  +  2+  3+

b  +  2+  3+

c  +  2+  3+

x  +  2+  3+

y  +  2+  3+

z  +  2+  3+

hide H<sub>2</sub>O/NH<sub>3</sub>

zoom 112-122

GO

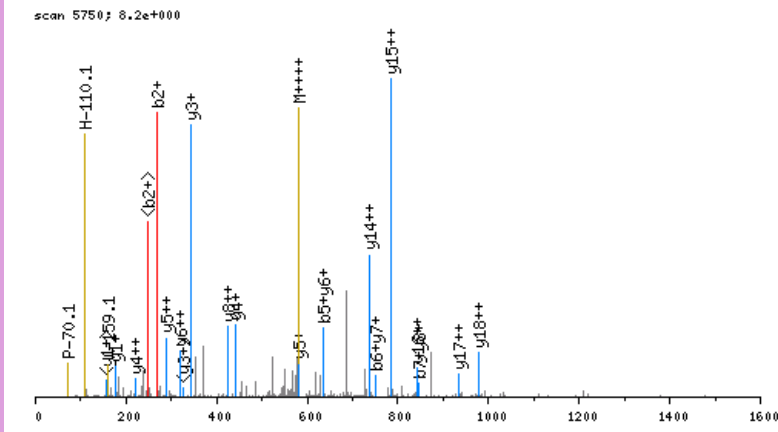

click image to zoom in; click top corners to zoom out [\[precursor±\]](#)

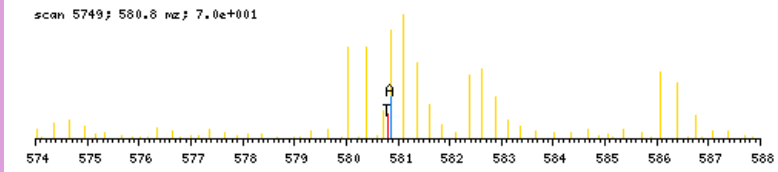

zoomed in precursor plot; T=theoretical m/z, A=acquired m/z

| b <sup>+</sup> | #  | AA # | y <sup>+</sup> | y <sup>2+</sup> |
|----------------|----|------|----------------|-----------------|
| 130.0504       | 1  | S 21 |                |                 |
| 267.1093       | 2  | H 20 | 2191.1777      | 1096.0927       |
| 364.1621       | 3  | P 19 | 2054.1188      | 1027.5633       |
| 451.1941       | 4  | S 18 | 1957.0660      | 979.0369        |
| 637.2734       | 5  | W 17 | 1870.0340      | 935.5209        |
| 750.3575       | 6  | L 16 | 1683.9547      | 842.4812        |
| 847.4103       | 7  | P 15 | 1570.8706      | 785.9392        |
| 944.4630       | 8  | P 14 | 1473.8178      | 737.4128        |
| 1100.5893      | 9  | K 13 | 1376.7651      | 688.8864        |
| 1187.6214      | 10 | S 12 | 1220.6388      | 610.8233        |
| 1288.6690      | 11 | T 11 | 1133.6067      | 567.3073        |
| 1345.6905      | 12 | G 10 | 1032.5591      | 516.7834        |
| 1474.7331      | 13 | E 9  | 975.5376       | 488.2727        |
| 1571.7859      | 14 | P 8  | 846.4950       | 423.7514        |
| 1684.8699      | 15 | L 7  | 749.4422       | 375.2250        |
| 1741.8914      | 16 | G 6  | 636.3582       | 318.6830        |
| 1878.9503      | 17 | H 5  | 579.3367       | 290.1723        |
| 1978.0187      | 18 | V 4  | 442.2778       | 221.6428        |
| 2075.0715      | 19 | P 3  | 343.2094       | 172.1086        |
| 2146.1086      | 20 | A 2  | 246.1566       | 123.5822        |
|                | 21 | R 1  | 175.1195       | 88.0637         |

N-term:+43.02 K(9):+156.13

SHQTGIQASEDVKEIFAR, MH+ 2092.0888, m/z 698.0344  
 L OSG39 P180811 230811-s1.05767.05767.3.dta

X-range:

-

MassTol: Y-zoom:

MassType:

AVG  MONO

Axis:

1  2

Label:

I  M  -

Ions:

a  +  2+  3+

b  +  2+  3+

c  +  2+  3+

x  +  2+  3+

y  +  2+  3+

z  +  2+  3+

hide H<sub>2</sub>O/NH<sub>3</sub>

zoom 112-122

GO

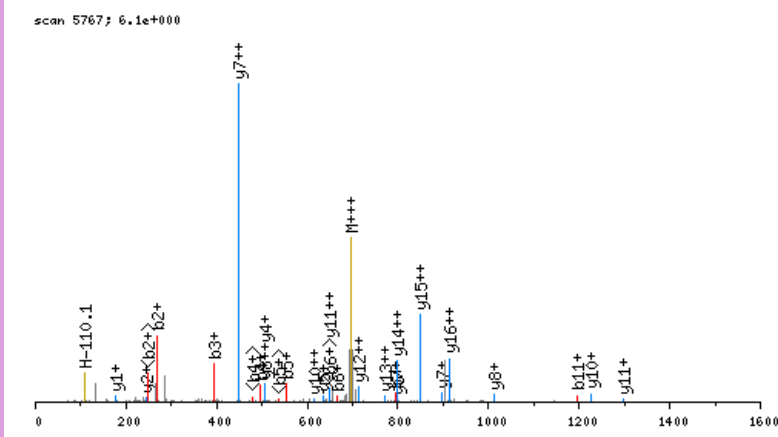

click image to zoom in; click top corners to zoom out [\[precursor±\]](#)

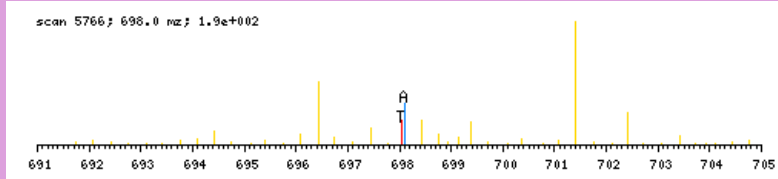

zoomed in precursor plot; T=theoretical m/z, A=acquired m/z

| b <sup>+</sup> | #  | AA | #  | y <sup>+</sup> | y <sup>2+</sup> |
|----------------|----|----|----|----------------|-----------------|
| 130.0504       | 1  | S  | 18 |                |                 |
| 267.1093       | 2  | H  | 17 | 1963.0462      | 982.0270        |
| 395.1679       | 3  | Q  | 16 | 1825.9872      | 913.4975        |
| 496.2156       | 4  | T  | 15 | 1697.9287      | 849.4682        |
| 553.2371       | 5  | G  | 14 | 1596.8810      | 798.9444        |
| 666.3211       | 6  | I  | 13 | 1539.8595      | 770.4337        |
| 794.3797       | 7  | Q  | 12 | 1426.7755      | 713.8916        |
| 865.4168       | 8  | A  | 11 | 1298.7169      | 649.8624        |
| 952.4488       | 9  | S  | 10 | 1227.6798      | 614.3438        |
| 1081.4914      | 10 | E  | 9  | 1140.6477      | 570.8278        |
| 1196.5184      | 11 | D  | 8  | 1011.6051      | 506.3065        |
| 1295.5868      | 12 | V  | 7  | 896.5782       | 448.7930        |
| 1457.7449      | 13 | K  | 6  | 797.5098       | 399.2588        |
| 1586.7875      | 14 | E  | 5  | 635.3517       | 318.1798        |
| 1699.8716      | 15 | I  | 4  | 506.3091       | 253.6585        |
| 1846.9400      | 16 | F  | 3  | 393.2250       | 197.1164        |
| 1917.9771      | 17 | A  | 2  | 246.1566       | 123.5822        |
|                | 18 | R  | 1  | 175.1195       | 88.0637         |

N-term:+43.02 K(13):+162.16

SHVAVENALGLDQQFAGLDLNSDDNQSGGSTASKGR, MH+ 3700.7803, m/z 925.9505  
 L OSG38 P180811 230811-s1.07576.07576.4.dta

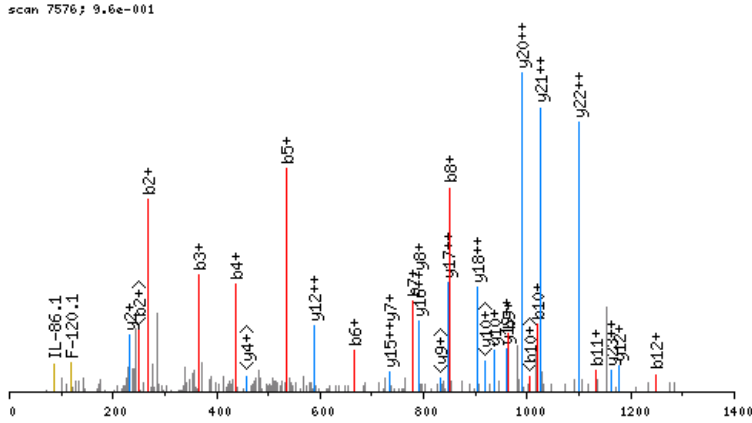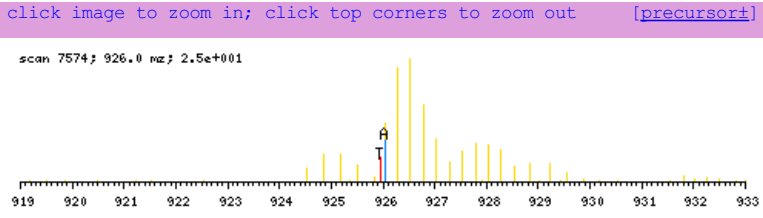

zoomed in precursor plot; T=theoretical m/z, A=acquired m/z

| b <sup>+</sup> | #  | AA | #  | y <sup>+</sup> | y <sup>2+</sup> |
|----------------|----|----|----|----------------|-----------------|
| 130.0504       | 1  | S  | 36 |                |                 |
| 267.1093       | 2  | H  | 35 | 3571.7377      | 1786.3728       |
| 366.1778       | 3  | V  | 34 | 3434.6788      | 1717.8433       |
| 437.2149       | 4  | A  | 33 | 3335.6104      | 1668.3091       |
| 536.2833       | 5  | V  | 32 | 3264.5733      | 1632.7906       |
| 665.3259       | 6  | E  | 31 | 3165.5049      | 1583.2564       |
| 779.3688       | 7  | N  | 30 | 3036.4623      | 1518.7351       |
| 850.4059       | 8  | A  | 29 | 2922.4194      | 1461.7136       |
| 963.4900       | 9  | L  | 28 | 2851.3823      | 1426.1950       |
| 1020.5114      | 10 | G  | 27 | 2738.2982      | 1369.6530       |
| 1133.5955      | 11 | L  | 26 | 2681.2767      | 1341.1423       |
| 1248.6225      | 12 | D  | 25 | 2568.1927      | 1284.6002       |
| 1376.6810      | 13 | Q  | 24 | 2453.1657      | 1227.0868       |
| 1504.7396      | 14 | Q  | 23 | 2325.1071      | 1163.0575       |
| 1651.8080      | 15 | F  | 22 | 2197.0486      | 1099.0282       |
| 1722.8451      | 16 | A  | 21 | 2049.9802      | 1025.4940       |
| 1779.8666      | 17 | G  | 20 | 1978.9430      | 989.9754        |
| 1892.9507      | 18 | L  | 19 | 1921.9216      | 961.4647        |
| 2007.9776      | 19 | D  | 18 | 1808.8375      | 904.9227        |
| 2121.0617      | 20 | L  | 17 | 1693.8106      | 847.4092        |
| 2235.1046      | 21 | N  | 16 | 1580.7265      | 790.8672        |
| 2322.1366      | 22 | S  | 15 | 1466.6836      | 733.8457        |
| 2409.1687      | 23 | S  | 14 | 1379.6515      | 690.3297        |
| 2524.1956      | 24 | D  | 13 | 1292.6195      | 646.8137        |
| 2638.2385      | 25 | N  | 12 | 1177.5926      | 589.3002        |
| 2766.2971      | 26 | Q  | 11 | 1063.5496      | 532.2787        |
| 2853.3291      | 27 | S  | 10 | 935.4911       | 468.2494        |
| 2910.3506      | 28 | G  | 9  | 848.4590       | 424.7334        |
| 2967.3721      | 29 | G  | 8  | 791.4376       | 396.2227        |
| 3054.4041      | 30 | S  | 7  | 734.4161       | 367.7120        |
| 3155.4518      | 31 | T  | 6  | 647.3841       | 324.1960        |
| 3226.4889      | 32 | A  | 5  | 546.3364       | 273.6721        |
| 3313.5209      | 33 | S  | 4  | 475.2993       | 238.1536        |
| 3469.6472      | 34 | K  | 3  | 388.2673       | 194.6375        |
| 3526.6687      | 35 | G  | 2  | 232.1410       | 116.5744        |
|                | 36 | R  | 1  | 175.1195       | 88.0637         |

N-term:+43.02 K(34):+156.13

X-range:

-

MassTol: Y-zoom:

MassType:

AVG  MONO

Axis:

1  2

Label:

I  M  -

Ions:

a  +  2+  3+

b  +  2+  3+

c  +  2+  3+

x  +  2+  3+

y  +  2+  3+

z  +  2+  3+

hide H<sub>2</sub>O/NH<sub>3</sub>

zoom 112-122

GO

SIEKIWAR, MH+ 1078.6474, m/z 539.8273  
 L OSG37 P180811 230811-s1.06127.06127.2.dta

X-range:

-

MassTol: Y-zoom:

MassType:

AVG  MONO

Axis:

1  2

Label:

I  M  -

Ions:

a  +  2+  3+

b  +  2+  3+

c  +  2+  3+

x  +  2+  3+

y  +  2+  3+

z  +  2+  3+

hide H<sub>2</sub>O/NH<sub>3</sub>

zoom 112-122

GO

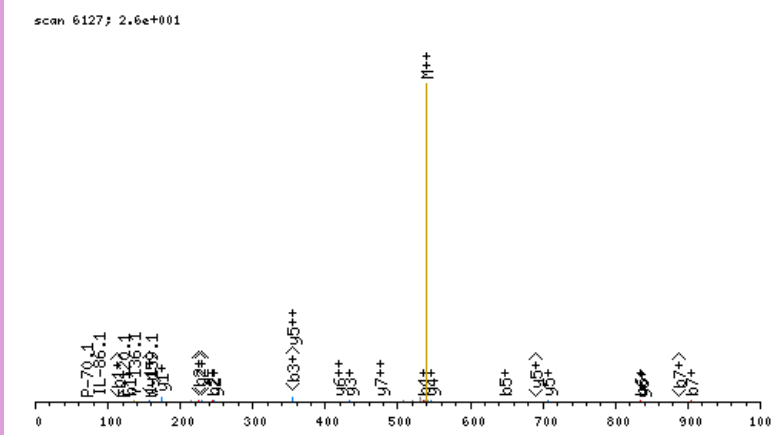

click image to zoom in; click top corners to zoom out [\[precursor±\]](#)

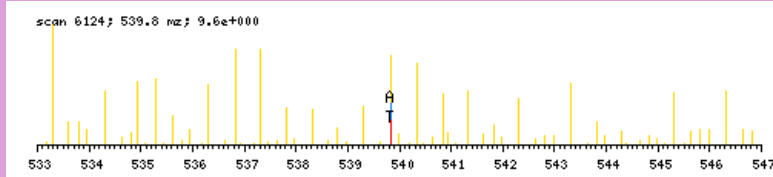

zoomed in precursor plot; T=theoretical m/z, A=acquired m/z

| b <sup>+</sup> | # | AA # | y <sup>+</sup> | y <sup>2+</sup> |
|----------------|---|------|----------------|-----------------|
| 130.0504       | 1 | S    | 8              |                 |
| 243.1345       | 2 | I    | 7              | 949.6047        |
| 372.1771       | 3 | E    | 6              | 836.5207        |
| 534.3352       | 4 | K    | 5              | 707.4781        |
| 647.4192       | 5 | I    | 4              | 545.3200        |
| 833.4986       | 6 | W    | 3              | 432.2359        |
| 904.5357       | 7 | A    | 2              | 246.1566        |
|                | 8 | R    | 1              | 175.1195        |

N-term:+43.02 K(4):+162.16

SIFPTNQIR, MH+ 1218.6483, m/z 609.8278  
 L OSG41 P180811 230811-s1.05760.05760.2.dta

X-range:

-

MassTol: Y-zoom:

MassType:

AVG  MONO

Axis:

1  2

Label:

I  M  -

Ions:

a  +  2+  3+

b  +  2+  3+

c  +  2+  3+

x  +  2+  3+

y  +  2+  3+

z  +  2+  3+

hide H<sub>2</sub>O/NH<sub>3</sub>

zoom 112-122

GO

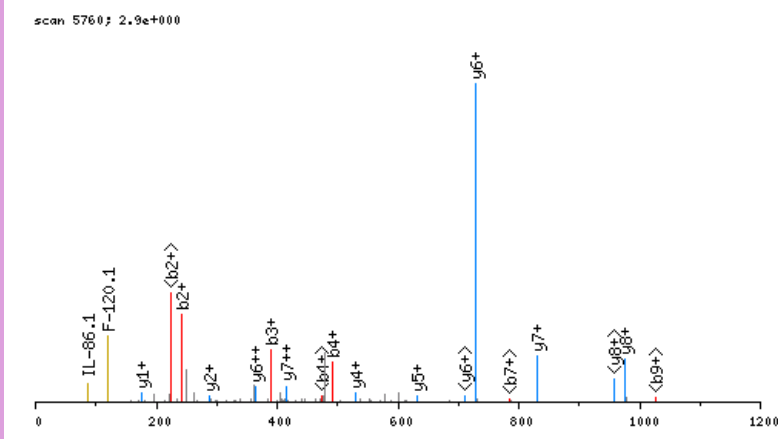

click image to zoom in; click top corners to zoom out [\[precursor±\]](#)

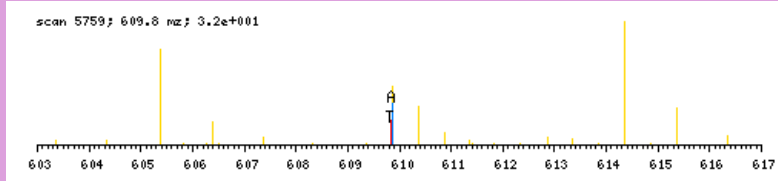

zoomed in precursor plot; T=theoretical m/z, A=acquired m/z

| b <sup>+</sup> | #  | AA # | y <sup>+</sup> | y <sup>2+</sup> |
|----------------|----|------|----------------|-----------------|
| 130.0504       | 1  | S 10 |                |                 |
| 243.1345       | 2  | I 9  | 1089.6057      | 545.3067        |
| 390.2029       | 3  | F 8  | 976.5216       | 488.7647        |
| 491.2506       | 4  | T 7  | 829.4532       | 415.2305        |
| 588.3033       | 5  | P 6  | 728.4055       | 364.7067        |
| 689.3510       | 6  | T 5  | 631.3527       | 316.1803        |
| 803.3940       | 7  | N 4  | 530.3051       | 265.6564        |
| 931.4525       | 8  | Q 3  | 416.2621       | 208.6350        |
| 1044.5366      | 9  | I 2  | 288.2036       | 144.6057        |
|                | 10 | R 1  | 175.1195       | 88.0637         |

N-term:+43.02

SIGVPIKVLHEAEGHIVTCETNTGEVYR, MH+ 3184.6525, m/z 796.9186  
 L OSG40 P180811 230811-sl.09136.09136.4.dta

X-range:

-

MassTol: Y-zoom:

MassType:

AVG  MONO

Axis:

1  2

Label:

I  M  -

Ions:

a  +  2+  3+

b  +  2+  3+

c  +  2+  3+

x  +  2+  3+

y  +  2+  3+

z  +  2+  3+

hide H<sub>2</sub>O/NH<sub>3</sub>

zoom 112-122

GO

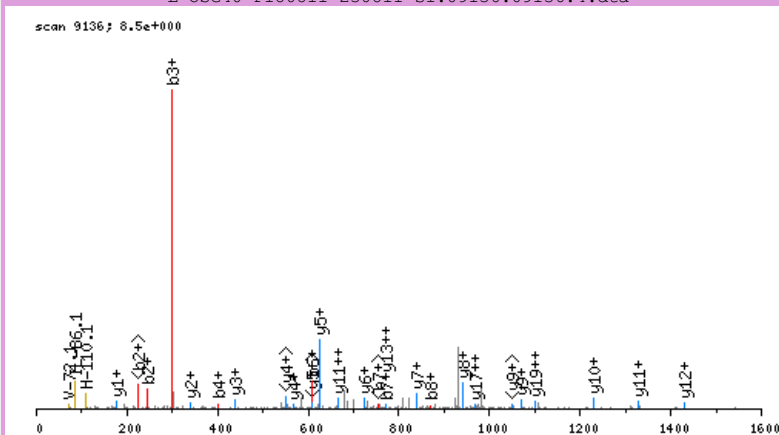

click image to zoom in; click top corners to zoom out [\[precursor±\]](#)

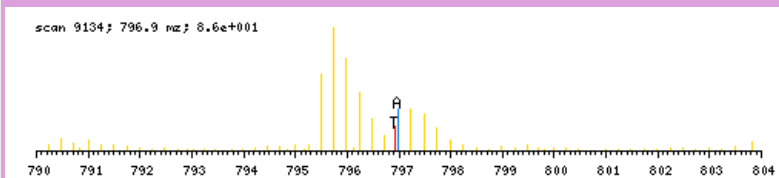

zoomed in precursor plot; T=theoretical m/z, A=acquired m/z

| b <sup>+</sup> | #  | AA | #  | y <sup>+</sup> | y <sup>2+</sup> |
|----------------|----|----|----|----------------|-----------------|
| 130.0504       | 1  | S  | 28 |                |                 |
| 243.1345       | 2  | I  | 27 | 3055.6099      | 1528.3088       |
| 300.1560       | 3  | G  | 26 | 2942.5258      | 1471.7668       |
| 399.2244       | 4  | V  | 25 | 2885.5043      | 1443.2561       |
| 496.2771       | 5  | P  | 24 | 2786.4359      | 1393.7219       |
| 609.3612       | 6  | I  | 23 | 2689.3832      | 1345.1955       |
| 771.5193       | 7  | K  | 22 | 2576.2991      | 1288.6535       |
| 870.5877       | 8  | V  | 21 | 2414.1410      | 1207.5744       |
| 983.6718       | 9  | L  | 20 | 2315.0726      | 1158.0402       |
| 1120.7307      | 10 | H  | 19 | 2201.9885      | 1101.4982       |
| 1249.7733      | 11 | E  | 18 | 2064.9296      | 1032.9687       |
| 1320.8104      | 12 | A  | 17 | 1935.8870      | 968.4474        |
| 1449.8530      | 13 | E  | 16 | 1864.8499      | 932.9289        |
| 1506.8745      | 14 | G  | 15 | 1735.8073      | 868.4076        |
| 1643.9334      | 15 | H  | 14 | 1678.7858      | 839.8968        |
| 1757.0174      | 16 | I  | 13 | 1541.7269      | 771.3674        |
| 1856.0858      | 17 | V  | 12 | 1428.6429      | 714.8253        |
| 1957.1335      | 18 | T  | 11 | 1329.5745      | 665.2911        |
| 2117.1641      | 19 | C  | 10 | 1228.5268      | 614.7673        |
| 2246.2067      | 20 | E  | 9  | 1068.4962      | 534.7520        |
| 2347.2544      | 21 | T  | 8  | 939.4536       | 470.2307        |
| 2461.2973      | 22 | N  | 7  | 838.4059       | 419.7069        |
| 2562.3450      | 23 | T  | 6  | 724.3630       | 362.6854        |
| 2619.3665      | 24 | G  | 5  | 623.3153       | 312.1616        |
| 2748.4091      | 25 | E  | 4  | 566.2938       | 283.6508        |
| 2847.4775      | 26 | V  | 3  | 437.2512       | 219.1295        |
| 3010.5408      | 27 | Y  | 2  | 338.1828       | 169.5953        |
|                | 28 | R  | 1  | 175.1195       | 88.0637         |

N-term:+43.02 K(7):+162.16  
 C(19):+160.03

SILYVSPHPDAFPSLR, MH+ 1840.9598, m/z 614.3248  
 L OSG36 P180811 230811-s1.06056.06056.3.dta

X-range:

-

MassTol: Y-zoom:

MassType:

AVG  MONO

Axis:

1  2

Label:

I  M  -

Ions:

a  +  2+  3+

b  +  2+  3+

c  +  2+  3+

x  +  2+  3+

y  +  2+  3+

z  +  2+  3+

hide H<sub>2</sub>O/NH<sub>3</sub>

zoom 112-122

GO

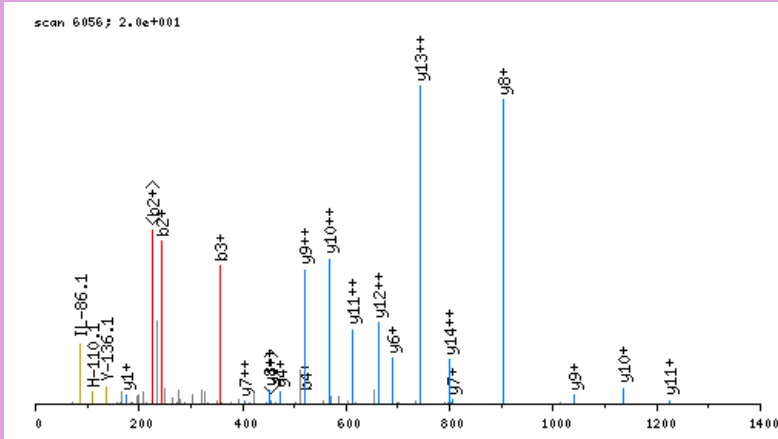

click image to zoom in; click top corners to zoom out [\[precursor±\]](#)

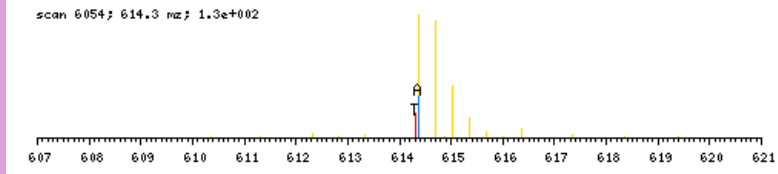

zoomed in precursor plot; T=theoretical m/z, A=acquired m/z

| b <sup>+</sup> | #  | AA # | y <sup>+</sup> | y <sup>2+</sup> |
|----------------|----|------|----------------|-----------------|
| 130.0504       | 1  | S 16 |                |                 |
| 243.1345       | 2  | I 15 | 1711.9172      | 856.4625        |
| 356.2186       | 3  | L 14 | 1598.8331      | 799.9205        |
| 519.2819       | 4  | Y 13 | 1485.7490      | 743.3784        |
| 618.3503       | 5  | V 12 | 1322.6857      | 661.8468        |
| 705.3823       | 6  | S 11 | 1223.6173      | 612.3126        |
| 802.4351       | 7  | P 10 | 1136.5853      | 568.7965        |
| 939.4940       | 8  | H 9  | 1039.5325      | 520.2702        |
| 1036.5468      | 9  | P 8  | 902.4736       | 451.7407        |
| 1151.5737      | 10 | D 7  | 805.4208       | 403.2143        |
| 1222.6108      | 11 | A 6  | 690.3939       | 345.7009        |
| 1369.6792      | 12 | F 5  | 619.3568       | 310.1823        |
| 1466.7320      | 13 | P 4  | 472.2884       | 236.6481        |
| 1553.7640      | 14 | S 3  | 375.2356       | 188.1217        |
| 1666.8481      | 15 | L 2  | 288.2036       | 144.6057        |
|                | 16 | R 1  | 175.1195       | 88.0637         |

N-term:+43.02



X-range:

-

MassTol: Y-zoom:

MassType:

AVG  MONO

Axis:

1  2

Label:

I  M  -

Ions:

a  +  2+  3+

b  +  2+  3+

c  +  2+  3+

x  +  2+  3+

y  +  2+  3+

z  +  2+  3+

hide H<sub>2</sub>O/NH<sub>3</sub>

zoom 112-122

GO

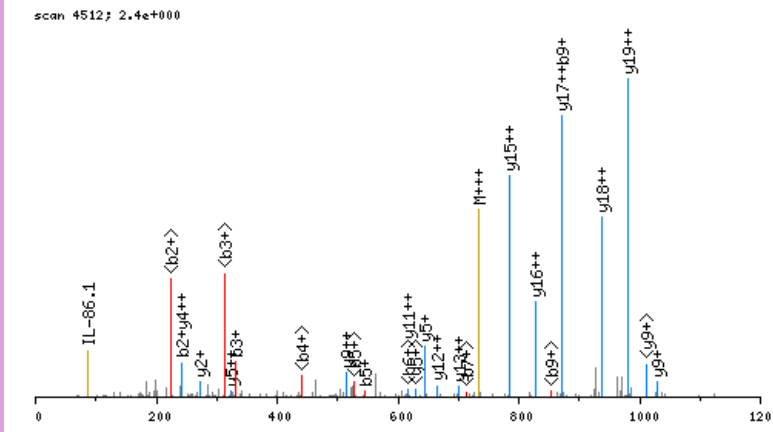

click image to zoom in; click top corners to zoom out [\[precursor±\]](#)

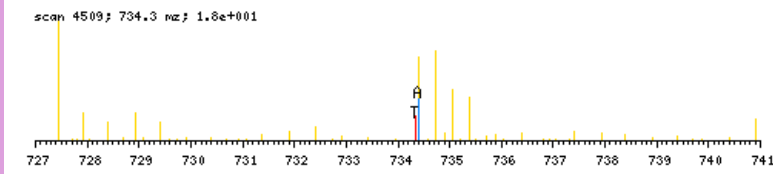

zoomed in precursor plot; T=theoretical m/z, A=acquired m/z

| b <sup>+</sup> | #  | AA | #  | y <sup>+</sup> | y <sup>2+</sup> |
|----------------|----|----|----|----------------|-----------------|
| 130.0504       | 1  | S  | 21 |                |                 |
| 243.1345       | 2  | I  | 20 | 2071.9830      | 1036.4954       |
| 330.1665       | 3  | S  | 19 | 1958.8990      | 979.9534        |
| 459.2091       | 4  | E  | 18 | 1871.8670      | 936.4374        |
| 546.2411       | 5  | S  | 17 | 1742.8244      | 871.9161        |
| 633.2732       | 6  | S  | 16 | 1655.7923      | 828.4001        |
| 730.3259       | 7  | P  | 15 | 1568.7603      | 784.8841        |
| 801.3630       | 8  | A  | 14 | 1471.7075      | 736.3577        |
| 872.4002       | 9  | A  | 13 | 1400.6704      | 700.8391        |
| 973.4478       | 10 | T  | 12 | 1329.6333      | 665.3206        |
| 1060.4799      | 11 | S  | 11 | 1228.5856      | 614.7967        |
| 1173.5639      | 12 | L  | 10 | 1141.5536      | 571.2807        |
| 1270.6167      | 13 | P  | 9  | 1028.4695      | 514.7387        |
| 1384.6596      | 14 | N  | 8  | 931.4168       | 466.2123        |
| 1441.6811      | 15 | G  | 7  | 817.3738       | 409.1908        |
| 1556.7080      | 16 | D  | 6  | 760.3524       | 380.6801        |
| 1716.7386      | 17 | C  | 5  | 645.3254       | 323.1666        |
| 1773.7601      | 18 | G  | 4  | 485.2948       | 243.1513        |
| 1929.8612      | 19 | R  | 3  | 428.2734       | 214.6406        |
| 2026.9140      | 20 | P  | 2  | 272.1723       | 136.5900        |
|                | 21 | R  | 1  | 175.1195       | 88.0637         |

N-term:+43.02 C(17):+160.03

SISSLGSIGKGR, MH+ 1237.7329, m/z 619.3701  
 L OSG37 P180811 230811-s1.05237.05237.2.dta

scan 5237; 3.1e+001

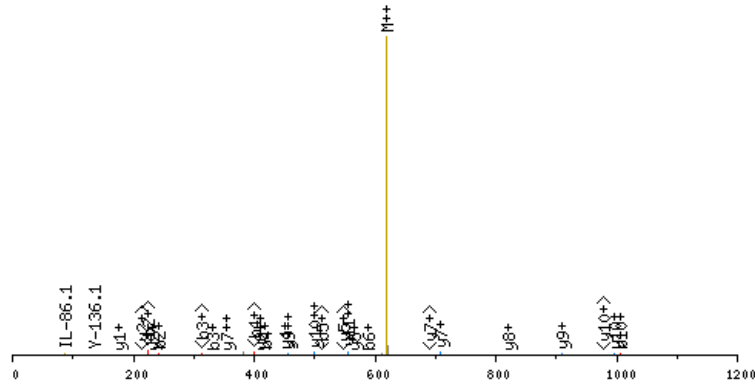

click image to zoom in; click top corners to zoom out [\[precursor±\]](#)

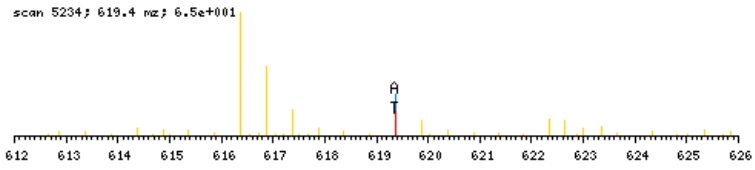

zoomed in precursor plot; T=theoretical m/z, A=acquired m/z

X-range:

-

MassTol: Y-zoom:

MassType:

AVG  MONO

Axis:

1  2

Label:

I  M  -

Ions:

a  +  2+  3+

b  +  2+  3+

c  +  2+  3+

x  +  2+  3+

y  +  2+  3+

z  +  2+  3+

hide H<sub>2</sub>O/NH<sub>3</sub>

zoom 112-122

GO

| b <sup>+</sup> | #  | AA | #  | y <sup>+</sup> | y <sup>2+</sup> |
|----------------|----|----|----|----------------|-----------------|
| 130.0504       | 1  | S  | 12 |                |                 |
| 243.1345       | 2  | I  | 11 | 1108.6903      | 554.8490        |
| 330.1665       | 3  | S  | 10 | 995.6062       | 498.3070        |
| 417.1985       | 4  | S  | 9  | 908.5742       | 454.7910        |
| 530.2826       | 5  | L  | 8  | 821.5421       | 411.2750        |
| 587.3041       | 6  | G  | 7  | 708.4581       | 354.7330        |
| 674.3361       | 7  | S  | 6  | 651.4366       | 326.2222        |
| 787.4202       | 8  | I  | 5  | 564.4046       | 282.7062        |
| 844.4416       | 9  | G  | 4  | 451.3205       | 226.1642        |
| 1006.5997      | 10 | K  | 3  | 394.2991       | 197.6534        |
| 1063.6212      | 11 | G  | 2  | 232.1410       | 116.5744        |
|                | 12 | R  | 1  | 175.1195       | 88.0637         |

N-term:+43.02 K(10):+162.16

SKQQPTQFINPETPGYVGFANLPNQVHR, MH+ 3237.6446, m/z 810.1666  
 L\_OSG38\_P180811\_230811-s1.07170.07170.4.dta

scan 7170; 2.0e+000

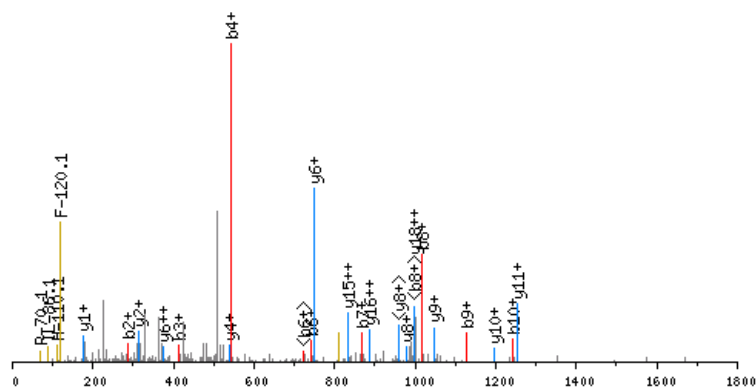

click image to zoom in; click top corners to zoom out [precursor±]

scan 7169; 810.2 m/z; 2.8e+001

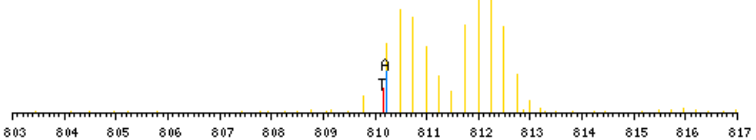

zoomed in precursor plot; T=theoretical m/z, A=acquired m/z

X-range:

-

MassTol: Y-zoom:

MassType:

AVG  MONO

Axis:

1  2

Label:

I  M  C-

Ions:

a  +  2+  3+

b  +  2+  3+

c  +  2+  3+

x  +  2+  3+

y  +  2+  3+

z  +  2+  3+

hide H<sub>2</sub>O/NH<sub>3</sub>

zoom 112-122

GO

| b <sup>+</sup> | #  | AA # | y <sup>+</sup> | y <sup>2+</sup> |
|----------------|----|------|----------------|-----------------|
| 130.0504       | 1  | S 28 |                |                 |
| 286.1767       | 2  | K 27 | 3108.6020      | 1554.8049       |
| 414.2353       | 3  | Q 26 | 2952.4757      | 1476.7417       |
| 542.2939       | 4  | Q 25 | 2824.4171      | 1412.7125       |
| 639.3466       | 5  | P 24 | 2696.3585      | 1348.6832       |
| 740.3943       | 6  | T 23 | 2599.3057      | 1300.1568       |
| 868.4529       | 7  | Q 22 | 2498.2581      | 1249.6329       |
| 1015.5213      | 8  | F 21 | 2370.1995      | 1185.6037       |
| 1128.6054      | 9  | I 20 | 2223.1311      | 1112.0695       |
| 1242.6483      | 10 | N 19 | 2110.0470      | 1055.5274       |
| 1339.7011      | 11 | P 18 | 1996.0041      | 998.5060        |
| 1468.7437      | 12 | E 17 | 1898.9513      | 949.9796        |
| 1569.7913      | 13 | T 16 | 1769.9087      | 885.4583        |
| 1666.8441      | 14 | P 15 | 1668.8610      | 834.9344        |
| 1723.8656      | 15 | G 14 | 1571.8083      | 786.4081        |
| 1886.9289      | 16 | Y 13 | 1514.7868      | 757.8973        |
| 1985.9973      | 17 | V 12 | 1351.7235      | 676.3657        |
| 2043.0188      | 18 | G 11 | 1252.6551      | 626.8315        |
| 2190.0872      | 19 | F 10 | 1195.6336      | 598.3207        |
| 2261.1243      | 20 | A 9  | 1048.5652      | 524.7865        |
| 2375.1672      | 21 | N 8  | 977.5281       | 489.2680        |
| 2488.2513      | 22 | L 7  | 863.4852       | 432.2465        |
| 2585.3041      | 23 | P 6  | 750.4011       | 375.7045        |
| 2699.3470      | 24 | N 5  | 653.3483       | 327.1781        |
| 2827.4056      | 25 | Q 4  | 539.3054       | 270.1566        |
| 2926.4740      | 26 | V 3  | 411.2468       | 206.1273        |
| 3063.5329      | 27 | H 2  | 312.1784       | 156.5931        |
|                | 28 | R 1  | 175.1195       | 88.0637         |

N-term:+43.02 K(2):+156.13

SKSEKIDAVDLGAIGGNIQQVVGVTQER, MH+ 3163.6964, m/z 791.6795  
 L OSG38 P180811 230811-s1.07792.07792.4.dta

scan 7792; 3.3e+000

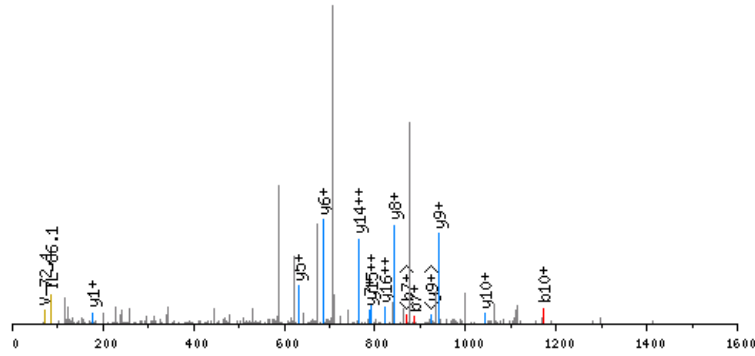

click image to zoom in; click top corners to zoom out [\[precursor±\]](#)

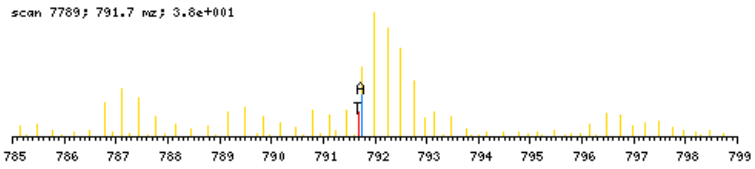

zoomed in precursor plot; T=theoretical m/z, A=acquired m/z

| b <sup>+</sup> | #  | AA | #  | y <sup>+</sup> | y <sup>2+</sup> |
|----------------|----|----|----|----------------|-----------------|
| 130.0504       | 1  | S  | 30 |                |                 |
| 286.1767       | 2  | K  | 29 | 3034.6538      | 1517.8308       |
| 373.2088       | 3  | S  | 28 | 2878.5275      | 1439.7676       |
| 502.2514       | 4  | E  | 27 | 2791.4954      | 1396.2516       |
| 658.3777       | 5  | K  | 26 | 2662.4528      | 1331.7303       |
| 771.4617       | 6  | I  | 25 | 2506.3265      | 1253.6672       |
| 886.4887       | 7  | D  | 24 | 2393.2425      | 1197.1252       |
| 957.5258       | 8  | A  | 23 | 2278.2155      | 1139.6117       |
| 1056.5942      | 9  | V  | 22 | 2207.1784      | 1104.0931       |
| 1171.6211      | 10 | D  | 21 | 2108.1100      | 1054.5589       |
| 1284.7052      | 11 | L  | 20 | 1993.0831      | 997.0454        |
| 1341.7267      | 12 | G  | 19 | 1879.9990      | 940.5034        |
| 1412.7638      | 13 | A  | 18 | 1822.9775      | 911.9927        |
| 1525.8478      | 14 | I  | 17 | 1751.9404      | 876.4741        |
| 1582.8693      | 15 | G  | 16 | 1638.8564      | 819.9321        |
| 1639.8908      | 16 | G  | 15 | 1581.8349      | 791.4214        |
| 1753.9337      | 17 | N  | 14 | 1524.8134      | 762.9106        |
| 1867.0178      | 18 | I  | 13 | 1410.7705      | 705.8892        |
| 1995.0763      | 19 | Q  | 12 | 1297.6864      | 649.3471        |
| 2123.1349      | 20 | Q  | 11 | 1169.6279      | 585.3178        |
| 2222.2033      | 21 | V  | 10 | 1041.5693      | 521.2886        |
| 2321.2717      | 22 | V  | 9  | 942.5009       | 471.7543        |
| 2378.2932      | 23 | G  | 8  | 843.4325       | 422.2201        |
| 2477.3616      | 24 | V  | 7  | 786.4110       | 393.7094        |
| 2534.3831      | 25 | G  | 6  | 687.3426       | 344.1752        |
| 2631.4358      | 26 | P  | 5  | 630.3211       | 315.6645        |
| 2732.4835      | 27 | T  | 4  | 533.2683       | 267.1381        |
| 2860.5421      | 28 | Q  | 3  | 432.2207       | 216.6142        |
| 2989.5847      | 29 | E  | 2  | 304.1621       | 152.5850        |
|                | 30 | R  | 1  | 175.1195       | 88.0637         |

N-term:+43.02 K(2):+156.13  
 K(5):+156.13

X-range:

-

MassTol: Y-zoom:

MassType:

AVG  MONO

Axis:

1  2

Label:

I  M  -

Ions:

a  +  2+  3+

b  +  2+  3+

c  +  2+  3+

x  +  2+  3+

y  +  2+  3+

z  +  2+  3+

hide H<sub>2</sub>O/NH<sub>3</sub>

zoom 112-122

GO

SKSESPKEPEQLR, MH+ 1624.9183, m/z 542.3110  
 L OSG39 P180811 230811-s1.02168.02168.3.dta

scan 2168; 1.3e+002

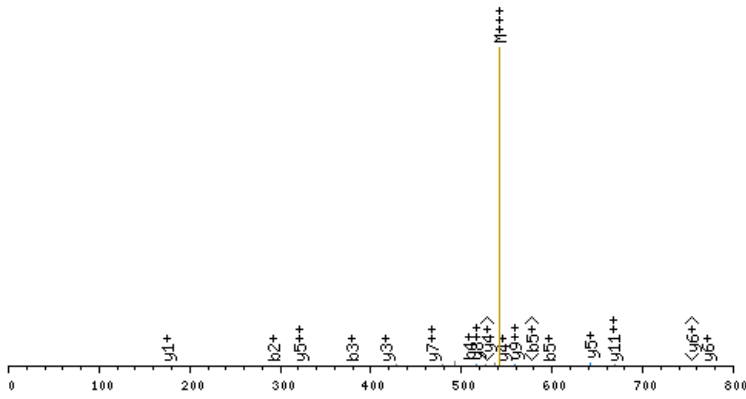

click image to zoom in; click top corners to zoom out [precursor±]

scan 2167; 542.3 m/z; 1.0e+001

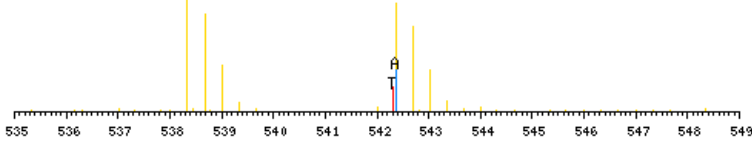

zoomed in precursor plot; T=theoretical m/z, A=acquired m/z

X-range:

-

MassTol: Y-zoom:

MassType:

AVG  MONO

Axis:

1  2

Label:

I  M  -

Ions:

a  +  2+  3+

b  +  2+  3+

c  +  2+  3+

x  +  2+  3+

y  +  2+  3+

z  +  2+  3+

hide H<sub>2</sub>O/NH<sub>3</sub>

zoom 112-122

GO

| b <sup>+</sup> | #  | AA | #  | y <sup>+</sup> | y <sup>2+</sup> |
|----------------|----|----|----|----------------|-----------------|
| 130.0504       | 1  | S  | 13 |                |                 |
| 292.2085       | 2  | K  | 12 | 1495.8757      | 748.4418        |
| 379.2406       | 3  | S  | 11 | 1333.7176      | 667.3627        |
| 508.2832       | 4  | E  | 10 | 1246.6856      | 623.8467        |
| 595.3152       | 5  | S  | 9  | 1117.6430      | 559.3254        |
| 692.3679       | 6  | P  | 8  | 1030.6110      | 515.8094        |
| 854.5260       | 7  | K  | 7  | 933.5582       | 467.2830        |
| 983.5686       | 8  | E  | 6  | 771.4001       | 386.2040        |
| 1080.6214      | 9  | P  | 5  | 642.3575       | 321.6827        |
| 1209.6640      | 10 | E  | 4  | 545.3047       | 273.1563        |
| 1337.7226      | 11 | Q  | 3  | 416.2621       | 208.6350        |
| 1450.8066      | 12 | L  | 2  | 288.2036       | 144.6057        |
|                | 13 | R  | 1  | 175.1195       | 88.0637         |

N-term:+43.02 K(2):+162.16  
 K(7):+162.16

SKSFQQSSLGR, MH+ 1300.7074, m/z 650.8573  
 L OSG37 P180811 230811-s1.02986.02986.2.dta

scan 2986; 1.6e+001

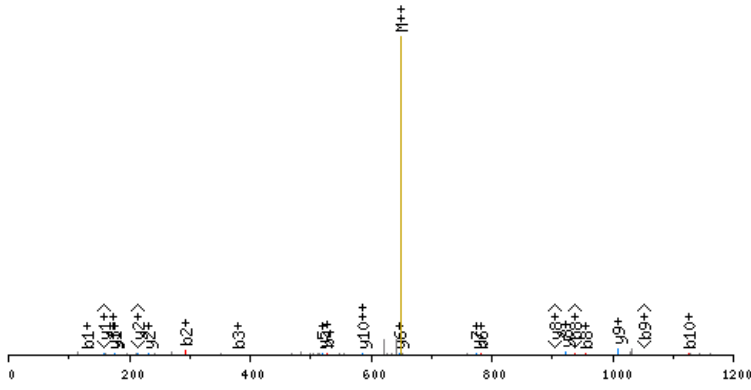

click image to zoom in; click top corners to zoom out [\[precursor±\]](#)

scan 2984; 650.9 m/z; 6.6e+001

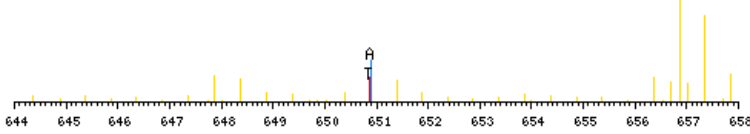

zoomed in precursor plot; T=theoretical m/z, A=acquired m/z

X-range:

-

MassTol: Y-zoom:

MassType:

AVG  MONO

Axis:

1  2

Label:

I  M  -

Ions:

a  +  2+  3+

b  +  2+  3+

c  +  2+  3+

x  +  2+  3+

y  +  2+  3+

z  +  2+  3+

hide H<sub>2</sub>O/NH<sub>3</sub>

zoom 112-122

GO

| b <sup>+</sup> | #  | AA # | y <sup>+</sup> | y <sup>2+</sup> |
|----------------|----|------|----------------|-----------------|
| 130.0504       | 1  | S 11 |                |                 |
| 292.2085       | 2  | K 10 | 1171.6648      | 586.3363        |
| 379.2406       | 3  | S 9  | 1009.5067      | 505.2573        |
| 526.3090       | 4  | F 8  | 922.4747       | 461.7412        |
| 654.3675       | 5  | Q 7  | 775.4062       | 388.2070        |
| 782.4261       | 6  | Q 6  | 647.3477       | 324.1777        |
| 869.4582       | 7  | S 5  | 519.2891       | 260.1485        |
| 956.4902       | 8  | S 4  | 432.2571       | 216.6324        |
| 1069.5742      | 9  | L 3  | 345.2250       | 173.1164        |
| 1126.5957      | 10 | G 2  | 232.1410       | 116.5744        |
|                | 11 | R 1  | 175.1195       | 88.0637         |

N-term:+43.02 K(2):+162.16

SLAIMEYLEETRPIPR, MH+ 1960.0214, m/z 654.0120  
 L OSG39 P180811 230811-s1.04742.04742.3.dta

X-range:

-

MassTol: Y-zoom:

MassType:

AVG  MONO

Axis:

1  2

Label:

I  M  -

Ions:

a  +  2+  3+

b  +  2+  3+

c  +  2+  3+

x  +  2+  3+

y  +  2+  3+

z  +  2+  3+

hide H<sub>2</sub>O/NH<sub>3</sub>

zoom 112-122

GO

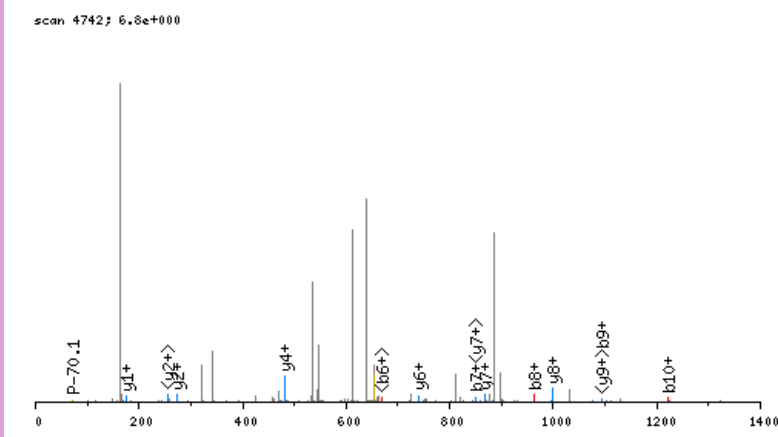

click image to zoom in; click top corners to zoom out [\[precursor±\]](#)

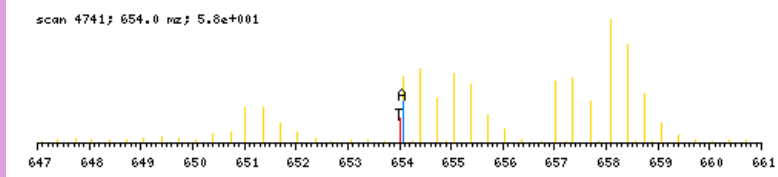

zoomed in precursor plot; T=theoretical m/z, A=acquired m/z

| b <sup>+</sup> | #  | AA # | y <sup>+</sup> | y <sup>2+</sup> |
|----------------|----|------|----------------|-----------------|
| 130.0504       | 1  | S 16 |                |                 |
| 243.1345       | 2  | L 15 | 1830.9788      | 915.9933        |
| 314.1716       | 3  | A 14 | 1717.8947      | 859.4513        |
| 427.2557       | 4  | I 13 | 1646.8576      | 823.9327        |
| 558.2962       | 5  | M 12 | 1533.7735      | 767.3907        |
| 687.3387       | 6  | E 11 | 1402.7331      | 701.8704        |
| 850.4021       | 7  | Y 10 | 1273.6905      | 637.3491        |
| 963.4861       | 8  | L 9  | 1110.6271      | 555.8175        |
| 1092.5287      | 9  | E 8  | 997.5431       | 499.2754        |
| 1221.5713      | 10 | E 7  | 868.5005       | 434.7542        |
| 1322.6190      | 11 | T 6  | 739.4579       | 370.2329        |
| 1478.7201      | 12 | R 5  | 638.4102       | 319.7090        |
| 1575.7729      | 13 | P 4  | 482.3091       | 241.6585        |
| 1688.8569      | 14 | I 3  | 385.2563       | 193.1321        |
| 1785.9097      | 15 | P 2  | 272.1723       | 136.5900        |
|                | 16 | R 1  | 175.1195       | 88.0637         |

N-term:+43.02

SLDIQCEQLSDAR, MH+ 1576.7277, m/z 788.8675  
 L OSG41 P180811 230811-s1.05226.05226.2.dta

X-range:

-

MassTol: Y-zoom:

MassType:

AVG  MONO

Axis:

1  2

Label:

I  M  -

Ions:

a  +  2+  3+

b  +  2+  3+

c  +  2+  3+

x  +  2+  3+

y  +  2+  3+

z  +  2+  3+

hide H<sub>2</sub>O/NH<sub>3</sub>

zoom 112-122

GO

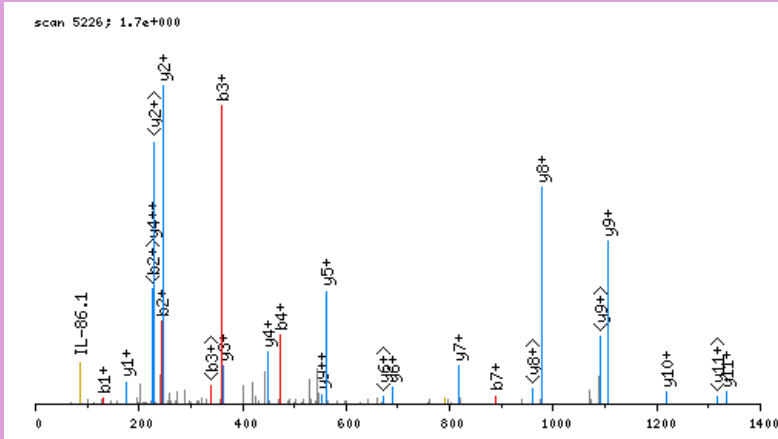

click image to zoom in; click top corners to zoom out [\[precursor±\]](#)

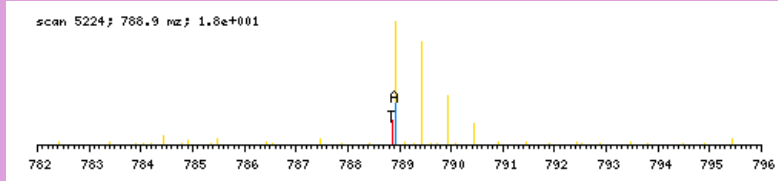

zoomed in precursor plot; T=theoretical m/z, A=acquired m/z

| b <sup>+</sup> | #  | AA # | y <sup>+</sup> | y <sup>2+</sup> |
|----------------|----|------|----------------|-----------------|
| 130.0504       | 1  | S 13 |                |                 |
| 243.1345       | 2  | L 12 | 1447.6851      | 724.3464        |
| 358.1614       | 3  | D 11 | 1334.6010      | 667.8044        |
| 471.2455       | 4  | I 10 | 1219.5741      | 610.2909        |
| 599.3041       | 5  | Q 9  | 1106.4900      | 553.7489        |
| 759.3347       | 6  | C 8  | 978.4314       | 489.7196        |
| 888.3773       | 7  | E 7  | 818.4008       | 409.7043        |
| 1016.4358      | 8  | Q 6  | 689.3582       | 345.1830        |
| 1129.5199      | 9  | L 5  | 561.2997       | 281.1537        |
| 1216.5519      | 10 | S 4  | 448.2156       | 224.6117        |
| 1331.5789      | 11 | D 3  | 361.1836       | 181.0957        |
| 1402.6160      | 12 | A 2  | 246.1566       | 123.5822        |
|                | 13 | R 1  | 175.1195       | 88.0637         |

N-term:+43.02 C(6):+160.03



SLGGVSEASR, MH+ 1004.5013, m/z 502.7543  
 L OSG41 P180811 230811-s1.03011.03011.2.dta

X-range:

-

MassTol: Y-zoom:

MassType:

AVG  MONO

Axis:

1  2

Label:

I  M  -

Ions:

a  +  2+  3+

b  +  2+  3+

c  +  2+  3+

x  +  2+  3+

y  +  2+  3+

z  +  2+  3+

hide H<sub>2</sub>O/NH<sub>3</sub>

zoom 112-122

GO

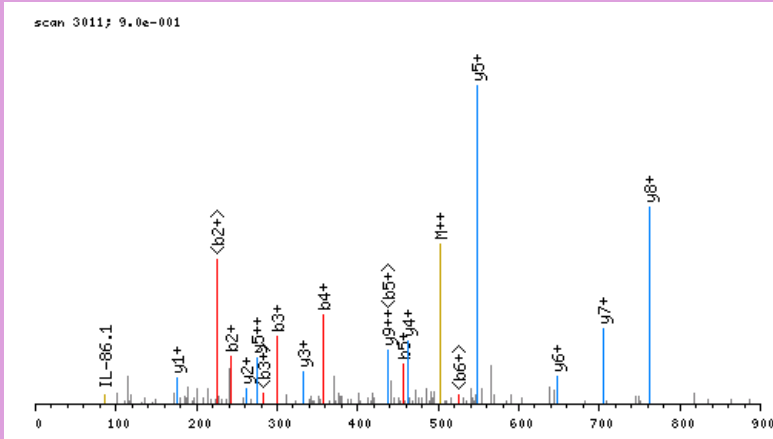

click image to zoom in; click top corners to zoom out [\[precursor±\]](#)

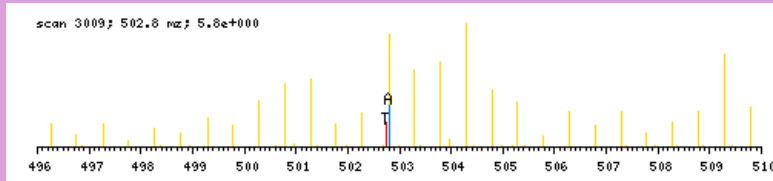

zoomed in precursor plot; T=theoretical m/z, A=acquired m/z

| b <sup>+</sup> | #  | AA | #  | y <sup>+</sup> | y <sup>2+</sup> |
|----------------|----|----|----|----------------|-----------------|
| 130.0504       | 1  | S  | 10 |                |                 |
| 243.1345       | 2  | L  | 9  | 875.4587       | 438.2332        |
| 300.1560       | 3  | G  | 8  | 762.3746       | 381.6912        |
| 357.1774       | 4  | G  | 7  | 705.3531       | 353.1805        |
| 456.2458       | 5  | V  | 6  | 648.3317       | 324.6698        |
| 543.2779       | 6  | S  | 5  | 549.2633       | 275.1355        |
| 672.3205       | 7  | E  | 4  | 462.2312       | 231.6195        |
| 743.3576       | 8  | A  | 3  | 333.1886       | 167.0982        |
| 830.3896       | 9  | S  | 2  | 262.1515       | 131.5797        |
|                | 10 | R  | 1  | 175.1195       | 88.0637         |

N-term: +43.02

SLHQLLEPITCHAWN, MH+ 2164.0762, m/z 722.0302  
 L OSG39 P180811 230811-s1.07675.07675.3.dta

X-range:

-

MassTol: Y-zoom:

MassType:

AVG  MONO

Axis:

1  2

Label:

I  M  -

Ions:

a  +  2+  3+

b  +  2+  3+

c  +  2+  3+

x  +  2+  3+

y  +  2+  3+

z  +  2+  3+

hide H<sub>2</sub>O/NH<sub>3</sub>

zoom 112-122

GO

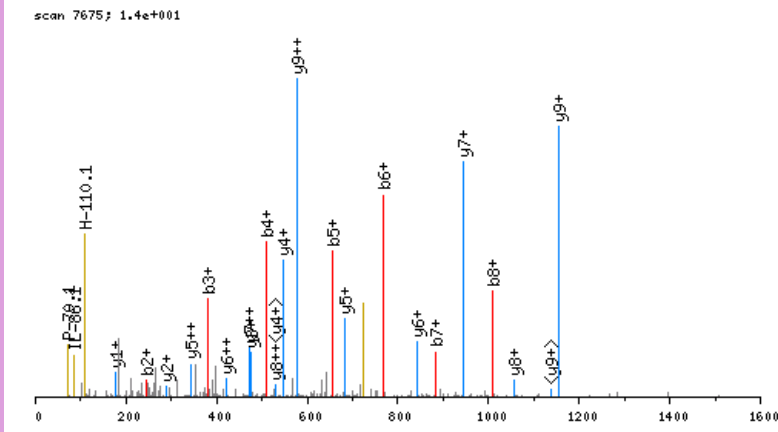

click image to zoom in; click top corners to zoom out [\[precursor±\]](#)

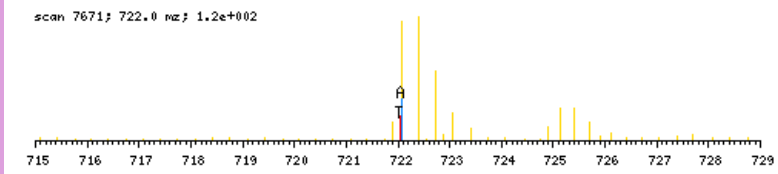

zoomed in precursor plot; T=theoretical m/z, A=acquired m/z

| b <sup>+</sup> | #  | AA | #  | y <sup>+</sup> | y <sup>2+</sup> |
|----------------|----|----|----|----------------|-----------------|
| 130.0504       | 1  | S  | 17 |                |                 |
| 243.1345       | 2  | L  | 16 | 2035.0336      | 1018.0207       |
| 380.1934       | 3  | H  | 15 | 1921.9495      | 961.4787        |
| 508.2520       | 4  | Q  | 14 | 1784.8906      | 892.9492        |
| 655.3204       | 5  | F  | 13 | 1656.8320      | 828.9199        |
| 768.4045       | 6  | L  | 12 | 1509.7636      | 755.3857        |
| 881.4885       | 7  | L  | 11 | 1396.6795      | 698.8437        |
| 1010.5311      | 8  | E  | 10 | 1283.5955      | 642.3016        |
| 1107.5839      | 9  | P  | 9  | 1154.5529      | 577.7803        |
| 1220.6679      | 10 | I  | 8  | 1057.5001      | 529.2540        |
| 1321.7156      | 11 | T  | 7  | 944.4160       | 472.7119        |
| 1481.7462      | 12 | C  | 6  | 843.3684       | 422.1881        |
| 1618.8051      | 13 | H  | 5  | 683.3378       | 342.1728        |
| 1689.8422      | 14 | A  | 4  | 546.2789       | 273.6433        |
| 1875.9216      | 15 | W  | 3  | 475.2417       | 238.1248        |
| 1989.9645      | 16 | N  | 2  | 289.1624       | 145.0851        |
|                | 17 | R  | 1  | 175.1195       | 88.0637         |

N-term:+43.02 C(12):+160.03

SLICISISNEVPEHPCVSPVSNHVVYER, MH+ 3051.4303, m/z 763.6130  
 L\_OSG38\_P180811\_230811-s1.07303.07303.4.dta

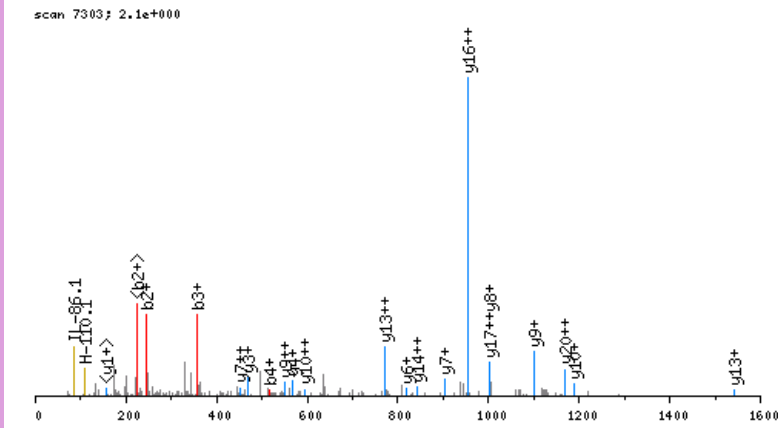

click image to zoom in; click top corners to zoom out [\[precursor±\]](#)

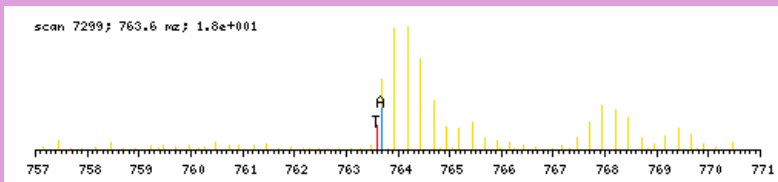

zoomed in precursor plot; T=theoretical m/z, A=acquired m/z

X-range:

-

MassTol: Y-zoom:

MassType:

AVG  MONO

Axis:

1  2

Label:

I  M  -

Ions:

a  +  2+  3+

b  +  2+  3+

c  +  2+  3+

x  +  2+  3+

y  +  2+  3+

z  +  2+  3+

hide H<sub>2</sub>O/NH<sub>3</sub>

zoom 112-122

GO

| b <sup>+</sup> | #  | AA | #  | y <sup>+</sup> | y <sup>2+</sup> |
|----------------|----|----|----|----------------|-----------------|
| 130.0504       | 1  | S  | 26 |                |                 |
| 243.1345       | 2  | L  | 25 | 2922.3877      | 1461.6978       |
| 356.2186       | 3  | I  | 24 | 2809.3037      | 1405.1558       |
| 516.2492       | 4  | C  | 23 | 2696.2196      | 1348.6137       |
| 603.2812       | 5  | S  | 22 | 2536.1890      | 1268.5984       |
| 716.3652       | 6  | I  | 21 | 2449.1570      | 1225.0824       |
| 803.3973       | 7  | S  | 20 | 2336.0729      | 1168.5404       |
| 917.4402       | 8  | N  | 19 | 2249.0409      | 1125.0244       |
| 1046.4828      | 9  | E  | 18 | 2134.9980      | 1068.0029       |
| 1145.5512      | 10 | V  | 17 | 2005.9554      | 1003.4816       |
| 1242.6040      | 11 | P  | 16 | 1906.8870      | 953.9474        |
| 1371.6466      | 12 | E  | 15 | 1809.8342      | 905.4210        |
| 1508.7055      | 13 | H  | 14 | 1680.7916      | 840.8997        |
| 1605.7582      | 14 | P  | 13 | 1543.7327      | 772.3703        |
| 1765.7888      | 15 | C  | 12 | 1446.6799      | 723.8439        |
| 1864.8573      | 16 | V  | 11 | 1286.6493      | 643.8286        |
| 1951.8893      | 17 | S  | 10 | 1187.5809      | 594.2944        |
| 2048.9421      | 18 | P  | 9  | 1100.5489      | 550.7784        |
| 2148.0105      | 19 | V  | 8  | 1003.4961      | 502.2520        |
| 2235.0425      | 20 | S  | 7  | 904.4277       | 452.7178        |
| 2349.0854      | 21 | N  | 6  | 817.3957       | 409.2018        |
| 2486.1443      | 22 | H  | 5  | 703.3527       | 352.1803        |
| 2585.2127      | 23 | V  | 4  | 566.2938       | 283.6508        |
| 2748.2761      | 24 | Y  | 3  | 467.2254       | 234.1166        |
| 2877.3187      | 25 | E  | 2  | 304.1621       | 152.5850        |
|                | 26 | R  | 1  | 175.1195       | 88.0637         |

N-term:+43.02 C(4):+160.03  
 C(15):+160.03

SLKPQPQPAPATGR, MH+ 1614.8968, m/z 538.9705  
 L OSG37 P180811 230811-s1.03388.03388.3.dta

X-range:

-

MassTol: Y-zoom:

MassType:

AVG  MONO

Axis:

1  2

Label:

I  M  -

Ions:

a  +  2+  3+

b  +  2+  3+

c  +  2+  3+

x  +  2+  3+

y  +  2+  3+

z  +  2+  3+

hide H<sub>2</sub>O/NH<sub>3</sub>

zoom 112-122

GO

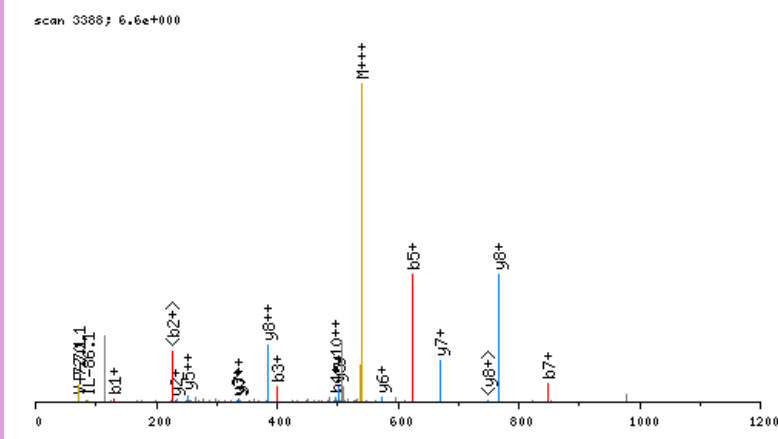

click image to zoom in; click top corners to zoom out [\[precursor±\]](#)

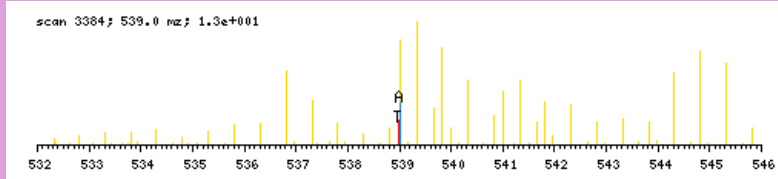

zoomed in precursor plot; T=theoretical m/z, A=acquired m/z

| b <sup>+</sup> | #  | AA # | y <sup>+</sup> | y <sup>2+</sup> |
|----------------|----|------|----------------|-----------------|
| 130.0504       | 1  | S 15 |                |                 |
| 243.1345       | 2  | L 14 | 1485.8542      | 743.4310        |
| 399.2608       | 3  | K 13 | 1372.7701      | 686.8890        |
| 496.3136       | 4  | P 12 | 1216.6438      | 608.8258        |
| 624.3721       | 5  | Q 11 | 1119.5911      | 560.2995        |
| 721.4249       | 6  | P 10 | 991.5325       | 496.2702        |
| 849.4835       | 7  | Q 9  | 894.4797       | 447.7438        |
| 946.5362       | 8  | P 8  | 766.4212       | 383.7145        |
| 1043.5890      | 9  | P 7  | 669.3684       | 335.1881        |
| 1114.6261      | 10 | A 6  | 572.3156       | 286.6617        |
| 1211.6789      | 11 | P 5  | 501.2785       | 251.1432        |
| 1282.7160      | 12 | A 4  | 404.2258       | 202.6168        |
| 1383.7637      | 13 | T 3  | 333.1886       | 167.0982        |
| 1440.7851      | 14 | G 2  | 232.1410       | 116.5744        |
|                | 15 | R 1  | 175.1195       | 88.0637         |

N-term:+43.02 K(3):+156.13

SLVAVPFYQKR, MH+ 1383.8213, m/z 692.4143  
 L OSG37 P180811 230811-s1.07276.07276.2.dta

X-range:

-

MassTol: Y-zoom:

MassType:

AVG  MONO

Axis:

1  2

Label:

I  M  -

Ions:

a  +  2+  3+

b  +  2+  3+

c  +  2+  3+

x  +  2+  3+

y  +  2+  3+

z  +  2+  3+

hide H<sub>2</sub>O/NH<sub>3</sub>

zoom 112-122

GO

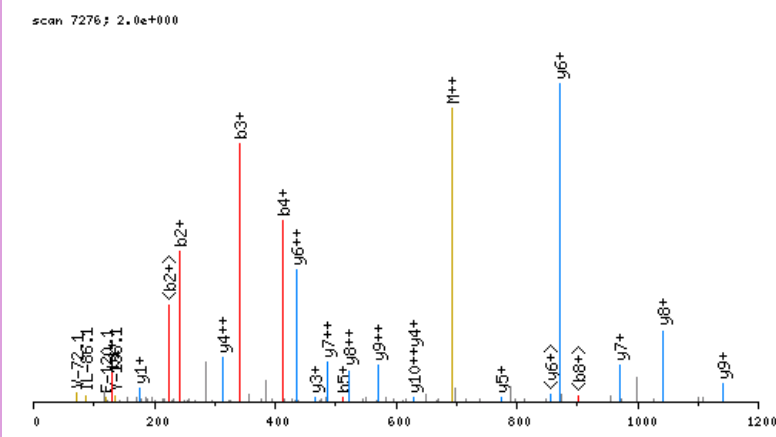

click image to zoom in; click top corners to zoom out [\[precursor±\]](#)

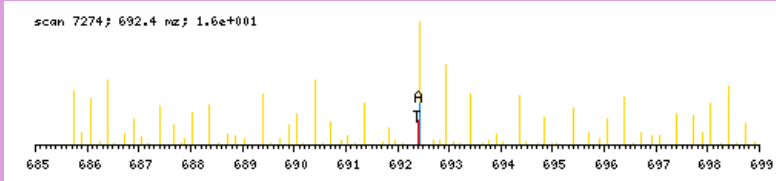

zoomed in precursor plot; T=theoretical m/z, A=acquired m/z

| b <sup>+</sup> | #  | AA | #  | y <sup>+</sup> | y <sup>2+</sup> |
|----------------|----|----|----|----------------|-----------------|
| 130.0504       | 1  | S  | 11 |                |                 |
| 243.1345       | 2  | L  | 10 | 1254.7787      | 627.8933        |
| 342.2029       | 3  | V  | 9  | 1141.6946      | 571.3512        |
| 413.2400       | 4  | A  | 8  | 1042.6262      | 521.8170        |
| 512.3084       | 5  | V  | 7  | 971.5891       | 486.2985        |
| 609.3612       | 6  | P  | 6  | 872.5207       | 436.7643        |
| 756.4296       | 7  | F  | 5  | 775.4679       | 388.2379        |
| 919.4929       | 8  | Y  | 4  | 628.3995       | 314.7037        |
| 1047.5515      | 9  | Q  | 3  | 465.3362       | 233.1720        |
| 1209.7096      | 10 | K  | 2  | 337.2776       | 169.1427        |
|                | 11 | R  | 1  | 175.1195       | 88.0637         |

N-term:+43.02 K(10):+162.16

SLVDLGKLLLEAAR, MH+ 1623.0482, m/z 541.6876  
 L OSG39 P180811 230811-s1.08058.08058.3.dta

scan 8058; 2.4e+001

X-range:

-

MassTol: Y-zoom:

MassType:

AVG  MONO

Axis:

1  2

Label:

I  M  -

Ions:

a  +  2+  3+

b  +  2+  3+

c  +  2+  3+

x  +  2+  3+

y  +  2+  3+

z  +  2+  3+

hide H<sub>2</sub>O/NH<sub>3</sub>

zoom 112-122

GO

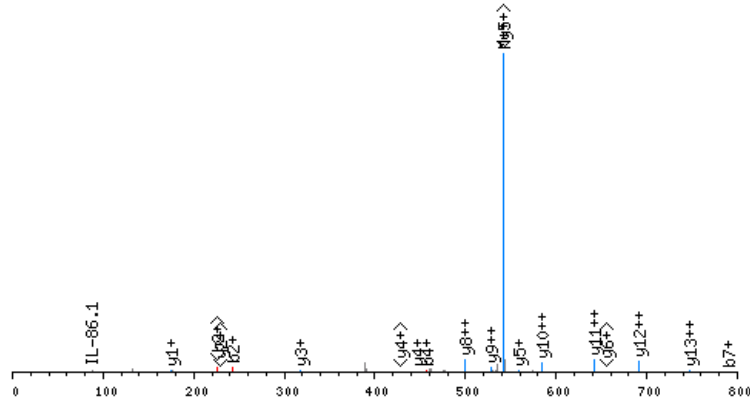

click image to zoom in; click top corners to zoom out [precursor±]

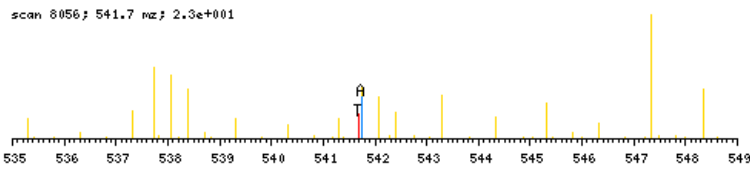

zoomed in precursor plot; T=theoretical m/z, A=acquired m/z

| b <sup>+</sup> | #  | AA # | y <sup>+</sup> | y <sup>2+</sup> |
|----------------|----|------|----------------|-----------------|
| 130.0504       | 1  | S    | 14             |                 |
| 243.1345       | 2  | L    | 13             | 1494.0056       |
| 342.2029       | 3  | V    | 12             | 1380.9215       |
| 457.2298       | 4  | D    | 11             | 1281.8531       |
| 570.3139       | 5  | L    | 10             | 1166.8262       |
| 627.3354       | 6  | G    | 9              | 1053.7421       |
| 789.4935       | 7  | K    | 8              | 996.7206        |
| 951.6516       | 8  | K    | 7              | 834.5625        |
| 1064.7356      | 9  | L    | 6              | 672.4044        |
| 1177.8197      | 10 | L    | 5              | 559.3204        |
| 1306.8623      | 11 | E    | 4              | 446.2363        |
| 1377.8994      | 12 | A    | 3              | 317.1937        |
| 1448.9365      | 13 | A    | 2              | 246.1566        |
|                | 14 | R    | 1              | 175.1195        |

N-term:+43.02 K(7):+162.16  
 K(8):+162.16

SLVLDLQKR, MH+ 963.6052, m/z 482.3062  
 L OSG37 P180811 230811-s1.04978.04978.2.dta

scan 4978; 1.2e+001

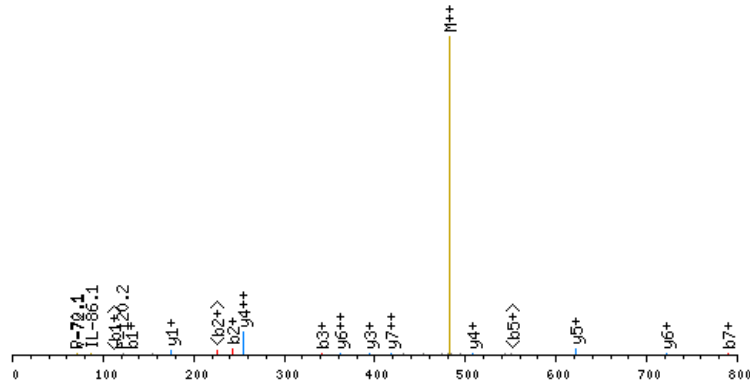

click image to zoom in; click top corners to zoom out [\[precursor±\]](#)

scan 4974; 482.3 m/z; 1.9e+001

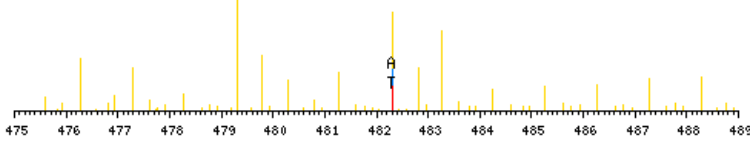

zoomed in precursor plot; T=theoretical m/z, A=acquired m/z

X-range:

-

MassTol: Y-zoom:

MassType:

AVG  MONO

Axis:

1  2

Label:

I  M  -

Ions:

a  +  2+  3+

b  +  2+  3+

c  +  2+  3+

x  +  2+  3+

y  +  2+  3+

z  +  2+  3+

hide H<sub>2</sub>O/NH<sub>3</sub>

zoom 112-122

GO

| b <sup>+</sup> | # | AA # | y <sup>+</sup> | y <sup>2+</sup> |
|----------------|---|------|----------------|-----------------|
| 130.0504       | 1 | S    | 8              |                 |
| 243.1345       | 2 | L    | 7              | 834.5625        |
| 342.2029       | 3 | V    | 6              | 721.4785        |
| 457.2298       | 4 | D    | 5              | 622.4101        |
| 570.3139       | 5 | L    | 4              | 507.3831        |
| 627.3354       | 6 | G    | 3              | 394.2991        |
| 789.4935       | 7 | K    | 2              | 337.2776        |
|                | 8 | R    | 1              | 175.1195        |

N-term:+43.02 K(7):+162.16

SMGLIHR, MH+ 855.4511, m/z 428.2292  
 L OSG38 P180811 230811-s1.04015.04015.2.dta

X-range:

-

MassTol: Y-zoom:

MassType:

AVG  MONO

Axis:

1  2

Label:

I  M  -

Ions:

a  +  2+  3+

b  +  2+  3+

c  +  2+  3+

x  +  2+  3+

y  +  2+  3+

z  +  2+  3+

hide H<sub>2</sub>O/NH<sub>3</sub>

zoom 112-122

GO

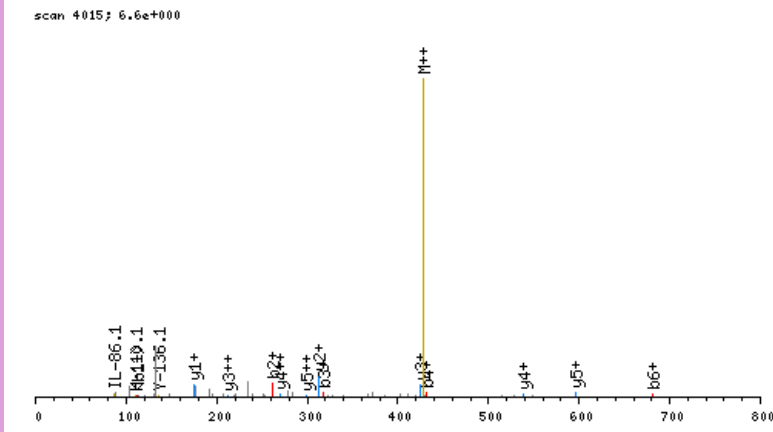

click image to zoom in; click top corners to zoom out [\[precursor±\]](#)

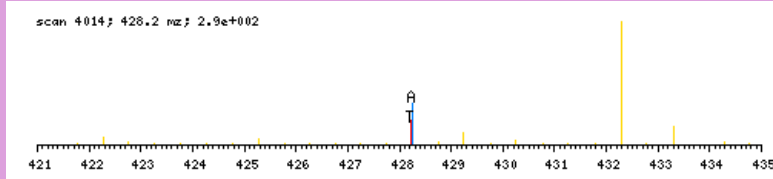

zoomed in precursor plot; T=theoretical m/z, A=acquired m/z

| b <sup>+</sup> | # | AA # | y <sup>+</sup> | y <sup>2+</sup>   |
|----------------|---|------|----------------|-------------------|
| 130.0504       | 1 | S    | 7              |                   |
| 261.0909       | 2 | M    | 6              | 726.4085 363.7082 |
| 318.1124       | 3 | G    | 5              | 595.3680 298.1879 |
| 431.1964       | 4 | L    | 4              | 538.3465 269.6772 |
| 544.2805       | 5 | I    | 3              | 425.2625 213.1352 |
| 681.3394       | 6 | H    | 2              | 312.1784 156.5931 |
|                | 7 | R    | 1              | 175.1195 88.0637  |

N-term:+43.02



SMHTEAAEVLLER, MH+ 1527.7477, m/z 764.3775  
 L OSG37 P180811 230811-s1.06373.06373.2.dta

X-range:

-

MassTol: Y-zoom:

MassType:

AVG  MONO

Axis:

1  2

Label:

I  M  -

Ions:

a  +  2+  3+

b  +  2+  3+

c  +  2+  3+

x  +  2+  3+

y  +  2+  3+

z  +  2+  3+

hide H<sub>2</sub>O/NH<sub>3</sub>

zoom 112-122

GO

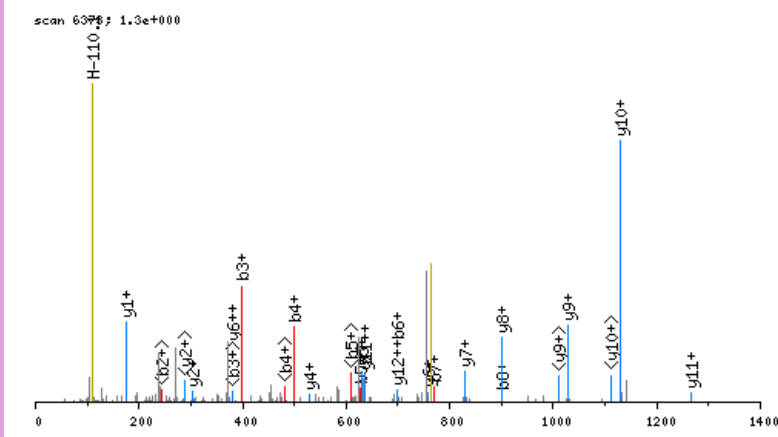

click image to zoom in; click top corners to zoom out [\[precursor±\]](#)

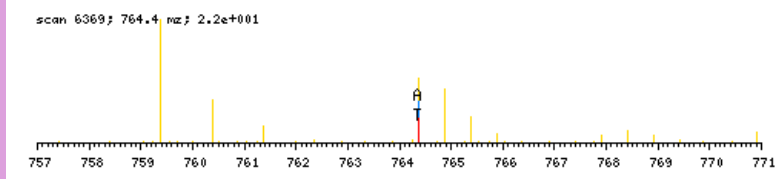

zoomed in precursor plot; T=theoretical m/z, A=acquired m/z

| b <sup>+</sup> | #  | AA # | y <sup>+</sup> | y <sup>2+</sup> |
|----------------|----|------|----------------|-----------------|
| 130.0504       | 1  | S 13 |                |                 |
| 261.0909       | 2  | M 12 | 1398.7051      | 699.8565        |
| 398.1498       | 3  | H 11 | 1267.6646      | 634.3362        |
| 499.1975       | 4  | T 10 | 1130.6057      | 565.8068        |
| 628.2401       | 5  | E 9  | 1029.5580      | 515.2829        |
| 699.2772       | 6  | A 8  | 900.5155       | 450.7616        |
| 770.3143       | 7  | A 7  | 829.4783       | 415.2431        |
| 899.3569       | 8  | E 6  | 758.4412       | 379.7245        |
| 998.4253       | 9  | V 5  | 629.3986       | 315.2032        |
| 1111.5094      | 10 | L 4  | 530.3302       | 265.6690        |
| 1224.5935      | 11 | L 3  | 417.2462       | 209.1270        |
| 1353.6361      | 12 | E 2  | 304.1621       | 152.5850        |
|                | 13 | R 1  | 175.1195       | 88.0637         |

N-term:+43.02

SMNKGPTLLDGLPEQENVLQR, MH+ 2530.3036, m/z 844.1060  
 L OSG36 P180811 230811-s1.05348.05348.3.dta

scan 5348; 3.5e+000

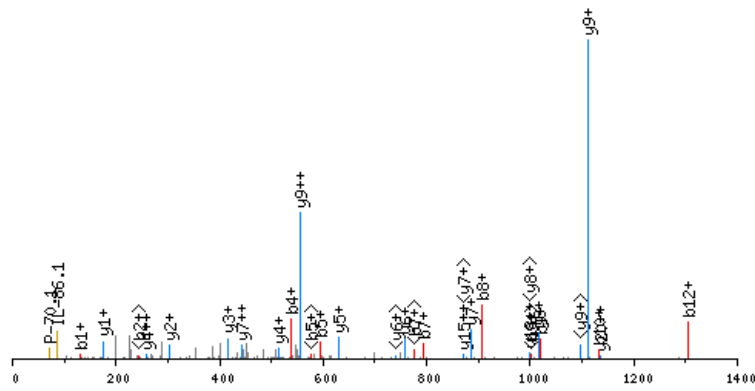

click image to zoom in; click top corners to zoom out [precursor±]

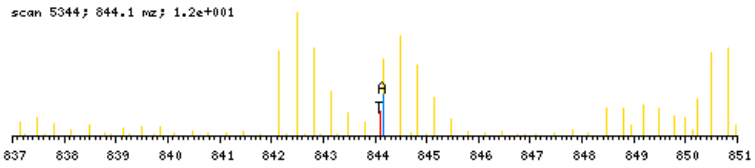

zoomed in precursor plot; T=theoretical m/z, A=acquired m/z

| b <sup>+</sup> | #  | AA | #  | y <sup>+</sup> | y <sup>2+</sup> |
|----------------|----|----|----|----------------|-----------------|
| 130.0504       | 1  | S  | 22 |                |                 |
| 261.0909       | 2  | M  | 21 | 2401.2610      | 1201.1344       |
| 375.1338       | 3  | N  | 20 | 2270.2205      | 1135.6142       |
| 537.2919       | 4  | K  | 19 | 2156.1776      | 1078.5927       |
| 594.3134       | 5  | G  | 18 | 1994.0195      | 997.5136        |
| 691.3662       | 6  | P  | 17 | 1936.9980      | 969.0029        |
| 792.4138       | 7  | T  | 16 | 1839.9452      | 920.4765        |
| 905.4979       | 8  | L  | 15 | 1738.8976      | 869.9527        |
| 1018.5820      | 9  | L  | 14 | 1625.8135      | 813.4107        |
| 1133.6089      | 10 | D  | 13 | 1512.7294      | 756.8686        |
| 1190.6304      | 11 | G  | 12 | 1397.7025      | 699.3552        |
| 1305.6573      | 12 | D  | 11 | 1340.6810      | 670.8444        |
| 1418.7414      | 13 | L  | 10 | 1225.6541      | 613.3310        |
| 1515.7942      | 14 | P  | 9  | 1112.5700      | 556.7889        |
| 1644.8367      | 15 | E  | 8  | 1015.5172      | 508.2625        |
| 1772.8953      | 16 | Q  | 7  | 886.4747       | 443.7412        |
| 1901.9379      | 17 | E  | 6  | 758.4161       | 379.7120        |
| 2015.9808      | 18 | N  | 5  | 629.3735       | 315.1907        |
| 2115.0493      | 19 | V  | 4  | 515.3306       | 258.1692        |
| 2228.1333      | 20 | L  | 3  | 416.2621       | 208.6350        |
| 2356.1919      | 21 | Q  | 2  | 303.1781       | 152.0930        |
|                | 22 | R  | 1  | 175.1195       | 88.0637         |

N-term:+43.02 K(4):+162.16

X-range:

-

MassTol: Y-zoom:

MassType:

AVG  MONO

Axis:

1  2

Label:

I  M  -

Ions:

a  +  2+  3+

b  +  2+  3+

c  +  2+  3+

x  +  2+  3+

y  +  2+  3+

z  +  2+  3+

hide H<sub>2</sub>O/NH<sub>3</sub>

zoom 112-122

GO

SMTVDIVCEKLR, MH+ 1520.7817, m/z 760.8945  
 L OSG37 P180811 230811-s1.06532.06532.2.dta

X-range:

-

MassTol: Y-zoom:

MassType:

AVG  MONO

Axis:

1  2

Label:

I  M  -

Ions:

a  +  2+  3+

b  +  2+  3+

c  +  2+  3+

x  +  2+  3+

y  +  2+  3+

z  +  2+  3+

hide H<sub>2</sub>O/NH<sub>3</sub>

zoom 112-122

GO

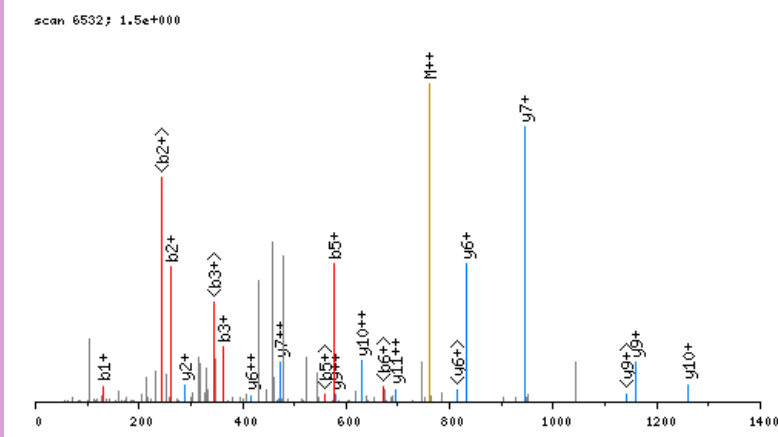

click image to zoom in; click top corners to zoom out [\[precursor±\]](#)

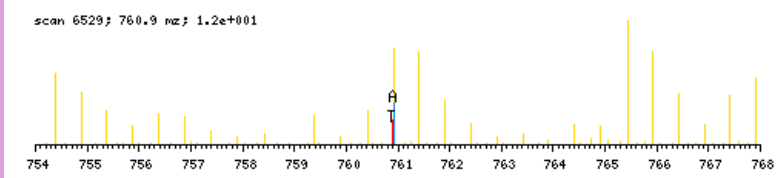

zoomed in precursor plot; T=theoretical m/z, A=acquired m/z

| b <sup>+</sup> | #  | AA # | y <sup>+</sup> | y <sup>2+</sup> |
|----------------|----|------|----------------|-----------------|
| 130.0504       | 1  | S    | 12             |                 |
| 261.0909       | 2  | M    | 11             | 1391.7391       |
| 362.1386       | 3  | T    | 10             | 1260.6986       |
| 461.2070       | 4  | V    | 9              | 1159.6509       |
| 576.2339       | 5  | D    | 8              | 1060.5825       |
| 689.3180       | 6  | I    | 7              | 945.5555        |
| 788.3864       | 7  | V    | 6              | 832.4715        |
| 948.4170       | 8  | C    | 5              | 733.4031        |
| 1077.4596      | 9  | E    | 4              | 573.3725        |
| 1233.5859      | 10 | K    | 3              | 444.3299        |
| 1346.6700      | 11 | L    | 2              | 288.2036        |
|                | 12 | R    | 1              | 175.1195        |

N-term: +43.02 C(8): +160.03  
 K(10): +156.13

SNEPPPPYPGGPTAPLLEEKSGAPLTPGR, MH+ 3002.5688, m/z 751.3977  
 L OSG36 P180811 230811-s1.05051.05051.4.dta

scan 5051; 6.2e-001

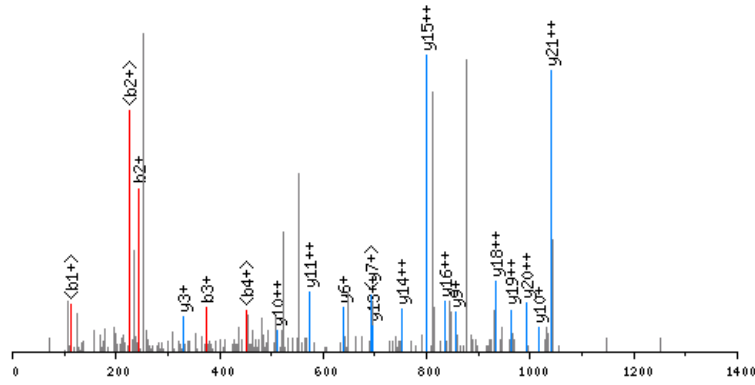

click image to zoom in; click top corners to zoom out [precursor±]

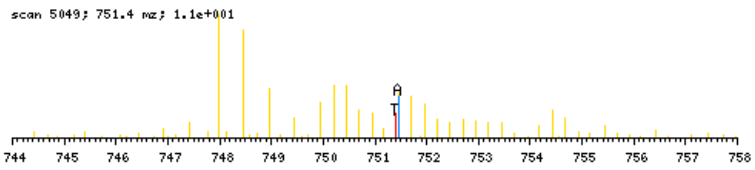

zoomed in precursor plot; T=theoretical m/z, A=acquired m/z

X-range:

0 - 0

MassTol: Y-zoom:

0. 1.

MassType:

AVG  MONO

Axis:

1  2

Label:

I  M  -

Ions:

a  +  2+  3+

b  +  2+  3+

c  +  2+  3+

x  +  2+  3+

y  +  2+  3+

z  +  2+  3+

hide H<sub>2</sub>O/NH<sub>3</sub>

zoom 112-122

GO

| b <sup>+</sup> | #  | AA | #  | y <sup>+</sup> | y <sup>2+</sup> |
|----------------|----|----|----|----------------|-----------------|
| 130.0504       | 1  | S  | 29 |                |                 |
| 244.0934       | 2  | N  | 28 | 2873.5262      | 1437.2670       |
| 373.1359       | 3  | E  | 27 | 2759.4832      | 1380.2455       |
| 470.1887       | 4  | P  | 26 | 2630.4407      | 1315.7242       |
| 567.2415       | 5  | P  | 25 | 2533.3879      | 1267.1979       |
| 664.2942       | 6  | P  | 24 | 2436.3351      | 1218.6715       |
| 761.3470       | 7  | P  | 23 | 2339.2824      | 1170.1451       |
| 924.4103       | 8  | Y  | 22 | 2242.2296      | 1121.6187       |
| 1021.4631      | 9  | P  | 21 | 2079.1663      | 1040.0870       |
| 1078.4846      | 10 | G  | 20 | 1982.1135      | 991.5607        |
| 1135.5060      | 11 | G  | 19 | 1925.0920      | 963.0499        |
| 1232.5588      | 12 | P  | 18 | 1868.0706      | 934.5392        |
| 1333.6065      | 13 | T  | 17 | 1771.0178      | 886.0128        |
| 1404.6436      | 14 | A  | 16 | 1669.9701      | 835.4890        |
| 1501.6963      | 15 | P  | 15 | 1598.9330      | 799.9704        |
| 1614.7804      | 16 | L  | 14 | 1501.8803      | 751.4440        |
| 1727.8645      | 17 | L  | 13 | 1388.7962      | 694.9020        |
| 1856.9071      | 18 | E  | 12 | 1275.7121      | 638.3600        |
| 1985.9497      | 19 | E  | 11 | 1146.6695      | 573.8387        |
| 2148.1078      | 20 | K  | 10 | 1017.6269      | 509.3174        |
| 2235.1398      | 21 | S  | 9  | 855.4688       | 428.2383        |
| 2292.1613      | 22 | G  | 8  | 768.4368       | 384.7223        |
| 2363.1984      | 23 | A  | 7  | 711.4153       | 356.2116        |
| 2460.2511      | 24 | P  | 6  | 640.3782       | 320.6930        |
| 2573.3352      | 25 | L  | 5  | 543.3255       | 272.1666        |
| 2674.3829      | 26 | T  | 4  | 430.2414       | 215.6246        |
| 2771.4356      | 27 | P  | 3  | 329.1937       | 165.1008        |
| 2828.4571      | 28 | G  | 2  | 232.1410       | 116.5744        |
|                | 29 | R  | 1  | 175.1195       | 88.0637         |

N-term:+43.02 K(20):+162.16

SNGYEDHMAEDCR, MH+ 1625.5960, m/z 813.3016  
 L OSG37 P180811 230811-s1.02782.02782.2.dta

X-range:

-

MassTol: Y-zoom:

MassType:

AVG  MONO

Axis:

1  2

Label:

I  M  -

Ions:

a  +  2+  3+

b  +  2+  3+

c  +  2+  3+

x  +  2+  3+

y  +  2+  3+

z  +  2+  3+

hide H<sub>2</sub>O/NH<sub>3</sub>

zoom 112-122

GO

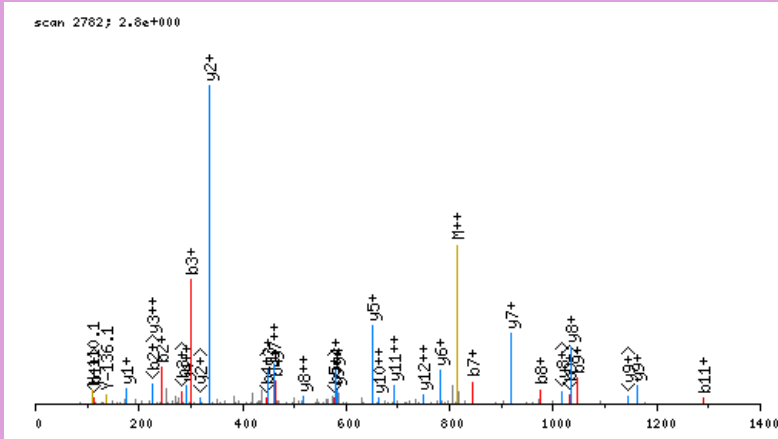

click image to zoom in; click top corners to zoom out [\[precursor±\]](#)

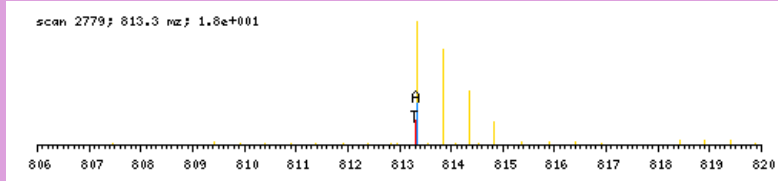

zoomed in precursor plot; T=theoretical m/z, A=acquired m/z

| b <sup>+</sup> | #  | AA # | y <sup>+</sup> | y <sup>2+</sup> |
|----------------|----|------|----------------|-----------------|
| 130.0504       | 1  | S 13 |                |                 |
| 244.0934       | 2  | N 12 | 1496.5534      | 748.7806        |
| 301.1148       | 3  | G 11 | 1382.5105      | 691.7592        |
| 464.1781       | 4  | Y 10 | 1325.4890      | 663.2484        |
| 593.2207       | 5  | E 9  | 1162.4257      | 581.7168        |
| 708.2477       | 6  | D 8  | 1033.3831      | 517.1955        |
| 845.3066       | 7  | H 7  | 918.3561       | 459.6820        |
| 976.3471       | 8  | M 6  | 781.2972       | 391.1525        |
| 1047.3842      | 9  | A 5  | 650.2568       | 325.6323        |
| 1176.4268      | 10 | E 4  | 579.2196       | 290.1137        |
| 1291.4537      | 11 | D 3  | 450.1770       | 225.5924        |
| 1451.4843      | 12 | C 2  | 335.1501       | 168.0790        |
|                | 13 | R 1  | 175.1195       | 88.0637         |

N-term:+43.02 C(12):+160.03

SNGYEDHMAEDCRDDIGR, MH+ 2181.8565, m/z 727.9570  
 L OSG40 P180811 230811-s1.04356.04356.3.dta

X-range:

-

MassTol: Y-zoom:

MassType:

AVG  MONO

Axis:

1  2

Label:

I  M  -

Ions:

a  +  2+  3+

b  +  2+  3+

c  +  2+  3+

x  +  2+  3+

y  +  2+  3+

z  +  2+  3+

hide H<sub>2</sub>O/NH<sub>3</sub>

zoom 112-122

GO

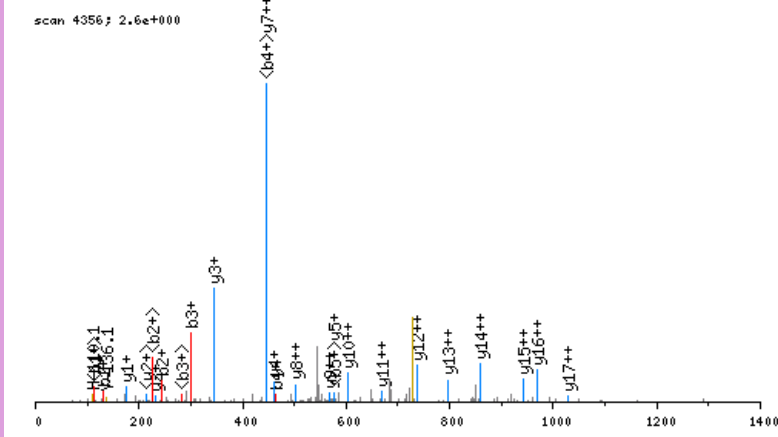

click image to zoom in; click top corners to zoom out [\[precursor±\]](#)

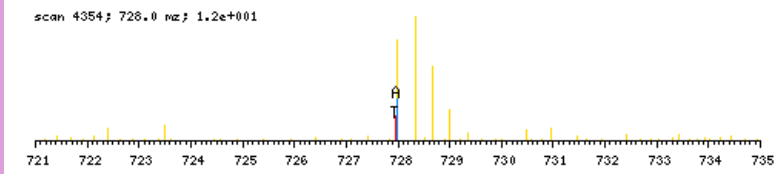

zoomed in precursor plot; T=theoretical m/z, A=acquired m/z

| b <sup>+</sup> | #  | AA # | y <sup>+</sup> | y <sup>2+</sup> |
|----------------|----|------|----------------|-----------------|
| 130.0504       | 1  | S 18 |                |                 |
| 244.0934       | 2  | N 17 | 2052.8139      | 1026.9109       |
| 301.1148       | 3  | G 16 | 1938.7710      | 969.8894        |
| 464.1781       | 4  | Y 15 | 1881.7495      | 941.3787        |
| 593.2207       | 5  | E 14 | 1718.6862      | 859.8470        |
| 708.2477       | 6  | D 13 | 1589.6436      | 795.3257        |
| 845.3066       | 7  | H 12 | 1474.6167      | 737.8122        |
| 976.3471       | 8  | M 11 | 1337.5578      | 669.2828        |
| 1047.3842      | 9  | A 10 | 1206.5173      | 603.7626        |
| 1176.4268      | 10 | E 9  | 1135.4802      | 568.2440        |
| 1291.4537      | 11 | D 8  | 1006.4376      | 503.7227        |
| 1451.4843      | 12 | C 7  | 891.4106       | 446.2092        |
| 1607.5854      | 13 | R 6  | 731.3800       | 366.1939        |
| 1722.6124      | 14 | D 5  | 575.2789       | 288.1434        |
| 1837.6393      | 15 | D 4  | 460.2520       | 230.6299        |
| 1950.7234      | 16 | I 3  | 345.2250       | 173.1164        |
| 2007.7449      | 17 | G 2  | 232.1410       | 116.5744        |
|                | 18 | R 1  | 175.1195       | 88.0637         |

N-term:+43.02 C(12):+160.03

SQAEFDKAAEEVKR, MH+ 1705.8762, m/z 853.4417  
 L OSG39 P180811 230811-s1.04047.04047.2.dta

scan 4047; 7.5e+001

X-range:

-

MassTol: Y-zoom:

MassType:

AVG  MONO

Axis:

1  2

Label:

I  M  -

Ions:

a  +  2+  3+

b  +  2+  3+

c  +  2+  3+

x  +  2+  3+

y  +  2+  3+

z  +  2+  3+

hide H<sub>2</sub>O/NH<sub>3</sub>

zoom 112-122

GO

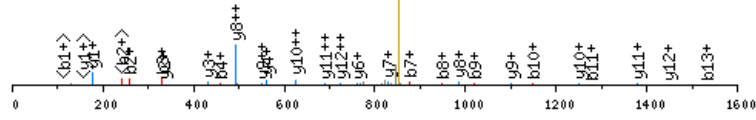

click image to zoom in; click top corners to zoom out [\[precursor±\]](#)

scan 4046; 853.4 m/z; 3.1e+002

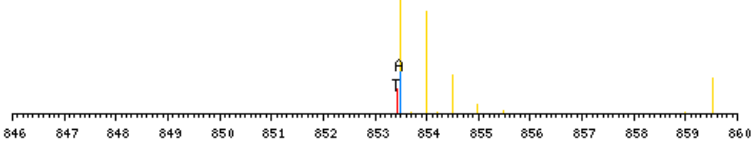

zoomed in precursor plot; T=theoretical m/z, A=acquired m/z

| b <sup>+</sup> | #  | AA # | y <sup>+</sup> | y <sup>2+</sup>    |
|----------------|----|------|----------------|--------------------|
| 130.0504       | 1  | S    | 14             |                    |
| 258.1090       | 2  | Q    | 13             | 1576.8336 788.9207 |
| 329.1461       | 3  | A    | 12             | 1448.7750 724.8914 |
| 458.1887       | 4  | E    | 11             | 1377.7379 689.3729 |
| 605.2571       | 5  | F    | 10             | 1248.6953 624.8516 |
| 720.2841       | 6  | D    | 9              | 1101.6269 551.3173 |
| 876.4104       | 7  | K    | 8              | 986.5999 493.8039  |
| 947.4475       | 8  | A    | 7              | 830.4736 415.7407  |
| 1018.4846      | 9  | A    | 6              | 759.4365 380.2222  |
| 1147.5272      | 10 | E    | 5              | 688.3994 344.7036  |
| 1276.5698      | 11 | E    | 4              | 559.3568 280.1823  |
| 1375.6382      | 12 | V    | 3              | 430.3142 215.6610  |
| 1531.7645      | 13 | K    | 2              | 331.2458 166.1268  |
|                | 14 | R    | 1              | 175.1195 88.0637   |

N-term:+43.02 K(7):+156.13  
 K(13):+156.13

SQERPTFYR, MH+ 1225.5966, m/z 613.3019  
 L OSG38 P180811 230811-s1.03281.03281.2.dta

X-range:

-

MassTol: Y-zoom:

MassType:

AVG  MONO

Axis:

1  2

Label:

I  M  -

Ions:

a  +  2+  3+

b  +  2+  3+

c  +  2+  3+

x  +  2+  3+

y  +  2+  3+

z  +  2+  3+

hide H<sub>2</sub>O/NH<sub>3</sub>

zoom 112-122

GO

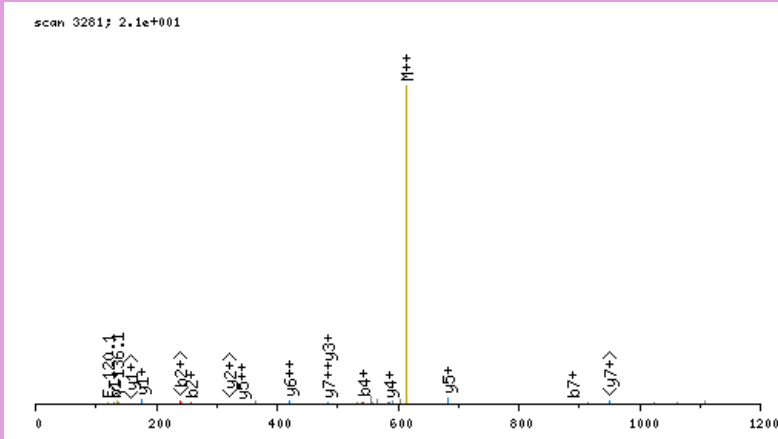

click image to zoom in; click top corners to zoom out [\[precursor±\]](#)

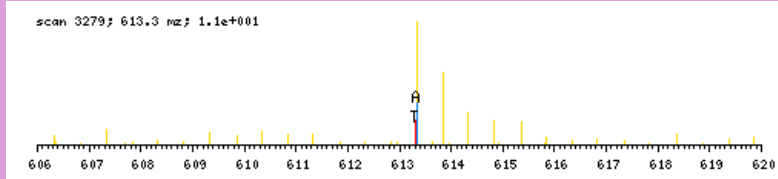

zoomed in precursor plot; T=theoretical m/z, A=acquired m/z

| b <sup>+</sup> | # | AA | # | y <sup>+</sup> | y <sup>2+</sup> |
|----------------|---|----|---|----------------|-----------------|
| 130.0504       | 1 | S  | 9 |                |                 |
| 258.1090       | 2 | Q  | 8 | 1096.5540      | 548.7809        |
| 387.1516       | 3 | E  | 7 | 968.4954       | 484.7516        |
| 543.2527       | 4 | R  | 6 | 839.4528       | 420.2303        |
| 640.3055       | 5 | P  | 5 | 683.3517       | 342.1798        |
| 741.3532       | 6 | T  | 4 | 586.2989       | 293.6534        |
| 888.4216       | 7 | F  | 3 | 485.2512       | 243.1295        |
| 1051.4849      | 8 | Y  | 2 | 338.1828       | 169.5953        |
|                | 9 | R  | 1 | 175.1195       | 88.0637         |

N-term: +43.02



SQGDSNPAAIPHAAEDIQDDR, MH+ 2306.0285, m/z 769.3477  
 L OSG37 P180811 230811-s1.04971.04971.3.dta

X-range:

-

MassTol: Y-zoom:

MassType:

AVG  MONO

Axis:

1  2

Label:

I  M  -

Ions:

a  +  2+  3+

b  +  2+  3+

c  +  2+  3+

x  +  2+  3+

y  +  2+  3+

z  +  2+  3+

hide H<sub>2</sub>O/NH<sub>3</sub>

zoom 112-122

GO

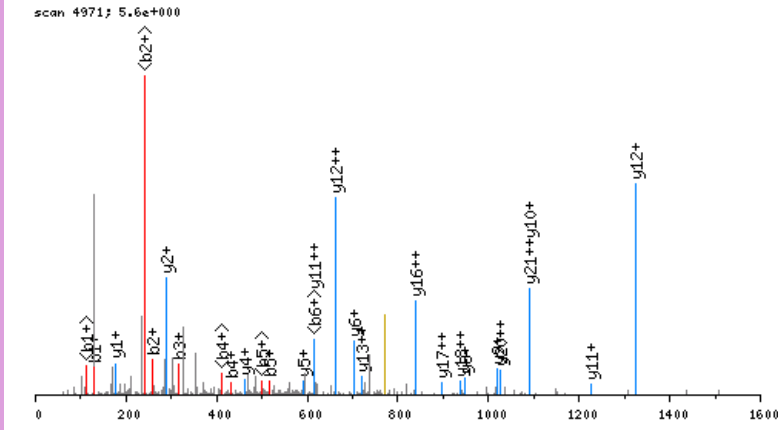

click image to zoom in; click top corners to zoom out [precursor±]

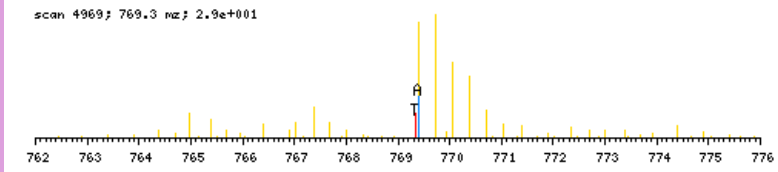

zoomed in precursor plot; T=theoretical m/z, A=acquired m/z

| b <sup>+</sup> | #  | AA # | y <sup>+</sup> | y <sup>2+</sup> |
|----------------|----|------|----------------|-----------------|
| 130.0504       | 1  | S 22 |                |                 |
| 258.1090       | 2  | Q 21 | 2176.9859      | 1088.9969       |
| 315.1305       | 3  | G 20 | 2048.9273      | 1024.9676       |
| 430.1574       | 4  | D 19 | 1991.9059      | 996.4569        |
| 517.1894       | 5  | S 18 | 1876.8789      | 938.9434        |
| 631.2324       | 6  | N 17 | 1789.8469      | 895.4274        |
| 728.2851       | 7  | P 16 | 1675.8040      | 838.4059        |
| 799.3222       | 8  | A 15 | 1578.7512      | 789.8795        |
| 870.3594       | 9  | A 14 | 1507.7141      | 754.3610        |
| 983.4434       | 10 | I 13 | 1436.6770      | 718.8424        |
| 1080.4962      | 11 | P 12 | 1323.5929      | 662.3004        |
| 1217.5551      | 12 | H 11 | 1226.5402      | 613.7740        |
| 1288.5922      | 13 | A 10 | 1089.4813      | 545.2445        |
| 1359.6293      | 14 | A 9  | 1018.4441      | 509.7260        |
| 1488.6719      | 15 | E 8  | 947.4070       | 474.2074        |
| 1603.6989      | 16 | D 7  | 818.3644       | 409.6861        |
| 1716.7829      | 17 | I 6  | 703.3375       | 352.1727        |
| 1844.8415      | 18 | Q 5  | 590.2534       | 295.6306        |
| 1901.8639      | 19 | G 4  | 462.1949       | 231.6013        |
| 2016.8899      | 20 | D 3  | 405.1734       | 203.0906        |
| 2131.9169      | 21 | D 2  | 290.1464       | 145.5771        |
|                | 22 | R 1  | 175.1195       | 88.0637         |

N-term:+43.02

SQKTEGHR, MH+ 1018.5494, m/z 509.7784  
 L OSG37 P180811 230811-s1.02596.02596.2.dta

scan 2596; 2.3e+000

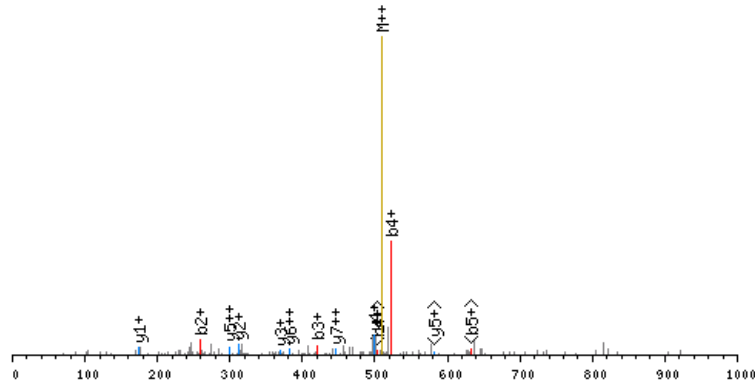

click image to zoom in; click top corners to zoom out [\[precursor±\]](#)

scan 2594; 509.8 m/z; 7.2e+000

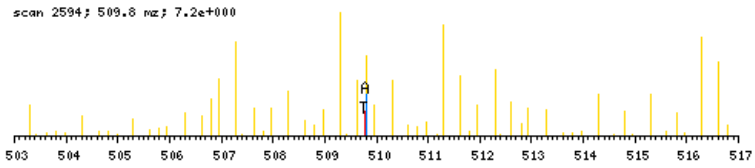

zoomed in precursor plot; T=theoretical m/z, A=acquired m/z

X-range:

-

MassTol: Y-zoom:

MassType:

AVG  MONO

Axis:

1  2

Label:

I  M  -

Ions:

a  +  2+  3+

b  +  2+  3+

c  +  2+  3+

x  +  2+  3+

y  +  2+  3+

z  +  2+  3+

hide H<sub>2</sub>O/NH<sub>3</sub>

zoom 112-122

GO

| b <sup>+</sup> | # | AA # | y <sup>+</sup> | y <sup>2+</sup> |
|----------------|---|------|----------------|-----------------|
| 130.0504       | 1 | S    | 8              |                 |
| 258.1090       | 2 | Q    | 7              | 889.5068        |
| 420.2671       | 3 | K    | 6              | 761.4482        |
| 521.3148       | 4 | T    | 5              | 599.2901        |
| 650.3574       | 5 | E    | 4              | 498.2425        |
| 707.3788       | 6 | G    | 3              | 369.1999        |
| 844.4378       | 7 | H    | 2              | 312.1784        |
|                | 8 | R    | 1              | 175.1195        |

N-term:+43.02 K(3):+162.16

SQPLLGAGGAGPSAGAPTAPPPR, MH+ 2055.0623, m/z 685.6923  
 L OSG37 P180811 230811-s1.04621.04621.3.dta

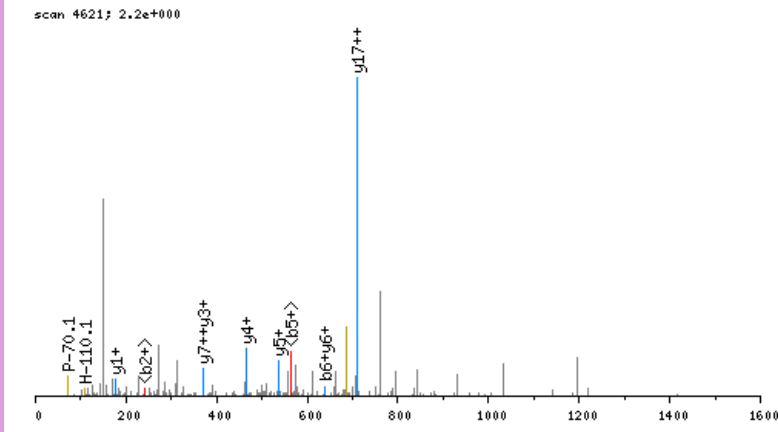

click image to zoom in; click top corners to zoom out [precursor±]

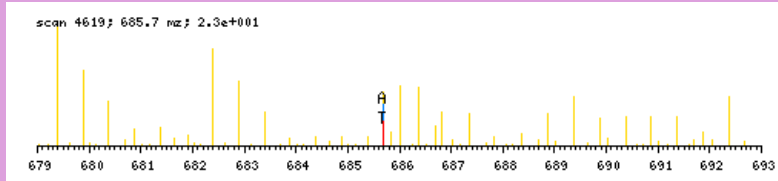

zoomed in precursor plot; T=theoretical m/z, A=acquired m/z

| b <sup>+</sup> | #  | AA # | y <sup>+</sup> | y <sup>2+</sup> |
|----------------|----|------|----------------|-----------------|
| 130.0504       | 1  | S 23 |                |                 |
| 258.1090       | 2  | Q 22 | 1926.0197      | 963.5138        |
| 355.1618       | 3  | P 21 | 1797.9612      | 899.4845        |
| 468.2458       | 4  | L 20 | 1700.9084      | 850.9581        |
| 581.3299       | 5  | L 19 | 1587.8243      | 794.4161        |
| 638.3514       | 6  | G 18 | 1474.7403      | 737.8740        |
| 695.3728       | 7  | G 17 | 1417.7188      | 709.3633        |
| 752.3943       | 8  | G 16 | 1360.6973      | 680.8526        |
| 823.4314       | 9  | A 15 | 1303.6759      | 652.3418        |
| 880.4529       | 10 | G 14 | 1232.6388      | 616.8233        |
| 937.4743       | 11 | G 13 | 1175.6173      | 588.3126        |
| 1034.5271      | 12 | P 12 | 1118.5958      | 559.8018        |
| 1121.5591      | 13 | S 11 | 1021.5431      | 511.2754        |
| 1192.5962      | 14 | A 10 | 934.5110       | 467.7594        |
| 1249.6177      | 15 | G 9  | 863.4739       | 432.2409        |
| 1320.6548      | 16 | A 8  | 806.4525       | 403.7301        |
| 1417.7076      | 17 | P 7  | 735.4153       | 368.2116        |
| 1518.7553      | 18 | T 6  | 638.3626       | 319.6852        |
| 1589.7924      | 19 | A 5  | 537.3149       | 269.1614        |
| 1686.8451      | 20 | P 4  | 466.2778       | 233.6428        |
| 1783.8979      | 21 | P 3  | 369.2250       | 185.1164        |
| 1880.9507      | 22 | P 2  | 272.1723       | 136.5900        |
|                | 23 | R 1  | 175.1195       | 88.0637         |

N-term:+43.02

X-range:

-

MassTol: Y-zoom:

MassType:

AVG  MONO

Axis:

1  2

Label:

I  M  -

Ions:

a  +  2+  3+

b  +  2+  3+

c  +  2+  3+

x  +  2+  3+

y  +  2+  3+

z  +  2+  3+

hide H<sub>2</sub>O/NH<sub>3</sub>

zoom 112-122

GO

SRGKDAIAPKR, MH+ 1308.8389, m/z 436.9511  
 L OSG40 P180811 230811-s1.05173.05173.3.dta

X-range:

-

MassTol: Y-zoom:

MassType:

AVG  MONO

Axis:

1  2

Label:

I  M  -

Ions:

a  +  2+  3+

b  +  2+  3+

c  +  2+  3+

x  +  2+  3+

y  +  2+  3+

z  +  2+  3+

hide H<sub>2</sub>O/NH<sub>3</sub>

zoom 112-122

GO

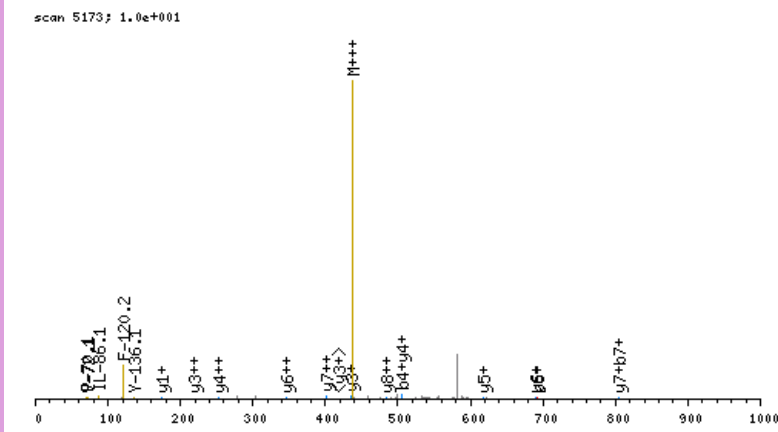

click image to zoom in; click top corners to zoom out [\[precursor±\]](#)

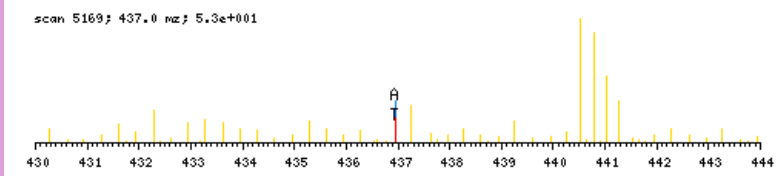

zoomed in precursor plot; T=theoretical m/z, A=acquired m/z

| b <sup>+</sup> | #  | AA | #  | y <sup>+</sup> | y <sup>2+</sup> |
|----------------|----|----|----|----------------|-----------------|
| 130.0504       | 1  | S  | 11 |                |                 |
| 286.1515       | 2  | R  | 10 | 1179.7963      | 590.4020        |
| 343.1730       | 3  | G  | 9  | 1023.6952      | 512.3515        |
| 505.3311       | 4  | K  | 8  | 966.6737       | 483.8408        |
| 620.3580       | 5  | D  | 7  | 804.5156       | 402.7617        |
| 691.3952       | 6  | A  | 6  | 689.4887       | 345.2482        |
| 804.4792       | 7  | I  | 5  | 618.4515       | 309.7297        |
| 875.5163       | 8  | A  | 4  | 505.3675       | 253.1877        |
| 972.5691       | 9  | P  | 3  | 434.3304       | 217.6691        |
| 1134.7272      | 10 | K  | 2  | 337.2776       | 169.1427        |
|                | 11 | R  | 1  | 175.1195       | 88.0637         |

N-term:+43.02 K(4):+162.16  
 K(10):+162.16

SSDAEMAVFGEAAPYLK, MH+ 1855.8536, m/z 928.4305  
 L OSG41 P180811 230811-s1.07371.07371.2.dta

X-range:

-

MassTol: Y-zoom:

MassType:

AVG  MONO

Axis:

1  2

Label:

I  M  -

Ions:

a  +  2+  3+

b  +  2+  3+

c  +  2+  3+

x  +  2+  3+

y  +  2+  3+

z  +  2+  3+

hide H<sub>2</sub>O/NH<sub>3</sub>

zoom 112-122

GO

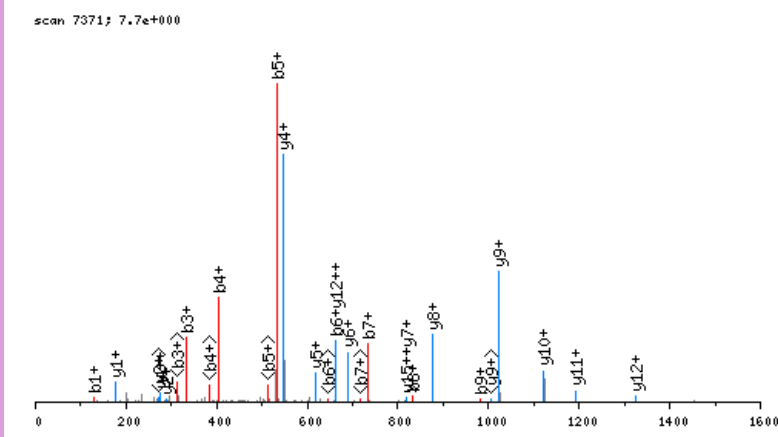

click image to zoom in; click top corners to zoom out [\[precursor±\]](#)

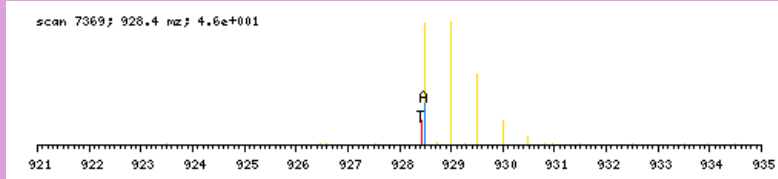

zoomed in precursor plot; T=theoretical m/z, A=acquired m/z

| b <sup>+</sup> | #  | AA # | y <sup>+</sup> | y <sup>2+</sup> |
|----------------|----|------|----------------|-----------------|
| 130.0504       | 1  | S 17 |                |                 |
| 217.0825       | 2  | S 16 | 1726.8110      | 863.9094        |
| 332.1094       | 3  | D 15 | 1639.7790      | 820.3934        |
| 403.1465       | 4  | A 14 | 1524.7521      | 762.8800        |
| 532.1891       | 5  | E 13 | 1453.7150      | 727.3614        |
| 663.2296       | 6  | M 12 | 1324.6724      | 662.8401        |
| 734.2667       | 7  | A 11 | 1193.6319      | 597.3199        |
| 833.3351       | 8  | V 10 | 1122.5948      | 561.8013        |
| 980.4035       | 9  | F 9  | 1023.5264      | 512.2671        |
| 1037.4250      | 10 | G 8  | 876.4579       | 438.7329        |
| 1166.4676      | 11 | E 7  | 819.4365       | 410.2222        |
| 1237.5047      | 12 | A 6  | 690.3939       | 345.7009        |
| 1308.5418      | 13 | A 5  | 619.3568       | 310.1823        |
| 1405.5946      | 14 | P 4  | 548.3197       | 274.6637        |
| 1568.6579      | 15 | Y 3  | 451.2669       | 226.1374        |
| 1681.7420      | 16 | L 2  | 288.2036       | 144.6057        |
|                | 17 | R 1  | 175.1195       | 88.0637         |

N-term:+43.02

SSDAQWLTAEER, MH+ 1434.6501, m/z 717.8287  
 L OSG41 P180811 230811-s1.05336.05336.2.dta

X-range:

-

MassTol: Y-zoom:

MassType:

AVG  MONO

Axis:

1  2

Label:

I  M  -

Ions:

a  +  2+  3+

b  +  2+  3+

c  +  2+  3+

x  +  2+  3+

y  +  2+  3+

z  +  2+  3+

hide H<sub>2</sub>O/NH<sub>3</sub>

zoom 112-122

GO

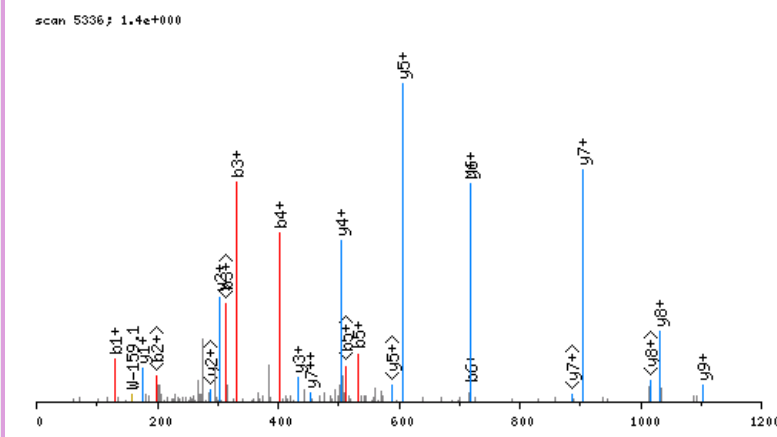

click image to zoom in; click top corners to zoom out [\[precursor±\]](#)

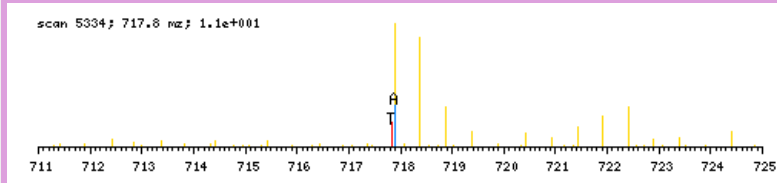

zoomed in precursor plot; T=theoretical m/z, A=acquired m/z

| b <sup>+</sup> | #  | AA | #  | y <sup>+</sup> | y <sup>2+</sup> |
|----------------|----|----|----|----------------|-----------------|
| 130.0504       | 1  | S  | 12 |                |                 |
| 217.0825       | 2  | S  | 11 | 1305.6075      | 653.3077        |
| 332.1094       | 3  | D  | 10 | 1218.5755      | 609.7917        |
| 403.1465       | 4  | A  | 9  | 1103.5485      | 552.2782        |
| 531.2051       | 5  | Q  | 8  | 1032.5114      | 516.7596        |
| 717.2844       | 6  | W  | 7  | 904.4529       | 452.7303        |
| 830.3685       | 7  | L  | 6  | 718.3735       | 359.6907        |
| 931.4161       | 8  | T  | 5  | 605.2895       | 303.1487        |
| 1002.4533      | 9  | A  | 4  | 504.2418       | 252.6248        |
| 1131.4959      | 10 | E  | 3  | 433.2047       | 217.1063        |
| 1260.5384      | 11 | E  | 2  | 304.1621       | 152.5850        |
|                | 12 | R  | 1  | 175.1195       | 88.0637         |

N-term:+43.02

SSDTSPAVVTTPPPPSMPHKER, MH+ 2394.2188, m/z 798.7444  
 L OSG39 P180811 230811-s1.03735.03735.3.dta

X-range:

-

MassTol: Y-zoom:

MassType:

AVG  MONO

Axis:

1  2

Label:

I  M  -

Ions:

a  +  2+  3+

b  +  2+  3+

c  +  2+  3+

x  +  2+  3+

y  +  2+  3+

z  +  2+  3+

hide H<sub>2</sub>O/NH<sub>3</sub>

zoom 112-122

GO

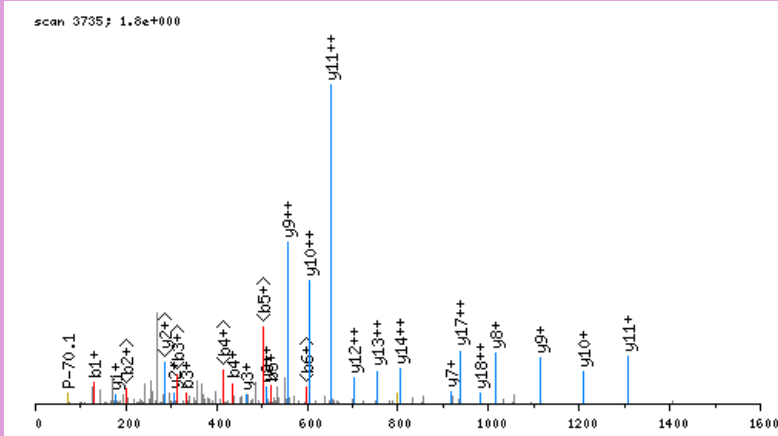

click image to zoom in; click top corners to zoom out [precursor±]

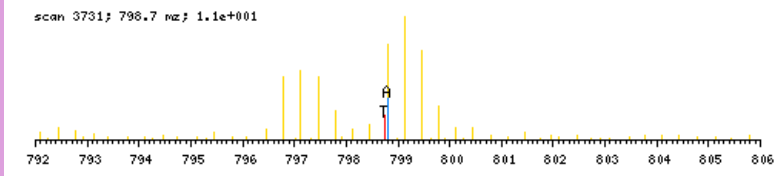

zoomed in precursor plot; T=theoretical m/z, A=acquired m/z

| b <sup>+</sup> | #  | AA # | y <sup>+</sup> | y <sup>2+</sup> |
|----------------|----|------|----------------|-----------------|
| 130.0504       | 1  | S 22 |                |                 |
| 217.0825       | 2  | S 21 | 2265.1762      | 1133.0920       |
| 332.1094       | 3  | D 20 | 2178.1442      | 1089.5760       |
| 433.1571       | 4  | T 19 | 2063.1172      | 1032.0625       |
| 520.1891       | 5  | S 18 | 1962.0695      | 981.5387        |
| 617.2419       | 6  | P 17 | 1875.0375      | 938.0227        |
| 688.2790       | 7  | A 16 | 1777.9847      | 889.4963        |
| 787.3474       | 8  | V 15 | 1706.9476      | 853.9777        |
| 886.4158       | 9  | V 14 | 1607.8792      | 804.4435        |
| 987.4635       | 10 | T 13 | 1508.8108      | 754.9093        |
| 1088.5112      | 11 | T 12 | 1407.7631      | 704.3855        |
| 1185.5639      | 12 | P 11 | 1306.7154      | 653.8616        |
| 1282.6167      | 13 | P 10 | 1209.6627      | 605.3352        |
| 1379.6695      | 14 | P 9  | 1112.6099      | 556.8089        |
| 1476.7222      | 15 | P 8  | 1015.5571      | 508.2825        |
| 1563.7543      | 16 | S 7  | 918.5044       | 459.7561        |
| 1694.7947      | 17 | M 6  | 831.4724       | 416.2401        |
| 1791.8475      | 18 | P 5  | 700.4319       | 350.7198        |
| 1928.9064      | 19 | H 4  | 603.3791       | 302.1935        |
| 2091.0645      | 20 | K 3  | 466.3202       | 233.6640        |
| 2220.1071      | 21 | E 2  | 304.1621       | 152.5850        |
|                | 22 | R 1  | 175.1195       | 88.0637         |

N-term:+43.02 K(20):+162.16

SSEPPPPPLQPPPTHQTSVGLLDTPR, MH+ 2690.3790, m/z 673.3502  
 L OSG36 P180811 230811-s1.04850.04850.4.dta

scan 4850; 1.2e+000

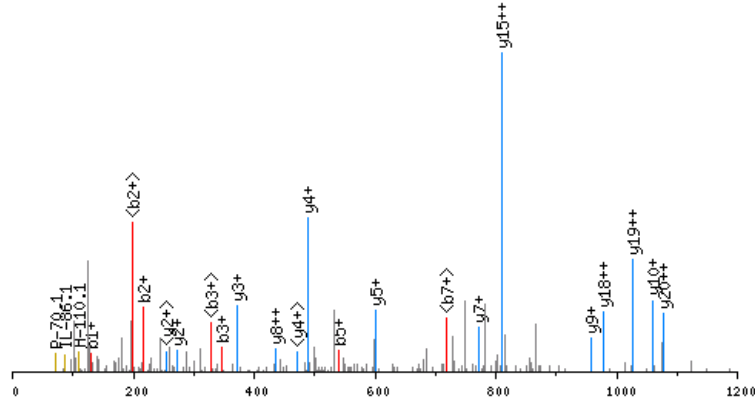

click image to zoom in; click top corners to zoom out [precursor±]

scan 4849; 673.4 mz; 7.9e+001

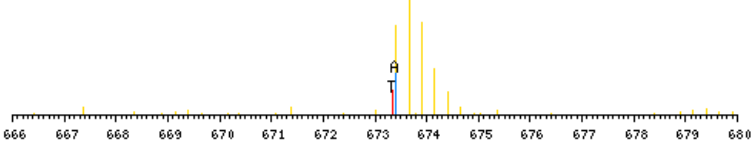

zoomed in precursor plot; T=theoretical m/z, A=acquired m/z

| b <sup>+</sup> | #  | AA # | y <sup>+</sup> | y <sup>2+</sup> |
|----------------|----|------|----------------|-----------------|
| 130.0504       | 1  | S 25 |                |                 |
| 217.0825       | 2  | S 24 | 2561.3364      | 1281.1721       |
| 346.1251       | 3  | E 23 | 2474.3043      | 1237.6561       |
| 443.1778       | 4  | P 22 | 2345.2618      | 1173.1348       |
| 540.2306       | 5  | P 21 | 2248.2090      | 1124.6084       |
| 637.2833       | 6  | P 20 | 2151.1562      | 1076.0820       |
| 734.3361       | 7  | P 19 | 2054.1035      | 1027.5556       |
| 831.3889       | 8  | P 18 | 1957.0507      | 979.0293        |
| 944.4729       | 9  | L 17 | 1859.9979      | 930.5029        |
| 1072.5315      | 10 | Q 16 | 1746.9139      | 873.9608        |
| 1169.5843      | 11 | P 15 | 1618.8553      | 809.9316        |
| 1266.6370      | 12 | P 14 | 1521.8025      | 761.4052        |
| 1367.6847      | 13 | T 13 | 1424.7498      | 712.8788        |
| 1504.7436      | 14 | H 12 | 1323.7021      | 662.3550        |
| 1632.8022      | 15 | Q 11 | 1186.6432      | 593.8255        |
| 1733.8499      | 16 | T 10 | 1058.5846      | 529.7962        |
| 1820.8819      | 17 | S 9  | 957.5369       | 479.2724        |
| 1919.9503      | 18 | V 8  | 870.5049       | 435.7564        |
| 1976.9718      | 19 | G 7  | 771.4365       | 386.2222        |
| 2090.0559      | 20 | L 6  | 714.4150       | 357.7114        |
| 2203.1399      | 21 | L 5  | 601.3310       | 301.1694        |
| 2318.1669      | 22 | D 4  | 488.2469       | 244.6274        |
| 2419.2145      | 23 | T 3  | 373.2199       | 187.1139        |
| 2516.2673      | 24 | P 2  | 272.1723       | 136.5900        |
|                | 25 | R 1  | 175.1195       | 88.0637         |

N-term:+43.02

X-range:

-

MassTol: Y-zoom:

MassType:

AVG  MONO

Axis:

1  2

Label:

I  M  -

Ions:

a  +  2+  3+

b  +  2+  3+

c  +  2+  3+

x  +  2+  3+

y  +  2+  3+

z  +  2+  3+

hide H<sub>2</sub>O/NH<sub>3</sub>

zoom 112-122

GO



SSGALLPKPQMR, MH+ 1360.7835, m/z 680.8954  
 L OSG37 P180811 230811-s1.04856.04856.2.dta

scan 4856; 8.2e+000

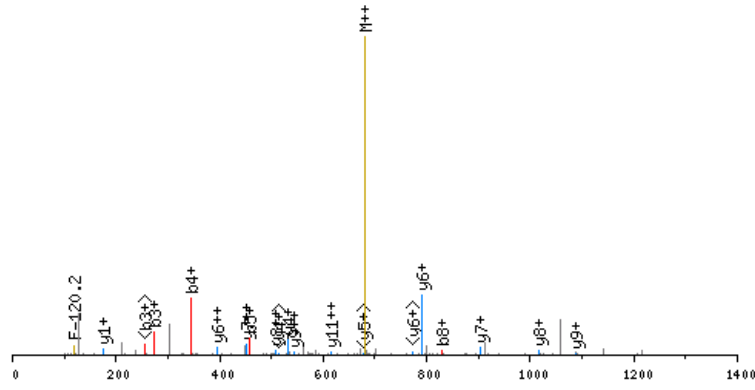

click image to zoom in; click top corners to zoom out [\[precursor±\]](#)

scan 4854; 680.9 m/z; 1.9e+001

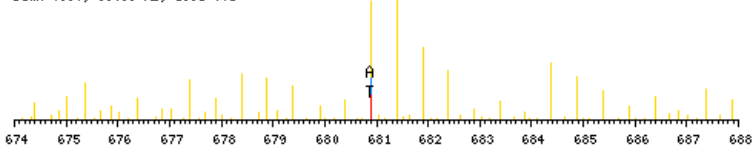

zoomed in precursor plot; T=theoretical m/z, A=acquired m/z

X-range:

-

MassTol: Y-zoom:

MassType:

AVG  MONO

Axis:

1  2

Label:

I  M  -

Ions:

a  +  2+  3+

b  +  2+  3+

c  +  2+  3+

x  +  2+  3+

y  +  2+  3+

z  +  2+  3+

hide H<sub>2</sub>O/NH<sub>3</sub>

zoom 112-122

GO

| b <sup>+</sup> | #  | AA | #  | y <sup>+</sup> | y <sup>2+</sup> |
|----------------|----|----|----|----------------|-----------------|
| 130.0504       | 1  | S  | 12 |                |                 |
| 217.0825       | 2  | S  | 11 | 1231.7409      | 616.3744        |
| 274.1039       | 3  | G  | 10 | 1144.7089      | 572.8584        |
| 345.1410       | 4  | A  | 9  | 1087.6874      | 544.3476        |
| 458.2251       | 5  | L  | 8  | 1016.6503      | 508.8291        |
| 571.3092       | 6  | L  | 7  | 903.5663       | 452.2870        |
| 668.3619       | 7  | P  | 6  | 790.4822       | 395.7450        |
| 830.5200       | 8  | K  | 5  | 693.4294       | 347.2186        |
| 927.5728       | 9  | P  | 4  | 531.2713       | 266.1396        |
| 1055.6314      | 10 | Q  | 3  | 434.2186       | 217.6132        |
| 1186.6719      | 11 | M  | 2  | 306.1600       | 153.5839        |
|                | 12 | R  | 1  | 175.1195       | 88.0637         |

N-term:+43.02 K(8):+162.16

SSGASVSALQR, MH+ 1104.5649, m/z 552.7861  
 L OSG41 P180811 230811-s1.03058.03058.2.dta

X-range:

-

MassTol: Y-zoom:

MassType:

AVG  MONO

Axis:

1  2

Label:

I  M  -

Ions:

a  +  2+  3+

b  +  2+  3+

c  +  2+  3+

x  +  2+  3+

y  +  2+  3+

z  +  2+  3+

hide H<sub>2</sub>O/NH<sub>3</sub>

zoom 112-122

GO

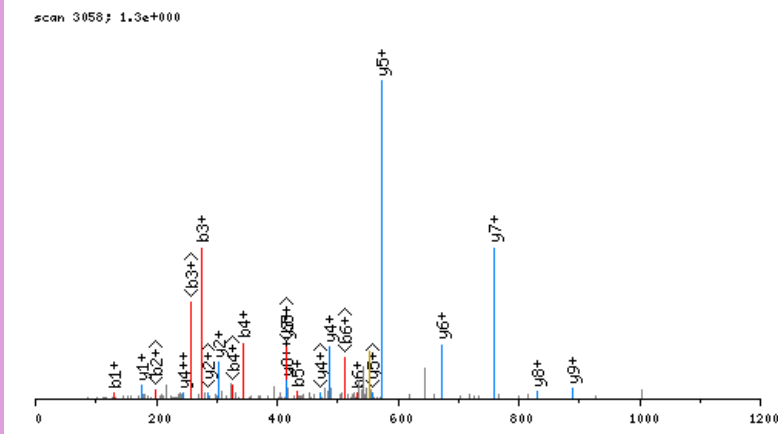

click image to zoom in; click top corners to zoom out [\[precursor±\]](#)

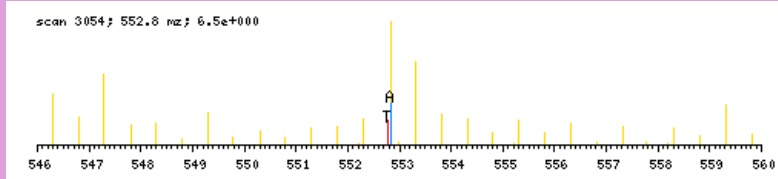

zoomed in precursor plot; T=theoretical m/z, A=acquired m/z

| b <sup>+</sup> | #  | AA | #  | y <sup>+</sup> | y <sup>2+</sup> |
|----------------|----|----|----|----------------|-----------------|
| 130.0504       | 1  | S  | 11 |                |                 |
| 217.0825       | 2  | S  | 10 | 975.5223       | 488.2651        |
| 274.1039       | 3  | G  | 9  | 888.4903       | 444.7491        |
| 345.1410       | 4  | A  | 8  | 831.4688       | 416.2383        |
| 432.1731       | 5  | S  | 7  | 760.4317       | 380.7198        |
| 531.2415       | 6  | V  | 6  | 673.3997       | 337.2038        |
| 618.2735       | 7  | S  | 5  | 574.3313       | 287.6696        |
| 689.3106       | 8  | A  | 4  | 487.2993       | 244.1535        |
| 802.3947       | 9  | L  | 3  | 416.2621       | 208.6350        |
| 930.4533       | 10 | Q  | 2  | 303.1781       | 152.0930        |
|                | 11 | R  | 1  | 175.1195       | 88.0637         |

N-term:+43.02

SSIGTGYDLSASTFSPDGR, MH+ 1959.8936, m/z 653.9694  
 L OSG41 P180811 230811-s1.06331.06331.3.dta

X-range:

-

MassTol: Y-zoom:

MassType:

AVG  MONO

Axis:

1  2

Label:

I  M  -

Ions:

a  +  2+  3+

b  +  2+  3+

c  +  2+  3+

x  +  2+  3+

y  +  2+  3+

z  +  2+  3+

hide H<sub>2</sub>O/NH<sub>3</sub>

zoom 112-122

GO

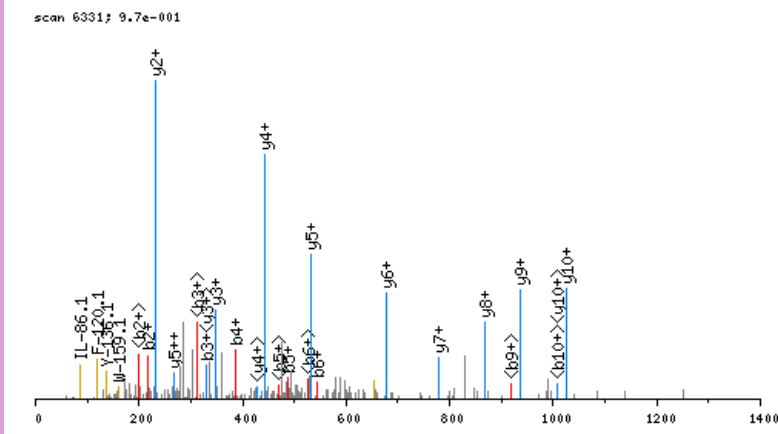

click image to zoom in; click top corners to zoom out [\[precursor±\]](#)

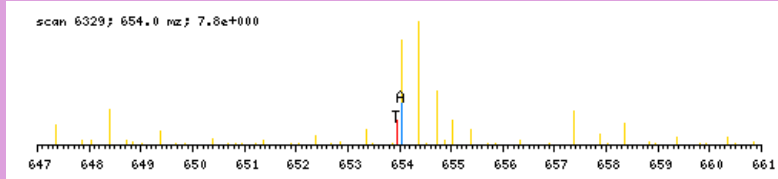

zoomed in precursor plot; T=theoretical m/z, A=acquired m/z

| b <sup>+</sup> | #  | AA # | y <sup>+</sup> | y <sup>2+</sup> |
|----------------|----|------|----------------|-----------------|
| 130.0504       | 1  | S 19 |                |                 |
| 217.0825       | 2  | S 18 | 1830.8510      | 915.9294        |
| 330.1665       | 3  | I 17 | 1743.8190      | 872.4134        |
| 387.1880       | 4  | G 16 | 1630.7349      | 815.8714        |
| 488.2357       | 5  | T 15 | 1573.7134      | 787.3606        |
| 545.2571       | 6  | G 14 | 1472.6658      | 736.8368        |
| 708.3205       | 7  | Y 13 | 1415.6443      | 708.3261        |
| 823.3474       | 8  | D 12 | 1252.5810      | 626.7944        |
| 936.4315       | 9  | L 11 | 1137.5540      | 569.2809        |
| 1023.4635      | 10 | S 10 | 1024.4700      | 512.7389        |
| 1094.5006      | 11 | A 9  | 937.4379       | 469.2229        |
| 1181.5326      | 12 | S 8  | 866.4008       | 433.7043        |
| 1282.5803      | 13 | T 7  | 779.3688       | 390.1883        |
| 1429.6487      | 14 | F 6  | 678.3211       | 339.6645        |
| 1516.6808      | 15 | S 5  | 531.2527       | 266.1303        |
| 1613.7335      | 16 | P 4  | 444.2207       | 222.6142        |
| 1728.7605      | 17 | D 3  | 347.1679       | 174.0879        |
| 1785.7819      | 18 | G 2  | 232.1410       | 116.5744        |
|                | 19 | R 1  | 175.1195       | 88.0637         |

N-term:+43.02

SSILPFTPPVVKR, MH+ 1510.8998, m/z 755.9535  
 L OSG37 P180811 230811-s1.08076.08076.2.dta

X-range:

-

MassTol: Y-zoom:

MassType:

AVG  MONO

Axis:

1  2

Label:

I  M  -

Ions:

a  +  2+  3+

b  +  2+  3+

c  +  2+  3+

x  +  2+  3+

y  +  2+  3+

z  +  2+  3+

hide H<sub>2</sub>O/NH<sub>3</sub>

zoom 112-122

GO

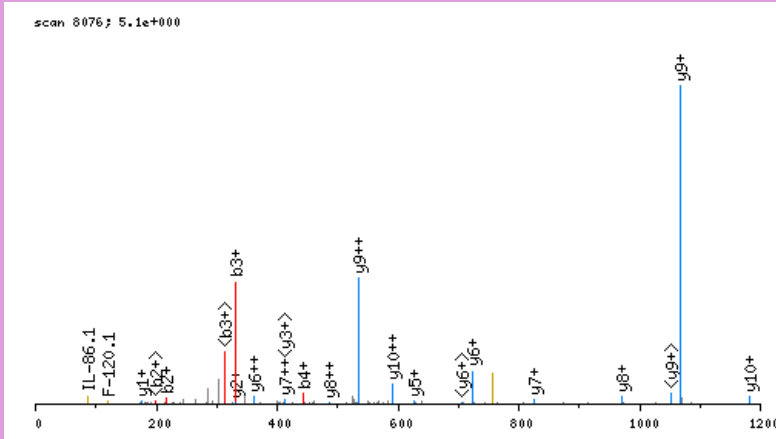

click image to zoom in; click top corners to zoom out [\[precursor±\]](#)

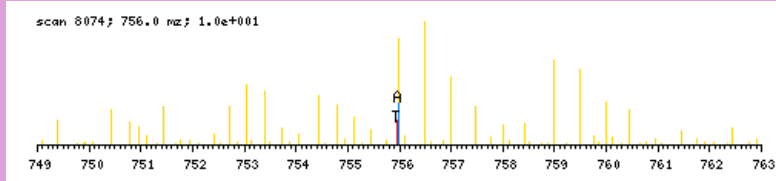

zoomed in precursor plot; T=theoretical m/z, A=acquired m/z

| b <sup>+</sup> | #  | AA # | y <sup>+</sup> | y <sup>2+</sup> |
|----------------|----|------|----------------|-----------------|
| 130.0504       | 1  | S 13 |                |                 |
| 217.0825       | 2  | S 12 | 1381.8572      | 691.4325        |
| 330.1665       | 3  | I 11 | 1294.8251      | 647.9165        |
| 443.2506       | 4  | L 10 | 1181.7411      | 591.3745        |
| 540.3033       | 5  | P 9  | 1068.6570      | 534.8324        |
| 687.3718       | 6  | F 8  | 971.6042       | 486.3060        |
| 788.4194       | 7  | T 7  | 824.5358       | 412.7718        |
| 885.4722       | 8  | P 6  | 723.4882       | 362.2480        |
| 982.5250       | 9  | P 5  | 626.4354       | 313.7216        |
| 1081.5934      | 10 | V 4  | 529.3826       | 265.1952        |
| 1180.6618      | 11 | V 3  | 430.3142       | 215.6610        |
| 1336.7881      | 12 | K 2  | 331.2458       | 166.1268        |
|                | 13 | R 1  | 175.1195       | 88.0637         |

N-term:+43.02 K(12):+156.13

SSKSMVLGYWDIR, MH+ 1611.8205, m/z 537.9450  
 L OSG37 P180811 230811-s1.08013.08013.3.dta

X-range:

-

MassTol: Y-zoom:

MassType:

AVG  MONO

Axis:

1  2

Label:

I  M  -

Ions:

a  +  2+  3+

b  +  2+  3+

c  +  2+  3+

x  +  2+  3+

y  +  2+  3+

z  +  2+  3+

hide H<sub>2</sub>O/NH<sub>3</sub>

zoom 112-122

GO

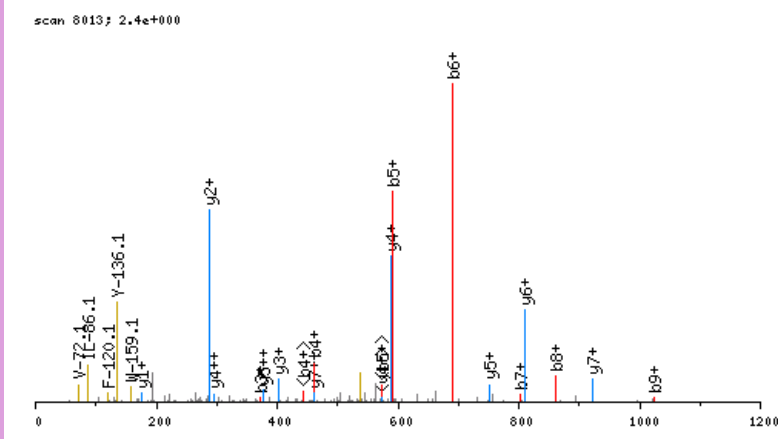

click image to zoom in; click top corners to zoom out [\[precursor±\]](#)

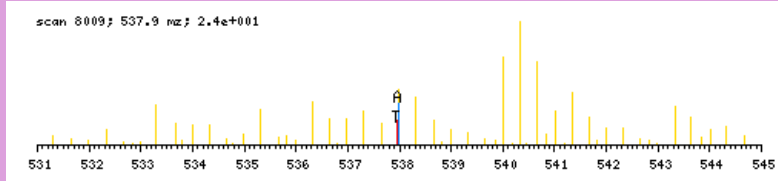

zoomed in precursor plot; T=theoretical m/z, A=acquired m/z

| b <sup>+</sup> | #  | AA # | y <sup>+</sup> | y <sup>2+</sup> |
|----------------|----|------|----------------|-----------------|
| 130.0504       | 1  | S 13 |                |                 |
| 217.0825       | 2  | S 12 | 1482.7779      | 741.8929        |
| 373.2088       | 3  | K 11 | 1395.7459      | 698.3769        |
| 460.2408       | 4  | S 10 | 1239.6196      | 620.3137        |
| 591.2813       | 5  | M 9  | 1152.5876      | 576.7977        |
| 690.3497       | 6  | V 8  | 1021.5471      | 511.2775        |
| 803.4337       | 7  | L 7  | 922.4787       | 461.7433        |
| 860.4552       | 8  | G 6  | 809.3946       | 405.2012        |
| 1023.5185      | 9  | Y 5  | 752.3731       | 376.6905        |
| 1209.5979      | 10 | W 4  | 589.3098       | 295.1588        |
| 1324.6248      | 11 | D 3  | 403.2305       | 202.1192        |
| 1437.7089      | 12 | I 2  | 288.2036       | 144.6057        |
|                | 13 | R 1  | 175.1195       | 88.0637         |

N-term:+43.02 K(3):+156.13

SSKTASTNSIAQAR, MH+ 1497.8086, m/z 499.9410  
 L OSG37 P180811 230811-s1.02205.02205.3.dta

X-range:

-

MassTol: Y-zoom:

MassType:

AVG  MONO

Axis:

1  2

Label:

I  M  -

Ions:

a  +  2+  3+

b  +  2+  3+

c  +  2+  3+

x  +  2+  3+

y  +  2+  3+

z  +  2+  3+

hide H<sub>2</sub>O/NH<sub>3</sub>

zoom 112-122

GO

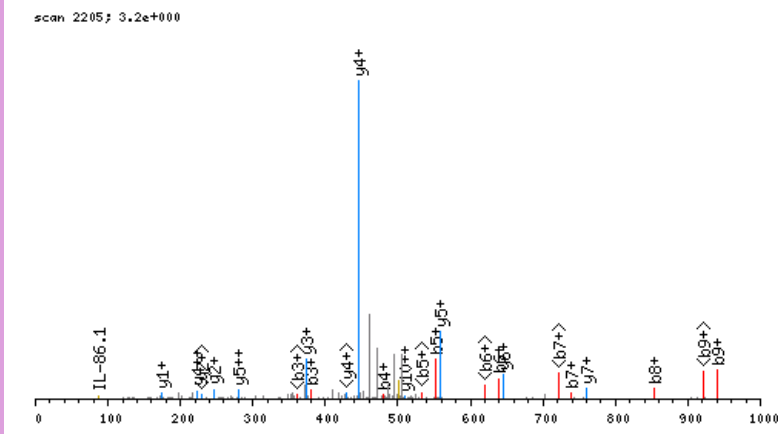

click image to zoom in; click top corners to zoom out [\[precursor±\]](#)

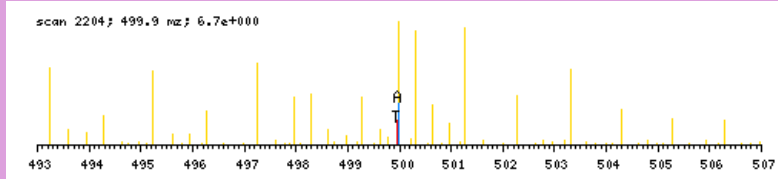

zoomed in precursor plot; T=theoretical m/z, A=acquired m/z

| b <sup>+</sup> | #  | AA # | y <sup>+</sup> | y <sup>2+</sup> |
|----------------|----|------|----------------|-----------------|
| 130.0504       | 1  | S 14 |                |                 |
| 217.0825       | 2  | S 13 | 1368.7660      | 684.8869        |
| 379.2406       | 3  | K 12 | 1281.7339      | 641.3709        |
| 480.2882       | 4  | T 11 | 1119.5758      | 560.2918        |
| 551.3253       | 5  | A 10 | 1018.5281      | 509.7680        |
| 638.3574       | 6  | S 9  | 947.4910       | 474.2494        |
| 739.4051       | 7  | T 8  | 860.4590       | 430.7334        |
| 853.4480       | 8  | N 7  | 759.4113       | 380.2096        |
| 940.4800       | 9  | S 6  | 645.3684       | 323.1881        |
| 1053.5641      | 10 | I 5  | 558.3364       | 279.6721        |
| 1124.6012      | 11 | A 4  | 445.2523       | 223.1301        |
| 1252.6598      | 12 | Q 3  | 374.2152       | 187.6115        |
| 1323.6969      | 13 | A 2  | 246.1566       | 123.5822        |
|                | 14 | R 1  | 175.1195       | 88.0637         |

N-term:+43.02 K(3):+162.16

SSLEISNSCFSPETR, MH+ 1755.7859, m/z 878.3966  
 L OSG41 P180811 230811-s1.05613.05613.2.dta

X-range:

-

MassTol: Y-zoom:

MassType:

AVG  MONO

Axis:

1  2

Label:

I  M  -

Ions:

a  +  2+  3+

b  +  2+  3+

c  +  2+  3+

x  +  2+  3+

y  +  2+  3+

z  +  2+  3+

hide H<sub>2</sub>O/NH<sub>3</sub>

zoom 112-122

GO

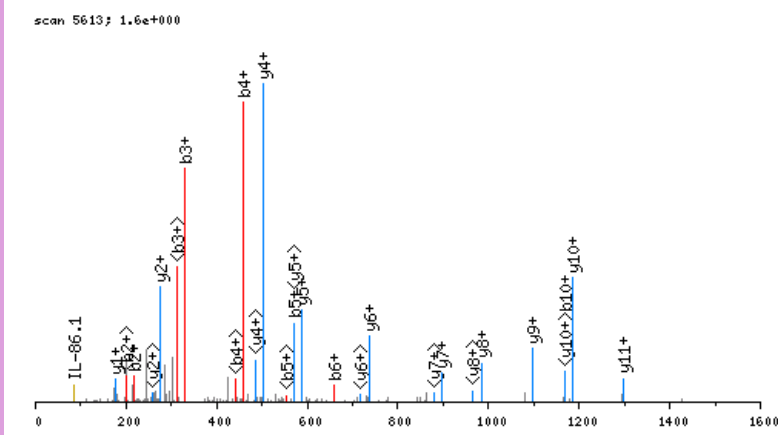

click image to zoom in; click top corners to zoom out [\[precursor±\]](#)

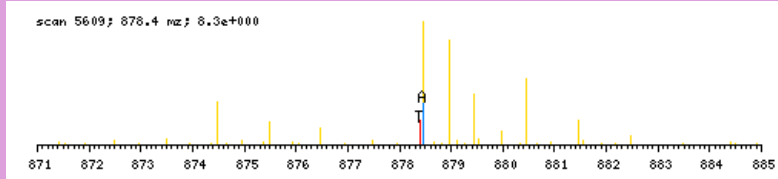

zoomed in precursor plot; T=theoretical m/z, A=acquired m/z

| b <sup>+</sup> | #  | AA # | y <sup>+</sup> | y <sup>2+</sup> |
|----------------|----|------|----------------|-----------------|
| 130.0504       | 1  | S 15 |                |                 |
| 217.0825       | 2  | S 14 | 1626.7433      | 813.8756        |
| 330.1665       | 3  | L 13 | 1539.7113      | 770.3596        |
| 459.2091       | 4  | E 12 | 1426.6272      | 713.8175        |
| 572.2932       | 5  | I 11 | 1297.5846      | 649.2962        |
| 659.3252       | 6  | S 10 | 1184.5006      | 592.7542        |
| 773.3681       | 7  | N 9  | 1097.4685      | 549.2382        |
| 860.4002       | 8  | S 8  | 983.4256       | 492.2167        |
| 1020.4308      | 9  | C 7  | 896.3936       | 448.7007        |
| 1167.4992      | 10 | F 6  | 736.3630       | 368.6854        |
| 1254.5312      | 11 | S 5  | 589.2946       | 295.1512        |
| 1351.5840      | 12 | P 4  | 502.2625       | 251.6352        |
| 1480.6266      | 13 | E 3  | 405.2098       | 203.1088        |
| 1581.6742      | 14 | T 2  | 276.1672       | 138.5875        |
|                | 15 | R 1  | 175.1195       | 88.0637         |

N-term:+43.02 C(9):+160.03

SSMTQNLK, MH+ 978.4679, m/z 489.7376  
 L OSG41 P180811 230811-s1.03117.03117.2.dta

X-range:

-

MassTol: Y-zoom:

MassType:

AVG  MONO

Axis:

1  2

Label:

I  M  -

Ions:

a  +  2+  3+

b  +  2+  3+

c  +  2+  3+

x  +  2+  3+

y  +  2+  3+

z  +  2+  3+

hide H<sub>2</sub>O/NH<sub>3</sub>

zoom 112-122

GO

scan 3117; 1.1e+000

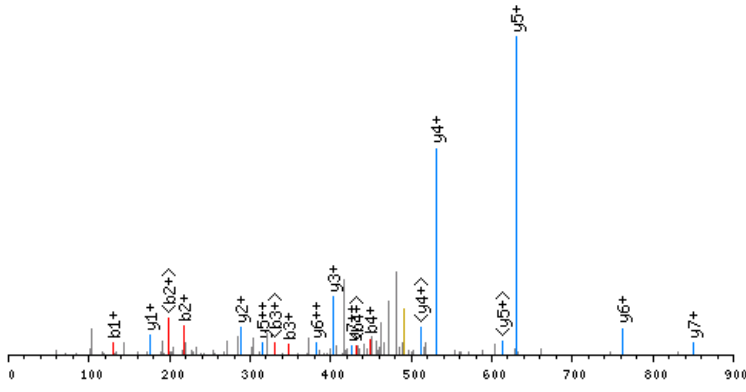

click image to zoom in; click top corners to zoom out [\[precursor±\]](#)

scan 3114; 489.7 m/z; 1.3e+001

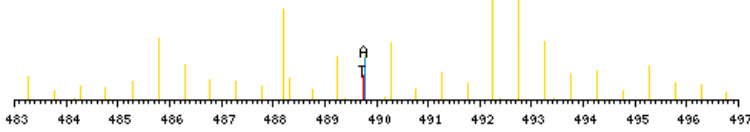

zoomed in precursor plot; T=theoretical m/z, A=acquired m/z

| b <sup>+</sup> | # | AA # | y <sup>+</sup> | y <sup>2+</sup>   |
|----------------|---|------|----------------|-------------------|
| 130.0504       | 1 | S    | 8              |                   |
| 217.0825       | 2 | S    | 7              | 849.4253 425.2165 |
| 348.1229       | 3 | M    | 6              | 762.3932 381.7005 |
| 449.1706       | 4 | T    | 5              | 631.3527 316.1803 |
| 577.2292       | 5 | Q    | 4              | 530.3051 265.6564 |
| 691.2721       | 6 | N    | 3              | 402.2465 201.6272 |
| 804.3562       | 7 | L    | 2              | 288.2036 144.6057 |
|                | 8 | R    | 1              | 175.1195 88.0637  |

N-term:+43.02



SSNECFKCGR, MH+ 1320.5888, m/z 660.7981  
 L OSG38 P180811 230811-s1.02183.02183.2.dta

X-range:

-

MassTol: Y-zoom:

MassType:

AVG  MONO

Axis:

1  2

Label:

I  M  -

Ions:

a  +  2+  3+

b  +  2+  3+

c  +  2+  3+

x  +  2+  3+

y  +  2+  3+

z  +  2+  3+

hide H<sub>2</sub>O/NH<sub>3</sub>

zoom 112-122

GO

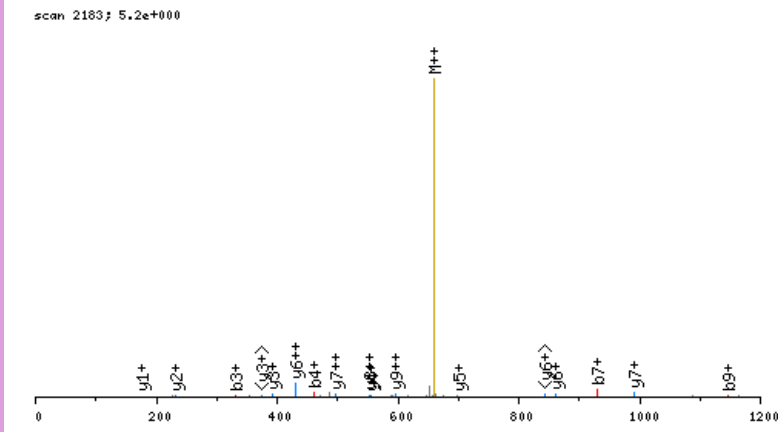

click image to zoom in; click top corners to zoom out [\[precursor±\]](#)

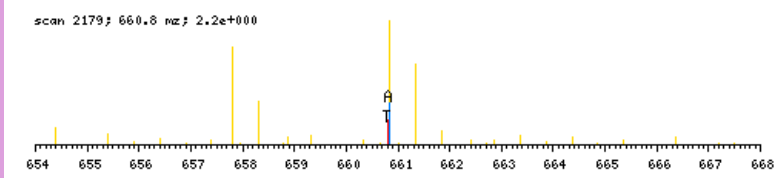

zoomed in precursor plot; T=theoretical m/z, A=acquired m/z

| b <sup>+</sup> | #  | AA | #  | y <sup>+</sup> | y <sup>2+</sup> |
|----------------|----|----|----|----------------|-----------------|
| 130.0504       | 1  | S  | 10 |                |                 |
| 217.0825       | 2  | S  | 9  | 1191.5462      | 596.2770        |
| 331.1254       | 3  | N  | 8  | 1104.5142      | 552.7610        |
| 460.1680       | 4  | E  | 7  | 990.4713       | 495.7395        |
| 620.1986       | 5  | C  | 6  | 861.4287       | 431.2183        |
| 767.2670       | 6  | F  | 5  | 701.3981       | 351.2030        |
| 929.4251       | 7  | K  | 4  | 554.3297       | 277.6687        |
| 1089.4557      | 8  | C  | 3  | 392.1716       | 196.5897        |
| 1146.4772      | 9  | G  | 2  | 232.1410       | 116.5744        |
|                | 10 | R  | 1  | 175.1195       | 88.0637         |

N-term:+43.02 C(5):+160.03  
 K(7):+162.16 C(8):+160.03

SSQPGIFCIGVDLNR, MH+ 1704.8379, m/z 568.9508  
 L OSG37 P180811 230811-s1.04533.04533.3.dta

X-range:

-

MassTol: Y-zoom:

MassType:

AVG  MONO

Axis:

1  2

Label:

I  M  -

Ions:

a  +  2+  3+

b  +  2+  3+

c  +  2+  3+

x  +  2+  3+

y  +  2+  3+

z  +  2+  3+

hide H<sub>2</sub>O/NH<sub>3</sub>

zoom 112-122

GO

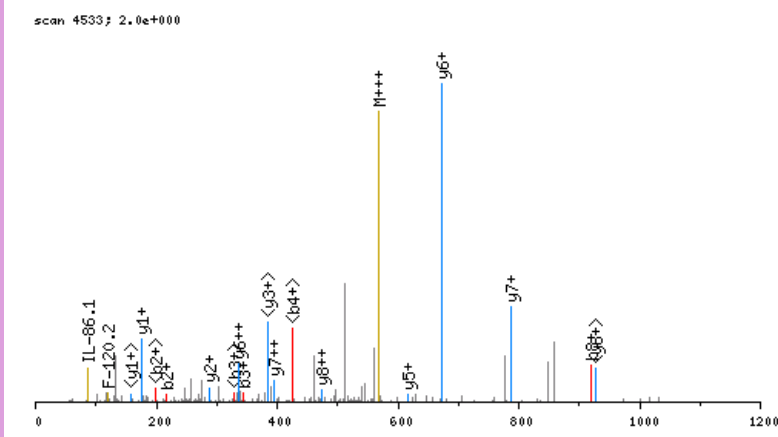

click image to zoom in; click top corners to zoom out [\[precursor±\]](#)

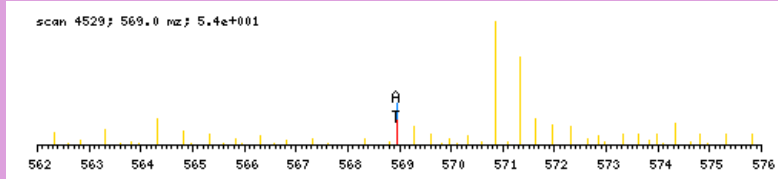

zoomed in precursor plot; T=theoretical m/z, A=acquired m/z

| b <sup>+</sup> | #  | AA | #  | y <sup>+</sup> | y <sup>2+</sup> |
|----------------|----|----|----|----------------|-----------------|
| 130.0504       | 1  | S  | 15 |                |                 |
| 217.0825       | 2  | S  | 14 | 1575.7953      | 788.4016        |
| 345.1410       | 3  | Q  | 13 | 1488.7633      | 744.8855        |
| 442.1938       | 4  | P  | 12 | 1360.7047      | 680.8563        |
| 499.2153       | 5  | G  | 11 | 1263.6519      | 632.3299        |
| 612.2993       | 6  | I  | 10 | 1206.6305      | 603.8191        |
| 759.3677       | 7  | F  | 9  | 1093.5464      | 547.2771        |
| 919.3983       | 8  | C  | 8  | 946.4780       | 473.7429        |
| 1032.4824      | 9  | I  | 7  | 786.4474       | 393.7276        |
| 1089.5039      | 10 | G  | 6  | 673.3633       | 337.1856        |
| 1188.5723      | 11 | V  | 5  | 616.3418       | 308.6748        |
| 1303.5992      | 12 | D  | 4  | 517.2734       | 259.1406        |
| 1416.6833      | 13 | L  | 3  | 402.2465       | 201.6272        |
| 1530.7262      | 14 | N  | 2  | 289.1624       | 145.0851        |
|                | 15 | R  | 1  | 175.1195       | 88.0637         |

N-term:+43.02 C(8):+160.03

SSSAASPLFAPGEDCGPAWR, MH+ 2104.9398, m/z 702.3181  
 L OSG41 P180811 230811-s1.06751.06751.3.dta

X-range:

-

MassTol: Y-zoom:

MassType:

AVG  MONO

Axis:

1  2

Label:

I  M  -

Ions:

a  +  2+  3+

b  +  2+  3+

c  +  2+  3+

x  +  2+  3+

y  +  2+  3+

z  +  2+  3+

hide H<sub>2</sub>O/NH<sub>3</sub>

zoom 112-122

GO

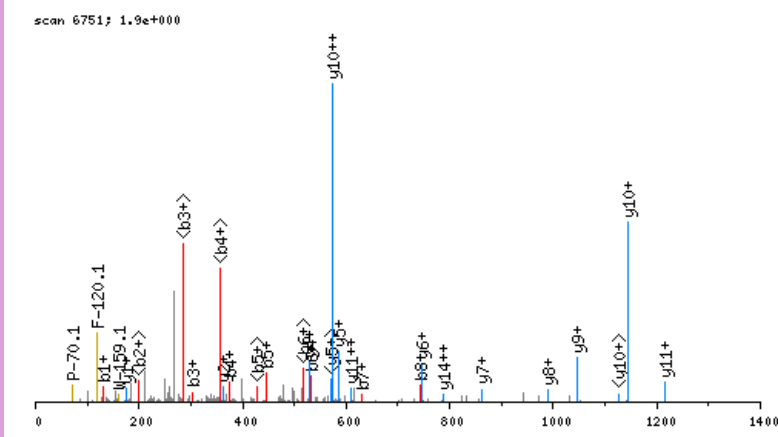

click image to zoom in; click top corners to zoom out [\[precursor±\]](#)

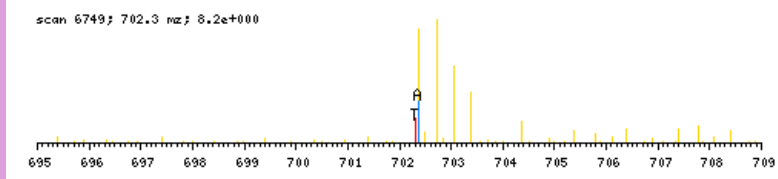

zoomed in precursor plot; T=theoretical m/z, A=acquired m/z

| b <sup>+</sup> | #  | AA # | y <sup>+</sup> | y <sup>2+</sup> |
|----------------|----|------|----------------|-----------------|
| 130.0504       | 1  | S 20 |                |                 |
| 217.0825       | 2  | S 19 | 1975.8972      | 988.4525        |
| 304.1145       | 3  | S 18 | 1888.8652      | 944.9365        |
| 375.1516       | 4  | A 17 | 1801.8331      | 901.4205        |
| 446.1887       | 5  | A 16 | 1730.7960      | 865.9019        |
| 533.2207       | 6  | S 15 | 1659.7589      | 830.3834        |
| 630.2735       | 7  | P 14 | 1572.7269      | 786.8673        |
| 743.3576       | 8  | L 13 | 1475.6741      | 738.3410        |
| 890.4260       | 9  | F 12 | 1362.5900      | 681.7989        |
| 961.4631       | 10 | A 11 | 1215.5216      | 608.2647        |
| 1058.5159      | 11 | P 10 | 1144.4845      | 572.7462        |
| 1115.5373      | 12 | G 9  | 1047.4318      | 524.2198        |
| 1244.5799      | 13 | E 8  | 990.4103       | 495.7091        |
| 1359.6069      | 14 | D 7  | 861.3677       | 431.1878        |
| 1519.6375      | 15 | C 6  | 746.3408       | 373.6743        |
| 1576.6589      | 16 | G 5  | 586.3102       | 293.6590        |
| 1673.7117      | 17 | P 4  | 529.2887       | 265.1483        |
| 1744.7488      | 18 | A 3  | 432.2359       | 216.6219        |
| 1930.8281      | 19 | W 2  | 361.1988       | 181.1033        |
|                | 20 | R 1  | 175.1195       | 88.0637         |

N-term:+43.02 C(15);+160.03

SSSLAGHVMVSLTPCEESR, MH+ 2160.0065, m/z 720.6737  
 L OSG36 P180811 230811-s1.05038.05038.3.dta

X-range:

-

MassTol: Y-zoom:

MassType:

AVG  MONO

Axis:

1  2

Label:

I  M  -

Ions:

a  +  2+  3+

b  +  2+  3+

c  +  2+  3+

x  +  2+  3+

y  +  2+  3+

z  +  2+  3+

hide H<sub>2</sub>O/NH<sub>3</sub>

zoom 112-122

GO

scan 5038; 1.3e+000

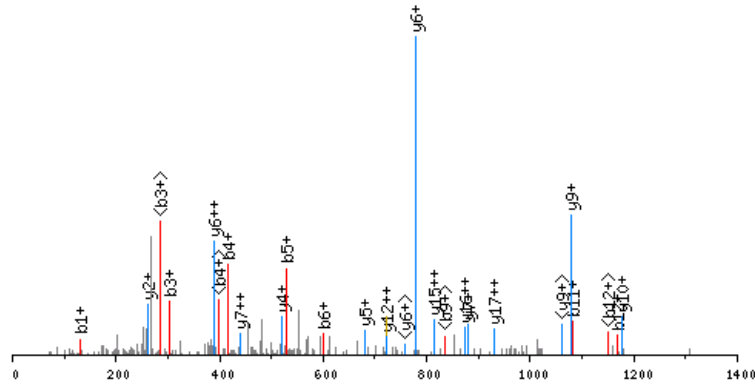

click image to zoom in; click top corners to zoom out [precursor±]

scan 5034; 720.7 m/z; 5.1e+000

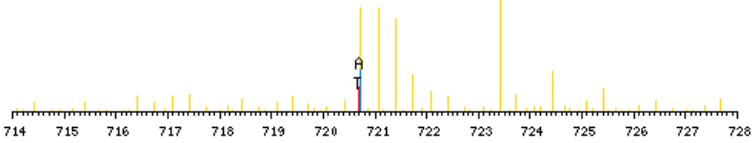

zoomed in precursor plot; T=theoretical m/z, A=acquired m/z

| b <sup>+</sup> | #  | AA | #  | y <sup>+</sup> | y <sup>2+</sup> |
|----------------|----|----|----|----------------|-----------------|
| 130.0504       | 1  | S  | 20 |                |                 |
| 217.0825       | 2  | S  | 19 | 2030.9639      | 1015.9859       |
| 304.1145       | 3  | S  | 18 | 1943.9319      | 972.4698        |
| 417.1985       | 4  | L  | 17 | 1856.8998      | 928.9538        |
| 530.2826       | 5  | L  | 16 | 1743.8158      | 872.4118        |
| 601.3197       | 6  | A  | 15 | 1630.7317      | 815.8698        |
| 658.3412       | 7  | G  | 14 | 1559.6946      | 780.3512        |
| 715.3627       | 8  | G  | 13 | 1502.6731      | 751.8405        |
| 852.4216       | 9  | H  | 12 | 1445.6517      | 723.3297        |
| 983.4621       | 10 | M  | 11 | 1308.5927      | 654.8003        |
| 1082.5305      | 11 | V  | 10 | 1177.5523      | 589.2800        |
| 1169.5625      | 12 | S  | 9  | 1078.4839      | 539.7458        |
| 1282.6466      | 13 | L  | 8  | 991.4518       | 496.2298        |
| 1383.6942      | 14 | T  | 7  | 878.3678       | 439.6878        |
| 1480.7470      | 15 | P  | 6  | 777.3201       | 389.1640        |
| 1640.7776      | 16 | C  | 5  | 680.2673       | 340.6376        |
| 1769.8202      | 17 | E  | 4  | 520.2367       | 260.6223        |
| 1898.8628      | 18 | E  | 3  | 391.1941       | 196.1010        |
| 1985.8948      | 19 | S  | 2  | 262.1515       | 131.5797        |
|                | 20 | R  | 1  | 175.1195       | 88.0637         |

N-term:+43.02 C(16):+160.03

SSSRPVALVTGANKGIGFAITR, MH+ 2272.2778, m/z 758.0974  
L OSG38 P180811 230811-s1.06625.06625.3.dta

scan 6625; 2.8e+001

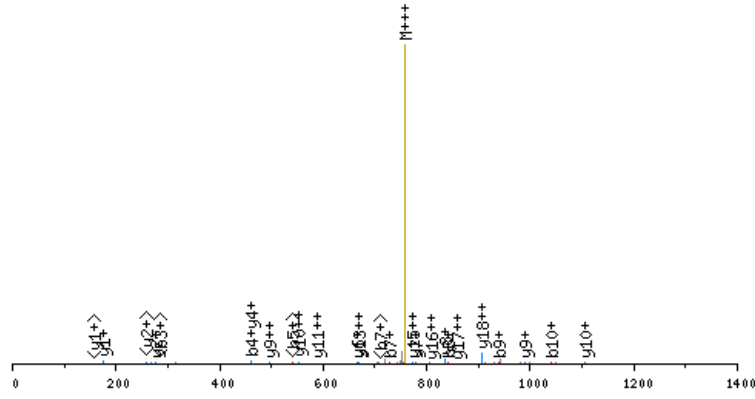

click image to zoom in; click top corners to zoom out [precursor±]

scan 6624; 758.1 mz; 3.9e+001

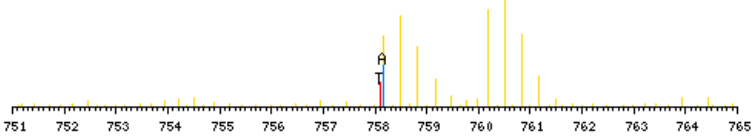

zoomed in precursor plot; T=theoretical m/z, A=acquired m/z

| b <sup>+</sup> | #  | AA # | y <sup>+</sup> | y <sup>2+</sup> |
|----------------|----|------|----------------|-----------------|
| 130.0504       | 1  | S 22 |                |                 |
| 217.0825       | 2  | S 21 | 2143.2352      | 1072.1215       |
| 304.1145       | 3  | S 20 | 2056.2032      | 1028.6055       |
| 460.2156       | 4  | R 19 | 1969.1711      | 985.0895        |
| 557.2684       | 5  | P 18 | 1813.0700      | 907.0389        |
| 656.3368       | 6  | V 17 | 1716.0173      | 858.5125        |
| 727.3739       | 7  | A 16 | 1616.9488      | 808.9783        |
| 840.4580       | 8  | L 15 | 1545.9117      | 773.4598        |
| 939.5264       | 9  | V 14 | 1432.8277      | 716.9177        |
| 1040.5740      | 10 | T 13 | 1333.7592      | 667.3835        |
| 1097.5955      | 11 | G 12 | 1232.7116      | 616.8597        |
| 1168.6326      | 12 | A 11 | 1175.6901      | 588.3490        |
| 1282.6755      | 13 | N 10 | 1104.6530      | 552.8304        |
| 1438.8018      | 14 | K 9  | 990.6101       | 495.8089        |
| 1495.8233      | 15 | G 8  | 834.4838       | 417.7458        |
| 1608.9074      | 16 | I 7  | 777.4623       | 389.2351        |
| 1665.9288      | 17 | G 6  | 664.3782       | 332.6930        |
| 1812.9973      | 18 | F 5  | 607.3568       | 304.1823        |
| 1884.0344      | 19 | A 4  | 460.2884       | 230.6481        |
| 1997.1184      | 20 | I 3  | 389.2512       | 195.1295        |
| 2098.1661      | 21 | T 2  | 276.1672       | 138.5875        |
|                | 22 | R 1  | 175.1195       | 88.0637         |

N-term:+43.02 K(14):+156.13

X-range:

-

MassTol: Y-zoom:

MassType:

AVG  MONO

Axis:

1  2

Label:

I  M  -

Ions:

a  +  2+  3+

b  +  2+  3+

c  +  2+  3+

x  +  2+  3+

y  +  2+  3+

z  +  2+  3+

hide H<sub>2</sub>O/NH<sub>3</sub>

zoom 112-122

GO

SSTQFNKGPSYGLSAEVKNR, MH+ 2268.1625, m/z 756.7257  
 L OSG39 P180811 230811-s1.03842.03842.3.dta

scan 3842; 1.1e+001

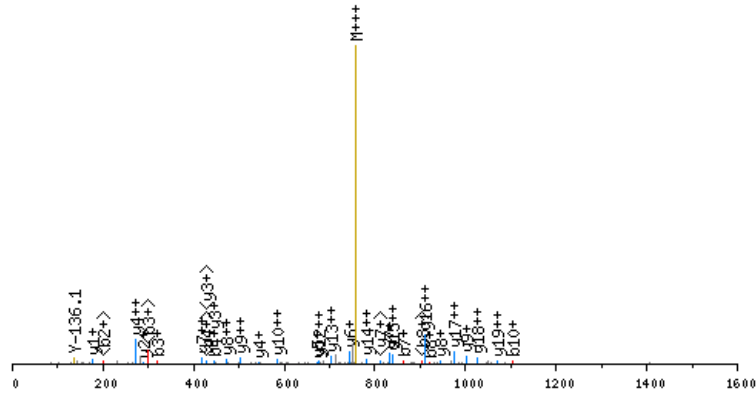

click image to zoom in; click top corners to zoom out [precursor±]

scan 3841; 756.7 m/z; 4.3e+001

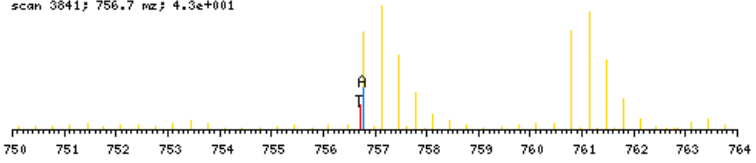

zoomed in precursor plot; T=theoretical m/z, A=acquired m/z

X-range:

-

MassTol: Y-zoom:

MassType:

AVG  MONO

Axis:

1  2

Label:

I  M  -

Ions:

a  +  2+  3+

b  +  2+  3+

c  +  2+  3+

x  +  2+  3+

y  +  2+  3+

z  +  2+  3+

hide H<sub>2</sub>O/NH<sub>3</sub>

zoom 112-122

GO

| b <sup>+</sup> | #  | AA | #  | y <sup>+</sup> | y <sup>2+</sup> |
|----------------|----|----|----|----------------|-----------------|
| 130.0504       | 1  | S  | 20 |                |                 |
| 217.0825       | 2  | S  | 19 | 2139.1199      | 1070.0639       |
| 318.1301       | 3  | T  | 18 | 2052.0879      | 1026.5479       |
| 446.1887       | 4  | Q  | 17 | 1951.0402      | 976.0240        |
| 593.2571       | 5  | F  | 16 | 1822.9816      | 911.9947        |
| 707.3001       | 6  | N  | 15 | 1675.9132      | 838.4605        |
| 863.4264       | 7  | K  | 14 | 1561.8703      | 781.4391        |
| 920.4478       | 8  | G  | 13 | 1405.7440      | 703.3759        |
| 1017.5006      | 9  | P  | 12 | 1348.7225      | 674.8652        |
| 1104.5326      | 10 | S  | 11 | 1251.6698      | 626.3388        |
| 1267.5959      | 11 | Y  | 10 | 1164.6377      | 582.8228        |
| 1324.6174      | 12 | G  | 9  | 1001.5744      | 501.2911        |
| 1437.7015      | 13 | L  | 8  | 944.5529       | 472.7804        |
| 1524.7335      | 14 | S  | 7  | 831.4689       | 416.2384        |
| 1595.7706      | 15 | A  | 6  | 744.4368       | 372.7223        |
| 1724.8132      | 16 | E  | 5  | 673.3997       | 337.2038        |
| 1823.8816      | 17 | V  | 4  | 544.3571       | 272.6825        |
| 1980.0079      | 18 | K  | 3  | 445.2887       | 223.1483        |
| 2094.0508      | 19 | N  | 2  | 289.1624       | 145.0851        |
|                | 20 | R  | 1  | 175.1195       | 88.0637         |

N-term: +43.02 K(7): +156.13  
 K(18): +156.13

SSVAVLTQESFAEHR, MH+ 1702.8400, m/z 568.2849  
 L OSG37 P180811 230811-s1.06760.06760.3.dta

X-range:

-

MassTol: Y-zoom:

MassType:

AVG  MONO

Axis:

1  2

Label:

I  M  -

Ions:

a  +  2+  3+

b  +  2+  3+

c  +  2+  3+

x  +  2+  3+

y  +  2+  3+

z  +  2+  3+

hide H<sub>2</sub>O/NH<sub>3</sub>

zoom 112-122

GO

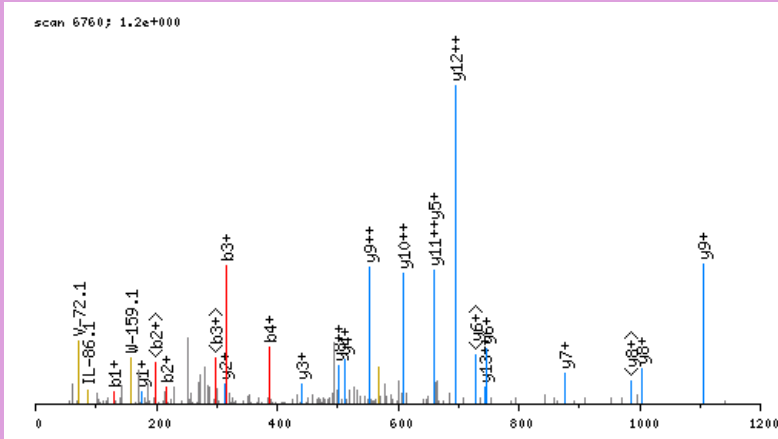

click image to zoom in; click top corners to zoom out [\[precursor±\]](#)

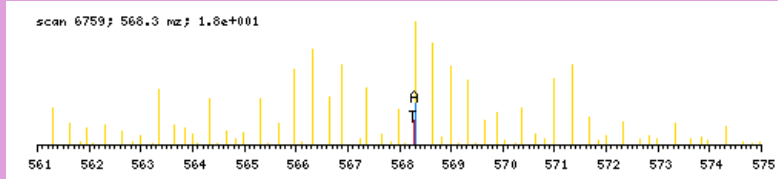

zoomed in precursor plot; T=theoretical m/z, A=acquired m/z

| b <sup>+</sup> | #  | AA # | y <sup>+</sup> | y <sup>2+</sup> |
|----------------|----|------|----------------|-----------------|
| 130.0504       | 1  | S 15 |                |                 |
| 217.0825       | 2  | S 14 | 1573.7974      | 787.4026        |
| 316.1509       | 3  | V 13 | 1486.7654      | 743.8866        |
| 387.1880       | 4  | A 12 | 1387.6970      | 694.3524        |
| 486.2564       | 5  | V 11 | 1316.6599      | 658.8339        |
| 599.3405       | 6  | L 10 | 1217.5915      | 609.2997        |
| 700.3881       | 7  | T 9  | 1104.5074      | 552.7576        |
| 828.4467       | 8  | Q 8  | 1003.4597      | 502.2338        |
| 957.4893       | 9  | E 7  | 875.4012       | 438.2045        |
| 1044.5213      | 10 | S 6  | 746.3586       | 373.6832        |
| 1191.5898      | 11 | F 5  | 659.3265       | 330.1672        |
| 1262.6269      | 12 | A 4  | 512.2581       | 256.6330        |
| 1391.6695      | 13 | E 3  | 441.2210       | 221.1144        |
| 1528.7284      | 14 | H 2  | 312.1784       | 156.5931        |
|                | 15 | R 1  | 175.1195       | 88.0637         |

N-term:+43.02

SSVTSTKEVADSPPLTR, MH+ 1942.0134, m/z 648.0093  
 L OSG36 P180811 230811-s1.03346.03346.3.dta

X-range:

-

MassTol: Y-zoom:

MassType:

AVG  MONO

Axis:

1  2

Label:

I  M  -

Ions:

a  +  2+  3+

b  +  2+  3+

c  +  2+  3+

x  +  2+  3+

y  +  2+  3+

z  +  2+  3+

hide H<sub>2</sub>O/NH<sub>3</sub>

zoom 112-122

GO

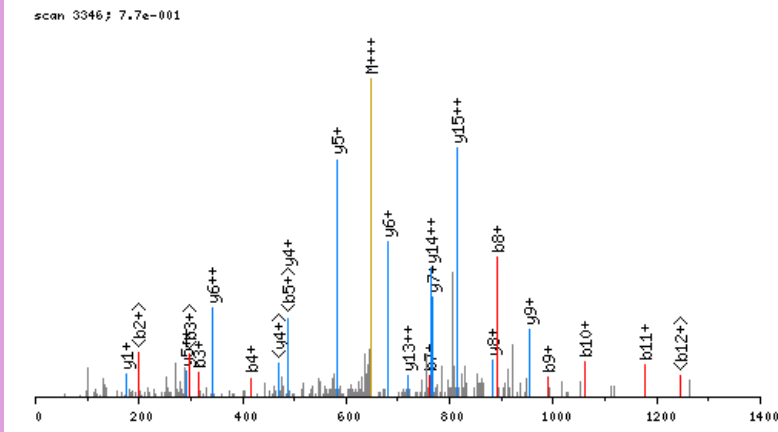

click image to zoom in; click top corners to zoom out [\[precursor±\]](#)

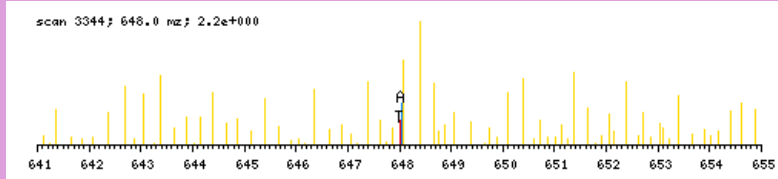

zoomed in precursor plot; T=theoretical m/z, A=acquired m/z

| b <sup>+</sup> | #  | AA # | y <sup>+</sup> | y <sup>2+</sup> |
|----------------|----|------|----------------|-----------------|
| 130.0504       | 1  | S 18 |                |                 |
| 217.0825       | 2  | S 17 | 1812.9708      | 906.9893        |
| 316.1509       | 3  | V 16 | 1725.9387      | 863.4733        |
| 417.1985       | 4  | T 15 | 1626.8703      | 813.9391        |
| 504.2306       | 5  | S 14 | 1525.8226      | 763.4152        |
| 605.2783       | 6  | T 13 | 1438.7906      | 719.8992        |
| 761.4046       | 7  | K 12 | 1337.7429      | 669.3754        |
| 890.4471       | 8  | E 11 | 1181.6166      | 591.3122        |
| 989.5156       | 9  | V 10 | 1052.5740      | 526.7909        |
| 1060.5527      | 10 | A 9  | 953.5056       | 477.2567        |
| 1175.5796      | 11 | D 8  | 882.4685       | 441.7382        |
| 1262.6116      | 12 | S 7  | 767.4416       | 384.2247        |
| 1359.6644      | 13 | P 6  | 680.4095       | 340.7087        |
| 1456.7172      | 14 | P 5  | 583.3568       | 292.1823        |
| 1553.7699      | 15 | P 4  | 486.3040       | 243.6559        |
| 1666.8540      | 16 | L 3  | 389.2512       | 195.1295        |
| 1767.9017      | 17 | T 2  | 276.1672       | 138.5875        |
|                | 18 | R 1  | 175.1195       | 88.0637         |

N-term:+43.02 K(7):+156.13



STAGVAAQDIR, MH+ 1130.5806, m/z 565.7939  
 L OSG41 P180811 230811-s1.03272.03272.2.dta

X-range:

-

MassTol: Y-zoom:

MassType:

AVG  MONO

Axis:

1  2

Label:

I  M  -

Ions:

a  +  2+  3+

b  +  2+  3+

c  +  2+  3+

x  +  2+  3+

y  +  2+  3+

z  +  2+  3+

hide H<sub>2</sub>O/NH<sub>3</sub>

zoom 112-122

GO

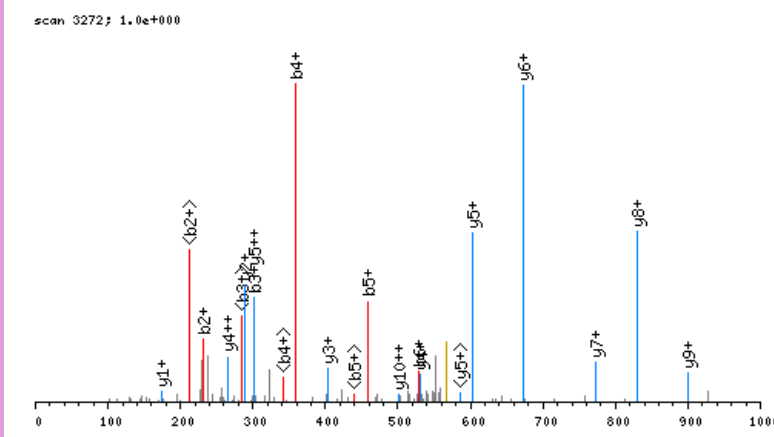

click image to zoom in; click top corners to zoom out [\[precursor±\]](#)

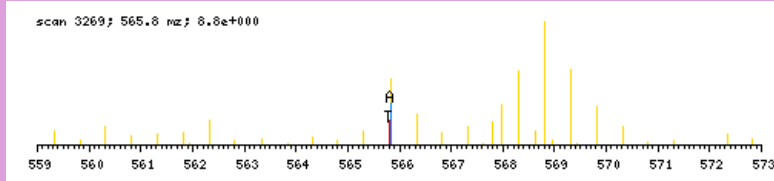

zoomed in precursor plot; T=theoretical m/z, A=acquired m/z

| b <sup>+</sup> | #  | AA | #  | y <sup>+</sup> | y <sup>2+</sup> |
|----------------|----|----|----|----------------|-----------------|
| 130.0504       | 1  | S  | 11 |                |                 |
| 231.0981       | 2  | T  | 10 | 1001.5380      | 501.2729        |
| 302.1352       | 3  | A  | 9  | 900.4903       | 450.7491        |
| 359.1567       | 4  | G  | 8  | 829.4532       | 415.2305        |
| 458.2251       | 5  | V  | 7  | 772.4317       | 386.7198        |
| 529.2622       | 6  | A  | 6  | 673.3633       | 337.1856        |
| 600.2993       | 7  | A  | 5  | 602.3262       | 301.6670        |
| 728.3579       | 8  | Q  | 4  | 531.2891       | 266.1485        |
| 843.3848       | 9  | D  | 3  | 403.2305       | 202.1192        |
| 956.4689       | 10 | I  | 2  | 288.2036       | 144.6057        |
|                | 11 | R  | 1  | 175.1195       | 88.0637         |

N-term:+43.02

STEASARPLR, MH+ 1129.5966, m/z 565.3019  
 L OSG38 P180811 230811-s1.02223.02223.2.dta

scan 2223; 3.0e+001

X-range:

-

MassTol: Y-zoom:

MassType:

AVG  MONO

Axis:

1  2

Label:

I  M  -

Ions:

a  +  2+  3+

b  +  2+  3+

c  +  2+  3+

x  +  2+  3+

y  +  2+  3+

z  +  2+  3+

hide H<sub>2</sub>O/NH<sub>3</sub>

zoom 112-122

GO

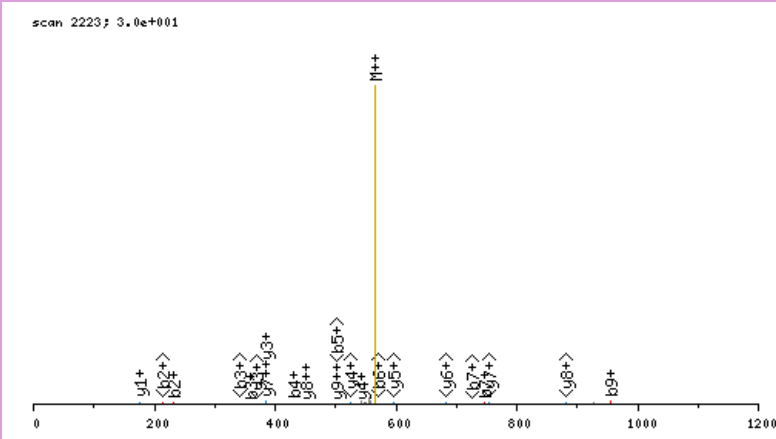

click image to zoom in; click top corners to zoom out [\[precursor±\]](#)

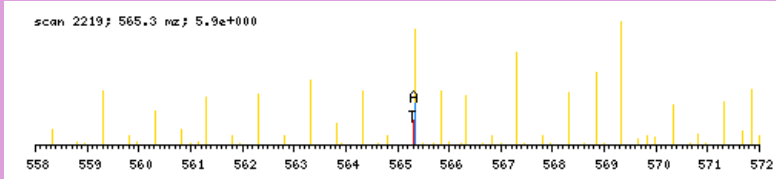

zoomed in precursor plot; T=theoretical m/z, A=acquired m/z

| b <sup>+</sup> | #  | AA | #  | y <sup>+</sup> | y <sup>2+</sup> |
|----------------|----|----|----|----------------|-----------------|
| 130.0504       | 1  | S  | 10 |                |                 |
| 231.0981       | 2  | T  | 9  | 1000.5540      | 500.7809        |
| 360.1407       | 3  | E  | 8  | 899.5063       | 450.2571        |
| 431.1778       | 4  | A  | 7  | 770.4637       | 385.7358        |
| 518.2098       | 5  | S  | 6  | 699.4266       | 350.2172        |
| 589.2470       | 6  | A  | 5  | 612.3946       | 306.7012        |
| 745.3481       | 7  | R  | 4  | 541.3574       | 271.1826        |
| 842.4008       | 8  | P  | 3  | 385.2563       | 193.1321        |
| 955.4849       | 9  | L  | 2  | 288.2036       | 144.6057        |
|                | 10 | R  | 1  | 175.1195       | 88.0637         |

N-term:+43.02

STGTFVVSQPLNYR, MH+ 1610.8179, m/z 805.9126  
 L OSG41 P180811 230811-s1.05702.05702.2.dta

X-range:

-

MassTol: Y-zoom:

MassType:

AVG  MONO

Axis:

1  2

Label:

I  M  -

Ions:

a  +  2+  3+

b  +  2+  3+

c  +  2+  3+

x  +  2+  3+

y  +  2+  3+

z  +  2+  3+

hide H<sub>2</sub>O/NH<sub>3</sub>

zoom 112-122

GO

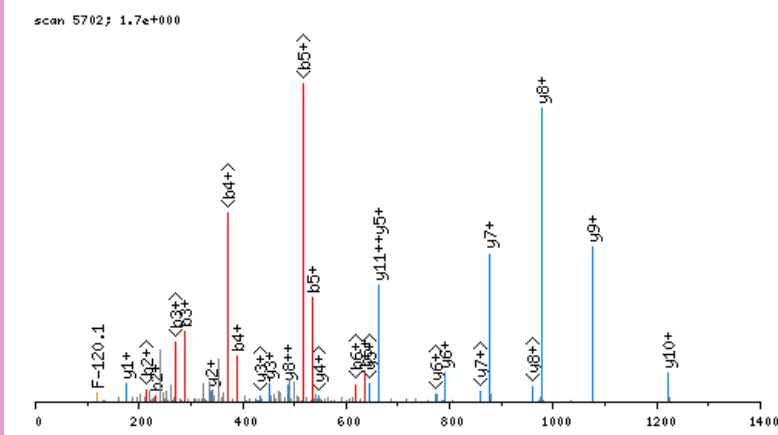

click image to zoom in; click top corners to zoom out [\[precursor±\]](#)

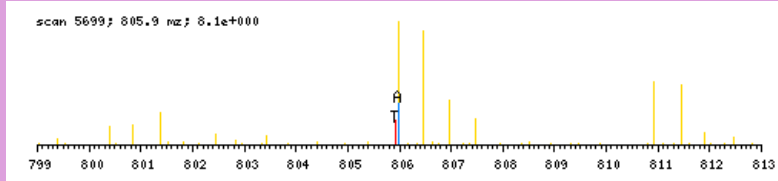

zoomed in precursor plot; T=theoretical m/z, A=acquired m/z

| b <sup>+</sup> | #  | AA # | y <sup>+</sup> | y <sup>2+</sup> |
|----------------|----|------|----------------|-----------------|
| 130.0504       | 1  | S 14 |                |                 |
| 231.0981       | 2  | T 13 | 1481.7753      | 741.3915        |
| 288.1196       | 3  | G 12 | 1380.7276      | 690.8677        |
| 389.1672       | 4  | T 11 | 1323.7061      | 662.3570        |
| 536.2357       | 5  | F 10 | 1222.6584      | 611.8331        |
| 635.3041       | 6  | V 9  | 1075.5900      | 538.2989        |
| 734.3725       | 7  | V 8  | 976.5216       | 488.7647        |
| 821.4045       | 8  | S 7  | 877.4532       | 439.2305        |
| 949.4631       | 9  | Q 6  | 790.4212       | 395.7145        |
| 1046.5159      | 10 | P 5  | 662.3626       | 331.6852        |
| 1159.5999      | 11 | L 4  | 565.3098       | 283.1588        |
| 1273.6429      | 12 | N 3  | 452.2258       | 226.6168        |
| 1436.7062      | 13 | Y 2  | 338.1828       | 169.5953        |
|                | 14 | R 1  | 175.1195       | 88.0637         |

N-term:+43.02

STLLIHHHPQYAWLQDLGLR, MH+ 2303.2301, m/z 768.4149  
 L OSG39 P180811 230811-s1.07923.07923.3.dta

scan 7923; 4.4e-001

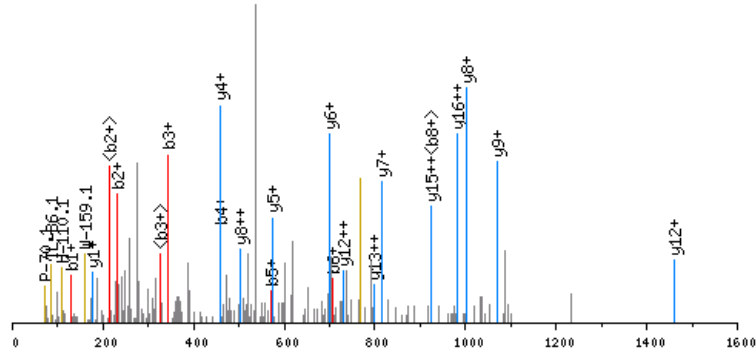

click image to zoom in; click top corners to zoom out [\[precursor±\]](#)

scan 7921; 768.4 m/z; 2.5e+003

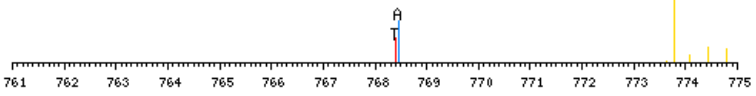

zoomed in precursor plot; T=theoretical m/z, A=acquired m/z

X-range:

-

MassTol: Y-zoom:

MassType:

AVG  MONO

Axis:

1  2

Label:

I  M  -

Ions:

a  +  2+  3+

b  +  2+  3+

c  +  2+  3+

x  +  2+  3+

y  +  2+  3+

z  +  2+  3+

hide H<sub>2</sub>O/NH<sub>3</sub>

zoom 112-122

GO

| b <sup>+</sup> | #  | AA | #  | y <sup>+</sup> | y <sup>2+</sup> |
|----------------|----|----|----|----------------|-----------------|
| 130.0504       | 1  | S  | 19 |                |                 |
| 231.0981       | 2  | T  | 18 | 2174.1875      | 1087.5976       |
| 344.1822       | 3  | L  | 17 | 2073.1398      | 1037.0738       |
| 457.2662       | 4  | L  | 16 | 1960.0557      | 980.5318        |
| 570.3503       | 5  | I  | 15 | 1846.9717      | 923.9897        |
| 707.4092       | 6  | H  | 14 | 1733.8876      | 867.4477        |
| 844.4681       | 7  | H  | 13 | 1596.8287      | 798.9183        |
| 941.5209       | 8  | P  | 12 | 1459.7698      | 730.3888        |
| 1069.5795      | 9  | Q  | 11 | 1362.7170      | 681.8624        |
| 1232.6428      | 10 | Y  | 10 | 1234.6584      | 617.8331        |
| 1303.6799      | 11 | A  | 9  | 1071.5951      | 536.3015        |
| 1489.7592      | 12 | W  | 8  | 1000.5580      | 500.7829        |
| 1602.8433      | 13 | L  | 7  | 814.4787       | 407.7433        |
| 1730.9019      | 14 | Q  | 6  | 701.3946       | 351.2012        |
| 1845.9288      | 15 | D  | 5  | 573.3360       | 287.1719        |
| 1959.0129      | 16 | L  | 4  | 458.3091       | 229.6585        |
| 2016.0343      | 17 | G  | 3  | 345.2250       | 173.1164        |
| 2129.1184      | 18 | L  | 2  | 288.2036       | 144.6057        |
|                | 19 | R  | 1  | 175.1195       | 88.0637         |

N-term:+43.02

STNIDLSSLSSYDEGQGSKFIR, MH+ 2381.1685, m/z 794.3944  
 L OSG37 P180811 230811-s1.06702.06702.3.dta

X-range:

-

MassTol: Y-zoom:

MassType:

AVG  MONO

Axis:

1  2

Label:

I  M  -

Ions:

a  +  2+  3+

b  +  2+  3+

c  +  2+  3+

x  +  2+  3+

y  +  2+  3+

z  +  2+  3+

hide H<sub>2</sub>O/NH<sub>3</sub>

zoom 112-122

GO

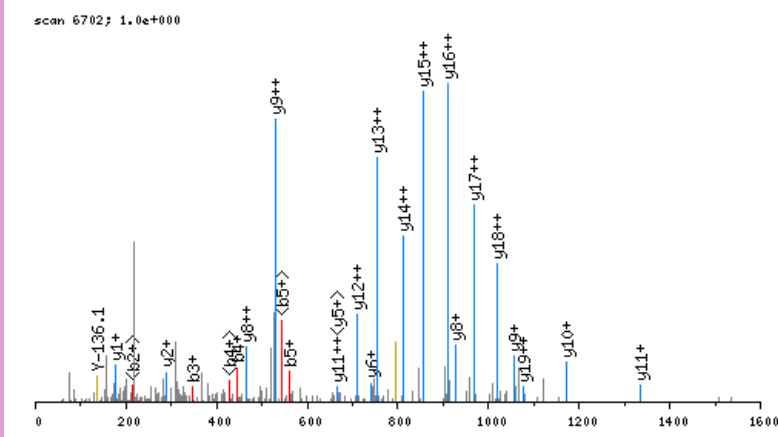

click image to zoom in; click top corners to zoom out [\[precursor±\]](#)

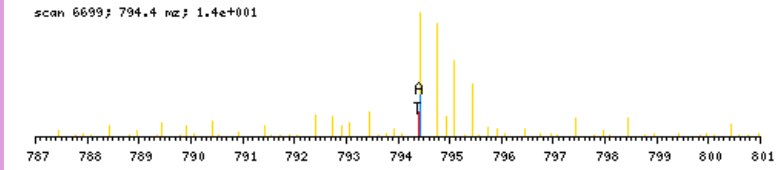

zoomed in precursor plot; T=theoretical m/z, A=acquired m/z

| b <sup>+</sup> | #  | AA # | y <sup>+</sup> | y <sup>2+</sup> |
|----------------|----|------|----------------|-----------------|
| 130.0504       | 1  | S 21 |                |                 |
| 231.0981       | 2  | T 20 | 2252.1259      | 1126.5669       |
| 345.1410       | 3  | N 19 | 2151.0782      | 1076.0430       |
| 446.1887       | 4  | T 18 | 2037.0353      | 1019.0216       |
| 561.2157       | 5  | D 17 | 1935.9876      | 968.4977        |
| 674.2997       | 6  | L 16 | 1820.9607      | 910.9843        |
| 761.3317       | 7  | S 15 | 1707.8766      | 854.4422        |
| 874.4158       | 8  | L 14 | 1620.8446      | 810.9262        |
| 961.4478       | 9  | S 13 | 1507.7605      | 754.3842        |
| 1048.4799      | 10 | S 12 | 1420.7285      | 710.8682        |
| 1211.5432      | 11 | Y 11 | 1333.6965      | 667.3522        |
| 1326.5701      | 12 | D 10 | 1170.6331      | 585.8205        |
| 1455.6127      | 13 | E 9  | 1055.6062      | 528.3070        |
| 1512.6342      | 14 | G 8  | 926.5636       | 463.7857        |
| 1640.6928      | 15 | Q 7  | 869.5421       | 435.2750        |
| 1697.7142      | 16 | G 6  | 741.4836       | 371.2457        |
| 1784.7463      | 17 | S 5  | 684.4621       | 342.7350        |
| 1946.9044      | 18 | K 4  | 597.4301       | 299.2190        |
| 2093.9728      | 19 | F 3  | 435.2720       | 218.1399        |
| 2207.0568      | 20 | I 2  | 288.2036       | 144.6057        |
|                | 21 | R 1  | 175.1195       | 88.0637         |

N-term:+43.02 K(18):+162.16

STPGKENFR, MH+ 1111.5960, m/z 556.3017  
 L OSG38 P180811 230811-s1.02241.02241.2.dta

scan 2241; 2.5e+001

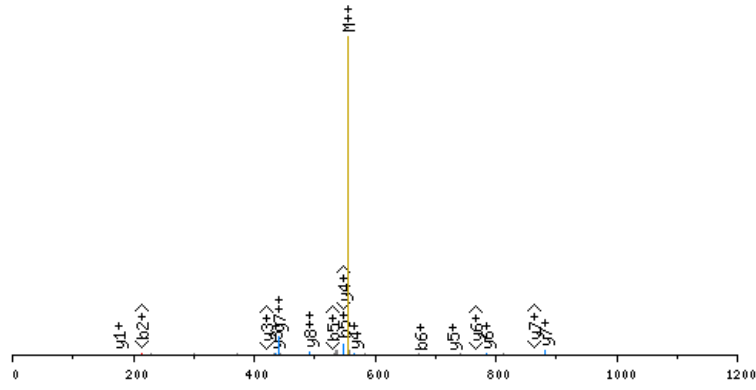

click image to zoom in; click top corners to zoom out [precursor±]

scan 2239; 556.3 m/z; 9.2e+000

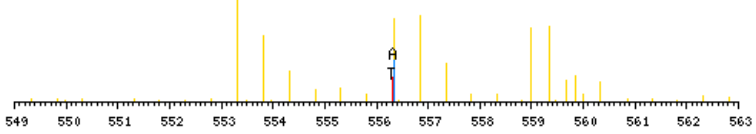

zoomed in precursor plot; T=theoretical m/z, A=acquired m/z

X-range:

-

MassTol: Y-zoom:

MassType:

AVG  MONO

Axis:

1  2

Label:

I  M  -

Ions:

a  +  2+  3+

b  +  2+  3+

c  +  2+  3+

x  +  2+  3+

y  +  2+  3+

z  +  2+  3+

hide H<sub>2</sub>O/NH<sub>3</sub>

zoom 112-122

GO

| b <sup>+</sup> | # | AA # | y <sup>+</sup> | y <sup>2+</sup> |
|----------------|---|------|----------------|-----------------|
| 130.0504       | 1 | S    | 9              |                 |
| 231.0981       | 2 | T    | 8              | 982.5534        |
| 328.1509       | 3 | P    | 7              | 881.5058        |
| 385.1723       | 4 | G    | 6              | 784.4530        |
| 547.3304       | 5 | K    | 5              | 727.4315        |
| 676.3730       | 6 | E    | 4              | 565.2734        |
| 790.4160       | 7 | N    | 3              | 436.2308        |
| 937.4844       | 8 | F    | 2              | 322.1879        |
|                | 9 | R    | 1              | 175.1195        |

N-term:+43.02 K(5):+162.16

STTTGPEAAPKPSAKSIYEQR, MH+ 2317.2040, m/z 773.0729  
 L OSG39 P180811 230811-s1.03093.03093.3.dta

X-range:

0 - 0

MassTol: Y-zoom:

0. 1.

MassType:

AVG  MONO

Axis:

1  2

Label:

I  M  -

Ions:

a  +  2+  3+

b  +  2+  3+

c  +  2+  3+

x  +  2+  3+

y  +  2+  3+

z  +  2+  3+

hide H<sub>2</sub>O/NH<sub>3</sub>

zoom 112-122

GO

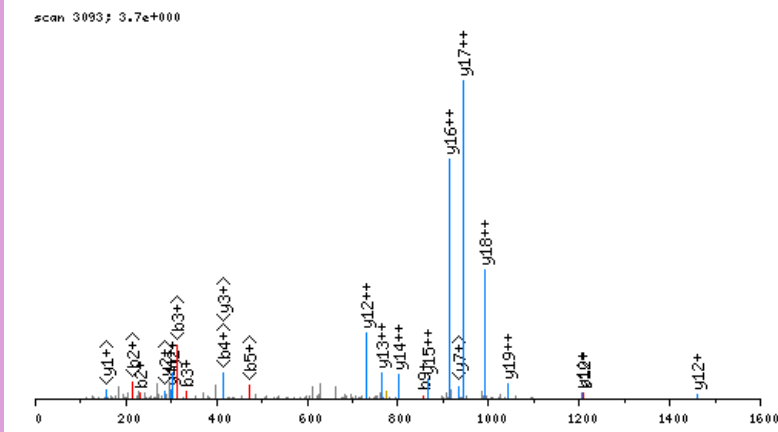

click image to zoom in; click top corners to zoom out [precursor±]

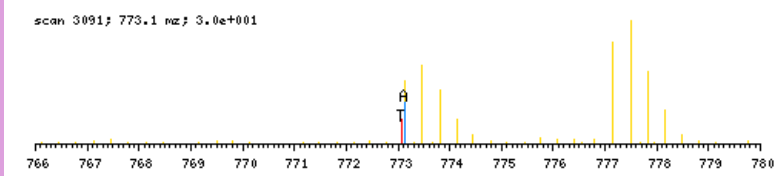

zoomed in precursor plot; T=theoretical m/z, A=acquired m/z

| b <sup>+</sup> | #  | AA | #  | y <sup>+</sup> | y <sup>2+</sup> |
|----------------|----|----|----|----------------|-----------------|
| 130.0504       | 1  | S  | 21 |                |                 |
| 231.0981       | 2  | T  | 20 | 2188.1614      | 1094.5846       |
| 332.1458       | 3  | T  | 19 | 2087.1138      | 1044.0608       |
| 433.1935       | 4  | T  | 18 | 1986.0661      | 993.5370        |
| 490.2149       | 5  | G  | 17 | 1885.0184      | 943.0131        |
| 587.2677       | 6  | P  | 16 | 1827.9969      | 914.5024        |
| 716.3103       | 7  | E  | 15 | 1730.9442      | 865.9760        |
| 787.3474       | 8  | A  | 14 | 1601.9016      | 801.4547        |
| 858.3845       | 9  | A  | 13 | 1530.8645      | 765.9362        |
| 955.4373       | 10 | P  | 12 | 1459.8274      | 730.4176        |
| 1111.5636      | 11 | K  | 11 | 1362.7746      | 681.8912        |
| 1208.6163      | 12 | P  | 10 | 1206.6483      | 603.8281        |
| 1295.6484      | 13 | S  | 9  | 1109.5955      | 555.3017        |
| 1366.6855      | 14 | A  | 8  | 1022.5635      | 511.7857        |
| 1522.8118      | 15 | K  | 7  | 951.5264       | 476.2671        |
| 1609.8438      | 16 | S  | 6  | 795.4001       | 398.2040        |
| 1722.9279      | 17 | I  | 5  | 708.3681       | 354.6879        |
| 1885.9912      | 18 | Y  | 4  | 595.2840       | 298.1459        |
| 2015.0338      | 19 | E  | 3  | 432.2207       | 216.6142        |
| 2143.0924      | 20 | Q  | 2  | 303.1781       | 152.0930        |
|                | 21 | R  | 1  | 175.1195       | 88.0637         |

N-term:+43.02 K(11):+156.13  
 K(15):+156.13

SVAFAPR, MH+ 860.4630, m/z 430.7352  
 L OSG41 P180811 230811-s1.04230.04230.2.dta

X-range:

-

MassTol: Y-zoom:

MassType:

AVG  MONO

Axis:

1  2

Label:

I  M  -

Ions:

a  +  2+  3+

b  +  2+  3+

c  +  2+  3+

x  +  2+  3+

y  +  2+  3+

z  +  2+  3+

hide H<sub>2</sub>O/NH<sub>3</sub>

zoom 112-122

GO

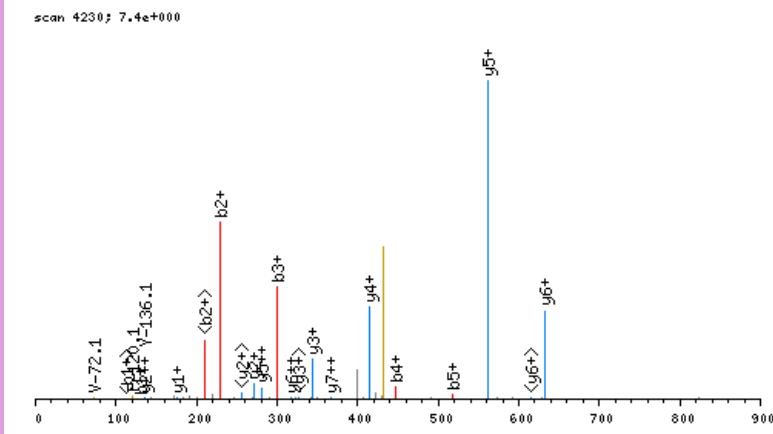

click image to zoom in; click top corners to zoom out [\[precursor±\]](#)

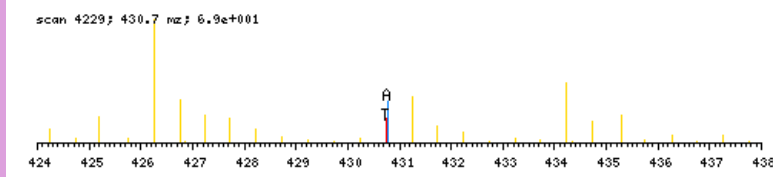

zoomed in precursor plot; T=theoretical m/z, A=acquired m/z

| b <sup>+</sup> | # | AA # | y <sup>+</sup> | y <sup>2+</sup> |
|----------------|---|------|----------------|-----------------|
| 130.0504       | 1 | S 8  |                |                 |
| 229.1188       | 2 | V 7  | 731.4204       | 366.2141        |
| 300.1560       | 3 | A 6  | 632.3520       | 316.6799        |
| 447.2244       | 4 | F 5  | 561.3149       | 281.1614        |
| 518.2615       | 5 | A 4  | 414.2465       | 207.6272        |
| 589.2986       | 6 | A 3  | 343.2094       | 172.1086        |
| 686.3514       | 7 | P 2  | 272.1723       | 136.5900        |
|                | 8 | R 1  | 175.1195       | 88.0637         |

N-term:+43.02



SVAVAPVAVHPDMSLSEAEPR, MH+ 2333.1447, m/z 778.3864  
 L OSG36 P180811 230811-s1.05220.05220.3.dta

scan 5220; 2.1e+000

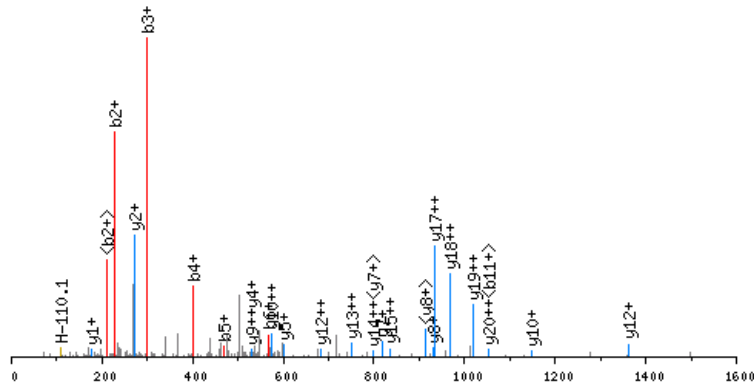

click image to zoom in; click top corners to zoom out [precursor±]

scan 5219; 778.4 mz; 8.5e+000

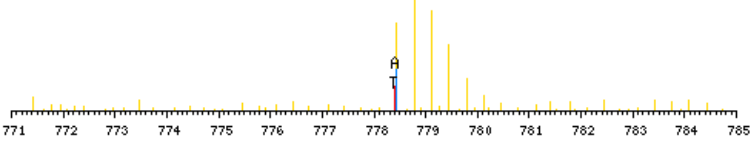

zoomed in precursor plot; T=theoretical m/z, A=acquired m/z

X-range:

-

MassTol: Y-zoom:

MassType:

AVG  MONO

Axis:

1  2

Label:

I  M  -

Ions:

a  +  2+  3+

b  +  2+  3+

c  +  2+  3+

x  +  2+  3+

y  +  2+  3+

z  +  2+  3+

hide H<sub>2</sub>O/NH<sub>3</sub>

zoom 112-122

GO

| b <sup>+</sup> | #  | AA | #  | y <sup>+</sup> | y <sup>2+</sup> |
|----------------|----|----|----|----------------|-----------------|
| 130.0504       | 1  | S  | 22 |                |                 |
| 229.1188       | 2  | V  | 21 | 2204.1021      | 1102.5550       |
| 300.1560       | 3  | A  | 20 | 2105.0337      | 1053.0208       |
| 399.2244       | 4  | V  | 19 | 2033.9966      | 1017.5022       |
| 470.2615       | 5  | A  | 18 | 1934.9282      | 967.9680        |
| 567.3142       | 6  | P  | 17 | 1863.8911      | 932.4495        |
| 666.3827       | 7  | V  | 16 | 1766.8383      | 883.9231        |
| 737.4198       | 8  | A  | 15 | 1667.7699      | 834.3889        |
| 836.4882       | 9  | V  | 14 | 1596.7328      | 798.8703        |
| 973.5471       | 10 | H  | 13 | 1497.6644      | 749.3361        |
| 1070.5999      | 11 | P  | 12 | 1360.6055      | 680.8066        |
| 1185.6268      | 12 | D  | 11 | 1263.5527      | 632.2803        |
| 1272.6588      | 13 | S  | 10 | 1148.5258      | 574.7668        |
| 1403.6993      | 14 | M  | 9  | 1061.4937      | 531.2508        |
| 1516.7834      | 15 | L  | 8  | 930.4533       | 465.7305        |
| 1603.8154      | 16 | S  | 7  | 817.3692       | 409.1885        |
| 1732.8580      | 17 | E  | 6  | 730.3372       | 365.6725        |
| 1803.8951      | 18 | A  | 5  | 601.2946       | 301.1512        |
| 1932.9377      | 19 | E  | 4  | 530.2575       | 265.6326        |
| 2061.9803      | 20 | E  | 3  | 401.2149       | 201.1113        |
| 2159.0331      | 21 | P  | 2  | 272.1723       | 136.5900        |
|                | 22 | R  | 1  | 175.1195       | 88.0637         |

N-term:+43.02

SVNTEDEL, MH+ 975.4747, m/z 488.2410  
 L OSG41 P180811 230811-s1.03260.03260.2.dta

scan 3260; 5.4e-001

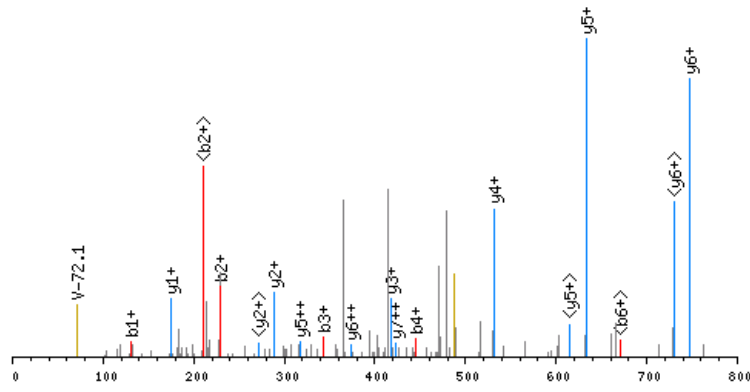

click image to zoom in; click top corners to zoom out [\[precursor±\]](#)

scan 3259; 488.2 m/z; 6.2e+000

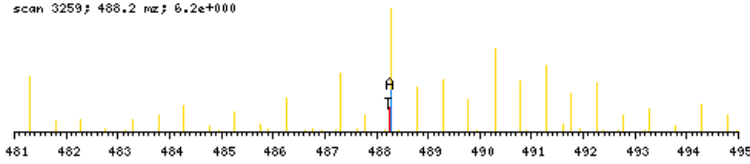

zoomed in precursor plot; T=theoretical m/z, A=acquired m/z

X-range:

-

MassTol: Y-zoom:

MassType:

AVG  MONO

Axis:

1  2

Label:

I  M  -

Ions:

a  +  2+  3+

b  +  2+  3+

c  +  2+  3+

x  +  2+  3+

y  +  2+  3+

z  +  2+  3+

hide H<sub>2</sub>O/NH<sub>3</sub>

zoom 112-122

GO

| b <sup>+</sup> | # | AA # | y <sup>+</sup> | y <sup>2+</sup> |
|----------------|---|------|----------------|-----------------|
| 130.0504       | 1 | S    | 8              |                 |
| 229.1188       | 2 | V    | 7              | 846.4321        |
| 343.1618       | 3 | N    | 6              | 747.3637        |
| 444.2094       | 4 | T    | 5              | 633.3208        |
| 559.2364       | 5 | D    | 4              | 532.2731        |
| 688.2790       | 6 | E    | 3              | 417.2462        |
| 801.3630       | 7 | L    | 2              | 288.2036        |
|                | 8 | R    | 1              | 175.1195        |

N-term:+43.02

SVPAFIDISEEDQAAELR, MH+ 2031.9875, m/z 678.0007  
 L OSG41 P180811 230811-s1.07383.07383.3.dta

X-range:

-

MassTol: Y-zoom:

MassType:

AVG  MONO

Axis:

1  2

Label:

I  M  -

Ions:

a  +  2+  3+

b  +  2+  3+

c  +  2+  3+

x  +  2+  3+

y  +  2+  3+

z  +  2+  3+

hide H<sub>2</sub>O/NH<sub>3</sub>

zoom 112-122

GO

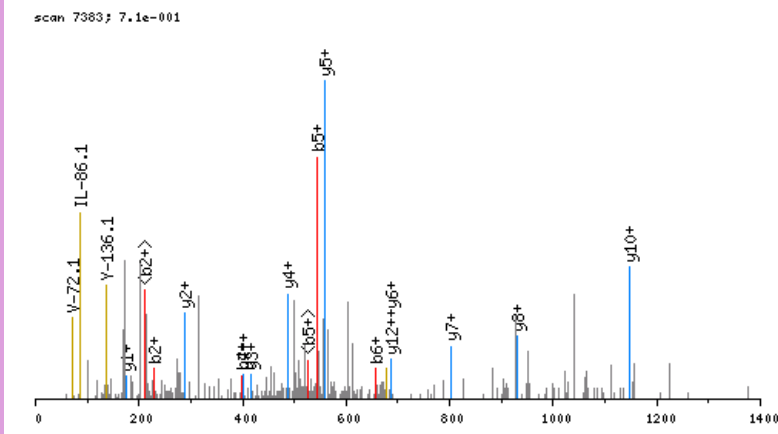

click image to zoom in; click top corners to zoom out [\[precursor±\]](#)

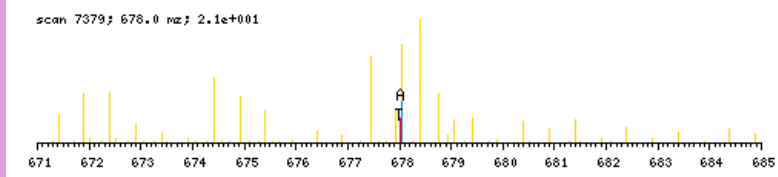

zoomed in precursor plot; T=theoretical m/z, A=acquired m/z

| b <sup>+</sup>  | #  | AA # | y <sup>+</sup>   | y <sup>2+</sup> |
|-----------------|----|------|------------------|-----------------|
| 130.0504        | 1  | S 18 |                  |                 |
| <b>229.1188</b> | 2  | V 17 | 1902.9449        | 951.9764        |
| 326.1716        | 3  | P 16 | 1803.8765        | 902.4422        |
| <b>397.2087</b> | 4  | A 15 | 1706.8237        | 853.9158        |
| <b>544.2771</b> | 5  | F 14 | 1635.7866        | 818.3972        |
| <b>657.3612</b> | 6  | I 13 | 1488.7182        | 744.8630        |
| 772.3881        | 7  | D 12 | 1375.6341        | <b>688.3210</b> |
| 885.4722        | 8  | I 11 | 1260.6072        | 630.8075        |
| 972.5042        | 9  | S 10 | <b>1147.5231</b> | 574.2655        |
| 1101.5468       | 10 | E 9  | 1060.4911        | 530.7495        |
| 1230.5894       | 11 | E 8  | <b>931.4485</b>  | 466.2282        |
| 1345.6164       | 12 | D 7  | <b>802.4059</b>  | <b>401.7069</b> |
| 1473.6749       | 13 | Q 6  | <b>687.3790</b>  | 344.1934        |
| 1544.7121       | 14 | A 5  | <b>559.3204</b>  | 280.1641        |
| 1615.7492       | 15 | A 4  | <b>488.2833</b>  | 244.6455        |
| 1744.7918       | 16 | E 3  | <b>417.2462</b>  | 209.1270        |
| 1857.8758       | 17 | L 2  | <b>288.2036</b>  | 144.6057        |
|                 | 18 | R 1  | <b>175.1195</b>  | 88.0637         |

N-term:+43.02

SVPLLTDAATVSGAER, MH+ 1628.8496, m/z 814.9284  
 L OSG41 P180811 230811-s1.07086.07086.2.dta

X-range:

-

MassTol: Y-zoom:

MassType:

AVG  MONO

Axis:

1  2

Label:

I  M  -

Ions:

a  +  2+  3+

b  +  2+  3+

c  +  2+  3+

x  +  2+  3+

y  +  2+  3+

z  +  2+  3+

hide H<sub>2</sub>O/NH<sub>3</sub>

zoom 112-122

GO

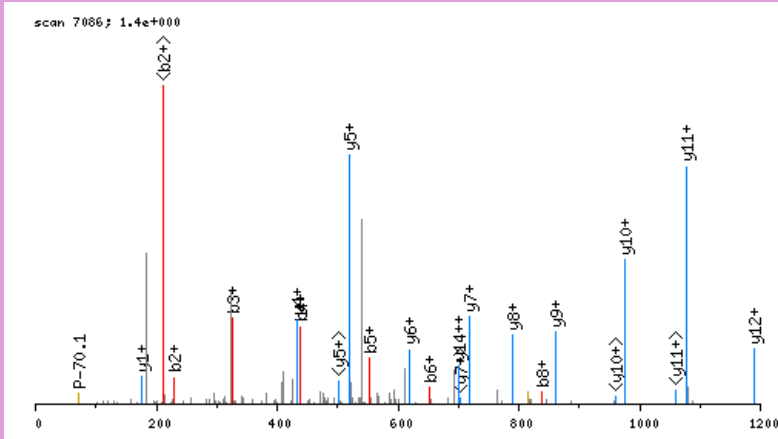

click image to zoom in; click top corners to zoom out [\[precursor±\]](#)

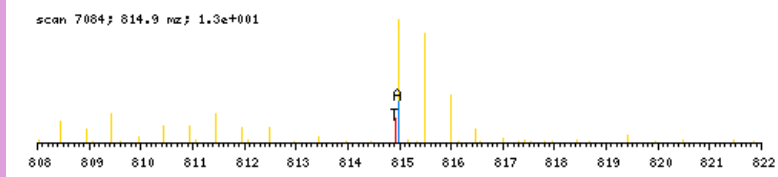

zoomed in precursor plot; T=theoretical m/z, A=acquired m/z

| b <sup>+</sup> | #  | AA # | y <sup>+</sup> | y <sup>2+</sup> |
|----------------|----|------|----------------|-----------------|
| 130.0504       | 1  | S 16 |                |                 |
| 229.1188       | 2  | V 15 | 1499.8069      | 750.4074        |
| 326.1716       | 3  | P 14 | 1400.7385      | 700.8732        |
| 439.2557       | 4  | L 13 | 1303.6858      | 652.3468        |
| 552.3397       | 5  | L 12 | 1190.6017      | 595.8048        |
| 653.3874       | 6  | T 11 | 1077.5176      | 539.2627        |
| 768.4144       | 7  | D 10 | 976.4700       | 488.7389        |
| 839.4515       | 8  | A 9  | 861.4430       | 431.2254        |
| 910.4886       | 9  | A 8  | 790.4059       | 395.7069        |
| 1011.5363      | 10 | T 7  | 719.3688       | 360.1883        |
| 1110.6047      | 11 | V 6  | 618.3211       | 309.6645        |
| 1197.6367      | 12 | S 5  | 519.2527       | 260.1303        |
| 1254.6582      | 13 | G 4  | 432.2207       | 216.6142        |
| 1325.6953      | 14 | A 3  | 375.1992       | 188.1035        |
| 1454.7379      | 15 | E 2  | 304.1621       | 152.5850        |
|                | 16 | R 1  | 175.1195       | 88.0637         |

N-term:+43.02

SVVSVETDDGTR, MH+ 1508.7080, m/z 754.8577  
 L OSG41 P180811 230811-s1.03793.03793.2.dta

X-range:

-

MassTol: Y-zoom:

MassType:

AVG  MONO

Axis:

1  2

Label:

I  M  -

Ions:

a  +  2+  3+

b  +  2+  3+

c  +  2+  3+

x  +  2+  3+

y  +  2+  3+

z  +  2+  3+

hide H<sub>2</sub>O/NH<sub>3</sub>

zoom 112-122

GO

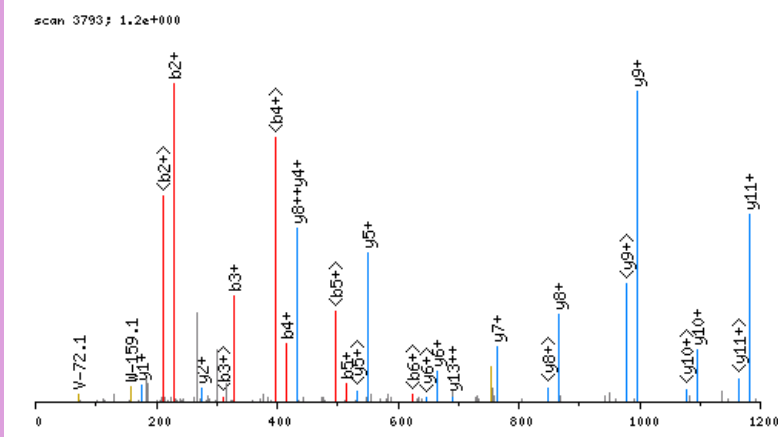

click image to zoom in; click top corners to zoom out [\[precursor±\]](#)

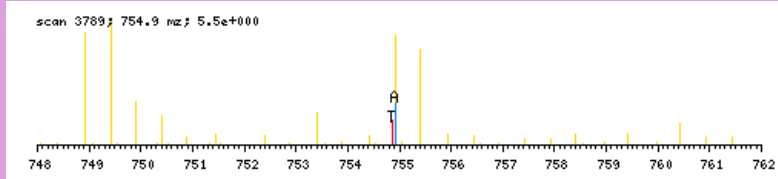

zoomed in precursor plot; T=theoretical m/z, A=acquired m/z

| b <sup>+</sup> | #  | AA # | y <sup>+</sup> | y <sup>2+</sup> |
|----------------|----|------|----------------|-----------------|
| 130.0504       | 1  | S 14 |                |                 |
| 229.1188       | 2  | V 13 | 1379.6654      | 690.3366        |
| 328.1873       | 3  | V 12 | 1280.5970      | 640.8024        |
| 415.2193       | 4  | S 11 | 1181.5286      | 591.2682        |
| 514.2877       | 5  | V 10 | 1094.4966      | 547.7522        |
| 643.3303       | 6  | E 9  | 995.4282       | 498.2180        |
| 744.3780       | 7  | T 8  | 866.3856       | 433.6967        |
| 845.4256       | 8  | T 7  | 765.3379       | 383.1729        |
| 960.4526       | 9  | D 6  | 664.2902       | 332.6490        |
| 1075.4795      | 10 | D 5  | 549.2633       | 275.1355        |
| 1132.5010      | 11 | G 4  | 434.2363       | 217.6221        |
| 1233.5487      | 12 | T 3  | 377.2149       | 189.1113        |
| 1334.5964      | 13 | T 2  | 276.1672       | 138.5875        |
|                | 14 | R 1  | 175.1195       | 88.0637         |

N-term:+43.02

SVVTGGGEAAGGGGGGAR, MH+ 1515.7152, m/z 758.3612  
 L OSG41 P180811 230811-s1.02626.02626.2.dta

X-range:

-

MassTol: Y-zoom:

MassType:

AVG  MONO

Axis:

1  2

Label:

I  M  -

Ions:

a  +  2+  3+

b  +  2+  3+

c  +  2+  3+

x  +  2+  3+

y  +  2+  3+

z  +  2+  3+

hide H<sub>2</sub>O/NH<sub>3</sub>

zoom 112-122

GO

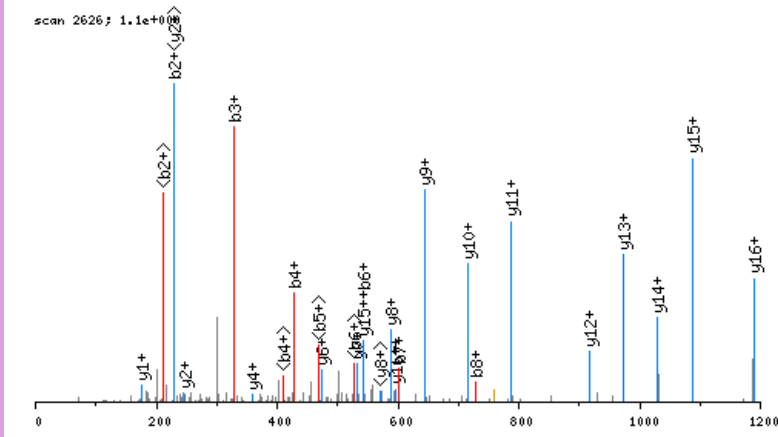

click image to zoom in; click top corners to zoom out [\[precursor±\]](#)

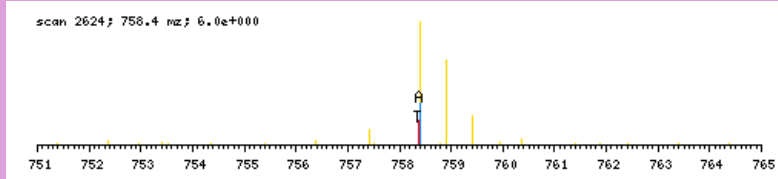

zoomed in precursor plot; T=theoretical m/z, A=acquired m/z

| b <sup>+</sup> | #  | AA # | y <sup>+</sup> | y <sup>2+</sup> |
|----------------|----|------|----------------|-----------------|
| 130.0504       | 1  | S 19 |                |                 |
| 229.1188       | 2  | V 18 | 1386.6726      | 693.8402        |
| 328.1873       | 3  | V 17 | 1287.6042      | 644.3060        |
| 429.2349       | 4  | T 16 | 1188.5358      | 594.7718        |
| 486.2564       | 5  | G 15 | 1087.4881      | 544.2479        |
| 543.2779       | 6  | G 14 | 1030.4666      | 515.7372        |
| 600.2993       | 7  | G 13 | 973.4451       | 487.2265        |
| 729.3419       | 8  | E 12 | 916.4237       | 458.7158        |
| 800.3790       | 9  | A 11 | 787.3811       | 394.1945        |
| 871.4161       | 10 | A 10 | 716.3440       | 358.6759        |
| 928.4376       | 11 | G 9  | 645.3069       | 323.1573        |
| 985.4591       | 12 | G 8  | 588.2854       | 294.6466        |
| 1042.4805      | 13 | G 7  | 531.2639       | 266.1359        |
| 1099.5020      | 14 | G 6  | 474.2425       | 237.6251        |
| 1156.5235      | 15 | G 5  | 417.2210       | 209.1144        |
| 1213.5449      | 16 | G 4  | 360.1995       | 180.6037        |
| 1270.5664      | 17 | G 3  | 303.1781       | 152.0930        |
| 1341.6035      | 18 | A 2  | 246.1566       | 123.5822        |
|                | 19 | R 1  | 175.1195       | 88.0637         |

N-term:+43.02

SWFADLAGR, MH+ 1064.5165, m/z 532.7619  
 L OSG41 P180811 230811-s1.07431.07431.2.dta

X-range:

-

MassTol: Y-zoom:

MassType:

AVG  MONO

Axis:

1  2

Label:

I  M  -

Ions:

a  +  2+  3+

b  +  2+  3+

c  +  2+  3+

x  +  2+  3+

y  +  2+  3+

z  +  2+  3+

hide H<sub>2</sub>O/NH<sub>3</sub>

zoom 112-122

GO

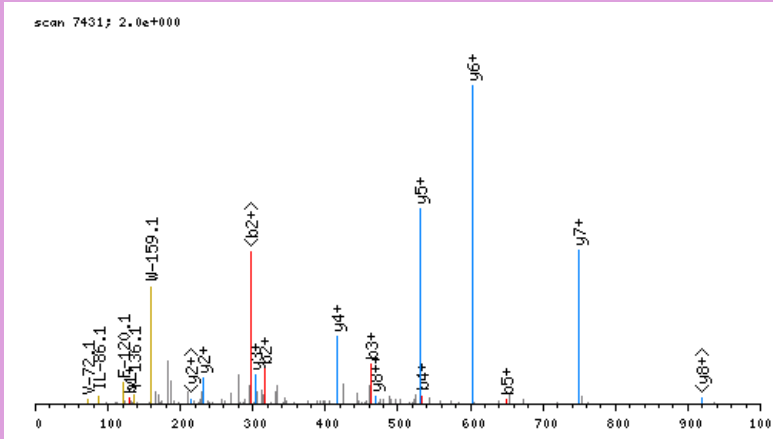

click image to zoom in; click top corners to zoom out [\[precursor±\]](#)

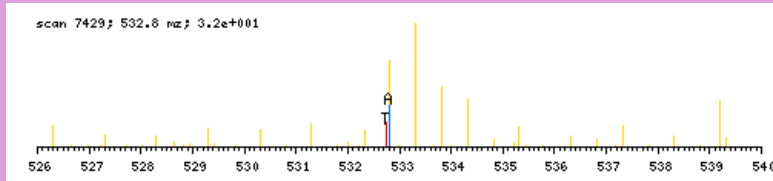

zoomed in precursor plot; T=theoretical m/z, A=acquired m/z

| b <sup>+</sup> | # | AA # | y <sup>+</sup> | y <sup>2+</sup> |
|----------------|---|------|----------------|-----------------|
| 130.0504       | 1 | S    | 9              |                 |
| 316.1297       | 2 | W    | 8              | 935.4739        |
| 463.1982       | 3 | F    | 7              | 749.3946        |
| 534.2353       | 4 | A    | 6              | 602.3262        |
| 649.2622       | 5 | D    | 5              | 531.2891        |
| 762.3463       | 6 | L    | 4              | 416.2621        |
| 833.3834       | 7 | A    | 3              | 303.1781        |
| 890.4049       | 8 | G    | 2              | 232.1410        |
|                | 9 | R    | 1              | 175.1195        |

N-term:+43.02

SYGPLDMYR, MH+ 1143.5145, m/z 572.2609  
 L OSG41 P180811 230811-s1.06143.06143.2.dta

X-range:

-

MassTol: Y-zoom:

MassType:

AVG  MONO

Axis:

1  2

Label:

I  M  -

Ions:

a  +  2+  3+

b  +  2+  3+

c  +  2+  3+

x  +  2+  3+

y  +  2+  3+

z  +  2+  3+

hide H<sub>2</sub>O/NH<sub>3</sub>

zoom 112-122

GO

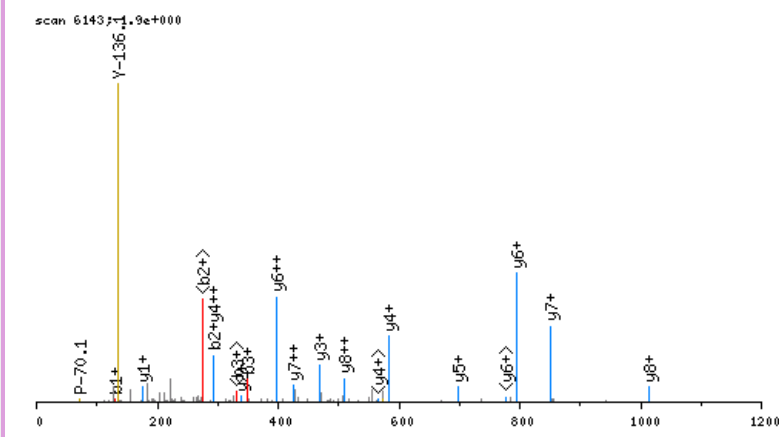

click image to zoom in; click top corners to zoom out [\[precursor±\]](#)

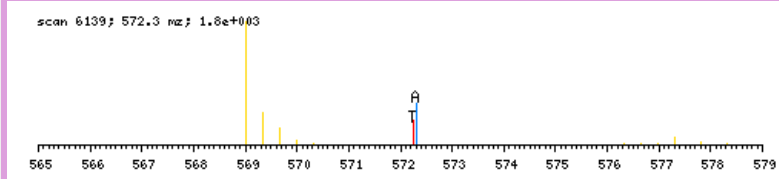

zoomed in precursor plot; T=theoretical m/z, A=acquired m/z

| b <sup>+</sup> | # | AA # | y <sup>+</sup> | y <sup>2+</sup>    |
|----------------|---|------|----------------|--------------------|
| 130.0504       | 1 | S    | 9              |                    |
| 293.1138       | 2 | Y    | 8              | 1014.4719 507.7399 |
| 350.1352       | 3 | G    | 7              | 851.4085 426.2082  |
| 447.1880       | 4 | P    | 6              | 794.3871 397.6975  |
| 560.2720       | 5 | L    | 5              | 697.3343 349.1711  |
| 675.2990       | 6 | D    | 4              | 584.2503 292.6290  |
| 806.3395       | 7 | M    | 3              | 469.2233 235.1156  |
| 969.4028       | 8 | Y    | 2              | 338.1828 169.5953  |
|                | 9 | R    | 1              | 175.1195 88.0637   |

N-term:+43.02



SYGRPPPDVEGMTSLKVDNLTYR, MH+ 2665.3296, m/z 889.1147  
 L OSG38 P180811 230811-s1.06777.06777.3.dta

scan 6777; 1.3e+001

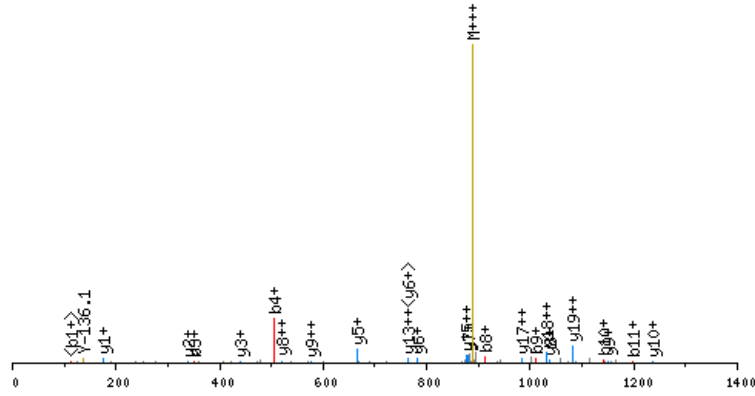

click image to zoom in; click top corners to zoom out [precursor±]

scan 6774; 889.1 m/z; 1.6e+001

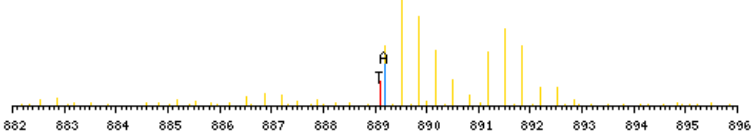

zoomed in precursor plot; T=theoretical m/z, A=acquired m/z

X-range:

0 - 0

MassTol: Y-zoom:

0. 1.

MassType:

AVG  MONO

Axis:

1  2

Label:

I  M  -

Ions:

a  +  2+  3+

b  +  2+  3+

c  +  2+  3+

x  +  2+  3+

y  +  2+  3+

z  +  2+  3+

hide H<sub>2</sub>O/NH<sub>3</sub>

zoom 112-122

GO

| b <sup>+</sup> | #  | AA | #  | y <sup>+</sup> | y <sup>2+</sup> |
|----------------|----|----|----|----------------|-----------------|
| 130.0504       | 1  | S  | 23 |                |                 |
| 293.1138       | 2  | Y  | 22 | 2536.2870      | 1268.6474       |
| 350.1352       | 3  | G  | 21 | 2373.2237      | 1187.1158       |
| 506.2363       | 4  | R  | 20 | 2316.2022      | 1158.6050       |
| 603.2891       | 5  | P  | 19 | 2160.1011      | 1080.5545       |
| 700.3419       | 6  | P  | 18 | 2063.0484      | 1032.0281       |
| 797.3946       | 7  | P  | 17 | 1965.9956      | 983.5017        |
| 912.4216       | 8  | D  | 16 | 1868.9428      | 934.9753        |
| 1011.4900      | 9  | V  | 15 | 1753.9159      | 877.4619        |
| 1140.5326      | 10 | E  | 14 | 1654.8475      | 827.9276        |
| 1197.5540      | 11 | G  | 13 | 1525.8049      | 763.4064        |
| 1328.5945      | 12 | M  | 12 | 1468.7834      | 734.8956        |
| 1429.6422      | 13 | T  | 11 | 1337.7429      | 669.3754        |
| 1516.6742      | 14 | S  | 10 | 1236.6952      | 618.8515        |
| 1629.7583      | 15 | L  | 9  | 1149.6632      | 575.3355        |
| 1785.8846      | 16 | K  | 8  | 1036.5792      | 518.7935        |
| 1884.9530      | 17 | V  | 7  | 880.4529       | 440.7303        |
| 1999.9799      | 18 | D  | 6  | 781.3844       | 391.1961        |
| 2114.0229      | 19 | N  | 5  | 666.3575       | 333.6827        |
| 2227.1069      | 20 | L  | 4  | 552.3146       | 276.6612        |
| 2328.1546      | 21 | T  | 3  | 439.2305       | 220.1192        |
| 2491.2179      | 22 | Y  | 2  | 338.1828       | 169.5953        |
|                | 23 | R  | 1  | 175.1195       | 88.0637         |

N-term:+43.02 K(16):+156.13

SYTPGIGGDSAQLAQR, MH+ 1662.8087, m/z 554.9411  
 L OSG41 P180811 230811-s1.04666.04666.3.dta

X-range:

-

MassTol: Y-zoom:

MassType:

AVG  MONO

Axis:

1  2

Label:

I  M  -

Ions:

a  +  2+  3+

b  +  2+  3+

c  +  2+  3+

x  +  2+  3+

y  +  2+  3+

z  +  2+  3+

hide H<sub>2</sub>O/NH<sub>3</sub>

zoom 112-122

GO

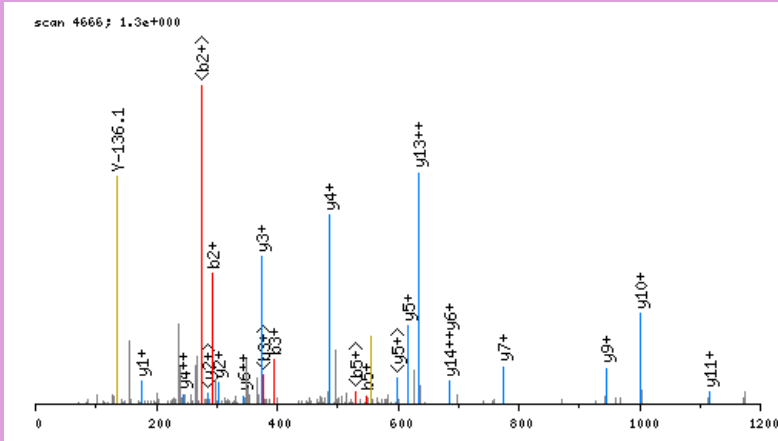

click image to zoom in; click top corners to zoom out [\[precursor±\]](#)

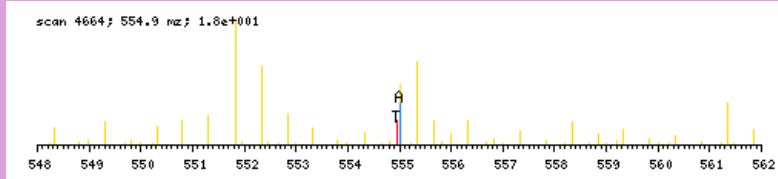

zoomed in precursor plot; T=theoretical m/z, A=acquired m/z

| b <sup>+</sup> | #  | AA # | y <sup>+</sup> | y <sup>2+</sup> |
|----------------|----|------|----------------|-----------------|
| 130.0504       | 1  | S 16 |                |                 |
| 293.1138       | 2  | Y 15 | 1533.7661      | 767.3870        |
| 394.1614       | 3  | T 14 | 1370.7028      | 685.8553        |
| 491.2142       | 4  | P 13 | 1269.6551      | 635.3315        |
| 548.2357       | 5  | G 12 | 1172.6024      | 586.8051        |
| 661.3197       | 6  | I 11 | 1115.5809      | 558.2944        |
| 718.3412       | 7  | G 10 | 1002.4968      | 501.7523        |
| 775.3627       | 8  | G 9  | 945.4754       | 473.2416        |
| 890.3896       | 9  | D 8  | 888.4539       | 444.7309        |
| 977.4216       | 10 | S 7  | 773.4270       | 387.2174        |
| 1048.4587      | 11 | A 6  | 686.3949       | 343.7014        |
| 1176.5173      | 12 | Q 5  | 615.3578       | 308.1828        |
| 1289.6014      | 13 | L 4  | 487.2993       | 244.1535        |
| 1360.6385      | 14 | A 3  | 374.2152       | 187.6115        |
| 1488.6971      | 15 | Q 2  | 303.1781       | 152.0930        |
|                | 16 | R 1  | 175.1195       | 88.0637         |

N-term:+43.02

SYTPGQPVTAVVQR, MH+ 1544.8073, m/z 772.9073  
 L OSG41 P180811 230811-s1.04818.04818.2.dta

X-range:

-

MassTol: Y-zoom:

MassType:

AVG  MONO

Axis:

1  2

Label:

I  M  -

Ions:

a  +  2+  3+

b  +  2+  3+

c  +  2+  3+

x  +  2+  3+

y  +  2+  3+

z  +  2+  3+

hide H<sub>2</sub>O/NH<sub>3</sub>

zoom 112-122

GO

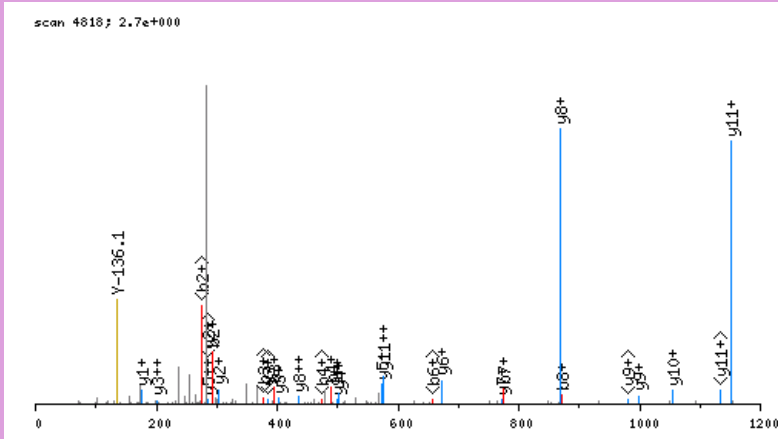

click image to zoom in; click top corners to zoom out [\[precursor±\]](#)

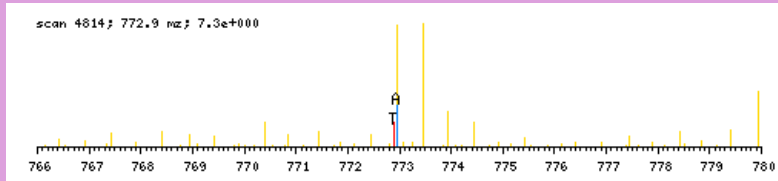

zoomed in precursor plot; T=theoretical m/z, A=acquired m/z

| b <sup>+</sup> | #  | AA # | y <sup>+</sup> | y <sup>2+</sup> |
|----------------|----|------|----------------|-----------------|
| 130.0504       | 1  | S 14 |                |                 |
| 293.1138       | 2  | Y 13 | 1415.7647      | 708.3863        |
| 394.1614       | 3  | T 12 | 1252.7014      | 626.8546        |
| 491.2142       | 4  | P 11 | 1151.6537      | 576.3308        |
| 548.2357       | 5  | G 10 | 1054.6009      | 527.8044        |
| 676.2942       | 6  | Q 9  | 997.5795       | 499.2936        |
| 773.3470       | 7  | P 8  | 869.5209       | 435.2644        |
| 872.4154       | 8  | V 7  | 772.4681       | 386.7380        |
| 973.4631       | 9  | T 6  | 673.3997       | 337.2038        |
| 1044.5002      | 10 | A 5  | 572.3520       | 286.6799        |
| 1143.5686      | 11 | V 4  | 501.3149       | 251.1614        |
| 1242.6370      | 12 | V 3  | 402.2465       | 201.6272        |
| 1370.6956      | 13 | Q 2  | 303.1781       | 152.0930        |
|                | 14 | R 1  | 175.1195       | 88.0637         |

N-term:+43.02

TAFFKTLR, MH+ 1059.6415, m/z 530.3244  
 L OSG37 P180811 230811-s1.07086.07086.2.dta

scan 7086; 3.1e+001

X-range:

-

MassTol: Y-zoom:

MassType:

AVG  MONO

Axis:

1  2

Label:

I  M  -

Ions:

a  +  2+  3+

b  +  2+  3+

c  +  2+  3+

x  +  2+  3+

y  +  2+  3+

z  +  2+  3+

hide H<sub>2</sub>O/NH<sub>3</sub>

zoom 112-122

GO

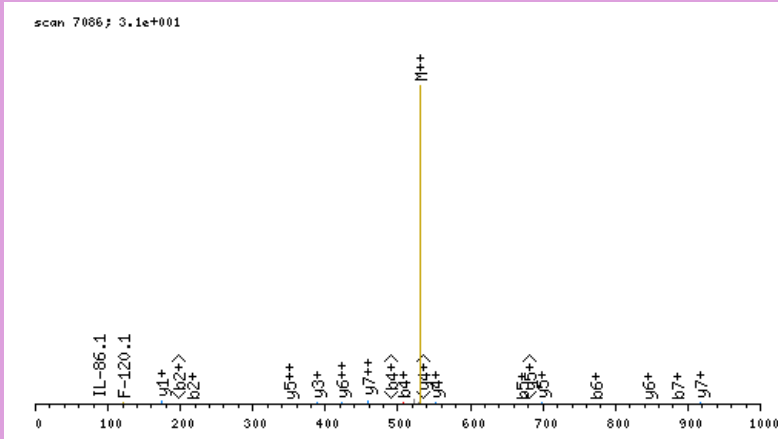

click image to zoom in; click top corners to zoom out [\[precursor±\]](#)

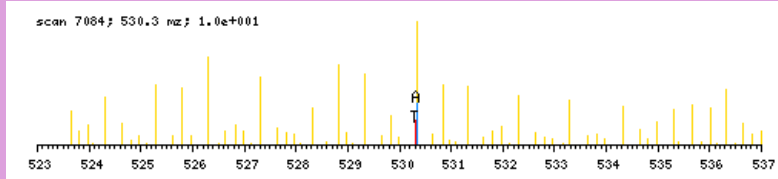

zoomed in precursor plot; T=theoretical m/z, A=acquired m/z

| b <sup>+</sup> | # | AA # | y <sup>+</sup> | y <sup>2+</sup> |
|----------------|---|------|----------------|-----------------|
| 144.0661       | 1 | T 8  |                |                 |
| 215.1032       | 2 | A 7  | 916.5833       | 458.7956        |
| 362.1716       | 3 | F 6  | 845.5462       | 423.2770        |
| 509.2400       | 4 | F 5  | 698.4778       | 349.7428        |
| 671.3981       | 5 | K 4  | 551.4093       | 276.2086        |
| 772.4458       | 6 | T 3  | 389.2512       | 195.1295        |
| 885.5299       | 7 | L 2  | 288.2036       | 144.6057        |
|                | 8 | R 1  | 175.1195       | 88.0637         |

N-term:+43.02 K(5):+162.16

TAIKEIVSR, MH+ 1199.7364, m/z 600.3718  
 L OSG37 P180811 230811-s1.08595.08595.2.dta

X-range:

-

MassTol: Y-zoom:

MassType:

AVG  MONO

Axis:

1  2

Label:

I  M  -

Ions:

a  +  2+  3+

b  +  2+  3+

c  +  2+  3+

x  +  2+  3+

y  +  2+  3+

z  +  2+  3+

hide H<sub>2</sub>O/NH<sub>3</sub>

zoom 112-122

GO

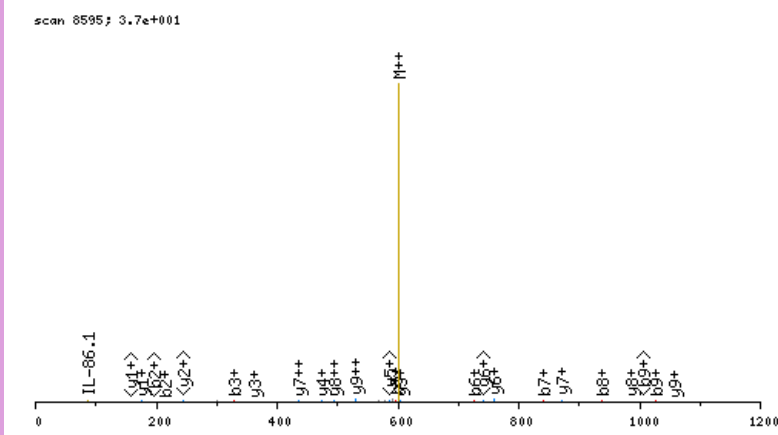

click image to zoom in; click top corners to zoom out [\[precursor±\]](#)

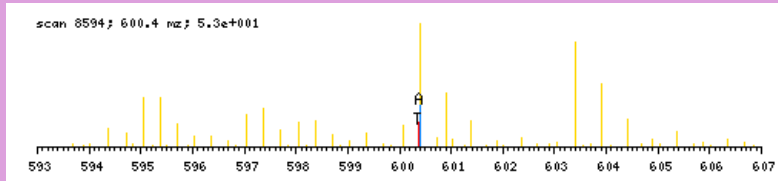

zoomed in precursor plot; T=theoretical m/z, A=acquired m/z

| b <sup>+</sup> | #  | AA # | y <sup>+</sup> | y <sup>2+</sup> |
|----------------|----|------|----------------|-----------------|
| 144.0661       | 1  | T 10 |                |                 |
| 215.1032       | 2  | A 9  | 1056.6781      | 528.8430        |
| 328.1873       | 3  | I 8  | 985.6410       | 493.3244        |
| 441.2713       | 4  | I 7  | 872.5570       | 436.7824        |
| 597.3976       | 5  | K 6  | 759.4729       | 380.2404        |
| 726.4402       | 6  | E 5  | 603.3466       | 302.1772        |
| 839.5243       | 7  | I 4  | 474.3040       | 237.6559        |
| 938.5927       | 8  | V 3  | 361.2199       | 181.1139        |
| 1025.6247      | 9  | S 2  | 262.1515       | 131.5797        |
|                | 10 | R 1  | 175.1195       | 88.0637         |

N-term:+43.02 K(5):+156.13

TATLRPYLSAVR, MH+ 1389.7854, m/z 695.3964  
 L OSG37 P180811 230811-s1.06651.06651.2.dta

X-range:

-

MassTol: Y-zoom:

MassType:

AVG  MONO

Axis:

1  2

Label:

I  M  -

Ions:

a  +  2+  3+

b  +  2+  3+

c  +  2+  3+

x  +  2+  3+

y  +  2+  3+

z  +  2+  3+

hide H<sub>2</sub>O/NH<sub>3</sub>

zoom 112-122

GO

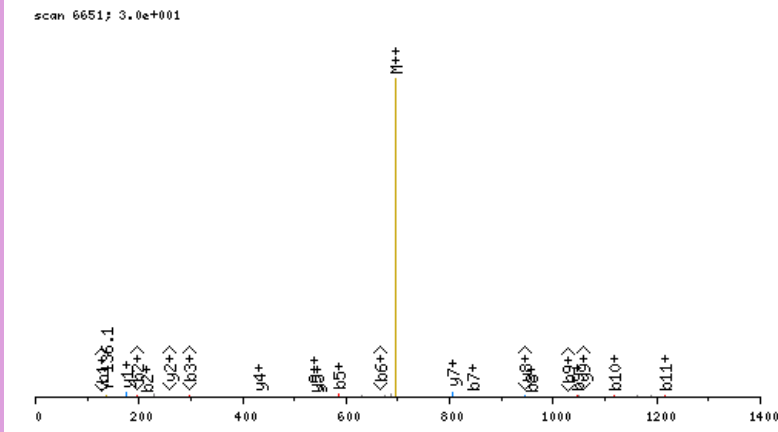

click image to zoom in; click top corners to zoom out [\[precursor±\]](#)

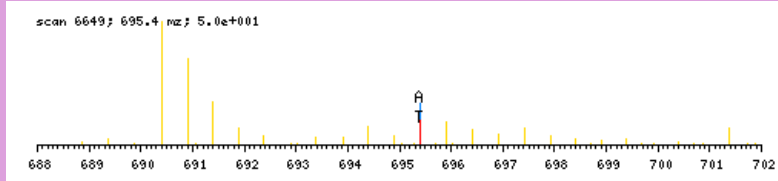

zoomed in precursor plot; T=theoretical m/z, A=acquired m/z

| b <sup>+</sup> | #  | AA # | y <sup>+</sup> | y <sup>2+</sup> |
|----------------|----|------|----------------|-----------------|
| 144.0661       | 1  | T 12 |                |                 |
| 215.1032       | 2  | A 11 | 1246.7272      | 623.8675        |
| 316.1509       | 3  | T 10 | 1175.6901      | 588.3489        |
| 429.2349       | 4  | L 9  | 1074.6424      | 537.8251        |
| 585.3360       | 5  | R 8  | 961.5583       | 481.2831        |
| 682.3888       | 6  | P 7  | 805.4572       | 403.2325        |
| 845.4521       | 7  | Y 6  | 708.4044       | 354.7061        |
| 958.5362       | 8  | L 5  | 545.3411       | 273.1745        |
| 1045.5682      | 9  | S 4  | 432.2571       | 216.6324        |
| 1116.6053      | 10 | A 3  | 345.2250       | 173.1164        |
| 1215.6738      | 11 | V 2  | 274.1879       | 137.5979        |
|                | 12 | R 1  | 175.1195       | 88.0637         |

N-term:+43.02

X-range:

-

MassTol: Y-zoom:

MassType:

AVG  MONO

Axis:

1  2

Label:

I  M  -

Ions:

a  +  2+  3+

b  +  2+  3+

c  +  2+  3+

x  +  2+  3+

y  +  2+  3+

z  +  2+  3+

hide H<sub>2</sub>O/NH<sub>3</sub>

zoom 112-122

GO

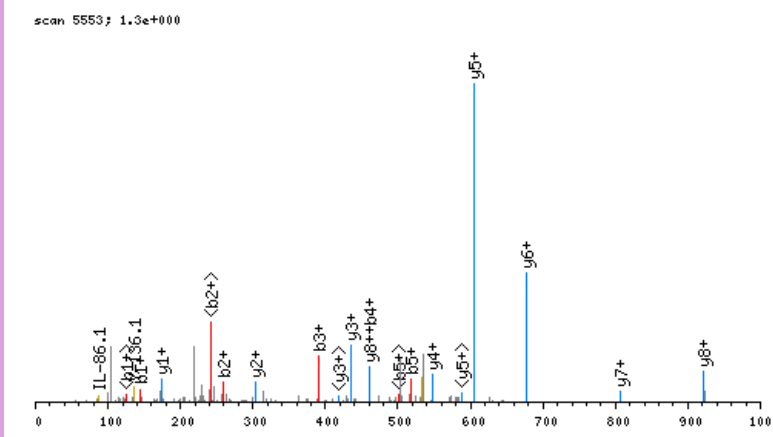

click image to zoom in; click top corners to zoom out [\[precursor±\]](#)

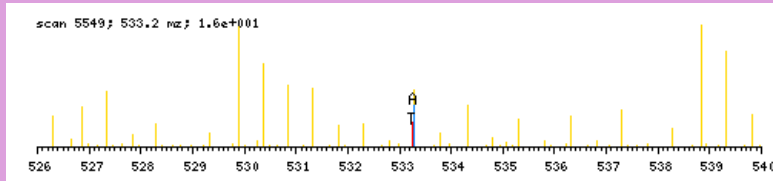

zoomed in precursor plot; T=theoretical m/z, A=acquired m/z

| b <sup>+</sup> | # | AA # | y <sup>+</sup> | y <sup>2+</sup>   |
|----------------|---|------|----------------|-------------------|
| 144.0661       | 1 | T    | 9              |                   |
| 259.0930       | 2 | D    | 8              | 922.4126 461.7102 |
| 390.1335       | 3 | M    | 7              | 807.3857 404.1968 |
| 461.1706       | 4 | A    | 6              | 676.3452 338.6765 |
| 518.1921       | 5 | G    | 5              | 605.3081 303.1580 |
| 631.2761       | 6 | L    | 4              | 548.2866 274.6472 |
| 762.3166       | 7 | M    | 3              | 435.2026 218.1052 |
| 891.3592       | 8 | E    | 2              | 304.1621 152.5850 |
|                | 9 | R    | 1              | 175.1195 88.0637  |

N-term:+43.02

TDNTNSQLVVR, MH+ 1288.6497, m/z 644.8285  
 L OSG41 P180811 230811-s1.03336.03336.2.dta

X-range:

-

MassTol: Y-zoom:

MassType:

AVG  MONO

Axis:

1  2

Label:

I  M  -

Ions:

a  +  2+  3+

b  +  2+  3+

c  +  2+  3+

x  +  2+  3+

y  +  2+  3+

z  +  2+  3+

hide H<sub>2</sub>O/NH<sub>3</sub>

zoom 112-122

GO

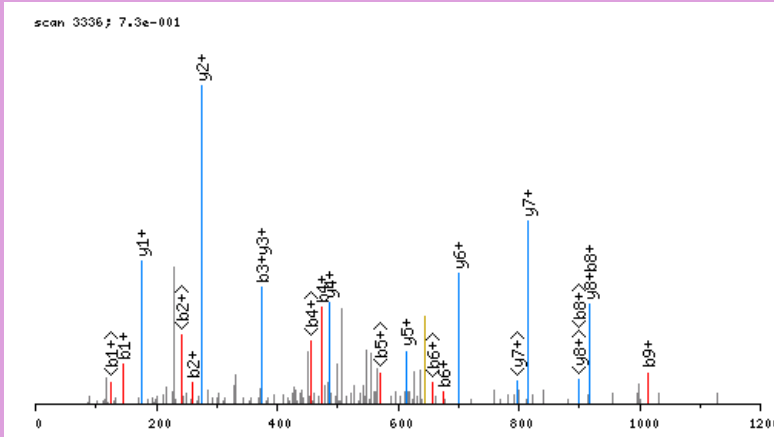

click image to zoom in; click top corners to zoom out [\[precursor±\]](#)

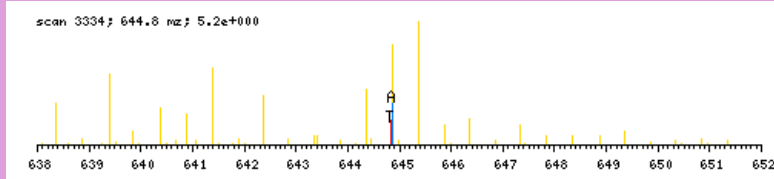

zoomed in precursor plot; T=theoretical m/z, A=acquired m/z

| b <sup>+</sup> | #  | AA # | y <sup>+</sup> | y <sup>2+</sup> |
|----------------|----|------|----------------|-----------------|
| 144.0661       | 1  | T 11 |                |                 |
| 259.0930       | 2  | D 10 | 1145.5915      | 573.2997        |
| 373.1359       | 3  | N 9  | 1030.5645      | 515.7862        |
| 474.1836       | 4  | T 8  | 916.5216       | 458.7647        |
| 588.2266       | 5  | N 7  | 815.4739       | 408.2409        |
| 675.2586       | 6  | S 6  | 701.4310       | 351.2194        |
| 803.3172       | 7  | Q 5  | 614.3990       | 307.7034        |
| 916.4012       | 8  | L 4  | 486.3404       | 243.6741        |
| 1015.4696      | 9  | V 3  | 373.2563       | 187.1321        |
| 1114.5381      | 10 | V 2  | 274.1879       | 137.5979        |
|                | 11 | R 1  | 175.1195       | 88.0637         |

N-term:+43.02



TDVESVITSFASSAR, MH+ 1611.7866, m/z 806.3969  
 L OSG41 P180811 230811-s1.07531.07531.2.dta

X-range:

-

MassTol: Y-zoom:

MassType:

AVG  MONO

Axis:

1  2

Label:

I  M  -

Ions:

a  +  2+  3+

b  +  2+  3+

c  +  2+  3+

x  +  2+  3+

y  +  2+  3+

z  +  2+  3+

hide H<sub>2</sub>O/NH<sub>3</sub>

zoom 112-122

GO

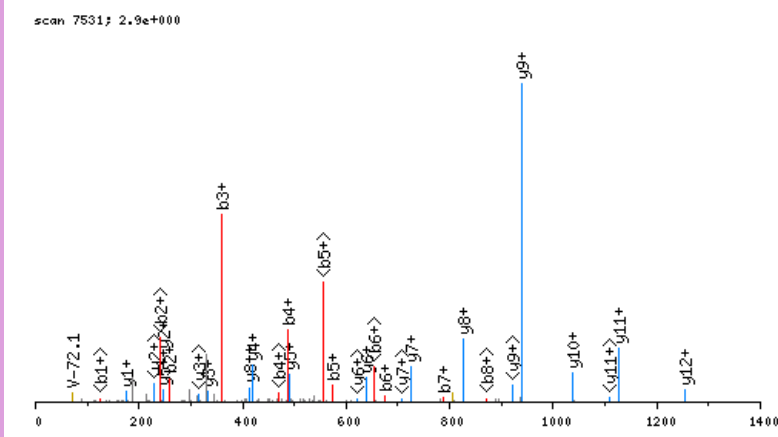

click image to zoom in; click top corners to zoom out [\[precursor±\]](#)

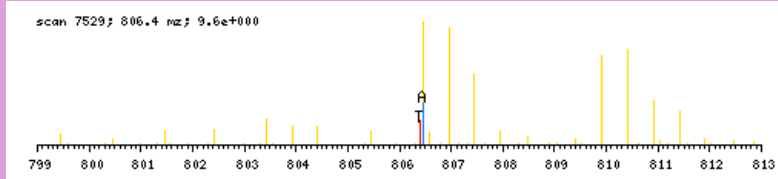

zoomed in precursor plot; T=theoretical m/z, A=acquired m/z

| b <sup>+</sup> | #  | AA # | y <sup>+</sup> | y <sup>2+</sup> |
|----------------|----|------|----------------|-----------------|
| 144.0661       | 1  | T 15 |                |                 |
| 259.0930       | 2  | D 14 | 1468.7284      | 734.8681        |
| 358.1614       | 3  | V 13 | 1353.7014      | 677.3546        |
| 487.2040       | 4  | E 12 | 1254.6330      | 627.8204        |
| 574.2361       | 5  | S 11 | 1125.5904      | 563.2991        |
| 673.3045       | 6  | V 10 | 1038.5584      | 519.7831        |
| 786.3885       | 7  | I 9  | 939.4900       | 470.2489        |
| 887.4362       | 8  | T 8  | 826.4059       | 413.7069        |
| 974.4682       | 9  | S 7  | 725.3582       | 363.1830        |
| 1121.5367      | 10 | F 6  | 638.3262       | 319.6670        |
| 1192.5738      | 11 | A 5  | 491.2578       | 246.1328        |
| 1279.6058      | 12 | S 4  | 420.2207       | 210.6142        |
| 1366.6378      | 13 | S 3  | 333.1886       | 167.0982        |
| 1437.6749      | 14 | A 2  | 246.1566       | 123.5822        |
|                | 15 | R 1  | 175.1195       | 88.0637         |

N-term:+43.02

TDVETTYADFIASGR, MH+ 1687.7815, m/z 844.3944  
 L OSG41 P180811 230811-s1.07238.07238.2.dta

X-range:

-

MassTol: Y-zoom:

MassType:

AVG  MONO

Axis:

1  2

Label:

I  M  -

Ions:

a  +  2+  3+

b  +  2+  3+

c  +  2+  3+

x  +  2+  3+

y  +  2+  3+

z  +  2+  3+

hide H<sub>2</sub>O/NH<sub>3</sub>

zoom 112-122

GO

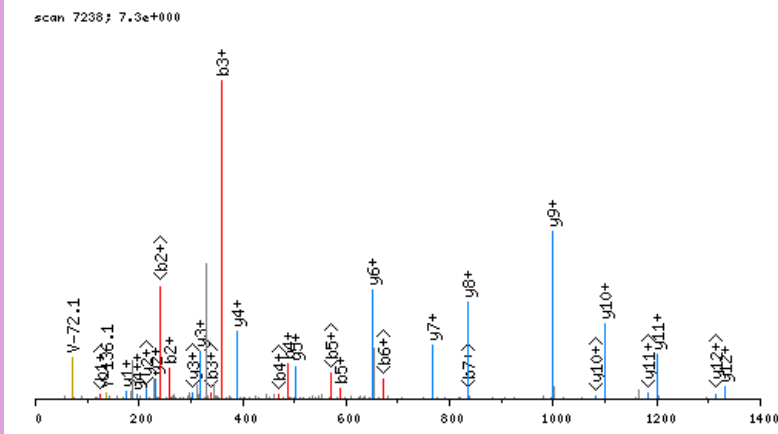

click image to zoom in; click top corners to zoom out [\[precursor±\]](#)

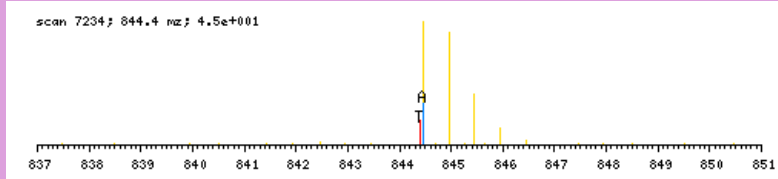

zoomed in precursor plot; T=theoretical m/z, A=acquired m/z

| b <sup>+</sup> | #  | AA # | y <sup>+</sup> | y <sup>2+</sup> |
|----------------|----|------|----------------|-----------------|
| 144.0661       | 1  | T 15 |                |                 |
| 259.0930       | 2  | D 14 | 1544.7233      | 772.8656        |
| 358.1614       | 3  | V 13 | 1429.6963      | 715.3521        |
| 487.2040       | 4  | E 12 | 1330.6279      | 665.8179        |
| 588.2517       | 5  | T 11 | 1201.5853      | 601.2966        |
| 689.2994       | 6  | T 10 | 1100.5376      | 550.7727        |
| 852.3627       | 7  | Y 9  | 999.4900       | 500.2489        |
| 923.3998       | 8  | A 8  | 836.4266       | 418.7172        |
| 1038.4268      | 9  | D 7  | 765.3895       | 383.1987        |
| 1185.4952      | 10 | F 6  | 650.3626       | 325.6852        |
| 1298.5792      | 11 | I 5  | 503.2942       | 252.1510        |
| 1369.6164      | 12 | A 4  | 390.2101       | 195.6090        |
| 1456.6484      | 13 | S 3  | 319.1730       | 160.0904        |
| 1513.6699      | 14 | G 2  | 232.1410       | 116.5744        |
|                | 15 | R 1  | 175.1195       | 88.0637         |

N-term:+43.02

TEEHTDLEAR, MH+ 1242.5602, m/z 621.7838  
 L OSG37 P180811 230811-s1.02352.02352.2.dta

X-range:

-

MassTol: Y-zoom:

MassType:

AVG  MONO

Axis:

1  2

Label:

I  M  -

Ions:

a  +  2+  3+

b  +  2+  3+

c  +  2+  3+

x  +  2+  3+

y  +  2+  3+

z  +  2+  3+

hide H<sub>2</sub>O/NH<sub>3</sub>

zoom 112-122

GO

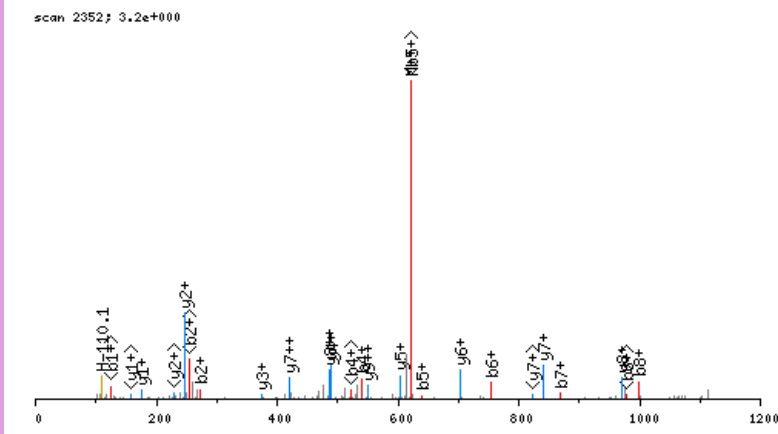

click image to zoom in; click top corners to zoom out [\[precursor±\]](#)

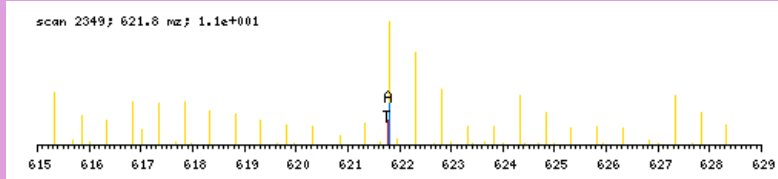

zoomed in precursor plot; T=theoretical m/z, A=acquired m/z

| b <sup>+</sup> | #  | AA # | y <sup>+</sup> | y <sup>2+</sup> |
|----------------|----|------|----------------|-----------------|
| 144.0661       | 1  | T    | 10             |                 |
| 273.1087       | 2  | E    | 9              | 1099.5020       |
| 402.1513       | 3  | E    | 8              | 970.4594        |
| 539.2102       | 4  | H    | 7              | 841.4168        |
| 640.2579       | 5  | T    | 6              | 704.3579        |
| 755.2848       | 6  | D    | 5              | 603.3102        |
| 868.3689       | 7  | L    | 4              | 488.2833        |
| 997.4115       | 8  | E    | 3              | 375.1992        |
| 1068.4486      | 9  | A    | 2              | 246.1566        |
|                | 10 | R    | 1              | 175.1195        |

N-term:+43.02

TEELITPVYCTGVSAQVQKKR, MH+ 2505.3387, m/z 835.7844  
 L OSG39 P180811 230811-s1.05700.05700.3.dta

X-range:

0 - 0

MassTol: Y-zoom:

0. 1.

MassType:

AVG  MONO

Axis:

1  2

Label:

I  M  -

Ions:

a  +  2+  3+

b  +  2+  3+

c  +  2+  3+

x  +  2+  3+

y  +  2+  3+

z  +  2+  3+

hide H<sub>2</sub>O/NH<sub>3</sub>

zoom 112-122

GO

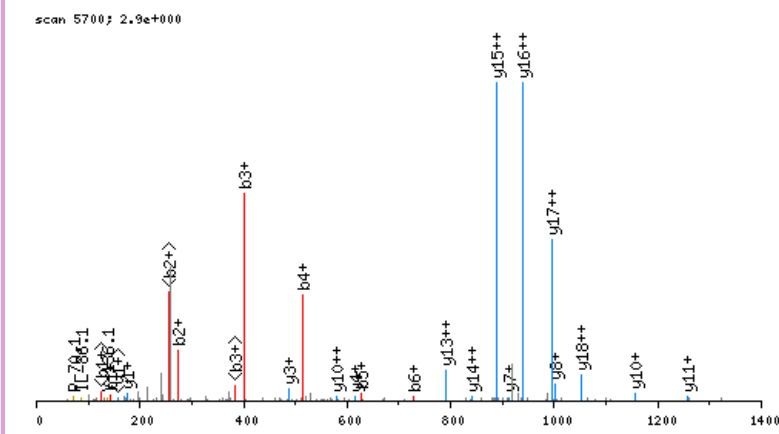

click image to zoom in; click top corners to zoom out [precursor±]

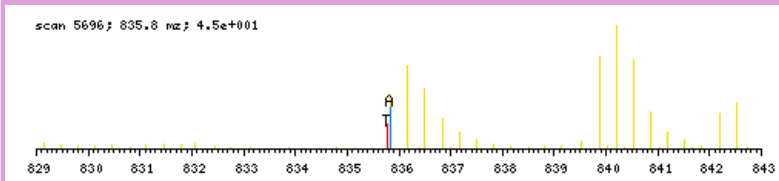

zoomed in precursor plot; T=theoretical m/z, A=acquired m/z

| b <sup>+</sup> | #  | AA | #  | y <sup>+</sup> | y <sup>2+</sup> |
|----------------|----|----|----|----------------|-----------------|
| 144.0661       | 1  | T  | 21 |                |                 |
| 273.1087       | 2  | E  | 20 | 2362.2805      | 1181.6441       |
| 402.1513       | 3  | E  | 19 | 2233.2379      | 1117.1228       |
| 515.2353       | 4  | L  | 18 | 2104.1953      | 1052.6016       |
| 628.3194       | 5  | I  | 17 | 1991.1112      | 996.0595        |
| 729.3671       | 6  | T  | 16 | 1878.0272      | 939.5175        |
| 826.4198       | 7  | P  | 15 | 1776.9795      | 888.9936        |
| 925.4882       | 8  | V  | 14 | 1679.9267      | 840.4673        |
| 1088.5516      | 9  | Y  | 13 | 1580.8583      | 790.9331        |
| 1248.5822      | 10 | C  | 12 | 1417.7950      | 709.4014        |
| 1349.6299      | 11 | T  | 11 | 1257.7644      | 629.3861        |
| 1406.6513      | 12 | G  | 10 | 1156.7167      | 578.8623        |
| 1505.7197      | 13 | V  | 9  | 1099.6952      | 550.3515        |
| 1592.7518      | 14 | S  | 8  | 1000.6268      | 500.8173        |
| 1663.7889      | 15 | A  | 7  | 913.5948       | 457.3013        |
| 1791.8475      | 16 | Q  | 6  | 842.5577       | 421.7827        |
| 1890.9159      | 17 | V  | 5  | 714.4991       | 357.7535        |
| 2018.9744      | 18 | Q  | 4  | 615.4307       | 308.2193        |
| 2175.1007      | 19 | K  | 3  | 487.3721       | 244.1900        |
| 2331.2270      | 20 | K  | 2  | 331.2458       | 166.1268        |
|                | 21 | R  | 1  | 175.1195       | 88.0637         |

N-term:+43.02 C(10):+160.03  
 K(19):+156.13 K(20):+156.13

TEKEVVESPPPPFGETPQSGLQR, MH+ 2713.3897, m/z 679.1029  
 L OSG36 P180811 230811-s1.04251.04251.4.dta

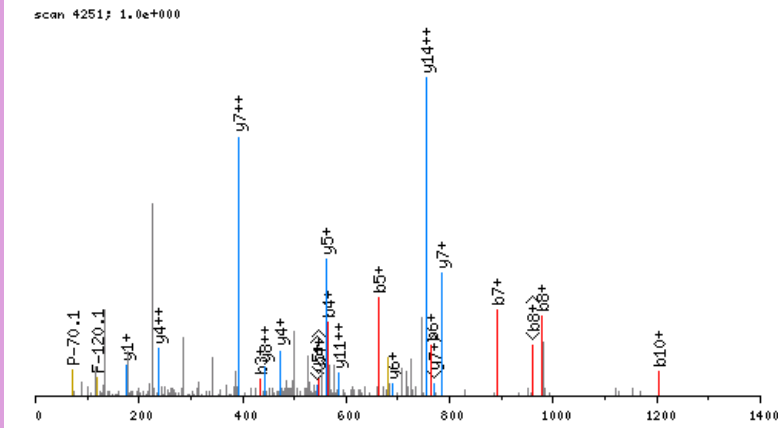

click image to zoom in; click top corners to zoom out [precursor±]

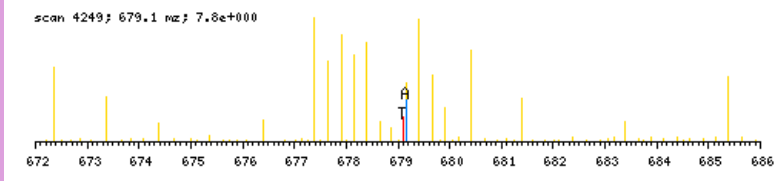

zoomed in precursor plot; T=theoretical m/z, A=acquired m/z

X-range:

-

MassTol: Y-zoom:

MassType:

AVG  MONO

Axis:

1  2

Label:

I  M  -

Ions:

a  +  2+  3+

b  +  2+  3+

c  +  2+  3+

x  +  2+  3+

y  +  2+  3+

z  +  2+  3+

hide H<sub>2</sub>O/NH<sub>3</sub>

zoom 112-122

GO

| b <sup>+</sup> | #  | AA # | y <sup>+</sup> | y <sup>2+</sup> |
|----------------|----|------|----------------|-----------------|
| 144.0661       | 1  | T 24 |                |                 |
| 273.1087       | 2  | E 23 | 2570.3315      | 1285.6697       |
| 435.2668       | 3  | K 22 | 2441.2889      | 1221.1484       |
| 564.3094       | 4  | E 21 | 2279.1308      | 1140.0693       |
| 663.3778       | 5  | V 20 | 2150.0882      | 1075.5480       |
| 762.4462       | 6  | V 19 | 2051.0198      | 1026.0138       |
| 891.4888       | 7  | E 18 | 1951.9514      | 976.4796        |
| 978.5208       | 8  | S 17 | 1822.9088      | 911.9583        |
| 1075.5736      | 9  | P 16 | 1735.8768      | 868.4423        |
| 1203.6322      | 10 | Q 15 | 1638.8240      | 819.9159        |
| 1300.6849      | 11 | P 14 | 1510.7654      | 755.8866        |
| 1397.7377      | 12 | P 13 | 1413.7127      | 707.3602        |
| 1544.8061      | 13 | F 12 | 1316.6599      | 658.8339        |
| 1641.8589      | 14 | P 11 | 1169.5915      | 585.2997        |
| 1698.8803      | 15 | G 10 | 1072.5387      | 536.7733        |
| 1827.9229      | 16 | E 9  | 1015.5172      | 508.2625        |
| 1928.9706      | 17 | T 8  | 886.4747       | 443.7412        |
| 2026.0234      | 18 | P 7  | 785.4270       | 393.2174        |
| 2154.0819      | 19 | Q 6  | 688.3742       | 344.6910        |
| 2241.1140      | 20 | S 5  | 560.3156       | 280.6617        |
| 2298.1354      | 21 | G 4  | 473.2836       | 237.1457        |
| 2411.2195      | 22 | L 3  | 416.2621       | 208.6350        |
| 2539.2781      | 23 | Q 2  | 303.1781       | 152.0930        |
|                | 24 | R 1  | 175.1195       | 88.0637         |

N-term:+43.02 K(3):+162.16

TETDGFYKSR, MH+ 1279.6383, m/z 640.3228  
 L OSG38 P180811 230811-s1.03395.03395.2.dta

X-range:

-

MassTol: Y-zoom:

MassType:

AVG  MONO

Axis:

1  2

Label:

I  M  -

Ions:

a  +  2+  3+

b  +  2+  3+

c  +  2+  3+

x  +  2+  3+

y  +  2+  3+

z  +  2+  3+

hide H<sub>2</sub>O/NH<sub>3</sub>

zoom 112-122

GO

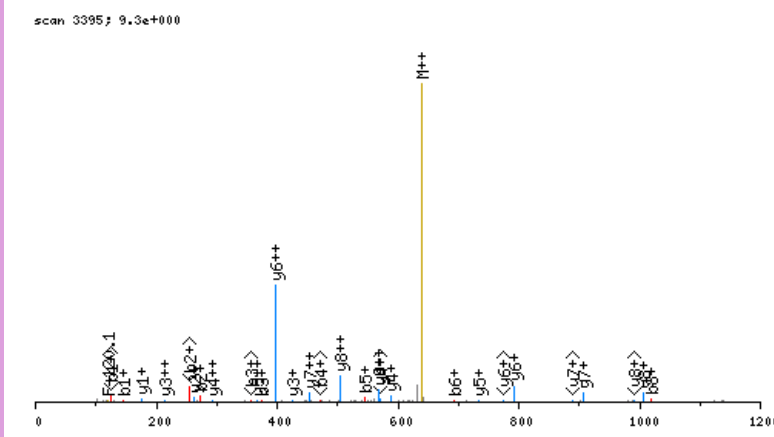

click image to zoom in; click top corners to zoom out [\[precursor±\]](#)

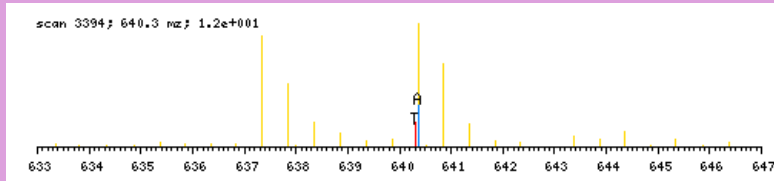

zoomed in precursor plot; T=theoretical m/z, A=acquired m/z

| b <sup>+</sup> | #  | AA # | y <sup>+</sup> | y <sup>2+</sup>    |
|----------------|----|------|----------------|--------------------|
| 144.0661       | 1  | T    | 10             |                    |
| 273.1087       | 2  | E    | 9              | 1136.5801 568.7939 |
| 374.1564       | 3  | T    | 8              | 1007.5375 504.2726 |
| 489.1833       | 4  | D    | 7              | 906.4898 453.7488  |
| 546.2048       | 5  | G    | 6              | 791.4628 396.2353  |
| 693.2732       | 6  | F    | 5              | 734.4414 367.7246  |
| 856.3365       | 7  | Y    | 4              | 587.3730 294.1904  |
| 1018.4946      | 8  | K    | 3              | 424.3096 212.6587  |
| 1105.5266      | 9  | S    | 2              | 262.1515 131.5797  |
|                | 10 | R    | 1              | 175.1195 88.0637   |

N-term:+43.02 K(8):+162.16

THSSQDAGSHGIQEEGR, MH+ 1837.8065, m/z 613.2737  
 L OSG40 P180811 230811-s1.01925.01925.3.dta

X-range:

-

MassTol: Y-zoom:

MassType:

AVG  MONO

Axis:

1  2

Label:

I  M  -

Ions:

a  +  2+  3+

b  +  2+  3+

c  +  2+  3+

x  +  2+  3+

y  +  2+  3+

z  +  2+  3+

hide H<sub>2</sub>O/NH<sub>3</sub>

zoom 112-122

GO

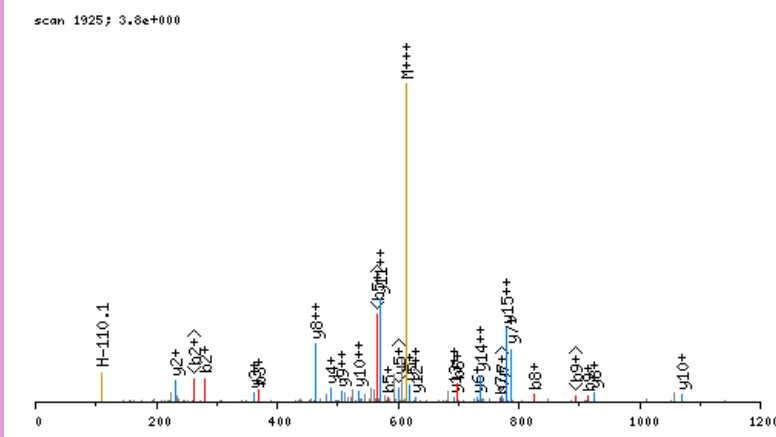

click image to zoom in; click top corners to zoom out [\[precursor±\]](#)

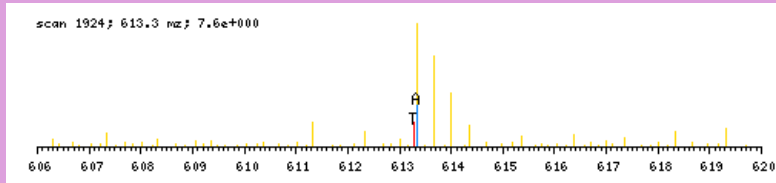

zoomed in precursor plot; T=theoretical m/z, A=acquired m/z

| b <sup>+</sup> | #  | AA | #  | y <sup>+</sup> | y <sup>2+</sup> |
|----------------|----|----|----|----------------|-----------------|
| 144.0661       | 1  | T  | 17 |                |                 |
| 281.1250       | 2  | H  | 16 | 1694.7483      | 847.8780        |
| 368.1570       | 3  | S  | 15 | 1557.6894      | 779.3486        |
| 455.1890       | 4  | S  | 14 | 1470.6573      | 735.8326        |
| 583.2476       | 5  | Q  | 13 | 1383.6253      | 692.3166        |
| 698.2746       | 6  | D  | 12 | 1255.5667      | 628.2873        |
| 769.3117       | 7  | A  | 11 | 1140.5398      | 570.7738        |
| 826.3331       | 8  | G  | 10 | 1069.5027      | 535.2552        |
| 913.3652       | 9  | S  | 9  | 1012.4812      | 506.7445        |
| 1050.4241      | 10 | H  | 8  | 925.4492       | 463.2285        |
| 1107.4455      | 11 | G  | 7  | 788.3903       | 394.6990        |
| 1220.5296      | 12 | I  | 6  | 731.3688       | 366.1883        |
| 1348.5882      | 13 | Q  | 5  | 618.2847       | 309.6463        |
| 1477.6308      | 14 | E  | 4  | 490.2262       | 245.6170        |
| 1606.6734      | 15 | E  | 3  | 361.1836       | 181.0957        |
| 1663.6948      | 16 | G  | 2  | 232.1410       | 116.5744        |
|                | 17 | R  | 1  | 175.1195       | 88.0637         |

N-term:+43.02

TKEIDLVR, MH+ 1163.6849, m/z 582.3461  
 L OSG38 P180811 230811-s1.04843.04843.2.dta

X-range:

-

MassTol: Y-zoom:

MassType:

AVG  MONO

Axis:

1  2

Label:

I  M  -

Ions:

a  +  2+  3+

b  +  2+  3+

c  +  2+  3+

x  +  2+  3+

y  +  2+  3+

z  +  2+  3+

hide H<sub>2</sub>O/NH<sub>3</sub>

zoom 112-122

GO

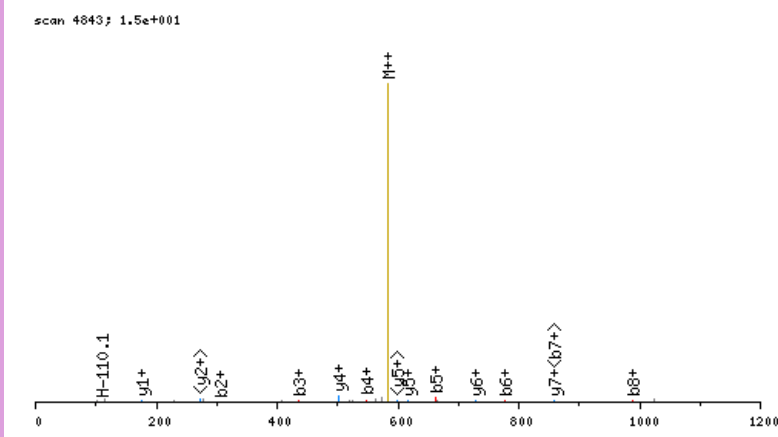

click image to zoom in; click top corners to zoom out [\[precursor±\]](#)

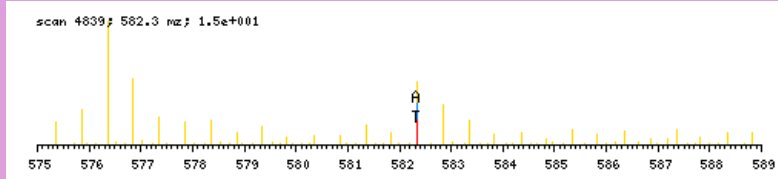

zoomed in precursor plot; T=theoretical m/z, A=acquired m/z

| b <sup>+</sup> | # | AA # | y <sup>+</sup> | y <sup>2+</sup> |
|----------------|---|------|----------------|-----------------|
| 144.0661       | 1 | T 9  |                |                 |
| 306.2242       | 2 | K 8  | 1020.6266      | 510.8172        |
| 435.2668       | 3 | E 7  | 858.4685       | 429.7382        |
| 548.3508       | 4 | I 6  | 729.4259       | 365.2169        |
| 663.3778       | 5 | D 5  | 616.3418       | 308.6748        |
| 776.4618       | 6 | L 4  | 501.3149       | 251.1614        |
| 875.5303       | 7 | V 3  | 388.2308       | 194.6193        |
| 989.5732       | 8 | N 2  | 289.1624       | 145.0851        |
|                | 9 | R 1  | 175.1195       | 88.0637         |

N-term:+43.02 K(2):+162.16



TLKSSEGGGNSMR, MH+ 1522.7172, m/z 508.2439  
 L OSG37 P180811 230811-s1.02335.02335.3.dta

X-range:

-

MassTol: Y-zoom:

MassType:

AVG  MONO

Axis:

1  2

Label:

I  M  -

Ions:

a  +  2+  3+

b  +  2+  3+

c  +  2+  3+

x  +  2+  3+

y  +  2+  3+

z  +  2+  3+

hide H<sub>2</sub>O/NH<sub>3</sub>

zoom 112-122

GO

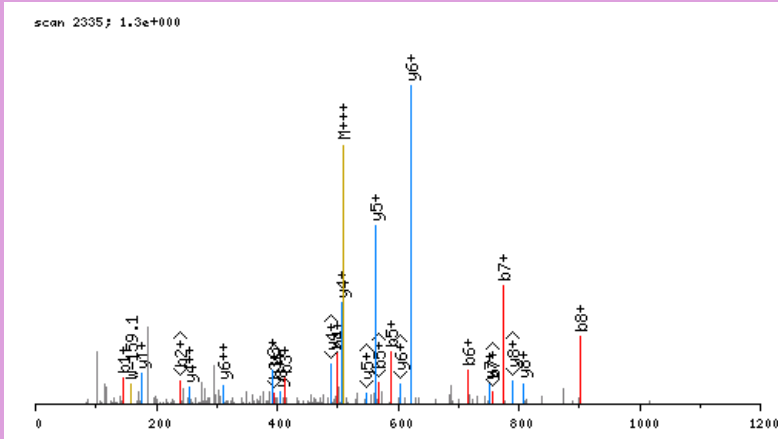

click image to zoom in; click top corners to zoom out [\[precursor±\]](#)

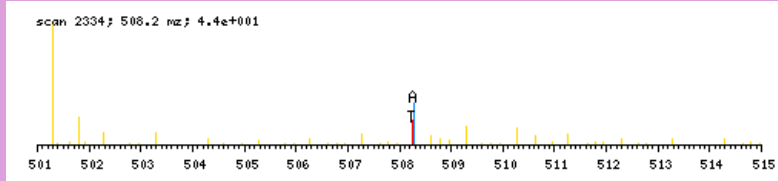

zoomed in precursor plot; T=theoretical m/z, A=acquired m/z

| b <sup>+</sup> | #  | AA # | y <sup>+</sup> | y <sup>2+</sup>    |
|----------------|----|------|----------------|--------------------|
| 144.0661       | 1  | T    | 14             |                    |
| 257.1501       | 2  | L    | 13             | 1379.6589 690.3334 |
| 413.2764       | 3  | K    | 12             | 1266.5749 633.7914 |
| 500.3085       | 4  | S    | 11             | 1110.4486 555.7282 |
| 587.3405       | 5  | S    | 10             | 1023.4165 512.2122 |
| 716.3831       | 6  | E    | 9              | 936.3845 468.6962  |
| 773.4046       | 7  | G    | 8              | 807.3419 404.1749  |
| 902.4471       | 8  | E    | 7              | 750.3205 375.6641  |
| 959.4686       | 9  | G    | 6              | 621.2779 311.1428  |
| 1016.4901      | 10 | G    | 5              | 564.2564 282.6321  |
| 1130.5330      | 11 | N    | 4              | 507.2349 254.1214  |
| 1217.5650      | 12 | S    | 3              | 393.1920 197.0999  |
| 1348.6055      | 13 | M    | 2              | 306.1600 153.5839  |
|                | 14 | R    | 1              | 175.1195 88.0637   |

N-term:+43.02 K(3):+156.13

TMDKSELVQKAKLAEQAEER, MH+ 2301.2489, m/z 576.0677  
 L OSG40 P180811 230811-s1.05930.05930.4.dta

scan 5930; 3.0e+001

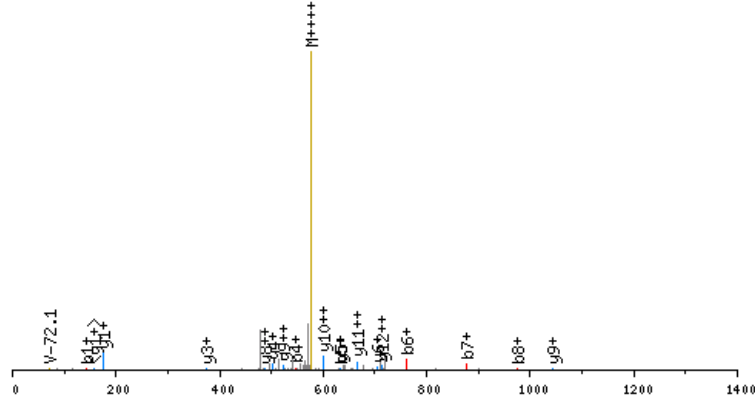

click image to zoom in; click top corners to zoom out [\[precursor±\]](#)

scan 5929; 576.1 Hz; 7.7e+001

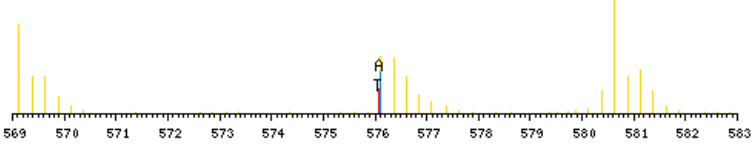

zoomed in precursor plot; T=theoretical m/z, A=acquired m/z

X-range:

-

MassTol: Y-zoom:

MassType:

AVG  MONO

Axis:

1  2

Label:

I  M  -

Ions:

a  +  2+  3+

b  +  2+  3+

c  +  2+  3+

x  +  2+  3+

y  +  2+  3+

z  +  2+  3+

hide H<sub>2</sub>O/NH<sub>3</sub>

zoom 112-122

GO

| b <sup>+</sup> | #  | AA | #  | y <sup>+</sup> | y <sup>2+</sup> |
|----------------|----|----|----|----------------|-----------------|
| 144.0661       | 1  | T  | 19 |                |                 |
| 275.1066       | 2  | M  | 18 | 2158.1907      | 1079.5992       |
| 390.1335       | 3  | D  | 17 | 2027.1502      | 1014.0790       |
| 546.2598       | 4  | K  | 16 | 1912.1232      | 956.5655        |
| 633.2918       | 5  | S  | 15 | 1755.9969      | 878.5024        |
| 762.3344       | 6  | E  | 14 | 1668.9649      | 834.9864        |
| 875.4185       | 7  | L  | 13 | 1539.9223      | 770.4651        |
| 974.4869       | 8  | V  | 12 | 1426.8383      | 713.9230        |
| 1102.5455      | 9  | Q  | 11 | 1327.7698      | 664.3888        |
| 1258.6718      | 10 | K  | 10 | 1199.7113      | 600.3595        |
| 1329.7089      | 11 | A  | 9  | 1043.5850      | 522.2964        |
| 1485.8352      | 12 | K  | 8  | 972.5479       | 486.7778        |
| 1598.9193      | 13 | L  | 7  | 816.4216       | 408.7147        |
| 1669.9564      | 14 | A  | 6  | 703.3375       | 352.1727        |
| 1798.9990      | 15 | E  | 5  | 632.3004       | 316.6541        |
| 1927.0575      | 16 | Q  | 4  | 503.2578       | 252.1328        |
| 1998.0947      | 17 | A  | 3  | 375.1992       | 188.1035        |
| 2127.1373      | 18 | E  | 2  | 304.1621       | 152.5850        |
|                | 19 | R  | 1  | 175.1195       | 88.0637         |

N-term:+43.02 K(4):+156.13  
 K(10):+156.13 K(12):+156.13

TMLADHAAR, MH+ 1027.4995, m/z 514.2534  
 L OSG37 P180811 230811-s1.03300.03300.2.dta

scan 3300; 2.5e+001

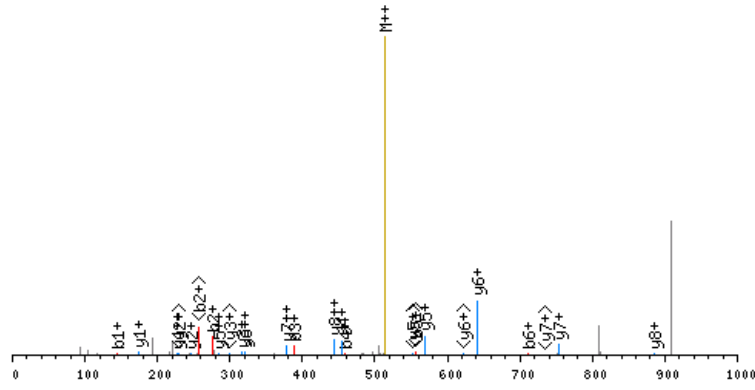

click image to zoom in; click top corners to zoom out [\[precursor±\]](#)

scan 3299; 514.3 m/z; 1.2e+002

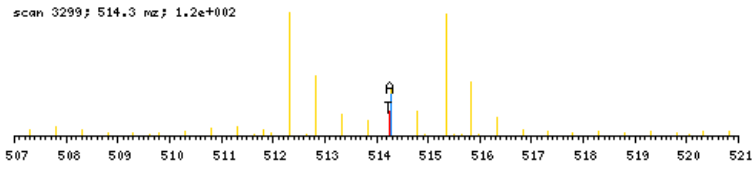

zoomed in precursor plot; T=theoretical m/z, A=acquired m/z

X-range:

-

MassTol: Y-zoom:

MassType:

AVG  MONO

Axis:

1  2

Label:

I  M  -

Ions:

a  +  2+  3+

b  +  2+  3+

c  +  2+  3+

x  +  2+  3+

y  +  2+  3+

z  +  2+  3+

hide H<sub>2</sub>O/NH<sub>3</sub>

zoom 112-122

GO

| b <sup>+</sup> | # | AA # | y <sup>+</sup> | y <sup>2+</sup>   |
|----------------|---|------|----------------|-------------------|
| 144.0661       | 1 | T    | 9              |                   |
| 275.1066       | 2 | M    | 8              | 884.4412 442.7245 |
| 388.1906       | 3 | L    | 7              | 753.4008 377.2043 |
| 459.2277       | 4 | A    | 6              | 640.3167 320.6623 |
| 574.2547       | 5 | D    | 5              | 569.2796 285.1437 |
| 711.3136       | 6 | H    | 4              | 454.2526 227.6302 |
| 782.3507       | 7 | A    | 3              | 317.1937 159.1008 |
| 853.3878       | 8 | A    | 2              | 246.1566 123.5822 |
|                | 9 | R    | 1              | 175.1195 88.0637  |

N-term:+43.02

TQEEAGRLPQVLAR, MH+ 1609.8662, m/z 537.2936  
 L OSG37 P180811 230811-s1.05668.05668.3.dta

X-range:

-

MassTol: Y-zoom:

MassType:

AVG  MONO

Axis:

1  2

Label:

I  M  -

Ions:

a  +  2+  3+

b  +  2+  3+

c  +  2+  3+

x  +  2+  3+

y  +  2+  3+

z  +  2+  3+

hide H<sub>2</sub>O/NH<sub>3</sub>

zoom 112-122

GO

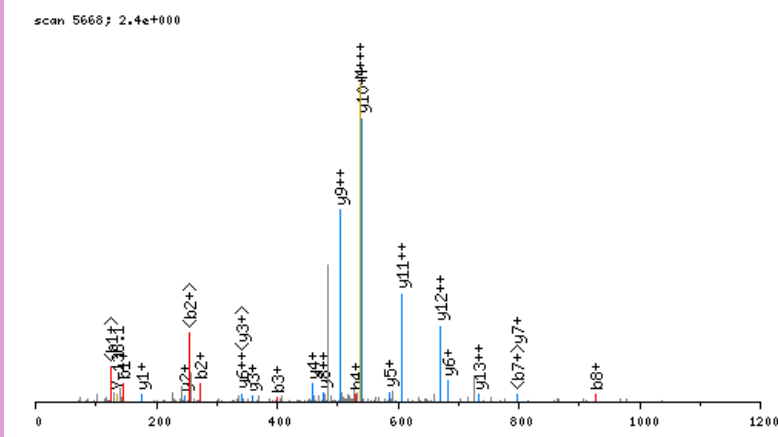

click image to zoom in; click top corners to zoom out [\[precursor±\]](#)

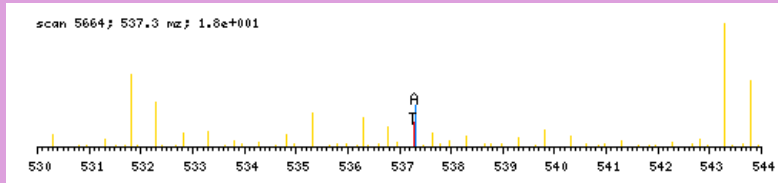

zoomed in precursor plot; T=theoretical m/z, A=acquired m/z

| b <sup>+</sup> | #  | AA | #  | y <sup>+</sup> | y <sup>2+</sup> |
|----------------|----|----|----|----------------|-----------------|
| 144.0661       | 1  | T  | 14 |                |                 |
| 272.1247       | 2  | Q  | 13 | 1466.8080      | 733.9079        |
| 401.1672       | 3  | E  | 12 | 1338.7494      | 669.8786        |
| 530.2098       | 4  | E  | 11 | 1209.7068      | 605.3573        |
| 601.2470       | 5  | A  | 10 | 1080.6642      | 540.8360        |
| 658.2684       | 6  | G  | 9  | 1009.6271      | 505.3174        |
| 814.3695       | 7  | R  | 8  | 952.6056       | 476.8067        |
| 927.4536       | 8  | L  | 7  | 796.5045       | 398.7562        |
| 1024.5064      | 9  | P  | 6  | 683.4204       | 342.2141        |
| 1152.5649      | 10 | Q  | 5  | 586.3677       | 293.6877        |
| 1251.6334      | 11 | V  | 4  | 458.3091       | 229.6585        |
| 1364.7174      | 12 | L  | 3  | 359.2407       | 180.1243        |
| 1435.7545      | 13 | A  | 2  | 246.1566       | 123.5822        |
|                | 14 | R  | 1  | 175.1195       | 88.0637         |

N-term:+43.02

TQEYDNKRPVLVLQNEALYPQR, MH+ 2744.4372, m/z 686.8648  
 L OSG38 P180811 230811-s1.06436.06436.4.dta

X-range:

-

MassTol: Y-zoom:

MassType:

AVG  MONO

Axis:

1  2

Label:

I  M  -

Ions:

a  +  2+  3+

b  +  2+  3+

c  +  2+  3+

x  +  2+  3+

y  +  2+  3+

z  +  2+  3+

hide H<sub>2</sub>O/NH<sub>3</sub>

zoom 112-122

GO

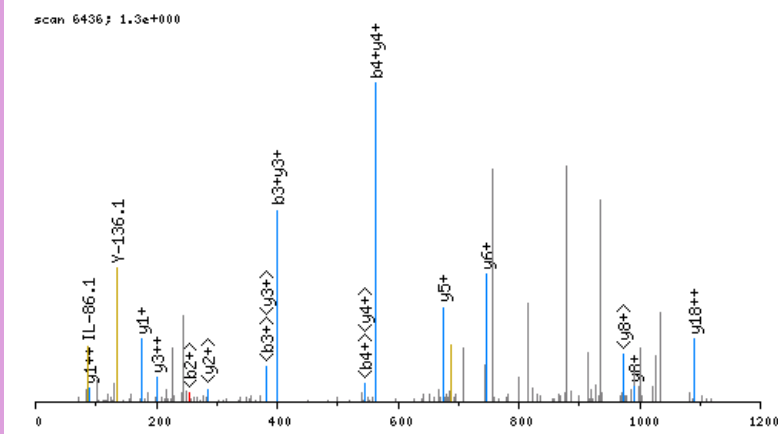

click image to zoom in; click top corners to zoom out [precursor±]

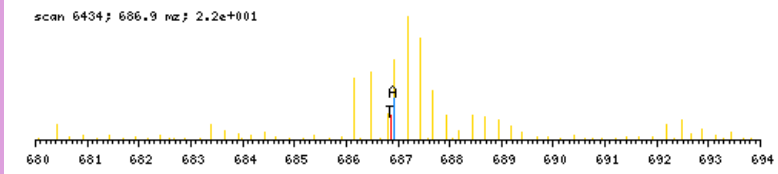

zoomed in precursor plot; T=theoretical m/z, A=acquired m/z

| b <sup>+</sup> | #  | AA # | y <sup>+</sup> | y <sup>2+</sup> |
|----------------|----|------|----------------|-----------------|
| 144.0661       | 1  | T 22 |                |                 |
| 272.1247       | 2  | Q 21 | 2601.3789      | 1301.1934       |
| 401.1672       | 3  | E 20 | 2473.3204      | 1237.1641       |
| 564.2306       | 4  | Y 19 | 2344.2778      | 1172.6428       |
| 679.2575       | 5  | D 18 | 2181.2144      | 1091.1111       |
| 793.3004       | 6  | N 17 | 2066.1875      | 1033.5977       |
| 949.4267       | 7  | K 16 | 1952.1446      | 976.5762        |
| 1105.5279      | 8  | R 15 | 1796.0183      | 898.5131        |
| 1202.5806      | 9  | P 14 | 1639.9172      | 820.4625        |
| 1301.6490      | 10 | V 13 | 1542.8644      | 771.9361        |
| 1414.7331      | 11 | L 12 | 1443.7960      | 722.4019        |
| 1513.8015      | 12 | V 11 | 1330.7119      | 665.8599        |
| 1626.8856      | 13 | L 10 | 1231.6435      | 616.3257        |
| 1754.9442      | 14 | Q 9  | 1118.5594      | 559.7836        |
| 1868.9871      | 15 | N 8  | 990.5009       | 495.7543        |
| 1998.0297      | 16 | E 7  | 876.4579       | 438.7329        |
| 2069.0668      | 17 | A 6  | 747.4153       | 374.2116        |
| 2182.1509      | 18 | L 5  | 676.3782       | 338.6930        |
| 2345.2142      | 19 | Y 4  | 563.2942       | 282.1510        |
| 2442.2669      | 20 | P 3  | 400.2308       | 200.6193        |
| 2570.3255      | 21 | Q 2  | 303.1781       | 152.0930        |
|                | 22 | R 1  | 175.1195       | 88.0637         |

N-term:+43.02 K(7):+156.13

TSALENYINR, MH+ 1222.6068, m/z 611.8070  
 L OSG41 P180811 230811-s1.06085.06085.2.dta

X-range:

-

MassTol: Y-zoom:

MassType:

AVG  MONO

Axis:

1  2

Label:

I  M  -

Ions:

a  +  2+  3+

b  +  2+  3+

c  +  2+  3+

x  +  2+  3+

y  +  2+  3+

z  +  2+  3+

hide H<sub>2</sub>O/NH<sub>3</sub>

zoom 112-122

GO

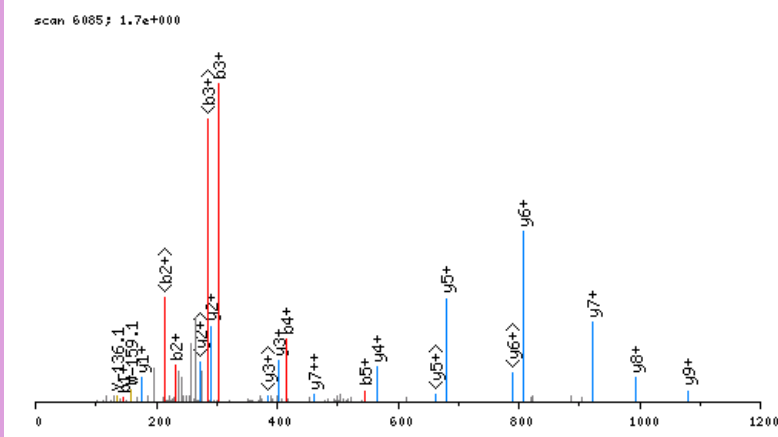

click image to zoom in; click top corners to zoom out [\[precursor±\]](#)

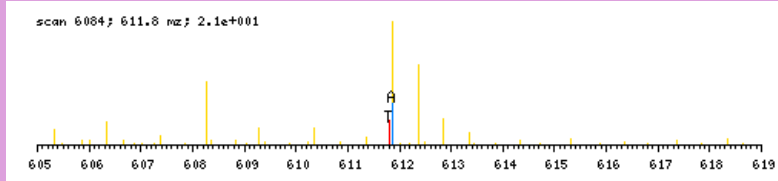

zoomed in precursor plot; T=theoretical m/z, A=acquired m/z

| b <sup>+</sup> | #  | AA | #  | y <sup>+</sup> | y <sup>2+</sup> |
|----------------|----|----|----|----------------|-----------------|
| 144.0661       | 1  | T  | 10 |                |                 |
| 231.0981       | 2  | S  | 9  | 1079.5485      | 540.2782        |
| 302.1352       | 3  | A  | 8  | 992.5165       | 496.7622        |
| 415.2193       | 4  | L  | 7  | 921.4794       | 461.2436        |
| 544.2619       | 5  | E  | 6  | 808.3953       | 404.7016        |
| 658.3048       | 6  | N  | 5  | 679.3527       | 340.1803        |
| 821.3681       | 7  | Y  | 4  | 565.3098       | 283.1588        |
| 934.4522       | 8  | I  | 3  | 402.2465       | 201.6272        |
| 1048.4951      | 9  | N  | 2  | 289.1624       | 145.0851        |
|                | 10 | R  | 1  | 175.1195       | 88.0637         |

N-term:+43.02

TSPEGAQNKEIDCLSPEAQR, MH+ 2300.0829, m/z 767.3658  
 L OSG36 P180811 230811-s1.03406.03406.3.dta

X-range:

-

MassTol: Y-zoom:

MassType:

AVG  MONO

Axis:

1  2

Label:

I  M  -

Ions:

a  +  2+  3+

b  +  2+  3+

c  +  2+  3+

x  +  2+  3+

y  +  2+  3+

z  +  2+  3+

hide H<sub>2</sub>O/NH<sub>3</sub>

zoom 112-122

GO

scan 3406; 1.4e+000

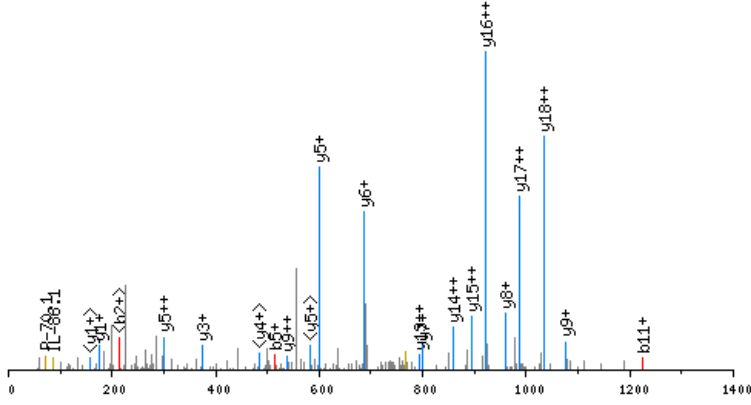

click image to zoom in; click top corners to zoom out [precursor±]

scan 3404; 767.4 m/z; 4.2e+000

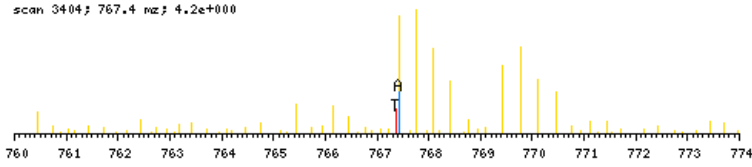

zoomed in precursor plot; T=theoretical m/z, A=acquired m/z

| b <sup>+</sup> | #  | AA | #  | y <sup>+</sup> | y <sup>2+</sup> |
|----------------|----|----|----|----------------|-----------------|
| 144.0661       | 1  | T  | 20 |                |                 |
| 231.0981       | 2  | S  | 19 | 2157.0246      | 1079.0162       |
| 328.1509       | 3  | P  | 18 | 2069.9926      | 1035.5002       |
| 457.1935       | 4  | E  | 17 | 1972.9398      | 986.9738        |
| 514.2149       | 5  | G  | 16 | 1843.8972      | 922.4525        |
| 585.2520       | 6  | A  | 15 | 1786.8758      | 893.9418        |
| 713.3106       | 7  | Q  | 14 | 1715.8386      | 858.4232        |
| 827.3535       | 8  | N  | 13 | 1587.7801      | 794.3939        |
| 983.4798       | 9  | K  | 12 | 1473.7371      | 737.3725        |
| 1112.5224      | 10 | E  | 11 | 1317.6108      | 659.3093        |
| 1225.6065      | 11 | I  | 10 | 1188.5682      | 594.7880        |
| 1340.6334      | 12 | D  | 9  | 1075.4842      | 538.2460        |
| 1500.6640      | 13 | C  | 8  | 960.4572       | 480.7325        |
| 1613.7481      | 14 | L  | 7  | 800.4266       | 400.7172        |
| 1700.7801      | 15 | S  | 6  | 687.3426       | 344.1752        |
| 1797.8329      | 16 | P  | 5  | 600.3105       | 300.6592        |
| 1926.8755      | 17 | E  | 4  | 503.2578       | 252.1328        |
| 1997.9126      | 18 | A  | 3  | 374.2152       | 187.6115        |
| 2125.9712      | 19 | Q  | 2  | 303.1781       | 152.0930        |
|                | 20 | R  | 1  | 175.1195       | 88.0637         |

N-term:+43.02 K(9):+156.13  
 C(13):+160.03

TSSYGHVLER, MH+ 1190.5806, m/z 595.7939  
 L OSG37 P180811 230811-s1.03810.03810.2.dta

X-range:

-

MassTol: Y-zoom:

MassType:

AVG  MONO

Axis:

1  2

Label:

I  M  -

Ions:

a  +  2+  3+

b  +  2+  3+

c  +  2+  3+

x  +  2+  3+

y  +  2+  3+

z  +  2+  3+

hide H<sub>2</sub>O/NH<sub>3</sub>

zoom 112-122

GO

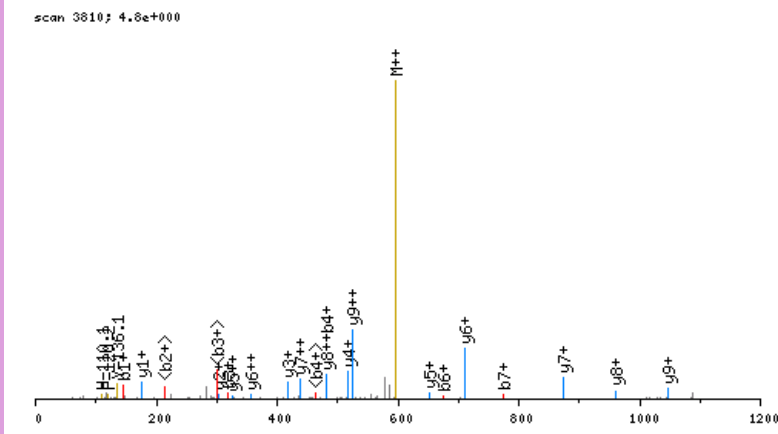

click image to zoom in; click top corners to zoom out [\[precursor±\]](#)

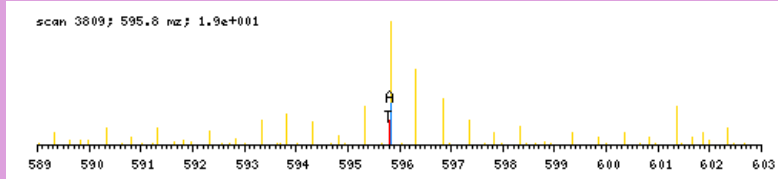

zoomed in precursor plot; T=theoretical m/z, A=acquired m/z

| b <sup>+</sup> | #  | AA # | y <sup>+</sup> | y <sup>2+</sup>    |
|----------------|----|------|----------------|--------------------|
| 144.0661       | 1  | T    | 10             |                    |
| 231.0981       | 2  | S    | 9              | 1047.5223 524.2651 |
| 318.1301       | 3  | S    | 8              | 960.4903 480.7491  |
| 481.1935       | 4  | Y    | 7              | 873.4583 437.2331  |
| 538.2149       | 5  | G    | 6              | 710.3949 355.7014  |
| 675.2738       | 6  | H    | 5              | 653.3735 327.1907  |
| 774.3423       | 7  | V    | 4              | 516.3146 258.6612  |
| 887.4263       | 8  | L    | 3              | 417.2462 209.1270  |
| 1016.4689      | 9  | E    | 2              | 304.1621 152.5850  |
|                | 10 | R    | 1              | 175.1195 88.0637   |

N-term:+43.02



TTKDPESEHPSVTLFR, MH+ 1913.9609, m/z 638.6585  
 L OSG39 P180811 230811-s1.04428.04428.3.dta

X-range:

-

MassTol: Y-zoom:

MassType:

AVG  MONO

Axis:

1  2

Label:

I  M  -

Ions:

a  +  2+  3+

b  +  2+  3+

c  +  2+  3+

x  +  2+  3+

y  +  2+  3+

z  +  2+  3+

hide H<sub>2</sub>O/NH<sub>3</sub>

zoom 112-122

GO

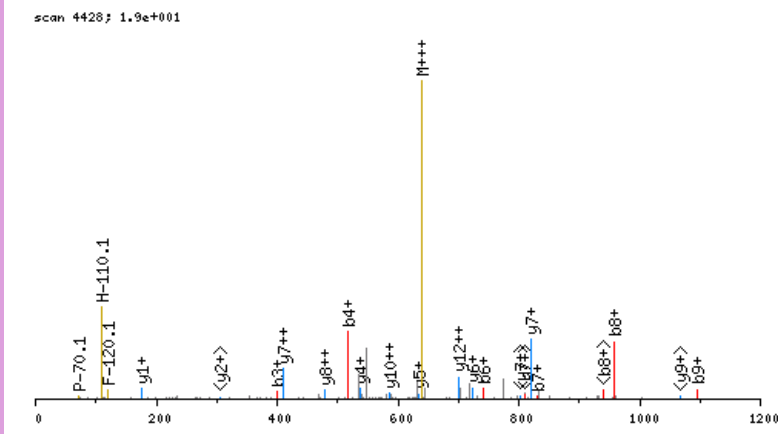

click image to zoom in; click top corners to zoom out [\[precursor±\]](#)

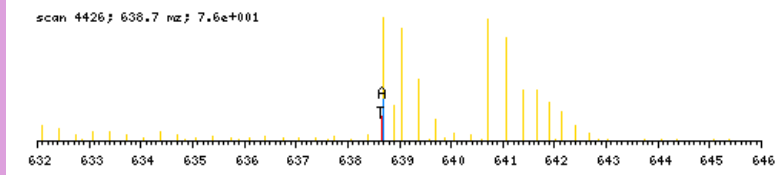

zoomed in precursor plot; T=theoretical m/z, A=acquired m/z

| b <sup>+</sup> | #  | AA # | y <sup>+</sup> | y <sup>2+</sup> |
|----------------|----|------|----------------|-----------------|
| 144.0661       | 1  | T 16 |                |                 |
| 245.1138       | 2  | T 15 | 1770.9027      | 885.9553        |
| 401.2401       | 3  | K 14 | 1669.8550      | 835.4314        |
| 516.2670       | 4  | D 13 | 1513.7287      | 757.3683        |
| 613.3198       | 5  | P 12 | 1398.7018      | 699.8548        |
| 742.3624       | 6  | E 11 | 1301.6490      | 651.3284        |
| 829.3944       | 7  | S 10 | 1172.6064      | 586.8071        |
| 958.4370       | 8  | E 9  | 1085.5744      | 543.2911        |
| 1095.4959      | 9  | H 8  | 956.5318       | 478.7698        |
| 1192.5487      | 10 | P 7  | 819.4729       | 410.2403        |
| 1279.5807      | 11 | S 6  | 722.4201       | 361.7140        |
| 1378.6491      | 12 | V 5  | 635.3881       | 318.1979        |
| 1479.6968      | 13 | T 4  | 536.3197       | 268.6637        |
| 1592.7808      | 14 | L 3  | 435.2720       | 218.1399        |
| 1739.8493      | 15 | F 2  | 322.1879       | 161.5979        |
|                | 16 | R 1  | 175.1195       | 88.0637         |

N-term:+43.02 K(3):+156.13

TTNTVPLHPYWPR, MH+ 1623.8284, m/z 541.9476  
 L OSG37 P180811 230811-s1.06771.06771.3.dta

X-range:

-

MassTol: Y-zoom:

MassType:

AVG  MONO

Axis:

1  2

Label:

I  M  -

Ions:

a  +  2+  3+

b  +  2+  3+

c  +  2+  3+

x  +  2+  3+

y  +  2+  3+

z  +  2+  3+

hide H<sub>2</sub>O/NH<sub>3</sub>

zoom 112-122

GO

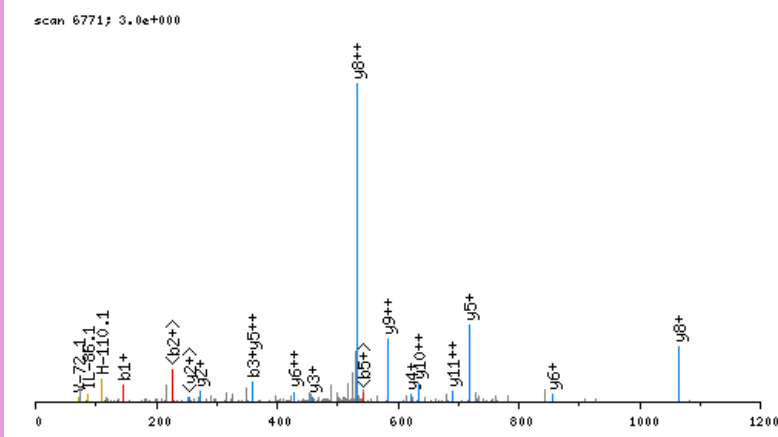

click image to zoom in; click top corners to zoom out [\[precursor±\]](#)

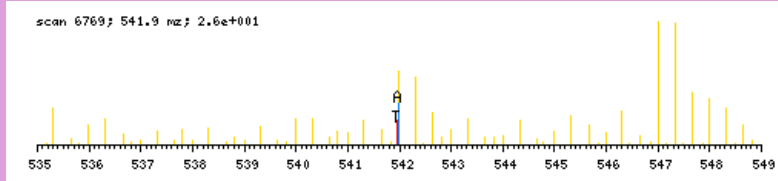

zoomed in precursor plot; T=theoretical m/z, A=acquired m/z

| b <sup>+</sup> | #  | AA # | y <sup>+</sup> | y <sup>2+</sup> |
|----------------|----|------|----------------|-----------------|
| 144.0661       | 1  | T 13 |                |                 |
| 245.1138       | 2  | T 12 | 1480.7701      | 740.8890        |
| 359.1567       | 3  | N 11 | 1379.7224      | 690.3651        |
| 460.2044       | 4  | T 10 | 1265.6795      | 633.3437        |
| 559.2728       | 5  | V 9  | 1164.6318      | 582.8198        |
| 656.3255       | 6  | P 8  | 1065.5634      | 533.2856        |
| 769.4096       | 7  | L 7  | 968.5106       | 484.7592        |
| 906.4685       | 8  | H 6  | 855.4266       | 428.2172        |
| 1003.5213      | 9  | P 5  | 718.3677       | 359.6877        |
| 1166.5846      | 10 | Y 4  | 621.3149       | 311.1614        |
| 1352.6639      | 11 | W 3  | 458.2516       | 229.6297        |
| 1449.7167      | 12 | P 2  | 272.1723       | 136.5900        |
|                | 13 | R 1  | 175.1195       | 88.0637         |

N-term:+43.02

TTQQIVLQGGPGWGER, MH+ 1826.9554, m/z 609.6566  
 L OSG41 P180811 230811-s1.07265.07265.3.dta

X-range:

-

MassTol: Y-zoom:

MassType:

AVG  MONO

Axis:

1  2

Label:

I  M  -

Ions:

a  +  2+  3+

b  +  2+  3+

c  +  2+  3+

x  +  2+  3+

y  +  2+  3+

z  +  2+  3+

hide H<sub>2</sub>O/NH<sub>3</sub>

zoom 112-122

GO

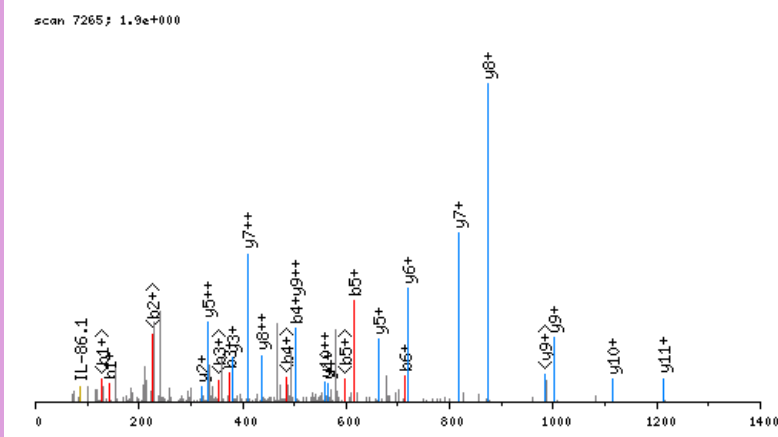

click image to zoom in; click top corners to zoom out [\[precursor±\]](#)

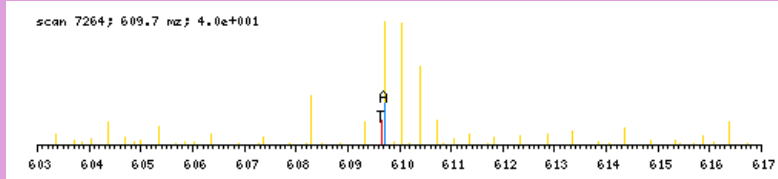

zoomed in precursor plot; T=theoretical m/z, A=acquired m/z

| b <sup>+</sup> | #  | AA # | y <sup>+</sup> | y <sup>2+</sup> |
|----------------|----|------|----------------|-----------------|
| 144.0661       | 1  | T 16 |                |                 |
| 245.1138       | 2  | T 15 | 1683.8971      | 842.4525        |
| 373.1723       | 3  | Q 14 | 1582.8494      | 791.9286        |
| 501.2309       | 4  | Q 13 | 1454.7908      | 727.8993        |
| 614.3150       | 5  | I 12 | 1326.7323      | 663.8700        |
| 713.3834       | 6  | V 11 | 1213.6482      | 607.3280        |
| 826.4675       | 7  | L 10 | 1114.5798      | 557.7938        |
| 954.5260       | 8  | Q 9  | 1001.4957      | 501.2518        |
| 1011.5475      | 9  | G 8  | 873.4371       | 437.2225        |
| 1108.6003      | 10 | P 7  | 816.4157       | 408.7118        |
| 1165.6217      | 11 | G 6  | 719.3629       | 360.1854        |
| 1262.6745      | 12 | P 5  | 662.3415       | 331.6746        |
| 1448.7538      | 13 | W 4  | 565.2887       | 283.1483        |
| 1505.7753      | 14 | G 3  | 379.2094       | 190.1086        |
| 1652.8437      | 15 | F 2  | 322.1879       | 161.5979        |
|                | 16 | R 1  | 175.1195       | 88.0637         |

N-term:+43.02

TTSGALFPSLVPGSR, MH+ 1531.8120, m/z 766.4097  
 L OSG41 P180811 230811-s1.07195.07195.2.dta

X-range:

-

MassTol: Y-zoom:

MassType:

AVG  MONO

Axis:

1  2

Label:

I  M  -

Ions:

a  +  2+  3+

b  +  2+  3+

c  +  2+  3+

x  +  2+  3+

y  +  2+  3+

z  +  2+  3+

hide H<sub>2</sub>O/NH<sub>3</sub>

zoom 112-122

GO

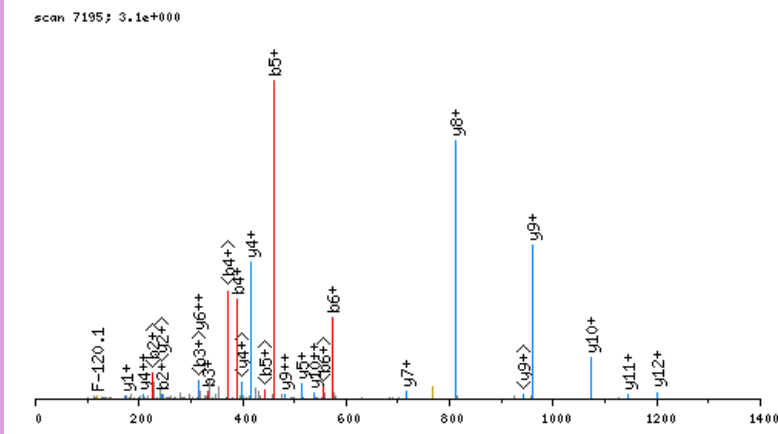

click image to zoom in; click top corners to zoom out [\[precursor±\]](#)

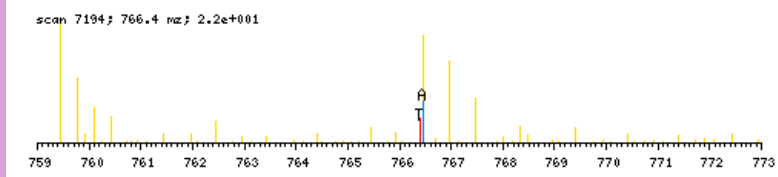

zoomed in precursor plot; T=theoretical m/z, A=acquired m/z

| b <sup>+</sup> | #  | AA | #  | y <sup>+</sup> | y <sup>2+</sup> |
|----------------|----|----|----|----------------|-----------------|
| 144.0661       | 1  | T  | 15 |                |                 |
| 245.1138       | 2  | T  | 14 | 1388.7538      | 694.8808        |
| 332.1458       | 3  | S  | 13 | 1287.7061      | 644.3570        |
| 389.1672       | 4  | G  | 12 | 1200.6741      | 600.8410        |
| 460.2044       | 5  | A  | 11 | 1143.6526      | 572.3302        |
| 573.2884       | 6  | L  | 10 | 1072.6155      | 536.8117        |
| 720.3568       | 7  | F  | 9  | 959.5314       | 480.2696        |
| 817.4096       | 8  | P  | 8  | 812.4630       | 406.7354        |
| 904.4416       | 9  | S  | 7  | 715.4103       | 358.2090        |
| 1017.5257      | 10 | L  | 6  | 628.3782       | 314.6930        |
| 1116.5941      | 11 | V  | 5  | 515.2942       | 258.1510        |
| 1213.6469      | 12 | P  | 4  | 416.2258       | 208.6168        |
| 1270.6683      | 13 | G  | 3  | 319.1730       | 160.0904        |
| 1357.7004      | 14 | S  | 2  | 262.1515       | 131.5797        |
|                | 15 | R  | 1  | 175.1195       | 88.0637         |

N-term:+43.02

TTSLQDQSAAGR, MH+ 1333.6348, m/z 667.3210  
 L OSG41 P180811 230811-s1.02650.02650.2.dta

X-range:

-

MassTol: Y-zoom:

MassType:

AVG  MONO

Axis:

1  2

Label:

I  M  -

Ions:

a  +  2+  3+

b  +  2+  3+

c  +  2+  3+

x  +  2+  3+

y  +  2+  3+

z  +  2+  3+

hide H<sub>2</sub>O/NH<sub>3</sub>

zoom 112-122

GO

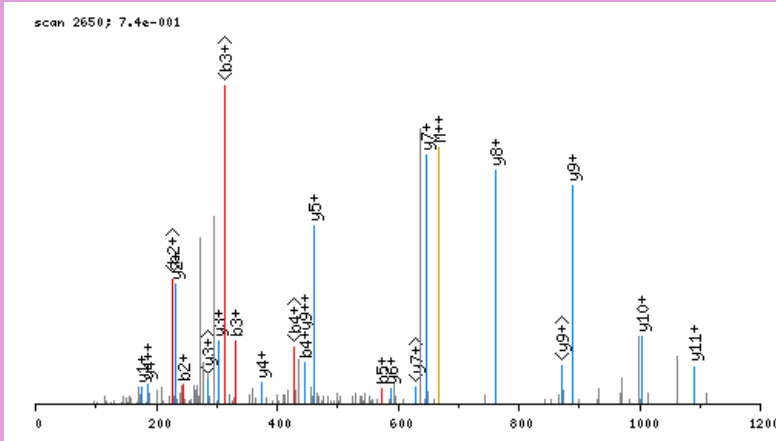

click image to zoom in; click top corners to zoom out [\[precursor±\]](#)

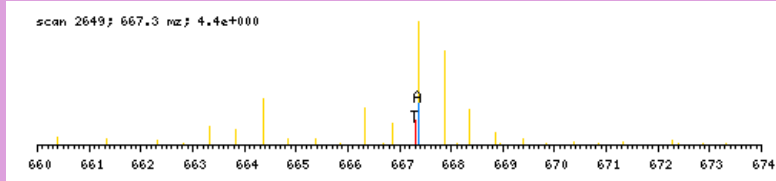

zoomed in precursor plot; T=theoretical m/z, A=acquired m/z

| b <sup>+</sup> | #  | AA # | y <sup>+</sup> | y <sup>2+</sup> |
|----------------|----|------|----------------|-----------------|
| 144.0661       | 1  | T 13 |                |                 |
| 245.1138       | 2  | T 12 | 1190.5766      | 595.7922        |
| 332.1458       | 3  | S 11 | 1089.5289      | 545.2683        |
| 445.2298       | 4  | L 10 | 1002.4968      | 501.7523        |
| 573.2884       | 5  | Q 9  | 889.4128       | 445.2103        |
| 688.3154       | 6  | D 8  | 761.3542       | 381.1810        |
| 745.3368       | 7  | G 7  | 646.3273       | 323.6675        |
| 873.3954       | 8  | Q 6  | 589.3058       | 295.1568        |
| 960.4274       | 9  | S 5  | 461.2472       | 231.1275        |
| 1031.4646      | 10 | A 4  | 374.2152       | 187.6115        |
| 1102.5017      | 11 | A 3  | 303.1781       | 152.0930        |
| 1159.5231      | 12 | G 2  | 232.1410       | 116.5744        |
|                | 13 | R 1  | 175.1195       | 88.0637         |

N-term:+43.02

TTTTTFKGVDPNSR, MH+ 1594.8077, m/z 532.2741  
 L OSG37 P180811 230811-s1.04013.04013.3.dta

X-range:

-

MassTol: Y-zoom:

MassType:

AVG  MONO

Axis:

1  2

Label:

I  M  -

Ions:

a  +  2+  3+

b  +  2+  3+

c  +  2+  3+

x  +  2+  3+

y  +  2+  3+

z  +  2+  3+

hide H<sub>2</sub>O/NH<sub>3</sub>

zoom 112-122

GO

scan 4013; 2.5e+000

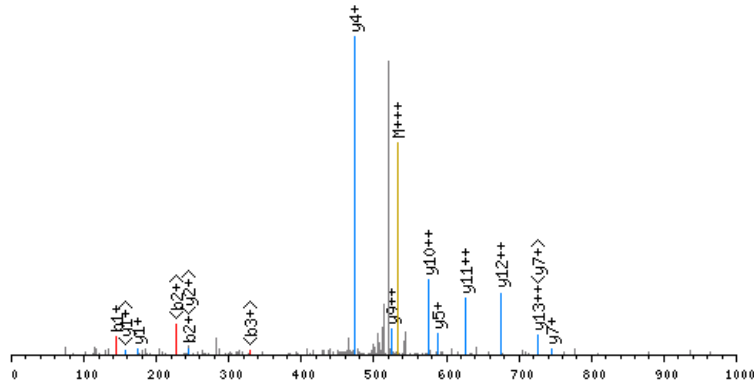

click image to zoom in; click top corners to zoom out [\[precursor±\]](#)

scan 4009; 532.3 m/z; 2.0e+001

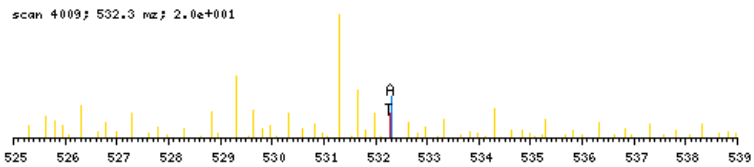

zoomed in precursor plot; T=theoretical m/z, A=acquired m/z

| b <sup>+</sup> | #  | AA # | y <sup>+</sup> | y <sup>2+</sup> |
|----------------|----|------|----------------|-----------------|
| 144.0661       | 1  | T 14 |                |                 |
| 245.1138       | 2  | T 13 | 1451.7495      | 726.3786        |
| 346.1614       | 3  | T 12 | 1350.7018      | 675.8548        |
| 447.2091       | 4  | T 11 | 1249.6541      | 625.3310        |
| 548.2568       | 5  | T 10 | 1148.6064      | 574.8071        |
| 695.3252       | 6  | F 9  | 1047.5588      | 524.2833        |
| 851.4515       | 7  | K 8  | 900.4903       | 450.7491        |
| 908.4730       | 8  | G 7  | 744.3640       | 372.6859        |
| 1007.5414      | 9  | V 6  | 687.3426       | 344.1752        |
| 1122.5683      | 10 | D 5  | 588.2742       | 294.6410        |
| 1219.6211      | 11 | P 4  | 473.2472       | 237.1275        |
| 1333.6640      | 12 | N 3  | 376.1945       | 188.6011        |
| 1420.6960      | 13 | S 2  | 262.1515       | 131.5797        |
|                | 14 | R 1  | 175.1195       | 88.0637         |

N-term:+43.02 K(7):+156.13

TTYLEFIQQNEER, MH+ 1712.8132, m/z 856.9102  
 L OSG41 P180811 230811-s1.07280.07280.2.dta

X-range:

-

MassTol: Y-zoom:

MassType:

AVG  MONO

Axis:

1  2

Label:

I  M  -

Ions:

a  +  2+  3+

b  +  2+  3+

c  +  2+  3+

x  +  2+  3+

y  +  2+  3+

z  +  2+  3+

hide H<sub>2</sub>O/NH<sub>3</sub>

zoom 112-122

GO

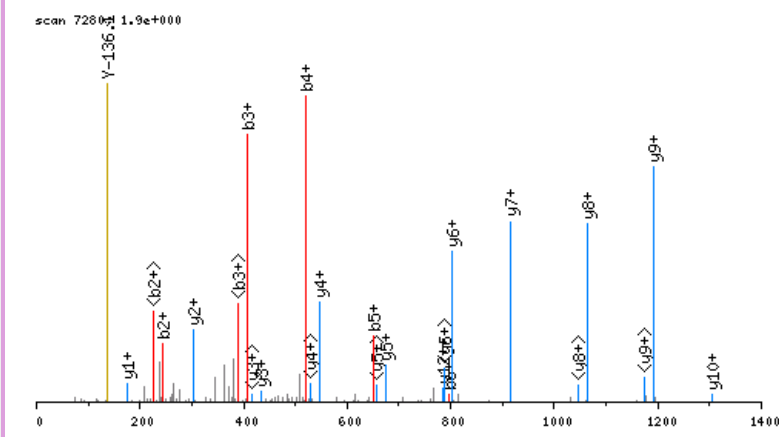

click image to zoom in; click top corners to zoom out [\[precursor±\]](#)

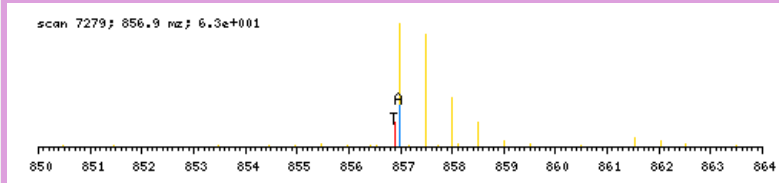

zoomed in precursor plot; T=theoretical m/z, A=acquired m/z

| b <sup>+</sup> | #  | AA # | y <sup>+</sup> | y <sup>2+</sup> |
|----------------|----|------|----------------|-----------------|
| 144.0661       | 1  | T 13 |                |                 |
| 245.1138       | 2  | T 12 | 1569.7549      | 785.3814        |
| 408.1771       | 3  | Y 11 | 1468.7072      | 734.8575        |
| 521.2611       | 4  | L 10 | 1305.6439      | 653.3259        |
| 650.3037       | 5  | E 9  | 1192.5598      | 596.7838        |
| 797.3722       | 6  | F 8  | 1063.5172      | 532.2625        |
| 910.4562       | 7  | I 7  | 916.4488       | 458.7283        |
| 1038.5148      | 8  | Q 6  | 803.3648       | 402.1863        |
| 1166.5734      | 9  | Q 5  | 675.3062       | 338.1570        |
| 1280.6163      | 10 | N 4  | 547.2476       | 274.1277        |
| 1409.6589      | 11 | E 3  | 433.2047       | 217.1063        |
| 1538.7015      | 12 | E 2  | 304.1621       | 152.5850        |
|                | 13 | R 1  | 175.1195       | 88.0637         |

N-term:+43.02

TVLSGGSTMYPGIADR, MH+ 1666.8111, m/z 556.2752  
 L OSG37 P180811 230811-s1.05757.05757.3.dta

X-range:

-

MassTol: Y-zoom:

MassType:

AVG  MONO

Axis:

1  2

Label:

I  M  -

Ions:

a  +  2+  3+

b  +  2+  3+

c  +  2+  3+

x  +  2+  3+

y  +  2+  3+

z  +  2+  3+

hide H<sub>2</sub>O/NH<sub>3</sub>

zoom 112-122

GO

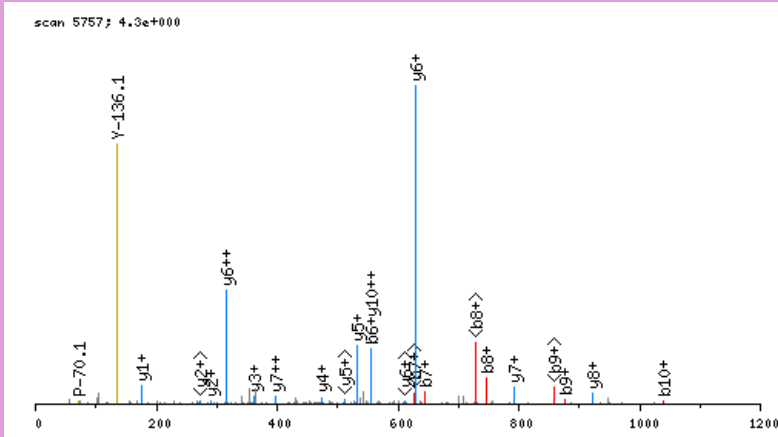

click image to zoom in; click top corners to zoom out [\[precursor±\]](#)

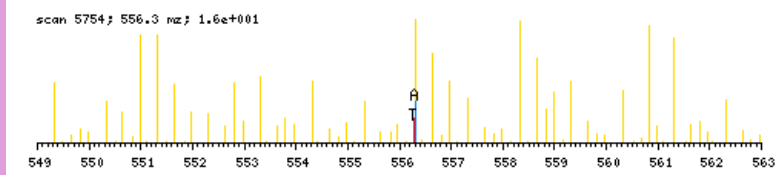

zoomed in precursor plot; T=theoretical m/z, A=acquired m/z

| b <sup>+</sup> | #  | AA # | y <sup>+</sup> | y <sup>2+</sup> |
|----------------|----|------|----------------|-----------------|
| 144.0661       | 1  | T 16 |                |                 |
| 243.1345       | 2  | V 15 | 1523.7528      | 762.3803        |
| 356.2186       | 3  | L 14 | 1424.6844      | 712.8461        |
| 443.2506       | 4  | S 13 | 1311.6003      | 656.3041        |
| 500.2720       | 5  | G 12 | 1224.5683      | 612.7881        |
| 557.2935       | 6  | G 11 | 1167.5468      | 584.2773        |
| 644.3255       | 7  | S 10 | 1110.5254      | 555.7666        |
| 745.3732       | 8  | T 9  | 1023.4933      | 512.2506        |
| 876.4137       | 9  | M 8  | 922.4457       | 461.7267        |
| 1039.4770      | 10 | Y 7  | 791.4052       | 396.2065        |
| 1136.5298      | 11 | P 6  | 628.3418       | 314.6748        |
| 1193.5513      | 12 | G 5  | 531.2891       | 266.1485        |
| 1306.6353      | 13 | I 4  | 474.2676       | 237.6377        |
| 1377.6724      | 14 | A 3  | 361.1836       | 181.0957        |
| 1492.6994      | 15 | D 2  | 290.1464       | 145.5771        |
|                | 16 | R 1  | 175.1195       | 88.0637         |

N-term:+43.02



VEAAPAGSGPLR, MH+ 1166.6170, m/z 583.8121  
 L OSG41 P180811 230811-s1.03991.03991.2.dta

X-range:

-

MassTol: Y-zoom:

MassType:

AVG  MONO

Axis:

1  2

Label:

I  M  -

Ions:

a  +  2+  3+

b  +  2+  3+

c  +  2+  3+

x  +  2+  3+

y  +  2+  3+

z  +  2+  3+

hide H<sub>2</sub>O/NH<sub>3</sub>

zoom 112-122

GO

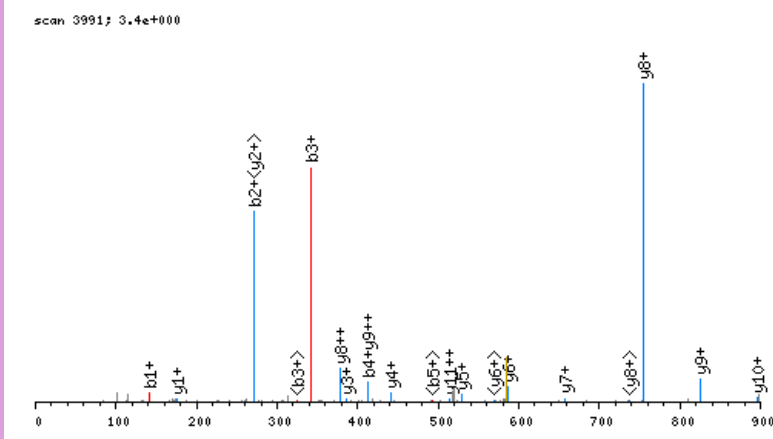

click image to zoom in; click top corners to zoom out [\[precursor±\]](#)

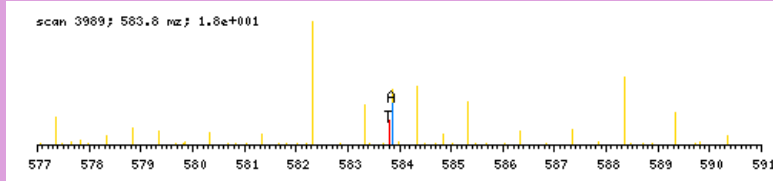

zoomed in precursor plot; T=theoretical m/z, A=acquired m/z

| b <sup>+</sup> | #  | AA | #  | y <sup>+</sup> | y <sup>2+</sup> |
|----------------|----|----|----|----------------|-----------------|
| 142.0868       | 1  | V  | 12 |                |                 |
| 271.1294       | 2  | E  | 11 | 1025.5380      | 513.2729        |
| 342.1665       | 3  | A  | 10 | 896.4954       | 448.7516        |
| 413.2036       | 4  | A  | 9  | 825.4583       | 413.2331        |
| 510.2564       | 5  | P  | 8  | 754.4212       | 377.7145        |
| 581.2935       | 6  | A  | 7  | 657.3684       | 329.1881        |
| 638.3150       | 7  | G  | 6  | 586.3313       | 293.6696        |
| 725.3470       | 8  | S  | 5  | 529.3098       | 265.1588        |
| 782.3685       | 9  | G  | 4  | 442.2778       | 221.6428        |
| 879.4212       | 10 | P  | 3  | 385.2563       | 193.1321        |
| 992.5053       | 11 | L  | 2  | 288.2036       | 144.6057        |
|                | 12 | R  | 1  | 175.1195       | 88.0637         |

N-term:+43.02

VEKEEAGGGGGGISEEEAAQYDR, MH+ 2471.1387, m/z 824.3844  
 L OSG36 P180811 230811-s1.03315.03315.3.dta

scan 3315; 1.3e+000

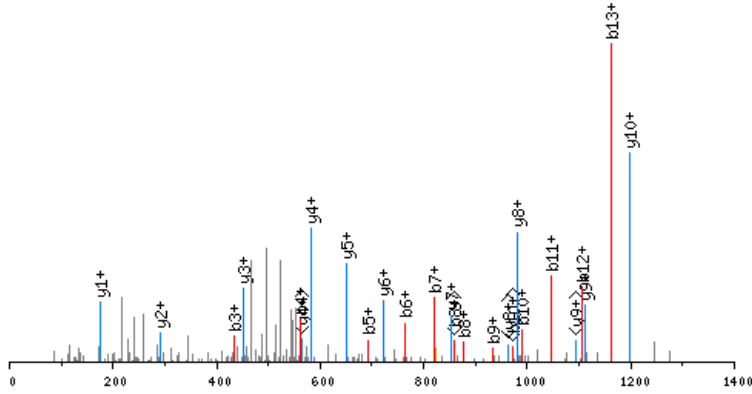

click image to zoom in; click top corners to zoom out [precursor±]

scan 3314; 824.4 m/z; 7.0e+000

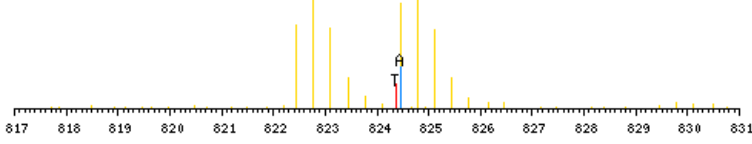

zoomed in precursor plot; T=theoretical m/z, A=acquired m/z

X-range:

-

MassTol: Y-zoom:

MassType:

AVG  MONO

Axis:

1  2

Label:

I  M  -

Ions:

a  +  2+  3+

b  +  2+  3+

c  +  2+  3+

x  +  2+  3+

y  +  2+  3+

z  +  2+  3+

hide H<sub>2</sub>O/NH<sub>3</sub>

zoom 112-122

GO

| b <sup>+</sup> | #  | AA | #  | y <sup>+</sup> | y <sup>2+</sup> |
|----------------|----|----|----|----------------|-----------------|
| 142.0868       | 1  | V  | 24 |                |                 |
| 271.1294       | 2  | E  | 23 | 2330.0597      | 1165.5338       |
| 433.2875       | 3  | K  | 22 | 2201.0171      | 1101.0125       |
| 562.3301       | 4  | E  | 21 | 2038.8590      | 1019.9334       |
| 691.3727       | 5  | E  | 20 | 1909.8164      | 955.4121        |
| 762.4098       | 6  | A  | 19 | 1780.7738      | 890.8908        |
| 819.4313       | 7  | G  | 18 | 1709.7367      | 855.3723        |
| 876.4527       | 8  | G  | 17 | 1652.7152      | 826.8615        |
| 933.4742       | 9  | G  | 16 | 1595.6938      | 798.3508        |
| 990.4957       | 10 | G  | 15 | 1538.6723      | 769.8401        |
| 1047.5171      | 11 | G  | 14 | 1481.6508      | 741.3293        |
| 1104.5386      | 12 | G  | 13 | 1424.6294      | 712.8186        |
| 1161.5601      | 13 | G  | 12 | 1367.6079      | 684.3079        |
| 1274.6441      | 14 | I  | 11 | 1310.5864      | 655.7971        |
| 1361.6761      | 15 | S  | 10 | 1197.5024      | 599.2551        |
| 1490.7187      | 16 | E  | 9  | 1110.4704      | 555.7391        |
| 1619.7613      | 17 | E  | 8  | 981.4278       | 491.2178        |
| 1748.8039      | 18 | E  | 7  | 852.3852       | 426.6965        |
| 1819.8410      | 19 | A  | 6  | 723.3426       | 362.1752        |
| 1890.8782      | 20 | A  | 5  | 652.3055       | 326.6566        |
| 2018.9367      | 21 | Q  | 4  | 581.2683       | 291.1381        |
| 2182.0001      | 22 | Y  | 3  | 453.2098       | 227.1088        |
| 2297.0270      | 23 | D  | 2  | 290.1464       | 145.5771        |
|                | 24 | R  | 1  | 175.1195       | 88.0637         |

N-term:+43.02 K(3):+162.16

VELFISTTPDSRKR, MH+ 1718.9442, m/z 573.6529  
 L OSG39 P180811 230811-s1.09319.09319.3.dta

X-range:

-

MassTol: Y-zoom:

MassType:

AVG  MONO

Axis:

1  2

Label:

I  M  -

Ions:

a  +  2+  3+

b  +  2+  3+

c  +  2+  3+

x  +  2+  3+

y  +  2+  3+

z  +  2+  3+

hide H<sub>2</sub>O/NH<sub>3</sub>

zoom 112-122

GO

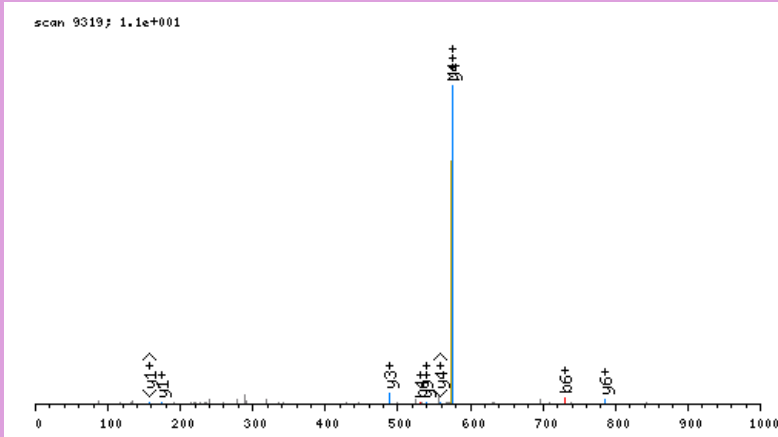

click image to zoom in; click top corners to zoom out [\[precursor±\]](#)

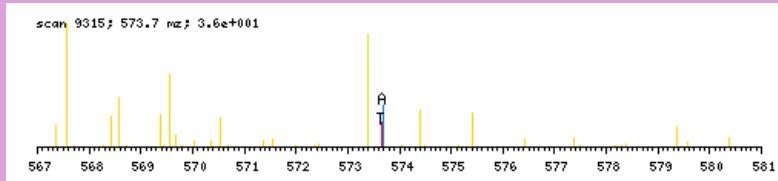

zoomed in precursor plot; T=theoretical m/z, A=acquired m/z

| b <sup>+</sup> | #  | AA # | y <sup>+</sup> | y <sup>2+</sup> |
|----------------|----|------|----------------|-----------------|
| 142.0868       | 1  | V 14 |                |                 |
| 271.1294       | 2  | E 13 | 1577.8652      | 789.4365        |
| 384.2135       | 3  | L 12 | 1448.8226      | 724.9152        |
| 531.2819       | 4  | F 11 | 1335.7385      | 668.3732        |
| 644.3659       | 5  | I 10 | 1188.6701      | 594.8390        |
| 731.3980       | 6  | S 9  | 1075.5860      | 538.2969        |
| 832.4457       | 7  | T 8  | 988.5540       | 494.7809        |
| 933.4933       | 8  | T 7  | 887.5063       | 444.2571        |
| 1030.5461      | 9  | P 6  | 786.4586       | 393.7332        |
| 1145.5730      | 10 | D 5  | 689.4059       | 345.2069        |
| 1232.6051      | 11 | S 4  | 574.3789       | 287.6934        |
| 1388.7062      | 12 | R 3  | 487.3469       | 244.1774        |
| 1544.8325      | 13 | K 2  | 331.2458       | 166.1268        |
|                | 14 | R 1  | 175.1195       | 88.0637         |

N-term:+43.02 K(13):+156.13

VKKMKLKTGKALNLGYALDYALR, MH+ 2806.8483, m/z 936.2876  
 L OSG39 P180811 230811-sl.07693.07693.3.dta

scan 7693; 2.4e+001

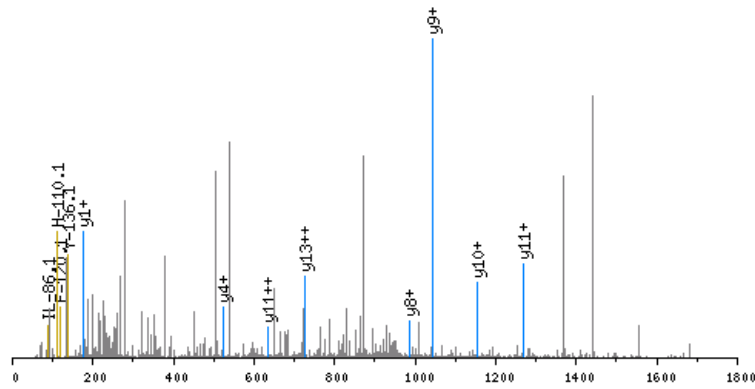

click image to zoom in; click top corners to zoom out [\[precursor±\]](#)

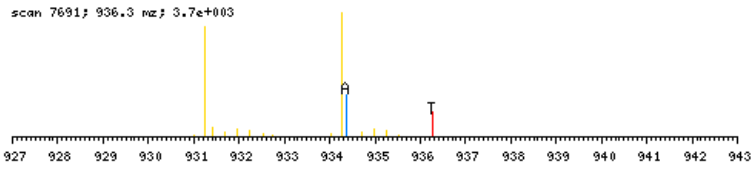

zoomed in precursor plot; T=theoretical m/z, A=acquired m/z

| b <sup>+</sup> | #  | AA # | y <sup>+</sup>   | y <sup>2+</sup> |
|----------------|----|------|------------------|-----------------|
| 142.0868       | 1  | V 23 |                  |                 |
| 304.2449       | 2  | K 22 | 2665.7693        | 1333.3886       |
| 466.4030       | 3  | K 21 | 2503.6112        | 1252.3095       |
| 597.4435       | 4  | M 20 | 2341.4531        | 1171.2305       |
| 759.6016       | 5  | K 19 | 2210.4126        | 1105.7102       |
| 872.6857       | 6  | L 18 | 2048.2545        | 1024.6312       |
| 1034.8438      | 7  | K 17 | 1935.1704        | 968.0891        |
| 1135.8914      | 8  | T 16 | 1773.0123        | 887.0101        |
| 1192.9129      | 9  | G 15 | 1671.9647        | 836.4862        |
| 1355.0710      | 10 | K 14 | 1614.9432        | 807.9755        |
| 1426.1081      | 11 | A 13 | 1452.7851        | <b>726.8965</b> |
| 1539.1922      | 12 | L 12 | 1381.7480        | 691.3779        |
| 1653.2351      | 13 | N 11 | <b>1268.6639</b> | <b>634.8359</b> |
| 1766.3192      | 14 | L 10 | <b>1154.6210</b> | 577.8144        |
| 1823.3406      | 15 | G 9  | <b>1041.5369</b> | 521.2724        |
| 1986.4040      | 16 | Y 8  | <b>984.5155</b>  | 492.7616        |
| 2057.4411      | 17 | A 7  | 821.4521         | 411.2300        |
| 2170.5251      | 18 | L 6  | 750.4150         | 375.7114        |
| 2285.5521      | 19 | D 5  | 637.3310         | 319.1694        |
| 2448.6154      | 20 | Y 4  | <b>522.3040</b>  | 261.6559        |
| 2519.6525      | 21 | A 3  | 359.2407         | 180.1243        |
| 2632.7366      | 22 | L 2  | 288.2036         | 144.6057        |
|                | 23 | R 1  | <b>175.1195</b>  | 88.0637         |

N-term:+43.02 K(2):+162.16  
 K(3):+162.16 K(5):+162.16 K(7):+162.16  
 K(10):+162.16

X-range:

-

MassTol: Y-zoom:

MassType:

AVG  MONO

Axis:

1  2

Label:

I  M  -

Ions:

a  +  2+  3+

b  +  2+  3+

c  +  2+  3+

x  +  2+  3+

y  +  2+  3+

z  +  2+  3+

hide H<sub>2</sub>O/NH<sub>3</sub>

zoom 112-122

GO

VKVGVNGFGR, MH+ 1108.6692, m/z 554.8382  
 L OSG37 P180811 230811-s1.04990.04990.2.dta

scan 4990; 3.4e+001

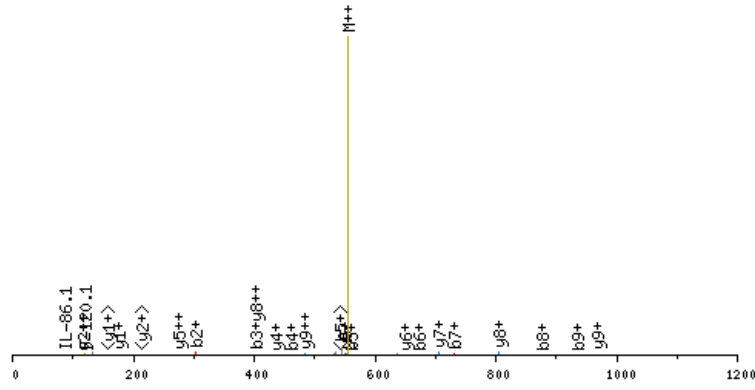

click image to zoom in; click top corners to zoom out [\[precursor±\]](#)

scan 4989; 554.8 m/z; 3.3e+001

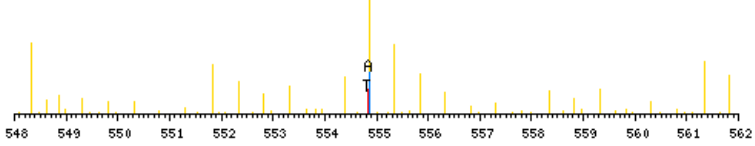

zoomed in precursor plot; T=theoretical m/z, A=acquired m/z

X-range:

-

MassTol: Y-zoom:

MassType:

AVG  MONO

Axis:

1  2

Label:

I  M  -

Ions:

a  +  2+  3+

b  +  2+  3+

c  +  2+  3+

x  +  2+  3+

y  +  2+  3+

z  +  2+  3+

hide H<sub>2</sub>O/NH<sub>3</sub>

zoom 112-122

GO

| b <sup>+</sup> | #  | AA | #  | y <sup>+</sup> | y <sup>2+</sup> |
|----------------|----|----|----|----------------|-----------------|
| 142.0868       | 1  | V  | 10 |                |                 |
| 304.2449       | 2  | K  | 9  | 967.5902       | 484.2990        |
| 403.3133       | 3  | V  | 8  | 805.4321       | 403.2199        |
| 460.3348       | 4  | G  | 7  | 706.3636       | 353.6857        |
| 559.4032       | 5  | V  | 6  | 649.3422       | 325.1750        |
| 673.4461       | 6  | N  | 5  | 550.2738       | 275.6408        |
| 730.4676       | 7  | G  | 4  | 436.2308       | 218.6193        |
| 877.5360       | 8  | F  | 3  | 379.2094       | 190.1086        |
| 934.5575       | 9  | G  | 2  | 232.1410       | 116.5744        |
|                | 10 | R  | 1  | 175.1195       | 88.0637         |

N-term:+43.02 K(2):+162.16

VNNLEVDSR, MH+ 1087.5384, m/z 544.2728  
 L OSG38 P180811 230811-s1.03373.03373.2.dta

scan 3373; 4.7e+000

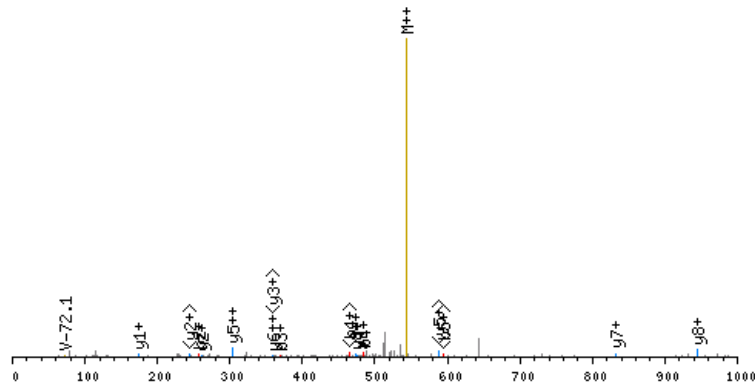

click image to zoom in; click top corners to zoom out [\[precursor±\]](#)

scan 3369; 544.3 m/z; 1.1e+001

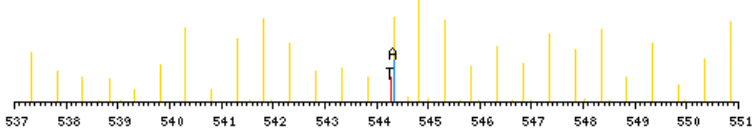

zoomed in precursor plot; T=theoretical m/z, A=acquired m/z

X-range:

-

MassTol: Y-zoom:

MassType:

AVG  MONO

Axis:

1  2

Label:

I  M  -

Ions:

a  +  2+  3+

b  +  2+  3+

c  +  2+  3+

x  +  2+  3+

y  +  2+  3+

z  +  2+  3+

hide H<sub>2</sub>O/NH<sub>3</sub>

zoom 112-122

GO

| b <sup>+</sup> | # | AA # | y <sup>+</sup> | y <sup>2+</sup> |
|----------------|---|------|----------------|-----------------|
| 142.0868       | 1 | V    | 9              |                 |
| 256.1297       | 2 | N    | 8              | 946.4594        |
| 370.1727       | 3 | N    | 7              | 832.4165        |
| 483.2567       | 4 | L    | 6              | 718.3735        |
| 612.2993       | 5 | E    | 5              | 605.2895        |
| 711.3677       | 6 | V    | 4              | 476.2469        |
| 826.3947       | 7 | D    | 3              | 377.1785        |
| 913.4267       | 8 | S    | 2              | 262.1515        |
|                | 9 | R    | 1              | 175.1195        |

N-term:+43.02

VNPTVFFDITADDEPLGR, MH+ 2047.9977, m/z 683.3374  
 L OSG41 P180811 230811-s1.07666.07666.3.dta

X-range:

-

MassTol: Y-zoom:

MassType:

AVG  MONO

Axis:

1  2

Label:

I  M  -

Ions:

a  +  2+  3+

b  +  2+  3+

c  +  2+  3+

x  +  2+  3+

y  +  2+  3+

z  +  2+  3+

hide H<sub>2</sub>O/NH<sub>3</sub>

zoom 112-122

GO

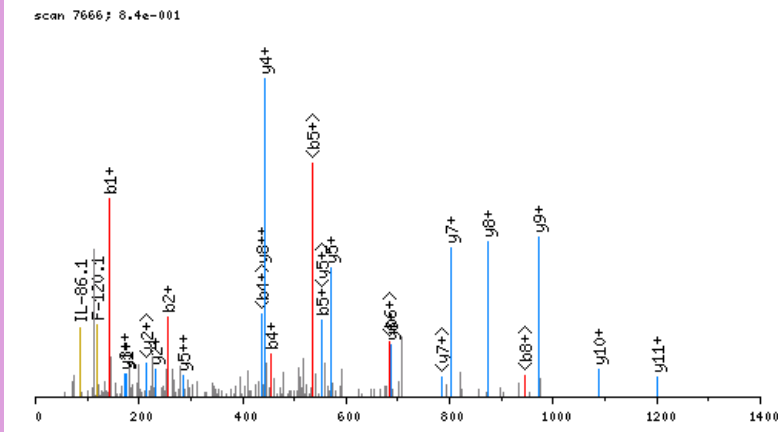

click image to zoom in; click top corners to zoom out [\[precursor±\]](#)

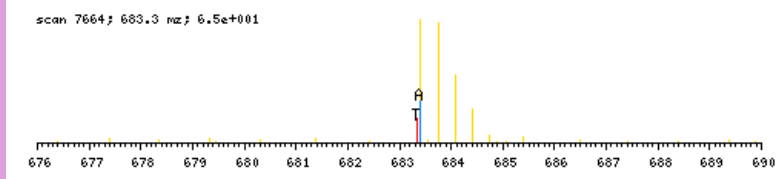

zoomed in precursor plot; T=theoretical m/z, A=acquired m/z

| b <sup>+</sup> | #  | AA # | y <sup>+</sup> | y <sup>2+</sup> |
|----------------|----|------|----------------|-----------------|
| 142.0868       | 1  | V 18 |                |                 |
| 256.1297       | 2  | N 17 | 1906.9187      | 953.9633        |
| 353.1825       | 3  | P 16 | 1792.8758      | 896.9418        |
| 454.2302       | 4  | T 15 | 1695.8230      | 848.4154        |
| 553.2986       | 5  | V 14 | 1594.7753      | 797.8916        |
| 700.3670       | 6  | F 13 | 1495.7069      | 748.3574        |
| 847.4354       | 7  | F 12 | 1348.6385      | 674.8232        |
| 962.4624       | 8  | D 11 | 1201.5701      | 601.2889        |
| 1075.5464      | 9  | I 10 | 1086.5431      | 543.7755        |
| 1176.5941      | 10 | T 9  | 973.4591       | 487.2334        |
| 1247.6312      | 11 | A 8  | 872.4114       | 436.7096        |
| 1362.6582      | 12 | D 7  | 801.3743       | 401.1910        |
| 1477.6851      | 13 | D 6  | 686.3473       | 343.6776        |
| 1606.7277      | 14 | E 5  | 571.3204       | 286.1641        |
| 1703.7805      | 15 | P 4  | 442.2778       | 221.6428        |
| 1816.8645      | 16 | L 3  | 345.2250       | 173.1164        |
| 1873.8860      | 17 | G 2  | 232.1410       | 116.5744        |
|                | 18 | R 1  | 175.1195       | 88.0637         |

N-term:+43.02

VPTPNVSVVDLTCR, MH+ 1598.8212, m/z 533.6119  
 L OSG36 P180811 230811-s1.06006.06006.3.dta

X-range:

-

MassTol: Y-zoom:

MassType:

AVG  MONO

Axis:

1  2

Label:

I  M  -

Ions:

a  +  2+  3+

b  +  2+  3+

c  +  2+  3+

x  +  2+  3+

y  +  2+  3+

z  +  2+  3+

hide H<sub>2</sub>O/NH<sub>3</sub>

zoom 112-122

GO

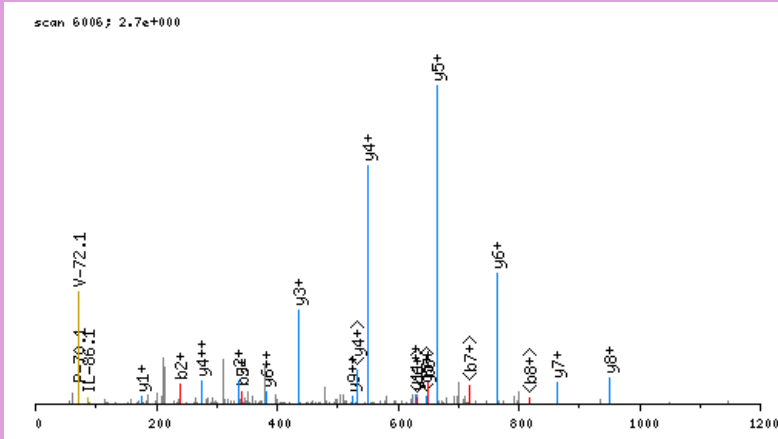

click image to zoom in; click top corners to zoom out [\[precursor±\]](#)

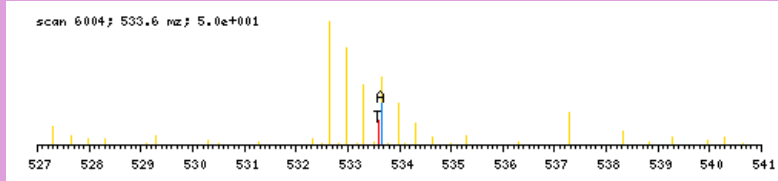

zoomed in precursor plot; T=theoretical m/z, A=acquired m/z

| b <sup>+</sup> | #  | AA # | y <sup>+</sup> | y <sup>2+</sup> |
|----------------|----|------|----------------|-----------------|
| 142.0868       | 1  | V 14 |                |                 |
| 239.1396       | 2  | P 13 | 1457.7422      | 729.3750        |
| 340.1873       | 3  | T 12 | 1360.6894      | 680.8486        |
| 437.2400       | 4  | P 11 | 1259.6417      | 630.3248        |
| 551.2829       | 5  | N 10 | 1162.5890      | 581.7984        |
| 650.3514       | 6  | V 9  | 1048.5461      | 524.7769        |
| 737.3834       | 7  | S 8  | 949.4776       | 475.2427        |
| 836.4518       | 8  | V 7  | 862.4456       | 431.7267        |
| 935.5202       | 9  | V 6  | 763.3772       | 382.1925        |
| 1050.5472      | 10 | D 5  | 664.3088       | 332.6583        |
| 1163.6312      | 11 | L 4  | 549.2818       | 275.1448        |
| 1264.6789      | 12 | T 3  | 436.1978       | 218.6028        |
| 1424.7095      | 13 | C 2  | 335.1501       | 168.0790        |
|                | 14 | R 1  | 175.1195       | 88.0637         |

N-term:+43.02 C(13):+160.03



VSMNNTVDTSHEDMIHDAQMDYYGTR, MH+ 3057.3029, m/z 765.0812  
 L OSG38 P180811 230811-s1.07525.07525.4.dta

scan 7525; 5.9e-001

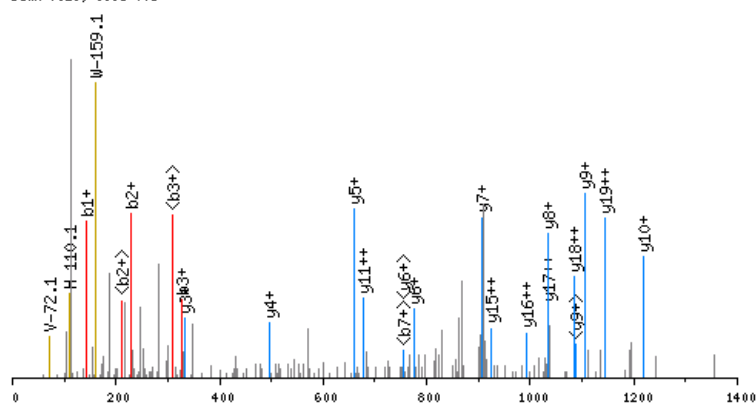

click image to zoom in; click top corners to zoom out [precursor±]

scan 7524; 765.1 m/z; 2.4e+001

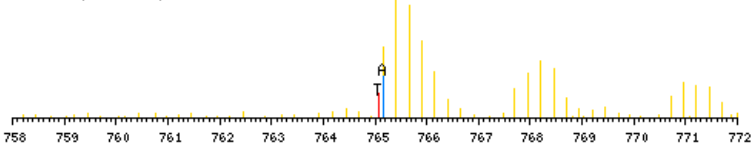

zoomed in precursor plot; T=theoretical m/z, A=acquired m/z

X-range:

-

MassTol: Y-zoom:

MassType:

AVG  MONO

Axis:

1  2

Label:

I  M  -

Ions:

a  +  2+  3+

b  +  2+  3+

c  +  2+  3+

x  +  2+  3+

y  +  2+  3+

z  +  2+  3+

hide H<sub>2</sub>O/NH<sub>3</sub>

zoom 112-122

GO

| b <sup>+</sup> | #  | AA # | y <sup>+</sup> | y <sup>2+</sup> |
|----------------|----|------|----------------|-----------------|
| 142.0868       | 1  | V 26 |                |                 |
| 229.1188       | 2  | S 25 | 2916.2239      | 1458.6158       |
| 328.1873       | 3  | V 24 | 2829.1918      | 1415.0998       |
| 459.2277       | 4  | M 23 | 2730.1234      | 1365.5656       |
| 573.2707       | 5  | N 22 | 2599.0829      | 1300.0454       |
| 674.3183       | 6  | T 21 | 2485.0400      | 1243.0239       |
| 773.3868       | 7  | V 20 | 2383.9923      | 1192.5001       |
| 888.4137       | 8  | D 19 | 2284.9239      | 1142.9659       |
| 989.4614       | 9  | T 18 | 2169.8970      | 1085.4524       |
| 1076.4934      | 10 | S 17 | 2068.8493      | 1034.9286       |
| 1213.5523      | 11 | H 16 | 1981.8173      | 991.4125        |
| 1342.5949      | 12 | E 15 | 1844.7584      | 922.8831        |
| 1457.6219      | 13 | D 14 | 1715.7158      | 858.3618        |
| 1588.6623      | 14 | M 13 | 1600.6888      | 800.8483        |
| 1701.7464      | 15 | I 12 | 1469.6483      | 735.3281        |
| 1838.8053      | 16 | H 11 | 1356.5643      | 678.7860        |
| 1953.8323      | 17 | D 10 | 1219.5054      | 610.2566        |
| 2024.8694      | 18 | A 9  | 1104.4784      | 552.7431        |
| 2152.9280      | 19 | Q 8  | 1033.4413      | 517.2246        |
| 2283.9684      | 20 | M 7  | 905.3827       | 453.1953        |
| 2398.9954      | 21 | D 6  | 774.3422       | 387.6750        |
| 2562.0587      | 22 | Y 5  | 659.3153       | 330.1616        |
| 2725.1220      | 23 | Y 4  | 496.2520       | 248.6299        |
| 2782.1435      | 24 | G 3  | 333.1886       | 167.0982        |
| 2883.1912      | 25 | T 2  | 276.1672       | 138.5875        |
|                | 26 | R 1  | 175.1195       | 88.0637         |

N-term:+43.02

VSVVDLTCR, MH+ 1090.5566, m/z 545.7820  
 L OSG36 P180811 230811-s1.05060.05060.2.dta

scan 5060; 1.9e+000

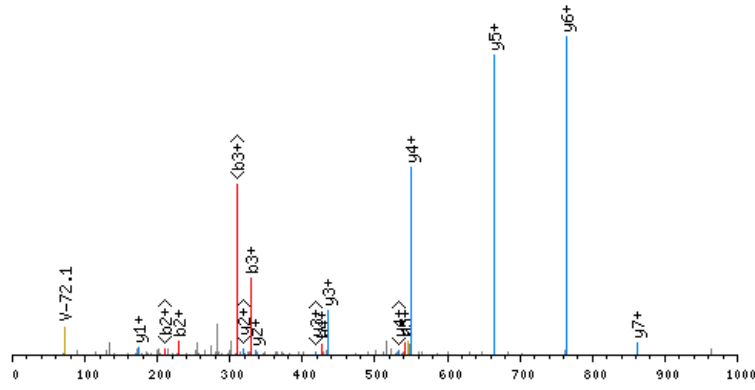

click image to zoom in; click top corners to zoom out [precursor±]

scan 5059; 545.8 m/z; 8.2e+000

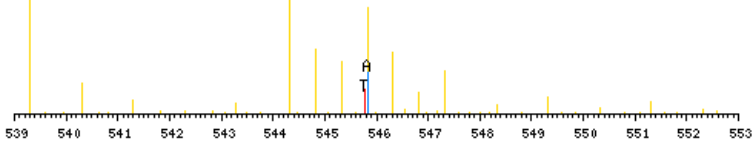

zoomed in precursor plot; T=theoretical m/z, A=acquired m/z

X-range:

-

MassTol: Y-zoom:

MassType:

AVG  MONO

Axis:

1  2

Label:

I  M  -

Ions:

a  +  2+  3+

b  +  2+  3+

c  +  2+  3+

x  +  2+  3+

y  +  2+  3+

z  +  2+  3+

hide H<sub>2</sub>O/NH<sub>3</sub>

zoom 112-122

GO

| b <sup>+</sup> | # | AA # | y <sup>+</sup> | y <sup>2+</sup>   |
|----------------|---|------|----------------|-------------------|
| 142.0868       | 1 | V    | 9              |                   |
| 229.1188       | 2 | S    | 8              | 949.4776 475.2427 |
| 328.1873       | 3 | V    | 7              | 862.4456 431.7267 |
| 427.2557       | 4 | V    | 6              | 763.3772 382.1925 |
| 542.2826       | 5 | D    | 5              | 664.3088 332.6583 |
| 655.3667       | 6 | L    | 4              | 549.2818 275.1448 |
| 756.4144       | 7 | T    | 3              | 436.1978 218.6028 |
| 916.4450       | 8 | C    | 2              | 335.1501 168.0790 |
|                | 9 | R    | 1              | 175.1195 88.0637  |

N-term:+43.02 C(8):+160.03

VVFDDTYDR, MH+ 1171.5272, m/z 586.2672  
 L OSG36 P180811 230811-s1.05270.05270.2.dta

X-range:

-

MassTol: Y-zoom:

MassType:

AVG  MONO

Axis:

1  2

Label:

I  M  -

Ions:

a  +  2+  3+

b  +  2+  3+

c  +  2+  3+

x  +  2+  3+

y  +  2+  3+

z  +  2+  3+

hide H<sub>2</sub>O/NH<sub>3</sub>

zoom 112-122

GO

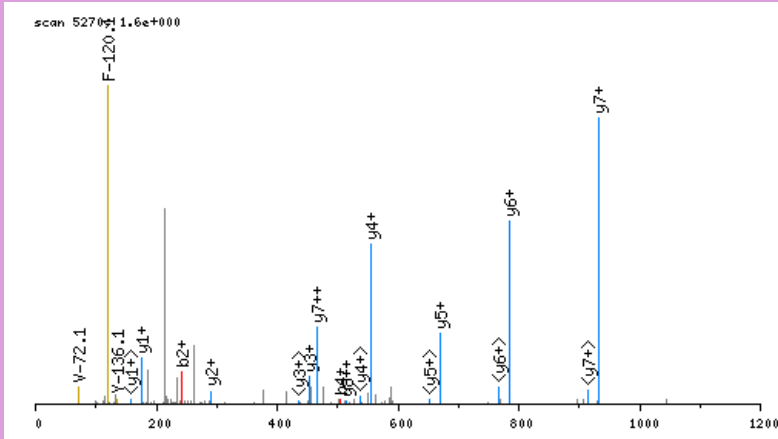

click image to zoom in; click top corners to zoom out [\[precursor±\]](#)

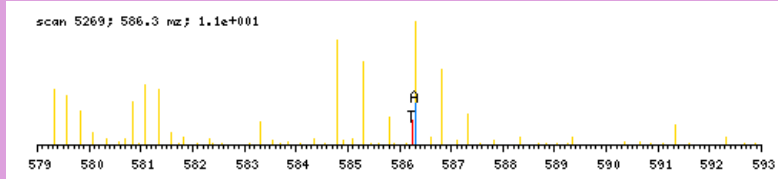

zoomed in precursor plot; T=theoretical m/z, A=acquired m/z

| b <sup>+</sup> | # | AA # | y <sup>+</sup> | y <sup>2+</sup> |
|----------------|---|------|----------------|-----------------|
| 142.0868       | 1 | V    | 9              |                 |
| 241.1552       | 2 | V    | 8              | 1030.4482       |
| 388.2236       | 3 | F    | 7              | 931.3798        |
| 503.2506       | 4 | D    | 6              | 784.3113        |
| 618.2775       | 5 | D    | 5              | 669.2844        |
| 719.3252       | 6 | T    | 4              | 554.2575        |
| 882.3885       | 7 | Y    | 3              | 453.2098        |
| 997.4155       | 8 | D    | 2              | 290.1464        |
|                | 9 | R    | 1              | 175.1195        |

N-term:+43.02

VVMTQTPLSLPLVSLGDAQASISCR, MH+ 2501.2743, m/z 834.4296  
 L OSG36 P180811 230811-s1.06205.06205.3.dta

X-range:

-

MassTol: Y-zoom:

MassType:

AVG  MONO

Axis:

1  2

Label:

I  M  -

Ions:

a  +  2+  3+

b  +  2+  3+

c  +  2+  3+

x  +  2+  3+

y  +  2+  3+

z  +  2+  3+

hide H<sub>2</sub>O/NH<sub>3</sub>

zoom 112-122

GO

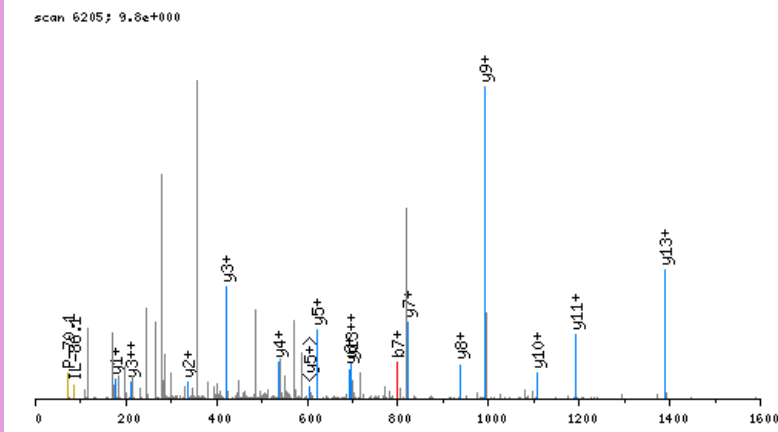

click image to zoom in; click top corners to zoom out [precursor±]

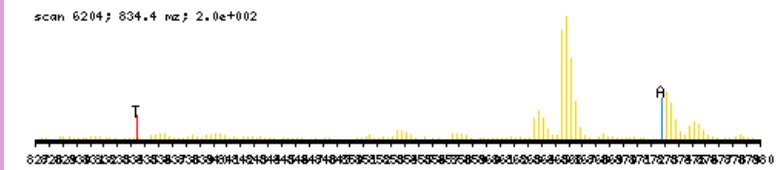

zoomed in precursor plot; T=theoretical m/z, A=acquired m/z

| b <sup>+</sup> | #  | AA # | y <sup>+</sup> | y <sup>2+</sup> |
|----------------|----|------|----------------|-----------------|
| 142.0868       | 1  | V 23 |                |                 |
| 241.1552       | 2  | V 22 | 2360.1953      | 1180.6016       |
| 372.1957       | 3  | M 21 | 2261.1269      | 1131.0674       |
| 473.2434       | 4  | T 20 | 2130.0864      | 1065.5471       |
| 601.3020       | 5  | Q 19 | 2029.0388      | 1015.0233       |
| 702.3496       | 6  | T 18 | 1900.9802      | 950.9940        |
| 799.4024       | 7  | P 17 | 1799.9325      | 900.4702        |
| 912.4865       | 8  | L 16 | 1702.8797      | 851.9438        |
| 999.5185       | 9  | S 15 | 1589.7957      | 795.4018        |
| 1112.6026      | 10 | L 14 | 1502.7637      | 751.8857        |
| 1209.6553      | 11 | P 13 | 1389.6796      | 695.3437        |
| 1308.7237      | 12 | V 12 | 1292.6268      | 646.8173        |
| 1395.7558      | 13 | S 11 | 1193.5584      | 597.2831        |
| 1508.8398      | 14 | L 10 | 1106.5264      | 553.7671        |
| 1565.8613      | 15 | G 9  | 993.4423       | 497.2251        |
| 1680.8882      | 16 | D 8  | 936.4209       | 468.7143        |
| 1808.9468      | 17 | Q 7  | 821.3939       | 411.2009        |
| 1879.9839      | 18 | A 6  | 693.3353       | 347.1716        |
| 1967.0160      | 19 | S 5  | 622.2982       | 311.6530        |
| 2080.1000      | 20 | I 4  | 535.2662       | 268.1370        |
| 2167.1321      | 21 | S 3  | 422.1821       | 211.5950        |
| 2327.1627      | 22 | C 2  | 335.1501       | 168.0790        |
|                | 23 | R 1  | 175.1195       | 88.0637         |

N-term:+43.02 C(22):+160.03

X-range:

-

MassTol: Y-zoom:

MassType:

AVG  MONO

Axis:

1  2

Label:

I  M  -

Ions:

a  +  2+  3+

b  +  2+  3+

c  +  2+  3+

x  +  2+  3+

y  +  2+  3+

z  +  2+  3+

hide H<sub>2</sub>O/NH<sub>3</sub>

zoom 112-122

GO

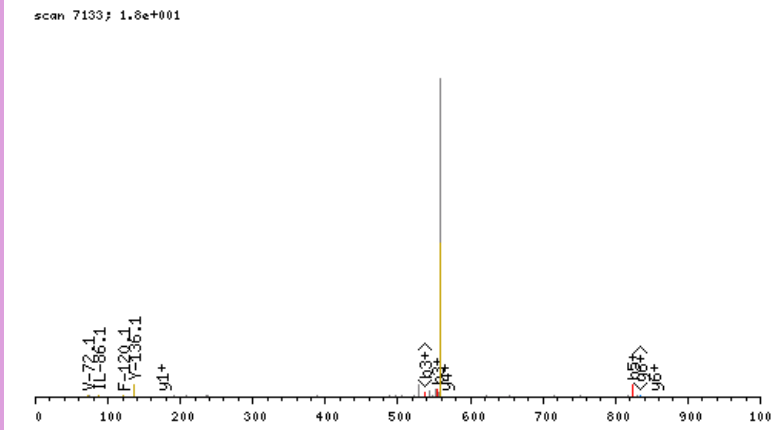

click image to zoom in; click top corners to zoom out [\[precursor±\]](#)

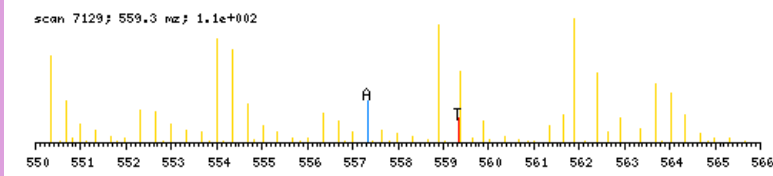

zoomed in precursor plot; T=theoretical m/z, A=acquired m/z

| b <sup>+</sup> | #  | AA # | y <sup>+</sup> | y <sup>2+</sup> |
|----------------|----|------|----------------|-----------------|
| 229.0977       | 1  | W 11 |                |                 |
| 391.2558       | 2  | K 10 | 1447.8844      | 724.4461        |
| 554.3191       | 3  | Y 9  | 1285.7263      | 643.3671        |
| 668.3621       | 4  | N 8  | 1122.6630      | 561.8354        |
| 824.4632       | 5  | R 7  | 1008.6200      | 504.8139        |
| 953.5058       | 6  | E 6  | 852.5189       | 426.7634        |
| 1113.5364      | 7  | C 5  | 723.4763       | 362.2421        |
| 1275.6945      | 8  | K 4  | 563.4457       | 282.2268        |
| 1388.7785      | 9  | L 3  | 401.2876       | 201.1477        |
| 1501.8626      | 10 | L 2  | 288.2036       | 144.6057        |
|                | 11 | R 1  | 175.1195       | 88.0637         |

N-term:+43.02 K(2):+162.16  
 C(7):+160.03 K(8):+162.16

WPPDAEPEPDPESAHGPR, MH+ 2025.8943, m/z 675.9696  
 L OSG37 P180811 230811-s1.06432.06432.3.dta

X-range:

-

MassTol: Y-zoom:

MassType:

AVG  MONO

Axis:

1  2

Label:

I  M  -

Ions:

a  +  2+  3+

b  +  2+  3+

c  +  2+  3+

x  +  2+  3+

y  +  2+  3+

z  +  2+  3+

hide H<sub>2</sub>O/NH<sub>3</sub>

zoom 112-122

GO

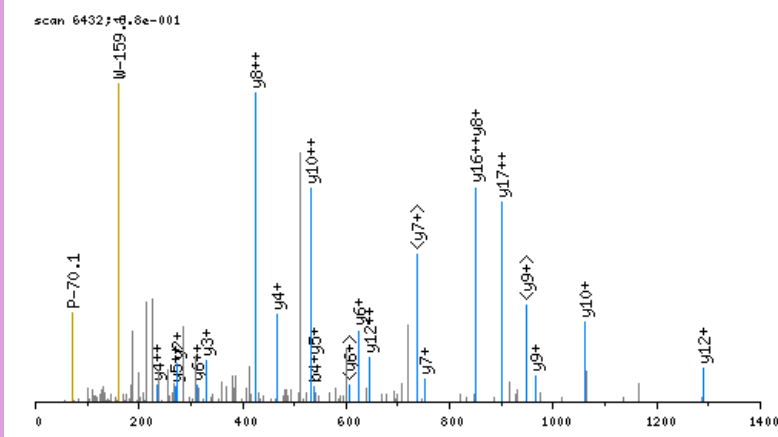

click image to zoom in; click top corners to zoom out [\[precursor±\]](#)

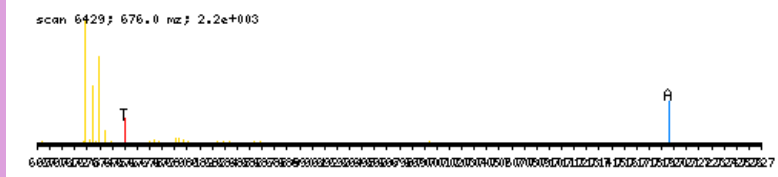

zoomed in precursor plot; T=theoretical m/z, A=acquired m/z

| b <sup>+</sup> | #  | AA # | y <sup>+</sup> | y <sup>2+</sup> |
|----------------|----|------|----------------|-----------------|
| 229.0977       | 1  | W 18 |                |                 |
| 326.1505       | 2  | P 17 | 1797.8044      | 899.4061        |
| 423.2032       | 3  | P 16 | 1700.7516      | 850.8797        |
| 538.2302       | 4  | D 15 | 1603.6989      | 802.3533        |
| 609.2673       | 5  | A 14 | 1488.6719      | 744.8399        |
| 738.3099       | 6  | E 13 | 1417.6348      | 709.3213        |
| 835.3627       | 7  | P 12 | 1288.5922      | 644.8000        |
| 964.4052       | 8  | E 11 | 1191.5394      | 596.2736        |
| 1061.4580      | 9  | P 10 | 1062.4968      | 531.7523        |
| 1176.4850      | 10 | D 9  | 965.4441       | 483.2260        |
| 1273.5377      | 11 | P 8  | 850.4171       | 425.7125        |
| 1402.5803      | 12 | E 7  | 753.3644       | 377.1861        |
| 1489.6123      | 13 | S 6  | 624.3218       | 312.6648        |
| 1560.6495      | 14 | A 5  | 537.2898       | 269.1488        |
| 1697.7084      | 15 | H 4  | 466.2526       | 233.6302        |
| 1754.7298      | 16 | G 3  | 329.1937       | 165.1008        |
| 1851.7826      | 17 | P 2  | 272.1723       | 136.5900        |
|                | 18 | R 1  | 175.1195       | 88.0637         |

N-term:+43.02

YAPGGAGLPGGR, MH+ 1114.5645, m/z 557.7859  
 L OSG41 P180811 230811-s1.05026.05026.2.dta

X-range:

-

MassTol: Y-zoom:

MassType:

AVG  MONO

Axis:

1  2

Label:

I  M  -

Ions:

a  +  2+  3+

b  +  2+  3+

c  +  2+  3+

x  +  2+  3+

y  +  2+  3+

z  +  2+  3+

hide H<sub>2</sub>O/NH<sub>3</sub>

zoom 112-122

GO

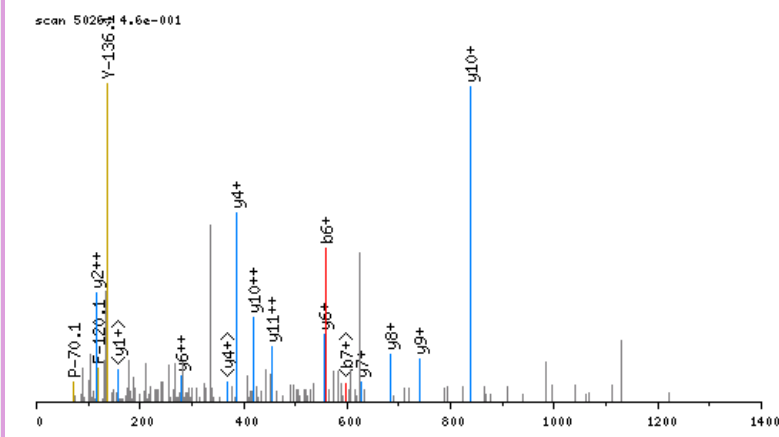

click image to zoom in; click top corners to zoom out [\[precursor±\]](#)

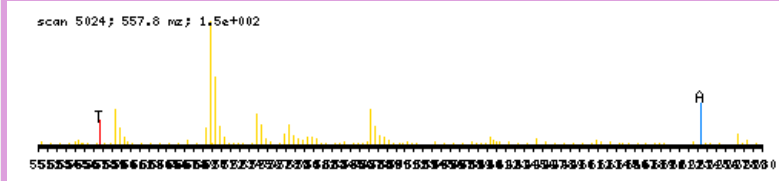

zoomed in precursor plot; T=theoretical m/z, A=acquired m/z

| b <sup>+</sup> | #  | AA | #  | y <sup>+</sup> | y <sup>2+</sup> |
|----------------|----|----|----|----------------|-----------------|
| 206.0817       | 1  | Y  | 12 |                |                 |
| 277.1188       | 2  | A  | 11 | 909.4906       | 455.2492        |
| 374.1716       | 3  | P  | 10 | 838.4535       | 419.7307        |
| 431.1931       | 4  | G  | 9  | 741.4008       | 371.2043        |
| 488.2145       | 5  | G  | 8  | 684.3793       | 342.6936        |
| 559.2516       | 6  | A  | 7  | 627.3578       | 314.1828        |
| 616.2731       | 7  | G  | 6  | 556.3207       | 278.6643        |
| 729.3572       | 8  | L  | 5  | 499.2993       | 250.1535        |
| 826.4099       | 9  | P  | 4  | 386.2152       | 193.6115        |
| 883.4314       | 10 | G  | 3  | 289.1624       | 145.0851        |
| 940.4529       | 11 | G  | 2  | 232.1410       | 116.5744        |
|                | 12 | R  | 1  | 175.1195       | 88.0637         |

N-term:+43.02

YKGIIDCVVR, MH+ 1292.7037, m/z 431.5727  
 L OSG40 P180811 230811-s1.05181.05181.3.dta

X-range:

-

MassTol: Y-zoom:

MassType:

AVG  MONO

Axis:

1  2

Label:

I  M  -

Ions:

a  +  2+  3+

b  +  2+  3+

c  +  2+  3+

x  +  2+  3+

y  +  2+  3+

z  +  2+  3+

hide H<sub>2</sub>O/NH<sub>3</sub>

zoom 112-122

GO

scan 5181; 4.9e+000

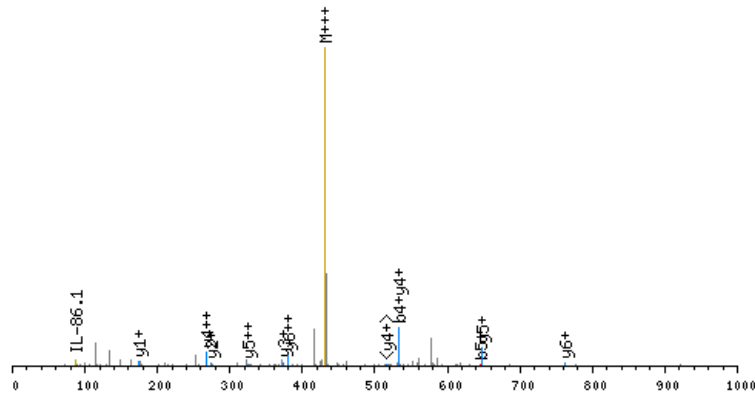

click image to zoom in; click top corners to zoom out [\[precursor±\]](#)

scan 5179; 431.6 mz; 1.4e+001

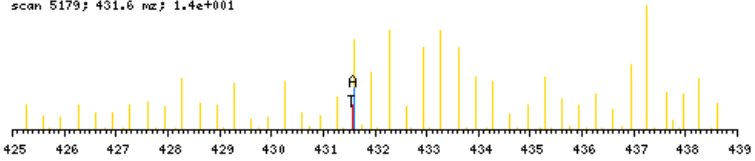

zoomed in precursor plot; T=theoretical m/z, A=acquired m/z

| b <sup>+</sup> | #  | AA # | y <sup>+</sup> | y <sup>2+</sup>    |
|----------------|----|------|----------------|--------------------|
| 206.0817       | 1  | Y    | 10             |                    |
| 362.2080       | 2  | K    | 9              | 1087.6298 544.3188 |
| 419.2295       | 3  | G    | 8              | 931.5035 466.2556  |
| 532.3136       | 4  | I    | 7              | 874.4820 437.7449  |
| 645.3976       | 5  | I    | 6              | 761.3979 381.2029  |
| 760.4246       | 6  | D    | 5              | 648.3139 324.6608  |
| 920.4552       | 7  | C    | 4              | 533.2869 267.1474  |
| 1019.5236      | 8  | V    | 3              | 373.2563 187.1321  |
| 1118.5920      | 9  | V    | 2              | 274.1879 137.5979  |
|                | 10 | R    | 1              | 175.1195 88.0637   |

N-term:+43.02 K(2):+156.13  
 C(7):+160.03



YTPIPQSGSFFPASVQDPGLHIWR, MH+ 2692.3524, m/z 898.1223  
 L OSG36 P180811 230811-s1.06210.06210.3.dta

scan 6210; 1.4e+001

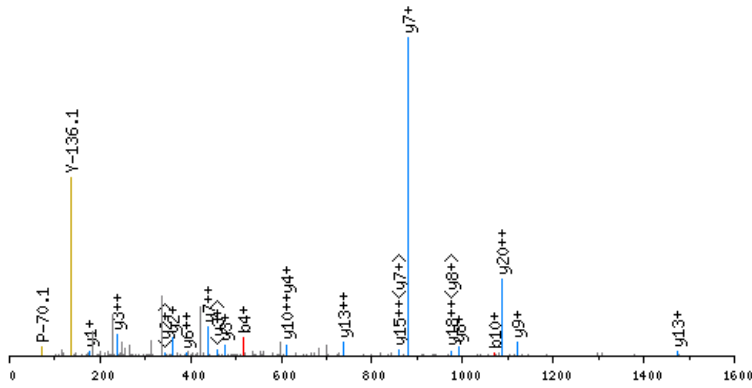

click image to zoom in; click top corners to zoom out [precursor±]

scan 6209; 898.1 mz; 1.2e+002

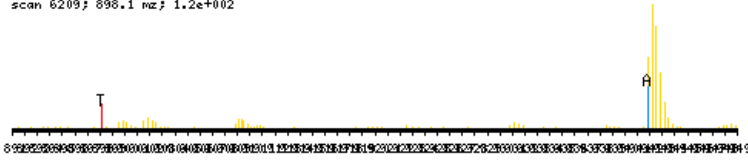

zoomed in precursor plot; T=theoretical m/z, A=acquired m/z

X-range:

-

MassTol: Y-zoom:

MassType:

AVG  MONO

Axis:

1  2

Label:

I  M  -

Ions:

a  +  2+  3+

b  +  2+  3+

c  +  2+  3+

x  +  2+  3+

y  +  2+  3+

z  +  2+  3+

hide H<sub>2</sub>O/NH<sub>3</sub>

zoom 112-122

GO

| b <sup>+</sup> | #  | AA # | y <sup>+</sup> | y <sup>2+</sup> |
|----------------|----|------|----------------|-----------------|
| 206.0817       | 1  | Y 24 |                |                 |
| 307.1294       | 2  | T 23 | 2487.2785      | 1244.1431       |
| 404.1822       | 3  | P 22 | 2386.2308      | 1193.6193       |
| 517.2662       | 4  | I 21 | 2289.1780      | 1145.0929       |
| 614.3190       | 5  | P 20 | 2176.0940      | 1088.5509       |
| 742.3776       | 6  | Q 19 | 2079.0412      | 1040.0245       |
| 829.4096       | 7  | S 18 | 1950.9826      | 975.9952        |
| 886.4311       | 8  | G 17 | 1863.9506      | 932.4792        |
| 973.4631       | 9  | S 16 | 1806.9291      | 903.9685        |
| 1070.5159      | 10 | P 15 | 1719.8971      | 860.4525        |
| 1217.5843      | 11 | F 14 | 1622.8443      | 811.9261        |
| 1314.6370      | 12 | P 13 | 1475.7759      | 738.3919        |
| 1385.6742      | 13 | A 12 | 1378.7232      | 689.8655        |
| 1472.7062      | 14 | S 11 | 1307.6860      | 654.3469        |
| 1571.7746      | 15 | V 10 | 1220.6540      | 610.8309        |
| 1699.8332      | 16 | Q 9  | 1121.5856      | 561.2967        |
| 1814.8601      | 17 | D 8  | 993.5270       | 497.2674        |
| 1911.9129      | 18 | P 7  | 878.5001       | 439.7540        |
| 1968.9343      | 19 | G 6  | 781.4473       | 391.2276        |
| 2082.0184      | 20 | L 5  | 724.4259       | 362.7168        |
| 2219.0773      | 21 | H 4  | 611.3418       | 306.1748        |
| 2332.1614      | 22 | I 3  | 474.2829       | 237.6454        |
| 2518.2407      | 23 | W 2  | 361.1988       | 181.1033        |
|                | 24 | R 1  | 175.1195       | 88.0637         |

N-term:+43.02
