# Supplementary material
Source: PubMed Central journal article supplement (PMC3591655)
Supplement: supp_M112.017962_mcp.M112.017962-26.pdf [file supp_M112.017962_mcp.M112.017962-26.pdf]

AAAAAAAAAAGAAGGR, MH+ 1240.6398, m/z 620.8236  
 H OS G29 P150811 220811-s1.04481.04481.2.dta

X-range:

-

MassTol: Y-zoom:

MassType:

AVG  MONO

Axis:

1  2

Label:

I  M  -

Ions:

a  +  2+  3+

b  +  2+  3+

c  +  2+  3+

x  +  2+  3+

y  +  2+  3+

z  +  2+  3+

hide H<sub>2</sub>O/NH<sub>3</sub>

zoom 112-122

GO

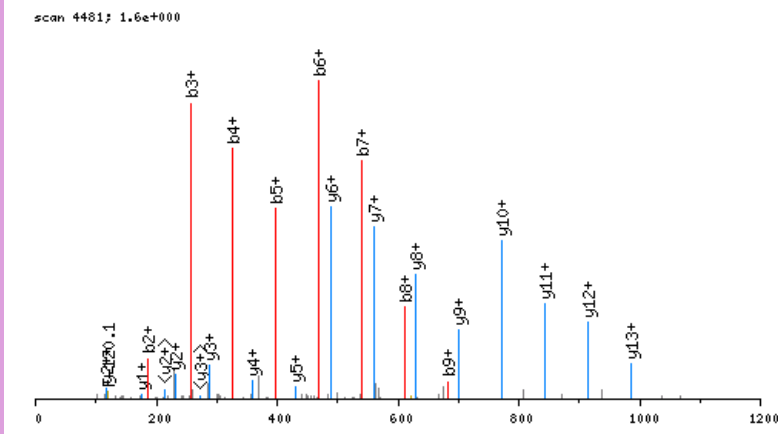

click image to zoom in; click top corners to zoom out [\[precursor±\]](#)

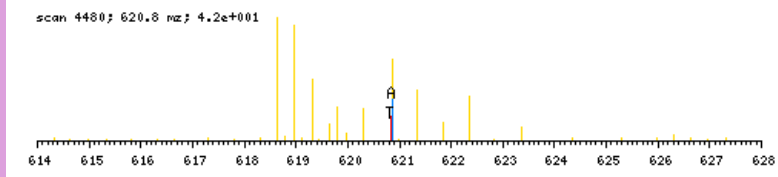

zoomed in precursor plot; T=theoretical m/z, A=acquired m/z

| b <sup>+</sup> | #  | AA # | y <sup>+</sup> | y <sup>2+</sup> |
|----------------|----|------|----------------|-----------------|
| 114.0555       | 1  | A 16 |                |                 |
| 185.0926       | 2  | A 15 | 1127.5921      | 564.3000        |
| 256.1297       | 3  | A 14 | 1056.5550      | 528.7814        |
| 327.1669       | 4  | A 13 | 985.5179       | 493.2629        |
| 398.2040       | 5  | A 12 | 914.4808       | 457.7443        |
| 469.2411       | 6  | A 11 | 843.4437       | 422.2258        |
| 540.2782       | 7  | A 10 | 772.4066       | 386.7072        |
| 611.3153       | 8  | A 9  | 701.3695       | 351.1886        |
| 682.3524       | 9  | A 8  | 630.3323       | 315.6701        |
| 753.3895       | 10 | A 7  | 559.2952       | 280.1515        |
| 810.4110       | 11 | G 6  | 488.2581       | 244.6330        |
| 881.4481       | 12 | A 5  | 431.2367       | 216.1222        |
| 952.4852       | 13 | A 4  | 360.1995       | 180.6037        |
| 1009.5067      | 14 | G 3  | 289.1624       | 145.0851        |
| 1066.5282      | 15 | G 2  | 232.1410       | 116.5744        |
|                | 16 | R 1  | 175.1195       | 88.0637         |

N-term:+43.02

AAAAAAAAAAGAAGGR, MH+ 1169.6027, m/z 585.3050  
 H OS G29 P150811 220811-s1.04061.04061.2.dta

X-range:

-

MassTol: Y-zoom:

MassType:

AVG  MONO

Axis:

1  2

Label:

I  M  -

Ions:

a  +  2+  3+

b  +  2+  3+

c  +  2+  3+

x  +  2+  3+

y  +  2+  3+

z  +  2+  3+

hide H<sub>2</sub>O/NH<sub>3</sub>

zoom 112-122

GO

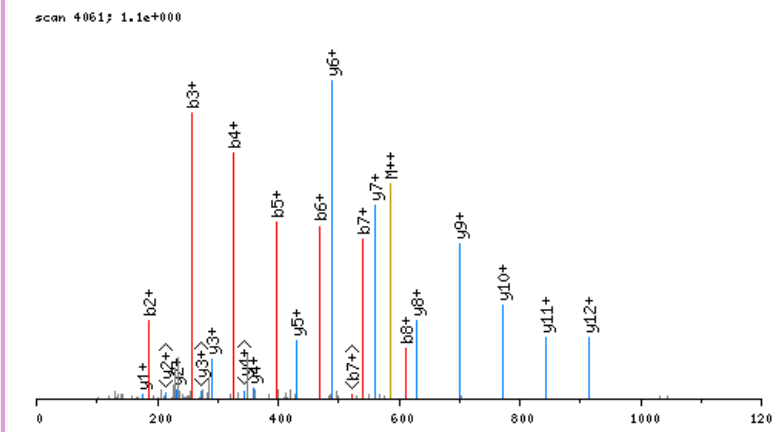

click image to zoom in; click top corners to zoom out [\[precursor±\]](#)

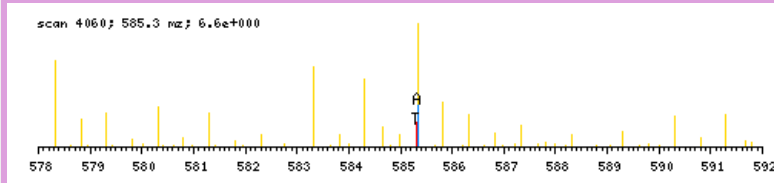

zoomed in precursor plot; T=theoretical m/z, A=acquired m/z

| b <sup>+</sup> | #  | AA | #  | y <sup>+</sup> | y <sup>2+</sup> |
|----------------|----|----|----|----------------|-----------------|
| 114.0555       | 1  | A  | 15 |                |                 |
| 185.0926       | 2  | A  | 14 | 1056.5550      | 528.7814        |
| 256.1297       | 3  | A  | 13 | 985.5179       | 493.2629        |
| 327.1669       | 4  | A  | 12 | 914.4808       | 457.7443        |
| 398.2040       | 5  | A  | 11 | 843.4437       | 422.2258        |
| 469.2411       | 6  | A  | 10 | 772.4066       | 386.7072        |
| 540.2782       | 7  | A  | 9  | 701.3695       | 351.1886        |
| 611.3153       | 8  | A  | 8  | 630.3323       | 315.6701        |
| 682.3524       | 9  | A  | 7  | 559.2952       | 280.1515        |
| 739.3739       | 10 | G  | 6  | 488.2581       | 244.6330        |
| 810.4110       | 11 | A  | 5  | 431.2367       | 216.1222        |
| 881.4481       | 12 | A  | 4  | 360.1995       | 180.6037        |
| 938.4696       | 13 | G  | 3  | 289.1624       | 145.0851        |
| 995.4910       | 14 | G  | 2  | 232.1410       | 116.5744        |
|                | 15 | R  | 1  | 175.1195       | 88.0637         |

N-term:+43.02

AAAAAAGAAGRGSGPGR, MH+ 1765.9170, m/z 589.3105  
 H OS G25 P150811 220811-s1.05661.05661.3.dta

scan 5661; 1.7e+000

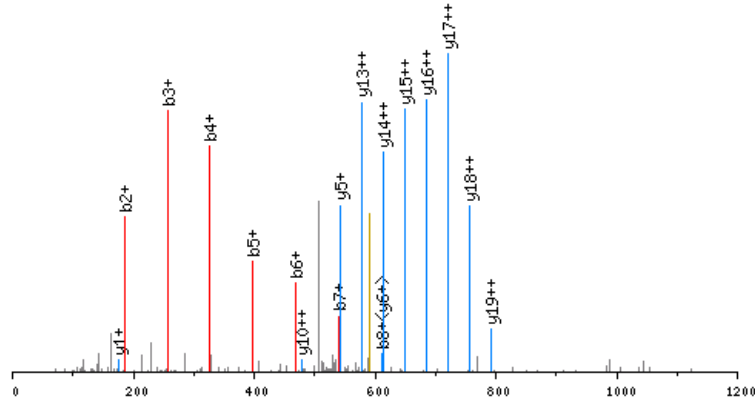

click image to zoom in; click top corners to zoom out [precursor±]

scan 5657; 589.3 m/z; 9.7e+001

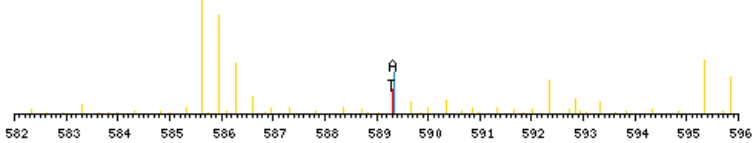

zoomed in precursor plot; T=theoretical m/z, A=acquired m/z

| b <sup>+</sup> | #  | AA # | y <sup>+</sup> | y <sup>2+</sup> |
|----------------|----|------|----------------|-----------------|
| 114.0555       | 1  | A 21 |                |                 |
| 185.0926       | 2  | A 20 | 1652.8693      | 826.9386        |
| 256.1297       | 3  | A 19 | 1581.8322      | 791.4200        |
| 327.1669       | 4  | A 18 | 1510.7951      | 755.9015        |
| 398.2040       | 5  | A 17 | 1439.7580      | 720.3829        |
| 469.2411       | 6  | A 16 | 1368.7209      | 684.8643        |
| 540.2782       | 7  | A 15 | 1297.6838      | 649.3458        |
| 611.3153       | 8  | A 14 | 1226.6466      | 613.8272        |
| 668.3368       | 9  | G 13 | 1155.6095      | 578.3087        |
| 739.3739       | 10 | A 12 | 1098.5881      | 549.7979        |
| 810.4110       | 11 | A 11 | 1027.5509      | 514.2794        |
| 867.4325       | 12 | G 10 | 956.5138       | 478.7608        |
| 924.4539       | 13 | G 9  | 899.4924       | 450.2501        |
| 1080.5550      | 14 | R 8  | 842.4709       | 421.7394        |
| 1137.5765      | 15 | G 7  | 686.3698       | 343.6888        |
| 1224.6085      | 16 | S 6  | 629.3483       | 315.1781        |
| 1281.6300      | 17 | G 5  | 542.3163       | 271.6621        |
| 1378.6828      | 18 | P 4  | 485.2948       | 243.1513        |
| 1435.7042      | 19 | G 3  | 388.2421       | 194.6250        |
| 1591.8053      | 20 | R 2  | 331.2206       | 166.1142        |
|                | 21 | R 1  | 175.1195       | 88.0637         |

N-term:+43.02

X-range:

-

MassTol: Y-zoom:

MassType:

AVG  MONO

Axis:

1  2

Label:

I  M  -

Ions:

a  +  2+  3+

b  +  2+  3+

c  +  2+  3+

x  +  2+  3+

y  +  2+  3+

z  +  2+  3+

hide H<sub>2</sub>O/NH<sub>3</sub>

zoom 112-122

GO

AAAAAAGPEMVR, MH+ 1156.5785, m/z 578.7929  
 H OS G29 P150811 220811-s1.03488.03488.2.dta

X-range:

-

MassTol: Y-zoom:

MassType:

AVG  MONO

Axis:

1  2

Label:

I  M  -

Ions:

a  +  2+  3+

b  +  2+  3+

c  +  2+  3+

x  +  2+  3+

y  +  2+  3+

z  +  2+  3+

hide H<sub>2</sub>O/NH<sub>3</sub>

zoom 112-122

GO

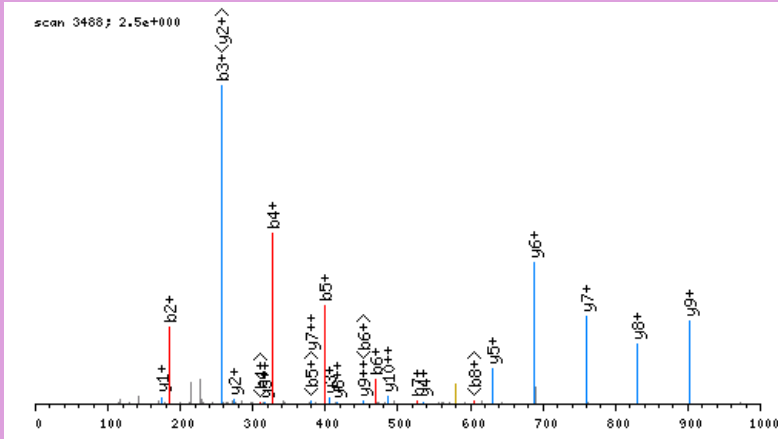

click image to zoom in; click top corners to zoom out [\[precursor±\]](#)

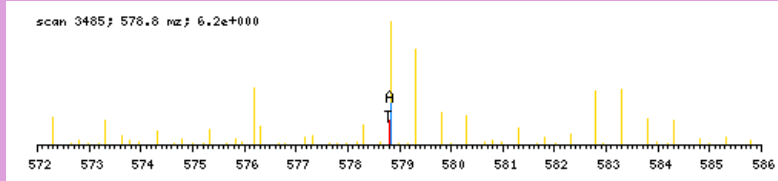

zoomed in precursor plot; T=theoretical m/z, A=acquired m/z

| b <sup>+</sup> | #  | AA | #  | y <sup>+</sup> | y <sup>2+</sup> |
|----------------|----|----|----|----------------|-----------------|
| 114.0555       | 1  | A  | 12 |                |                 |
| 185.0926       | 2  | A  | 11 | 1043.5308      | 522.2693        |
| 256.1297       | 3  | A  | 10 | 972.4937       | 486.7508        |
| 327.1669       | 4  | A  | 9  | 901.4566       | 451.2322        |
| 398.2040       | 5  | A  | 8  | 830.4194       | 415.7136        |
| 469.2411       | 6  | A  | 7  | 759.3823       | 380.1951        |
| 526.2625       | 7  | G  | 6  | 688.3452       | 344.6765        |
| 623.3153       | 8  | P  | 5  | 631.3238       | 316.1658        |
| 752.3579       | 9  | E  | 4  | 534.2710       | 267.6394        |
| 883.3984       | 10 | M  | 3  | 405.2284       | 203.1181        |
| 982.4668       | 11 | V  | 2  | 274.1879       | 137.5979        |
|                | 12 | R  | 1  | 175.1195       | 88.0637         |

N-term:+43.02

AAAAAAPGGGGGEPR, MH+ 1251.6082, m/z 626.3077  
 H OS G29 P150811 220811-s1.02436.02436.2.dta

scan 2436; 3.7e+000

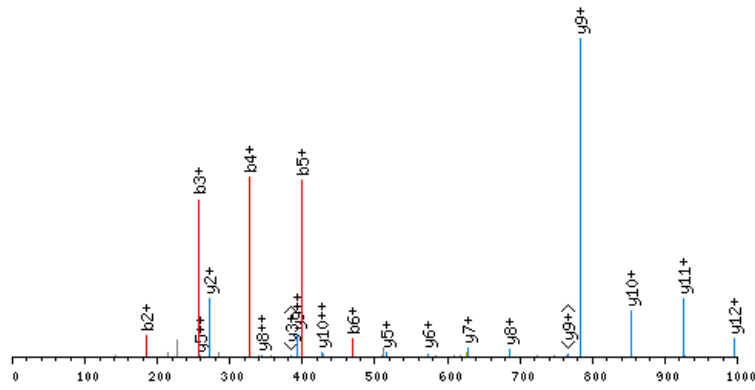

click image to zoom in; click top corners to zoom out [precursor±]

scan 2435; 626.3 m/z; 2.0e+001

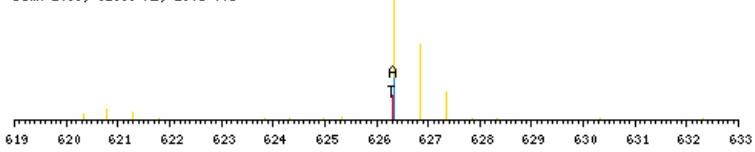

zoomed in precursor plot; T=theoretical m/z, A=acquired m/z

X-range:

-

MassTol: Y-zoom:

MassType:

AVG  MONO

Axis:

1  2

Label:

I  M  -

Ions:

a  +  2+  3+

b  +  2+  3+

c  +  2+  3+

x  +  2+  3+

y  +  2+  3+

z  +  2+  3+

hide H<sub>2</sub>O/NH<sub>3</sub>

zoom 112-122

GO

| b <sup>+</sup> | #  | AA # | y <sup>+</sup> | y <sup>2+</sup> |
|----------------|----|------|----------------|-----------------|
| 114.0555       | 1  | A 15 |                |                 |
| 185.0926       | 2  | A 14 | 1138.5605      | 569.7842        |
| 256.1297       | 3  | A 13 | 1067.5234      | 534.2656        |
| 327.1669       | 4  | A 12 | 996.4863       | 498.7471        |
| 398.2040       | 5  | A 11 | 925.4492       | 463.2285        |
| 469.2411       | 6  | A 10 | 854.4121       | 427.7099        |
| 566.2938       | 7  | P 9  | 783.3749       | 392.1914        |
| 623.3153       | 8  | G 8  | 686.3222       | 343.6650        |
| 680.3368       | 9  | G 7  | 629.3007       | 315.1543        |
| 737.3582       | 10 | G 6  | 572.2792       | 286.6435        |
| 794.3797       | 11 | G 5  | 515.2578       | 258.1328        |
| 851.4012       | 12 | G 4  | 458.2363       | 229.6221        |
| 980.4438       | 13 | E 3  | 401.2149       | 201.1113        |
| 1077.4965      | 14 | P 2  | 272.1723       | 136.5900        |
|                | 15 | R 1  | 175.1195       | 88.0637         |

N-term:+43.02

AAAAA VAGAGR, MH+ 998.5383, m/z 499.7728  
 H OS G29 P150811 220811-s1.03634.03634.2.dta

X-range:

-

MassTol: Y-zoom:

MassType:

AVG  MONO

Axis:

1  2

Label:

I  M  -

Ions:

a  +  2+  3+

b  +  2+  3+

c  +  2+  3+

x  +  2+  3+

y  +  2+  3+

z  +  2+  3+

hide H<sub>2</sub>O/NH<sub>3</sub>

zoom 112-122

GO

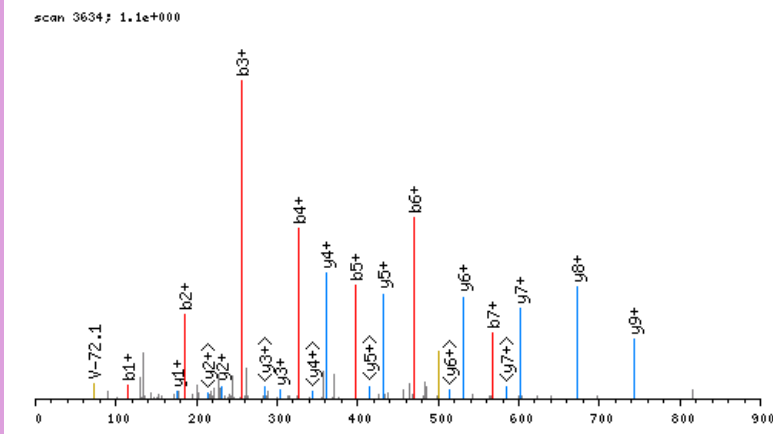

click image to zoom in; click top corners to zoom out [\[precursor±\]](#)

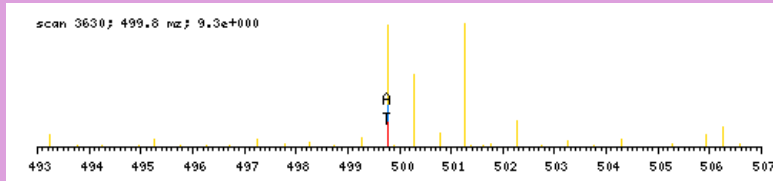

zoomed in precursor plot; T=theoretical m/z, A=acquired m/z

| b <sup>+</sup> | #  | AA # | y <sup>+</sup> | y <sup>2+</sup>   |
|----------------|----|------|----------------|-------------------|
| 114.0555       | 1  | A    | 12             |                   |
| 185.0926       | 2  | A    | 11             | 885.4906 443.2492 |
| 256.1297       | 3  | A    | 10             | 814.4535 407.7307 |
| 327.1669       | 4  | A    | 9              | 743.4164 372.2121 |
| 398.2040       | 5  | A    | 8              | 672.3793 336.6936 |
| 469.2411       | 6  | A    | 7              | 601.3422 301.1750 |
| 568.3095       | 7  | V    | 6              | 530.3051 265.6564 |
| 639.3466       | 8  | A    | 5              | 431.2367 216.1222 |
| 696.3681       | 9  | G    | 4              | 360.1995 180.6037 |
| 767.4052       | 10 | A    | 3              | 303.1781 152.0930 |
| 824.4267       | 11 | G    | 2              | 232.1410 116.5744 |
|                | 12 | R    | 1              | 175.1195 88.0637  |

N-term:+43.02

AAAAAGPASSQR, MH+ 1099.5496, m/z 550.2784  
 H OS G29 P150811 220811-s1.02188.02188.2.dta

X-range:

-

MassTol: Y-zoom:

MassType:

AVG  MONO

Axis:

1  2

Label:

I  M  -

Ions:

a  +  2+  3+

b  +  2+  3+

c  +  2+  3+

x  +  2+  3+

y  +  2+  3+

z  +  2+  3+

hide H<sub>2</sub>O/NH<sub>3</sub>

zoom 112-122

GO

scan 2188; 3.6e-001

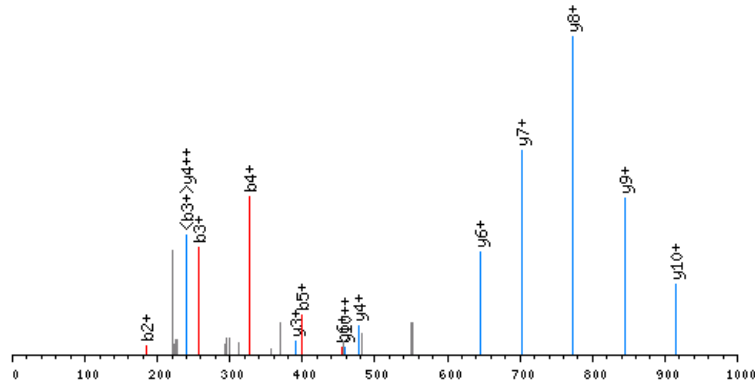

click image to zoom in; click top corners to zoom out [\[precursor±\]](#)

scan 2187; 550.3 m/z; 8.1e-001

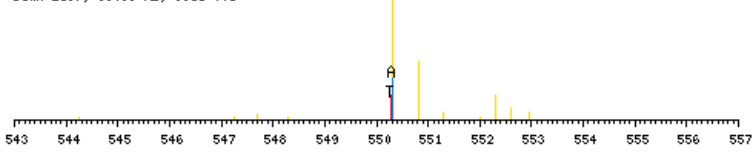

zoomed in precursor plot; T=theoretical m/z, A=acquired m/z

| b <sup>+</sup> | #  | AA | #  | y <sup>+</sup> | y <sup>2+</sup> |
|----------------|----|----|----|----------------|-----------------|
| 114.0555       | 1  | A  | 12 |                |                 |
| 185.0926       | 2  | A  | 11 | 986.5019       | 493.7549        |
| 256.1297       | 3  | A  | 10 | 915.4648       | 458.2363        |
| 327.1669       | 4  | A  | 9  | 844.4277       | 422.7178        |
| 398.2040       | 5  | A  | 8  | 773.3906       | 387.1992        |
| 455.2254       | 6  | G  | 7  | 702.3535       | 351.6807        |
| 552.2782       | 7  | P  | 6  | 645.3320       | 323.1699        |
| 623.3153       | 8  | A  | 5  | 548.2792       | 274.6435        |
| 710.3473       | 9  | S  | 4  | 477.2421       | 239.1250        |
| 797.3794       | 10 | S  | 3  | 390.2101       | 195.6090        |
| 925.4379       | 11 | Q  | 2  | 303.1781       | 152.0930        |
|                | 12 | R  | 1  | 175.1195       | 88.0637         |

N-term:+43.02

AAAAAAMAEQEGAR, MH+ 1288.5956, m/z 644.8014  
 H OS G29 P150811 220811-s1.03752.03752.2.dta

X-range:

-

MassTol: Y-zoom:

MassType:

AVG  MONO

Axis:

1  2

Label:

I  M  -

Ions:

a  +  2+  3+

b  +  2+  3+

c  +  2+  3+

x  +  2+  3+

y  +  2+  3+

z  +  2+  3+

hide H<sub>2</sub>O/NH<sub>3</sub>

zoom 112-122

GO

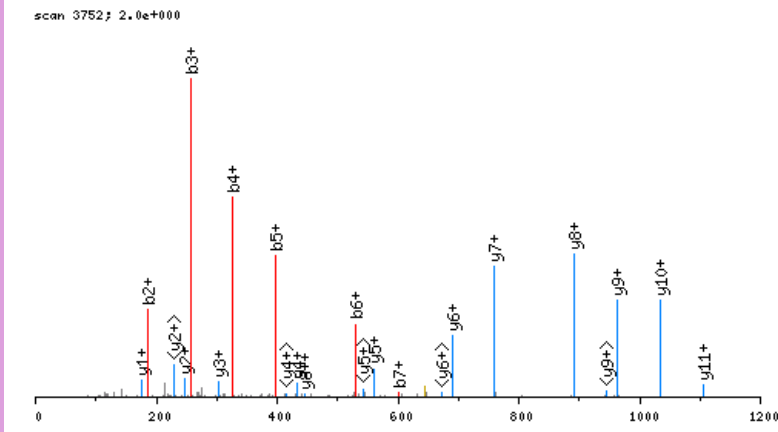

click image to zoom in; click top corners to zoom out [\[precursor±\]](#)

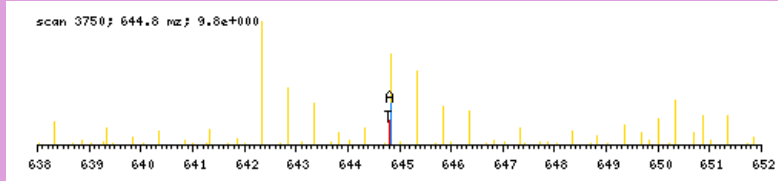

zoomed in precursor plot; T=theoretical m/z, A=acquired m/z

| b <sup>+</sup> | #  | AA # | y <sup>+</sup> | y <sup>2+</sup> |
|----------------|----|------|----------------|-----------------|
| 114.0555       | 1  | A 13 |                |                 |
| 185.0926       | 2  | A 12 | 1175.5479      | 588.2779        |
| 256.1297       | 3  | A 11 | 1104.5108      | 552.7593        |
| 327.1669       | 4  | A 10 | 1033.4737      | 517.2407        |
| 398.2040       | 5  | A 9  | 962.4366       | 481.7222        |
| 529.2445       | 6  | M 8  | 891.3994       | 446.2036        |
| 600.2816       | 7  | A 7  | 760.3590       | 380.6834        |
| 729.3242       | 8  | E 6  | 689.3218       | 345.1648        |
| 857.3827       | 9  | Q 5  | 560.2792       | 280.6435        |
| 986.4253       | 10 | E 4  | 432.2207       | 216.6142        |
| 1043.4468      | 11 | G 3  | 303.1781       | 152.0930        |
| 1114.4839      | 12 | A 2  | 246.1566       | 123.5822        |
|                | 13 | R 1  | 175.1195       | 88.0637         |

N-term:+43.02



AAAAASGAGGVAVAGAGGAGPAGR, MH+ 1836.9317, m/z 612.9821  
 H OS G29 P150811 220811-s1.03707.03707.3.dta

X-range:

-

MassTol: Y-zoom:

MassType:

AVG  MONO

Axis:

1  2

Label:

I  M  -

Ions:

a  +  2+  3+

b  +  2+  3+

c  +  2+  3+

x  +  2+  3+

y  +  2+  3+

z  +  2+  3+

hide H<sub>2</sub>O/NH<sub>3</sub>

zoom 112-122

GO

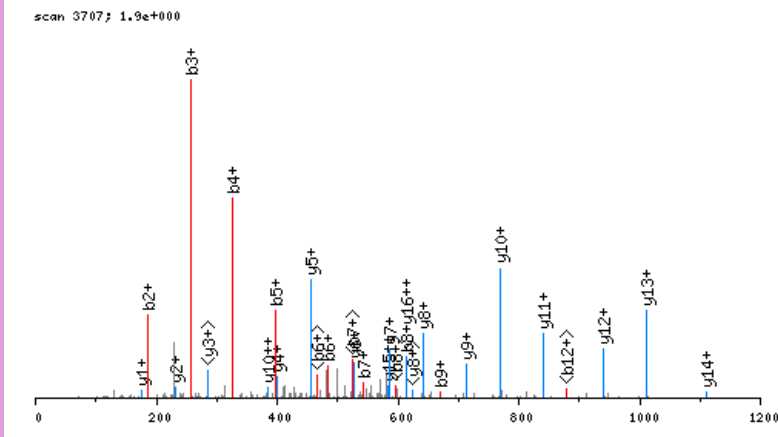

click image to zoom in; click top corners to zoom out [precursor±]

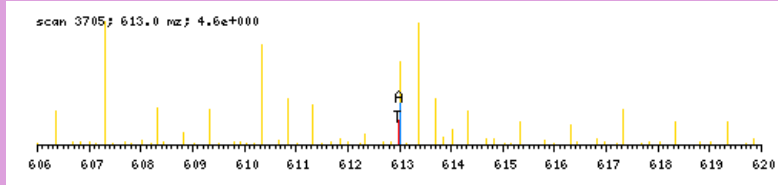

zoomed in precursor plot; T=theoretical m/z, A=acquired m/z

| b <sup>+</sup> | #  | AA # | y <sup>+</sup> | y <sup>2+</sup> |
|----------------|----|------|----------------|-----------------|
| 114.0555       | 1  | A 24 |                |                 |
| 185.0926       | 2  | A 23 | 1723.8840      | 862.4459        |
| 256.1297       | 3  | A 22 | 1652.8469      | 826.9273        |
| 327.1669       | 4  | A 21 | 1581.8097      | 791.4088        |
| 398.2040       | 5  | A 20 | 1510.7726      | 755.8902        |
| 485.2360       | 6  | S 19 | 1439.7355      | 720.3717        |
| 542.2575       | 7  | G 18 | 1352.7035      | 676.8557        |
| 613.2946       | 8  | A 17 | 1295.6820      | 648.3449        |
| 670.3160       | 9  | G 16 | 1224.6449      | 612.8264        |
| 727.3375       | 10 | G 15 | 1167.6234      | 584.3156        |
| 826.4059       | 11 | V 14 | 1110.6020      | 555.8049        |
| 897.4430       | 12 | A 13 | 1011.5336      | 506.2707        |
| 996.5114       | 13 | V 12 | 940.4965       | 470.7521        |
| 1067.5486      | 14 | A 11 | 841.4280       | 421.2179        |
| 1124.5700      | 15 | G 10 | 770.3909       | 385.6994        |
| 1195.6071      | 16 | A 9  | 713.3695       | 357.1886        |
| 1252.6286      | 17 | G 8  | 642.3323       | 321.6701        |
| 1309.6501      | 18 | G 7  | 585.3109       | 293.1594        |
| 1380.6872      | 19 | A 6  | 528.2894       | 264.6486        |
| 1437.7086      | 20 | G 5  | 457.2523       | 229.1301        |
| 1534.7614      | 21 | P 4  | 400.2308       | 200.6193        |
| 1605.7985      | 22 | A 3  | 303.1781       | 152.0930        |
| 1662.8200      | 23 | G 2  | 232.1410       | 116.5744        |
|                | 24 | R 1  | 175.1195       | 88.0637         |

N-term:+43.02

AAAAATAAAAAAPSGGGGEEER, MH+ 2012.9274, m/z 671.6473  
 H OS G29 P150811 220811-s1.03861.03861.3.dta

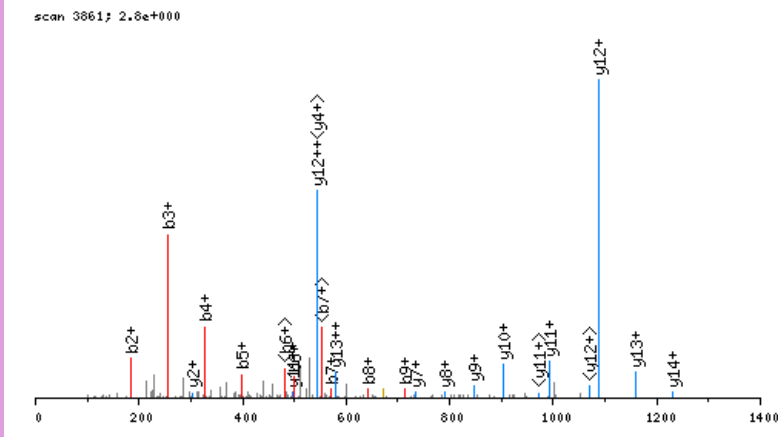

click image to zoom in; click top corners to zoom out [precursor±]

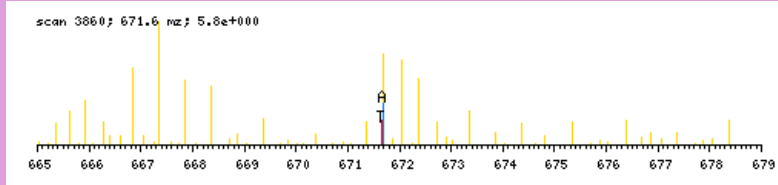

zoomed in precursor plot; T=theoretical m/z, A=acquired m/z

| b <sup>+</sup> | #  | AA # | y <sup>+</sup> | y <sup>2+</sup> |
|----------------|----|------|----------------|-----------------|
| 114.0555       | 1  | A 24 |                |                 |
| 185.0926       | 2  | A 23 | 1899.8797      | 950.4437        |
| 256.1297       | 3  | A 22 | 1828.8426      | 914.9252        |
| 327.1669       | 4  | A 21 | 1757.8054      | 879.4066        |
| 398.2040       | 5  | A 20 | 1686.7683      | 843.8881        |
| 499.2516       | 6  | T 19 | 1615.7312      | 808.3695        |
| 570.2888       | 7  | A 18 | 1514.6835      | 757.8457        |
| 641.3259       | 8  | A 17 | 1443.6464      | 722.3271        |
| 712.3630       | 9  | A 16 | 1372.6093      | 686.8086        |
| 783.4001       | 10 | A 15 | 1301.5722      | 651.2900        |
| 854.4372       | 11 | A 14 | 1230.5351      | 615.7715        |
| 925.4743       | 12 | A 13 | 1159.4980      | 580.2529        |
| 1022.5271      | 13 | P 12 | 1088.4609      | 544.7343        |
| 1109.5591      | 14 | S 11 | 991.4081       | 496.2080        |
| 1166.5806      | 15 | G 10 | 904.3761       | 452.6919        |
| 1223.6021      | 16 | G 9  | 847.3546       | 424.1812        |
| 1280.6235      | 17 | G 8  | 790.3331       | 395.6705        |
| 1337.6450      | 18 | G 7  | 733.3117       | 367.1597        |
| 1394.6664      | 19 | G 6  | 676.2902       | 338.6490        |
| 1451.6879      | 20 | G 5  | 619.2687       | 310.1383        |
| 1580.7305      | 21 | E 4  | 562.2473       | 281.6276        |
| 1709.7731      | 22 | E 3  | 433.2047       | 217.1063        |
| 1838.8157      | 23 | E 2  | 304.1621       | 152.5850        |
|                | 24 | R 1  | 175.1195       | 88.0637         |

N-term:+43.02

X-range:

-

MassTol: Y-zoom:

MassType:

AVG  MONO

Axis:

1  2

Label:

I  M  -

Ions:

a  +  2+  3+

b  +  2+  3+

c  +  2+  3+

x  +  2+  3+

y  +  2+  3+

z  +  2+  3+

hide H<sub>2</sub>O/NH<sub>3</sub>

zoom 112-122

GO

AAAAEGVPATR, MH+ 1055.5486, m/z 528.2779  
 H OS G29 P150811 220811-s1.02697.02697.2.dta

X-range:

-

MassTol: Y-zoom:

MassType:

AVG  MONO

Axis:

1  2

Label:

I  M  -

Ions:

a  +  2+  3+

b  +  2+  3+

c  +  2+  3+

x  +  2+  3+

y  +  2+  3+

z  +  2+  3+

hide H<sub>2</sub>O/NH<sub>3</sub>

zoom 112-122

GO

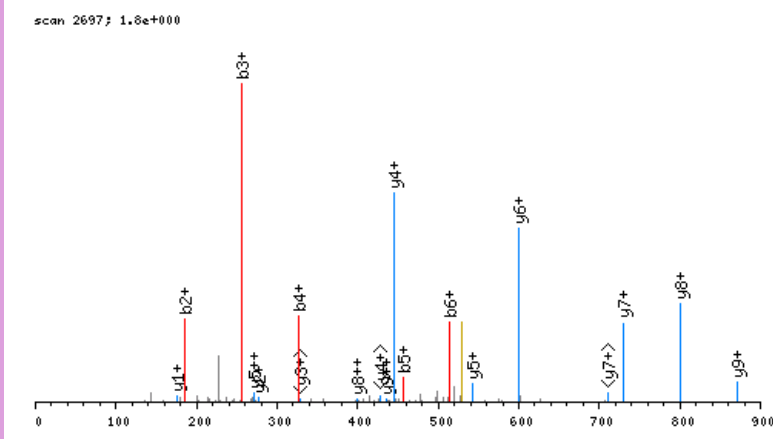

click image to zoom in; click top corners to zoom out [\[precursor±\]](#)

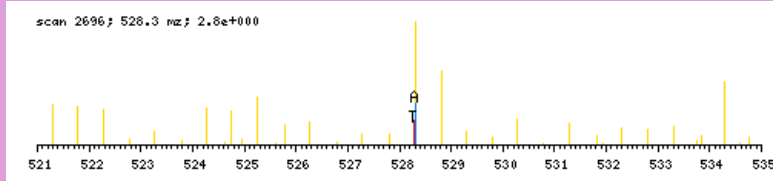

zoomed in precursor plot; T=theoretical m/z, A=acquired m/z

| b <sup>+</sup> | #  | AA # | y <sup>+</sup> | y <sup>2+</sup>   |
|----------------|----|------|----------------|-------------------|
| 114.0555       | 1  | A    | 11             |                   |
| 185.0926       | 2  | A    | 10             | 942.5009 471.7543 |
| 256.1297       | 3  | A    | 9              | 871.4638 436.2358 |
| 327.1669       | 4  | A    | 8              | 800.4266 400.7172 |
| 456.2094       | 5  | E    | 7              | 729.3895 365.1987 |
| 513.2309       | 6  | G    | 6              | 600.3469 300.6774 |
| 612.2993       | 7  | V    | 5              | 543.3255 272.1666 |
| 709.3521       | 8  | P    | 4              | 444.2571 222.6324 |
| 780.3892       | 9  | A    | 3              | 347.2043 174.1061 |
| 881.4369       | 10 | T    | 2              | 276.1672 138.5875 |
|                | 11 | R    | 1              | 175.1195 88.0637  |

N-term:+43.02

AAAAGAVVASAASGPAEGKKITELR, MH+ 2394.3357, m/z 599.3394  
 H OS G26 P150811 220811-s1.05818.05818.4.dta

X-range:

-

MassTol: Y-zoom:

MassType:

AVG  MONO

Axis:

1  2

Label:

I  M  -

Ions:

a  +  2+  3+

b  +  2+  3+

c  +  2+  3+

x  +  2+  3+

y  +  2+  3+

z  +  2+  3+

hide H<sub>2</sub>O/NH<sub>3</sub>

zoom 112-122

GO

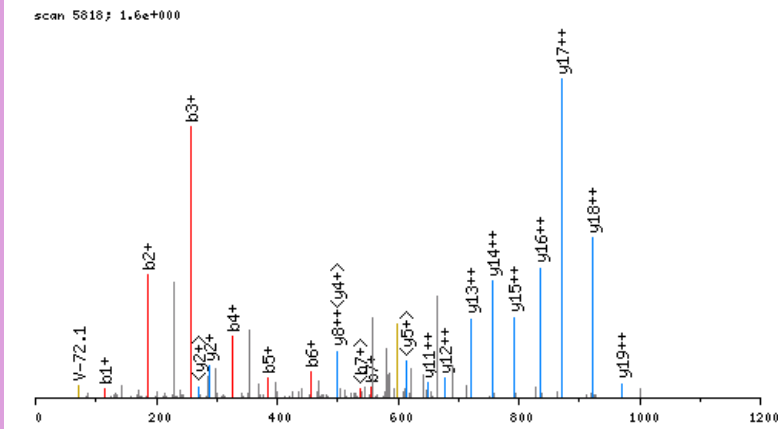

click image to zoom in; click top corners to zoom out [\[precursor±\]](#)

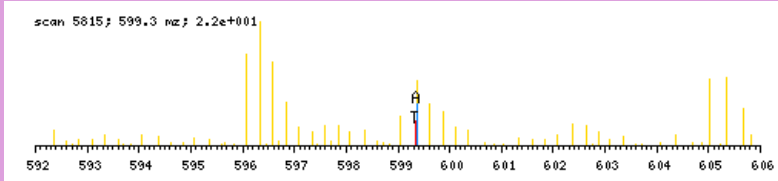

zoomed in precursor plot; T=theoretical m/z, A=acquired m/z

| b <sup>+</sup> | #  | AA | #  | y <sup>+</sup> | y <sup>2+</sup> |
|----------------|----|----|----|----------------|-----------------|
| 114.0555       | 1  | A  | 25 |                |                 |
| 185.0926       | 2  | A  | 24 | 2281.2880      | 1141.1479       |
| 256.1297       | 3  | A  | 23 | 2210.2509      | 1105.6294       |
| 327.1669       | 4  | A  | 22 | 2139.2138      | 1070.1108       |
| 384.1883       | 5  | G  | 21 | 2068.1767      | 1034.5923       |
| 455.2254       | 6  | A  | 20 | 2011.1552      | 1006.0815       |
| 554.2938       | 7  | V  | 19 | 1940.1181      | 970.5630        |
| 653.3623       | 8  | V  | 18 | 1841.0497      | 921.0288        |
| 724.3994       | 9  | A  | 17 | 1741.9813      | 871.4946        |
| 811.4314       | 10 | S  | 16 | 1670.9442      | 835.9760        |
| 882.4685       | 11 | A  | 15 | 1583.9122      | 792.4600        |
| 953.5056       | 12 | A  | 14 | 1512.8750      | 756.9414        |
| 1040.5377      | 13 | S  | 13 | 1441.8379      | 721.4229        |
| 1097.5591      | 14 | G  | 12 | 1354.8059      | 677.9069        |
| 1194.6119      | 15 | P  | 11 | 1297.7844      | 649.3961        |
| 1265.6490      | 16 | A  | 10 | 1200.7317      | 600.8697        |
| 1394.6916      | 17 | E  | 9  | 1129.6946      | 565.3512        |
| 1451.7131      | 18 | G  | 8  | 1000.6520      | 500.8299        |
| 1607.8394      | 19 | K  | 7  | 943.6305       | 472.3192        |
| 1763.9657      | 20 | K  | 6  | 787.5042       | 394.2560        |
| 1877.0497      | 21 | I  | 5  | 631.3779       | 316.1929        |
| 1978.0974      | 22 | T  | 4  | 518.2938       | 259.6508        |
| 2107.1400      | 23 | E  | 3  | 417.2462       | 209.1270        |
| 2220.2241      | 24 | L  | 2  | 288.2036       | 144.6057        |
|                | 25 | R  | 1  | 175.1195       | 88.0637         |

N-term: +43.02 K(19) : +156.13  
 K(20) : +156.13

AAAAVVEFOR, MH+ 1103.5849, m/z 552.2961  
 H OS G29 P150811 220811-s1.04802.04802.2.dta

X-range:

-

MassTol: Y-zoom:

MassType:

AVG  MONO

Axis:

1  2

Label:

I  M  -

Ions:

a  +  2+  3+

b  +  2+  3+

c  +  2+  3+

x  +  2+  3+

y  +  2+  3+

z  +  2+  3+

hide H<sub>2</sub>O/NH<sub>3</sub>

zoom 112-122

GO

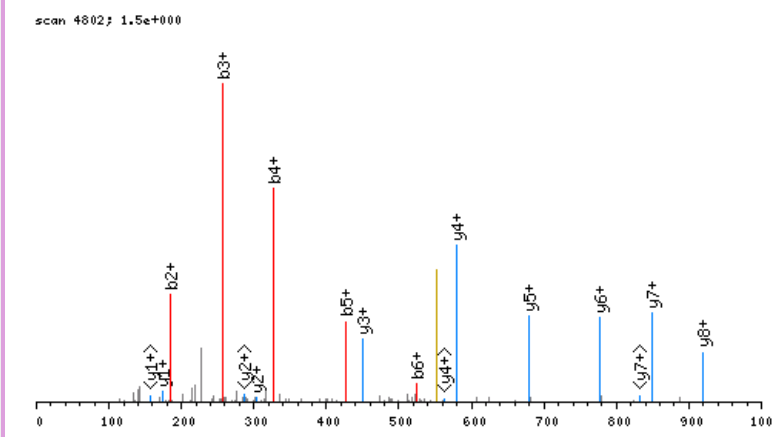

click image to zoom in; click top corners to zoom out [\[precursor±\]](#)

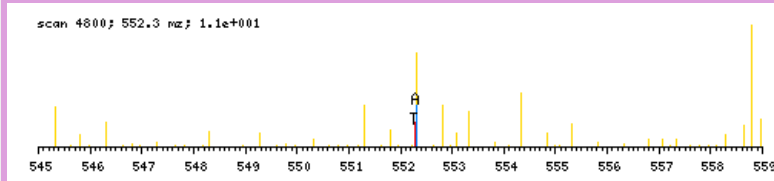

zoomed in precursor plot; T=theoretical m/z, A=acquired m/z

| b <sup>+</sup> | #  | AA | #  | y <sup>+</sup> | y <sup>2+</sup> |
|----------------|----|----|----|----------------|-----------------|
| 114.0555       | 1  | A  | 10 |                |                 |
| 185.0926       | 2  | A  | 9  | 990.5373       | 495.7725        |
| 256.1297       | 3  | A  | 8  | 919.5001       | 460.2540        |
| 327.1669       | 4  | A  | 7  | 848.4630       | 424.7354        |
| 426.2353       | 5  | V  | 6  | 777.4259       | 389.2169        |
| 525.3037       | 6  | V  | 5  | 678.3575       | 339.6827        |
| 654.3463       | 7  | E  | 4  | 579.2891       | 290.1485        |
| 801.4147       | 8  | F  | 3  | 450.2465       | 225.6272        |
| 929.4733       | 9  | Q  | 2  | 303.1781       | 152.0930        |
|                | 10 | R  | 1  | 175.1195       | 88.0637         |

N-term: +43.02

AAAEEGCGVGVEDDR, MH+ 1576.6549, m/z 788.8311  
 H OS G29 P150811 220811-s1.02942.02942.2.dta

X-range:

-

MassTol: Y-zoom:

MassType:

AVG  MONO

Axis:

1  2

Label:

I  M  -

Ions:

a  +  2+  3+

b  +  2+  3+

c  +  2+  3+

x  +  2+  3+

y  +  2+  3+

z  +  2+  3+

hide H<sub>2</sub>O/NH<sub>3</sub>

zoom 112-122

GO

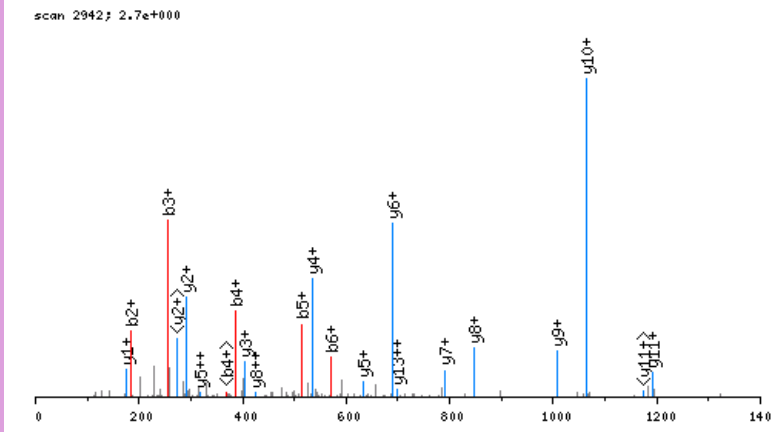

click image to zoom in; click top corners to zoom out [\[precursor±\]](#)

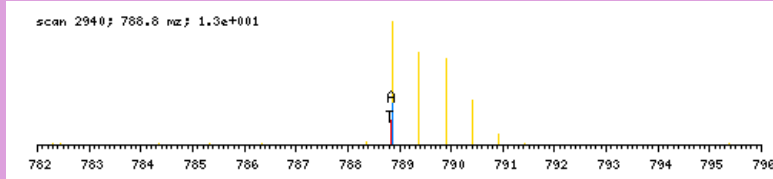

zoomed in precursor plot; T=theoretical m/z, A=acquired m/z

| b <sup>+</sup> | #  | AA # | y <sup>+</sup> | y <sup>2+</sup> |
|----------------|----|------|----------------|-----------------|
| 114.0555       | 1  | A 15 |                |                 |
| 185.0926       | 2  | A 14 | 1463.6072      | 732.3075        |
| 256.1297       | 3  | A 13 | 1392.5701      | 696.7890        |
| 385.1723       | 4  | E 12 | 1321.5330      | 661.2704        |
| 514.2149       | 5  | E 11 | 1192.4904      | 596.7491        |
| 571.2364       | 6  | G 10 | 1063.4478      | 532.2278        |
| 731.2670       | 7  | C 9  | 1006.4263      | 503.7171        |
| 788.2885       | 8  | G 8  | 846.3957       | 423.7018        |
| 887.3569       | 9  | V 7  | 789.3743       | 395.1910        |
| 944.3783       | 10 | G 6  | 690.3059       | 345.6568        |
| 1043.4467      | 11 | V 5  | 633.2844       | 317.1461        |
| 1172.4893      | 12 | E 4  | 534.2160       | 267.6119        |
| 1287.5163      | 13 | D 3  | 405.1734       | 203.0906        |
| 1402.5432      | 14 | D 2  | 290.1464       | 145.5771        |
|                | 15 | R 1  | 175.1195       | 88.0637         |

N-term:+43.02 C(7):+160.03

AAAGAGPGVGSAGPGGAAASATTAEDR, MH+ 2434.1599, m/z 812.0581  
 H OS G29 P150811 220811-s1.03601.03601.3.dta

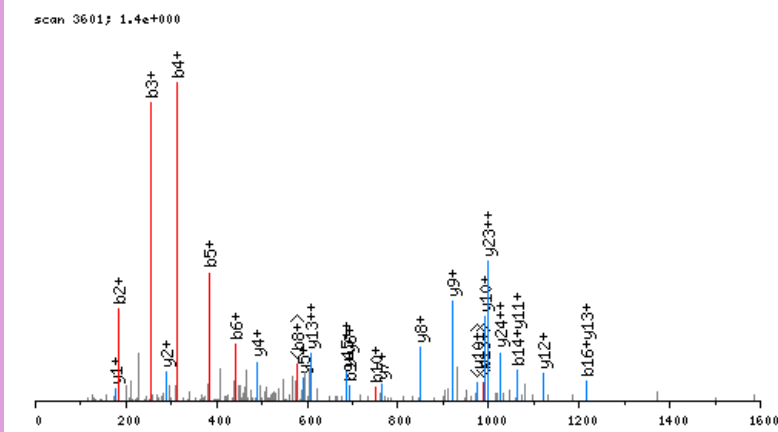

click image to zoom in; click top corners to zoom out [\[precursor±\]](#)

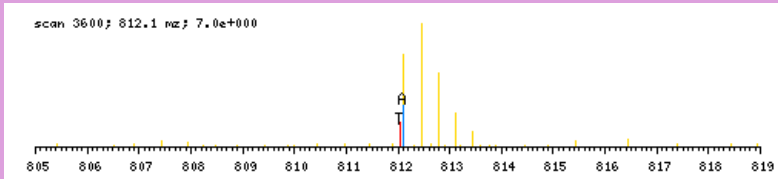

zoomed in precursor plot; T=theoretical m/z, A=acquired m/z

X-range:

-

MassTol: Y-zoom:

MassType:

AVG  MONO

Axis:

1  2

Label:

I  M  -

Ions:

a  +  2+  3+

b  +  2+  3+

c  +  2+  3+

x  +  2+  3+

y  +  2+  3+

z  +  2+  3+

hide H<sub>2</sub>O/NH<sub>3</sub>

zoom 112-122

GO

| b <sup>+</sup> | #  | AA | #  | y <sup>+</sup> | y <sup>2+</sup> |
|----------------|----|----|----|----------------|-----------------|
| 114.0555       | 1  | A  | 29 |                |                 |
| 185.0926       | 2  | A  | 28 | 2321.1122      | 1161.0600       |
| 256.1297       | 3  | A  | 27 | 2250.0751      | 1125.5415       |
| 313.1512       | 4  | G  | 26 | 2179.0380      | 1090.0229       |
| 384.1883       | 5  | A  | 25 | 2122.0165      | 1061.5122       |
| 441.2098       | 6  | G  | 24 | 2050.9794      | 1025.9936       |
| 538.2625       | 7  | P  | 23 | 1993.9579      | 997.4829        |
| 595.2840       | 8  | G  | 22 | 1896.9052      | 948.9565        |
| 692.3368       | 9  | P  | 21 | 1839.8837      | 920.4458        |
| 749.3582       | 10 | G  | 20 | 1742.8309      | 871.9194        |
| 848.4267       | 11 | V  | 19 | 1685.8095      | 843.4086        |
| 935.4587       | 12 | S  | 18 | 1586.7411      | 793.8744        |
| 1006.4958      | 13 | A  | 17 | 1499.7090      | 750.3584        |
| 1063.5173      | 14 | G  | 16 | 1428.6719      | 714.8399        |
| 1160.5700      | 15 | P  | 15 | 1371.6504      | 686.3291        |
| 1217.5915      | 16 | G  | 14 | 1274.5977      | 637.8028        |
| 1314.6442      | 17 | P  | 13 | 1217.5762      | 609.2920        |
| 1371.6657      | 18 | G  | 12 | 1120.5235      | 560.7656        |
| 1442.7028      | 19 | A  | 11 | 1063.5020      | 532.2549        |
| 1513.7399      | 20 | A  | 10 | 992.4649       | 496.7364        |
| 1584.7771      | 21 | A  | 9  | 921.4278       | 461.2178        |
| 1671.8091      | 22 | S  | 8  | 850.3907       | 425.6992        |
| 1742.8462      | 23 | A  | 7  | 763.3586       | 382.1832        |
| 1843.8939      | 24 | T  | 6  | 692.3215       | 346.6647        |
| 1944.9416      | 25 | T  | 5  | 591.2738       | 296.1408        |
| 2015.9787      | 26 | A  | 4  | 490.2262       | 245.6170        |
| 2145.0213      | 27 | E  | 3  | 419.1890       | 210.0984        |
| 2260.0482      | 28 | D  | 2  | 290.1464       | 145.5771        |
|                | 29 | R  | 1  | 175.1195       | 88.0637         |

N-term:+43.02

AAAGGGAAAAAGR, MH+ 1013.5128, m/z 507.2601  
 H OS G29 P150811 220811-s1.02264.02264.2.dta

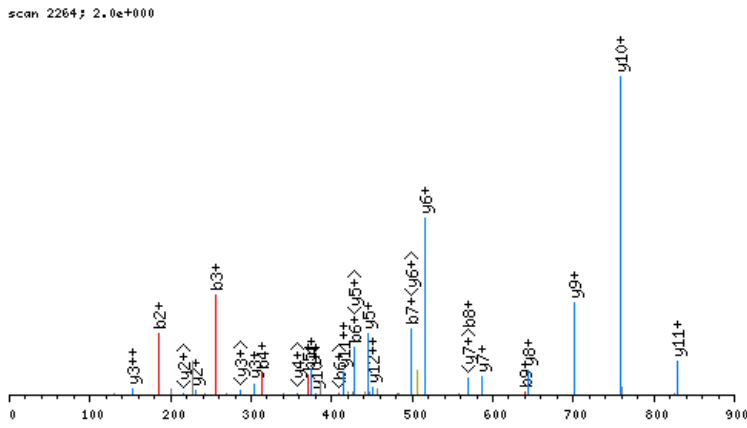

click image to zoom in; click top corners to zoom out [\[precursor±\]](#)

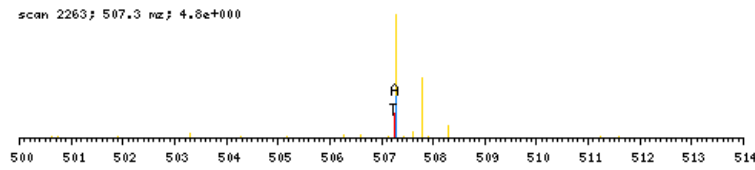

zoomed in precursor plot; T=theoretical m/z, A=acquired m/z

X-range:

-

MassTol: Y-zoom:

MassType:

AVG  MONO

Axis:

1  2

Label:

I  M  -

Ions:

a  +  2+  3+

b  +  2+  3+

c  +  2+  3+

x  +  2+  3+

y  +  2+  3+

z  +  2+  3+

hide H<sub>2</sub>O/NH<sub>3</sub>

zoom 112-122

GO

| b <sup>+</sup> | #  | AA # | y <sup>+</sup> | y <sup>2+</sup>   |
|----------------|----|------|----------------|-------------------|
| 114.0555       | 1  | A    | 13             |                   |
| 185.0926       | 2  | A    | 12             | 900.4652 450.7365 |
| 256.1297       | 3  | A    | 11             | 829.4280 415.2179 |
| 313.1512       | 4  | G    | 10             | 758.3909 379.6994 |
| 370.1727       | 5  | G    | 9              | 701.3695 351.1886 |
| 427.1941       | 6  | G    | 8              | 644.3480 322.6779 |
| 498.2312       | 7  | A    | 7              | 587.3265 294.1672 |
| 569.2684       | 8  | A    | 6              | 516.2894 258.6486 |
| 640.3055       | 9  | A    | 5              | 445.2523 223.1301 |
| 711.3426       | 10 | A    | 4              | 374.2152 187.6115 |
| 782.3797       | 11 | A    | 3              | 303.1781 152.0930 |
| 839.4012       | 12 | G    | 2              | 232.1410 116.5744 |
|                | 13 | R    | 1              | 175.1195 88.0637  |

N-term:+43.02



AAAGSAAVSGAGTPVAGPTGR, MH+ 1767.8990, m/z 589.9712  
 H OS G29 P150811 220811-s1.03421.03421.3.dta

X-range:

-

MassTol: Y-zoom:

MassType:

AVG  MONO

Axis:

1  2

Label:

I  M  -

Ions:

a  +  2+  3+

b  +  2+  3+

c  +  2+  3+

x  +  2+  3+

y  +  2+  3+

z  +  2+  3+

hide H<sub>2</sub>O/NH<sub>3</sub>

zoom 112-122

GO

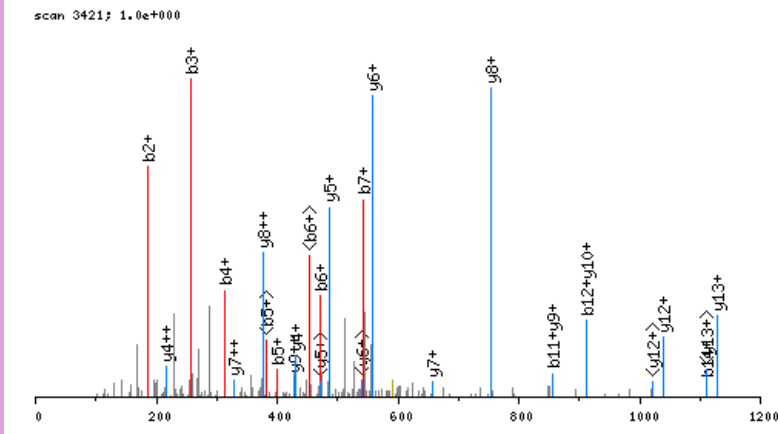

click image to zoom in; click top corners to zoom out [\[precursor±\]](#)

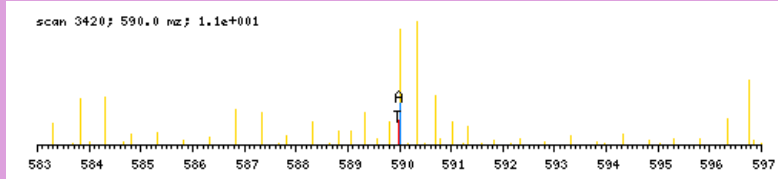

zoomed in precursor plot; T=theoretical m/z, A=acquired m/z

| b <sup>+</sup> | #  | AA | #  | y <sup>+</sup> | y <sup>2+</sup> |
|----------------|----|----|----|----------------|-----------------|
| 114.0555       | 1  | A  | 21 |                |                 |
| 185.0926       | 2  | A  | 20 | 1654.8513      | 827.9295        |
| 256.1297       | 3  | A  | 19 | 1583.8142      | 792.4110        |
| 313.1512       | 4  | G  | 18 | 1512.7770      | 756.8924        |
| 400.1832       | 5  | S  | 17 | 1455.7556      | 728.3817        |
| 471.2203       | 6  | A  | 16 | 1368.7236      | 684.8657        |
| 542.2575       | 7  | A  | 15 | 1297.6864      | 649.3471        |
| 641.3259       | 8  | V  | 14 | 1226.6493      | 613.8286        |
| 728.3579       | 9  | S  | 13 | 1127.5809      | 564.2944        |
| 785.3794       | 10 | G  | 12 | 1040.5489      | 520.7784        |
| 856.4165       | 11 | A  | 11 | 983.5274       | 492.2676        |
| 913.4379       | 12 | G  | 10 | 912.4903       | 456.7491        |
| 1014.4856      | 13 | T  | 9  | 855.4688       | 428.2383        |
| 1111.5384      | 14 | P  | 8  | 754.4212       | 377.7145        |
| 1210.6068      | 15 | V  | 7  | 657.3684       | 329.1881        |
| 1281.6439      | 16 | A  | 6  | 558.3000       | 279.6539        |
| 1338.6654      | 17 | G  | 5  | 487.2629       | 244.1353        |
| 1435.7181      | 18 | P  | 4  | 430.2414       | 215.6246        |
| 1536.7658      | 19 | T  | 3  | 333.1886       | 167.0982        |
| 1593.7873      | 20 | G  | 2  | 232.1410       | 116.5744        |
|                | 21 | R  | 1  | 175.1195       | 88.0637         |

N-term:+43.02

AAAKDGCGLTAAGNGR, MH+ 1688.8026, m/z 563.6057  
 H OS G25 P150811 220811-s1.03021.03021.3.dta

scan 3021; 2.7e+000

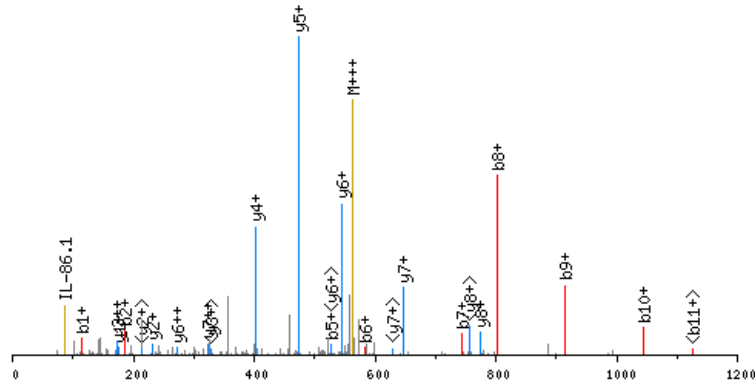

click image to zoom in; click top corners to zoom out [\[precursor±\]](#)

scan 3017; 563.6 mz; 1.9e+001

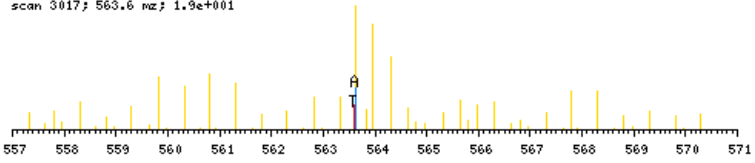

zoomed in precursor plot; T=theoretical m/z, A=acquired m/z

X-range:

-

MassTol: Y-zoom:

MassType:

AVG  MONO

Axis:

1  2

Label:

I  M  -

Ions:

a  +  2+  3+

b  +  2+  3+

c  +  2+  3+

x  +  2+  3+

y  +  2+  3+

z  +  2+  3+

hide H<sub>2</sub>O/NH<sub>3</sub>

zoom 112-122

GO

| b <sup>+</sup> | #  | AA # | y <sup>+</sup> | y <sup>2+</sup> |
|----------------|----|------|----------------|-----------------|
| 114.0555       | 1  | A 17 |                |                 |
| 185.0926       | 2  | A 16 | 1575.7549      | 788.3814        |
| 256.1297       | 3  | A 15 | 1504.7178      | 752.8628        |
| 412.2560       | 4  | K 14 | 1433.6807      | 717.3443        |
| 527.2830       | 5  | D 13 | 1277.5544      | 639.2811        |
| 584.3044       | 6  | G 12 | 1162.5274      | 581.7676        |
| 744.3350       | 7  | C 11 | 1105.5060      | 553.2569        |
| 801.3565       | 8  | G 10 | 945.4754       | 473.2416        |
| 914.4406       | 9  | L 9  | 888.4539       | 444.7309        |
| 1043.4832      | 10 | E 8  | 775.3699       | 388.1888        |
| 1144.5308      | 11 | T 7  | 646.3273       | 323.6675        |
| 1215.5680      | 12 | A 6  | 545.2796       | 273.1437        |
| 1286.6051      | 13 | A 5  | 474.2425       | 237.6251        |
| 1343.6265      | 14 | G 4  | 403.2054       | 202.1066        |
| 1457.6695      | 15 | N 3  | 346.1839       | 173.5959        |
| 1514.6909      | 16 | G 2  | 232.1410       | 116.5744        |
|                | 17 | R 1  | 175.1195       | 88.0637         |

N-term:+43.02 K(4):+156.13  
 C(7):+160.03

AAAMDVDTPSGTNSGAGKKR, MH+ 2044.0770, m/z 682.0305  
 H OS G27 P150811 220811-s1.03070.03070.3.dta

X-range:

-

MassTol: Y-zoom:

MassType:

AVG  MONO

Axis:

1  2

Label:

I  M  -

Ions:

a  +  2+  3+

b  +  2+  3+

c  +  2+  3+

x  +  2+  3+

y  +  2+  3+

z  +  2+  3+

hide H<sub>2</sub>O/NH<sub>3</sub>

zoom 112-122

GO

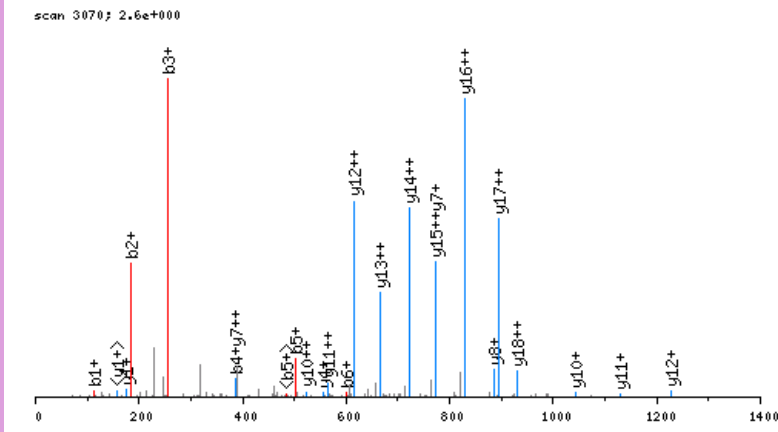

click image to zoom in; click top corners to zoom out [\[precursor±\]](#)

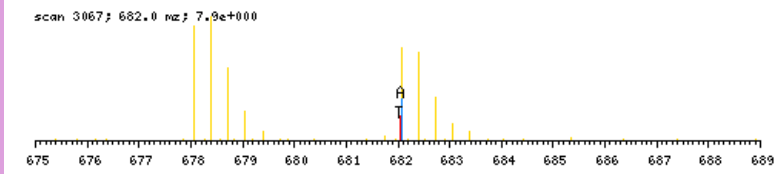

zoomed in precursor plot; T=theoretical m/z, A=acquired m/z

| b <sup>+</sup> | #  | AA # | y <sup>+</sup> | y <sup>2+</sup> |
|----------------|----|------|----------------|-----------------|
| 114.0555       | 1  | A 20 |                |                 |
| 185.0926       | 2  | A 19 | 1931.0293      | 966.0186        |
| 256.1297       | 3  | A 18 | 1859.9922      | 930.5000        |
| 387.1702       | 4  | M 17 | 1788.9551      | 894.9815        |
| 502.1972       | 5  | D 16 | 1657.9146      | 829.4612        |
| 601.2656       | 6  | V 15 | 1542.8877      | 771.9477        |
| 716.2925       | 7  | D 14 | 1443.8193      | 722.4135        |
| 817.3402       | 8  | T 13 | 1328.7923      | 664.9001        |
| 914.3930       | 9  | P 12 | 1227.7446      | 614.3762        |
| 1001.4250      | 10 | S 11 | 1130.6919      | 565.8498        |
| 1058.4465      | 11 | G 10 | 1043.6598      | 522.3338        |
| 1159.4941      | 12 | T 9  | 986.6384       | 493.8231        |
| 1273.5371      | 13 | N 8  | 885.5907       | 443.2993        |
| 1360.5691      | 14 | S 7  | 771.5478       | 386.2778        |
| 1417.5906      | 15 | G 6  | 684.5157       | 342.7618        |
| 1488.6277      | 16 | A 5  | 627.4943       | 314.2511        |
| 1545.6491      | 17 | G 4  | 556.4572       | 278.7325        |
| 1707.8072      | 18 | K 3  | 499.4357       | 250.2218        |
| 1869.9653      | 19 | K 2  | 337.2776       | 169.1427        |
|                | 20 | R 1  | 175.1195       | 88.0637         |

N-term:+43.02 K(18):+162.16  
 K(19):+162.16

AAAQAVEEMR, MH+ 1117.5312, m/z 559.2692  
 H OS G29 P150811 220811-s1.04103.04103.2.dta

X-range:

-

MassTol: Y-zoom:

MassType:

AVG  MONO

Axis:

1  2

Label:

I  M  -

Ions:

a  +  2+  3+

b  +  2+  3+

c  +  2+  3+

x  +  2+  3+

y  +  2+  3+

z  +  2+  3+

hide H<sub>2</sub>O/NH<sub>3</sub>

zoom 112-122

GO

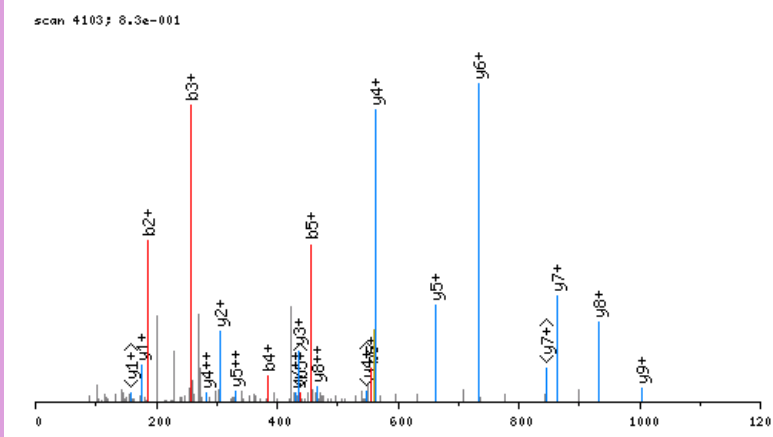

click image to zoom in; click top corners to zoom out [\[precursor±\]](#)

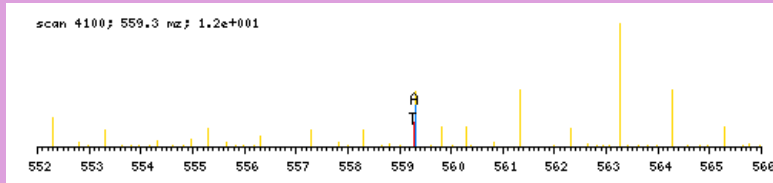

zoomed in precursor plot; T=theoretical m/z, A=acquired m/z

| b <sup>+</sup> | #  | AA | #  | y <sup>+</sup> | y <sup>2+</sup> |
|----------------|----|----|----|----------------|-----------------|
| 114.0555       | 1  | A  | 10 |                |                 |
| 185.0926       | 2  | A  | 9  | 1004.4835      | 502.7457        |
| 256.1297       | 3  | A  | 8  | 933.4464       | 467.2271        |
| 384.1883       | 4  | Q  | 7  | 862.4093       | 431.7086        |
| 455.2254       | 5  | A  | 6  | 734.3507       | 367.6793        |
| 554.2938       | 6  | V  | 5  | 663.3136       | 332.1607        |
| 683.3364       | 7  | E  | 4  | 564.2452       | 282.6265        |
| 812.3790       | 8  | E  | 3  | 435.2026       | 218.1052        |
| 943.4195       | 9  | M  | 2  | 306.1600       | 153.5839        |
|                | 10 | R  | 1  | 175.1195       | 88.0637         |

N-term:+43.02

AAASGYTDLR, MH+ 1066.5169, m/z 533.7621  
 H OS G29 P150811 220811-s1.03393.03393.2.dta

X-range:

-

MassTol: Y-zoom:

MassType:

AVG  MONO

Axis:

1  2

Label:

I  M  -

Ions:

a  +  2+  3+

b  +  2+  3+

c  +  2+  3+

x  +  2+  3+

y  +  2+  3+

z  +  2+  3+

hide H<sub>2</sub>O/NH<sub>3</sub>

zoom 112-122

GO

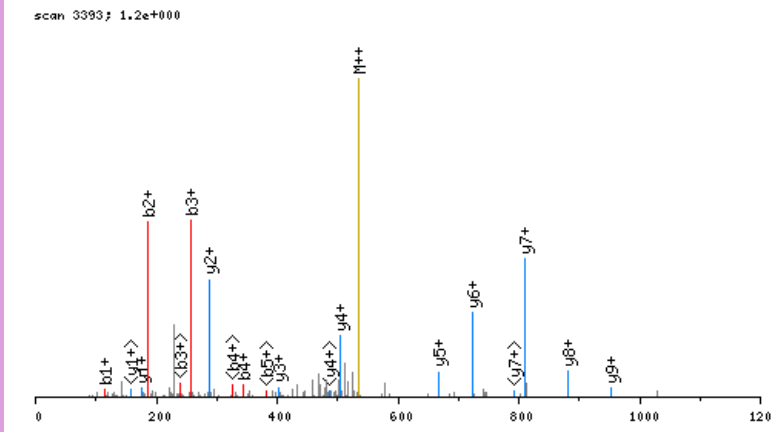

click image to zoom in; click top corners to zoom out [\[precursor±\]](#)

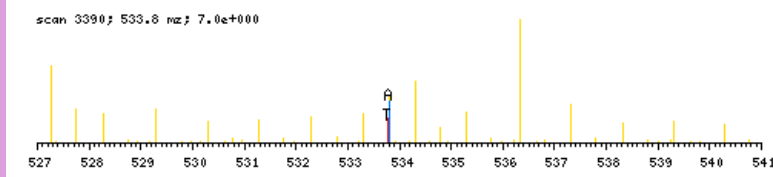

zoomed in precursor plot; T=theoretical m/z, A=acquired m/z

| b <sup>+</sup> | #  | AA | #  | y <sup>+</sup> | y <sup>2+</sup> |
|----------------|----|----|----|----------------|-----------------|
| 114.0555       | 1  | A  | 10 |                |                 |
| 185.0926       | 2  | A  | 9  | 953.4692       | 477.2385        |
| 256.1297       | 3  | A  | 8  | 882.4321       | 441.7200        |
| 343.1618       | 4  | S  | 7  | 811.3950       | 406.2014        |
| 400.1832       | 5  | G  | 6  | 724.3630       | 362.6854        |
| 563.2466       | 6  | Y  | 5  | 667.3415       | 334.1747        |
| 664.2942       | 7  | T  | 4  | 504.2782       | 252.6430        |
| 779.3212       | 8  | D  | 3  | 403.2305       | 202.1192        |
| 892.4052       | 9  | L  | 2  | 288.2036       | 144.6057        |
|                | 10 | R  | 1  | 175.1195       | 88.0637         |

N-term: +43.02

AAATLSFGPER, MH+ 1161.5904, m/z 581.2988  
 H OS G29 P150811 220811-s1.04722.04722.2.dta

scan 4722; 1.6e+000

X-range:

-

MassTol: Y-zoom:

MassType:

AVG  MONO

Axis:

1  2

Label:

I  M  -

Ions:

a  +  2+  3+

b  +  2+  3+

c  +  2+  3+

x  +  2+  3+

y  +  2+  3+

z  +  2+  3+

hide H<sub>2</sub>O/NH<sub>3</sub>

zoom 112-122

GO

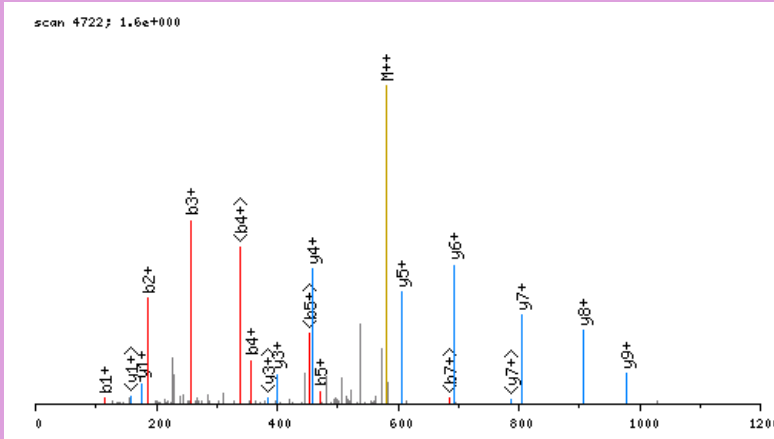

click image to zoom in; click top corners to zoom out [\[precursor±\]](#)

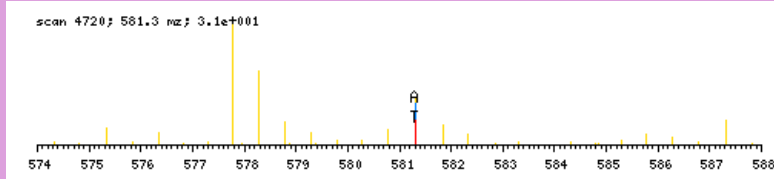

zoomed in precursor plot; T=theoretical m/z, A=acquired m/z

| b <sup>+</sup> | #  | AA | #  | y <sup>+</sup> | y <sup>2+</sup> |
|----------------|----|----|----|----------------|-----------------|
| 114.0555       | 1  | A  | 11 |                |                 |
| 185.0926       | 2  | A  | 10 | 1048.5427      | 524.7753        |
| 256.1297       | 3  | A  | 9  | 977.5056       | 489.2567        |
| 357.1774       | 4  | T  | 8  | 906.4685       | 453.7382        |
| 470.2615       | 5  | L  | 7  | 805.4208       | 403.2143        |
| 557.2935       | 6  | S  | 6  | 692.3368       | 346.6723        |
| 704.3619       | 7  | F  | 5  | 605.3047       | 303.1563        |
| 761.3834       | 8  | G  | 4  | 458.2363       | 229.6221        |
| 858.4362       | 9  | P  | 3  | 401.2149       | 201.1113        |
| 987.4787       | 10 | E  | 2  | 304.1621       | 152.5850        |
|                | 11 | R  | 1  | 175.1195       | 88.0637         |

N-term:+43.02

AAATPTEPPEGSGLMDAR, MH+ 2041.9501, m/z 681.3215  
 H OS G29 P150811 220811-s1.04046.04046.3.dta

X-range:

-

MassTol: Y-zoom:

MassType:

AVG  MONO

Axis:

1  2

Label:

I  M  -

Ions:

a  +  2+  3+

b  +  2+  3+

c  +  2+  3+

x  +  2+  3+

y  +  2+  3+

z  +  2+  3+

hide H<sub>2</sub>O/NH<sub>3</sub>

zoom 112-122

GO

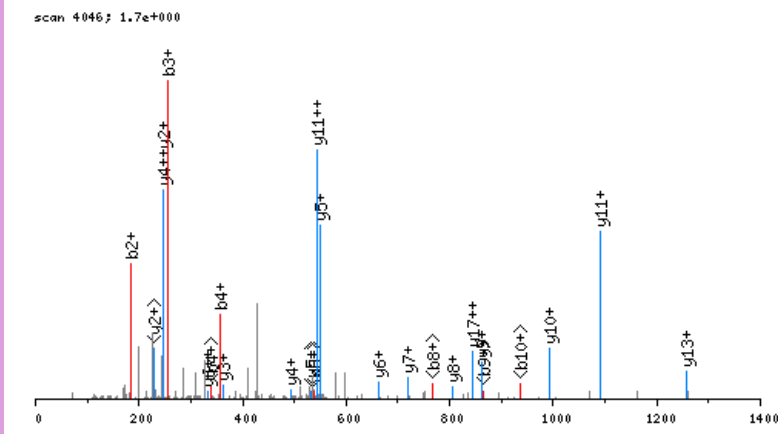

click image to zoom in; click top corners to zoom out [\[precursor±\]](#)

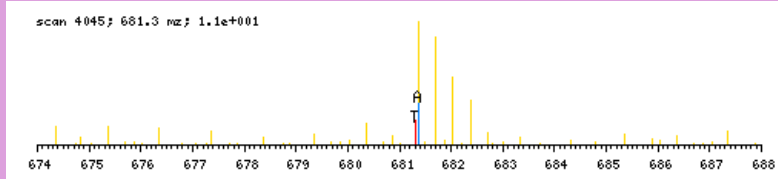

zoomed in precursor plot; T=theoretical m/z, A=acquired m/z

| b <sup>+</sup> | #  | AA # | y <sup>+</sup> | y <sup>2+</sup> |
|----------------|----|------|----------------|-----------------|
| 114.0555       | 1  | A 21 |                |                 |
| 185.0926       | 2  | A 20 | 1928.9024      | 964.9551        |
| 256.1297       | 3  | A 19 | 1857.8653      | 929.4365        |
| 357.1774       | 4  | T 18 | 1786.8282      | 893.9180        |
| 454.2302       | 5  | P 17 | 1685.7805      | 843.3941        |
| 555.2779       | 6  | T 16 | 1588.7277      | 794.8678        |
| 684.3205       | 7  | E 15 | 1487.6800      | 744.3439        |
| 785.3681       | 8  | T 14 | 1358.6374      | 679.8226        |
| 882.4209       | 9  | P 13 | 1257.5898      | 629.2988        |
| 953.4580       | 10 | A 12 | 1160.5370      | 580.7724        |
| 1050.5108      | 11 | P 11 | 1089.4999      | 545.2539        |
| 1179.5534      | 12 | E 10 | 992.4471       | 496.7275        |
| 1236.5748      | 13 | G 9  | 863.4045       | 432.2062        |
| 1323.6069      | 14 | S 8  | 806.3831       | 403.6954        |
| 1380.6283      | 15 | G 7  | 719.3510       | 360.1794        |
| 1493.7124      | 16 | L 6  | 662.3296       | 331.6687        |
| 1550.7339      | 17 | G 5  | 549.2455       | 275.1267        |
| 1681.7743      | 18 | M 4  | 492.2240       | 246.6159        |
| 1796.8013      | 19 | D 3  | 361.1836       | 181.0957        |
| 1867.8384      | 20 | A 2  | 246.1566       | 123.5822        |
|                | 21 | R 1  | 175.1195       | 88.0637         |

N-term:+43.02

AAAVAVAAASR, MH+ 999.5587, m/z 500.2830  
 H OS G29 P150811 220811-s1.04116.04116.2.dta

X-range:

-

MassTol: Y-zoom:

MassType:

AVG  MONO

Axis:

1  2

Label:

I  M  -

Ions:

a  +  2+  3+

b  +  2+  3+

c  +  2+  3+

x  +  2+  3+

y  +  2+  3+

z  +  2+  3+

hide H<sub>2</sub>O/NH<sub>3</sub>

zoom 112-122

GO

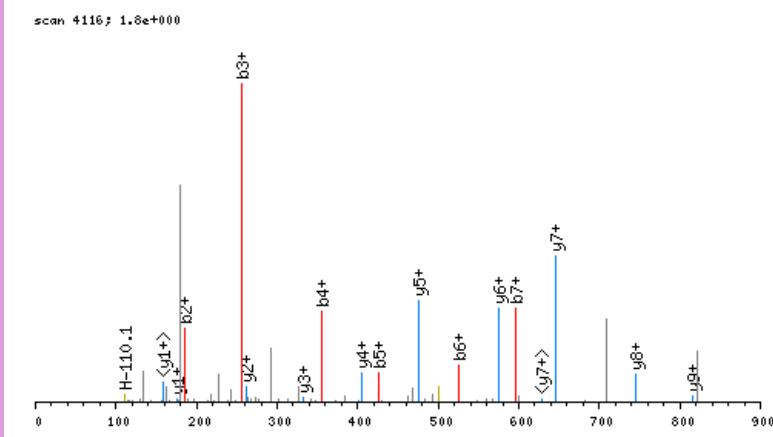

click image to zoom in; click top corners to zoom out [\[precursor±\]](#)

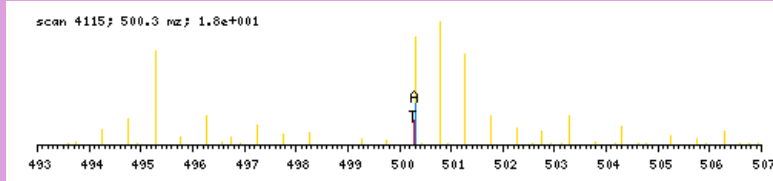

zoomed in precursor plot; T=theoretical m/z, A=acquired m/z

| b <sup>+</sup> | #  | AA | #  | y <sup>+</sup> | y <sup>2+</sup> |
|----------------|----|----|----|----------------|-----------------|
| 114.0555       | 1  | A  | 11 |                |                 |
| 185.0926       | 2  | A  | 10 | 886.5110       | 443.7594        |
| 256.1297       | 3  | A  | 9  | 815.4739       | 408.2409        |
| 355.1982       | 4  | V  | 8  | 744.4368       | 372.7223        |
| 426.2353       | 5  | A  | 7  | 645.3684       | 323.1881        |
| 525.3037       | 6  | V  | 6  | 574.3313       | 287.6696        |
| 596.3408       | 7  | A  | 5  | 475.2629       | 238.1353        |
| 667.3779       | 8  | A  | 4  | 404.2258       | 202.6168        |
| 738.4150       | 9  | A  | 3  | 333.1886       | 167.0982        |
| 825.4471       | 10 | S  | 2  | 262.1515       | 131.5797        |
|                | 11 | R  | 1  | 175.1195       | 88.0637         |

N-term:+43.02



AAAVVDPQOSVVMR, MH+ 1512.7844, m/z 504.9330  
 H OS G29 P150811 220811-s1.04633.04633.3.dta

X-range:

-

MassTol: Y-zoom:

MassType:

AVG  MONO

Axis:

1  2

Label:

I  M  -

Ions:

a  +  2+  3+

b  +  2+  3+

c  +  2+  3+

x  +  2+  3+

y  +  2+  3+

z  +  2+  3+

hide H<sub>2</sub>O/NH<sub>3</sub>

zoom 112-122

GO

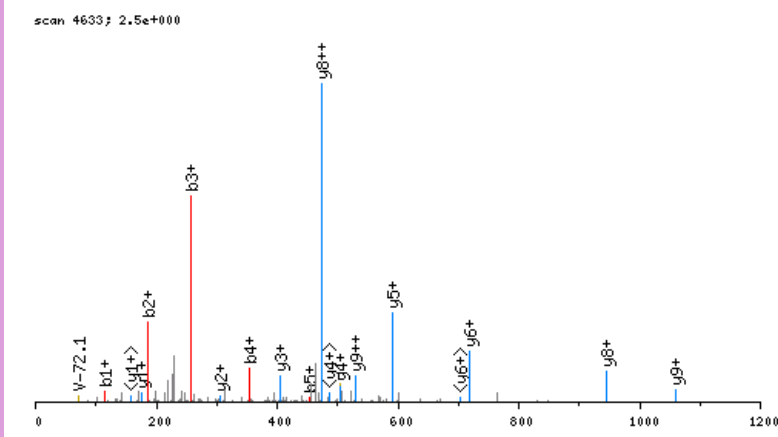

click image to zoom in; click top corners to zoom out [\[precursor±\]](#)

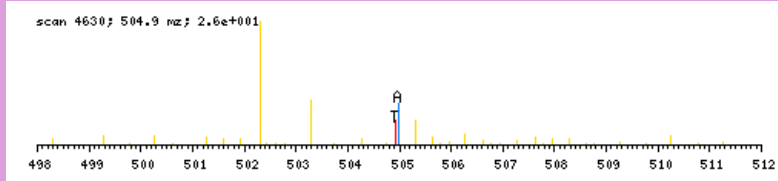

zoomed in precursor plot; T=theoretical m/z, A=acquired m/z

| b <sup>+</sup> | #  | AA # | y <sup>+</sup> | y <sup>2+</sup> |
|----------------|----|------|----------------|-----------------|
| 114.0555       | 1  | A 14 |                |                 |
| 185.0926       | 2  | A 13 | 1399.7368      | 700.3723        |
| 256.1297       | 3  | A 12 | 1328.6996      | 664.8537        |
| 355.1982       | 4  | V 11 | 1257.6625      | 629.3352        |
| 454.2666       | 5  | V 10 | 1158.5941      | 579.8010        |
| 569.2935       | 6  | D 9  | 1059.5257      | 530.2668        |
| 666.3463       | 7  | P 8  | 944.4988       | 472.7533        |
| 794.4049       | 8  | Q 7  | 847.4460       | 424.2269        |
| 922.4634       | 9  | Q 6  | 719.3874       | 360.1976        |
| 1009.4955      | 10 | S 5  | 591.3288       | 296.1683        |
| 1108.5639      | 11 | V 4  | 504.2968       | 252.6523        |
| 1207.6323      | 12 | V 3  | 405.2284       | 203.1181        |
| 1338.6728      | 13 | M 2  | 306.1600       | 153.5839        |
|                | 14 | R 1  | 175.1195       | 88.0637         |

N-term:+43.02

AADIEQVFR, MH+ 1090.5533, m/z 545.7803  
 H OS G29 P150811 220811-s1.06032.06032.2.dta

X-range:

-

MassTol: Y-zoom:

MassType:

AVG  MONO

Axis:

1  2

Label:

I  M  -

Ions:

a  +  2+  3+

b  +  2+  3+

c  +  2+  3+

x  +  2+  3+

y  +  2+  3+

z  +  2+  3+

hide H<sub>2</sub>O/NH<sub>3</sub>

zoom 112-122

GO

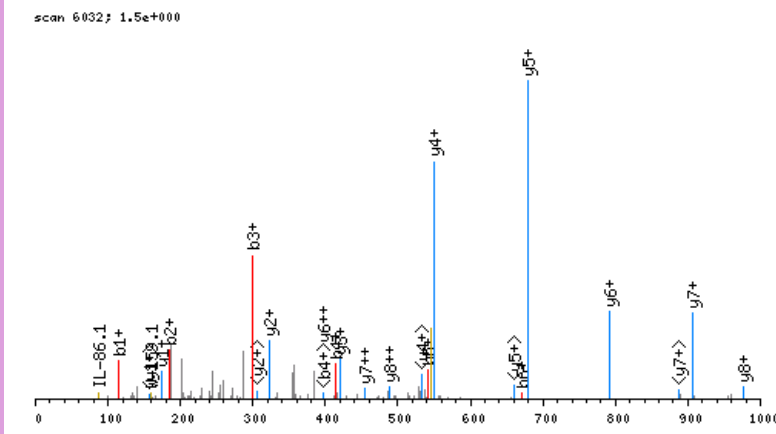

click image to zoom in; click top corners to zoom out [\[precursor±\]](#)

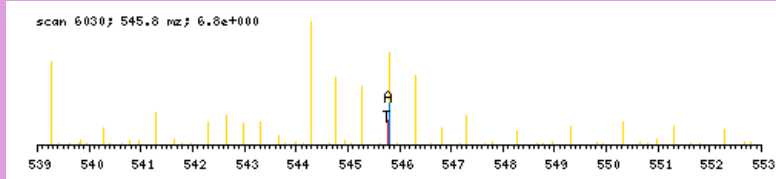

zoomed in precursor plot; T=theoretical m/z, A=acquired m/z

| b <sup>+</sup> | # | AA # | y <sup>+</sup> | y <sup>2+</sup>   |
|----------------|---|------|----------------|-------------------|
| 114.0555       | 1 | A    | 9              |                   |
| 185.0926       | 2 | A    | 8              | 977.5056 489.2567 |
| 300.1196       | 3 | D    | 7              | 906.4685 453.7382 |
| 413.2036       | 4 | I    | 6              | 791.4416 396.2247 |
| 542.2462       | 5 | E    | 5              | 678.3575 339.6827 |
| 670.3048       | 6 | Q    | 4              | 549.3149 275.1614 |
| 769.3732       | 7 | V    | 3              | 421.2563 211.1321 |
| 916.4416       | 8 | F    | 2              | 322.1879 161.5979 |
|                | 9 | R    | 1              | 175.1195 88.0637  |

N-term:+43.02

AADISQWAGPLCLQEVDEPPQHALR, MH+ 2843.3786, m/z 711.6001  
 H OS G24 P150811 220811-s1.04927.04927.4.dta

scan 4927; 8.8e-001

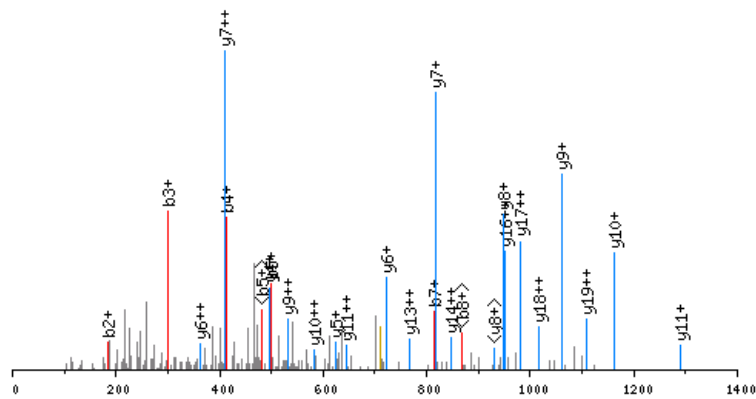

click image to zoom in; click top corners to zoom out [precursor±]

scan 4925; 711.6 nz; 7.5e+000

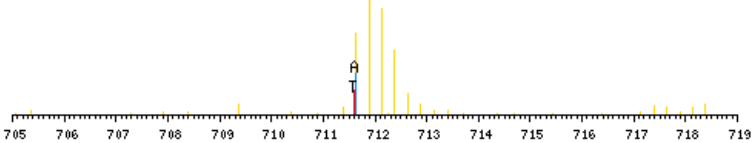

zoomed in precursor plot; T=theoretical m/z, A=acquired m/z

X-range:

-

MassTol: Y-zoom:

MassType:

AVG  MONO

Axis:

1  2

Label:

I  M  -

Ions:

a  +  2+  3+

b  +  2+  3+

c  +  2+  3+

x  +  2+  3+

y  +  2+  3+

z  +  2+  3+

hide H<sub>2</sub>O/NH<sub>3</sub>

zoom 112-122

GO

| b <sup>+</sup> | #  | AA | #  | y <sup>+</sup> | y <sup>2+</sup> |
|----------------|----|----|----|----------------|-----------------|
| 114.0555       | 1  | A  | 25 |                |                 |
| 185.0926       | 2  | A  | 24 | 2730.3309      | 1365.6694       |
| 300.1196       | 3  | D  | 23 | 2659.2938      | 1330.1508       |
| 413.2036       | 4  | I  | 22 | 2544.2669      | 1272.6373       |
| 500.2357       | 5  | S  | 21 | 2431.1828      | 1216.0953       |
| 628.2942       | 6  | Q  | 20 | 2344.1508      | 1172.5793       |
| 814.3736       | 7  | W  | 19 | 2216.0922      | 1108.5500       |
| 885.4107       | 8  | A  | 18 | 2030.0129      | 1015.5104       |
| 942.4321       | 9  | G  | 17 | 1958.9758      | 979.9918        |
| 1039.4849      | 10 | P  | 16 | 1901.9543      | 951.4811        |
| 1152.5690      | 11 | L  | 15 | 1804.9015      | 902.9547        |
| 1312.5996      | 12 | C  | 14 | 1691.8175      | 846.4127        |
| 1425.6836      | 13 | L  | 13 | 1531.7869      | 766.3974        |
| 1553.7422      | 14 | Q  | 12 | 1418.7028      | 709.8553        |
| 1682.7848      | 15 | E  | 11 | 1290.6442      | 645.8260        |
| 1781.8532      | 16 | V  | 10 | 1161.6016      | 581.3047        |
| 1896.8802      | 17 | D  | 9  | 1062.5332      | 531.7705        |
| 2025.9227      | 18 | E  | 8  | 947.5063       | 474.2571        |
| 2122.9755      | 19 | P  | 7  | 818.4637       | 409.7358        |
| 2220.0283      | 20 | P  | 6  | 721.4109       | 361.2094        |
| 2348.0868      | 21 | Q  | 5  | 624.3582       | 312.6830        |
| 2485.1458      | 22 | H  | 4  | 496.2996       | 248.6537        |
| 2556.1829      | 23 | A  | 3  | 359.2407       | 180.1243        |
| 2669.2669      | 24 | L  | 2  | 288.2036       | 144.6057        |
|                | 25 | R  | 1  | 175.1195       | 88.0637         |

N-term:+43.02 C(12):+160.03

AEEEEATLTVR, MH+ 1102.5744, m/z 551.7909  
 H OS G29 P150811 220811-s1.03638.03638.2.dta

X-range:

-

MassTol: Y-zoom:

MassType:

AVG  MONO

Axis:

1  2

Label:

I  M  -

Ions:

a  +  2+  3+

b  +  2+  3+

c  +  2+  3+

x  +  2+  3+

y  +  2+  3+

z  +  2+  3+

hide H<sub>2</sub>O/NH<sub>3</sub>

zoom 112-122

GO

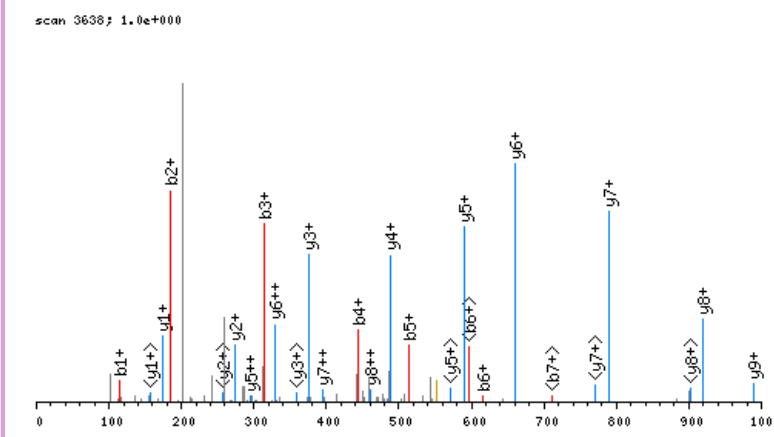

click image to zoom in; click top corners to zoom out [\[precursor±\]](#)

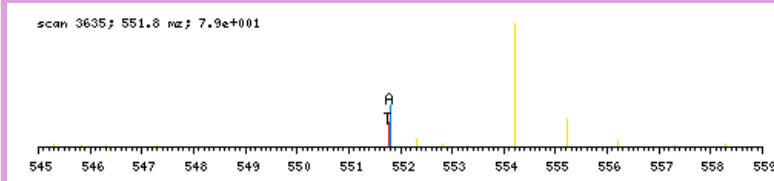

zoomed in precursor plot; T=theoretical m/z, A=acquired m/z

| b <sup>+</sup> | #  | AA | #  | y <sup>+</sup> | y <sup>2+</sup> |
|----------------|----|----|----|----------------|-----------------|
| 114.0555       | 1  | A  | 10 |                |                 |
| 185.0926       | 2  | A  | 9  | 989.5267       | 495.2673        |
| 314.1352       | 3  | E  | 8  | 918.4896       | 459.7487        |
| 443.1778       | 4  | E  | 7  | 789.4470       | 395.2274        |
| 514.2149       | 5  | A  | 6  | 660.4044       | 330.7061        |
| 615.2626       | 6  | T  | 5  | 589.3673       | 295.1876        |
| 728.3467       | 7  | L  | 4  | 488.3197       | 244.6637        |
| 829.3943       | 8  | T  | 3  | 375.2356       | 188.1217        |
| 928.4628       | 9  | V  | 2  | 274.1879       | 137.5979        |
|                | 10 | R  | 1  | 175.1195       | 88.0637         |

N-term: +43.02

AAEIQQPLTR, MH+ 1265.6854, m/z 633.3463  
 H OS G29 P150811 220811-s1.03817.03817.2.dta

X-range:

-

MassTol: Y-zoom:

MassType:

AVG  MONO

Axis:

1  2

Label:

I  M  -

Ions:

a  +  2+  3+

b  +  2+  3+

c  +  2+  3+

x  +  2+  3+

y  +  2+  3+

z  +  2+  3+

hide H<sub>2</sub>O/NH<sub>3</sub>

zoom 112-122

GO

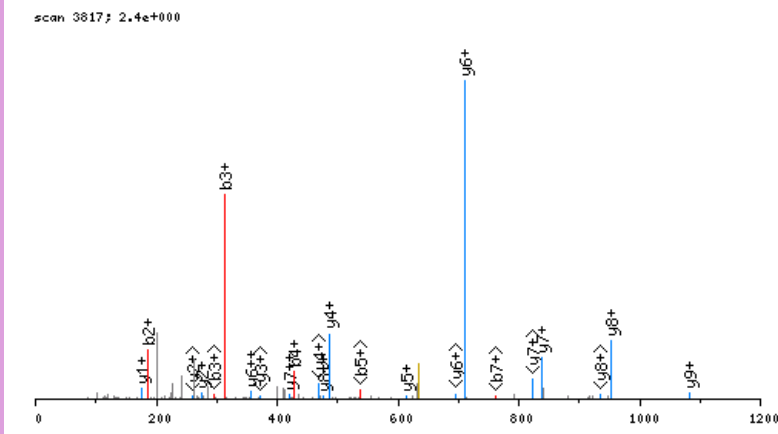

click image to zoom in; click top corners to zoom out [\[precursor±\]](#)

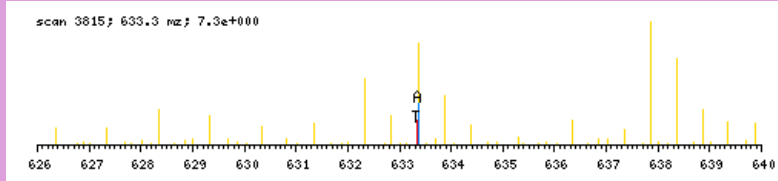

zoomed in precursor plot; T=theoretical m/z, A=acquired m/z

| b <sup>+</sup> | #  | AA # | y <sup>+</sup> | y <sup>2+</sup> |
|----------------|----|------|----------------|-----------------|
| 114.0555       | 1  | A 11 |                |                 |
| 185.0926       | 2  | A 10 | 1152.6377      | 576.8228        |
| 314.1352       | 3  | E 9  | 1081.6006      | 541.3042        |
| 427.2193       | 4  | I 8  | 952.5580       | 476.7829        |
| 555.2779       | 5  | Q 7  | 839.4739       | 420.2409        |
| 652.3306       | 6  | P 6  | 711.4153       | 356.2116        |
| 780.3892       | 7  | Q 5  | 614.3626       | 307.6852        |
| 877.4420       | 8  | P 4  | 486.3040       | 243.6559        |
| 990.5260       | 9  | L 3  | 389.2512       | 195.1295        |
| 1091.5737      | 10 | T 2  | 276.1672       | 138.5875        |
|                | 11 | R 1  | 175.1195       | 88.0637         |

N-term:+43.02

AAETVELHKLKLAELKQECLAR, MH+ 2676.5123, m/z 669.8835  
 H OS G28 P150811 220811-s1.07071.07071.4.dta

X-range:

-

MassTol: Y-zoom:

MassType:

AVG  MONO

Axis:

1  2

Label:

I  M  -

Ions:

a  +  2+  3+

b  +  2+  3+

c  +  2+  3+

x  +  2+  3+

y  +  2+  3+

z  +  2+  3+

hide H<sub>2</sub>O/NH<sub>3</sub>

zoom 112-122

GO

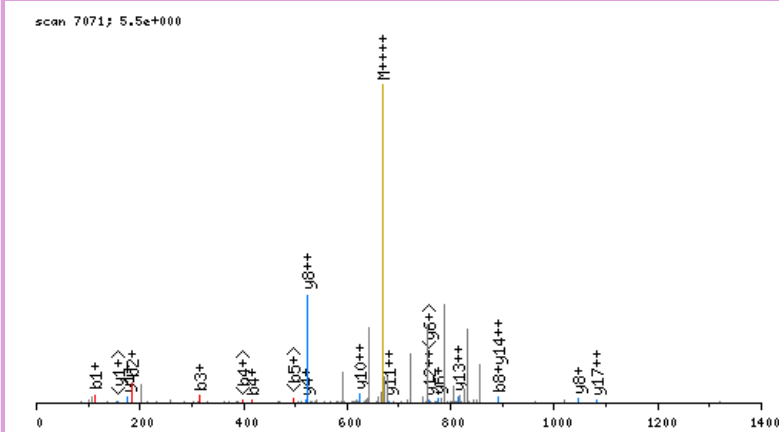

click image to zoom in; click top corners to zoom out [\[precursor±\]](#)

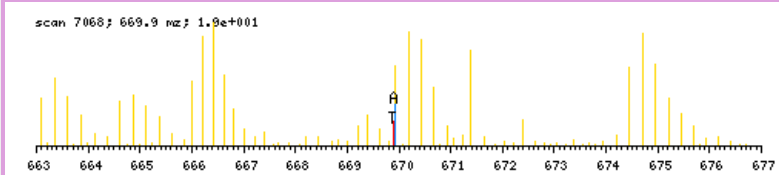

zoomed in precursor plot; T=theoretical m/z, A=acquired m/z

| b <sup>+</sup> | #  | AA | #  | y <sup>+</sup> | y <sup>2+</sup> |
|----------------|----|----|----|----------------|-----------------|
| 114.0555       | 1  | A  | 22 |                |                 |
| 185.0926       | 2  | A  | 21 | 2563.4646      | 1282.2362       |
| 314.1352       | 3  | E  | 20 | 2492.4275      | 1246.7177       |
| 415.1829       | 4  | T  | 19 | 2363.3849      | 1182.1964       |
| 514.2513       | 5  | V  | 18 | 2262.3372      | 1131.6725       |
| 643.2939       | 6  | E  | 17 | 2163.2688      | 1082.1383       |
| 756.3780       | 7  | L  | 16 | 2034.2262      | 1017.6170       |
| 893.4369       | 8  | H  | 15 | 1921.1422      | 961.0750        |
| 1049.5632      | 9  | K  | 14 | 1784.0832      | 892.5455        |
| 1162.6472      | 10 | L  | 13 | 1627.9569      | 814.4824        |
| 1318.7735      | 11 | K  | 12 | 1514.8729      | 757.9404        |
| 1431.8576      | 12 | L  | 11 | 1358.7466      | 679.8772        |
| 1502.8947      | 13 | A  | 10 | 1245.6625      | 623.3352        |
| 1631.9373      | 14 | E  | 9  | 1174.6254      | 587.8166        |
| 1745.0214      | 15 | L  | 8  | 1045.5828      | 523.2953        |
| 1901.1477      | 16 | K  | 7  | 932.4987       | 466.7533        |
| 2029.2063      | 17 | Q  | 6  | 776.3724       | 388.6901        |
| 2158.2489      | 18 | E  | 5  | 648.3139       | 324.6608        |
| 2318.2795      | 19 | C  | 4  | 519.2713       | 260.1396        |
| 2431.3635      | 20 | L  | 3  | 359.2407       | 180.1243        |
| 2502.4006      | 21 | A  | 2  | 246.1566       | 123.5822        |
|                | 22 | R  | 1  | 175.1195       | 88.0637         |

N-term:+43.02 K(9):+156.13  
 K(11):+156.13 K(16):+156.13  
 C(19):+160.03

AAGCEGIAPPTLGER, MH+ 1540.7429, m/z 514.2525  
 H OS G29 P150811 220811-s1.04377.04377.3.dta

X-range:

-

MassTol: Y-zoom:

MassType:

AVG  MONO

Axis:

1  2

Label:

I  M  -

Ions:

a  +  2+  3+

b  +  2+  3+

c  +  2+  3+

x  +  2+  3+

y  +  2+  3+

z  +  2+  3+

hide H<sub>2</sub>O/NH<sub>3</sub>

zoom 112-122

GO

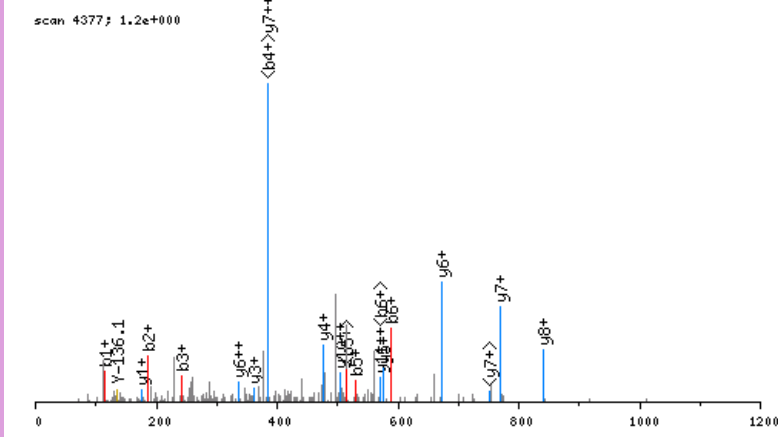

click image to zoom in; click top corners to zoom out [\[precursor±\]](#)

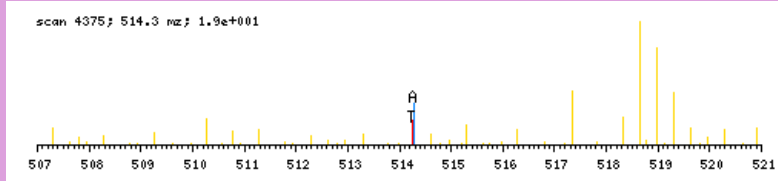

zoomed in precursor plot; T=theoretical m/z, A=acquired m/z

| b <sup>+</sup> | #  | AA # | y <sup>+</sup> | y <sup>2+</sup> |
|----------------|----|------|----------------|-----------------|
| 114.0555       | 1  | A 15 |                |                 |
| 185.0926       | 2  | A 14 | 1427.6952      | 714.3515        |
| 242.1141       | 3  | G 13 | 1356.6581      | 678.8330        |
| 402.1447       | 4  | C 12 | 1299.6367      | 650.3222        |
| 531.1873       | 5  | E 11 | 1139.6061      | 570.3069        |
| 588.2087       | 6  | G 10 | 1010.5635      | 505.7856        |
| 701.2928       | 7  | I 9  | 953.5420       | 477.2749        |
| 772.3299       | 8  | A 8  | 840.4579       | 420.7329        |
| 869.3827       | 9  | P 7  | 769.4208       | 385.2143        |
| 966.4355       | 10 | P 6  | 672.3681       | 336.6879        |
| 1067.4831      | 11 | T 5  | 575.3153       | 288.1616        |
| 1180.5672      | 12 | L 4  | 474.2676       | 237.6377        |
| 1237.5887      | 13 | G 3  | 361.1836       | 181.0957        |
| 1366.6313      | 14 | E 2  | 304.1621       | 152.5850        |
|                | 15 | R 1  | 175.1195       | 88.0637         |

N-term:+43.02 C(4):+160.03

AAGGAVVAPECR, MH+ 1270.6214, m/z 635.8143  
 H OS G29 P150811 220811-s1.03041.03041.2.dta

X-range:

-

MassTol: Y-zoom:

MassType:

AVG  MONO

Axis:

1  2

Label:

I  M  -

Ions:

a  +  2+  3+

b  +  2+  3+

c  +  2+  3+

x  +  2+  3+

y  +  2+  3+

z  +  2+  3+

hide H<sub>2</sub>O/NH<sub>3</sub>

zoom 112-122

GO

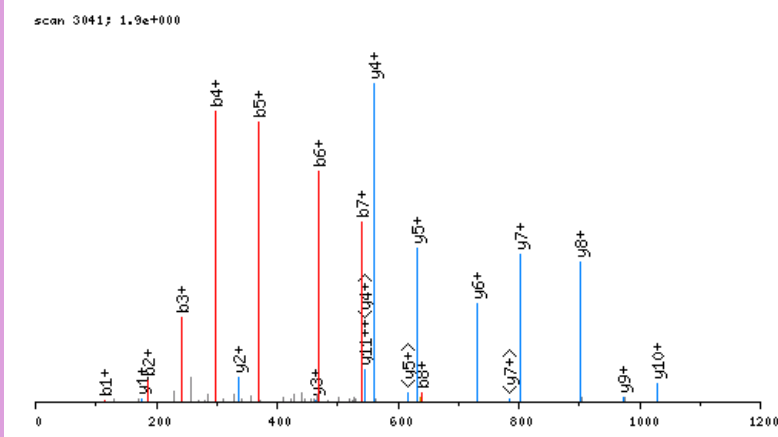

click image to zoom in; click top corners to zoom out [\[precursor±\]](#)

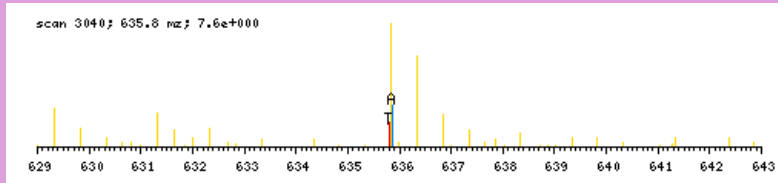

zoomed in precursor plot; T=theoretical m/z, A=acquired m/z

| b <sup>+</sup> | #  | AA # | y <sup>+</sup> | y <sup>2+</sup> |
|----------------|----|------|----------------|-----------------|
| 114.0555       | 1  | A 13 |                |                 |
| 185.0926       | 2  | A 12 | 1157.5737      | 579.2907        |
| 242.1141       | 3  | G 11 | 1086.5366      | 543.7722        |
| 299.1356       | 4  | G 10 | 1029.5151      | 515.2615        |
| 370.1727       | 5  | A 9  | 972.4936       | 486.7507        |
| 469.2411       | 6  | V 8  | 901.4565       | 451.2322        |
| 540.2782       | 7  | A 7  | 802.3881       | 401.6980        |
| 639.3466       | 8  | V 6  | 731.3510       | 366.1794        |
| 710.3837       | 9  | A 5  | 632.2826       | 316.6452        |
| 807.4365       | 10 | P 4  | 561.2455       | 281.1266        |
| 936.4791       | 11 | E 3  | 464.1927       | 232.6003        |
| 1096.5097      | 12 | C 2  | 335.1501       | 168.0790        |
|                | 13 | R 1  | 175.1195       | 88.0637         |

N-term:+43.02 C(12):+160.03



AAGTLTYYPENWR, MH+ 1583.7494, m/z 792.3784  
 H OS G28 P150811 220811-s1.08530.08530.2.dta

X-range:

-

MassTol: Y-zoom:

MassType:

AVG  MONO

Axis:

1  2

Label:

I  M  -

Ions:

a  +  2+  3+

b  +  2+  3+

c  +  2+  3+

x  +  2+  3+

y  +  2+  3+

z  +  2+  3+

hide H<sub>2</sub>O/NH<sub>3</sub>

zoom 112-122

GO

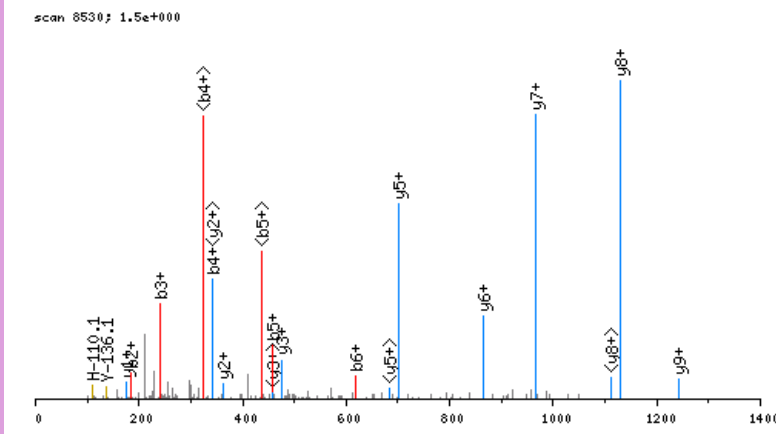

click image to zoom in; click top corners to zoom out [\[precursor±\]](#)

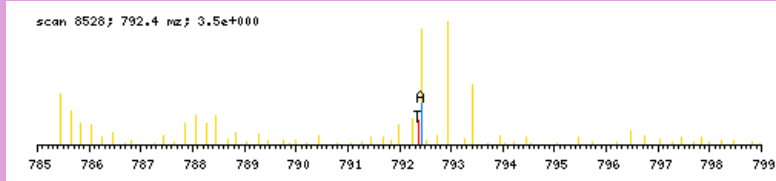

zoomed in precursor plot; T=theoretical m/z, A=acquired m/z

| b <sup>+</sup> | #  | AA # | y <sup>+</sup> | y <sup>2+</sup> |
|----------------|----|------|----------------|-----------------|
| 114.0555       | 1  | A 13 |                |                 |
| 185.0926       | 2  | A 12 | 1470.7018      | 735.8548        |
| 242.1141       | 3  | G 11 | 1399.6646      | 700.3362        |
| 343.1618       | 4  | T 10 | 1342.6432      | 671.8255        |
| 456.2458       | 5  | L 9  | 1241.5955      | 621.3017        |
| 619.3092       | 6  | Y 8  | 1128.5114      | 564.7596        |
| 720.3568       | 7  | T 7  | 965.4481       | 483.2280        |
| 883.4202       | 8  | Y 6  | 864.4004       | 432.7041        |
| 980.4729       | 9  | P 5  | 701.3371       | 351.1725        |
| 1109.5155      | 10 | E 4  | 604.2843       | 302.6461        |
| 1223.5585      | 11 | N 3  | 475.2417       | 238.1248        |
| 1409.6378      | 12 | W 2  | 361.1988       | 181.1033        |
|                | 13 | R 1  | 175.1195       | 88.0637         |

N-term:+43.02

AAGTSNYWEDLR, MH+ 1424.6446, m/z 712.8260  
 H OS G29 P150811 220811-s1.05289.05289.2.dta

X-range:

-

MassTol: Y-zoom:

MassType:

AVG  MONO

Axis:

1  2

Label:

I  M  -

Ions:

a  +  2+  3+

b  +  2+  3+

c  +  2+  3+

x  +  2+  3+

y  +  2+  3+

z  +  2+  3+

hide H<sub>2</sub>O/NH<sub>3</sub>

zoom 112-122

GO

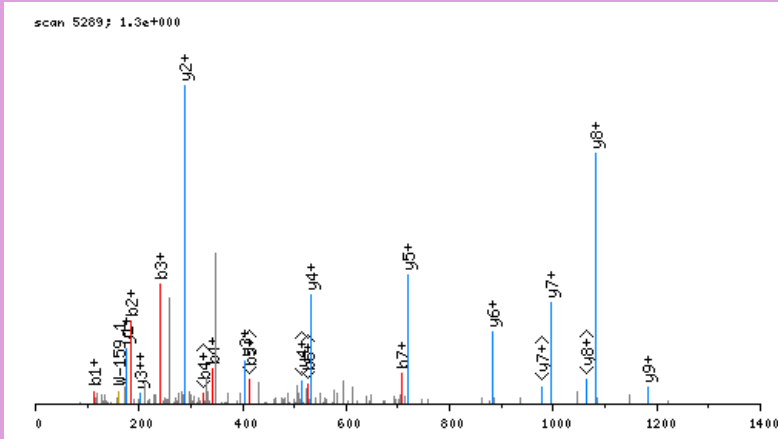

click image to zoom in; click top corners to zoom out [\[precursor±\]](#)

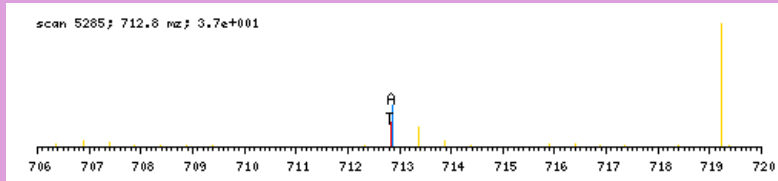

zoomed in precursor plot; T=theoretical m/z, A=acquired m/z

| b <sup>+</sup> | #  | AA # | y <sup>+</sup> | y <sup>2+</sup> |
|----------------|----|------|----------------|-----------------|
| 114.0555       | 1  | A 12 |                |                 |
| 185.0926       | 2  | A 11 | 1311.5970      | 656.3024        |
| 242.1141       | 3  | G 10 | 1240.5598      | 620.7838        |
| 343.1618       | 4  | T 9  | 1183.5384      | 592.2731        |
| 430.1938       | 5  | S 8  | 1082.4907      | 541.7493        |
| 544.2367       | 6  | N 7  | 995.4587       | 498.2332        |
| 707.3001       | 7  | Y 6  | 881.4157       | 441.2118        |
| 893.3794       | 8  | W 5  | 718.3524       | 359.6801        |
| 1022.4220      | 9  | E 4  | 532.2731       | 266.6405        |
| 1137.4489      | 10 | D 3  | 403.2305       | 202.1192        |
| 1250.5330      | 11 | L 2  | 288.2036       | 144.6057        |
|                | 12 | R 1  | 175.1195       | 88.0637         |

N-term:+43.02

AAKPKLYYFNGR, MH+ 1525.8532, m/z 509.2892  
 H OS G27 P150811 220811-s1.04733.04733.3.dta

scan 4733; 5.8e+001

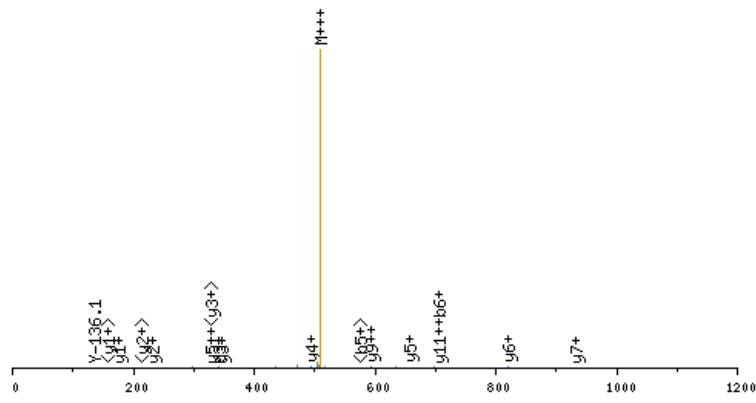

click image to zoom in; click top corners to zoom out [\[precursor±\]](#)

scan 4732; 509.3 mz; 2.2e+001

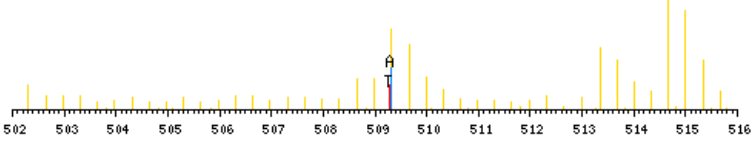

zoomed in precursor plot; T=theoretical m/z, A=acquired m/z

X-range:

-

MassTol: Y-zoom:

MassType:

AVG  MONO

Axis:

1  2

Label:

I  M  -

Ions:

a  +  2+  3+

b  +  2+  3+

c  +  2+  3+

x  +  2+  3+

y  +  2+  3+

z  +  2+  3+

hide H<sub>2</sub>O/NH<sub>3</sub>

zoom 112-122

GO

| b <sup>+</sup> | #  | AA # | y <sup>+</sup> | y <sup>2+</sup> |
|----------------|----|------|----------------|-----------------|
| 114.0555       | 1  | A    | 12             |                 |
| 185.0926       | 2  | A    | 11             | 1412.8055       |
| 341.2189       | 3  | K    | 10             | 1341.7684       |
| 438.2717       | 4  | P    | 9              | 1185.6421       |
| 594.3980       | 5  | K    | 8              | 1088.5893       |
| 707.4821       | 6  | L    | 7              | 932.4630        |
| 870.5454       | 7  | Y    | 6              | 819.3790        |
| 1033.6087      | 8  | Y    | 5              | 656.3156        |
| 1180.6771      | 9  | F    | 4              | 493.2523        |
| 1294.7201      | 10 | N    | 3              | 346.1839        |
| 1351.7415      | 11 | G    | 2              | 232.1410        |
|                | 12 | R    | 1              | 175.1195        |

N-term:+43.02 K(3):+156.13  
 K(5):+156.13

AALALGSAALGAAFATGLLLGKR, MH+ 2183.2916, m/z 546.5784  
 H OS G28 P150811 220811-s1.04291.04291.4.dta

scan 4291; 4.8e+000

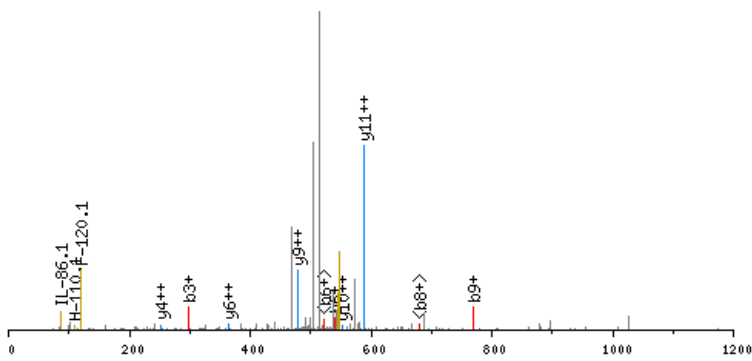

click image to zoom in; click top corners to zoom out [\[precursor±\]](#)

scan 4288; 546.6 m/z; 1.2e+001

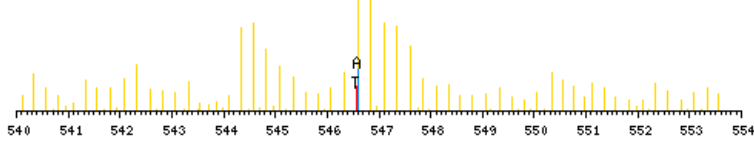

zoomed in precursor plot; T=theoretical m/z, A=acquired m/z

X-range:

-

MassTol: Y-zoom:

MassType:

AVG  MONO

Axis:

1  2

Label:

I  M  -

Ions:

a  +  2+  3+

b  +  2+  3+

c  +  2+  3+

x  +  2+  3+

y  +  2+  3+

z  +  2+  3+

hide H<sub>2</sub>O/NH<sub>3</sub>

zoom 112-122

GO

| b <sup>+</sup> | #  | AA # | y <sup>+</sup> | y <sup>2+</sup> |
|----------------|----|------|----------------|-----------------|
| 114.0555       | 1  | A 23 |                |                 |
| 185.0926       | 2  | A 22 | 2070.2440      | 1035.6259       |
| 298.1767       | 3  | L 21 | 1999.2068      | 1000.1073       |
| 369.2138       | 4  | A 20 | 1886.1228      | 943.5653        |
| 482.2979       | 5  | L 19 | 1815.0857      | 908.0467        |
| 539.3193       | 6  | G 18 | 1702.0016      | 851.5047        |
| 626.3514       | 7  | S 17 | 1644.9801      | 822.9940        |
| 697.3885       | 8  | A 16 | 1557.9481      | 779.4780        |
| 768.4256       | 9  | A 15 | 1486.9110      | 743.9594        |
| 881.5097       | 10 | L 14 | 1415.8739      | 708.4409        |
| 938.5311       | 11 | G 13 | 1302.7898      | 651.8988        |
| 1009.5682      | 12 | A 12 | 1245.7684      | 623.3881        |
| 1080.6053      | 13 | A 11 | 1174.7312      | 587.8695        |
| 1227.6738      | 14 | F 10 | 1103.6941      | 552.3510        |
| 1298.7109      | 15 | A 9  | 956.6257       | 478.8168        |
| 1399.7586      | 16 | T 8  | 885.5886       | 443.2982        |
| 1456.7800      | 17 | G 7  | 784.5409       | 392.7744        |
| 1569.8641      | 18 | L 6  | 727.5195       | 364.2636        |
| 1682.9481      | 19 | L 5  | 614.4354       | 307.7216        |
| 1796.0322      | 20 | L 4  | 501.3513       | 251.1796        |
| 1853.0537      | 21 | G 3  | 388.2673       | 194.6375        |
| 2009.1800      | 22 | K 2  | 331.2458       | 166.1268        |
|                | 23 | R 1  | 175.1195       | 88.0637         |

N-term:+43.02 K(22):+156.13

AALGSSSQNVTEYVVR, MH+ 1722.8663, m/z 574.9603  
 H OS G29 P150811 220811-s1.05167.05167.3.dta

X-range:

-

MassTol: Y-zoom:

MassType:

AVG  MONO

Axis:

1  2

Label:

I  M  -

Ions:

a  +  2+  3+

b  +  2+  3+

c  +  2+  3+

x  +  2+  3+

y  +  2+  3+

z  +  2+  3+

hide H<sub>2</sub>O/NH<sub>3</sub>

zoom 112-122

GO

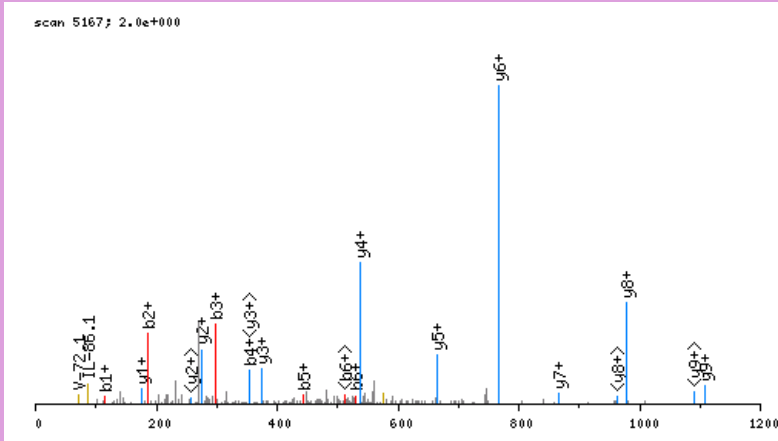

click image to zoom in; click top corners to zoom out [\[precursor±\]](#)

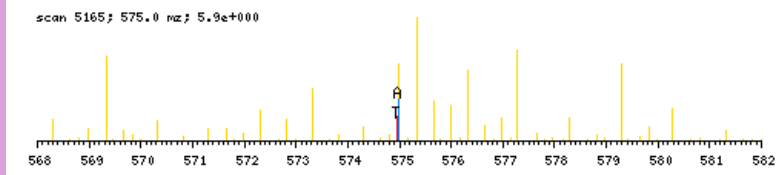

zoomed in precursor plot; T=theoretical m/z, A=acquired m/z

| b <sup>+</sup> | #  | AA # | y <sup>+</sup> | y <sup>2+</sup> |
|----------------|----|------|----------------|-----------------|
| 114.0555       | 1  | A 16 |                |                 |
| 185.0926       | 2  | A 15 | 1609.8186      | 805.4132        |
| 298.1767       | 3  | L 14 | 1538.7815      | 769.8946        |
| 355.1982       | 4  | G 13 | 1425.6974      | 713.3526        |
| 442.2302       | 5  | S 12 | 1368.6759      | 684.8419        |
| 529.2622       | 6  | S 11 | 1281.6439      | 641.3259        |
| 616.2942       | 7  | S 10 | 1194.6119      | 597.8099        |
| 744.3528       | 8  | Q 9  | 1107.5798      | 554.2938        |
| 858.3957       | 9  | N 8  | 979.5213       | 490.2645        |
| 957.4642       | 10 | V 7  | 865.4783       | 433.2431        |
| 1058.5118      | 11 | T 6  | 766.4099       | 383.7089        |
| 1187.5544      | 12 | E 5  | 665.3623       | 333.1850        |
| 1350.6178      | 13 | Y 4  | 536.3197       | 268.6637        |
| 1449.6862      | 14 | V 3  | 373.2563       | 187.1321        |
| 1548.7546      | 15 | V 2  | 274.1879       | 137.5979        |
|                | 16 | R 1  | 175.1195       | 88.0637         |

N-term:+43.02

AALVVSETAEPGSR, MH+ 1428.7335, m/z 714.8704  
 H OS G29 P150811 220811-s1.04692.04692.2.dta

X-range:

-

MassTol: Y-zoom:

MassType:

AVG  MONO

Axis:

1  2

Label:

I  M  -

Ions:

a  +  2+  3+

b  +  2+  3+

c  +  2+  3+

x  +  2+  3+

y  +  2+  3+

z  +  2+  3+

hide H<sub>2</sub>O/NH<sub>3</sub>

zoom 112-122

GO

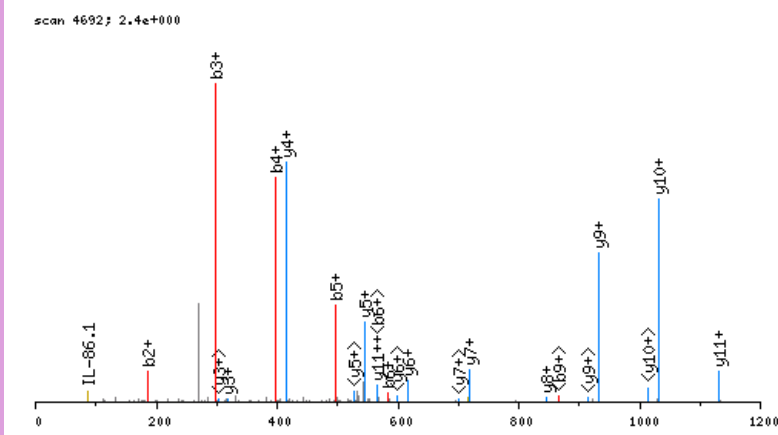

click image to zoom in; click top corners to zoom out [\[precursor±\]](#)

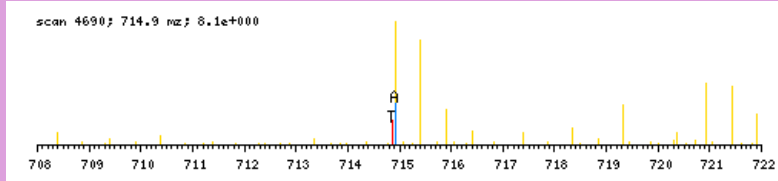

zoomed in precursor plot; T=theoretical m/z, A=acquired m/z

| b <sup>+</sup> | #  | AA # | y <sup>+</sup> | y <sup>2+</sup> |
|----------------|----|------|----------------|-----------------|
| 114.0555       | 1  | A 14 |                |                 |
| 185.0926       | 2  | A 13 | 1315.6858      | 658.3468        |
| 298.1767       | 3  | L 12 | 1244.6487      | 622.8282        |
| 397.2451       | 4  | V 11 | 1131.5646      | 566.2862        |
| 496.3135       | 5  | V 10 | 1032.4962      | 516.7520        |
| 583.3455       | 6  | S 9  | 933.4278       | 467.2178        |
| 712.3881       | 7  | E 8  | 846.3957       | 423.7018        |
| 813.4358       | 8  | T 7  | 717.3531       | 359.1805        |
| 884.4729       | 9  | A 6  | 616.3055       | 308.6566        |
| 1013.5155      | 10 | E 5  | 545.2683       | 273.1381        |
| 1110.5683      | 11 | P 4  | 416.2258       | 208.6168        |
| 1167.5898      | 12 | G 3  | 319.1730       | 160.0904        |
| 1254.6218      | 13 | S 2  | 262.1515       | 131.5797        |
|                | 14 | R 1  | 175.1195       | 88.0637         |

N-term:+43.02

AALYGGVEGGTR, MH+ 1249.6177, m/z 625.3125  
 H OS G29 P150811 220811-s1.03934.03934.2.dta

X-range:

-

MassTol: Y-zoom:

MassType:

AVG  MONO

Axis:

1  2

Label:

I  M  -

Ions:

a  +  2+  3+

b  +  2+  3+

c  +  2+  3+

x  +  2+  3+

y  +  2+  3+

z  +  2+  3+

hide H<sub>2</sub>O/NH<sub>3</sub>

zoom 112-122

GO

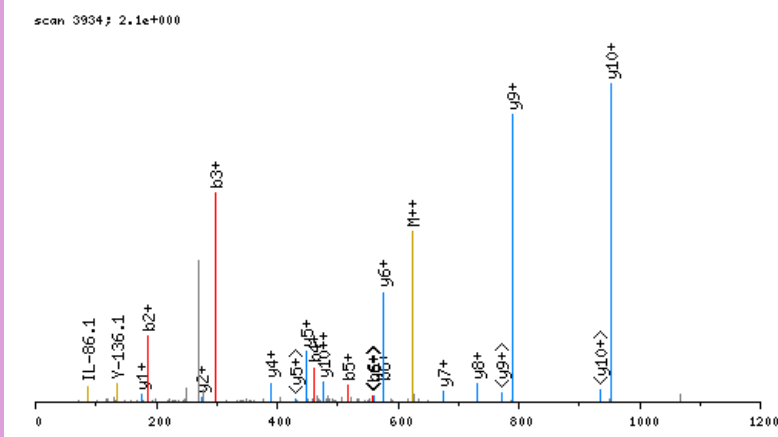

click image to zoom in; click top corners to zoom out [\[precursor±\]](#)

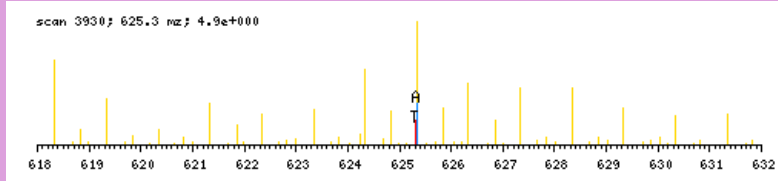

zoomed in precursor plot; T=theoretical m/z, A=acquired m/z

| b <sup>+</sup> | #  | AA # | y <sup>+</sup> | y <sup>2+</sup> |
|----------------|----|------|----------------|-----------------|
| 114.0555       | 1  | A 13 |                |                 |
| 185.0926       | 2  | A 12 | 1136.5700      | 568.7889        |
| 298.1767       | 3  | L 11 | 1065.5329      | 533.2704        |
| 461.2400       | 4  | Y 10 | 952.4488       | 476.7283        |
| 518.2615       | 5  | G 9  | 789.3855       | 395.1967        |
| 575.2829       | 6  | G 8  | 732.3640       | 366.6859        |
| 674.3514       | 7  | V 7  | 675.3426       | 338.1752        |
| 803.3940       | 8  | E 6  | 576.2742       | 288.6410        |
| 860.4154       | 9  | G 5  | 447.2316       | 224.1197        |
| 917.4369       | 10 | G 4  | 390.2101       | 195.6090        |
| 974.4583       | 11 | G 3  | 333.1886       | 167.0982        |
| 1075.5060      | 12 | T 2  | 276.1672       | 138.5875        |
|                | 13 | R 1  | 175.1195       | 88.0637         |

N-term:+43.02

AANATTNPSQLLPLELVDKIGSR, MH+ 2638.3874, m/z 880.1340  
 H OS G24 P150811 220811-s1.04966.04966.3.dta

scan 4966; 3.1e+000

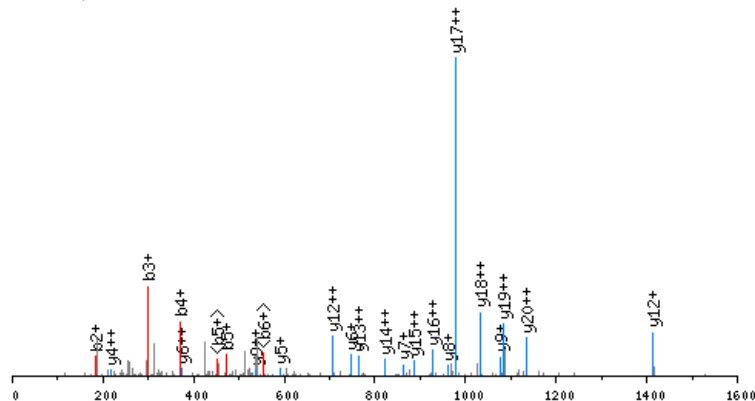

click image to zoom in; click top corners to zoom out [\[precursor±\]](#)

scan 4965; 880.1 m/z; 1.7e+001

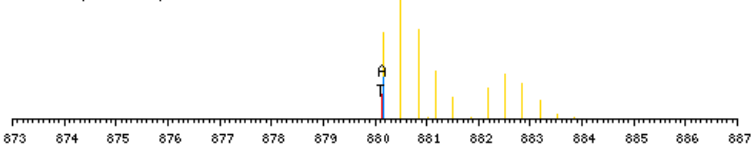

zoomed in precursor plot; T=theoretical m/z, A=acquired m/z

X-range:

-

MassTol: Y-zoom:

MassType:

AVG  MONO

Axis:

1  2

Label:

I  M  -

Ions:

a  +  2+  3+

b  +  2+  3+

c  +  2+  3+

x  +  2+  3+

y  +  2+  3+

z  +  2+  3+

hide H<sub>2</sub>O/NH<sub>3</sub>

zoom 112-122

GO

| b <sup>+</sup> | #  | AA # | y <sup>+</sup> | y <sup>2+</sup> |
|----------------|----|------|----------------|-----------------|
| 114.0555       | 1  | A 24 |                |                 |
| 185.0926       | 2  | A 23 | 2525.3397      | 1263.1738       |
| 299.1356       | 3  | N 22 | 2454.3026      | 1227.6552       |
| 370.1727       | 4  | A 21 | 2340.2597      | 1170.6338       |
| 471.2203       | 5  | T 20 | 2269.2226      | 1135.1152       |
| 572.2680       | 6  | T 19 | 2168.1749      | 1084.5914       |
| 686.3110       | 7  | N 18 | 2067.1272      | 1034.0675       |
| 783.3637       | 8  | P 17 | 1953.0843      | 977.0461        |
| 870.3957       | 9  | S 16 | 1856.0315      | 928.5197        |
| 998.4543       | 10 | Q 15 | 1768.9995      | 885.0037        |
| 1111.5384      | 11 | L 14 | 1640.9409      | 820.9744        |
| 1224.6225      | 12 | L 13 | 1527.8569      | 764.4323        |
| 1321.6752      | 13 | P 12 | 1414.7728      | 707.8903        |
| 1434.7593      | 14 | L 11 | 1317.7200      | 659.3639        |
| 1563.8019      | 15 | E 10 | 1204.6360      | 602.8219        |
| 1676.8859      | 16 | L 9  | 1075.5934      | 538.3006        |
| 1775.9544      | 17 | V 8  | 962.5093       | 481.7586        |
| 1890.9813      | 18 | D 7  | 863.4409       | 432.2244        |
| 2047.1076      | 19 | K 6  | 748.4140       | 374.7109        |
| 2207.1382      | 20 | C 5  | 592.2877       | 296.6477        |
| 2320.2223      | 21 | I 4  | 432.2571       | 216.6324        |
| 2377.2437      | 22 | G 3  | 319.1730       | 160.0904        |
| 2464.2757      | 23 | S 2  | 262.1515       | 131.5797        |
|                | 24 | R 1  | 175.1195       | 88.0637         |

N-term:+43.02 K(19) :+156.13  
 C(20) :+160.03



AAPAAPAAGETGPDAR, MH+ 1464.7083, m/z 732.8578  
 H OS G29 P150811 220811-s1.02680.02680.2.dta

X-range:

-

MassTol: Y-zoom:

MassType:

AVG  MONO

Axis:

1  2

Label:

I  M  -

Ions:

a  +  2+  3+

b  +  2+  3+

c  +  2+  3+

x  +  2+  3+

y  +  2+  3+

z  +  2+  3+

hide H<sub>2</sub>O/NH<sub>3</sub>

zoom 112-122

GO

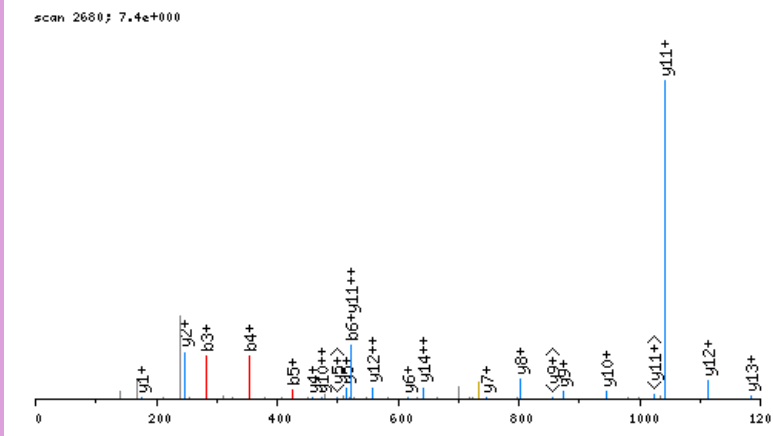

click image to zoom in; click top corners to zoom out [\[precursor±\]](#)

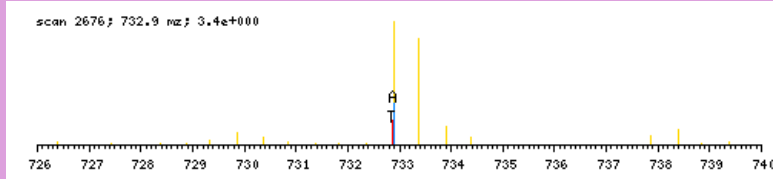

zoomed in precursor plot; T=theoretical m/z, A=acquired m/z

| b <sup>+</sup> | #  | AA # | y <sup>+</sup> | y <sup>2+</sup> |
|----------------|----|------|----------------|-----------------|
| 114.0555       | 1  | A 16 |                |                 |
| 185.0926       | 2  | A 15 | 1351.6606      | 676.3342        |
| 282.1454       | 3  | P 14 | 1280.6235      | 640.8157        |
| 353.1825       | 4  | A 13 | 1183.5707      | 592.2893        |
| 424.2196       | 5  | A 12 | 1112.5336      | 556.7707        |
| 521.2724       | 6  | P 11 | 1041.4965      | 521.2522        |
| 592.3095       | 7  | A 10 | 944.4437       | 472.7258        |
| 663.3466       | 8  | A 9  | 873.4066       | 437.2072        |
| 720.3681       | 9  | G 8  | 802.3695       | 401.6887        |
| 849.4107       | 10 | E 7  | 745.3481       | 373.1779        |
| 950.4583       | 11 | T 6  | 616.3055       | 308.6566        |
| 1007.4798      | 12 | G 5  | 515.2578       | 258.1328        |
| 1104.5326      | 13 | P 4  | 458.2363       | 229.6221        |
| 1219.5595      | 14 | D 3  | 361.1836       | 181.0957        |
| 1290.5966      | 15 | A 2  | 246.1566       | 123.5822        |
|                | 16 | R 1  | 175.1195       | 88.0637         |

N-term:+43.02

AAPAGGGGSAVSVLAPNGR, MH+ 1650.8564, m/z 550.9570  
 H OS G29 P150811 220811-s1.04161.04161.3.dta

scan 4161; 2.3e+000

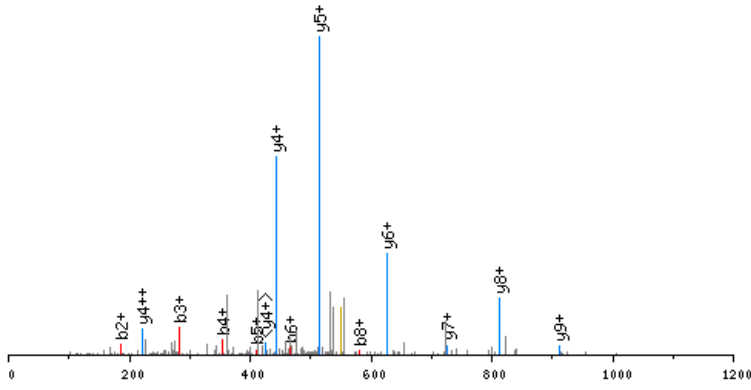

click image to zoom in; click top corners to zoom out [\[precursor±\]](#)

scan 4160; 551.0 m/z; 7.3e+000

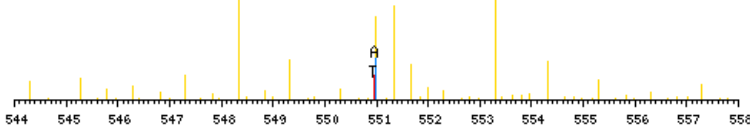

zoomed in precursor plot; T=theoretical m/z, A=acquired m/z

X-range:

-

MassTol: Y-zoom:

MassType:

AVG  MONO

Axis:

1  2

Label:

I  M  -

Ions:

a  +  2+  3+

b  +  2+  3+

c  +  2+  3+

x  +  2+  3+

y  +  2+  3+

z  +  2+  3+

hide H<sub>2</sub>O/NH<sub>3</sub>

zoom 112-122

GO

| b <sup>+</sup> | #  | AA # | y <sup>+</sup> | y <sup>2+</sup> |
|----------------|----|------|----------------|-----------------|
| 114.0555       | 1  | A 19 |                |                 |
| 185.0926       | 2  | A 18 | 1537.8087      | 769.4083        |
| 282.1454       | 3  | P 17 | 1466.7716      | 733.8897        |
| 353.1825       | 4  | A 16 | 1369.7188      | 685.3633        |
| 410.2040       | 5  | G 15 | 1298.6817      | 649.8448        |
| 467.2254       | 6  | G 14 | 1241.6602      | 621.3340        |
| 524.2469       | 7  | G 13 | 1184.6388      | 592.8233        |
| 581.2684       | 8  | G 12 | 1127.6173      | 564.3126        |
| 668.3004       | 9  | S 11 | 1070.5958      | 535.8018        |
| 739.3375       | 10 | A 10 | 983.5638       | 492.2858        |
| 838.4059       | 11 | V 9  | 912.5267       | 456.7673        |
| 925.4379       | 12 | S 8  | 813.4583       | 407.2331        |
| 1024.5064      | 13 | V 7  | 726.4262       | 363.7170        |
| 1137.5904      | 14 | L 6  | 627.3578       | 314.1828        |
| 1208.6275      | 15 | A 5  | 514.2738       | 257.6408        |
| 1305.6803      | 16 | P 4  | 443.2367       | 222.1222        |
| 1419.7232      | 17 | N 3  | 346.1839       | 173.5959        |
| 1476.7447      | 18 | G 2  | 232.1410       | 116.5744        |
|                | 19 | R 1  | 175.1195       | 88.0637         |

N-term:+43.02

X-range:

-

MassTol: Y-zoom:

MassType:

AVG  MONO

Axis:

1  2

Label:

I  M  -

Ions:

a  +  2+  3+

b  +  2+  3+

c  +  2+  3+

x  +  2+  3+

y  +  2+  3+

z  +  2+  3+

hide H<sub>2</sub>O/NH<sub>3</sub>

zoom 112-122

GO

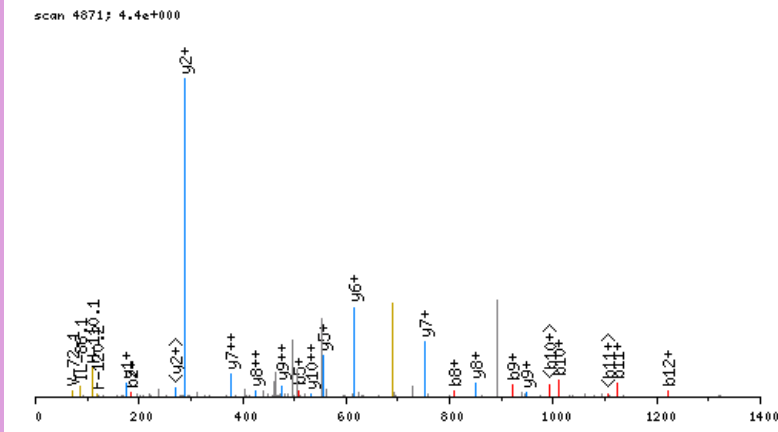

click image to zoom in; click top corners to zoom out [\[precursor±\]](#)

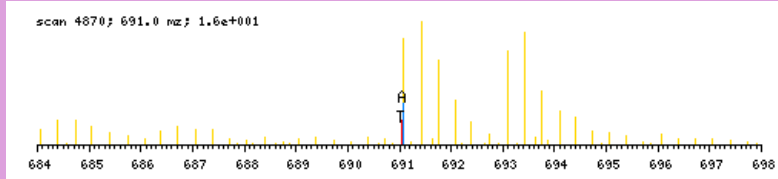

zoomed in precursor plot; T=theoretical m/z, A=acquired m/z

| b <sup>+</sup> | #  | AA # | y <sup>+</sup> | y <sup>2+</sup> |
|----------------|----|------|----------------|-----------------|
| 114.0555       | 1  | A 20 |                |                 |
| 185.0926       | 2  | A 19 | 1958.0824      | 979.5451        |
| 282.1454       | 3  | P 18 | 1887.0453      | 944.0265        |
| 353.1825       | 4  | A 17 | 1789.9925      | 895.5002        |
| 509.3088       | 5  | K 16 | 1718.9554      | 859.9816        |
| 566.3303       | 6  | G 15 | 1562.8291      | 781.9185        |
| 695.3729       | 7  | E 14 | 1505.8076      | 753.4077        |
| 809.4158       | 8  | N 13 | 1376.7650      | 688.8864        |
| 922.4999       | 9  | L 12 | 1262.7221      | 631.8650        |
| 1009.5319      | 10 | S 11 | 1149.6380      | 575.3229        |
| 1122.6159      | 11 | L 10 | 1062.6060      | 531.8069        |
| 1221.6844      | 12 | V 9  | 949.5219       | 475.2649        |
| 1320.7528      | 13 | V 8  | 850.4535       | 425.7307        |
| 1457.8117      | 14 | H 7  | 751.3851       | 376.1965        |
| 1514.8331      | 15 | G 6  | 614.3262       | 307.6670        |
| 1611.8859      | 16 | P 5  | 557.3047       | 279.1563        |
| 1668.9074      | 17 | G 4  | 460.2520       | 230.6299        |
| 1783.9343      | 18 | D 3  | 403.2305       | 202.1192        |
| 1897.0184      | 19 | I 2  | 288.2036       | 144.6057        |
|                | 20 | R 1  | 175.1195       | 88.0637         |

N-term:+43.02 K(5):+156.13

AAPPGYFVSQVSCR, MH+ 1853.8492, m/z 618.6212  
 H OS G29 P150811 220811-s1.05066.05066.3.dta

X-range:

-

MassTol: Y-zoom:

MassType:

AVG  MONO

Axis:

1  2

Label:

I  M  -

Ions:

a  +  2+  3+

b  +  2+  3+

c  +  2+  3+

x  +  2+  3+

y  +  2+  3+

z  +  2+  3+

hide H<sub>2</sub>O/NH<sub>3</sub>

zoom 112-122

GO

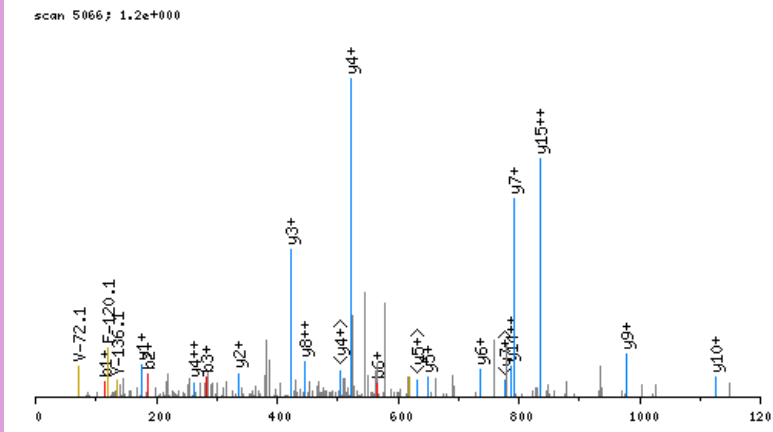

click image to zoom in; click top corners to zoom out [\[precursor±\]](#)

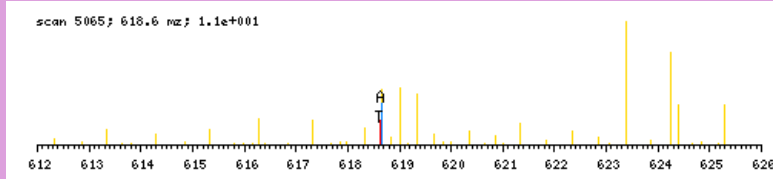

zoomed in precursor plot; T=theoretical m/z, A=acquired m/z

| b <sup>+</sup> | #  | AA # | y <sup>+</sup> | y <sup>2+</sup> |
|----------------|----|------|----------------|-----------------|
| 114.0555       | 1  | A 17 |                |                 |
| 185.0926       | 2  | A 16 | 1740.8015      | 870.9047        |
| 282.1454       | 3  | P 15 | 1669.7644      | 835.3861        |
| 379.1982       | 4  | P 14 | 1572.7116      | 786.8597        |
| 436.2196       | 5  | G 13 | 1475.6589      | 738.3333        |
| 565.2622       | 6  | E 12 | 1418.6374      | 709.8226        |
| 728.3255       | 7  | Y 11 | 1289.5948      | 645.3013        |
| 875.3940       | 8  | F 10 | 1126.5315      | 563.7696        |
| 962.4260       | 9  | S 9  | 979.4631       | 490.2354        |
| 1061.4944      | 10 | V 8  | 892.4310       | 446.7194        |
| 1118.5159      | 11 | G 7  | 793.3626       | 397.1852        |
| 1205.5479      | 12 | S 6  | 736.3411       | 368.6745        |
| 1333.6065      | 13 | Q 5  | 649.3091       | 325.1585        |
| 1432.6749      | 14 | V 4  | 521.2505       | 261.1292        |
| 1519.7069      | 15 | S 3  | 422.1821       | 211.5950        |
| 1679.7375      | 16 | C 2  | 335.1501       | 168.0790        |
|                | 17 | R 1  | 175.1195       | 88.0637         |

N-term:+43.02 C(16):+160.03

AAPQDVHVR, MH+ 1034.5383, m/z 517.7728  
 H OS G25 P150811 220811-s1.02603.02603.2.dta

X-range:

-

MassTol: Y-zoom:

MassType:

AVG  MONO

Axis:

1  2

Label:

I  M  -

Ions:

a  +  2+  3+

b  +  2+  3+

c  +  2+  3+

x  +  2+  3+

y  +  2+  3+

z  +  2+  3+

hide H<sub>2</sub>O/NH<sub>3</sub>

zoom 112-122

GO

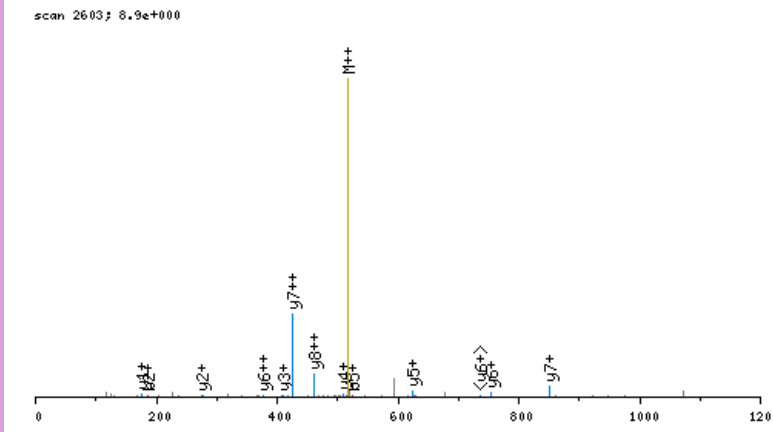

click image to zoom in; click top corners to zoom out [\[precursor±\]](#)

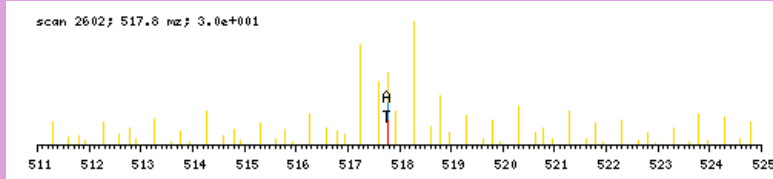

zoomed in precursor plot; T=theoretical m/z, A=acquired m/z

| b <sup>+</sup> | # | AA # | y <sup>+</sup> | y <sup>2+</sup> |
|----------------|---|------|----------------|-----------------|
| 114.0555       | 1 | A 9  |                |                 |
| 185.0926       | 2 | A 8  | 921.4906       | 461.2492        |
| 282.1454       | 3 | P 7  | 850.4535       | 425.7307        |
| 410.2040       | 4 | Q 6  | 753.4008       | 377.2043        |
| 525.2309       | 5 | D 5  | 625.3422       | 313.1750        |
| 624.2993       | 6 | V 4  | 510.3152       | 255.6615        |
| 761.3582       | 7 | H 3  | 411.2468       | 206.1273        |
| 860.4267       | 8 | V 2  | 274.1879       | 137.5979        |
|                | 9 | R 1  | 175.1195       | 88.0637         |

N-term:+43.02

AAPSEPAGEFPR, MH+ 1141.5642, m/z 571.2857  
 H OS G29 P150811 220811-s1.03651.03651.2.dta

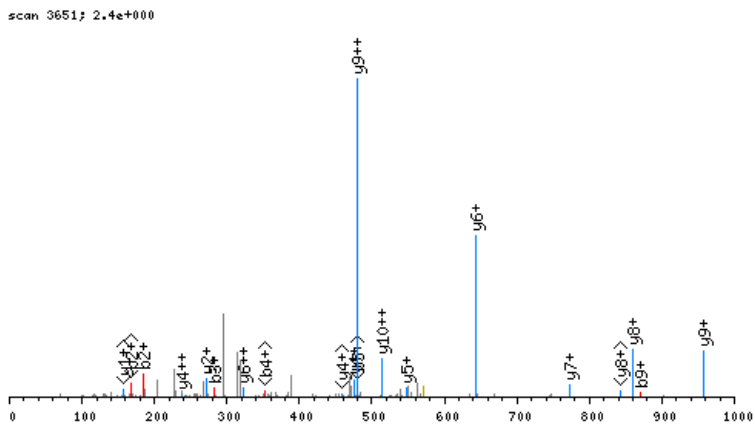

click image to zoom in; click top corners to zoom out [\[precursor±\]](#)

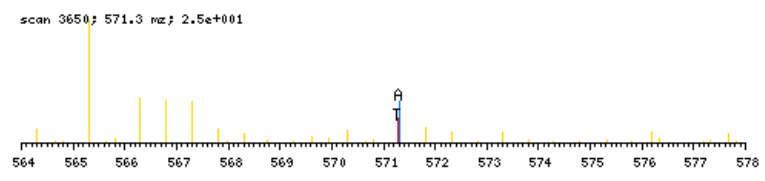

zoomed in precursor plot; T=theoretical m/z, A=acquired m/z

X-range:

-

MassTol: Y-zoom:

MassType:

AVG  MONO

Axis:

1  2

Label:

I  M  -

Ions:

a  +  2+  3+

b  +  2+  3+

c  +  2+  3+

x  +  2+  3+

y  +  2+  3+

z  +  2+  3+

hide H<sub>2</sub>O/NH<sub>3</sub>

zoom 112-122

GO

| b <sup>+</sup> | #  | AA | #  | y <sup>+</sup> | y <sup>2+</sup> |
|----------------|----|----|----|----------------|-----------------|
| 114.0555       | 1  | A  | 11 |                |                 |
| 185.0926       | 2  | A  | 10 | 1028.5165      | 514.7622        |
| 282.1454       | 3  | P  | 9  | 957.4794       | 479.2436        |
| 369.1774       | 4  | S  | 8  | 860.4266       | 430.7172        |
| 498.2200       | 5  | E  | 7  | 773.3946       | 387.2012        |
| 595.2728       | 6  | P  | 6  | 644.3520       | 322.6799        |
| 666.3099       | 7  | A  | 5  | 547.2993       | 274.1535        |
| 723.3314       | 8  | G  | 4  | 476.2621       | 238.6350        |
| 870.3998       | 9  | F  | 3  | 419.2407       | 210.1243        |
| 967.4525       | 10 | P  | 2  | 272.1723       | 136.5900        |
|                | 11 | R  | 1  | 175.1195       | 88.0637         |

N-term:+43.02

AAPSVPTPLYGHVGR, MH+ 1563.8284, m/z 521.9476  
 H OS G25 P150811 220811-s1.06133.06133.3.dta

X-range:

-

MassTol: Y-zoom:

MassType:

AVG  MONO

Axis:

1  2

Label:

I  M  -

Ions:

a  +  2+  3+

b  +  2+  3+

c  +  2+  3+

x  +  2+  3+

y  +  2+  3+

z  +  2+  3+

hide H<sub>2</sub>O/NH<sub>3</sub>

zoom 112-122

GO

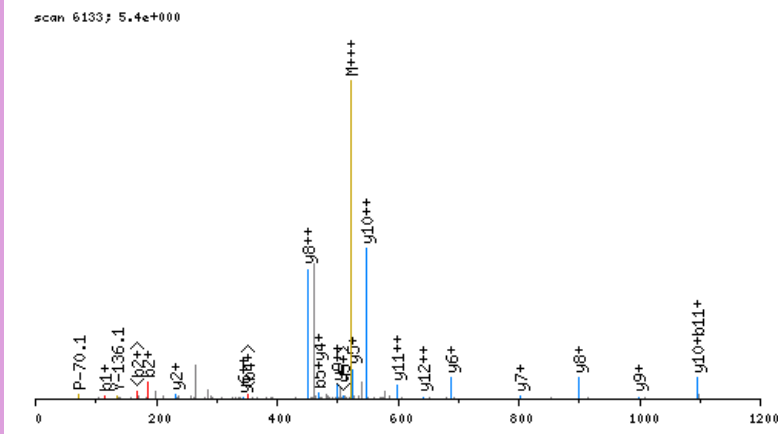

click image to zoom in; click top corners to zoom out [\[precursor±\]](#)

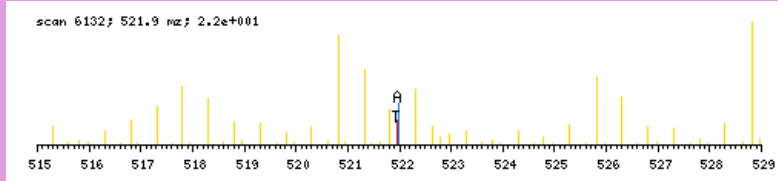

zoomed in precursor plot; T=theoretical m/z, A=acquired m/z

| b <sup>+</sup> | #  | AA # | y <sup>+</sup> | y <sup>2+</sup> |
|----------------|----|------|----------------|-----------------|
| 114.0555       | 1  | A 15 |                |                 |
| 185.0926       | 2  | A 14 | 1450.7807      | 725.8942        |
| 282.1454       | 3  | P 13 | 1379.7436      | 690.3757        |
| 369.1774       | 4  | S 12 | 1282.6908      | 641.8493        |
| 468.2458       | 5  | V 11 | 1195.6588      | 598.3333        |
| 565.2986       | 6  | P 10 | 1096.5904      | 548.7991        |
| 666.3463       | 7  | T 9  | 999.5376       | 500.2727        |
| 763.3990       | 8  | P 8  | 898.4899       | 449.7489        |
| 876.4831       | 9  | L 7  | 801.4371       | 401.2225        |
| 1039.5464      | 10 | Y 6  | 688.3531       | 344.6805        |
| 1096.5679      | 11 | G 5  | 525.2898       | 263.1488        |
| 1233.6268      | 12 | H 4  | 468.2683       | 234.6381        |
| 1332.6952      | 13 | V 3  | 331.2094       | 166.1086        |
| 1389.7167      | 14 | G 2  | 232.1410       | 116.5744        |
|                | 15 | R 1  | 175.1195       | 88.0637         |

N-term:+43.02

AAQALAAQAVASR, MH+ 1269.6915, m/z 635.3494  
 H OS G29 P150811 220811-s1.04679.04679.2.dta

X-range:

-

MassTol: Y-zoom:

MassType:

AVG  MONO

Axis:

1  2

Label:

I  M  -

Ions:

a  +  2+  3+

b  +  2+  3+

c  +  2+  3+

x  +  2+  3+

y  +  2+  3+

z  +  2+  3+

hide H<sub>2</sub>O/NH<sub>3</sub>

zoom 112-122

GO

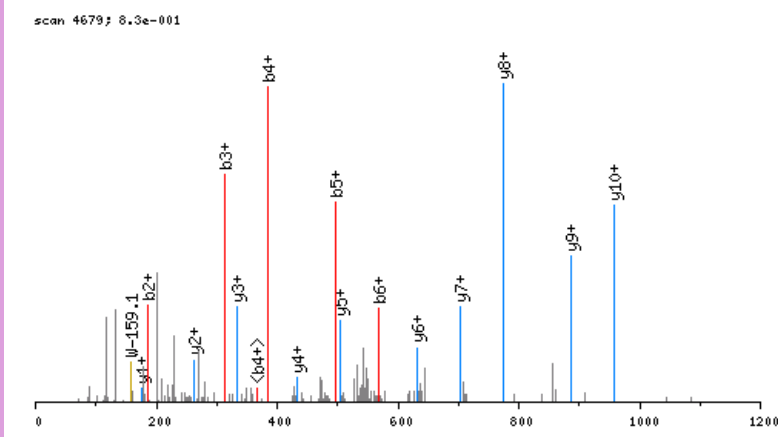

click image to zoom in; click top corners to zoom out [\[precursor±\]](#)

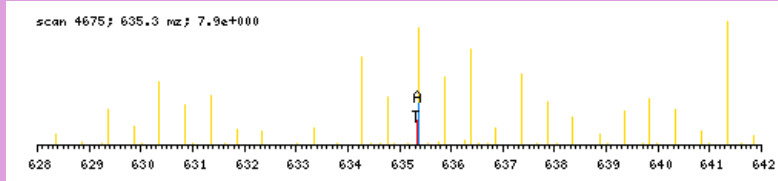

zoomed in precursor plot; T=theoretical m/z, A=acquired m/z

| b <sup>+</sup> | #  | AA # | y <sup>+</sup> | y <sup>2+</sup> |
|----------------|----|------|----------------|-----------------|
| 114.0555       | 1  | A 13 |                |                 |
| 185.0926       | 2  | A 12 | 1156.6438      | 578.8258        |
| 313.1512       | 3  | Q 11 | 1085.6067      | 543.3073        |
| 384.1883       | 4  | A 10 | 957.5482       | 479.2780        |
| 497.2724       | 5  | L 9  | 886.5110       | 443.7594        |
| 568.3095       | 6  | A 8  | 773.4270       | 387.2174        |
| 639.3466       | 7  | A 7  | 702.3899       | 351.6988        |
| 767.4052       | 8  | Q 6  | 631.3527       | 316.1803        |
| 838.4423       | 9  | A 5  | 503.2942       | 252.1510        |
| 937.5107       | 10 | V 4  | 432.2571       | 216.6324        |
| 1008.5478      | 11 | A 3  | 333.1886       | 167.0982        |
| 1095.5799      | 12 | S 2  | 262.1515       | 131.5797        |
|                | 13 | R 1  | 175.1195       | 88.0637         |

N-term:+43.02



AAQAVSLLR, MH+ 970.5686, m/z 485.7879  
 H OS G29 P150811 220811-s1.05286.05286.2.dta

X-range:

-

MassTol: Y-zoom:

MassType:

AVG  MONO

Axis:

1  2

Label:

I  M  -

Ions:

a  +  2+  3+

b  +  2+  3+

c  +  2+  3+

x  +  2+  3+

y  +  2+  3+

z  +  2+  3+

hide H<sub>2</sub>O/NH<sub>3</sub>

zoom 112-122

GO

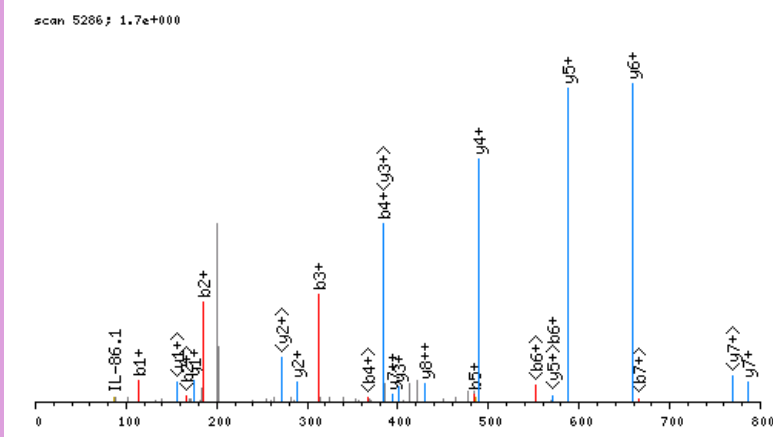

click image to zoom in; click top corners to zoom out [\[precursor±\]](#)

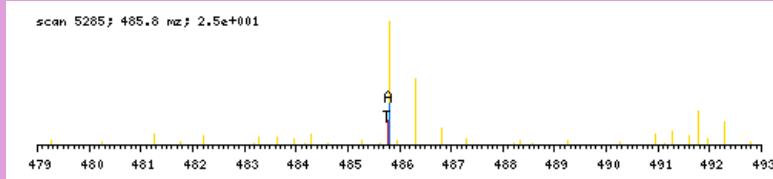

zoomed in precursor plot; T=theoretical m/z, A=acquired m/z

| b <sup>+</sup> | # | AA # | y <sup>+</sup> | y <sup>2+</sup> |
|----------------|---|------|----------------|-----------------|
| 114.0555       | 1 | A 9  |                |                 |
| 185.0926       | 2 | A 8  | 857.5209       | 429.2644        |
| 313.1512       | 3 | Q 7  | 786.4838       | 393.7458        |
| 384.1883       | 4 | A 6  | 658.4252       | 329.7165        |
| 483.2567       | 5 | V 5  | 587.3881       | 294.1979        |
| 570.2888       | 6 | S 4  | 488.3197       | 244.6637        |
| 683.3728       | 7 | L 3  | 401.2876       | 201.1477        |
| 796.4569       | 8 | L 2  | 288.2036       | 144.6057        |
|                | 9 | R 1  | 175.1195       | 88.0637         |

N-term:+43.02

AASAASSEHFPEKLHEIFR, MH+ 2100.0515, m/z 525.7683  
 H OS G28 P150811 220811-s1.07057.07057.4.dta

X-range:

-

MassTol: Y-zoom:

MassType:

AVG  MONO

Axis:

1  2

Label:

I  M  -

Ions:

a  +  2+  3+

b  +  2+  3+

c  +  2+  3+

x  +  2+  3+

y  +  2+  3+

z  +  2+  3+

hide H<sub>2</sub>O/NH<sub>3</sub>

zoom 112-122

GO

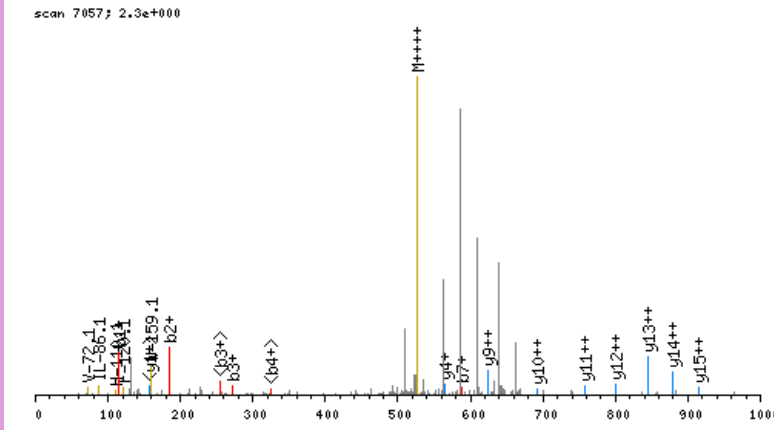

click image to zoom in; click top corners to zoom out [\[precursor±\]](#)

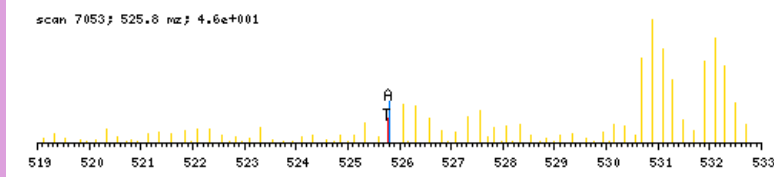

zoomed in precursor plot; T=theoretical m/z, A=acquired m/z

| b <sup>+</sup> | #  | AA # | y <sup>+</sup> | y <sup>2+</sup> |
|----------------|----|------|----------------|-----------------|
| 114.0555       | 1  | A 18 |                |                 |
| 185.0926       | 2  | A 17 | 1987.0038      | 994.0058        |
| 272.1247       | 3  | S 16 | 1915.9667      | 958.4872        |
| 343.1618       | 4  | A 15 | 1828.9346      | 914.9712        |
| 414.1989       | 5  | A 14 | 1757.8975      | 879.4527        |
| 501.2309       | 6  | S 13 | 1686.8604      | 843.9341        |
| 588.2629       | 7  | S 12 | 1599.8284      | 800.4181        |
| 717.3055       | 8  | E 11 | 1512.7964      | 756.9021        |
| 854.3644       | 9  | H 10 | 1383.7538      | 692.3808        |
| 1001.4329      | 10 | F 9  | 1246.6949      | 623.8513        |
| 1130.4755      | 11 | E 8  | 1099.6264      | 550.3171        |
| 1286.6018      | 12 | K 7  | 970.5838       | 485.7958        |
| 1399.6858      | 13 | L 6  | 814.4575       | 407.7327        |
| 1536.7447      | 14 | H 5  | 701.3735       | 351.1907        |
| 1665.7873      | 15 | E 4  | 564.3146       | 282.6612        |
| 1778.8714      | 16 | I 3  | 435.2720       | 218.1399        |
| 1925.9398      | 17 | F 2  | 322.1879       | 161.5979        |
|                | 18 | R 1  | 175.1195       | 88.0637         |

N-term:+43.02 K(12):+156.13

AASAIKGLSALR, MH+ 1227.7425, m/z 614.3749  
 H OS G25 P150811 220811-s1.07003.07003.2.dta

X-range:

-

MassTol: Y-zoom:

MassType:

AVG  MONO

Axis:

1  2

Label:

I  M  -

Ions:

a  +  2+  3+

b  +  2+  3+

c  +  2+  3+

x  +  2+  3+

y  +  2+  3+

z  +  2+  3+

hide H<sub>2</sub>O/NH<sub>3</sub>

zoom 112-122

GO

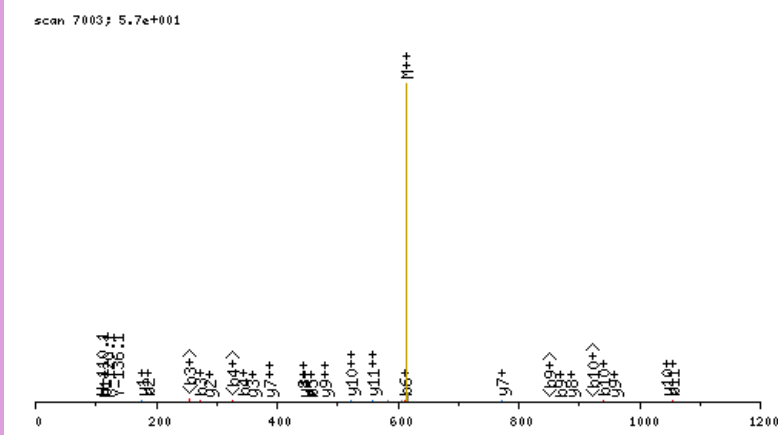

click image to zoom in; click top corners to zoom out [\[precursor±\]](#)

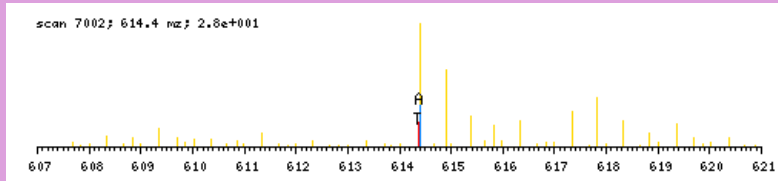

zoomed in precursor plot; T=theoretical m/z, A=acquired m/z

| b <sup>+</sup> | #  | AA # | y <sup>+</sup> | y <sup>2+</sup> |
|----------------|----|------|----------------|-----------------|
| 114.0555       | 1  | A 12 |                |                 |
| 185.0926       | 2  | A 11 | 1114.6949      | 557.8513        |
| 272.1247       | 3  | S 10 | 1043.6577      | 522.3328        |
| 343.1618       | 4  | A 9  | 956.6257       | 478.8168        |
| 456.2458       | 5  | I 8  | 885.5886       | 443.2982        |
| 612.3721       | 6  | K 7  | 772.5045       | 386.7562        |
| 669.3936       | 7  | G 6  | 616.3782       | 308.6930        |
| 782.4777       | 8  | L 5  | 559.3568       | 280.1823        |
| 869.5097       | 9  | S 4  | 446.2727       | 223.6403        |
| 940.5468       | 10 | A 3  | 359.2407       | 180.1243        |
| 1053.6309      | 11 | L 2  | 288.2036       | 144.6057        |
|                | 12 | R 1  | 175.1195       | 88.0637         |

N-term:+43.02 K(6):+156.13

AASEDELLLPR, MH+ 1255.6534, m/z 628.3303  
 H OS G29 P150811 220811-s1.05287.05287.2.dta

X-range:

-

MassTol: Y-zoom:

MassType:

AVG  MONO

Axis:

1  2

Label:

I  M  -

Ions:

a  +  2+  3+

b  +  2+  3+

c  +  2+  3+

x  +  2+  3+

y  +  2+  3+

z  +  2+  3+

hide H<sub>2</sub>O/NH<sub>3</sub>

zoom 112-122

GO

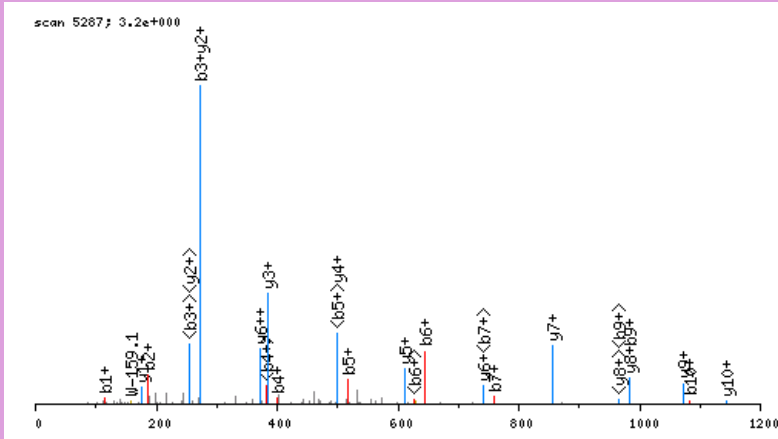

click image to zoom in; click top corners to zoom out [\[precursor±\]](#)

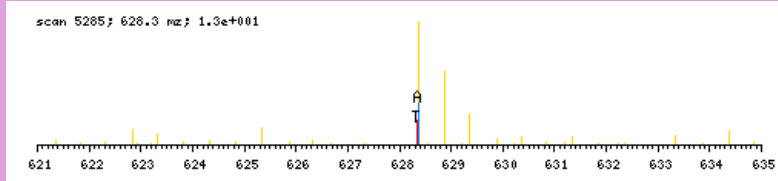

zoomed in precursor plot; T=theoretical m/z, A=acquired m/z

| b <sup>+</sup> | #  | AA # | y <sup>+</sup> | y <sup>2+</sup> |
|----------------|----|------|----------------|-----------------|
| 114.0555       | 1  | A 11 |                |                 |
| 185.0926       | 2  | A 10 | 1142.6057      | 571.8068        |
| 272.1247       | 3  | S 9  | 1071.5686      | 536.2882        |
| 401.1672       | 4  | E 8  | 984.5366       | 492.7722        |
| 516.1942       | 5  | D 7  | 855.4940       | 428.2509        |
| 645.2368       | 6  | E 6  | 740.4670       | 370.7374        |
| 758.3208       | 7  | L 5  | 611.4245       | 306.2161        |
| 871.4049       | 8  | L 4  | 498.3404       | 249.6741        |
| 984.4890       | 9  | L 3  | 385.2563       | 193.1321        |
| 1081.5417      | 10 | P 2  | 272.1723       | 136.5900        |
|                | 11 | R 1  | 175.1195       | 88.0637         |

N-term:+43.02

AASGDPGSAESYR, MH+ 1309.5661, m/z 655.2867  
 H OS G29 P150811 220811-s1.02524.02524.2.dta

X-range:

-

MassTol: Y-zoom:

MassType:

AVG  MONO

Axis:

1  2

Label:

I  M  -

Ions:

a  +  2+  3+

b  +  2+  3+

c  +  2+  3+

x  +  2+  3+

y  +  2+  3+

z  +  2+  3+

hide H<sub>2</sub>O/NH<sub>3</sub>

zoom 112-122

GO

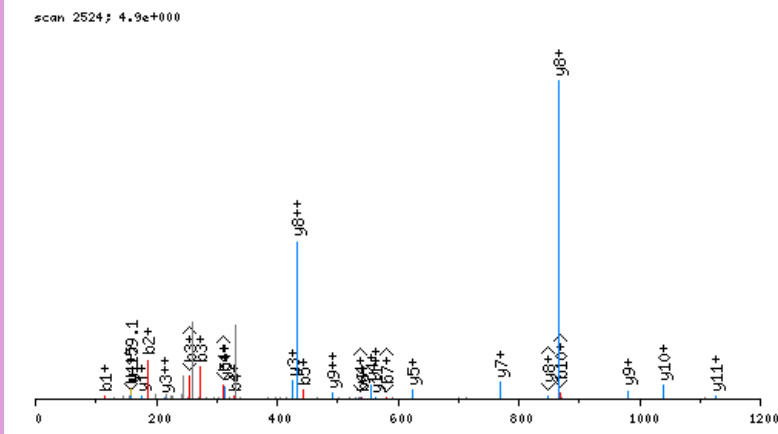

click image to zoom in; click top corners to zoom out [\[precursor±\]](#)

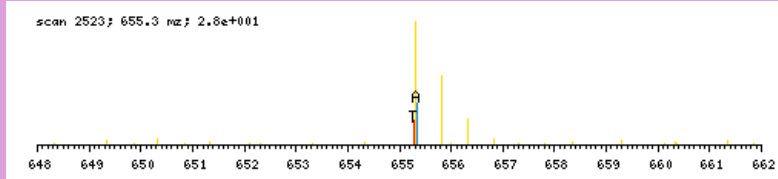

zoomed in precursor plot; T=theoretical m/z, A=acquired m/z

| b <sup>+</sup> | #  | AA # | y <sup>+</sup> | y <sup>2+</sup> |
|----------------|----|------|----------------|-----------------|
| 114.0555       | 1  | A 13 |                |                 |
| 185.0926       | 2  | A 12 | 1196.5184      | 598.7631        |
| 272.1247       | 3  | S 11 | 1125.4813      | 563.2445        |
| 329.1461       | 4  | G 10 | 1038.4492      | 519.7285        |
| 444.1731       | 5  | D 9  | 981.4278       | 491.2178        |
| 541.2258       | 6  | P 8  | 866.4008       | 433.7043        |
| 598.2473       | 7  | G 7  | 769.3481       | 385.1779        |
| 685.2793       | 8  | S 6  | 712.3266       | 356.6672        |
| 756.3164       | 9  | A 5  | 625.2946       | 313.1512        |
| 885.3590       | 10 | E 4  | 554.2575       | 277.6326        |
| 972.3911       | 11 | S 3  | 425.2149       | 213.1113        |
| 1135.4544      | 12 | Y 2  | 338.1828       | 169.5953        |
|                | 13 | R 1  | 175.1195       | 88.0637         |

N-term:+43.02

AASPSKTEIQTIFKR, MH+ 1775.0068, m/z 592.3404  
 H OS G26 P150811 220811-s1.04677.04677.3.dta

X-range:

-

MassTol: Y-zoom:

MassType:

AVG  MONO

Axis:

1  2

Label:

I  M  -

Ions:

a  +  2+  3+

b  +  2+  3+

c  +  2+  3+

x  +  2+  3+

y  +  2+  3+

z  +  2+  3+

hide H<sub>2</sub>O/NH<sub>3</sub>

zoom 112-122

GO

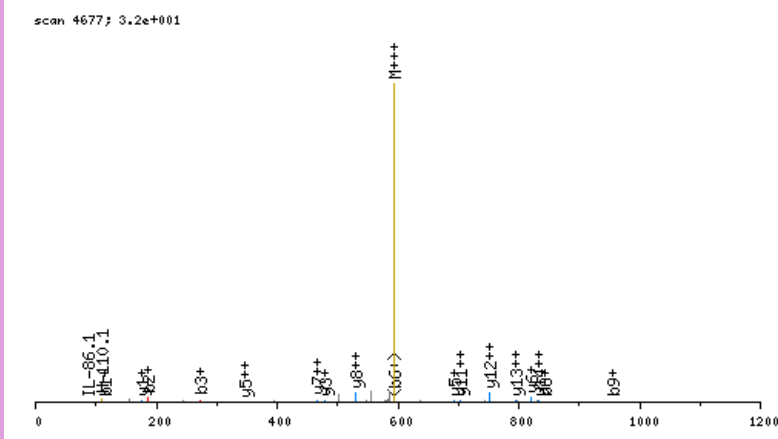

click image to zoom in; click top corners to zoom out [\[precursor±\]](#)

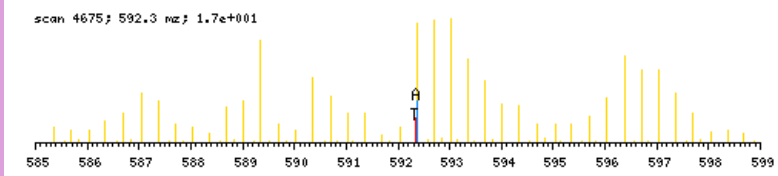

zoomed in precursor plot; T=theoretical m/z, A=acquired m/z

| b <sup>+</sup> | #  | AA | #  | y <sup>+</sup> | y <sup>2+</sup> |
|----------------|----|----|----|----------------|-----------------|
| 114.0555       | 1  | A  | 15 |                |                 |
| 185.0926       | 2  | A  | 14 | 1661.9591      | 831.4835        |
| 272.1247       | 3  | S  | 13 | 1590.9220      | 795.9649        |
| 369.1774       | 4  | P  | 12 | 1503.8900      | 752.4489        |
| 456.2094       | 5  | S  | 11 | 1406.8372      | 703.9225        |
| 612.3357       | 6  | K  | 10 | 1319.8052      | 660.4065        |
| 713.3834       | 7  | T  | 9  | 1163.6789      | 582.3433        |
| 842.4260       | 8  | E  | 8  | 1062.6312      | 531.8195        |
| 955.5101       | 9  | I  | 7  | 933.5886       | 467.2982        |
| 1083.5687      | 10 | Q  | 6  | 820.5045       | 410.7562        |
| 1184.6163      | 11 | T  | 5  | 692.4460       | 346.7269        |
| 1297.7004      | 12 | I  | 4  | 591.3983       | 296.2031        |
| 1444.7688      | 13 | F  | 3  | 478.3142       | 239.6610        |
| 1600.8951      | 14 | K  | 2  | 331.2458       | 166.1268        |
|                | 15 | R  | 1  | 175.1195       | 88.0637         |

N-term:+43.02 K(6):+156.13  
 K(14):+156.13

X-range:

-

MassTol: Y-zoom:

MassType:

AVG  MONO

Axis:

1  2

Label:

I  M  -

Ions:

a  +  2+  3+

b  +  2+  3+

c  +  2+  3+

x  +  2+  3+

y  +  2+  3+

z  +  2+  3+

hide H<sub>2</sub>O/NH<sub>3</sub>

zoom 112-122

GO

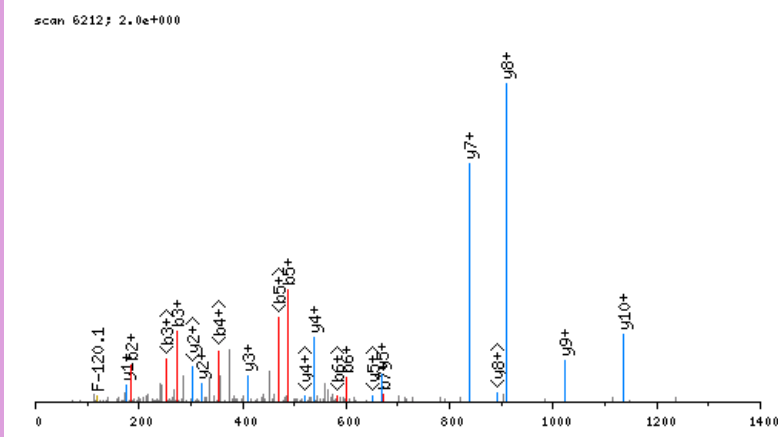

click image to zoom in; click top corners to zoom out [\[precursor±\]](#)

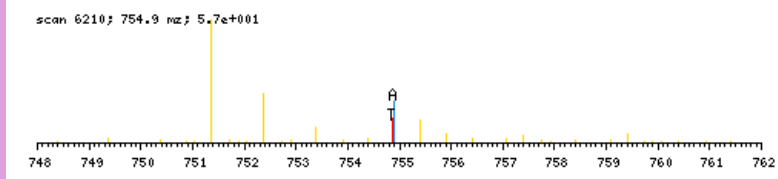

zoomed in precursor plot; T=theoretical m/z, A=acquired m/z

| b <sup>+</sup> | #  | AA # | y <sup>+</sup> | y <sup>2+</sup> |
|----------------|----|------|----------------|-----------------|
| 114.0555       | 1  | A 14 |                |                 |
| 185.0926       | 2  | A 13 | 1395.6756      | 698.3417        |
| 272.1247       | 3  | S 12 | 1324.6385      | 662.8232        |
| 373.1723       | 4  | T 11 | 1237.6065      | 619.3071        |
| 488.1993       | 5  | D 10 | 1136.5588      | 568.7833        |
| 601.2833       | 6  | I 9  | 1021.5318      | 511.2698        |
| 672.3205       | 7  | A 8  | 908.4478       | 454.7278        |
| 729.3419       | 8  | G 7  | 837.4107       | 419.2092        |
| 842.4260       | 9  | L 6  | 780.3892       | 390.6985        |
| 971.4686       | 10 | E 5  | 667.3051       | 334.1565        |
| 1100.5112      | 11 | E 4  | 538.2625       | 269.6352        |
| 1187.5432      | 12 | S 3  | 409.2199       | 205.1139        |
| 1334.6116      | 13 | F 2  | 322.1879       | 161.5979        |
|                | 14 | R 1  | 175.1195       | 88.0637         |

N-term:+43.02

AATAAEVAASGSGEAR, MH+ 1460.6981, m/z 730.8527  
 H OS G29 P150811 220811-s1.03546.03546.2.dta

X-range:

-

MassTol: Y-zoom:

MassType:

AVG  MONO

Axis:

1  2

Label:

I  M  -

Ions:

a  +  2+  3+

b  +  2+  3+

c  +  2+  3+

x  +  2+  3+

y  +  2+  3+

z  +  2+  3+

hide H<sub>2</sub>O/NH<sub>3</sub>

zoom 112-122

GO

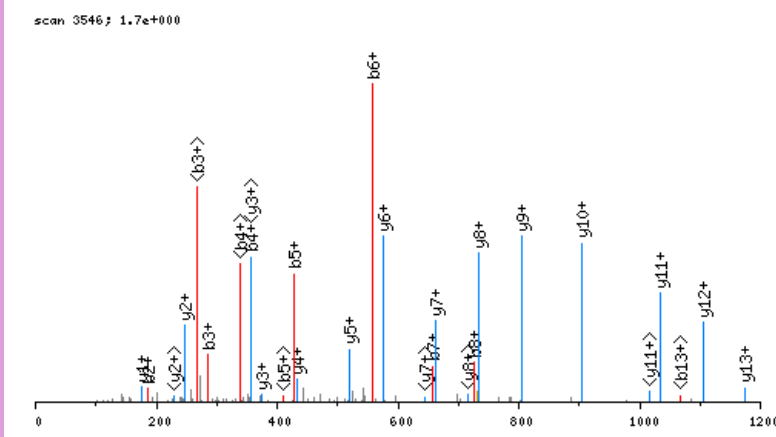

click image to zoom in; click top corners to zoom out [\[precursor±\]](#)

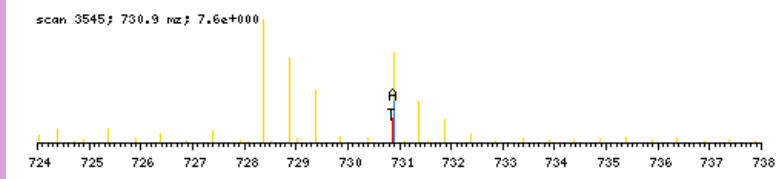

zoomed in precursor plot; T=theoretical m/z, A=acquired m/z

| b <sup>+</sup> | #  | AA # | y <sup>+</sup> | y <sup>2+</sup> |
|----------------|----|------|----------------|-----------------|
| 114.0555       | 1  | A 16 |                |                 |
| 185.0926       | 2  | A 15 | 1347.6504      | 674.3291        |
| 286.1403       | 3  | T 14 | 1276.6133      | 638.8106        |
| 357.1774       | 4  | A 13 | 1175.5657      | 588.2867        |
| 428.2145       | 5  | A 12 | 1104.5285      | 552.7682        |
| 557.2571       | 6  | E 11 | 1033.4914      | 517.2496        |
| 656.3255       | 7  | V 10 | 904.4488       | 452.7283        |
| 727.3627       | 8  | A 9  | 805.3804       | 403.1941        |
| 798.3998       | 9  | A 8  | 734.3433       | 367.6756        |
| 885.4318       | 10 | S 7  | 663.3062       | 332.1570        |
| 942.4533       | 11 | G 6  | 576.2742       | 288.6410        |
| 1029.4853      | 12 | S 5  | 519.2527       | 260.1303        |
| 1086.5068      | 13 | G 4  | 432.2207       | 216.6142        |
| 1215.5493      | 14 | E 3  | 375.1992       | 188.1035        |
| 1286.5865      | 15 | A 2  | 246.1566       | 123.5822        |
|                | 16 | R 1  | 175.1195       | 88.0637         |

N-term:+43.02



AATAAVPGAAAGR, MH+ 1125.6017, m/z 563.3045  
 H OS G29 P150811 220811-s1.02891.02891.2.dta

X-range:

-

MassTol: Y-zoom:

MassType:

AVG  MONO

Axis:

1  2

Label:

I  M  -

Ions:

a  +  2+  3+

b  +  2+  3+

c  +  2+  3+

x  +  2+  3+

y  +  2+  3+

z  +  2+  3+

hide H<sub>2</sub>O/NH<sub>3</sub>

zoom 112-122

GO

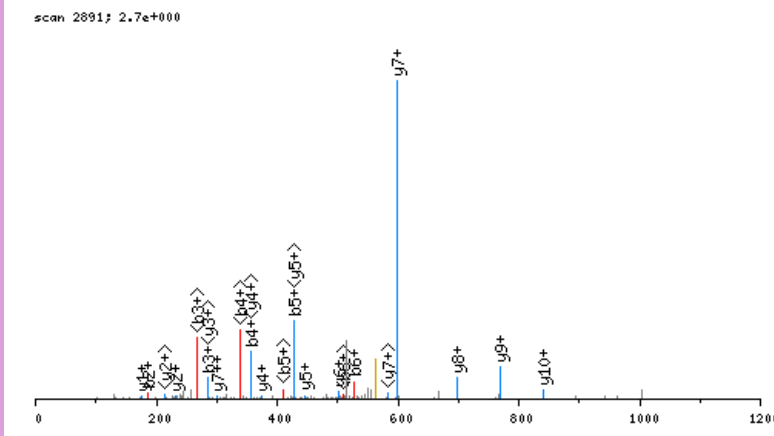

click image to zoom in; click top corners to zoom out [\[precursor±\]](#)

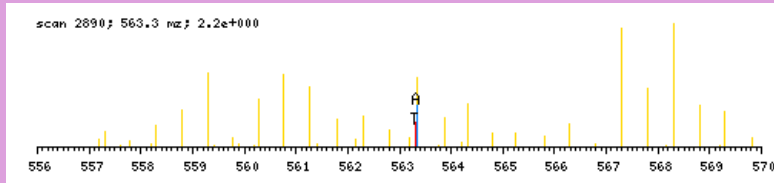

zoomed in precursor plot; T=theoretical m/z, A=acquired m/z

| b <sup>+</sup> | #  | AA | #  | y <sup>+</sup> | y <sup>2+</sup> |
|----------------|----|----|----|----------------|-----------------|
| 114.0555       | 1  | A  | 13 |                |                 |
| 185.0926       | 2  | A  | 12 | 1012.5540      | 506.7809        |
| 286.1403       | 3  | T  | 11 | 941.5169       | 471.2623        |
| 357.1774       | 4  | A  | 10 | 840.4692       | 420.7385        |
| 428.2145       | 5  | A  | 9  | 769.4321       | 385.2199        |
| 527.2829       | 6  | V  | 8  | 698.3949       | 349.7014        |
| 624.3357       | 7  | P  | 7  | 599.3265       | 300.1672        |
| 681.3572       | 8  | G  | 6  | 502.2738       | 251.6408        |
| 752.3943       | 9  | A  | 5  | 445.2523       | 223.1301        |
| 823.4314       | 10 | A  | 4  | 374.2152       | 187.6115        |
| 894.4685       | 11 | A  | 3  | 303.1781       | 152.0930        |
| 951.4900       | 12 | G  | 2  | 232.1410       | 116.5744        |
|                | 13 | R  | 1  | 175.1195       | 88.0637         |

N-term:+43.02

AATLSVEPTGR, MH+ 1143.6010, m/z 572.3041  
 H OS G29 P150811 220811-s1.03603.03603.2.dta

scan 3603; 1.6e+000

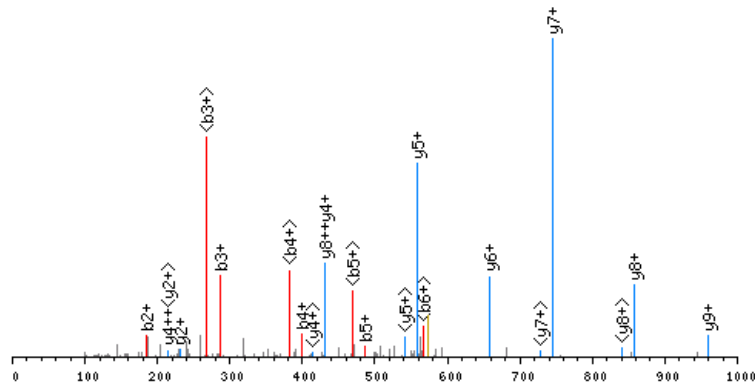

click image to zoom in; click top corners to zoom out [precursor±]

scan 3600; 572.3 m/z; 5.7e+001

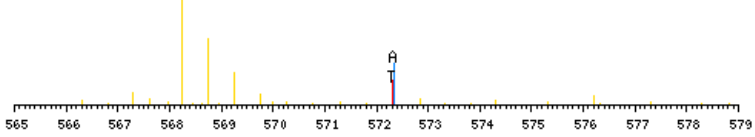

zoomed in precursor plot; T=theoretical m/z, A=acquired m/z

X-range:

0 - 0

MassTol: Y-zoom:

0. 1.

MassType:

AVG  MONO

Axis:

1  2

Label:

I  M  -

Ions:

a  +  2+  3+

b  +  2+  3+

c  +  2+  3+

x  +  2+  3+

y  +  2+  3+

z  +  2+  3+

hide H<sub>2</sub>O/NH<sub>3</sub>

zoom 112-122

GO

| b <sup>+</sup> | #  | AA | #  | y <sup>+</sup> | y <sup>2+</sup> |
|----------------|----|----|----|----------------|-----------------|
| 114.0555       | 1  | A  | 11 |                |                 |
| 185.0926       | 2  | A  | 10 | 1030.5533      | 515.7806        |
| 286.1403       | 3  | T  | 9  | 959.5162       | 480.2620        |
| 399.2244       | 4  | L  | 8  | 858.4685       | 429.7382        |
| 486.2564       | 5  | S  | 7  | 745.3844       | 373.1961        |
| 585.3248       | 6  | V  | 6  | 658.3524       | 329.6801        |
| 714.3674       | 7  | E  | 5  | 559.2840       | 280.1459        |
| 811.4202       | 8  | P  | 4  | 430.2414       | 215.6246        |
| 912.4678       | 9  | T  | 3  | 333.1886       | 167.0982        |
| 969.4893       | 10 | G  | 2  | 232.1410       | 116.5744        |
|                | 11 | R  | 1  | 175.1195       | 88.0637         |

N-term:+43.02

AATTAAVVAEEDTELK, MH+ 1688.8343, m/z 844.9208  
 H OS G29 P150811 220811-s1.05433.05433.2.dta

X-range:

-

MassTol: Y-zoom:

MassType:

AVG  MONO

Axis:

1  2

Label:

I  M  -

Ions:

a  +  2+  3+

b  +  2+  3+

c  +  2+  3+

x  +  2+  3+

y  +  2+  3+

z  +  2+  3+

hide H<sub>2</sub>O/NH<sub>3</sub>

zoom 112-122

GO

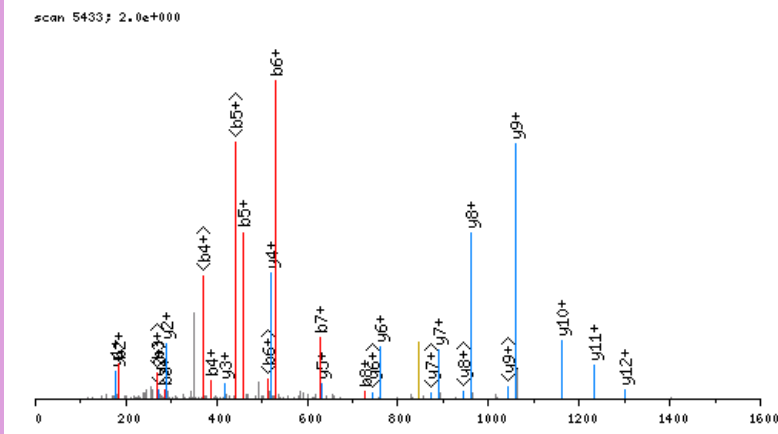

click image to zoom in; click top corners to zoom out [\[precursor±\]](#)

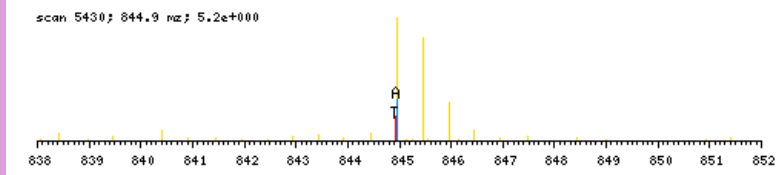

zoomed in precursor plot; T=theoretical m/z, A=acquired m/z

| b <sup>+</sup> | #  | AA # | y <sup>+</sup> | y <sup>2+</sup> |
|----------------|----|------|----------------|-----------------|
| 114.0555       | 1  | A 16 |                |                 |
| 185.0926       | 2  | A 15 | 1575.7866      | 788.3972        |
| 286.1403       | 3  | T 14 | 1504.7495      | 752.8787        |
| 387.1880       | 4  | T 13 | 1403.7018      | 702.3548        |
| 458.2251       | 5  | A 12 | 1302.6541      | 651.8310        |
| 529.2622       | 6  | A 11 | 1231.6170      | 616.3124        |
| 628.3306       | 7  | V 10 | 1160.5799      | 580.7939        |
| 727.3990       | 8  | V 9  | 1061.5115      | 531.2597        |
| 798.4362       | 9  | A 8  | 962.4431       | 481.7255        |
| 927.4787       | 10 | E 7  | 891.4060       | 446.2069        |
| 1056.5213      | 11 | E 6  | 762.3634       | 381.6856        |
| 1171.5483      | 12 | D 5  | 633.3208       | 317.1643        |
| 1272.5960      | 13 | T 4  | 518.2938       | 259.6508        |
| 1401.6386      | 14 | E 3  | 417.2462       | 209.1270        |
| 1514.7226      | 15 | L 2  | 288.2036       | 144.6057        |
|                | 16 | R 1  | 175.1195       | 88.0637         |

N-term:+43.02

AATTGSGVKVPR, MH+ 1219.7223, m/z 610.3648  
 H OS G25 P150811 220811-s1.02850.02850.2.dta

scan 2850; 5.1e+001

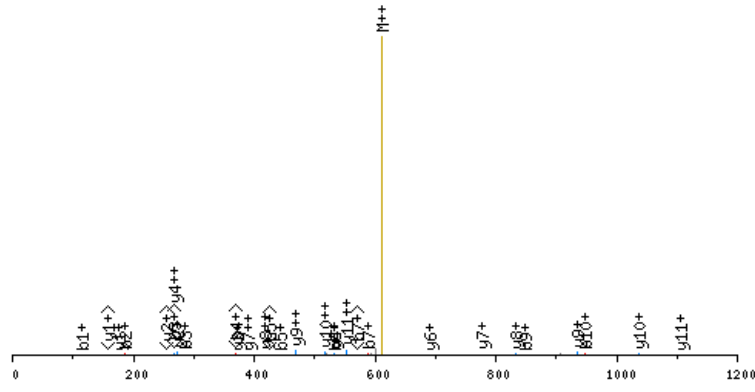

click image to zoom in; click top corners to zoom out [\[precursor±\]](#)

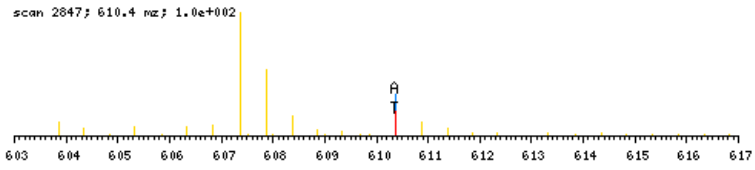

zoomed in precursor plot; T=theoretical m/z, A=acquired m/z

X-range:

-

MassTol: Y-zoom:

MassType:

AVG  MONO

Axis:

1  2

Label:

I  M  -

Ions:

a  +  2+  3+

b  +  2+  3+

c  +  2+  3+

x  +  2+  3+

y  +  2+  3+

z  +  2+  3+

hide H<sub>2</sub>O/NH<sub>3</sub>

zoom 112-122

GO

| b <sup>+</sup> | #  | AA # | y <sup>+</sup> | y <sup>2+</sup> |
|----------------|----|------|----------------|-----------------|
| 114.0555       | 1  | A 12 |                |                 |
| 185.0926       | 2  | A 11 | 1106.6746      | 553.8412        |
| 286.1403       | 3  | T 10 | 1035.6375      | 518.3227        |
| 387.1880       | 4  | T 9  | 934.5898       | 467.7988        |
| 444.2094       | 5  | G 8  | 833.5421       | 417.2750        |
| 531.2415       | 6  | S 7  | 776.5207       | 388.7643        |
| 588.2629       | 7  | G 6  | 689.4887       | 345.2482        |
| 687.3314       | 8  | V 5  | 632.4672       | 316.7375        |
| 849.4895       | 9  | K 4  | 533.3988       | 267.2033        |
| 948.5579       | 10 | V 3  | 371.2407       | 186.1243        |
| 1045.6106      | 11 | P 2  | 272.1723       | 136.5900        |
|                | 12 | R 1  | 175.1195       | 88.0637         |

N-term:+43.02 K(9):+162.16

AAVGSPGSLESAPR, MH+ 1340.6810, m/z 670.8442  
 H OS G29 P150811 220811-s1.03537.03537.2.dta

scan 3537; 3.1e+000

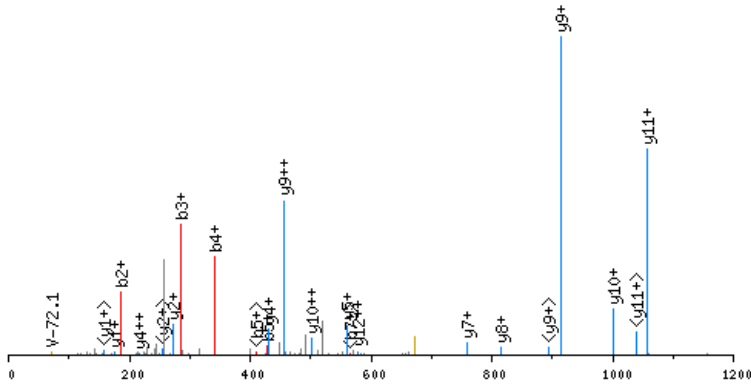

click image to zoom in; click top corners to zoom out [\[precursor±\]](#)

scan 3535; 670.8 m/z; 9.9e+000

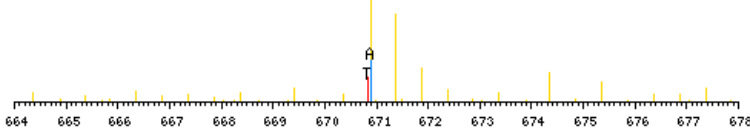

zoomed in precursor plot; T=theoretical m/z, A=acquired m/z

X-range:

-

MassTol: Y-zoom:

MassType:

AVG  MONO

Axis:

1  2

Label:

I  M  -

Ions:

a  +  2+  3+

b  +  2+  3+

c  +  2+  3+

x  +  2+  3+

y  +  2+  3+

z  +  2+  3+

hide H<sub>2</sub>O/NH<sub>3</sub>

zoom 112-122

GO

| b <sup>+</sup> | #  | AA # | y <sup>+</sup> | y <sup>2+</sup> |
|----------------|----|------|----------------|-----------------|
| 114.0555       | 1  | A 14 |                |                 |
| 185.0926       | 2  | A 13 | 1227.6333      | 614.3206        |
| 284.1610       | 3  | V 12 | 1156.5962      | 578.8020        |
| 341.1825       | 4  | G 11 | 1057.5278      | 529.2678        |
| 428.2145       | 5  | S 10 | 1000.5063      | 500.7571        |
| 525.2673       | 6  | P 9  | 913.4743       | 457.2411        |
| 582.2888       | 7  | G 8  | 816.4216       | 408.7147        |
| 669.3208       | 8  | S 7  | 759.4001       | 380.2040        |
| 782.4049       | 9  | L 6  | 672.3681       | 336.6879        |
| 911.4474       | 10 | E 5  | 559.2840       | 280.1459        |
| 998.4795       | 11 | S 4  | 430.2414       | 215.6246        |
| 1069.5166      | 12 | A 3  | 343.2094       | 172.1086        |
| 1166.5694      | 13 | P 2  | 272.1723       | 136.5900        |
|                | 14 | R 1  | 175.1195       | 88.0637         |

N-term:+43.02

AAVKTLNPKAEVAR, MH+ 1565.9380, m/z 522.6508  
 H OS G26 P150811 220811-s1.03106.03106.3.dta

X-range:

-

MassTol: Y-zoom:

MassType:

AVG  MONO

Axis:

1  2

Label:

I  M  -

Ions:

a  +  2+  3+

b  +  2+  3+

c  +  2+  3+

x  +  2+  3+

y  +  2+  3+

z  +  2+  3+

hide H<sub>2</sub>O/NH<sub>3</sub>

zoom 112-122

GO

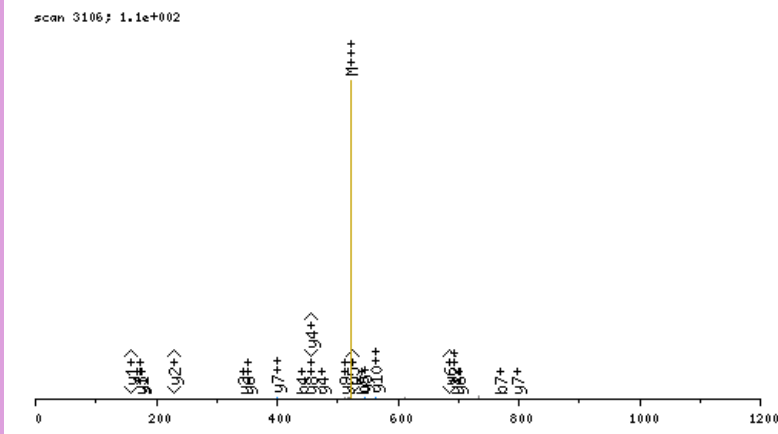

click image to zoom in; click top corners to zoom out [\[precursor±\]](#)

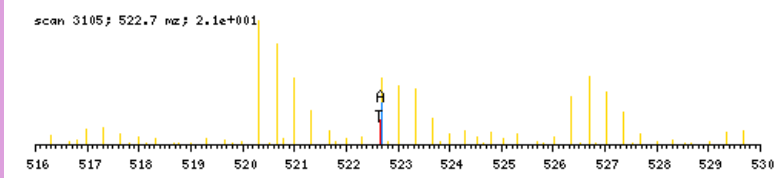

zoomed in precursor plot; T=theoretical m/z, A=acquired m/z

| b <sup>+</sup> | #  | AA # | y <sup>+</sup> | y <sup>2+</sup> |
|----------------|----|------|----------------|-----------------|
| 114.0555       | 1  | A 14 |                |                 |
| 185.0926       | 2  | A 13 | 1452.8903      | 726.9491        |
| 284.1610       | 3  | V 12 | 1381.8532      | 691.4305        |
| 440.2873       | 4  | K 11 | 1282.7848      | 641.8963        |
| 541.3350       | 5  | T 10 | 1126.6585      | 563.8331        |
| 654.4191       | 6  | L 9  | 1025.6108      | 513.3093        |
| 768.4620       | 7  | N 8  | 912.5267       | 456.7673        |
| 865.5148       | 8  | P 7  | 798.4838       | 399.7458        |
| 1021.6411      | 9  | K 6  | 701.4310       | 351.2194        |
| 1092.6782      | 10 | A 5  | 545.3047       | 273.1563        |
| 1221.7208      | 11 | E 4  | 474.2676       | 237.6377        |
| 1320.7892      | 12 | V 3  | 345.2250       | 173.1164        |
| 1391.8263      | 13 | A 2  | 246.1566       | 123.5822        |
|                | 14 | R 1  | 175.1195       | 88.0637         |

N-term:+43.02 K(4):+156.13  
 K(9):+156.13

AAVPSAVHLPR, MH+ 1159.6588, m/z 580.3330  
 H OS G25 P150811 220811-s1.05498.05498.2.dta

X-range:

-

MassTol: Y-zoom:

MassType:

AVG  MONO

Axis:

1  2

Label:

I  M  -

Ions:

a  +  2+  3+

b  +  2+  3+

c  +  2+  3+

x  +  2+  3+

y  +  2+  3+

z  +  2+  3+

hide H<sub>2</sub>O/NH<sub>3</sub>

zoom 112-122

GO

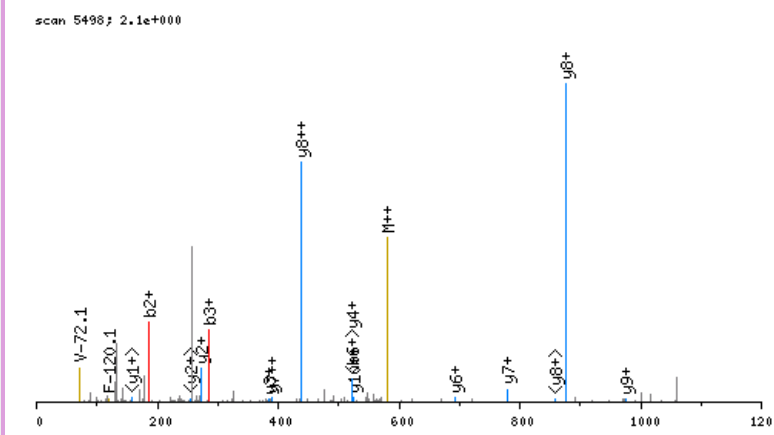

click image to zoom in; click top corners to zoom out [\[precursor±\]](#)

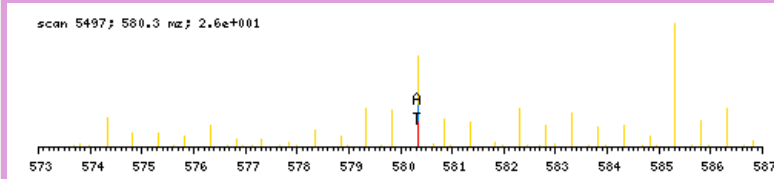

zoomed in precursor plot; T=theoretical m/z, A=acquired m/z

| b <sup>+</sup> | #  | AA | #  | y <sup>+</sup> | y <sup>2+</sup> |
|----------------|----|----|----|----------------|-----------------|
| 114.0555       | 1  | A  | 11 |                |                 |
| 185.0926       | 2  | A  | 10 | 1046.6111      | 523.8095        |
| 284.1610       | 3  | V  | 9  | 975.5740       | 488.2909        |
| 381.2138       | 4  | P  | 8  | 876.5056       | 438.7567        |
| 468.2458       | 5  | S  | 7  | 779.4528       | 390.2303        |
| 539.2829       | 6  | A  | 6  | 692.4208       | 346.7143        |
| 638.3514       | 7  | V  | 5  | 621.3837       | 311.1957        |
| 775.4103       | 8  | H  | 4  | 522.3152       | 261.6615        |
| 888.4943       | 9  | L  | 3  | 385.2563       | 193.1321        |
| 985.5471       | 10 | P  | 2  | 272.1723       | 136.5900        |
|                | 11 | R  | 1  | 175.1195       | 88.0637         |

N-term:+43.02

AAVVDPQQSVVMR, MH+ 1441.7473, m/z 721.3773  
 H OS G29 P150811 220811-s1.04511.04511.2.dta

scan 4511; 3.9e+000

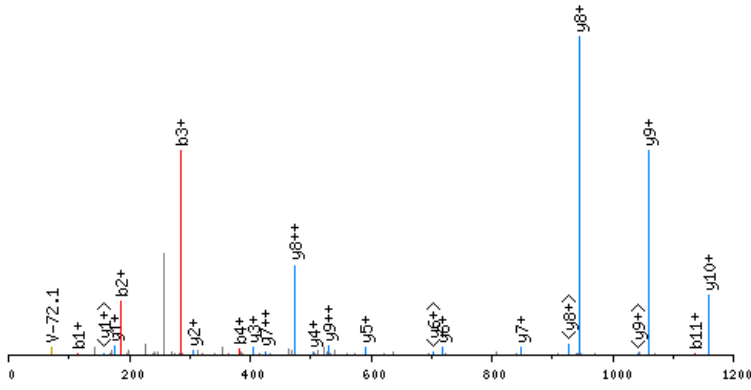

click image to zoom in; click top corners to zoom out [\[precursor±\]](#)

scan 4510; 721.4 m/z; 1.2e+001

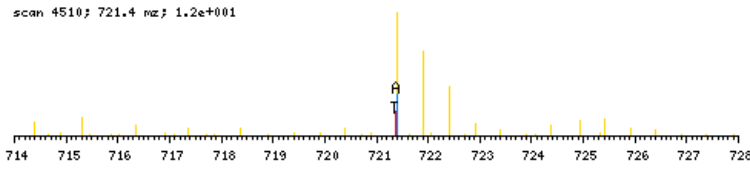

zoomed in precursor plot; T=theoretical m/z, A=acquired m/z

X-range:

-

MassTol: Y-zoom:

MassType:

AVG  MONO

Axis:

1  2

Label:

I  M  -

Ions:

a  +  2+  3+

b  +  2+  3+

c  +  2+  3+

x  +  2+  3+

y  +  2+  3+

z  +  2+  3+

hide H<sub>2</sub>O/NH<sub>3</sub>

zoom 112-122

GO

| b <sup>+</sup> | #  | AA | #  | y <sup>+</sup> | y <sup>2+</sup> |
|----------------|----|----|----|----------------|-----------------|
| 114.0555       | 1  | A  | 13 |                |                 |
| 185.0926       | 2  | A  | 12 | 1328.6996      | 664.8537        |
| 284.1610       | 3  | V  | 11 | 1257.6625      | 629.3352        |
| 383.2295       | 4  | V  | 10 | 1158.5941      | 579.8010        |
| 498.2564       | 5  | D  | 9  | 1059.5257      | 530.2668        |
| 595.3092       | 6  | P  | 8  | 944.4988       | 472.7533        |
| 723.3677       | 7  | Q  | 7  | 847.4460       | 424.2269        |
| 851.4263       | 8  | Q  | 6  | 719.3874       | 360.1976        |
| 938.4583       | 9  | S  | 5  | 591.3288       | 296.1683        |
| 1037.5268      | 10 | V  | 4  | 504.2968       | 252.6523        |
| 1136.5952      | 11 | V  | 3  | 405.2284       | 203.1181        |
| 1267.6357      | 12 | M  | 2  | 306.1600       | 153.5839        |
|                | 13 | R  | 1  | 175.1195       | 88.0637         |

N-term:+43.02



AAVVLGGDTMGPER, MH+ 1414.7000, m/z 707.8537  
 H OS G29 P150811 220811-s1.05161.05161.2.dta

X-range:

-

MassTol: Y-zoom:

MassType:

AVG  MONO

Axis:

1  2

Label:

I  M  -

Ions:

a  +  2+  3+

b  +  2+  3+

c  +  2+  3+

x  +  2+  3+

y  +  2+  3+

z  +  2+  3+

hide H<sub>2</sub>O/NH<sub>3</sub>

zoom 112-122

GO

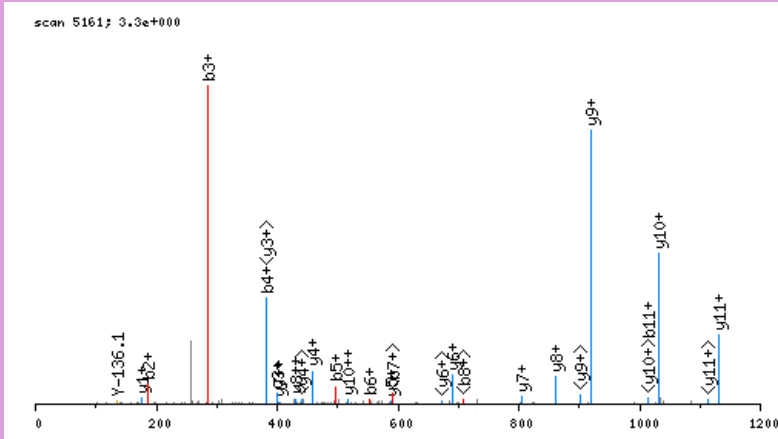

click image to zoom in; click top corners to zoom out [\[precursor±\]](#)

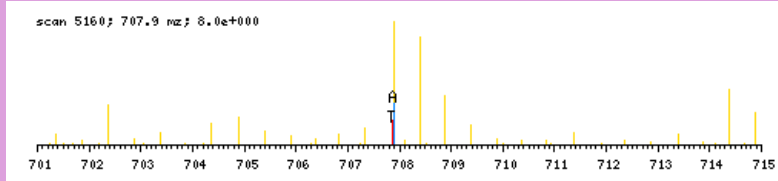

zoomed in precursor plot; T=theoretical m/z, A=acquired m/z

| b <sup>+</sup> | #  | AA # | y <sup>+</sup> | y <sup>2+</sup> |
|----------------|----|------|----------------|-----------------|
| 114.0555       | 1  | A 14 |                |                 |
| 185.0926       | 2  | A 13 | 1301.6524      | 651.3301        |
| 284.1610       | 3  | V 12 | 1230.6152      | 615.8115        |
| 383.2295       | 4  | V 11 | 1131.5468      | 566.2773        |
| 496.3135       | 5  | L 10 | 1032.4784      | 516.7431        |
| 553.3350       | 6  | G 9  | 919.3944       | 460.2011        |
| 610.3564       | 7  | G 8  | 862.3729       | 431.6904        |
| 725.3834       | 8  | D 7  | 805.3514       | 403.1796        |
| 826.4311       | 9  | T 6  | 690.3245       | 345.6662        |
| 957.4716       | 10 | M 5  | 589.2768       | 295.1423        |
| 1014.4930      | 11 | G 4  | 458.2363       | 229.6221        |
| 1111.5458      | 12 | P 3  | 401.2149       | 201.1113        |
| 1240.5884      | 13 | E 2  | 304.1621       | 152.5850        |
|                | 14 | R 1  | 175.1195       | 88.0637         |

N-term:+43.02

AAYKLVLIR, MH+ 1116.7145, m/z 558.8609  
 H OS G25 P150811 220811-s1.07303.07303.2.dta

X-range:

-

MassTol: Y-zoom:

MassType:

AVG  MONO

Axis:

1  2

Label:

I  M  -

Ions:

a  +  2+  3+

b  +  2+  3+

c  +  2+  3+

x  +  2+  3+

y  +  2+  3+

z  +  2+  3+

hide H<sub>2</sub>O/NH<sub>3</sub>

zoom 112-122

GO

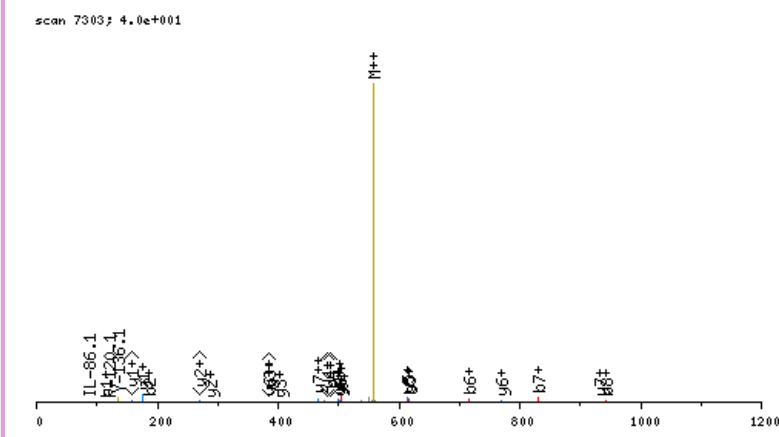

click image to zoom in; click top corners to zoom out [\[precursor±\]](#)

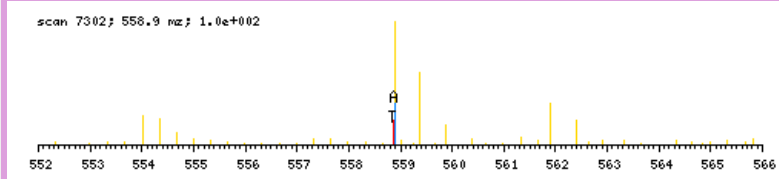

zoomed in precursor plot; T=theoretical m/z, A=acquired m/z

| b <sup>+</sup> | # | AA # | y <sup>+</sup> | y <sup>2+</sup>    |
|----------------|---|------|----------------|--------------------|
| 114.0555       | 1 | A    | 9              |                    |
| 185.0926       | 2 | A    | 8              | 1003.6668 502.3373 |
| 348.1560       | 3 | Y    | 7              | 932.6297 466.8188  |
| 504.2823       | 4 | K    | 6              | 769.5664 385.2871  |
| 617.3663       | 5 | L    | 5              | 613.4401 307.2240  |
| 716.4347       | 6 | V    | 4              | 500.3560 250.6819  |
| 829.5188       | 7 | L    | 3              | 401.2876 201.1477  |
| 942.6029       | 8 | I    | 2              | 288.2036 144.6057  |
|                | 9 | R    | 1              | 175.1195 88.0637   |

N-term:+43.02 K(4):+156.13

ACGLVASNLNPKPECLKVR, MH+ 2309.3110, m/z 770.4418  
 H OS G26 P150811 220811-s1.05927.05927.3.dta

X-range:

-

MassTol: Y-zoom:

MassType:

AVG  MONO

Axis:

1  2

Label:

I  M  -

Ions:

a  +  2+  3+

b  +  2+  3+

c  +  2+  3+

x  +  2+  3+

y  +  2+  3+

z  +  2+  3+

hide H<sub>2</sub>O/NH<sub>3</sub>

zoom 112-122

GO

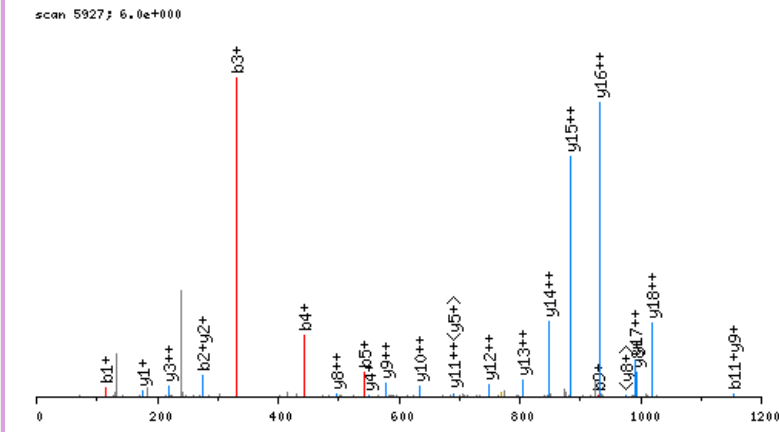

click image to zoom in; click top corners to zoom out [\[precursor±\]](#)

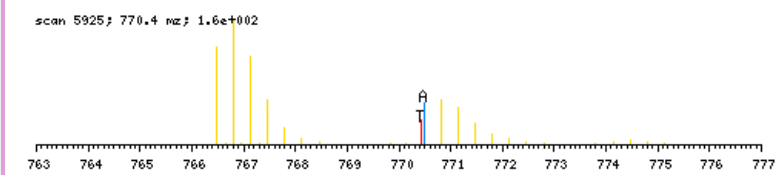

zoomed in precursor plot; T=theoretical m/z, A=acquired m/z

| b <sup>+</sup> | #  | AA | #  | y <sup>+</sup> | y <sup>2+</sup> |
|----------------|----|----|----|----------------|-----------------|
| 114.0555       | 1  | A  | 20 |                |                 |
| 274.0861       | 2  | C  | 19 | 2196.2633      | 1098.6355       |
| 331.1076       | 3  | G  | 18 | 2036.2327      | 1018.6202       |
| 444.1916       | 4  | L  | 17 | 1979.2112      | 990.1095        |
| 543.2601       | 5  | V  | 16 | 1866.1271      | 933.5675        |
| 614.2972       | 6  | A  | 15 | 1767.0587      | 884.0333        |
| 701.3292       | 7  | S  | 14 | 1696.0216      | 848.5147        |
| 815.3721       | 8  | N  | 13 | 1608.9896      | 804.9987        |
| 928.4562       | 9  | L  | 12 | 1494.9467      | 747.9772        |
| 1042.4991      | 10 | N  | 11 | 1381.8626      | 691.4352        |
| 1155.5832      | 11 | L  | 10 | 1267.8197      | 634.4137        |
| 1317.7413      | 12 | K  | 9  | 1154.7356      | 577.8717        |
| 1414.7940      | 13 | P  | 8  | 992.5775       | 496.7927        |
| 1471.8155      | 14 | G  | 7  | 895.5247       | 448.2663        |
| 1600.8581      | 15 | E  | 6  | 838.5033       | 419.7555        |
| 1760.8887      | 16 | C  | 5  | 709.4607       | 355.2343        |
| 1873.9728      | 17 | L  | 4  | 549.4301       | 275.2190        |
| 2036.1309      | 18 | K  | 3  | 436.3460       | 218.6769        |
| 2135.1993      | 19 | V  | 2  | 274.1879       | 137.5979        |
|                | 20 | R  | 1  | 175.1195       | 88.0637         |

N-term:+43.02 C(2):+160.03  
 K(12):+162.16 C(16):+160.03  
 K(18):+162.16

ADAAAGEPLPR, MH+ 1109.5591, m/z 555.2832  
 H OS G29 P150811 220811-s1.03204.03204.2.dta

X-range:

-

MassTol: Y-zoom:

MassType:

AVG  MONO

Axis:

1  2

Label:

I  M  -

Ions:

a  +  2+  3+

b  +  2+  3+

c  +  2+  3+

x  +  2+  3+

y  +  2+  3+

z  +  2+  3+

hide H<sub>2</sub>O/NH<sub>3</sub>

zoom 112-122

GO

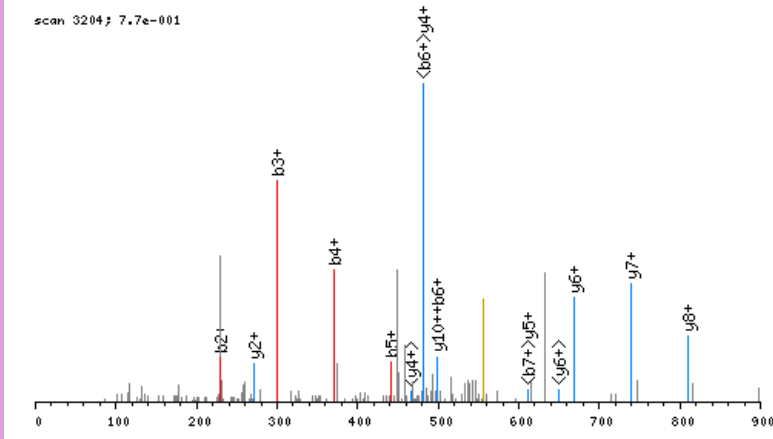

click image to zoom in; click top corners to zoom out [\[precursor±\]](#)

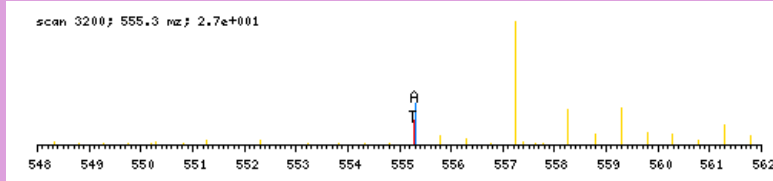

zoomed in precursor plot; T=theoretical m/z, A=acquired m/z

| b <sup>+</sup> | #  | AA | #  | y <sup>+</sup> | y <sup>2+</sup> |
|----------------|----|----|----|----------------|-----------------|
| 114.0555       | 1  | A  | 11 |                |                 |
| 229.0825       | 2  | D  | 10 | 996.5114       | 498.7596        |
| 300.1196       | 3  | A  | 9  | 881.4845       | 441.2462        |
| 371.1567       | 4  | A  | 8  | 810.4474       | 405.7276        |
| 442.1938       | 5  | A  | 7  | 739.4103       | 370.2090        |
| 499.2153       | 6  | G  | 6  | 668.3731       | 334.6905        |
| 628.2579       | 7  | E  | 5  | 611.3517       | 306.1798        |
| 725.3106       | 8  | P  | 4  | 482.3091       | 241.6585        |
| 838.3947       | 9  | L  | 3  | 385.2563       | 193.1321        |
| 935.4474       | 10 | P  | 2  | 272.1723       | 136.5900        |
|                | 11 | R  | 1  | 175.1195       | 88.0637         |

N-term:+43.02

ADAQMVAPEPTIQMR, MH+ 1799.8784, m/z 600.6310  
 H OS G29 P150811 220811-s1.04867.04867.3.dta

X-range:

-

MassTol: Y-zoom:

MassType:

AVG  MONO

Axis:

1  2

Label:

I  M  -

Ions:

a  +  2+  3+

b  +  2+  3+

c  +  2+  3+

x  +  2+  3+

y  +  2+  3+

z  +  2+  3+

hide H<sub>2</sub>O/NH<sub>3</sub>

zoom 112-122

GO

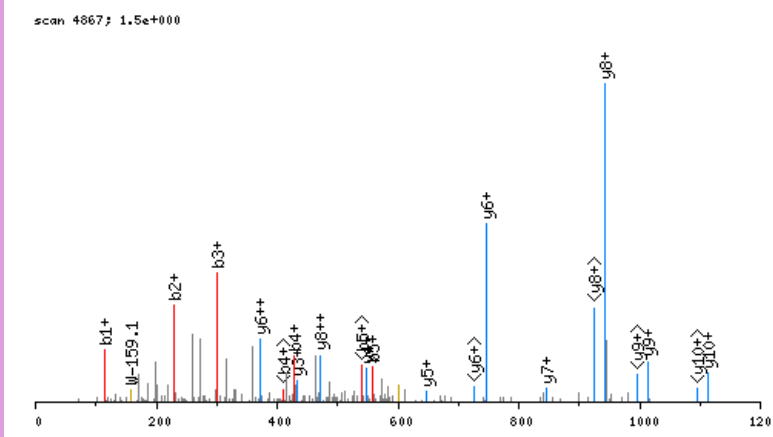

click image to zoom in; click top corners to zoom out [\[precursor±\]](#)

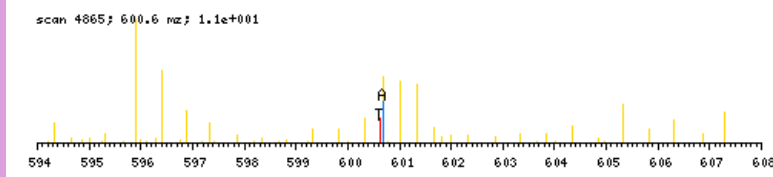

zoomed in precursor plot; T=theoretical m/z, A=acquired m/z

| b <sup>+</sup> | #  | AA # | y <sup>+</sup> | y <sup>2+</sup> |
|----------------|----|------|----------------|-----------------|
| 114.0555       | 1  | A 16 |                |                 |
| 229.0825       | 2  | D 15 | 1686.8307      | 843.9193        |
| 300.1196       | 3  | A 14 | 1571.8038      | 786.4058        |
| 428.1781       | 4  | Q 13 | 1500.7667      | 750.8873        |
| 559.2186       | 5  | M 12 | 1372.7081      | 686.8580        |
| 687.2772       | 6  | Q 11 | 1241.6676      | 621.3377        |
| 786.3456       | 7  | V 10 | 1113.6090      | 557.3084        |
| 857.3827       | 8  | A 9  | 1014.5406      | 507.7742        |
| 954.4355       | 9  | P 8  | 943.5035       | 472.2557        |
| 1055.4832      | 10 | T 7  | 846.4507       | 423.7293        |
| 1152.5359      | 11 | P 6  | 745.4031       | 373.2054        |
| 1253.5836      | 12 | T 5  | 648.3503       | 324.6791        |
| 1366.6677      | 13 | I 4  | 547.3026       | 274.1552        |
| 1494.7263      | 14 | Q 3  | 434.2186       | 217.6132        |
| 1625.7667      | 15 | M 2  | 306.1600       | 153.5839        |
|                | 16 | R 1  | 175.1195       | 88.0637         |

N-term:+43.02

ADDVDDQQTTINTVVEEPLDLIR, MH+ 2442.1636, m/z 814.7261  
 H OS G29 P150811 220811-s1.06182.06182.3.dta

X-range:

-

MassTol: Y-zoom:

MassType:

AVG  MONO

Axis:

1  2

Label:

I  M  -

Ions:

a  +  2+  3+

b  +  2+  3+

c  +  2+  3+

x  +  2+  3+

y  +  2+  3+

z  +  2+  3+

hide H<sub>2</sub>O/NH<sub>3</sub>

zoom 112-122

GO

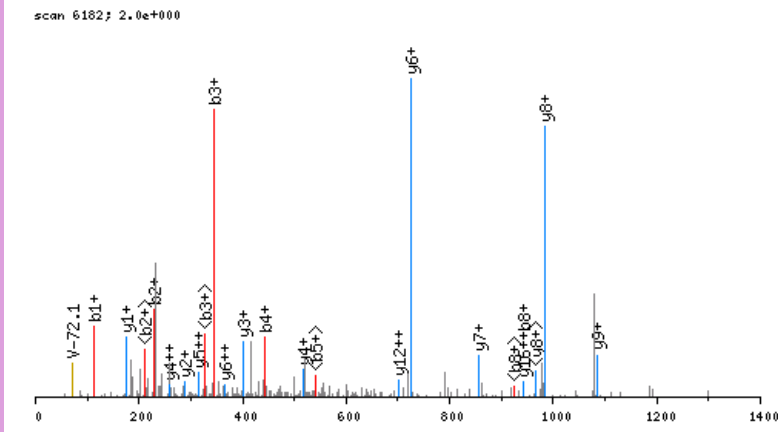

click image to zoom in; click top corners to zoom out [precursor±]

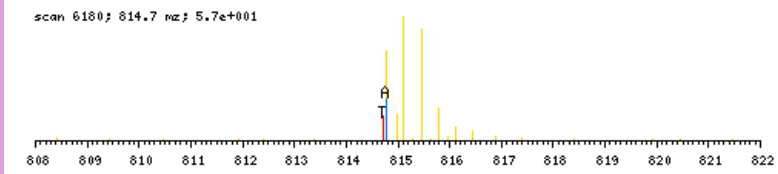

zoomed in precursor plot; T=theoretical m/z, A=acquired m/z

| b <sup>+</sup> | #  | AA | #  | y <sup>+</sup> | y <sup>2+</sup> |
|----------------|----|----|----|----------------|-----------------|
| 114.0555       | 1  | A  | 21 |                |                 |
| 229.0825       | 2  | D  | 20 | 2329.1159      | 1165.0619       |
| 344.1094       | 3  | D  | 19 | 2214.0890      | 1107.5484       |
| 443.1778       | 4  | V  | 18 | 2099.0621      | 1050.0349       |
| 558.2048       | 5  | D  | 17 | 1999.9936      | 1000.5007       |
| 686.2633       | 6  | Q  | 16 | 1884.9667      | 942.9873        |
| 814.3219       | 7  | Q  | 15 | 1756.9081      | 878.9580        |
| 942.3805       | 8  | Q  | 14 | 1628.8495      | 814.9287        |
| 1043.4282      | 9  | T  | 13 | 1500.7910      | 750.8994        |
| 1144.4758      | 10 | T  | 12 | 1399.7433      | 700.3756        |
| 1258.5188      | 11 | N  | 11 | 1298.6956      | 649.8517        |
| 1359.5665      | 12 | T  | 10 | 1184.6527      | 592.8303        |
| 1458.6349      | 13 | V  | 9  | 1083.6050      | 542.3064        |
| 1587.6775      | 14 | E  | 8  | 984.5366       | 492.7722        |
| 1716.7201      | 15 | E  | 7  | 855.4940       | 428.2509        |
| 1813.7728      | 16 | P  | 6  | 726.4514       | 363.7296        |
| 1926.8569      | 17 | L  | 5  | 629.3986       | 315.2032        |
| 2041.8838      | 18 | D  | 4  | 516.3146       | 258.6612        |
| 2154.9679      | 19 | L  | 3  | 401.2876       | 201.1477        |
| 2268.0520      | 20 | I  | 2  | 288.2036       | 144.6057        |
|                | 21 | R  | 1  | 175.1195       | 88.0637         |

N-term:+43.02

ADEALAGLDEGALR, MH+ 1442.7127, m/z 721.8600  
 H OS G29 P150811 220811-s1.05847.05847.2.dta

X-range:

-

MassTol: Y-zoom:

MassType:

AVG  MONO

Axis:

1  2

Label:

I  M  -

Ions:

a  +  2+  3+

b  +  2+  3+

c  +  2+  3+

x  +  2+  3+

y  +  2+  3+

z  +  2+  3+

hide H<sub>2</sub>O/NH<sub>3</sub>

zoom 112-122

GO

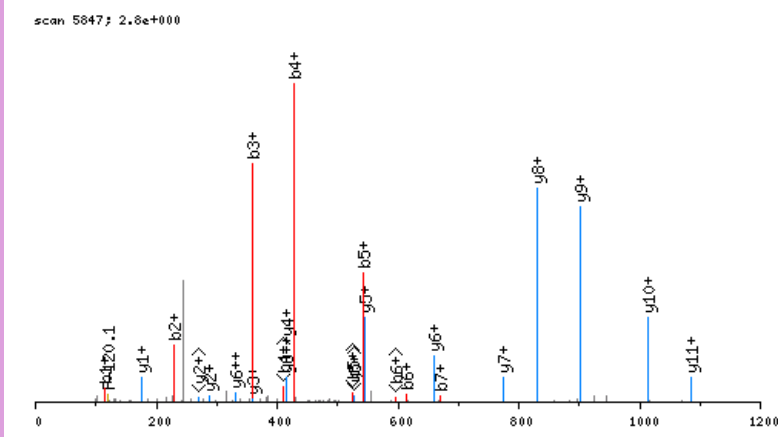

click image to zoom in; click top corners to zoom out [\[precursor±\]](#)

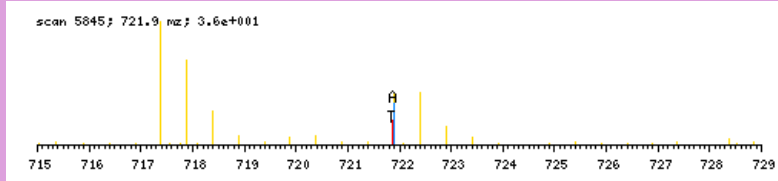

zoomed in precursor plot; T=theoretical m/z, A=acquired m/z

| b <sup>+</sup> | #  | AA # | y <sup>+</sup> | y <sup>2+</sup> |
|----------------|----|------|----------------|-----------------|
| 114.0555       | 1  | A 14 |                |                 |
| 229.0825       | 2  | D 13 | 1329.6650      | 665.3364        |
| 358.1251       | 3  | E 12 | 1214.6381      | 607.8230        |
| 429.1622       | 4  | A 11 | 1085.5955      | 543.3017        |
| 542.2462       | 5  | L 10 | 1014.5584      | 507.7831        |
| 613.2833       | 6  | A 9  | 901.4743       | 451.2411        |
| 670.3048       | 7  | G 8  | 830.4372       | 415.7225        |
| 783.3889       | 8  | L 7  | 773.4157       | 387.2118        |
| 898.4158       | 9  | D 6  | 660.3317       | 330.6698        |
| 1027.4584      | 10 | E 5  | 545.3047       | 273.1563        |
| 1084.4799      | 11 | G 4  | 416.2621       | 208.6350        |
| 1155.5170      | 12 | A 3  | 359.2407       | 180.1243        |
| 1268.6010      | 13 | L 2  | 288.2036       | 144.6057        |
|                | 14 | R 1  | 175.1195       | 88.0637         |

N-term:+43.02

AEDGEIGHPSAPHR, MH+ 1629.7257, m/z 543.9134  
 H OS G27 P150811 220811-s1.02671.02671.3.dta

X-range:

-

MassTol: Y-zoom:

MassType:

AVG  MONO

Axis:

1  2

Label:

I  M  -

Ions:

a  +  2+  3+

b  +  2+  3+

c  +  2+  3+

x  +  2+  3+

y  +  2+  3+

z  +  2+  3+

hide H<sub>2</sub>O/NH<sub>3</sub>

zoom 112-122

GO

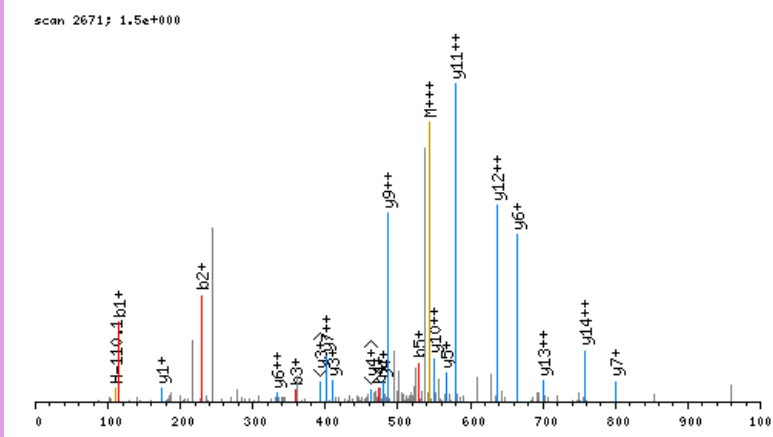

click image to zoom in; click top corners to zoom out [\[precursor±\]](#)

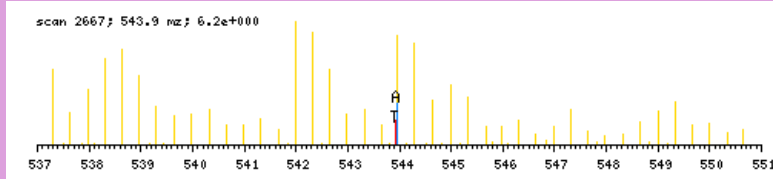

zoomed in precursor plot; T=theoretical m/z, A=acquired m/z

| b <sup>+</sup> | #  | AA # | y <sup>+</sup> | y <sup>2+</sup> |
|----------------|----|------|----------------|-----------------|
| 114.0555       | 1  | A 15 |                |                 |
| 229.0825       | 2  | D 14 | 1516.6781      | 758.8429        |
| 358.1251       | 3  | E 13 | 1401.6511      | 701.3295        |
| 473.1520       | 4  | D 12 | 1272.6085      | 636.8082        |
| 530.1735       | 5  | G 11 | 1157.5816      | 579.2947        |
| 659.2160       | 6  | E 10 | 1100.5601      | 550.7840        |
| 716.2375       | 7  | G 9  | 971.5175       | 486.2627        |
| 829.3216       | 8  | I 8  | 914.4961       | 457.7519        |
| 966.3805       | 9  | H 7  | 801.4120       | 401.2099        |
| 1063.4333      | 10 | P 6  | 664.3531       | 332.6805        |
| 1150.4653      | 11 | S 5  | 567.3003       | 284.1541        |
| 1221.5024      | 12 | A 4  | 480.2683       | 240.6381        |
| 1318.5552      | 13 | P 3  | 409.2312       | 205.1195        |
| 1455.6141      | 14 | H 2  | 312.1784       | 156.5931        |
|                | 15 | R 1  | 175.1195       | 88.0637         |

N-term:+43.02



ADEEKLPPGWEKR, MH+ 1652.8649, m/z 551.6265  
 H OS G26 P150811 220811-s1.03541.03541.3.dta

X-range:

-

MassTol: Y-zoom:

MassType:

AVG  MONO

Axis:

1  2

Label:

I  M  -

Ions:

a  +  2+  3+

b  +  2+  3+

c  +  2+  3+

x  +  2+  3+

y  +  2+  3+

z  +  2+  3+

hide H<sub>2</sub>O/NH<sub>3</sub>

zoom 112-122

GO

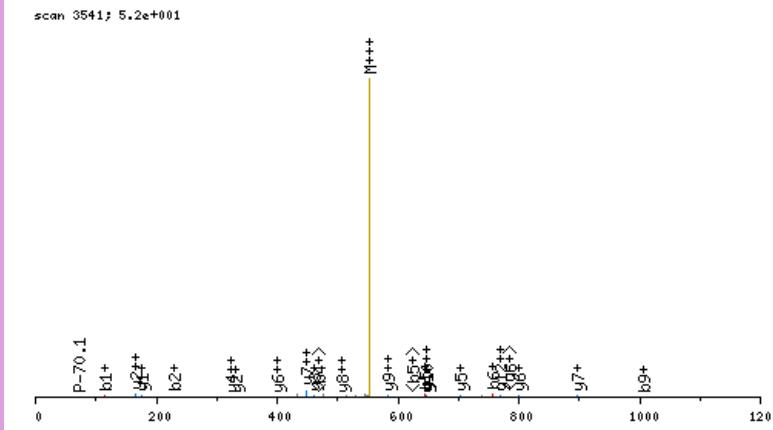

click image to zoom in; click top corners to zoom out [\[precursor±\]](#)

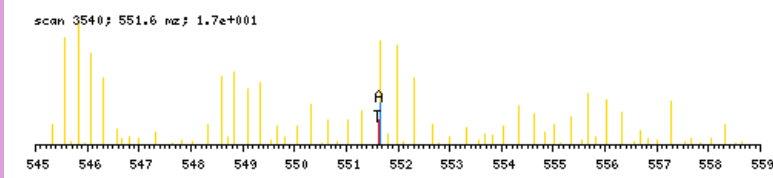

zoomed in precursor plot; T=theoretical m/z, A=acquired m/z

| b <sup>+</sup> | #  | AA # | y <sup>+</sup> | y <sup>2+</sup> |
|----------------|----|------|----------------|-----------------|
| 114.0555       | 1  | A    | 13             |                 |
| 229.0825       | 2  | D    | 12             | 1539.8172       |
| 358.1251       | 3  | E    | 11             | 1424.7902       |
| 487.1676       | 4  | E    | 10             | 1295.7477       |
| 643.2939       | 5  | K    | 9              | 1166.7051       |
| 756.3780       | 6  | L    | 8              | 1010.5788       |
| 853.4308       | 7  | P    | 7              | 897.4947        |
| 950.4835       | 8  | P    | 6              | 800.4419        |
| 1007.5050      | 9  | G    | 5              | 703.3892        |
| 1193.5843      | 10 | W    | 4              | 646.3677        |
| 1322.6269      | 11 | E    | 3              | 460.2884        |
| 1478.7532      | 12 | K    | 2              | 331.2458        |
|                | 13 | R    | 1              | 175.1195        |

N-term:+43.02 K(5):+156.13  
 K(12):+156.13

ADEELEALR, MH+ 1087.5272, m/z 544.2672  
 H OS G29 P150811 220811-s1.04214.04214.2.dta

X-range:

-

MassTol: Y-zoom:

MassType:

AVG  MONO

Axis:

1  2

Label:

I  M  -

Ions:

a  +  2+  3+

b  +  2+  3+

c  +  2+  3+

x  +  2+  3+

y  +  2+  3+

z  +  2+  3+

hide H<sub>2</sub>O/NH<sub>3</sub>

zoom 112-122

GO

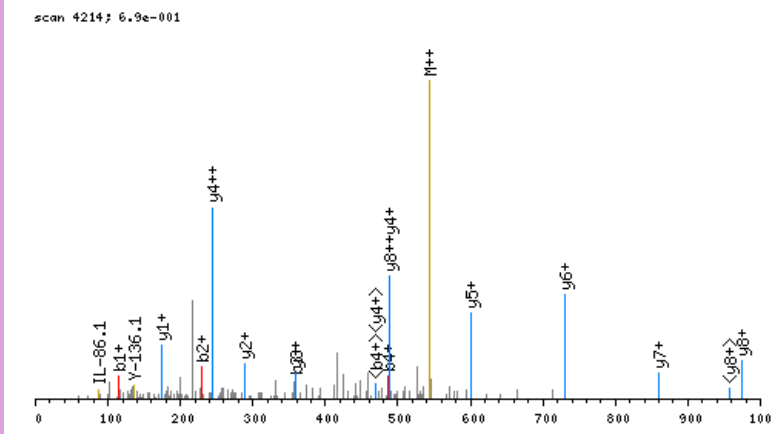

click image to zoom in; click top corners to zoom out [\[precursor±\]](#)

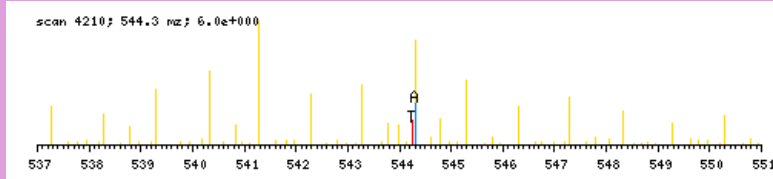

zoomed in precursor plot; T=theoretical m/z, A=acquired m/z

| b <sup>+</sup> | # | AA # | y <sup>+</sup> | y <sup>2+</sup> |
|----------------|---|------|----------------|-----------------|
| 114.0555       | 1 | A 9  |                |                 |
| 229.0825       | 2 | D 8  | 974.4795       | 487.7436        |
| 358.1251       | 3 | E 7  | 859.4525       | 430.2302        |
| 487.1676       | 4 | E 6  | 730.4099       | 365.7089        |
| 600.2517       | 5 | L 5  | 601.3673       | 301.1876        |
| 729.2943       | 6 | E 4  | 488.2833       | 244.6455        |
| 800.3314       | 7 | A 3  | 359.2407       | 180.1243        |
| 913.4155       | 8 | L 2  | 288.2036       | 144.6057        |
|                | 9 | R 1  | 175.1195       | 88.0637         |

N-term:+43.02

ADEIAKAQAQPPGGDTIFGKIIR, MH+ 2496.3827, m/z 624.8511  
 H OS G27 P150811 220811-s1.07252.07252.4.dta

X-range:

-

MassTol: Y-zoom:

MassType:

AVG  MONO

Axis:

1  2

Label:

I  M  -

Ions:

a  +  2+  3+

b  +  2+  3+

c  +  2+  3+

x  +  2+  3+

y  +  2+  3+

z  +  2+  3+

hide H<sub>2</sub>O/NH<sub>3</sub>

zoom 112-122

GO

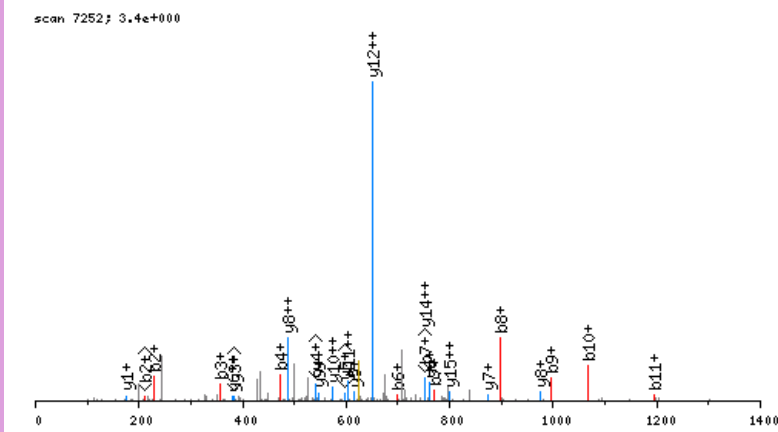

click image to zoom in; click top corners to zoom out [\[precursor±\]](#)

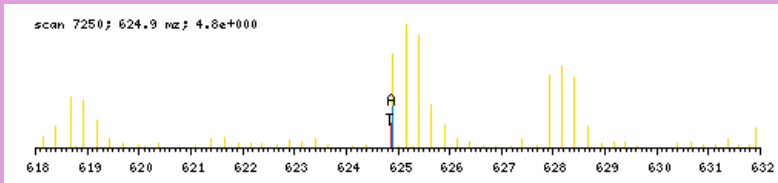

zoomed in precursor plot; T=theoretical m/z, A=acquired m/z

| b <sup>+</sup> | #  | AA | #  | y <sup>+</sup> | y <sup>2+</sup> |
|----------------|----|----|----|----------------|-----------------|
| 114.0555       | 1  | A  | 23 |                |                 |
| 229.0825       | 2  | D  | 22 | 2383.3350      | 1192.1714       |
| 358.1251       | 3  | E  | 21 | 2268.3081      | 1134.6579       |
| 471.2091       | 4  | I  | 20 | 2139.2655      | 1070.1366       |
| 542.2462       | 5  | A  | 19 | 2026.1814      | 1013.5946       |
| 698.3725       | 6  | K  | 18 | 1955.1443      | 978.0761        |
| 769.4096       | 7  | A  | 17 | 1799.0180      | 900.0129        |
| 897.4682       | 8  | Q  | 16 | 1727.9809      | 864.4943        |
| 996.5366       | 9  | V  | 15 | 1599.9223      | 800.4651        |
| 1067.5737      | 10 | A  | 14 | 1500.8539      | 750.9308        |
| 1195.6323      | 11 | Q  | 13 | 1429.8168      | 715.4123        |
| 1292.6851      | 12 | P  | 12 | 1301.7582      | 651.3830        |
| 1349.7066      | 13 | G  | 11 | 1204.7054      | 602.8566        |
| 1406.7280      | 14 | G  | 10 | 1147.6840      | 574.3459        |
| 1521.7550      | 15 | D  | 9  | 1090.6625      | 545.8352        |
| 1622.8026      | 16 | T  | 8  | 975.6355       | 488.3217        |
| 1735.8867      | 17 | I  | 7  | 874.5879       | 437.7978        |
| 1882.9551      | 18 | F  | 6  | 761.5038       | 381.2558        |
| 1939.9766      | 19 | G  | 5  | 614.4354       | 307.7216        |
| 2096.1029      | 20 | K  | 4  | 557.4139       | 279.2109        |
| 2209.1869      | 21 | I  | 3  | 401.2876       | 201.1477        |
| 2322.2710      | 22 | I  | 2  | 288.2036       | 144.6057        |
|                | 23 | R  | 1  | 175.1195       | 88.0637         |

N-term:+43.02 K(6):+156.13  
 K(20):+156.13

ADEVTEKQVYDAHTKEIDLVR, MH+ 2671.3580, m/z 668.5950  
 H OS G27 P150811 220811-s1.05869.05869.4.dta

scan 5869; 1.6e+000

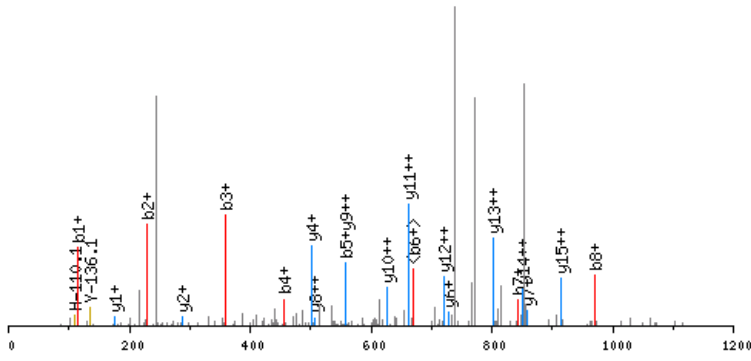

click image to zoom in; click top corners to zoom out [precursor±]

scan 5867; 668.6 m/z; 2.2e+001

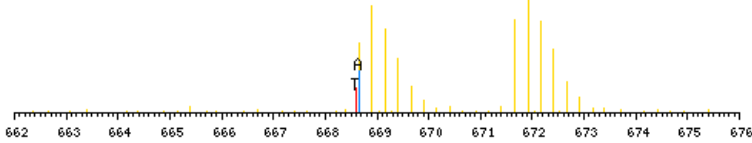

zoomed in precursor plot; T=theoretical m/z, A=acquired m/z

X-range:

0 - 0

MassTol: Y-zoom:

0. 1.

MassType:

AVG  MONO

Axis:

1  2

Label:

I  M  -

Ions:

a  +  2+  3+

b  +  2+  3+

c  +  2+  3+

x  +  2+  3+

y  +  2+  3+

z  +  2+  3+

hide H<sub>2</sub>O/NH<sub>3</sub>

zoom 112-122

GO

| b <sup>+</sup> | #  | AA | #  | y <sup>+</sup> | y <sup>2+</sup> |
|----------------|----|----|----|----------------|-----------------|
| 114.0555       | 1  | A  | 22 |                |                 |
| 229.0825       | 2  | D  | 21 | 2558.3103      | 1279.6591       |
| 358.1251       | 3  | E  | 20 | 2443.2834      | 1222.1456       |
| 457.1935       | 4  | V  | 19 | 2314.2408      | 1157.6243       |
| 558.2411       | 5  | T  | 18 | 2215.1723      | 1108.0901       |
| 687.2837       | 6  | E  | 17 | 2114.1247      | 1057.5662       |
| 843.4100       | 7  | K  | 16 | 1985.0821      | 993.0449        |
| 971.4686       | 8  | Q  | 15 | 1828.9558      | 914.9818        |
| 1070.5370      | 9  | V  | 14 | 1700.8972      | 850.9525        |
| 1233.6004      | 10 | Y  | 13 | 1601.8288      | 801.4183        |
| 1348.6273      | 11 | D  | 12 | 1438.7655      | 719.8866        |
| 1419.6644      | 12 | A  | 11 | 1323.7385      | 662.3732        |
| 1556.7233      | 13 | H  | 10 | 1252.7014      | 626.8546        |
| 1657.7710      | 14 | T  | 9  | 1115.6425      | 558.3252        |
| 1813.8973      | 15 | K  | 8  | 1014.5948      | 507.8013        |
| 1942.9399      | 16 | E  | 7  | 858.4685       | 429.7382        |
| 2056.0240      | 17 | I  | 6  | 729.4259       | 365.2169        |
| 2171.0509      | 18 | D  | 5  | 616.3418       | 308.6748        |
| 2284.1350      | 19 | L  | 4  | 501.3149       | 251.1614        |
| 2383.2034      | 20 | V  | 3  | 388.2308       | 194.6193        |
| 2497.2463      | 21 | N  | 2  | 289.1624       | 145.0851        |
|                | 22 | R  | 1  | 175.1195       | 88.0637         |

N-term:+43.02 K(7):+156.13  
 K(15):+156.13

ADFDTYDDR, MH+ 1159.4544, m/z 580.2308  
 H OS G29 P150811 220811-s1.03669.03669.2.dta

X-range:

-

MassTol: Y-zoom:

MassType:

AVG  MONO

Axis:

1  2

Label:

I  M  -

Ions:

a  +  2+  3+

b  +  2+  3+

c  +  2+  3+

x  +  2+  3+

y  +  2+  3+

z  +  2+  3+

hide H<sub>2</sub>O/NH<sub>3</sub>

zoom 112-122

GO

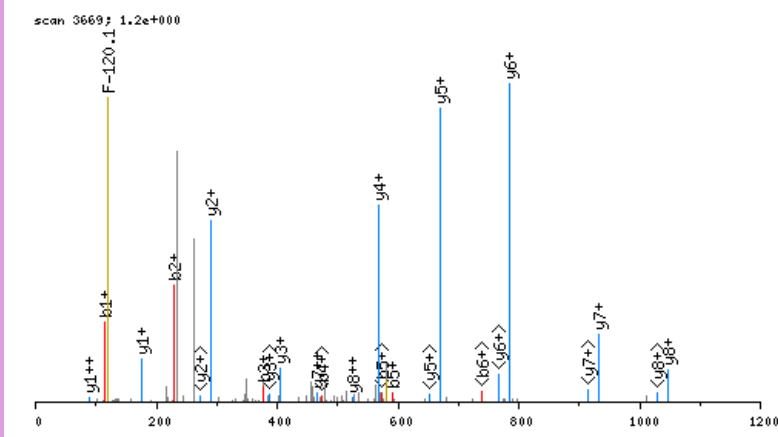

click image to zoom in; click top corners to zoom out [\[precursor±\]](#)

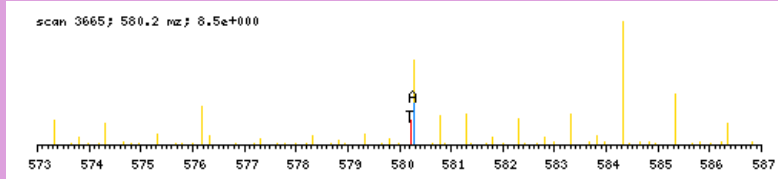

zoomed in precursor plot; T=theoretical m/z, A=acquired m/z

| b <sup>+</sup> | # | AA # | y <sup>+</sup> | y <sup>2+</sup>    |
|----------------|---|------|----------------|--------------------|
| 114.0555       | 1 | A    | 9              |                    |
| 229.0825       | 2 | D    | 8              | 1046.4067 523.7073 |
| 376.1509       | 3 | F    | 7              | 931.3798 466.1938  |
| 491.1778       | 4 | D    | 6              | 784.3113 392.6596  |
| 592.2255       | 5 | T    | 5              | 669.2844 335.1461  |
| 755.2888       | 6 | Y    | 4              | 568.2367 284.6223  |
| 870.3158       | 7 | D    | 3              | 405.1734 203.0906  |
| 985.3427       | 8 | D    | 2              | 290.1464 145.5771  |
|                | 9 | R    | 1              | 175.1195 88.0637   |

N-term:+43.02

ADGELNVDSLIIR, MH+ 1444.7284, m/z 722.8678  
 H OS G29 P150811 220811-s1.05942.05942.2.dta

scan 5942; 2.2e+000

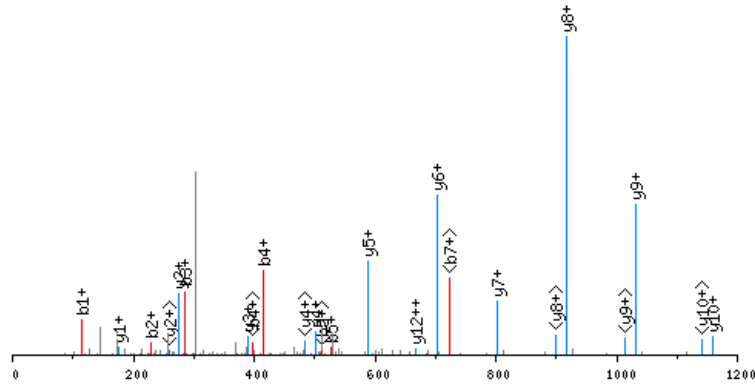

click image to zoom in; click top corners to zoom out [precursor±]

scan 5940; 722.9 m/z; 9.5e+000

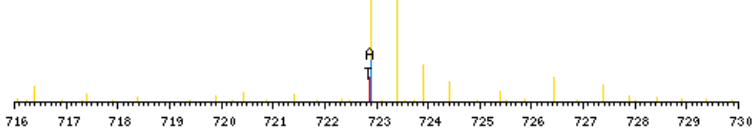

zoomed in precursor plot; T=theoretical m/z, A=acquired m/z

X-range:

-

MassTol: Y-zoom:

MassType:

AVG  MONO

Axis:

1  2

Label:

I  M  -

Ions:

a  +  2+  3+

b  +  2+  3+

c  +  2+  3+

x  +  2+  3+

y  +  2+  3+

z  +  2+  3+

hide H<sub>2</sub>O/NH<sub>3</sub>

zoom 112-122

GO

| b <sup>+</sup> | #  | AA | #  | y <sup>+</sup> | y <sup>2+</sup> |
|----------------|----|----|----|----------------|-----------------|
| 114.0555       | 1  | A  | 13 |                |                 |
| 229.0825       | 2  | D  | 12 | 1331.6807      | 666.3443        |
| 286.1039       | 3  | G  | 11 | 1216.6537      | 608.8308        |
| 415.1465       | 4  | E  | 10 | 1159.6323      | 580.3201        |
| 528.2306       | 5  | L  | 9  | 1030.5897      | 515.7988        |
| 642.2735       | 6  | N  | 8  | 917.5056       | 459.2567        |
| 741.3419       | 7  | V  | 7  | 803.4627       | 402.2353        |
| 856.3689       | 8  | D  | 6  | 704.3943       | 352.7011        |
| 943.4009       | 9  | S  | 5  | 589.3673       | 295.1876        |
| 1056.4850      | 10 | L  | 4  | 502.3353       | 251.6716        |
| 1169.5690      | 11 | I  | 3  | 389.2512       | 195.1295        |
| 1270.6167      | 12 | T  | 2  | 276.1672       | 138.5875        |
|                | 13 | R  | 1  | 175.1195       | 88.0637         |

N-term:+43.02

ADGGAASQDESSAAAAAADSR, MH+ 1991.8543, m/z 664.6229  
 H OS G29 P150811 220811-s1.03246.03246.3.dta

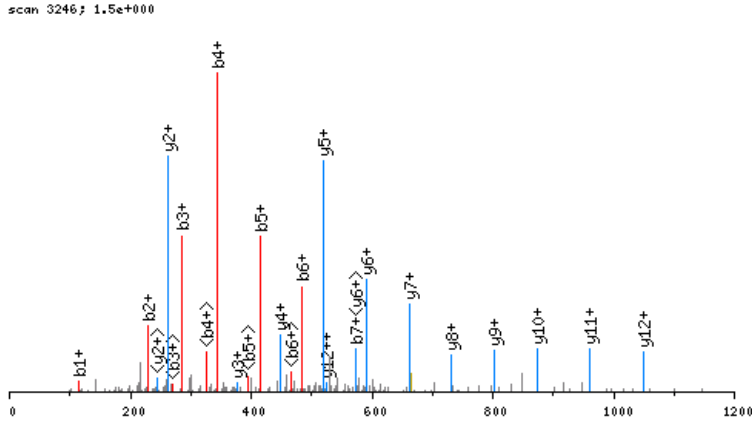

click image to zoom in; click top corners to zoom out [\[precursor±\]](#)

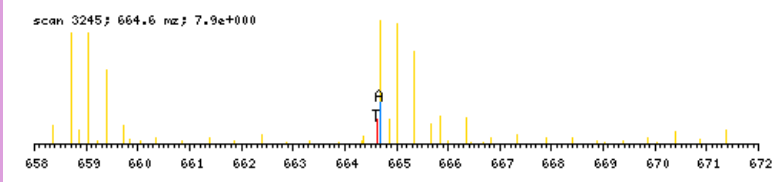

zoomed in precursor plot; T=theoretical m/z, A=acquired m/z

| b <sup>+</sup> | #  | AA # | y <sup>+</sup> | y <sup>2+</sup> |
|----------------|----|------|----------------|-----------------|
| 114.0555       | 1  | A 22 |                |                 |
| 229.0825       | 2  | D 21 | 1878.8066      | 939.9072        |
| 286.1039       | 3  | G 20 | 1763.7796      | 882.3937        |
| 343.1254       | 4  | G 19 | 1706.7582      | 853.8830        |
| 414.1625       | 5  | A 18 | 1649.7367      | 825.3723        |
| 485.1996       | 6  | A 17 | 1578.6996      | 789.8537        |
| 572.2316       | 7  | S 16 | 1507.6625      | 754.3351        |
| 700.2902       | 8  | Q 15 | 1420.6304      | 710.8191        |
| 815.3172       | 9  | D 14 | 1292.5719      | 646.7898        |
| 944.3598       | 10 | E 13 | 1177.5449      | 589.2764        |
| 1031.3918      | 11 | S 12 | 1048.5023      | 524.7551        |
| 1118.4238      | 12 | S 11 | 961.4703       | 481.2391        |
| 1189.4609      | 13 | A 10 | 874.4383       | 437.7230        |
| 1260.4980      | 14 | A 9  | 803.4012       | 402.2045        |
| 1331.5352      | 15 | A 8  | 732.3640       | 366.6859        |
| 1402.5723      | 16 | A 7  | 661.3269       | 331.1674        |
| 1473.6094      | 17 | A 6  | 590.2898       | 295.6488        |
| 1544.6465      | 18 | A 5  | 519.2527       | 260.1303        |
| 1615.6836      | 19 | A 4  | 448.2156       | 224.6117        |
| 1730.7106      | 20 | D 3  | 377.1785       | 189.0931        |
| 1817.7426      | 21 | S 2  | 262.1515       | 131.5797        |
|                | 22 | R 1  | 175.1195       | 88.0637         |

N-term:+43.02

X-range:

-

MassTol: Y-zoom:

MassType:

AVG  MONO

Axis:

1  2

Label:

I  M  -

Ions:

a  +  2+  3+

b  +  2+  3+

c  +  2+  3+

x  +  2+  3+

y  +  2+  3+

z  +  2+  3+

hide H<sub>2</sub>O/NH<sub>3</sub>

zoom 112-122

GO

ADIDKLNIDSIIQR, MH+ 1689.9600, m/z 563.9915  
 H OS G24 P150811 220811-s1.04863.04863.3.dta

X-range:

-

MassTol: Y-zoom:

MassType:

AVG  MONO

Axis:

1  2

Label:

I  M  -

Ions:

a  +  2+  3+

b  +  2+  3+

c  +  2+  3+

x  +  2+  3+

y  +  2+  3+

z  +  2+  3+

hide H<sub>2</sub>O/NH<sub>3</sub>

zoom 112-122

GO

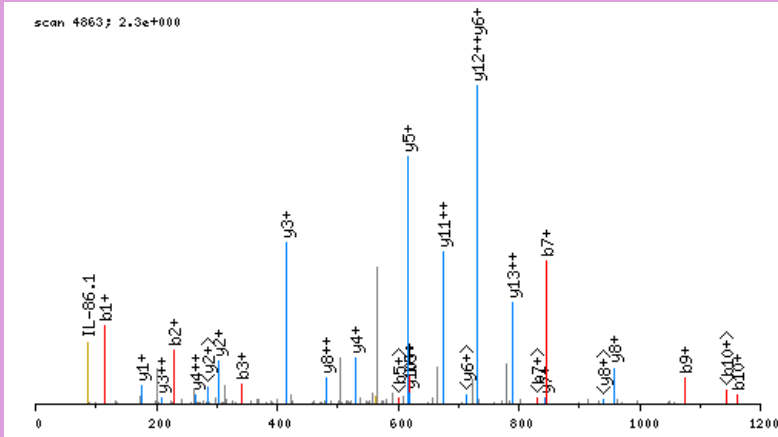

click image to zoom in; click top corners to zoom out [\[precursor±\]](#)

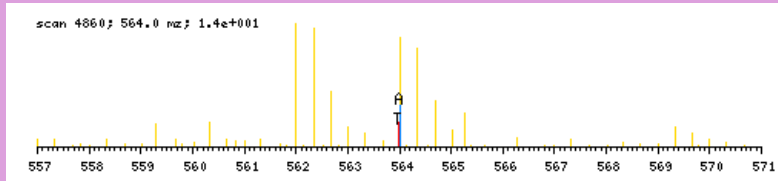

zoomed in precursor plot; T=theoretical m/z, A=acquired m/z

| b <sup>+</sup> | #  | AA # | y <sup>+</sup> | y <sup>2+</sup> |
|----------------|----|------|----------------|-----------------|
| 114.0555       | 1  | A 14 |                |                 |
| 229.0825       | 2  | D 13 | 1576.9123      | 788.9601        |
| 342.1665       | 3  | I 12 | 1461.8853      | 731.4466        |
| 457.1935       | 4  | D 11 | 1348.8013      | 674.9046        |
| 619.3516       | 5  | K 10 | 1233.7743      | 617.3911        |
| 732.4356       | 6  | L 9  | 1071.6162      | 536.3120        |
| 846.4786       | 7  | N 8  | 958.5322       | 479.7700        |
| 959.5626       | 8  | I 7  | 844.4892       | 422.7485        |
| 1074.5896      | 9  | D 6  | 731.4052       | 366.2065        |
| 1161.6216      | 10 | S 5  | 616.3782       | 308.6930        |
| 1274.7057      | 11 | I 4  | 529.3462       | 265.1770        |
| 1387.7897      | 12 | I 3  | 416.2621       | 208.6350        |
| 1515.8483      | 13 | Q 2  | 303.1781       | 152.0930        |
|                | 14 | R 1  | 175.1195       | 88.0637         |

N-term:+43.02 K(5):+162.16



ADKEAAFDDAVEER, MH+ 1641.7821, m/z 547.9322  
 H OS G25 P150811 220811-s1.05068.05068.3.dta

X-range:

-

MassTol: Y-zoom:

MassType:

AVG  MONO

Axis:

1  2

Label:

I  M  -

Ions:

a  +  2+  3+

b  +  2+  3+

c  +  2+  3+

x  +  2+  3+

y  +  2+  3+

z  +  2+  3+

hide H<sub>2</sub>O/NH<sub>3</sub>

zoom 112-122

GO

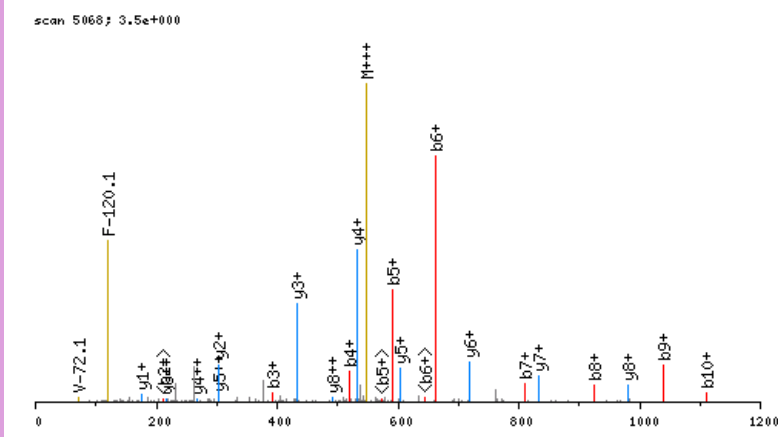

click image to zoom in; click top corners to zoom out [\[precursor±\]](#)

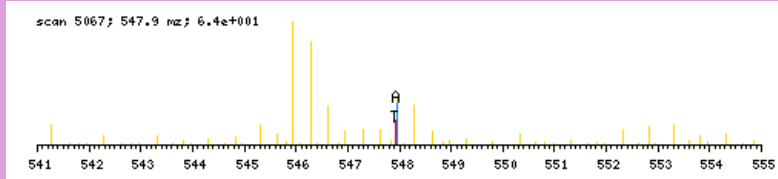

zoomed in precursor plot; T=theoretical m/z, A=acquired m/z

| b <sup>+</sup> | #  | AA # | y <sup>+</sup> | y <sup>2+</sup> |
|----------------|----|------|----------------|-----------------|
| 114.0555       | 1  | A 14 |                |                 |
| 229.0825       | 2  | D 13 | 1528.7344      | 764.8711        |
| 391.2406       | 3  | K 12 | 1413.7074      | 707.3576        |
| 520.2832       | 4  | E 11 | 1251.5493      | 626.2786        |
| 591.3203       | 5  | A 10 | 1122.5067      | 561.7573        |
| 662.3574       | 6  | A 9  | 1051.4696      | 526.2387        |
| 809.4258       | 7  | F 8  | 980.4325       | 490.7202        |
| 924.4527       | 8  | D 7  | 833.3641       | 417.1860        |
| 1039.4797      | 9  | D 6  | 718.3372       | 359.6725        |
| 1110.5168      | 10 | A 5  | 603.3102       | 302.1590        |
| 1209.5852      | 11 | V 4  | 532.2731       | 266.6405        |
| 1338.6278      | 12 | E 3  | 433.2047       | 217.1063        |
| 1467.6704      | 13 | E 2  | 304.1621       | 152.5850        |
|                | 14 | R 1  | 175.1195       | 88.0637         |

N-term:+43.02 K(3):+162.16

ADLEEQLSDEEKVR, MH+ 1736.8767, m/z 579.6304  
 H OS G24 P150811 220811-s1.04020.04020.3.dta

X-range:

-

MassTol: Y-zoom:

MassType:

AVG  MONO

Axis:

1  2

Label:

I  M  -

Ions:

a  +  2+  3+

b  +  2+  3+

c  +  2+  3+

x  +  2+  3+

y  +  2+  3+

z  +  2+  3+

hide H<sub>2</sub>O/NH<sub>3</sub>

zoom 112-122

GO

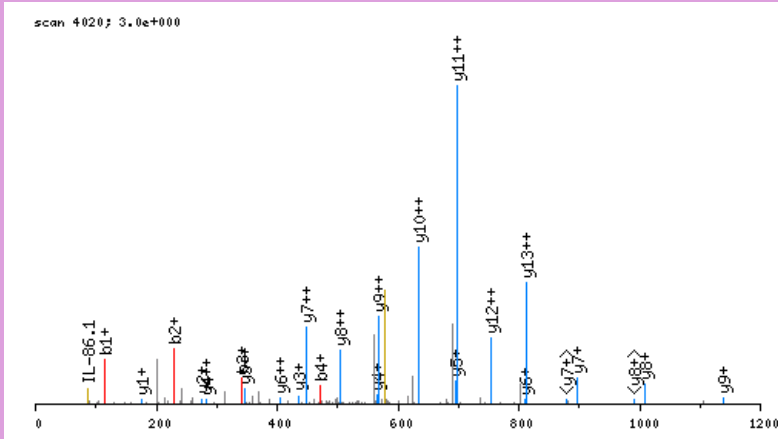

click image to zoom in; click top corners to zoom out [\[precursor±\]](#)

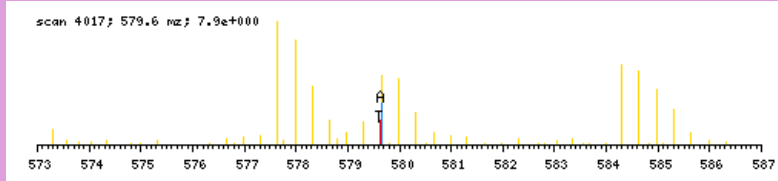

zoomed in precursor plot; T=theoretical m/z, A=acquired m/z

| b <sup>+</sup> | #  | AA # | y <sup>+</sup> | y <sup>2+</sup> |
|----------------|----|------|----------------|-----------------|
| 114.0555       | 1  | A 14 |                |                 |
| 229.0825       | 2  | D 13 | 1623.8290      | 812.4184        |
| 342.1665       | 3  | L 12 | 1508.8021      | 754.9049        |
| 471.2091       | 4  | E 11 | 1395.7180      | 698.3629        |
| 600.2517       | 5  | E 10 | 1266.6754      | 633.8416        |
| 728.3103       | 6  | Q 9  | 1137.6328      | 569.3203        |
| 841.3943       | 7  | L 8  | 1009.5742      | 505.2910        |
| 928.4264       | 8  | S 7  | 896.4902       | 448.7490        |
| 1043.4533      | 9  | D 6  | 809.4581       | 405.2330        |
| 1172.4959      | 10 | E 5  | 694.4312       | 347.7195        |
| 1301.5385      | 11 | E 4  | 565.3886       | 283.1982        |
| 1463.6966      | 12 | K 3  | 436.3460       | 218.6769        |
| 1562.7650      | 13 | V 2  | 274.1879       | 137.5979        |
|                | 14 | R 1  | 175.1195       | 88.0637         |

N-term:+43.02 K(12):+162.16

X-range:

-

MassTol: Y-zoom:

MassType:

AVG  MONO

Axis:

1  2

Label:

I  M  -

Ions:

a  +  2+  3+

b  +  2+  3+

c  +  2+  3+

x  +  2+  3+

y  +  2+  3+

z  +  2+  3+

hide H<sub>2</sub>O/NH<sub>3</sub>

zoom 112-122

GO

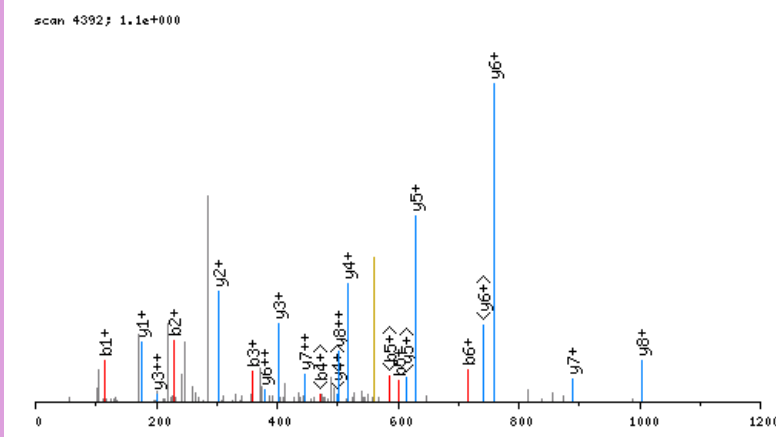

click image to zoom in; click top corners to zoom out [\[precursor±\]](#)

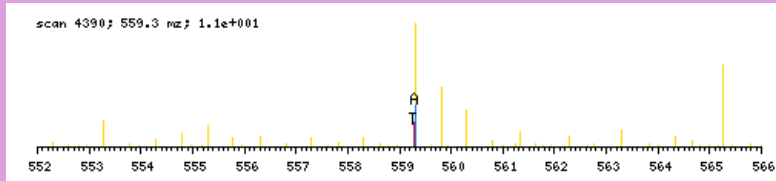

zoomed in precursor plot; T=theoretical m/z, A=acquired m/z

| b <sup>+</sup> | # | AA # | y <sup>+</sup> | y <sup>2+</sup> |
|----------------|---|------|----------------|-----------------|
| 114.0555       | 1 | A 9  |                |                 |
| 229.0825       | 2 | D 8  | 1004.4835      | 502.7457        |
| 360.1229       | 3 | M 7  | 889.4566       | 445.2322        |
| 488.1815       | 4 | Q 6  | 758.4161       | 379.7120        |
| 602.2244       | 5 | N 5  | 630.3575       | 315.6827        |
| 715.3085       | 6 | L 4  | 516.3146       | 258.6612        |
| 814.3769       | 7 | V 3  | 403.2305       | 202.1192        |
| 943.4195       | 8 | E 2  | 304.1621       | 152.5850        |
|                | 9 | R 1  | 175.1195       | 88.0637         |

N-term:+43.02

ADPAAGPPPSEGEESTVR, MH+ 1808.8303, m/z 603.6149  
 H OS G29 P150811 220811-s1.02949.02949.3.dta

scan 2949; 6.6e-001

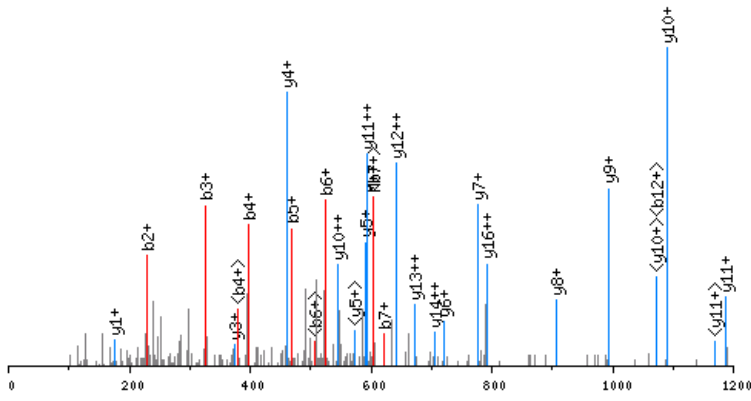

click image to zoom in; click top corners to zoom out [\[precursor±\]](#)

scan 2945; 603.6 m/z; 3.9e+000

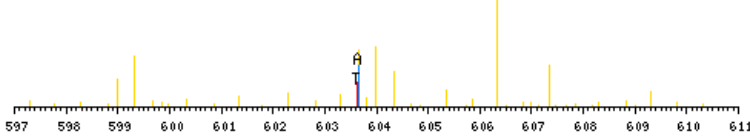

zoomed in precursor plot; T=theoretical m/z, A=acquired m/z

X-range:

-

MassTol: Y-zoom:

MassType:

AVG  MONO

Axis:

1  2

Label:

I  M  -

Ions:

a  +  2+  3+

b  +  2+  3+

c  +  2+  3+

x  +  2+  3+

y  +  2+  3+

z  +  2+  3+

hide H<sub>2</sub>O/NH<sub>3</sub>

zoom 112-122

GO

| b <sup>+</sup> | #  | AA | #  | y <sup>+</sup> | y <sup>2+</sup> |
|----------------|----|----|----|----------------|-----------------|
| 114.0555       | 1  | A  | 18 |                |                 |
| 229.0825       | 2  | D  | 17 | 1695.7826      | 848.3952        |
| 326.1352       | 3  | P  | 16 | 1580.7556      | 790.8817        |
| 397.1723       | 4  | A  | 15 | 1483.7029      | 742.3554        |
| 468.2094       | 5  | A  | 14 | 1412.6658      | 706.8368        |
| 525.2309       | 6  | G  | 13 | 1341.6286      | 671.3182        |
| 622.2837       | 7  | P  | 12 | 1284.6072      | 642.8075        |
| 719.3364       | 8  | P  | 11 | 1187.5544      | 594.2811        |
| 816.3892       | 9  | P  | 10 | 1090.5017      | 545.7547        |
| 903.4212       | 10 | S  | 9  | 993.4489       | 497.2284        |
| 1032.4638      | 11 | E  | 8  | 906.4169       | 453.7123        |
| 1089.4853      | 12 | G  | 7  | 777.3743       | 389.1910        |
| 1218.5279      | 13 | E  | 6  | 720.3528       | 360.6803        |
| 1347.5705      | 14 | E  | 5  | 591.3102       | 296.1590        |
| 1434.6025      | 15 | S  | 4  | 462.2676       | 231.6377        |
| 1535.6502      | 16 | T  | 3  | 375.2356       | 188.1217        |
| 1634.7186      | 17 | V  | 2  | 274.1879       | 137.5979        |
|                | 18 | R  | 1  | 175.1195       | 88.0637         |

N-term:+43.02

ADPEPWSQIGR, MH+ 1384.6497, m/z 692.8285  
 H OS G29 P150811 220811-s1.05079.05079.2.dta

X-range:

-

MassTol: Y-zoom:

MassType:

AVG  MONO

Axis:

1  2

Label:

I  M  -

Ions:

a  +  2+  3+

b  +  2+  3+

c  +  2+  3+

x  +  2+  3+

y  +  2+  3+

z  +  2+  3+

hide H<sub>2</sub>O/NH<sub>3</sub>

zoom 112-122

GO

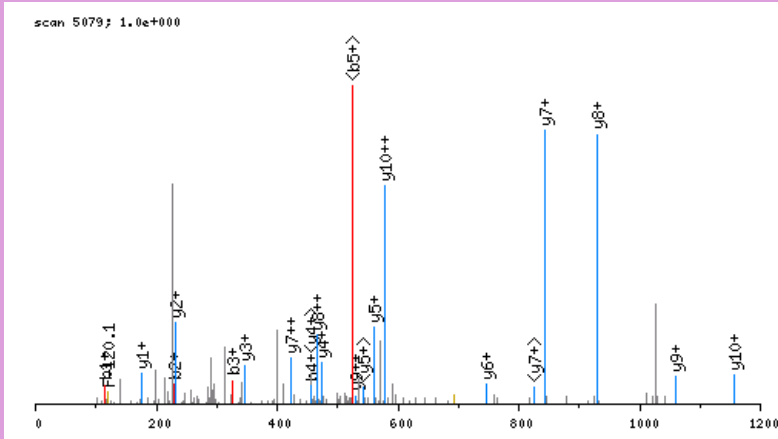

click image to zoom in; click top corners to zoom out [\[precursor±\]](#)

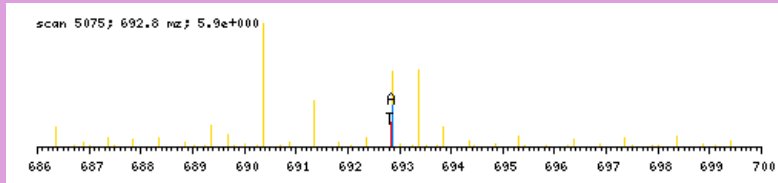

zoomed in precursor plot; T=theoretical m/z, A=acquired m/z

| b <sup>+</sup> | #  | AA # | y <sup>+</sup> | y <sup>2+</sup> |
|----------------|----|------|----------------|-----------------|
| 114.0555       | 1  | A 12 |                |                 |
| 229.0825       | 2  | D 11 | 1271.6020      | 636.3049        |
| 326.1352       | 3  | P 10 | 1156.5751      | 578.7915        |
| 455.1778       | 4  | E 9  | 1059.5223      | 530.2651        |
| 542.2098       | 5  | S 8  | 930.4797       | 465.7438        |
| 639.2626       | 6  | P 7  | 843.4477       | 422.2278        |
| 825.3419       | 7  | W 6  | 746.3949       | 373.7014        |
| 912.3739       | 8  | S 5  | 560.3156       | 280.6617        |
| 1040.4325      | 9  | Q 4  | 473.2836       | 237.1457        |
| 1153.5166      | 10 | I 3  | 345.2250       | 173.1164        |
| 1210.5381      | 11 | G 2  | 232.1410       | 116.5744        |
|                | 12 | R 1  | 175.1195       | 88.0637         |

N-term:+43.02

ADPKYADLPGIAR, MH+ 1456.7801, m/z 486.2649  
 H OS G24 P150811 220811-s1.03829.03829.3.dta

X-range:

-

MassTol: Y-zoom:

MassType:

AVG  MONO

Axis:

1  2

Label:

I  M  -

Ions:

a  +  2+  3+

b  +  2+  3+

c  +  2+  3+

x  +  2+  3+

y  +  2+  3+

z  +  2+  3+

hide H<sub>2</sub>O/NH<sub>3</sub>

zoom 112-122

GO

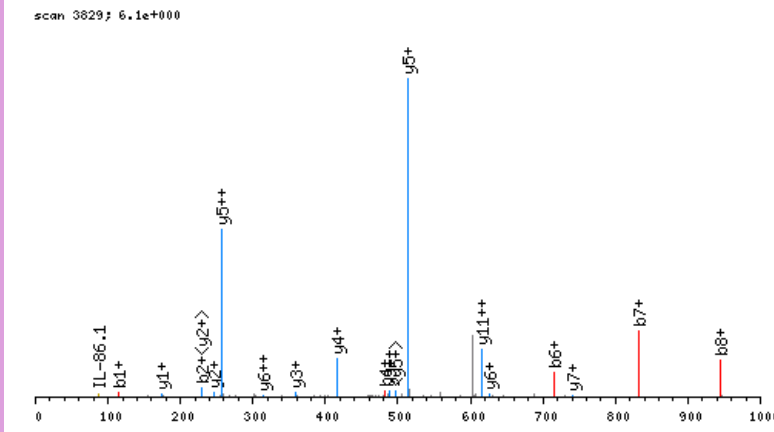

click image to zoom in; click top corners to zoom out [\[precursor±\]](#)

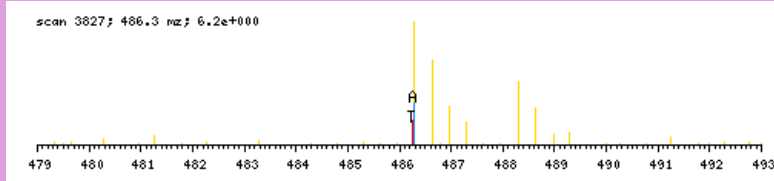

zoomed in precursor plot; T=theoretical m/z, A=acquired m/z

| b <sup>+</sup> | #  | AA # | y <sup>+</sup> | y <sup>2+</sup> |
|----------------|----|------|----------------|-----------------|
| 114.0555       | 1  | A 13 |                |                 |
| 229.0825       | 2  | D 12 | 1343.7324      | 672.3701        |
| 326.1352       | 3  | P 11 | 1228.7054      | 614.8566        |
| 482.2615       | 4  | K 10 | 1131.6527      | 566.3302        |
| 645.3248       | 5  | Y 9  | 975.5264       | 488.2671        |
| 716.3620       | 6  | A 8  | 812.4630       | 406.7354        |
| 831.3889       | 7  | D 7  | 741.4259       | 371.2169        |
| 944.4730       | 8  | L 6  | 626.3990       | 313.7034        |
| 1041.5257      | 9  | P 5  | 513.3149       | 257.1614        |
| 1098.5472      | 10 | G 4  | 416.2621       | 208.6350        |
| 1211.6313      | 11 | I 3  | 359.2407       | 180.1243        |
| 1282.6684      | 12 | A 2  | 246.1566       | 123.5822        |
|                | 13 | R 1  | 175.1195       | 88.0637         |

N-term:+43.02 K(4):+156.13

ADQGAMAAADIAR, MH+ 1302.6112, m/z 651.8093  
 H OS G29 P150811 220811-s1.04042.04042.2.dta

X-range:

-

MassTol: Y-zoom:

MassType:

AVG  MONO

Axis:

1  2

Label:

I  M  -

Ions:

a  +  2+  3+

b  +  2+  3+

c  +  2+  3+

x  +  2+  3+

y  +  2+  3+

z  +  2+  3+

hide H<sub>2</sub>O/NH<sub>3</sub>

zoom 112-122

GO

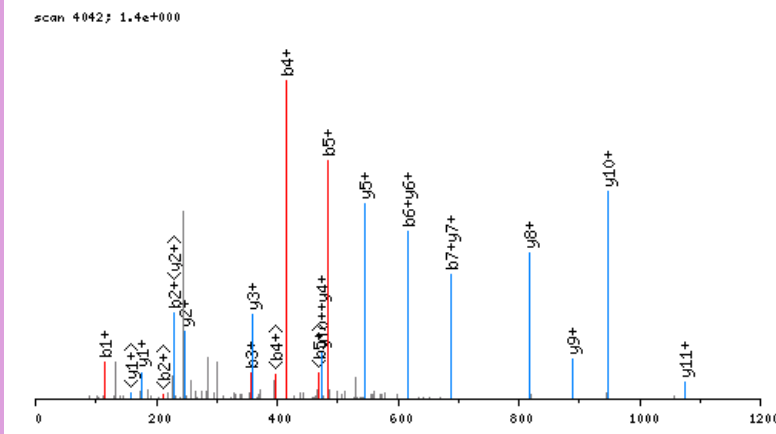

click image to zoom in; click top corners to zoom out [\[precursor±\]](#)

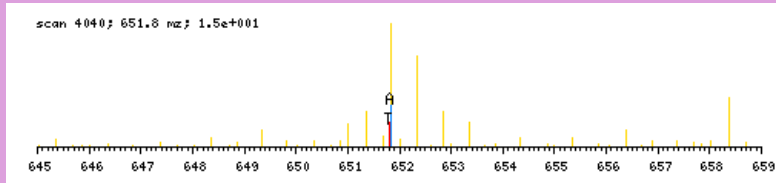

zoomed in precursor plot; T=theoretical m/z, A=acquired m/z

| b <sup>+</sup> | #  | AA # | y <sup>+</sup> | y <sup>2+</sup> |
|----------------|----|------|----------------|-----------------|
| 114.0555       | 1  | A 13 |                |                 |
| 229.0825       | 2  | D 12 | 1189.5635      | 595.2857        |
| 357.1410       | 3  | Q 11 | 1074.5366      | 537.7722        |
| 414.1625       | 4  | G 10 | 946.4780       | 473.7429        |
| 485.1996       | 5  | A 9  | 889.4566       | 445.2322        |
| 616.2401       | 6  | M 8  | 818.4194       | 409.7136        |
| 687.2772       | 7  | A 7  | 687.3790       | 344.1934        |
| 758.3143       | 8  | A 6  | 616.3418       | 308.6748        |
| 829.3514       | 9  | A 5  | 545.3047       | 273.1563        |
| 944.3784       | 10 | D 4  | 474.2676       | 237.6377        |
| 1057.4624      | 11 | I 3  | 359.2407       | 180.1243        |
| 1128.4996      | 12 | A 2  | 246.1566       | 123.5822        |
|                | 13 | R 1  | 175.1195       | 88.0637         |

N-term:+43.02

ADSGPAGGAALAAPAPGPGSGSTGPR, MH+ 2189.0587, m/z 730.3578  
 H OS G29 P150811 220811-s1.03709.03709.3.dta

scan 3709; 3.9e+000

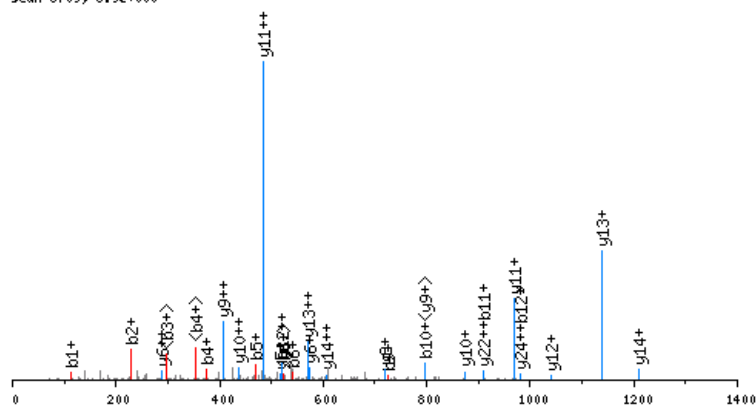

click image to zoom in; click top corners to zoom out [precursor±]

scan 3705; 730.4 mz; 3.7e+001

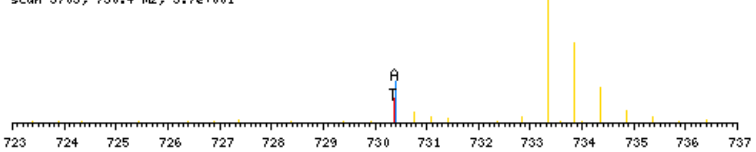

zoomed in precursor plot; T=theoretical m/z, A=acquired m/z

X-range:

-

MassTol: Y-zoom:

MassType:

AVG  MONO

Axis:

1  2

Label:

I  M  -

Ions:

a  +  2+  3+

b  +  2+  3+

c  +  2+  3+

x  +  2+  3+

y  +  2+  3+

z  +  2+  3+

hide H<sub>2</sub>O/NH<sub>3</sub>

zoom 112-122

GO

| b <sup>+</sup> | #  | AA # | y <sup>+</sup> | y <sup>2+</sup> |
|----------------|----|------|----------------|-----------------|
| 114.0555       | 1  | A 26 |                |                 |
| 229.0825       | 2  | D 25 | 2076.0110      | 1038.5094       |
| 316.1145       | 3  | S 24 | 1960.9841      | 980.9960        |
| 373.1359       | 4  | G 23 | 1873.9520      | 937.4799        |
| 470.1887       | 5  | P 22 | 1816.9306      | 908.9692        |
| 541.2258       | 6  | A 21 | 1719.8778      | 860.4428        |
| 598.2473       | 7  | G 20 | 1648.8407      | 824.9243        |
| 655.2688       | 8  | G 19 | 1591.8192      | 796.4135        |
| 726.3059       | 9  | A 18 | 1534.7978      | 767.9028        |
| 797.3430       | 10 | A 17 | 1463.7607      | 732.3842        |
| 910.4270       | 11 | L 16 | 1392.7236      | 696.8657        |
| 981.4642       | 12 | A 15 | 1279.6395      | 640.3237        |
| 1052.5013      | 13 | A 14 | 1208.6024      | 604.8051        |
| 1149.5540      | 14 | P 13 | 1137.5653      | 569.2865        |
| 1220.5912      | 15 | A 12 | 1040.5125      | 520.7602        |
| 1317.6439      | 16 | P 11 | 969.4754       | 485.2416        |
| 1374.6654      | 17 | G 10 | 872.4226       | 436.7152        |
| 1471.7181      | 18 | P 9  | 815.4012       | 408.2045        |
| 1528.7396      | 19 | G 8  | 718.3484       | 359.6781        |
| 1615.7716      | 20 | S 7  | 661.3269       | 331.1674        |
| 1672.7931      | 21 | G 6  | 574.2949       | 287.6514        |
| 1759.8251      | 22 | S 5  | 517.2734       | 259.1406        |
| 1860.8728      | 23 | T 4  | 430.2414       | 215.6246        |
| 1917.8943      | 24 | G 3  | 329.1937       | 165.1008        |
| 2014.9470      | 25 | P 2  | 272.1723       | 136.5900        |
|                | 26 | R 1  | 175.1195       | 88.0637         |

N-term:+43.02



ADTAPQLKR, MH+ 1069.6006, m/z 535.3040  
 H OS G25 P150811 220811-s1.02534.02534.2.dta

scan 2534; 3.0e+001

X-range:

-

MassTol: Y-zoom:

MassType:

AVG  MONO

Axis:

1  2

Label:

I  M  -

Ions:

a  +  2+  3+

b  +  2+  3+

c  +  2+  3+

x  +  2+  3+

y  +  2+  3+

z  +  2+  3+

hide H<sub>2</sub>O/NH<sub>3</sub>

zoom 112-122

GO

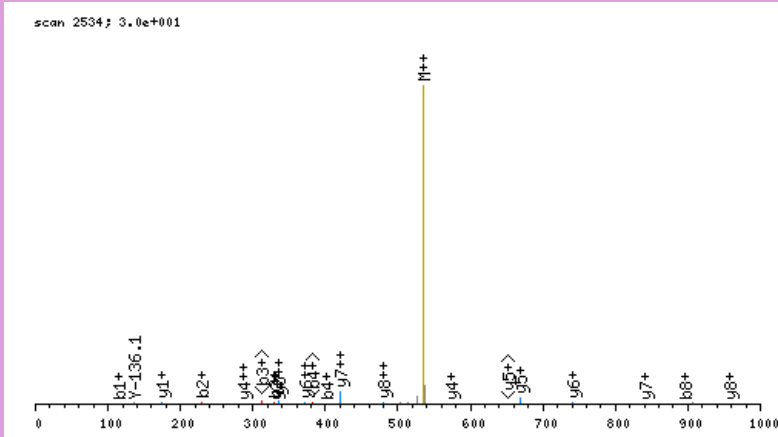

click image to zoom in; click top corners to zoom out [\[precursor±\]](#)

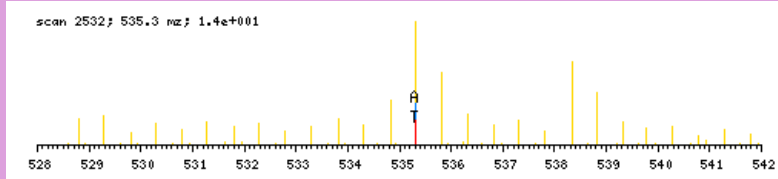

zoomed in precursor plot; T=theoretical m/z, A=acquired m/z

| b <sup>+</sup> | # | AA # | y <sup>+</sup> | y <sup>2+</sup>   |
|----------------|---|------|----------------|-------------------|
| 114.0555       | 1 | A    | 9              |                   |
| 229.0825       | 2 | D    | 8              | 956.5529 478.7804 |
| 330.1301       | 3 | T    | 7              | 841.5260 421.2669 |
| 401.1672       | 4 | A    | 6              | 740.4783 370.7431 |
| 498.2200       | 5 | P    | 5              | 669.4412 335.2245 |
| 626.2786       | 6 | Q    | 4              | 572.3884 286.6981 |
| 739.3627       | 7 | L    | 3              | 444.3299 222.6688 |
| 895.4890       | 8 | K    | 2              | 331.2458 166.1268 |
|                | 9 | R    | 1              | 175.1195 88.0637  |

N-term: +43.02 K(8): +156.13

X-range:

-

MassTol: Y-zoom:

MassType:

AVG  MONO

Axis:

1  2

Label:

I  M  -

Ions:

a  +  2+  3+

b  +  2+  3+

c  +  2+  3+

x  +  2+  3+

y  +  2+  3+

z  +  2+  3+

hide H<sub>2</sub>O/NH<sub>3</sub>

zoom 112-122

GO

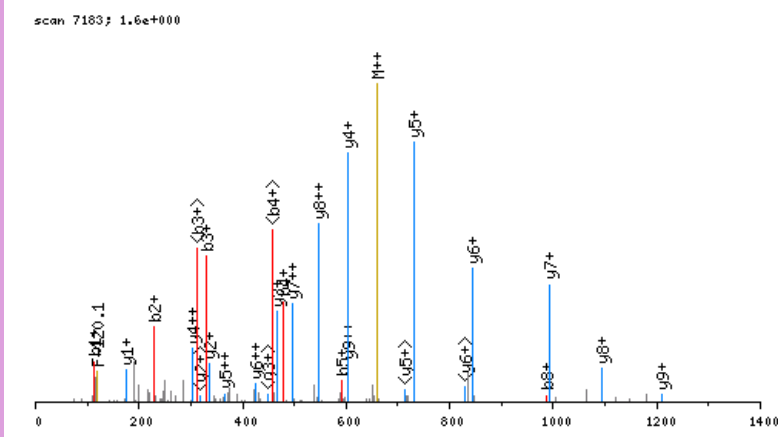

click image to zoom in; click top corners to zoom out [\[precursor±\]](#)

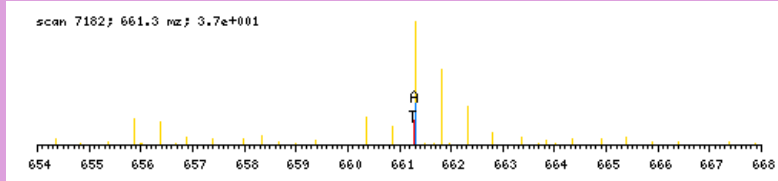

zoomed in precursor plot; T=theoretical m/z, A=acquired m/z

| b <sup>+</sup> | #  | AA | #  | y <sup>+</sup> | y <sup>2+</sup> |
|----------------|----|----|----|----------------|-----------------|
| 114.0555       | 1  | A  | 10 |                |                 |
| 229.0825       | 2  | D  | 9  | 1208.5192      | 604.7635        |
| 330.1301       | 3  | T  | 8  | 1093.4922      | 547.2500        |
| 477.1985       | 4  | F  | 7  | 992.4446       | 496.7262        |
| 590.2826       | 5  | L  | 6  | 845.3762       | 423.1920        |
| 719.3252       | 6  | E  | 5  | 732.2921       | 366.6500        |
| 856.3841       | 7  | H  | 4  | 603.2495       | 302.1287        |
| 987.4246       | 8  | M  | 3  | 466.1906       | 233.5992        |
| 1147.4552      | 9  | C  | 2  | 335.1501       | 168.0790        |
|                | 10 | R  | 1  | 175.1195       | 88.0637         |

N-term:+43.02 C(9):+160.03

X-range:

-

MassTol: Y-zoom:

MassType:

AVG  MONO

Axis:

1  2

Label:

I  M  -

Ions:

a  +  2+  3+

b  +  2+  3+

c  +  2+  3+

x  +  2+  3+

y  +  2+  3+

z  +  2+  3+

hide H<sub>2</sub>O/NH<sub>3</sub>

zoom 112-122

GO

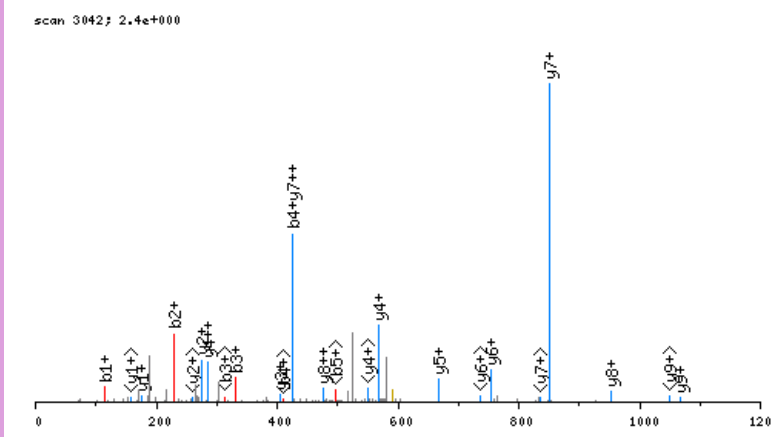

click image to zoom in; click top corners to zoom out [\[precursor±\]](#)

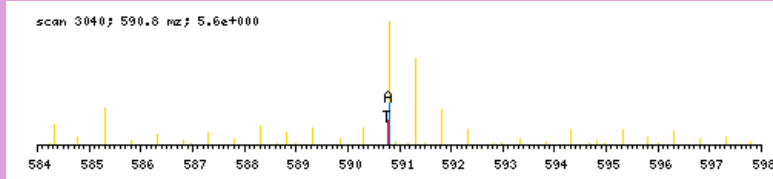

zoomed in precursor plot; T=theoretical m/z, A=acquired m/z

| b <sup>+</sup> | #  | AA # | y <sup>+</sup> | y <sup>2+</sup>    |
|----------------|----|------|----------------|--------------------|
| 114.0555       | 1  | A    | 10             |                    |
| 229.0825       | 2  | D    | 9              | 1067.5009 534.2544 |
| 330.1301       | 3  | T    | 8              | 952.4740 476.7409  |
| 427.1829       | 4  | P    | 7              | 851.4263 426.2171  |
| 514.2149       | 5  | S    | 6              | 754.3735 377.6907  |
| 613.2833       | 6  | V    | 5              | 667.3415 334.1747  |
| 776.3467       | 7  | Y    | 4              | 568.2731 284.6405  |
| 905.3893       | 8  | E    | 3              | 405.2098 203.1088  |
| 1006.4369      | 9  | T    | 2              | 276.1672 138.5875  |
|                | 10 | R    | 1              | 175.1195 88.0637   |

N-term:+43.02

ADTQYILPNDIGVSSLDGR, MH+ 2179.0341, m/z 727.0162  
 H OS G29 P150811 220811-s1.06193.06193.3.dta

scan 6193; 3.0e+000

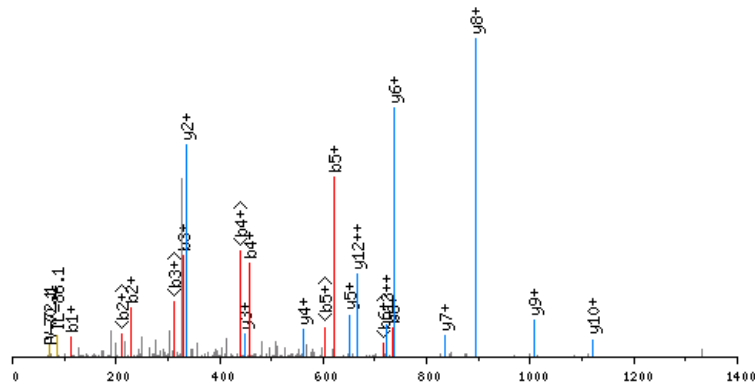

click image to zoom in; click top corners to zoom out [precursor±]

scan 6190; 727.0 m/z; 2.5e+001

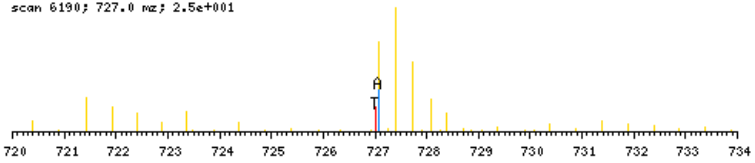

zoomed in precursor plot; T=theoretical m/z, A=acquired m/z

X-range:

-

MassTol: Y-zoom:

MassType:

AVG  MONO

Axis:

1  2

Label:

I  M  -

Ions:

a  +  2+  3+

b  +  2+  3+

c  +  2+  3+

x  +  2+  3+

y  +  2+  3+

z  +  2+  3+

hide H<sub>2</sub>O/NH<sub>3</sub>

zoom 112-122

GO

| b <sup>+</sup> | #  | AA | #  | y <sup>+</sup> | y <sup>2+</sup> |
|----------------|----|----|----|----------------|-----------------|
| 114.0555       | 1  | A  | 19 |                |                 |
| 229.0825       | 2  | D  | 18 | 2065.9864      | 1033.4971       |
| 330.1301       | 3  | T  | 17 | 1950.9595      | 975.9836        |
| 458.1887       | 4  | Q  | 16 | 1849.9118      | 925.4598        |
| 621.2520       | 5  | Y  | 15 | 1721.8532      | 861.4305        |
| 734.3361       | 6  | I  | 14 | 1558.7899      | 779.8988        |
| 847.4202       | 7  | L  | 13 | 1445.7058      | 723.3568        |
| 944.4729       | 8  | P  | 12 | 1332.6217      | 666.8148        |
| 1058.5159      | 9  | N  | 11 | 1235.5690      | 618.2884        |
| 1173.5428      | 10 | D  | 10 | 1121.5260      | 561.2669        |
| 1286.6269      | 11 | I  | 9  | 1006.4991      | 503.7535        |
| 1343.6483      | 12 | G  | 8  | 893.4150       | 447.2114        |
| 1442.7167      | 13 | V  | 7  | 836.3936       | 418.7007        |
| 1529.7488      | 14 | S  | 6  | 737.3252       | 369.1665        |
| 1616.7808      | 15 | S  | 5  | 650.2931       | 325.6505        |
| 1729.8649      | 16 | L  | 4  | 563.2611       | 282.1345        |
| 1844.8918      | 17 | D  | 3  | 450.1770       | 225.5924        |
| 2004.9224      | 18 | C  | 2  | 335.1501       | 168.0790        |
|                | 19 | R  | 1  | 175.1195       | 88.0637         |

N-term:+43.02 C(18):+160.03

ADVSVDSKLPVKEVCR, MH+ 2097.1651, m/z 699.7265  
 H OS G26 P150811 220811-s1.04429.04429.3.dta

X-range:

-

MassTol: Y-zoom:

MassType:

AVG  MONO

Axis:

1  2

Label:

I  M  -

Ions:

a  +  2+  3+

b  +  2+  3+

c  +  2+  3+

x  +  2+  3+

y  +  2+  3+

z  +  2+  3+

hide H<sub>2</sub>O/NH<sub>3</sub>

zoom 112-122

GO

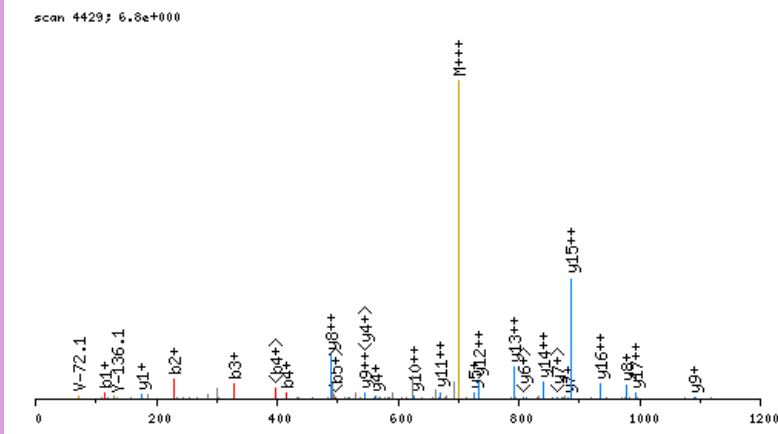

click image to zoom in; click top corners to zoom out [\[precursor±\]](#)

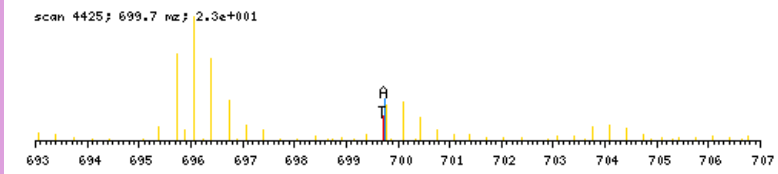

zoomed in precursor plot; T=theoretical m/z, A=acquired m/z

| b <sup>+</sup> | #  | AA # | y <sup>+</sup> | y <sup>2+</sup> |
|----------------|----|------|----------------|-----------------|
| 114.0555       | 1  | A 18 |                |                 |
| 229.0825       | 2  | D 17 | 1984.1174      | 992.5626        |
| 328.1509       | 3  | V 16 | 1869.0904      | 935.0491        |
| 415.1829       | 4  | S 15 | 1770.0220      | 885.5149        |
| 514.2513       | 5  | V 14 | 1682.9900      | 841.9989        |
| 629.2783       | 6  | D 13 | 1583.9216      | 792.4647        |
| 757.3368       | 7  | Q 12 | 1468.8946      | 734.9512        |
| 844.3689       | 8  | S 11 | 1340.8360      | 670.9219        |
| 1006.5270      | 9  | K 10 | 1253.8040      | 627.4059        |
| 1119.6110      | 10 | L 9  | 1091.6459      | 546.3269        |
| 1216.6638      | 11 | P 8  | 978.5618       | 489.7848        |
| 1273.6853      | 12 | G 7  | 881.5091       | 441.2585        |
| 1372.7537      | 13 | V 6  | 824.4876       | 412.7477        |
| 1534.9118      | 14 | K 5  | 725.4192       | 363.2135        |
| 1663.9544      | 15 | E 4  | 563.2611       | 282.1345        |
| 1763.0228      | 16 | V 3  | 434.2185       | 217.6132        |
| 1923.0534      | 17 | C 2  | 335.1501       | 168.0790        |
|                | 18 | R 1  | 175.1195       | 88.0637         |

N-term:+43.02 K(9):+162.16  
 K(14):+162.16 C(17):+160.03

ADVVPANDSTASQDVANR, MH+ 1935.8684, m/z 645.9610  
 H OS G29 P150811 220811-s1.03431.03431.3.dta

X-range:

-

MassTol: Y-zoom:

MassType:

AVG  MONO

Axis:

1  2

Label:

I  M  -

Ions:

a  +  2+  3+

b  +  2+  3+

c  +  2+  3+

x  +  2+  3+

y  +  2+  3+

z  +  2+  3+

hide H<sub>2</sub>O/NH<sub>3</sub>

zoom 112-122

GO

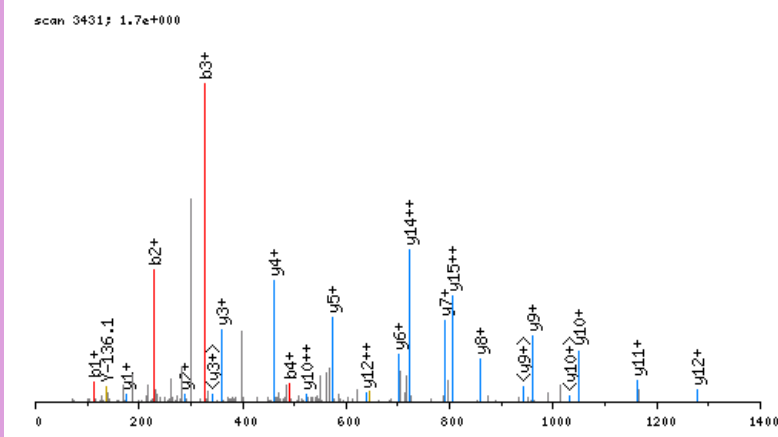

click image to zoom in; click top corners to zoom out [\[precursor±\]](#)

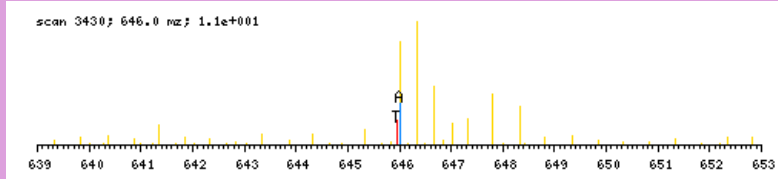

zoomed in precursor plot; T=theoretical m/z, A=acquired m/z

| b <sup>+</sup> | #  | AA | #  | y <sup>+</sup> | y <sup>2+</sup> |
|----------------|----|----|----|----------------|-----------------|
| 114.0555       | 1  | A  | 18 |                |                 |
| 229.0825       | 2  | D  | 17 | 1822.8208      | 911.9143        |
| 328.1509       | 3  | V  | 16 | 1707.7938      | 854.4008        |
| 491.2142       | 4  | Y  | 15 | 1608.7254      | 804.8666        |
| 588.2670       | 5  | P  | 14 | 1445.6621      | 723.3349        |
| 659.3041       | 6  | A  | 13 | 1348.6093      | 674.8086        |
| 773.3470       | 7  | N  | 12 | 1277.5722      | 639.2900        |
| 888.3739       | 8  | D  | 11 | 1163.5293      | 582.2685        |
| 975.4060       | 9  | S  | 10 | 1048.5023      | 524.7551        |
| 1076.4537      | 10 | T  | 9  | 961.4703       | 481.2391        |
| 1147.4908      | 11 | A  | 8  | 860.4226       | 430.7152        |
| 1234.5228      | 12 | S  | 7  | 789.3855       | 395.1967        |
| 1362.5814      | 13 | Q  | 6  | 702.3535       | 351.6807        |
| 1477.6083      | 14 | D  | 5  | 574.2949       | 287.6514        |
| 1576.6767      | 15 | V  | 4  | 459.2680       | 230.1379        |
| 1647.7138      | 16 | A  | 3  | 360.1995       | 180.6037        |
| 1761.7568      | 17 | N  | 2  | 289.1624       | 145.0851        |
|                | 18 | R  | 1  | 175.1195       | 88.0637         |

N-term:+43.02

AEAAIDPR, MH+ 884.4478, m/z 442.7275  
 H OS G29 P150811 220811-s1.02883.02883.2.dta

X-range:

-

MassTol: Y-zoom:

MassType:

AVG  MONO

Axis:

1  2

Label:

I  M  -

Ions:

a  +  2+  3+

b  +  2+  3+

c  +  2+  3+

x  +  2+  3+

y  +  2+  3+

z  +  2+  3+

hide H<sub>2</sub>O/NH<sub>3</sub>

zoom 112-122

GO

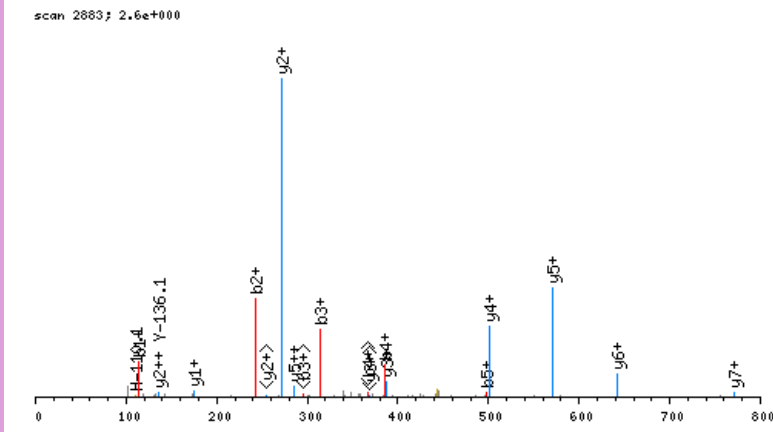

click image to zoom in; click top corners to zoom out [\[precursor±\]](#)

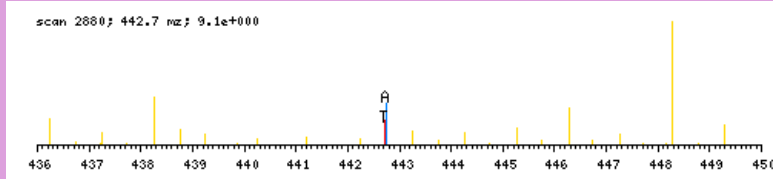

zoomed in precursor plot; T=theoretical m/z, A=acquired m/z

| b <sup>+</sup> | # | AA # | y <sup>+</sup> | y <sup>2+</sup> |
|----------------|---|------|----------------|-----------------|
| 114.0555       | 1 | A 8  |                |                 |
| 243.0981       | 2 | E 7  | 771.4001       | 386.2040        |
| 314.1352       | 3 | A 6  | 642.3575       | 321.6827        |
| 385.1723       | 4 | A 5  | 571.3204       | 286.1641        |
| 498.2564       | 5 | I 4  | 500.2833       | 250.6455        |
| 613.2833       | 6 | D 3  | 387.1992       | 194.1035        |
| 710.3361       | 7 | P 2  | 272.1723       | 136.5900        |
|                | 8 | R 1  | 175.1195       | 88.0637         |

N-term:+43.02

AEAALLLPPEAAAER, MH+ 1563.8383, m/z 782.4228  
 H OS G29 P150811 220811-s1.06142.06142.2.dta

X-range:

-

MassTol: Y-zoom:

MassType:

AVG  MONO

Axis:

1  2

Label:

I  M  -

Ions:

a  +  2+  3+

b  +  2+  3+

c  +  2+  3+

x  +  2+  3+

y  +  2+  3+

z  +  2+  3+

hide H<sub>2</sub>O/NH<sub>3</sub>

zoom 112-122

GO

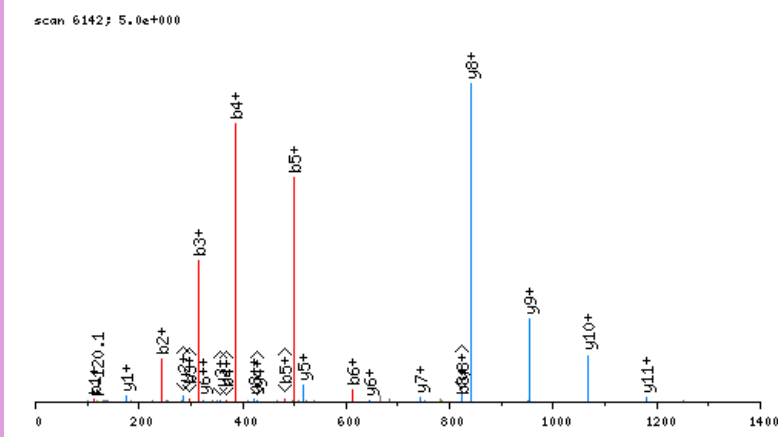

click image to zoom in; click top corners to zoom out [\[precursor±\]](#)

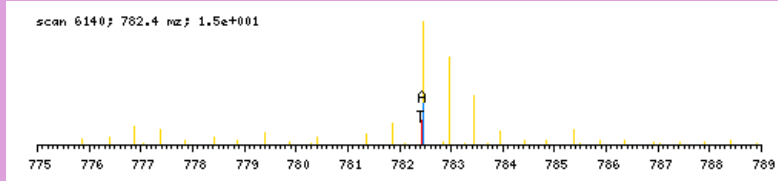

zoomed in precursor plot; T=theoretical m/z, A=acquired m/z

| b <sup>+</sup> | #  | AA # | y <sup>+</sup> | y <sup>2+</sup> |
|----------------|----|------|----------------|-----------------|
| 114.0555       | 1  | A    | 15             |                 |
| 243.0981       | 2  | E    | 14             | 1450.7906       |
| 314.1352       | 3  | A    | 13             | 1321.7480       |
| 385.1723       | 4  | A    | 12             | 1250.7109       |
| 498.2564       | 5  | L    | 11             | 1179.6737       |
| 611.3405       | 6  | L    | 10             | 1066.5897       |
| 724.4245       | 7  | L    | 9              | 953.5056        |
| 821.4773       | 8  | P    | 8              | 840.4216        |
| 918.5301       | 9  | P    | 7              | 743.3688        |
| 1047.5726      | 10 | E    | 6              | 646.3160        |
| 1118.6098      | 11 | A    | 5              | 517.2734        |
| 1189.6469      | 12 | A    | 4              | 446.2363        |
| 1260.6840      | 13 | A    | 3              | 375.1992        |
| 1389.7266      | 14 | E    | 2              | 304.1621        |
|                | 15 | R    | 1              | 175.1195        |

N-term:+43.02



AEAEAAQLKEEGNR, MH+ 1585.7822, m/z 529.2656  
 H OS G25 P150811 220811-s1.04056.04056.3.dta

scan 4056; 8.5e+000

X-range:

-

MassTol: Y-zoom:

MassType:

AVG  MONO

Axis:

1  2

Label:

I  M  -

Ions:

a  +  2+  3+

b  +  2+  3+

c  +  2+  3+

x  +  2+  3+

y  +  2+  3+

z  +  2+  3+

hide H<sub>2</sub>O/NH<sub>3</sub>

zoom 112-122

GO

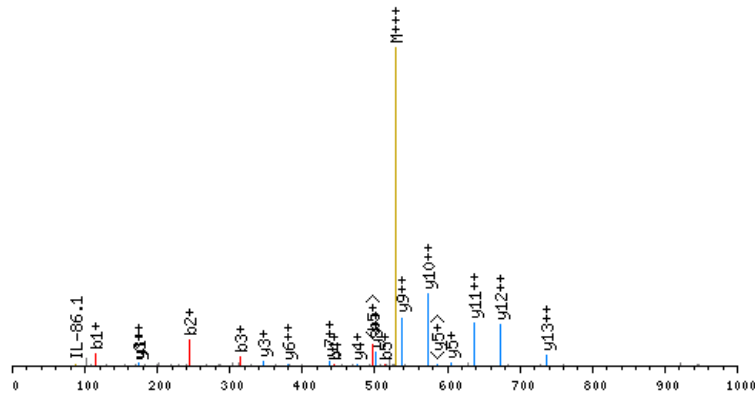

click image to zoom in; click top corners to zoom out [\[precursor±\]](#)

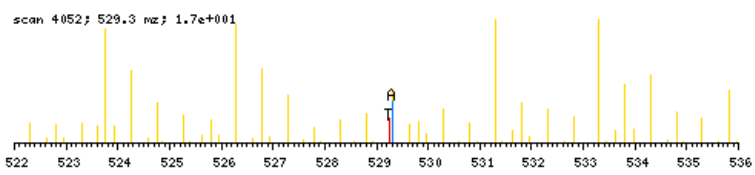

zoomed in precursor plot; T=theoretical m/z, A=acquired m/z

| b <sup>+</sup> | #  | AA # | y <sup>+</sup> | y <sup>2+</sup> |
|----------------|----|------|----------------|-----------------|
| 114.0555       | 1  | A 14 |                |                 |
| 243.0981       | 2  | E 13 | 1472.7345      | 736.8712        |
| 314.1352       | 3  | A 12 | 1343.6920      | 672.3499        |
| 443.1778       | 4  | E 11 | 1272.6548      | 636.8313        |
| 514.2149       | 5  | A 10 | 1143.6122      | 572.3100        |
| 585.2520       | 6  | A 9  | 1072.5751      | 536.7915        |
| 713.3106       | 7  | Q 8  | 1001.5380      | 501.2729        |
| 826.3947       | 8  | L 7  | 873.4794       | 437.2436        |
| 982.5210       | 9  | K 6  | 760.3954       | 380.7016        |
| 1111.5636      | 10 | E 5  | 604.2691       | 302.6385        |
| 1240.6062      | 11 | E 4  | 475.2265       | 238.1172        |
| 1297.6276      | 12 | G 3  | 346.1839       | 173.5959        |
| 1411.6706      | 13 | N 2  | 289.1624       | 145.0851        |
|                | 14 | R 1  | 175.1195       | 88.0637         |

N-term:+43.02 K(9):+156.13

X-range:

-

MassTol: Y-zoom:

MassType:

AVG  MONO

Axis:

1  2

Label:

I  M  -

Ions:

a  +  2+  3+

b  +  2+  3+

c  +  2+  3+

x  +  2+  3+

y  +  2+  3+

z  +  2+  3+

hide H<sub>2</sub>O/NH<sub>3</sub>

zoom 112-122

GO

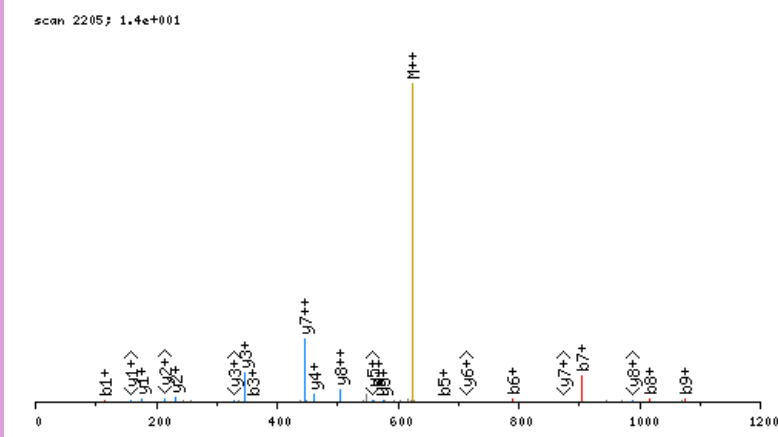

click image to zoom in; click top corners to zoom out [\[precursor±\]](#)

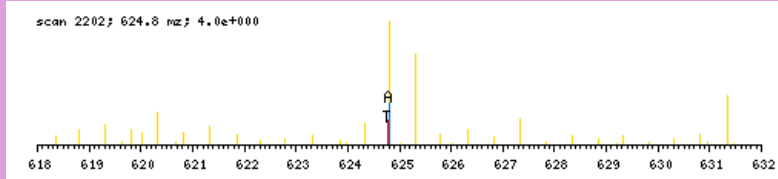

zoomed in precursor plot; T=theoretical m/z, A=acquired m/z

| b <sup>+</sup> | #  | AA # | y <sup>+</sup> | y <sup>2+</sup> |
|----------------|----|------|----------------|-----------------|
| 114.0555       | 1  | A 10 |                |                 |
| 243.0981       | 2  | E 9  | 1135.4802      | 568.2440        |
| 358.1251       | 3  | D 8  | 1006.4376      | 503.7227        |
| 518.1557       | 4  | C 7  | 891.4106       | 446.2092        |
| 674.2568       | 5  | R 6  | 731.3800       | 366.1939        |
| 789.2837       | 6  | D 5  | 575.2789       | 288.1434        |
| 904.3106       | 7  | D 4  | 460.2520       | 230.6299        |
| 1017.3947      | 8  | I 3  | 345.2250       | 173.1164        |
| 1074.4162      | 9  | G 2  | 232.1410       | 116.5744        |
|                | 10 | R 1  | 175.1195       | 88.0637         |

N-term:+43.02 C(4):+160.03

AEGGAADLDTQR, MH+ 1245.5711, m/z 623.2892  
 H OS G29 P150811 220811-s1.02727.02727.2.dta

scan 2727; 1.2e+000

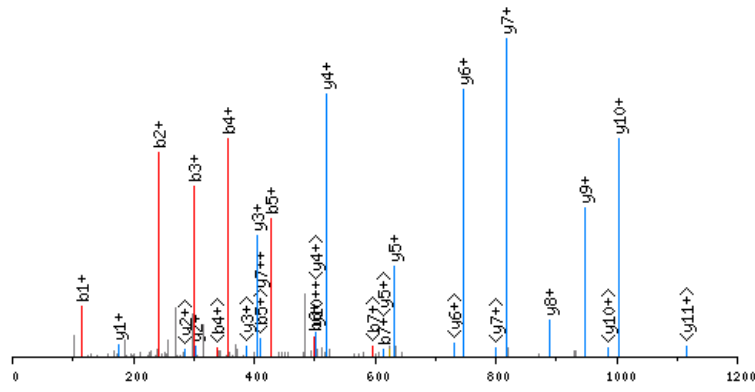

click image to zoom in; click top corners to zoom out [\[precursor±\]](#)

scan 2726; 623.3 m/z; 3.8e+000

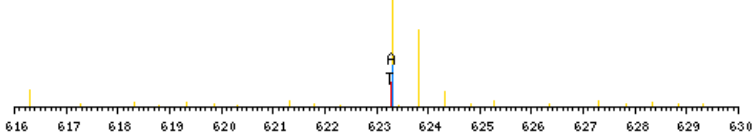

zoomed in precursor plot; T=theoretical m/z, A=acquired m/z

X-range:

-

MassTol: Y-zoom:

MassType:

AVG  MONO

Axis:

1  2

Label:

I  M  -

Ions:

a  +  2+  3+

b  +  2+  3+

c  +  2+  3+

x  +  2+  3+

y  +  2+  3+

z  +  2+  3+

hide H<sub>2</sub>O/NH<sub>3</sub>

zoom 112-122

GO

| b <sup>+</sup> | #  | AA | #  | y <sup>+</sup> | y <sup>2+</sup> |
|----------------|----|----|----|----------------|-----------------|
| 114.0555       | 1  | A  | 12 |                |                 |
| 243.0981       | 2  | E  | 11 | 1132.5235      | 566.7656        |
| 300.1196       | 3  | G  | 10 | 1003.4809      | 502.2443        |
| 357.1410       | 4  | G  | 9  | 946.4594       | 473.7336        |
| 428.1781       | 5  | A  | 8  | 889.4379       | 445.2229        |
| 499.2153       | 6  | A  | 7  | 818.4008       | 409.7043        |
| 614.2422       | 7  | D  | 6  | 747.3637       | 374.1858        |
| 727.3263       | 8  | L  | 5  | 632.3368       | 316.6723        |
| 842.3532       | 9  | D  | 4  | 519.2527       | 260.1303        |
| 943.4009       | 10 | T  | 3  | 404.2258       | 202.6168        |
| 1071.4595      | 11 | Q  | 2  | 303.1781       | 152.0930        |
|                | 12 | R  | 1  | 175.1195       | 88.0637         |

N-term:+43.02



AEGQVLVLDGR, MH+ 1198.6432, m/z 599.8252  
 H OS G29 P150811 220811-s1.04882.04882.2.dta

X-range:

-

MassTol: Y-zoom:

MassType:

AVG  MONO

Axis:

1  2

Label:

I  M  -

Ions:

a  +  2+  3+

b  +  2+  3+

c  +  2+  3+

x  +  2+  3+

y  +  2+  3+

z  +  2+  3+

hide H<sub>2</sub>O/NH<sub>3</sub>

zoom 112-122

GO

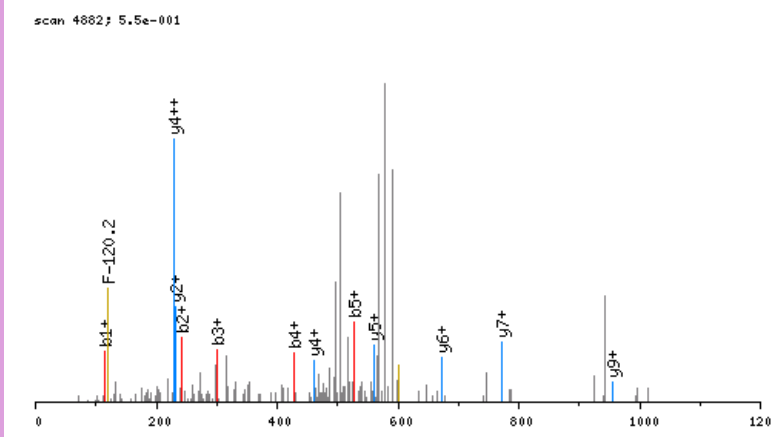

click image to zoom in; click top corners to zoom out [\[precursor±\]](#)

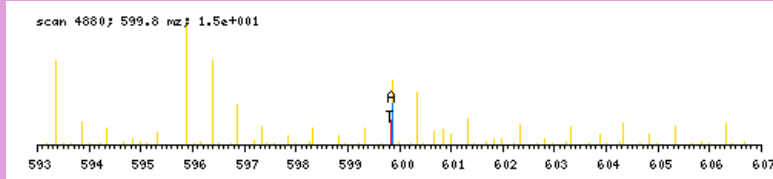

zoomed in precursor plot; T=theoretical m/z, A=acquired m/z

| b <sup>+</sup> | #  | AA # | y <sup>+</sup> | y <sup>2+</sup> |
|----------------|----|------|----------------|-----------------|
| 114.0555       | 1  | A 11 |                |                 |
| 243.0981       | 2  | E 10 | 1085.5955      | 543.3017        |
| 300.1196       | 3  | G 9  | 956.5529       | 478.7804        |
| 428.1781       | 4  | Q 8  | 899.5314       | 450.2696        |
| 527.2466       | 5  | V 7  | 771.4729       | 386.2403        |
| 640.3306       | 6  | L 6  | 672.4044       | 336.7061        |
| 739.3990       | 7  | V 5  | 559.3204       | 280.1641        |
| 852.4831       | 8  | L 4  | 460.2520       | 230.6299        |
| 967.5100       | 9  | D 3  | 347.1679       | 174.0879        |
| 1024.5315      | 10 | G 2  | 232.1410       | 116.5744        |
|                | 11 | R 1  | 175.1195       | 88.0637         |

N-term:+43.02

AELGEADEAELQR, MH+ 1472.6869, m/z 736.8471  
 H OS G29 P150811 220811-s1.04143.04143.2.dta

scan 4143; 3.6e+000

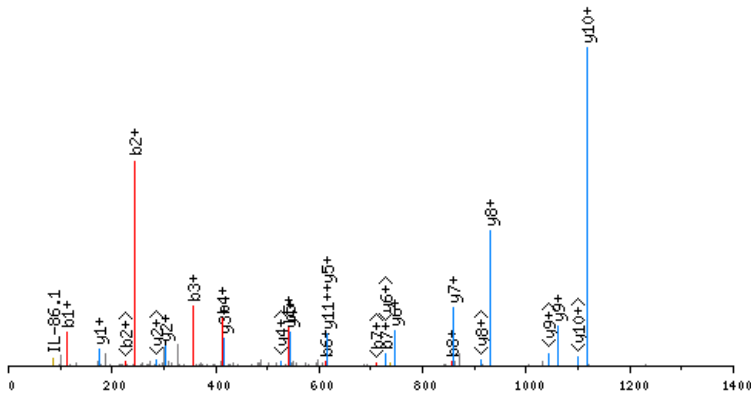

click image to zoom in; click top corners to zoom out [precursor±]

scan 4140; 736.8 m/z; 1.9e+001

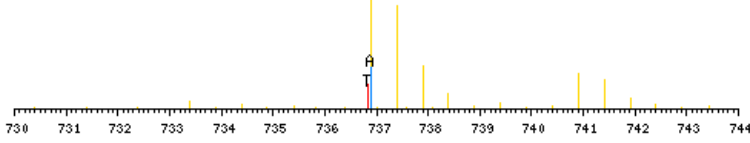

zoomed in precursor plot; T=theoretical m/z, A=acquired m/z

X-range:

-

MassTol: Y-zoom:

MassType:

AVG  MONO

Axis:

1  2

Label:

I  M  -

Ions:

a  +  2+  3+

b  +  2+  3+

c  +  2+  3+

x  +  2+  3+

y  +  2+  3+

z  +  2+  3+

hide H<sub>2</sub>O/NH<sub>3</sub>

zoom 112-122

GO

| b <sup>+</sup> | #  | AA # | y <sup>+</sup> | y <sup>2+</sup> |
|----------------|----|------|----------------|-----------------|
| 114.0555       | 1  | A 13 |                |                 |
| 243.0981       | 2  | E 12 | 1359.6392      | 680.3235        |
| 356.1822       | 3  | L 11 | 1230.5966      | 615.8022        |
| 413.2036       | 4  | G 10 | 1117.5126      | 559.2602        |
| 542.2462       | 5  | E 9  | 1060.4911      | 530.7495        |
| 613.2833       | 6  | A 8  | 931.4485       | 466.2282        |
| 728.3103       | 7  | D 7  | 860.4114       | 430.7096        |
| 857.3529       | 8  | E 6  | 745.3844       | 373.1961        |
| 928.3900       | 9  | A 5  | 616.3418       | 308.6748        |
| 1057.4326      | 10 | E 4  | 545.3047       | 273.1563        |
| 1170.5166      | 11 | L 3  | 416.2621       | 208.6350        |
| 1298.5752      | 12 | Q 2  | 303.1781       | 152.0930        |
|                | 13 | R 1  | 175.1195       | 88.0637         |

N-term:+43.02

AELVQGSAPVGMKAEGFVDALHR, MH+ 2580.3245, m/z 645.8366  
 H OS G26 P150811 220811-s1.06674.06674.4.dta

scan 6674; 2.7e+000

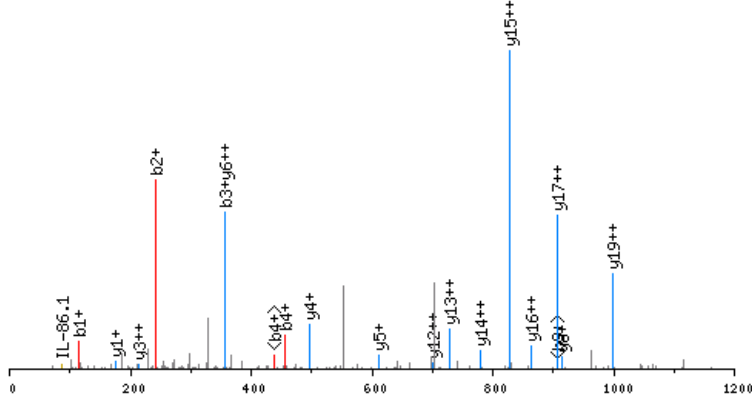

click image to zoom in; click top corners to zoom out [precursor±]

scan 6670; 645.8 mz; 7.9e+000

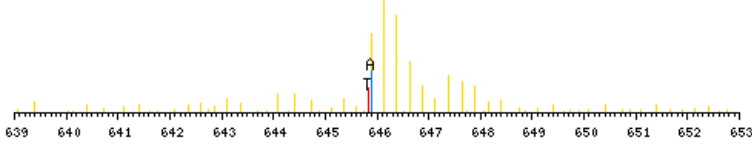

zoomed in precursor plot; T=theoretical m/z, A=acquired m/z

X-range:

0 - 0

MassTol: Y-zoom:

0. 1.

MassType:

AVG  MONO

Axis:

1  2

Label:

I  M  -

Ions:

a  +  2+  3+

b  +  2+  3+

c  +  2+  3+

x  +  2+  3+

y  +  2+  3+

z  +  2+  3+

hide H<sub>2</sub>O/NH<sub>3</sub>

zoom 112-122

GO

| b <sup>+</sup> | #  | AA # | y <sup>+</sup> | y <sup>2+</sup> |
|----------------|----|------|----------------|-----------------|
| 114.0555       | 1  | A 24 |                |                 |
| 243.0981       | 2  | E 23 | 2467.2768      | 1234.1423       |
| 356.1822       | 3  | L 22 | 2338.2342      | 1169.6210       |
| 455.2506       | 4  | V 21 | 2225.1501      | 1113.0790       |
| 583.3092       | 5  | Q 20 | 2126.0817      | 1063.5448       |
| 640.3306       | 6  | G 19 | 1998.0231      | 999.5155        |
| 768.3892       | 7  | Q 18 | 1941.0017      | 971.0048        |
| 855.4212       | 8  | S 17 | 1812.9431      | 906.9755        |
| 926.4583       | 9  | A 16 | 1725.9111      | 863.4594        |
| 1023.5111      | 10 | P 15 | 1654.8740      | 827.9409        |
| 1122.5795      | 11 | V 14 | 1557.8212      | 779.4145        |
| 1179.6010      | 12 | G 13 | 1458.7528      | 729.8803        |
| 1310.6415      | 13 | M 12 | 1401.7313      | 701.3696        |
| 1466.7678      | 14 | K 11 | 1270.6908      | 635.8493        |
| 1537.8049      | 15 | A 10 | 1114.5645      | 557.7862        |
| 1666.8475      | 16 | E 9  | 1043.5274      | 522.2676        |
| 1723.8689      | 17 | G 8  | 914.4848       | 457.7463        |
| 1870.9374      | 18 | F 7  | 857.4634       | 429.2356        |
| 1970.0058      | 19 | V 6  | 710.3949       | 355.7014        |
| 2085.0327      | 20 | D 5  | 611.3265       | 306.1672        |
| 2156.0698      | 21 | A 4  | 496.2996       | 248.6537        |
| 2269.1539      | 22 | L 3  | 425.2625       | 213.1352        |
| 2406.2128      | 23 | H 2  | 312.1784       | 156.5931        |
|                | 24 | R 1  | 175.1195       | 88.0637         |

N-term:+43.02 K(14):+156.13

X-range:

-

MassTol: Y-zoom:

MassType:

AVG  MONO

Axis:

1  2

Label:

I  M  -

Ions:

a  +  2+  3+

b  +  2+  3+

c  +  2+  3+

x  +  2+  3+

y  +  2+  3+

z  +  2+  3+

hide H<sub>2</sub>O/NH<sub>3</sub>

zoom 112-122

GO

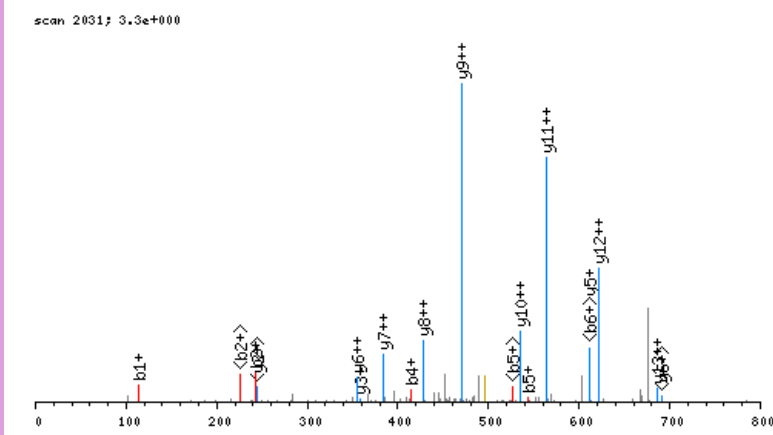

click image to zoom in; click top corners to zoom out [\[precursor±\]](#)

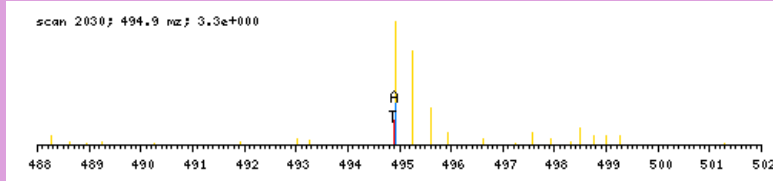

zoomed in precursor plot; T=theoretical m/z, A=acquired m/z

| b <sup>+</sup> | #  | AA # | y <sup>+</sup> | y <sup>2+</sup> |
|----------------|----|------|----------------|-----------------|
| 114.0555       | 1  | A 14 |                |                 |
| 243.0981       | 2  | E 13 | 1369.6460      | 685.3269        |
| 357.1410       | 3  | N 12 | 1240.6034      | 620.8056        |
| 414.1625       | 4  | G 11 | 1126.5605      | 563.7842        |
| 543.2051       | 5  | E 10 | 1069.5390      | 535.2734        |
| 630.2371       | 6  | S 9  | 940.4965       | 470.7521        |
| 717.2691       | 7  | S 8  | 853.4644       | 427.2361        |
| 774.2906       | 8  | G 7  | 766.4324       | 383.7201        |
| 871.3434       | 9  | P 6  | 709.4109       | 355.2094        |
| 968.3961       | 10 | P 5  | 612.3582       | 306.6830        |
| 1124.4973      | 11 | R 4  | 515.3054       | 258.1566        |
| 1221.5500      | 12 | P 3  | 359.2043       | 180.1061        |
| 1308.5820      | 13 | S 2  | 262.1515       | 131.5797        |
|                | 14 | R 1  | 175.1195       | 88.0637         |

N-term:+43.02



X-range:

-

MassTol: Y-zoom:

MassType:

AVG  MONO

Axis:

1  2

Label:

I  M  -

Ions:

a  +  2+  3+

b  +  2+  3+

c  +  2+  3+

x  +  2+  3+

y  +  2+  3+

z  +  2+  3+

hide H<sub>2</sub>O/NH<sub>3</sub>

zoom 112-122

GO

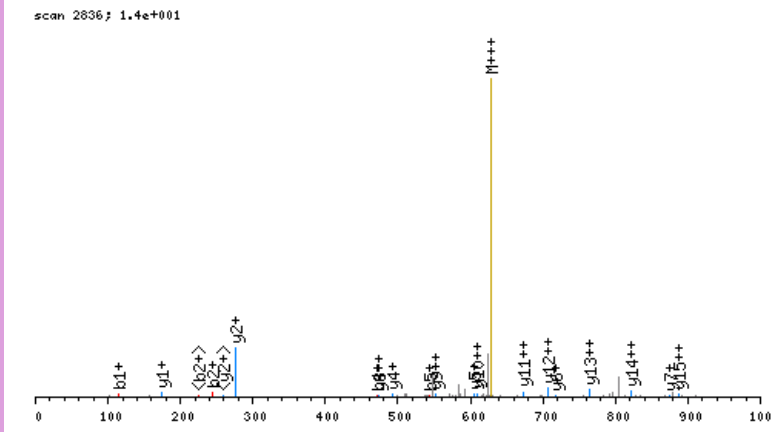

click image to zoom in; click top corners to zoom out [\[precursor±\]](#)

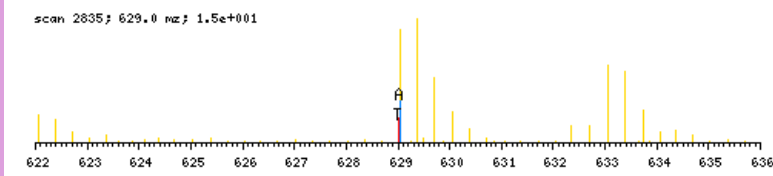

zoomed in precursor plot; T=theoretical m/z, A=acquired m/z

| b <sup>+</sup> | #  | AA # | y <sup>+</sup> | y <sup>2+</sup> |
|----------------|----|------|----------------|-----------------|
| 114.0555       | 1  | A 16 |                |                 |
| 243.0981       | 2  | E 15 | 1771.9667      | 886.4873        |
| 357.1410       | 3  | N 14 | 1642.9241      | 821.9660        |
| 471.1840       | 4  | N 13 | 1528.8812      | 764.9445        |
| 542.2211       | 5  | A 12 | 1414.8383      | 707.9230        |
| 670.2797       | 6  | Q 11 | 1343.8011      | 672.4045        |
| 784.3226       | 7  | N 10 | 1215.7426      | 608.3752        |
| 940.4489       | 8  | K 9  | 1101.6996      | 551.3537        |
| 1011.4860      | 9  | A 8  | 945.5733       | 473.2906        |
| 1167.6123      | 10 | K 7  | 874.5362       | 437.7720        |
| 1280.6964      | 11 | L 6  | 718.4099       | 359.7089        |
| 1393.7804      | 12 | I 5  | 605.3259       | 303.1668        |
| 1480.8125      | 13 | S 4  | 492.2418       | 246.6248        |
| 1609.8550      | 14 | E 3  | 405.2098       | 203.1088        |
| 1710.9027      | 15 | T 2  | 276.1672       | 138.5875        |
|                | 16 | R 1  | 175.1195       | 88.0637         |

N-term:+43.02 K(8):+156.13  
 K(10):+156.13

X-range:

-

MassTol: Y-zoom:

MassType:

AVG  MONO

Axis:

1  2

Label:

I  M  -

Ions:

a  +  2+  3+

b  +  2+  3+

c  +  2+  3+

x  +  2+  3+

y  +  2+  3+

z  +  2+  3+

hide H<sub>2</sub>O/NH<sub>3</sub>

zoom 112-122

GO

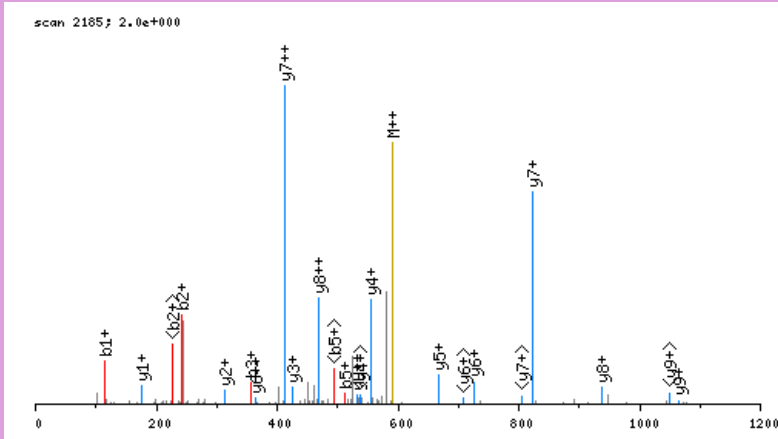

click image to zoom in; click top corners to zoom out [\[precursor±\]](#)

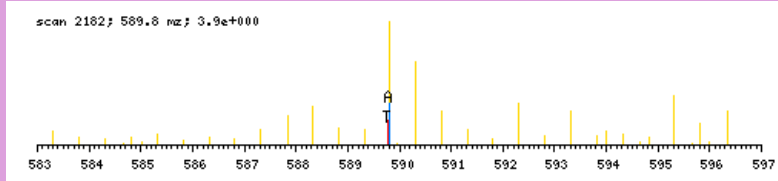

zoomed in precursor plot; T=theoretical m/z, A=acquired m/z

| b <sup>+</sup> | #  | AA # | y <sup>+</sup> | y <sup>2+</sup>    |
|----------------|----|------|----------------|--------------------|
| 114.0555       | 1  | A    | 10             |                    |
| 243.0981       | 2  | E    | 9              | 1065.5077 533.2578 |
| 357.1410       | 3  | N    | 8              | 936.4652 468.7365  |
| 454.1938       | 4  | P    | 7              | 822.4222 411.7150  |
| 511.2153       | 5  | G    | 6              | 725.3695 363.1886  |
| 624.2993       | 6  | L    | 5              | 668.3480 334.6779  |
| 753.3419       | 7  | E    | 4              | 555.2639 278.1359  |
| 867.3848       | 8  | N    | 3              | 426.2213 213.6146  |
| 1004.4438      | 9  | H    | 2              | 312.1784 156.5931  |
|                | 10 | R    | 1              | 175.1195 88.0637   |

N-term:+43.02

AEPGTGSGDPAFGPGASESGTR, MH+ 2046.9005, m/z 682.9717  
 H OS G29 P150811 220811-s1.03531.03531.3.dta

scan 3531; 1.8e+000

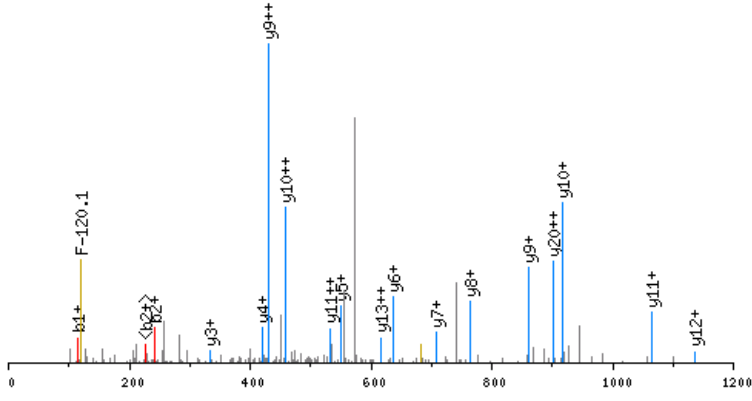

click image to zoom in; click top corners to zoom out [\[precursor±\]](#)

scan 3530; 683.0 m/z; 9.1e+000

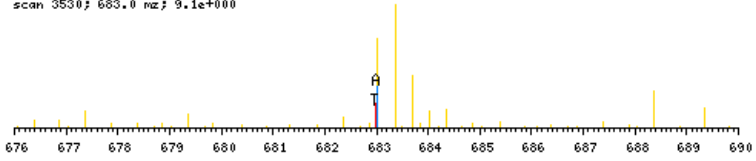

zoomed in precursor plot; T=theoretical m/z, A=acquired m/z

X-range:

-

MassTol: Y-zoom:

MassType:

AVG  MONO

Axis:

1  2

Label:

I  M  -

Ions:

a  +  2+  3+

b  +  2+  3+

c  +  2+  3+

x  +  2+  3+

y  +  2+  3+

z  +  2+  3+

hide H<sub>2</sub>O/NH<sub>3</sub>

zoom 112-122

GO

| b <sup>+</sup> | #  | AA # | y <sup>+</sup> | y <sup>2+</sup> |
|----------------|----|------|----------------|-----------------|
| 114.0555       | 1  | A 22 |                |                 |
| 243.0981       | 2  | E 21 | 1933.8528      | 967.4303        |
| 340.1509       | 3  | P 20 | 1804.8102      | 902.9090        |
| 397.1723       | 4  | G 19 | 1707.7574      | 854.3826        |
| 498.2200       | 5  | T 18 | 1650.7360      | 825.8719        |
| 555.2415       | 6  | G 17 | 1549.6883      | 775.3481        |
| 642.2735       | 7  | S 16 | 1492.6668      | 746.8373        |
| 699.2950       | 8  | G 15 | 1405.6348      | 703.3213        |
| 814.3219       | 9  | D 14 | 1348.6133      | 674.8106        |
| 911.3747       | 10 | P 13 | 1233.5864      | 617.2971        |
| 982.4118       | 11 | A 12 | 1136.5336      | 568.7707        |
| 1129.4802      | 12 | F 11 | 1065.4965      | 533.2522        |
| 1186.5017      | 13 | G 10 | 918.4281       | 459.7180        |
| 1283.5544      | 14 | P 9  | 861.4066       | 431.2072        |
| 1340.5759      | 15 | G 8  | 764.3539       | 382.6808        |
| 1411.6130      | 16 | A 7  | 707.3324       | 354.1701        |
| 1498.6450      | 17 | S 6  | 636.2953       | 318.6516        |
| 1627.6876      | 18 | E 5  | 549.2633       | 275.1355        |
| 1714.7197      | 19 | S 4  | 420.2207       | 210.6142        |
| 1771.7411      | 20 | G 3  | 333.1886       | 167.0982        |
| 1872.7888      | 21 | T 2  | 276.1672       | 138.5875        |
|                | 22 | R 1  | 175.1195       | 88.0637         |

N-term:+43.02

AEPWGNELASAAAR, MH+ 1484.7134, m/z 742.8603  
 H OS G29 P150811 220811-s1.05464.05464.2.dta

X-range:

-

MassTol: Y-zoom:

MassType:

AVG  MONO

Axis:

1  2

Label:

I  M  -

Ions:

a  +  2+  3+

b  +  2+  3+

c  +  2+  3+

x  +  2+  3+

y  +  2+  3+

z  +  2+  3+

hide H<sub>2</sub>O/NH<sub>3</sub>

zoom 112-122

GO

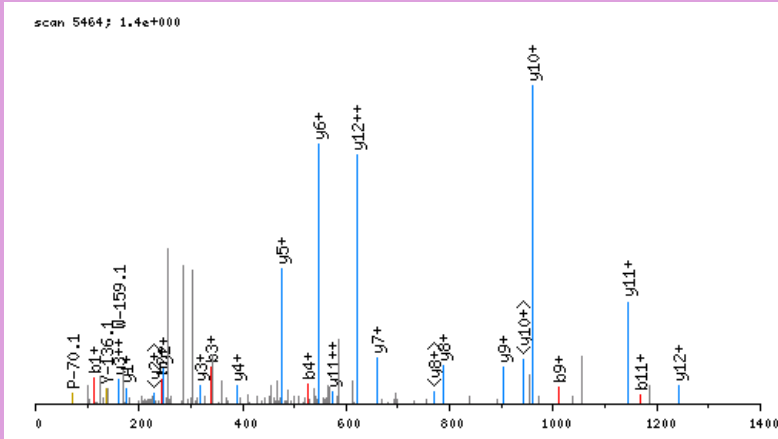

click image to zoom in; click top corners to zoom out [\[precursor±\]](#)

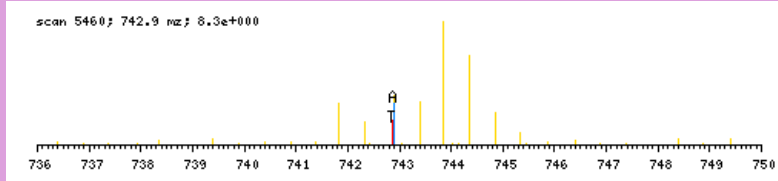

zoomed in precursor plot; T=theoretical m/z, A=acquired m/z

| b <sup>+</sup> | #  | AA # | y <sup>+</sup> | y <sup>2+</sup> |
|----------------|----|------|----------------|-----------------|
| 114.0555       | 1  | A 14 |                |                 |
| 243.0981       | 2  | E 13 | 1371.6657      | 686.3368        |
| 340.1509       | 3  | P 12 | 1242.6231      | 621.8155        |
| 526.2302       | 4  | W 11 | 1145.5703      | 573.2891        |
| 583.2516       | 5  | G 10 | 959.4910       | 480.2494        |
| 697.2946       | 6  | N 9  | 902.4696       | 451.7387        |
| 826.3372       | 7  | E 8  | 788.4266       | 394.7172        |
| 939.4212       | 8  | L 7  | 659.3840       | 330.1959        |
| 1010.4583      | 9  | A 6  | 546.3000       | 273.6539        |
| 1097.4904      | 10 | S 5  | 475.2629       | 238.1353        |
| 1168.5275      | 11 | A 4  | 388.2308       | 194.6193        |
| 1239.5646      | 12 | A 3  | 317.1937       | 159.1008        |
| 1310.6017      | 13 | A 2  | 246.1566       | 123.5822        |
|                | 14 | R 1  | 175.1195       | 88.0637         |

N-term:+43.02

AERPEDLNLPNAVITR, MH+ 1849.9772, m/z 617.3306  
 H OS G24 P150811 220811-s1.04184.04184.3.dta

scan 4184; 2.5e+000

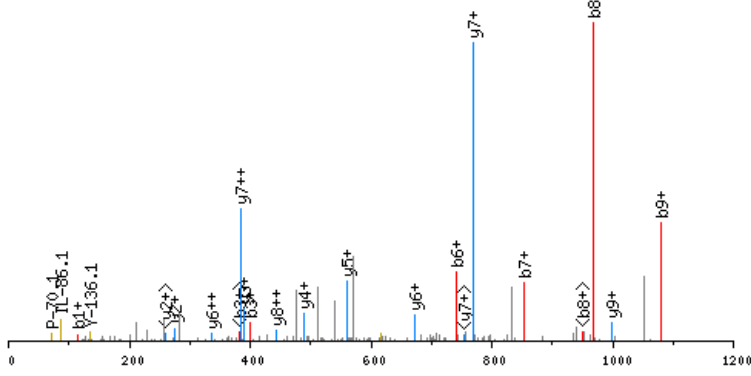

click image to zoom in; click top corners to zoom out [\[precursor±\]](#)

scan 4182; 617.3 m/z; 1.6e+001

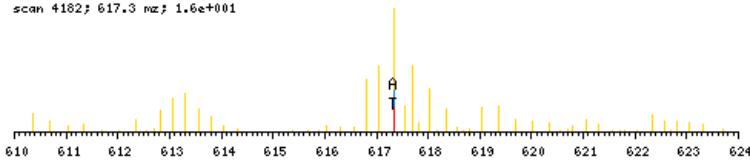

zoomed in precursor plot; T=theoretical m/z, A=acquired m/z

X-range:

-

MassTol: Y-zoom:

MassType:

AVG  MONO

Axis:

1  2

Label:

I  M  -

Ions:

a  +  2+  3+

b  +  2+  3+

c  +  2+  3+

x  +  2+  3+

y  +  2+  3+

z  +  2+  3+

hide H<sub>2</sub>O/NH<sub>3</sub>

zoom 112-122

GO

| b <sup>+</sup> | #  | AA # | y <sup>+</sup> | y <sup>2+</sup> |
|----------------|----|------|----------------|-----------------|
| 114.0555       | 1  | A 16 |                |                 |
| 243.0981       | 2  | E 15 | 1736.9295      | 868.9687        |
| 399.1992       | 3  | R 14 | 1607.8869      | 804.4474        |
| 496.2520       | 4  | P 13 | 1451.7858      | 726.3968        |
| 625.2946       | 5  | E 12 | 1354.7331      | 677.8704        |
| 740.3215       | 6  | D 11 | 1225.6905      | 613.3491        |
| 853.4056       | 7  | L 10 | 1110.6635      | 555.8357        |
| 967.4485       | 8  | N 9  | 997.5795       | 499.2936        |
| 1080.5326      | 9  | L 8  | 883.5365       | 442.2722        |
| 1177.5853      | 10 | P 7  | 770.4525       | 385.7301        |
| 1291.6283      | 11 | N 6  | 673.3997       | 337.2038        |
| 1362.6654      | 12 | A 5  | 559.3568       | 280.1823        |
| 1461.7338      | 13 | V 4  | 488.3197       | 244.6637        |
| 1574.8179      | 14 | I 3  | 389.2512       | 195.1295        |
| 1675.8655      | 15 | T 2  | 276.1672       | 138.5875        |
|                | 16 | R 1  | 175.1195       | 88.0637         |

N-term:+43.02

AESDWDTVTVLR, MH+ 1433.6913, m/z 717.3493  
 H OS G29 P150811 220811-s1.05878.05878.2.dta

X-range:

-

MassTol: Y-zoom:

MassType:

AVG  MONO

Axis:

1  2

Label:

I  M  -

Ions:

a  +  2+  3+

b  +  2+  3+

c  +  2+  3+

x  +  2+  3+

y  +  2+  3+

z  +  2+  3+

hide H<sub>2</sub>O/NH<sub>3</sub>

zoom 112-122

GO

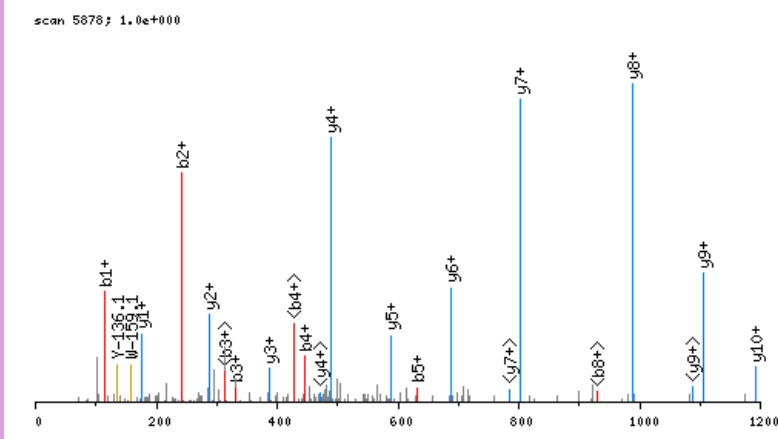

click image to zoom in; click top corners to zoom out [\[precursor±\]](#)

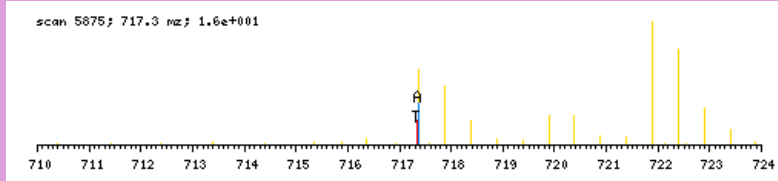

zoomed in precursor plot; T=theoretical m/z, A=acquired m/z

| b <sup>+</sup> | #  | AA # | y <sup>+</sup> | y <sup>2+</sup> |
|----------------|----|------|----------------|-----------------|
| 114.0555       | 1  | A 12 |                |                 |
| 243.0981       | 2  | E 11 | 1320.6436      | 660.8257        |
| 330.1301       | 3  | S 10 | 1191.6010      | 596.3044        |
| 445.1571       | 4  | D 9  | 1104.5689      | 552.7884        |
| 631.2364       | 5  | W 8  | 989.5420       | 495.2749        |
| 746.2633       | 6  | D 7  | 803.4627       | 402.2353        |
| 847.3110       | 7  | T 6  | 688.4357       | 344.7218        |
| 946.3794       | 8  | V 5  | 587.3881       | 294.1979        |
| 1047.4271      | 9  | T 4  | 488.3197       | 244.6637        |
| 1146.4955      | 10 | V 3  | 387.2720       | 194.1399        |
| 1259.5796      | 11 | L 2  | 288.2036       | 144.6057        |
|                | 12 | R 1  | 175.1195       | 88.0637         |

N-term:+43.02

AESNEEVAVLVQR, MH+ 1485.7549, m/z 495.9232  
 H OS G29 P150811 220811-s1.04739.04739.3.dta

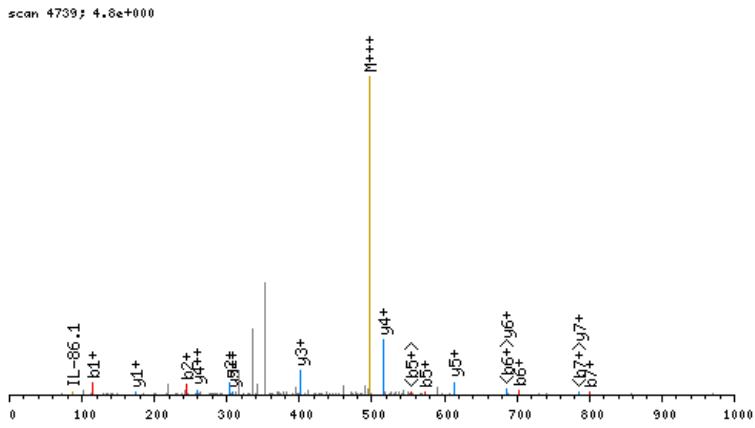

click image to zoom in; click top corners to zoom out [\[precursor±\]](#)

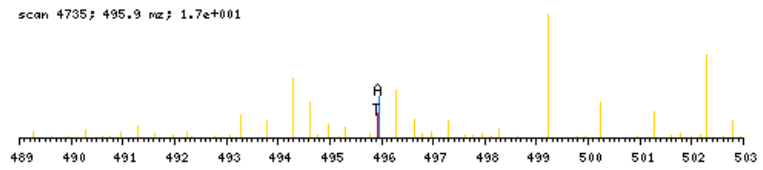

zoomed in precursor plot; T=theoretical m/z, A=acquired m/z

X-range:  -

MassTol: Y-zoom:

MassType:  AVG  MONO

Axis:  1  2

Label:  I  M  -

Ions:

a  +  2+  3+

b  +  2+  3+

c  +  2+  3+

x  +  2+  3+

y  +  2+  3+

z  +  2+  3+

hide H<sub>2</sub>O/NH<sub>3</sub>

zoom 112-122

| b <sup>+</sup> | #  | AA # | y <sup>+</sup> | y <sup>2+</sup> |
|----------------|----|------|----------------|-----------------|
| 114.0555       | 1  | A 13 |                |                 |
| 243.0981       | 2  | E 12 | 1372.7072      | 686.8575        |
| 330.1301       | 3  | S 11 | 1243.6646      | 622.3362        |
| 444.1731       | 4  | N 10 | 1156.6326      | 578.8202        |
| 573.2157       | 5  | E 9  | 1042.5897      | 521.7988        |
| 702.2582       | 6  | E 8  | 913.5471       | 457.2775        |
| 801.3267       | 7  | V 7  | 784.5045       | 392.7562        |
| 872.3638       | 8  | A 6  | 685.4361       | 343.2220        |
| 971.4322       | 9  | V 5  | 614.3990       | 307.7034        |
| 1084.5163      | 10 | L 4  | 515.3306       | 258.1692        |
| 1183.5847      | 11 | V 3  | 402.2465       | 201.6272        |
| 1311.6432      | 12 | Q 2  | 303.1781       | 152.0930        |
|                | 13 | R 1  | 175.1195       | 88.0637         |

N-term:+43.02

AESPAPGAAAESCQEER, MH+ 1987.8303, m/z 663.2816  
 H OS G29 P150811 220811-s1.02708.02708.3.dta

X-range:

-

MassTol: Y-zoom:

MassType:

AVG  MONO

Axis:

1  2

Label:

I  M  -

Ions:

a  +  2+  3+

b  +  2+  3+

c  +  2+  3+

x  +  2+  3+

y  +  2+  3+

z  +  2+  3+

hide H<sub>2</sub>O/NH<sub>3</sub>

zoom 112-122

GO

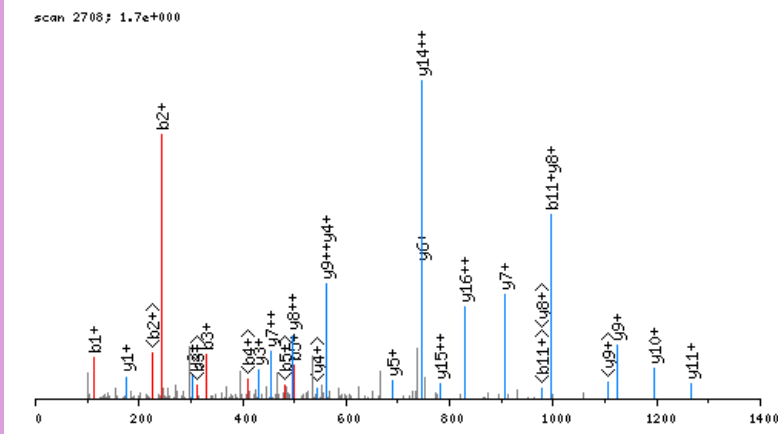

click image to zoom in; click top corners to zoom out [\[precursor±\]](#)

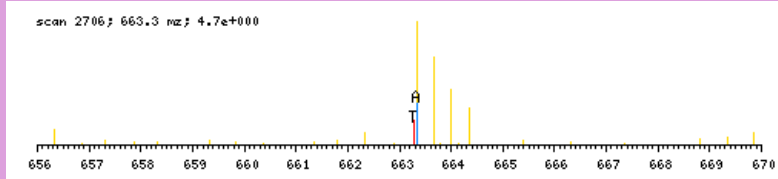

zoomed in precursor plot; T=theoretical m/z, A=acquired m/z

| b <sup>+</sup> | #  | AA | #  | y <sup>+</sup> | y <sup>2+</sup> |
|----------------|----|----|----|----------------|-----------------|
| 114.0555       | 1  | A  | 19 |                |                 |
| 243.0981       | 2  | E  | 18 | 1874.7826      | 937.8952        |
| 330.1301       | 3  | S  | 17 | 1745.7400      | 873.3739        |
| 427.1829       | 4  | P  | 16 | 1658.7080      | 829.8579        |
| 498.2200       | 5  | A  | 15 | 1561.6552      | 781.3315        |
| 595.2728       | 6  | P  | 14 | 1490.6181      | 745.8130        |
| 652.2942       | 7  | G  | 13 | 1393.5653      | 697.2866        |
| 723.3314       | 8  | A  | 12 | 1336.5439      | 668.7759        |
| 794.3685       | 9  | A  | 11 | 1265.5068      | 633.2573        |
| 865.4056       | 10 | A  | 10 | 1194.4697      | 597.7387        |
| 994.4482       | 11 | E  | 9  | 1123.4325      | 562.2202        |
| 1081.4802      | 12 | S  | 8  | 994.3899       | 497.6989        |
| 1241.5108      | 13 | C  | 7  | 907.3579       | 454.1829        |
| 1298.5323      | 14 | G  | 6  | 747.3273       | 374.1676        |
| 1427.5749      | 15 | E  | 5  | 690.3059       | 345.6568        |
| 1556.6175      | 16 | E  | 4  | 561.2633       | 281.1355        |
| 1684.6760      | 17 | Q  | 3  | 432.2207       | 216.6142        |
| 1813.7186      | 18 | E  | 2  | 304.1621       | 152.5850        |
|                | 19 | R  | 1  | 175.1195       | 88.0637         |

N-term:+43.02 C(13):+160.03



AESSELSASSPAR, MH+ 1420.6556, m/z 710.8314  
 H OS G29 P150811 220811-s1.02728.02728.2.dta

X-range:

-

MassTol: Y-zoom:

MassType:

AVG  MONO

Axis:

1  2

Label:

I  M  -

Ions:

a  +  2+  3+

b  +  2+  3+

c  +  2+  3+

x  +  2+  3+

y  +  2+  3+

z  +  2+  3+

hide H<sub>2</sub>O/NH<sub>3</sub>

zoom 112-122

GO

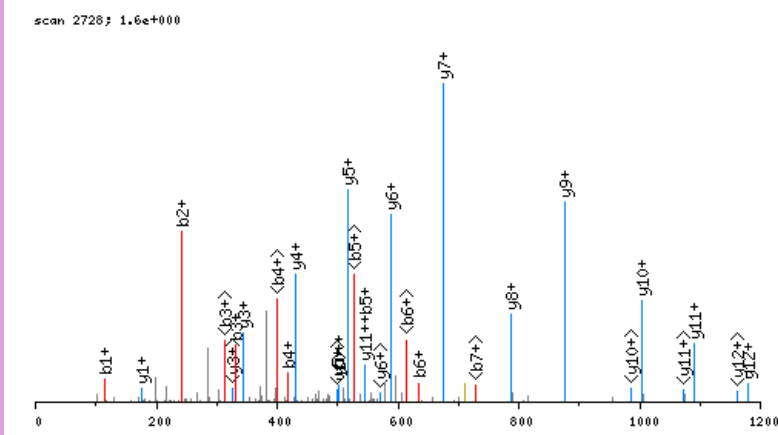

click image to zoom in; click top corners to zoom out [\[precursor±\]](#)

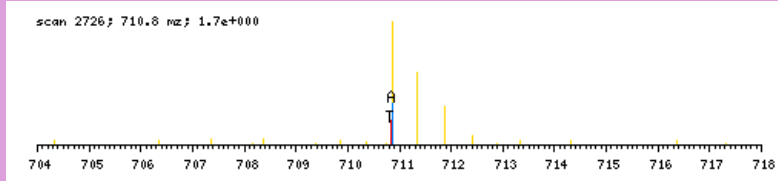

zoomed in precursor plot; T=theoretical m/z, A=acquired m/z

| b <sup>+</sup> | #  | AA # | y <sup>+</sup> | y <sup>2+</sup> |
|----------------|----|------|----------------|-----------------|
| 114.0555       | 1  | A 14 |                |                 |
| 243.0981       | 2  | E 13 | 1307.6079      | 654.3079        |
| 330.1301       | 3  | S 12 | 1178.5653      | 589.7866        |
| 417.1622       | 4  | S 11 | 1091.5333      | 546.2706        |
| 546.2048       | 5  | E 10 | 1004.5013      | 502.7545        |
| 633.2368       | 6  | S 9  | 875.4587       | 438.2332        |
| 746.3208       | 7  | L 8  | 788.4266       | 394.7172        |
| 833.3529       | 8  | S 7  | 675.3426       | 338.1752        |
| 904.3900       | 9  | A 6  | 588.3105       | 294.6592        |
| 991.4220       | 10 | S 5  | 517.2734       | 259.1406        |
| 1078.4540      | 11 | S 4  | 430.2414       | 215.6246        |
| 1175.5068      | 12 | P 3  | 343.2094       | 172.1086        |
| 1246.5439      | 13 | A 2  | 246.1566       | 123.5822        |
|                | 14 | R 1  | 175.1195       | 88.0637         |

N-term:+43.02

AETAAESGGGDSGVGACER, MH+ 1879.7728, m/z 627.2624  
 H OS G29 P150811 220811-s1.02587.02587.3.dta

X-range:

-

MassTol: Y-zoom:

MassType:

AVG  MONO

Axis:

1  2

Label:

I  M  -

Ions:

a  +  2+  3+

b  +  2+  3+

c  +  2+  3+

x  +  2+  3+

y  +  2+  3+

z  +  2+  3+

hide H<sub>2</sub>O/NH<sub>3</sub>

zoom 112-122

GO

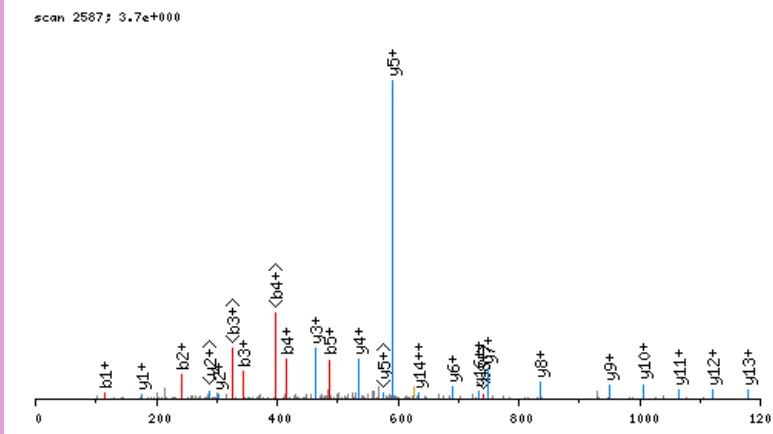

click image to zoom in; click top corners to zoom out [\[precursor±\]](#)

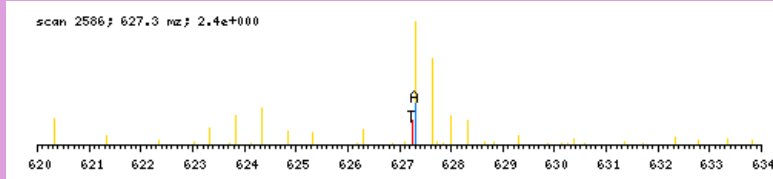

zoomed in precursor plot; T=theoretical m/z, A=acquired m/z

| b <sup>+</sup> | #  | AA | #  | y <sup>+</sup> | y <sup>2+</sup> |
|----------------|----|----|----|----------------|-----------------|
| 114.0555       | 1  | A  | 20 |                |                 |
| 243.0981       | 2  | E  | 19 | 1766.7251      | 883.8665        |
| 344.1458       | 3  | T  | 18 | 1637.6825      | 819.3452        |
| 415.1829       | 4  | A  | 17 | 1536.6348      | 768.8213        |
| 486.2200       | 5  | A  | 16 | 1465.5977      | 733.3028        |
| 615.2626       | 6  | E  | 15 | 1394.5606      | 697.7842        |
| 702.2946       | 7  | S  | 14 | 1265.5180      | 633.2629        |
| 759.3161       | 8  | G  | 13 | 1178.4860      | 589.7469        |
| 816.3376       | 9  | G  | 12 | 1121.4645      | 561.2362        |
| 873.3590       | 10 | G  | 11 | 1064.4430      | 532.7254        |
| 930.3805       | 11 | G  | 10 | 1007.4216      | 504.2147        |
| 1045.4074      | 12 | D  | 9  | 950.4001       | 475.7040        |
| 1132.4395      | 13 | S  | 8  | 835.3732       | 418.1905        |
| 1189.4609      | 14 | G  | 7  | 748.3411       | 374.6745        |
| 1288.5293      | 15 | V  | 6  | 691.3197       | 346.1638        |
| 1345.5508      | 16 | G  | 5  | 592.2513       | 296.6295        |
| 1416.5879      | 17 | A  | 4  | 535.2298       | 268.1188        |
| 1576.6185      | 18 | C  | 3  | 464.1927       | 232.6003        |
| 1705.6611      | 19 | E  | 2  | 304.1621       | 152.5850        |
|                | 20 | R  | 1  | 175.1195       | 88.0637         |

N-term:+43.02 C(18):+160.03

AETLSGLGDASAAGAAVSSAASETGTR, MH+ 2521.2018, m/z 841.0721  
 H\_OS\_G29\_P150811\_220811-s1.06168.06168.3.dta

X-range:

-

MassTol: Y-zoom:

MassType:

AVG  MONO

Axis:

1  2

Label:

I  M  -

Ions:

a  +  2+  3+

b  +  2+  3+

c  +  2+  3+

x  +  2+  3+

y  +  2+  3+

z  +  2+  3+

hide H<sub>2</sub>O/NH<sub>3</sub>

zoom 112-122

GO

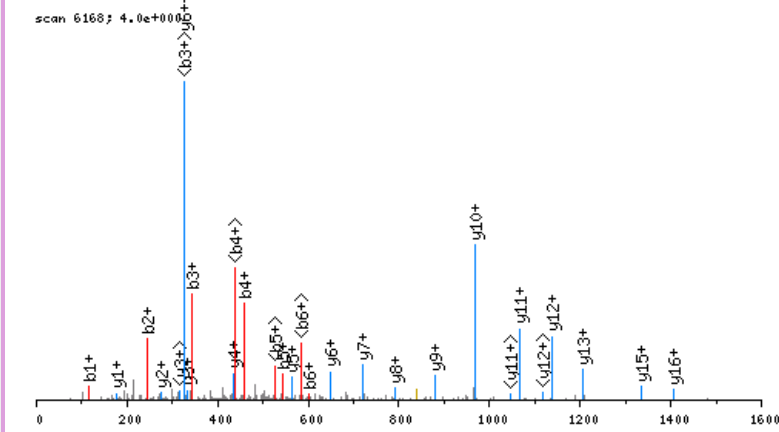

click image to zoom in; click top corners to zoom out [precursor±]

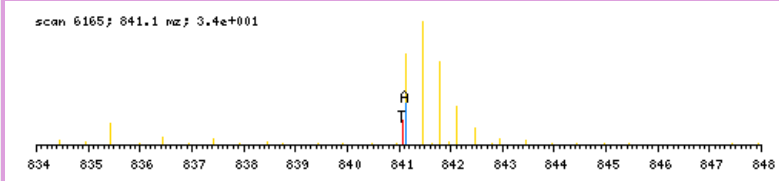

zoomed in precursor plot; T=theoretical m/z, A=acquired m/z

| b <sup>+</sup> | #  | AA # | y <sup>+</sup> | y <sup>2+</sup> |
|----------------|----|------|----------------|-----------------|
| 114.0555       | 1  | A 28 |                |                 |
| 243.0981       | 2  | E 27 | 2408.1541      | 1204.5810       |
| 344.1458       | 3  | T 26 | 2279.1115      | 1140.0597       |
| 457.2298       | 4  | L 25 | 2178.0638      | 1089.5358       |
| 544.2619       | 5  | S 24 | 2064.9798      | 1032.9938       |
| 601.2833       | 6  | G 23 | 1977.9478      | 989.4778        |
| 714.3674       | 7  | L 22 | 1920.9263      | 960.9671        |
| 771.3889       | 8  | G 21 | 1807.8422      | 904.4250        |
| 886.4158       | 9  | D 20 | 1750.8208      | 875.9143        |
| 957.4529       | 10 | A 19 | 1635.7938      | 818.4008        |
| 1044.4850      | 11 | S 18 | 1564.7567      | 782.8823        |
| 1115.5221      | 12 | A 17 | 1477.7247      | 739.3662        |
| 1186.5592      | 13 | A 16 | 1406.6876      | 703.8477        |
| 1243.5806      | 14 | G 15 | 1335.6504      | 668.3291        |
| 1314.6178      | 15 | A 14 | 1278.6290      | 639.8184        |
| 1385.6549      | 16 | A 13 | 1207.5919      | 604.2998        |
| 1456.6920      | 17 | A 12 | 1136.5548      | 568.7813        |
| 1555.7604      | 18 | V 11 | 1065.5176      | 533.2627        |
| 1642.7924      | 19 | S 10 | 966.4492       | 483.7285        |
| 1729.8245      | 20 | S 9  | 879.4172       | 440.2125        |
| 1800.8616      | 21 | A 8  | 792.3852       | 396.6965        |
| 1871.8987      | 22 | A 7  | 721.3481       | 361.1779        |
| 1958.9307      | 23 | S 6  | 650.3109       | 325.6594        |
| 2087.9733      | 24 | E 5  | 563.2789       | 282.1434        |
| 2189.0210      | 25 | T 4  | 434.2363       | 217.6221        |
| 2246.0424      | 26 | G 3  | 333.1886       | 167.0982        |
| 2347.0901      | 27 | T 2  | 276.1672       | 138.5875        |
|                | 28 | R 1  | 175.1195       | 88.0637         |

N-term:+43.02

AEVEETLKR, MH+ 1144.6214, m/z 572.8144  
 H OS G25 P150811 220811-s1.04439.04439.2.dta

scan 4439; 4.1e+001

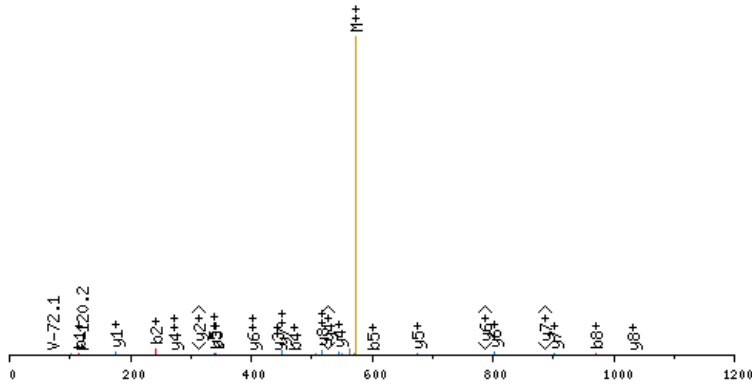

click image to zoom in; click top corners to zoom out [\[precursor±\]](#)

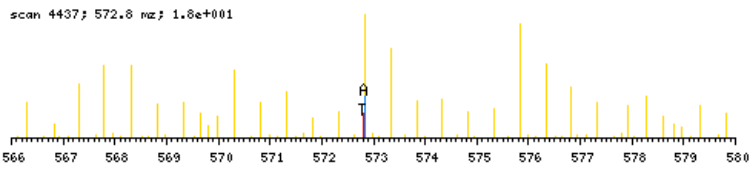

zoomed in precursor plot; T=theoretical m/z, A=acquired m/z

X-range:

-

MassTol: Y-zoom:

MassType:

AVG  MONO

Axis:

1  2

Label:

I  M  -

Ions:

a  +  2+  3+

b  +  2+  3+

c  +  2+  3+

x  +  2+  3+

y  +  2+  3+

z  +  2+  3+

hide H<sub>2</sub>O/NH<sub>3</sub>

zoom 112-122

GO

| b <sup>+</sup> | # | AA # | y <sup>+</sup> | y <sup>2+</sup>    |
|----------------|---|------|----------------|--------------------|
| 114.0555       | 1 | A    | 9              |                    |
| 243.0981       | 2 | E    | 8              | 1031.5737 516.2908 |
| 342.1665       | 3 | V    | 7              | 902.5311 451.7695  |
| 471.2091       | 4 | E    | 6              | 803.4627 402.2353  |
| 600.2517       | 5 | E    | 5              | 674.4201 337.7140  |
| 701.2994       | 6 | T    | 4              | 545.3775 273.1927  |
| 814.3834       | 7 | L    | 3              | 444.3299 222.6688  |
| 970.5097       | 8 | K    | 2              | 331.2458 166.1268  |
|                | 9 | R    | 1              | 175.1195 88.0637   |

N-term:+43.02 K(8):+156.13

AEVGEIIEGCR, MH+ 1274.6050, m/z 637.8062  
 H OS G29 P150811 220811-s1.05423.05423.2.dta

X-range:

-

MassTol: Y-zoom:

MassType:

AVG  MONO

Axis:

1  2

Label:

I  M  -

Ions:

a  +  2+  3+

b  +  2+  3+

c  +  2+  3+

x  +  2+  3+

y  +  2+  3+

z  +  2+  3+

hide H<sub>2</sub>O/NH<sub>3</sub>

zoom 112-122

GO

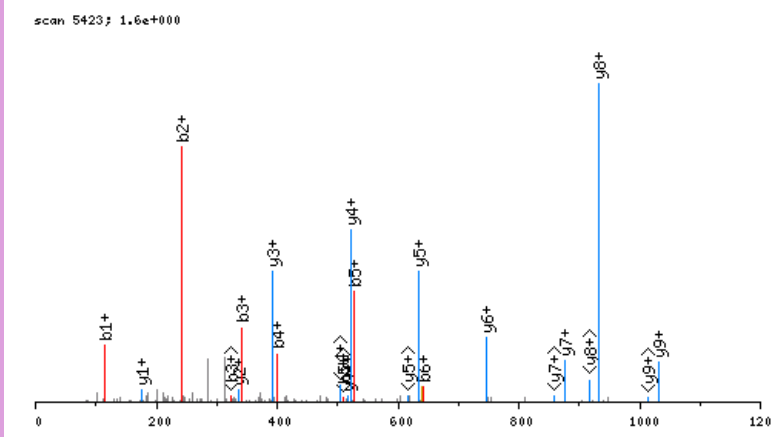

click image to zoom in; click top corners to zoom out [\[precursor±\]](#)

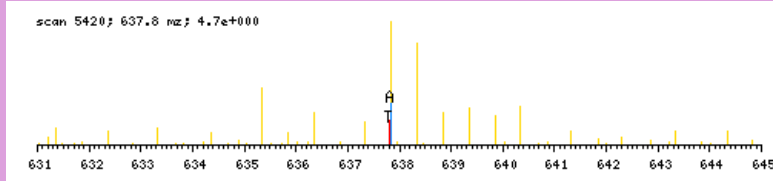

zoomed in precursor plot; T=theoretical m/z, A=acquired m/z

| b <sup>+</sup> | #  | AA # | y <sup>+</sup> | y <sup>2+</sup> |
|----------------|----|------|----------------|-----------------|
| 114.0555       | 1  | A 11 |                |                 |
| 243.0981       | 2  | E 10 | 1161.5573      | 581.2826        |
| 342.1665       | 3  | V 9  | 1032.5148      | 516.7613        |
| 399.1880       | 4  | G 8  | 933.4463       | 467.2271        |
| 528.2306       | 5  | E 7  | 876.4249       | 438.7164        |
| 641.3146       | 6  | I 6  | 747.3823       | 374.1951        |
| 754.3987       | 7  | I 5  | 634.2982       | 317.6530        |
| 883.4413       | 8  | E 4  | 521.2142       | 261.1110        |
| 940.4628       | 9  | G 3  | 392.1716       | 196.5897        |
| 1100.4934      | 10 | C 2  | 335.1501       | 168.0790        |
|                | 11 | R 1  | 175.1195       | 88.0637         |

N-term:+43.02 C(10):+160.03

AEVLSAGPESVAGCR, MH+ 1544.7378, m/z 772.8726  
 H OS G29 P150811 220811-s1.04849.04849.2.dta

X-range:

-

MassTol: Y-zoom:

MassType:

AVG  MONO

Axis:

1  2

Label:

I  M  -

Ions:

a  +  2+  3+

b  +  2+  3+

c  +  2+  3+

x  +  2+  3+

y  +  2+  3+

z  +  2+  3+

hide H<sub>2</sub>O/NH<sub>3</sub>

zoom 112-122

GO

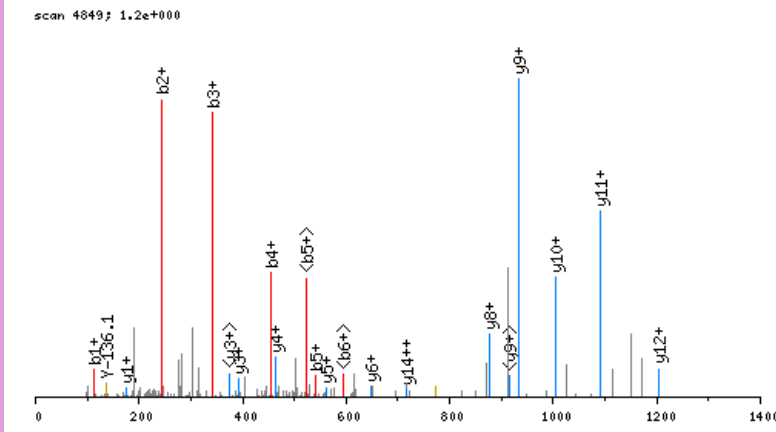

click image to zoom in; click top corners to zoom out [\[precursor±\]](#)

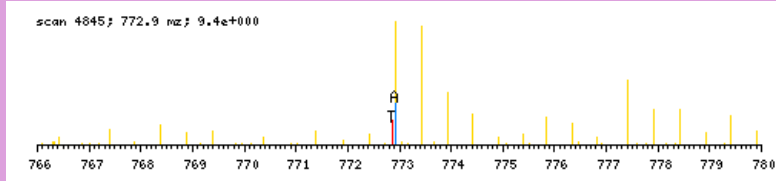

zoomed in precursor plot; T=theoretical m/z, A=acquired m/z

| b <sup>+</sup> | #  | AA # | y <sup>+</sup> | y <sup>2+</sup> |
|----------------|----|------|----------------|-----------------|
| 114.0555       | 1  | A    | 15             |                 |
| 243.0981       | 2  | E    | 14             | 1431.6902       |
| 342.1665       | 3  | V    | 13             | 1302.6476       |
| 455.2506       | 4  | L    | 12             | 1203.5791       |
| 542.2826       | 5  | S    | 11             | 1090.4951       |
| 613.3197       | 6  | A    | 10             | 1003.4631       |
| 670.3412       | 7  | G    | 9              | 932.4259        |
| 767.3940       | 8  | P    | 8              | 875.4045        |
| 896.4365       | 9  | E    | 7              | 778.3517        |
| 983.4686       | 10 | S    | 6              | 649.3091        |
| 1082.5370      | 11 | V    | 5              | 562.2771        |
| 1153.5741      | 12 | A    | 4              | 463.2087        |
| 1210.5956      | 13 | G    | 3              | 392.1716        |
| 1370.6262      | 14 | C    | 2              | 335.1501        |
|                | 15 | R    | 1              | 175.1195        |

N-term:+43.02 C(14):+160.03

AEYDLTTR, MH+ 1010.4795, m/z 505.7434  
 H OS G29 P150811 220811-s1.03397.03397.2.dta

X-range:

-

MassTol: Y-zoom:

MassType:

AVG  MONO

Axis:

1  2

Label:

I  M  -

Ions:

a  +  2+  3+

b  +  2+  3+

c  +  2+  3+

x  +  2+  3+

y  +  2+  3+

z  +  2+  3+

hide H<sub>2</sub>O/NH<sub>3</sub>

zoom 112-122

GO

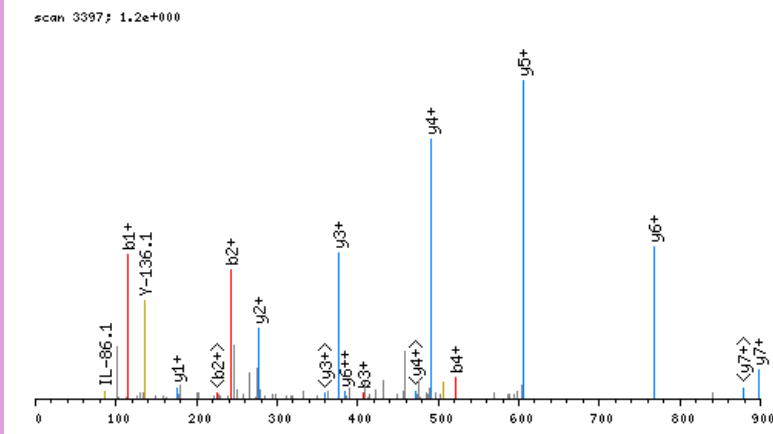

click image to zoom in; click top corners to zoom out [\[precursor±\]](#)

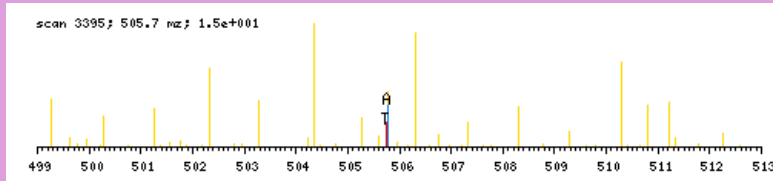

zoomed in precursor plot; T=theoretical m/z, A=acquired m/z

| b <sup>+</sup> | # | AA # | y <sup>+</sup> | y <sup>2+</sup> |
|----------------|---|------|----------------|-----------------|
| 114.0555       | 1 | A 8  |                |                 |
| 243.0981       | 2 | E 7  | 897.4318       | 449.2198        |
| 406.1614       | 3 | Y 6  | 768.3892       | 384.6985        |
| 521.1884       | 4 | D 5  | 605.3259       | 303.1668        |
| 634.2724       | 5 | L 4  | 490.2989       | 245.6534        |
| 735.3201       | 6 | T 3  | 377.2149       | 189.1113        |
| 836.3678       | 7 | T 2  | 276.1672       | 138.5875        |
|                | 8 | R 1  | 175.1195       | 88.0637         |

N-term:+43.02

AFCAPPAYLTHQQKVLK, MH+ 2070.0959, m/z 690.7035  
 H OS G26 P150811 220811-s1.05223.05223.3.dta

X-range:

-

MassTol: Y-zoom:

MassType:

AVG  MONO

Axis:

1  2

Label:

I  M  -

Ions:

a  +  2+  3+

b  +  2+  3+

c  +  2+  3+

x  +  2+  3+

y  +  2+  3+

z  +  2+  3+

hide H<sub>2</sub>O/NH<sub>3</sub>

zoom 112-122

GO

scan 5223; 2.2e+000

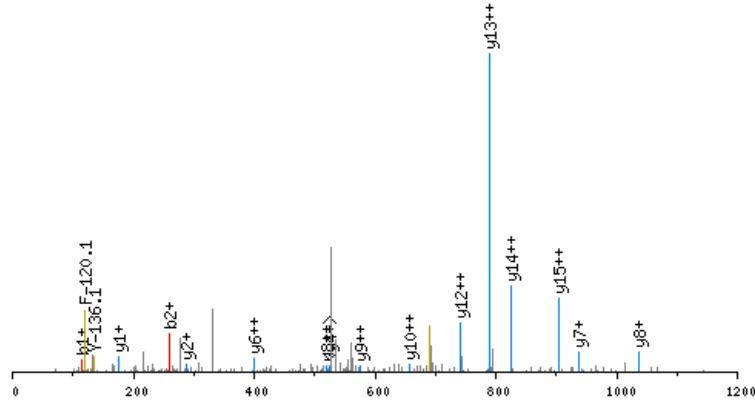

click image to zoom in; click top corners to zoom out [\[precursor±\]](#)

scan 5220; 690.7 mz; 3.0e+001

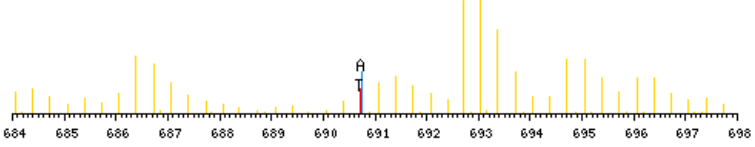

zoomed in precursor plot; T=theoretical m/z, A=acquired m/z

| b <sup>+</sup> | #  | AA | #  | y <sup>+</sup> | y <sup>2+</sup> |
|----------------|----|----|----|----------------|-----------------|
| 114.0555       | 1  | A  | 17 |                |                 |
| 261.1239       | 2  | F  | 16 | 1957.0482      | 979.0280        |
| 421.1545       | 3  | C  | 15 | 1809.9798      | 905.4938        |
| 492.1916       | 4  | A  | 14 | 1649.9492      | 825.4785        |
| 589.2444       | 5  | P  | 13 | 1578.9121      | 789.9599        |
| 686.2972       | 6  | P  | 12 | 1481.8593      | 741.4336        |
| 757.3343       | 7  | A  | 11 | 1384.8065      | 692.9072        |
| 920.3976       | 8  | Y  | 10 | 1313.7694      | 657.3886        |
| 1033.4817      | 9  | L  | 9  | 1150.7061      | 575.8570        |
| 1134.5294      | 10 | T  | 8  | 1037.6220      | 519.3149        |
| 1271.5883      | 11 | H  | 7  | 936.5743       | 468.7911        |
| 1399.6468      | 12 | Q  | 6  | 799.5154       | 400.2616        |
| 1527.7054      | 13 | Q  | 5  | 671.4569       | 336.2323        |
| 1683.8317      | 14 | K  | 4  | 543.3983       | 272.2031        |
| 1782.9001      | 15 | V  | 3  | 387.2720       | 194.1399        |
| 1895.9842      | 16 | L  | 2  | 288.2036       | 144.6057        |
|                | 17 | R  | 1  | 175.1195       | 88.0637         |

N-term:+43.02 C(3):+160.03  
 K(14):+156.13



AFKDTGKTPVEPEVAIHR, MH+ 2105.2032, m/z 527.0563  
 H OS G27 P150811 220811-s1.04813.04813.4.dta

X-range:

-

MassTol: Y-zoom:

MassType:

AVG  MONO

Axis:

1  2

Label:

I  M  -

Ions:

a  +  2+  3+

b  +  2+  3+

c  +  2+  3+

x  +  2+  3+

y  +  2+  3+

z  +  2+  3+

hide H<sub>2</sub>O/NH<sub>3</sub>

zoom 112-122

GO

scan 4813; 3.6e+000

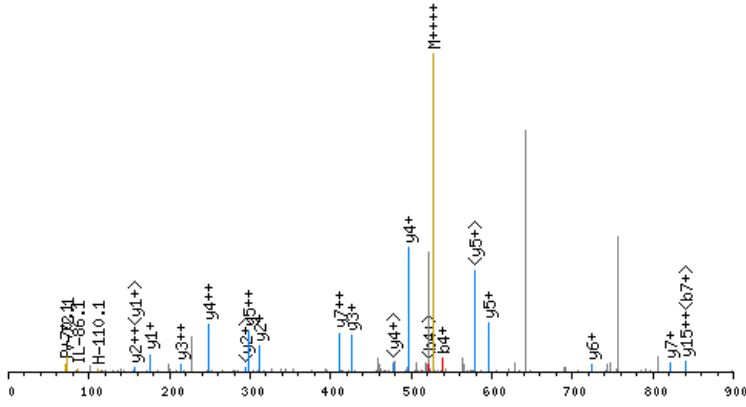

click image to zoom in; click top corners to zoom out [\[precursor±\]](#)

scan 4812; 527.1 Hz; 2.2e+001

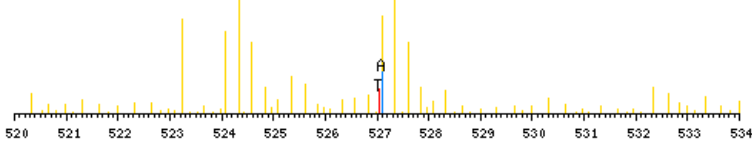

zoomed in precursor plot; T=theoretical m/z, A=acquired m/z

| b <sup>+</sup> | #  | AA # | y <sup>+</sup> | y <sup>2+</sup> |
|----------------|----|------|----------------|-----------------|
| 114.0555       | 1  | A 18 |                |                 |
| 261.1239       | 2  | F 17 | 1992.1555      | 996.5817        |
| 423.2820       | 3  | K 16 | 1845.0871      | 923.0475        |
| 538.3090       | 4  | D 15 | 1682.9290      | 841.9684        |
| 639.3566       | 5  | T 14 | 1567.9021      | 784.4549        |
| 696.3781       | 6  | G 13 | 1466.8544      | 733.9311        |
| 858.5362       | 7  | K 12 | 1409.8329      | 705.4204        |
| 959.5839       | 8  | T 11 | 1247.6748      | 624.3413        |
| 1056.6367      | 9  | P 10 | 1146.6271      | 573.8175        |
| 1155.7051      | 10 | V 9  | 1049.5744      | 525.2911        |
| 1284.7477      | 11 | E 8  | 950.5060       | 475.7569        |
| 1381.8004      | 12 | P 7  | 821.4634       | 411.2356        |
| 1510.8430      | 13 | E 6  | 724.4106       | 362.7092        |
| 1609.9114      | 14 | V 5  | 595.3680       | 298.1879        |
| 1680.9485      | 15 | A 4  | 496.2996       | 248.6537        |
| 1794.0326      | 16 | I 3  | 425.2625       | 213.1352        |
| 1931.0915      | 17 | H 2  | 312.1784       | 156.5931        |
|                | 18 | R 1  | 175.1195       | 88.0637         |

N-term:+43.02 K(3):+162.16  
 K(7):+162.16

AGAACCFSEQFR, MH+ 1560.6211, m/z 520.8785  
 H OS G29 P150811 220811-s1.04379.04379.3.dta

X-range:

-

MassTol: Y-zoom:

MassType:

AVG  MONO

Axis:

1  2

Label:

I  M  -

Ions:

a  +  2+  3+

b  +  2+  3+

c  +  2+  3+

x  +  2+  3+

y  +  2+  3+

z  +  2+  3+

hide H<sub>2</sub>O/NH<sub>3</sub>

zoom 112-122

GO

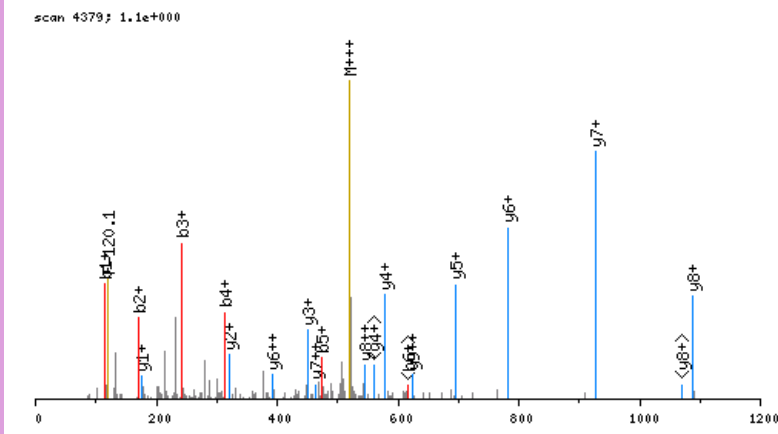

click image to zoom in; click top corners to zoom out [\[precursor±\]](#)

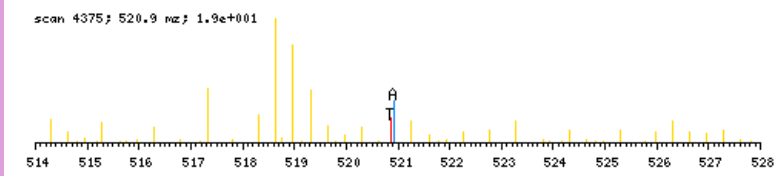

zoomed in precursor plot; T=theoretical m/z, A=acquired m/z

| b <sup>+</sup> | #  | AA # | y <sup>+</sup> | y <sup>2+</sup>    |
|----------------|----|------|----------------|--------------------|
| 114.0555       | 1  | A    | 13             |                    |
| 171.0770       | 2  | G    | 12             | 1447.5734 724.2906 |
| 242.1141       | 3  | A    | 11             | 1390.5519 695.7799 |
| 313.1512       | 4  | A    | 10             | 1319.5148 660.2613 |
| 473.1818       | 5  | C    | 9              | 1248.4777 624.7427 |
| 633.2124       | 6  | C    | 8              | 1088.4471 544.7274 |
| 780.2808       | 7  | F    | 7              | 928.4165 464.7121  |
| 867.3128       | 8  | S    | 6              | 781.3481 391.1779  |
| 982.3398       | 9  | D    | 5              | 694.3160 347.6619  |
| 1111.3824      | 10 | E    | 4              | 579.2891 290.1485  |
| 1239.4410      | 11 | Q    | 3              | 450.2465 225.6272  |
| 1386.5094      | 12 | F    | 2              | 322.1879 161.5979  |
|                | 13 | R    | 1              | 175.1195 88.0637   |

N-term:+43.02 C(5):+160.03  
 C(6):+160.03

AGDAVQSEPR, MH+ 1071.5071, m/z 536.2572  
 H OS G29 P150811 220811-s1.02355.02355.2.dta

X-range:

-

MassTol: Y-zoom:

MassType:

AVG  MONO

Axis:

1  2

Label:

I  M  -

Ions:

a  +  2+  3+

b  +  2+  3+

c  +  2+  3+

x  +  2+  3+

y  +  2+  3+

z  +  2+  3+

hide H<sub>2</sub>O/NH<sub>3</sub>

zoom 112-122

GO

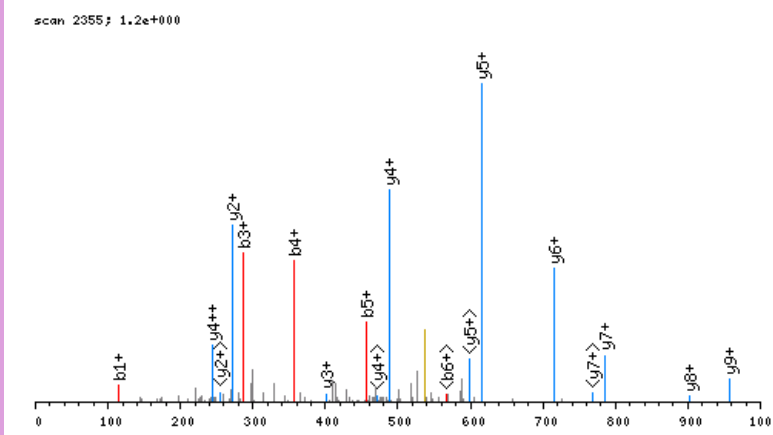

click image to zoom in; click top corners to zoom out [\[precursor±\]](#)

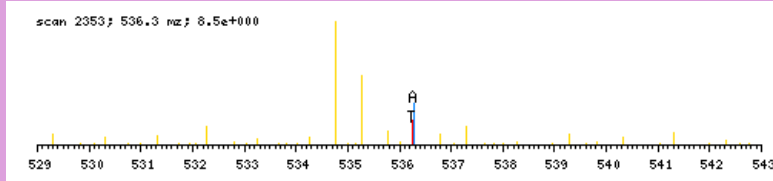

zoomed in precursor plot; T=theoretical m/z, A=acquired m/z

| b <sup>+</sup> | #  | AA | #  | y <sup>+</sup> | y <sup>2+</sup> |
|----------------|----|----|----|----------------|-----------------|
| 114.0555       | 1  | A  | 10 |                |                 |
| 171.0770       | 2  | G  | 9  | 958.4594       | 479.7336        |
| 286.1039       | 3  | D  | 8  | 901.4379       | 451.2229        |
| 357.1410       | 4  | A  | 7  | 786.4110       | 393.7094        |
| 456.2094       | 5  | V  | 6  | 715.3739       | 358.1909        |
| 584.2680       | 6  | Q  | 5  | 616.3055       | 308.6566        |
| 671.3001       | 7  | S  | 4  | 488.2469       | 244.6274        |
| 800.3426       | 8  | E  | 3  | 401.2149       | 201.1113        |
| 897.3954       | 9  | P  | 2  | 272.1723       | 136.5900        |
|                | 10 | R  | 1  | 175.1195       | 88.0637         |

N-term: +43.02

AGEGLGQQGASATAAPETR, MH+ 1813.8681, m/z 605.2942  
 H OS G29 P150811 220811-s1.03026.03026.3.dta

scan 3026; 1.5e+000

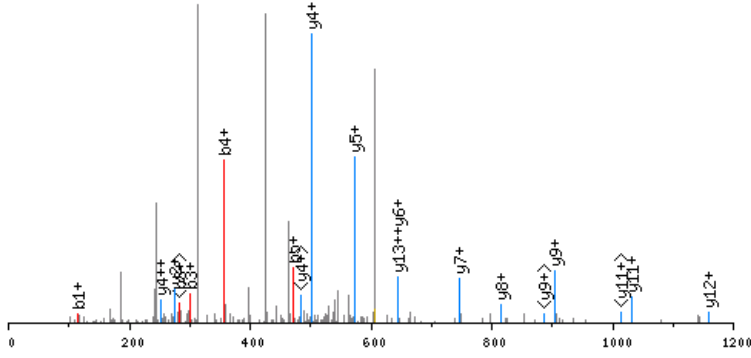

click image to zoom in; click top corners to zoom out [\[precursor±\]](#)

scan 3025; 605.3 m/z; 1.4e+001

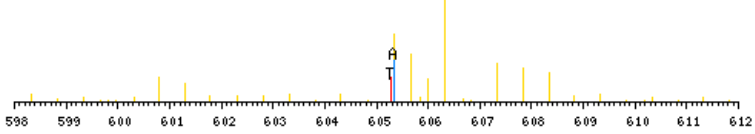

zoomed in precursor plot; T=theoretical m/z, A=acquired m/z

X-range:

-

MassTol: Y-zoom:

MassType:

AVG  MONO

Axis:

1  2

Label:

I  M  -

Ions:

a  +  2+  3+

b  +  2+  3+

c  +  2+  3+

x  +  2+  3+

y  +  2+  3+

z  +  2+  3+

hide H<sub>2</sub>O/NH<sub>3</sub>

zoom 112-122

GO

| b <sup>+</sup> | #  | AA | #  | y <sup>+</sup> | y <sup>2+</sup> |
|----------------|----|----|----|----------------|-----------------|
| 114.0555       | 1  | A  | 19 |                |                 |
| 171.0770       | 2  | G  | 18 | 1700.8204      | 850.9141        |
| 300.1196       | 3  | E  | 17 | 1643.7989      | 822.4034        |
| 357.1410       | 4  | G  | 16 | 1514.7563      | 757.8821        |
| 470.2251       | 5  | L  | 15 | 1457.7348      | 729.3713        |
| 527.2466       | 6  | G  | 14 | 1344.6508      | 672.8293        |
| 655.3051       | 7  | Q  | 13 | 1287.6293      | 644.3186        |
| 783.3637       | 8  | Q  | 12 | 1159.5707      | 580.2893        |
| 840.3852       | 9  | G  | 11 | 1031.5122      | 516.2600        |
| 911.4223       | 10 | A  | 10 | 974.4907       | 487.7493        |
| 998.4543       | 11 | S  | 9  | 903.4536       | 452.2307        |
| 1069.4914      | 12 | A  | 8  | 816.4216       | 408.7147        |
| 1170.5391      | 13 | T  | 7  | 745.3844       | 373.1961        |
| 1241.5762      | 14 | A  | 6  | 644.3368       | 322.6723        |
| 1312.6133      | 15 | A  | 5  | 573.2997       | 287.1537        |
| 1409.6661      | 16 | P  | 4  | 502.2625       | 251.6352        |
| 1538.7087      | 17 | E  | 3  | 405.2098       | 203.1088        |
| 1639.7564      | 18 | T  | 2  | 276.1672       | 138.5875        |
|                | 19 | R  | 1  | 175.1195       | 88.0637         |

N-term:+43.02

AGGEAGVTLGQPHLSR, MH+ 1591.8193, m/z 531.2779  
 H OS G25 P150811 220811-s1.04985.04985.3.dta

X-range:

-

MassTol: Y-zoom:

MassType:

AVG  MONO

Axis:

1  2

Label:

I  M  -

Ions:

a  +  2+  3+

b  +  2+  3+

c  +  2+  3+

x  +  2+  3+

y  +  2+  3+

z  +  2+  3+

hide H<sub>2</sub>O/NH<sub>3</sub>

zoom 112-122

GO

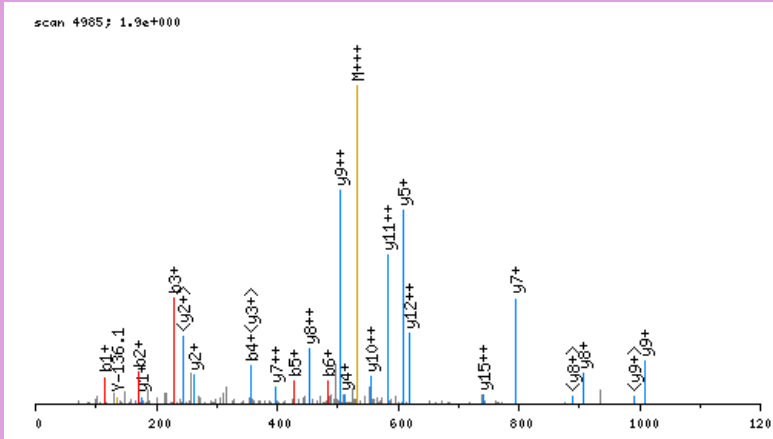

click image to zoom in; click top corners to zoom out [\[precursor±\]](#)

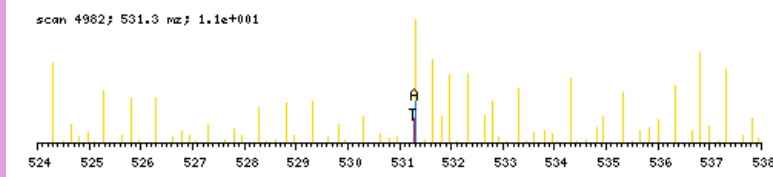

zoomed in precursor plot; T=theoretical m/z, A=acquired m/z

| b <sup>+</sup> | #  | AA # | y <sup>+</sup> | y <sup>2+</sup> |
|----------------|----|------|----------------|-----------------|
| 114.0555       | 1  | A 16 |                |                 |
| 171.0770       | 2  | G 15 | 1478.7716      | 739.8897        |
| 228.0984       | 3  | G 14 | 1421.7501      | 711.3790        |
| 357.1410       | 4  | E 13 | 1364.7286      | 682.8682        |
| 428.1781       | 5  | A 12 | 1235.6860      | 618.3469        |
| 485.1996       | 6  | G 11 | 1164.6489      | 582.8284        |
| 584.2680       | 7  | V 10 | 1107.6275      | 554.3176        |
| 685.3157       | 8  | T 9  | 1008.5591      | 504.7834        |
| 798.3998       | 9  | L 8  | 907.5114       | 454.2596        |
| 855.4212       | 10 | G 7  | 794.4273       | 397.7176        |
| 983.4798       | 11 | Q 6  | 737.4058       | 369.2068        |
| 1080.5326      | 12 | P 5  | 609.3473       | 305.1775        |
| 1217.5915      | 13 | H 4  | 512.2945       | 256.6512        |
| 1330.6755      | 14 | L 3  | 375.2356       | 188.1217        |
| 1417.7076      | 15 | S 2  | 262.1515       | 131.5797        |
|                | 16 | R 1  | 175.1195       | 88.0637         |

N-term:+43.02

AGGEGGVTLGQPHLSR, MH+ 1577.8036, m/z 526.6061  
 H OS G25 P150811 220811-s1.04778.04778.3.dta

X-range:

-

MassTol: Y-zoom:

MassType:

AVG  MONO

Axis:

1  2

Label:

I  M  -

Ions:

a  +  2+  3+

b  +  2+  3+

c  +  2+  3+

x  +  2+  3+

y  +  2+  3+

z  +  2+  3+

hide H<sub>2</sub>O/NH<sub>3</sub>

zoom 112-122

GO

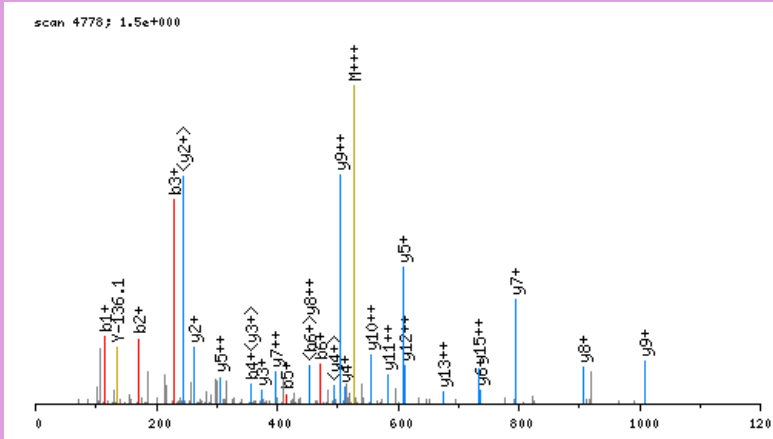

click image to zoom in; click top corners to zoom out [\[precursor±\]](#)

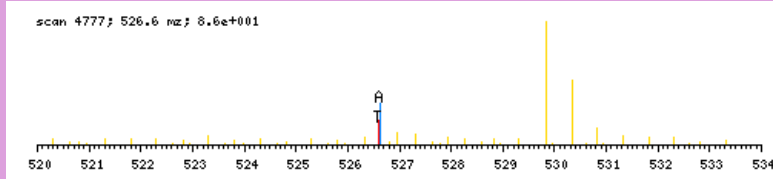

zoomed in precursor plot; T=theoretical m/z, A=acquired m/z

| b <sup>+</sup> | #  | AA # | y <sup>+</sup> | y <sup>2+</sup> |
|----------------|----|------|----------------|-----------------|
| 114.0555       | 1  | A 16 |                |                 |
| 171.0770       | 2  | G 15 | 1464.7559      | 732.8819        |
| 228.0984       | 3  | G 14 | 1407.7345      | 704.3711        |
| 357.1410       | 4  | E 13 | 1350.7130      | 675.8604        |
| 414.1625       | 5  | G 12 | 1221.6704      | 611.3391        |
| 471.1840       | 6  | G 11 | 1164.6489      | 582.8284        |
| 570.2524       | 7  | V 10 | 1107.6275      | 554.3176        |
| 671.3001       | 8  | T 9  | 1008.5591      | 504.7834        |
| 784.3841       | 9  | L 8  | 907.5114       | 454.2596        |
| 841.4056       | 10 | G 7  | 794.4273       | 397.7176        |
| 969.4642       | 11 | Q 6  | 737.4058       | 369.2068        |
| 1066.5169      | 12 | P 5  | 609.3473       | 305.1775        |
| 1203.5758      | 13 | H 4  | 512.2945       | 256.6512        |
| 1316.6599      | 14 | L 3  | 375.2356       | 188.1217        |
| 1403.6919      | 15 | S 2  | 262.1515       | 131.5797        |
|                | 16 | R 1  | 175.1195       | 88.0637         |

N-term:+43.02

AGGPPKALPSTGPOSLR, MH+ 1703.9445, m/z 568.6530  
 H OS G24 P150811 220811-s1.03266.03266.3.dta

X-range:

-

MassTol: Y-zoom:

MassType:

AVG  MONO

Axis:

1  2

Label:

I  M  -

Ions:

a  +  2+  3+

b  +  2+  3+

c  +  2+  3+

x  +  2+  3+

y  +  2+  3+

z  +  2+  3+

hide H<sub>2</sub>O/NH<sub>3</sub>

zoom 112-122

GO

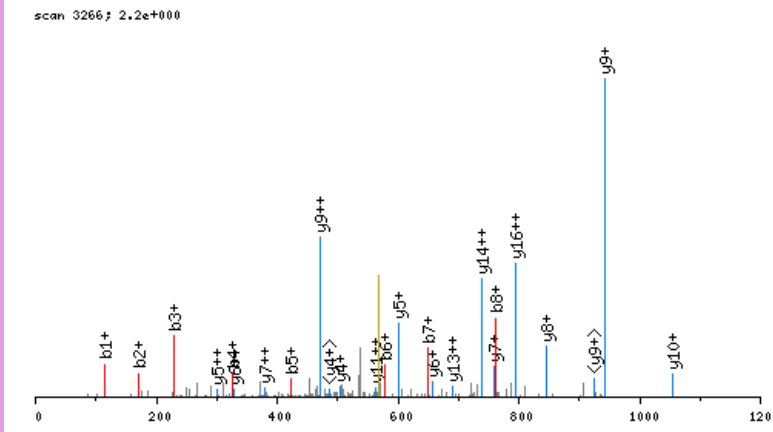

click image to zoom in; click top corners to zoom out [\[precursor±\]](#)

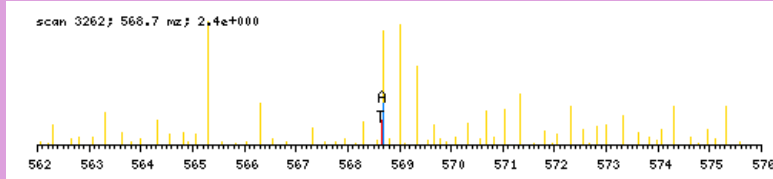

zoomed in precursor plot; T=theoretical m/z, A=acquired m/z

| b <sup>+</sup> | #  | AA # | y <sup>+</sup> | y <sup>2+</sup> |
|----------------|----|------|----------------|-----------------|
| 114.0555       | 1  | A 17 |                |                 |
| 171.0770       | 2  | G 16 | 1590.8968      | 795.9523        |
| 228.0984       | 3  | G 15 | 1533.8753      | 767.4416        |
| 325.1512       | 4  | P 14 | 1476.8539      | 738.9308        |
| 422.2040       | 5  | P 13 | 1379.8011      | 690.4045        |
| 578.3303       | 6  | K 12 | 1282.7483      | 641.8781        |
| 649.3674       | 7  | A 11 | 1126.6220      | 563.8149        |
| 762.4514       | 8  | L 10 | 1055.5849      | 528.2964        |
| 859.5042       | 9  | P 9  | 942.5009       | 471.7543        |
| 946.5362       | 10 | S 8  | 845.4481       | 423.2280        |
| 1047.5839      | 11 | T 7  | 758.4161       | 379.7120        |
| 1104.6054      | 12 | G 6  | 657.3684       | 329.1881        |
| 1201.6581      | 13 | P 5  | 600.3469       | 300.6774        |
| 1329.7167      | 14 | Q 4  | 503.2942       | 252.1510        |
| 1416.7488      | 15 | S 3  | 375.2356       | 188.1217        |
| 1529.8328      | 16 | L 2  | 288.2036       | 144.6057        |
|                | 17 | R 1  | 175.1195       | 88.0637         |

N-term:+43.02 K(6):+156.13

AGKPVLYHYFDGR, MH+ 1435.7911, m/z 479.2685  
 H OS G27 P150811 220811-s1.05420.05420.3.dta

X-range:

-

MassTol: Y-zoom:

MassType:

AVG  MONO

Axis:

1  2

Label:

I  M  -

Ions:

a  +  2+  3+

b  +  2+  3+

c  +  2+  3+

x  +  2+  3+

y  +  2+  3+

z  +  2+  3+

hide H<sub>2</sub>O/NH<sub>3</sub>

zoom 112-122

GO

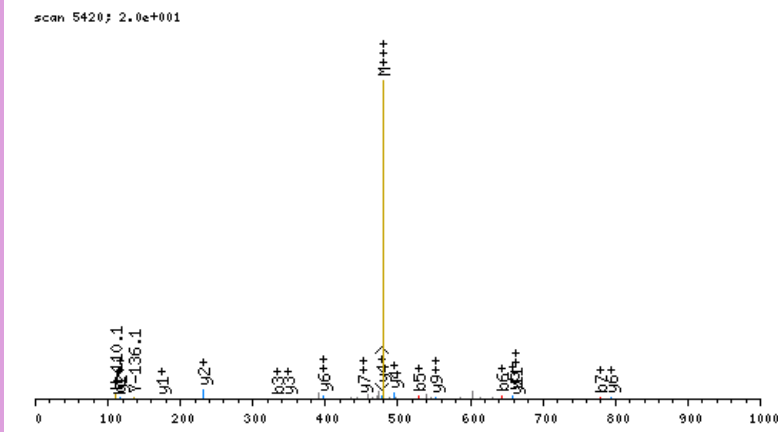

click image to zoom in; click top corners to zoom out [\[precursor±\]](#)

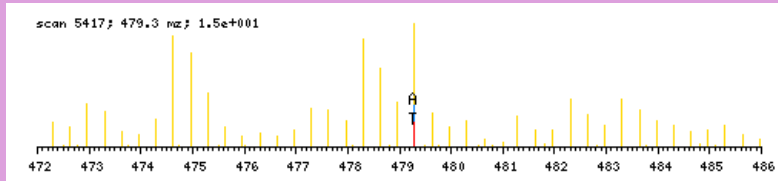

zoomed in precursor plot; T=theoretical m/z, A=acquired m/z

| b <sup>+</sup> | #  | AA # | y <sup>+</sup> | y <sup>2+</sup> |
|----------------|----|------|----------------|-----------------|
| 114.0555       | 1  | A 12 |                |                 |
| 171.0770       | 2  | G 11 | 1322.7434      | 661.8756        |
| 333.2351       | 3  | K 10 | 1265.7219      | 633.3649        |
| 430.2878       | 4  | P 9  | 1103.5638      | 552.2858        |
| 529.3563       | 5  | V 8  | 1006.5110      | 503.7594        |
| 642.4403       | 6  | L 7  | 907.4426       | 454.2252        |
| 779.4992       | 7  | H 6  | 794.3586       | 397.6832        |
| 942.5626       | 8  | Y 5  | 657.2997       | 329.1537        |
| 1089.6310      | 9  | F 4  | 494.2363       | 247.6221        |
| 1204.6579      | 10 | D 3  | 347.1679       | 174.0879        |
| 1261.6794      | 11 | G 2  | 232.1410       | 116.5744        |
|                | 12 | R 1  | 175.1195       | 88.0637         |

N-term:+43.02 K(3):+162.16



AGKPVLYHFNAR, MH+ 1442.7909, m/z 481.6018  
 H OS G27 P150811 220811-s1.04988.04988.3.dta

X-range:

-

MassTol: Y-zoom:

MassType:

AVG  MONO

Axis:

1  2

Label:

I  M  -

Ions:

a  +  2+  3+

b  +  2+  3+

c  +  2+  3+

x  +  2+  3+

y  +  2+  3+

z  +  2+  3+

hide H<sub>2</sub>O/NH<sub>3</sub>

zoom 112-122

GO

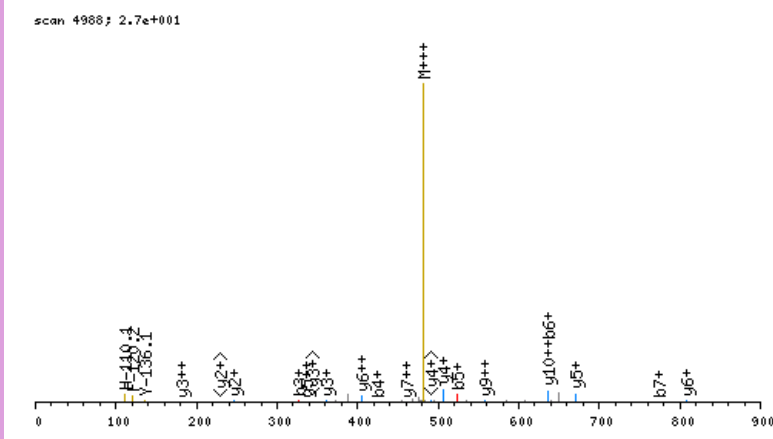

click image to zoom in; click top corners to zoom out [\[precursor±\]](#)

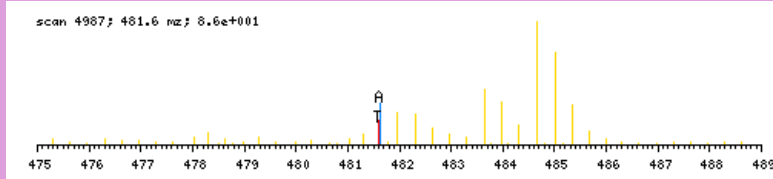

zoomed in precursor plot; T=theoretical m/z, A=acquired m/z

| b <sup>+</sup> | #  | AA # | y <sup>+</sup> | y <sup>2+</sup> |
|----------------|----|------|----------------|-----------------|
| 114.0555       | 1  | A 12 |                |                 |
| 171.0770       | 2  | G 11 | 1329.7432      | 665.3755        |
| 327.2033       | 3  | K 10 | 1272.7217      | 636.8648        |
| 424.2560       | 4  | P 9  | 1116.5954      | 558.8016        |
| 523.3245       | 5  | V 8  | 1019.5427      | 510.2752        |
| 636.4085       | 6  | L 7  | 920.4743       | 460.7410        |
| 773.4674       | 7  | H 6  | 807.3902       | 404.1990        |
| 936.5308       | 8  | Y 5  | 670.3313       | 335.6696        |
| 1083.5992      | 9  | F 4  | 507.2680       | 254.1379        |
| 1197.6421      | 10 | N 3  | 360.1995       | 180.6037        |
| 1268.6792      | 11 | A 2  | 246.1566       | 123.5822        |
|                | 12 | R 1  | 175.1195       | 88.0637         |

N-term:+43.02 K(3):+156.13

AGLELLSDQGYR, MH+ 1363.6858, m/z 682.3465  
 H OS G29 P150811 220811-s1.06047.06047.2.dta

X-range:

-

MassTol: Y-zoom:

MassType:

AVG  MONO

Axis:

1  2

Label:

I  M  -

Ions:

a  +  2+  3+

b  +  2+  3+

c  +  2+  3+

x  +  2+  3+

y  +  2+  3+

z  +  2+  3+

hide H<sub>2</sub>O/NH<sub>3</sub>

zoom 112-122

GO

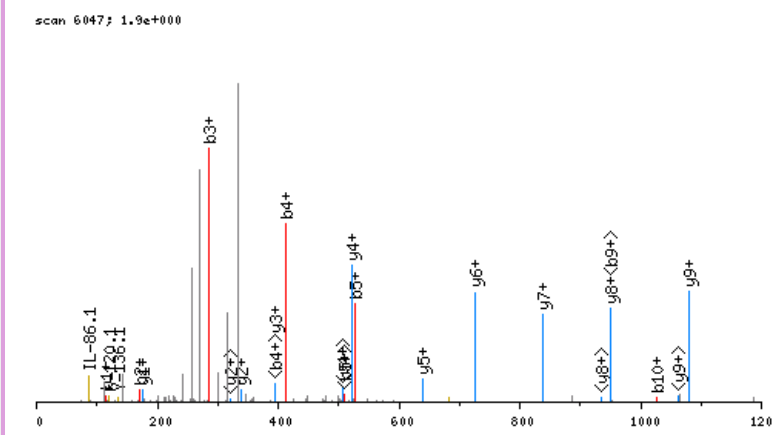

click image to zoom in; click top corners to zoom out [\[precursor±\]](#)

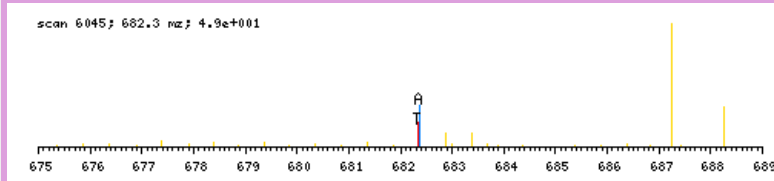

zoomed in precursor plot; T=theoretical m/z, A=acquired m/z

| b <sup>+</sup> | #  | AA | #  | y <sup>+</sup> | y <sup>2+</sup> |
|----------------|----|----|----|----------------|-----------------|
| 114.0555       | 1  | A  | 12 |                |                 |
| 171.0770       | 2  | G  | 11 | 1250.6381      | 625.8230        |
| 284.1610       | 3  | L  | 10 | 1193.6166      | 597.3122        |
| 413.2036       | 4  | E  | 9  | 1080.5326      | 540.7702        |
| 526.2877       | 5  | L  | 8  | 951.4900       | 476.2489        |
| 639.3718       | 6  | L  | 7  | 838.4059       | 419.7069        |
| 726.4038       | 7  | S  | 6  | 725.3218       | 363.1648        |
| 841.4307       | 8  | D  | 5  | 638.2898       | 319.6488        |
| 969.4893       | 9  | Q  | 4  | 523.2629       | 262.1353        |
| 1026.5108      | 10 | G  | 3  | 395.2043       | 198.1061        |
| 1189.5741      | 11 | Y  | 2  | 338.1828       | 169.5953        |
|                | 12 | R  | 1  | 175.1195       | 88.0637         |

N-term:+43.02

AGLGHPSAFGR, MH+ 1111.5649, m/z 556.2861  
 H OS G25 P150811 220811-s1.04263.04263.2.dta

scan 4263; 1.4e+001

X-range:

-

MassTol: Y-zoom:

MassType:

AVG  MONO

Axis:

1  2

Label:

I  M  -

Ions:

a  +  2+  3+

b  +  2+  3+

c  +  2+  3+

x  +  2+  3+

y  +  2+  3+

z  +  2+  3+

hide H<sub>2</sub>O/NH<sub>3</sub>

zoom 112-122

GO

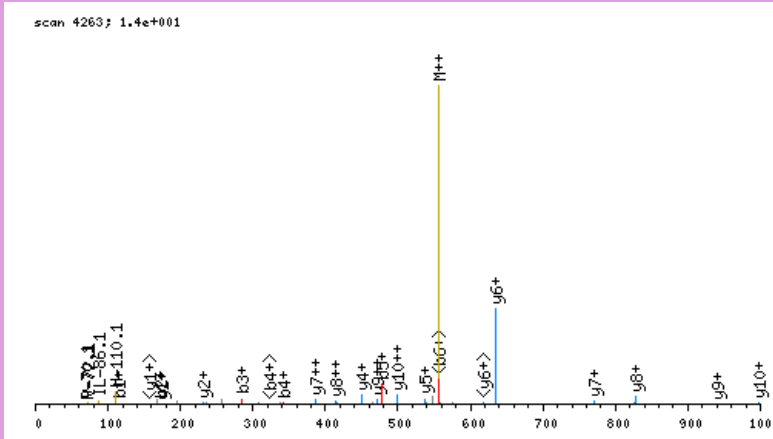

click image to zoom in; click top corners to zoom out [\[precursor±\]](#)

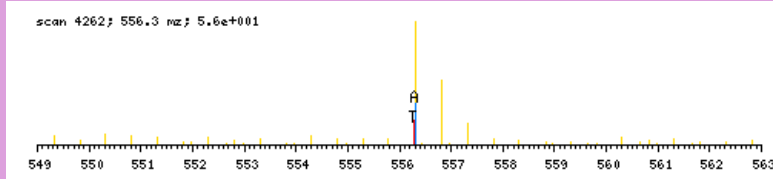

zoomed in precursor plot; T=theoretical m/z, A=acquired m/z

| b <sup>+</sup> | #  | AA | #  | y <sup>+</sup> | y <sup>2+</sup> |
|----------------|----|----|----|----------------|-----------------|
| 114.0555       | 1  | A  | 11 |                |                 |
| 171.0770       | 2  | G  | 10 | 998.5172       | 499.7625        |
| 284.1610       | 3  | L  | 9  | 941.4957       | 471.2518        |
| 341.1825       | 4  | G  | 8  | 828.4117       | 414.7097        |
| 478.2414       | 5  | H  | 7  | 771.3902       | 386.1990        |
| 575.2942       | 6  | P  | 6  | 634.3313       | 317.6696        |
| 662.3262       | 7  | S  | 5  | 537.2785       | 269.1432        |
| 733.3633       | 8  | A  | 4  | 450.2465       | 225.6272        |
| 880.4317       | 9  | F  | 3  | 379.2094       | 190.1086        |
| 937.4532       | 10 | G  | 2  | 232.1410       | 116.5744        |
|                | 11 | R  | 1  | 175.1195       | 88.0637         |

N-term: +43.02

AGLNSLEAVKR, MH+ 1227.7062, m/z 614.3567  
 H OS G25 P150811 220811-s1.05199.05199.2.dta

X-range:

-

MassTol: Y-zoom:

MassType:

AVG  MONO

Axis:

1  2

Label:

I  M  -

Ions:

a  +  2+  3+

b  +  2+  3+

c  +  2+  3+

x  +  2+  3+

y  +  2+  3+

z  +  2+  3+

hide H<sub>2</sub>O/NH<sub>3</sub>

zoom 112-122

GO

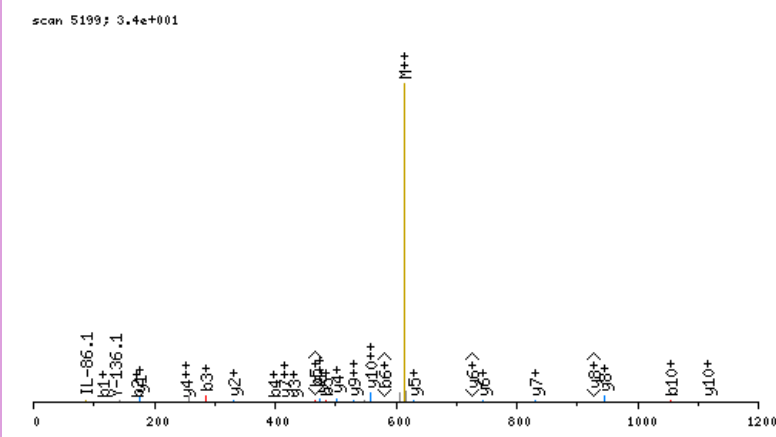

click image to zoom in; click top corners to zoom out [\[precursor±\]](#)

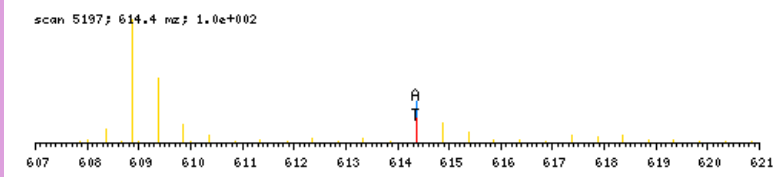

zoomed in precursor plot; T=theoretical m/z, A=acquired m/z

| b <sup>+</sup> | #  | AA # | y <sup>+</sup> | y <sup>2+</sup> |
|----------------|----|------|----------------|-----------------|
| 114.0555       | 1  | A 11 |                |                 |
| 171.0770       | 2  | G 10 | 1114.6585      | 557.8331        |
| 284.1610       | 3  | L 9  | 1057.6370      | 529.3224        |
| 398.2040       | 4  | N 8  | 944.5529       | 472.7804        |
| 485.2360       | 5  | S 7  | 830.5100       | 415.7589        |
| 598.3201       | 6  | L 6  | 743.4780       | 372.2429        |
| 727.3627       | 7  | E 5  | 630.3939       | 315.7009        |
| 798.3998       | 8  | A 4  | 501.3513       | 251.1796        |
| 897.4682       | 9  | V 3  | 430.3142       | 215.6610        |
| 1053.5945      | 10 | K 2  | 331.2458       | 166.1268        |
|                | 11 | R 1  | 175.1195       | 88.0637         |

N-term:+43.02 K(10):+156.13

AGNKVPPALASHQPDR, MH+ 1727.9193, m/z 576.6446  
 H OS G26 P150811 220811-s1.02814.02814.3.dta

X-range:

-

MassTol: Y-zoom:

MassType:

AVG  MONO

Axis:

1  2

Label:

I  M  -

Ions:

a  +  2+  3+

b  +  2+  3+

c  +  2+  3+

x  +  2+  3+

y  +  2+  3+

z  +  2+  3+

hide H<sub>2</sub>O/NH<sub>3</sub>

zoom 112-122

GO

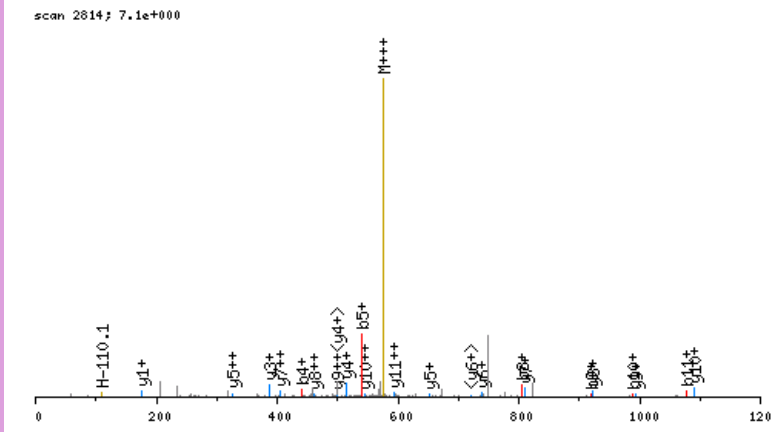

click image to zoom in; click top corners to zoom out [\[precursor±\]](#)

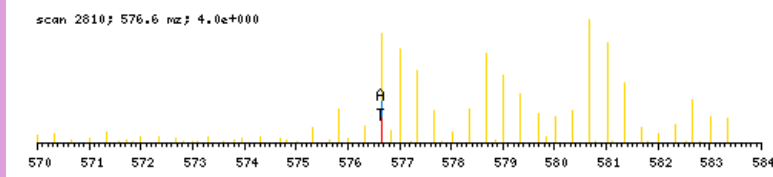

zoomed in precursor plot; T=theoretical m/z, A=acquired m/z

| b <sup>+</sup> | #  | AA # | y <sup>+</sup> | y <sup>2+</sup> |
|----------------|----|------|----------------|-----------------|
| 114.0555       | 1  | A 16 |                |                 |
| 171.0770       | 2  | G 15 | 1614.8717      | 807.9397        |
| 285.1199       | 3  | N 14 | 1557.8502      | 779.4290        |
| 441.2462       | 4  | K 13 | 1443.8073      | 722.4075        |
| 540.3146       | 5  | V 12 | 1287.6810      | 644.3444        |
| 637.3674       | 6  | P 11 | 1188.6125      | 594.8102        |
| 734.4201       | 7  | P 10 | 1091.5598      | 546.2838        |
| 805.4573       | 8  | A 9  | 994.5070       | 497.7574        |
| 918.5413       | 9  | L 8  | 923.4699       | 462.2389        |
| 989.5784       | 10 | A 7  | 810.3858       | 405.6968        |
| 1076.6105      | 11 | S 6  | 739.3487       | 370.1783        |
| 1213.6694      | 12 | H 5  | 652.3167       | 326.6623        |
| 1341.7280      | 13 | Q 4  | 515.2578       | 258.1328        |
| 1438.7807      | 14 | P 3  | 387.1992       | 194.1035        |
| 1553.8077      | 15 | D 2  | 290.1464       | 145.5771        |
|                | 16 | R 1  | 175.1195       | 88.0637         |

N-term:+43.02 K(4):+156.13

AGPFGAALLESPR, MH+ 1221.6228, m/z 611.3150  
 H OS G29 P150811 220811-s1.03333.03333.2.dta

scan 3333; 9.6e-001

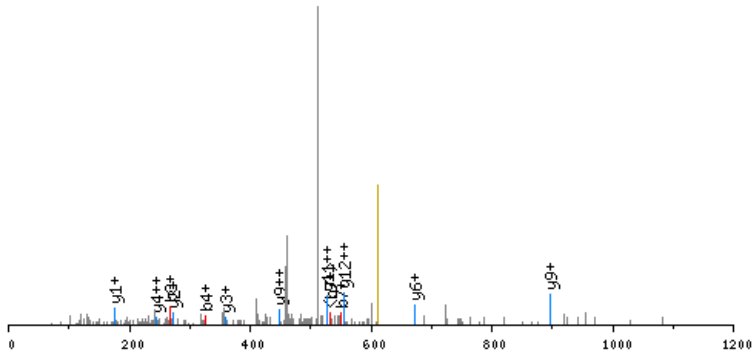

click image to zoom in; click top corners to zoom out [\[precursor±\]](#)

scan 3330; 611.3 m/z; 2.8e+000

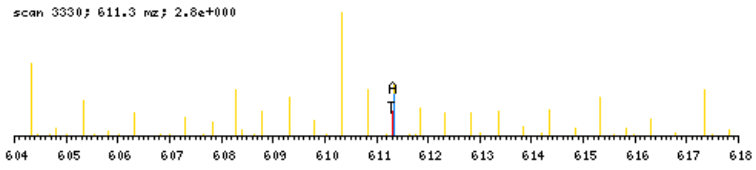

zoomed in precursor plot; T=theoretical m/z, A=acquired m/z

X-range:

-

MassTol: Y-zoom:

MassType:

AVG  MONO

Axis:

1  2

Label:

I  M  -

Ions:

a  +  2+  3+

b  +  2+  3+

c  +  2+  3+

x  +  2+  3+

y  +  2+  3+

z  +  2+  3+

hide H<sub>2</sub>O/NH<sub>3</sub>

zoom 112-122

GO

| b <sup>+</sup> | #  | AA # | y <sup>+</sup> | y <sup>2+</sup> |
|----------------|----|------|----------------|-----------------|
| 114.0555       | 1  | A 13 |                |                 |
| 171.0770       | 2  | G 12 | 1108.5751      | 554.7915        |
| 268.1297       | 3  | P 11 | 1051.5536      | 526.2807        |
| 325.1512       | 4  | G 10 | 954.5009       | 477.7543        |
| 422.2040       | 5  | P 9  | 897.4794       | 449.2436        |
| 479.2254       | 6  | G 8  | 800.4266       | 400.7172        |
| 550.2625       | 7  | A 7  | 743.4052       | 372.2065        |
| 621.2997       | 8  | A 6  | 672.3681       | 336.6879        |
| 734.3837       | 9  | L 5  | 601.3310       | 301.1694        |
| 863.4263       | 10 | E 4  | 488.2469       | 244.6274        |
| 950.4583       | 11 | S 3  | 359.2043       | 180.1061        |
| 1047.5111      | 12 | P 2  | 272.1723       | 136.5900        |
|                | 13 | R 1  | 175.1195       | 88.0637         |

N-term:+43.02

AGQEDPVQR, MH+ 1041.4965, m/z 521.2519  
 H OS G29 P150811 220811-s1.02345.02345.2.dta

X-range:

-

MassTol: Y-zoom:

MassType:

AVG  MONO

Axis:

1  2

Label:

I  M  -

Ions:

a  +  2+  3+

b  +  2+  3+

c  +  2+  3+

x  +  2+  3+

y  +  2+  3+

z  +  2+  3+

hide H<sub>2</sub>O/NH<sub>3</sub>

zoom 112-122

GO

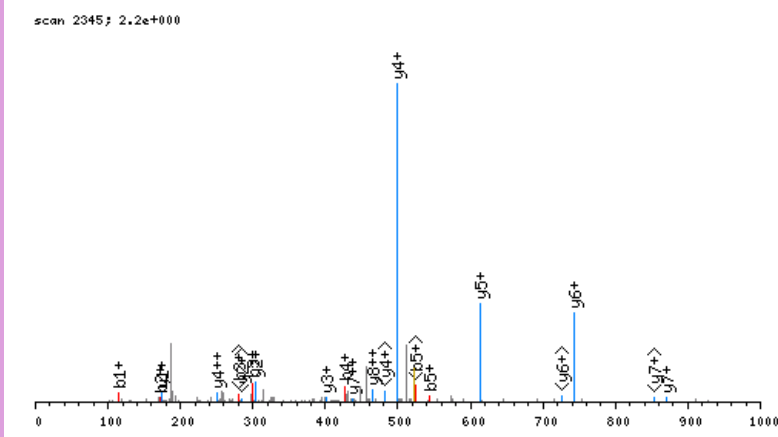

click image to zoom in; click top corners to zoom out [\[precursor±\]](#)

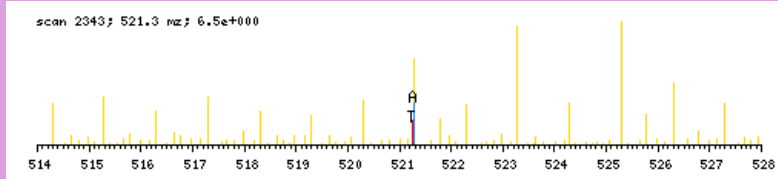

zoomed in precursor plot; T=theoretical m/z, A=acquired m/z

| b <sup>+</sup> | # | AA # | y <sup>+</sup> | y <sup>2+</sup> |
|----------------|---|------|----------------|-----------------|
| 114.0555       | 1 | A 9  |                |                 |
| 171.0770       | 2 | G 8  | 928.4488       | 464.7283        |
| 299.1356       | 3 | Q 7  | 871.4274       | 436.2176        |
| 428.1781       | 4 | E 6  | 743.3688       | 372.1883        |
| 543.2051       | 5 | D 5  | 614.3262       | 307.6670        |
| 640.2579       | 6 | P 4  | 499.2993       | 250.1535        |
| 739.3263       | 7 | V 3  | 402.2465       | 201.6272        |
| 867.3848       | 8 | Q 2  | 303.1781       | 152.0930        |
|                | 9 | R 1  | 175.1195       | 88.0637         |

N-term:+43.02

AGSSAEQAADYR, MH+ 1267.5555, m/z 634.2814  
 H OS G29 P150811 220811-s1.02689.02689.2.dta

scan 2689; 7.6e-001

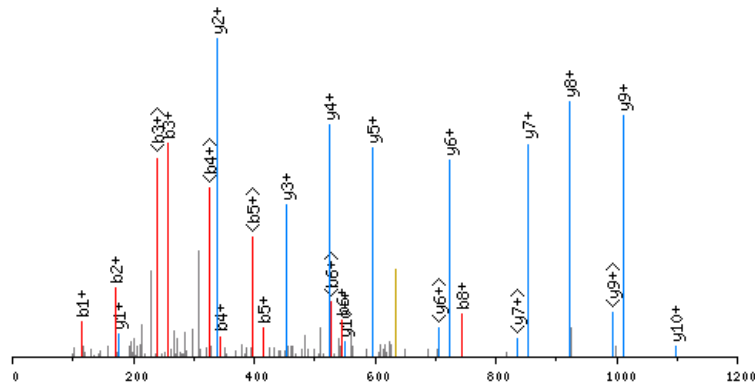

click image to zoom in; click top corners to zoom out [\[precursor±\]](#)

scan 2686; 634.3 m/z; 4.1e+000

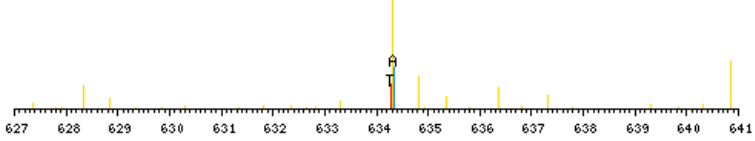

zoomed in precursor plot; T=theoretical m/z, A=acquired m/z

X-range:

-

MassTol: Y-zoom:

MassType:

AVG  MONO

Axis:

1  2

Label:

I  M  -

Ions:

a  +  2+  3+

b  +  2+  3+

c  +  2+  3+

x  +  2+  3+

y  +  2+  3+

z  +  2+  3+

hide H<sub>2</sub>O/NH<sub>3</sub>

zoom 112-122

GO

| b <sup>+</sup> | #  | AA | #  | y <sup>+</sup> | y <sup>2+</sup> |
|----------------|----|----|----|----------------|-----------------|
| 114.0555       | 1  | A  | 12 |                |                 |
| 171.0770       | 2  | G  | 11 | 1154.5078      | 577.7578        |
| 258.1090       | 3  | S  | 10 | 1097.4863      | 549.2471        |
| 345.1410       | 4  | S  | 9  | 1010.4543      | 505.7311        |
| 416.1781       | 5  | A  | 8  | 923.4223       | 462.2151        |
| 545.2207       | 6  | E  | 7  | 852.3852       | 426.6965        |
| 673.2793       | 7  | Q  | 6  | 723.3426       | 362.1752        |
| 744.3164       | 8  | A  | 5  | 595.2840       | 298.1459        |
| 815.3535       | 9  | A  | 4  | 524.2469       | 262.6274        |
| 930.3805       | 10 | D  | 3  | 453.2098       | 227.1088        |
| 1093.4438      | 11 | Y  | 2  | 338.1828       | 169.5953        |
|                | 12 | R  | 1  | 175.1195       | 88.0637         |

N-term:+43.02



AGTSSEAEAEALAAAR, MH+ 1546.7349, m/z 516.2498  
 H OS G29 P150811 220811-s1.04477.04477.3.dta

X-range:

-

MassTol: Y-zoom:

MassType:

AVG  MONO

Axis:

1  2

Label:

I  M  -

Ions:

a  +  2+  3+

b  +  2+  3+

c  +  2+  3+

x  +  2+  3+

y  +  2+  3+

z  +  2+  3+

hide H<sub>2</sub>O/NH<sub>3</sub>

zoom 112-122

GO

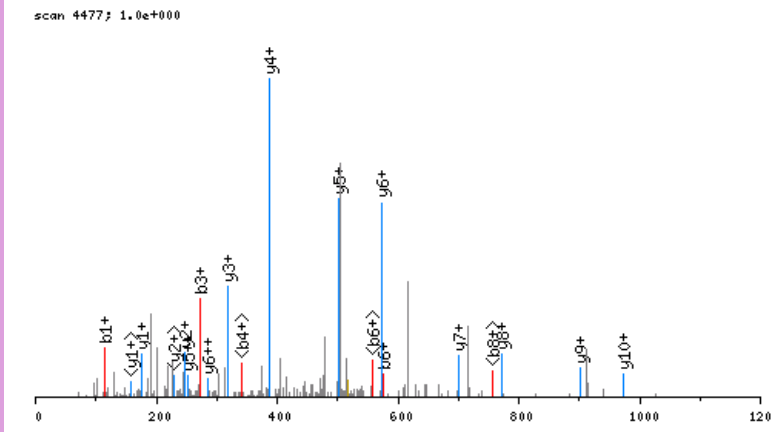

click image to zoom in; click top corners to zoom out [\[precursor±\]](#)

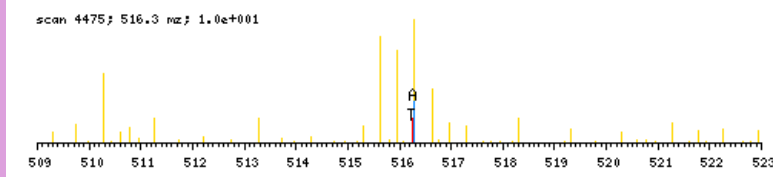

zoomed in precursor plot; T=theoretical m/z, A=acquired m/z

| b <sup>+</sup> | #  | AA # | y <sup>+</sup> | y <sup>2+</sup> |
|----------------|----|------|----------------|-----------------|
| 114.0555       | 1  | A 16 |                |                 |
| 171.0770       | 2  | G 15 | 1433.6872      | 717.3475        |
| 272.1247       | 3  | T 14 | 1376.6658      | 688.8368        |
| 359.1567       | 4  | S 13 | 1275.6181      | 638.3130        |
| 446.1887       | 5  | S 12 | 1188.5861      | 594.7969        |
| 575.2313       | 6  | E 11 | 1101.5540      | 551.2809        |
| 646.2684       | 7  | A 10 | 972.5114       | 486.7596        |
| 775.3110       | 8  | E 9  | 901.4743       | 451.2411        |
| 846.3481       | 9  | A 8  | 772.4317       | 386.7198        |
| 975.3907       | 10 | E 7  | 701.3946       | 351.2012        |
| 1046.4278      | 11 | A 6  | 572.3520       | 286.6799        |
| 1159.5119      | 12 | L 5  | 501.3149       | 251.1614        |
| 1230.5490      | 13 | A 4  | 388.2308       | 194.6193        |
| 1301.5861      | 14 | A 3  | 317.1937       | 159.1008        |
| 1372.6232      | 15 | A 2  | 246.1566       | 123.5822        |
|                | 16 | R 1  | 175.1195       | 88.0637         |

N-term:+43.02

AGTTTIEAVKR, MH+ 1216.6902, m/z 608.8487  
 H OS G25 P150811 220811-s1.03413.03413.2.dta

scan 3413; 2.6e+001

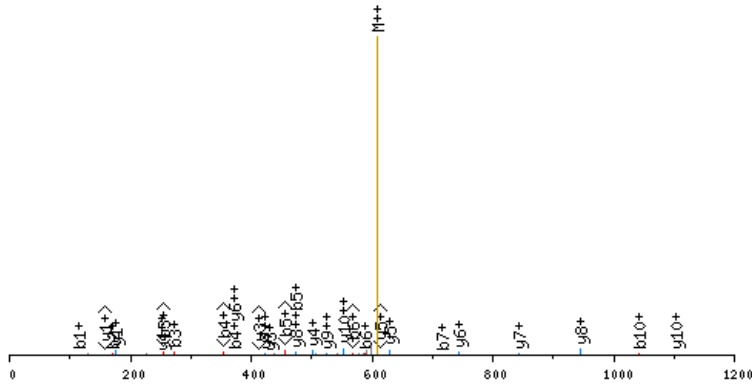

click image to zoom in; click top corners to zoom out [\[precursor±\]](#)

scan 3412; 608.8 m/z; 1.5e+001

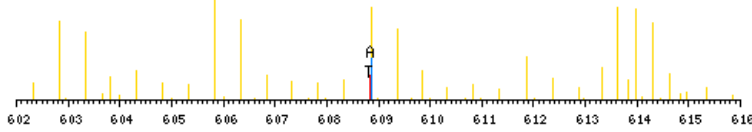

zoomed in precursor plot; T=theoretical m/z, A=acquired m/z

X-range:

-

MassTol: Y-zoom:

MassType:

AVG  MONO

Axis:

1  2

Label:

I  M  -

Ions:

a  +  2+  3+

b  +  2+  3+

c  +  2+  3+

x  +  2+  3+

y  +  2+  3+

z  +  2+  3+

hide H<sub>2</sub>O/NH<sub>3</sub>

zoom 112-122

GO

| b <sup>+</sup> | #  | AA # | y <sup>+</sup> | y <sup>2+</sup> |
|----------------|----|------|----------------|-----------------|
| 114.0555       | 1  | A 11 |                |                 |
| 171.0770       | 2  | G 10 | 1103.6425      | 552.3252        |
| 272.1247       | 3  | T 9  | 1046.6210      | 523.8144        |
| 373.1723       | 4  | T 8  | 945.5733       | 473.2906        |
| 474.2200       | 5  | T 7  | 844.5257       | 422.7667        |
| 587.3041       | 6  | I 6  | 743.4780       | 372.2429        |
| 716.3467       | 7  | E 5  | 630.3939       | 315.7009        |
| 787.3838       | 8  | A 4  | 501.3513       | 251.1796        |
| 886.4522       | 9  | V 3  | 430.3142       | 215.6610        |
| 1042.5785      | 10 | K 2  | 331.2458       | 166.1268        |
|                | 11 | R 1  | 175.1195       | 88.0637         |

N-term:+43.02 K(10):+156.13

AGTVVLDVDEL, MH+ 1328.7062, m/z 664.8567  
 H OS G29 P150811 220811-s1.06038.06038.2.dta

X-range:

-

MassTol: Y-zoom:

MassType:

AVG  MONO

Axis:

1  2

Label:

I  M  -

Ions:

a  +  2+  3+

b  +  2+  3+

c  +  2+  3+

x  +  2+  3+

y  +  2+  3+

z  +  2+  3+

hide H<sub>2</sub>O/NH<sub>3</sub>

zoom 112-122

GO

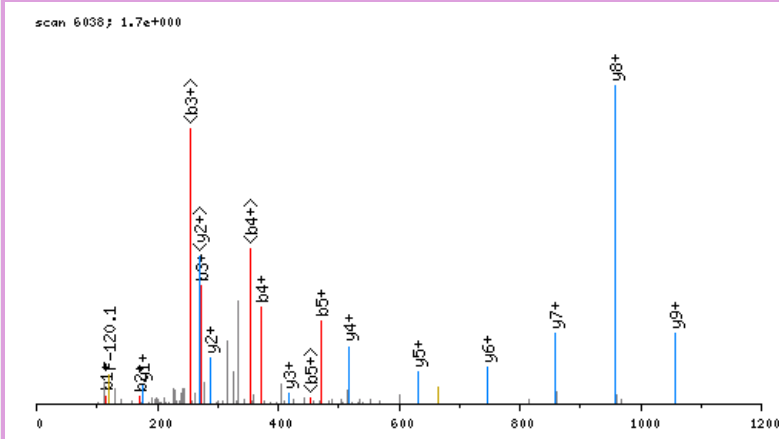

click image to zoom in; click top corners to zoom out [\[precursor±\]](#)

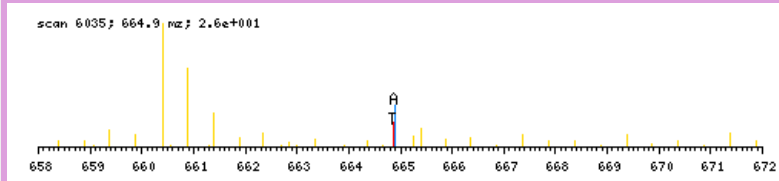

zoomed in precursor plot; T=theoretical m/z, A=acquired m/z

| b <sup>+</sup> | #  | AA # | y <sup>+</sup> | y <sup>2+</sup> |
|----------------|----|------|----------------|-----------------|
| 114.0555       | 1  | A 12 |                |                 |
| 171.0770       | 2  | G 11 | 1215.6585      | 608.3332        |
| 272.1247       | 3  | T 10 | 1158.6370      | 579.8224        |
| 371.1931       | 4  | V 9  | 1057.5893      | 529.2986        |
| 470.2615       | 5  | V 8  | 958.5209       | 479.7644        |
| 583.3455       | 6  | L 7  | 859.4525       | 430.2302        |
| 698.3725       | 7  | D 6  | 746.3685       | 373.6881        |
| 813.3994       | 8  | D 5  | 631.3415       | 316.1747        |
| 912.4678       | 9  | V 4  | 516.3146       | 258.6612        |
| 1041.5104      | 10 | E 3  | 417.2462       | 209.1270        |
| 1154.5945      | 11 | L 2  | 288.2036       | 144.6057        |
|                | 12 | R 1  | 175.1195       | 88.0637         |

N-term:+43.02

AGVDQHEGTIQVQGQNLFFR, MH+ 2286.1267, m/z 762.7138  
 H OS G24 P150811 220811-s1.04595.04595.3.dta

X-range:

-

MassTol: Y-zoom:

MassType:

AVG  MONO

Axis:

1  2

Label:

I  M  -

Ions:

a  +  2+  3+

b  +  2+  3+

c  +  2+  3+

x  +  2+  3+

y  +  2+  3+

z  +  2+  3+

hide H<sub>2</sub>O/NH<sub>3</sub>

zoom 112-122

GO

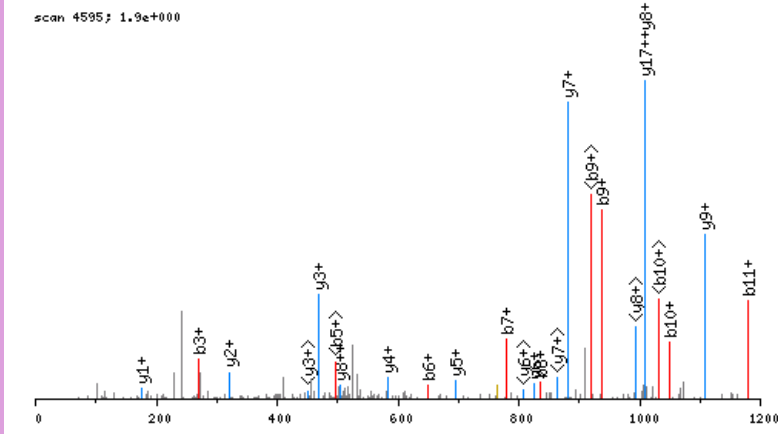

click image to zoom in; click top corners to zoom out [precursor±]

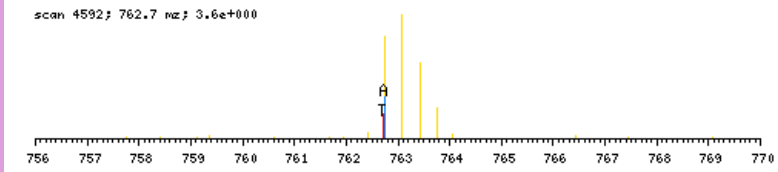

zoomed in precursor plot; T=theoretical m/z, A=acquired m/z

| b <sup>+</sup> | #  | AA # | y <sup>+</sup> | y <sup>2+</sup> |
|----------------|----|------|----------------|-----------------|
| 114.0555       | 1  | A 20 |                |                 |
| 171.0770       | 2  | G 19 | 2173.0790      | 1087.0434       |
| 270.1454       | 3  | V 18 | 2116.0576      | 1058.5327       |
| 385.1723       | 4  | D 17 | 2016.9892      | 1008.9985       |
| 513.2309       | 5  | Q 16 | 1901.9622      | 951.4850        |
| 650.2898       | 6  | H 15 | 1773.9036      | 887.4557        |
| 779.3324       | 7  | E 14 | 1636.8447      | 818.9263        |
| 836.3539       | 8  | G 13 | 1507.8021      | 754.4050        |
| 937.4016       | 9  | T 12 | 1450.7807      | 725.8942        |
| 1050.4856      | 10 | I 11 | 1349.7330      | 675.3704        |
| 1178.5442      | 11 | Q 10 | 1236.6489      | 618.8284        |
| 1277.6126      | 12 | V 9  | 1108.5904      | 554.7991        |
| 1405.6712      | 13 | Q 8  | 1009.5219      | 505.2649        |
| 1462.6927      | 14 | G 7  | 881.4634       | 441.2356        |
| 1590.7512      | 15 | Q 6  | 824.4419       | 412.7249        |
| 1704.7942      | 16 | N 5  | 696.3833       | 348.6956        |
| 1817.8782      | 17 | L 4  | 582.3404       | 291.6741        |
| 1964.9466      | 18 | F 3  | 469.2563       | 235.1321        |
| 2112.0151      | 19 | F 2  | 322.1879       | 161.5979        |
|                | 20 | R 1  | 175.1195       | 88.0637         |

N-term:+43.02

AGVRPDNVAEVVAGAR, MH+ 1622.8615, m/z 541.6253  
 H OS G24 P150811 220811-s1.03999.03999.3.dta

X-range:

-

MassTol: Y-zoom:

MassType:

AVG  MONO

Axis:

1  2

Label:

I  M  -

Ions:

a  +  2+  3+

b  +  2+  3+

c  +  2+  3+

x  +  2+  3+

y  +  2+  3+

z  +  2+  3+

hide H<sub>2</sub>O/NH<sub>3</sub>

zoom 112-122

GO

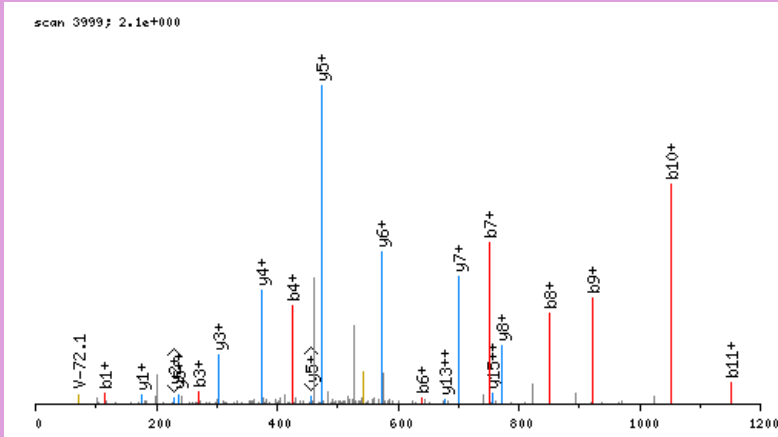

click image to zoom in; click top corners to zoom out [\[precursor±\]](#)

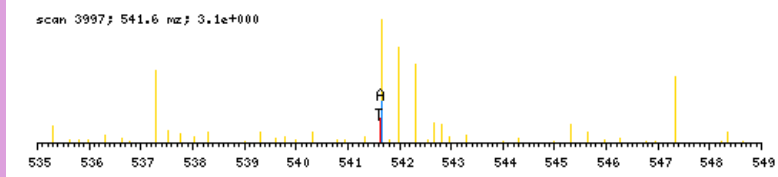

zoomed in precursor plot; T=theoretical m/z, A=acquired m/z

| b <sup>+</sup> | #  | AA # | y <sup>+</sup> | y <sup>2+</sup> |
|----------------|----|------|----------------|-----------------|
| 114.0555       | 1  | A 16 |                |                 |
| 171.0770       | 2  | G 15 | 1509.8138      | 755.4108        |
| 270.1454       | 3  | V 14 | 1452.7923      | 726.9001        |
| 426.2465       | 4  | R 13 | 1353.7239      | 677.3659        |
| 523.2993       | 5  | P 12 | 1197.6228      | 599.3153        |
| 638.3262       | 6  | D 11 | 1100.5700      | 550.7889        |
| 752.3691       | 7  | N 10 | 985.5431       | 493.2754        |
| 851.4376       | 8  | V 9  | 871.5001       | 436.2540        |
| 922.4747       | 9  | A 8  | 772.4317       | 386.7198        |
| 1051.5173      | 10 | E 7  | 701.3946       | 351.2012        |
| 1150.5857      | 11 | V 6  | 572.3520       | 286.6799        |
| 1249.6541      | 12 | V 5  | 473.2836       | 237.1457        |
| 1320.6912      | 13 | A 4  | 374.2152       | 187.6115        |
| 1377.7127      | 14 | G 3  | 303.1781       | 152.0930        |
| 1448.7498      | 15 | A 2  | 246.1566       | 123.5822        |
|                | 16 | R 1  | 175.1195       | 88.0637         |

N-term:+43.02

AHATPPSALEQGGPIR, MH+ 1643.8506, m/z 548.6217  
 H OS G24 P150811 220811-s1.03273.03273.3.dta

X-range:

-

MassTol: Y-zoom:

MassType:

AVG  MONO

Axis:

1  2

Label:

I  M  -

Ions:

a  +  2+  3+

b  +  2+  3+

c  +  2+  3+

x  +  2+  3+

y  +  2+  3+

z  +  2+  3+

hide H<sub>2</sub>O/NH<sub>3</sub>

zoom 112-122

GO

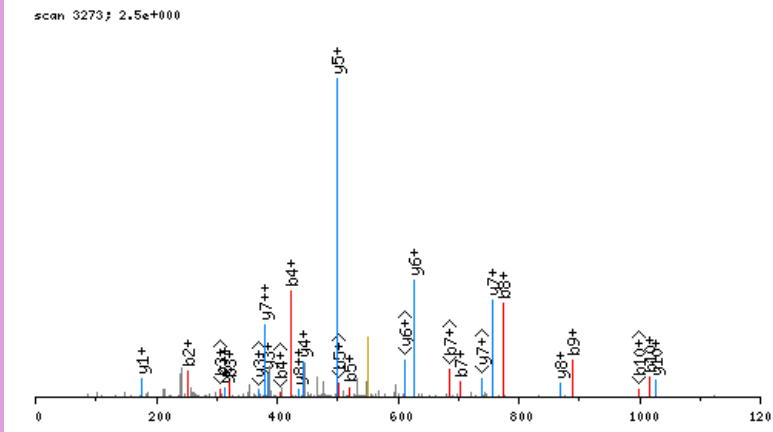

click image to zoom in; click top corners to zoom out [\[precursor±\]](#)

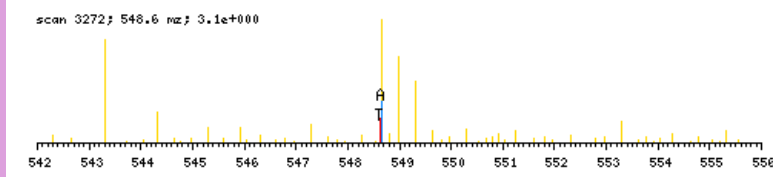

zoomed in precursor plot; T=theoretical m/z, A=acquired m/z

| b <sup>+</sup> | #  | AA # | y <sup>+</sup> | y <sup>2+</sup> |
|----------------|----|------|----------------|-----------------|
| 114.0555       | 1  | A 16 |                |                 |
| 251.1144       | 2  | H 15 | 1530.8029      | 765.9053        |
| 322.1515       | 3  | A 14 | 1393.7440      | 697.3759        |
| 423.1992       | 4  | T 13 | 1322.7068      | 661.8573        |
| 520.2520       | 5  | P 12 | 1221.6592      | 611.3335        |
| 617.3047       | 6  | P 11 | 1124.6064      | 562.8071        |
| 704.3368       | 7  | S 10 | 1027.5536      | 514.2807        |
| 775.3739       | 8  | A 9  | 940.5216       | 470.7647        |
| 888.4580       | 9  | L 8  | 869.4845       | 435.2462        |
| 1017.5005      | 10 | E 7  | 756.4004       | 378.7041        |
| 1145.5591      | 11 | Q 6  | 627.3578       | 314.1828        |
| 1202.5806      | 12 | G 5  | 499.2993       | 250.1535        |
| 1259.6021      | 13 | G 4  | 442.2778       | 221.6428        |
| 1356.6548      | 14 | P 3  | 385.2563       | 193.1321        |
| 1469.7389      | 15 | I 2  | 288.2036       | 144.6057        |
|                | 16 | R 1  | 175.1195       | 88.0637         |

N-term:+43.02

AKCLLTSSLSVR, MH+ 1404.7885, m/z 702.8979  
 H OS G25 P150811 220811-s1.06701.06701.2.dta

scan 6701; 2.1e+001

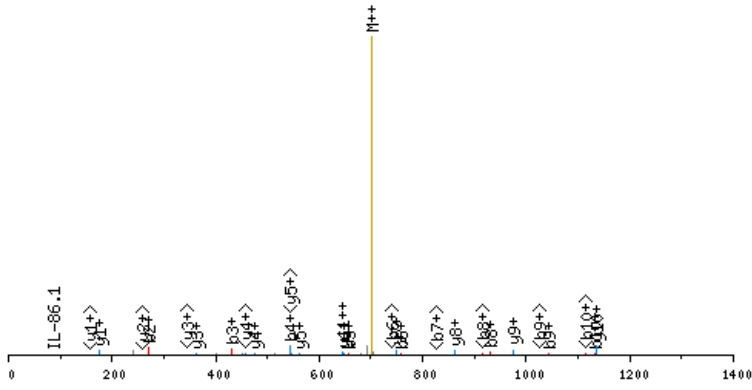

click image to zoom in; click top corners to zoom out [\[precursor±\]](#)

scan 6697; 702.9 mz; 1.6e+001

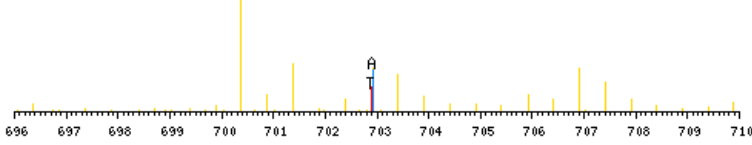

zoomed in precursor plot; T=theoretical m/z, A=acquired m/z

X-range:

-

MassTol: Y-zoom:

MassType:

AVG  MONO

Axis:

1  2

Label:

I  M  -

Ions:

a  +  2+  3+

b  +  2+  3+

c  +  2+  3+

x  +  2+  3+

y  +  2+  3+

z  +  2+  3+

hide H<sub>2</sub>O/NH<sub>3</sub>

zoom 112-122

GO

| b <sup>+</sup> | #  | AA # | y <sup>+</sup> | y <sup>2+</sup> |
|----------------|----|------|----------------|-----------------|
| 114.0555       | 1  | A    | 12             |                 |
| 270.1818       | 2  | K    | 11             | 1291.7408       |
| 430.2124       | 3  | C    | 10             | 1135.6145       |
| 543.2965       | 4  | L    | 9              | 975.5839        |
| 656.3805       | 5  | L    | 8              | 862.4998        |
| 757.4282       | 6  | T    | 7              | 749.4157        |
| 844.4602       | 7  | S    | 6              | 648.3681        |
| 931.4923       | 8  | S    | 5              | 561.3360        |
| 1044.5763      | 9  | L    | 4              | 474.3040        |
| 1131.6084      | 10 | S    | 3              | 361.2199        |
| 1230.6768      | 11 | V    | 2              | 274.1879        |
|                | 12 | R    | 1              | 175.1195        |

N-term:+43.02 K(2):+156.13  
 C(3):+160.03

AKIAKTHEIEAQIR, MH+ 1833.0871, m/z 459.0272  
 H OS G28 P150811 220811-s1.04292.04292.4.dta

X-range:

-

MassTol: Y-zoom:

MassType:

AVG  MONO

Axis:

1  2

Label:

I  M  -

Ions:

a  +  2+  3+

b  +  2+  3+

c  +  2+  3+

x  +  2+  3+

y  +  2+  3+

z  +  2+  3+

hide H<sub>2</sub>O/NH<sub>3</sub>

zoom 112-122

GO

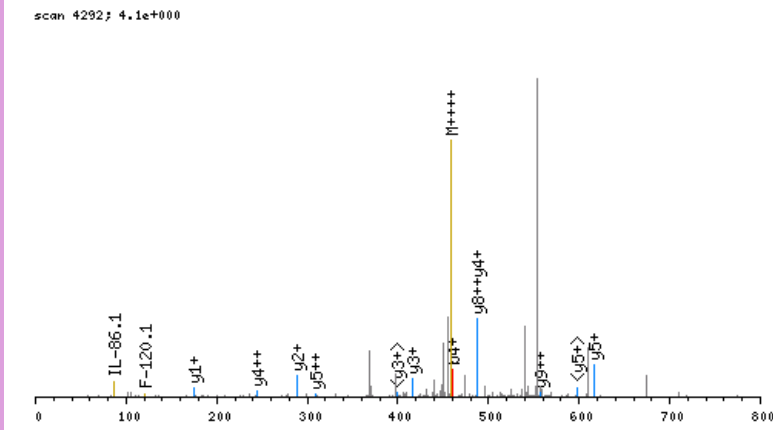

click image to zoom in; click top corners to zoom out [precursor±]

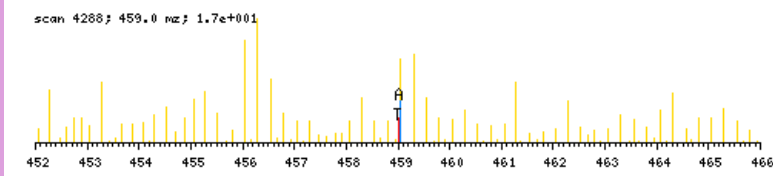

zoomed in precursor plot; T=theoretical m/z, A=acquired m/z

| b <sup>+</sup> | #  | AA | #  | y <sup>+</sup> | y <sup>2+</sup> |
|----------------|----|----|----|----------------|-----------------|
| 114.0555       | 1  | A  | 15 |                |                 |
| 276.2136       | 2  | K  | 14 | 1720.0394      | 860.5236        |
| 389.2977       | 3  | I  | 13 | 1557.8813      | 779.4446        |
| 460.3348       | 4  | A  | 12 | 1444.7973      | 722.9025        |
| 622.4929       | 5  | K  | 11 | 1373.7601      | 687.3840        |
| 723.5406       | 6  | T  | 10 | 1211.6020      | 606.3049        |
| 860.5995       | 7  | H  | 9  | 1110.5544      | 555.7811        |
| 989.6421       | 8  | E  | 8  | 973.4954       | 487.2516        |
| 1104.6690      | 9  | D  | 7  | 844.4529       | 422.7303        |
| 1217.7531      | 10 | I  | 6  | 729.4259       | 365.2169        |
| 1346.7957      | 11 | E  | 5  | 616.3418       | 308.6748        |
| 1417.8328      | 12 | A  | 4  | 487.2993       | 244.1535        |
| 1545.8914      | 13 | Q  | 3  | 416.2621       | 208.6350        |
| 1658.9754      | 14 | I  | 2  | 288.2036       | 144.6057        |
|                | 15 | R  | 1  | 175.1195       | 88.0637         |

N-term:+43.02 K(2):+162.16  
 K(5):+162.16



AKIAQGAMYR, MH+ 1184.6674, m/z 592.8374  
 H OS G25 P150811 220811-s1.04019.04019.2.dta

X-range:

-

MassTol: Y-zoom:

MassType:

AVG  MONO

Axis:

1  2

Label:

I  M  -

Ions:

a  +  2+  3+

b  +  2+  3+

c  +  2+  3+

x  +  2+  3+

y  +  2+  3+

z  +  2+  3+

hide H<sub>2</sub>O/NH<sub>3</sub>

zoom 112-122

GO

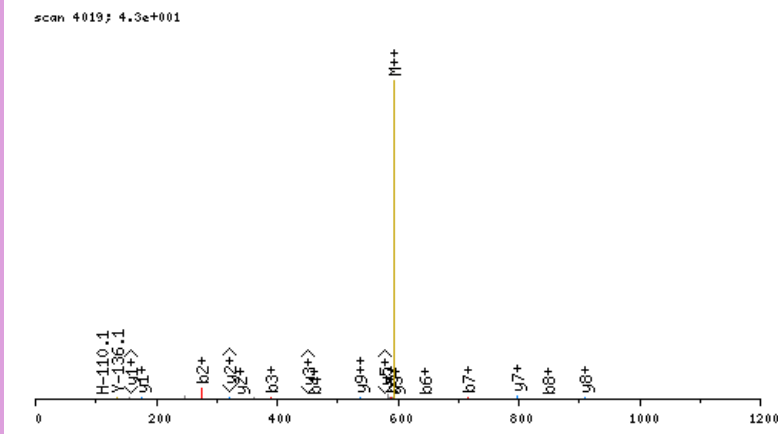

click image to zoom in; click top corners to zoom out [\[precursor±\]](#)

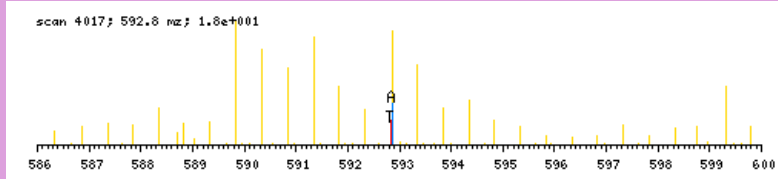

zoomed in precursor plot; T=theoretical m/z, A=acquired m/z

| b <sup>+</sup> | #  | AA # | y <sup>+</sup> | y <sup>2+</sup> |
|----------------|----|------|----------------|-----------------|
| 114.0555       | 1  | A 10 |                |                 |
| 276.2136       | 2  | K 9  | 1071.6197      | 536.3138        |
| 389.2977       | 3  | I 8  | 909.4616       | 455.2347        |
| 460.3348       | 4  | A 7  | 796.3776       | 398.6927        |
| 588.3934       | 5  | Q 6  | 725.3405       | 363.1741        |
| 645.4148       | 6  | G 5  | 597.2819       | 299.1449        |
| 716.4519       | 7  | A 4  | 540.2604       | 270.6341        |
| 847.4924       | 8  | M 3  | 469.2233       | 235.1156        |
| 1010.5558      | 9  | Y 2  | 338.1828       | 169.5953        |
|                | 10 | R 1  | 175.1195       | 88.0637         |

N-term:+43.02 K(2):+162.16

AKNGSEADIDESLYSR, MH+ 1024.8616, m/z 608.9587  
 H OS G25 P150811 220811-s1.04730.04730.3.dta

X-range:

-

MassTol: Y-zoom:

MassType:

AVG  MONO

Axis:

1  2

Label:

I  M  -

Ions:

a  +  2+  3+

b  +  2+  3+

c  +  2+  3+

x  +  2+  3+

y  +  2+  3+

z  +  2+  3+

hide H<sub>2</sub>O/NH<sub>3</sub>

zoom 112-122

GO

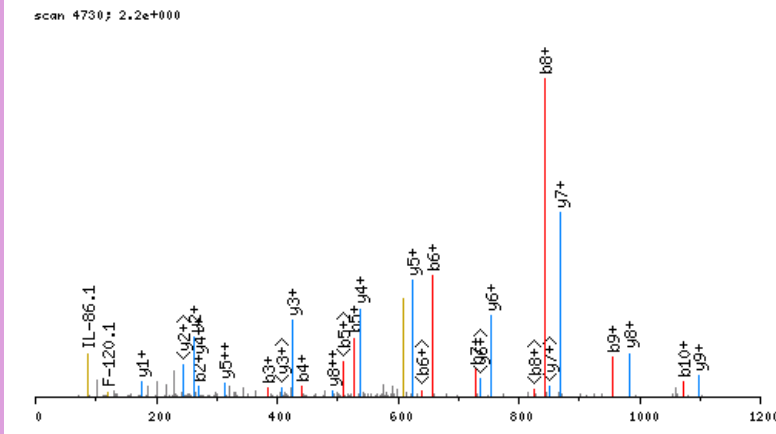

click image to zoom in; click top corners to zoom out [\[precursor±\]](#)

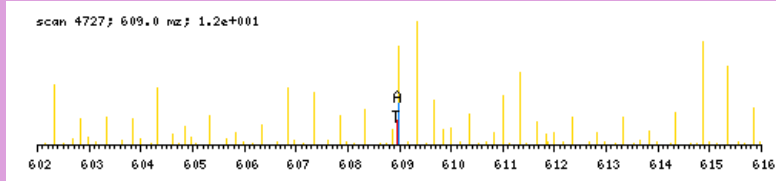

zoomed in precursor plot; T=theoretical m/z, A=acquired m/z

| b <sup>+</sup> | #  | AA # | y <sup>+</sup> | y <sup>2+</sup> |
|----------------|----|------|----------------|-----------------|
| 114.0555       | 1  | A 16 |                |                 |
| 270.1818       | 2  | K 15 | 1711.8139      | 856.4109        |
| 384.2247       | 3  | N 14 | 1555.6876      | 778.3477        |
| 441.2462       | 4  | G 13 | 1441.6447      | 721.3263        |
| 528.2782       | 5  | S 12 | 1384.6232      | 692.8155        |
| 657.3208       | 6  | E 11 | 1297.5912      | 649.2995        |
| 728.3579       | 7  | A 10 | 1168.5486      | 584.7782        |
| 843.3849       | 8  | D 9  | 1097.5115      | 549.2597        |
| 956.4689       | 9  | I 8  | 982.4846       | 491.7462        |
| 1071.4959      | 10 | D 7  | 869.4005       | 435.2042        |
| 1200.5385      | 11 | E 6  | 754.3735       | 377.6907        |
| 1287.5705      | 12 | S 5  | 625.3310       | 313.1694        |
| 1400.6546      | 13 | L 4  | 538.2989       | 269.6534        |
| 1563.7179      | 14 | Y 3  | 425.2149       | 213.1113        |
| 1650.7499      | 15 | S 2  | 262.1515       | 131.5797        |
|                | 16 | R 1  | 175.1195       | 88.0637         |

N-term:+43.02 K(2):+156.13

AKTEEMVQTEEMETPR, MH+ 1984.9420, m/z 662.3189  
 H OS G24 P150811 220811-s1.03419.03419.3.dta

X-range:

-

MassTol: Y-zoom:

MassType:

AVG  MONO

Axis:

1  2

Label:

I  M  -

Ions:

a  +  2+  3+

b  +  2+  3+

c  +  2+  3+

x  +  2+  3+

y  +  2+  3+

z  +  2+  3+

hide H<sub>2</sub>O/NH<sub>3</sub>

zoom 112-122

GO

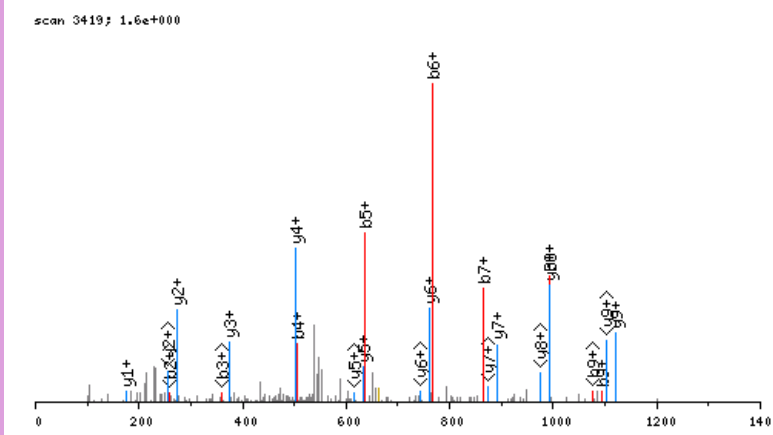

click image to zoom in; click top corners to zoom out [\[precursor±\]](#)

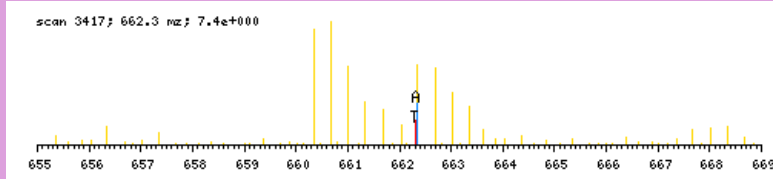

zoomed in precursor plot; T=theoretical m/z, A=acquired m/z

| b <sup>+</sup> | #  | AA # | y <sup>+</sup> | y <sup>2+</sup> |
|----------------|----|------|----------------|-----------------|
| 114.0555       | 1  | A 16 |                |                 |
| 276.2136       | 2  | K 15 | 1871.8943      | 936.4511        |
| 377.2613       | 3  | T 14 | 1709.7362      | 855.3720        |
| 506.3039       | 4  | E 13 | 1608.6885      | 804.8482        |
| 635.3465       | 5  | E 12 | 1479.6460      | 740.3269        |
| 766.3870       | 6  | M 11 | 1350.6034      | 675.8056        |
| 865.4554       | 7  | V 10 | 1219.5629      | 610.2854        |
| 993.5140       | 8  | Q 9  | 1120.4945      | 560.7511        |
| 1094.5616      | 9  | T 8  | 992.4359       | 496.7219        |
| 1223.6042      | 10 | E 7  | 891.3882       | 446.1980        |
| 1352.6468      | 11 | E 6  | 762.3456       | 381.6767        |
| 1483.6873      | 12 | M 5  | 633.3030       | 317.1554        |
| 1612.7299      | 13 | E 4  | 502.2625       | 251.6352        |
| 1713.7776      | 14 | T 3  | 373.2199       | 187.1139        |
| 1810.8303      | 15 | P 2  | 272.1723       | 136.5900        |
|                | 16 | R 1  | 175.1195       | 88.0637         |

N-term:+43.02 K(2):+162.16

AKVEQVLSLEPQHELKFR, MH+ 2249.2659, m/z 563.0719  
 H OS G27 P150811 220811-s1.06865.06865.4.dta

scan 6865; 3.0e+000

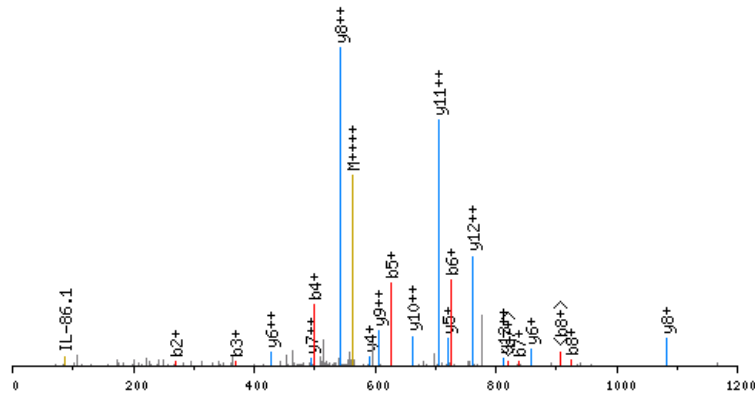

click image to zoom in; click top corners to zoom out [precursor±]

scan 6862; 563.1 m/z; 1.5e+001

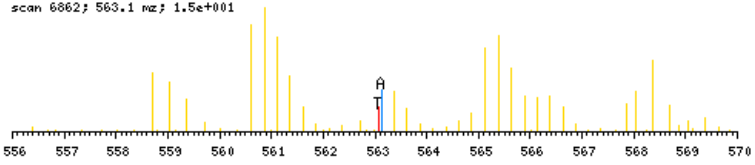

zoomed in precursor plot; T=theoretical m/z, A=acquired m/z

X-range:

-

MassTol: Y-zoom:

MassType:

AVG  MONO

Axis:

1  2

Label:

I  M  -

Ions:

a  +  2+  3+

b  +  2+  3+

c  +  2+  3+

x  +  2+  3+

y  +  2+  3+

z  +  2+  3+

hide H<sub>2</sub>O/NH<sub>3</sub>

zoom 112-122

GO

| b <sup>+</sup> | #  | AA | #  | y <sup>+</sup> | y <sup>2+</sup> |
|----------------|----|----|----|----------------|-----------------|
| 114.0555       | 1  | A  | 18 |                |                 |
| 270.1818       | 2  | K  | 17 | 2136.2182      | 1068.6130       |
| 369.2502       | 3  | V  | 16 | 1980.0919      | 990.5498        |
| 498.2928       | 4  | E  | 15 | 1881.0235      | 941.0156        |
| 626.3514       | 5  | Q  | 14 | 1751.9809      | 876.4943        |
| 725.4198       | 6  | V  | 13 | 1623.9223      | 812.4651        |
| 838.5039       | 7  | L  | 12 | 1524.8539      | 762.9308        |
| 925.5359       | 8  | S  | 11 | 1411.7698      | 706.3888        |
| 1038.6200      | 9  | L  | 10 | 1324.7378      | 662.8728        |
| 1167.6626      | 10 | E  | 9  | 1211.6537      | 606.3308        |
| 1264.7153      | 11 | P  | 8  | 1082.6111      | 541.8095        |
| 1392.7739      | 12 | Q  | 7  | 985.5584       | 493.2831        |
| 1529.8328      | 13 | H  | 6  | 857.4998       | 429.2538        |
| 1658.8754      | 14 | E  | 5  | 720.4409       | 360.7243        |
| 1771.9595      | 15 | L  | 4  | 591.3983       | 296.2031        |
| 1928.0858      | 16 | K  | 3  | 478.3142       | 239.6610        |
| 2075.1542      | 17 | F  | 2  | 322.1879       | 161.5979        |
|                | 18 | R  | 1  | 175.1195       | 88.0637         |

N-term: +43.02 K(2): +156.13  
 K(16): +156.13

ALDGPEQMELEEGKAGSGLR, MH+ 2157.0498, m/z 719.6881  
 H OS G24 P150811 220811-s1.04119.04119.3.dta

X-range:

-

MassTol: Y-zoom:

MassType:

AVG  MONO

Axis:

1  2

Label:

I  M  -

Ions:

a  +  2+  3+

b  +  2+  3+

c  +  2+  3+

x  +  2+  3+

y  +  2+  3+

z  +  2+  3+

hide H<sub>2</sub>O/NH<sub>3</sub>

zoom 112-122

GO

scan 4119; 3.5e+000

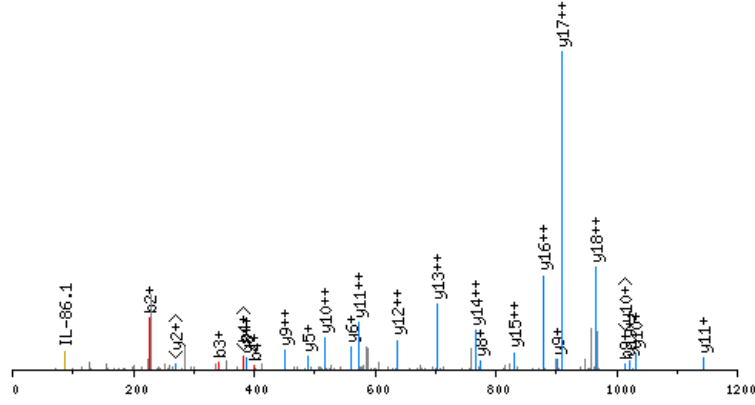

click image to zoom in; click top corners to zoom out [\[precursor±\]](#)

scan 4117; 719.7 nz; 7.1e+000

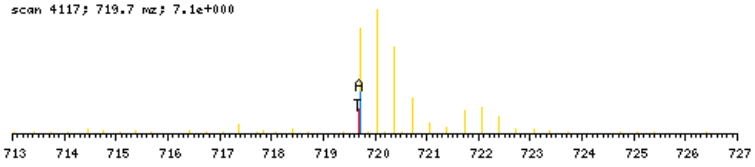

zoomed in precursor plot; T=theoretical m/z, A=acquired m/z

| b <sup>+</sup> | #  | AA # | y <sup>+</sup> | y <sup>2+</sup> |
|----------------|----|------|----------------|-----------------|
| 114.0555       | 1  | A 20 |                |                 |
| 227.1396       | 2  | L 19 | 2044.0021      | 1022.5050       |
| 342.1665       | 3  | D 18 | 1930.9181      | 965.9629        |
| 399.1880       | 4  | G 17 | 1815.8911      | 908.4495        |
| 496.2407       | 5  | P 16 | 1758.8697      | 879.9387        |
| 625.2833       | 6  | E 15 | 1661.8169      | 831.4124        |
| 753.3419       | 7  | Q 14 | 1532.7743      | 766.8911        |
| 884.3824       | 8  | M 13 | 1404.7157      | 702.8618        |
| 1013.4250      | 9  | E 12 | 1273.6752      | 637.3415        |
| 1126.5091      | 10 | L 11 | 1144.6326      | 572.8202        |
| 1255.5517      | 11 | E 10 | 1031.5486      | 516.2782        |
| 1384.5942      | 12 | E 9  | 902.5060       | 451.7569        |
| 1441.6157      | 13 | G 8  | 773.4634       | 387.2356        |
| 1597.7420      | 14 | K 7  | 716.4419       | 358.7249        |
| 1668.7791      | 15 | A 6  | 560.3156       | 280.6617        |
| 1725.8006      | 16 | G 5  | 489.2785       | 245.1432        |
| 1812.8326      | 17 | S 4  | 432.2571       | 216.6324        |
| 1869.8541      | 18 | G 3  | 345.2250       | 173.1164        |
| 1982.9381      | 19 | L 2  | 288.2036       | 144.6057        |
|                | 20 | R 1  | 175.1195       | 88.0637         |

N-term:+43.02 K(14):+156.13

X-range:

-

MassTol: Y-zoom:

MassType:

AVG  MONO

Axis:

1  2

Label:

I  M  -

Ions:

a  +  2+  3+

b  +  2+  3+

c  +  2+  3+

x  +  2+  3+

y  +  2+  3+

z  +  2+  3+

hide H<sub>2</sub>O/NH<sub>3</sub>

zoom 112-122

GO

scan 3078; 5.8e+001

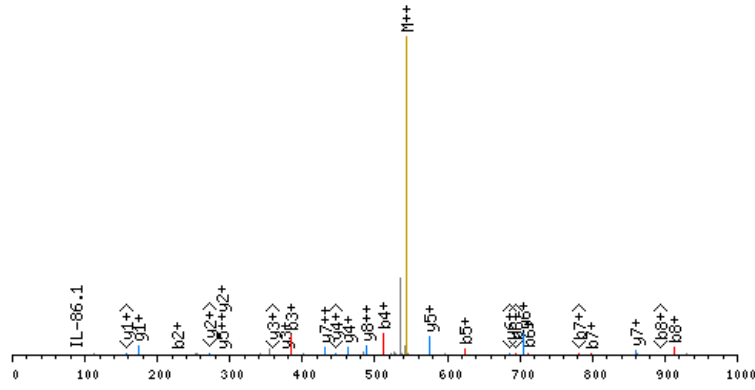

click image to zoom in; click top corners to zoom out [\[precursor±\]](#)

scan 3077; 543.8 m/z; 6.0e+002

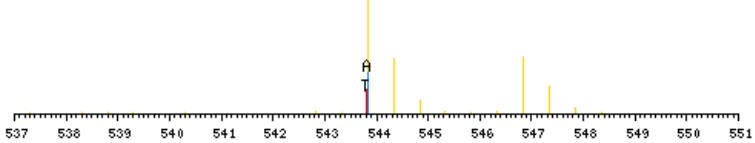

zoomed in precursor plot; T=theoretical m/z, A=acquired m/z

| b <sup>+</sup> | # | AA # | y <sup>+</sup> | y <sup>2+</sup> |
|----------------|---|------|----------------|-----------------|
| 114.0555       | 1 | A    | 9              |                 |
| 227.1396       | 2 | L    | 8              | 973.5795        |
| 383.2659       | 3 | K    | 7              | 860.4954        |
| 511.3245       | 4 | Q    | 6              | 704.3691        |
| 624.4085       | 5 | I    | 5              | 576.3105        |
| 711.4405       | 6 | S    | 4              | 463.2265        |
| 798.4726       | 7 | S    | 3              | 376.1945        |
| 912.5155       | 8 | N    | 2              | 289.1624        |
|                | 9 | R    | 1              | 175.1195        |

N-term:+43.02 K(3):+156.13

ALLAEHLKPLPADR, MH+ 1733.0538, m/z 578.3561  
 H OS G26 P150811 220811-s1.06832.06832.3.dta

X-range:

-

MassTol: Y-zoom:

MassType:

AVG  MONO

Axis:

1  2

Label:

I  M  -

Ions:

a  +  2+  3+

b  +  2+  3+

c  +  2+  3+

x  +  2+  3+

y  +  2+  3+

z  +  2+  3+

hide H<sub>2</sub>O/NH<sub>3</sub>

zoom 112-122

GO

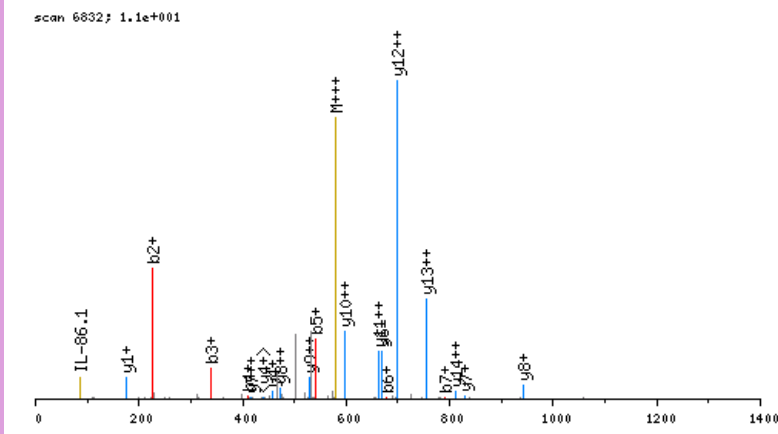

click image to zoom in; click top corners to zoom out [\[precursor±\]](#)

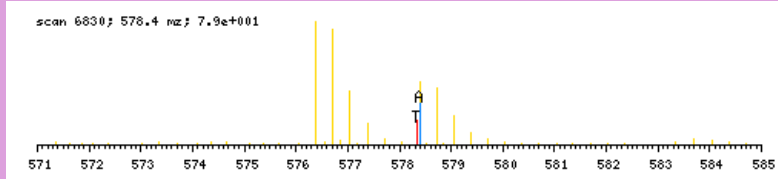

zoomed in precursor plot; T=theoretical m/z, A=acquired m/z

| b <sup>+</sup> | #  | AA # | y <sup>+</sup> | y <sup>2+</sup> |
|----------------|----|------|----------------|-----------------|
| 114.0555       | 1  | A 15 |                |                 |
| 227.1396       | 2  | L 14 | 1620.0061      | 810.5070        |
| 340.2236       | 3  | L 13 | 1506.9221      | 753.9649        |
| 411.2608       | 4  | A 12 | 1393.8380      | 697.4229        |
| 540.3033       | 5  | E 11 | 1322.8009      | 661.9044        |
| 677.3623       | 6  | H 10 | 1193.7583      | 597.3831        |
| 790.4463       | 7  | L 9  | 1056.6994      | 528.8536        |
| 903.5304       | 8  | L 8  | 943.6153       | 472.3116        |
| 1065.6885      | 9  | K 7  | 830.5312       | 415.7695        |
| 1162.7413      | 10 | P 6  | 668.3731       | 334.6905        |
| 1275.8253      | 11 | L 5  | 571.3204       | 286.1641        |
| 1372.8781      | 12 | P 4  | 458.2363       | 229.6221        |
| 1443.9152      | 13 | A 3  | 361.1836       | 181.0957        |
| 1558.9421      | 14 | D 2  | 290.1464       | 145.5771        |
|                | 15 | R 1  | 175.1195       | 88.0637         |

N-term:+43.02 K(9):+162.16

ALPGPAVFGPGSR, MH+ 1267.6799, m/z 634.3436  
 H OS G29 P150811 220811-s1.05481.05481.2.dta

X-range:

-

MassTol: Y-zoom:

MassType:

AVG  MONO

Axis:

1  2

Label:

I  M  -

Ions:

a  +  2+  3+

b  +  2+  3+

c  +  2+  3+

x  +  2+  3+

y  +  2+  3+

z  +  2+  3+

hide H<sub>2</sub>O/NH<sub>3</sub>

zoom 112-122

GO

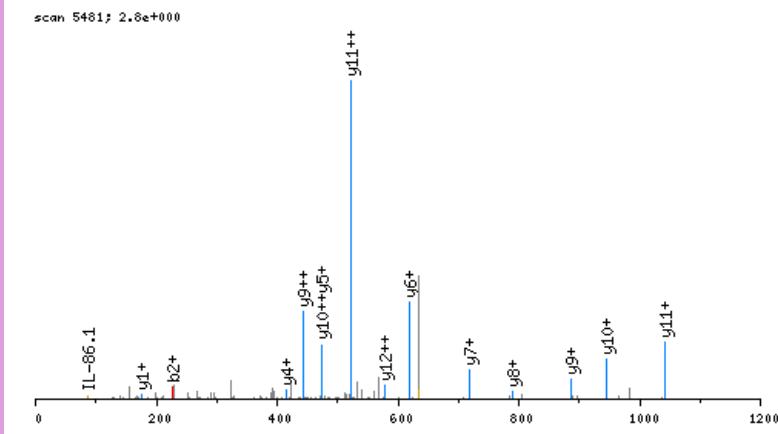

click image to zoom in; click top corners to zoom out [\[precursor±\]](#)

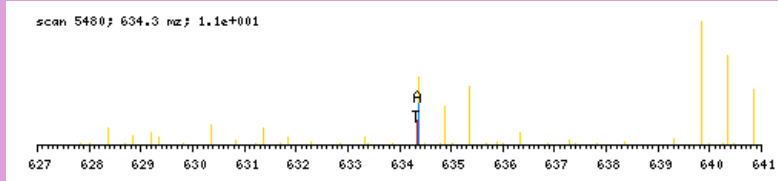

zoomed in precursor plot; T=theoretical m/z, A=acquired m/z

| b <sup>+</sup> | #  | AA # | y <sup>+</sup> | y <sup>2+</sup> |
|----------------|----|------|----------------|-----------------|
| 114.0555       | 1  | A 13 |                |                 |
| 227.1396       | 2  | L 12 | 1154.6322      | 577.8200        |
| 324.1923       | 3  | P 11 | 1041.5482      | 521.2780        |
| 381.2138       | 4  | G 10 | 944.4954       | 472.7516        |
| 478.2666       | 5  | P 9  | 887.4739       | 444.2409        |
| 549.3037       | 6  | A 8  | 790.4212       | 395.7145        |
| 648.3721       | 7  | V 7  | 719.3840       | 360.1959        |
| 795.4405       | 8  | F 6  | 620.3156       | 310.6617        |
| 852.4620       | 9  | G 5  | 473.2472       | 237.1275        |
| 949.5147       | 10 | P 4  | 416.2258       | 208.6168        |
| 1006.5362      | 11 | G 3  | 319.1730       | 160.0904        |
| 1093.5682      | 12 | S 2  | 262.1515       | 131.5797        |
|                | 13 | R 1  | 175.1195       | 88.0637         |

N-term:+43.02



ALQALHSSGVGLR, MH+ 1350.7494, m/z 675.8783  
 H OS G25 P150811 220811-s1.06501.06501.2.dta

X-range:

-

MassTol: Y-zoom:

MassType:

AVG  MONO

Axis:

1  2

Label:

I  M  -

Ions:

a  +  2+  3+

b  +  2+  3+

c  +  2+  3+

x  +  2+  3+

y  +  2+  3+

z  +  2+  3+

hide H<sub>2</sub>O/NH<sub>3</sub>

zoom 112-122

GO

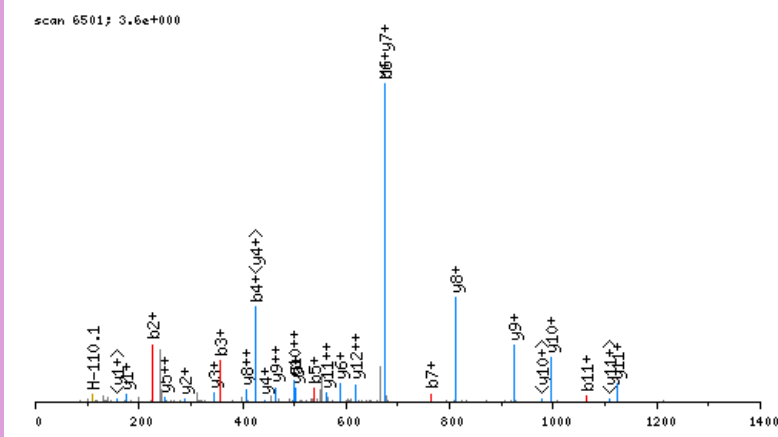

click image to zoom in; click top corners to zoom out [\[precursor±\]](#)

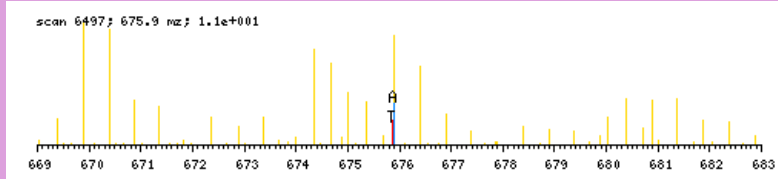

zoomed in precursor plot; T=theoretical m/z, A=acquired m/z

| b <sup>+</sup> | #  | AA # | y <sup>+</sup> | y <sup>2+</sup> |
|----------------|----|------|----------------|-----------------|
| 114.0555       | 1  | A 13 |                |                 |
| 227.1396       | 2  | L 12 | 1237.7017      | 619.3548        |
| 355.1982       | 3  | Q 11 | 1124.6176      | 562.8127        |
| 426.2353       | 4  | A 10 | 996.5591       | 498.7834        |
| 539.3193       | 5  | L 9  | 925.5219       | 463.2649        |
| 676.3782       | 6  | H 8  | 812.4379       | 406.7228        |
| 763.4103       | 7  | S 7  | 675.3790       | 338.1934        |
| 850.4423       | 8  | S 6  | 588.3469       | 294.6774        |
| 907.4638       | 9  | G 5  | 501.3149       | 251.1614        |
| 1006.5322      | 10 | V 4  | 444.2934       | 222.6506        |
| 1063.5536      | 11 | G 3  | 345.2250       | 173.1164        |
| 1176.6377      | 12 | L 2  | 288.2036       | 144.6057        |
|                | 13 | R 1  | 175.1195       | 88.0637         |

N-term:+43.02

ALSHSEALEAEER, MH+ 1483.7029, m/z 495.2391  
 H OS G27 P150811 220811-s1.04534.04534.3.dta

X-range:

-

MassTol: Y-zoom:

MassType:

AVG  MONO

Axis:

1  2

Label:

I  M  -

Ions:

a  +  2+  3+

b  +  2+  3+

c  +  2+  3+

x  +  2+  3+

y  +  2+  3+

z  +  2+  3+

hide H<sub>2</sub>O/NH<sub>3</sub>

zoom 112-122

GO

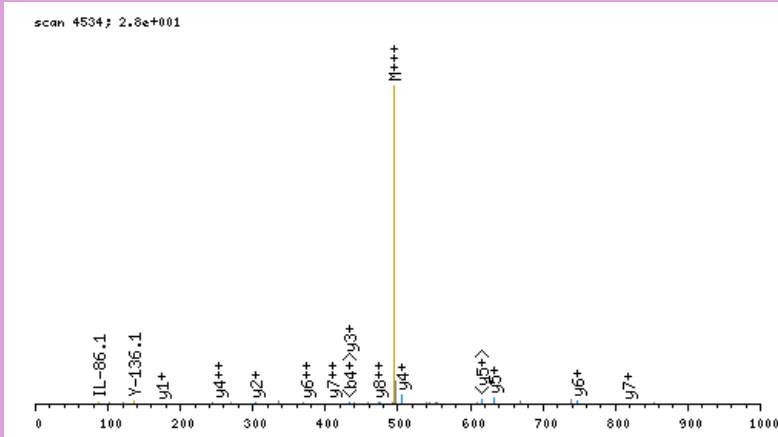

click image to zoom in; click top corners to zoom out [\[precursor±\]](#)

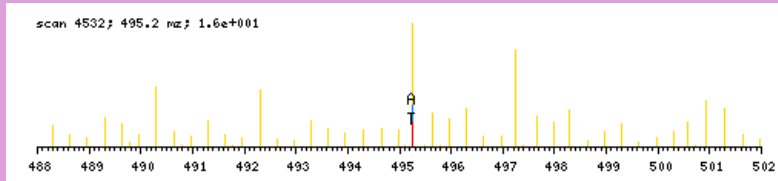

zoomed in precursor plot; T=theoretical m/z, A=acquired m/z

| b <sup>+</sup> | #  | AA # | y <sup>+</sup> | y <sup>2+</sup> |
|----------------|----|------|----------------|-----------------|
| 114.0555       | 1  | A 13 |                |                 |
| 227.1396       | 2  | L 12 | 1370.6552      | 685.8315        |
| 314.1716       | 3  | S 11 | 1257.5711      | 629.2895        |
| 451.2305       | 4  | H 10 | 1170.5391      | 585.7735        |
| 538.2625       | 5  | S 9  | 1033.4802      | 517.2440        |
| 667.3051       | 6  | E 8  | 946.4482       | 473.7280        |
| 738.3423       | 7  | A 7  | 817.4056       | 409.2067        |
| 851.4263       | 8  | L 6  | 746.3685       | 373.6881        |
| 980.4689       | 9  | E 5  | 633.2844       | 317.1461        |
| 1051.5060      | 10 | A 4  | 504.2418       | 252.6248        |
| 1180.5486      | 11 | E 3  | 433.2047       | 217.1063        |
| 1309.5912      | 12 | E 2  | 304.1621       | 152.5850        |
|                | 13 | R 1  | 175.1195       | 88.0637         |

N-term:+43.02

AMQKIFAR, MH+ 1034.5821, m/z 517.7947  
 H OS G25 P150811 220811-s1.05778.05778.2.dta

scan 5778; 4.8e+001

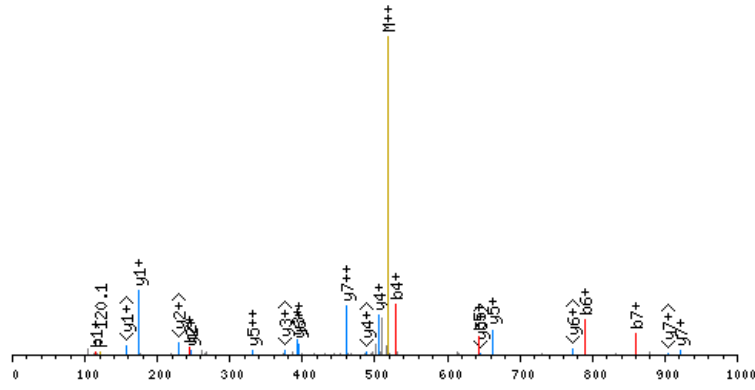

click image to zoom in; click top corners to zoom out [precursor±]

scan 5777; 517.8 m/z; 2.1e+003

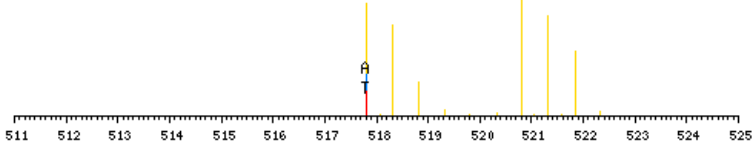

zoomed in precursor plot; T=theoretical m/z, A=acquired m/z

X-range:

-

MassTol: Y-zoom:

MassType:

AVG  MONO

Axis:

1  2

Label:

I  M  -

Ions:

a  +  2+  3+

b  +  2+  3+

c  +  2+  3+

x  +  2+  3+

y  +  2+  3+

z  +  2+  3+

hide H<sub>2</sub>O/NH<sub>3</sub>

zoom 112-122

GO

| b <sup>+</sup> | # | AA # | y <sup>+</sup> | y <sup>2+</sup>   |
|----------------|---|------|----------------|-------------------|
| 114.0555       | 1 | A    | 8              |                   |
| 245.0960       | 2 | M    | 7              | 921.5345 461.2711 |
| 373.1546       | 3 | Q    | 6              | 790.4940 395.7509 |
| 529.2809       | 4 | K    | 5              | 662.4354 331.7216 |
| 642.3649       | 5 | I    | 4              | 506.3091 253.6585 |
| 789.4334       | 6 | F    | 3              | 393.2250 197.1164 |
| 860.4705       | 7 | A    | 2              | 246.1566 123.5822 |
|                | 8 | R    | 1              | 175.1195 88.0637  |

N-term:+43.02 K(4):+156.13

AMRRLFAR, MH+ 1062.5995, m/z 531.8034  
 H OS G25 P150811 220811-s1.06518.06518.2.dta

X-range:

-

MassTol: Y-zoom:

MassType:

AVG  MONO

Axis:

1  2

Label:

I  M  -

Ions:

a  +  2+  3+

b  +  2+  3+

c  +  2+  3+

x  +  2+  3+

y  +  2+  3+

z  +  2+  3+

hide H<sub>2</sub>O/NH<sub>3</sub>

zoom 112-122

GO

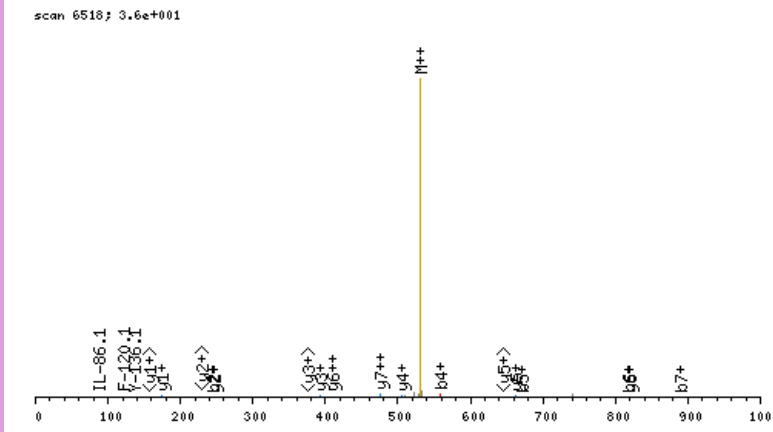

click image to zoom in; click top corners to zoom out [\[precursor±\]](#)

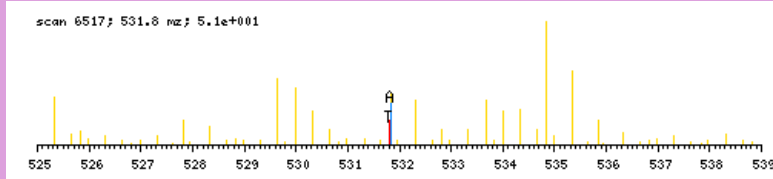

zoomed in precursor plot; T=theoretical m/z, A=acquired m/z

| b <sup>+</sup> | # | AA # | y <sup>+</sup> | y <sup>2+</sup> |
|----------------|---|------|----------------|-----------------|
| 114.0555       | 1 | A 8  |                |                 |
| 245.0960       | 2 | M 7  | 949.5518       | 475.2798        |
| 401.1971       | 3 | R 6  | 818.5113       | 409.7596        |
| 557.2982       | 4 | R 5  | 662.4102       | 331.7090        |
| 670.3823       | 5 | L 4  | 506.3091       | 253.6585        |
| 817.4507       | 6 | F 3  | 393.2250       | 197.1164        |
| 888.4878       | 7 | A 2  | 246.1566       | 123.5822        |
|                | 8 | R 1  | 175.1195       | 88.0637         |

N-term:+43.02

AMVSEFLKQAR, MH+ 1349.7252, m/z 675.3662  
 H OS G25 P150811 220811-s1.07416.07416.2.dta

scan 7416; 7.8e+000

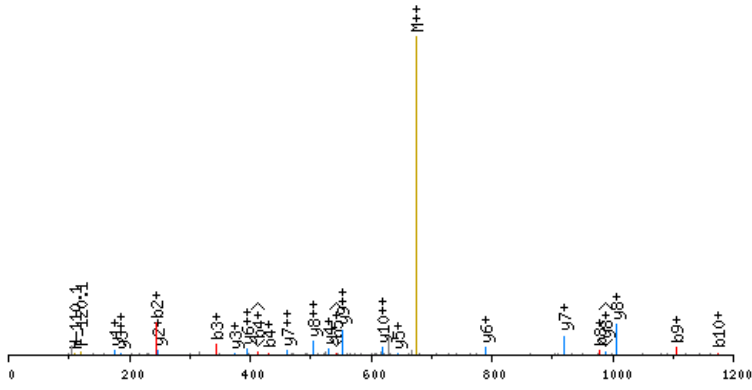

click image to zoom in; click top corners to zoom out [precursor±]

scan 7412; 675.4 m/z; 9.1e+000

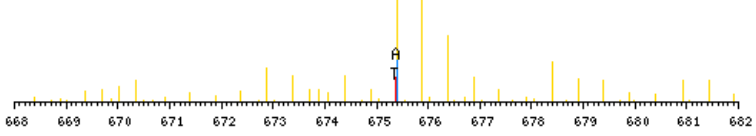

zoomed in precursor plot; T=theoretical m/z, A=acquired m/z

X-range:

-

MassTol: Y-zoom:

MassType:

AVG  MONO

Axis:

1  2

Label:

I  M  -

Ions:

a  +  2+  3+

b  +  2+  3+

c  +  2+  3+

x  +  2+  3+

y  +  2+  3+

z  +  2+  3+

hide H<sub>2</sub>O/NH<sub>3</sub>

zoom 112-122

GO

| b <sup>+</sup> | #  | AA # | y <sup>+</sup> | y <sup>2+</sup>    |
|----------------|----|------|----------------|--------------------|
| 114.0555       | 1  | A    | 11             |                    |
| 245.0960       | 2  | M    | 10             | 1236.6775 618.8427 |
| 344.1644       | 3  | V    | 9              | 1105.6370 553.3224 |
| 431.1964       | 4  | S    | 8              | 1006.5686 503.7882 |
| 560.2390       | 5  | E    | 7              | 919.5366 460.2722  |
| 707.3074       | 6  | F    | 6              | 790.4940 395.7509  |
| 820.3915       | 7  | L    | 5              | 643.4256 322.2167  |
| 976.5178       | 8  | K    | 4              | 530.3415 265.6747  |
| 1104.5764      | 9  | Q    | 3              | 374.2152 187.6115  |
| 1175.6135      | 10 | A    | 2              | 246.1566 123.5822  |
|                | 11 | R    | 1              | 175.1195 88.0637   |

N-term:+43.02 K(8):+156.13

X-range:

-

MassTol: Y-zoom:

MassType:

AVG  MONO

Axis:

1  2

Label:

I  M  -

Ions:

a  +  2+  3+

b  +  2+  3+

c  +  2+  3+

x  +  2+  3+

y  +  2+  3+

z  +  2+  3+

hide H<sub>2</sub>O/NH<sub>3</sub>

zoom 112-122

GO

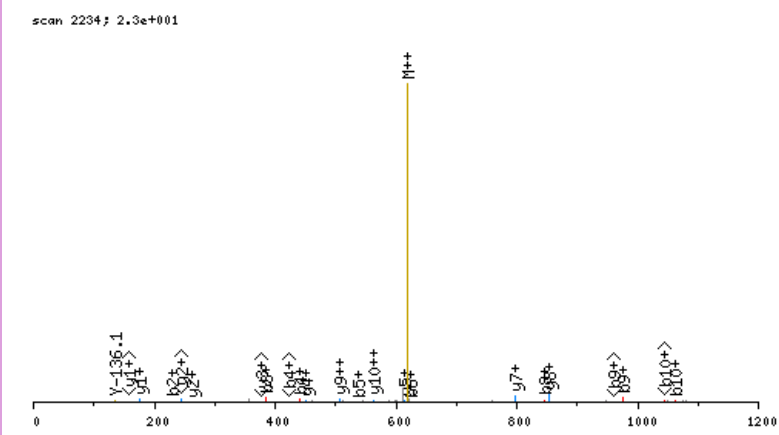

click image to zoom in; click top corners to zoom out [precursor±]

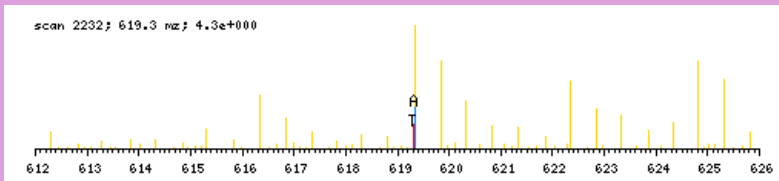

zoomed in precursor plot; T=theoretical m/z, A=acquired m/z

| b <sup>+</sup> | #  | AA # | y <sup>+</sup> | y <sup>2+</sup> |
|----------------|----|------|----------------|-----------------|
| 114.0555       | 1  | A 11 |                |                 |
| 228.0984       | 2  | N 10 | 1124.5523      | 562.7801        |
| 384.2247       | 3  | K 9  | 1010.5094      | 505.7586        |
| 441.2462       | 4  | G 8  | 854.3831       | 427.6954        |
| 538.2990       | 5  | P 7  | 797.3616       | 399.1847        |
| 625.3310       | 6  | S 6  | 700.3088       | 350.6583        |
| 788.3943       | 7  | Y 5  | 613.2768       | 307.1423        |
| 845.4158       | 8  | G 4  | 450.2135       | 225.6107        |
| 976.4563       | 9  | M 3  | 393.1920       | 197.0999        |
| 1063.4883      | 10 | S 2  | 262.1515       | 131.5797        |
|                | 11 | R 1  | 175.1195       | 88.0637         |

N-term:+43.02 K(3):+156.13

ANSANTNTVPKLYR, MH+ 1618.8553, m/z 540.2900  
 H OS G25 P150811 220811-s1.04351.04351.3.dta

X-range:

-

MassTol: Y-zoom:

MassType:

AVG  MONO

Axis:

1  2

Label:

I  M  -

Ions:

a  +  2+  3+

b  +  2+  3+

c  +  2+  3+

x  +  2+  3+

y  +  2+  3+

z  +  2+  3+

hide H<sub>2</sub>O/NH<sub>3</sub>

zoom 112-122

GO

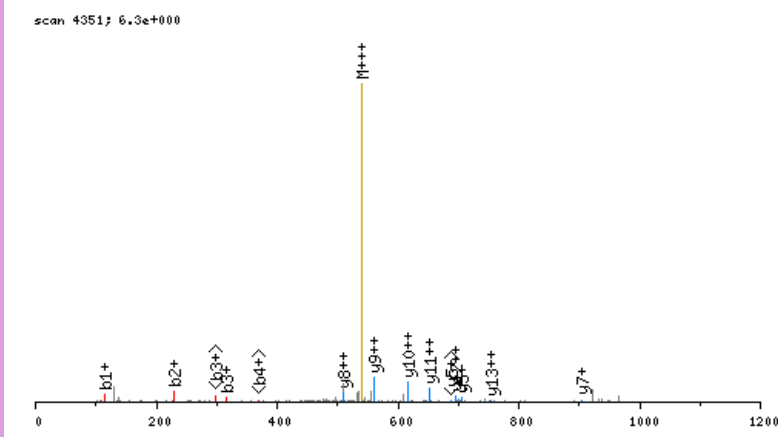

click image to zoom in; click top corners to zoom out [\[precursor±\]](#)

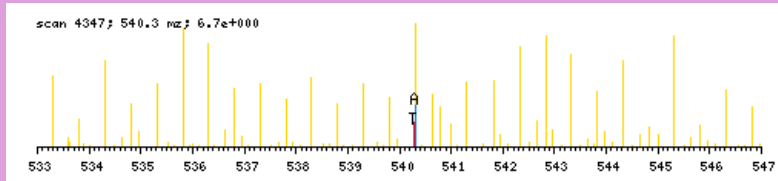

zoomed in precursor plot; T=theoretical m/z, A=acquired m/z

| b <sup>+</sup> | #  | AA # | y <sup>+</sup> | y <sup>2+</sup> |
|----------------|----|------|----------------|-----------------|
| 114.0555       | 1  | A 14 |                |                 |
| 228.0984       | 2  | N 13 | 1505.8077      | 753.4077        |
| 315.1305       | 3  | S 12 | 1391.7647      | 696.3863        |
| 386.1676       | 4  | A 11 | 1304.7327      | 652.8703        |
| 500.2105       | 5  | N 10 | 1233.6956      | 617.3517        |
| 601.2582       | 6  | T 9  | 1119.6527      | 560.3302        |
| 715.3011       | 7  | N 8  | 1018.6050      | 509.8064        |
| 816.3488       | 8  | T 7  | 904.5620       | 452.7849        |
| 915.4172       | 9  | V 6  | 803.5144       | 402.2611        |
| 1012.4700      | 10 | P 5  | 704.4460       | 352.7269        |
| 1168.5963      | 11 | K 4  | 607.3932       | 304.2005        |
| 1281.6803      | 12 | L 3  | 451.2669       | 226.1374        |
| 1444.7437      | 13 | Y 2  | 338.1828       | 169.5953        |
|                | 14 | R 1  | 175.1195       | 88.0637         |

N-term:+43.02 K(11):+156.13

AQALSEEEFQR, MH+ 1349.6337, m/z 675.3205  
 H OS G29 P150811 220811-s1.04269.04269.2.dta

X-range:

-

MassTol: Y-zoom:

MassType:

AVG  MONO

Axis:

1  2

Label:

I  M  -

Ions:

a  +  2+  3+

b  +  2+  3+

c  +  2+  3+

x  +  2+  3+

y  +  2+  3+

z  +  2+  3+

hide H<sub>2</sub>O/NH<sub>3</sub>

zoom 112-122

GO

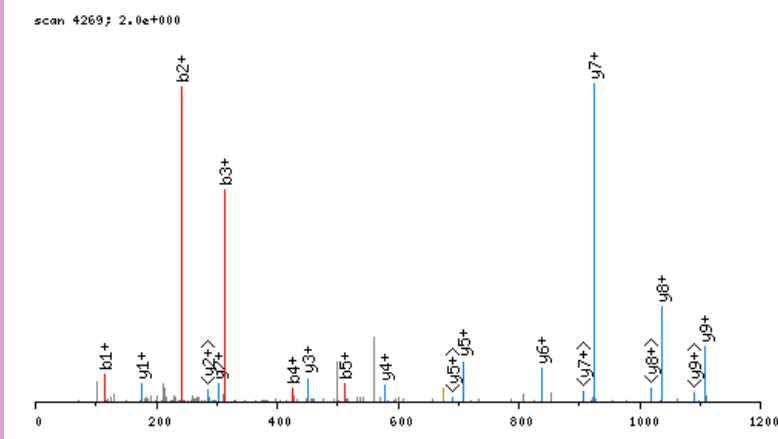

click image to zoom in; click top corners to zoom out [\[precursor±\]](#)

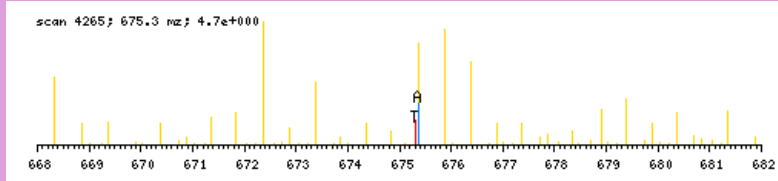

zoomed in precursor plot; T=theoretical m/z, A=acquired m/z

| b <sup>+</sup> | #  | AA # | y <sup>+</sup> | y <sup>2+</sup> |
|----------------|----|------|----------------|-----------------|
| 114.0555       | 1  | A 11 |                |                 |
| 242.1141       | 2  | Q 10 | 1236.5861      | 618.7969        |
| 313.1512       | 3  | A 9  | 1108.5275      | 554.7677        |
| 426.2353       | 4  | L 8  | 1037.4904      | 519.2491        |
| 513.2673       | 5  | S 7  | 924.4063       | 462.7071        |
| 642.3099       | 6  | E 6  | 837.3743       | 419.1910        |
| 771.3525       | 7  | E 5  | 708.3317       | 354.6698        |
| 900.3951       | 8  | E 4  | 579.2891       | 290.1485        |
| 1047.4635      | 9  | F 3  | 450.2465       | 225.6272        |
| 1175.5221      | 10 | Q 2  | 303.1781       | 152.0930        |
|                | 11 | R 1  | 175.1195       | 88.0637         |

N-term:+43.02



AQAPAKCPSYPGSGDGEMGKLR, MH+ 2375.1488, m/z 594.5427  
 H OS G26 P150811 220811-s1.03462.03462.4.dta

X-range:

0 - 0

MassTol: Y-zoom:

0. 1.

MassType:

AVG  MONO

Axis:

1  2

Label:

I  M  -

Ions:

a  +  2+  3+

b  +  2+  3+

c  +  2+  3+

x  +  2+  3+

y  +  2+  3+

z  +  2+  3+

hide H<sub>2</sub>O/NH<sub>3</sub>

zoom 112-122

GO

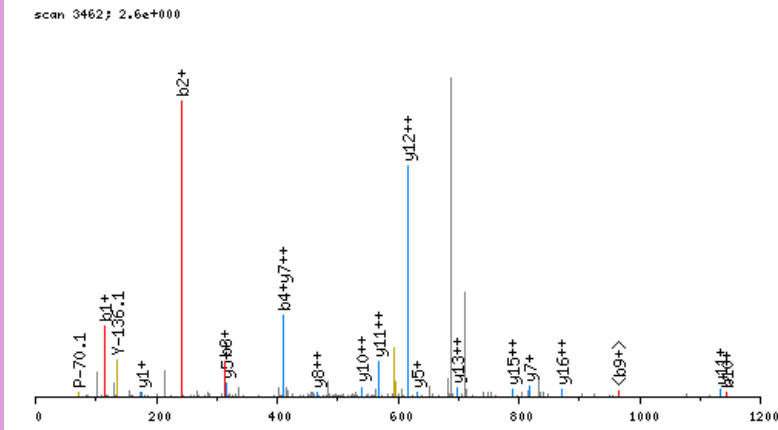

click image to zoom in; click top corners to zoom out [precursor±]

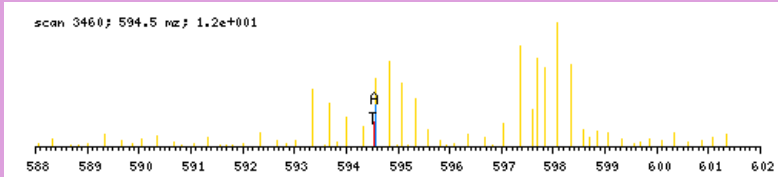

zoomed in precursor plot; T=theoretical m/z, A=acquired m/z

| b <sup>+</sup> | #  | AA | #  | y <sup>+</sup> | y <sup>2+</sup> |
|----------------|----|----|----|----------------|-----------------|
| 114.0555       | 1  | A  | 22 |                |                 |
| 242.1141       | 2  | Q  | 21 | 2262.1011      | 1131.5545       |
| 313.1512       | 3  | A  | 20 | 2134.0425      | 1067.5252       |
| 410.2040       | 4  | P  | 19 | 2063.0054      | 1032.0066       |
| 481.2411       | 5  | A  | 18 | 1965.9527      | 983.4802        |
| 637.3674       | 6  | K  | 17 | 1894.9156      | 947.9617        |
| 797.3980       | 7  | C  | 16 | 1738.7893      | 869.8985        |
| 894.4507       | 8  | P  | 15 | 1578.7587      | 789.8832        |
| 981.4828       | 9  | S  | 14 | 1481.7059      | 741.3569        |
| 1144.5461      | 10 | Y  | 13 | 1394.6739      | 697.8408        |
| 1241.5989      | 11 | P  | 12 | 1231.6105      | 616.3092        |
| 1298.6203      | 12 | G  | 11 | 1134.5578      | 567.7828        |
| 1385.6524      | 13 | S  | 10 | 1077.5363      | 539.2721        |
| 1442.6738      | 14 | G  | 9  | 990.5043       | 495.7561        |
| 1557.7008      | 15 | D  | 8  | 933.4828       | 467.2453        |
| 1614.7222      | 16 | G  | 7  | 818.4559       | 409.7318        |
| 1743.7648      | 17 | E  | 6  | 761.4344       | 381.2211        |
| 1874.8053      | 18 | M  | 5  | 632.3918       | 316.6998        |
| 1931.8268      | 19 | G  | 4  | 501.3513       | 251.1796        |
| 2087.9531      | 20 | K  | 3  | 444.3299       | 222.6688        |
| 2201.0371      | 21 | L  | 2  | 288.2036       | 144.6057        |
|                | 22 | R  | 1  | 175.1195       | 88.0637         |

N-term:+43.02 K(6):+156.13  
 C(7):+160.03 K(20):+156.13

AQAPTIVIVTQPGFVR, MH+ 1625.9015, m/z 542.6387  
 H OS G29 P150811 220811-s1.05441.05441.3.dta

X-range:

-

MassTol: Y-zoom:

MassType:

AVG  MONO

Axis:

1  2

Label:

I  M  -

Ions:

a  +  2+  3+

b  +  2+  3+

c  +  2+  3+

x  +  2+  3+

y  +  2+  3+

z  +  2+  3+

hide H<sub>2</sub>O/NH<sub>3</sub>

zoom 112-122

GO

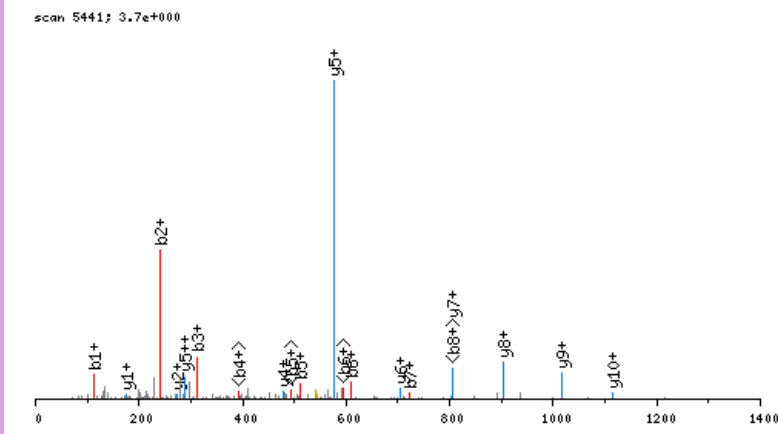

click image to zoom in; click top corners to zoom out [\[precursor±\]](#)

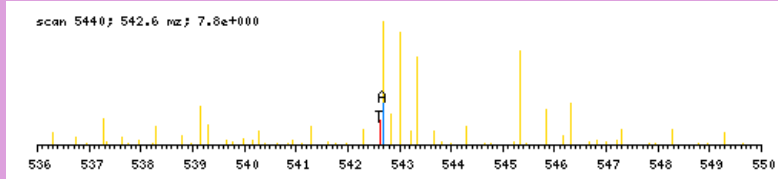

zoomed in precursor plot; T=theoretical m/z, A=acquired m/z

| b <sup>+</sup> | #  | AA # | y <sup>+</sup> | y <sup>2+</sup> |
|----------------|----|------|----------------|-----------------|
| 114.0555       | 1  | A 15 |                |                 |
| 242.1141       | 2  | Q 14 | 1512.8538      | 756.9308        |
| 313.1512       | 3  | A 13 | 1384.7953      | 692.9015        |
| 410.2040       | 4  | P 12 | 1313.7581      | 657.3830        |
| 511.2516       | 5  | T 11 | 1216.7054      | 608.8566        |
| 610.3201       | 6  | V 10 | 1115.6577      | 558.3328        |
| 723.4041       | 7  | I 9  | 1016.5893      | 508.7986        |
| 822.4725       | 8  | V 8  | 903.5052       | 452.2565        |
| 923.5202       | 9  | T 7  | 804.4368       | 402.7223        |
| 1051.5788      | 10 | Q 6  | 703.3891       | 352.1985        |
| 1148.6316      | 11 | P 5  | 575.3306       | 288.1692        |
| 1205.6530      | 12 | G 4  | 478.2778       | 239.6428        |
| 1352.7214      | 13 | F 3  | 421.2563       | 211.1321        |
| 1451.7899      | 14 | V 2  | 274.1879       | 137.5979        |
|                | 15 | R 1  | 175.1195       | 88.0637         |

N-term:+43.02

AQDGVLEKSVR, MH+ 1400.7386, m/z 700.8729  
 H OS G25 P150811 220811-s1.04375.04375.2.dta

scan 4375; 1.2e+001

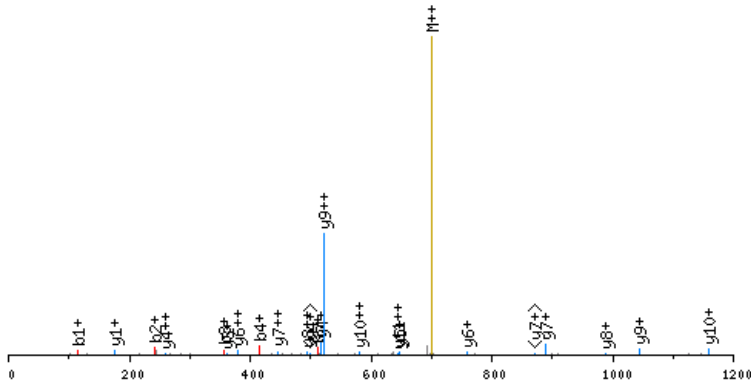

click image to zoom in; click top corners to zoom out [\[precursor±\]](#)

scan 4372; 700.9 m/z; 1.3e+001

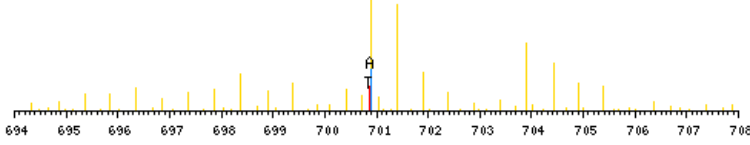

zoomed in precursor plot; T=theoretical m/z, A=acquired m/z

X-range:

-

MassTol: Y-zoom:

MassType:

AVG  MONO

Axis:

1  2

Label:

I  M  -

Ions:

a  +  2+  3+

b  +  2+  3+

c  +  2+  3+

x  +  2+  3+

y  +  2+  3+

z  +  2+  3+

hide H<sub>2</sub>O/NH<sub>3</sub>

zoom 112-122

GO

| b <sup>+</sup> | #  | AA | #  | y <sup>+</sup> | y <sup>2+</sup> |
|----------------|----|----|----|----------------|-----------------|
| 114.0555       | 1  | A  | 12 |                |                 |
| 242.1141       | 2  | Q  | 11 | 1287.6909      | 644.3494        |
| 357.1410       | 3  | D  | 10 | 1159.6323      | 580.3201        |
| 414.1625       | 4  | G  | 9  | 1044.6054      | 522.8066        |
| 513.2309       | 5  | V  | 8  | 987.5839       | 494.2959        |
| 642.2735       | 6  | E  | 7  | 888.5155       | 444.7617        |
| 755.3576       | 7  | L  | 6  | 759.4729       | 380.2404        |
| 884.4002       | 8  | E  | 5  | 646.3888       | 323.6983        |
| 1040.5265      | 9  | K  | 4  | 517.3462       | 259.1770        |
| 1127.5585      | 10 | S  | 3  | 361.2199       | 181.1139        |
| 1226.6269      | 11 | V  | 2  | 274.1879       | 137.5979        |
|                | 12 | R  | 1  | 175.1195       | 88.0637         |

N-term:+43.02 K(9):+156.13

AQDLSEKELLR, MH+ 1377.7802, m/z 689.3937  
 H OS G25 P150811 220811-s1.05610.05610.2.dta

scan 5610; 1.2e+001

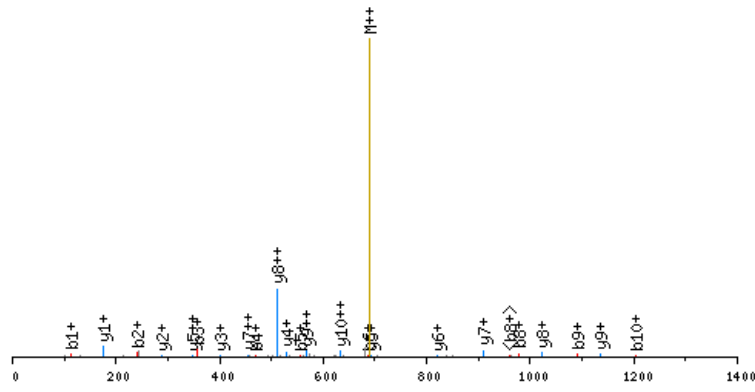

click image to zoom in; click top corners to zoom out [\[precursor±\]](#)

scan 5607; 689.4 m/z; 3.0e+001

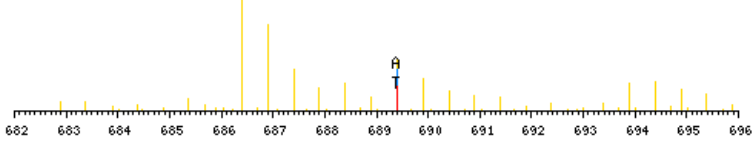

zoomed in precursor plot; T=theoretical m/z, A=acquired m/z

X-range:

-

MassTol: Y-zoom:

MassType:

AVG  MONO

Axis:

1  2

Label:

I  M  -

Ions:

a  +  2+  3+

b  +  2+  3+

c  +  2+  3+

x  +  2+  3+

y  +  2+  3+

z  +  2+  3+

hide H<sub>2</sub>O/NH<sub>3</sub>

zoom 112-122

GO

| b <sup>+</sup> | #  | AA # | y <sup>+</sup> | y <sup>2+</sup> |
|----------------|----|------|----------------|-----------------|
| 114.0555       | 1  | A 11 |                |                 |
| 242.1141       | 2  | Q 10 | 1264.7325      | 632.8702        |
| 357.1410       | 3  | D 9  | 1136.6740      | 568.8409        |
| 470.2251       | 4  | L 8  | 1021.6470      | 511.3274        |
| 557.2571       | 5  | S 7  | 908.5629       | 454.7854        |
| 686.2997       | 6  | E 6  | 821.5309       | 411.2694        |
| 848.4578       | 7  | K 5  | 692.4883       | 346.7481        |
| 977.5004       | 8  | E 4  | 530.3302       | 265.6690        |
| 1090.5845      | 9  | L 3  | 401.2876       | 201.1477        |
| 1203.6685      | 10 | L 2  | 288.2036       | 144.6057        |
|                | 11 | R 1  | 175.1195       | 88.0637         |

N-term:+43.02 K(7):+162.16

AQDQGEKENPMR, MH+ 1472.6804, m/z 491.5650  
 H OS G25 P150811 220811-s1.02238.02238.3.dta

X-range:

-

MassTol: Y-zoom:

MassType:

AVG  MONO

Axis:

1  2

Label:

I  M  -

Ions:

a  +  2+  3+

b  +  2+  3+

c  +  2+  3+

x  +  2+  3+

y  +  2+  3+

z  +  2+  3+

hide H<sub>2</sub>O/NH<sub>3</sub>

zoom 112-122

GO

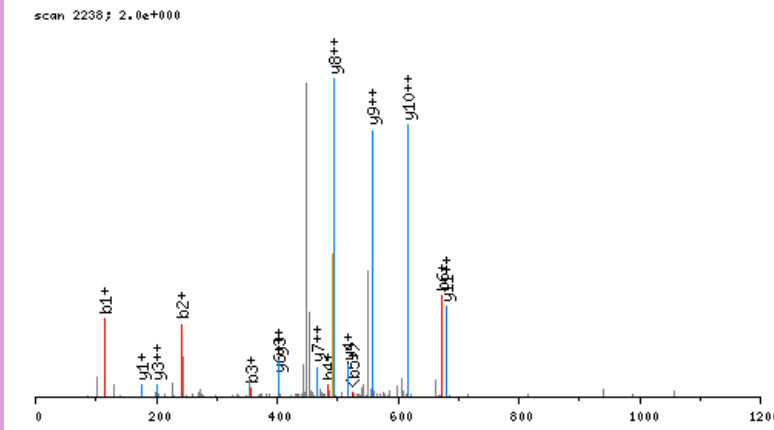

click image to zoom in; click top corners to zoom out [\[precursor±\]](#)

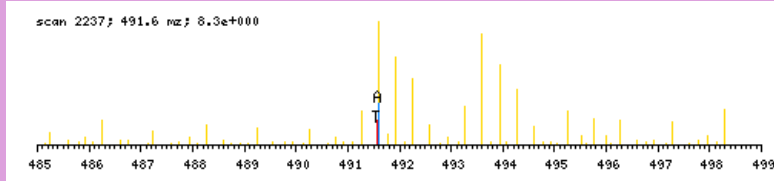

zoomed in precursor plot; T=theoretical m/z, A=acquired m/z

| b <sup>+</sup> | #  | AA | #  | y <sup>+</sup> | y <sup>2+</sup> |
|----------------|----|----|----|----------------|-----------------|
| 114.0555       | 1  | A  | 12 |                |                 |
| 242.1141       | 2  | Q  | 11 | 1359.6327      | 680.3203        |
| 357.1410       | 3  | D  | 10 | 1231.5741      | 616.2910        |
| 485.1996       | 4  | Q  | 9  | 1116.5472      | 558.7775        |
| 542.2211       | 5  | G  | 8  | 988.4886       | 494.7482        |
| 671.2637       | 6  | E  | 7  | 931.4672       | 466.2375        |
| 827.3900       | 7  | K  | 6  | 802.4246       | 401.7162        |
| 956.4326       | 8  | E  | 5  | 646.2983       | 323.6530        |
| 1070.4755      | 9  | N  | 4  | 517.2557       | 259.1318        |
| 1167.5283      | 10 | P  | 3  | 403.2127       | 202.1103        |
| 1298.5687      | 11 | M  | 2  | 306.1600       | 153.5839        |
|                | 12 | R  | 1  | 175.1195       | 88.0637         |

N-term:+43.02 K(7):+156.13

AQELQHPEFAR, MH+ 1367.6708, m/z 456.5618  
 H OS G25 P150811 220811-s1.04868.04868.3.dta

scan 4868; 2.2e+000

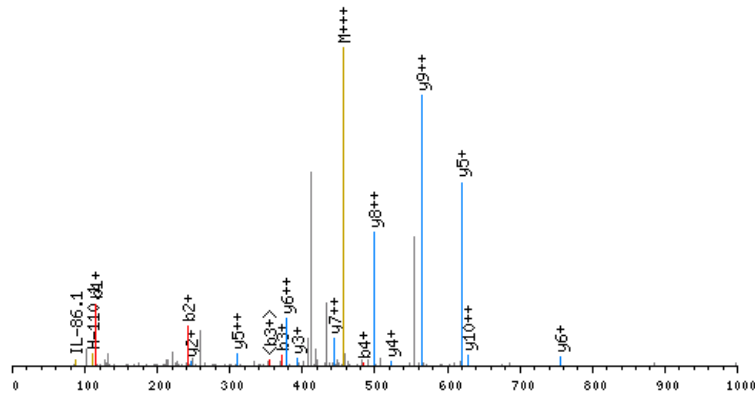

click image to zoom in; click top corners to zoom out [\[precursor±\]](#)

scan 4867; 456.6 m/z; 1.9e+001

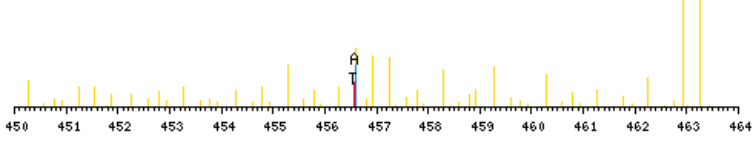

zoomed in precursor plot; T=theoretical m/z, A=acquired m/z

X-range:

-

MassTol: Y-zoom:

MassType:

AVG  MONO

Axis:

1  2

Label:

I  M  -

Ions:

a  +  2+  3+

b  +  2+  3+

c  +  2+  3+

x  +  2+  3+

y  +  2+  3+

z  +  2+  3+

hide H<sub>2</sub>O/NH<sub>3</sub>

zoom 112-122

GO

| b <sup>+</sup> | #  | AA # | y <sup>+</sup> | y <sup>2+</sup> |
|----------------|----|------|----------------|-----------------|
| 114.0555       | 1  | A 11 |                |                 |
| 242.1141       | 2  | Q 10 | 1254.6231      | 627.8155        |
| 371.1567       | 3  | E 9  | 1126.5645      | 563.7862        |
| 484.2407       | 4  | L 8  | 997.5219       | 499.2649        |
| 612.2993       | 5  | Q 7  | 884.4379       | 442.7228        |
| 749.3582       | 6  | H 6  | 756.3793       | 378.6936        |
| 846.4110       | 7  | P 5  | 619.3204       | 310.1641        |
| 975.4536       | 8  | E 4  | 522.2676       | 261.6377        |
| 1122.5220      | 9  | F 3  | 393.2250       | 197.1164        |
| 1193.5591      | 10 | A 2  | 246.1566       | 123.5822        |
|                | 11 | R 1  | 175.1195       | 88.0637         |

N-term:+43.02

AQERPSCAVEPEHVQR, MH+ 1934.9142, m/z 645.6429  
 H OS G26 P150811 220811-s1.02391.02391.3.dta

scan 2391; 2.6e+000

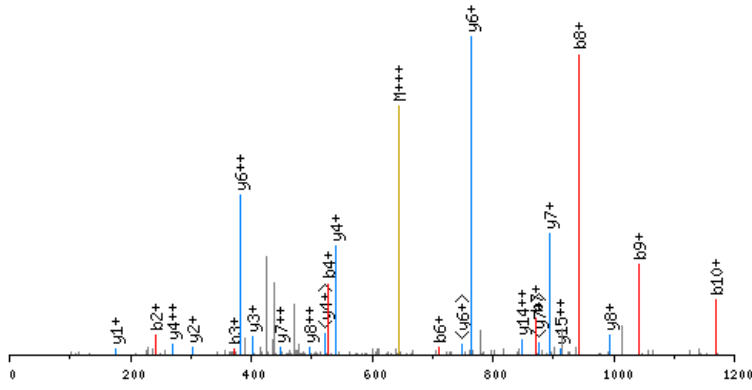

click image to zoom in; click top corners to zoom out [\[precursor±\]](#)

scan 2390; 645.6 m/z; 3.4e+000

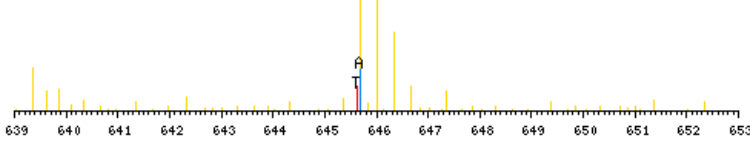

zoomed in precursor plot; T=theoretical m/z, A=acquired m/z

X-range:

-

MassTol: Y-zoom:

MassType:

AVG  MONO

Axis:

1  2

Label:

I  M  -

Ions:

a  +  2+  3+

b  +  2+  3+

c  +  2+  3+

x  +  2+  3+

y  +  2+  3+

z  +  2+  3+

hide H<sub>2</sub>O/NH<sub>3</sub>

zoom 112-122

GO

| b <sup>+</sup> | #  | AA # | y <sup>+</sup> | y <sup>2+</sup> |
|----------------|----|------|----------------|-----------------|
| 114.0555       | 1  | A 16 |                |                 |
| 242.1141       | 2  | Q 15 | 1821.8666      | 911.4372        |
| 371.1567       | 3  | E 14 | 1693.8080      | 847.4079        |
| 527.2578       | 4  | R 13 | 1564.7654      | 782.8866        |
| 624.3106       | 5  | P 12 | 1408.6643      | 704.8360        |
| 711.3426       | 6  | S 11 | 1311.6115      | 656.3097        |
| 871.3732       | 7  | C 10 | 1224.5795      | 612.7937        |
| 942.4103       | 8  | A 9  | 1064.5489      | 532.7784        |
| 1041.4787      | 9  | V 8  | 993.5118       | 497.2598        |
| 1170.5213      | 10 | E 7  | 894.4434       | 447.7256        |
| 1267.5741      | 11 | P 6  | 765.4008       | 383.2043        |
| 1396.6167      | 12 | E 5  | 668.3480       | 334.6779        |
| 1533.6756      | 13 | H 4  | 539.3054       | 270.1566        |
| 1632.7440      | 14 | V 3  | 402.2465       | 201.6272        |
| 1760.8026      | 15 | Q 2  | 303.1781       | 152.0930        |
|                | 16 | R 1  | 175.1195       | 88.0637         |

N-term:+43.02 C(7):+160.03

AQEVSEYLSQNPR, MH+ 1562.7451, m/z 521.5865  
 H OS G29 P150811 220811-s1.05396.05396.3.dta

X-range:

-

MassTol: Y-zoom:

MassType:

AVG  MONO

Axis:

1  2

Label:

I  M  -

Ions:

a  +  2+  3+

b  +  2+  3+

c  +  2+  3+

x  +  2+  3+

y  +  2+  3+

z  +  2+  3+

hide H<sub>2</sub>O/NH<sub>3</sub>

zoom 112-122

GO

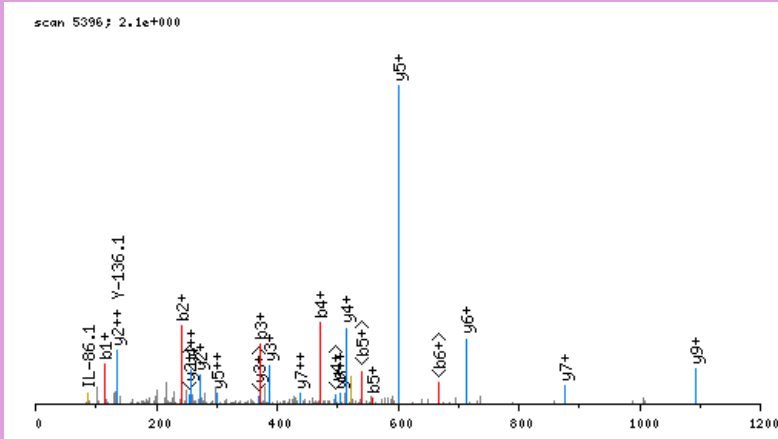

click image to zoom in; click top corners to zoom out [\[precursor±\]](#)

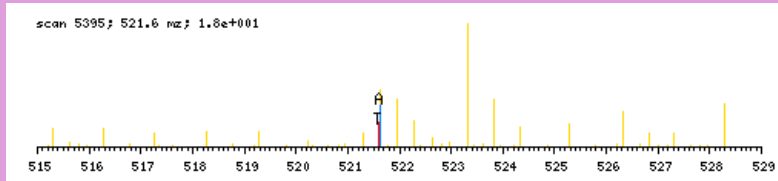

zoomed in precursor plot; T=theoretical m/z, A=acquired m/z

| b <sup>+</sup> | #  | AA # | y <sup>+</sup> | y <sup>2+</sup> |
|----------------|----|------|----------------|-----------------|
| 114.0555       | 1  | A 13 |                |                 |
| 242.1141       | 2  | Q 12 | 1449.6974      | 725.3526        |
| 371.1567       | 3  | E 11 | 1321.6388      | 661.3233        |
| 470.2251       | 4  | V 10 | 1192.5962      | 596.8020        |
| 557.2571       | 5  | S 9  | 1093.5278      | 547.2678        |
| 686.2997       | 6  | E 8  | 1006.4958      | 503.7518        |
| 849.3630       | 7  | Y 7  | 877.4532       | 439.2305        |
| 962.4471       | 8  | L 6  | 714.3899       | 357.6988        |
| 1049.4791      | 9  | S 5  | 601.3058       | 301.1568        |
| 1177.5377      | 10 | Q 4  | 514.2738       | 257.6408        |
| 1291.5806      | 11 | N 3  | 386.2152       | 193.6115        |
| 1388.6334      | 12 | P 2  | 272.1723       | 136.5900        |
|                | 13 | R 1  | 175.1195       | 88.0637         |

N-term:+43.02



AQGLIEVER, MH+ 1056.5690, m/z 528.7881  
 H OS G29 P150811 220811-s1.04426.04426.2.dta

X-range:

-

MassTol: Y-zoom:

MassType:

AVG  MONO

Axis:

1  2

Label:

I  M  -

Ions:

a  +  2+  3+

b  +  2+  3+

c  +  2+  3+

x  +  2+  3+

y  +  2+  3+

z  +  2+  3+

hide H<sub>2</sub>O/NH<sub>3</sub>

zoom 112-122

GO

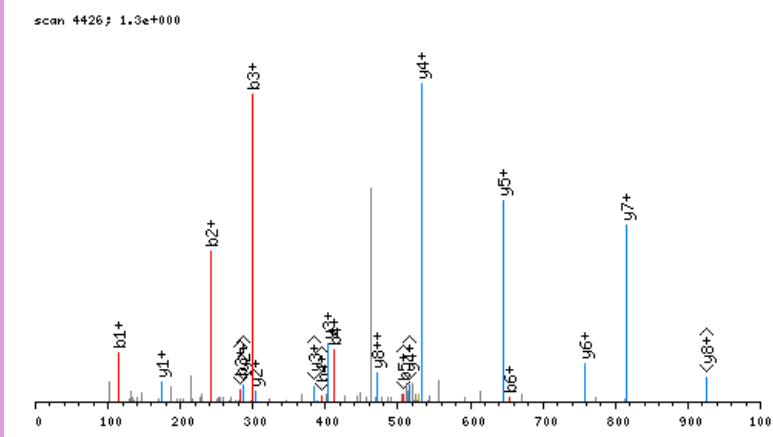

click image to zoom in; click top corners to zoom out [\[precursor±\]](#)

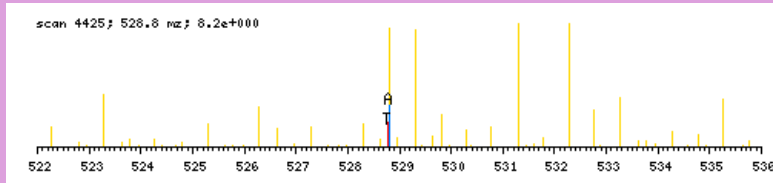

zoomed in precursor plot; T=theoretical m/z, A=acquired m/z

| b <sup>+</sup> | # | AA # | y <sup>+</sup> | y <sup>2+</sup> |
|----------------|---|------|----------------|-----------------|
| 114.0555       | 1 | A    | 9              |                 |
| 242.1141       | 2 | Q    | 8              | 943.5213        |
| 299.1356       | 3 | G    | 7              | 815.4627        |
| 412.2196       | 4 | L    | 6              | 758.4412        |
| 525.3037       | 5 | I    | 5              | 645.3572        |
| 654.3463       | 6 | E    | 4              | 532.2731        |
| 753.4147       | 7 | V    | 3              | 403.2305        |
| 882.4573       | 8 | E    | 2              | 304.1621        |
|                | 9 | R    | 1              | 175.1195        |

N-term:+43.02

AQGSHQIDFQVLHDLR, MH+ 1905.9571, m/z 635.9906  
 H OS G27 P150811 220811-s1.06691.06691.3.dta

X-range:

-

MassTol: Y-zoom:

MassType:

AVG  MONO

Axis:

1  2

Label:

I  M  -

Ions:

a  +  2+  3+

b  +  2+  3+

c  +  2+  3+

x  +  2+  3+

y  +  2+  3+

z  +  2+  3+

hide H<sub>2</sub>O/NH<sub>3</sub>

zoom 112-122

GO

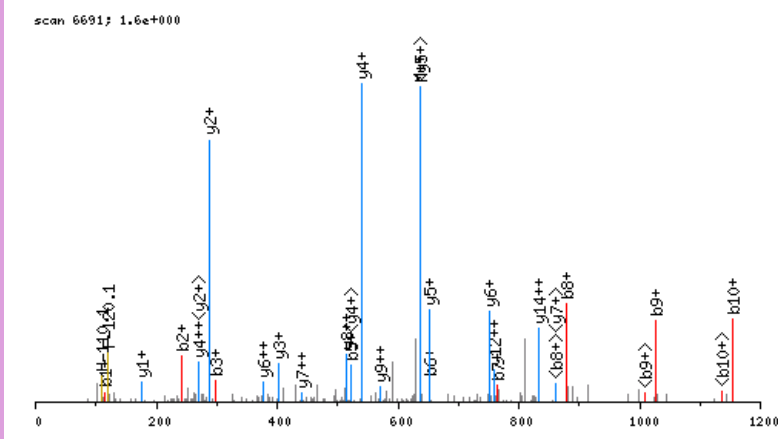

click image to zoom in; click top corners to zoom out [\[precursor±\]](#)

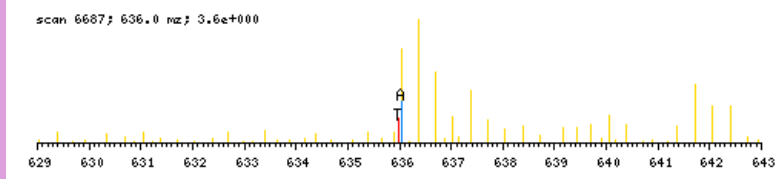

zoomed in precursor plot; T=theoretical m/z, A=acquired m/z

| b <sup>+</sup> | #  | AA # | y <sup>+</sup> | y <sup>2+</sup> |
|----------------|----|------|----------------|-----------------|
| 114.0555       | 1  | A 16 |                |                 |
| 242.1141       | 2  | Q 15 | 1792.9095      | 896.9586        |
| 299.1356       | 3  | G 14 | 1664.8509      | 832.9294        |
| 386.1676       | 4  | S 13 | 1607.8294      | 804.4186        |
| 523.2265       | 5  | H 12 | 1520.7974      | 760.9026        |
| 651.2851       | 6  | Q 11 | 1383.7385      | 692.3731        |
| 764.3691       | 7  | I 10 | 1255.6799      | 628.3439        |
| 879.3961       | 8  | D 9  | 1142.5958      | 571.8018        |
| 1026.4645      | 9  | F 8  | 1027.5689      | 514.2884        |
| 1154.5231      | 10 | Q 7  | 880.5005       | 440.7542        |
| 1253.5915      | 11 | V 6  | 752.4419       | 376.7249        |
| 1366.6755      | 12 | L 5  | 653.3735       | 327.1907        |
| 1503.7345      | 13 | H 4  | 540.2894       | 270.6486        |
| 1618.7614      | 14 | D 3  | 403.2305       | 202.1192        |
| 1731.8455      | 15 | L 2  | 288.2036       | 144.6057        |
|                | 16 | R 1  | 175.1195       | 88.0637         |

N-term:+43.02

AQKPDGGAGLR, MH+ 1145.6491, m/z 573.3282  
 H OS G25 P150811 220811-s1.02139.02139.2.dta

scan 2139; 3.5e+001

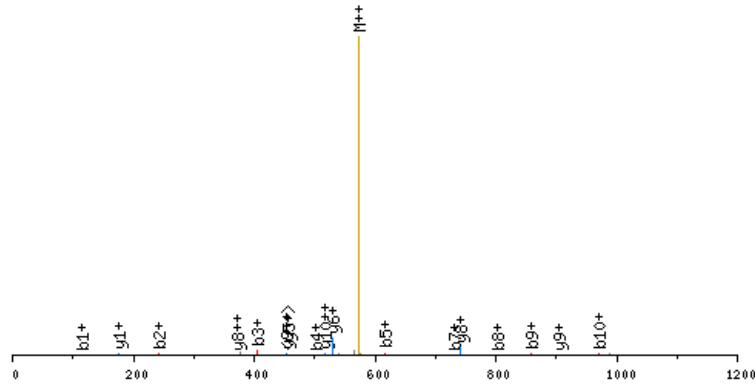

click image to zoom in; click top corners to zoom out [\[precursor±\]](#)

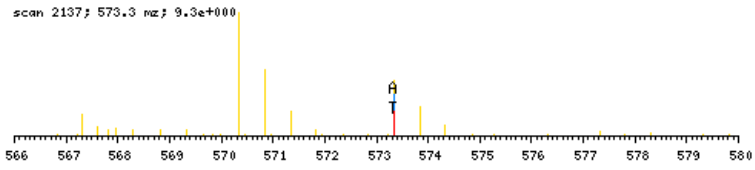

zoomed in precursor plot; T=theoretical m/z, A=acquired m/z

X-range:

-

MassTol: Y-zoom:

MassType:

AVG  MONO

Axis:

1  2

Label:

I  M  -

Ions:

a  +  2+  3+

b  +  2+  3+

c  +  2+  3+

x  +  2+  3+

y  +  2+  3+

z  +  2+  3+

hide H<sub>2</sub>O/NH<sub>3</sub>

zoom 112-122

GO

| b <sup>+</sup> | #  | AA | #  | y <sup>+</sup> | y <sup>2+</sup> |
|----------------|----|----|----|----------------|-----------------|
| 114.0555       | 1  | A  | 11 |                |                 |
| 242.1141       | 2  | Q  | 10 | 1032.6015      | 516.8046        |
| 404.2722       | 3  | K  | 9  | 904.5429       | 452.7754        |
| 501.3250       | 4  | P  | 8  | 742.3848       | 371.6963        |
| 616.3519       | 5  | D  | 7  | 645.3320       | 323.1699        |
| 673.3734       | 6  | G  | 6  | 530.3051       | 265.6564        |
| 730.3948       | 7  | G  | 5  | 473.2836       | 237.1457        |
| 801.4319       | 8  | A  | 4  | 416.2621       | 208.6350        |
| 858.4534       | 9  | G  | 3  | 345.2250       | 173.1164        |
| 971.5375       | 10 | L  | 2  | 288.2036       | 144.6057        |
|                | 11 | R  | 1  | 175.1195       | 88.0637         |

N-term:+43.02 K(3):+162.16

AQNLIKDLAGR, MH+ 1161.6804, m/z 581.3439  
 H OS G25 P150811 220811-s1.04760.04760.2.dta

X-range:

-

MassTol: Y-zoom:

MassType:

AVG  MONO

Axis:

1  2

Label:

I  M  -

Ions:

a  +  2+  3+

b  +  2+  3+

c  +  2+  3+

x  +  2+  3+

y  +  2+  3+

z  +  2+  3+

hide H<sub>2</sub>O/NH<sub>3</sub>

zoom 112-122

GO

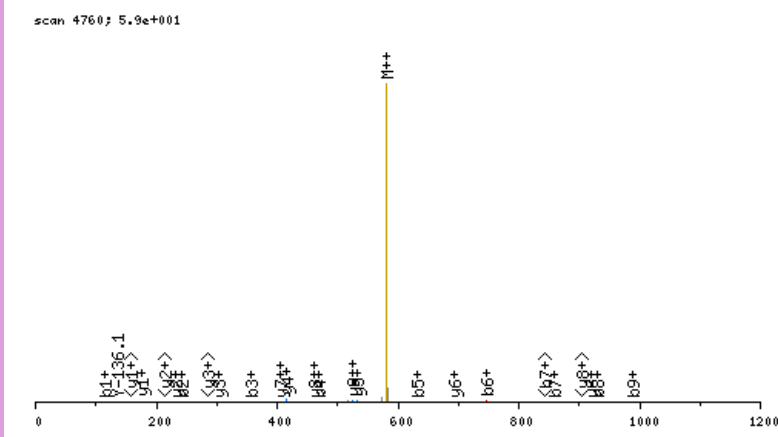

click image to zoom in; click top corners to zoom out [\[precursor±\]](#)

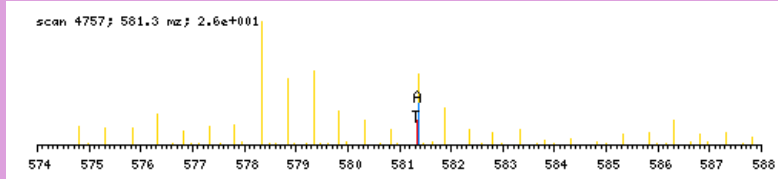

zoomed in precursor plot; T=theoretical m/z, A=acquired m/z

| b <sup>+</sup> | #  | AA | #  | y <sup>+</sup> | y <sup>2+</sup> |
|----------------|----|----|----|----------------|-----------------|
| 114.0555       | 1  | A  | 10 |                |                 |
| 242.1141       | 2  | Q  | 9  | 1048.6328      | 524.8203        |
| 356.1570       | 3  | N  | 8  | 920.5742       | 460.7910        |
| 469.2411       | 4  | L  | 7  | 806.5312       | 403.7695        |
| 631.3992       | 5  | K  | 6  | 693.4472       | 347.2275        |
| 746.4261       | 6  | D  | 5  | 531.2891       | 266.1485        |
| 859.5102       | 7  | L  | 4  | 416.2621       | 208.6350        |
| 930.5473       | 8  | A  | 3  | 303.1781       | 152.0930        |
| 987.5688       | 9  | G  | 2  | 232.1410       | 116.5744        |
|                | 10 | R  | 1  | 175.1195       | 88.0637         |

N-term:+43.02 K(5):+162.16

AQNPSNMEPLR, MH+ 1298.6163, m/z 649.8118  
 H OS G29 P150811 220811-s1.03478.03478.2.dta

scan 3478; 2.7e+000

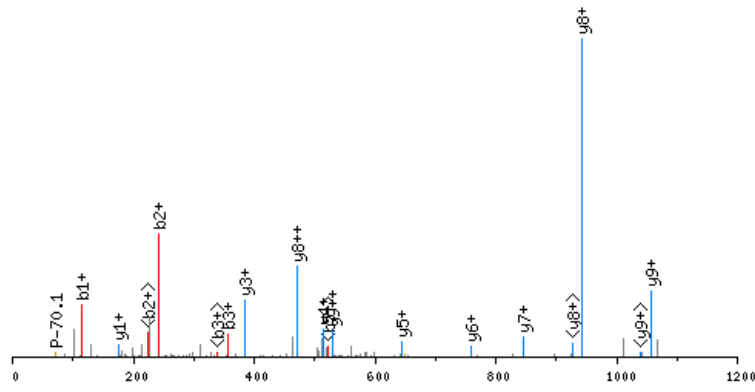

click image to zoom in; click top corners to zoom out [\[precursor±\]](#)

scan 3475; 649.8 m/z; 9.3e+000

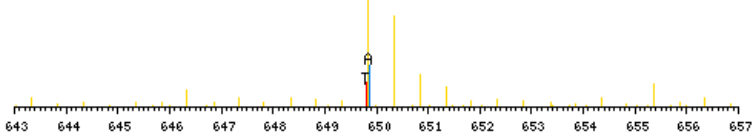

zoomed in precursor plot; T=theoretical m/z, A=acquired m/z

X-range:

-

MassTol: Y-zoom:

MassType:

AVG  MONO

Axis:

1  2

Label:

I  M  -

Ions:

a  +  2+  3+

b  +  2+  3+

c  +  2+  3+

x  +  2+  3+

y  +  2+  3+

z  +  2+  3+

hide H<sub>2</sub>O/NH<sub>3</sub>

zoom 112-122

GO

| b <sup>+</sup> | #  | AA # | y <sup>+</sup> | y <sup>2+</sup> |
|----------------|----|------|----------------|-----------------|
| 114.0555       | 1  | A 11 |                |                 |
| 242.1141       | 2  | Q 10 | 1185.5686      | 593.2882        |
| 356.1570       | 3  | N 9  | 1057.5101      | 529.2589        |
| 453.2098       | 4  | P 8  | 943.4671       | 472.2375        |
| 540.2418       | 5  | S 7  | 846.4144       | 423.7111        |
| 654.2847       | 6  | N 6  | 759.3823       | 380.1951        |
| 785.3252       | 7  | M 5  | 645.3394       | 323.1736        |
| 914.3678       | 8  | E 4  | 514.2989       | 257.6534        |
| 1011.4206      | 9  | P 3  | 385.2563       | 193.1321        |
| 1124.5046      | 10 | L 2  | 288.2036       | 144.6057        |
|                | 11 | R 1  | 175.1195       | 88.0637         |

N-term:+43.02

AQPGPAPQPDVSLQQR, MH+ 1730.8826, m/z 577.6324  
 H OS G29 P150811 220811-s1.03619.03619.3.dta

X-range:

-

MassTol: Y-zoom:

MassType:

AVG  MONO

Axis:

1  2

Label:

I  M  -

Ions:

a  +  2+  3+

b  +  2+  3+

c  +  2+  3+

x  +  2+  3+

y  +  2+  3+

z  +  2+  3+

hide H<sub>2</sub>O/NH<sub>3</sub>

zoom 112-122

GO

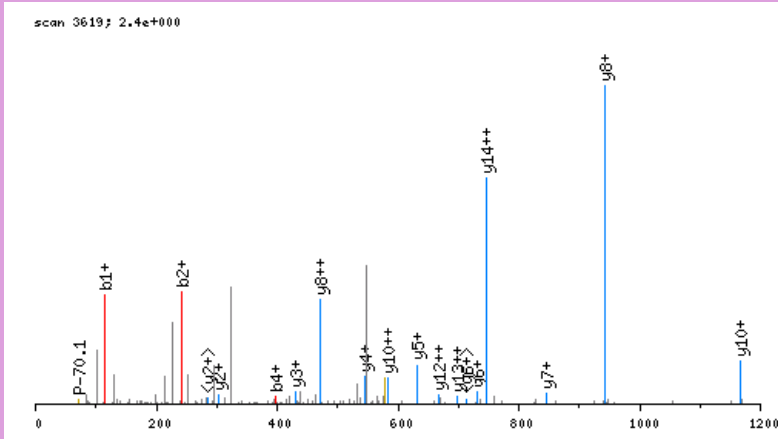

click image to zoom in; click top corners to zoom out [\[precursor±\]](#)

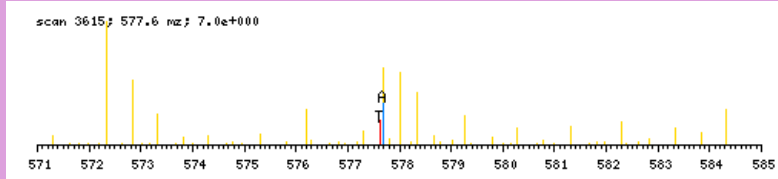

zoomed in precursor plot; T=theoretical m/z, A=acquired m/z

| b <sup>+</sup> | #  | AA # | y <sup>+</sup> | y <sup>2+</sup> |
|----------------|----|------|----------------|-----------------|
| 114.0555       | 1  | A 16 |                |                 |
| 242.1141       | 2  | Q 15 | 1617.8349      | 809.4214        |
| 339.1669       | 3  | P 14 | 1489.7763      | 745.3921        |
| 396.1883       | 4  | G 13 | 1392.7236      | 696.8657        |
| 493.2411       | 5  | P 12 | 1335.7021      | 668.3550        |
| 564.2782       | 6  | A 11 | 1238.6493      | 619.8286        |
| 661.3310       | 7  | P 10 | 1167.6122      | 584.3100        |
| 789.3895       | 8  | Q 9  | 1070.5594      | 535.7836        |
| 886.4423       | 9  | P 8  | 942.5009       | 471.7543        |
| 1001.4692      | 10 | D 7  | 845.4481       | 423.2280        |
| 1100.5377      | 11 | V 6  | 730.4212       | 365.7145        |
| 1187.5697      | 12 | S 5  | 631.3527       | 316.1803        |
| 1300.6538      | 13 | L 4  | 544.3207       | 272.6643        |
| 1428.7123      | 14 | Q 3  | 431.2367       | 216.1222        |
| 1556.7709      | 15 | Q 2  | 303.1781       | 152.0930        |
|                | 16 | R 1  | 175.1195       | 88.0637         |

N-term:+43.02

AQTASPPAR, MH+ 1068.5438, m/z 534.7755  
 H OS G29 P150811 220811-s1.02339.02339.2.dta

X-range:

-

MassTol: Y-zoom:

MassType:

AVG  MONO

Axis:

1  2

Label:

I  M  -

Ions:

a  +  2+  3+

b  +  2+  3+

c  +  2+  3+

x  +  2+  3+

y  +  2+  3+

z  +  2+  3+

hide H<sub>2</sub>O/NH<sub>3</sub>

zoom 112-122

GO

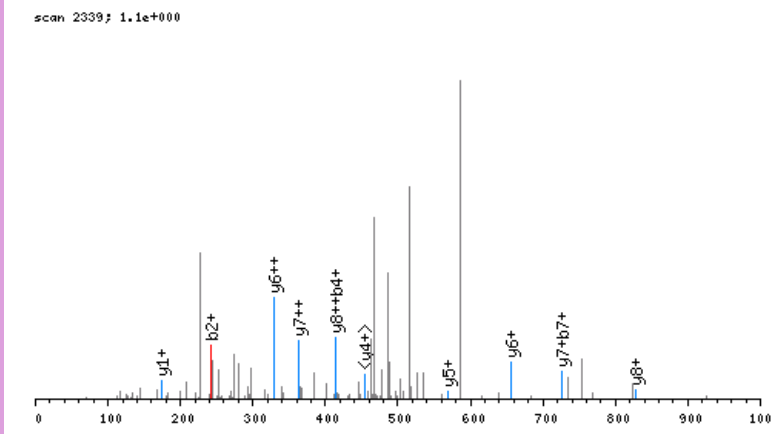

click image to zoom in; click top corners to zoom out [\[precursor±\]](#)

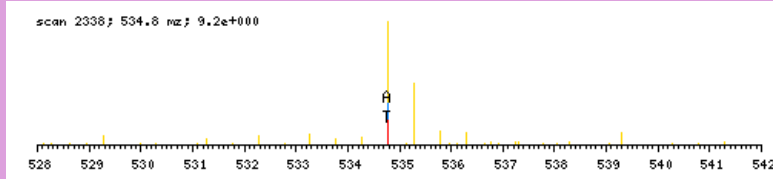

zoomed in precursor plot; T=theoretical m/z, A=acquired m/z

| b <sup>+</sup> | #  | AA | #  | y <sup>+</sup> | y <sup>2+</sup> |
|----------------|----|----|----|----------------|-----------------|
| 114.0555       | 1  | A  | 10 |                |                 |
| 242.1141       | 2  | Q  | 9  | 955.4961       | 478.2520        |
| 343.1618       | 3  | T  | 8  | 827.4375       | 414.2227        |
| 414.1989       | 4  | A  | 7  | 726.3899       | 363.6988        |
| 501.2309       | 5  | S  | 6  | 655.3527       | 328.1803        |
| 598.2837       | 6  | P  | 5  | 568.3207       | 284.6643        |
| 726.3423       | 7  | Q  | 4  | 471.2680       | 236.1379        |
| 823.3950       | 8  | P  | 3  | 343.2094       | 172.1086        |
| 894.4321       | 9  | A  | 2  | 246.1566       | 123.5822        |
|                | 10 | R  | 1  | 175.1195       | 88.0637         |

N-term:+43.02

ASALEQFVNSVR, MH+ 1362.7018, m/z 681.8545  
 H OS G29 P150811 220811-s1.06537.06537.2.dta

X-range:

-

MassTol: Y-zoom:

MassType:

AVG  MONO

Axis:

1  2

Label:

I  M  -

Ions:

a  +  2+  3+

b  +  2+  3+

c  +  2+  3+

x  +  2+  3+

y  +  2+  3+

z  +  2+  3+

hide H<sub>2</sub>O/NH<sub>3</sub>

zoom 112-122

GO

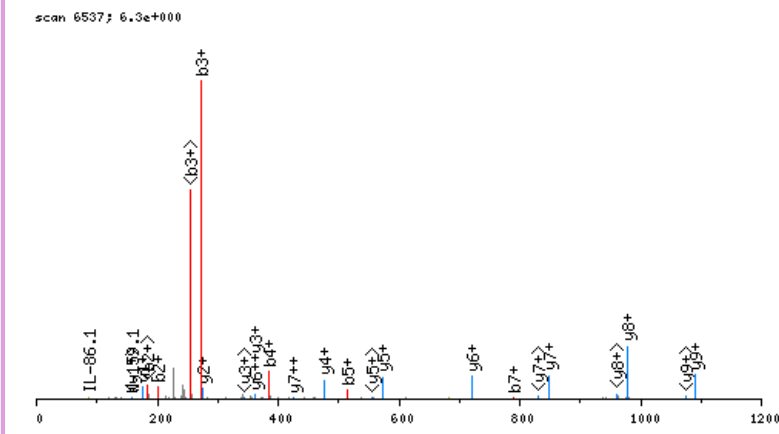

click image to zoom in; click top corners to zoom out [\[precursor±\]](#)

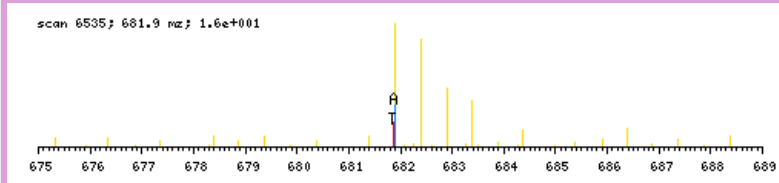

zoomed in precursor plot; T=theoretical m/z, A=acquired m/z

| b <sup>+</sup> | #  | AA # | y <sup>+</sup> | y <sup>2+</sup> |
|----------------|----|------|----------------|-----------------|
| 114.0555       | 1  | A 12 |                |                 |
| 201.0875       | 2  | S 11 | 1249.6541      | 625.3310        |
| 272.1247       | 3  | A 10 | 1162.6220      | 581.8149        |
| 385.2087       | 4  | L 9  | 1091.5849      | 546.2964        |
| 514.2513       | 5  | E 8  | 978.5009       | 489.7543        |
| 642.3099       | 6  | Q 7  | 849.4583       | 425.2331        |
| 789.3783       | 7  | F 6  | 721.3997       | 361.2038        |
| 888.4467       | 8  | V 5  | 574.3313       | 287.6696        |
| 1002.4896      | 9  | N 4  | 475.2629       | 238.1353        |
| 1089.5217      | 10 | S 3  | 361.2199       | 181.1139        |
| 1188.5901      | 11 | V 2  | 274.1879       | 137.5979        |
|                | 12 | R 1  | 175.1195       | 88.0637         |

N-term:+43.02



X-range:

-

MassTol: Y-zoom:

MassType:

AVG  MONO

Axis:

1  2

Label:

I  M  -

Ions:

a  +  2+  3+

b  +  2+  3+

c  +  2+  3+

x  +  2+  3+

y  +  2+  3+

z  +  2+  3+

hide H<sub>2</sub>O/NH<sub>3</sub>

zoom 112-122

GO

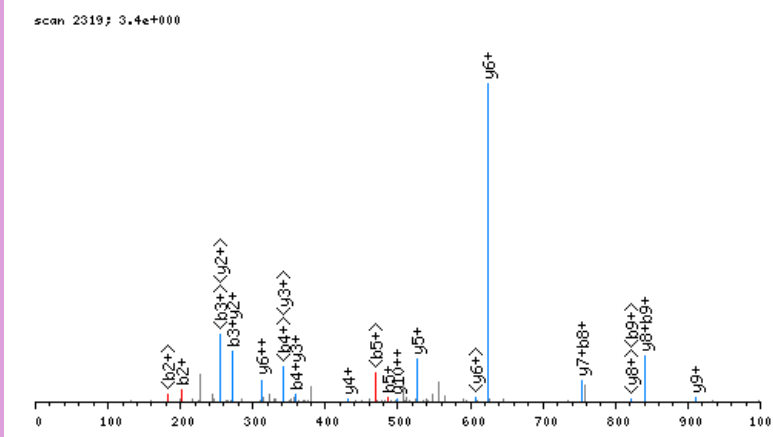

click image to zoom in; click top corners to zoom out [\[precursor±\]](#)

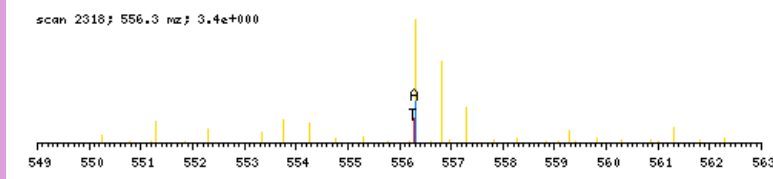

zoomed in precursor plot; T=theoretical m/z, A=acquired m/z

| b <sup>+</sup> | #  | AA # | y <sup>+</sup> | y <sup>2+</sup> |
|----------------|----|------|----------------|-----------------|
| 114.0555       | 1  | A 11 |                |                 |
| 201.0875       | 2  | S 10 | 998.4907       | 499.7493        |
| 272.1247       | 3  | A 9  | 911.4587       | 456.2332        |
| 359.1567       | 4  | S 8  | 840.4216       | 420.7147        |
| 488.1993       | 5  | E 7  | 753.3895       | 377.1987        |
| 585.2520       | 6  | P 6  | 624.3469       | 312.6774        |
| 682.3048       | 7  | P 5  | 527.2942       | 264.1510        |
| 753.3419       | 8  | A 4  | 430.2414       | 215.6246        |
| 840.3739       | 9  | S 3  | 359.2043       | 180.1061        |
| 937.4267       | 10 | P 2  | 272.1723       | 136.5900        |
|                | 11 | R 1  | 175.1195       | 88.0637         |

N-term:+43.02

ASAVSPANLPAVLLQPR, MH+ 1745.9914, m/z 582.6687  
 H OS G29 P150811 220811-s1.06388.06388.3.dta

X-range:

-

MassTol: Y-zoom:

MassType:

AVG  MONO

Axis:

1  2

Label:

I  M  -

Ions:

a  +  2+  3+

b  +  2+  3+

c  +  2+  3+

x  +  2+  3+

y  +  2+  3+

z  +  2+  3+

hide H<sub>2</sub>O/NH<sub>3</sub>

zoom 112-122

GO

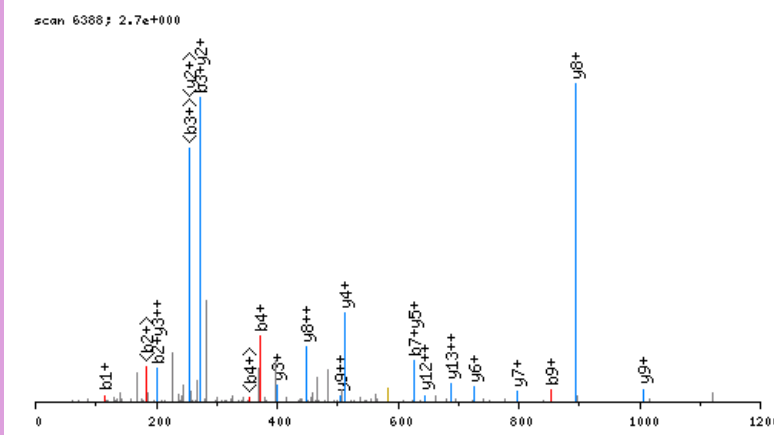

click image to zoom in; click top corners to zoom out [\[precursor±\]](#)

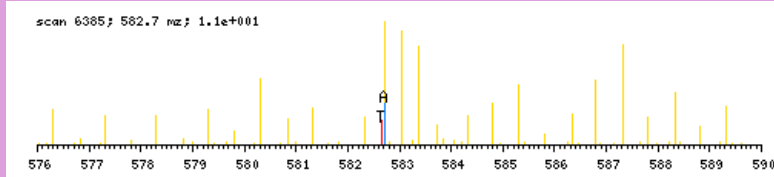

zoomed in precursor plot; T=theoretical m/z, A=acquired m/z

| b <sup>+</sup> | #  | AA # | y <sup>+</sup> | y <sup>2+</sup> |
|----------------|----|------|----------------|-----------------|
| 114.0555       | 1  | A 17 |                |                 |
| 201.0875       | 2  | S 16 | 1632.9437      | 816.9758        |
| 272.1247       | 3  | A 15 | 1545.9117      | 773.4598        |
| 371.1931       | 4  | V 14 | 1474.8746      | 737.9412        |
| 458.2251       | 5  | S 13 | 1375.8062      | 688.4070        |
| 555.2779       | 6  | P 12 | 1288.7741      | 644.8910        |
| 626.3150       | 7  | A 11 | 1191.7214      | 596.3646        |
| 740.3579       | 8  | N 10 | 1120.6843      | 560.8460        |
| 853.4420       | 9  | L 9  | 1006.6413      | 503.8246        |
| 950.4947       | 10 | P 8  | 893.5573       | 447.2825        |
| 1021.5318      | 11 | A 7  | 796.5045       | 398.7562        |
| 1120.6003      | 12 | V 6  | 725.4674       | 363.2376        |
| 1233.6843      | 13 | L 5  | 626.3990       | 313.7034        |
| 1346.7684      | 14 | L 4  | 513.3149       | 257.1614        |
| 1474.8270      | 15 | Q 3  | 400.2308       | 200.6193        |
| 1571.8797      | 16 | P 2  | 272.1723       | 136.5900        |
|                | 17 | R 1  | 175.1195       | 88.0637         |

N-term:+43.02

ASCASIDIEDATQHLLR, MH+ 1828.8499, m/z 610.2882  
 H OS G25 P150811 220811-s1.07298.07298.3.dta

X-range:

-

MassTol: Y-zoom:

MassType:

AVG  MONO

Axis:

1  2

Label:

I  M  -

Ions:

a  +  2+  3+

b  +  2+  3+

c  +  2+  3+

x  +  2+  3+

y  +  2+  3+

z  +  2+  3+

hide H<sub>2</sub>O/NH<sub>3</sub>

zoom 112-122

GO

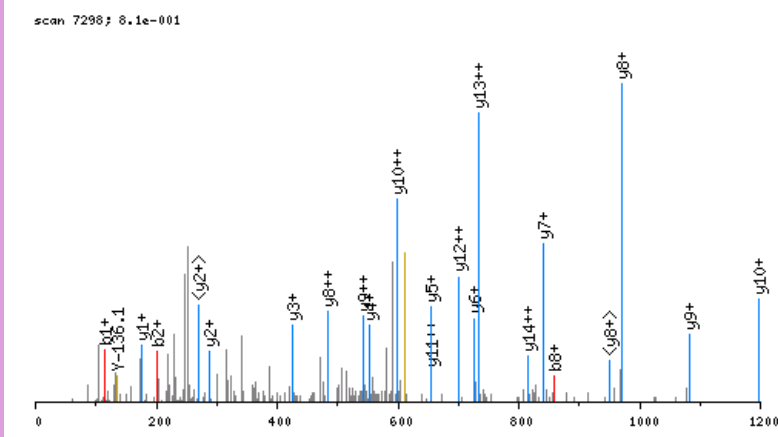

click image to zoom in; click top corners to zoom out [\[precursor±\]](#)

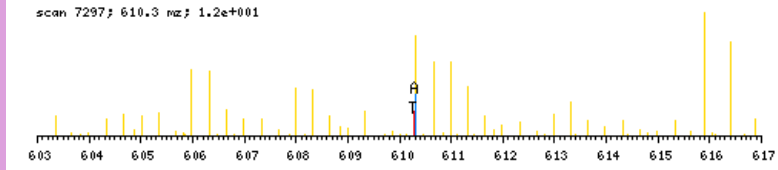

zoomed in precursor plot; T=theoretical m/z, A=acquired m/z

| b <sup>+</sup> | #  | AA # | y <sup>+</sup> | y <sup>2+</sup> |
|----------------|----|------|----------------|-----------------|
| 114.0555       | 1  | A 16 |                |                 |
| 201.0875       | 2  | S 15 | 1715.8022      | 858.4050        |
| 361.1181       | 3  | C 14 | 1628.7702      | 814.8890        |
| 432.1553       | 4  | A 13 | 1468.7396      | 734.8737        |
| 519.1873       | 5  | S 12 | 1397.7025      | 699.3552        |
| 632.2713       | 6  | I 11 | 1310.6705      | 655.8391        |
| 747.2983       | 7  | D 10 | 1197.5864      | 599.2971        |
| 860.3824       | 8  | I 9  | 1082.5594      | 541.7836        |
| 989.4249       | 9  | E 8  | 969.4754       | 485.2416        |
| 1104.4519      | 10 | D 7  | 840.4328       | 420.7203        |
| 1175.4890      | 11 | A 6  | 725.4058       | 363.2068        |
| 1276.5367      | 12 | T 5  | 654.3687       | 327.6883        |
| 1404.5953      | 13 | Q 4  | 553.3211       | 277.1644        |
| 1541.6542      | 14 | H 3  | 425.2625       | 213.1352        |
| 1654.7382      | 15 | L 2  | 288.2036       | 144.6057        |
|                | 16 | R 1  | 175.1195       | 88.0637         |

N-term:+43.02 C(3):+160.03

X-range:

-

MassTol: Y-zoom:

MassType:

AVG  MONO

Axis:

1  2

Label:

I  M  -

Ions:

a  +  2+  3+

b  +  2+  3+

c  +  2+  3+

x  +  2+  3+

y  +  2+  3+

z  +  2+  3+

hide H<sub>2</sub>O/NH<sub>3</sub>

zoom 112-122

GO

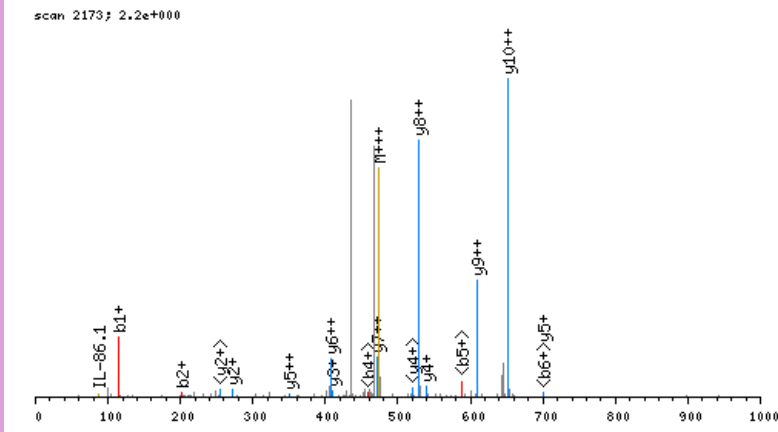

click image to zoom in; click top corners to zoom out [\[precursor±\]](#)

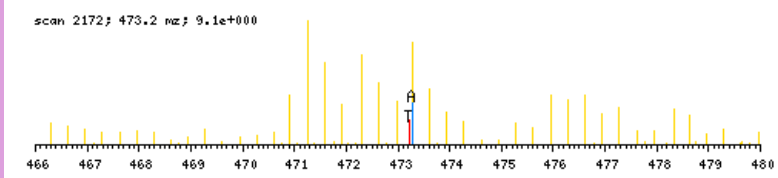

zoomed in precursor plot; T=theoretical m/z, A=acquired m/z

| b <sup>+</sup> | #  | AA # | y <sup>+</sup> | y <sup>2+</sup> |
|----------------|----|------|----------------|-----------------|
| 114.0555       | 1  | A    | 11             |                 |
| 201.0875       | 2  | S    | 10             | 1304.6481       |
| 361.1181       | 3  | C    | 9              | 1217.6161       |
| 476.1451       | 4  | D    | 8              | 1057.5855       |
| 605.1877       | 5  | E    | 7              | 942.5585        |
| 718.2717       | 6  | I    | 6              | 813.5159        |
| 880.4298       | 7  | K    | 5              | 700.4319        |
| 1009.4724      | 8  | E    | 4              | 538.2738        |
| 1146.5313      | 9  | H    | 3              | 409.2312        |
| 1243.5841      | 10 | P    | 2              | 272.1723        |
|                | 11 | R    | 1              | 175.1195        |

N-term:+43.02 C(3):+160.03  
 K(7):+162.16

ASDSGGPGVLSASER, MH+ 1431.6716, m/z 716.3394  
 H OS G29 P150811 220811-s1.03278.03278.2.dta

X-range:

-

MassTol: Y-zoom:

MassType:

AVG  MONO

Axis:

1  2

Label:

I  M  -

Ions:

a  +  2+  3+

b  +  2+  3+

c  +  2+  3+

x  +  2+  3+

y  +  2+  3+

z  +  2+  3+

hide H<sub>2</sub>O/NH<sub>3</sub>

zoom 112-122

GO

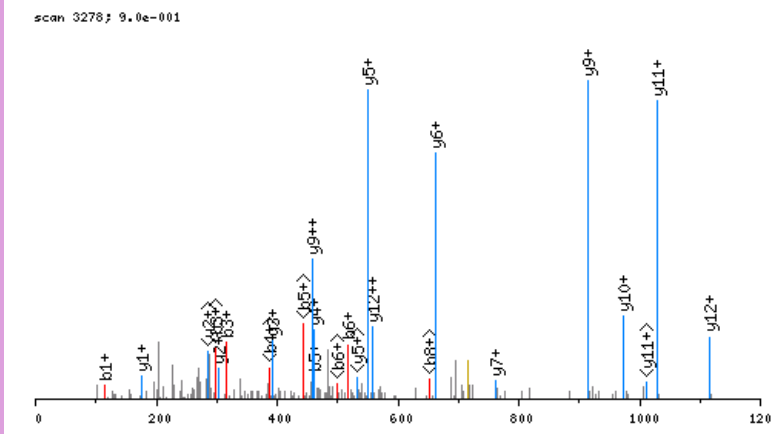

click image to zoom in; click top corners to zoom out [\[precursor±\]](#)

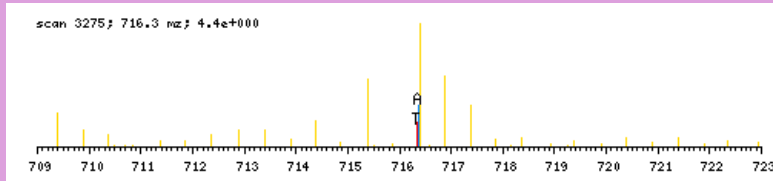

zoomed in precursor plot; T=theoretical m/z, A=acquired m/z

| b <sup>+</sup> | #  | AA # | y <sup>+</sup> | y <sup>2+</sup> |
|----------------|----|------|----------------|-----------------|
| 114.0555       | 1  | A 15 |                |                 |
| 201.0875       | 2  | S 14 | 1318.6239      | 659.8159        |
| 316.1145       | 3  | D 13 | 1231.5919      | 616.2998        |
| 403.1465       | 4  | S 12 | 1116.5649      | 558.7864        |
| 460.1680       | 5  | G 11 | 1029.5329      | 515.2704        |
| 517.1894       | 6  | G 10 | 972.5114       | 486.7596        |
| 614.2422       | 7  | P 9  | 915.4900       | 458.2489        |
| 671.2637       | 8  | G 8  | 818.4372       | 409.7225        |
| 770.3321       | 9  | V 7  | 761.4157       | 381.2118        |
| 883.4161       | 10 | L 6  | 662.3473       | 331.6776        |
| 970.4482       | 11 | S 5  | 549.2633       | 275.1355        |
| 1041.4853      | 12 | A 4  | 462.2312       | 231.6195        |
| 1128.5173      | 13 | S 3  | 391.1941       | 196.1010        |
| 1257.5599      | 14 | E 2  | 304.1621       | 152.5850        |
|                | 15 | R 1  | 175.1195       | 88.0637         |

N-term:+43.02

X-range:

-

MassTol: Y-zoom:

MassType:

AVG  MONO

Axis:

1  2

Label:

I  M  -

Ions:

a  +  2+  3+

b  +  2+  3+

c  +  2+  3+

x  +  2+  3+

y  +  2+  3+

z  +  2+  3+

hide H<sub>2</sub>O/NH<sub>3</sub>

zoom 112-122

GO

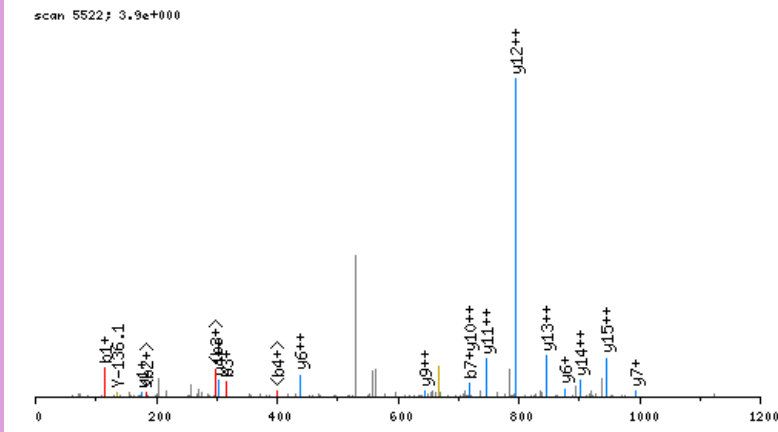

click image to zoom in; click top corners to zoom out [\[precursor±\]](#)

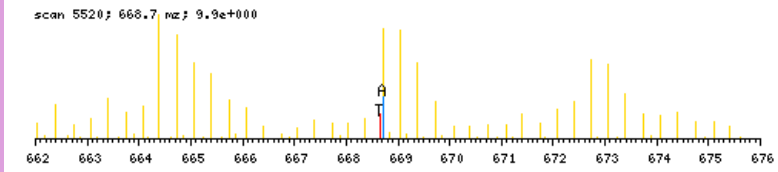

zoomed in precursor plot; T=theoretical m/z, A=acquired m/z

| b <sup>+</sup> | #  | AA # | y <sup>+</sup> | y <sup>2+</sup> |
|----------------|----|------|----------------|-----------------|
| 114.0555       | 1  | A    | 16             |                 |
| 201.0875       | 2  | S    | 15             | 1890.9425       |
| 316.1145       | 3  | D    | 14             | 1803.9104       |
| 417.1622       | 4  | T    | 13             | 1688.8835       |
| 514.2149       | 5  | P    | 12             | 1587.8358       |
| 571.2364       | 6  | G    | 11             | 1490.7831       |
| 718.3048       | 7  | F    | 10             | 1433.7616       |
| 881.3681       | 8  | Y    | 9              | 1286.6932       |
| 1012.4086      | 9  | M    | 8              | 1123.6298       |
| 1127.4356      | 10 | D    | 7              | 992.5894        |
| 1283.5619      | 11 | K    | 6              | 877.5624        |
| 1396.6459      | 12 | L    | 5              | 721.4361        |
| 1510.6889      | 13 | N    | 4              | 608.3521        |
| 1666.8152      | 14 | K    | 3              | 494.3091        |
| 1829.8785      | 15 | Y    | 2              | 338.1828        |
|                | 16 | R    | 1              | 175.1195        |

N-term:+43.02 K(11):+156.13  
 K(14):+156.13

ASESGKLWGR, MH+ 1217.6279, m/z 609.3176  
 H OS G25 P150811 220811-s1.04300.04300.2.dta

X-range:

-

MassTol: Y-zoom:

MassType:

AVG  MONO

Axis:

1  2

Label:

I  M  -

Ions:

a  +  2+  3+

b  +  2+  3+

c  +  2+  3+

x  +  2+  3+

y  +  2+  3+

z  +  2+  3+

hide H<sub>2</sub>O/NH<sub>3</sub>

zoom 112-122

GO

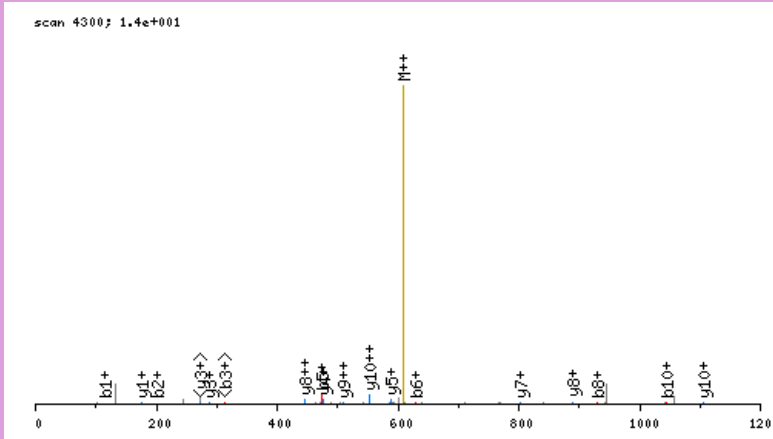

click image to zoom in; click top corners to zoom out [\[precursor±\]](#)

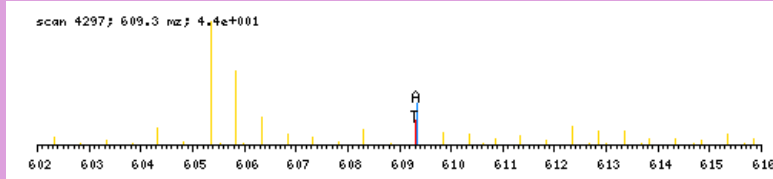

zoomed in precursor plot; T=theoretical m/z, A=acquired m/z

| b <sup>+</sup> | #  | AA # | y <sup>+</sup> | y <sup>2+</sup> |
|----------------|----|------|----------------|-----------------|
| 114.0555       | 1  | A 11 |                |                 |
| 201.0875       | 2  | S 10 | 1104.5802      | 552.7940        |
| 330.1301       | 3  | E 9  | 1017.5482      | 509.2780        |
| 417.1622       | 4  | S 8  | 888.5056       | 444.7567        |
| 474.1836       | 5  | G 7  | 801.4736       | 401.2407        |
| 630.3099       | 6  | K 6  | 744.4521       | 372.7300        |
| 743.3940       | 7  | L 5  | 588.3258       | 294.6668        |
| 929.4733       | 8  | W 4  | 475.2417       | 238.1248        |
| 986.4948       | 9  | G 3  | 289.1624       | 145.0851        |
| 1043.5162      | 10 | G 2  | 232.1410       | 116.5744        |
|                | 11 | R 1  | 175.1195       | 88.0637         |

N-term:+43.02 K(6):+156.13

X-range:  -   
 MassTol: Y-zoom:    
 MassType:  AVG  MONO  
 Axis:  1  2  
 Label:  I  M  -  
 Ions:  
 a  +  2+  3+  
 b  +  2+  3+  
 c  +  2+  3+  
 x  +  2+  3+  
 y  +  2+  3+  
 z  +  2+  3+  
 hide H<sub>2</sub>O/NH<sub>3</sub>   
 zoom 112-122

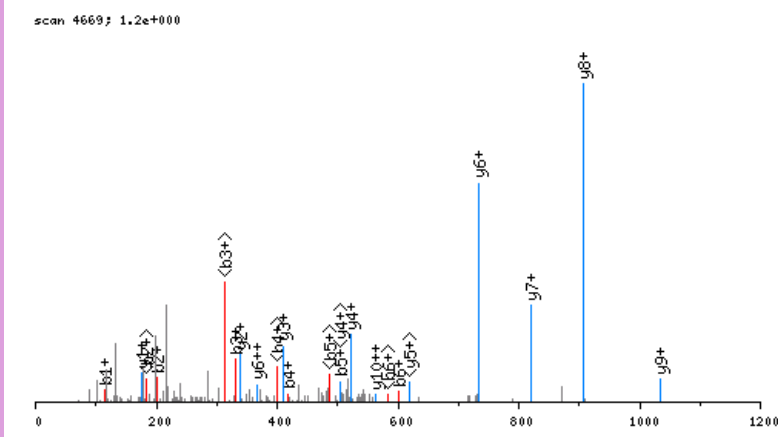

click image to zoom in; click top corners to zoom out [\[precursor±\]](#)

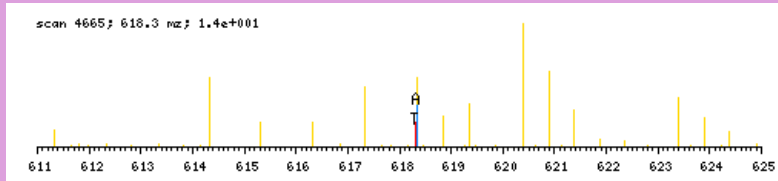

zoomed in precursor plot; T=theoretical m/z, A=acquired m/z

| b <sup>+</sup> | #  | AA # | y <sup>+</sup> | y <sup>2+</sup> |
|----------------|----|------|----------------|-----------------|
| 114.0555       | 1  | A 11 |                |                 |
| 201.0875       | 2  | S 10 | 1122.5795      | 561.7937        |
| 330.1301       | 3  | E 9  | 1035.5475      | 518.2777        |
| 417.1622       | 4  | S 8  | 906.5049       | 453.7564        |
| 504.1942       | 5  | S 7  | 819.4729       | 410.2403        |
| 601.2470       | 6  | P 6  | 732.4408       | 366.7243        |
| 714.3310       | 7  | L 5  | 635.3881       | 318.1979        |
| 827.4151       | 8  | L 4  | 522.3040       | 261.6559        |
| 898.4522       | 9  | A 3  | 409.2199       | 205.1139        |
| 1061.5155      | 10 | Y 2  | 338.1828       | 169.5953        |
|                | 11 | R 1  | 175.1195       | 88.0637         |

N-term:+43.02



ASEVEEQIPVR, MH+ 1298.6592, m/z 649.8333  
 H OS G29 P150811 220811-s1.04469.04469.2.dta

X-range:

-

MassTol: Y-zoom:

MassType:

AVG  MONO

Axis:

1  2

Label:

I  M  -

Ions:

a  +  2+  3+

b  +  2+  3+

c  +  2+  3+

x  +  2+  3+

y  +  2+  3+

z  +  2+  3+

hide H<sub>2</sub>O/NH<sub>3</sub>

zoom 112-122

GO

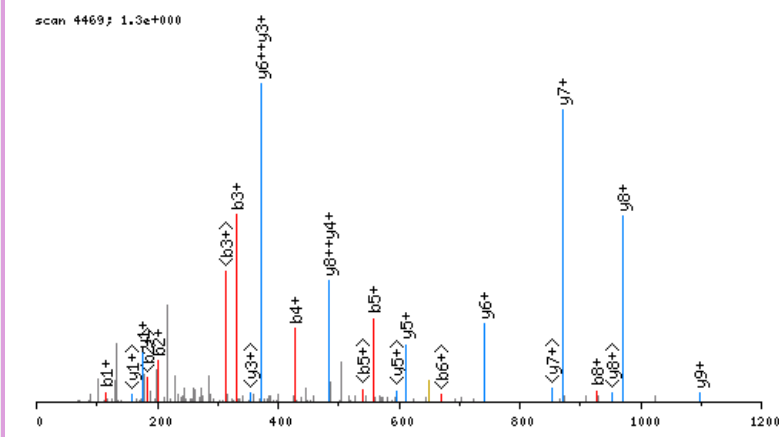

click image to zoom in; click top corners to zoom out [\[precursor±\]](#)

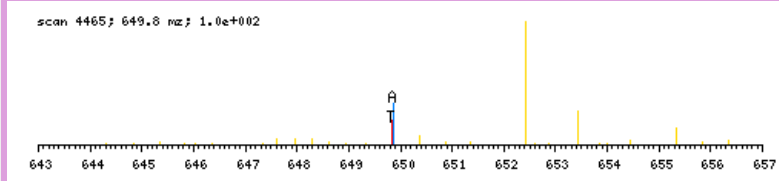

zoomed in precursor plot; T=theoretical m/z, A=acquired m/z

| b <sup>+</sup> | #  | AA # | y <sup>+</sup> | y <sup>2+</sup> |
|----------------|----|------|----------------|-----------------|
| 114.0555       | 1  | A 11 |                |                 |
| 201.0875       | 2  | S 10 | 1185.6115      | 593.3097        |
| 330.1301       | 3  | E 9  | 1098.5795      | 549.7937        |
| 429.1985       | 4  | V 8  | 969.5369       | 485.2724        |
| 558.2411       | 5  | E 7  | 870.4685       | 435.7382        |
| 687.2837       | 6  | E 6  | 741.4259       | 371.2169        |
| 815.3423       | 7  | Q 5  | 612.3833       | 306.6956        |
| 928.4264       | 8  | I 4  | 484.3247       | 242.6663        |
| 1025.4791      | 9  | P 3  | 371.2407       | 186.1243        |
| 1124.5476      | 10 | V 2  | 274.1879       | 137.5979        |
|                | 11 | R 1  | 175.1195       | 88.0637         |

N-term:+43.02

ASGADSKGDDLSTAILKQKNRPNR, MH+ 2668.4383, m/z 667.8650  
 H OS G28 P150811 220811-s1.04561.04561.4.dta

scan 4561; 1.3e+001

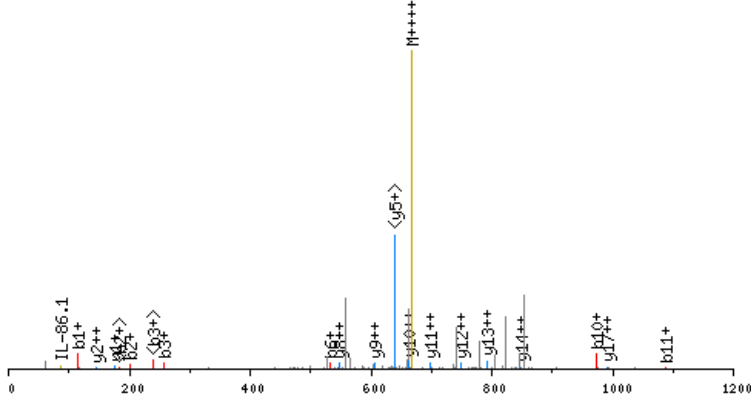

click image to zoom in; click top corners to zoom out [\[precursor±\]](#)

scan 4558; 667.9 nz; 4.4e+001

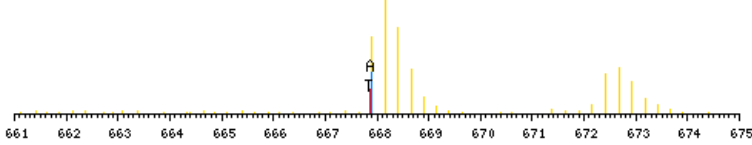

zoomed in precursor plot; T=theoretical m/z, A=acquired m/z

X-range:

-

MassTol: Y-zoom:

MassType:

AVG  MONO

Axis:

1  2

Label:

I  M  -

Ions:

a  +  2+  3+

b  +  2+  3+

c  +  2+  3+

x  +  2+  3+

y  +  2+  3+

z  +  2+  3+

hide H<sub>2</sub>O/NH<sub>3</sub>

zoom 112-122

GO

| b <sup>+</sup> | #  | AA | #  | y <sup>+</sup> | y <sup>2+</sup> |
|----------------|----|----|----|----------------|-----------------|
| 114.0555       | 1  | A  | 24 |                |                 |
| 201.0875       | 2  | S  | 23 | 2555.3906      | 1278.1992       |
| 258.1090       | 3  | G  | 22 | 2468.3586      | 1234.6832       |
| 329.1461       | 4  | A  | 21 | 2411.3372      | 1206.1725       |
| 444.1731       | 5  | D  | 20 | 2340.3000      | 1170.6539       |
| 531.2051       | 6  | S  | 19 | 2225.2731      | 1113.1405       |
| 687.3314       | 7  | K  | 18 | 2138.2411      | 1069.6244       |
| 744.3529       | 8  | G  | 17 | 1982.1148      | 991.5613        |
| 859.3798       | 9  | D  | 16 | 1925.0933      | 963.0506        |
| 974.4067       | 10 | D  | 15 | 1810.0664      | 905.5371        |
| 1087.4908      | 11 | L  | 14 | 1695.0394      | 848.0236        |
| 1174.5228      | 12 | S  | 13 | 1581.9554      | 791.4816        |
| 1275.5705      | 13 | T  | 12 | 1494.9233      | 747.9656        |
| 1346.6076      | 14 | A  | 11 | 1393.8757      | 697.4417        |
| 1459.6917      | 15 | I  | 10 | 1322.8385      | 661.9232        |
| 1572.7758      | 16 | L  | 9  | 1209.7545      | 605.3811        |
| 1728.9021      | 17 | K  | 8  | 1096.6704      | 548.8391        |
| 1856.9606      | 18 | Q  | 7  | 940.5441       | 470.7760        |
| 2013.0869      | 19 | K  | 6  | 812.4855       | 406.7467        |
| 2127.1299      | 20 | N  | 5  | 656.3592       | 328.6835        |
| 2283.2310      | 21 | R  | 4  | 542.3163       | 271.6621        |
| 2380.2837      | 22 | P  | 3  | 386.2152       | 193.6115        |
| 2494.3267      | 23 | N  | 2  | 289.1624       | 145.0851        |
|                | 24 | R  | 1  | 175.1195       | 88.0637         |

N-term:+43.02 K(7):+156.13  
 K(17):+156.13 K(19):+156.13

ASGCKIGPSILNSDLANLGAELR, MH+ 2586.3019, m/z 862.7722  
 H OS G24 P150811 220811-s1.04912.04912.3.dta

scan 4912; 1.1e+000

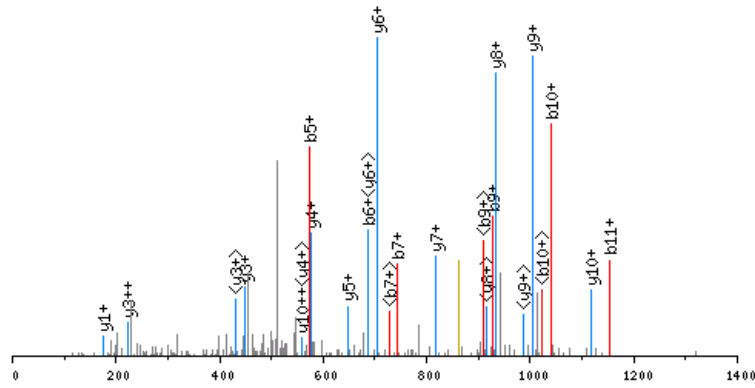

click image to zoom in; click top corners to zoom out [\[precursor±\]](#)

scan 4910; 862.8 mz; 1.2e+001

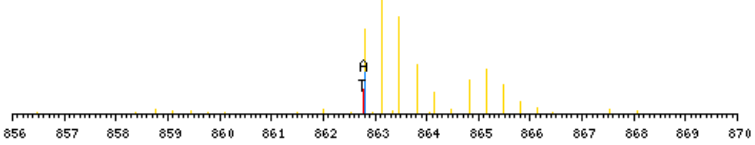

zoomed in precursor plot; T=theoretical m/z, A=acquired m/z

X-range:

-

MassTol: Y-zoom:

MassType:  
 AVG  MONO

Axis:

1  2

Label:

I  M  -

Ions:

a  +  2+  3+

b  +  2+  3+

c  +  2+  3+

x  +  2+  3+

y  +  2+  3+

z  +  2+  3+

hide H<sub>2</sub>O/NH<sub>3</sub>

zoom 112-122

GO

| b <sup>+</sup> | #  | AA | #  | y <sup>+</sup> | y <sup>2+</sup> |
|----------------|----|----|----|----------------|-----------------|
| 114.0555       | 1  | A  | 24 |                |                 |
| 201.0875       | 2  | S  | 23 | 2473.2542      | 1237.1310       |
| 258.1090       | 3  | G  | 22 | 2386.2222      | 1193.6150       |
| 418.1396       | 4  | C  | 21 | 2329.2008      | 1165.1043       |
| 574.2659       | 5  | K  | 20 | 2169.1702      | 1085.0890       |
| 687.3500       | 6  | I  | 19 | 2013.0439      | 1007.0258       |
| 744.3714       | 7  | G  | 18 | 1899.9598      | 950.4838        |
| 841.4242       | 8  | P  | 17 | 1842.9383      | 921.9731        |
| 928.4562       | 9  | S  | 16 | 1745.8856      | 873.4467        |
| 1041.5403      | 10 | I  | 15 | 1658.8535      | 829.9307        |
| 1154.6244      | 11 | L  | 14 | 1545.7695      | 773.3886        |
| 1268.6673      | 12 | N  | 13 | 1432.6854      | 716.8466        |
| 1355.6993      | 13 | S  | 12 | 1318.6425      | 659.8252        |
| 1470.7263      | 14 | D  | 11 | 1231.6104      | 616.3091        |
| 1583.8103      | 15 | L  | 10 | 1116.5835      | 558.7957        |
| 1654.8474      | 16 | A  | 9  | 1003.4994      | 502.2536        |
| 1768.8904      | 17 | N  | 8  | 932.4623       | 466.7351        |
| 1881.9744      | 18 | L  | 7  | 818.4194       | 409.7136        |
| 1938.9959      | 19 | G  | 6  | 705.3353       | 353.1716        |
| 2010.0330      | 20 | A  | 5  | 648.3139       | 324.6608        |
| 2139.0756      | 21 | E  | 4  | 577.2768       | 289.1423        |
| 2299.1062      | 22 | C  | 3  | 448.2342       | 224.6210        |
| 2412.1903      | 23 | L  | 2  | 288.2036       | 144.6057        |
|                | 24 | R  | 1  | 175.1195       | 88.0637         |

N-term:+43.02 C(4):+160.03  
 K(5):+156.13 C(22):+160.03

ASGSMATSEEEER, MH+ 1296.5378, m/z 648.7725  
 H OS G29 P150811 220811-s1.02424.02424.2.dta

X-range:

-

MassTol: Y-zoom:

MassType:

AVG  MONO

Axis:

1  2

Label:

I  M  -

Ions:

a  +  2+  3+

b  +  2+  3+

c  +  2+  3+

x  +  2+  3+

y  +  2+  3+

z  +  2+  3+

hide H<sub>2</sub>O/NH<sub>3</sub>

zoom 112-122

GO

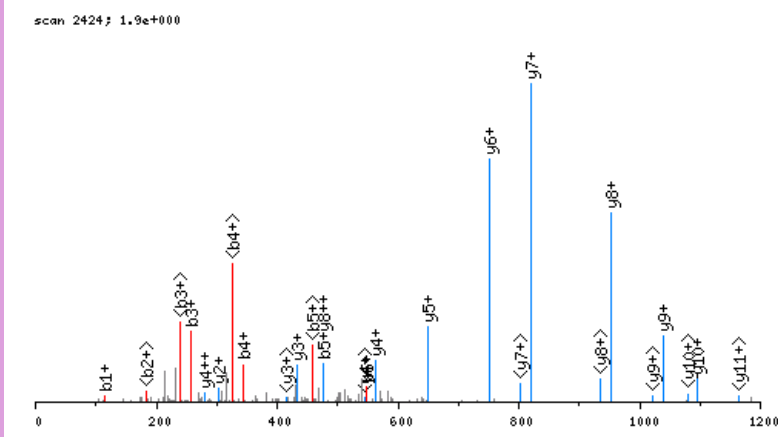

click image to zoom in; click top corners to zoom out [\[precursor±\]](#)

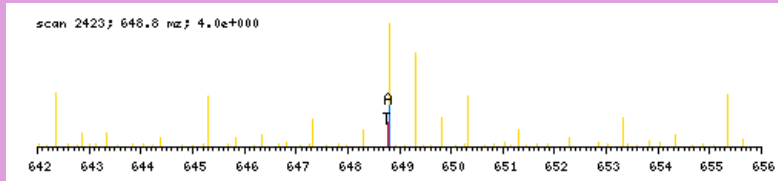

zoomed in precursor plot; T=theoretical m/z, A=acquired m/z

| b <sup>+</sup> | #  | AA # | y <sup>+</sup> | y <sup>2+</sup> |
|----------------|----|------|----------------|-----------------|
| 114.0555       | 1  | A 12 |                |                 |
| 201.0875       | 2  | S 11 | 1183.4901      | 592.2490        |
| 258.1090       | 3  | G 10 | 1096.4581      | 548.7330        |
| 345.1410       | 4  | S 9  | 1039.4366      | 520.2222        |
| 476.1815       | 5  | M 8  | 952.4046       | 476.7062        |
| 547.2186       | 6  | A 7  | 821.3641       | 411.1860        |
| 648.2663       | 7  | T 6  | 750.3270       | 375.6674        |
| 735.2983       | 8  | S 5  | 649.2793       | 325.1436        |
| 864.3409       | 9  | E 4  | 562.2473       | 281.6276        |
| 993.3835       | 10 | E 3  | 433.2047       | 217.1063        |
| 1122.4261      | 11 | E 2  | 304.1621       | 152.5850        |
|                | 12 | R 1  | 175.1195       | 88.0637         |

N-term:+43.02

ASGSSSDAAEPAGPAGR, MH+ 1529.6832, m/z 765.3452  
 H OS G29 P150811 220811-s1.02316.02316.2.dta

scan 2316; 1.1e+000

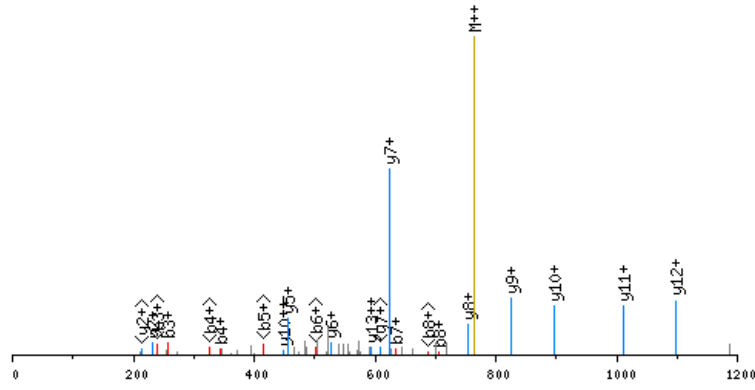

click image to zoom in; click top corners to zoom out [\[precursor±\]](#)

scan 2313; 765.3 m/z; 6.5e-001

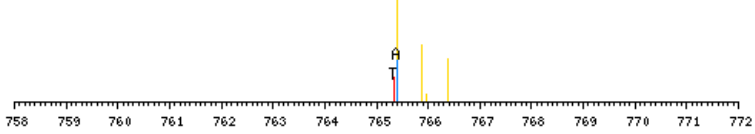

zoomed in precursor plot; T=theoretical m/z, A=acquired m/z

X-range:

-

MassTol: Y-zoom:

MassType:

AVG  MONO

Axis:

1  2

Label:

I  M  -

Ions:

a  +  2+  3+

b  +  2+  3+

c  +  2+  3+

x  +  2+  3+

y  +  2+  3+

z  +  2+  3+

hide H<sub>2</sub>O/NH<sub>3</sub>

zoom 112-122

GO

| b <sup>+</sup> | #  | AA # | y <sup>+</sup> | y <sup>2+</sup> |
|----------------|----|------|----------------|-----------------|
| 114.0555       | 1  | A 17 |                |                 |
| 201.0875       | 2  | S 16 | 1416.6355      | 708.8217        |
| 258.1090       | 3  | G 15 | 1329.6035      | 665.3057        |
| 345.1410       | 4  | S 14 | 1272.5820      | 636.7949        |
| 432.1731       | 5  | S 13 | 1185.5500      | 593.2789        |
| 519.2051       | 6  | S 12 | 1098.5180      | 549.7629        |
| 634.2320       | 7  | D 11 | 1011.4859      | 506.2469        |
| 705.2691       | 8  | A 10 | 896.4590       | 448.7334        |
| 776.3063       | 9  | A 9  | 825.4219       | 413.2149        |
| 905.3489       | 10 | E 8  | 754.3848       | 377.6963        |
| 1002.4016      | 11 | P 7  | 625.3422       | 313.1750        |
| 1073.4387      | 12 | A 6  | 528.2894       | 264.6486        |
| 1130.4602      | 13 | G 5  | 457.2523       | 229.1301        |
| 1227.5130      | 14 | P 4  | 400.2308       | 200.6193        |
| 1298.5501      | 15 | A 3  | 303.1781       | 152.0930        |
| 1355.5715      | 16 | G 2  | 232.1410       | 116.5744        |
|                | 17 | R 1  | 175.1195       | 88.0637         |

N-term:+43.02

ASGVAVSDGVIKVFNDMKVR, MH+ 2202.2593, m/z 734.7580  
 H OS G26 P150811 220811-s1.06889.06889.3.dta

X-range:

-

MassTol: Y-zoom:

MassType:

AVG  MONO

Axis:

1  2

Label:

I  M  -

Ions:

a  +  2+  3+

b  +  2+  3+

c  +  2+  3+

x  +  2+  3+

y  +  2+  3+

z  +  2+  3+

hide H<sub>2</sub>O/NH<sub>3</sub>

zoom 112-122

GO

scan 6889; 4.1e+000

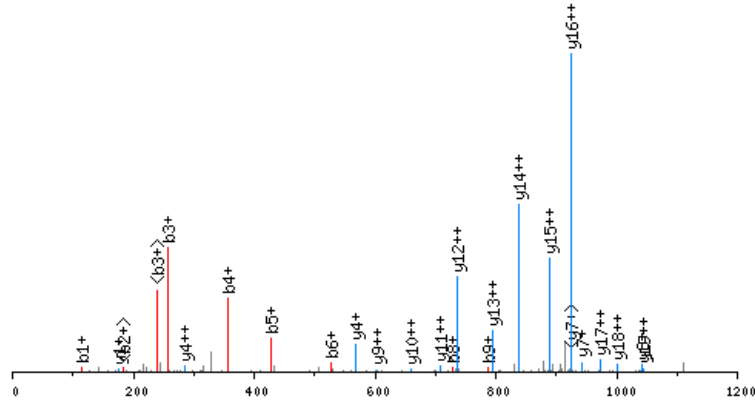

click image to zoom in; click top corners to zoom out [\[precursor±\]](#)

scan 6885; 734.8 m/z; 5.7e+001

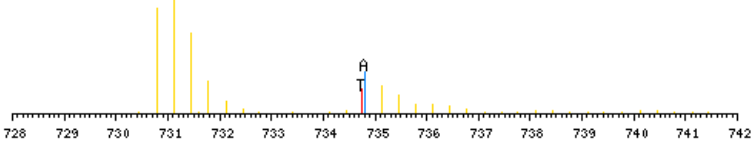

zoomed in precursor plot; T=theoretical m/z, A=acquired m/z

| b <sup>+</sup> | #  | AA | #  | y <sup>+</sup> | y <sup>2+</sup> |
|----------------|----|----|----|----------------|-----------------|
| 114.0555       | 1  | A  | 20 |                |                 |
| 201.0875       | 2  | S  | 19 | 2089.2116      | 1045.1097       |
| 258.1090       | 3  | G  | 18 | 2002.1796      | 1001.5937       |
| 357.1774       | 4  | V  | 17 | 1945.1582      | 973.0830        |
| 428.2145       | 5  | A  | 16 | 1846.0897      | 923.5488        |
| 527.2829       | 6  | V  | 15 | 1775.0526      | 888.0302        |
| 614.3150       | 7  | S  | 14 | 1675.9842      | 838.4960        |
| 729.3419       | 8  | D  | 13 | 1588.9522      | 794.9800        |
| 786.3634       | 9  | G  | 12 | 1473.9252      | 737.4665        |
| 885.4318       | 10 | V  | 11 | 1416.9038      | 708.9558        |
| 998.5159       | 11 | I  | 10 | 1317.8354      | 659.4216        |
| 1160.6740      | 12 | K  | 9  | 1204.7513      | 602.8796        |
| 1259.7424      | 13 | V  | 8  | 1042.5932      | 521.8005        |
| 1406.8108      | 14 | F  | 7  | 943.5248       | 472.2663        |
| 1520.8537      | 15 | N  | 6  | 796.4564       | 398.7321        |
| 1635.8807      | 16 | D  | 5  | 682.4134       | 341.7106        |
| 1766.9211      | 17 | M  | 4  | 567.3865       | 284.1972        |
| 1929.0792      | 18 | K  | 3  | 436.3460       | 218.6769        |
| 2028.1477      | 19 | V  | 2  | 274.1879       | 137.5979        |
|                | 20 | R  | 1  | 175.1195       | 88.0637         |

N-term:+43.02 K(12):+162.16  
 K(18):+162.16

ASGVQVADEVCR, MH+ 1332.6218, m/z 666.8145  
 H OS G29 P150811 220811-s1.03583.03583.2.dta

X-range:

-

MassTol: Y-zoom:

MassType:

AVG  MONO

Axis:

1  2

Label:

I  M  -

Ions:

a  +  2+  3+

b  +  2+  3+

c  +  2+  3+

x  +  2+  3+

y  +  2+  3+

z  +  2+  3+

hide H<sub>2</sub>O/NH<sub>3</sub>

zoom 112-122

GO

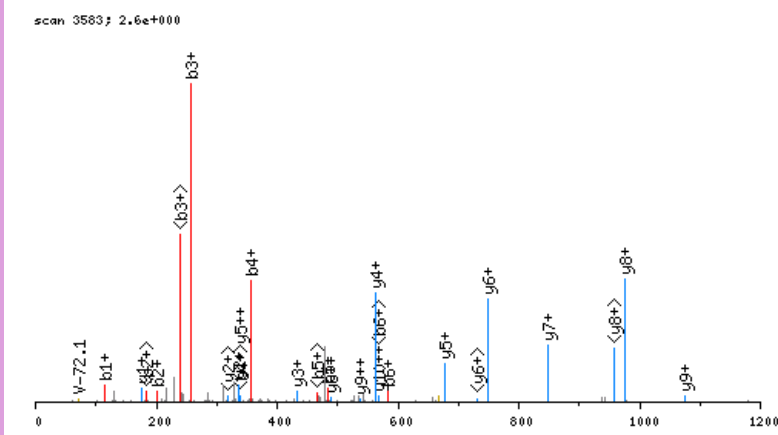

click image to zoom in; click top corners to zoom out [\[precursor±\]](#)

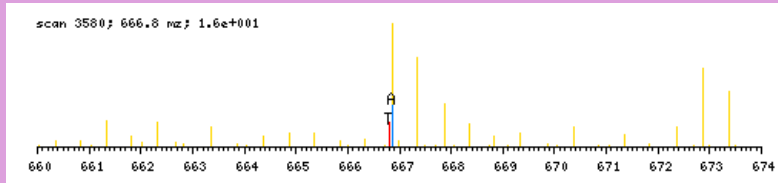

zoomed in precursor plot; T=theoretical m/z, A=acquired m/z

| b <sup>+</sup> | #  | AA # | y <sup>+</sup> | y <sup>2+</sup> |
|----------------|----|------|----------------|-----------------|
| 114.0555       | 1  | A 12 |                |                 |
| 201.0875       | 2  | S 11 | 1219.5741      | 610.2909        |
| 258.1090       | 3  | G 10 | 1132.5420      | 566.7749        |
| 357.1774       | 4  | V 9  | 1075.5206      | 538.2642        |
| 485.2360       | 5  | Q 8  | 976.4522       | 488.7300        |
| 584.3044       | 6  | V 7  | 848.3936       | 424.7007        |
| 655.3415       | 7  | A 6  | 749.3252       | 375.1665        |
| 770.3685       | 8  | D 5  | 678.2881       | 339.6479        |
| 899.4111       | 9  | E 4  | 563.2611       | 282.1345        |
| 998.4795       | 10 | V 3  | 434.2185       | 217.6132        |
| 1158.5101      | 11 | C 2  | 335.1501       | 168.0790        |
|                | 12 | R 1  | 175.1195       | 88.0637         |

N-term:+43.02 C(11):+160.03

ASGVIVNDEVIKVFNDMKVR, MH+ 2319.2383, m/z 773.7510  
 H OS G26 P150811 220811-s1.06936.06936.3.dta

X-range:

-

MassTol: Y-zoom:

MassType:

AVG  MONO

Axis:

1  2

Label:

I  M  -

Ions:

a  +  2+  3+

b  +  2+  3+

c  +  2+  3+

x  +  2+  3+

y  +  2+  3+

z  +  2+  3+

hide H<sub>2</sub>O/NH<sub>3</sub>

zoom 112-122

GO

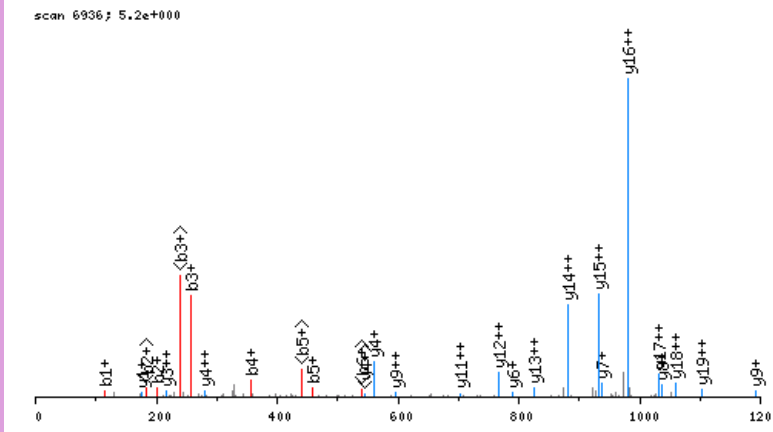

click image to zoom in; click top corners to zoom out [\[precursor±\]](#)

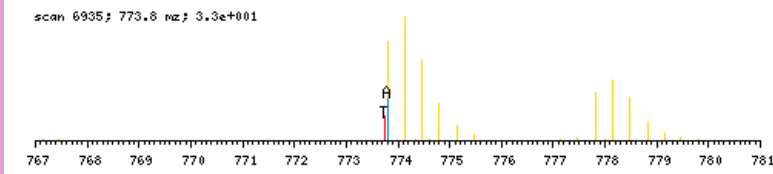

zoomed in precursor plot; T=theoretical m/z, A=acquired m/z

| b <sup>+</sup> | #  | AA | #  | y <sup>+</sup> | y <sup>2+</sup> |
|----------------|----|----|----|----------------|-----------------|
| 114.0555       | 1  | A  | 20 |                |                 |
| 201.0875       | 2  | S  | 19 | 2206.1906      | 1103.5992       |
| 258.1090       | 3  | G  | 18 | 2119.1586      | 1060.0832       |
| 357.1774       | 4  | V  | 17 | 2062.1371      | 1031.5725       |
| 458.2251       | 5  | T  | 16 | 1963.0687      | 982.0383        |
| 557.2935       | 6  | V  | 15 | 1862.0211      | 931.5144        |
| 671.3364       | 7  | N  | 14 | 1762.9526      | 881.9802        |
| 786.3634       | 8  | D  | 13 | 1648.9097      | 824.9588        |
| 915.4060       | 9  | E  | 12 | 1533.8828      | 767.4453        |
| 1014.4744      | 10 | V  | 11 | 1404.8402      | 702.9240        |
| 1127.5585      | 11 | I  | 10 | 1305.7718      | 653.3898        |
| 1283.6848      | 12 | K  | 9  | 1192.6877      | 596.8478        |
| 1382.7532      | 13 | V  | 8  | 1036.5614      | 518.7846        |
| 1529.8216      | 14 | F  | 7  | 937.4930       | 469.2504        |
| 1643.8645      | 15 | N  | 6  | 790.4246       | 395.7162        |
| 1758.8915      | 16 | D  | 5  | 676.3816       | 338.6947        |
| 1889.9319      | 17 | M  | 4  | 561.3547       | 281.1813        |
| 2046.0582      | 18 | K  | 3  | 430.3142       | 215.6610        |
| 2145.1267      | 19 | V  | 2  | 274.1879       | 137.5979        |
|                | 20 | R  | 1  | 175.1195       | 88.0637         |

N-term:+43.02 K(12):+156.13  
 K(18):+156.13



ASKEMFEDTVEER, MH+ 1640.7478, m/z 547.5875  
 H OS G25 P150811 220811-s1.05578.05578.3.dta

X-range:

-

MassTol: Y-zoom:

MassType:

AVG  MONO

Axis:

1  2

Label:

I  M  -

Ions:

a  +  2+  3+

b  +  2+  3+

c  +  2+  3+

x  +  2+  3+

y  +  2+  3+

z  +  2+  3+

hide H<sub>2</sub>O/NH<sub>3</sub>

zoom 112-122

GO

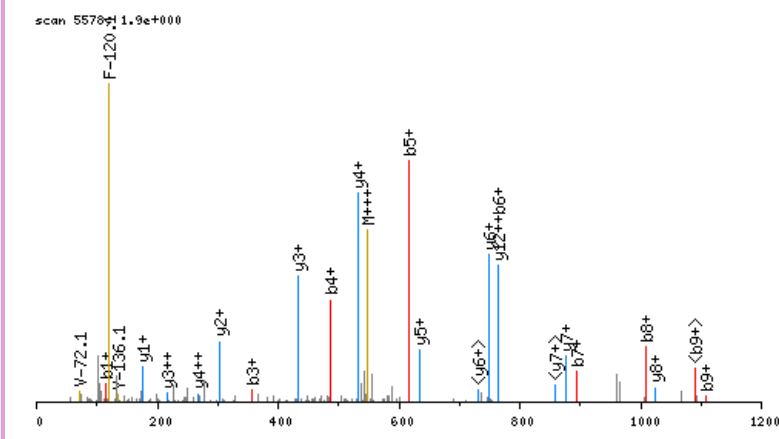

click image to zoom in; click top corners to zoom out [\[precursor±\]](#)

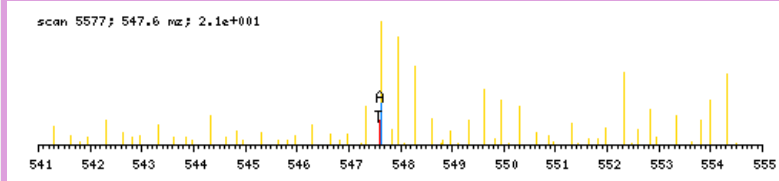

zoomed in precursor plot; T=theoretical m/z, A=acquired m/z

| b <sup>+</sup> | #  | AA # | y <sup>+</sup> | y <sup>2+</sup> |
|----------------|----|------|----------------|-----------------|
| 114.0555       | 1  | A 13 |                |                 |
| 201.0875       | 2  | S 12 | 1527.7001      | 764.3540        |
| 357.2138       | 3  | K 11 | 1440.6681      | 720.8380        |
| 486.2564       | 4  | E 10 | 1284.5418      | 642.7748        |
| 617.2969       | 5  | M 9  | 1155.4992      | 578.2535        |
| 764.3653       | 6  | F 8  | 1024.4587      | 512.7333        |
| 893.4079       | 7  | E 7  | 877.3903       | 439.1991        |
| 1008.4349      | 8  | D 6  | 748.3477       | 374.6778        |
| 1109.4825      | 9  | T 5  | 633.3208       | 317.1643        |
| 1208.5510      | 10 | V 4  | 532.2731       | 266.6405        |
| 1337.5936      | 11 | E 3  | 433.2047       | 217.1063        |
| 1466.6361      | 12 | E 2  | 304.1621       | 152.5850        |
|                | 13 | R 1  | 175.1195       | 88.0637         |

N-term:+43.02 K(3):+156.13

ASLKDLEGKWR, MH+ 1412.8539, m/z 706.9306  
 H OS G27 P150811 220811-s1.06114.06114.2.dta

X-range:

-

MassTol: Y-zoom:

MassType:

AVG  MONO

Axis:

1  2

Label:

I  M  -

Ions:

a  +  2+  3+

b  +  2+  3+

c  +  2+  3+

x  +  2+  3+

y  +  2+  3+

z  +  2+  3+

hide H<sub>2</sub>O/NH<sub>3</sub>

zoom 112-122

GO

scan 6114; 6.8e+001

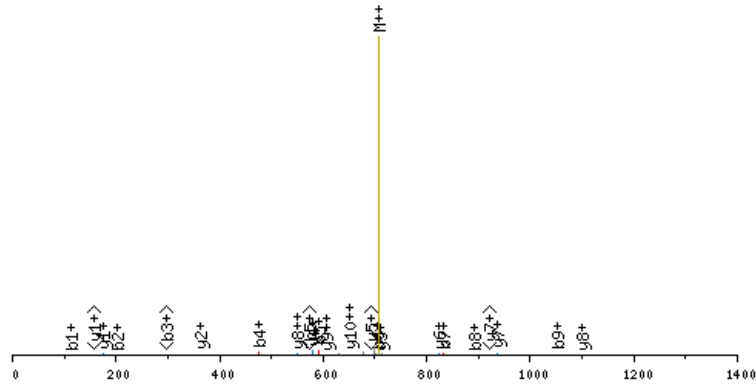

click image to zoom in; click top corners to zoom out [\[precursor±\]](#)

scan 6112; 706.9 m/z; 5.1e+002

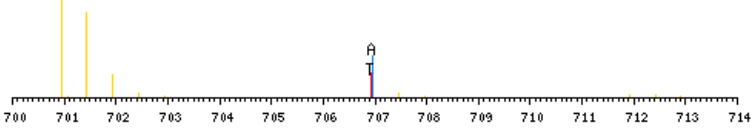

zoomed in precursor plot; T=theoretical m/z, A=acquired m/z

| b <sup>+</sup> | #  | AA # | y <sup>+</sup> | y <sup>2+</sup> |
|----------------|----|------|----------------|-----------------|
| 114.0555       | 1  | A    | 11             |                 |
| 201.0875       | 2  | S    | 10             | 1299.8062       |
| 314.1716       | 3  | L    | 9              | 1212.7741       |
| 476.3297       | 4  | K    | 8              | 1099.6901       |
| 591.3566       | 5  | D    | 7              | 937.5320        |
| 704.4407       | 6  | L    | 6              | 822.5050        |
| 833.4833       | 7  | E    | 5              | 709.4210        |
| 890.5048       | 8  | G    | 4              | 580.3784        |
| 1052.6629      | 9  | K    | 3              | 523.3569        |
| 1238.7422      | 10 | W    | 2              | 361.1988        |
|                | 11 | R    | 1              | 175.1195        |

N-term:+43.02 K(4):+162.16  
 K(9):+162.16

ASLSLAPVNIKFAGADEER, MH+ 2064.1190, m/z 688.7112  
 H OS G24 P150811 220811-s1.04936.04936.3.dta

scan 4936; 4.4e+000

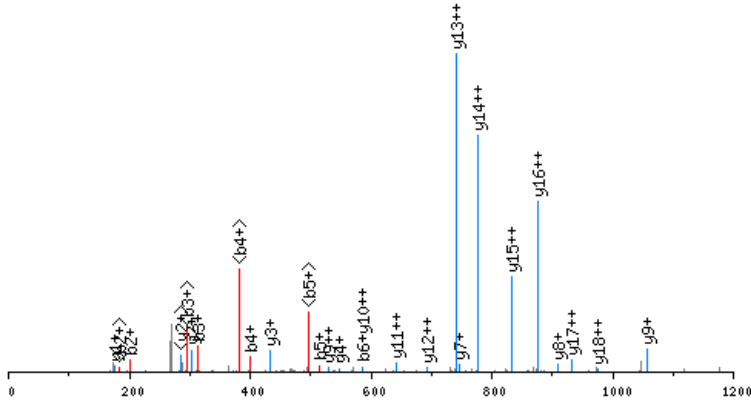

click image to zoom in; click top corners to zoom out [\[precursor±\]](#)

scan 4935; 688.7 m/z; 1.5e+002

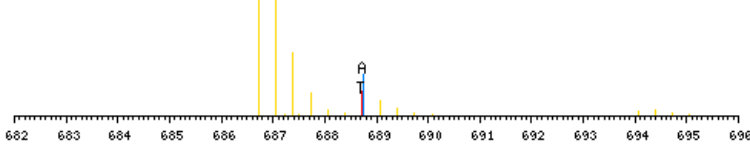

zoomed in precursor plot; T=theoretical m/z, A=acquired m/z

X-range:

-

MassTol: Y-zoom:

MassType:

AVG  MONO

Axis:

1  2

Label:

I  M  -

Ions:

a  +  2+  3+

b  +  2+  3+

c  +  2+  3+

x  +  2+  3+

y  +  2+  3+

z  +  2+  3+

hide H<sub>2</sub>O/NH<sub>3</sub>

zoom 112-122

GO

| b <sup>+</sup> | #  | AA | #  | y <sup>+</sup> | y <sup>2+</sup> |
|----------------|----|----|----|----------------|-----------------|
| 114.0555       | 1  | A  | 19 |                |                 |
| 201.0875       | 2  | S  | 18 | 1951.0713      | 976.0396        |
| 314.1716       | 3  | L  | 17 | 1864.0393      | 932.5236        |
| 401.2036       | 4  | S  | 16 | 1750.9552      | 875.9815        |
| 514.2877       | 5  | L  | 15 | 1663.9232      | 832.4655        |
| 585.3248       | 6  | A  | 14 | 1550.8391      | 775.9235        |
| 682.3776       | 7  | P  | 13 | 1479.8020      | 740.4049        |
| 781.4460       | 8  | V  | 12 | 1382.7492      | 691.8785        |
| 895.4889       | 9  | N  | 11 | 1283.6808      | 642.3443        |
| 1008.5730      | 10 | I  | 10 | 1169.6379      | 585.3229        |
| 1155.6414      | 11 | F  | 9  | 1056.5538      | 528.7808        |
| 1317.7995      | 12 | K  | 8  | 909.4854       | 455.2466        |
| 1388.8366      | 13 | A  | 7  | 747.3273       | 374.1676        |
| 1445.8581      | 14 | G  | 6  | 676.2902       | 338.6490        |
| 1516.8952      | 15 | A  | 5  | 619.2687       | 310.1383        |
| 1631.9221      | 16 | D  | 4  | 548.2316       | 274.6197        |
| 1760.9647      | 17 | E  | 3  | 433.2047       | 217.1063        |
| 1890.0073      | 18 | E  | 2  | 304.1621       | 152.5850        |
|                | 19 | R  | 1  | 175.1195       | 88.0637         |

N-term:+43.02 K(12);+162.16

ASNEKKTMASSAQR, MH+ 1725.8959, m/z 575.9701  
 H OS G26 P150811 220811-s1.02453.02453.3.dta

X-range:

-

MassTol: Y-zoom:

MassType:

AVG  MONO

Axis:

1  2

Label:

I  M  -

Ions:

a  +  2+  3+

b  +  2+  3+

c  +  2+  3+

x  +  2+  3+

y  +  2+  3+

z  +  2+  3+

hide H<sub>2</sub>O/NH<sub>3</sub>

zoom 112-122

GO

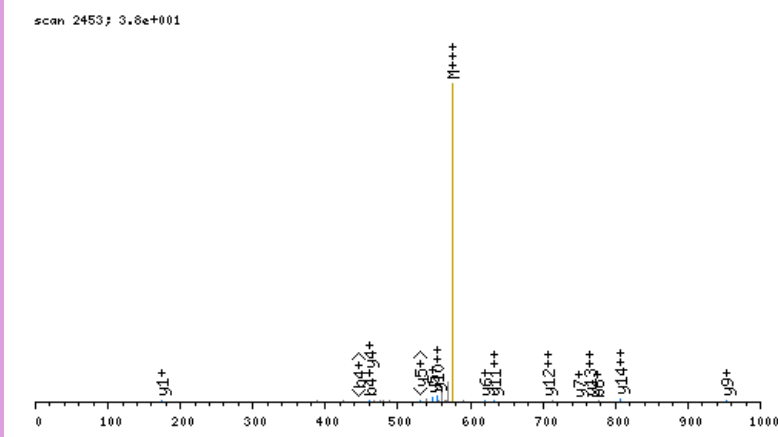

click image to zoom in; click top corners to zoom out [\[precursor±\]](#)

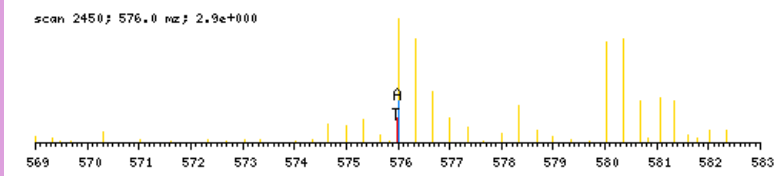

zoomed in precursor plot; T=theoretical m/z, A=acquired m/z

| b <sup>+</sup> | #  | AA | #  | y <sup>+</sup> | y <sup>2+</sup> |
|----------------|----|----|----|----------------|-----------------|
| 114.0555       | 1  | A  | 15 |                |                 |
| 201.0875       | 2  | S  | 14 | 1612.8482      | 806.9280        |
| 315.1305       | 3  | N  | 13 | 1525.8161      | 763.4120        |
| 462.1989       | 4  | F  | 12 | 1411.7732      | 706.3905        |
| 618.3252       | 5  | K  | 11 | 1264.7048      | 632.8563        |
| 774.4515       | 6  | K  | 10 | 1108.5785      | 554.7932        |
| 875.4992       | 7  | T  | 9  | 952.4522       | 476.7300        |
| 976.5468       | 8  | T  | 8  | 851.4045       | 426.2062        |
| 1107.5873      | 9  | M  | 7  | 750.3568       | 375.6823        |
| 1178.6244      | 10 | A  | 6  | 619.3164       | 310.1621        |
| 1265.6565      | 11 | S  | 5  | 548.2792       | 274.6435        |
| 1352.6885      | 12 | S  | 4  | 461.2472       | 231.1275        |
| 1423.7256      | 13 | A  | 3  | 374.2152       | 187.6115        |
| 1551.7842      | 14 | Q  | 2  | 303.1781       | 152.0930        |
|                | 15 | R  | 1  | 175.1195       | 88.0637         |

N-term:+43.02 K(5):+156.13  
 K(6):+156.13

ASNNTASIAQAR, MH+ 1245.6188, m/z 623.3130  
 H OS G29 P150811 220811-s1.02543.02543.2.dta

scan 2543; 6.6e-001

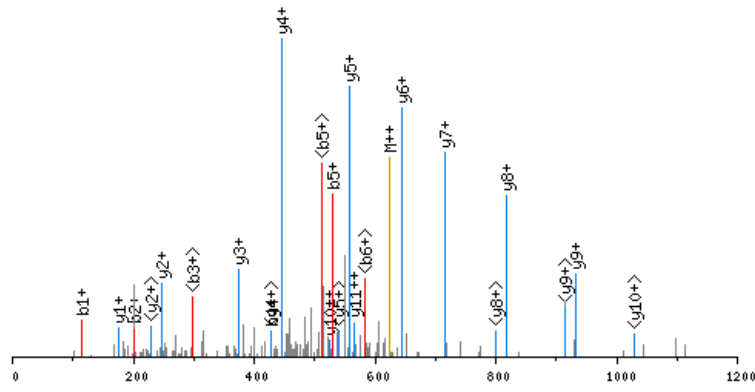

click image to zoom in; click top corners to zoom out [\[precursor±\]](#)

scan 2541; 623.3 m/z; 2.4e+000

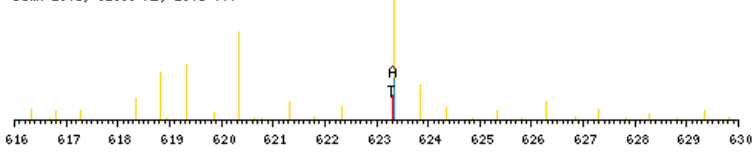

zoomed in precursor plot; T=theoretical m/z, A=acquired m/z

X-range:

-

MassTol: Y-zoom:

MassType:

AVG  MONO

Axis:

1  2

Label:

I  M  -

Ions:

a  +  2+  3+

b  +  2+  3+

c  +  2+  3+

x  +  2+  3+

y  +  2+  3+

z  +  2+  3+

hide H<sub>2</sub>O/NH<sub>3</sub>

zoom 112-122

GO

| b <sup>+</sup> | #  | AA | #  | y <sup>+</sup> | y <sup>2+</sup> |
|----------------|----|----|----|----------------|-----------------|
| 114.0555       | 1  | A  | 12 |                |                 |
| 201.0875       | 2  | S  | 11 | 1132.5711      | 566.7894        |
| 315.1305       | 3  | N  | 10 | 1045.5390      | 523.2734        |
| 429.1734       | 4  | N  | 9  | 931.4961       | 466.2520        |
| 530.2211       | 5  | T  | 8  | 817.4532       | 409.2305        |
| 601.2582       | 6  | A  | 7  | 716.4055       | 358.7067        |
| 688.2902       | 7  | S  | 6  | 645.3684       | 323.1881        |
| 801.3743       | 8  | I  | 5  | 558.3364       | 279.6721        |
| 872.4114       | 9  | A  | 4  | 445.2523       | 223.1301        |
| 1000.4700      | 10 | Q  | 3  | 374.2152       | 187.6115        |
| 1071.5071      | 11 | A  | 2  | 246.1566       | 123.5822        |
|                | 12 | R  | 1  | 175.1195       | 88.0637         |

N-term:+43.02

ASPAAGVVIVGSLIGR, MH+ 1622.9230, m/z 811.9651  
 H OS G29 P150811 220811-s1.06127.06127.2.dta

scan 6127; 1.5e+000

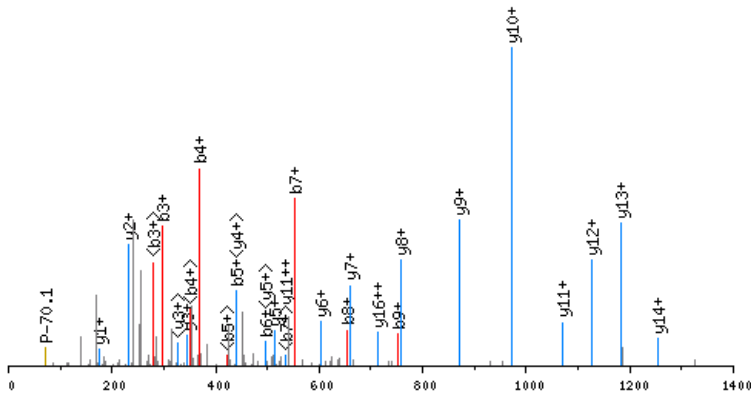

click image to zoom in; click top corners to zoom out [\[precursor±\]](#)

scan 6125; 812.0 m/z; 3.7e+001

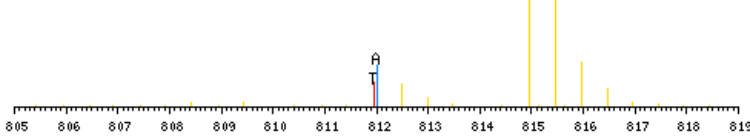

zoomed in precursor plot; T=theoretical m/z, A=acquired m/z

X-range:

-

MassTol: Y-zoom:

MassType:

AVG  MONO

Axis:

1  2

Label:

I  M  -

Ions:

a  +  2+  3+

b  +  2+  3+

c  +  2+  3+

x  +  2+  3+

y  +  2+  3+

z  +  2+  3+

hide H<sub>2</sub>O/NH<sub>3</sub>

zoom 112-122

GO

| b <sup>+</sup> | #  | AA | #  | y <sup>+</sup> | y <sup>2+</sup> |
|----------------|----|----|----|----------------|-----------------|
| 114.0555       | 1  | A  | 18 |                |                 |
| 201.0875       | 2  | S  | 17 | 1509.8753      | 755.4416        |
| 298.1403       | 3  | P  | 16 | 1422.8433      | 711.9255        |
| 369.1774       | 4  | A  | 15 | 1325.7905      | 663.3992        |
| 440.2145       | 5  | A  | 14 | 1254.7534      | 627.8806        |
| 497.2360       | 6  | G  | 13 | 1183.7163      | 592.3621        |
| 554.2575       | 7  | G  | 12 | 1126.6948      | 563.8513        |
| 653.3259       | 8  | V  | 11 | 1069.6734      | 535.3406        |
| 752.3943       | 9  | V  | 10 | 970.6049       | 485.8064        |
| 865.4784       | 10 | I  | 9  | 871.5365       | 436.2722        |
| 964.5468       | 11 | V  | 8  | 758.4525       | 379.7301        |
| 1021.5682      | 12 | G  | 7  | 659.3840       | 330.1959        |
| 1108.6003      | 13 | S  | 6  | 602.3626       | 301.6852        |
| 1165.6217      | 14 | G  | 5  | 515.3306       | 258.1692        |
| 1278.7058      | 15 | L  | 4  | 458.3091       | 229.6585        |
| 1391.7899      | 16 | I  | 3  | 345.2250       | 173.1164        |
| 1448.8113      | 17 | G  | 2  | 232.1410       | 116.5744        |
|                | 18 | R  | 1  | 175.1195       | 88.0637         |

N-term:+43.02

ASQSQGIQQLLQAEKR, MH+ 1855.0038, m/z 619.0061  
 H OS G25 P150811 220811-s1.06793.06793.3.dta

X-range:

-

MassTol: Y-zoom:

MassType:

AVG  MONO

Axis:

1  2

Label:

I  M  -

Ions:

a  +  2+  3+

b  +  2+  3+

c  +  2+  3+

x  +  2+  3+

y  +  2+  3+

z  +  2+  3+

hide H<sub>2</sub>O/NH<sub>3</sub>

zoom 112-122

GO

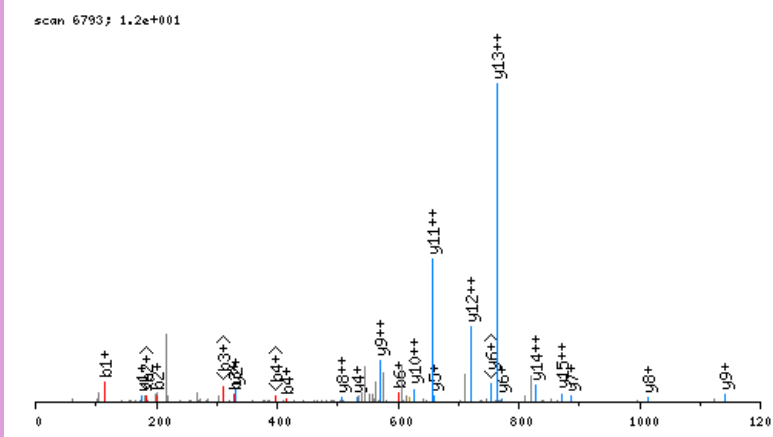

click image to zoom in; click top corners to zoom out [\[precursor±\]](#)

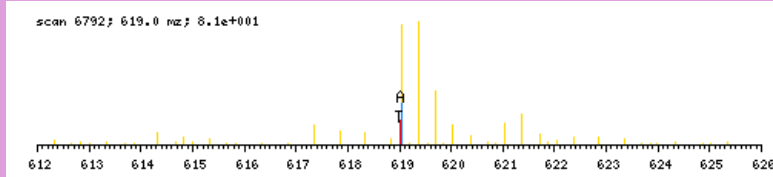

zoomed in precursor plot; T=theoretical m/z, A=acquired m/z

| b <sup>+</sup> | #  | AA # | y <sup>+</sup> | y <sup>2+</sup> |
|----------------|----|------|----------------|-----------------|
| 114.0555       | 1  | A 16 |                |                 |
| 201.0875       | 2  | S 15 | 1741.9561      | 871.4820        |
| 329.1461       | 3  | Q 14 | 1654.9241      | 827.9660        |
| 416.1781       | 4  | S 13 | 1526.8655      | 763.9367        |
| 544.2367       | 5  | Q 12 | 1439.8335      | 720.4206        |
| 601.2582       | 6  | G 11 | 1311.7749      | 656.3914        |
| 714.3423       | 7  | I 10 | 1254.7534      | 627.8806        |
| 842.4008       | 8  | Q 9  | 1141.6694      | 571.3386        |
| 970.4594       | 9  | Q 8  | 1013.6108      | 507.3093        |
| 1083.5435      | 10 | L 7  | 885.5522       | 443.2800        |
| 1196.6275      | 11 | L 6  | 772.4681       | 386.7380        |
| 1324.6861      | 12 | Q 5  | 659.3841       | 330.1960        |
| 1395.7232      | 13 | A 4  | 531.3255       | 266.1667        |
| 1524.7658      | 14 | E 3  | 460.2884       | 230.6481        |
| 1680.8921      | 15 | K 2  | 331.2458       | 166.1268        |
|                | 16 | R 1  | 175.1195       | 88.0637         |

N-term:+43.02 K(15):+156.13

ASSAQSSTSGSGGPAVPTVQR, MH+ 1872.9052, m/z 624.9732  
 H OS G29 P150811 220811-s1.03032.03032.3.dta

X-range:

-

MassTol: Y-zoom:

MassType:

AVG  MONO

Axis:

1  2

Label:

I  M  -

Ions:

a  +  2+  3+

b  +  2+  3+

c  +  2+  3+

x  +  2+  3+

y  +  2+  3+

z  +  2+  3+

hide H<sub>2</sub>O/NH<sub>3</sub>

zoom 112-122

GO

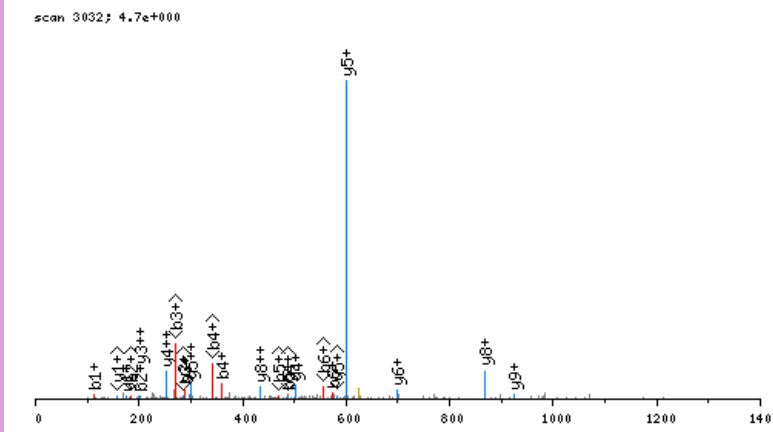

click image to zoom in; click top corners to zoom out [\[precursor±\]](#)

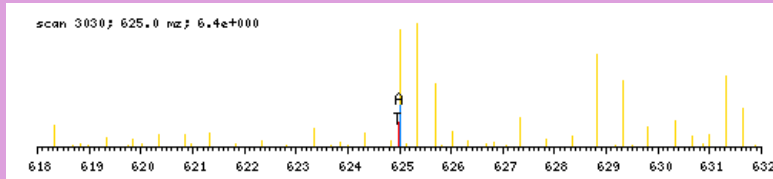

zoomed in precursor plot; T=theoretical m/z, A=acquired m/z

| b <sup>+</sup> | #  | AA # | y <sup>+</sup> | y <sup>2+</sup> |
|----------------|----|------|----------------|-----------------|
| 114.0555       | 1  | A 20 |                |                 |
| 201.0875       | 2  | S 19 | 1759.8575      | 880.4327        |
| 288.1196       | 3  | S 18 | 1672.8255      | 836.9166        |
| 359.1567       | 4  | A 17 | 1585.7934      | 793.4006        |
| 487.2153       | 5  | Q 16 | 1514.7563      | 757.8821        |
| 574.2473       | 6  | S 15 | 1386.6977      | 693.8528        |
| 661.2793       | 7  | S 14 | 1299.6657      | 650.3368        |
| 718.3008       | 8  | G 13 | 1212.6337      | 606.8207        |
| 805.3328       | 9  | S 12 | 1155.6122      | 578.3100        |
| 892.3648       | 10 | S 11 | 1068.5802      | 534.7940        |
| 949.3863       | 11 | G 10 | 981.5482       | 491.2780        |
| 1006.4078      | 12 | G 9  | 924.5267       | 462.7673        |
| 1103.4605      | 13 | P 8  | 867.5052       | 434.2565        |
| 1174.4976      | 14 | A 7  | 770.4525       | 385.7301        |
| 1273.5661      | 15 | V 6  | 699.4153       | 350.2116        |
| 1370.6188      | 16 | P 5  | 600.3469       | 300.6774        |
| 1471.6665      | 17 | T 4  | 503.2942       | 252.1510        |
| 1570.7349      | 18 | V 3  | 402.2465       | 201.6272        |
| 1698.7935      | 19 | Q 2  | 303.1781       | 152.0930        |
|                | 20 | R 1  | 175.1195       | 88.0637         |

N-term:+43.02



ASSDIQVKELEKR, MH+ 1600.8911, m/z 534.3019  
 H OS G27 P150811 220811-s1.04168.04168.3.dta

X-range:

-

MassTol: Y-zoom:

MassType:

AVG  MONO

Axis:

1  2

Label:

I  M  -

Ions:

a  +  2+  3+

b  +  2+  3+

c  +  2+  3+

x  +  2+  3+

y  +  2+  3+

z  +  2+  3+

hide H<sub>2</sub>O/NH<sub>3</sub>

zoom 112-122

GO

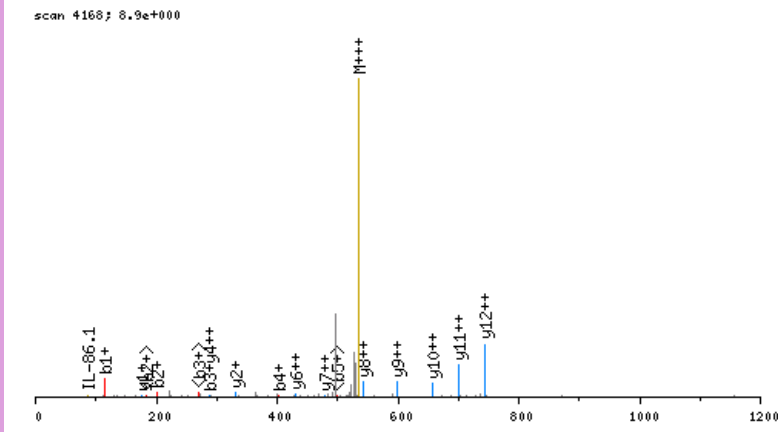

click image to zoom in; click top corners to zoom out [\[precursor±\]](#)

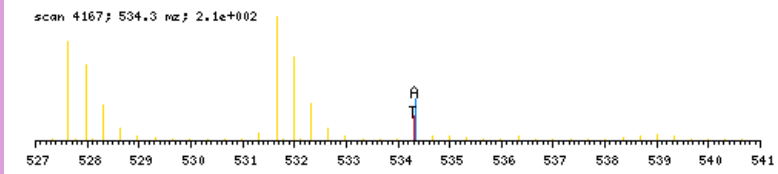

zoomed in precursor plot; T=theoretical m/z, A=acquired m/z

| b <sup>+</sup> | #  | AA # | y <sup>+</sup> | y <sup>2+</sup> |
|----------------|----|------|----------------|-----------------|
| 114.0555       | 1  | A    | 13             |                 |
| 201.0875       | 2  | S    | 12             | 1487.8434       |
| 288.1196       | 3  | S    | 11             | 1400.8114       |
| 403.1465       | 4  | D    | 10             | 1313.7793       |
| 516.2306       | 5  | I    | 9              | 1198.7524       |
| 644.2892       | 6  | Q    | 8              | 1085.6683       |
| 743.3576       | 7  | V    | 7              | 957.6098        |
| 899.4839       | 8  | K    | 6              | 858.5414        |
| 1028.5265      | 9  | E    | 5              | 702.4151        |
| 1141.6105      | 10 | L    | 4              | 573.3725        |
| 1270.6531      | 11 | E    | 3              | 460.2884        |
| 1426.7794      | 12 | K    | 2              | 331.2458        |
|                | 13 | R    | 1              | 175.1195        |

N-term:+43.02 K(8):+156.13  
 K(12):+156.13

ASSGNYPYVEIIEQPR, MH+ 1864.9081, m/z 622.3076  
 H OS G29 P150811 220811-s1.06036.06036.3.dta

X-range:

-

MassTol: Y-zoom:

MassType:

AVG  MONO

Axis:

1  2

Label:

I  M  -

Ions:

a  +  2+  3+

b  +  2+  3+

c  +  2+  3+

x  +  2+  3+

y  +  2+  3+

z  +  2+  3+

hide H<sub>2</sub>O/NH<sub>3</sub>

zoom 112-122

GO

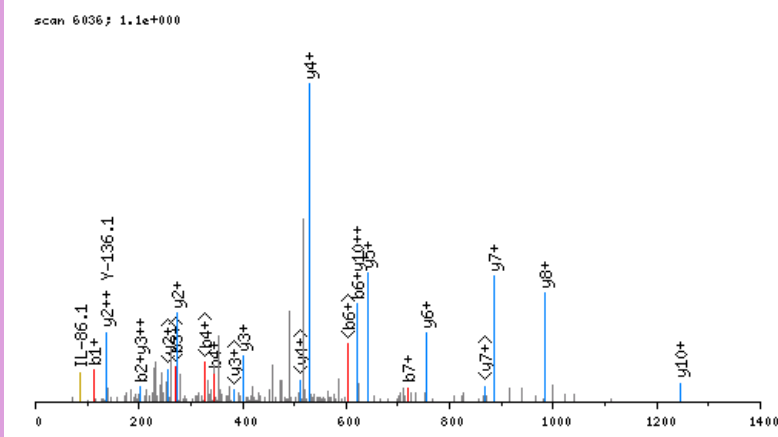

click image to zoom in; click top corners to zoom out [\[precursor±\]](#)

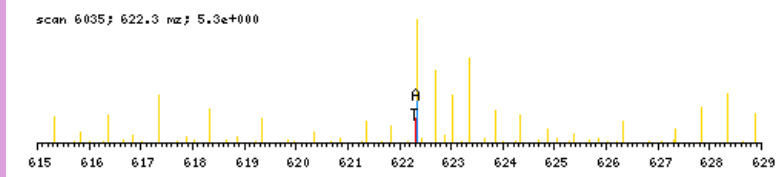

zoomed in precursor plot; T=theoretical m/z, A=acquired m/z

| b <sup>+</sup> | #  | AA # | y <sup>+</sup> | y <sup>2+</sup> |
|----------------|----|------|----------------|-----------------|
| 114.0555       | 1  | A 16 |                |                 |
| 201.0875       | 2  | S 15 | 1751.8604      | 876.4341        |
| 288.1196       | 3  | S 14 | 1664.8284      | 832.9181        |
| 345.1410       | 4  | G 13 | 1577.7964      | 789.4021        |
| 508.2044       | 5  | Y 12 | 1520.7749      | 760.8914        |
| 622.2473       | 6  | N 11 | 1357.7116      | 679.3597        |
| 719.3001       | 7  | P 10 | 1243.6687      | 622.3382        |
| 882.3634       | 8  | Y 9  | 1146.6159      | 573.8119        |
| 981.4318       | 9  | V 8  | 983.5526       | 492.2802        |
| 1110.4744      | 10 | E 7  | 884.4842       | 442.7460        |
| 1223.5585      | 11 | I 6  | 755.4416       | 378.2247        |
| 1336.6425      | 12 | I 5  | 642.3575       | 321.6827        |
| 1465.6851      | 13 | E 4  | 529.2734       | 265.1406        |
| 1593.7437      | 14 | Q 3  | 400.2308       | 200.6193        |
| 1690.7965      | 15 | P 2  | 272.1723       | 136.5900        |
|                | 16 | R 1  | 175.1195       | 88.0637         |

N-term:+43.02

X-range:

-

MassTol: Y-zoom:

MassType:

AVG  MONO

Axis:

1  2

Label:

I  M  -

Ions:

a  +  2+  3+

b  +  2+  3+

c  +  2+  3+

x  +  2+  3+

y  +  2+  3+

z  +  2+  3+

hide H<sub>2</sub>O/NH<sub>3</sub>

zoom 112-122

GO

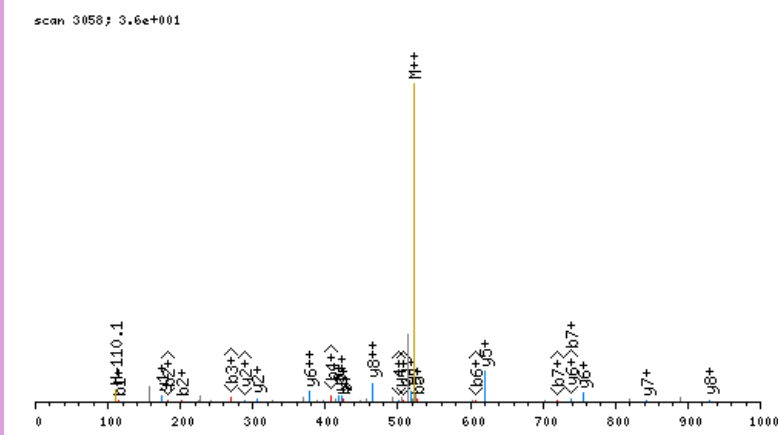

click image to zoom in; click top corners to zoom out [\[precursor±\]](#)

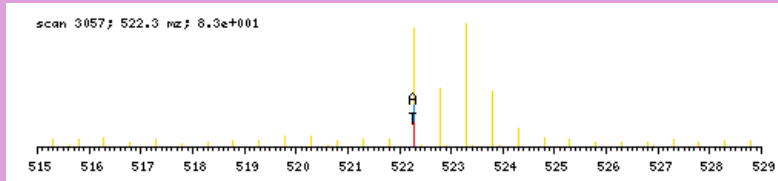

zoomed in precursor plot; T=theoretical m/z, A=acquired m/z

| b <sup>+</sup> | # | AA # | y <sup>+</sup> | y <sup>2+</sup> |
|----------------|---|------|----------------|-----------------|
| 114.0555       | 1 | A    | 9              |                 |
| 201.0875       | 2 | S    | 8              | 930.4831        |
| 288.1196       | 3 | S    | 7              | 843.4511        |
| 425.1785       | 4 | H    | 6              | 756.4191        |
| 526.2262       | 5 | T    | 5              | 619.3601        |
| 625.2946       | 6 | V    | 4              | 518.3125        |
| 738.3786       | 7 | L    | 3              | 419.2440        |
| 869.4191       | 8 | M    | 2              | 306.1600        |
|                | 9 | R    | 1              | 175.1195        |

N-term:+43.02

ASSKKVTLSVLSR, MH+ 1485.9641, m/z 495.9929  
 H OS G26 P150811 220811-s1.03636.03636.3.dta

X-range:

-

MassTol: Y-zoom:

MassType:

AVG  MONO

Axis:

1  2

Label:

I  M  -

Ions:

a  +  2+  3+

b  +  2+  3+

c  +  2+  3+

x  +  2+  3+

y  +  2+  3+

z  +  2+  3+

hide H<sub>2</sub>O/NH<sub>3</sub>

zoom 112-122

GO

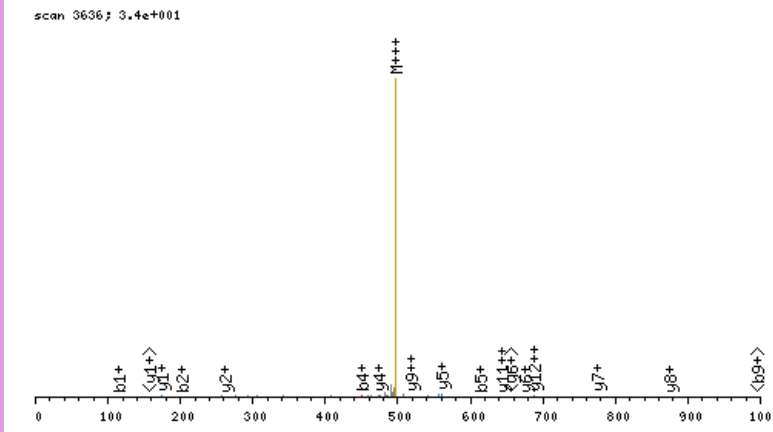

click image to zoom in; click top corners to zoom out [\[precursor±\]](#)

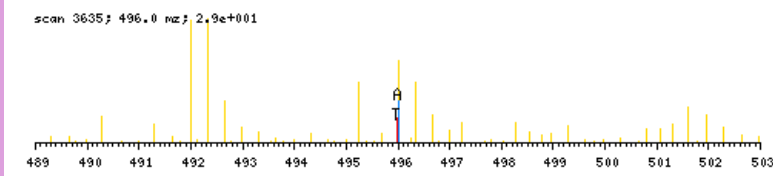

zoomed in precursor plot; T=theoretical m/z, A=acquired m/z

| b <sup>+</sup> | #  | AA # | y <sup>+</sup> | y <sup>2+</sup> |
|----------------|----|------|----------------|-----------------|
| 114.0555       | 1  | A    | 13             |                 |
| 201.0875       | 2  | S    | 12             | 1372.9164       |
| 288.1196       | 3  | S    | 11             | 1285.8844       |
| 450.2777       | 4  | K    | 10             | 1198.8524       |
| 612.4358       | 5  | K    | 9              | 1036.6943       |
| 711.5042       | 6  | V    | 8              | 874.5362        |
| 812.5519       | 7  | T    | 7              | 775.4678        |
| 925.6359       | 8  | L    | 6              | 674.4201        |
| 1012.6680      | 9  | S    | 5              | 561.3360        |
| 1111.7364      | 10 | V    | 4              | 474.3040        |
| 1224.8204      | 11 | L    | 3              | 375.2356        |
| 1311.8525      | 12 | S    | 2              | 262.1515        |
|                | 13 | R    | 1              | 175.1195        |

N-term:+43.02 K(4):+162.16  
 K(5):+162.16

ASSPQGLDNPALLR, MH+ 1480.7760, m/z 494.2635  
 H OS G29 P150811 220811-s1.04731.04731.3.dta

scan 4731; 6.8e-001

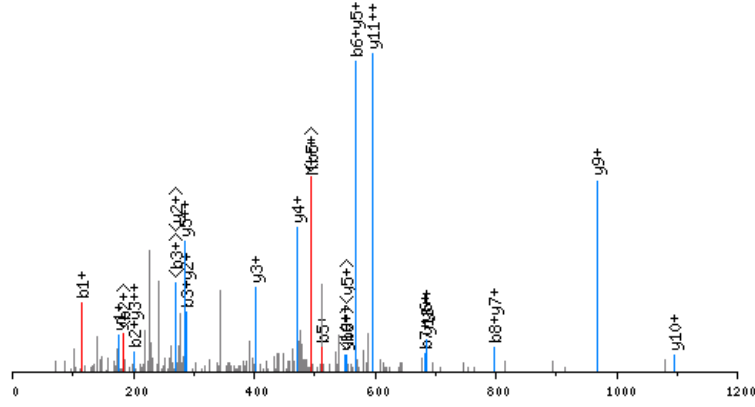

click image to zoom in; click top corners to zoom out [\[precursor±\]](#)

scan 4730; 494.3 m/z; 1.6e+001

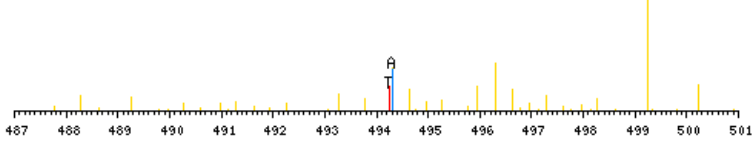

zoomed in precursor plot; T=theoretical m/z, A=acquired m/z

X-range:

-

MassTol: Y-zoom:

MassType:

AVG  MONO

Axis:

1  2

Label:

I  M  -

Ions:

a  +  2+  3+

b  +  2+  3+

c  +  2+  3+

x  +  2+  3+

y  +  2+  3+

z  +  2+  3+

hide H<sub>2</sub>O/NH<sub>3</sub>

zoom 112-122

GO

| b <sup>+</sup> | #  | AA # | y <sup>+</sup> | y <sup>2+</sup> |
|----------------|----|------|----------------|-----------------|
| 114.0555       | 1  | A 14 |                |                 |
| 201.0875       | 2  | S 13 | 1367.7283      | 684.3681        |
| 288.1196       | 3  | S 12 | 1280.6963      | 640.8520        |
| 385.1723       | 4  | P 11 | 1193.6642      | 597.3360        |
| 513.2309       | 5  | Q 10 | 1096.6115      | 548.8097        |
| 570.2524       | 6  | G 9  | 968.5529       | 484.7804        |
| 683.3364       | 7  | L 8  | 911.5314       | 456.2696        |
| 798.3634       | 8  | D 7  | 798.4474       | 399.7276        |
| 912.4063       | 9  | N 6  | 683.4204       | 342.2141        |
| 1009.4591      | 10 | P 5  | 569.3775       | 285.1927        |
| 1080.4962      | 11 | A 4  | 472.3247       | 236.6663        |
| 1193.5803      | 12 | L 3  | 401.2876       | 201.1477        |
| 1306.6643      | 13 | L 2  | 288.2036       | 144.6057        |
|                | 14 | R 1  | 175.1195       | 88.0637         |

N-term:+43.02

ASSSGNDDDLTIPR, MH+ 1489.6771, m/z 745.3422  
 H OS G29 P150811 220811-s1.03779.03779.2.dta

X-range:

-

MassTol: Y-zoom:

MassType:

AVG  MONO

Axis:

1  2

Label:

I  M  -

Ions:

a  +  2+  3+

b  +  2+  3+

c  +  2+  3+

x  +  2+  3+

y  +  2+  3+

z  +  2+  3+

hide H<sub>2</sub>O/NH<sub>3</sub>

zoom 112-122

GO

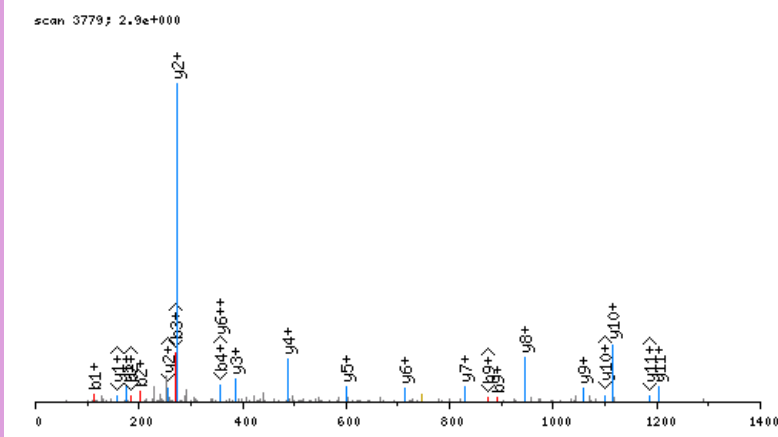

click image to zoom in; click top corners to zoom out [\[precursor±\]](#)

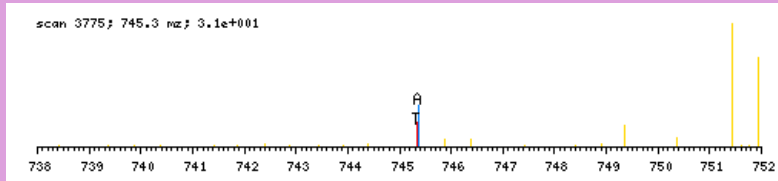

zoomed in precursor plot; T=theoretical m/z, A=acquired m/z

| b <sup>+</sup> | #  | AA # | y <sup>+</sup> | y <sup>2+</sup> |
|----------------|----|------|----------------|-----------------|
| 114.0555       | 1  | A 14 |                |                 |
| 201.0875       | 2  | S 13 | 1376.6294      | 688.8186        |
| 288.1196       | 3  | S 12 | 1289.5973      | 645.3026        |
| 375.1516       | 4  | S 11 | 1202.5653      | 601.7866        |
| 432.1731       | 5  | G 10 | 1115.5333      | 558.2706        |
| 546.2160       | 6  | N 9  | 1058.5118      | 529.7598        |
| 661.2429       | 7  | D 8  | 944.4689       | 472.7384        |
| 776.2699       | 8  | D 7  | 829.4420       | 415.2249        |
| 891.2968       | 9  | D 6  | 714.4150       | 357.7114        |
| 1004.3809      | 10 | L 5  | 599.3881       | 300.1979        |
| 1105.4286      | 11 | T 4  | 486.3040       | 243.6559        |
| 1218.5126      | 12 | I 3  | 385.2563       | 193.1321        |
| 1315.5654      | 13 | P 2  | 272.1723       | 136.5900        |
|                | 14 | R 1  | 175.1195       | 88.0637         |

N-term:+43.02

ASTDIAGLEESFR, MH+ 1437.6862, m/z 719.3467  
 H OS G29 P150811 220811-s1.06081.06081.2.dta

X-range:

-

MassTol: Y-zoom:

MassType:

AVG  MONO

Axis:

1  2

Label:

I  M  -

Ions:

a  +  2+  3+

b  +  2+  3+

c  +  2+  3+

x  +  2+  3+

y  +  2+  3+

z  +  2+  3+

hide H<sub>2</sub>O/NH<sub>3</sub>

zoom 112-122

GO

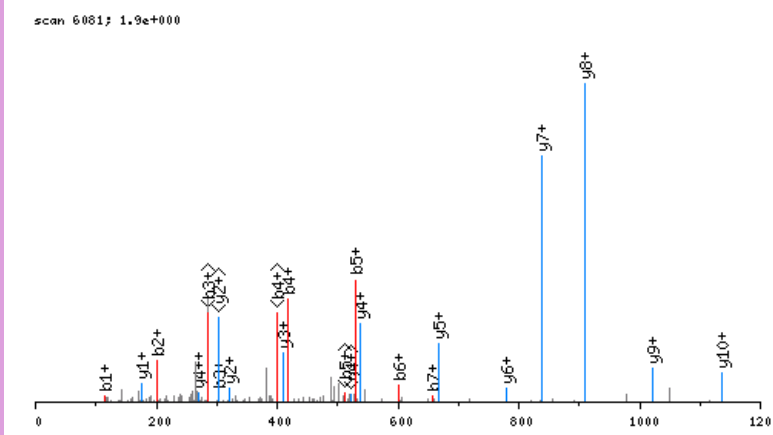

click image to zoom in; click top corners to zoom out [\[precursor±\]](#)

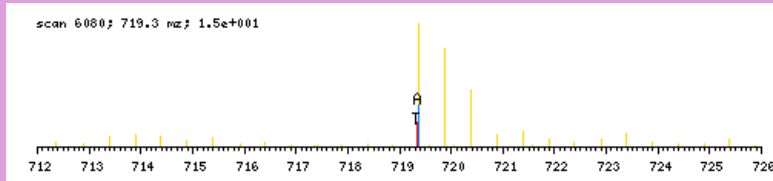

zoomed in precursor plot; T=theoretical m/z, A=acquired m/z

| b <sup>+</sup> | #  | AA # | y <sup>+</sup> | y <sup>2+</sup> |
|----------------|----|------|----------------|-----------------|
| 114.0555       | 1  | A 13 |                |                 |
| 201.0875       | 2  | S 12 | 1324.6385      | 662.8232        |
| 302.1352       | 3  | T 11 | 1237.6065      | 619.3071        |
| 417.1622       | 4  | D 10 | 1136.5588      | 568.7833        |
| 530.2462       | 5  | I 9  | 1021.5318      | 511.2698        |
| 601.2833       | 6  | A 8  | 908.4478       | 454.7278        |
| 658.3048       | 7  | G 7  | 837.4107       | 419.2092        |
| 771.3889       | 8  | L 6  | 780.3892       | 390.6985        |
| 900.4315       | 9  | E 5  | 667.3051       | 334.1565        |
| 1029.4741      | 10 | E 4  | 538.2625       | 269.6352        |
| 1116.5061      | 11 | S 3  | 409.2199       | 205.1139        |
| 1263.5745      | 12 | F 2  | 322.1879       | 161.5979        |
|                | 13 | R 1  | 175.1195       | 88.0637         |

N-term:+43.02

ASWAEPSEPAALR, MH+ 1426.6967, m/z 713.8520  
 H OS G29 P150811 220811-s1.04916.04916.2.dta

scan 4916; 2.6e+000

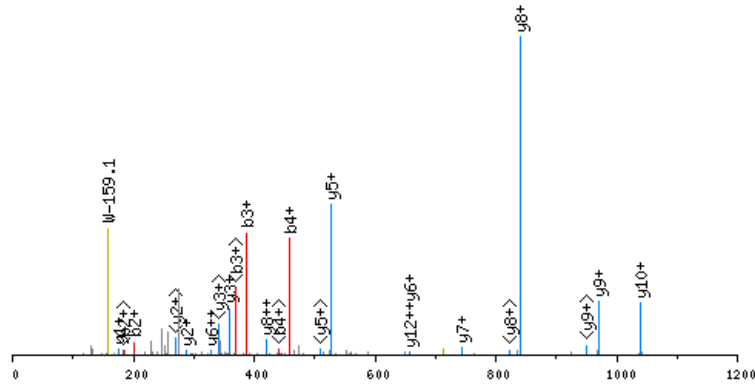

click image to zoom in; click top corners to zoom out [\[precursor±\]](#)

scan 4915; 713.9 m/z; 9.8e+000

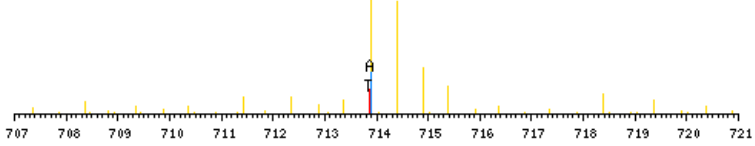

zoomed in precursor plot; T=theoretical m/z, A=acquired m/z

X-range:

-

MassTol: Y-zoom:

MassType:

AVG  MONO

Axis:

1  2

Label:

I  M  -

Ions:

a  +  2+  3+

b  +  2+  3+

c  +  2+  3+

x  +  2+  3+

y  +  2+  3+

z  +  2+  3+

hide H<sub>2</sub>O/NH<sub>3</sub>

zoom 112-122

GO

| b <sup>+</sup> | #  | AA # | y <sup>+</sup> | y <sup>2+</sup> |
|----------------|----|------|----------------|-----------------|
| 114.0555       | 1  | A 13 |                |                 |
| 201.0875       | 2  | S 12 | 1313.6490      | 657.3284        |
| 387.1669       | 3  | W 11 | 1226.6170      | 613.8124        |
| 458.2040       | 4  | A 10 | 1040.5376      | 520.7727        |
| 587.2466       | 5  | E 9  | 969.5005       | 485.2542        |
| 684.2993       | 6  | P 8  | 840.4579       | 420.7329        |
| 771.3314       | 7  | S 7  | 743.4052       | 372.2065        |
| 900.3739       | 8  | E 6  | 656.3731       | 328.6905        |
| 997.4267       | 9  | P 5  | 527.3306       | 264.1692        |
| 1068.4638      | 10 | A 4  | 430.2778       | 215.6428        |
| 1139.5009      | 11 | A 3  | 359.2407       | 180.1243        |
| 1252.5850      | 12 | L 2  | 288.2036       | 144.6057        |
|                | 13 | R 1  | 175.1195       | 88.0637         |

N-term:+43.02



ASYFDEHDCEPLNPER, MH+ 2020.8347, m/z 674.2831  
 H OS G24 P150811 220811-s1.04000.04000.3.dta

X-range:

-

MassTol: Y-zoom:

MassType:

AVG  MONO

Axis:

1  2

Label:

I  M  -

Ions:

a  +  2+  3+

b  +  2+  3+

c  +  2+  3+

x  +  2+  3+

y  +  2+  3+

z  +  2+  3+

hide H<sub>2</sub>O/NH<sub>3</sub>

zoom 112-122

GO

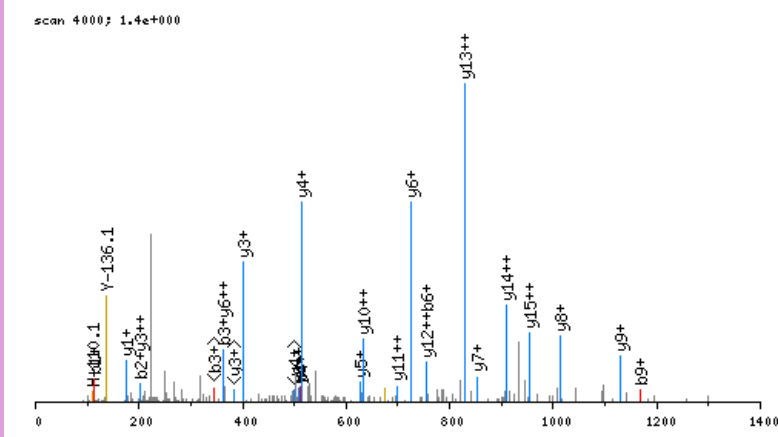

click image to zoom in; click top corners to zoom out [\[precursor±\]](#)

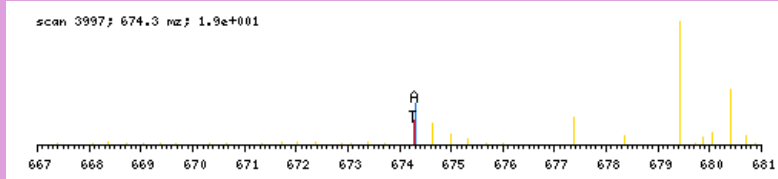

zoomed in precursor plot; T=theoretical m/z, A=acquired m/z

| b <sup>+</sup> | #  | AA # | y <sup>+</sup> | y <sup>2+</sup> |
|----------------|----|------|----------------|-----------------|
| 114.0555       | 1  | A 16 |                |                 |
| 201.0875       | 2  | S 15 | 1907.7870      | 954.3974        |
| 364.1509       | 3  | Y 14 | 1820.7549      | 910.8814        |
| 511.2193       | 4  | F 13 | 1657.6916      | 829.3497        |
| 626.2462       | 5  | D 12 | 1510.6232      | 755.8155        |
| 755.2888       | 6  | E 11 | 1395.5963      | 698.3020        |
| 892.3477       | 7  | H 10 | 1266.5537      | 633.7807        |
| 1007.3747      | 8  | D 9  | 1129.4947      | 565.2513        |
| 1167.4053      | 9  | C 8  | 1014.4678      | 507.7378        |
| 1296.4479      | 10 | E 7  | 854.4372       | 427.7225        |
| 1393.5006      | 11 | P 6  | 725.3946       | 363.2012        |
| 1506.5847      | 12 | L 5  | 628.3418       | 314.6748        |
| 1620.6276      | 13 | N 4  | 515.2578       | 258.1328        |
| 1717.6804      | 14 | P 3  | 401.2149       | 201.1113        |
| 1846.7230      | 15 | E 2  | 304.1621       | 152.5850        |
|                | 16 | R 1  | 175.1195       | 88.0637         |

N-term:+43.02 C(9):+160.03

ASYYEILDVPR, MH+ 1367.6847, m/z 684.3460  
 H OS G29 P150811 220811-s1.06227.06227.2.dta

X-range:

-

MassTol: Y-zoom:

MassType:

AVG  MONO

Axis:

1  2

Label:

I  M  -

Ions:

a  +  2+  3+

b  +  2+  3+

c  +  2+  3+

x  +  2+  3+

y  +  2+  3+

z  +  2+  3+

hide H<sub>2</sub>O/NH<sub>3</sub>

zoom 112-122

GO

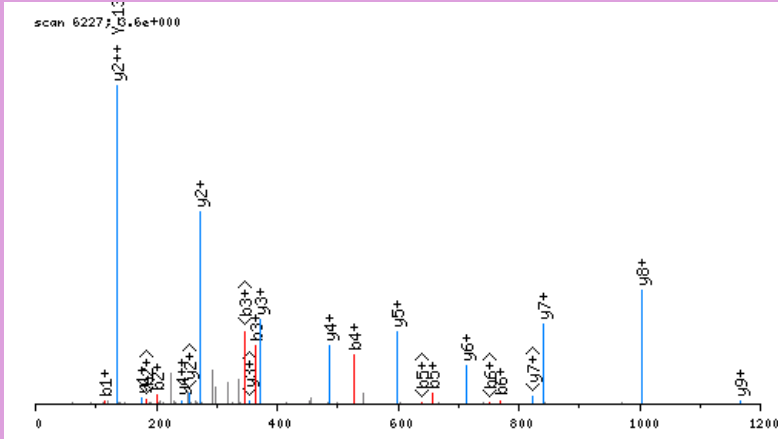

click image to zoom in; click top corners to zoom out [\[precursor±\]](#)

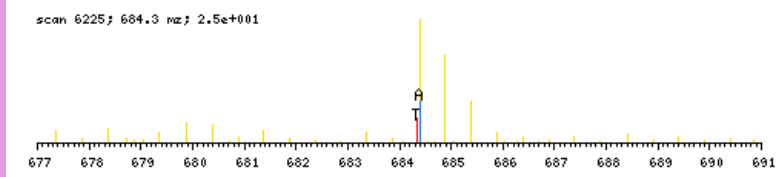

zoomed in precursor plot; T=theoretical m/z, A=acquired m/z

| b <sup>+</sup> | #  | AA # | y <sup>+</sup> | y <sup>2+</sup> |
|----------------|----|------|----------------|-----------------|
| 114.0555       | 1  | A 11 |                |                 |
| 201.0875       | 2  | S 10 | 1254.6370      | 627.8224        |
| 364.1509       | 3  | Y 9  | 1167.6050      | 584.3064        |
| 527.2142       | 4  | Y 8  | 1004.5417      | 502.7747        |
| 656.2568       | 5  | E 7  | 841.4783       | 421.2431        |
| 769.3409       | 6  | I 6  | 712.4357       | 356.7218        |
| 882.4249       | 7  | L 5  | 599.3517       | 300.1798        |
| 997.4519       | 8  | D 4  | 486.2676       | 243.6377        |
| 1096.5203      | 9  | V 3  | 371.2407       | 186.1243        |
| 1193.5730      | 10 | P 2  | 272.1723       | 136.5900        |
|                | 11 | R 1  | 175.1195       | 88.0637         |

N-term:+43.02

ATCPVLQKETLFR, MH+ 1632.8783, m/z 544.9643  
 H OS G24 P150811 220811-s1.04248.04248.3.dta

X-range:

-

MassTol: Y-zoom:

MassType:

AVG  MONO

Axis:

1  2

Label:

I  M  -

Ions:

a  +  2+  3+

b  +  2+  3+

c  +  2+  3+

x  +  2+  3+

y  +  2+  3+

z  +  2+  3+

hide H<sub>2</sub>O/NH<sub>3</sub>

zoom 112-122

GO

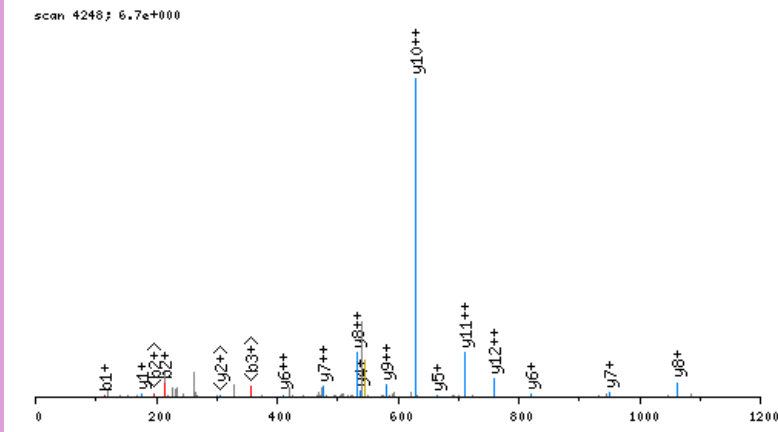

click image to zoom in; click top corners to zoom out [\[precursor±\]](#)

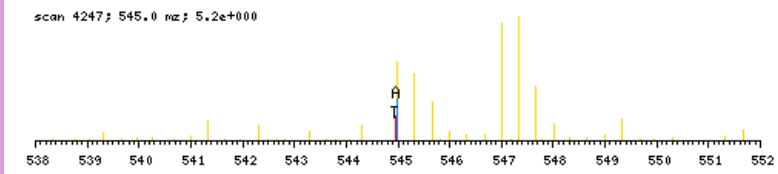

zoomed in precursor plot; T=theoretical m/z, A=acquired m/z

| b <sup>+</sup> | #  | AA # | y <sup>+</sup> | y <sup>2+</sup> |
|----------------|----|------|----------------|-----------------|
| 114.0555       | 1  | A 13 |                |                 |
| 215.1032       | 2  | T 12 | 1519.8306      | 760.4192        |
| 375.1338       | 3  | C 11 | 1418.7830      | 709.8954        |
| 472.1866       | 4  | P 10 | 1258.7524      | 629.8801        |
| 571.2550       | 5  | V 9  | 1161.6996      | 581.3537        |
| 684.3390       | 6  | L 8  | 1062.6312      | 531.8195        |
| 812.3976       | 7  | Q 7  | 949.5471       | 475.2775        |
| 968.5239       | 8  | K 6  | 821.4886       | 411.2482        |
| 1097.5665      | 9  | E 5  | 665.3623       | 333.1850        |
| 1198.6142      | 10 | T 4  | 536.3197       | 268.6637        |
| 1311.6982      | 11 | L 3  | 435.2720       | 218.1399        |
| 1458.7667      | 12 | F 2  | 322.1879       | 161.5979        |
|                | 13 | R 1  | 175.1195       | 88.0637         |

N-term:+43.02 C(3):+160.03  
 K(8):+156.13

ATDDKSSPTLDSANDLPR, MH+ 1972.9464, m/z 658.3203  
 H OS G24 P150811 220811-s1.03296.03296.3.dta

X-range:

-

MassTol: Y-zoom:

MassType:

AVG  MONO

Axis:

1  2

Label:

I  M  -

Ions:

a  +  2+  3+

b  +  2+  3+

c  +  2+  3+

x  +  2+  3+

y  +  2+  3+

z  +  2+  3+

hide H<sub>2</sub>O/NH<sub>3</sub>

zoom 112-122

GO

scan 3296; 7.7e-001

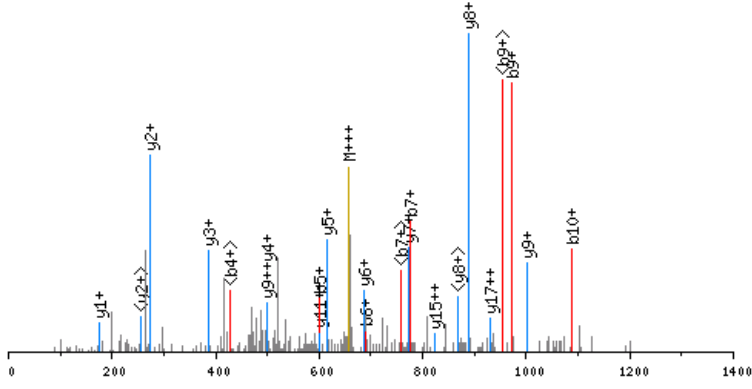

click image to zoom in; click top corners to zoom out [\[precursor±\]](#)

scan 3292; 658.3 m/z; 2.2e+000

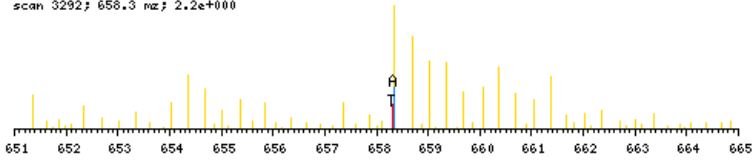

zoomed in precursor plot; T=theoretical m/z, A=acquired m/z

| b <sup>+</sup> | #  | AA # | y <sup>+</sup> | y <sup>2+</sup> |
|----------------|----|------|----------------|-----------------|
| 114.0555       | 1  | A 18 |                |                 |
| 215.1032       | 2  | T 17 | 1859.8987      | 930.4533        |
| 330.1301       | 3  | D 16 | 1758.8510      | 879.9294        |
| 445.1571       | 4  | D 15 | 1643.8241      | 822.4160        |
| 601.2834       | 5  | K 14 | 1528.7971      | 764.9025        |
| 688.3154       | 6  | S 13 | 1372.6708      | 686.8393        |
| 775.3474       | 7  | S 12 | 1285.6388      | 643.3233        |
| 872.4002       | 8  | P 11 | 1198.6068      | 599.8073        |
| 973.4479       | 9  | T 10 | 1101.5540      | 551.2809        |
| 1086.5319      | 10 | L 9  | 1000.5063      | 500.7571        |
| 1201.5589      | 11 | D 8  | 887.4223       | 444.2151        |
| 1288.5909      | 12 | S 7  | 772.3953       | 386.7016        |
| 1359.6280      | 13 | A 6  | 685.3633       | 343.1856        |
| 1473.6710      | 14 | N 5  | 614.3262       | 307.6670        |
| 1588.6979      | 15 | D 4  | 500.2833       | 250.6455        |
| 1701.7820      | 16 | L 3  | 385.2563       | 193.1321        |
| 1798.8347      | 17 | P 2  | 272.1723       | 136.5900        |
|                | 18 | R 1  | 175.1195       | 88.0637         |

N-term:+43.02 K(5):+156.13

ATDELASKLSR, MH+ 1266.7118, m/z 633.8595  
 H OS G25 P150811 220811-s1.05103.05103.2.dta

scan 5103; 3.6e+001

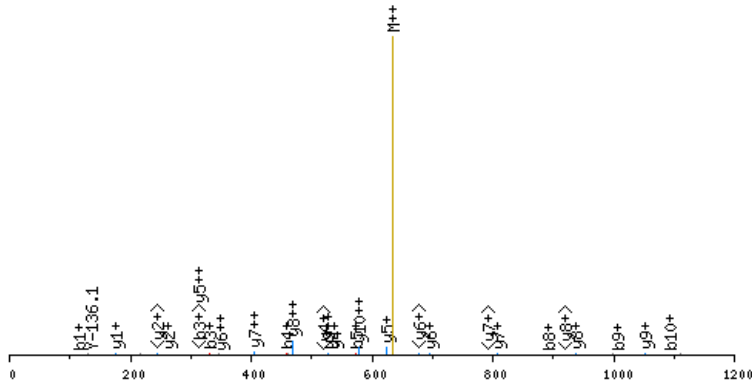

click image to zoom in; click top corners to zoom out [\[precursor±\]](#)

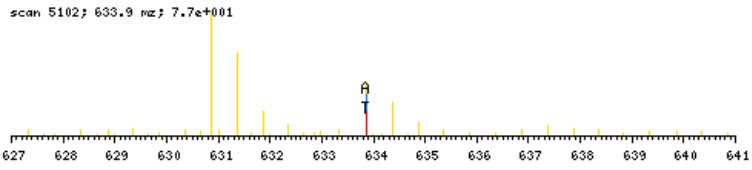

zoomed in precursor plot; T=theoretical m/z, A=acquired m/z

X-range:

-

MassTol: Y-zoom:

MassType:

AVG  MONO

Axis:

1  2

Label:

I  M  -

Ions:

a  +  2+  3+

b  +  2+  3+

c  +  2+  3+

x  +  2+  3+

y  +  2+  3+

z  +  2+  3+

hide H<sub>2</sub>O/NH<sub>3</sub>

zoom 112-122

GO

| b <sup>+</sup> | #  | AA # | y <sup>+</sup> | y <sup>2+</sup> |
|----------------|----|------|----------------|-----------------|
| 114.0555       | 1  | A 11 |                |                 |
| 215.1032       | 2  | T 10 | 1153.6641      | 577.3360        |
| 330.1301       | 3  | D 9  | 1052.6164      | 526.8121        |
| 459.1727       | 4  | E 8  | 937.5895       | 469.2987        |
| 572.2568       | 5  | L 7  | 808.5469       | 404.7774        |
| 643.2939       | 6  | A 6  | 695.4628       | 348.2353        |
| 730.3259       | 7  | S 5  | 624.4257       | 312.7168        |
| 892.4840       | 8  | K 4  | 537.3937       | 269.2008        |
| 1005.5681      | 9  | L 3  | 375.2356       | 188.1217        |
| 1092.6001      | 10 | S 2  | 262.1515       | 131.5797        |
|                | 11 | R 1  | 175.1195       | 88.0637         |

N-term:+43.02 K(8):+162.16

ATEGMILTNDHQIR, MH+ 1777.8656, m/z 593.2934  
 H OS G27 P150811 220811-s1.04811.04811.3.dta

X-range:

-

MassTol: Y-zoom:

MassType:

AVG  MONO

Axis:

1  2

Label:

I  M  -

Ions:

a  +  2+  3+

b  +  2+  3+

c  +  2+  3+

x  +  2+  3+

y  +  2+  3+

z  +  2+  3+

hide H<sub>2</sub>O/NH<sub>3</sub>

zoom 112-122

GO

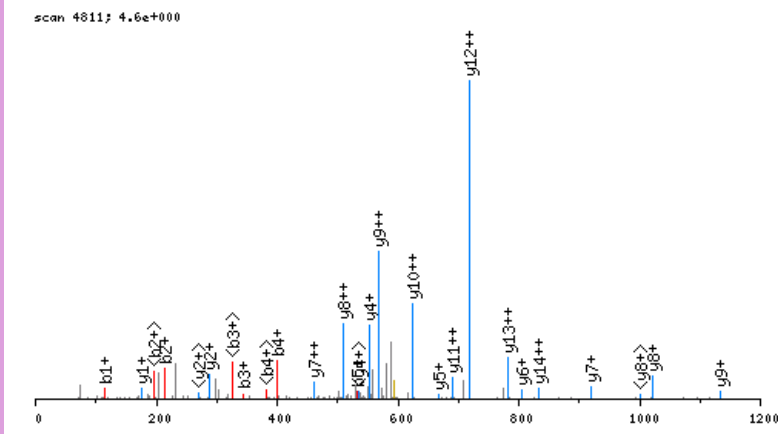

click image to zoom in; click top corners to zoom out [\[precursor±\]](#)

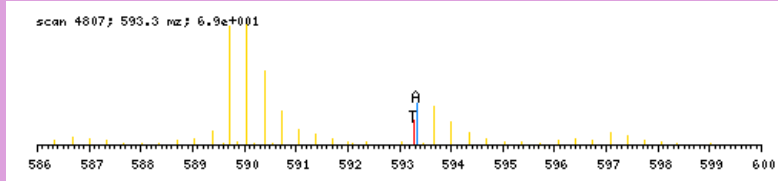

zoomed in precursor plot; T=theoretical m/z, A=acquired m/z

| b <sup>+</sup> | #  | AA # | y <sup>+</sup> | y <sup>2+</sup> |
|----------------|----|------|----------------|-----------------|
| 114.0555       | 1  | A 15 |                |                 |
| 215.1032       | 2  | T 14 | 1664.8179      | 832.9128        |
| 344.1458       | 3  | E 13 | 1563.7702      | 782.3890        |
| 401.1672       | 4  | G 12 | 1434.7276      | 717.8677        |
| 532.2077       | 5  | M 11 | 1377.7061      | 689.3570        |
| 645.2918       | 6  | I 10 | 1246.6656      | 623.8367        |
| 758.3759       | 7  | L 9  | 1133.5816      | 567.2947        |
| 859.4235       | 8  | T 8  | 1020.4975      | 510.7527        |
| 973.4665       | 9  | N 7  | 919.4498       | 460.2288        |
| 1110.5254      | 10 | H 6  | 805.4069       | 403.2074        |
| 1225.5523      | 11 | D 5  | 668.3480       | 334.6779        |
| 1362.6112      | 12 | H 4  | 553.3211       | 277.1644        |
| 1490.6698      | 13 | Q 3  | 416.2621       | 208.6350        |
| 1603.7539      | 14 | I 2  | 288.2036       | 144.6057        |
|                | 15 | R 1  | 175.1195       | 88.0637         |

N-term:+43.02

ATESSPLTHVLDTASGLPAQGLCLR, MH+ 2737.3830, m/z 913.1325  
 H OS G24 P150811 220811-s1.04871.04871.3.dta

scan 4871: 1.7e+001

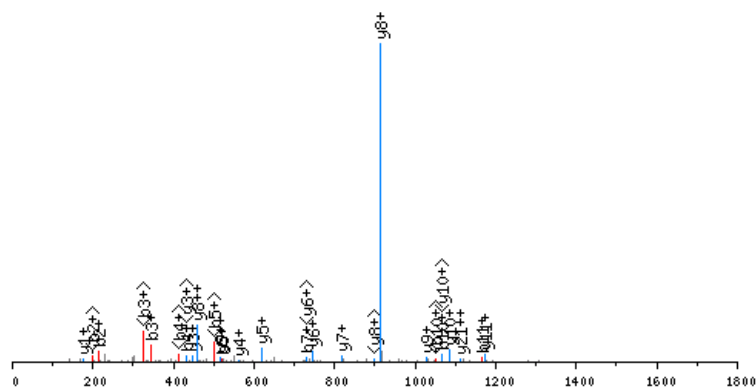

click image to zoom in; click top corners to zoom out [precursor±]

scan 4870: 913.1 m/z; 1.0e+002

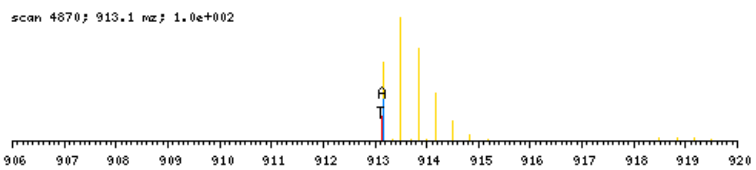

zoomed in precursor plot; T=theoretical m/z, A=acquired m/z

X-range:

-

MassTol: Y-zoom:

MassType:

AVG  MONO

Axis:

1  2

Label:

I  M  -

Ions:

a  +  2+  3+

b  +  2+  3+

c  +  2+  3+

x  +  2+  3+

y  +  2+  3+

z  +  2+  3+

hide H<sub>2</sub>O/NH<sub>3</sub>

zoom 112-122

GO

| b <sup>+</sup> | #  | AA # | y <sup>+</sup> | y <sup>2+</sup> |
|----------------|----|------|----------------|-----------------|
| 114.0555       | 1  | A 26 |                |                 |
| 215.1032       | 2  | T 25 | 2624.3353      | 1312.6716       |
| 344.1458       | 3  | E 24 | 2523.2877      | 1262.1477       |
| 431.1778       | 4  | S 23 | 2394.2451      | 1197.6264       |
| 518.2098       | 5  | S 22 | 2307.2130      | 1154.1104       |
| 615.2626       | 6  | P 21 | 2220.1810      | 1110.5944       |
| 728.3467       | 7  | L 20 | 2123.1283      | 1062.0680       |
| 829.3943       | 8  | T 19 | 2010.0442      | 1005.5260       |
| 930.4420       | 9  | T 18 | 1908.9965      | 955.0022        |
| 1067.5009      | 10 | H 17 | 1807.9488      | 904.4783        |
| 1166.5694      | 11 | V 16 | 1670.8899      | 835.9489        |
| 1279.6534      | 12 | L 15 | 1571.8215      | 786.4147        |
| 1394.6804      | 13 | D 14 | 1458.7374      | 729.8726        |
| 1495.7280      | 14 | T 13 | 1343.7105      | 672.3592        |
| 1566.7652      | 15 | A 12 | 1242.6628      | 621.8353        |
| 1653.7972      | 16 | S 11 | 1171.6257      | 586.3168        |
| 1710.8186      | 17 | G 10 | 1084.5937      | 542.8008        |
| 1823.9027      | 18 | L 9  | 1027.5722      | 514.2900        |
| 1920.9555      | 19 | P 8  | 914.4881       | 457.7480        |
| 1991.9926      | 20 | A 7  | 817.4354       | 409.2216        |
| 2120.0512      | 21 | Q 6  | 746.3983       | 373.7030        |
| 2177.0726      | 22 | G 5  | 618.3397       | 309.6738        |
| 2290.1567      | 23 | L 4  | 561.3182       | 281.1630        |
| 2450.1873      | 24 | C 3  | 448.2342       | 224.6210        |
| 2563.2714      | 25 | L 2  | 288.2036       | 144.6057        |
|                | 26 | R 1  | 175.1195       | 88.0637         |

N-term:+43.02 C(24):+160.03

ATGANATPLDFPSKKR, MH+ 1784.0343, m/z 595.3496  
 H OS G26 P150811 220811-s1.03597.03597.3.dta

X-range:

-

MassTol: Y-zoom:

MassType:

AVG  MONO

Axis:

1  2

Label:

I  M  -

Ions:

a  +  2+  3+

b  +  2+  3+

c  +  2+  3+

x  +  2+  3+

y  +  2+  3+

z  +  2+  3+

hide H<sub>2</sub>O/NH<sub>3</sub>

zoom 112-122

GO

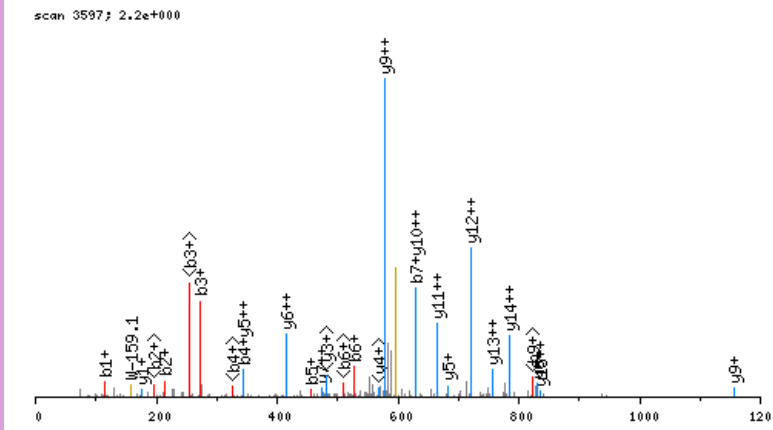

click image to zoom in; click top corners to zoom out [\[precursor±\]](#)

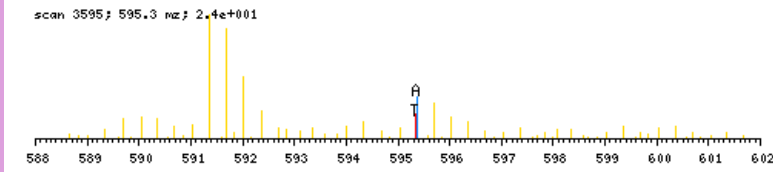

zoomed in precursor plot; T=theoretical m/z, A=acquired m/z

| b <sup>+</sup> | #  | AA | #  | y <sup>+</sup> | y <sup>2+</sup> |
|----------------|----|----|----|----------------|-----------------|
| 114.0555       | 1  | A  | 16 |                |                 |
| 215.1032       | 2  | T  | 15 | 1670.9867      | 835.9972        |
| 272.1247       | 3  | G  | 14 | 1569.9390      | 785.4734        |
| 343.1618       | 4  | A  | 13 | 1512.9175      | 756.9627        |
| 457.2047       | 5  | N  | 12 | 1441.8804      | 721.4441        |
| 528.2418       | 6  | A  | 11 | 1327.8375      | 664.4226        |
| 629.2895       | 7  | T  | 10 | 1256.8004      | 628.9041        |
| 726.3423       | 8  | P  | 9  | 1155.7527      | 578.3803        |
| 839.4263       | 9  | L  | 8  | 1058.6999      | 529.8539        |
| 954.4533       | 10 | D  | 7  | 945.6159       | 473.3118        |
| 1101.5217      | 11 | F  | 6  | 830.5889       | 415.7984        |
| 1198.5744      | 12 | P  | 5  | 683.5205       | 342.2642        |
| 1285.6065      | 13 | S  | 4  | 586.4677       | 293.7378        |
| 1447.7646      | 14 | K  | 3  | 499.4357       | 250.2218        |
| 1609.9227      | 15 | K  | 2  | 337.2776       | 169.1427        |
|                | 16 | R  | 1  | 175.1195       | 88.0637         |

N-term:+43.02 K(14):+162.16  
 K(15):+162.16



ATIATMPVPETR, MH+ 1328.6884, m/z 664.8478  
 H OS G29 P150811 220811-s1.04687.04687.2.dta

scan 4637; 2.8e+000

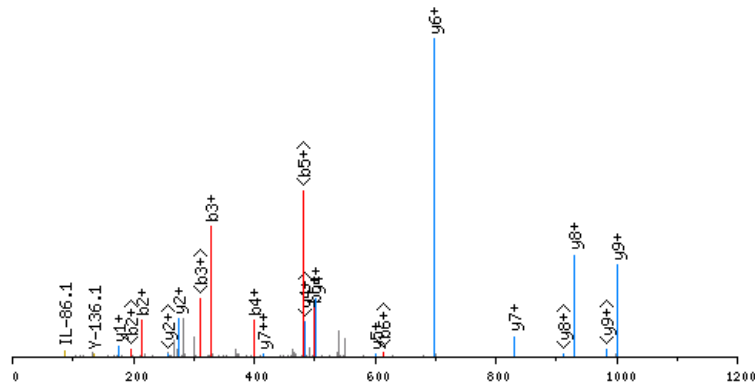

click image to zoom in; click top corners to zoom out [\[precursor±\]](#)

scan 4685; 664.8 m/z; 9.6e+000

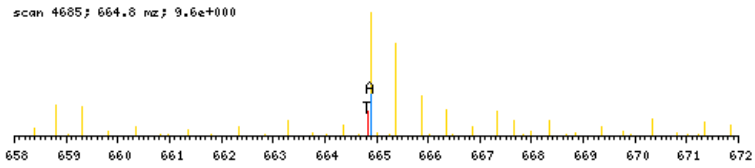

zoomed in precursor plot; T=theoretical m/z, A=acquired m/z

X-range:

-

MassTol: Y-zoom:

MassType:

AVG  MONO

Axis:

1  2

Label:

I  M  -

Ions:

a  +  2+  3+

b  +  2+  3+

c  +  2+  3+

x  +  2+  3+

y  +  2+  3+

z  +  2+  3+

hide H<sub>2</sub>O/NH<sub>3</sub>

zoom 112-122

GO

| b <sup>+</sup> | #  | AA | #  | y <sup>+</sup> | y <sup>2+</sup> |
|----------------|----|----|----|----------------|-----------------|
| 114.0555       | 1  | A  | 12 |                |                 |
| 215.1032       | 2  | T  | 11 | 1215.6407      | 608.3243        |
| 328.1873       | 3  | I  | 10 | 1114.5931      | 557.8004        |
| 399.2244       | 4  | A  | 9  | 1001.5090      | 501.2584        |
| 500.2720       | 5  | T  | 8  | 930.4719       | 465.7399        |
| 631.3125       | 6  | M  | 7  | 829.4242       | 415.2160        |
| 728.3653       | 7  | P  | 6  | 698.3837       | 349.6958        |
| 827.4337       | 8  | V  | 5  | 601.3310       | 301.1694        |
| 924.4865       | 9  | P  | 4  | 502.2625       | 251.6352        |
| 1053.5291      | 10 | E  | 3  | 405.2098       | 203.1088        |
| 1154.5767      | 11 | T  | 2  | 276.1672       | 138.5875        |
|                | 12 | R  | 1  | 175.1195       | 88.0637         |

N-term:+43.02

ATIGPSGLHPGER, MH+ 1333.6864, m/z 667.3469  
 H OS G25 P150811 220811-s1.04299.04299.2.dta

X-range:

-

MassTol: Y-zoom:

MassType:

AVG  MONO

Axis:

1  2

Label:

I  M  -

Ions:

a  +  2+  3+

b  +  2+  3+

c  +  2+  3+

x  +  2+  3+

y  +  2+  3+

z  +  2+  3+

hide H<sub>2</sub>O/NH<sub>3</sub>

zoom 112-122

GO

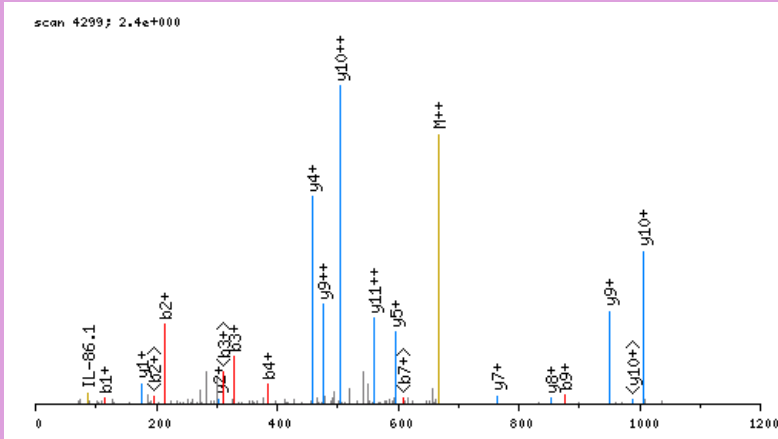

click image to zoom in; click top corners to zoom out [\[precursor±\]](#)

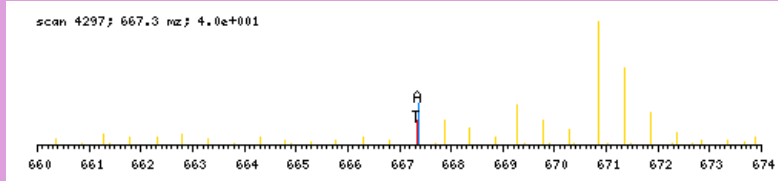

zoomed in precursor plot; T=theoretical m/z, A=acquired m/z

| b <sup>+</sup> | #  | AA # | y <sup>+</sup> | y <sup>2+</sup> |
|----------------|----|------|----------------|-----------------|
| 114.0555       | 1  | A 13 |                |                 |
| 215.1032       | 2  | T 12 | 1220.6388      | 610.8233        |
| 328.1873       | 3  | I 11 | 1119.5911      | 560.2995        |
| 385.2087       | 4  | G 10 | 1006.5070      | 503.7574        |
| 482.2615       | 5  | P 9  | 949.4856       | 475.2467        |
| 569.2935       | 6  | S 8  | 852.4328       | 426.7203        |
| 626.3150       | 7  | G 7  | 765.4008       | 383.2043        |
| 739.3990       | 8  | L 6  | 708.3793       | 354.6936        |
| 876.4580       | 9  | H 5  | 595.2952       | 298.1515        |
| 973.5107       | 10 | P 4  | 458.2363       | 229.6221        |
| 1030.5322      | 11 | G 3  | 361.1836       | 181.0957        |
| 1159.5748      | 12 | E 2  | 304.1621       | 152.5850        |
|                | 13 | R 1  | 175.1195       | 88.0637         |

N-term:+43.02

ATKCTKCGPGYSTPLEAMKGPR, MH+ 2554.3680, m/z 639.3475  
 H OS G27 P150811 220811-s1.04455.04455.4.dta

X-range:

-

MassTol: Y-zoom:

MassType:

AVG  MONO

Axis:

1  2

Label:

I  M  -

Ions:

a  +  2+  3+

b  +  2+  3+

c  +  2+  3+

x  +  2+  3+

y  +  2+  3+

z  +  2+  3+

hide H<sub>2</sub>O/NH<sub>3</sub>

zoom 112-122

GO

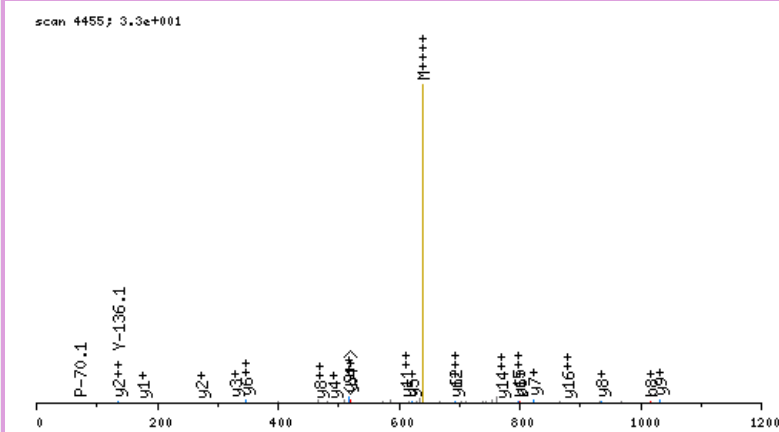

click image to zoom in; click top corners to zoom out [\[precursor±\]](#)

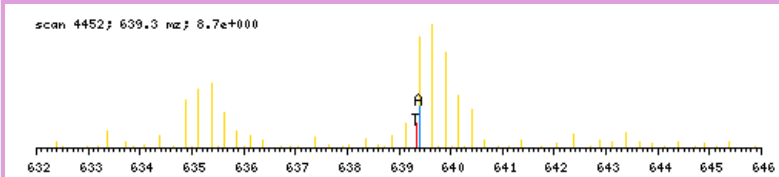

zoomed in precursor plot; T=theoretical m/z, A=acquired m/z

| b <sup>+</sup> | #  | AA # | y <sup>+</sup> | y <sup>2+</sup> |
|----------------|----|------|----------------|-----------------|
| 114.0555       | 1  | A 22 |                |                 |
| 215.1032       | 2  | T 21 | 2441.3203      | 1221.1641       |
| 377.2613       | 3  | K 20 | 2340.2727      | 1170.6402       |
| 537.2919       | 4  | C 19 | 2178.1146      | 1089.5612       |
| 638.3396       | 5  | T 18 | 2018.0840      | 1009.5459       |
| 800.4977       | 6  | K 17 | 1917.0363      | 959.0220        |
| 960.5283       | 7  | C 16 | 1754.8782      | 877.9430        |
| 1017.5497      | 8  | G 15 | 1594.8476      | 797.9277        |
| 1114.6025      | 9  | P 14 | 1537.8261      | 769.4170        |
| 1171.6240      | 10 | G 13 | 1440.7733      | 720.8906        |
| 1334.6873      | 11 | Y 12 | 1383.7519      | 692.3799        |
| 1421.7193      | 12 | S 11 | 1220.6886      | 610.8482        |
| 1522.7670      | 13 | T 10 | 1133.6565      | 567.3322        |
| 1619.8198      | 14 | P 9  | 1032.6088      | 516.8083        |
| 1732.9038      | 15 | L 8  | 935.5561       | 468.2820        |
| 1861.9464      | 16 | E 7  | 822.4720       | 411.7399        |
| 1932.9835      | 17 | A 6  | 693.4294       | 347.2186        |
| 2064.0240      | 18 | M 5  | 622.3923       | 311.7001        |
| 2226.1821      | 19 | K 4  | 491.3518       | 246.1798        |
| 2283.2036      | 20 | G 3  | 329.1937       | 165.1008        |
| 2380.2563      | 21 | P 2  | 272.1723       | 136.5900        |
|                | 22 | R 1  | 175.1195       | 88.0637         |

N-term:+43.02 K(3):+162.16  
 C(4):+160.03 K(6):+162.16 C(7):+160.03  
 K(19):+162.16

X-range:

-

MassTol: Y-zoom:

MassType:

AVG  MONO

Axis:

1  2

Label:

I  M  -

Ions:

a  +  2+  3+

b  +  2+  3+

c  +  2+  3+

x  +  2+  3+

y  +  2+  3+

z  +  2+  3+

hide H<sub>2</sub>O/NH<sub>3</sub>

zoom 112-122

GO

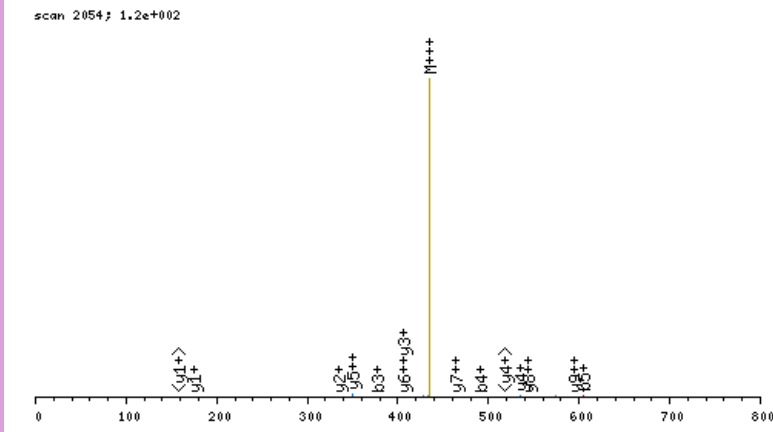

click image to zoom in; click top corners to zoom out [\[precursor±\]](#)

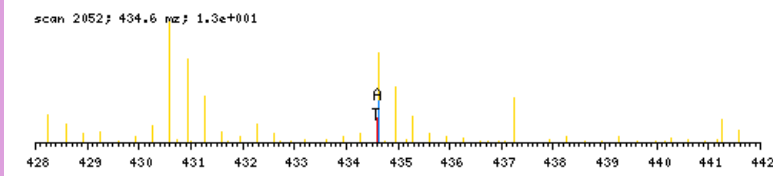

zoomed in precursor plot; T=theoretical m/z, A=acquired m/z

| b <sup>+</sup> | #  | AA # | y <sup>+</sup> | y <sup>2+</sup> |
|----------------|----|------|----------------|-----------------|
| 114.0555       | 1  | A 10 |                |                 |
| 215.1032       | 2  | T 9  | 1188.7047      | 594.8563        |
| 377.2613       | 3  | K 8  | 1087.6570      | 544.3324        |
| 490.3454       | 4  | I 7  | 925.4989       | 463.2534        |
| 605.3723       | 5  | D 6  | 812.4149       | 406.7113        |
| 767.5304       | 6  | K 5  | 697.3879       | 349.1979        |
| 896.5730       | 7  | E 4  | 535.2298       | 268.1188        |
| 967.6101       | 8  | A 3  | 406.1872       | 203.5975        |
| 1127.6407      | 9  | C 2  | 335.1501       | 168.0790        |
|                | 10 | R 1  | 175.1195       | 88.0637         |

N-term:+43.02 K(3):+162.16  
K(6):+162.16 C(9):+160.03

X-range:

-

MassTol: Y-zoom:

MassType:

AVG  MONO

Axis:

1  2

Label:

I  M  -

Ions:

a  +  2+  3+

b  +  2+  3+

c  +  2+  3+

x  +  2+  3+

y  +  2+  3+

z  +  2+  3+

hide H<sub>2</sub>O/NH<sub>3</sub>

zoom 112-122

GO

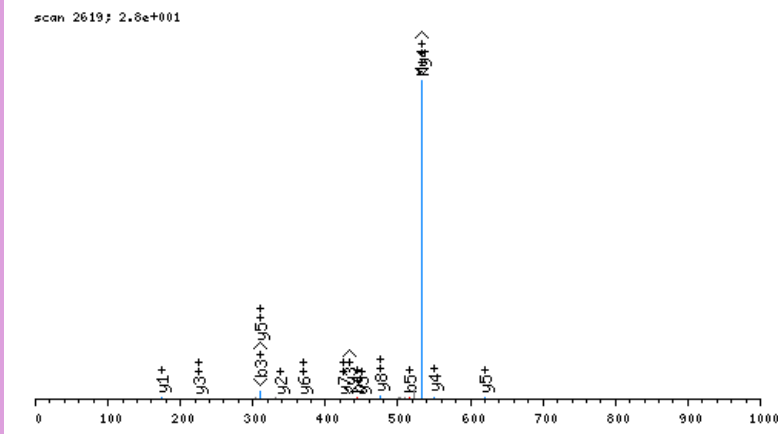

click image to zoom in; click top corners to zoom out [\[precursor±\]](#)

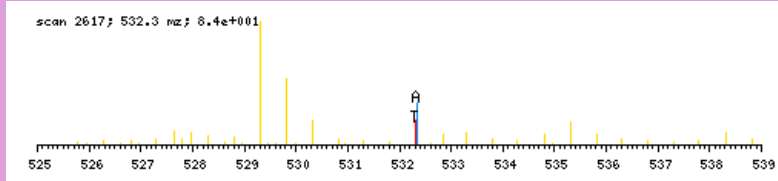

zoomed in precursor plot; T=theoretical m/z, A=acquired m/z

| b <sup>+</sup> | # | AA # | y <sup>+</sup> | y <sup>2+</sup> |
|----------------|---|------|----------------|-----------------|
| 114.0555       | 1 | A    | 9              |                 |
| 215.1032       | 2 | T    | 8              | 950.5847        |
| 329.1461       | 3 | N    | 7              | 849.5371        |
| 444.1731       | 4 | D    | 6              | 735.4941        |
| 515.2102       | 5 | A    | 5              | 620.4672        |
| 614.2786       | 6 | V    | 4              | 549.4301        |
| 727.3627       | 7 | L    | 3              | 450.3617        |
| 889.5208       | 8 | K    | 2              | 337.2776        |
|                | 9 | R    | 1              | 175.1195        |

N-term:+43.02 K(8):+162.16

ATPAAPASGVR, MH+ 1039.5536, m/z 520.2805  
 H OS G29 P150811 220811-s1.02522.02522.2.dta

X-range:

-

MassTol: Y-zoom:

MassType:

AVG  MONO

Axis:

1  2

Label:

I  M  -

Ions:

a  +  2+  3+

b  +  2+  3+

c  +  2+  3+

x  +  2+  3+

y  +  2+  3+

z  +  2+  3+

hide H<sub>2</sub>O/NH<sub>3</sub>

zoom 112-122

GO

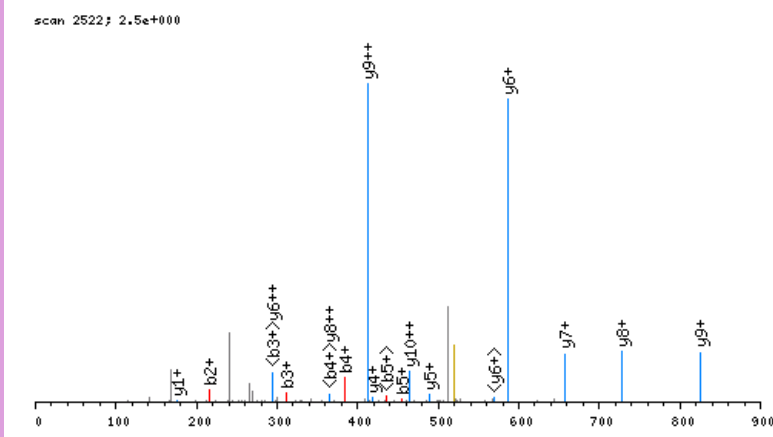

click image to zoom in; click top corners to zoom out [\[precursor±\]](#)

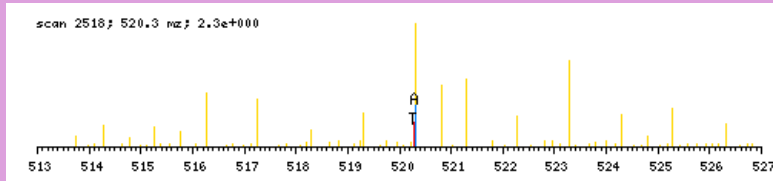

zoomed in precursor plot; T=theoretical m/z, A=acquired m/z

| b <sup>+</sup> | #  | AA | #  | y <sup>+</sup> | y <sup>2+</sup> |
|----------------|----|----|----|----------------|-----------------|
| 114.0555       | 1  | A  | 11 |                |                 |
| 215.1032       | 2  | T  | 10 | 926.5060       | 463.7569        |
| 312.1560       | 3  | P  | 9  | 825.4583       | 413.2331        |
| 383.1931       | 4  | A  | 8  | 728.4055       | 364.7067        |
| 454.2302       | 5  | A  | 7  | 657.3684       | 329.1881        |
| 551.2829       | 6  | P  | 6  | 586.3313       | 293.6696        |
| 622.3201       | 7  | A  | 5  | 489.2785       | 245.1432        |
| 709.3521       | 8  | S  | 4  | 418.2414       | 209.6246        |
| 766.3736       | 9  | G  | 3  | 331.2094       | 166.1086        |
| 865.4420       | 10 | V  | 2  | 274.1879       | 137.5979        |
|                | 11 | R  | 1  | 175.1195       | 88.0637         |

N-term:+43.02

ATPEASGSGEKVEGSEPSVTYYR, MH+ 2477.1897, m/z 826.4014  
 H OS G24 P150811 220811-s1.03265.03265.3.dta

X-range:

-

MassTol: Y-zoom:

MassType:

AVG  MONO

Axis:

1  2

Label:

I  M  -

Ions:

a  +  2+  3+

b  +  2+  3+

c  +  2+  3+

x  +  2+  3+

y  +  2+  3+

z  +  2+  3+

hide H<sub>2</sub>O/NH<sub>3</sub>

zoom 112-122

GO

scan 3265; 2.9e+000

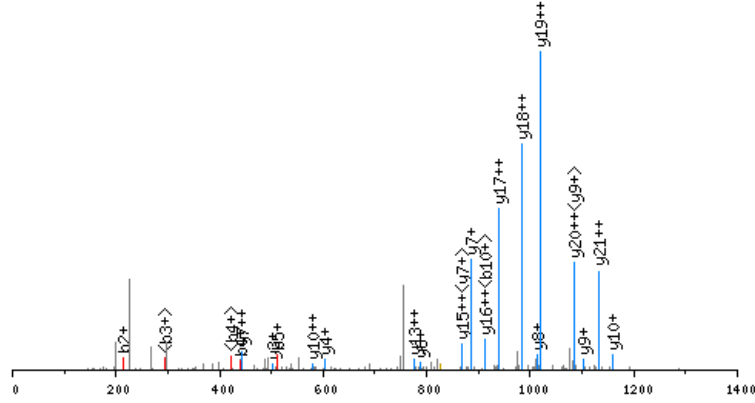

click image to zoom in; click top corners to zoom out [precursor±]

scan 3262; 826.4 Hz; 1.2e+001

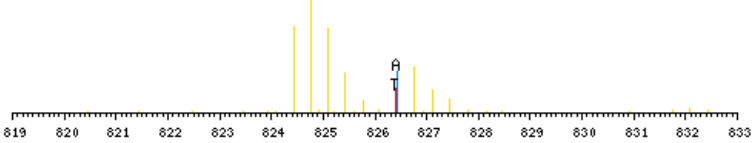

zoomed in precursor plot; T=theoretical m/z, A=acquired m/z

| b <sup>+</sup> | #  | AA # | y <sup>+</sup> | y <sup>2+</sup> |
|----------------|----|------|----------------|-----------------|
| 114.0555       | 1  | A 23 |                |                 |
| 215.1032       | 2  | T 22 | 2364.1420      | 1182.5749       |
| 312.1560       | 3  | P 21 | 2263.0943      | 1132.0511       |
| 441.1985       | 4  | E 20 | 2166.0415      | 1083.5247       |
| 512.2357       | 5  | A 19 | 2036.9989      | 1019.0034       |
| 599.2677       | 6  | S 18 | 1965.9618      | 983.4848        |
| 656.2892       | 7  | G 17 | 1878.9298      | 939.9688        |
| 743.3212       | 8  | S 16 | 1821.9083      | 911.4581        |
| 800.3426       | 9  | G 15 | 1734.8763      | 867.9421        |
| 929.3852       | 10 | E 14 | 1677.8548      | 839.4313        |
| 1091.5433      | 11 | K 13 | 1548.8122      | 774.9100        |
| 1190.6118      | 12 | V 12 | 1386.6541      | 693.8310        |
| 1319.6543      | 13 | E 11 | 1287.5857      | 644.2968        |
| 1376.6758      | 14 | G 10 | 1158.5431      | 579.7755        |
| 1463.7078      | 15 | S 9  | 1101.5217      | 551.2647        |
| 1592.7504      | 16 | E 8  | 1014.4896      | 507.7487        |
| 1689.8032      | 17 | P 7  | 885.4470       | 443.2274        |
| 1776.8352      | 18 | S 6  | 788.3943       | 394.7011        |
| 1875.9036      | 19 | V 5  | 701.3623       | 351.1850        |
| 1976.9513      | 20 | T 4  | 602.2938       | 301.6508        |
| 2140.0146      | 21 | Y 3  | 501.2462       | 251.1270        |
| 2303.0780      | 22 | Y 2  | 338.1828       | 169.5953        |
|                | 23 | R 1  | 175.1195       | 88.0637         |

N-term:+43.02 K(11):+162.16

ATQHKTSLPQGV, MH+ 1492.8236, m/z 498.2794  
 H OS G27 P150811 220811-s1.02411.02411.3.dta

scan 2411; 9.7e+000

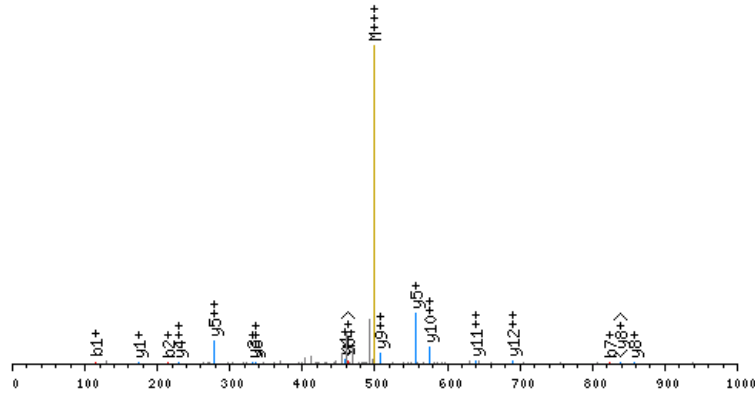

click image to zoom in; click top corners to zoom out [\[precursor±\]](#)

scan 2407; 498.3 m/z; 1.9e+003

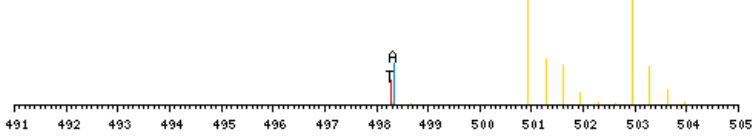

zoomed in precursor plot; T=theoretical m/z, A=acquired m/z

X-range:

-

MassTol: Y-zoom:

MassType:

AVG  MONO

Axis:

1  2

Label:

I  M  -

Ions:

a  +  2+  3+

b  +  2+  3+

c  +  2+  3+

x  +  2+  3+

y  +  2+  3+

z  +  2+  3+

hide H<sub>2</sub>O/NH<sub>3</sub>

zoom 112-122

GO

| b <sup>+</sup> | #  | AA # | y <sup>+</sup> | y <sup>2+</sup> |
|----------------|----|------|----------------|-----------------|
| 114.0555       | 1  | A 13 |                |                 |
| 215.1032       | 2  | T 12 | 1379.7760      | 690.3919        |
| 343.1618       | 3  | Q 11 | 1278.7283      | 639.8681        |
| 480.2207       | 4  | H 10 | 1150.6697      | 575.8388        |
| 636.3470       | 5  | K 9  | 1013.6108      | 507.3093        |
| 737.3947       | 6  | T 8  | 857.4845       | 429.2462        |
| 824.4267       | 7  | S 7  | 756.4368       | 378.7223        |
| 937.5108       | 8  | L 6  | 669.4048       | 335.2063        |
| 1034.5635      | 9  | P 5  | 556.3207       | 278.6643        |
| 1162.6221      | 10 | Q 4  | 459.2680       | 230.1379        |
| 1219.6436      | 11 | G 3  | 331.2094       | 166.1086        |
| 1318.7120      | 12 | V 2  | 274.1879       | 137.5979        |
|                | 13 | R 1  | 175.1195       | 88.0637         |

N-term:+43.02 K(5):+156.13



ATRGTVTDFPGFDGR, MH+ 1638.7876, m/z 546.9341  
 H OS G25 P150811 220811-s1.06431.06431.3.dta

X-range:

-

MassTol: Y-zoom:

MassType:

AVG  MONO

Axis:

1  2

Label:

I  M  -

Ions:

a  +  2+  3+

b  +  2+  3+

c  +  2+  3+

x  +  2+  3+

y  +  2+  3+

z  +  2+  3+

hide H<sub>2</sub>O/NH<sub>3</sub>

zoom 112-122

GO

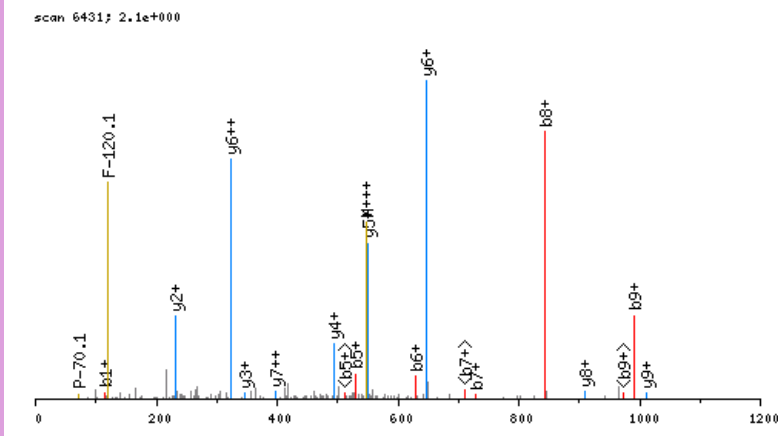

click image to zoom in; click top corners to zoom out [\[precursor±\]](#)

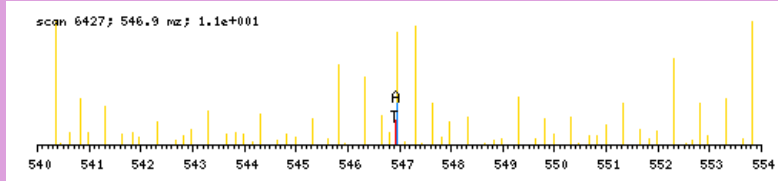

zoomed in precursor plot; T=theoretical m/z, A=acquired m/z

| b <sup>+</sup> | #  | AA # | y <sup>+</sup> | y <sup>2+</sup> |
|----------------|----|------|----------------|-----------------|
| 114.0555       | 1  | A 15 |                |                 |
| 215.1032       | 2  | T 14 | 1525.7399      | 763.3739        |
| 371.2043       | 3  | R 13 | 1424.6923      | 712.8500        |
| 428.2258       | 4  | G 12 | 1268.5911      | 634.7995        |
| 529.2734       | 5  | T 11 | 1211.5697      | 606.2888        |
| 628.3419       | 6  | V 10 | 1110.5220      | 555.7649        |
| 729.3895       | 7  | T 9  | 1011.4536      | 506.2307        |
| 844.4165       | 8  | D 8  | 910.4059       | 455.7069        |
| 991.4849       | 9  | F 7  | 795.3790       | 398.1934        |
| 1088.5377      | 10 | P 6  | 648.3105       | 324.6592        |
| 1145.5591      | 11 | G 5  | 551.2578       | 276.1328        |
| 1292.6275      | 12 | F 4  | 494.2363       | 247.6221        |
| 1407.6545      | 13 | D 3  | 347.1679       | 174.0879        |
| 1464.6759      | 14 | G 2  | 232.1410       | 116.5744        |
|                | 15 | R 1  | 175.1195       | 88.0637         |

N-term:+43.02

ATSELSQVSEENQER, MH+ 1908.8245, m/z 636.9463  
 H OS G29 P150811 220811-s1.03523.03523.3.dta

X-range:

-

MassTol: Y-zoom:

MassType:

AVG  MONO

Axis:

1  2

Label:

I  M  -

Ions:

a  +  2+  3+

b  +  2+  3+

c  +  2+  3+

x  +  2+  3+

y  +  2+  3+

z  +  2+  3+

hide H<sub>2</sub>O/NH<sub>3</sub>

zoom 112-122

GO

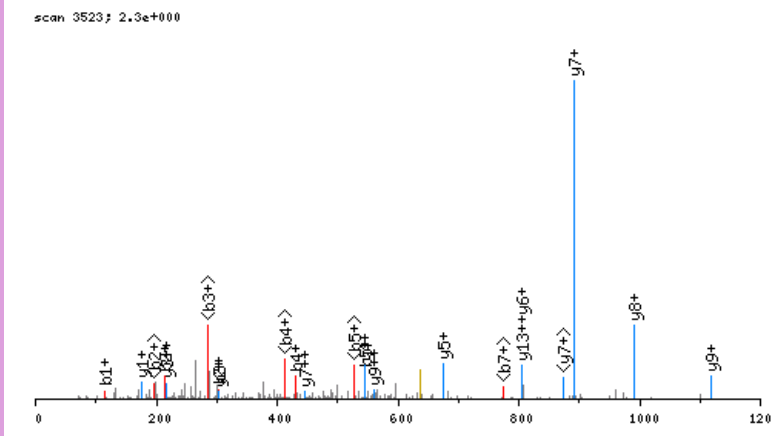

click image to zoom in; click top corners to zoom out [\[precursor±\]](#)

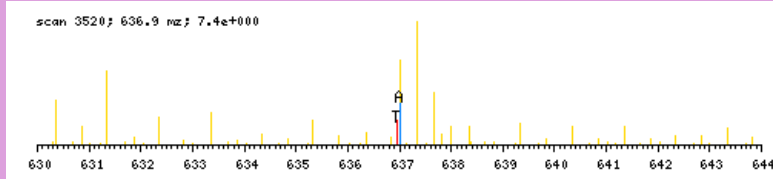

zoomed in precursor plot; T=theoretical m/z, A=acquired m/z

| b <sup>+</sup> | #  | AA # | y <sup>+</sup> | y <sup>2+</sup> |
|----------------|----|------|----------------|-----------------|
| 114.0555       | 1  | A 16 |                |                 |
| 215.1032       | 2  | T 15 | 1795.7768      | 898.3923        |
| 302.1352       | 3  | S 14 | 1694.7291      | 847.8685        |
| 431.1778       | 4  | E 13 | 1607.6971      | 804.3525        |
| 544.2619       | 5  | L 12 | 1478.6545      | 739.8312        |
| 631.2939       | 6  | S 11 | 1365.5704      | 683.2891        |
| 791.3245       | 7  | C 10 | 1278.5384      | 639.7731        |
| 919.3831       | 8  | Q 9  | 1118.5078      | 559.7578        |
| 1018.4515      | 9  | V 8  | 990.4492       | 495.7285        |
| 1105.4835      | 10 | S 7  | 891.3808       | 446.1943        |
| 1234.5261      | 11 | E 6  | 804.3488       | 402.6783        |
| 1363.5687      | 12 | E 5  | 675.3062       | 338.1570        |
| 1477.6116      | 13 | N 4  | 546.2636       | 273.6357        |
| 1605.6702      | 14 | Q 3  | 432.2207       | 216.6142        |
| 1734.7128      | 15 | E 2  | 304.1621       | 152.5850        |
|                | 16 | R 1  | 175.1195       | 88.0637         |

N-term:+43.02 C(7):+160.03

ATTAQQSPQPVAGKR, MH+ 1609.8662, m/z 537.2936  
 H OS G25 P150811 220811-s1.02174.02174.3.dta

X-range:

-

MassTol: Y-zoom:

MassType:

AVG  MONO

Axis:

1  2

Label:

I  M  -

Ions:

a  +  2+  3+

b  +  2+  3+

c  +  2+  3+

x  +  2+  3+

y  +  2+  3+

z  +  2+  3+

hide H<sub>2</sub>O/NH<sub>3</sub>

zoom 112-122

GO

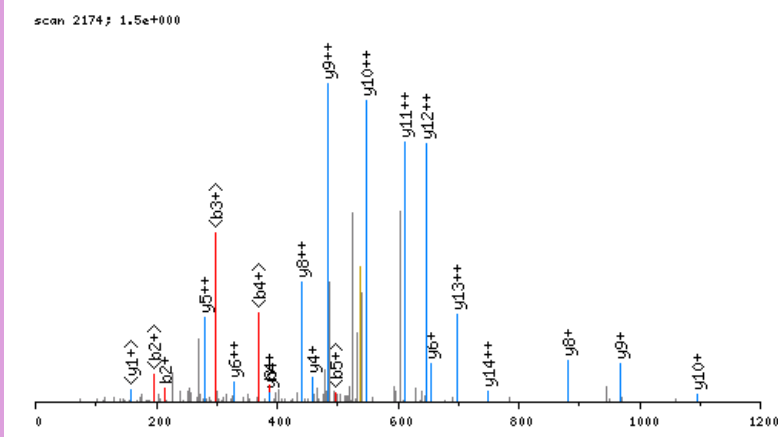

click image to zoom in; click top corners to zoom out [\[precursor±\]](#)

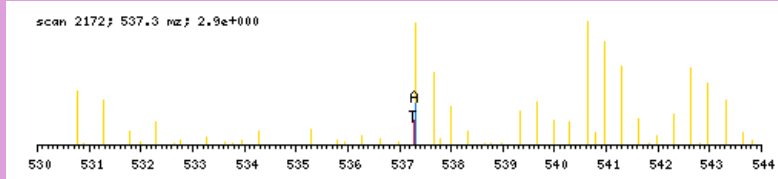

zoomed in precursor plot; T=theoretical m/z, A=acquired m/z

| b <sup>+</sup> | #  | AA # | y <sup>+</sup> | y <sup>2+</sup> |
|----------------|----|------|----------------|-----------------|
| 114.0555       | 1  | A 15 |                |                 |
| 215.1032       | 2  | T 14 | 1496.8186      | 748.9132        |
| 316.1509       | 3  | T 13 | 1395.7709      | 698.3893        |
| 387.1880       | 4  | A 12 | 1294.7232      | 647.8655        |
| 515.2466       | 5  | Q 11 | 1223.6861      | 612.3470        |
| 643.3051       | 6  | Q 10 | 1095.6275      | 548.3177        |
| 730.3372       | 7  | S 9  | 967.5689       | 484.2884        |
| 827.3899       | 8  | P 8  | 880.5369       | 440.7724        |
| 955.4485       | 9  | Q 7  | 783.4841       | 392.2460        |
| 1052.5013      | 10 | P 6  | 655.4256       | 328.2167        |
| 1151.5697      | 11 | V 5  | 558.3728       | 279.6903        |
| 1222.6068      | 12 | A 4  | 459.3044       | 230.1561        |
| 1279.6283      | 13 | G 3  | 388.2673       | 194.6375        |
| 1435.7546      | 14 | K 2  | 331.2458       | 166.1268        |
|                | 15 | R 1  | 175.1195       | 88.0637         |

N-term:+43.02 K(14):+156.13

ATVAATTKVPEIR, MH+ 1426.8270, m/z 713.9171  
 H OS G24 P150811 220811-s1.03489.03489.2.dta

scan 3489; 1.1e+001

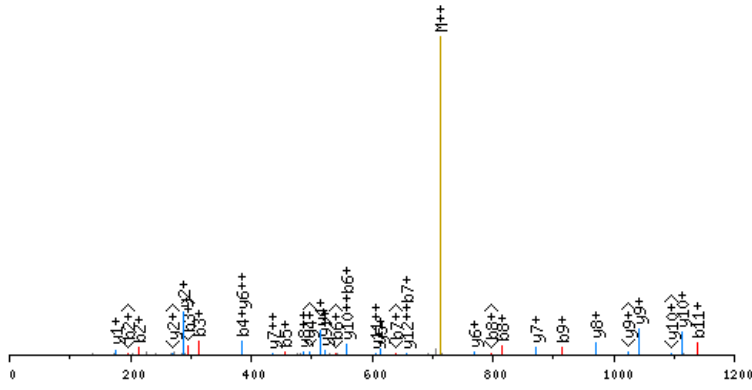

click image to zoom in; click top corners to zoom out [\[precursor±\]](#)

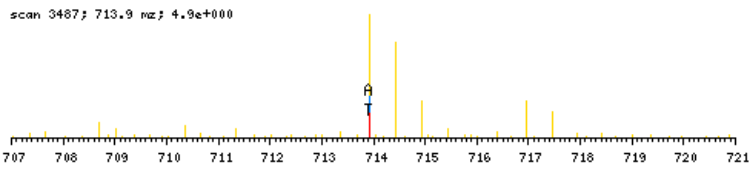

zoomed in precursor plot; T=theoretical m/z, A=acquired m/z

X-range:

-

MassTol: Y-zoom:

MassType:

AVG  MONO

Axis:

1  2

Label:

I  M  -

Ions:

a  +  2+  3+

b  +  2+  3+

c  +  2+  3+

x  +  2+  3+

y  +  2+  3+

z  +  2+  3+

hide H<sub>2</sub>O/NH<sub>3</sub>

zoom 112-122

GO

| b <sup>+</sup> | #  | AA # | y <sup>+</sup> | y <sup>2+</sup> |
|----------------|----|------|----------------|-----------------|
| 114.0555       | 1  | A 13 |                |                 |
| 215.1032       | 2  | T 12 | 1313.7793      | 657.3936        |
| 314.1716       | 3  | V 11 | 1212.7316      | 606.8697        |
| 385.2087       | 4  | A 10 | 1113.6632      | 557.3355        |
| 456.2458       | 5  | A 9  | 1042.6261      | 521.8170        |
| 557.2935       | 6  | T 8  | 971.5890       | 486.2984        |
| 658.3412       | 7  | T 7  | 870.5413       | 435.7746        |
| 814.4675       | 8  | K 6  | 769.4936       | 385.2507        |
| 913.5359       | 9  | V 5  | 613.3673       | 307.1876        |
| 1010.5887      | 10 | P 4  | 514.2989       | 257.6534        |
| 1139.6313      | 11 | E 3  | 417.2462       | 209.1270        |
| 1252.7153      | 12 | I 2  | 288.2036       | 144.6057        |
|                | 13 | R 1  | 175.1195       | 88.0637         |

N-term:+43.02 K(8):+156.13

ATVDLEKLR, MH+ 1114.6472, m/z 557.8273  
 H OS G25 P150811 220811-s1.05669.05669.2.dta

X-range:

-

MassTol: Y-zoom:

MassType:

AVG  MONO

Axis:

1  2

Label:

I  M  -

Ions:

a  +  2+  3+

b  +  2+  3+

c  +  2+  3+

x  +  2+  3+

y  +  2+  3+

z  +  2+  3+

hide H<sub>2</sub>O/NH<sub>3</sub>

zoom 112-122

GO

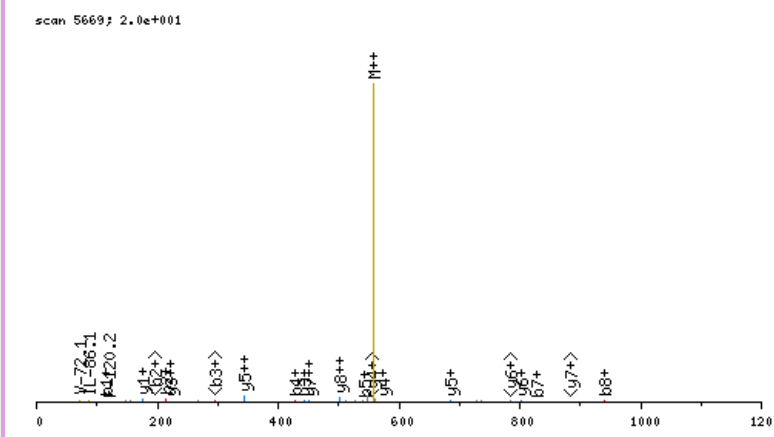

click image to zoom in; click top corners to zoom out [\[precursor±\]](#)

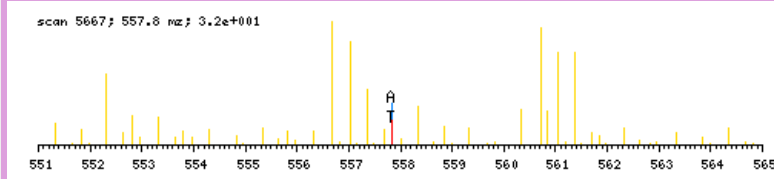

zoomed in precursor plot; T=theoretical m/z, A=acquired m/z

| b <sup>+</sup> | # | AA # | y <sup>+</sup> | y <sup>2+</sup> |
|----------------|---|------|----------------|-----------------|
| 114.0555       | 1 | A    | 9              |                 |
| 215.1032       | 2 | T    | 8              | 1001.5996       |
| 314.1716       | 3 | V    | 7              | 900.5519        |
| 429.1985       | 4 | D    | 6              | 801.4835        |
| 542.2826       | 5 | L    | 5              | 686.4565        |
| 671.3252       | 6 | E    | 4              | 573.3725        |
| 827.4515       | 7 | K    | 3              | 444.3299        |
| 940.5356       | 8 | L    | 2              | 288.2036        |
|                | 9 | R    | 1              | 175.1195        |

N-term:+43.02 K(7):+156.13

ATYLEFIQQNEER, MH+ 1682.8026, m/z 841.9049  
 H OS G29 P150811 220811-s1.06338.06338.2.dta

X-range:

-

MassTol: Y-zoom:

MassType:

AVG  MONO

Axis:

1  2

Label:

I  M  -

Ions:

a  +  2+  3+

b  +  2+  3+

c  +  2+  3+

x  +  2+  3+

y  +  2+  3+

z  +  2+  3+

hide H<sub>2</sub>O/NH<sub>3</sub>

zoom 112-122

GO

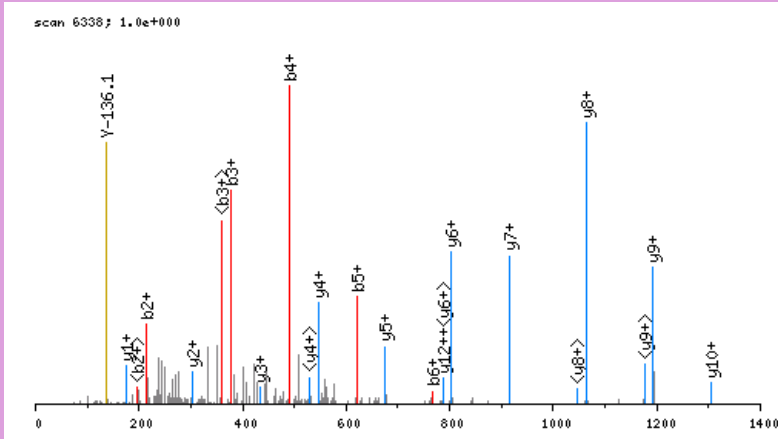

click image to zoom in; click top corners to zoom out [\[precursor±\]](#)

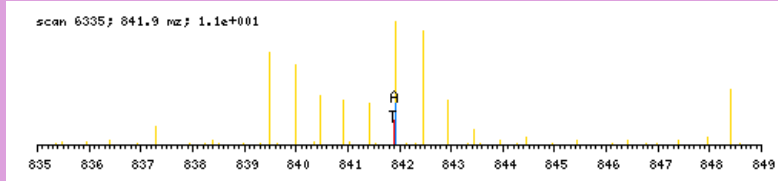

zoomed in precursor plot; T=theoretical m/z, A=acquired m/z

| b <sup>+</sup> | #  | AA # | y <sup>+</sup> | y <sup>2+</sup> |
|----------------|----|------|----------------|-----------------|
| 114.0555       | 1  | A 13 |                |                 |
| 215.1032       | 2  | T 12 | 1569.7549      | 785.3814        |
| 378.1665       | 3  | Y 11 | 1468.7072      | 734.8575        |
| 491.2506       | 4  | L 10 | 1305.6439      | 653.3259        |
| 620.2932       | 5  | E 9  | 1192.5598      | 596.7838        |
| 767.3616       | 6  | F 8  | 1063.5172      | 532.2625        |
| 880.4457       | 7  | I 7  | 916.4488       | 458.7283        |
| 1008.5042      | 8  | Q 6  | 803.3648       | 402.1863        |
| 1136.5628      | 9  | Q 5  | 675.3062       | 338.1570        |
| 1250.6057      | 10 | N 4  | 547.2476       | 274.1277        |
| 1379.6483      | 11 | E 3  | 433.2047       | 217.1063        |
| 1508.6909      | 12 | E 2  | 304.1621       | 152.5850        |
|                | 13 | R 1  | 175.1195       | 88.0637         |

N-term:+43.02

AVAAAAATAMSAAGGGGASAAR, MH+ 1873.9190, m/z 625.3112  
 H OS G29 P150811 220811-s1.06128.06128.3.dta

X-range:

-

MassTol: Y-zoom:

MassType:

AVG  MONO

Axis:

I  M  C

Label:

I  M  C

Ions:

a  +  2+  3+

b  +  2+  3+

c  +  2+  3+

x  +  2+  3+

y  +  2+  3+

z  +  2+  3+

hide H<sub>2</sub>O/NH<sub>3</sub>

zoom 112-122

GO

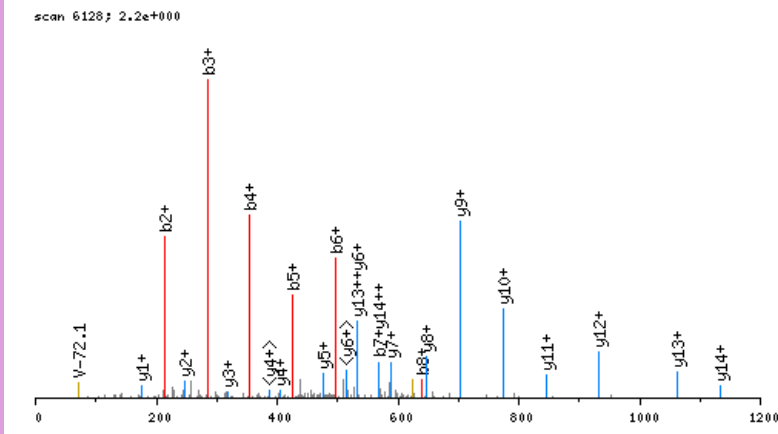

click image to zoom in; click top corners to zoom out [precursor±]

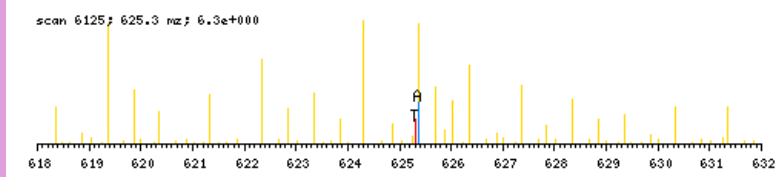

zoomed in precursor plot; T=theoretical m/z, A=acquired m/z

| b <sup>+</sup> | #  | AA # | y <sup>+</sup> | y <sup>2+</sup> |
|----------------|----|------|----------------|-----------------|
| 114.0555       | 1  | A 23 |                |                 |
| 213.1239       | 2  | V 22 | 1760.8714      | 880.9396        |
| 284.1610       | 3  | A 21 | 1661.8029      | 831.4054        |
| 355.1982       | 4  | A 20 | 1590.7658      | 795.8868        |
| 426.2353       | 5  | A 19 | 1519.7287      | 760.3683        |
| 497.2724       | 6  | A 18 | 1448.6916      | 724.8497        |
| 568.3095       | 7  | A 17 | 1377.6545      | 689.3312        |
| 639.3466       | 8  | A 16 | 1306.6174      | 653.8126        |
| 740.3943       | 9  | T 15 | 1235.5803      | 618.2940        |
| 811.4314       | 10 | A 14 | 1134.5326      | 567.7702        |
| 942.4719       | 11 | M 13 | 1063.4955      | 532.2516        |
| 1029.5039      | 12 | S 12 | 932.4550       | 466.7314        |
| 1100.5410      | 13 | A 11 | 845.4230       | 423.2154        |
| 1171.5781      | 14 | A 10 | 774.3858       | 387.6968        |
| 1228.5996      | 15 | G 9  | 703.3487       | 352.1783        |
| 1285.6211      | 16 | G 8  | 646.3273       | 323.6675        |
| 1342.6425      | 17 | G 7  | 589.3058       | 295.1568        |
| 1399.6640      | 18 | G 6  | 532.2843       | 266.6461        |
| 1470.7011      | 19 | A 5  | 475.2629       | 238.1353        |
| 1557.7331      | 20 | S 4  | 404.2258       | 202.6168        |
| 1628.7703      | 21 | A 3  | 317.1937       | 159.1008        |
| 1699.8074      | 22 | A 2  | 246.1566       | 123.5822        |
|                | 23 | R 1  | 175.1195       | 88.0637         |

N-term:+43.02

AVAAAVAAPAGGGGAR, MH+ 1379.7395, m/z 690.3734  
 H OS G29 P150811 220811-s1.03667.03667.2.dta

X-range:

-

MassTol: Y-zoom:

MassType:

AVG  MONO

Axis:

1  2

Label:

I  M  -

Ions:

a  +  2+  3+

b  +  2+  3+

c  +  2+  3+

x  +  2+  3+

y  +  2+  3+

z  +  2+  3+

hide H<sub>2</sub>O/NH<sub>3</sub>

zoom 112-122

GO

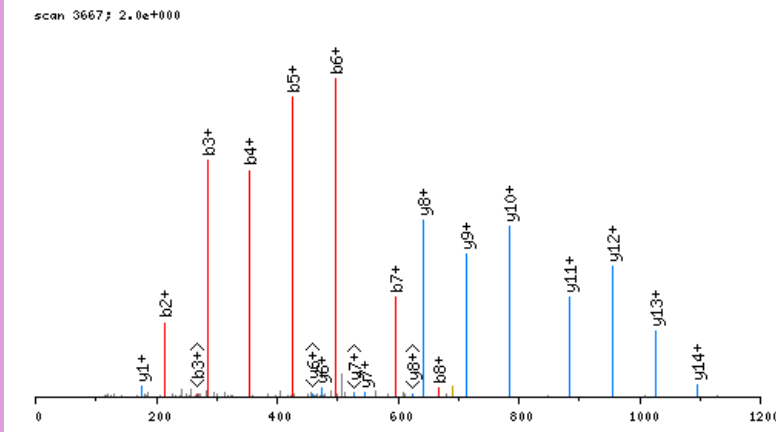

click image to zoom in; click top corners to zoom out [\[precursor±\]](#)

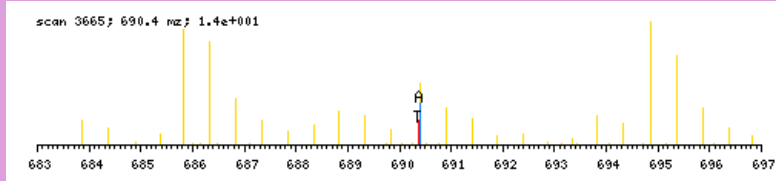

zoomed in precursor plot; T=theoretical m/z, A=acquired m/z

| b <sup>+</sup> | #  | AA # | y <sup>+</sup> | y <sup>2+</sup> |
|----------------|----|------|----------------|-----------------|
| 114.0555       | 1  | A 17 |                |                 |
| 213.1239       | 2  | V 16 | 1266.6919      | 633.8498        |
| 284.1610       | 3  | A 15 | 1167.6234      | 584.3156        |
| 355.1982       | 4  | A 14 | 1096.5863      | 548.7971        |
| 426.2353       | 5  | A 13 | 1025.5492      | 513.2785        |
| 497.2724       | 6  | A 12 | 954.5121       | 477.7600        |
| 596.3408       | 7  | V 11 | 883.4750       | 442.2414        |
| 667.3779       | 8  | A 10 | 784.4066       | 392.7072        |
| 738.4150       | 9  | A 9  | 713.3695       | 357.1886        |
| 835.4678       | 10 | P 8  | 642.3323       | 321.6701        |
| 906.5049       | 11 | A 7  | 545.2796       | 273.1437        |
| 963.5264       | 12 | G 6  | 474.2425       | 237.6251        |
| 1020.5478      | 13 | G 5  | 417.2210       | 209.1144        |
| 1077.5693      | 14 | G 4  | 360.1995       | 180.6037        |
| 1134.5908      | 15 | G 3  | 303.1781       | 152.0930        |
| 1205.6279      | 16 | A 2  | 246.1566       | 123.5822        |
|                | 17 | R 1  | 175.1195       | 88.0637         |

N-term:+43.02



AVAVGRPSNEELR, MH+ 1439.7607, m/z 720.3840  
 H OS G25 P150811 220811-s1.03900.03900.2.dta

X-range:

-

MassTol: Y-zoom:

MassType:

AVG  MONO

Axis:

1  2

Label:

I  M  -

Ions:

a  +  2+  3+

b  +  2+  3+

c  +  2+  3+

x  +  2+  3+

y  +  2+  3+

z  +  2+  3+

hide H<sub>2</sub>O/NH<sub>3</sub>

zoom 112-122

GO

scan 3900; 8.5e+001

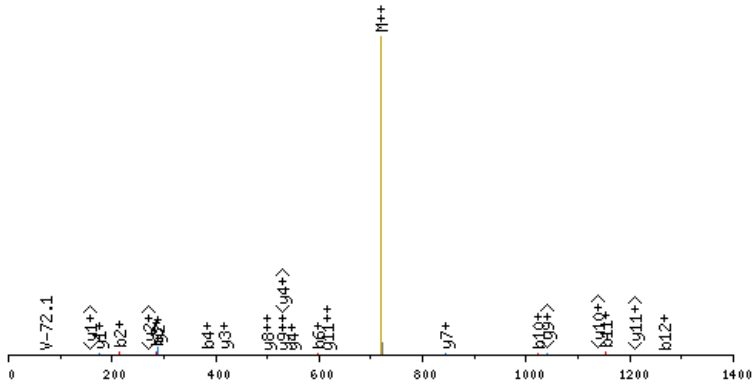

click image to zoom in; click top corners to zoom out [\[precursor±\]](#)

scan 3897; 720.4 m/z; 1.8e+001

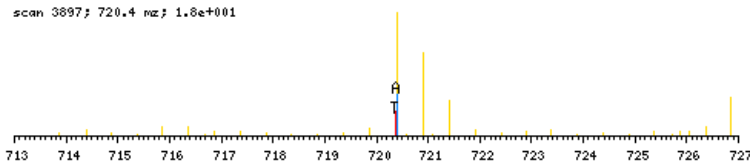

zoomed in precursor plot; T=theoretical m/z, A=acquired m/z

| b <sup>+</sup> | #  | AA # | y <sup>+</sup> | y <sup>2+</sup> |
|----------------|----|------|----------------|-----------------|
| 114.0555       | 1  | A 13 |                |                 |
| 213.1239       | 2  | V 12 | 1326.7130      | 663.8604        |
| 284.1610       | 3  | A 11 | 1227.6446      | 614.3262        |
| 383.2295       | 4  | V 10 | 1156.6075      | 578.8076        |
| 440.2509       | 5  | G 9  | 1057.5390      | 529.2734        |
| 596.3520       | 6  | R 8  | 1000.5176      | 500.7627        |
| 693.4048       | 7  | P 7  | 844.4165       | 422.7121        |
| 780.4368       | 8  | S 6  | 747.3637       | 374.1858        |
| 894.4798       | 9  | N 5  | 660.3317       | 330.6698        |
| 1023.5223      | 10 | E 4  | 546.2888       | 273.6483        |
| 1152.5649      | 11 | E 3  | 417.2462       | 209.1270        |
| 1265.6490      | 12 | L 2  | 288.2036       | 144.6057        |
|                | 13 | R 1  | 175.1195       | 88.0637         |

N-term:+43.02

AVDGGCGDTGDWEGR, MH+ 1593.6239, m/z 797.3156  
 H OS G29 P150811 220811-s1.03446.03446.2.dta

X-range:

-

MassTol: Y-zoom:

MassType:

AVG  MONO

Axis:

1  2

Label:

I  M  -

Ions:

a  +  2+  3+

b  +  2+  3+

c  +  2+  3+

x  +  2+  3+

y  +  2+  3+

z  +  2+  3+

hide H<sub>2</sub>O/NH<sub>3</sub>

zoom 112-122

GO

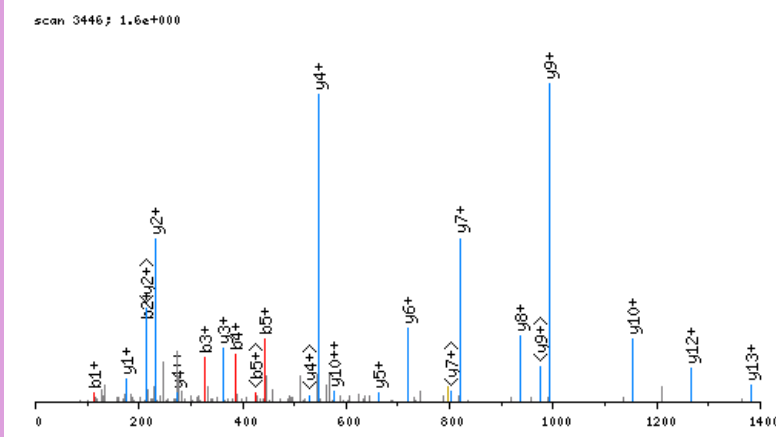

click image to zoom in; click top corners to zoom out [\[precursor±\]](#)

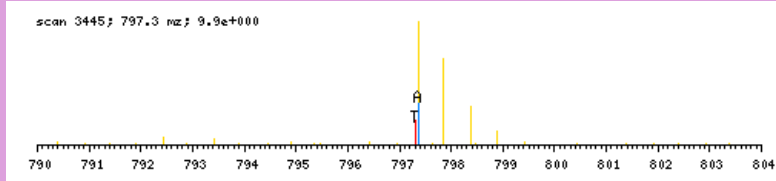

zoomed in precursor plot; T=theoretical m/z, A=acquired m/z

| b <sup>+</sup> | #  | AA # | y <sup>+</sup> | y <sup>2+</sup> |
|----------------|----|------|----------------|-----------------|
| 114.0555       | 1  | A 15 |                |                 |
| 213.1239       | 2  | V 14 | 1480.5762      | 740.7920        |
| 328.1509       | 3  | D 13 | 1381.5078      | 691.2578        |
| 385.1723       | 4  | G 12 | 1266.4809      | 633.7444        |
| 442.1938       | 5  | G 11 | 1209.4594      | 605.2336        |
| 602.2244       | 6  | C 10 | 1152.4380      | 576.7229        |
| 659.2459       | 7  | G 9  | 992.4074       | 496.7076        |
| 774.2728       | 8  | D 8  | 935.3859       | 468.1969        |
| 875.3205       | 9  | T 7  | 820.3590       | 410.6834        |
| 932.3419       | 10 | G 6  | 719.3113       | 360.1596        |
| 1047.3689      | 11 | D 5  | 662.2898       | 331.6488        |
| 1233.4482      | 12 | W 4  | 547.2629       | 274.1353        |
| 1362.4908      | 13 | E 3  | 361.1836       | 181.0957        |
| 1419.5123      | 14 | G 2  | 232.1410       | 116.5744        |
|                | 15 | R 1  | 175.1195       | 88.0637         |

N-term:+43.02 C(6):+160.03

AVLVDLEPGTMSVR, MH+ 1643.8315, m/z 548.6153  
 H OS G24 P150811 220811-s1.04576.04576.3.dta

X-range:

-

MassTol: Y-zoom:

MassType:

AVG  MONO

Axis:

1  2

Label:

I  M  -

Ions:

a  +  2+  3+

b  +  2+  3+

c  +  2+  3+

x  +  2+  3+

y  +  2+  3+

z  +  2+  3+

hide H<sub>2</sub>O/NH<sub>3</sub>

zoom 112-122

GO

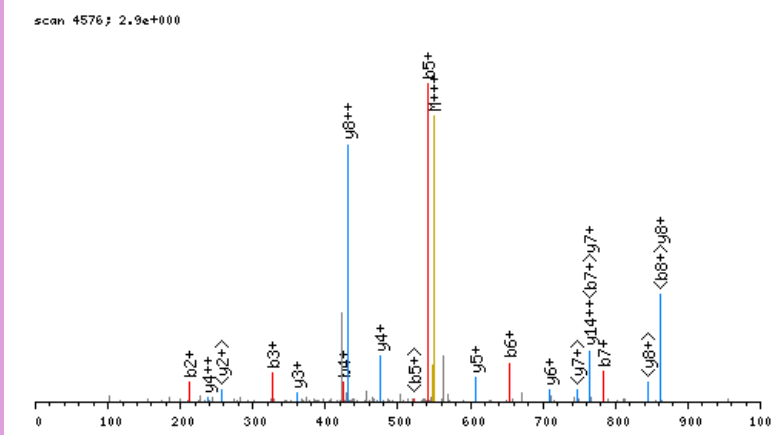

click image to zoom in; click top corners to zoom out [\[precursor±\]](#)

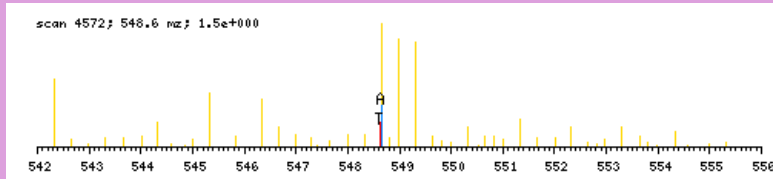

zoomed in precursor plot; T=theoretical m/z, A=acquired m/z

| b <sup>+</sup> | #  | AA # | y <sup>+</sup> | y <sup>2+</sup> |
|----------------|----|------|----------------|-----------------|
| 114.0555       | 1  | A 15 |                |                 |
| 213.1239       | 2  | V 14 | 1530.7838      | 765.8958        |
| 326.2080       | 3  | L 13 | 1431.7154      | 716.3616        |
| 425.2764       | 4  | V 12 | 1318.6313      | 659.8196        |
| 540.3033       | 5  | D 11 | 1219.5629      | 610.2854        |
| 653.3874       | 6  | L 10 | 1104.5359      | 552.7719        |
| 782.4300       | 7  | E 9  | 991.4519       | 496.2298        |
| 879.4828       | 8  | P 8  | 862.4093       | 431.7086        |
| 936.5042       | 9  | G 7  | 765.3565       | 383.1822        |
| 1037.5519      | 10 | T 6  | 708.3350       | 354.6714        |
| 1168.5924      | 11 | M 5  | 607.2874       | 304.1476        |
| 1283.6193      | 12 | D 4  | 476.2469       | 238.6274        |
| 1370.6514      | 13 | S 3  | 361.2199       | 181.1139        |
| 1469.7198      | 14 | V 2  | 274.1879       | 137.5979        |
|                | 15 | R 1  | 175.1195       | 88.0637         |

N-term:+43.02

AVNVYSTSVTSDNLSR, MH+ 1754.8561, m/z 585.6235  
 H OS G29 P150811 220811-s1.04537.04537.3.dta

X-range:

-

MassTol: Y-zoom:

MassType:

AVG  MONO

Axis:

1  2

Label:

I  M  -

Ions:

a  +  2+  3+

b  +  2+  3+

c  +  2+  3+

x  +  2+  3+

y  +  2+  3+

z  +  2+  3+

hide H<sub>2</sub>O/NH<sub>3</sub>

zoom 112-122

GO

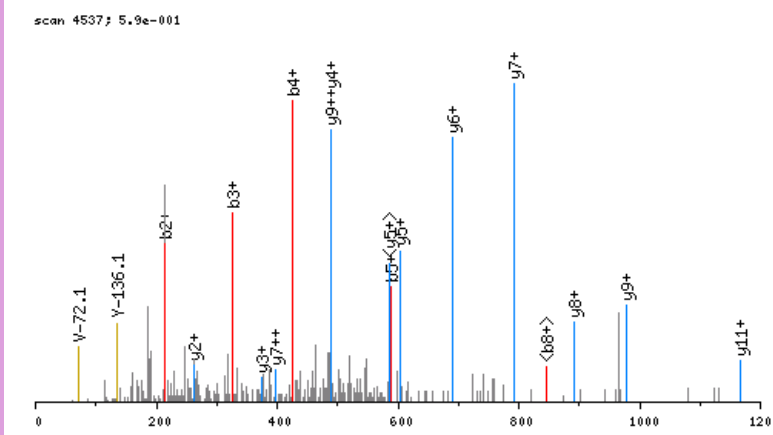

click image to zoom in; click top corners to zoom out [\[precursor±\]](#)

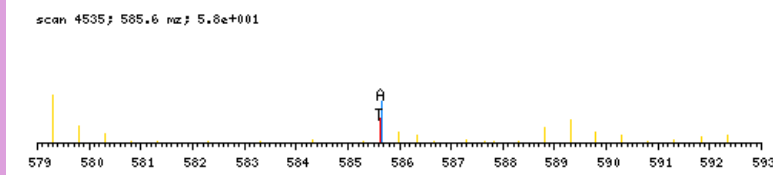

zoomed in precursor plot; T=theoretical m/z, A=acquired m/z

| b <sup>+</sup> | #  | AA # | y <sup>+</sup> | y <sup>2+</sup> |
|----------------|----|------|----------------|-----------------|
| 114.0555       | 1  | A 16 |                |                 |
| 213.1239       | 2  | V 15 | 1641.8084      | 821.4081        |
| 327.1669       | 3  | N 14 | 1542.7400      | 771.8739        |
| 426.2353       | 4  | V 13 | 1428.6971      | 714.8524        |
| 589.2986       | 5  | Y 12 | 1329.6286      | 665.3182        |
| 676.3306       | 6  | S 11 | 1166.5653      | 583.7866        |
| 777.3783       | 7  | T 10 | 1079.5333      | 540.2706        |
| 864.4103       | 8  | S 9  | 978.4856       | 489.7467        |
| 963.4787       | 9  | V 8  | 891.4536       | 446.2307        |
| 1064.5264      | 10 | T 7  | 792.3852       | 396.6965        |
| 1151.5585      | 11 | S 6  | 691.3375       | 346.1727        |
| 1266.5854      | 12 | D 5  | 604.3055       | 302.6566        |
| 1380.6283      | 13 | N 4  | 489.2785       | 245.1432        |
| 1493.7124      | 14 | L 3  | 375.2356       | 188.1217        |
| 1580.7444      | 15 | S 2  | 262.1515       | 131.5797        |
|                | 16 | R 1  | 175.1195       | 88.0637         |

N-term:+43.02

AVSTGVKVPK, MH+ 1083.6527, m/z 542.3300  
 H OS G25 P150811 220811-s1.03619.03619.2.dta

X-range:

-

MassTol: Y-zoom:

MassType:

AVG  MONO

Axis:

1  2

Label:

I  M  -

Ions:

a  +  2+  3+

b  +  2+  3+

c  +  2+  3+

x  +  2+  3+

y  +  2+  3+

z  +  2+  3+

hide H<sub>2</sub>O/NH<sub>3</sub>

zoom 112-122

GO

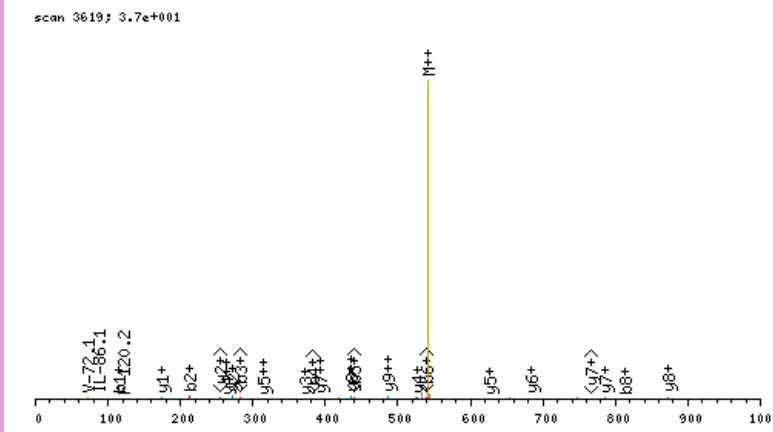

click image to zoom in; click top corners to zoom out [\[precursor±\]](#)

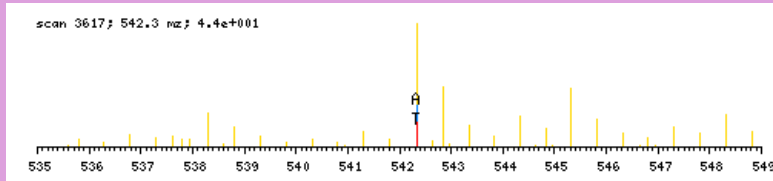

zoomed in precursor plot; T=theoretical m/z, A=acquired m/z

| b <sup>+</sup> | #  | AA | #  | y <sup>+</sup> | y <sup>2+</sup> |
|----------------|----|----|----|----------------|-----------------|
| 114.0555       | 1  | A  | 10 |                |                 |
| 213.1239       | 2  | V  | 9  | 970.6050       | 485.8064        |
| 300.1560       | 3  | S  | 8  | 871.5366       | 436.2722        |
| 401.2036       | 4  | T  | 7  | 784.5045       | 392.7562        |
| 458.2251       | 5  | G  | 6  | 683.4569       | 342.2323        |
| 557.2935       | 6  | V  | 5  | 626.4354       | 313.7216        |
| 713.4198       | 7  | K  | 4  | 527.3670       | 264.1874        |
| 812.4882       | 8  | V  | 3  | 371.2407       | 186.1243        |
| 909.5410       | 9  | P  | 2  | 272.1723       | 136.5900        |
|                | 10 | R  | 1  | 175.1195       | 88.0637         |

N-term:+43.02 K(7):+156.13

AWKSGGASHSELIHNLR, MH+ 1933.0045, m/z 484.0066  
 H OS G28 P150811 220811-s1.04884.04884.4.dta

scan 4884; 1.8e+001

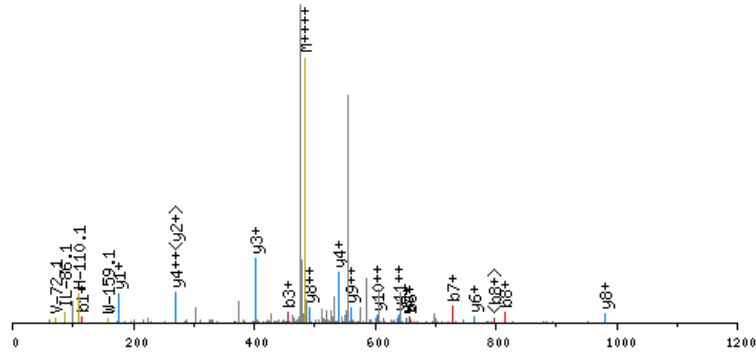

click image to zoom in; click top corners to zoom out [precursor±]

scan 4883; 484.0 m/z; 7.2e+001

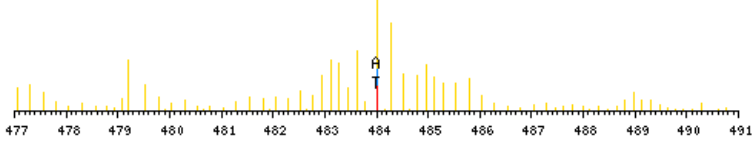

zoomed in precursor plot; T=theoretical m/z, A=acquired m/z

X-range:

-

MassTol: Y-zoom:

MassType:

AVG  MONO

Axis:

1  2

Label:

I  M  -

Ions:

a  +  2+  3+

b  +  2+  3+

c  +  2+  3+

x  +  2+  3+

y  +  2+  3+

z  +  2+  3+

hide H<sub>2</sub>O/NH<sub>3</sub>

zoom 112-122

GO

| b <sup>+</sup> | #  | AA # | y <sup>+</sup> | y <sup>2+</sup> |
|----------------|----|------|----------------|-----------------|
| 114.0555       | 1  | A 17 |                |                 |
| 300.1348       | 2  | W 16 | 1819.9568      | 910.4823        |
| 456.2611       | 3  | K 15 | 1633.8775      | 817.4426        |
| 543.2932       | 4  | S 14 | 1477.7512      | 739.3795        |
| 600.3146       | 5  | G 13 | 1390.7191      | 695.8635        |
| 657.3361       | 6  | G 12 | 1333.6977      | 667.3527        |
| 728.3732       | 7  | A 11 | 1276.6762      | 638.8420        |
| 815.4052       | 8  | S 10 | 1205.6391      | 603.3235        |
| 952.4641       | 9  | H 9  | 1118.6071      | 559.8074        |
| 1039.4962      | 10 | S 8  | 981.5482       | 491.2780        |
| 1168.5388      | 11 | E 7  | 894.5161       | 447.7620        |
| 1281.6228      | 12 | L 6  | 765.4735       | 383.2407        |
| 1394.7069      | 13 | I 5  | 652.3895       | 326.6986        |
| 1531.7658      | 14 | H 4  | 539.3054       | 270.1566        |
| 1645.8087      | 15 | N 3  | 402.2465       | 201.6272        |
| 1758.8928      | 16 | L 2  | 288.2036       | 144.6057        |
|                | 17 | R 1  | 175.1195       | 88.0637         |

N-term:+43.02 K(3):+156.13

AYHSFLVEPISCHAWNKDR, MH+ 2406.1877, m/z 602.3024  
 H OS G28 P150811 220811-s1.07894.07894.4.dta

X-range:

-

MassTol: Y-zoom:

MassType:

AVG  MONO

Axis:

1  2

Label:

I  M  -

Ions:

a  +  2+  3+

b  +  2+  3+

c  +  2+  3+

x  +  2+  3+

y  +  2+  3+

z  +  2+  3+

hide H<sub>2</sub>O/NH<sub>3</sub>

zoom 112-122

GO

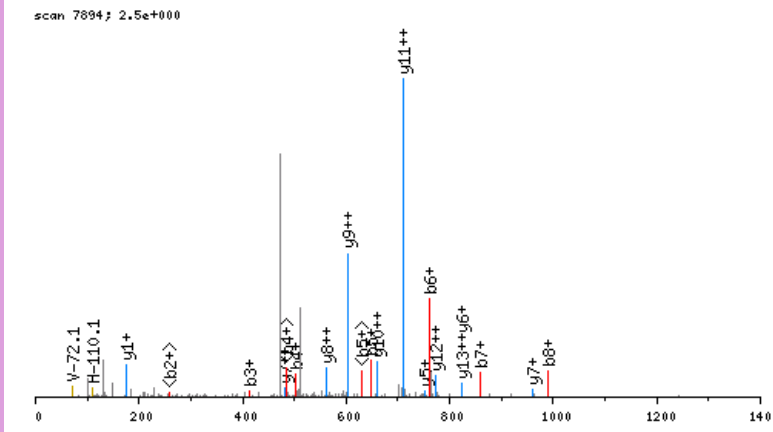

click image to zoom in; click top corners to zoom out [\[precursor±\]](#)

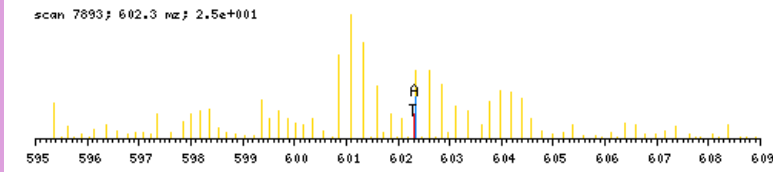

zoomed in precursor plot; T=theoretical m/z, A=acquired m/z

| b <sup>+</sup> | #  | AA | #  | y <sup>+</sup> | y <sup>2+</sup> |
|----------------|----|----|----|----------------|-----------------|
| 114.0555       | 1  | A  | 19 |                |                 |
| 277.1188       | 2  | Y  | 18 | 2293.1400      | 1147.0739       |
| 414.1778       | 3  | H  | 17 | 2130.0767      | 1065.5423       |
| 501.2098       | 4  | S  | 16 | 1993.0178      | 997.0128        |
| 648.2782       | 5  | F  | 15 | 1905.9858      | 953.4968        |
| 761.3623       | 6  | L  | 14 | 1758.9173      | 879.9626        |
| 860.4307       | 7  | V  | 13 | 1645.8333      | 823.4205        |
| 989.4733       | 8  | E  | 12 | 1546.7649      | 773.8863        |
| 1086.5260      | 9  | P  | 11 | 1417.7223      | 709.3650        |
| 1199.6101      | 10 | I  | 10 | 1320.6695      | 660.8387        |
| 1286.6421      | 11 | S  | 9  | 1207.5854      | 604.2966        |
| 1446.6727      | 12 | C  | 8  | 1120.5534      | 560.7806        |
| 1583.7316      | 13 | H  | 7  | 960.5228       | 480.7653        |
| 1654.7687      | 14 | A  | 6  | 823.4639       | 412.2359        |
| 1840.8481      | 15 | W  | 5  | 752.4268       | 376.7173        |
| 1954.8910      | 16 | N  | 4  | 566.3475       | 283.6776        |
| 2117.0491      | 17 | K  | 3  | 452.3045       | 226.6562        |
| 2232.0760      | 18 | D  | 2  | 290.1464       | 145.5771        |
|                | 19 | R  | 1  | 175.1195       | 88.0637         |

N-term: +43.02 C(12): +160.03  
 K(17): +162.16

AYKLVLR, MH+ 1045.6774, m/z 523.3424  
 H OS G25 P150811 220811-s1.07153.07153.2.dta

X-range:

-

MassTol: Y-zoom:

MassType:

AVG  MONO

Axis:

1  2

Label:

I  M  -

Ions:

a  +  2+  3+

b  +  2+  3+

c  +  2+  3+

x  +  2+  3+

y  +  2+  3+

z  +  2+  3+

hide H<sub>2</sub>O/NH<sub>3</sub>

zoom 112-122

GO

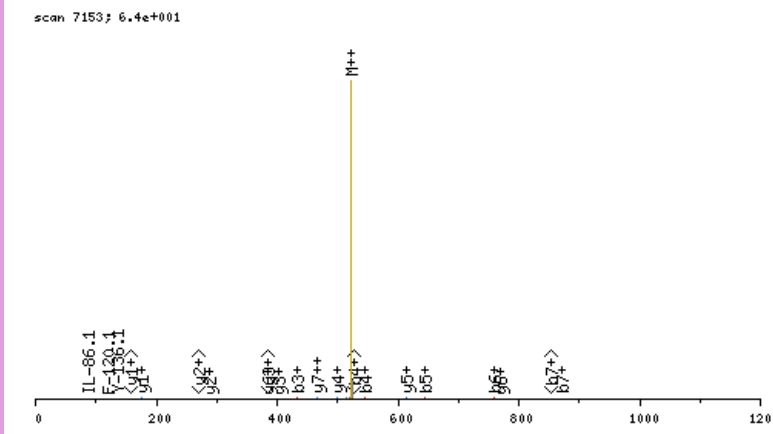

click image to zoom in; click top corners to zoom out [\[precursor±\]](#)

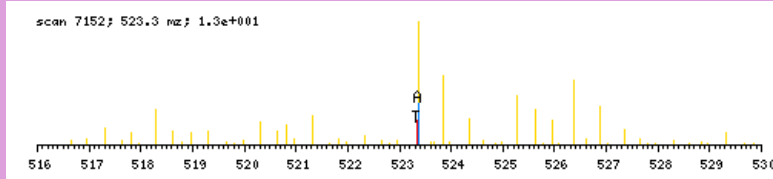

zoomed in precursor plot; T=theoretical m/z, A=acquired m/z

| b <sup>+</sup> | # | AA # | y <sup>+</sup> | y <sup>2+</sup> |
|----------------|---|------|----------------|-----------------|
| 114.0555       | 1 | A 8  |                |                 |
| 277.1188       | 2 | Y 7  | 932.6297       | 466.8188        |
| 433.2451       | 3 | K 6  | 769.5664       | 385.2871        |
| 546.3292       | 4 | L 5  | 613.4401       | 307.2240        |
| 645.3976       | 5 | V 4  | 500.3560       | 250.6819        |
| 758.4817       | 6 | L 3  | 401.2876       | 201.1477        |
| 871.5657       | 7 | I 2  | 288.2036       | 144.6057        |
|                | 8 | R 1  | 175.1195       | 88.0637         |

N-term:+43.02 K(3):+156.13



DAATLTYDTRL, MH+ 1281.6327, m/z 641.3200  
 H OS G29 P150811 220811-s1.06136.06136.2.dta

X-range:

-

MassTol: Y-zoom:

MassType:

AVG  MONO

Axis:

1  2

Label:

I  M  -

Ions:

a  +  2+  3+

b  +  2+  3+

c  +  2+  3+

x  +  2+  3+

y  +  2+  3+

z  +  2+  3+

hide H<sub>2</sub>O/NH<sub>3</sub>

zoom 112-122

GO

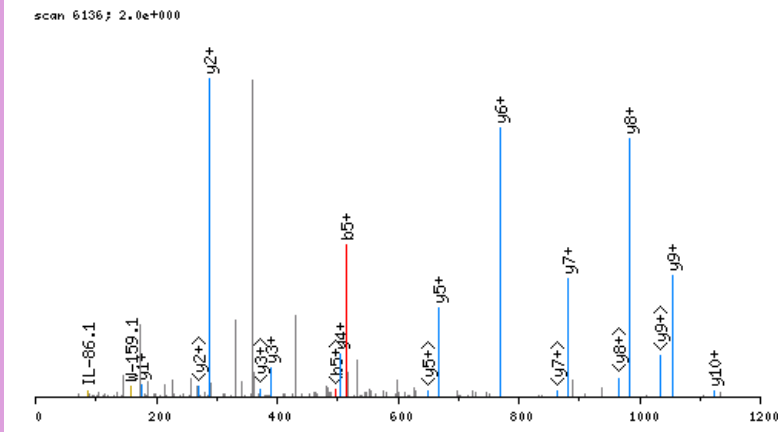

click image to zoom in; click top corners to zoom out [\[precursor±\]](#)

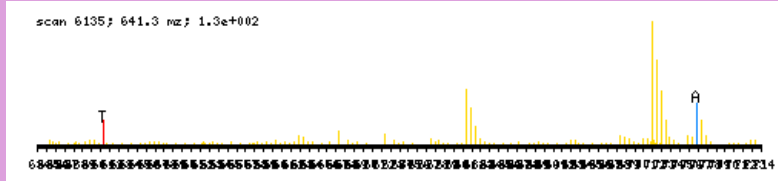

zoomed in precursor plot; T=theoretical m/z, A=acquired m/z

| b <sup>+</sup> | #  | AA # | y <sup>+</sup> | y <sup>2+</sup> |
|----------------|----|------|----------------|-----------------|
| 158.0453       | 1  | D 11 |                |                 |
| 229.0825       | 2  | A 10 | 1124.5952      | 562.8015        |
| 300.1196       | 3  | A 9  | 1053.5580      | 527.2829        |
| 401.1672       | 4  | T 8  | 982.5209       | 491.7644        |
| 514.2513       | 5  | L 7  | 881.4733       | 441.2405        |
| 615.2990       | 6  | T 6  | 768.3892       | 384.6985        |
| 778.3623       | 7  | Y 5  | 667.3415       | 334.1747        |
| 893.3893       | 8  | D 4  | 504.2782       | 252.6430        |
| 994.4369       | 9  | T 3  | 389.2512       | 195.1295        |
| 1107.5210      | 10 | L 2  | 288.2036       | 144.6057        |
|                | 11 | R 1  | 175.1195       | 88.0637         |

N-term:+43.02

DDDI AALVVDN GSGMCKAGFAGDDAPR, MH+ 2807.2616, m/z 936.4254  
 H OS G24 P150811 220811-s1.04872.04872.3.dta

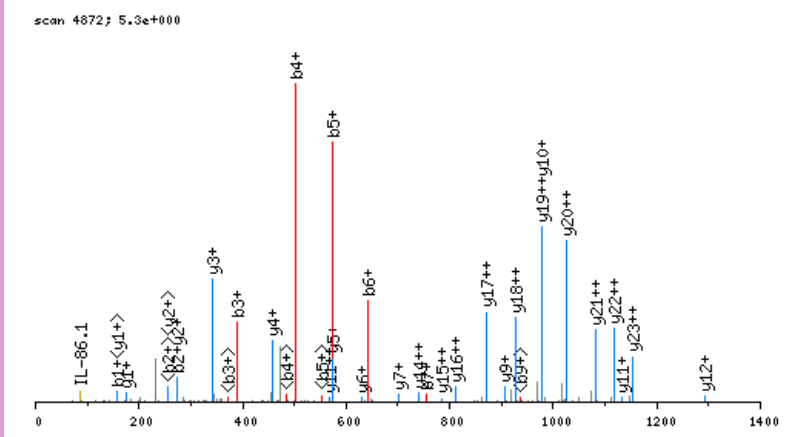

click image to zoom in; click top corners to zoom out [\[precursor±\]](#)

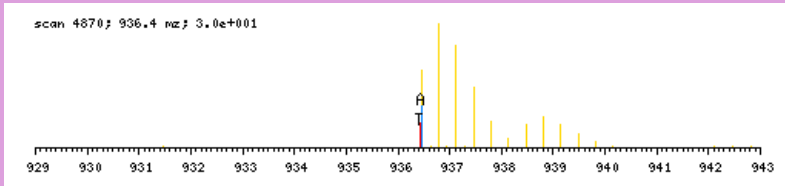

zoomed in precursor plot; T=theoretical m/z, A=acquired m/z

| b <sup>+</sup> | #  | AA | #  | y <sup>+</sup> | y <sup>2+</sup> |
|----------------|----|----|----|----------------|-----------------|
| 158.0453       | 1  | D  | 27 |                |                 |
| 273.0723       | 2  | D  | 26 | 2650.2241      | 1325.6160       |
| 388.0992       | 3  | D  | 25 | 2535.1972      | 1268.1025       |
| 501.1833       | 4  | I  | 24 | 2420.1702      | 1210.5890       |
| 572.2204       | 5  | A  | 23 | 2307.0862      | 1154.0470       |
| 643.2575       | 6  | A  | 22 | 2236.0491      | 1118.5284       |
| 756.3416       | 7  | L  | 21 | 2165.0119      | 1083.0099       |
| 855.4100       | 8  | V  | 20 | 2051.9279      | 1026.4678       |
| 954.4784       | 9  | V  | 19 | 1952.8595      | 976.9336        |
| 1069.5054      | 10 | D  | 18 | 1853.7910      | 927.3994        |
| 1183.5483      | 11 | N  | 17 | 1738.7641      | 869.8860        |
| 1240.5697      | 12 | G  | 16 | 1624.7212      | 812.8645        |
| 1327.6018      | 13 | S  | 15 | 1567.6997      | 784.3538        |
| 1384.6232      | 14 | G  | 14 | 1480.6677      | 740.8378        |
| 1515.6637      | 15 | M  | 13 | 1423.6462      | 712.3270        |
| 1675.6943      | 16 | C  | 12 | 1292.6057      | 646.8068        |
| 1831.8206      | 17 | K  | 11 | 1132.5751      | 566.7915        |
| 1902.8577      | 18 | A  | 10 | 976.4488       | 488.7283        |
| 1959.8792      | 19 | G  | 9  | 905.4117       | 453.2098        |
| 2106.9476      | 20 | F  | 8  | 848.3903       | 424.6990        |
| 2177.9847      | 21 | A  | 7  | 701.3218       | 351.1648        |
| 2235.0062      | 22 | G  | 6  | 630.2847       | 315.6463        |
| 2350.0331      | 23 | D  | 5  | 573.2633       | 287.1355        |
| 2465.0601      | 24 | D  | 4  | 458.2363       | 229.6221        |
| 2536.0972      | 25 | A  | 3  | 343.2094       | 172.1086        |
| 2633.1500      | 26 | P  | 2  | 272.1723       | 136.5900        |
|                | 27 | R  | 1  | 175.1195       | 88.0637         |

N-term: +43.02 C(16) : +160.03  
 K(17) : +156.13

X-range:

-

MassTol: Y-zoom:

MassType:

AVG  MONO

Axis:

1  2

Label:

I  M  -

Ions:

a  +  2+  3+

b  +  2+  3+

c  +  2+  3+

x  +  2+  3+

y  +  2+  3+

z  +  2+  3+

hide H<sub>2</sub>O/NH<sub>3</sub>

zoom 112-122

GO

DDEEETYSR, MH+ 1098.4227, m/z 549.7150  
 H OS G29 P150811 220811-s1.02944.02944.2.dta

X-range:

-

MassTol: Y-zoom:

MassType:

AVG  MONO

Axis:

1  2

Label:

I  M  -

Ions:

a  +  2+  3+

b  +  2+  3+

c  +  2+  3+

x  +  2+  3+

y  +  2+  3+

z  +  2+  3+

hide H<sub>2</sub>O/NH<sub>3</sub>

zoom 112-122

GO

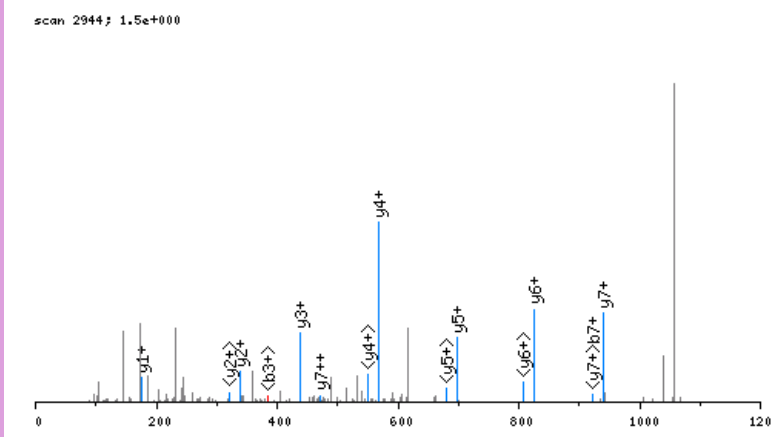

click image to zoom in; click top corners to zoom out [\[precursor±\]](#)

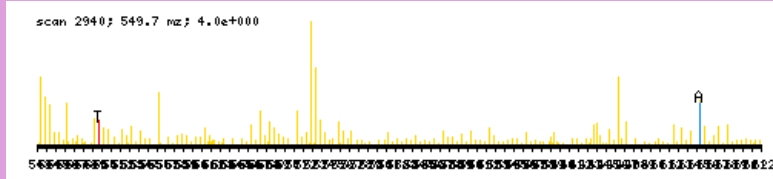

zoomed in precursor plot; T=theoretical m/z, A=acquired m/z

| b <sup>+</sup> | # | AA # | y <sup>+</sup> | y <sup>2+</sup> |
|----------------|---|------|----------------|-----------------|
| 158.0453       | 1 | D 8  |                |                 |
| 273.0723       | 2 | D 7  | 941.3852       | 471.1965        |
| 402.1149       | 3 | E 6  | 826.3583       | 413.6831        |
| 531.1575       | 4 | E 5  | 697.3157       | 349.1618        |
| 660.2001       | 5 | E 4  | 568.2731       | 284.6405        |
| 761.2477       | 6 | T 3  | 439.2305       | 220.1192        |
| 924.3111       | 7 | Y 2  | 338.1828       | 169.5953        |
|                | 8 | R 1  | 175.1195       | 88.0637         |

N-term:+43.02

DDI FTQCR, MH+ 1096.4733, m/z 548.7403  
 H OS G29 P150811 220811-s1.05553.05553.2.dta

scan 5553; 2.7e+000

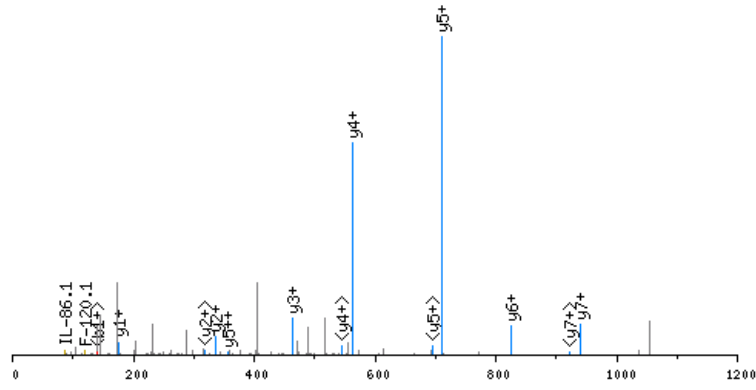

click image to zoom in; click top corners to zoom out [\[precursor±\]](#)

scan 5550; 548.7 m/z; 1.1e+001

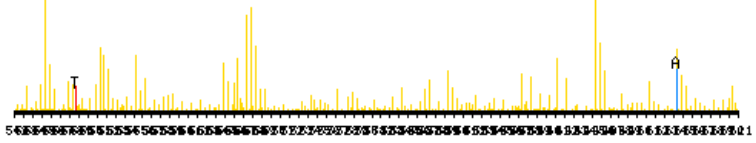

zoomed in precursor plot; T=theoretical m/z, A=acquired m/z

X-range:

-

MassTol: Y-zoom:

MassType:

AVG  MONO

Axis:

1  2

Label:

I  M  -

Ions:

a  +  2+  3+

b  +  2+  3+

c  +  2+  3+

x  +  2+  3+

y  +  2+  3+

z  +  2+  3+

hide H<sub>2</sub>O/NH<sub>3</sub>

zoom 112-122

GO

| b <sup>+</sup> | # | AA # | y <sup>+</sup> | y <sup>2+</sup> |
|----------------|---|------|----------------|-----------------|
| 158.0453       | 1 | D 8  |                |                 |
| 273.0723       | 2 | D 7  | 939.4358       | 470.2218        |
| 386.1564       | 3 | I 6  | 824.4088       | 412.7083        |
| 533.2248       | 4 | F 5  | 711.3248       | 356.1663        |
| 634.2724       | 5 | T 4  | 564.2564       | 282.6321        |
| 762.3310       | 6 | Q 3  | 463.2087       | 232.1083        |
| 922.3616       | 7 | C 2  | 335.1501       | 168.0790        |
|                | 8 | R 1  | 175.1195       | 88.0637         |

N-term:+43.02 C(7):+160.03

DDREDLVYQAKLAEQAER, MH+ 2225.1263, m/z 742.3803  
 H OS G26 P150811 220811-s1.05442.05442.3.dta

X-range:

-

MassTol: Y-zoom:

MassType:

AVG  MONO

Axis:

1  2

Label:

I  M  -

Ions:

a  +  2+  3+

b  +  2+  3+

c  +  2+  3+

x  +  2+  3+

y  +  2+  3+

z  +  2+  3+

hide H<sub>2</sub>O/NH<sub>3</sub>

zoom 112-122

GO

scan 5442: 2.0e+001

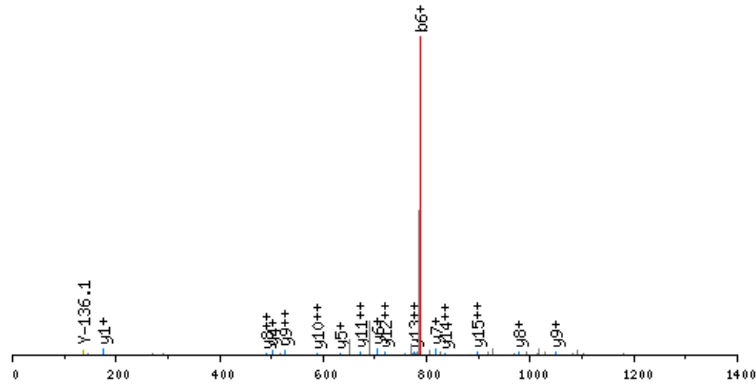

click image to zoom in; click top corners to zoom out [\[precursor±\]](#)

scan 5440: 742.4 nz: 4.6e+001

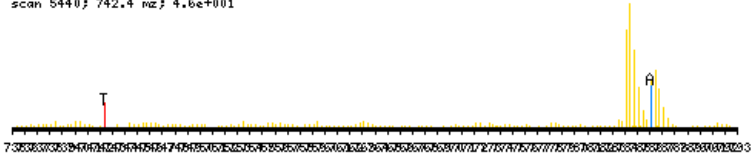

zoomed in precursor plot; T=theoretical m/z, A=acquired m/z

| b <sup>+</sup> | #  | AA # | y <sup>+</sup> | y <sup>2+</sup> |
|----------------|----|------|----------------|-----------------|
| 158.0453       | 1  | D 18 |                |                 |
| 273.0723       | 2  | D 17 | 2068.0887      | 1034.5483       |
| 429.1734       | 3  | R 16 | 1953.0618      | 977.0348        |
| 558.2160       | 4  | E 15 | 1796.9607      | 898.9843        |
| 673.2429       | 5  | D 14 | 1667.9181      | 834.4630        |
| 786.3270       | 6  | L 13 | 1552.8912      | 776.9495        |
| 885.3954       | 7  | V 12 | 1439.8071      | 720.4075        |
| 1048.4587      | 8  | Y 11 | 1340.7387      | 670.8733        |
| 1176.5173      | 9  | Q 10 | 1177.6753      | 589.3416        |
| 1247.5544      | 10 | A 9  | 1049.6168      | 525.3123        |
| 1409.7125      | 11 | K 8  | 978.5797       | 489.7937        |
| 1522.7966      | 12 | L 7  | 816.4216       | 408.7147        |
| 1593.8337      | 13 | A 6  | 703.3375       | 352.1727        |
| 1722.8763      | 14 | E 5  | 632.3004       | 316.6541        |
| 1850.9349      | 15 | Q 4  | 503.2578       | 252.1328        |
| 1921.9720      | 16 | A 3  | 375.1992       | 188.1035        |
| 2051.0146      | 17 | E 2  | 304.1621       | 152.5850        |
|                | 18 | R 1  | 175.1195       | 88.0637         |

N-term:+43.02 K(11):+162.16

DEDETTALVCDNNGSLVKAGFAGDDAPR, MH+ 2956.3694, m/z 986.1280  
 H OS G24 P150811 220811-s1.04554.04554.3.dta

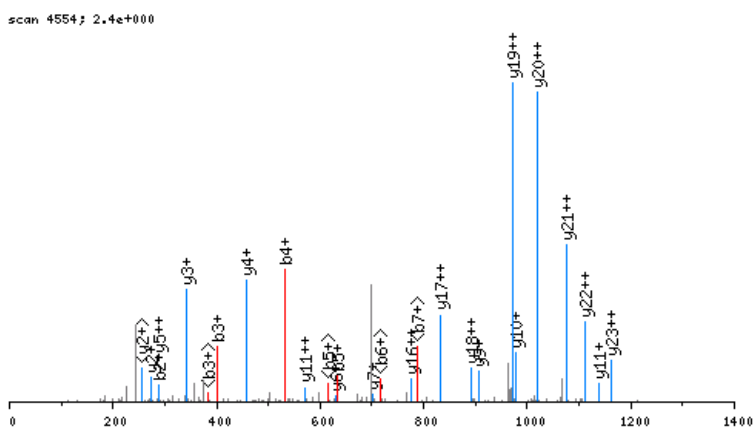

click image to zoom in; click top corners to zoom out [\[precursor±\]](#)

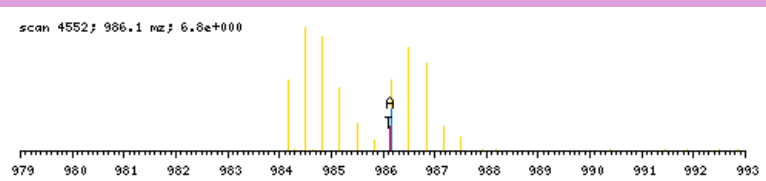

zoomed in precursor plot; T=theoretical m/z, A=acquired m/z

| b <sup>+</sup> | #  | AA # | y <sup>+</sup> | y <sup>2+</sup> |
|----------------|----|------|----------------|-----------------|
| 158.0453       | 1  | D 28 |                |                 |
| 287.0879       | 2  | E 27 | 2799.3319      | 1400.1699       |
| 402.1149       | 3  | D 26 | 2670.2893      | 1335.6486       |
| 531.1575       | 4  | E 25 | 2555.2624      | 1278.1351       |
| 632.2052       | 5  | T 24 | 2426.2198      | 1213.6138       |
| 733.2528       | 6  | T 23 | 2325.1721      | 1163.0900       |
| 804.2899       | 7  | A 22 | 2224.1244      | 1112.5661       |
| 917.3740       | 8  | L 21 | 2153.0873      | 1077.0476       |
| 1016.4424      | 9  | V 20 | 2040.0033      | 1020.5055       |
| 1176.4730      | 10 | C 19 | 1940.9348      | 970.9713        |
| 1291.5000      | 11 | D 18 | 1780.9042      | 890.9560        |
| 1405.5429      | 12 | N 17 | 1665.8773      | 833.4426        |
| 1462.5644      | 13 | G 16 | 1551.8344      | 776.4211        |
| 1549.5964      | 14 | S 15 | 1494.8129      | 747.9104        |
| 1606.6178      | 15 | G 14 | 1407.7809      | 704.3944        |
| 1719.7019      | 16 | L 13 | 1350.7594      | 675.8836        |
| 1818.7703      | 17 | V 12 | 1237.6753      | 619.3416        |
| 1980.9284      | 18 | K 11 | 1138.6069      | 569.8074        |
| 2051.9655      | 19 | A 10 | 976.4488       | 488.7283        |
| 2108.9870      | 20 | G 9  | 905.4117       | 453.2098        |
| 2256.0554      | 21 | F 8  | 848.3903       | 424.6990        |
| 2327.0925      | 22 | A 7  | 701.3218       | 351.1648        |
| 2384.1140      | 23 | G 6  | 630.2847       | 315.6463        |
| 2499.1409      | 24 | D 5  | 573.2633       | 287.1355        |
| 2614.1679      | 25 | D 4  | 458.2363       | 229.6221        |
| 2685.2050      | 26 | A 3  | 343.2094       | 172.1086        |
| 2782.2578      | 27 | P 2  | 272.1723       | 136.5900        |
|                | 28 | R 1  | 175.1195       | 88.0637         |

N-term: +43.02 C(10) : +160.03  
 K(18) : +162.16

X-range:

-

MassTol: Y-zoom:

MassType:

AVG  MONO

Axis:

1  2

Label:

I  M  -

Ions:

a  +  2+  3+

b  +  2+  3+

c  +  2+  3+

x  +  2+  3+

y  +  2+  3+

z  +  2+  3+

hide H<sub>2</sub>O/NH<sub>3</sub>

zoom 112-122

GO

DETSPLVSPER, MH+ 1271.6119, m/z 636.3096  
 H OS G29 P150811 220811-s1.04381.04381.2.dta

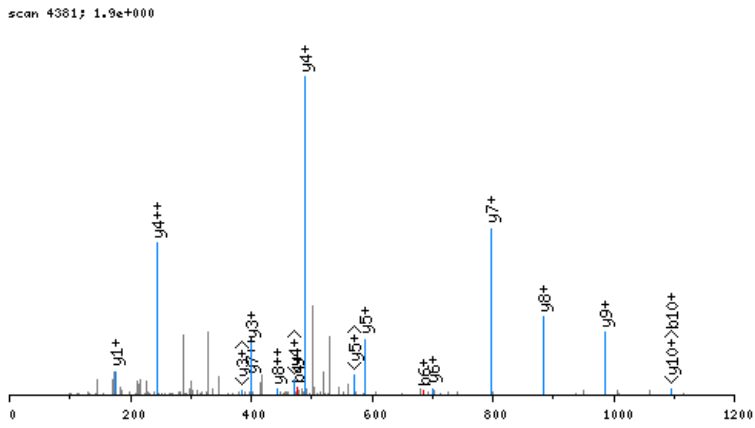

click image to zoom in; click top corners to zoom out [\[precursor±\]](#)

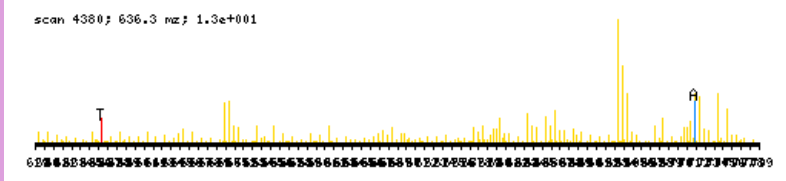

zoomed in precursor plot; T=theoretical m/z, A=acquired m/z

X-range:

-

MassTol: Y-zoom:

MassType:

AVG  MONO

Axis:

1  2

Label:

I  M  -

Ions:

a  +  2+  3+

b  +  2+  3+

c  +  2+  3+

x  +  2+  3+

y  +  2+  3+

z  +  2+  3+

hide H<sub>2</sub>O/NH<sub>3</sub>

zoom 112-122

GO

| b <sup>+</sup> | #  | AA # | y <sup>+</sup> | y <sup>2+</sup> |
|----------------|----|------|----------------|-----------------|
| 158.0453       | 1  | D 11 |                |                 |
| 287.0879       | 2  | E 10 | 1114.5744      | 557.7911        |
| 388.1356       | 3  | T 9  | 985.5318       | 493.2698        |
| 475.1676       | 4  | S 8  | 884.4842       | 442.7460        |
| 572.2204       | 5  | P 7  | 797.4521       | 399.2300        |
| 685.3045       | 6  | L 6  | 700.3994       | 350.7036        |
| 784.3729       | 7  | V 5  | 587.3153       | 294.1616        |
| 871.4049       | 8  | S 4  | 488.2469       | 244.6274        |
| 968.4577       | 9  | P 3  | 401.2149       | 201.1113        |
| 1097.5003      | 10 | E 2  | 304.1621       | 152.5850        |
|                | 11 | R 1  | 175.1195       | 88.0637         |

N-term:+43.02

DFSKLPK, MH+ 932.5458, m/z 466.7765  
 H OS G25 P150811 220811-s1.06454.06454.2.dta

X-range:

-

MassTol: Y-zoom:

MassType:

AVG  MONO

Axis:

1  2

Label:

I  M  -

Ions:

a  +  2+  3+

b  +  2+  3+

c  +  2+  3+

x  +  2+  3+

y  +  2+  3+

z  +  2+  3+

hide H<sub>2</sub>O/NH<sub>3</sub>

zoom 112-122

GO

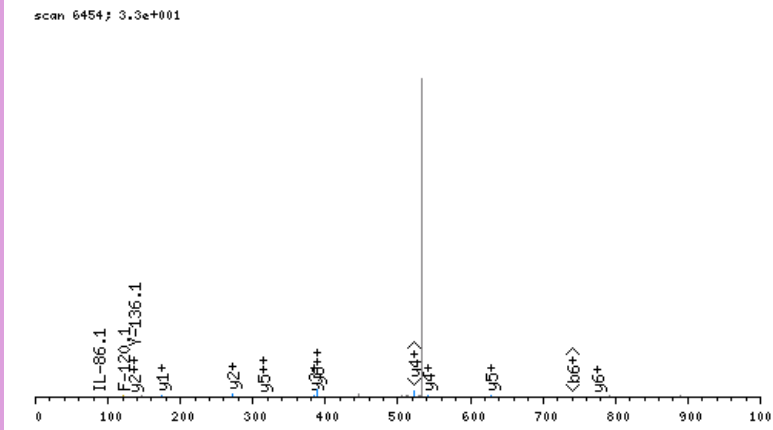

click image to zoom in; click top corners to zoom out [\[precursor±\]](#)

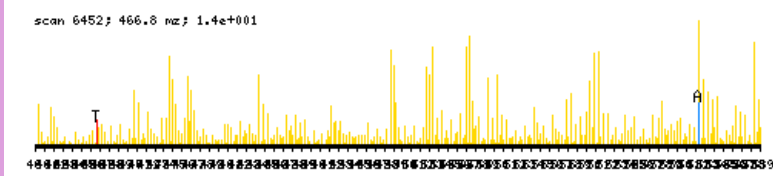

zoomed in precursor plot; T=theoretical m/z, A=acquired m/z

| b <sup>+</sup> | # | AA # | y <sup>+</sup> | y <sup>2+</sup>   |
|----------------|---|------|----------------|-------------------|
| 158.0453       | 1 | D    | 7              |                   |
| 305.1138       | 2 | F    | 6              | 775.5083 388.2580 |
| 392.1458       | 3 | S    | 5              | 628.4398 314.7238 |
| 548.2721       | 4 | K    | 4              | 541.4078 271.2078 |
| 661.3561       | 5 | L    | 3              | 385.2815 193.1447 |
| 758.4089       | 6 | P    | 2              | 272.1975 136.6026 |
|                | 7 | K    | 1              | 175.1447 88.0763  |

N-term:+43.02 K(4):+156.13  
 K(7):+156.13



DFSKLPKIR, MH+ 1213.7946, m/z 405.2697  
 H OS G27 P150811 220811-s1.06615.06615.3.dta

X-range:

-

MassTol: Y-zoom:

MassType:

AVG  MONO

Axis:

1  2

Label:

I  M  -

Ions:

a  +  2+  3+

b  +  2+  3+

c  +  2+  3+

x  +  2+  3+

y  +  2+  3+

z  +  2+  3+

hide H<sub>2</sub>O/NH<sub>3</sub>

zoom 112-122

GO

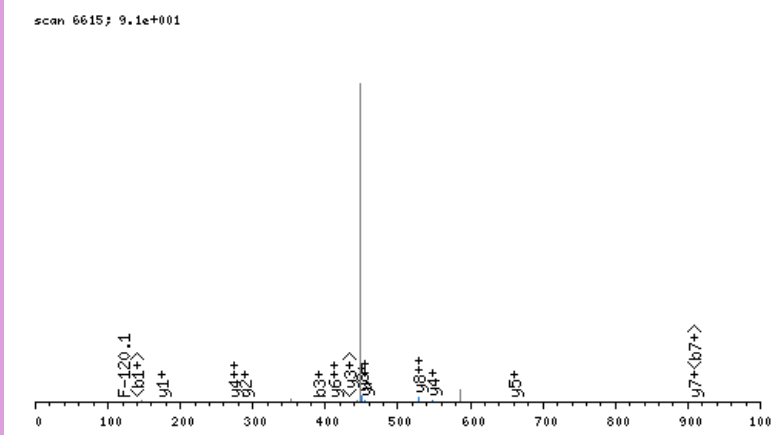

click image to zoom in; click top corners to zoom out [\[precursor±\]](#)

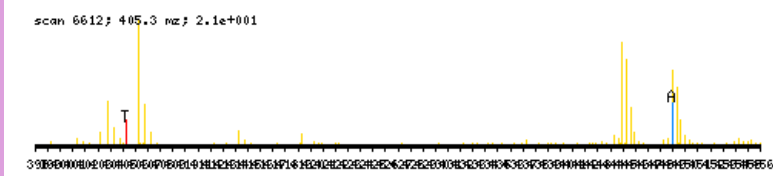

zoomed in precursor plot; T=theoretical m/z, A=acquired m/z

| b <sup>+</sup> | # | AA # | y <sup>+</sup> | y <sup>2+</sup> |
|----------------|---|------|----------------|-----------------|
| 158.0453       | 1 | D    | 9              |                 |
| 305.1138       | 2 | F    | 8              | 1056.7570       |
| 392.1458       | 3 | S    | 7              | 909.6886        |
| 554.3039       | 4 | K    | 6              | 822.6566        |
| 667.3879       | 5 | L    | 5              | 660.4985        |
| 764.4407       | 6 | P    | 4              | 547.4144        |
| 926.5988       | 7 | K    | 3              | 450.3617        |
| 1039.6829      | 8 | I    | 2              | 288.2036        |
|                | 9 | R    | 1              | 175.1195        |

N-term:+43.02 K(4):+162.16  
 K(7):+162.16

DGDKLVVECVMKGVTSR, MH+ 2092.0783, m/z 523.7750  
 H OS G27 P150811 220811-s1.06684.06684.4.dta

X-range:

-

MassTol: Y-zoom:

MassType:

AVG  MONO

Axis:

1  2

Label:

I  M  -

Ions:

a  +  2+  3+

b  +  2+  3+

c  +  2+  3+

x  +  2+  3+

y  +  2+  3+

z  +  2+  3+

hide H<sub>2</sub>O/NH<sub>3</sub>

zoom 112-122

GO

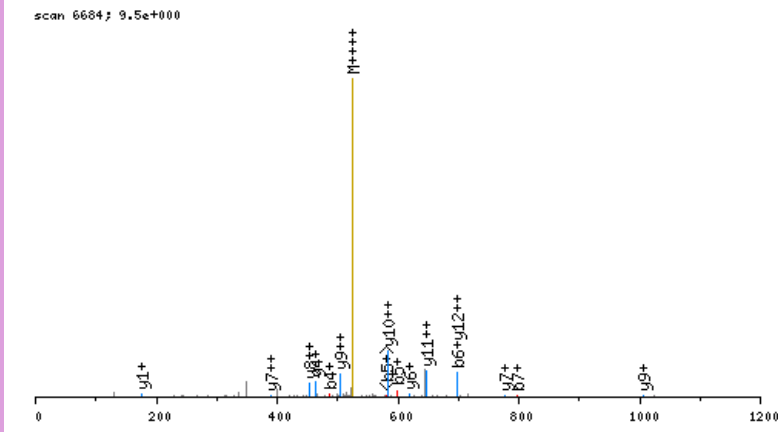

click image to zoom in; click top corners to zoom out [\[precursor±\]](#)

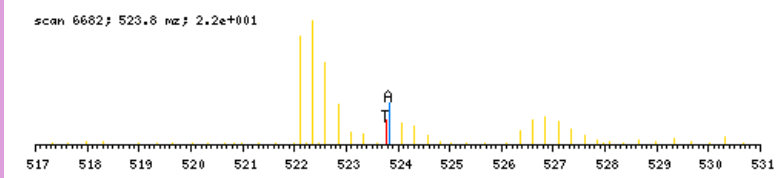

zoomed in precursor plot; T=theoretical m/z, A=acquired m/z

| b <sup>+</sup> | #  | AA | #  | y <sup>+</sup> | y <sup>2+</sup> |
|----------------|----|----|----|----------------|-----------------|
| 158.0453       | 1  | D  | 18 |                |                 |
| 215.0668       | 2  | G  | 17 | 1935.0408      | 968.0243        |
| 330.0937       | 3  | D  | 16 | 1878.0193      | 939.5136        |
| 486.2200       | 4  | K  | 15 | 1762.9923      | 882.0001        |
| 599.3041       | 5  | L  | 14 | 1606.8660      | 803.9369        |
| 698.3725       | 6  | V  | 13 | 1493.7820      | 747.3949        |
| 797.4409       | 7  | V  | 12 | 1394.7136      | 697.8607        |
| 926.4835       | 8  | E  | 11 | 1295.6452      | 648.3265        |
| 1086.5141      | 9  | C  | 10 | 1166.6026      | 583.8052        |
| 1185.5825      | 10 | V  | 9  | 1006.5720      | 503.7899        |
| 1316.6230      | 11 | M  | 8  | 907.5035       | 454.2557        |
| 1472.7493      | 12 | K  | 7  | 776.4631       | 388.7354        |
| 1529.7708      | 13 | G  | 6  | 620.3368       | 310.6723        |
| 1628.8392      | 14 | V  | 5  | 563.3153       | 282.1616        |
| 1729.8869      | 15 | T  | 4  | 464.2469       | 232.6274        |
| 1816.9189      | 16 | S  | 3  | 363.1992       | 182.1035        |
| 1917.9666      | 17 | T  | 2  | 276.1672       | 138.5875        |
|                | 18 | R  | 1  | 175.1195       | 88.0637         |

N-term:+43.02 K(4):+156.13  
 C(9):+160.03 K(12):+156.13

DGEDDSNLVIKKR, MH+ 1586.8391, m/z 529.6179  
 H OS G27 P150811 220811-s1.04419.04419.3.dta

X-range:

-

MassTol: Y-zoom:

MassType:

AVG  MONO

Axis:

1  2

Label:

I  M  -

Ions:

a  +  2+  3+

b  +  2+  3+

c  +  2+  3+

x  +  2+  3+

y  +  2+  3+

z  +  2+  3+

hide H<sub>2</sub>O/NH<sub>3</sub>

zoom 112-122

GO

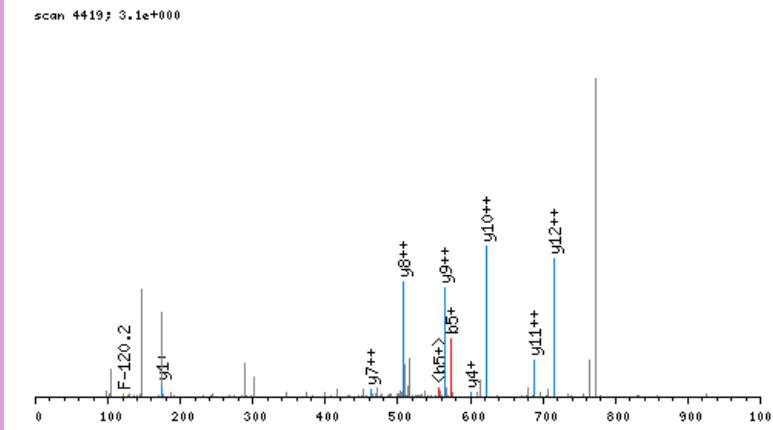

click image to zoom in; click top corners to zoom out [\[precursor±\]](#)

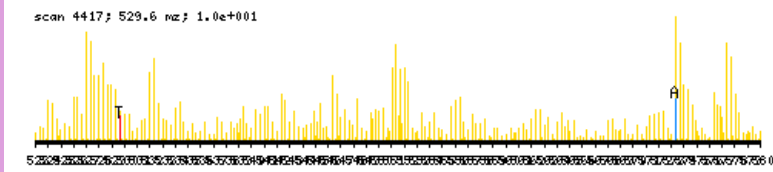

zoomed in precursor plot; T=theoretical m/z, A=acquired m/z

| b <sup>+</sup> | #  | AA # | y <sup>+</sup> | y <sup>2+</sup> |
|----------------|----|------|----------------|-----------------|
| 158.0453       | 1  | D    | 13             |                 |
| 215.0668       | 2  | G    | 12             | 1429.8015       |
| 344.1094       | 3  | E    | 11             | 1372.7801       |
| 459.1363       | 4  | D    | 10             | 1243.7375       |
| 574.1633       | 5  | D    | 9              | 1128.7105       |
| 661.1953       | 6  | S    | 8              | 1013.6836       |
| 775.2382       | 7  | N    | 7              | 926.6516        |
| 888.3223       | 8  | L    | 6              | 812.6086        |
| 987.3907       | 9  | V    | 5              | 699.5246        |
| 1100.4748      | 10 | I    | 4              | 600.4562        |
| 1256.6011      | 11 | K    | 3              | 487.3721        |
| 1412.7274      | 12 | K    | 2              | 331.2458        |
|                | 13 | R    | 1              | 175.1195        |

N-term:+43.02 K(11):+156.13  
 K(12):+156.13

DGIVPDIAVGTKR, MH+ 1410.7957, m/z 705.9015  
 H OS G25 P150811 220811-s1.07668.07668.2.dta

scan 7668; 7.4e+000

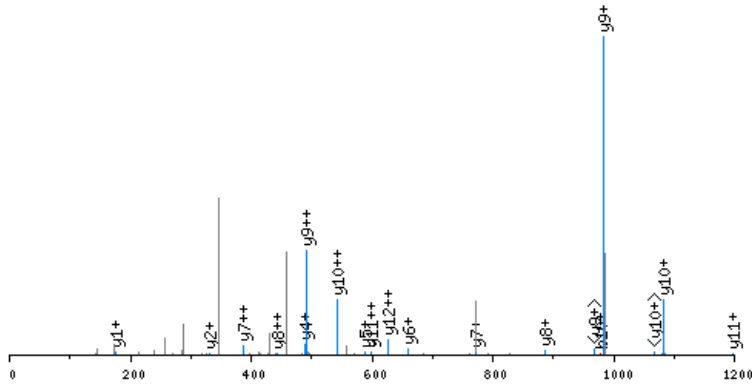

click image to zoom in; click top corners to zoom out [\[precursor±\]](#)

scan 7667; 705.9 m/z; 2.3e+001

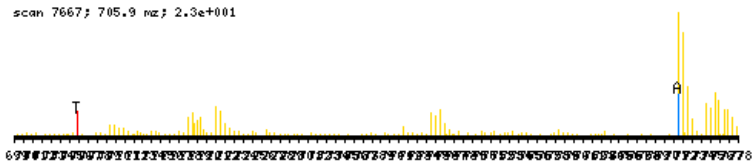

zoomed in precursor plot; T=theoretical m/z, A=acquired m/z

X-range:

-

MassTol: Y-zoom:

MassType:

AVG  MONO

Axis:

1  2

Label:

I  M  -

Ions:

a  +  2+  3+

b  +  2+  3+

c  +  2+  3+

x  +  2+  3+

y  +  2+  3+

z  +  2+  3+

hide H<sub>2</sub>O/NH<sub>3</sub>

zoom 112-122

GO

| b <sup>+</sup> | #  | AA | #  | y <sup>+</sup> | y <sup>2+</sup> |
|----------------|----|----|----|----------------|-----------------|
| 158.0453       | 1  | D  | 13 |                |                 |
| 215.0668       | 2  | G  | 12 | 1253.7582      | 627.3830        |
| 328.1509       | 3  | I  | 11 | 1196.7367      | 598.8723        |
| 427.2193       | 4  | V  | 10 | 1083.6527      | 542.3302        |
| 524.2720       | 5  | P  | 9  | 984.5842       | 492.7960        |
| 639.2990       | 6  | D  | 8  | 887.5315       | 444.2697        |
| 752.3831       | 7  | I  | 7  | 772.5045       | 386.7562        |
| 823.4202       | 8  | A  | 6  | 659.4205       | 330.2141        |
| 922.4886       | 9  | V  | 5  | 588.3834       | 294.6956        |
| 979.5100       | 10 | G  | 4  | 489.3149       | 245.1614        |
| 1080.5577      | 11 | T  | 3  | 432.2935       | 216.6507        |
| 1236.6840      | 12 | K  | 2  | 331.2458       | 166.1268        |
|                | 13 | R  | 1  | 175.1195       | 88.0637         |

N-term:+43.02 K(12):+156.13

DGLVAQCSAR, MH+ 1118.5264, m/z 559.7668  
 H OS G29 P150811 220811-s1.04196.04196.2.dta

X-range:

-

MassTol: Y-zoom:

MassType:

AVG  MONO

Axis:

1  2

Label:

I  M  -

Ions:

a  +  2+  3+

b  +  2+  3+

c  +  2+  3+

x  +  2+  3+

y  +  2+  3+

z  +  2+  3+

hide H<sub>2</sub>O/NH<sub>3</sub>

zoom 112-122

GO

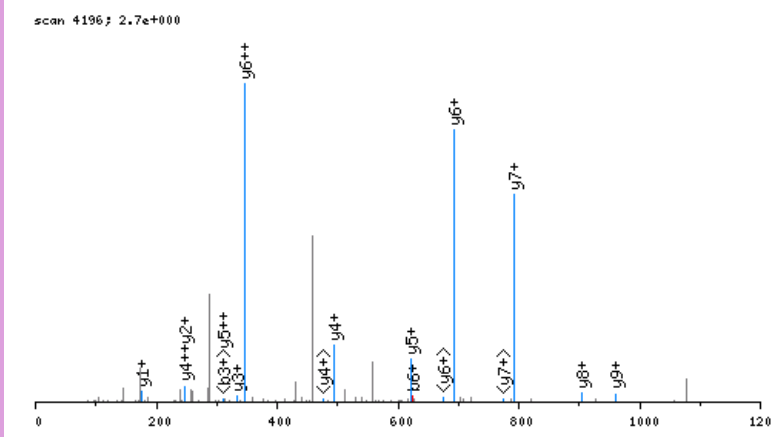

click image to zoom in; click top corners to zoom out [\[precursor±\]](#)

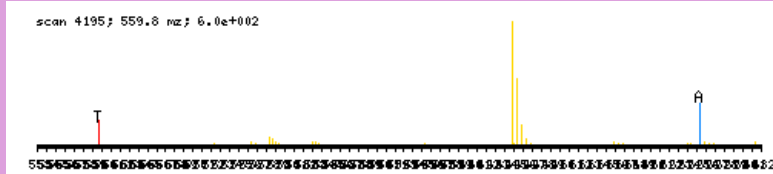

zoomed in precursor plot; T=theoretical m/z, A=acquired m/z

| b <sup>+</sup> | #  | AA | #  | y <sup>+</sup> | y <sup>2+</sup> |
|----------------|----|----|----|----------------|-----------------|
| 158.0453       | 1  | D  | 10 |                |                 |
| 215.0668       | 2  | G  | 9  | 961.4889       | 481.2484        |
| 328.1509       | 3  | L  | 8  | 904.4674       | 452.7376        |
| 427.2193       | 4  | V  | 7  | 791.3833       | 396.1956        |
| 498.2564       | 5  | A  | 6  | 692.3149       | 346.6614        |
| 626.3150       | 6  | Q  | 5  | 621.2778       | 311.1428        |
| 786.3456       | 7  | C  | 4  | 493.2192       | 247.1135        |
| 873.3776       | 8  | S  | 3  | 333.1886       | 167.0982        |
| 944.4147       | 9  | A  | 2  | 246.1566       | 123.5822        |
|                | 10 | R  | 1  | 175.1195       | 88.0637         |

N-term:+43.02 C(7):+160.03

DGSEDDPTIFSAR, MH+ 1451.6291, m/z 726.3182  
 H OS G29 P150811 220811-s1.05181.05181.2.dta

scan 5181; 2.2e+000

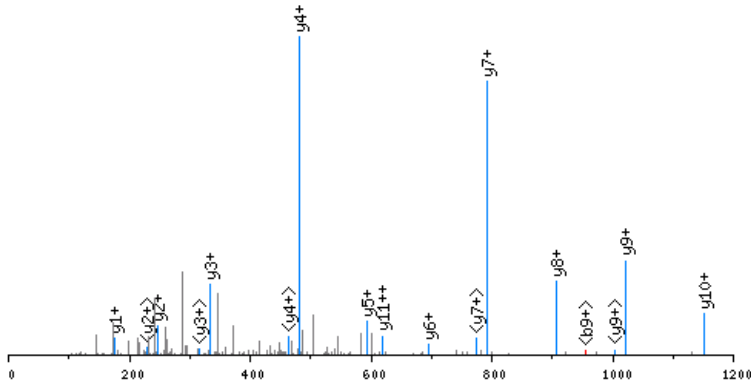

click image to zoom in; click top corners to zoom out [precursor±]

scan 5180; 726.3 m/z; 2.1e+001

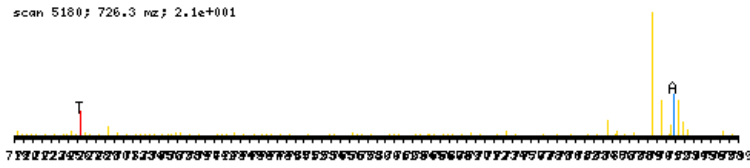

zoomed in precursor plot; T=theoretical m/z, A=acquired m/z

X-range:

-

MassTol: Y-zoom:

MassType:

AVG  MONO

Axis:

1  2

Label:

I  M  -

Ions:

a  +  2+  3+

b  +  2+  3+

c  +  2+  3+

x  +  2+  3+

y  +  2+  3+

z  +  2+  3+

hide H<sub>2</sub>O/NH<sub>3</sub>

zoom 112-122

GO

| b <sup>+</sup> | #  | AA # | y <sup>+</sup> | y <sup>2+</sup> |
|----------------|----|------|----------------|-----------------|
| 158.0453       | 1  | D 13 |                |                 |
| 215.0668       | 2  | G 12 | 1294.5915      | 647.7997        |
| 302.0988       | 3  | S 11 | 1237.5701      | 619.2889        |
| 431.1414       | 4  | E 10 | 1150.5380      | 575.7729        |
| 546.1684       | 5  | D 9  | 1021.4954      | 511.2516        |
| 661.1953       | 6  | D 8  | 906.4685       | 453.7382        |
| 758.2481       | 7  | P 7  | 791.4416       | 396.2247        |
| 859.2958       | 8  | T 6  | 694.3888       | 347.6983        |
| 972.3798       | 9  | I 5  | 593.3411       | 297.1745        |
| 1119.4482      | 10 | F 4  | 480.2571       | 240.6324        |
| 1206.4803      | 11 | S 3  | 333.1886       | 167.0982        |
| 1277.5174      | 12 | A 2  | 246.1566       | 123.5822        |
|                | 13 | R 1  | 175.1195       | 88.0637         |

N-term:+43.02

DHGKFLDCVVR, MH+ 1421.7423, m/z 474.5856  
 H OS G27 P150811 220811-s1.05418.05418.3.dta

X-range:

-

MassTol: Y-zoom:

MassType:

AVG  MONO

Axis:

1  2

Label:

I  M  -

Ions:

a  +  2+  3+

b  +  2+  3+

c  +  2+  3+

x  +  2+  3+

y  +  2+  3+

z  +  2+  3+

hide H<sub>2</sub>O/NH<sub>3</sub>

zoom 112-122

GO

scan 5418; 1.9e+001

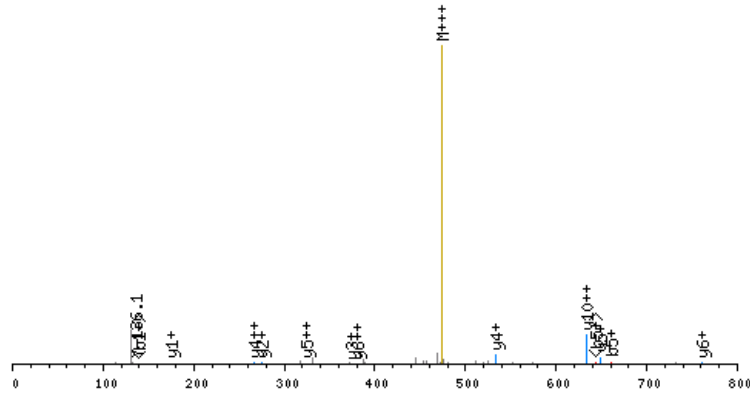

click image to zoom in; click top corners to zoom out [\[precursor±\]](#)

scan 5417; 474.6 mz; 1.5e+001

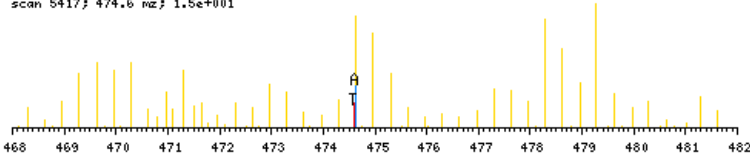

zoomed in precursor plot; T=theoretical m/z, A=acquired m/z

| b <sup>+</sup> | #  | AA # | y <sup>+</sup> | y <sup>2+</sup> |
|----------------|----|------|----------------|-----------------|
| 158.0453       | 1  | D 11 |                |                 |
| 295.1043       | 2  | H 10 | 1264.7048      | 632.8563        |
| 352.1257       | 3  | G 9  | 1127.6459      | 564.3269        |
| 514.2838       | 4  | K 8  | 1070.6244      | 535.8161        |
| 661.3522       | 5  | F 7  | 908.4663       | 454.7371        |
| 774.4363       | 6  | L 6  | 761.3979       | 381.2029        |
| 889.4632       | 7  | D 5  | 648.3139       | 324.6608        |
| 1049.4938      | 8  | C 4  | 533.2869       | 267.1474        |
| 1148.5623      | 9  | V 3  | 373.2563       | 187.1321        |
| 1247.6307      | 10 | V 2  | 274.1879       | 137.5979        |
|                | 11 | R 1  | 175.1195       | 88.0637         |

N-term:+43.02 K(4):+162.16  
 C(8):+160.03

DIAIHHPWIR, MH+ 1299.6962, m/z 433.9036  
 H OS G27 P150811 220811-s1.06713.06713.3.dta

X-range:

-

MassTol: Y-zoom:

MassType:

AVG  MONO

Axis:

1  2

Label:

I  M  -

Ions:

a  +  2+  3+

b  +  2+  3+

c  +  2+  3+

x  +  2+  3+

y  +  2+  3+

z  +  2+  3+

hide H<sub>2</sub>O/NH<sub>3</sub>

zoom 112-122

GO

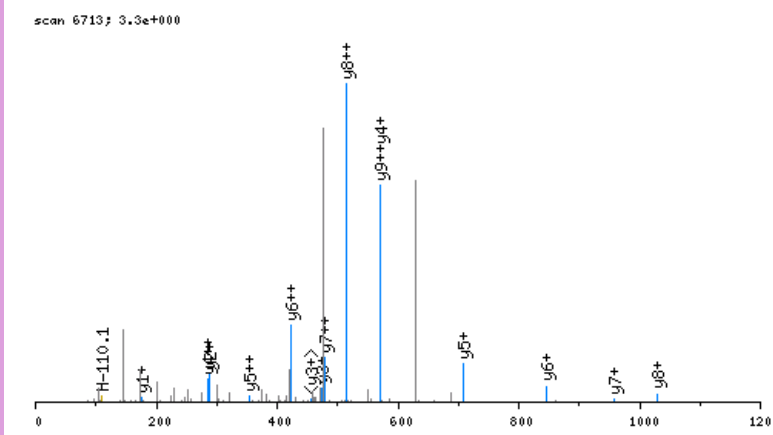

click image to zoom in; click top corners to zoom out [\[precursor±\]](#)

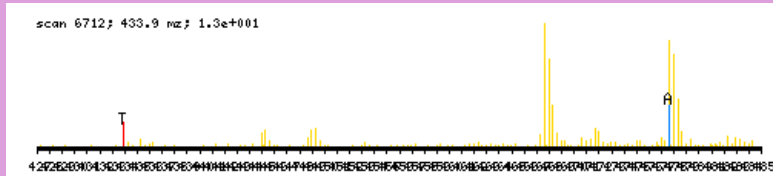

zoomed in precursor plot; T=theoretical m/z, A=acquired m/z

| b <sup>+</sup> | #  | AA # | y <sup>+</sup> | y <sup>2+</sup> |
|----------------|----|------|----------------|-----------------|
| 158.0453       | 1  | D 10 |                |                 |
| 271.1294       | 2  | I 9  | 1142.6587      | 571.8333        |
| 342.1665       | 3  | A 8  | 1029.5746      | 515.2912        |
| 455.2506       | 4  | I 7  | 958.5375       | 479.7727        |
| 592.3095       | 5  | H 6  | 845.4535       | 423.2306        |
| 729.3684       | 6  | H 5  | 708.3946       | 354.7012        |
| 826.4212       | 7  | P 4  | 571.3356       | 286.1717        |
| 1012.5005      | 8  | W 3  | 474.2829       | 237.6454        |
| 1125.5845      | 9  | I 2  | 288.2036       | 144.6057        |
|                | 10 | R 1  | 175.1195       | 88.0637         |

N-term:+43.02



DIDLPEFDAR, MH+ 1333.6276, m/z 667.3174  
 H OS G24 P150811 220811-s1.04441.04441.2.dta

X-range:

-

MassTol: Y-zoom:

MassType:

AVG  MONO

Axis:

1  2

Label:

I  M  -

Ions:

a  +  2+  3+

b  +  2+  3+

c  +  2+  3+

x  +  2+  3+

y  +  2+  3+

z  +  2+  3+

hide H<sub>2</sub>O/NH<sub>3</sub>

zoom 112-122

GO

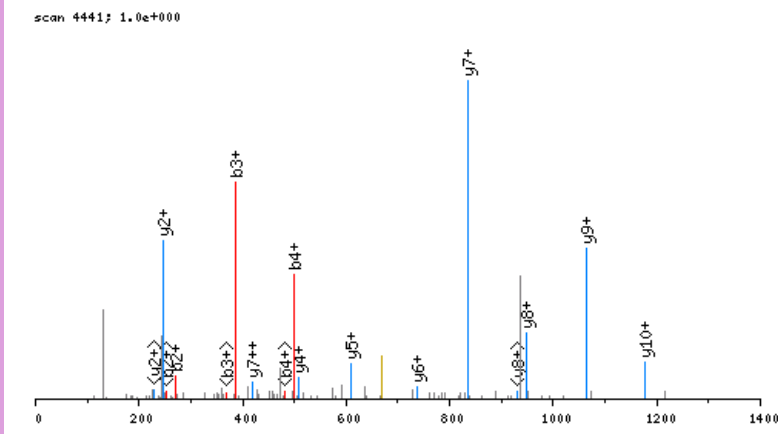

click image to zoom in; click top corners to zoom out [\[precursor±\]](#)

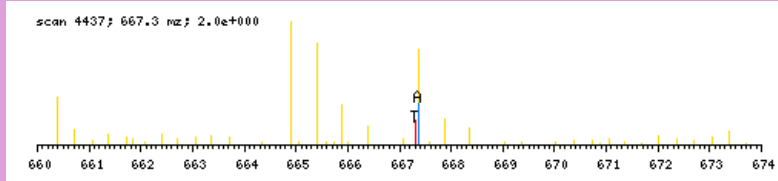

zoomed in precursor plot; T=theoretical m/z, A=acquired m/z

| b <sup>+</sup> | #  | AA # | y <sup>+</sup> | y <sup>2+</sup> |
|----------------|----|------|----------------|-----------------|
| 158.0453       | 1  | D 11 |                |                 |
| 271.1294       | 2  | I 10 | 1176.5901      | 588.7990        |
| 386.1564       | 3  | D 9  | 1063.5060      | 532.2569        |
| 499.2404       | 4  | L 8  | 948.4791       | 474.7434        |
| 596.2932       | 5  | P 7  | 835.3950       | 418.2014        |
| 725.3358       | 6  | E 6  | 738.3422       | 369.6750        |
| 826.3834       | 7  | T 5  | 609.2997       | 305.1537        |
| 973.4519       | 8  | F 4  | 508.2520       | 254.6299        |
| 1088.4788      | 9  | D 3  | 361.1836       | 181.0957        |
| 1159.5159      | 10 | A 2  | 246.1566       | 123.5822        |
|                | 11 | R 1  | 175.1195       | 88.0637         |

N-term:+43.02

DKDSGFAYSWHR, MH+ 1544.7347, m/z 772.8710  
 H OS G29 P150811 220811-s1.04171.04171.2.dta

scan 4171; 1.1e+000

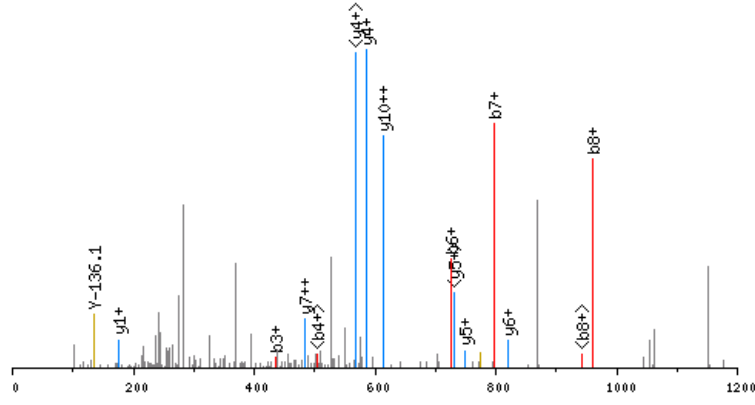

click image to zoom in; click top corners to zoom out [precursor±]

scan 4170; 772.9 m/z; 7.4e+000

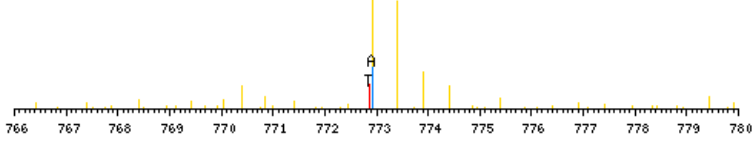

zoomed in precursor plot; T=theoretical m/z, A=acquired m/z

X-range:

0 - 0

MassTol: Y-zoom:

0. 1.

MassType:

AVG  MONO

Axis:

1  2

Label:

I  M  -

Ions:

a  +  2+  3+

b  +  2+  3+

c  +  2+  3+

x  +  2+  3+

y  +  2+  3+

z  +  2+  3+

hide H<sub>2</sub>O/NH<sub>3</sub>

zoom 112-122

GO

| b <sup>+</sup> | #  | AA # | y <sup>+</sup> | y <sup>2+</sup> |
|----------------|----|------|----------------|-----------------|
| 158.0453       | 1  | D 12 |                |                 |
| 320.2034       | 2  | K 11 | 1387.6971      | 694.3525        |
| 435.2304       | 3  | D 10 | 1225.5390      | 613.2734        |
| 522.2624       | 4  | S 9  | 1110.5121      | 555.7600        |
| 579.2839       | 5  | G 8  | 1023.4801      | 512.2439        |
| 726.3523       | 6  | F 7  | 966.4586       | 483.7332        |
| 797.3894       | 7  | A 6  | 819.3902       | 410.1990        |
| 960.4527       | 8  | Y 5  | 748.3531       | 374.6805        |
| 1047.4848      | 9  | S 4  | 585.2898       | 293.1488        |
| 1233.5641      | 10 | W 3  | 498.2577       | 249.6328        |
| 1370.6230      | 11 | H 2  | 312.1784       | 156.5931        |
|                | 12 | R 1  | 175.1195       | 88.0637         |

N-term:+43.02 K(2):+162.16

DKNELVQKAK, MH+ 1316.8639, m/z 439.6261  
 H OS G26 P150811 220811-s1.02801.02801.3.dta

scan 2801; 8.0e+001

X-range:

-

MassTol: Y-zoom:

MassType:

AVG  MONO

Axis:

1  2

Label:

I  M  -

Ions:

a  +  2+  3+

b  +  2+  3+

c  +  2+  3+

x  +  2+  3+

y  +  2+  3+

z  +  2+  3+

hide H<sub>2</sub>O/NH<sub>3</sub>

zoom 112-122

GO

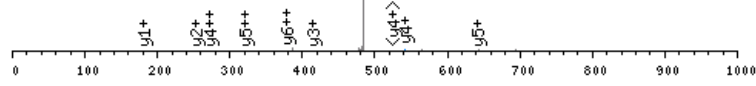

click image to zoom in; click top corners to zoom out [\[precursor±\]](#)

scan 2800; 439.6 mz; 1.5e+001

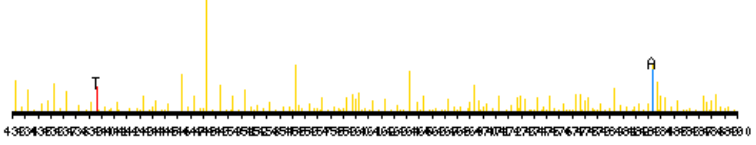

zoomed in precursor plot; T=theoretical m/z, A=acquired m/z

| b <sup>+</sup> | #  | AA # | y <sup>+</sup> | y <sup>2+</sup> |
|----------------|----|------|----------------|-----------------|
| 158.0453       | 1  | D 10 |                |                 |
| 320.2034       | 2  | K 9  | 1159.8264      | 580.4171        |
| 434.2464       | 3  | N 8  | 997.6683       | 499.3381        |
| 563.2890       | 4  | E 7  | 883.6254       | 442.3166        |
| 676.3730       | 5  | L 6  | 754.5828       | 377.7953        |
| 775.4414       | 6  | V 5  | 641.4987       | 321.2533        |
| 903.5000       | 7  | Q 4  | 542.4303       | 271.7191        |
| 1065.6581      | 8  | K 3  | 414.3717       | 207.6898        |
| 1136.6952      | 9  | A 2  | 252.2136       | 126.6107        |
|                | 10 | K 1  | 181.1765       | 91.0922         |

N-term:+43.02 K(2):+162.16  
 K(8):+162.16 K(10):+162.16

DKNELVQKAKLAEQAER, MH+ 2114.2671, m/z 705.4272  
 H OS G28 P150811 220811-s1.06269.06269.3.dta

X-range:

-

MassTol: Y-zoom:

MassType:

AVG  MONO

Axis:

1  2

Label:

I  M  -

Ions:

a  +  2+  3+

b  +  2+  3+

c  +  2+  3+

x  +  2+  3+

y  +  2+  3+

z  +  2+  3+

hide H<sub>2</sub>O/NH<sub>3</sub>

zoom 112-122

GO

scan 6269; 5.4e+001

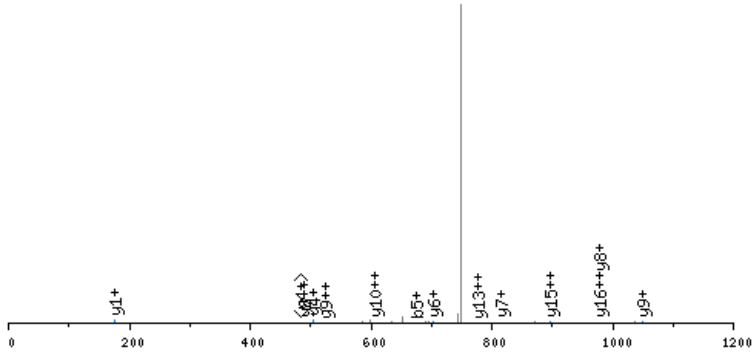

click image to zoom in; click top corners to zoom out [\[precursor±\]](#)

scan 6268; 705.4 mz; 3.5e+001

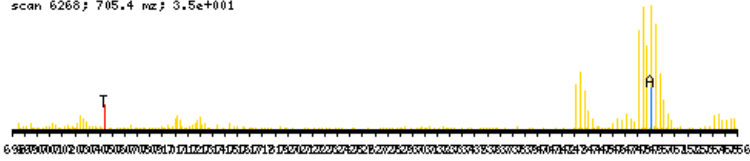

zoomed in precursor plot; T=theoretical m/z, A=acquired m/z

| b <sup>+</sup> | #  | AA # | y <sup>+</sup> | y <sup>2+</sup> |
|----------------|----|------|----------------|-----------------|
| 158.0453       | 1  | D 17 |                |                 |
| 320.2034       | 2  | K 16 | 1957.2295      | 979.1187        |
| 434.2464       | 3  | N 15 | 1795.0714      | 898.0396        |
| 563.2890       | 4  | E 14 | 1681.0285      | 841.0182        |
| 676.3730       | 5  | L 13 | 1551.9859      | 776.4969        |
| 775.4414       | 6  | V 12 | 1438.9019      | 719.9548        |
| 903.5000       | 7  | Q 11 | 1339.8334      | 670.4206        |
| 1065.6581      | 8  | K 10 | 1211.7749      | 606.3913        |
| 1136.6952      | 9  | A 9  | 1049.6168      | 525.3123        |
| 1298.8533      | 10 | K 8  | 978.5797       | 489.7937        |
| 1411.9374      | 11 | L 7  | 816.4216       | 408.7147        |
| 1482.9745      | 12 | A 6  | 703.3375       | 352.1727        |
| 1612.0171      | 13 | E 5  | 632.3004       | 316.6541        |
| 1740.0757      | 14 | Q 4  | 503.2578       | 252.1328        |
| 1811.1128      | 15 | A 3  | 375.1992       | 188.1035        |
| 1940.1554      | 16 | E 2  | 304.1621       | 152.5850        |
|                | 17 | R 1  | 175.1195       | 88.0637         |

N-term:+43.02 K(2):+162.16  
 K(8):+162.16 K(10):+162.16

DLAAAAEPGAGSQHPEVR, MH+ 1817.8782, m/z 606.6309  
 H OS G24 P150811 220811-s1.03793.03793.3.dta

X-range:

-

MassTol: Y-zoom:

MassType:

AVG  MONO

Axis:

1  2

Label:

I  M  -

Ions:

a  +  2+  3+

b  +  2+  3+

c  +  2+  3+

x  +  2+  3+

y  +  2+  3+

z  +  2+  3+

hide H<sub>2</sub>O/NH<sub>3</sub>

zoom 112-122

GO

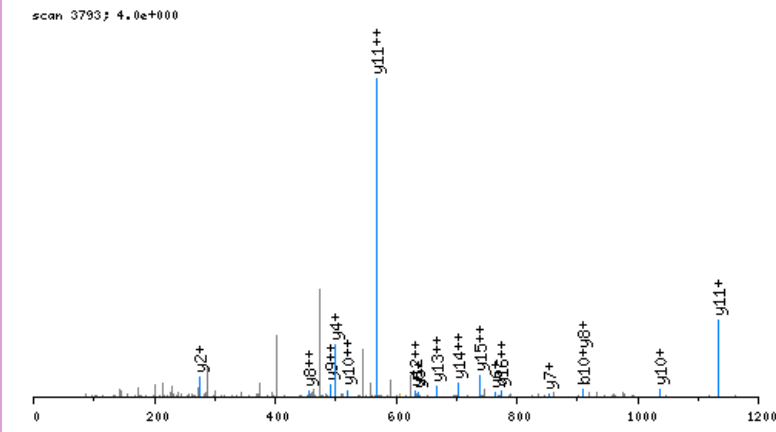

click image to zoom in; click top corners to zoom out [\[precursor±\]](#)

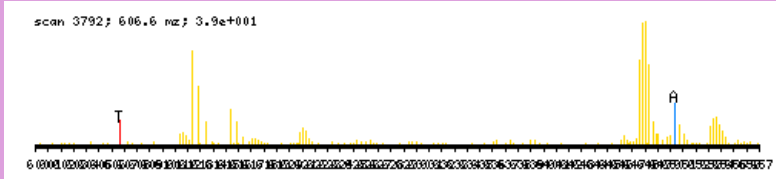

zoomed in precursor plot; T=theoretical m/z, A=acquired m/z

| b <sup>+</sup> | #  | AA # | y <sup>+</sup> | y <sup>2+</sup> |
|----------------|----|------|----------------|-----------------|
| 158.0453       | 1  | D 18 |                |                 |
| 271.1294       | 2  | L 17 | 1660.8407      | 830.9243        |
| 342.1665       | 3  | A 16 | 1547.7566      | 774.3822        |
| 413.2036       | 4  | A 15 | 1476.7195      | 738.8637        |
| 484.2407       | 5  | A 14 | 1405.6824      | 703.3451        |
| 555.2779       | 6  | A 13 | 1334.6453      | 667.8266        |
| 684.3205       | 7  | E 12 | 1263.6082      | 632.3080        |
| 781.3732       | 8  | P 11 | 1134.5656      | 567.7867        |
| 838.3947       | 9  | G 10 | 1037.5128      | 519.2603        |
| 909.4318       | 10 | A 9  | 980.4914       | 490.7496        |
| 966.4533       | 11 | G 8  | 909.4543       | 455.2310        |
| 1053.4853      | 12 | S 7  | 852.4328       | 426.7203        |
| 1181.5439      | 13 | Q 6  | 765.4008       | 383.2043        |
| 1318.6028      | 14 | H 5  | 637.3422       | 319.1750        |
| 1415.6555      | 15 | P 4  | 500.2833       | 250.6455        |
| 1544.6981      | 16 | E 3  | 403.2305       | 202.1192        |
| 1643.7665      | 17 | V 2  | 274.1879       | 137.5979        |
|                | 18 | R 1  | 175.1195       | 88.0637         |

N-term:+43.02

DLEAVCKR, MH+ 1060.5461, m/z 530.7767  
 H OS G25 P150811 220811-s1.05296.05296.2.dta

scan 5296; 2.7e+001

X-range:

-

MassTol: Y-zoom:

MassType:

AVG  MONO

Axis:

1  2

Label:

I  M  -

Ions:

a  +  2+  3+

b  +  2+  3+

c  +  2+  3+

x  +  2+  3+

y  +  2+  3+

z  +  2+  3+

hide H<sub>2</sub>O/NH<sub>3</sub>

zoom 112-122

GO

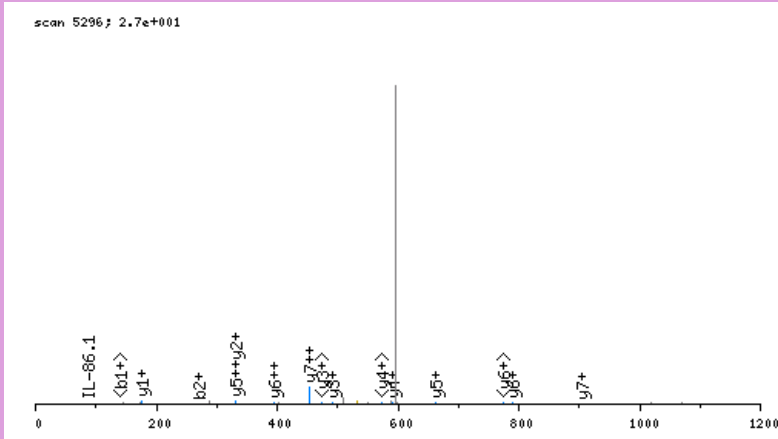

click image to zoom in; click top corners to zoom out [\[precursor±\]](#)

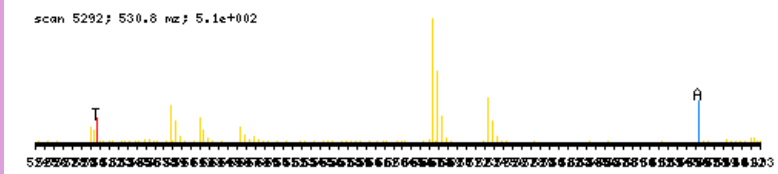

zoomed in precursor plot; T=theoretical m/z, A=acquired m/z

| b <sup>+</sup> | # | AA # | y <sup>+</sup> | y <sup>2+</sup>   |
|----------------|---|------|----------------|-------------------|
| 158.0453       | 1 | D    | 8              |                   |
| 271.1294       | 2 | L    | 7              | 903.5086 452.2582 |
| 400.1720       | 3 | E    | 6              | 790.4245 395.7162 |
| 471.2091       | 4 | A    | 5              | 661.3819 331.1949 |
| 570.2775       | 5 | V    | 4              | 590.3448 295.6763 |
| 730.3081       | 6 | C    | 3              | 491.2764 246.1421 |
| 886.4344       | 7 | K    | 2              | 331.2458 166.1268 |
|                | 8 | R    | 1              | 175.1195 88.0637  |

N-term:+43.02 C(6):+160.03  
 K(7):+156.13

DLGLAGR, MH+ 743.4052, m/z 372.2062  
 H OS G29 P150811 220811-s1.04781.04781.2.dta

X-range:

-

MassTol: Y-zoom:

MassType:

AVG  MONO

Axis:

1  2

Label:

I  M  -

Ions:

a  +  2+  3+

b  +  2+  3+

c  +  2+  3+

x  +  2+  3+

y  +  2+  3+

z  +  2+  3+

hide H<sub>2</sub>O/NH<sub>3</sub>

zoom 112-122

GO

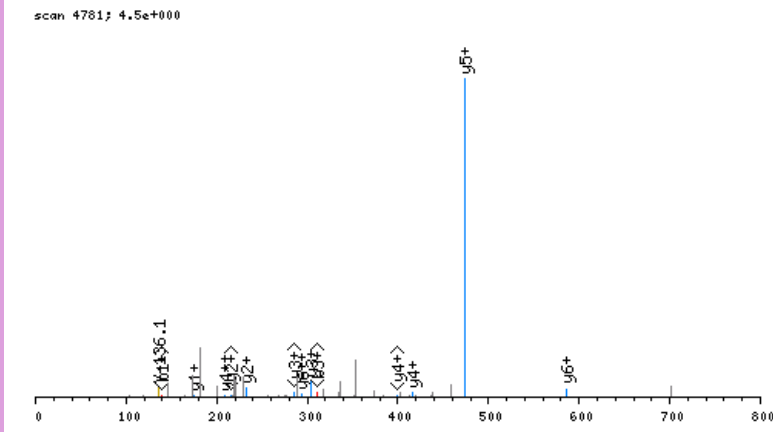

click image to zoom in; click top corners to zoom out [\[precursor±\]](#)

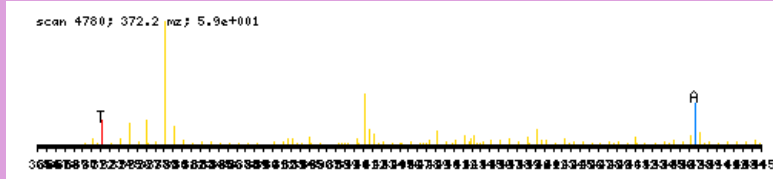

zoomed in precursor plot; T=theoretical m/z, A=acquired m/z

| b <sup>+</sup> | # | AA # | y <sup>+</sup> | y <sup>2+</sup>   |
|----------------|---|------|----------------|-------------------|
| 158.0453       | 1 | D    | 7              |                   |
| 271.1294       | 2 | L    | 6              | 586.3677 293.6877 |
| 328.1509       | 3 | G    | 5              | 473.2836 237.1457 |
| 441.2349       | 4 | L    | 4              | 416.2621 208.6350 |
| 512.2720       | 5 | A    | 3              | 303.1781 152.0930 |
| 569.2935       | 6 | G    | 2              | 232.1410 116.5744 |
|                | 7 | R    | 1              | 175.1195 88.0637  |

N-term:+43.02

DLLFGR, MH+ 762.4150, m/z 381.7112  
 H OS G29 P150811 220811-s1.06527.06527.2.dta

X-range:

-

MassTol: Y-zoom:

MassType:

AVG  MONO

Axis:

1  2

Label:

I  M  -

Ions:

a  +  2+  3+

b  +  2+  3+

c  +  2+  3+

x  +  2+  3+

y  +  2+  3+

z  +  2+  3+

hide H<sub>2</sub>O/NH<sub>3</sub>

zoom 112-122

GO

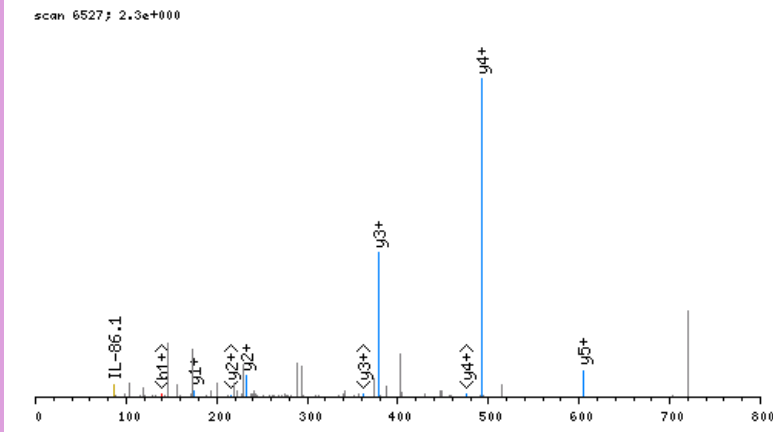

click image to zoom in; click top corners to zoom out [\[precursor±\]](#)

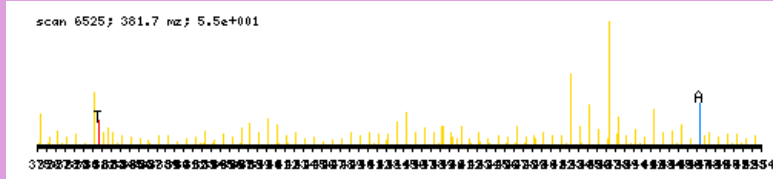

zoomed in precursor plot; T=theoretical m/z, A=acquired m/z

| b <sup>+</sup> | # | AA # | y <sup>+</sup> | y <sup>2+</sup> |
|----------------|---|------|----------------|-----------------|
| 158.0453       | 1 | D 6  |                |                 |
| 271.1294       | 2 | L 5  | 605.3775       | 303.1927        |
| 384.2135       | 3 | L 4  | 492.2934       | 246.6506        |
| 531.2819       | 4 | F 3  | 379.2094       | 190.1086        |
| 588.3033       | 5 | G 2  | 232.1410       | 116.5744        |
|                | 6 | R 1  | 175.1195       | 88.0637         |

N-term:+43.02



DLSELER, MH+ 903.4424, m/z 452.2248  
 H OS G29 P150811 220811-s1.05431.05431.2.dta

X-range:

-

MassTol: Y-zoom:

MassType:

AVG  MONO

Axis:

1  2

Label:

I  M  -

Ions:

a  +  2+  3+

b  +  2+  3+

c  +  2+  3+

x  +  2+  3+

y  +  2+  3+

z  +  2+  3+

hide H<sub>2</sub>O/NH<sub>3</sub>

zoom 112-122

GO

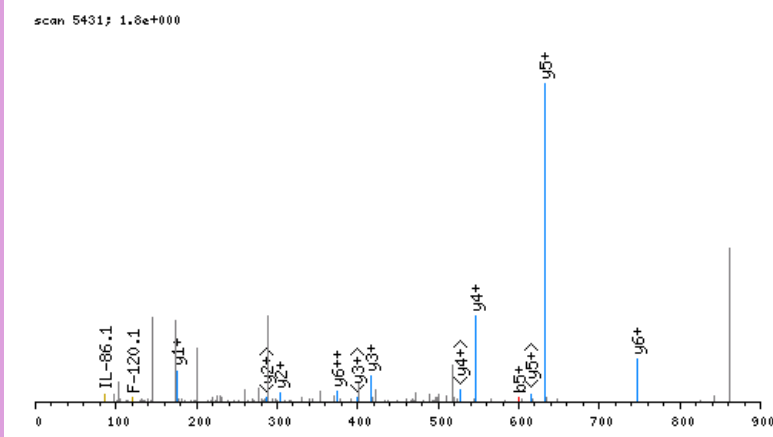

click image to zoom in; click top corners to zoom out [\[precursor±\]](#)

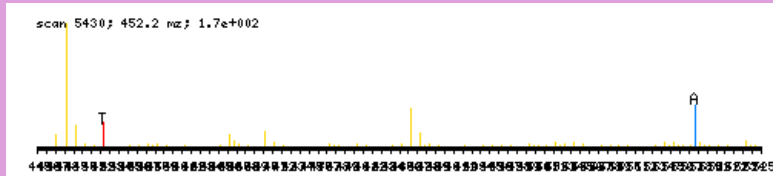

zoomed in precursor plot; T=theoretical m/z, A=acquired m/z

| b <sup>+</sup> | # | AA # | y <sup>+</sup> | y <sup>2+</sup> |
|----------------|---|------|----------------|-----------------|
| 158.0453       | 1 | D 7  |                |                 |
| 271.1294       | 2 | L 6  | 746.4048       | 373.7063        |
| 358.1614       | 3 | S 5  | 633.3208       | 317.1643        |
| 487.2040       | 4 | E 4  | 546.2888       | 273.6483        |
| 600.2881       | 5 | L 3  | 417.2462       | 209.1270        |
| 729.3307       | 6 | E 2  | 304.1621       | 152.5850        |
|                | 7 | R 1  | 175.1195       | 88.0637         |

N-term:+43.02

DLSSDLSTASKIVK, MH+ 1648.9010, m/z 550.3052  
 H OS G26 P150811 220811-s1.04717.04717.3.dta

X-range:

-

MassTol: Y-zoom:

MassType:

AVG  MONO

Axis:

1  2

Label:

I  M  -

Ions:

a  +  2+  3+

b  +  2+  3+

c  +  2+  3+

x  +  2+  3+

y  +  2+  3+

z  +  2+  3+

hide H<sub>2</sub>O/NH<sub>3</sub>

zoom 112-122

GO

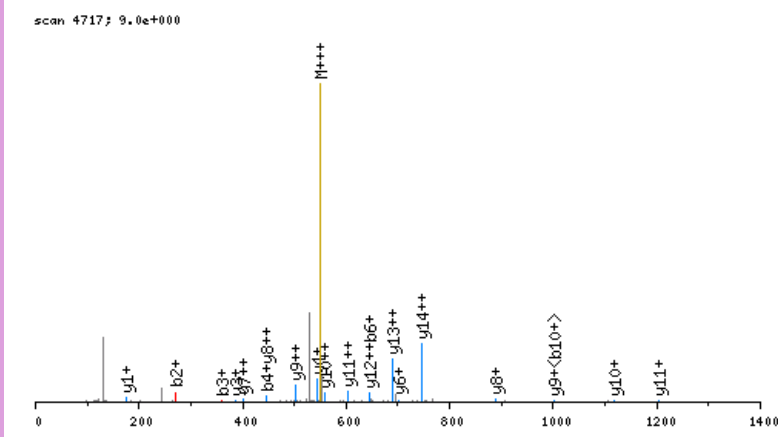

click image to zoom in; click top corners to zoom out [\[precursor±\]](#)

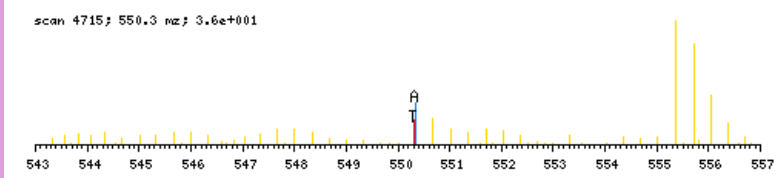

zoomed in precursor plot; T=theoretical m/z, A=acquired m/z

| b <sup>+</sup> | #  | AA | #  | y <sup>+</sup> | y <sup>2+</sup> |
|----------------|----|----|----|----------------|-----------------|
| 158.0453       | 1  | D  | 15 |                |                 |
| 271.1294       | 2  | L  | 14 | 1491.8635      | 746.4356        |
| 358.1614       | 3  | S  | 13 | 1378.7794      | 689.8936        |
| 445.1935       | 4  | S  | 12 | 1291.7474      | 646.3776        |
| 532.2255       | 5  | S  | 11 | 1204.7154      | 602.8616        |
| 647.2524       | 6  | D  | 10 | 1117.6833      | 559.3456        |
| 760.3365       | 7  | L  | 9  | 1002.6564      | 501.8321        |
| 847.3685       | 8  | S  | 8  | 889.5723       | 445.2901        |
| 948.4162       | 9  | T  | 7  | 802.5403       | 401.7741        |
| 1019.4533      | 10 | A  | 6  | 701.4926       | 351.2502        |
| 1106.4853      | 11 | S  | 5  | 630.4555       | 315.7317        |
| 1262.6116      | 12 | K  | 4  | 543.4235       | 272.2156        |
| 1375.6957      | 13 | I  | 3  | 387.2972       | 194.1525        |
| 1474.7641      | 14 | V  | 2  | 274.2131       | 137.6105        |
|                | 15 | K  | 1  | 175.1447       | 88.0763         |

N-term:+43.02 K(12):+156.13  
 K(15):+156.13

DMGNQHPSISR, MH+ 1283.5803, m/z 642.2938  
 H OS G25 P150811 220811-s1.04146.04146.2.dta

X-range:

-

MassTol: Y-zoom:

MassType:

AVG  MONO

Axis:

1  2

Label:

I  M  -

Ions:

a  +  2+  3+

b  +  2+  3+

c  +  2+  3+

x  +  2+  3+

y  +  2+  3+

z  +  2+  3+

hide H<sub>2</sub>O/NH<sub>3</sub>

zoom 112-122

GO

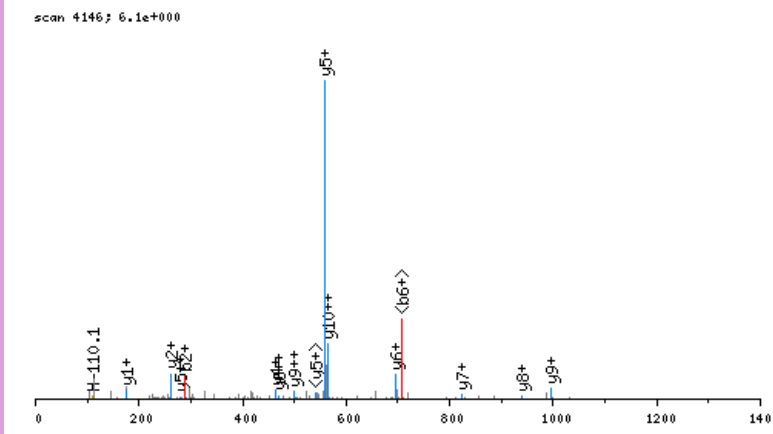

click image to zoom in; click top corners to zoom out [\[precursor±\]](#)

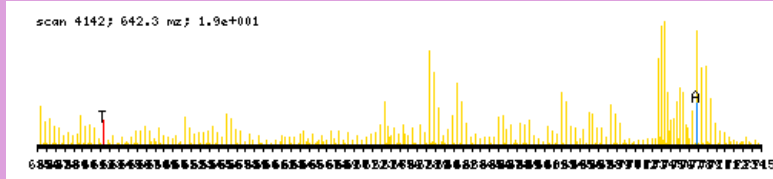

zoomed in precursor plot; T=theoretical m/z, A=acquired m/z

| b <sup>+</sup>  | #  | AA # | y <sup>+</sup> | y <sup>2+</sup> |
|-----------------|----|------|----------------|-----------------|
| 158.0453        | 1  | D 11 |                |                 |
| <b>289.0858</b> | 2  | M 10 | 1126.5428      | <b>563.7753</b> |
| 346.1073        | 3  | G 9  | 995.5023       | 498.2550        |
| 460.1502        | 4  | N 8  | 938.4808       | 469.7443        |
| 588.2088        | 5  | Q 7  | 824.4379       | 412.7228        |
| 725.2677        | 6  | H 6  | 696.3793       | 348.6936        |
| 822.3205        | 7  | P 5  | 559.3204       | 280.1641        |
| 909.3525        | 8  | S 4  | 462.2676       | 231.6377        |
| 1022.4366       | 9  | I 3  | 375.2356       | 188.1217        |
| 1109.4686       | 10 | S 2  | 262.1515       | 131.5797        |
|                 | 11 | R 1  | 175.1195       | 88.0637         |

N-term:+43.02

DNLSPPEEVQLR, MH+ 1341.6650, m/z 671.3362  
 H OS G29 P150811 220811-s1.05308.05308.2.dta

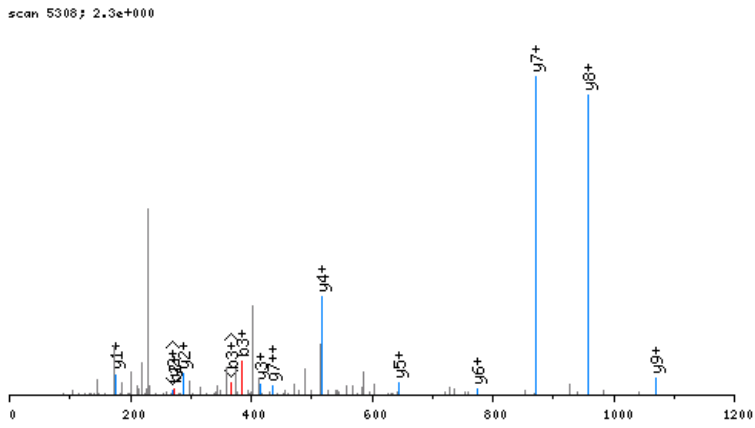

click image to zoom in; click top corners to zoom out [\[precursor±\]](#)

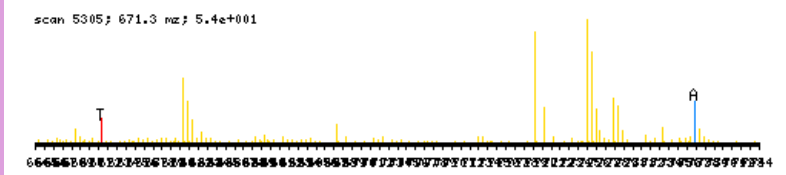

zoomed in precursor plot; T=theoretical m/z, A=acquired m/z

X-range:

-

MassTol: Y-zoom:

MassType:

AVG  MONO

Axis:

1  2

Label:

I  M  -

Ions:

a  +  2+  3+

b  +  2+  3+

c  +  2+  3+

x  +  2+  3+

y  +  2+  3+

z  +  2+  3+

hide H<sub>2</sub>O/NH<sub>3</sub>

zoom 112-122

GO

| b <sup>+</sup> | #  | AA # | y <sup>+</sup> | y <sup>2+</sup> |
|----------------|----|------|----------------|-----------------|
| 158.0453       | 1  | D 11 |                |                 |
| 272.0883       | 2  | N 10 | 1184.6275      | 592.8177        |
| 385.1723       | 3  | L 9  | 1070.5846      | 535.7962        |
| 472.2044       | 4  | S 8  | 957.5005       | 479.2542        |
| 569.2571       | 5  | P 7  | 870.4685       | 435.7382        |
| 698.2997       | 6  | E 6  | 773.4157       | 387.2118        |
| 827.3423       | 7  | E 5  | 644.3731       | 322.6905        |
| 926.4107       | 8  | V 4  | 515.3306       | 258.1692        |
| 1054.4693      | 9  | Q 3  | 416.2621       | 208.6350        |
| 1167.5534      | 10 | L 2  | 288.2036       | 144.6057        |
|                | 11 | R 1  | 175.1195       | 88.0637         |

N-term:+43.02

DNSGKQAEAMALLAEAER, MH+ 1979.9921, m/z 660.6689  
 H OS G24 P150811 220811-s1.04781.04781.3.dta

scan 4781; 2.1e+000

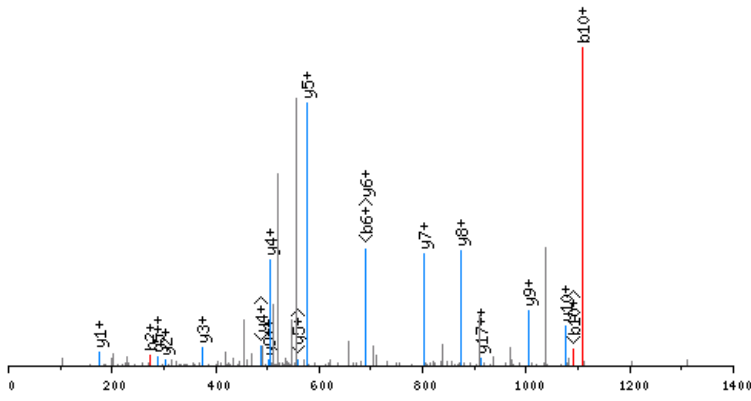

click image to zoom in; click top corners to zoom out [precursor±]

scan 4780; 660.7 m/z; 5.6e+000

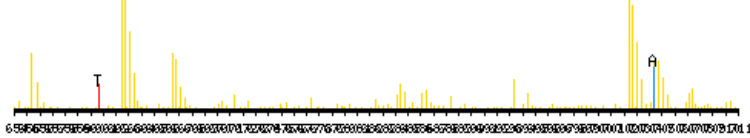

zoomed in precursor plot; T=theoretical m/z, A=acquired m/z

X-range:

-

MassTol: Y-zoom:

MassType:

AVG  MONO

Axis:

1  2

Label:

I  M  -

Ions:

a  +  2+  3+

b  +  2+  3+

c  +  2+  3+

x  +  2+  3+

y  +  2+  3+

z  +  2+  3+

hide H<sub>2</sub>O/NH<sub>3</sub>

zoom 112-122

GO

| b <sup>+</sup> | #  | AA # | y <sup>+</sup> | y <sup>2+</sup> |
|----------------|----|------|----------------|-----------------|
| 158.0453       | 1  | D 18 |                |                 |
| 272.0883       | 2  | N 17 | 1822.9546      | 911.9812        |
| 359.1203       | 3  | S 16 | 1708.9116      | 854.9597        |
| 416.1418       | 4  | G 15 | 1621.8796      | 811.4437        |
| 578.2999       | 5  | K 14 | 1564.8581      | 782.9330        |
| 706.3584       | 6  | Q 13 | 1402.7000      | 701.8539        |
| 777.3956       | 7  | A 12 | 1274.6415      | 637.8246        |
| 906.4381       | 8  | E 11 | 1203.6043      | 602.3061        |
| 977.4753       | 9  | A 10 | 1074.5618      | 537.7848        |
| 1108.5157      | 10 | M 9  | 1003.5246      | 502.2662        |
| 1179.5529      | 11 | A 8  | 872.4842       | 436.7460        |
| 1292.6369      | 12 | L 7  | 801.4470       | 401.2274        |
| 1405.7210      | 13 | L 6  | 688.3630       | 344.6854        |
| 1476.7581      | 14 | A 5  | 575.2789       | 288.1434        |
| 1605.8007      | 15 | E 4  | 504.2418       | 252.6248        |
| 1676.8378      | 16 | A 3  | 375.1992       | 188.1035        |
| 1805.8804      | 17 | E 2  | 304.1621       | 152.5850        |
|                | 18 | R 1  | 175.1195       | 88.0637         |

N-term:+43.02 K(5):+162.16

DPNTIIEALR, MH+ 1183.6323, m/z 592.3198  
 H OS G29 P150811 220811-s1.06507.06507.2.dta

X-range:

-

MassTol: Y-zoom:

MassType:

AVG  MONO

Axis:

1  2

Label:

I  M  -

Ions:

a  +  2+  3+

b  +  2+  3+

c  +  2+  3+

x  +  2+  3+

y  +  2+  3+

z  +  2+  3+

hide H<sub>2</sub>O/NH<sub>3</sub>

zoom 112-122

GO

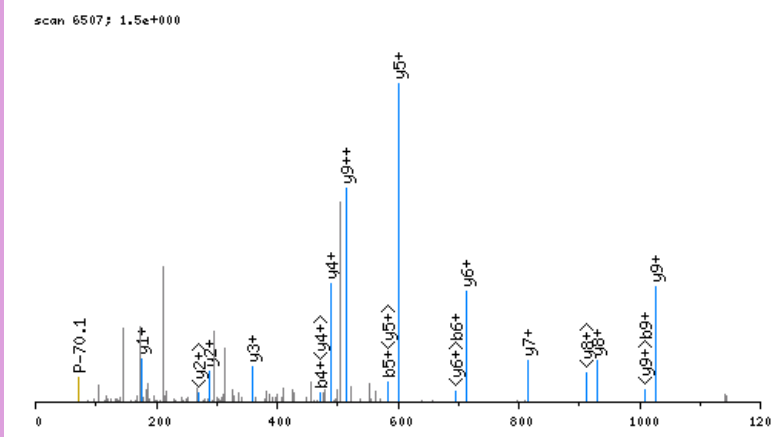

click image to zoom in; click top corners to zoom out [\[precursor±\]](#)

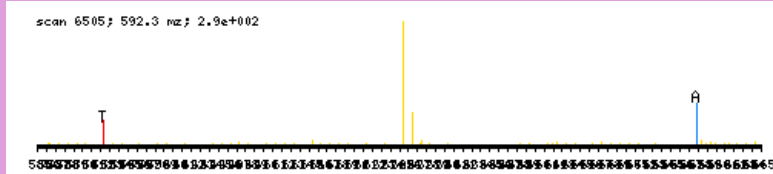

zoomed in precursor plot; T=theoretical m/z, A=acquired m/z

| b <sup>+</sup> | #  | AA # | y <sup>+</sup> | y <sup>2+</sup> |
|----------------|----|------|----------------|-----------------|
| 158.0453       | 1  | D 10 |                |                 |
| 255.0981       | 2  | P 9  | 1026.5948      | 513.8013        |
| 369.1410       | 3  | N 8  | 929.5420       | 465.2749        |
| 470.1887       | 4  | T 7  | 815.4991       | 408.2535        |
| 583.2728       | 5  | I 6  | 714.4514       | 357.7296        |
| 696.3568       | 6  | I 5  | 601.3673       | 301.1876        |
| 825.3994       | 7  | E 4  | 488.2833       | 244.6455        |
| 896.4365       | 8  | A 3  | 359.2407       | 180.1243        |
| 1009.5206      | 9  | L 2  | 288.2036       | 144.6057        |
|                | 10 | R 1  | 175.1195       | 88.0637         |

N-term:+43.02

DPSAALHR, MH+ 908.4590, m/z 454.7331  
 H OS G25 P150811 220811-s1.04500.04500.2.dta

scan 4500; 2.2e+000

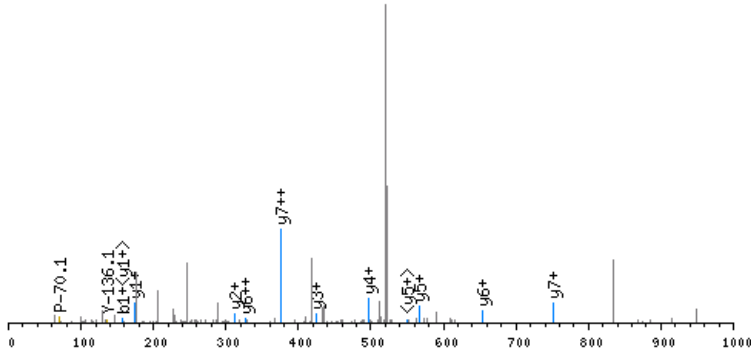

click image to zoom in; click top corners to zoom out [\[precursor±\]](#)

scan 4497; 454.7 m/z; 1.1e+002

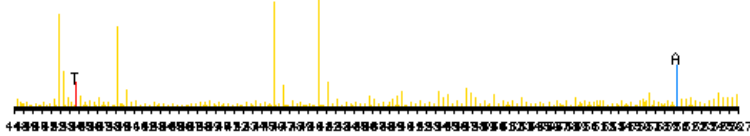

zoomed in precursor plot; T=theoretical m/z, A=acquired m/z

X-range:

-

MassTol: Y-zoom:

MassType:

AVG  MONO

Axis:

1  2

Label:

I  M  -

Ions:

a  +  2+  3+

b  +  2+  3+

c  +  2+  3+

x  +  2+  3+

y  +  2+  3+

z  +  2+  3+

hide H<sub>2</sub>O/NH<sub>3</sub>

zoom 112-122

GO

| b <sup>+</sup> | # | AA # | y <sup>+</sup> | y <sup>2+</sup> |
|----------------|---|------|----------------|-----------------|
| 158.0453       | 1 | D 8  |                |                 |
| 255.0981       | 2 | P 7  | 751.4215       | 376.2147        |
| 342.1301       | 3 | S 6  | 654.3687       | 327.6883        |
| 413.1672       | 4 | A 5  | 567.3367       | 284.1723        |
| 484.2044       | 5 | A 4  | 496.2996       | 248.6537        |
| 597.2884       | 6 | L 3  | 425.2625       | 213.1352        |
| 734.3473       | 7 | H 2  | 312.1784       | 156.5931        |
|                | 8 | R 1  | 175.1195       | 88.0637         |

N-term:+43.02

DPSGVKLVLETAEDIQER, MH+ 1962.0244, m/z 654.6797  
 H OS G24 P150811 220811-s1.04742.04742.3.dta

X-range:

-

MassTol: Y-zoom:

MassType:

AVG  MONO

Axis:

1  2

Label:

I  M  -

Ions:

a  +  2+  3+

b  +  2+  3+

c  +  2+  3+

x  +  2+  3+

y  +  2+  3+

z  +  2+  3+

hide H<sub>2</sub>O/NH<sub>3</sub>

zoom 112-122

GO

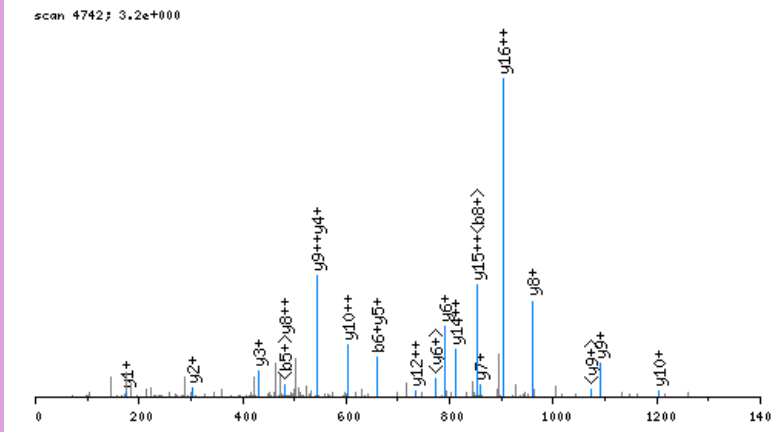

click image to zoom in; click top corners to zoom out [\[precursor±\]](#)

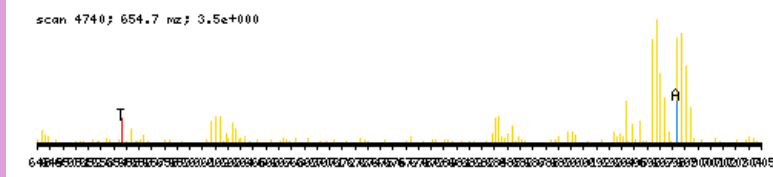

zoomed in precursor plot; T=theoretical m/z, A=acquired m/z

| b <sup>+</sup> | #  | AA # | y <sup>+</sup> | y <sup>2+</sup> |
|----------------|----|------|----------------|-----------------|
| 158.0453       | 1  | D 17 |                |                 |
| 255.0981       | 2  | P 16 | 1804.9869      | 902.9974        |
| 342.1301       | 3  | S 15 | 1707.9341      | 854.4710        |
| 399.1516       | 4  | G 14 | 1620.9021      | 810.9550        |
| 498.2200       | 5  | V 13 | 1563.8806      | 782.4442        |
| 660.3781       | 6  | K 12 | 1464.8122      | 732.9100        |
| 759.4465       | 7  | V 11 | 1302.6541      | 651.8310        |
| 872.5306       | 8  | L 10 | 1203.5857      | 602.2968        |
| 1001.5732      | 9  | E 9  | 1090.5017      | 545.7547        |
| 1102.6209      | 10 | T 8  | 961.4591       | 481.2334        |
| 1173.6580      | 11 | A 7  | 860.4114       | 430.7096        |
| 1302.7006      | 12 | E 6  | 789.3743       | 395.1910        |
| 1417.7275      | 13 | D 5  | 660.3317       | 330.6698        |
| 1530.8116      | 14 | I 4  | 545.3047       | 273.1563        |
| 1658.8702      | 15 | Q 3  | 432.2207       | 216.6142        |
| 1787.9127      | 16 | E 2  | 304.1621       | 152.5850        |
|                | 17 | R 1  | 175.1195       | 88.0637         |

N-term:+43.02 K(6):+162.16



DQVMQFVEPSR, MH+ 1377.6473, m/z 689.3273  
H OS G29 P150811 220811-s1.06406.06406.2.dta

X-range:

-

MassTol: Y-zoom:

MassType:

AVG  MONO

Axis:

1  2

Label:

I  M  -

Ions:

a  +  2+  3+

b  +  2+  3+

c  +  2+  3+

x  +  2+  3+

y  +  2+  3+

z  +  2+  3+

hide H<sub>2</sub>O/NH<sub>3</sub>

zoom 112-122

GO

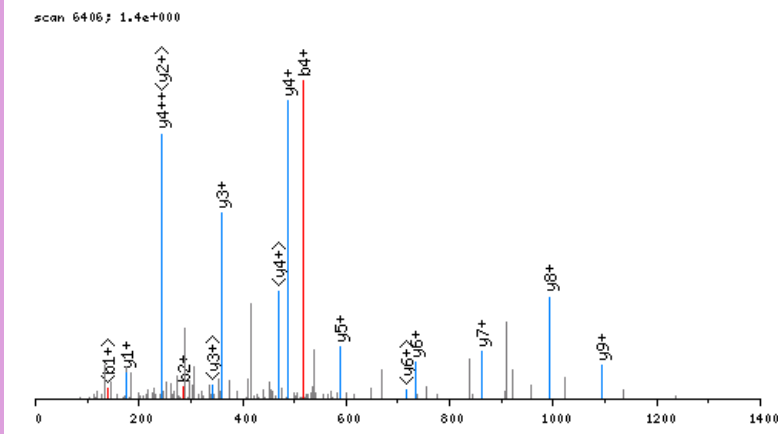

click image to zoom in; click top corners to zoom out [\[precursor±\]](#)

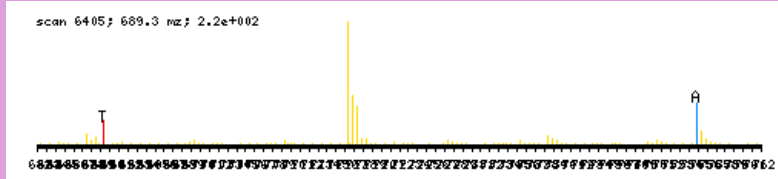

zoomed in precursor plot; T=theoretical m/z, A=acquired m/z

| b <sup>+</sup>  | #  | AA # | y <sup>+</sup>   | y <sup>2+</sup> |
|-----------------|----|------|------------------|-----------------|
| 158.0453        | 1  | D 11 |                  |                 |
| <b>286.1039</b> | 2  | Q 10 | 1220.6098        | 610.8088        |
| 385.1723        | 3  | V 9  | <b>1092.5512</b> | 546.7795        |
| <b>516.2128</b> | 4  | M 8  | <b>993.4828</b>  | 497.2453        |
| 644.2714        | 5  | Q 7  | <b>862.4423</b>  | 431.7251        |
| 791.3398        | 6  | F 6  | <b>734.3837</b>  | 367.6958        |
| 890.4082        | 7  | V 5  | <b>587.3153</b>  | 294.1616        |
| 1019.4508       | 8  | E 4  | <b>488.2469</b>  | <b>244.6274</b> |
| 1116.5036       | 9  | P 3  | <b>359.2043</b>  | 180.1061        |
| 1203.5356       | 10 | S 2  | 262.1515         | 131.5797        |
|                 | 11 | R 1  | <b>175.1195</b>  | 88.0637         |

N-term:+43.02

DSEAFQHAR, MH+ 1102.4918, m/z 551.7495  
 H OS G25 P150811 220811-s1.04091.04091.2.dta

X-range:

-

MassTol: Y-zoom:

MassType:

AVG  MONO

Axis:

1  2

Label:

I  M  -

Ions:

a  +  2+  3+

b  +  2+  3+

c  +  2+  3+

x  +  2+  3+

y  +  2+  3+

z  +  2+  3+

hide H<sub>2</sub>O/NH<sub>3</sub>

zoom 112-122

GO

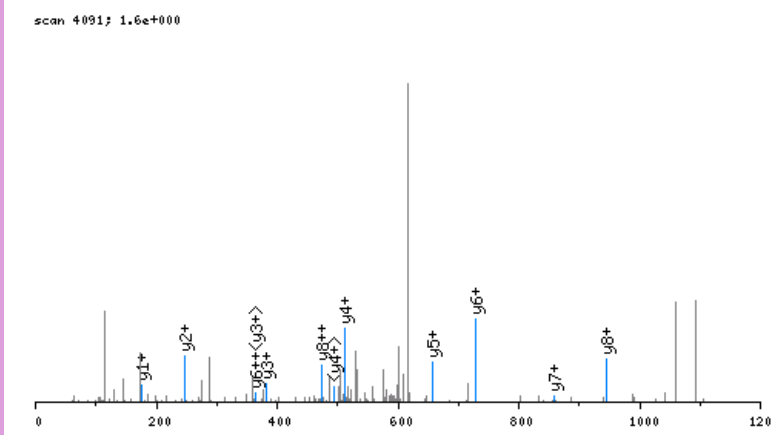

click image to zoom in; click top corners to zoom out [\[precursor±\]](#)

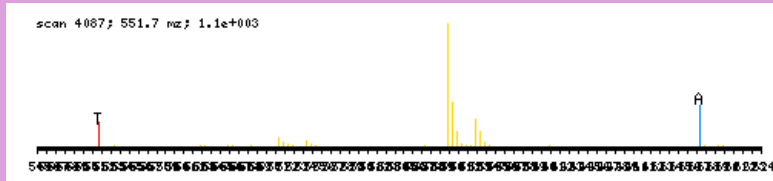

zoomed in precursor plot; T=theoretical m/z, A=acquired m/z

| b <sup>+</sup> | # | AA # | y <sup>+</sup> | y <sup>2+</sup>   |
|----------------|---|------|----------------|-------------------|
| 158.0453       | 1 | D    | 9              |                   |
| 245.0774       | 2 | S    | 8              | 945.4543 473.2310 |
| 374.1200       | 3 | E    | 7              | 858.4222 429.7150 |
| 445.1571       | 4 | A    | 6              | 729.3796 365.1937 |
| 592.2255       | 5 | F    | 5              | 658.3425 329.6752 |
| 720.2841       | 6 | Q    | 4              | 511.2741 256.1410 |
| 857.3430       | 7 | H    | 3              | 383.2155 192.1117 |
| 928.3801       | 8 | A    | 2              | 246.1566 123.5822 |
|                | 9 | R    | 1              | 175.1195 88.0637  |

N-term:+43.02

DSFEDKLLQQLR, MH+ 1454.7704, m/z 485.5950  
 H OS G25 P150811 220811-s1.07968.07968.3.dta

X-range:

-

MassTol: Y-zoom:

MassType:

AVG  MONO

Axis:

1  2

Label:

I  M  -

Ions:

a  +  2+  3+

b  +  2+  3+

c  +  2+  3+

x  +  2+  3+

y  +  2+  3+

z  +  2+  3+

hide H<sub>2</sub>O/NH<sub>3</sub>

zoom 112-122

GO

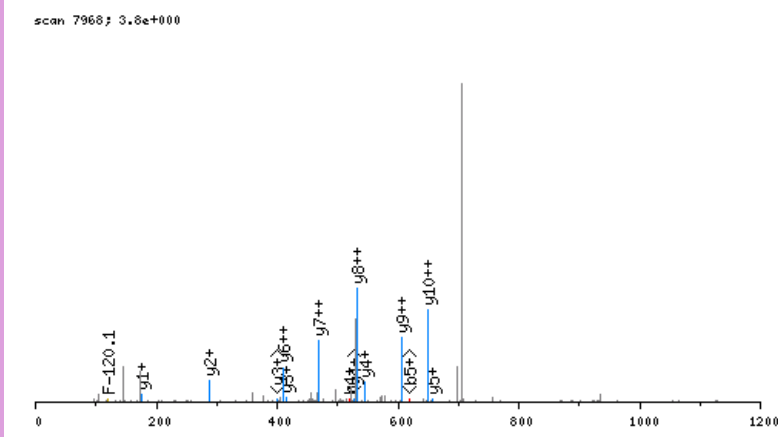

click image to zoom in; click top corners to zoom out [\[precursor±\]](#)

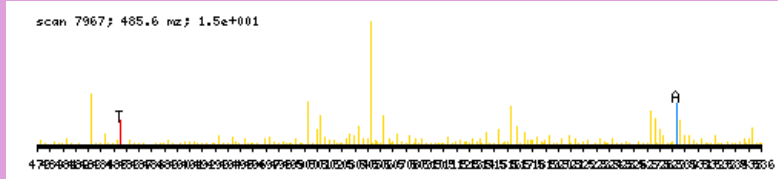

zoomed in precursor plot; T=theoretical m/z, A=acquired m/z

| b <sup>+</sup> | #  | AA # | y <sup>+</sup> | y <sup>2+</sup> |
|----------------|----|------|----------------|-----------------|
| 158.0453       | 1  | D 11 |                |                 |
| 245.0774       | 2  | S 10 | 1297.7329      | 649.3703        |
| 392.1458       | 3  | F 9  | 1210.7008      | 605.8543        |
| 521.1884       | 4  | E 8  | 1063.6324      | 532.3201        |
| 636.2153       | 5  | D 7  | 934.5898       | 467.7988        |
| 798.3734       | 6  | K 6  | 819.5629       | 410.2854        |
| 911.4575       | 7  | L 5  | 657.4048       | 329.2063        |
| 1039.5161      | 8  | Q 4  | 544.3207       | 272.6643        |
| 1167.5746      | 9  | Q 3  | 416.2621       | 208.6350        |
| 1280.6587      | 10 | L 2  | 288.2036       | 144.6057        |
|                | 11 | R 1  | 175.1195       | 88.0637         |

N-term:+43.02 K(6):+162.16

DVKDGGKYR, MH+ 1090.6534, m/z 545.8303  
 H OS G25 P150811 220811-s1.04814.04814.2.dta

scan 4814; 1.2e+001

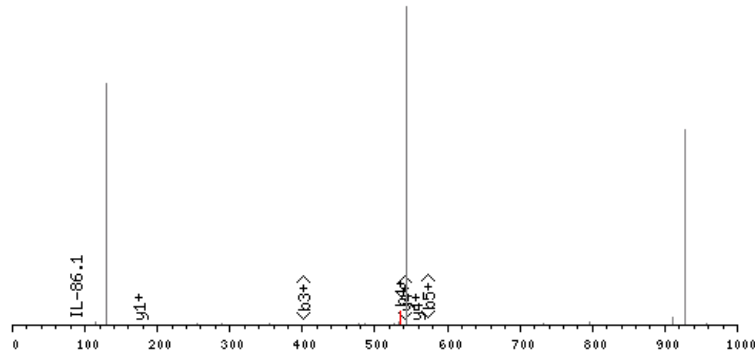

click image to zoom in; click top corners to zoom out [\[precursor±\]](#)

scan 4812; 545.8 mz; 3.7e+001

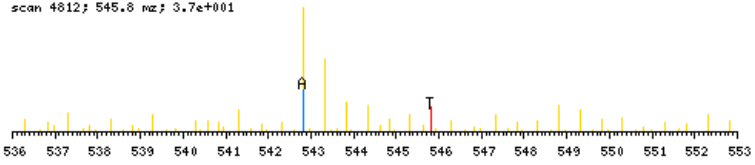

zoomed in precursor plot; T=theoretical m/z, A=acquired m/z

X-range:

-

MassTol: Y-zoom:

MassType:

AVG  MONO

Axis:

1  2

Label:

I  M  -

Ions:

a  +  2+  3+

b  +  2+  3+

c  +  2+  3+

x  +  2+  3+

y  +  2+  3+

z  +  2+  3+

hide H<sub>2</sub>O/NH<sub>3</sub>

zoom 112-122

GO

| b <sup>+</sup> | # | AA # | y <sup>+</sup> | y <sup>2+</sup>   |
|----------------|---|------|----------------|-------------------|
| 158.0453       | 1 | D    | 8              |                   |
| 257.1138       | 2 | V    | 7              | 933.6159 467.3118 |
| 419.2719       | 3 | K    | 6              | 834.5474 417.7776 |
| 534.2988       | 4 | D    | 5              | 672.3893 336.6986 |
| 591.3203       | 5 | G    | 4              | 557.3624 279.1851 |
| 753.4784       | 6 | K    | 3              | 500.3409 250.6744 |
| 916.5417       | 7 | Y    | 2              | 338.1828 169.5953 |
|                | 8 | R    | 1              | 175.1195 88.0637  |

N-term:+43.02 K(3):+162.16  
 K(6):+162.16

DVNLAPLR, MH+ 939.5264, m/z 470.2668  
 H OS G29 P150811 220811-s1.05696.05696.2.dta

X-range:

-

MassTol: Y-zoom:

MassType:

AVG  MONO

Axis:

1  2

Label:

I  M  -

Ions:

a  +  2+  3+

b  +  2+  3+

c  +  2+  3+

x  +  2+  3+

y  +  2+  3+

z  +  2+  3+

hide H<sub>2</sub>O/NH<sub>3</sub>

zoom 112-122

GO

scan 5696; 5.5e+000

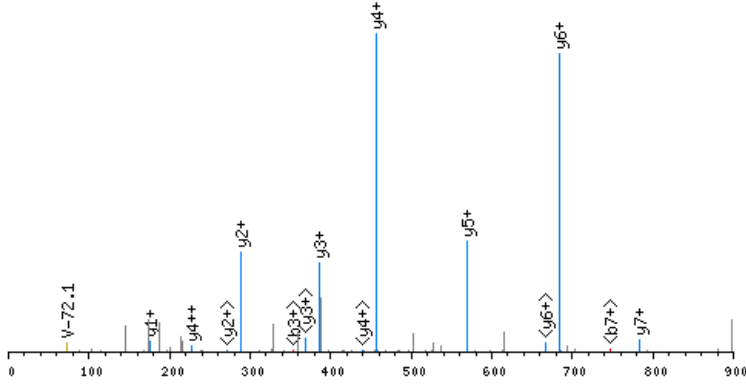

click image to zoom in; click top corners to zoom out [\[precursor±\]](#)

scan 5695; 470.3 m/z; 6.3e+001

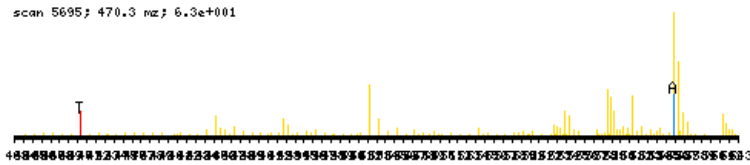

zoomed in precursor plot; T=theoretical m/z, A=acquired m/z

| b <sup>+</sup> | # | AA # | y <sup>+</sup> | y <sup>2+</sup> |
|----------------|---|------|----------------|-----------------|
| 158.0453       | 1 | D 8  |                |                 |
| 257.1138       | 2 | V 7  | 782.4888       | 391.7483        |
| 371.1567       | 3 | N 6  | 683.4204       | 342.2141        |
| 484.2407       | 4 | L 5  | 569.3775       | 285.1927        |
| 555.2779       | 5 | A 4  | 456.2934       | 228.6506        |
| 652.3306       | 6 | P 3  | 385.2563       | 193.1321        |
| 765.4147       | 7 | L 2  | 288.2036       | 144.6057        |
|                | 8 | R 1  | 175.1195       | 88.0637         |

N-term:+43.02

DVSGQETDWR, MH+ 1234.5340, m/z 617.7707  
 H OS G29 P150811 220811-s1.04388.04388.2.dta

X-range:

-

MassTol: Y-zoom:

MassType:

AVG  MONO

Axis:

1  2

Label:

I  M  -

Ions:

a  +  2+  3+

b  +  2+  3+

c  +  2+  3+

x  +  2+  3+

y  +  2+  3+

z  +  2+  3+

hide H<sub>2</sub>O/NH<sub>3</sub>

zoom 112-122

GO

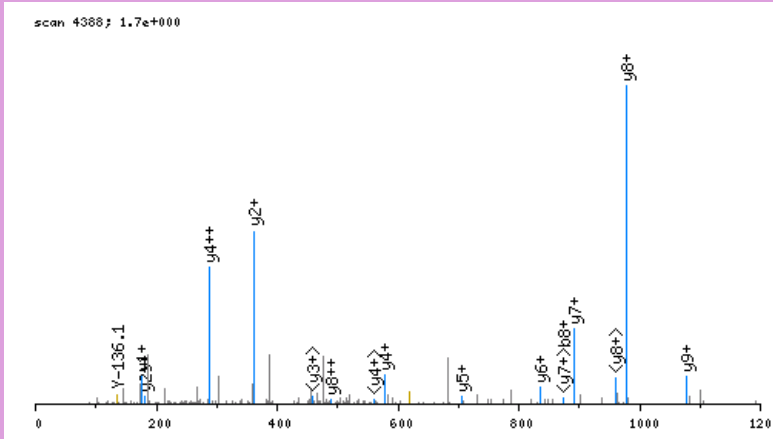

click image to zoom in; click top corners to zoom out [\[precursor±\]](#)

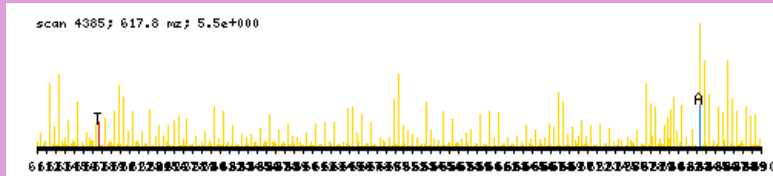

zoomed in precursor plot; T=theoretical m/z, A=acquired m/z

| b <sup>+</sup> | #  | AA # | y <sup>+</sup> | y <sup>2+</sup> |
|----------------|----|------|----------------|-----------------|
| 158.0453       | 1  | D    | 10             |                 |
| 257.1138       | 2  | V    | 9              | 1077.4965       |
| 344.1458       | 3  | S    | 8              | 978.4281        |
| 401.1672       | 4  | G    | 7              | 891.3961        |
| 529.2258       | 5  | Q    | 6              | 834.3746        |
| 658.2684       | 6  | E    | 5              | 706.3160        |
| 759.3161       | 7  | T    | 4              | 577.2734        |
| 874.3430       | 8  | D    | 3              | 476.2258        |
| 1060.4224      | 9  | W    | 2              | 361.1988        |
|                | 10 | R    | 1              | 175.1195        |

N-term:+43.02

DWLMGKSK, MH+ 1062.5659, m/z 531.7866  
 H OS G25 P150811 220811-s1.07984.07984.2.dta

scan 7984; 5.6e+000

X-range:

-

MassTol: Y-zoom:

MassType:

AVG  MONO

Axis:

1  2

Label:

I  M  -

Ions:

a  +  2+  3+

b  +  2+  3+

c  +  2+  3+

x  +  2+  3+

y  +  2+  3+

z  +  2+  3+

hide H<sub>2</sub>O/NH<sub>3</sub>

zoom 112-122

GO

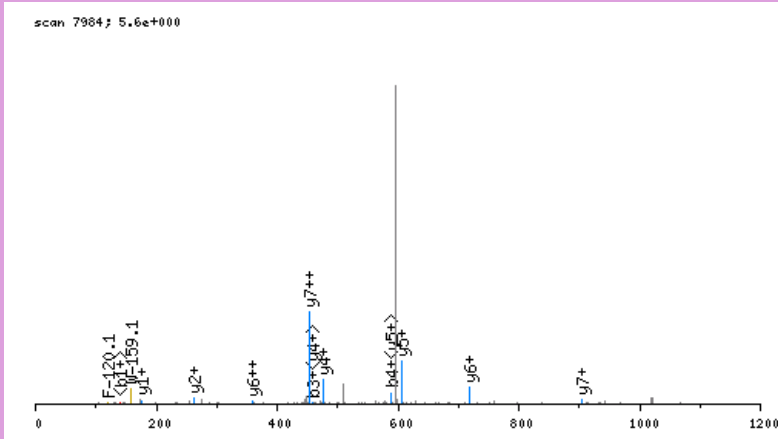

click image to zoom in; click top corners to zoom out [\[precursor±\]](#)

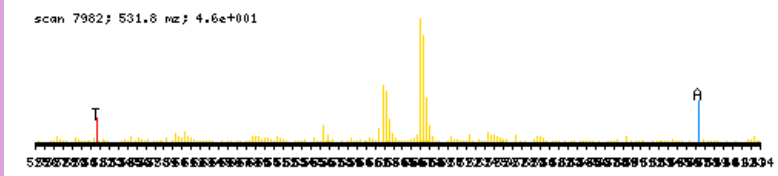

zoomed in precursor plot; T=theoretical m/z, A=acquired m/z

| b <sup>+</sup> | # | AA # | y <sup>+</sup> | y <sup>2+</sup>   |
|----------------|---|------|----------------|-------------------|
| 158.0453       | 1 | D    | 8              |                   |
| 344.1247       | 2 | W    | 7              | 905.5283 453.2681 |
| 457.2087       | 3 | L    | 6              | 719.4490 360.2284 |
| 588.2492       | 4 | M    | 5              | 606.3650 303.6864 |
| 645.2707       | 5 | G    | 4              | 475.3245 238.1662 |
| 801.3970       | 6 | K    | 3              | 418.3030 209.6554 |
| 888.4290       | 7 | S    | 2              | 262.1767 131.5923 |
|                | 8 | K    | 1              | 175.1447 88.0763  |

N-term:+43.02 K(6):+156.13  
 K(8):+156.13

EAALADGEPDR, MH+ 1185.5388, m/z 593.2730  
 H OS G29 P150811 220811-s1.04331.04331.2.dta

scan 4331; 1.6e+000

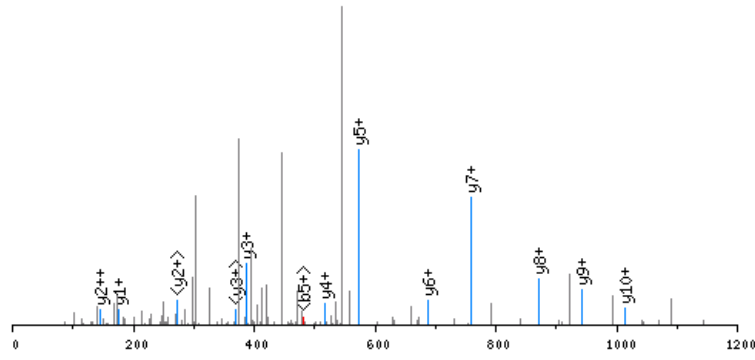

click image to zoom in; click top corners to zoom out [precursor±]

scan 4330; 593.3 m/z; 5.8e+001

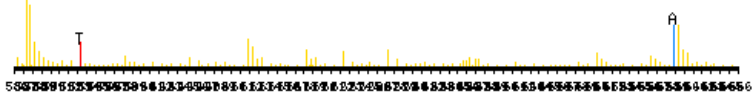

zoomed in precursor plot; T=theoretical m/z, A=acquired m/z

X-range:

-

MassTol: Y-zoom:

MassType:

AVG  MONO

Axis:

1  2

Label:

I  M  -

Ions:

a  +  2+  3+

b  +  2+  3+

c  +  2+  3+

x  +  2+  3+

y  +  2+  3+

z  +  2+  3+

hide H<sub>2</sub>O/NH<sub>3</sub>

zoom 112-122

GO

| b <sup>+</sup> | #  | AA # | y <sup>+</sup> | y <sup>2+</sup> |
|----------------|----|------|----------------|-----------------|
| 172.0610       | 1  | E 11 |                |                 |
| 243.0981       | 2  | A 10 | 1014.4856      | 507.7467        |
| 314.1352       | 3  | A 9  | 943.4485       | 472.2282        |
| 427.2193       | 4  | L 8  | 872.4114       | 436.7096        |
| 498.2564       | 5  | A 7  | 759.3273       | 380.1676        |
| 613.2833       | 6  | D 6  | 688.2902       | 344.6490        |
| 670.3048       | 7  | G 5  | 573.2633       | 287.1355        |
| 799.3474       | 8  | E 4  | 516.2418       | 258.6248        |
| 896.4002       | 9  | P 3  | 387.1992       | 194.1035        |
| 1011.4271      | 10 | D 2  | 290.1464       | 145.5771        |
|                | 11 | R 1  | 175.1195       | 88.0637         |

N-term:+43.02



EAAALAVTR, MH+ 872.4842, m/z 436.7457  
 H OS G29 P150811 220811-s1.05192.05192.2.dta

X-range:

-

MassTol: Y-zoom:

MassType:

AVG  MONO

Axis:

1  2

Label:

I  M  -

Ions:

a  +  2+  3+

b  +  2+  3+

c  +  2+  3+

x  +  2+  3+

y  +  2+  3+

z  +  2+  3+

hide H<sub>2</sub>O/NH<sub>3</sub>

zoom 112-122

GO

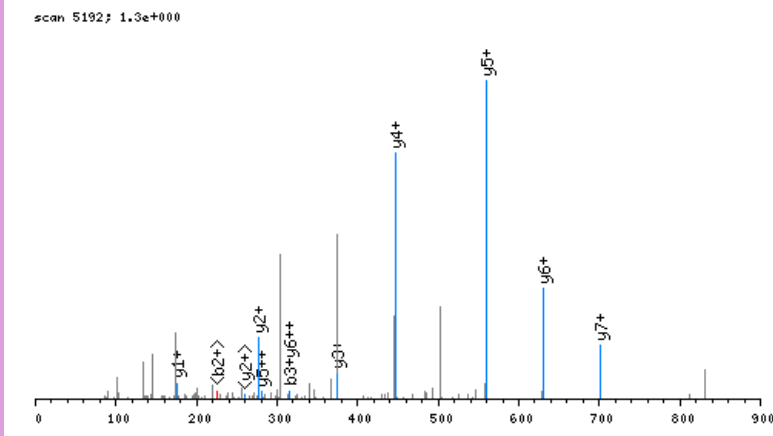

click image to zoom in; click top corners to zoom out [\[precursor±\]](#)

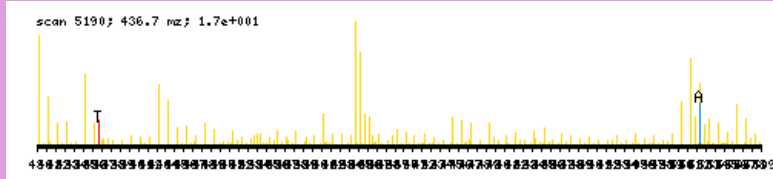

zoomed in precursor plot; T=theoretical m/z, A=acquired m/z

| b <sup>+</sup> | # | AA # | y <sup>+</sup> | y <sup>2+</sup> |
|----------------|---|------|----------------|-----------------|
| 172.0610       | 1 | E 8  |                |                 |
| 243.0981       | 2 | A 7  | 701.4310       | 351.2194        |
| 314.1352       | 3 | A 6  | 630.3939       | 315.7009        |
| 427.2193       | 4 | L 5  | 559.3568       | 280.1823        |
| 498.2564       | 5 | A 4  | 446.2727       | 223.6403        |
| 597.3248       | 6 | V 3  | 375.2356       | 188.1217        |
| 698.3725       | 7 | T 2  | 276.1672       | 138.5875        |
|                | 8 | R 1  | 175.1195       | 88.0637         |

N-term:+43.02

EAATHQVGMAGPR, MH+ 1366.6538, m/z 456.2228  
 H OS G25 P150811 220811-s1.04766.04766.3.dta

X-range:

-

MassTol: Y-zoom:

MassType:

AVG  MONO

Axis:

1  2

Label:

I  M  -

Ions:

a  +  2+  3+

b  +  2+  3+

c  +  2+  3+

x  +  2+  3+

y  +  2+  3+

z  +  2+  3+

hide H<sub>2</sub>O/NH<sub>3</sub>

zoom 112-122

GO

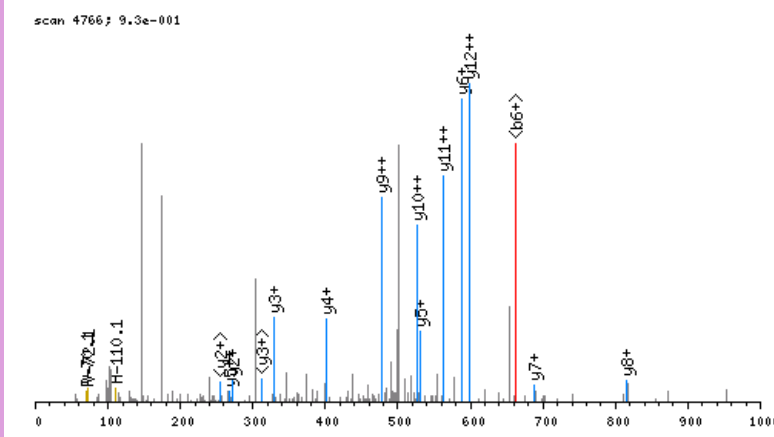

click image to zoom in; click top corners to zoom out [\[precursor±\]](#)

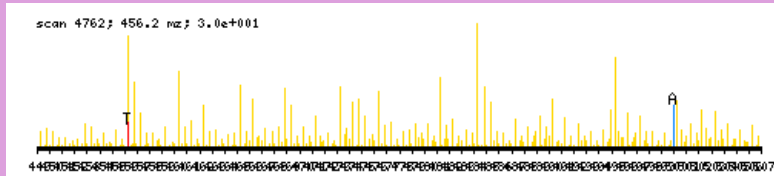

zoomed in precursor plot; T=theoretical m/z, A=acquired m/z

| b <sup>+</sup> | #  | AA # | y <sup>+</sup> | y <sup>2+</sup> |
|----------------|----|------|----------------|-----------------|
| 172.0610       | 1  | E 13 |                |                 |
| 243.0981       | 2  | A 12 | 1195.6006      | 598.3042        |
| 314.1352       | 3  | A 11 | 1124.5635      | 562.7857        |
| 415.1829       | 4  | T 10 | 1053.5264      | 527.2671        |
| 552.2418       | 5  | H 9  | 952.4787       | 476.7433        |
| 680.3004       | 6  | Q 8  | 815.4198       | 408.2138        |
| 779.3688       | 7  | V 7  | 687.3612       | 344.1845        |
| 836.3903       | 8  | G 6  | 588.2928       | 294.6503        |
| 967.4308       | 9  | M 5  | 531.2713       | 266.1396        |
| 1038.4679      | 10 | A 4  | 400.2308       | 200.6193        |
| 1095.4893      | 11 | G 3  | 329.1937       | 165.1008        |
| 1192.5421      | 12 | P 2  | 272.1723       | 136.5900        |
|                | 13 | R 1  | 175.1195       | 88.0637         |

N-term:+43.02

EAEAADAPPGR, MH+ 1125.5177, m/z 563.2625  
 H OS G29 P150811 220811-s1.02983.02983.2.dta

X-range:

-

MassTol: Y-zoom:

MassType:

AVG  MONO

Axis:

1  2

Label:

I  M  -

Ions:

a  +  2+  3+

b  +  2+  3+

c  +  2+  3+

x  +  2+  3+

y  +  2+  3+

z  +  2+  3+

hide H<sub>2</sub>O/NH<sub>3</sub>

zoom 112-122

GO

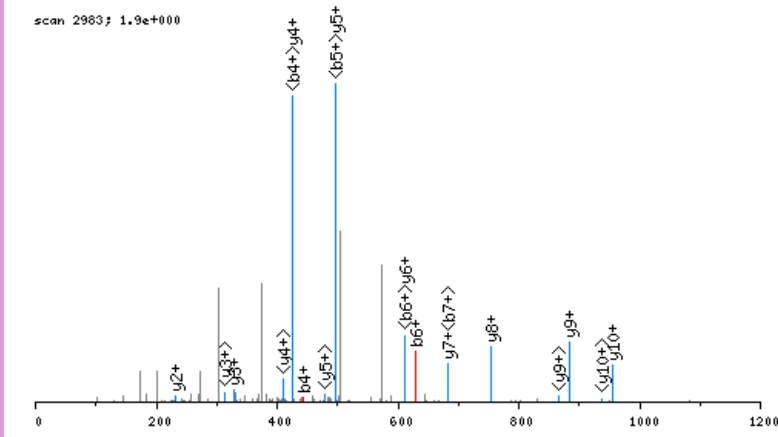

click image to zoom in; click top corners to zoom out [\[precursor±\]](#)

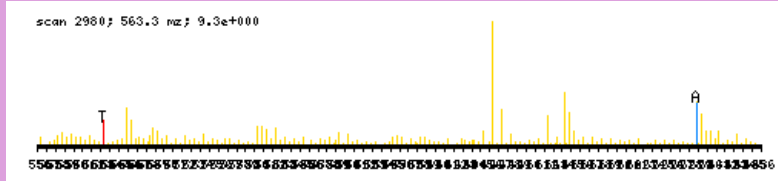

zoomed in precursor plot; T=theoretical m/z, A=acquired m/z

| b <sup>+</sup> | #  | AA | #  | y <sup>+</sup> | y <sup>2+</sup> |
|----------------|----|----|----|----------------|-----------------|
| 172.0610       | 1  | E  | 11 |                |                 |
| 243.0981       | 2  | A  | 10 | 954.4645       | 477.7362        |
| 372.1407       | 3  | E  | 9  | 883.4274       | 442.2176        |
| 443.1778       | 4  | A  | 8  | 754.3848       | 377.6963        |
| 514.2149       | 5  | A  | 7  | 683.3477       | 342.1777        |
| 629.2419       | 6  | D  | 6  | 612.3105       | 306.6592        |
| 700.2790       | 7  | A  | 5  | 497.2836       | 249.1457        |
| 797.3317       | 8  | P  | 4  | 426.2465       | 213.6272        |
| 894.3845       | 9  | P  | 3  | 329.1937       | 165.1008        |
| 951.4060       | 10 | G  | 2  | 232.1410       | 116.5744        |
|                | 11 | R  | 1  | 175.1195       | 88.0637         |

N-term:+43.02

EAGGLGCAVCLTGASR, MH+ 1719.8157, m/z 573.9434  
 H OS G29 P150811 220811-s1.06381.06381.3.dta

scan 6381; 3.2e+000

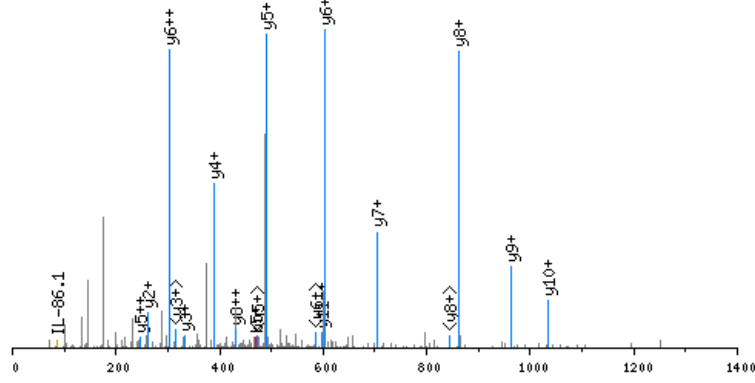

click image to zoom in; click top corners to zoom out [precursor±]

scan 6380; 573.9 m/z; 5.1e+001

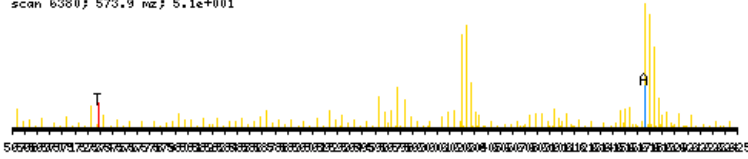

zoomed in precursor plot; T=theoretical m/z, A=acquired m/z

X-range:

-

MassTol: Y-zoom:

MassType:

AVG  MONO

Axis:

1  2

Label:

I  M  -

Ions:

a  +  2+  3+

b  +  2+  3+

c  +  2+  3+

x  +  2+  3+

y  +  2+  3+

z  +  2+  3+

hide H<sub>2</sub>O/NH<sub>3</sub>

zoom 112-122

GO

| b <sup>+</sup> | #  | AA # | y <sup>+</sup> | y <sup>2+</sup> |
|----------------|----|------|----------------|-----------------|
| 172.0610       | 1  | E 17 |                |                 |
| 243.0981       | 2  | A 16 | 1548.7626      | 774.8852        |
| 300.1196       | 3  | G 15 | 1477.7254      | 739.3666        |
| 357.1410       | 4  | G 14 | 1420.7040      | 710.8559        |
| 470.2251       | 5  | L 13 | 1363.6825      | 682.3452        |
| 527.2466       | 6  | G 12 | 1250.5985      | 625.8031        |
| 687.2772       | 7  | C 11 | 1193.5770      | 597.2924        |
| 758.3143       | 8  | A 10 | 1033.5464      | 517.2771        |
| 857.3827       | 9  | V 9  | 962.5093       | 481.7586        |
| 1017.4133      | 10 | C 8  | 863.4409       | 432.2243        |
| 1116.4817      | 11 | V 7  | 703.4103       | 352.2090        |
| 1229.5658      | 12 | L 6  | 604.3418       | 302.6748        |
| 1330.6134      | 13 | T 5  | 491.2578       | 246.1328        |
| 1387.6349      | 14 | G 4  | 390.2101       | 195.6090        |
| 1458.6720      | 15 | A 3  | 333.1886       | 167.0982        |
| 1545.7041      | 16 | S 2  | 262.1515       | 131.5797        |
|                | 17 | R 1  | 175.1195       | 88.0637         |

N-term:+43.02 C(7):+160.03  
 C(10):+160.03

EAKGGTVKAASGFNATEDAQTLR, MH+ 2432.3058, m/z 608.8319  
 H OS G26 P150811 220811-s1.04181.04181.4.dta

X-range:

-

MassTol: Y-zoom:

MassType:

AVG  MONO

Axis:

1  2

Label:

I  M  -

Ions:

a  +  2+  3+

b  +  2+  3+

c  +  2+  3+

x  +  2+  3+

y  +  2+  3+

z  +  2+  3+

hide H<sub>2</sub>O/NH<sub>3</sub>

zoom 112-122

GO

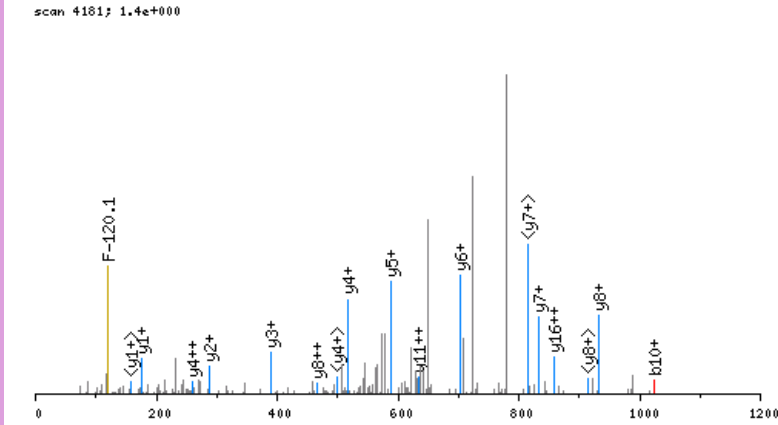

click image to zoom in; click top corners to zoom out [\[precursor±\]](#)

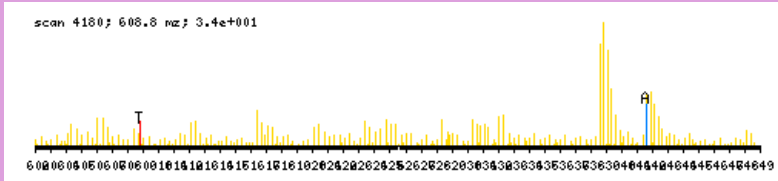

zoomed in precursor plot; T=theoretical m/z, A=acquired m/z

| b <sup>+</sup> | #  | AA # | y <sup>+</sup> | y <sup>2+</sup> |
|----------------|----|------|----------------|-----------------|
| 172.0610       | 1  | E 23 |                |                 |
| 243.0981       | 2  | A 22 | 2261.2527      | 1131.1302       |
| 405.2562       | 3  | K 21 | 2190.2155      | 1095.6117       |
| 462.2777       | 4  | G 20 | 2028.0574      | 1014.5326       |
| 519.2991       | 5  | G 19 | 1971.0360      | 986.0219        |
| 620.3468       | 6  | T 18 | 1914.0145      | 957.5112        |
| 719.4152       | 7  | V 17 | 1812.9668      | 906.9873        |
| 881.5733       | 8  | K 16 | 1713.8984      | 857.4531        |
| 952.6104       | 9  | A 15 | 1551.7403      | 776.3741        |
| 1023.6476      | 10 | A 14 | 1480.7032      | 740.8555        |
| 1110.6796      | 11 | S 13 | 1409.6661      | 705.3370        |
| 1167.7010      | 12 | G 12 | 1322.6341      | 661.8209        |
| 1314.7695      | 13 | F 11 | 1265.6126      | 633.3102        |
| 1428.8124      | 14 | N 10 | 1118.5442      | 559.7760        |
| 1499.8495      | 15 | A 9  | 1004.5013      | 502.7545        |
| 1600.8972      | 16 | T 8  | 933.4641       | 467.2360        |
| 1729.9398      | 17 | E 7  | 832.4165       | 416.7121        |
| 1844.9667      | 18 | D 6  | 703.3739       | 352.1909        |
| 1916.0038      | 19 | A 5  | 588.3469       | 294.6774        |
| 2044.0624      | 20 | Q 4  | 517.3098       | 259.1588        |
| 2145.1101      | 21 | T 3  | 389.2512       | 195.1295        |
| 2258.1942      | 22 | L 2  | 288.2036       | 144.6057        |
|                | 23 | R 1  | 175.1195       | 88.0637         |

N-term:+43.02 K(3):+162.16  
 K(8):+162.16

EAPELGPGGLVER, MH+ 1308.6800, m/z 654.8436  
 H OS G29 P150811 220811-s1.05703.05703.2.dta

X-range:

-

MassTol: Y-zoom:

MassType:

AVG  MONO

Axis:

1  2

Label:

I  M  -

Ions:

a  +  2+  3+

b  +  2+  3+

c  +  2+  3+

x  +  2+  3+

y  +  2+  3+

z  +  2+  3+

hide H<sub>2</sub>O/NH<sub>3</sub>

zoom 112-122

GO

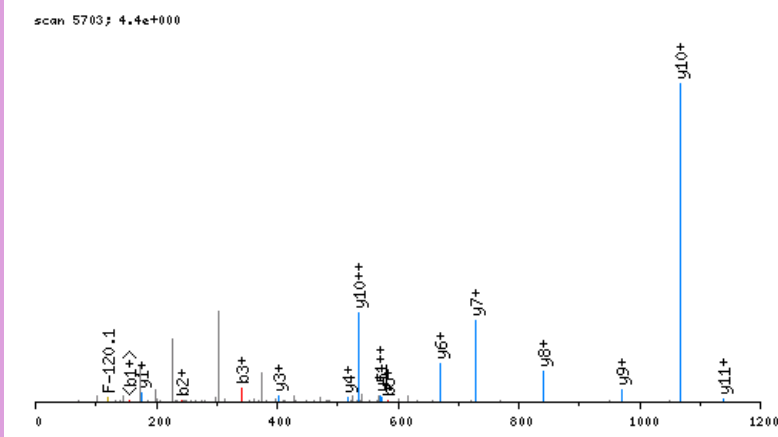

click image to zoom in; click top corners to zoom out [\[precursor±\]](#)

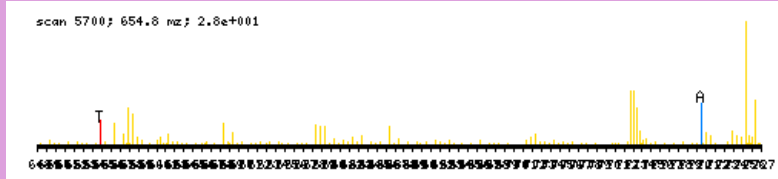

zoomed in precursor plot; T=theoretical m/z, A=acquired m/z

| b <sup>+</sup> | #  | AA # | y <sup>+</sup> | y <sup>2+</sup> |
|----------------|----|------|----------------|-----------------|
| 172.0610       | 1  | E 12 |                |                 |
| 243.0981       | 2  | A 11 | 1137.6268      | 569.3173        |
| 340.1509       | 3  | P 10 | 1066.5897      | 533.7988        |
| 469.1935       | 4  | E 9  | 969.5369       | 485.2724        |
| 582.2775       | 5  | L 8  | 840.4943       | 420.7511        |
| 639.2990       | 6  | G 7  | 727.4103       | 364.2090        |
| 736.3518       | 7  | P 6  | 670.3888       | 335.6983        |
| 793.3732       | 8  | G 5  | 573.3360       | 287.1719        |
| 906.4573       | 9  | L 4  | 516.3146       | 258.6612        |
| 1005.5257      | 10 | V 3  | 403.2305       | 202.1192        |
| 1134.5683      | 11 | E 2  | 304.1621       | 152.5850        |
|                | 12 | R 1  | 175.1195       | 88.0637         |

N-term:+43.02

EATGVLPFVR, MH+ 1130.6210, m/z 565.8141  
 H OS G29 P150811 220811-s1.06367.06367.2.dta

scan 6367; 9.8e-001

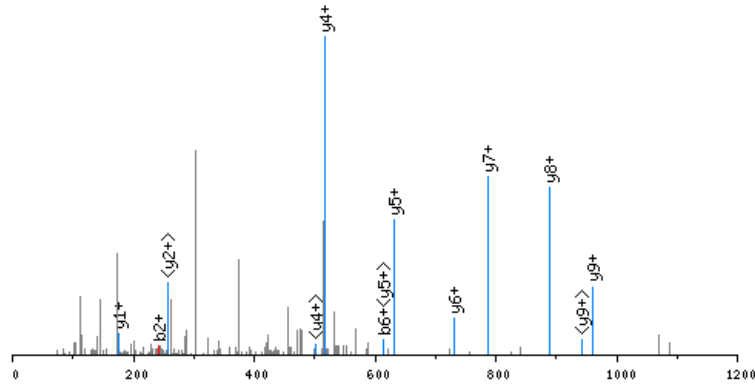

click image to zoom in; click top corners to zoom out [\[precursor±\]](#)

scan 6365; 565.8 m/z; 4.7e+001

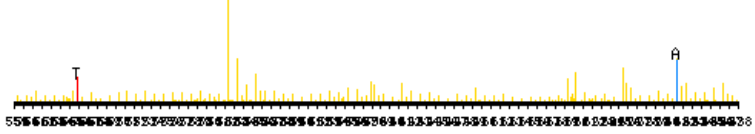

zoomed in precursor plot; T=theoretical m/z, A=acquired m/z

X-range:

-

MassTol: Y-zoom:

MassType:

AVG  MONO

Axis:

1  2

Label:

I  M  -

Ions:

a  +  2+  3+

b  +  2+  3+

c  +  2+  3+

x  +  2+  3+

y  +  2+  3+

z  +  2+  3+

hide H<sub>2</sub>O/NH<sub>3</sub>

zoom 112-122

GO

| b <sup>+</sup>  | #  | AA | #  | y <sup>+</sup>  | y <sup>2+</sup> |
|-----------------|----|----|----|-----------------|-----------------|
| 172.0610        | 1  | E  | 10 |                 |                 |
| <b>243.0981</b> | 2  | A  | 9  | <b>959.5678</b> | 480.2878        |
| 344.1458        | 3  | T  | 8  | <b>888.5307</b> | 444.7693        |
| 401.1672        | 4  | G  | 7  | <b>787.4830</b> | 394.2454        |
| 500.2357        | 5  | V  | 6  | <b>730.4616</b> | 365.7347        |
| <b>613.3197</b> | 6  | L  | 5  | <b>631.3932</b> | 316.2005        |
| 710.3725        | 7  | P  | 4  | <b>518.3091</b> | 259.6585        |
| 857.4409        | 8  | F  | 3  | 421.2563        | 211.1321        |
| 956.5093        | 9  | V  | 2  | 274.1879        | 137.5979        |
|                 | 10 | R  | 1  | <b>175.1195</b> | 88.0637         |

N-term:+43.02

EATLNLEPSGR, MH+ 1228.6174, m/z 614.8123  
 H OS G29 P150811 220811-s1.04106.04106.2.dta

X-range:

-

MassTol: Y-zoom:

MassType:

AVG  MONO

Axis:

1  2

Label:

I  M  -

Ions:

a  +  2+  3+

b  +  2+  3+

c  +  2+  3+

x  +  2+  3+

y  +  2+  3+

z  +  2+  3+

hide H<sub>2</sub>O/NH<sub>3</sub>

zoom 112-122

GO

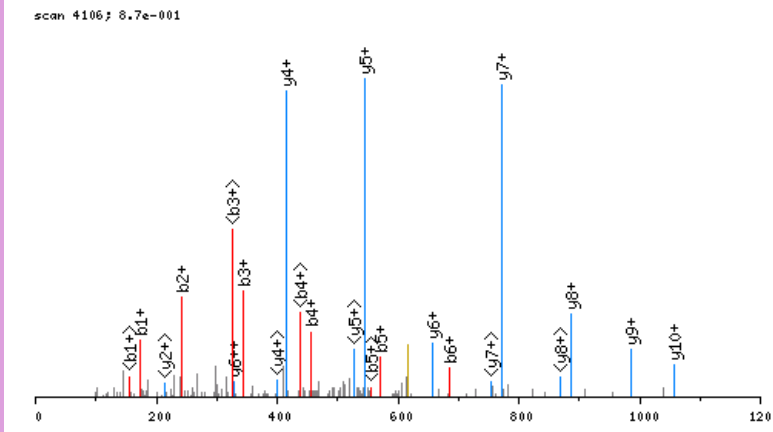

click image to zoom in; click top corners to zoom out [\[precursor±\]](#)

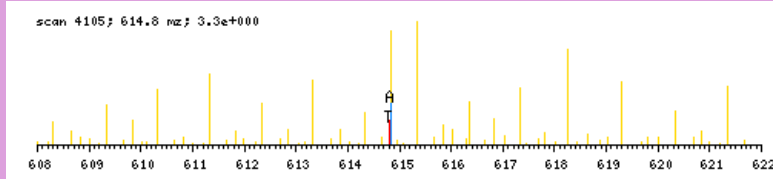

zoomed in precursor plot; T=theoretical m/z, A=acquired m/z

| b <sup>+</sup> | #  | AA # | y <sup>+</sup> | y <sup>2+</sup> |
|----------------|----|------|----------------|-----------------|
| 172.0610       | 1  | E 11 |                |                 |
| 243.0981       | 2  | A 10 | 1057.5642      | 529.2860        |
| 344.1458       | 3  | T 9  | 986.5271       | 493.7675        |
| 457.2298       | 4  | L 8  | 885.4794       | 443.2436        |
| 571.2728       | 5  | N 7  | 772.3953       | 386.7016        |
| 684.3568       | 6  | L 6  | 658.3524       | 329.6801        |
| 813.3994       | 7  | E 5  | 545.2683       | 273.1381        |
| 910.4522       | 8  | P 4  | 416.2258       | 208.6168        |
| 997.4842       | 9  | S 3  | 319.1730       | 160.0904        |
| 1054.5057      | 10 | G 2  | 232.1410       | 116.5744        |
|                | 11 | R 1  | 175.1195       | 88.0637         |

N-term:+43.02



EAVAAAEVTER, MH+ 1187.5908, m/z 594.2990  
 H OS G29 P150811 220811-s1.05129.05129.2.dta

scan 5129; 1.3e+000

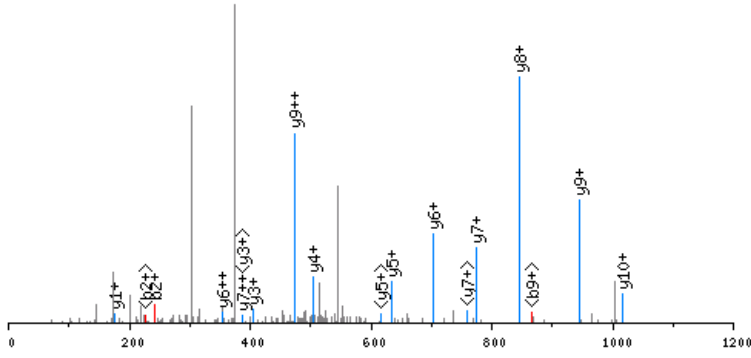

click image to zoom in; click top corners to zoom out [precursor±]

scan 5125; 594.3 m/z; 9.2e+002

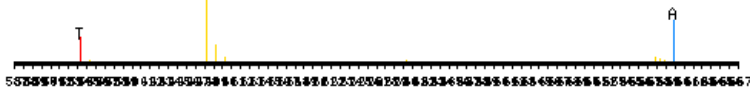

zoomed in precursor plot; T=theoretical m/z, A=acquired m/z

X-range:

-

MassTol: Y-zoom:

MassType:

AVG  MONO

Axis:

1  2

Label:

I  M  -

Ions:

a  +  2+  3+

b  +  2+  3+

c  +  2+  3+

x  +  2+  3+

y  +  2+  3+

z  +  2+  3+

hide H<sub>2</sub>O/NH<sub>3</sub>

zoom 112-122

GO

| b <sup>+</sup>  | #  | AA # | y <sup>+</sup> | y <sup>2+</sup> |
|-----------------|----|------|----------------|-----------------|
| 172.0610        | 1  | E 11 |                |                 |
| <b>243.0981</b> | 2  | A 10 | 1016.5376      | 508.7727        |
| 342.1665        | 3  | V 9  | 945.5005       | 473.2542        |
| 413.2036        | 4  | A 8  | 846.4321       | 423.7200        |
| 484.2407        | 5  | A 7  | 775.3950       | 388.2014        |
| 555.2779        | 6  | A 6  | 704.3579       | 352.6829        |
| 684.3205        | 7  | E 5  | 633.3208       | 317.1643        |
| 783.3889        | 8  | V 4  | 504.2782       | 252.6430        |
| 884.4365        | 9  | T 3  | 405.2098       | 203.1088        |
| 1013.4791       | 10 | E 2  | 304.1621       | 152.5850        |
|                 | 11 | R 1  | 175.1195       | 88.0637         |

N-term:+43.02

EDDQELER, MH+ 1075.4544, m/z 538.2308  
 H OS G29 P150811 220811-s1.03191.03191.2.dta

X-range:

-

MassTol: Y-zoom:

MassType:

AVG  MONO

Axis:

1  2

Label:

I  M  -

Ions:

a  +  2+  3+

b  +  2+  3+

c  +  2+  3+

x  +  2+  3+

y  +  2+  3+

z  +  2+  3+

hide H<sub>2</sub>O/NH<sub>3</sub>

zoom 112-122

GO

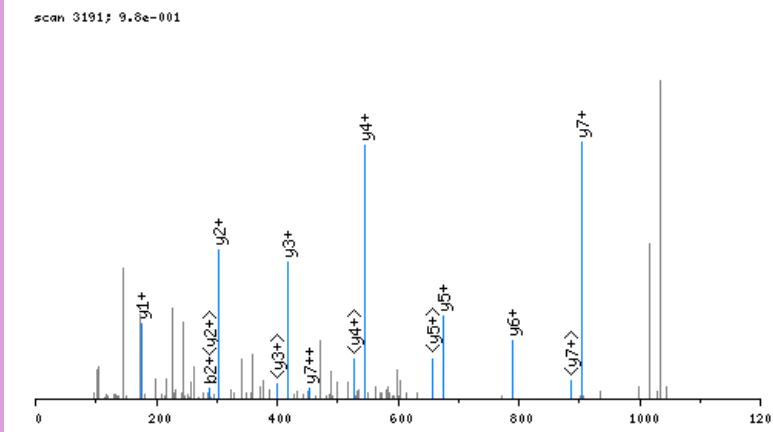

click image to zoom in; click top corners to zoom out [\[precursor±\]](#)

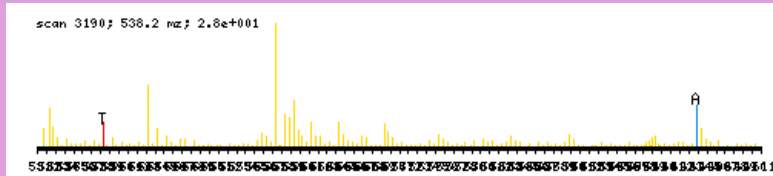

zoomed in precursor plot; T=theoretical m/z, A=acquired m/z

| b <sup>+</sup> | # | AA # | y <sup>+</sup> | y <sup>2+</sup> |
|----------------|---|------|----------------|-----------------|
| 172.0610       | 1 | E 8  |                |                 |
| 287.0879       | 2 | D 7  | 904.4012       | 452.7045        |
| 402.1149       | 3 | D 6  | 789.3743       | 395.1910        |
| 530.1735       | 4 | Q 5  | 674.3473       | 337.6776        |
| 659.2160       | 5 | E 4  | 546.2888       | 273.6483        |
| 772.3001       | 6 | L 3  | 417.2462       | 209.1270        |
| 901.3427       | 7 | E 2  | 304.1621       | 152.5850        |
|                | 8 | R 1  | 175.1195       | 88.0637         |

N-term:+43.02

EDEVVR, MH+ 788.3790, m/z 394.6932  
 H OS G29 P150811 220811-s1.03321.03321.2.dta

X-range:

-

MassTol: Y-zoom:

MassType:

AVG  MONO

Axis:

1  2

Label:

I  M  -

Ions:

a  +  2+  3+

b  +  2+  3+

c  +  2+  3+

x  +  2+  3+

y  +  2+  3+

z  +  2+  3+

hide H<sub>2</sub>O/NH<sub>3</sub>

zoom 112-122

GO

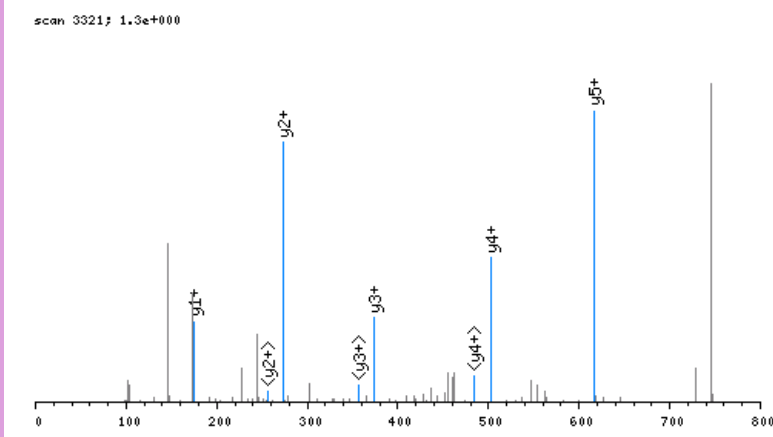

click image to zoom in; click top corners to zoom out [\[precursor±\]](#)

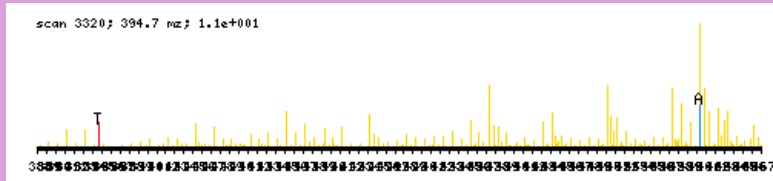

zoomed in precursor plot; T=theoretical m/z, A=acquired m/z

| b <sup>+</sup> | # | AA # | y <sup>+</sup> | y <sup>2+</sup> |
|----------------|---|------|----------------|-----------------|
| 172.0610       | 1 | E 6  |                |                 |
| 287.0879       | 2 | D 5  | 617.3259       | 309.1668        |
| 416.1305       | 3 | E 4  | 502.2989       | 251.6534        |
| 515.1989       | 4 | V 3  | 373.2563       | 187.1321        |
| 614.2674       | 5 | V 2  | 274.1879       | 137.5979        |
|                | 6 | R 1  | 175.1195       | 88.0637         |

N-term:+43.02

EDGVAGPR, MH+ 842.4008, m/z 421.7041  
 H OS G29 P150811 220811-s1.02918.02918.2.dta

X-range:

-

MassTol: Y-zoom:

MassType:

AVG  MONO

Axis:

1  2

Label:

I  M  -

Ions:

a  +  2+  3+

b  +  2+  3+

c  +  2+  3+

x  +  2+  3+

y  +  2+  3+

z  +  2+  3+

hide H<sub>2</sub>O/NH<sub>3</sub>

zoom 112-122

GO

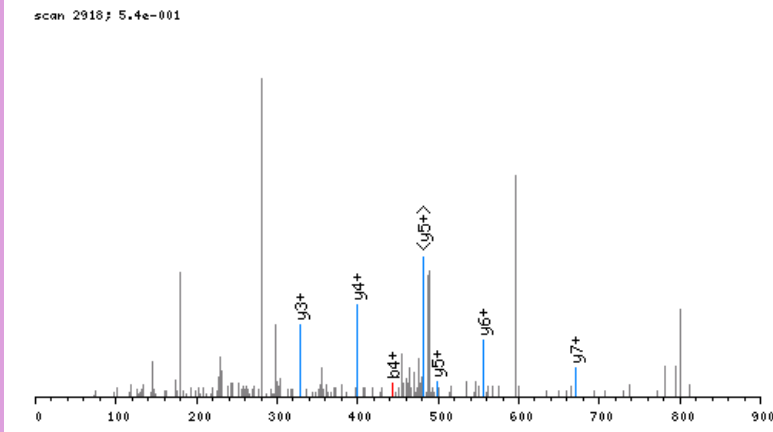

click image to zoom in; click top corners to zoom out [\[precursor±\]](#)

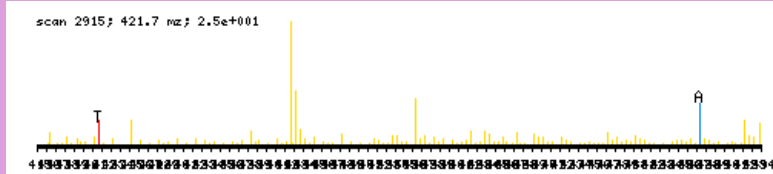

zoomed in precursor plot; T=theoretical m/z, A=acquired m/z

| b <sup>+</sup> | # | AA # | y <sup>+</sup> | y <sup>2+</sup> |
|----------------|---|------|----------------|-----------------|
| 172.0610       | 1 | E 8  |                |                 |
| 287.0879       | 2 | D 7  | 671.3477       | 336.1777        |
| 344.1094       | 3 | G 6  | 556.3207       | 278.6643        |
| 443.1778       | 4 | V 5  | 499.2993       | 250.1535        |
| 514.2149       | 5 | A 4  | 400.2308       | 200.6193        |
| 571.2364       | 6 | G 3  | 329.1937       | 165.1008        |
| 668.2892       | 7 | P 2  | 272.1723       | 136.5900        |
|                | 8 | R 1  | 175.1195       | 88.0637         |

N-term:+43.02

EDIMQLPKAR, MH+ 1270.6830, m/z 424.2325  
 H OS G25 P150811 220811-s1.07509.07509.3.dta

X-range:

-

MassTol: Y-zoom:

MassType:

AVG  MONO

Axis:

1  2

Label:

I  M  -

Ions:

a  +  2+  3+

b  +  2+  3+

c  +  2+  3+

x  +  2+  3+

y  +  2+  3+

z  +  2+  3+

hide H<sub>2</sub>O/NH<sub>3</sub>

zoom 112-122

GO

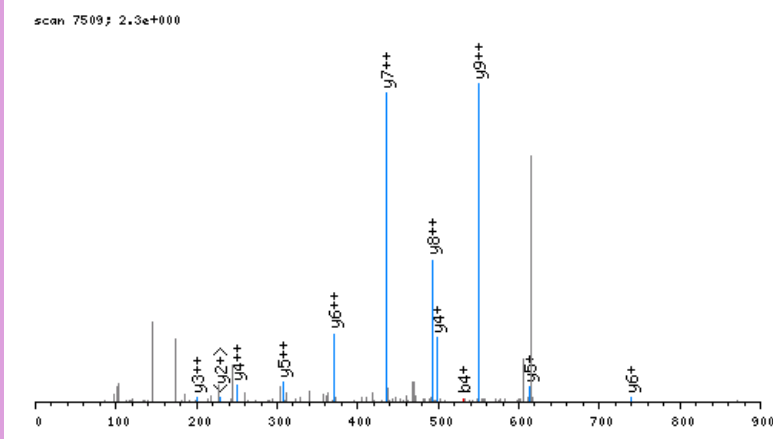

click image to zoom in; click top corners to zoom out [\[precursor±\]](#)

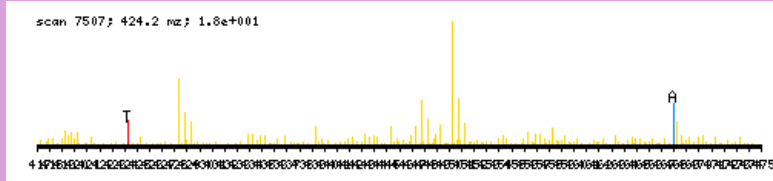

zoomed in precursor plot; T=theoretical m/z, A=acquired m/z

| b <sup>+</sup> | #  | AA # | y <sup>+</sup> | y <sup>2+</sup> |
|----------------|----|------|----------------|-----------------|
| 172.0610       | 1  | E 10 |                |                 |
| 287.0879       | 2  | D 9  | 1099.6298      | 550.3188        |
| 400.1720       | 3  | I 8  | 984.6029       | 492.8053        |
| 531.2125       | 4  | M 7  | 871.5188       | 436.2633        |
| 659.2711       | 5  | Q 6  | 740.4783       | 370.7431        |
| 772.3551       | 6  | L 5  | 612.4197       | 306.7138        |
| 869.4079       | 7  | P 4  | 499.3357       | 250.1718        |
| 1025.5342      | 8  | K 3  | 402.2829       | 201.6454        |
| 1096.5713      | 9  | A 2  | 246.1566       | 123.5822        |
|                | 10 | R 1  | 175.1195       | 88.0637         |

N-term:+43.02 K(8):+156.13

EDKPLVVSK, MH+ 1112.6568, m/z 556.8320  
H OS G24 P150811 220811-s1.03199.03199.2.dta

X-range:

-

MassTol: Y-zoom:

MassType:

AVG  MONO

Axis:

1  2

Label:

I  M  -

Ions:

a  +  2+  3+

b  +  2+  3+

c  +  2+  3+

x  +  2+  3+

y  +  2+  3+

z  +  2+  3+

hide H<sub>2</sub>O/NH<sub>3</sub>

zoom 112-122

GO

scan 3199; 8.3e+000

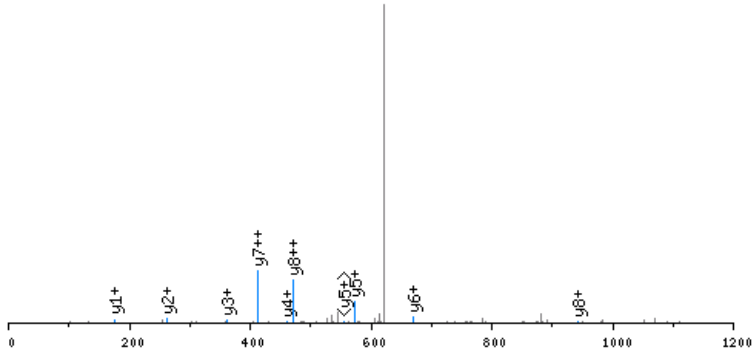

click image to zoom in; click top corners to zoom out [\[precursor±\]](#)

scan 3197; 556.8 mz; 2.5e+000

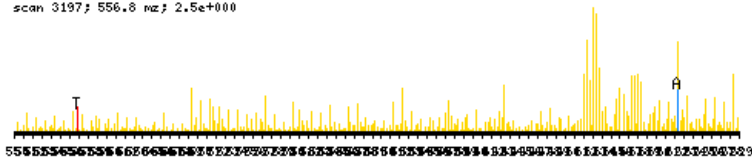

zoomed in precursor plot; T=theoretical m/z, A=acquired m/z

| b <sup>+</sup> | # | AA # | y <sup>+</sup> | y <sup>2+</sup>   |
|----------------|---|------|----------------|-------------------|
| 172.0610       | 1 | E    | 9              |                   |
| 287.0879       | 2 | D    | 8              | 941.6036 471.3057 |
| 443.2142       | 3 | K    | 7              | 826.5767 413.7922 |
| 540.2670       | 4 | P    | 6              | 670.4504 335.7291 |
| 653.3511       | 5 | L    | 5              | 573.3976 287.2027 |
| 752.4195       | 6 | V    | 4              | 460.3135 230.6607 |
| 851.4879       | 7 | V    | 3              | 361.2451 181.1265 |
| 938.5199       | 8 | S    | 2              | 262.1767 131.5923 |
|                | 9 | K    | 1              | 175.1447 88.0763  |

N-term:+43.02 K(3):+156.13  
K(9):+156.13

EDPGEDTSIHR, MH+ 1297.5661, m/z 649.2867  
 H OS G25 P150811 220811-s1.03578.03578.2.dta

X-range:

-

MassTol: Y-zoom:

MassType:

AVG  MONO

Axis:

1  2

Label:

I  M  -

Ions:

a  +  2+  3+

b  +  2+  3+

c  +  2+  3+

x  +  2+  3+

y  +  2+  3+

z  +  2+  3+

hide H<sub>2</sub>O/NH<sub>3</sub>

zoom 112-122

GO

scan 3578; 4.7e+000

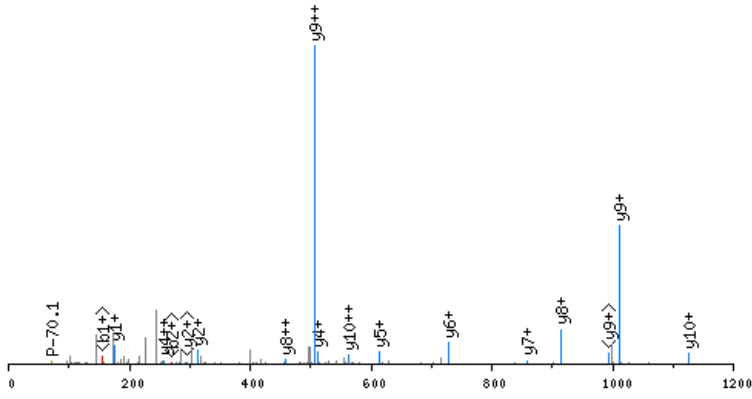

click image to zoom in; click top corners to zoom out [\[precursor±\]](#)

scan 3577; 649.3 m/z; 7.2e+001

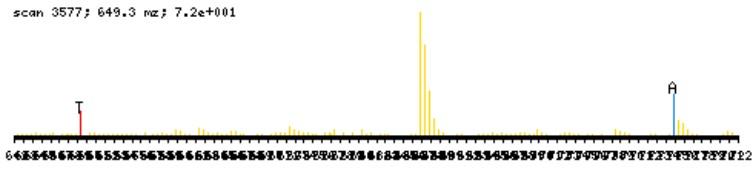

zoomed in precursor plot; T=theoretical m/z, A=acquired m/z

| b <sup>+</sup> | #  | AA # | y <sup>+</sup> | y <sup>2+</sup> |
|----------------|----|------|----------------|-----------------|
| 172.0610       | 1  | E 11 |                |                 |
| 287.0879       | 2  | D 10 | 1126.5129      | 563.7604        |
| 384.1407       | 3  | P 9  | 1011.4859      | 506.2469        |
| 441.1622       | 4  | G 8  | 914.4332       | 457.7205        |
| 570.2048       | 5  | E 7  | 857.4117       | 429.2098        |
| 685.2317       | 6  | D 6  | 728.3691       | 364.6885        |
| 786.2794       | 7  | T 5  | 613.3422       | 307.1750        |
| 873.3114       | 8  | S 4  | 512.2945       | 256.6512        |
| 986.3955       | 9  | I 3  | 425.2625       | 213.1352        |
| 1123.4544      | 10 | H 2  | 312.1784       | 156.5931        |
|                | 11 | R 1  | 175.1195       | 88.0637         |

N-term:+43.02

EDVNSNVNADQEVK, MH+ 1630.7309, m/z 544.2485  
 H OS G29 P150811 220811-s1.03708.03708.3.dta

X-range:

-

MassTol: Y-zoom:

MassType:

AVG  MONO

Axis:

1  2

Label:

I  M  -

Ions:

a  +  2+  3+

b  +  2+  3+

c  +  2+  3+

x  +  2+  3+

y  +  2+  3+

z  +  2+  3+

hide H<sub>2</sub>O/NH<sub>3</sub>

zoom 112-122

GO

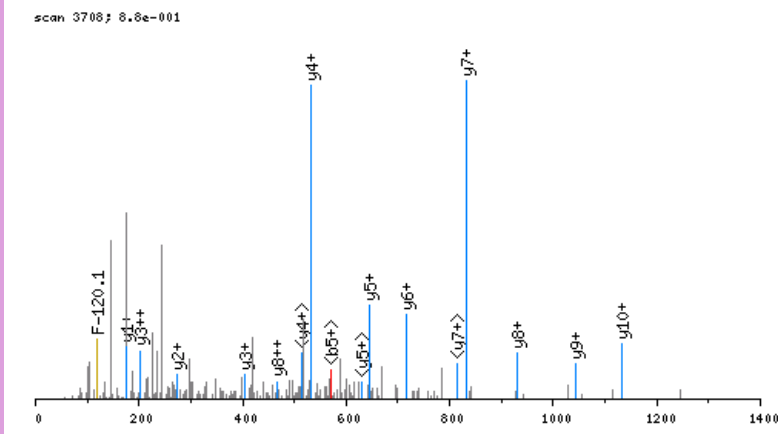

click image to zoom in; click top corners to zoom out [\[precursor±\]](#)

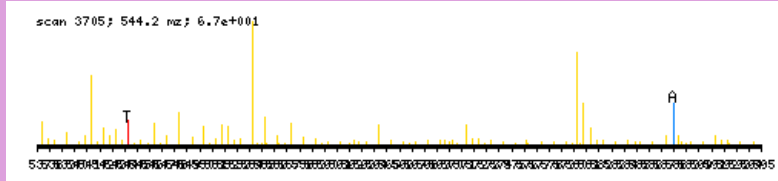

zoomed in precursor plot; T=theoretical m/z, A=acquired m/z

| b <sup>+</sup> | #  | AA # | y <sup>+</sup> | y <sup>2+</sup> |
|----------------|----|------|----------------|-----------------|
| 172.0610       | 1  | E 14 |                |                 |
| 287.0879       | 2  | D 13 | 1459.6777      | 730.3428        |
| 386.1564       | 3  | V 12 | 1344.6508      | 672.8293        |
| 500.1993       | 4  | N 11 | 1245.5824      | 623.2951        |
| 587.2313       | 5  | S 10 | 1131.5394      | 566.2736        |
| 701.2742       | 6  | N 9  | 1044.5074      | 522.7576        |
| 800.3426       | 7  | V 8  | 930.4645       | 465.7362        |
| 914.3856       | 8  | N 7  | 831.3961       | 416.2019        |
| 985.4227       | 9  | A 6  | 717.3531       | 359.1805        |
| 1100.4496      | 10 | D 5  | 646.3160       | 323.6619        |
| 1228.5082      | 11 | Q 4  | 531.2891       | 266.1485        |
| 1357.5508      | 12 | E 3  | 403.2305       | 202.1192        |
| 1456.6192      | 13 | V 2  | 274.1879       | 137.5979        |
|                | 14 | R 1  | 175.1195       | 88.0637         |

N-term:+43.02



X-range:

-

MassTol: Y-zoom:

MassType:

AVG  MONO

Axis:

1  2

Label:

I  M  -

Ions:

a  +  2+  3+

b  +  2+  3+

c  +  2+  3+

x  +  2+  3+

y  +  2+  3+

z  +  2+  3+

hide H<sub>2</sub>O/NH<sub>3</sub>

zoom 112-122

GO

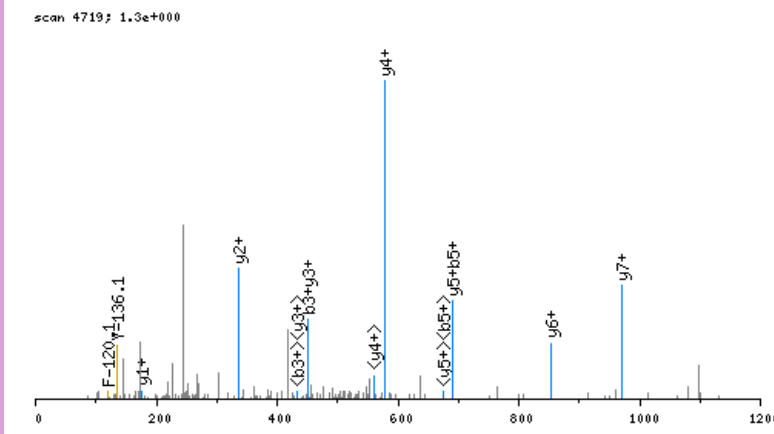

click image to zoom in; click top corners to zoom out [\[precursor±\]](#)

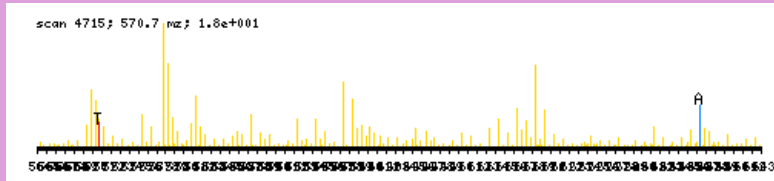

zoomed in precursor plot; T=theoretical m/z, A=acquired m/z

| b <sup>+</sup> | # | AA # | y <sup>+</sup> | y <sup>2+</sup> |
|----------------|---|------|----------------|-----------------|
| 172.0610       | 1 | E 8  |                |                 |
| 287.0879       | 2 | D 7  | 969.4100       | 485.2089        |
| 450.1513       | 3 | Y 6  | 854.3830       | 427.6954        |
| 563.2353       | 4 | L 5  | 691.3197       | 346.1638        |
| 691.2939       | 5 | Q 4  | 578.2356       | 289.6217        |
| 806.3208       | 6 | D 3  | 450.1770       | 225.5924        |
| 966.3514       | 7 | C 2  | 335.1501       | 168.0790        |
|                | 8 | R 1  | 175.1195       | 88.0637         |

N-term:+43.02 C(7):+160.03

EEAELVKGR, MH+ 1106.6270, m/z 553.8171  
 H OS G25 P150811 220811-s1.05073.05073.2.dta

scan 5073; 3.1e+001

X-range:

-

MassTol: Y-zoom:

MassType:

AVG  MONO

Axis:

1  2

Label:

I  M  -

Ions:

a  +  2+  3+

b  +  2+  3+

c  +  2+  3+

x  +  2+  3+

y  +  2+  3+

z  +  2+  3+

hide H<sub>2</sub>O/NH<sub>3</sub>

zoom 112-122

GO

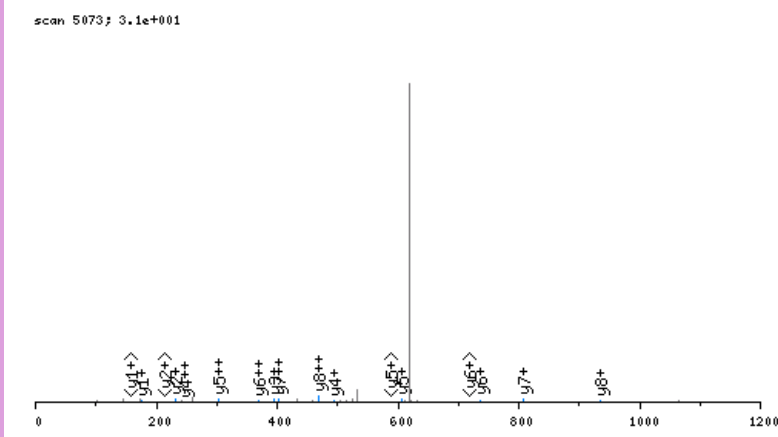

click image to zoom in; click top corners to zoom out [\[precursor±\]](#)

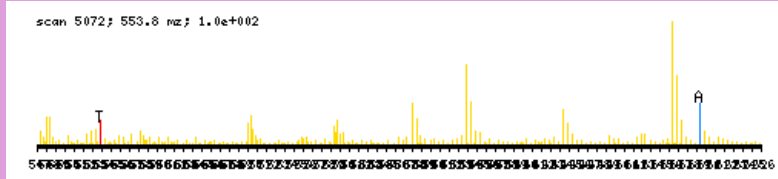

zoomed in precursor plot; T=theoretical m/z, A=acquired m/z

| b <sup>+</sup> | # | AA # | y <sup>+</sup> | y <sup>2+</sup> |
|----------------|---|------|----------------|-----------------|
| 172.0610       | 1 | E 9  |                |                 |
| 301.1036       | 2 | E 8  | 935.5738       | 468.2908        |
| 372.1407       | 3 | A 7  | 806.5312       | 403.7695        |
| 501.1833       | 4 | E 6  | 735.4941       | 368.2510        |
| 614.2674       | 5 | L 5  | 606.4515       | 303.7297        |
| 713.3358       | 6 | V 4  | 493.3675       | 247.1877        |
| 875.4939       | 7 | K 3  | 394.2991       | 197.6534        |
| 932.5153       | 8 | G 2  | 232.1410       | 116.5744        |
|                | 9 | R 1  | 175.1195       | 88.0637         |

N-term:+43.02 K(7):+162.16

EEAPHGCPGADSAQAGR, MH+ 1751.7407, m/z 584.5851  
 H OS G25 P150811 220811-s1.03068.03068.3.dta

X-range:

-

MassTol: Y-zoom:

MassType:

AVG  MONO

Axis:

1  2

Label:

I  M  -

Ions:

a  +  2+  3+

b  +  2+  3+

c  +  2+  3+

x  +  2+  3+

y  +  2+  3+

z  +  2+  3+

hide H<sub>2</sub>O/NH<sub>3</sub>

zoom 112-122

GO

scan 3068; 2.3e+000

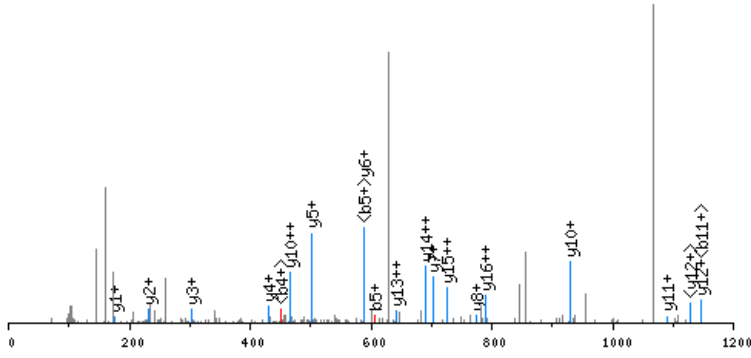

click image to zoom in; click top corners to zoom out [\[precursor±\]](#)

scan 3067; 584.6 m/z; 1.5e+002

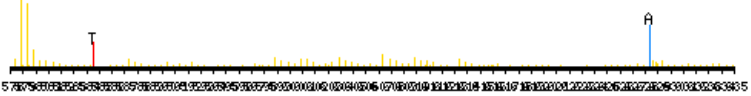

zoomed in precursor plot; T=theoretical m/z, A=acquired m/z

| b <sup>+</sup> | #  | AA # | y <sup>+</sup> | y <sup>2+</sup> |
|----------------|----|------|----------------|-----------------|
| 172.0610       | 1  | E 17 |                |                 |
| 301.1036       | 2  | E 16 | 1580.6875      | 790.8477        |
| 372.1407       | 3  | A 15 | 1451.6449      | 726.3264        |
| 469.1935       | 4  | P 14 | 1380.6078      | 690.8078        |
| 606.2524       | 5  | H 13 | 1283.5551      | 642.2814        |
| 663.2738       | 6  | G 12 | 1146.4961      | 573.7520        |
| 823.3044       | 7  | C 11 | 1089.4747      | 545.2413        |
| 920.3572       | 8  | P 10 | 929.4441       | 465.2260        |
| 977.3787       | 9  | G 9  | 832.3913       | 416.6996        |
| 1048.4158      | 10 | A 8  | 775.3699       | 388.1888        |
| 1163.4427      | 11 | D 7  | 704.3327       | 352.6703        |
| 1250.4748      | 12 | S 6  | 589.3058       | 295.1568        |
| 1321.5119      | 13 | A 5  | 502.2738       | 251.6408        |
| 1449.5704      | 14 | Q 4  | 431.2367       | 216.1222        |
| 1520.6076      | 15 | A 3  | 303.1781       | 152.0930        |
| 1577.6290      | 16 | G 2  | 232.1410       | 116.5744        |
|                | 17 | R 1  | 175.1195       | 88.0637         |

N-term:+43.02 C(7):+160.03

EEASGSAGNDR, MH+ 1134.4663, m/z 567.7368  
 H OS G29 P150811 220811-s1.02386.02386.2.dta

scan 2386; 1.2e+000

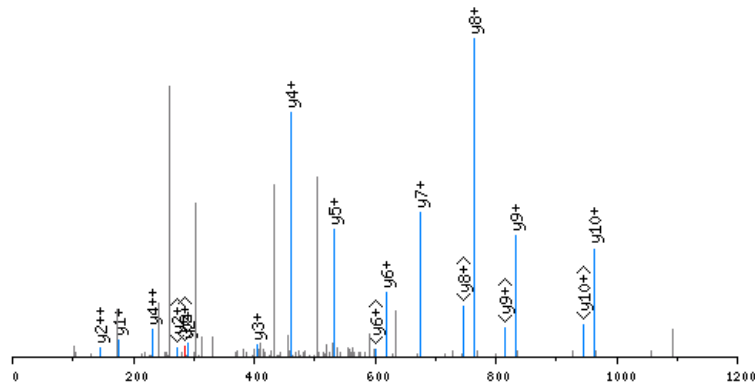

click image to zoom in; click top corners to zoom out [precursor±]

scan 2383; 567.7 m/z; 7.4e+001

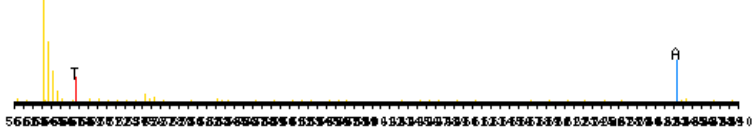

zoomed in precursor plot; T=theoretical m/z, A=acquired m/z

X-range:

-

MassTol: Y-zoom:

MassType:

AVG  MONO

Axis:

1  2

Label:

I  M  -

Ions:

a  +  2+  3+

b  +  2+  3+

c  +  2+  3+

x  +  2+  3+

y  +  2+  3+

z  +  2+  3+

hide H<sub>2</sub>O/NH<sub>3</sub>

zoom 112-122

GO

| b <sup>+</sup> | #  | AA | #  | y <sup>+</sup> | y <sup>2+</sup> |
|----------------|----|----|----|----------------|-----------------|
| 172.0610       | 1  | E  | 11 |                |                 |
| 301.1036       | 2  | E  | 10 | 963.4132       | 482.2105        |
| 372.1407       | 3  | A  | 9  | 834.3706       | 417.6892        |
| 459.1727       | 4  | S  | 8  | 763.3335       | 382.1706        |
| 516.1942       | 5  | G  | 7  | 676.3014       | 338.6546        |
| 603.2262       | 6  | S  | 6  | 619.2800       | 310.1439        |
| 674.2633       | 7  | A  | 5  | 532.2479       | 266.6279        |
| 731.2848       | 8  | G  | 4  | 461.2108       | 231.1093        |
| 845.3277       | 9  | N  | 3  | 404.1894       | 202.5986        |
| 960.3547       | 10 | D  | 2  | 290.1464       | 145.5771        |
|                | 11 | R  | 1  | 175.1195       | 88.0637         |

N-term:+43.02

EEDSTALVCDNGSGLCKAGFAGDDAPR, MH+ 3011.2998, m/z 1004.4381  
 H OS G24 P150811 220811-s1.04016.04016.3.dta

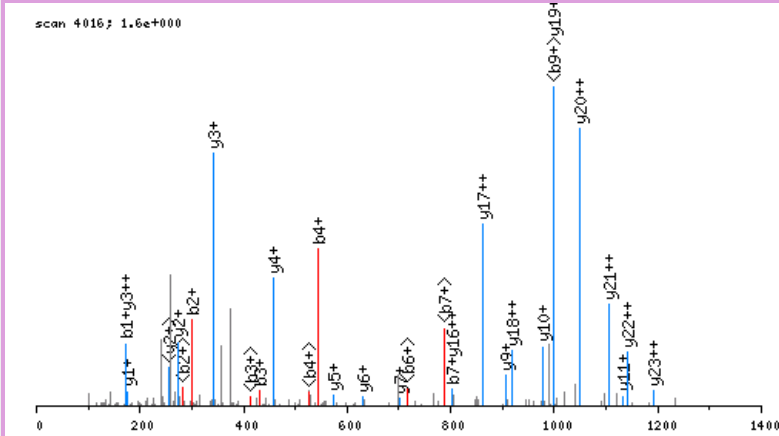

click image to zoom in; click top corners to zoom out [\[precursor±\]](#)

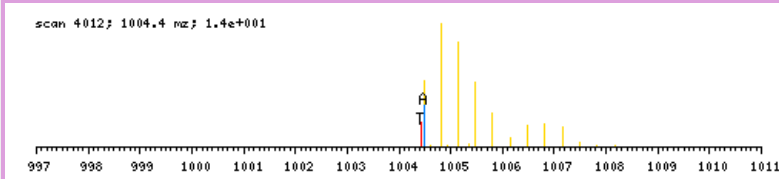

zoomed in precursor plot; T=theoretical m/z, A=acquired m/z

| b <sup>+</sup> | #  | AA # | y <sup>+</sup> | y <sup>2+</sup> |
|----------------|----|------|----------------|-----------------|
| 172.0610       | 1  | E 28 |                |                 |
| 301.1036       | 2  | E 27 | 2840.2467      | 1420.6272       |
| 430.1462       | 3  | E 26 | 2711.2041      | 1356.1059       |
| 545.1731       | 4  | D 25 | 2582.1615      | 1291.5846       |
| 632.2052       | 5  | S 24 | 2467.1345      | 1234.0712       |
| 733.2528       | 6  | T 23 | 2380.1025      | 1190.5552       |
| 804.2899       | 7  | A 22 | 2279.0548      | 1140.0313       |
| 917.3740       | 8  | L 21 | 2208.0177      | 1104.5128       |
| 1016.4424      | 9  | V 20 | 2094.9336      | 1047.9707       |
| 1176.4730      | 10 | C 19 | 1995.8652      | 998.4365        |
| 1291.5000      | 11 | D 18 | 1835.8346      | 918.4212        |
| 1405.5429      | 12 | N 17 | 1720.8077      | 860.9078        |
| 1462.5644      | 13 | G 16 | 1606.7648      | 803.8863        |
| 1549.5964      | 14 | S 15 | 1549.7433      | 775.3756        |
| 1606.6178      | 15 | G 14 | 1462.7113      | 731.8595        |
| 1719.7019      | 16 | L 13 | 1405.6898      | 703.3488        |
| 1879.7325      | 17 | C 12 | 1292.6057      | 646.8068        |
| 2035.8588      | 18 | K 11 | 1132.5751      | 566.7915        |
| 2106.8959      | 19 | A 10 | 976.4488       | 488.7283        |
| 2163.9174      | 20 | G 9  | 905.4117       | 453.2098        |
| 2310.9858      | 21 | F 8  | 848.3903       | 424.6990        |
| 2382.0229      | 22 | A 7  | 701.3218       | 351.1648        |
| 2439.0444      | 23 | G 6  | 630.2847       | 315.6463        |
| 2554.0713      | 24 | D 5  | 573.2633       | 287.1355        |
| 2669.0983      | 25 | D 4  | 458.2363       | 229.6221        |
| 2740.1354      | 26 | A 3  | 343.2094       | 172.1086        |
| 2837.1881      | 27 | P 2  | 272.1723       | 136.5900        |
|                | 28 | R 1  | 175.1195       | 88.0637         |

N-term:+43.02 C(10):+160.03  
 C(17):+160.03 K(18):+156.13

X-range:

-

MassTol: Y-zoom:

MassType:

AVG  MONO

Axis:

1  2

Label:

I  M  -

Ions:

a  +  2+  3+

b  +  2+  3+

c  +  2+  3+

x  +  2+  3+

y  +  2+  3+

z  +  2+  3+

hide H<sub>2</sub>O/NH<sub>3</sub>

zoom 112-122

GO

EEEEIAALVIDNGSGMCKAGFAGDDAPR, MH+ 2863.3242, m/z 716.5865  
 H OS G24 P150811 220811-s1.04559.04559.4.dta

scan 4559; 7.0e+000

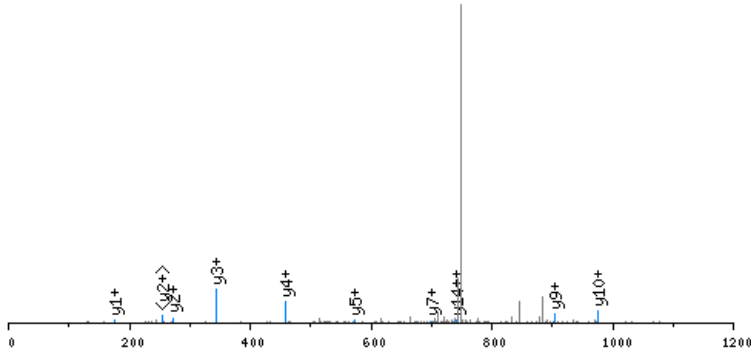

click image to zoom in; click top corners to zoom out [\[precursor±\]](#)

scan 4557; 716.6 mz; 1.6e+001

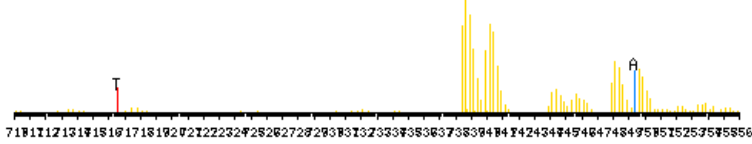

zoomed in precursor plot; T=theoretical m/z, A=acquired m/z

| b <sup>+</sup> | #  | AA # | y <sup>+</sup>  | y <sup>2+</sup> |
|----------------|----|------|-----------------|-----------------|
| 172.0610       | 1  | E 27 |                 |                 |
| 301.1036       | 2  | E 26 | 2692.2711       | 1346.6394       |
| 430.1462       | 3  | E 25 | 2563.2285       | 1282.1181       |
| 543.2302       | 4  | I 24 | 2434.1859       | 1217.5969       |
| 614.2674       | 5  | A 23 | 2321.1018       | 1161.0548       |
| 685.3045       | 6  | A 22 | 2250.0647       | 1125.5363       |
| 798.3885       | 7  | L 21 | 2179.0276       | 1090.0177       |
| 897.4569       | 8  | V 20 | 2065.9435       | 1033.4757       |
| 1010.5410      | 9  | I 19 | 1966.8751       | 983.9415        |
| 1125.5680      | 10 | D 18 | 1853.7910       | 927.3994        |
| 1239.6109      | 11 | N 17 | 1738.7641       | 869.8860        |
| 1296.6323      | 12 | G 16 | 1624.7212       | 812.8645        |
| 1383.6644      | 13 | S 15 | 1567.6997       | 784.3538        |
| 1440.6858      | 14 | G 14 | 1480.6677       | <b>740.8378</b> |
| 1571.7263      | 15 | M 13 | 1423.6462       | 712.3270        |
| 1731.7569      | 16 | C 12 | 1292.6057       | 646.8068        |
| 1887.8832      | 17 | K 11 | 1132.5751       | 566.7915        |
| 1958.9203      | 18 | A 10 | <b>976.4488</b> | 488.7283        |
| 2015.9418      | 19 | G 9  | <b>905.4117</b> | 453.2098        |
| 2163.0102      | 20 | F 8  | 848.3903        | 424.6990        |
| 2234.0473      | 21 | A 7  | <b>701.3218</b> | 351.1648        |
| 2291.0688      | 22 | G 6  | 630.2847        | 315.6463        |
| 2406.0957      | 23 | D 5  | <b>573.2633</b> | 287.1355        |
| 2521.1227      | 24 | D 4  | <b>458.2363</b> | 229.6221        |
| 2592.1598      | 25 | A 3  | <b>343.2094</b> | 172.1086        |
| 2689.2126      | 26 | P 2  | <b>272.1723</b> | 136.5900        |
|                | 27 | R 1  | <b>175.1195</b> | 88.0637         |

N-term: +43.02 C(16) : +160.03  
 K(17) : +156.13

X-range:

-

MassTol: Y-zoom:

MassType:

AVG  MONO

Axis:

1  2

Label:

I  M  -

Ions:

a  +  2+  3+

b  +  2+  3+

c  +  2+  3+

x  +  2+  3+

y  +  2+  3+

z  +  2+  3+

hide H<sub>2</sub>O/NH<sub>3</sub>

zoom 112-122

GO

EESIKEGSEKPR, MH+ 1615.8180, m/z 539.2775  
 H OS G26 P150811 220811-s1.02596.02596.3.dta

scan 2596; 8.7e+000

X-range:

-

MassTol: Y-zoom:

MassType:

AVG  MONO

Axis:

1  2

Label:

I  M  -

Ions:

a  +  2+  3+

b  +  2+  3+

c  +  2+  3+

x  +  2+  3+

y  +  2+  3+

z  +  2+  3+

hide H<sub>2</sub>O/NH<sub>3</sub>

zoom 112-122

GO

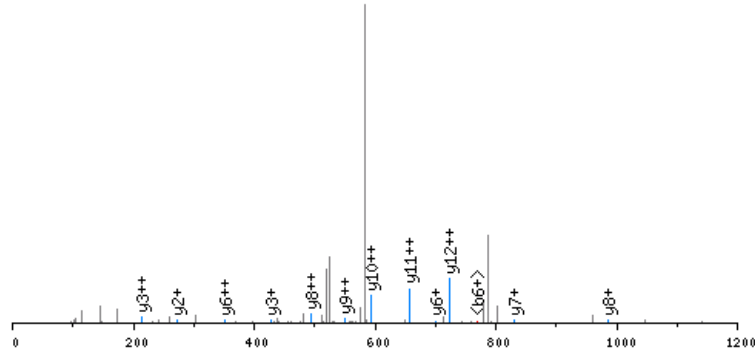

click image to zoom in; click top corners to zoom out [\[precursor±\]](#)

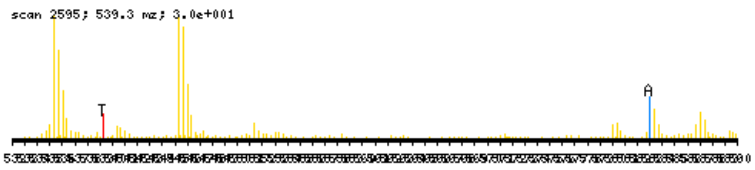

zoomed in precursor plot; T=theoretical m/z, A=acquired m/z

| b <sup>+</sup> | #  | AA | #  | y <sup>+</sup> | y <sup>2+</sup> |
|----------------|----|----|----|----------------|-----------------|
| 172.0610       | 1  | E  | 13 |                |                 |
| 301.1036       | 2  | E  | 12 | 1444.7648      | 722.8863        |
| 430.1462       | 3  | E  | 11 | 1315.7222      | 658.3650        |
| 517.1782       | 4  | S  | 10 | 1186.6796      | 593.8437        |
| 630.2623       | 5  | I  | 9  | 1099.6476      | 550.3277        |
| 786.3886       | 6  | K  | 8  | 986.5635       | 493.7857        |
| 915.4312       | 7  | E  | 7  | 830.4372       | 415.7225        |
| 972.4526       | 8  | G  | 6  | 701.3946       | 351.2012        |
| 1059.4847      | 9  | S  | 5  | 644.3732       | 322.6905        |
| 1188.5273      | 10 | E  | 4  | 557.3412       | 279.1745        |
| 1344.6536      | 11 | K  | 3  | 428.2986       | 214.6532        |
| 1441.7063      | 12 | P  | 2  | 272.1723       | 136.5900        |
|                | 13 | R  | 1  | 175.1195       | 88.0637         |

N-term:+43.02 K(6):+156.13  
 K(11):+156.13

EEGPAVGTLSR, MH+ 1157.5803, m/z 579.2938  
 H OS G29 P150811 220811-s1.04133.04133.2.dta

X-range:

-

MassTol: Y-zoom:

MassType:

AVG  MONO

Axis:

1  2

Label:

I  M  -

Ions:

a  +  2+  3+

b  +  2+  3+

c  +  2+  3+

x  +  2+  3+

y  +  2+  3+

z  +  2+  3+

hide H<sub>2</sub>O/NH<sub>3</sub>

zoom 112-122

GO

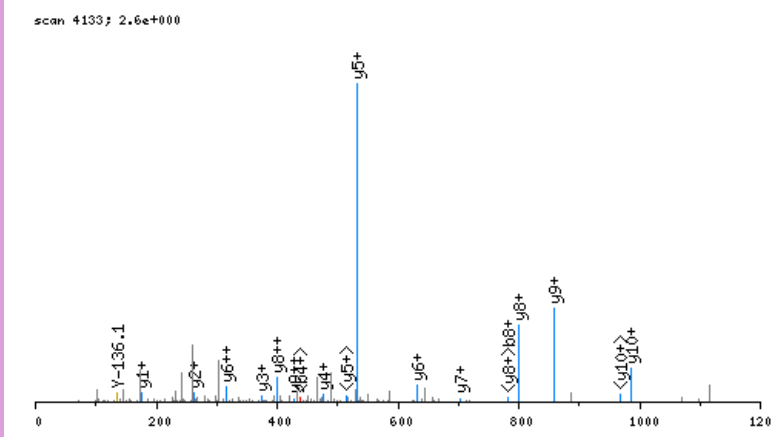

click image to zoom in; click top corners to zoom out [\[precursor±\]](#)

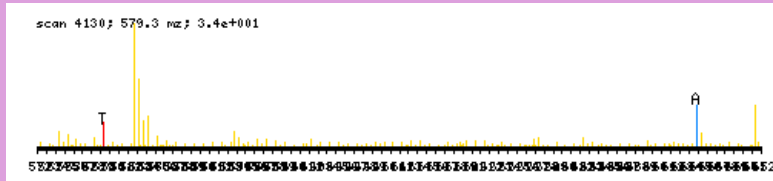

zoomed in precursor plot; T=theoretical m/z, A=acquired m/z

| b <sup>+</sup> | #  | AA | #  | y <sup>+</sup> | y <sup>2+</sup> |
|----------------|----|----|----|----------------|-----------------|
| 172.0610       | 1  | E  | 11 |                |                 |
| 301.1036       | 2  | E  | 10 | 986.5271       | 493.7675        |
| 358.1251       | 3  | G  | 9  | 857.4845       | 429.2462        |
| 455.1778       | 4  | P  | 8  | 800.4630       | 400.7354        |
| 526.2149       | 5  | A  | 7  | 703.4103       | 352.2090        |
| 625.2833       | 6  | V  | 6  | 632.3731       | 316.6905        |
| 682.3048       | 7  | G  | 5  | 533.3047       | 267.1563        |
| 783.3525       | 8  | T  | 4  | 476.2833       | 238.6455        |
| 896.4365       | 9  | L  | 3  | 375.2356       | 188.1217        |
| 983.4686       | 10 | S  | 2  | 262.1515       | 131.5797        |
|                | 11 | R  | 1  | 175.1195       | 88.0637         |

N-term:+43.02



EELSADEIR, MH+ 1103.5221, m/z 552.2647  
 H OS G29 P150811 220811-s1.04992.04992.2.dta

X-range:

-

MassTol: Y-zoom:

MassType:

AVG  MONO

Axis:

1  2

Label:

I  M  -

Ions:

a  +  2+  3+

b  +  2+  3+

c  +  2+  3+

x  +  2+  3+

y  +  2+  3+

z  +  2+  3+

hide H<sub>2</sub>O/NH<sub>3</sub>

zoom 112-122

GO

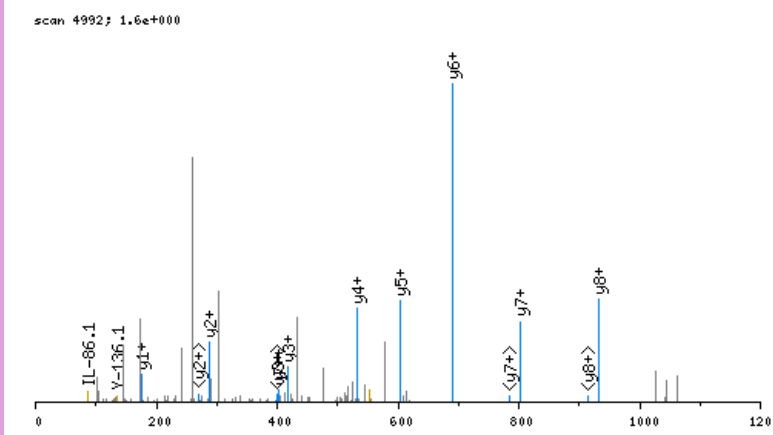

click image to zoom in; click top corners to zoom out [\[precursor±\]](#)

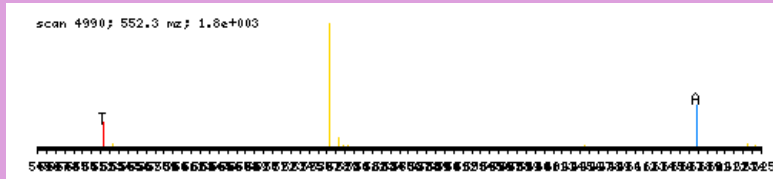

zoomed in precursor plot; T=theoretical m/z, A=acquired m/z

| b <sup>+</sup> | # | AA # | y <sup>+</sup> | y <sup>2+</sup> |
|----------------|---|------|----------------|-----------------|
| 172.0610       | 1 | E 9  |                |                 |
| 301.1036       | 2 | E 8  | 932.4689       | 466.7384        |
| 414.1877       | 3 | L 7  | 803.4263       | 402.2171        |
| 501.2197       | 4 | S 6  | 690.3422       | 345.6750        |
| 572.2568       | 5 | A 5  | 603.3102       | 302.1590        |
| 687.2837       | 6 | D 4  | 532.2731       | 266.6405        |
| 816.3263       | 7 | E 3  | 417.2462       | 209.1270        |
| 929.4104       | 8 | I 2  | 288.2036       | 144.6057        |
|                | 9 | R 1  | 175.1195       | 88.0637         |

N-term:+43.02

EERPSETNSNVDSQAQPSVAQLAGR, MH+ 2671.2560, m/z 668.5694  
 H OS G24 P150811 220811-s1.03644.03644.4.dta

scan 3644; 2.0e+000

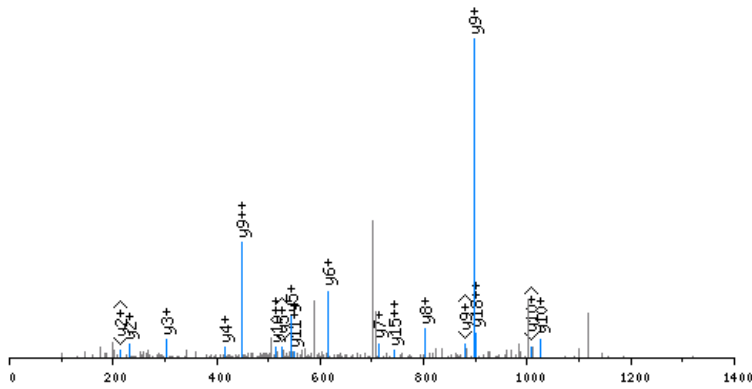

click image to zoom in; click top corners to zoom out [precursor±]

scan 3642; 668.6 m/z; 4.5e+000

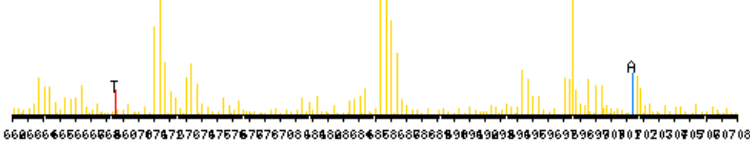

zoomed in precursor plot; T=theoretical m/z, A=acquired m/z

X-range:

-

MassTol: Y-zoom:

MassType:

AVG  MONO

Axis:

1  2

Label:

I  M  -

Ions:

a  +  2+  3+

b  +  2+  3+

c  +  2+  3+

x  +  2+  3+

y  +  2+  3+

z  +  2+  3+

hide H<sub>2</sub>O/NH<sub>3</sub>

zoom 112-122

GO

| b <sup>+</sup> | #  | AA # | y <sup>+</sup> | y <sup>2+</sup> |
|----------------|----|------|----------------|-----------------|
| 172.0610       | 1  | E 25 |                |                 |
| 301.1036       | 2  | E 24 | 2500.2028      | 1250.6053       |
| 457.2047       | 3  | R 23 | 2371.1602      | 1186.0840       |
| 554.2575       | 4  | P 22 | 2215.0591      | 1108.0335       |
| 641.2895       | 5  | S 21 | 2118.0063      | 1059.5071       |
| 770.3321       | 6  | E 20 | 2030.9743      | 1015.9911       |
| 871.3798       | 7  | T 19 | 1901.9317      | 951.4698        |
| 985.4227       | 8  | N 18 | 1800.8840      | 900.9459        |
| 1072.4547      | 9  | S 17 | 1686.8411      | 843.9245        |
| 1186.4976      | 10 | N 16 | 1599.8091      | 800.4084        |
| 1285.5661      | 11 | V 15 | 1485.7661      | 743.3870        |
| 1400.5930      | 12 | D 14 | 1386.6977      | 693.8528        |
| 1487.6250      | 13 | S 13 | 1271.6708      | 636.3393        |
| 1574.6571      | 14 | S 12 | 1184.6388      | 592.8233        |
| 1645.6942      | 15 | A 11 | 1097.6067      | 549.3073        |
| 1773.7527      | 16 | Q 10 | 1026.5696      | 513.7887        |
| 1870.8055      | 17 | P 9  | 898.5110       | 449.7594        |
| 1957.8375      | 18 | S 8  | 801.4583       | 401.2331        |
| 2056.9060      | 19 | V 7  | 714.4262       | 357.7170        |
| 2127.9431      | 20 | A 6  | 615.3578       | 308.1828        |
| 2256.0016      | 21 | Q 5  | 544.3207       | 272.6643        |
| 2369.0857      | 22 | L 4  | 416.2621       | 208.6350        |
| 2440.1228      | 23 | A 3  | 303.1781       | 152.0930        |
| 2497.1443      | 24 | G 2  | 232.1410       | 116.5744        |
|                | 25 | R 1  | 175.1195       | 88.0637         |

N-term:+43.02

EFAELIKTPR, MH+ 1273.7157, m/z 637.3615  
 H OS G25 P150811 220811-s1.08200.08200.2.dta

X-range:

-

MassTol: Y-zoom:

MassType:

AVG  MONO

Axis:

1  2

Label:

I  M  -

Ions:

a  +  2+  3+

b  +  2+  3+

c  +  2+  3+

x  +  2+  3+

y  +  2+  3+

z  +  2+  3+

hide H<sub>2</sub>O/NH<sub>3</sub>

zoom 112-122

GO

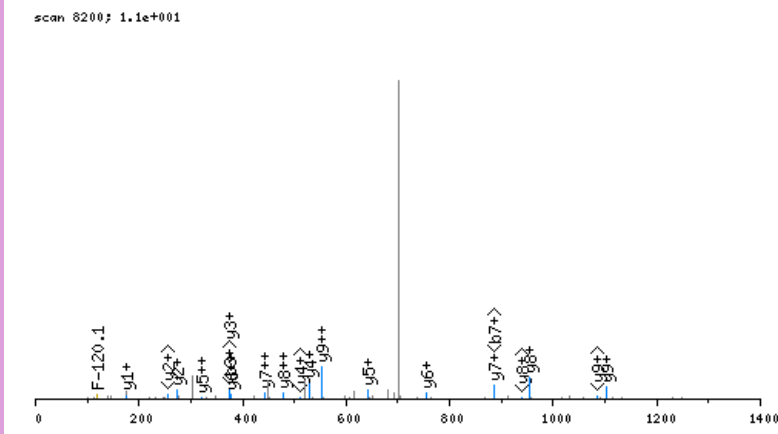

click image to zoom in; click top corners to zoom out [\[precursor±\]](#)

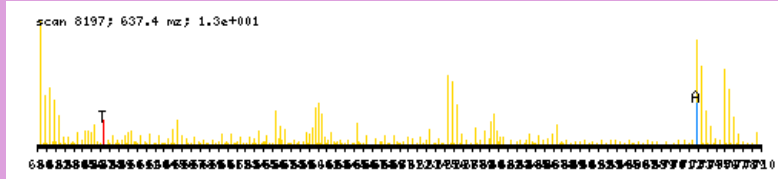

zoomed in precursor plot; T=theoretical m/z, A=acquired m/z

| b <sup>+</sup> | #  | AA # | y <sup>+</sup> | y <sup>2+</sup>    |
|----------------|----|------|----------------|--------------------|
| 172.0610       | 1  | E    | 10             |                    |
| 319.1294       | 2  | F    | 9              | 1102.6625 551.8352 |
| 390.1665       | 3  | A    | 8              | 955.5941 478.3010  |
| 519.2091       | 4  | E    | 7              | 884.5570 442.7824  |
| 632.2932       | 5  | L    | 6              | 755.5144 378.2611  |
| 745.3772       | 6  | I    | 5              | 642.4303 321.7191  |
| 901.5035       | 7  | K    | 4              | 529.3462 265.1770  |
| 1002.5512      | 8  | T    | 3              | 373.2199 187.1139  |
| 1099.6040      | 9  | P    | 2              | 272.1723 136.5900  |
|                | 10 | R    | 1              | 175.1195 88.0637   |

N-term:+43.02 K(7):+156.13

EFPDLGAHCSEPSQR, MH+ 1931.8015, m/z 644.6054  
 H OS G25 P150811 220811-s1.06896.06896.3.dta

X-range:

-

MassTol: Y-zoom:

MassType:

AVG  MONO

Axis:

1  2

Label:

I  M  -

Ions:

a  +  2+  3+

b  +  2+  3+

c  +  2+  3+

x  +  2+  3+

y  +  2+  3+

z  +  2+  3+

hide H<sub>2</sub>O/NH<sub>3</sub>

zoom 112-122

GO

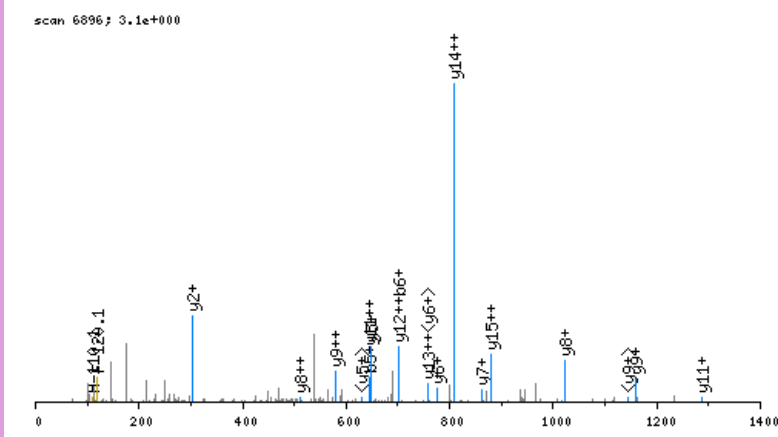

click image to zoom in; click top corners to zoom out [precursor±]

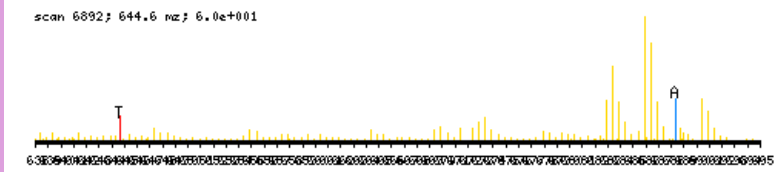

zoomed in precursor plot; T=theoretical m/z, A=acquired m/z

| b <sup>+</sup> | #  | AA # | y <sup>+</sup> | y <sup>2+</sup> |
|----------------|----|------|----------------|-----------------|
| 172.0610       | 1  | E 16 |                |                 |
| 319.1294       | 2  | F 15 | 1760.7484      | 880.8781        |
| 416.1822       | 3  | P 14 | 1613.6800      | 807.3439        |
| 531.2091       | 4  | D 13 | 1516.6272      | 758.8175        |
| 644.2932       | 5  | L 12 | 1401.6002      | 701.3040        |
| 701.3146       | 6  | G 11 | 1288.5162      | 644.7620        |
| 772.3518       | 7  | A 10 | 1231.4947      | 616.2513        |
| 909.4107       | 8  | H 9  | 1160.4576      | 580.7327        |
| 1069.4413      | 9  | C 8  | 1023.3987      | 512.2033        |
| 1156.4733      | 10 | S 7  | 863.3681       | 432.1880        |
| 1285.5159      | 11 | E 6  | 776.3361       | 388.6719        |
| 1382.5687      | 12 | P 5  | 647.2935       | 324.1506        |
| 1469.6007      | 13 | S 4  | 550.2407       | 275.6243        |
| 1629.6313      | 14 | C 3  | 463.2087       | 232.1083        |
| 1757.6899      | 15 | Q 2  | 303.1781       | 152.0930        |
|                | 16 | R 1  | 175.1195       | 88.0637         |

N-term:+43.02 C(9):+160.03  
 C(14):+160.03

EGDGPAAATAPQYQPVCPTR, MH+ 2056.9398, m/z 686.3181  
 H OS G29 P150811 220811-s1.04206.04206.3.dta

X-range:

-

MassTol: Y-zoom:

MassType:

AVG  MONO

Axis:

1  2

Label:

I  M  -

Ions:

a  +  2+  3+

b  +  2+  3+

c  +  2+  3+

x  +  2+  3+

y  +  2+  3+

z  +  2+  3+

hide H<sub>2</sub>O/NH<sub>3</sub>

zoom 112-122

GO

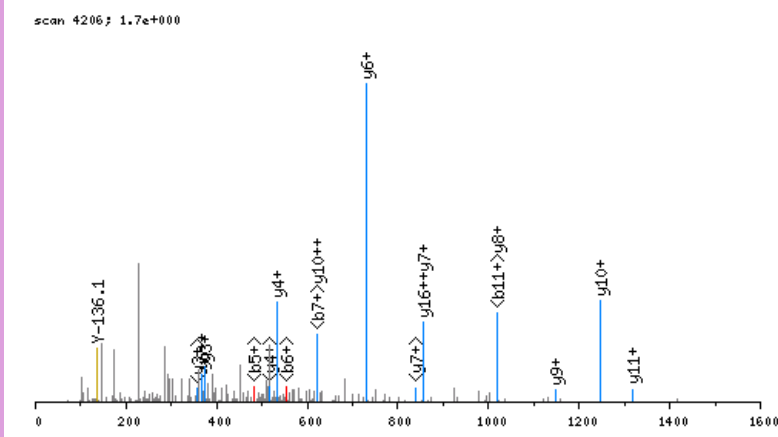

click image to zoom in; click top corners to zoom out [\[precursor±\]](#)

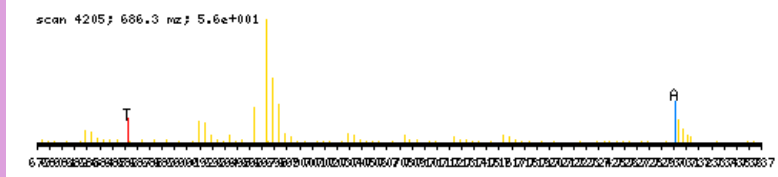

zoomed in precursor plot; T=theoretical m/z, A=acquired m/z

| b <sup>+</sup> | #  | AA # | y <sup>+</sup>   | y <sup>2+</sup> |
|----------------|----|------|------------------|-----------------|
| 172.0610       | 1  | E 19 |                  |                 |
| 229.0825       | 2  | G 18 | 1885.8866        | 943.4472        |
| 344.1094       | 3  | D 17 | 1828.8652        | 914.9365        |
| 401.1309       | 4  | G 16 | 1713.8382        | <b>857.4230</b> |
| 498.1836       | 5  | P 15 | 1656.8168        | 828.9123        |
| 569.2207       | 6  | A 14 | 1559.7640        | 780.3859        |
| 640.2579       | 7  | A 13 | 1488.7269        | 744.8673        |
| 741.3055       | 8  | T 12 | 1417.6898        | 709.3488        |
| 812.3426       | 9  | A 11 | <b>1316.6421</b> | 658.8250        |
| 909.3954       | 10 | P 10 | <b>1245.6050</b> | <b>623.3064</b> |
| 1037.4540      | 11 | Q 9  | <b>1148.5522</b> | 574.7800        |
| 1200.5173      | 12 | Y 8  | <b>1020.4936</b> | 510.7507        |
| 1328.5759      | 13 | Q 7  | <b>857.4303</b>  | 429.2191        |
| 1425.6287      | 14 | P 6  | <b>729.3717</b>  | <b>365.1898</b> |
| 1524.6971      | 15 | V 5  | 632.3190         | 316.6634        |
| 1684.7277      | 16 | C 4  | <b>533.2505</b>  | 267.1292        |
| 1781.7804      | 17 | P 3  | <b>373.2199</b>  | 187.1139        |
| 1882.8281      | 18 | T 2  | 276.1672         | 138.5875        |
|                | 19 | R 1  | 175.1195         | 88.0637         |

N-term:+43.02 C(16):+160.03

EGDSTISVAGR, MH+ 1190.5653, m/z 595.7863  
 H OS G29 P150811 220811-s1.03689.03689.2.dta

X-range:

-

MassTol: Y-zoom:

MassType:

AVG  MONO

Axis:

1  2

Label:

I  M  -

Ions:

a  +  2+  3+

b  +  2+  3+

c  +  2+  3+

x  +  2+  3+

y  +  2+  3+

z  +  2+  3+

hide H<sub>2</sub>O/NH<sub>3</sub>

zoom 112-122

GO

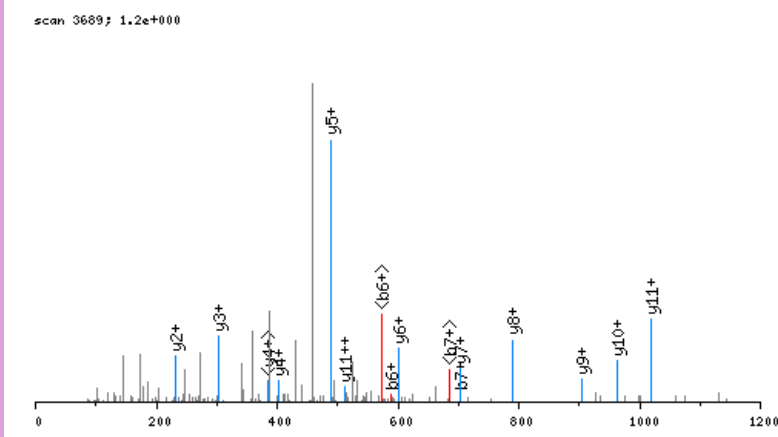

click image to zoom in; click top corners to zoom out [\[precursor±\]](#)

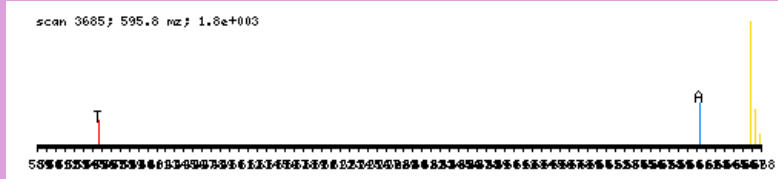

zoomed in precursor plot; T=theoretical m/z, A=acquired m/z

| b <sup>+</sup> | #  | AA # | y <sup>+</sup> | y <sup>2+</sup> |
|----------------|----|------|----------------|-----------------|
| 172.0610       | 1  | E 12 |                |                 |
| 229.0825       | 2  | G 11 | 1019.5122      | 510.2600        |
| 286.1039       | 3  | G 10 | 962.4907       | 481.7493        |
| 401.1309       | 4  | D 9  | 905.4692       | 453.2385        |
| 488.1629       | 5  | S 8  | 790.4423       | 395.7251        |
| 589.2106       | 6  | T 7  | 703.4103       | 352.2090        |
| 702.2946       | 7  | I 6  | 602.3626       | 301.6852        |
| 789.3267       | 8  | S 5  | 489.2785       | 245.1432        |
| 888.3951       | 9  | V 4  | 402.2465       | 201.6272        |
| 959.4322       | 10 | A 3  | 303.1781       | 152.0930        |
| 1016.4537      | 11 | G 2  | 232.1410       | 116.5744        |
|                | 12 | R 1  | 175.1195       | 88.0637         |

N-term:+43.02

EGPLSVFGDR, MH+ 1118.5482, m/z 559.7777  
 H OS G29 P150811 220811-s1.06369.06369.2.dta

X-range:

-

MassTol: Y-zoom:

MassType:

AVG  MONO

Axis:

1  2

Label:

I  M  -

Ions:

a  +  2+  3+

b  +  2+  3+

c  +  2+  3+

x  +  2+  3+

y  +  2+  3+

z  +  2+  3+

hide H<sub>2</sub>O/NH<sub>3</sub>

zoom 112-122

GO

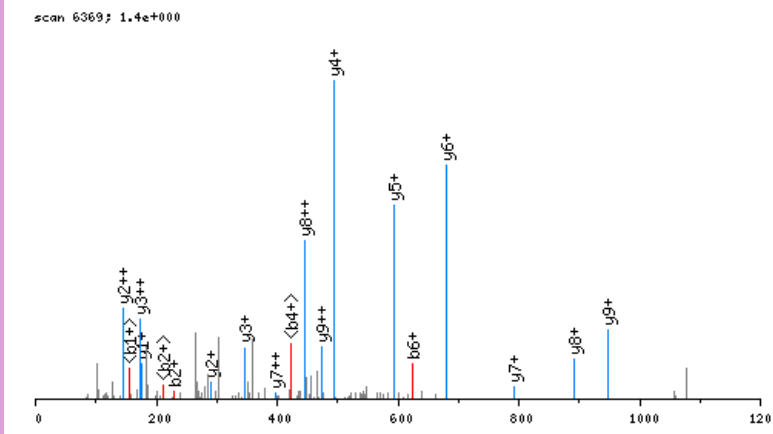

click image to zoom in; click top corners to zoom out [\[precursor±\]](#)

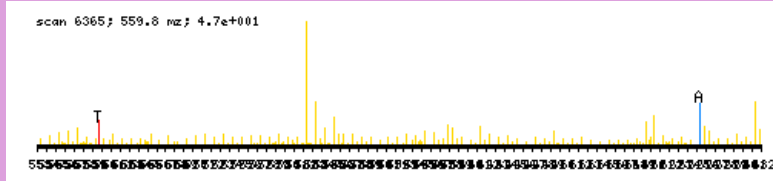

zoomed in precursor plot; T=theoretical m/z, A=acquired m/z

| b <sup>+</sup>  | #  | AA | #  | y <sup>+</sup>  | y <sup>2+</sup> |
|-----------------|----|----|----|-----------------|-----------------|
| 172.0610        | 1  | E  | 10 |                 |                 |
| <b>229.0825</b> | 2  | G  | 9  | <b>947.4951</b> | <b>474.2514</b> |
| 326.1352        | 3  | P  | 8  | 890.4736        | 445.7407        |
| 439.2193        | 4  | L  | 7  | 793.4208        | 397.2143        |
| 526.2513        | 5  | S  | 6  | 680.3368        | 340.6723        |
| <b>625.3197</b> | 6  | V  | 5  | <b>593.3047</b> | 297.1563        |
| 772.3881        | 7  | F  | 4  | 494.2363        | 247.6221        |
| 829.4096        | 8  | G  | 3  | 347.1679        | 174.0879        |
| 944.4365        | 9  | D  | 2  | 290.1464        | 145.5771        |
|                 | 10 | R  | 1  | 175.1195        | 88.0637         |

N-term:+43.02

EGVDCSMALADAAAGSPR, MH+ 1819.7954, m/z 607.2700  
 H OS G29 P150811 220811-s1.06048.06048.3.dta

X-range:

-

MassTol: Y-zoom:

MassType:

AVG  MONO

Axis:

1  2

Label:

I  M  -

Ions:

a  +  2+  3+

b  +  2+  3+

c  +  2+  3+

x  +  2+  3+

y  +  2+  3+

z  +  2+  3+

hide H<sub>2</sub>O/NH<sub>3</sub>

zoom 112-122

GO

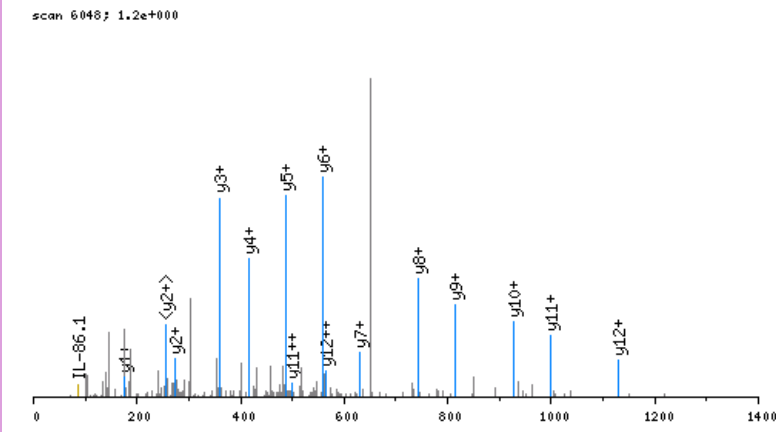

click image to zoom in; click top corners to zoom out [\[precursor±\]](#)

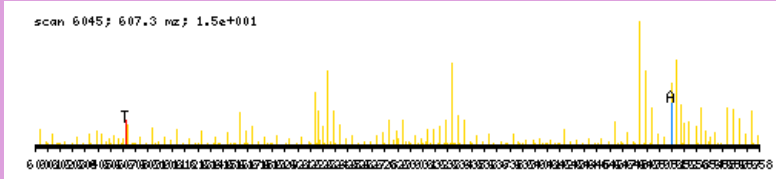

zoomed in precursor plot; T=theoretical m/z, A=acquired m/z

| b <sup>+</sup> | #  | AA # | y <sup>+</sup> | y <sup>2+</sup> |
|----------------|----|------|----------------|-----------------|
| 172.0610       | 1  | E 18 |                |                 |
| 229.0825       | 2  | G 17 | 1648.7423      | 824.8750        |
| 328.1509       | 3  | V 16 | 1591.7208      | 796.3643        |
| 443.1778       | 4  | D 15 | 1492.6524      | 746.8301        |
| 603.2084       | 5  | C 14 | 1377.6254      | 689.3166        |
| 690.2404       | 6  | S 13 | 1217.5948      | 609.3013        |
| 821.2809       | 7  | M 12 | 1130.5628      | 565.7853        |
| 892.3180       | 8  | A 11 | 999.5223       | 500.2651        |
| 1005.4021      | 9  | L 10 | 928.4852       | 464.7465        |
| 1076.4392      | 10 | A 9  | 815.4012       | 408.2045        |
| 1191.4662      | 11 | D 8  | 744.3640       | 372.6859        |
| 1262.5033      | 12 | A 7  | 629.3371       | 315.1725        |
| 1333.5404      | 13 | A 6  | 558.3000       | 279.6539        |
| 1404.5775      | 14 | A 5  | 487.2629       | 244.1353        |
| 1461.5990      | 15 | G 4  | 416.2258       | 208.6168        |
| 1548.6310      | 16 | S 3  | 359.2043       | 180.1061        |
| 1645.6838      | 17 | P 2  | 272.1723       | 136.5900        |
|                | 18 | R 1  | 175.1195       | 88.0637         |

N-term:+43.02 C(5):+160.03



EGYHKPDQQLQALKDTANR, MH+ 2466.3106, m/z 617.3331  
 H OS G28 P150811 220811-s1.04600.04600.4.dta

X-range:

-

MassTol: Y-zoom:

MassType:

AVG  MONO

Axis:

1  2

Label:

I  M  -

Ions:

a  +  2+  3+

b  +  2+  3+

c  +  2+  3+

x  +  2+  3+

y  +  2+  3+

z  +  2+  3+

hide H<sub>2</sub>O/NH<sub>3</sub>

zoom 112-122

GO

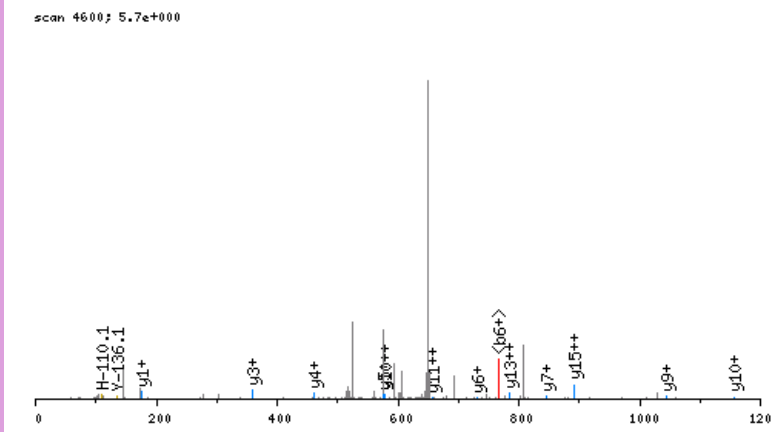

click image to zoom in; click top corners to zoom out [\[precursor±\]](#)

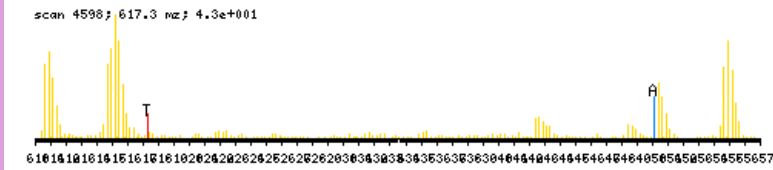

zoomed in precursor plot; T=theoretical m/z, A=acquired m/z

| b <sup>+</sup> | #  | AA | #  | y <sup>+</sup> | y <sup>2+</sup> |
|----------------|----|----|----|----------------|-----------------|
| 172.0610       | 1  | E  | 20 |                |                 |
| 229.0825       | 2  | G  | 19 | 2295.2574      | 1148.1326       |
| 392.1458       | 3  | Y  | 18 | 2238.2360      | 1119.6219       |
| 529.2047       | 4  | H  | 17 | 2075.1727      | 1038.0902       |
| 685.3310       | 5  | K  | 16 | 1938.1137      | 969.5608        |
| 782.3838       | 6  | P  | 15 | 1781.9874      | 891.4976        |
| 897.4107       | 7  | D  | 14 | 1684.9347      | 842.9713        |
| 1025.4693      | 8  | Q  | 13 | 1569.9077      | 785.4578        |
| 1153.5279      | 9  | Q  | 12 | 1441.8492      | 721.4285        |
| 1309.6542      | 10 | K  | 11 | 1313.7906      | 657.3992        |
| 1422.7382      | 11 | L  | 10 | 1157.6643      | 579.3361        |
| 1550.7968      | 12 | Q  | 9  | 1044.5802      | 522.7940        |
| 1621.8339      | 13 | A  | 8  | 916.5216       | 458.7647        |
| 1734.9180      | 14 | L  | 7  | 845.4845       | 423.2462        |
| 1891.0443      | 15 | K  | 6  | 732.4005       | 366.7041        |
| 2006.0712      | 16 | D  | 5  | 576.2742       | 288.6410        |
| 2107.1189      | 17 | T  | 4  | 461.2472       | 231.1275        |
| 2178.1560      | 18 | A  | 3  | 360.1995       | 180.6037        |
| 2292.1989      | 19 | N  | 2  | 289.1624       | 145.0851        |
|                | 20 | R  | 1  | 175.1195       | 88.0637         |

N-term: +43.02 K(5): +156.13  
 K(10): +156.13 K(15): +156.13

EHSPEGASPEPSGQPPATDSTR, MH+ 2405.0493, m/z 802.3546  
 H OS G24 P150811 220811-s1.02900.02900.3.dta

X-range:

-

MassTol: Y-zoom:

MassType:

AVG  MONO

Axis:

1  2

Label:

I  M  -

Ions:

a  +  2+  3+

b  +  2+  3+

c  +  2+  3+

x  +  2+  3+

y  +  2+  3+

z  +  2+  3+

hide H<sub>2</sub>O/NH<sub>3</sub>

zoom 112-122

GO

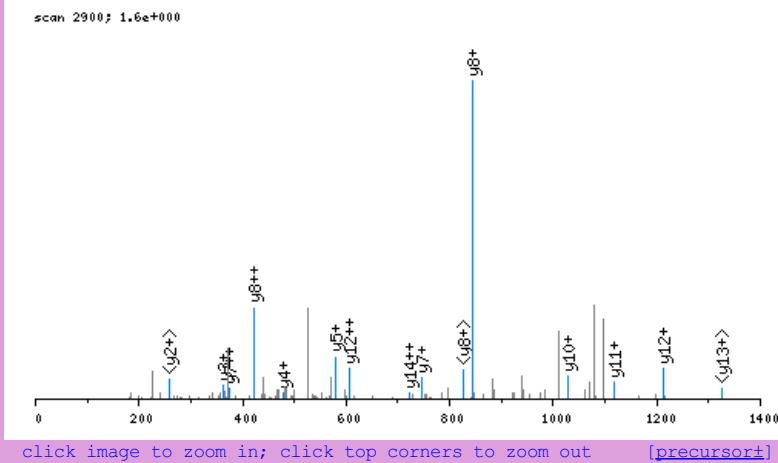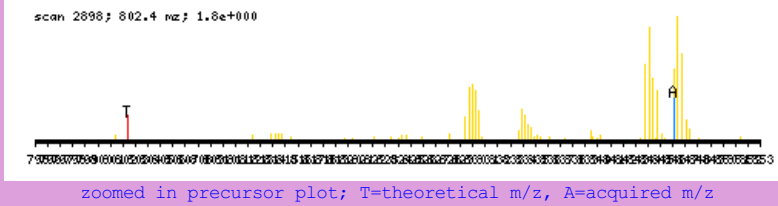

| b <sup>+</sup> | #  | AA # | y <sup>+</sup> | y <sup>2+</sup> |
|----------------|----|------|----------------|-----------------|
| 172.0610       | 1  | E 23 |                |                 |
| 309.1199       | 2  | H 22 | 2233.9962      | 1117.5020       |
| 396.1519       | 3  | S 21 | 2096.9372      | 1048.9725       |
| 493.2047       | 4  | P 20 | 2009.9052      | 1005.4565       |
| 622.2473       | 5  | E 19 | 1912.8525      | 956.9301        |
| 751.2899       | 6  | E 18 | 1783.8099      | 892.4088        |
| 808.3113       | 7  | G 17 | 1654.7673      | 827.8875        |
| 879.3485       | 8  | A 16 | 1597.7458      | 799.3768        |
| 966.3805       | 9  | S 15 | 1526.7087      | 763.8583        |
| 1063.4333      | 10 | P 14 | 1439.6767      | 720.3422        |
| 1192.4758      | 11 | E 13 | 1342.6239      | 671.8159        |
| 1289.5286      | 12 | P 12 | 1213.5813      | 607.2946        |
| 1376.5606      | 13 | S 11 | 1116.5285      | 558.7682        |
| 1433.5821      | 14 | G 10 | 1029.4965      | 515.2522        |
| 1561.6407      | 15 | Q 9  | 972.4750       | 486.7414        |
| 1658.6934      | 16 | P 8  | 844.4165       | 422.7121        |
| 1755.7462      | 17 | P 7  | 747.3637       | 374.1858        |
| 1826.7833      | 18 | A 6  | 650.3109       | 325.6594        |
| 1927.8310      | 19 | T 5  | 579.2738       | 290.1408        |
| 2042.8579      | 20 | D 4  | 478.2262       | 239.6170        |
| 2129.8900      | 21 | S 3  | 363.1992       | 182.1035        |
| 2230.9377      | 22 | T 2  | 276.1672       | 138.5875        |
|                | 23 | R 1  | 175.1195       | 88.0637         |

N-term:+43.02

EIAGAAGADGGGAPVAEEQLSGER, MH+ 2254.0588, m/z 752.0244  
 H OS G26 P150811 220811-s1.02110.02110.3.dta

scan 2110; 3.4e+000

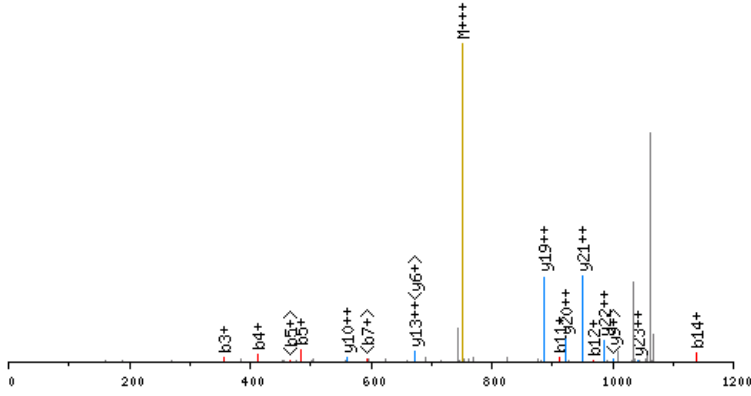

click image to zoom in; click top corners to zoom out [\[precursor±\]](#)

scan 2106; 752.0 m/z; 2.1e+000

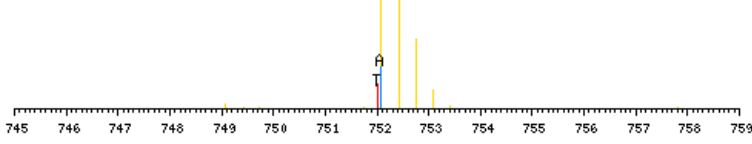

zoomed in precursor plot; T=theoretical m/z, A=acquired m/z

X-range:

-

MassTol: Y-zoom:

MassType:

AVG  MONO

Axis:

1  2

Label:

I  M  -

Ions:

a  +  2+  3+

b  +  2+  3+

c  +  2+  3+

x  +  2+  3+

y  +  2+  3+

z  +  2+  3+

hide H<sub>2</sub>O/NH<sub>3</sub>

zoom 112-122

GO

| b <sup>+</sup> | #  | AA # | y <sup>+</sup> | y <sup>2+</sup> |
|----------------|----|------|----------------|-----------------|
| 172.0610       | 1  | E 24 |                |                 |
| 285.1451       | 2  | I 23 | 2083.0056      | 1042.0067       |
| 356.1822       | 3  | A 22 | 1969.9215      | 985.4647        |
| 413.2036       | 4  | G 21 | 1898.8844      | 949.9461        |
| 484.2407       | 5  | A 20 | 1841.8630      | 921.4354        |
| 555.2779       | 6  | A 19 | 1770.8258      | 885.9168        |
| 612.2993       | 7  | G 18 | 1699.7887      | 850.3983        |
| 683.3364       | 8  | A 17 | 1642.7673      | 821.8875        |
| 798.3634       | 9  | D 16 | 1571.7302      | 786.3690        |
| 855.3848       | 10 | G 15 | 1456.7032      | 728.8555        |
| 912.4063       | 11 | G 14 | 1399.6817      | 700.3448        |
| 969.4278       | 12 | G 13 | 1342.6603      | 671.8341        |
| 1040.4649      | 13 | A 12 | 1285.6388      | 643.3233        |
| 1137.5177      | 14 | P 11 | 1214.6017      | 607.8048        |
| 1236.5861      | 15 | V 10 | 1117.5489      | 559.2784        |
| 1307.6232      | 16 | A 9  | 1018.4805      | 509.7442        |
| 1436.6658      | 17 | E 8  | 947.4434       | 474.2256        |
| 1565.7084      | 18 | E 7  | 818.4008       | 409.7043        |
| 1693.7669      | 19 | Q 6  | 689.3582       | 345.1830        |
| 1806.8510      | 20 | L 5  | 561.2997       | 281.1537        |
| 1893.8830      | 21 | S 4  | 448.2156       | 224.6117        |
| 1950.9045      | 22 | G 3  | 361.1836       | 181.0957        |
| 2079.9471      | 23 | E 2  | 304.1621       | 152.5850        |
|                | 24 | R 1  | 175.1195       | 88.0637         |

N-term:+43.02

EIGTEISR, MH+ 946.4846, m/z 473.7459  
 H OS G29 P150811 220811-s1.04556.04556.2.dta

X-range:

-

MassTol: Y-zoom:

MassType:

AVG  MONO

Axis:

1  2

Label:

I  M  -

Ions:

a  +  2+  3+

b  +  2+  3+

c  +  2+  3+

x  +  2+  3+

y  +  2+  3+

z  +  2+  3+

hide H<sub>2</sub>O/NH<sub>3</sub>

zoom 112-122

GO

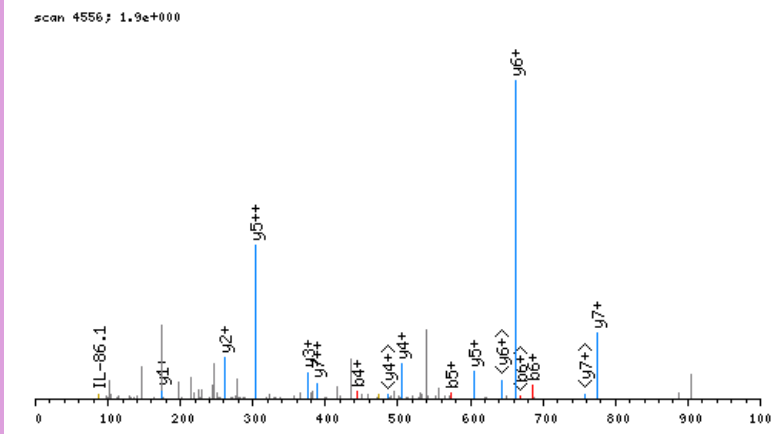

click image to zoom in; click top corners to zoom out [\[precursor±\]](#)

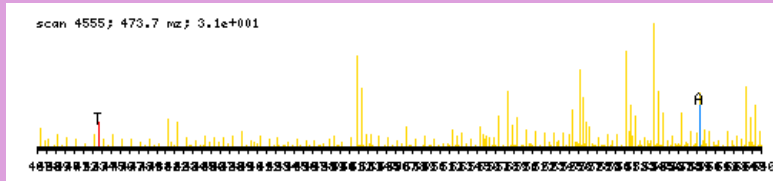

zoomed in precursor plot; T=theoretical m/z, A=acquired m/z

| b <sup>+</sup> | # | AA # | y <sup>+</sup> | y <sup>2+</sup> |
|----------------|---|------|----------------|-----------------|
| 172.0610       | 1 | E 8  |                |                 |
| 285.1451       | 2 | I 7  | 775.4314       | 388.2196        |
| 342.1665       | 3 | G 6  | 662.3473       | 331.6776        |
| 443.2142       | 4 | T 5  | 605.3259       | 303.1668        |
| 572.2568       | 5 | E 4  | 504.2782       | 252.6430        |
| 685.3409       | 6 | I 3  | 375.2356       | 188.1217        |
| 772.3729       | 7 | S 2  | 262.1515       | 131.5797        |
|                | 8 | R 1  | 175.1195       | 88.0637         |

N-term:+43.02

EIQSGPQPGSPGR, MH+ 1351.6606, m/z 676.3340  
 H OS G29 P150811 220811-s1.03458.03458.2.dta

X-range:

-

MassTol: Y-zoom:

MassType:

AVG  MONO

Axis:

1  2

Label:

I  M  -

Ions:

a  +  2+  3+

b  +  2+  3+

c  +  2+  3+

x  +  2+  3+

y  +  2+  3+

z  +  2+  3+

hide H<sub>2</sub>O/NH<sub>3</sub>

zoom 112-122

GO

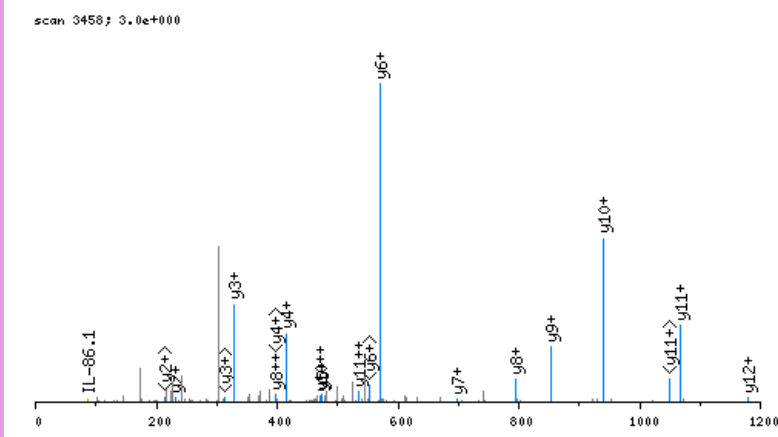

click image to zoom in; click top corners to zoom out [\[precursor±\]](#)

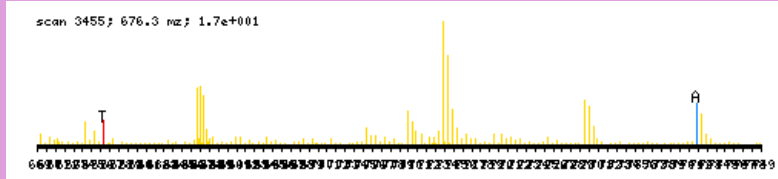

zoomed in precursor plot; T=theoretical m/z, A=acquired m/z

| b <sup>+</sup> | #  | AA # | y <sup>+</sup> | y <sup>2+</sup> |
|----------------|----|------|----------------|-----------------|
| 172.0610       | 1  | E 13 |                |                 |
| 285.1451       | 2  | I 12 | 1180.6075      | 590.8076        |
| 413.2036       | 3  | Q 11 | 1067.5234      | 534.2656        |
| 500.2357       | 4  | S 10 | 939.4648       | 470.2363        |
| 557.2571       | 5  | G 9  | 852.4328       | 426.7203        |
| 654.3099       | 6  | P 8  | 795.4113       | 398.2096        |
| 782.3685       | 7  | Q 7  | 698.3586       | 349.6832        |
| 879.4212       | 8  | P 6  | 570.3000       | 285.6539        |
| 936.4427       | 9  | G 5  | 473.2472       | 237.1275        |
| 1023.4747      | 10 | S 4  | 416.2258       | 208.6168        |
| 1120.5275      | 11 | P 3  | 329.1937       | 165.1008        |
| 1177.5490      | 12 | G 2  | 232.1410       | 116.5744        |
|                | 13 | R 1  | 175.1195       | 88.0637         |

N-term:+43.02

EKEEETTR, MH+ 1097.5539, m/z 549.2806  
 H OS G25 P150811 220811-s1.02101.02101.2.dta

X-range:

-

MassTol: Y-zoom:

MassType:

AVG  MONO

Axis:

1  2

Label:

I  M  -

Ions:

a  +  2+  3+

b  +  2+  3+

c  +  2+  3+

x  +  2+  3+

y  +  2+  3+

z  +  2+  3+

hide H<sub>2</sub>O/NH<sub>3</sub>

zoom 112-122

GO

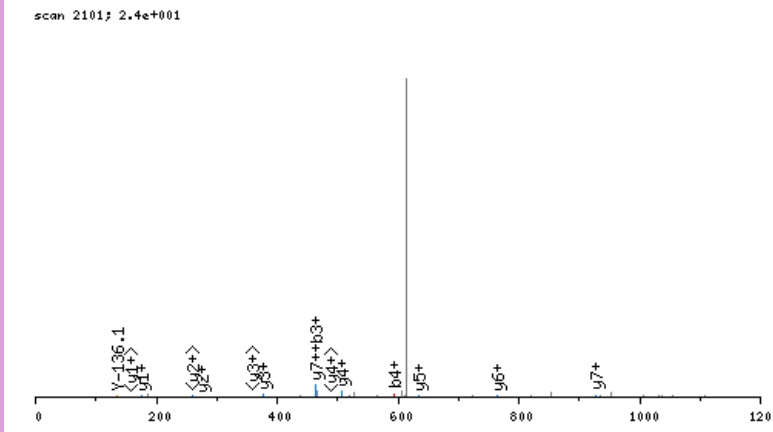

click image to zoom in; click top corners to zoom out [\[precursor±\]](#)

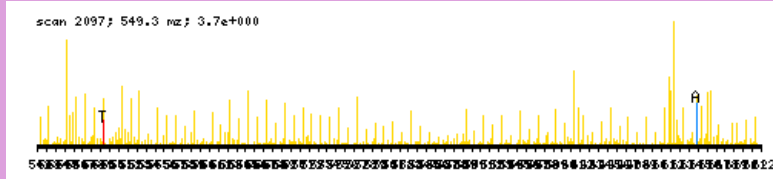

zoomed in precursor plot; T=theoretical m/z, A=acquired m/z

| b <sup>+</sup> | # | AA # | y <sup>+</sup> | y <sup>2+</sup> |
|----------------|---|------|----------------|-----------------|
| 172.0610       | 1 | E 8  |                |                 |
| 334.2191       | 2 | K 7  | 926.5007       | 463.7543        |
| 463.2617       | 3 | E 6  | 764.3426       | 382.6752        |
| 592.3043       | 4 | E 5  | 635.3000       | 318.1539        |
| 721.3469       | 5 | E 4  | 506.2575       | 253.6326        |
| 822.3946       | 6 | T 3  | 377.2149       | 189.1113        |
| 923.4422       | 7 | T 2  | 276.1672       | 138.5875        |
|                | 8 | R 1  | 175.1195       | 88.0637         |

N-term:+43.02 K(2):+162.16

EKPAASTEPPQGSRPALGR, MH+ 1928.0414, m/z 643.3520  
 H OS G26 P150811 220811-s1.02833.02833.3.dta

X-range:

-

MassTol: Y-zoom:

MassType:

AVG  MONO

Axis:

1  2

Label:

I  M  -

Ions:

a  +  2+  3+

b  +  2+  3+

c  +  2+  3+

x  +  2+  3+

y  +  2+  3+

z  +  2+  3+

hide H<sub>2</sub>O/NH<sub>3</sub>

zoom 112-122

GO

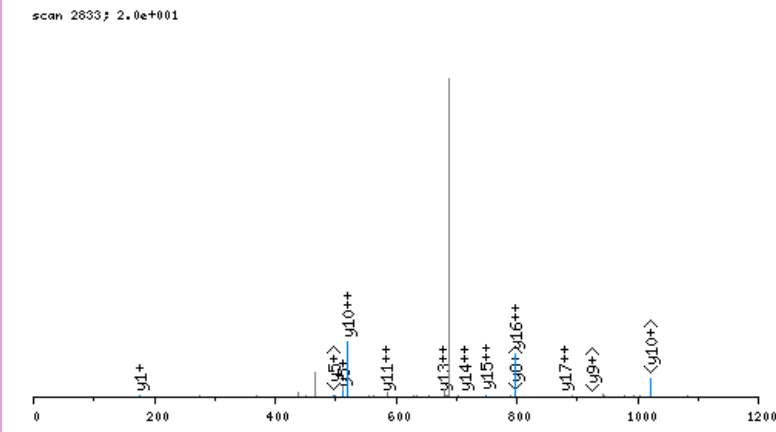

click image to zoom in; click top corners to zoom out [\[precursor±\]](#)

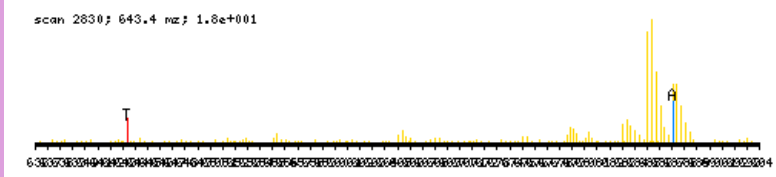

zoomed in precursor plot; T=theoretical m/z, A=acquired m/z

| b <sup>+</sup> | #  | AA # | y <sup>+</sup> | y <sup>2+</sup> |
|----------------|----|------|----------------|-----------------|
| 172.0610       | 1  | E 18 |                |                 |
| 334.2191       | 2  | K 17 | 1756.9882      | 878.9980        |
| 431.2719       | 3  | P 16 | 1594.8301      | 797.9190        |
| 502.3090       | 4  | A 15 | 1497.7774      | 749.3926        |
| 573.3461       | 5  | A 14 | 1426.7403      | 713.8740        |
| 660.3781       | 6  | S 13 | 1355.7032      | 678.3555        |
| 761.4258       | 7  | T 12 | 1268.6711      | 634.8395        |
| 890.4684       | 8  | E 11 | 1167.6234      | 584.3156        |
| 987.5211       | 9  | P 10 | 1038.5809      | 519.7943        |
| 1115.5797      | 10 | Q 9  | 941.5281       | 471.2680        |
| 1172.6012      | 11 | G 8  | 813.4695       | 407.2387        |
| 1259.6332      | 12 | S 7  | 756.4480       | 378.7279        |
| 1415.7343      | 13 | R 6  | 669.4160       | 335.2119        |
| 1512.7871      | 14 | P 5  | 513.3149       | 257.1614        |
| 1583.8242      | 15 | A 4  | 416.2621       | 208.6350        |
| 1696.9083      | 16 | L 3  | 345.2250       | 173.1164        |
| 1753.9297      | 17 | G 2  | 232.1410       | 116.5744        |
|                | 18 | R 1  | 175.1195       | 88.0637         |

N-term:+43.02 K(2):+162.16

EKTELIQKAK, MH+ 1331.8999, m/z 444.6382  
 H OS G26 P150811 220811-s1.03116.03116.3.dta

scan 3116; 7.3e+001

X-range:

-

MassTol: Y-zoom:

MassType:

AVG  MONO

Axis:

1  2

Label:

I  M  -

Ions:

a  +  2+  3+

b  +  2+  3+

c  +  2+  3+

x  +  2+  3+

y  +  2+  3+

z  +  2+  3+

hide H<sub>2</sub>O/NH<sub>3</sub>

zoom 112-122

GO

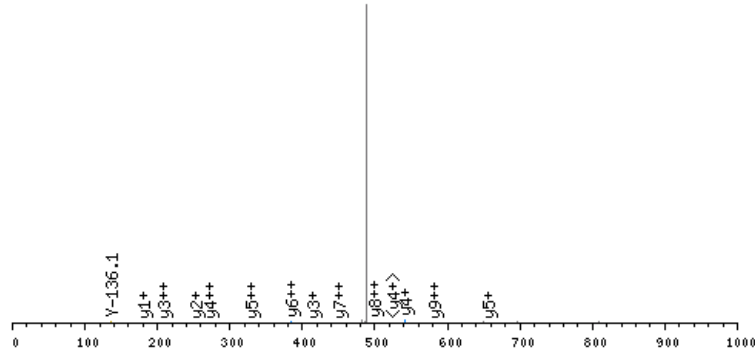

click image to zoom in; click top corners to zoom out [\[precursor±\]](#)

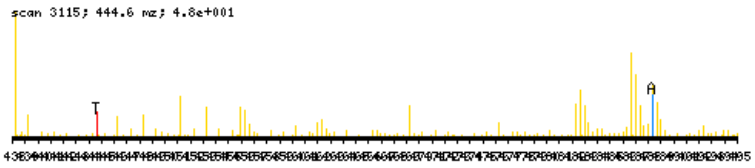

zoomed in precursor plot; T=theoretical m/z, A=acquired m/z

| b <sup>+</sup> | #  | AA # | y <sup>+</sup> | y <sup>2+</sup> |
|----------------|----|------|----------------|-----------------|
| 172.0610       | 1  | E 10 |                |                 |
| 334.2191       | 2  | K 9  | 1160.8468      | 580.9273        |
| 435.2668       | 3  | T 8  | 998.6887       | 499.8483        |
| 564.3094       | 4  | E 7  | 897.6410       | 449.3244        |
| 677.3934       | 5  | L 6  | 768.5984       | 384.8031        |
| 790.4775       | 6  | I 5  | 655.5143       | 328.2611        |
| 918.5361       | 7  | Q 4  | 542.4303       | 271.7191        |
| 1080.6942      | 8  | K 3  | 414.3717       | 207.6898        |
| 1151.7313      | 9  | A 2  | 252.2136       | 126.6107        |
|                | 10 | K 1  | 181.1765       | 91.0922         |

N-term:+43.02 K(2):+162.16  
 K(8):+162.16 K(10):+162.16



EKTELIQKAKLAEQAER, MH+ 2111.2077, m/z 704.4074  
 H OS G28 P150811 220811-s1.06235.06235.3.dta

X-range:

-

MassTol: Y-zoom:

MassType:

AVG  MONO

Axis:

1  2

Label:

I  M  -

Ions:

a  +  2+  3+

b  +  2+  3+

c  +  2+  3+

x  +  2+  3+

y  +  2+  3+

z  +  2+  3+

hide H<sub>2</sub>O/NH<sub>3</sub>

zoom 112-122

GO

scan 6235; 5.1e+001

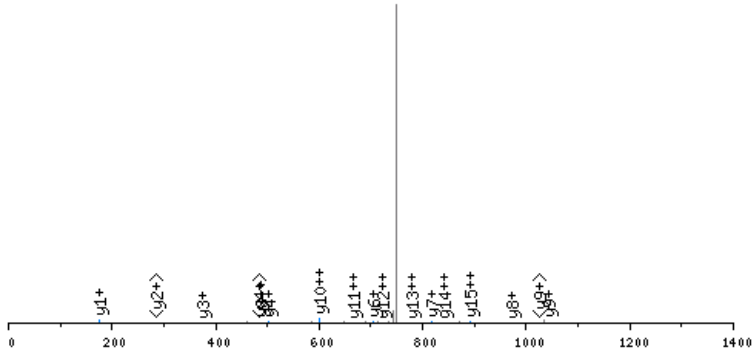

click image to zoom in; click top corners to zoom out [precursor±]

scan 6233; 704.4 nz; 5.0e+001

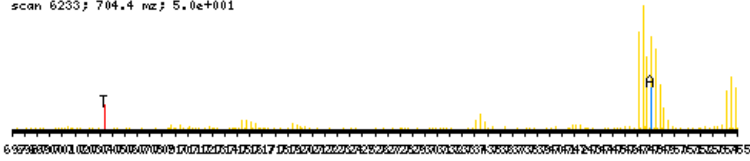

zoomed in precursor plot; T=theoretical m/z, A=acquired m/z

| b <sup>+</sup> | #  | AA | #  | y <sup>+</sup> | y <sup>2+</sup> |
|----------------|----|----|----|----------------|-----------------|
| 172.0610       | 1  | E  | 17 |                |                 |
| 328.1873       | 2  | K  | 16 | 1940.1545      | 970.5812        |
| 429.2350       | 3  | T  | 15 | 1784.0282      | 892.5180        |
| 558.2776       | 4  | E  | 14 | 1682.9806      | 841.9942        |
| 671.3616       | 5  | L  | 13 | 1553.9380      | 777.4729        |
| 784.4457       | 6  | I  | 12 | 1440.8539      | 720.9309        |
| 912.5043       | 7  | Q  | 11 | 1327.7698      | 664.3888        |
| 1068.6306      | 8  | K  | 10 | 1199.7113      | 600.3595        |
| 1139.6677      | 9  | A  | 9  | 1043.5850      | 522.2964        |
| 1295.7940      | 10 | K  | 8  | 972.5479       | 486.7778        |
| 1408.8780      | 11 | L  | 7  | 816.4216       | 408.7147        |
| 1479.9152      | 12 | A  | 6  | 703.3375       | 352.1727        |
| 1608.9578      | 13 | E  | 5  | 632.3004       | 316.6541        |
| 1737.0163      | 14 | Q  | 4  | 503.2578       | 252.1328        |
| 1808.0534      | 15 | A  | 3  | 375.1992       | 188.1035        |
| 1937.0960      | 16 | E  | 2  | 304.1621       | 152.5850        |
|                | 17 | R  | 1  | 175.1195       | 88.0637         |

N-term:+43.02 K(2):+156.13  
 K(8):+156.13 K(10):+156.13

EKTLETVPLER, MH+ 1390.8006, m/z 695.9039  
 H OS G25 P150811 220811-s1.06840.06840.2.dta

scan 6840; 2.0e+001

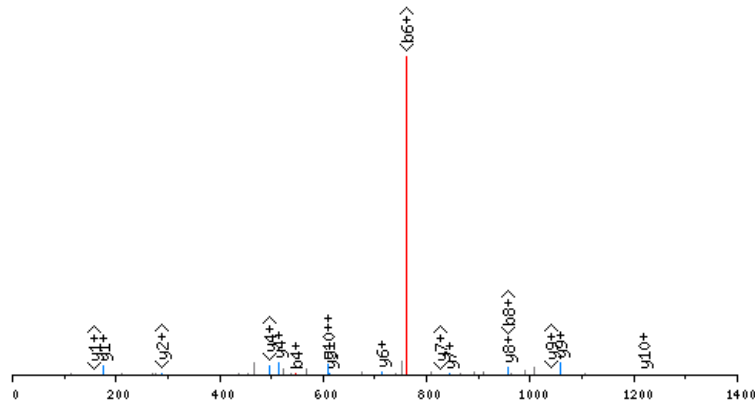

click image to zoom in; click top corners to zoom out [\[precursor±\]](#)

scan 6837; 695.9 m/z; 4.2e+001

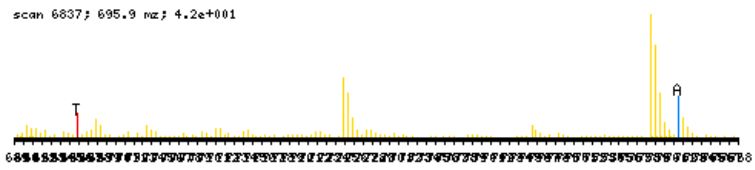

zoomed in precursor plot; T=theoretical m/z, A=acquired m/z

X-range:

-

MassTol: Y-zoom:

MassType:

AVG  MONO

Axis:

1  2

Label:

I  M  -

Ions:

a  +  2+  3+

b  +  2+  3+

c  +  2+  3+

x  +  2+  3+

y  +  2+  3+

z  +  2+  3+

hide H<sub>2</sub>O/NH<sub>3</sub>

zoom 112-122

GO

| b <sup>+</sup> | #  | AA # | y <sup>+</sup> | y <sup>2+</sup> |
|----------------|----|------|----------------|-----------------|
| 172.0610       | 1  | E 11 |                |                 |
| 334.2191       | 2  | K 10 | 1219.7474      | 610.3776        |
| 435.2668       | 3  | T 9  | 1057.5893      | 529.2986        |
| 548.3508       | 4  | L 8  | 956.5417       | 478.7747        |
| 677.3934       | 5  | E 7  | 843.4576       | 422.2327        |
| 778.4411       | 6  | T 6  | 714.4150       | 357.7114        |
| 877.5095       | 7  | V 5  | 613.3673       | 307.1876        |
| 974.5623       | 8  | P 4  | 514.2989       | 257.6534        |
| 1087.6463      | 9  | L 3  | 417.2462       | 209.1270        |
| 1216.6889      | 10 | E 2  | 304.1621       | 152.5850        |
|                | 11 | R 1  | 175.1195       | 88.0637         |

N-term:+43.02 K(2):+162.16

EKVPGDMEIER, MH+ 1378.7101, m/z 689.8587  
 H OS G25 P150811 220811-s1.05779.05779.2.dta

scan 5779; 1.0e+001

X-range:

-

MassTol: Y-zoom:

MassType:

AVG  MONO

Axis:

1  2

Label:

I  M  -

Ions:

a  +  2+  3+

b  +  2+  3+

c  +  2+  3+

x  +  2+  3+

y  +  2+  3+

z  +  2+  3+

hide H<sub>2</sub>O/NH<sub>3</sub>

zoom 112-122

GO

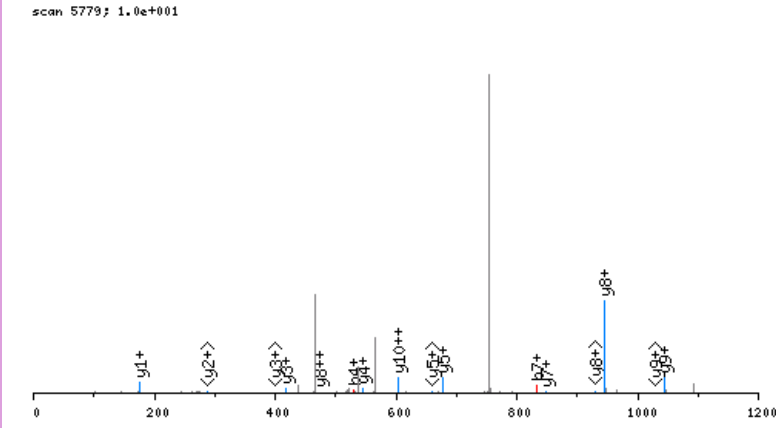

click image to zoom in; click top corners to zoom out [\[precursor±\]](#)

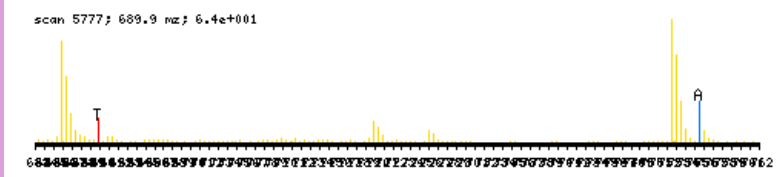

zoomed in precursor plot; T=theoretical m/z, A=acquired m/z

| b <sup>+</sup> | #  | AA # | y <sup>+</sup> | y <sup>2+</sup> |
|----------------|----|------|----------------|-----------------|
| 172.0610       | 1  | E 11 |                |                 |
| 334.2191       | 2  | K 10 | 1207.6569      | 604.3324        |
| 433.2875       | 3  | V 9  | 1045.4988      | 523.2533        |
| 530.3403       | 4  | P 8  | 946.4304       | 473.7191        |
| 587.3617       | 5  | G 7  | 849.3776       | 425.1927        |
| 702.3887       | 6  | D 6  | 792.3562       | 396.6820        |
| 833.4292       | 7  | M 5  | 677.3292       | 339.1685        |
| 962.4718       | 8  | E 4  | 546.2888       | 273.6483        |
| 1075.5558      | 9  | I 3  | 417.2462       | 209.1270        |
| 1204.5984      | 10 | E 2  | 304.1621       | 152.5850        |
|                | 11 | R 1  | 175.1195       | 88.0637         |

N-term:+43.02 K(2):+162.16

EKVPGDMEIERR, MH+ 1528.7794, m/z 510.2647  
 H OS G27 P150811 220811-s1.05014.05014.3.dta

scan 5014; 5.7e+001

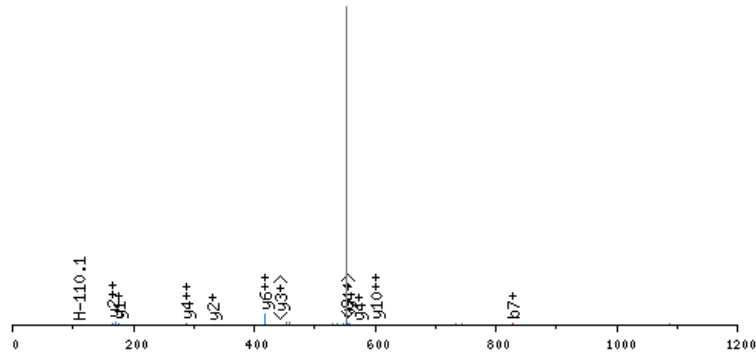

click image to zoom in; click top corners to zoom out [\[precursor±\]](#)

scan 5012; 510.3 m/z; 6.9e+001

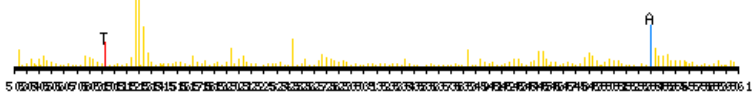

zoomed in precursor plot; T=theoretical m/z, A=acquired m/z

X-range:

-

MassTol: Y-zoom:

MassType:

AVG  MONO

Axis:

1  2

Label:

I  M  -

Ions:

a  +  2+  3+

b  +  2+  3+

c  +  2+  3+

x  +  2+  3+

y  +  2+  3+

z  +  2+  3+

hide H<sub>2</sub>O/NH<sub>3</sub>

zoom 112-122

GO

| b <sup>+</sup> | #  | AA # | y <sup>+</sup> | y <sup>2+</sup> |
|----------------|----|------|----------------|-----------------|
| 172.0610       | 1  | E 12 |                |                 |
| 328.1873       | 2  | K 11 | 1357.7262      | 679.3670        |
| 427.2557       | 3  | V 10 | 1201.5999      | 601.3039        |
| 524.3085       | 4  | P 9  | 1102.5315      | 551.7697        |
| 581.3299       | 5  | G 8  | 1005.4788      | 503.2433        |
| 696.3569       | 6  | D 7  | 948.4573       | 474.7326        |
| 827.3974       | 7  | M 6  | 833.4303       | 417.2191        |
| 956.4400       | 8  | E 5  | 702.3899       | 351.6988        |
| 1069.5240      | 9  | I 4  | 573.3473       | 287.1775        |
| 1198.5666      | 10 | E 3  | 460.2632       | 230.6355        |
| 1354.6677      | 11 | R 2  | 331.2206       | 166.1142        |
|                | 12 | R 1  | 175.1195       | 88.0637         |

N-term:+43.02 K(2):+156.13

X-range:

-

MassTol: Y-zoom:

MassType:

AVG  MONO

Axis:

1  2

Label:

I  M  -

Ions:

a  +  2+  3+

b  +  2+  3+

c  +  2+  3+

x  +  2+  3+

y  +  2+  3+

z  +  2+  3+

hide H<sub>2</sub>O/NH<sub>3</sub>

zoom 112-122

GO

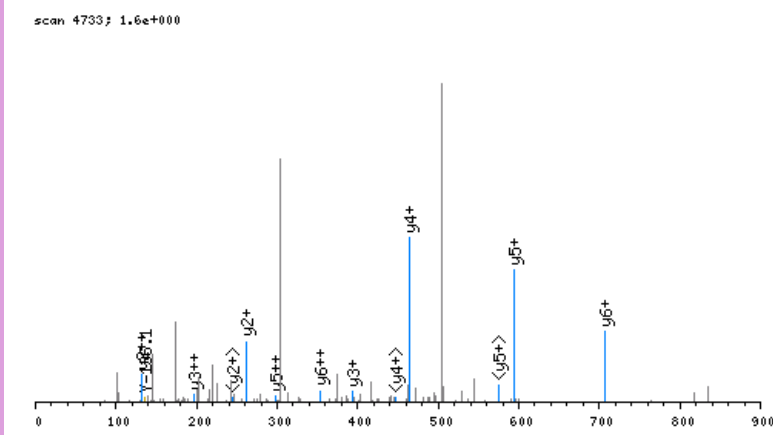

click image to zoom in; click top corners to zoom out [\[precursor±\]](#)

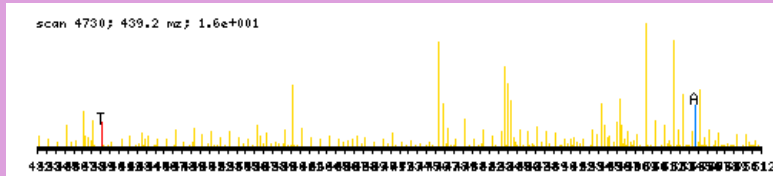

zoomed in precursor plot; T=theoretical m/z, A=acquired m/z

| b <sup>+</sup> | # | AA # | y <sup>+</sup> | y <sup>2+</sup> |
|----------------|---|------|----------------|-----------------|
| 172.0610       | 1 | E 7  |                |                 |
| 285.1451       | 2 | L 6  | 706.3558       | 353.6818        |
| 414.1877       | 3 | E 5  | 593.2717       | 297.1398        |
| 485.2248       | 4 | A 4  | 464.2291       | 232.6185        |
| 616.2652       | 5 | M 3  | 393.1920       | 197.0999        |
| 703.2973       | 6 | S 2  | 262.1515       | 131.5797        |
|                | 7 | R 1  | 175.1195       | 88.0637         |

N-term:+43.02

ELISNASDALDKIR, MH+ 1614.8703, m/z 538.9616  
 H OS G26 P150811 220811-s1.05452.05452.3.dta

X-range:

-

MassTol: Y-zoom:

MassType:

AVG  MONO

Axis:

1  2

Label:

I  M  -

Ions:

a  +  2+  3+

b  +  2+  3+

c  +  2+  3+

x  +  2+  3+

y  +  2+  3+

z  +  2+  3+

hide H<sub>2</sub>O/NH<sub>3</sub>

zoom 112-122

GO

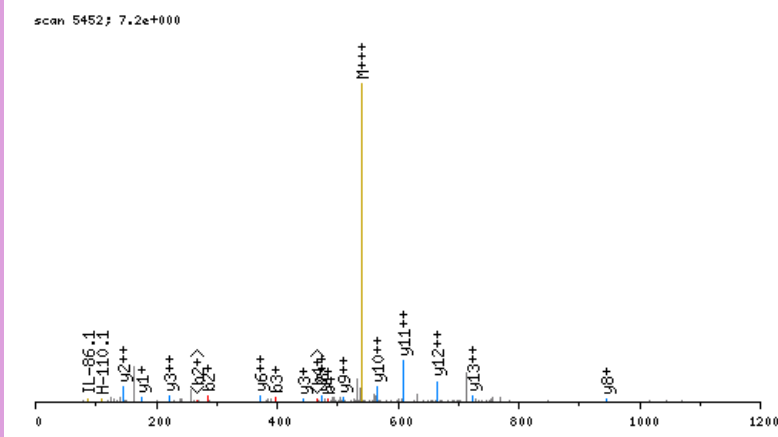

click image to zoom in; click top corners to zoom out [\[precursor±\]](#)

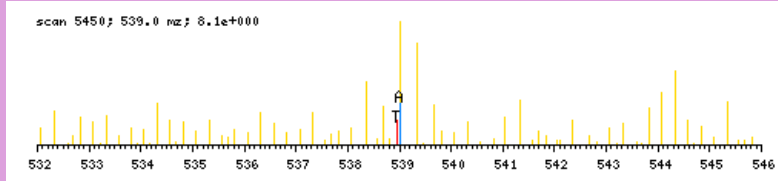

zoomed in precursor plot; T=theoretical m/z, A=acquired m/z

| b <sup>+</sup> | #  | AA # | y <sup>+</sup> | y <sup>2+</sup> |
|----------------|----|------|----------------|-----------------|
| 172.0610       | 1  | E 14 |                |                 |
| 285.1451       | 2  | L 13 | 1443.8172      | 722.4125        |
| 398.2291       | 3  | I 12 | 1330.7331      | 665.8705        |
| 485.2611       | 4  | S 11 | 1217.6490      | 609.3284        |
| 599.3041       | 5  | N 10 | 1130.6170      | 565.8124        |
| 670.3412       | 6  | A 9  | 1016.5741      | 508.7909        |
| 757.3732       | 7  | S 8  | 945.5370       | 473.2724        |
| 872.4002       | 8  | D 7  | 858.5049       | 429.7564        |
| 943.4373       | 9  | A 6  | 743.4780       | 372.2429        |
| 1056.5213      | 10 | L 5  | 672.4409       | 336.7243        |
| 1171.5483      | 11 | D 4  | 559.3568       | 280.1823        |
| 1327.6746      | 12 | K 3  | 444.3299       | 222.6688        |
| 1440.7586      | 13 | I 2  | 288.2036       | 144.6057        |
|                | 14 | R 1  | 175.1195       | 88.0637         |

N-term:+43.02 K(12):+156.13

ELSADYLR, MH+ 1008.5002, m/z 504.7537  
 H OS G29 P150811 220811-s1.05726.05726.2.dta

X-range:

-

MassTol: Y-zoom:

MassType:

AVG  MONO

Axis:

1  2

Label:

I  M  -

Ions:

a  +  2+  3+

b  +  2+  3+

c  +  2+  3+

x  +  2+  3+

y  +  2+  3+

z  +  2+  3+

hide H<sub>2</sub>O/NH<sub>3</sub>

zoom 112-122

GO

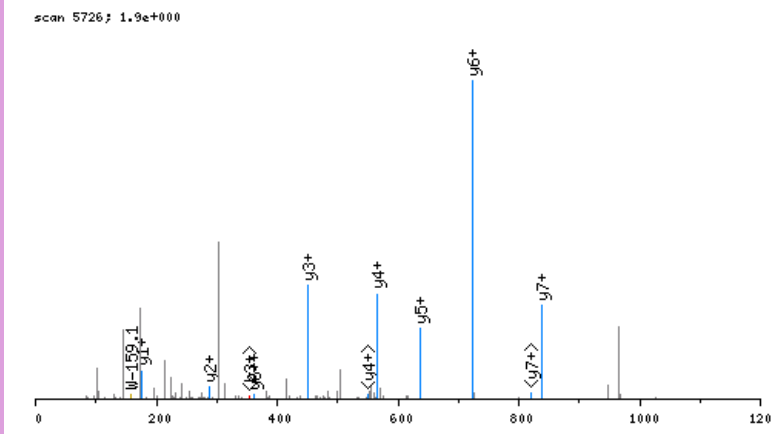

click image to zoom in; click top corners to zoom out [\[precursor±\]](#)

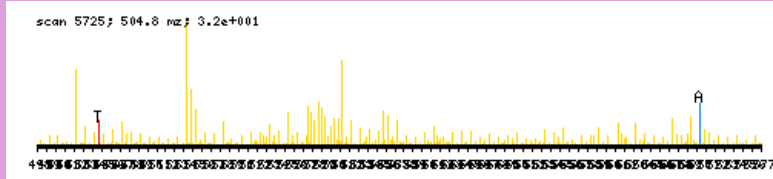

zoomed in precursor plot; T=theoretical m/z, A=acquired m/z

| b <sup>+</sup> | # | AA # | y <sup>+</sup> | y <sup>2+</sup> |
|----------------|---|------|----------------|-----------------|
| 172.0610       | 1 | E 8  |                |                 |
| 285.1451       | 2 | L 7  | 837.4470       | 419.2274        |
| 372.1771       | 3 | S 6  | 724.3630       | 362.6854        |
| 443.2142       | 4 | A 5  | 637.3310       | 319.1694        |
| 558.2411       | 5 | D 4  | 566.2938       | 283.6508        |
| 721.3045       | 6 | Y 3  | 451.2669       | 226.1374        |
| 834.3885       | 7 | L 2  | 288.2036       | 144.6057        |
|                | 8 | R 1  | 175.1195       | 88.0637         |

N-term:+43.02

ELSESVQR, MH+ 989.4904, m/z 495.2488  
 H OS G29 P150811 220811-s1.03963.03963.2.dta

X-range:

-

MassTol: Y-zoom:

MassType:

AVG  MONO

Axis:

1  2

Label:

I  M  -

Ions:

a  +  2+  3+

b  +  2+  3+

c  +  2+  3+

x  +  2+  3+

y  +  2+  3+

z  +  2+  3+

hide H<sub>2</sub>O/NH<sub>3</sub>

zoom 112-122

GO

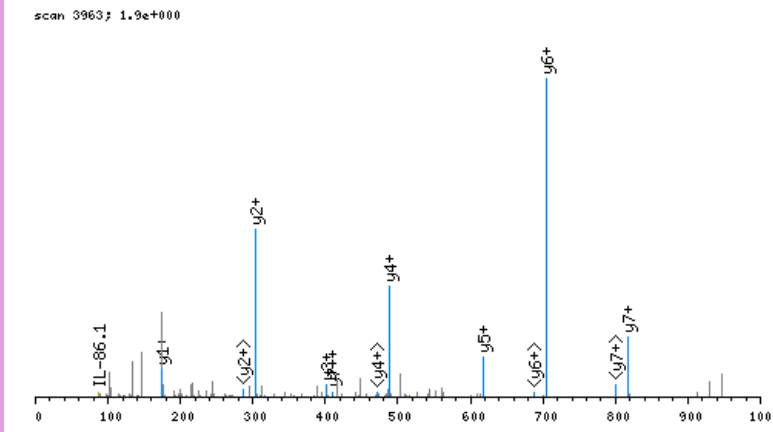

click image to zoom in; click top corners to zoom out [\[precursor±\]](#)

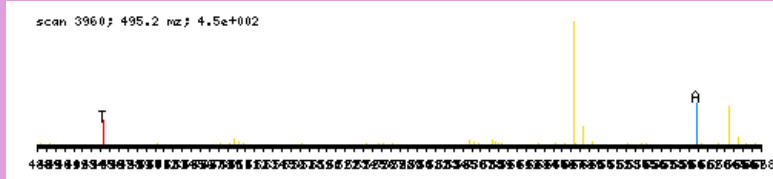

zoomed in precursor plot; T=theoretical m/z, A=acquired m/z

| b <sup>+</sup> | # | AA # | y <sup>+</sup> | y <sup>2+</sup> |
|----------------|---|------|----------------|-----------------|
| 172.0610       | 1 | E 8  |                |                 |
| 285.1451       | 2 | L 7  | 818.4372       | 409.7225        |
| 372.1771       | 3 | S 6  | 705.3531       | 353.1805        |
| 501.2197       | 4 | E 5  | 618.3211       | 309.6645        |
| 588.2517       | 5 | S 4  | 489.2785       | 245.1432        |
| 687.3201       | 6 | V 3  | 402.2465       | 201.6272        |
| 815.3787       | 7 | Q 2  | 303.1781       | 152.0930        |
|                | 8 | R 1  | 175.1195       | 88.0637         |

N-term:+43.02



ELSGEYVGCDEPQR, MH+ 1737.7390, m/z 579.9178  
 H OS G29 P150811 220811-s1.04766.04766.3.dta

X-range:

-

MassTol: Y-zoom:

MassType:

AVG  MONO

Axis:

1  2

Label:

I  M  -

Ions:

a  +  2+  3+

b  +  2+  3+

c  +  2+  3+

x  +  2+  3+

y  +  2+  3+

z  +  2+  3+

hide H<sub>2</sub>O/NH<sub>3</sub>

zoom 112-122

GO

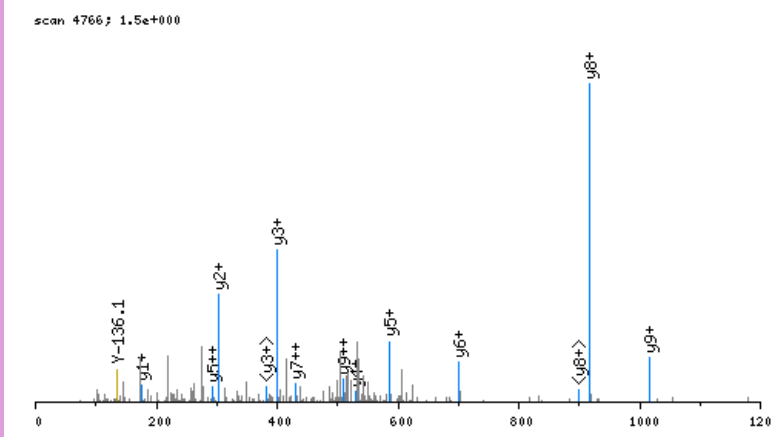

click image to zoom in; click top corners to zoom out [\[precursor±\]](#)

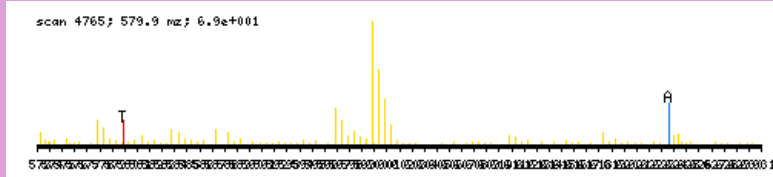

zoomed in precursor plot; T=theoretical m/z, A=acquired m/z

| b <sup>+</sup> | #  | AA # | y <sup>+</sup> | y <sup>2+</sup> |
|----------------|----|------|----------------|-----------------|
| 172.0610       | 1  | E 15 |                |                 |
| 285.1451       | 2  | L 14 | 1566.6858      | 783.8468        |
| 372.1771       | 3  | S 13 | 1453.6017      | 727.3048        |
| 429.1985       | 4  | G 12 | 1366.5697      | 683.7888        |
| 558.2411       | 5  | E 11 | 1309.5482      | 655.2780        |
| 721.3045       | 6  | Y 10 | 1180.5056      | 590.7567        |
| 820.3729       | 7  | V 9  | 1017.4423      | 509.2251        |
| 877.3943       | 8  | G 8  | 918.3739       | 459.6909        |
| 1037.4249      | 9  | C 7  | 861.3524       | 431.1801        |
| 1152.4519      | 10 | D 6  | 701.3218       | 351.1648        |
| 1209.4734      | 11 | G 5  | 586.2949       | 293.6514        |
| 1338.5159      | 12 | E 4  | 529.2734       | 265.1406        |
| 1435.5687      | 13 | P 3  | 400.2308       | 200.6193        |
| 1563.6273      | 14 | Q 2  | 303.1781       | 152.0930        |
|                | 15 | R 1  | 175.1195       | 88.0637         |

N-term:+43.02 C(9):+160.03

ELVEVLKR, MH+ 1061.6783, m/z 531.3428  
 H OS G25 P150811 220811-s1.08204.08204.2.dta

X-range:

-

MassTol: Y-zoom:

MassType:

AVG  MONO

Axis:

1  2

Label:

I  M  -

Ions:

a  +  2+  3+

b  +  2+  3+

c  +  2+  3+

x  +  2+  3+

y  +  2+  3+

z  +  2+  3+

hide H<sub>2</sub>O/NH<sub>3</sub>

zoom 112-122

GO

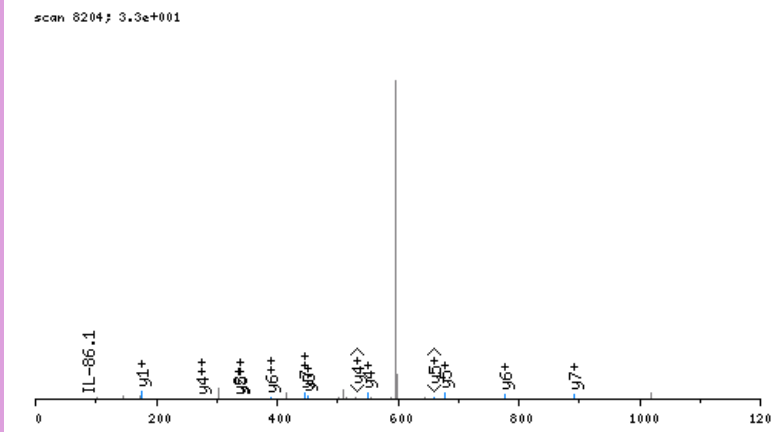

click image to zoom in; click top corners to zoom out [\[precursor±\]](#)

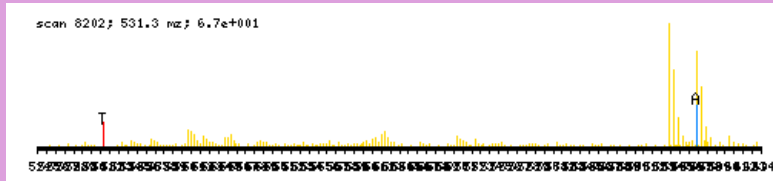

zoomed in precursor plot; T=theoretical m/z, A=acquired m/z

| b <sup>+</sup> | # | AA # | y <sup>+</sup> | y <sup>2+</sup> |
|----------------|---|------|----------------|-----------------|
| 172.0610       | 1 | E 8  |                |                 |
| 285.1451       | 2 | L 7  | 890.6251       | 445.8165        |
| 384.2135       | 3 | V 6  | 777.5411       | 389.2745        |
| 513.2561       | 4 | E 5  | 678.4727       | 339.7402        |
| 612.3245       | 5 | V 4  | 549.4301       | 275.2190        |
| 725.4085       | 6 | L 3  | 450.3617       | 225.6847        |
| 887.5666       | 7 | K 2  | 337.2776       | 169.1427        |
|                | 8 | R 1  | 175.1195       | 88.0637         |

N-term:+43.02 K(7):+162.16

X-range:

-

MassTol: Y-zoom:

MassType:

AVG  MONO

Axis:

1  2

Label:

I  M  -

Ions:

a  +  2+  3+

b  +  2+  3+

c  +  2+  3+

x  +  2+  3+

y  +  2+  3+

z  +  2+  3+

hide H<sub>2</sub>O/NH<sub>3</sub>

zoom 112-122

GO

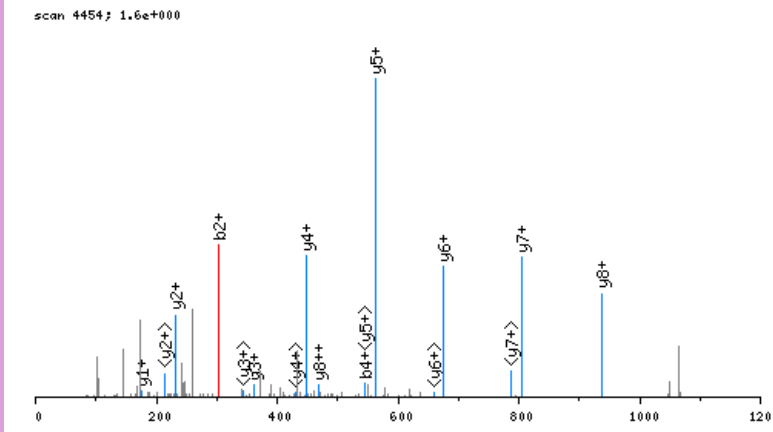

click image to zoom in; click top corners to zoom out [\[precursor±\]](#)

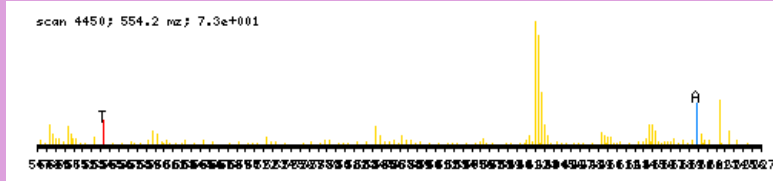

zoomed in precursor plot; T=theoretical m/z, A=acquired m/z

| b <sup>+</sup> | # | AA # | y <sup>+</sup> | y <sup>2+</sup> |
|----------------|---|------|----------------|-----------------|
| 172.0610       | 1 | E 9  |                |                 |
| 303.1015       | 2 | M 8  | 936.4097       | 468.7087        |
| 432.1441       | 3 | E 7  | 805.3692       | 403.1885        |
| 545.2281       | 4 | L 6  | 676.3266       | 338.6672        |
| 660.2551       | 5 | D 5  | 563.2425       | 282.1252        |
| 747.2871       | 6 | S 4  | 448.2156       | 224.6117        |
| 876.3297       | 7 | E 3  | 361.1836       | 181.0957        |
| 933.3512       | 8 | G 2  | 232.1410       | 116.5744        |
|                | 9 | R 1  | 175.1195       | 88.0637         |

N-term:+43.02

EMTSTSLKR, MH+ 1122.5829, m/z 561.7951  
 H OS G25 P150811 220811-s1.04428.04428.2.dta

X-range:

-

MassTol: Y-zoom:

MassType:

AVG  MONO

Axis:

1  2

Label:

I  M  -

Ions:

a  +  2+  3+

b  +  2+  3+

c  +  2+  3+

x  +  2+  3+

y  +  2+  3+

z  +  2+  3+

hide H<sub>2</sub>O/NH<sub>3</sub>

zoom 112-122

GO

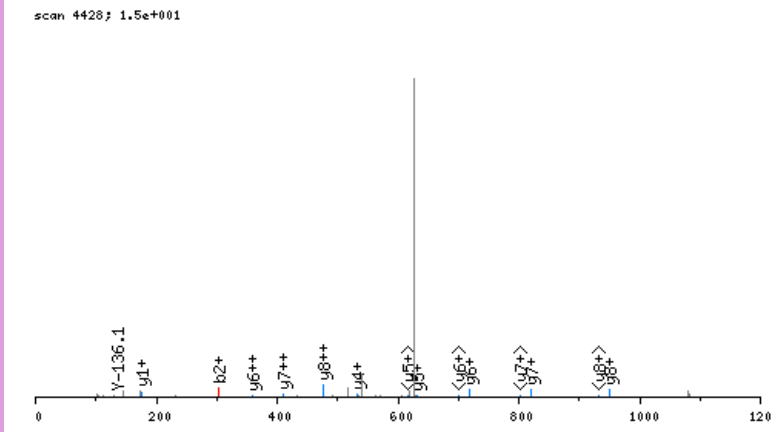

click image to zoom in; click top corners to zoom out [\[precursor±\]](#)

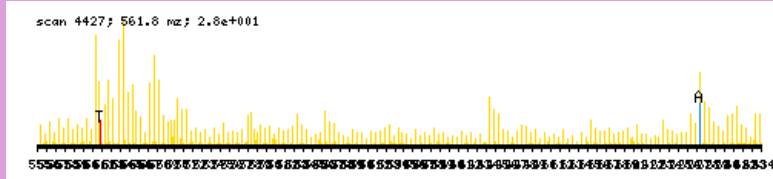

zoomed in precursor plot; T=theoretical m/z, A=acquired m/z

| b <sup>+</sup> | # | AA # | y <sup>+</sup> | y <sup>2+</sup>   |
|----------------|---|------|----------------|-------------------|
| 172.0610       | 1 | E    | 9              |                   |
| 303.1015       | 2 | M    | 8              | 951.5298 476.2688 |
| 404.1492       | 3 | T    | 7              | 820.4893 410.7486 |
| 491.1812       | 4 | S    | 6              | 719.4416 360.2247 |
| 592.2289       | 5 | T    | 5              | 632.4096 316.7087 |
| 679.2609       | 6 | S    | 4              | 531.3619 266.1849 |
| 792.3450       | 7 | L    | 3              | 444.3299 222.6688 |
| 948.4713       | 8 | K    | 2              | 331.2458 166.1268 |
|                | 9 | R    | 1              | 175.1195 88.0637  |

N-term:+43.02 K(8):+156.13

ENEYKR, MH+ 908.4478, m/z 454.7275  
 H OS G25 P150811 220811-s1.02458.02458.2.dta

scan 2458; 4.1e+001

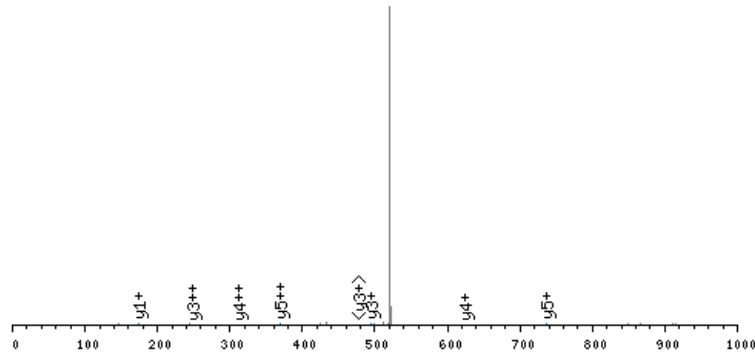

click image to zoom in; click top corners to zoom out [\[precursor±\]](#)

scan 2457; 454.7 m/z; 2.9e+001

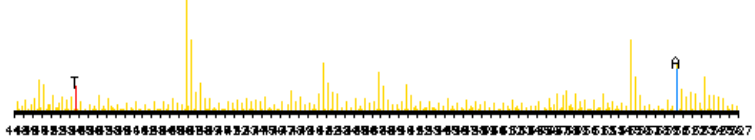

zoomed in precursor plot; T=theoretical m/z, A=acquired m/z

X-range:

-

MassTol: Y-zoom:

MassType:

AVG  MONO

Axis:

1  2

Label:

I  M  -

Ions:

a  +  2+  3+

b  +  2+  3+

c  +  2+  3+

x  +  2+  3+

y  +  2+  3+

z  +  2+  3+

hide H<sub>2</sub>O/NH<sub>3</sub>

zoom 112-122

GO

| b <sup>+</sup> | # | AA # | y <sup>+</sup> | y <sup>2+</sup> |
|----------------|---|------|----------------|-----------------|
| 172.0610       | 1 | E 6  |                |                 |
| 286.1039       | 2 | N 5  | 737.3946       | 369.2012        |
| 415.1465       | 3 | E 4  | 623.3517       | 312.1798        |
| 578.2098       | 4 | Y 3  | 494.3091       | 247.6585        |
| 734.3361       | 5 | K 2  | 331.2458       | 166.1268        |
|                | 6 | R 1  | 175.1195       | 88.0637         |

N-term:+43.02 K(5):+156.13

ENQLTKSVEER, MH+ 1402.7178, m/z 701.8626  
 H OS G25 P150811 220811-s1.05346.05346.2.dta

X-range:

-

MassTol: Y-zoom:

MassType:

AVG  MONO

Axis:

1  2

Label:

I  M  -

Ions:

a  +  2+  3+

b  +  2+  3+

c  +  2+  3+

x  +  2+  3+

y  +  2+  3+

z  +  2+  3+

hide H<sub>2</sub>O/NH<sub>3</sub>

zoom 112-122

GO

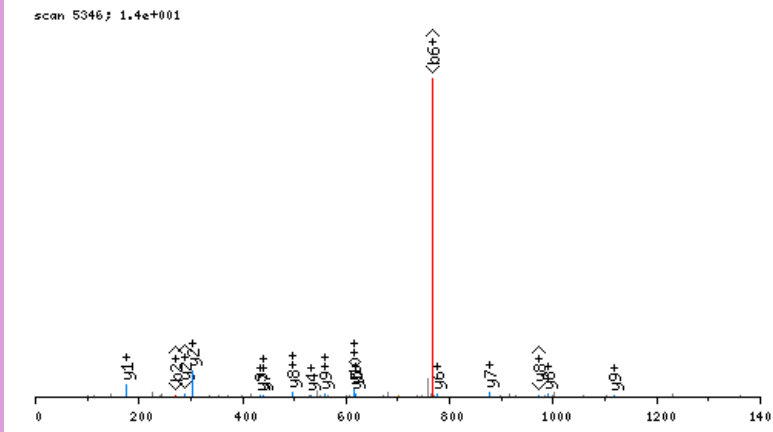

click image to zoom in; click top corners to zoom out [\[precursor±\]](#)

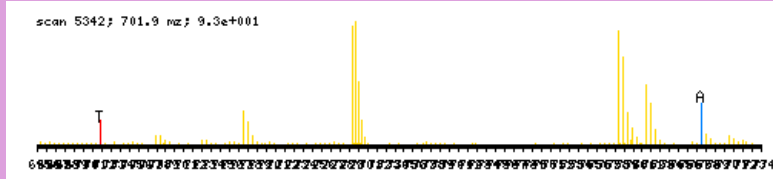

zoomed in precursor plot; T=theoretical m/z, A=acquired m/z

| b <sup>+</sup> | #  | AA # | y <sup>+</sup> | y <sup>2+</sup> |
|----------------|----|------|----------------|-----------------|
| 172.0610       | 1  | E 11 |                |                 |
| 286.1039       | 2  | N 10 | 1231.6647      | 616.3363        |
| 414.1625       | 3  | Q 9  | 1117.6217      | 559.3148        |
| 527.2466       | 4  | L 8  | 989.5632       | 495.2855        |
| 628.2942       | 5  | T 7  | 876.4791       | 438.7435        |
| 784.4205       | 6  | K 6  | 775.4314       | 388.2196        |
| 871.4526       | 7  | S 5  | 619.3051       | 310.1565        |
| 970.5210       | 8  | V 4  | 532.2731       | 266.6405        |
| 1099.5636      | 9  | E 3  | 433.2047       | 217.1063        |
| 1228.6062      | 10 | E 2  | 304.1621       | 152.5850        |
|                | 11 | R 1  | 175.1195       | 88.0637         |

N-term:+43.02 K(6):+156.13

X-range:

0 - 0

MassTol: Y-zoom:

0. 1.

MassType:

AVG  MONO

Axis:

1  2

Label:

I  M  -

Ions:

a  +  2+  3+

b  +  2+  3+

c  +  2+  3+

x  +  2+  3+

y  +  2+  3+

z  +  2+  3+

hide H<sub>2</sub>O/NH<sub>3</sub>

zoom 112-122

GO

scan 2881: 2.6e+000

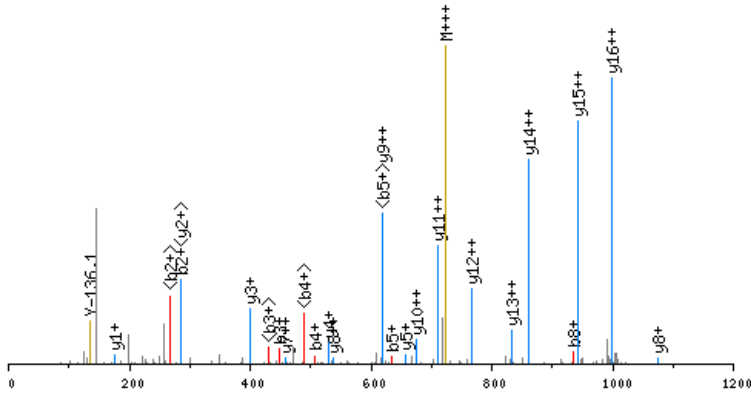

click image to zoom in; click top corners to zoom out [\[precursor±\]](#)

scan 2880: 723.6 nz: 1.7e+001

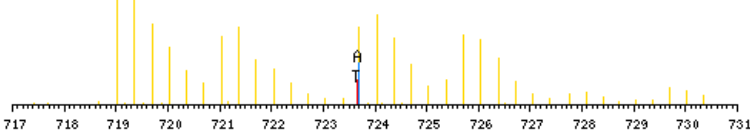

zoomed in precursor plot; T=theoretical m/z, A=acquired m/z

| b <sup>+</sup>  | #  | AA # | y <sup>+</sup>   | y <sup>2+</sup> |
|-----------------|----|------|------------------|-----------------|
| 172.0610        | 1  | E 17 |                  |                 |
| <b>286.1039</b> | 2  | N 16 | 1997.8696        | <b>999.4387</b> |
| <b>449.1672</b> | 3  | Y 15 | 1883.8267        | <b>942.4173</b> |
| <b>506.1887</b> | 4  | G 14 | 1720.7634        | <b>860.8856</b> |
| <b>635.2313</b> | 5  | E 13 | 1663.7419        | <b>832.3749</b> |
| 748.3154        | 6  | L 12 | 1534.6993        | <b>767.8536</b> |
| 819.3525        | 7  | A 11 | 1421.6153        | <b>711.3115</b> |
| <b>934.3794</b> | 8  | D 10 | 1350.5782        | <b>675.7930</b> |
| 1094.4100       | 9  | C 9  | 1235.5512        | <b>618.2795</b> |
| 1254.4406       | 10 | C 8  | <b>1075.5206</b> | <b>538.2642</b> |
| 1355.4883       | 11 | T 7  | 915.4900         | <b>458.2489</b> |
| 1511.6146       | 12 | K 6  | 814.4423         | 407.7251        |
| 1639.6732       | 13 | Q 5  | <b>658.3160</b>  | 329.6619        |
| 1768.7158       | 14 | E 4  | <b>530.2575</b>  | 265.6326        |
| 1865.7685       | 15 | P 3  | <b>401.2149</b>  | 201.1113        |
| 1994.8111       | 16 | E 2  | 304.1621         | 152.5850        |
|                 | 17 | R 1  | <b>175.1195</b>  | 88.0637         |

N-term: +43.02 C(9): +160.03  
C(10): +160.03 K(12): +156.13

EPAGGGGVSSSTDPR, MH+ 1472.6617, m/z 491.5588  
 H OS G29 P150811 220811-s1.02867.02867.3.dta

X-range:

-

MassTol: Y-zoom:

MassType:

AVG  MONO

Axis:

1  2

Label:

I  M  -

Ions:

a  +  2+  3+

b  +  2+  3+

c  +  2+  3+

x  +  2+  3+

y  +  2+  3+

z  +  2+  3+

hide H<sub>2</sub>O/NH<sub>3</sub>

zoom 112-122

GO

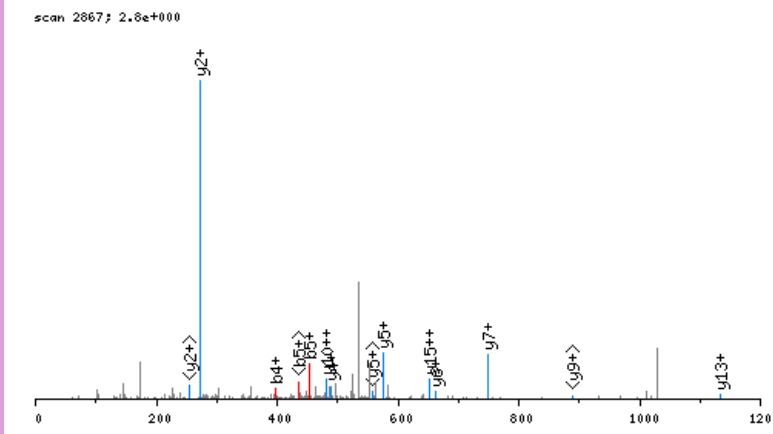

click image to zoom in; click top corners to zoom out [\[precursor±\]](#)

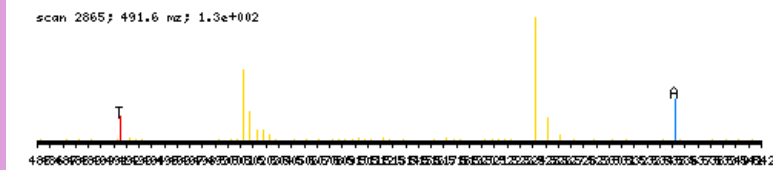

zoomed in precursor plot; T=theoretical m/z, A=acquired m/z

| b <sup>+</sup> | #  | AA # | y <sup>+</sup> | y <sup>2+</sup> |
|----------------|----|------|----------------|-----------------|
| 172.0610       | 1  | E 16 |                |                 |
| 269.1138       | 2  | P 15 | 1301.6086      | 651.3082        |
| 340.1509       | 3  | A 14 | 1204.5558      | 602.7818        |
| 397.1723       | 4  | G 13 | 1133.5187      | 567.2633        |
| 454.1938       | 5  | G 12 | 1076.4972      | 538.7525        |
| 511.2153       | 6  | G 11 | 1019.4758      | 510.2418        |
| 568.2367       | 7  | G 10 | 962.4543       | 481.7311        |
| 625.2582       | 8  | G 9  | 905.4328       | 453.2203        |
| 724.3266       | 9  | V 8  | 848.4114       | 424.7096        |
| 811.3586       | 10 | S 7  | 749.3430       | 375.1754        |
| 898.3907       | 11 | S 6  | 662.3109       | 331.6594        |
| 985.4227       | 12 | S 5  | 575.2789       | 288.1434        |
| 1086.4704      | 13 | T 4  | 488.2469       | 244.6274        |
| 1201.4973      | 14 | D 3  | 387.1992       | 194.1035        |
| 1298.5501      | 15 | P 2  | 272.1723       | 136.5900        |
|                | 16 | R 1  | 175.1195       | 88.0637         |

N-term:+43.02



EPAMEPETLEAR, MH+ 1414.6524, m/z 707.8299  
 H OS G29 P150811 220811-s1.04928.04928.2.dta

X-range:

-

MassTol: Y-zoom:

MassType:

AVG  MONO

Axis:

1  2

Label:

I  M  -

Ions:

a  +  2+  3+

b  +  2+  3+

c  +  2+  3+

x  +  2+  3+

y  +  2+  3+

z  +  2+  3+

hide H<sub>2</sub>O/NH<sub>3</sub>

zoom 112-122

GO

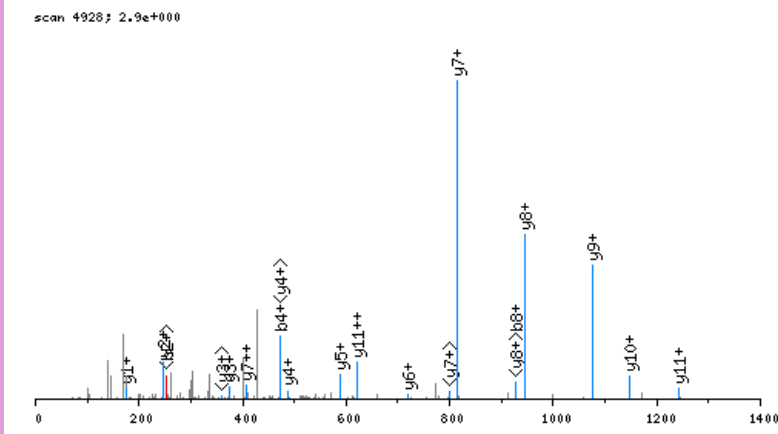

click image to zoom in; click top corners to zoom out [\[precursor±\]](#)

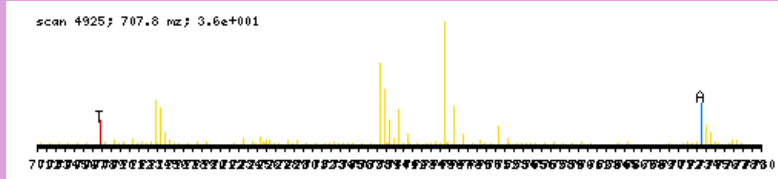

zoomed in precursor plot; T=theoretical m/z, A=acquired m/z

| b <sup>+</sup> | #  | AA # | y <sup>+</sup> | y <sup>2+</sup> |
|----------------|----|------|----------------|-----------------|
| 172.0610       | 1  | E 12 |                |                 |
| 269.1138       | 2  | P 11 | 1243.5993      | 622.3035        |
| 340.1509       | 3  | A 10 | 1146.5465      | 573.7772        |
| 471.1914       | 4  | M 9  | 1075.5094      | 538.2586        |
| 600.2339       | 5  | E 8  | 944.4689       | 472.7384        |
| 697.2867       | 6  | P 7  | 815.4263       | 408.2171        |
| 826.3293       | 7  | E 6  | 718.3735       | 359.6907        |
| 927.3770       | 8  | T 5  | 589.3310       | 295.1694        |
| 1040.4610      | 9  | L 4  | 488.2833       | 244.6455        |
| 1169.5036      | 10 | E 3  | 375.1992       | 188.1035        |
| 1240.5408      | 11 | A 2  | 246.1566       | 123.5822        |
|                | 12 | R 1  | 175.1195       | 88.0637         |

N-term:+43.02

EPCELQNELVSAEGR, MH+ 1772.8125, m/z 591.6090  
 H OS G29 P150811 220811-s1.06147.06147.3.dta

X-range:

-

MassTol: Y-zoom:

MassType:

AVG  MONO

Axis:

1  2

Label:

I  M  -

Ions:

a  +  2+  3+

b  +  2+  3+

c  +  2+  3+

x  +  2+  3+

y  +  2+  3+

z  +  2+  3+

hide H<sub>2</sub>O/NH<sub>3</sub>

zoom 112-122

GO

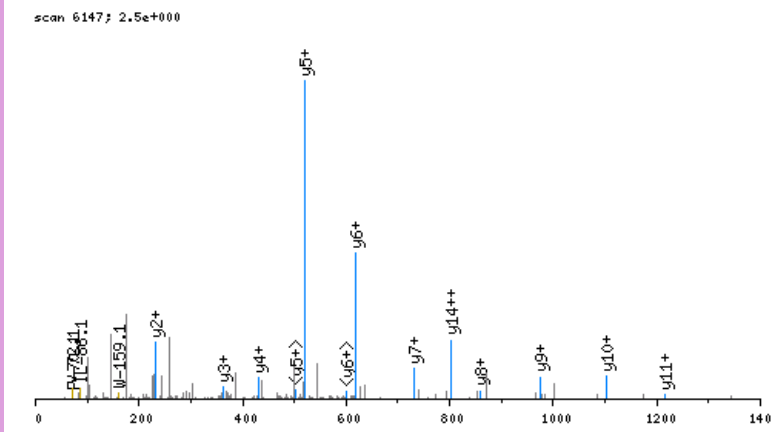

click image to zoom in; click top corners to zoom out [\[precursor±\]](#)

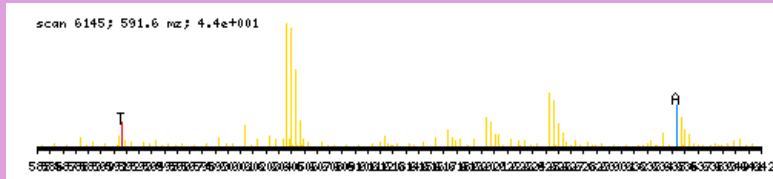

zoomed in precursor plot; T=theoretical m/z, A=acquired m/z

| b <sup>+</sup> | #  | AA # | y <sup>+</sup> | y <sup>2+</sup> |
|----------------|----|------|----------------|-----------------|
| 172.0610       | 1  | E 15 |                |                 |
| 269.1138       | 2  | P 14 | 1601.7593      | 801.3836        |
| 429.1444       | 3  | C 13 | 1504.7065      | 752.8572        |
| 558.1870       | 4  | E 12 | 1344.6759      | 672.8419        |
| 671.2710       | 5  | L 11 | 1215.6333      | 608.3206        |
| 799.3296       | 6  | Q 10 | 1102.5493      | 551.7786        |
| 913.3725       | 7  | N 9  | 974.4907       | 487.7493        |
| 1042.4151      | 8  | E 8  | 860.4478       | 430.7278        |
| 1155.4992      | 9  | L 7  | 731.4052       | 366.2065        |
| 1254.5676      | 10 | V 6  | 618.3211       | 309.6645        |
| 1341.5996      | 11 | S 5  | 519.2527       | 260.1303        |
| 1412.6367      | 12 | A 4  | 432.2207       | 216.6142        |
| 1541.6793      | 13 | E 3  | 361.1836       | 181.0957        |
| 1598.7008      | 14 | G 2  | 232.1410       | 116.5744        |
|                | 15 | R 1  | 175.1195       | 88.0637         |

N-term:+43.02 C(3):+160.03

EPGPAAPSSGAPR, MH+ 1235.6021, m/z 618.3047  
 H OS G29 P150811 220811-s1.02961.02961.2.dta

X-range:

-

MassTol: Y-zoom:

MassType:

AVG  MONO

Axis:

1  2

Label:

I  M  -

Ions:

a  +  2+  3+

b  +  2+  3+

c  +  2+  3+

x  +  2+  3+

y  +  2+  3+

z  +  2+  3+

hide H<sub>2</sub>O/NH<sub>3</sub>

zoom 112-122

GO

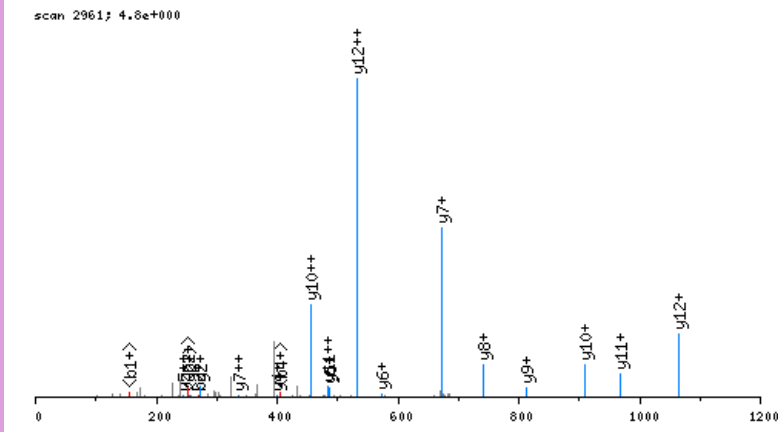

click image to zoom in; click top corners to zoom out [\[precursor±\]](#)

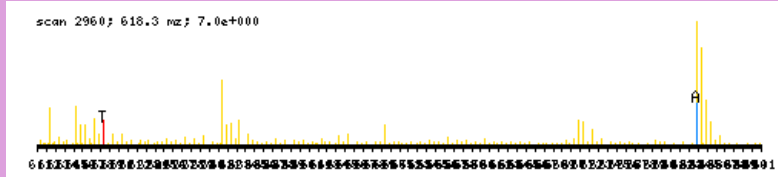

zoomed in precursor plot; T=theoretical m/z, A=acquired m/z

| b <sup>+</sup> | #  | AA # | y <sup>+</sup> | y <sup>2+</sup> |
|----------------|----|------|----------------|-----------------|
| 172.0610       | 1  | E 13 |                |                 |
| 269.1138       | 2  | P 12 | 1064.5489      | 532.7784        |
| 326.1352       | 3  | G 11 | 967.4961       | 484.2520        |
| 423.1880       | 4  | P 10 | 910.4747       | 455.7412        |
| 494.2251       | 5  | A 9  | 813.4219       | 407.2149        |
| 565.2622       | 6  | A 8  | 742.3848       | 371.6963        |
| 662.3150       | 7  | P 7  | 671.3477       | 336.1777        |
| 749.3470       | 8  | S 6  | 574.2949       | 287.6514        |
| 836.3790       | 9  | S 5  | 487.2629       | 244.1353        |
| 893.4005       | 10 | G 4  | 400.2308       | 200.6193        |
| 964.4376       | 11 | A 3  | 343.2094       | 172.1086        |
| 1061.4904      | 12 | P 2  | 272.1723       | 136.5900        |
|                | 13 | R 1  | 175.1195       | 88.0637         |

N-term:+43.02

EPGPDGPAAPGPAAIR, MH+ 1514.7603, m/z 505.5916  
 H OS G29 P150811 220811-s1.04321.04321.3.dta

X-range:

-

MassTol: Y-zoom:

MassType:

AVG  MONO

Axis:

1  2

Label:

I  M  -

Ions:

a  +  2+  3+

b  +  2+  3+

c  +  2+  3+

x  +  2+  3+

y  +  2+  3+

z  +  2+  3+

hide H<sub>2</sub>O/NH<sub>3</sub>

zoom 112-122

GO

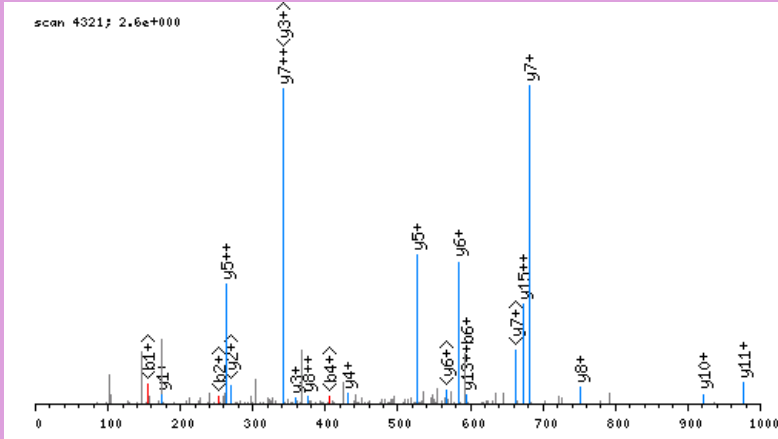

click image to zoom in; click top corners to zoom out [\[precursor±\]](#)

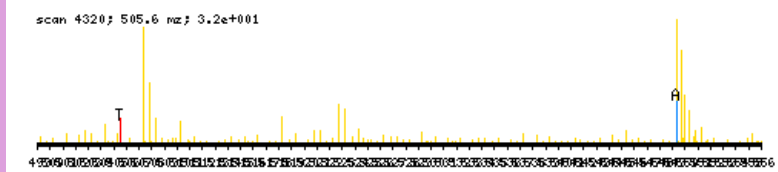

zoomed in precursor plot; T=theoretical m/z, A=acquired m/z

| b <sup>+</sup> | #  | AA # | y <sup>+</sup> | y <sup>2+</sup> |
|----------------|----|------|----------------|-----------------|
| 172.0610       | 1  | E 16 |                |                 |
| 269.1138       | 2  | P 15 | 1343.7072      | 672.3575        |
| 326.1352       | 3  | G 14 | 1246.6544      | 623.8311        |
| 423.1880       | 4  | P 13 | 1189.6329      | 595.3204        |
| 538.2149       | 5  | D 12 | 1092.5802      | 546.7940        |
| 595.2364       | 6  | G 11 | 977.5532       | 489.2805        |
| 692.2892       | 7  | P 10 | 920.5318       | 460.7698        |
| 763.3263       | 8  | A 9  | 823.4790       | 412.2434        |
| 834.3634       | 9  | A 8  | 752.4419       | 376.7249        |
| 931.4161       | 10 | P 7  | 681.4048       | 341.2063        |
| 988.4376       | 11 | G 6  | 584.3520       | 292.6799        |
| 1085.4904      | 12 | P 5  | 527.3306       | 264.1692        |
| 1156.5275      | 13 | A 4  | 430.2778       | 215.6428        |
| 1227.5646      | 14 | A 3  | 359.2407       | 180.1243        |
| 1340.6487      | 15 | I 2  | 288.2036       | 144.6057        |
|                | 16 | R 1  | 175.1195       | 88.0637         |

N-term:+43.02

EPKAPCPAAVPSEER, MH+ 1713.8694, m/z 571.9613  
 H OS G24 P150811 220811-s1.03224.03224.3.dta

X-range:

-

MassTol: Y-zoom:

MassType:

AVG  MONO

Axis:

1  2

Label:

I  M  -

Ions:

a  +  2+  3+

b  +  2+  3+

c  +  2+  3+

x  +  2+  3+

y  +  2+  3+

z  +  2+  3+

hide H<sub>2</sub>O/NH<sub>3</sub>

zoom 112-122

GO

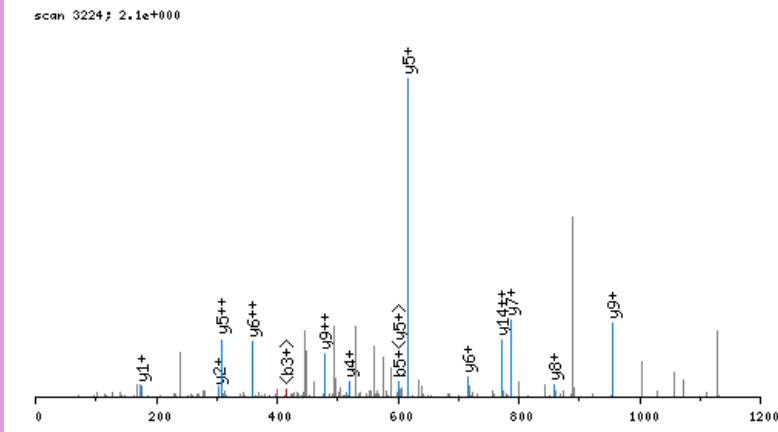

click image to zoom in; click top corners to zoom out [\[precursor±\]](#)

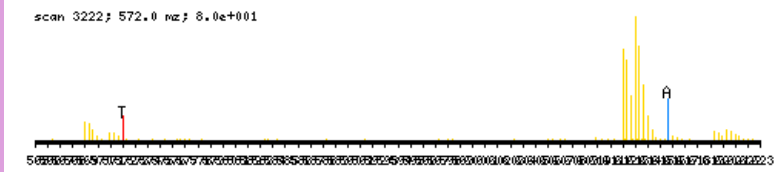

zoomed in precursor plot; T=theoretical m/z, A=acquired m/z

| b <sup>+</sup> | #  | AA | #  | y <sup>+</sup> | y <sup>2+</sup> |
|----------------|----|----|----|----------------|-----------------|
| 172.0610       | 1  | E  | 15 |                |                 |
| 269.1138       | 2  | P  | 14 | 1542.8162      | 771.9120        |
| 431.2719       | 3  | K  | 13 | 1445.7635      | 723.3856        |
| 502.3090       | 4  | A  | 12 | 1283.6054      | 642.3066        |
| 599.3617       | 5  | P  | 11 | 1212.5682      | 606.7880        |
| 759.3923       | 6  | C  | 10 | 1115.5155      | 558.2617        |
| 856.4451       | 7  | P  | 9  | 955.4849       | 478.2464        |
| 927.4822       | 8  | A  | 8  | 858.4321       | 429.7200        |
| 998.5193       | 9  | A  | 7  | 787.3950       | 394.2014        |
| 1097.5877      | 10 | V  | 6  | 716.3579       | 358.6829        |
| 1194.6405      | 11 | P  | 5  | 617.2895       | 309.1487        |
| 1281.6725      | 12 | S  | 4  | 520.2367       | 260.6223        |
| 1410.7151      | 13 | E  | 3  | 433.2047       | 217.1063        |
| 1539.7577      | 14 | E  | 2  | 304.1621       | 152.5850        |
|                | 15 | R  | 1  | 175.1195       | 88.0637         |

N-term:+43.02 K(3):+162.16  
 C(6):+160.03

EQAVHGESKR, MH+ 1216.6499, m/z 406.2215  
 H OS G27 P150811 220811-s1.02299.02299.3.dta

scan 2299; 6.3e+000

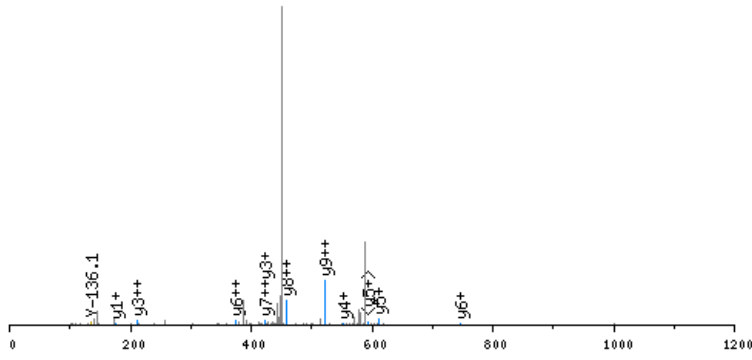

click image to zoom in; click top corners to zoom out [\[precursor±\]](#)

scan 2297; 406.2 m/z; 7.2e+001

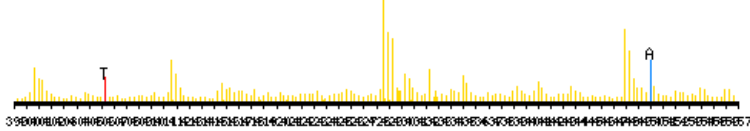

zoomed in precursor plot; T=theoretical m/z, A=acquired m/z

X-range:

-

MassTol: Y-zoom:

MassType:

AVG  MONO

Axis:

1  2

Label:

I  M  -

Ions:

a  +  2+  3+

b  +  2+  3+

c  +  2+  3+

x  +  2+  3+

y  +  2+  3+

z  +  2+  3+

hide H<sub>2</sub>O/NH<sub>3</sub>

zoom 112-122

GO

| b <sup>+</sup> | #  | AA # | y <sup>+</sup> | y <sup>2+</sup> |
|----------------|----|------|----------------|-----------------|
| 172.0610       | 1  | E 10 |                |                 |
| 300.1196       | 2  | Q 9  | 1045.5967      | 523.3023        |
| 371.1567       | 3  | A 8  | 917.5381       | 459.2730        |
| 470.2251       | 4  | V 7  | 846.5010       | 423.7544        |
| 607.2840       | 5  | H 6  | 747.4326       | 374.2202        |
| 664.3055       | 6  | G 5  | 610.3737       | 305.6908        |
| 793.3481       | 7  | E 4  | 553.3522       | 277.1800        |
| 880.3801       | 8  | S 3  | 424.3096       | 212.6587        |
| 1042.5382      | 9  | K 2  | 337.2776       | 169.1427        |
|                | 10 | R 1  | 175.1195       | 88.0637         |

N-term:+43.02 K(9):+162.16

EQTETLTR, MH+ 1019.5009, m/z 510.2541  
 H OS G29 P150811 220811-s1.03432.03432.2.dta

scan 3432; 8.1e-001

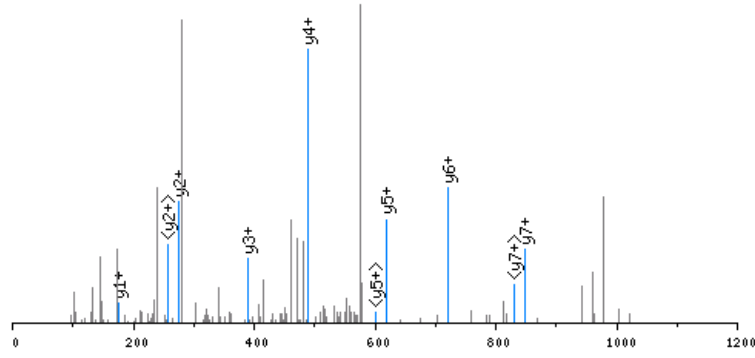

click image to zoom in; click top corners to zoom out [\[precursor±\]](#)

scan 3430; 510.3 m/z; 2.8e+001

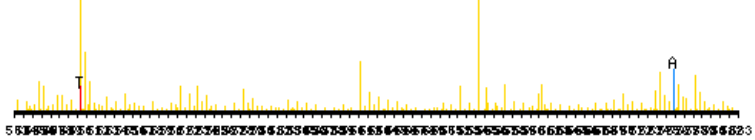

zoomed in precursor plot; T=theoretical m/z, A=acquired m/z

X-range:

-

MassTol: Y-zoom:

MassType:

AVG  MONO

Axis:

1  2

Label:

I  M  -

Ions:

a  +  2+  3+

b  +  2+  3+

c  +  2+  3+

x  +  2+  3+

y  +  2+  3+

z  +  2+  3+

hide H<sub>2</sub>O/NH<sub>3</sub>

zoom 112-122

GO

| b <sup>+</sup> | # | AA # | y <sup>+</sup> | y <sup>2+</sup> |
|----------------|---|------|----------------|-----------------|
| 172.0610       | 1 | E 8  |                |                 |
| 300.1196       | 2 | Q 7  | 848.4478       | 424.7278        |
| 401.1672       | 3 | T 6  | 720.3892       | 360.6985        |
| 530.2098       | 4 | E 5  | 619.3415       | 310.1747        |
| 631.2575       | 5 | T 4  | 490.2989       | 245.6534        |
| 744.3416       | 6 | L 3  | 389.2512       | 195.1295        |
| 845.3893       | 7 | T 2  | 276.1672       | 138.5875        |
|                | 8 | R 1  | 175.1195       | 88.0637         |

N-term:+43.02

ESDFYLR, MH+ 971.4474, m/z 486.2274  
 H OS G29 P150811 220811-s1.05508.05508.2.dta

X-range:

-

MassTol: Y-zoom:

MassType:

AVG  MONO

Axis:

1  2

Label:

I  M  -

Ions:

a  +  2+  3+

b  +  2+  3+

c  +  2+  3+

x  +  2+  3+

y  +  2+  3+

z  +  2+  3+

hide H<sub>2</sub>O/NH<sub>3</sub>

zoom 112-122

GO

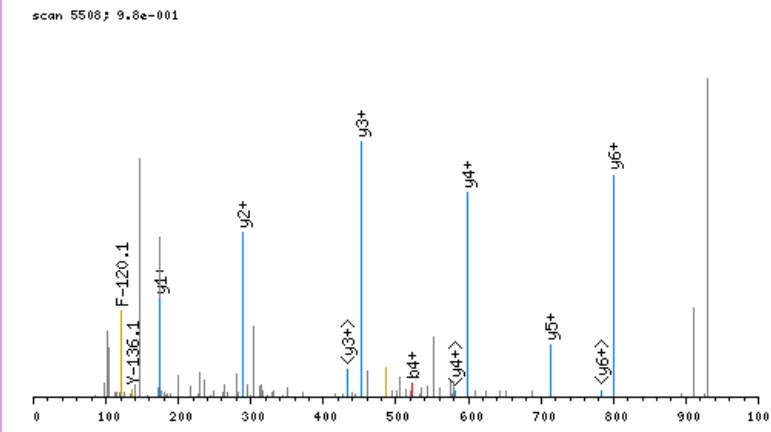

click image to zoom in; click top corners to zoom out [\[precursor±\]](#)

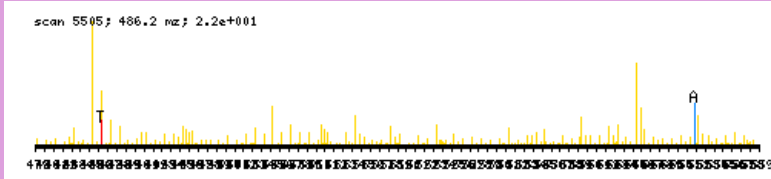

zoomed in precursor plot; T=theoretical m/z, A=acquired m/z

| b <sup>+</sup> | # | AA # | y <sup>+</sup> | y <sup>2+</sup> |
|----------------|---|------|----------------|-----------------|
| 172.0610       | 1 | E 7  |                |                 |
| 259.0930       | 2 | S 6  | 800.3943       | 400.7011        |
| 374.1200       | 3 | D 5  | 713.3623       | 357.1850        |
| 521.1884       | 4 | F 4  | 598.3353       | 299.6716        |
| 684.2517       | 5 | Y 3  | 451.2669       | 226.1374        |
| 797.3358       | 6 | L 2  | 288.2036       | 144.6057        |
|                | 7 | R 1  | 175.1195       | 88.0637         |

N-term:+43.02



ESEMSDPQLQEEER, MH+ 1716.7387, m/z 572.9177  
 H OS G29 P150811 220811-s1.04396.04396.3.dta

X-range:

-

MassTol: Y-zoom:

MassType:

AVG  MONO

Axis:

1  2

Label:

I  M  -

Ions:

a  +  2+  3+

b  +  2+  3+

c  +  2+  3+

x  +  2+  3+

y  +  2+  3+

z  +  2+  3+

hide H<sub>2</sub>O/NH<sub>3</sub>

zoom 112-122

GO

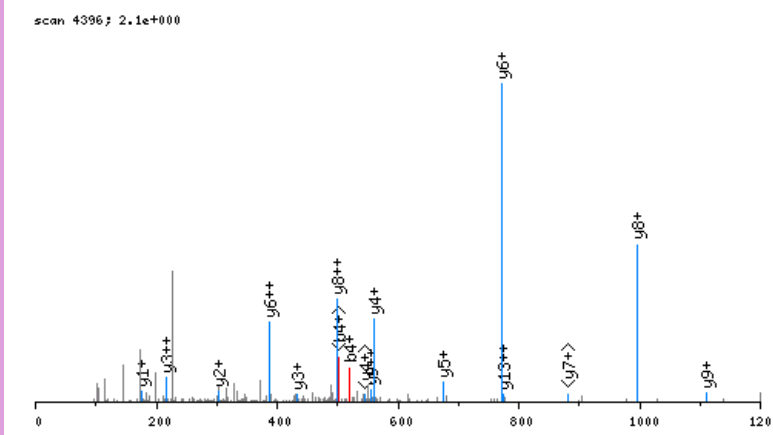

click image to zoom in; click top corners to zoom out [\[precursor±\]](#)

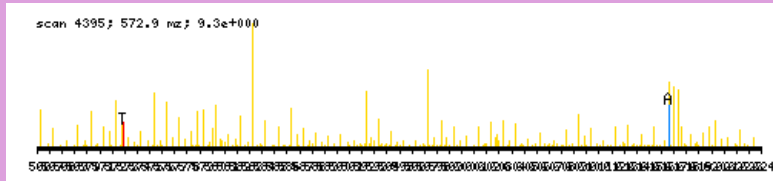

zoomed in precursor plot; T=theoretical m/z, A=acquired m/z

| b <sup>+</sup> | #  | AA # | y <sup>+</sup> | y <sup>2+</sup> |
|----------------|----|------|----------------|-----------------|
| 172.0610       | 1  | E 14 |                |                 |
| 259.0930       | 2  | S 13 | 1545.6855      | 773.3467        |
| 388.1356       | 3  | E 12 | 1458.6535      | 729.8307        |
| 519.1761       | 4  | M 11 | 1329.6109      | 665.3094        |
| 606.2081       | 5  | S 10 | 1198.5704      | 599.7891        |
| 721.2351       | 6  | D 9  | 1111.5384      | 556.2731        |
| 818.2878       | 7  | P 8  | 996.5114       | 498.7596        |
| 946.3464       | 8  | Q 7  | 899.4587       | 450.2332        |
| 1043.3992      | 9  | P 6  | 771.4001       | 386.2040        |
| 1156.4832      | 10 | L 5  | 674.3473       | 337.6776        |
| 1284.5418      | 11 | Q 4  | 561.2633       | 281.1355        |
| 1413.5844      | 12 | E 3  | 433.2047       | 217.1063        |
| 1542.6270      | 13 | E 2  | 304.1621       | 152.5850        |
|                | 14 | R 1  | 175.1195       | 88.0637         |

N-term:+43.02

ESGFTSKDTYLSEFNPR, MH+ 2055.9776, m/z 685.9974  
 H OS G26 P150811 220811-s1.05734.05734.3.dta

X-range:

-

MassTol: Y-zoom:

MassType:

AVG  MONO

Axis:

1  2

Label:

I  M  -

Ions:

a  +  2+  3+

b  +  2+  3+

c  +  2+  3+

x  +  2+  3+

y  +  2+  3+

z  +  2+  3+

hide H<sub>2</sub>O/NH<sub>3</sub>

zoom 112-122

GO

scan 5734; 2.0e+000

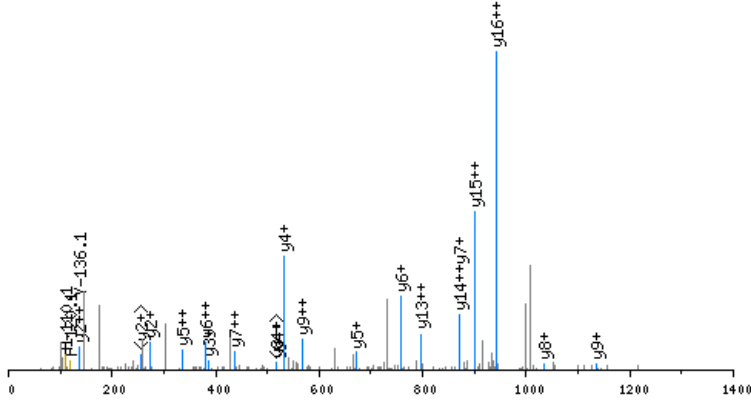

click image to zoom in; click top corners to zoom out [\[precursor±\]](#)

scan 5730; 686.0 m/z; 2.3e+001

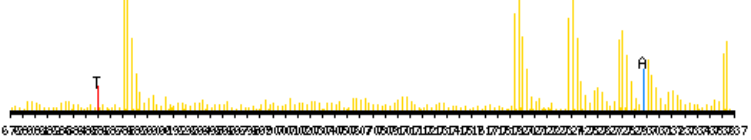

zoomed in precursor plot; T=theoretical m/z, A=acquired m/z

| b <sup>+</sup> | #  | AA | #  | y <sup>+</sup> | y <sup>2+</sup> |
|----------------|----|----|----|----------------|-----------------|
| 172.0610       | 1  | E  | 17 |                |                 |
| 259.0930       | 2  | S  | 16 | 1884.9245      | 942.9661        |
| 316.1145       | 3  | G  | 15 | 1797.8924      | 899.4501        |
| 463.1829       | 4  | F  | 14 | 1740.8710      | 870.9394        |
| 564.2306       | 5  | T  | 13 | 1593.8026      | 797.4052        |
| 651.2626       | 6  | S  | 12 | 1492.7549      | 746.8814        |
| 807.3889       | 7  | K  | 11 | 1405.7229      | 703.3653        |
| 922.4158       | 8  | D  | 10 | 1249.5966      | 625.3022        |
| 1023.4635      | 9  | T  | 9  | 1134.5696      | 567.7887        |
| 1186.5269      | 10 | Y  | 8  | 1033.5219      | 517.2649        |
| 1299.6109      | 11 | L  | 7  | 870.4586       | 435.7332        |
| 1386.6429      | 12 | S  | 6  | 757.3745       | 379.1912        |
| 1523.7019      | 13 | H  | 5  | 670.3425       | 335.6752        |
| 1670.7703      | 14 | F  | 4  | 533.2836       | 267.1457        |
| 1784.8132      | 15 | N  | 3  | 386.2152       | 193.6115        |
| 1881.8660      | 16 | P  | 2  | 272.1723       | 136.5900        |
|                | 17 | R  | 1  | 175.1195       | 88.0637         |

N-term:+43.02 K(7):+156.13

ESTFSSPAEAAALQR, MH+ 1535.7342, m/z 512.5829  
 H OS G29 P150811 220811-s1.05432.05432.3.dta

scan 5432; 7.8e-001

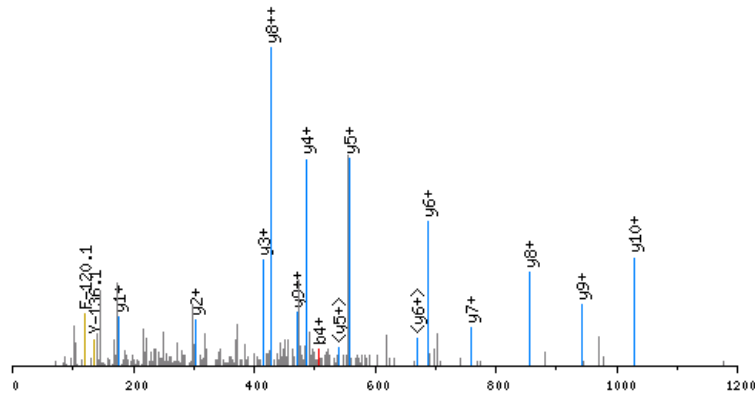

click image to zoom in; click top corners to zoom out [\[precursor±\]](#)

scan 5430; 512.6 m/z; 9.0e+000

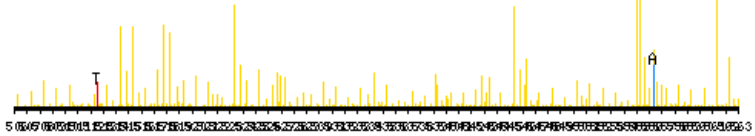

zoomed in precursor plot; T=theoretical m/z, A=acquired m/z

X-range:

-

MassTol: Y-zoom:

MassType:

AVG  MONO

Axis:

1  2

Label:

I  M  -

Ions:

a  +  2+  3+

b  +  2+  3+

c  +  2+  3+

x  +  2+  3+

y  +  2+  3+

z  +  2+  3+

hide H<sub>2</sub>O/NH<sub>3</sub>

zoom 112-122

GO

| b <sup>+</sup> | #  | AA # | y <sup>+</sup> | y <sup>2+</sup> |
|----------------|----|------|----------------|-----------------|
| 172.0610       | 1  | E 14 |                |                 |
| 259.0930       | 2  | S 13 | 1364.6810      | 682.8444        |
| 360.1407       | 3  | T 12 | 1277.6490      | 639.3284        |
| 507.2091       | 4  | F 11 | 1176.6013      | 588.8046        |
| 594.2411       | 5  | S 10 | 1029.5329      | 515.2704        |
| 681.2732       | 6  | S 9  | 942.5009       | 471.7543        |
| 778.3259       | 7  | P 8  | 855.4688       | 428.2383        |
| 849.3630       | 8  | A 7  | 758.4161       | 379.7120        |
| 978.4056       | 9  | E 6  | 687.3790       | 344.1934        |
| 1049.4428      | 10 | A 5  | 558.3364       | 279.6721        |
| 1120.4799      | 11 | A 4  | 487.2993       | 244.1535        |
| 1233.5639      | 12 | L 3  | 416.2621       | 208.6350        |
| 1361.6225      | 13 | Q 2  | 303.1781       | 152.0930        |
|                | 14 | R 1  | 175.1195       | 88.0637         |

N-term:+43.02

X-range:

-

MassTol: Y-zoom:

MassType:

AVG  MONO

Axis:

1  2

Label:

I  M  -

Ions:

a  +  2+  3+

b  +  2+  3+

c  +  2+  3+

x  +  2+  3+

y  +  2+  3+

z  +  2+  3+

hide H<sub>2</sub>O/NH<sub>3</sub>

zoom 112-122

GO

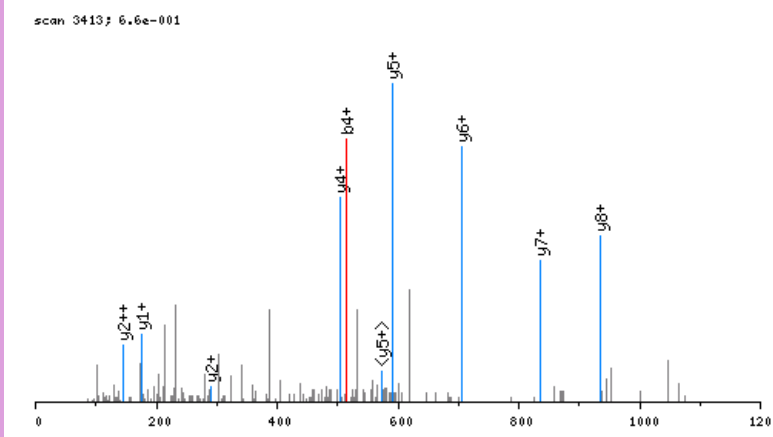

click image to zoom in; click top corners to zoom out [\[precursor±\]](#)

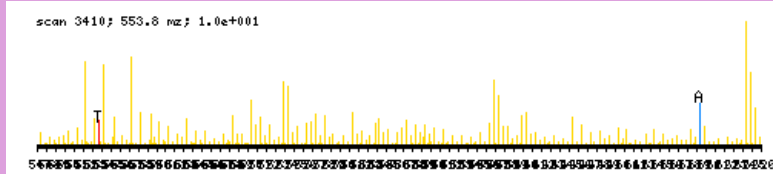

zoomed in precursor plot; T=theoretical m/z, A=acquired m/z

| b <sup>+</sup> | # | AA # | y <sup>+</sup> | y <sup>2+</sup> |
|----------------|---|------|----------------|-----------------|
| 172.0610       | 1 | E 9  |                |                 |
| 273.1087       | 2 | T 8  | 935.4434       | 468.2256        |
| 402.1513       | 3 | E 7  | 834.3957       | 417.7018        |
| 515.2353       | 4 | L 6  | 705.3531       | 353.1805        |
| 602.2674       | 5 | S 5  | 592.2691       | 296.6385        |
| 689.2994       | 6 | S 4  | 505.2370       | 253.1224        |
| 817.3580       | 7 | Q 3  | 418.2050       | 209.6064        |
| 932.3849       | 8 | D 2  | 290.1464       | 145.5771        |
|                | 9 | R 1  | 175.1195       | 88.0637         |

N-term:+43.02

ETGPAPLVAPPR, MH+ 1246.6796, m/z 623.8434  
 H OS G29 P150811 220811-s1.04827.04827.2.dta

X-range:

-

MassTol: Y-zoom:

MassType:

AVG  MONO

Axis:

1  2

Label:

I  M  -

Ions:

a  +  2+  3+

b  +  2+  3+

c  +  2+  3+

x  +  2+  3+

y  +  2+  3+

z  +  2+  3+

hide H<sub>2</sub>O/NH<sub>3</sub>

zoom 112-122

GO

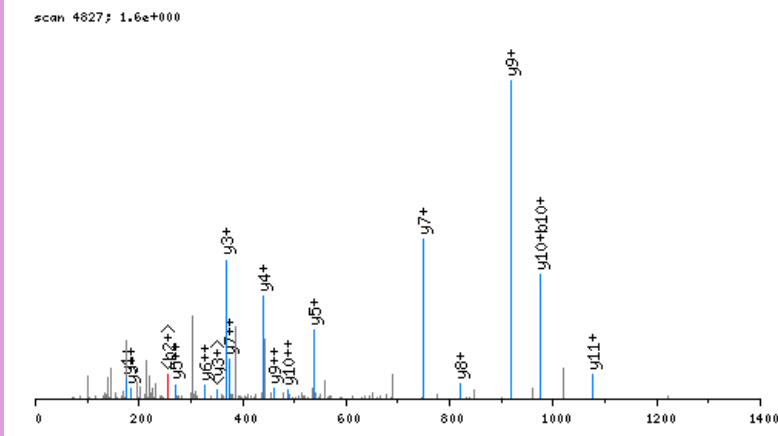

click image to zoom in; click top corners to zoom out [\[precursor±\]](#)

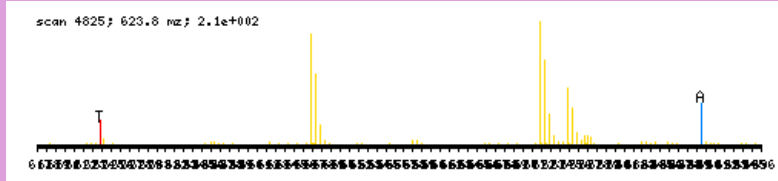

zoomed in precursor plot; T=theoretical m/z, A=acquired m/z

| b <sup>+</sup> | #  | AA # | y <sup>+</sup> | y <sup>2+</sup> |
|----------------|----|------|----------------|-----------------|
| 172.0610       | 1  | E 12 |                |                 |
| 273.1087       | 2  | T 11 | 1075.6264      | 538.3171        |
| 330.1301       | 3  | G 10 | 974.5787       | 487.7933        |
| 427.1829       | 4  | P 9  | 917.5573       | 459.2825        |
| 498.2200       | 5  | A 8  | 820.5045       | 410.7562        |
| 595.2728       | 6  | P 7  | 749.4674       | 375.2376        |
| 708.3568       | 7  | L 6  | 652.4146       | 326.7112        |
| 807.4253       | 8  | V 5  | 539.3306       | 270.1692        |
| 878.4624       | 9  | A 4  | 440.2621       | 220.6350        |
| 975.5151       | 10 | P 3  | 369.2250       | 185.1164        |
| 1072.5679      | 11 | P 2  | 272.1723       | 136.5900        |
|                | 12 | R 1  | 175.1195       | 88.0637         |

N-term:+43.02

ETGSDSDQLER, MH+ 1278.5450, m/z 639.7761  
 H OS G29 P150811 220811-s1.03059.03059.2.dta

X-range:

-

MassTol: Y-zoom:

MassType:

AVG  MONO

Axis:

1  2

Label:

I  M  -

Ions:

a  +  2+  3+

b  +  2+  3+

c  +  2+  3+

x  +  2+  3+

y  +  2+  3+

z  +  2+  3+

hide H<sub>2</sub>O/NH<sub>3</sub>

zoom 112-122

GO

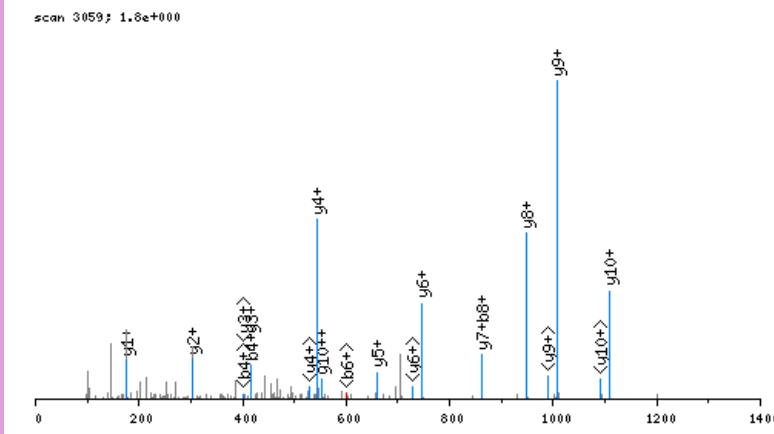

click image to zoom in; click top corners to zoom out [\[precursor±\]](#)

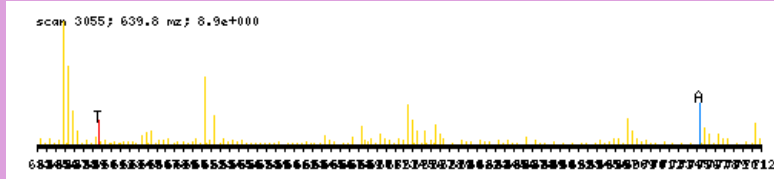

zoomed in precursor plot; T=theoretical m/z, A=acquired m/z

| b <sup>+</sup> | #  | AA | #  | y <sup>+</sup> | y <sup>2+</sup> |
|----------------|----|----|----|----------------|-----------------|
| 172.0610       | 1  | E  | 11 |                |                 |
| 273.1087       | 2  | T  | 10 | 1107.4918      | 554.2498        |
| 330.1301       | 3  | G  | 9  | 1006.4441      | 503.7260        |
| 417.1622       | 4  | S  | 8  | 949.4227       | 475.2153        |
| 532.1891       | 5  | D  | 7  | 862.3907       | 431.6992        |
| 619.2211       | 6  | S  | 6  | 747.3637       | 374.1858        |
| 734.2481       | 7  | D  | 5  | 660.3317       | 330.6698        |
| 862.3067       | 8  | Q  | 4  | 545.3047       | 273.1563        |
| 975.3907       | 9  | L  | 3  | 417.2462       | 209.1270        |
| 1104.4333      | 10 | E  | 2  | 304.1621       | 152.5850        |
|                | 11 | R  | 1  | 175.1195       | 88.0637         |

N-term:+43.02

ETILEQQQR, MH+ 1058.5482, m/z 529.7777  
 H OS G29 P150811 220811-s1.05246.05246.2.dta

X-range:

-

MassTol: Y-zoom:

MassType:

AVG  MONO

Axis:

1  2

Label:

I  M  -

Ions:

a  +  2+  3+

b  +  2+  3+

c  +  2+  3+

x  +  2+  3+

y  +  2+  3+

z  +  2+  3+

hide H<sub>2</sub>O/NH<sub>3</sub>

zoom 112-122

GO

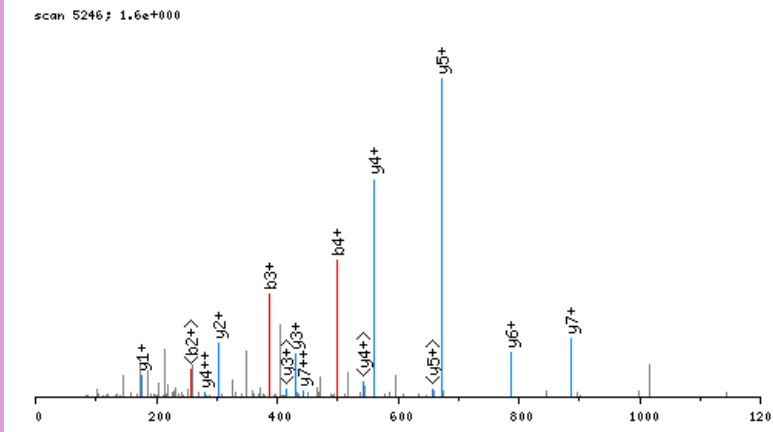

click image to zoom in; click top corners to zoom out [\[precursor±\]](#)

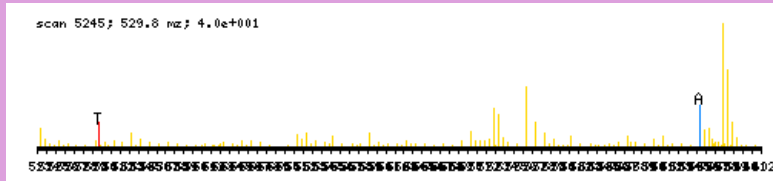

zoomed in precursor plot; T=theoretical m/z, A=acquired m/z

| b <sup>+</sup> | # | AA # | y <sup>+</sup> | y <sup>2+</sup> |
|----------------|---|------|----------------|-----------------|
| 172.0610       | 1 | E 8  |                |                 |
| 273.1087       | 2 | T 7  | 887.4951       | 444.2514        |
| 386.1927       | 3 | I 6  | 786.4474       | 393.7276        |
| 499.2768       | 4 | L 5  | 673.3633       | 337.1856        |
| 628.3194       | 5 | E 4  | 560.2792       | 280.6435        |
| 756.3780       | 6 | Q 3  | 431.2367       | 216.1222        |
| 884.4365       | 7 | Q 2  | 303.1781       | 152.0930        |
|                | 8 | R 1  | 175.1195       | 88.0637         |

N-term:+43.02

ETPKPR, MH+ 797.4522, m/z 399.2297  
 H OS G25 P150811 220811-s1.02266.02266.2.dta

scan 2266; 1.5e+001

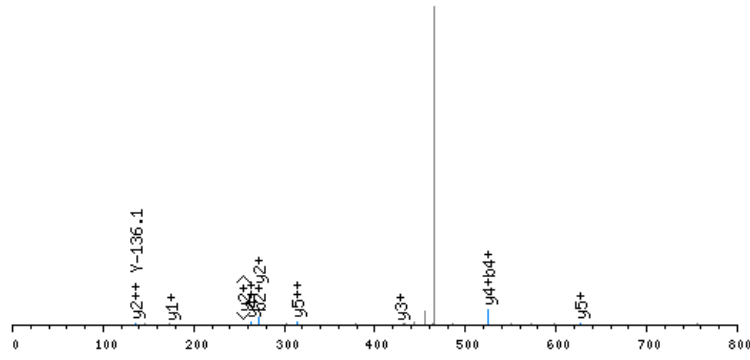

click image to zoom in; click top corners to zoom out [\[precursor±\]](#)

scan 2262; 399.2 m/z; 6.2e+000

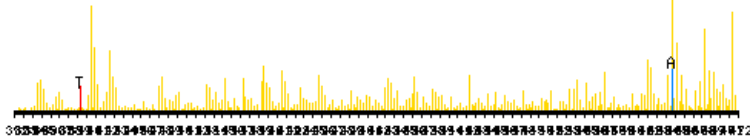

zoomed in precursor plot; T=theoretical m/z, A=acquired m/z

X-range:

-

MassTol: Y-zoom:

MassType:

AVG  MONO

Axis:

1  2

Label:

I  M  -

Ions:

a  +  2+  3+

b  +  2+  3+

c  +  2+  3+

x  +  2+  3+

y  +  2+  3+

z  +  2+  3+

hide H<sub>2</sub>O/NH<sub>3</sub>

zoom 112-122

GO

| b <sup>+</sup> | # | AA # | y <sup>+</sup> | y <sup>2+</sup>   |
|----------------|---|------|----------------|-------------------|
| 172.0610       | 1 | E    | 6              |                   |
| 273.1087       | 2 | T    | 5              | 626.3990 313.7034 |
| 370.1614       | 3 | P    | 4              | 525.3513 263.1796 |
| 526.2877       | 4 | K    | 3              | 428.2986 214.6532 |
| 623.3405       | 5 | P    | 2              | 272.1723 136.5900 |
|                | 6 | R    | 1              | 175.1195 88.0637  |

N-term:+43.02 K(4):+156.13



ETPLDVLSR, MH+ 1071.5686, m/z 536.2880  
 H OS G29 P150811 220811-s1.06329.06329.2.dta

X-range:

-

MassTol: Y-zoom:

MassType:

AVG  MONO

Axis:

1  2

Label:

I  M  -

Ions:

a  +  2+  3+

b  +  2+  3+

c  +  2+  3+

x  +  2+  3+

y  +  2+  3+

z  +  2+  3+

hide H<sub>2</sub>O/NH<sub>3</sub>

zoom 112-122

GO

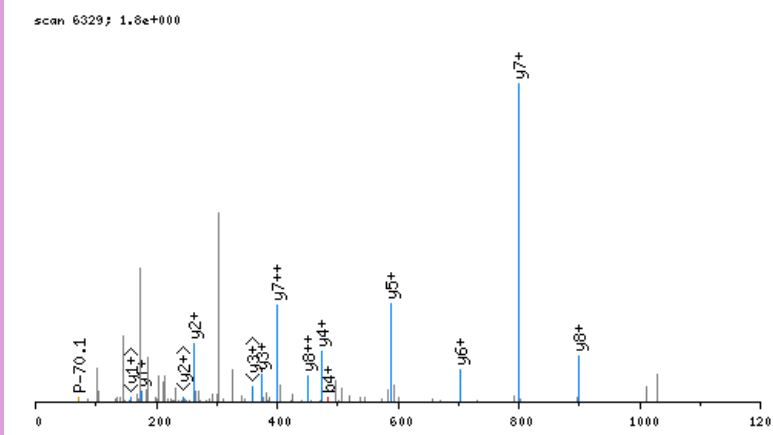

click image to zoom in; click top corners to zoom out [\[precursor±\]](#)

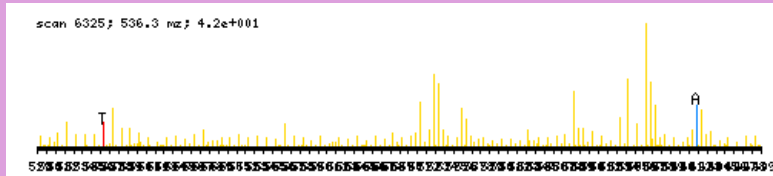

zoomed in precursor plot; T=theoretical m/z, A=acquired m/z

| b <sup>+</sup> | # | AA # | y <sup>+</sup> | y <sup>2+</sup> |
|----------------|---|------|----------------|-----------------|
| 172.0610       | 1 | E 9  |                |                 |
| 273.1087       | 2 | T 8  | 900.5155       | 450.7616        |
| 370.1614       | 3 | P 7  | 799.4678       | 400.2378        |
| 483.2455       | 4 | L 6  | 702.4150       | 351.7114        |
| 598.2724       | 5 | D 5  | 589.3310       | 295.1694        |
| 697.3409       | 6 | V 4  | 474.3040       | 237.6559        |
| 810.4249       | 7 | L 3  | 375.2356       | 188.1217        |
| 897.4569       | 8 | S 2  | 262.1515       | 131.5797        |
|                | 9 | R 1  | 175.1195       | 88.0637         |

N-term:+43.02

EVKPPGRRPQPDSSGR, MH+ 1686.8928, m/z 562.9691  
 H OS G26 P150811 220811-s1.02781.02781.3.dta

scan 2781; 4.8e+001

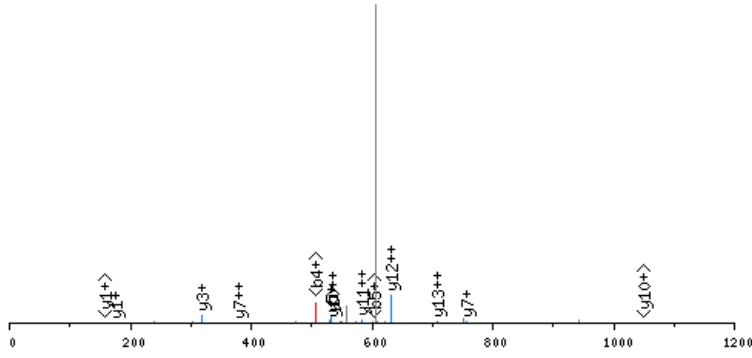

click image to zoom in; click top corners to zoom out [\[precursor±\]](#)

scan 2780; 563.0 m/z; 2.5e+001

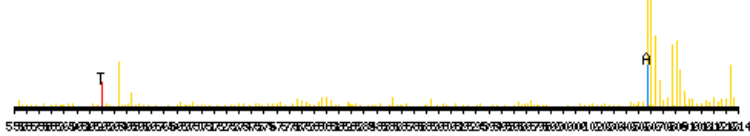

zoomed in precursor plot; T=theoretical m/z, A=acquired m/z

X-range:

-

MassTol: Y-zoom:

MassType:

AVG  MONO

Axis:

1  2

Label:

I  M  -

Ions:

a  +  2+  3+

b  +  2+  3+

c  +  2+  3+

x  +  2+  3+

y  +  2+  3+

z  +  2+  3+

hide H<sub>2</sub>O/NH<sub>3</sub>

zoom 112-122

GO

| b <sup>+</sup> | #  | AA # | y <sup>+</sup> | y <sup>2+</sup> |
|----------------|----|------|----------------|-----------------|
| 172.0610       | 1  | E 15 |                |                 |
| 271.1294       | 2  | V 14 | 1515.8396      | 758.4237        |
| 427.2557       | 3  | K 13 | 1416.7712      | 708.8895        |
| 524.3085       | 4  | P 12 | 1260.6449      | 630.8264        |
| 621.3612       | 5  | P 11 | 1163.5921      | 582.3000        |
| 718.4140       | 6  | P 10 | 1066.5394      | 533.7736        |
| 775.4355       | 7  | G 9  | 969.4866       | 485.2472        |
| 931.5366       | 8  | R 8  | 912.4652       | 456.7365        |
| 1028.5893      | 9  | P 7  | 756.3640       | 378.6859        |
| 1156.6479      | 10 | Q 6  | 659.3113       | 330.1596        |
| 1253.7007      | 11 | P 5  | 531.2527       | 266.1303        |
| 1368.7276      | 12 | D 4  | 434.1999       | 217.6039        |
| 1455.7597      | 13 | S 3  | 319.1730       | 160.0904        |
| 1512.7811      | 14 | G 2  | 232.1410       | 116.5744        |
|                | 15 | R 1  | 175.1195       | 88.0637         |

N-term:+43.02 K(3):+156.13

EVLATDTASQQER, MH+ 1489.7135, m/z 497.2427  
 H OS G29 P150811 220811-s1.04856.04856.3.dta

X-range:

-

MassTol: Y-zoom:

MassType:

AVG  MONO

Axis:

1  2

Label:

I  M  -

Ions:

a  +  2+  3+

b  +  2+  3+

c  +  2+  3+

x  +  2+  3+

y  +  2+  3+

z  +  2+  3+

hide H<sub>2</sub>O/NH<sub>3</sub>

zoom 112-122

GO

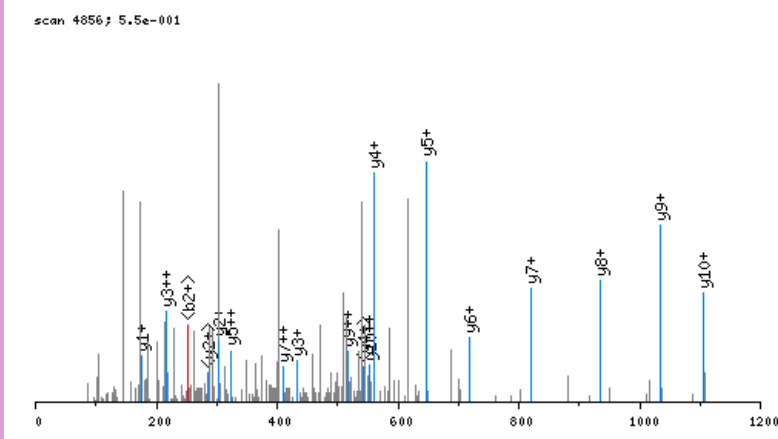

click image to zoom in; click top corners to zoom out [\[precursor±\]](#)

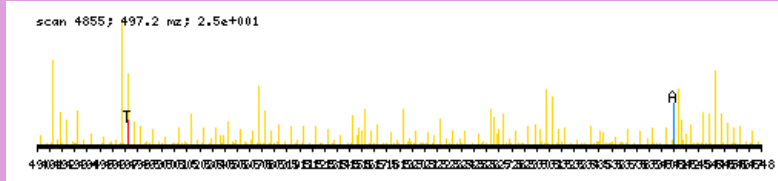

zoomed in precursor plot; T=theoretical m/z, A=acquired m/z

| b <sup>+</sup> | #  | AA # | y <sup>+</sup> | y <sup>2+</sup> |
|----------------|----|------|----------------|-----------------|
| 172.0610       | 1  | E 13 |                |                 |
| 271.1294       | 2  | V 12 | 1318.6603      | 659.8341        |
| 384.2135       | 3  | L 11 | 1219.5919      | 610.2998        |
| 455.2506       | 4  | A 10 | 1106.5078      | 553.7578        |
| 556.2983       | 5  | T 9  | 1035.4707      | 518.2393        |
| 671.3252       | 6  | D 8  | 934.4230       | 467.7154        |
| 772.3729       | 7  | T 7  | 819.3961       | 410.2019        |
| 843.4100       | 8  | A 6  | 718.3484       | 359.6781        |
| 930.4420       | 9  | S 5  | 647.3113       | 324.1596        |
| 1058.5006      | 10 | Q 4  | 560.2792       | 280.6435        |
| 1186.5592      | 11 | Q 3  | 432.2207       | 216.6142        |
| 1315.6018      | 12 | E 2  | 304.1621       | 152.5850        |
|                | 13 | R 1  | 175.1195       | 88.0637         |

N-term:+43.02

EVQCGGAGFIPESRR, MH+ 1635.7437, m/z 545.9194  
 H OS G29 P150811 220811-s1.05151.05151.3.dta

X-range:

-

MassTol: Y-zoom:

MassType:

AVG  MONO

Axis:

1  2

Label:

I  M  -

Ions:

a  +  2+  3+

b  +  2+  3+

c  +  2+  3+

x  +  2+  3+

y  +  2+  3+

z  +  2+  3+

hide H<sub>2</sub>O/NH<sub>3</sub>

zoom 112-122

GO

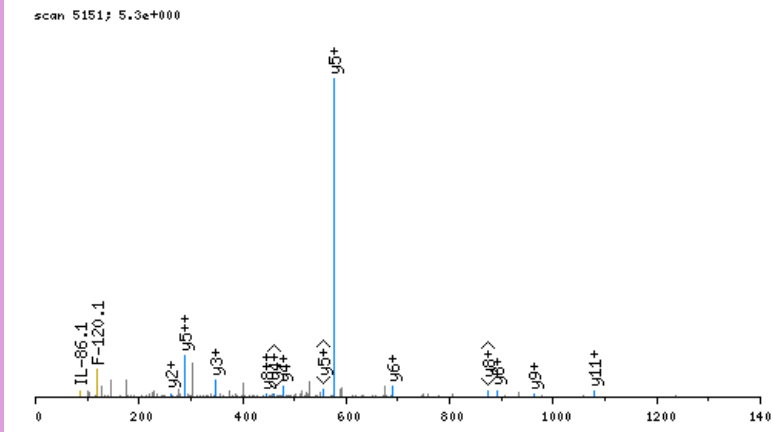

click image to zoom in; click top corners to zoom out [\[precursor±\]](#)

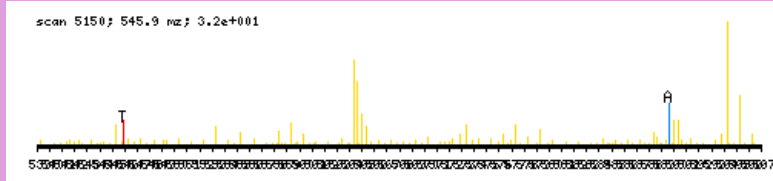

zoomed in precursor plot; T=theoretical m/z, A=acquired m/z

| b <sup>+</sup> | #  | AA # | y <sup>+</sup> | y <sup>2+</sup> |
|----------------|----|------|----------------|-----------------|
| 172.0610       | 1  | E 15 |                |                 |
| 271.1294       | 2  | V 14 | 1464.6905      | 732.8492        |
| 399.1880       | 3  | Q 13 | 1365.6221      | 683.3150        |
| 559.2186       | 4  | C 12 | 1237.5635      | 619.2857        |
| 616.2400       | 5  | G 11 | 1077.5329      | 539.2704        |
| 673.2615       | 6  | G 10 | 1020.5114      | 510.7596        |
| 744.2986       | 7  | A 9  | 963.4900       | 482.2489        |
| 801.3201       | 8  | G 8  | 892.4529       | 446.7303        |
| 948.3885       | 9  | F 7  | 835.4314       | 418.2196        |
| 1061.4726      | 10 | I 6  | 688.3630       | 344.6854        |
| 1158.5253      | 11 | P 5  | 575.2789       | 288.1434        |
| 1287.5679      | 12 | E 4  | 478.2262       | 239.6170        |
| 1374.6000      | 13 | S 3  | 349.1836       | 175.0957        |
| 1461.6320      | 14 | S 2  | 262.1515       | 131.5797        |
|                | 15 | R 1  | 175.1195       | 88.0637         |

N-term:+43.02 C(4):+160.03

EVSQAASGTDGVR, MH+ 1318.6239, m/z 659.8156  
 H OS G29 P150811 220811-s1.03558.03558.2.dta

X-range:

-

MassTol: Y-zoom:

MassType:

AVG  MONO

Axis:

1  2

Label:

I  M  -

Ions:

a  +  2+  3+

b  +  2+  3+

c  +  2+  3+

x  +  2+  3+

y  +  2+  3+

z  +  2+  3+

hide H<sub>2</sub>O/NH<sub>3</sub>

zoom 112-122

GO

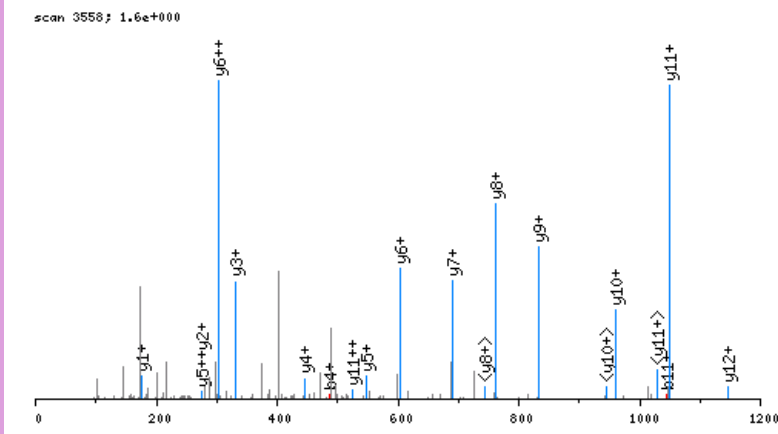

click image to zoom in; click top corners to zoom out [\[precursor±\]](#)

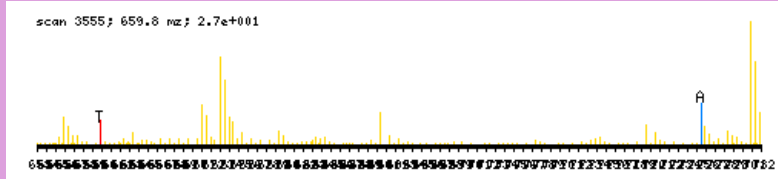

zoomed in precursor plot; T=theoretical m/z, A=acquired m/z

| b <sup>+</sup> | #  | AA # | y <sup>+</sup> | y <sup>2+</sup> |
|----------------|----|------|----------------|-----------------|
| 172.0610       | 1  | E 13 |                |                 |
| 271.1294       | 2  | V 12 | 1147.5707      | 574.2893        |
| 358.1614       | 3  | S 11 | 1048.5023      | 524.7551        |
| 486.2200       | 4  | Q 10 | 961.4703       | 481.2391        |
| 557.2571       | 5  | A 9  | 833.4117       | 417.2098        |
| 628.2942       | 6  | A 8  | 762.3746       | 381.6912        |
| 715.3263       | 7  | S 7  | 691.3375       | 346.1727        |
| 772.3477       | 8  | G 6  | 604.3055       | 302.6566        |
| 873.3954       | 9  | T 5  | 547.2840       | 274.1459        |
| 988.4224       | 10 | D 4  | 446.2363       | 223.6221        |
| 1045.4438      | 11 | G 3  | 331.2094       | 166.1086        |
| 1144.5122      | 12 | V 2  | 274.1879       | 137.5979        |
|                | 13 | R 1  | 175.1195       | 88.0637         |

N-term:+43.02

FAKKGSAVPSDGQAR, MH+ 1673.8976, m/z 558.6374  
 H OS G26 P150811 220811-s1.02979.02979.3.dta

X-range:

-

MassTol: Y-zoom:

MassType:

AVG  MONO

Axis:

1  2

Label:

I  M  -

Ions:

a  +  2+  3+

b  +  2+  3+

c  +  2+  3+

x  +  2+  3+

y  +  2+  3+

z  +  2+  3+

hide H<sub>2</sub>O/NH<sub>3</sub>

zoom 112-122

GO

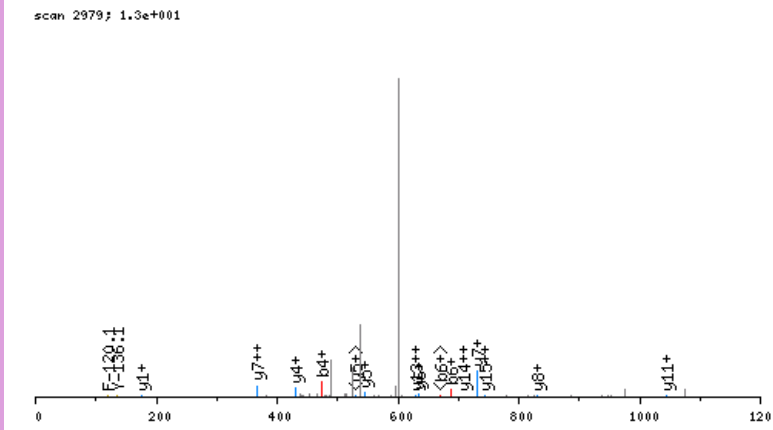

click image to zoom in; click top corners to zoom out [\[precursor±\]](#)

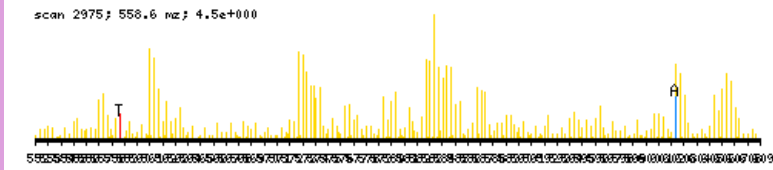

zoomed in precursor plot; T=theoretical m/z, A=acquired m/z

| b <sup>+</sup> | #  | AA | #  | y <sup>+</sup> | y <sup>2+</sup> |
|----------------|----|----|----|----------------|-----------------|
| 190.0868       | 1  | F  | 16 |                |                 |
| 261.1239       | 2  | A  | 15 | 1484.8186      | 742.9132        |
| 417.2502       | 3  | K  | 14 | 1413.7815      | 707.3946        |
| 474.2717       | 4  | G  | 13 | 1257.6552      | 629.3315        |
| 630.3980       | 5  | K  | 12 | 1200.6337      | 600.8208        |
| 687.4195       | 6  | G  | 11 | 1044.5074      | 522.7576        |
| 774.4515       | 7  | S  | 10 | 987.4859       | 494.2469        |
| 845.4886       | 8  | A  | 9  | 900.4539       | 450.7309        |
| 944.5570       | 9  | V  | 8  | 829.4168       | 415.2123        |
| 1041.6098      | 10 | P  | 7  | 730.3484       | 365.6781        |
| 1128.6418      | 11 | S  | 6  | 633.2956       | 317.1517        |
| 1243.6687      | 12 | D  | 5  | 546.2636       | 273.6357        |
| 1300.6902      | 13 | G  | 4  | 431.2367       | 216.1222        |
| 1428.7488      | 14 | Q  | 3  | 374.2152       | 187.6115        |
| 1499.7859      | 15 | A  | 2  | 246.1566       | 123.5822        |
|                | 16 | R  | 1  | 175.1195       | 88.0637         |

N-term:+43.02 K(3):+156.13  
 K(5):+156.13

FFGFPGPR, MH+ 966.4838, m/z 483.7455  
 H OS G25 P150811 220811-s1.06516.06516.2.dta

X-range:

-

MassTol: Y-zoom:

MassType:

AVG  MONO

Axis:

1  2

Label:

I  M  -

Ions:

a  +  2+  3+

b  +  2+  3+

c  +  2+  3+

x  +  2+  3+

y  +  2+  3+

z  +  2+  3+

hide H<sub>2</sub>O/NH<sub>3</sub>

zoom 112-122

GO

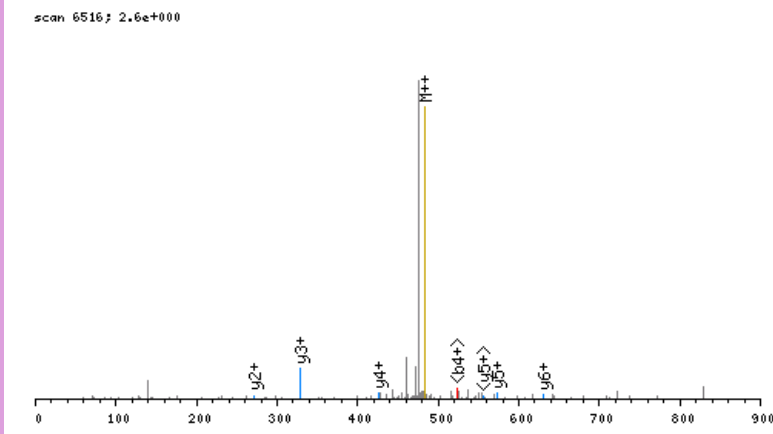

click image to zoom in; click top corners to zoom out [\[precursor±\]](#)

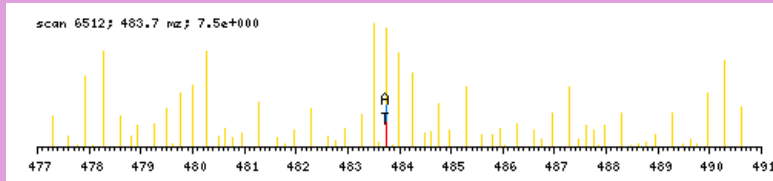

zoomed in precursor plot; T=theoretical m/z, A=acquired m/z

| b <sup>+</sup> | # | AA # | y <sup>+</sup> | y <sup>2+</sup> |
|----------------|---|------|----------------|-----------------|
| 190.0868       | 1 | F 8  |                |                 |
| 337.1552       | 2 | F 7  | 777.4048       | 389.2063        |
| 394.1767       | 3 | G 6  | 630.3364       | 315.6721        |
| 541.2451       | 4 | F 5  | 573.3149       | 287.1614        |
| 638.2979       | 5 | P 4  | 426.2465       | 213.6272        |
| 695.3193       | 6 | G 3  | 329.1937       | 165.1008        |
| 792.3721       | 7 | P 2  | 272.1723       | 136.5900        |
|                | 8 | R 1  | 175.1195       | 88.0637         |

N-term:+43.02

FPAAAAAGAGR, MH+ 1001.5169, m/z 501.2621  
 H OS G29 P150811 220811-s1.02649.02649.2.dta

scan 2649; 6.9e-001

X-range:

-

MassTol: Y-zoom:

MassType:

AVG  MONO

Axis:

1  2

Label:

I  M  -

Ions:

a  +  2+  3+

b  +  2+  3+

c  +  2+  3+

x  +  2+  3+

y  +  2+  3+

z  +  2+  3+

hide H<sub>2</sub>O/NH<sub>3</sub>

zoom 112-122

GO

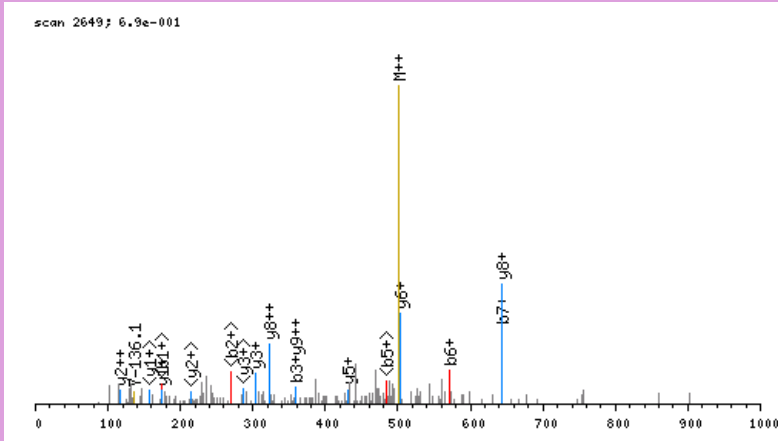

click image to zoom in; click top corners to zoom out [\[precursor±\]](#)

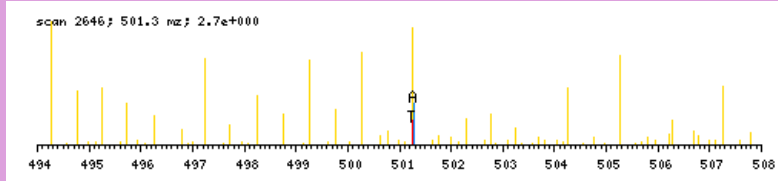

zoomed in precursor plot; T=theoretical m/z, A=acquired m/z

| b <sup>+</sup> | #  | AA | #  | y <sup>+</sup> | y <sup>2+</sup> |
|----------------|----|----|----|----------------|-----------------|
| 190.0868       | 1  | F  | 11 |                |                 |
| 287.1396       | 2  | P  | 10 | 812.4379       | 406.7228        |
| 358.1767       | 3  | A  | 9  | 715.3851       | 358.1965        |
| 429.2138       | 4  | A  | 8  | 644.3480       | 322.6779        |
| 500.2509       | 5  | A  | 7  | 573.3109       | 287.1594        |
| 571.2880       | 6  | A  | 6  | 502.2738       | 251.6408        |
| 642.3251       | 7  | A  | 5  | 431.2367       | 216.1222        |
| 699.3466       | 8  | G  | 4  | 360.1995       | 180.6037        |
| 770.3837       | 9  | A  | 3  | 303.1781       | 152.0930        |
| 827.4052       | 10 | G  | 2  | 232.1410       | 116.5744        |
|                | 11 | R  | 1  | 175.1195       | 88.0637         |

N-term:+43.02



FQGADSQAGKSGSR, MH+ 1465.7036, m/z 489.2394  
 H OS G25 P150811 220811-s1.03524.03524.3.dta

X-range:

-

MassTol: Y-zoom:

MassType:

AVG  MONO

Axis:

1  2

Label:

I  M  -

Ions:

a  +  2+  3+

b  +  2+  3+

c  +  2+  3+

x  +  2+  3+

y  +  2+  3+

z  +  2+  3+

hide H<sub>2</sub>O/NH<sub>3</sub>

zoom 112-122

GO

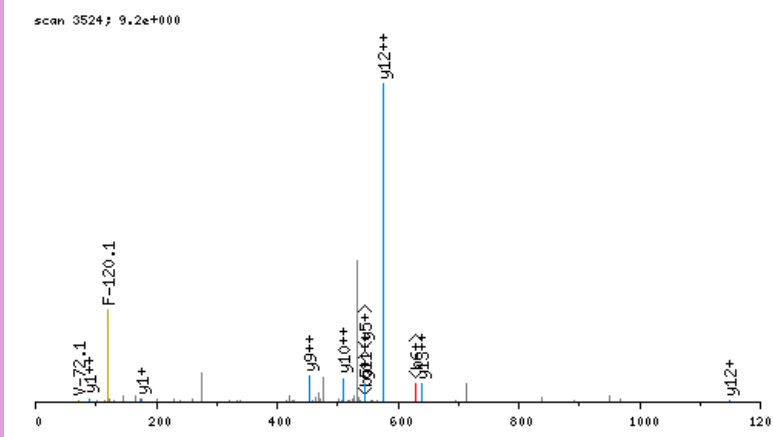

click image to zoom in; click top corners to zoom out [\[precursor±\]](#)

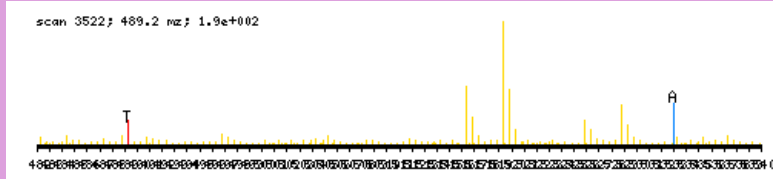

zoomed in precursor plot; T=theoretical m/z, A=acquired m/z

| b <sup>+</sup> | #  | AA # | y <sup>+</sup> | y <sup>2+</sup> |
|----------------|----|------|----------------|-----------------|
| 190.0868       | 1  | F 14 |                |                 |
| 318.1454       | 2  | Q 13 | 1276.6246      | 638.8162        |
| 375.1669       | 3  | G 12 | 1148.5660      | 574.7869        |
| 446.2040       | 4  | A 11 | 1091.5446      | 546.2762        |
| 561.2309       | 5  | D 10 | 1020.5074      | 510.7576        |
| 648.2629       | 6  | S 9  | 905.4805       | 453.2442        |
| 776.3215       | 7  | Q 8  | 818.4485       | 409.7282        |
| 847.3586       | 8  | A 7  | 690.3899       | 345.6989        |
| 904.3801       | 9  | G 6  | 619.3528       | 310.1803        |
| 1060.5064      | 10 | K 5  | 562.3313       | 281.6696        |
| 1147.5384      | 11 | S 4  | 406.2050       | 203.6064        |
| 1204.5599      | 12 | G 3  | 319.1730       | 160.0904        |
| 1291.5919      | 13 | S 2  | 262.1515       | 131.5797        |
|                | 14 | R 1  | 175.1195       | 88.0637         |

N-term:+43.02 K(10):+156.13

FSWVSKDAR, MH+ 1165.6006, m/z 583.3040  
 H OS G25 P150811 220811-s1.07799.07799.2.dta

X-range:

-

MassTol: Y-zoom:

MassType:

AVG  MONO

Axis:

1  2

Label:

I  M  -

Ions:

a  +  2+  3+

b  +  2+  3+

c  +  2+  3+

x  +  2+  3+

y  +  2+  3+

z  +  2+  3+

hide H<sub>2</sub>O/NH<sub>3</sub>

zoom 112-122

GO

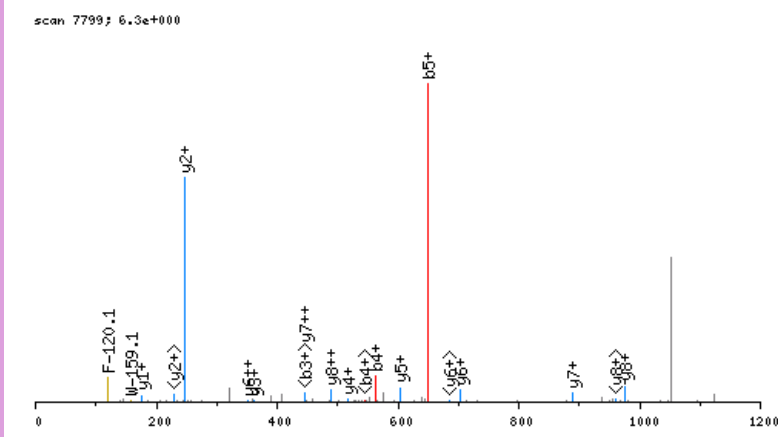

click image to zoom in; click top corners to zoom out [\[precursor±\]](#)

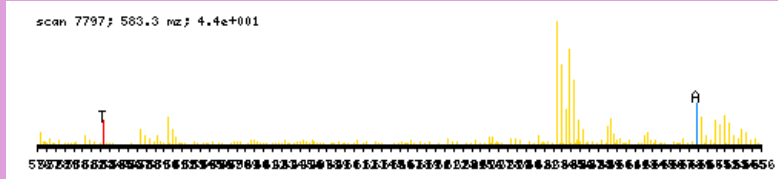

zoomed in precursor plot; T=theoretical m/z, A=acquired m/z

| b <sup>+</sup> | # | AA # | y <sup>+</sup> | y <sup>2+</sup> |
|----------------|---|------|----------------|-----------------|
| 190.0868       | 1 | F    | 9              |                 |
| 277.1188       | 2 | S    | 8              | 976.5216        |
| 463.1982       | 3 | W    | 7              | 889.4896        |
| 562.2666       | 4 | V    | 6              | 703.4103        |
| 649.2986       | 5 | S    | 5              | 604.3419        |
| 805.4249       | 6 | K    | 4              | 517.3099        |
| 920.4518       | 7 | D    | 3              | 361.1836        |
| 991.4890       | 8 | A    | 2              | 246.1566        |
|                | 9 | R    | 1              | 175.1195        |

N-term:+43.02 K(6):+156.13

GDEMDAMIPER, MH+ 1305.5455, m/z 653.2764  
 H OS G29 P150811 220811-s1.04758.04758.2.dta

X-range:

-

MassTol: Y-zoom:

MassType:

AVG  MONO

Axis:

1  2

Label:

I  M  -

Ions:

a  +  2+  3+

b  +  2+  3+

c  +  2+  3+

x  +  2+  3+

y  +  2+  3+

z  +  2+  3+

hide H<sub>2</sub>O/NH<sub>3</sub>

zoom 112-122

GO

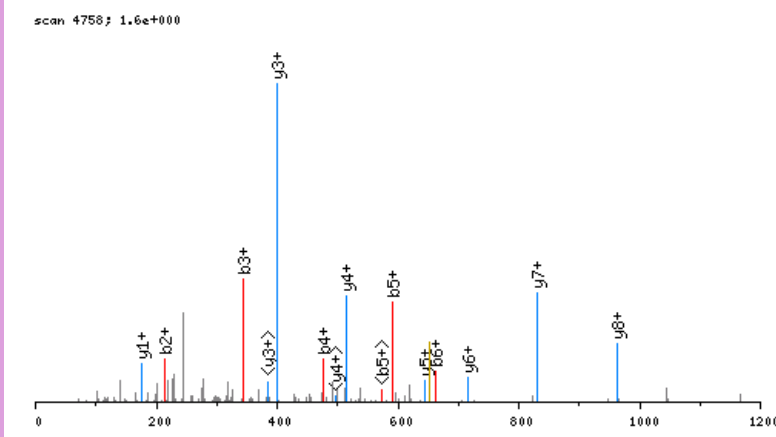

click image to zoom in; click top corners to zoom out [\[precursor±\]](#)

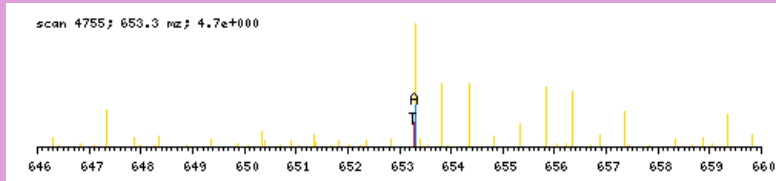

zoomed in precursor plot; T=theoretical m/z, A=acquired m/z

| b <sup>+</sup> | #  | AA # | y <sup>+</sup> | y <sup>2+</sup> |
|----------------|----|------|----------------|-----------------|
| 100.0399       | 1  | G 11 |                |                 |
| 215.0668       | 2  | D 10 | 1206.5135      | 603.7607        |
| 344.1094       | 3  | E 9  | 1091.4865      | 546.2472        |
| 475.1499       | 4  | M 8  | 962.4439       | 481.7259        |
| 590.1768       | 5  | D 7  | 831.4035       | 416.2056        |
| 661.2139       | 6  | A 6  | 716.3765       | 358.6922        |
| 792.2544       | 7  | M 5  | 645.3394       | 323.1736        |
| 905.3385       | 8  | I 4  | 514.2989       | 257.6534        |
| 1002.3913      | 9  | P 3  | 401.2149       | 201.1113        |
| 1131.4338      | 10 | E 2  | 304.1621       | 152.5850        |
|                | 11 | R 1  | 175.1195       | 88.0637         |

N-term:+43.02

GDLSHIER, MH+ 968.4801, m/z 484.7437  
 H OS G25 P150811 220811-s1.04343.04343.2.dta

X-range:

-

MassTol: Y-zoom:

MassType:

AVG  MONO

Axis:

1  2

Label:

I  M  -

Ions:

a  +  2+  3+

b  +  2+  3+

c  +  2+  3+

x  +  2+  3+

y  +  2+  3+

z  +  2+  3+

hide H<sub>2</sub>O/NH<sub>3</sub>

zoom 112-122

GO

scan 4343; 1.8e+001

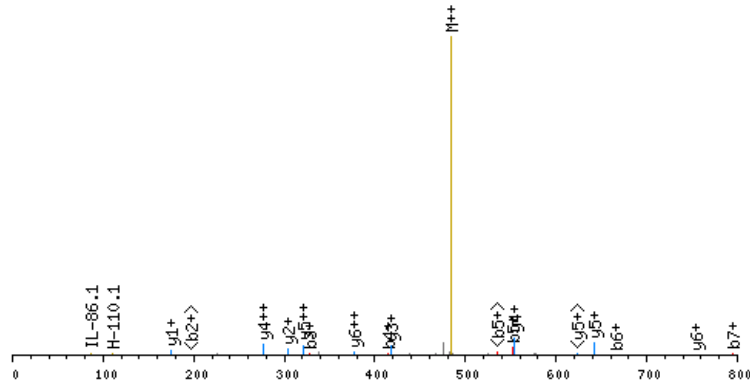

click image to zoom in; click top corners to zoom out [\[precursor±\]](#)

scan 4342; 484.7 m/z; 6.2e+001

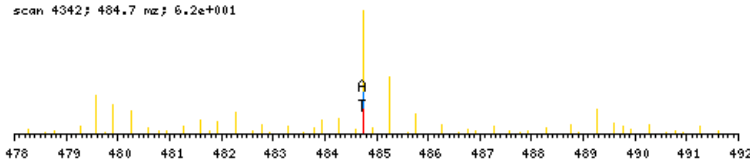

zoomed in precursor plot; T=theoretical m/z, A=acquired m/z

| b <sup>+</sup> | # | AA # | y <sup>+</sup> | y <sup>2+</sup> |
|----------------|---|------|----------------|-----------------|
| 100.0399       | 1 | G 8  |                |                 |
| 215.0668       | 2 | D 7  | 869.4481       | 435.2280        |
| 328.1509       | 3 | L 6  | 754.4212       | 377.7145        |
| 415.1829       | 4 | S 5  | 641.3371       | 321.1725        |
| 552.2418       | 5 | H 4  | 554.3051       | 277.6564        |
| 665.3259       | 6 | I 3  | 417.2462       | 209.1270        |
| 794.3685       | 7 | E 2  | 304.1621       | 152.5850        |
|                | 8 | R 1  | 175.1195       | 88.0637         |

N-term:+43.02

GDREQLLQR, MH+ 1156.6075, m/z 578.8074  
 H OS G25 P150811 220811-s1.03054.03054.2.dta

X-range:

-

MassTol: Y-zoom:

MassType:

AVG  MONO

Axis:

1  2

Label:

I  M  -

Ions:

a  +  2+  3+

b  +  2+  3+

c  +  2+  3+

x  +  2+  3+

y  +  2+  3+

z  +  2+  3+

hide H<sub>2</sub>O/NH<sub>3</sub>

zoom 112-122

GO

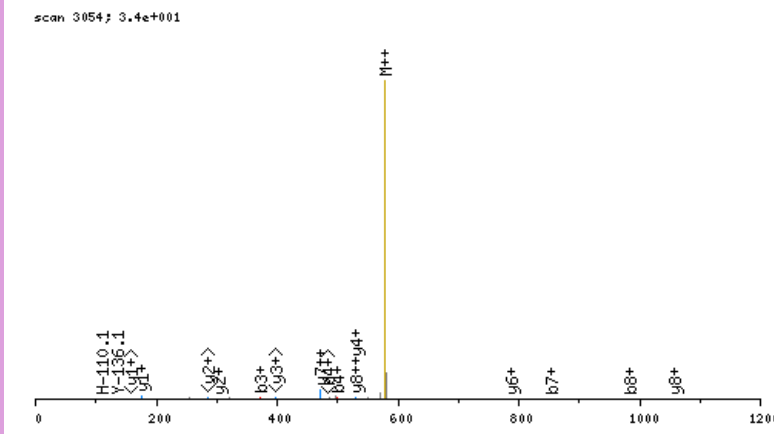

click image to zoom in; click top corners to zoom out [\[precursor±\]](#)

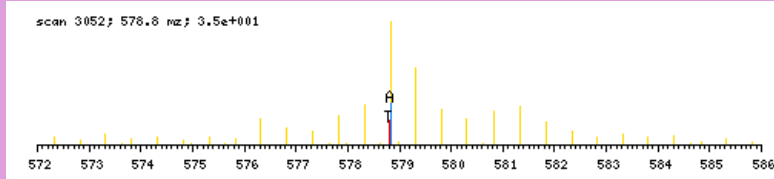

zoomed in precursor plot; T=theoretical m/z, A=acquired m/z

| b <sup>+</sup> | # | AA # | y <sup>+</sup> | y <sup>2+</sup>    |
|----------------|---|------|----------------|--------------------|
| 100.0399       | 1 | G    | 9              |                    |
| 215.0668       | 2 | D    | 8              | 1057.5754 529.2916 |
| 371.1679       | 3 | R    | 7              | 942.5485 471.7782  |
| 500.2105       | 4 | E    | 6              | 786.4474 393.7276  |
| 628.2691       | 5 | Q    | 5              | 657.4048 329.2063  |
| 741.3532       | 6 | L    | 4              | 529.3462 265.1770  |
| 854.4372       | 7 | L    | 3              | 416.2621 208.6350  |
| 982.4958       | 8 | Q    | 2              | 303.1781 152.0930  |
|                | 9 | R    | 1              | 175.1195 88.0637   |

N-term:+43.02

GEKGRPGEPGLDGFPGPR, MH+ 1892.9619, m/z 631.6588  
 H OS G25 P150811 220811-s1.06605.06605.3.dta

X-range:

-

MassTol: Y-zoom:

MassType:

AVG  MONO

Axis:

1  2

Label:

I  M  -

Ions:

a  +  2+  3+

b  +  2+  3+

c  +  2+  3+

x  +  2+  3+

y  +  2+  3+

z  +  2+  3+

hide H<sub>2</sub>O/NH<sub>3</sub>

zoom 112-122

GO

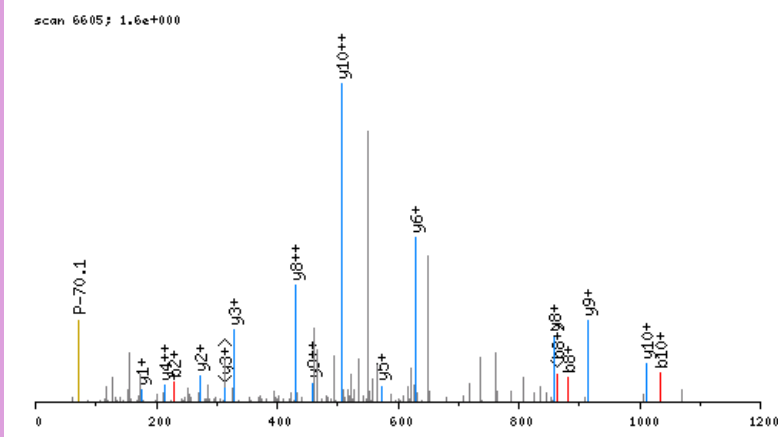

click image to zoom in; click top corners to zoom out [\[precursor±\]](#)

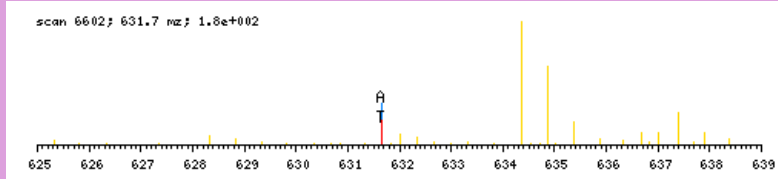

zoomed in precursor plot; T=theoretical m/z, A=acquired m/z

| b <sup>+</sup> | #  | AA # | y <sup>+</sup> | y <sup>2+</sup> |
|----------------|----|------|----------------|-----------------|
| 100.0399       | 1  | G 18 |                |                 |
| 229.0825       | 2  | E 17 | 1793.9299      | 897.4689        |
| 385.2088       | 3  | K 16 | 1664.8873      | 832.9476        |
| 442.2302       | 4  | G 15 | 1508.7610      | 754.8844        |
| 598.3313       | 5  | R 14 | 1451.7395      | 726.3737        |
| 695.3841       | 6  | P 13 | 1295.6384      | 648.3231        |
| 752.4056       | 7  | G 12 | 1198.5857      | 599.7967        |
| 881.4482       | 8  | E 11 | 1141.5642      | 571.2860        |
| 978.5009       | 9  | P 10 | 1012.5216      | 506.7647        |
| 1035.5224      | 10 | G 9  | 915.4688       | 458.2383        |
| 1148.6064      | 11 | L 8  | 858.4474       | 429.7276        |
| 1263.6334      | 12 | D 7  | 745.3633       | 373.1856        |
| 1320.6549      | 13 | G 6  | 630.3364       | 315.6721        |
| 1467.7233      | 14 | F 5  | 573.3149       | 287.1614        |
| 1564.7760      | 15 | P 4  | 426.2465       | 213.6272        |
| 1621.7975      | 16 | G 3  | 329.1937       | 165.1008        |
| 1718.8503      | 17 | P 2  | 272.1723       | 136.5900        |
|                | 18 | R 1  | 175.1195       | 88.0637         |

N-term:+43.02 K(3):+156.13

GEQPIFSTR, MH+ 1076.5377, m/z 538.7725  
 H OS G29 P150811 220811-s1.03832.03832.2.dta

X-range:

-

MassTol: Y-zoom:

MassType:

AVG  MONO

Axis:

1  2

Label:

I  M  -

Ions:

a  +  2+  3+

b  +  2+  3+

c  +  2+  3+

x  +  2+  3+

y  +  2+  3+

z  +  2+  3+

hide H<sub>2</sub>O/NH<sub>3</sub>

zoom 112-122

GO

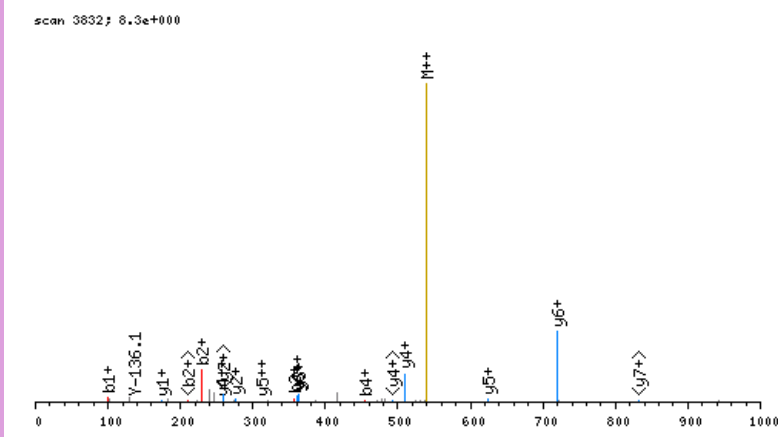

click image to zoom in; click top corners to zoom out [\[precursor±\]](#)

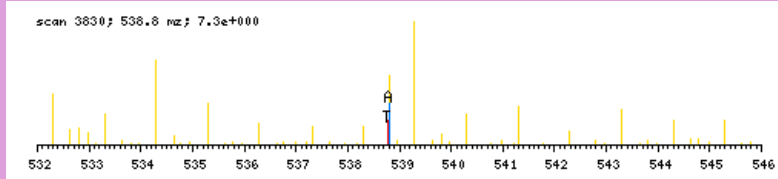

zoomed in precursor plot; T=theoretical m/z, A=acquired m/z

| b <sup>+</sup> | # | AA # | y <sup>+</sup> | y <sup>2+</sup> |
|----------------|---|------|----------------|-----------------|
| 100.0399       | 1 | G    | 9              |                 |
| 229.0825       | 2 | E    | 8              | 977.5056        |
| 357.1410       | 3 | Q    | 7              | 848.4630        |
| 454.1938       | 4 | P    | 6              | 720.4044        |
| 567.2779       | 5 | I    | 5              | 623.3517        |
| 714.3463       | 6 | F    | 4              | 510.2676        |
| 801.3783       | 7 | S    | 3              | 363.1992        |
| 902.4260       | 8 | T    | 2              | 276.1672        |
|                | 9 | R    | 1              | 175.1195        |

N-term:+43.02

GETGPAGPAGPIGPAGAR, MH+ 1574.7927, m/z 525.6024  
 H OS G24 P150811 220811-s1.02953.02953.3.dta

X-range:

-

MassTol: Y-zoom:

MassType:

AVG  MONO

Axis:

1  2

Label:

I  M  -

Ions:

a  +  2+  3+

b  +  2+  3+

c  +  2+  3+

x  +  2+  3+

y  +  2+  3+

z  +  2+  3+

hide H<sub>2</sub>O/NH<sub>3</sub>

zoom 112-122

GO

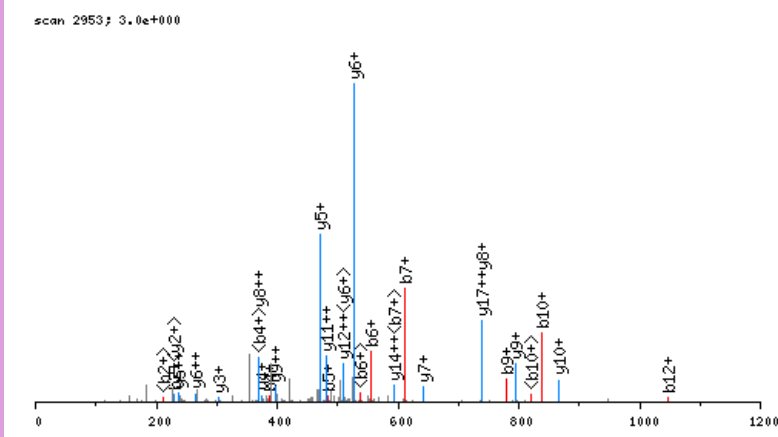

click image to zoom in; click top corners to zoom out [\[precursor±\]](#)

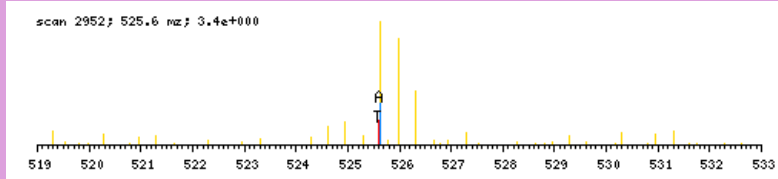

zoomed in precursor plot; T=theoretical m/z, A=acquired m/z

| b <sup>+</sup> | #  | AA # | y <sup>+</sup> | y <sup>2+</sup> |
|----------------|----|------|----------------|-----------------|
| 100.0399       | 1  | G 18 |                |                 |
| 229.0825       | 2  | E 17 | 1475.7607      | 738.3842        |
| 330.1301       | 3  | T 16 | 1346.7181      | 673.8629        |
| 387.1516       | 4  | G 15 | 1245.6704      | 623.3391        |
| 484.2044       | 5  | P 14 | 1188.6489      | 594.8284        |
| 555.2415       | 6  | A 13 | 1091.5962      | 546.3020        |
| 612.2629       | 7  | G 12 | 1020.5591      | 510.7834        |
| 709.3157       | 8  | P 11 | 963.5376       | 482.2727        |
| 780.3528       | 9  | A 10 | 866.4848       | 433.7463        |
| 837.3743       | 10 | G 9  | 795.4477       | 398.2278        |
| 934.4270       | 11 | P 8  | 738.4262       | 369.7170        |
| 1047.5111      | 12 | I 7  | 641.3735       | 321.1907        |
| 1104.5326      | 13 | G 6  | 528.2894       | 264.6486        |
| 1201.5853      | 14 | P 5  | 471.2680       | 236.1379        |
| 1272.6225      | 15 | A 4  | 374.2152       | 187.6115        |
| 1329.6439      | 16 | G 3  | 303.1781       | 152.0930        |
| 1400.6810      | 17 | A 2  | 246.1566       | 123.5822        |
|                | 18 | R 1  | 175.1195       | 88.0637         |

N-term:+43.02



X-range:

-

MassTol: Y-zoom:

MassType:

AVG  MONO

Axis:

1  2

Label:

I  M  -

Ions:

a  +  2+  3+

b  +  2+  3+

c  +  2+  3+

x  +  2+  3+

y  +  2+  3+

z  +  2+  3+

hide H<sub>2</sub>O/NH<sub>3</sub>

zoom 112-122

GO

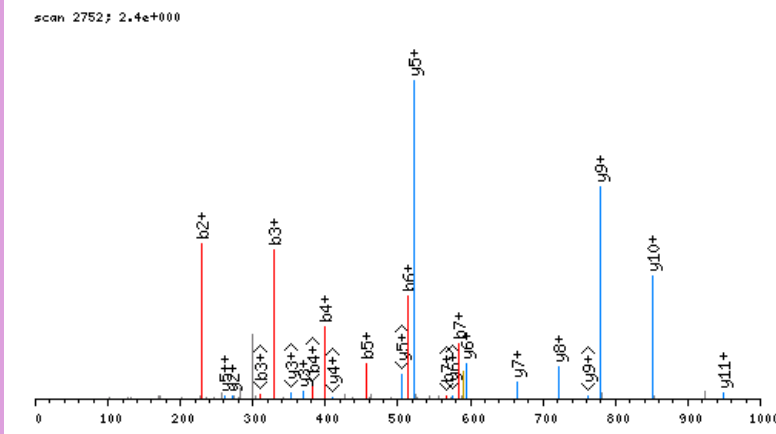

click image to zoom in; click top corners to zoom out [\[precursor±\]](#)

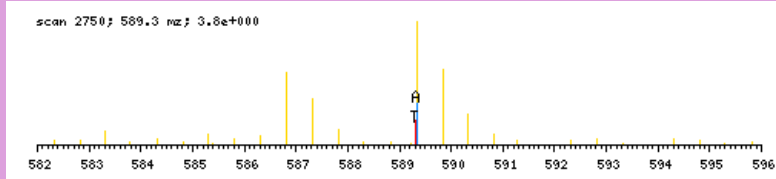

zoomed in precursor plot; T=theoretical m/z, A=acquired m/z

| b <sup>+</sup> | #  | AA # | y <sup>+</sup> | y <sup>2+</sup> |
|----------------|----|------|----------------|-----------------|
| 100.0399       | 1  | G 13 |                |                 |
| 229.0825       | 2  | E 12 | 1078.5645      | 539.7862        |
| 328.1509       | 3  | V 11 | 949.5219       | 475.2649        |
| 399.1880       | 4  | A 10 | 850.4535       | 425.7307        |
| 456.2094       | 5  | G 9  | 779.4164       | 390.2121        |
| 513.2309       | 6  | G 8  | 722.3949       | 361.7014        |
| 584.2680       | 7  | A 7  | 665.3735       | 333.1907        |
| 655.3051       | 8  | A 6  | 594.3364       | 297.6721        |
| 752.3579       | 9  | P 5  | 523.2993       | 262.1535        |
| 809.3794       | 10 | G 4  | 426.2465       | 213.6272        |
| 906.4321       | 11 | P 3  | 369.2250       | 185.1164        |
| 1003.4849      | 12 | P 2  | 272.1723       | 136.5900        |
|                | 13 | R 1  | 175.1195       | 88.0637         |

N-term:+43.02

GSEAAQLLEAADFAAHKHR, MH+ 2098.0894, m/z 525.2778  
 H OS G28 P150811 220811-s1.08587.08587.4.dta

X-range:

-

MassTol: Y-zoom:

MassType:

AVG  MONO

Axis:

1  2

Label:

I  M  -

Ions:

a  +  2+  3+

b  +  2+  3+

c  +  2+  3+

x  +  2+  3+

y  +  2+  3+

z  +  2+  3+

hide H<sub>2</sub>O/NH<sub>3</sub>

zoom 112-122

GO

scan 8587; 1.4e+000

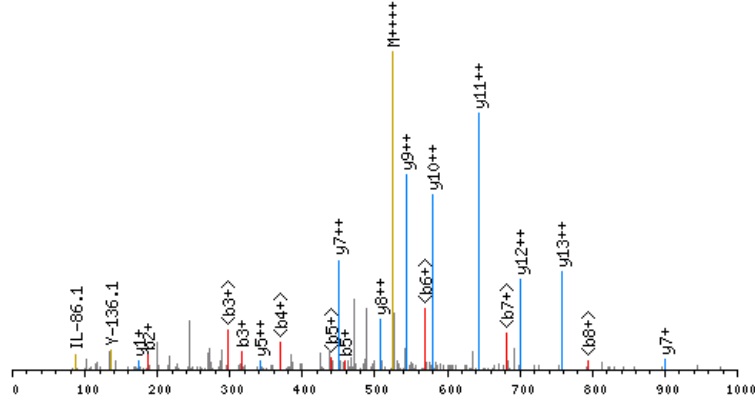

click image to zoom in; click top corners to zoom out [precursor±]

scan 8583; 525.3 m/z; 4.5e+000

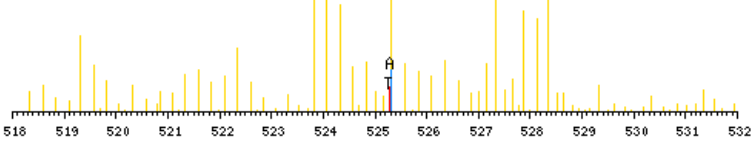

zoomed in precursor plot; T=theoretical m/z, A=acquired m/z

| b <sup>+</sup> | #  | AA | #  | y <sup>+</sup> | y <sup>2+</sup> |
|----------------|----|----|----|----------------|-----------------|
| 100.0399       | 1  | G  | 19 |                |                 |
| 187.0719       | 2  | S  | 18 | 1999.0574      | 1000.0326       |
| 316.1145       | 3  | E  | 17 | 1912.0254      | 956.5166        |
| 387.1516       | 4  | A  | 16 | 1782.9828      | 891.9953        |
| 458.1887       | 5  | A  | 15 | 1711.9456      | 856.4767        |
| 586.2473       | 6  | Q  | 14 | 1640.9085      | 820.9582        |
| 699.3314       | 7  | L  | 13 | 1512.8500      | 756.9289        |
| 812.4154       | 8  | L  | 12 | 1399.7659      | 700.3869        |
| 941.4580       | 9  | E  | 11 | 1286.6818      | 643.8448        |
| 1012.4951      | 10 | A  | 10 | 1157.6392      | 579.3235        |
| 1083.5322      | 11 | A  | 9  | 1086.6021      | 543.8050        |
| 1198.5592      | 12 | D  | 8  | 1015.5650      | 508.2864        |
| 1345.6276      | 13 | F  | 7  | 900.5381       | 450.7729        |
| 1416.6647      | 14 | A  | 6  | 753.4697       | 377.2387        |
| 1487.7018      | 15 | A  | 5  | 682.4325       | 341.7202        |
| 1624.7607      | 16 | H  | 4  | 611.3954       | 306.2016        |
| 1786.9188      | 17 | K  | 3  | 474.3365       | 237.6722        |
| 1923.9777      | 18 | H  | 2  | 312.1784       | 156.5931        |
|                | 19 | R  | 1  | 175.1195       | 88.0637         |

N-term:+43.02 K(17):+162.16

GTALVYHEDMTATR, MH+ 1606.7535, m/z 536.2560  
 H OS G25 P150811 220811-s1.05221.05221.3.dta

scan 5221; 2.9e+000

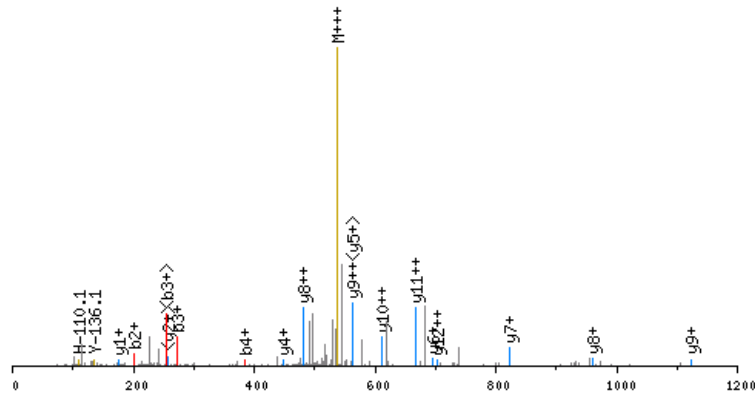

click image to zoom in; click top corners to zoom out [\[precursor±\]](#)

scan 5217; 536.3 m/z; 3.1e+001

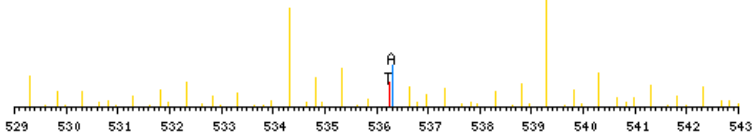

zoomed in precursor plot; T=theoretical m/z, A=acquired m/z

X-range:

-

MassTol: Y-zoom:

MassType:

AVG  MONO

Axis:

1  2

Label:

I  M  -

Ions:

a  +  2+  3+

b  +  2+  3+

c  +  2+  3+

x  +  2+  3+

y  +  2+  3+

z  +  2+  3+

hide H<sub>2</sub>O/NH<sub>3</sub>

zoom 112-122

GO

| b <sup>+</sup> | #  | AA # | y <sup>+</sup> | y <sup>2+</sup> |
|----------------|----|------|----------------|-----------------|
| 100.0399       | 1  | G 14 |                |                 |
| 201.0875       | 2  | T 13 | 1507.7215      | 754.3647        |
| 272.1247       | 3  | A 12 | 1406.6738      | 703.8408        |
| 385.2087       | 4  | L 11 | 1335.6367      | 668.3223        |
| 484.2771       | 5  | V 10 | 1222.5526      | 611.7802        |
| 647.3405       | 6  | Y 9  | 1123.4842      | 562.2460        |
| 784.3994       | 7  | H 8  | 960.4209       | 480.7144        |
| 913.4420       | 8  | E 7  | 823.3620       | 412.1849        |
| 1028.4689      | 9  | D 6  | 694.3194       | 347.6636        |
| 1159.5094      | 10 | M 5  | 579.2925       | 290.1501        |
| 1260.5571      | 11 | T 4  | 448.2520       | 224.6299        |
| 1331.5942      | 12 | A 3  | 347.2043       | 174.1061        |
| 1432.6419      | 13 | T 2  | 276.1672       | 138.5875        |
|                | 14 | R 1  | 175.1195       | 88.0637         |

N-term:+43.02

GTKCCTLPEDQR, MH+ 1540.7311, m/z 514.2486  
 H OS G27 P150811 220811-s1.03050.03050.3.dta

scan 3050; 1.7e+001

X-range:

-

MassTol: Y-zoom:

MassType:

AVG  MONO

Axis:

1  2

Label:

I  M  -

Ions:

a  +  2+  3+

b  +  2+  3+

c  +  2+  3+

x  +  2+  3+

y  +  2+  3+

z  +  2+  3+

hide H<sub>2</sub>O/NH<sub>3</sub>

zoom 112-122

GO

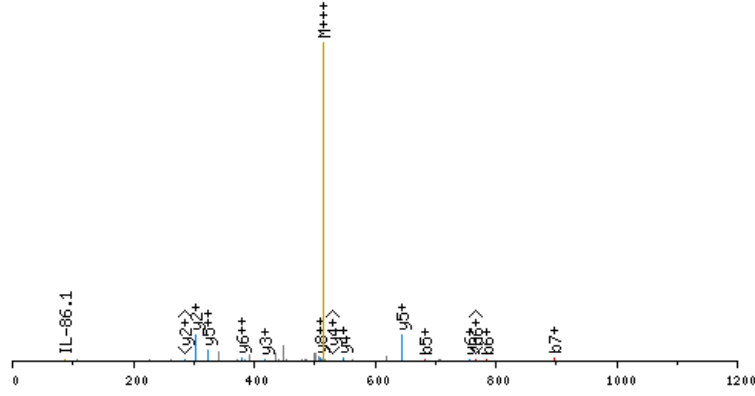

click image to zoom in; click top corners to zoom out [\[precursor±\]](#)

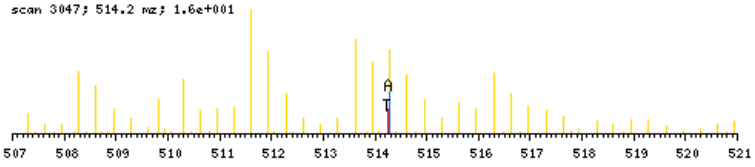

zoomed in precursor plot; T=theoretical m/z, A=acquired m/z

| b <sup>+</sup> | #  | AA # | y <sup>+</sup> | y <sup>2+</sup> |
|----------------|----|------|----------------|-----------------|
| 100.0399       | 1  | G 12 |                |                 |
| 201.0875       | 2  | T 11 | 1441.6991      | 721.3535        |
| 363.2456       | 3  | K 10 | 1340.6514      | 670.8296        |
| 523.2762       | 4  | C 9  | 1178.4933      | 589.7506        |
| 683.3068       | 5  | C 8  | 1018.4627      | 509.7353        |
| 784.3545       | 6  | T 7  | 858.4321       | 429.7200        |
| 897.4386       | 7  | L 6  | 757.3844       | 379.1961        |
| 994.4913       | 8  | P 5  | 644.3004       | 322.6541        |
| 1123.5339      | 9  | E 4  | 547.2476       | 274.1277        |
| 1238.5609      | 10 | D 3  | 418.2050       | 209.6064        |
| 1366.6195      | 11 | Q 2  | 303.1781       | 152.0930        |
|                | 12 | R 1  | 175.1195       | 88.0637         |

N-term:+43.02 K(3):+162.16  
 C(4):+160.03 C(5):+160.03

GTSEAAPPPFAR, MH+ 1242.6119, m/z 621.8096  
 H OS G29 P150811 220811-s1.03643.03643.2.dta

scan 3643; 2.6e+000

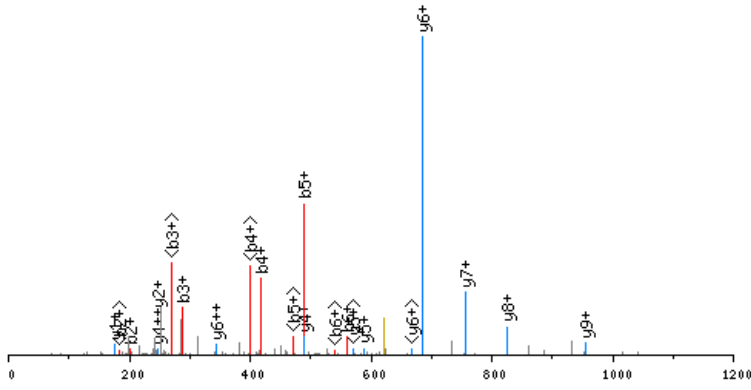

click image to zoom in; click top corners to zoom out [\[precursor±\]](#)

scan 3640; 621.8 m/z; 6.3e+000

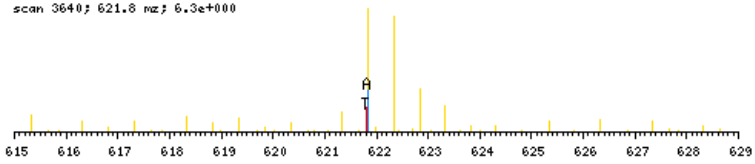

zoomed in precursor plot; T=theoretical m/z, A=acquired m/z

X-range:

-

MassTol: Y-zoom:

MassType:

AVG  MONO

Axis:

1  2

Label:

I  M  -

Ions:

a  +  2+  3+

b  +  2+  3+

c  +  2+  3+

x  +  2+  3+

y  +  2+  3+

z  +  2+  3+

hide H<sub>2</sub>O/NH<sub>3</sub>

zoom 112-122

GO

| b <sup>+</sup> | #  | AA # | y <sup>+</sup> | y <sup>2+</sup> |
|----------------|----|------|----------------|-----------------|
| 100.0399       | 1  | G 12 |                |                 |
| 201.0875       | 2  | T 11 | 1143.5798      | 572.2938        |
| 288.1196       | 3  | S 10 | 1042.5322      | 521.7700        |
| 417.1622       | 4  | E 9  | 955.5001       | 478.2540        |
| 488.1993       | 5  | A 8  | 826.4575       | 413.7327        |
| 559.2364       | 6  | A 7  | 755.4204       | 378.2141        |
| 656.2892       | 7  | P 6  | 684.3833       | 342.6956        |
| 753.3419       | 8  | P 5  | 587.3306       | 294.1692        |
| 850.3947       | 9  | P 4  | 490.2778       | 245.6428        |
| 997.4631       | 10 | F 3  | 393.2250       | 197.1164        |
| 1068.5002      | 11 | A 2  | 246.1566       | 123.5822        |
|                | 12 | R 1  | 175.1195       | 88.0637         |

N-term:+43.02

GVQVETISPGDGR, MH+ 1356.6759, m/z 678.8416  
 H OS G29 P150811 220811-s1.03717.03717.2.dta

X-range:

-

MassTol: Y-zoom:

MassType:

AVG  MONO

Axis:

1  2

Label:

I  M  -

Ions:

a  +  2+  3+

b  +  2+  3+

c  +  2+  3+

x  +  2+  3+

y  +  2+  3+

z  +  2+  3+

hide H<sub>2</sub>O/NH<sub>3</sub>

zoom 112-122

GO

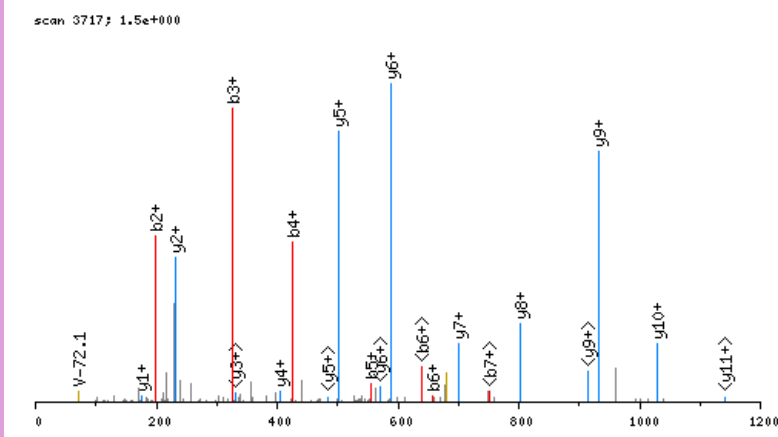

click image to zoom in; click top corners to zoom out [\[precursor±\]](#)

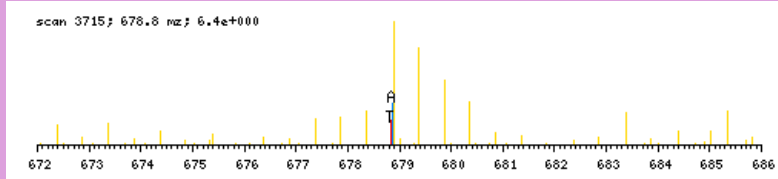

zoomed in precursor plot; T=theoretical m/z, A=acquired m/z

| b <sup>+</sup> | #  | AA # | y <sup>+</sup> | y <sup>2+</sup> |
|----------------|----|------|----------------|-----------------|
| 100.0399       | 1  | G 13 |                |                 |
| 199.1083       | 2  | V 12 | 1257.6439      | 629.3259        |
| 327.1669       | 3  | Q 11 | 1158.5755      | 579.7917        |
| 426.2353       | 4  | V 10 | 1030.5169      | 515.7624        |
| 555.2779       | 5  | E 9  | 931.4485       | 466.2282        |
| 656.3255       | 6  | T 8  | 802.4059       | 401.7069        |
| 769.4096       | 7  | I 7  | 701.3582       | 351.1830        |
| 856.4416       | 8  | S 6  | 588.2742       | 294.6410        |
| 953.4944       | 9  | P 5  | 501.2421       | 251.1250        |
| 1010.5159      | 10 | G 4  | 404.1894       | 202.5986        |
| 1125.5428      | 11 | D 3  | 347.1679       | 174.0879        |
| 1182.5643      | 12 | G 2  | 232.1410       | 116.5744        |
|                | 13 | R 1  | 175.1195       | 88.0637         |

N-term:+43.02

HFSIPETESR, MH+ 1244.5912, m/z 622.7992  
 H OS G25 P150811 220811-s1.06511.06511.2.dta

X-range:

-

MassTol: Y-zoom:

MassType:

AVG  MONO

Axis:

1  2

Label:

I  M  -

Ions:

a  +  2+  3+

b  +  2+  3+

c  +  2+  3+

x  +  2+  3+

y  +  2+  3+

z  +  2+  3+

hide H<sub>2</sub>O/NH<sub>3</sub>

zoom 112-122

GO

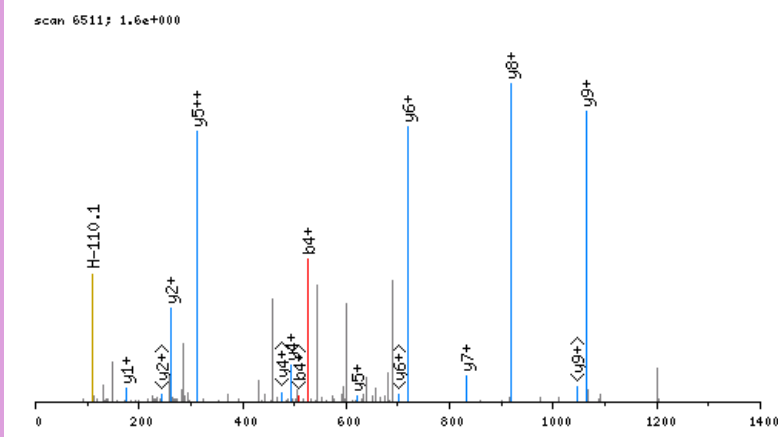

click image to zoom in; click top corners to zoom out [\[precursor±\]](#)

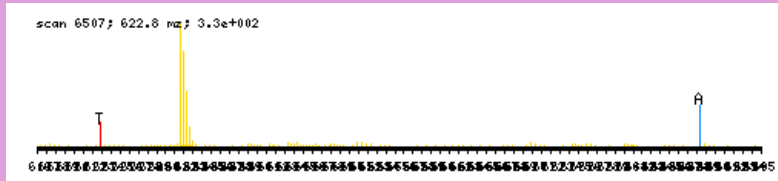

zoomed in precursor plot; T=theoretical m/z, A=acquired m/z

| b <sup>+</sup> | #  | AA # | y <sup>+</sup> | y <sup>2+</sup> |
|----------------|----|------|----------------|-----------------|
| 180.0773       | 1  | H    | 10             |                 |
| 327.1457       | 2  | F    | 9              | 1065.5217       |
| 414.1778       | 3  | S    | 8              | 918.4533        |
| 527.2618       | 4  | I    | 7              | 831.4212        |
| 624.3146       | 5  | P    | 6              | 718.3372        |
| 753.3572       | 6  | E    | 5              | 621.2844        |
| 854.4049       | 7  | T    | 4              | 492.2418        |
| 983.4474       | 8  | E    | 3              | 391.1941        |
| 1070.4795      | 9  | S    | 2              | 262.1515        |
|                | 10 | R    | 1              | 175.1195        |

N-term:+43.02

IDDTSEVLDELYR, MH+ 1696.7918, m/z 566.2688  
 H OS G25 P150811 220811-s1.07458.07458.3.dta

scan 7458; 3.3e+001

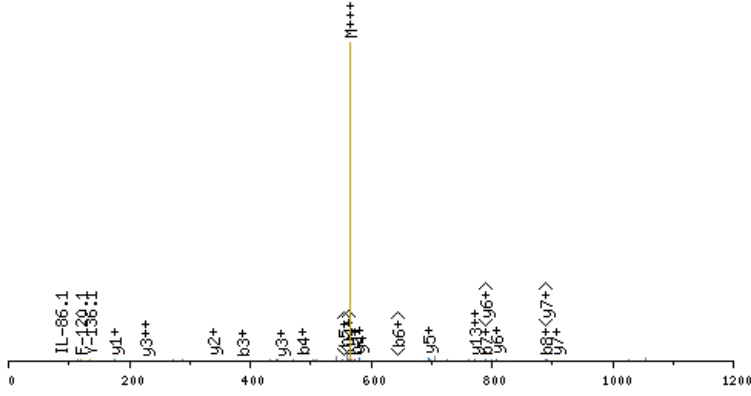

click image to zoom in; click top corners to zoom out [\[precursor±\]](#)

scan 7457; 566.3 m/z; 1.2e+002

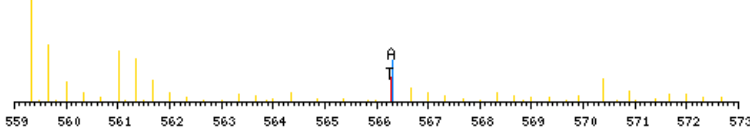

zoomed in precursor plot; T=theoretical m/z, A=acquired m/z

X-range:

-

MassTol: Y-zoom:

MassType:

AVG  MONO

Axis:

1  2

Label:

I  M  -

Ions:

a  +  2+  3+

b  +  2+  3+

c  +  2+  3+

x  +  2+  3+

y  +  2+  3+

z  +  2+  3+

hide H<sub>2</sub>O/NH<sub>3</sub>

zoom 112-122

GO

| b <sup>+</sup> | #  | AA # | y <sup>+</sup> | y <sup>2+</sup> |
|----------------|----|------|----------------|-----------------|
| 156.1025       | 1  | I 14 |                |                 |
| 271.1294       | 2  | D 13 | 1541.6971      | 771.3525        |
| 386.1564       | 3  | D 12 | 1426.6702      | 713.8390        |
| 487.2040       | 4  | T 11 | 1311.6432      | 656.3255        |
| 574.2361       | 5  | S 10 | 1210.5956      | 605.8017        |
| 661.2681       | 6  | S 9  | 1123.5635      | 562.2857        |
| 790.3107       | 7  | E 8  | 1036.5315      | 518.7697        |
| 889.3791       | 8  | V 7  | 907.4889       | 454.2484        |
| 1002.4632      | 9  | L 6  | 808.4205       | 404.7142        |
| 1117.4901      | 10 | D 5  | 695.3364       | 348.1721        |
| 1246.5327      | 11 | E 4  | 580.3095       | 290.6587        |
| 1359.6168      | 12 | L 3  | 451.2669       | 226.1374        |
| 1522.6801      | 13 | Y 2  | 338.1828       | 169.5953        |
|                | 14 | R 1  | 175.1195       | 88.0637         |

N-term:+43.02



ILGGQEAHAHAR, MH+ 1235.6497, m/z 412.5547  
 H OS G27 P150811 220811-s1.02150.02150.3.dta

X-range:

-

MassTol: Y-zoom:

MassType:

AVG  MONO

Axis:

1  2

Label:

I  M  -

Ions:

a  +  2+  3+

b  +  2+  3+

c  +  2+  3+

x  +  2+  3+

y  +  2+  3+

z  +  2+  3+

hide H<sub>2</sub>O/NH<sub>3</sub>

zoom 112-122

GO

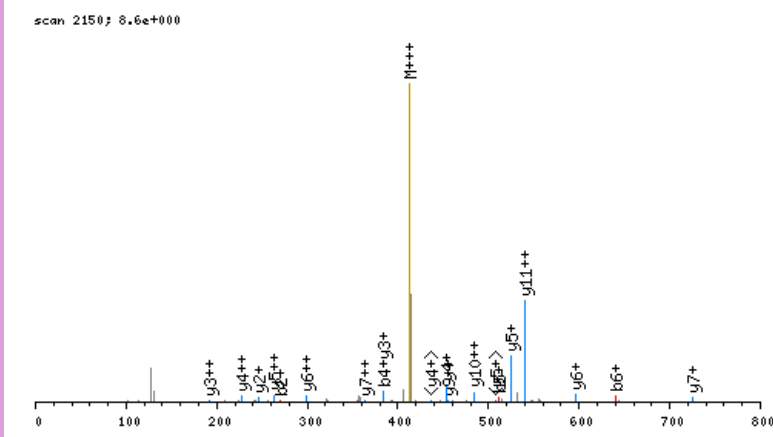

click image to zoom in; click top corners to zoom out [\[precursor±\]](#)

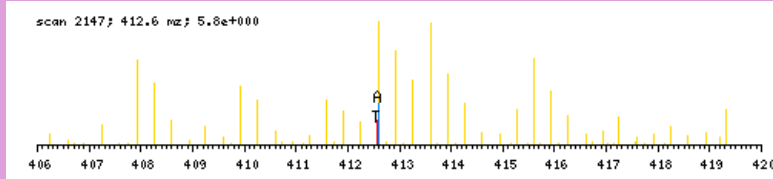

zoomed in precursor plot; T=theoretical m/z, A=acquired m/z

| b <sup>+</sup> | #  | AA # | y <sup>+</sup> | y <sup>2+</sup> |
|----------------|----|------|----------------|-----------------|
| 156.1025       | 1  | I 12 |                |                 |
| 269.1865       | 2  | L 11 | 1080.5550      | 540.7814        |
| 326.2080       | 3  | G 10 | 967.4710       | 484.2394        |
| 383.2295       | 4  | G 9  | 910.4495       | 455.7287        |
| 511.2880       | 5  | Q 8  | 853.4280       | 427.2179        |
| 640.3306       | 6  | E 7  | 725.3695       | 363.1886        |
| 711.3677       | 7  | A 6  | 596.3269       | 298.6673        |
| 782.4049       | 8  | A 5  | 525.2898       | 263.1488        |
| 853.4420       | 9  | A 4  | 454.2526       | 227.6302        |
| 990.5009       | 10 | H 3  | 383.2155       | 192.1117        |
| 1061.5380      | 11 | A 2  | 246.1566       | 123.5822        |
|                | 12 | R 1  | 175.1195       | 88.0637         |

N-term:+43.02

IQMTQSTSSLSASLGDR, MH+ 1823.8809, m/z 608.6318  
 H OS G24 P150811 220811-s1.04084.04084.3.dta

X-range:

-

MassTol: Y-zoom:

MassType:

AVG  MONO

Axis:

1  2

Label:

I  M  -

Ions:

a  +  2+  3+

b  +  2+  3+

c  +  2+  3+

x  +  2+  3+

y  +  2+  3+

z  +  2+  3+

hide H<sub>2</sub>O/NH<sub>3</sub>

zoom 112-122

GO

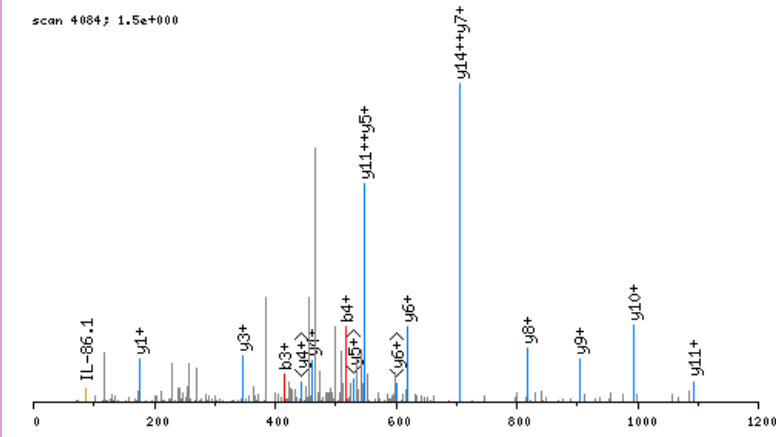

click image to zoom in; click top corners to zoom out [\[precursor±\]](#)

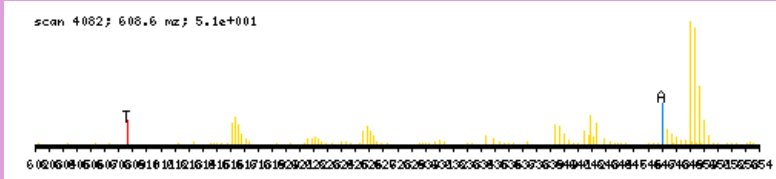

zoomed in precursor plot; T=theoretical m/z, A=acquired m/z

| b <sup>+</sup> | #  | AA # | y <sup>+</sup> | y <sup>2+</sup> |
|----------------|----|------|----------------|-----------------|
| 156.1025       | 1  | I 17 |                |                 |
| 284.1610       | 2  | Q 16 | 1668.7863      | 834.8971        |
| 415.2015       | 3  | M 15 | 1540.7277      | 770.8678        |
| 516.2492       | 4  | T 14 | 1409.6872      | 705.3475        |
| 644.3078       | 5  | Q 13 | 1308.6395      | 654.8237        |
| 731.3398       | 6  | S 12 | 1180.5810      | 590.7944        |
| 832.3875       | 7  | T 11 | 1093.5489      | 547.2784        |
| 919.4195       | 8  | S 10 | 992.5013       | 496.7545        |
| 1006.4515      | 9  | S 9  | 905.4692       | 453.2385        |
| 1119.5356      | 10 | L 8  | 818.4372       | 409.7225        |
| 1206.5676      | 11 | S 7  | 705.3531       | 353.1805        |
| 1277.6048      | 12 | A 6  | 618.3211       | 309.6645        |
| 1364.6368      | 13 | S 5  | 547.2840       | 274.1459        |
| 1477.7208      | 14 | L 4  | 460.2520       | 230.6299        |
| 1534.7423      | 15 | G 3  | 347.1679       | 174.0879        |
| 1649.7693      | 16 | D 2  | 290.1464       | 145.5771        |
|                | 17 | R 1  | 175.1195       | 88.0637         |

N-term:+43.02

IQMTQTTSSLSASLGDR, MH+ 1837.8966, m/z 613.3037  
 H OS G24 P150811 220811-s1.03613.03613.3.dta

X-range:

-

MassTol: Y-zoom:

MassType:

AVG  MONO

Axis:

1  2

Label:

I  M  -

Ions:

a  +  2+  3+

b  +  2+  3+

c  +  2+  3+

x  +  2+  3+

y  +  2+  3+

z  +  2+  3+

hide H<sub>2</sub>O/NH<sub>3</sub>

zoom 112-122

GO

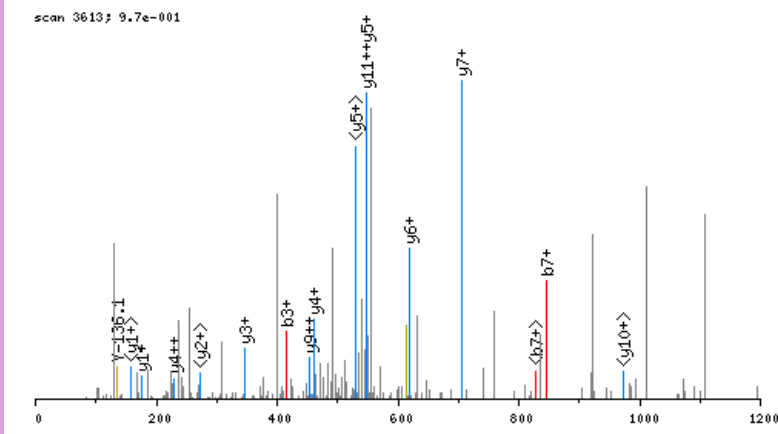

click image to zoom in; click top corners to zoom out [\[precursor±\]](#)

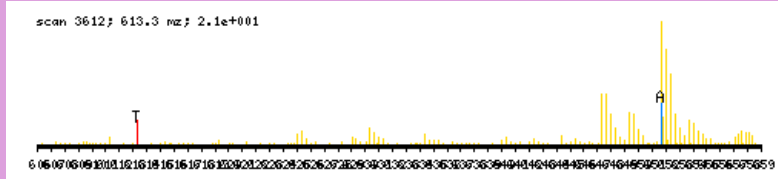

zoomed in precursor plot; T=theoretical m/z, A=acquired m/z

| b <sup>+</sup> | #  | AA # | y <sup>+</sup> | y <sup>2+</sup> |
|----------------|----|------|----------------|-----------------|
| 156.1025       | 1  | I 17 |                |                 |
| 284.1610       | 2  | Q 16 | 1682.8019      | 841.9049        |
| 415.2015       | 3  | M 15 | 1554.7434      | 777.8756        |
| 516.2492       | 4  | T 14 | 1423.7029      | 712.3554        |
| 644.3078       | 5  | Q 13 | 1322.6552      | 661.8315        |
| 745.3555       | 6  | T 12 | 1194.5966      | 597.8022        |
| 846.4031       | 7  | T 11 | 1093.5489      | 547.2784        |
| 933.4352       | 8  | S 10 | 992.5013       | 496.7545        |
| 1020.4672      | 9  | S 9  | 905.4692       | 453.2385        |
| 1133.5513      | 10 | L 8  | 818.4372       | 409.7225        |
| 1220.5833      | 11 | S 7  | 705.3531       | 353.1805        |
| 1291.6204      | 12 | A 6  | 618.3211       | 309.6645        |
| 1378.6524      | 13 | S 5  | 547.2840       | 274.1459        |
| 1491.7365      | 14 | L 4  | 460.2520       | 230.6299        |
| 1548.7580      | 15 | G 3  | 347.1679       | 174.0879        |
| 1663.7849      | 16 | D 2  | 290.1464       | 145.5771        |
|                | 17 | R 1  | 175.1195       | 88.0637         |

N-term:+43.02

ISWYDNEYGYSNR, MH+ 1708.7244, m/z 570.2463  
 H OS G25 P150811 220811-s1.06975.06975.3.dta

X-range:

-

MassTol: Y-zoom:

MassType:

AVG  MONO

Axis:

1  2

Label:

I  M  -

Ions:

a  +  2+  3+

b  +  2+  3+

c  +  2+  3+

x  +  2+  3+

y  +  2+  3+

z  +  2+  3+

hide H<sub>2</sub>O/NH<sub>3</sub>

zoom 112-122

GO

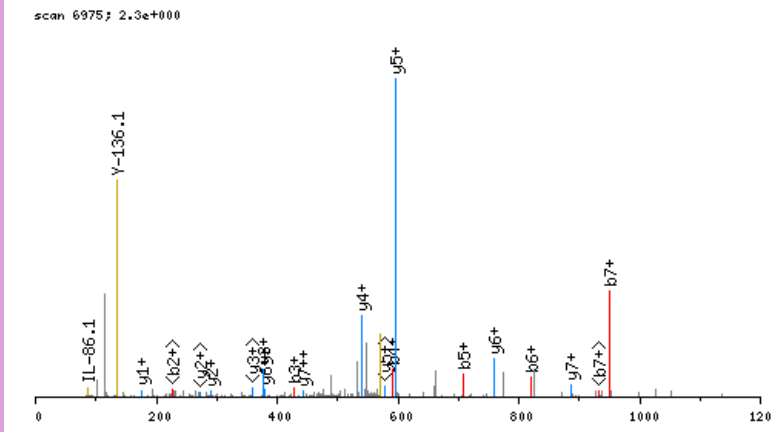

click image to zoom in; click top corners to zoom out [\[precursor±\]](#)

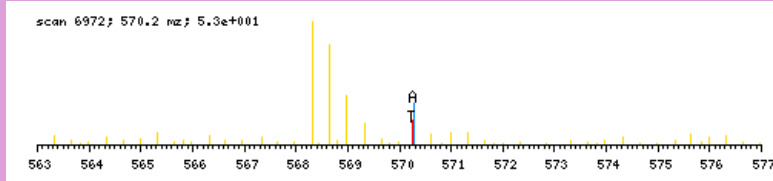

zoomed in precursor plot; T=theoretical m/z, A=acquired m/z

| b <sup>+</sup> | #  | AA # | y <sup>+</sup> | y <sup>2+</sup> |
|----------------|----|------|----------------|-----------------|
| 156.1025       | 1  | I 13 |                |                 |
| 243.1345       | 2  | S 12 | 1553.6297      | 777.3188        |
| 429.2138       | 3  | W 11 | 1466.5977      | 733.8028        |
| 592.2771       | 4  | Y 10 | 1280.5184      | 640.7631        |
| 707.3041       | 5  | D 9  | 1117.4550      | 559.2314        |
| 821.3470       | 6  | N 8  | 1002.4281      | 501.7180        |
| 950.3896       | 7  | E 7  | 888.3852       | 444.6965        |
| 1113.4529      | 8  | Y 6  | 759.3426       | 380.1752        |
| 1170.4744      | 9  | G 5  | 596.2792       | 298.6435        |
| 1333.5377      | 10 | Y 4  | 539.2578       | 270.1328        |
| 1420.5697      | 11 | S 3  | 376.1945       | 188.6011        |
| 1534.6127      | 12 | N 2  | 289.1624       | 145.0851        |
|                | 13 | R 1  | 175.1195       | 88.0637         |

N-term:+43.02

IYENLQNSR, MH+ 1178.5806, m/z 589.7939  
 H OS G29 P150811 220811-s1.04842.04842.2.dta

X-range:

-

MassTol: Y-zoom:

MassType:

AVG  MONO

Axis:

1  2

Label:

I  M  -

Ions:

a  +  2+  3+

b  +  2+  3+

c  +  2+  3+

x  +  2+  3+

y  +  2+  3+

z  +  2+  3+

hide H<sub>2</sub>O/NH<sub>3</sub>

zoom 112-122

GO

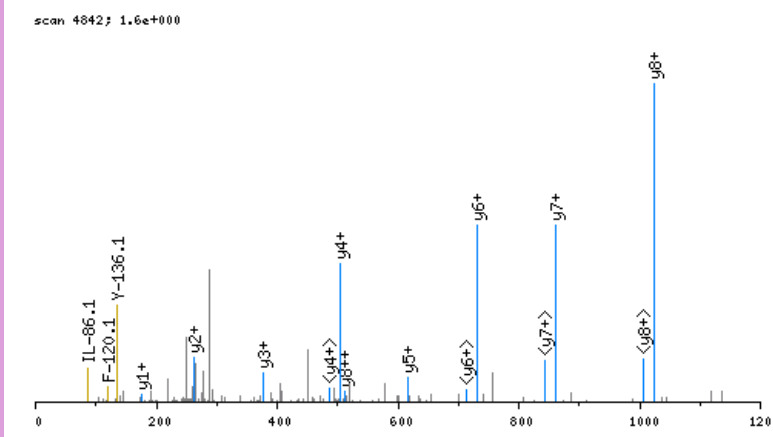

click image to zoom in; click top corners to zoom out [\[precursor±\]](#)

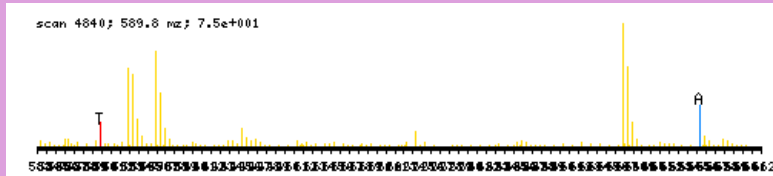

zoomed in precursor plot; T=theoretical m/z, A=acquired m/z

| b <sup>+</sup> | # | AA # | y <sup>+</sup> | y <sup>2+</sup>    |
|----------------|---|------|----------------|--------------------|
| 156.1025       | 1 | I    | 9              |                    |
| 319.1658       | 2 | Y    | 8              | 1023.4859 512.2469 |
| 448.2084       | 3 | E    | 7              | 860.4226 430.7152  |
| 562.2513       | 4 | N    | 6              | 731.3800 366.1939  |
| 675.3354       | 5 | L    | 5              | 617.3371 309.1725  |
| 803.3940       | 6 | Q    | 4              | 504.2530 252.6304  |
| 917.4369       | 7 | N    | 3              | 376.1945 188.6011  |
| 1004.4689      | 8 | S    | 2              | 262.1515 131.5797  |
|                | 9 | R    | 1              | 175.1195 88.0637   |

N-term: +43.02

KAEIIKLK, MH+ 1086.8352, m/z 543.9212  
 H OS G26 P150811 220811-s1.07750.07750.2.dta

scan 7750; 1.8e+000

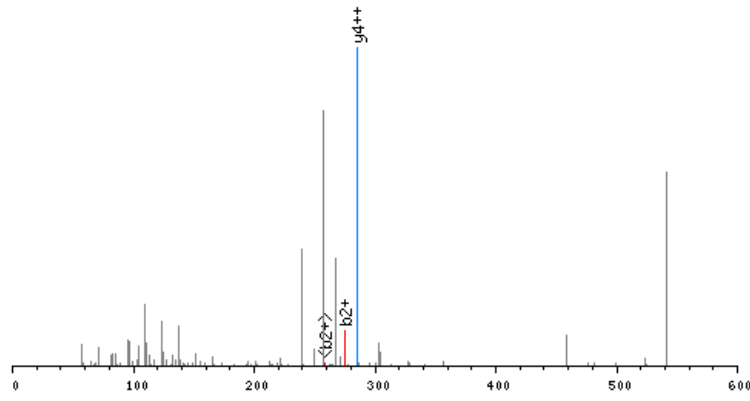

click image to zoom in; click top corners to zoom out [\[precursor±\]](#)

scan 7748; 543.9 mz; 7.5e+000

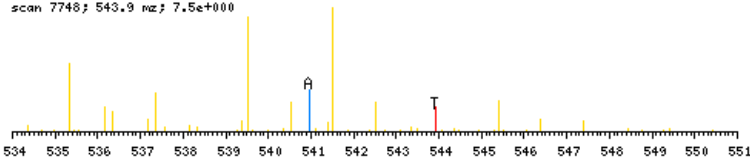

zoomed in precursor plot; T=theoretical m/z, A=acquired m/z

X-range:

-

MassTol: Y-zoom:

MassType:

AVG  MONO

Axis:

1  2

Label:

I  M  -

Ions:

a  +  2+  3+

b  +  2+  3+

c  +  2+  3+

x  +  2+  3+

y  +  2+  3+

z  +  2+  3+

hide H<sub>2</sub>O/NH<sub>3</sub>

zoom 112-122

GO

| b <sup>+</sup> | # | AA # | y <sup>+</sup> | y <sup>2+</sup>   |
|----------------|---|------|----------------|-------------------|
| 205.1765       | 1 | K    | 8              |                   |
| 276.2136       | 2 | A    | 7              | 882.6665 441.8372 |
| 405.2562       | 3 | E    | 6              | 811.6294 406.3186 |
| 518.3403       | 4 | I    | 5              | 682.5868 341.7973 |
| 631.4243       | 5 | I    | 4              | 569.5027 285.2553 |
| 793.5824       | 6 | K    | 3              | 456.4187 228.7132 |
| 906.6665       | 7 | L    | 2              | 294.2606 147.6342 |
|                | 8 | K    | 1              | 181.1765 91.0922  |

N-term:+43.02 K(1):+162.16

K(6):+162.16 K(8):+162.16

KLNFSGLR, MH+ 1004.5893, m/z 502.7983  
 H OS G25 P150811 220811-s1.07163.07163.2.dta

scan 7163; 6.4e+001

X-range:

-

MassTol: Y-zoom:

MassType:

AVG  MONO

Axis:

1  2

Label:

I  M  -

Ions:

a  +  2+  3+

b  +  2+  3+

c  +  2+  3+

x  +  2+  3+

y  +  2+  3+

z  +  2+  3+

hide H<sub>2</sub>O/NH<sub>3</sub>

zoom 112-122

GO

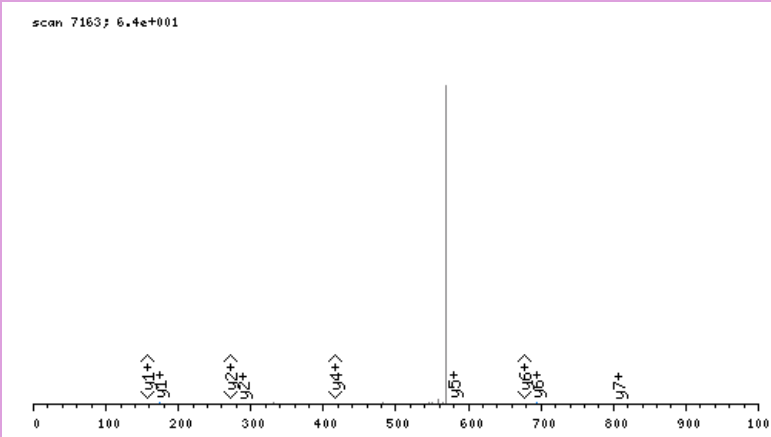

click image to zoom in; click top corners to zoom out [\[precursor±\]](#)

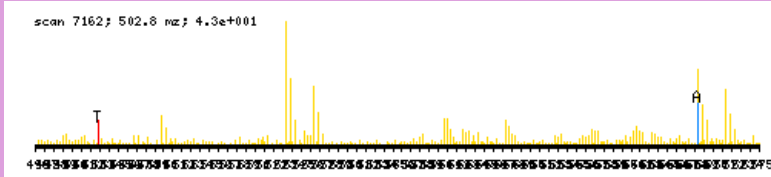

zoomed in precursor plot; T=theoretical m/z, A=acquired m/z

| b <sup>+</sup> | # | AA # | y <sup>+</sup> | y <sup>2+</sup> |
|----------------|---|------|----------------|-----------------|
| 199.1447       | 1 | K    | 8              |                 |
| 312.2288       | 2 | L    | 7              | 806.4525        |
| 426.2717       | 3 | N    | 6              | 693.3684        |
| 573.3401       | 4 | F    | 5              | 579.3255        |
| 660.3721       | 5 | S    | 4              | 432.2571        |
| 717.3936       | 6 | G    | 3              | 345.2250        |
| 830.4777       | 7 | L    | 2              | 288.2036        |
|                | 8 | R    | 1              | 175.1195        |

N-term:+43.02 K(1) :+156.13

KNKEMDIDESLYSR, MH+ 1825.9007, m/z 609.3051  
 H OS G24 P150811 220811-s1.03403.03403.3.dta

X-range:

-

MassTol: Y-zoom:

MassType:

AVG  MONO

Axis:

1  2

Label:

I  M  -

Ions:

a  +  2+  3+

b  +  2+  3+

c  +  2+  3+

x  +  2+  3+

y  +  2+  3+

z  +  2+  3+

hide H<sub>2</sub>O/NH<sub>3</sub>

zoom 112-122

GO

scan 3403; 2.6e+000

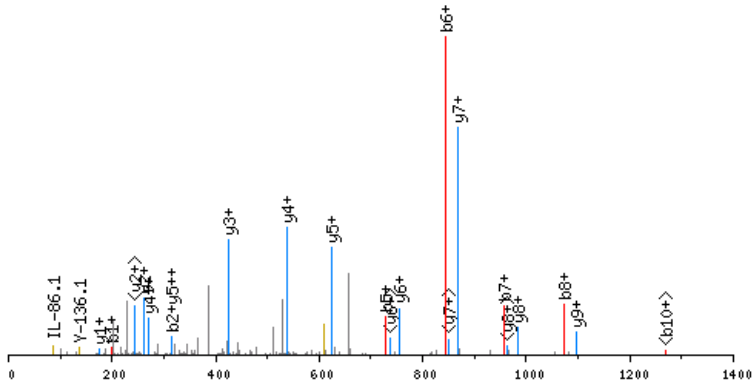

click image to zoom in; click top corners to zoom out [\[precursor±\]](#)

scan 3402; 609.3 mz; 9.1e+000

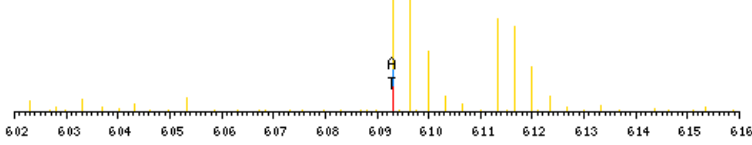

zoomed in precursor plot; T=theoretical m/z, A=acquired m/z

| b <sup>+</sup> | #  | AA # | y <sup>+</sup> | y <sup>2+</sup> |
|----------------|----|------|----------------|-----------------|
| 199.1447       | 1  | K 14 |                |                 |
| 313.1876       | 2  | N 13 | 1627.7638      | 814.3858        |
| 469.3139       | 3  | K 12 | 1513.7209      | 757.3643        |
| 598.3565       | 4  | E 11 | 1357.5946      | 679.3012        |
| 729.3970       | 5  | M 10 | 1228.5520      | 614.7799        |
| 844.4239       | 6  | D 9  | 1097.5115      | 549.2597        |
| 957.5080       | 7  | I 8  | 982.4846       | 491.7462        |
| 1072.5350      | 8  | D 7  | 869.4005       | 435.2042        |
| 1201.5775      | 9  | E 6  | 754.3735       | 377.6907        |
| 1288.6096      | 10 | S 5  | 625.3310       | 313.1694        |
| 1401.6936      | 11 | L 4  | 538.2989       | 269.6534        |
| 1564.7570      | 12 | Y 3  | 425.2149       | 213.1113        |
| 1651.7890      | 13 | S 2  | 262.1515       | 131.5797        |
|                | 14 | R 1  | 175.1195       | 88.0637         |

N-term:+43.02 K(1):+156.13  
 K(3):+156.13



KQPKNLEGYVGFANLPNQVYR, MH+ 2545.4204, m/z 637.1106  
 H OS G26 P150811 220811-s1.06306.06306.4.dta

X-range:

0 - 0

MassTol: Y-zoom:

0. 1.

MassType:

AVG  MONO

Axis:

1  2

Label:

I  M  -

Ions:

a  +  2+  3+

b  +  2+  3+

c  +  2+  3+

x  +  2+  3+

y  +  2+  3+

z  +  2+  3+

hide H<sub>2</sub>O/NH<sub>3</sub>

zoom 112-122

GO

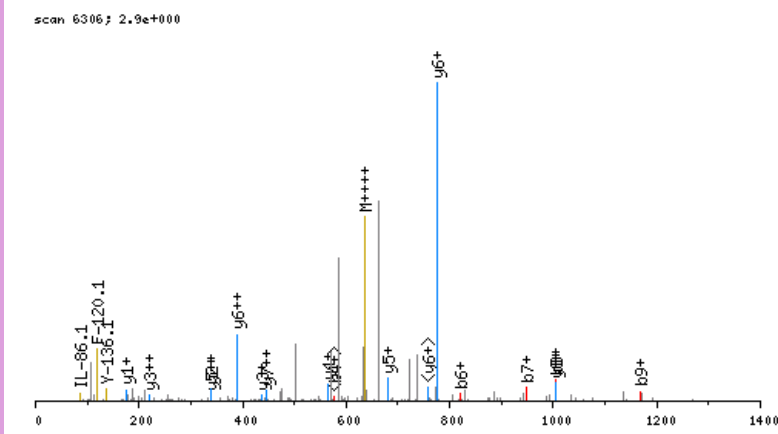

click image to zoom in; click top corners to zoom out [precursor±]

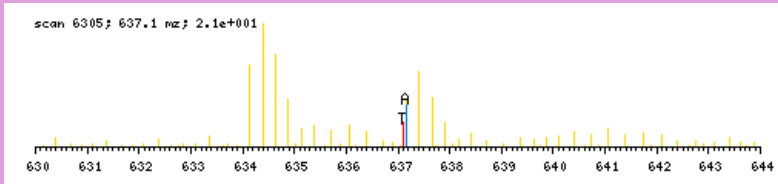

zoomed in precursor plot; T=theoretical m/z, A=acquired m/z

| b <sup>+</sup> | #  | AA # | y <sup>+</sup> | y <sup>2+</sup> |
|----------------|----|------|----------------|-----------------|
| 205.1765       | 1  | K 21 |                |                 |
| 333.2351       | 2  | Q 20 | 2341.2517      | 1171.1298       |
| 430.2878       | 3  | P 19 | 2213.1931      | 1107.1005       |
| 592.4459       | 4  | K 18 | 2116.1404      | 1058.5741       |
| 706.4889       | 5  | N 17 | 1953.9823      | 977.4951        |
| 819.5729       | 6  | L 16 | 1839.9394      | 920.4736        |
| 948.6155       | 7  | E 15 | 1726.8553      | 863.9316        |
| 1005.6370      | 8  | G 14 | 1597.8127      | 799.4103        |
| 1168.7003      | 9  | Y 13 | 1540.7912      | 770.8995        |
| 1267.7687      | 10 | V 12 | 1377.7279      | 689.3679        |
| 1324.7902      | 11 | G 11 | 1278.6595      | 639.8337        |
| 1471.8586      | 12 | F 10 | 1221.6380      | 611.3229        |
| 1542.8957      | 13 | A 9  | 1074.5696      | 537.7887        |
| 1656.9387      | 14 | N 8  | 1003.5325      | 502.2702        |
| 1770.0227      | 15 | L 7  | 889.4896       | 445.2487        |
| 1867.0755      | 16 | P 6  | 776.4055       | 388.7067        |
| 1981.1184      | 17 | N 5  | 679.3527       | 340.1803        |
| 2109.1770      | 18 | Q 4  | 565.3098       | 283.1588        |
| 2208.2454      | 19 | V 3  | 437.2512       | 219.1295        |
| 2371.3087      | 20 | Y 2  | 338.1828       | 169.5953        |
|                | 21 | R 1  | 175.1195       | 88.0637         |

N-term:+43.02 K(1):+162.16  
 K(4):+162.16

KVVNKESLVISGLR, MH+ 1652.0748, m/z 413.7741  
 H OS G28 P150811 220811-s1.03351.03351.4.dta

scan 3351; 1.2e+001

X-range:

-

MassTol: Y-zoom:

MassType:

AVG  MONO

Axis:

1  2

Label:

I  M  -

Ions:

a  +  2+  3+

b  +  2+  3+

c  +  2+  3+

x  +  2+  3+

y  +  2+  3+

z  +  2+  3+

hide H<sub>2</sub>O/NH<sub>3</sub>

zoom 112-122

GO

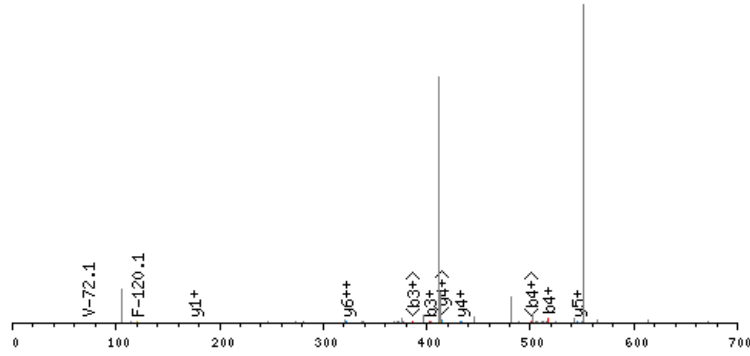

click image to zoom in; click top corners to zoom out [\[precursor±\]](#)

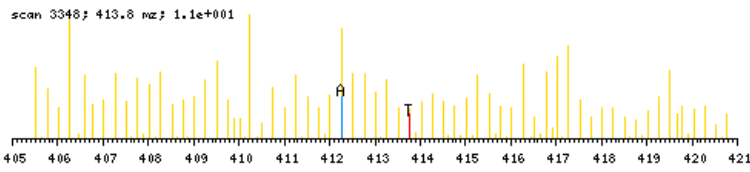

zoomed in precursor plot; T=theoretical m/z, A=acquired m/z

| b <sup>+</sup> | #  | AA # | y <sup>+</sup> | y <sup>2+</sup> |
|----------------|----|------|----------------|-----------------|
| 205.1765       | 1  | K 14 |                |                 |
| 304.2449       | 2  | V 13 | 1447.9061      | 724.4570        |
| 403.3133       | 3  | V 12 | 1348.8377      | 674.9227        |
| 517.3563       | 4  | N 11 | 1249.7692      | 625.3885        |
| 679.5144       | 5  | K 10 | 1135.7263      | 568.3671        |
| 808.5569       | 6  | E 9  | 973.5682       | 487.2880        |
| 895.5890       | 7  | S 8  | 844.5256       | 422.7667        |
| 1008.6730      | 8  | L 7  | 757.4936       | 379.2507        |
| 1107.7415      | 9  | V 6  | 644.4095       | 322.7087        |
| 1220.8255      | 10 | I 5  | 545.3411       | 273.1745        |
| 1307.8575      | 11 | S 4  | 432.2571       | 216.6324        |
| 1364.8790      | 12 | G 3  | 345.2250       | 173.1164        |
| 1477.9631      | 13 | L 2  | 288.2036       | 144.6057        |
|                | 14 | R 1  | 175.1195       | 88.0637         |

N-term:+43.02 K(1):+162.16  
 K(5):+162.16

LFVLEEDLSR, MH+ 1262.6633, m/z 421.5593  
 H OS G27 P150811 220811-s1.02188.02188.3.dta

scan 2188; 1.3e+001

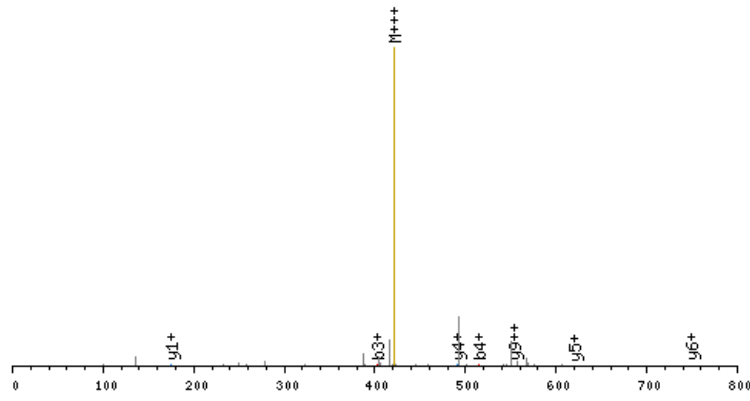

click image to zoom in; click top corners to zoom out [\[precursor±\]](#)

scan 2187; 421.6 m/z; 5.7e+000

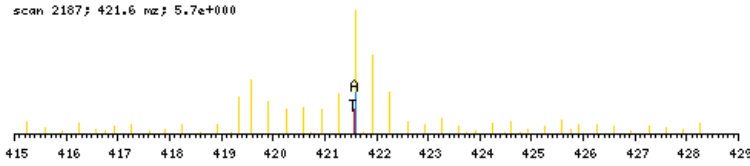

zoomed in precursor plot; T=theoretical m/z, A=acquired m/z

X-range:

-

MassTol: Y-zoom:

MassType:

AVG  MONO

Axis:

1  2

Label:

I  M  -

Ions:

a  +  2+  3+

b  +  2+  3+

c  +  2+  3+

x  +  2+  3+

y  +  2+  3+

z  +  2+  3+

hide H<sub>2</sub>O/NH<sub>3</sub>

zoom 112-122

GO

| b <sup>+</sup> | #  | AA # | y <sup>+</sup> | y <sup>2+</sup> |
|----------------|----|------|----------------|-----------------|
| 156.1025       | 1  | L 10 |                |                 |
| 303.1709       | 2  | F 9  | 1107.5686      | 554.2882        |
| 402.2393       | 3  | V 8  | 960.5002       | 480.7540        |
| 515.3234       | 4  | L 7  | 861.4318       | 431.2198        |
| 644.3659       | 5  | E 6  | 748.3477       | 374.6778        |
| 773.4085       | 6  | E 5  | 619.3051       | 310.1565        |
| 888.4355       | 7  | D 4  | 490.2625       | 245.6352        |
| 1001.5195      | 8  | L 3  | 375.2356       | 188.1217        |
| 1088.5516      | 9  | S 2  | 262.1515       | 131.5797        |
|                | 10 | R 1  | 175.1195       | 88.0637         |

N-term:+43.02

LGADESSVR, MH+ 1046.5118, m/z 523.7596  
 H OS G29 P150811 220811-s1.03891.03891.2.dta

scan 3891; 8.5e-001

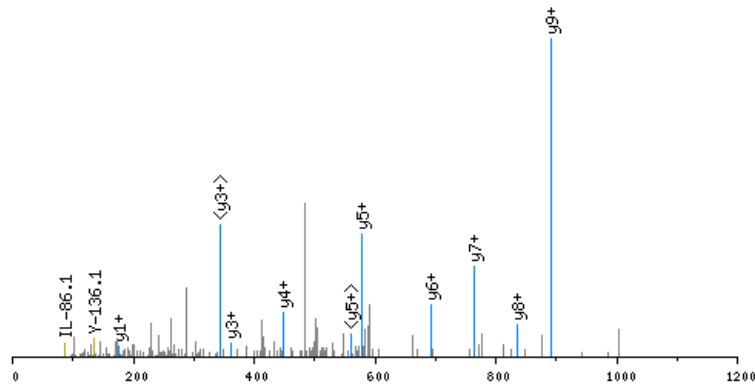

click image to zoom in; click top corners to zoom out [\[precursor±\]](#)

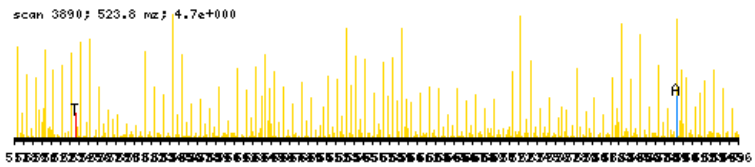

zoomed in precursor plot; T=theoretical m/z, A=acquired m/z

X-range:

-

MassTol: Y-zoom:

MassType:

AVG  MONO

Axis:

1  2

Label:

I  M  -

Ions:

a  +  2+  3+

b  +  2+  3+

c  +  2+  3+

x  +  2+  3+

y  +  2+  3+

z  +  2+  3+

hide H<sub>2</sub>O/NH<sub>3</sub>

zoom 112-122

GO

| b <sup>+</sup> | #  | AA | #  | y <sup>+</sup> | y <sup>2+</sup> |
|----------------|----|----|----|----------------|-----------------|
| 156.1025       | 1  | L  | 10 |                |                 |
| 213.1239       | 2  | G  | 9  | 891.4172       | 446.2125        |
| 284.1610       | 3  | A  | 8  | 834.3957       | 417.7018        |
| 355.1982       | 4  | A  | 7  | 763.3586       | 382.1832        |
| 470.2251       | 5  | D  | 6  | 692.3215       | 346.6647        |
| 599.2677       | 6  | E  | 5  | 577.2946       | 289.1512        |
| 686.2997       | 7  | S  | 4  | 448.2520       | 224.6299        |
| 773.3317       | 8  | S  | 3  | 361.2199       | 181.1139        |
| 872.4002       | 9  | V  | 2  | 274.1879       | 137.5979        |
|                | 10 | R  | 1  | 175.1195       | 88.0637         |

N-term:+43.02

LGGLGKLAAEGLAHR, MH+ 1532.8913, m/z 511.6353  
 H OS G26 P150811 220811-s1.06491.06491.3.dta

X-range:

-

MassTol: Y-zoom:

MassType:

AVG  MONO

Axis:

1  2

Label:

I  M  -

Ions:

a  +  2+  3+

b  +  2+  3+

c  +  2+  3+

x  +  2+  3+

y  +  2+  3+

z  +  2+  3+

hide H<sub>2</sub>O/NH<sub>3</sub>

zoom 112-122

GO

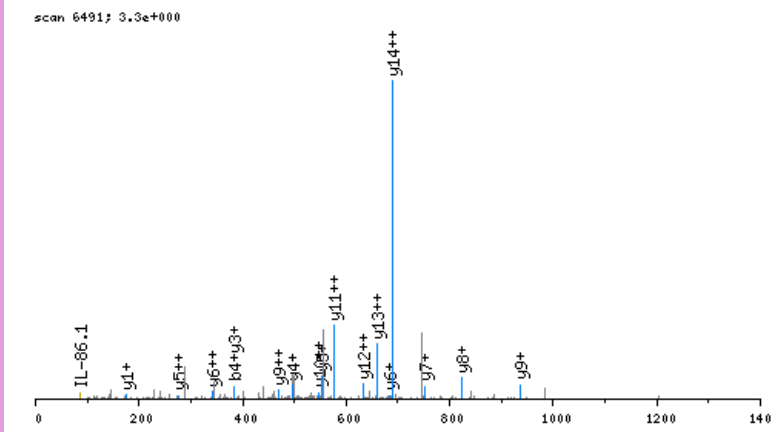

click image to zoom in; click top corners to zoom out [\[precursor±\]](#)

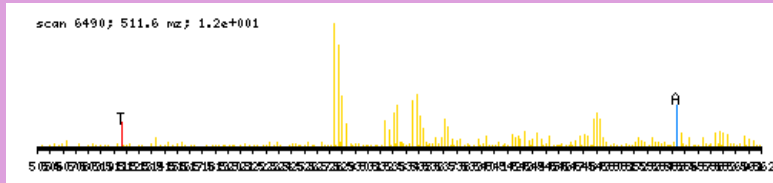

zoomed in precursor plot; T=theoretical m/z, A=acquired m/z

| b <sup>+</sup> | #  | AA | #  | y <sup>+</sup> | y <sup>2+</sup> |
|----------------|----|----|----|----------------|-----------------|
| 156.1025       | 1  | L  | 15 |                |                 |
| 213.1239       | 2  | G  | 14 | 1377.7967      | 689.4023        |
| 270.1454       | 3  | G  | 13 | 1320.7752      | 660.8915        |
| 383.2295       | 4  | L  | 12 | 1263.7538      | 632.3808        |
| 440.2509       | 5  | G  | 11 | 1150.6697      | 575.8388        |
| 596.3772       | 6  | K  | 10 | 1093.6482      | 547.3280        |
| 709.4613       | 7  | L  | 9  | 937.5219       | 469.2649        |
| 780.4984       | 8  | A  | 8  | 824.4379       | 412.7228        |
| 851.5355       | 9  | A  | 7  | 753.4008       | 377.2043        |
| 980.5781       | 10 | E  | 6  | 682.3636       | 341.6857        |
| 1037.5996      | 11 | G  | 5  | 553.3211       | 277.1644        |
| 1150.6836      | 12 | L  | 4  | 496.2996       | 248.6537        |
| 1221.7207      | 13 | A  | 3  | 383.2155       | 192.1117        |
| 1358.7797      | 14 | H  | 2  | 312.1784       | 156.5931        |
|                | 15 | R  | 1  | 175.1195       | 88.0637         |

N-term:+43.02 K(6):+156.13

LGSGFKAER, MH+ 1040.5953, m/z 520.8013  
 H OS G25 P150811 220811-s1.05210.05210.2.dta

scan 5210; 1.7e+001

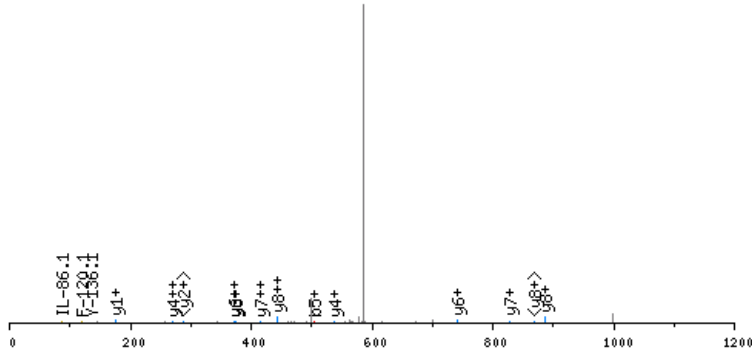

click image to zoom in; click top corners to zoom out [\[precursor±\]](#)

scan 5207; 520.8 m/z; 7.2e+001

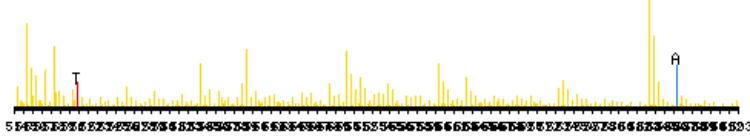

zoomed in precursor plot; T=theoretical m/z, A=acquired m/z

X-range:

-

MassTol: Y-zoom:

MassType:

AVG  MONO

Axis:

1  2

Label:

I  M  -

Ions:

a  +  2+  3+

b  +  2+  3+

c  +  2+  3+

x  +  2+  3+

y  +  2+  3+

z  +  2+  3+

hide H<sub>2</sub>O/NH<sub>3</sub>

zoom 112-122

GO

| b <sup>+</sup> | # | AA # | y <sup>+</sup> | y <sup>2+</sup>   |
|----------------|---|------|----------------|-------------------|
| 156.1025       | 1 | L    | 9              |                   |
| 213.1239       | 2 | G    | 8              | 885.5007 443.2543 |
| 300.1560       | 3 | S    | 7              | 828.4792 414.7435 |
| 357.1774       | 4 | G    | 6              | 741.4472 371.2275 |
| 504.2458       | 5 | F    | 5              | 684.4257 342.7168 |
| 666.4039       | 6 | K    | 4              | 537.3573 269.1826 |
| 737.4410       | 7 | A    | 3              | 375.1992 188.1035 |
| 866.4836       | 8 | E    | 2              | 304.1621 152.5850 |
|                | 9 | R    | 1              | 175.1195 88.0637  |

N-term:+43.02 K(6):+162.16

LKFPVKPADLKKR, MH+ 1718.2370, m/z 573.4172  
 H OS G29 P150811 220811-s1.07621.07621.3.dta

X-range:

-

MassTol: Y-zoom:

MassType:

AVG  MONO

Axis:

1  2

Label:

I  M  -

Ions:

a  +  2+  3+

b  +  2+  3+

c  +  2+  3+

x  +  2+  3+

y  +  2+  3+

z  +  2+  3+

hide H<sub>2</sub>O/NH<sub>3</sub>

zoom 112-122

GO

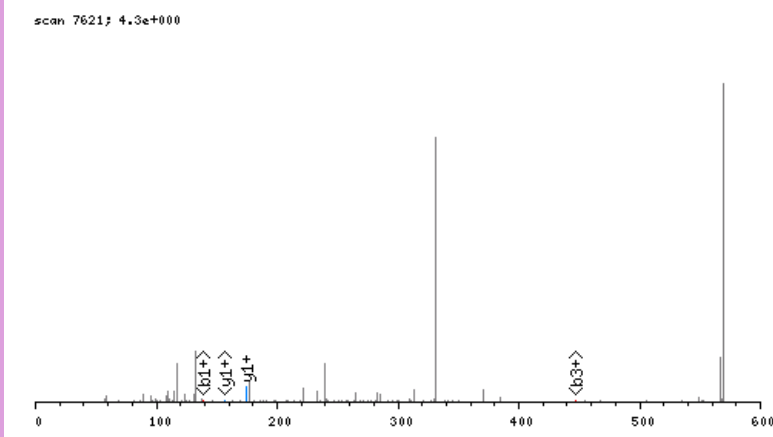

click image to zoom in; click top corners to zoom out [\[precursor±\]](#)

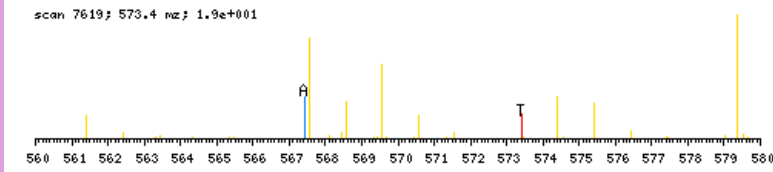

zoomed in precursor plot; T=theoretical m/z, A=acquired m/z

| b <sup>+</sup> | #  | AA # | y <sup>+</sup> | y <sup>2+</sup> |
|----------------|----|------|----------------|-----------------|
| 156.1025       | 1  | L 13 |                |                 |
| 318.2606       | 2  | K 12 | 1563.1424      | 782.0751        |
| 465.3290       | 3  | F 11 | 1400.9843      | 700.9961        |
| 562.3817       | 4  | P 10 | 1253.9159      | 627.4618        |
| 661.4502       | 5  | V 9  | 1156.8631      | 578.9355        |
| 823.6083       | 6  | K 8  | 1057.7947      | 529.4013        |
| 920.6610       | 7  | P 7  | 895.6366       | 448.3222        |
| 991.6981       | 8  | A 6  | 798.5838       | 399.7958        |
| 1106.7251      | 9  | D 5  | 727.5467       | 364.2773        |
| 1219.8091      | 10 | L 4  | 612.5198       | 306.7638        |
| 1381.9672      | 11 | K 3  | 499.4357       | 250.2218        |
| 1544.1253      | 12 | K 2  | 337.2776       | 169.1427        |
|                | 13 | R 1  | 175.1195       | 88.0637         |

N-term:+43.02 K(2):+162.16  
 K(6):+162.16 K(11):+162.16  
 K(12):+162.16

LKPQPPQOTSQPQQPPPTQQAVAR, MH+ 2720.4484, m/z 680.8676  
 H OS G24 P150811 220811-s1.03290.03290.4.dta

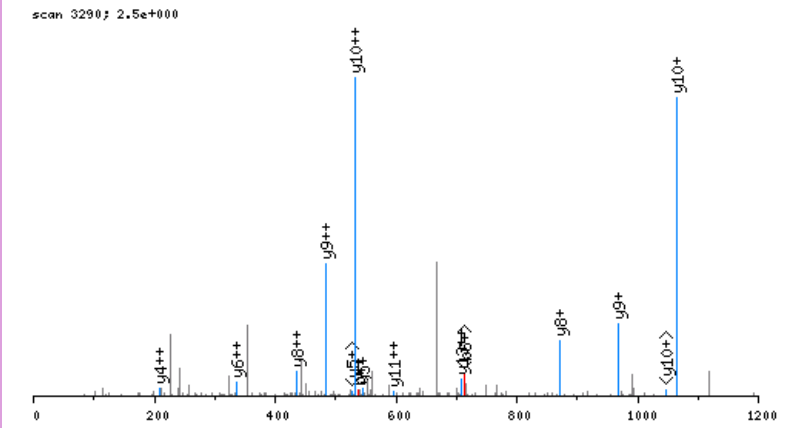

click image to zoom in; click top corners to zoom out [precursor±]

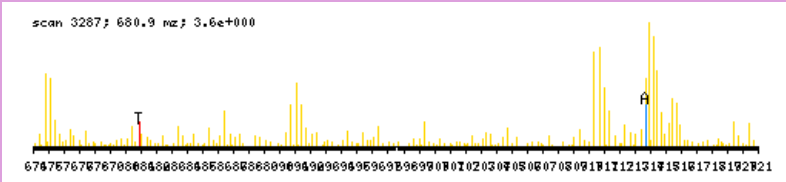

zoomed in precursor plot; T=theoretical m/z, A=acquired m/z

X-range:

-

MassTol: Y-zoom:

MassType:

AVG  MONO

Axis:

1  2

Label:

I  M  -

Ions:

a  +  2+  3+

b  +  2+  3+

c  +  2+  3+

x  +  2+  3+

y  +  2+  3+

z  +  2+  3+

hide H<sub>2</sub>O/NH<sub>3</sub>

zoom 112-122

GO

| b <sup>+</sup> | #  | AA # | y <sup>+</sup> | y <sup>2+</sup> |
|----------------|----|------|----------------|-----------------|
| 156.1025       | 1  | L 24 |                |                 |
| 312.2288       | 2  | K 23 | 2565.3538      | 1283.1808       |
| 409.2815       | 3  | P 22 | 2409.2275      | 1205.1177       |
| 537.3401       | 4  | Q 21 | 2312.1747      | 1156.5913       |
| 634.3929       | 5  | P 20 | 2184.1162      | 1092.5620       |
| 731.4456       | 6  | P 19 | 2087.0634      | 1044.0356       |
| 859.5042       | 7  | Q 18 | 1990.0106      | 995.5092        |
| 987.5628       | 8  | Q 17 | 1861.9520      | 931.4799        |
| 1088.6105      | 9  | T 16 | 1733.8935      | 867.4506        |
| 1175.6425      | 10 | S 15 | 1632.8458      | 816.9268        |
| 1303.7011      | 11 | Q 14 | 1545.8138      | 773.4108        |
| 1400.7538      | 12 | P 13 | 1417.7552      | 709.3815        |
| 1528.8124      | 13 | Q 12 | 1320.7024      | 660.8551        |
| 1656.8710      | 14 | Q 11 | 1192.6438      | 596.8258        |
| 1753.9238      | 15 | P 10 | 1064.5853      | 532.7965        |
| 1850.9765      | 16 | P 9  | 967.5325       | 484.2702        |
| 1948.0293      | 17 | P 8  | 870.4797       | 435.7438        |
| 2049.0770      | 18 | T 7  | 773.4270       | 387.2174        |
| 2177.1355      | 19 | Q 6  | 672.3793       | 336.6936        |
| 2305.1941      | 20 | Q 5  | 544.3207       | 272.6643        |
| 2376.2312      | 21 | A 4  | 416.2621       | 208.6350        |
| 2475.2996      | 22 | V 3  | 345.2250       | 173.1164        |
| 2546.3368      | 23 | A 2  | 246.1566       | 123.5822        |
|                | 24 | R 1  | 175.1195       | 88.0637         |

N-term:+43.02 K(2):+156.13



LPKRLVKKGKK, MH+ 1507.2313, m/z 503.0820  
 H OS G26 P150811 220811-s1.06383.06383.3.dta

X-range:

-

MassTol: Y-zoom:

MassType:

AVG  MONO

Axis:

1  2

Label:

I  M  -

Ions:

a  +  2+  3+

b  +  2+  3+

c  +  2+  3+

x  +  2+  3+

y  +  2+  3+

z  +  2+  3+

hide H<sub>2</sub>O/NH<sub>3</sub>

zoom 112-122

GO

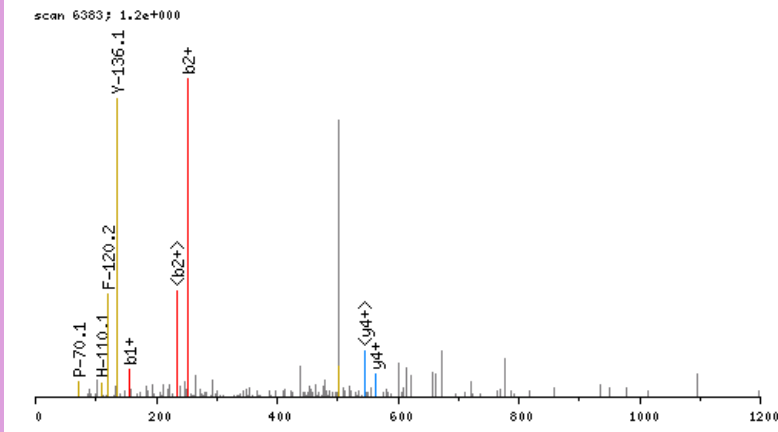

click image to zoom in; click top corners to zoom out [\[precursor±\]](#)

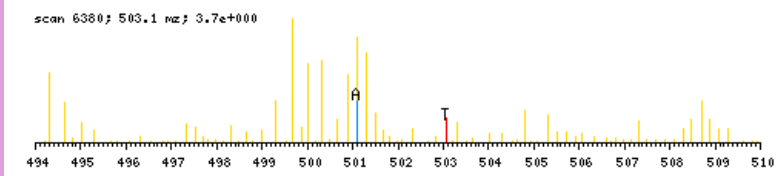

zoomed in precursor plot; T=theoretical m/z, A=acquired m/z

| b <sup>+</sup> | #  | AA | #  | y <sup>+</sup> | y <sup>2+</sup> |
|----------------|----|----|----|----------------|-----------------|
| 156.1025       | 1  | L  | 11 |                |                 |
| 253.1552       | 2  | P  | 10 | 1352.1367      | 676.5723        |
| 415.3133       | 3  | K  | 9  | 1255.0839      | 628.0459        |
| 571.4144       | 4  | R  | 8  | 1092.9258      | 546.9668        |
| 684.4985       | 5  | L  | 7  | 936.8247       | 468.9163        |
| 783.5669       | 6  | V  | 6  | 823.7407       | 412.3742        |
| 945.7250       | 7  | K  | 5  | 724.6723       | 362.8400        |
| 1107.8831      | 8  | K  | 4  | 562.5142       | 281.7610        |
| 1164.9046      | 9  | G  | 3  | 400.3561       | 200.6819        |
| 1327.0627      | 10 | K  | 2  | 343.3346       | 172.1712        |
|                | 11 | K  | 1  | 181.1765       | 91.0922         |

N-term:+43.02 K(3):+162.16  
 K(7):+162.16 K(8):+162.16  
 K(10):+162.16 K(11):+162.16

X-range:

-

MassTol: Y-zoom:

MassType:

AVG  MONO

Axis:

1  2

Label:

I  M  -

Ions:

a  +  2+  3+

b  +  2+  3+

c  +  2+  3+

x  +  2+  3+

y  +  2+  3+

z  +  2+  3+

hide H<sub>2</sub>O/NH<sub>3</sub>

zoom 112-122

GO

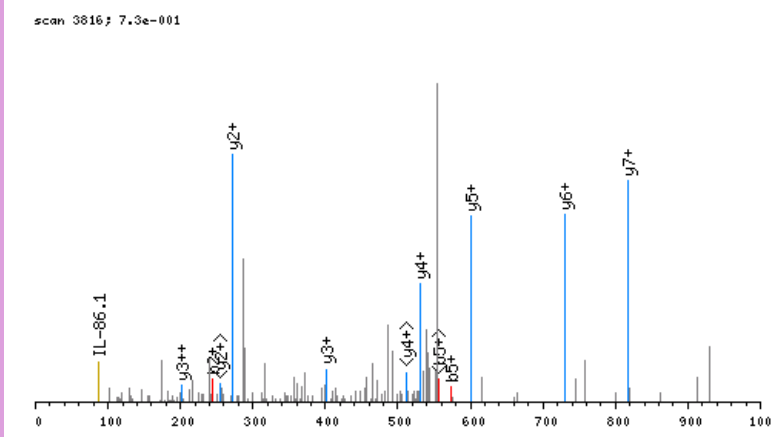

click image to zoom in; click top corners to zoom out [\[precursor±\]](#)

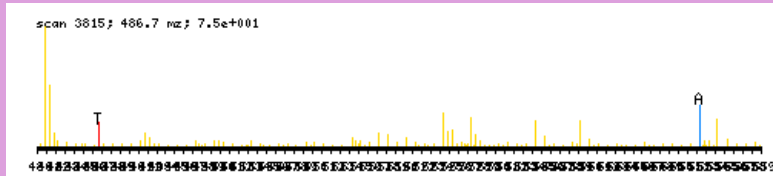

zoomed in precursor plot; T=theoretical m/z, A=acquired m/z

| b <sup>+</sup> | # | AA # | y <sup>+</sup> | y <sup>2+</sup> |
|----------------|---|------|----------------|-----------------|
| 156.1025       | 1 | L 8  |                |                 |
| 243.1345       | 2 | S 7  | 817.3692       | 409.1885        |
| 372.1771       | 3 | E 6  | 730.3372       | 365.6725        |
| 443.2142       | 4 | A 5  | 601.2946       | 301.1512        |
| 572.2568       | 5 | E 4  | 530.2575       | 265.6326        |
| 701.2994       | 6 | E 3  | 401.2149       | 201.1113        |
| 798.3521       | 7 | P 2  | 272.1723       | 136.5900        |
|                | 8 | R 1  | 175.1195       | 88.0637         |

N-term:+43.02

LSFQYPDVYR, MH+ 1329.6479, m/z 665.3276  
 H OS G29 P150811 220811-s1.06368.06368.2.dta

X-range:

-

MassTol: Y-zoom:

MassType:

AVG  MONO

Axis:

1  2

Label:

I  M  -

Ions:

a  +  2+  3+

b  +  2+  3+

c  +  2+  3+

x  +  2+  3+

y  +  2+  3+

z  +  2+  3+

hide H<sub>2</sub>O/NH<sub>3</sub>

zoom 112-122

GO

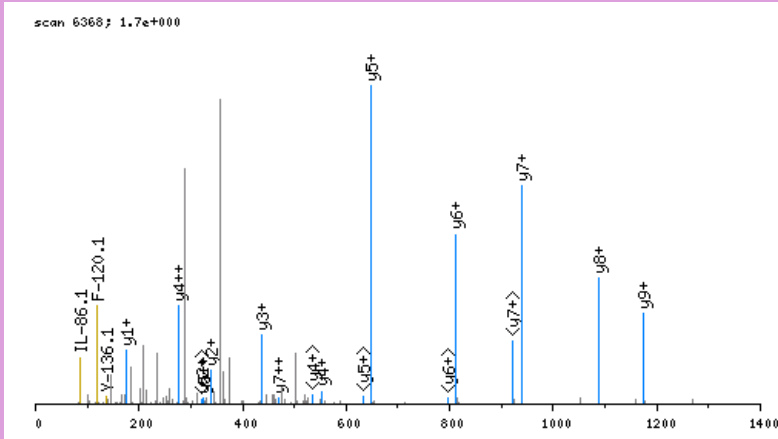

click image to zoom in; click top corners to zoom out [\[precursor±\]](#)

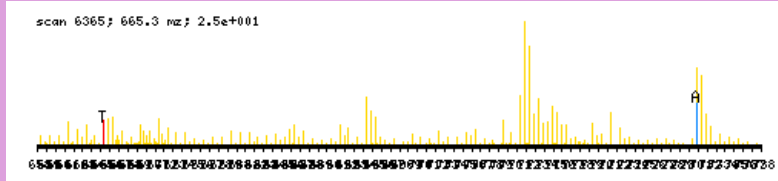

zoomed in precursor plot; T=theoretical m/z, A=acquired m/z

| b <sup>+</sup> | #  | AA # | y <sup>+</sup> | y <sup>2+</sup>    |
|----------------|----|------|----------------|--------------------|
| 156.1025       | 1  | L    | 10             |                    |
| 243.1345       | 2  | S    | 9              | 1174.5533 587.7806 |
| 390.2029       | 3  | F    | 8              | 1087.5213 544.2645 |
| 518.2615       | 4  | Q    | 7              | 940.4529 470.7303  |
| 681.3248       | 5  | Y    | 6              | 812.3943 406.7011  |
| 778.3776       | 6  | P    | 5              | 649.3310 325.1694  |
| 893.4045       | 7  | D    | 4              | 552.2782 276.6430  |
| 992.4729       | 8  | V    | 3              | 437.2512 219.1295  |
| 1155.5363      | 9  | Y    | 2              | 338.1828 169.5953  |
|                | 10 | R    | 1              | 175.1195 88.0637   |

N-term:+43.02

MDAVLSDFVFR, MH+ 1194.5829, m/z 597.7951  
 H OS G29 P150811 220811-s1.06571.06571.2.dta

X-range:

-

MassTol: Y-zoom:

MassType:

AVG  MONO

Axis:

1  2

Label:

I  M  -

Ions:

a  +  2+  3+

b  +  2+  3+

c  +  2+  3+

x  +  2+  3+

y  +  2+  3+

z  +  2+  3+

hide H<sub>2</sub>O/NH<sub>3</sub>

zoom 112-122

GO

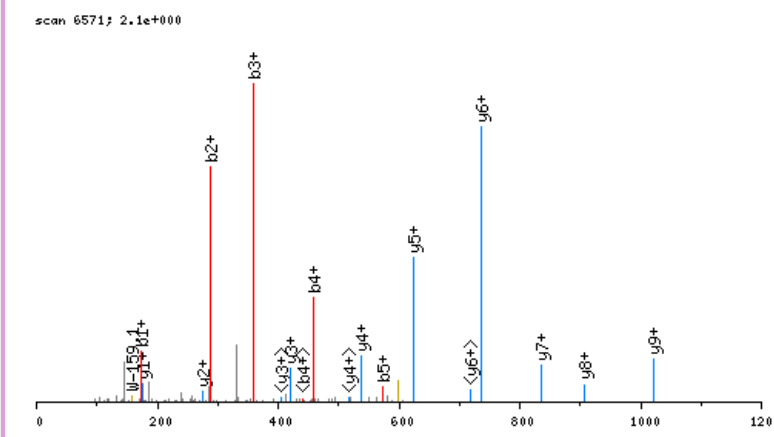

click image to zoom in; click top corners to zoom out [\[precursor±\]](#)

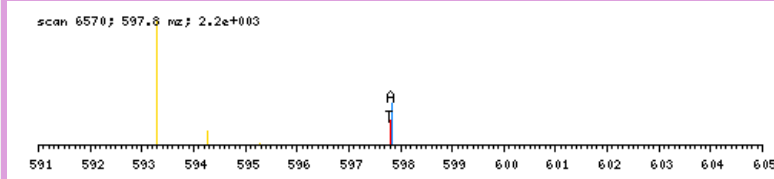

zoomed in precursor plot; T=theoretical m/z, A=acquired m/z

| b <sup>+</sup> | #  | AA # | y <sup>+</sup> | y <sup>2+</sup> |
|----------------|----|------|----------------|-----------------|
| 174.0589       | 1  | M    | 10             |                 |
| 289.0858       | 2  | D    | 9              | 1021.5318       |
| 360.1229       | 3  | A    | 8              | 906.5049        |
| 459.1914       | 4  | V    | 7              | 835.4678        |
| 572.2754       | 5  | L    | 6              | 736.3994        |
| 659.3074       | 6  | S    | 5              | 623.3153        |
| 774.3344       | 7  | D    | 4              | 536.2833        |
| 921.4028       | 8  | F    | 3              | 421.2563        |
| 1020.4712      | 9  | V    | 2              | 274.1879        |
|                | 10 | R    | 1              | 175.1195        |

N-term:+43.02

MDKSELVQKAKLAEQAER, MH+ 2200.2012, m/z 550.8058  
 H OS G28 P150811 220811-s1.06216.06216.4.dta

X-range:

-

MassTol: Y-zoom:

MassType:

AVG  MONO

Axis:

1  2

Label:

I  M  -

Ions:

a  +  2+  3+

b  +  2+  3+

c  +  2+  3+

x  +  2+  3+

y  +  2+  3+

z  +  2+  3+

hide H<sub>2</sub>O/NH<sub>3</sub>

zoom 112-122

GO

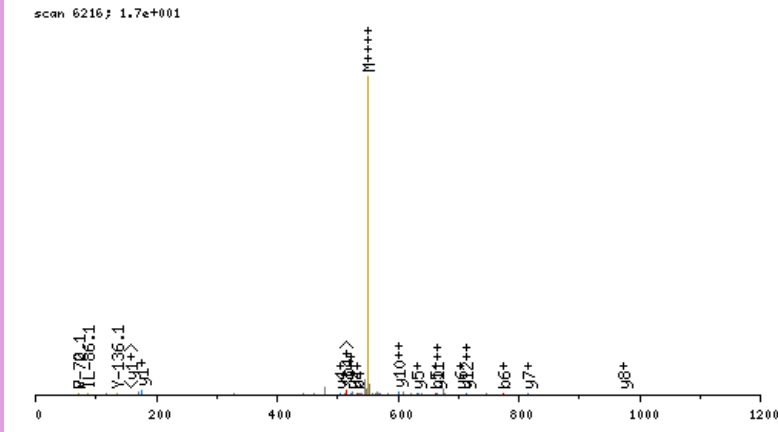

click image to zoom in; click top corners to zoom out [\[precursor±\]](#)

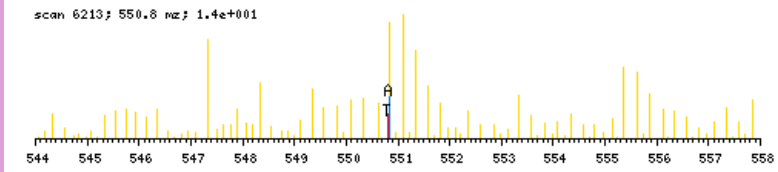

zoomed in precursor plot; T=theoretical m/z, A=acquired m/z

| b <sup>+</sup> | #  | AA # | y <sup>+</sup> | y <sup>2+</sup> |
|----------------|----|------|----------------|-----------------|
| 174.0589       | 1  | M 18 |                |                 |
| 289.0858       | 2  | D 17 | 2027.1502      | 1014.0790       |
| 445.2121       | 3  | K 16 | 1912.1232      | 956.5655        |
| 532.2442       | 4  | S 15 | 1755.9969      | 878.5024        |
| 661.2867       | 5  | E 14 | 1668.9649      | 834.9864        |
| 774.3708       | 6  | L 13 | 1539.9223      | 770.4651        |
| 873.4392       | 7  | V 12 | 1426.8383      | 713.9230        |
| 1001.4978      | 8  | Q 11 | 1327.7698      | 664.3888        |
| 1157.6241      | 9  | K 10 | 1199.7113      | 600.3595        |
| 1228.6612      | 10 | A 9  | 1043.5850      | 522.2964        |
| 1384.7875      | 11 | K 8  | 972.5479       | 486.7778        |
| 1497.8716      | 12 | L 7  | 816.4216       | 408.7147        |
| 1568.9087      | 13 | A 6  | 703.3375       | 352.1727        |
| 1697.9513      | 14 | E 5  | 632.3004       | 316.6541        |
| 1826.0099      | 15 | Q 4  | 503.2578       | 252.1328        |
| 1897.0470      | 16 | A 3  | 375.1992       | 188.1035        |
| 2026.0896      | 17 | E 2  | 304.1621       | 152.5850        |
|                | 18 | R 1  | 175.1195       | 88.0637         |

N-term: +43.02 K(3): +156.13  
 K(9): +156.13 K(11): +156.13

MDLVAELPRPAGAAR, MH+ 1608.8532, m/z 536.9559  
 H OS G25 P150811 220811-s1.08086.08086.3.dta

X-range:

-

MassTol: Y-zoom:

MassType:

AVG  MONO

Axis:

1  2

Label:

I  M  -

Ions:

a  +  2+  3+

b  +  2+  3+

c  +  2+  3+

x  +  2+  3+

y  +  2+  3+

z  +  2+  3+

hide H<sub>2</sub>O/NH<sub>3</sub>

zoom 112-122

GO

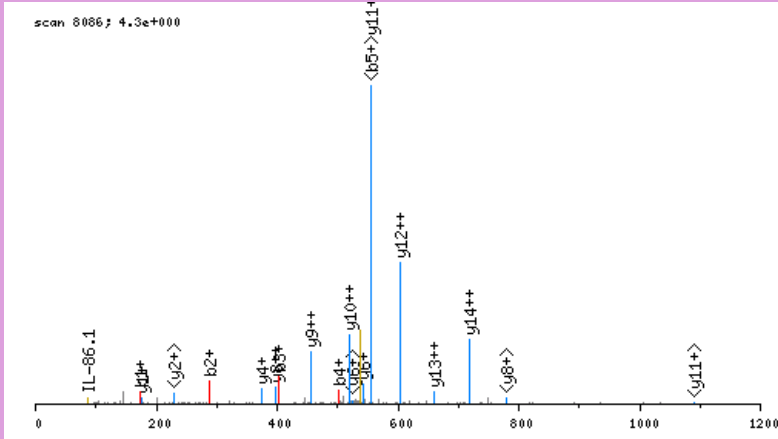

click image to zoom in; click top corners to zoom out [\[precursor±\]](#)

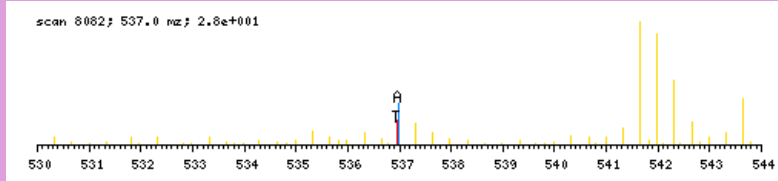

zoomed in precursor plot; T=theoretical m/z, A=acquired m/z

| b <sup>+</sup> | #  | AA # | y <sup>+</sup> | y <sup>2+</sup> |
|----------------|----|------|----------------|-----------------|
| 174.0589       | 1  | M 15 |                |                 |
| 289.0858       | 2  | D 14 | 1435.8021      | 718.4050        |
| 402.1699       | 3  | L 13 | 1320.7752      | 660.8915        |
| 501.2383       | 4  | V 12 | 1207.6911      | 604.3495        |
| 572.2754       | 5  | A 11 | 1108.6227      | 554.8153        |
| 701.3180       | 6  | E 10 | 1037.5856      | 519.2967        |
| 814.4021       | 7  | L 9  | 908.5430       | 454.7754        |
| 911.4548       | 8  | P 8  | 795.4589       | 398.2334        |
| 1067.5560      | 9  | R 7  | 698.4062       | 349.7070        |
| 1164.6087      | 10 | P 6  | 542.3051       | 271.6564        |
| 1235.6458      | 11 | A 5  | 445.2523       | 223.1301        |
| 1292.6673      | 12 | G 4  | 374.2152       | 187.6115        |
| 1363.7044      | 13 | A 3  | 317.1937       | 159.1008        |
| 1434.7415      | 14 | A 2  | 246.1566       | 123.5822        |
|                | 15 | R 1  | 175.1195       | 88.0637         |

N-term:+43.02

MDLVKSHLMYAVR, MH+ 1632.8606, m/z 544.9584  
 H OS G26 P150811 220811-s1.06657.06657.3.dta

X-range:

-

MassTol: Y-zoom:

MassType:

AVG  MONO

Axis:

1  2

Label:

I  M  -

Ions:

a  +  2+  3+

b  +  2+  3+

c  +  2+  3+

x  +  2+  3+

y  +  2+  3+

z  +  2+  3+

hide H<sub>2</sub>O/NH<sub>3</sub>

zoom 112-122

GO

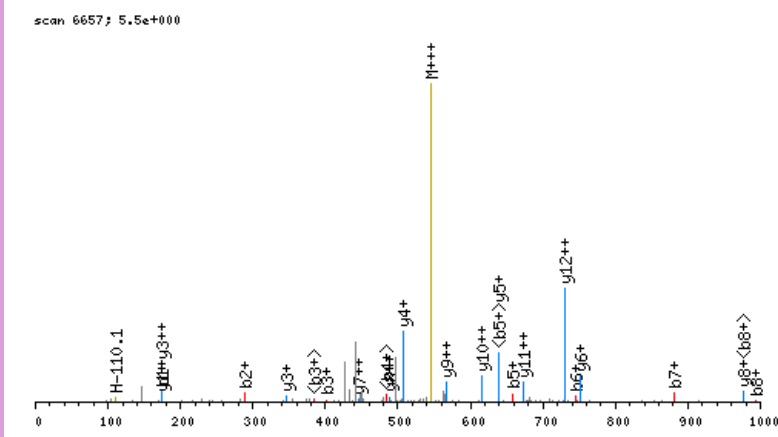

click image to zoom in; click top corners to zoom out [\[precursor±\]](#)

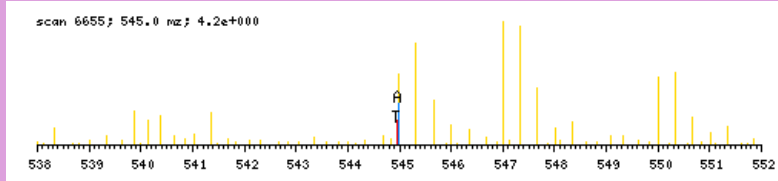

zoomed in precursor plot; T=theoretical m/z, A=acquired m/z

| b <sup>+</sup> | #  | AA # | y <sup>+</sup> | y <sup>2+</sup> |
|----------------|----|------|----------------|-----------------|
| 174.0589       | 1  | M 13 |                |                 |
| 289.0858       | 2  | D 12 | 1459.8096      | 730.4087        |
| 402.1699       | 3  | L 11 | 1344.7826      | 672.8952        |
| 501.2383       | 4  | V 10 | 1231.6986      | 616.3532        |
| 657.3646       | 5  | K 9  | 1132.6301      | 566.8190        |
| 744.3966       | 6  | S 8  | 976.5038       | 488.7558        |
| 881.4555       | 7  | H 7  | 889.4718       | 445.2398        |
| 994.5396       | 8  | L 6  | 752.4129       | 376.7104        |
| 1125.5801      | 9  | M 5  | 639.3288       | 320.1683        |
| 1288.6434      | 10 | Y 4  | 508.2884       | 254.6481        |
| 1359.6805      | 11 | A 3  | 345.2250       | 173.1164        |
| 1458.7490      | 12 | V 2  | 274.1879       | 137.5979        |
|                | 13 | R 1  | 175.1195       | 88.0637         |

N-term:+43.02 K(5):+156.13

MDPESEGASQALR, MH+ 1432.6378, m/z 716.8226  
 H OS G29 P150811 220811-s1.03762.03762.2.dta

scan 3762; 9.7e-001

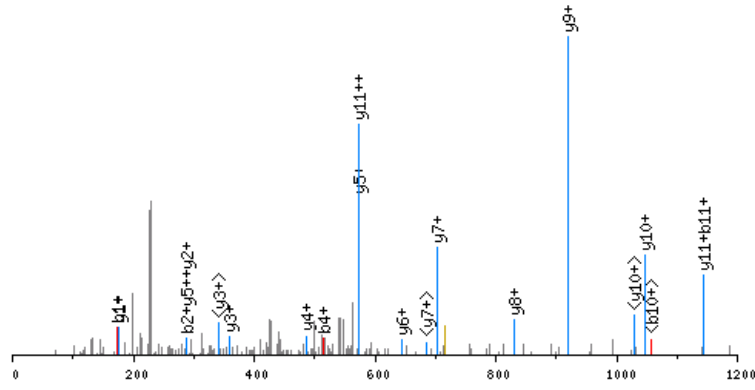

click image to zoom in; click top corners to zoom out [\[precursor±\]](#)

scan 3760; 716.8 m/z; 3.0e+000

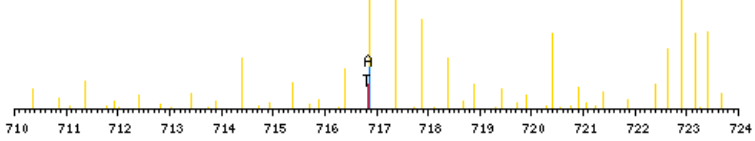

zoomed in precursor plot; T=theoretical m/z, A=acquired m/z

X-range:

-

MassTol: Y-zoom:

MassType:

AVG  MONO

Axis:

1  2

Label:

I  M  -

Ions:

a  +  2+  3+

b  +  2+  3+

c  +  2+  3+

x  +  2+  3+

y  +  2+  3+

z  +  2+  3+

hide H<sub>2</sub>O/NH<sub>3</sub>

zoom 112-122

GO

| b <sup>+</sup> | #  | AA # | y <sup>+</sup> | y <sup>2+</sup> |
|----------------|----|------|----------------|-----------------|
| 174.0589       | 1  | M 13 |                |                 |
| 289.0858       | 2  | D 12 | 1259.5868      | 630.2973        |
| 386.1386       | 3  | P 11 | 1144.5598      | 572.7838        |
| 515.1812       | 4  | E 10 | 1047.5071      | 524.2575        |
| 602.2132       | 5  | S 9  | 918.4645       | 459.7362        |
| 731.2558       | 6  | E 8  | 831.4325       | 416.2201        |
| 788.2773       | 7  | G 7  | 702.3899       | 351.6988        |
| 859.3144       | 8  | A 6  | 645.3684       | 323.1881        |
| 946.3464       | 9  | S 5  | 574.3313       | 287.6696        |
| 1074.4050      | 10 | Q 4  | 487.2993       | 244.1535        |
| 1145.4421      | 11 | A 3  | 359.2407       | 180.1243        |
| 1258.5262      | 12 | L 2  | 288.2036       | 144.6057        |
|                | 13 | R 1  | 175.1195       | 88.0637         |

N-term:+43.02



MDSAEELLAPLR, MH+ 1386.6939, m/z 693.8506  
 H OS G29 P150811 220811-s1.06441.06441.2.dta

X-range:

-

MassTol: Y-zoom:

MassType:

AVG  MONO

Axis:

1  2

Label:

I  M  -

Ions:

a  +  2+  3+

b  +  2+  3+

c  +  2+  3+

x  +  2+  3+

y  +  2+  3+

z  +  2+  3+

hide H<sub>2</sub>O/NH<sub>3</sub>

zoom 112-122

GO

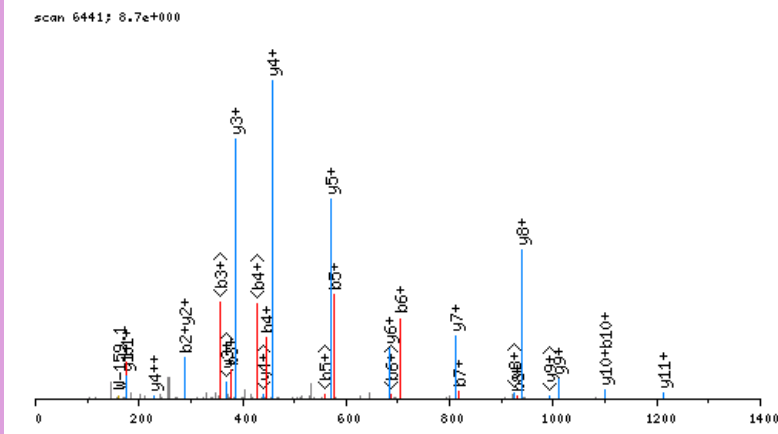

click image to zoom in; click top corners to zoom out [\[precursor±\]](#)

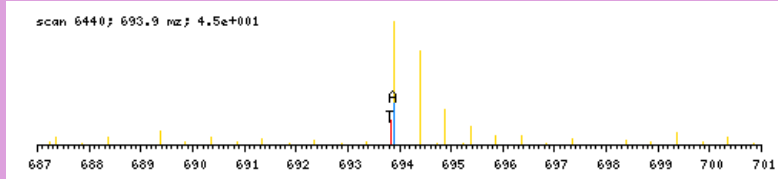

zoomed in precursor plot; T=theoretical m/z, A=acquired m/z

| b <sup>+</sup> | #  | AA # | y <sup>+</sup> | y <sup>2+</sup> |
|----------------|----|------|----------------|-----------------|
| 174.0589       | 1  | M 12 |                |                 |
| 289.0858       | 2  | D 11 | 1213.6428      | 607.3253        |
| 376.1179       | 3  | S 10 | 1098.6159      | 549.8119        |
| 447.1550       | 4  | A 9  | 1011.5839      | 506.2958        |
| 576.1976       | 5  | E 8  | 940.5468       | 470.7773        |
| 705.2402       | 6  | E 7  | 811.5042       | 406.2560        |
| 818.3242       | 7  | L 6  | 682.4616       | 341.7347        |
| 931.4083       | 8  | L 5  | 569.3775       | 285.1927        |
| 1002.4454      | 9  | A 4  | 456.2934       | 228.6506        |
| 1099.4982      | 10 | P 3  | 385.2563       | 193.1321        |
| 1212.5822      | 11 | L 2  | 288.2036       | 144.6057        |
|                | 12 | R 1  | 175.1195       | 88.0637         |

N-term:+43.02

MEAADVFHR, MH+ 1117.5101, m/z 559.2587  
 H OS G25 P150811 220811-s1.06073.06073.2.dta

X-range:

-

MassTol: Y-zoom:

MassType:

AVG  MONO

Axis:

1  2

Label:

I  M  -

Ions:

a  +  2+  3+

b  +  2+  3+

c  +  2+  3+

x  +  2+  3+

y  +  2+  3+

z  +  2+  3+

hide H<sub>2</sub>O/NH<sub>3</sub>

zoom 112-122

GO

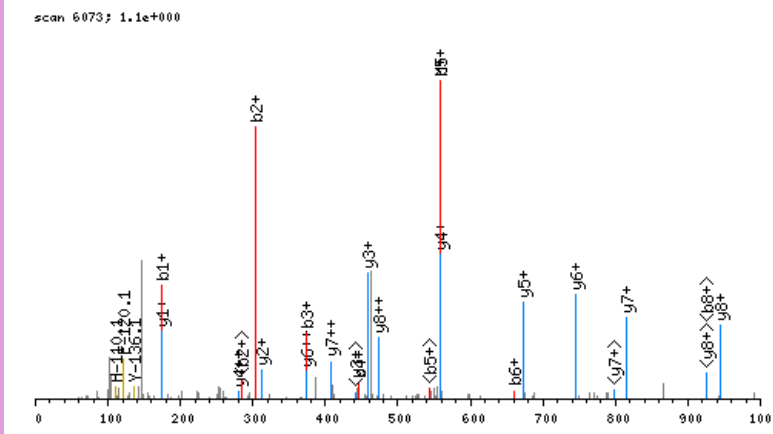

click image to zoom in; click top corners to zoom out [\[precursor±\]](#)

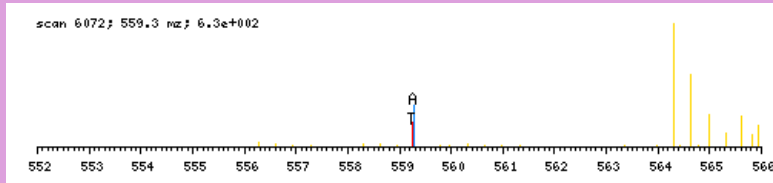

zoomed in precursor plot; T=theoretical m/z, A=acquired m/z

| b <sup>+</sup> | # | AA # | y <sup>+</sup> | y <sup>2+</sup> |
|----------------|---|------|----------------|-----------------|
| 174.0589       | 1 | M    | 9              |                 |
| 303.1015       | 2 | E    | 8              | 944.4590        |
| 374.1386       | 3 | A    | 7              | 815.4164        |
| 445.1757       | 4 | A    | 6              | 744.3793        |
| 560.2026       | 5 | D    | 5              | 673.3422        |
| 659.2711       | 6 | V    | 4              | 558.3152        |
| 806.3395       | 7 | F    | 3              | 459.2468        |
| 943.3984       | 8 | H    | 2              | 312.1784        |
|                | 9 | R    | 1              | 175.1195        |

N-term:+43.02

MEGTMEGPEAVQR, MH+ 1476.6463, m/z 738.8268  
 H OS G29 P150811 220811-s1.03866.03866.2.dta

X-range:

-

MassTol: Y-zoom:

MassType:

AVG  MONO

Axis:

1  2

Label:

I  M  -

Ions:

a  +  2+  3+

b  +  2+  3+

c  +  2+  3+

x  +  2+  3+

y  +  2+  3+

z  +  2+  3+

hide H<sub>2</sub>O/NH<sub>3</sub>

zoom 112-122

GO

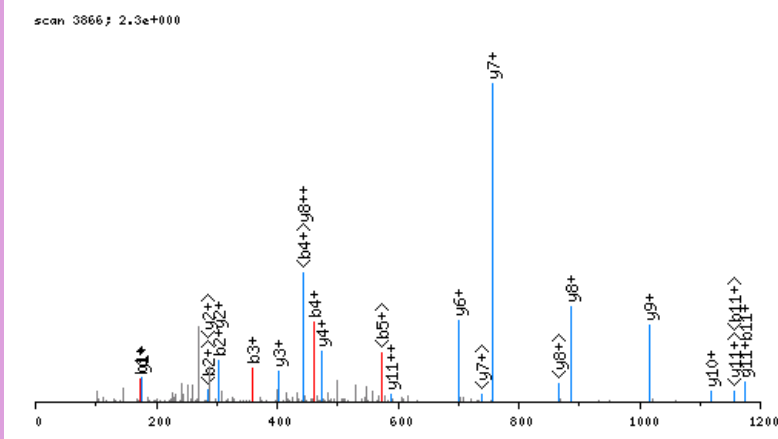

click image to zoom in; click top corners to zoom out [\[precursor±\]](#)

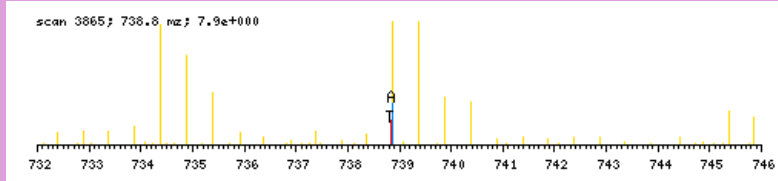

zoomed in precursor plot; T=theoretical m/z, A=acquired m/z

| b <sup>+</sup> | #  | AA # | y <sup>+</sup> | y <sup>2+</sup> |
|----------------|----|------|----------------|-----------------|
| 174.0589       | 1  | M 13 |                |                 |
| 303.1015       | 2  | E 12 | 1303.5952      | 652.3015        |
| 360.1229       | 3  | G 11 | 1174.5526      | 587.7802        |
| 461.1706       | 4  | T 10 | 1117.5312      | 559.2695        |
| 592.2111       | 5  | M 9  | 1016.4835      | 508.7457        |
| 721.2537       | 6  | E 8  | 885.4430       | 443.2254        |
| 778.2752       | 7  | G 7  | 756.4004       | 378.7041        |
| 875.3279       | 8  | P 6  | 699.3790       | 350.1934        |
| 1004.3705      | 9  | E 5  | 602.3262       | 301.6670        |
| 1075.4076      | 10 | A 4  | 473.2836       | 237.1457        |
| 1174.4760      | 11 | V 3  | 402.2465       | 201.6272        |
| 1302.5346      | 12 | Q 2  | 303.1781       | 152.0930        |
|                | 13 | R 1  | 175.1195       | 88.0637         |

N-term:+43.02

MEGYSEEASLLR, MH+ 1426.6524, m/z 713.8299  
 H OS G29 P150811 220811-s1.05581.05581.2.dta

X-range:

-

MassTol: Y-zoom:

MassType:

AVG  MONO

Axis:

1  2

Label:

I  M  -

Ions:

a  +  2+  3+

b  +  2+  3+

c  +  2+  3+

x  +  2+  3+

y  +  2+  3+

z  +  2+  3+

hide H<sub>2</sub>O/NH<sub>3</sub>

zoom 112-122

GO

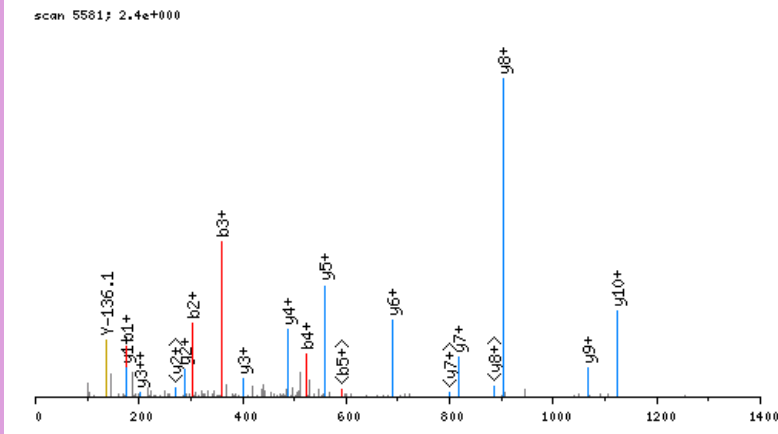

click image to zoom in; click top corners to zoom out [\[precursor±\]](#)

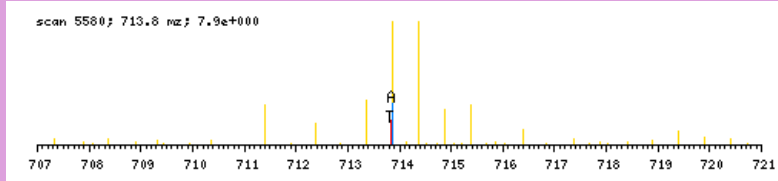

zoomed in precursor plot; T=theoretical m/z, A=acquired m/z

| b <sup>+</sup> | #  | AA # | y <sup>+</sup> | y <sup>2+</sup> |
|----------------|----|------|----------------|-----------------|
| 174.0589       | 1  | M 12 |                |                 |
| 303.1015       | 2  | E 11 | 1253.6014      | 627.3046        |
| 360.1229       | 3  | G 10 | 1124.5588      | 562.7833        |
| 523.1863       | 4  | Y 9  | 1067.5373      | 534.2726        |
| 610.2183       | 5  | S 8  | 904.4740       | 452.7409        |
| 739.2609       | 6  | E 7  | 817.4420       | 409.2249        |
| 868.3035       | 7  | E 6  | 688.3994       | 344.7036        |
| 939.3406       | 8  | A 5  | 559.3568       | 280.1823        |
| 1026.3726      | 9  | S 4  | 488.3197       | 244.6637        |
| 1139.4567      | 10 | L 3  | 401.2876       | 201.1477        |
| 1252.5408      | 11 | L 2  | 288.2036       | 144.6057        |
|                | 12 | R 1  | 175.1195       | 88.0637         |

N-term:+43.02

MEKPSPLLVGR, MH+ 1296.7350, m/z 648.8711  
 H OS G25 P150811 220811-s1.05705.05705.2.dta

scan 5705; 2.0e+001

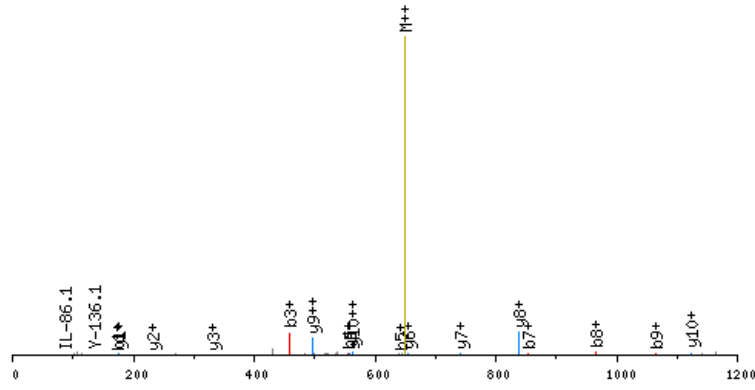

click image to zoom in; click top corners to zoom out [\[precursor±\]](#)

scan 5702; 648.9 m/z; 1.4e+001

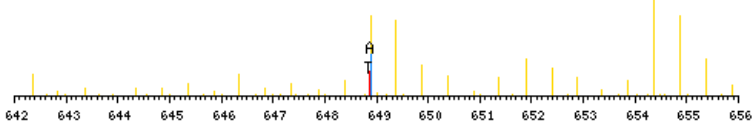

zoomed in precursor plot; T=theoretical m/z, A=acquired m/z

X-range:

-

MassTol: Y-zoom:

MassType:

AVG  MONO

Axis:

1  2

Label:

I  M  -

Ions:

a  +  2+  3+

b  +  2+  3+

c  +  2+  3+

x  +  2+  3+

y  +  2+  3+

z  +  2+  3+

hide H<sub>2</sub>O/NH<sub>3</sub>

zoom 112-122

GO

| b <sup>+</sup> | #  | AA # | y <sup>+</sup> | y <sup>2+</sup> |
|----------------|----|------|----------------|-----------------|
| 174.0589       | 1  | M 11 |                |                 |
| 303.1015       | 2  | E 10 | 1123.6840      | 562.3459        |
| 459.2278       | 3  | K 9  | 994.6414       | 497.8246        |
| 556.2805       | 4  | P 8  | 838.5151       | 419.7614        |
| 643.3126       | 5  | S 7  | 741.4623       | 371.2351        |
| 740.3653       | 6  | P 6  | 654.4303       | 327.7190        |
| 853.4494       | 7  | L 5  | 557.3775       | 279.1927        |
| 966.5335       | 8  | L 4  | 444.2934       | 222.6506        |
| 1065.6019      | 9  | V 3  | 331.2094       | 166.1086        |
| 1122.6233      | 10 | G 2  | 232.1410       | 116.5744        |
|                | 11 | R 1  | 175.1195       | 88.0637         |

N-term:+43.02 K(3):+156.13

MEMLPDITGKALMFAKR, MH+ 2107.1391, m/z 703.0512  
 H OS G26 P150811 220811-s1.06612.06612.3.dta

X-range:

-

MassTol: Y-zoom:

MassType:

AVG  MONO

Axis:

1  2

Label:

I  M  -

Ions:

a  +  2+  3+

b  +  2+  3+

c  +  2+  3+

x  +  2+  3+

y  +  2+  3+

z  +  2+  3+

hide H<sub>2</sub>O/NH<sub>3</sub>

zoom 112-122

GO

scan 6612; 7.0e+000

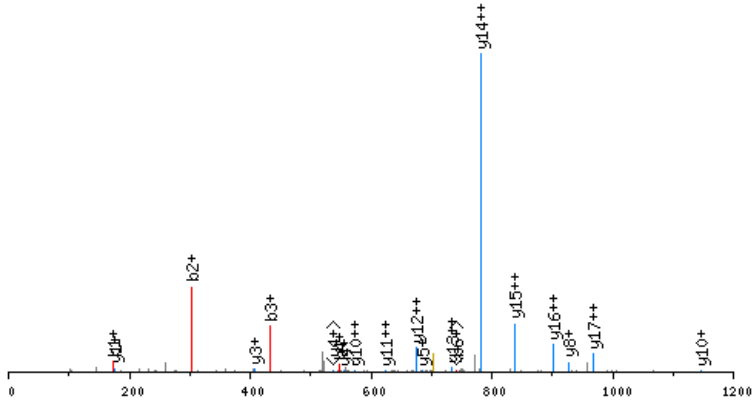

click image to zoom in; click top corners to zoom out [\[precursor±\]](#)

scan 6610; 703.1 m/z; 3.7e+000

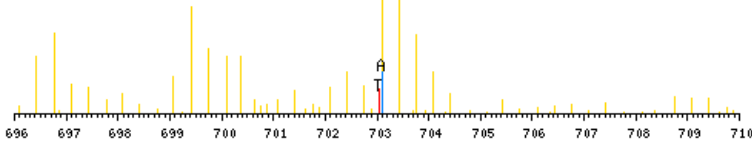

zoomed in precursor plot; T=theoretical m/z, A=acquired m/z

| b <sup>+</sup> | #  | AA | #  | y <sup>+</sup> | y <sup>2+</sup> |
|----------------|----|----|----|----------------|-----------------|
| 174.0589       | 1  | M  | 18 |                |                 |
| 303.1015       | 2  | E  | 17 | 1934.0880      | 967.5479        |
| 434.1420       | 3  | M  | 16 | 1805.0454      | 903.0266        |
| 547.2260       | 4  | L  | 15 | 1674.0049      | 837.5064        |
| 644.2788       | 5  | P  | 14 | 1560.9209      | 780.9644        |
| 759.3057       | 6  | D  | 13 | 1463.8681      | 732.4380        |
| 860.3534       | 7  | T  | 12 | 1348.8412      | 674.9245        |
| 961.4011       | 8  | T  | 11 | 1247.7935      | 624.4007        |
| 1018.4226      | 9  | G  | 10 | 1146.7458      | 573.8768        |
| 1180.5807      | 10 | K  | 9  | 1089.7244      | 545.3661        |
| 1237.6021      | 11 | G  | 8  | 927.5663       | 464.2870        |
| 1308.6392      | 12 | A  | 7  | 870.5448       | 435.7763        |
| 1421.7233      | 13 | L  | 6  | 799.5077       | 400.2578        |
| 1552.7638      | 14 | M  | 5  | 686.4236       | 343.7157        |
| 1699.8322      | 15 | F  | 4  | 555.3831       | 278.1955        |
| 1770.8693      | 16 | A  | 3  | 408.3147       | 204.6613        |
| 1933.0274      | 17 | K  | 2  | 337.2776       | 169.1427        |
|                | 18 | R  | 1  | 175.1195       | 88.0637         |

N-term:+43.02 K(10):+162.16  
 K(17):+162.16

X-range:

-

MassTol: Y-zoom:

MassType:

AVG  MONO

Axis:

1  2

Label:

I  M  -

Ions:

a  +  2+  3+

b  +  2+  3+

c  +  2+  3+

x  +  2+  3+

y  +  2+  3+

z  +  2+  3+

hide H<sub>2</sub>O/NH<sub>3</sub>

zoom 112-122

GO

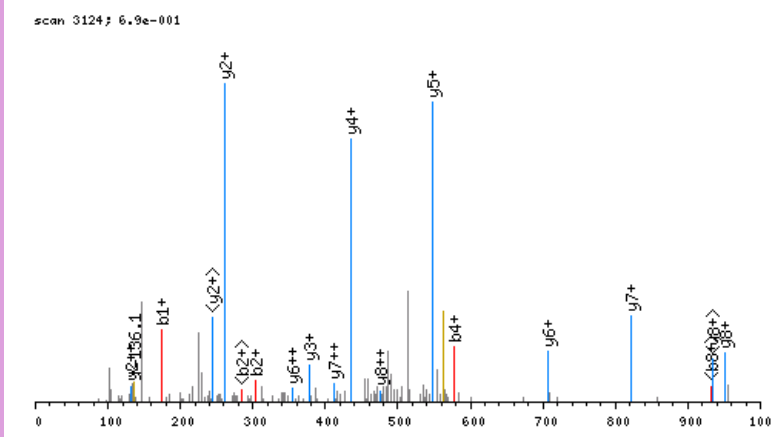

click image to zoom in; click top corners to zoom out [\[precursor±\]](#)

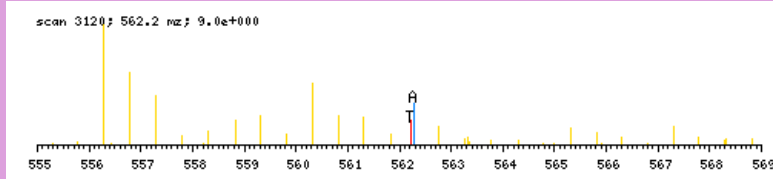

zoomed in precursor plot; T=theoretical m/z, A=acquired m/z

| b <sup>+</sup> | # | AA # | y <sup>+</sup> | y <sup>2+</sup> |
|----------------|---|------|----------------|-----------------|
| 174.0589       | 1 | M    | 9              |                 |
| 303.1015       | 2 | E    | 8              | 950.4001        |
| 417.1444       | 3 | N    | 7              | 821.3575        |
| 577.1750       | 4 | C    | 6              | 707.3146        |
| 690.2591       | 5 | L    | 5              | 547.2840        |
| 747.2805       | 6 | G    | 4              | 434.1999        |
| 862.3075       | 7 | D    | 3              | 377.1785        |
| 949.3395       | 8 | S    | 2              | 262.1515        |
|                | 9 | R    | 1              | 175.1195        |

N-term:+43.02 C(4):+160.03

MENLFQLVR, MH+ 1191.6196, m/z 596.3134  
 H OS G29 P150811 220811-s1.06601.06601.2.dta

scan 6601; 5.5e-001

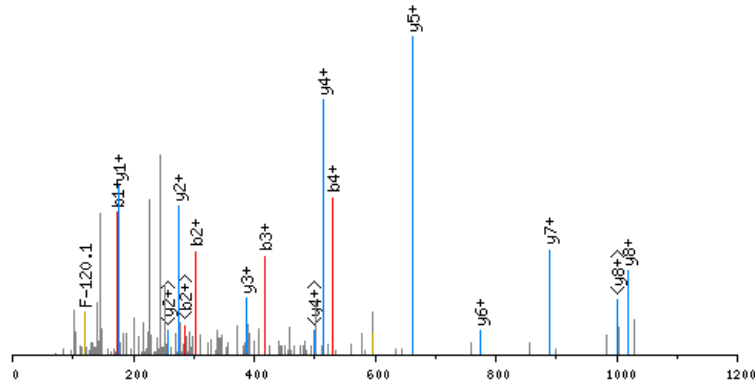

click image to zoom in; click top corners to zoom out [precursor±]

scan 6600; 596.3 m/z; 7.6e+000

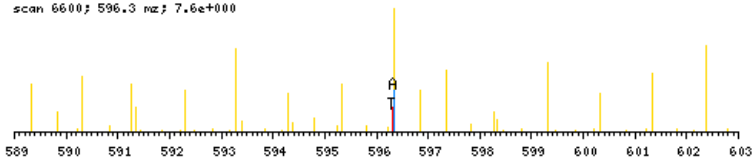

zoomed in precursor plot; T=theoretical m/z, A=acquired m/z

X-range:

-

MassTol: Y-zoom:

MassType:

AVG  MONO

Axis:

1  2

Label:

I  M  -

Ions:

a  +  2+  3+

b  +  2+  3+

c  +  2+  3+

x  +  2+  3+

y  +  2+  3+

z  +  2+  3+

hide H<sub>2</sub>O/NH<sub>3</sub>

zoom 112-122

GO

| b <sup>+</sup> | # | AA | # | y <sup>+</sup> | y <sup>2+</sup> |
|----------------|---|----|---|----------------|-----------------|
| 174.0589       | 1 | M  | 9 |                |                 |
| 303.1015       | 2 | E  | 8 | 1018.5686      | 509.7882        |
| 417.1444       | 3 | N  | 7 | 889.5260       | 445.2669        |
| 530.2285       | 4 | L  | 6 | 775.4830       | 388.2454        |
| 677.2969       | 5 | F  | 5 | 662.3990       | 331.7034        |
| 805.3555       | 6 | Q  | 4 | 515.3306       | 258.1692        |
| 918.4395       | 7 | L  | 3 | 387.2720       | 194.1399        |
| 1017.5079      | 8 | V  | 2 | 274.1879       | 137.5979        |
|                | 9 | R  | 1 | 175.1195       | 88.0637         |

N-term:+43.02



MEPETLEAR, MH+ 1117.5200, m/z 559.2636  
 H OS G29 P150811 220811-s1.03811.03811.2.dta

X-range:

-

MassTol: Y-zoom:

MassType:

AVG  MONO

Axis:

1  2

Label:

I  M  -

Ions:

a  +  2+  3+

b  +  2+  3+

c  +  2+  3+

x  +  2+  3+

y  +  2+  3+

z  +  2+  3+

hide H<sub>2</sub>O/NH<sub>3</sub>

zoom 112-122

GO

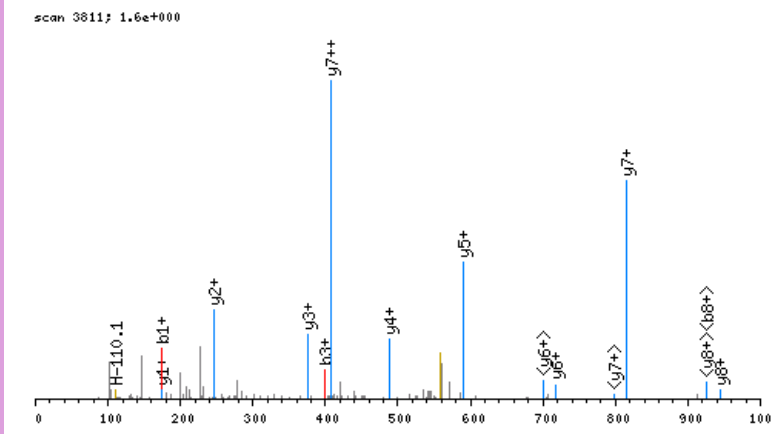

click image to zoom in; click top corners to zoom out [\[precursor±\]](#)

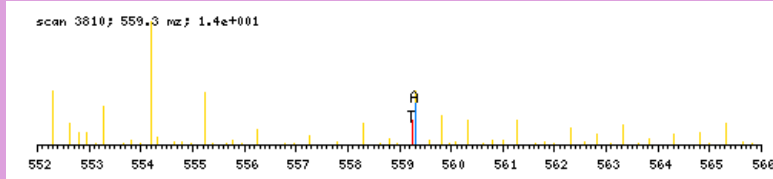

zoomed in precursor plot; T=theoretical m/z, A=acquired m/z

| b <sup>+</sup> | # | AA # | y <sup>+</sup> | y <sup>2+</sup> |
|----------------|---|------|----------------|-----------------|
| 174.0589       | 1 | M    | 9              |                 |
| 303.1015       | 2 | E    | 8              | 944.4689        |
| 400.1542       | 3 | P    | 7              | 815.4263        |
| 529.1968       | 4 | E    | 6              | 718.3735        |
| 630.2445       | 5 | T    | 5              | 589.3310        |
| 743.3286       | 6 | L    | 4              | 488.2833        |
| 872.3712       | 7 | E    | 3              | 375.1992        |
| 943.4083       | 8 | A    | 2              | 246.1566        |
|                | 9 | R    | 1              | 175.1195        |

N-term:+43.02

MEPNEEEEDSPGGR, MH+ 1859.7605, m/z 620.5917  
 H OS G29 P150811 220811-s1.03909.03909.3.dta

X-range:

-

MassTol: Y-zoom:

MassType:

AVG  MONO

Axis:

1  2

Label:

I  M  -

Ions:

a  +  2+  3+

b  +  2+  3+

c  +  2+  3+

x  +  2+  3+

y  +  2+  3+

z  +  2+  3+

hide H<sub>2</sub>O/NH<sub>3</sub>

zoom 112-122

GO

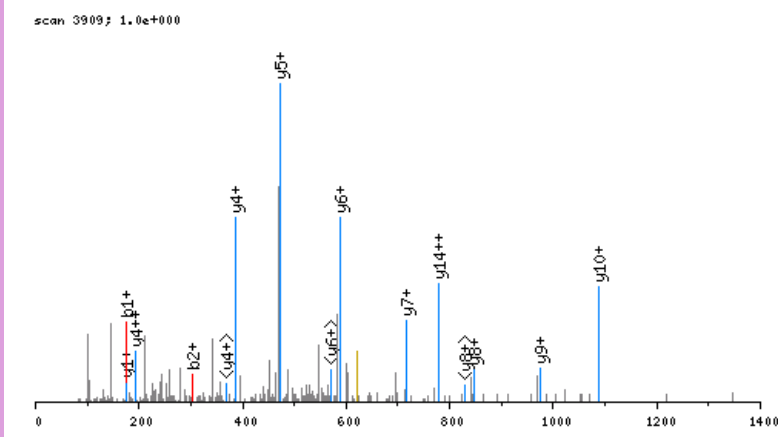

click image to zoom in; click top corners to zoom out [\[precursor±\]](#)

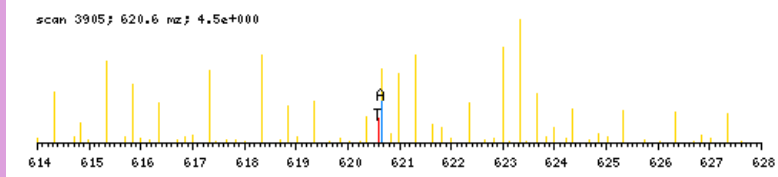

zoomed in precursor plot; T=theoretical m/z, A=acquired m/z

| b <sup>+</sup> | #  | AA # | y <sup>+</sup> | y <sup>2+</sup>                 |
|----------------|----|------|----------------|---------------------------------|
| 174.0589       | 1  | M    | 16             |                                 |
| 303.1015       | 2  | E    | 15             | 1686.7095 843.8587              |
| 400.1542       | 3  | P    | 14             | 1557.6669 <b>779.3374</b>       |
| 514.1972       | 4  | N    | 13             | 1460.6141 730.8110              |
| 643.2398       | 5  | E    | 12             | 1346.5712 673.7895              |
| 772.2824       | 6  | E    | 11             | 1217.5286 609.2682              |
| 885.3664       | 7  | L    | 10             | <b>1088.4860</b> 544.7469       |
| 1014.4090      | 8  | E    | 9              | <b>975.4019</b> 488.2049        |
| 1143.4516      | 9  | E    | 8              | <b>846.3593</b> 423.6836        |
| 1272.4942      | 10 | E    | 7              | <b>717.3168</b> 359.1623        |
| 1387.5211      | 11 | D    | 6              | <b>588.2742</b> 294.6410        |
| 1474.5532      | 12 | S    | 5              | <b>473.2472</b> 237.1275        |
| 1571.6059      | 13 | P    | 4              | <b>386.2152</b> <b>193.6115</b> |
| 1628.6274      | 14 | G    | 3              | 289.1624 145.0851               |
| 1685.6489      | 15 | G    | 2              | 232.1410 116.5744               |
|                | 16 | R    | 1              | <b>175.1195</b> 88.0637         |

N-term:+43.02

MLGPEGGEGYVVKLR, MH+ 1674.8889, m/z 558.9678  
 H OS G25 P150811 220811-s1.07443.07443.3.dta

X-range:

-

MassTol: Y-zoom:

MassType:

AVG  MONO

Axis:

1  2

Label:

I  M  -

Ions:

a  +  2+  3+

b  +  2+  3+

c  +  2+  3+

x  +  2+  3+

y  +  2+  3+

z  +  2+  3+

hide H<sub>2</sub>O/NH<sub>3</sub>

zoom 112-122

GO

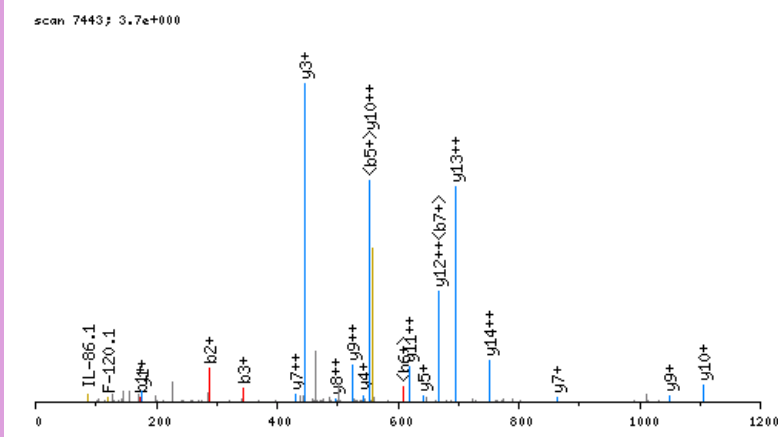

click image to zoom in; click top corners to zoom out [\[precursor±\]](#)

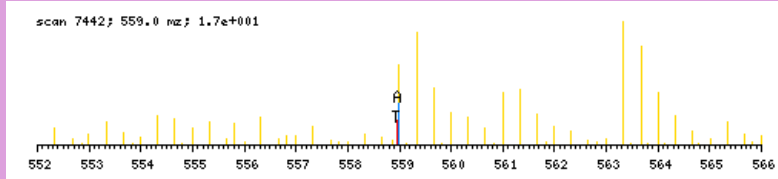

zoomed in precursor plot; T=theoretical m/z, A=acquired m/z

| b <sup>+</sup> | #  | AA # | y <sup>+</sup> | y <sup>2+</sup> |
|----------------|----|------|----------------|-----------------|
| 174.0589       | 1  | M 15 |                |                 |
| 287.1429       | 2  | L 14 | 1501.8379      | 751.4229        |
| 344.1644       | 3  | G 13 | 1388.7538      | 694.8808        |
| 441.2172       | 4  | P 12 | 1331.7324      | 666.3701        |
| 570.2598       | 5  | E 11 | 1234.6796      | 617.8437        |
| 627.2812       | 6  | G 10 | 1105.6370      | 553.3224        |
| 684.3027       | 7  | G 9  | 1048.6155      | 524.8117        |
| 813.3453       | 8  | E 8  | 991.5941       | 496.3010        |
| 870.3668       | 9  | G 7  | 862.5515       | 431.7797        |
| 1033.4301      | 10 | Y 6  | 805.5300       | 403.2689        |
| 1132.4985      | 11 | V 5  | 642.4667       | 321.7373        |
| 1231.5669      | 12 | V 4  | 543.3983       | 272.2031        |
| 1387.6932      | 13 | K 3  | 444.3299       | 222.6688        |
| 1500.7773      | 14 | L 2  | 288.2036       | 144.6057        |
|                | 15 | R 1  | 175.1195       | 88.0637         |

N-term:+43.02 K(13):+156.13

MLQQELLSR, MH+ 1159.6145, m/z 580.3109  
 H OS G29 P150811 220811-s1.05667.05667.2.dta

X-range:

-

MassTol: Y-zoom:

MassType:

AVG  MONO

Axis:

1  2

Label:

I  M  -

Ions:

a  +  2+  3+

b  +  2+  3+

c  +  2+  3+

x  +  2+  3+

y  +  2+  3+

z  +  2+  3+

hide H<sub>2</sub>O/NH<sub>3</sub>

zoom 112-122

GO

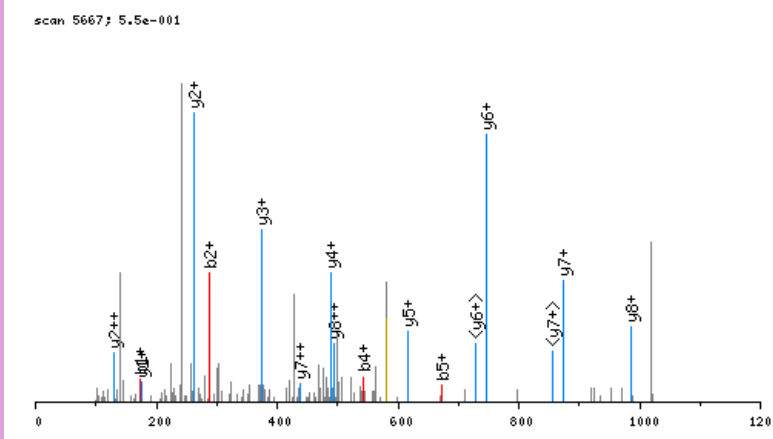

click image to zoom in; click top corners to zoom out [\[precursor±\]](#)

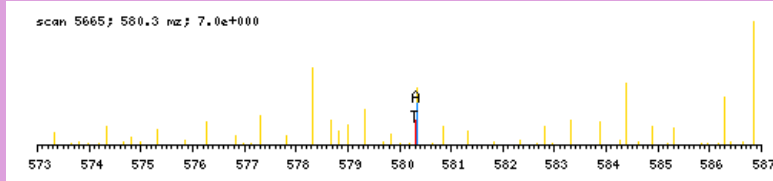

zoomed in precursor plot; T=theoretical m/z, A=acquired m/z

| b <sup>+</sup> | # | AA # | y <sup>+</sup> | y <sup>2+</sup>   |
|----------------|---|------|----------------|-------------------|
| 174.0589       | 1 | M    | 9              |                   |
| 287.1429       | 2 | L    | 8              | 986.5635 493.7856 |
| 415.2015       | 3 | Q    | 7              | 873.4794 437.2436 |
| 543.2601       | 4 | Q    | 6              | 745.4208 373.2143 |
| 672.3027       | 5 | E    | 5              | 617.3623 309.1850 |
| 785.3868       | 6 | L    | 4              | 488.3197 244.6637 |
| 898.4708       | 7 | L    | 3              | 375.2356 188.1217 |
| 985.5029       | 8 | S    | 2              | 262.1515 131.5797 |
|                | 9 | R    | 1              | 175.1195 88.0637  |

N-term:+43.02

MLSTEGR, MH+ 835.3984, m/z 418.2028  
 H OS G29 P150811 220811-s1.04073.04073.2.dta

X-range:

-

MassTol: Y-zoom:

MassType:

AVG  MONO

Axis:

1  2

Label:

I  M  -

Ions:

a  +  2+  3+

b  +  2+  3+

c  +  2+  3+

x  +  2+  3+

y  +  2+  3+

z  +  2+  3+

hide H<sub>2</sub>O/NH<sub>3</sub>

zoom 112-122

GO

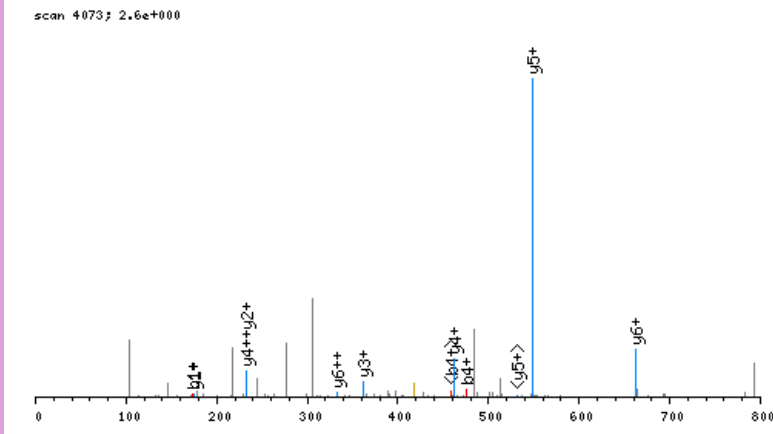

click image to zoom in; click top corners to zoom out [\[precursor±\]](#)

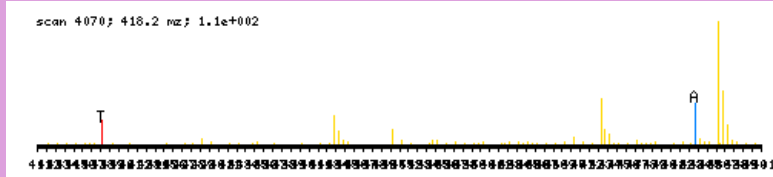

zoomed in precursor plot; T=theoretical m/z, A=acquired m/z

| b <sup>+</sup> | # | AA # | y <sup>+</sup> | y <sup>2+</sup>   |
|----------------|---|------|----------------|-------------------|
| 174.0589       | 1 | M    | 7              |                   |
| 287.1429       | 2 | L    | 6              | 662.3473 331.6776 |
| 374.1750       | 3 | S    | 5              | 549.2633 275.1355 |
| 475.2227       | 4 | T    | 4              | 462.2312 231.6195 |
| 604.2652       | 5 | E    | 3              | 361.1836 181.0957 |
| 661.2867       | 6 | G    | 2              | 232.1410 116.5744 |
|                | 7 | R    | 1              | 175.1195 88.0637  |

N-term:+43.02

MMAAAAER, MH+ 892.4021, m/z 446.7047  
 H OS G29 P150811 220811-s1.04563.04563.2.dta

scan 4563; 1.5e+000

X-range:

-

MassTol: Y-zoom:

MassType:

AVG  MONO

Axis:

1  2

Label:

I  M  -

Ions:

a  +  2+  3+

b  +  2+  3+

c  +  2+  3+

x  +  2+  3+

y  +  2+  3+

z  +  2+  3+

hide H<sub>2</sub>O/NH<sub>3</sub>

zoom 112-122

GO

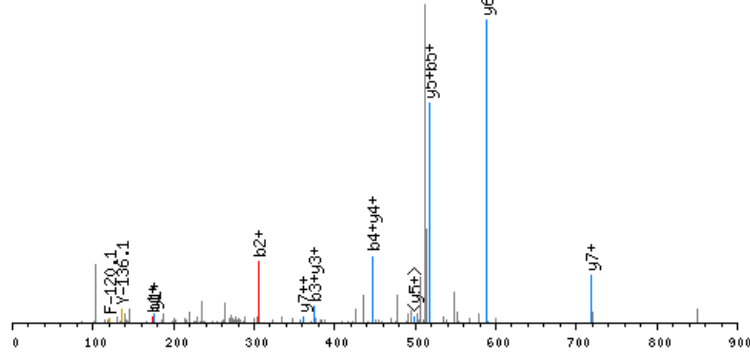

click image to zoom in; click top corners to zoom out [\[precursor±\]](#)

scan 4560; 446.7 m/z; 1.4e+001

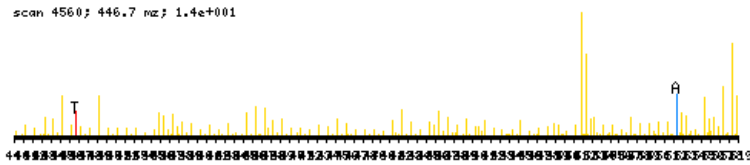

zoomed in precursor plot; T=theoretical m/z, A=acquired m/z

| b <sup>+</sup> | # | AA # | y <sup>+</sup> | y <sup>2+</sup> |
|----------------|---|------|----------------|-----------------|
| 174.0589       | 1 | M 8  |                |                 |
| 305.0994       | 2 | M 7  | 719.3510       | 360.1794        |
| 376.1365       | 3 | A 6  | 588.3105       | 294.6592        |
| 447.1736       | 4 | A 5  | 517.2734       | 259.1406        |
| 518.2107       | 5 | A 4  | 446.2363       | 223.6221        |
| 589.2478       | 6 | A 3  | 375.1992       | 188.1035        |
| 718.2904       | 7 | E 2  | 304.1621       | 152.5850        |
|                | 8 | R 1  | 175.1195       | 88.0637         |

N-term:+43.02

MNTEQSQNTIVSR, MH+ 1549.7281, m/z 517.2475  
 H OS G29 P150811 220811-s1.03239.03239.3.dta

X-range:

-

MassTol: Y-zoom:

MassType:

AVG  MONO

Axis:

1  2

Label:

I  M  -

Ions:

a  +  2+  3+

b  +  2+  3+

c  +  2+  3+

x  +  2+  3+

y  +  2+  3+

z  +  2+  3+

hide H<sub>2</sub>O/NH<sub>3</sub>

zoom 112-122

GO

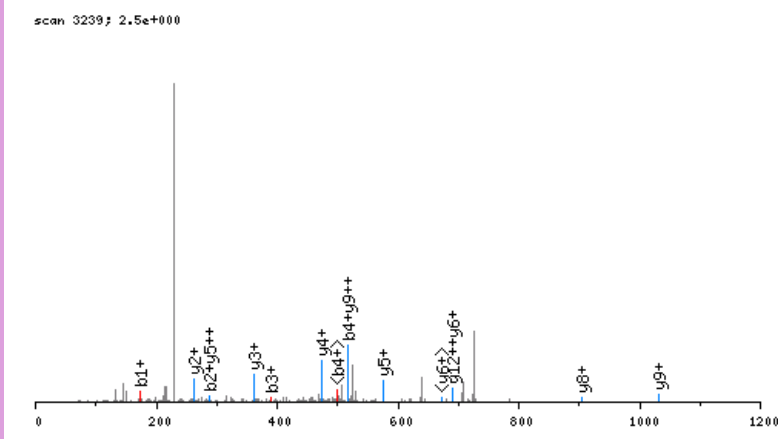

click image to zoom in; click top corners to zoom out [\[precursor±\]](#)

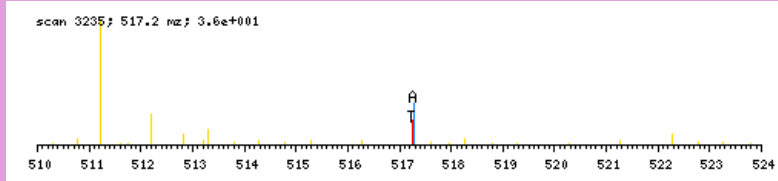

zoomed in precursor plot; T=theoretical m/z, A=acquired m/z

| b <sup>+</sup> | #  | AA # | y <sup>+</sup> | y <sup>2+</sup> |
|----------------|----|------|----------------|-----------------|
| 174.0589       | 1  | M 13 |                |                 |
| 288.1018       | 2  | N 12 | 1376.6770      | 688.8424        |
| 389.1495       | 3  | T 11 | 1262.6341      | 631.8209        |
| 518.1921       | 4  | E 10 | 1161.5864      | 581.2971        |
| 646.2507       | 5  | Q 9  | 1032.5438      | 516.7758        |
| 733.2827       | 6  | S 8  | 904.4852       | 452.7465        |
| 861.3413       | 7  | Q 7  | 817.4532       | 409.2305        |
| 975.3842       | 8  | N 6  | 689.3946       | 345.2012        |
| 1076.4319      | 9  | T 5  | 575.3517       | 288.1798        |
| 1189.5159      | 10 | I 4  | 474.3040       | 237.6559        |
| 1288.5844      | 11 | V 3  | 361.2199       | 181.1139        |
| 1375.6164      | 12 | S 2  | 262.1515       | 131.5797        |
|                | 13 | R 1  | 175.1195       | 88.0637         |

N-term:+43.02

MQKIFAR, MH+ 963.5450, m/z 482.2762  
 H OS G25 P150811 220811-s1.05653.05653.2.dta

scan 5653; 3.0e+001

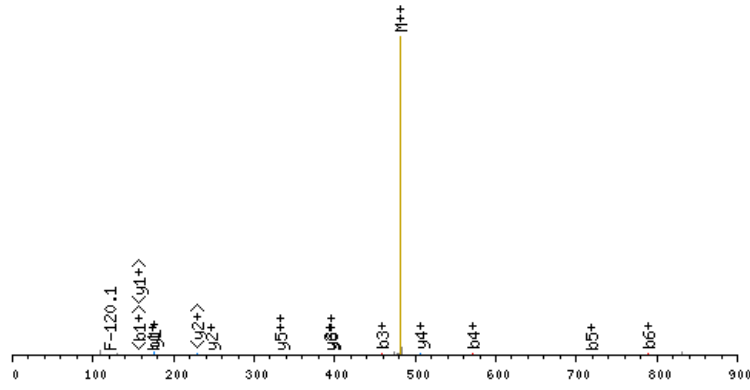

click image to zoom in; click top corners to zoom out [\[precursor±\]](#)

scan 5652; 482.3 m/z; 1.4e+002

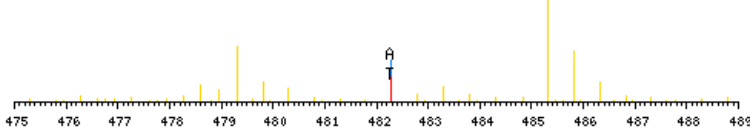

zoomed in precursor plot; T=theoretical m/z, A=acquired m/z

X-range:

-

MassTol: Y-zoom:

MassType:

AVG  MONO

Axis:

1  2

Label:

I  M  -

Ions:

a  +  2+  3+

b  +  2+  3+

c  +  2+  3+

x  +  2+  3+

y  +  2+  3+

z  +  2+  3+

hide H<sub>2</sub>O/NH<sub>3</sub>

zoom 112-122

GO

| b <sup>+</sup> | # | AA # | y <sup>+</sup> | y <sup>2+</sup> |
|----------------|---|------|----------------|-----------------|
| 174.0589       | 1 | M    | 7              |                 |
| 302.1175       | 2 | Q    | 6              | 790.4940        |
| 458.2438       | 3 | K    | 5              | 662.4354        |
| 571.3278       | 4 | I    | 4              | 506.3091        |
| 718.3962       | 5 | F    | 3              | 393.2250        |
| 789.4334       | 6 | A    | 2              | 246.1566        |
|                | 7 | R    | 1              | 175.1195        |

N-term:+43.02 K(3):+156.13



MQQVEASLQPETLR, MH+ 1671.8376, m/z 557.9507  
 H OS G24 P150811 220811-s1.03545.03545.3.dta

X-range:

-

MassTol: Y-zoom:

MassType:

AVG  MONO

Axis:

1  2

Label:

I  M  -

Ions:

a  +  2+  3+

b  +  2+  3+

c  +  2+  3+

x  +  2+  3+

y  +  2+  3+

z  +  2+  3+

hide H<sub>2</sub>O/NH<sub>3</sub>

zoom 112-122

GO

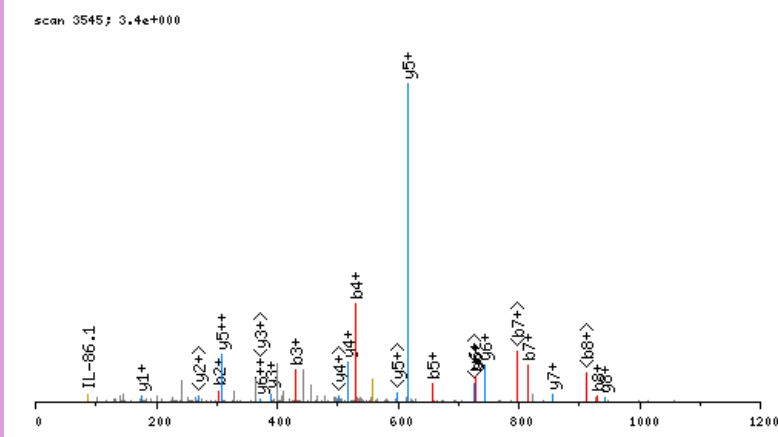

click image to zoom in; click top corners to zoom out [\[precursor±\]](#)

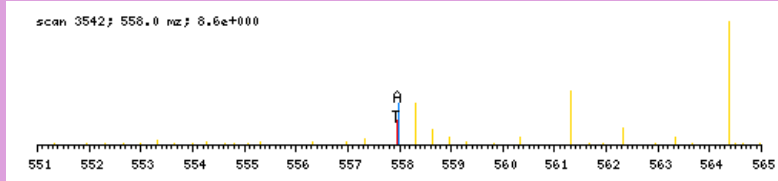

zoomed in precursor plot; T=theoretical m/z, A=acquired m/z

| b <sup>+</sup> | #  | AA # | y <sup>+</sup> | y <sup>2+</sup> |
|----------------|----|------|----------------|-----------------|
| 174.0589       | 1  | M 14 |                |                 |
| 302.1175       | 2  | Q 13 | 1498.7865      | 749.8972        |
| 430.1760       | 3  | Q 12 | 1370.7280      | 685.8679        |
| 529.2445       | 4  | V 11 | 1242.6694      | 621.8386        |
| 658.2870       | 5  | E 10 | 1143.6010      | 572.3044        |
| 729.3242       | 6  | A 9  | 1014.5584      | 507.7831        |
| 816.3562       | 7  | S 8  | 943.5213       | 472.2645        |
| 929.4403       | 8  | L 7  | 856.4892       | 428.7485        |
| 1057.4988      | 9  | Q 6  | 743.4052       | 372.2065        |
| 1154.5516      | 10 | P 5  | 615.3466       | 308.1772        |
| 1283.5942      | 11 | E 4  | 518.2938       | 259.6508        |
| 1384.6419      | 12 | T 3  | 389.2512       | 195.1295        |
| 1497.7259      | 13 | L 2  | 288.2036       | 144.6057        |
|                | 14 | R 1  | 175.1195       | 88.0637         |

N-term:+43.02

MTEEHTDLEAR, MH+ 1373.6007, m/z 687.3040  
 H OS G25 P150811 220811-s1.04759.04759.2.dta

X-range:

-

MassTol: Y-zoom:

MassType:

AVG  MONO

Axis:

1  2

Label:

I  M  -

Ions:

a  +  2+  3+

b  +  2+  3+

c  +  2+  3+

x  +  2+  3+

y  +  2+  3+

z  +  2+  3+

hide H<sub>2</sub>O/NH<sub>3</sub>

zoom 112-122

GO

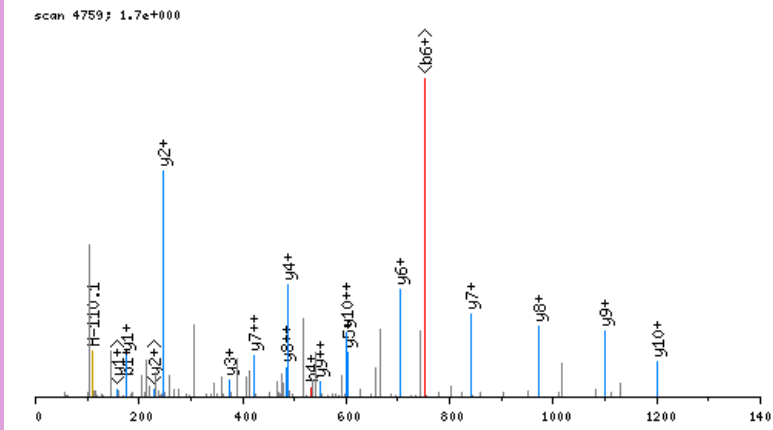

click image to zoom in; click top corners to zoom out [\[precursor±\]](#)

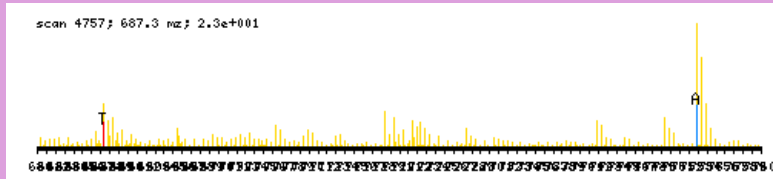

zoomed in precursor plot; T=theoretical m/z, A=acquired m/z

| b <sup>+</sup> | #  | AA # | y <sup>+</sup> | y <sup>2+</sup> |
|----------------|----|------|----------------|-----------------|
| 174.0589       | 1  | M 11 |                |                 |
| 275.1066       | 2  | T 10 | 1200.5497      | 600.7787        |
| 404.1492       | 3  | E 9  | 1099.5020      | 550.2549        |
| 533.1917       | 4  | E 8  | 970.4594       | 485.7336        |
| 670.2507       | 5  | H 7  | 841.4168       | 421.2123        |
| 771.2983       | 6  | T 6  | 704.3579       | 352.6829        |
| 886.3253       | 7  | D 5  | 603.3102       | 302.1590        |
| 999.4093       | 8  | L 4  | 488.2833       | 244.6455        |
| 1128.4519      | 9  | E 3  | 375.1992       | 188.1035        |
| 1199.4891      | 10 | A 2  | 246.1566       | 123.5822        |
|                | 11 | R 1  | 175.1195       | 88.0637         |

N-term:+43.02

NAGSDPVVIVSAAR, MH+ 1397.7389, m/z 699.3731  
 H OS G29 P150811 220811-s1.05149.05149.2.dta

X-range:

-

MassTol: Y-zoom:

MassType:

AVG  MONO

Axis:

1  2

Label:

I  M  -

Ions:

a  +  2+  3+

b  +  2+  3+

c  +  2+  3+

x  +  2+  3+

y  +  2+  3+

z  +  2+  3+

hide H<sub>2</sub>O/NH<sub>3</sub>

zoom 112-122

GO

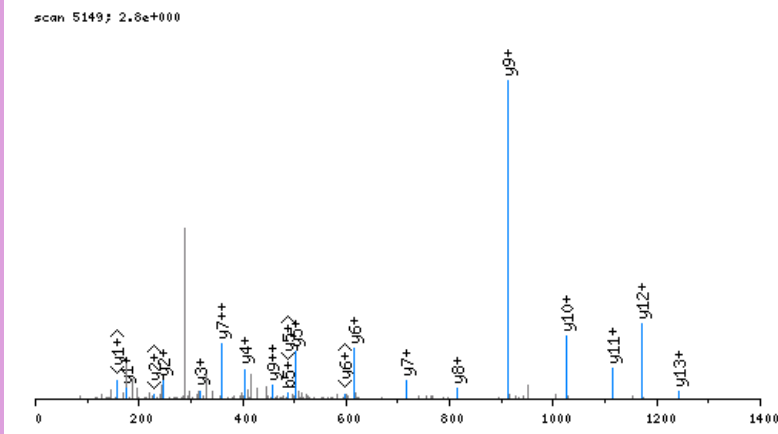

click image to zoom in; click top corners to zoom out [\[precursor±\]](#)

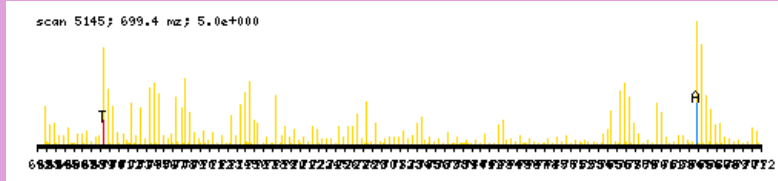

zoomed in precursor plot; T=theoretical m/z, A=acquired m/z

| b <sup>+</sup> | #  | AA # | y <sup>+</sup> | y <sup>2+</sup> |
|----------------|----|------|----------------|-----------------|
| 157.0613       | 1  | N 14 |                |                 |
| 228.0984       | 2  | A 13 | 1241.6854      | 621.3466        |
| 285.1199       | 3  | G 12 | 1170.6483      | 585.8280        |
| 372.1519       | 4  | S 11 | 1113.6268      | 557.3173        |
| 487.1789       | 5  | D 10 | 1026.5948      | 513.8013        |
| 584.2316       | 6  | P 9  | 911.5678       | 456.2878        |
| 683.3001       | 7  | V 8  | 814.5151       | 407.7614        |
| 782.3685       | 8  | V 7  | 715.4466       | 358.2272        |
| 895.4525       | 9  | I 6  | 616.3782       | 308.6930        |
| 994.5209       | 10 | V 5  | 503.2942       | 252.1510        |
| 1081.5530      | 11 | S 4  | 404.2258       | 202.6168        |
| 1152.5901      | 12 | A 3  | 317.1937       | 159.1008        |
| 1223.6272      | 13 | A 2  | 246.1566       | 123.5822        |
|                | 14 | R 1  | 175.1195       | 88.0637         |

N-term:+43.02

NGPLHPR, MH+ 832.4430, m/z 416.7251  
 H OS G25 P150811 220811-s1.03426.03426.2.dta

X-range:

-

MassTol: Y-zoom:

MassType:

AVG  MONO

Axis:

1  2

Label:

I  M  -

Ions:

a  +  2+  3+

b  +  2+  3+

c  +  2+  3+

x  +  2+  3+

y  +  2+  3+

z  +  2+  3+

hide H<sub>2</sub>O/NH<sub>3</sub>

zoom 112-122

GO

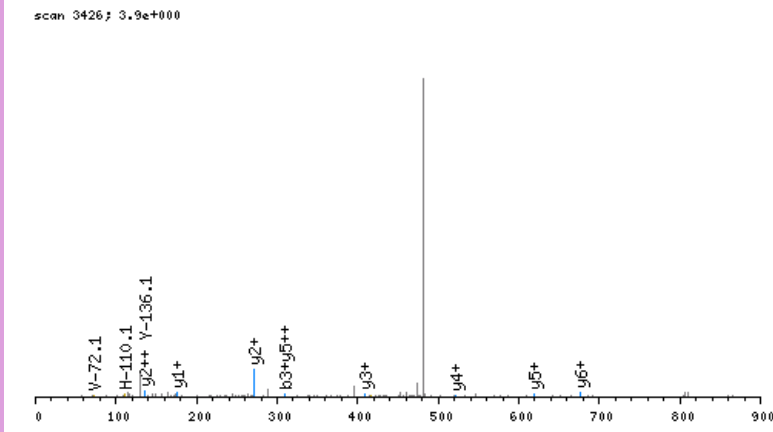

click image to zoom in; click top corners to zoom out [\[precursor±\]](#)

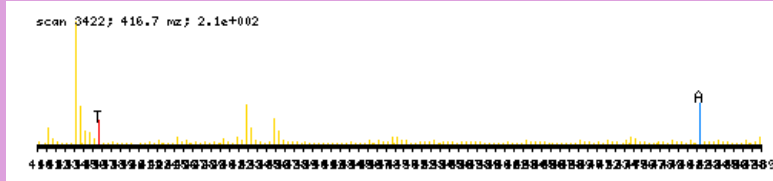

zoomed in precursor plot; T=theoretical m/z, A=acquired m/z

| b <sup>+</sup> | # | AA # | y <sup>+</sup> | y <sup>2+</sup>   |
|----------------|---|------|----------------|-------------------|
| 157.0613       | 1 | N    | 7              |                   |
| 214.0828       | 2 | G    | 6              | 676.3895 338.6986 |
| 311.1356       | 3 | P    | 5              | 619.3680 310.1879 |
| 424.2196       | 4 | L    | 4              | 522.3152 261.6615 |
| 561.2785       | 5 | H    | 3              | 409.2312 205.1195 |
| 658.3313       | 6 | P    | 2              | 272.1723 136.5900 |
|                | 7 | R    | 1              | 175.1195 88.0637  |

N-term:+43.02

NHTSQAFITAASGGQPPNYER, MH+ 2288.0696, m/z 763.3614  
 H OS G24 P150811 220811-s1.04045.04045.3.dta

X-range:

-

MassTol: Y-zoom:

MassType:

AVG  MONO

Axis:

1  2

Label:

I  M  -

Ions:

a  +  2+  3+

b  +  2+  3+

c  +  2+  3+

x  +  2+  3+

y  +  2+  3+

z  +  2+  3+

hide H<sub>2</sub>O/NH<sub>3</sub>

zoom 112-122

GO

scan 4045; 1.9e+000

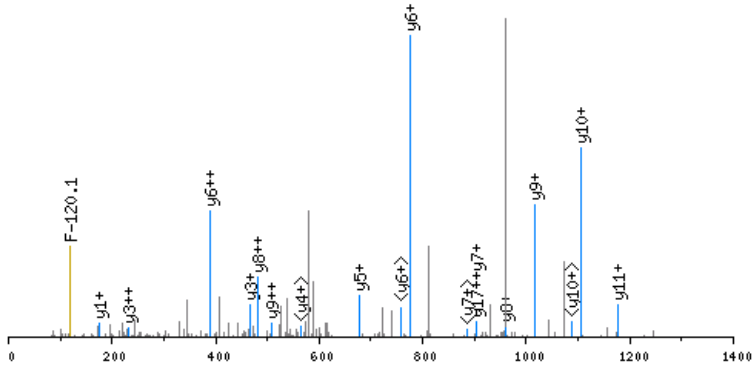

click image to zoom in; click top corners to zoom out [precursor±]

scan 4042; 763.4 m/z; 6.1e+000

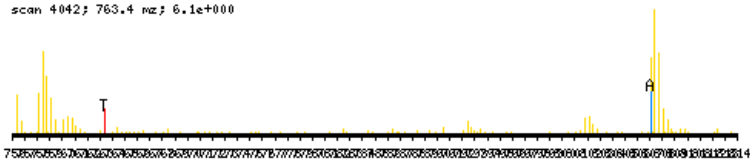

zoomed in precursor plot; T=theoretical m/z, A=acquired m/z

| b <sup>+</sup> | #  | AA # | y <sup>+</sup> | y <sup>2+</sup> |
|----------------|----|------|----------------|-----------------|
| 157.0613       | 1  | N 21 |                |                 |
| 294.1202       | 2  | H 20 | 2132.0161      | 1066.5120       |
| 395.1679       | 3  | T 19 | 1994.9572      | 997.9825        |
| 482.1999       | 4  | S 18 | 1893.9095      | 947.4587        |
| 610.2585       | 5  | Q 17 | 1806.8775      | 903.9427        |
| 681.2956       | 6  | A 16 | 1678.8189      | 839.9134        |
| 828.3641       | 7  | F 15 | 1607.7818      | 804.3948        |
| 941.4481       | 8  | I 14 | 1460.7134      | 730.8606        |
| 1042.4958      | 9  | T 13 | 1347.6293      | 674.3186        |
| 1113.5329      | 10 | A 12 | 1246.5816      | 623.7947        |
| 1184.5700      | 11 | A 11 | 1175.5445      | 588.2762        |
| 1271.6021      | 12 | S 10 | 1104.5074      | 552.7576        |
| 1328.6235      | 13 | G 9  | 1017.4754      | 509.2416        |
| 1385.6450      | 14 | G 8  | 960.4539       | 480.7309        |
| 1513.7036      | 15 | Q 7  | 903.4325       | 452.2201        |
| 1610.7563      | 16 | P 6  | 775.3739       | 388.1909        |
| 1707.8091      | 17 | P 5  | 678.3211       | 339.6645        |
| 1821.8520      | 18 | N 4  | 581.2683       | 291.1381        |
| 1984.9153      | 19 | Y 3  | 467.2254       | 234.1166        |
| 2113.9579      | 20 | E 2  | 304.1621       | 152.5850        |
|                | 21 | R 1  | 175.1195       | 88.0637         |

N-term:+43.02

NKAPQPTGPPPAR, MH+ 1400.7651, m/z 467.5932  
 H OS G24 P150811 220811-s1.02742.02742.3.dta

X-range:

-

MassTol: Y-zoom:

MassType:

AVG  MONO

Axis:

1  2

Label:

I  M  -

Ions:

a  +  2+  3+

b  +  2+  3+

c  +  2+  3+

x  +  2+  3+

y  +  2+  3+

z  +  2+  3+

hide H<sub>2</sub>O/NH<sub>3</sub>

zoom 112-122

GO

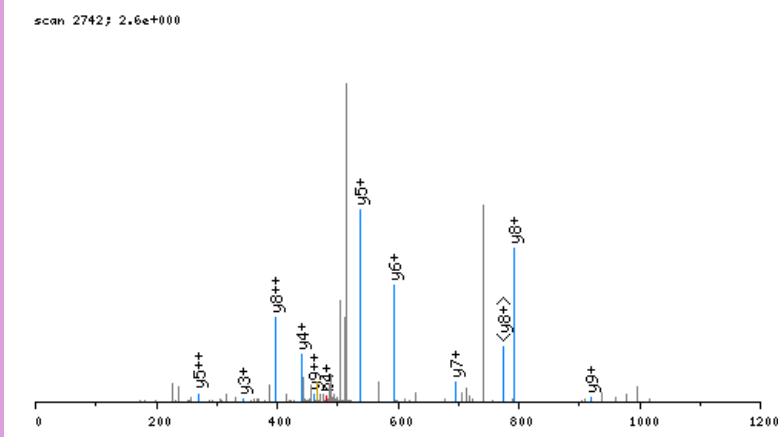

click image to zoom in; click top corners to zoom out [\[precursor±\]](#)

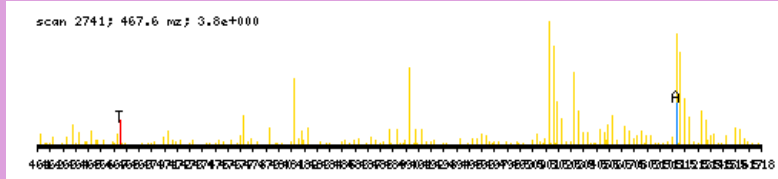

zoomed in precursor plot; T=theoretical m/z, A=acquired m/z

| b <sup>+</sup> | #  | AA # | y <sup>+</sup> | y <sup>2+</sup> |
|----------------|----|------|----------------|-----------------|
| 157.0613       | 1  | N 13 |                |                 |
| 313.1876       | 2  | K 12 | 1244.7116      | 622.8597        |
| 384.2247       | 3  | A 11 | 1088.5853      | 544.7965        |
| 481.2775       | 4  | P 10 | 1017.5482      | 509.2780        |
| 609.3361       | 5  | Q 9  | 920.4954       | 460.7516        |
| 706.3888       | 6  | P 8  | 792.4368       | 396.7223        |
| 807.4365       | 7  | T 7  | 695.3840       | 348.1959        |
| 864.4580       | 8  | G 6  | 594.3364       | 297.6721        |
| 961.5108       | 9  | P 5  | 537.3149       | 269.1614        |
| 1058.5635      | 10 | P 4  | 440.2621       | 220.6350        |
| 1155.6163      | 11 | P 3  | 343.2094       | 172.1086        |
| 1226.6534      | 12 | A 2  | 246.1566       | 123.5822        |
|                | 13 | R 1  | 175.1195       | 88.0637         |

N-term:+43.02 K(2):+156.13

NNASEGPRPPR, MH+ 1293.6300, m/z 431.8815  
 H OS G28 P150811 220811-s1.02076.02076.3.dta

scan 2076; 1.9e+000

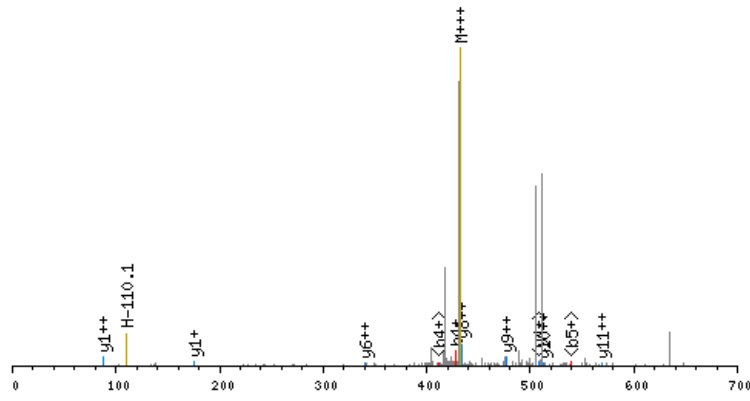

click image to zoom in; click top corners to zoom out [\[precursor±\]](#)

scan 2073; 431.9 m/z; 1.2e+001

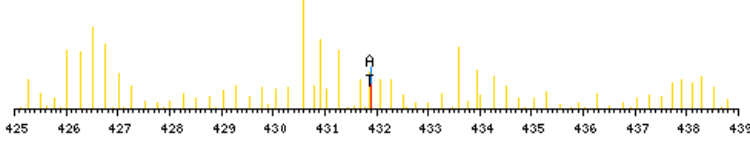

zoomed in precursor plot; T=theoretical m/z, A=acquired m/z

X-range:

-

MassTol: Y-zoom:

MassType:

AVG  MONO

Axis:

1  2

Label:

I  M  -

Ions:

a  +  2+  3+

b  +  2+  3+

c  +  2+  3+

x  +  2+  3+

y  +  2+  3+

z  +  2+  3+

hide H<sub>2</sub>O/NH<sub>3</sub>

zoom 112-122

GO

| b <sup>+</sup> | #  | AA # | y <sup>+</sup> | y <sup>2+</sup> |
|----------------|----|------|----------------|-----------------|
| 157.0613       | 1  | N 12 |                |                 |
| 271.1043       | 2  | N 11 | 1137.5765      | 569.2922        |
| 342.1414       | 3  | A 10 | 1023.5336      | 512.2707        |
| 429.1734       | 4  | S 9  | 952.4965       | 476.7521        |
| 558.2160       | 5  | E 8  | 865.4644       | 433.2361        |
| 615.2375       | 6  | G 7  | 736.4218       | 368.7148        |
| 712.2902       | 7  | P 6  | 679.4004       | 340.2041        |
| 769.3117       | 8  | G 5  | 582.3476       | 291.6777        |
| 925.4128       | 9  | R 4  | 525.3261       | 263.1670        |
| 1022.4656      | 10 | P 3  | 369.2250       | 185.1164        |
| 1119.5183      | 11 | P 2  | 272.1723       | 136.5900        |
|                | 12 | R 1  | 175.1195       | 88.0637         |

N-term:+43.02

NQEKLAKLQAQVR, MH+ 1636.0183, m/z 546.0110  
 H OS G26 P150811 220811-s1.04102.04102.3.dta

scan 4102; 7.0e+001

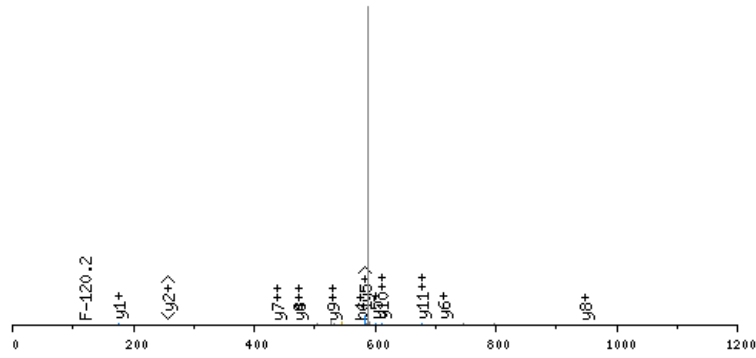

click image to zoom in; click top corners to zoom out [\[precursor±\]](#)

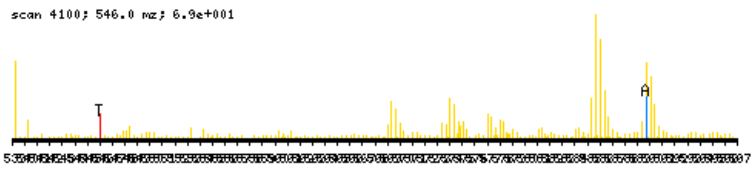

zoomed in precursor plot; T=theoretical m/z, A=acquired m/z

X-range:

-

MassTol: Y-zoom:

MassType:

AVG  MONO

Axis:

1  2

Label:

I  M  -

Ions:

a  +  2+  3+

b  +  2+  3+

c  +  2+  3+

x  +  2+  3+

y  +  2+  3+

z  +  2+  3+

hide H<sub>2</sub>O/NH<sub>3</sub>

zoom 112-122

GO

| b <sup>+</sup> | #  | AA | #  | y <sup>+</sup> | y <sup>2+</sup> |
|----------------|----|----|----|----------------|-----------------|
| 157.0613       | 1  | N  | 13 |                |                 |
| 285.1199       | 2  | Q  | 12 | 1479.9648      | 740.4863        |
| 414.1625       | 3  | E  | 11 | 1351.9062      | 676.4570        |
| 576.3206       | 4  | K  | 10 | 1222.8636      | 611.9357        |
| 689.4047       | 5  | L  | 9  | 1060.7055      | 530.8567        |
| 760.4418       | 6  | A  | 8  | 947.6215       | 474.3146        |
| 922.5999       | 7  | K  | 7  | 876.5843       | 438.7961        |
| 1035.6839      | 8  | L  | 6  | 714.4262       | 357.7170        |
| 1163.7425      | 9  | Q  | 5  | 601.3422       | 301.1750        |
| 1234.7796      | 10 | A  | 4  | 473.2836       | 237.1457        |
| 1362.8382      | 11 | Q  | 3  | 402.2465       | 201.6272        |
| 1461.9066      | 12 | V  | 2  | 274.1879       | 137.5979        |
|                | 13 | R  | 1  | 175.1195       | 88.0637         |

N-term:+43.02 K(4):+162.16  
 K(7):+162.16



NRPAPVEISYENMR, MH+ 1717.8332, m/z 573.2826  
 H OS G25 P150811 220811-s1.06221.06221.3.dta

X-range:

-

MassTol: Y-zoom:

MassType:

AVG  MONO

Axis:

1  2

Label:

I  M  -

Ions:

a  +  2+  3+

b  +  2+  3+

c  +  2+  3+

x  +  2+  3+

y  +  2+  3+

z  +  2+  3+

hide H<sub>2</sub>O/NH<sub>3</sub>

zoom 112-122

GO

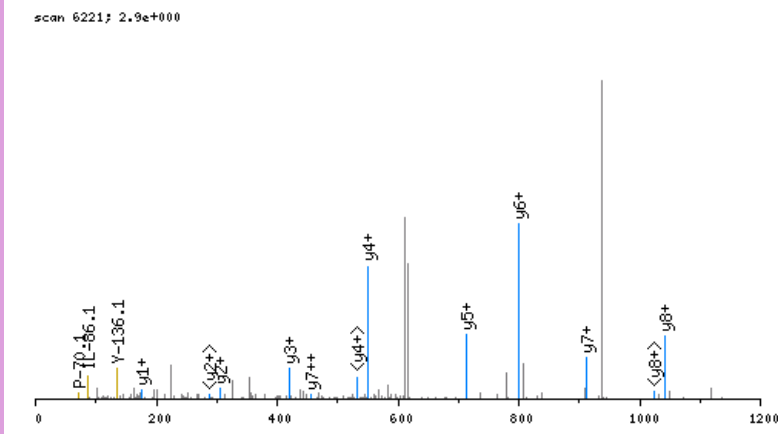

click image to zoom in; click top corners to zoom out [\[precursor±\]](#)

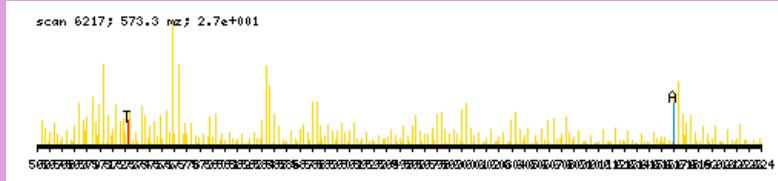

zoomed in precursor plot; T=theoretical m/z, A=acquired m/z

| b <sup>+</sup> | #  | AA # | y <sup>+</sup> | y <sup>2+</sup> |
|----------------|----|------|----------------|-----------------|
| 157.0613       | 1  | N 14 |                |                 |
| 313.1624       | 2  | R 13 | 1561.7797      | 781.3938        |
| 410.2152       | 3  | P 12 | 1405.6786      | 703.3432        |
| 481.2523       | 4  | A 11 | 1308.6258      | 654.8168        |
| 578.3051       | 5  | P 10 | 1237.5887      | 619.2983        |
| 677.3735       | 6  | V 9  | 1140.5359      | 570.7719        |
| 806.4161       | 7  | E 8  | 1041.4675      | 521.2377        |
| 919.5002       | 8  | I 7  | 912.4249       | 456.7164        |
| 1006.5322      | 9  | S 6  | 799.3409       | 400.1743        |
| 1169.5955      | 10 | Y 5  | 712.3088       | 356.6583        |
| 1298.6381      | 11 | E 4  | 549.2455       | 275.1267        |
| 1412.6810      | 12 | N 3  | 420.2029       | 210.6054        |
| 1543.7215      | 13 | M 2  | 306.1600       | 153.5839        |
|                | 14 | R 1  | 175.1195       | 88.0637         |

N-term:+43.02

NSVGEACTDMKR, MH+ 1443.6784, m/z 722.3428  
 H OS G25 P150811 220811-s1.04284.04284.2.dta

scan 4284; 4.6e+000

X-range:

-

MassTol: Y-zoom:

MassType:

AVG  MONO

Axis:

1  2

Label:

I  M  -

Ions:

a  +  2+  3+

b  +  2+  3+

c  +  2+  3+

x  +  2+  3+

y  +  2+  3+

z  +  2+  3+

hide H<sub>2</sub>O/NH<sub>3</sub>

zoom 112-122

GO

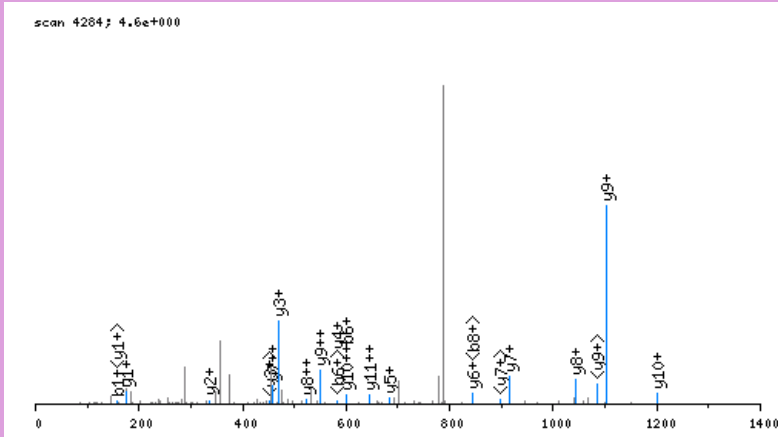

click image to zoom in; click top corners to zoom out [precursor±]

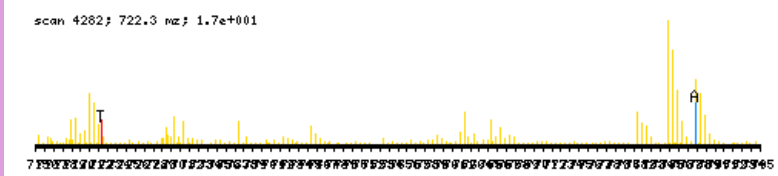

zoomed in precursor plot; T=theoretical m/z, A=acquired m/z

| b <sup>+</sup> | #  | AA | #  | y <sup>+</sup> | y <sup>2+</sup> |
|----------------|----|----|----|----------------|-----------------|
| 157.0613       | 1  | N  | 12 |                |                 |
| 244.0934       | 2  | S  | 11 | 1287.6249      | 644.3164        |
| 343.1618       | 3  | V  | 10 | 1200.5929      | 600.8004        |
| 400.1832       | 4  | G  | 9  | 1101.5245      | 551.2662        |
| 529.2258       | 5  | E  | 8  | 1044.5030      | 522.7554        |
| 600.2629       | 6  | A  | 7  | 915.4604       | 458.2341        |
| 760.2935       | 7  | C  | 6  | 844.4233       | 422.7156        |
| 861.3412       | 8  | T  | 5  | 684.3927       | 342.7003        |
| 976.3682       | 9  | D  | 4  | 583.3450       | 292.1764        |
| 1107.4086      | 10 | M  | 3  | 468.3181       | 234.6630        |
| 1269.5667      | 11 | K  | 2  | 337.2776       | 169.1427        |
|                | 12 | R  | 1  | 175.1195       | 88.0637         |

N-term:+43.02 C(7):+160.03  
 K(11):+162.16

NVEHEVNLLVEEIHR, MH+ 1871.9616, m/z 624.6587  
 H OS G26 P150811 220811-s1.06952.06952.3.dta

scan 6952; 1.4e+000

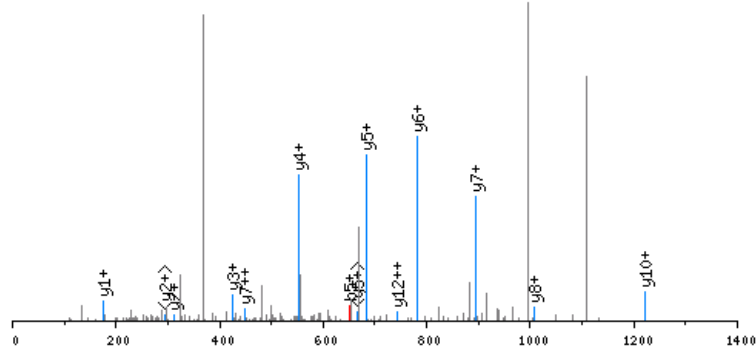

click image to zoom in; click top corners to zoom out [\[precursor±\]](#)

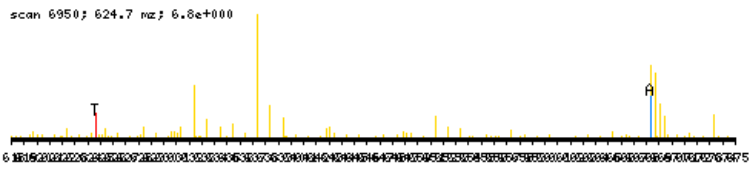

zoomed in precursor plot; T=theoretical m/z, A=acquired m/z

X-range:

-

MassTol: Y-zoom:

MassType:

AVG  MONO

Axis:

1  2

Label:

I  M  -

Ions:

a  +  2+  3+

b  +  2+  3+

c  +  2+  3+

x  +  2+  3+

y  +  2+  3+

z  +  2+  3+

hide H<sub>2</sub>O/NH<sub>3</sub>

zoom 112-122

GO

| b <sup>+</sup> | #  | AA # | y <sup>+</sup> | y <sup>2+</sup> |
|----------------|----|------|----------------|-----------------|
| 157.0613       | 1  | N 15 |                |                 |
| 256.1297       | 2  | V 14 | 1715.9081      | 858.4579        |
| 385.1723       | 3  | E 13 | 1616.8396      | 808.9237        |
| 522.2312       | 4  | H 12 | 1487.7971      | 744.4024        |
| 651.2738       | 5  | E 11 | 1350.7381      | 675.8730        |
| 750.3423       | 6  | V 10 | 1221.6955      | 611.3517        |
| 864.3852       | 7  | N 9  | 1122.6271      | 561.8175        |
| 977.4692       | 8  | L 8  | 1008.5842      | 504.7960        |
| 1090.5533      | 9  | L 7  | 895.5001       | 448.2540        |
| 1189.6217      | 10 | V 6  | 782.4161       | 391.7120        |
| 1318.6643      | 11 | E 5  | 683.3477       | 342.1777        |
| 1447.7069      | 12 | E 4  | 554.3051       | 277.6564        |
| 1560.7910      | 13 | I 3  | 425.2625       | 213.1352        |
| 1697.8499      | 14 | H 2  | 312.1784       | 156.5931        |
|                | 15 | R 1  | 175.1195       | 88.0637         |

N-term:+43.02

NVNDLKQR, MH+ 1062.6120, m/z 531.8097  
 H OS G25 P150811 220811-s1.04200.04200.2.dta

X-range:

-

MassTol: Y-zoom:

MassType:

AVG  MONO

Axis:

1  2

Label:

I  M  -

Ions:

a  +  2+  3+

b  +  2+  3+

c  +  2+  3+

x  +  2+  3+

y  +  2+  3+

z  +  2+  3+

hide H<sub>2</sub>O/NH<sub>3</sub>

zoom 112-122

GO

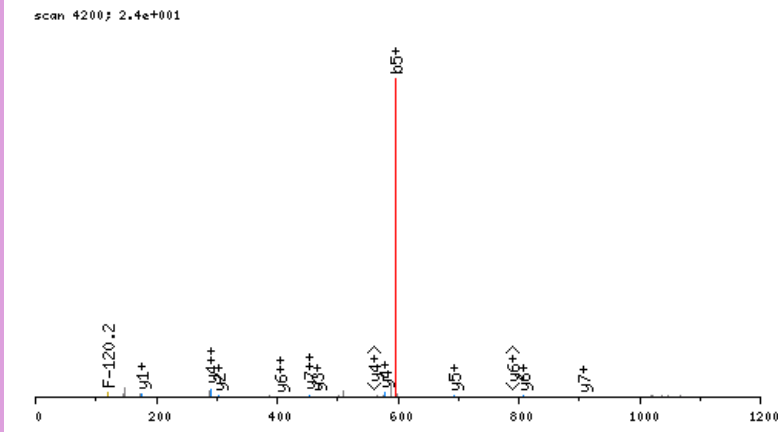

click image to zoom in; click top corners to zoom out [\[precursor±\]](#)

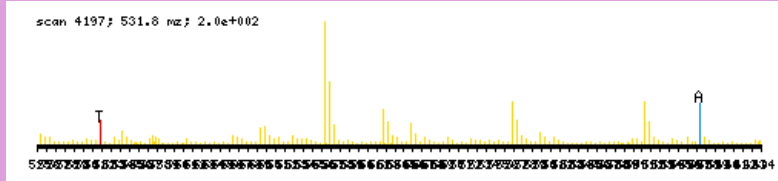

zoomed in precursor plot; T=theoretical m/z, A=acquired m/z

| b <sup>+</sup> | # | AA # | y <sup>+</sup> | y <sup>2+</sup>   |
|----------------|---|------|----------------|-------------------|
| 157.0613       | 1 | N    | 8              |                   |
| 256.1297       | 2 | V    | 7              | 906.5585 453.7832 |
| 370.1727       | 3 | N    | 6              | 807.4901 404.2490 |
| 485.1996       | 4 | D    | 5              | 693.4472 347.2275 |
| 598.2837       | 5 | L    | 4              | 578.4202 289.7140 |
| 760.4418       | 6 | K    | 3              | 465.3362 233.1720 |
| 888.5004       | 7 | Q    | 2              | 303.1781 152.0930 |
|                | 8 | R    | 1              | 175.1195 88.0637  |

N-term:+43.02 K(6):+162.16

NVVDLGR, MH+ 814.4423, m/z 407.7248  
 H OS G29 P150811 220811-s1.05073.05073.2.dta

X-range:

-

MassTol: Y-zoom:

MassType:

AVG  MONO

Axis:

1  2

Label:

I  M  -

Ions:

a  +  2+  3+

b  +  2+  3+

c  +  2+  3+

x  +  2+  3+

y  +  2+  3+

z  +  2+  3+

hide H<sub>2</sub>O/NH<sub>3</sub>

zoom 112-122

GO

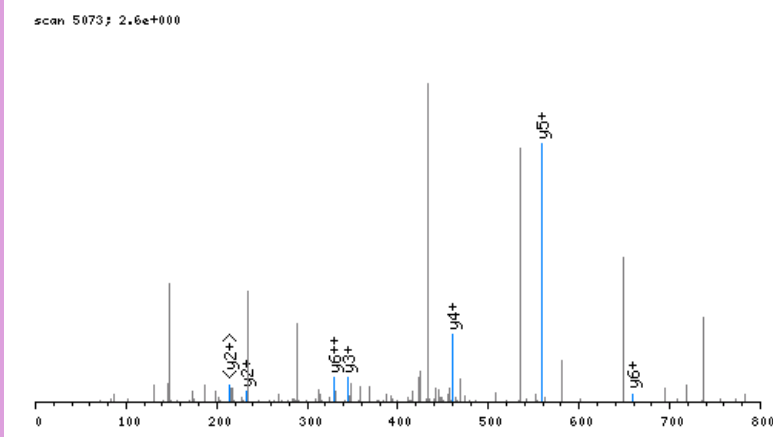

click image to zoom in; click top corners to zoom out [\[precursor±\]](#)

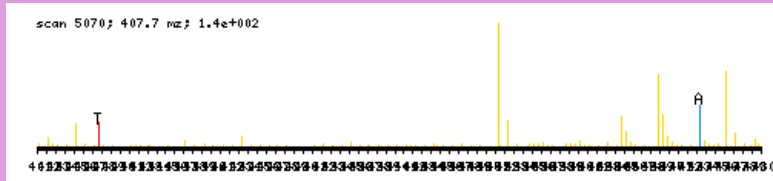

zoomed in precursor plot; T=theoretical m/z, A=acquired m/z

| b <sup>+</sup> | # | AA # | y <sup>+</sup> | y <sup>2+</sup>   |
|----------------|---|------|----------------|-------------------|
| 157.0613       | 1 | N    | 7              |                   |
| 256.1297       | 2 | V    | 6              | 658.3888 329.6983 |
| 355.1982       | 3 | V    | 5              | 559.3204 280.1641 |
| 470.2251       | 4 | D    | 4              | 460.2520 230.6299 |
| 583.3092       | 5 | L    | 3              | 345.2250 173.1164 |
| 640.3306       | 6 | G    | 2              | 232.1410 116.5744 |
|                | 7 | R    | 1              | 175.1195 88.0637  |

N-term:+43.02

QAALVETAR, MH+ 1000.5427, m/z 500.7750  
 H OS G29 P150811 220811-s1.05112.05112.2.dta

scan 5112; 8.6e-001

X-range:

-

MassTol: Y-zoom:

MassType:

AVG  MONO

Axis:

1  2

Label:

I  M  -

Ions:

a  +  2+  3+

b  +  2+  3+

c  +  2+  3+

x  +  2+  3+

y  +  2+  3+

z  +  2+  3+

hide H<sub>2</sub>O/NH<sub>3</sub>

zoom 112-122

GO

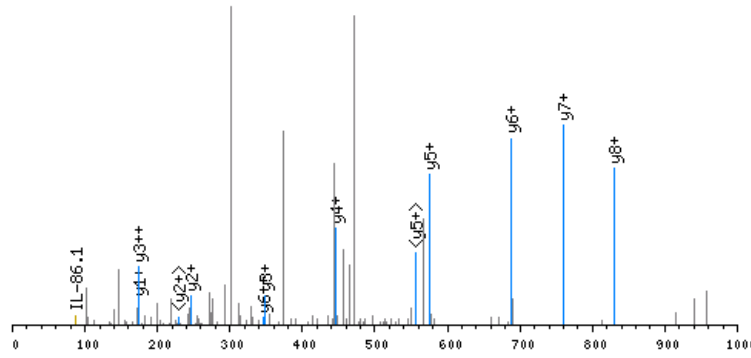

click image to zoom in; click top corners to zoom out [\[precursor±\]](#)

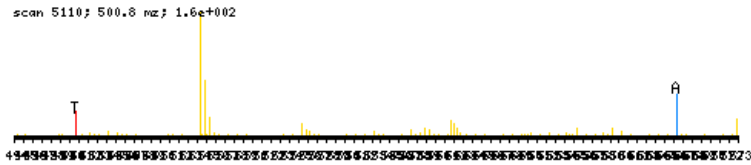

zoomed in precursor plot; T=theoretical m/z, A=acquired m/z

| b <sup>+</sup> | # | AA # | y <sup>+</sup> | y <sup>2+</sup> |
|----------------|---|------|----------------|-----------------|
| 171.0770       | 1 | Q    | 9              |                 |
| 242.1141       | 2 | A    | 8              | 830.4736        |
| 313.1512       | 3 | A    | 7              | 759.4365        |
| 426.2353       | 4 | L    | 6              | 688.3994        |
| 555.2779       | 5 | E    | 5              | 575.3153        |
| 654.3463       | 6 | V    | 4              | 446.2727        |
| 755.3940       | 7 | T    | 3              | 347.2043        |
| 826.4311       | 8 | A    | 2              | 246.1566        |
|                | 9 | R    | 1              | 175.1195        |

N-term:+43.02

QDAENVAVPEAAEER, MH+ 1669.7669, m/z 557.2605  
 H OS G29 P150811 220811-s1.04471.04471.3.dta

X-range:

-

MassTol: Y-zoom:

MassType:

AVG  MONO

Axis:

1  2

Label:

I  M  -

Ions:

a  +  2+  3+

b  +  2+  3+

c  +  2+  3+

x  +  2+  3+

y  +  2+  3+

z  +  2+  3+

hide H<sub>2</sub>O/NH<sub>3</sub>

zoom 112-122

GO

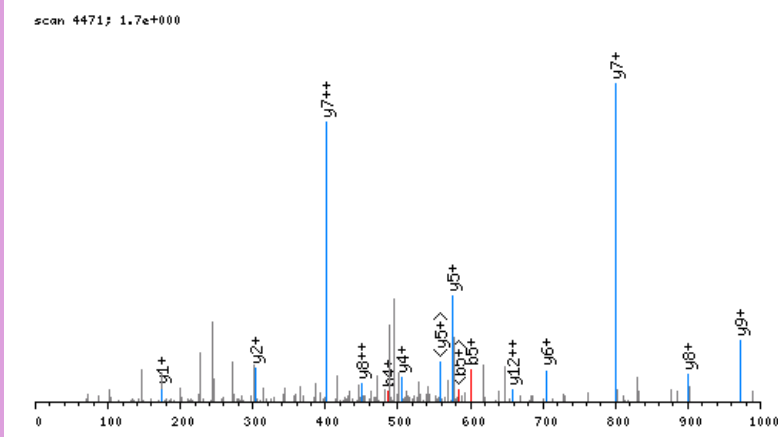

click image to zoom in; click top corners to zoom out [\[precursor±\]](#)

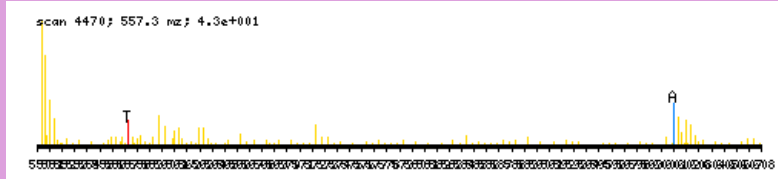

zoomed in precursor plot; T=theoretical m/z, A=acquired m/z

| b <sup>+</sup> | #  | AA # | y <sup>+</sup> | y <sup>2+</sup> |
|----------------|----|------|----------------|-----------------|
| 171.0770       | 1  | Q 15 |                |                 |
| 286.1039       | 2  | D 14 | 1499.6978      | 750.3528        |
| 357.1410       | 3  | A 13 | 1384.6708      | 692.8393        |
| 486.1836       | 4  | E 12 | 1313.6337      | 657.3208        |
| 600.2266       | 5  | N 11 | 1184.5911      | 592.7995        |
| 699.2950       | 6  | V 10 | 1070.5482      | 535.7780        |
| 770.3321       | 7  | A 9  | 971.4798       | 486.2438        |
| 869.4005       | 8  | V 8  | 900.4427       | 450.7253        |
| 966.4533       | 9  | P 7  | 801.3743       | 401.1910        |
| 1095.4959      | 10 | E 6  | 704.3215       | 352.6647        |
| 1166.5330      | 11 | A 5  | 575.2789       | 288.1434        |
| 1237.5701      | 12 | A 4  | 504.2418       | 252.6248        |
| 1366.6127      | 13 | E 3  | 433.2047       | 217.1063        |
| 1495.6553      | 14 | E 2  | 304.1621       | 152.5850        |
|                | 15 | R 1  | 175.1195       | 88.0637         |

N-term:+43.02

QEFKEAFTVIDQNR, MH+ 1794.9027, m/z 598.9724  
 H OS G26 P150811 220811-s1.05156.05156.3.dta

scan 5156; 2.6e+001

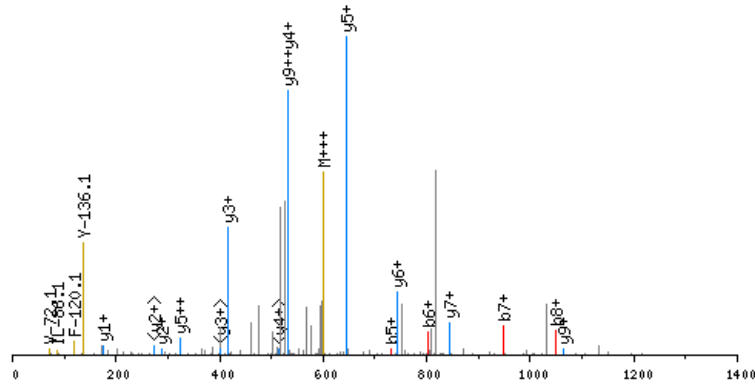

click image to zoom in; click top corners to zoom out [\[precursor±\]](#)

scan 5155; 599.0 m/z; 1.6e+003

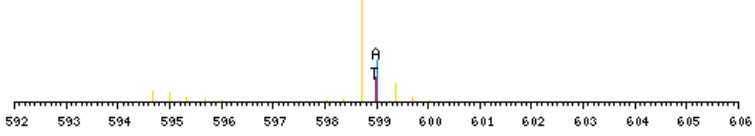

zoomed in precursor plot; T=theoretical m/z, A=acquired m/z

X-range:

-

MassTol: Y-zoom:

MassType:

AVG  MONO

Axis:

1  2

Label:

I  M  -

Ions:

a  +  2+  3+

b  +  2+  3+

c  +  2+  3+

x  +  2+  3+

y  +  2+  3+

z  +  2+  3+

hide H<sub>2</sub>O/NH<sub>3</sub>

zoom 112-122

GO

| b <sup>+</sup> | #  | AA # | y <sup>+</sup> | y <sup>2+</sup> |
|----------------|----|------|----------------|-----------------|
| 171.0770       | 1  | Q 14 |                |                 |
| 300.1196       | 2  | E 13 | 1624.8335      | 812.9207        |
| 447.1880       | 3  | F 12 | 1495.7909      | 748.3994        |
| 603.3143       | 4  | K 11 | 1348.7225      | 674.8652        |
| 732.3569       | 5  | E 10 | 1192.5962      | 596.8020        |
| 803.3940       | 6  | A 9  | 1063.5536      | 532.2807        |
| 950.4624       | 7  | F 8  | 992.5165       | 496.7622        |
| 1051.5101      | 8  | T 7  | 845.4481       | 423.2280        |
| 1150.5785      | 9  | V 6  | 744.4004       | 372.7041        |
| 1263.6626      | 10 | I 5  | 645.3320       | 323.1699        |
| 1378.6895      | 11 | D 4  | 532.2479       | 266.6279        |
| 1506.7481      | 12 | Q 3  | 417.2210       | 209.1144        |
| 1620.7910      | 13 | N 2  | 289.1624       | 145.0851        |
|                | 14 | R 1  | 175.1195       | 88.0637         |

N-term:+43.02 K(4):+156.13



QEMNLLPTPEPVTR, MH+ 1753.8795, m/z 585.2980  
 H OS G29 P150811 220811-s1.06247.06247.3.dta

X-range:

-

MassTol: Y-zoom:

MassType:

AVG  MONO

Axis:

1  2

Label:

I  M  -

Ions:

a  +  2+  3+

b  +  2+  3+

c  +  2+  3+

x  +  2+  3+

y  +  2+  3+

z  +  2+  3+

hide H<sub>2</sub>O/NH<sub>3</sub>

zoom 112-122

GO

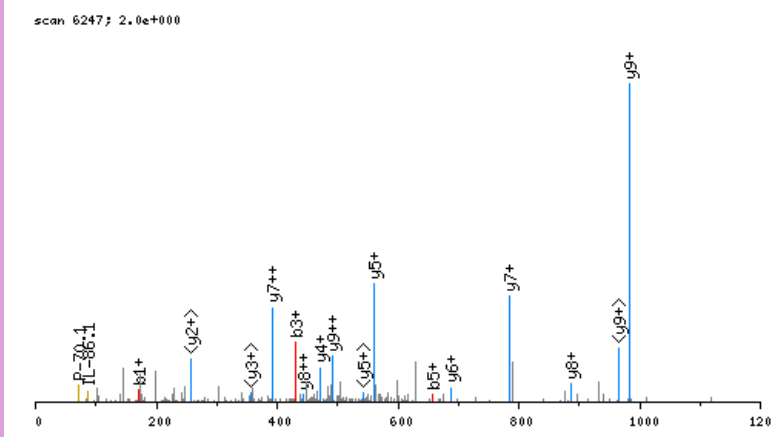

click image to zoom in; click top corners to zoom out [\[precursor±\]](#)

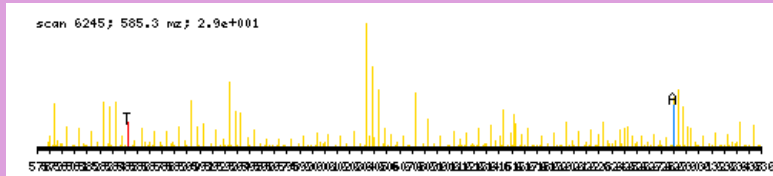

zoomed in precursor plot; T=theoretical m/z, A=acquired m/z

| b <sup>+</sup> | #  | AA # | y <sup>+</sup> | y <sup>2+</sup> |
|----------------|----|------|----------------|-----------------|
| 171.0770       | 1  | Q 15 |                |                 |
| 300.1196       | 2  | E 14 | 1583.8103      | 792.4091        |
| 431.1601       | 3  | M 13 | 1454.7677      | 727.8878        |
| 545.2030       | 4  | N 12 | 1323.7272      | 662.3675        |
| 658.2870       | 5  | L 11 | 1209.6843      | 605.3461        |
| 771.3711       | 6  | L 10 | 1096.6002      | 548.8040        |
| 868.4239       | 7  | P 9  | 983.5162       | 492.2620        |
| 969.4716       | 8  | T 8  | 886.4634       | 443.7356        |
| 1066.5243      | 9  | P 7  | 785.4157       | 393.2118        |
| 1195.5669      | 10 | E 6  | 688.3630       | 344.6854        |
| 1282.5989      | 11 | S 5  | 559.3204       | 280.1641        |
| 1379.6517      | 12 | P 4  | 472.2884       | 236.6481        |
| 1478.7201      | 13 | V 3  | 375.2356       | 188.1217        |
| 1579.7678      | 14 | T 2  | 276.1672       | 138.5875        |
|                | 15 | R 1  | 175.1195       | 88.0637         |

N-term:+43.02

QLLLTADDR, MH+ 1086.5795, m/z 543.7934  
 H OS G25 P150811 220811-s1.05396.05396.2.dta

scan 5396; 1.2e+001

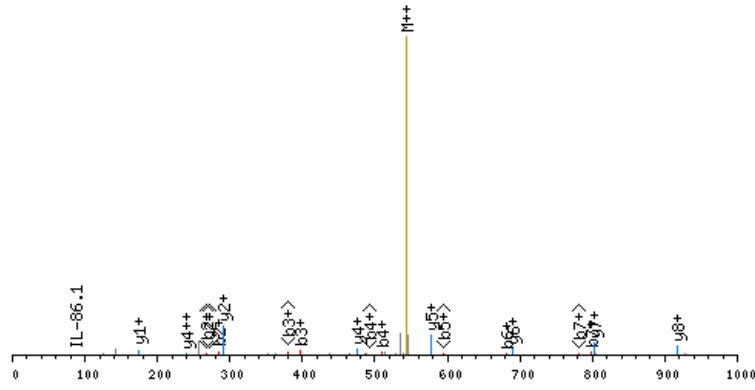

click image to zoom in; click top corners to zoom out [\[precursor±\]](#)

scan 5392; 543.8 m/z; 1.4e+002

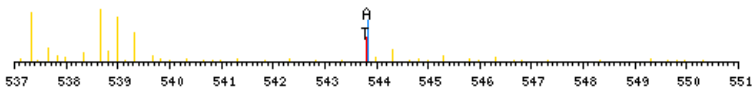

zoomed in precursor plot; T=theoretical m/z, A=acquired m/z

X-range:

-

MassTol: Y-zoom:

MassType:

AVG  MONO

Axis:

1  2

Label:

I  M  -

Ions:

a  +  2+  3+

b  +  2+  3+

c  +  2+  3+

x  +  2+  3+

y  +  2+  3+

z  +  2+  3+

hide H<sub>2</sub>O/NH<sub>3</sub>

zoom 112-122

GO

| b <sup>+</sup> | # | AA # | y <sup>+</sup> | y <sup>2+</sup> |
|----------------|---|------|----------------|-----------------|
| 171.0770       | 1 | Q    | 9              |                 |
| 284.1610       | 2 | L    | 8              | 916.5104        |
| 397.2451       | 3 | L    | 7              | 803.4263        |
| 510.3292       | 4 | L    | 6              | 690.3422        |
| 611.3768       | 5 | T    | 5              | 577.2582        |
| 682.4140       | 6 | A    | 4              | 476.2105        |
| 797.4409       | 7 | D    | 3              | 405.1734        |
| 912.4678       | 8 | D    | 2              | 290.1464        |
|                | 9 | R    | 1              | 175.1195        |

N-term:+43.02

QNDAGEFVDLYVPR, MH+ 1664.7920, m/z 555.6022  
 H OS G29 P150811 220811-s1.06342.06342.3.dta

X-range:

-

MassTol: Y-zoom:

MassType:

AVG  MONO

Axis:

1  2

Label:

I  M  -

Ions:

a  +  2+  3+

b  +  2+  3+

c  +  2+  3+

x  +  2+  3+

y  +  2+  3+

z  +  2+  3+

hide H<sub>2</sub>O/NH<sub>3</sub>

zoom 112-122

GO

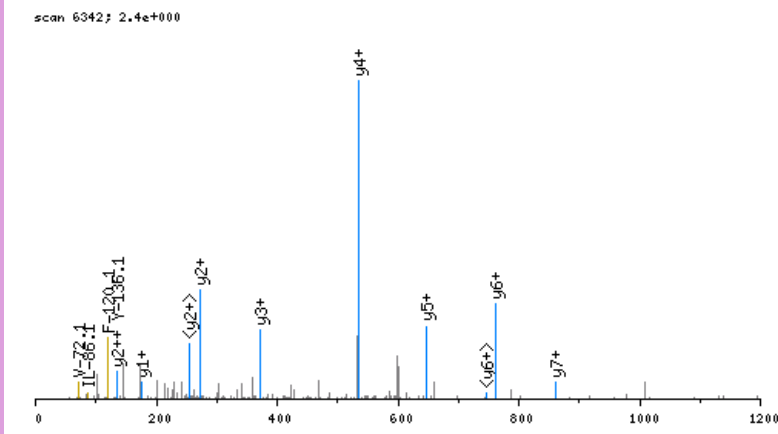

click image to zoom in; click top corners to zoom out [\[precursor±\]](#)

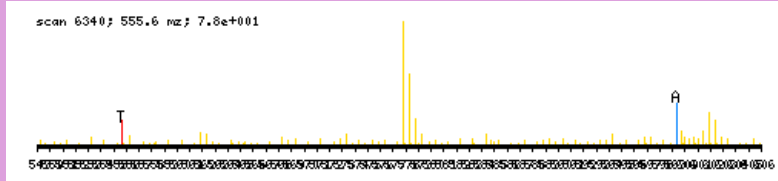

zoomed in precursor plot; T=theoretical m/z, A=acquired m/z

| b <sup>+</sup> | #  | AA # | y <sup>+</sup> | y <sup>2+</sup> |
|----------------|----|------|----------------|-----------------|
| 171.0770       | 1  | Q 14 |                |                 |
| 285.1199       | 2  | N 13 | 1494.7229      | 747.8654        |
| 400.1468       | 3  | D 12 | 1380.6800      | 690.8439        |
| 471.1840       | 4  | A 11 | 1265.6530      | 633.3304        |
| 528.2054       | 5  | G 10 | 1194.6159      | 597.8119        |
| 657.2480       | 6  | E 9  | 1137.5944      | 569.3011        |
| 804.3164       | 7  | F 8  | 1008.5518      | 504.7798        |
| 903.3848       | 8  | V 7  | 861.4834       | 431.2456        |
| 1018.4118      | 9  | D 6  | 762.4150       | 381.7114        |
| 1131.4959      | 10 | L 5  | 647.3881       | 324.1979        |
| 1294.5592      | 11 | Y 4  | 534.3040       | 267.6559        |
| 1393.6276      | 12 | V 3  | 371.2407       | 186.1243        |
| 1490.6804      | 13 | P 2  | 272.1723       | 136.5900        |
|                | 14 | R 1  | 175.1195       | 88.0637         |

N-term:+43.02

QNGKILLIMNIDMEPGAVDPQLR, MH+ 2623.3588, m/z 656.5952  
 H OS G26 P150811 220811-s1.04796.04796.4.dta

X-range:

-

MassTol: Y-zoom:

MassType:

AVG  MONO

Axis:

1  2

Label:

I  M  -

Ions:

a  +  2+  3+

b  +  2+  3+

c  +  2+  3+

x  +  2+  3+

y  +  2+  3+

z  +  2+  3+

hide H<sub>2</sub>O/NH<sub>3</sub>

zoom 112-122

GO

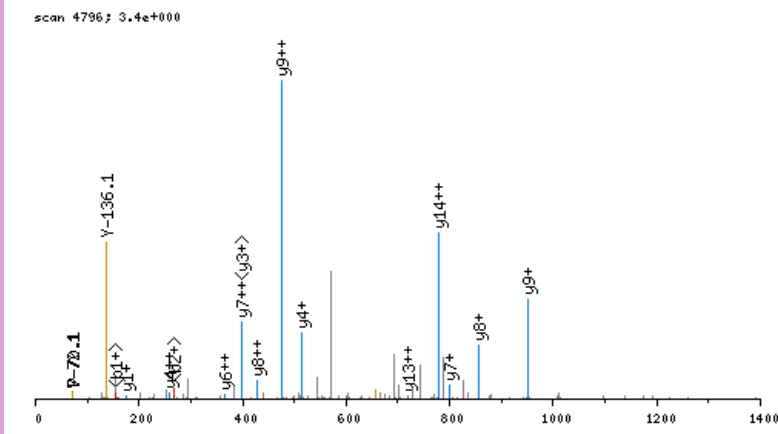

click image to zoom in; click top corners to zoom out [\[precursor±\]](#)

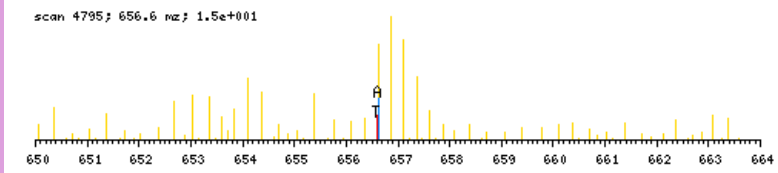

zoomed in precursor plot; T=theoretical m/z, A=acquired m/z

| b <sup>+</sup> | #  | AA # | y <sup>+</sup> | y <sup>2+</sup> |
|----------------|----|------|----------------|-----------------|
| 171.0770       | 1  | Q 23 |                |                 |
| 285.1199       | 2  | N 22 | 2453.2897      | 1227.1487       |
| 342.1414       | 3  | G 21 | 2339.2467      | 1170.1273       |
| 498.2677       | 4  | K 20 | 2282.2253      | 1141.6165       |
| 599.3153       | 5  | T 19 | 2126.0990      | 1063.5534       |
| 712.3994       | 6  | L 18 | 2025.0513      | 1013.0296       |
| 825.4835       | 7  | L 17 | 1911.9672      | 956.4875        |
| 938.5675       | 8  | I 16 | 1798.8832      | 899.9455        |
| 1069.6080      | 9  | M 15 | 1685.7991      | 843.4035        |
| 1183.6510      | 10 | N 14 | 1554.7586      | 777.8832        |
| 1296.7350      | 11 | I 13 | 1440.7157      | 720.8618        |
| 1411.7620      | 12 | D 12 | 1327.6316      | 664.3197        |
| 1542.8024      | 13 | M 11 | 1212.6047      | 606.8063        |
| 1671.8450      | 14 | E 10 | 1081.5642      | 541.2860        |
| 1768.8978      | 15 | P 9  | 952.5216       | 476.7647        |
| 1825.9193      | 16 | G 8  | 855.4688       | 428.2383        |
| 1896.9564      | 17 | A 7  | 798.4474       | 399.7276        |
| 1996.0248      | 18 | V 6  | 727.4103       | 364.2090        |
| 2111.0517      | 19 | D 5  | 628.3418       | 314.6748        |
| 2208.1045      | 20 | P 4  | 513.3149       | 257.1614        |
| 2336.1631      | 21 | Q 3  | 416.2621       | 208.6350        |
| 2449.2471      | 22 | L 2  | 288.2036       | 144.6057        |
|                | 23 | R 1  | 175.1195       | 88.0637         |

N-term:+43.02 K(4):+156.13

QNVINIVKGGK, MH+ 1198.7160, m/z 599.8617  
 H OS G25 P150811 220811-s1.06695.06695.2.dta

scan 6695; 2.7e+000

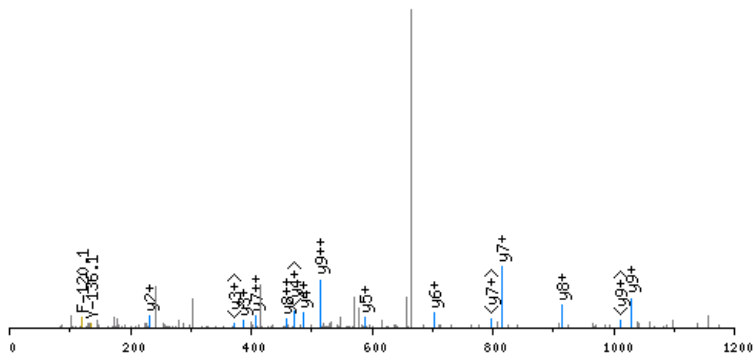

click image to zoom in; click top corners to zoom out [precursor±]

scan 6692; 599.9 mz; 5.2e+001

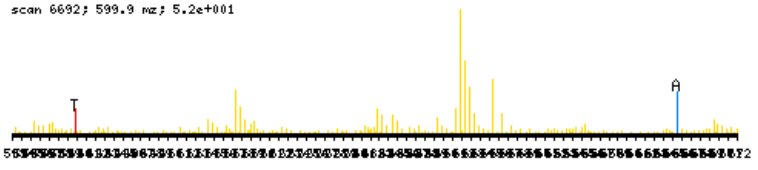

zoomed in precursor plot; T=theoretical m/z, A=acquired m/z

X-range:

-

MassTol: Y-zoom:

MassType:

AVG  MONO

Axis:

1  2

Label:

I  M  -

Ions:

a  +  2+  3+

b  +  2+  3+

c  +  2+  3+

x  +  2+  3+

y  +  2+  3+

z  +  2+  3+

hide H<sub>2</sub>O/NH<sub>3</sub>

zoom 112-122

GO

| b <sup>+</sup> | #  | AA # | y <sup>+</sup> | y <sup>2+</sup> |
|----------------|----|------|----------------|-----------------|
| 171.0770       | 1  | Q    | 10             |                 |
| 285.1199       | 2  | N    | 9              | 1028.6469       |
| 384.1883       | 3  | V    | 8              | 914.6040        |
| 497.2724       | 4  | I    | 7              | 815.5355        |
| 611.3153       | 5  | N    | 6              | 702.4515        |
| 712.3630       | 6  | T    | 5              | 588.4085        |
| 811.4314       | 7  | V    | 4              | 487.3609        |
| 967.5577       | 8  | K    | 3              | 388.2925        |
| 1024.5792      | 9  | G    | 2              | 232.1662        |
|                | 10 | K    | 1              | 175.1447        |

N-term:+43.02 K(8):+156.13  
 K(10):+156.13

QPASAKWYDR, MH+ 1291.6436, m/z 646.3254  
 H OS G25 P150811 220811-s1.05135.05135.2.dta

scan 5135; 9.3e+000

X-range:

-

MassTol: Y-zoom:

MassType:

AVG  MONO

Axis:

1  2

Label:

I  M  -

Ions:

a  +  2+  3+

b  +  2+  3+

c  +  2+  3+

x  +  2+  3+

y  +  2+  3+

z  +  2+  3+

hide H<sub>2</sub>O/NH<sub>3</sub>

zoom 112-122

GO

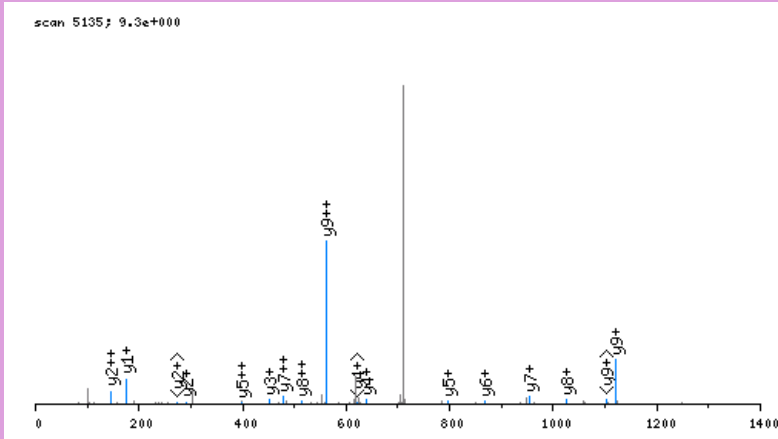

click image to zoom in; click top corners to zoom out [\[precursor±\]](#)

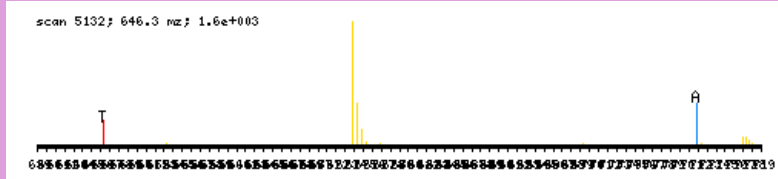

zoomed in precursor plot; T=theoretical m/z, A=acquired m/z

| b <sup>+</sup> | #  | AA # | y <sup>+</sup> | y <sup>2+</sup>    |
|----------------|----|------|----------------|--------------------|
| 171.0770       | 1  | Q    | 10             |                    |
| 268.1297       | 2  | P    | 9              | 1121.5744 561.2911 |
| 339.1669       | 3  | A    | 8              | 1024.5216 512.7647 |
| 426.1989       | 4  | S    | 7              | 953.4845 477.2462  |
| 497.2360       | 5  | A    | 6              | 866.4525 433.7302  |
| 653.3623       | 6  | K    | 5              | 795.4154 398.2116  |
| 839.4416       | 7  | W    | 4              | 639.2891 320.1485  |
| 1002.5049      | 8  | Y    | 3              | 453.2098 227.1088  |
| 1117.5319      | 9  | D    | 2              | 290.1464 145.5771  |
|                | 10 | R    | 1              | 175.1195 88.0637   |

N-term:+43.02 K(6):+156.13

QSAPLEQPAKRPR, MH+ 1547.8658, m/z 516.6268  
 H OS G27 P150811 220811-s1.03246.03246.3.dta

X-range:

-

MassTol: Y-zoom:

MassType:

AVG  MONO

Axis:

1  2

Label:

I  M  -

Ions:

a  +  2+  3+

b  +  2+  3+

c  +  2+  3+

x  +  2+  3+

y  +  2+  3+

z  +  2+  3+

hide H<sub>2</sub>O/NH<sub>3</sub>

zoom 112-122

GO

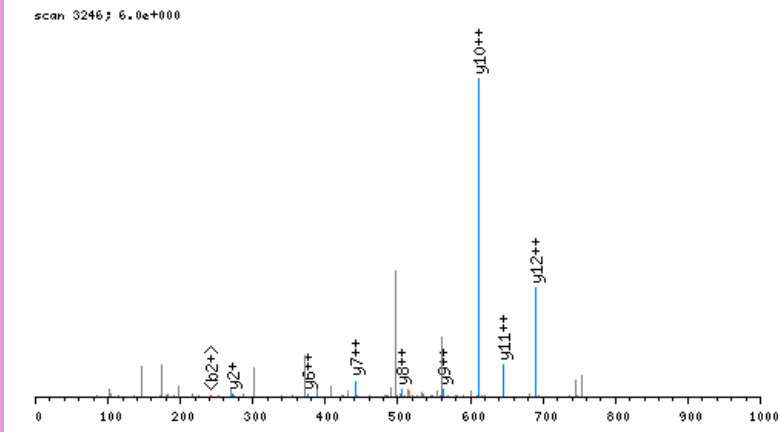

click image to zoom in; click top corners to zoom out [\[precursor±\]](#)

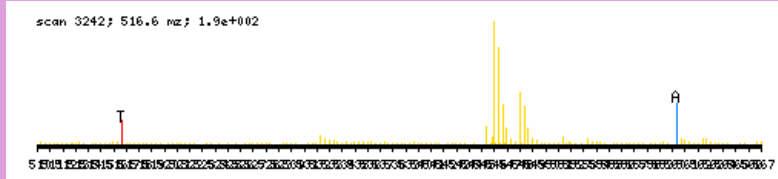

zoomed in precursor plot; T=theoretical m/z, A=acquired m/z

| b <sup>+</sup> | #  | AA # | y <sup>+</sup> | y <sup>2+</sup> |
|----------------|----|------|----------------|-----------------|
| 171.0770       | 1  | Q    | 13             |                 |
| 258.1090       | 2  | S    | 12             | 1377.7967       |
| 329.1461       | 3  | A    | 11             | 1290.7647       |
| 426.1989       | 4  | P    | 10             | 1219.7276       |
| 539.2829       | 5  | L    | 9              | 1122.6748       |
| 668.3255       | 6  | E    | 8              | 1009.5907       |
| 796.3841       | 7  | Q    | 7              | 880.5481        |
| 893.4369       | 8  | P    | 6              | 752.4896        |
| 964.4740       | 9  | A    | 5              | 655.4368        |
| 1120.6003      | 10 | K    | 4              | 584.3997        |
| 1276.7014      | 11 | R    | 3              | 428.2734        |
| 1373.7542      | 12 | P    | 2              | 272.1723        |
|                | 13 | R    | 1              | 175.1195        |

N-term:+43.02 K(10):+156.13

QVQTKIKHPSLRR, MH+ 1701.0925, m/z 567.7023  
 H OS G25 P150811 220811-s1.09110.09110.3.dta

X-range:

-

MassTol: Y-zoom:

MassType:

AVG  MONO

Axis:

1  2

Label:

I  M  -

Ions:

a  +  2+  3+

b  +  2+  3+

c  +  2+  3+

x  +  2+  3+

y  +  2+  3+

z  +  2+  3+

hide H<sub>2</sub>O/NH<sub>3</sub>

zoom 112-122

GO

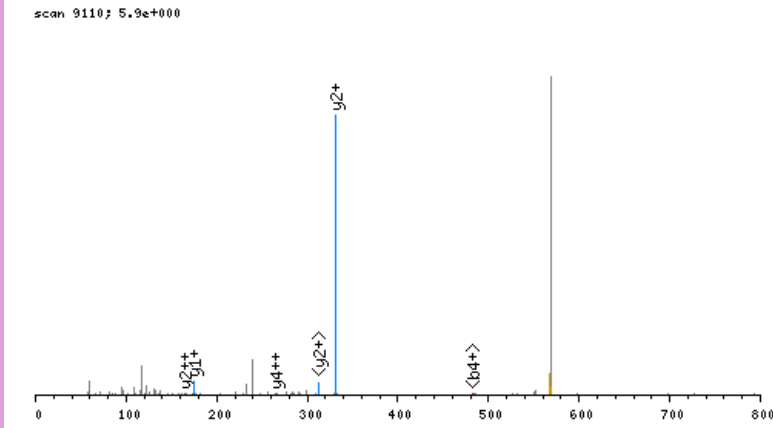

click image to zoom in; click top corners to zoom out [\[precursor±\]](#)

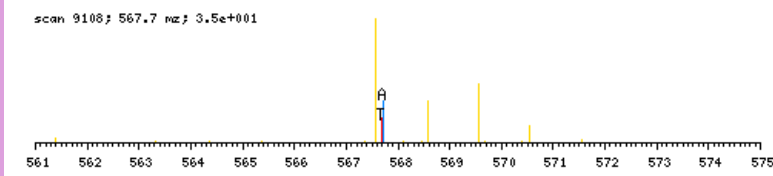

zoomed in precursor plot; T=theoretical m/z, A=acquired m/z

| b <sup>+</sup> | #  | AA # | y <sup>+</sup> | y <sup>2+</sup>                 |
|----------------|----|------|----------------|---------------------------------|
| 171.0770       | 1  | Q    | 13             |                                 |
| 270.1454       | 2  | V    | 12             | 1531.0233 766.0156              |
| 398.2040       | 3  | Q    | 11             | 1431.9549 716.4814              |
| 499.2516       | 4  | T    | 10             | 1303.8963 652.4521              |
| 661.4097       | 5  | K    | 9              | 1202.8486 601.9282              |
| 774.4938       | 6  | I    | 8              | 1040.6905 520.8492              |
| 936.6519       | 7  | K    | 7              | 927.6065 464.3072               |
| 1073.7108      | 8  | H    | 6              | 765.4484 383.2281               |
| 1170.7636      | 9  | P    | 5              | 628.3895 314.6986               |
| 1257.7956      | 10 | S    | 4              | 531.3367 <b>266.1723</b>        |
| 1370.8797      | 11 | L    | 3              | 444.3047 222.6563               |
| 1526.9808      | 12 | R    | 2              | <b>331.2206</b> <b>166.1142</b> |
|                | 13 | R    | 1              | <b>175.1195</b> 88.0637         |

N-term:+43.02 K(5):+162.16  
 K(7):+162.16



RVDGDNIYVR, MH+ 1248.6337, m/z 624.8205  
 H OS G29 P150811 220811-s1.06277.06277.2.dta

X-range:

-

MassTol: Y-zoom:

MassType:

AVG  MONO

Axis:

1  2

Label:

I  M  -

Ions:

a  +  2+  3+

b  +  2+  3+

c  +  2+  3+

x  +  2+  3+

y  +  2+  3+

z  +  2+  3+

hide H<sub>2</sub>O/NH<sub>3</sub>

zoom 112-122

GO

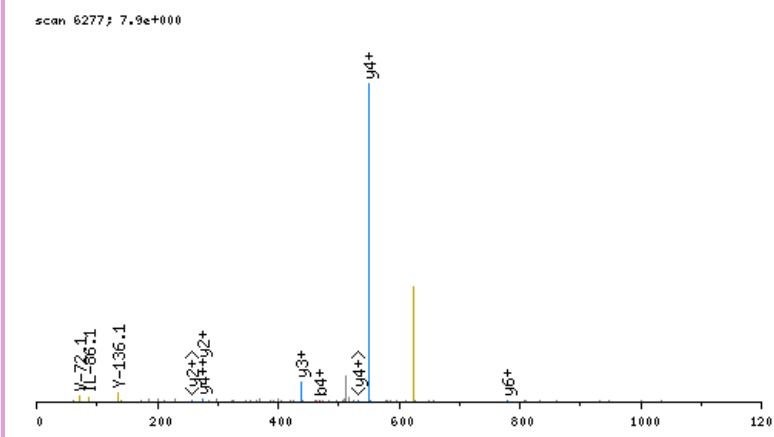

click image to zoom in; click top corners to zoom out [\[precursor±\]](#)

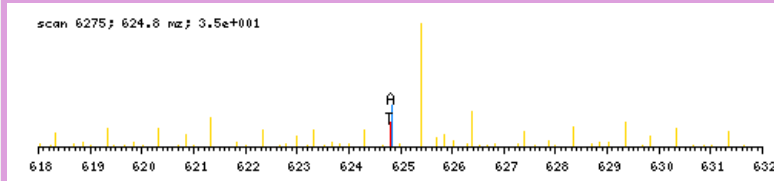

zoomed in precursor plot; T=theoretical m/z, A=acquired m/z

| b <sup>+</sup> | #  | AA # | y <sup>+</sup> | y <sup>2+</sup> |
|----------------|----|------|----------------|-----------------|
| 199.1195       | 1  | R 10 |                |                 |
| 298.1879       | 2  | V 9  | 1050.5220      | 525.7649        |
| 413.2149       | 3  | D 8  | 951.4536       | 476.2307        |
| 470.2363       | 4  | G 7  | 836.4266       | 418.7172        |
| 585.2633       | 5  | D 6  | 779.4052       | 390.2065        |
| 699.3062       | 6  | N 5  | 664.3782       | 332.6930        |
| 812.3903       | 7  | I 4  | 550.3353       | 275.6716        |
| 975.4536       | 8  | Y 3  | 437.2512       | 219.1295        |
| 1074.5220      | 9  | V 2  | 274.1879       | 137.5979        |
|                | 10 | R 1  | 175.1195       | 88.0637         |

N-term:+43.02

SAAEEVDGLGVVRPHYGSVLDNER, MH+ 2611.2752, m/z 871.0966  
 H OS G26 P150811 220811-s1.05503.05503.3.dta

scan 5503; 3.2e+000

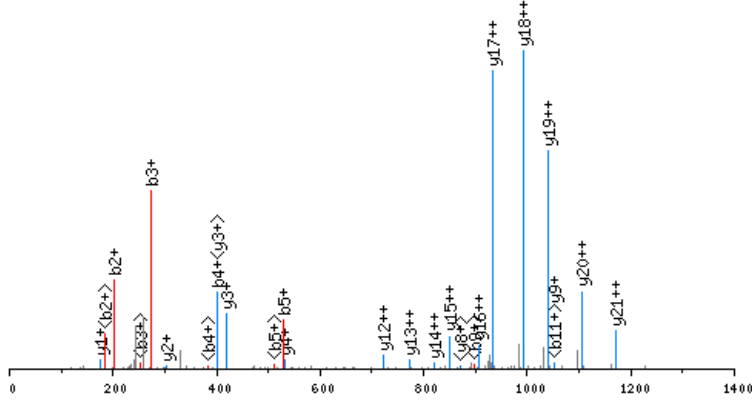

click image to zoom in; click top corners to zoom out [precursor±]

scan 5500; 871.1 m/z; 1.2e+001

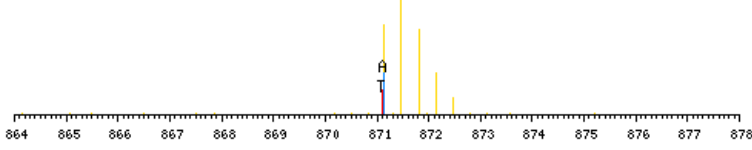

zoomed in precursor plot; T=theoretical m/z, A=acquired m/z

X-range:

0 - 0

MassTol: Y-zoom:

0. 1.

MassType:

AVG  MONO

Axis:

1  2

Label:

I  M  -

Ions:

a  +  2+  3+

b  +  2+  3+

c  +  2+  3+

x  +  2+  3+

y  +  2+  3+

z  +  2+  3+

hide H<sub>2</sub>O/NH<sub>3</sub>

zoom 112-122

GO

| b <sup>+</sup> | #  | AA | #  | y <sup>+</sup> | y <sup>2+</sup> |
|----------------|----|----|----|----------------|-----------------|
| 130.0504       | 1  | S  | 24 |                |                 |
| 201.0875       | 2  | A  | 23 | 2482.2326      | 1241.6202       |
| 272.1247       | 3  | A  | 22 | 2411.1955      | 1206.1017       |
| 401.1672       | 4  | E  | 21 | 2340.1584      | 1170.5831       |
| 530.2098       | 5  | E  | 20 | 2211.1158      | 1106.0618       |
| 629.2783       | 6  | V  | 19 | 2082.0732      | 1041.5405       |
| 744.3052       | 7  | D  | 18 | 1983.0048      | 992.0063        |
| 801.3267       | 8  | G  | 17 | 1867.9779      | 934.4928        |
| 914.4107       | 9  | L  | 16 | 1810.9564      | 905.9821        |
| 971.4322       | 10 | G  | 15 | 1697.8723      | 849.4401        |
| 1070.5006      | 11 | V  | 14 | 1640.8509      | 820.9294        |
| 1169.5690      | 12 | V  | 13 | 1541.7825      | 771.3951        |
| 1325.6701      | 13 | R  | 12 | 1442.7140      | 721.8609        |
| 1422.7229      | 14 | P  | 11 | 1286.6129      | 643.8104        |
| 1559.7818      | 15 | H  | 10 | 1189.5602      | 595.2840        |
| 1722.8451      | 16 | Y  | 9  | 1052.5013      | 526.7545        |
| 1779.8666      | 17 | G  | 8  | 889.4379       | 445.2229        |
| 1866.8986      | 18 | S  | 7  | 832.4165       | 416.7121        |
| 1965.9670      | 19 | V  | 6  | 745.3844       | 373.1961        |
| 2079.0511      | 20 | L  | 5  | 646.3160       | 323.6619        |
| 2194.0780      | 21 | D  | 4  | 533.2320       | 267.1199        |
| 2308.1210      | 22 | N  | 3  | 418.2050       | 209.6064        |
| 2437.1636      | 23 | E  | 2  | 304.1621       | 152.5850        |
|                | 24 | R  | 1  | 175.1195       | 88.0637         |

N-term:+43.02

SAAETGSEPSQGAGPSEATLHSLR, MH+ 2382.1173, m/z 794.7106  
 H OS G24 P150811 220811-s1.03278.03278.3.dta

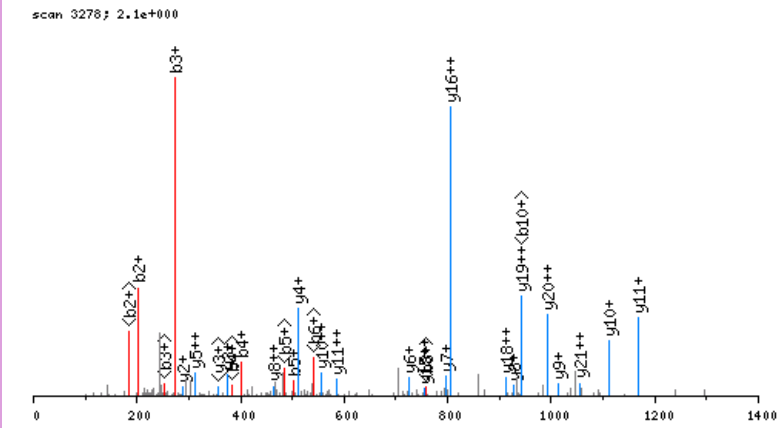

click image to zoom in; click top corners to zoom out [precursor±]

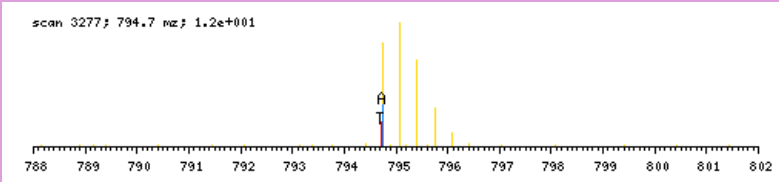

zoomed in precursor plot; T=theoretical m/z, A=acquired m/z

X-range:  -   
 MassTol: Y-zoom:    
 MassType:  AVG  MONO  
 Axis:  1  2  
 Label:  I  M  -  
 Ions: a  +  2+  3+  
 b  +  2+  3+  
 c  +  2+  3+  
 x  +  2+  3+  
 y  +  2+  3+  
 z  +  2+  3+  
 hide H<sub>2</sub>O/NH<sub>3</sub>   
 zoom 112-122

| b <sup>+</sup> | #  | AA # | y <sup>+</sup> | y <sup>2+</sup> |
|----------------|----|------|----------------|-----------------|
| 130.0504       | 1  | S 24 |                |                 |
| 201.0875       | 2  | A 23 | 2253.0747      | 1127.0413       |
| 272.1247       | 3  | A 22 | 2182.0376      | 1091.5227       |
| 401.1672       | 4  | E 21 | 2111.0005      | 1056.0042       |
| 502.2149       | 5  | T 20 | 1981.9579      | 991.4829        |
| 559.2364       | 6  | G 19 | 1880.9102      | 940.9590        |
| 646.2684       | 7  | S 18 | 1823.8888      | 912.4483        |
| 775.3110       | 8  | E 17 | 1736.8568      | 868.9323        |
| 872.3638       | 9  | P 16 | 1607.8142      | 804.4110        |
| 959.3958       | 10 | S 15 | 1510.7614      | 755.8846        |
| 1087.4544      | 11 | Q 14 | 1423.7294      | 712.3686        |
| 1144.4758      | 12 | G 13 | 1295.6708      | 648.3393        |
| 1215.5130      | 13 | A 12 | 1238.6493      | 619.8286        |
| 1272.5344      | 14 | G 11 | 1167.6122      | 584.3100        |
| 1369.5872      | 15 | P 10 | 1110.5907      | 555.7993        |
| 1456.6192      | 16 | S 9  | 1013.5380      | 507.2729        |
| 1585.6618      | 17 | E 8  | 926.5060       | 463.7569        |
| 1656.6989      | 18 | A 7  | 797.4634       | 399.2356        |
| 1757.7466      | 19 | T 6  | 726.4262       | 363.7170        |
| 1870.8307      | 20 | L 5  | 625.3786       | 313.1932        |
| 2007.8896      | 21 | H 4  | 512.2945       | 256.6512        |
| 2094.9216      | 22 | S 3  | 375.2356       | 188.1217        |
| 2208.0057      | 23 | L 2  | 288.2036       | 144.6057        |
|                | 24 | R 1  | 175.1195       | 88.0637         |

N-term:+43.02

X-range:

-

MassTol: Y-zoom:

MassType:

AVG  MONO

Axis:

1  2

Label:

I  M  -

Ions:

a  +  2+  3+

b  +  2+  3+

c  +  2+  3+

x  +  2+  3+

y  +  2+  3+

z  +  2+  3+

hide H<sub>2</sub>O/NH<sub>3</sub>

zoom 112-122

GO

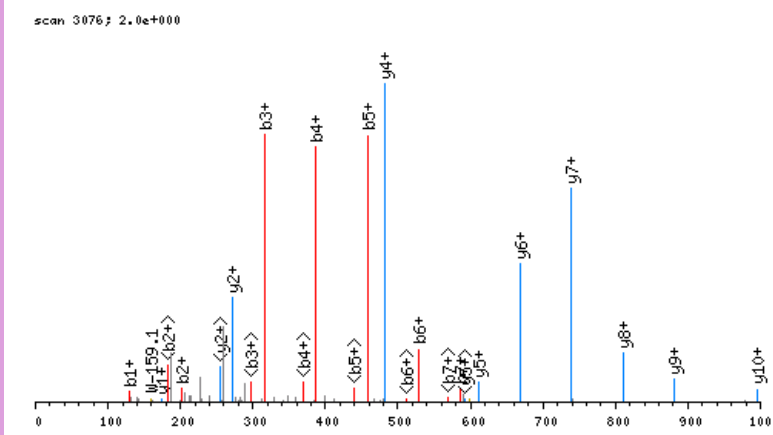

click image to zoom in; click top corners to zoom out [\[precursor±\]](#)

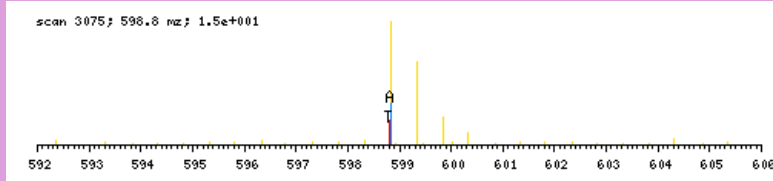

zoomed in precursor plot; T=theoretical m/z, A=acquired m/z

| b <sup>+</sup> | #  | AA # | y <sup>+</sup> | y <sup>2+</sup> |
|----------------|----|------|----------------|-----------------|
| 130.0504       | 1  | S 12 |                |                 |
| 201.0875       | 2  | A 11 | 1067.5485      | 534.2782        |
| 316.1145       | 3  | D 10 | 996.5114       | 498.7596        |
| 387.1516       | 4  | A 9  | 881.4845       | 441.2462        |
| 458.1887       | 5  | A 8  | 810.4474       | 405.7276        |
| 529.2258       | 6  | A 7  | 739.4103       | 370.2090        |
| 586.2473       | 7  | G 6  | 668.3731       | 334.6905        |
| 715.2899       | 8  | E 5  | 611.3517       | 306.1798        |
| 812.3426       | 9  | P 4  | 482.3091       | 241.6585        |
| 925.4267       | 10 | L 3  | 385.2563       | 193.1321        |
| 1022.4795      | 11 | P 2  | 272.1723       | 136.5900        |
|                | 12 | R 1  | 175.1195       | 88.0637         |

N-term:+43.02

SAFNLLHLVTKSQPVAPR, MH+ 2048.1657, m/z 683.3934  
 H OS G26 P150811 220811-s1.06863.06863.3.dta

X-range:

-

MassTol: Y-zoom:

MassType:

AVG  MONO

Axis:

1  2

Label:

I  M  -

Ions:

a  +  2+  3+

b  +  2+  3+

c  +  2+  3+

x  +  2+  3+

y  +  2+  3+

z  +  2+  3+

hide H<sub>2</sub>O/NH<sub>3</sub>

zoom 112-122

GO

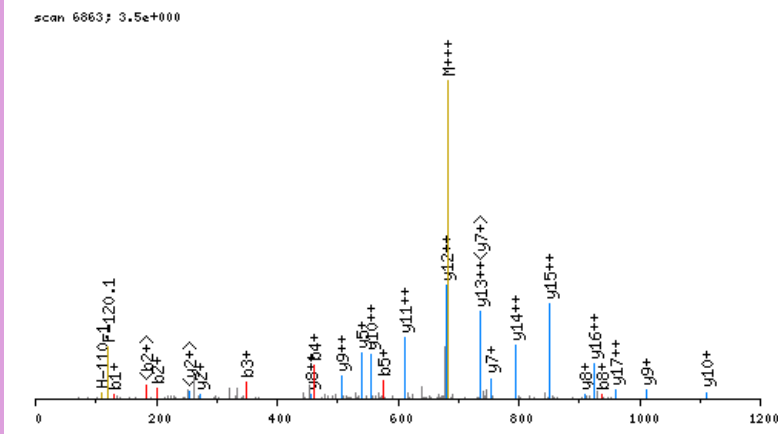

click image to zoom in; click top corners to zoom out [\[precursor±\]](#)

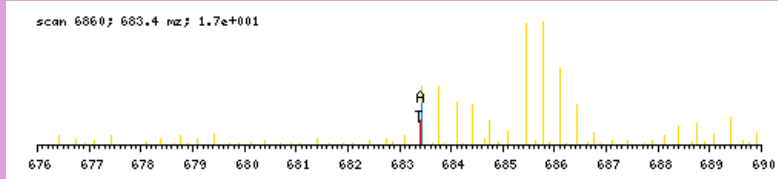

zoomed in precursor plot; T=theoretical m/z, A=acquired m/z

| b <sup>+</sup> | #  | AA # | y <sup>+</sup> | y <sup>2+</sup> |
|----------------|----|------|----------------|-----------------|
| 130.0504       | 1  | S 18 |                |                 |
| 201.0875       | 2  | A 17 | 1919.1231      | 960.0655        |
| 348.1560       | 3  | F 16 | 1848.0860      | 924.5469        |
| 462.1989       | 4  | N 15 | 1701.0176      | 851.0127        |
| 575.2829       | 5  | L 14 | 1586.9747      | 793.9912        |
| 688.3670       | 6  | L 13 | 1473.8906      | 737.4492        |
| 825.4259       | 7  | H 12 | 1360.8065      | 680.9072        |
| 938.5100       | 8  | L 11 | 1223.7476      | 612.3777        |
| 1037.5784      | 9  | V 10 | 1110.6636      | 555.8357        |
| 1138.6261      | 10 | T 9  | 1011.5951      | 506.3015        |
| 1294.7524      | 11 | K 8  | 910.5475       | 455.7776        |
| 1381.7844      | 12 | S 7  | 754.4212       | 377.7145        |
| 1509.8430      | 13 | Q 6  | 667.3891       | 334.1985        |
| 1606.8957      | 14 | P 5  | 539.3306       | 270.1692        |
| 1705.9642      | 15 | V 4  | 442.2778       | 221.6428        |
| 1777.0013      | 16 | A 3  | 343.2094       | 172.1086        |
| 1874.0540      | 17 | P 2  | 272.1723       | 136.5900        |
|                | 18 | R 1  | 175.1195       | 88.0637         |

N-term:+43.02 K(11):+156.13

SAGGAVPPPPNPAVSPAPR, MH+ 1928.0030, m/z 643.3392  
 H OS G29 P150811 220811-s1.05137.05137.3.dta

X-range:

-

MassTol: Y-zoom:

MassType:

AVG  MONO

Axis:

1  2

Label:

I  M  -

Ions:

a  +  2+  3+

b  +  2+  3+

c  +  2+  3+

x  +  2+  3+

y  +  2+  3+

z  +  2+  3+

hide H<sub>2</sub>O/NH<sub>3</sub>

zoom 112-122

GO

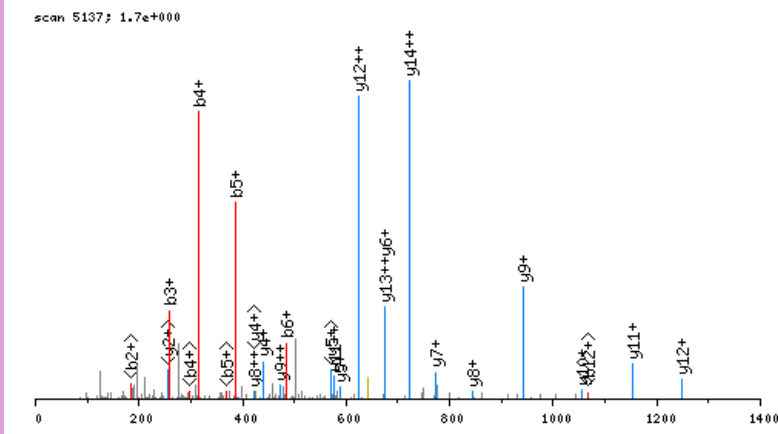

click image to zoom in; click top corners to zoom out [\[precursor±\]](#)

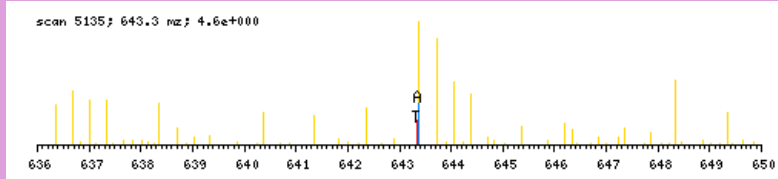

zoomed in precursor plot; T=theoretical m/z, A=acquired m/z

| b <sup>+</sup> | #  | AA # | y <sup>+</sup> | y <sup>2+</sup> |
|----------------|----|------|----------------|-----------------|
| 130.0504       | 1  | S 20 |                |                 |
| 201.0875       | 2  | A 19 | 1798.9604      | 899.9841        |
| 258.1090       | 3  | G 18 | 1727.9233      | 864.4656        |
| 315.1305       | 4  | G 17 | 1670.9019      | 835.9548        |
| 386.1676       | 5  | A 16 | 1613.8804      | 807.4441        |
| 485.2360       | 6  | V 15 | 1542.8433      | 771.9255        |
| 582.2888       | 7  | P 14 | 1443.7749      | 722.3913        |
| 679.3415       | 8  | P 13 | 1346.7221      | 673.8650        |
| 776.3943       | 9  | P 12 | 1249.6693      | 625.3386        |
| 873.4471       | 10 | P 11 | 1152.6166      | 576.8122        |
| 987.4900       | 11 | N 10 | 1055.5638      | 528.2858        |
| 1084.5427      | 12 | P 9  | 941.5209       | 471.2644        |
| 1155.5799      | 13 | A 8  | 844.4681       | 422.7380        |
| 1254.6483      | 14 | V 7  | 773.4310       | 387.2194        |
| 1341.6803      | 15 | S 6  | 674.3626       | 337.6852        |
| 1488.7487      | 16 | F 5  | 587.3306       | 294.1692        |
| 1585.8015      | 17 | P 4  | 440.2621       | 220.6350        |
| 1656.8386      | 18 | A 3  | 343.2094       | 172.1086        |
| 1753.8914      | 19 | P 2  | 272.1723       | 136.5900        |
|                | 20 | R 1  | 175.1195       | 88.0637         |

N-term:+43.02

SAHLQWVVVR, MH+ 1268.6574, m/z 634.8323  
 H OS G25 P150811 220811-s1.06933.06933.2.dta

X-range:

-

MassTol: Y-zoom:

MassType:

AVG  MONO

Axis:

1  2

Label:

I  M  -

Ions:

a  +  2+  3+

b  +  2+  3+

c  +  2+  3+

x  +  2+  3+

y  +  2+  3+

z  +  2+  3+

hide H<sub>2</sub>O/NH<sub>3</sub>

zoom 112-122

GO

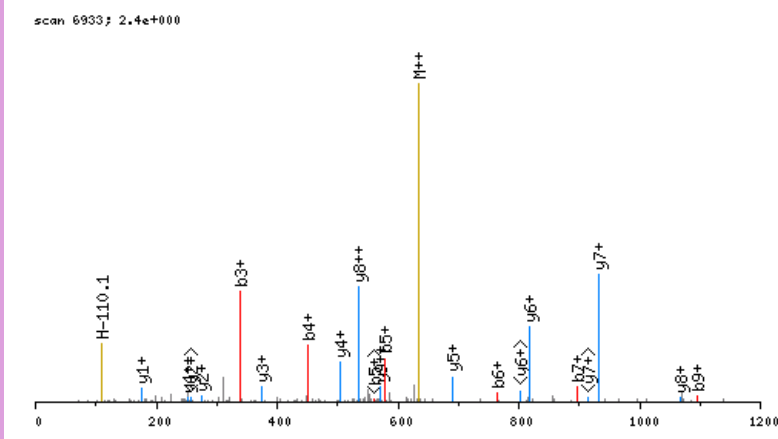

click image to zoom in; click top corners to zoom out [\[precursor±\]](#)

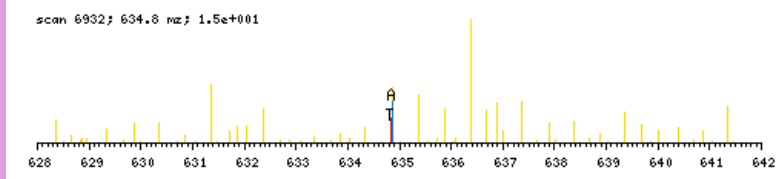

zoomed in precursor plot; T=theoretical m/z, A=acquired m/z

| b <sup>+</sup> | #  | AA # | y <sup>+</sup> | y <sup>2+</sup> |
|----------------|----|------|----------------|-----------------|
| 130.0504       | 1  | S 10 |                |                 |
| 201.0875       | 2  | A 9  | 1139.6148      | 570.3113        |
| 338.1465       | 3  | H 8  | 1068.5777      | 534.7928        |
| 451.2305       | 4  | L 7  | 931.5188       | 466.2633        |
| 579.2891       | 5  | Q 6  | 818.4347       | 409.7213        |
| 765.3684       | 6  | W 5  | 690.3761       | 345.6920        |
| 896.4089       | 7  | M 4  | 504.2968       | 252.6523        |
| 995.4773       | 8  | V 3  | 373.2563       | 187.1321        |
| 1094.5457      | 9  | V 2  | 274.1879       | 137.5979        |
|                | 10 | R 1  | 175.1195       | 88.0637         |

N-term:+43.02

SAKAISEQTGKELLYKYICTTSAIQNR, MH+ 3199.7037, m/z 800.6814  
 H OS G27 P150811 220811-s1.07296.07296.4.dta

scan 7296; 1.7e+001

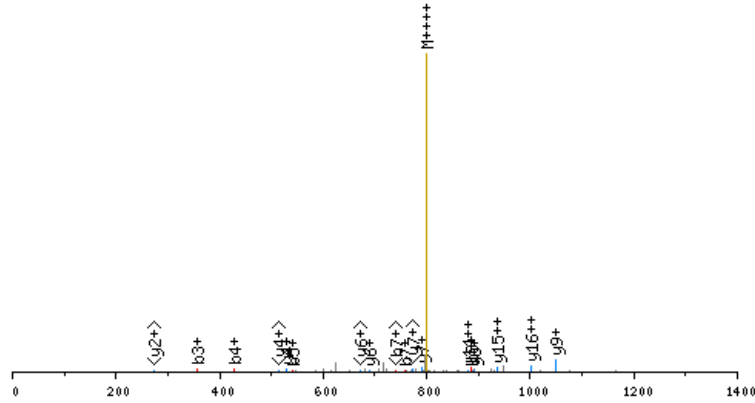

click image to zoom in; click top corners to zoom out [precursor±]

scan 7295; 800.7 m/z; 3.6e+000

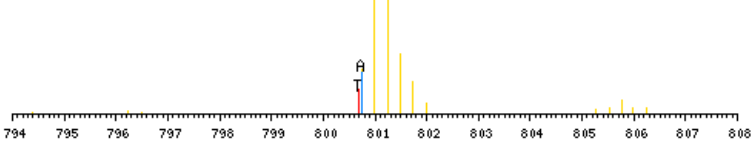

zoomed in precursor plot; T=theoretical m/z, A=acquired m/z

X-range:

-

MassTol: Y-zoom:

MassType:

AVG  MONO

Axis:

1  2

Label:

I  M  -

Ions:

a  +  2+  3+

b  +  2+  3+

c  +  2+  3+

x  +  2+  3+

y  +  2+  3+

z  +  2+  3+

hide H<sub>2</sub>O/NH<sub>3</sub>

zoom 112-122

GO

| b <sup>+</sup> | #  | AA | #  | y <sup>+</sup> | y <sup>2+</sup> |
|----------------|----|----|----|----------------|-----------------|
| 130.0504       | 1  | S  | 27 |                |                 |
| 201.0875       | 2  | A  | 26 | 3070.6611      | 1535.8345       |
| 357.2138       | 3  | K  | 25 | 2999.6240      | 1500.3159       |
| 428.2510       | 4  | A  | 24 | 2843.4977      | 1422.2528       |
| 541.3350       | 5  | I  | 23 | 2772.4606      | 1386.7342       |
| 628.3670       | 6  | S  | 22 | 2659.3766      | 1330.1922       |
| 757.4096       | 7  | E  | 21 | 2572.3445      | 1286.6762       |
| 885.4682       | 8  | Q  | 20 | 2443.3019      | 1222.1549       |
| 986.5159       | 9  | T  | 19 | 2315.2434      | 1158.1256       |
| 1043.5374      | 10 | G  | 18 | 2214.1957      | 1107.6018       |
| 1199.6637      | 11 | K  | 17 | 2157.1742      | 1079.0910       |
| 1328.7063      | 12 | E  | 16 | 2001.0479      | 1001.0279       |
| 1441.7903      | 13 | L  | 15 | 1872.0053      | 936.5066        |
| 1554.8744      | 14 | L  | 14 | 1758.9213      | 879.9645        |
| 1717.9377      | 15 | Y  | 13 | 1645.8372      | 823.4225        |
| 1874.0640      | 16 | K  | 12 | 1482.7739      | 741.8908        |
| 2037.1273      | 17 | Y  | 11 | 1326.6476      | 663.8277        |
| 2150.2114      | 18 | I  | 10 | 1163.5842      | 582.2960        |
| 2310.2420      | 19 | C  | 9  | 1050.5002      | 525.7540        |
| 2411.2897      | 20 | T  | 8  | 890.4696       | 445.7387        |
| 2512.3374      | 21 | T  | 7  | 789.4219       | 395.2149        |
| 2599.3694      | 22 | S  | 6  | 688.3742       | 344.6910        |
| 2670.4065      | 23 | A  | 5  | 601.3422       | 301.1750        |
| 2783.4906      | 24 | I  | 4  | 530.3051       | 265.6564        |
| 2911.5491      | 25 | Q  | 3  | 417.2210       | 209.1144        |
| 3025.5921      | 26 | N  | 2  | 289.1624       | 145.0851        |
|                | 27 | R  | 1  | 175.1195       | 88.0637         |

N-term:+43.02 K(3):+156.13  
 K(11):+156.13 K(16):+156.13  
 C(19):+160.03



SALEKSMHLGR, MH+ 1304.7209, m/z 435.5785  
 H OS G27 P150811 220811-s1.05004.05004.3.dta

scan 5004; 1.3e+001

X-range:

-

MassTol: Y-zoom:

MassType:

AVG  MONO

Axis:

1  2

Label:

I  M  -

Ions:

a  +  2+  3+

b  +  2+  3+

c  +  2+  3+

x  +  2+  3+

y  +  2+  3+

z  +  2+  3+

hide H<sub>2</sub>O/NH<sub>3</sub>

zoom 112-122

GO

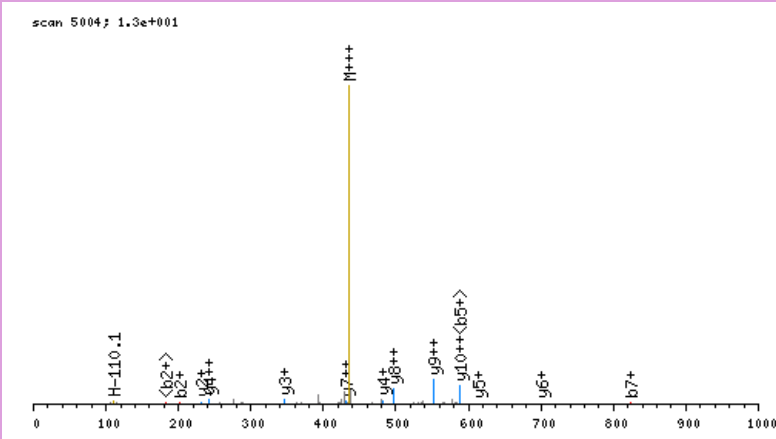

click image to zoom in; click top corners to zoom out [\[precursor±\]](#)

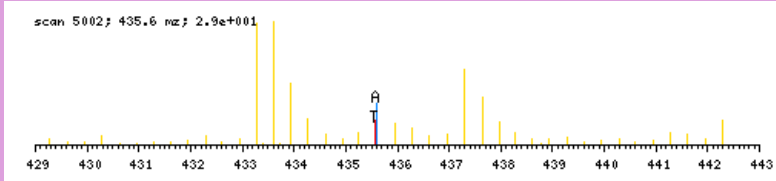

zoomed in precursor plot; T=theoretical m/z, A=acquired m/z

| b <sup>+</sup> | #  | AA # | y <sup>+</sup> | y <sup>2+</sup> |
|----------------|----|------|----------------|-----------------|
| 130.0504       | 1  | S 11 |                |                 |
| 201.0875       | 2  | A 10 | 1175.6783      | 588.3431        |
| 314.1716       | 3  | L 9  | 1104.6412      | 552.8245        |
| 443.2142       | 4  | E 8  | 991.5571       | 496.2825        |
| 605.3723       | 5  | K 7  | 862.5146       | 431.7612        |
| 692.4043       | 6  | S 6  | 700.3565       | 350.6821        |
| 823.4448       | 7  | M 5  | 613.3244       | 307.1661        |
| 960.5037       | 8  | H 4  | 482.2839       | 241.6459        |
| 1073.5878      | 9  | L 3  | 345.2250       | 173.1164        |
| 1130.6093      | 10 | G 2  | 232.1410       | 116.5744        |
|                | 11 | R 1  | 175.1195       | 88.0637         |

N-term:+43.02 K(5):+162.16

SALKAVFQYIDENQDR, MH+ 1966.9875, m/z 656.3340  
 H OS G25 P150811 220811-s1.08304.08304.3.dta

X-range:

-

MassTol: Y-zoom:

MassType:

AVG  MONO

Axis:

1  2

Label:

I  M  -

Ions:

a  +  2+  3+

b  +  2+  3+

c  +  2+  3+

x  +  2+  3+

y  +  2+  3+

z  +  2+  3+

hide H<sub>2</sub>O/NH<sub>3</sub>

zoom 112-122

GO

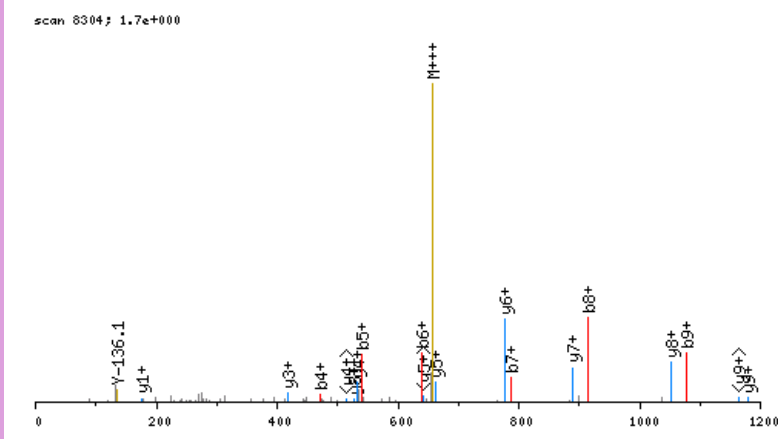

click image to zoom in; click top corners to zoom out [\[precursor±\]](#)

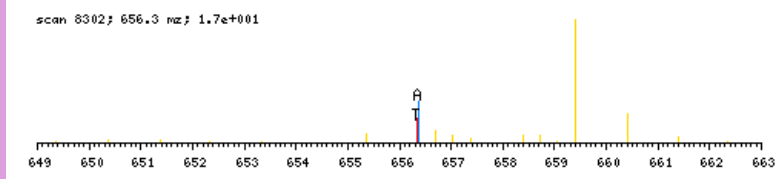

zoomed in precursor plot; T=theoretical m/z, A=acquired m/z

| b <sup>+</sup> | #  | AA # | y <sup>+</sup> | y <sup>2+</sup> |
|----------------|----|------|----------------|-----------------|
| 130.0504       | 1  | S 16 |                |                 |
| 201.0875       | 2  | A 15 | 1837.9449      | 919.4763        |
| 314.1716       | 3  | L 14 | 1766.9078      | 883.9578        |
| 470.2979       | 4  | K 13 | 1653.8237      | 827.4158        |
| 541.3350       | 5  | A 12 | 1497.6974      | 749.3526        |
| 640.4034       | 6  | V 11 | 1426.6603      | 713.8341        |
| 787.4718       | 7  | F 10 | 1327.5919      | 664.2998        |
| 915.5304       | 8  | Q 9  | 1180.5235      | 590.7656        |
| 1078.5938      | 9  | Y 8  | 1052.4649      | 526.7364        |
| 1191.6778      | 10 | I 7  | 889.4015       | 445.2047        |
| 1306.7048      | 11 | D 6  | 776.3175       | 388.6627        |
| 1435.7474      | 12 | E 5  | 661.2905       | 331.1492        |
| 1549.7903      | 13 | N 4  | 532.2479       | 266.6279        |
| 1677.8489      | 14 | Q 3  | 418.2050       | 209.6064        |
| 1792.8758      | 15 | D 2  | 290.1464       | 145.5771        |
|                | 16 | R 1  | 175.1195       | 88.0637         |

N-term:+43.02 K(4):+156.13

SAMEAADVFHR, MH+ 1275.5792, m/z 638.2932  
 H OS G25 P150811 220811-s1.06220.06220.2.dta

X-range:

-

MassTol: Y-zoom:

MassType:

AVG  MONO

Axis:

1  2

Label:

I  M  -

Ions:

a  +  2+  3+

b  +  2+  3+

c  +  2+  3+

x  +  2+  3+

y  +  2+  3+

z  +  2+  3+

hide H<sub>2</sub>O/NH<sub>3</sub>

zoom 112-122

GO

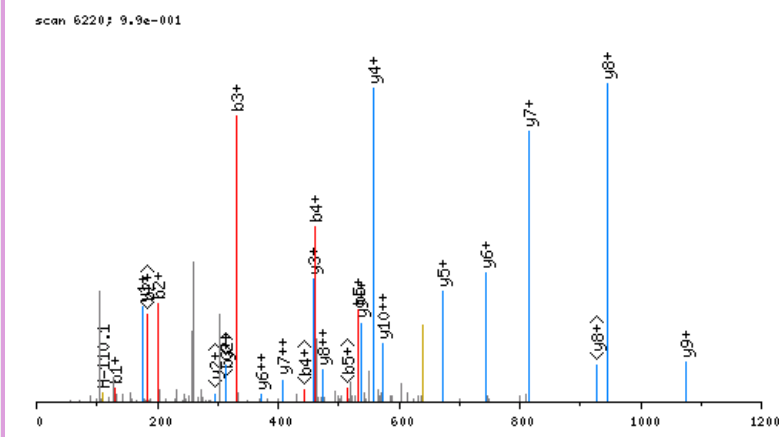

click image to zoom in; click top corners to zoom out [\[precursor±\]](#)

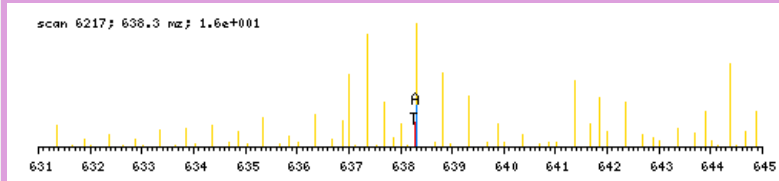

zoomed in precursor plot; T=theoretical m/z, A=acquired m/z

| b <sup>+</sup> | #  | AA # | y <sup>+</sup> | y <sup>2+</sup> |
|----------------|----|------|----------------|-----------------|
| 130.0504       | 1  | S 11 |                |                 |
| 201.0875       | 2  | A 10 | 1146.5366      | 573.7722        |
| 332.1280       | 3  | M 9  | 1075.4995      | 538.2537        |
| 461.1706       | 4  | E 8  | 944.4590       | 472.7334        |
| 532.2077       | 5  | A 7  | 815.4164       | 408.2121        |
| 603.2448       | 6  | A 6  | 744.3793       | 372.6936        |
| 718.2718       | 7  | D 5  | 673.3422       | 337.1750        |
| 817.3402       | 8  | V 4  | 558.3152       | 279.6615        |
| 964.4086       | 9  | F 3  | 459.2468       | 230.1273        |
| 1101.4675      | 10 | H 2  | 312.1784       | 156.5931        |
|                | 11 | R 1  | 175.1195       | 88.0637         |

N-term:+43.02

SAPAGSPHPAAGAR, MH+ 1288.6398, m/z 644.8236  
 H OS G25 P150811 220811-s1.02011.02011.2.dta

scan 2011; 4.2e+000

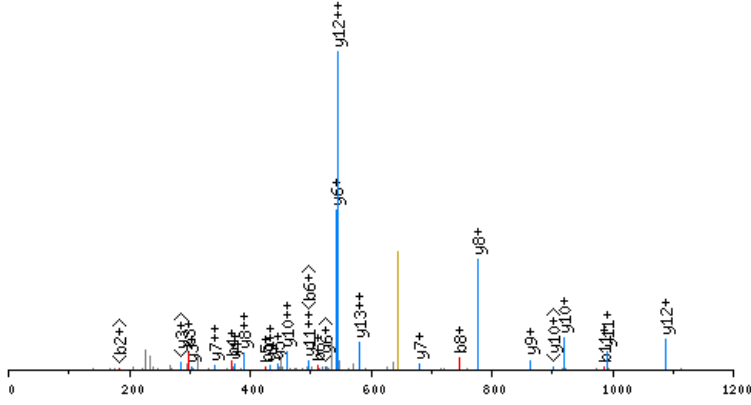

click image to zoom in; click top corners to zoom out [precursor±]

scan 2007; 644.8 m/z; 2.4e+000

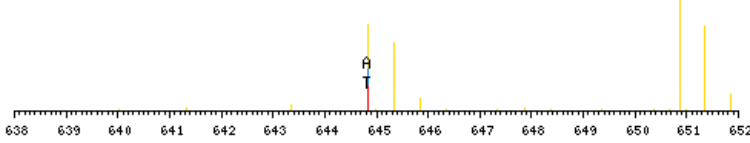

zoomed in precursor plot; T=theoretical m/z, A=acquired m/z

X-range:

-

MassTol: Y-zoom:

MassType:

AVG  MONO

Axis:

1  2

Label:

I  M  -

Ions:

a  +  2+  3+

b  +  2+  3+

c  +  2+  3+

x  +  2+  3+

y  +  2+  3+

z  +  2+  3+

hide H<sub>2</sub>O/NH<sub>3</sub>

zoom 112-122

GO

| b <sup>+</sup> | #  | AA # | y <sup>+</sup> | y <sup>2+</sup> |
|----------------|----|------|----------------|-----------------|
| 130.0504       | 1  | S 14 |                |                 |
| 201.0875       | 2  | A 13 | 1159.5972      | 580.3025        |
| 298.1403       | 3  | P 12 | 1088.5601      | 544.7840        |
| 369.1774       | 4  | A 11 | 991.5074       | 496.2576        |
| 426.1989       | 5  | G 10 | 920.4702       | 460.7390        |
| 513.2309       | 6  | S 9  | 863.4488       | 432.2283        |
| 610.2837       | 7  | P 8  | 776.4167       | 388.7123        |
| 747.3426       | 8  | H 7  | 679.3640       | 340.1859        |
| 844.3954       | 9  | P 6  | 542.3051       | 271.6564        |
| 915.4325       | 10 | A 5  | 445.2523       | 223.1301        |
| 986.4696       | 11 | A 4  | 374.2152       | 187.6115        |
| 1043.4910      | 12 | G 3  | 303.1781       | 152.0930        |
| 1114.5282      | 13 | A 2  | 246.1566       | 123.5822        |
|                | 14 | R 1  | 175.1195       | 88.0637         |

N-term:+43.02

SAPMPAVVPAAR, MH+ 1208.6462, m/z 604.8267  
 H OS G29 P150811 220811-s1.04257.04257.2.dta

X-range:

-

MassTol: Y-zoom:

MassType:

AVG  MONO

Axis:

1  2

Label:

I  M  -

Ions:

a  +  2+  3+

b  +  2+  3+

c  +  2+  3+

x  +  2+  3+

y  +  2+  3+

z  +  2+  3+

hide H<sub>2</sub>O/NH<sub>3</sub>

zoom 112-122

GO

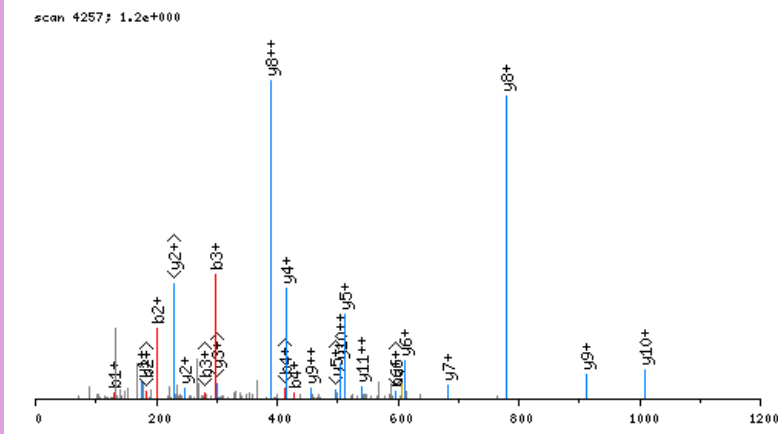

click image to zoom in; click top corners to zoom out [\[precursor±\]](#)

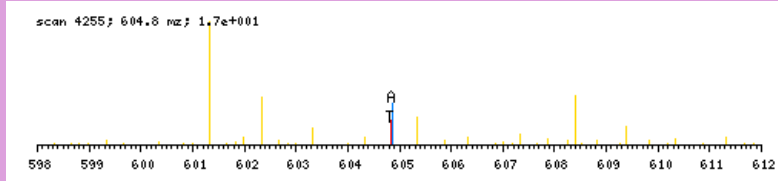

zoomed in precursor plot; T=theoretical m/z, A=acquired m/z

| b <sup>+</sup> | #  | AA # | y <sup>+</sup> | y <sup>2+</sup> |
|----------------|----|------|----------------|-----------------|
| 130.0504       | 1  | S 12 |                |                 |
| 201.0875       | 2  | A 11 | 1079.6036      | 540.3057        |
| 298.1403       | 3  | P 10 | 1008.5664      | 504.7871        |
| 429.1808       | 4  | M 9  | 911.5137       | 456.2608        |
| 526.2336       | 5  | P 8  | 780.4732       | 390.7405        |
| 597.2707       | 6  | A 7  | 683.4204       | 342.2141        |
| 696.3391       | 7  | V 6  | 612.3833       | 306.6956        |
| 795.4075       | 8  | V 5  | 513.3149       | 257.1614        |
| 892.4603       | 9  | P 4  | 414.2465       | 207.6272        |
| 963.4974       | 10 | A 3  | 317.1937       | 159.1008        |
| 1034.5345      | 11 | A 2  | 246.1566       | 123.5822        |
|                | 12 | R 1  | 175.1195       | 88.0637         |

N-term:+43.02

SAPSEEEYAR, MH+ 1309.5548, m/z 655.2811  
 H OS G29 P150811 220811-s1.02683.02683.2.dta

scan 2683; 4.5e+000

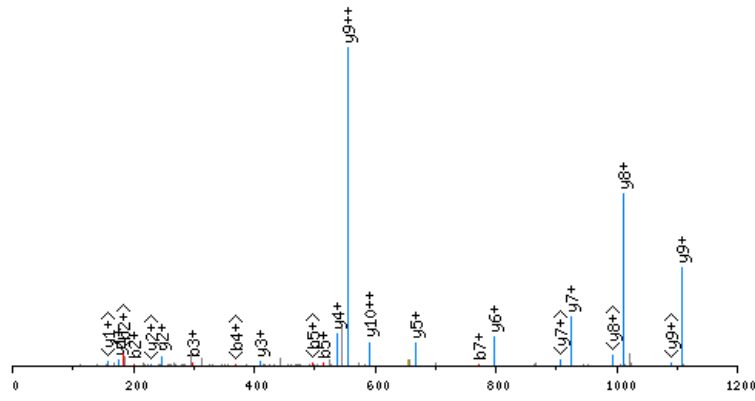

click image to zoom in; click top corners to zoom out [precursor±]

scan 2681; 655.3 m/z; 7.7e+000

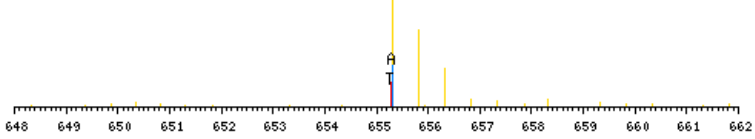

zoomed in precursor plot; T=theoretical m/z, A=acquired m/z

X-range:

0 - 0

MassTol: Y-zoom:

0. 1.

MassType:

AVG  MONO

Axis:

1  2

Label:

I  M  -

Ions:

a  +  2+  3+

b  +  2+  3+

c  +  2+  3+

x  +  2+  3+

y  +  2+  3+

z  +  2+  3+

hide H<sub>2</sub>O/NH<sub>3</sub>

zoom 112-122

GO

| b <sup>+</sup> | #  | AA # | y <sup>+</sup> | y <sup>2+</sup> |
|----------------|----|------|----------------|-----------------|
| 130.0504       | 1  | S 11 |                |                 |
| 201.0875       | 2  | A 10 | 1180.5122      | 590.7600        |
| 298.1403       | 3  | P 9  | 1109.4751      | 555.2415        |
| 385.1723       | 4  | S 8  | 1012.4223      | 506.7151        |
| 514.2149       | 5  | E 7  | 925.3903       | 463.1991        |
| 643.2575       | 6  | E 6  | 796.3477       | 398.6778        |
| 772.3001       | 7  | E 5  | 667.3051       | 334.1565        |
| 901.3427       | 8  | E 4  | 538.2625       | 269.6352        |
| 1064.4060      | 9  | Y 3  | 409.2199       | 205.1139        |
| 1135.4431      | 10 | A 2  | 246.1566       | 123.5822        |
|                | 11 | R 1  | 175.1195       | 88.0637         |

N-term:+43.02

SASVVSVISR, MH+ 1046.5846, m/z 523.7959  
 H OS G29 P150811 220811-s1.04627.04627.2.dta

X-range:

-

MassTol: Y-zoom:

MassType:

AVG  MONO

Axis:

1  2

Label:

I  M  -

Ions:

a  +  2+  3+

b  +  2+  3+

c  +  2+  3+

x  +  2+  3+

y  +  2+  3+

z  +  2+  3+

hide H<sub>2</sub>O/NH<sub>3</sub>

zoom 112-122

GO

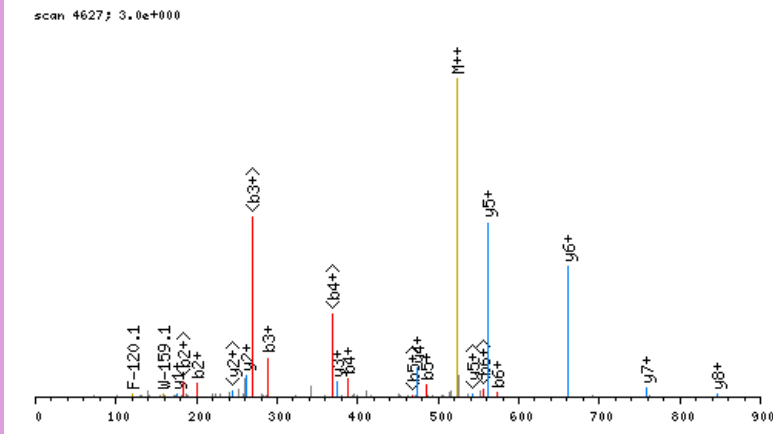

click image to zoom in; click top corners to zoom out [\[precursor±\]](#)

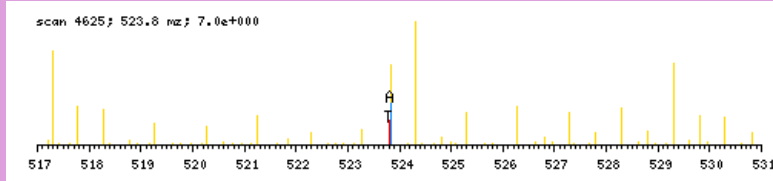

zoomed in precursor plot; T=theoretical m/z, A=acquired m/z

| b <sup>+</sup> | #  | AA | #  | y <sup>+</sup> | y <sup>2+</sup> |
|----------------|----|----|----|----------------|-----------------|
| 130.0504       | 1  | S  | 10 |                |                 |
| 201.0875       | 2  | A  | 9  | 917.5420       | 459.2749        |
| 288.1196       | 3  | S  | 8  | 846.5049       | 423.7564        |
| 387.1880       | 4  | V  | 7  | 759.4729       | 380.2403        |
| 486.2564       | 5  | V  | 6  | 660.4044       | 330.7061        |
| 573.2884       | 6  | S  | 5  | 561.3360       | 281.1719        |
| 672.3568       | 7  | V  | 4  | 474.3040       | 237.6559        |
| 785.4409       | 8  | I  | 3  | 375.2356       | 188.1217        |
| 872.4729       | 9  | S  | 2  | 262.1515       | 131.5797        |
|                | 10 | R  | 1  | 175.1195       | 88.0637         |

N-term:+43.02

SATQHKTSLPQGVK, MH+ 1585.8875, m/z 529.3007  
 H OS G27 P150811 220811-s1.02503.02503.3.dta

scan 2503; 3.5e+001

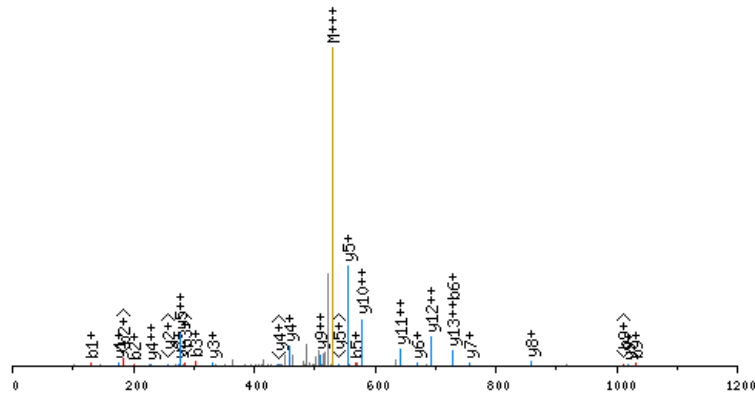

click image to zoom in; click top corners to zoom out [\[precursor±\]](#)

scan 2502; 529.3 m/z; 1.9e+003

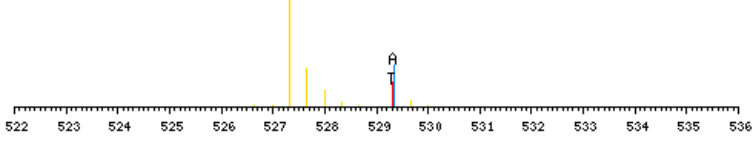

zoomed in precursor plot; T=theoretical m/z, A=acquired m/z

X-range:

-

MassTol: Y-zoom:

MassType:

AVG  MONO

Axis:

1  2

Label:

I  M  -

Ions:

a  +  2+  3+

b  +  2+  3+

c  +  2+  3+

x  +  2+  3+

y  +  2+  3+

z  +  2+  3+

hide H<sub>2</sub>O/NH<sub>3</sub>

zoom 112-122

GO

| b <sup>+</sup> | #  | AA # | y <sup>+</sup> | y <sup>2+</sup> |
|----------------|----|------|----------------|-----------------|
| 130.0504       | 1  | S 14 |                |                 |
| 201.0875       | 2  | A 13 | 1456.8449      | 728.9263        |
| 302.1352       | 3  | T 12 | 1385.8078      | 693.4078        |
| 430.1938       | 4  | Q 11 | 1284.7601      | 642.8840        |
| 567.2527       | 5  | H 10 | 1156.7015      | 578.8547        |
| 729.4108       | 6  | K 9  | 1019.6426      | 510.3252        |
| 830.4585       | 7  | T 8  | 857.4845       | 429.2462        |
| 917.4905       | 8  | S 7  | 756.4368       | 378.7223        |
| 1030.5746      | 9  | L 6  | 669.4048       | 335.2063        |
| 1127.6273      | 10 | P 5  | 556.3207       | 278.6643        |
| 1255.6859      | 11 | Q 4  | 459.2680       | 230.1379        |
| 1312.7074      | 12 | G 3  | 331.2094       | 166.1086        |
| 1411.7758      | 13 | V 2  | 274.1879       | 137.5979        |
|                | 14 | R 1  | 175.1195       | 88.0637         |

N-term:+43.02 K(6):+162.16



SDEKNLGVSQKLVSPSR, MH+ 1942.0610, m/z 648.0252  
 H OS G26 P150811 220811-s1.03459.03459.3.dta

scan 3459; 1.3e+001

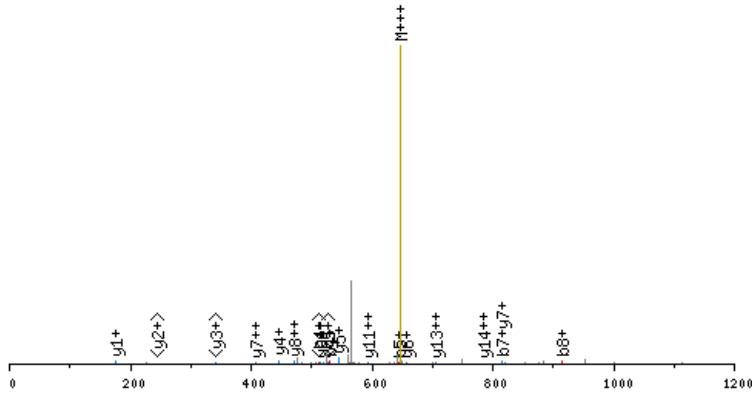

click image to zoom in; click top corners to zoom out [precursor±]

scan 3455; 648.0 mz; 1.2e+001

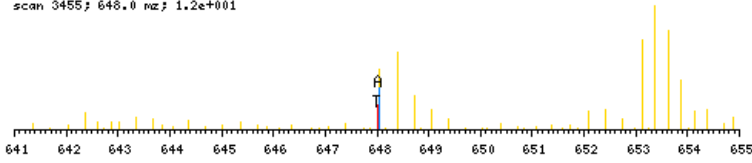

zoomed in precursor plot; T=theoretical m/z, A=acquired m/z

X-range:

-

MassTol: Y-zoom:

MassType:

AVG  MONO

Axis:

1  2

Label:

I  M  -

Ions:

a  +  2+  3+

b  +  2+  3+

c  +  2+  3+

x  +  2+  3+

y  +  2+  3+

z  +  2+  3+

hide H<sub>2</sub>O/NH<sub>3</sub>

zoom 112-122

GO

| b <sup>+</sup> | #  | AA # | y <sup>+</sup> | y <sup>2+</sup>    |
|----------------|----|------|----------------|--------------------|
| 130.0504       | 1  | S    | 17             |                    |
| 245.0774       | 2  | D    | 16             | 1813.0184 907.0131 |
| 374.1200       | 3  | E    | 15             | 1697.9915 849.4996 |
| 530.2463       | 4  | K    | 14             | 1568.9489 784.9783 |
| 644.2892       | 5  | N    | 13             | 1412.8226 706.9152 |
| 757.3733       | 6  | L    | 12             | 1298.7796 649.8937 |
| 814.3947       | 7  | G    | 11             | 1185.6956 593.3517 |
| 913.4631       | 8  | V    | 10             | 1128.6741 564.8410 |
| 1000.4952      | 9  | S    | 9              | 1029.6057 515.3068 |
| 1128.5537      | 10 | Q    | 8              | 942.5737 471.7908  |
| 1284.6800      | 11 | K    | 7              | 814.5151 407.7615  |
| 1397.7641      | 12 | L    | 6              | 658.3888 329.6983  |
| 1496.8325      | 13 | V    | 5              | 545.3047 273.1563  |
| 1583.8645      | 14 | S    | 4              | 446.2363 223.6221  |
| 1680.9173      | 15 | P    | 3              | 359.2043 180.1061  |
| 1767.9493      | 16 | S    | 2              | 262.1515 131.5797  |
|                | 17 | R    | 1              | 175.1195 88.0637   |

N-term:+43.02 K(4):+156.13  
 K(11):+156.13

SDNGELEDKPPAPPVR, MH+ 1796.9243, m/z 599.6463  
 H OS G24 P150811 220811-s1.03100.03100.3.dta

X-range:

-

MassTol: Y-zoom:

MassType:

AVG  MONO

Axis:

1  2

Label:

I  M  -

Ions:

a  +  2+  3+

b  +  2+  3+

c  +  2+  3+

x  +  2+  3+

y  +  2+  3+

z  +  2+  3+

hide H<sub>2</sub>O/NH<sub>3</sub>

zoom 112-122

GO

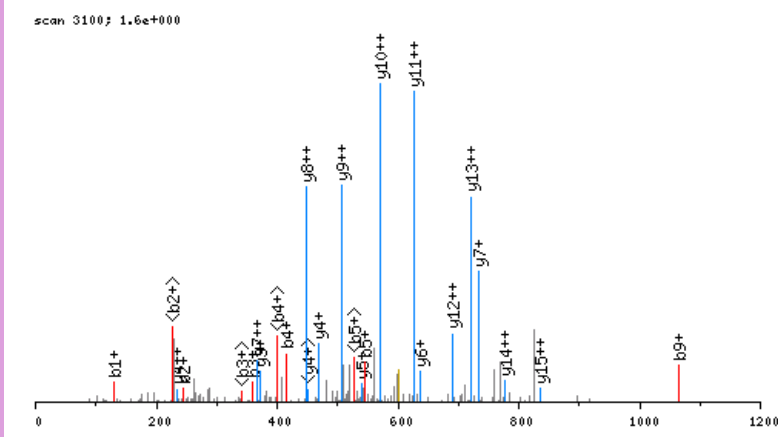

click image to zoom in; click top corners to zoom out [\[precursor±\]](#)

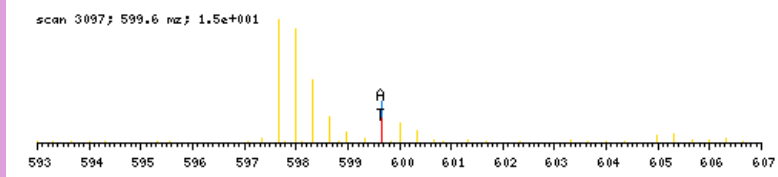

zoomed in precursor plot; T=theoretical m/z, A=acquired m/z

| b <sup>+</sup> | #  | AA # | y <sup>+</sup> | y <sup>2+</sup> |
|----------------|----|------|----------------|-----------------|
| 130.0504       | 1  | S 16 |                |                 |
| 245.0774       | 2  | D 15 | 1667.8817      | 834.4448        |
| 359.1203       | 3  | N 14 | 1552.8548      | 776.9313        |
| 416.1418       | 4  | G 13 | 1438.8118      | 719.9098        |
| 545.1844       | 5  | E 12 | 1381.7904      | 691.3991        |
| 658.2684       | 6  | L 11 | 1252.7478      | 626.8778        |
| 787.3110       | 7  | E 10 | 1139.6637      | 570.3358        |
| 902.3380       | 8  | D 9  | 1010.6211      | 505.8145        |
| 1064.4961      | 9  | K 8  | 895.5942       | 448.3010        |
| 1161.5488      | 10 | P 7  | 733.4361       | 367.2220        |
| 1258.6016      | 11 | P 6  | 636.3833       | 318.6956        |
| 1329.6387      | 12 | A 5  | 539.3306       | 270.1692        |
| 1426.6915      | 13 | P 4  | 468.2934       | 234.6506        |
| 1523.7442      | 14 | P 3  | 371.2407       | 186.1243        |
| 1622.8126      | 15 | V 2  | 274.1879       | 137.5979        |
|                | 16 | R 1  | 175.1195       | 88.0637         |

N-term:+43.02 K(9):+162.16

SDPQPLQEER, MH+ 1240.5810, m/z 620.7941  
 H OS G29 P150811 220811-s1.02684.02684.2.dta

scan 2684; 3.1e+000

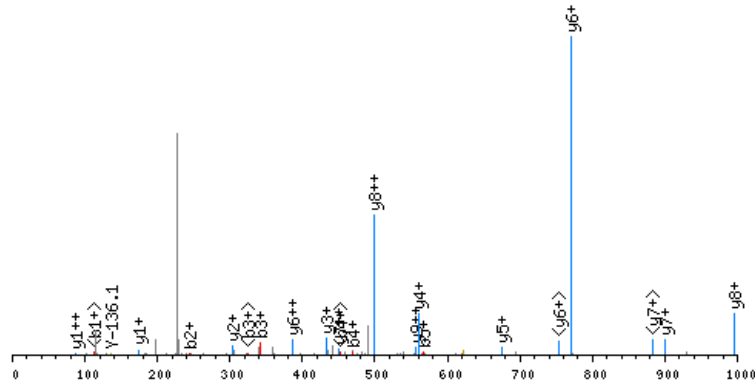

click image to zoom in; click top corners to zoom out [precursor±]

scan 2681; 620.8 m/z; 4.0e+000

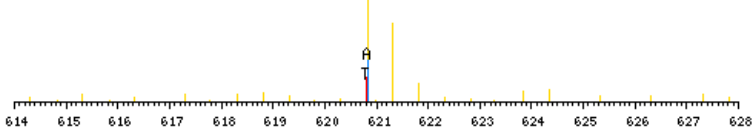

zoomed in precursor plot; T=theoretical m/z, A=acquired m/z

X-range:

-

MassTol: Y-zoom:

MassType:

AVG  MONO

Axis:

1  2

Label:

I  M  -

Ions:

a  +  2+  3+

b  +  2+  3+

c  +  2+  3+

x  +  2+  3+

y  +  2+  3+

z  +  2+  3+

hide H<sub>2</sub>O/NH<sub>3</sub>

zoom 112-122

GO

| b <sup>+</sup> | #  | AA # | y <sup>+</sup> | y <sup>2+</sup>    |
|----------------|----|------|----------------|--------------------|
| 130.0504       | 1  | S    | 10             |                    |
| 245.0774       | 2  | D    | 9              | 1111.5384 556.2731 |
| 342.1301       | 3  | P    | 8              | 996.5114 498.7596  |
| 470.1887       | 4  | Q    | 7              | 899.4587 450.2332  |
| 567.2415       | 5  | P    | 6              | 771.4001 386.2040  |
| 680.3255       | 6  | L    | 5              | 674.3473 337.6776  |
| 808.3841       | 7  | Q    | 4              | 561.2633 281.1355  |
| 937.4267       | 8  | E    | 3              | 433.2047 217.1063  |
| 1066.4693      | 9  | E    | 2              | 304.1621 152.5850  |
|                | 10 | R    | 1              | 175.1195 88.0637   |

N-term:+43.02

SDQQLDLCLDLR, MH+ 1606.7205, m/z 803.8639  
 H OS G29 P150811 220811-s1.06242.06242.2.dta

X-range:

-

MassTol: Y-zoom:

MassType:

AVG  MONO

Axis:

1  2

Label:

I  M  -

Ions:

a  +  2+  3+

b  +  2+  3+

c  +  2+  3+

x  +  2+  3+

y  +  2+  3+

z  +  2+  3+

hide H<sub>2</sub>O/NH<sub>3</sub>

zoom 112-122

GO

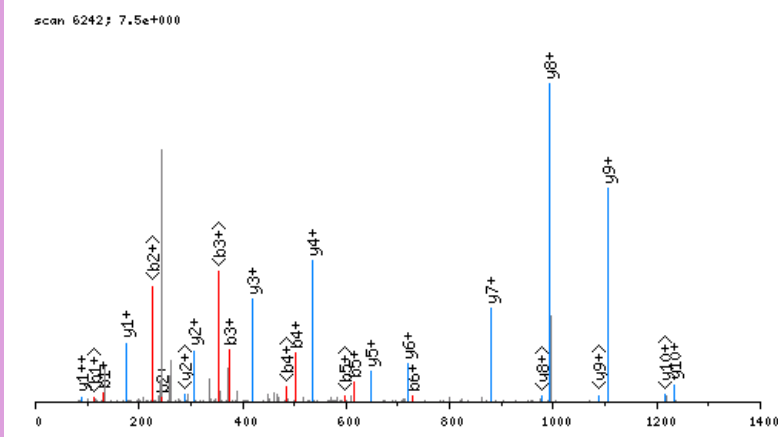

click image to zoom in; click top corners to zoom out [\[precursor±\]](#)

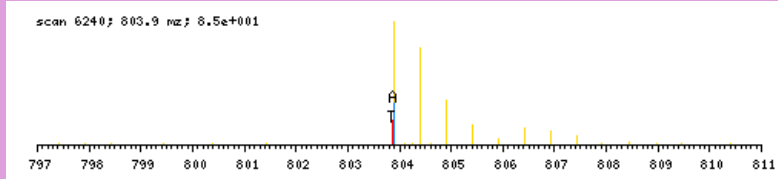

zoomed in precursor plot; T=theoretical m/z, A=acquired m/z

| b <sup>+</sup> | #  | AA # | y <sup>+</sup> | y <sup>2+</sup> |
|----------------|----|------|----------------|-----------------|
| 130.0504       | 1  | S 13 |                |                 |
| 245.0774       | 2  | D 12 | 1477.6779      | 739.3429        |
| 373.1359       | 3  | Q 11 | 1362.6509      | 681.8294        |
| 501.1945       | 4  | Q 10 | 1234.5924      | 617.8001        |
| 614.2786       | 5  | L 9  | 1106.5338      | 553.7708        |
| 729.3055       | 6  | D 8  | 993.4497       | 497.2288        |
| 889.3361       | 7  | C 7  | 878.4228       | 439.7153        |
| 960.3732       | 8  | A 6  | 718.3922       | 359.7000        |
| 1073.4573      | 9  | L 5  | 647.3551       | 324.1814        |
| 1188.4843      | 10 | D 4  | 534.2710       | 267.6394        |
| 1301.5683      | 11 | L 3  | 419.2440       | 210.1259        |
| 1432.6088      | 12 | M 2  | 306.1600       | 153.5839        |
|                | 13 | R 1  | 175.1195       | 88.0637         |

N-term:+43.02 C(7):+160.03

SDSEKLNLDISIIGR, MH+ 1622.8814, m/z 541.6320  
 H OS G24 P150811 220811-s1.04549.04549.3.dta

scan 4549; 2.2e+000

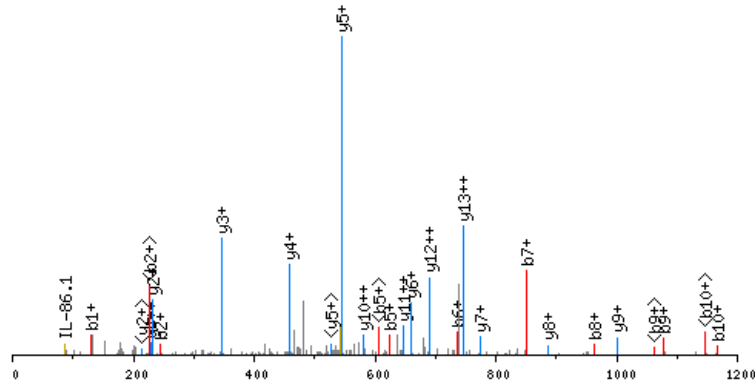

click image to zoom in; click top corners to zoom out [\[precursor±\]](#)

scan 4547; 541.6 m/z; 1.4e+001

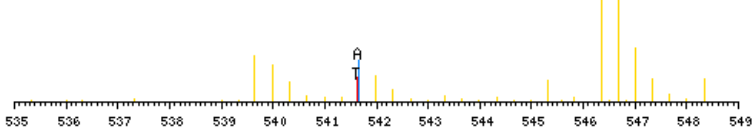

zoomed in precursor plot; T=theoretical m/z, A=acquired m/z

X-range:

-

MassTol: Y-zoom:

MassType:

AVG  MONO

Axis:

1  2

Label:

I  M  -

Ions:

a  +  2+  3+

b  +  2+  3+

c  +  2+  3+

x  +  2+  3+

y  +  2+  3+

z  +  2+  3+

hide H<sub>2</sub>O/NH<sub>3</sub>

zoom 112-122

GO

| b <sup>+</sup> | #  | AA # | y <sup>+</sup> | y <sup>2+</sup> |
|----------------|----|------|----------------|-----------------|
| 130.0504       | 1  | S 14 |                |                 |
| 245.0774       | 2  | D 13 | 1493.8388      | 747.4233        |
| 332.1094       | 3  | S 12 | 1378.8118      | 689.9098        |
| 461.1520       | 4  | E 11 | 1291.7798      | 646.3938        |
| 623.3101       | 5  | K 10 | 1162.7372      | 581.8725        |
| 736.3942       | 6  | L 9  | 1000.5791      | 500.7935        |
| 850.4371       | 7  | N 8  | 887.4951       | 444.2514        |
| 963.5211       | 8  | L 7  | 773.4521       | 387.2300        |
| 1078.5481      | 9  | D 6  | 660.3681       | 330.6879        |
| 1165.5801      | 10 | S 5  | 545.3411       | 273.1745        |
| 1278.6642      | 11 | I 4  | 458.3091       | 229.6585        |
| 1391.7482      | 12 | I 3  | 345.2250       | 173.1164        |
| 1448.7697      | 13 | G 2  | 232.1410       | 116.5744        |
|                | 14 | R 1  | 175.1195       | 88.0637         |

N-term:+43.02 K(5):+162.16

SDSLDNEEKPPAPPLR, MH+ 1840.9505, m/z 614.3217  
 H OS G24 P150811 220811-s1.03345.03345.3.dta

X-range:

-

MassTol: Y-zoom:

MassType:

AVG  MONO

Axis:

1  2

Label:

I  M  -

Ions:

a  +  2+  3+

b  +  2+  3+

c  +  2+  3+

x  +  2+  3+

y  +  2+  3+

z  +  2+  3+

hide H<sub>2</sub>O/NH<sub>3</sub>

zoom 112-122

GO

scan 3345; 1.3e+000

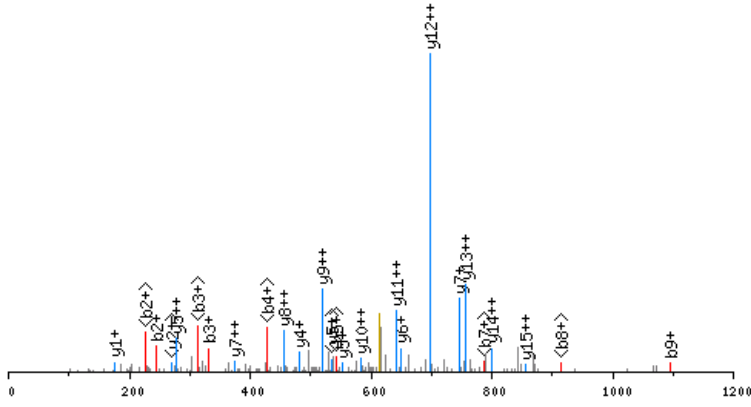

click image to zoom in; click top corners to zoom out [\[precursor±\]](#)

scan 3342; 614.3 m/z; 3.6e+000

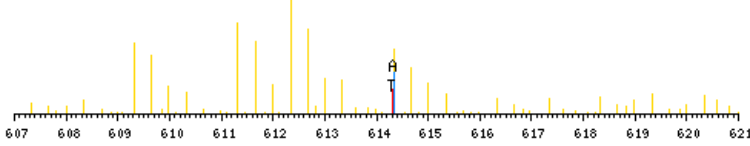

zoomed in precursor plot; T=theoretical m/z, A=acquired m/z

| b <sup>+</sup> | #  | AA # | y <sup>+</sup> | y <sup>2+</sup> |
|----------------|----|------|----------------|-----------------|
| 130.0504       | 1  | S 16 |                |                 |
| 245.0774       | 2  | D 15 | 1711.9079      | 856.4579        |
| 332.1094       | 3  | S 14 | 1596.8810      | 798.9444        |
| 445.1935       | 4  | L 13 | 1509.8490      | 755.4284        |
| 560.2204       | 5  | D 12 | 1396.7649      | 698.8864        |
| 674.2633       | 6  | N 11 | 1281.7379      | 641.3729        |
| 803.3059       | 7  | E 10 | 1167.6950      | 584.3514        |
| 932.3485       | 8  | E 9  | 1038.6524      | 519.8301        |
| 1094.5066      | 9  | K 8  | 909.6098       | 455.3088        |
| 1191.5594      | 10 | P 7  | 747.4517       | 374.2298        |
| 1288.6121      | 11 | P 6  | 650.3990       | 325.7034        |
| 1359.6493      | 12 | A 5  | 553.3462       | 277.1770        |
| 1456.7020      | 13 | P 4  | 482.3091       | 241.6585        |
| 1553.7548      | 14 | P 3  | 385.2563       | 193.1321        |
| 1666.8389      | 15 | L 2  | 288.2036       | 144.6057        |
|                | 16 | R 1  | 175.1195       | 88.0637         |

N-term:+43.02 K(9):+162.16

SDSLVVCEVDPELKETLR, MH+ 2165.1224, m/z 722.3790  
 H OS G24 P150811 220811-s1.04797.04797.3.dta

X-range:

-

MassTol: Y-zoom:

MassType:

AVG  MONO

Axis:

1  2

Label:

I  M  -

Ions:

a  +  2+  3+

b  +  2+  3+

c  +  2+  3+

x  +  2+  3+

y  +  2+  3+

z  +  2+  3+

hide H<sub>2</sub>O/NH<sub>3</sub>

zoom 112-122

GO

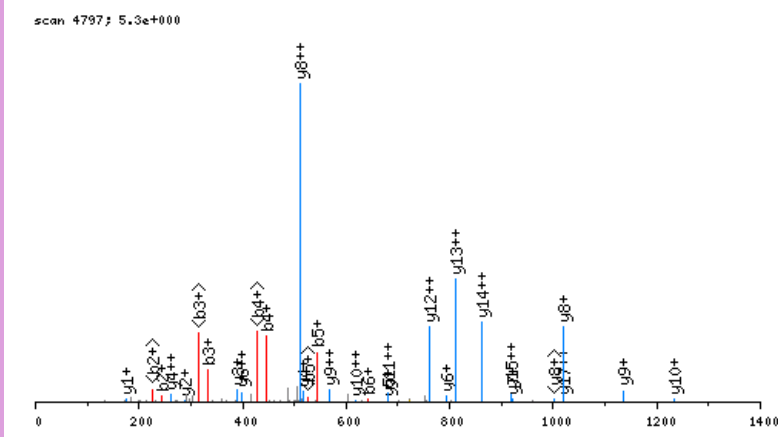

click image to zoom in; click top corners to zoom out [\[precursor±\]](#)

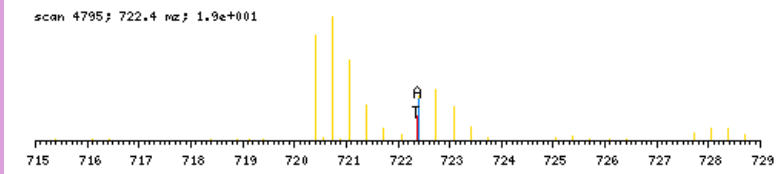

zoomed in precursor plot; T=theoretical m/z, A=acquired m/z

| b <sup>+</sup> | #  | AA | #  | y <sup>+</sup> | y <sup>2+</sup> |
|----------------|----|----|----|----------------|-----------------|
| 130.0504       | 1  | S  | 18 |                |                 |
| 245.0774       | 2  | D  | 17 | 2036.0798      | 1018.5438       |
| 332.1094       | 3  | S  | 16 | 1921.0528      | 961.0303        |
| 445.1935       | 4  | L  | 15 | 1834.0208      | 917.5143        |
| 544.2619       | 5  | V  | 14 | 1720.9367      | 860.9723        |
| 643.3303       | 6  | V  | 13 | 1621.8683      | 811.4381        |
| 803.3609       | 7  | C  | 12 | 1522.7999      | 761.9039        |
| 932.4035       | 8  | E  | 11 | 1362.7693      | 681.8886        |
| 1031.4719      | 9  | V  | 10 | 1233.7267      | 617.3673        |
| 1146.4988      | 10 | D  | 9  | 1134.6583      | 567.8331        |
| 1243.5516      | 11 | P  | 8  | 1019.6314      | 510.3196        |
| 1372.5942      | 12 | E  | 7  | 922.5786       | 461.7932        |
| 1485.6783      | 13 | L  | 6  | 793.5360       | 397.2719        |
| 1647.8364      | 14 | K  | 5  | 680.4519       | 340.7299        |
| 1776.8790      | 15 | E  | 4  | 518.2938       | 259.6508        |
| 1877.9266      | 16 | T  | 3  | 389.2512       | 195.1295        |
| 1991.0107      | 17 | L  | 2  | 288.2036       | 144.6057        |
|                | 18 | R  | 1  | 175.1195       | 88.0637         |

N-term: +43.02 C(7): +160.03  
 K(14): +162.16

SDSMDTGAGSIR, MH+ 1238.5323, m/z 619.7698  
 H OS G29 P150811 220811-s1.02873.02873.2.dta

X-range:

-

MassTol: Y-zoom:

MassType:

AVG  MONO

Axis:

1  2

Label:

I  M  -

Ions:

a  +  2+  3+

b  +  2+  3+

c  +  2+  3+

x  +  2+  3+

y  +  2+  3+

z  +  2+  3+

hide H<sub>2</sub>O/NH<sub>3</sub>

zoom 112-122

GO

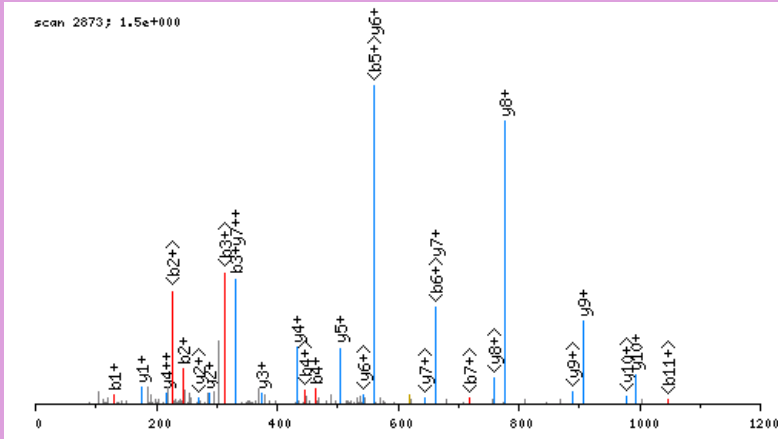

click image to zoom in; click top corners to zoom out [\[precursor±\]](#)

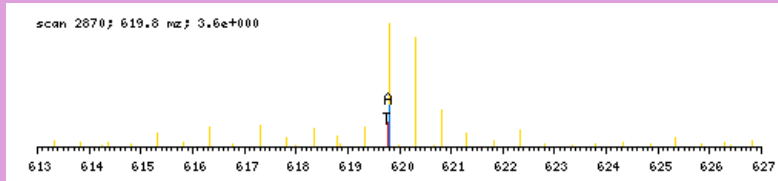

zoomed in precursor plot; T=theoretical m/z, A=acquired m/z

| b <sup>+</sup> | #  | AA # | y <sup>+</sup> | y <sup>2+</sup> |
|----------------|----|------|----------------|-----------------|
| 130.0504       | 1  | S 12 |                |                 |
| 245.0774       | 2  | D 11 | 1109.4897      | 555.2488        |
| 332.1094       | 3  | S 10 | 994.4628       | 497.7353        |
| 463.1499       | 4  | M 9  | 907.4307       | 454.2193        |
| 578.1768       | 5  | D 8  | 776.3903       | 388.6990        |
| 679.2245       | 6  | T 7  | 661.3633       | 331.1856        |
| 736.2460       | 7  | G 6  | 560.3156       | 280.6617        |
| 807.2831       | 8  | A 5  | 503.2942       | 252.1510        |
| 864.3045       | 9  | G 4  | 432.2571       | 216.6324        |
| 951.3366       | 10 | S 3  | 375.2356       | 188.1217        |
| 1064.4206      | 11 | I 2  | 288.2036       | 144.6057        |
|                | 12 | R 1  | 175.1195       | 88.0637         |

N-term:+43.02



SDSSDSMDTGAGSIR, MH+ 1527.6233, m/z 764.3153  
 H OS G29 P150811 220811-s1.02846.02846.2.dta

X-range:

-

MassTol: Y-zoom:

MassType:

AVG  MONO

Axis:

1  2

Label:

I  M  -

Ions:

a  +  2+  3+

b  +  2+  3+

c  +  2+  3+

x  +  2+  3+

y  +  2+  3+

z  +  2+  3+

hide H<sub>2</sub>O/NH<sub>3</sub>

zoom 112-122

GO

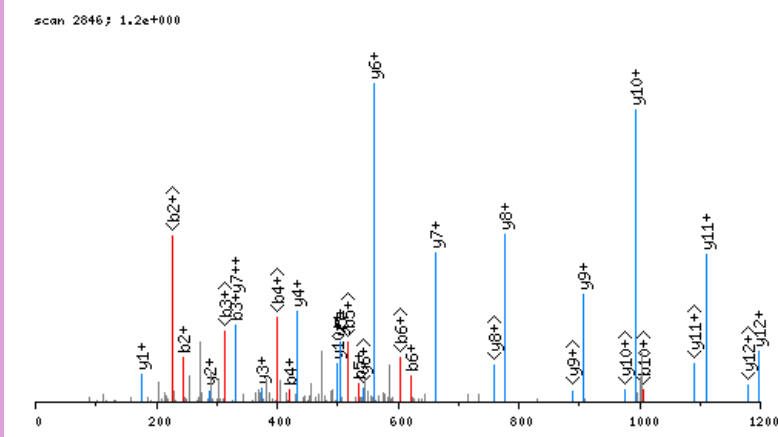

click image to zoom in; click top corners to zoom out [\[precursor±\]](#)

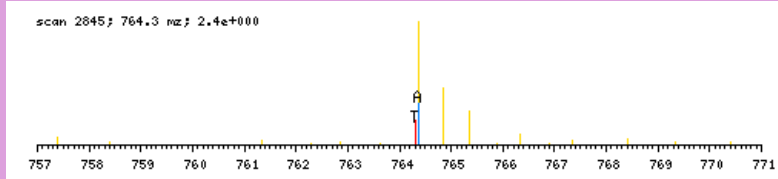

zoomed in precursor plot; T=theoretical m/z, A=acquired m/z

| b <sup>+</sup> | #  | AA # | y <sup>+</sup> | y <sup>2+</sup> |
|----------------|----|------|----------------|-----------------|
| 130.0504       | 1  | S 15 |                |                 |
| 245.0774       | 2  | D 14 | 1398.5807      | 699.7943        |
| 332.1094       | 3  | S 13 | 1283.5538      | 642.2808        |
| 419.1414       | 4  | S 12 | 1196.5217      | 598.7648        |
| 534.1684       | 5  | D 11 | 1109.4897      | 555.2488        |
| 621.2004       | 6  | S 10 | 994.4628       | 497.7353        |
| 752.2409       | 7  | M 9  | 907.4307       | 454.2193        |
| 867.2678       | 8  | D 8  | 776.3903       | 388.6990        |
| 968.3155       | 9  | T 7  | 661.3633       | 331.1856        |
| 1025.3370      | 10 | G 6  | 560.3156       | 280.6617        |
| 1096.3741      | 11 | A 5  | 503.2942       | 252.1510        |
| 1153.3955      | 12 | G 4  | 432.2571       | 216.6324        |
| 1240.4276      | 13 | S 3  | 375.2356       | 188.1217        |
| 1353.5116      | 14 | I 2  | 288.2036       | 144.6057        |
|                | 15 | R 1  | 175.1195       | 88.0637         |

N-term:+43.02

SDTAVADTR, MH+ 977.4540, m/z 489.2306  
 H OS G29 P150811 220811-s1.02284.02284.2.dta

scan 2284; 8.5e-001

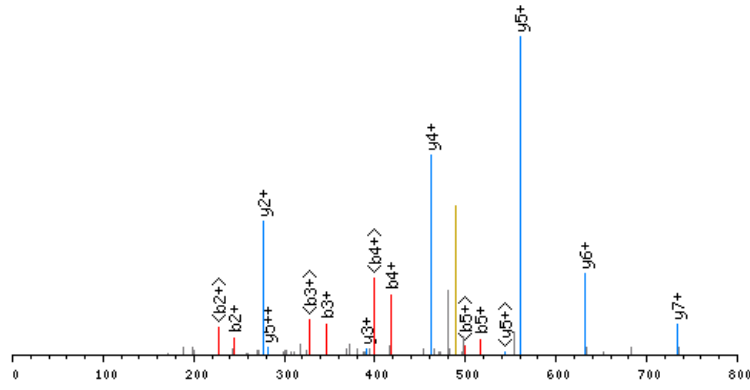

click image to zoom in; click top corners to zoom out [\[precursor±\]](#)

scan 2283; 489.2 m/z; 1.2e+000

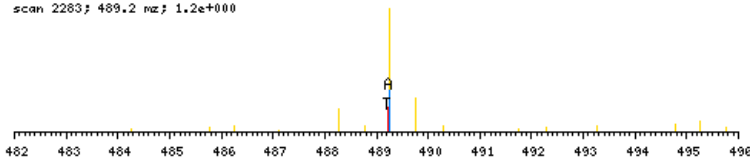

zoomed in precursor plot; T=theoretical m/z, A=acquired m/z

X-range:

-

MassTol: Y-zoom:

MassType:

AVG  MONO

Axis:

1  2

Label:

I  M  -

Ions:

a  +  2+  3+

b  +  2+  3+

c  +  2+  3+

x  +  2+  3+

y  +  2+  3+

z  +  2+  3+

hide H<sub>2</sub>O/NH<sub>3</sub>

zoom 112-122

GO

| b <sup>+</sup> | # | AA # | y <sup>+</sup> | y <sup>2+</sup>   |
|----------------|---|------|----------------|-------------------|
| 130.0504       | 1 | S    | 9              |                   |
| 245.0774       | 2 | D    | 8              | 848.4114 424.7096 |
| 346.1251       | 3 | T    | 7              | 733.3844 367.1961 |
| 417.1622       | 4 | A    | 6              | 632.3368 316.6723 |
| 516.2306       | 5 | V    | 5              | 561.2997 281.1537 |
| 587.2677       | 6 | A    | 4              | 462.2312 231.6195 |
| 702.2946       | 7 | D    | 3              | 391.1941 196.1010 |
| 803.3423       | 8 | T    | 2              | 276.1672 138.5875 |
|                | 9 | R    | 1              | 175.1195 88.0637  |

N-term:+43.02

SDTPASTFGGR, MH+ 1137.5177, m/z 569.2625  
 H OS G29 P150811 220811-s1.02912.02912.2.dta

scan 2912; 8.4e-001

X-range:

-

MassTol: Y-zoom:

MassType:

AVG  MONO

Axis:

1  2

Label:

I  M  -

Ions:

a  +  2+  3+

b  +  2+  3+

c  +  2+  3+

x  +  2+  3+

y  +  2+  3+

z  +  2+  3+

hide H<sub>2</sub>O/NH<sub>3</sub>

zoom 112-122

GO

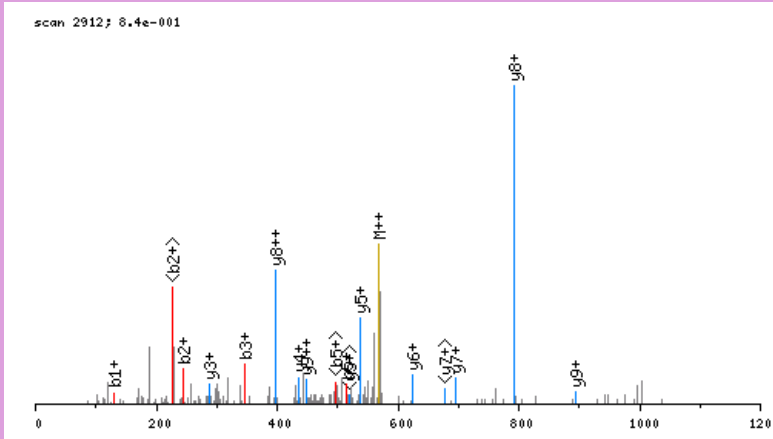

click image to zoom in; click top corners to zoom out [\[precursor±\]](#)

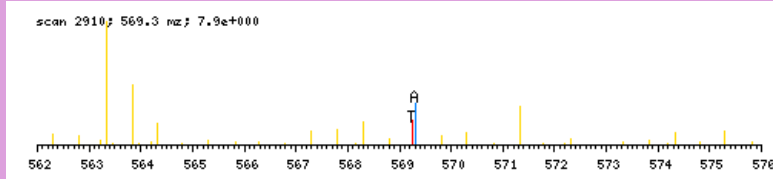

zoomed in precursor plot; T=theoretical m/z, A=acquired m/z

| b <sup>+</sup> | #  | AA | #  | y <sup>+</sup> | y <sup>2+</sup> |
|----------------|----|----|----|----------------|-----------------|
| 130.0504       | 1  | S  | 11 |                |                 |
| 245.0774       | 2  | D  | 10 | 1008.4750      | 504.7414        |
| 346.1251       | 3  | T  | 9  | 893.4481       | 447.2280        |
| 443.1778       | 4  | P  | 8  | 792.4004       | 396.7041        |
| 514.2149       | 5  | A  | 7  | 695.3477       | 348.1777        |
| 601.2470       | 6  | S  | 6  | 624.3105       | 312.6592        |
| 702.2946       | 7  | T  | 5  | 537.2785       | 269.1432        |
| 849.3630       | 8  | F  | 4  | 436.2308       | 218.6193        |
| 906.3845       | 9  | G  | 3  | 289.1624       | 145.0851        |
| 963.4060       | 10 | G  | 2  | 232.1410       | 116.5744        |
|                | 11 | R  | 1  | 175.1195       | 88.0637         |

N-term:+43.02

SDVLELTDENFESR, MH+ 1695.7714, m/z 565.9286  
 H OS G25 P150811 220811-s1.07124.07124.3.dta

scan 7124; 2.3e+000

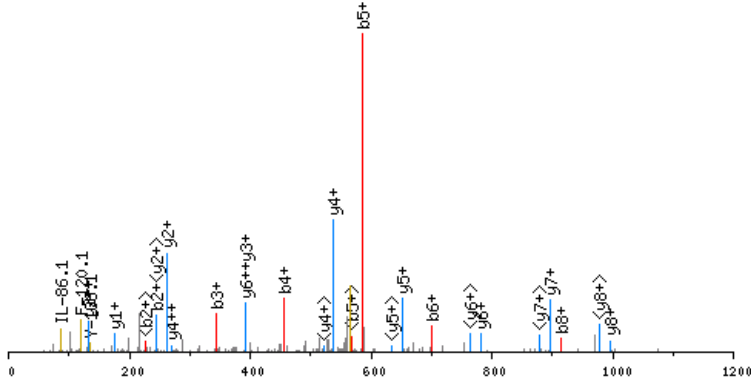

click image to zoom in; click top corners to zoom out [\[precursor±\]](#)

scan 7122; 565.9 m/z; 2.7e+001

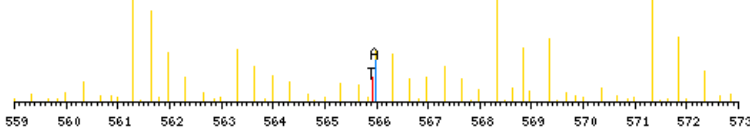

zoomed in precursor plot; T=theoretical m/z, A=acquired m/z

X-range:

-

MassTol: Y-zoom:

MassType:

AVG  MONO

Axis:

1  2

Label:

I  M  -

Ions:

a  +  2+  3+

b  +  2+  3+

c  +  2+  3+

x  +  2+  3+

y  +  2+  3+

z  +  2+  3+

hide H<sub>2</sub>O/NH<sub>3</sub>

zoom 112-122

GO

| b <sup>+</sup> | #  | AA # | y <sup>+</sup> | y <sup>2+</sup> |
|----------------|----|------|----------------|-----------------|
| 130.0504       | 1  | S 14 |                |                 |
| 245.0774       | 2  | D 13 | 1566.7288      | 783.8683        |
| 344.1458       | 3  | V 12 | 1451.7018      | 726.3548        |
| 457.2298       | 4  | L 11 | 1352.6334      | 676.8206        |
| 586.2724       | 5  | E 10 | 1239.5493      | 620.2786        |
| 699.3565       | 6  | L 9  | 1110.5067      | 555.7573        |
| 800.4042       | 7  | T 8  | 997.4227       | 499.2153        |
| 915.4311       | 8  | D 7  | 896.3750       | 448.6914        |
| 1044.4737      | 9  | E 6  | 781.3481       | 391.1779        |
| 1158.5166      | 10 | N 5  | 652.3055       | 326.6566        |
| 1305.5851      | 11 | F 4  | 538.2625       | 269.6352        |
| 1434.6277      | 12 | E 3  | 391.1941       | 196.1010        |
| 1521.6597      | 13 | S 2  | 262.1515       | 131.5797        |
|                | 14 | R 1  | 175.1195       | 88.0637         |

N-term:+43.02

SDYNTGGPPPGPPPPAGGGGGAAGAGGPPPPGAGDR, MH+ 3287.5106, m/z 822.6331  
 H\_OS\_G29\_P150811\_220811-s1.03728.03728.4.dta

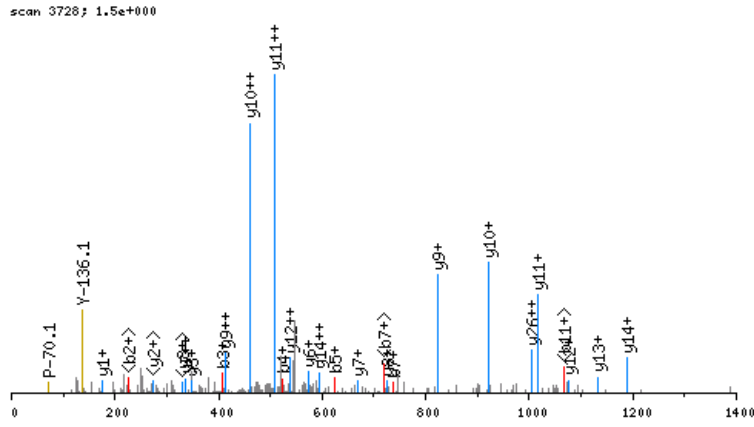

click image to zoom in; click top corners to zoom out [\[precursor±\]](#)

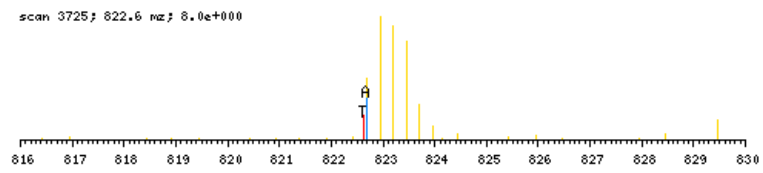

zoomed in precursor plot; T=theoretical m/z, A=acquired m/z

| b <sup>+</sup> | #  | AA # | y <sup>+</sup> | y <sup>2+</sup> |
|----------------|----|------|----------------|-----------------|
| 130.0504       | 1  | S 39 |                |                 |
| 245.0774       | 2  | D 38 | 3158.4680      | 1579.7379       |
| 408.1407       | 3  | Y 37 | 3043.4411      | 1522.2244       |
| 522.1836       | 4  | N 36 | 2880.3777      | 1440.6928       |
| 623.2313       | 5  | T 35 | 2766.3348      | 1383.6713       |
| 680.2528       | 6  | G 34 | 2665.2871      | 1333.1475       |
| 737.2742       | 7  | G 33 | 2608.2657      | 1304.6367       |
| 834.3270       | 8  | P 32 | 2551.2442      | 1276.1260       |
| 931.3798       | 9  | P 31 | 2454.1914      | 1227.5996       |
| 1028.4325      | 10 | P 30 | 2357.1387      | 1179.0733       |
| 1085.4540      | 11 | G 29 | 2260.0859      | 1130.5469       |
| 1182.5068      | 12 | P 28 | 2203.0645      | 1102.0361       |
| 1279.5595      | 13 | P 27 | 2106.0117      | 1053.5098       |
| 1376.6123      | 14 | P 26 | 2008.9589      | 1004.9834       |
| 1473.6650      | 15 | P 25 | 1911.9062      | 956.4570        |
| 1544.7022      | 16 | A 24 | 1814.8534      | 907.9306        |
| 1601.7236      | 17 | G 23 | 1743.8163      | 872.4121        |
| 1658.7451      | 18 | G 22 | 1686.7948      | 843.9013        |
| 1715.7665      | 19 | G 21 | 1629.7734      | 815.3906        |
| 1772.7880      | 20 | G 20 | 1572.7519      | 786.8799        |
| 1829.8095      | 21 | G 19 | 1515.7304      | 758.3691        |
| 1900.8466      | 22 | A 18 | 1458.7090      | 729.8584        |
| 1971.8837      | 23 | A 17 | 1387.6719      | 694.3398        |
| 2028.9052      | 24 | G 16 | 1316.6347      | 658.8213        |
| 2099.9423      | 25 | A 15 | 1259.6133      | 630.3105        |
| 2156.9637      | 26 | G 14 | 1188.5762      | 594.7920        |
| 2213.9852      | 27 | G 13 | 1131.5547      | 566.2813        |
| 2271.0067      | 28 | G 12 | 1074.5332      | 537.7705        |
| 2368.0594      | 29 | P 11 | 1017.5118      | 509.2598        |
| 2465.1122      | 30 | P 10 | 920.4590       | 460.7334        |
| 2562.1650      | 31 | P 9  | 823.4062       | 412.2070        |
| 2619.1864      | 32 | G 8  | 726.3535       | 363.6807        |
| 2716.2392      | 33 | P 7  | 669.3320       | 335.1699        |
| 2813.2920      | 34 | P 6  | 572.2792       | 286.6435        |
| 2870.3134      | 35 | G 5  | 475.2265       | 238.1172        |
| 2941.3505      | 36 | A 4  | 418.2050       | 209.6064        |
| 2998.3720      | 37 | G 3  | 347.1679       | 174.0879        |
| 3113.3989      | 38 | D 2  | 290.1464       | 145.5771        |
|                | 39 | R 1  | 175.1195       | 88.0637         |

N-term:+43.02

X-range:

-

MassTol: Y-zoom:

MassType:

AVG  MONO

Axis:

1  2

Label:

I  M  -

Ions:

a  +  2+  3+

b  +  2+  3+

c  +  2+  3+

x  +  2+  3+

y  +  2+  3+

z  +  2+  3+

hide H<sub>2</sub>O/NH<sub>3</sub>

zoom 112-122

GO

SEAFDCAKCNESLYGR, MH+ 1976.8482, m/z 659.6209  
 H OS G25 P150811 220811-s1.05508.05508.3.dta

X-range:

-

MassTol: Y-zoom:

MassType:

AVG  MONO

Axis:

1  2

Label:

I  M  -

Ions:

a  +  2+  3+

b  +  2+  3+

c  +  2+  3+

x  +  2+  3+

y  +  2+  3+

z  +  2+  3+

hide H<sub>2</sub>O/NH<sub>3</sub>

zoom 112-122

GO

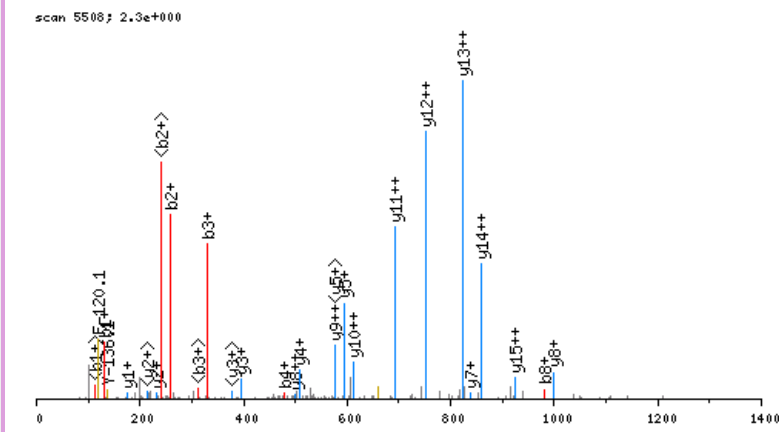

click image to zoom in; click top corners to zoom out [\[precursor±\]](#)

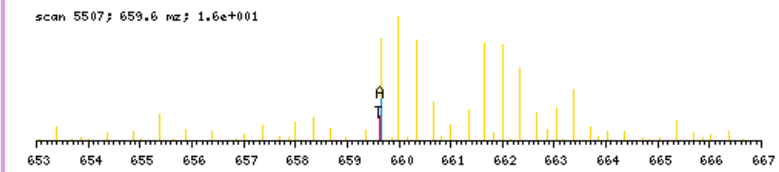

zoomed in precursor plot; T=theoretical m/z, A=acquired m/z

| b <sup>+</sup> | #  | AA # | y <sup>+</sup> | y <sup>2+</sup> |
|----------------|----|------|----------------|-----------------|
| 130.0504       | 1  | S    | 16             |                 |
| 259.0930       | 2  | E    | 15             | 1847.8056       |
| 330.1301       | 3  | A    | 14             | 1718.7630       |
| 477.1985       | 4  | F    | 13             | 1647.7259       |
| 592.2255       | 5  | D    | 12             | 1500.6575       |
| 752.2561       | 6  | C    | 11             | 1385.6305       |
| 823.2932       | 7  | A    | 10             | 1225.5999       |
| 979.4195       | 8  | K    | 9              | 1154.5628       |
| 1139.4501      | 9  | C    | 8              | 998.4365        |
| 1253.4930      | 10 | N    | 7              | 838.4059        |
| 1382.5356      | 11 | E    | 6              | 724.3630        |
| 1469.5677      | 12 | S    | 5              | 595.3204        |
| 1582.6517      | 13 | L    | 4              | 508.2884        |
| 1745.7150      | 14 | Y    | 3              | 395.2043        |
| 1802.7365      | 15 | G    | 2              | 232.1410        |
|                | 16 | R    | 1              | 175.1195        |

N-term:+43.02 C(6):+160.03  
 K(8):+156.13 C(9):+160.03

SEDSSALPWSINR, MH+ 1503.7080, m/z 752.3576  
 H OS G29 P150811 220811-s1.05456.05456.2.dta

scan 5456; 3.4e+000

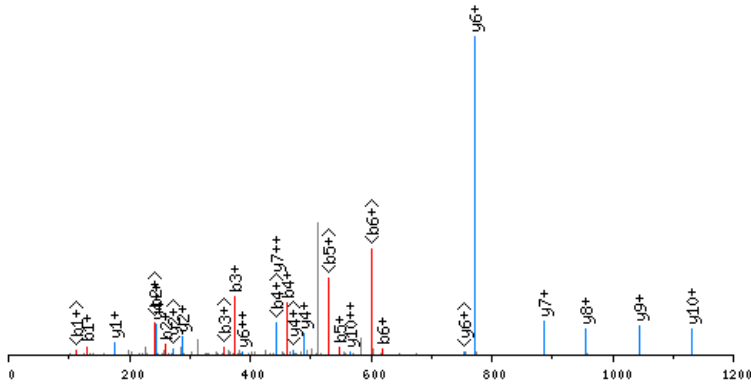

click image to zoom in; click top corners to zoom out [precursor±]

scan 5455; 752.4 m/z; 8.4e+000

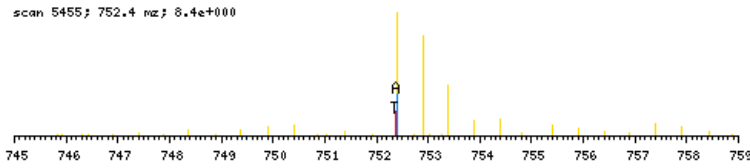

zoomed in precursor plot; T=theoretical m/z, A=acquired m/z

X-range:

-

MassTol: Y-zoom:

MassType:

AVG  MONO

Axis:

1  2

Label:

I  M  -

Ions:

a  +  2+  3+

b  +  2+  3+

c  +  2+  3+

x  +  2+  3+

y  +  2+  3+

z  +  2+  3+

hide H<sub>2</sub>O/NH<sub>3</sub>

zoom 112-122

GO

| b <sup>+</sup> | #  | AA # | y <sup>+</sup> | y <sup>2+</sup> |
|----------------|----|------|----------------|-----------------|
| 130.0504       | 1  | S 13 |                |                 |
| 259.0930       | 2  | E 12 | 1374.6654      | 687.8366        |
| 374.1200       | 3  | D 11 | 1245.6228      | 623.3153        |
| 461.1520       | 4  | S 10 | 1130.5958      | 565.8018        |
| 548.1840       | 5  | S 9  | 1043.5638      | 522.2858        |
| 619.2211       | 6  | A 8  | 956.5318       | 478.7698        |
| 732.3052       | 7  | L 7  | 885.4947       | 443.2512        |
| 829.3580       | 8  | P 6  | 772.4106       | 386.7092        |
| 1015.4373      | 9  | W 5  | 675.3578       | 338.1828        |
| 1102.4693      | 10 | S 4  | 489.2785       | 245.1432        |
| 1215.5534      | 11 | I 3  | 402.2465       | 201.6272        |
| 1329.5963      | 12 | N 2  | 289.1624       | 145.0851        |
|                | 13 | R 1  | 175.1195       | 88.0637         |

N-term:+43.02

SEGDSVGDsvhGKPSVVYR, MH+ 2044.9940, m/z 682.3362  
 H OS G26 P150811 220811-s1.03027.03027.3.dta

X-range:

-

MassTol: Y-zoom:

MassType:

AVG  MONO

Axis:

1  2

Label:

I  M  -

Ions:

a  +  2+  3+

b  +  2+  3+

c  +  2+  3+

x  +  2+  3+

y  +  2+  3+

z  +  2+  3+

hide H<sub>2</sub>O/NH<sub>3</sub>

zoom 112-122

GO

scan 3027; 2.8e+000

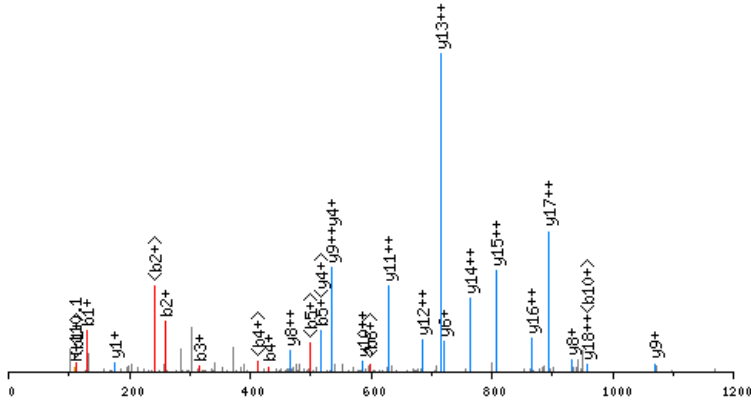

click image to zoom in; click top corners to zoom out [\[precursor±\]](#)

scan 3025; 682.3 m/z; 1.2e+001

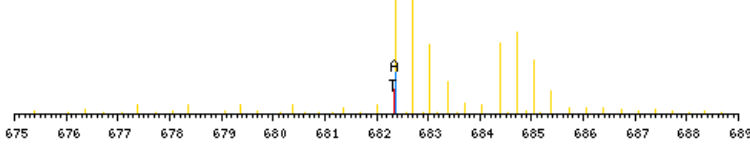

zoomed in precursor plot; T=theoretical m/z, A=acquired m/z

| b <sup>+</sup> | #  | AA # | y <sup>+</sup> | y <sup>2+</sup> |
|----------------|----|------|----------------|-----------------|
| 130.0504       | 1  | S 19 |                |                 |
| 259.0930       | 2  | E 18 | 1915.9514      | 958.4796        |
| 316.1145       | 3  | G 17 | 1786.9088      | 893.9583        |
| 431.1414       | 4  | D 16 | 1729.8874      | 865.4476        |
| 518.1735       | 5  | S 15 | 1614.8604      | 807.9341        |
| 617.2419       | 6  | V 14 | 1527.8284      | 764.4181        |
| 674.2633       | 7  | G 13 | 1428.7600      | 714.8839        |
| 789.2903       | 8  | D 12 | 1371.7385      | 686.3732        |
| 876.3223       | 9  | S 11 | 1256.7116      | 628.8597        |
| 975.3907       | 10 | V 10 | 1169.6795      | 585.3437        |
| 1112.4496      | 11 | H 9  | 1070.6111      | 535.8095        |
| 1169.4711      | 12 | G 8  | 933.5522       | 467.2800        |
| 1325.5974      | 13 | K 7  | 876.5307       | 438.7693        |
| 1422.6502      | 14 | P 6  | 720.4044       | 360.7061        |
| 1509.6822      | 15 | S 5  | 623.3517       | 312.1798        |
| 1608.7506      | 16 | V 4  | 536.3197       | 268.6637        |
| 1707.8190      | 17 | V 3  | 437.2512       | 219.1295        |
| 1870.8823      | 18 | Y 2  | 338.1828       | 169.5953        |
|                | 19 | R 1  | 175.1195       | 88.0637         |

N-term:+43.02 K(13):+156.13



SEKFDCHYCR, MH+ 1471.6098, m/z 491.2081  
 H OS G27 P150811 220811-s1.02763.02763.3.dta

scan 2763; 2.6e+001

X-range:

-

MassTol: Y-zoom:

MassType:

AVG  MONO

Axis:

1  2

Label:

I  M  -

Ions:

a  +  2+  3+

b  +  2+  3+

c  +  2+  3+

x  +  2+  3+

y  +  2+  3+

z  +  2+  3+

hide H<sub>2</sub>O/NH<sub>3</sub>

zoom 112-122

GO

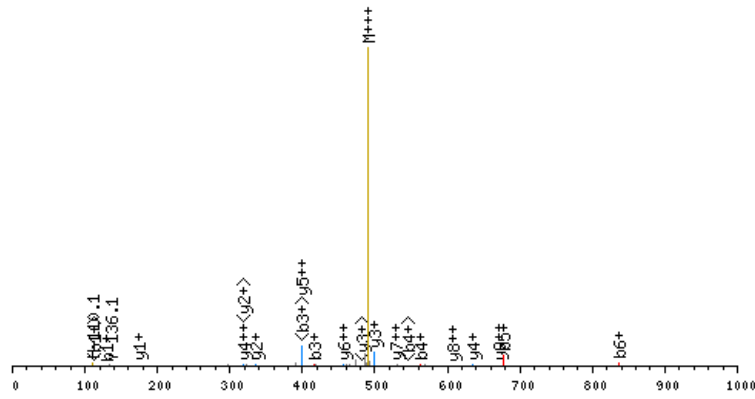

click image to zoom in; click top corners to zoom out [\[precursor±\]](#)

scan 2762; 491.2 m/z; 5.7e+001

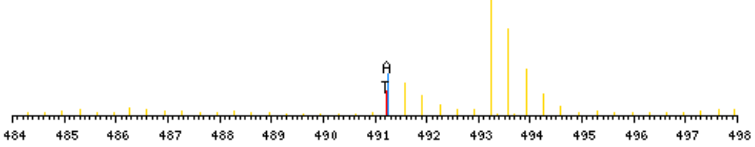

zoomed in precursor plot; T=theoretical m/z, A=acquired m/z

| b <sup>+</sup> | #  | AA # | y <sup>+</sup> | y <sup>2+</sup> |
|----------------|----|------|----------------|-----------------|
| 130.0504       | 1  | S    | 10             |                 |
| 259.0930       | 2  | E    | 9              | 1342.5672       |
| 415.2193       | 3  | K    | 8              | 1213.5246       |
| 562.2877       | 4  | F    | 7              | 1057.3983       |
| 677.3147       | 5  | D    | 6              | 910.3299        |
| 837.3453       | 6  | C    | 5              | 795.3029        |
| 974.4042       | 7  | H    | 4              | 635.2723        |
| 1137.4675      | 8  | Y    | 3              | 498.2134        |
| 1297.4981      | 9  | C    | 2              | 335.1501        |
|                | 10 | R    | 1              | 175.1195        |

N-term:+43.02 K(3):+156.13  
 C(6):+160.03 C(9):+160.03

SELEQLRQEAQLR, MH+ 1770.8986, m/z 590.9711  
 H OS G25 P150811 220811-s1.08005.08005.3.dta

scan 8005; 2.1e+000

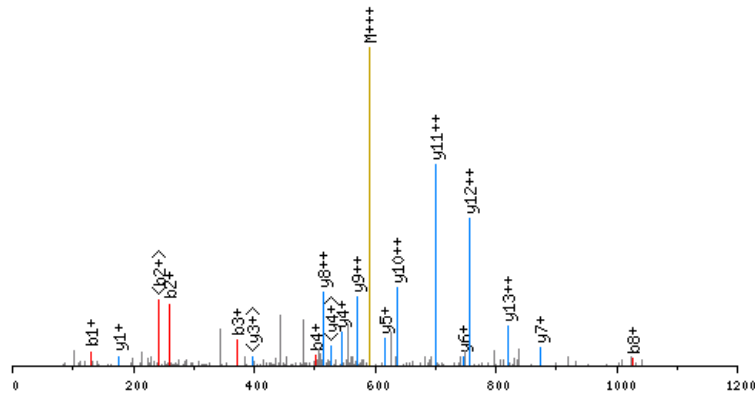

click image to zoom in; click top corners to zoom out [\[precursor±\]](#)

scan 8002; 591.0 m/z; 4.6e+000

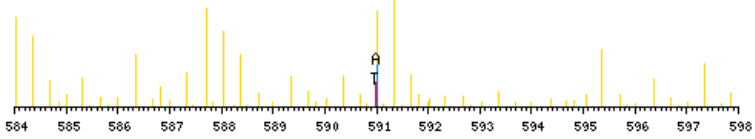

zoomed in precursor plot; T=theoretical m/z, A=acquired m/z

X-range:

-

MassTol: Y-zoom:

MassType:

AVG  MONO

Axis:

1  2

Label:

I  M  -

Ions:

a  +  2+  3+

b  +  2+  3+

c  +  2+  3+

x  +  2+  3+

y  +  2+  3+

z  +  2+  3+

hide H<sub>2</sub>O/NH<sub>3</sub>

zoom 112-122

GO

| b <sup>+</sup> | #  | AA # | y <sup>+</sup> | y <sup>2+</sup> |
|----------------|----|------|----------------|-----------------|
| 130.0504       | 1  | S 14 |                |                 |
| 259.0930       | 2  | E 13 | 1641.8560      | 821.4319        |
| 372.1771       | 3  | L 12 | 1512.8134      | 756.9106        |
| 501.2197       | 4  | E 11 | 1399.7294      | 700.3686        |
| 629.2783       | 5  | Q 10 | 1270.6868      | 635.8473        |
| 742.3623       | 6  | L 9  | 1142.6282      | 571.8180        |
| 898.4634       | 7  | R 8  | 1029.5441      | 515.2760        |
| 1026.5220      | 8  | Q 7  | 873.4430       | 437.2254        |
| 1155.5646      | 9  | E 6  | 745.3844       | 373.1961        |
| 1226.6017      | 10 | A 5  | 616.3418       | 308.6748        |
| 1355.6443      | 11 | E 4  | 545.3047       | 273.1563        |
| 1483.7029      | 12 | Q 3  | 416.2621       | 208.6350        |
| 1596.7870      | 13 | L 2  | 288.2036       | 144.6057        |
|                | 14 | R 1  | 175.1195       | 88.0637         |

N-term:+43.02

SETAPAAPAAPAPAEKTPVKKAR, MH+ 2541.4770, m/z 636.1247  
 H\_OS\_G28\_P150811\_220811-s1.02491.02491.4.dta

X-range:

-

MassTol: Y-zoom:

MassType:

AVG  MONO

Axis:

1  2

Label:

I  M  -

Ions:

a  +  2+  3+

b  +  2+  3+

c  +  2+  3+

x  +  2+  3+

y  +  2+  3+

z  +  2+  3+

hide H<sub>2</sub>O/NH<sub>3</sub>

zoom 112-122

GO

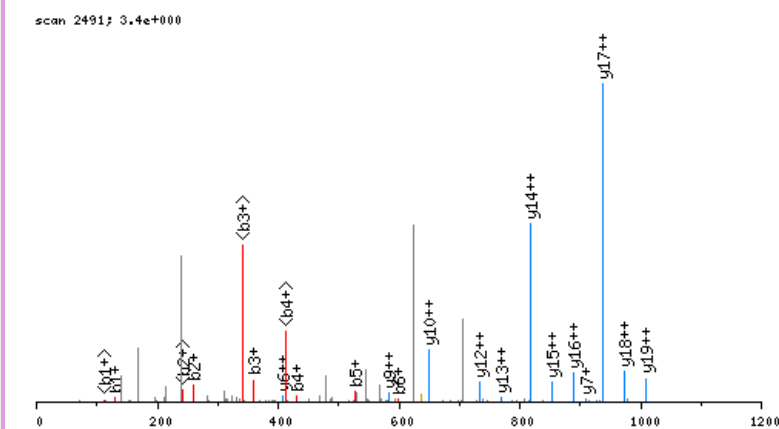

click image to zoom in; click top corners to zoom out [\[precursor±\]](#)

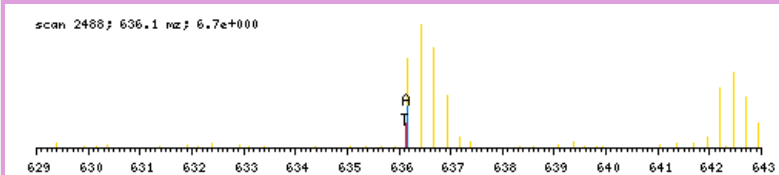

zoomed in precursor plot; T=theoretical m/z, A=acquired m/z

| b <sup>+</sup> | #  | AA | #  | y <sup>+</sup> | y <sup>2+</sup> |
|----------------|----|----|----|----------------|-----------------|
| 130.0504       | 1  | S  | 24 |                |                 |
| 259.0930       | 2  | E  | 23 | 2412.4344      | 1206.7211       |
| 360.1407       | 3  | T  | 22 | 2283.3918      | 1142.1998       |
| 431.1778       | 4  | A  | 21 | 2182.3441      | 1091.6760       |
| 528.2306       | 5  | P  | 20 | 2111.3070      | 1056.1574       |
| 599.2677       | 6  | A  | 19 | 2014.2542      | 1007.6310       |
| 670.3048       | 7  | A  | 18 | 1943.2171      | 972.1125        |
| 767.3576       | 8  | P  | 17 | 1872.1800      | 936.5939        |
| 838.3947       | 9  | A  | 16 | 1775.1272      | 888.0675        |
| 909.4318       | 10 | A  | 15 | 1704.0901      | 852.5490        |
| 1006.4846      | 11 | P  | 14 | 1633.0530      | 817.0304        |
| 1077.5217      | 12 | A  | 13 | 1536.0003      | 768.5040        |
| 1174.5744      | 13 | P  | 12 | 1464.9631      | 732.9855        |
| 1245.6116      | 14 | A  | 11 | 1367.9104      | 684.4591        |
| 1374.6541      | 15 | E  | 10 | 1296.8733      | 648.9405        |
| 1530.7804      | 16 | K  | 9  | 1167.8307      | 584.4192        |
| 1631.8281      | 17 | T  | 8  | 1011.7044      | 506.3561        |
| 1728.8809      | 18 | P  | 7  | 910.6567       | 455.8323        |
| 1827.9493      | 19 | V  | 6  | 813.6039       | 407.3059        |
| 1984.0756      | 20 | K  | 5  | 714.5355       | 357.7717        |
| 2140.2019      | 21 | K  | 4  | 558.4092       | 279.7085        |
| 2296.3282      | 22 | K  | 3  | 402.2829       | 201.6454        |
| 2367.3653      | 23 | A  | 2  | 246.1566       | 123.5822        |
|                | 24 | R  | 1  | 175.1195       | 88.0637         |

N-term:+43.02 K(16):+156.13  
 K(20):+156.13 K(21):+156.13  
 K(22):+156.13

SETVICSSR, MH+ 1080.4995, m/z 540.7534  
 H OS G29 P150811 220811-s1.02751.02751.2.dta

X-range:

-

MassTol: Y-zoom:

MassType:

AVG  MONO

Axis:

1  2

Label:

I  M  -

Ions:

a  +  2+  3+

b  +  2+  3+

c  +  2+  3+

x  +  2+  3+

y  +  2+  3+

z  +  2+  3+

hide H<sub>2</sub>O/NH<sub>3</sub>

zoom 112-122

GO

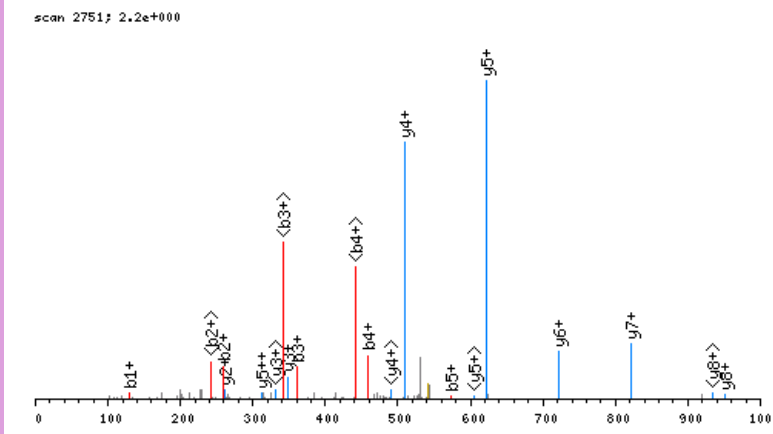

click image to zoom in; click top corners to zoom out [\[precursor±\]](#)

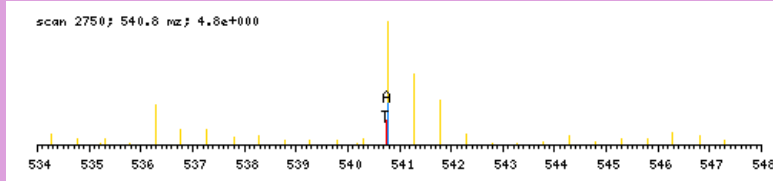

zoomed in precursor plot; T=theoretical m/z, A=acquired m/z

| b <sup>+</sup> | # | AA # | y <sup>+</sup> | y <sup>2+</sup> |
|----------------|---|------|----------------|-----------------|
| 130.0504       | 1 | S 9  |                |                 |
| 259.0930       | 2 | E 8  | 951.4569       | 476.2324        |
| 360.1407       | 3 | T 7  | 822.4143       | 411.7111        |
| 459.2091       | 4 | V 6  | 721.3666       | 361.1872        |
| 572.2932       | 5 | I 5  | 622.2982       | 311.6530        |
| 732.3238       | 6 | C 4  | 509.2142       | 255.1110        |
| 819.3558       | 7 | S 3  | 349.1836       | 175.0957        |
| 906.3878       | 8 | S 2  | 262.1515       | 131.5797        |
|                | 9 | R 1  | 175.1195       | 88.0637         |

N-term:+43.02 C(6):+160.03

SGAPPSYSFVALPPR, MH+ 1587.8171, m/z 794.4122  
 H OS G29 P150811 220811-s1.05643.05643.2.dta

X-range:

-

MassTol: Y-zoom:

MassType:

AVG  MONO

Axis:

1  2

Label:

I  M  -

Ions:

a  +  2+  3+

b  +  2+  3+

c  +  2+  3+

x  +  2+  3+

y  +  2+  3+

z  +  2+  3+

hide H<sub>2</sub>O/NH<sub>3</sub>

zoom 112-122

GO

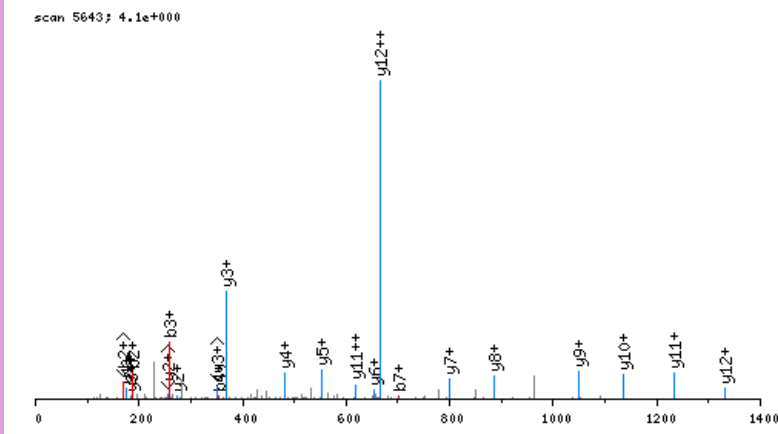

click image to zoom in; click top corners to zoom out [\[precursor±\]](#)

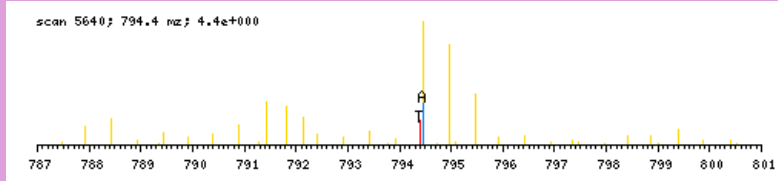

zoomed in precursor plot; T=theoretical m/z, A=acquired m/z

| b <sup>+</sup> | #  | AA # | y <sup>+</sup> | y <sup>2+</sup> |
|----------------|----|------|----------------|-----------------|
| 130.0504       | 1  | S 15 |                |                 |
| 187.0719       | 2  | G 14 | 1458.7745      | 729.8912        |
| 258.1090       | 3  | A 13 | 1401.7531      | 701.3804        |
| 355.1618       | 4  | P 12 | 1330.7159      | 665.8619        |
| 452.2145       | 5  | P 11 | 1233.6632      | 617.3355        |
| 539.2466       | 6  | S 10 | 1136.6104      | 568.8091        |
| 702.3099       | 7  | Y 9  | 1049.5784      | 525.2931        |
| 789.3419       | 8  | S 8  | 886.5151       | 443.7614        |
| 936.4103       | 9  | F 7  | 799.4830       | 400.2454        |
| 1035.4787      | 10 | V 6  | 652.4146       | 326.7112        |
| 1106.5159      | 11 | A 5  | 553.3462       | 277.1770        |
| 1219.5999      | 12 | L 4  | 482.3091       | 241.6585        |
| 1316.6527      | 13 | P 3  | 369.2250       | 185.1164        |
| 1413.7055      | 14 | P 2  | 272.1723       | 136.5900        |
|                | 15 | R 1  | 175.1195       | 88.0637         |

N-term:+43.02

SGCQAQGDCCSRPCGAQDKEHPR, MH+ 2731.1192, m/z 683.5353  
 H OS G28 P150811 220811-s1.01786.01786.4.dta

scan 1786; 2.9e+000

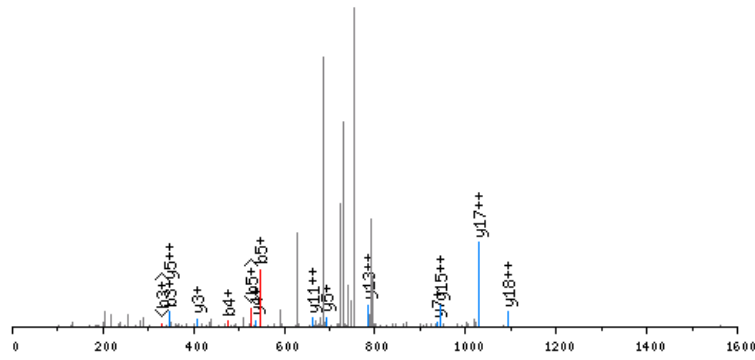

click image to zoom in; click top corners to zoom out [\[precursor±\]](#)

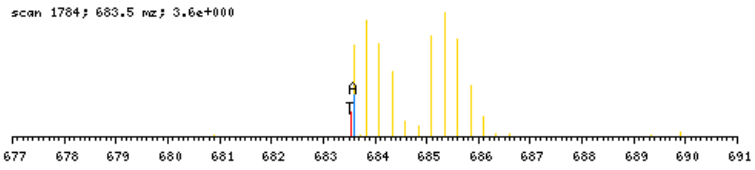

zoomed in precursor plot; T=theoretical m/z, A=acquired m/z

X-range:

-

MassTol: Y-zoom:

MassType:

AVG  MONO

Axis:

1  2

Label:

I  M  -

Ions:

a  +  2+  3+

b  +  2+  3+

c  +  2+  3+

x  +  2+  3+

y  +  2+  3+

z  +  2+  3+

hide H<sub>2</sub>O/NH<sub>3</sub>

zoom 112-122

GO

| b <sup>+</sup> | #  | AA # | y <sup>+</sup> | y <sup>2+</sup> |
|----------------|----|------|----------------|-----------------|
| 130.0504       | 1  | S 23 |                |                 |
| 187.0719       | 2  | G 22 | 2602.0766      | 1301.5422       |
| 347.1025       | 3  | C 21 | 2545.0551      | 1273.0315       |
| 475.1611       | 4  | Q 20 | 2385.0245      | 1193.0162       |
| 546.1982       | 5  | A 19 | 2256.9660      | 1128.9869       |
| 674.2568       | 6  | Q 18 | 2185.9289      | 1093.4683       |
| 731.2782       | 7  | G 17 | 2057.8703      | 1029.4391       |
| 846.3052       | 8  | D 16 | 2000.8488      | 1000.9283       |
| 1006.3358      | 9  | C 15 | 1885.8219      | 943.4148        |
| 1166.3664      | 10 | C 14 | 1725.7913      | 863.3995        |
| 1253.3984      | 11 | S 13 | 1565.7607      | 783.3842        |
| 1409.4995      | 12 | R 12 | 1478.7286      | 739.8682        |
| 1506.5523      | 13 | P 11 | 1322.6275      | 661.8177        |
| 1666.5829      | 14 | C 10 | 1225.5748      | 613.2913        |
| 1723.6043      | 15 | G 9  | 1065.5442      | 533.2760        |
| 1794.6414      | 16 | A 8  | 1008.5227      | 504.7653        |
| 1922.7000      | 17 | Q 7  | 937.4856       | 469.2467        |
| 2037.7270      | 18 | D 6  | 809.4270       | 405.2174        |
| 2193.8533      | 19 | K 5  | 694.4001       | 347.7039        |
| 2322.8959      | 20 | E 4  | 538.2738       | 269.6408        |
| 2459.9548      | 21 | H 3  | 409.2312       | 205.1195        |
| 2557.0075      | 22 | P 2  | 272.1723       | 136.5900        |
|                | 23 | R 1  | 175.1195       | 88.0637         |

N-term:+43.02 C(3):+160.03  
 C(9):+160.03 C(10):+160.03  
 C(14):+160.03 K(19):+156.13

SGEDGPAAGPGAAAAAAR, MH+ 1680.7942, m/z 560.9362  
 H OS G29 P150811 220811-s1.03437.03437.3.dta

scan 3437; 1.2e+000

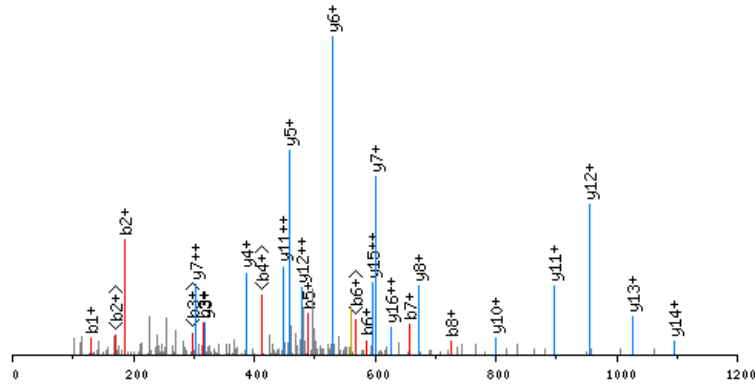

click image to zoom in; click top corners to zoom out [precursor±]

scan 3435; 560.9 m/z; 2.4e+001

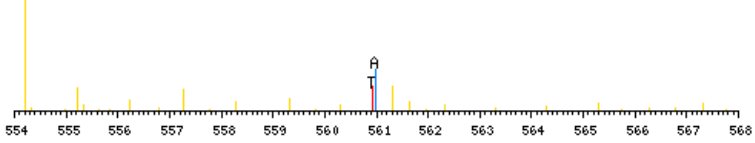

zoomed in precursor plot; T=theoretical m/z, A=acquired m/z

X-range:

-

MassTol: Y-zoom:

MassType:

AVG  MONO

Axis:

1  2

Label:

I  M  -

Ions:

a  +  2+  3+

b  +  2+  3+

c  +  2+  3+

x  +  2+  3+

y  +  2+  3+

z  +  2+  3+

hide H<sub>2</sub>O/NH<sub>3</sub>

zoom 112-122

GO

| b <sup>+</sup> | #  | AA | #  | y <sup>+</sup> | y <sup>2+</sup> |
|----------------|----|----|----|----------------|-----------------|
| 130.0504       | 1  | S  | 20 |                |                 |
| 187.0719       | 2  | G  | 19 | 1551.7516      | 776.3797        |
| 316.1145       | 3  | E  | 18 | 1494.7301      | 747.8690        |
| 431.1414       | 4  | D  | 17 | 1365.6875      | 683.3477        |
| 488.1629       | 5  | G  | 16 | 1250.6606      | 625.8342        |
| 585.2157       | 6  | P  | 15 | 1193.6391      | 597.3235        |
| 656.2528       | 7  | A  | 14 | 1096.5863      | 548.7971        |
| 727.2899       | 8  | A  | 13 | 1025.5492      | 513.2785        |
| 784.3113       | 9  | G  | 12 | 954.5121       | 477.7600        |
| 881.3641       | 10 | P  | 11 | 897.4906       | 449.2492        |
| 938.3856       | 11 | G  | 10 | 800.4379       | 400.7228        |
| 1009.4227      | 12 | A  | 9  | 743.4164       | 372.2121        |
| 1080.4598      | 13 | A  | 8  | 672.3793       | 336.6936        |
| 1151.4969      | 14 | A  | 7  | 601.3422       | 301.1750        |
| 1222.5340      | 15 | A  | 6  | 530.3051       | 265.6564        |
| 1293.5711      | 16 | A  | 5  | 459.2680       | 230.1379        |
| 1364.6083      | 17 | A  | 4  | 388.2308       | 194.6193        |
| 1435.6454      | 18 | A  | 3  | 317.1937       | 159.1008        |
| 1506.6825      | 19 | A  | 2  | 246.1566       | 123.5822        |
|                | 20 | R  | 1  | 175.1195       | 88.0637         |

N-term:+43.02

SGEGENPASKPTPVQDVQDGR, MH+ 2301.1172, m/z 767.7106  
 H OS G24 P150811 220811-s1.02859.02859.3.dta

scan 2859; 3.8e+000

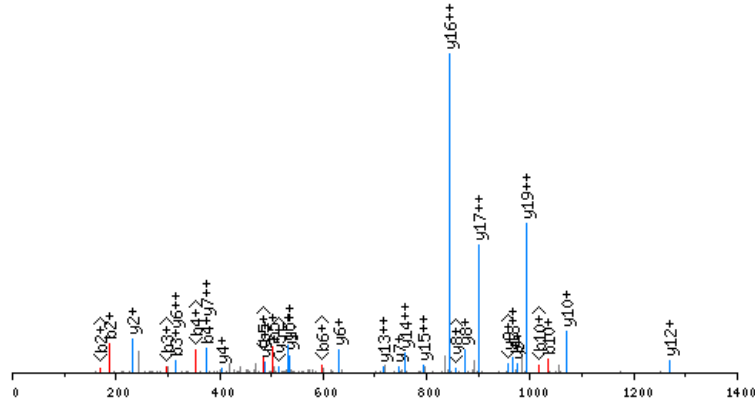

click image to zoom in; click top corners to zoom out [precursor±]

scan 2857; 767.7 mz; 8.6e+000

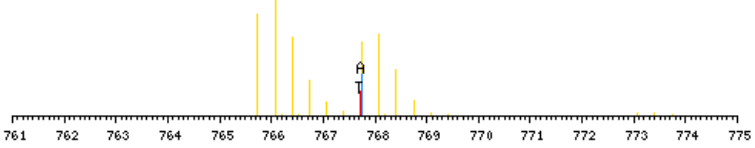

zoomed in precursor plot; T=theoretical m/z, A=acquired m/z

X-range:

-

MassTol: Y-zoom:

MassType:

AVG  MONO

Axis:

1  2

Label:

I  M  -

Ions:

a  +  2+  3+

b  +  2+  3+

c  +  2+  3+

x  +  2+  3+

y  +  2+  3+

z  +  2+  3+

hide H<sub>2</sub>O/NH<sub>3</sub>

zoom 112-122

GO

| b <sup>+</sup> | #  | AA | #  | y <sup>+</sup> | y <sup>2+</sup> |
|----------------|----|----|----|----------------|-----------------|
| 130.0504       | 1  | S  | 22 |                |                 |
| 187.0719       | 2  | G  | 21 | 2172.0746      | 1086.5412       |
| 316.1145       | 3  | E  | 20 | 2115.0531      | 1058.0305       |
| 373.1359       | 4  | G  | 19 | 1986.0105      | 993.5092        |
| 502.1785       | 5  | E  | 18 | 1928.9890      | 964.9984        |
| 616.2215       | 6  | N  | 17 | 1799.9464      | 900.4771        |
| 713.2742       | 7  | P  | 16 | 1685.9035      | 843.4557        |
| 784.3113       | 8  | A  | 15 | 1588.8507      | 794.9293        |
| 871.3434       | 9  | S  | 14 | 1517.8136      | 759.4107        |
| 1033.5015      | 10 | K  | 13 | 1430.7816      | 715.8947        |
| 1130.5542      | 11 | P  | 12 | 1268.6235      | 634.8157        |
| 1231.6019      | 12 | T  | 11 | 1171.5707      | 586.2893        |
| 1328.6547      | 13 | P  | 10 | 1070.5231      | 535.7654        |
| 1427.7231      | 14 | V  | 9  | 973.4703       | 487.2391        |
| 1555.7817      | 15 | Q  | 8  | 874.4019       | 437.7049        |
| 1670.8086      | 16 | D  | 7  | 746.3433       | 373.6756        |
| 1769.8770      | 17 | V  | 6  | 631.3164       | 316.1621        |
| 1897.9356      | 18 | Q  | 5  | 532.2479       | 266.6279        |
| 1954.9571      | 19 | G  | 4  | 404.1894       | 202.5986        |
| 2069.9840      | 20 | D  | 3  | 347.1679       | 174.0879        |
| 2127.0055      | 21 | G  | 2  | 232.1410       | 116.5744        |
|                | 22 | R  | 1  | 175.1195       | 88.0637         |

N-term:+43.02 K(10):+162.16



SGGKYVDSEGHLYTVPIR, MH+ 2048.0453, m/z 683.3533  
 H OS G26 P150811 220811-s1.04584.04584.3.dta

X-range:

-

MassTol: Y-zoom:

MassType:

AVG  MONO

Axis:

1  2

Label:

I  M  -

Ions:

a  +  2+  3+

b  +  2+  3+

c  +  2+  3+

x  +  2+  3+

y  +  2+  3+

z  +  2+  3+

hide H<sub>2</sub>O/NH<sub>3</sub>

zoom 112-122

GO

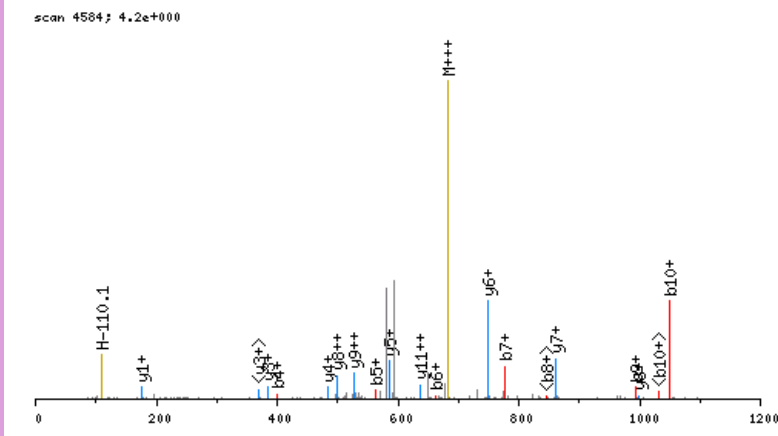

click image to zoom in; click top corners to zoom out [\[precursor±\]](#)

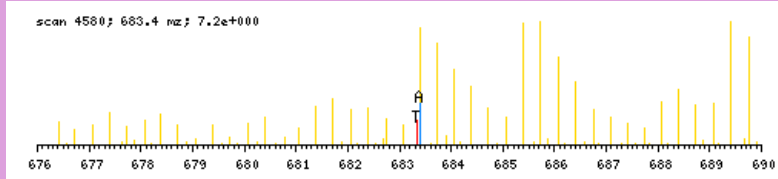

zoomed in precursor plot; T=theoretical m/z, A=acquired m/z

| b <sup>+</sup> | #  | AA # | y <sup>+</sup> | y <sup>2+</sup> |
|----------------|----|------|----------------|-----------------|
| 130.0504       | 1  | S 18 |                |                 |
| 187.0719       | 2  | G 17 | 1919.0027      | 960.0053        |
| 244.0934       | 3  | G 16 | 1861.9813      | 931.4945        |
| 400.2197       | 4  | K 15 | 1804.9598      | 902.9838        |
| 563.2830       | 5  | Y 14 | 1648.8335      | 824.9207        |
| 662.3514       | 6  | V 13 | 1485.7702      | 743.3890        |
| 777.3783       | 7  | D 12 | 1386.7018      | 693.8548        |
| 864.4104       | 8  | S 11 | 1271.6748      | 636.3413        |
| 993.4530       | 9  | E 10 | 1184.6428      | 592.8253        |
| 1050.4744      | 10 | G 9  | 1055.6002      | 528.3040        |
| 1187.5333      | 11 | H 8  | 998.5787       | 499.7933        |
| 1300.6174      | 12 | L 7  | 861.5198       | 431.2638        |
| 1463.6807      | 13 | Y 6  | 748.4357       | 374.7218        |
| 1564.7284      | 14 | T 5  | 585.3724       | 293.1901        |
| 1663.7968      | 15 | V 4  | 484.3247       | 242.6663        |
| 1760.8496      | 16 | P 3  | 385.2563       | 193.1321        |
| 1873.9337      | 17 | I 2  | 288.2036       | 144.6057        |
|                | 18 | R 1  | 175.1195       | 88.0637         |

N-term:+43.02 K(4):+156.13

SGGSTMYPGIADR, MH+ 1353.6109, m/z 677.3091  
 H OS G25 P150811 220811-s1.04046.04046.2.dta

X-range:

-

MassTol: Y-zoom:

MassType:

AVG  MONO

Axis:

1  2

Label:

I  M  -

Ions:

a  +  2+  3+

b  +  2+  3+

c  +  2+  3+

x  +  2+  3+

y  +  2+  3+

z  +  2+  3+

hide H<sub>2</sub>O/NH<sub>3</sub>

zoom 112-122

GO

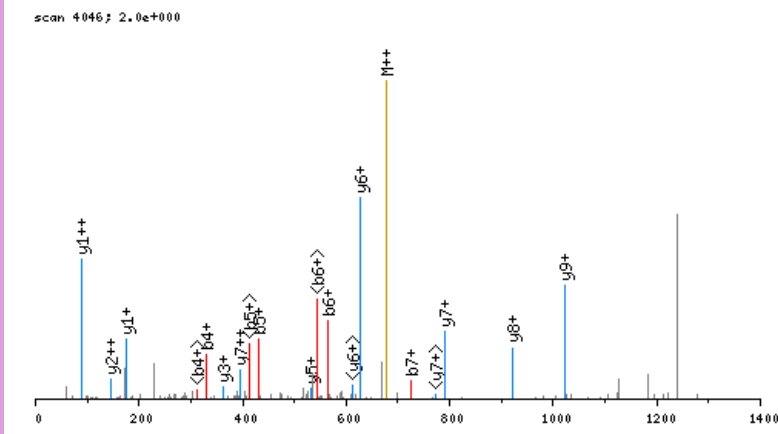

click image to zoom in; click top corners to zoom out [\[precursor±\]](#)

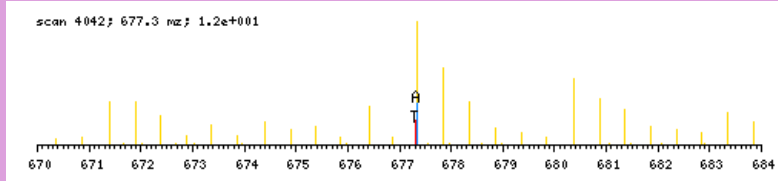

zoomed in precursor plot; T=theoretical m/z, A=acquired m/z

| b <sup>+</sup> | #  | AA # | y <sup>+</sup> | y <sup>2+</sup> |
|----------------|----|------|----------------|-----------------|
| 130.0504       | 1  | S 13 |                |                 |
| 187.0719       | 2  | G 12 | 1224.5683      | 612.7881        |
| 244.0934       | 3  | G 11 | 1167.5468      | 584.2773        |
| 331.1254       | 4  | S 10 | 1110.5254      | 555.7666        |
| 432.1731       | 5  | T 9  | 1023.4933      | 512.2506        |
| 563.2135       | 6  | M 8  | 922.4457       | 461.7267        |
| 726.2769       | 7  | Y 7  | 791.4052       | 396.2065        |
| 823.3296       | 8  | P 6  | 628.3418       | 314.6748        |
| 880.3511       | 9  | G 5  | 531.2891       | 266.1485        |
| 993.4352       | 10 | I 4  | 474.2676       | 237.6377        |
| 1064.4723      | 11 | A 3  | 361.1836       | 181.0957        |
| 1179.4992      | 12 | D 2  | 290.1464       | 145.5771        |
|                | 13 | R 1  | 175.1195       | 88.0637         |

N-term:+43.02

SGQPGVGPAGVR, MH+ 1220.6388, m/z 610.8230  
 H OS G25 P150811 220811-s1.02749.02749.2.dta

X-range:

-

MassTol: Y-zoom:

MassType:

AVG  MONO

Axis:

1  2

Label:

I  M  -

Ions:

a  +  2+  3+

b  +  2+  3+

c  +  2+  3+

x  +  2+  3+

y  +  2+  3+

z  +  2+  3+

hide H<sub>2</sub>O/NH<sub>3</sub>

zoom 112-122

GO

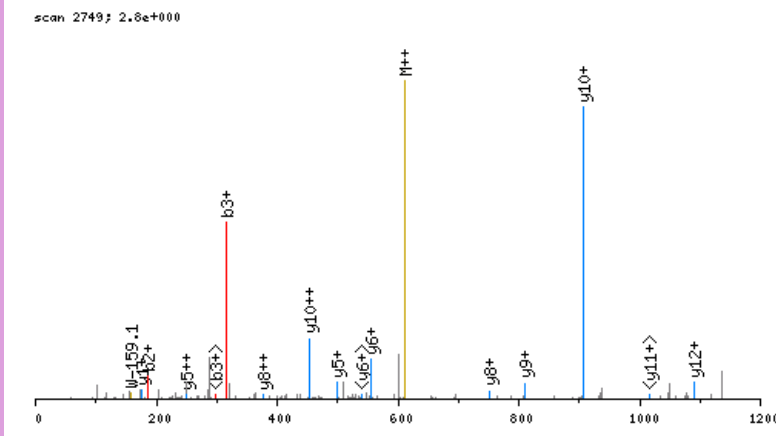

click image to zoom in; click top corners to zoom out [\[precursor±\]](#)

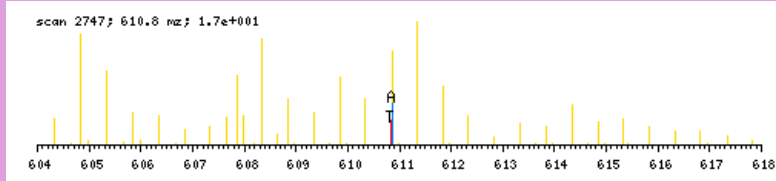

zoomed in precursor plot; T=theoretical m/z, A=acquired m/z

| b <sup>+</sup> | #  | AA # | y <sup>+</sup> | y <sup>2+</sup> |
|----------------|----|------|----------------|-----------------|
| 130.0504       | 1  | S 13 |                |                 |
| 187.0719       | 2  | G 12 | 1091.5962      | 546.3020        |
| 315.1305       | 3  | Q 11 | 1034.5747      | 517.7913        |
| 412.1832       | 4  | P 10 | 906.5161       | 453.7620        |
| 469.2047       | 5  | G 9  | 809.4634       | 405.2356        |
| 566.2575       | 6  | P 8  | 752.4419       | 376.7249        |
| 665.3259       | 7  | V 7  | 655.3891       | 328.1985        |
| 722.3473       | 8  | G 6  | 556.3207       | 278.6643        |
| 819.4001       | 9  | P 5  | 499.2993       | 250.1535        |
| 890.4372       | 10 | A 4  | 402.2465       | 201.6272        |
| 947.4587       | 11 | G 3  | 331.2094       | 166.1086        |
| 1046.5271      | 12 | V 2  | 274.1879       | 137.5979        |
|                | 13 | R 1  | 175.1195       | 88.0637         |

N-term:+43.02

SGSSSVAAMKKVVQQLR, MH+ 1874.0534, m/z 625.3560  
 H OS G26 P150811 220811-s1.05476.05476.3.dta

scan 5476; 7.7e+000

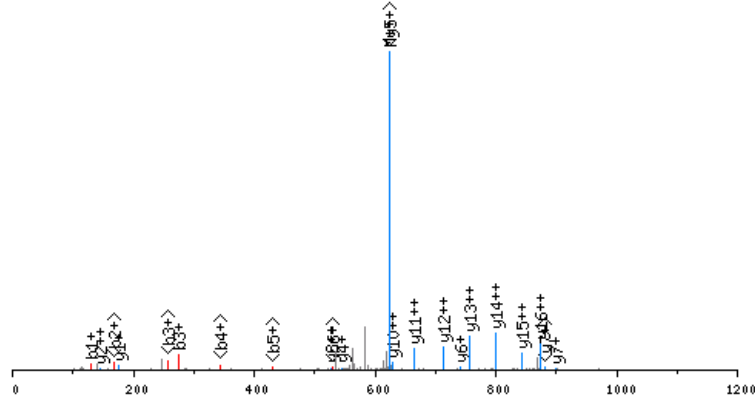

click image to zoom in; click top corners to zoom out [precursor±]

scan 5475; 625.4 mz; 1.3e+001

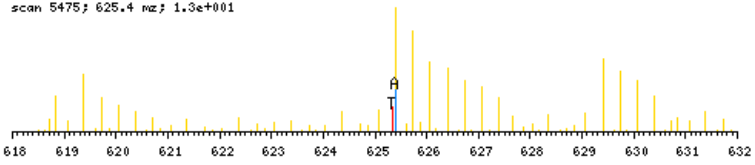

zoomed in precursor plot; T=theoretical m/z, A=acquired m/z

X-range:

-

MassTol: Y-zoom:

MassType:

AVG  MONO

Axis:

1  2

Label:

I  M  -

Ions:

a  +  2+  3+

b  +  2+  3+

c  +  2+  3+

x  +  2+  3+

y  +  2+  3+

z  +  2+  3+

hide H<sub>2</sub>O/NH<sub>3</sub>

zoom 112-122

GO

| b <sup>+</sup> | #  | AA | #  | y <sup>+</sup> | y <sup>2+</sup> |
|----------------|----|----|----|----------------|-----------------|
| 130.0504       | 1  | S  | 17 |                |                 |
| 187.0719       | 2  | G  | 16 | 1745.0108      | 873.0093        |
| 274.1039       | 3  | S  | 15 | 1687.9894      | 844.4986        |
| 361.1359       | 4  | S  | 14 | 1600.9573      | 800.9826        |
| 448.1680       | 5  | S  | 13 | 1513.9253      | 757.4666        |
| 547.2364       | 6  | V  | 12 | 1426.8933      | 713.9505        |
| 618.2735       | 7  | A  | 11 | 1327.8249      | 664.4163        |
| 689.3106       | 8  | A  | 10 | 1256.7877      | 628.8978        |
| 820.3511       | 9  | M  | 9  | 1185.7506      | 593.3792        |
| 976.4774       | 10 | K  | 8  | 1054.7101      | 527.8590        |
| 1132.6037      | 11 | K  | 7  | 898.5838       | 449.7958        |
| 1231.6721      | 12 | V  | 6  | 742.4575       | 371.7327        |
| 1330.7405      | 13 | V  | 5  | 643.3891       | 322.1985        |
| 1458.7991      | 14 | Q  | 4  | 544.3207       | 272.6643        |
| 1586.8577      | 15 | Q  | 3  | 416.2621       | 208.6350        |
| 1699.9418      | 16 | L  | 2  | 288.2036       | 144.6057        |
|                | 17 | R  | 1  | 175.1195       | 88.0637         |

N-term:+43.02 K(10):+156.13  
 K(11):+156.13

SGVQVADEVCR, MH+ 1261.5846, m/z 631.2960  
 H OS G29 P150811 220811-s1.03439.03439.2.dta

scan 3439; 1.2e+000

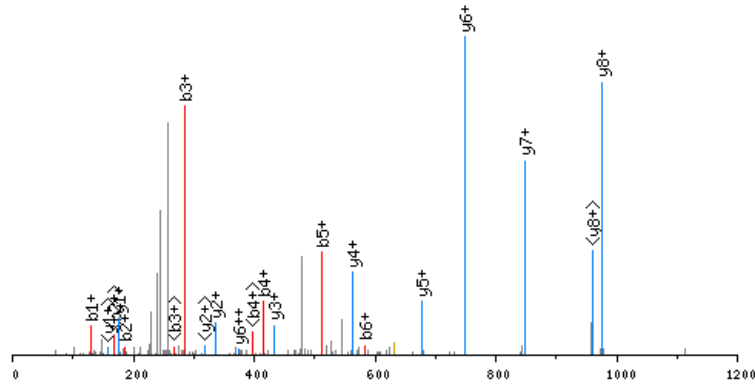

click image to zoom in; click top corners to zoom out [\[precursor±\]](#)

scan 3435; 631.3 m/z; 3.9e+000

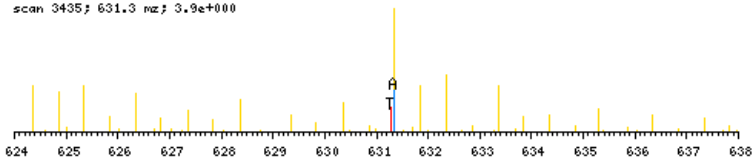

zoomed in precursor plot; T=theoretical m/z, A=acquired m/z

X-range:

-

MassTol: Y-zoom:

MassType:

AVG  MONO

Axis:

1  2

Label:

I  M  -

Ions:

a  +  2+  3+

b  +  2+  3+

c  +  2+  3+

x  +  2+  3+

y  +  2+  3+

z  +  2+  3+

hide H<sub>2</sub>O/NH<sub>3</sub>

zoom 112-122

GO

| b <sup>+</sup> | #  | AA # | y <sup>+</sup> | y <sup>2+</sup> |
|----------------|----|------|----------------|-----------------|
| 130.0504       | 1  | S 11 |                |                 |
| 187.0719       | 2  | G 10 | 1132.5420      | 566.7749        |
| 286.1403       | 3  | V 9  | 1075.5206      | 538.2642        |
| 414.1989       | 4  | Q 8  | 976.4522       | 488.7300        |
| 513.2673       | 5  | V 7  | 848.3936       | 424.7007        |
| 584.3044       | 6  | A 6  | 749.3252       | 375.1665        |
| 699.3314       | 7  | D 5  | 678.2881       | 339.6479        |
| 828.3739       | 8  | E 4  | 563.2611       | 282.1345        |
| 927.4424       | 9  | V 3  | 434.2185       | 217.6132        |
| 1087.4730      | 10 | C 2  | 335.1501       | 168.0790        |
|                | 11 | R 1  | 175.1195       | 88.0637         |

N-term:+43.02 C(10):+160.03

SGYTPDEKLR, MH+ 1235.6272, m/z 618.3173  
 H OS G25 P150811 220811-s1.03373.03373.2.dta

X-range:

-

MassTol: Y-zoom:

MassType:

AVG  MONO

Axis:

1  2

Label:

I  M  -

Ions:

a  +  2+  3+

b  +  2+  3+

c  +  2+  3+

x  +  2+  3+

y  +  2+  3+

z  +  2+  3+

hide H<sub>2</sub>O/NH<sub>3</sub>

zoom 112-122

GO

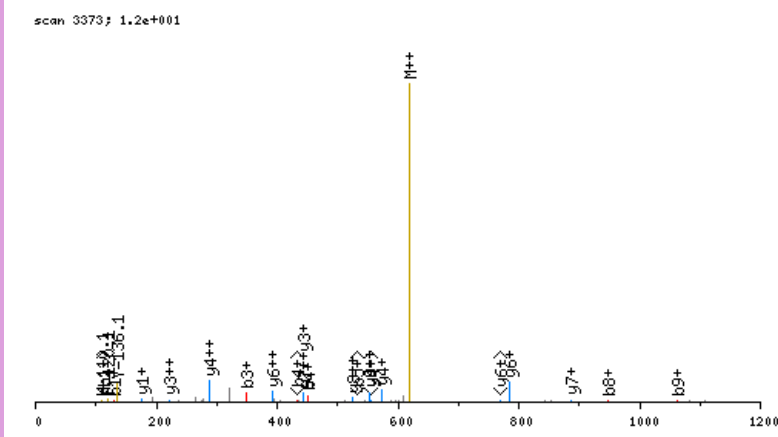

click image to zoom in; click top corners to zoom out [\[precursor±\]](#)

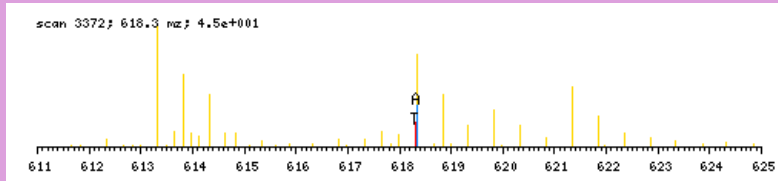

zoomed in precursor plot; T=theoretical m/z, A=acquired m/z

| b <sup>+</sup> | #  | AA # | y <sup>+</sup> | y <sup>2+</sup> |
|----------------|----|------|----------------|-----------------|
| 130.0504       | 1  | S    | 10             |                 |
| 187.0719       | 2  | G    | 9              | 1106.5846       |
| 350.1352       | 3  | Y    | 8              | 1049.5632       |
| 451.1829       | 4  | T    | 7              | 886.4998        |
| 548.2357       | 5  | P    | 6              | 785.4522        |
| 663.2626       | 6  | D    | 5              | 688.3994        |
| 792.3052       | 7  | E    | 4              | 573.3725        |
| 948.4315       | 8  | K    | 3              | 444.3299        |
| 1061.5156      | 9  | L    | 2              | 288.2036        |
|                | 10 | R    | 1              | 175.1195        |

N-term:+43.02 K(8):+156.13

SHGFTKEEVAEFQAAFNR, MH+ 2138.0307, m/z 535.2631  
 H OS G27 P150811 220811-s1.06945.06945.4.dta

X-range:

-

MassTol: Y-zoom:

MassType:

AVG  MONO

Axis:

1  2

Label:

I  M  -

Ions:

a  +  2+  3+

b  +  2+  3+

c  +  2+  3+

x  +  2+  3+

y  +  2+  3+

z  +  2+  3+

hide H<sub>2</sub>O/NH<sub>3</sub>

zoom 112-122

GO

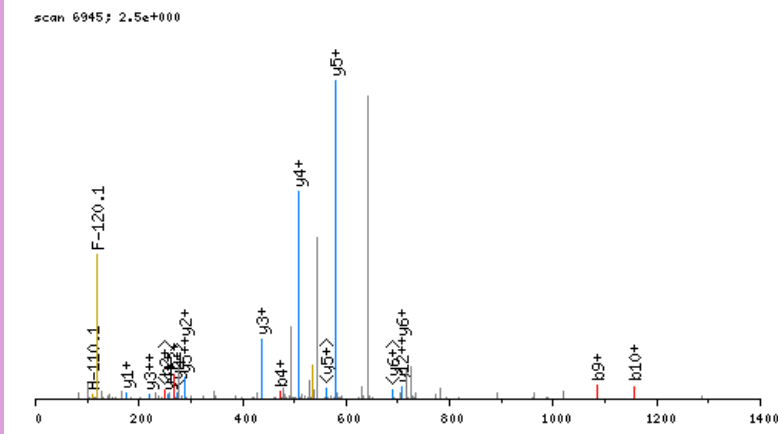

click image to zoom in; click top corners to zoom out [\[precursor±\]](#)

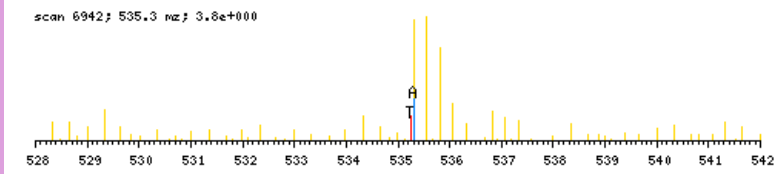

zoomed in precursor plot; T=theoretical m/z, A=acquired m/z

| b <sup>+</sup> | #  | AA | #  | y <sup>+</sup> | y <sup>2+</sup> |
|----------------|----|----|----|----------------|-----------------|
| 130.0504       | 1  | S  | 18 |                |                 |
| 267.1093       | 2  | H  | 17 | 2008.9881      | 1004.9980       |
| 324.1308       | 3  | G  | 16 | 1871.9292      | 936.4685        |
| 471.1992       | 4  | F  | 15 | 1814.9078      | 907.9578        |
| 572.2469       | 5  | T  | 14 | 1667.8393      | 834.4236        |
| 728.3732       | 6  | K  | 13 | 1566.7917      | 783.8997        |
| 857.4158       | 7  | E  | 12 | 1410.6654      | 705.8366        |
| 986.4584       | 8  | E  | 11 | 1281.6228      | 641.3153        |
| 1085.5268      | 9  | V  | 10 | 1152.5802      | 576.7940        |
| 1156.5639      | 10 | A  | 9  | 1053.5118      | 527.2598        |
| 1285.6065      | 11 | E  | 8  | 982.4747       | 491.7412        |
| 1432.6749      | 12 | F  | 7  | 853.4321       | 427.2199        |
| 1560.7335      | 13 | Q  | 6  | 706.3636       | 353.6857        |
| 1631.7706      | 14 | A  | 5  | 578.3051       | 289.6564        |
| 1702.8077      | 15 | A  | 4  | 507.2680       | 254.1379        |
| 1849.8761      | 16 | F  | 3  | 436.2308       | 218.6193        |
| 1963.9191      | 17 | N  | 2  | 289.1624       | 145.0851        |
|                | 18 | R  | 1  | 175.1195       | 88.0637         |

N-term:+43.02 K(6):+156.13

SHPSWLPPKSTGEPLGHVPAR, MH+ 2326.2521, m/z 582.3185  
 H OS G27 P150811 220811-s1.05240.05240.4.dta

X-range:

-

MassTol: Y-zoom:

MassType:

AVG  MONO

Axis:

1  2

Label:

I  M  -

Ions:

a  +  2+  3+

b  +  2+  3+

c  +  2+  3+

x  +  2+  3+

y  +  2+  3+

z  +  2+  3+

hide H<sub>2</sub>O/NH<sub>3</sub>

zoom 112-122

GO

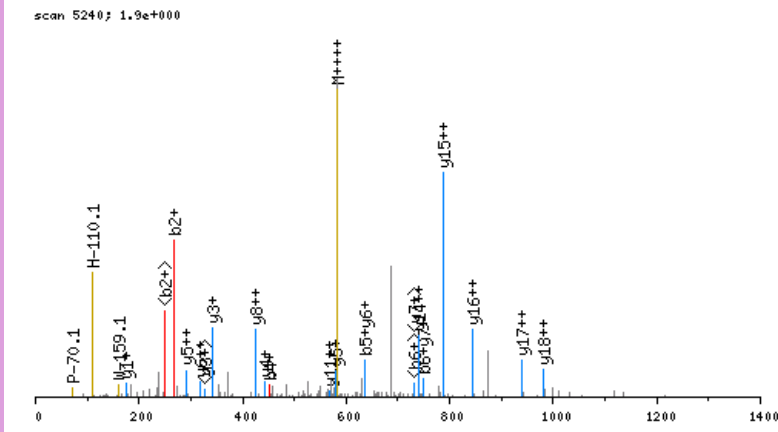

click image to zoom in; click top corners to zoom out [precursor±]

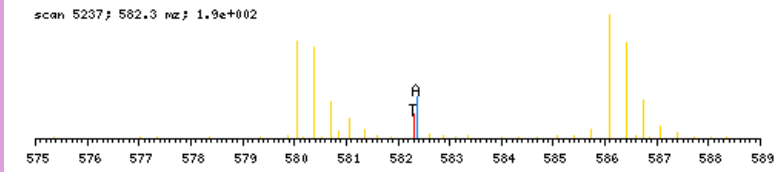

zoomed in precursor plot; T=theoretical m/z, A=acquired m/z

| b <sup>+</sup> | #  | AA # | y <sup>+</sup> | y <sup>2+</sup> |
|----------------|----|------|----------------|-----------------|
| 130.0504       | 1  | S 21 |                |                 |
| 267.1093       | 2  | H 20 | 2197.2095      | 1099.1086       |
| 364.1621       | 3  | P 19 | 2060.1506      | 1030.5792       |
| 451.1941       | 4  | S 18 | 1963.0978      | 982.0528        |
| 637.2734       | 5  | W 17 | 1876.0658      | 938.5368        |
| 750.3575       | 6  | L 16 | 1689.9865      | 845.4971        |
| 847.4103       | 7  | P 15 | 1576.9024      | 788.9551        |
| 944.4630       | 8  | P 14 | 1479.8496      | 740.4287        |
| 1106.6211      | 9  | K 13 | 1382.7969      | 691.9023        |
| 1193.6532      | 10 | S 12 | 1220.6388      | 610.8233        |
| 1294.7008      | 11 | T 11 | 1133.6067      | 567.3073        |
| 1351.7223      | 12 | G 10 | 1032.5591      | 516.7834        |
| 1480.7649      | 13 | E 9  | 975.5376       | 488.2727        |
| 1577.8177      | 14 | P 8  | 846.4950       | 423.7514        |
| 1690.9017      | 15 | L 7  | 749.4422       | 375.2250        |
| 1747.9232      | 16 | G 6  | 636.3582       | 318.6830        |
| 1884.9821      | 17 | H 5  | 579.3367       | 290.1723        |
| 1984.0505      | 18 | V 4  | 442.2778       | 221.6428        |
| 2081.1033      | 19 | P 3  | 343.2094       | 172.1086        |
| 2152.1404      | 20 | A 2  | 246.1566       | 123.5822        |
|                | 21 | R 1  | 175.1195       | 88.0637         |

N-term:+43.02 K(9):+162.16



SHQTGIQASEDVKEIFAR, MH+ 2086.0570, m/z 696.0238  
 H OS G26 P150811 220811-s1.05456.05456.3.dta

X-range:

-

MassTol: Y-zoom:

MassType:

AVG  MONO

Axis:

1  2

Label:

I  M  -

Ions:

a  +  2+  3+

b  +  2+  3+

c  +  2+  3+

x  +  2+  3+

y  +  2+  3+

z  +  2+  3+

hide H<sub>2</sub>O/NH<sub>3</sub>

zoom 112-122

GO

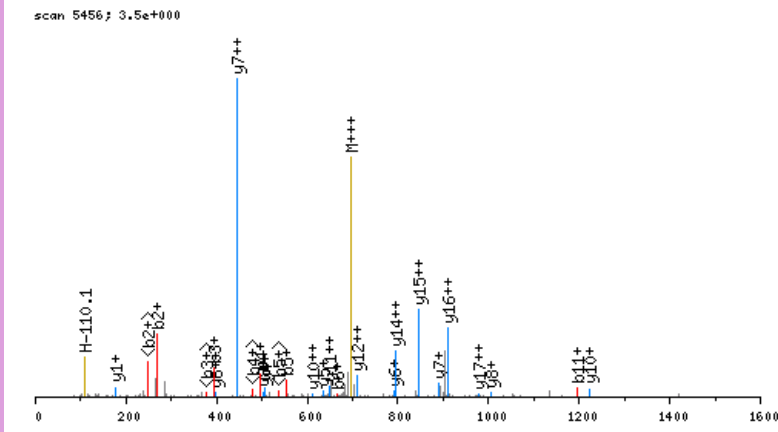

click image to zoom in; click top corners to zoom out [\[precursor±\]](#)

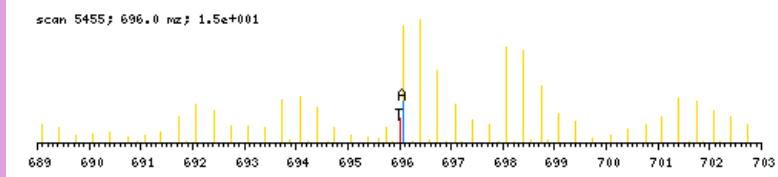

zoomed in precursor plot; T=theoretical m/z, A=acquired m/z

| b <sup>+</sup> | #  | AA # | y <sup>+</sup> | y <sup>2+</sup> |
|----------------|----|------|----------------|-----------------|
| 130.0504       | 1  | S 18 |                |                 |
| 267.1093       | 2  | H 17 | 1957.0144      | 979.0111        |
| 395.1679       | 3  | Q 16 | 1819.9554      | 910.4816        |
| 496.2156       | 4  | T 15 | 1691.8969      | 846.4523        |
| 553.2371       | 5  | G 14 | 1590.8492      | 795.9285        |
| 666.3211       | 6  | I 13 | 1533.8277      | 767.4178        |
| 794.3797       | 7  | Q 12 | 1420.7437      | 710.8757        |
| 865.4168       | 8  | A 11 | 1292.6851      | 646.8465        |
| 952.4488       | 9  | S 10 | 1221.6480      | 611.3279        |
| 1081.4914      | 10 | E 9  | 1134.6159      | 567.8119        |
| 1196.5184      | 11 | D 8  | 1005.5733      | 503.2906        |
| 1295.5868      | 12 | V 7  | 890.5464       | 445.7771        |
| 1451.7131      | 13 | K 6  | 791.4780       | 396.2429        |
| 1580.7557      | 14 | E 5  | 635.3517       | 318.1798        |
| 1693.8398      | 15 | I 4  | 506.3091       | 253.6585        |
| 1840.9082      | 16 | F 3  | 393.2250       | 197.1164        |
| 1911.9453      | 17 | A 2  | 246.1566       | 123.5822        |
|                | 18 | R 1  | 175.1195       | 88.0637         |

N-term:+43.02 K(13):+156.13

SHTILLVQPTKRPEGR, MH+ 1908.1244, m/z 477.7865  
 H OS G28 P150811 220811-s1.04344.04344.4.dta

X-range:

-

MassTol: Y-zoom:

MassType:

AVG  MONO

Axis:

1  2

Label:

I  M  -

Ions:

a  +  2+  3+

b  +  2+  3+

c  +  2+  3+

x  +  2+  3+

y  +  2+  3+

z  +  2+  3+

hide H<sub>2</sub>O/NH<sub>3</sub>

zoom 112-122

GO

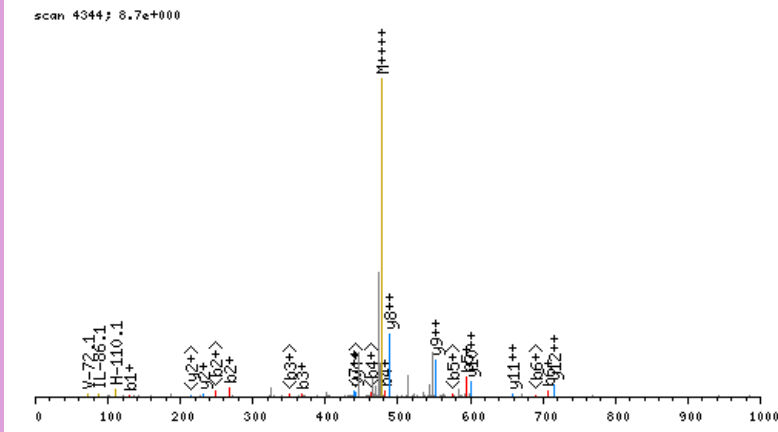

click image to zoom in; click top corners to zoom out [\[precursor±\]](#)

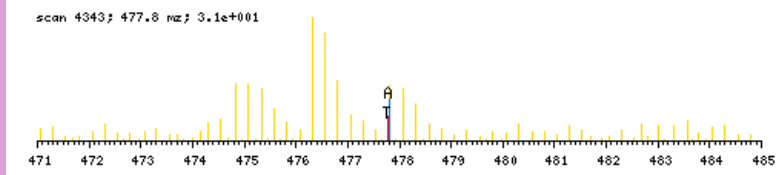

zoomed in precursor plot; T=theoretical m/z, A=acquired m/z

| b <sup>+</sup> | #  | AA # | y <sup>+</sup> | y <sup>2+</sup> |
|----------------|----|------|----------------|-----------------|
| 130.0504       | 1  | S 16 |                |                 |
| 267.1093       | 2  | H 15 | 1779.0817      | 890.0448        |
| 368.1570       | 3  | T 14 | 1642.0228      | 821.5153        |
| 481.2411       | 4  | I 13 | 1540.9752      | 770.9915        |
| 594.3251       | 5  | L 12 | 1427.8911      | 714.4495        |
| 707.4092       | 6  | L 11 | 1314.8070      | 657.9074        |
| 806.4776       | 7  | V 10 | 1201.7230      | 601.3654        |
| 934.5362       | 8  | Q 9  | 1102.6546      | 551.8312        |
| 1031.5890      | 9  | P 8  | 974.5960       | 487.8019        |
| 1132.6366      | 10 | T 7  | 877.5432       | 439.2755        |
| 1294.7947      | 11 | K 6  | 776.4955       | 388.7517        |
| 1450.8959      | 12 | R 5  | 614.3374       | 307.6726        |
| 1547.9486      | 13 | P 4  | 458.2363       | 229.6221        |
| 1676.9912      | 14 | E 3  | 361.1836       | 181.0957        |
| 1734.0127      | 15 | G 2  | 232.1410       | 116.5744        |
|                | 16 | R 1  | 175.1195       | 88.0637         |

N-term:+43.02 K(11):+162.16

SILYVSPHPDAFPSLR, MH+ 1840.9598, m/z 614.3248  
 H OS G24 P150811 220811-s1.04888.04888.3.dta

X-range:

-

MassTol: Y-zoom:

MassType:

AVG  MONO

Axis:

1  2

Label:

I  M  -

Ions:

a  +  2+  3+

b  +  2+  3+

c  +  2+  3+

x  +  2+  3+

y  +  2+  3+

z  +  2+  3+

hide H<sub>2</sub>O/NH<sub>3</sub>

zoom 112-122

GO

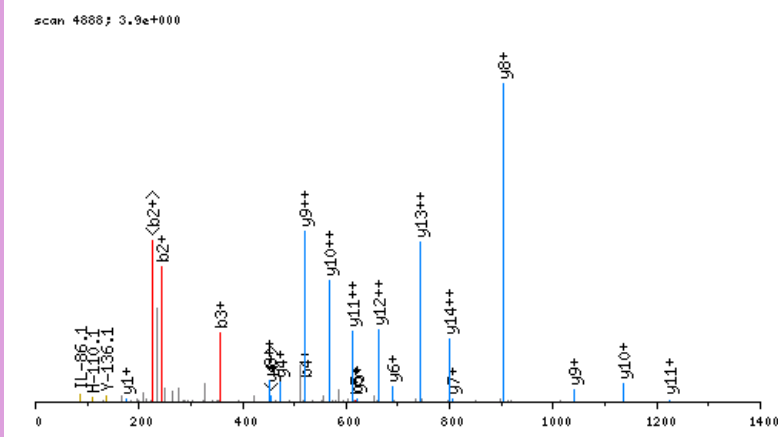

click image to zoom in; click top corners to zoom out [\[precursor±\]](#)

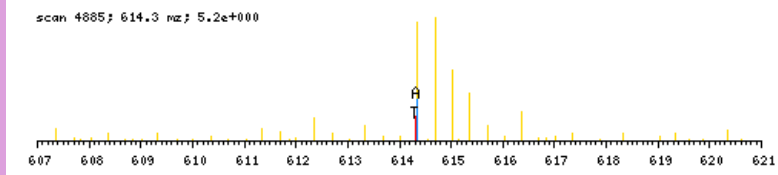

zoomed in precursor plot; T=theoretical m/z, A=acquired m/z

| b <sup>+</sup> | #  | AA # | y <sup>+</sup> | y <sup>2+</sup> |
|----------------|----|------|----------------|-----------------|
| 130.0504       | 1  | S 16 |                |                 |
| 243.1345       | 2  | I 15 | 1711.9172      | 856.4625        |
| 356.2186       | 3  | L 14 | 1598.8331      | 799.9205        |
| 519.2819       | 4  | Y 13 | 1485.7490      | 743.3784        |
| 618.3503       | 5  | V 12 | 1322.6857      | 661.8468        |
| 705.3823       | 6  | S 11 | 1223.6173      | 612.3126        |
| 802.4351       | 7  | P 10 | 1136.5853      | 568.7965        |
| 939.4940       | 8  | H 9  | 1039.5325      | 520.2702        |
| 1036.5468      | 9  | P 8  | 902.4736       | 451.7407        |
| 1151.5737      | 10 | D 7  | 805.4208       | 403.2143        |
| 1222.6108      | 11 | A 6  | 690.3939       | 345.7009        |
| 1369.6792      | 12 | F 5  | 619.3568       | 310.1823        |
| 1466.7320      | 13 | P 4  | 472.2884       | 236.6481        |
| 1553.7640      | 14 | S 3  | 375.2356       | 188.1217        |
| 1666.8481      | 15 | L 2  | 288.2036       | 144.6057        |
|                | 16 | R 1  | 175.1195       | 88.0637         |

N-term:+43.02

X-range:

-

MassTol: Y-zoom:

MassType:

AVG  MONO

Axis:

1  2

Label:

I  M  -

Ions:

a  +  2+  3+

b  +  2+  3+

c  +  2+  3+

x  +  2+  3+

y  +  2+  3+

z  +  2+  3+

hide H<sub>2</sub>O/NH<sub>3</sub>

zoom 112-122

GO

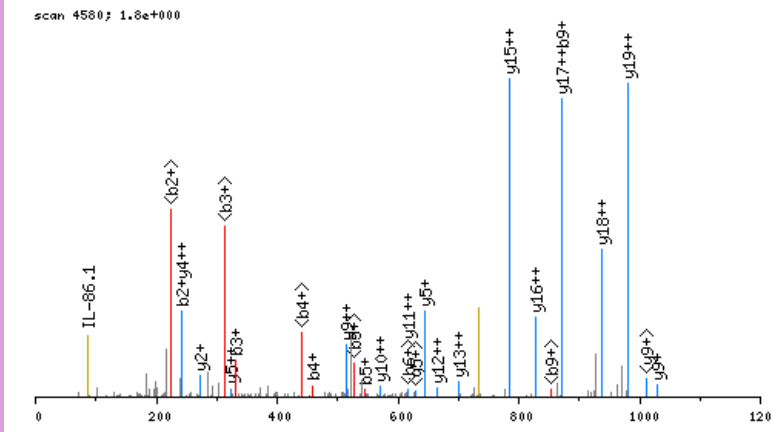

click image to zoom in; click top corners to zoom out [\[precursor±\]](#)

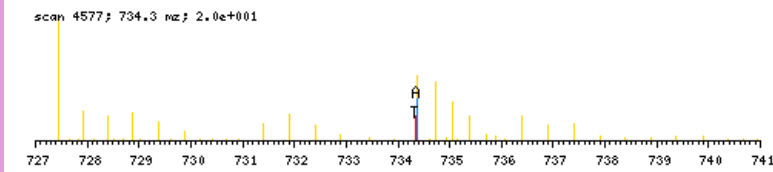

zoomed in precursor plot; T=theoretical m/z, A=acquired m/z

| b <sup>+</sup> | #  | AA # | y <sup>+</sup> | y <sup>2+</sup> |
|----------------|----|------|----------------|-----------------|
| 130.0504       | 1  | S 21 |                |                 |
| 243.1345       | 2  | I 20 | 2071.9830      | 1036.4954       |
| 330.1665       | 3  | S 19 | 1958.8990      | 979.9534        |
| 459.2091       | 4  | E 18 | 1871.8670      | 936.4374        |
| 546.2411       | 5  | S 17 | 1742.8244      | 871.9161        |
| 633.2732       | 6  | S 16 | 1655.7923      | 828.4001        |
| 730.3259       | 7  | P 15 | 1568.7603      | 784.8841        |
| 801.3630       | 8  | A 14 | 1471.7075      | 736.3577        |
| 872.4002       | 9  | A 13 | 1400.6704      | 700.8391        |
| 973.4478       | 10 | T 12 | 1329.6333      | 665.3206        |
| 1060.4799      | 11 | S 11 | 1228.5856      | 614.7967        |
| 1173.5639      | 12 | L 10 | 1141.5536      | 571.2807        |
| 1270.6167      | 13 | P 9  | 1028.4695      | 514.7387        |
| 1384.6596      | 14 | N 8  | 931.4168       | 466.2123        |
| 1441.6811      | 15 | G 7  | 817.3738       | 409.1908        |
| 1556.7080      | 16 | D 6  | 760.3524       | 380.6801        |
| 1716.7386      | 17 | C 5  | 645.3254       | 323.1666        |
| 1773.7601      | 18 | G 4  | 485.2948       | 243.1513        |
| 1929.8612      | 19 | R 3  | 428.2734       | 214.6406        |
| 2026.9140      | 20 | P 2  | 272.1723       | 136.5900        |
|                | 21 | R 1  | 175.1195       | 88.0637         |

N-term:+43.02 C(17):+160.03

SIVVSPILIPENQR, MH+ 1606.9168, m/z 536.3105  
 H OS G24 P150811 220811-s1.04569.04569.3.dta

scan 4569; 2.2e+000

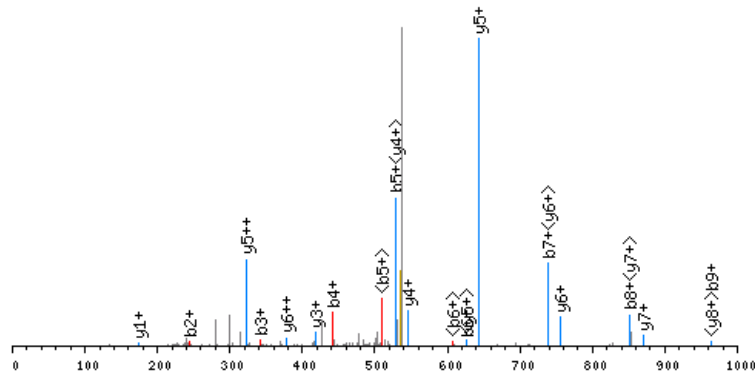

click image to zoom in; click top corners to zoom out [precursor±]

scan 4567; 536.3 m/z; 1.9e+000

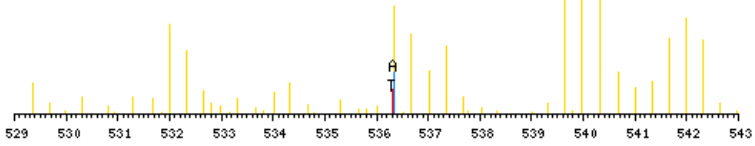

zoomed in precursor plot; T=theoretical m/z, A=acquired m/z

X-range:

-

MassTol: Y-zoom:

MassType:

AVG  MONO

Axis:

1  2

Label:

I  M  -

Ions:

a  +  2+  3+

b  +  2+  3+

c  +  2+  3+

x  +  2+  3+

y  +  2+  3+

z  +  2+  3+

hide H<sub>2</sub>O/NH<sub>3</sub>

zoom 112-122

GO

| b <sup>+</sup> | #  | AA # | y <sup>+</sup> | y <sup>2+</sup> |
|----------------|----|------|----------------|-----------------|
| 130.0504       | 1  | S 14 |                |                 |
| 243.1345       | 2  | I 13 | 1477.8742      | 739.4410        |
| 342.2029       | 3  | V 12 | 1364.7902      | 682.8990        |
| 441.2713       | 4  | V 11 | 1265.7218      | 633.3648        |
| 528.3033       | 5  | S 10 | 1166.6533      | 583.8306        |
| 625.3561       | 6  | P 9  | 1079.6213      | 540.3146        |
| 738.4402       | 7  | I 8  | 982.5686       | 491.7882        |
| 851.5242       | 8  | L 7  | 869.4845       | 435.2462        |
| 964.6083       | 9  | I 6  | 756.4004       | 378.7041        |
| 1061.6611      | 10 | P 5  | 643.3164       | 322.1621        |
| 1190.7037      | 11 | E 4  | 546.2636       | 273.6357        |
| 1304.7466      | 12 | N 3  | 417.2210       | 209.1144        |
| 1432.8052      | 13 | Q 2  | 303.1781       | 152.0930        |
|                | 14 | R 1  | 175.1195       | 88.0637         |

N-term:+43.02

X-range:

-

MassTol: Y-zoom:

MassType:

AVG  MONO

Axis:

1  2

Label:

I  M  -

Ions:

a  +  2+  3+

b  +  2+  3+

c  +  2+  3+

x  +  2+  3+

y  +  2+  3+

z  +  2+  3+

hide H<sub>2</sub>O/NH<sub>3</sub>

zoom 112-122

GO

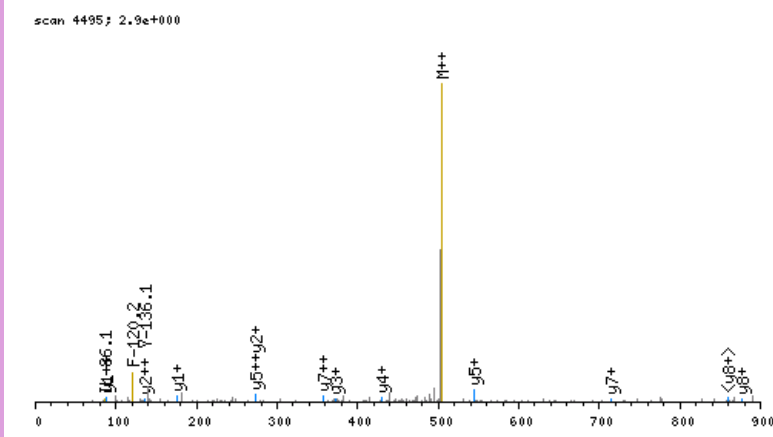

click image to zoom in; click top corners to zoom out [\[precursor±\]](#)

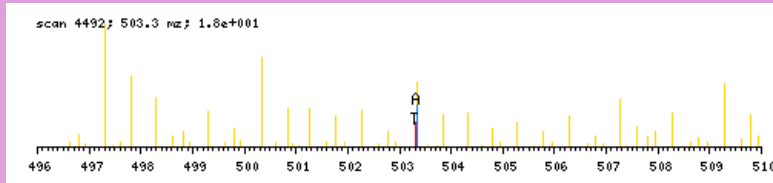

zoomed in precursor plot; T=theoretical m/z, A=acquired m/z

| b <sup>+</sup> | # | AA # | y <sup>+</sup> | y <sup>2+</sup>   |
|----------------|---|------|----------------|-------------------|
| 130.0504       | 1 | S    | 9              |                   |
| 292.2085       | 2 | K    | 8              | 876.5480 438.7779 |
| 349.2300       | 3 | G    | 7              | 714.3899 357.6988 |
| 462.3141       | 4 | L    | 6              | 657.3684 329.1881 |
| 576.3570       | 5 | N    | 5              | 544.2843 272.6461 |
| 633.3784       | 6 | G    | 4              | 430.2414 215.6246 |
| 734.4261       | 7 | T    | 3              | 373.2199 187.1139 |
| 831.4789       | 8 | P    | 2              | 272.1723 136.5900 |
|                | 9 | R    | 1              | 175.1195 88.0637  |

N-term:+43.02 K(2):+162.16

SKSESPKEPEQLR, MH+ 1624.9183, m/z 542.3110  
 H OS G26 P150811 220811-s1.02158.02158.3.dta

scan 2158; 1.1e+002

X-range:

-

MassTol: Y-zoom:

MassType:

AVG  MONO

Axis:

1  2

Label:

I  M  -

Ions:

a  +  2+  3+

b  +  2+  3+

c  +  2+  3+

x  +  2+  3+

y  +  2+  3+

z  +  2+  3+

hide H<sub>2</sub>O/NH<sub>3</sub>

zoom 112-122

GO

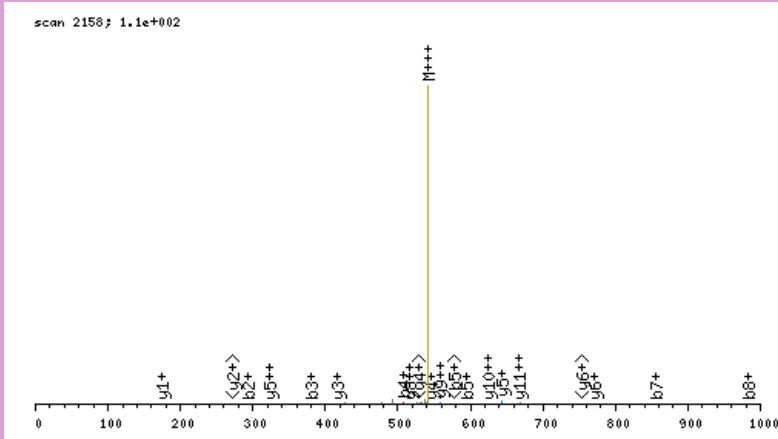

click image to zoom in; click top corners to zoom out [\[precursor±\]](#)

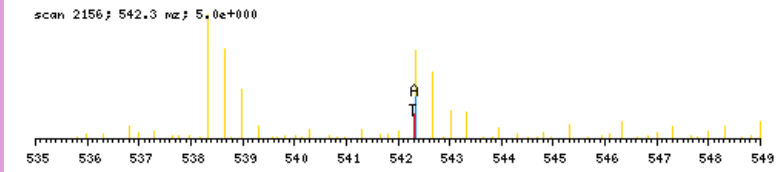

zoomed in precursor plot; T=theoretical m/z, A=acquired m/z

| b <sup>+</sup> | #  | AA # | y <sup>+</sup> | y <sup>2+</sup> |
|----------------|----|------|----------------|-----------------|
| 130.0504       | 1  | S 13 |                |                 |
| 292.2085       | 2  | K 12 | 1495.8757      | 748.4418        |
| 379.2406       | 3  | S 11 | 1333.7176      | 667.3627        |
| 508.2832       | 4  | E 10 | 1246.6856      | 623.8467        |
| 595.3152       | 5  | S 9  | 1117.6430      | 559.3254        |
| 692.3679       | 6  | P 8  | 1030.6110      | 515.8094        |
| 854.5260       | 7  | K 7  | 933.5582       | 467.2830        |
| 983.5686       | 8  | E 6  | 771.4001       | 386.2040        |
| 1080.6214      | 9  | P 5  | 642.3575       | 321.6827        |
| 1209.6640      | 10 | E 4  | 545.3047       | 273.1563        |
| 1337.7226      | 11 | Q 3  | 416.2621       | 208.6350        |
| 1450.8066      | 12 | L 2  | 288.2036       | 144.6057        |
|                | 13 | R 1  | 175.1195       | 88.0637         |

N-term:+43.02 K(2):+162.16  
 K(7):+162.16

SLDIQCEQLSDAR, MH+ 1576.7277, m/z 788.8675  
 H OS G29 P150811 220811-s1.04516.04516.2.dta

X-range:

-

MassTol: Y-zoom:

MassType:

AVG  MONO

Axis:

1  2

Label:

I  M  -

Ions:

a  +  2+  3+

b  +  2+  3+

c  +  2+  3+

x  +  2+  3+

y  +  2+  3+

z  +  2+  3+

hide H<sub>2</sub>O/NH<sub>3</sub>

zoom 112-122

GO

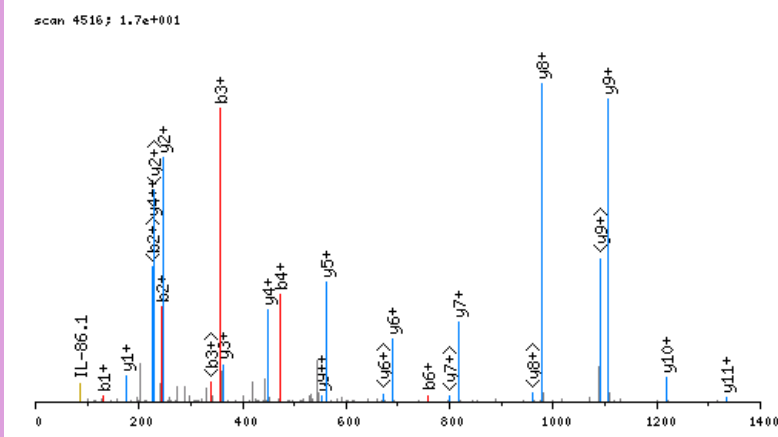

click image to zoom in; click top corners to zoom out [\[precursor±\]](#)

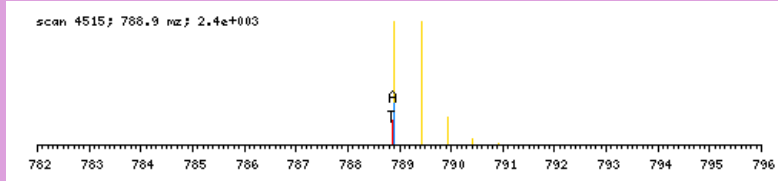

zoomed in precursor plot; T=theoretical m/z, A=acquired m/z

| b <sup>+</sup> | #  | AA # | y <sup>+</sup> | y <sup>2+</sup> |
|----------------|----|------|----------------|-----------------|
| 130.0504       | 1  | S 13 |                |                 |
| 243.1345       | 2  | L 12 | 1447.6851      | 724.3464        |
| 358.1614       | 3  | D 11 | 1334.6010      | 667.8044        |
| 471.2455       | 4  | I 10 | 1219.5741      | 610.2909        |
| 599.3041       | 5  | Q 9  | 1106.4900      | 553.7489        |
| 759.3347       | 6  | C 8  | 978.4314       | 489.7196        |
| 888.3773       | 7  | E 7  | 818.4008       | 409.7043        |
| 1016.4358      | 8  | Q 6  | 689.3582       | 345.1830        |
| 1129.5199      | 9  | L 5  | 561.2997       | 281.1537        |
| 1216.5519      | 10 | S 4  | 448.2156       | 224.6117        |
| 1331.5789      | 11 | D 3  | 361.1836       | 181.0957        |
| 1402.6160      | 12 | A 2  | 246.1566       | 123.5822        |
|                | 13 | R 1  | 175.1195       | 88.0637         |

N-term:+43.02 C(6):+160.03



SLGGVSEASR, MH+ 1004.5013, m/z 502.7543  
 H OS G29 P150811 220811-s1.02788.02788.2.dta

X-range:

-

MassTol: Y-zoom:

MassType:

AVG  MONO

Axis:

1  2

Label:

I  M  -

Ions:

a  +  2+  3+

b  +  2+  3+

c  +  2+  3+

x  +  2+  3+

y  +  2+  3+

z  +  2+  3+

hide H<sub>2</sub>O/NH<sub>3</sub>

zoom 112-122

GO

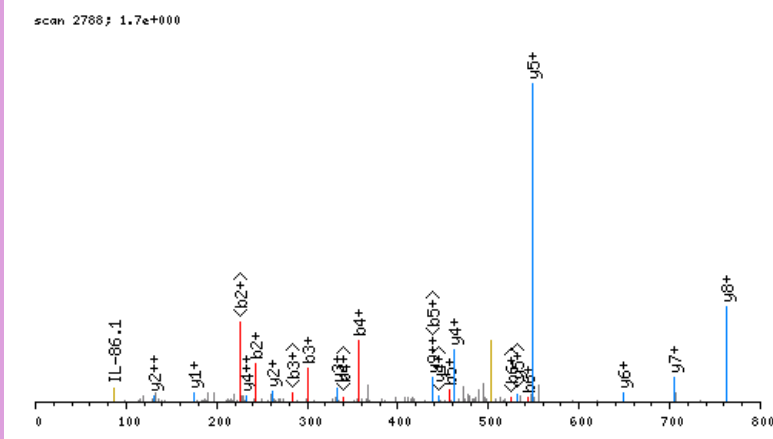

click image to zoom in; click top corners to zoom out [\[precursor±\]](#)

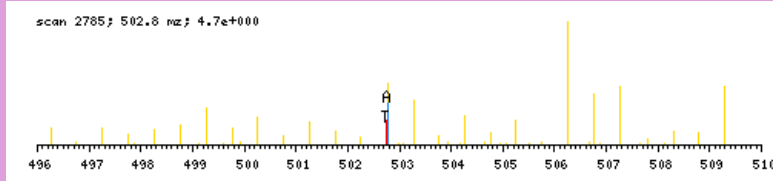

zoomed in precursor plot; T=theoretical m/z, A=acquired m/z

| b <sup>+</sup> | #  | AA | #  | y <sup>+</sup> | y <sup>2+</sup> |
|----------------|----|----|----|----------------|-----------------|
| 130.0504       | 1  | S  | 10 |                |                 |
| 243.1345       | 2  | L  | 9  | 875.4587       | 438.2332        |
| 300.1560       | 3  | G  | 8  | 762.3746       | 381.6912        |
| 357.1774       | 4  | G  | 7  | 705.3531       | 353.1805        |
| 456.2458       | 5  | V  | 6  | 648.3317       | 324.6698        |
| 543.2779       | 6  | S  | 5  | 549.2633       | 275.1355        |
| 672.3205       | 7  | E  | 4  | 462.2312       | 231.6195        |
| 743.3576       | 8  | A  | 3  | 333.1886       | 167.0982        |
| 830.3896       | 9  | S  | 2  | 262.1515       | 131.5797        |
|                | 10 | R  | 1  | 175.1195       | 88.0637         |

N-term:+43.02

SLKPQPPAPATGR, MH+ 1614.8968, m/z 538.9705  
 H OS G24 P150811 220811-s1.02868.02868.3.dta

X-range:

-

MassTol: Y-zoom:

MassType:

AVG  MONO

Axis:

1  2

Label:

I  M  -

Ions:

a  +  2+  3+

b  +  2+  3+

c  +  2+  3+

x  +  2+  3+

y  +  2+  3+

z  +  2+  3+

hide H<sub>2</sub>O/NH<sub>3</sub>

zoom 112-122

GO

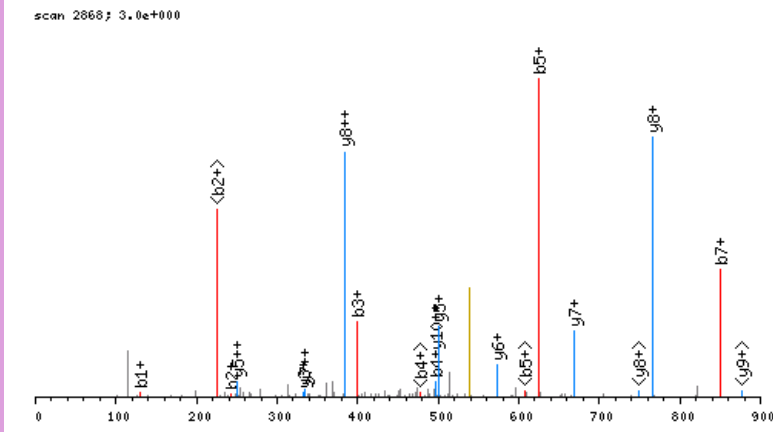

click image to zoom in; click top corners to zoom out [\[precursor±\]](#)

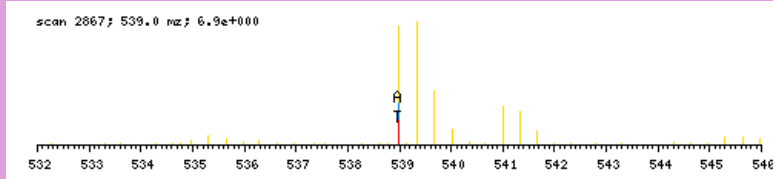

zoomed in precursor plot; T=theoretical m/z, A=acquired m/z

| b <sup>+</sup> | #  | AA # | y <sup>+</sup> | y <sup>2+</sup> |
|----------------|----|------|----------------|-----------------|
| 130.0504       | 1  | S 15 |                |                 |
| 243.1345       | 2  | L 14 | 1485.8542      | 743.4310        |
| 399.2608       | 3  | K 13 | 1372.7701      | 686.8890        |
| 496.3136       | 4  | P 12 | 1216.6438      | 608.8258        |
| 624.3721       | 5  | Q 11 | 1119.5911      | 560.2995        |
| 721.4249       | 6  | P 10 | 991.5325       | 496.2702        |
| 849.4835       | 7  | Q 9  | 894.4797       | 447.7438        |
| 946.5362       | 8  | P 8  | 807.4270       | 383.7145        |
| 1043.5890      | 9  | P 7  | 720.3743       | 335.1881        |
| 1114.6261      | 10 | A 6  | 633.3216       | 286.6617        |
| 1211.6789      | 11 | P 5  | 546.2785       | 251.1432        |
| 1282.7160      | 12 | A 4  | 460.2258       | 202.6168        |
| 1383.7637      | 13 | T 3  | 373.1886       | 167.0982        |
| 1440.7851      | 14 | G 2  | 287.1410       | 116.5744        |
|                | 15 | R 1  | 175.1195       | 88.0637         |

N-term:+43.02 K(3):+156.13

SLSNKLTLDKLDVKGKR, MH+ 2069.2700, m/z 690.4282  
 H OS G28 P150811 220811-s1.05786.05786.3.dta

scan 5786; 1.5e+001

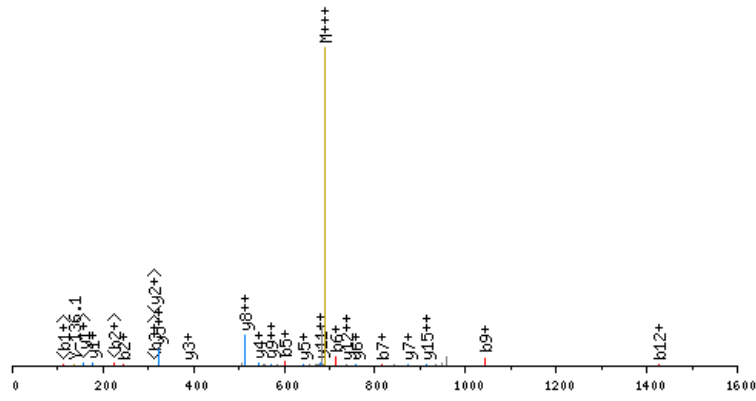

click image to zoom in; click top corners to zoom out [precursor±]

scan 5783; 690.4 mz; 1.2e+001

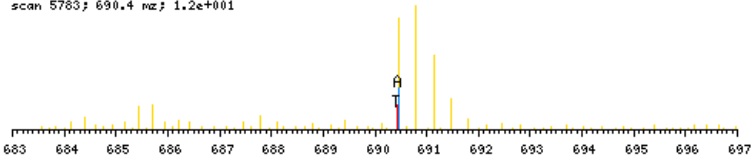

zoomed in precursor plot; T=theoretical m/z, A=acquired m/z

X-range:

-

MassTol: Y-zoom:

MassType:

AVG  MONO

Axis:

1  2

Label:

I  M  -

Ions:

a  +  2+  3+

b  +  2+  3+

c  +  2+  3+

x  +  2+  3+

y  +  2+  3+

z  +  2+  3+

hide H<sub>2</sub>O/NH<sub>3</sub>

zoom 112-122

GO

| b <sup>+</sup> | #  | AA | #  | y <sup>+</sup> | y <sup>2+</sup> |
|----------------|----|----|----|----------------|-----------------|
| 130.0504       | 1  | S  | 17 |                |                 |
| 243.1345       | 2  | L  | 16 | 1940.2274      | 970.6176        |
| 330.1665       | 3  | S  | 15 | 1827.1433      | 914.0756        |
| 444.2094       | 4  | N  | 14 | 1740.1113      | 870.5595        |
| 600.3357       | 5  | K  | 13 | 1626.0683      | 813.5381        |
| 713.4198       | 6  | L  | 12 | 1469.9420      | 735.4749        |
| 814.4675       | 7  | T  | 11 | 1356.8580      | 678.9329        |
| 927.5516       | 8  | L  | 10 | 1255.8103      | 628.4091        |
| 1042.5785      | 9  | D  | 9  | 1142.7262      | 571.8670        |
| 1198.7048      | 10 | K  | 8  | 1027.6993      | 514.3536        |
| 1311.7889      | 11 | L  | 7  | 871.5730       | 436.2904        |
| 1426.8158      | 12 | D  | 6  | 758.4889       | 379.7484        |
| 1525.8842      | 13 | V  | 5  | 643.4620       | 322.2349        |
| 1682.0105      | 14 | K  | 4  | 544.3936       | 272.7007        |
| 1739.0320      | 15 | G  | 3  | 388.2673       | 194.6375        |
| 1895.1583      | 16 | K  | 2  | 331.2458       | 166.1268        |
|                | 17 | R  | 1  | 175.1195       | 88.0637         |

N-term:+43.02 K(5):+156.13  
 K(10):+156.13 K(14):+156.13  
 K(16):+156.13

SMHTEAAEVLLER, MH+ 1527.7477, m/z 509.9208  
 H OS G25 P150811 220811-s1.06633.06633.3.dta

scan 6633; 5.2e+000

X-range:

-

MassTol: Y-zoom:

MassType:

AVG  MONO

Axis:

1  2

Label:

I  M  -

Ions:

a  +  2+  3+

b  +  2+  3+

c  +  2+  3+

x  +  2+  3+

y  +  2+  3+

z  +  2+  3+

hide H<sub>2</sub>O/NH<sub>3</sub>

zoom 112-122

GO

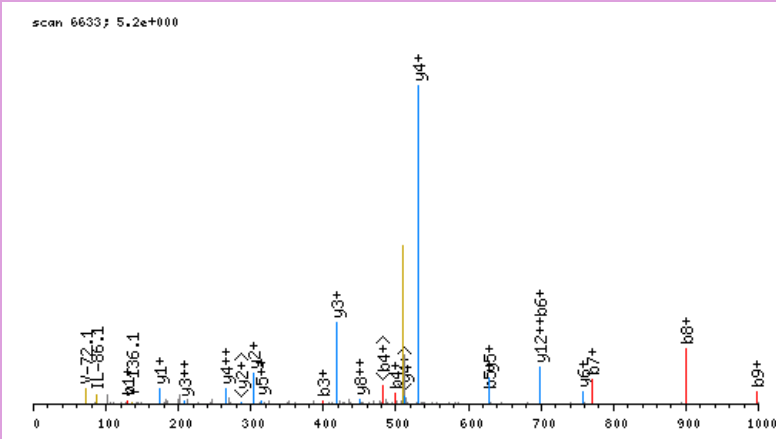

click image to zoom in; click top corners to zoom out

[\[precursor±\]](#)

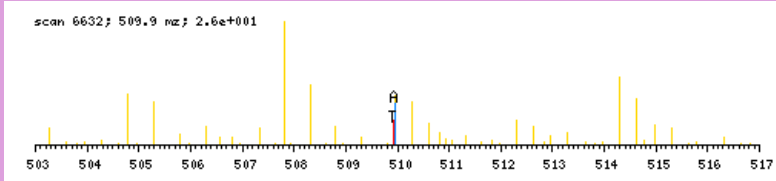

zoomed in precursor plot; T=theoretical m/z, A=acquired m/z

| b <sup>+</sup> | #  | AA # | y <sup>+</sup> | y <sup>2+</sup> |
|----------------|----|------|----------------|-----------------|
| 130.0504       | 1  | S 13 |                |                 |
| 261.0909       | 2  | M 12 | 1398.7051      | 699.8565        |
| 398.1498       | 3  | H 11 | 1267.6646      | 634.3362        |
| 499.1975       | 4  | T 10 | 1130.6057      | 565.8068        |
| 628.2401       | 5  | E 9  | 1029.5580      | 515.2829        |
| 699.2772       | 6  | A 8  | 900.5155       | 450.7616        |
| 770.3143       | 7  | A 7  | 829.4783       | 415.2431        |
| 899.3569       | 8  | E 6  | 758.4412       | 379.7245        |
| 998.4253       | 9  | V 5  | 629.3986       | 315.2032        |
| 1111.5094      | 10 | L 4  | 530.3302       | 265.6690        |
| 1224.5935      | 11 | L 3  | 417.2462       | 209.1270        |
| 1353.6361      | 12 | E 2  | 304.1621       | 152.5850        |
|                | 13 | R 1  | 175.1195       | 88.0637         |

N-term:+43.02

SMNKGPTLLDGLPEQENVLQR, MH+ 2524.2718, m/z 842.0954  
 H OS G24 P150811 220811-s1.04613.04613.3.dta

scan 4613; 5.3e+000

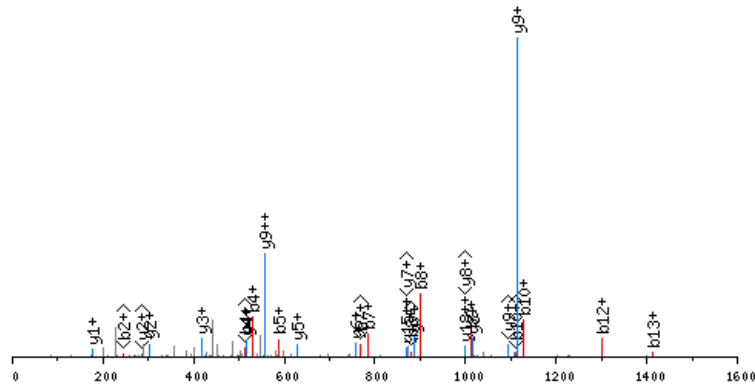

click image to zoom in; click top corners to zoom out [precursor±]

scan 4612; 842.1 m/z; 1.2e+001

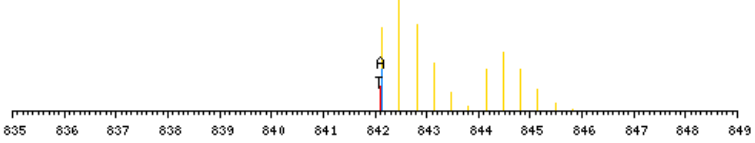

zoomed in precursor plot; T=theoretical m/z, A=acquired m/z

X-range:

-

MassTol: Y-zoom:

MassType:

AVG  MONO

Axis:

1  2

Label:

I  M  -

Ions:

a  +  2+  3+

b  +  2+  3+

c  +  2+  3+

x  +  2+  3+

y  +  2+  3+

z  +  2+  3+

hide H<sub>2</sub>O/NH<sub>3</sub>

zoom 112-122

GO

| b <sup>+</sup> | #  | AA | #  | y <sup>+</sup> | y <sup>2+</sup> |
|----------------|----|----|----|----------------|-----------------|
| 130.0504       | 1  | S  | 22 |                |                 |
| 261.0909       | 2  | M  | 21 | 2395.2292      | 1198.1185       |
| 375.1338       | 3  | N  | 20 | 2264.1887      | 1132.5983       |
| 531.2601       | 4  | K  | 19 | 2150.1458      | 1075.5768       |
| 588.2816       | 5  | G  | 18 | 1994.0195      | 997.5136        |
| 685.3344       | 6  | P  | 17 | 1936.9980      | 969.0029        |
| 786.3820       | 7  | T  | 16 | 1839.9452      | 920.4765        |
| 899.4661       | 8  | L  | 15 | 1738.8976      | 869.9527        |
| 1012.5502      | 9  | L  | 14 | 1625.8135      | 813.4107        |
| 1127.5771      | 10 | D  | 13 | 1512.7294      | 756.8686        |
| 1184.5986      | 11 | G  | 12 | 1397.7025      | 699.3552        |
| 1299.6255      | 12 | D  | 11 | 1340.6810      | 670.8444        |
| 1412.7096      | 13 | L  | 10 | 1225.6541      | 613.3310        |
| 1509.7624      | 14 | P  | 9  | 1112.5700      | 556.7889        |
| 1638.8049      | 15 | E  | 8  | 1015.5172      | 508.2625        |
| 1766.8635      | 16 | Q  | 7  | 886.4747       | 443.7412        |
| 1895.9061      | 17 | E  | 6  | 758.4161       | 379.7120        |
| 2009.9490      | 18 | N  | 5  | 629.3735       | 315.1907        |
| 2109.0175      | 19 | V  | 4  | 515.3306       | 258.1692        |
| 2222.1015      | 20 | L  | 3  | 416.2621       | 208.6350        |
| 2350.1601      | 21 | Q  | 2  | 303.1781       | 152.0930        |
|                | 22 | R  | 1  | 175.1195       | 88.0637         |

N-term:+43.02 K(4):+156.13

SNGYEDHMAEDCR, MH+ 1625.5960, m/z 542.5369  
 H OS G25 P150811 220811-s1.02774.02774.3.dta

X-range:

-

MassTol: Y-zoom:

MassType:

AVG  MONO

Axis:

1  2

Label:

I  M  -

Ions:

a  +  2+  3+

b  +  2+  3+

c  +  2+  3+

x  +  2+  3+

y  +  2+  3+

z  +  2+  3+

hide H<sub>2</sub>O/NH<sub>3</sub>

zoom 112-122

GO

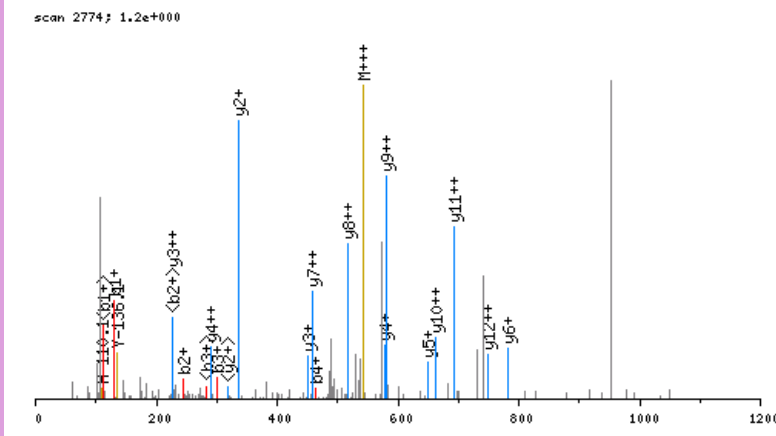

click image to zoom in; click top corners to zoom out [\[precursor±\]](#)

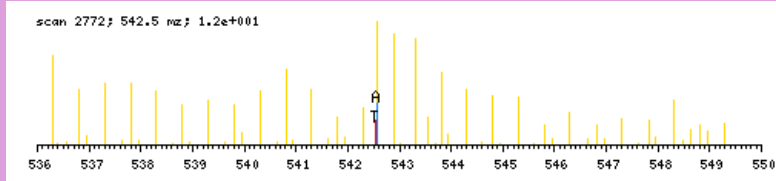

zoomed in precursor plot; T=theoretical m/z, A=acquired m/z

| b <sup>+</sup> | #  | AA # | y <sup>+</sup> | y <sup>2+</sup> |
|----------------|----|------|----------------|-----------------|
| 130.0504       | 1  | S 13 |                |                 |
| 244.0934       | 2  | N 12 | 1496.5534      | 748.7806        |
| 301.1148       | 3  | G 11 | 1382.5105      | 691.7592        |
| 464.1781       | 4  | Y 10 | 1325.4890      | 663.2484        |
| 593.2207       | 5  | E 9  | 1162.4257      | 581.7168        |
| 708.2477       | 6  | D 8  | 1033.3831      | 517.1955        |
| 845.3066       | 7  | H 7  | 918.3561       | 459.6820        |
| 976.3471       | 8  | M 6  | 781.2972       | 391.1525        |
| 1047.3842      | 9  | A 5  | 650.2568       | 325.6323        |
| 1176.4268      | 10 | E 4  | 579.2196       | 290.1137        |
| 1291.4537      | 11 | D 3  | 450.1770       | 225.5924        |
| 1451.4843      | 12 | C 2  | 335.1501       | 168.0790        |
|                | 13 | R 1  | 175.1195       | 88.0637         |

N-term:+43.02 C(12):+160.03

SNNGVDIQDKPPAPPMR, MH+ 1905.9493, m/z 635.9880  
 H OS G24 P150811 220811-s1.03281.03281.3.dta

X-range:

-

MassTol: Y-zoom:

MassType:

AVG  MONO

Axis:

1  2

Label:

I  M  -

Ions:

a  +  2+  3+

b  +  2+  3+

c  +  2+  3+

x  +  2+  3+

y  +  2+  3+

z  +  2+  3+

hide H<sub>2</sub>O/NH<sub>3</sub>

zoom 112-122

GO

scan 3281; 1.4e+000

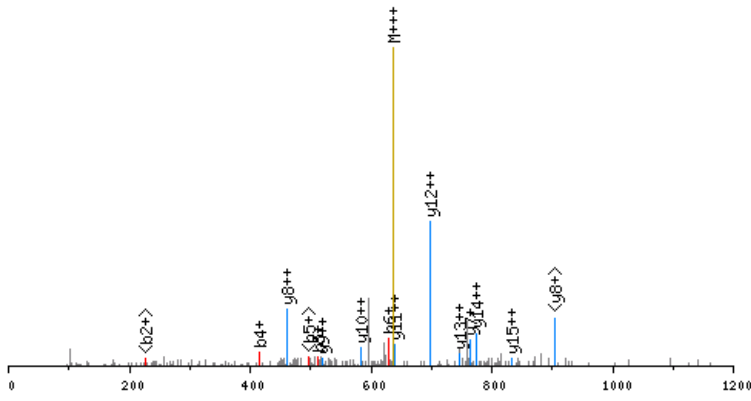

click image to zoom in; click top corners to zoom out [\[precursor±\]](#)

scan 3277; 636.0 m/z; 1.6e+000

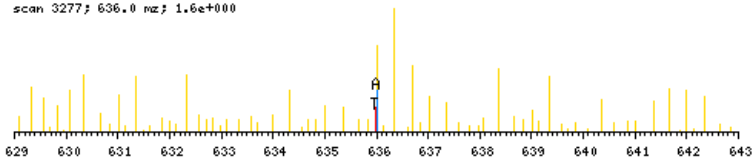

zoomed in precursor plot; T=theoretical m/z, A=acquired m/z

| b <sup>+</sup> | #  | AA # | y <sup>+</sup> | y <sup>2+</sup> |
|----------------|----|------|----------------|-----------------|
| 130.0504       | 1  | S 17 |                |                 |
| 244.0934       | 2  | N 16 | 1776.9067      | 888.9573        |
| 358.1363       | 3  | N 15 | 1662.8638      | 831.9358        |
| 415.1577       | 4  | G 14 | 1548.8209      | 774.9143        |
| 514.2262       | 5  | V 13 | 1491.7994      | 746.4036        |
| 629.2531       | 6  | D 12 | 1392.7310      | 696.8694        |
| 742.3372       | 7  | I 11 | 1277.7040      | 639.3559        |
| 870.3957       | 8  | Q 10 | 1164.6200      | 582.8139        |
| 985.4227       | 9  | D 9  | 1036.5614      | 518.7846        |
| 1141.5490      | 10 | K 8  | 921.5345       | 461.2711        |
| 1238.6018      | 11 | P 7  | 765.4082       | 383.2080        |
| 1335.6545      | 12 | P 6  | 668.3554       | 334.6816        |
| 1406.6916      | 13 | A 5  | 571.3026       | 286.1552        |
| 1503.7444      | 14 | P 4  | 500.2655       | 250.6367        |
| 1600.7972      | 15 | P 3  | 403.2127       | 202.1103        |
| 1731.8376      | 16 | M 2  | 306.1600       | 153.5839        |
|                | 17 | R 1  | 175.1195       | 88.0637         |

N-term:+43.02 K(10):+156.13

SPEIALLNR, MH+ 941.5056, m/z 471.2565  
 H OS G29 P150811 220811-s1.04583.04583.2.dta

X-range:

-

MassTol: Y-zoom:

MassType:

AVG  MONO

Axis:

1  2

Label:

I  M  -

Ions:

a  +  2+  3+

b  +  2+  3+

c  +  2+  3+

x  +  2+  3+

y  +  2+  3+

z  +  2+  3+

hide H<sub>2</sub>O/NH<sub>3</sub>

zoom 112-122

GO

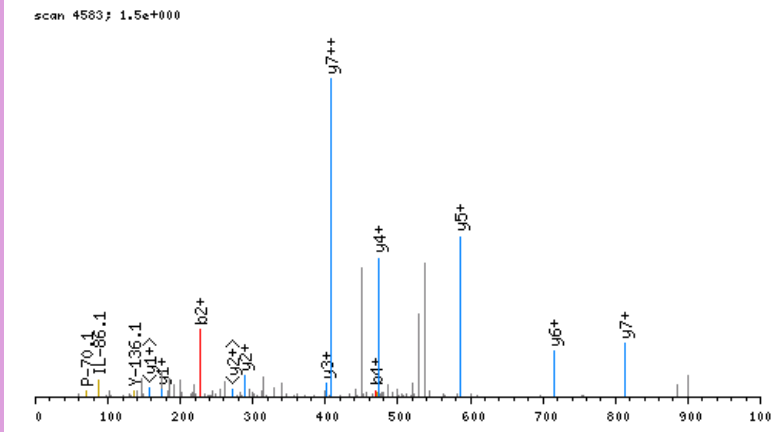

click image to zoom in; click top corners to zoom out [\[precursor±\]](#)

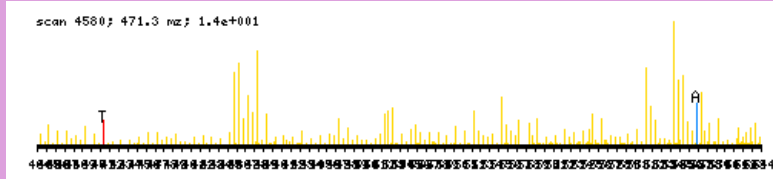

zoomed in precursor plot; T=theoretical m/z, A=acquired m/z

| b <sup>+</sup> | # | AA # | y <sup>+</sup> | y <sup>2+</sup>   |
|----------------|---|------|----------------|-------------------|
| 130.0504       | 1 | S    | 8              |                   |
| 227.1032       | 2 | P    | 7              | 812.4630 406.7354 |
| 356.1458       | 3 | E    | 6              | 715.4103 358.2090 |
| 469.2298       | 4 | I    | 5              | 586.3677 293.6877 |
| 540.2670       | 5 | A    | 4              | 473.2836 237.1457 |
| 653.3510       | 6 | L    | 3              | 402.2465 201.6272 |
| 767.3940       | 7 | N    | 2              | 289.1624 145.0851 |
|                | 8 | R    | 1              | 175.1195 88.0637  |

N-term:+43.02



SQAEFDKAAEEVKR, MH+ 1705.8762, m/z 853.4417  
 H OS G26 P150811 220811-s1.03911.03911.2.dta

scan 3911; 3.4e+001

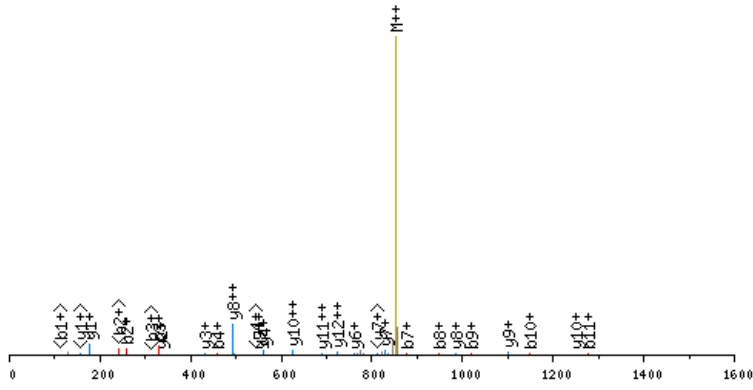

click image to zoom in; click top corners to zoom out [\[precursor±\]](#)

scan 3910; 853.4 nz; 1.5e+002

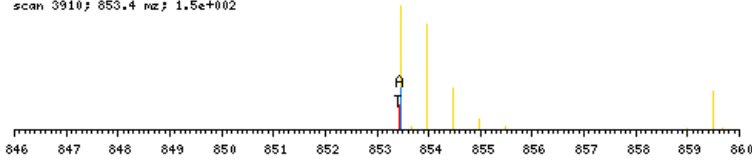

zoomed in precursor plot; T=theoretical m/z, A=acquired m/z

X-range:

-

MassTol: Y-zoom:

MassType:

AVG  MONO

Axis:

1  2

Label:

I  M  -

Ions:

a  +  2+  3+

b  +  2+  3+

c  +  2+  3+

x  +  2+  3+

y  +  2+  3+

z  +  2+  3+

hide H<sub>2</sub>O/NH<sub>3</sub>

zoom 112-122

GO

| b <sup>+</sup> | #  | AA # | y <sup>+</sup> | y <sup>2+</sup>    |
|----------------|----|------|----------------|--------------------|
| 130.0504       | 1  | S    | 14             |                    |
| 258.1090       | 2  | Q    | 13             | 1576.8336 788.9207 |
| 329.1461       | 3  | A    | 12             | 1448.7750 724.8914 |
| 458.1887       | 4  | E    | 11             | 1377.7379 689.3729 |
| 605.2571       | 5  | F    | 10             | 1248.6953 624.8516 |
| 720.2841       | 6  | D    | 9              | 1101.6269 551.3173 |
| 876.4104       | 7  | K    | 8              | 986.5999 493.8039  |
| 947.4475       | 8  | A    | 7              | 830.4736 415.7407  |
| 1018.4846      | 9  | A    | 6              | 759.4365 380.2222  |
| 1147.5272      | 10 | E    | 5              | 688.3994 344.7036  |
| 1276.5698      | 11 | E    | 4              | 559.3568 280.1823  |
| 1375.6382      | 12 | V    | 3              | 430.3142 215.6610  |
| 1531.7645      | 13 | K    | 2              | 331.2458 166.1268  |
|                | 14 | R    | 1              | 175.1195 88.0637   |

N-term:+43.02 K(7):+156.13  
 K(13):+156.13

SQEKASSPSGKMDGEKPKVDASEEKR, MH+ 2831.4098, m/z 708.6079  
 H OS G28 P150811 220811-s1.02325.02325.4.dta

scan 2325; 2.7e+001

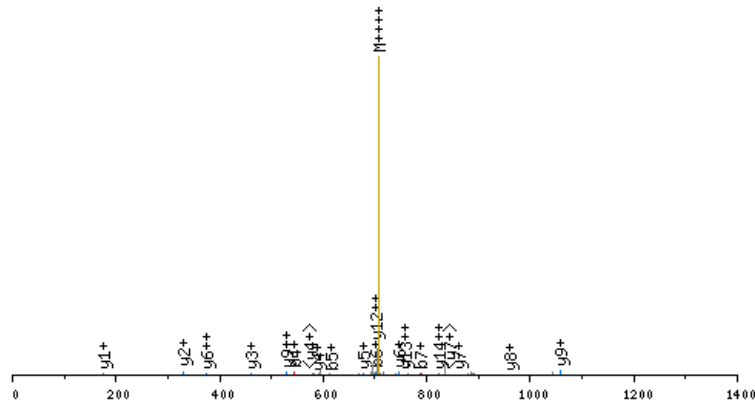

click image to zoom in; click top corners to zoom out [precursor±]

scan 2323; 708.6 m/z; 1.3e+001

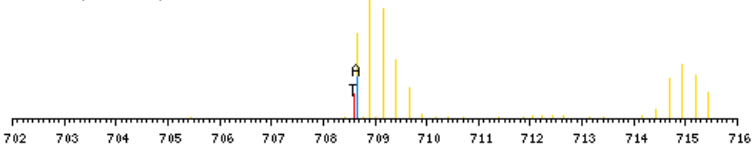

zoomed in precursor plot; T=theoretical m/z, A=acquired m/z

X-range:

-

MassTol: Y-zoom:

MassType:

AVG  MONO

Axis:

1  2

Label:

I  M  -

Ions:

a  +  2+  3+

b  +  2+  3+

c  +  2+  3+

x  +  2+  3+

y  +  2+  3+

z  +  2+  3+

hide H<sub>2</sub>O/NH<sub>3</sub>

zoom 112-122

GO

| b <sup>+</sup> | #  | AA | #  | y <sup>+</sup> | y <sup>2+</sup> |
|----------------|----|----|----|----------------|-----------------|
| 130.0504       | 1  | S  | 25 |                |                 |
| 258.1090       | 2  | Q  | 24 | 2702.3672      | 1351.6875       |
| 387.1516       | 3  | E  | 23 | 2574.3087      | 1287.6582       |
| 543.2779       | 4  | K  | 22 | 2445.2661      | 1223.1369       |
| 614.3150       | 5  | A  | 21 | 2289.1398      | 1145.0738       |
| 701.3470       | 6  | S  | 20 | 2218.1026      | 1109.5552       |
| 788.3791       | 7  | S  | 19 | 2131.0706      | 1066.0392       |
| 885.4318       | 8  | P  | 18 | 2044.0386      | 1022.5232       |
| 972.4639       | 9  | S  | 17 | 1946.9858      | 973.9968        |
| 1029.4853      | 10 | G  | 16 | 1859.9538      | 930.4808        |
| 1185.6116      | 11 | K  | 15 | 1802.9323      | 901.9701        |
| 1316.6521      | 12 | M  | 14 | 1646.8060      | 823.9069        |
| 1431.6791      | 13 | D  | 13 | 1515.7656      | 758.3867        |
| 1488.7005      | 14 | G  | 12 | 1400.7386      | 700.8732        |
| 1617.7431      | 15 | E  | 11 | 1343.7171      | 672.3625        |
| 1773.8694      | 16 | K  | 10 | 1214.6746      | 607.8412        |
| 1870.9222      | 17 | P  | 9  | 1058.5483      | 529.7780        |
| 1969.9906      | 18 | V  | 8  | 961.4955       | 481.2517        |
| 2085.0175      | 19 | D  | 7  | 862.4271       | 431.7174        |
| 2156.0546      | 20 | A  | 6  | 747.4001       | 374.2040        |
| 2243.0867      | 21 | S  | 5  | 676.3630       | 338.6854        |
| 2372.1293      | 22 | E  | 4  | 589.3310       | 295.1694        |
| 2501.1719      | 23 | E  | 3  | 460.2884       | 230.6481        |
| 2657.2982      | 24 | K  | 2  | 331.2458       | 166.1268        |
|                | 25 | R  | 1  | 175.1195       | 88.0637         |

N-term:+43.02 K(4):+156.13  
 K(11):+156.13 K(16):+156.13  
 K(24):+156.13

SQERPTFYR, MH+ 1225.5966, m/z 613.3019  
 H OS G25 P150811 220811-s1.03325.03325.2.dta

X-range:

-

MassTol: Y-zoom:

MassType:

AVG  MONO

Axis:

1  2

Label:

I  M  -

Ions:

a  +  2+  3+

b  +  2+  3+

c  +  2+  3+

x  +  2+  3+

y  +  2+  3+

z  +  2+  3+

hide H<sub>2</sub>O/NH<sub>3</sub>

zoom 112-122

GO

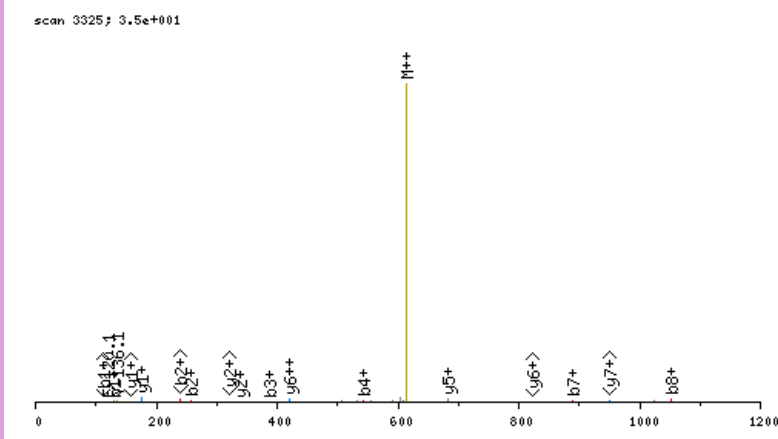

click image to zoom in; click top corners to zoom out [\[precursor±\]](#)

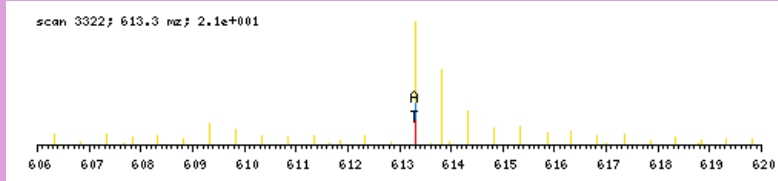

zoomed in precursor plot; T=theoretical m/z, A=acquired m/z

| b <sup>+</sup> | # | AA | # | y <sup>+</sup> | y <sup>2+</sup> |
|----------------|---|----|---|----------------|-----------------|
| 130.0504       | 1 | S  | 9 |                |                 |
| 258.1090       | 2 | Q  | 8 | 1096.5540      | 548.7809        |
| 387.1516       | 3 | E  | 7 | 968.4954       | 484.7516        |
| 543.2527       | 4 | R  | 6 | 839.4528       | 420.2303        |
| 640.3055       | 5 | P  | 5 | 683.3517       | 342.1798        |
| 741.3532       | 6 | T  | 4 | 586.2989       | 293.6534        |
| 888.4216       | 7 | F  | 3 | 485.2512       | 243.1295        |
| 1051.4849      | 8 | Y  | 2 | 338.1828       | 169.5953        |
|                | 9 | R  | 1 | 175.1195       | 88.0637         |

N-term: +43.02

SQGDSNPAAIPHAAEDIQGDDR, MH+ 2306.0285, m/z 769.3477  
 H OS G24 P150811 220811-s1.03368.03368.3.dta

X-range:

-

MassTol: Y-zoom:

MassType:

AVG  MONO

Axis:

1  2

Label:

I  M  -

Ions:

a  +  2+  3+

b  +  2+  3+

c  +  2+  3+

x  +  2+  3+

y  +  2+  3+

z  +  2+  3+

hide H<sub>2</sub>O/NH<sub>3</sub>

zoom 112-122

GO

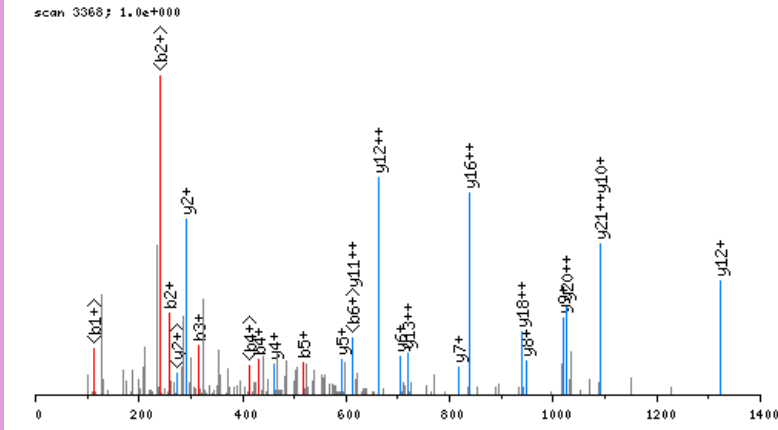

click image to zoom in; click top corners to zoom out [precursor±]

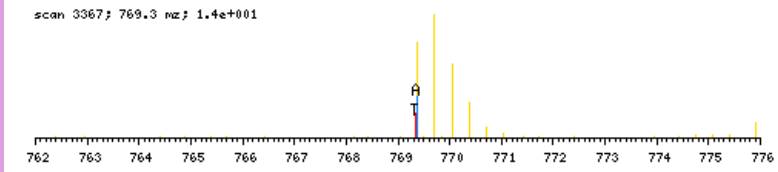

zoomed in precursor plot; T=theoretical m/z, A=acquired m/z

| b <sup>+</sup> | #  | AA # | y <sup>+</sup> | y <sup>2+</sup> |
|----------------|----|------|----------------|-----------------|
| 130.0504       | 1  | S 22 |                |                 |
| 258.1090       | 2  | Q 21 | 2176.9859      | 1088.9969       |
| 315.1305       | 3  | G 20 | 2048.9273      | 1024.9676       |
| 430.1574       | 4  | D 19 | 1991.9059      | 996.4569        |
| 517.1894       | 5  | S 18 | 1876.8789      | 938.9434        |
| 631.2324       | 6  | N 17 | 1789.8469      | 895.4274        |
| 728.2851       | 7  | P 16 | 1675.8040      | 838.4059        |
| 799.3222       | 8  | A 15 | 1578.7512      | 789.8795        |
| 870.3594       | 9  | A 14 | 1507.7141      | 754.3610        |
| 983.4434       | 10 | I 13 | 1436.6770      | 718.8424        |
| 1080.4962      | 11 | P 12 | 1323.5929      | 662.3004        |
| 1217.5551      | 12 | H 11 | 1226.5402      | 613.7740        |
| 1288.5922      | 13 | A 10 | 1089.4813      | 545.2445        |
| 1359.6293      | 14 | A 9  | 1018.4441      | 509.7260        |
| 1488.6719      | 15 | E 8  | 947.4070       | 474.2074        |
| 1603.6989      | 16 | D 7  | 818.3644       | 409.6861        |
| 1716.7829      | 17 | I 6  | 703.3375       | 352.1727        |
| 1844.8415      | 18 | Q 5  | 590.2534       | 295.6306        |
| 1901.8639      | 19 | G 4  | 462.1949       | 231.6013        |
| 2016.8899      | 20 | D 3  | 405.1734       | 203.0906        |
| 2131.9169      | 21 | D 2  | 290.1464       | 145.5771        |
|                | 22 | R 1  | 175.1195       | 88.0637         |

N-term:+43.02

SQKTEGHR, MH+ 1018.5494, m/z 509.7784  
 H OS G25 P150811 220811-s1.02594.02594.2.dta

X-range:

-

MassTol: Y-zoom:

MassType:

AVG  MONO

Axis:

1  2

Label:

I  M  -

Ions:

a  +  2+  3+

b  +  2+  3+

c  +  2+  3+

x  +  2+  3+

y  +  2+  3+

z  +  2+  3+

hide H<sub>2</sub>O/NH<sub>3</sub>

zoom 112-122

GO

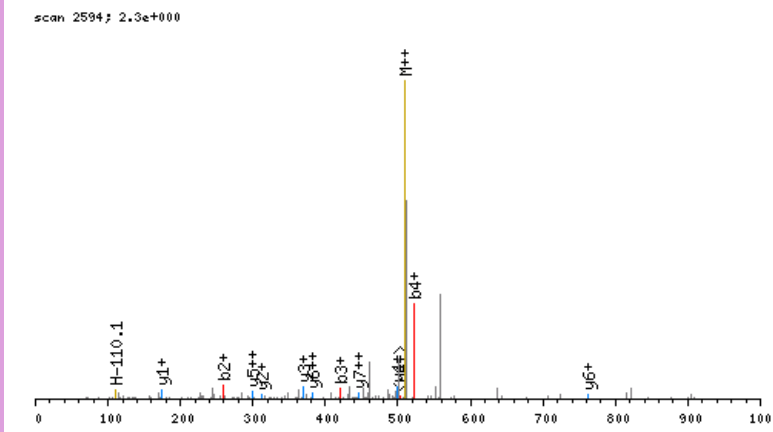

click image to zoom in; click top corners to zoom out [\[precursor±\]](#)

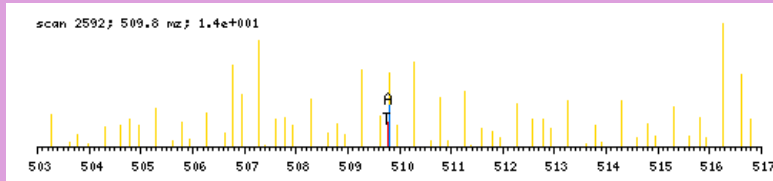

zoomed in precursor plot; T=theoretical m/z, A=acquired m/z

| b <sup>+</sup> | # | AA # | y <sup>+</sup> | y <sup>2+</sup> |
|----------------|---|------|----------------|-----------------|
| 130.0504       | 1 | S    | 8              |                 |
| 258.1090       | 2 | Q    | 7              | 889.5068        |
| 420.2671       | 3 | K    | 6              | 761.4482        |
| 521.3148       | 4 | T    | 5              | 599.2901        |
| 650.3574       | 5 | E    | 4              | 498.2425        |
| 707.3788       | 6 | G    | 3              | 369.1999        |
| 844.4378       | 7 | H    | 2              | 312.1784        |
|                | 8 | R    | 1              | 175.1195        |

N-term:+43.02 K(3):+162.16

SSAPTPPSVDKVDGFSR, MH+ 1917.9558, m/z 639.9901  
 H OS G24 P150811 220811-s1.03494.03494.3.dta

X-range:

-

MassTol: Y-zoom:

MassType:

AVG  MONO

Axis:

1  2

Label:

I  M  -

Ions:

a  +  2+  3+

b  +  2+  3+

c  +  2+  3+

x  +  2+  3+

y  +  2+  3+

z  +  2+  3+

hide H<sub>2</sub>O/NH<sub>3</sub>

zoom 112-122

GO

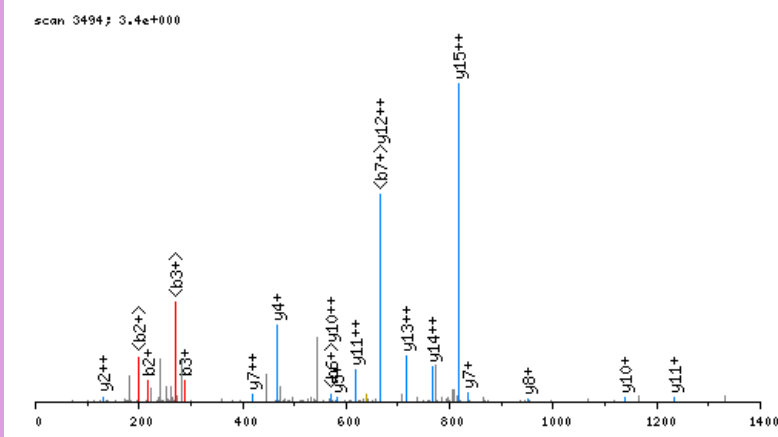

click image to zoom in; click top corners to zoom out [\[precursor±\]](#)

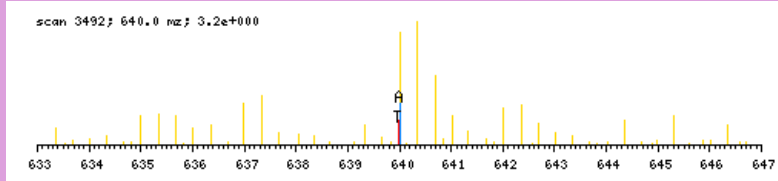

zoomed in precursor plot; T=theoretical m/z, A=acquired m/z

| b <sup>+</sup> | #  | AA # | y <sup>+</sup> | y <sup>2+</sup> |
|----------------|----|------|----------------|-----------------|
| 130.0504       | 1  | S 18 |                |                 |
| 217.0825       | 2  | S 17 | 1788.9132      | 894.9605        |
| 288.1196       | 3  | A 16 | 1701.8812      | 851.4445        |
| 385.1723       | 4  | P 15 | 1630.8441      | 815.9260        |
| 486.2200       | 5  | T 14 | 1533.7913      | 767.3996        |
| 587.2677       | 6  | T 13 | 1432.7437      | 716.8757        |
| 684.3205       | 7  | P 12 | 1331.6960      | 666.3519        |
| 781.3732       | 8  | P 11 | 1234.6432      | 617.8255        |
| 868.4052       | 9  | S 10 | 1137.5904      | 569.2991        |
| 967.4737       | 10 | V 9  | 1050.5584      | 525.7831        |
| 1082.5006      | 11 | D 8  | 951.4900       | 476.2489        |
| 1238.6269      | 12 | K 7  | 836.4631       | 418.7354        |
| 1337.6953      | 13 | V 6  | 680.3368       | 340.6723        |
| 1452.7223      | 14 | D 5  | 581.2683       | 291.1381        |
| 1509.7437      | 15 | G 4  | 466.2414       | 233.6246        |
| 1656.8121      | 16 | F 3  | 409.2199       | 205.1139        |
| 1743.8442      | 17 | S 2  | 262.1515       | 131.5797        |
|                | 18 | R 1  | 175.1195       | 88.0637         |

N-term:+43.02 K(12):+156.13

SSDAEMAVFGEAAPYLK, MH+ 1855.8536, m/z 928.4305  
 H OS G29 P150811 220811-s1.06373.06373.2.dta

X-range:

-

MassTol: Y-zoom:

MassType:

AVG  MONO

Axis:

1  2

Label:

I  M  -

Ions:

a  +  2+  3+

b  +  2+  3+

c  +  2+  3+

x  +  2+  3+

y  +  2+  3+

z  +  2+  3+

hide H<sub>2</sub>O/NH<sub>3</sub>

zoom 112-122

GO

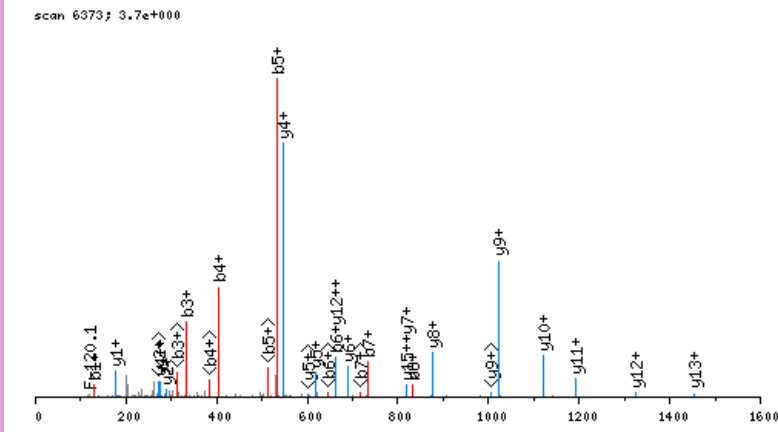

click image to zoom in; click top corners to zoom out [\[precursor±\]](#)

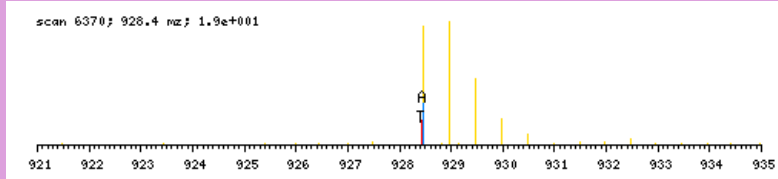

zoomed in precursor plot; T=theoretical m/z, A=acquired m/z

| b <sup>+</sup> | #  | AA # | y <sup>+</sup> | y <sup>2+</sup> |
|----------------|----|------|----------------|-----------------|
| 130.0504       | 1  | S 17 |                |                 |
| 217.0825       | 2  | S 16 | 1726.8110      | 863.9094        |
| 332.1094       | 3  | D 15 | 1639.7790      | 820.3934        |
| 403.1465       | 4  | A 14 | 1524.7521      | 762.8800        |
| 532.1891       | 5  | E 13 | 1453.7150      | 727.3614        |
| 663.2296       | 6  | M 12 | 1324.6724      | 662.8401        |
| 734.2667       | 7  | A 11 | 1193.6319      | 597.3199        |
| 833.3351       | 8  | V 10 | 1122.5948      | 561.8013        |
| 980.4035       | 9  | F 9  | 1023.5264      | 512.2671        |
| 1037.4250      | 10 | G 8  | 876.4579       | 438.7329        |
| 1166.4676      | 11 | E 7  | 819.4365       | 410.2222        |
| 1237.5047      | 12 | A 6  | 690.3939       | 345.7009        |
| 1308.5418      | 13 | A 5  | 619.3568       | 310.1823        |
| 1405.5946      | 14 | P 4  | 548.3197       | 274.6637        |
| 1568.6579      | 15 | Y 3  | 451.2669       | 226.1374        |
| 1681.7420      | 16 | L 2  | 288.2036       | 144.6057        |
|                | 17 | R 1  | 175.1195       | 88.0637         |

N-term:+43.02

SSDAQWLTAEER, MH+ 1434.6501, m/z 717.8287  
 H OS G29 P150811 220811-s1.04578.04578.2.dta

X-range:

-

MassTol: Y-zoom:

MassType:

AVG  MONO

Axis:

1  2

Label:

I  M  -

Ions:

a  +  2+  3+

b  +  2+  3+

c  +  2+  3+

x  +  2+  3+

y  +  2+  3+

z  +  2+  3+

hide H<sub>2</sub>O/NH<sub>3</sub>

zoom 112-122

GO

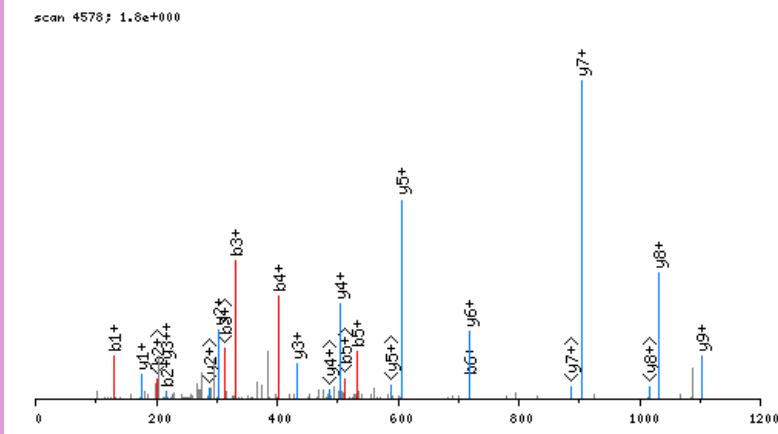

click image to zoom in; click top corners to zoom out [\[precursor±\]](#)

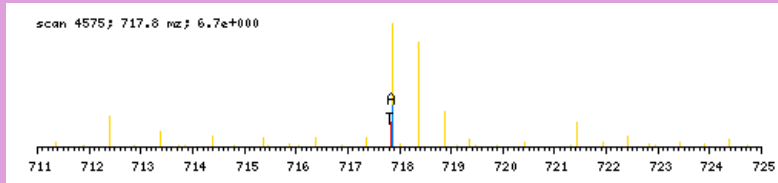

zoomed in precursor plot; T=theoretical m/z, A=acquired m/z

| b <sup>+</sup> | #  | AA # | y <sup>+</sup> | y <sup>2+</sup> |
|----------------|----|------|----------------|-----------------|
| 130.0504       | 1  | S 12 |                |                 |
| 217.0825       | 2  | S 11 | 1305.6075      | 653.3077        |
| 332.1094       | 3  | D 10 | 1218.5755      | 609.7917        |
| 403.1465       | 4  | A 9  | 1103.5485      | 552.2782        |
| 531.2051       | 5  | Q 8  | 1032.5114      | 516.7596        |
| 717.2844       | 6  | W 7  | 904.4529       | 452.7303        |
| 830.3685       | 7  | L 6  | 718.3735       | 359.6907        |
| 931.4161       | 8  | T 5  | 605.2895       | 303.1487        |
| 1002.4533      | 9  | A 4  | 504.2418       | 252.6248        |
| 1131.4959      | 10 | E 3  | 433.2047       | 217.1063        |
| 1260.5384      | 11 | E 2  | 304.1621       | 152.5850        |
|                | 12 | R 1  | 175.1195       | 88.0637         |

N-term:+43.02



SSEPPPPPLQPPPTHQTSVGLLDTPR, MH+ 2690.3790, m/z 673.3502  
 H OS G24 P150811 220811-s1.04270.04270.4.dta

scan 4270; 1.4e+000

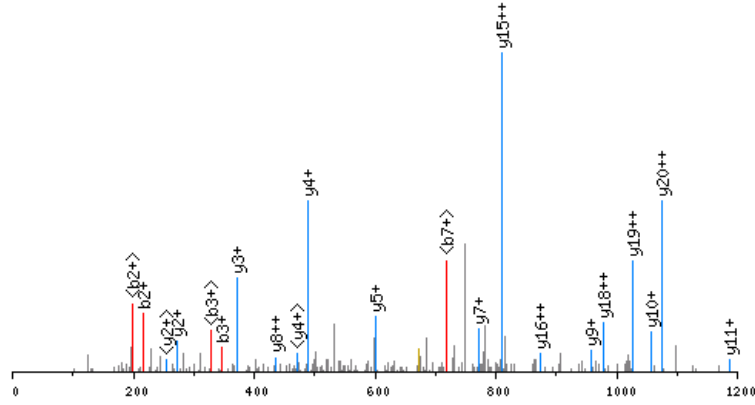

click image to zoom in; click top corners to zoom out [precursor±]

scan 4267; 673.4 mz; 4.6e+000

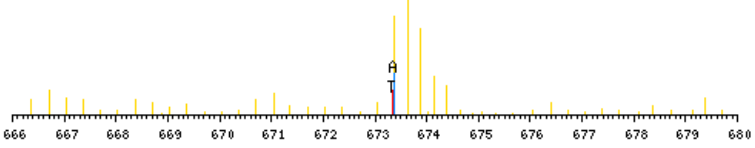

zoomed in precursor plot; T=theoretical m/z, A=acquired m/z

| b <sup>+</sup> | #  | AA # | y <sup>+</sup> | y <sup>2+</sup> |
|----------------|----|------|----------------|-----------------|
| 130.0504       | 1  | S 25 |                |                 |
| 217.0825       | 2  | S 24 | 2561.3364      | 1281.1721       |
| 346.1251       | 3  | E 23 | 2474.3043      | 1237.6561       |
| 443.1778       | 4  | P 22 | 2345.2618      | 1173.1348       |
| 540.2306       | 5  | P 21 | 2248.2090      | 1124.6084       |
| 637.2833       | 6  | P 20 | 2151.1562      | 1076.0820       |
| 734.3361       | 7  | P 19 | 2054.1035      | 1027.5556       |
| 831.3889       | 8  | P 18 | 1957.0507      | 979.0293        |
| 944.4729       | 9  | L 17 | 1859.9979      | 930.5029        |
| 1072.5315      | 10 | Q 16 | 1746.9139      | 873.9608        |
| 1169.5843      | 11 | P 15 | 1618.8553      | 809.9316        |
| 1266.6370      | 12 | P 14 | 1521.8025      | 761.4052        |
| 1367.6847      | 13 | T 13 | 1424.7498      | 712.8788        |
| 1504.7436      | 14 | H 12 | 1323.7021      | 662.3550        |
| 1632.8022      | 15 | Q 11 | 1186.6432      | 593.8255        |
| 1733.8499      | 16 | T 10 | 1058.5846      | 529.7962        |
| 1820.8819      | 17 | S 9  | 957.5369       | 479.2724        |
| 1919.9503      | 18 | V 8  | 870.5049       | 435.7564        |
| 1976.9718      | 19 | G 7  | 771.4365       | 386.2222        |
| 2090.0559      | 20 | L 6  | 714.4150       | 357.7114        |
| 2203.1399      | 21 | L 5  | 601.3310       | 301.1694        |
| 2318.1669      | 22 | D 4  | 488.2469       | 244.6274        |
| 2419.2145      | 23 | T 3  | 373.2199       | 187.1139        |
| 2516.2673      | 24 | P 2  | 272.1723       | 136.5900        |
|                | 25 | R 1  | 175.1195       | 88.0637         |

N-term:+43.02

X-range:

-

MassTol: Y-zoom:

MassType:

AVG  MONO

Axis:

1  2

Label:

I  M  -

Ions:

a  +  2+  3+

b  +  2+  3+

c  +  2+  3+

x  +  2+  3+

y  +  2+  3+

z  +  2+  3+

hide H<sub>2</sub>O/NH<sub>3</sub>

zoom 112-122

GO

SSGALLPKPQMR, MH+ 1354.7517, m/z 677.8795  
 H OS G25 P150811 220811-s1.05013.05013.2.dta

X-range:

-

MassTol: Y-zoom:

MassType:

AVG  MONO

Axis:

1  2

Label:

I  M  -

Ions:

a  +  2+  3+

b  +  2+  3+

c  +  2+  3+

x  +  2+  3+

y  +  2+  3+

z  +  2+  3+

hide H<sub>2</sub>O/NH<sub>3</sub>

zoom 112-122

GO

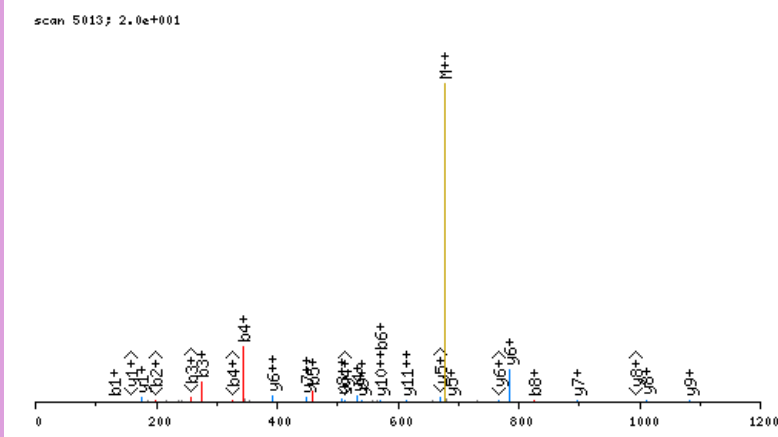

click image to zoom in; click top corners to zoom out [\[precursor±\]](#)

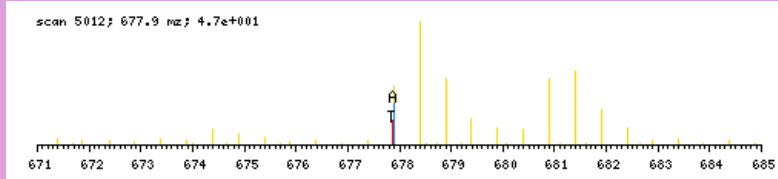

zoomed in precursor plot; T=theoretical m/z, A=acquired m/z

| b <sup>+</sup> | #  | AA # | y <sup>+</sup> | y <sup>2+</sup> |
|----------------|----|------|----------------|-----------------|
| 130.0504       | 1  | S 12 |                |                 |
| 217.0825       | 2  | S 11 | 1225.7091      | 613.3585        |
| 274.1039       | 3  | G 10 | 1138.6771      | 569.8425        |
| 345.1410       | 4  | A 9  | 1081.6556      | 541.3317        |
| 458.2251       | 5  | L 8  | 1010.6185      | 505.8132        |
| 571.3092       | 6  | L 7  | 897.5345       | 449.2711        |
| 668.3619       | 7  | P 6  | 784.4504       | 392.7291        |
| 824.4882       | 8  | K 5  | 687.3976       | 344.2027        |
| 921.5410       | 9  | P 4  | 531.2713       | 266.1396        |
| 1049.5996      | 10 | Q 3  | 434.2186       | 217.6132        |
| 1180.6401      | 11 | M 2  | 306.1600       | 153.5839        |
|                | 12 | R 1  | 175.1195       | 88.0637         |

N-term:+43.02 K(8):+156.13

SSIGTGYDLSASTFSPDGR, MH+ 1959.8936, m/z 653.9694  
 H OS G29 P150811 220811-s1.05536.05536.3.dta

X-range:

-

MassTol: Y-zoom:

MassType:

AVG  MONO

Axis:

1  2

Label:

I  M  -

Ions:

a  +  2+  3+

b  +  2+  3+

c  +  2+  3+

x  +  2+  3+

y  +  2+  3+

z  +  2+  3+

hide H<sub>2</sub>O/NH<sub>3</sub>

zoom 112-122

GO

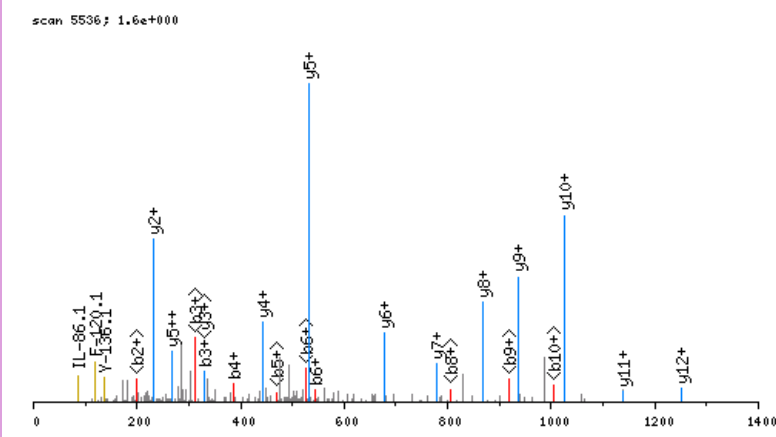

click image to zoom in; click top corners to zoom out [\[precursor±\]](#)

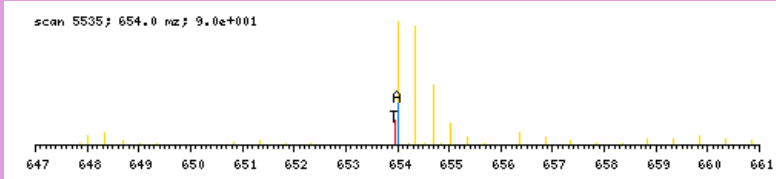

zoomed in precursor plot; T=theoretical m/z, A=acquired m/z

| b <sup>+</sup> | #  | AA # | y <sup>+</sup> | y <sup>2+</sup> |
|----------------|----|------|----------------|-----------------|
| 130.0504       | 1  | S 19 |                |                 |
| 217.0825       | 2  | S 18 | 1830.8510      | 915.9294        |
| 330.1665       | 3  | I 17 | 1743.8190      | 872.4134        |
| 387.1880       | 4  | G 16 | 1630.7349      | 815.8714        |
| 488.2357       | 5  | T 15 | 1573.7134      | 787.3606        |
| 545.2571       | 6  | G 14 | 1472.6658      | 736.8368        |
| 708.3205       | 7  | Y 13 | 1415.6443      | 708.3261        |
| 823.3474       | 8  | D 12 | 1252.5810      | 626.7944        |
| 936.4315       | 9  | L 11 | 1137.5540      | 569.2809        |
| 1023.4635      | 10 | S 10 | 1024.4700      | 512.7389        |
| 1094.5006      | 11 | A 9  | 937.4379       | 469.2229        |
| 1181.5326      | 12 | S 8  | 866.4008       | 433.7043        |
| 1282.5803      | 13 | T 7  | 779.3688       | 390.1883        |
| 1429.6487      | 14 | F 6  | 678.3211       | 339.6645        |
| 1516.6808      | 15 | S 5  | 531.2527       | 266.1303        |
| 1613.7335      | 16 | P 4  | 444.2207       | 222.6142        |
| 1728.7605      | 17 | D 3  | 347.1679       | 174.0879        |
| 1785.7819      | 18 | G 2  | 232.1410       | 116.5744        |
|                | 19 | R 1  | 175.1195       | 88.0637         |

N-term:+43.02

SSIKVECVLR, MH+ 1266.7304, m/z 633.8688  
 H OS G25 P150811 220811-s1.05530.05530.2.dta

scan 5530; 1.1e+001

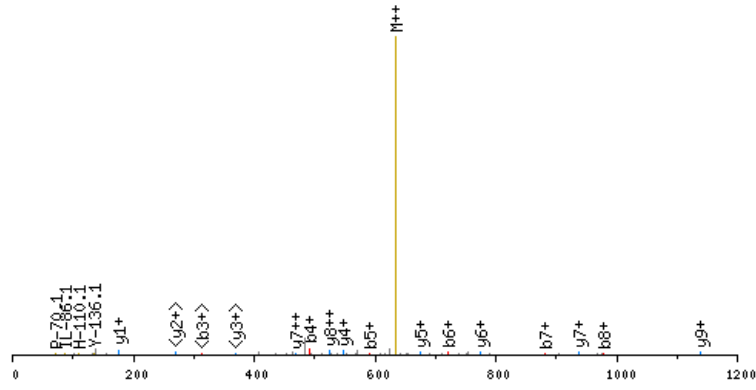

click image to zoom in; click top corners to zoom out [\[precursor±\]](#)

scan 5527; 633.9 mz; 1.5e+002

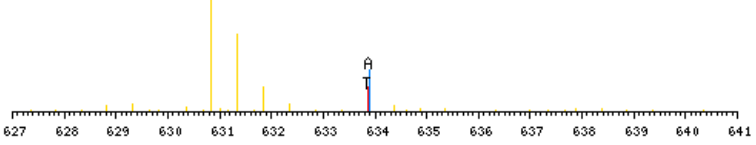

zoomed in precursor plot; T=theoretical m/z, A=acquired m/z

X-range:

-

MassTol: Y-zoom:

MassType:

AVG  MONO

Axis:

1  2

Label:

I  M  -

Ions:

a  +  2+  3+

b  +  2+  3+

c  +  2+  3+

x  +  2+  3+

y  +  2+  3+

z  +  2+  3+

hide H<sub>2</sub>O/NH<sub>3</sub>

zoom 112-122

GO

| b <sup>+</sup> | #  | AA | #  | y <sup>+</sup> | y <sup>2+</sup> |
|----------------|----|----|----|----------------|-----------------|
| 130.0504       | 1  | S  | 10 |                |                 |
| 217.0825       | 2  | S  | 9  | 1137.6878      | 569.3478        |
| 330.1665       | 3  | I  | 8  | 1050.6557      | 525.8318        |
| 492.3246       | 4  | K  | 7  | 937.5717       | 469.2898        |
| 591.3930       | 5  | V  | 6  | 775.4136       | 388.2107        |
| 720.4356       | 6  | E  | 5  | 676.3452       | 338.6765        |
| 880.4662       | 7  | C  | 4  | 547.3026       | 274.1552        |
| 979.5346       | 8  | V  | 3  | 387.2720       | 194.1399        |
| 1092.6187      | 9  | L  | 2  | 288.2036       | 144.6057        |
|                | 10 | R  | 1  | 175.1195       | 88.0637         |

N-term:+43.02 K(4):+162.16  
 C(7):+160.03

SSKTASTNSIAQAR, MH+ 1497.8086, m/z 499.9410  
 H OS G25 P150811 220811-s1.02193.02193.3.dta

scan 2193; 3.8e+000

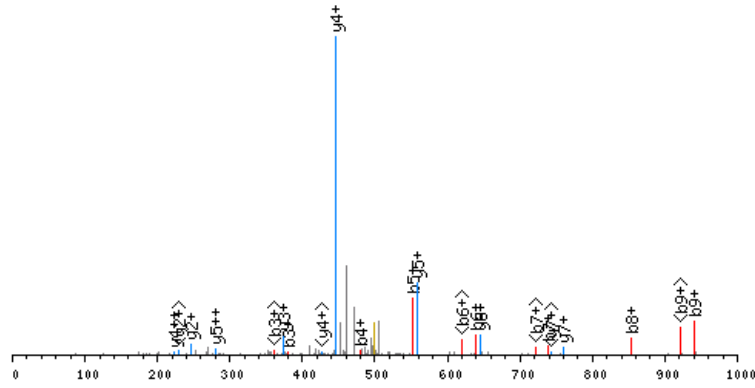

click image to zoom in; click top corners to zoom out [\[precursor±\]](#)

scan 2192; 499.9 m/z; 9.3e+000

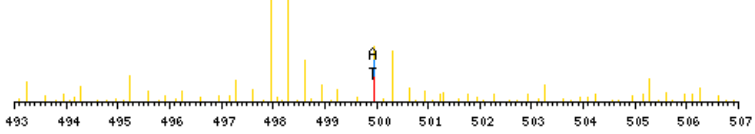

zoomed in precursor plot; T=theoretical m/z, A=acquired m/z

X-range:

-

MassTol: Y-zoom:

MassType:

AVG  MONO

Axis:

1  2

Label:

I  M  -

Ions:

a  +  2+  3+

b  +  2+  3+

c  +  2+  3+

x  +  2+  3+

y  +  2+  3+

z  +  2+  3+

hide H<sub>2</sub>O/NH<sub>3</sub>

zoom 112-122

GO

| b <sup>+</sup> | #  | AA # | y <sup>+</sup> | y <sup>2+</sup> |
|----------------|----|------|----------------|-----------------|
| 130.0504       | 1  | S 14 |                |                 |
| 217.0825       | 2  | S 13 | 1368.7660      | 684.8869        |
| 379.2406       | 3  | K 12 | 1281.7339      | 641.3709        |
| 480.2882       | 4  | T 11 | 1119.5758      | 560.2918        |
| 551.3253       | 5  | A 10 | 1018.5281      | 509.7680        |
| 638.3574       | 6  | S 9  | 947.4910       | 474.2494        |
| 739.4051       | 7  | T 8  | 860.4590       | 430.7334        |
| 853.4480       | 8  | N 7  | 759.4113       | 380.2096        |
| 940.4800       | 9  | S 6  | 645.3684       | 323.1881        |
| 1053.5641      | 10 | I 5  | 558.3364       | 279.6721        |
| 1124.6012      | 11 | A 4  | 445.2523       | 223.1301        |
| 1252.6598      | 12 | Q 3  | 374.2152       | 187.6115        |
| 1323.6969      | 13 | A 2  | 246.1566       | 123.5822        |
|                | 14 | R 1  | 175.1195       | 88.0637         |

N-term:+43.02 K(3):+162.16

SSLEISNSCFSPETR, MH+ 1755.7859, m/z 878.3966  
 H OS G29 P150811 220811-s1.04839.04839.2.dta

X-range:

-

MassTol: Y-zoom:

MassType:

AVG  MONO

Axis:

1  2

Label:

I  M  -

Ions:

a  +  2+  3+

b  +  2+  3+

c  +  2+  3+

x  +  2+  3+

y  +  2+  3+

z  +  2+  3+

hide H<sub>2</sub>O/NH<sub>3</sub>

zoom 112-122

GO

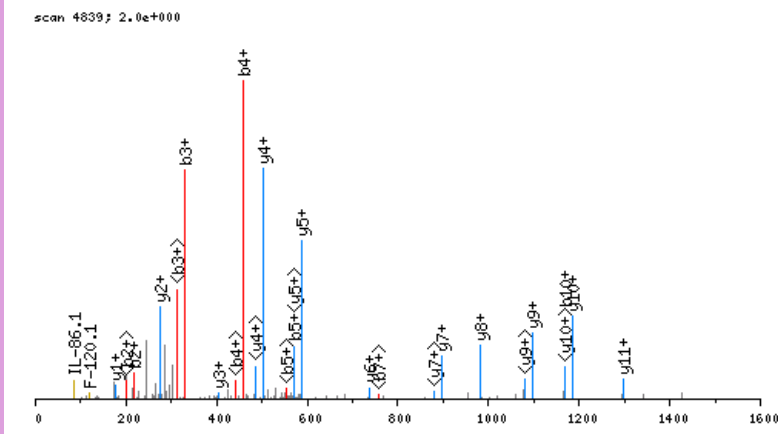

click image to zoom in; click top corners to zoom out [\[precursor±\]](#)

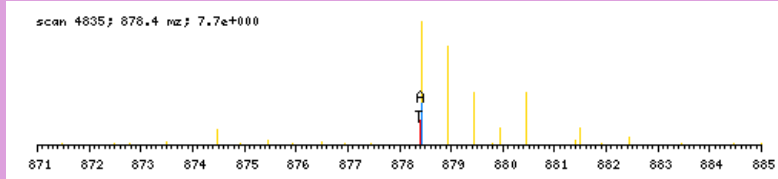

zoomed in precursor plot; T=theoretical m/z, A=acquired m/z

| b <sup>+</sup> | #  | AA # | y <sup>+</sup> | y <sup>2+</sup> |
|----------------|----|------|----------------|-----------------|
| 130.0504       | 1  | S 15 |                |                 |
| 217.0825       | 2  | S 14 | 1626.7433      | 813.8756        |
| 330.1665       | 3  | L 13 | 1539.7113      | 770.3596        |
| 459.2091       | 4  | E 12 | 1426.6272      | 713.8175        |
| 572.2932       | 5  | I 11 | 1297.5846      | 649.2962        |
| 659.3252       | 6  | S 10 | 1184.5006      | 592.7542        |
| 773.3681       | 7  | N 9  | 1097.4685      | 549.2382        |
| 860.4002       | 8  | S 8  | 983.4256       | 492.2167        |
| 1020.4308      | 9  | C 7  | 896.3936       | 448.7007        |
| 1167.4992      | 10 | F 6  | 736.3630       | 368.6854        |
| 1254.5312      | 11 | S 5  | 589.2946       | 295.1512        |
| 1351.5840      | 12 | P 4  | 502.2625       | 251.6352        |
| 1480.6266      | 13 | E 3  | 405.2098       | 203.1088        |
| 1581.6742      | 14 | T 2  | 276.1672       | 138.5875        |
|                | 15 | R 1  | 175.1195       | 88.0637         |

N-term:+43.02 C(9):+160.03

SSSAASPLFAPGEDCGPAWR, MH+ 2104.9398, m/z 702.3181  
 H OS G29 P150811 220811-s1.05837.05837.3.dta

X-range:

-

MassTol: Y-zoom:

MassType:

AVG  MONO

Axis:

1  2

Label:

I  M  -

Ions:

a  +  2+  3+

b  +  2+  3+

c  +  2+  3+

x  +  2+  3+

y  +  2+  3+

z  +  2+  3+

hide H<sub>2</sub>O/NH<sub>3</sub>

zoom 112-122

GO

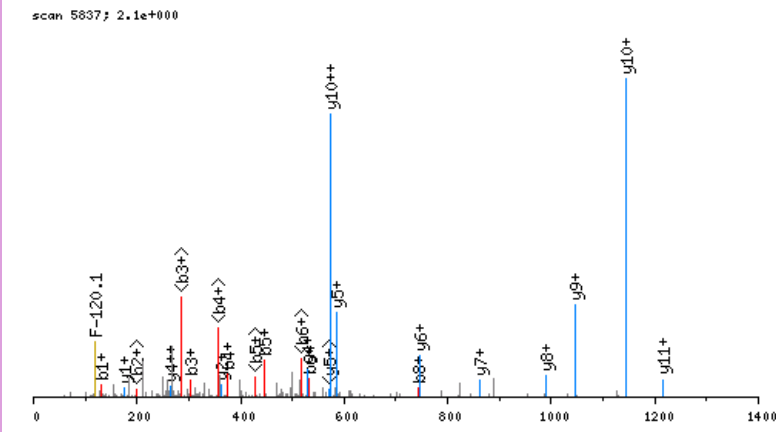

click image to zoom in; click top corners to zoom out [\[precursor±\]](#)

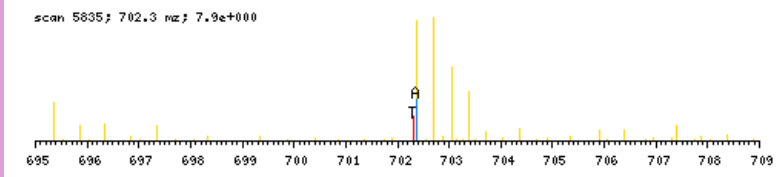

zoomed in precursor plot; T=theoretical m/z, A=acquired m/z

| b <sup>+</sup> | #  | AA # | y <sup>+</sup> | y <sup>2+</sup> |
|----------------|----|------|----------------|-----------------|
| 130.0504       | 1  | S 20 |                |                 |
| 217.0825       | 2  | S 19 | 1975.8972      | 988.4525        |
| 304.1145       | 3  | S 18 | 1888.8652      | 944.9365        |
| 375.1516       | 4  | A 17 | 1801.8331      | 901.4205        |
| 446.1887       | 5  | A 16 | 1730.7960      | 865.9019        |
| 533.2207       | 6  | S 15 | 1659.7589      | 830.3834        |
| 630.2735       | 7  | P 14 | 1572.7269      | 786.8673        |
| 743.3576       | 8  | L 13 | 1475.6741      | 738.3410        |
| 890.4260       | 9  | F 12 | 1362.5900      | 681.7989        |
| 961.4631       | 10 | A 11 | 1215.5216      | 608.2647        |
| 1058.5159      | 11 | P 10 | 1144.4845      | 572.7462        |
| 1115.5373      | 12 | G 9  | 1047.4318      | 524.2198        |
| 1244.5799      | 13 | E 8  | 990.4103       | 495.7091        |
| 1359.6069      | 14 | D 7  | 861.3677       | 431.1878        |
| 1519.6375      | 15 | C 6  | 746.3408       | 373.6743        |
| 1576.6589      | 16 | G 5  | 586.3102       | 293.6590        |
| 1673.7117      | 17 | P 4  | 529.2887       | 265.1483        |
| 1744.7488      | 18 | A 3  | 432.2359       | 216.6219        |
| 1930.8281      | 19 | W 2  | 361.1988       | 181.1033        |
|                | 20 | R 1  | 175.1195       | 88.0637         |

N-term:+43.02 C(15);+160.03

SSSASAANGNDSKKFKGDNR, MH+ 2167.0745, m/z 542.5241  
 H OS G28 P150811 220811-s1.01824.01824.4.dta

X-range:

-

MassTol: Y-zoom:

MassType:

AVG  MONO

Axis:

1  2

Label:

I  M  -

Ions:

a  +  2+  3+

b  +  2+  3+

c  +  2+  3+

x  +  2+  3+

y  +  2+  3+

z  +  2+  3+

hide H<sub>2</sub>O/NH<sub>3</sub>

zoom 112-122

GO

scan 1824; 2.8e+000

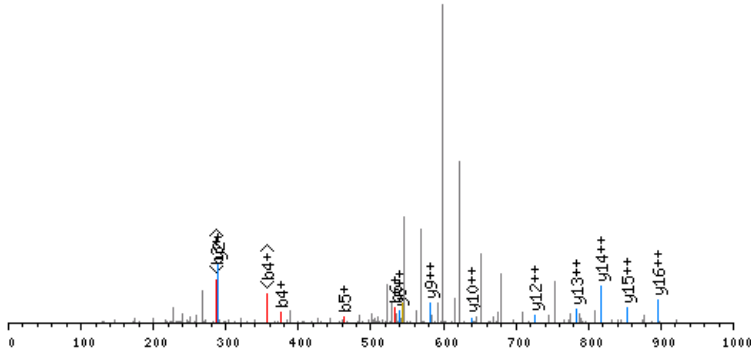

click image to zoom in; click top corners to zoom out [precursor±]

scan 1823; 542.5 mz; 5.7e+000

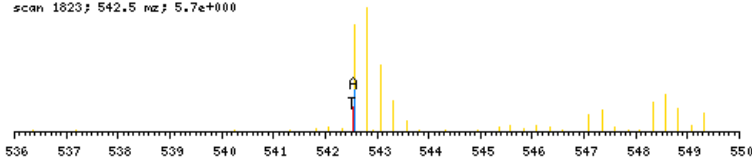

zoomed in precursor plot; T=theoretical m/z, A=acquired m/z

| b <sup>+</sup> | #  | AA | #  | y <sup>+</sup> | y <sup>2+</sup> |
|----------------|----|----|----|----------------|-----------------|
| 130.0504       | 1  | S  | 20 |                |                 |
| 217.0825       | 2  | S  | 19 | 2038.0319      | 1019.5198       |
| 304.1145       | 3  | S  | 18 | 1950.9998      | 976.0038        |
| 375.1516       | 4  | A  | 17 | 1863.9678      | 932.4878        |
| 462.1836       | 5  | S  | 16 | 1792.9307      | 896.9693        |
| 533.2207       | 6  | A  | 15 | 1705.8987      | 853.4532        |
| 604.2579       | 7  | A  | 14 | 1634.8616      | 817.9347        |
| 718.3008       | 8  | N  | 13 | 1563.8244      | 782.4161        |
| 775.3222       | 9  | G  | 12 | 1449.7815      | 725.3947        |
| 889.3652       | 10 | N  | 11 | 1392.7600      | 696.8839        |
| 1004.3921      | 11 | D  | 10 | 1278.7171      | 639.8625        |
| 1091.4241      | 12 | S  | 9  | 1163.6902      | 582.3490        |
| 1247.5504      | 13 | K  | 8  | 1076.6581      | 538.8330        |
| 1403.6767      | 14 | K  | 7  | 920.5318       | 460.7698        |
| 1550.7452      | 15 | F  | 6  | 764.4055       | 382.7067        |
| 1706.8715      | 16 | K  | 5  | 617.3371       | 309.1725        |
| 1763.8929      | 17 | G  | 4  | 461.2108       | 231.1093        |
| 1878.9199      | 18 | D  | 3  | 404.1894       | 202.5986        |
| 1992.9628      | 19 | N  | 2  | 289.1624       | 145.0851        |
|                | 20 | R  | 1  | 175.1195       | 88.0637         |

N-term:+43.02 K(13):+156.13  
 K(14):+156.13 K(16):+156.13



SSSRPVALVTGANKGIGFAITR, MH+ 2272.2778, m/z 758.0974  
 H OS G26 P150811 220811-s1.05761.05761.3.dta

scan 5761; 4.8e+001

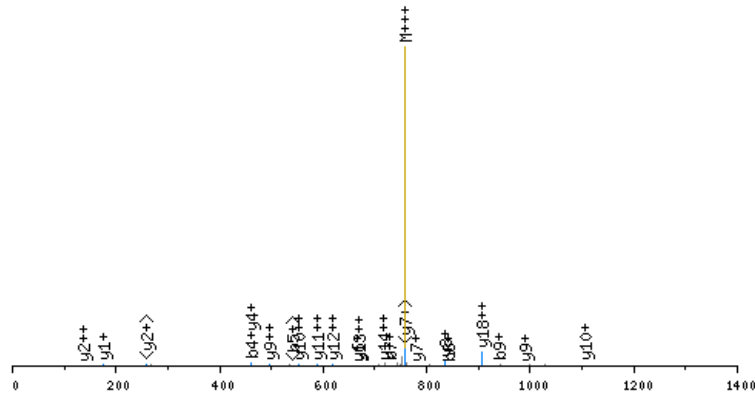

click image to zoom in; click top corners to zoom out [precursor±]

scan 5760; 758.1 mz; 3.7e+001

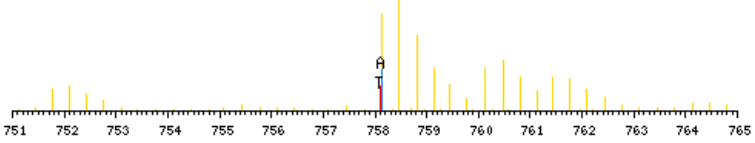

zoomed in precursor plot; T=theoretical m/z, A=acquired m/z

X-range:

-

MassTol: Y-zoom:

MassType:

AVG  MONO

Axis:

1  2

Label:

I  M  -

Ions:

a  +  2+  3+

b  +  2+  3+

c  +  2+  3+

x  +  2+  3+

y  +  2+  3+

z  +  2+  3+

hide H<sub>2</sub>O/NH<sub>3</sub>

zoom 112-122

GO

| b <sup>+</sup> | #  | AA | #  | y <sup>+</sup> | y <sup>2+</sup> |
|----------------|----|----|----|----------------|-----------------|
| 130.0504       | 1  | S  | 22 |                |                 |
| 217.0825       | 2  | S  | 21 | 2143.2352      | 1072.1215       |
| 304.1145       | 3  | S  | 20 | 2056.2032      | 1028.6055       |
| 460.2156       | 4  | R  | 19 | 1969.1711      | 985.0895        |
| 557.2684       | 5  | P  | 18 | 1813.0700      | 907.0389        |
| 656.3368       | 6  | V  | 17 | 1716.0173      | 858.5125        |
| 727.3739       | 7  | A  | 16 | 1616.9488      | 808.9783        |
| 840.4580       | 8  | L  | 15 | 1545.9117      | 773.4598        |
| 939.5264       | 9  | V  | 14 | 1432.8277      | 716.9177        |
| 1040.5740      | 10 | T  | 13 | 1333.7592      | 667.3835        |
| 1097.5955      | 11 | G  | 12 | 1232.7116      | 616.8597        |
| 1168.6326      | 12 | A  | 11 | 1175.6901      | 588.3490        |
| 1282.6755      | 13 | N  | 10 | 1104.6530      | 552.8304        |
| 1438.8018      | 14 | K  | 9  | 990.6101       | 495.8089        |
| 1495.8233      | 15 | G  | 8  | 834.4838       | 417.7458        |
| 1608.9074      | 16 | I  | 7  | 777.4623       | 389.2351        |
| 1665.9288      | 17 | G  | 6  | 664.3782       | 332.6930        |
| 1812.9973      | 18 | F  | 5  | 607.3568       | 304.1823        |
| 1884.0344      | 19 | A  | 4  | 460.2884       | 230.6481        |
| 1997.1184      | 20 | I  | 3  | 389.2512       | 195.1295        |
| 2098.1661      | 21 | T  | 2  | 276.1672       | 138.5875        |
|                | 22 | R  | 1  | 175.1195       | 88.0637         |

N-term:+43.02 K(14):+156.13

SSTQFNKGPSYGLSAEVKNR, MH+ 2268.1625, m/z 756.7257  
 H OS G26 P150811 220811-s1.03706.03706.3.dta

X-range:

-

MassTol: Y-zoom:

MassType:

AVG  MONO

Axis:

1  2

Label:

I  M  -

Ions:

a  +  2+  3+

b  +  2+  3+

c  +  2+  3+

x  +  2+  3+

y  +  2+  3+

z  +  2+  3+

hide H<sub>2</sub>O/NH<sub>3</sub>

zoom 112-122

GO

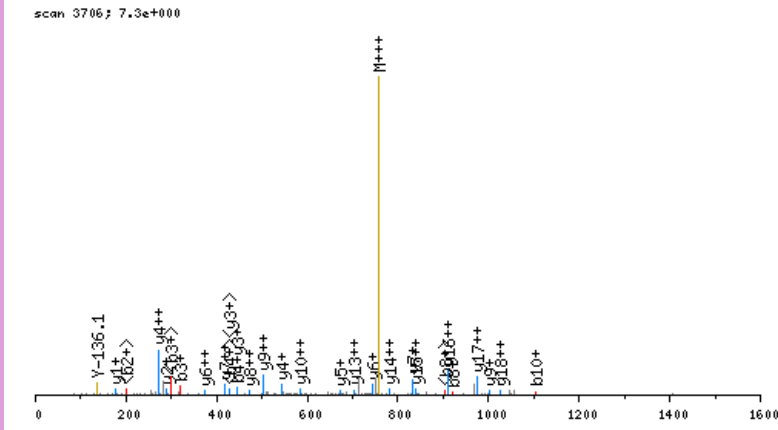

click image to zoom in; click top corners to zoom out [\[precursor±\]](#)

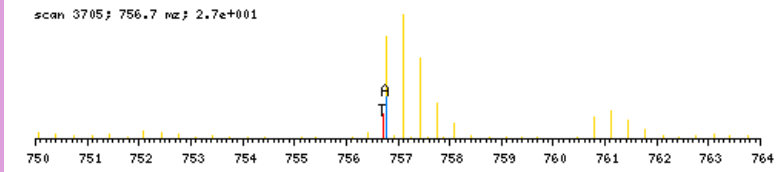

zoomed in precursor plot; T=theoretical m/z, A=acquired m/z

| b <sup>+</sup> | #  | AA | #  | y <sup>+</sup> | y <sup>2+</sup> |
|----------------|----|----|----|----------------|-----------------|
| 130.0504       | 1  | S  | 20 |                |                 |
| 217.0825       | 2  | S  | 19 | 2139.1199      | 1070.0639       |
| 318.1301       | 3  | T  | 18 | 2052.0879      | 1026.5479       |
| 446.1887       | 4  | Q  | 17 | 1951.0402      | 976.0240        |
| 593.2571       | 5  | F  | 16 | 1822.9816      | 911.9947        |
| 707.3001       | 6  | N  | 15 | 1675.9132      | 838.4605        |
| 863.4264       | 7  | K  | 14 | 1561.8703      | 781.4391        |
| 920.4478       | 8  | G  | 13 | 1405.7440      | 703.3759        |
| 1017.5006      | 9  | P  | 12 | 1348.7225      | 674.8652        |
| 1104.5326      | 10 | S  | 11 | 1251.6698      | 626.3388        |
| 1267.5959      | 11 | Y  | 10 | 1164.6377      | 582.8228        |
| 1324.6174      | 12 | G  | 9  | 1001.5744      | 501.2911        |
| 1437.7015      | 13 | L  | 8  | 944.5529       | 472.7804        |
| 1524.7335      | 14 | S  | 7  | 831.4689       | 416.2384        |
| 1595.7706      | 15 | A  | 6  | 744.4368       | 372.7223        |
| 1724.8132      | 16 | E  | 5  | 673.3997       | 337.2038        |
| 1823.8816      | 17 | V  | 4  | 544.3571       | 272.6825        |
| 1980.0079      | 18 | K  | 3  | 445.2887       | 223.1483        |
| 2094.0508      | 19 | N  | 2  | 289.1624       | 145.0851        |
|                | 20 | R  | 1  | 175.1195       | 88.0637         |

N-term: +43.02 K(7): +156.13  
 K(18): +156.13

SSVAVLTPQESFAEHR, MH+ 1702.8400, m/z 568.2849  
 H OS G25 P150811 220811-s1.06918.06918.3.dta

X-range:

-

MassTol: Y-zoom:

MassType:

AVG  MONO

Axis:

1  2

Label:

I  M  -

Ions:

a  +  2+  3+

b  +  2+  3+

c  +  2+  3+

x  +  2+  3+

y  +  2+  3+

z  +  2+  3+

hide H<sub>2</sub>O/NH<sub>3</sub>

zoom 112-122

GO

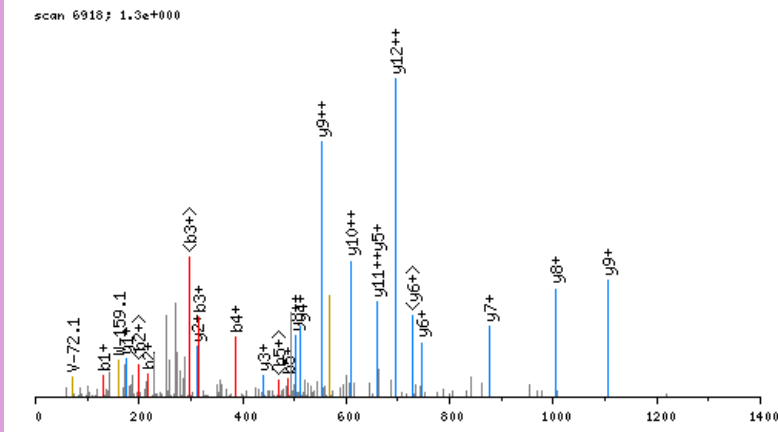

click image to zoom in; click top corners to zoom out [\[precursor±\]](#)

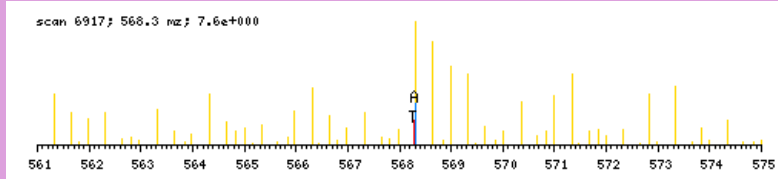

zoomed in precursor plot; T=theoretical m/z, A=acquired m/z

| b <sup>+</sup> | #  | AA # | y <sup>+</sup> | y <sup>2+</sup> |
|----------------|----|------|----------------|-----------------|
| 130.0504       | 1  | S 15 |                |                 |
| 217.0825       | 2  | S 14 | 1573.7974      | 787.4026        |
| 316.1509       | 3  | V 13 | 1486.7654      | 743.8866        |
| 387.1880       | 4  | A 12 | 1387.6970      | 694.3524        |
| 486.2564       | 5  | V 11 | 1316.6599      | 658.8339        |
| 599.3405       | 6  | L 10 | 1217.5915      | 609.2997        |
| 700.3881       | 7  | T 9  | 1104.5074      | 552.7576        |
| 828.4467       | 8  | Q 8  | 1003.4597      | 502.2338        |
| 957.4893       | 9  | E 7  | 875.4012       | 438.2045        |
| 1044.5213      | 10 | S 6  | 746.3586       | 373.6832        |
| 1191.5898      | 11 | F 5  | 659.3265       | 330.1672        |
| 1262.6269      | 12 | A 4  | 512.2581       | 256.6330        |
| 1391.6695      | 13 | E 3  | 441.2210       | 221.1144        |
| 1528.7284      | 14 | H 2  | 312.1784       | 156.5931        |
|                | 15 | R 1  | 175.1195       | 88.0637         |

N-term:+43.02

STGTFVVSQPLNYR, MH+ 1610.8179, m/z 805.9126  
 H OS G29 P150811 220811-s1.04943.04943.2.dta

X-range:

-

MassTol: Y-zoom:

MassType:

AVG  MONO

Axis:

1  2

Label:

I  M  -

Ions:

a  +  2+  3+

b  +  2+  3+

c  +  2+  3+

x  +  2+  3+

y  +  2+  3+

z  +  2+  3+

hide H<sub>2</sub>O/NH<sub>3</sub>

zoom 112-122

GO

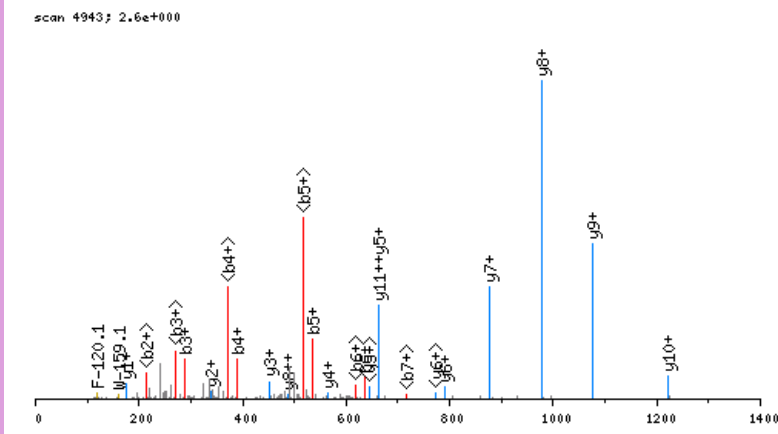

click image to zoom in; click top corners to zoom out [\[precursor±\]](#)

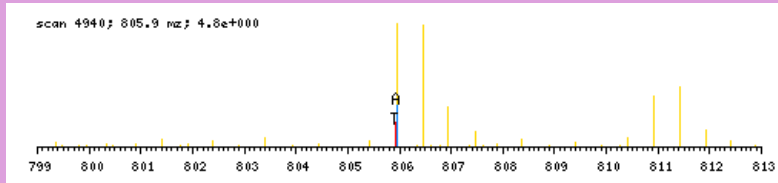

zoomed in precursor plot; T=theoretical m/z, A=acquired m/z

| b <sup>+</sup> | #  | AA # | y <sup>+</sup> | y <sup>2+</sup> |
|----------------|----|------|----------------|-----------------|
| 130.0504       | 1  | S 14 |                |                 |
| 231.0981       | 2  | T 13 | 1481.7753      | 741.3915        |
| 288.1196       | 3  | G 12 | 1380.7276      | 690.8677        |
| 389.1672       | 4  | T 11 | 1323.7061      | 662.3570        |
| 536.2357       | 5  | F 10 | 1222.6584      | 611.8331        |
| 635.3041       | 6  | V 9  | 1075.5900      | 538.2989        |
| 734.3725       | 7  | V 8  | 976.5216       | 488.7647        |
| 821.4045       | 8  | S 7  | 877.4532       | 439.2305        |
| 949.4631       | 9  | Q 6  | 790.4212       | 395.7145        |
| 1046.5159      | 10 | P 5  | 662.3626       | 331.6852        |
| 1159.5999      | 11 | L 4  | 565.3098       | 283.1588        |
| 1273.6429      | 12 | N 3  | 452.2258       | 226.6168        |
| 1436.7062      | 13 | Y 2  | 338.1828       | 169.5953        |
|                | 14 | R 1  | 175.1195       | 88.0637         |

N-term:+43.02

STGVPSGSSAATGSNR, MH+ 1477.6883, m/z 739.3478  
 H OS G29 P150811 220811-s1.02340.02340.2.dta

X-range:

-

MassTol: Y-zoom:

MassType:

AVG  MONO

Axis:

1  2

Label:

I  M  -

Ions:

a  +  2+  3+

b  +  2+  3+

c  +  2+  3+

x  +  2+  3+

y  +  2+  3+

z  +  2+  3+

hide H<sub>2</sub>O/NH<sub>3</sub>

zoom 112-122

GO

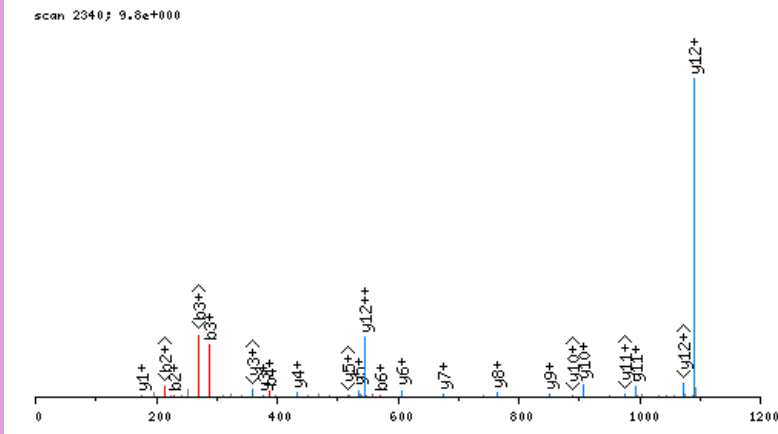

click image to zoom in; click top corners to zoom out [\[precursor±\]](#)

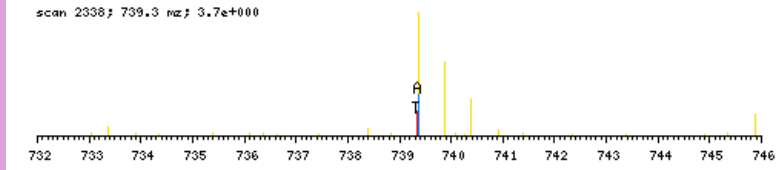

zoomed in precursor plot; T=theoretical m/z, A=acquired m/z

| b <sup>+</sup> | #  | AA # | y <sup>+</sup> | y <sup>2+</sup> |
|----------------|----|------|----------------|-----------------|
| 130.0504       | 1  | S 16 |                |                 |
| 231.0981       | 2  | T 15 | 1348.6457      | 674.8268        |
| 288.1196       | 3  | G 14 | 1247.5980      | 624.3029        |
| 387.1880       | 4  | V 13 | 1190.5766      | 595.7922        |
| 484.2407       | 5  | P 12 | 1091.5081      | 546.2580        |
| 571.2728       | 6  | S 11 | 994.4554       | 497.7316        |
| 628.2942       | 7  | G 10 | 907.4233       | 454.2156        |
| 715.3263       | 8  | S 9  | 850.4019       | 425.7049        |
| 802.3583       | 9  | S 8  | 763.3699       | 382.1888        |
| 873.3954       | 10 | A 7  | 676.3378       | 338.6728        |
| 944.4325       | 11 | A 6  | 605.3007       | 303.1543        |
| 1045.4802      | 12 | T 5  | 534.2636       | 267.6357        |
| 1102.5017      | 13 | G 4  | 433.2159       | 217.1119        |
| 1189.5337      | 14 | S 3  | 376.1945       | 188.6011        |
| 1303.5766      | 15 | N 2  | 289.1624       | 145.0851        |
|                | 16 | R 1  | 175.1195       | 88.0637         |

N-term:+43.02

STMYPGIADR, MH+ 1152.5359, m/z 576.7716  
 H OS G25 P150811 220811-s1.04188.04188.2.dta

scan 4188; 1.4e+001

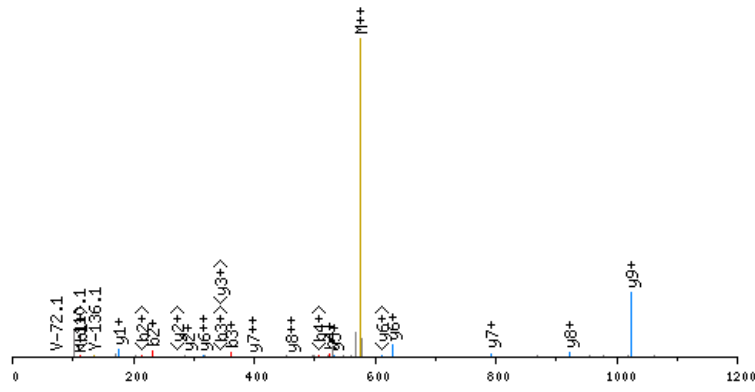

click image to zoom in; click top corners to zoom out [\[precursor±\]](#)

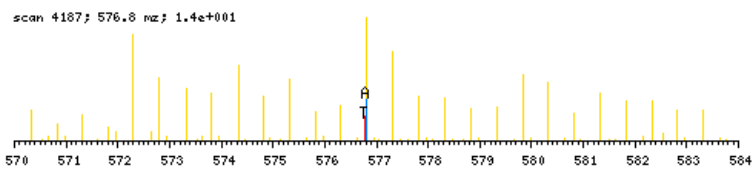

zoomed in precursor plot; T=theoretical m/z, A=acquired m/z

X-range:

-

MassTol: Y-zoom:

MassType:

AVG  MONO

Axis:

1  2

Label:

I  M  -

Ions:

a  +  2+  3+

b  +  2+  3+

c  +  2+  3+

x  +  2+  3+

y  +  2+  3+

z  +  2+  3+

hide H<sub>2</sub>O/NH<sub>3</sub>

zoom 112-122

GO

| b <sup>+</sup> | #  | AA | #  | y <sup>+</sup> | y <sup>2+</sup> |
|----------------|----|----|----|----------------|-----------------|
| 130.0504       | 1  | S  | 10 |                |                 |
| 231.0981       | 2  | T  | 9  | 1023.4933      | 512.2506        |
| 362.1386       | 3  | M  | 8  | 922.4457       | 461.7267        |
| 525.2019       | 4  | Y  | 7  | 791.4052       | 396.2065        |
| 622.2547       | 5  | P  | 6  | 628.3418       | 314.6748        |
| 679.2761       | 6  | G  | 5  | 531.2891       | 266.1485        |
| 792.3602       | 7  | I  | 4  | 474.2676       | 237.6377        |
| 863.3973       | 8  | A  | 3  | 361.1836       | 181.0957        |
| 978.4243       | 9  | D  | 2  | 290.1464       | 145.5771        |
|                | 10 | R  | 1  | 175.1195       | 88.0637         |

N-term:+43.02

STTTGPEAAPKPSAKSIYEQR, MH+ 2317.2040, m/z 773.0729  
 H OS G26 P150811 220811-s1.03007.03007.3.dta

X-range:

-

MassTol: Y-zoom:

MassType:

AVG  MONO

Axis:

1  2

Label:

I  M  -

Ions:

a  +  2+  3+

b  +  2+  3+

c  +  2+  3+

x  +  2+  3+

y  +  2+  3+

z  +  2+  3+

hide H<sub>2</sub>O/NH<sub>3</sub>

zoom 112-122

GO

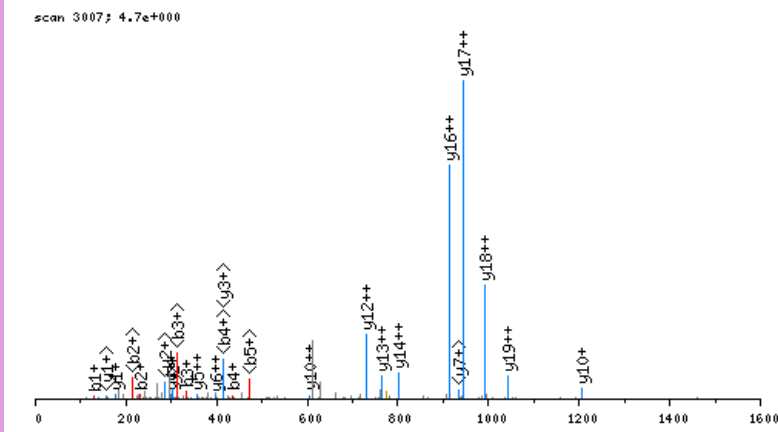

click image to zoom in; click top corners to zoom out [\[precursor±\]](#)

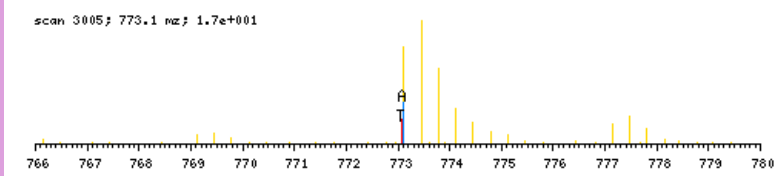

zoomed in precursor plot; T=theoretical m/z, A=acquired m/z

| b <sup>+</sup> | #  | AA | #  | y <sup>+</sup> | y <sup>2+</sup> |
|----------------|----|----|----|----------------|-----------------|
| 130.0504       | 1  | S  | 21 |                |                 |
| 231.0981       | 2  | T  | 20 | 2188.1614      | 1094.5846       |
| 332.1458       | 3  | T  | 19 | 2087.1138      | 1044.0608       |
| 433.1935       | 4  | T  | 18 | 1986.0661      | 993.5370        |
| 490.2149       | 5  | G  | 17 | 1885.0184      | 943.0131        |
| 587.2677       | 6  | P  | 16 | 1827.9969      | 914.5024        |
| 716.3103       | 7  | E  | 15 | 1730.9442      | 865.9760        |
| 787.3474       | 8  | A  | 14 | 1601.9016      | 801.4547        |
| 858.3845       | 9  | A  | 13 | 1530.8645      | 765.9362        |
| 955.4373       | 10 | P  | 12 | 1459.8274      | 730.4176        |
| 1111.5636      | 11 | K  | 11 | 1362.7746      | 681.8912        |
| 1208.6163      | 12 | P  | 10 | 1206.6483      | 603.8281        |
| 1295.6484      | 13 | S  | 9  | 1109.5955      | 555.3017        |
| 1366.6855      | 14 | A  | 8  | 1022.5635      | 511.7857        |
| 1522.8118      | 15 | K  | 7  | 951.5264       | 476.2671        |
| 1609.8438      | 16 | S  | 6  | 795.4001       | 398.2040        |
| 1722.9279      | 17 | I  | 5  | 708.3681       | 354.6879        |
| 1885.9912      | 18 | Y  | 4  | 595.2840       | 298.1459        |
| 2015.0338      | 19 | E  | 3  | 432.2207       | 216.6142        |
| 2143.0924      | 20 | Q  | 2  | 303.1781       | 152.0930        |
|                | 21 | R  | 1  | 175.1195       | 88.0637         |

N-term:+43.02 K(11):+156.13  
 K(15):+156.13

SVFGKLFAGGGKAGKGGPTPQEAIQR, MH+ 2741.5104, m/z 686.1331  
 H OS G27 P150811 220811-s1.06704.06704.4.dta

scan 6704; 2.2e+001

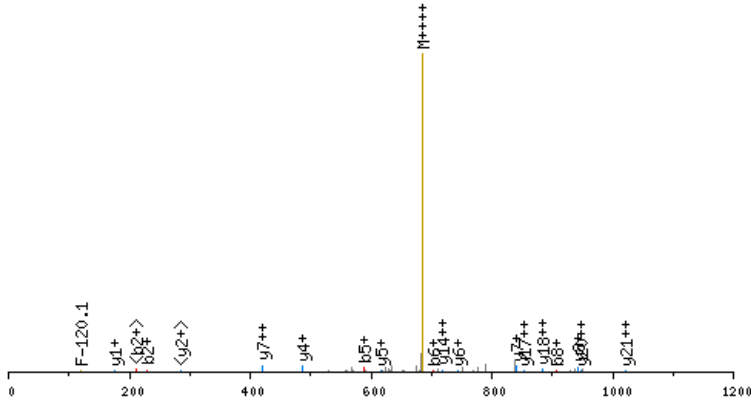

click image to zoom in; click top corners to zoom out [\[precursor±\]](#)

scan 6702; 686.1 m/z; 1.2e+001

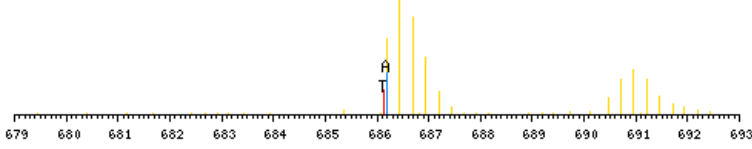

zoomed in precursor plot; T=theoretical m/z, A=acquired m/z

X-range:

-

MassTol: Y-zoom:

MassType:

AVG  MONO

Axis:

1  2

Label:

I  M  -

Ions:

a  +  2+  3+

b  +  2+  3+

c  +  2+  3+

x  +  2+  3+

y  +  2+  3+

z  +  2+  3+

hide H<sub>2</sub>O/NH<sub>3</sub>

zoom 112-122

GO

| b <sup>+</sup> | #  | AA # | y <sup>+</sup> | y <sup>2+</sup> |
|----------------|----|------|----------------|-----------------|
| 130.0504       | 1  | S    | 27             |                 |
| 229.1188       | 2  | V    | 26             | 2612.4678       |
| 376.1873       | 3  | F    | 25             | 2513.3994       |
| 433.2087       | 4  | G    | 24             | 2366.3309       |
| 589.3350       | 5  | K    | 23             | 2309.3095       |
| 702.4191       | 6  | L    | 22             | 2153.1832       |
| 849.4875       | 7  | F    | 21             | 2040.0991       |
| 906.5090       | 8  | G    | 20             | 1893.0307       |
| 977.5461       | 9  | A    | 19             | 1836.0092       |
| 1034.5675      | 10 | G    | 18             | 1764.9721       |
| 1091.5890      | 11 | G    | 17             | 1707.9507       |
| 1148.6105      | 12 | G    | 16             | 1650.9292       |
| 1304.7368      | 13 | K    | 15             | 1593.9077       |
| 1375.7739      | 14 | A    | 14             | 1437.7814       |
| 1432.7953      | 15 | G    | 13             | 1366.7443       |
| 1588.9216      | 16 | K    | 12             | 1309.7229       |
| 1645.9431      | 17 | G    | 11             | 1153.5966       |
| 1702.9646      | 18 | G    | 10             | 1096.5751       |
| 1800.0173      | 19 | P    | 9              | 1039.5536       |
| 1901.0650      | 20 | T    | 8              | 942.5009        |
| 1998.1178      | 21 | P    | 7              | 841.4532        |
| 2126.1764      | 22 | Q    | 6              | 744.4004        |
| 2255.2189      | 23 | E    | 5              | 616.3418        |
| 2326.2561      | 24 | A    | 4              | 487.2993        |
| 2439.3401      | 25 | I    | 3              | 416.2621        |
| 2567.3987      | 26 | Q    | 2              | 303.1781        |
|                | 27 | R    | 1              | 175.1195        |

N-term:+43.02 K(5):+156.13  
 K(13):+156.13 K(16):+156.13



SVPLLTDAATVSGAER, MH+ 1628.8496, m/z 814.9284  
 H OS G29 P150811 220811-s1.06121.06121.2.dta

X-range:

-

MassTol: Y-zoom:

MassType:

AVG  MONO

Axis:

1  2

Label:

I  M  -

Ions:

a  +  2+  3+

b  +  2+  3+

c  +  2+  3+

x  +  2+  3+

y  +  2+  3+

z  +  2+  3+

hide H<sub>2</sub>O/NH<sub>3</sub>

zoom 112-122

GO

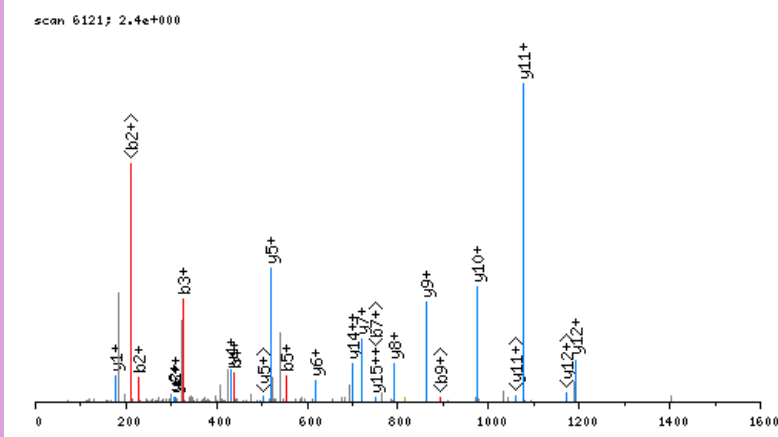

click image to zoom in; click top corners to zoom out [\[precursor±\]](#)

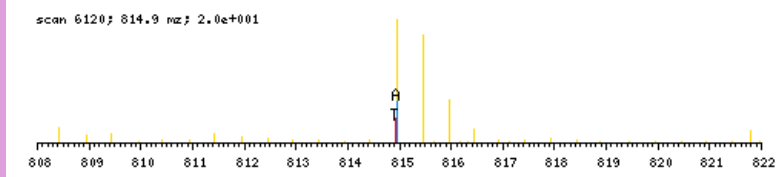

zoomed in precursor plot; T=theoretical m/z, A=acquired m/z

| b <sup>+</sup> | #  | AA # | y <sup>+</sup> | y <sup>2+</sup> |
|----------------|----|------|----------------|-----------------|
| 130.0504       | 1  | S 16 |                |                 |
| 229.1188       | 2  | V 15 | 1499.8069      | 750.4074        |
| 326.1716       | 3  | P 14 | 1400.7385      | 700.8732        |
| 439.2557       | 4  | L 13 | 1303.6858      | 652.3468        |
| 552.3397       | 5  | L 12 | 1190.6017      | 595.8048        |
| 653.3874       | 6  | T 11 | 1077.5176      | 539.2627        |
| 768.4144       | 7  | D 10 | 976.4700       | 488.7389        |
| 839.4515       | 8  | A 9  | 861.4430       | 431.2254        |
| 910.4886       | 9  | A 8  | 790.4059       | 395.7069        |
| 1011.5363      | 10 | T 7  | 719.3688       | 360.1883        |
| 1110.6047      | 11 | V 6  | 618.3211       | 309.6645        |
| 1197.6367      | 12 | S 5  | 519.2527       | 260.1303        |
| 1254.6582      | 13 | G 4  | 432.2207       | 216.6142        |
| 1325.6953      | 14 | A 3  | 375.1992       | 188.1035        |
| 1454.7379      | 15 | E 2  | 304.1621       | 152.5850        |
|                | 16 | R 1  | 175.1195       | 88.0637         |

N-term:+43.02

SVQVAAPGSTGLGPER, MH+ 1567.8080, m/z 784.4076  
 H OS G29 P150811 220811-s1.04009.04009.2.dta

X-range:

-

MassTol: Y-zoom:

MassType:

AVG  MONO

Axis:

1  2

Label:

I  M  -

Ions:

a  +  2+  3+

b  +  2+  3+

c  +  2+  3+

x  +  2+  3+

y  +  2+  3+

z  +  2+  3+

hide H<sub>2</sub>O/NH<sub>3</sub>

zoom 112-122

GO

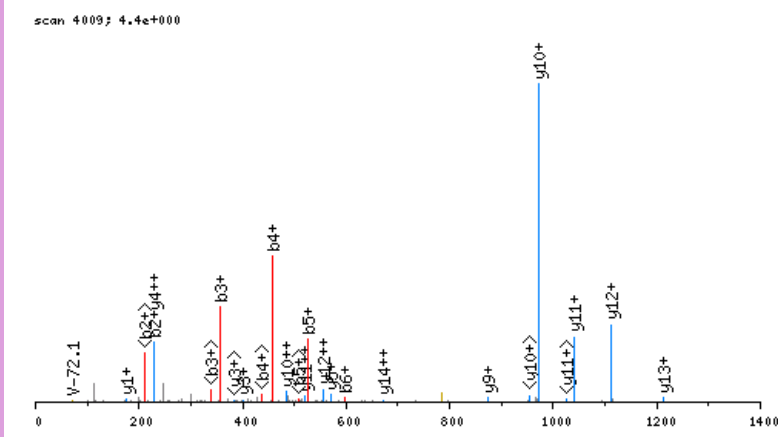

click image to zoom in; click top corners to zoom out [\[precursor±\]](#)

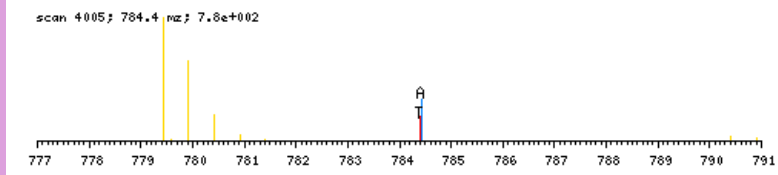

zoomed in precursor plot; T=theoretical m/z, A=acquired m/z

| b <sup>+</sup> | #  | AA # | y <sup>+</sup> | y <sup>2+</sup> |
|----------------|----|------|----------------|-----------------|
| 130.0504       | 1  | S 16 |                |                 |
| 229.1188       | 2  | V 15 | 1438.7654      | 719.8866        |
| 357.1774       | 3  | Q 14 | 1339.6970      | 670.3524        |
| 456.2458       | 4  | V 13 | 1211.6384      | 606.3231        |
| 527.2829       | 5  | A 12 | 1112.5700      | 556.7889        |
| 598.3201       | 6  | A 11 | 1041.5329      | 521.2704        |
| 695.3728       | 7  | P 10 | 970.4958       | 485.7518        |
| 752.3943       | 8  | G 9  | 873.4430       | 437.2254        |
| 839.4263       | 9  | S 8  | 816.4216       | 408.7147        |
| 940.4740       | 10 | T 7  | 729.3895       | 365.1987        |
| 997.4955       | 11 | G 6  | 628.3418       | 314.6748        |
| 1110.5795      | 12 | L 5  | 571.3204       | 286.1641        |
| 1167.6010      | 13 | G 4  | 458.2363       | 229.6221        |
| 1264.6538      | 14 | P 3  | 401.2149       | 201.1113        |
| 1393.6963      | 15 | E 2  | 304.1621       | 152.5850        |
|                | 16 | R 1  | 175.1195       | 88.0637         |

N-term:+43.02

SVVTGGGEAAGGGGGGAR, MH+ 1515.7152, m/z 758.3612  
 H OS G29 P150811 220811-s1.02547.02547.2.dta

X-range:

-

MassTol: Y-zoom:

MassType:

AVG  MONO

Axis:

1  2

Label:

I  M  -

Ions:

a  +  2+  3+

b  +  2+  3+

c  +  2+  3+

x  +  2+  3+

y  +  2+  3+

z  +  2+  3+

hide H<sub>2</sub>O/NH<sub>3</sub>

zoom 112-122

GO

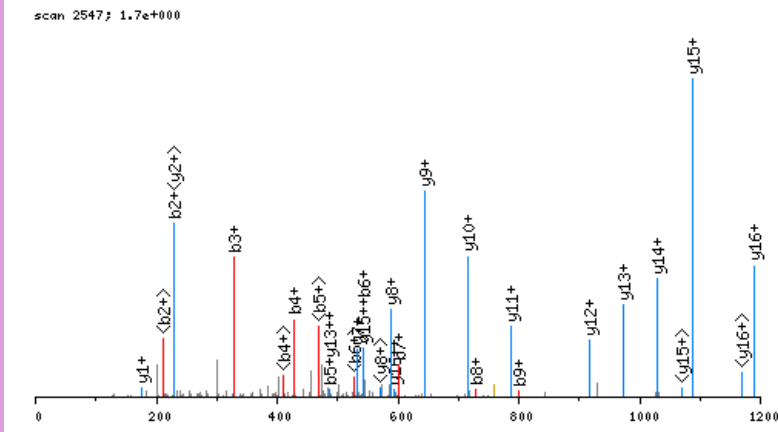

click image to zoom in; click top corners to zoom out [\[precursor±\]](#)

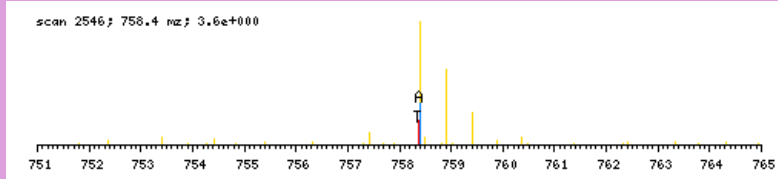

zoomed in precursor plot; T=theoretical m/z, A=acquired m/z

| b <sup>+</sup> | #  | AA # | y <sup>+</sup> | y <sup>2+</sup> |
|----------------|----|------|----------------|-----------------|
| 130.0504       | 1  | S 19 |                |                 |
| 229.1188       | 2  | V 18 | 1386.6726      | 693.8402        |
| 328.1873       | 3  | V 17 | 1287.6042      | 644.3060        |
| 429.2349       | 4  | T 16 | 1188.5358      | 594.7718        |
| 486.2564       | 5  | G 15 | 1087.4881      | 544.2479        |
| 543.2779       | 6  | G 14 | 1030.4666      | 515.7372        |
| 600.2993       | 7  | G 13 | 973.4451       | 487.2265        |
| 729.3419       | 8  | E 12 | 916.4237       | 458.7158        |
| 800.3790       | 9  | A 11 | 877.3811       | 394.1945        |
| 871.4161       | 10 | A 10 | 716.3440       | 358.6759        |
| 928.4376       | 11 | G 9  | 645.3069       | 323.1573        |
| 985.4591       | 12 | G 8  | 588.2854       | 294.6466        |
| 1042.4805      | 13 | G 7  | 531.2639       | 266.1359        |
| 1099.5020      | 14 | G 6  | 474.2425       | 237.6251        |
| 1156.5235      | 15 | G 5  | 417.2210       | 209.1144        |
| 1213.5449      | 16 | G 4  | 360.1995       | 180.6037        |
| 1270.5664      | 17 | G 3  | 303.1781       | 152.0930        |
| 1341.6035      | 18 | A 2  | 246.1566       | 123.5822        |
|                | 19 | R 1  | 175.1195       | 88.0637         |

N-term:+43.02

SYGPLDMYR, MH+ 1143.5145, m/z 572.2609  
 H OS G29 P150811 220811-s1.05284.05284.2.dta

X-range:

-

MassTol: Y-zoom:

MassType:

AVG  MONO

Axis:

1  2

Label:

I  M  -

Ions:

a  +  2+  3+

b  +  2+  3+

c  +  2+  3+

x  +  2+  3+

y  +  2+  3+

z  +  2+  3+

hide H<sub>2</sub>O/NH<sub>3</sub>

zoom 112-122

GO

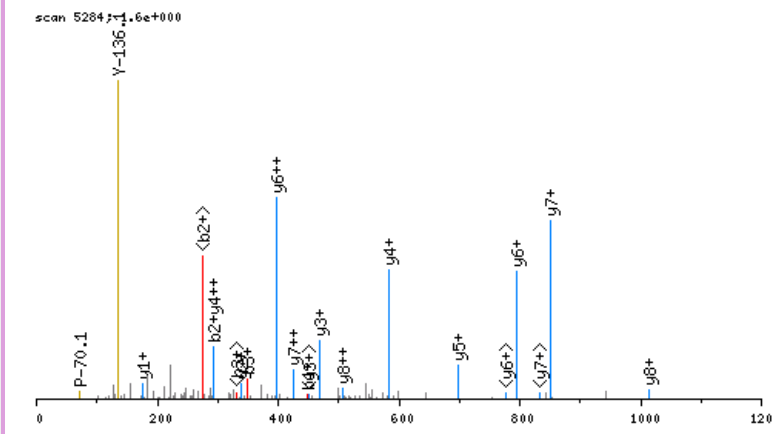

click image to zoom in; click top corners to zoom out [\[precursor±\]](#)

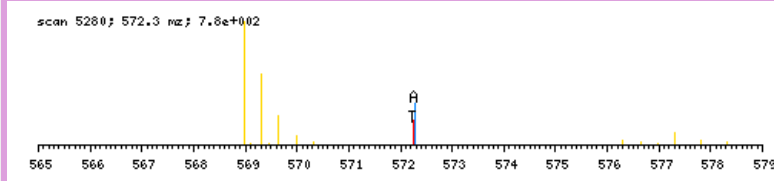

zoomed in precursor plot; T=theoretical m/z, A=acquired m/z

| b <sup>+</sup> | # | AA # | y <sup>+</sup> | y <sup>2+</sup>    |
|----------------|---|------|----------------|--------------------|
| 130.0504       | 1 | S    | 9              |                    |
| 293.1138       | 2 | Y    | 8              | 1014.4719 507.7399 |
| 350.1352       | 3 | G    | 7              | 851.4085 426.2082  |
| 447.1880       | 4 | P    | 6              | 794.3871 397.6975  |
| 560.2720       | 5 | L    | 5              | 697.3343 349.1711  |
| 675.2990       | 6 | D    | 4              | 584.2503 292.6290  |
| 806.3395       | 7 | M    | 3              | 469.2233 235.1156  |
| 969.4028       | 8 | Y    | 2              | 338.1828 169.5953  |
|                | 9 | R    | 1              | 175.1195 88.0637   |

N-term:+43.02

SYHGSDSLQLER, MH+ 1461.6610, m/z 487.8919  
 H OS G27 P150811 220811-s1.03184.03184.3.dta

X-range:

-

MassTol: Y-zoom:

MassType:

AVG  MONO

Axis:

1  2

Label:

I  M  -

Ions:

a  +  2+  3+

b  +  2+  3+

c  +  2+  3+

x  +  2+  3+

y  +  2+  3+

z  +  2+  3+

hide H<sub>2</sub>O/NH<sub>3</sub>

zoom 112-122

GO

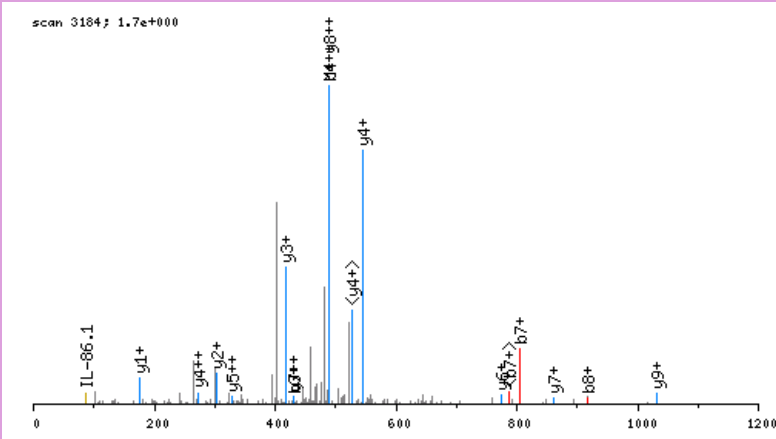

click image to zoom in; click top corners to zoom out [\[precursor±\]](#)

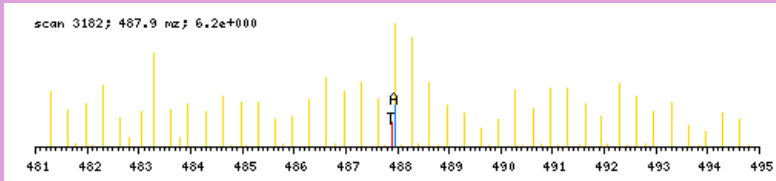

zoomed in precursor plot; T=theoretical m/z, A=acquired m/z

| b <sup>+</sup> | #  | AA | #  | y <sup>+</sup> | y <sup>2+</sup> |
|----------------|----|----|----|----------------|-----------------|
| 130.0504       | 1  | S  | 12 |                |                 |
| 293.1138       | 2  | Y  | 11 | 1332.6184      | 666.8131        |
| 430.1727       | 3  | H  | 10 | 1169.5551      | 585.2815        |
| 487.1941       | 4  | G  | 9  | 1032.4962      | 516.7520        |
| 602.2211       | 5  | D  | 8  | 975.4747       | 488.2413        |
| 689.2531       | 6  | S  | 7  | 860.4478       | 430.7278        |
| 804.2800       | 7  | D  | 6  | 773.4157       | 387.2118        |
| 917.3641       | 8  | L  | 5  | 658.3888       | 329.6983        |
| 1045.4227      | 9  | Q  | 4  | 545.3047       | 273.1563        |
| 1158.5068      | 10 | L  | 3  | 417.2462       | 209.1270        |
| 1287.5493      | 11 | E  | 2  | 304.1621       | 152.5850        |
|                | 12 | R  | 1  | 175.1195       | 88.0637         |

N-term:+43.02

SYQGKKNIPR, MH+ 1300.8014, m/z 434.2720  
 H OS G27 P150811 220811-s1.02013.02013.3.dta

scan 2013; 8.5e+001

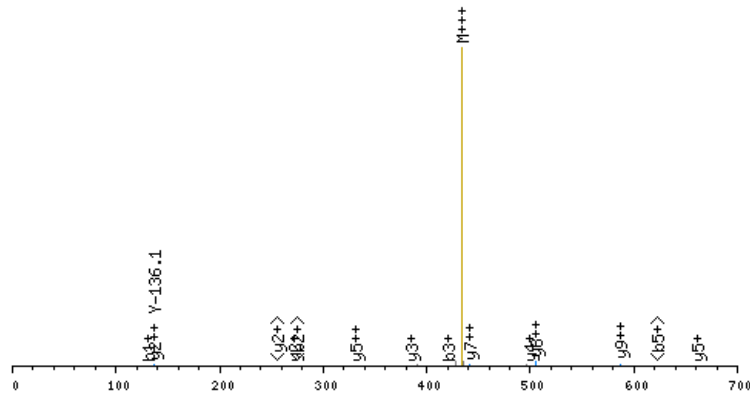

click image to zoom in; click top corners to zoom out [precursor±]

scan 2012; 434.3 mz; 1.9e+001

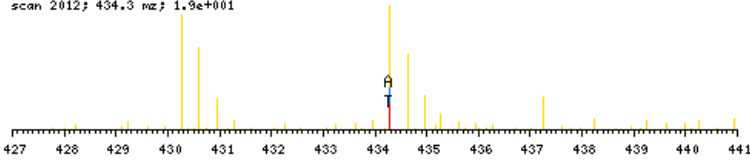

zoomed in precursor plot; T=theoretical m/z, A=acquired m/z

X-range:

-

MassTol: Y-zoom:

MassType:

AVG  MONO

Axis:

1  2

Label:

I  M  -

Ions:

a  +  2+  3+

b  +  2+  3+

c  +  2+  3+

x  +  2+  3+

y  +  2+  3+

z  +  2+  3+

hide H<sub>2</sub>O/NH<sub>3</sub>

zoom 112-122

GO

| b <sup>+</sup> | #  | AA # | y <sup>+</sup> | y <sup>2+</sup> |
|----------------|----|------|----------------|-----------------|
| 130.0504       | 1  | S    | 10             |                 |
| 293.1138       | 2  | Y    | 9              | 1171.7588       |
| 421.1723       | 3  | Q    | 8              | 1008.6955       |
| 478.1938       | 4  | G    | 7              | 880.6369        |
| 640.3519       | 5  | K    | 6              | 823.6155        |
| 802.5100       | 6  | K    | 5              | 661.4574        |
| 916.5529       | 7  | N    | 4              | 499.2993        |
| 1029.6370      | 8  | I    | 3              | 385.2563        |
| 1126.6898      | 9  | P    | 2              | 272.1723        |
|                | 10 | R    | 1              | 175.1195        |

N-term:+43.02 K(5):+162.16  
 K(6):+162.16

SYTLDISLGNPSAYR, MH+ 1585.7498, m/z 793.3786  
 H OS G29 P150811 220811-s1.05482.05482.2.dta

X-range:

-

MassTol: Y-zoom:

MassType:

AVG  MONO

Axis:

1  2

Label:

I  M  -

Ions:

a  +  2+  3+

b  +  2+  3+

c  +  2+  3+

x  +  2+  3+

y  +  2+  3+

z  +  2+  3+

hide H<sub>2</sub>O/NH<sub>3</sub>

zoom 112-122

GO

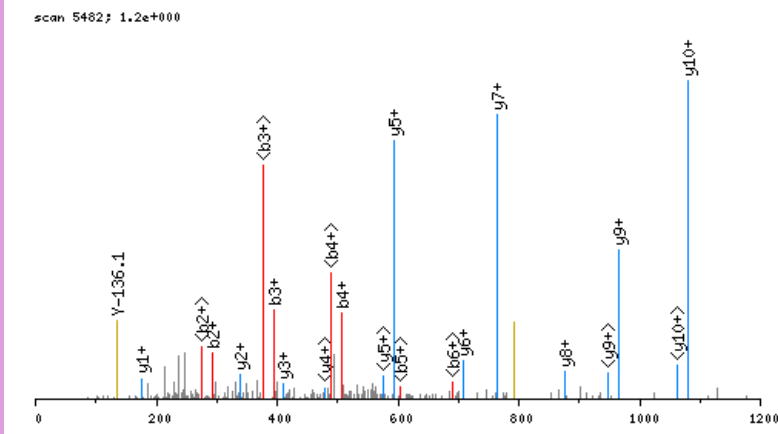

click image to zoom in; click top corners to zoom out [\[precursor±\]](#)

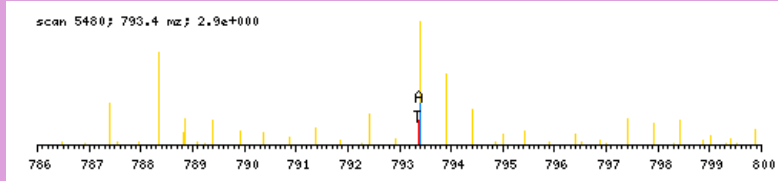

zoomed in precursor plot; T=theoretical m/z, A=acquired m/z

| b <sup>+</sup> | #  | AA # | y <sup>+</sup> | y <sup>2+</sup> |
|----------------|----|------|----------------|-----------------|
| 130.0504       | 1  | S 14 |                |                 |
| 293.1138       | 2  | Y 13 | 1456.7072      | 728.8575        |
| 394.1614       | 3  | T 12 | 1293.6439      | 647.3259        |
| 507.2455       | 4  | L 11 | 1192.5962      | 596.8020        |
| 622.2724       | 5  | D 10 | 1079.5122      | 540.2600        |
| 709.3045       | 6  | S 9  | 964.4852       | 482.7465        |
| 822.3885       | 7  | L 8  | 877.4532       | 439.2305        |
| 879.4100       | 8  | G 7  | 764.3691       | 382.6885        |
| 993.4529       | 9  | N 6  | 707.3477       | 354.1777        |
| 1090.5057      | 10 | P 5  | 593.3047       | 297.1563        |
| 1177.5377      | 11 | S 4  | 496.2520       | 248.6299        |
| 1248.5748      | 12 | A 3  | 409.2199       | 205.1139        |
| 1411.6382      | 13 | Y 2  | 338.1828       | 169.5953        |
|                | 14 | R 1  | 175.1195       | 88.0637         |

N-term:+43.02

SYTPGIGGDSAQLAQR, MH+ 1662.8087, m/z 554.9411  
 H OS G29 P150811 220811-s1.04041.04041.3.dta

X-range:

-

MassTol: Y-zoom:

MassType:

AVG  MONO

Axis:

1  2

Label:

I  M  -

Ions:

a  +  2+  3+

b  +  2+  3+

c  +  2+  3+

x  +  2+  3+

y  +  2+  3+

z  +  2+  3+

hide H<sub>2</sub>O/NH<sub>3</sub>

zoom 112-122

GO

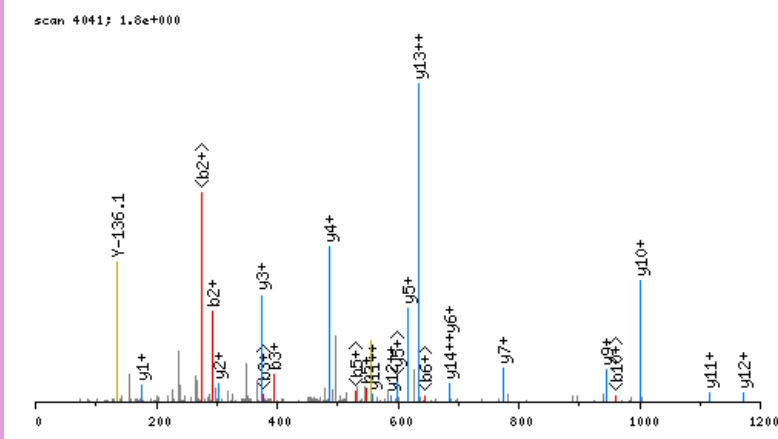

click image to zoom in; click top corners to zoom out [\[precursor±\]](#)

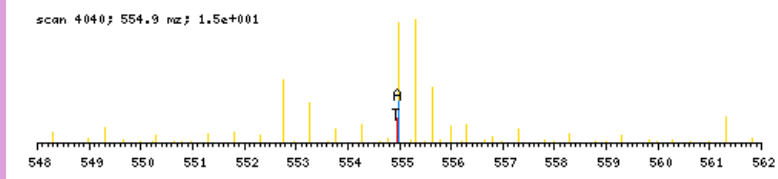

zoomed in precursor plot; T=theoretical m/z, A=acquired m/z

| b <sup>+</sup> | #  | AA | #  | y <sup>+</sup> | y <sup>2+</sup> |
|----------------|----|----|----|----------------|-----------------|
| 130.0504       | 1  | S  | 16 |                |                 |
| 293.1138       | 2  | Y  | 15 | 1533.7661      | 767.3870        |
| 394.1614       | 3  | T  | 14 | 1370.7028      | 685.8553        |
| 491.2142       | 4  | P  | 13 | 1269.6551      | 635.3315        |
| 548.2357       | 5  | G  | 12 | 1172.6024      | 586.8051        |
| 661.3197       | 6  | I  | 11 | 1115.5809      | 558.2944        |
| 718.3412       | 7  | G  | 10 | 1002.4968      | 501.7523        |
| 775.3627       | 8  | G  | 9  | 945.4754       | 473.2416        |
| 890.3896       | 9  | D  | 8  | 888.4539       | 444.7309        |
| 977.4216       | 10 | S  | 7  | 773.4270       | 387.2174        |
| 1048.4587      | 11 | A  | 6  | 686.3949       | 343.7014        |
| 1176.5173      | 12 | Q  | 5  | 615.3578       | 308.1828        |
| 1289.6014      | 13 | L  | 4  | 487.2993       | 244.1535        |
| 1360.6385      | 14 | A  | 3  | 374.2152       | 187.6115        |
| 1488.6971      | 15 | Q  | 2  | 303.1781       | 152.0930        |
|                | 16 | R  | 1  | 175.1195       | 88.0637         |

N-term:+43.02



SYTPGQPVTAVVQR, MH+ 1544.8073, m/z 515.6073  
 H OS G29 P150811 220811-s1.04241.04241.3.dta

X-range:

-

MassTol: Y-zoom:

MassType:

AVG  MONO

Axis:

1  2

Label:

I  M  -

Ions:

a  +  2+  3+

b  +  2+  3+

c  +  2+  3+

x  +  2+  3+

y  +  2+  3+

z  +  2+  3+

hide H<sub>2</sub>O/NH<sub>3</sub>

zoom 112-122

GO

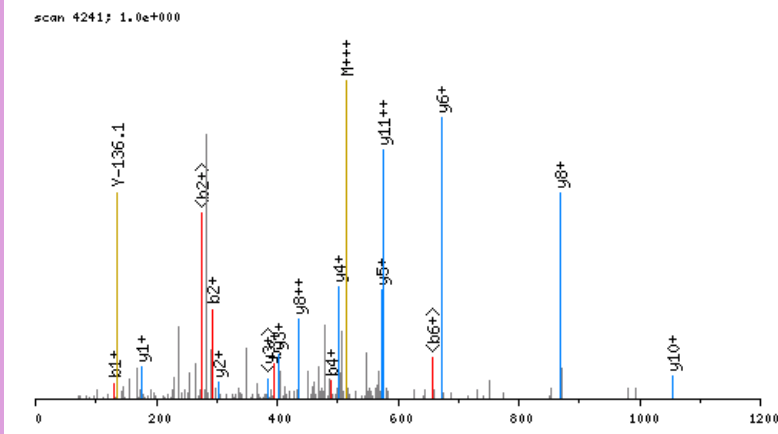

click image to zoom in; click top corners to zoom out [\[precursor±\]](#)

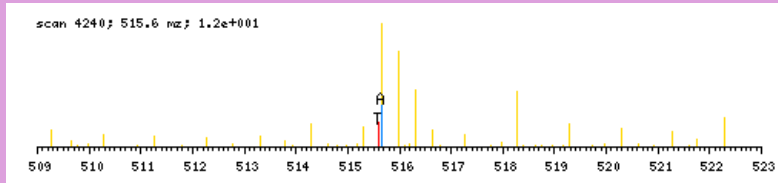

zoomed in precursor plot; T=theoretical m/z, A=acquired m/z

| b <sup>+</sup> | #  | AA # | y <sup>+</sup> | y <sup>2+</sup> |
|----------------|----|------|----------------|-----------------|
| 130.0504       | 1  | S 14 |                |                 |
| 293.1138       | 2  | Y 13 | 1415.7647      | 708.3863        |
| 394.1614       | 3  | T 12 | 1252.7014      | 626.8546        |
| 491.2142       | 4  | P 11 | 1151.6537      | 576.3308        |
| 548.2357       | 5  | G 10 | 1054.6009      | 527.8044        |
| 676.2942       | 6  | Q 9  | 997.5795       | 499.2936        |
| 773.3470       | 7  | P 8  | 869.5209       | 435.2644        |
| 872.4154       | 8  | V 7  | 772.4681       | 386.7380        |
| 973.4631       | 9  | T 6  | 673.3997       | 337.2038        |
| 1044.5002      | 10 | A 5  | 572.3520       | 286.6799        |
| 1143.5686      | 11 | V 4  | 501.3149       | 251.1614        |
| 1242.6370      | 12 | V 3  | 402.2465       | 201.6272        |
| 1370.6956      | 13 | Q 2  | 303.1781       | 152.0930        |
|                | 14 | R 1  | 175.1195       | 88.0637         |

N-term:+43.02

TAIKEIVSR, MH+ 1199.7364, m/z 600.3718  
 H OS G25 P150811 220811-s1.08185.08185.2.dta

X-range:

-

MassTol: Y-zoom:

MassType:

AVG  MONO

Axis:

1  2

Label:

I  M  -

Ions:

a  +  2+  3+

b  +  2+  3+

c  +  2+  3+

x  +  2+  3+

y  +  2+  3+

z  +  2+  3+

hide H<sub>2</sub>O/NH<sub>3</sub>

zoom 112-122

GO

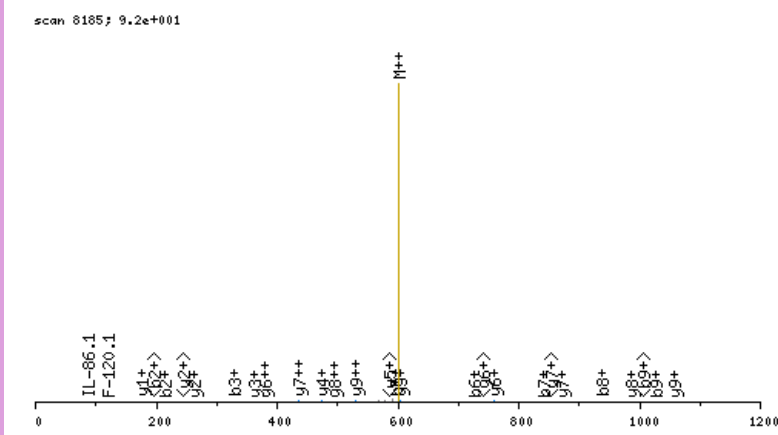

click image to zoom in; click top corners to zoom out [\[precursor±\]](#)

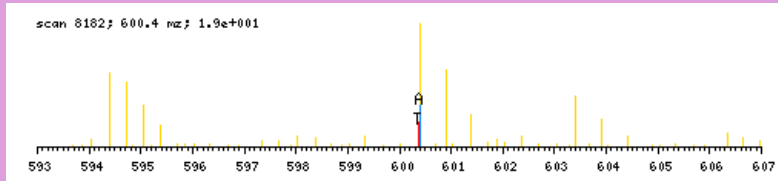

zoomed in precursor plot; T=theoretical m/z, A=acquired m/z

| b <sup>+</sup> | #  | AA # | y <sup>+</sup> | y <sup>2+</sup>    |
|----------------|----|------|----------------|--------------------|
| 144.0661       | 1  | T    | 10             |                    |
| 215.1032       | 2  | A    | 9              | 1056.6781 528.8430 |
| 328.1873       | 3  | I    | 8              | 985.6410 493.3244  |
| 441.2713       | 4  | I    | 7              | 872.5570 436.7824  |
| 597.3976       | 5  | K    | 6              | 759.4729 380.2404  |
| 726.4402       | 6  | E    | 5              | 603.3466 302.1772  |
| 839.5243       | 7  | I    | 4              | 474.3040 237.6559  |
| 938.5927       | 8  | V    | 3              | 361.2199 181.1139  |
| 1025.6247      | 9  | S    | 2              | 262.1515 131.5797  |
|                | 10 | R    | 1              | 175.1195 88.0637   |

N-term:+43.02 K(5):+156.13

X-range:

-

MassTol: Y-zoom:

MassType:

AVG  MONO

Axis:

1  2

Label:

I  M  -

Ions:

a  +  2+  3+

b  +  2+  3+

c  +  2+  3+

x  +  2+  3+

y  +  2+  3+

z  +  2+  3+

hide H<sub>2</sub>O/NH<sub>3</sub>

zoom 112-122

GO

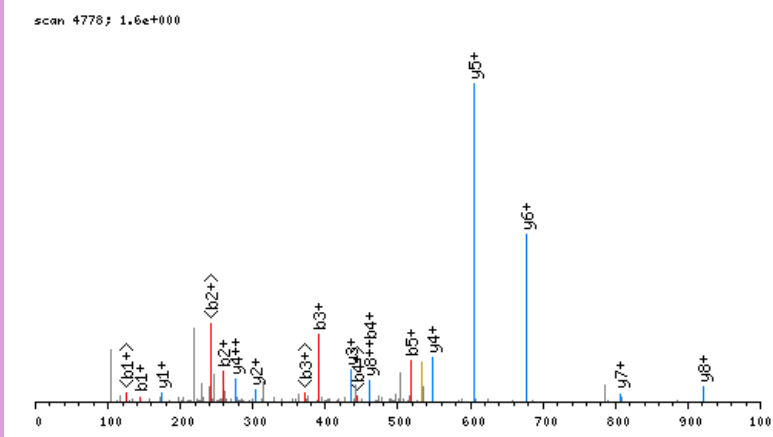

click image to zoom in; click top corners to zoom out [\[precursor±\]](#)

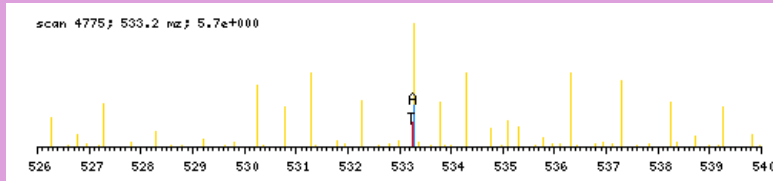

zoomed in precursor plot; T=theoretical m/z, A=acquired m/z

| b <sup>+</sup> | # | AA # | y <sup>+</sup> | y <sup>2+</sup> |
|----------------|---|------|----------------|-----------------|
| 144.0661       | 1 | T 9  |                |                 |
| 259.0930       | 2 | D 8  | 922.4126       | 461.7102        |
| 390.1335       | 3 | M 7  | 807.3857       | 404.1968        |
| 461.1706       | 4 | A 6  | 676.3452       | 338.6765        |
| 518.1921       | 5 | G 5  | 605.3081       | 303.1580        |
| 631.2761       | 6 | L 4  | 548.2866       | 274.6472        |
| 762.3166       | 7 | M 3  | 435.2026       | 218.1052        |
| 891.3592       | 8 | E 2  | 304.1621       | 152.5850        |
|                | 9 | R 1  | 175.1195       | 88.0637         |

N-term:+43.02

TDNTNSQLVVR, MH+ 1288.6497, m/z 644.8285  
 H OS G29 P150811 220811-s1.03029.03029.2.dta

X-range:

-

MassTol: Y-zoom:

MassType:

AVG  MONO

Axis:

1  2

Label:

I  M  -

Ions:

a  +  2+  3+

b  +  2+  3+

c  +  2+  3+

x  +  2+  3+

y  +  2+  3+

z  +  2+  3+

hide H<sub>2</sub>O/NH<sub>3</sub>

zoom 112-122

GO

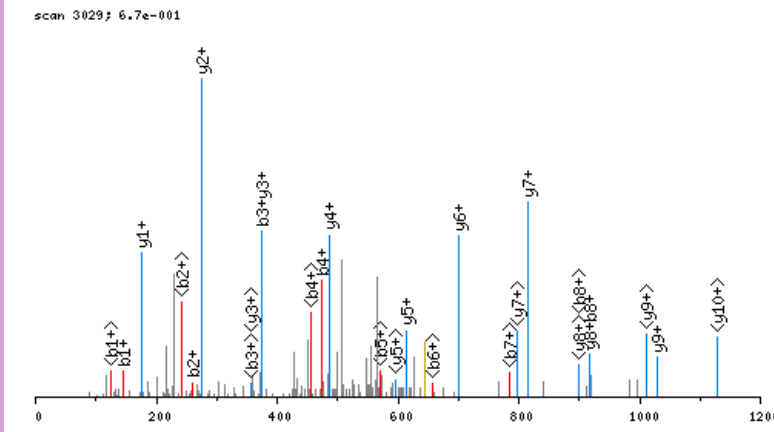

click image to zoom in; click top corners to zoom out [\[precursor±\]](#)

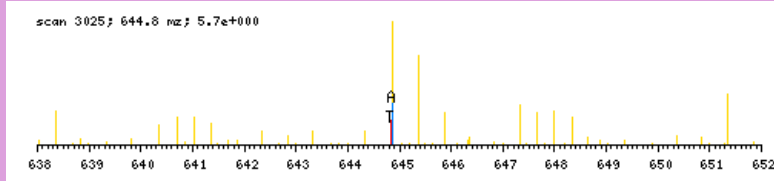

zoomed in precursor plot; T=theoretical m/z, A=acquired m/z

| b <sup>+</sup> | #  | AA # | y <sup>+</sup> | y <sup>2+</sup>    |
|----------------|----|------|----------------|--------------------|
| 144.0661       | 1  | T    | 11             |                    |
| 259.0930       | 2  | D    | 10             | 1145.5915 573.2997 |
| 373.1359       | 3  | N    | 9              | 1030.5645 515.7862 |
| 474.1836       | 4  | T    | 8              | 916.5216 458.7647  |
| 588.2266       | 5  | N    | 7              | 815.4739 408.2409  |
| 675.2586       | 6  | S    | 6              | 701.4310 351.2194  |
| 803.3172       | 7  | Q    | 5              | 614.3990 307.7034  |
| 916.4012       | 8  | L    | 4              | 486.3404 243.6741  |
| 1015.4696      | 9  | V    | 3              | 373.2563 187.1321  |
| 1114.5381      | 10 | V    | 2              | 274.1879 137.5979  |
|                | 11 | R    | 1              | 175.1195 88.0637   |

N-term:+43.02

TDVESVITSFASSAR, MH+ 1611.7866, m/z 806.3969  
 H OS G29 P150811 220811-s1.06529.06529.2.dta

X-range:

-

MassTol: Y-zoom:

MassType:

AVG  MONO

Axis:

1  2

Label:

I  M  -

Ions:

a  +  2+  3+

b  +  2+  3+

c  +  2+  3+

x  +  2+  3+

y  +  2+  3+

z  +  2+  3+

hide H<sub>2</sub>O/NH<sub>3</sub>

zoom 112-122

GO

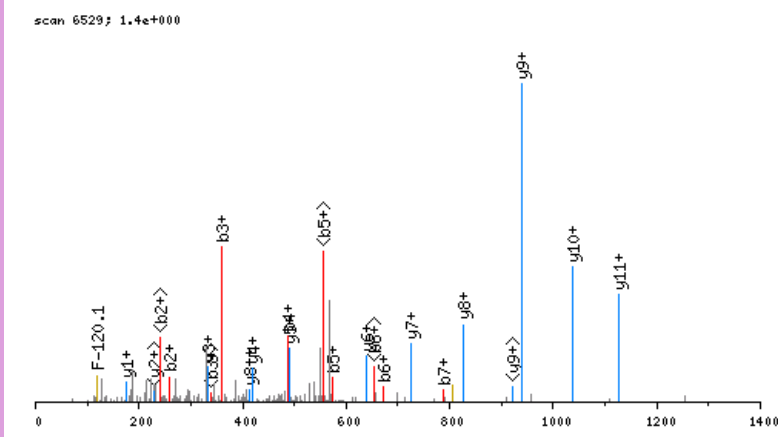

click image to zoom in; click top corners to zoom out [\[precursor±\]](#)

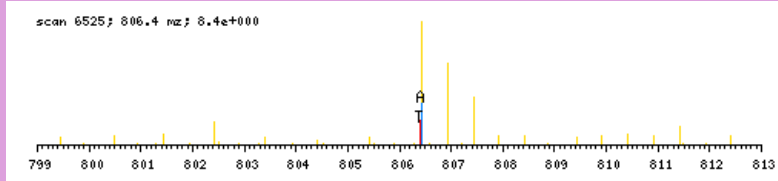

zoomed in precursor plot; T=theoretical m/z, A=acquired m/z

| b <sup>+</sup> | #  | AA # | y <sup>+</sup> | y <sup>2+</sup> |
|----------------|----|------|----------------|-----------------|
| 144.0661       | 1  | T 15 |                |                 |
| 259.0930       | 2  | D 14 | 1468.7284      | 734.8681        |
| 358.1614       | 3  | V 13 | 1353.7014      | 677.3546        |
| 487.2040       | 4  | E 12 | 1254.6330      | 627.8204        |
| 574.2361       | 5  | S 11 | 1125.5904      | 563.2991        |
| 673.3045       | 6  | V 10 | 1038.5584      | 519.7831        |
| 786.3885       | 7  | I 9  | 939.4900       | 470.2489        |
| 887.4362       | 8  | T 8  | 826.4059       | 413.7069        |
| 974.4682       | 9  | S 7  | 725.3582       | 363.1830        |
| 1121.5367      | 10 | F 6  | 638.3262       | 319.6670        |
| 1192.5738      | 11 | A 5  | 491.2578       | 246.1328        |
| 1279.6058      | 12 | S 4  | 420.2207       | 210.6142        |
| 1366.6378      | 13 | S 3  | 333.1886       | 167.0982        |
| 1437.6749      | 14 | A 2  | 246.1566       | 123.5822        |
|                | 15 | R 1  | 175.1195       | 88.0637         |

N-term:+43.02

TDVETTYADFIASGR, MH+ 1687.7815, m/z 844.3944  
 H OS G29 P150811 220811-s1.06241.06241.2.dta

X-range:

-

MassTol: Y-zoom:

MassType:

AVG  MONO

Axis:

1  2

Label:

I  M  -

Ions:

a  +  2+  3+

b  +  2+  3+

c  +  2+  3+

x  +  2+  3+

y  +  2+  3+

z  +  2+  3+

hide H<sub>2</sub>O/NH<sub>3</sub>

zoom 112-122

GO

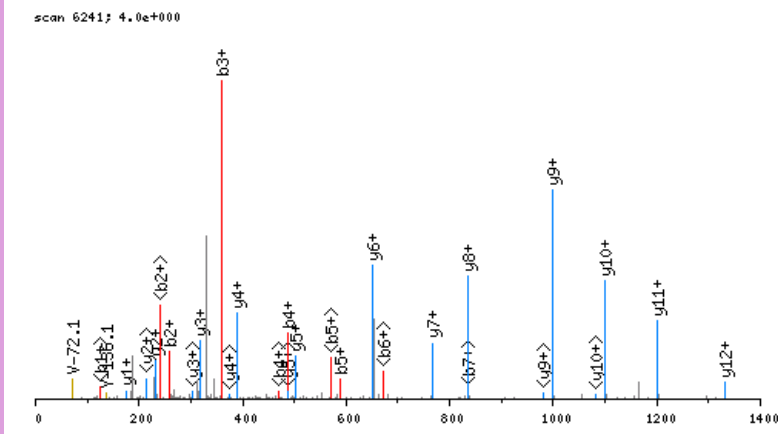

click image to zoom in; click top corners to zoom out [\[precursor±\]](#)

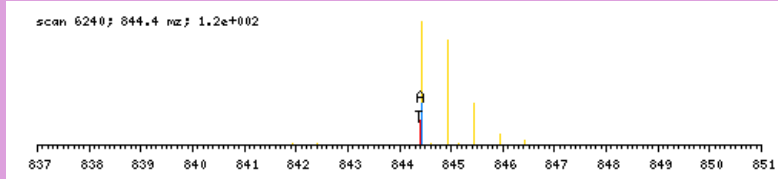

zoomed in precursor plot; T=theoretical m/z, A=acquired m/z

| b <sup>+</sup> | #  | AA | #  | y <sup>+</sup> | y <sup>2+</sup> |
|----------------|----|----|----|----------------|-----------------|
| 144.0661       | 1  | T  | 15 |                |                 |
| 259.0930       | 2  | D  | 14 | 1544.7233      | 772.8656        |
| 358.1614       | 3  | V  | 13 | 1429.6963      | 715.3521        |
| 487.2040       | 4  | E  | 12 | 1330.6279      | 665.8179        |
| 588.2517       | 5  | T  | 11 | 1201.5853      | 601.2966        |
| 689.2994       | 6  | T  | 10 | 1100.5376      | 550.7727        |
| 852.3627       | 7  | Y  | 9  | 999.4900       | 500.2489        |
| 923.3998       | 8  | A  | 8  | 836.4266       | 418.7172        |
| 1038.4268      | 9  | D  | 7  | 765.3895       | 383.1987        |
| 1185.4952      | 10 | F  | 6  | 650.3626       | 325.6852        |
| 1298.5792      | 11 | I  | 5  | 503.2942       | 252.1510        |
| 1369.6164      | 12 | A  | 4  | 390.2101       | 195.6090        |
| 1456.6484      | 13 | S  | 3  | 319.1730       | 160.0904        |
| 1513.6699      | 14 | G  | 2  | 232.1410       | 116.5744        |
|                | 15 | R  | 1  | 175.1195       | 88.0637         |

N-term:+43.02

TEEHTDLEAR, MH+ 1242.5602, m/z 621.7838  
 H OS G25 P150811 220811-s1.02338.02338.2.dta

X-range:

-

MassTol: Y-zoom:

MassType:

AVG  MONO

Axis:

1  2

Label:

I  M  -

Ions:

a  +  2+  3+

b  +  2+  3+

c  +  2+  3+

x  +  2+  3+

y  +  2+  3+

z  +  2+  3+

hide H<sub>2</sub>O/NH<sub>3</sub>

zoom 112-122

GO

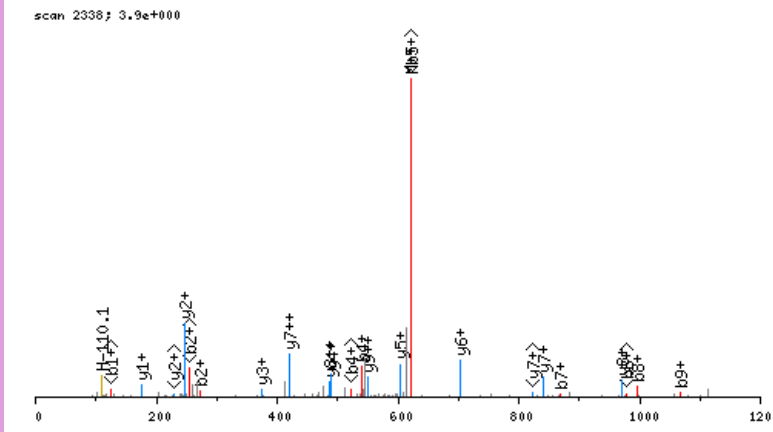

click image to zoom in; click top corners to zoom out [\[precursor±\]](#)

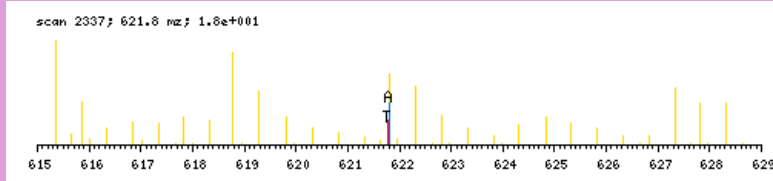

zoomed in precursor plot; T=theoretical m/z, A=acquired m/z

| b <sup>+</sup> | #  | AA | #  | y <sup>+</sup> | y <sup>2+</sup> |
|----------------|----|----|----|----------------|-----------------|
| 144.0661       | 1  | T  | 10 |                |                 |
| 273.1087       | 2  | E  | 9  | 1099.5020      | 550.2549        |
| 402.1513       | 3  | E  | 8  | 970.4594       | 485.7336        |
| 539.2102       | 4  | H  | 7  | 841.4168       | 421.2123        |
| 640.2579       | 5  | T  | 6  | 704.3579       | 352.6829        |
| 755.2848       | 6  | D  | 5  | 603.3102       | 302.1590        |
| 868.3689       | 7  | L  | 4  | 488.2833       | 244.6455        |
| 997.4115       | 8  | E  | 3  | 375.1992       | 188.1035        |
| 1068.4486      | 9  | A  | 2  | 246.1566       | 123.5822        |
|                | 10 | R  | 1  | 175.1195       | 88.0637         |

N-term:+43.02

TEELITPVYCTGVSAQVQKKR, MH+ 2505.3387, m/z 835.7844  
 H OS G26 P150811 220811-s1.05373.05373.3.dta

X-range:

0 - 0

MassTol: Y-zoom:

0. 1.

MassType:

AVG  MONO

Axis:

1  2

Label:

I  M  -

Ions:

a  +  2+  3+

b  +  2+  3+

c  +  2+  3+

x  +  2+  3+

y  +  2+  3+

z  +  2+  3+

hide H<sub>2</sub>O/NH<sub>3</sub>

zoom 112-122

GO

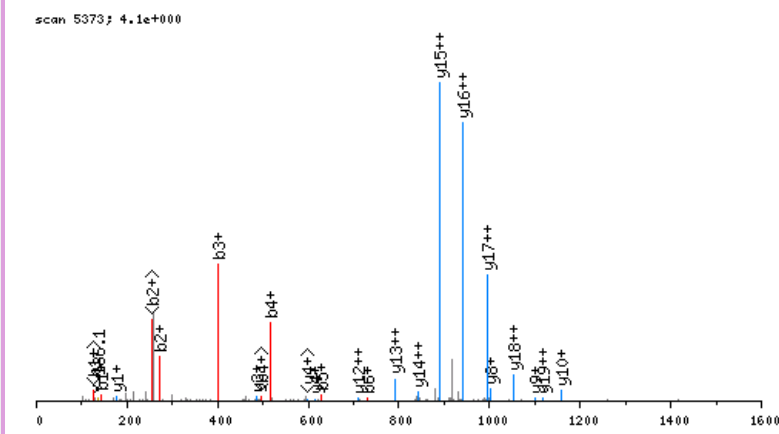

click image to zoom in; click top corners to zoom out [precursor±]

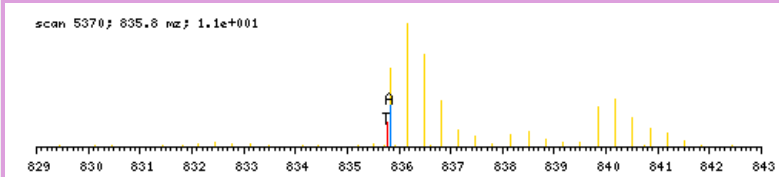

zoomed in precursor plot; T=theoretical m/z, A=acquired m/z

| b <sup>+</sup> | #  | AA | #  | y <sup>+</sup> | y <sup>2+</sup> |
|----------------|----|----|----|----------------|-----------------|
| 144.0661       | 1  | T  | 21 |                |                 |
| 273.1087       | 2  | E  | 20 | 2362.2805      | 1181.6441       |
| 402.1513       | 3  | E  | 19 | 2233.2379      | 1117.1228       |
| 515.2353       | 4  | L  | 18 | 2104.1953      | 1052.6016       |
| 628.3194       | 5  | I  | 17 | 1991.1112      | 996.0595        |
| 729.3671       | 6  | T  | 16 | 1878.0272      | 939.5175        |
| 826.4198       | 7  | P  | 15 | 1776.9795      | 888.9936        |
| 925.4882       | 8  | V  | 14 | 1679.9267      | 840.4673        |
| 1088.5516      | 9  | Y  | 13 | 1580.8583      | 790.9331        |
| 1248.5822      | 10 | C  | 12 | 1417.7950      | 709.4014        |
| 1349.6299      | 11 | T  | 11 | 1257.7644      | 629.3861        |
| 1406.6513      | 12 | G  | 10 | 1156.7167      | 578.8623        |
| 1505.7197      | 13 | V  | 9  | 1099.6952      | 550.3515        |
| 1592.7518      | 14 | S  | 8  | 1000.6268      | 500.8173        |
| 1663.7889      | 15 | A  | 7  | 913.5948       | 457.3013        |
| 1791.8475      | 16 | Q  | 6  | 842.5577       | 421.7827        |
| 1890.9159      | 17 | V  | 5  | 714.4991       | 357.7535        |
| 2018.9744      | 18 | Q  | 4  | 615.4307       | 308.2193        |
| 2175.1007      | 19 | K  | 3  | 487.3721       | 244.1900        |
| 2331.2270      | 20 | K  | 2  | 331.2458       | 166.1268        |
|                | 21 | R  | 1  | 175.1195       | 88.0637         |

N-term:+43.02 C(10):+160.03  
 K(19):+156.13 K(20):+156.13



TEGLQPASVVVLP, MH+ 1507.8484, m/z 754.4279  
 H OS G29 P150811 220811-s1.05751.05751.2.dta

scan 5751; 4.0e+000

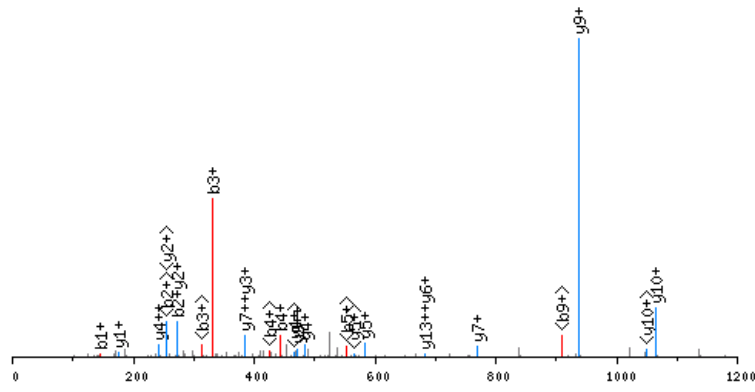

click image to zoom in; click top corners to zoom out [\[precursor±\]](#)

scan 5750; 754.4 m/z; 4.8e+000

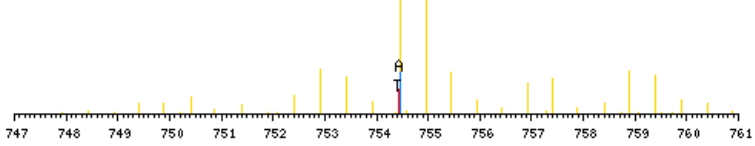

zoomed in precursor plot; T=theoretical m/z, A=acquired m/z

X-range:

-

MassTol: Y-zoom:

MassType:

AVG  MONO

Axis:

1  2

Label:

I  M  -

Ions:

a  +  2+  3+

b  +  2+  3+

c  +  2+  3+

x  +  2+  3+

y  +  2+  3+

z  +  2+  3+

hide H<sub>2</sub>O/NH<sub>3</sub>

zoom 112-122

GO

| b <sup>+</sup> | #  | AA # | y <sup>+</sup> | y <sup>2+</sup> |
|----------------|----|------|----------------|-----------------|
| 144.0661       | 1  | T 14 |                |                 |
| 273.1087       | 2  | E 13 | 1364.7902      | 682.8990        |
| 330.1301       | 3  | G 12 | 1235.7476      | 618.3777        |
| 443.2142       | 4  | L 11 | 1178.7261      | 589.8670        |
| 571.2728       | 5  | Q 10 | 1065.6421      | 533.3249        |
| 668.3255       | 6  | P 9  | 937.5835       | 469.2957        |
| 739.3627       | 7  | A 8  | 840.5307       | 420.7693        |
| 826.3947       | 8  | S 7  | 769.4936       | 385.2507        |
| 925.4631       | 9  | V 6  | 682.4616       | 341.7347        |
| 1024.5315      | 10 | V 5  | 583.3932       | 292.2005        |
| 1123.5999      | 11 | V 4  | 484.3247       | 242.6663        |
| 1236.6840      | 12 | L 3  | 385.2563       | 193.1321        |
| 1333.7368      | 13 | P 2  | 272.1723       | 136.5900        |
|                | 14 | R 1  | 175.1195       | 88.0637         |

N-term:+43.02

TELQSALLLR, MH+ 1185.6843, m/z 593.3458  
 H OS G29 P150811 220811-s1.06196.06196.2.dta

X-range:

-

MassTol: Y-zoom:

MassType:

AVG  MONO

Axis:

1  2

Label:

I  M  -

Ions:

a  +  2+  3+

b  +  2+  3+

c  +  2+  3+

x  +  2+  3+

y  +  2+  3+

z  +  2+  3+

hide H<sub>2</sub>O/NH<sub>3</sub>

zoom 112-122

GO

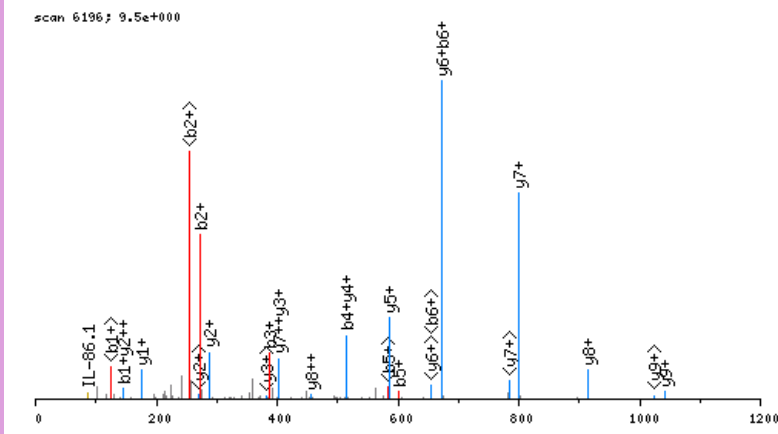

click image to zoom in; click top corners to zoom out [\[precursor±\]](#)

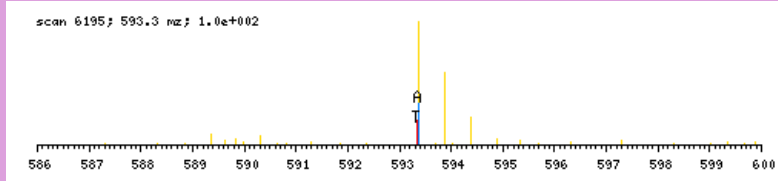

zoomed in precursor plot; T=theoretical m/z, A=acquired m/z

| b <sup>+</sup> | #  | AA # | y <sup>+</sup> | y <sup>2+</sup>    |
|----------------|----|------|----------------|--------------------|
| 144.0661       | 1  | T    | 10             |                    |
| 273.1087       | 2  | E    | 9              | 1042.6261 521.8169 |
| 386.1927       | 3  | L    | 8              | 913.5835 457.2957  |
| 514.2513       | 4  | Q    | 7              | 800.4994 400.7536  |
| 601.2833       | 5  | S    | 6              | 672.4408 336.7243  |
| 672.3205       | 6  | A    | 5              | 585.4088 293.2083  |
| 785.4045       | 7  | L    | 4              | 514.3717 257.6898  |
| 898.4886       | 8  | L    | 3              | 401.2876 201.1477  |
| 1011.5726      | 9  | L    | 2              | 288.2036 144.6057  |
|                | 10 | R    | 1              | 175.1195 88.0637   |

N-term:+43.02

TETDGFYKSR, MH+ 1273.6065, m/z 637.3069  
 H OS G25 P150811 220811-s1.03410.03410.2.dta

X-range:

-

MassTol: Y-zoom:

MassType:

AVG  MONO

Axis:

1  2

Label:

I  M  -

Ions:

a  +  2+  3+

b  +  2+  3+

c  +  2+  3+

x  +  2+  3+

y  +  2+  3+

z  +  2+  3+

hide H<sub>2</sub>O/NH<sub>3</sub>

zoom 112-122

GO

scan 3410; 1.2e+001

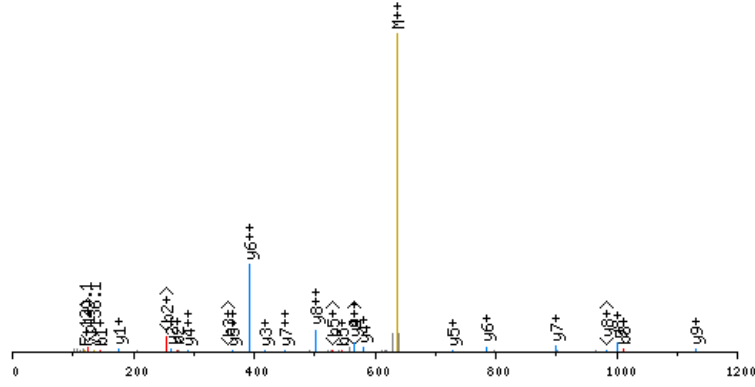

click image to zoom in; click top corners to zoom out [\[precursor±\]](#)

scan 3407; 637.3 m/z; 2.1e+001

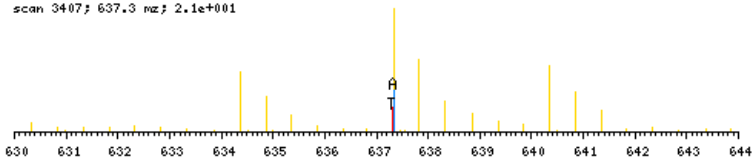

zoomed in precursor plot; T=theoretical m/z, A=acquired m/z

| b <sup>+</sup> | #  | AA # | y <sup>+</sup> | y <sup>2+</sup>    |
|----------------|----|------|----------------|--------------------|
| 144.0661       | 1  | T    | 10             |                    |
| 273.1087       | 2  | E    | 9              | 1130.5483 565.7780 |
| 374.1564       | 3  | T    | 8              | 1001.5057 501.2567 |
| 489.1833       | 4  | D    | 7              | 900.4580 450.7329  |
| 546.2048       | 5  | G    | 6              | 785.4310 393.2194  |
| 693.2732       | 6  | F    | 5              | 728.4096 364.7087  |
| 856.3365       | 7  | Y    | 4              | 581.3412 291.1745  |
| 1012.4628      | 8  | K    | 3              | 418.2778 209.6428  |
| 1099.4948      | 9  | S    | 2              | 262.1515 131.5797  |
|                | 10 | R    | 1              | 175.1195 88.0637   |

N-term:+43.02 K(8):+156.13

TFAEDKTYKYIR, MH+ 1632.8638, m/z 544.9595  
 H OS G27 P150811 220811-s1.05008.05008.3.dta

X-range:

-

MassTol: Y-zoom:

MassType:

AVG  MONO

Axis:

1  2

Label:

I  M  -

Ions:

a  +  2+  3+

b  +  2+  3+

c  +  2+  3+

x  +  2+  3+

y  +  2+  3+

z  +  2+  3+

hide H<sub>2</sub>O/NH<sub>3</sub>

zoom 112-122

GO

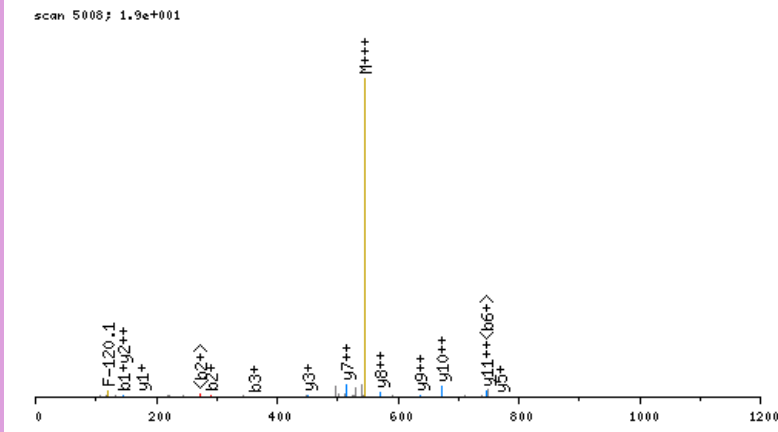

click image to zoom in; click top corners to zoom out [\[precursor±\]](#)

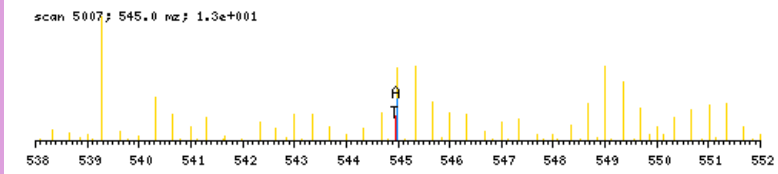

zoomed in precursor plot; T=theoretical m/z, A=acquired m/z

| b <sup>+</sup> | #  | AA | #  | y <sup>+</sup> | y <sup>2+</sup> |
|----------------|----|----|----|----------------|-----------------|
| 144.0661       | 1  | T  | 12 |                |                 |
| 291.1345       | 2  | F  | 11 | 1489.8056      | 745.4067        |
| 362.1716       | 3  | A  | 10 | 1342.7372      | 671.8725        |
| 491.2142       | 4  | E  | 9  | 1271.7000      | 636.3539        |
| 606.2411       | 5  | D  | 8  | 1142.6574      | 571.8326        |
| 762.3674       | 6  | K  | 7  | 1027.6305      | 514.3192        |
| 863.4151       | 7  | T  | 6  | 871.5042       | 436.2560        |
| 1026.4784      | 8  | Y  | 5  | 770.4565       | 385.7322        |
| 1182.6047      | 9  | K  | 4  | 607.3932       | 304.2005        |
| 1345.6681      | 10 | Y  | 3  | 451.2669       | 226.1374        |
| 1458.7521      | 11 | I  | 2  | 288.2036       | 144.6057        |
|                | 12 | R  | 1  | 175.1195       | 88.0637         |

N-term:+43.02 K(6):+156.13  
 K(9):+156.13

THSSQDAGSHGIQEEGR, MH+ 1837.8065, m/z 613.2737  
 H OS G27 P150811 220811-s1.01955.01955.3.dta

X-range:

-

MassTol: Y-zoom:

MassType:

AVG  MONO

Axis:

1  2

Label:

I  M  -

Ions:

a  +  2+  3+

b  +  2+  3+

c  +  2+  3+

x  +  2+  3+

y  +  2+  3+

z  +  2+  3+

hide H<sub>2</sub>O/NH<sub>3</sub>

zoom 112-122

GO

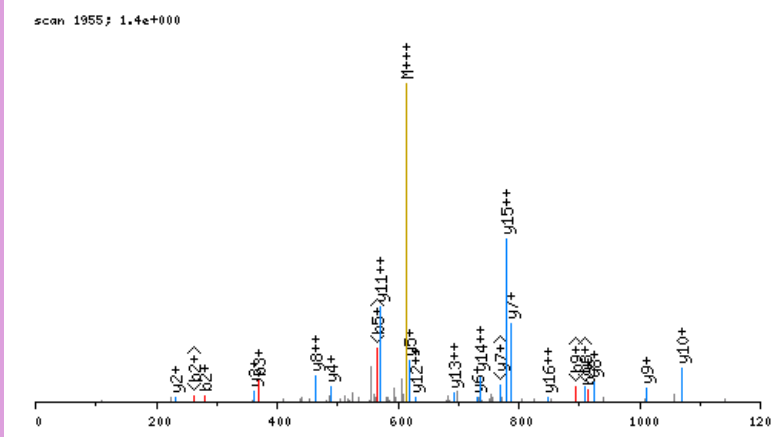

click image to zoom in; click top corners to zoom out [\[precursor±\]](#)

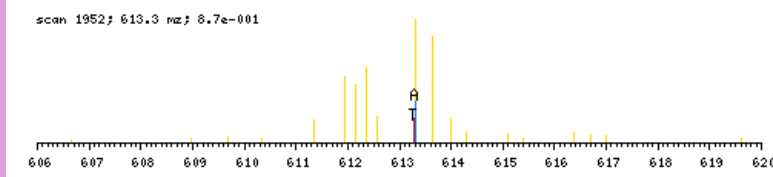

zoomed in precursor plot; T=theoretical m/z, A=acquired m/z

| b <sup>+</sup> | #  | AA # | y <sup>+</sup> | y <sup>2+</sup> |
|----------------|----|------|----------------|-----------------|
| 144.0661       | 1  | T 17 |                |                 |
| 281.1250       | 2  | H 16 | 1694.7483      | 847.8780        |
| 368.1570       | 3  | S 15 | 1557.6894      | 779.3486        |
| 455.1890       | 4  | S 14 | 1470.6573      | 735.8326        |
| 583.2476       | 5  | Q 13 | 1383.6253      | 692.3166        |
| 698.2746       | 6  | D 12 | 1255.5667      | 628.2873        |
| 769.3117       | 7  | A 11 | 1140.5398      | 570.7738        |
| 826.3331       | 8  | G 10 | 1069.5027      | 535.2552        |
| 913.3652       | 9  | S 9  | 1012.4812      | 506.7445        |
| 1050.4241      | 10 | H 8  | 925.4492       | 463.2285        |
| 1107.4455      | 11 | G 7  | 788.3903       | 394.6990        |
| 1220.5296      | 12 | I 6  | 731.3688       | 366.1883        |
| 1348.5882      | 13 | Q 5  | 618.2847       | 309.6463        |
| 1477.6308      | 14 | E 4  | 490.2262       | 245.6170        |
| 1606.6734      | 15 | E 3  | 361.1836       | 181.0957        |
| 1663.6948      | 16 | G 2  | 232.1410       | 116.5744        |
|                | 17 | R 1  | 175.1195       | 88.0637         |

N-term:+43.02

TLGLEQAEEQR, MH+ 1315.6494, m/z 658.3283  
 H OS G29 P150811 220811-s1.04003.04003.2.dta

scan 4003; 2.3e+000

X-range:

-

MassTol: Y-zoom:

MassType:

AVG  MONO

Axis:

1  2

Label:

I  M  -

Ions:

a  +  2+  3+

b  +  2+  3+

c  +  2+  3+

x  +  2+  3+

y  +  2+  3+

z  +  2+  3+

hide H<sub>2</sub>O/NH<sub>3</sub>

zoom 112-122

GO

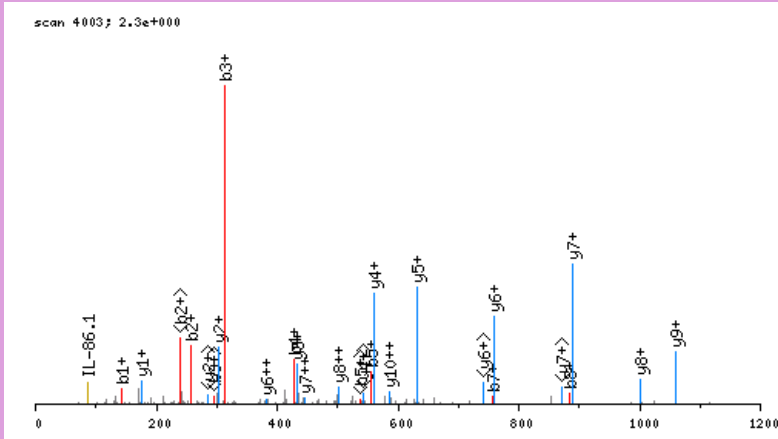

click image to zoom in; click top corners to zoom out [\[precursor±\]](#)

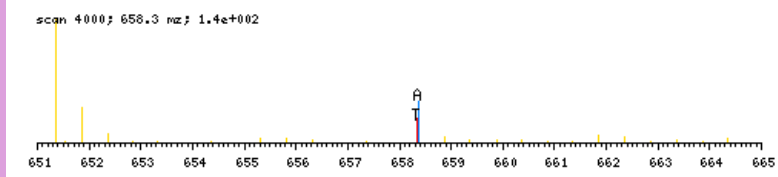

zoomed in precursor plot; T=theoretical m/z, A=acquired m/z

| b <sup>+</sup> | #  | AA # | y <sup>+</sup> | y <sup>2+</sup> |
|----------------|----|------|----------------|-----------------|
| 144.0661       | 1  | T 11 |                |                 |
| 257.1501       | 2  | L 10 | 1172.5911      | 586.7995        |
| 314.1716       | 3  | G 9  | 1059.5071      | 530.2575        |
| 427.2557       | 4  | L 8  | 1002.4856      | 501.7467        |
| 556.2983       | 5  | E 7  | 889.4015       | 445.2047        |
| 684.3568       | 6  | Q 6  | 760.3590       | 380.6834        |
| 755.3940       | 7  | A 5  | 632.3004       | 316.6541        |
| 884.4365       | 8  | E 4  | 561.2633       | 281.1355        |
| 1013.4791      | 9  | E 3  | 432.2207       | 216.6142        |
| 1141.5377      | 10 | Q 2  | 303.1781       | 152.0930        |
|                | 11 | R 1  | 175.1195       | 88.0637         |

N-term:+43.02

TMDKSELVQKAKLAEQAEER, MH+ 2301.2489, m/z 576.0677  
 H OS G28 P150811 220811-s1.06060.06060.4.dta

X-range:

-

MassTol: Y-zoom:

MassType:

AVG  MONO

Axis:

1  2

Label:

I  M  -

Ions:

a  +  2+  3+

b  +  2+  3+

c  +  2+  3+

x  +  2+  3+

y  +  2+  3+

z  +  2+  3+

hide H<sub>2</sub>O/NH<sub>3</sub>

zoom 112-122

GO

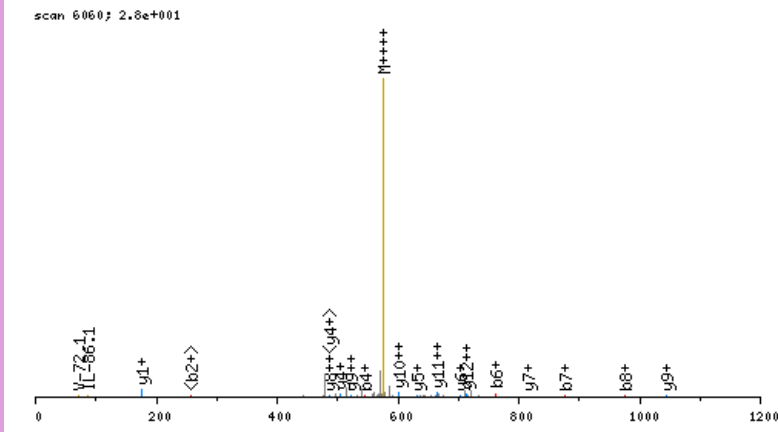

click image to zoom in; click top corners to zoom out [\[precursor±\]](#)

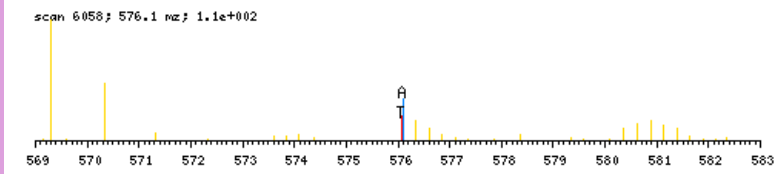

zoomed in precursor plot; T=theoretical m/z, A=acquired m/z

| b <sup>+</sup> | #  | AA | #  | y <sup>+</sup> | y <sup>2+</sup> |
|----------------|----|----|----|----------------|-----------------|
| 144.0661       | 1  | T  | 19 |                |                 |
| 275.1066       | 2  | M  | 18 | 2158.1907      | 1079.5992       |
| 390.1335       | 3  | D  | 17 | 2027.1502      | 1014.0790       |
| 546.2598       | 4  | K  | 16 | 1912.1232      | 956.5655        |
| 633.2918       | 5  | S  | 15 | 1755.9969      | 878.5024        |
| 762.3344       | 6  | E  | 14 | 1668.9649      | 834.9864        |
| 875.4185       | 7  | L  | 13 | 1539.9223      | 770.4651        |
| 974.4869       | 8  | V  | 12 | 1426.8383      | 713.9230        |
| 1102.5455      | 9  | Q  | 11 | 1327.7698      | 664.3888        |
| 1258.6718      | 10 | K  | 10 | 1199.7113      | 600.3595        |
| 1329.7089      | 11 | A  | 9  | 1043.5850      | 522.2964        |
| 1485.8352      | 12 | K  | 8  | 972.5479       | 486.7778        |
| 1598.9193      | 13 | L  | 7  | 816.4216       | 408.7147        |
| 1669.9564      | 14 | A  | 6  | 703.3375       | 352.1727        |
| 1798.9990      | 15 | E  | 5  | 632.3004       | 316.6541        |
| 1927.0575      | 16 | Q  | 4  | 503.2578       | 252.1328        |
| 1998.0947      | 17 | A  | 3  | 375.1992       | 188.1035        |
| 2127.1373      | 18 | E  | 2  | 304.1621       | 152.5850        |
|                | 19 | R  | 1  | 175.1195       | 88.0637         |

N-term:+43.02 K(4):+156.13  
 K(10):+156.13 K(12):+156.13

TQSLVCPDVTVSR, MH+ 1404.6793, m/z 702.8433  
 H OS G29 P150811 220811-s1.03781.03781.2.dta

scan 3781; 2.5e+000

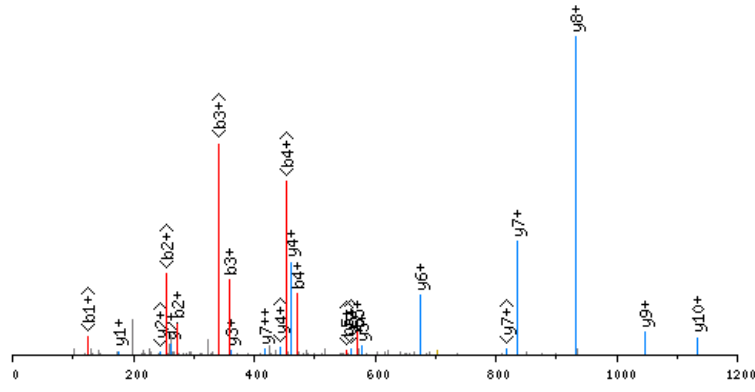

click image to zoom in; click top corners to zoom out [\[precursor±\]](#)

scan 3780; 702.8 m/z; 6.0e+000

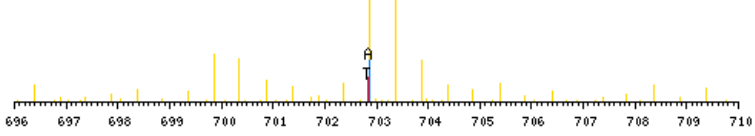

zoomed in precursor plot; T=theoretical m/z, A=acquired m/z

X-range:

-

MassTol: Y-zoom:

MassType:

AVG  MONO

Axis:

1  2

Label:

I  M  -

Ions:

a  +  2+  3+

b  +  2+  3+

c  +  2+  3+

x  +  2+  3+

y  +  2+  3+

z  +  2+  3+

hide H<sub>2</sub>O/NH<sub>3</sub>

zoom 112-122

GO

| b <sup>+</sup> | #  | AA | #  | y <sup>+</sup> | y <sup>2+</sup> |
|----------------|----|----|----|----------------|-----------------|
| 144.0661       | 1  | T  | 12 |                |                 |
| 272.1247       | 2  | Q  | 11 | 1261.6210      | 631.3144        |
| 359.1567       | 3  | S  | 10 | 1133.5624      | 567.2851        |
| 472.2407       | 4  | L  | 9  | 1046.5304      | 523.7691        |
| 571.3092       | 5  | V  | 8  | 933.4463       | 467.2271        |
| 731.3398       | 6  | C  | 7  | 834.3779       | 417.6929        |
| 828.3925       | 7  | P  | 6  | 674.3473       | 337.6776        |
| 943.4195       | 8  | D  | 5  | 577.2946       | 289.1512        |
| 1044.4671      | 9  | T  | 4  | 462.2676       | 231.6377        |
| 1143.5356      | 10 | V  | 3  | 361.2199       | 181.1139        |
| 1230.5676      | 11 | S  | 2  | 262.1515       | 131.5797        |
|                | 12 | R  | 1  | 175.1195       | 88.0637         |

N-term:+43.02 C(6):+160.03



TSALENYINR, MH+ 1222.6068, m/z 611.8070  
 H OS G29 P150811 220811-s1.05247.05247.2.dta

X-range:

-

MassTol: Y-zoom:

MassType:

AVG  MONO

Axis:

1  2

Label:

I  M  -

Ions:

a  +  2+  3+

b  +  2+  3+

c  +  2+  3+

x  +  2+  3+

y  +  2+  3+

z  +  2+  3+

hide H<sub>2</sub>O/NH<sub>3</sub>

zoom 112-122

GO

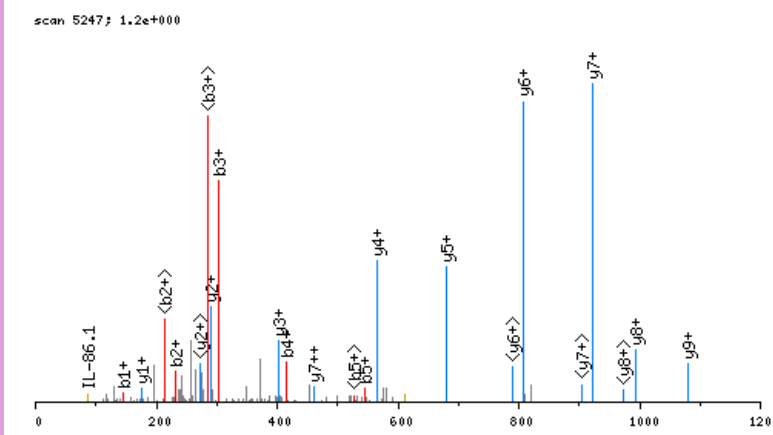

click image to zoom in; click top corners to zoom out [\[precursor±\]](#)

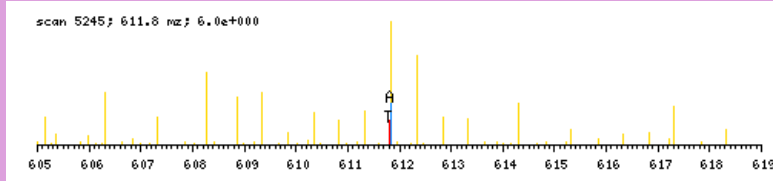

zoomed in precursor plot; T=theoretical m/z, A=acquired m/z

| b <sup>+</sup> | #  | AA # | y <sup>+</sup> | y <sup>2+</sup> |
|----------------|----|------|----------------|-----------------|
| 144.0661       | 1  | T    | 10             |                 |
| 231.0981       | 2  | S    | 9              | 1079.5485       |
| 302.1352       | 3  | A    | 8              | 496.7622        |
| 415.2193       | 4  | L    | 7              | 921.4794        |
| 544.2619       | 5  | E    | 6              | 808.3953        |
| 658.3048       | 6  | N    | 5              | 679.3527        |
| 821.3681       | 7  | Y    | 4              | 565.3098        |
| 934.4522       | 8  | I    | 3              | 402.2465        |
| 1048.4951      | 9  | N    | 2              | 289.1624        |
|                | 10 | R    | 1              | 175.1195        |

N-term:+43.02

TSDQDAKVVVAEPQAQR, MH+ 1812.9092, m/z 604.9746  
 H OS G24 P150811 220811-s1.02708.02708.3.dta

scan 2708; 5.1e-001

X-range:

-

MassTol: Y-zoom:

MassType:

AVG  MONO

Axis:

1  2

Label:

I  M  -

Ions:

a  +  2+  3+

b  +  2+  3+

c  +  2+  3+

x  +  2+  3+

y  +  2+  3+

z  +  2+  3+

hide H<sub>2</sub>O/NH<sub>3</sub>

zoom 112-122

GO

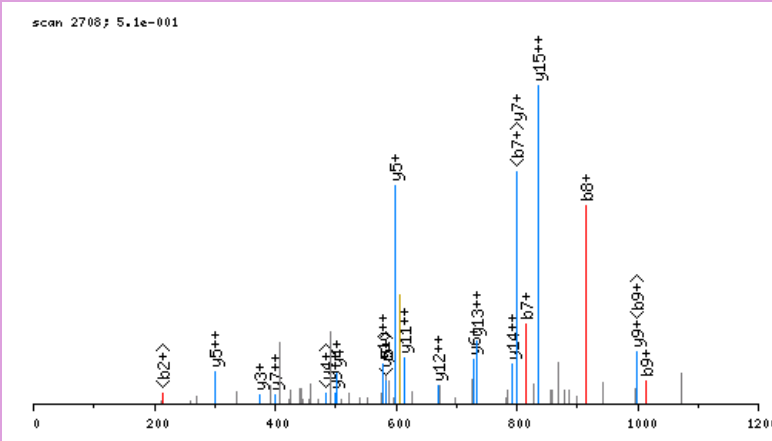

click image to zoom in; click top corners to zoom out [\[precursor±\]](#)

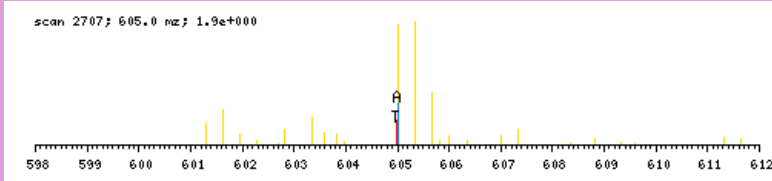

zoomed in precursor plot; T=theoretical m/z, A=acquired m/z

| b <sup>+</sup> | #  | AA | #  | y <sup>+</sup> | y <sup>2+</sup> |
|----------------|----|----|----|----------------|-----------------|
| 144.0661       | 1  | T  | 16 |                |                 |
| 231.0981       | 2  | S  | 15 | 1669.8510      | 835.4294        |
| 346.1251       | 3  | D  | 14 | 1582.8189      | 791.9134        |
| 474.1836       | 4  | Q  | 13 | 1467.7920      | 734.3999        |
| 589.2106       | 5  | D  | 12 | 1339.7334      | 670.3706        |
| 660.2477       | 6  | A  | 11 | 1224.7065      | 612.8572        |
| 816.3740       | 7  | K  | 10 | 1153.6694      | 577.3386        |
| 915.4424       | 8  | V  | 9  | 997.5431       | 499.2754        |
| 1014.5108      | 9  | V  | 8  | 898.4747       | 449.7412        |
| 1085.5479      | 10 | A  | 7  | 799.4062       | 400.2070        |
| 1214.5905      | 11 | E  | 6  | 728.3691       | 364.6885        |
| 1311.6433      | 12 | P  | 5  | 599.3265       | 300.1672        |
| 1439.7019      | 13 | Q  | 4  | 502.2738       | 251.6408        |
| 1510.7390      | 14 | A  | 3  | 374.2152       | 187.6115        |
| 1638.7976      | 15 | Q  | 2  | 303.1781       | 152.0930        |
|                | 16 | R  | 1  | 175.1195       | 88.0637         |

N-term:+43.02 K(7):+156.13

TSPEGAQNKEIDCLSPEAQR, MH+ 2306.1147, m/z 769.3764  
 H OS G24 P150811 220811-s1.03284.03284.3.dta

scan 3284; 2.2e+000

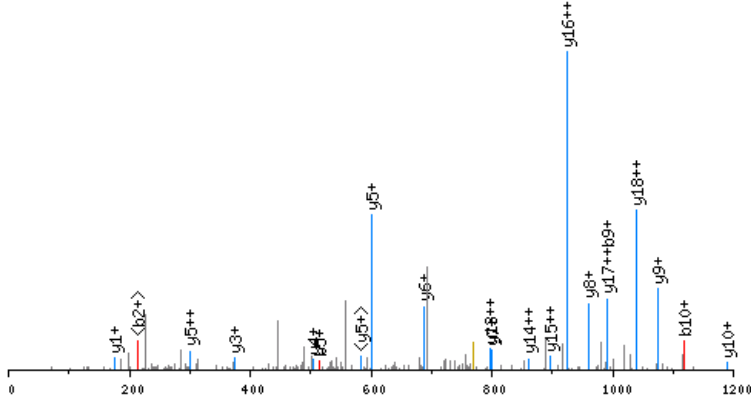

click image to zoom in; click top corners to zoom out [precursor±]

scan 3282; 769.4 m/z; 1.3e+001

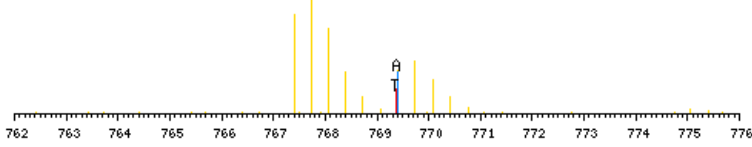

zoomed in precursor plot; T=theoretical m/z, A=acquired m/z

X-range:

-

MassTol: Y-zoom:

MassType:

AVG  MONO

Axis:

1  2

Label:

I  M  -

Ions:

a  +  2+  3+

b  +  2+  3+

c  +  2+  3+

x  +  2+  3+

y  +  2+  3+

z  +  2+  3+

hide H<sub>2</sub>O/NH<sub>3</sub>

zoom 112-122

GO

| b <sup>+</sup> | #  | AA | #  | y <sup>+</sup> | y <sup>2+</sup> |
|----------------|----|----|----|----------------|-----------------|
| 144.0661       | 1  | T  | 20 |                |                 |
| 231.0981       | 2  | S  | 19 | 2163.0564      | 1082.0321       |
| 328.1509       | 3  | P  | 18 | 2076.0244      | 1038.5161       |
| 457.1935       | 4  | E  | 17 | 1978.9716      | 989.9897        |
| 514.2149       | 5  | G  | 16 | 1849.9290      | 925.4684        |
| 585.2520       | 6  | A  | 15 | 1792.9076      | 896.9577        |
| 713.3106       | 7  | Q  | 14 | 1721.8704      | 861.4391        |
| 827.3535       | 8  | N  | 13 | 1593.8119      | 797.4098        |
| 989.5116       | 9  | K  | 12 | 1479.7689      | 740.3884        |
| 1118.5542      | 10 | E  | 11 | 1317.6108      | 659.3093        |
| 1231.6383      | 11 | I  | 10 | 1188.5682      | 594.7880        |
| 1346.6652      | 12 | D  | 9  | 1075.4842      | 538.2460        |
| 1506.6958      | 13 | C  | 8  | 960.4572       | 480.7325        |
| 1619.7799      | 14 | L  | 7  | 800.4266       | 400.7172        |
| 1706.8119      | 15 | S  | 6  | 687.3426       | 344.1752        |
| 1803.8647      | 16 | P  | 5  | 600.3105       | 300.6592        |
| 1932.9073      | 17 | E  | 4  | 503.2578       | 252.1328        |
| 2003.9444      | 18 | A  | 3  | 374.2152       | 187.6115        |
| 2132.0030      | 19 | Q  | 2  | 303.1781       | 152.0930        |
|                | 20 | R  | 1  | 175.1195       | 88.0637         |

N-term:+43.02 K(9):+162.16  
 C(13):+160.03

TSSYGHVLER, MH+ 1190.5806, m/z 595.7939  
 H OS G25 P150811 220811-s1.03890.03890.2.dta

X-range:

-

MassTol: Y-zoom:

MassType:

AVG  MONO

Axis:

1  2

Label:

I  M  -

Ions:

a  +  2+  3+

b  +  2+  3+

c  +  2+  3+

x  +  2+  3+

y  +  2+  3+

z  +  2+  3+

hide H<sub>2</sub>O/NH<sub>3</sub>

zoom 112-122

GO

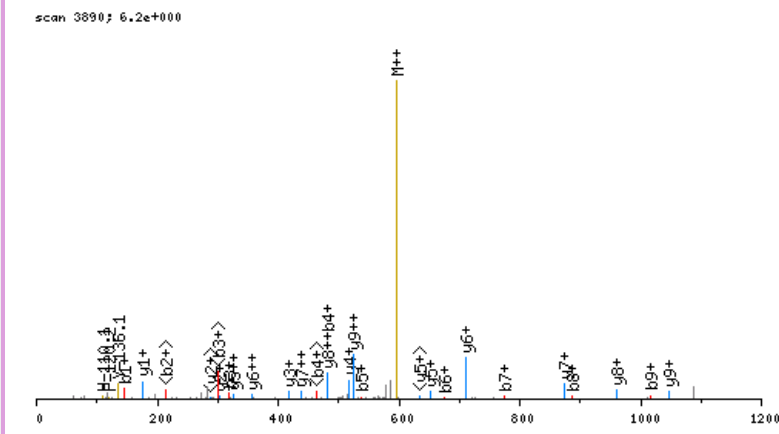

click image to zoom in; click top corners to zoom out [\[precursor±\]](#)

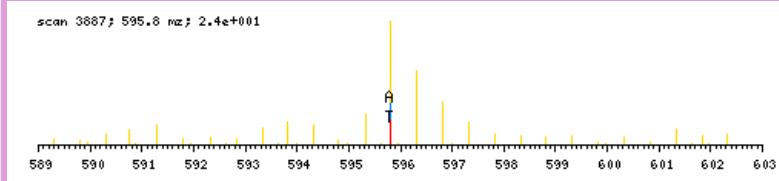

zoomed in precursor plot; T=theoretical m/z, A=acquired m/z

| b <sup>+</sup> | #  | AA # | y <sup>+</sup> | y <sup>2+</sup>    |
|----------------|----|------|----------------|--------------------|
| 144.0661       | 1  | T    | 10             |                    |
| 231.0981       | 2  | S    | 9              | 1047.5223 524.2651 |
| 318.1301       | 3  | S    | 8              | 960.4903 480.7491  |
| 481.1935       | 4  | Y    | 7              | 873.4583 437.2331  |
| 538.2149       | 5  | G    | 6              | 710.3949 355.7014  |
| 675.2738       | 6  | H    | 5              | 653.3735 327.1907  |
| 774.3423       | 7  | V    | 4              | 516.3146 258.6612  |
| 887.4263       | 8  | L    | 3              | 417.2462 209.1270  |
| 1016.4689      | 9  | E    | 2              | 304.1621 152.5850  |
|                | 10 | R    | 1              | 175.1195 88.0637   |

N-term:+43.02

TTKDPESEHPSVTLFR, MH+ 1913.9609, m/z 638.6585  
 H OS G26 P150811 220811-s1.04226.04226.3.dta

X-range:

-

MassTol: Y-zoom:

MassType:

AVG  MONO

Axis:

1  2

Label:

I  M  -

Ions:

a  +  2+  3+

b  +  2+  3+

c  +  2+  3+

x  +  2+  3+

y  +  2+  3+

z  +  2+  3+

hide H<sub>2</sub>O/NH<sub>3</sub>

zoom 112-122

GO

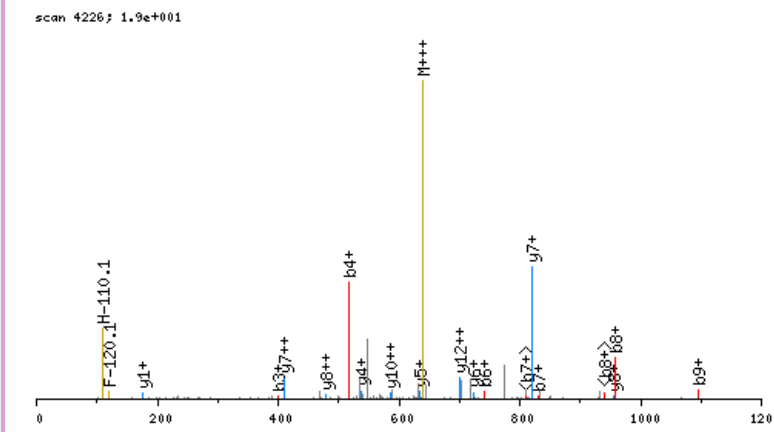

click image to zoom in; click top corners to zoom out [\[precursor±\]](#)

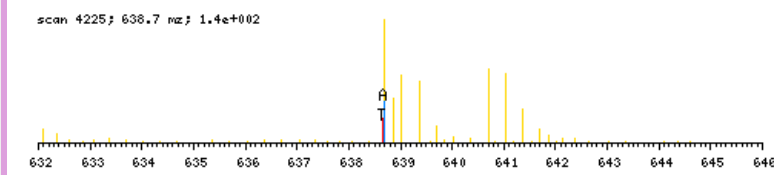

zoomed in precursor plot; T=theoretical m/z, A=acquired m/z

| b <sup>+</sup> | #  | AA # | y <sup>+</sup> | y <sup>2+</sup> |
|----------------|----|------|----------------|-----------------|
| 144.0661       | 1  | T 16 |                |                 |
| 245.1138       | 2  | T 15 | 1770.9027      | 885.9553        |
| 401.2401       | 3  | K 14 | 1669.8550      | 835.4314        |
| 516.2670       | 4  | D 13 | 1513.7287      | 757.3683        |
| 613.3198       | 5  | P 12 | 1398.7018      | 699.8548        |
| 742.3624       | 6  | E 11 | 1301.6490      | 651.3284        |
| 829.3944       | 7  | S 10 | 1172.6064      | 586.8071        |
| 958.4370       | 8  | E 9  | 1085.5744      | 543.2911        |
| 1095.4959      | 9  | H 8  | 956.5318       | 478.7698        |
| 1192.5487      | 10 | P 7  | 819.4729       | 410.2403        |
| 1279.5807      | 11 | S 6  | 722.4201       | 361.7140        |
| 1378.6491      | 12 | V 5  | 635.3881       | 318.1979        |
| 1479.6968      | 13 | T 4  | 536.3197       | 268.6637        |
| 1592.7808      | 14 | L 3  | 435.2720       | 218.1399        |
| 1739.8493      | 15 | F 2  | 322.1879       | 161.5979        |
|                | 16 | R 1  | 175.1195       | 88.0637         |

N-term:+43.02 K(3):+156.13

TTQQIVLQGPWPWGER, MH+ 1826.9554, m/z 609.6566  
H OS G29 P150811 220811-s1.06281.06281.3.dta

X-range:

-

MassTol: Y-zoom:

MassType:

AVG  MONO

Axis:

1  2

Label:

I  M  -

Ions:

a  +  2+  3+

b  +  2+  3+

c  +  2+  3+

x  +  2+  3+

y  +  2+  3+

z  +  2+  3+

hide H<sub>2</sub>O/NH<sub>3</sub>

zoom 112-122

GO

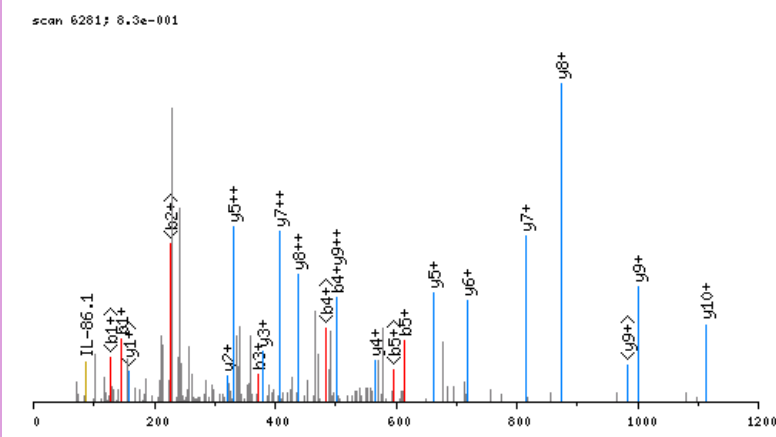

click image to zoom in; click top corners to zoom out [[precursor±](#)]

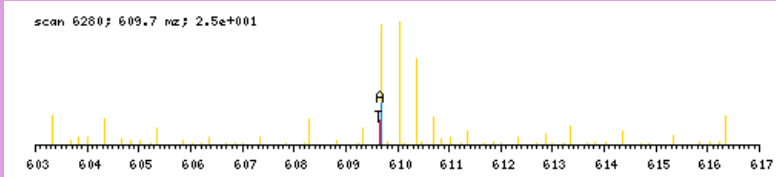

zoomed in precursor plot; T=theoretical m/z, A=acquired m/z

| b <sup>+</sup> | #  | AA # | y <sup>+</sup> | y <sup>2+</sup> |
|----------------|----|------|----------------|-----------------|
| 144.0661       | 1  | T 16 |                |                 |
| 245.1138       | 2  | T 15 | 1683.8971      | 842.4525        |
| 373.1723       | 3  | Q 14 | 1582.8494      | 791.9286        |
| 501.2309       | 4  | Q 13 | 1454.7908      | 727.8993        |
| 614.3150       | 5  | I 12 | 1326.7323      | 663.8700        |
| 713.3834       | 6  | V 11 | 1213.6482      | 607.3280        |
| 826.4675       | 7  | L 10 | 1114.5798      | 557.7938        |
| 954.5260       | 8  | Q 9  | 1001.4957      | 501.2518        |
| 1011.5475      | 9  | G 8  | 873.4371       | 437.2225        |
| 1108.6003      | 10 | P 7  | 816.4157       | 408.7118        |
| 1165.6217      | 11 | G 6  | 719.3629       | 360.1854        |
| 1262.6745      | 12 | P 5  | 662.3415       | 331.6746        |
| 1448.7538      | 13 | W 4  | 565.2887       | 283.1483        |
| 1505.7753      | 14 | G 3  | 379.2094       | 190.1086        |
| 1652.8437      | 15 | F 2  | 322.1879       | 161.5979        |
|                | 16 | R 1  | 175.1195       | 88.0637         |

N-term:+43.02

TTSGALFPSLVPGSR, MH+ 1531.8120, m/z 766.4097  
 H OS G29 P150811 220811-s1.06216.06216.2.dta

scan 6216; 1.2e+001

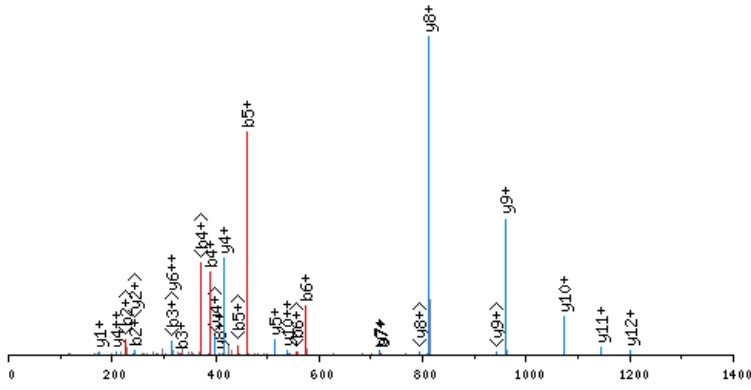

click image to zoom in; click top corners to zoom out [\[precursor±\]](#)

scan 6215; 766.4 m/z; 8.7e+001

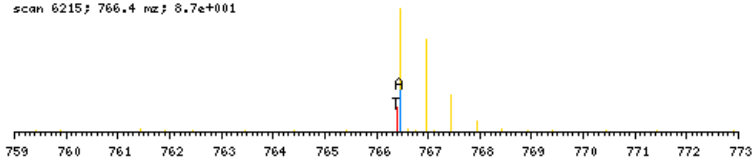

zoomed in precursor plot; T=theoretical m/z, A=acquired m/z

X-range:

-

MassTol: Y-zoom:

MassType:

AVG  MONO

Axis:

1  2

Label:

I  M  -

Ions:

a  +  2+  3+

b  +  2+  3+

c  +  2+  3+

x  +  2+  3+

y  +  2+  3+

z  +  2+  3+

hide H<sub>2</sub>O/NH<sub>3</sub>

zoom 112-122

GO

| b <sup>+</sup> | #  | AA | #  | y <sup>+</sup> | y <sup>2+</sup> |
|----------------|----|----|----|----------------|-----------------|
| 144.0661       | 1  | T  | 15 |                |                 |
| 245.1138       | 2  | T  | 14 | 1388.7538      | 694.8808        |
| 332.1458       | 3  | S  | 13 | 1287.7061      | 644.3570        |
| 389.1672       | 4  | G  | 12 | 1200.6741      | 600.8410        |
| 460.2044       | 5  | A  | 11 | 1143.6526      | 572.3302        |
| 573.2884       | 6  | L  | 10 | 1072.6155      | 536.8117        |
| 720.3568       | 7  | F  | 9  | 959.5314       | 480.2696        |
| 817.4096       | 8  | P  | 8  | 812.4630       | 406.7354        |
| 904.4416       | 9  | S  | 7  | 715.4103       | 358.2090        |
| 1017.5257      | 10 | L  | 6  | 628.3782       | 314.6930        |
| 1116.5941      | 11 | V  | 5  | 515.2942       | 258.1510        |
| 1213.6469      | 12 | P  | 4  | 416.2258       | 208.6168        |
| 1270.6683      | 13 | G  | 3  | 319.1730       | 160.0904        |
| 1357.7004      | 14 | S  | 2  | 262.1515       | 131.5797        |
|                | 15 | R  | 1  | 175.1195       | 88.0637         |

N-term:+43.02

TTYLEFIQQNEER, MH+ 1712.8132, m/z 856.9102  
 H OS G29 P150811 220811-s1.06286.06286.2.dta

X-range:

-

MassTol: Y-zoom:

MassType:

AVG  MONO

Axis:

1  2

Label:

I  M  -

Ions:

a  +  2+  3+

b  +  2+  3+

c  +  2+  3+

x  +  2+  3+

y  +  2+  3+

z  +  2+  3+

hide H<sub>2</sub>O/NH<sub>3</sub>

zoom 112-122

GO

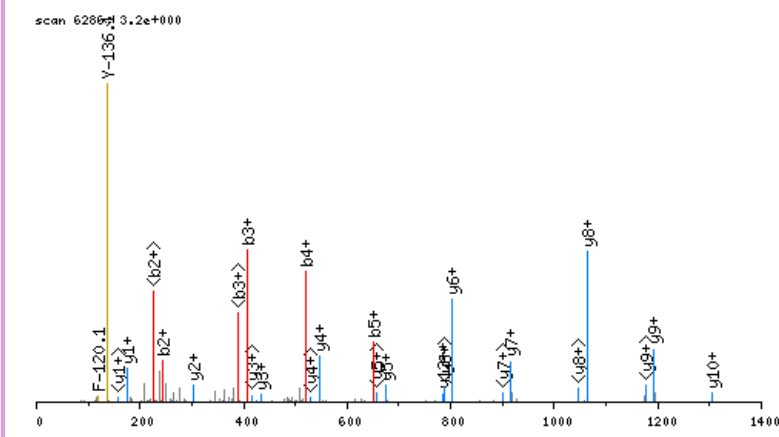

click image to zoom in; click top corners to zoom out [\[precursor±\]](#)

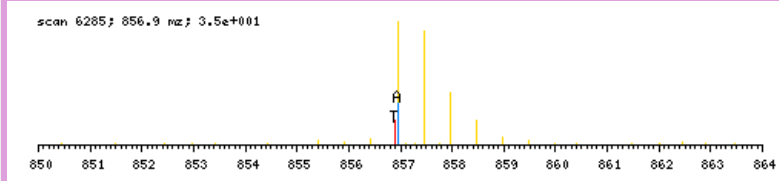

zoomed in precursor plot; T=theoretical m/z, A=acquired m/z

| b <sup>+</sup> | #  | AA # | y <sup>+</sup> | y <sup>2+</sup> |
|----------------|----|------|----------------|-----------------|
| 144.0661       | 1  | T 13 |                |                 |
| 245.1138       | 2  | T 12 | 1569.7549      | 785.3814        |
| 408.1771       | 3  | Y 11 | 1468.7072      | 734.8575        |
| 521.2611       | 4  | L 10 | 1305.6439      | 653.3259        |
| 650.3037       | 5  | E 9  | 1192.5598      | 596.7838        |
| 797.3722       | 6  | F 8  | 1063.5172      | 532.2625        |
| 910.4562       | 7  | I 7  | 916.4488       | 458.7283        |
| 1038.5148      | 8  | Q 6  | 803.3648       | 402.1863        |
| 1166.5734      | 9  | Q 5  | 675.3062       | 338.1570        |
| 1280.6163      | 10 | N 4  | 547.2476       | 274.1277        |
| 1409.6589      | 11 | E 3  | 433.2047       | 217.1063        |
| 1538.7015      | 12 | E 2  | 304.1621       | 152.5850        |
|                | 13 | R 1  | 175.1195       | 88.0637         |

N-term:+43.02



TTYLVLEADR, MH+ 1337.6589, m/z 669.3331  
 H OS G29 P150811 220811-s1.05777.05777.2.dta

X-range:

-

MassTol: Y-zoom:

MassType:

AVG  MONO

Axis:

1  2

Label:

I  M  -

Ions:

a  +  2+  3+

b  +  2+  3+

c  +  2+  3+

x  +  2+  3+

y  +  2+  3+

z  +  2+  3+

hide H<sub>2</sub>O/NH<sub>3</sub>

zoom 112-122

GO

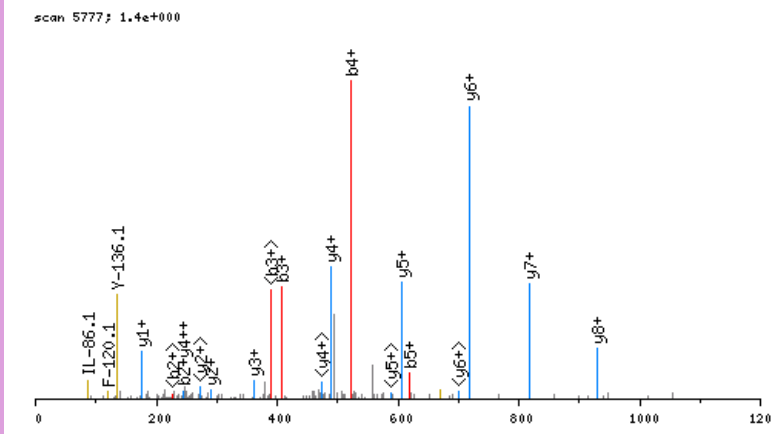

click image to zoom in; click top corners to zoom out [\[precursor±\]](#)

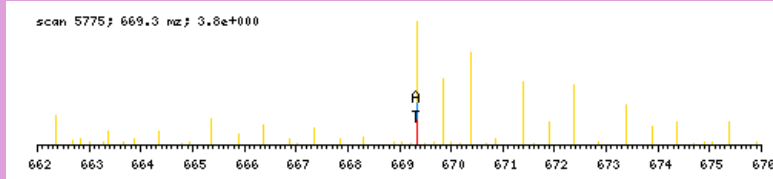

zoomed in precursor plot; T=theoretical m/z, A=acquired m/z

| b <sup>+</sup> | #  | AA # | y <sup>+</sup> | y <sup>2+</sup> |
|----------------|----|------|----------------|-----------------|
| 144.0661       | 1  | T 11 |                |                 |
| 245.1138       | 2  | T 10 | 1194.6006      | 597.8042        |
| 408.1771       | 3  | Y 9  | 1093.5530      | 547.2804        |
| 521.2611       | 4  | L 8  | 930.4896       | 465.7487        |
| 620.3296       | 5  | V 7  | 817.4056       | 409.2067        |
| 733.4136       | 6  | L 6  | 718.3372       | 359.6725        |
| 848.4406       | 7  | D 5  | 605.2531       | 303.1305        |
| 977.4832       | 8  | E 4  | 490.2262       | 245.6170        |
| 1048.5203      | 9  | A 3  | 361.1836       | 181.0957        |
| 1163.5472      | 10 | D 2  | 290.1464       | 145.5771        |
|                | 11 | R 1  | 175.1195       | 88.0637         |

N-term:+43.02

TVKKIAIFGATGR, MH+ 1459.9001, m/z 487.3049  
 H OS G26 P150811 220811-s1.04484.04484.3.dta

X-range:

-

MassTol: Y-zoom:

MassType:

AVG  MONO

Axis:

1  2

Label:

I  M  -

Ions:

a  +  2+  3+

b  +  2+  3+

c  +  2+  3+

x  +  2+  3+

y  +  2+  3+

z  +  2+  3+

hide H<sub>2</sub>O/NH<sub>3</sub>

zoom 112-122

GO

scan 4484; 4.1e+001

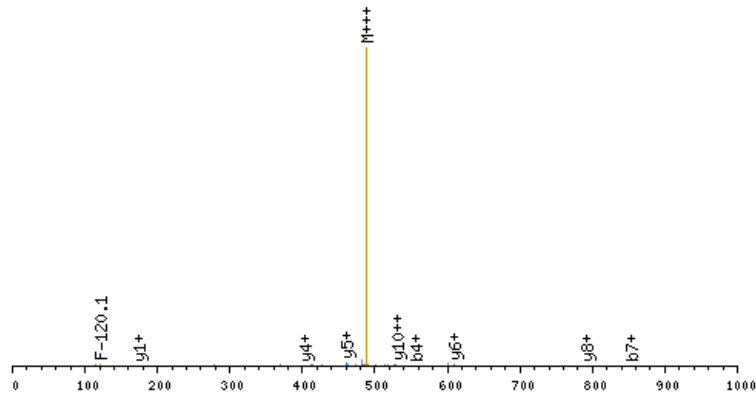

click image to zoom in; click top corners to zoom out [\[precursor±\]](#)

scan 4480; 487.3 m/z; 8.0e+000

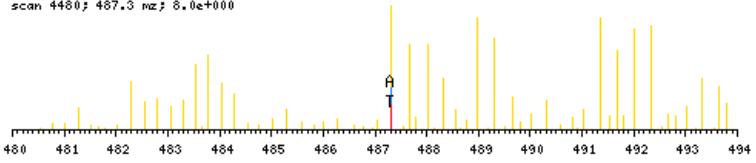

zoomed in precursor plot; T=theoretical m/z, A=acquired m/z

| b <sup>+</sup> | #  | AA # | y <sup>+</sup> | y <sup>2+</sup> |
|----------------|----|------|----------------|-----------------|
| 144.0661       | 1  | T 13 |                |                 |
| 243.1345       | 2  | V 12 | 1316.8419      | 658.9249        |
| 399.2608       | 3  | K 11 | 1217.7735      | 609.3907        |
| 555.3871       | 4  | K 10 | 1061.6472      | 531.3275        |
| 668.4712       | 5  | I 9  | 905.5209       | 453.2644        |
| 739.5083       | 6  | A 8  | 792.4368       | 396.7223        |
| 852.5923       | 7  | I 7  | 721.3997       | 361.2038        |
| 999.6607       | 8  | F 6  | 608.3156       | 304.6617        |
| 1056.6822      | 9  | G 5  | 461.2472       | 231.1275        |
| 1127.7193      | 10 | A 4  | 404.2258       | 202.6168        |
| 1228.7670      | 11 | T 3  | 333.1886       | 167.0982        |
| 1285.7885      | 12 | G 2  | 232.1410       | 116.5744        |
|                | 13 | R 1  | 175.1195       | 88.0637         |

N-term:+43.02 K(3):+156.13  
 K(4):+156.13

TVLSGGSTMYPGIADR, MH+ 1666.8111, m/z 556.2752  
 H OS G25 P150811 220811-s1.05920.05920.3.dta

X-range:

-

MassTol: Y-zoom:

MassType:

AVG  MONO

Axis:

1  2

Label:

I  M  -

Ions:

a  +  2+  3+

b  +  2+  3+

c  +  2+  3+

x  +  2+  3+

y  +  2+  3+

z  +  2+  3+

hide H<sub>2</sub>O/NH<sub>3</sub>

zoom 112-122

GO

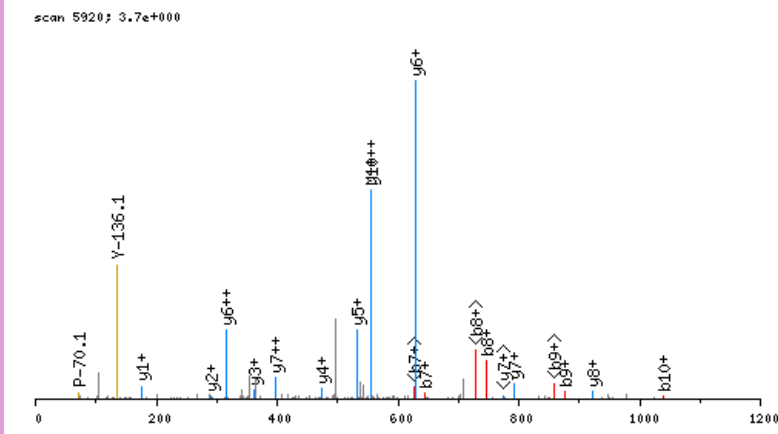

click image to zoom in; click top corners to zoom out [\[precursor±\]](#)

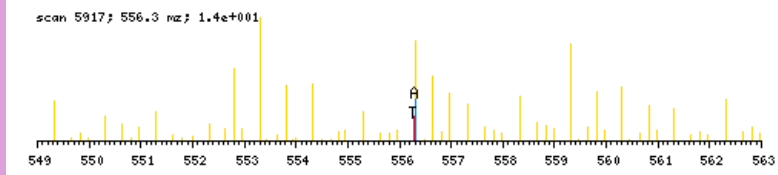

zoomed in precursor plot; T=theoretical m/z, A=acquired m/z

| b <sup>+</sup>   | #         | AA #        | y <sup>+</sup>   | y <sup>2+</sup> |
|------------------|-----------|-------------|------------------|-----------------|
| 144.0661         | 1         | T 16        |                  |                 |
| 243.1345         | 2         | V 15        | 1523.7528        | 762.3803        |
| 356.2186         | 3         | L 14        | 1424.6844        | 712.8461        |
| 443.2506         | 4         | S 13        | 1311.6003        | 656.3041        |
| 500.2720         | 5         | G 12        | 1224.5683        | 612.7881        |
| 557.2935         | 6         | G 11        | 1167.5468        | 584.2773        |
| <b>644.3255</b>  | <b>7</b>  | <b>S 10</b> | <b>1110.5254</b> | <b>555.7666</b> |
| <b>745.3732</b>  | <b>8</b>  | <b>T 9</b>  | <b>1023.4933</b> | <b>512.2506</b> |
| <b>876.4137</b>  | <b>9</b>  | <b>M 8</b>  | <b>922.4457</b>  | <b>461.7267</b> |
| <b>1039.4770</b> | <b>10</b> | <b>Y 7</b>  | <b>791.4052</b>  | <b>396.2065</b> |
| 1136.5298        | 11        | P 6         | 628.3418         | 314.6748        |
| 1193.5513        | 12        | G 5         | 531.2891         | 266.1485        |
| 1306.6353        | 13        | I 4         | 474.2676         | 237.6377        |
| 1377.6724        | 14        | A 3         | 361.1836         | 181.0957        |
| 1492.6994        | 15        | D 2         | 290.1464         | 145.5771        |
|                  | 16        | R 1         | 175.1195         | 88.0637         |

N-term:+43.02

VEAAPAGSGPLR, MH+ 1166.6170, m/z 583.8121  
 H OS G29 P150811 220811-s1.03549.03549.2.dta

scan 3549; 3.4e+000

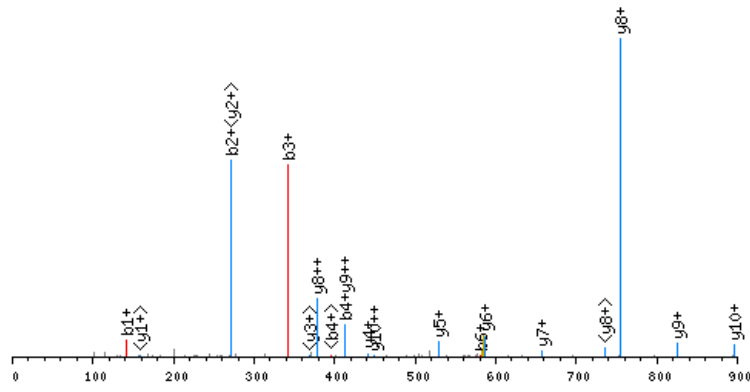

click image to zoom in; click top corners to zoom out [\[precursor±\]](#)

scan 3545; 583.8 m/z; 7.8e+000

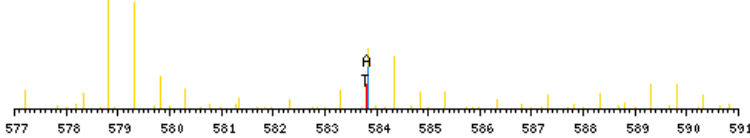

zoomed in precursor plot; T=theoretical m/z, A=acquired m/z

X-range:

-

MassTol: Y-zoom:

MassType:

AVG  MONO

Axis:

1  2

Label:

I  M  -

Ions:

a  +  2+  3+

b  +  2+  3+

c  +  2+  3+

x  +  2+  3+

y  +  2+  3+

z  +  2+  3+

hide H<sub>2</sub>O/NH<sub>3</sub>

zoom 112-122

GO

| b <sup>+</sup> | #  | AA | #  | y <sup>+</sup> | y <sup>2+</sup> |
|----------------|----|----|----|----------------|-----------------|
| 142.0868       | 1  | V  | 12 |                |                 |
| 271.1294       | 2  | E  | 11 | 1025.5380      | 513.2729        |
| 342.1665       | 3  | A  | 10 | 896.4954       | 448.7516        |
| 413.2036       | 4  | A  | 9  | 825.4583       | 413.2331        |
| 510.2564       | 5  | P  | 8  | 754.4212       | 377.7145        |
| 581.2935       | 6  | A  | 7  | 657.3684       | 329.1881        |
| 638.3150       | 7  | G  | 6  | 586.3313       | 293.6696        |
| 725.3470       | 8  | S  | 5  | 529.3098       | 265.1588        |
| 782.3685       | 9  | G  | 4  | 442.2778       | 221.6428        |
| 879.4212       | 10 | P  | 3  | 385.2563       | 193.1321        |
| 992.5053       | 11 | L  | 2  | 288.2036       | 144.6057        |
|                | 12 | R  | 1  | 175.1195       | 88.0637         |

N-term:+43.02

VEKEEAGGGGGGISEEEAAQYDR, MH+ 2465.1069, m/z 822.3738  
 H OS G24 P150811 220811-s1.03215.03215.3.dta

scan 3215; 2.0e+000

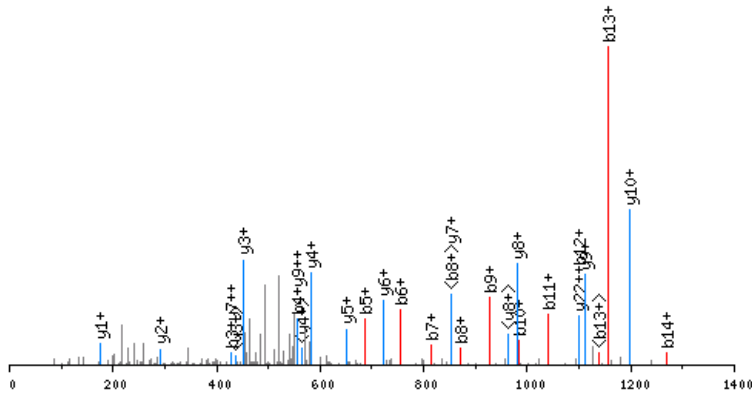

click image to zoom in; click top corners to zoom out [precursor±]

scan 3212; 822.4 m/z; 6.2e+000

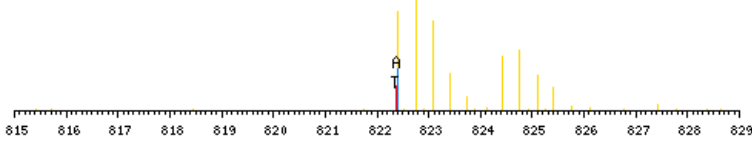

zoomed in precursor plot; T=theoretical m/z, A=acquired m/z

X-range:

-

MassTol: Y-zoom:

MassType:

AVG  MONO

Axis:

1  2

Label:

I  M  -

Ions:

a  +  2+  3+

b  +  2+  3+

c  +  2+  3+

x  +  2+  3+

y  +  2+  3+

z  +  2+  3+

hide H<sub>2</sub>O/NH<sub>3</sub>

zoom 112-122

GO

| b <sup>+</sup> | #  | AA | #  | y <sup>+</sup> | y <sup>2+</sup> |
|----------------|----|----|----|----------------|-----------------|
| 142.0868       | 1  | V  | 24 |                |                 |
| 271.1294       | 2  | E  | 23 | 2324.0279      | 1162.5179       |
| 427.2557       | 3  | K  | 22 | 2194.9853      | 1097.9966       |
| 556.2983       | 4  | E  | 21 | 2038.8590      | 1019.9334       |
| 685.3409       | 5  | E  | 20 | 1909.8164      | 955.4121        |
| 756.3780       | 6  | A  | 19 | 1780.7738      | 890.8908        |
| 813.3995       | 7  | G  | 18 | 1709.7367      | 855.3723        |
| 870.4209       | 8  | G  | 17 | 1652.7152      | 826.8615        |
| 927.4424       | 9  | G  | 16 | 1595.6938      | 798.3508        |
| 984.4639       | 10 | G  | 15 | 1538.6723      | 769.8401        |
| 1041.4853      | 11 | G  | 14 | 1481.6508      | 741.3293        |
| 1098.5068      | 12 | G  | 13 | 1424.6294      | 712.8186        |
| 1155.5283      | 13 | G  | 12 | 1367.6079      | 684.3079        |
| 1268.6123      | 14 | I  | 11 | 1310.5864      | 655.7971        |
| 1355.6443      | 15 | S  | 10 | 1197.5024      | 599.2551        |
| 1484.6869      | 16 | E  | 9  | 1110.4704      | 555.7391        |
| 1613.7295      | 17 | E  | 8  | 981.4278       | 491.2178        |
| 1742.7721      | 18 | E  | 7  | 852.3852       | 426.6965        |
| 1813.8092      | 19 | A  | 6  | 723.3426       | 362.1752        |
| 1884.8464      | 20 | A  | 5  | 652.3055       | 326.6566        |
| 2012.9049      | 21 | Q  | 4  | 581.2683       | 291.1381        |
| 2175.9683      | 22 | Y  | 3  | 453.2098       | 227.1088        |
| 2290.9952      | 23 | D  | 2  | 290.1464       | 145.5771        |
|                | 24 | R  | 1  | 175.1195       | 88.0637         |

N-term:+43.02 K(3):+156.13

VEQGDAAPLLR, MH+ 1210.6432, m/z 605.8252  
 H OS G29 P150811 220811-s1.04548.04548.2.dta

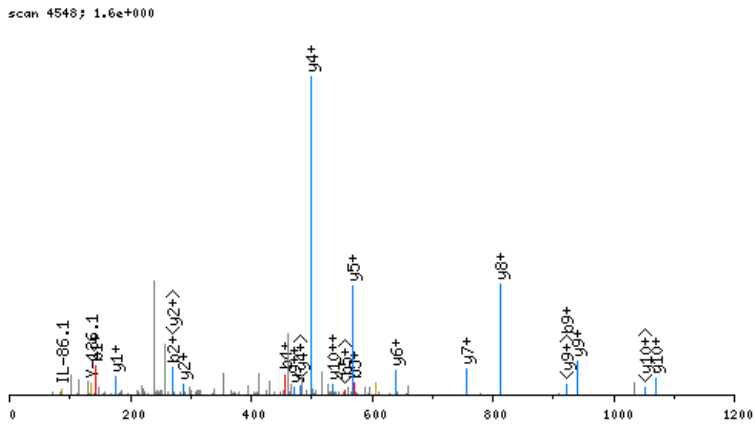

click image to zoom in; click top corners to zoom out [\[precursor±\]](#)

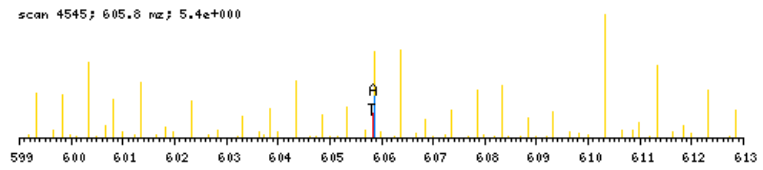

zoomed in precursor plot; T=theoretical m/z, A=acquired m/z

- X-range:  -
- MassTol: Y-zoom:
- MassType:  AVG  MONO
- Axis:  1  2
- Label:  I  M  -
- Ions:
- a  +  2+  3+
- b  +  2+  3+
- c  +  2+  3+
- x  +  2+  3+
- y  +  2+  3+
- z  +  2+  3+
- hide H<sub>2</sub>O/NH<sub>3</sub>
- zoom 112-122
- 

| b <sup>+</sup> | #  | AA # | y <sup>+</sup> | y <sup>2+</sup> |
|----------------|----|------|----------------|-----------------|
| 142.0868       | 1  | V 11 |                |                 |
| 271.1294       | 2  | E 10 | 1069.5642      | 535.2860        |
| 399.1880       | 3  | Q 9  | 940.5216       | 470.7647        |
| 456.2094       | 4  | G 8  | 812.4630       | 406.7354        |
| 571.2364       | 5  | D 7  | 755.4416       | 378.2247        |
| 642.2735       | 6  | A 6  | 640.4146       | 320.7112        |
| 713.3106       | 7  | A 5  | 569.3775       | 285.1927        |
| 810.3634       | 8  | P 4  | 498.3404       | 249.6741        |
| 923.4474       | 9  | L 3  | 401.2876       | 201.1477        |
| 1036.5315      | 10 | L 2  | 288.2036       | 144.6057        |
|                | 11 | R 1  | 175.1195       | 88.0637         |

N-term:+43.02

VKVGVNGFGR, MH+ 1108.6692, m/z 554.8382  
 H OS G25 P150811 220811-s1.05169.05169.2.dta

scan 5169; 3.8e+001

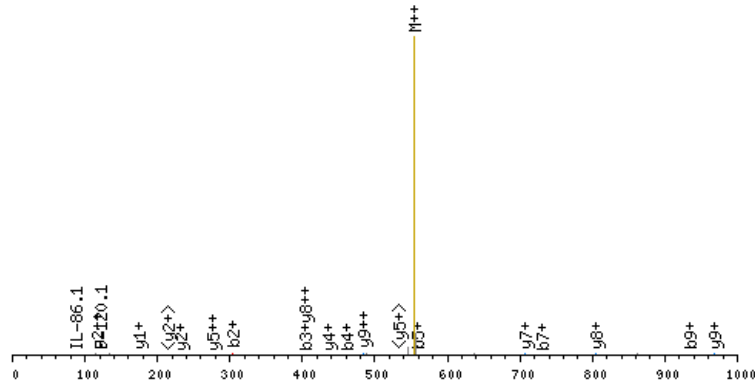

click image to zoom in; click top corners to zoom out [\[precursor±\]](#)

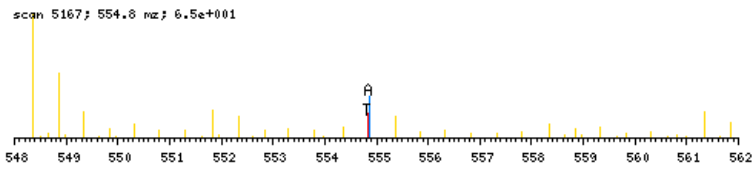

zoomed in precursor plot; T=theoretical m/z, A=acquired m/z

X-range:

-

MassTol: Y-zoom:

MassType:

AVG  MONO

Axis:

1  2

Label:

I  M  -

Ions:

a  +  2+  3+

b  +  2+  3+

c  +  2+  3+

x  +  2+  3+

y  +  2+  3+

z  +  2+  3+

hide H<sub>2</sub>O/NH<sub>3</sub>

zoom 112-122

GO

| b <sup>+</sup> | #  | AA | #  | y <sup>+</sup> | y <sup>2+</sup> |
|----------------|----|----|----|----------------|-----------------|
| 142.0868       | 1  | V  | 10 |                |                 |
| 304.2449       | 2  | K  | 9  | 967.5902       | 484.2990        |
| 403.3133       | 3  | V  | 8  | 805.4321       | 403.2199        |
| 460.3348       | 4  | G  | 7  | 706.3636       | 353.6857        |
| 559.4032       | 5  | V  | 6  | 649.3422       | 325.1750        |
| 673.4461       | 6  | N  | 5  | 550.2738       | 275.6408        |
| 730.4676       | 7  | G  | 4  | 436.2308       | 218.6193        |
| 877.5360       | 8  | F  | 3  | 379.2094       | 190.1086        |
| 934.5575       | 9  | G  | 2  | 232.1410       | 116.5744        |
|                | 10 | R  | 1  | 175.1195       | 88.0637         |

N-term:+43.02 K(2):+162.16

VPSQEPPAAER, MH+ 1254.5966, m/z 627.8020  
 H OS G29 P150811 220811-s1.03223.03223.2.dta

X-range:

-

MassTol: Y-zoom:

MassType:

AVG  MONO

Axis:

1  2

Label:

I  M  -

Ions:

a  +  2+  3+

b  +  2+  3+

c  +  2+  3+

x  +  2+  3+

y  +  2+  3+

z  +  2+  3+

hide H<sub>2</sub>O/NH<sub>3</sub>

zoom 112-122

GO

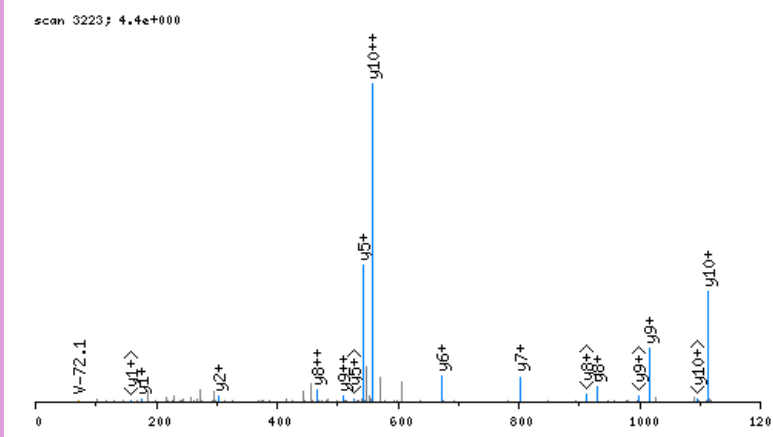

click image to zoom in; click top corners to zoom out [\[precursor±\]](#)

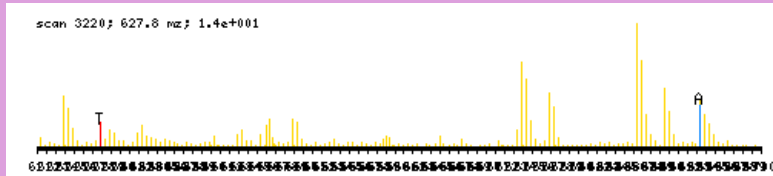

zoomed in precursor plot; T=theoretical m/z, A=acquired m/z

| b <sup>+</sup> | #  | AA # | y <sup>+</sup> | y <sup>2+</sup>    |
|----------------|----|------|----------------|--------------------|
| 142.0868       | 1  | V    | 11             |                    |
| 239.1396       | 2  | P    | 10             | 1113.5176 557.2627 |
| 326.1716       | 3  | S    | 9              | 1016.4649 508.7364 |
| 454.2302       | 4  | Q    | 8              | 929.4328 465.2203  |
| 583.2728       | 5  | E    | 7              | 801.3743 401.1910  |
| 712.3154       | 6  | E    | 6              | 672.3317 336.6698  |
| 809.3681       | 7  | P    | 5              | 543.2891 272.1485  |
| 880.4052       | 8  | A    | 4              | 446.2363 223.6221  |
| 951.4424       | 9  | A    | 3              | 375.1992 188.1035  |
| 1080.4850      | 10 | E    | 2              | 304.1621 152.5850  |
|                | 11 | R    | 1              | 175.1195 88.0637   |

N-term:+43.02



VSMNPTVDTSHEDMIHDAQMDYYGTR, MH+ 3057.3029, m/z 765.0812  
 H OS G26 P150811 220811-s1.06647.06647.4.dta

scan 6647; 4.7e-001

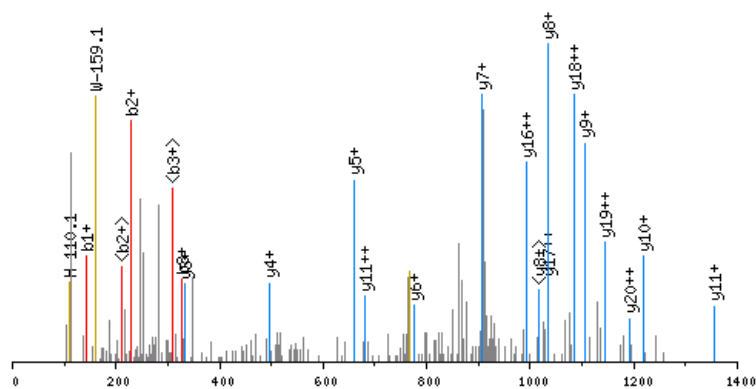

click image to zoom in; click top corners to zoom out [precursor±]

scan 6645; 765.1 m/z; 7.0e+000

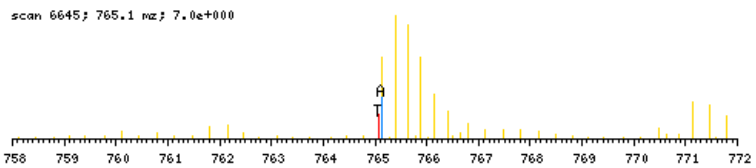

zoomed in precursor plot; T=theoretical m/z, A=acquired m/z

X-range:

-

MassTol: Y-zoom:

MassType:

AVG  MONO

Axis:

1  2

Label:

I  M  -

Ions:

a  +  2+  3+

b  +  2+  3+

c  +  2+  3+

x  +  2+  3+

y  +  2+  3+

z  +  2+  3+

hide H<sub>2</sub>O/NH<sub>3</sub>

zoom 112-122

GO

| b <sup>+</sup> | #  | AA # | y <sup>+</sup> | y <sup>2+</sup> |
|----------------|----|------|----------------|-----------------|
| 142.0868       | 1  | V 26 |                |                 |
| 229.1188       | 2  | S 25 | 2916.2239      | 1458.6158       |
| 328.1873       | 3  | V 24 | 2829.1918      | 1415.0998       |
| 459.2277       | 4  | M 23 | 2730.1234      | 1365.5656       |
| 573.2707       | 5  | N 22 | 2599.0829      | 1300.0454       |
| 674.3183       | 6  | T 21 | 2485.0400      | 1243.0239       |
| 773.3868       | 7  | V 20 | 2383.9923      | 1192.5001       |
| 888.4137       | 8  | D 19 | 2284.9239      | 1142.9659       |
| 989.4614       | 9  | T 18 | 2169.8970      | 1085.4524       |
| 1076.4934      | 10 | S 17 | 2068.8493      | 1034.9286       |
| 1213.5523      | 11 | H 16 | 1981.8173      | 991.4125        |
| 1342.5949      | 12 | E 15 | 1844.7584      | 922.8831        |
| 1457.6219      | 13 | D 14 | 1715.7158      | 858.3618        |
| 1588.6623      | 14 | M 13 | 1600.6888      | 800.8483        |
| 1701.7464      | 15 | I 12 | 1469.6483      | 735.3281        |
| 1838.8053      | 16 | H 11 | 1356.5643      | 678.7860        |
| 1953.8323      | 17 | D 10 | 1219.5054      | 610.2566        |
| 2024.8694      | 18 | A 9  | 1104.4784      | 552.7431        |
| 2152.9280      | 19 | Q 8  | 1033.4413      | 517.2246        |
| 2283.9684      | 20 | M 7  | 905.3827       | 453.1953        |
| 2398.9954      | 21 | D 6  | 774.3422       | 387.6750        |
| 2562.0587      | 22 | Y 5  | 659.3153       | 330.1616        |
| 2725.1220      | 23 | Y 4  | 496.2520       | 248.6299        |
| 2782.1435      | 24 | G 3  | 333.1886       | 167.0982        |
| 2883.1912      | 25 | T 2  | 276.1672       | 138.5875        |
|                | 26 | R 1  | 175.1195       | 88.0637         |

N-term:+43.02

VVFDDTYDR, MH+ 1171.5272, m/z 586.2672  
 H OS G24 P150811 220811-s1.04519.04519.2.dta

X-range:

-

MassTol: Y-zoom:

MassType:

AVG  MONO

Axis:

1  2

Label:

I  M  -

Ions:

a  +  2+  3+

b  +  2+  3+

c  +  2+  3+

x  +  2+  3+

y  +  2+  3+

z  +  2+  3+

hide H<sub>2</sub>O/NH<sub>3</sub>

zoom 112-122

GO

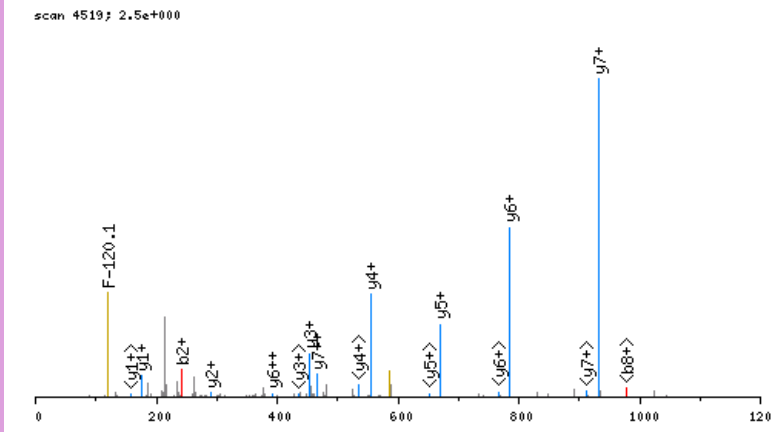

click image to zoom in; click top corners to zoom out [\[precursor±\]](#)

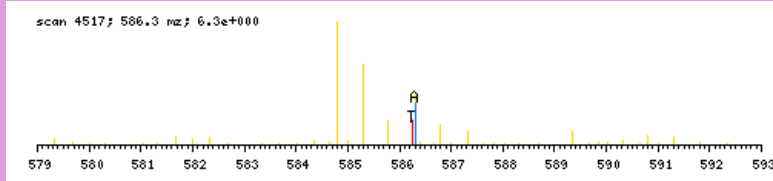

zoomed in precursor plot; T=theoretical m/z, A=acquired m/z

| b <sup>+</sup> | # | AA # | y <sup>+</sup> | y <sup>2+</sup> |
|----------------|---|------|----------------|-----------------|
| 142.0868       | 1 | V 9  |                |                 |
| 241.1552       | 2 | V 8  | 1030.4482      | 515.7280        |
| 388.2236       | 3 | F 7  | 931.3798       | 466.1938        |
| 503.2506       | 4 | D 6  | 784.3113       | 392.6596        |
| 618.2775       | 5 | D 5  | 669.2844       | 335.1461        |
| 719.3252       | 6 | T 4  | 554.2575       | 277.6326        |
| 882.3885       | 7 | Y 3  | 453.2098       | 227.1088        |
| 997.4155       | 8 | D 2  | 290.1464       | 145.5771        |
|                | 9 | R 1  | 175.1195       | 88.0637         |

N-term:+43.02

WGKVNNSDEVGGEALGR, MH+ 1743.8666, m/z 581.9604  
 H OS G27 P150811 220811-s1.05036.05036.3.dta

X-range:

-

MassTol: Y-zoom:

MassType:

AVG  MONO

Axis:

1  2

Label:

I  M  -

Ions:

a  +  2+  3+

b  +  2+  3+

c  +  2+  3+

x  +  2+  3+

y  +  2+  3+

z  +  2+  3+

hide H<sub>2</sub>O/NH<sub>3</sub>

zoom 112-122

GO

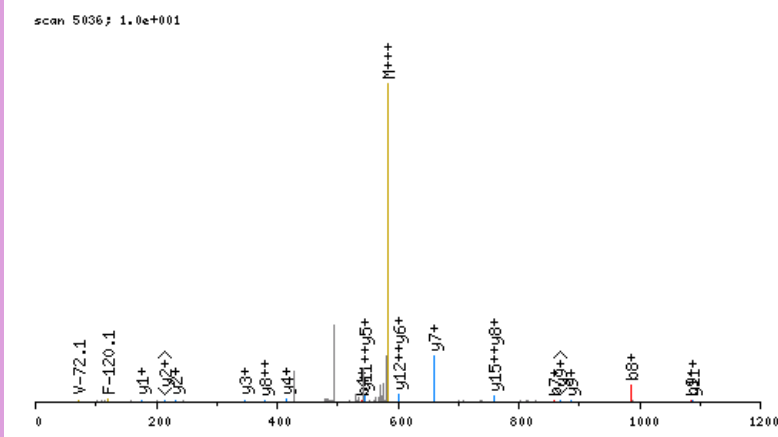

click image to zoom in; click top corners to zoom out [\[precursor±\]](#)

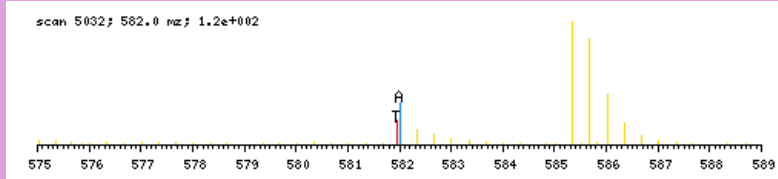

zoomed in precursor plot; T=theoretical m/z, A=acquired m/z

| b <sup>+</sup> | #  | AA # | y <sup>+</sup> | y <sup>2+</sup> |
|----------------|----|------|----------------|-----------------|
| 229.0977       | 1  | W 16 |                |                 |
| 286.1192       | 2  | G 15 | 1515.7767      | 758.3923        |
| 442.2455       | 3  | K 14 | 1458.7553      | 729.8816        |
| 541.3139       | 4  | V 13 | 1302.6290      | 651.8184        |
| 655.3568       | 5  | N 12 | 1203.5606      | 602.2842        |
| 742.3888       | 6  | S 11 | 1089.5176      | 545.2627        |
| 857.4158       | 7  | D 10 | 1002.4856      | 501.7467        |
| 986.4584       | 8  | E 9  | 887.4587       | 444.2332        |
| 1085.5268      | 9  | V 8  | 758.4161       | 379.7120        |
| 1142.5483      | 10 | G 7  | 659.3477       | 330.1777        |
| 1199.5697      | 11 | G 6  | 602.3262       | 301.6670        |
| 1328.6123      | 12 | E 5  | 545.3047       | 273.1563        |
| 1399.6494      | 13 | A 4  | 416.2621       | 208.6350        |
| 1512.7335      | 14 | L 3  | 345.2250       | 173.1164        |
| 1569.7550      | 15 | G 2  | 232.1410       | 116.5744        |
|                | 16 | R 1  | 175.1195       | 88.0637         |

N-term:+43.02 K(3):+156.13

WITKQYDEAGPSIVHR, MH+ 2099.0562, m/z 525.5195  
 H OS G28 P150811 220811-s1.04654.04654.4.dta

X-range:

-

MassTol: Y-zoom:

MassType:

AVG  MONO

Axis:

1  2

Label:

I  M  -

Ions:

a  +  2+  3+

b  +  2+  3+

c  +  2+  3+

x  +  2+  3+

y  +  2+  3+

z  +  2+  3+

hide H<sub>2</sub>O/NH<sub>3</sub>

zoom 112-122

GO

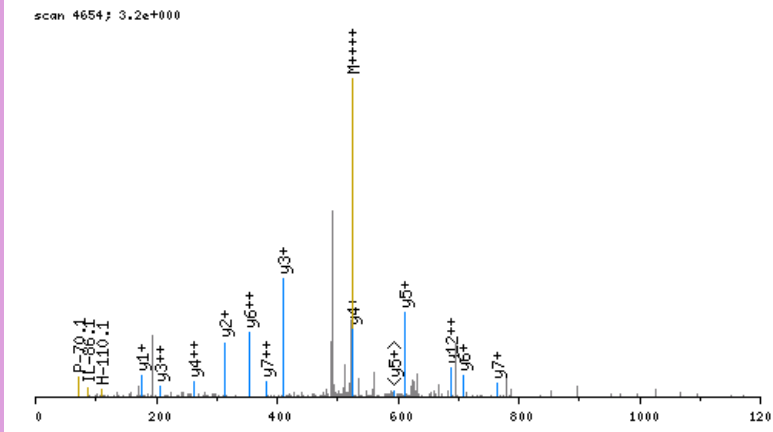

click image to zoom in; click top corners to zoom out [\[precursor±\]](#)

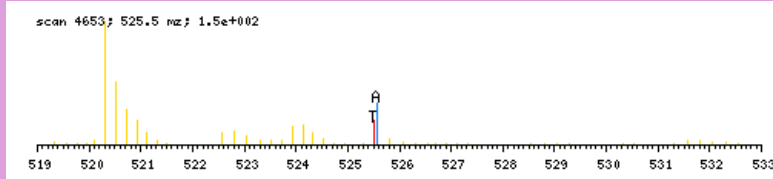

zoomed in precursor plot; T=theoretical m/z, A=acquired m/z

| b <sup>+</sup> | #  | AA # | y <sup>+</sup>  | y <sup>2+</sup> |
|----------------|----|------|-----------------|-----------------|
| 229.0977       | 1  | W 17 |                 |                 |
| 342.1818       | 2  | I 16 | 1870.9663       | 935.9871        |
| 443.2295       | 3  | T 15 | 1757.8823       | 879.4450        |
| 599.3558       | 4  | K 14 | 1656.8346       | 828.9212        |
| 727.4143       | 5  | Q 13 | 1500.7083       | 750.8581        |
| 856.4569       | 6  | E 12 | 1372.6497       | <b>686.8288</b> |
| 1019.5203      | 7  | Y 11 | 1243.6071       | 622.3075        |
| 1134.5472      | 8  | D 10 | 1080.5438       | 540.7758        |
| 1263.5898      | 9  | E 9  | 965.5169        | 483.2623        |
| 1334.6269      | 10 | A 8  | 836.4743        | 418.7410        |
| 1391.6484      | 11 | G 7  | <b>765.4371</b> | <b>383.2225</b> |
| 1488.7011      | 12 | P 6  | <b>708.4157</b> | <b>354.7118</b> |
| 1575.7332      | 13 | S 5  | <b>611.3629</b> | 306.1854        |
| 1688.8172      | 14 | I 4  | <b>524.3309</b> | <b>262.6694</b> |
| 1787.8856      | 15 | V 3  | <b>411.2468</b> | <b>206.1273</b> |
| 1924.9446      | 16 | H 2  | <b>312.1784</b> | 156.5931        |
|                | 17 | R 1  | <b>175.1195</b> | 88.0637         |

N-term:+43.02 K(4):+156.13

WPNGITLDDLSSQR, MH+ 1554.8280, m/z 518.9475  
 H OS G26 P150811 220811-s1.04431.04431.3.dta

scan 4431; 3.5e+001

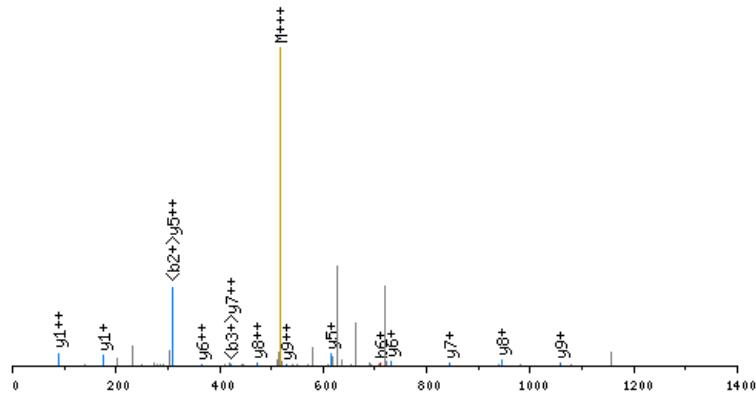

click image to zoom in; click top corners to zoom out [\[precursor±\]](#)

scan 4430; 518.9 m/z; 1.4e+003

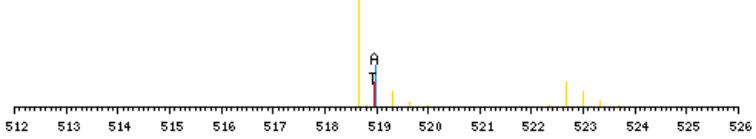

zoomed in precursor plot; T=theoretical m/z, A=acquired m/z

X-range:

-

MassTol: Y-zoom:

MassType:

AVG  MONO

Axis:

1  2

Label:

I  M  -

Ions:

a  +  2+  3+

b  +  2+  3+

c  +  2+  3+

x  +  2+  3+

y  +  2+  3+

z  +  2+  3+

hide H<sub>2</sub>O/NH<sub>3</sub>

zoom 112-122

GO

| b <sup>+</sup> | #  | AA # | y <sup>+</sup> | y <sup>2+</sup> |
|----------------|----|------|----------------|-----------------|
| 229.0977       | 1  | W 13 |                |                 |
| 326.1505       | 2  | P 12 | 1326.7381      | 663.8730        |
| 440.1934       | 3  | N 11 | 1229.6854      | 615.3466        |
| 497.2149       | 4  | G 10 | 1115.6424      | 558.3251        |
| 610.2989       | 5  | I 9  | 1058.6210      | 529.8144        |
| 711.3466       | 6  | T 8  | 945.5369       | 473.2724        |
| 824.4307       | 7  | L 7  | 844.4892       | 422.7485        |
| 939.4576       | 8  | D 6  | 731.4052       | 366.2065        |
| 1052.5417      | 9  | L 5  | 616.3782       | 308.6930        |
| 1165.6257      | 10 | L 4  | 503.2942       | 252.1510        |
| 1252.6578      | 11 | S 3  | 390.2101       | 195.6090        |
| 1380.7164      | 12 | Q 2  | 303.1781       | 152.0930        |
|                | 13 | R 1  | 175.1195       | 88.0637         |

N-term:+43.02

YTQKAPQVSTPTLVEAAR, MH+ 2030.0923, m/z 677.3689  
 H OS G26 P150811 220811-s1.03797.03797.3.dta

X-range:

-

MassTol: Y-zoom:

MassType:

AVG  MONO

Axis:

1  2

Label:

I  M  -

Ions:

a  +  2+  3+

b  +  2+  3+

c  +  2+  3+

x  +  2+  3+

y  +  2+  3+

z  +  2+  3+

hide H<sub>2</sub>O/NH<sub>3</sub>

zoom 112-122

GO

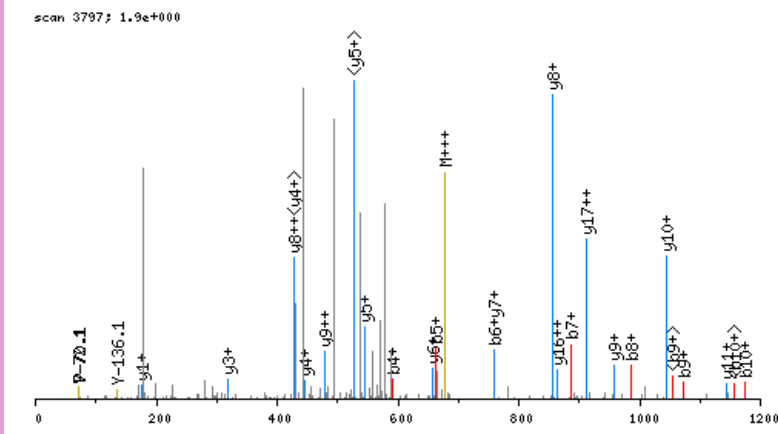

click image to zoom in; click top corners to zoom out [\[precursor±\]](#)

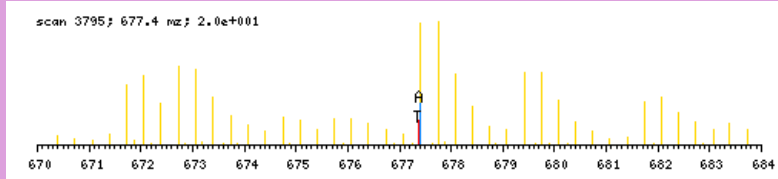

zoomed in precursor plot; T=theoretical m/z, A=acquired m/z

| b <sup>+</sup> | #  | AA | #  | y <sup>+</sup> | y <sup>2+</sup> |
|----------------|----|----|----|----------------|-----------------|
| 206.0817       | 1  | Y  | 18 |                |                 |
| 307.1294       | 2  | T  | 17 | 1825.0184      | 913.0131        |
| 435.1880       | 3  | Q  | 16 | 1723.9707      | 862.4893        |
| 591.3143       | 4  | K  | 15 | 1595.9121      | 798.4600        |
| 662.3514       | 5  | A  | 14 | 1439.7858      | 720.3968        |
| 759.4042       | 6  | P  | 13 | 1368.7487      | 684.8783        |
| 887.4627       | 7  | Q  | 12 | 1271.6959      | 636.3519        |
| 986.5312       | 8  | V  | 11 | 1143.6374      | 572.3226        |
| 1073.5632      | 9  | S  | 10 | 1044.5689      | 522.7884        |
| 1174.6109      | 10 | T  | 9  | 957.5369       | 479.2724        |
| 1271.6636      | 11 | P  | 8  | 856.4892       | 428.7485        |
| 1372.7113      | 12 | T  | 7  | 759.4365       | 380.2222        |
| 1485.7954      | 13 | L  | 6  | 658.3888       | 329.6983        |
| 1584.8638      | 14 | V  | 5  | 545.3047       | 273.1563        |
| 1713.9064      | 15 | E  | 4  | 446.2363       | 223.6221        |
| 1784.9435      | 16 | A  | 3  | 317.1937       | 159.1008        |
| 1855.9806      | 17 | A  | 2  | 246.1566       | 123.5822        |
|                | 18 | R  | 1  | 175.1195       | 88.0637         |

N-term:+43.02 K(4):+156.13
