# Supplementary material
Source: PubMed Central journal article supplement (PMC3591655)
Supplement: supp_M112.017962_mcp.M112.017962-27.pdf [file supp_M112.017962_mcp.M112.017962-27.pdf]

X-range:

0 - 0

MassTol: Y-zoom:

0. 1.

MassType:

☐AVG ☒MONO

Axis:

☒1 ☐2

Label:

☒I ☐M ☐-

Ions:

a ☐+ ☐2+ ☐3+

b ☒+ ☐2+ ☐3+

c ☐+ ☐2+ ☐3+

x ☐+ ☐2+ ☐3+

y ☒+ ☒2+ ☐3+

z ☐+ ☐2+ ☐3+

hide H<sub>2</sub>O/NH<sub>3</sub> ☐

zoom 112-122 ☐

GO

AAAAAAAAGAAGGRGSGPGR, MH+ 1765.9170, m/z 589.3105  
L OS G30 P160811 220811-s1.04635.04635.3.dta

scan 4635; 2.6e+000

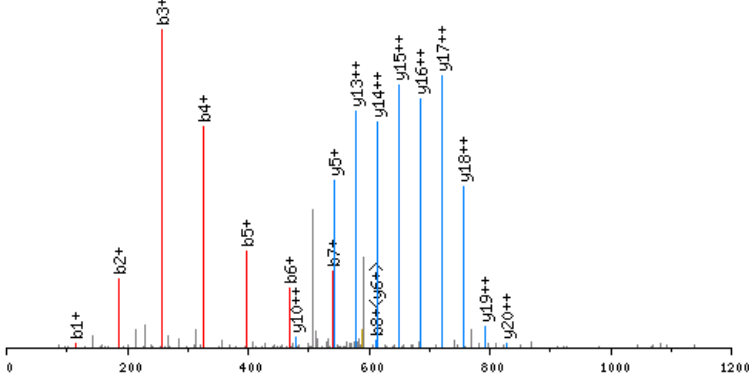

click image to zoom in; click top corners to zoom out [precursor±]

scan 4634; 589.3 m/z; 2.4e+001

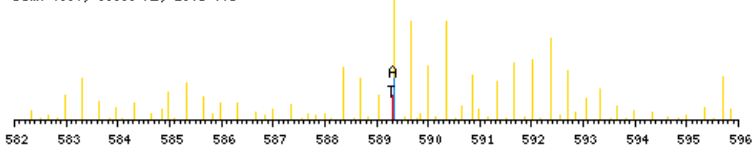

zoomed in precursor plot; T=theoretical m/z, A=acquired m/z

| b <sup>+</sup> | #  | AA | #  | y <sup>+</sup> | y <sup>2+</sup> |
|----------------|----|----|----|----------------|-----------------|
| 114.0555       | 1  | A  | 21 |                |                 |
| 185.0926       | 2  | A  | 20 | 1652.8693      | 826.9386        |
| 256.1297       | 3  | A  | 19 | 1581.8322      | 791.4200        |
| 327.1669       | 4  | A  | 18 | 1510.7951      | 755.9015        |
| 398.2040       | 5  | A  | 17 | 1439.7580      | 720.3829        |
| 469.2411       | 6  | A  | 16 | 1368.7209      | 684.8643        |
| 540.2782       | 7  | A  | 15 | 1297.6838      | 649.3458        |
| 611.3153       | 8  | A  | 14 | 1226.6466      | 613.8272        |
| 668.3368       | 9  | G  | 13 | 1155.6095      | 578.3087        |
| 739.3739       | 10 | A  | 12 | 1098.5881      | 549.7979        |
| 810.4110       | 11 | A  | 11 | 1027.5509      | 514.2794        |
| 867.4325       | 12 | G  | 10 | 956.5138       | 478.7608        |
| 924.4539       | 13 | G  | 9  | 899.4924       | 450.2501        |
| 1080.5550      | 14 | R  | 8  | 842.4709       | 421.7394        |
| 1137.5765      | 15 | G  | 7  | 686.3698       | 343.6888        |
| 1224.6085      | 16 | S  | 6  | 629.3483       | 315.1781        |
| 1281.6300      | 17 | G  | 5  | 542.3163       | 271.6621        |
| 1378.6828      | 18 | P  | 4  | 485.2948       | 243.1513        |
| 1435.7042      | 19 | G  | 3  | 388.2421       | 194.6250        |
| 1591.8053      | 20 | R  | 2  | 331.2206       | 166.1142        |
|                | 21 | R  | 1  | 175.1195       | 88.0637         |

N-term:+43.02

X-range:

0 - 0

MassTol: Y-zoom:

0. 1.

MassType:

☐ AVG ☒ MONO

Axis:

☒ 1 ☐ 2

Label:

☒ I ☐ M ☐ -

Ions:

a ☐ + ☐ 2+ ☐ 3+

b ☒ + ☐ 2+ ☐ 3+

c ☐ + ☐ 2+ ☐ 3+

x ☐ + ☐ 2+ ☐ 3+

y ☒ + ☒ 2+ ☐ 3+

z ☐ + ☐ 2+ ☐ 3+

hide H<sub>2</sub>O/NH<sub>3</sub> ☐

zoom 112-122 ☐

GO

AAAAAAEPYPASGTTKR, MH+ 1779.9454, m/z 593.9866  
L OS G30 P160811 220811-s1.04760.04760.3.dta

scan 4760; 3.1e+001

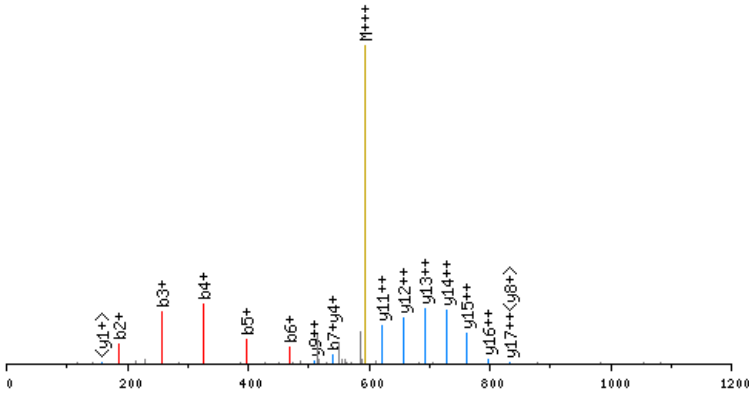

click image to zoom in; click top corners to zoom out [\[precursor±\]](#)

scan 4759; 594.0 m/z; 1.6e+003

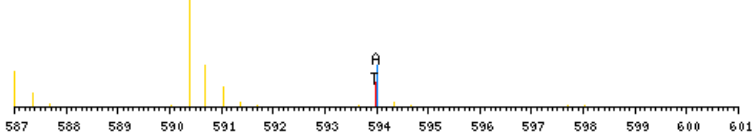

zoomed in precursor plot; T=theoretical m/z, A=acquired m/z

| b <sup>+</sup> | #  | AA | #  | y <sup>+</sup> | y <sup>2+</sup> |
|----------------|----|----|----|----------------|-----------------|
| 114.0555       | 1  | A  | 18 |                |                 |
| 185.0926       | 2  | A  | 17 | 1666.8977      | 833.9528        |
| 256.1297       | 3  | A  | 16 | 1595.8606      | 798.4342        |
| 327.1669       | 4  | A  | 15 | 1524.8235      | 762.9156        |
| 398.2040       | 5  | A  | 14 | 1453.7864      | 727.3971        |
| 469.2411       | 6  | A  | 13 | 1382.7492      | 691.8785        |
| 540.2782       | 7  | A  | 12 | 1311.7121      | 656.3600        |
| 669.3208       | 8  | E  | 11 | 1240.6750      | 620.8414        |
| 766.3736       | 9  | P  | 10 | 1111.6324      | 556.3201        |
| 929.4369       | 10 | Y  | 9  | 1014.5797      | 507.7937        |
| 1026.4896      | 11 | P  | 8  | 851.5163       | 426.2621        |
| 1097.5268      | 12 | A  | 7  | 754.4636       | 377.7357        |
| 1184.5588      | 13 | S  | 6  | 683.4264       | 342.2171        |
| 1241.5803      | 14 | G  | 5  | 596.3944       | 298.7011        |
| 1342.6279      | 15 | T  | 4  | 539.3730       | 270.1904        |
| 1443.6756      | 16 | T  | 3  | 438.3253       | 219.6666        |
| 1605.8337      | 17 | K  | 2  | 337.2776       | 169.1427        |
|                | 18 | R  | 1  | 175.1195       | 88.0637         |

N-term:+43.02 K(17):+162.16

X-range:

0 - 0

MassTol: Y-zoom:

0. 1.

MassType:

☐ AVG ☒ MONO

Axis:

☒ 1 ☐ 2

Label:

☒ I ☐ M ☐ -

Ions:

a ☐ + ☐ 2+ ☐ 3+

b ☒ + ☐ 2+ ☐ 3+

c ☐ + ☐ 2+ ☐ 3+

x ☐ + ☐ 2+ ☐ 3+

y ☒ + ☒ 2+ ☐ 3+

z ☐ + ☐ 2+ ☐ 3+

hide H<sub>2</sub>O/NH<sub>3</sub> ☐

zoom 112-122 ☐

GO

AAAAAASHLNLDALR, MH+ 1506.8029, m/z 502.9391  
L OS G30 P160811 220811-s1.06463.06463.3.dta

scan 6463; 1.5e+000

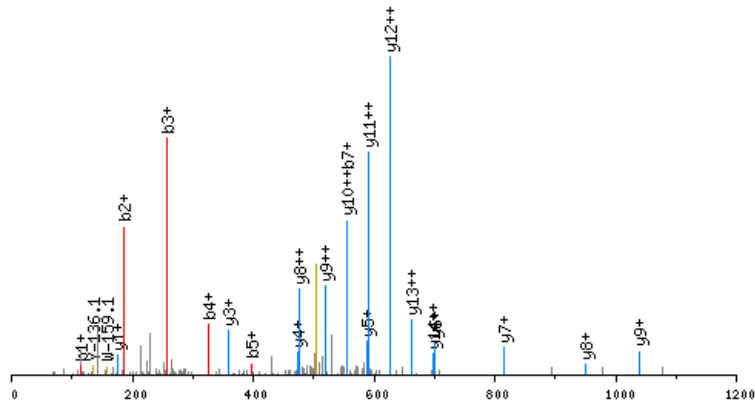

click image to zoom in; click top corners to zoom out

[precursor±]

scan 6459; 502.9 m/z; 2.5e+001

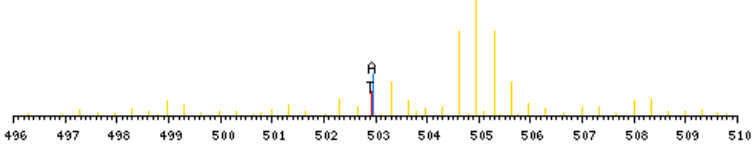

zoomed in precursor plot; T=theoretical m/z, A=acquired m/z

| b <sup>+</sup> | #  | AA | #  | y <sup>+</sup> | y <sup>2+</sup> |
|----------------|----|----|----|----------------|-----------------|
| 114.0555       | 1  | A  | 15 |                |                 |
| 185.0926       | 2  | A  | 14 | 1393.7552      | 697.3815        |
| 256.1297       | 3  | A  | 13 | 1322.7181      | 661.8629        |
| 327.1669       | 4  | A  | 12 | 1251.6810      | 626.3444        |
| 398.2040       | 5  | A  | 11 | 1180.6438      | 590.8258        |
| 469.2411       | 6  | A  | 10 | 1109.6067      | 555.3073        |
| 556.2731       | 7  | S  | 9  | 1038.5696      | 519.7887        |
| 693.3320       | 8  | H  | 8  | 951.5376       | 476.2727        |
| 806.4161       | 9  | L  | 7  | 814.4787       | 407.7433        |
| 920.4590       | 10 | N  | 6  | 701.3946       | 351.2012        |
| 1033.5431      | 11 | L  | 5  | 587.3517       | 294.1798        |
| 1148.5700      | 12 | D  | 4  | 474.2676       | 237.6377        |
| 1219.6071      | 13 | A  | 3  | 359.2407       | 180.1243        |
| 1332.6912      | 14 | L  | 2  | 288.2036       | 144.6057        |
|                | 15 | R  | 1  | 175.1195       | 88.0637         |

N-term:+43.02

X-range:

$$\boxed{0} - \boxed{0}$$

0. 1.

☐ AVG ☒ MONO

1 2

☒ I ☐ M ☐ -

Ions :

a.  $\square^1 + \square^2 + \square^3 +$

b ☒ 1+ ☐ 2+ ☐ 3+ $\square + \square^2 + \square^3 + \dots$ 

**c**

**x** |  +  2 +  3 +

**y** ☒ <sup>1</sup>+ ☒ <sup>2</sup>+ ☐ <sup>3</sup>+

$$z \begin{bmatrix} \square \\ \square \end{bmatrix} + \begin{bmatrix} \square \\ \square \end{bmatrix}^2 + \begin{bmatrix} \square \\ \square \end{bmatrix}^3 + \dots$$
hide H<sub>2</sub>O/NH<sub>3</sub> ☐

zoom 112-122

GO

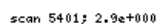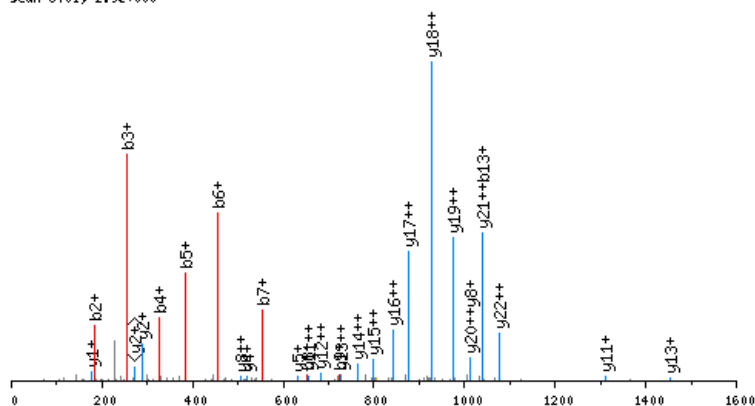

click image to zoom in; click top corners to zoom out

[precursor<sub>±</sub>]

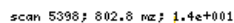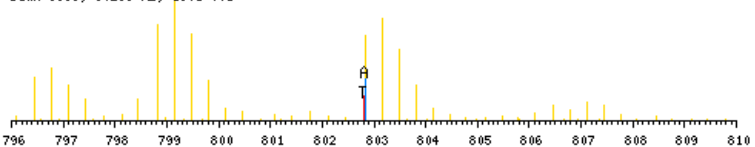

zoomed in precursor plot; T=theoretical m/z, A=acquired m/z

| $b^+$     | #  | AA | #  | $y^+$     | $y^2$     |
|-----------|----|----|----|-----------|-----------|
| 114.0555  | 1  | A  | 25 |           |           |
| 185.0926  | 2  | A  | 24 | 2293.3516 | 1147.1797 |
| 256.1297  | 3  | A  | 23 | 2222.3145 | 1111.6612 |
| 327.1669  | 4  | A  | 22 | 2151.2774 | 1076.1426 |
| 384.1883  | 5  | G  | 21 | 2080.2403 | 1040.6241 |
| 455.2254  | 6  | A  | 20 | 2023.2188 | 1012.1133 |
| 554.2938  | 7  | V  | 19 | 1952.1817 | 976.5948  |
| 653.3623  | 8  | V  | 18 | 1853.1133 | 927.0606  |
| 724.3994  | 9  | A  | 17 | 1754.0449 | 877.5264  |
| 811.4314  | 10 | S  | 16 | 1683.0078 | 842.0078  |
| 882.4685  | 11 | A  | 15 | 1595.9758 | 798.4918  |
| 953.5056  | 12 | A  | 14 | 1524.9386 | 762.9732  |
| 1040.5377 | 13 | S  | 13 | 1453.9015 | 727.4547  |
| 1097.5591 | 14 | G  | 12 | 1366.8695 | 683.9387  |
| 1194.6119 | 15 | P  | 11 | 1309.8480 | 655.4279  |
| 1265.6490 | 16 | A  | 10 | 1212.7953 | 606.9015  |
| 1394.6916 | 17 | E  | 9  | 1141.7582 | 571.3830  |
| 1451.7131 | 18 | G  | 8  | 1012.7156 | 506.8617  |
| 1613.8712 | 19 | K  | 7  | 955.6941  | 478.3510  |
| 1776.0293 | 20 | K  | 6  | 793.5360  | 397.2719  |
| 1889.1133 | 21 | I  | 5  | 631.3779  | 316.1929  |
| 1990.1610 | 22 | T  | 4  | 518.2938  | 259.6508  |
| 2119.2036 | 23 | E  | 3  | 417.2462  | 209.1270  |
| 2232.2877 | 24 | L  | 2  | 288.2036  | 144.6057  |
|           | 25 | R  | 1  | 175.1195  | 88.0637   |

N-term:+43.02 K(19):+162.16  
K(20):+162.16

X-range:

0 - 0

MassTol: Y-zoom:

0. 1.

MassType:

☐ AVG ☒ MONO

Axis:

☒ 1 ☐ 2

Label:

☒ I ☐ M ☐ -

Ions:

a ☐ + ☐ 2+ ☐ 3+

b ☒ + ☐ 2+ ☐ 3+

c ☐ + ☐ 2+ ☐ 3+

x ☐ + ☐ 2+ ☐ 3+

y ☒ + ☒ 2+ ☐ 3+

z ☐ + ☐ 2+ ☐ 3+

hide H<sub>2</sub>O/NH<sub>3</sub> ☐

zoom 112-122 ☐

GO

AAAKDGCGLTAAGNGR, MH+ 1688.8026, m/z 563.6057  
L OS G30 P160811 220811-s1.02631.02631.3.dta

scan 2631; 3.2e+000

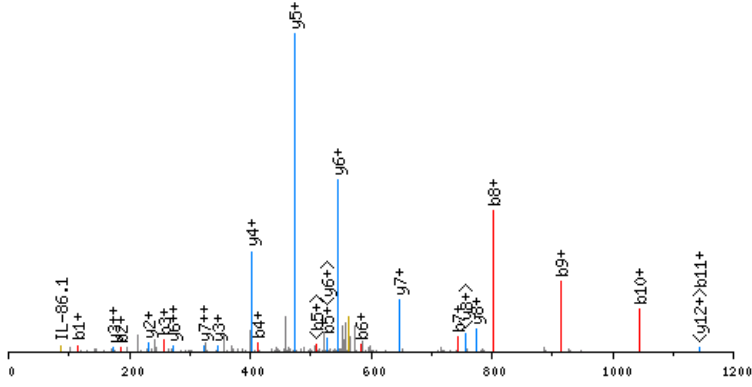

click image to zoom in; click top corners to zoom out [\[precursor±\]](#)

scan 2629; 563.6 m/z; 7.9e+000

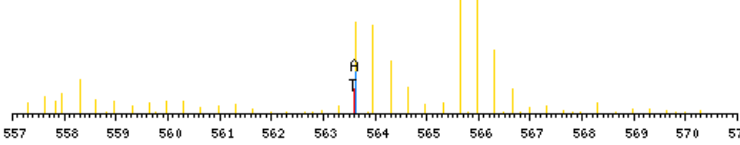

zoomed in precursor plot; T=theoretical m/z, A=acquired m/z

| b <sup>+</sup> | #  | AA | #  | y <sup>+</sup> | y <sup>2+</sup> |
|----------------|----|----|----|----------------|-----------------|
| 114.0555       | 1  | A  | 17 |                |                 |
| 185.0926       | 2  | A  | 16 | 1575.7549      | 788.3814        |
| 256.1297       | 3  | A  | 15 | 1504.7178      | 752.8628        |
| 412.2560       | 4  | K  | 14 | 1433.6807      | 717.3443        |
| 527.2830       | 5  | D  | 13 | 1277.5544      | 639.2811        |
| 584.3044       | 6  | G  | 12 | 1162.5274      | 581.7676        |
| 744.3350       | 7  | C  | 11 | 1105.5060      | 553.2569        |
| 801.3565       | 8  | G  | 10 | 945.4754       | 473.2416        |
| 914.4406       | 9  | L  | 9  | 888.4539       | 444.7309        |
| 1043.4832      | 10 | E  | 8  | 775.3699       | 388.1888        |
| 1144.5308      | 11 | T  | 7  | 646.3273       | 323.6675        |
| 1215.5680      | 12 | A  | 6  | 545.2796       | 273.1437        |
| 1286.6051      | 13 | A  | 5  | 474.2425       | 237.6251        |
| 1343.6265      | 14 | G  | 4  | 403.2054       | 202.1066        |
| 1457.6695      | 15 | N  | 3  | 346.1839       | 173.5959        |
| 1514.6909      | 16 | G  | 2  | 232.1410       | 116.5744        |
|                | 17 | R  | 1  | 175.1195       | 88.0637         |

N-term:+43.02 K(4):+156.13  
C(7):+160.03

X-range:

0 - 0

MassTol: Y-zoom:

0. 1.

MassType:

☐ AVG ☒ MONO

Axis:

☒ 1 ☐ 2

Label:

☒ I ☐ M ☐ -

Ions:

a ☐ + ☐ 2+ ☐ 3+

b ☒ + ☐ 2+ ☐ 3+

c ☐ + ☐ 2+ ☐ 3+

x ☐ + ☐ 2+ ☐ 3+

y ☒ + ☒ 2+ ☐ 3+

z ☐ + ☐ 2+ ☐ 3+

hide H<sub>2</sub>O/NH<sub>3</sub> ☐

zoom 112-122 ☐

GO

AAAMDVDTPSGTNSGAGKKR, MH+ 2032.0134, m/z 678.0093  
L OS G33 P160811 220811-s1.02689.02689.3.dta

scan 2689; 3.6e+000

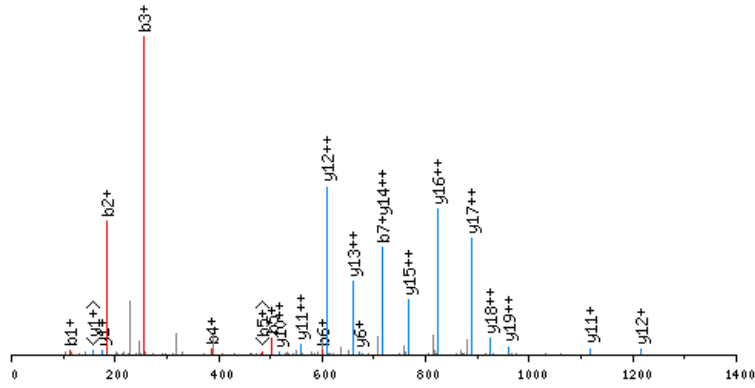

click image to zoom in; click top corners to zoom out [precursor±]

scan 2687; 678.0 m/z; 8.4e+000

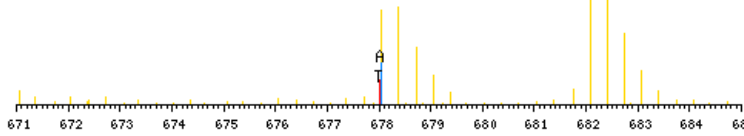

zoomed in precursor plot; T=theoretical m/z, A=acquired m/z

| b <sup>+</sup> | #  | AA | #  | y <sup>+</sup> | y <sup>2+</sup> |
|----------------|----|----|----|----------------|-----------------|
| 114.0555       | 1  | A  | 20 |                |                 |
| 185.0926       | 2  | A  | 19 | 1918.9657      | 959.9868        |
| 256.1297       | 3  | A  | 18 | 1847.9286      | 924.4682        |
| 387.1702       | 4  | M  | 17 | 1776.8915      | 888.9497        |
| 502.1972       | 5  | D  | 16 | 1645.8510      | 823.4294        |
| 601.2656       | 6  | V  | 15 | 1530.8241      | 765.9159        |
| 716.2925       | 7  | D  | 14 | 1431.7557      | 716.3817        |
| 817.3402       | 8  | T  | 13 | 1316.7287      | 658.8683        |
| 914.3930       | 9  | P  | 12 | 1215.6810      | 608.3444        |
| 1001.4250      | 10 | S  | 11 | 1118.6283      | 559.8180        |
| 1058.4465      | 11 | G  | 10 | 1031.5962      | 516.3020        |
| 1159.4941      | 12 | T  | 9  | 974.5748       | 487.7913        |
| 1273.5371      | 13 | N  | 8  | 873.5271       | 437.2675        |
| 1360.5691      | 14 | S  | 7  | 759.4842       | 380.2460        |
| 1417.5906      | 15 | G  | 6  | 672.4521       | 336.7300        |
| 1488.6277      | 16 | A  | 5  | 615.4307       | 308.2193        |
| 1545.6491      | 17 | G  | 4  | 544.3936       | 272.7007        |
| 1701.7754      | 18 | K  | 3  | 487.3721       | 244.1900        |
| 1857.9017      | 19 | K  | 2  | 331.2458       | 166.1268        |
|                | 20 | R  | 1  | 175.1195       | 88.0637         |

N-term:+43.02 K(18):+156.13  
K(19):+156.13

X-range:

0 - 0

MassTol: Y-zoom:

0. 1.

MassType:

☐AVG ☒MONO

Axis:

☒1 ☐2

Label:

☒I ☐M ☐-

Ions:

a ☐+ ☐2+ ☐3+

b ☒+ ☐2+ ☐3+

c ☐+ ☐2+ ☐3+

x ☐+ ☐2+ ☐3+

y ☒+ ☒2+ ☐3+

z ☐+ ☐2+ ☐3+

hide H<sub>2</sub>O/NH<sub>3</sub> ☐

zoom 112-122 ☐

GO

AAAPATLALDPQPQEKQKDAESESELSR, MH+ 3036.5490, m/z 759.8927  
L OS G32 P160811 220811-s1.04310.04310.4.dta

scan 4310; 3.2e+000

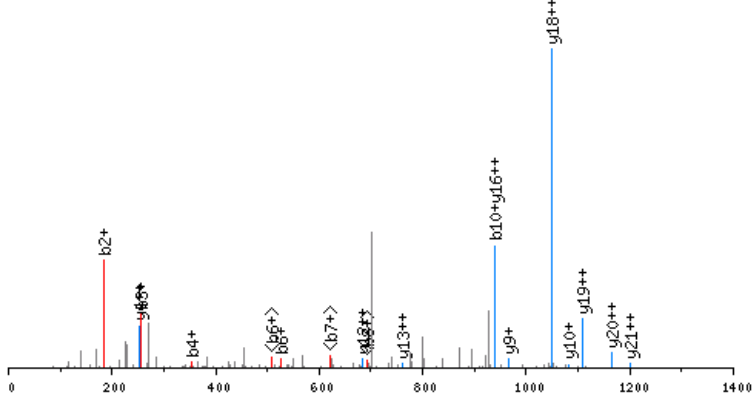

click image to zoom in; click top corners to zoom out

[precursor±]

scan 4308; 759.9 mz; 1.6e+001

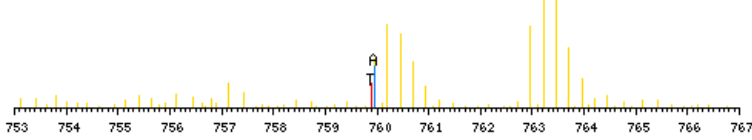

zoomed in precursor plot; T=theoretical m/z, A=acquired m/z

| b <sup>+</sup> | #  | AA | #  | y <sup>+</sup> | y <sup>2+</sup> |
|----------------|----|----|----|----------------|-----------------|
| 114.0555       | 1  | A  | 28 |                |                 |
| 185.0926       | 2  | A  | 27 | 2923.5013      | 1462.2546       |
| 256.1297       | 3  | A  | 26 | 2852.4642      | 1426.7360       |
| 353.1825       | 4  | P  | 25 | 2781.4271      | 1391.2175       |
| 424.2196       | 5  | A  | 24 | 2684.3744      | 1342.6911       |
| 525.2673       | 6  | T  | 23 | 2613.3372      | 1307.1725       |
| 638.3514       | 7  | L  | 22 | 2512.2896      | 1256.6487       |
| 709.3885       | 8  | A  | 21 | 2399.2055      | 1200.1067       |
| 822.4725       | 9  | L  | 20 | 2328.1684      | 1164.5881       |
| 937.4995       | 10 | D  | 19 | 2215.0843      | 1108.0461       |
| 1034.5522      | 11 | P  | 18 | 2100.0574      | 1050.5326       |
| 1162.6108      | 12 | Q  | 17 | 2003.0046      | 1002.0062       |
| 1259.6636      | 13 | P  | 16 | 1874.9460      | 937.9769        |
| 1387.7222      | 14 | Q  | 15 | 1777.8933      | 889.4505        |
| 1516.7648      | 15 | E  | 14 | 1649.8347      | 825.4213        |
| 1672.8911      | 16 | K  | 13 | 1520.7921      | 760.9000        |
| 1800.9496      | 17 | Q  | 12 | 1364.6658      | 682.8368        |
| 1957.0759      | 18 | K  | 11 | 1236.6072      | 618.8075        |
| 2072.1029      | 19 | D  | 10 | 1080.4809      | 540.7444        |
| 2143.1400      | 20 | A  | 9  | 965.4540       | 483.2309        |
| 2230.1720      | 21 | S  | 8  | 894.4169       | 447.7123        |
| 2359.2146      | 22 | E  | 7  | 807.3848       | 404.1963        |
| 2446.2466      | 23 | S  | 6  | 678.3422       | 339.6750        |
| 2533.2787      | 24 | S  | 5  | 591.3102       | 296.1590        |
| 2662.3213      | 25 | E  | 4  | 504.2782       | 252.6430        |
| 2775.4053      | 26 | L  | 3  | 375.2356       | 188.1217        |
| 2862.4374      | 27 | S  | 2  | 262.1515       | 131.5797        |
|                | 28 | R  | 1  | 175.1195       | 88.0637         |

N-term:+43.02 K(16):+156.13  
K(18):+156.13

X-range:

0 - 0

MassTol: Y-zoom:

0. 1.

MassType:

☐AVG ☒MONO

Axis:

☒1 ☐2

Label:

☒I ☐M ☐-

Ions:

a ☐+ ☐2+ ☐3+

b ☒+ ☐2+ ☐3+

c ☐+ ☐2+ ☐3+

x ☐+ ☐2+ ☐3+

y ☒+ ☒2+ ☐3+

z ☐+ ☐2+ ☐3+

hide H<sub>2</sub>O/NH<sub>3</sub> ☐

zoom 112-122 ☐

GO

AADDKVAILTDDEEEQKR, MH+ 2144.0724, m/z 715.3623  
L OS G32 P160811 220811-s1.03891.03891.3.dta

scan 3891; 3.2e+000

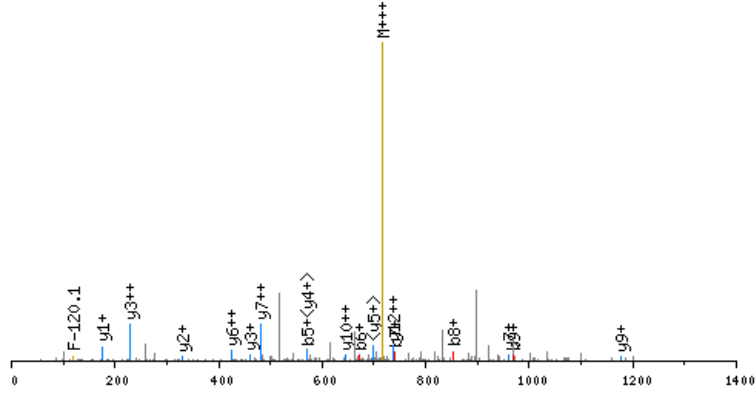

click image to zoom in; click top corners to zoom out [\[precursor±\]](#)

scan 3888; 715.4 m/z; 4.3e+000

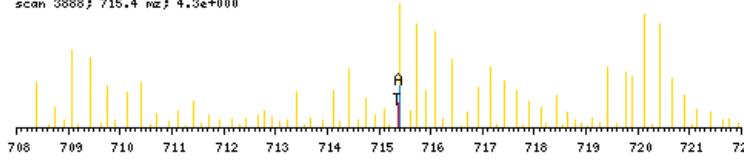

zoomed in precursor plot; T=theoretical m/z, A=acquired m/z

| b <sup>+</sup> | #  | AA | #  | y <sup>+</sup> | y <sup>2+</sup> |
|----------------|----|----|----|----------------|-----------------|
| 114.0555       | 1  | A  | 18 |                |                 |
| 185.0926       | 2  | A  | 17 | 2031.0247      | 1016.0163       |
| 300.1196       | 3  | D  | 16 | 1959.9876      | 980.4977        |
| 415.1465       | 4  | D  | 15 | 1844.9606      | 922.9842        |
| 571.2728       | 5  | K  | 14 | 1729.9337      | 865.4708        |
| 670.3412       | 6  | V  | 13 | 1573.8074      | 787.4076        |
| 741.3783       | 7  | A  | 12 | 1474.7390      | 737.8734        |
| 854.4624       | 8  | I  | 11 | 1403.7019      | 702.3548        |
| 967.5465       | 9  | L  | 10 | 1290.6178      | 645.8128        |
| 1068.5941      | 10 | T  | 9  | 1177.5337      | 589.2708        |
| 1183.6211      | 11 | D  | 8  | 1076.4860      | 538.7469        |
| 1298.6480      | 12 | D  | 7  | 961.4591       | 481.2335        |
| 1427.6906      | 13 | E  | 6  | 846.4322       | 423.7200        |
| 1556.7332      | 14 | E  | 5  | 717.3896       | 359.1987        |
| 1685.7758      | 15 | E  | 4  | 588.3470       | 294.6774        |
| 1813.8344      | 16 | Q  | 3  | 459.3044       | 230.1561        |
| 1969.9607      | 17 | K  | 2  | 331.2458       | 166.1268        |
|                | 18 | R  | 1  | 175.1195       | 88.0637         |

N-term:+43.02 K(5):+156.13  
K(17):+156.13

X-range:

0 - 0

MassTol: Y-zoom:

0. 1.

MassType:

☐ AVG ☒ MONO

Axis:

☒ 1 ☐ 2

Label:

☒ I ☐ M ☐ -

Ions:

a ☐ + ☐ 2+ ☐ 3+

b ☒ + ☐ 2+ ☐ 3+

c ☐ + ☐ 2+ ☐ 3+

x ☐ + ☐ 2+ ☐ 3+

y ☒ + ☒ 2+ ☐ 3+

z ☐ + ☐ 2+ ☐ 3+

hide H<sub>2</sub>O/NH<sub>3</sub> ☐

zoom 112-122 ☐

GO

AADISQWAGPLCLQEVDEPPQHALR, MH+ 2843.3786, m/z 948.4644  
L OS G30 P160811 220811-s1.07677.07677.3.dta

scan 7677; 2.0e+001

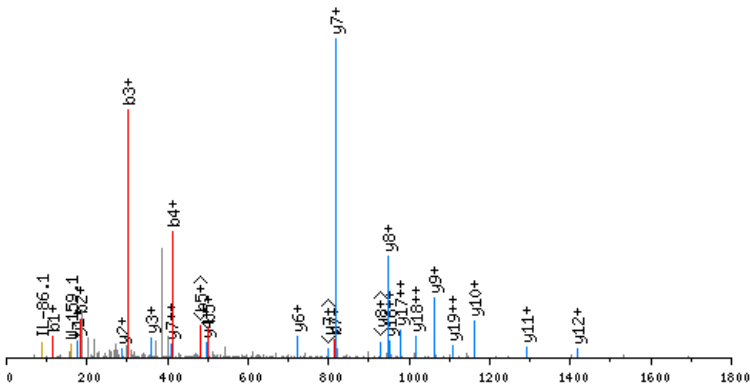

click image to zoom in; click top corners to zoom out [\[precursor±\]](#)

scan 7674; 948.5 m/z; 6.8e+001

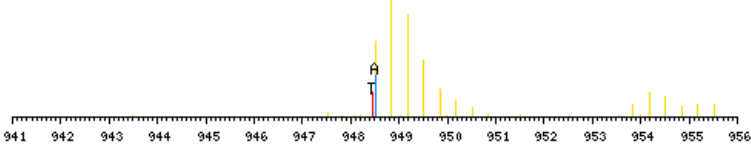

zoomed in precursor plot; T=theoretical m/z, A=acquired m/z

| b <sup>+</sup> | #  | AA | #  | y <sup>+</sup> | y <sup>2+</sup> |
|----------------|----|----|----|----------------|-----------------|
| 114.0555       | 1  | A  | 25 |                |                 |
| 185.0926       | 2  | A  | 24 | 2730.3309      | 1365.6694       |
| 300.1196       | 3  | D  | 23 | 2659.2938      | 1330.1508       |
| 413.2036       | 4  | I  | 22 | 2544.2669      | 1272.6373       |
| 500.2357       | 5  | S  | 21 | 2431.1828      | 1216.0953       |
| 628.2942       | 6  | Q  | 20 | 2344.1508      | 1172.5793       |
| 814.3736       | 7  | W  | 19 | 2216.0922      | 1108.5500       |
| 885.4107       | 8  | A  | 18 | 2030.0129      | 1015.5104       |
| 942.4321       | 9  | G  | 17 | 1958.9758      | 979.9918        |
| 1039.4849      | 10 | P  | 16 | 1901.9543      | 951.4811        |
| 1152.5690      | 11 | L  | 15 | 1804.9015      | 902.9547        |
| 1312.5996      | 12 | C  | 14 | 1691.8175      | 846.4127        |
| 1425.6836      | 13 | L  | 13 | 1531.7869      | 766.3974        |
| 1553.7422      | 14 | Q  | 12 | 1418.7028      | 709.8553        |
| 1682.7848      | 15 | E  | 11 | 1290.6442      | 645.8260        |
| 1781.8532      | 16 | V  | 10 | 1161.6016      | 581.3047        |
| 1896.8802      | 17 | D  | 9  | 1062.5332      | 531.7705        |
| 2025.9227      | 18 | E  | 8  | 947.5063       | 474.2571        |
| 2122.9755      | 19 | P  | 7  | 818.4637       | 409.7358        |
| 2220.0283      | 20 | P  | 6  | 721.4109       | 361.2094        |
| 2348.0868      | 21 | Q  | 5  | 624.3582       | 312.6830        |
| 2485.1458      | 22 | H  | 4  | 496.2996       | 248.6537        |
| 2556.1829      | 23 | A  | 3  | 359.2407       | 180.1243        |
| 2669.2669      | 24 | L  | 2  | 288.2036       | 144.6057        |
|                | 25 | R  | 1  | 175.1195       | 88.0637         |

N-term:+43.02 C(12):+160.03

X-range:

0 - 0

MassTol: Y-zoom:

0. 1.

MassType:

☐AVG ☒MONO

Axis:

☒1 ☐2

Label:

☒I ☐M ☐-

Ions:

a ☐+ ☐2+ ☐3+

b ☒+ ☐2+ ☐3+

c ☐+ ☐2+ ☐3+

x ☐+ ☐2+ ☐3+

y ☒+ ☒2+ ☐3+

z ☐+ ☐2+ ☐3+

hide H<sub>2</sub>O/NH<sub>3</sub> ☐

zoom 112-122 ☐

GO

AAGFKTVEPLEYYR, MH+ 1713.8852, m/z 571.9666  
L OS G30 P160811 220811-s1.06412.06412.3.dta

scan 6412; 1.0e+000

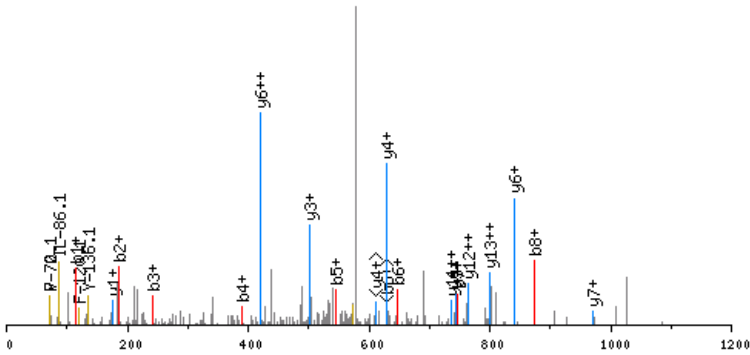

click image to zoom in; click top corners to zoom out [\[precursor±\]](#)

scan 6409; 572.0 m/z; 1.6e+001

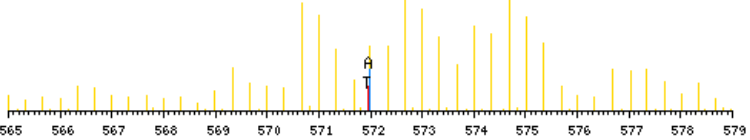

zoomed in precursor plot; T=theoretical m/z, A=acquired m/z

| b <sup>+</sup> | #  | AA | #  | y <sup>+</sup> | y <sup>2+</sup> |
|----------------|----|----|----|----------------|-----------------|
| 114.0555       | 1  | A  | 14 |                |                 |
| 185.0926       | 2  | A  | 13 | 1600.8376      | 800.9227        |
| 242.1141       | 3  | G  | 12 | 1529.8004      | 765.4041        |
| 389.1825       | 4  | F  | 11 | 1472.7790      | 736.8934        |
| 545.3088       | 5  | K  | 10 | 1325.7106      | 663.3592        |
| 646.3565       | 6  | T  | 9  | 1169.5843      | 585.2960        |
| 745.4249       | 7  | V  | 8  | 1068.5366      | 534.7722        |
| 874.4675       | 8  | E  | 7  | 969.4682       | 485.2380        |
| 971.5203       | 9  | P  | 6  | 840.4256       | 420.7167        |
| 1084.6043      | 10 | L  | 5  | 743.3728       | 372.1903        |
| 1213.6469      | 11 | E  | 4  | 630.2888       | 315.6483        |
| 1376.7102      | 12 | Y  | 3  | 501.2462       | 251.1270        |
| 1539.7736      | 13 | Y  | 2  | 338.1828       | 169.5953        |
|                | 14 | R  | 1  | 175.1195       | 88.0637         |

N-term:+43.02 K(5):+156.13

X-range:

0 - 0

MassTol: Y-zoom:

0. 1.

MassType:

☐AVG ☒MONO

Axis:

☒1 ☐2

Label:

☒I ☐M ☐-

Ions:

a ☐+ ☐2+ ☐3+

b ☒+ ☐2+ ☐3+

c ☐+ ☐2+ ☐3+

x ☐+ ☐2+ ☐3+

y ☒+ ☒2+ ☐3+

z ☐+ ☐2+ ☐3+

hide H<sub>2</sub>O/NH<sub>3</sub> ☐

zoom 112-122 ☐

GO

AAGPGTQPGLYSYIR, MH+ 1592.8073, m/z 531.6073  
L OS G30 P160811 220811-s1.03137.03137.3.dta

scan 3137; 1.4e+000

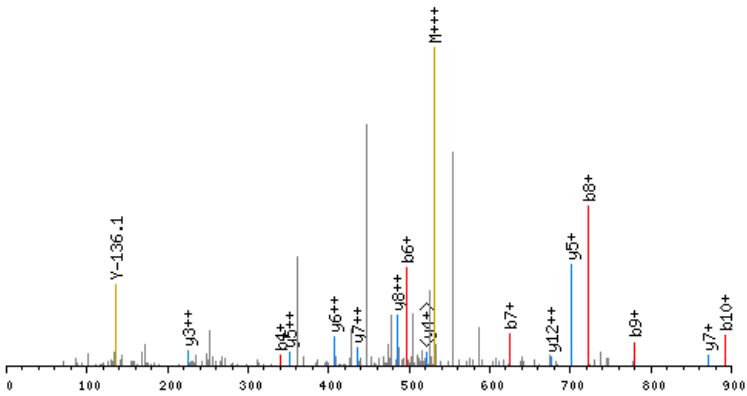

click image to zoom in; click top corners to zoom out [\[precursor±\]](#)

scan 3134; 531.6 m/z; 1.7e+001

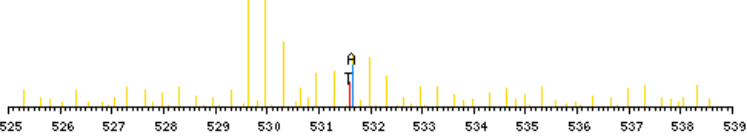

zoomed in precursor plot; T=theoretical m/z, A=acquired m/z

| b <sup>+</sup> | #  | AA | #  | y <sup>+</sup> | y <sup>2+</sup> |
|----------------|----|----|----|----------------|-----------------|
| 114.0555       | 1  | A  | 15 |                |                 |
| 185.0926       | 2  | A  | 14 | 1479.7596      | 740.3837        |
| 242.1141       | 3  | G  | 13 | 1408.7225      | 704.8652        |
| 339.1669       | 4  | P  | 12 | 1351.7010      | 676.3544        |
| 396.1883       | 5  | G  | 11 | 1254.6483      | 627.8280        |
| 497.2360       | 6  | T  | 10 | 1197.6268      | 599.3173        |
| 625.2946       | 7  | Q  | 9  | 1096.5791      | 548.7935        |
| 722.3473       | 8  | P  | 8  | 968.5205       | 484.7642        |
| 779.3688       | 9  | G  | 7  | 871.4678       | 436.2378        |
| 892.4529       | 10 | L  | 6  | 814.4463       | 407.7271        |
| 1055.5162      | 11 | Y  | 5  | 701.3623       | 351.1850        |
| 1142.5482      | 12 | S  | 4  | 538.2989       | 269.6534        |
| 1305.6116      | 13 | Y  | 3  | 451.2669       | 226.1374        |
| 1418.6956      | 14 | I  | 2  | 288.2036       | 144.6057        |
|                | 15 | R  | 1  | 175.1195       | 88.0637         |

N-term:+43.02

X-range:

0 - 0

MassTol: Y-zoom:

0. 1.

MassType:

☐AVG ☒MONO

Axis:

☒1 ☐2

Label:

☒I ☐M ☐-

Ions:

a ☐+ ☐2+ ☐3+

b ☒+ ☐2+ ☐3+

c ☐+ ☐2+ ☐3+

x ☐+ ☐2+ ☐3+

y ☒+ ☒2+ ☐3+

z ☐+ ☐2+ ☐3+

hide H<sub>2</sub>O/NH<sub>3</sub> ☐

zoom 112-122 ☐

GO

AAIPSSGSLVATHDYR, MH+ 1849.9085, m/z 617.3077  
L OS G30 P160811 220811-s1.05278.05278.3.dta

scan 5278; 1.2e+001

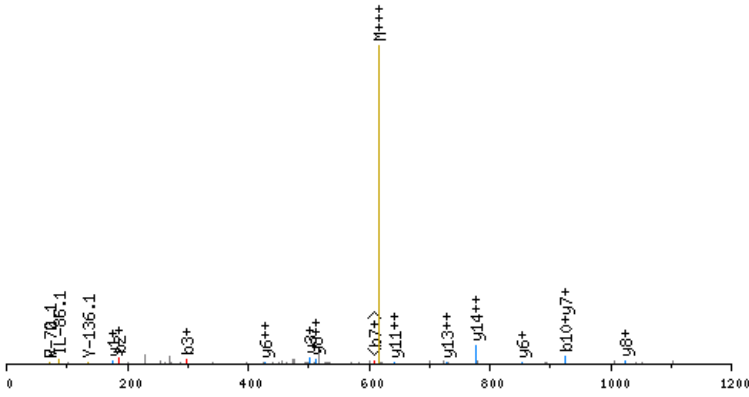

click image to zoom in; click top corners to zoom out

[precursor±]

scan 5274; 617.3 m/z; 6.4e+000

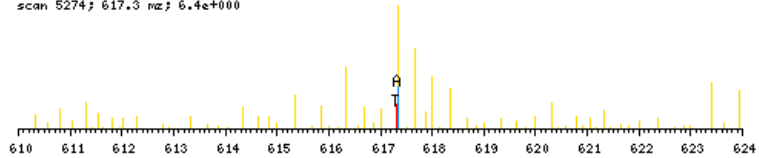

zoomed in precursor plot; T=theoretical m/z, A=acquired m/z

| b <sup>+</sup> | #  | AA | #  | y <sup>+</sup> | y <sup>2+</sup> |
|----------------|----|----|----|----------------|-----------------|
| 114.0555       | 1  | A  | 17 |                |                 |
| 185.0926       | 2  | A  | 16 | 1736.8608      | 868.9343        |
| 298.1767       | 3  | I  | 15 | 1665.8237      | 833.4157        |
| 395.2295       | 4  | P  | 14 | 1552.7396      | 776.8737        |
| 482.2615       | 5  | S  | 13 | 1455.6868      | 728.3473        |
| 569.2935       | 6  | S  | 12 | 1368.6548      | 684.8313        |
| 626.3150       | 7  | G  | 11 | 1281.6228      | 641.3153        |
| 713.3470       | 8  | S  | 10 | 1224.6013      | 612.8046        |
| 826.4311       | 9  | L  | 9  | 1137.5693      | 569.2886        |
| 925.4995       | 10 | V  | 8  | 1024.4852      | 512.7465        |
| 996.5366       | 11 | A  | 7  | 925.4168       | 463.2123        |
| 1097.5843      | 12 | T  | 6  | 854.3797       | 427.6938        |
| 1234.6432      | 13 | H  | 5  | 753.3320       | 377.1699        |
| 1349.6701      | 14 | D  | 4  | 616.2731       | 308.6405        |
| 1512.7335      | 15 | Y  | 3  | 501.2462       | 251.1270        |
| 1675.7968      | 16 | Y  | 2  | 338.1828       | 169.5953        |
|                | 17 | R  | 1  | 175.1195       | 88.0637         |

N-term:+43.02

X-range:

0 - 0

MassTol: Y-zoom:

0. 1.

MassType:

☐ AVG ☒ MONO

Axis:

☒ 1 ☐ 2

Label:

☒ I ☐ M ☐ -

Ions:

a ☐ + ☐ 2+ ☐ 3+

b ☒ + ☐ 2+ ☐ 3+

c ☐ + ☐ 2+ ☐ 3+

x ☐ + ☐ 2+ ☐ 3+

y ☒ + ☒ 2+ ☐ 3+

z ☐ + ☐ 2+ ☐ 3+

hide H<sub>2</sub>O/NH<sub>3</sub> ☐

zoom 112-122 ☐

GO

AAKPKLYYFNGR, MH+ 1525.8532, m/z 509.2892  
L OS G33 P160811 220811-s1.04110.04110.3.dta

scan 4110; 3.9e+001

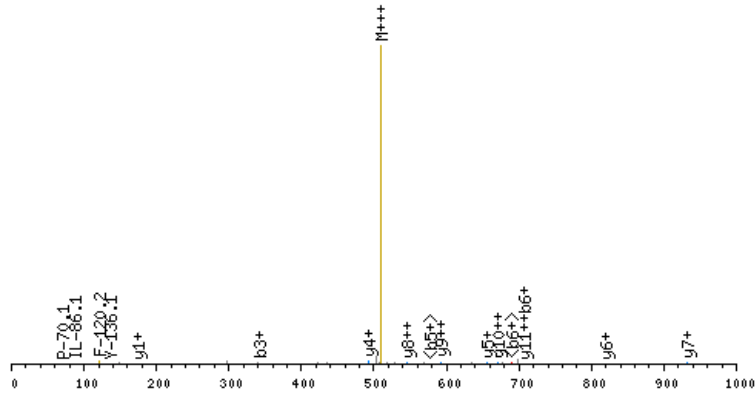

scan 4107; 509.3 m/z; 2.7e+001

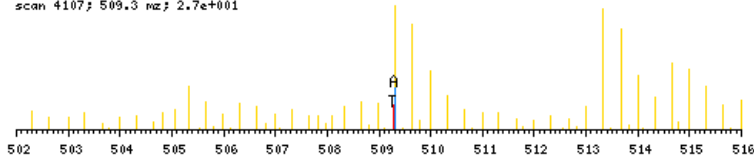

| b <sup>+</sup> | #  | AA | #  | y <sup>+</sup> | y <sup>2+</sup> |
|----------------|----|----|----|----------------|-----------------|
| 114.0555       | 1  | A  | 12 |                |                 |
| 185.0926       | 2  | A  | 11 | 1412.8055      | 706.9067        |
| 341.2189       | 3  | K  | 10 | 1341.7684      | 671.3881        |
| 438.2717       | 4  | P  | 9  | 1185.6421      | 593.3250        |
| 594.3980       | 5  | K  | 8  | 1088.5893      | 544.7986        |
| 707.4821       | 6  | L  | 7  | 932.4630       | 466.7354        |
| 870.5454       | 7  | Y  | 6  | 819.3790       | 410.1934        |
| 1033.6087      | 8  | Y  | 5  | 656.3156       | 328.6617        |
| 1180.6771      | 9  | F  | 4  | 493.2523       | 247.1301        |
| 1294.7201      | 10 | N  | 3  | 346.1839       | 173.5959        |
| 1351.7415      | 11 | G  | 2  | 232.1410       | 116.5744        |
|                | 12 | R  | 1  | 175.1195       | 88.0637         |

N-term:+43.02 K(3):+156.13  
K(5):+156.13

X-range:

0 - 0

MassTol: Y-zoom:

0. 1.

MassType:

☐ AVG ☒ MONO

Axis:

☒ 1 ☐ 2

Label:

☒ I ☐ M ☐ -

Ions:

a ☐ + ☐ 2+ ☐ 3+b ☒ + ☐ 2+ ☐ 3+c ☐ + ☐ 2+ ☐ 3+x ☐ + ☐ 2+ ☐ 3+y ☒ + ☒ 2+ ☐ 3+z ☐ + ☐ 2+ ☐ 3+hide H<sub>2</sub>O/NH<sub>3</sub> ☐zoom 112-122 ☐

GO

AANATTNPSQLLPLELVDKCIGSR, MH+ 2644.4192, m/z 882.1446  
L OS G30 P160811 220811-s1.07806.07806.3.dta

scan 7806; 6.7e+000

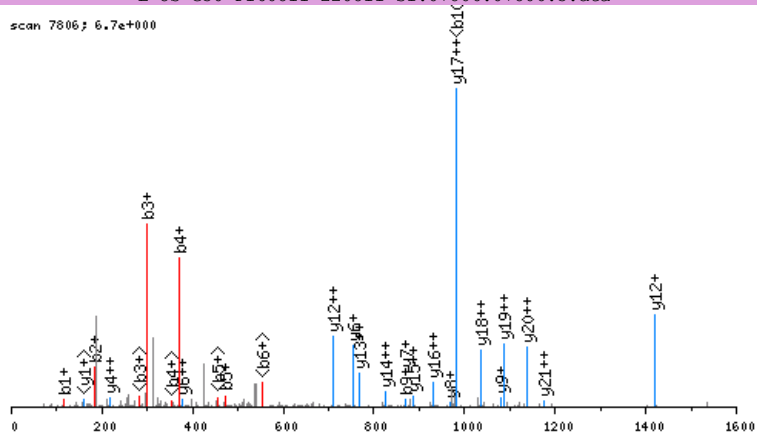

click image to zoom in; click top corners to zoom out

[\[precursor±\]](#)

scan 7804; 882.1 m/z; 7.2e+001

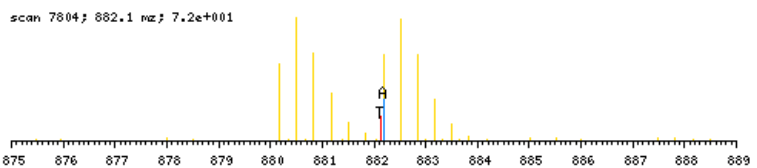

zoomed in precursor plot; T=theoretical m/z, A=acquired m/z

| b <sup>+</sup> | #  | AA | #  | y <sup>+</sup> | y <sup>2+</sup> |
|----------------|----|----|----|----------------|-----------------|
| 114.0555       | 1  | A  | 24 |                |                 |
| 185.0926       | 2  | A  | 23 | 2531.3715      | 1266.1897       |
| 299.1356       | 3  | N  | 22 | 2460.3344      | 1230.6711       |
| 370.1727       | 4  | A  | 21 | 2346.2915      | 1173.6497       |
| 471.2203       | 5  | T  | 20 | 2275.2544      | 1138.1311       |
| 572.2680       | 6  | T  | 19 | 2174.2067      | 1087.6073       |
| 686.3110       | 7  | N  | 18 | 2073.1590      | 1037.0834       |
| 783.3637       | 8  | P  | 17 | 1959.1161      | 980.0620        |
| 870.3957       | 9  | S  | 16 | 1862.0633      | 931.5356        |
| 998.4543       | 10 | Q  | 15 | 1775.0313      | 888.0196        |
| 1111.5384      | 11 | L  | 14 | 1646.9727      | 823.9903        |
| 1224.6225      | 12 | L  | 13 | 1533.8887      | 767.4482        |
| 1321.6752      | 13 | P  | 12 | 1420.8046      | 710.9062        |
| 1434.7593      | 14 | L  | 11 | 1323.7518      | 662.3798        |
| 1563.8019      | 15 | E  | 10 | 1210.6678      | 605.8378        |
| 1676.8859      | 16 | L  | 9  | 1081.6252      | 541.3165        |
| 1775.9544      | 17 | V  | 8  | 968.5411       | 484.7745        |
| 1890.9813      | 18 | D  | 7  | 869.4727       | 435.2403        |
| 2053.1394      | 19 | K  | 6  | 754.4458       | 377.7268        |
| 2213.1700      | 20 | C  | 5  | 592.2877       | 296.6477        |
| 2326.2541      | 21 | I  | 4  | 432.2571       | 216.6324        |
| 2383.2755      | 22 | G  | 3  | 319.1730       | 160.0904        |
| 2470.3075      | 23 | S  | 2  | 262.1515       | 131.5797        |
|                | 24 | R  | 1  | 175.1195       | 88.0637         |

N-term:+43.02 K(19) :+162.16

C(20) :+160.03

X-range:

0 - 0

MassTol: Y-zoom:

0. 1.

MassType:

☐ AVG ☒ MONO

Axis:

☒ 1 ☐ 2

Label:

☒ I ☐ M ☐ -

Ions:

a ☐ + ☐ 2+ ☐ 3+

b ☒ + ☐ 2+ ☐ 3+

c ☐ + ☐ 2+ ☐ 3+

x ☐ + ☐ 2+ ☐ 3+

y ☒ + ☒ 2+ ☐ 3+

z ☐ + ☐ 2+ ☐ 3+

hide H<sub>2</sub>O/NH<sub>3</sub> ☐

zoom 112-122 ☐

GO

AAPAKGENLSLVVHGPDIR, MH+ 2071.1301, m/z 691.0482  
L OS G33 P160811 220811-s1.05429.05429.3.dta

scan 5429; 4.2e+000

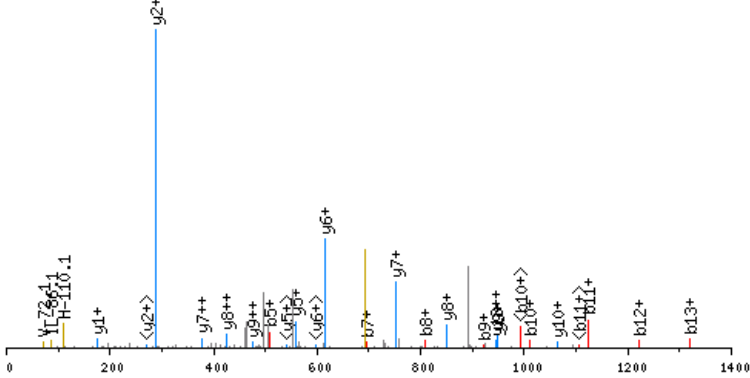

click image to zoom in; click top corners to zoom out

[precursor±]

scan 5427; 691.0 m/z; 1.3e+001

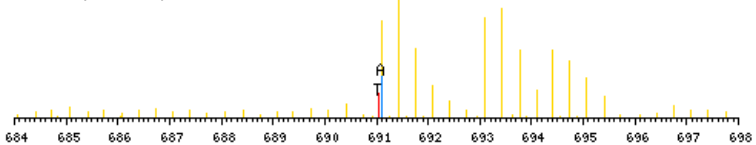

zoomed in precursor plot; T=theoretical m/z, A=acquired m/z

| b <sup>+</sup> | #  | AA | #  | y <sup>+</sup> | y <sup>2+</sup> |
|----------------|----|----|----|----------------|-----------------|
| 114.0555       | 1  | A  | 20 |                |                 |
| 185.0926       | 2  | A  | 19 | 1958.0824      | 979.5451        |
| 282.1454       | 3  | P  | 18 | 1887.0453      | 944.0265        |
| 353.1825       | 4  | A  | 17 | 1789.9925      | 895.5002        |
| 509.3088       | 5  | K  | 16 | 1718.9554      | 859.9816        |
| 566.3303       | 6  | G  | 15 | 1562.8291      | 781.9185        |
| 695.3729       | 7  | E  | 14 | 1505.8076      | 753.4077        |
| 809.4158       | 8  | N  | 13 | 1376.7650      | 688.8864        |
| 922.4999       | 9  | L  | 12 | 1262.7221      | 631.8650        |
| 1009.5319      | 10 | S  | 11 | 1149.6380      | 575.3229        |
| 1122.6159      | 11 | L  | 10 | 1062.6060      | 531.8069        |
| 1221.6844      | 12 | V  | 9  | 949.5219       | 475.2649        |
| 1320.7528      | 13 | V  | 8  | 850.4535       | 425.7307        |
| 1457.8117      | 14 | H  | 7  | 751.3851       | 376.1965        |
| 1514.8331      | 15 | G  | 6  | 614.3262       | 307.6670        |
| 1611.8859      | 16 | P  | 5  | 557.3047       | 279.1563        |
| 1668.9074      | 17 | G  | 4  | 460.2520       | 230.6299        |
| 1783.9343      | 18 | D  | 3  | 403.2305       | 202.1192        |
| 1897.0184      | 19 | I  | 2  | 288.2036       | 144.6057        |
|                | 20 | R  | 1  | 175.1195       | 88.0637         |

N-term:+43.02 K(5):+156.13



X-range:

0 - 0

MassTol: Y-zoom:

0. 1.

MassType:

☐AVG ☒MONO

Axis:

☒1 ☐2

Label:

☒I ☐M ☐-

Ions:

a ☐+ ☐2+ ☐3+

b ☒+ ☐2+ ☐3+

c ☐+ ☐2+ ☐3+

x ☐+ ☐2+ ☐3+

y ☒+ ☒2+ ☐3+

z ☐+ ☐2+ ☐3+

hide H<sub>2</sub>O/NH<sub>3</sub> ☐

zoom 112-122 ☐

GO

AAQVAPAAASSLGNPPPPSELKKAEQQQR, MH+ 3136.6756, m/z 784.9243  
L OS G32 P160811 220811-s1.04436.04436.4.dta

scan 4436; 3.8e+000

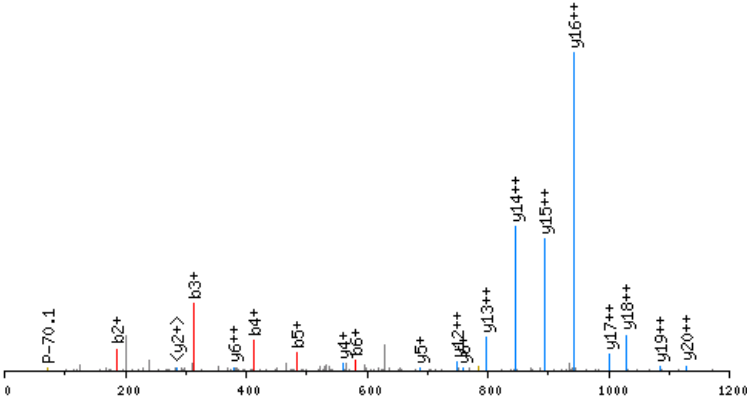

click image to zoom in; click top corners to zoom out

[precursor±]

scan 4433; 784.9 m/z; 7.3e+000

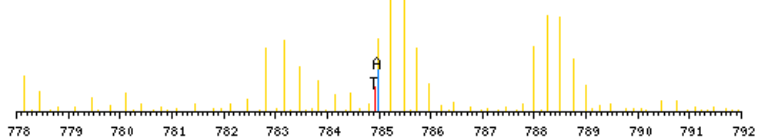

zoomed in precursor plot; T=theoretical m/z, A=acquired m/z

| b <sup>+</sup> | #  | AA | #  | y <sup>+</sup> | y <sup>2+</sup> |
|----------------|----|----|----|----------------|-----------------|
| 114.0555       | 1  | A  | 30 |                |                 |
| 185.0926       | 2  | A  | 29 | 3023.6279      | 1512.3179       |
| 313.1512       | 3  | Q  | 28 | 2952.5908      | 1476.7993       |
| 412.2196       | 4  | V  | 27 | 2824.5322      | 1412.7700       |
| 483.2567       | 5  | A  | 26 | 2725.4638      | 1363.2358       |
| 580.3095       | 6  | P  | 25 | 2654.4267      | 1327.7172       |
| 651.3466       | 7  | A  | 24 | 2557.3739      | 1279.1909       |
| 722.3837       | 8  | A  | 23 | 2486.3368      | 1243.6723       |
| 793.4208       | 9  | A  | 22 | 2415.2997      | 1208.1537       |
| 880.4529       | 10 | S  | 21 | 2344.2626      | 1172.6352       |
| 967.4849       | 11 | S  | 20 | 2257.2305      | 1129.1192       |
| 1080.5690      | 12 | L  | 19 | 2170.1985      | 1085.6032       |
| 1137.5904      | 13 | G  | 18 | 2057.1144      | 1029.0611       |
| 1251.6334      | 14 | N  | 17 | 2000.0930      | 1000.5504       |
| 1348.6861      | 15 | P  | 16 | 1886.0500      | 943.5289        |
| 1445.7389      | 16 | P  | 15 | 1788.9973      | 895.0026        |
| 1542.7916      | 17 | P  | 14 | 1691.9445      | 846.4762        |
| 1639.8444      | 18 | P  | 13 | 1594.8918      | 797.9498        |
| 1736.8972      | 19 | P  | 12 | 1497.8390      | 749.4234        |
| 1823.9292      | 20 | S  | 11 | 1400.7862      | 700.8970        |
| 1952.9718      | 21 | E  | 10 | 1313.7542      | 657.3810        |
| 2066.0559      | 22 | L  | 9  | 1184.7116      | 592.8597        |
| 2222.1822      | 23 | K  | 8  | 1071.6275      | 536.3177        |
| 2378.3085      | 24 | K  | 7  | 915.5012       | 458.2545        |
| 2449.3456      | 25 | A  | 6  | 759.3749       | 380.1914        |
| 2578.3882      | 26 | E  | 5  | 688.3378       | 344.6728        |
| 2706.4467      | 27 | Q  | 4  | 559.2952       | 280.1515        |
| 2834.5053      | 28 | Q  | 3  | 431.2367       | 216.1222        |
| 2962.5639      | 29 | Q  | 2  | 303.1781       | 152.0930        |
|                | 30 | R  | 1  | 175.1195       | 88.0637         |

N-term:+43.02 K(23) :+156.13  
K(24) :+156.13







X-range:

0 - 0

MassTol: Y-zoom:

0. 1.

MassType:

☐ AVG ☒ MONO

Axis:

☒ 1 ☐ 2

Label:

☒ I ☐ M ☐ -

Ions:

a ☐ + ☐ 2+ ☐ 3+

b ☒ + ☐ 2+ ☐ 3+

c ☐ + ☐ 2+ ☐ 3+

x ☐ + ☐ 2+ ☐ 3+

y ☒ + ☒ 2+ ☐ 3+

z ☐ + ☐ 2+ ☐ 3+

hide H<sub>2</sub>O/NH<sub>3</sub> ☐

zoom 112-122 ☐

GO

AASSSQVSEMKGVEDSSKTQTEGPR, MH+ 2706.3529, m/z 677.3437  
L OS G32 P160811 220811-s1.03295.03295.4.dta

scan 3295; 1.7e+000

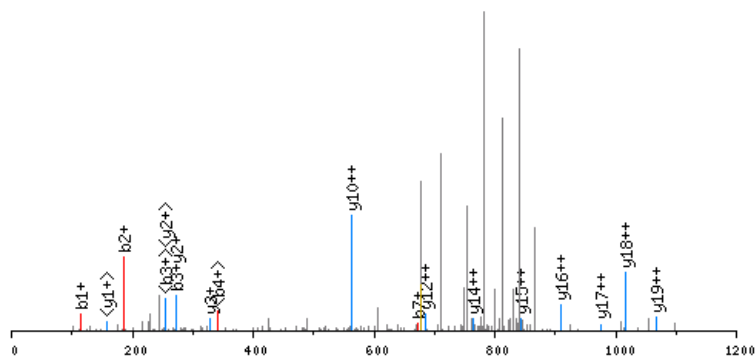

click image to zoom in; click top corners to zoom out

[precursor±]

scan 3293; 677.3 m/z; 3.4e+000

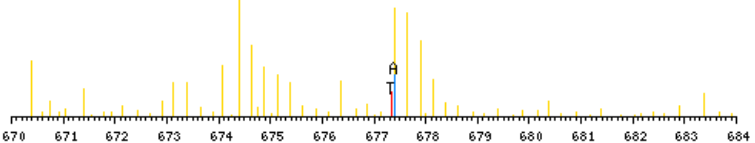

zoomed in precursor plot; T=theoretical m/z, A=acquired m/z

| b <sup>+</sup> | #  | AA | #  | y <sup>+</sup> | y <sup>2+</sup> |
|----------------|----|----|----|----------------|-----------------|
| 114.0555       | 1  | A  | 25 |                |                 |
| 185.0926       | 2  | A  | 24 | 2593.3052      | 1297.1565       |
| 272.1247       | 3  | S  | 23 | 2522.2681      | 1261.6380       |
| 359.1567       | 4  | S  | 22 | 2435.2361      | 1218.1220       |
| 446.1887       | 5  | S  | 21 | 2348.2041      | 1174.6059       |
| 574.2473       | 6  | Q  | 20 | 2261.1720      | 1131.0899       |
| 673.3157       | 7  | V  | 19 | 2133.1134      | 1067.0606       |
| 760.3477       | 8  | S  | 18 | 2034.0450      | 1017.5264       |
| 889.3903       | 9  | E  | 17 | 1947.0130      | 974.0104        |
| 1020.4308      | 10 | M  | 16 | 1817.9704      | 909.4891        |
| 1182.5889      | 11 | K  | 15 | 1686.9299      | 843.9689        |
| 1239.6104      | 12 | G  | 14 | 1524.7718      | 762.8898        |
| 1338.6788      | 13 | V  | 13 | 1467.7504      | 734.3791        |
| 1467.7214      | 14 | E  | 12 | 1368.6819      | 684.8449        |
| 1582.7483      | 15 | D  | 11 | 1239.6394      | 620.3236        |
| 1669.7804      | 16 | S  | 10 | 1124.6124      | 562.8101        |
| 1756.8124      | 17 | S  | 9  | 1037.5804      | 519.2941        |
| 1918.9705      | 18 | K  | 8  | 950.5484       | 475.7781        |
| 2020.0182      | 19 | T  | 7  | 788.3903       | 394.6990        |
| 2148.0767      | 20 | Q  | 6  | 687.3426       | 344.1752        |
| 2249.1244      | 21 | T  | 5  | 559.2840       | 280.1459        |
| 2378.1670      | 22 | E  | 4  | 458.2363       | 229.6221        |
| 2435.1885      | 23 | G  | 3  | 329.1937       | 165.1008        |
| 2532.2412      | 24 | P  | 2  | 272.1723       | 136.5900        |
|                | 25 | R  | 1  | 175.1195       | 88.0637         |

N-term:+43.02 K(11):+162.16  
K(18):+162.16

X-range:

0 - 0

MassTol: Y-zoom:

0. 1.

MassType:

☐ AVG ☒ MONO

Axis:

☒ 1 ☐ 2

Label:

☒ I ☐ M ☐ -

Ions:

a ☐ + ☐ 2+ ☐ 3+

b ☒ + ☐ 2+ ☐ 3+

c ☐ + ☐ 2+ ☐ 3+

x ☐ + ☐ 2+ ☐ 3+

y ☒ + ☒ 2+ ☐ 3+

z ☐ + ☐ 2+ ☐ 3+

hide H<sub>2</sub>O/NH<sub>3</sub> ☐

zoom 112-122 ☐

GO

AATFFGEVVKAPCR, MH+ 1622.8365, m/z 541.6170  
L OS G30 P160811 220811-s1.07440.07440.3.dta

scan 7440; 6.5e+000

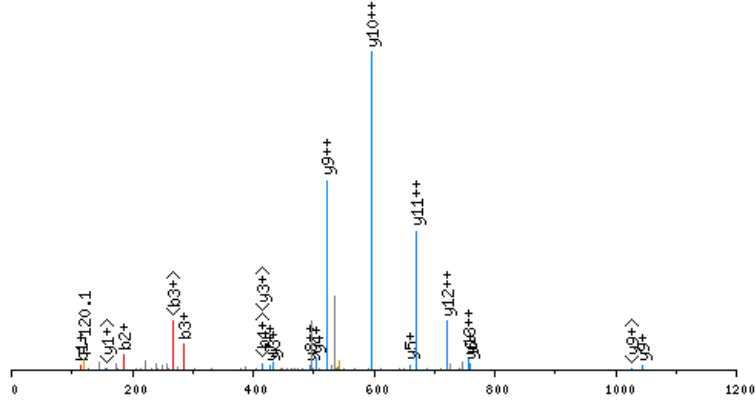

click image to zoom in; click top corners to zoom out

[precursor±]

scan 7439; 541.6 m/z; 2.8e+001

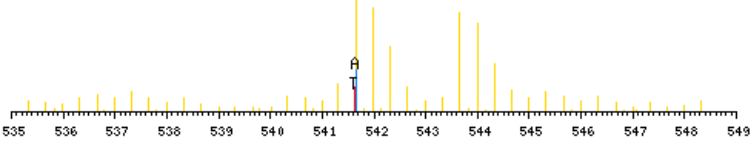

zoomed in precursor plot; T=theoretical m/z, A=acquired m/z

| b <sup>+</sup> | #  | AA | #  | y <sup>+</sup> | y <sup>2+</sup> |
|----------------|----|----|----|----------------|-----------------|
| 114.0555       | 1  | A  | 14 |                |                 |
| 185.0926       | 2  | A  | 13 | 1509.7888      | 755.3983        |
| 286.1403       | 3  | T  | 12 | 1438.7517      | 719.8797        |
| 433.2087       | 4  | F  | 11 | 1337.7040      | 669.3559        |
| 580.2771       | 5  | F  | 10 | 1190.6356      | 595.8217        |
| 637.2986       | 6  | G  | 9  | 1043.5672      | 522.2875        |
| 766.3412       | 7  | E  | 8  | 986.5457       | 493.7768        |
| 865.4096       | 8  | V  | 7  | 857.5031       | 429.2555        |
| 964.4780       | 9  | V  | 6  | 758.4347       | 379.7213        |
| 1120.6043      | 10 | K  | 5  | 659.3663       | 330.1871        |
| 1191.6414      | 11 | A  | 4  | 503.2400       | 252.1239        |
| 1288.6942      | 12 | P  | 3  | 432.2029       | 216.6053        |
| 1448.7248      | 13 | C  | 2  | 335.1501       | 168.0790        |
|                | 14 | R  | 1  | 175.1195       | 88.0637         |

N-term:+43.02 K(10):+156.13  
C(13):+160.03

X-range:

0 - 0

MassTol: Y-zoom:

0. 1.

MassType:

☐AVG ☒MONO

Axis:

☒1 ☐2

Label:

☒I ☐M ☐-

Ions:

a ☐+ ☐2+ ☐3+

b ☒+ ☐2+ ☐3+

c ☐+ ☐2+ ☐3+

x ☐+ ☐2+ ☐3+

y ☒+ ☒2+ ☐3+

z ☐+ ☐2+ ☐3+

hide H<sub>2</sub>O/NH<sub>3</sub> ☐

zoom 112-122 ☐

GO

AATTGSGVKVPR, MH+ 1213.6905, m/z 607.3489  
L OS G31 P160811 220811-s1.02890.02890.2.dta

scan 2890; 4.7e+001

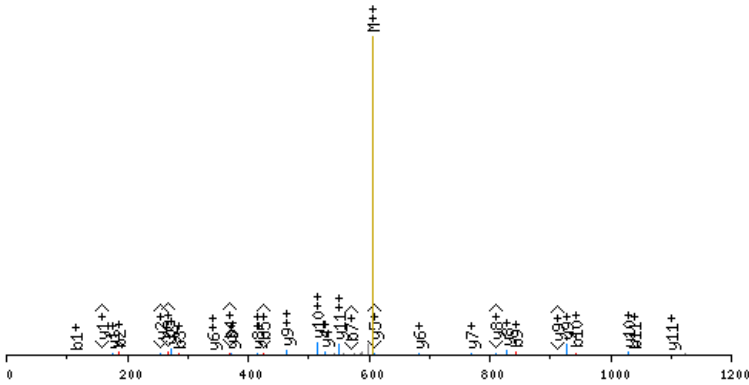

click image to zoom in; click top corners to zoom out

[precursor±]

scan 2889; 607.3 m/z; 1.3e+002

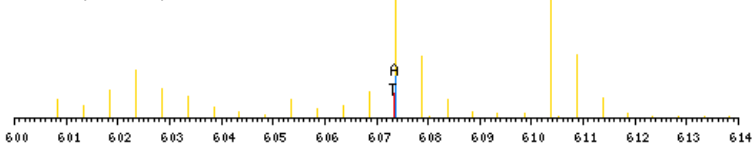

zoomed in precursor plot; T=theoretical m/z, A=acquired m/z

| b <sup>+</sup> | #  | AA | #  | y <sup>+</sup> | y <sup>2+</sup> |
|----------------|----|----|----|----------------|-----------------|
| 114.0555       | 1  | A  | 12 |                |                 |
| 185.0926       | 2  | A  | 11 | 1100.6428      | 550.8253        |
| 286.1403       | 3  | T  | 10 | 1029.6057      | 515.3068        |
| 387.1880       | 4  | T  | 9  | 928.5580       | 464.7829        |
| 444.2094       | 5  | G  | 8  | 827.5103       | 414.2591        |
| 531.2415       | 6  | S  | 7  | 770.4889       | 385.7484        |
| 588.2629       | 7  | G  | 6  | 683.4569       | 342.2323        |
| 687.3314       | 8  | V  | 5  | 626.4354       | 313.7216        |
| 843.4577       | 9  | K  | 4  | 527.3670       | 264.1874        |
| 942.5261       | 10 | V  | 3  | 371.2407       | 186.1243        |
| 1039.5788      | 11 | P  | 2  | 272.1723       | 136.5900        |
|                | 12 | R  | 1  | 175.1195       | 88.0637         |

N-term:+43.02 K(9):+156.13

X-range:

0 - 0

MassTol: Y-zoom:

0. 1.

MassType:

☐ AVG ☒ MONO

Axis:

☒ 1 ☐ 2

Label:

☒ I ☐ M ☐ -

Ions:

a ☐ + ☐ 2+ ☐ 3+

b ☒ + ☐ 2+ ☐ 3+

c ☐ + ☐ 2+ ☐ 3+

x ☐ + ☐ 2+ ☐ 3+

y ☒ + ☒ 2+ ☐ 3+

z ☐ + ☐ 2+ ☐ 3+

hide H<sub>2</sub>O/NH<sub>3</sub> ☐

zoom 112-122 ☐

GO

AAYKLVLIR, MH+ 1122.7463, m/z 561.8768  
L OS G30 P160811 220811-s1.06077.06077.2.dta

scan 6077; 4.5e+001

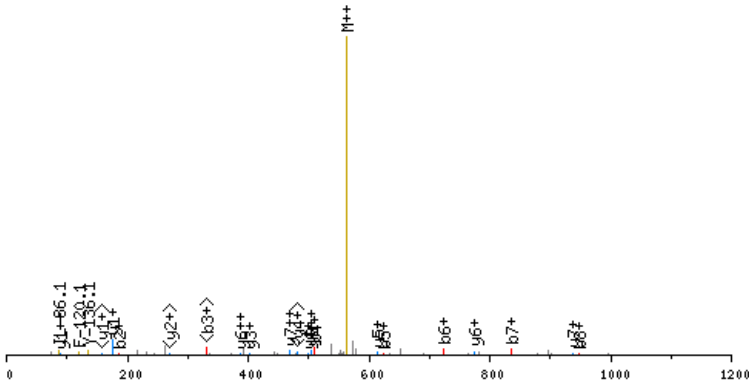

click image to zoom in; click top corners to zoom out

[precursor±]

scan 6074; 561.9 m/z; 1.6e+002

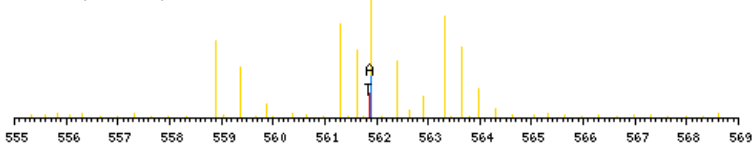

zoomed in precursor plot; T=theoretical m/z, A=acquired m/z

| b <sup>+</sup> | # | AA | # | y <sup>+</sup> | y <sup>2+</sup> |
|----------------|---|----|---|----------------|-----------------|
| 114.0555       | 1 | A  | 9 |                |                 |
| 185.0926       | 2 | A  | 8 | 1009.6986      | 505.3532        |
| 348.1560       | 3 | Y  | 7 | 938.6615       | 469.8347        |
| 510.3141       | 4 | K  | 6 | 775.5982       | 388.3030        |
| 623.3981       | 5 | L  | 5 | 613.4401       | 307.2240        |
| 722.4665       | 6 | V  | 4 | 500.3560       | 250.6819        |
| 835.5506       | 7 | L  | 3 | 401.2876       | 201.1477        |
| 948.6347       | 8 | I  | 2 | 288.2036       | 144.6057        |
|                | 9 | R  | 1 | 175.1195       | 88.0637         |

N-term:+43.02 K(4):+162.16

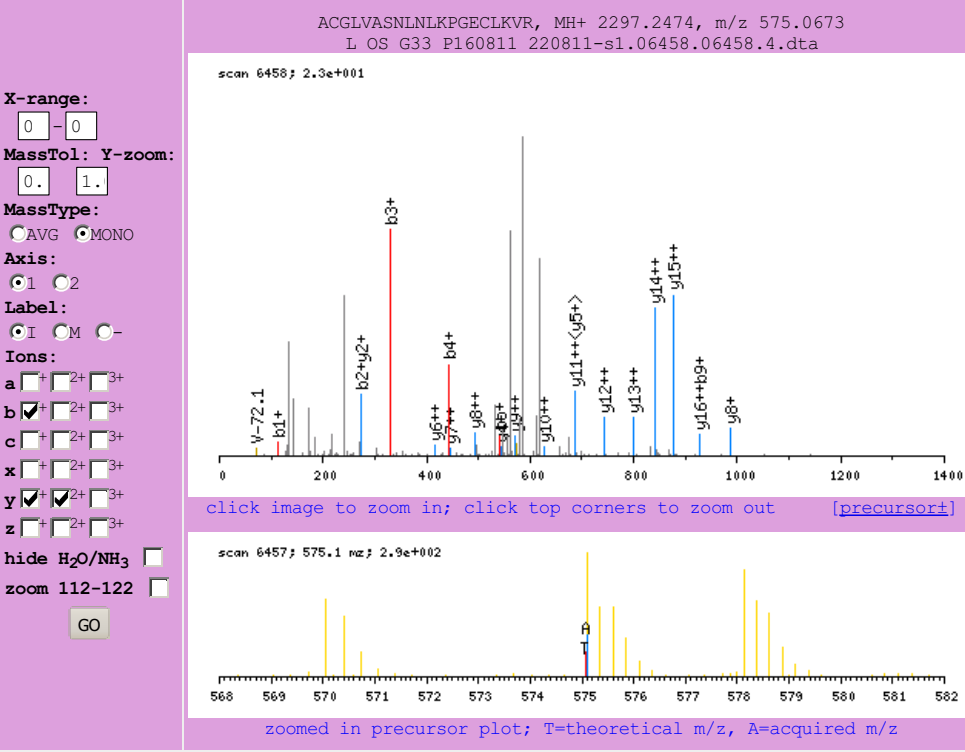

| b <sup>+</sup> | #  | AA | #  | y <sup>+</sup> | y <sup>2+</sup> |
|----------------|----|----|----|----------------|-----------------|
| 114.0555       | 1  | A  | 20 |                |                 |
| 274.0861       | 2  | C  | 19 | 2184.1997      | 1092.6037       |
| 331.1076       | 3  | G  | 18 | 2024.1691      | 1012.5884       |
| 444.1916       | 4  | L  | 17 | 1967.1476      | 984.0777        |
| 543.2601       | 5  | V  | 16 | 1854.0635      | 927.5357        |
| 614.2972       | 6  | A  | 15 | 1754.9951      | 878.0015        |
| 701.3292       | 7  | S  | 14 | 1683.9580      | 842.4829        |
| 815.3721       | 8  | N  | 13 | 1596.9260      | 798.9669        |
| 928.4562       | 9  | L  | 12 | 1482.8831      | 741.9454        |
| 1042.4991      | 10 | N  | 11 | 1369.7990      | 685.4034        |
| 1155.5832      | 11 | L  | 10 | 1255.7561      | 628.3819        |
| 1311.7095      | 12 | K  | 9  | 1142.6720      | 571.8399        |
| 1408.7622      | 13 | P  | 8  | 986.5457       | 493.7768        |
| 1465.7837      | 14 | G  | 7  | 889.4929       | 445.2504        |
| 1594.8263      | 15 | E  | 6  | 832.4715       | 416.7396        |
| 1754.8569      | 16 | C  | 5  | 703.4289       | 352.2184        |
| 1867.9410      | 17 | L  | 4  | 543.3983       | 272.2031        |
| 2024.0673      | 18 | K  | 3  | 430.3142       | 215.6610        |
| 2123.1357      | 19 | V  | 2  | 274.1879       | 137.5979        |
|                | 20 | R  | 1  | 175.1195       | 88.0637         |

N-term:+43.02 C(2):+160.03  
K(12):+156.13 C(16):+160.03  
K(18):+156.13

X-range:  

0-0

MassTol: Y-zoom:  

0.1.

MassType:  

☐AVG☒MONO

Axis:  

☒1☐2

Label:  

☒I☐M☐-

Ions:  

a☐+☐2+☐3+

b☒+☐2+☐3+

c☐+☐2+☐3+

x☐+☐2+☐3+

y☒+☒2+☐3+

z☐+☐2+☐3+

hide H<sub>2</sub>O/NH<sub>3</sub>☐

zoom 112-122☐

GO

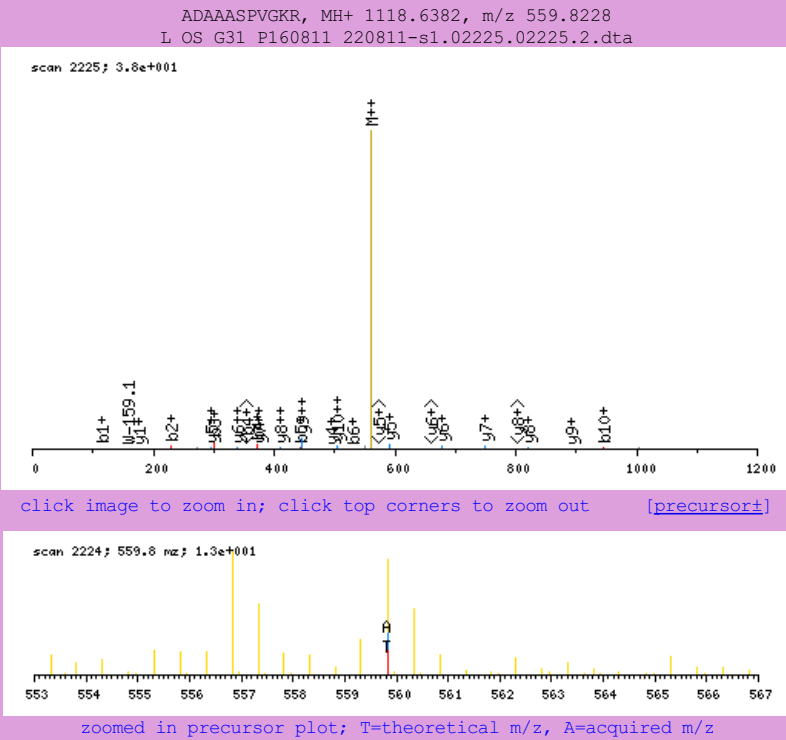

| b <sup>+</sup> | #  | AA | #  | y <sup>+</sup> | y <sup>2+</sup> |
|----------------|----|----|----|----------------|-----------------|
| 114.0555       | 1  | A  | 11 |                |                 |
| 229.0825       | 2  | D  | 10 | 1005.5906      | 503.2992        |
| 300.1196       | 3  | A  | 9  | 890.5636       | 445.7857        |
| 371.1567       | 4  | A  | 8  | 819.5265       | 410.2672        |
| 442.1938       | 5  | A  | 7  | 748.4894       | 374.7486        |
| 529.2258       | 6  | S  | 6  | 677.4523       | 339.2300        |
| 626.2786       | 7  | P  | 5  | 590.4202       | 295.7140        |
| 725.3470       | 8  | V  | 4  | 493.3675       | 247.1877        |
| 782.3685       | 9  | G  | 3  | 394.2991       | 197.6534        |
| 944.5266       | 10 | K  | 2  | 337.2776       | 169.1427        |
|                | 11 | R  | 1  | 175.1195       | 88.0637         |

N-term:+43.02 K(10):+162.16



N-term: +43.02



X-range:

0 - 0

MassTol: Y-zoom:

0. 1.

MassType:

☐ AVG ☒ MONO

Axis:

☒ 1 ☐ 2

Label:

☒ I ☐ M ☐ -

Ions:

a ☐ + ☐ 2+ ☐ 3+

b ☒ + ☐ 2+ ☐ 3+

c ☐ + ☐ 2+ ☐ 3+

x ☐ + ☐ 2+ ☐ 3+

y ☒ + ☒ 2+ ☐ 3+

z ☐ + ☐ 2+ ☐ 3+

hide H<sub>2</sub>O/NH<sub>3</sub> ☐

zoom 112-122 ☐

GO

ADEIAKAQVAQPGGDTIFGKIIR, MH+ 2508.4463, m/z 627.8670  
L OS G33 P160811 220811-s1.07278.07278.4.dta

scan 7278; 3.6e+000

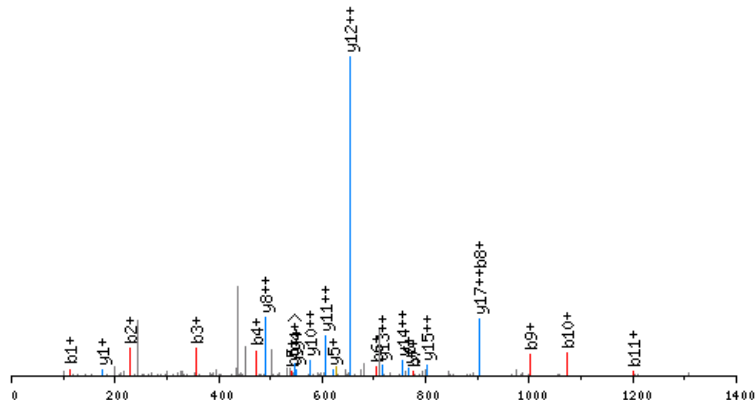

click image to zoom in; click top corners to zoom out

[precursor±]

scan 7277; 627.9 m/z; 1.5e+001

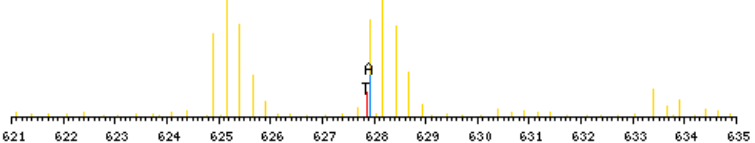

zoomed in precursor plot; T=theoretical m/z, A=acquired m/z

| b <sup>+</sup> | #  | AA | #  | y <sup>+</sup> | y <sup>2+</sup> |
|----------------|----|----|----|----------------|-----------------|
| 114.0555       | 1  | A  | 23 |                |                 |
| 229.0825       | 2  | D  | 22 | 2395.3986      | 1198.2032       |
| 358.1251       | 3  | E  | 21 | 2280.3717      | 1140.6897       |
| 471.2091       | 4  | I  | 20 | 2151.3291      | 1076.1684       |
| 542.2462       | 5  | A  | 19 | 2038.2450      | 1019.6264       |
| 704.4043       | 6  | K  | 18 | 1967.2079      | 984.1079        |
| 775.4414       | 7  | A  | 17 | 1805.0498      | 903.0288        |
| 903.5000       | 8  | Q  | 16 | 1734.0127      | 867.5102        |
| 1002.5684      | 9  | V  | 15 | 1605.9541      | 803.4810        |
| 1073.6055      | 10 | A  | 14 | 1506.8857      | 753.9467        |
| 1201.6641      | 11 | Q  | 13 | 1435.8486      | 718.4282        |
| 1298.7169      | 12 | P  | 12 | 1307.7900      | 654.3989        |
| 1355.7384      | 13 | G  | 11 | 1210.7372      | 605.8725        |
| 1412.7598      | 14 | G  | 10 | 1153.7158      | 577.3618        |
| 1527.7868      | 15 | D  | 9  | 1096.6943      | 548.8511        |
| 1628.8344      | 16 | T  | 8  | 981.6673       | 491.3376        |
| 1741.9185      | 17 | I  | 7  | 880.6197       | 440.8137        |
| 1888.9869      | 18 | F  | 6  | 767.5356       | 384.2717        |
| 1946.0084      | 19 | G  | 5  | 620.4672       | 310.7375        |
| 2108.1665      | 20 | K  | 4  | 563.4457       | 282.2268        |
| 2221.2505      | 21 | I  | 3  | 401.2876       | 201.1477        |
| 2334.3346      | 22 | I  | 2  | 288.2036       | 144.6057        |
|                | 23 | R  | 1  | 175.1195       | 88.0637         |

N-term:+43.02 K(6):+162.16  
K(20):+162.16

X-range:

0 - 0

MassTol: Y-zoom:

0. 1.

MassType:

AVG MONO

Axis:

1 2

Label:

I M -

Ions:

a + 2+ 3+

b + 2+ 3+

c + 2+ 3+

x + 2+ 3+

y + 2+ 3+

z + 2+ 3+

hide H<sub>2</sub>O/NH<sub>3</sub>

zoom 112-122

GO

ADEVTEKQVYDAHTKEIDLVR, MH+ 2683.4216, m/z 671.6109  
L OS G34 P160811 220811-s1.06558.06558.4.dta

scan 6558; 3.2e+000

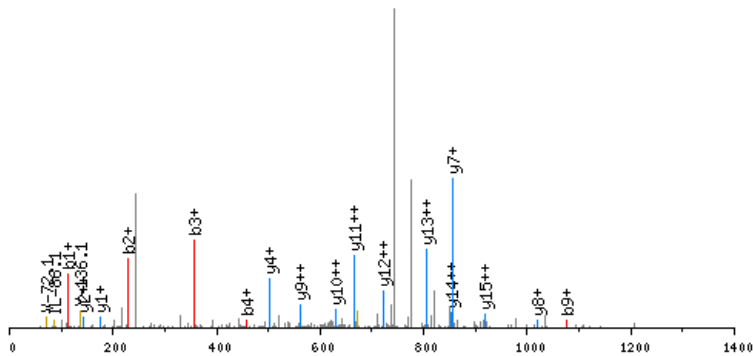

click image to zoom in; click top corners to zoom out

[precursor±]

scan 6555; 671.6 m/z; 3.0e+001

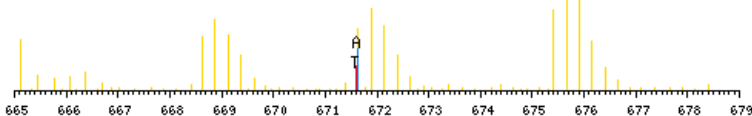

zoomed in precursor plot; T=theoretical m/z, A=acquired m/z

| b <sup>+</sup> | #  | AA | #  | y <sup>+</sup> | y <sup>2+</sup> |
|----------------|----|----|----|----------------|-----------------|
| 114.0555       | 1  | A  | 22 |                |                 |
| 229.0825       | 2  | D  | 21 | 2570.3739      | 1285.6909       |
| 358.1251       | 3  | E  | 20 | 2455.3470      | 1228.1774       |
| 457.1935       | 4  | V  | 19 | 2326.3044      | 1163.6561       |
| 558.2411       | 5  | T  | 18 | 2227.2359      | 1114.1219       |
| 687.2837       | 6  | E  | 17 | 2126.1883      | 1063.5980       |
| 849.4418       | 7  | K  | 16 | 1997.1457      | 999.0767        |
| 977.5004       | 8  | Q  | 15 | 1834.9876      | 917.9977        |
| 1076.5688      | 9  | V  | 14 | 1706.9290      | 853.9684        |
| 1239.6322      | 10 | Y  | 13 | 1607.8606      | 804.4342        |
| 1354.6591      | 11 | D  | 12 | 1444.7973      | 722.9025        |
| 1425.6962      | 12 | A  | 11 | 1329.7703      | 665.3891        |
| 1562.7551      | 13 | H  | 10 | 1258.7332      | 629.8705        |
| 1663.8028      | 14 | T  | 9  | 1121.6743      | 561.3411        |
| 1825.9609      | 15 | K  | 8  | 1020.6266      | 510.8172        |
| 1955.0035      | 16 | E  | 7  | 858.4685       | 429.7382        |
| 2068.0876      | 17 | I  | 6  | 729.4259       | 365.2169        |
| 2183.1145      | 18 | D  | 5  | 616.3418       | 308.6748        |
| 2296.1986      | 19 | L  | 4  | 501.3149       | 251.1614        |
| 2395.2670      | 20 | V  | 3  | 388.2308       | 194.6193        |
| 2509.3099      | 21 | N  | 2  | 289.1624       | 145.0851        |
|                | 22 | R  | 1  | 175.1195       | 88.0637         |

N-term:+43.02 K(7):+162.16  
K(15):+162.16

X-range:

0 - 0

MassTol: Y-zoom:

0. 1.

MassType:

☐ AVG ☒ MONO

Axis:

☒ 1 ☐ 2

Label:

☒ I ☐ M ☐ -

Ions:

a ☐ + ☐ 2+ ☐ 3+

b ☒ + ☐ 2+ ☐ 3+

c ☐ + ☐ 2+ ☐ 3+

x ☐ + ☐ 2+ ☐ 3+

y ☒ + ☒ 2+ ☐ 3+

z ☐ + ☐ 2+ ☐ 3+

hide H<sub>2</sub>O/NH<sub>3</sub> ☐

zoom 112-122 ☐

GO

ADKEAAFDDAVEER, MH+ 1635.7503, m/z 545.9216  
L OS G30 P160811 220811-s1.04140.04140.3.dta

scan 4140; 1.8e+001

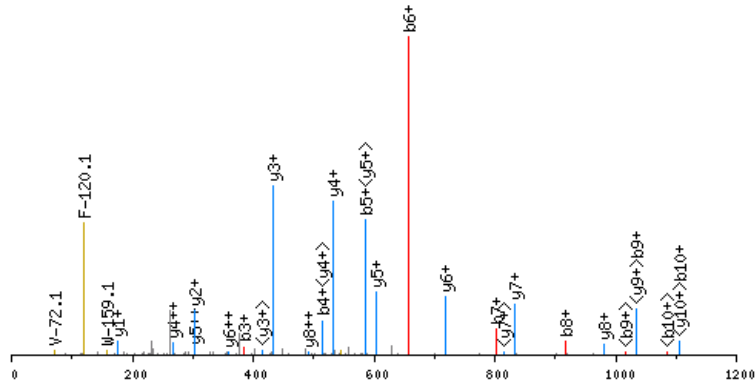

click image to zoom in; click top corners to zoom out

[precursor±]

scan 4139; 545.9 m/z; 1.7e+002

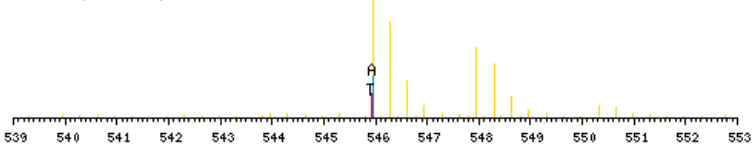

zoomed in precursor plot; T=theoretical m/z, A=acquired m/z

| b <sup>+</sup> | #  | AA | #  | y <sup>+</sup> | y <sup>2+</sup> |
|----------------|----|----|----|----------------|-----------------|
| 114.0555       | 1  | A  | 14 |                |                 |
| 229.0825       | 2  | D  | 13 | 1522.7026      | 761.8552        |
| 385.2088       | 3  | K  | 12 | 1407.6756      | 704.3417        |
| 514.2514       | 4  | E  | 11 | 1251.5493      | 626.2786        |
| 585.2885       | 5  | A  | 10 | 1122.5067      | 561.7573        |
| 656.3256       | 6  | A  | 9  | 1051.4696      | 526.2387        |
| 803.3940       | 7  | F  | 8  | 980.4325       | 490.7202        |
| 918.4209       | 8  | D  | 7  | 833.3641       | 417.1860        |
| 1033.4479      | 9  | D  | 6  | 718.3372       | 359.6725        |
| 1104.4850      | 10 | A  | 5  | 603.3102       | 302.1590        |
| 1203.5534      | 11 | V  | 4  | 532.2731       | 266.6405        |
| 1332.5960      | 12 | E  | 3  | 433.2047       | 217.1063        |
| 1461.6386      | 13 | E  | 2  | 304.1621       | 152.5850        |
|                | 14 | R  | 1  | 175.1195       | 88.0637         |

N-term:+43.02 K(3):+156.13



X-range:

0 - 0

MassTol: Y-zoom:

0. 1.

MassType:

☐AVG ☒MONO

Axis:

☒1 ☐2

Label:

☒I ☐M ☐-

Ions:

a ☐+ ☐2+ ☐3+

b ☒+ ☐2+ ☐3+

c ☐+ ☐2+ ☐3+

x ☐+ ☐2+ ☐3+

y ☒+ ☒2+ ☐3+

z ☐+ ☐2+ ☐3+

hide H<sub>2</sub>O/NH<sub>3</sub> ☐

zoom 112-122 ☐

GO

ADLEEQLSDEEKVR, MH+ 1736.8767, m/z 579.6304  
L OS G30 P160811 220811-s1.05446.05446.3.dta

scan 5446; 2.2e+000

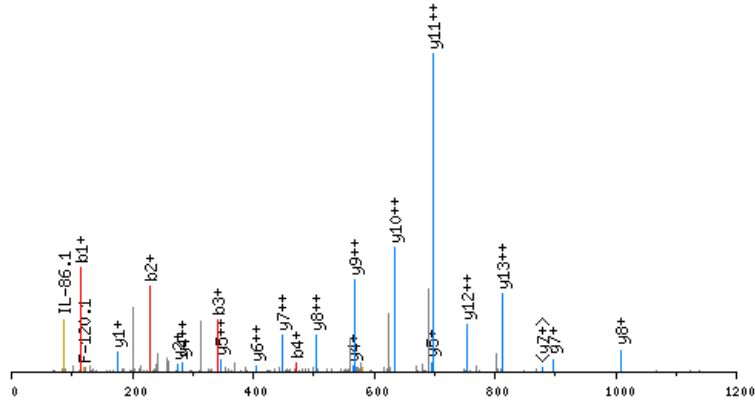

click image to zoom in; click top corners to zoom out

[precursor±]

scan 5444; 579.6 m/z; 1.9e+001

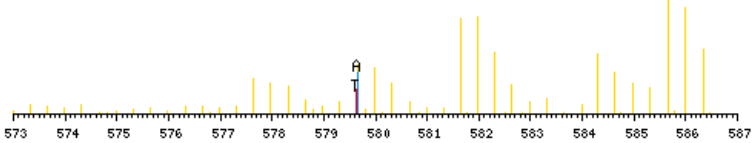

zoomed in precursor plot; T=theoretical m/z, A=acquired m/z

| b <sup>+</sup> | #  | AA | #  | y <sup>+</sup> | y <sup>2+</sup> |
|----------------|----|----|----|----------------|-----------------|
| 114.0555       | 1  | A  | 14 |                |                 |
| 229.0825       | 2  | D  | 13 | 1623.8290      | 812.4184        |
| 342.1665       | 3  | L  | 12 | 1508.8021      | 754.9049        |
| 471.2091       | 4  | E  | 11 | 1395.7180      | 698.3629        |
| 600.2517       | 5  | E  | 10 | 1266.6754      | 633.8416        |
| 728.3103       | 6  | Q  | 9  | 1137.6328      | 569.3203        |
| 841.3943       | 7  | L  | 8  | 1009.5742      | 505.2910        |
| 928.4264       | 8  | S  | 7  | 896.4902       | 448.7490        |
| 1043.4533      | 9  | D  | 6  | 809.4581       | 405.2330        |
| 1172.4959      | 10 | E  | 5  | 694.4312       | 347.7195        |
| 1301.5385      | 11 | E  | 4  | 565.3886       | 283.1982        |
| 1463.6966      | 12 | K  | 3  | 436.3460       | 218.6769        |
| 1562.7650      | 13 | V  | 2  | 274.1879       | 137.5979        |
|                | 14 | R  | 1  | 175.1195       | 88.0637         |

N-term:+43.02 K(12):+162.16

X-range:

0 - 0

MassTol: Y-zoom:

0. 1.

MassType:

☐ AVG ☒ MONO

Axis:

☒ 1 ☐ 2

Label:

☒ I ☐ M ☐ -

Ions:

a ☐ + ☐ 2+ ☐ 3+

b ☒ + ☐ 2+ ☐ 3+

c ☐ + ☐ 2+ ☐ 3+

x ☐ + ☐ 2+ ☐ 3+

y ☒ + ☒ 2+ ☐ 3+

z ☐ + ☐ 2+ ☐ 3+

hide H<sub>2</sub>O/NH<sub>3</sub> ☐

zoom 112-122 ☐

GO

ADLSLVDALTEPPPEIEGEIKR, MH+ 2468.3349, m/z 823.4498  
L OS G30 P160811 220811-s1.07870.07870.3.dta

scan 7870; 5.1e+000

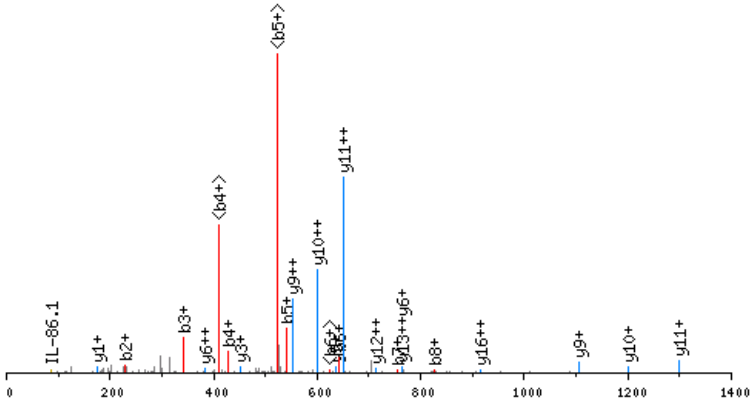

click image to zoom in; click top corners to zoom out [precursor±]

scan 7869; 823.5 m/z; 1.3e+001

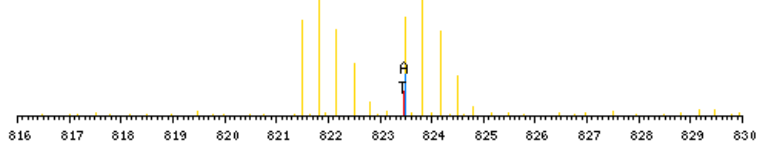

zoomed in precursor plot; T=theoretical m/z, A=acquired m/z

| b <sup>+</sup> | #  | AA | #  | y <sup>+</sup> | y <sup>2+</sup> |
|----------------|----|----|----|----------------|-----------------|
| 114.0555       | 1  | A  | 22 |                |                 |
| 229.0825       | 2  | D  | 21 | 2355.2872      | 1178.1475       |
| 342.1665       | 3  | L  | 20 | 2240.2602      | 1120.6340       |
| 429.1985       | 4  | S  | 19 | 2127.1762      | 1064.0920       |
| 542.2826       | 5  | L  | 18 | 2040.1441      | 1020.5760       |
| 641.3510       | 6  | V  | 17 | 1927.0601      | 964.0339        |
| 756.3780       | 7  | D  | 16 | 1827.9917      | 914.4997        |
| 827.4151       | 8  | A  | 15 | 1712.9647      | 856.9863        |
| 940.4991       | 9  | L  | 14 | 1641.9276      | 821.4677        |
| 1041.5468      | 10 | T  | 13 | 1528.8435      | 764.9257        |
| 1170.5894      | 11 | E  | 12 | 1427.7959      | 714.4018        |
| 1267.6422      | 12 | P  | 11 | 1298.7533      | 649.8805        |
| 1364.6949      | 13 | P  | 10 | 1201.7005      | 601.3542        |
| 1461.7477      | 14 | P  | 9  | 1104.6477      | 552.8278        |
| 1590.7903      | 15 | E  | 8  | 1007.5950      | 504.3014        |
| 1703.8744      | 16 | I  | 7  | 878.5524       | 439.7801        |
| 1832.9170      | 17 | E  | 6  | 765.4683       | 383.2381        |
| 1889.9384      | 18 | G  | 5  | 636.4257       | 318.7168        |
| 2018.9810      | 19 | E  | 4  | 579.4043       | 290.2060        |
| 2132.0651      | 20 | I  | 3  | 450.3617       | 225.6847        |
| 2294.2232      | 21 | K  | 2  | 337.2776       | 169.1427        |
|                | 22 | R  | 1  | 175.1195       | 88.0637         |

N-term:+43.02 K(21):+162.16

ADTAPQLKR, MH+ 1069.6006, m/z 535.3040  
L OS G31 P160811 220811-s1.02570.02570.2.dta

scan 2570; 3.5e+001

click image to zoom in; click top corners to zoom out      [precursor±]

scan 2569; 535.3 m/z; 2.1e+001

zoomed in precursor plot; T=theoretical m/z, A=acquired m/z

X-range:  
 -

MassTol: Y-zoom:

MassType:  
☐ AVG ☒ MONO

Axis:  
☒ 1 ☐ 2

Label:  
☒ I ☐ M ☐ -

Ions:  
a ☐ + ☐ 2+ ☐ 3+  
b ☒ + ☐ 2+ ☐ 3+  
c ☐ + ☐ 2+ ☐ 3+  
x ☐ + ☐ 2+ ☐ 3+  
y ☒ + ☒ 2+ ☐ 3+  
z ☐ + ☐ 2+ ☐ 3+

hide H<sub>2</sub>O/NH<sub>3</sub> ☐

zoom 112-122 ☐

GO

| b <sup>+</sup> | # | AA | # | y <sup>+</sup> | y <sup>2+</sup> |
|----------------|---|----|---|----------------|-----------------|
| 114.0555       | 1 | A  | 9 |                |                 |
| 229.0825       | 2 | D  | 8 | 956.5529       | 478.7804        |
| 330.1301       | 3 | T  | 7 | 841.5260       | 421.2669        |
| 401.1672       | 4 | A  | 6 | 740.4783       | 370.7431        |
| 498.2200       | 5 | P  | 5 | 669.4412       | 335.2245        |
| 626.2786       | 6 | Q  | 4 | 572.3884       | 286.6981        |
| 739.3627       | 7 | L  | 3 | 444.3299       | 222.6688        |
| 895.4890       | 8 | K  | 2 | 331.2458       | 166.1268        |
|                | 9 | R  | 1 | 175.1195       | 88.0637         |

N-term:+43.02 K(8):+156.13

X-range:

0 - 0

MassTol: Y-zoom:

0. 1.

MassType:

☐ AVG ☒ MONO

Axis:

☒ 1 ☐ 2

Label:

☒ I ☐ M ☐ -

Ions:

a ☐ + ☐ 2+ ☐ 3+

b ☒ + ☐ 2+ ☐ 3+

c ☐ + ☐ 2+ ☐ 3+

x ☐ + ☐ 2+ ☐ 3+

y ☒ + ☒ 2+ ☐ 3+

z ☐ + ☐ 2+ ☐ 3+

hide H<sub>2</sub>O/NH<sub>3</sub> ☐

zoom 112-122 ☐

GO

ADTFLEHMCR, MH+ 1321.5669, m/z 661.2871  
L OS G31 P160811 220811-s1.07327.07327.2.dta

scan 7327; 1.3e+000

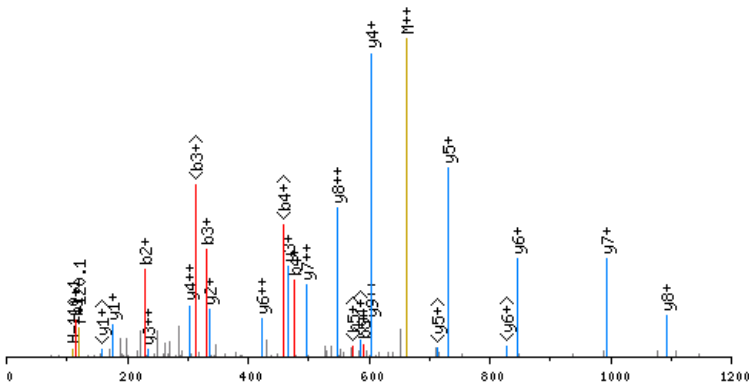

click image to zoom in; click top corners to zoom out

[precursor±]

scan 7324; 661.3 m/z; 6.6e+000

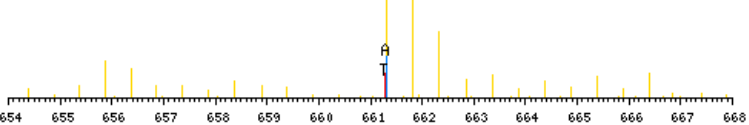

zoomed in precursor plot; T=theoretical m/z, A=acquired m/z

| b <sup>+</sup> | #  | AA | #  | y <sup>+</sup> | y <sup>2+</sup> |
|----------------|----|----|----|----------------|-----------------|
| 114.0555       | 1  | A  | 10 |                |                 |
| 229.0825       | 2  | D  | 9  | 1208.5192      | 604.7635        |
| 330.1301       | 3  | T  | 8  | 1093.4922      | 547.2500        |
| 477.1985       | 4  | F  | 7  | 992.4446       | 496.7262        |
| 590.2826       | 5  | L  | 6  | 845.3762       | 423.1920        |
| 719.3252       | 6  | E  | 5  | 732.2921       | 366.6500        |
| 856.3841       | 7  | H  | 4  | 603.2495       | 302.1287        |
| 987.4246       | 8  | M  | 3  | 466.1906       | 233.5992        |
| 1147.4552      | 9  | C  | 2  | 335.1501       | 168.0790        |
|                | 10 | R  | 1  | 175.1195       | 88.0637         |

N-term:+43.02 C(9):+160.03

X-range:

0 - 0

MassTol: Y-zoom:

0. 1.

MassType:

☐ AVG ☒ MONO

Axis:

☒ 1 ☐ 2

Label:

☒ I ☐ M ☐ -

Ions:

a ☐ + ☐ 2+ ☐ 3+

b ☒ + ☐ 2+ ☐ 3+

c ☐ + ☐ 2+ ☐ 3+

x ☐ + ☐ 2+ ☐ 3+

y ☒ + ☒ 2+ ☐ 3+

z ☐ + ☐ 2+ ☐ 3+

hide H<sub>2</sub>O/NH<sub>3</sub> ☐

zoom 112-122 ☐

GO

ADTYAVVQKR, MH+ 1226.6958, m/z 613.8515  
L OS G31 P160811 220811-s1.03655.03655.2.dta

scan 3655; 3.4e+001

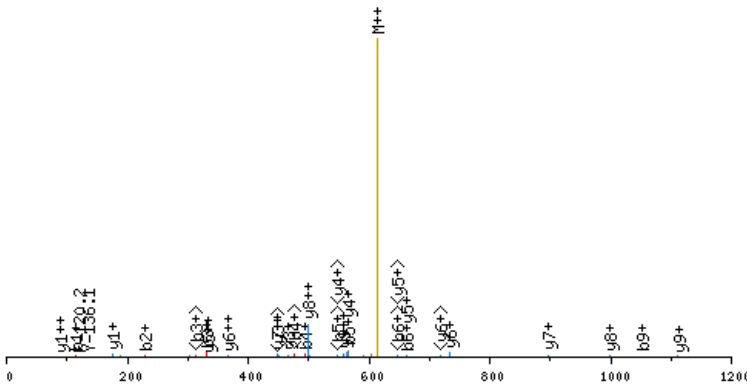

click image to zoom in; click top corners to zoom out [precursor±]

scan 3654; 613.9 m/z; 4.3e+001

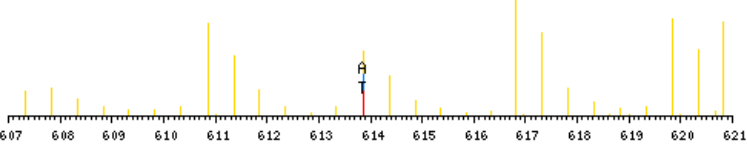

zoomed in precursor plot; T=theoretical m/z, A=acquired m/z

| b <sup>+</sup> | #  | AA | #  | y <sup>+</sup> | y <sup>2+</sup> |
|----------------|----|----|----|----------------|-----------------|
| 114.0555       | 1  | A  | 10 |                |                 |
| 229.0825       | 2  | D  | 9  | 1113.6481      | 557.3279        |
| 330.1301       | 3  | T  | 8  | 998.6211       | 499.8145        |
| 493.1935       | 4  | Y  | 7  | 897.5734       | 449.2906        |
| 564.2306       | 5  | A  | 6  | 734.5101       | 367.7590        |
| 663.2990       | 6  | V  | 5  | 663.4730       | 332.2404        |
| 762.3674       | 7  | V  | 4  | 564.4046       | 282.7062        |
| 890.4260       | 8  | Q  | 3  | 465.3362       | 233.1720        |
| 1052.5841      | 9  | K  | 2  | 337.2776       | 169.1427        |
|                | 10 | R  | 1  | 175.1195       | 88.0637         |

N-term:+43.02 K(9):+162.16

X-range:

0 - 0

MassTol: Y-zoom:

0. 1.

MassType:

☐AVG ☒MONO

Axis:

☒1 ☐2

Label:

☒I ☐M ☐-

Ions:

a ☐+ ☐2+ ☐3+

b ☒+ ☐2+ ☐3+

c ☐+ ☐2+ ☐3+

x ☐+ ☐2+ ☐3+

y ☒+ ☒2+ ☐3+

z ☐+ ☐2+ ☐3+

hide H<sub>2</sub>O/NH<sub>3</sub> ☐

zoom 112-122 ☐

GO

ADVSVDQSKLPGVKEVCR, MH+ 2097.1651, m/z 699.7265  
L OS G32 P160811 220811-s1.04147.04147.3.dta

scan 4147; 6.1e+000

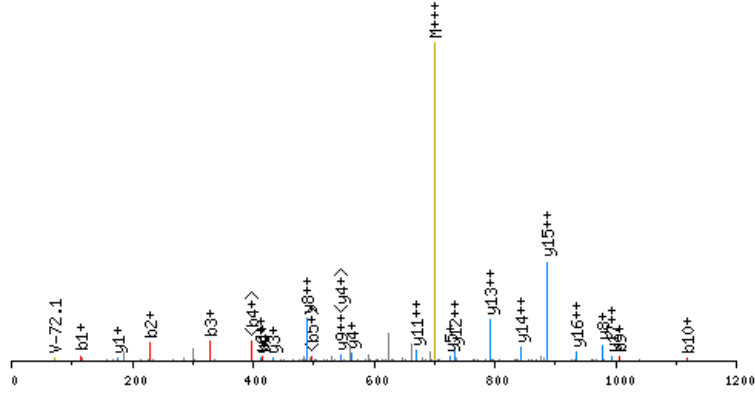

click image to zoom in; click top corners to zoom out [\[precursor±\]](#)

scan 4143; 699.7 m/z; 3.5e+001

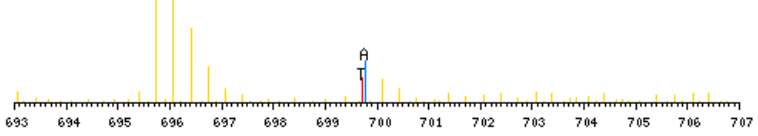

zoomed in precursor plot; T=theoretical m/z, A=acquired m/z

| b <sup>+</sup> | #  | AA | #  | y <sup>+</sup> | y <sup>2+</sup> |
|----------------|----|----|----|----------------|-----------------|
| 114.0555       | 1  | A  | 18 |                |                 |
| 229.0825       | 2  | D  | 17 | 1984.1174      | 992.5626        |
| 328.1509       | 3  | V  | 16 | 1869.0904      | 935.0491        |
| 415.1829       | 4  | S  | 15 | 1770.0220      | 885.5149        |
| 514.2513       | 5  | V  | 14 | 1682.9900      | 841.9989        |
| 629.2783       | 6  | D  | 13 | 1583.9216      | 792.4647        |
| 757.3368       | 7  | Q  | 12 | 1468.8946      | 734.9512        |
| 844.3689       | 8  | S  | 11 | 1340.8360      | 670.9219        |
| 1006.5270      | 9  | K  | 10 | 1253.8040      | 627.4059        |
| 1119.6110      | 10 | L  | 9  | 1091.6459      | 546.3269        |
| 1216.6638      | 11 | P  | 8  | 978.5618       | 489.7848        |
| 1273.6853      | 12 | G  | 7  | 881.5091       | 441.2585        |
| 1372.7537      | 13 | V  | 6  | 824.4876       | 412.7477        |
| 1534.9118      | 14 | K  | 5  | 725.4192       | 363.2135        |
| 1663.9544      | 15 | E  | 4  | 563.2611       | 282.1345        |
| 1763.0228      | 16 | V  | 3  | 434.2185       | 217.6132        |
| 1923.0534      | 17 | C  | 2  | 335.1501       | 168.0790        |
|                | 18 | R  | 1  | 175.1195       | 88.0637         |

N-term:+43.02 K(9):+162.16  
K(14):+162.16 C(17):+160.03



X-range:

0 - 0

MassTol: Y-zoom:

0. 1.

MassType:

☐AVG ☒MONO

Axis:

☒1 ☐2

Label:

☒I ☐M ☐-

Ions:

a ☐+ ☐2+ ☐3+

b ☒+ ☐2+ ☐3+

c ☐+ ☐2+ ☐3+

x ☐+ ☐2+ ☐3+

y ☒+ ☒2+ ☐3+

z ☐+ ☐2+ ☐3+

hide H<sub>2</sub>O/NH<sub>3</sub> ☐

zoom 112-122 ☐

GO

AEEQPQVELFVKAGSDGAKIGNCPFSQR, MH+ 3172.6374, m/z 793.9148  
L OS G32 P160811 220811-s1.06174.06174.4.dta

scan 6174; 5.6e+000

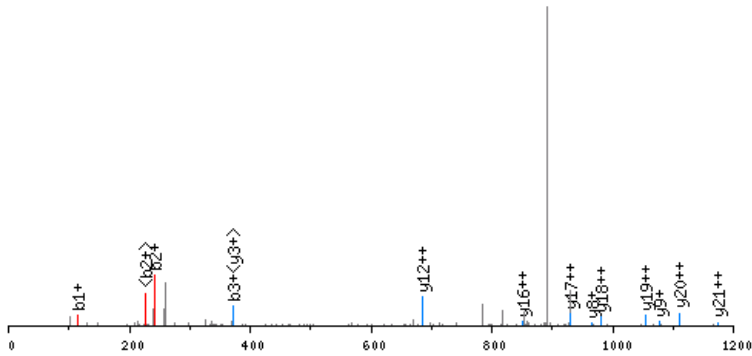

click image to zoom in; click top corners to zoom out

[precursor±]

scan 6173; 793.9 m/z; 1.5e+001

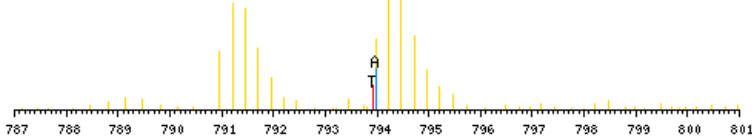

zoomed in precursor plot; T=theoretical m/z, A=acquired m/z

| b <sup>+</sup> | #  | AA | #  | y <sup>+</sup> | y <sup>2+</sup> |
|----------------|----|----|----|----------------|-----------------|
| 114.0555       | 1  | A  | 28 |                |                 |
| 243.0981       | 2  | E  | 27 | 3059.5897      | 1530.2987       |
| 372.1407       | 3  | E  | 26 | 2930.5471      | 1465.7775       |
| 500.1993       | 4  | Q  | 25 | 2801.5045      | 1401.2562       |
| 597.2520       | 5  | P  | 24 | 2673.4459      | 1337.2269       |
| 725.3106       | 6  | Q  | 23 | 2576.3931      | 1288.7005       |
| 824.3790       | 7  | V  | 22 | 2448.3346      | 1224.6712       |
| 953.4216       | 8  | E  | 21 | 2349.2662      | 1175.1370       |
| 1066.5057      | 9  | L  | 20 | 2220.2236      | 1110.6157       |
| 1213.5741      | 10 | F  | 19 | 2107.1395      | 1054.0737       |
| 1312.6425      | 11 | V  | 18 | 1960.0711      | 980.5395        |
| 1474.8006      | 12 | K  | 17 | 1861.0027      | 931.0052        |
| 1545.8377      | 13 | A  | 16 | 1698.8446      | 849.9262        |
| 1602.8592      | 14 | G  | 15 | 1627.8075      | 814.4076        |
| 1689.8912      | 15 | S  | 14 | 1570.7860      | 785.8969        |
| 1804.9182      | 16 | D  | 13 | 1483.7540      | 742.3809        |
| 1861.9396      | 17 | G  | 12 | 1368.7270      | 684.8674        |
| 1932.9767      | 18 | A  | 11 | 1311.7056      | 656.3567        |
| 2095.1348      | 19 | K  | 10 | 1240.6684      | 620.8381        |
| 2208.2189      | 20 | I  | 9  | 1078.5103      | 539.7591        |
| 2265.2404      | 21 | G  | 8  | 965.4263       | 483.2171        |
| 2379.2833      | 22 | N  | 7  | 908.4048       | 454.7063        |
| 2539.3139      | 23 | C  | 6  | 794.3619       | 397.6849        |
| 2636.3667      | 24 | P  | 5  | 634.3313       | 317.6696        |
| 2783.4351      | 25 | F  | 4  | 537.2785       | 269.1432        |
| 2870.4671      | 26 | S  | 3  | 390.2101       | 195.6090        |
| 2998.5257      | 27 | Q  | 2  | 303.1781       | 152.0930        |
|                | 28 | R  | 1  | 175.1195       | 88.0637         |

N-term:+43.02 K(12):+162.16  
K(19):+162.16 C(23):+160.03

X-range:

0 - 0

MassTol: Y-zoom:

0. 1.

MassType:

☐ AVG ☒ MONO

Axis:

☒ 1 ☐ 2

Label:

☒ I ☐ M ☐ -

Ions:

a ☐ + ☐ 2+ ☐ 3+

b ☒ + ☐ 2+ ☐ 3+

c ☐ + ☐ 2+ ☐ 3+

x ☐ + ☐ 2+ ☐ 3+

y ☒ + ☒ 2+ ☐ 3+

z ☐ + ☐ 2+ ☐ 3+

hide H<sub>2</sub>O/NH<sub>3</sub> ☐

zoom 112-122 ☐

GO

AEFPSKVSTR, MH+ 1197.6692, m/z 599.3382  
L OS G31 P160811 220811-s1.03872.03872.2.dta

scan 3872; 1.4e+001

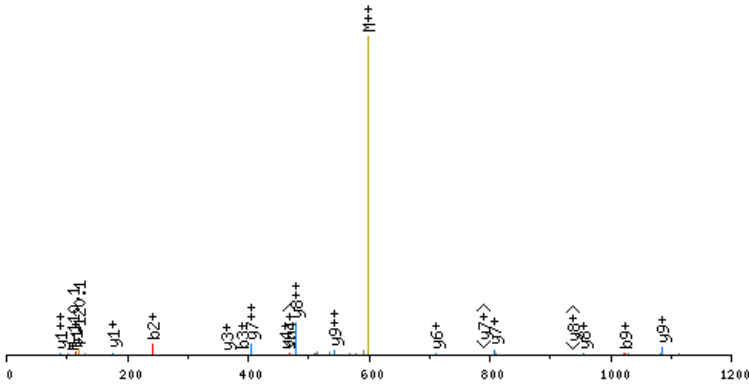

click image to zoom in; click top corners to zoom out

[precursor±]

scan 3869; 599.3 m/z; 1.6e+001

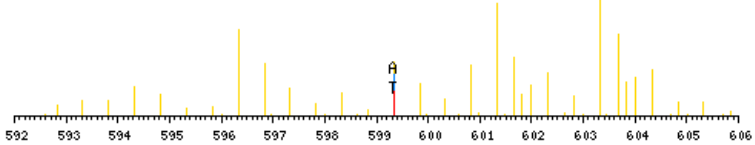

zoomed in precursor plot; T=theoretical m/z, A=acquired m/z

| b <sup>+</sup> | #  | AA | #  | y <sup>+</sup> | y <sup>2+</sup> |
|----------------|----|----|----|----------------|-----------------|
| 114.0555       | 1  | A  | 10 |                |                 |
| 243.0981       | 2  | E  | 9  | 1084.6215      | 542.8147        |
| 390.1665       | 3  | F  | 8  | 955.5789       | 478.2934        |
| 487.2193       | 4  | P  | 7  | 808.5105       | 404.7592        |
| 574.2513       | 5  | S  | 6  | 711.4578       | 356.2328        |
| 736.4094       | 6  | K  | 5  | 624.4257       | 312.7168        |
| 835.4778       | 7  | V  | 4  | 462.2676       | 231.6377        |
| 922.5099       | 8  | S  | 3  | 363.1992       | 182.1035        |
| 1023.5575      | 9  | T  | 2  | 276.1672       | 138.5875        |
|                | 10 | R  | 1  | 175.1195       | 88.0637         |

N-term:+43.02 K(6):+162.16

X-range:

0 - 0

MassTol: Y-zoom:

0. 1.

MassType:

☐ AVG ☒ MONO

Axis:

☒ 1 ☐ 2

Label:

☒ I ☐ M ☐ -

Ions:

a ☐ + ☐ 2+ ☐ 3+

b ☒ + ☐ 2+ ☐ 3+

c ☐ + ☐ 2+ ☐ 3+

x ☐ + ☐ 2+ ☐ 3+

y ☒ + ☒ 2+ ☐ 3+

z ☐ + ☐ 2+ ☐ 3+

hide H<sub>2</sub>O/NH<sub>3</sub> ☐

zoom 112-122 ☐

GO

AEKTQKSVKIAPGAVVCVESEIR, MH+ 2643.5604, m/z 661.6456  
L OS G34 P160811 220811-s1.06333.06333.4.dta

scan 6333; 3.0e+000

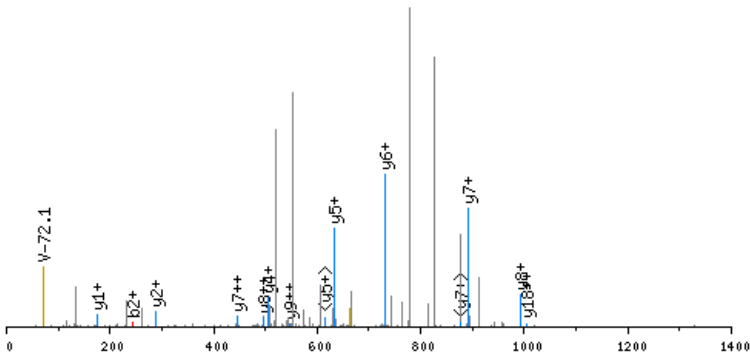

click image to zoom in; click top corners to zoom out [\[precursor±\]](#)

scan 6330; 661.6 m/z; 1.4e+001

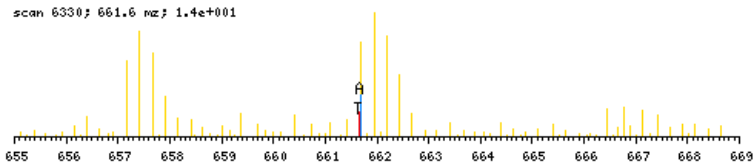

zoomed in precursor plot; T=theoretical m/z, A=acquired m/z

| b <sup>+</sup> | #  | AA | #  | y <sup>+</sup> | y <sup>2+</sup> |
|----------------|----|----|----|----------------|-----------------|
| 114.0555       | 1  | A  | 23 |                |                 |
| 243.0981       | 2  | E  | 22 | 2530.5127      | 1265.7603       |
| 405.2562       | 3  | K  | 21 | 2401.4701      | 1201.2390       |
| 506.3039       | 4  | T  | 20 | 2239.3120      | 1120.1599       |
| 634.3625       | 5  | Q  | 19 | 2138.2644      | 1069.6361       |
| 796.5206       | 6  | K  | 18 | 2010.2058      | 1005.6068       |
| 883.5526       | 7  | S  | 17 | 1848.0477      | 924.5278        |
| 982.6210       | 8  | V  | 16 | 1761.0157      | 881.0117        |
| 1144.7791      | 9  | K  | 15 | 1661.9472      | 831.4775        |
| 1257.8632      | 10 | I  | 14 | 1499.7891      | 750.3985        |
| 1328.9003      | 11 | A  | 13 | 1386.7051      | 693.8565        |
| 1425.9530      | 12 | P  | 12 | 1315.6680      | 658.3379        |
| 1482.9745      | 13 | G  | 11 | 1218.6152      | 609.8115        |
| 1554.0116      | 14 | A  | 10 | 1161.5937      | 581.3008        |
| 1653.0800      | 15 | V  | 9  | 1090.5566      | 545.7822        |
| 1752.1485      | 16 | V  | 8  | 991.4882       | 496.2480        |
| 1912.1791      | 17 | C  | 7  | 892.4198       | 446.7138        |
| 2011.2475      | 18 | V  | 6  | 732.3892       | 366.6985        |
| 2140.2901      | 19 | E  | 5  | 633.3208       | 317.1643        |
| 2227.3221      | 20 | S  | 4  | 504.2782       | 252.6430        |
| 2356.3647      | 21 | E  | 3  | 417.2462       | 209.1270        |
| 2469.4487      | 22 | I  | 2  | 288.2036       | 144.6057        |
|                | 23 | R  | 1  | 175.1195       | 88.0637         |

N-term:+43.02 K(3):+162.16  
K(6):+162.16 K(9):+162.16  
C(17):+160.03

X-range:

0 - 0

MassTol: Y-zoom:

0. 1.

MassType:

☐ AVG ☒ MONO

Axis:

☒ 1 ☐ 2

Label:

☒ I ☐ M ☐ -

Ions:

a ☐ + ☐ 2+ ☐ 3+

b ☒ + ☐ 2+ ☐ 3+

c ☐ + ☐ 2+ ☐ 3+

x ☐ + ☐ 2+ ☐ 3+

y ☒ + ☒ 2+ ☐ 3+

z ☐ + ☐ 2+ ☐ 3+

hide H<sub>2</sub>O/NH<sub>3</sub> ☐

zoom 112-122 ☐

GO

AELDIGQHCQVQHCR, MH+ 1892.8495, m/z 631.6213  
L OS G34 P160811 220811-s1.04056.04056.3.dta

scan 4056; 1.3e+000

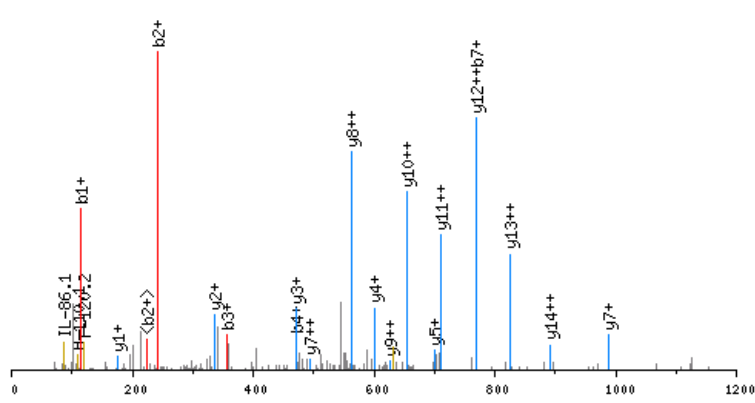

click image to zoom in; click top corners to zoom out [\[precursor±\]](#)

scan 4055; 631.6 m/z; 4.8e+001

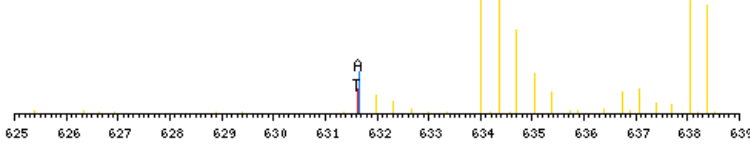

zoomed in precursor plot; T=theoretical m/z, A=acquired m/z

| b <sup>+</sup> | #  | AA | #  | y <sup>+</sup> | y <sup>2+</sup> |
|----------------|----|----|----|----------------|-----------------|
| 114.0555       | 1  | A  | 15 |                |                 |
| 243.0981       | 2  | E  | 14 | 1779.8018      | 890.4048        |
| 356.1822       | 3  | L  | 13 | 1650.7592      | 825.8835        |
| 471.2091       | 4  | D  | 12 | 1537.6751      | 769.3415        |
| 584.2932       | 5  | I  | 11 | 1422.6482      | 711.8280        |
| 641.3146       | 6  | G  | 10 | 1309.5641      | 655.2860        |
| 769.3732       | 7  | Q  | 9  | 1252.5427      | 626.7752        |
| 906.4321       | 8  | H  | 8  | 1124.4841      | 562.7460        |
| 1066.4627      | 9  | C  | 7  | 987.4252       | 494.2165        |
| 1194.5213      | 10 | Q  | 6  | 827.3946       | 414.2012        |
| 1293.5897      | 11 | V  | 5  | 699.3360       | 350.1719        |
| 1421.6483      | 12 | Q  | 4  | 600.2676       | 300.6377        |
| 1558.7072      | 13 | H  | 3  | 472.2090       | 236.6084        |
| 1718.7378      | 14 | C  | 2  | 335.1501       | 168.0790        |
|                | 15 | R  | 1  | 175.1195       | 88.0637         |

N-term:+43.02 C(9):+160.03  
C(14):+160.03

X-range:

0 - 0

MassTol: Y-zoom:

0. 1.

MassType:

☐ AVG ☒ MONO

Axis:

☒ 1 ☐ 2

Label:

☒ I ☐ M ☐ -

Ions:

a ☐ + ☐ 2+ ☐ 3+

b ☒ + ☐ 2+ ☐ 3+

c ☐ + ☐ 2+ ☐ 3+

x ☐ + ☐ 2+ ☐ 3+

y ☒ + ☒ 2+ ☐ 3+

z ☐ + ☐ 2+ ☐ 3+

hide H<sub>2</sub>O/NH<sub>3</sub> ☐

zoom 112-122 ☐

GO

AELEEVTLDGKPLQALR, MH+ 1958.1023, m/z 653.3723  
L OS G30 P160811 220811-s1.07515.07515.3.dta

scan 7515; 1.1e+001

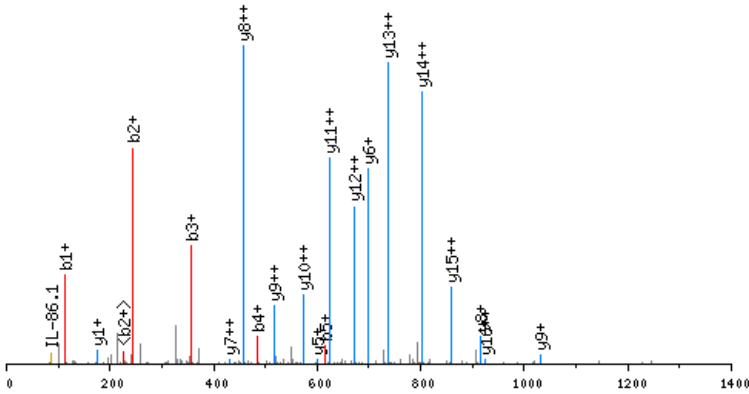

click image to zoom in; click top corners to zoom out

[precursor±]

scan 7514; 653.4 m/z; 6.5e+001

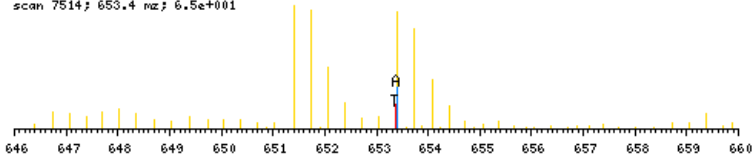

zoomed in precursor plot; T=theoretical m/z, A=acquired m/z

| b <sup>+</sup> | #  | AA | #  | y <sup>+</sup> | y <sup>2+</sup> |
|----------------|----|----|----|----------------|-----------------|
| 114.0555       | 1  | A  | 17 |                |                 |
| 243.0981       | 2  | E  | 16 | 1845.0546      | 923.0312        |
| 356.1822       | 3  | L  | 15 | 1716.0120      | 858.5099        |
| 485.2248       | 4  | E  | 14 | 1602.9279      | 801.9679        |
| 614.2674       | 5  | E  | 13 | 1473.8853      | 737.4466        |
| 713.3358       | 6  | V  | 12 | 1344.8427      | 672.9253        |
| 814.3834       | 7  | T  | 11 | 1245.7743      | 623.3911        |
| 927.4675       | 8  | L  | 10 | 1144.7267      | 572.8672        |
| 1042.4945      | 9  | D  | 9  | 1031.6426      | 516.3252        |
| 1099.5159      | 10 | G  | 8  | 916.6156       | 458.8117        |
| 1261.6740      | 11 | K  | 7  | 859.5942       | 430.3010        |
| 1358.7268      | 12 | P  | 6  | 697.4361       | 349.2220        |
| 1471.8108      | 13 | L  | 5  | 600.3833       | 300.6956        |
| 1599.8694      | 14 | Q  | 4  | 487.2993       | 244.1535        |
| 1670.9065      | 15 | A  | 3  | 359.2407       | 180.1243        |
| 1783.9906      | 16 | L  | 2  | 288.2036       | 144.6057        |
|                | 17 | R  | 1  | 175.1195       | 88.0637         |

N-term:+43.02 K(11):+162.16

X-range:

0 - 0

MassTol: Y-zoom:

0. 1.

MassType:

☐AVG ☒MONO

Axis:

☒1 ☐2

Label:

☒I ☐M ☐-

Ions:

a ☐+ ☐2+ ☐3+

b ☒+ ☐2+ ☐3+

c ☐+ ☐2+ ☐3+

x ☐+ ☐2+ ☐3+

y ☒+ ☒2+ ☐3+

z ☐+ ☐2+ ☐3+

hide H<sub>2</sub>O/NH<sub>3</sub> ☐

zoom 112-122 ☐

GO

AELQEVQITEEKPLLPQTTPETAKEAELAAR, MH+ 3487.8537, m/z 872.7189  
L OS G31 P160811 220811-s1.07747.07747.4.dta

scan 7747; 1.6e+000

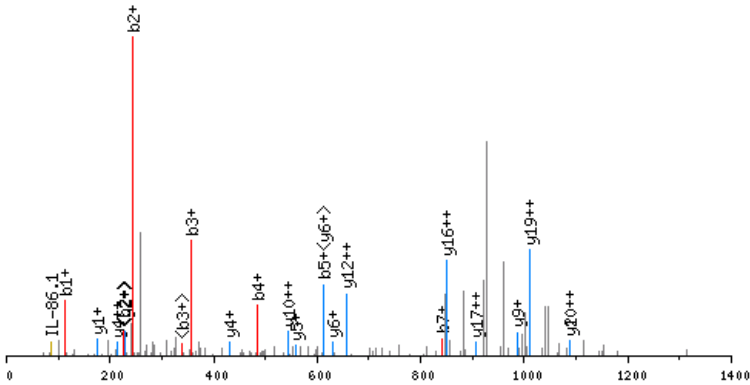

click image to zoom in; click top corners to zoom out

[precursor±]

scan 7744; 872.7 m/z; 1.9e+001

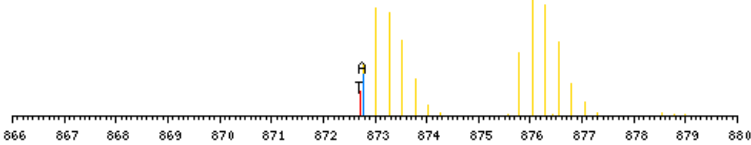

zoomed in precursor plot; T=theoretical m/z, A=acquired m/z

| b <sup>+</sup> | #  | AA | #  | y <sup>+</sup> | y <sup>2+</sup> |
|----------------|----|----|----|----------------|-----------------|
| 114.0555       | 1  | A  | 31 |                |                 |
| 243.0981       | 2  | E  | 30 | 3374.8060      | 1687.9069       |
| 356.1822       | 3  | L  | 29 | 3245.7634      | 1623.3856       |
| 484.2407       | 4  | Q  | 28 | 3132.6793      | 1566.8436       |
| 613.2833       | 5  | E  | 27 | 3004.6207      | 1502.8143       |
| 712.3518       | 6  | V  | 26 | 2875.5781      | 1438.2930       |
| 840.4103       | 7  | Q  | 25 | 2776.5097      | 1388.7588       |
| 953.4944       | 8  | I  | 24 | 2648.4511      | 1324.7295       |
| 1054.5421      | 9  | T  | 23 | 2535.3671      | 1268.1875       |
| 1183.5847      | 10 | E  | 22 | 2434.3194      | 1217.6636       |
| 1312.6273      | 11 | E  | 21 | 2305.2768      | 1153.1423       |
| 1468.7536      | 12 | K  | 20 | 2176.2342      | 1088.6210       |
| 1565.8063      | 13 | P  | 19 | 2020.1079      | 1010.5579       |
| 1678.8904      | 14 | L  | 18 | 1923.0552      | 962.0315        |
| 1791.9745      | 15 | L  | 17 | 1809.9711      | 905.4895        |
| 1889.0272      | 16 | P  | 16 | 1696.8870      | 848.9474        |
| 1946.0487      | 17 | G  | 15 | 1599.8343      | 800.4210        |
| 2074.1073      | 18 | Q  | 14 | 1542.8128      | 771.9103        |
| 2175.1549      | 19 | T  | 13 | 1414.7542      | 707.8810        |
| 2272.2077      | 20 | P  | 12 | 1313.7065      | 657.3572        |
| 2401.2503      | 21 | E  | 11 | 1216.6538      | 608.8308        |
| 2502.2980      | 22 | T  | 10 | 1087.6112      | 544.3095        |
| 2573.3351      | 23 | A  | 9  | 986.5635       | 493.7857        |
| 2729.4614      | 24 | K  | 8  | 915.5264       | 458.2671        |
| 2858.5040      | 25 | E  | 7  | 759.4001       | 380.2040        |
| 2929.5411      | 26 | A  | 6  | 630.3575       | 315.6827        |
| 3058.5837      | 27 | E  | 5  | 559.3204       | 280.1641        |
| 3171.6678      | 28 | L  | 4  | 430.2778       | 215.6428        |
| 3242.7049      | 29 | A  | 3  | 317.1937       | 159.1008        |
| 3313.7420      | 30 | A  | 2  | 246.1566       | 123.5822        |
|                | 31 | R  | 1  | 175.1195       | 88.0637         |

N-term:+43.02 K(12):+156.13  
K(24):+156.13

N-term:+43.02 K(15):+156.13

X-range:

0 - 0

MassTol: Y-zoom:

0. 1.

MassType:

☐ AVG ☒ MONO

Axis:

☒ 1 ☐ 2

Label:

☒ I ☐ M ☐ -

Ions:

a ☐ + ☐ 2+ ☐ 3+

b ☒ + ☐ 2+ ☐ 3+

c ☐ + ☐ 2+ ☐ 3+

x ☐ + ☐ 2+ ☐ 3+

y ☒ + ☒ 2+ ☐ 3+

z ☐ + ☐ 2+ ☐ 3+

hide H<sub>2</sub>O/NH<sub>3</sub> ☐

zoom 112-122 ☐

GO

AELVQGQSAPVGMKAEGFVDALHR, MH+ 2586.3563, m/z 647.3445  
L OS G32 P160811 220811-s1.06289.06289.4.dta

scan 6289; 2.6e+000

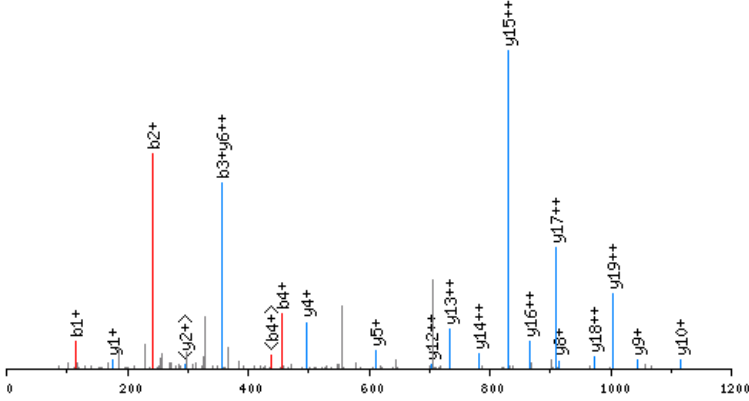

click image to zoom in; click top corners to zoom out [\[precursor±\]](#)

scan 6288; 647.3 m/z; 1.1e+001

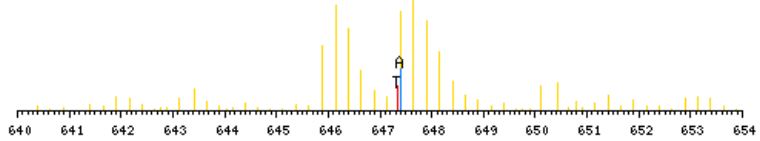

zoomed in precursor plot; T=theoretical m/z, A=acquired m/z

| b <sup>+</sup> | #  | AA | #  | y <sup>+</sup> | y <sup>2+</sup> |
|----------------|----|----|----|----------------|-----------------|
| 114.0555       | 1  | A  | 24 |                |                 |
| 243.0981       | 2  | E  | 23 | 2473.3086      | 1237.1582       |
| 356.1822       | 3  | L  | 22 | 2344.2660      | 1172.6369       |
| 455.2506       | 4  | V  | 21 | 2231.1819      | 1116.0949       |
| 583.3092       | 5  | Q  | 20 | 2132.1135      | 1066.5607       |
| 640.3306       | 6  | G  | 19 | 2004.0549      | 1002.5314       |
| 768.3892       | 7  | Q  | 18 | 1947.0335      | 974.0207        |
| 855.4212       | 8  | S  | 17 | 1818.9749      | 909.9914        |
| 926.4583       | 9  | A  | 16 | 1731.9429      | 866.4753        |
| 1023.5111      | 10 | P  | 15 | 1660.9058      | 830.9568        |
| 1122.5795      | 11 | V  | 14 | 1563.8530      | 782.4304        |
| 1179.6010      | 12 | G  | 13 | 1464.7846      | 732.8962        |
| 1310.6415      | 13 | M  | 12 | 1407.7631      | 704.3855        |
| 1472.7996      | 14 | K  | 11 | 1276.7226      | 638.8652        |
| 1543.8367      | 15 | A  | 10 | 1114.5645      | 557.7862        |
| 1672.8793      | 16 | E  | 9  | 1043.5274      | 522.2676        |
| 1729.9007      | 17 | G  | 8  | 914.4848       | 457.7463        |
| 1876.9692      | 18 | F  | 7  | 857.4634       | 429.2356        |
| 1976.0376      | 19 | V  | 6  | 710.3949       | 355.7014        |
| 2091.0645      | 20 | D  | 5  | 611.3265       | 306.1672        |
| 2162.1016      | 21 | A  | 4  | 496.2996       | 248.6537        |
| 2275.1857      | 22 | L  | 3  | 425.2625       | 213.1352        |
| 2412.2446      | 23 | H  | 2  | 312.1784       | 156.5931        |
|                | 24 | R  | 1  | 175.1195       | 88.0637         |

N-term:+43.02 K(14):+162.16

X-range:

0 - 0

MassTol: Y-zoom:

0. 1.

MassType:

☐ AVG ☒ MONO

Axis:

☒ 1 ☐ 2

Label:

☒ I ☐ M ☐ -

Ions:

a ☐ + ☐ 2+ ☐ 3+

b ☒ + ☐ 2+ ☐ 3+

c ☐ + ☐ 2+ ☐ 3+

x ☐ + ☐ 2+ ☐ 3+

y ☒ + ☒ 2+ ☐ 3+

z ☐ + ☐ 2+ ☐ 3+

hide H<sub>2</sub>O/NH<sub>3</sub> ☐

zoom 112-122 ☐

GO

AELYVKPGNKR, MH+ 1513.9015, m/z 505.3054  
L OS G33 P160811 220811-s1.02910.02910.3.dta

scan 2910; 7.4e+000

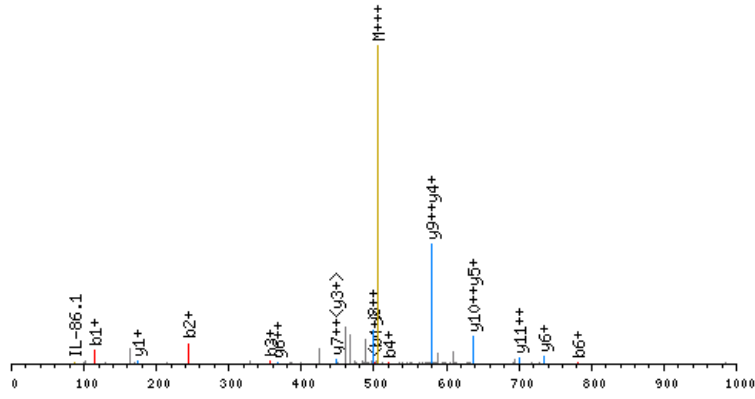

click image to zoom in; click top corners to zoom out [\[precursor±\]](#)

scan 2907; 505.3 m/z; 2.2e+001

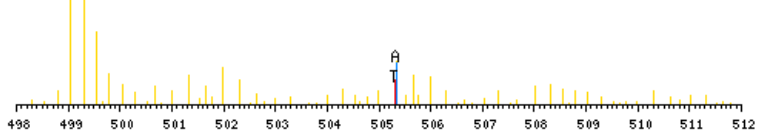

zoomed in precursor plot; T=theoretical m/z, A=acquired m/z

| b <sup>+</sup> | #  | AA | #  | y <sup>+</sup> | y <sup>2+</sup> |
|----------------|----|----|----|----------------|-----------------|
| 114.0555       | 1  | A  | 12 |                |                 |
| 243.0981       | 2  | E  | 11 | 1400.8538      | 700.9308        |
| 356.1822       | 3  | L  | 10 | 1271.8113      | 636.4095        |
| 519.2455       | 4  | Y  | 9  | 1158.7272      | 579.8675        |
| 618.3139       | 5  | V  | 8  | 995.6639       | 498.3358        |
| 780.4720       | 6  | K  | 7  | 896.5954       | 448.8016        |
| 877.5248       | 7  | P  | 6  | 734.4373       | 367.7226        |
| 934.5462       | 8  | G  | 5  | 637.3846       | 319.1962        |
| 1048.5892      | 9  | N  | 4  | 580.3631       | 290.6855        |
| 1210.7473      | 10 | K  | 3  | 466.3202       | 233.6640        |
| 1339.7899      | 11 | E  | 2  | 304.1621       | 152.5850        |
|                | 12 | R  | 1  | 175.1195       | 88.0637         |

N-term:+43.02 K(6):+162.16  
K(10):+162.16

X-range:

0 - 0

MassTol: Y-zoom:

0. 1.

MassType:

☐AVG ☒MONO

Axis:

☒1 ☐2

Label:

☒I ☐M ☐-

Ions:

a ☐+ ☐2+ ☐3+

b ☒+ ☐2+ ☐3+

c ☐+ ☐2+ ☐3+

x ☐+ ☐2+ ☐3+

y ☒+ ☒2+ ☐3+

z ☐+ ☐2+ ☐3+

hide H<sub>2</sub>O/NH<sub>3</sub> ☐

zoom 112-122 ☐

GO

AENGESSGPPRPSR, MH+ 1482.6937, m/z 494.9028  
L OS G31 P160811 220811-s1.02023.02023.3.dta

scan 2023; 2.6e+000

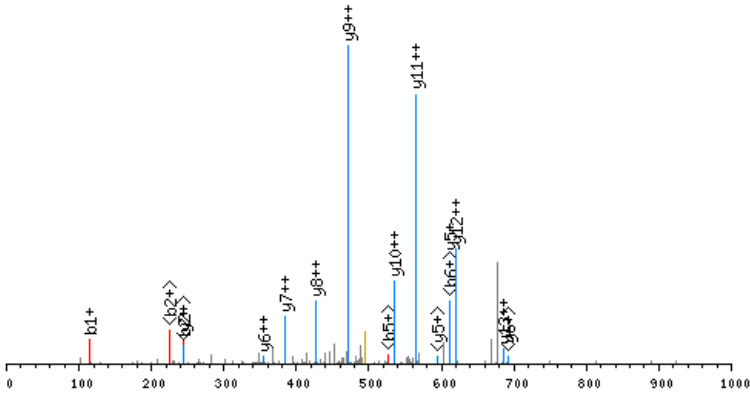

click image to zoom in; click top corners to zoom out

[precursor±]

scan 2021; 494.9 m/z; 1.7e+000

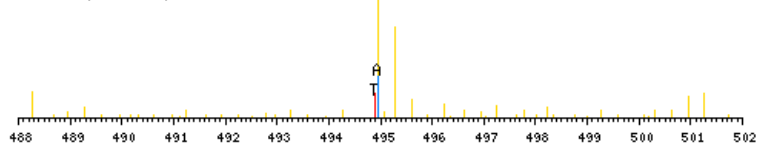

zoomed in precursor plot; T=theoretical m/z, A=acquired m/z

| b <sup>+</sup> | #  | AA | #  | y <sup>+</sup> | y <sup>2+</sup> |
|----------------|----|----|----|----------------|-----------------|
| 114.0555       | 1  | A  | 14 |                |                 |
| 243.0981       | 2  | E  | 13 | 1369.6460      | 685.3269        |
| 357.1410       | 3  | N  | 12 | 1240.6034      | 620.8056        |
| 414.1625       | 4  | G  | 11 | 1126.5605      | 563.7842        |
| 543.2051       | 5  | E  | 10 | 1069.5390      | 535.2734        |
| 630.2371       | 6  | S  | 9  | 940.4965       | 470.7521        |
| 717.2691       | 7  | S  | 8  | 853.4644       | 427.2361        |
| 774.2906       | 8  | G  | 7  | 766.4324       | 383.7201        |
| 871.3434       | 9  | P  | 6  | 709.4109       | 355.2094        |
| 968.3961       | 10 | P  | 5  | 612.3582       | 306.6830        |
| 1124.4973      | 11 | R  | 4  | 515.3054       | 258.1566        |
| 1221.5500      | 12 | P  | 3  | 359.2043       | 180.1061        |
| 1308.5820      | 13 | S  | 2  | 262.1515       | 131.5797        |
|                | 14 | R  | 1  | 175.1195       | 88.0637         |

N-term:+43.02





X-range:

0 - 0

MassTol: Y-zoom:

0. 1.

MassType:

☐ AVG ☒ MONO

Axis:

☒ 1 ☐ 2

Label:

☒ I ☐ M ☐ -

Ions:

a ☐ + ☐ 2+ ☐ 3+

b ☒ + ☐ 2+ ☐ 3+

c ☐ + ☐ 2+ ☐ 3+

x ☐ + ☐ 2+ ☐ 3+

y ☒ + ☒ 2+ ☐ 3+

z ☐ + ☐ 2+ ☐ 3+

hide H<sub>2</sub>O/NH<sub>3</sub> ☐

zoom 112-122 ☐

GO

AENPGLENHR, MH+ 1178.5554, m/z 589.7814  
L OS G31 P160811 220811-s1.02182.02182.2.dta

scan 2182; 1.7e+000

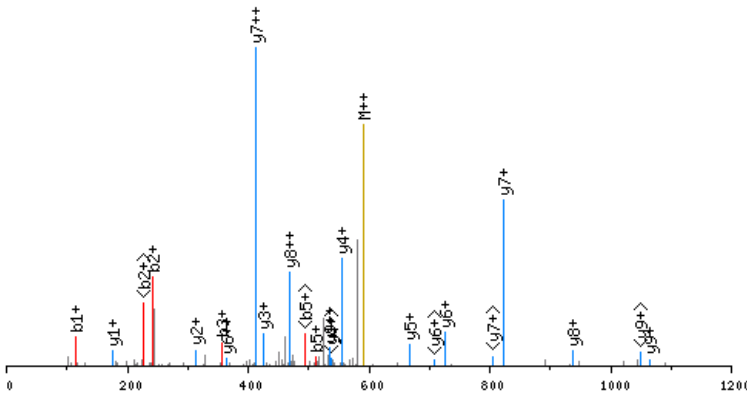

click image to zoom in; click top corners to zoom out

[precursor±]

scan 2179; 589.8 m/z; 7.7e+000

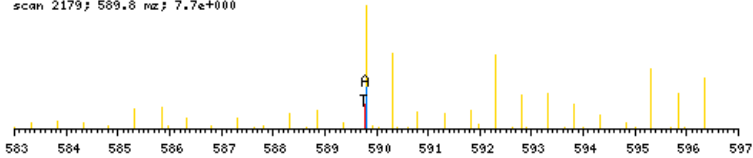

zoomed in precursor plot; T=theoretical m/z, A=acquired m/z

| b <sup>+</sup> | #  | AA | #  | y <sup>+</sup> | y <sup>2+</sup> |
|----------------|----|----|----|----------------|-----------------|
| 114.0555       | 1  | A  | 10 |                |                 |
| 243.0981       | 2  | E  | 9  | 1065.5077      | 533.2578        |
| 357.1410       | 3  | N  | 8  | 936.4652       | 468.7365        |
| 454.1938       | 4  | P  | 7  | 822.4222       | 411.7150        |
| 511.2153       | 5  | G  | 6  | 725.3695       | 363.1886        |
| 624.2993       | 6  | L  | 5  | 668.3480       | 334.6779        |
| 753.3419       | 7  | E  | 4  | 555.2639       | 278.1359        |
| 867.3848       | 8  | N  | 3  | 426.2213       | 213.6146        |
| 1004.4438      | 9  | H  | 2  | 312.1784       | 156.5931        |
|                | 10 | R  | 1  | 175.1195       | 88.0637         |

N-term:+43.02

X-range:

0 - 0

MassTol: Y-zoom:

0. 1.

MassType:

☐AVG ☒MONO

Axis:

☒1 ☐2

Label:

☒I ☐M ☐-

Ions:

a ☐+ ☐2+ ☐3+

b ☒+ ☐2+ ☐3+

c ☐+ ☐2+ ☐3+

x ☐+ ☐2+ ☐3+

y ☒+ ☒2+ ☐3+

z ☐+ ☐2+ ☐3+

hide H<sub>2</sub>O/NH<sub>3</sub> ☐

zoom 112-122 ☐

GO

AERPEDLNLPNAVITR, MH+ 1849.9772, m/z 617.3306  
L OS G30 P160811 220811-s1.05711.05711.3.dta

scan 5711; 3.9e+000

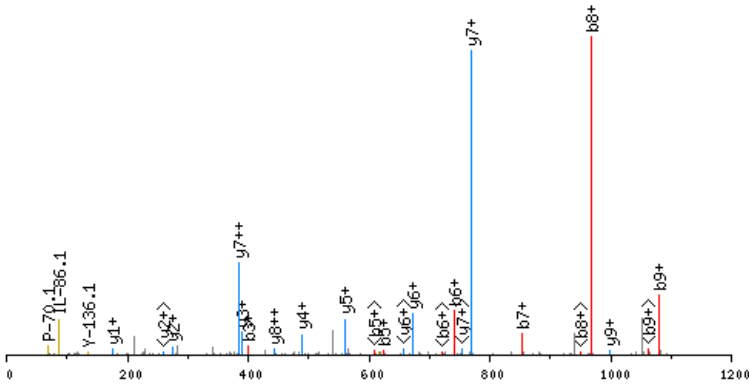

click image to zoom in; click top corners to zoom out

[precursor±]

scan 5709; 617.3 m/z; 1.1e+001

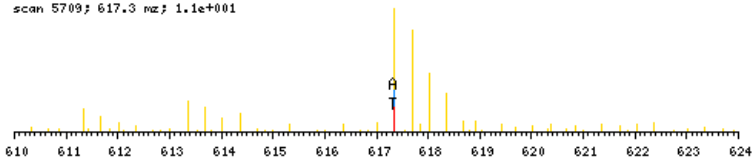

zoomed in precursor plot; T=theoretical m/z, A=acquired m/z

| b <sup>+</sup> | #  | AA | #  | y <sup>+</sup> | y <sup>2+</sup> |
|----------------|----|----|----|----------------|-----------------|
| 114.0555       | 1  | A  | 16 |                |                 |
| 243.0981       | 2  | E  | 15 | 1736.9295      | 868.9687        |
| 399.1992       | 3  | R  | 14 | 1607.8869      | 804.4474        |
| 496.2520       | 4  | P  | 13 | 1451.7858      | 726.3968        |
| 625.2946       | 5  | E  | 12 | 1354.7331      | 677.8704        |
| 740.3215       | 6  | D  | 11 | 1225.6905      | 613.3491        |
| 853.4056       | 7  | L  | 10 | 1110.6635      | 555.8357        |
| 967.4485       | 8  | N  | 9  | 997.5795       | 499.2936        |
| 1080.5326      | 9  | L  | 8  | 883.5365       | 442.2722        |
| 1177.5853      | 10 | P  | 7  | 770.4525       | 385.7301        |
| 1291.6283      | 11 | N  | 6  | 673.3997       | 337.2038        |
| 1362.6654      | 12 | A  | 5  | 559.3568       | 280.1823        |
| 1461.7338      | 13 | V  | 4  | 488.3197       | 244.6637        |
| 1574.8179      | 14 | I  | 3  | 389.2512       | 195.1295        |
| 1675.8655      | 15 | T  | 2  | 276.1672       | 138.5875        |
|                | 16 | R  | 1  | 175.1195       | 88.0637         |

N-term:+43.02

X-range:

0 - 0

MassTol: Y-zoom:

0. 1.

MassType:

☐ AVG ☒ MONO

Axis:

☒ 1 ☐ 2

Label:

☒ I ☐ M ☐ -

Ions:

a ☐ + ☐ 2+ ☐ 3+

b ☒ + ☐ 2+ ☐ 3+

c ☐ + ☐ 2+ ☐ 3+

x ☐ + ☐ 2+ ☐ 3+

y ☒ + ☒ 2+ ☐ 3+

z ☐ + ☐ 2+ ☐ 3+

hide H<sub>2</sub>O/NH<sub>3</sub> ☐

zoom 112-122 ☐

GO

AETLSGLGDASAAGAAVSSAASETGTRR, MH+ 2677.3029, m/z 893.1058  
L OS G30 P160811 220811-s1.07343.07343.3.dta

scan 7343; 3.3e+000

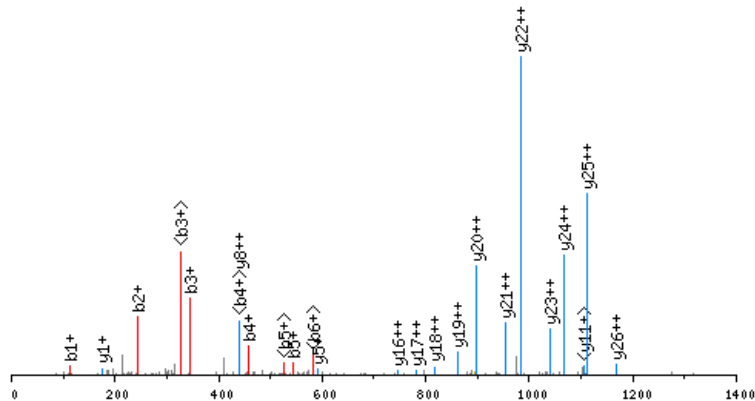

click image to zoom in; click top corners to zoom out

[precursor±]

scan 7339; 893.1 m/z; 8.8e+000

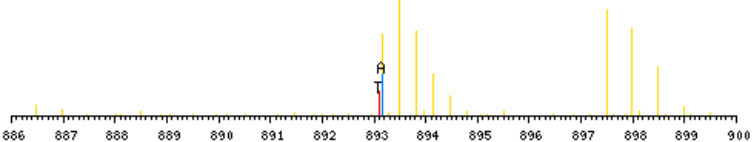

zoomed in precursor plot; T=theoretical m/z, A=acquired m/z

| b <sup>+</sup> | #  | AA | #  | y <sup>+</sup> | y <sup>2+</sup> |
|----------------|----|----|----|----------------|-----------------|
| 114.0555       | 1  | A  | 29 |                |                 |
| 243.0981       | 2  | E  | 28 | 2564.2552      | 1282.6315       |
| 344.1458       | 3  | T  | 27 | 2435.2126      | 1218.1102       |
| 457.2298       | 4  | L  | 26 | 2334.1650      | 1167.5864       |
| 544.2619       | 5  | S  | 25 | 2221.0809      | 1111.0444       |
| 601.2833       | 6  | G  | 24 | 2134.0489      | 1067.5283       |
| 714.3674       | 7  | L  | 23 | 2077.0274      | 1039.0176       |
| 771.3889       | 8  | G  | 22 | 1963.9433      | 982.4756        |
| 886.4158       | 9  | D  | 21 | 1906.9219      | 953.9648        |
| 957.4529       | 10 | A  | 20 | 1791.8949      | 896.4514        |
| 1044.4850      | 11 | S  | 19 | 1720.8578      | 860.9328        |
| 1115.5221      | 12 | A  | 18 | 1633.8258      | 817.4168        |
| 1186.5592      | 13 | A  | 17 | 1562.7887      | 781.8982        |
| 1243.5806      | 14 | G  | 16 | 1491.7516      | 746.3797        |
| 1314.6178      | 15 | A  | 15 | 1434.7301      | 717.8690        |
| 1385.6549      | 16 | A  | 14 | 1363.6930      | 682.3504        |
| 1456.6920      | 17 | A  | 13 | 1292.6559      | 646.8318        |
| 1555.7604      | 18 | V  | 12 | 1221.6188      | 611.3133        |
| 1642.7924      | 19 | S  | 11 | 1122.5503      | 561.7791        |
| 1729.8245      | 20 | S  | 10 | 1035.5183      | 518.2631        |
| 1800.8616      | 21 | A  | 9  | 948.4863       | 474.7471        |
| 1871.8987      | 22 | A  | 8  | 877.4492       | 439.2285        |
| 1958.9307      | 23 | S  | 7  | 806.4121       | 403.7099        |
| 2087.9733      | 24 | E  | 6  | 719.3800       | 360.1939        |
| 2189.0210      | 25 | T  | 5  | 590.3374       | 295.6726        |
| 2246.0424      | 26 | G  | 4  | 489.2898       | 245.1488        |
| 2347.0901      | 27 | T  | 3  | 432.2683       | 216.6381        |
| 2503.1912      | 28 | R  | 2  | 331.2206       | 166.1142        |
|                | 29 | R  | 1  | 175.1195       | 88.0637         |

N-term:+43.02

X-range:

0 - 0

MassTol: Y-zoom:

0. 1.

MassType:

☐ AVG ☒ MONO

Axis:

☒ 1 ☐ 2

Label:

☒ I ☐ M ☐ -

Ions:

a ☐ + ☐ 2+ ☐ 3+

b ☒ + ☐ 2+ ☐ 3+

c ☐ + ☐ 2+ ☐ 3+

x ☐ + ☐ 2+ ☐ 3+

y ☒ + ☒ 2+ ☐ 3+

z ☐ + ☐ 2+ ☐ 3+

hide H<sub>2</sub>O/NH<sub>3</sub> ☐

zoom 112-122 ☐

GO

AEVEETLKR, MH+ 1144.6214, m/z 572.8144  
L OS G31 P160811 220811-s1.04576.04576.2.dta

scan 4576; 3.1e+001

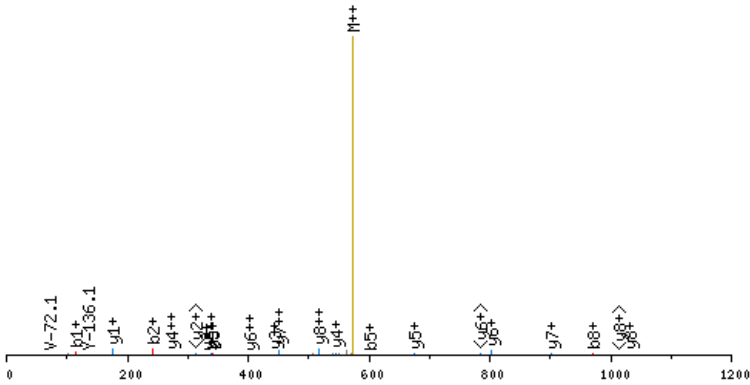

click image to zoom in; click top corners to zoom out [\[precursor±\]](#)

scan 4574; 572.8 m/z; 4.4e+001

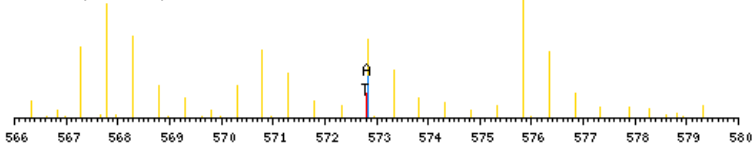

zoomed in precursor plot; T=theoretical m/z, A=acquired m/z

| b <sup>+</sup> | # | AA | # | y <sup>+</sup> | y <sup>2+</sup> |
|----------------|---|----|---|----------------|-----------------|
| 114.0555       | 1 | A  | 9 |                |                 |
| 243.0981       | 2 | E  | 8 | 1031.5737      | 516.2908        |
| 342.1665       | 3 | V  | 7 | 902.5311       | 451.7695        |
| 471.2091       | 4 | E  | 6 | 803.4627       | 402.2353        |
| 600.2517       | 5 | E  | 5 | 674.4201       | 337.7140        |
| 701.2994       | 6 | T  | 4 | 545.3775       | 273.1927        |
| 814.3834       | 7 | L  | 3 | 444.3299       | 222.6688        |
| 970.5097       | 8 | K  | 2 | 331.2458       | 166.1268        |
|                | 9 | R  | 1 | 175.1195       | 88.0637         |

N-term:+43.02 K(8):+156.13



X-range:

0 - 0

MassTol: Y-zoom:

0. 1.

MassType:

☐ AVG ☒ MONO

Axis:

☒ 1 ☐ 2

Label:

☒ I ☐ M ☐ -

Ions:

a ☐ + ☐ 2+ ☐ 3+

b ☒ + ☐ 2+ ☐ 3+

c ☐ + ☐ 2+ ☐ 3+

x ☐ + ☐ 2+ ☐ 3+

y ☒ + ☒ 2+ ☐ 3+

z ☐ + ☐ 2+ ☐ 3+

hide H<sub>2</sub>O/NH<sub>3</sub> ☐

zoom 112-122 ☐

GO

AFASEDNVYHSSNAVYR, MH+ 1971.8837, m/z 657.9661  
L OS G30 P160811 220811-s1.04615.04615.3.dta

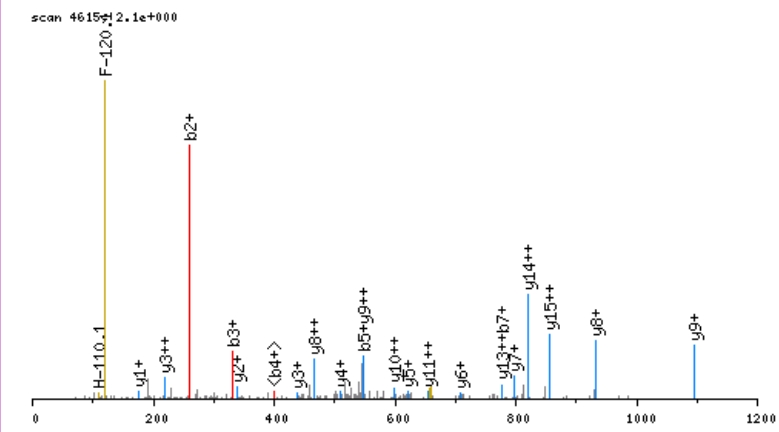

click image to zoom in; click top corners to zoom out [\[precursor±\]](#)

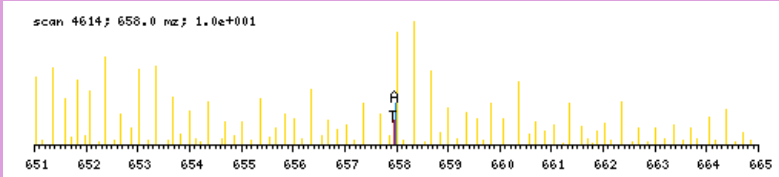

zoomed in precursor plot; T=theoretical m/z, A=acquired m/z

| b <sup>+</sup> | #  | AA | #  | y <sup>+</sup> | y <sup>2+</sup> |
|----------------|----|----|----|----------------|-----------------|
| 114.0555       | 1  | A  | 17 |                |                 |
| 261.1239       | 2  | F  | 16 | 1858.8360      | 929.9219        |
| 332.1610       | 3  | A  | 15 | 1711.7676      | 856.3877        |
| 419.1931       | 4  | S  | 14 | 1640.7305      | 820.8692        |
| 548.2357       | 5  | E  | 13 | 1553.6985      | 777.3531        |
| 663.2626       | 6  | D  | 12 | 1424.6559      | 712.8318        |
| 777.3055       | 7  | N  | 11 | 1309.6289      | 655.3184        |
| 876.3739       | 8  | V  | 10 | 1195.5860      | 598.2969        |
| 1039.4373      | 9  | Y  | 9  | 1096.5176      | 548.7627        |
| 1176.4962      | 10 | H  | 8  | 933.4543       | 467.2310        |
| 1263.5282      | 11 | S  | 7  | 796.3953       | 398.7016        |
| 1350.5602      | 12 | S  | 6  | 709.3633       | 355.1856        |
| 1464.6032      | 13 | N  | 5  | 622.3313       | 311.6696        |
| 1535.6403      | 14 | A  | 4  | 508.2884       | 254.6481        |
| 1634.7087      | 15 | V  | 3  | 437.2512       | 219.1295        |
| 1797.7720      | 16 | Y  | 2  | 338.1828       | 169.5953        |
|                | 17 | R  | 1  | 175.1195       | 88.0637         |

N-term:+43.02

X-range:

0 - 0

MassTol: Y-zoom:

0. 1.

MassType:

☐ AVG ☒ MONO

Axis:

☒ 1 ☐ 2

Label:

☒ I ☐ M ☐ -

Ions:

a ☐ + ☐ 2+ ☐ 3+

b ☒ + ☐ 2+ ☐ 3+

c ☐ + ☐ 2+ ☐ 3+

x ☐ + ☐ 2+ ☐ 3+

y ☒ + ☒ 2+ ☐ 3+

z ☐ + ☐ 2+ ☐ 3+

hide H<sub>2</sub>O/NH<sub>3</sub> ☐

zoom 112-122 ☐

GO

AFCAPPAYLTHQQKVLK, MH+ 2076.1277, m/z 692.7141  
L OS G33 P160811 220811-s1.05743.05743.3.dta

scan 5743; 4.0e+000

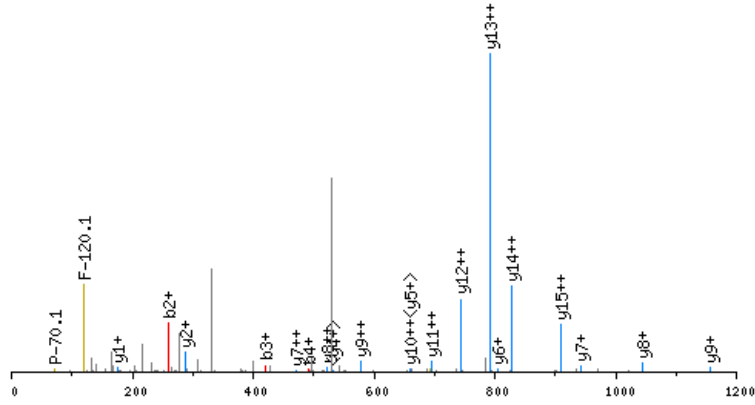

click image to zoom in; click top corners to zoom out [\[precursor±\]](#)

scan 5742; 692.7 m/z; 1.6e+001

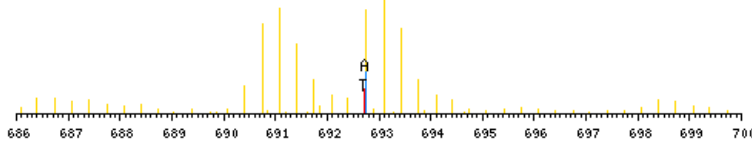

zoomed in precursor plot; T=theoretical m/z, A=acquired m/z

| b <sup>+</sup> | #  | AA | #  | y <sup>+</sup> | y <sup>2+</sup> |
|----------------|----|----|----|----------------|-----------------|
| 114.0555       | 1  | A  | 17 |                |                 |
| 261.1239       | 2  | F  | 16 | 1963.0800      | 982.0439        |
| 421.1545       | 3  | C  | 15 | 1816.0116      | 908.5097        |
| 492.1916       | 4  | A  | 14 | 1655.9810      | 828.4944        |
| 589.2444       | 5  | P  | 13 | 1584.9439      | 792.9758        |
| 686.2972       | 6  | P  | 12 | 1487.8911      | 744.4495        |
| 757.3343       | 7  | A  | 11 | 1390.8383      | 695.9231        |
| 920.3976       | 8  | Y  | 10 | 1319.8012      | 660.4045        |
| 1033.4817      | 9  | L  | 9  | 1156.7379      | 578.8729        |
| 1134.5294      | 10 | T  | 8  | 1043.6538      | 522.3308        |
| 1271.5883      | 11 | H  | 7  | 942.6061       | 471.8070        |
| 1399.6468      | 12 | Q  | 6  | 805.5472       | 403.2775        |
| 1527.7054      | 13 | Q  | 5  | 677.4887       | 339.2482        |
| 1689.8635      | 14 | K  | 4  | 549.4301       | 275.2190        |
| 1788.9319      | 15 | V  | 3  | 387.2720       | 194.1399        |
| 1902.0160      | 16 | L  | 2  | 288.2036       | 144.6057        |
|                | 17 | R  | 1  | 175.1195       | 88.0637         |

N-term:+43.02 C(3):+160.03  
K(14):+162.16



X-range:

0 - 0

MassTol: Y-zoom:

0. 1.

MassType:

☐AVG ☒MONO

Axis:

☒1 ☐2

Label:

☒I ☐M ☐-

Ions:

a ☐+ ☐2+ ☐3+

b ☒+ ☐2+ ☐3+

c ☐+ ☐2+ ☐3+

x ☐+ ☐2+ ☐3+

y ☒+ ☒2+ ☐3+

z ☐+ ☐2+ ☐3+

hide H<sub>2</sub>O/NH<sub>3</sub> ☐

zoom 112-122 ☐

GO

AFNKLTASSTPPALDR, MH+ 1764.9709, m/z 588.9951  
L OS G30 P160811 220811-s1.06005.06005.3.dta

scan 6005; 1.5e+000

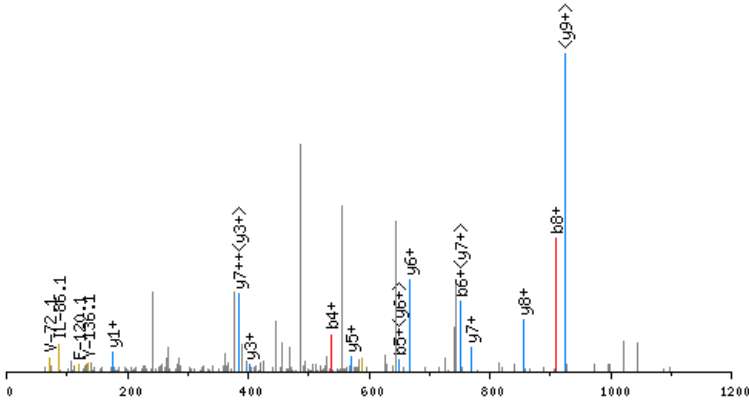

click image to zoom in; click top corners to zoom out

[precursor±]

scan 6004; 589.0 m/z; 1.1e+001

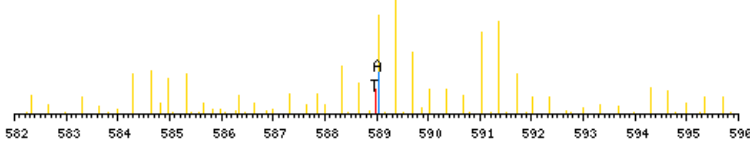

zoomed in precursor plot; T=theoretical m/z, A=acquired m/z

| b <sup>+</sup> | #  | AA | #  | y <sup>+</sup> | y <sup>2+</sup> |
|----------------|----|----|----|----------------|-----------------|
| 114.0555       | 1  | A  | 16 |                |                 |
| 261.1239       | 2  | F  | 15 | 1651.9232      | 826.4655        |
| 375.1669       | 3  | N  | 14 | 1504.8548      | 752.9313        |
| 537.3250       | 4  | K  | 13 | 1390.8118      | 695.9098        |
| 650.4090       | 5  | L  | 12 | 1228.6537      | 614.8308        |
| 751.4567       | 6  | T  | 11 | 1115.5697      | 558.2888        |
| 822.4938       | 7  | A  | 10 | 1014.5220      | 507.7649        |
| 909.5258       | 8  | S  | 9  | 943.4849       | 472.2464        |
| 996.5579       | 9  | S  | 8  | 856.4529       | 428.7303        |
| 1097.6055      | 10 | T  | 7  | 769.4208       | 385.2143        |
| 1194.6583      | 11 | P  | 6  | 668.3731       | 334.6905        |
| 1291.7111      | 12 | P  | 5  | 571.3204       | 286.1641        |
| 1362.7482      | 13 | A  | 4  | 474.2676       | 237.6377        |
| 1475.8323      | 14 | L  | 3  | 403.2305       | 202.1192        |
| 1590.8592      | 15 | D  | 2  | 290.1464       | 145.5771        |
|                | 16 | R  | 1  | 175.1195       | 88.0637         |

N-term:+43.02 K(4):+162.16

X-range:

0 - 0

MassTol: Y-zoom:

0. 1.

MassType:

☐AVG ☒MONO

Axis:

☒1 ☐2

Label:

☒I ☐M ☐-

Ions:

a ☐+ ☐2+ ☐3+

b ☒+ ☐2+ ☐3+

c ☐+ ☐2+ ☐3+

x ☐+ ☐2+ ☐3+

y ☒+ ☒2+ ☐3+

z ☐+ ☐2+ ☐3+

hide H<sub>2</sub>O/NH<sub>3</sub> ☐

zoom 112-122 ☐

GO

AGGEAGVTTLGQPHLSR, MH+ 1591.8193, m/z 531.2779  
L OS G31 P160811 220811-s1.05157.05157.3.dta

scan 5157; 2.9e+000

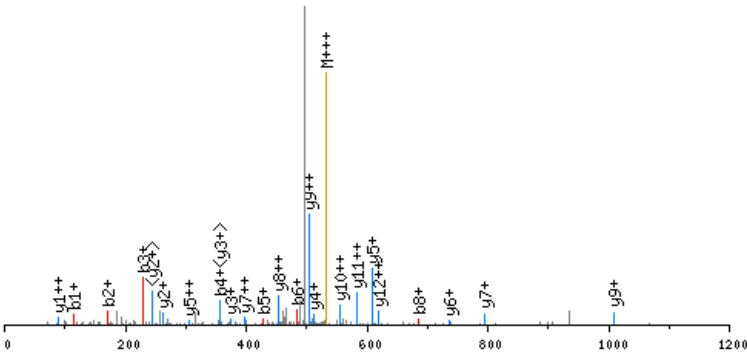

click image to zoom in; click top corners to zoom out

[precursor±]

scan 5154; 531.3 m/z; 1.2e+001

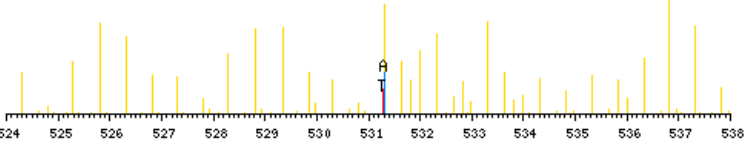

zoomed in precursor plot; T=theoretical m/z, A=acquired m/z

| b <sup>+</sup> | #  | AA | #  | y <sup>+</sup> | y <sup>2+</sup> |
|----------------|----|----|----|----------------|-----------------|
| 114.0555       | 1  | A  | 16 |                |                 |
| 171.0770       | 2  | G  | 15 | 1478.7716      | 739.8897        |
| 228.0984       | 3  | G  | 14 | 1421.7501      | 711.3790        |
| 357.1410       | 4  | E  | 13 | 1364.7286      | 682.8682        |
| 428.1781       | 5  | A  | 12 | 1235.6860      | 618.3469        |
| 485.1996       | 6  | G  | 11 | 1164.6489      | 582.8284        |
| 584.2680       | 7  | V  | 10 | 1107.6275      | 554.3176        |
| 685.3157       | 8  | T  | 9  | 1008.5591      | 504.7834        |
| 798.3998       | 9  | I  | 8  | 907.5114       | 454.2596        |
| 855.4212       | 10 | G  | 7  | 794.4273       | 397.7176        |
| 983.4798       | 11 | Q  | 6  | 737.4058       | 369.2068        |
| 1080.5326      | 12 | P  | 5  | 609.3473       | 305.1775        |
| 1217.5915      | 13 | H  | 4  | 512.2945       | 256.6512        |
| 1330.6755      | 14 | L  | 3  | 375.2356       | 188.1217        |
| 1417.7076      | 15 | S  | 2  | 262.1515       | 131.5797        |
|                | 16 | R  | 1  | 175.1195       | 88.0637         |

N-term:+43.02

X-range:

0 - 0

MassTol: Y-zoom:

0. 1.

MassType:

☐AVG ☒MONO

Axis:

☒1 ☐2

Label:

☒I ☐M ☐-

Ions:

a ☐+ ☐2+ ☐3+

b ☒+ ☐2+ ☐3+

c ☐+ ☐2+ ☐3+

x ☐+ ☐2+ ☐3+

y ☒+ ☒2+ ☐3+

z ☐+ ☐2+ ☐3+

hide H<sub>2</sub>O/NH<sub>3</sub> ☐

zoom 112-122 ☐

GO

AGGEGGVTLGQPHLSR, MH+ 1577.8036, m/z 789.4054  
L OS G31 P160811 220811-s1.04957.04957.2.dta

scan 4957; 2.0e+000

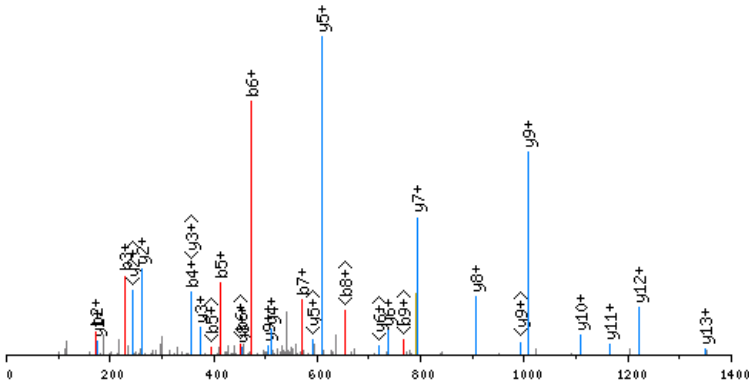

click image to zoom in; click top corners to zoom out

[precursor±]

scan 4954; 789.4 m/z; 1.4e+001

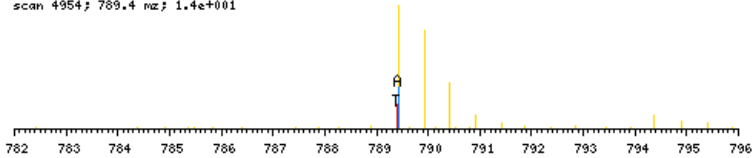

zoomed in precursor plot; T=theoretical m/z, A=acquired m/z

| b <sup>+</sup> | #  | AA | #  | y <sup>+</sup> | y <sup>2+</sup> |
|----------------|----|----|----|----------------|-----------------|
| 114.0555       | 1  | A  | 16 |                |                 |
| 171.0770       | 2  | G  | 15 | 1464.7559      | 732.8819        |
| 228.0984       | 3  | G  | 14 | 1407.7345      | 704.3711        |
| 357.1410       | 4  | E  | 13 | 1350.7130      | 675.8604        |
| 414.1625       | 5  | G  | 12 | 1221.6704      | 611.3391        |
| 471.1840       | 6  | G  | 11 | 1164.6489      | 582.8284        |
| 570.2524       | 7  | V  | 10 | 1107.6275      | 554.3176        |
| 671.3001       | 8  | T  | 9  | 1008.5591      | 504.7834        |
| 784.3841       | 9  | L  | 8  | 907.5114       | 454.2596        |
| 841.4056       | 10 | G  | 7  | 794.4273       | 397.7176        |
| 969.4642       | 11 | Q  | 6  | 737.4058       | 369.2068        |
| 1066.5169      | 12 | P  | 5  | 609.3473       | 305.1775        |
| 1203.5758      | 13 | H  | 4  | 512.2945       | 256.6512        |
| 1316.6599      | 14 | L  | 3  | 375.2356       | 188.1217        |
| 1403.6919      | 15 | S  | 2  | 262.1515       | 131.5797        |
|                | 16 | R  | 1  | 175.1195       | 88.0637         |

N-term:+43.02

X-range:

0 - 0

MassTol: Y-zoom:

0. 1.

MassType:

☐ AVG ☒ MONO

Axis:

☒ 1 ☐ 2

Label:

☒ I ☐ M ☐ -

Ions:

a ☐ + ☐ 2+ ☐ 3+

b ☒ + ☐ 2+ ☐ 3+

c ☐ + ☐ 2+ ☐ 3+

x ☐ + ☐ 2+ ☐ 3+

y ☒ + ☒ 2+ ☐ 3+

z ☐ + ☐ 2+ ☐ 3+

hide H<sub>2</sub>O/NH<sub>3</sub> ☐

zoom 112-122 ☐

GO

AGGPPKALPSTGPQSLR, MH+ 1709.9763, m/z 570.6636  
L OS G30 P160811 220811-s1.03816.03816.3.dta

scan 3816; 8.3e-001

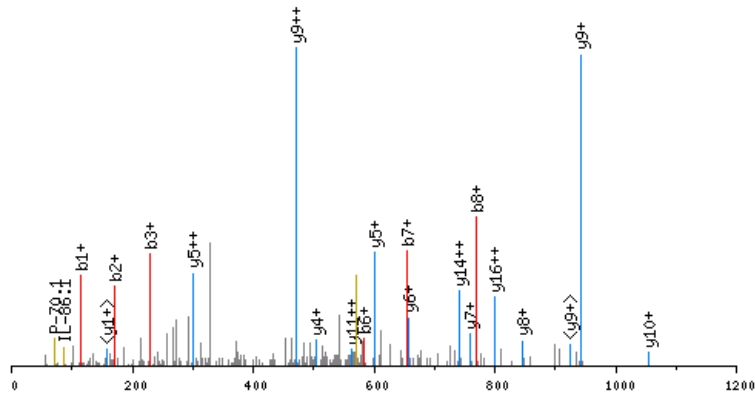

click image to zoom in; click top corners to zoom out

[precursor±]

scan 3814; 570.7 m/z; 9.0e+000

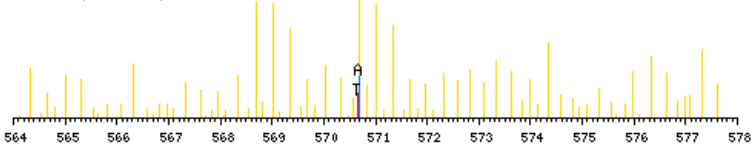

zoomed in precursor plot; T=theoretical m/z, A=acquired m/z

| b <sup>+</sup> | #  | AA | #  | y <sup>+</sup> | y <sup>2+</sup> |
|----------------|----|----|----|----------------|-----------------|
| 114.0555       | 1  | A  | 17 |                |                 |
| 171.0770       | 2  | G  | 16 | 1596.9286      | 798.9682        |
| 228.0984       | 3  | G  | 15 | 1539.9071      | 770.4575        |
| 325.1512       | 4  | P  | 14 | 1482.8857      | 741.9467        |
| 422.2040       | 5  | P  | 13 | 1385.8329      | 693.4204        |
| 584.3621       | 6  | K  | 12 | 1288.7801      | 644.8940        |
| 655.3992       | 7  | A  | 11 | 1126.6220      | 563.8149        |
| 768.4832       | 8  | L  | 10 | 1055.5849      | 528.2964        |
| 865.5360       | 9  | P  | 9  | 942.5009       | 471.7543        |
| 952.5680       | 10 | S  | 8  | 845.4481       | 423.2280        |
| 1053.6157      | 11 | T  | 7  | 758.4161       | 379.7120        |
| 1110.6372      | 12 | G  | 6  | 657.3684       | 329.1881        |
| 1207.6899      | 13 | P  | 5  | 600.3469       | 300.6774        |
| 1335.7485      | 14 | Q  | 4  | 503.2942       | 252.1510        |
| 1422.7806      | 15 | S  | 3  | 375.2356       | 188.1217        |
| 1535.8646      | 16 | L  | 2  | 288.2036       | 144.6057        |
|                | 17 | R  | 1  | 175.1195       | 88.0637         |

N-term:+43.02 K(6):+162.16

X-range:

0 - 0

MassTol: Y-zoom:

0. 1.

MassType:

☐ AVG ☒ MONO

Axis:

☒ 1 ☐ 2

Label:

☒ I ☐ M ☐ -

Ions:

a ☐ + ☐ 2+ ☐ 3+

b ☒ + ☐ 2+ ☐ 3+

c ☐ + ☐ 2+ ☐ 3+

x ☐ + ☐ 2+ ☐ 3+

y ☒ + ☒ 2+ ☐ 3+

z ☐ + ☐ 2+ ☐ 3+

hide H<sub>2</sub>O/NH<sub>3</sub> ☐

zoom 112-122 ☐

GO

AGKPVLYHYFDGR, MH+ 1429.7593, m/z 477.2579  
L OS G34 P160811 220811-s1.06009.06009.3.dta

scan 6009; 1.8e+001

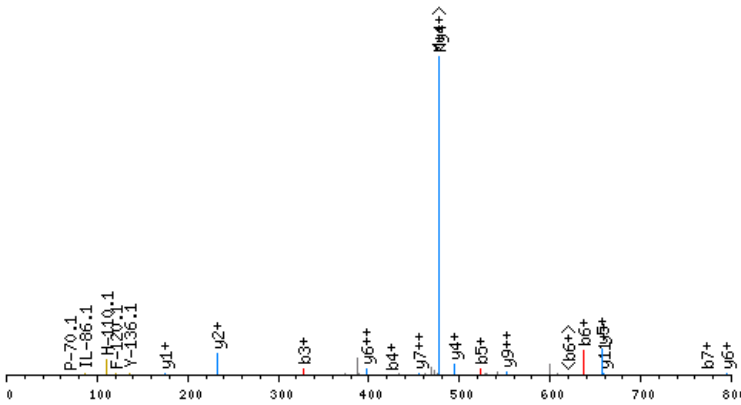

click image to zoom in; click top corners to zoom out

[precursor±]

scan 6005; 477.3 m/z; 3.7e+001

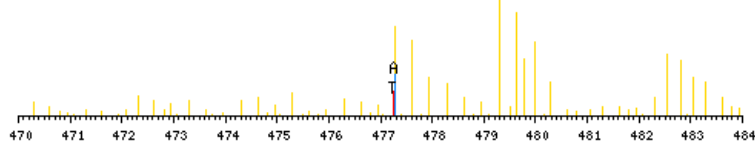

zoomed in precursor plot; T=theoretical m/z, A=acquired m/z

| b <sup>+</sup> | #  | AA | #  | y <sup>+</sup> | y <sup>2+</sup> |
|----------------|----|----|----|----------------|-----------------|
| 114.0555       | 1  | A  | 12 |                |                 |
| 171.0770       | 2  | G  | 11 | 1316.7116      | 658.8597        |
| 327.2033       | 3  | K  | 10 | 1259.6901      | 630.3490        |
| 424.2560       | 4  | P  | 9  | 1103.5638      | 552.2858        |
| 523.3245       | 5  | V  | 8  | 1006.5110      | 503.7594        |
| 636.4085       | 6  | L  | 7  | 907.4426       | 454.2252        |
| 773.4674       | 7  | H  | 6  | 794.3586       | 397.6832        |
| 936.5308       | 8  | Y  | 5  | 657.2997       | 329.1537        |
| 1083.5992      | 9  | F  | 4  | 494.2363       | 247.6221        |
| 1198.6261      | 10 | D  | 3  | 347.1679       | 174.0879        |
| 1255.6476      | 11 | G  | 2  | 232.1410       | 116.5744        |
|                | 12 | R  | 1  | 175.1195       | 88.0637         |

N-term:+43.02 K(3):+156.13

X-range:

0 - 0

MassTol: Y-zoom:

0. 1.

MassType:

☐AVG ☒MONO

Axis:

☒1 ☐2

Label:

☒I ☐M ☐-

Ions:

a ☐+ ☐2+ ☐3+

b ☒+ ☐2+ ☐3+

c ☐+ ☐2+ ☐3+

x ☐+ ☐2+ ☐3+

y ☒+ ☒2+ ☐3+

z ☐+ ☐2+ ☐3+

hide H<sub>2</sub>O/NH<sub>3</sub> ☐

zoom 112-122 ☐

GO

AGKPVLHYFNAR, MH+ 1442.7909, m/z 481.6018  
L OS G33 P160811 220811-s1.04249.04249.3.dta

scan 4249; 1.4e+001

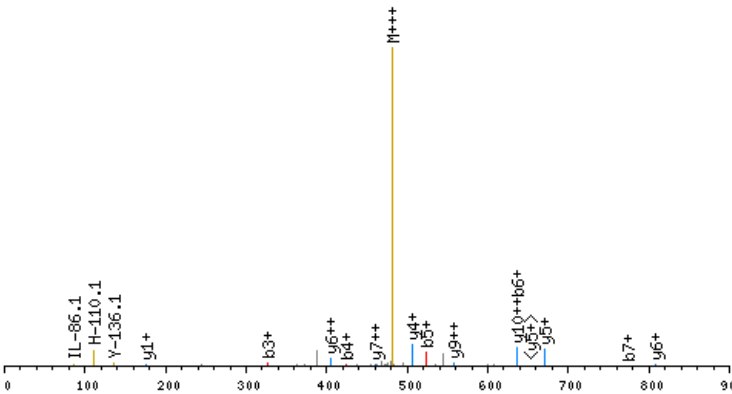

click image to zoom in; click top corners to zoom out

[precursor±]

scan 4247; 481.6 m/z; 3.4e+001

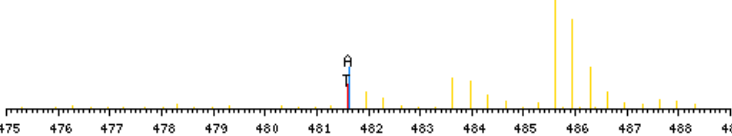

zoomed in precursor plot; T=theoretical m/z, A=acquired m/z

| b <sup>+</sup> | #  | AA | #  | y <sup>+</sup> | y <sup>2+</sup> |
|----------------|----|----|----|----------------|-----------------|
| 114.0555       | 1  | A  | 12 |                |                 |
| 171.0770       | 2  | G  | 11 | 1329.7432      | 665.3755        |
| 327.2033       | 3  | K  | 10 | 1272.7217      | 636.8648        |
| 424.2560       | 4  | P  | 9  | 1116.5954      | 558.8016        |
| 523.3245       | 5  | V  | 8  | 1019.5427      | 510.2752        |
| 636.4085       | 6  | L  | 7  | 920.4743       | 460.7410        |
| 773.4674       | 7  | H  | 6  | 807.3902       | 404.1990        |
| 936.5308       | 8  | Y  | 5  | 670.3313       | 335.6696        |
| 1083.5992      | 9  | F  | 4  | 507.2680       | 254.1379        |
| 1197.6421      | 10 | N  | 3  | 360.1995       | 180.6037        |
| 1268.6792      | 11 | A  | 2  | 246.1566       | 123.5822        |
|                | 12 | R  | 1  | 175.1195       | 88.0637         |

N-term:+43.02 K(3):+156.13

X-range:

0 - 0

MassTol: Y-zoom:

0. 1.

MassType:

☐ AVG ☒ MONO

Axis:

☒ 1 ☐ 2

Label:

☒ I ☐ M ☐ -

Ions:

a ☐ + ☐ 2+ ☐ 3+

b ☒ + ☐ 2+ ☐ 3+

c ☐ + ☐ 2+ ☐ 3+

x ☐ + ☐ 2+ ☐ 3+

y ☒ + ☒ 2+ ☐ 3+

z ☐ + ☐ 2+ ☐ 3+

hide H<sub>2</sub>O/NH<sub>3</sub> ☐

zoom 112-122 ☐

GO

AGLGHPSAFGR, MH+ 1111.5649, m/z 556.2861  
L OS G32 P160811 220811-s1.03377.03377.2.dta

scan 3377; 4.1e+000

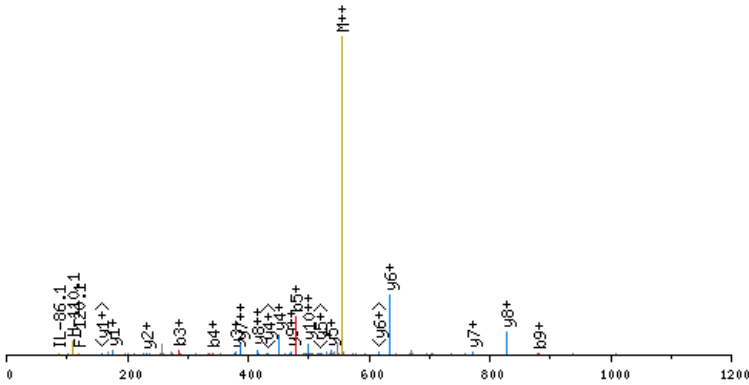

click image to zoom in; click top corners to zoom out [precursor±]

scan 3373; 556.3 m/z; 2.1e+000

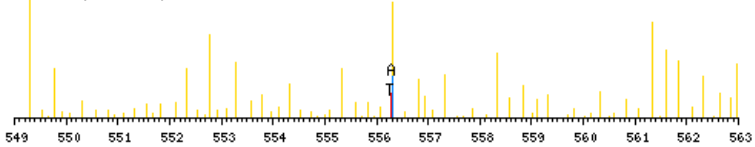

zoomed in precursor plot; T=theoretical m/z, A=acquired m/z

| b <sup>+</sup> | #  | AA | #  | y <sup>+</sup> | y <sup>2+</sup> |
|----------------|----|----|----|----------------|-----------------|
| 114.0555       | 1  | A  | 11 |                |                 |
| 171.0770       | 2  | G  | 10 | 998.5172       | 499.7625        |
| 284.1610       | 3  | L  | 9  | 941.4957       | 471.2518        |
| 341.1825       | 4  | G  | 8  | 828.4117       | 414.7097        |
| 478.2414       | 5  | H  | 7  | 771.3902       | 386.1990        |
| 575.2942       | 6  | P  | 6  | 634.3313       | 317.6696        |
| 662.3262       | 7  | S  | 5  | 537.2785       | 269.1432        |
| 733.3633       | 8  | A  | 4  | 450.2465       | 225.6272        |
| 880.4317       | 9  | F  | 3  | 379.2094       | 190.1086        |
| 937.4532       | 10 | G  | 2  | 232.1410       | 116.5744        |
|                | 11 | R  | 1  | 175.1195       | 88.0637         |

N-term:+43.02

X-range:

0 - 0

MassTol: Y-zoom:

0. 1.

MassType:

☐ AVG ☒ MONO

Axis:

☒ 1 ☐ 2

Label:

☒ I ☐ M ☐ -

Ions:

a ☐ + ☐ 2+ ☐ 3+

b ☒ + ☐ 2+ ☐ 3+

c ☐ + ☐ 2+ ☐ 3+

x ☐ + ☐ 2+ ☐ 3+

y ☒ + ☒ 2+ ☐ 3+

z ☐ + ☐ 2+ ☐ 3+

hide H<sub>2</sub>O/NH<sub>3</sub> ☐

zoom 112-122 ☐

GO

AGLLKTTGLVGLAVCDTPHER, MH+ 2434.3492, m/z 609.3428  
L OS G34 P160811 220811-s1.09224.09224.4.dta

scan 9224; 1.8e+000

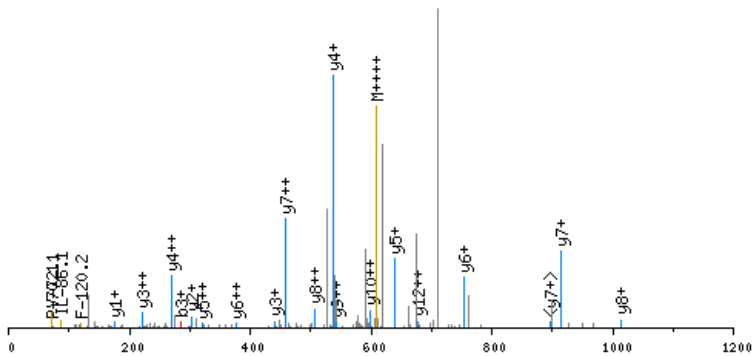

X-range:

0 - 0

MassTol: Y-zoom:

0. 1.

MassType:

☐ AVG ☒ MONO

Axis:

☒ 1 ☐ 2

Label:

☒ I ☐ M ☐ -

Ions:

a ☐ + ☐ 2+ ☐ 3+

b ☒ + ☐ 2+ ☐ 3+

c ☐ + ☐ 2+ ☐ 3+

x ☐ + ☐ 2+ ☐ 3+

y ☒ + ☒ 2+ ☐ 3+

z ☐ + ☐ 2+ ☐ 3+

hide H<sub>2</sub>O/NH<sub>3</sub> ☐

zoom 112-122 ☐

GO

AGLINSLEAVKR, MH+ 1233.7380, m/z 617.3726  
L OS G31 P160811 220811-s1.05387.05387.2.dta

scan 5387; 2.0e+001

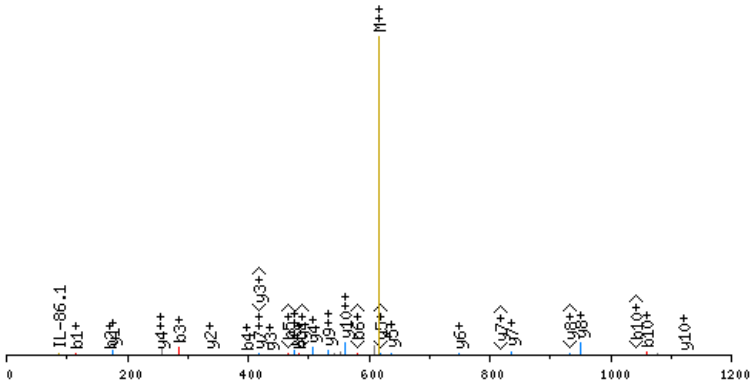

click image to zoom in; click top corners to zoom out

[precursor±]

scan 5384; 617.4 m/z; 1.2e+001

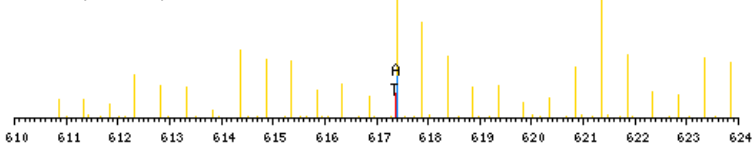

zoomed in precursor plot; T=theoretical m/z, A=acquired m/z

| b <sup>+</sup> | #  | AA | #  | y <sup>+</sup> | y <sup>2+</sup> |
|----------------|----|----|----|----------------|-----------------|
| 114.0555       | 1  | A  | 11 |                |                 |
| 171.0770       | 2  | G  | 10 | 1120.6903      | 560.8490        |
| 284.1610       | 3  | L  | 9  | 1063.6688      | 532.3383        |
| 398.2040       | 4  | N  | 8  | 950.5847       | 475.7963        |
| 485.2360       | 5  | S  | 7  | 836.5418       | 418.7748        |
| 598.3201       | 6  | L  | 6  | 749.5098       | 375.2588        |
| 727.3627       | 7  | E  | 5  | 636.4257       | 318.7168        |
| 798.3998       | 8  | A  | 4  | 507.3831       | 254.1955        |
| 897.4682       | 9  | V  | 3  | 436.3460       | 218.6769        |
| 1059.6263      | 10 | K  | 2  | 337.2776       | 169.1427        |
|                | 11 | R  | 1  | 175.1195       | 88.0637         |

N-term:+43.02 K(10):+162.16

X-range:

0 - 0

MassTol: Y-zoom:

0. 1.

MassType:

☐AVG ☒MONO

Axis:

☒1 ☐2

Label:

☒I ☐M ☐-

Ions:

a ☐+ ☐2+ ☐3+

b ☒+ ☐2+ ☐3+

c ☐+ ☐2+ ☐3+

x ☐+ ☐2+ ☐3+

y ☒+ ☒2+ ☐3+

z ☐+ ☐2+ ☐3+

hide H<sub>2</sub>O/NH<sub>3</sub> ☐

zoom 112-122 ☐

GO

AGSAWVSKVSR, MH+ 1217.6643, m/z 609.3358  
L OS G31 P160811 220811-s1.05271.05271.2.dta

scan 5271; 2.7e+001

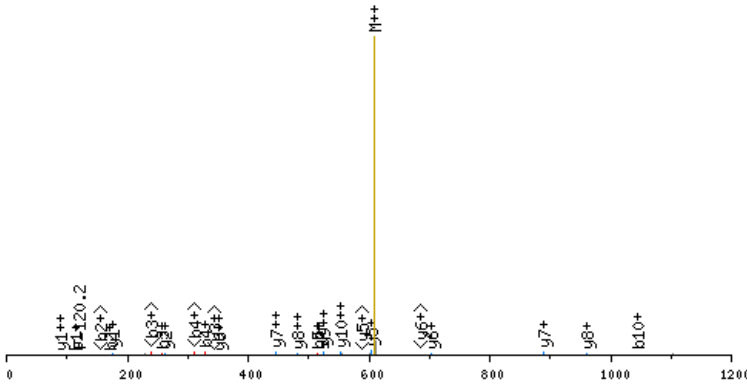

click image to zoom in; click top corners to zoom out

[precursor±]

scan 5269; 609.3 m/z; 1.0e+002

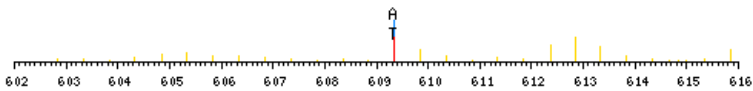

zoomed in precursor plot; T=theoretical m/z, A=acquired m/z

| b <sup>+</sup> | #  | AA | #  | y <sup>+</sup> | y <sup>2+</sup> |
|----------------|----|----|----|----------------|-----------------|
| 114.0555       | 1  | A  | 11 |                |                 |
| 171.0770       | 2  | G  | 10 | 1104.6166      | 552.8122        |
| 258.1090       | 3  | S  | 9  | 1047.5951      | 524.3015        |
| 329.1461       | 4  | A  | 8  | 960.5631       | 480.7855        |
| 515.2254       | 5  | W  | 7  | 889.5260       | 445.2669        |
| 614.2938       | 6  | V  | 6  | 703.4467       | 352.2273        |
| 701.3259       | 7  | S  | 5  | 604.3783       | 302.6930        |
| 857.4522       | 8  | K  | 4  | 517.3462       | 259.1770        |
| 956.5206       | 9  | V  | 3  | 361.2199       | 181.1139        |
| 1043.5526      | 10 | S  | 2  | 262.1515       | 131.5797        |
|                | 11 | R  | 1  | 175.1195       | 88.0637         |

N-term:+43.02 K(8):+156.13

X-range:

0 - 0

MassTol: Y-zoom:

0. 1.

MassType:

☐ AVG ☒ MONO

Axis:

☒ 1 ☐ 2

Label:

☒ I ☐ M ☐ -

Ions:

a ☐ + ☐ 2+ ☐ 3+

b ☒ + ☐ 2+ ☐ 3+

c ☐ + ☐ 2+ ☐ 3+

x ☐ + ☐ 2+ ☐ 3+

y ☒ + ☒ 2+ ☐ 3+

z ☐ + ☐ 2+ ☐ 3+

hide H<sub>2</sub>O/NH<sub>3</sub> ☐

zoom 112-122 ☐

GO

AGTTTIEAVKR, MH+ 1216.6902, m/z 608.8487  
L OS G31 P160811 220811-s1.03476.03476.2.dta

scan 3476; 1.8e+001

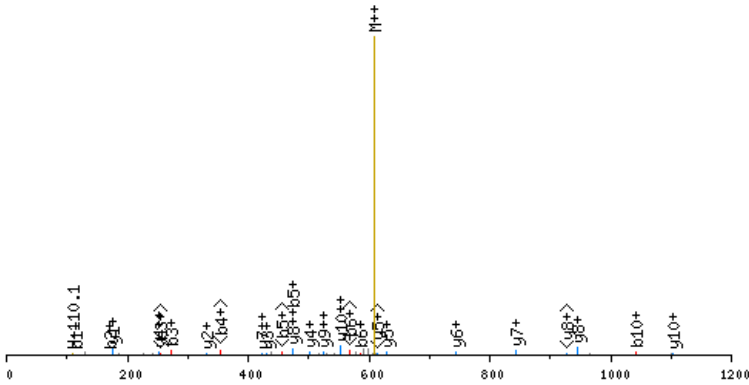

click image to zoom in; click top corners to zoom out

[precursor±]

scan 3474; 608.8 m/z; 4.0e+001

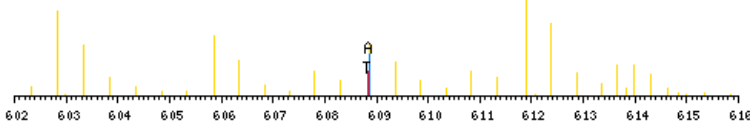

zoomed in precursor plot; T=theoretical m/z, A=acquired m/z

| b <sup>+</sup> | #  | AA | #  | y <sup>+</sup> | y <sup>2+</sup> |
|----------------|----|----|----|----------------|-----------------|
| 114.0555       | 1  | A  | 11 |                |                 |
| 171.0770       | 2  | G  | 10 | 1103.6425      | 552.3252        |
| 272.1247       | 3  | T  | 9  | 1046.6210      | 523.8144        |
| 373.1723       | 4  | T  | 8  | 945.5733       | 473.2906        |
| 474.2200       | 5  | T  | 7  | 844.5257       | 422.7667        |
| 587.3041       | 6  | I  | 6  | 743.4780       | 372.2429        |
| 716.3467       | 7  | E  | 5  | 630.3939       | 315.7009        |
| 787.3838       | 8  | A  | 4  | 501.3513       | 251.1796        |
| 886.4522       | 9  | V  | 3  | 430.3142       | 215.6610        |
| 1042.5785      | 10 | K  | 2  | 331.2458       | 166.1268        |
|                | 11 | R  | 1  | 175.1195       | 88.0637         |

N-term:+43.02 K(10):+156.13

N-term:+43.02

X-range:

0 - 0

MassTol: Y-zoom:

0. 1.

MassType:

☐AVG ☒MONO

Axis:

☒1 ☐2

Label:

☒I ☐M ☐-

Ions:

a ☐+ ☐2+ ☐3+

b ☒+ ☐2+ ☐3+

c ☐+ ☐2+ ☐3+

x ☐+ ☐2+ ☐3+

y ☒+ ☒2+ ☐3+

z ☐+ ☐2+ ☐3+

hide H<sub>2</sub>O/NH<sub>3</sub> ☐

zoom 112-122 ☐

GO

AGVRPDNVAEVVAGAR, MH+ 1622.8615, m/z 541.6253  
L OS G30 P160811 220811-s1.05333.05333.3.dta

scan 5333; 2.7e+000

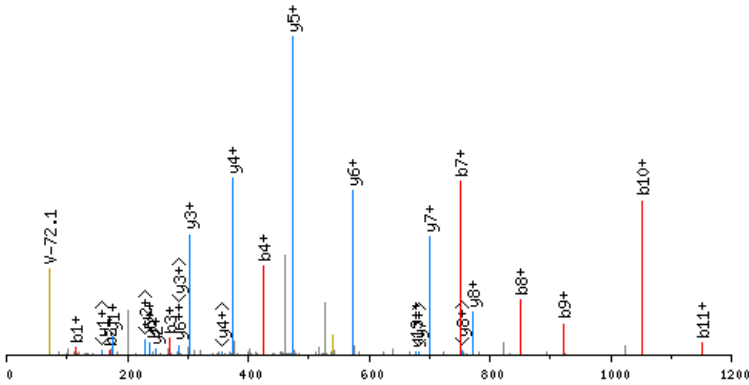

click image to zoom in; click top corners to zoom out

[precursor±]

scan 5329; 541.6 m/z; 9.4e+000

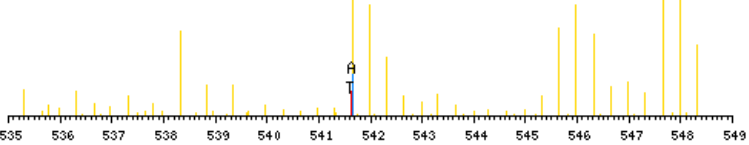

zoomed in precursor plot; T=theoretical m/z, A=acquired m/z

| b <sup>+</sup> | #  | AA | #  | y <sup>+</sup> | y <sup>2+</sup> |
|----------------|----|----|----|----------------|-----------------|
| 114.0555       | 1  | A  | 16 |                |                 |
| 171.0770       | 2  | G  | 15 | 1509.8138      | 755.4108        |
| 270.1454       | 3  | V  | 14 | 1452.7923      | 726.9001        |
| 426.2465       | 4  | R  | 13 | 1353.7239      | 677.3659        |
| 523.2993       | 5  | P  | 12 | 1197.6228      | 599.3153        |
| 638.3262       | 6  | D  | 11 | 1100.5700      | 550.7889        |
| 752.3691       | 7  | N  | 10 | 985.5431       | 493.2754        |
| 851.4376       | 8  | V  | 9  | 871.5001       | 436.2540        |
| 922.4747       | 9  | A  | 8  | 772.4317       | 386.7198        |
| 1051.5173      | 10 | E  | 7  | 701.3946       | 351.2012        |
| 1150.5857      | 11 | V  | 6  | 572.3520       | 286.6799        |
| 1249.6541      | 12 | V  | 5  | 473.2836       | 237.1457        |
| 1320.6912      | 13 | A  | 4  | 374.2152       | 187.6115        |
| 1377.7127      | 14 | G  | 3  | 303.1781       | 152.0930        |
| 1448.7498      | 15 | A  | 2  | 246.1566       | 123.5822        |
|                | 16 | R  | 1  | 175.1195       | 88.0637         |

N-term:+43.02

X-range:

0 - 0

MassTol: Y-zoom:

0. 1.

MassType:

☐AVG ☒MONO

Axis:

☒1 ☐2

Label:

☒I ☐M ☐-

Ions:

a ☐+ ☐2+ ☐3+

b ☒+ ☐2+ ☐3+

c ☐+ ☐2+ ☐3+

x ☐+ ☐2+ ☐3+

y ☒+ ☒2+ ☐3+

z ☐+ ☐2+ ☐3+

hide H<sub>2</sub>O/NH<sub>3</sub> ☐

zoom 112-122 ☐

GO

AHATPPSALEQGGPIR, MH+ 1643.8506, m/z 548.6217  
L OS G30 P160811 220811-s1.03820.03820.3.dta

scan 3820; 1.9e+000

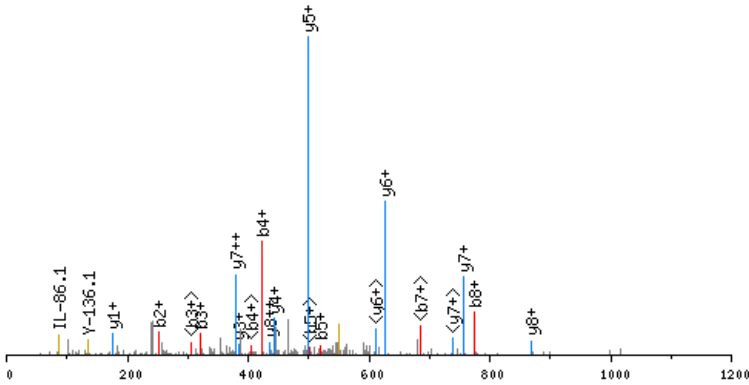

click image to zoom in; click top corners to zoom out

[precursor±]

scan 3819; 548.6 m/z; 1.4e+001

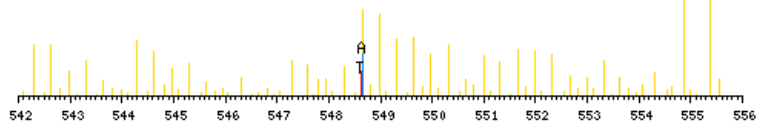

zoomed in precursor plot; T=theoretical m/z, A=acquired m/z

| b <sup>+</sup> | #  | AA | #  | y <sup>+</sup> | y <sup>2+</sup> |
|----------------|----|----|----|----------------|-----------------|
| 114.0555       | 1  | A  | 16 |                |                 |
| 251.1144       | 2  | H  | 15 | 1530.8029      | 765.9053        |
| 322.1515       | 3  | A  | 14 | 1393.7440      | 697.3759        |
| 423.1992       | 4  | T  | 13 | 1322.7068      | 661.8573        |
| 520.2520       | 5  | P  | 12 | 1221.6592      | 611.3335        |
| 617.3047       | 6  | P  | 11 | 1124.6064      | 562.8071        |
| 704.3368       | 7  | S  | 10 | 1027.5536      | 514.2807        |
| 775.3739       | 8  | A  | 9  | 940.5216       | 470.7647        |
| 888.4580       | 9  | L  | 8  | 869.4845       | 435.2462        |
| 1017.5005      | 10 | E  | 7  | 756.4004       | 378.7041        |
| 1145.5591      | 11 | Q  | 6  | 627.3578       | 314.1828        |
| 1202.5806      | 12 | G  | 5  | 499.2993       | 250.1535        |
| 1259.6021      | 13 | G  | 4  | 442.2778       | 221.6428        |
| 1356.6548      | 14 | P  | 3  | 385.2563       | 193.1321        |
| 1469.7389      | 15 | I  | 2  | 288.2036       | 144.6057        |
|                | 16 | R  | 1  | 175.1195       | 88.0637         |

N-term:+43.02

X-range:

0 - 0

MassTol: Y-zoom:

0. 1.

MassType:

☐ AVG ☒ MONO

Axis:

☒ 1 ☐ 2

Label:

☒ I ☐ M ☐ -

Ions:

a ☐ + ☐ 2+ ☐ 3+

b ☒ + ☐ 2+ ☐ 3+

c ☐ + ☐ 2+ ☐ 3+

x ☐ + ☐ 2+ ☐ 3+

y ☒ + ☒ 2+ ☐ 3+

z ☐ + ☐ 2+ ☐ 3+

hide H<sub>2</sub>O/NH<sub>3</sub> ☐

zoom 112-122 ☐

GO

AKDILGEAGLHFDELNKLK, MH+ 2249.2931, m/z 563.0787  
L OS G34 P160811 220811-s1.09388.09388.4.dta

scan 9388; 5.9e+000

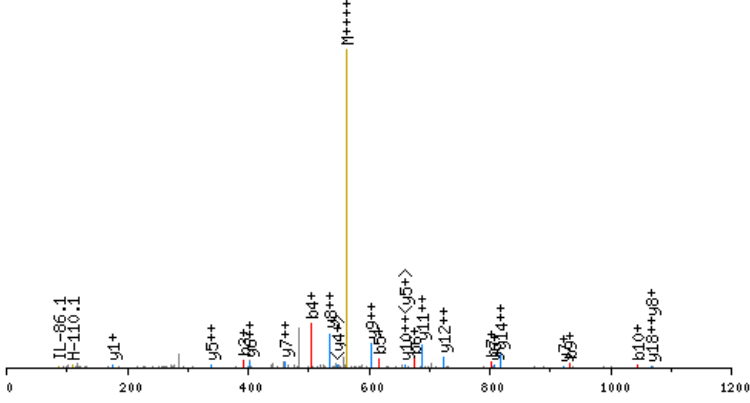

click image to zoom in; click top corners to zoom out [\[precursor±\]](#)

scan 9385; 563.1 m/z; 1.1e+001

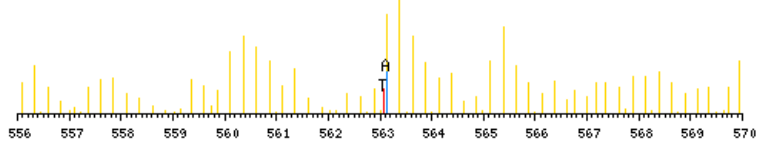

zoomed in precursor plot; T=theoretical m/z, A=acquired m/z

| b <sup>+</sup> | #  | AA | #  | y <sup>+</sup> | y <sup>2+</sup> |
|----------------|----|----|----|----------------|-----------------|
| 114.0555       | 1  | A  | 19 |                |                 |
| 276.2136       | 2  | K  | 18 | 2136.2454      | 1068.6266       |
| 391.2406       | 3  | D  | 17 | 1974.0873      | 987.5476        |
| 504.3246       | 4  | I  | 16 | 1859.0603      | 930.0341        |
| 617.4087       | 5  | L  | 15 | 1745.9763      | 873.4921        |
| 674.4301       | 6  | G  | 14 | 1632.8922      | 816.9500        |
| 803.4727       | 7  | E  | 13 | 1575.8708      | 788.4393        |
| 874.5099       | 8  | A  | 12 | 1446.8282      | 723.9180        |
| 931.5313       | 9  | G  | 11 | 1375.7910      | 688.3994        |
| 1044.6154      | 10 | L  | 10 | 1318.7696      | 659.8887        |
| 1181.6743      | 11 | H  | 9  | 1205.6855      | 603.3467        |
| 1328.7427      | 12 | F  | 8  | 1068.6266      | 534.8172        |
| 1443.7697      | 13 | D  | 7  | 921.5582       | 461.2830        |
| 1572.8122      | 14 | E  | 6  | 806.5312       | 403.7695        |
| 1685.8963      | 15 | L  | 5  | 677.4887       | 339.2482        |
| 1799.9392      | 16 | N  | 4  | 564.4046       | 282.7062        |
| 1962.0973      | 17 | K  | 3  | 450.3617       | 225.6847        |
| 2075.1814      | 18 | L  | 2  | 288.2036       | 144.6057        |
|                | 19 | R  | 1  | 175.1195       | 88.0637         |

N-term:+43.02 K(2):+162.16  
K(17):+162.16

X-range:

0 - 0

MassTol: Y-zoom:

0. 1.

MassType:

☐AVG ☒MONO

Axis:

☒1 ☐2

Label:

☒I ☐M ☐-

Ions:

a ☐+ ☐2+ ☐3+

b ☒+ ☐2+ ☐3+

c ☐+ ☐2+ ☐3+

x ☐+ ☐2+ ☐3+

y ☒+ ☒2+ ☐3+

z ☐+ ☐2+ ☐3+

hide H<sub>2</sub>O/NH<sub>3</sub> ☐

zoom 112-122 ☐

GO

AKIAKTHEDIAQIR, MH+ 1833.0871, m/z 459.0272  
L OS G34 P160811 220811-s1.04314.04314.4.dta

scan 4314; 1.7e+001

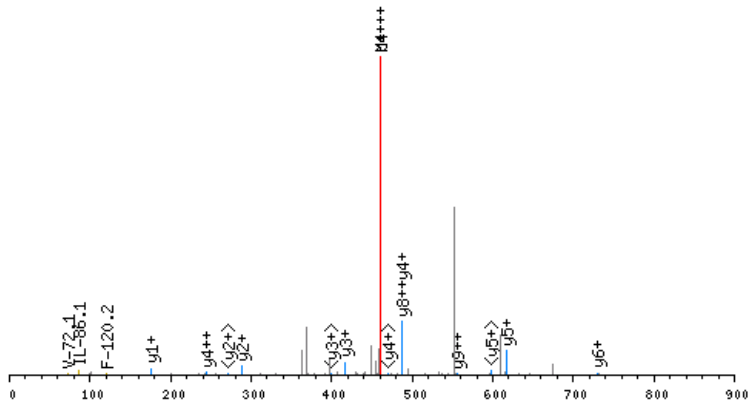

click image to zoom in; click top corners to zoom out [\[precursor±\]](#)

scan 4310; 459.0 m/z; 2.2e+001

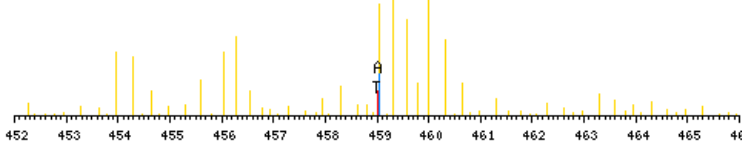

zoomed in precursor plot; T=theoretical m/z, A=acquired m/z

| b <sup>+</sup> | #  | AA | #  | y <sup>+</sup> | y <sup>2+</sup> |
|----------------|----|----|----|----------------|-----------------|
| 114.0555       | 1  | A  | 15 |                |                 |
| 276.2136       | 2  | K  | 14 | 1720.0394      | 860.5236        |
| 389.2977       | 3  | I  | 13 | 1557.8813      | 779.4446        |
| 460.3348       | 4  | A  | 12 | 1444.7973      | 722.9025        |
| 622.4929       | 5  | K  | 11 | 1373.7601      | 687.3840        |
| 723.5406       | 6  | T  | 10 | 1211.6020      | 606.3049        |
| 860.5995       | 7  | H  | 9  | 1110.5544      | 555.7811        |
| 989.6421       | 8  | E  | 8  | 973.4954       | 487.2516        |
| 1104.6690      | 9  | D  | 7  | 844.4529       | 422.7303        |
| 1217.7531      | 10 | I  | 6  | 729.4259       | 365.2169        |
| 1346.7957      | 11 | E  | 5  | 616.3418       | 308.6748        |
| 1417.8328      | 12 | A  | 4  | 487.2993       | 244.1535        |
| 1545.8914      | 13 | Q  | 3  | 416.2621       | 208.6350        |
| 1658.9754      | 14 | I  | 2  | 288.2036       | 144.6057        |
|                | 15 | R  | 1  | 175.1195       | 88.0637         |

N-term:+43.02 K(2):+162.16  
K(5):+162.16

X-range:

0 - 0

MassTol: Y-zoom:

0. 1.

MassType:

☐ AVG ☒ MONO

Axis:

☒ 1 ☐ 2

Label:

☒ I ☐ M ☐ -

Ions:

a ☐ + ☐ 2+ ☐ 3+

b ☒ + ☐ 2+ ☐ 3+

c ☐ + ☐ 2+ ☐ 3+

x ☐ + ☐ 2+ ☐ 3+

y ☒ + ☒ 2+ ☐ 3+

z ☐ + ☐ 2+ ☐ 3+

hide H<sub>2</sub>O/NH<sub>3</sub> ☐

zoom 112-122 ☐

GO

AKIAQGAMYR, MH+ 1178.6356, m/z 589.8215  
L OS G31 P160811 220811-s1.04140.04140.2.dta

scan 4140; 4.6e+001

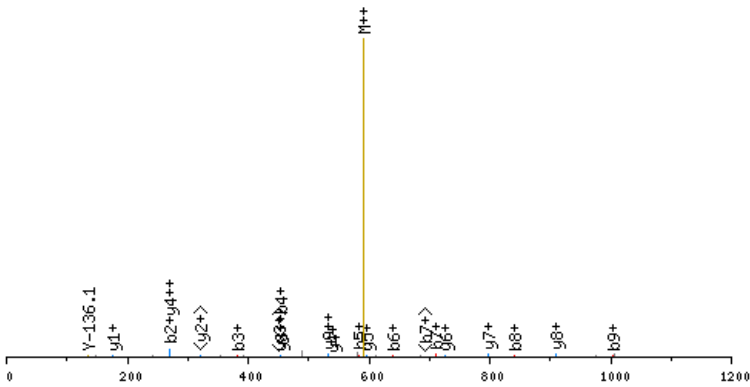

click image to zoom in; click top corners to zoom out

[precursor±]

scan 4139; 589.8 m/z; 4.2e+001

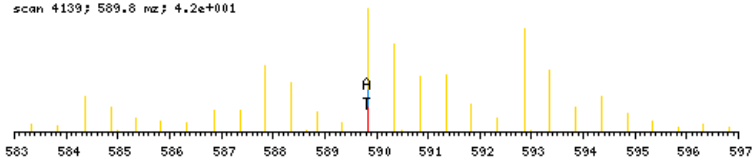

zoomed in precursor plot; T=theoretical m/z, A=acquired m/z

| b <sup>+</sup> | #  | AA | #  | y <sup>+</sup> | y <sup>2+</sup> |
|----------------|----|----|----|----------------|-----------------|
| 114.0555       | 1  | A  | 10 |                |                 |
| 270.1818       | 2  | K  | 9  | 1065.5879      | 533.2979        |
| 383.2659       | 3  | I  | 8  | 909.4616       | 455.2347        |
| 454.3030       | 4  | A  | 7  | 796.3776       | 398.6927        |
| 582.3616       | 5  | Q  | 6  | 725.3405       | 363.1741        |
| 639.3830       | 6  | G  | 5  | 597.2819       | 299.1449        |
| 710.4201       | 7  | A  | 4  | 540.2604       | 270.6341        |
| 841.4606       | 8  | M  | 3  | 469.2233       | 235.1156        |
| 1004.5240      | 9  | Y  | 2  | 338.1828       | 169.5953        |
|                | 10 | R  | 1  | 175.1195       | 88.0637         |

N-term:+43.02 K(2):+156.13

X-range:

0 - 0

MassTol: Y-zoom:

0. 1.

MassType:

☐ AVG ☒ MONO

Axis:

☒ 1 ☐ 2

Label:

☒ I ☐ M ☐ -

Ions:

a ☐ + ☐ 2+ ☐ 3+

b ☒ + ☐ 2+ ☐ 3+

c ☐ + ☐ 2+ ☐ 3+

x ☐ + ☐ 2+ ☐ 3+

y ☒ + ☒ 2+ ☐ 3+

z ☐ + ☐ 2+ ☐ 3+

hide H<sub>2</sub>O/NH<sub>3</sub> ☐

zoom 112-122 ☐

GO

AKNGSEADIDESLYSR, MH+ 1830.8934, m/z 610.9693  
L OS G30 P160811 220811-s1.03862.03862.3.dta

scan 3862; 1.3e+000

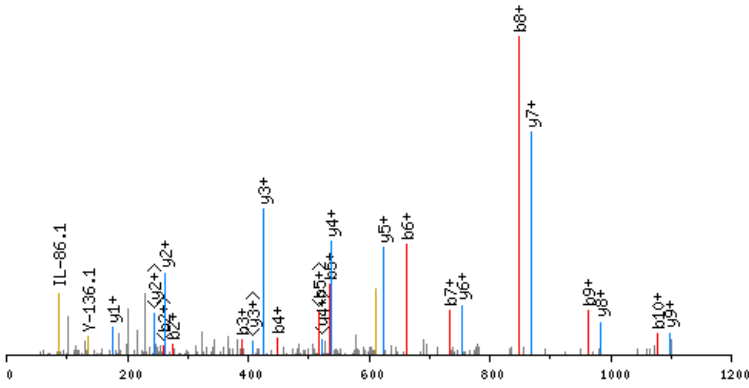

click image to zoom in; click top corners to zoom out

[precursor±]

scan 3859; 611.0 m/z; 1.6e+001

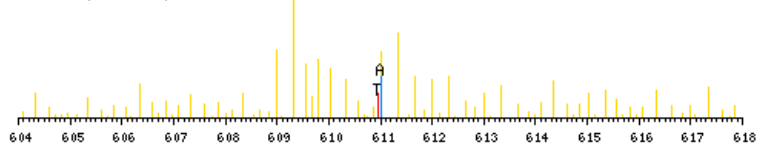

zoomed in precursor plot; T=theoretical m/z, A=acquired m/z

| b <sup>+</sup> | #  | AA | #  | y <sup>+</sup> | y <sup>2+</sup> |
|----------------|----|----|----|----------------|-----------------|
| 114.0555       | 1  | A  | 16 |                |                 |
| 276.2136       | 2  | K  | 15 | 1717.8457      | 859.4268        |
| 390.2565       | 3  | N  | 14 | 1555.6876      | 778.3477        |
| 447.2780       | 4  | G  | 13 | 1441.6447      | 721.3263        |
| 534.3100       | 5  | S  | 12 | 1384.6232      | 692.8155        |
| 663.3526       | 6  | E  | 11 | 1297.5912      | 649.2995        |
| 734.3897       | 7  | A  | 10 | 1168.5486      | 584.7782        |
| 849.4167       | 8  | D  | 9  | 1097.5115      | 549.2597        |
| 962.5007       | 9  | I  | 8  | 982.4846       | 491.7462        |
| 1077.5277      | 10 | D  | 7  | 869.4005       | 435.2042        |
| 1206.5703      | 11 | E  | 6  | 754.3735       | 377.6907        |
| 1293.6023      | 12 | S  | 5  | 625.3310       | 313.1694        |
| 1406.6864      | 13 | L  | 4  | 538.2989       | 269.6534        |
| 1569.7497      | 14 | Y  | 3  | 425.2149       | 213.1113        |
| 1656.7817      | 15 | S  | 2  | 262.1515       | 131.5797        |
|                | 16 | R  | 1  | 175.1195       | 88.0637         |

N-term:+43.02 K(2):+162.16

X-range:

0 - 0

MassTol: Y-zoom:

0. 1.

MassType:

☐AVG ☒MONO

Axis:

☒1 ☐2

Label:

☒I ☐M ☐-

Ions:

a ☐+ ☐2+ ☐3+

b ☒+ ☐2+ ☐3+

c ☐+ ☐2+ ☐3+

x ☐+ ☐2+ ☐3+

y ☒+ ☒2+ ☐3+

z ☐+ ☐2+ ☐3+

hide H<sub>2</sub>O/NH<sub>3</sub> ☐

zoom 112-122 ☐

GO

AKTEEMVQTEEMETPR, MH+ 1978.9102, m/z 660.3083  
L OS G30 P160811 220811-s1.04112.04112.3.dta

scan 4112; 1.5e+000

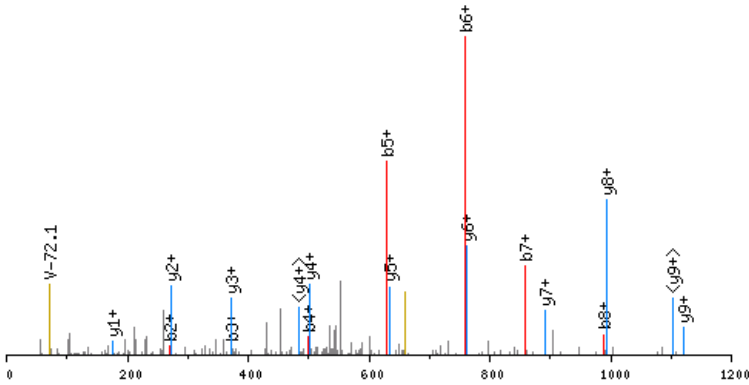

click image to zoom in; click top corners to zoom out

[precursor±]

scan 4109; 660.3 m/z; 2.6e+001

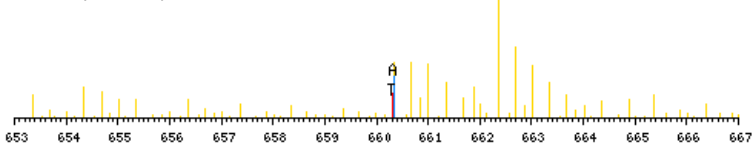

zoomed in precursor plot; T=theoretical m/z, A=acquired m/z

| b <sup>+</sup> | #  | AA | #  | y <sup>+</sup> | y <sup>2+</sup> |
|----------------|----|----|----|----------------|-----------------|
| 114.0555       | 1  | A  | 16 |                |                 |
| 270.1818       | 2  | K  | 15 | 1865.8625      | 933.4352        |
| 371.2295       | 3  | T  | 14 | 1709.7362      | 855.3720        |
| 500.2721       | 4  | E  | 13 | 1608.6885      | 804.8482        |
| 629.3147       | 5  | E  | 12 | 1479.6460      | 740.3269        |
| 760.3552       | 6  | M  | 11 | 1350.6034      | 675.8056        |
| 859.4236       | 7  | V  | 10 | 1219.5629      | 610.2854        |
| 987.4822       | 8  | Q  | 9  | 1120.4945      | 560.7511        |
| 1088.5298      | 9  | T  | 8  | 992.4359       | 496.7219        |
| 1217.5724      | 10 | E  | 7  | 891.3882       | 446.1980        |
| 1346.6150      | 11 | E  | 6  | 762.3456       | 381.6767        |
| 1477.6555      | 12 | M  | 5  | 633.3030       | 317.1554        |
| 1606.6981      | 13 | E  | 4  | 502.2625       | 251.6352        |
| 1707.7458      | 14 | T  | 3  | 373.2199       | 187.1139        |
| 1804.7985      | 15 | P  | 2  | 272.1723       | 136.5900        |
|                | 16 | R  | 1  | 175.1195       | 88.0637         |

N-term:+43.02 K(2):+156.13

X-range:

MassTol: Y-zoom:

0. 1.

MassType:  
☐ AVG ☒ MONO

Axis:

1 2

Label:

☒ I ☐ M ☐ -

Ions:

$$a \quad \boxed{\phantom{00}} + \boxed{\phantom{00}}^2 + \boxed{\phantom{00}}^3 +$$
b ☒ 1+ ☐ 2+ ☐ 3+

100

**c** 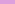

**x**  +  2+  3+

**y** ☒+ ☒2+ ☐3+

$$z \quad \boxed{\phantom{0}} + \boxed{\phantom{0}}^2 + \boxed{\phantom{0}}^3 +$$
hide H<sub>2</sub>O/NH<sub>3</sub> ☐

zoom 112-122

GO

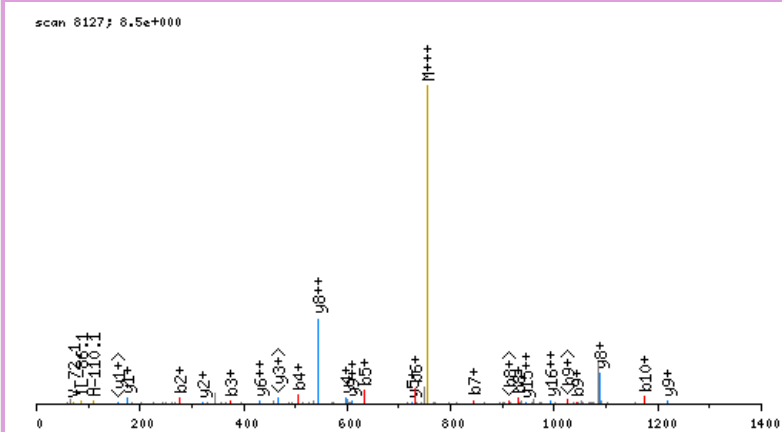

click image to zoom in; click top corners to zoom out      [precursor±]

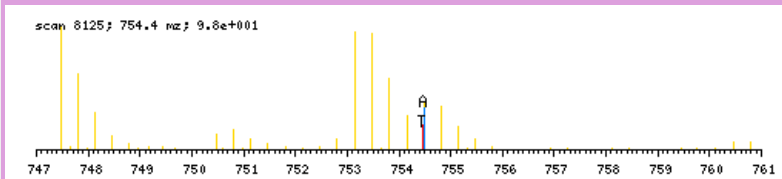

zoomed in precursor plot; T=theoretical m/z, A=acquired m/z

| $b^+$     | #  | AA | #  | $y^+$     | $y^2$     |
|-----------|----|----|----|-----------|-----------|
| 114.0555  | 1  | A  | 18 |           |           |
| 276.2136  | 2  | K  | 17 | 2148.2818 | 1074.6448 |
| 375.2820  | 3  | V  | 16 | 1986.1237 | 993.5657  |
| 504.3246  | 4  | E  | 15 | 1887.0553 | 944.0315  |
| 632.3832  | 5  | Q  | 14 | 1758.0127 | 879.5102  |
| 731.4516  | 6  | V  | 13 | 1629.9541 | 815.4810  |
| 844.5357  | 7  | L  | 12 | 1530.8857 | 765.9467  |
| 931.5677  | 8  | S  | 11 | 1417.8016 | 709.4047  |
| 1044.6518 | 9  | L  | 10 | 1330.7696 | 665.8887  |
| 1173.6944 | 10 | E  | 9  | 1217.6855 | 609.3467  |
| 1270.7471 | 11 | P  | 8  | 1088.6429 | 544.8254  |
| 1398.8057 | 12 | Q  | 7  | 991.5902  | 496.2990  |
| 1535.8646 | 13 | H  | 6  | 863.5316  | 432.2697  |
| 1664.9072 | 14 | E  | 5  | 726.4727  | 363.7402  |
| 1777.9913 | 15 | L  | 4  | 597.4301  | 299.2190  |
| 1940.1494 | 16 | K  | 3  | 484.3460  | 242.6769  |
| 2087.2178 | 17 | F  | 2  | 322.1879  | 161.5979  |
|           | 18 | R  | 1  | 175.1195  | 88.0637   |

N-term: +43.02 K(2): +162.16  
K(16): +162.16

X-range:

0 - 0

MassTol: Y-zoom:

0. 1.

MassType:

☐ AVG ☒ MONO

Axis:

☒ 1 ☐ 2

Label:

☒ I ☐ M ☐ -

Ions:

a ☐ + ☐ 2+ ☐ 3+

b ☒ + ☐ 2+ ☐ 3+

c ☐ + ☐ 2+ ☐ 3+

x ☐ + ☐ 2+ ☐ 3+

y ☒ + ☒ 2+ ☐ 3+

z ☐ + ☐ 2+ ☐ 3+

hide H<sub>2</sub>O/NH<sub>3</sub> ☐

zoom 112-122 ☐

GO

ALDGPEQMELEEGKAGSGLR, MH+ 2163.0816, m/z 721.6987  
L OS G30 P160811 220811-s1.05575.05575.3.dta

scan 5575; 2.3e+000

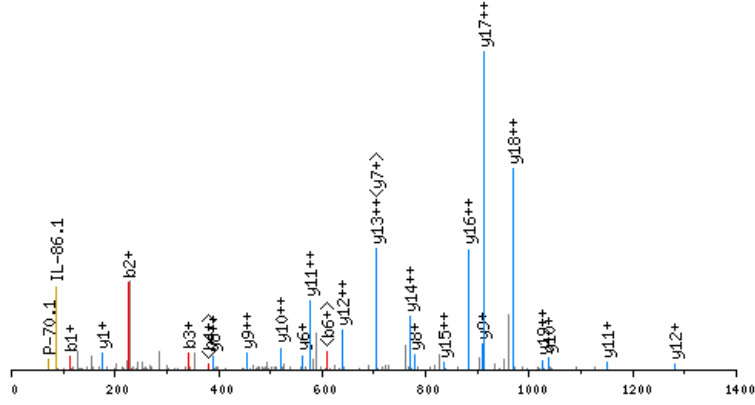

click image to zoom in; click top corners to zoom out [\[precursor±\]](#)

scan 5574; 721.7 m/z; 1.2e+001

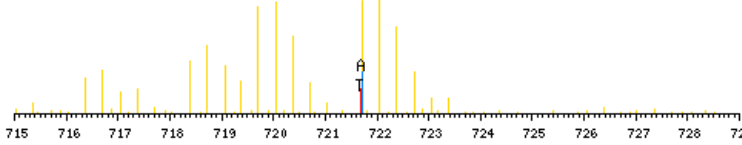

zoomed in precursor plot; T=theoretical m/z, A=acquired m/z

| b <sup>+</sup> | #  | AA | #  | y <sup>+</sup> | y <sup>2+</sup> |
|----------------|----|----|----|----------------|-----------------|
| 114.0555       | 1  | A  | 20 |                |                 |
| 227.1396       | 2  | L  | 19 | 2050.0339      | 1025.5209       |
| 342.1665       | 3  | D  | 18 | 1936.9499      | 968.9788        |
| 399.1880       | 4  | G  | 17 | 1821.9229      | 911.4654        |
| 496.2407       | 5  | P  | 16 | 1764.9015      | 882.9546        |
| 625.2833       | 6  | E  | 15 | 1667.8487      | 834.4283        |
| 753.3419       | 7  | Q  | 14 | 1538.8061      | 769.9070        |
| 884.3824       | 8  | M  | 13 | 1410.7475      | 705.8777        |
| 1013.4250      | 9  | E  | 12 | 1279.7070      | 640.3574        |
| 1126.5091      | 10 | L  | 11 | 1150.6644      | 575.8361        |
| 1255.5517      | 11 | E  | 10 | 1037.5804      | 519.2941        |
| 1384.5942      | 12 | E  | 9  | 908.5378       | 454.7728        |
| 1441.6157      | 13 | G  | 8  | 779.4952       | 390.2515        |
| 1603.7738      | 14 | K  | 7  | 722.4737       | 361.7408        |
| 1674.8109      | 15 | A  | 6  | 560.3156       | 280.6617        |
| 1731.8324      | 16 | G  | 5  | 489.2785       | 245.1432        |
| 1818.8644      | 17 | S  | 4  | 432.2571       | 216.6324        |
| 1875.8859      | 18 | G  | 3  | 345.2250       | 173.1164        |
| 1988.9699      | 19 | L  | 2  | 288.2036       | 144.6057        |
|                | 20 | R  | 1  | 175.1195       | 88.0637         |

N-term:+43.02 K(14):+162.16

X-range:

0 - 0

MassTol: Y-zoom:

0. 1.

MassType:

☐AVG ☒MONO

Axis:

☒1 ☐2

Label:

☒I ☐M ☐-

Ions:

a ☐+ ☐2+ ☐3+

b ☒+ ☐2+ ☐3+

c ☐+ ☐2+ ☐3+

x ☐+ ☐2+ ☐3+

y ☒+ ☒2+ ☐3+

z ☐+ ☐2+ ☐3+

hide H<sub>2</sub>O/NH<sub>3</sub> ☐

zoom 112-122 ☐

GO

ALDPAEQHLLR, MH+ 1191.6122, m/z 596.3097  
L OS G31 P160811 220811-s1.04437.04437.2.dta

scan 4437; 2.6e+000

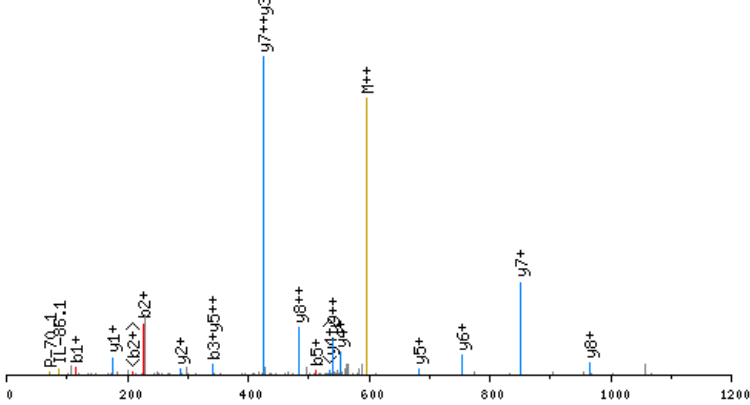

click image to zoom in; click top corners to zoom out

[precursor±]

scan 4434; 596.3 m/z; 1.1e+001

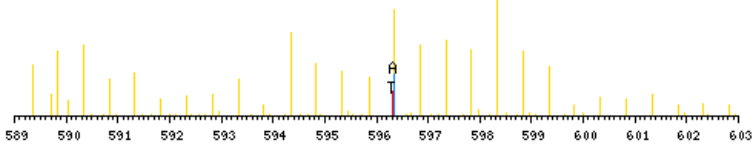

zoomed in precursor plot; T=theoretical m/z, A=acquired m/z

| b <sup>+</sup> | #  | AA | #  | y <sup>+</sup> | y <sup>2+</sup> |
|----------------|----|----|----|----------------|-----------------|
| 114.0555       | 1  | A  | 10 |                |                 |
| 227.1396       | 2  | L  | 9  | 1078.5645      | 539.7862        |
| 342.1665       | 3  | D  | 8  | 965.4805       | 483.2441        |
| 439.2193       | 4  | P  | 7  | 850.4535       | 425.7307        |
| 510.2564       | 5  | A  | 6  | 753.4008       | 377.2043        |
| 639.2990       | 6  | E  | 5  | 682.3636       | 341.6857        |
| 767.3576       | 7  | Q  | 4  | 553.3211       | 277.1644        |
| 904.4165       | 8  | H  | 3  | 425.2625       | 213.1352        |
| 1017.5005      | 9  | L  | 2  | 288.2036       | 144.6057        |
|                | 10 | R  | 1  | 175.1195       | 88.0637         |

N-term:+43.02

X-range:

0 - 0

MassTol: Y-zoom:

0. 1.

MassType:

☐AVG ☒MONO

Axis:

☒1 ☐2

Label:

☒I ☐M ☐-

Ions:

a ☐+ ☐2+ ☐3+

b ☒+ ☐2+ ☐3+

c ☐+ ☐2+ ☐3+

x ☐+ ☐2+ ☐3+

y ☒+ ☒2+ ☐3+

z ☐+ ☐2+ ☐3+

hide H<sub>2</sub>O/NH<sub>3</sub> ☐

zoom 112-122 ☐

GO

ALETVPKDLR, MH+ 1217.7318, m/z 609.3695  
L OS G31 P160811 220811-s1.05718.05718.2.dta

scan 5718; 6.7e+000

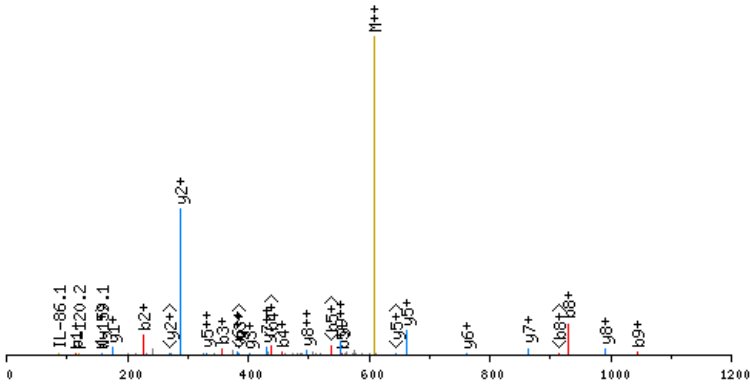

click image to zoom in; click top corners to zoom out [precursor±]

scan 5714; 609.4 m/z; 9.9e+000

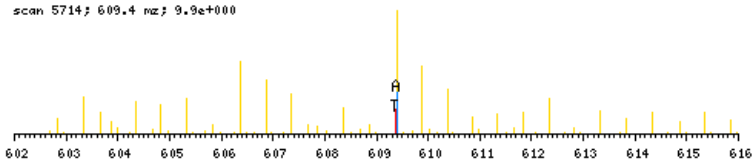

zoomed in precursor plot; T=theoretical m/z, A=acquired m/z

| b <sup>+</sup> | #  | AA | #  | y <sup>+</sup> | y <sup>2+</sup> |
|----------------|----|----|----|----------------|-----------------|
| 114.0555       | 1  | A  | 10 |                |                 |
| 227.1396       | 2  | L  | 9  | 1104.6841      | 552.8460        |
| 356.1822       | 3  | E  | 8  | 991.6001       | 496.3039        |
| 457.2298       | 4  | T  | 7  | 862.5575       | 431.7826        |
| 556.2983       | 5  | V  | 6  | 761.5098       | 381.2588        |
| 653.3510       | 6  | P  | 5  | 662.4414       | 331.7246        |
| 815.5091       | 7  | K  | 4  | 565.3886       | 283.1982        |
| 930.5361       | 8  | D  | 3  | 403.2305       | 202.1192        |
| 1043.6201      | 9  | L  | 2  | 288.2036       | 144.6057        |
|                | 10 | R  | 1  | 175.1195       | 88.0637         |

N-term:+43.02 K(7):+162.16

X-range:

0 - 0

MassTol: Y-zoom:

0. 1.

MassType:

☐AVG ☒MONO

Axis:

☒1 ☐2

Label:

☒I ☐M ☐-

Ions:

a ☐+ ☐2+ ☐3+

b ☒+ ☐2+ ☐3+

c ☐+ ☐2+ ☐3+

x ☐+ ☐2+ ☐3+

y ☒+ ☒2+ ☐3+

z ☐+ ☐2+ ☐3+

hide H<sub>2</sub>O/NH<sub>3</sub> ☐

zoom 112-122 ☐

GO

ALHISNVR, MH+ 951.5376, m/z 476.2724  
L OS G31 P160811 220811-s1.02957.02957.2.dta

scan 2957; 8.7e+000

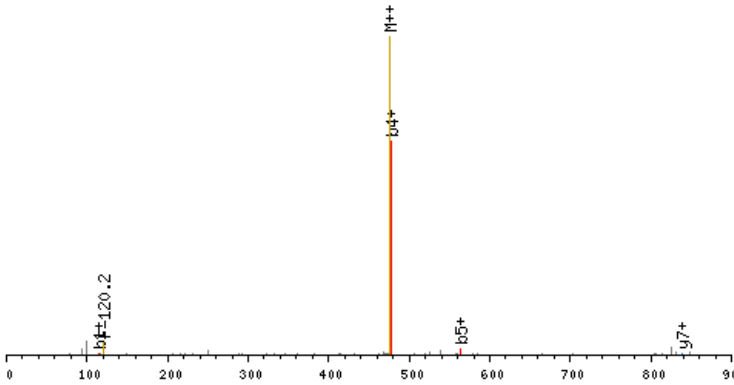

click image to zoom in; click top corners to zoom out [precursor±]

scan 2954; 476.3 m/z; 1.5e+001

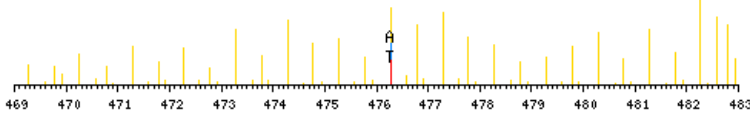

zoomed in precursor plot; T=theoretical m/z, A=acquired m/z

| b <sup>+</sup> | # | AA | # | y <sup>+</sup> | y <sup>2+</sup> |
|----------------|---|----|---|----------------|-----------------|
| 114.0555       | 1 | A  | 8 |                |                 |
| 227.1396       | 2 | L  | 7 | 838.4899       | 419.7489        |
| 364.1985       | 3 | H  | 6 | 725.4058       | 363.2068        |
| 477.2826       | 4 | I  | 5 | 588.3469       | 294.6774        |
| 564.3146       | 5 | S  | 4 | 475.2629       | 238.1353        |
| 678.3575       | 6 | N  | 3 | 388.2308       | 194.6193        |
| 777.4259       | 7 | V  | 2 | 274.1879       | 137.5979        |
|                | 8 | R  | 1 | 175.1195       | 88.0637         |

N-term:+43.02

X-range:

0 - 0

MassTol: Y-zoom:

0. 1.

MassType:

☐AVG ☒MONO

Axis:

☒1 ☐2

Label:

☒I ☐M ☐-

Ions:

a ☐+ ☐2+ ☐3+

b ☒+ ☐2+ ☐3+

c ☐+ ☐2+ ☐3+

x ☐+ ☐2+ ☐3+

y ☒+ ☒2+ ☐3+

z ☐+ ☐2+ ☐3+

hide H<sub>2</sub>O/NH<sub>3</sub> ☐

zoom 112-122 ☐

GO

ALKAVFQYIDENQDR, MH+ 1879.9554, m/z 627.3233  
L OS G30 P160811 220811-s1.07878.07878.3.dta

scan 7878; 6.6e-001

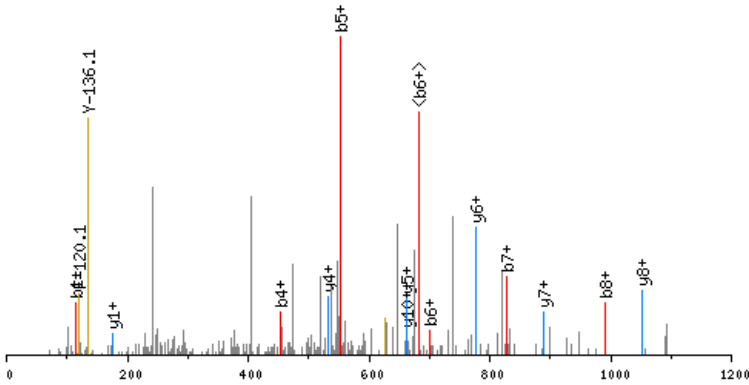

click image to zoom in; click top corners to zoom out

[precursor±]

scan 7874; 627.3 m/z; 3.2e+000

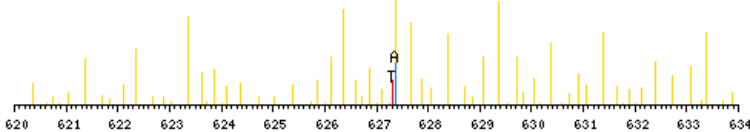

zoomed in precursor plot; T=theoretical m/z, A=acquired m/z

| b <sup>+</sup> | #  | AA | #  | y <sup>+</sup> | y <sup>2+</sup> |
|----------------|----|----|----|----------------|-----------------|
| 114.0555       | 1  | A  | 15 |                |                 |
| 227.1396       | 2  | L  | 14 | 1766.9078      | 883.9578        |
| 383.2659       | 3  | K  | 13 | 1653.8237      | 827.4158        |
| 454.3030       | 4  | A  | 12 | 1497.6974      | 749.3526        |
| 553.3714       | 5  | V  | 11 | 1426.6603      | 713.8341        |
| 700.4398       | 6  | F  | 10 | 1327.5919      | 664.2998        |
| 828.4984       | 7  | Q  | 9  | 1180.5235      | 590.7656        |
| 991.5617       | 8  | Y  | 8  | 1052.4649      | 526.7364        |
| 1104.6458      | 9  | I  | 7  | 889.4015       | 445.2047        |
| 1219.6727      | 10 | D  | 6  | 776.3175       | 388.6627        |
| 1348.7153      | 11 | E  | 5  | 661.2905       | 331.1492        |
| 1462.7583      | 12 | N  | 4  | 532.2479       | 266.6279        |
| 1590.8168      | 13 | Q  | 3  | 418.2050       | 209.6064        |
| 1705.8438      | 14 | D  | 2  | 290.1464       | 145.5771        |
|                | 15 | R  | 1  | 175.1195       | 88.0637         |

N-term:+43.02 K(3):+156.13

ALKQISSNR, MH+ 1086.6272, m/z 543.8172  
L OS G31 P160811 220811-s1.03251.03251.2.dta

scan 3251; 3.8e+001

click image to zoom in; click top corners to zoom out    [precursor±]

scan 3249; 543.8 m/z; 1.4e+001

zoomed in precursor plot; T=theoretical m/z, A=acquired m/z

X-range:  
0 - 0

MassTol: Y-zoom:  
0. 1.

MassType:  
☐AVG ☒MONO

Axis:  
☒1 ☐2

Label:  
☒I ☐M ☐-

Ions:  
a ☐+ ☐2+ ☐3+  
b ☒+ ☐2+ ☐3+  
c ☐+ ☐2+ ☐3+  
x ☐+ ☐2+ ☐3+  
y ☒+ ☒2+ ☐3+  
z ☐+ ☐2+ ☐3+

hide H<sub>2</sub>O/NH<sub>3</sub> ☐

zoom 112-122 ☐

GO

| b <sup>+</sup> | # | AA | # | y <sup>+</sup> | y <sup>2+</sup> |
|----------------|---|----|---|----------------|-----------------|
| 114.0555       | 1 | A  | 9 |                |                 |
| 227.1396       | 2 | L  | 8 | 973.5795       | 487.2937        |
| 383.2659       | 3 | K  | 7 | 860.4954       | 430.7516        |
| 511.3245       | 4 | Q  | 6 | 704.3691       | 352.6885        |
| 624.4085       | 5 | I  | 5 | 576.3105       | 288.6592        |
| 711.4405       | 6 | S  | 4 | 463.2265       | 232.1172        |
| 798.4726       | 7 | S  | 3 | 376.1945       | 188.6011        |
| 912.5155       | 8 | N  | 2 | 289.1624       | 145.0851        |
|                | 9 | R  | 1 | 175.1195       | 88.0637         |

N-term:+43.02 K(3):+156.13

X-range:

0 - 0

MassTol: Y-zoom:

0. 1.

MassType:

☐AVG ☒MONO

Axis:

☒1 ☐2

Label:

☒I ☐M ☐-

Ions:

a ☐+ ☐2+ ☐3+

b ☒+ ☐2+ ☐3+

c ☐+ ☐2+ ☐3+

x ☐+ ☐2+ ☐3+

y ☒+ ☒2+ ☐3+

z ☐+ ☐2+ ☐3+

hide H<sub>2</sub>O/NH<sub>3</sub> ☐

zoom 112-122 ☐

GO

ALLAEHLKPLPADR, MH+ 1727.0220, m/z 576.3455  
L OS G32 P160811 220811-s1.06514.06514.3.dta

scan 6514; 4.1e+001

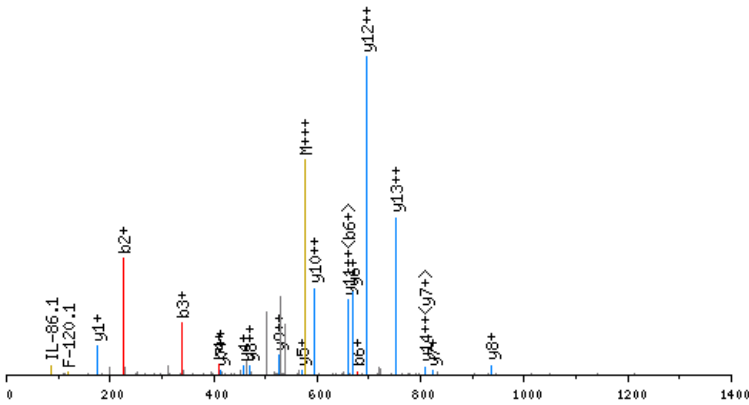

click image to zoom in; click top corners to zoom out

[precursor±]

scan 6513; 576.3 m/z; 6.9e+002

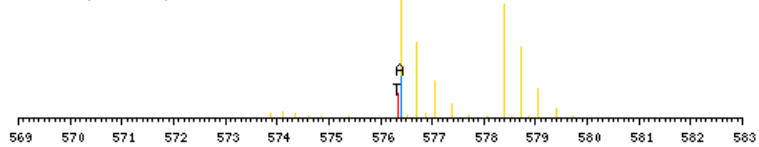

zoomed in precursor plot; T=theoretical m/z, A=acquired m/z

| b <sup>+</sup> | #  | AA | #  | y <sup>+</sup> | y <sup>2+</sup> |
|----------------|----|----|----|----------------|-----------------|
| 114.0555       | 1  | A  | 15 |                |                 |
| 227.1396       | 2  | L  | 14 | 1613.9743      | 807.4911        |
| 340.2236       | 3  | L  | 13 | 1500.8903      | 750.9490        |
| 411.2608       | 4  | A  | 12 | 1387.8062      | 694.4070        |
| 540.3033       | 5  | E  | 11 | 1316.7691      | 658.8885        |
| 677.3623       | 6  | H  | 10 | 1187.7265      | 594.3672        |
| 790.4463       | 7  | L  | 9  | 1050.6676      | 525.8377        |
| 903.5304       | 8  | L  | 8  | 937.5835       | 469.2957        |
| 1059.6567      | 9  | K  | 7  | 824.4994       | 412.7536        |
| 1156.7095      | 10 | P  | 6  | 668.3731       | 334.6905        |
| 1269.7935      | 11 | L  | 5  | 571.3204       | 286.1641        |
| 1366.8463      | 12 | P  | 4  | 458.2363       | 229.6221        |
| 1437.8834      | 13 | A  | 3  | 361.1836       | 181.0957        |
| 1552.9103      | 14 | D  | 2  | 290.1464       | 145.5771        |
|                | 15 | R  | 1  | 175.1195       | 88.0637         |

N-term:+43.02 K(9):+156.13

X-range:

0 - 0

MassTol: Y-zoom:

0. 1.

MassType:

☐AVG ☒MONO

Axis:

☒1 ☐2

Label:

☒I ☐M ☐-

Ions:

a ☐+ ☐2+ ☐3+

b ☒+ ☐2+ ☐3+

c ☐+ ☐2+ ☐3+

x ☐+ ☐2+ ☐3+

y ☒+ ☒2+ ☐3+

z ☐+ ☐2+ ☐3+

hide H<sub>2</sub>O/NH<sub>3</sub> ☐

zoom 112-122 ☐

GO

ALPEAHR, MH+ 835.4426, m/z 418.2250  
L OS G35 P160811 220811-s1.05577.05577.2.dta

scan 5577; 1.7e+001

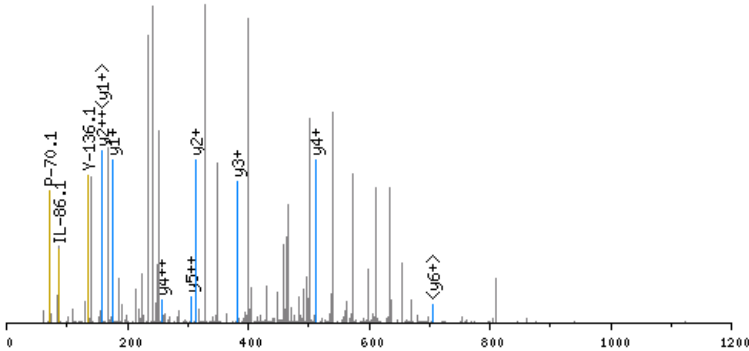

click image to zoom in; click top corners to zoom out

[precursor±]

scan 5573; 418.2 m/z; 2.1e+003

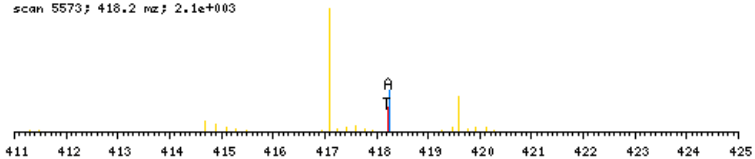

zoomed in precursor plot; T=theoretical m/z, A=acquired m/z

| b <sup>+</sup> | # | AA | # | y <sup>+</sup> | y <sup>2+</sup> |
|----------------|---|----|---|----------------|-----------------|
| 114.0555       | 1 | A  | 7 |                |                 |
| 227.1396       | 2 | L  | 6 | 722.3949       | 361.7014        |
| 324.1923       | 3 | P  | 5 | 609.3109       | 305.1594        |
| 453.2349       | 4 | E  | 4 | 512.2581       | 256.6330        |
| 524.2720       | 5 | A  | 3 | 383.2155       | 192.1117        |
| 661.3310       | 6 | H  | 2 | 312.1784       | 156.5931        |
|                | 7 | R  | 1 | 175.1195       | 88.0637         |

N-term:+43.02

X-range:

0 - 0

MassTol: Y-zoom:

0. 1.

MassType:

☐ AVG ☒ MONO

Axis:

☒ 1 ☐ 2

Label:

☒ I ☐ M ☐ -

Ions:

a ☐ + ☐ 2+ ☐ 3+

b ☒ + ☐ 2+ ☐ 3+

c ☐ + ☐ 2+ ☐ 3+

x ☐ + ☐ 2+ ☐ 3+

y ☒ + ☒ 2+ ☐ 3+

z ☐ + ☐ 2+ ☐ 3+

hide H<sub>2</sub>O/NH<sub>3</sub> ☐

zoom 112-122 ☐

GO

ALQALHSSGVGLR, MH+ 1350.7494, m/z 675.8783  
L OS G31 P160811 220811-s1.06666.06666.2.dta

scan 6666; 4.4e+000

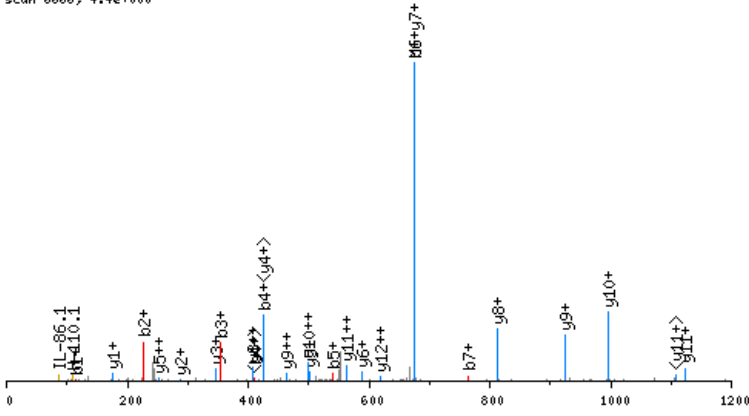

click image to zoom in; click top corners to zoom out [\[precursor±\]](#)

scan 6664; 675.9 m/z; 8.3e+000

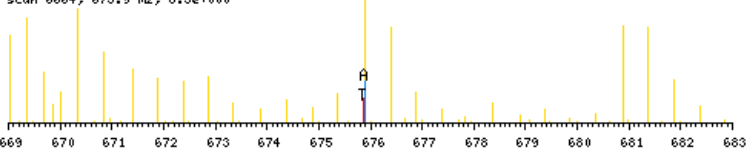

zoomed in precursor plot; T=theoretical m/z, A=acquired m/z

| b <sup>+</sup> | #  | AA | #  | y <sup>+</sup> | y <sup>2+</sup> |
|----------------|----|----|----|----------------|-----------------|
| 114.0555       | 1  | A  | 13 |                |                 |
| 227.1396       | 2  | L  | 12 | 1237.7017      | 619.3548        |
| 355.1982       | 3  | Q  | 11 | 1124.6176      | 562.8127        |
| 426.2353       | 4  | A  | 10 | 996.5591       | 498.7834        |
| 539.3193       | 5  | L  | 9  | 925.5219       | 463.2649        |
| 676.3782       | 6  | H  | 8  | 812.4379       | 406.7228        |
| 763.4103       | 7  | S  | 7  | 675.3790       | 338.1934        |
| 850.4423       | 8  | S  | 6  | 588.3469       | 294.6774        |
| 907.4638       | 9  | G  | 5  | 501.3149       | 251.1614        |
| 1006.5322      | 10 | V  | 4  | 444.2934       | 222.6506        |
| 1063.5536      | 11 | G  | 3  | 345.2250       | 173.1164        |
| 1176.6377      | 12 | L  | 2  | 288.2036       | 144.6057        |
|                | 13 | R  | 1  | 175.1195       | 88.0637         |

N-term:+43.02

X-range:

0 - 0

MassTol: Y-zoom:

0. 1.

MassType:

☐ AVG ☒ MONO

Axis:

☒ 1 ☐ 2

Label:

☒ I ☐ M ☐ -

Ions:

a ☐ + ☐ 2+ ☐ 3+

b ☒ + ☐ 2+ ☐ 3+

c ☐ + ☐ 2+ ☐ 3+

x ☐ + ☐ 2+ ☐ 3+

y ☒ + ☒ 2+ ☐ 3+

z ☐ + ☐ 2+ ☐ 3+

hide H<sub>2</sub>O/NH<sub>3</sub> ☐

zoom 112-122 ☐

GO

AMNYSAKDEV DGGPAGPPGGAAKTR, MH+ 2515.2252, m/z 629.5618  
L OS G32 P160811 220811-s1.03367.03367.4.dta

scan 3367; 1.2e+000

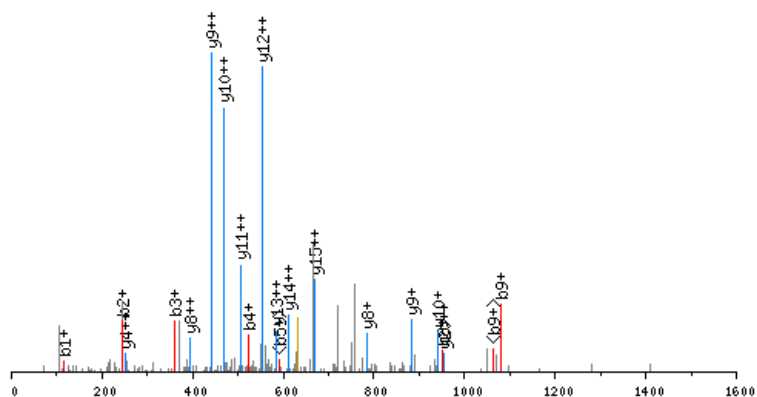

click image to zoom in; click top corners to zoom out

[precursor±]

scan 3363; 629.6 m/z; 4.4e+000

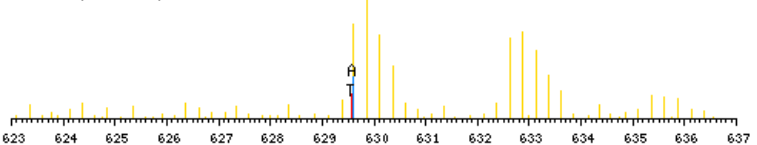

zoomed in precursor plot; T=theoretical m/z, A=acquired m/z

| b <sup>+</sup> | #  | AA | #  | y <sup>+</sup> | y <sup>2+</sup> |
|----------------|----|----|----|----------------|-----------------|
| 114.0555       | 1  | A  | 25 |                |                 |
| 245.0960       | 2  | M  | 24 | 2402.1775      | 1201.5927       |
| 359.1389       | 3  | N  | 23 | 2271.1370      | 1136.0724       |
| 522.2023       | 4  | Y  | 22 | 2157.0941      | 1079.0510       |
| 609.2343       | 5  | S  | 21 | 1994.0308      | 997.5193        |
| 680.2714       | 6  | A  | 20 | 1906.9987      | 954.0033        |
| 836.3977       | 7  | K  | 19 | 1835.9616      | 918.4847        |
| 951.4246       | 8  | D  | 18 | 1679.8353      | 840.4216        |
| 1080.4672      | 9  | E  | 17 | 1564.8084      | 782.9081        |
| 1179.5356      | 10 | V  | 16 | 1435.7658      | 718.3868        |
| 1294.5626      | 11 | D  | 15 | 1336.6974      | 668.8526        |
| 1351.5841      | 12 | G  | 14 | 1221.6704      | 611.3391        |
| 1408.6055      | 13 | G  | 13 | 1164.6490      | 582.8284        |
| 1505.6583      | 14 | P  | 12 | 1107.6275      | 554.3177        |
| 1576.6954      | 15 | A  | 11 | 1010.5747      | 505.7913        |
| 1633.7169      | 16 | G  | 10 | 939.5376       | 470.2727        |
| 1730.7696      | 17 | P  | 9  | 882.5162       | 441.7620        |
| 1827.8224      | 18 | P  | 8  | 785.4634       | 393.2356        |
| 1884.8439      | 19 | G  | 7  | 688.4106       | 344.7092        |
| 1941.8653      | 20 | G  | 6  | 631.3892       | 316.1985        |
| 2012.9024      | 21 | A  | 5  | 574.3677       | 287.6878        |
| 2083.9395      | 22 | A  | 4  | 503.3306       | 252.1692        |
| 2240.0658      | 23 | K  | 3  | 432.2935       | 216.6507        |
| 2341.1135      | 24 | T  | 2  | 276.1672       | 138.5875        |
|                | 25 | R  | 1  | 175.1195       | 88.0637         |

N-term:+43.02 K(7):+156.13  
K(23):+156.13

X-range:

0 - 0

MassTol: Y-zoom:

0. 1.

MassType:

☐ AVG ☒ MONO

Axis:

☒ 1 ☐ 2

Label:

☒ I ☐ M ☐ -

Ions:

a ☐ + ☐ 2+ ☐ 3+

b ☒ + ☐ 2+ ☐ 3+

c ☐ + ☐ 2+ ☐ 3+

x ☐ + ☐ 2+ ☐ 3+

y ☒ + ☒ 2+ ☐ 3+

z ☐ + ☐ 2+ ☐ 3+

hide H<sub>2</sub>O/NH<sub>3</sub> ☐

zoom 112-122 ☐

GO

AMQKIFAR, MH+ 1034.5821, m/z 517.7947  
L OS G31 P160811 220811-s1.06135.06135.2.dta

scan 6135; 3.3e+001

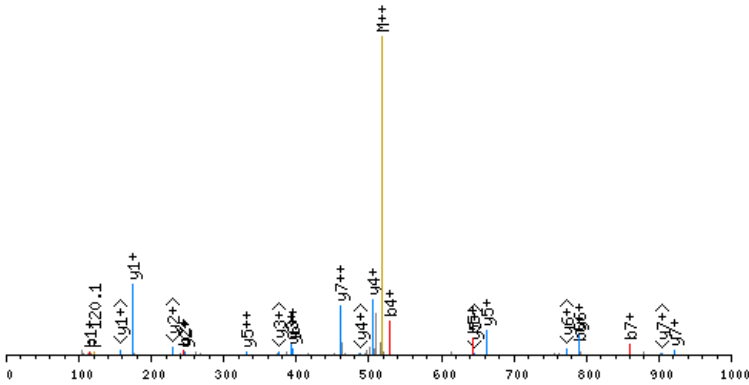

click image to zoom in; click top corners to zoom out

[precursor±]

scan 6134; 517.8 m/z; 1.9e+003

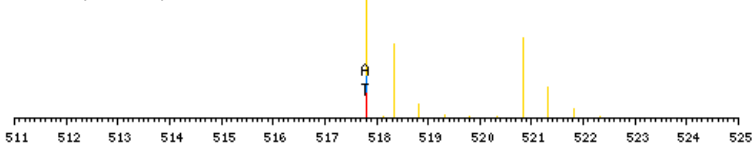

zoomed in precursor plot; T=theoretical m/z, A=acquired m/z

| b <sup>+</sup> | # | AA | # | y <sup>+</sup> | y <sup>2+</sup> |
|----------------|---|----|---|----------------|-----------------|
| 114.0555       | 1 | A  | 8 |                |                 |
| 245.0960       | 2 | M  | 7 | 921.5345       | 461.2711        |
| 373.1546       | 3 | Q  | 6 | 790.4940       | 395.7509        |
| 529.2809       | 4 | K  | 5 | 662.4354       | 331.7216        |
| 642.3649       | 5 | I  | 4 | 506.3091       | 253.6585        |
| 789.4334       | 6 | F  | 3 | 393.2250       | 197.1164        |
| 860.4705       | 7 | A  | 2 | 246.1566       | 123.5822        |
|                | 8 | R  | 1 | 175.1195       | 88.0637         |

N-term:+43.02 K(4):+156.13

X-range:

0 - 0

MassTol: Y-zoom:

0. 1.

MassType:

☐AVG ☒MONO

Axis:

☒1 ☐2

Label:

☒I ☐M ☐-

Ions:

a ☐+ ☐2+ ☐3+

b ☒+ ☐2+ ☐3+

c ☐+ ☐2+ ☐3+

x ☐+ ☐2+ ☐3+

y ☒+ ☒2+ ☐3+

z ☐+ ☐2+ ☐3+

hide H<sub>2</sub>O/NH<sub>3</sub> ☐

zoom 112-122 ☐

GO

AMVSEFLKQAR, MH+ 1349.7252, m/z 675.3662  
L OS G31 P160811 220811-s1.07548.07548.2.dta

scan 7548; 1.0e+001

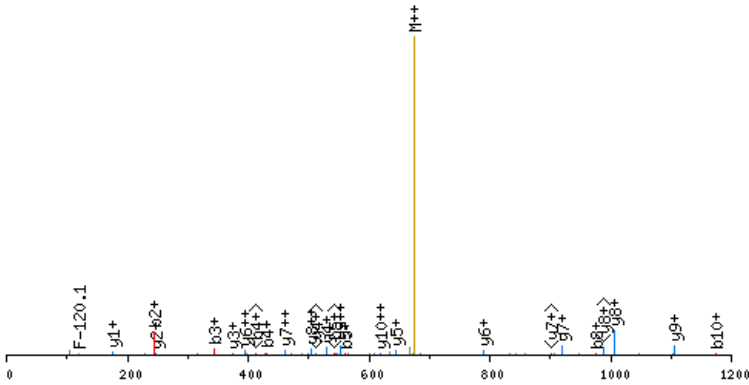

click image to zoom in; click top corners to zoom out [precursor±]

scan 7544; 675.4 m/z; 6.2e+000

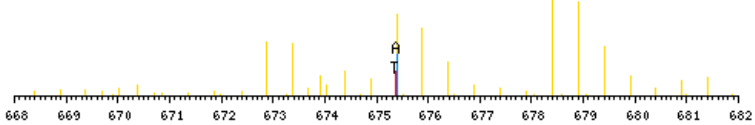

zoomed in precursor plot; T=theoretical m/z, A=acquired m/z

| b <sup>+</sup> | #  | AA | #  | y <sup>+</sup> | y <sup>2+</sup> |
|----------------|----|----|----|----------------|-----------------|
| 114.0555       | 1  | A  | 11 |                |                 |
| 245.0960       | 2  | M  | 10 | 1236.6775      | 618.8427        |
| 344.1644       | 3  | V  | 9  | 1105.6370      | 553.3224        |
| 431.1964       | 4  | S  | 8  | 1006.5686      | 503.7882        |
| 560.2390       | 5  | E  | 7  | 919.5366       | 460.2722        |
| 707.3074       | 6  | F  | 6  | 790.4940       | 395.7509        |
| 820.3915       | 7  | L  | 5  | 643.4256       | 322.2167        |
| 976.5178       | 8  | K  | 4  | 530.3415       | 265.6747        |
| 1104.5764      | 9  | Q  | 3  | 374.2152       | 187.6115        |
| 1175.6135      | 10 | A  | 2  | 246.1566       | 123.5822        |
|                | 11 | R  | 1  | 175.1195       | 88.0637         |

N-term:+43.02 K(8):+156.13

X-range:

0 - 0

MassTol: Y-zoom:

0. 1.

MassType:

☐AVG ☒MONO

Axis:

☒1 ☐2

Label:

☒I ☐M ☐-

Ions:

a ☐+ ☐2+ ☐3+

b ☒+ ☐2+ ☐3+

c ☐+ ☐2+ ☐3+

x ☐+ ☐2+ ☐3+

y ☒+ ☒2+ ☐3+

z ☐+ ☐2+ ☐3+

hide H<sub>2</sub>O/NH<sub>3</sub> ☐

zoom 112-122 ☐

GO

ANEVQVLPSPKGR, MH+ 1577.9016, m/z 526.6387  
L OS G30 P160811 220811-s1.05338.05338.3.dta

scan 5338; 3.8e+000

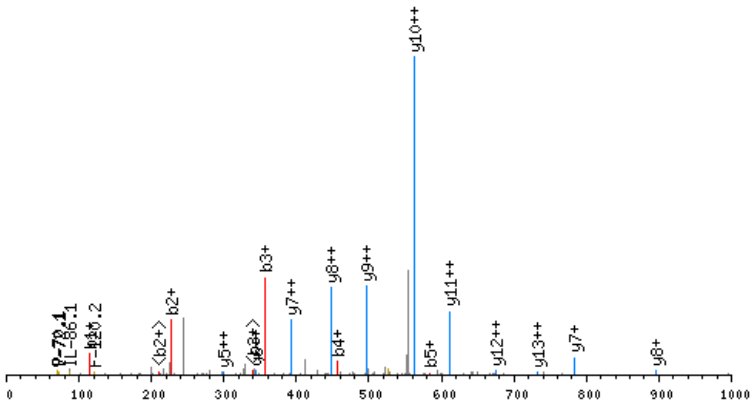

click image to zoom in; click top corners to zoom out

[precursor±]

scan 5334; 526.6 m/z; 1.9e+001

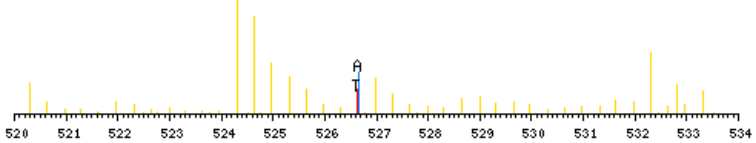

zoomed in precursor plot; T=theoretical m/z, A=acquired m/z

| b <sup>+</sup> | #  | AA | #  | y <sup>+</sup> | y <sup>2+</sup> |
|----------------|----|----|----|----------------|-----------------|
| 114.0555       | 1  | A  | 14 |                |                 |
| 228.0984       | 2  | N  | 13 | 1464.8539      | 732.9308        |
| 357.1410       | 3  | E  | 12 | 1350.8109      | 675.9094        |
| 456.2094       | 4  | V  | 11 | 1221.7684      | 611.3881        |
| 584.2680       | 5  | Q  | 10 | 1122.6999      | 561.8539        |
| 683.3364       | 6  | V  | 9  | 994.6414       | 497.8246        |
| 796.4205       | 7  | L  | 8  | 895.5729       | 448.2904        |
| 893.4733       | 8  | P  | 7  | 782.4889       | 391.7484        |
| 980.5053       | 9  | S  | 6  | 685.4361       | 343.2220        |
| 1077.5581      | 10 | P  | 5  | 598.4041       | 299.7060        |
| 1190.6421      | 11 | L  | 4  | 501.3513       | 251.1796        |
| 1346.7684      | 12 | K  | 3  | 388.2673       | 194.6375        |
| 1403.7899      | 13 | G  | 2  | 232.1410       | 116.5744        |
|                | 14 | R  | 1  | 175.1195       | 88.0637         |

N-term:+43.02 K(12):+156.13

X-range:

0 - 0

MassTol: Y-zoom:

0. 1.

MassType:

☐AVG ☒MONO

Axis:

☒1 ☐2

Label:

☒I ☐M ☐-

Ions:

a ☐+ ☐2+ ☐3+

b ☒+ ☐2+ ☐3+

c ☐+ ☐2+ ☐3+

x ☐+ ☐2+ ☐3+

y ☒+ ☒2+ ☐3+

z ☐+ ☐2+ ☐3+

hide H<sub>2</sub>O/NH<sub>3</sub> ☐

zoom 112-122 ☐

GO

ANHAPFETDISTLTR, MH+ 1714.8400, m/z 572.2849  
L OS G30 P160811 220811-s1.06012.06012.3.dta

scan 6012; 2.6e+000

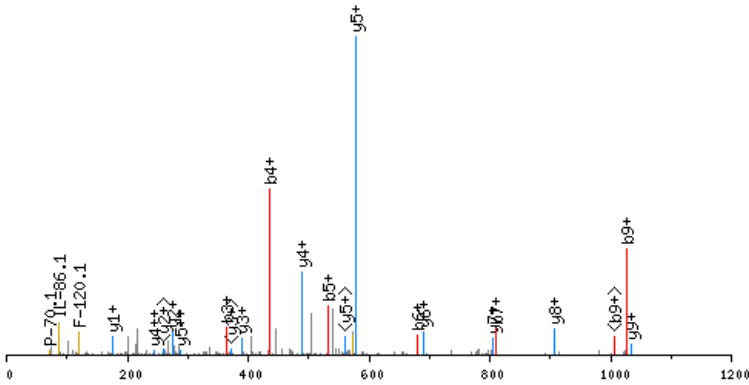

click image to zoom in; click top corners to zoom out

[precursor±]

scan 6009; 572.3 m/z; 2.0e+001

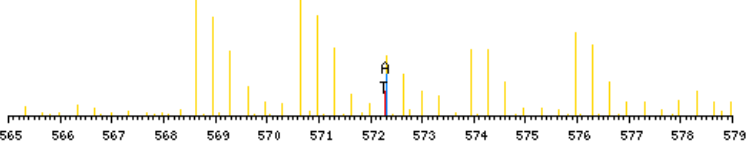

zoomed in precursor plot; T=theoretical m/z, A=acquired m/z

| b <sup>+</sup> | #  | AA | #  | y <sup>+</sup> | y <sup>2+</sup> |
|----------------|----|----|----|----------------|-----------------|
| 114.0555       | 1  | A  | 15 |                |                 |
| 228.0984       | 2  | N  | 14 | 1601.7924      | 801.4001        |
| 365.1574       | 3  | H  | 13 | 1487.7494      | 744.3786        |
| 436.1945       | 4  | A  | 12 | 1350.6905      | 675.8492        |
| 533.2472       | 5  | P  | 11 | 1279.6534      | 640.3306        |
| 680.3156       | 6  | F  | 10 | 1182.6006      | 591.8042        |
| 809.3582       | 7  | E  | 9  | 1035.5322      | 518.2700        |
| 910.4059       | 8  | T  | 8  | 906.4896       | 453.7487        |
| 1025.4329      | 9  | D  | 7  | 805.4420       | 403.2249        |
| 1138.5169      | 10 | I  | 6  | 690.4150       | 345.7114        |
| 1225.5490      | 11 | S  | 5  | 577.3310       | 289.1694        |
| 1326.5966      | 12 | T  | 4  | 490.2989       | 245.6534        |
| 1439.6807      | 13 | L  | 3  | 389.2512       | 195.1295        |
| 1540.7284      | 14 | T  | 2  | 276.1672       | 138.5875        |
|                | 15 | R  | 1  | 175.1195       | 88.0637         |

N-term:+43.02

X-range:

0 - 0

MassTol: Y-zoom:

0. 1.

MassType:

☐ AVG ☒ MONO

Axis:

☒ 1 ☐ 2

Label:

☒ I ☐ M ☐ -

Ions:

a ☐ + ☐ 2+ ☐ 3+

b ☒ + ☐ 2+ ☐ 3+

c ☐ + ☐ 2+ ☐ 3+

x ☐ + ☐ 2+ ☐ 3+

y ☒ + ☒ 2+ ☐ 3+

z ☐ + ☐ 2+ ☐ 3+

hide H<sub>2</sub>O/NH<sub>3</sub> ☐

zoom 112-122 ☐

GO

ANKGPSYGMSR, MH+ 1243.6318, m/z 622.3195  
L OS G31 P160811 220811-s1.02236.02236.2.dta

scan 2236; 3.4e+001

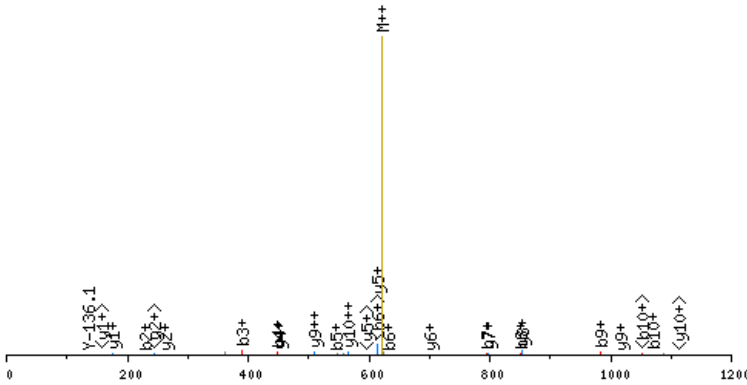

click image to zoom in; click top corners to zoom out

[precursor±]

scan 2234; 622.3 m/z; 4.3e+001

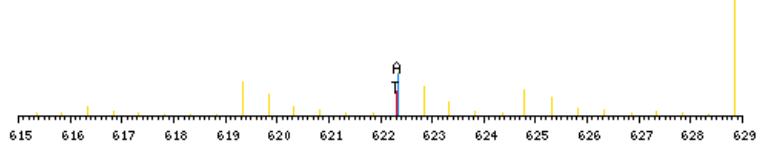

zoomed in precursor plot; T=theoretical m/z, A=acquired m/z

| b <sup>+</sup> | #  | AA | #  | y <sup>+</sup> | y <sup>2+</sup> |
|----------------|----|----|----|----------------|-----------------|
| 114.0555       | 1  | A  | 11 |                |                 |
| 228.0984       | 2  | N  | 10 | 1130.5841      | 565.7960        |
| 390.2565       | 3  | K  | 9  | 1016.5412      | 508.7745        |
| 447.2780       | 4  | G  | 8  | 854.3831       | 427.6954        |
| 544.3308       | 5  | P  | 7  | 797.3616       | 399.1847        |
| 631.3628       | 6  | S  | 6  | 700.3088       | 350.6583        |
| 794.4261       | 7  | Y  | 5  | 613.2768       | 307.1423        |
| 851.4476       | 8  | G  | 4  | 450.2135       | 225.6107        |
| 982.4881       | 9  | M  | 3  | 393.1920       | 197.0999        |
| 1069.5201      | 10 | S  | 2  | 262.1515       | 131.5797        |
|                | 11 | R  | 1  | 175.1195       | 88.0637         |

N-term:+43.02 K(3):+162.16



X-range:

0 - 0

MassTol: Y-zoom:

0. 1.

MassType:

☐AVG ☒MONO

Axis:

☒1 ☐2

Label:

☒I ☐M ☐-

Ions:

a ☐+ ☐2+ ☐3+

b ☒+ ☐2+ ☐3+

c ☐+ ☐2+ ☐3+

x ☐+ ☐2+ ☐3+

y ☒+ ☒2+ ☐3+

z ☐+ ☐2+ ☐3+

hide H<sub>2</sub>O/NH<sub>3</sub> ☐

zoom 112-122 ☐

GO

ANVADTKLYDILGVPPGASENELKKAYR, MH+ 3176.8057, m/z 794.9569  
L OS G34 P160811 220811-s1.09226.09226.4.dta

scan 9226; 4.9e+000

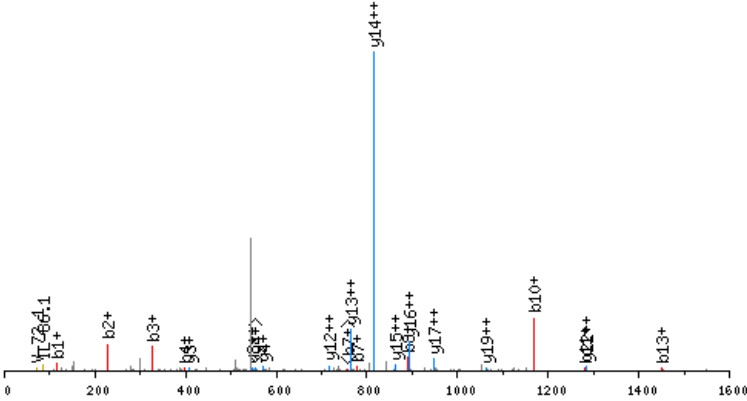

click image to zoom in; click top corners to zoom out [precursor±]

scan 9225; 795.0 m/z; 2.9e+001

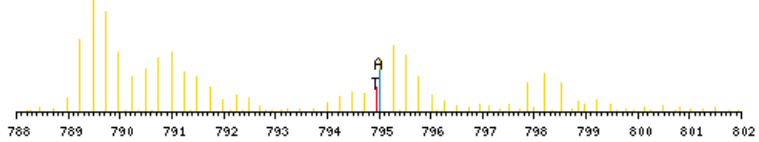

zoomed in precursor plot; T=theoretical m/z, A=acquired m/z

| b <sup>+</sup> | #  | AA | #  | y <sup>+</sup> | y <sup>2+</sup> |
|----------------|----|----|----|----------------|-----------------|
| 114.0555       | 1  | A  | 28 |                |                 |
| 228.0984       | 2  | N  | 27 | 3063.7580      | 1532.3829       |
| 327.1669       | 3  | V  | 26 | 2949.7150      | 1475.3614       |
| 398.2040       | 4  | A  | 25 | 2850.6466      | 1425.8272       |
| 513.2309       | 5  | D  | 24 | 2779.6095      | 1390.3087       |
| 614.2786       | 6  | T  | 23 | 2664.5826      | 1332.7952       |
| 776.4367       | 7  | K  | 22 | 2563.5349      | 1282.2714       |
| 889.5208       | 8  | L  | 21 | 2401.3768      | 1201.1923       |
| 1052.5841      | 9  | Y  | 20 | 2288.2927      | 1144.6503       |
| 1167.6110      | 10 | D  | 19 | 2125.2294      | 1063.1186       |
| 1280.6951      | 11 | I  | 18 | 2010.2025      | 1005.6051       |
| 1393.7792      | 12 | L  | 17 | 1897.1184      | 949.0631        |
| 1450.8006      | 13 | G  | 16 | 1784.0343      | 892.5211        |
| 1549.8690      | 14 | V  | 15 | 1727.0129      | 864.0103        |
| 1646.9218      | 15 | P  | 14 | 1627.9445      | 814.4761        |
| 1743.9746      | 16 | P  | 13 | 1530.8917      | 765.9498        |
| 1800.9960      | 17 | G  | 12 | 1433.8389      | 717.4234        |
| 1872.0331      | 18 | A  | 11 | 1376.8175      | 688.9126        |
| 1959.0652      | 19 | S  | 10 | 1305.7803      | 653.3941        |
| 2088.1078      | 20 | E  | 9  | 1218.7483      | 609.8781        |
| 2202.1507      | 21 | N  | 8  | 1089.7057      | 545.3568        |
| 2331.1933      | 22 | E  | 7  | 975.6628       | 488.3353        |
| 2444.2773      | 23 | L  | 6  | 846.6202       | 423.8140        |
| 2606.4354      | 24 | K  | 5  | 733.5361       | 367.2720        |
| 2768.5935      | 25 | K  | 4  | 571.3780       | 286.1929        |
| 2839.6307      | 26 | A  | 3  | 409.2199       | 205.1139        |
| 3002.6940      | 27 | Y  | 2  | 338.1828       | 169.5953        |
|                | 28 | R  | 1  | 175.1195       | 88.0637         |

N-term:+43.02 K(7):+162.16  
K(24):+162.16 K(25):+162.16

X-range:

0 - 0

MassTol: Y-zoom:

0. 1.

MassType:

☐ AVG ☒ MONO

Axis:

☒ 1 ☐ 2

Label:

☒ I ☐ M ☐ -

Ions:

a ☐ + ☐ 2+ ☐ 3+

b ☒ + ☐ 2+ ☐ 3+

c ☐ + ☐ 2+ ☐ 3+

x ☐ + ☐ 2+ ☐ 3+

y ☒ + ☒ 2+ ☐ 3+

z ☐ + ☐ 2+ ☐ 3+

hide H<sub>2</sub>O/NH<sub>3</sub> ☐

zoom 112-122 ☐

GO

APKVSDSVEQLR, MH+ 1404.7911, m/z 468.9352  
L OS G34 P160811 220811-s1.03288.03288.3.dta

scan 3288; 2.2e+001

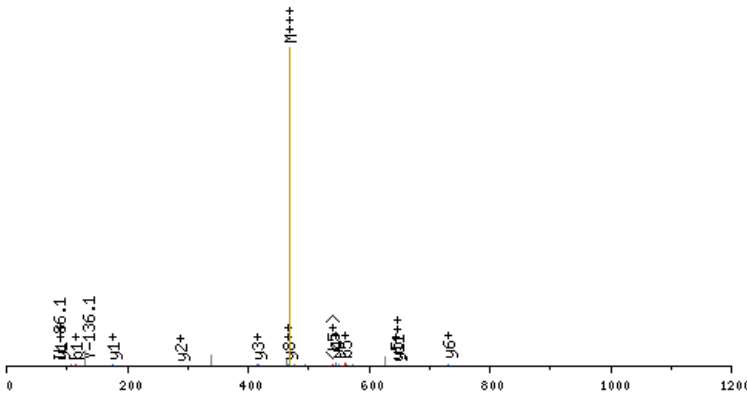

click image to zoom in; click top corners to zoom out

[precursor±]

scan 3285; 468.9 m/z; 2.5e+001

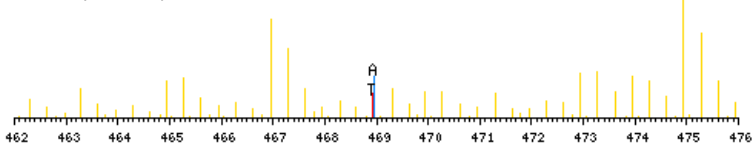

zoomed in precursor plot; T=theoretical m/z, A=acquired m/z

| b <sup>+</sup> | #  | AA | #  | y <sup>+</sup> | y <sup>2+</sup> |
|----------------|----|----|----|----------------|-----------------|
| 114.0555       | 1  | A  | 12 |                |                 |
| 211.1083       | 2  | P  | 11 | 1291.7434      | 646.3756        |
| 373.2664       | 3  | K  | 10 | 1194.6907      | 597.8492        |
| 472.3348       | 4  | V  | 9  | 1032.5326      | 516.7702        |
| 559.3668       | 5  | S  | 8  | 933.4641       | 467.2360        |
| 674.3938       | 6  | D  | 7  | 846.4321       | 423.7200        |
| 761.4258       | 7  | S  | 6  | 731.4052       | 366.2065        |
| 860.4942       | 8  | V  | 5  | 644.3731       | 322.6905        |
| 989.5368       | 9  | E  | 4  | 545.3047       | 273.1563        |
| 1117.5954      | 10 | Q  | 3  | 416.2621       | 208.6350        |
| 1230.6794      | 11 | L  | 2  | 288.2036       | 144.6057        |
|                | 12 | R  | 1  | 175.1195       | 88.0637         |

N-term:+43.02 K(3):+162.16

X-range:

0 - 0

MassTol: Y-zoom:

0. 1.

MassType:

☐ AVG ☒ MONO

Axis:

☒ 1 ☐ 2

Label:

☒ I ☐ M ☐ -

Ions:

a ☐ + ☐ 2+ ☐ 3+

b ☒ + ☐ 2+ ☐ 3+

c ☐ + ☐ 2+ ☐ 3+

x ☐ + ☐ 2+ ☐ 3+

y ☒ + ☒ 2+ ☐ 3+

z ☐ + ☐ 2+ ☐ 3+

hide H<sub>2</sub>O/NH<sub>3</sub> ☐

zoom 112-122 ☐

GO

AQAEGAYHRPLATSR, MH+ 1669.8411, m/z 557.2852  
L OS G34 P160811 220811-s1.02888.02888.3.dta

scan 2888; 2.7e+000

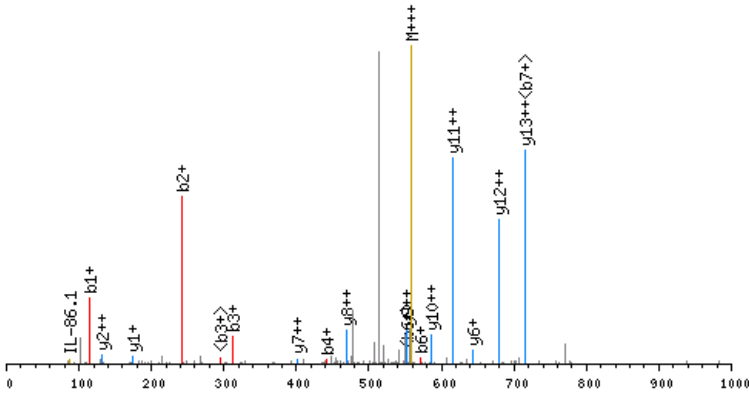

click image to zoom in; click top corners to zoom out

[precursor±]

scan 2885; 557.3 m/z; 4.0e+001

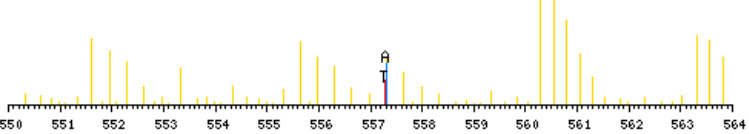

zoomed in precursor plot; T=theoretical m/z, A=acquired m/z

| b <sup>+</sup> | #  | AA | #  | y <sup>+</sup> | y <sup>2+</sup> |
|----------------|----|----|----|----------------|-----------------|
| 114.0555       | 1  | A  | 15 |                |                 |
| 242.1141       | 2  | Q  | 14 | 1556.7934      | 778.9006        |
| 313.1512       | 3  | A  | 13 | 1428.7348      | 714.8713        |
| 442.1938       | 4  | E  | 12 | 1357.6977      | 679.3527        |
| 499.2153       | 5  | G  | 11 | 1228.6551      | 614.8315        |
| 570.2524       | 6  | A  | 10 | 1171.6336      | 586.3207        |
| 733.3157       | 7  | Y  | 9  | 1100.5965      | 550.8022        |
| 870.3746       | 8  | H  | 8  | 937.5332       | 469.2705        |
| 1026.4757      | 9  | R  | 7  | 800.4743       | 400.7410        |
| 1123.5285      | 10 | P  | 6  | 644.3731       | 322.6905        |
| 1236.6126      | 11 | L  | 5  | 547.3204       | 274.1641        |
| 1307.6497      | 12 | A  | 4  | 434.2363       | 217.6221        |
| 1408.6973      | 13 | T  | 3  | 363.1992       | 182.1035        |
| 1495.7294      | 14 | S  | 2  | 262.1515       | 131.5797        |
|                | 15 | R  | 1  | 175.1195       | 88.0637         |

N-term:+43.02

X-range:

0 - 0

MassTol: Y-zoom:

0. 1.

MassType:

☐ AVG ☒ MONO

Axis:

☒ 1 ☐ 2

Label:

☒ I ☐ M ☐ -

Ions:

a ☐ + ☐ 2+ ☐ 3+

b ☒ + ☐ 2+ ☐ 3+

c ☐ + ☐ 2+ ☐ 3+

x ☐ + ☐ 2+ ☐ 3+

y ☒ + ☒ 2+ ☐ 3+

z ☐ + ☐ 2+ ☐ 3+

hide H<sub>2</sub>O/NH<sub>3</sub> ☐

zoom 112-122 ☐

GO

AQAPAKCPSYPGSGDGEMGKLR, MH+ 2387.2124, m/z 597.5586  
L OS G32 P160811 220811-s1.03434.03434.4.dta

scan 3434; 3.2e+000

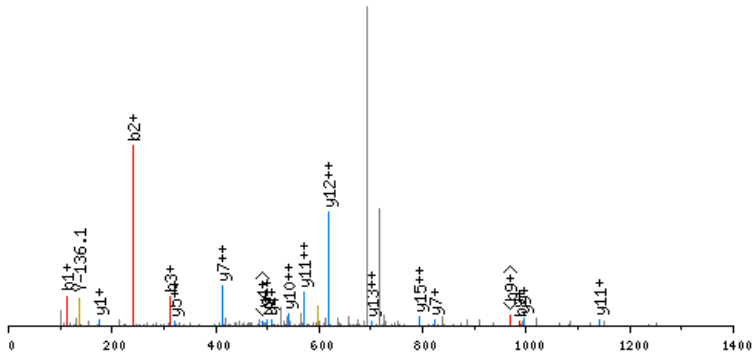

click image to zoom in; click top corners to zoom out

[precursor±]

scan 3433; 597.6 m/z; 1.0e+001

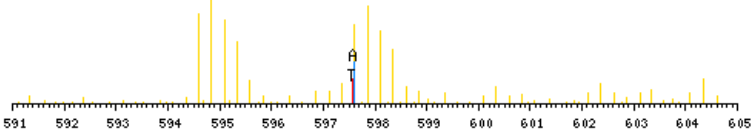

zoomed in precursor plot; T=theoretical m/z, A=acquired m/z

| b <sup>+</sup> | #  | AA | #  | y <sup>+</sup> | y <sup>2+</sup> |
|----------------|----|----|----|----------------|-----------------|
| 114.0555       | 1  | A  | 22 |                |                 |
| 242.1141       | 2  | Q  | 21 | 2274.1647      | 1137.5863       |
| 313.1512       | 3  | A  | 20 | 2146.1061      | 1073.5570       |
| 410.2040       | 4  | P  | 19 | 2075.0690      | 1038.0384       |
| 481.2411       | 5  | A  | 18 | 1978.0163      | 989.5120        |
| 643.3992       | 6  | K  | 17 | 1906.9792      | 953.9935        |
| 803.4298       | 7  | C  | 16 | 1744.8211      | 872.9144        |
| 900.4825       | 8  | P  | 15 | 1584.7905      | 792.8991        |
| 987.5146       | 9  | S  | 14 | 1487.7377      | 744.3728        |
| 1150.5779      | 10 | Y  | 13 | 1400.7057      | 700.8567        |
| 1247.6307      | 11 | P  | 12 | 1237.6423      | 619.3251        |
| 1304.6521      | 12 | G  | 11 | 1140.5896      | 570.7987        |
| 1391.6842      | 13 | S  | 10 | 1083.5681      | 542.2880        |
| 1448.7056      | 14 | G  | 9  | 996.5361       | 498.7720        |
| 1563.7326      | 15 | D  | 8  | 939.5146       | 470.2612        |
| 1620.7540      | 16 | G  | 7  | 824.4877       | 412.7477        |
| 1749.7966      | 17 | E  | 6  | 767.4662       | 384.2370        |
| 1880.8371      | 18 | M  | 5  | 638.4236       | 319.7157        |
| 1937.8586      | 19 | G  | 4  | 507.3831       | 254.1955        |
| 2100.0167      | 20 | K  | 3  | 450.3617       | 225.6847        |
| 2213.1007      | 21 | L  | 2  | 288.2036       | 144.6057        |
|                | 22 | R  | 1  | 175.1195       | 88.0637         |

N-term:+43.02 K(6):+162.16  
C(7):+160.03 K(20):+162.16

X-range:

0 - 0

MassTol: Y-zoom:

0. 1.

MassType:

☐AVG ☒MONO

Axis:

☒1 ☐2

Label:

☒I ☐M ☐-

Ions:

a ☐+ ☐2+ ☐3+

b ☒+ ☐2+ ☐3+

c ☐+ ☐2+ ☐3+

x ☐+ ☐2+ ☐3+

y ☒+ ☒2+ ☐3+

z ☐+ ☐2+ ☐3+

hide H<sub>2</sub>O/NH<sub>3</sub> ☐

zoom 112-122 ☐

GO

AQDGVELEKSVR, MH+ 1400.7386, m/z 700.8729  
L OS G31 P160811 220811-s1.04522.04522.2.dta

scan 4522; 1.2e+001

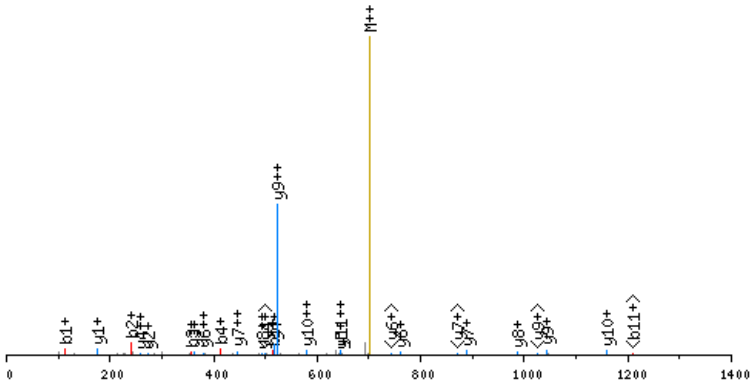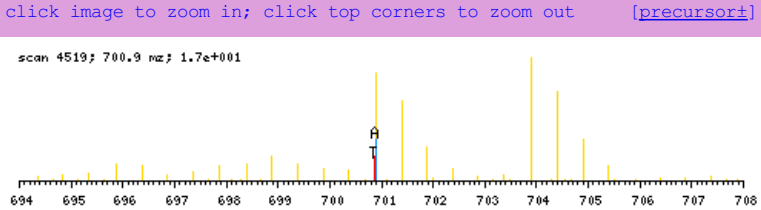

zoomed in precursor plot; T=theoretical m/z, A=acquired m/z

| b <sup>+</sup> | #  | AA | #  | y <sup>+</sup> | y <sup>2+</sup> |
|----------------|----|----|----|----------------|-----------------|
| 114.0555       | 1  | A  | 12 |                |                 |
| 242.1141       | 2  | Q  | 11 | 1287.6909      | 644.3494        |
| 357.1410       | 3  | D  | 10 | 1159.6323      | 580.3201        |
| 414.1625       | 4  | G  | 9  | 1044.6054      | 522.8066        |
| 513.2309       | 5  | V  | 8  | 987.5839       | 494.2959        |
| 642.2735       | 6  | E  | 7  | 888.5155       | 444.7617        |
| 755.3576       | 7  | L  | 6  | 759.4729       | 380.2404        |
| 884.4002       | 8  | E  | 5  | 646.3888       | 323.6983        |
| 1040.5265      | 9  | K  | 4  | 517.3462       | 259.1770        |
| 1127.5585      | 10 | S  | 3  | 361.2199       | 181.1139        |
| 1226.6269      | 11 | V  | 2  | 274.1879       | 137.5979        |
|                | 12 | R  | 1  | 175.1195       | 88.0637         |

N-term:+43.02 K(9):+156.13

X-range:  

0-0

MassTol: Y-zoom:  

0.1.

MassType:  

☐AVG☒MONO

Axis:  

☒1☐2

Label:  

☒I☐M☐-

Ions:  

a

☐+☐2+☐3+

b

☒+☐2+☐3+

c

☐+☐2+☐3+

x

☐+☐2+☐3+

y

☒+☒2+☐3+

z

☐+☐2+☐3+

hide H<sub>2</sub>O/NH<sub>3</sub>

☐

zoom 112-122

☐

GO

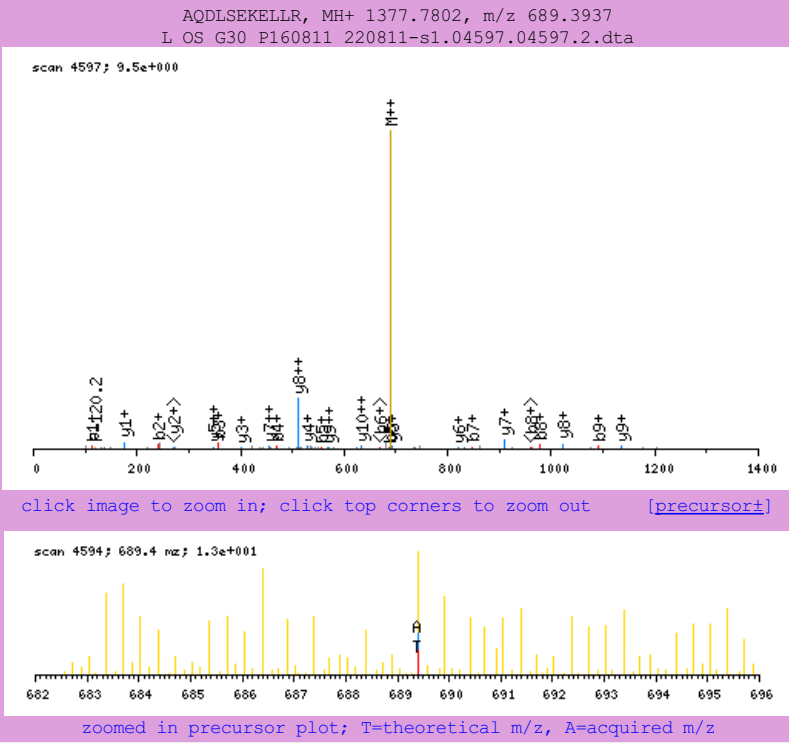

| b <sup>+</sup> | #  | AA | #  | y <sup>+</sup> | y <sup>2+</sup> |
|----------------|----|----|----|----------------|-----------------|
| 114.0555       | 1  | A  | 11 |                |                 |
| 242.1141       | 2  | Q  | 10 | 1264.7325      | 632.8702        |
| 357.1410       | 3  | D  | 9  | 1136.6740      | 568.8409        |
| 470.2251       | 4  | L  | 8  | 1021.6470      | 511.3274        |
| 557.2571       | 5  | S  | 7  | 908.5629       | 454.7854        |
| 686.2997       | 6  | E  | 6  | 821.5309       | 411.2694        |
| 848.4578       | 7  | K  | 5  | 692.4883       | 346.7481        |
| 977.5004       | 8  | E  | 4  | 530.3302       | 265.6690        |
| 1090.5845      | 9  | L  | 3  | 401.2876       | 201.1477        |
| 1203.6685      | 10 | L  | 2  | 288.2036       | 144.6057        |
|                | 11 | R  | 1  | 175.1195       | 88.0637         |

N-term:+43.02 K(7):+162.16

X-range:

0 - 0

MassTol: Y-zoom:

0. 1.

MassType:

☐AVG ☒MONO

Axis:

☒1 ☐2

Label:

☒I ☐M ☐-

Ions:

a ☐+ ☐2+ ☐3+

b ☒+ ☐2+ ☐3+

c ☐+ ☐2+ ☐3+

x ☐+ ☐2+ ☐3+

y ☒+ ☒2+ ☐3+

z ☐+ ☐2+ ☐3+

hide H<sub>2</sub>O/NH<sub>3</sub> ☐

zoom 112-122 ☐

GO

AQDQGEKENPMR, MH+ 1472.6804, m/z 491.5650  
L OS G31 P160811 220811-s1.02240.02240.3.dta

scan 2240; 1.7e+000

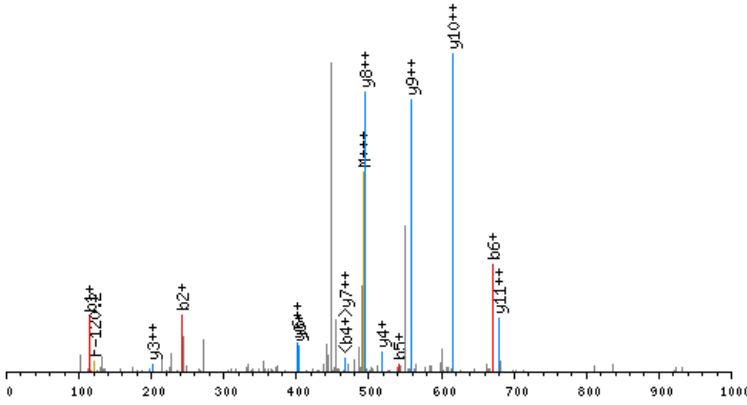

click image to zoom in; click top corners to zoom out

[precursor±]

scan 2239; 491.6 m/z; 5.1e+000

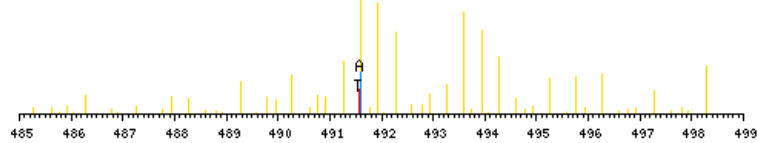

zoomed in precursor plot; T=theoretical m/z, A=acquired m/z

| b <sup>+</sup> | #  | AA | #  | y <sup>+</sup> | y <sup>2+</sup> |
|----------------|----|----|----|----------------|-----------------|
| 114.0555       | 1  | A  | 12 |                |                 |
| 242.1141       | 2  | Q  | 11 | 1359.6327      | 680.3203        |
| 357.1410       | 3  | D  | 10 | 1231.5741      | 616.2910        |
| 485.1996       | 4  | Q  | 9  | 1116.5472      | 558.7775        |
| 542.2211       | 5  | G  | 8  | 988.4886       | 494.7482        |
| 671.2637       | 6  | E  | 7  | 931.4672       | 466.2375        |
| 827.3900       | 7  | K  | 6  | 802.4246       | 401.7162        |
| 956.4326       | 8  | E  | 5  | 646.2983       | 323.6530        |
| 1070.4755      | 9  | N  | 4  | 517.2557       | 259.1318        |
| 1167.5283      | 10 | P  | 3  | 403.2127       | 202.1103        |
| 1298.5687      | 11 | M  | 2  | 306.1600       | 153.5839        |
|                | 12 | R  | 1  | 175.1195       | 88.0637         |

N-term:+43.02 K(7):+156.13

X-range:

0 - 0

MassTol: Y-zoom:

0. 1.

MassType:

☐ AVG ☒ MONO

Axis:

☒ 1 ☐ 2

Label:

☒ I ☐ M ☐ -

Ions:

a ☐ + ☐ 2+ ☐ 3+

b ☒ + ☐ 2+ ☐ 3+

c ☐ + ☐ 2+ ☐ 3+

x ☐ + ☐ 2+ ☐ 3+

y ☒ + ☒ 2+ ☐ 3+

z ☐ + ☐ 2+ ☐ 3+

hide H<sub>2</sub>O/NH<sub>3</sub> ☐

zoom 112-122 ☐

GO

AQELQHPEFAR, MH+ 1367.6708, m/z 456.5618  
L OS G31 P160811 220811-s1.05056.05056.3.dta

scan 5056; 1.7e+000

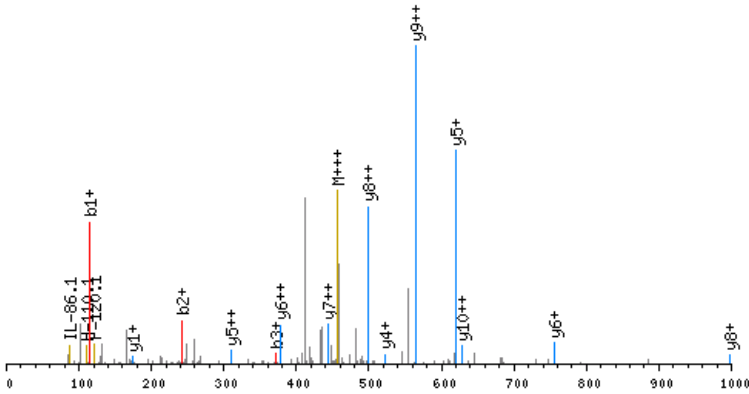

click image to zoom in; click top corners to zoom out

[precursor±]

scan 5054; 456.6 m/z; 1.6e+002

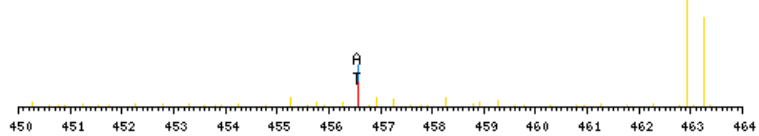

zoomed in precursor plot; T=theoretical m/z, A=acquired m/z

| b <sup>+</sup> | #  | AA | #  | y <sup>+</sup> | y <sup>2+</sup> |
|----------------|----|----|----|----------------|-----------------|
| 114.0555       | 1  | A  | 11 |                |                 |
| 242.1141       | 2  | Q  | 10 | 1254.6231      | 627.8155        |
| 371.1567       | 3  | E  | 9  | 1126.5645      | 563.7862        |
| 484.2407       | 4  | L  | 8  | 997.5219       | 499.2649        |
| 612.2993       | 5  | Q  | 7  | 884.4379       | 442.7228        |
| 749.3582       | 6  | H  | 6  | 756.3793       | 378.6936        |
| 846.4110       | 7  | P  | 5  | 619.3204       | 310.1641        |
| 975.4536       | 8  | E  | 4  | 522.2676       | 261.6377        |
| 1122.5220      | 9  | F  | 3  | 393.2250       | 197.1164        |
| 1193.5591      | 10 | A  | 2  | 246.1566       | 123.5822        |
|                | 11 | R  | 1  | 175.1195       | 88.0637         |

N-term:+43.02

X-range:

0 - 0

MassTol: Y-zoom:

0. 1.

MassType:

☐AVG ☒MONO

Axis:

☒1 ☐2

Label:

☒I ☐M ☐-

Ions:

a ☐+ ☐2+ ☐3+

b ☒+ ☐2+ ☐3+

c ☐+ ☐2+ ☐3+

x ☐+ ☐2+ ☐3+

y ☒+ ☒2+ ☐3+

z ☐+ ☐2+ ☐3+

hide H<sub>2</sub>O/NH<sub>3</sub> ☐

zoom 112-122 ☐

GO

AQERPSCAVEPEHVQR, MH+ 1934.9142, m/z 645.6429  
L OS G33 P160811 220811-s1.02460.02460.3.dta

scan 2460; 2.6e+000

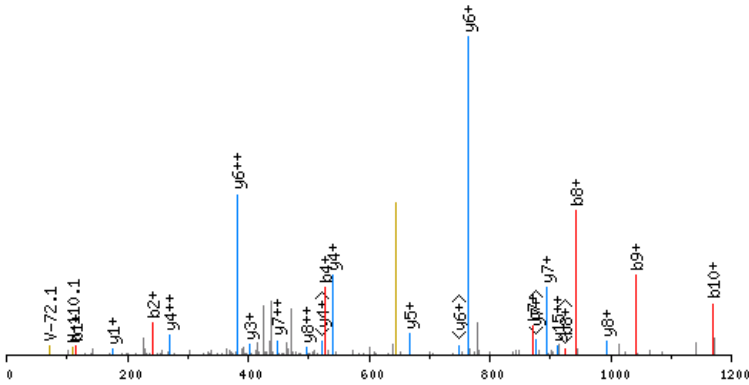

click image to zoom in; click top corners to zoom out

[precursor±]

scan 2457; 645.6 m/z; 1.0e+001

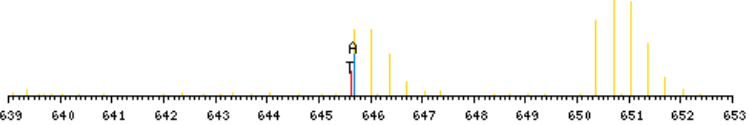

zoomed in precursor plot; T=theoretical m/z, A=acquired m/z

| b <sup>+</sup> | #  | AA | #  | y <sup>+</sup> | y <sup>2+</sup> |
|----------------|----|----|----|----------------|-----------------|
| 114.0555       | 1  | A  | 16 |                |                 |
| 242.1141       | 2  | Q  | 15 | 1821.8666      | 911.4372        |
| 371.1567       | 3  | E  | 14 | 1693.8080      | 847.4079        |
| 527.2578       | 4  | R  | 13 | 1564.7654      | 782.8866        |
| 624.3106       | 5  | P  | 12 | 1408.6643      | 704.8360        |
| 711.3426       | 6  | S  | 11 | 1311.6115      | 656.3097        |
| 871.3732       | 7  | C  | 10 | 1224.5795      | 612.7937        |
| 942.4103       | 8  | A  | 9  | 1064.5489      | 532.7784        |
| 1041.4787      | 9  | V  | 8  | 993.5118       | 497.2598        |
| 1170.5213      | 10 | E  | 7  | 894.4434       | 447.7256        |
| 1267.5741      | 11 | P  | 6  | 765.4008       | 383.2043        |
| 1396.6167      | 12 | E  | 5  | 668.3480       | 334.6779        |
| 1533.6756      | 13 | H  | 4  | 539.3054       | 270.1566        |
| 1632.7440      | 14 | V  | 3  | 402.2465       | 201.6272        |
| 1760.8026      | 15 | Q  | 2  | 303.1781       | 152.0930        |
|                | 16 | R  | 1  | 175.1195       | 88.0637         |

N-term:+43.02 C(7):+160.03

N-term: +43.02

| $b^+$     | #  | AA | #  | $y^+$     | $y^{2+}$ |
|-----------|----|----|----|-----------|----------|
| 114.0555  | 1  | A  | 16 |           |          |
| 242.1141  | 2  | Q  | 15 | 1792.9095 | 896.9586 |
| 299.1356  | 3  | G  | 14 | 1664.8509 | 832.9294 |
| 386.1676  | 4  | S  | 13 | 1607.8294 | 804.4186 |
| 523.2265  | 5  | H  | 12 | 1520.7974 | 760.9026 |
| 651.2851  | 6  | Q  | 11 | 1383.7385 | 692.3731 |
| 764.3691  | 7  | I  | 10 | 1255.6799 | 628.3439 |
| 879.3961  | 8  | D  | 9  | 1142.5958 | 571.8018 |
| 1026.4645 | 9  | F  | 8  | 1027.5689 | 514.2884 |
| 1154.5231 | 10 | Q  | 7  | 880.5005  | 440.7542 |
| 1253.5915 | 11 | V  | 6  | 752.4419  | 376.7249 |
| 1366.6755 | 12 | L  | 5  | 653.3735  | 327.1907 |
| 1503.7345 | 13 | H  | 4  | 540.2894  | 270.6486 |
| 1618.7614 | 14 | D  | 3  | 403.2305  | 202.1192 |
| 1731.8455 | 15 | L  | 2  | 288.2036  | 144.6057 |
|           | 16 | R  | 1  | 175.1195  | 88.0637  |

X-range:  
 -   
MassTol: Y-zoom:  
   
MassType:  
☐ AVG ☒ MONO  
Axis:  
☒ 1 ☐ 2  
Label:  
☒ I ☐ M ☐ -  
Ions:  
a ☐ + ☐ 2+ ☐ 3+  
b ☒ + ☐ 2+ ☐ 3+  
c ☐ + ☐ 2+ ☐ 3+  
x ☐ + ☐ 2+ ☐ 3+  
y ☒ + ☒ 2+ ☐ 3+  
z ☐ + ☐ 2+ ☐ 3+  
hide H<sub>2</sub>O/NH<sub>3</sub> ☐  
zoom 112-122 ☐

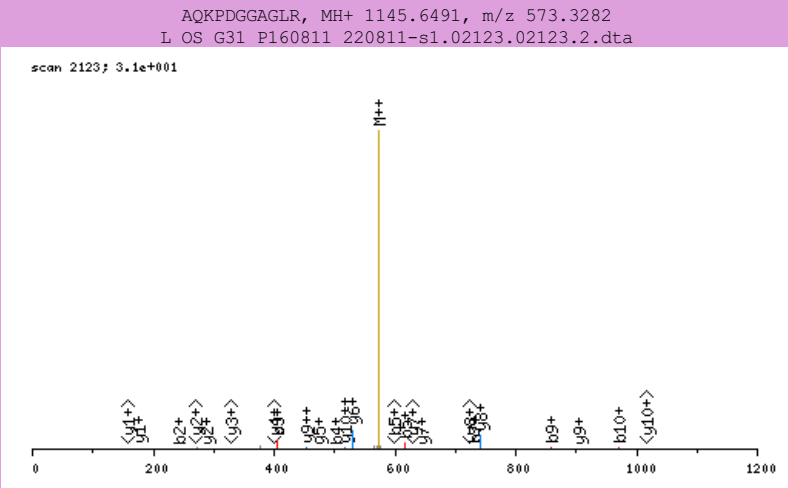

click image to zoom in; click top corners to zoom out [\[precursor±\]](#)

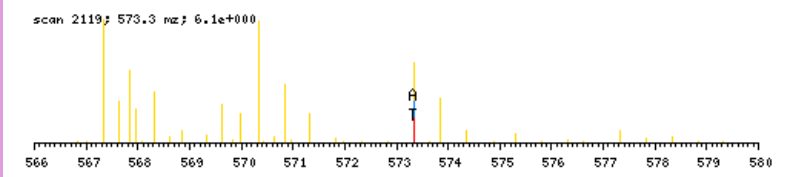

zoomed in precursor plot; T=theoretical m/z, A=acquired m/z

| b <sup>+</sup> | #  | AA | #  | y <sup>+</sup> | y <sup>2+</sup> |
|----------------|----|----|----|----------------|-----------------|
| 114.0555       | 1  | A  | 11 |                |                 |
| 242.1141       | 2  | Q  | 10 | 1032.6015      | 516.8046        |
| 404.2722       | 3  | K  | 9  | 904.5429       | 452.7754        |
| 501.3250       | 4  | P  | 8  | 742.3848       | 371.6963        |
| 616.3519       | 5  | D  | 7  | 645.3320       | 323.1699        |
| 673.3734       | 6  | G  | 6  | 530.3051       | 265.6564        |
| 730.3948       | 7  | G  | 5  | 473.2836       | 237.1457        |
| 801.4319       | 8  | A  | 4  | 416.2621       | 208.6350        |
| 858.4534       | 9  | G  | 3  | 345.2250       | 173.1164        |
| 971.5375       | 10 | L  | 2  | 288.2036       | 144.6057        |
|                | 11 | R  | 1  | 175.1195       | 88.0637         |

N-term:+43.02 K(3):+162.16

X-range:

0 - 0

MassTol: Y-zoom:

0. 1.

MassType:

☐ AVG ☒ MONO

Axis:

☒ 1 ☐ 2

Label:

☒ I ☐ M ☐ -

Ions:

a ☐ + ☐ 2+ ☐ 3+

b ☒ + ☐ 2+ ☐ 3+

c ☐ + ☐ 2+ ☐ 3+

x ☐ + ☐ 2+ ☐ 3+

y ☒ + ☒ 2+ ☐ 3+

z ☐ + ☐ 2+ ☐ 3+

hide H<sub>2</sub>O/NH<sub>3</sub> ☐

zoom 112-122 ☐

GO

AQNLIKDLGR, MH+ 1155.6486, m/z 578.3280  
L OS G31 P160811 220811-s1.04943.04943.2.dta

scan 4943; 3.5e+001

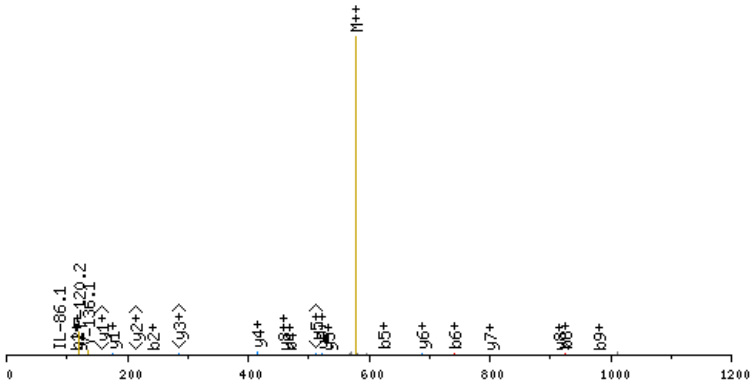

click image to zoom in; click top corners to zoom out

[precursor±]

scan 4939; 578.3 m/z; 3.1e+001

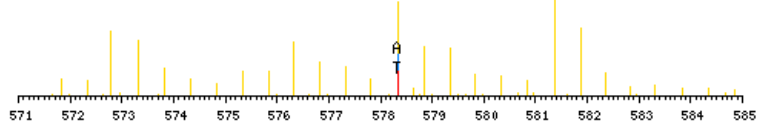

zoomed in precursor plot; T=theoretical m/z, A=acquired m/z

| b <sup>+</sup> | #  | AA | #  | y <sup>+</sup> | y <sup>2+</sup> |
|----------------|----|----|----|----------------|-----------------|
| 114.0555       | 1  | A  | 10 |                |                 |
| 242.1141       | 2  | Q  | 9  | 1042.6010      | 521.8044        |
| 356.1570       | 3  | N  | 8  | 914.5424       | 457.7751        |
| 469.2411       | 4  | L  | 7  | 800.4994       | 400.7536        |
| 625.3674       | 5  | K  | 6  | 687.4154       | 344.2116        |
| 740.3943       | 6  | D  | 5  | 531.2891       | 266.1485        |
| 853.4784       | 7  | L  | 4  | 416.2621       | 208.6350        |
| 924.5155       | 8  | A  | 3  | 303.1781       | 152.0930        |
| 981.5370       | 9  | G  | 2  | 232.1410       | 116.5744        |
|                | 10 | R  | 1  | 175.1195       | 88.0637         |

N-term:+43.02 K(5):+156.13

X-range:

0 - 0

MassTol: Y-zoom:

0. 1.

MassType:

☐AVG ☒MONO

Axis:

☒1 ☐2

Label:

☒I ☐M ☐-

Ions:

a ☐+ ☐2+ ☐3+

b ☒+ ☐2+ ☐3+

c ☐+ ☐2+ ☐3+

x ☐+ ☐2+ ☐3+

y ☒+ ☒2+ ☐3+

z ☐+ ☐2+ ☐3+

hide H<sub>2</sub>O/NH<sub>3</sub> ☐

zoom 112-122 ☐

GO

AQPKNLEGYVGFANLPNQVYR, MH+ 2454.2994, m/z 818.7713  
L OS G30 P160811 220811-s1.07388.07388.3.dta

scan 7388; 2.6e+000

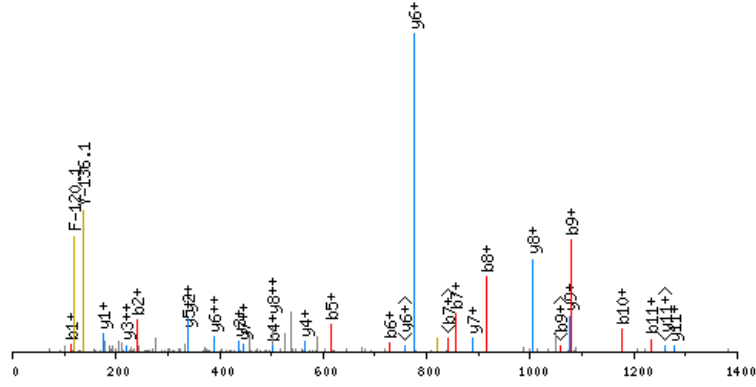

click image to zoom in; click top corners to zoom out [\[precursor±\]](#)

scan 7384; 818.8 m/z; 1.7e+001

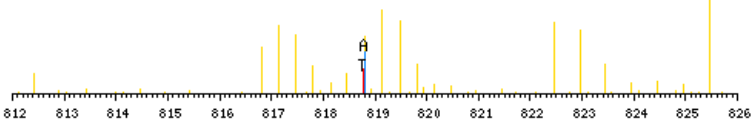

zoomed in precursor plot; T=theoretical m/z, A=acquired m/z

| b <sup>+</sup> | #  | AA | #  | y <sup>+</sup> | y <sup>2+</sup> |
|----------------|----|----|----|----------------|-----------------|
| 114.0555       | 1  | A  | 21 |                |                 |
| 242.1141       | 2  | Q  | 20 | 2341.2517      | 1171.1298       |
| 339.1669       | 3  | P  | 19 | 2213.1931      | 1107.1005       |
| 501.3250       | 4  | K  | 18 | 2116.1404      | 1058.5741       |
| 615.3679       | 5  | N  | 17 | 1953.9823      | 977.4951        |
| 728.4519       | 6  | L  | 16 | 1839.9394      | 920.4736        |
| 857.4945       | 7  | E  | 15 | 1726.8553      | 863.9316        |
| 914.5160       | 8  | G  | 14 | 1597.8127      | 799.4103        |
| 1077.5793      | 9  | Y  | 13 | 1540.7912      | 770.8995        |
| 1176.6477      | 10 | V  | 12 | 1377.7279      | 689.3679        |
| 1233.6692      | 11 | G  | 11 | 1278.6595      | 639.8337        |
| 1380.7376      | 12 | F  | 10 | 1221.6380      | 611.3229        |
| 1451.7747      | 13 | A  | 9  | 1074.5696      | 537.7887        |
| 1565.8177      | 14 | N  | 8  | 1003.5325      | 502.2702        |
| 1678.9017      | 15 | L  | 7  | 889.4896       | 445.2487        |
| 1775.9545      | 16 | P  | 6  | 776.4055       | 388.7067        |
| 1889.9974      | 17 | N  | 5  | 679.3527       | 340.1803        |
| 2018.0560      | 18 | Q  | 4  | 565.3098       | 283.1588        |
| 2117.1244      | 19 | V  | 3  | 437.2512       | 219.1295        |
| 2280.1877      | 20 | Y  | 2  | 338.1828       | 169.5953        |
|                | 21 | R  | 1  | 175.1195       | 88.0637         |

N-term:+43.02 K(4):+162.16

X-range:

0 - 0

MassTol: Y-zoom:

0. 1.

MassType:

☐AVG ☒MONO

Axis:

☒1 ☐2

Label:

☒I ☐M ☐-

Ions:

a ☐+ ☐2+ ☐3+

b ☒+ ☐2+ ☐3+

c ☐+ ☐2+ ☐3+

x ☐+ ☐2+ ☐3+

y ☒+ ☒2+ ☐3+

z ☐+ ☐2+ ☐3+

hide H<sub>2</sub>O/NH<sub>3</sub> ☐

zoom 112-122 ☐

GO

ASASYHISNLLKMTSSDKDFR, MH+ 2610.3511, m/z 653.3432  
L OS G34 P160811 220811-s1.09329.09329.4.dta

scan 9329; 6.1e+000

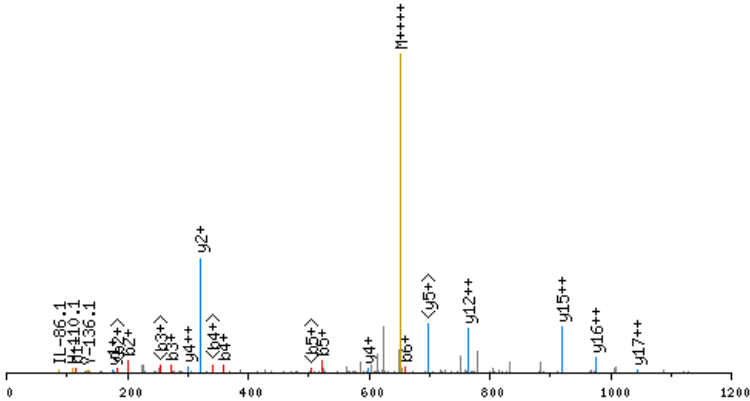

click image to zoom in; click top corners to zoom out [\[precursor±\]](#)

scan 9325; 653.3 m/z; 1.7e+001

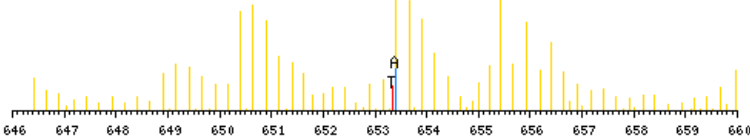

zoomed in precursor plot; T=theoretical m/z, A=acquired m/z

| b <sup>+</sup> | #  | AA | #  | y <sup>+</sup> | y <sup>2+</sup> |
|----------------|----|----|----|----------------|-----------------|
| 114.0555       | 1  | A  | 22 |                |                 |
| 201.0875       | 2  | S  | 21 | 2497.3034      | 1249.1556       |
| 272.1247       | 3  | A  | 20 | 2410.2713      | 1205.6396       |
| 359.1567       | 4  | S  | 19 | 2339.2342      | 1170.1210       |
| 522.2200       | 5  | Y  | 18 | 2252.2022      | 1126.6050       |
| 659.2789       | 6  | H  | 17 | 2089.1389      | 1045.0733       |
| 772.3630       | 7  | I  | 16 | 1952.0800      | 976.5439        |
| 859.3950       | 8  | S  | 15 | 1838.9959      | 920.0019        |
| 973.4379       | 9  | N  | 14 | 1751.9639      | 876.4858        |
| 1086.5220      | 10 | L  | 13 | 1637.9209      | 819.4644        |
| 1199.6061      | 11 | L  | 12 | 1524.8369      | 762.9224        |
| 1328.6487      | 12 | E  | 11 | 1411.7528      | 706.3803        |
| 1490.8068      | 13 | K  | 10 | 1282.7102      | 641.8590        |
| 1621.8473      | 14 | M  | 9  | 1120.5521      | 560.7800        |
| 1722.8949      | 15 | T  | 8  | 989.5116       | 495.2597        |
| 1809.9270      | 16 | S  | 7  | 888.4640       | 444.7359        |
| 1896.9590      | 17 | S  | 6  | 801.4319       | 401.2199        |
| 2011.9859      | 18 | D  | 5  | 714.3999       | 357.7039        |
| 2174.1440      | 19 | K  | 4  | 599.3730       | 300.1904        |
| 2289.1710      | 20 | D  | 3  | 437.2149       | 219.1113        |
| 2436.2394      | 21 | F  | 2  | 322.1879       | 161.5979        |
|                | 22 | R  | 1  | 175.1195       | 88.0637         |

N-term:+43.02 K(13):+162.16  
K(19):+162.16

X-range:

0 - 0

MassTol: Y-zoom:

0. 1.

MassType:

☐ AVG ☒ MONO

Axis:

☒ 1 ☐ 2

Label:

☒ I ☐ M ☐ -

Ions:

a ☐ + ☐ 2+ ☐ 3+

b ☒ + ☐ 2+ ☐ 3+

c ☐ + ☐ 2+ ☐ 3+

x ☐ + ☐ 2+ ☐ 3+

y ☒ + ☒ 2+ ☐ 3+

z ☐ + ☐ 2+ ☐ 3+

hide H<sub>2</sub>O/NH<sub>3</sub> ☐

zoom 112-122 ☐

GO

ASCASIDIEDATQHRLR, MH+ 1828.8499, m/z 610.2882  
L OS G30 P160811 220811-s1.06311.06311.3.dta

scan 6311; 6.4e-001

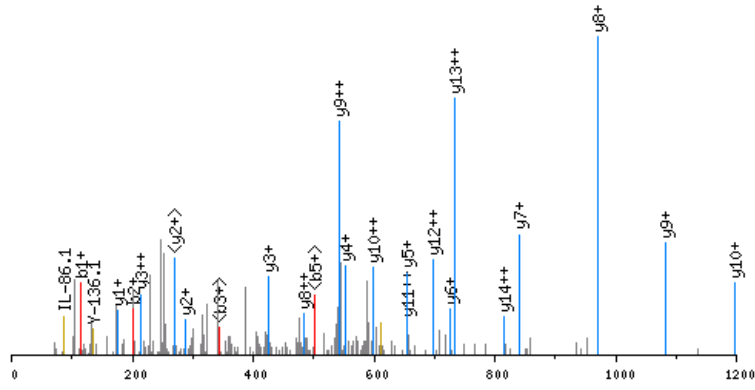

click image to zoom in; click top corners to zoom out

[precursor±]

scan 6309; 610.3 m/z; 9.8e+001

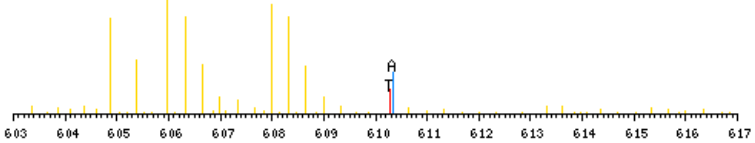

zoomed in precursor plot; T=theoretical m/z, A=acquired m/z

| b <sup>+</sup> | #  | AA | #  | y <sup>+</sup> | y <sup>2+</sup> |
|----------------|----|----|----|----------------|-----------------|
| 114.0555       | 1  | A  | 16 |                |                 |
| 201.0875       | 2  | S  | 15 | 1715.8022      | 858.4050        |
| 361.1181       | 3  | C  | 14 | 1628.7702      | 814.8890        |
| 432.1553       | 4  | A  | 13 | 1468.7396      | 734.8737        |
| 519.1873       | 5  | S  | 12 | 1397.7025      | 699.3552        |
| 632.2713       | 6  | I  | 11 | 1310.6705      | 655.8391        |
| 747.2983       | 7  | D  | 10 | 1197.5864      | 599.2971        |
| 860.3824       | 8  | I  | 9  | 1082.5594      | 541.7836        |
| 989.4249       | 9  | E  | 8  | 969.4754       | 485.2416        |
| 1104.4519      | 10 | D  | 7  | 840.4328       | 420.7203        |
| 1175.4890      | 11 | A  | 6  | 725.4058       | 363.2068        |
| 1276.5367      | 12 | T  | 5  | 654.3687       | 327.6883        |
| 1404.5953      | 13 | Q  | 4  | 553.3211       | 277.1644        |
| 1541.6542      | 14 | H  | 3  | 425.2625       | 213.1352        |
| 1654.7382      | 15 | L  | 2  | 288.2036       | 144.6057        |
|                | 16 | R  | 1  | 175.1195       | 88.0637         |

N-term:+43.02 C(3):+160.03

X-range:

0 - 0

MassTol: Y-zoom:

0. 1.

MassType:

☐ AVG ☒ MONO

Axis:

☒ 1 ☐ 2

Label:

☒ I ☐ M ☐ -

Ions:

a ☐ + ☐ 2+ ☐ 3+

b ☒ + ☐ 2+ ☐ 3+

c ☐ + ☐ 2+ ☐ 3+

x ☐ + ☐ 2+ ☐ 3+

y ☒ + ☒ 2+ ☐ 3+

z ☐ + ☐ 2+ ☐ 3+

hide H<sub>2</sub>O/NH<sub>3</sub> ☐

zoom 112-122 ☐

GO

ASCDEIKEHPR, MH+ 1411.6640, m/z 471.2262  
L OS G34 P160811 220811-s1.02216.02216.3.dta

scan 2216; 2.1e+000

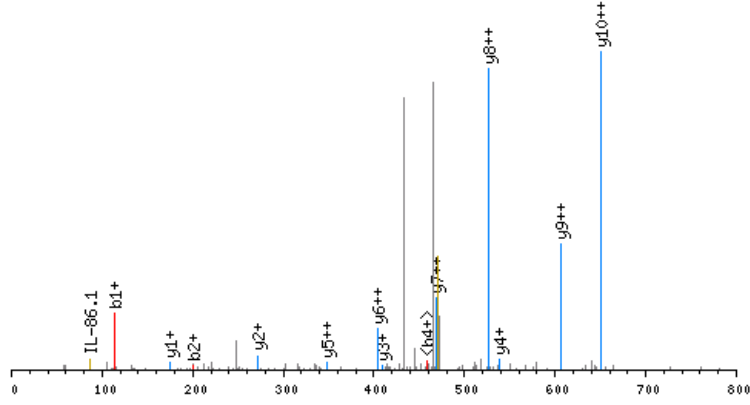

click image to zoom in; click top corners to zoom out [\[precursor±\]](#)

scan 2215; 471.2 m/z; 1.2e+001

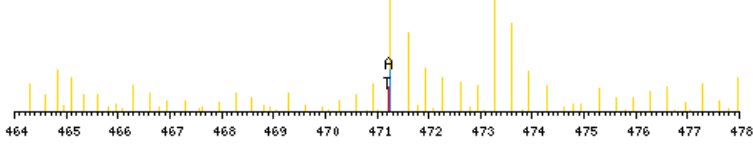

zoomed in precursor plot; T=theoretical m/z, A=acquired m/z

| b <sup>+</sup> | #  | AA | #  | y <sup>+</sup> | y <sup>2+</sup> |
|----------------|----|----|----|----------------|-----------------|
| 114.0555       | 1  | A  | 11 |                |                 |
| 201.0875       | 2  | S  | 10 | 1298.6163      | 649.8121        |
| 361.1181       | 3  | C  | 9  | 1211.5843      | 606.2960        |
| 476.1451       | 4  | D  | 8  | 1051.5537      | 526.2807        |
| 605.1877       | 5  | E  | 7  | 936.5267       | 468.7673        |
| 718.2717       | 6  | I  | 6  | 807.4841       | 404.2460        |
| 874.3980       | 7  | K  | 5  | 694.4001       | 347.7039        |
| 1003.4406      | 8  | E  | 4  | 538.2738       | 269.6408        |
| 1140.4995      | 9  | H  | 3  | 409.2312       | 205.1195        |
| 1237.5523      | 10 | P  | 2  | 272.1723       | 136.5900        |
|                | 11 | R  | 1  | 175.1195       | 88.0637         |

N-term:+43.02 C(3):+160.03  
K(7):+156.13

X-range:

0 - 0

MassTol: Y-zoom:

0. 1.

MassType:

☐ AVG ☒ MONO

Axis:

☒ 1 ☐ 2

Label:

☒ I ☐ M ☐ -

Ions:

a ☐ + ☐ 2+ ☐ 3+

b ☒ + ☐ 2+ ☐ 3+

c ☐ + ☐ 2+ ☐ 3+

x ☐ + ☐ 2+ ☐ 3+

y ☒ + ☒ 2+ ☐ 3+

z ☐ + ☐ 2+ ☐ 3+

hide H<sub>2</sub>O/NH<sub>3</sub> ☐

zoom 112-122 ☐

GO

ASDTPGFYMDKLNKYR, MH+ 2016.0538, m/z 672.6894  
L OS G33 P160811 220811-s1.06141.06141.3.dta

scan 6141; 3.9e+000

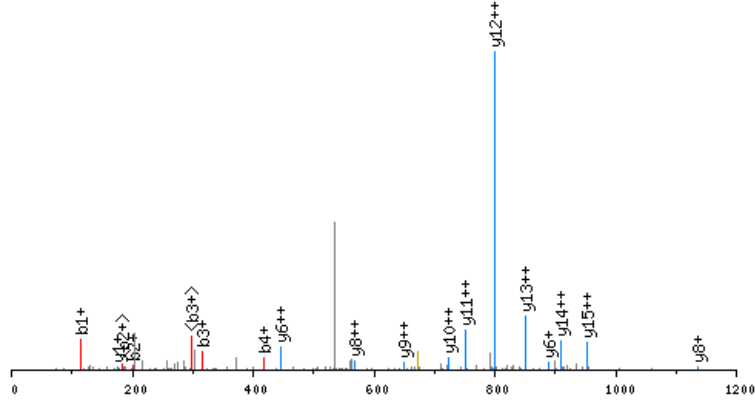

click image to zoom in; click top corners to zoom out [\[precursor±\]](#)

scan 6137; 672.7 m/z; 1.2e+001

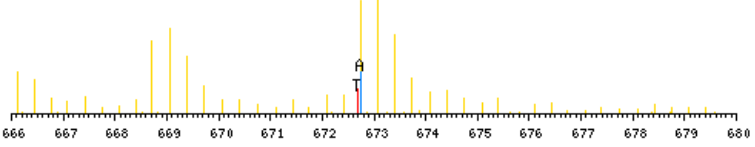

zoomed in precursor plot; T=theoretical m/z, A=acquired m/z

| b <sup>+</sup> | #  | AA | #  | y <sup>+</sup> | y <sup>2+</sup> |
|----------------|----|----|----|----------------|-----------------|
| 114.0555       | 1  | A  | 16 |                |                 |
| 201.0875       | 2  | S  | 15 | 1903.0061      | 952.0069        |
| 316.1145       | 3  | D  | 14 | 1815.9740      | 908.4909        |
| 417.1622       | 4  | T  | 13 | 1700.9471      | 850.9775        |
| 514.2149       | 5  | P  | 12 | 1599.8994      | 800.4536        |
| 571.2364       | 6  | G  | 11 | 1502.8467      | 751.9272        |
| 718.3048       | 7  | F  | 10 | 1445.8252      | 723.4165        |
| 881.3681       | 8  | Y  | 9  | 1298.7568      | 649.8823        |
| 1012.4086      | 9  | M  | 8  | 1135.6934      | 568.3506        |
| 1127.4356      | 10 | D  | 7  | 1004.6530      | 502.8304        |
| 1289.5937      | 11 | K  | 6  | 889.6260       | 445.3169        |
| 1402.6777      | 12 | L  | 5  | 727.4679       | 364.2379        |
| 1516.7207      | 13 | N  | 4  | 614.3839       | 307.6958        |
| 1678.8788      | 14 | K  | 3  | 500.3409       | 250.6744        |
| 1841.9421      | 15 | Y  | 2  | 338.1828       | 169.5953        |
|                | 16 | R  | 1  | 175.1195       | 88.0637         |

N-term:+43.02 K(11):+162.16  
K(14):+162.16

X-range:

0 - 0

MassTol: Y-zoom:

0. 1.

MassType:

☐ AVG ☒ MONO

Axis:

☒ 1 ☐ 2

Label:

☒ I ☐ M ☐ -

Ions:

a ☐ + ☐ 2+ ☐ 3+

b ☒ + ☐ 2+ ☐ 3+

c ☐ + ☐ 2+ ☐ 3+

x ☐ + ☐ 2+ ☐ 3+

y ☒ + ☒ 2+ ☐ 3+

z ☐ + ☐ 2+ ☐ 3+

hide H<sub>2</sub>O/NH<sub>3</sub> ☐

zoom 112-122 ☐

GO

ASESGKLWGGR, MH+ 1217.6279, m/z 609.3176  
L OS G31 P160811 220811-s1.04451.04451.2.dta

scan 4451; 3.3e+001

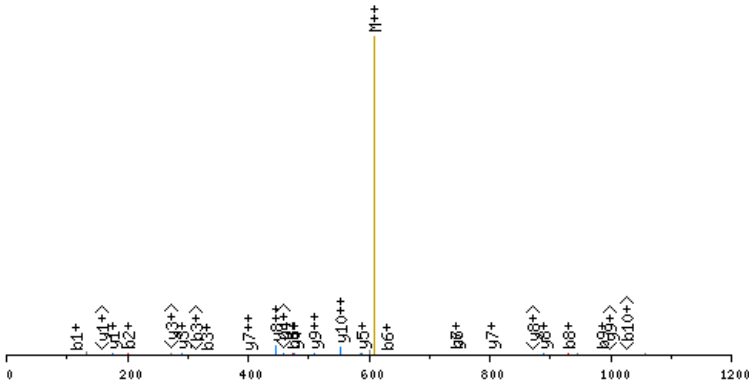

click image to zoom in; click top corners to zoom out

[precursor±]

scan 4449; 609.3 m/z; 9.1e+001

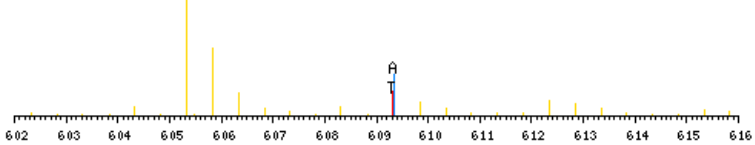

zoomed in precursor plot; T=theoretical m/z, A=acquired m/z

| b <sup>+</sup> | #  | AA | #  | y <sup>+</sup> | y <sup>2+</sup> |
|----------------|----|----|----|----------------|-----------------|
| 114.0555       | 1  | A  | 11 |                |                 |
| 201.0875       | 2  | S  | 10 | 1104.5802      | 552.7940        |
| 330.1301       | 3  | E  | 9  | 1017.5482      | 509.2780        |
| 417.1622       | 4  | S  | 8  | 888.5056       | 444.7567        |
| 474.1836       | 5  | G  | 7  | 801.4736       | 401.2407        |
| 630.3099       | 6  | K  | 6  | 744.4521       | 372.7300        |
| 743.3940       | 7  | L  | 5  | 588.3258       | 294.6668        |
| 929.4733       | 8  | W  | 4  | 475.2417       | 238.1248        |
| 986.4948       | 9  | G  | 3  | 289.1624       | 145.0851        |
| 1043.5162      | 10 | G  | 2  | 232.1410       | 116.5744        |
|                | 11 | R  | 1  | 175.1195       | 88.0637         |

N-term:+43.02 K(6):+156.13

X-range:

0 - 0

MassTol: Y-zoom:

0. 1.

MassType:

☐ AVG ☒ MONO

Axis:

☒ 1 ☐ 2

Label:

☒ I ☐ M ☐ -

Ions:

a ☐ + ☐ 2+ ☐ 3+

b ☒ + ☐ 2+ ☐ 3+

c ☐ + ☐ 2+ ☐ 3+

x ☐ + ☐ 2+ ☐ 3+

y ☒ + ☒ 2+ ☐ 3+

z ☐ + ☐ 2+ ☐ 3+

hide H<sub>2</sub>O/NH<sub>3</sub> ☐

zoom 112-122 ☐

GO

ASGADSKGDDLSTAILKQKNRPNR, MH+ 2668.4383, m/z 667.8650  
L OS G35 P160811 220811-s1.04811.04811.4.dta

scan 4811; 9.2e+000

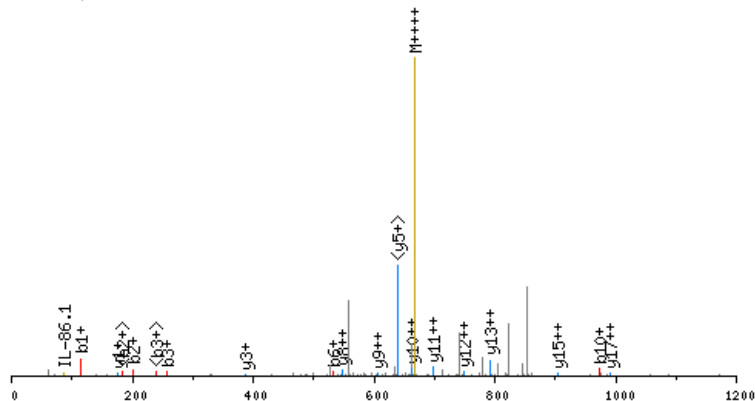

click image to zoom in; click top corners to zoom out [\[precursor±\]](#)

scan 4808; 667.9 mz; 5.8e+001

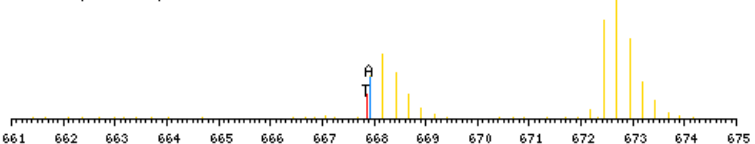

zoomed in precursor plot; T=theoretical m/z, A=acquired m/z

| b <sup>+</sup> | #  | AA | #  | y <sup>+</sup> | y <sup>2+</sup> |
|----------------|----|----|----|----------------|-----------------|
| 114.0555       | 1  | A  | 24 |                |                 |
| 201.0875       | 2  | S  | 23 | 2555.3906      | 1278.1992       |
| 258.1090       | 3  | G  | 22 | 2468.3586      | 1234.6832       |
| 329.1461       | 4  | A  | 21 | 2411.3372      | 1206.1725       |
| 444.1731       | 5  | D  | 20 | 2340.3000      | 1170.6539       |
| 531.2051       | 6  | S  | 19 | 2225.2731      | 1113.1405       |
| 687.3314       | 7  | K  | 18 | 2138.2411      | 1069.6244       |
| 744.3529       | 8  | G  | 17 | 1982.1148      | 991.5613        |
| 859.3798       | 9  | D  | 16 | 1925.0933      | 963.0506        |
| 974.4067       | 10 | D  | 15 | 1810.0664      | 905.5371        |
| 1087.4908      | 11 | L  | 14 | 1695.0394      | 848.0236        |
| 1174.5228      | 12 | S  | 13 | 1581.9554      | 791.4816        |
| 1275.5705      | 13 | T  | 12 | 1494.9233      | 747.9656        |
| 1346.6076      | 14 | A  | 11 | 1393.8757      | 697.4417        |
| 1459.6917      | 15 | I  | 10 | 1322.8385      | 661.9232        |
| 1572.7758      | 16 | L  | 9  | 1209.7545      | 605.3811        |
| 1728.9021      | 17 | K  | 8  | 1096.6704      | 548.8391        |
| 1856.9606      | 18 | Q  | 7  | 940.5441       | 470.7760        |
| 2013.0869      | 19 | K  | 6  | 812.4855       | 406.7467        |
| 2127.1299      | 20 | N  | 5  | 656.3592       | 328.6835        |
| 2283.2310      | 21 | R  | 4  | 542.3163       | 271.6621        |
| 2380.2837      | 22 | P  | 3  | 386.2152       | 193.6115        |
| 2494.3267      | 23 | N  | 2  | 289.1624       | 145.0851        |
|                | 24 | R  | 1  | 175.1195       | 88.0637         |

N-term:+43.02 K(7):+156.13  
K(17):+156.13 K(19):+156.13

X-range:

0 - 0

MassTol: Y-zoom:

0. 1.

MassType:

☐ AVG ☒ MONO

Axis:

☒ 1 ☐ 2

Label:

☒ I ☐ M ☐ -

Ions:

a ☐ + ☐ 2+ ☐ 3+

b ☒ + ☐ 2+ ☐ 3+

c ☐ + ☐ 2+ ☐ 3+

x ☐ + ☐ 2+ ☐ 3+

y ☒ + ☒ 2+ ☐ 3+

z ☐ + ☐ 2+ ☐ 3+

hide H<sub>2</sub>O/NH<sub>3</sub> ☐

zoom 112-122 ☐

GO

ASGCKIGPSILNSDLANLGAECLR, MH+ 2586.3019, m/z 862.7722  
L OS G30 P160811 220811-s1.07625.07625.3.dta

scan 7625; 1.0e+001

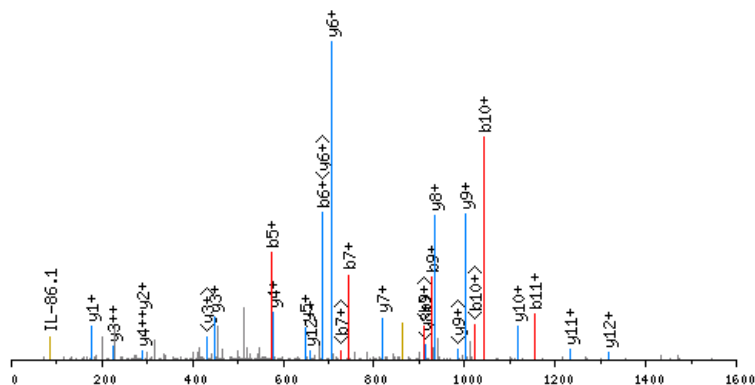

click image to zoom in; click top corners to zoom out [\[precursor±\]](#)

scan 7624; 862.8 m/z; 1.1e+002

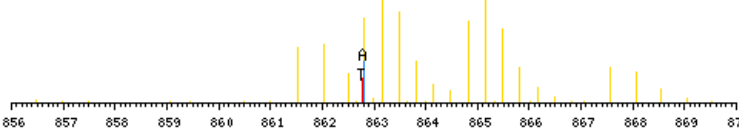

zoomed in precursor plot; T=theoretical m/z, A=acquired m/z

| b <sup>+</sup> | #  | AA | #  | y <sup>+</sup> | y <sup>2+</sup> |
|----------------|----|----|----|----------------|-----------------|
| 114.0555       | 1  | A  | 24 |                |                 |
| 201.0875       | 2  | S  | 23 | 2473.2542      | 1237.1310       |
| 258.1090       | 3  | G  | 22 | 2386.2222      | 1193.6150       |
| 418.1396       | 4  | C  | 21 | 2329.2008      | 1165.1043       |
| 574.2659       | 5  | K  | 20 | 2169.1702      | 1085.0890       |
| 687.3500       | 6  | I  | 19 | 2013.0439      | 1007.0258       |
| 744.3714       | 7  | G  | 18 | 1899.9598      | 950.4838        |
| 841.4242       | 8  | P  | 17 | 1842.9383      | 921.9731        |
| 928.4562       | 9  | S  | 16 | 1745.8856      | 873.4467        |
| 1041.5403      | 10 | I  | 15 | 1658.8535      | 829.9307        |
| 1154.6244      | 11 | L  | 14 | 1545.7695      | 773.3886        |
| 1268.6673      | 12 | N  | 13 | 1432.6854      | 716.8466        |
| 1355.6993      | 13 | S  | 12 | 1318.6425      | 659.8252        |
| 1470.7263      | 14 | D  | 11 | 1231.6104      | 616.3091        |
| 1583.8103      | 15 | L  | 10 | 1116.5835      | 558.7957        |
| 1654.8474      | 16 | A  | 9  | 1003.4994      | 502.2536        |
| 1768.8904      | 17 | N  | 8  | 932.4623       | 466.7351        |
| 1881.9744      | 18 | L  | 7  | 818.4194       | 409.7136        |
| 1938.9959      | 19 | G  | 6  | 705.3353       | 353.1716        |
| 2010.0330      | 20 | A  | 5  | 648.3139       | 324.6608        |
| 2139.0756      | 21 | E  | 4  | 577.2768       | 289.1423        |
| 2299.1062      | 22 | C  | 3  | 448.2342       | 224.6210        |
| 2412.1903      | 23 | L  | 2  | 288.2036       | 144.6057        |
|                | 24 | R  | 1  | 175.1195       | 88.0637         |

N-term:+43.02 C(4):+160.03  
K(5):+156.13 C(22):+160.03

X-range:

0 - 0

MassTol: Y-zoom:

0. 1.

MassType:

☐AVG ☒MONO

Axis:

☒1 ☐2

Label:

☒I ☐M ☐-

Ions:

a ☐+ ☐2+ ☐3+

b ☒+ ☐2+ ☐3+

c ☐+ ☐2+ ☐3+

x ☐+ ☐2+ ☐3+

y ☒+ ☒2+ ☐3+

z ☐+ ☐2+ ☐3+

hide H<sub>2</sub>O/NH<sub>3</sub> ☐

zoom 112-122 ☐

GO

ASGRPEELWEAVVGAAER, MH+ 1968.9779, m/z 656.9975  
L OS G30 P160811 220811-s1.07805.07805.3.dta

scan 7805; 6.1e+000

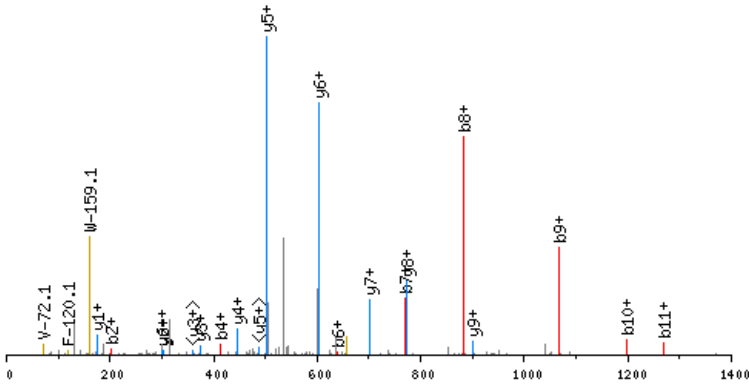

click image to zoom in; click top corners to zoom out

[precursor±]

scan 7804; 657.0 m/z; 5.7e+001

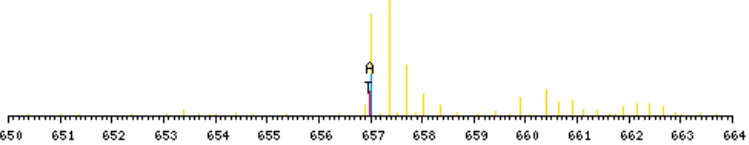

zoomed in precursor plot; T=theoretical m/z, A=acquired m/z

| b <sup>+</sup> | #  | AA | #  | y <sup>+</sup> | y <sup>2+</sup> |
|----------------|----|----|----|----------------|-----------------|
| 114.0555       | 1  | A  | 18 |                |                 |
| 201.0875       | 2  | S  | 17 | 1855.9303      | 928.4690        |
| 258.1090       | 3  | G  | 16 | 1768.8982      | 884.9530        |
| 414.2101       | 4  | R  | 15 | 1711.8768      | 856.4423        |
| 511.2629       | 5  | P  | 14 | 1555.7756      | 778.3917        |
| 640.3055       | 6  | E  | 13 | 1458.7229      | 729.8654        |
| 769.3481       | 7  | E  | 12 | 1329.6803      | 665.3441        |
| 882.4321       | 8  | L  | 11 | 1200.6377      | 600.8228        |
| 1068.5114      | 9  | W  | 10 | 1087.5536      | 544.2807        |
| 1197.5540      | 10 | E  | 9  | 901.4743       | 451.2411        |
| 1268.5912      | 11 | A  | 8  | 772.4317       | 386.7198        |
| 1367.6596      | 12 | V  | 7  | 701.3946       | 351.2012        |
| 1466.7280      | 13 | V  | 6  | 602.3262       | 301.6670        |
| 1523.7494      | 14 | G  | 5  | 503.2578       | 252.1328        |
| 1594.7866      | 15 | A  | 4  | 446.2363       | 223.6221        |
| 1665.8237      | 16 | A  | 3  | 375.1992       | 188.1035        |
| 1794.8663      | 17 | E  | 2  | 304.1621       | 152.5850        |
|                | 18 | R  | 1  | 175.1195       | 88.0637         |

N-term:+43.02

X-range:

0 - 0

MassTol: Y-zoom:

0. 1.

MassType:

☐ AVG ☒ MONO

Axis:

☒ 1 ☐ 2

Label:

☒ I ☐ M ☐ -

Ions:

a ☐ + ☐ 2+ ☐ 3+

b ☒ + ☐ 2+ ☐ 3+

c ☐ + ☐ 2+ ☐ 3+

x ☐ + ☐ 2+ ☐ 3+

y ☒ + ☒ 2+ ☐ 3+

z ☐ + ☐ 2+ ☐ 3+

hide H<sub>2</sub>O/NH<sub>3</sub> ☐

zoom 112-122 ☐

GO

ASGVAVSDGVIKVFNDMKVR, MH+ 2190.1957, m/z 730.7368  
L OS G33 P160811 220811-s1.07468.07468.3.dta

scan 7468: 5.8e+001

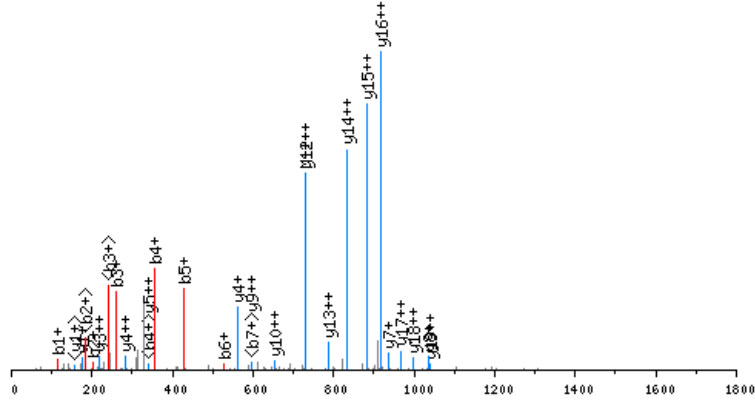

click image to zoom in; click top corners to zoom out [\[precursor±\]](#)

scan 7467: 730.7 m/z; 7.9e+002

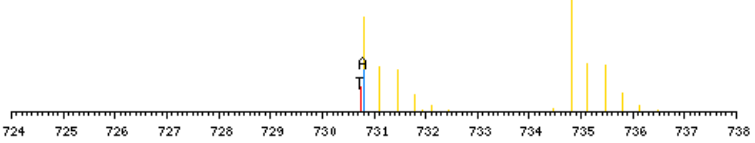

zoomed in precursor plot; T=theoretical m/z, A=acquired m/z

| b <sup>+</sup> | #  | AA | #  | y <sup>+</sup> | y <sup>2+</sup> |
|----------------|----|----|----|----------------|-----------------|
| 114.0555       | 1  | A  | 20 |                |                 |
| 201.0875       | 2  | S  | 19 | 2077.1480      | 1039.0779       |
| 258.1090       | 3  | G  | 18 | 1990.1160      | 995.5619        |
| 357.1774       | 4  | V  | 17 | 1933.0946      | 967.0512        |
| 428.2145       | 5  | A  | 16 | 1834.0261      | 917.5170        |
| 527.2829       | 6  | V  | 15 | 1762.9890      | 881.9984        |
| 614.3150       | 7  | S  | 14 | 1663.9206      | 832.4642        |
| 729.3419       | 8  | D  | 13 | 1576.8886      | 788.9482        |
| 786.3634       | 9  | G  | 12 | 1461.8616      | 731.4347        |
| 885.4318       | 10 | V  | 11 | 1404.8402      | 702.9240        |
| 998.5159       | 11 | I  | 10 | 1305.7718      | 653.3898        |
| 1154.6422      | 12 | K  | 9  | 1192.6877      | 596.8478        |
| 1253.7106      | 13 | V  | 8  | 1036.5614      | 518.7846        |
| 1400.7790      | 14 | F  | 7  | 937.4930       | 469.2504        |
| 1514.8219      | 15 | N  | 6  | 790.4246       | 395.7162        |
| 1629.8489      | 16 | D  | 5  | 676.3816       | 338.6947        |
| 1760.8893      | 17 | M  | 4  | 561.3547       | 281.1813        |
| 1917.0156      | 18 | K  | 3  | 430.3142       | 215.6610        |
| 2016.0841      | 19 | V  | 2  | 274.1879       | 137.5979        |
|                | 20 | R  | 1  | 175.1195       | 88.0637         |

N-term:+43.02 K(12):+156.13  
K(18):+156.13

X-range:

0 - 0

MassTol: Y-zoom:

0. 1.

MassType:

☐AVG ☒MONO

Axis:

☒1 ☐2

Label:

☒I ☐M ☐-

Ions:

a ☐+ ☐2+ ☐3+

b ☒+ ☐2+ ☐3+

c ☐+ ☐2+ ☐3+

x ☐+ ☐2+ ☐3+

y ☒+ ☒2+ ☐3+

z ☐+ ☐2+ ☐3+

hide H<sub>2</sub>O/NH<sub>3</sub> ☐

zoom 112-122 ☐

GO

ASGVTIVNDEVIKVFNDMKVR, MH+ 2319.2383, m/z 773.7510  
L OS G32 P160811 220811-s1.06659.06659.3.dta

scan 6659; 4.7e+001

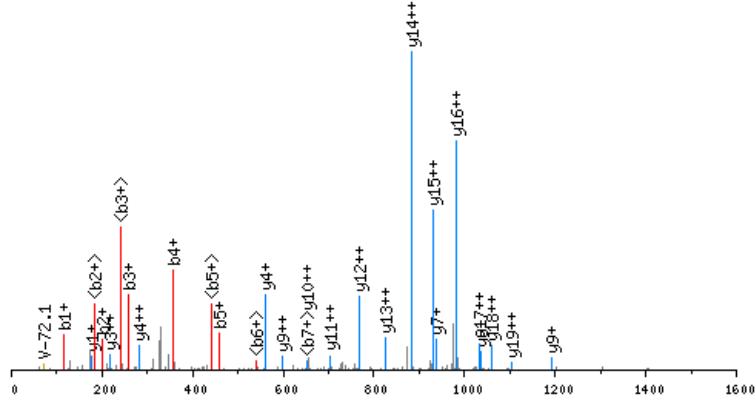

click image to zoom in; click top corners to zoom out [\[precursor±\]](#)

scan 6658; 773.8 m/z; 9.4e+002

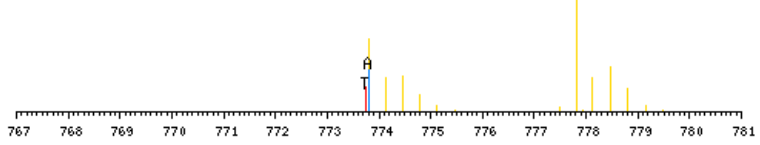

zoomed in precursor plot; T=theoretical m/z, A=acquired m/z

| b <sup>+</sup> | #  | AA | #  | y <sup>+</sup> | y <sup>2+</sup> |
|----------------|----|----|----|----------------|-----------------|
| 114.0555       | 1  | A  | 20 |                |                 |
| 201.0875       | 2  | S  | 19 | 2206.1906      | 1103.5992       |
| 258.1090       | 3  | G  | 18 | 2119.1586      | 1060.0832       |
| 357.1774       | 4  | V  | 17 | 2062.1371      | 1031.5725       |
| 458.2251       | 5  | T  | 16 | 1963.0687      | 982.0383        |
| 557.2935       | 6  | V  | 15 | 1862.0211      | 931.5144        |
| 671.3364       | 7  | N  | 14 | 1762.9526      | 881.9802        |
| 786.3634       | 8  | D  | 13 | 1648.9097      | 824.9588        |
| 915.4060       | 9  | E  | 12 | 1533.8828      | 767.4453        |
| 1014.4744      | 10 | V  | 11 | 1404.8402      | 702.9240        |
| 1127.5585      | 11 | I  | 10 | 1305.7718      | 653.3898        |
| 1283.6848      | 12 | K  | 9  | 1192.6877      | 596.8478        |
| 1382.7532      | 13 | V  | 8  | 1036.5614      | 518.7846        |
| 1529.8216      | 14 | F  | 7  | 937.4930       | 469.2504        |
| 1643.8645      | 15 | N  | 6  | 790.4246       | 395.7162        |
| 1758.8915      | 16 | D  | 5  | 676.3816       | 338.6947        |
| 1889.9319      | 17 | M  | 4  | 561.3547       | 281.1813        |
| 2046.0582      | 18 | K  | 3  | 430.3142       | 215.6610        |
| 2145.1267      | 19 | V  | 2  | 274.1879       | 137.5979        |
|                | 20 | R  | 1  | 175.1195       | 88.0637         |

N-term:+43.02 K(12):+156.13  
K(18):+156.13

X-range:

0 - 0

MassTol: Y-zoom:

0. 1.

MassType:

☐ AVG ☒ MONO

Axis:

☒ 1 ☐ 2

Label:

☒ I ☐ M ☐ -

Ions:

a ☐ + ☐ 2+ ☐ 3+

b ☒ + ☐ 2+ ☐ 3+

c ☐ + ☐ 2+ ☐ 3+

x ☐ + ☐ 2+ ☐ 3+

y ☒ + ☒ 2+ ☐ 3+

z ☐ + ☐ 2+ ☐ 3+

hide H<sub>2</sub>O/NH<sub>3</sub> ☐

zoom 112-122 ☐

GO

ASKEMFEDTVEER, MH+ 1640.7478, m/z 820.8776  
L OS G30 P160811 220811-s1.04590.04590.2.dta

scan 4590; 2.2e+001

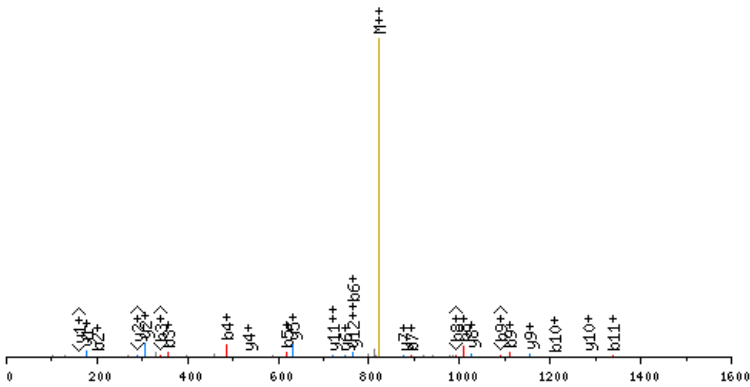

click image to zoom in; click top corners to zoom out

[precursor±]

scan 4589; 820.9 m/z; 2.9e+001

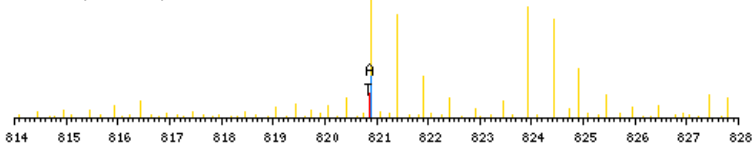

zoomed in precursor plot; T=theoretical m/z, A=acquired m/z

| b <sup>+</sup> | #  | AA | #  | y <sup>+</sup> | y <sup>2+</sup> |
|----------------|----|----|----|----------------|-----------------|
| 114.0555       | 1  | A  | 13 |                |                 |
| 201.0875       | 2  | S  | 12 | 1527.7001      | 764.3540        |
| 357.2138       | 3  | K  | 11 | 1440.6681      | 720.8380        |
| 486.2564       | 4  | E  | 10 | 1284.5418      | 642.7748        |
| 617.2969       | 5  | M  | 9  | 1155.4992      | 578.2535        |
| 764.3653       | 6  | F  | 8  | 1024.4587      | 512.7333        |
| 893.4079       | 7  | E  | 7  | 877.3903       | 439.1991        |
| 1008.4349      | 8  | D  | 6  | 748.3477       | 374.6778        |
| 1109.4825      | 9  | T  | 5  | 633.3208       | 317.1643        |
| 1208.5510      | 10 | V  | 4  | 532.2731       | 266.6405        |
| 1337.5936      | 11 | E  | 3  | 433.2047       | 217.1063        |
| 1466.6361      | 12 | E  | 2  | 304.1621       | 152.5850        |
|                | 13 | R  | 1  | 175.1195       | 88.0637         |

N-term:+43.02 K(3):+156.13



X-range:

0 - 0

MassTol: Y-zoom:

0. 1.

MassType:

☐AVG ☒MONO

Axis:

☒1 ☐2

Label:

☒I ☐M ☐-

Ions:

a ☐+ ☐2+ ☐3+

b ☒+ ☐2+ ☐3+

c ☐+ ☐2+ ☐3+

x ☐+ ☐2+ ☐3+

y ☒+ ☒2+ ☐3+

z ☐+ ☐2+ ☐3+

hide H<sub>2</sub>O/NH<sub>3</sub> ☐

zoom 112-122 ☐

GO

ASLPPHAGPATPLSPTR, MH+ 1711.9132, m/z 571.3092  
L OS G30 P160811 220811-s1.04217.04217.3.dta

scan 4217; 1.9e+000

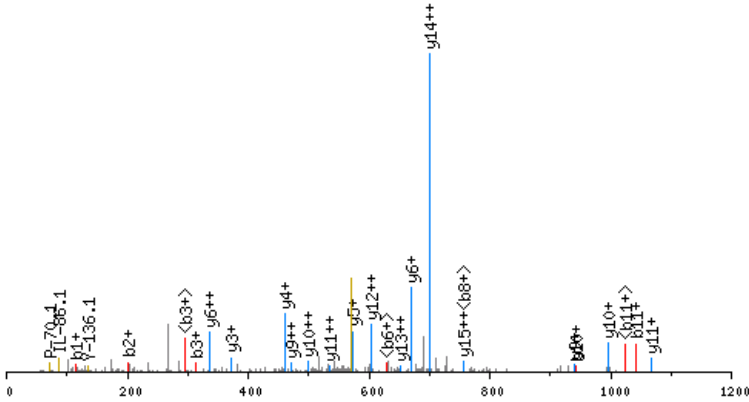

click image to zoom in; click top corners to zoom out

[precursor±]

scan 4214; 571.3 m/z; 6.6e+000

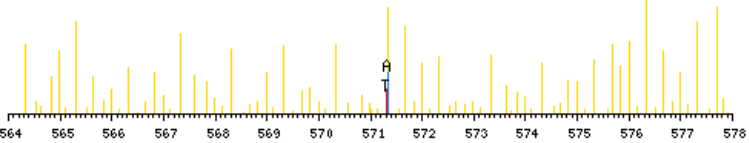

zoomed in precursor plot; T=theoretical m/z, A=acquired m/z

| b <sup>+</sup> | #  | AA | #  | y <sup>+</sup> | y <sup>2+</sup> |
|----------------|----|----|----|----------------|-----------------|
| 114.0555       | 1  | A  | 17 |                |                 |
| 201.0875       | 2  | S  | 16 | 1598.8655      | 799.9366        |
| 314.1716       | 3  | L  | 15 | 1511.8334      | 756.4206        |
| 411.2244       | 4  | P  | 14 | 1398.7494      | 699.8786        |
| 508.2771       | 5  | P  | 13 | 1301.6966      | 651.3522        |
| 645.3360       | 6  | H  | 12 | 1204.6438      | 602.8258        |
| 716.3732       | 7  | A  | 11 | 1067.5849      | 534.2964        |
| 773.3946       | 8  | G  | 10 | 996.5478       | 498.7778        |
| 870.4474       | 9  | P  | 9  | 939.5264       | 470.2671        |
| 941.4845       | 10 | A  | 8  | 842.4736       | 421.7407        |
| 1042.5322      | 11 | T  | 7  | 771.4365       | 386.2222        |
| 1139.5849      | 12 | P  | 6  | 670.3888       | 335.6983        |
| 1252.6690      | 13 | L  | 5  | 573.3360       | 287.1719        |
| 1339.7010      | 14 | S  | 4  | 460.2520       | 230.6299        |
| 1436.7538      | 15 | P  | 3  | 373.2199       | 187.1139        |
| 1537.8015      | 16 | T  | 2  | 276.1672       | 138.5875        |
|                | 17 | R  | 1  | 175.1195       | 88.0637         |

N-term:+43.02

X-range:

0 - 0

MassTol: Y-zoom:

0. 1.

MassType:

☐AVG ☒MONO

Axis:

☒1 ☐2

Label:

☒I ☐M ☐-

Ions:

a ☐+ ☐2+ ☐3+

b ☒+ ☐2+ ☐3+

c ☐+ ☐2+ ☐3+

x ☐+ ☐2+ ☐3+

y ☒+ ☒2+ ☐3+

z ☐+ ☐2+ ☐3+

hide H<sub>2</sub>O/NH<sub>3</sub> ☐

zoom 112-122 ☐

GO

ASLSLAPVNIKFAGADEER, MH+ 2064.1190, m/z 688.7112  
L OS G30 P160811 220811-s1.07698.07698.3.dta

scan 7698; 5.1e+001

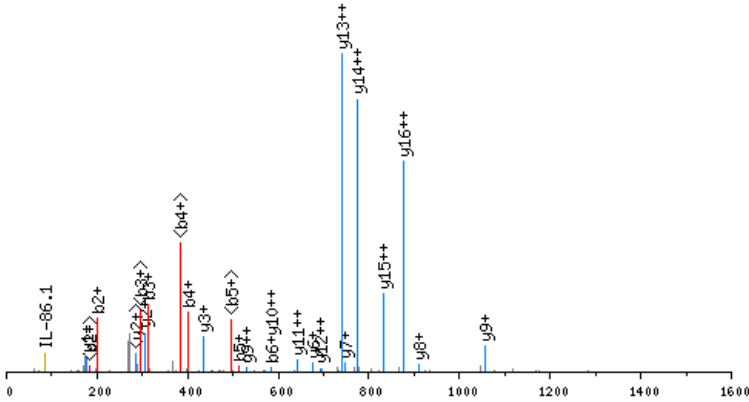

click image to zoom in; click top corners to zoom out

[precursor±]

scan 7694; 688.7 m/z; 1.5e+002

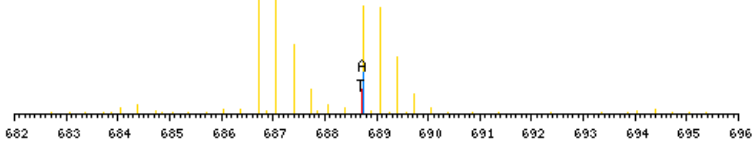

zoomed in precursor plot; T=theoretical m/z, A=acquired m/z

| b <sup>+</sup> | #  | AA | #  | y <sup>+</sup> | y <sup>2+</sup> |
|----------------|----|----|----|----------------|-----------------|
| 114.0555       | 1  | A  | 19 |                |                 |
| 201.0875       | 2  | S  | 18 | 1951.0713      | 976.0396        |
| 314.1716       | 3  | L  | 17 | 1864.0393      | 932.5236        |
| 401.2036       | 4  | S  | 16 | 1750.9552      | 875.9815        |
| 514.2877       | 5  | L  | 15 | 1663.9232      | 832.4655        |
| 585.3248       | 6  | A  | 14 | 1550.8391      | 775.9235        |
| 682.3776       | 7  | P  | 13 | 1479.8020      | 740.4049        |
| 781.4460       | 8  | V  | 12 | 1382.7492      | 691.8785        |
| 895.4889       | 9  | N  | 11 | 1283.6808      | 642.3443        |
| 1008.5730      | 10 | I  | 10 | 1169.6379      | 585.3229        |
| 1155.6414      | 11 | F  | 9  | 1056.5538      | 528.7808        |
| 1317.7995      | 12 | K  | 8  | 909.4854       | 455.2466        |
| 1388.8366      | 13 | A  | 7  | 747.3273       | 374.1676        |
| 1445.8581      | 14 | G  | 6  | 676.2902       | 338.6490        |
| 1516.8952      | 15 | A  | 5  | 619.2687       | 310.1383        |
| 1631.9221      | 16 | D  | 4  | 548.2316       | 274.6197        |
| 1760.9647      | 17 | E  | 3  | 433.2047       | 217.1063        |
| 1890.0073      | 18 | E  | 2  | 304.1621       | 152.5850        |
|                | 19 | R  | 1  | 175.1195       | 88.0637         |

N-term:+43.02 K(12):+162.16

zoomed in precursor plot; T=theoretical m/z, A=acquired m/z

X-range:

0 - 0

MassTol: Y-zoom:

0. 1.

MassType:

☐AVG ☒MONO

Axis:

☒1 ☐2

Label:

☒I ☐M ☐-

Ions:

a ☐+ ☐2+ ☐3+

b ☒+ ☐2+ ☐3+

c ☐+ ☐2+ ☐3+

x ☐+ ☐2+ ☐3+

y ☒+ ☒2+ ☐3+

z ☐+ ☐2+ ☐3+

hide H<sub>2</sub>O/NH<sub>3</sub> ☐

zoom 112-122 ☐

GO

ASNPDRGEILLTELQGDSR, MH+ 2113.0526, m/z 705.0224  
L OS G30 P160811 220811-s1.06611.06611.3.dta

scan 6611: 1.2e+000

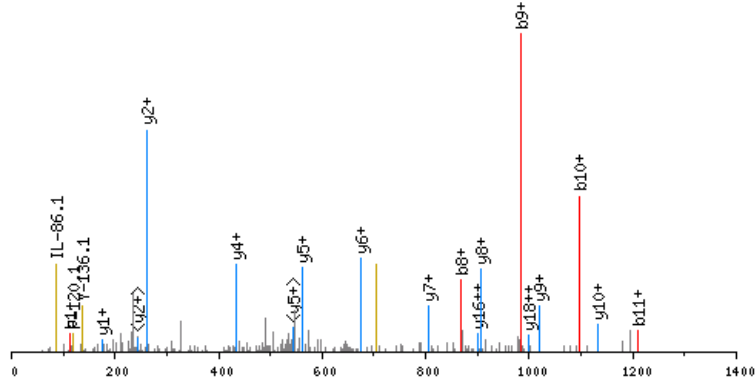

click image to zoom in; click top corners to zoom out [\[precursor±\]](#)

scan 6609: 705.0 m/z; 1.2e+001

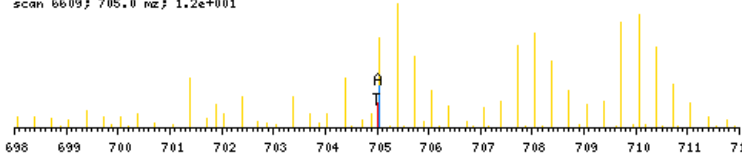

zoomed in precursor plot; T=theoretical m/z, A=acquired m/z

| b <sup>+</sup> | #  | AA | #  | y <sup>+</sup> | y <sup>2+</sup> |
|----------------|----|----|----|----------------|-----------------|
| 114.0555       | 1  | A  | 19 |                |                 |
| 201.0875       | 2  | S  | 18 | 2000.0049      | 1000.5063       |
| 315.1305       | 3  | N  | 17 | 1912.9728      | 956.9903        |
| 412.1832       | 4  | P  | 16 | 1798.9299      | 899.9689        |
| 527.2102       | 5  | D  | 15 | 1701.8772      | 851.4425        |
| 683.3113       | 6  | R  | 14 | 1586.8502      | 793.9290        |
| 740.3328       | 7  | G  | 13 | 1430.7491      | 715.8785        |
| 869.3753       | 8  | E  | 12 | 1373.7276      | 687.3677        |
| 982.4594       | 9  | I  | 11 | 1244.6850      | 622.8464        |
| 1095.5435      | 10 | L  | 10 | 1131.6010      | 566.3044        |
| 1208.6275      | 11 | L  | 9  | 1018.5169      | 509.7624        |
| 1309.6752      | 12 | T  | 8  | 905.4328       | 453.2203        |
| 1438.7178      | 13 | E  | 7  | 804.3852       | 402.6965        |
| 1551.8019      | 14 | L  | 6  | 675.3426       | 338.1752        |
| 1679.8604      | 15 | Q  | 5  | 562.2585       | 281.6332        |
| 1736.8819      | 16 | G  | 4  | 434.1999       | 217.6039        |
| 1851.9089      | 17 | D  | 3  | 377.1785       | 189.0931        |
| 1938.9409      | 18 | S  | 2  | 262.1515       | 131.5797        |
|                | 19 | R  | 1  | 175.1195       | 88.0637         |

N-term:+43.02

X-range:

0 - 0

MassTol: Y-zoom:

0. 1.

MassType:

☐AVG ☒MONO

Axis:

☒1 ☐2

Label:

☒I ☐M ☐-

Ions:

a ☐+ ☐2+ ☐3+

b ☒+ ☐2+ ☐3+

c ☐+ ☐2+ ☐3+

x ☐+ ☐2+ ☐3+

y ☒+ ☒2+ ☐3+

z ☐+ ☐2+ ☐3+

hide H<sub>2</sub>O/NH<sub>3</sub> ☐

zoom 112-122 ☐

GO

ASQNRDPAAASVAAVR, MH+ 1625.8360, m/z 542.6168  
L OS G30 P160811 220811-s1.02882.02882.3.dta

scan 2882; 1.7e+000

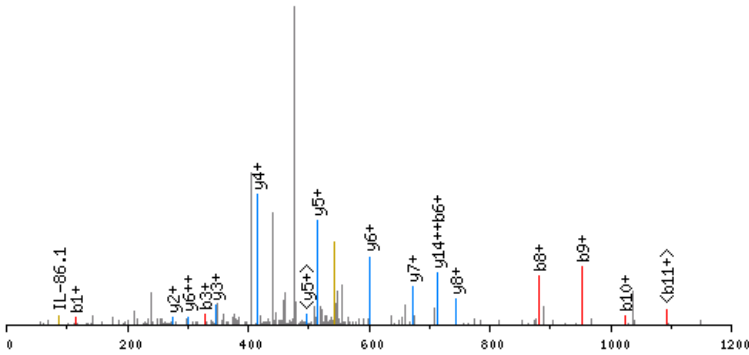

click image to zoom in; click top corners to zoom out

[precursor±]

scan 2879; 542.6 m/z; 8.4e+000

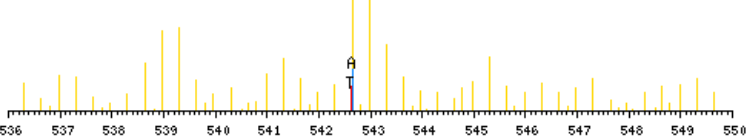

zoomed in precursor plot; T=theoretical m/z, A=acquired m/z

| b <sup>+</sup> | #  | AA | #  | y <sup>+</sup> | y <sup>2+</sup> |
|----------------|----|----|----|----------------|-----------------|
| 114.0555       | 1  | A  | 16 |                |                 |
| 201.0875       | 2  | S  | 15 | 1512.7883      | 756.8981        |
| 329.1461       | 3  | Q  | 14 | 1425.7562      | 713.3820        |
| 443.1890       | 4  | N  | 13 | 1297.6977      | 649.3527        |
| 599.2902       | 5  | R  | 12 | 1183.6547      | 592.3313        |
| 714.3171       | 6  | D  | 11 | 1027.5536      | 514.2807        |
| 811.3699       | 7  | P  | 10 | 912.5267       | 456.7673        |
| 882.4070       | 8  | A  | 9  | 815.4739       | 408.2409        |
| 953.4441       | 9  | A  | 8  | 744.4368       | 372.7223        |
| 1024.4812      | 10 | A  | 7  | 673.3997       | 337.2038        |
| 1111.5132      | 11 | S  | 6  | 602.3626       | 301.6852        |
| 1210.5816      | 12 | V  | 5  | 515.3306       | 258.1692        |
| 1281.6188      | 13 | A  | 4  | 416.2621       | 208.6350        |
| 1352.6559      | 14 | A  | 3  | 345.2250       | 173.1164        |
| 1451.7243      | 15 | V  | 2  | 274.1879       | 137.5979        |
|                | 16 | R  | 1  | 175.1195       | 88.0637         |

N-term:+43.02

N-term: +43.02 K(15): +156.13

X-range:

0 - 0

MassTol: Y-zoom:

0. 1.

MassType:

☐ AVG ☒ MONO

Axis:

☒ 1 ☐ 2

Label:

☒ I ☐ M ☐ -

Ions:

a ☐ + ☐ 2+ ☐ 3+

b ☒ + ☐ 2+ ☐ 3+

c ☐ + ☐ 2+ ☐ 3+

x ☐ + ☐ 2+ ☐ 3+

y ☒ + ☒ 2+ ☐ 3+

z ☐ + ☐ 2+ ☐ 3+

hide H<sub>2</sub>O/NH<sub>3</sub> ☐

zoom 112-122 ☐

GO

ASRPAAEPPGAR, MH+ 1221.6340, m/z 407.8829  
L OS G34 P160811 220811-s1.02071.02071.3.dta

scan 2071; 3.9e+001

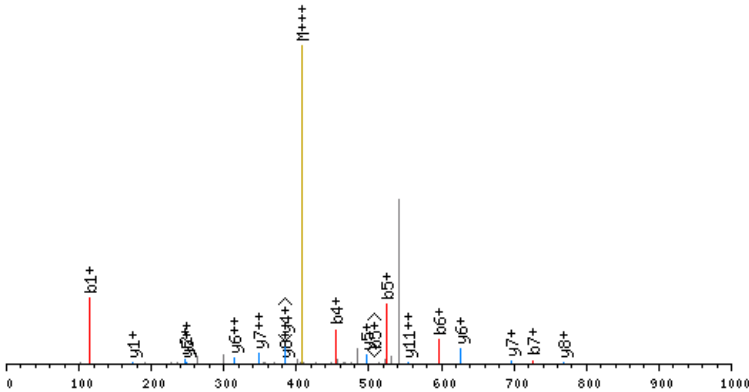

click image to zoom in; click top corners to zoom out

[precursor±]

scan 2070; 407.9 m/z; 1.9e+002

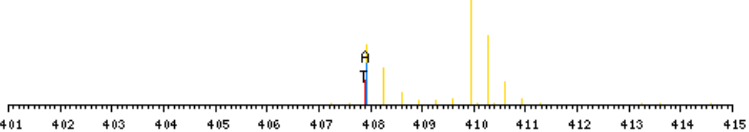

zoomed in precursor plot; T=theoretical m/z, A=acquired m/z

| b <sup>+</sup> | #  | AA | #  | y <sup>+</sup> | y <sup>2+</sup> |
|----------------|----|----|----|----------------|-----------------|
| 114.0555       | 1  | A  | 12 |                |                 |
| 201.0875       | 2  | S  | 11 | 1108.5863      | 554.7971        |
| 357.1887       | 3  | R  | 10 | 1021.5543      | 511.2811        |
| 454.2414       | 4  | P  | 9  | 865.4532       | 433.2305        |
| 525.2785       | 5  | A  | 8  | 768.4004       | 384.7041        |
| 596.3156       | 6  | A  | 7  | 697.3633       | 349.1856        |
| 725.3582       | 7  | E  | 6  | 626.3262       | 313.6670        |
| 822.4110       | 8  | P  | 5  | 497.2836       | 249.1457        |
| 919.4638       | 9  | P  | 4  | 400.2308       | 200.6193        |
| 976.4852       | 10 | G  | 3  | 303.1781       | 152.0930        |
| 1047.5223      | 11 | A  | 2  | 246.1566       | 123.5822        |
|                | 12 | R  | 1  | 175.1195       | 88.0637         |

N-term:+43.02

X-range:

0 - 0

MassTol: Y-zoom:

0. 1.

MassType:

☐ AVG ☒ MONO

Axis:

☒ 1 ☐ 2

Label:

☒ I ☐ M ☐ -

Ions:

a ☐ + ☐ 2+ ☐ 3+

b ☒ + ☐ 2+ ☐ 3+

c ☐ + ☐ 2+ ☐ 3+

x ☐ + ☐ 2+ ☐ 3+

y ☒ + ☒ 2+ ☐ 3+

z ☐ + ☐ 2+ ☐ 3+

hide H<sub>2</sub>O/NH<sub>3</sub> ☐

zoom 112-122 ☐

GO

ASSDIQVKELEKR, MH+ 1600.8911, m/z 534.3019  
L OS G33 P160811 220811-s1.03526.03526.3.dta

scan 3526; 1.4e+001

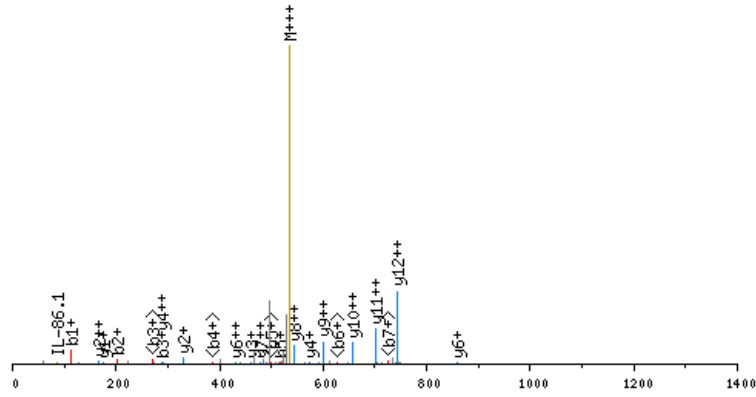

click image to zoom in; click top corners to zoom out [\[precursor±\]](#)

scan 3522; 534.3 m/z; 2.6e+001

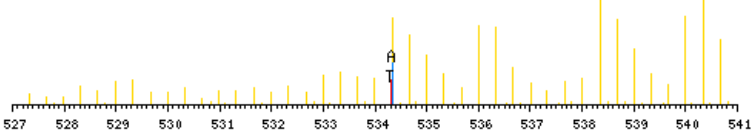

zoomed in precursor plot; T=theoretical m/z, A=acquired m/z

| b <sup>+</sup> | #  | AA | #  | y <sup>+</sup> | y <sup>2+</sup> |
|----------------|----|----|----|----------------|-----------------|
| 114.0555       | 1  | A  | 13 |                |                 |
| 201.0875       | 2  | S  | 12 | 1487.8434      | 744.4256        |
| 288.1196       | 3  | S  | 11 | 1400.8114      | 700.9096        |
| 403.1465       | 4  | D  | 10 | 1313.7793      | 657.3936        |
| 516.2306       | 5  | I  | 9  | 1198.7524      | 599.8801        |
| 644.2892       | 6  | Q  | 8  | 1085.6683      | 543.3381        |
| 743.3576       | 7  | V  | 7  | 957.6098       | 479.3088        |
| 899.4839       | 8  | K  | 6  | 858.5414       | 429.7746        |
| 1028.5265      | 9  | E  | 5  | 702.4151       | 351.7114        |
| 1141.6105      | 10 | L  | 4  | 573.3725       | 287.1901        |
| 1270.6531      | 11 | E  | 3  | 460.2884       | 230.6481        |
| 1426.7794      | 12 | K  | 2  | 331.2458       | 166.1268        |
|                | 13 | R  | 1  | 175.1195       | 88.0637         |

N-term:+43.02 K(8):+156.13  
K(12):+156.13

ASSHTVLMR, MH+ 1043.5308, m/z 522.2690  
L OS G31 P160811 220811-s1.03116.03116.2.dta

scan 3116; 1.9e+001

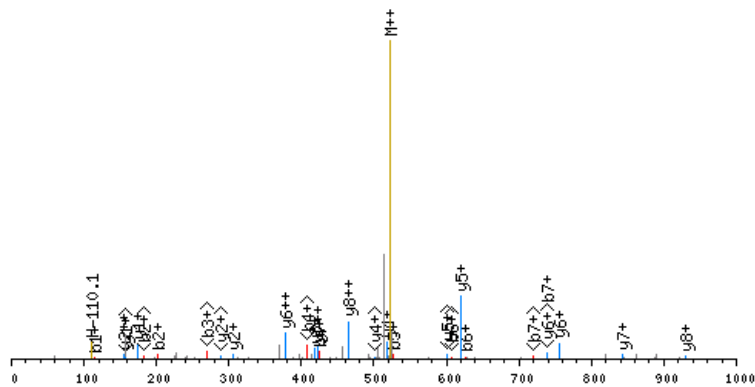

click image to zoom in; click top corners to zoom out [precursor±]

scan 3114; 522.3 m/z; 5.4e+001

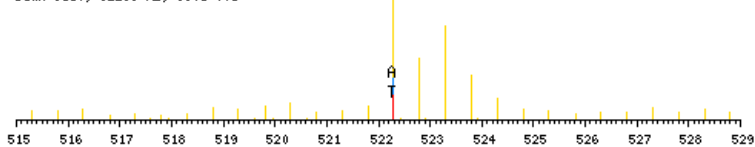

zoomed in precursor plot; T=theoretical m/z, A=acquired m/z

X-range:

0 - 0

MassTol: Y-zoom:

0. 1.

MassType:

☐ AVG ☒ MONO

Axis:

☒ 1 ☐ 2

Label:

☒ I ☐ M ☐ -

Ions:

a ☐ + ☐ 2+ ☐ 3+

b ☒ + ☐ 2+ ☐ 3+

c ☐ + ☐ 2+ ☐ 3+

x ☐ + ☐ 2+ ☐ 3+

y ☒ + ☒ 2+ ☐ 3+

z ☐ + ☐ 2+ ☐ 3+

hide H<sub>2</sub>O/NH<sub>3</sub> ☐

zoom 112-122 ☐

GO

| b <sup>+</sup> | # | AA | # | y <sup>+</sup> | y <sup>2+</sup> |
|----------------|---|----|---|----------------|-----------------|
| 114.0555       | 1 | A  | 9 |                |                 |
| 201.0875       | 2 | S  | 8 | 930.4831       | 465.7455        |
| 288.1196       | 3 | S  | 7 | 843.4511       | 422.2295        |
| 425.1785       | 4 | H  | 6 | 756.4191       | 378.7134        |
| 526.2262       | 5 | T  | 5 | 619.3601       | 310.1840        |
| 625.2946       | 6 | V  | 4 | 518.3125       | 259.6601        |
| 738.3786       | 7 | L  | 3 | 419.2440       | 210.1259        |
| 869.4191       | 8 | M  | 2 | 306.1600       | 153.5839        |
|                | 9 | R  | 1 | 175.1195       | 88.0637         |

N-term:+43.02

X-range:

0 - 0

MassTol: Y-zoom:

0. 1.

MassType:

☐ AVG ☒ MONO

Axis:

☒ 1 ☐ 2

Label:

☒ I ☐ M ☐ -

Ions:

a ☐ + ☐ 2+ ☐ 3+

b ☒ + ☐ 2+ ☐ 3+

c ☐ + ☐ 2+ ☐ 3+

x ☐ + ☐ 2+ ☐ 3+

y ☒ + ☒ 2+ ☐ 3+

z ☐ + ☐ 2+ ☐ 3+

hide H<sub>2</sub>O/NH<sub>3</sub> ☐

zoom 112-122 ☐

GO

ASSKKVTL SVLSR, MH+ 1485.9641, m/z 495.9929  
L OS G33 P160811 220811-s1.03909.03909.3.dta

scan 3909; 5.6e+001

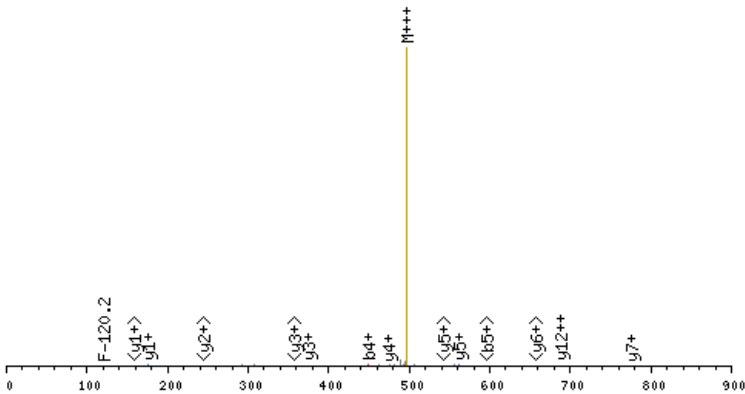

click image to zoom in; click top corners to zoom out [\[precursor±\]](#)

scan 3907; 496.0 m/z; 2.4e+001

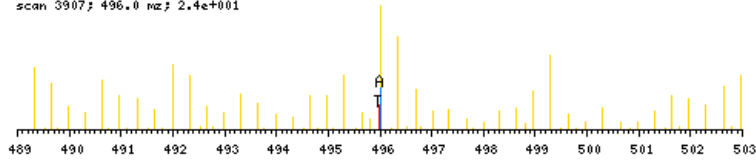

zoomed in precursor plot; T=theoretical m/z, A=acquired m/z

| b <sup>+</sup> | #  | AA | #  | y <sup>+</sup> | y <sup>2+</sup> |
|----------------|----|----|----|----------------|-----------------|
| 114.0555       | 1  | A  | 13 |                |                 |
| 201.0875       | 2  | S  | 12 | 1372.9164      | 686.9621        |
| 288.1196       | 3  | S  | 11 | 1285.8844      | 643.4461        |
| 450.2777       | 4  | K  | 10 | 1198.8524      | 599.9301        |
| 612.4358       | 5  | K  | 9  | 1036.6943      | 518.8511        |
| 711.5042       | 6  | V  | 8  | 874.5362       | 437.7720        |
| 812.5519       | 7  | T  | 7  | 775.4678       | 388.2378        |
| 925.6359       | 8  | L  | 6  | 674.4201       | 337.7140        |
| 1012.6680      | 9  | S  | 5  | 561.3360       | 281.1719        |
| 1111.7364      | 10 | V  | 4  | 474.3040       | 237.6559        |
| 1224.8204      | 11 | L  | 3  | 375.2356       | 188.1217        |
| 1311.8525      | 12 | S  | 2  | 262.1515       | 131.5797        |
|                | 13 | R  | 1  | 175.1195       | 88.0637         |

N-term:+43.02 K(4):+162.16  
K(5):+162.16

X-range:

0 - 0

MassTol: Y-zoom:

0. 1.

MassType:

☐ AVG ☒ MONO

Axis:

☒ 1 ☐ 2

Label:

☒ I ☐ M ☐ -

Ions:

a ☐ + ☐ 2+ ☐ 3+

b ☒ + ☐ 2+ ☐ 3+

c ☐ + ☐ 2+ ☐ 3+

x ☐ + ☐ 2+ ☐ 3+

y ☒ + ☒ 2+ ☐ 3+

z ☐ + ☐ 2+ ☐ 3+

hide H<sub>2</sub>O/NH<sub>3</sub> ☐

zoom 112-122 ☐

GO

ASYFDEHDCPELNPER, MH+ 2020.8347, m/z 674.2831  
L OS G30 P160811 220811-s1.05411.05411.3.dta

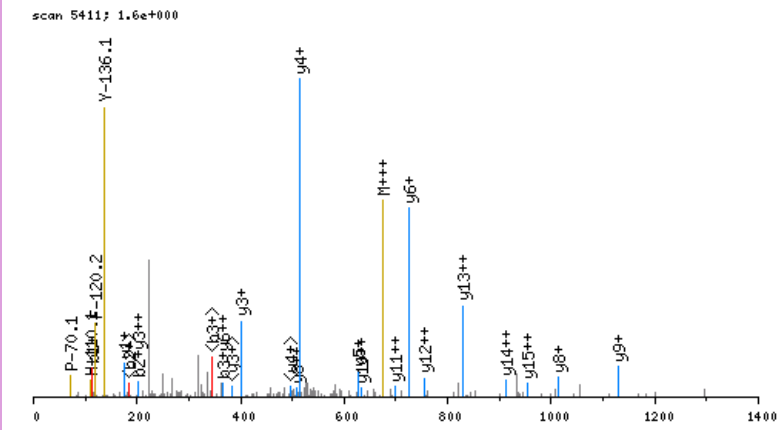

click image to zoom in; click top corners to zoom out

[precursor±]

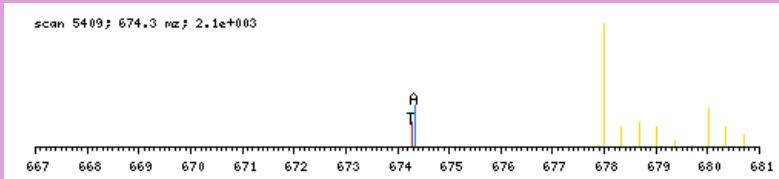

zoomed in precursor plot; T=theoretical m/z, A=acquired m/z

| b <sup>+</sup> | #  | AA | #  | y <sup>+</sup> | y <sup>2+</sup> |
|----------------|----|----|----|----------------|-----------------|
| 114.0555       | 1  | A  | 16 |                |                 |
| 201.0875       | 2  | S  | 15 | 1907.7870      | 954.3974        |
| 364.1509       | 3  | Y  | 14 | 1820.7549      | 910.8814        |
| 511.2193       | 4  | F  | 13 | 1657.6916      | 829.3497        |
| 626.2462       | 5  | D  | 12 | 1510.6232      | 755.8155        |
| 755.2888       | 6  | E  | 11 | 1395.5963      | 698.3020        |
| 892.3477       | 7  | H  | 10 | 1266.5537      | 633.7807        |
| 1007.3747      | 8  | D  | 9  | 1129.4947      | 565.2513        |
| 1167.4053      | 9  | C  | 8  | 1014.4678      | 507.7378        |
| 1296.4479      | 10 | E  | 7  | 854.4372       | 427.7225        |
| 1393.5006      | 11 | P  | 6  | 725.3946       | 363.2012        |
| 1506.5847      | 12 | L  | 5  | 628.3418       | 314.6748        |
| 1620.6276      | 13 | N  | 4  | 515.2578       | 258.1328        |
| 1717.6804      | 14 | P  | 3  | 401.2149       | 201.1113        |
| 1846.7230      | 15 | E  | 2  | 304.1621       | 152.5850        |
|                | 16 | R  | 1  | 175.1195       | 88.0637         |

N-term:+43.02 C(9):+160.03

X-range:

0 - 0

MassTol: Y-zoom:

0. 1.

MassType:

☐ AVG ☒ MONO

Axis:

☒ 1 ☐ 2

Label:

☒ I ☐ M ☐ -

Ions:

a ☐ + ☐ 2+ ☐ 3+

b ☒ + ☐ 2+ ☐ 3+

c ☐ + ☐ 2+ ☐ 3+

x ☐ + ☐ 2+ ☐ 3+

y ☒ + ☒ 2+ ☐ 3+

z ☐ + ☐ 2+ ☐ 3+

hide H<sub>2</sub>O/NH<sub>3</sub> ☐

zoom 112-122 ☐

GO

ATCPVLQKETLFR, MH+ 1638.9101, m/z 546.9749  
L OS G30 P160811 220811-s1.05866.05866.3.dta

scan 5866; 7.3e+000

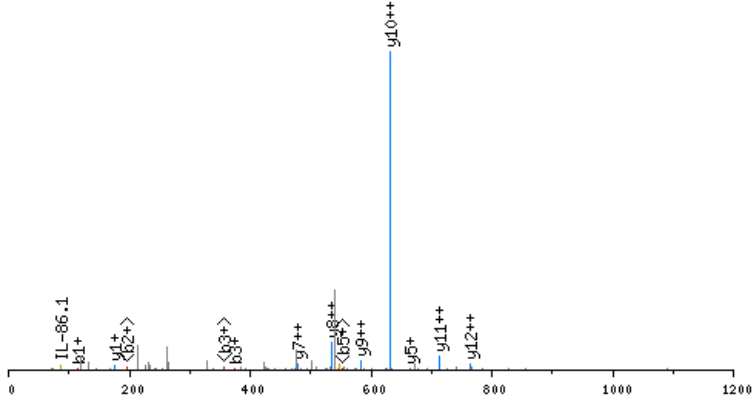

click image to zoom in; click top corners to zoom out [\[precursor±\]](#)

scan 5864; 547.0 m/z; 2.0e+001

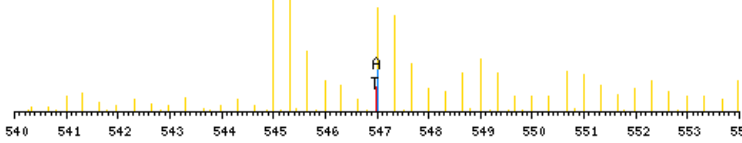

zoomed in precursor plot; T=theoretical m/z, A=acquired m/z

| b <sup>+</sup> | #  | AA | #  | y <sup>+</sup> | y <sup>2+</sup> |
|----------------|----|----|----|----------------|-----------------|
| 114.0555       | 1  | A  | 13 |                |                 |
| 215.1032       | 2  | T  | 12 | 1525.8624      | 763.4351        |
| 375.1338       | 3  | C  | 11 | 1424.8148      | 712.9113        |
| 472.1866       | 4  | P  | 10 | 1264.7842      | 632.8960        |
| 571.2550       | 5  | V  | 9  | 1167.7314      | 584.3696        |
| 684.3390       | 6  | L  | 8  | 1068.6630      | 534.8354        |
| 812.3976       | 7  | Q  | 7  | 955.5789       | 478.2934        |
| 974.5557       | 8  | K  | 6  | 827.5204       | 414.2641        |
| 1103.5983      | 9  | E  | 5  | 665.3623       | 333.1850        |
| 1204.6460      | 10 | T  | 4  | 536.3197       | 268.6637        |
| 1317.7300      | 11 | L  | 3  | 435.2720       | 218.1399        |
| 1464.7985      | 12 | F  | 2  | 322.1879       | 161.5979        |
|                | 13 | R  | 1  | 175.1195       | 88.0637         |

N-term:+43.02 C(3):+160.03  
K(8):+162.16

X-range:

0 - 0

MassTol: Y-zoom:

0. 1.

MassType:

☐AVG ☒MONO

Axis:

☒1 ☐2

Label:

☒I ☐M ☐-

Ions:

a ☐+ ☐2+ ☐3+

b ☒+ ☐2+ ☐3+

c ☐+ ☐2+ ☐3+

x ☐+ ☐2+ ☐3+

y ☒+ ☒2+ ☐3+

z ☐+ ☐2+ ☐3+

hide H<sub>2</sub>O/NH<sub>3</sub> ☐

zoom 112-122 ☐

GO

ATDDKSSPTLDSANDLPR, MH+ 1972.9464, m/z 658.3203  
L OS G30 P160811 220811-s1.03912.03912.3.dta

scan 3912; 9.2e-001

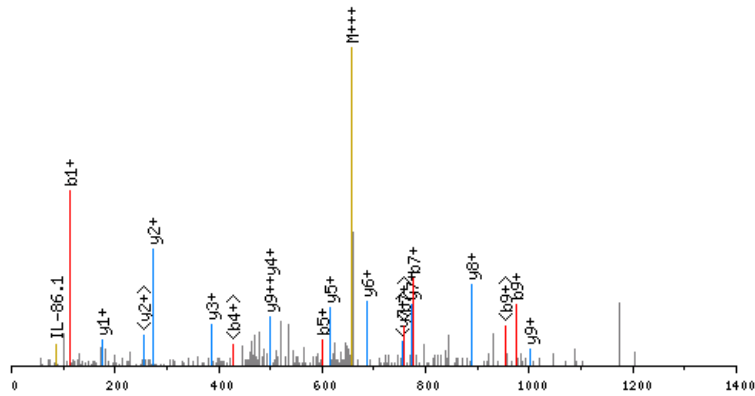

click image to zoom in; click top corners to zoom out

[precursor±]

scan 3909; 658.3 m/z; 1.1e+001

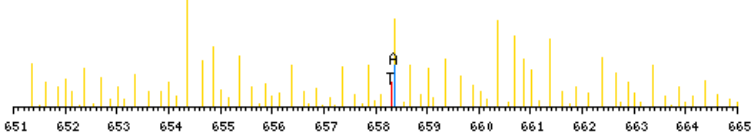

zoomed in precursor plot; T=theoretical m/z, A=acquired m/z

| b <sup>+</sup> | #  | AA | #  | y <sup>+</sup> | y <sup>2+</sup> |
|----------------|----|----|----|----------------|-----------------|
| 114.0555       | 1  | A  | 18 |                |                 |
| 215.1032       | 2  | T  | 17 | 1859.8987      | 930.4533        |
| 330.1301       | 3  | D  | 16 | 1758.8510      | 879.9294        |
| 445.1571       | 4  | D  | 15 | 1643.8241      | 822.4160        |
| 601.2834       | 5  | K  | 14 | 1528.7971      | 764.9025        |
| 688.3154       | 6  | S  | 13 | 1372.6708      | 686.8393        |
| 775.3474       | 7  | S  | 12 | 1285.6388      | 643.3233        |
| 872.4002       | 8  | P  | 11 | 1198.6068      | 599.8073        |
| 973.4479       | 9  | T  | 10 | 1101.5540      | 551.2809        |
| 1086.5319      | 10 | L  | 9  | 1000.5063      | 500.7571        |
| 1201.5589      | 11 | D  | 8  | 887.4223       | 444.2151        |
| 1288.5909      | 12 | S  | 7  | 772.3953       | 386.7016        |
| 1359.6280      | 13 | A  | 6  | 685.3633       | 343.1856        |
| 1473.6710      | 14 | N  | 5  | 614.3262       | 307.6670        |
| 1588.6979      | 15 | D  | 4  | 500.2833       | 250.6455        |
| 1701.7820      | 16 | L  | 3  | 385.2563       | 193.1321        |
| 1798.8347      | 17 | P  | 2  | 272.1723       | 136.5900        |
|                | 18 | R  | 1  | 175.1195       | 88.0637         |

N-term:+43.02 K(5):+156.13

X-range:

0 - 0

MassTol: Y-zoom:

0. 1.

MassType:

☐AVG ☒MONO

Axis:

☒1 ☐2

Label:

☒I ☐M ☐-

Ions:

a ☐+ ☐2+ ☐3+

b ☒+ ☐2+ ☐3+

c ☐+ ☐2+ ☐3+

x ☐+ ☐2+ ☐3+

y ☒+ ☒2+ ☐3+

z ☐+ ☐2+ ☐3+

hide H<sub>2</sub>O/NH<sub>3</sub> ☐

zoom 112-122 ☐

GO

ATDELASKLSR, MH+ 1260.6800, m/z 630.8436  
L OS G30 P160811 220811-s1.04168.04168.2.dta

scan 4168; 3.6e+001

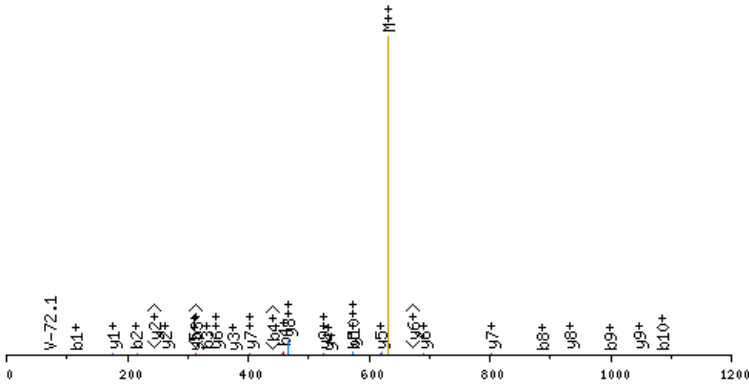

click image to zoom in; click top corners to zoom out [\[precursor±\]](#)

scan 4164; 630.8 m/z; 3.3e+001

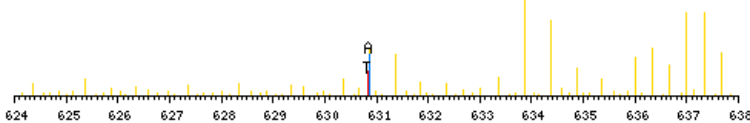

zoomed in precursor plot; T=theoretical m/z, A=acquired m/z

| b <sup>+</sup> | #  | AA | #  | y <sup>+</sup> | y <sup>2+</sup> |
|----------------|----|----|----|----------------|-----------------|
| 114.0555       | 1  | A  | 11 |                |                 |
| 215.1032       | 2  | T  | 10 | 1147.6323      | 574.3201        |
| 330.1301       | 3  | D  | 9  | 1046.5846      | 523.7962        |
| 459.1727       | 4  | E  | 8  | 931.5577       | 466.2828        |
| 572.2568       | 5  | L  | 7  | 802.5151       | 401.7615        |
| 643.2939       | 6  | A  | 6  | 689.4310       | 345.2194        |
| 730.3259       | 7  | S  | 5  | 618.3939       | 309.7009        |
| 886.4522       | 8  | K  | 4  | 531.3619       | 266.1849        |
| 999.5363       | 9  | L  | 3  | 375.2356       | 188.1217        |
| 1086.5683      | 10 | S  | 2  | 262.1515       | 131.5797        |
|                | 11 | R  | 1  | 175.1195       | 88.0637         |

N-term:+43.02 K(8):+156.13

N-term:+43.02 C(12):+160.03  
K(13):+162.16 K(17):+162.16  
K(21):+162.16

X-range:

0 - 0

MassTol: Y-zoom:

0. 1.

MassType:

☐ AVG ☒ MONO

Axis:

☒ 1 ☐ 2

Label:

☒ I ☐ M ☐ -

Ions:

a ☐ + ☐ 2+ ☐ 3+

b ☒ + ☐ 2+ ☐ 3+

c ☐ + ☐ 2+ ☐ 3+

x ☐ + ☐ 2+ ☐ 3+

y ☒ + ☒ 2+ ☐ 3+

z ☐ + ☐ 2+ ☐ 3+

hide H<sub>2</sub>O/NH<sub>3</sub> ☐

zoom 112-122 ☐

GO

ATEGDVELELETETSGPERPPEKPR, MH+ 2836.3853, m/z 946.1333  
L OS G32 P160811 220811-s1.04914.04914.3.dta

scan 4914; 1.6e+000

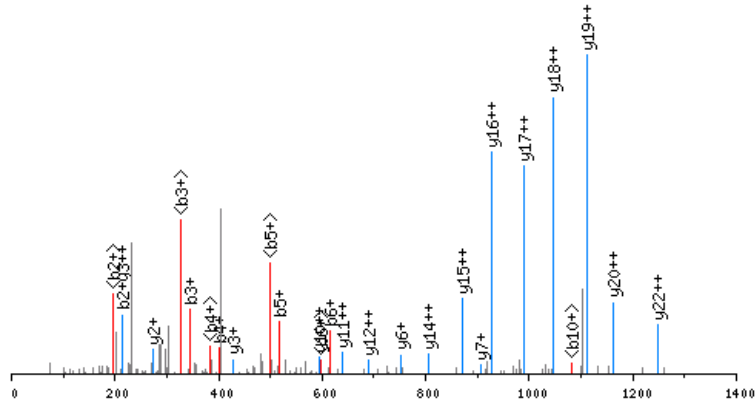

click image to zoom in; click top corners to zoom out [\[precursor±\]](#)

scan 4913; 946.1 m/z; 2.8e+001

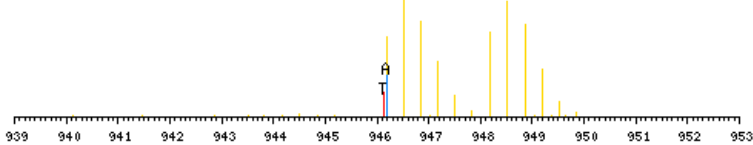

zoomed in precursor plot; T=theoretical m/z, A=acquired m/z

| b <sup>+</sup> | #  | AA | #  | y <sup>+</sup> | y <sup>2+</sup> |
|----------------|----|----|----|----------------|-----------------|
| 114.0555       | 1  | A  | 25 |                |                 |
| 215.1032       | 2  | T  | 24 | 2723.3376      | 1362.1727       |
| 344.1458       | 3  | E  | 23 | 2622.2899      | 1311.6489       |
| 401.1672       | 4  | G  | 22 | 2493.2473      | 1247.1276       |
| 516.1942       | 5  | D  | 21 | 2436.2259      | 1218.6168       |
| 615.2626       | 6  | V  | 20 | 2321.1989      | 1161.1034       |
| 744.3052       | 7  | E  | 19 | 2222.1305      | 1111.5692       |
| 857.3893       | 8  | L  | 18 | 2093.0879      | 1047.0479       |
| 986.4319       | 9  | E  | 17 | 1980.0038      | 990.5058        |
| 1099.5159      | 10 | L  | 16 | 1850.9613      | 925.9845        |
| 1228.5585      | 11 | E  | 15 | 1737.8772      | 869.4425        |
| 1329.6062      | 12 | T  | 14 | 1608.8346      | 804.9212        |
| 1458.6488      | 13 | E  | 13 | 1507.7869      | 754.3974        |
| 1559.6965      | 14 | T  | 12 | 1378.7443      | 689.8761        |
| 1646.7285      | 15 | S  | 11 | 1277.6966      | 639.3522        |
| 1703.7500      | 16 | G  | 10 | 1190.6646      | 595.8362        |
| 1800.8027      | 17 | P  | 9  | 1133.6432      | 567.3255        |
| 1929.8453      | 18 | E  | 8  | 1036.5904      | 518.7991        |
| 2085.9464      | 19 | R  | 7  | 907.5478       | 454.2778        |
| 2182.9992      | 20 | P  | 6  | 751.4467       | 376.2273        |
| 2280.0520      | 21 | P  | 5  | 654.3939       | 327.7009        |
| 2409.0945      | 22 | E  | 4  | 557.3412       | 279.1745        |
| 2565.2208      | 23 | K  | 3  | 428.2986       | 214.6532        |
| 2662.2736      | 24 | P  | 2  | 272.1723       | 136.5900        |
|                | 25 | R  | 1  | 175.1195       | 88.0637         |

N-term:+43.02 K(23):+156.13

X-range:

0 - 0

MassTol: Y-zoom:

0. 1.

MassType:

☐ AVG ☒ MONO

Axis:

☒ 1 ☐ 2

Label:

☒ I ☐ M ☐ -

Ions:

a ☐ + ☐ 2+ ☐ 3+

b ☒ + ☐ 2+ ☐ 3+

c ☐ + ☐ 2+ ☐ 3+

x ☐ + ☐ 2+ ☐ 3+

y ☒ + ☒ 2+ ☐ 3+

z ☐ + ☐ 2+ ☐ 3+

hide H<sub>2</sub>O/NH<sub>3</sub> ☐

zoom 112-122 ☐

GO

ATEGMILTNDHQIR, MH+ 1777.8656, m/z 593.2934  
L OS G34 P160811 220811-s1.05327.05327.3.dta

scan 5327; 2.3e+000

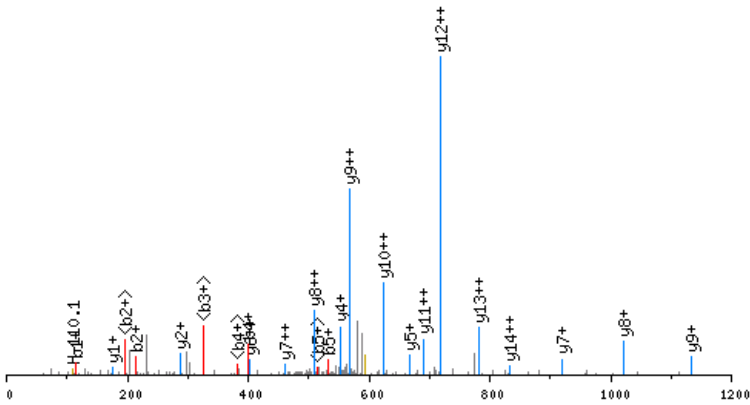

click image to zoom in; click top corners to zoom out

[precursor±]

scan 5325; 593.3 m/z; 1.3e+001

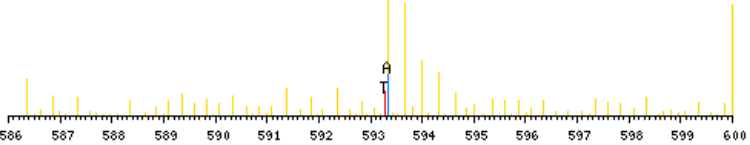

zoomed in precursor plot; T=theoretical m/z, A=acquired m/z

| b <sup>+</sup> | #  | AA | #  | y <sup>+</sup> | y <sup>2+</sup> |
|----------------|----|----|----|----------------|-----------------|
| 114.0555       | 1  | A  | 15 |                |                 |
| 215.1032       | 2  | T  | 14 | 1664.8179      | 832.9128        |
| 344.1458       | 3  | E  | 13 | 1563.7702      | 782.3890        |
| 401.1672       | 4  | G  | 12 | 1434.7276      | 717.8677        |
| 532.2077       | 5  | M  | 11 | 1377.7061      | 689.3570        |
| 645.2918       | 6  | I  | 10 | 1246.6656      | 623.8367        |
| 758.3759       | 7  | L  | 9  | 1133.5816      | 567.2947        |
| 859.4235       | 8  | T  | 8  | 1020.4975      | 510.7527        |
| 973.4665       | 9  | N  | 7  | 919.4498       | 460.2288        |
| 1110.5254      | 10 | H  | 6  | 805.4069       | 403.2074        |
| 1225.5523      | 11 | D  | 5  | 668.3480       | 334.6779        |
| 1362.6112      | 12 | H  | 4  | 553.3211       | 277.1644        |
| 1490.6698      | 13 | Q  | 3  | 416.2621       | 208.6350        |
| 1603.7539      | 14 | I  | 2  | 288.2036       | 144.6057        |
|                | 15 | R  | 1  | 175.1195       | 88.0637         |

N-term:+43.02

X-range:

$$\boxed{0} - \boxed{0}$$

0. 1.

☐ AVG ☒ MONO

1 2

I M -

a  + <sup>2</sup> + <sup>3</sup> +

**B**

$$x \begin{bmatrix} 1 \\ 2 \\ 3 \end{bmatrix} + \begin{bmatrix} 1 \\ 2 \\ 3 \end{bmatrix}^2 + \begin{bmatrix} 1 \\ 2 \\ 3 \end{bmatrix}^3 + \dots$$
$$2 \square + \square^2 + \square^3 +$$

zoom 112-122

GO

click image to zoom in; click top corners to zoom out      [precursor+]

| m/z | Relative Intensity (%) |
|-----|------------------------|
| 312 | 10                     |
| 313 | 100                    |
| 314 | 85                     |
| 315 | 45                     |
| 316 | 15                     |

zoomed in precursor plot; T=theoretical m/z, A=acquired m/z

N-term:+43.02 C (24) :+160.03

X-range:

0 - 0

MassTol: Y-zoom:

0. 1.

MassType:

☐ AVG ☒ MONO

Axis:

☒ 1 ☐ 2

Label:

☐ I ☐ M ☐ -

Ions:

a ☐ + ☐ 2+ ☐ 3+

b ☒ + ☐ 2+ ☐ 3+

c ☐ + ☐ 2+ ☐ 3+

x ☐ + ☐ 2+ ☐ 3+

y ☒ + ☒ 2+ ☐ 3+

z ☐ + ☐ 2+ ☐ 3+

hide H<sub>2</sub>O/NH<sub>3</sub> ☐

zoom 112-122 ☐

GO

ATGANATPLDFPSKKR, MH+ 1784.0343, m/z 595.3496  
L OS G33 P160811 220811-s1.03876.03876.3.dta

scan 3876; 3.4e+000

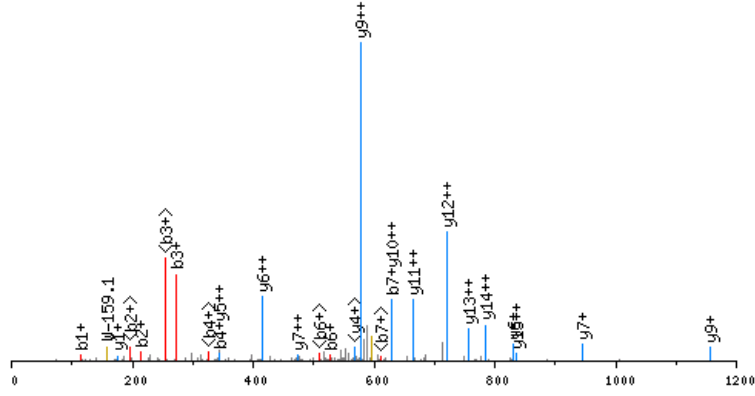

click image to zoom in; click top corners to zoom out [\[precursor±\]](#)

scan 3872; 595.3 m/z; 1.6e+002

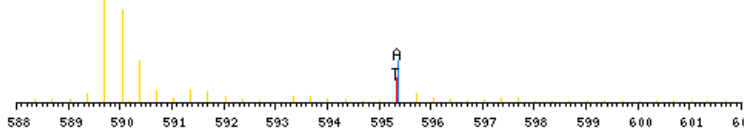

zoomed in precursor plot; T=theoretical m/z, A=acquired m/z

| b <sup>+</sup> | #  | AA | #  | y <sup>+</sup> | y <sup>2+</sup> |
|----------------|----|----|----|----------------|-----------------|
| 114.0555       | 1  | A  | 16 |                |                 |
| 215.1032       | 2  | T  | 15 | 1670.9867      | 835.9972        |
| 272.1247       | 3  | G  | 14 | 1569.9390      | 785.4734        |
| 343.1618       | 4  | A  | 13 | 1512.9175      | 756.9627        |
| 457.2047       | 5  | N  | 12 | 1441.8804      | 721.4441        |
| 528.2418       | 6  | A  | 11 | 1327.8375      | 664.4226        |
| 629.2895       | 7  | T  | 10 | 1256.8004      | 628.9041        |
| 726.3423       | 8  | P  | 9  | 1155.7527      | 578.3803        |
| 839.4263       | 9  | L  | 8  | 1058.6999      | 529.8539        |
| 954.4533       | 10 | D  | 7  | 945.6159       | 473.3118        |
| 1101.5217      | 11 | F  | 6  | 830.5889       | 415.7984        |
| 1198.5744      | 12 | P  | 5  | 683.5205       | 342.2642        |
| 1285.6065      | 13 | S  | 4  | 586.4677       | 293.7378        |
| 1447.7646      | 14 | K  | 3  | 499.4357       | 250.2218        |
| 1609.9227      | 15 | K  | 2  | 337.2776       | 169.1427        |
|                | 16 | R  | 1  | 175.1195       | 88.0637         |

N-term:+43.02 K(14):+162.16  
K(15):+162.16

X-range:

0 - 0

MassTol: Y-zoom:

0. 1.

MassType:

☐AVG ☒MONO

Axis:

☒1 ☐2

Label:

☒I ☐M ☐-

Ions:

a ☐+ ☐2+ ☐3+

b ☒+ ☐2+ ☐3+

c ☐+ ☐2+ ☐3+

x ☐+ ☐2+ ☐3+

y ☒+ ☒2+ ☐3+

z ☐+ ☐2+ ☐3+

hide H<sub>2</sub>O/NH<sub>3</sub> ☐

zoom 112-122 ☐

GO

ATIGPSGLHPGER, MH+ 1333.6864, m/z 667.3469  
L OS G31 P160811 220811-s1.04441.04441.2.dta

scan 4441; 2.0e+000

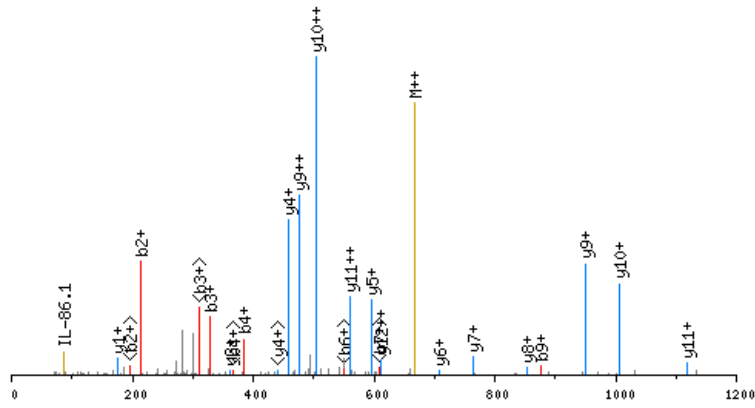

click image to zoom in; click top corners to zoom out

[precursor±]

scan 4439; 667.3 m/z; 1.8e+001

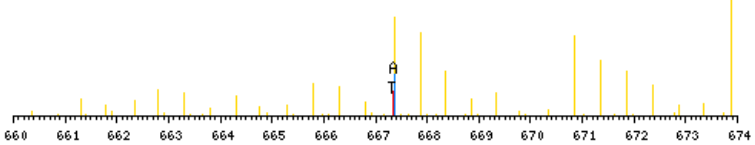

zoomed in precursor plot; T=theoretical m/z, A=acquired m/z

| b <sup>+</sup> | #  | AA | #  | y <sup>+</sup> | y <sup>2+</sup> |
|----------------|----|----|----|----------------|-----------------|
| 114.0555       | 1  | A  | 13 |                |                 |
| 215.1032       | 2  | T  | 12 | 1220.6388      | 610.8233        |
| 328.1873       | 3  | I  | 11 | 1119.5911      | 560.2995        |
| 385.2087       | 4  | G  | 10 | 1006.5070      | 503.7574        |
| 482.2615       | 5  | P  | 9  | 949.4856       | 475.2467        |
| 569.2935       | 6  | S  | 8  | 852.4328       | 426.7203        |
| 626.3150       | 7  | G  | 7  | 765.4008       | 383.2043        |
| 739.3990       | 8  | L  | 6  | 708.3793       | 354.6936        |
| 876.4580       | 9  | H  | 5  | 595.2952       | 298.1515        |
| 973.5107       | 10 | P  | 4  | 458.2363       | 229.6221        |
| 1030.5322      | 11 | G  | 3  | 361.1836       | 181.0957        |
| 1159.5748      | 12 | E  | 2  | 304.1621       | 152.5850        |
|                | 13 | R  | 1  | 175.1195       | 88.0637         |

N-term:+43.02

X-range:

0-0

0. 1.

☐ AVG ☒ MONO

1 2

☒ I ☐ M ☐ -

a  +  2 +  3 +

b. ☒ 1+ ☐ 2+ ☐ 3+

c

$$y \begin{matrix} \checkmark \\ \checkmark \end{matrix} + \begin{matrix} \checkmark \\ \checkmark \end{matrix} 2 + \begin{matrix} \square \\ \square \end{matrix} 3 +$$
 $2 \square + \square^2 + \square^3 +$ hide H<sub>2</sub>O/NH<sub>3</sub>

60

GO

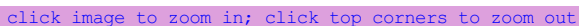

```
[precursor±]
```

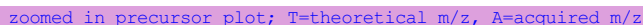

N-term:+43.02 K(3):+156.13  
C(4):+160.03 K(6):+156.13 C(7):+160.03  
K(19):+156.13

X-range:

0 - 0

MassTol: Y-zoom:

0. 1.

MassType:

☐ AVG ☒ MONO

Axis:

☒ 1 ☐ 2

Label:

☒ I ☐ M ☐ -

Ions:

a ☐ + ☐ 2+ ☐ 3+

b ☒ + ☐ 2+ ☐ 3+

c ☐ + ☐ 2+ ☐ 3+

x ☐ + ☐ 2+ ☐ 3+

y ☒ + ☒ 2+ ☐ 3+

z ☐ + ☐ 2+ ☐ 3+

hide H<sub>2</sub>O/NH<sub>3</sub> ☐

zoom 112-122 ☐

GO

ATKIDKEACR, MH+ 1289.6888, m/z 430.5678  
L OS G34 P160811 220811-s1.02061.02061.3.dta

scan 2061; 9.2e+001

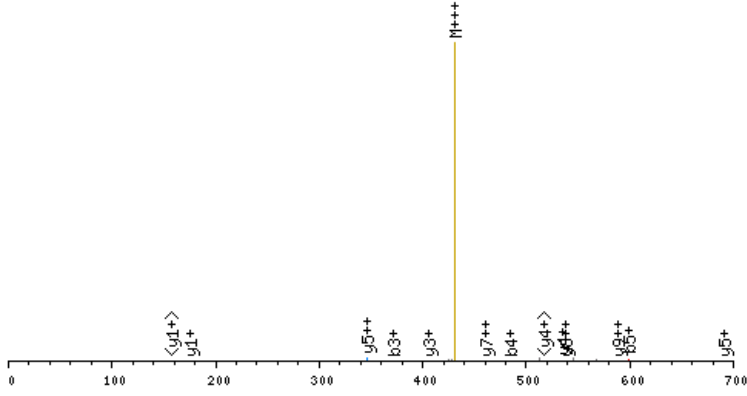

click image to zoom in; click top corners to zoom out [precursor±]

scan 2060; 430.6 m/z; 3.2e+001

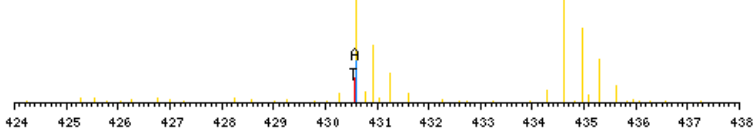

zoomed in precursor plot; T=theoretical m/z, A=acquired m/z

| b <sup>+</sup> | #  | AA | #  | y <sup>+</sup> | y <sup>2+</sup> |
|----------------|----|----|----|----------------|-----------------|
| 114.0555       | 1  | A  | 10 |                |                 |
| 215.1032       | 2  | T  | 9  | 1176.6411      | 588.8245        |
| 371.2295       | 3  | K  | 8  | 1075.5934      | 538.3006        |
| 484.3136       | 4  | I  | 7  | 919.4671       | 460.2375        |
| 599.3405       | 5  | D  | 6  | 806.3831       | 403.6954        |
| 755.4668       | 6  | K  | 5  | 691.3561       | 346.1820        |
| 884.5094       | 7  | E  | 4  | 535.2298       | 268.1188        |
| 955.5465       | 8  | A  | 3  | 406.1872       | 203.5975        |
| 1115.5771      | 9  | C  | 2  | 335.1501       | 168.0790        |
|                | 10 | R  | 1  | 175.1195       | 88.0637         |

N-term:+43.02 K(3):+156.13  
K(6):+156.13 C(9):+160.03

ATNDAVLKR, MH+ 1057.6006, m/z 529.3040  
L OS G31 P160811 220811-s1.02653.02653.2.dta

scan 2653; 3.0e+001

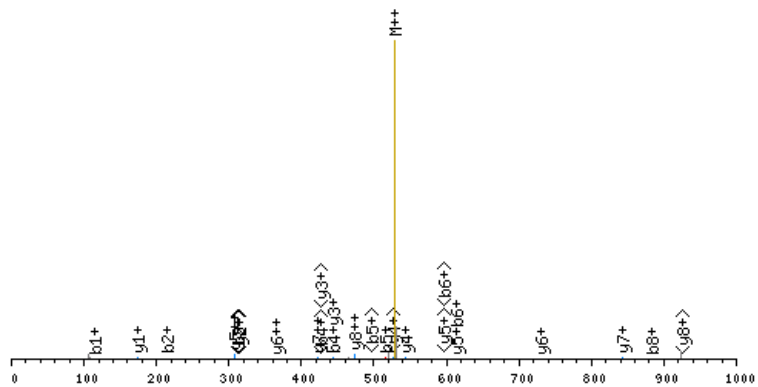

click image to zoom in; click top corners to zoom out

[precursor±]

scan 2649; 529.3 m/z; 2.6e+001

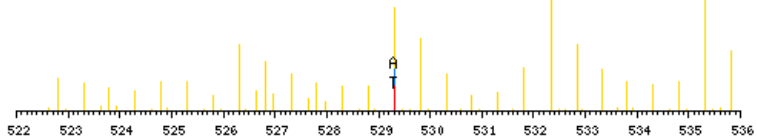

zoomed in precursor plot; T=theoretical m/z, A=acquired m/z

X-range:

0 - 0

MassTol: Y-zoom:

0. 1.

MassType:

☐ AVG ☒ MONO

Axis:

☒ 1 ☐ 2

Label:

☒ I ☐ M ☐ -

Ions:

a ☐ + ☐ 2+ ☐ 3+

b ☒ + ☐ 2+ ☐ 3+

c ☐ + ☐ 2+ ☐ 3+

x ☐ + ☐ 2+ ☐ 3+

y ☒ + ☒ 2+ ☐ 3+

z ☐ + ☐ 2+ ☐ 3+

hide H<sub>2</sub>O/NH<sub>3</sub> ☐

zoom 112-122 ☐

GO

| b <sup>+</sup> | # | AA | # | y <sup>+</sup> | y <sup>2+</sup> |
|----------------|---|----|---|----------------|-----------------|
| 114.0555       | 1 | A  | 9 |                |                 |
| 215.1032       | 2 | T  | 8 | 944.5529       | 472.7804        |
| 329.1461       | 3 | N  | 7 | 843.5053       | 422.2565        |
| 444.1731       | 4 | D  | 6 | 729.4623       | 365.2351        |
| 515.2102       | 5 | A  | 5 | 614.4354       | 307.7216        |
| 614.2786       | 6 | V  | 4 | 543.3983       | 272.2031        |
| 727.3627       | 7 | L  | 3 | 444.3299       | 222.6688        |
| 883.4890       | 8 | K  | 2 | 331.2458       | 166.1268        |
|                | 9 | R  | 1 | 175.1195       | 88.0637         |

N-term:+43.02 K(8):+156.13

X-range:

0 - 0

MassTol: Y-zoom:

0. 1.

MassType:

☐ AVG ☒ MONO

Axis:

☒ 1 ☐ 2

Label:

☒ I ☐ M ☐ -

Ions:

a ☐ + ☐ 2+ ☐ 3+

b ☒ + ☐ 2+ ☐ 3+

c ☐ + ☐ 2+ ☐ 3+

x ☐ + ☐ 2+ ☐ 3+

y ☒ + ☒ 2+ ☐ 3+

z ☐ + ☐ 2+ ☐ 3+

hide H<sub>2</sub>O/NH<sub>3</sub> ☐

zoom 112-122 ☐

GO

ATPDSLALFTGLGLSENKAR, MH+ 2131.1400, m/z 711.0515  
L OS G30 P160811 220811-s1.07803.07803.3.dta

scan 7803; 2.5e+000

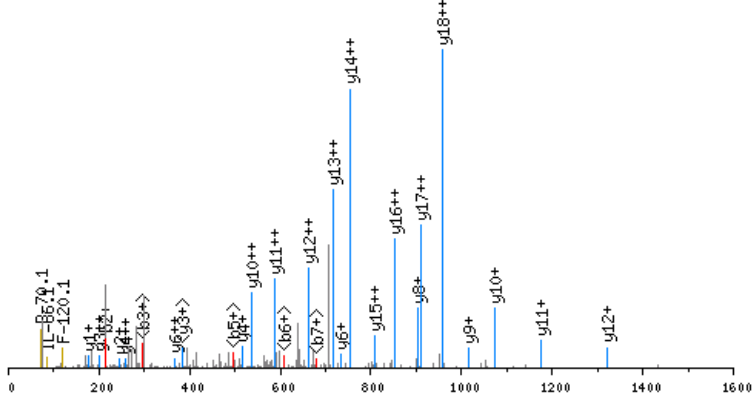

click image to zoom in; click top corners to zoom out (precursor±)

scan 7799; 711.1 m/z; 5.7e+001

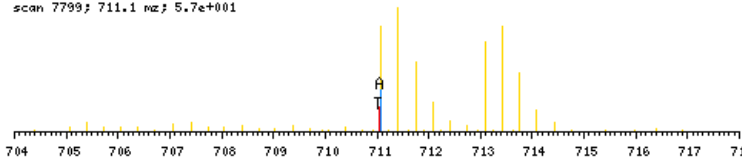

zoomed in precursor plot; T=theoretical m/z, A=acquired m/z

| b <sup>+</sup> | #  | AA | #  | y <sup>+</sup> | y <sup>2+</sup> |
|----------------|----|----|----|----------------|-----------------|
| 114.0555       | 1  | A  | 20 |                |                 |
| 215.1032       | 2  | T  | 19 | 2018.0923      | 1009.5500       |
| 312.1560       | 3  | P  | 18 | 1917.0446      | 959.0262        |
| 427.1829       | 4  | D  | 17 | 1819.9918      | 910.4998        |
| 514.2149       | 5  | S  | 16 | 1704.9649      | 852.9864        |
| 627.2990       | 6  | L  | 15 | 1617.9329      | 809.4703        |
| 698.3361       | 7  | A  | 14 | 1504.8488      | 752.9283        |
| 811.4202       | 8  | L  | 13 | 1433.8117      | 717.4098        |
| 958.4886       | 9  | F  | 12 | 1320.7276      | 660.8677        |
| 1059.5363      | 10 | T  | 11 | 1173.6592      | 587.3335        |
| 1116.5577      | 11 | G  | 10 | 1072.6115      | 536.8097        |
| 1229.6418      | 12 | L  | 9  | 1015.5901      | 508.2989        |
| 1286.6633      | 13 | G  | 8  | 902.5060       | 451.7569        |
| 1399.7473      | 14 | L  | 7  | 845.4845       | 423.2462        |
| 1486.7793      | 15 | S  | 6  | 732.4005       | 366.7041        |
| 1615.8219      | 16 | E  | 5  | 645.3684       | 323.1881        |
| 1729.8649      | 17 | N  | 4  | 516.3258       | 258.6668        |
| 1885.9912      | 18 | K  | 3  | 402.2829       | 201.6454        |
| 1957.0283      | 19 | A  | 2  | 246.1566       | 123.5822        |
|                | 20 | R  | 1  | 175.1195       | 88.0637         |

N-term:+43.02 K(18):+156.13

X-range:

0 - 0

MassTol: Y-zoom:

0. 1.

MassType:

☐ AVG ☒ MONO

Axis:

☒ 1 ☐ 2

Label:

☒ I ☐ M ☐ -

Ions:

a ☐ + ☐ 2+ ☐ 3+

b ☒ + ☐ 2+ ☐ 3+

c ☐ + ☐ 2+ ☐ 3+

x ☐ + ☐ 2+ ☐ 3+

y ☒ + ☒ 2+ ☐ 3+

z ☐ + ☐ 2+ ☐ 3+

hide H<sub>2</sub>O/NH<sub>3</sub> ☐

zoom 112-122 ☐

GO

ATPEASGSGEKVEGSEPSVTYYR, MH+ 2477.1897, m/z 826.4014  
L OS G30 P160811 220811-s1.03833.03833.3.dta

scan 3833; 1.9e+000

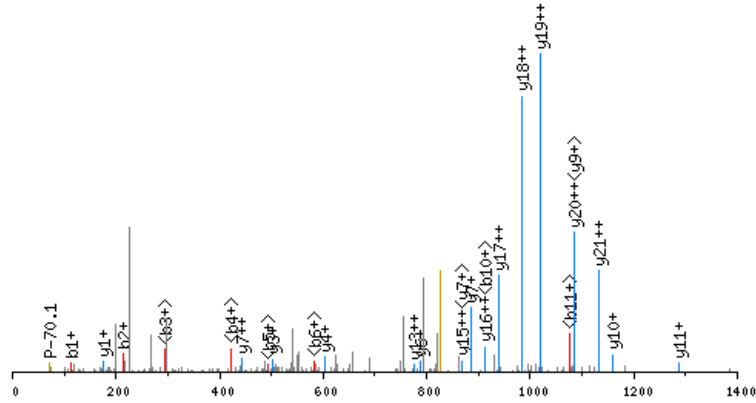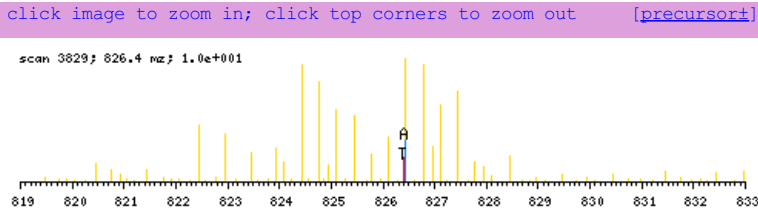

zoomed in precursor plot; T=theoretical m/z, A=acquired m/z

| b <sup>+</sup> | #  | AA | #  | y <sup>+</sup> | y <sup>2+</sup> |
|----------------|----|----|----|----------------|-----------------|
| 114.0555       | 1  | A  | 23 |                |                 |
| 215.1032       | 2  | T  | 22 | 2364.1420      | 1182.5749       |
| 312.1560       | 3  | P  | 21 | 2263.0943      | 1132.0511       |
| 441.1985       | 4  | E  | 20 | 2166.0415      | 1083.5247       |
| 512.2357       | 5  | A  | 19 | 2036.9989      | 1019.0034       |
| 599.2677       | 6  | S  | 18 | 1965.9618      | 983.4848        |
| 656.2892       | 7  | G  | 17 | 1878.9298      | 939.9688        |
| 743.3212       | 8  | S  | 16 | 1821.9083      | 911.4581        |
| 800.3426       | 9  | G  | 15 | 1734.8763      | 867.9421        |
| 929.3852       | 10 | E  | 14 | 1677.8548      | 839.4313        |
| 1091.5433      | 11 | K  | 13 | 1548.8122      | 774.9100        |
| 1190.6118      | 12 | V  | 12 | 1386.6541      | 693.8310        |
| 1319.6543      | 13 | E  | 11 | 1287.5857      | 644.2968        |
| 1376.6758      | 14 | G  | 10 | 1158.5431      | 579.7755        |
| 1463.7078      | 15 | S  | 9  | 1101.5217      | 551.2647        |
| 1592.7504      | 16 | E  | 8  | 1014.4896      | 507.7487        |
| 1689.8032      | 17 | P  | 7  | 885.4470       | 443.2274        |
| 1776.8352      | 18 | S  | 6  | 788.3943       | 394.7011        |
| 1875.9036      | 19 | V  | 5  | 701.3623       | 351.1850        |
| 1976.9513      | 20 | T  | 4  | 602.2938       | 301.6508        |
| 2140.0146      | 21 | Y  | 3  | 501.2462       | 251.1270        |
| 2303.0780      | 22 | Y  | 2  | 338.1828       | 169.5953        |
|                | 23 | R  | 1  | 175.1195       | 88.0637         |

N-term:+43.02 K(11):+162.16

X-range:

0 - 0

MassTol: Y-zoom:

0. 1.

MassType:

☐AVG ☒MONO

Axis:

☒1 ☐2

Label:

☒I ☐M ☐-

Ions:

a ☐+ ☐2+ ☐3+

b ☒+ ☐2+ ☐3+

c ☐+ ☐2+ ☐3+

x ☐+ ☐2+ ☐3+

y ☒+ ☒2+ ☐3+

z ☐+ ☐2+ ☐3+

hide H<sub>2</sub>O/NH<sub>3</sub> ☐

zoom 112-122 ☐

GO

ATQHKTSLPQGVK, MH+ 1498.8554, m/z 500.2900  
L OS G33 P160811 220811-s1.02250.02250.3.dta

scan 2250; 1.1e+001

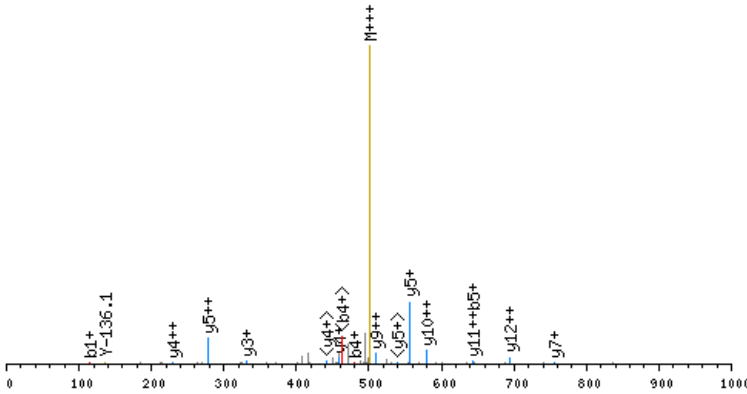

click image to zoom in; click top corners to zoom out

[precursor±]

scan 2247; 500.3 m/z; 2.2e+001

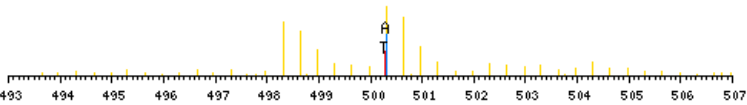

zoomed in precursor plot; T=theoretical m/z, A=acquired m/z

| b <sup>+</sup> | #  | AA | #  | y <sup>+</sup> | y <sup>2+</sup> |
|----------------|----|----|----|----------------|-----------------|
| 114.0555       | 1  | A  | 13 |                |                 |
| 215.1032       | 2  | T  | 12 | 1385.8078      | 693.4078        |
| 343.1618       | 3  | Q  | 11 | 1284.7601      | 642.8840        |
| 480.2207       | 4  | H  | 10 | 1156.7015      | 578.8547        |
| 642.3788       | 5  | K  | 9  | 1019.6426      | 510.3252        |
| 743.4265       | 6  | T  | 8  | 857.4845       | 429.2462        |
| 830.4585       | 7  | S  | 7  | 756.4368       | 378.7223        |
| 943.5426       | 8  | L  | 6  | 669.4048       | 335.2063        |
| 1040.5953      | 9  | P  | 5  | 556.3207       | 278.6643        |
| 1168.6539      | 10 | Q  | 4  | 459.2680       | 230.1379        |
| 1225.6754      | 11 | G  | 3  | 331.2094       | 166.1086        |
| 1324.7438      | 12 | V  | 2  | 274.1879       | 137.5979        |
|                | 13 | R  | 1  | 175.1195       | 88.0637         |

N-term:+43.02 K(5):+162.16

X-range:

0 - 0

MassTol: Y-zoom:

0. 1.

MassType:

☐AVG ☒MONO

Axis:

☒1 ☐2

Label:

☒I ☐M ☐-

Ions:

a ☐+ ☐2+ ☐3+

b ☒+ ☐2+ ☐3+

c ☐+ ☐2+ ☐3+

x ☐+ ☐2+ ☐3+

y ☒+ ☒2+ ☐3+

z ☐+ ☐2+ ☐3+

hide H<sub>2</sub>O/NH<sub>3</sub> ☐

zoom 112-122 ☐

GO

ATTAQQSPQPVAGKR, MH+ 1615.8980, m/z 539.3042  
L OS G31 P160811 220811-s1.02170.02170.3.dta

scan 2170; 1.4e+000

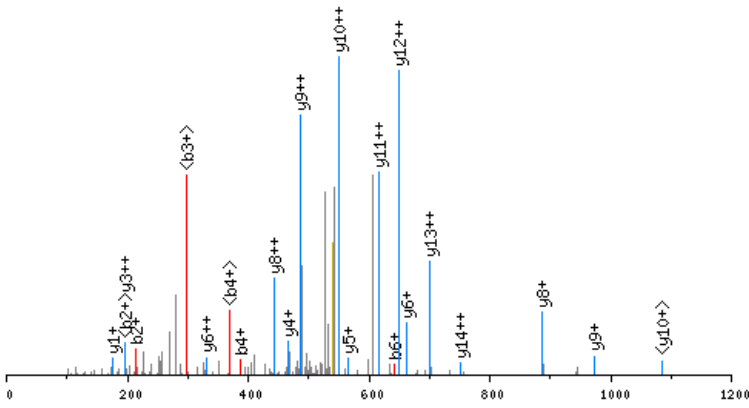

click image to zoom in; click top corners to zoom out

[precursor±]

scan 2169; 539.3 m/z; 2.7e+001

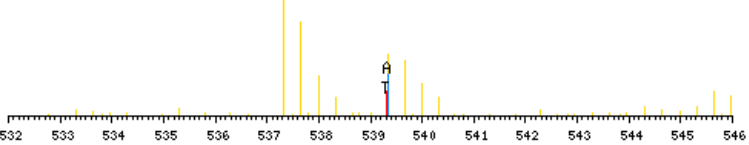

zoomed in precursor plot; T=theoretical m/z, A=acquired m/z

| b <sup>+</sup> | #  | AA | #  | y <sup>+</sup> | y <sup>2+</sup> |
|----------------|----|----|----|----------------|-----------------|
| 114.0555       | 1  | A  | 15 |                |                 |
| 215.1032       | 2  | T  | 14 | 1502.8504      | 751.9291        |
| 316.1509       | 3  | T  | 13 | 1401.8027      | 701.4052        |
| 387.1880       | 4  | A  | 12 | 1300.7550      | 650.8814        |
| 515.2466       | 5  | Q  | 11 | 1229.7179      | 615.3629        |
| 643.3051       | 6  | Q  | 10 | 1101.6593      | 551.3336        |
| 730.3372       | 7  | S  | 9  | 973.6007       | 487.3043        |
| 827.3899       | 8  | P  | 8  | 886.5687       | 443.7883        |
| 955.4485       | 9  | Q  | 7  | 789.5159       | 395.2619        |
| 1052.5013      | 10 | P  | 6  | 661.4574       | 331.2326        |
| 1151.5697      | 11 | V  | 5  | 564.4046       | 282.7062        |
| 1222.6068      | 12 | A  | 4  | 465.3362       | 233.1720        |
| 1279.6283      | 13 | G  | 3  | 394.2991       | 197.6534        |
| 1441.7864      | 14 | K  | 2  | 337.2776       | 169.1427        |
|                | 15 | R  | 1  | 175.1195       | 88.0637         |

N-term:+43.02 K(14):+162.16

N-term: +43.02 K(8): +156.13

ATVDLEKLR, MH+ 1114.6472, m/z 557.8273  
L OS G31 P160811 220811-s1.05831.05831.2.dta

scan 5831: 1.5e+001

X-range:

MassTol: Y-zoom:

|    |  |    |
|----|--|----|
| 0. |  | 1. |
|----|--|----|

**MassType:**

AVG MONO

Axis:

1 2

Label:

☒ I ☐ M ☐ -

Ions:

a  + 2 + 3 +

$$1. \quad \begin{bmatrix} 1 & 0 & 0 \\ 0 & 1 & 0 \\ 0 & 0 & 1 \end{bmatrix} + \begin{bmatrix} 0 & 0 & 0 \\ 0 & 0 & 0 \\ 0 & 0 & 0 \end{bmatrix} + \begin{bmatrix} 0 & 0 & 0 \\ 0 & 0 & 0 \\ 0 & 0 & 0 \end{bmatrix} +$$

$\square$ ,  $\square_2$ ,  $\square_{2+}$

☐ ☐ ☐

|          |  |  |  |  |
|----------|--|--|--|--|
| <b>x</b> |  |  |  |  |
|----------|--|--|--|--|

y ☒+ ☒2+ ☐3+

$$2 \square + \square^2 + \square^3 +$$
hide H<sub>2</sub>O/NH<sub>3</sub> ☐

zoom 112-122

GO

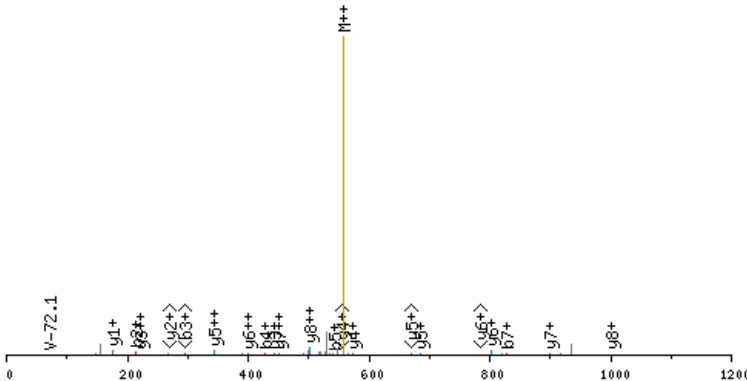

click image to zoom in; click top corners to zoom out [precursor+]

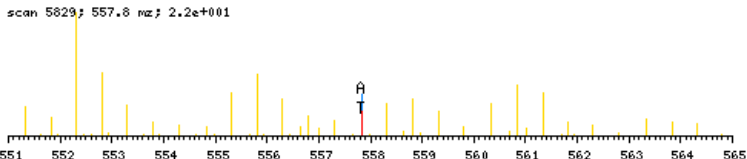

zoomed in precursor plot; T=theoretical m/z, A=acquired m/z

| $b^+$    | # | AA | # | $y^+$     | $y^{2+}$ |
|----------|---|----|---|-----------|----------|
| 114.0555 | 1 | A  | 9 |           |          |
| 215.1032 | 2 | T  | 8 | 1001.5996 | 501.3037 |
| 314.1716 | 3 | V  | 7 | 900.5519  | 450.7799 |
| 429.1985 | 4 | D  | 6 | 801.4835  | 401.2456 |
| 542.2826 | 5 | L  | 5 | 686.4565  | 343.7322 |
| 671.3252 | 6 | E  | 4 | 573.3725  | 287.1901 |
| 827.4515 | 7 | K  | 3 | 444.3299  | 222.6688 |
| 940.5356 | 8 | L  | 2 | 288.2036  | 144.6057 |
|          | 9 | R  | 1 | 175.1195  | 88.0637  |

N-term: +43.02 K(7): +156.13

X-range:

0 - 0

MassTol: Y-zoom:

0. 1.

MassType:

☐ AVG ☒ MONO

Axis:

☒ 1 ☐ 2

Label:

☒ I ☐ M ☐ -

Ions:

a ☐ + ☐ 2+ ☐ 3+

b ☒ + ☐ 2+ ☐ 3+

c ☐ + ☐ 2+ ☐ 3+

x ☐ + ☐ 2+ ☐ 3+

y ☒ + ☒ 2+ ☐ 3+

z ☐ + ☐ 2+ ☐ 3+

hide H<sub>2</sub>O/NH<sub>3</sub> ☐

zoom 112-122 ☐

GO

AVAVGRPSNEELR, MH+ 1439.7607, m/z 720.3840  
L OS G31 P160811 220811-s1.04006.04006.2.dta

scan 4006; 5.3e+001

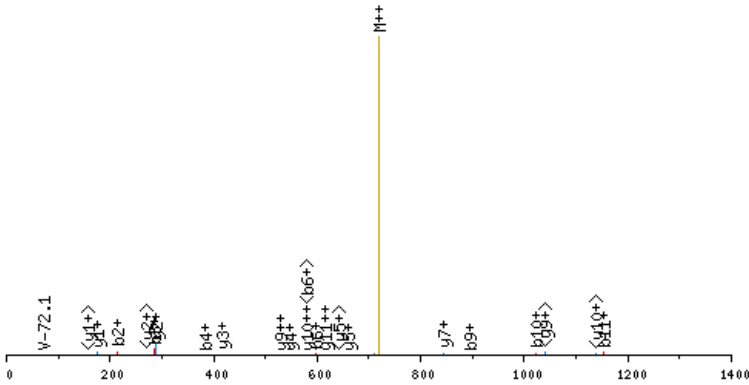

click image to zoom in; click top corners to zoom out

[precursor±]

scan 4004; 720.4 m/z; 1.8e+001

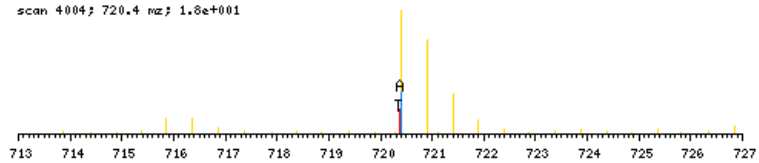

zoomed in precursor plot; T=theoretical m/z, A=acquired m/z

| b <sup>+</sup> | #  | AA | #  | y <sup>+</sup> | y <sup>2+</sup> |
|----------------|----|----|----|----------------|-----------------|
| 114.0555       | 1  | A  | 13 |                |                 |
| 213.1239       | 2  | V  | 12 | 1326.7130      | 663.8604        |
| 284.1610       | 3  | A  | 11 | 1227.6446      | 614.3262        |
| 383.2295       | 4  | V  | 10 | 1156.6075      | 578.8076        |
| 440.2509       | 5  | G  | 9  | 1057.5390      | 529.2734        |
| 596.3520       | 6  | R  | 8  | 1000.5176      | 500.7627        |
| 693.4048       | 7  | P  | 7  | 844.4165       | 422.7121        |
| 780.4368       | 8  | S  | 6  | 747.3637       | 374.1858        |
| 894.4798       | 9  | N  | 5  | 660.3317       | 330.6698        |
| 1023.5223      | 10 | E  | 4  | 546.2888       | 273.6483        |
| 1152.5649      | 11 | E  | 3  | 417.2462       | 209.1270        |
| 1265.6490      | 12 | L  | 2  | 288.2036       | 144.6057        |
|                | 13 | R  | 1  | 175.1195       | 88.0637         |

N-term:+43.02

X-range:

0 - 0

MassTol: Y-zoom:

0. 1.

MassType:

☐AVG ☒MONO

Axis:

☒1 ☐2

Label:

☒I ☐M ☐-

Ions:

a ☐+ ☐2+ ☐3+

b ☒+ ☐2+ ☐3+

c ☐+ ☐2+ ☐3+

x ☐+ ☐2+ ☐3+

y ☒+ ☒2+ ☐3+

z ☐+ ☐2+ ☐3+

hide H<sub>2</sub>O/NH<sub>3</sub> ☐

zoom 112-122 ☐

GO

AVPPTYADLGKSAR, MH+ 1521.8490, m/z 761.4281  
L OS G31 P160811 220811-s1.05583.05583.2.dta

scan 5583; 5.4e+000

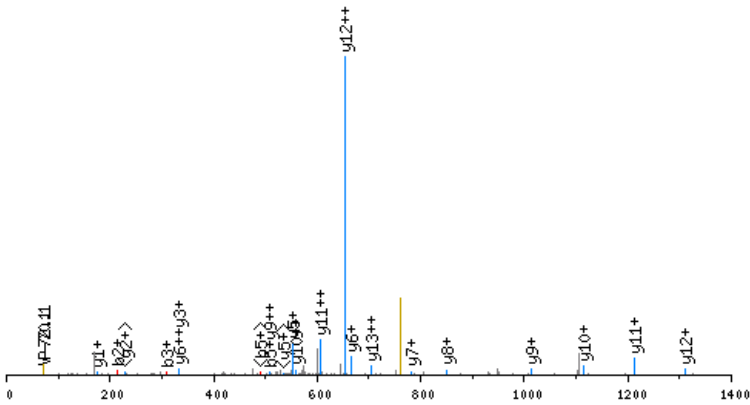

click image to zoom in; click top corners to zoom out

[precursor±]

scan 5579; 761.4 m/z; 1.4e+001

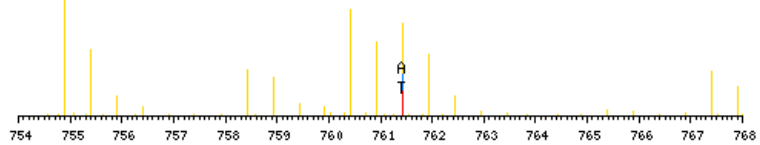

zoomed in precursor plot; T=theoretical m/z, A=acquired m/z

| b <sup>+</sup> | #  | AA | #  | y <sup>+</sup> | y <sup>2+</sup> |
|----------------|----|----|----|----------------|-----------------|
| 114.0555       | 1  | A  | 14 |                |                 |
| 213.1239       | 2  | V  | 13 | 1408.8013      | 704.9046        |
| 310.1767       | 3  | P  | 12 | 1309.7329      | 655.3703        |
| 407.2295       | 4  | P  | 11 | 1212.6801      | 606.8440        |
| 508.2771       | 5  | T  | 10 | 1115.6273      | 558.3176        |
| 671.3405       | 6  | Y  | 9  | 1014.5797      | 507.7937        |
| 742.3776       | 7  | A  | 8  | 851.5163       | 426.2621        |
| 857.4045       | 8  | D  | 7  | 780.4792       | 390.7435        |
| 970.4886       | 9  | L  | 6  | 665.4523       | 333.2300        |
| 1027.5100      | 10 | G  | 5  | 552.3682       | 276.6880        |
| 1189.6681      | 11 | K  | 4  | 495.3467       | 248.1773        |
| 1276.7002      | 12 | S  | 3  | 333.1886       | 167.0982        |
| 1347.7373      | 13 | A  | 2  | 246.1566       | 123.5822        |
|                | 14 | R  | 1  | 175.1195       | 88.0637         |

N-term:+43.02 K(11):+162.16

X-range:

0 - 0

MassTol: Y-zoom:

0. 1.

MassType:

☐AVG ☒MONO

Axis:

☒1 ☐2

Label:

☒I ☐M ☐-

Ions:

a ☐+ ☐2+ ☐3+

b ☒+ ☐2+ ☐3+

c ☐+ ☐2+ ☐3+

x ☐+ ☐2+ ☐3+

y ☒+ ☒2+ ☐3+

z ☐+ ☐2+ ☐3+

hide H<sub>2</sub>O/NH<sub>3</sub> ☐

zoom 112-122 ☐

GO

AVSTGVKVP, MH+ 1083.6527, m/z 542.3300  
L OS G31 P160811 220811-s1.03682.03682.2.dta

scan 3682; 3.7e+001

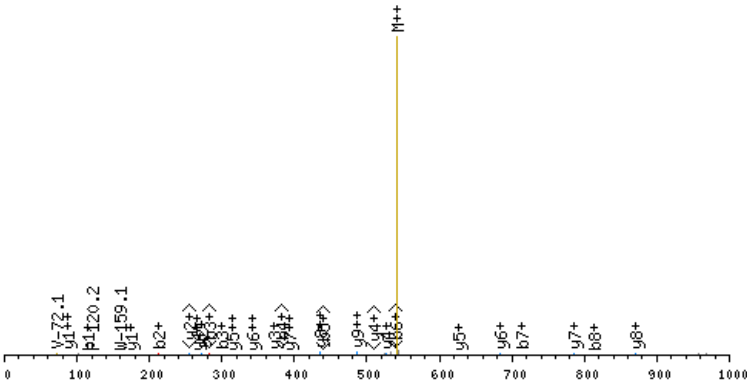

click image to zoom in; click top corners to zoom out [precursor±]

scan 3679; 542.3 m/z; 8.6e+001

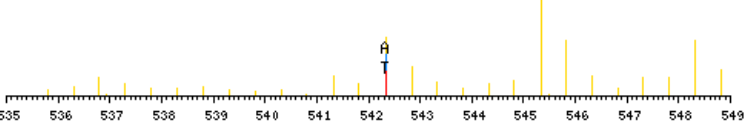

zoomed in precursor plot; T=theoretical m/z, A=acquired m/z

| b <sup>+</sup> | #  | AA | #  | y <sup>+</sup> | y <sup>2+</sup> |
|----------------|----|----|----|----------------|-----------------|
| 114.0555       | 1  | A  | 10 |                |                 |
| 213.1239       | 2  | V  | 9  | 970.6050       | 485.8064        |
| 300.1560       | 3  | S  | 8  | 871.5366       | 436.2722        |
| 401.2036       | 4  | T  | 7  | 784.5045       | 392.7562        |
| 458.2251       | 5  | G  | 6  | 683.4569       | 342.2323        |
| 557.2935       | 6  | V  | 5  | 626.4354       | 313.7216        |
| 713.4198       | 7  | K  | 4  | 527.3670       | 264.1874        |
| 812.4882       | 8  | V  | 3  | 371.2407       | 186.1243        |
| 909.5410       | 9  | P  | 2  | 272.1723       | 136.5900        |
|                | 10 | R  | 1  | 175.1195       | 88.0637         |

N-term:+43.02 K(7):+156.13



X-range:

0 - 0

MassTol: Y-zoom:

0. 1.

MassType:

☐AVG ☒MONO

Axis:

☒1 ☐2

Label:

☒I ☐M ☐-

Ions:

a ☐+ ☐2+ ☐3+

b ☒+ ☐2+ ☐3+

c ☐+ ☐2+ ☐3+

x ☐+ ☐2+ ☐3+

y ☒+ ☒2+ ☐3+

z ☐+ ☐2+ ☐3+

hide H<sub>2</sub>O/NH<sub>3</sub> ☐

zoom 112-122 ☐

GO

AYHSFLVEPISCHAWNKDR, MH+ 2406.1877, m/z 602.3024  
L OS G34 P160811 220811-s1.07697.07697.4.dta

scan 7697; 3.9e+000

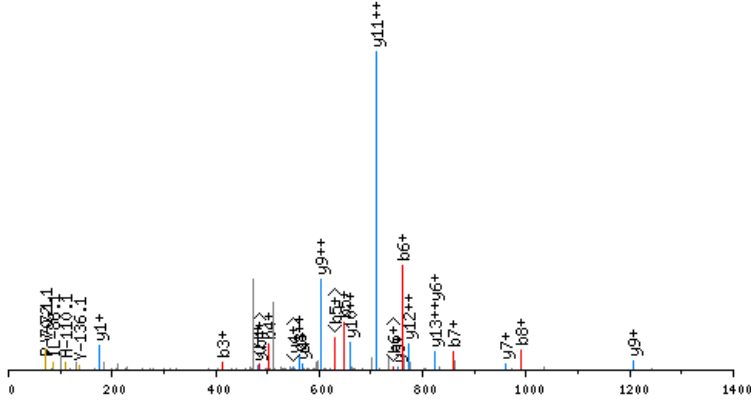

click image to zoom in; click top corners to zoom out

[precursor±]

scan 7695; 602.3 m/z; 4.1e+001

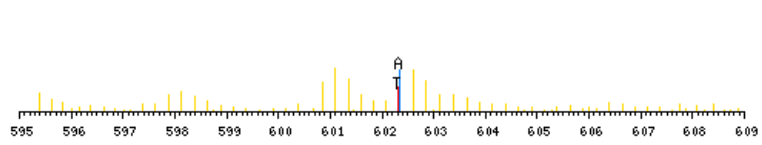

zoomed in precursor plot; T=theoretical m/z, A=acquired m/z

| b <sup>+</sup> | #  | AA | #  | y <sup>+</sup> | y <sup>2+</sup> |
|----------------|----|----|----|----------------|-----------------|
| 114.0555       | 1  | A  | 19 |                |                 |
| 277.1188       | 2  | Y  | 18 | 2293.1400      | 1147.0739       |
| 414.1778       | 3  | H  | 17 | 2130.0767      | 1065.5423       |
| 501.2098       | 4  | S  | 16 | 1993.0178      | 997.0128        |
| 648.2782       | 5  | F  | 15 | 1905.9858      | 953.4968        |
| 761.3623       | 6  | L  | 14 | 1758.9173      | 879.9626        |
| 860.4307       | 7  | V  | 13 | 1645.8333      | 823.4205        |
| 989.4733       | 8  | E  | 12 | 1546.7649      | 773.8863        |
| 1086.5260      | 9  | P  | 11 | 1417.7223      | 709.3650        |
| 1199.6101      | 10 | I  | 10 | 1320.6695      | 660.8387        |
| 1286.6421      | 11 | S  | 9  | 1207.5854      | 604.2966        |
| 1446.6727      | 12 | C  | 8  | 1120.5534      | 560.7806        |
| 1583.7316      | 13 | H  | 7  | 960.5228       | 480.7653        |
| 1654.7687      | 14 | A  | 6  | 823.4639       | 412.2359        |
| 1840.8481      | 15 | W  | 5  | 752.4268       | 376.7173        |
| 1954.8910      | 16 | N  | 4  | 566.3475       | 283.6776        |
| 2117.0491      | 17 | K  | 3  | 452.3045       | 226.6562        |
| 2232.0760      | 18 | D  | 2  | 290.1464       | 145.5771        |
|                | 19 | R  | 1  | 175.1195       | 88.0637         |

N-term:+43.02 C(12):+160.03  
K(17):+162.16

X-range:

$$\boxed{0} - \boxed{0}$$

0. 1.

AVG MONO

1 2

☒ I ☐ M ☐ -

**a**  +  <sup>2</sup> +  <sup>3</sup> +

b ☒ 1+ ☐ 2+ ☐ 3+
$$= \square + \square^2 + \square^3 + \dots$$

c

| x | 1 | 2 | 3 |
|---|---|---|---|
|---|---|---|---|

**y** ☒<sup>+</sup> ☒<sup>2+</sup> ☐<sup>3+</sup>

$$z^2 + z^2 + z^3 +$$
hide  $\text{H}_2\text{O}/\text{NH}_3$  ☐

zoom 112-122

GO

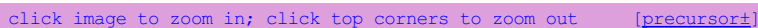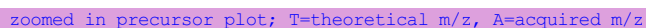

N-term: +43.02    K(3): +162.16

X-range:

0 - 0

MassTol: Y-zoom:

0. 1.

MassType:

☐ AVG ☒ MONO

Axis:

☒ 1 ☐ 2

Label:

☒ I ☐ M ☐ -

Ions:

a ☐ + ☐ 2+ ☐ 3+

b ☒ + ☐ 2+ ☐ 3+

c ☐ + ☐ 2+ ☐ 3+

x ☐ + ☐ 2+ ☐ 3+

y ☒ + ☒ 2+ ☐ 3+

z ☐ + ☐ 2+ ☐ 3+

hide H<sub>2</sub>O/NH<sub>3</sub> ☐

zoom 112-122 ☐

GO

DADKDNIKQACDER, MH+ 1775.8234, m/z 592.6127  
L OS G33 P160811 220811-s1.02723.02723.3.dta

scan 2723; 1.2e+001

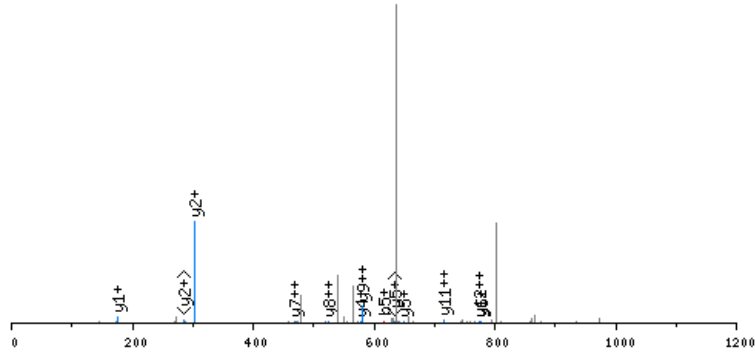

click image to zoom in; click top corners to zoom out [\[precursor±\]](#)

scan 2722; 592.6 m/z; 2.9e+001

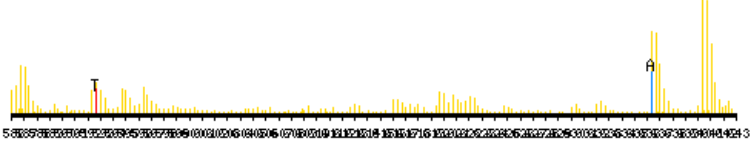

zoomed in precursor plot; T=theoretical m/z, A=acquired m/z

| b <sup>+</sup> | #  | AA | #  | y <sup>+</sup> | y <sup>2+</sup> |
|----------------|----|----|----|----------------|-----------------|
| 158.0453       | 1  | D  | 14 |                |                 |
| 229.0825       | 2  | A  | 13 | 1618.7859      | 809.8969        |
| 344.1094       | 3  | D  | 12 | 1547.7488      | 774.3783        |
| 500.2357       | 4  | K  | 11 | 1432.7219      | 716.8648        |
| 615.2626       | 5  | D  | 10 | 1276.5956      | 638.8017        |
| 729.3056       | 6  | N  | 9  | 1161.5686      | 581.2882        |
| 842.3896       | 7  | I  | 8  | 1047.5257      | 524.2668        |
| 998.5159       | 8  | K  | 7  | 934.4416       | 467.7247        |
| 1126.5745      | 9  | Q  | 6  | 778.3153       | 389.6616        |
| 1197.6116      | 10 | A  | 5  | 650.2568       | 325.6323        |
| 1357.6422      | 11 | C  | 4  | 579.2196       | 290.1137        |
| 1472.6692      | 12 | D  | 3  | 419.1890       | 210.0984        |
| 1601.7118      | 13 | E  | 2  | 304.1621       | 152.5850        |
|                | 14 | R  | 1  | 175.1195       | 88.0637         |

N-term:+43.02 K(4):+156.13  
K(8):+156.13 C(11):+160.03



X-range:

0 - 0

MassTol: Y-zoom:

0. 1.

MassType:

☐AVG ☒MONO

Axis:

☒1 ☐2

Label:

☒I ☐M ☐-

Ions:

a ☐+ ☐2+ ☐3+

b ☒+ ☐2+ ☐3+

c ☐+ ☐2+ ☐3+

x ☐+ ☐2+ ☐3+

y ☒+ ☒2+ ☐3+

z ☐+ ☐2+ ☐3+

hide H<sub>2</sub>O/NH<sub>3</sub> ☐

zoom 112-122 ☐

GO

DDREDLVYQAK, MH+ 1421.6913, m/z 474.5686  
L OS G30 P160811 220811-s1.04210.04210.3.dta

scan 4210; 4.2e+000

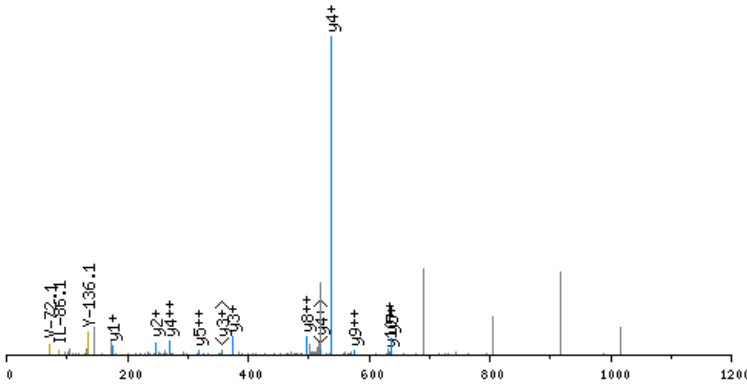

click image to zoom in; click top corners to zoom out [precursor±]

scan 4209; 474.6 m/z; 2.4e+001

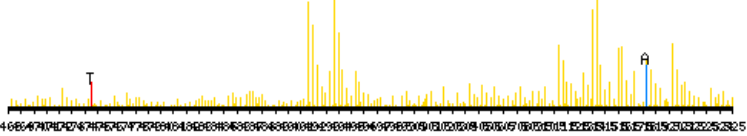

zoomed in precursor plot; T=theoretical m/z, A=acquired m/z

| b <sup>+</sup> | #  | AA | #  | y <sup>+</sup> | y <sup>2+</sup> |
|----------------|----|----|----|----------------|-----------------|
| 158.0453       | 1  | D  | 11 |                |                 |
| 273.0723       | 2  | D  | 10 | 1264.6538      | 632.8308        |
| 429.1734       | 3  | R  | 9  | 1149.6268      | 575.3173        |
| 558.2160       | 4  | E  | 8  | 993.5257       | 497.2668        |
| 673.2429       | 5  | D  | 7  | 864.4831       | 432.7455        |
| 786.3270       | 6  | L  | 6  | 749.4562       | 375.2320        |
| 885.3954       | 7  | V  | 5  | 636.3721       | 318.6900        |
| 1048.4587      | 8  | Y  | 4  | 537.3037       | 269.1558        |
| 1176.5173      | 9  | Q  | 3  | 374.2404       | 187.6241        |
| 1247.5544      | 10 | A  | 2  | 246.1818       | 123.5948        |
|                | 11 | K  | 1  | 175.1447       | 88.0763         |

N-term:+43.02 K(11):+156.13

X-range:

0 - 0

MassTol: Y-zoom:

0. 1.

MassType:

☐ AVG ☒ MONO

Axis:

☒ 1 ☐ 2

Label:

☒ I ☐ M ☐ -

Ions:

a ☐ + ☐ 2+ ☐ 3+

b ☒ + ☐ 2+ ☐ 3+

c ☐ + ☐ 2+ ☐ 3+

x ☐ + ☐ 2+ ☐ 3+

y ☒ + ☒ 2+ ☐ 3+

z ☐ + ☐ 2+ ☐ 3+

hide H<sub>2</sub>O/NH<sub>3</sub> ☐

zoom 112-122 ☐

GO

DDREDLVYQAKLAQAER, MH+ 2225.1263, m/z 742.3803  
L OS G32 P160811 220811-s1.05089.05089.3.dta

scan 5089: 1.6e+001

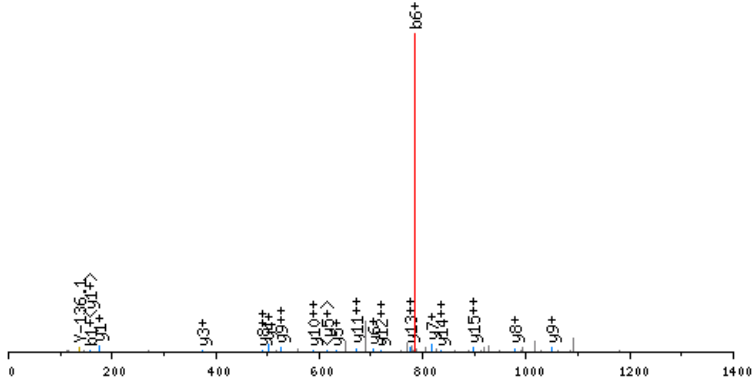

click image to zoom in; click top corners to zoom out [\[precursor±\]](#)

scan 5088: 742.4 m/z; 1.2e+001

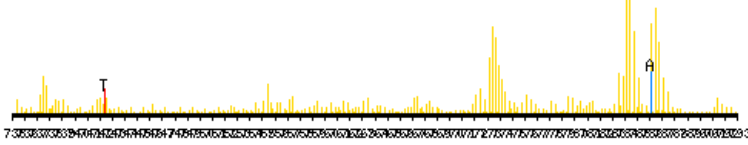

zoomed in precursor plot; T=theoretical m/z, A=acquired m/z

| b <sup>+</sup> | #  | AA | #  | y <sup>+</sup> | y <sup>2+</sup> |
|----------------|----|----|----|----------------|-----------------|
| 158.0453       | 1  | D  | 18 |                |                 |
| 273.0723       | 2  | D  | 17 | 2068.0887      | 1034.5483       |
| 429.1734       | 3  | R  | 16 | 1953.0618      | 977.0348        |
| 558.2160       | 4  | E  | 15 | 1796.9607      | 898.9843        |
| 673.2429       | 5  | D  | 14 | 1667.9181      | 834.4630        |
| 786.3270       | 6  | L  | 13 | 1552.8912      | 776.9495        |
| 885.3954       | 7  | V  | 12 | 1439.8071      | 720.4075        |
| 1048.4587      | 8  | Y  | 11 | 1340.7387      | 670.8733        |
| 1176.5173      | 9  | Q  | 10 | 1177.6753      | 589.3416        |
| 1247.5544      | 10 | A  | 9  | 1049.6168      | 525.3123        |
| 1409.7125      | 11 | K  | 8  | 978.5797       | 489.7937        |
| 1522.7966      | 12 | L  | 7  | 816.4216       | 408.7147        |
| 1593.8337      | 13 | A  | 6  | 703.3375       | 352.1727        |
| 1722.8763      | 14 | E  | 5  | 632.3004       | 316.6541        |
| 1850.9349      | 15 | Q  | 4  | 503.2578       | 252.1328        |
| 1921.9720      | 16 | A  | 3  | 375.1992       | 188.1035        |
| 2051.0146      | 17 | E  | 2  | 304.1621       | 152.5850        |
|                | 18 | R  | 1  | 175.1195       | 88.0637         |

N-term:+43.02 K(11) :+162.16

N-term: +43.02 C(10): +160.03  
K(18): +156.13

X-range:

0 - 0

MassTol: Y-zoom:

0. 1.

MassType:

☐ AVG ☒ MONO

Axis:

☒ 1 ☐ 2

Label:

☒ I ☐ M ☐ -

Ions:

a ☐ + ☐ 2+ ☐ 3+

b ☒ + ☐ 2+ ☐ 3+

c ☐ + ☐ 2+ ☐ 3+

x ☐ + ☐ 2+ ☐ 3+

y ☒ + ☒ 2+ ☐ 3+

z ☐ + ☐ 2+ ☐ 3+

hide H<sub>2</sub>O/NH<sub>3</sub> ☐

zoom 112-122 ☐

GO

DFSKLPK, MH+ 944.6094, m/z 472.8083  
L OS G30 P160811 220811-s1.05311.05311.2.dta

scan 5311; 2.8e+001

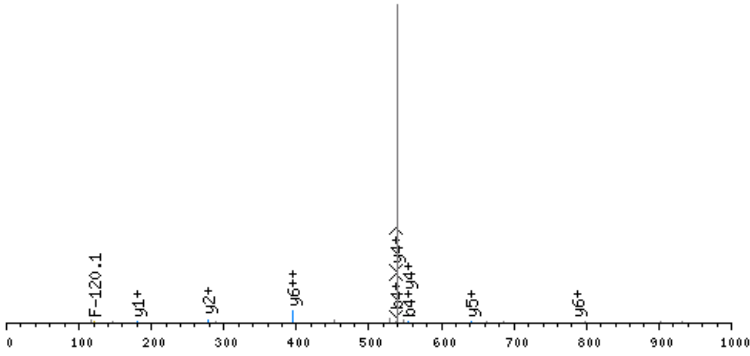

click image to zoom in; click top corners to zoom out [\[precursor±\]](#)

scan 5309; 472.8 m/z; 4.7e+001

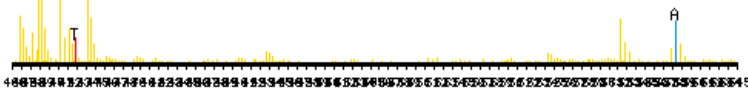

zoomed in precursor plot; T=theoretical m/z, A=acquired m/z

| b <sup>+</sup> | # | AA # | y <sup>+</sup> | y <sup>2+</sup>   |
|----------------|---|------|----------------|-------------------|
| 158.0453       | 1 | D    | 7              |                   |
| 305.1138       | 2 | F    | 6              | 787.5719 394.2898 |
| 392.1458       | 3 | S    | 5              | 640.5034 320.7556 |
| 554.3039       | 4 | K    | 4              | 553.4714 277.2396 |
| 667.3879       | 5 | L    | 3              | 391.3133 196.1606 |
| 764.4407       | 6 | P    | 2              | 278.2293 139.6185 |
|                | 7 | K    | 1              | 181.1765 91.0922  |

N-term:+43.02 K(4):+162.16  
K(7):+162.16

X-range:

0 - 0

MassTol: Y-zoom:

0. 1.

MassType:

☐ AVG ☒ MONO

Axis:

☒ 1 ☐ 2

Label:

☒ I ☐ M ☐ -

Ions:

a ☐ + ☐ 2+ ☐ 3+

b ☒ + ☐ 2+ ☐ 3+

c ☐ + ☐ 2+ ☐ 3+

x ☐ + ☐ 2+ ☐ 3+

y ☒ + ☒ 2+ ☐ 3+

z ☐ + ☐ 2+ ☐ 3+

hide H<sub>2</sub>O/NH<sub>3</sub> ☐

zoom 112-122 ☐

GO

DFSKLPKIR, MH+ 1213.7946, m/z 405.2697  
L OS G33 P160811 220811-s1.06365.06365.3.dta

scan 6365; 3.3e+001

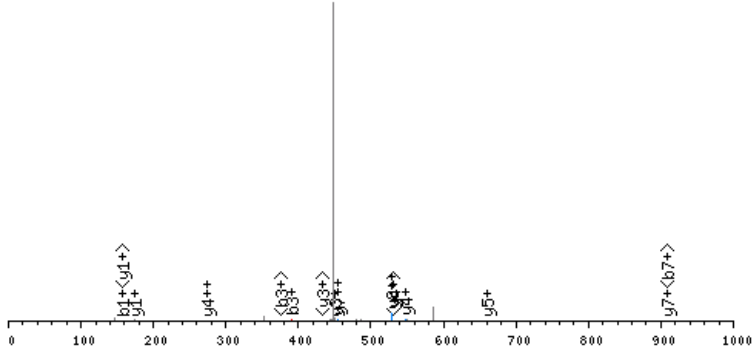

click image to zoom in; click top corners to zoom out [\[precursor±\]](#)

scan 6362; 405.3 m/z; 6.0e+000

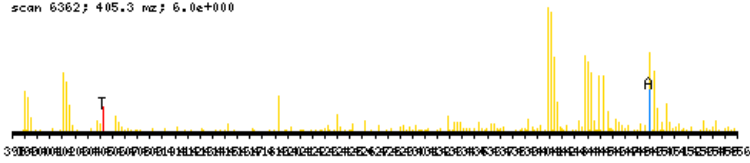

zoomed in precursor plot; T=theoretical m/z, A=acquired m/z

| b <sup>+</sup> | # | AA # | y <sup>+</sup> | y <sup>2+</sup> |
|----------------|---|------|----------------|-----------------|
| 158.0453       | 1 | D    | 9              |                 |
| 305.1138       | 2 | F    | 8              | 1056.7570       |
| 392.1458       | 3 | S    | 7              | 909.6886        |
| 554.3039       | 4 | K    | 6              | 822.6566        |
| 667.3879       | 5 | L    | 5              | 660.4985        |
| 764.4407       | 6 | P    | 4              | 547.4144        |
| 926.5988       | 7 | K    | 3              | 450.3617        |
| 1039.6829      | 8 | I    | 2              | 288.2036        |
|                | 9 | R    | 1              | 175.1195        |

N-term:+43.02 K(4):+162.16  
K(7):+162.16

X-range:

0 - 0

MassTol: Y-zoom:

0. 1.

MassType:

☐ AVG ☒ MONO

Axis:

☒ 1 ☐ 2

Label:

☒ I ☐ M ☐ -

Ions:

a ☐ + ☐ 2+ ☐ 3+

b ☒ + ☐ 2+ ☐ 3+

c ☐ + ☐ 2+ ☐ 3+

x ☐ + ☐ 2+ ☐ 3+

y ☒ + ☒ 2+ ☐ 3+

z ☐ + ☐ 2+ ☐ 3+

hide H<sub>2</sub>O/NH<sub>3</sub> ☐

zoom 112-122 ☐

GO

DGEDDSNLVIKKR, MH+ 1598.9027, m/z 533.6391  
L OS G33 P160811 220811-s1.03856.03856.3.dta

scan 3856; 4.2e+000

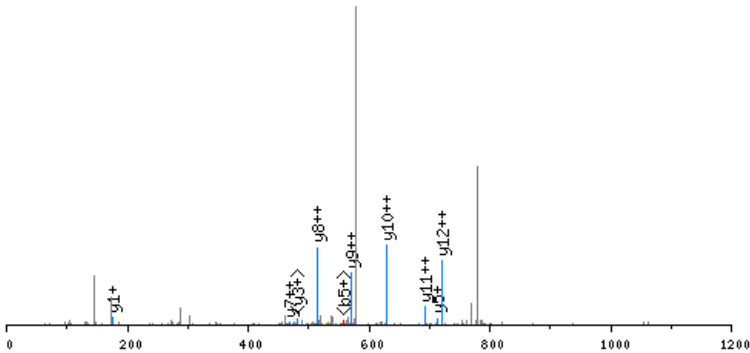

click image to zoom in; click top corners to zoom out [\[precursor±\]](#)

scan 3852; 533.6 m/z; 4.7e+001

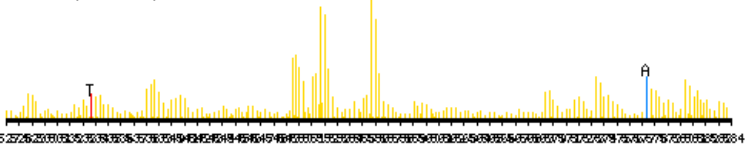

zoomed in precursor plot; T=theoretical m/z, A=acquired m/z

| b <sup>+</sup> | #  | AA | #  | y <sup>+</sup> | y <sup>2+</sup> |
|----------------|----|----|----|----------------|-----------------|
| 158.0453       | 1  | D  | 13 |                |                 |
| 215.0668       | 2  | G  | 12 | 1441.8651      | 721.4365        |
| 344.1094       | 3  | E  | 11 | 1384.8437      | 692.9258        |
| 459.1363       | 4  | D  | 10 | 1255.8011      | 628.4045        |
| 574.1633       | 5  | D  | 9  | 1140.7741      | 570.8910        |
| 661.1953       | 6  | S  | 8  | 1025.7472      | 513.3775        |
| 775.2382       | 7  | N  | 7  | 938.7152       | 469.8615        |
| 888.3223       | 8  | L  | 6  | 824.6722       | 412.8400        |
| 987.3907       | 9  | V  | 5  | 711.5882       | 356.2980        |
| 1100.4748      | 10 | I  | 4  | 612.5198       | 306.7638        |
| 1262.6329      | 11 | K  | 3  | 499.4357       | 250.2218        |
| 1424.7910      | 12 | K  | 2  | 337.2776       | 169.1427        |
|                | 13 | R  | 1  | 175.1195       | 88.0637         |

N-term:+43.02 K(11):+162.16  
K(12):+162.16

X-range:

0 - 0

MassTol: Y-zoom:

0. 1.

MassType:

☐ AVG ☒ MONO

Axis:

☒ 1 ☐ 2

Label:

☒ I ☐ M ☐ -

Ions:

a ☐ + ☐ 2+ ☐ 3+

b ☒ + ☐ 2+ ☐ 3+

c ☐ + ☐ 2+ ☐ 3+

x ☐ + ☐ 2+ ☐ 3+

y ☒ + ☒ 2+ ☐ 3+

z ☐ + ☐ 2+ ☐ 3+

hide H<sub>2</sub>O/NH<sub>3</sub> ☐

zoom 112-122 ☐

GO

DGIVPDIAVGTKR, MH+ 1416.8275, m/z 708.9174  
L OS G30 P160811 220811-s1.06805.06805.2.dta

scan 6805; 2.2e+001

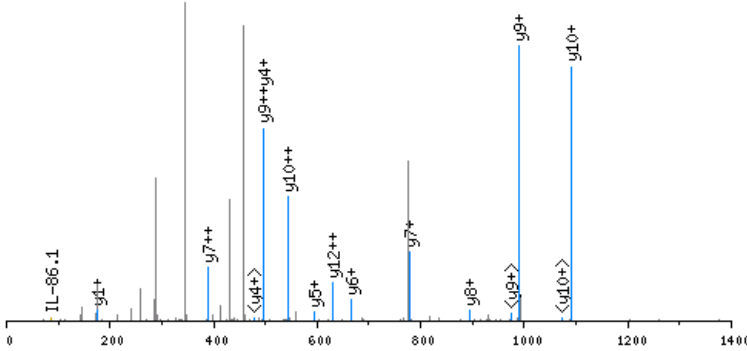

click image to zoom in; click top corners to zoom out

[precursor±]

scan 6804; 708.9 m/z; 1.2e+003

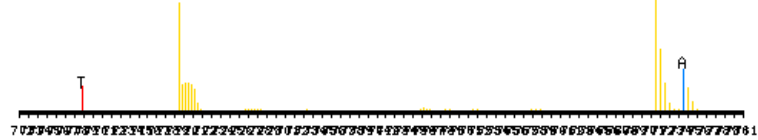

zoomed in precursor plot; T=theoretical m/z, A=acquired m/z

| b <sup>+</sup> | #  | AA | #  | y <sup>+</sup> | y <sup>2+</sup> |
|----------------|----|----|----|----------------|-----------------|
| 158.0453       | 1  | D  | 13 |                |                 |
| 215.0668       | 2  | G  | 12 | 1259.7900      | 630.3989        |
| 328.1509       | 3  | I  | 11 | 1202.7685      | 601.8882        |
| 427.2193       | 4  | V  | 10 | 1089.6845      | 545.3461        |
| 524.2720       | 5  | P  | 9  | 990.6160       | 495.8119        |
| 639.2990       | 6  | D  | 8  | 893.5633       | 447.2856        |
| 752.3831       | 7  | I  | 7  | 778.5363       | 389.7721        |
| 823.4202       | 8  | A  | 6  | 665.4523       | 333.2300        |
| 922.4886       | 9  | V  | 5  | 594.4152       | 297.7115        |
| 979.5100       | 10 | G  | 4  | 495.3467       | 248.1773        |
| 1080.5577      | 11 | T  | 3  | 438.3253       | 219.6666        |
| 1242.7158      | 12 | K  | 2  | 337.2776       | 169.1427        |
|                | 13 | R  | 1  | 175.1195       | 88.0637         |

N-term:+43.02 K(12):+162.16

X-range:

0 - 0

MassTol: Y-zoom:

0. 1.

MassType:

☐AVG ☒MONO

Axis:

☒1 ☐2

Label:

☒I ☐M ☐-

Ions:

a ☐+ ☐2+ ☐3+

b ☒+ ☐2+ ☐3+

c ☐+ ☐2+ ☐3+

x ☐+ ☐2+ ☐3+

y ☒+ ☒2+ ☐3+

z ☐+ ☐2+ ☐3+

hide H<sub>2</sub>O/NH<sub>3</sub> ☐

zoom 112-122 ☐

GO

DGKEINFLLR, MH+ 1161.6268, m/z 581.3171  
L OS G31 P160811 220811-s1.03803.03803.2.dta

scan 3803; 1.5e+001

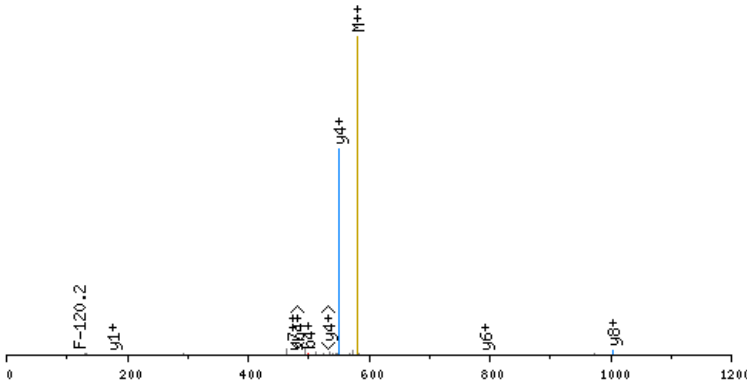

click image to zoom in; click top corners to zoom out [precursor±]

scan 3799; 581.3 m/z; 6.2e+001

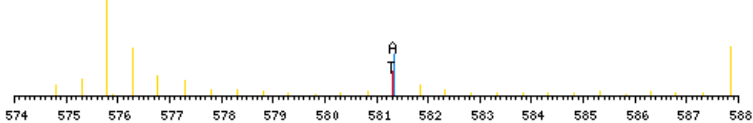

zoomed in precursor plot; T=theoretical m/z, A=acquired m/z

| b <sup>+</sup> | # | AA | # | y <sup>+</sup> | y <sup>2+</sup> |
|----------------|---|----|---|----------------|-----------------|
| 158.0453       | 1 | D  | 9 |                |                 |
| 215.0668       | 2 | G  | 8 | 1004.5893      | 502.7986        |
| 371.1931       | 3 | K  | 7 | 947.5679       | 474.2878        |
| 500.2357       | 4 | E  | 6 | 791.4416       | 396.2247        |
| 613.3198       | 5 | I  | 5 | 662.3990       | 331.7034        |
| 727.3627       | 6 | N  | 4 | 549.3149       | 275.1614        |
| 874.4311       | 7 | F  | 3 | 435.2720       | 218.1399        |
| 987.5152       | 8 | L  | 2 | 288.2036       | 144.6057        |
|                | 9 | R  | 1 | 175.1195       | 88.0637         |

N-term:+43.02 K(3):+156.13

X-range:

0 - 0

MassTol: Y-zoom:

0. 1.

MassType:

☐AVG ☒MONO

Axis:

☒1 ☐2

Label:

☒I ☐M ☐-

Ions:

a ☐+ ☐2+ ☐3+

b ☒+ ☐2+ ☐3+

c ☐+ ☐2+ ☐3+

x ☐+ ☐2+ ☐3+

y ☒+ ☒2+ ☐3+

z ☐+ ☐2+ ☐3+

hide H<sub>2</sub>O/NH<sub>3</sub> ☐

zoom 112-122 ☐

GO

DIAIHHPWIR, MH+ 1299.6962, m/z 433.9036  
L OS G34 P160811 220811-s1.07906.07906.3.dta

scan 7906; 3.5e+001

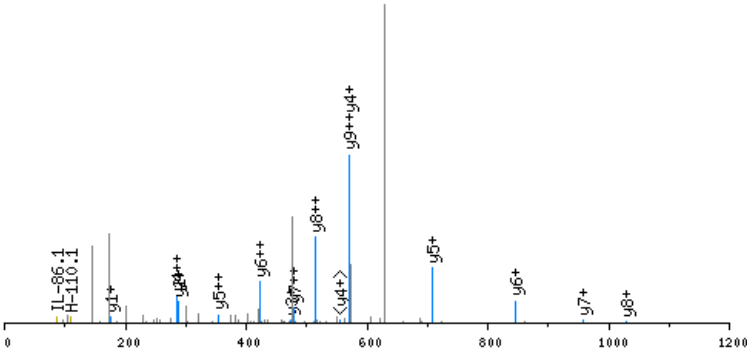

click image to zoom in; click top corners to zoom out [precursor±]

scan 7905; 433.9 m/z; 2.0e+002

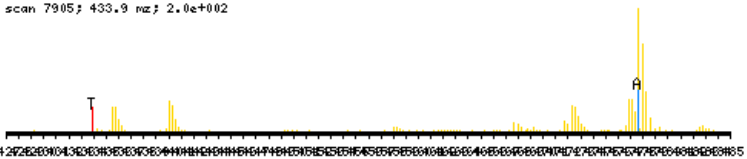

zoomed in precursor plot; T=theoretical m/z, A=acquired m/z

| b <sup>+</sup> | #  | AA | #  | y <sup>+</sup> | y <sup>2+</sup> |
|----------------|----|----|----|----------------|-----------------|
| 158.0453       | 1  | D  | 10 |                |                 |
| 271.1294       | 2  | I  | 9  | 1142.6587      | 571.8333        |
| 342.1665       | 3  | A  | 8  | 1029.5746      | 515.2912        |
| 455.2506       | 4  | I  | 7  | 958.5375       | 479.7727        |
| 592.3095       | 5  | H  | 6  | 845.4535       | 423.2306        |
| 729.3684       | 6  | H  | 5  | 708.3946       | 354.7012        |
| 826.4212       | 7  | P  | 4  | 571.3356       | 286.1717        |
| 1012.5005      | 8  | W  | 3  | 474.2829       | 237.6454        |
| 1125.5845      | 9  | I  | 2  | 288.2036       | 144.6057        |
|                | 10 | R  | 1  | 175.1195       | 88.0637         |

N-term:+43.02

X-range:

0 - 0

MassTol: Y-zoom:

0. 1.

MassType:

☐ AVG ☒ MONO

Axis:

☒ 1 ☐ 2

Label:

☒ I ☐ M ☐ -

Ions:

a ☐ + ☐ 2+ ☐ 3+

b ☒ + ☐ 2+ ☐ 3+

c ☐ + ☐ 2+ ☐ 3+

x ☐ + ☐ 2+ ☐ 3+

y ☒ + ☒ 2+ ☐ 3+

z ☐ + ☐ 2+ ☐ 3+

hide H<sub>2</sub>O/NH<sub>3</sub> ☐

zoom 112-122 ☐

GO

DKNELVQK, MH+ 1083.6687, m/z 542.3380  
L OS G30 P160811 220811-s1.02941.02941.2.dta

scan 2941; 2.1e+001

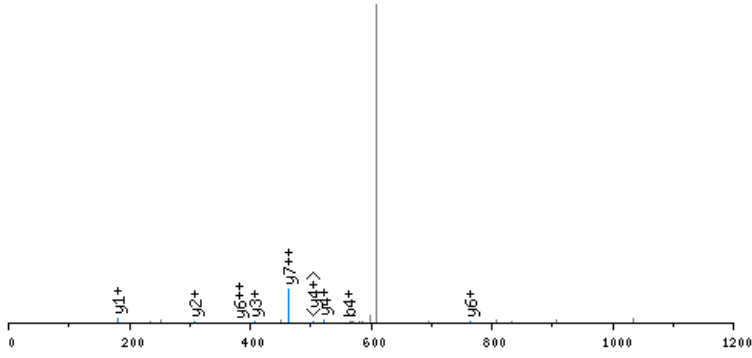

click image to zoom in; click top corners to zoom out [\[precursor±\]](#)

scan 2939; 542.3 m/z; 1.9e+001

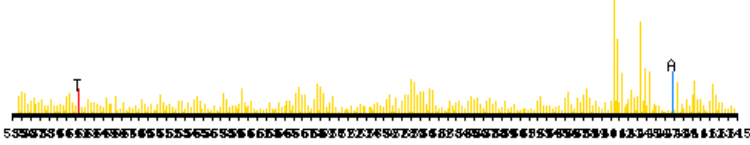

zoomed in precursor plot; T=theoretical m/z, A=acquired m/z

| b <sup>+</sup> | # | AA # | y <sup>+</sup> | y <sup>2+</sup> |
|----------------|---|------|----------------|-----------------|
| 158.0453       | 1 | D    | 8              |                 |
| 320.2034       | 2 | K    | 7              | 926.6312        |
| 434.2464       | 3 | N    | 6              | 764.4731        |
| 563.2890       | 4 | E    | 5              | 650.4301        |
| 676.3730       | 5 | L    | 4              | 521.3875        |
| 775.4414       | 6 | V    | 3              | 408.3035        |
| 903.5000       | 7 | Q    | 2              | 309.2351        |
|                | 8 | K    | 1              | 181.1765        |

N-term:+43.02 K(2):+162.16  
K(8):+162.16

X-range:

0 - 0

MassTol: Y-zoom:

0. 1.

MassType:

☐ AVG ☒ MONO

Axis:

☒ 1 ☐ 2

Label:

☒ I ☐ M ☐ -

Ions:

a ☐ + ☐ 2+ ☐ 3+

b ☒ + ☐ 2+ ☐ 3+

c ☐ + ☐ 2+ ☐ 3+

x ☐ + ☐ 2+ ☐ 3+

y ☒ + ☒ 2+ ☐ 3+

z ☐ + ☐ 2+ ☐ 3+

hide H<sub>2</sub>O/NH<sub>3</sub> ☐

zoom 112-122 ☐

GO

DKNELVQKAK, MH+ 1298.7685, m/z 433.5943  
L OS G33 P160811 220811-s1.02964.02964.3.dta

scan 2964; 5.3e+001

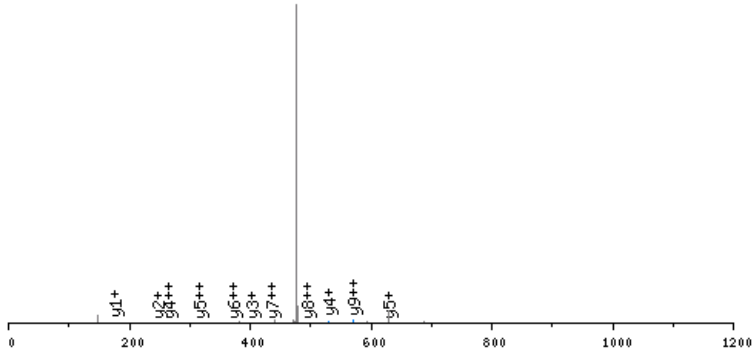

click image to zoom in; click top corners to zoom out [\[precursor±\]](#)

scan 2962; 433.6 m/z; 5.9e+001

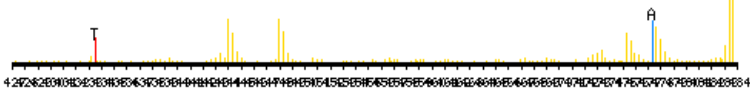

zoomed in precursor plot; T=theoretical m/z, A=acquired m/z

| b <sup>+</sup> | #  | AA | #  | y <sup>+</sup> | y <sup>2+</sup> |
|----------------|----|----|----|----------------|-----------------|
| 158.0453       | 1  | D  | 10 |                |                 |
| 314.1716       | 2  | K  | 9  | 1141.7310      | 571.3694        |
| 428.2146       | 3  | N  | 8  | 985.6047       | 493.3063        |
| 557.2572       | 4  | E  | 7  | 871.5618       | 436.2848        |
| 670.3412       | 5  | L  | 6  | 742.5192       | 371.7635        |
| 769.4096       | 6  | V  | 5  | 629.4351       | 315.2215        |
| 897.4682       | 7  | Q  | 4  | 530.3667       | 265.6873        |
| 1053.5945      | 8  | K  | 3  | 402.3081       | 201.6580        |
| 1124.6316      | 9  | A  | 2  | 246.1818       | 123.5948        |
|                | 10 | K  | 1  | 175.1447       | 88.0763         |

N-term:+43.02 K(2):+156.13  
K(8):+156.13 K(10):+156.13

X-range:

0 - 0

MassTol: Y-zoom:

0. 1.

MassType:

☐ AVG ☒ MONO

Axis:

☒ 1 ☐ 2

Label:

☒ I ☐ M ☐ -

Ions:

a ☐ + ☐ 2+ ☐ 3+

b ☒ + ☐ 2+ ☐ 3+

c ☐ + ☐ 2+ ☐ 3+

x ☐ + ☐ 2+ ☐ 3+

y ☒ + ☒ 2+ ☐ 3+

z ☐ + ☐ 2+ ☐ 3+

hide H<sub>2</sub>O/NH<sub>3</sub> ☐

zoom 112-122 ☐

GO

DKNELVQKAKLAQAER, MH+ 2114.2671, m/z 705.4272  
L OS G34 P160811 220811-s1.06167.06167.3.dta

scan 6167: 1.9e+001

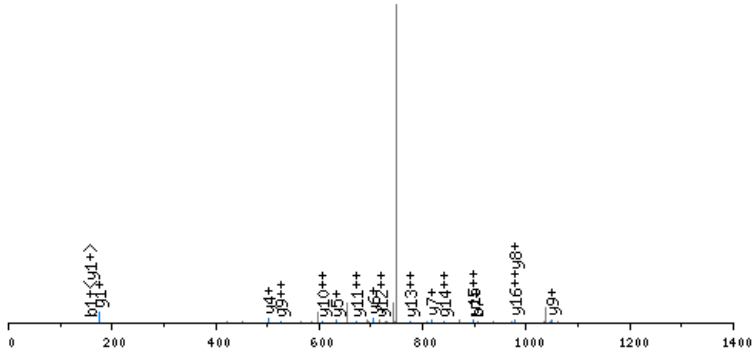

click image to zoom in; click top corners to zoom out

[precursor±]

scan 6165: 705.4 m/z; 5.4e+001

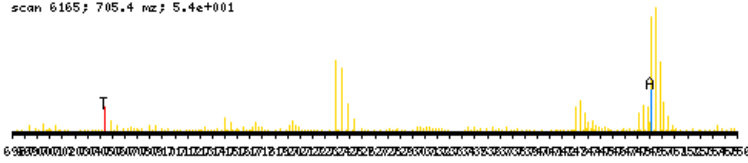

zoomed in precursor plot; T=theoretical m/z, A=acquired m/z

| b <sup>+</sup> | #  | AA | #  | y <sup>+</sup> | y <sup>2+</sup> |
|----------------|----|----|----|----------------|-----------------|
| 158.0453       | 1  | D  | 17 |                |                 |
| 320.2034       | 2  | K  | 16 | 1957.2295      | 979.1187        |
| 434.2464       | 3  | N  | 15 | 1795.0714      | 898.0396        |
| 563.2890       | 4  | E  | 14 | 1681.0285      | 841.0182        |
| 676.3730       | 5  | L  | 13 | 1551.9859      | 776.4969        |
| 775.4414       | 6  | V  | 12 | 1438.9019      | 719.9548        |
| 903.5000       | 7  | Q  | 11 | 1339.8334      | 670.4206        |
| 1065.6581      | 8  | K  | 10 | 1211.7749      | 606.3913        |
| 1136.6952      | 9  | A  | 9  | 1049.6168      | 525.3123        |
| 1298.8533      | 10 | K  | 8  | 978.5797       | 489.7937        |
| 1411.9374      | 11 | L  | 7  | 816.4216       | 408.7147        |
| 1482.9745      | 12 | A  | 6  | 703.3375       | 352.1727        |
| 1612.0171      | 13 | E  | 5  | 632.3004       | 316.6541        |
| 1740.0757      | 14 | Q  | 4  | 503.2578       | 252.1328        |
| 1811.1128      | 15 | A  | 3  | 375.1992       | 188.1035        |
| 1940.1554      | 16 | E  | 2  | 304.1621       | 152.5850        |
|                | 17 | R  | 1  | 175.1195       | 88.0637         |

N-term:+43.02 K(2):+162.16  
K(8):+162.16 K(10):+162.16

X-range:

0 - 0

MassTol: Y-zoom:

0. 1.

MassType:

☐AVG ☒MONO

Axis:

☒1 ☐2

Label:

☒I ☐M ☐-

Ions:

a ☐+ ☐2+ ☐3+

b ☒+ ☐2+ ☐3+

c ☐+ ☐2+ ☐3+

x ☐+ ☐2+ ☐3+

y ☒+ ☒2+ ☐3+

z ☐+ ☐2+ ☐3+

hide H<sub>2</sub>O/NH<sub>3</sub> ☐

zoom 112-122 ☐

GO

DLAAAAEPGAGSQHPEVR, MH+ 1817.8782, m/z 606.6309  
L OS G30 P160811 220811-s1.04915.04915.3.dta

scan 4915; 3.9e+000

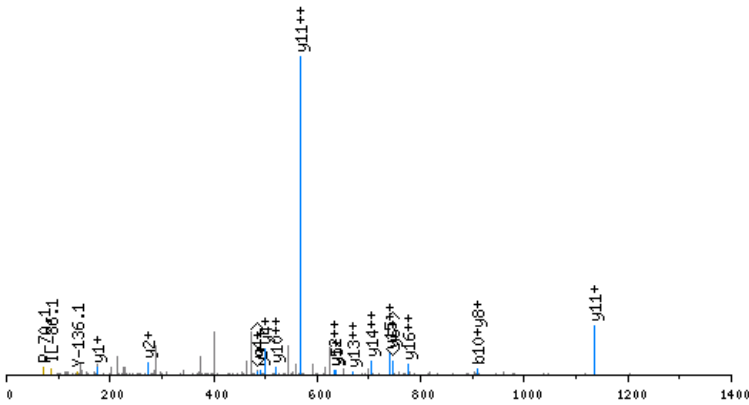

click image to zoom in; click top corners to zoom out

[precursor±]

scan 4914; 606.6 m/z; 4.9e+001

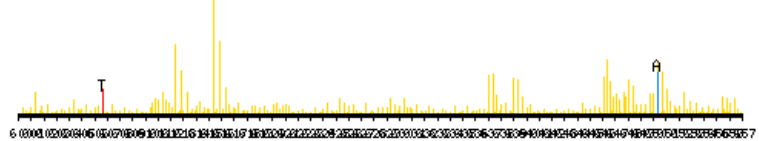

zoomed in precursor plot; T=theoretical m/z, A=acquired m/z

| b <sup>+</sup> | #  | AA | #  | y <sup>+</sup> | y <sup>2+</sup> |
|----------------|----|----|----|----------------|-----------------|
| 158.0453       | 1  | D  | 18 |                |                 |
| 271.1294       | 2  | L  | 17 | 1660.8407      | 830.9243        |
| 342.1665       | 3  | A  | 16 | 1547.7566      | 774.3822        |
| 413.2036       | 4  | A  | 15 | 1476.7195      | 738.8637        |
| 484.2407       | 5  | A  | 14 | 1405.6824      | 703.3451        |
| 555.2779       | 6  | A  | 13 | 1334.6453      | 667.8266        |
| 684.3205       | 7  | E  | 12 | 1263.6082      | 632.3080        |
| 781.3732       | 8  | P  | 11 | 1134.5656      | 567.7867        |
| 838.3947       | 9  | G  | 10 | 1037.5128      | 519.2603        |
| 909.4318       | 10 | A  | 9  | 980.4914       | 490.7496        |
| 966.4533       | 11 | G  | 8  | 909.4543       | 455.2310        |
| 1053.4853      | 12 | S  | 7  | 852.4328       | 426.7203        |
| 1181.5439      | 13 | Q  | 6  | 765.4008       | 383.2043        |
| 1318.6028      | 14 | H  | 5  | 637.3422       | 319.1750        |
| 1415.6555      | 15 | P  | 4  | 500.2833       | 250.6455        |
| 1544.6981      | 16 | E  | 3  | 403.2305       | 202.1192        |
| 1643.7665      | 17 | V  | 2  | 274.1879       | 137.5979        |
|                | 18 | R  | 1  | 175.1195       | 88.0637         |

N-term:+43.02

X-range:

0 - 0

MassTol: Y-zoom:

0. 1.

MassType:

☐ AVG ☒ MONO

Axis:

☒ 1 ☐ 2

Label:

☒ I ☐ M ☐ -

Ions:

a ☐ + ☐ 2+ ☐ 3+

b ☒ + ☐ 2+ ☐ 3+

c ☐ + ☐ 2+ ☐ 3+

x ☐ + ☐ 2+ ☐ 3+

y ☒ + ☒ 2+ ☐ 3+

z ☐ + ☐ 2+ ☐ 3+

hide H<sub>2</sub>O/NH<sub>3</sub> ☐

zoom 112-122 ☐

GO

DLEAVCKR, MH+ 1060.5461, m/z 530.7767  
L OS G31 P160811 220811-s1.05496.05496.2.dta

scan 5496; 2.3e+001

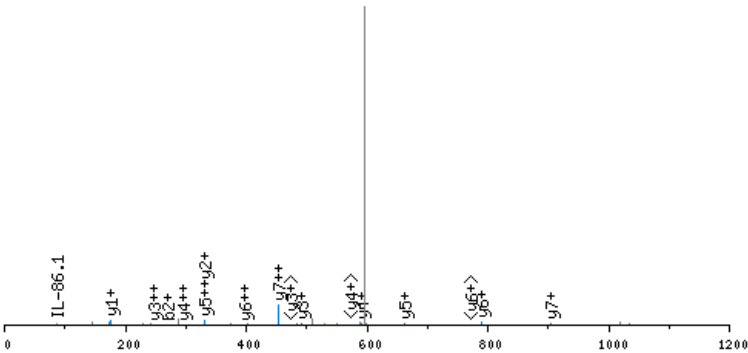

click image to zoom in; click top corners to zoom out [precursor±]

scan 5494; 530.8 m/z; 4.5e+002

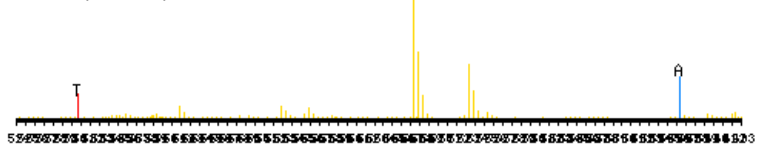

zoomed in precursor plot; T=theoretical m/z, A=acquired m/z

| b <sup>+</sup> | # | AA | # | y <sup>+</sup> | y <sup>2+</sup> |
|----------------|---|----|---|----------------|-----------------|
| 158.0453       | 1 | D  | 8 |                |                 |
| 271.1294       | 2 | L  | 7 | 903.5086       | 452.2582        |
| 400.1720       | 3 | E  | 6 | 790.4245       | 395.7162        |
| 471.2091       | 4 | A  | 5 | 661.3819       | 331.1949        |
| 570.2775       | 5 | V  | 4 | 590.3448       | 295.6763        |
| 730.3081       | 6 | C  | 3 | 491.2764       | 246.1421        |
| 886.4344       | 7 | K  | 2 | 331.2458       | 166.1268        |
|                | 8 | R  | 1 | 175.1195       | 88.0637         |

N-term:+43.02 C(6):+160.03  
K(7):+156.13

X-range:

0 - 0

MassTol: Y-zoom:

0. 1.

MassType:

☐ AVG ☒ MONO

Axis:

☒ 1 ☐ 2

Label:

☒ I ☐ M ☐ -

Ions:

a ☐ + ☐ 2+ ☐ 3+

b ☒ + ☐ 2+ ☐ 3+

c ☐ + ☐ 2+ ☐ 3+

x ☐ + ☐ 2+ ☐ 3+

y ☒ + ☒ 2+ ☐ 3+

z ☐ + ☐ 2+ ☐ 3+

hide H<sub>2</sub>O/NH<sub>3</sub> ☐

zoom 112-122 ☐

GO

DMGNQHPISIR, MH+ 1283.5803, m/z 642.2938  
L OS G31 P160811 220811-s1.04273.04273.2.dta

scan 4273; 7.6e+000

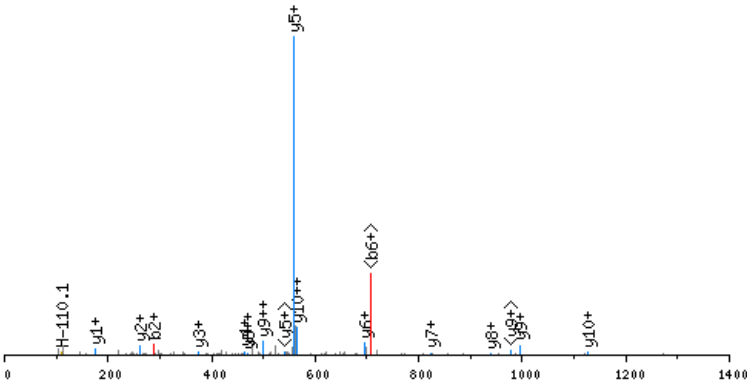

click image to zoom in; click top corners to zoom out

[precursor±]

scan 4269; 642.3 m/z; 6.3e+001

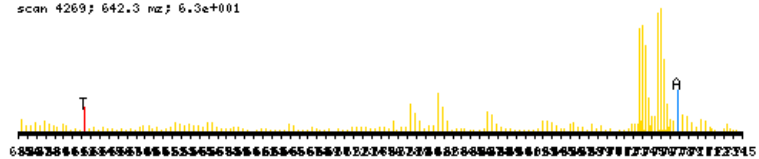

zoomed in precursor plot; T=theoretical m/z, A=acquired m/z

| b <sup>+</sup> | #  | AA | #  | y <sup>+</sup> | y <sup>2+</sup> |
|----------------|----|----|----|----------------|-----------------|
| 158.0453       | 1  | D  | 11 |                |                 |
| 289.0858       | 2  | M  | 10 | 1126.5428      | 563.7753        |
| 346.1073       | 3  | G  | 9  | 995.5023       | 498.2550        |
| 460.1502       | 4  | N  | 8  | 938.4808       | 469.7443        |
| 588.2088       | 5  | Q  | 7  | 824.4379       | 412.7228        |
| 725.2677       | 6  | H  | 6  | 696.3793       | 348.6936        |
| 822.3205       | 7  | P  | 5  | 559.3204       | 280.1641        |
| 909.3525       | 8  | S  | 4  | 462.2676       | 231.6377        |
| 1022.4366      | 9  | I  | 3  | 375.2356       | 188.1217        |
| 1109.4686      | 10 | S  | 2  | 262.1515       | 131.5797        |
|                | 11 | R  | 1  | 175.1195       | 88.0637         |

N-term:+43.02

X-range:

0 - 0

MassTol: Y-zoom:

0. 1.

MassType:

☐ AVG ☒ MONO

Axis:

☒ 1 ☐ 2

Label:

☒ I ☐ M ☐ -

Ions:

a ☐ + ☐ 2+ ☐ 3+

b ☒ + ☐ 2+ ☐ 3+

c ☐ + ☐ 2+ ☐ 3+

x ☐ + ☐ 2+ ☐ 3+

y ☒ + ☒ 2+ ☐ 3+

z ☐ + ☐ 2+ ☐ 3+

hide H<sub>2</sub>O/NH<sub>3</sub> ☐

zoom 112-122 ☐

GO

DNLSDTLKKLKITAADR, MH+ 2028.1706, m/z 507.7981  
L OS G34 P160811 220811-s1.09376.09376.4.dta

scan 9376; 3.3e+000

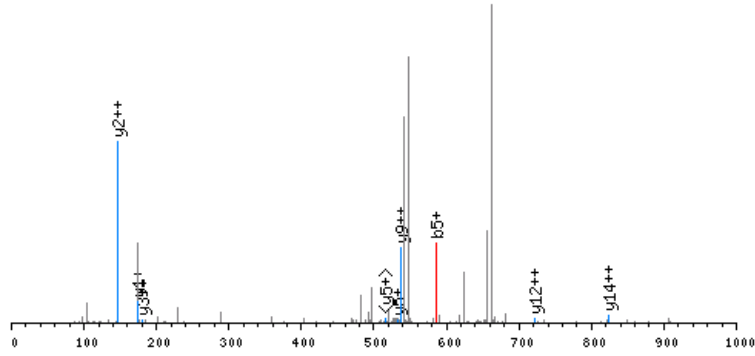

click image to zoom in; click top corners to zoom out [\[precursor±\]](#)

scan 9375; 507.8 m/z; 9.5e+001

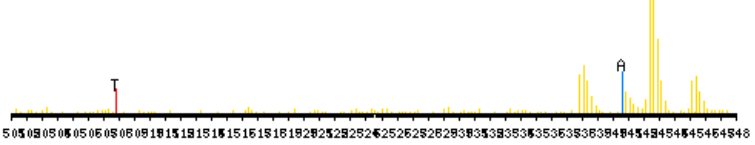

zoomed in precursor plot; T=theoretical m/z, A=acquired m/z

| b <sup>+</sup> | #  | AA | #  | y <sup>+</sup> | y <sup>2+</sup> |
|----------------|----|----|----|----------------|-----------------|
| 158.0453       | 1  | D  | 17 |                |                 |
| 272.0883       | 2  | N  | 16 | 1871.1331      | 936.0705        |
| 385.1723       | 3  | L  | 15 | 1757.0902      | 879.0490        |
| 472.2044       | 4  | S  | 14 | 1644.0061      | 822.5070        |
| 587.2313       | 5  | D  | 13 | 1556.9741      | 778.9909        |
| 688.2790       | 6  | T  | 12 | 1441.9471      | 721.4775        |
| 801.3630       | 7  | L  | 11 | 1340.8994      | 670.9536        |
| 957.4893       | 8  | K  | 10 | 1227.8154      | 614.4116        |
| 1113.6156      | 9  | K  | 9  | 1071.6891      | 536.3485        |
| 1226.6997      | 10 | L  | 8  | 915.5628       | 458.2853        |
| 1382.8260      | 11 | K  | 7  | 802.4787       | 401.7433        |
| 1495.9101      | 12 | I  | 6  | 646.3524       | 323.6801        |
| 1596.9578      | 13 | T  | 5  | 533.2683       | 267.1381        |
| 1667.9949      | 14 | A  | 4  | 432.2207       | 216.6142        |
| 1739.0320      | 15 | A  | 3  | 361.1836       | 181.0957        |
| 1854.0589      | 16 | D  | 2  | 290.1464       | 145.5771        |
|                | 17 | R  | 1  | 175.1195       | 88.0637         |

N-term:+43.02 K(8):+156.13  
K(9):+156.13 K(11):+156.13

X-range:

0 - 0

MassTol: Y-zoom:

0. 1.

MassType:

☐AVG ☒MONO

Axis:

☒1 ☐2

Label:

☒I ☐M ☐-

Ions:

a ☐+ ☐2+ ☐3+

b ☒+ ☐2+ ☐3+

c ☐+ ☐2+ ☐3+

x ☐+ ☐2+ ☐3+

y ☒+ ☒2+ ☐3+

z ☐+ ☐2+ ☐3+

hide H<sub>2</sub>O/NH<sub>3</sub> ☐

zoom 112-122 ☐

GO

DNSGKQAEAMALLAEAER, MH+ 1979.9921, m/z 660.6689  
L OS G30 P160811 220811-s1.07281.07281.3.dta

scan 7281; 1.8e+000

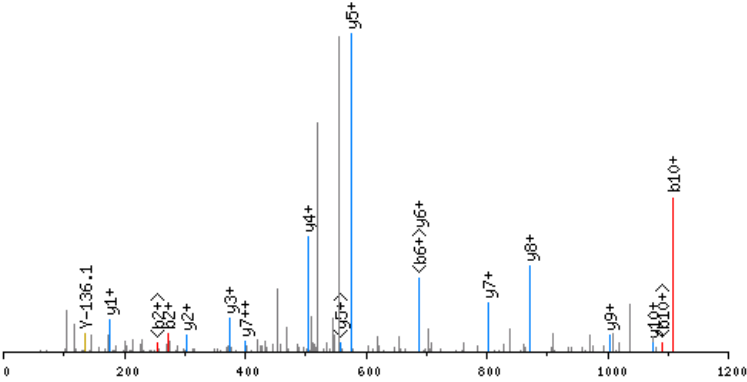

click image to zoom in; click top corners to zoom out [\[precursor±\]](#)

scan 7279; 660.7 m/z; 1.2e+002

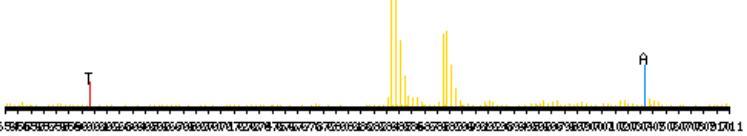

zoomed in precursor plot; T=theoretical m/z, A=acquired m/z

| b <sup>+</sup> | #  | AA | #  | y <sup>+</sup> | y <sup>2+</sup> |
|----------------|----|----|----|----------------|-----------------|
| 158.0453       | 1  | D  | 18 |                |                 |
| 272.0883       | 2  | N  | 17 | 1822.9546      | 911.9812        |
| 359.1203       | 3  | S  | 16 | 1708.9116      | 854.9597        |
| 416.1418       | 4  | G  | 15 | 1621.8796      | 811.4437        |
| 578.2999       | 5  | K  | 14 | 1564.8581      | 782.9330        |
| 706.3584       | 6  | Q  | 13 | 1402.7000      | 701.8539        |
| 777.3956       | 7  | A  | 12 | 1274.6415      | 637.8246        |
| 906.4381       | 8  | E  | 11 | 1203.6043      | 602.3061        |
| 977.4753       | 9  | A  | 10 | 1074.5618      | 537.7848        |
| 1108.5157      | 10 | M  | 9  | 1003.5246      | 502.2662        |
| 1179.5529      | 11 | A  | 8  | 872.4842       | 436.7460        |
| 1292.6369      | 12 | L  | 7  | 801.4470       | 401.2274        |
| 1405.7210      | 13 | L  | 6  | 688.3630       | 344.6854        |
| 1476.7581      | 14 | A  | 5  | 575.2789       | 288.1434        |
| 1605.8007      | 15 | E  | 4  | 504.2418       | 252.6248        |
| 1676.8378      | 16 | A  | 3  | 375.1992       | 188.1035        |
| 1805.8804      | 17 | E  | 2  | 304.1621       | 152.5850        |
|                | 18 | R  | 1  | 175.1195       | 88.0637         |

N-term:+43.02 K(5):+162.16

X-range:

0 - 0

MassTol: Y-zoom:

0. 1.

MassType:

☐ AVG ☒ MONO

Axis:

☒ 1 ☐ 2

Label:

☒ I ☐ M ☐ -

Ions:

a ☐ + ☐ 2+ ☐ 3+

b ☒ + ☐ 2+ ☐ 3+

c ☐ + ☐ 2+ ☐ 3+

x ☐ + ☐ 2+ ☐ 3+

y ☒ + ☒ 2+ ☐ 3+

z ☐ + ☐ 2+ ☐ 3+

hide H<sub>2</sub>O/NH<sub>3</sub> ☐

zoom 112-122 ☐

GO

DPNCSASDGCSCAGACKCK, MH+ 2449.8971, m/z 817.3039  
L OS G30 P160811 220811-s1.02460.02460.3.dta

scan 2460; 1.7e+000

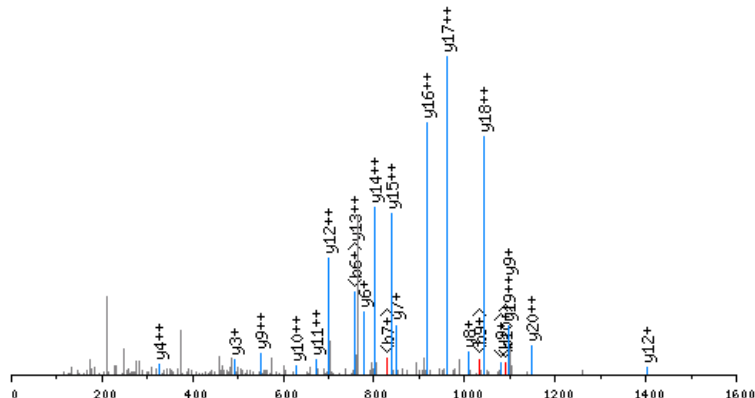

click image to zoom in; click top corners to zoom out

[precursor±]

scan 2459; 817.3 m/z; 6.6e+000

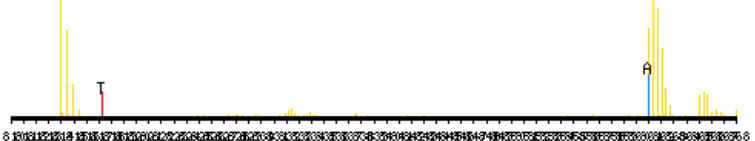

zoomed in precursor plot; T=theoretical m/z, A=acquired m/z

| b <sup>+</sup> | #  | AA | #  | y <sup>+</sup> | y <sup>2+</sup> |
|----------------|----|----|----|----------------|-----------------|
| 158.0453       | 1  | D  | 21 |                |                 |
| 255.0981       | 2  | P  | 20 | 2292.8596      | 1146.9337       |
| 369.1410       | 3  | N  | 19 | 2195.8068      | 1098.4073       |
| 529.1716       | 4  | C  | 18 | 2081.7639      | 1041.3859       |
| 616.2037       | 5  | S  | 17 | 1921.7333      | 961.3706        |
| 776.2343       | 6  | C  | 16 | 1834.7013      | 917.8546        |
| 847.2714       | 7  | A  | 15 | 1674.6707      | 837.8393        |
| 934.3034       | 8  | S  | 14 | 1603.6336      | 802.3207        |
| 1049.3303      | 9  | D  | 13 | 1516.6015      | 758.8047        |
| 1106.3518      | 10 | G  | 12 | 1401.5746      | 701.2912        |
| 1193.3838      | 11 | S  | 11 | 1344.5531      | 672.7805        |
| 1353.4144      | 12 | C  | 10 | 1257.5211      | 629.2645        |
| 1440.4465      | 13 | S  | 9  | 1097.4905      | 549.2492        |
| 1600.4771      | 14 | C  | 8  | 1010.4585      | 505.7332        |
| 1671.5142      | 15 | A  | 7  | 850.4279       | 425.7179        |
| 1728.5356      | 16 | G  | 6  | 779.3908       | 390.1993        |
| 1799.5728      | 17 | A  | 5  | 722.3693       | 361.6886        |
| 1959.6034      | 18 | C  | 4  | 651.3322       | 326.1700        |
| 2115.7297      | 19 | K  | 3  | 491.3016       | 246.1547        |
| 2275.7603      | 20 | C  | 2  | 335.1753       | 168.0916        |
|                | 21 | K  | 1  | 175.1447       | 88.0763         |

N-term:+43.02 C(4):+160.03  
C(6):+160.03 C(12):+160.03  
C(14):+160.03 C(18):+160.03  
K(19):+156.13 C(20):+160.03  
K(21):+156.13

X-range:

0 - 0

MassTol: Y-zoom:

0. 1.

MassType:

☐AVG ☒MONO

Axis:

☒1 ☐2

Label:

☒I ☐M ☐-

Ions:

a ☐+ ☐2+ ☐3+

b ☒+ ☐2+ ☐3+

c ☐+ ☐2+ ☐3+

x ☐+ ☐2+ ☐3+

y ☒+ ☒2+ ☐3+

z ☐+ ☐2+ ☐3+

hide H<sub>2</sub>O/NH<sub>3</sub> ☐

zoom 112-122 ☐

GO

DPSGVKVLTAEDIQER, MH+ 1962.0244, m/z 654.6797  
L OS G30 P160811 220811-s1.07186.07186.3.dta

scan 7186; 1.6e+000

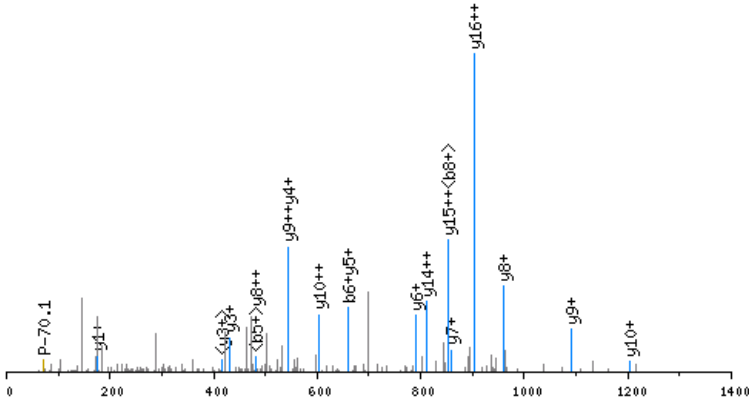

click image to zoom in; click top corners to zoom out

[precursor±]

scan 7184; 654.7 m/z; 7.6e+001

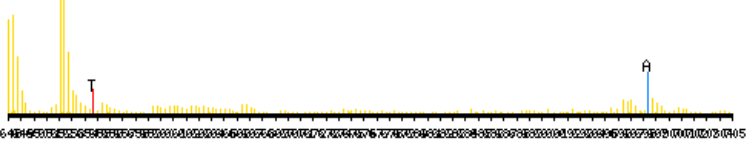

zoomed in precursor plot; T=theoretical m/z, A=acquired m/z

| b <sup>+</sup> | #  | AA | #  | y <sup>+</sup> | y <sup>2+</sup> |
|----------------|----|----|----|----------------|-----------------|
| 158.0453       | 1  | D  | 17 |                |                 |
| 255.0981       | 2  | P  | 16 | 1804.9869      | 902.9974        |
| 342.1301       | 3  | S  | 15 | 1707.9341      | 854.4710        |
| 399.1516       | 4  | G  | 14 | 1620.9021      | 810.9550        |
| 498.2200       | 5  | V  | 13 | 1563.8806      | 782.4442        |
| 660.3781       | 6  | K  | 12 | 1464.8122      | 732.9100        |
| 759.4465       | 7  | V  | 11 | 1302.6541      | 651.8310        |
| 872.5306       | 8  | L  | 10 | 1203.5857      | 602.2968        |
| 1001.5732      | 9  | E  | 9  | 1090.5017      | 545.7547        |
| 1102.6209      | 10 | T  | 8  | 961.4591       | 481.2334        |
| 1173.6580      | 11 | A  | 7  | 860.4114       | 430.7096        |
| 1302.7006      | 12 | E  | 6  | 789.3743       | 395.1910        |
| 1417.7275      | 13 | D  | 5  | 660.3317       | 330.6698        |
| 1530.8116      | 14 | I  | 4  | 545.3047       | 273.1563        |
| 1658.8702      | 15 | Q  | 3  | 432.2207       | 216.6142        |
| 1787.9127      | 16 | E  | 2  | 304.1621       | 152.5850        |
|                | 17 | R  | 1  | 175.1195       | 88.0637         |

N-term:+43.02 K(6):+162.16

X-range:

0 - 0

MassTol: Y-zoom:

0. 1.

MassType:

☐AVG ☒MONO

Axis:

☒1 ☐2

Label:

☒I ☐M ☐-

Ions:

a ☐+ ☐2+ ☐3+

b ☒+ ☐2+ ☐3+

c ☐+ ☐2+ ☐3+

x ☐+ ☐2+ ☐3+

y ☒+ ☒2+ ☐3+

z ☐+ ☐2+ ☐3+

hide H<sub>2</sub>O/NH<sub>3</sub> ☐

zoom 112-122 ☐

GO

DPSWATQSESAVAEKVLR, MH+ 2086.0457, m/z 696.0201  
L OS G30 P160811 220811-s1.07841.07841.3.dta

scan 7841; 2.5e+000

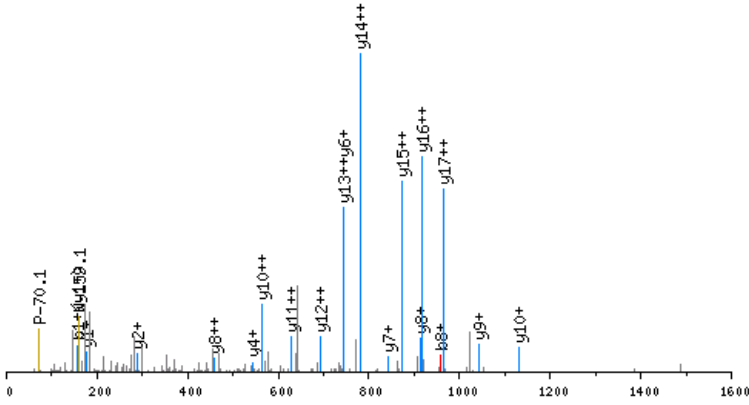

click image to zoom in; click top corners to zoom out

[precursor±]

scan 7839; 696.0 m/z; 3.9e+001

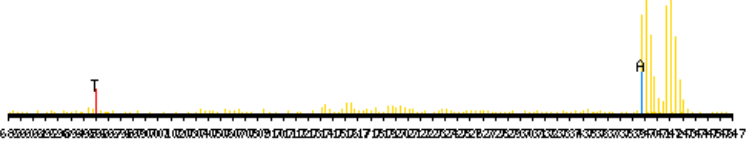

zoomed in precursor plot; T=theoretical m/z, A=acquired m/z

| b <sup>+</sup> | #  | AA | #  | y <sup>+</sup> | y <sup>2+</sup> |
|----------------|----|----|----|----------------|-----------------|
| 158.0453       | 1  | D  | 18 |                |                 |
| 255.0981       | 2  | P  | 17 | 1929.0082      | 965.0080        |
| 342.1301       | 3  | S  | 16 | 1831.9554      | 916.4816        |
| 528.2094       | 4  | W  | 15 | 1744.9234      | 872.9656        |
| 599.2466       | 5  | A  | 14 | 1558.8441      | 779.9260        |
| 700.2942       | 6  | T  | 13 | 1487.8070      | 744.4074        |
| 828.3528       | 7  | Q  | 12 | 1386.7593      | 693.8836        |
| 957.3954       | 8  | E  | 11 | 1258.7007      | 629.8543        |
| 1044.4274      | 9  | S  | 10 | 1129.6581      | 565.3330        |
| 1173.4700      | 10 | E  | 9  | 1042.6261      | 521.8170        |
| 1244.5071      | 11 | A  | 8  | 913.5835       | 457.2957        |
| 1343.5756      | 12 | V  | 7  | 842.5464       | 421.7771        |
| 1414.6127      | 13 | A  | 6  | 743.4780       | 372.2429        |
| 1543.6553      | 14 | E  | 5  | 672.4409       | 336.7243        |
| 1699.7816      | 15 | K  | 4  | 543.3983       | 272.2031        |
| 1798.8500      | 16 | V  | 3  | 387.2720       | 194.1399        |
| 1911.9340      | 17 | L  | 2  | 288.2036       | 144.6057        |
|                | 18 | R  | 1  | 175.1195       | 88.0637         |

N-term:+43.02 K(15):+156.13

X-range:

0 - 0

MassTol: Y-zoom:

0. 1.

MassType:

☐AVG ☒MONO

Axis:

☒1 ☐2

Label:

☒I ☐M ☐-

Ions:

a ☐+ ☐2+ ☐3+

b ☒+ ☐2+ ☐3+

c ☐+ ☐2+ ☐3+

x ☐+ ☐2+ ☐3+

y ☒+ ☒2+ ☐3+

z ☐+ ☐2+ ☐3+

hide H<sub>2</sub>O/NH<sub>3</sub> ☐

zoom 112-122 ☐

GO

DSEAFQHAR, MH+ 1102.4918, m/z 551.7495  
L OS G31 P160811 220811-s1.04241.04241.2.dta

scan 4241; 2.5e+000

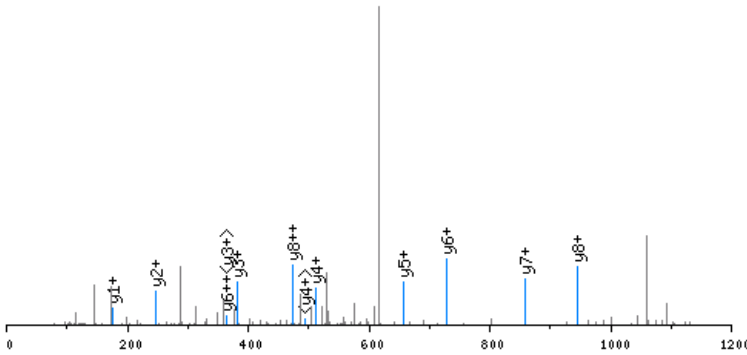

click image to zoom in; click top corners to zoom out [precursor±]

scan 4239; 551.7 m/z; 2.0e+002

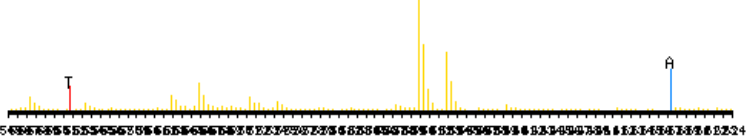

zoomed in precursor plot; T=theoretical m/z, A=acquired m/z

| b <sup>+</sup> | # | AA | # | y <sup>+</sup> | y <sup>2+</sup> |
|----------------|---|----|---|----------------|-----------------|
| 158.0453       | 1 | D  | 9 |                |                 |
| 245.0774       | 2 | S  | 8 | 945.4543       | 473.2310        |
| 374.1200       | 3 | E  | 7 | 858.4222       | 429.7150        |
| 445.1571       | 4 | A  | 6 | 729.3796       | 365.1937        |
| 592.2255       | 5 | F  | 5 | 658.3425       | 329.6752        |
| 720.2841       | 6 | Q  | 4 | 511.2741       | 256.1410        |
| 857.3430       | 7 | H  | 3 | 383.2155       | 192.1117        |
| 928.3801       | 8 | A  | 2 | 246.1566       | 123.5822        |
|                | 9 | R  | 1 | 175.1195       | 88.0637         |

N-term:+43.02

X-range:

0 - 0

MassTol: Y-zoom:

0. 1.

MassType:

☐AVG ☒MONO

Axis:

☒1 ☐2

Label:

☒I ☐M ☐-

Ions:

a ☐+ ☐2+ ☐3+

b ☒+ ☐2+ ☐3+

c ☐+ ☐2+ ☐3+

x ☐+ ☐2+ ☐3+

y ☒+ ☒2+ ☐3+

z ☐+ ☐2+ ☐3+

hide H<sub>2</sub>O/NH<sub>3</sub> ☐

zoom 112-122 ☐

GO

DSFEDKLQQLR, MH+ 1454.7704, m/z 485.5950  
L OS G30 P160811 220811-s1.07277.07277.3.dta

scan 7277; 1.9e+000

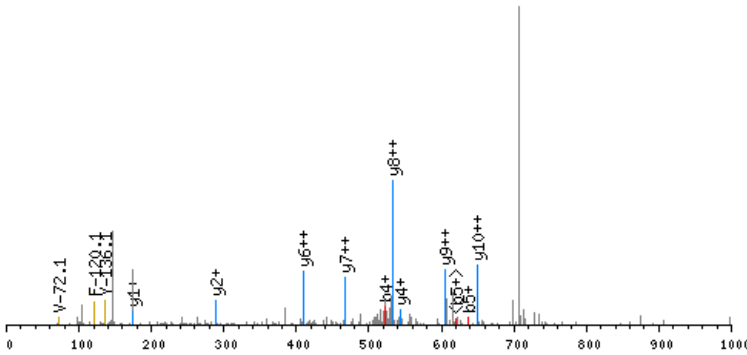

click image to zoom in; click top corners to zoom out [\[precursor±\]](#)

scan 7274; 485.6 m/z; 1.3e+001

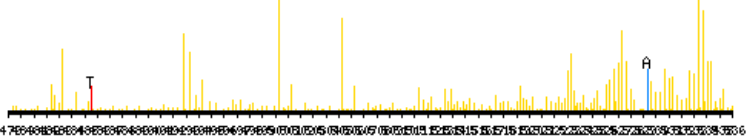

zoomed in precursor plot; T=theoretical m/z, A=acquired m/z

| b <sup>+</sup> | #  | AA | #  | y <sup>+</sup> | y <sup>2+</sup> |
|----------------|----|----|----|----------------|-----------------|
| 158.0453       | 1  | D  | 11 |                |                 |
| 245.0774       | 2  | S  | 10 | 1297.7329      | 649.3703        |
| 392.1458       | 3  | F  | 9  | 1210.7008      | 605.8543        |
| 521.1884       | 4  | E  | 8  | 1063.6324      | 532.3201        |
| 636.2153       | 5  | D  | 7  | 934.5898       | 467.7988        |
| 798.3734       | 6  | K  | 6  | 819.5629       | 410.2854        |
| 911.4575       | 7  | L  | 5  | 657.4048       | 329.2063        |
| 1039.5161      | 8  | Q  | 4  | 544.3207       | 272.6643        |
| 1167.5746      | 9  | Q  | 3  | 416.2621       | 208.6350        |
| 1280.6587      | 10 | L  | 2  | 288.2036       | 144.6057        |
|                | 11 | R  | 1  | 175.1195       | 88.0637         |

N-term:+43.02 K(6):+162.16

X-range:

0 - 0

MassTol: Y-zoom:

0. 1.

MassType:

☐ AVG ☒ MONO

Axis:

☒ 1 ☐ 2

Label:

☒ I ☐ M ☐ -

Ions:

a ☐ + ☐ 2+ ☐ 3+

b ☒ + ☐ 2+ ☐ 3+

c ☐ + ☐ 2+ ☐ 3+

x ☐ + ☐ 2+ ☐ 3+

y ☒ + ☒ 2+ ☐ 3+

z ☐ + ☐ 2+ ☐ 3+

hide H<sub>2</sub>O/NH<sub>3</sub> ☐

zoom 112-122 ☐

GO

DSKESLAPPGR, MH+ 1232.6699, m/z 411.5615  
L OS G30 P160811 220811-s1.03240.03240.3.dta

scan 3240; 1.2e+000

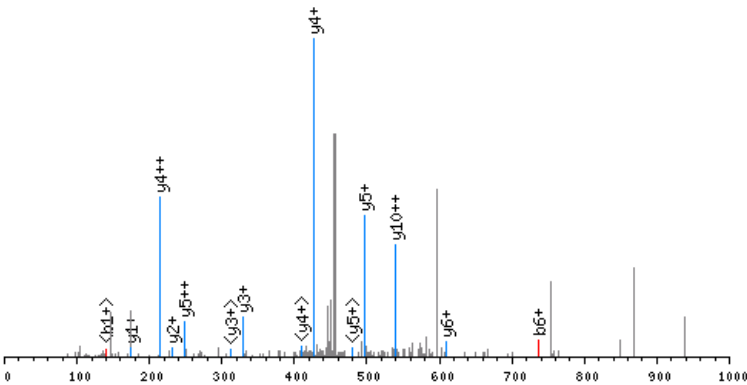

click image to zoom in; click top corners to zoom out

[precursor±]

scan 3239; 411.6 m/z; 1.1e+002

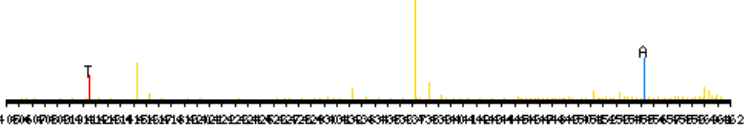

zoomed in precursor plot; T=theoretical m/z, A=acquired m/z

| b <sup>+</sup> | #  | AA | #  | y <sup>+</sup> | y <sup>2+</sup> |
|----------------|----|----|----|----------------|-----------------|
| 158.0453       | 1  | D  | 11 |                |                 |
| 245.0774       | 2  | S  | 10 | 1075.6324      | 538.3201        |
| 407.2355       | 3  | K  | 9  | 988.6004       | 494.8041        |
| 536.2781       | 4  | E  | 8  | 826.4423       | 413.7251        |
| 623.3101       | 5  | S  | 7  | 697.3997       | 349.2038        |
| 736.3942       | 6  | L  | 6  | 610.3677       | 305.6877        |
| 807.4313       | 7  | A  | 5  | 497.2836       | 249.1457        |
| 904.4840       | 8  | P  | 4  | 426.2465       | 213.6272        |
| 1001.5368      | 9  | P  | 3  | 329.1937       | 165.1008        |
| 1058.5583      | 10 | G  | 2  | 232.1410       | 116.5744        |
|                | 11 | R  | 1  | 175.1195       | 88.0637         |

N-term:+43.02 K(3):+162.16

X-range:

0 - 0

0. 1.

☐ AVG ☒ MONO

1 2

☒ I ☐ M ☐ -

$$a \quad \boxed{\phantom{00}} + \boxed{\phantom{00}}^2 + \boxed{\phantom{00}}^3 +$$
b. ☒ 1 + ☐ 2 + ☐ 3 +

c

v ☒ 1+ ☒ 2+ ☐ 3+

$$7 \square + \square^2 + \square^3 +$$
hide  $\text{H}_2\text{O}/\text{NH}_3$ 

zoom 112-122 

GO

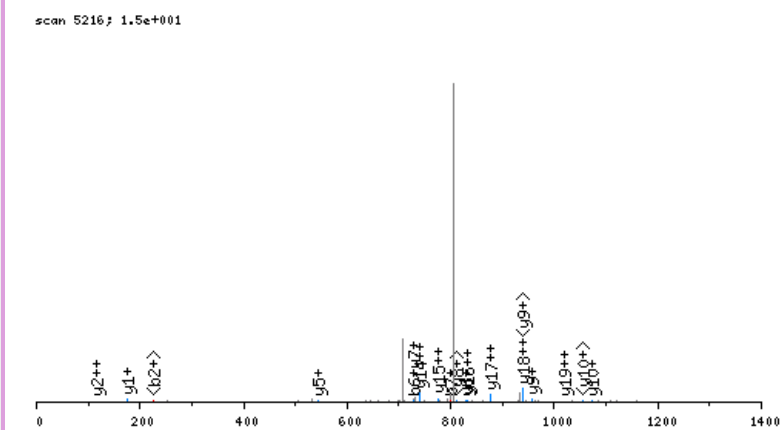

click image to zoom in; click top corners to zoom out      [\[precursor+\]](#)

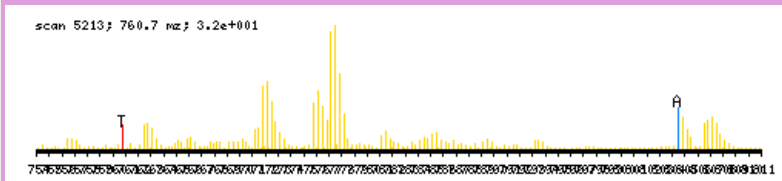

zoomed in precursor plot; T=theoretical m/z, A=acquired m/z

| $b^+$     | #  | AA | #  | $y^+$     | $y^{2+}$  |
|-----------|----|----|----|-----------|-----------|
| 158.0453  | 1  | D  | 21 |           |           |
| 245.0774  | 2  | S  | 20 | 2123.1461 | 1062.0770 |
| 401.2037  | 3  | K  | 19 | 2036.1141 | 1018.5609 |
| 530.2463  | 4  | E  | 18 | 1879.9878 | 940.4978  |
| 617.2783  | 5  | S  | 17 | 1750.9452 | 875.9765  |
| 730.3624  | 6  | L  | 16 | 1663.9131 | 832.4605  |
| 801.3995  | 7  | A  | 15 | 1550.8291 | 775.9185  |
| 898.4522  | 8  | P  | 14 | 1479.7920 | 740.3999  |
| 995.5050  | 9  | P  | 13 | 1382.7392 | 691.8735  |
| 1052.5265 | 10 | G  | 12 | 1285.6864 | 643.3471  |
| 1208.6276 | 11 | R  | 11 | 1228.6650 | 614.8364  |
| 1323.6545 | 12 | D  | 10 | 1072.5639 | 536.7858  |
| 1452.6971 | 13 | E  | 9  | 957.5369  | 479.2724  |
| 1551.7655 | 14 | V  | 8  | 828.4943  | 414.7511  |
| 1648.8183 | 15 | P  | 7  | 729.4259  | 365.2169  |
| 1735.8503 | 16 | S  | 6  | 632.3731  | 316.6905  |
| 1822.8823 | 17 | S  | 5  | 545.3411  | 273.1745  |
| 1935.9664 | 18 | L  | 4  | 458.3091  | 229.6585  |
| 2049.0505 | 19 | L  | 3  | 345.2250  | 173.1164  |
| 2106.0719 | 20 | G  | 2  | 232.1410  | 116.5744  |
|           | 21 | R  | 1  | 175.1195  | 88.0637   |

N-term: +43.02 K(3): +156.13

X-range:

0 - 0

MassTol: Y-zoom:

0. 1.

MassType:

☐AVG ☒MONO

Axis:

☒1 ☐2

Label:

☒I ☐M ☐-

Ions:

a ☐+ ☐2+ ☐3+

b ☒+ ☐2+ ☐3+

c ☐+ ☐2+ ☐3+

x ☐+ ☐2+ ☐3+

y ☒+ ☒2+ ☐3+

z ☐+ ☐2+ ☐3+

hide H<sub>2</sub>O/NH<sub>3</sub> ☐

zoom 112-122 ☐

GO

DSSAVITQISKEEAR, MH+ 1709.9134, m/z 570.6427  
L OS G30 P160811 220811-s1.06366.06366.3.dta

scan 6366; 1.8e+000

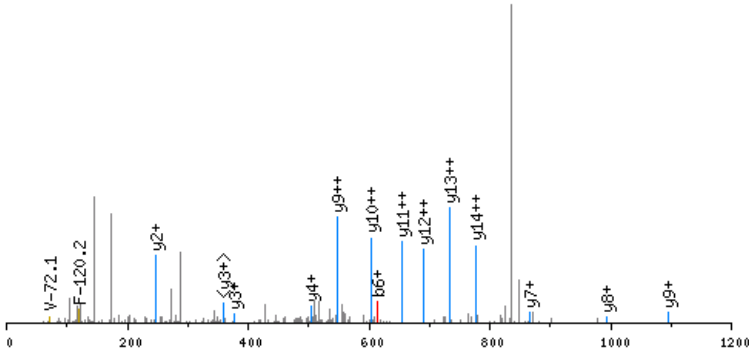

click image to zoom in; click top corners to zoom out [\[precursor±\]](#)

scan 6364; 570.6 m/z; 5.0e+001

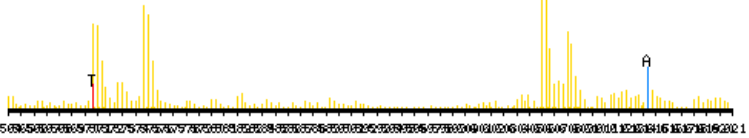

zoomed in precursor plot; T=theoretical m/z, A=acquired m/z

| b <sup>+</sup> | #  | AA | #  | y <sup>+</sup> | y <sup>2+</sup> |
|----------------|----|----|----|----------------|-----------------|
| 158.0453       | 1  | D  | 15 |                |                 |
| 245.0774       | 2  | S  | 14 | 1552.8759      | 776.9419        |
| 332.1094       | 3  | S  | 13 | 1465.8439      | 733.4258        |
| 403.1465       | 4  | A  | 12 | 1378.8118      | 689.9098        |
| 502.2149       | 5  | V  | 11 | 1307.7747      | 654.3913        |
| 615.2990       | 6  | I  | 10 | 1208.7063      | 604.8571        |
| 716.3467       | 7  | T  | 9  | 1095.6222      | 548.3150        |
| 844.4052       | 8  | Q  | 8  | 994.5746       | 497.7912        |
| 957.4893       | 9  | I  | 7  | 866.5160       | 433.7619        |
| 1044.5213      | 10 | S  | 6  | 753.4319       | 377.2199        |
| 1206.6794      | 11 | K  | 5  | 666.3999       | 333.7039        |
| 1335.7220      | 12 | E  | 4  | 504.2418       | 252.6248        |
| 1464.7646      | 13 | E  | 3  | 375.1992       | 188.1035        |
| 1535.8017      | 14 | A  | 2  | 246.1566       | 123.5822        |
|                | 15 | R  | 1  | 175.1195       | 88.0637         |

N-term:+43.02 K(11):+162.16

X-range:

0 - 0

MassTol: Y-zoom:

0. 1.

MassType:

☐ AVG ☒ MONO

Axis:

☒ 1 ☐ 2

Label:

☒ I ☐ M ☐ -

Ions:

a ☐ + ☐ 2+ ☐ 3+

b ☒ + ☐ 2+ ☐ 3+

c ☐ + ☐ 2+ ☐ 3+

x ☐ + ☐ 2+ ☐ 3+

y ☒ + ☒ 2+ ☐ 3+

z ☐ + ☐ 2+ ☐ 3+

hide H<sub>2</sub>O/NH<sub>3</sub> ☐

zoom 112-122 ☐

GO

DVQLVESGGGLVQPGGSR, MH+ 1796.9143, m/z 599.6429  
L OS G30 P160811 220811-s1.04640.04640.3.dta

scan 4640; 4.2e+000

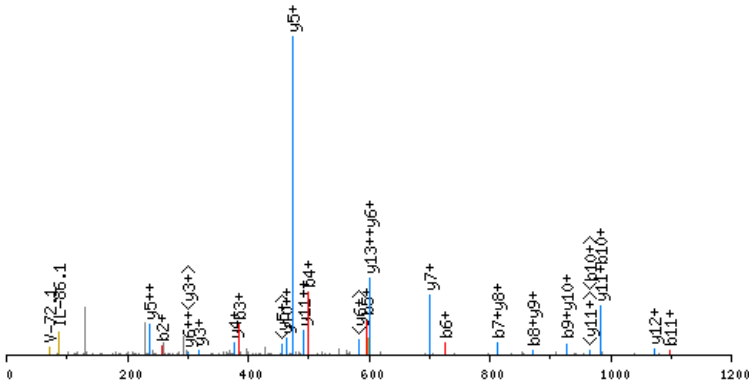

click image to zoom in; click top corners to zoom out

[precursor±]

scan 4639; 599.6 m/z; 1.7e+001

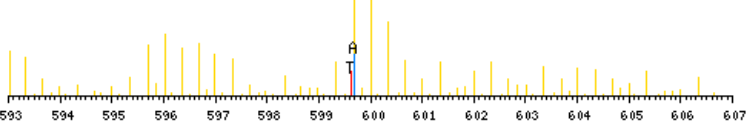

zoomed in precursor plot; T=theoretical m/z, A=acquired m/z

| b <sup>+</sup> | #  | AA | #  | y <sup>+</sup> | y <sup>2+</sup> |
|----------------|----|----|----|----------------|-----------------|
| 158.0453       | 1  | D  | 18 |                |                 |
| 257.1138       | 2  | V  | 17 | 1639.8768      | 820.4423        |
| 385.1723       | 3  | Q  | 16 | 1540.8083      | 770.9081        |
| 498.2564       | 4  | L  | 15 | 1412.7498      | 706.8788        |
| 597.3248       | 5  | V  | 14 | 1299.6657      | 650.3368        |
| 726.3674       | 6  | E  | 13 | 1200.5973      | 600.8026        |
| 813.3994       | 7  | S  | 12 | 1071.5547      | 536.2813        |
| 870.4209       | 8  | G  | 11 | 984.5227       | 492.7652        |
| 927.4424       | 9  | G  | 10 | 927.5012       | 464.2545        |
| 984.4638       | 10 | G  | 9  | 870.4797       | 435.7438        |
| 1097.5479      | 11 | L  | 8  | 813.4583       | 407.2331        |
| 1196.6163      | 12 | V  | 7  | 700.3742       | 350.6910        |
| 1324.6749      | 13 | Q  | 6  | 601.3058       | 301.1568        |
| 1421.7276      | 14 | P  | 5  | 473.2472       | 237.1275        |
| 1478.7491      | 15 | G  | 4  | 376.1945       | 188.6011        |
| 1535.7706      | 16 | G  | 3  | 319.1730       | 160.0904        |
| 1622.8026      | 17 | S  | 2  | 262.1515       | 131.5797        |
|                | 18 | R  | 1  | 175.1195       | 88.0637         |

N-term:+43.02

X-range:

0 - 0

MassTol: Y-zoom:

0. 1.

MassType:

☐AVG ☒MONO

Axis:

☒1 ☐2

Label:

☒I ☐M ☐-

Ions:

a ☐+ ☐2+ ☐3+

b ☒+ ☐2+ ☐3+

c ☐+ ☐2+ ☐3+

x ☐+ ☐2+ ☐3+

y ☒+ ☒2+ ☐3+

z ☐+ ☐2+ ☐3+

hide H<sub>2</sub>O/NH<sub>3</sub> ☐

zoom 112-122 ☐

GO

EAAHSKSTEECLSYFGVSETTGLTPDQVKR, MH+ 3425.6535, m/z 857.1688  
L OS G34 P160811 220811-s1.07938.07938.4.dta

scan 7938; 1.5e+000

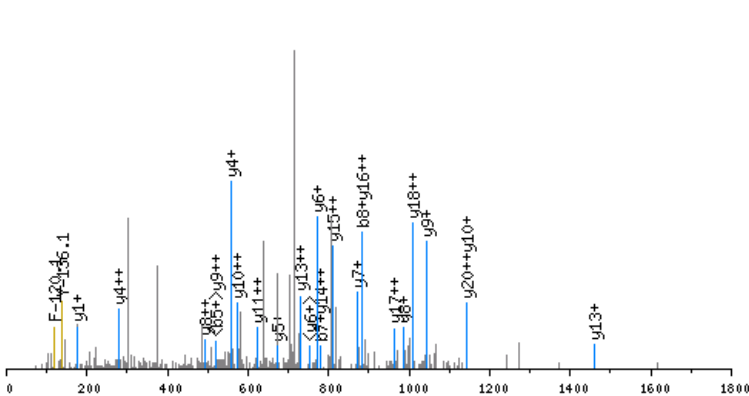

click image to zoom in; click top corners to zoom out

[precursor±]

scan 7935; 857.2 m/z; 4.4e+001

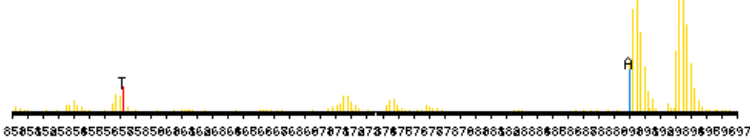

zoomed in precursor plot; T=theoretical m/z, A=acquired m/z

| b <sup>+</sup> | #  | AA | #  | y <sup>+</sup> | y <sup>2+</sup> |
|----------------|----|----|----|----------------|-----------------|
| 172.0610       | 1  | E  | 30 |                |                 |
| 243.0981       | 2  | A  | 29 | 3254.6004      | 1627.8041       |
| 314.1352       | 3  | A  | 28 | 3183.5632      | 1592.2855       |
| 451.1941       | 4  | H  | 27 | 3112.5261      | 1556.7670       |
| 538.2262       | 5  | S  | 26 | 2975.4672      | 1488.2375       |
| 694.3525       | 6  | K  | 25 | 2888.4352      | 1444.7215       |
| 781.3845       | 7  | S  | 24 | 2732.3089      | 1366.6584       |
| 882.4322       | 8  | T  | 23 | 2645.2769      | 1323.1423       |
| 1011.4748      | 9  | E  | 22 | 2544.2292      | 1272.6185       |
| 1140.5174      | 10 | E  | 21 | 2415.1866      | 1208.0972       |
| 1300.5480      | 11 | C  | 20 | 2286.1440      | 1143.5759       |
| 1413.6320      | 12 | L  | 19 | 2126.1134      | 1063.5606       |
| 1500.6640      | 13 | S  | 18 | 2013.0293      | 1007.0186       |
| 1663.7274      | 14 | Y  | 17 | 1925.9973      | 963.5026        |
| 1810.7958      | 15 | F  | 16 | 1762.9340      | 881.9709        |
| 1867.8173      | 16 | G  | 15 | 1615.8656      | 808.4367        |
| 1966.8857      | 17 | V  | 14 | 1558.8441      | 779.9260        |
| 2053.9177      | 18 | S  | 13 | 1459.7757      | 730.3918        |
| 2182.9603      | 19 | E  | 12 | 1372.7437      | 686.8757        |
| 2284.0080      | 20 | T  | 11 | 1243.7011      | 622.3544        |
| 2385.0556      | 21 | T  | 10 | 1142.6534      | 571.8306        |
| 2442.0771      | 22 | G  | 9  | 1041.6057      | 521.3068        |
| 2555.1612      | 23 | L  | 8  | 984.5842       | 492.7960        |
| 2656.2089      | 24 | T  | 7  | 871.5002       | 436.2540        |
| 2753.2616      | 25 | P  | 6  | 770.4525       | 385.7302        |
| 2868.2886      | 26 | D  | 5  | 673.3997       | 337.2038        |
| 2996.3471      | 27 | Q  | 4  | 558.3728       | 279.6903        |
| 3095.4156      | 28 | V  | 3  | 430.3142       | 215.6610        |
| 3251.5419      | 29 | K  | 2  | 331.2458       | 166.1268        |
|                | 30 | R  | 1  | 175.1195       | 88.0637         |

N-term:+43.02 K(6):+156.13  
C(11):+160.03 K(29):+156.13

X-range:

0 - 0

MassTol: Y-zoom:

0. 1.

MassType:

☐AVG ☒MONO

Axis:

☒1 ☐2

Label:

☒I ☐M ☐-

Ions:

a ☐+ ☐2+ ☐3+

b ☒+ ☐2+ ☐3+

c ☐+ ☐2+ ☐3+

x ☐+ ☐2+ ☐3+

y ☒+ ☒2+ ☐3+

z ☐+ ☐2+ ☐3+

hide H<sub>2</sub>O/NH<sub>3</sub> ☐

zoom 112-122 ☐

GO

EAKGGTVKAASGFNATEDAQTLR, MH+ 2420.2422, m/z 605.8160  
L OS G32 P160811 220811-s1.03979.03979.4.dta

scan 3979; 2.1e+000

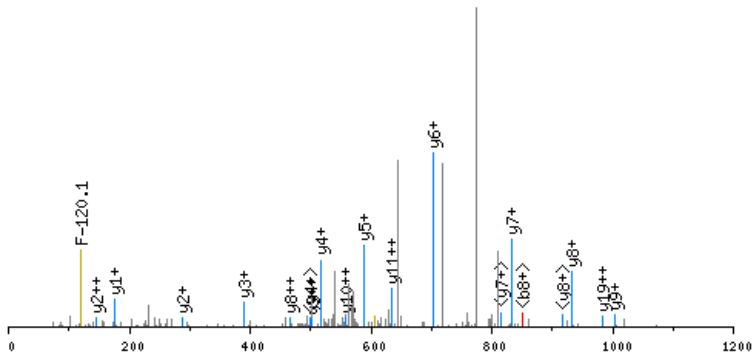

click image to zoom in; click top corners to zoom out

[precursor±]

scan 3978; 605.8 m/z; 3.5e+001

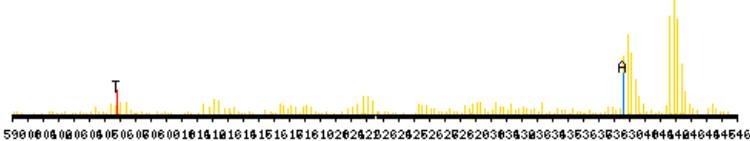

zoomed in precursor plot; T=theoretical m/z, A=acquired m/z

| b <sup>+</sup> | #  | AA | #  | y <sup>+</sup> | y <sup>2+</sup> |
|----------------|----|----|----|----------------|-----------------|
| 172.0610       | 1  | E  | 23 |                |                 |
| 243.0981       | 2  | A  | 22 | 2249.1891      | 1125.0984       |
| 399.2244       | 3  | K  | 21 | 2178.1519      | 1089.5799       |
| 456.2459       | 4  | G  | 20 | 2022.0256      | 1011.5167       |
| 513.2673       | 5  | G  | 19 | 1965.0042      | 983.0060        |
| 614.3150       | 6  | T  | 18 | 1907.9827      | 954.4953        |
| 713.3834       | 7  | V  | 17 | 1806.9350      | 903.9714        |
| 869.5097       | 8  | K  | 16 | 1707.8666      | 854.4372        |
| 940.5468       | 9  | A  | 15 | 1551.7403      | 776.3741        |
| 1011.5840      | 10 | A  | 14 | 1480.7032      | 740.8555        |
| 1098.6160      | 11 | S  | 13 | 1409.6661      | 705.3370        |
| 1155.6374      | 12 | G  | 12 | 1322.6341      | 661.8209        |
| 1302.7059      | 13 | F  | 11 | 1265.6126      | 633.3102        |
| 1416.7488      | 14 | N  | 10 | 1118.5442      | 559.7760        |
| 1487.7859      | 15 | A  | 9  | 1004.5013      | 502.7545        |
| 1588.8336      | 16 | T  | 8  | 933.4641       | 467.2360        |
| 1717.8762      | 17 | E  | 7  | 832.4165       | 416.7121        |
| 1832.9031      | 18 | D  | 6  | 703.3739       | 352.1909        |
| 1903.9402      | 19 | A  | 5  | 588.3469       | 294.6774        |
| 2031.9988      | 20 | Q  | 4  | 517.3098       | 259.1588        |
| 2133.0465      | 21 | T  | 3  | 389.2512       | 195.1295        |
| 2246.1306      | 22 | L  | 2  | 288.2036       | 144.6057        |
|                | 23 | R  | 1  | 175.1195       | 88.0637         |

N-term:+43.02 K(3):+156.13  
K(8):+156.13

X-range:

0 - 0

MassTol: Y-zoom:

0. 1.

MassType:

☐AVG ☒MONO

Axis:

☒1 ☐2

Label:

☒I ☐M ☐-

Ions:

a ☐+ ☐2+ ☐3+

b ☒+ ☐2+ ☐3+

c ☐+ ☐2+ ☐3+

x ☐+ ☐2+ ☐3+

y ☒+ ☒2+ ☐3+

z ☐+ ☐2+ ☐3+

hide H<sub>2</sub>O/NH<sub>3</sub> ☐

zoom 112-122 ☐

GO

EDEMPKTLVVGNLRS, MH+ 1827.9375, m/z 609.9840  
L OS G30 P160811 220811-s1.06686.06686.3.dta

scan 6686; 1.4e+000

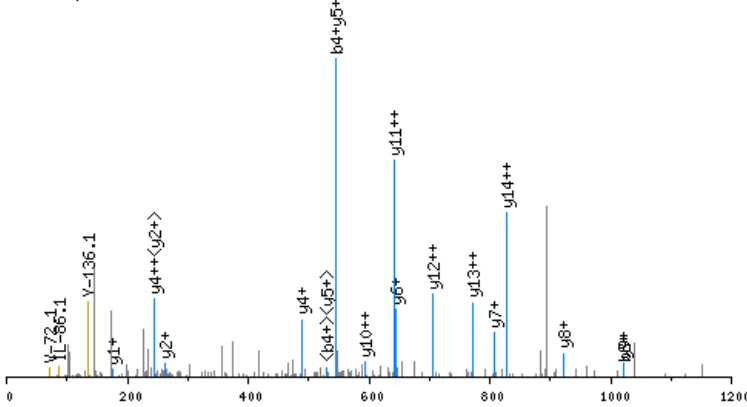

click image to zoom in; click top corners to zoom out [precursor±]

scan 6684; 610.0 m/z; 2.2e+001

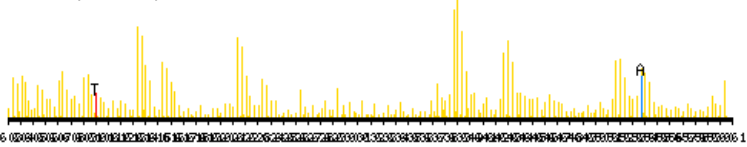

zoomed in precursor plot; T=theoretical m/z, A=acquired m/z

| b <sup>+</sup> | #  | AA | #  | y <sup>+</sup> | y <sup>2+</sup> |
|----------------|----|----|----|----------------|-----------------|
| 172.0610       | 1  | E  | 15 |                |                 |
| 287.0879       | 2  | D  | 14 | 1656.8844      | 828.9461        |
| 416.1305       | 3  | E  | 13 | 1541.8574      | 771.4326        |
| 547.1710       | 4  | M  | 12 | 1412.8148      | 706.9113        |
| 644.2238       | 5  | P  | 11 | 1281.7743      | 641.3911        |
| 806.3819       | 6  | K  | 10 | 1184.7216      | 592.8647        |
| 907.4296       | 7  | T  | 9  | 1022.5635      | 511.7856        |
| 1020.5136      | 8  | L  | 8  | 921.5158       | 461.2618        |
| 1183.5769      | 9  | Y  | 7  | 808.4317       | 404.7198        |
| 1282.6454      | 10 | V  | 6  | 645.3684       | 323.1881        |
| 1339.6668      | 11 | G  | 5  | 546.3000       | 273.6539        |
| 1453.7098      | 12 | N  | 4  | 489.2785       | 245.1432        |
| 1566.7938      | 13 | L  | 3  | 375.2356       | 188.1217        |
| 1653.8258      | 14 | S  | 2  | 262.1515       | 131.5797        |
|                | 15 | R  | 1  | 175.1195       | 88.0637         |

N-term:+43.02 K(6):+162.16

X-range:

0 - 0

MassTol: Y-zoom:

0. 1.

MassType:

☐ AVG ☒ MONO

Axis:

☒ 1 ☐ 2

Label:

☒ I ☐ M ☐ -

Ions:

a ☐ + ☐ 2+ ☐ 3+

b ☒ + ☐ 2+ ☐ 3+

c ☐ + ☐ 2+ ☐ 3+

x ☐ + ☐ 2+ ☐ 3+

y ☒ + ☒ 2+ ☐ 3+

z ☐ + ☐ 2+ ☐ 3+

hide H<sub>2</sub>O/NH<sub>3</sub> ☐

zoom 112-122 ☐

GO

EDIMQLPKAR, MH+ 1270.6830, m/z 635.8451  
L OS G30 P160811 220811-s1.06576.06576.2.dta

scan 6576; 3.4e+000

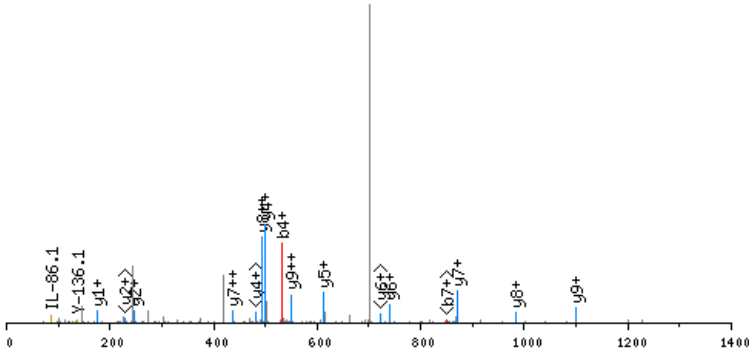

click image to zoom in; click top corners to zoom out

[precursor±]

scan 6574; 635.8 m/z; 9.5e+002

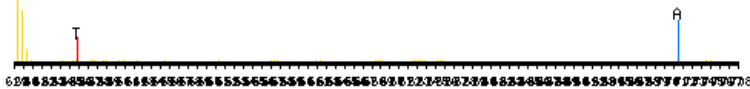

zoomed in precursor plot; T=theoretical m/z, A=acquired m/z

| b <sup>+</sup> | #  | AA | #  | y <sup>+</sup> | y <sup>2+</sup> |
|----------------|----|----|----|----------------|-----------------|
| 172.0610       | 1  | E  | 10 |                |                 |
| 287.0879       | 2  | D  | 9  | 1099.6298      | 550.3188        |
| 400.1720       | 3  | I  | 8  | 984.6029       | 492.8053        |
| 531.2125       | 4  | M  | 7  | 871.5188       | 436.2633        |
| 659.2711       | 5  | Q  | 6  | 740.4783       | 370.7431        |
| 772.3551       | 6  | L  | 5  | 612.4197       | 306.7138        |
| 869.4079       | 7  | P  | 4  | 499.3357       | 250.1718        |
| 1025.5342      | 8  | K  | 3  | 402.2829       | 201.6454        |
| 1096.5713      | 9  | A  | 2  | 246.1566       | 123.5822        |
|                | 10 | R  | 1  | 175.1195       | 88.0637         |

N-term:+43.02 K(8):+156.13

EDKPLVVSK, MH+ 1124.7204, m/z 562.8638  
L OS G30 P160811 220811-s1.03661.03661.2.dta

scan 3661: 8.3e+000

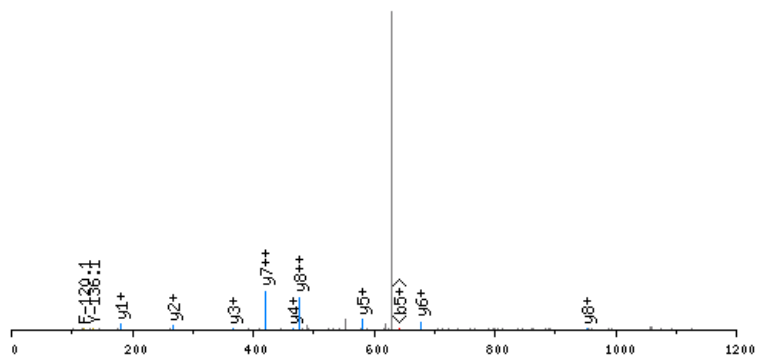

click image to zoom in; click top corners to zoom out [precursor±]

scan 3659: 562.9 m/z; 1.1e+001

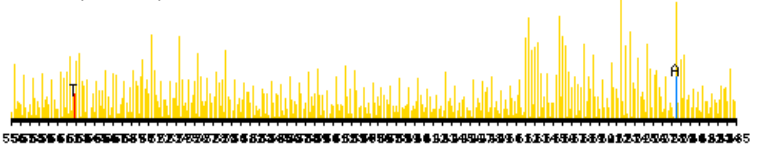

zoomed in precursor plot; T=theoretical m/z, A=acquired m/z

X-range:

0 - 0

MassTol: Y-zoom:

0. 1.

MassType:

☐ AVG ☒ MONO

Axis:

☒ 1 ☐ 2

Label:

☒ I ☐ M ☐ -

Ions:

a ☐ + ☐ 2+ ☐ 3+

b ☒ + ☐ 2+ ☐ 3+

c ☐ + ☐ 2+ ☐ 3+

x ☐ + ☐ 2+ ☐ 3+

y ☒ + ☒ 2+ ☐ 3+

z ☐ + ☐ 2+ ☐ 3+

hide H<sub>2</sub>O/NH<sub>3</sub> ☐

zoom 112-122 ☐

GO

| b <sup>+</sup> | # | AA # | y <sup>+</sup> | y <sup>2+</sup>   |
|----------------|---|------|----------------|-------------------|
| 172.0610       | 1 | E    | 9              |                   |
| 287.0879       | 2 | D    | 8              | 953.6672 477.3375 |
| 449.2460       | 3 | K    | 7              | 838.6403 419.8240 |
| 546.2988       | 4 | P    | 6              | 676.4822 338.7450 |
| 659.3829       | 5 | L    | 5              | 579.4294 290.2186 |
| 758.4513       | 6 | V    | 4              | 466.3453 233.6766 |
| 857.5197       | 7 | V    | 3              | 367.2769 184.1424 |
| 944.5517       | 8 | S    | 2              | 268.2085 134.6082 |
|                | 9 | K    | 1              | 181.1765 91.0922  |

N-term:+43.02 K(3):+162.16  
K(9):+162.16

X-range:

0 - 0

MassTol: Y-zoom:

0. 1.

MassType:

☐ AVG ☒ MONO

Axis:

☒ 1 ☐ 2

Label:

☒ I ☐ M ☐ -

Ions:

a ☐ + ☐ 2+ ☐ 3+

b ☒ + ☐ 2+ ☐ 3+

c ☐ + ☐ 2+ ☐ 3+

x ☐ + ☐ 2+ ☐ 3+

y ☒ + ☒ 2+ ☐ 3+

z ☐ + ☐ 2+ ☐ 3+

hide H<sub>2</sub>O/NH<sub>3</sub> ☐

zoom 112-122 ☐

GO

EDVTLHIVER, MH+ 1252.6538, m/z 626.8305  
L OS G30 P160811 220811-s1.06415.06415.2.dta

scan 6415; 8.5e-001

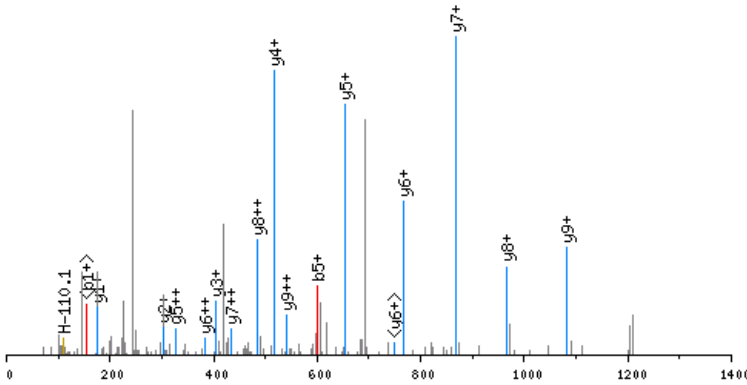

click image to zoom in; click top corners to zoom out

[precursor±]

scan 6414; 626.8 m/z; 2.0e+001

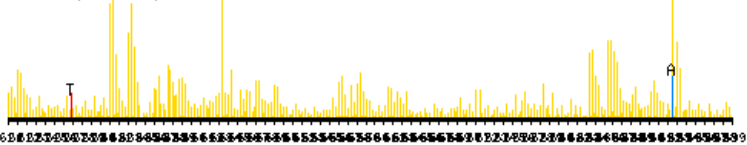

zoomed in precursor plot; T=theoretical m/z, A=acquired m/z

| b <sup>+</sup> | #  | AA | #  | y <sup>+</sup> | y <sup>2+</sup> |
|----------------|----|----|----|----------------|-----------------|
| 172.0610       | 1  | E  | 10 |                |                 |
| 287.0879       | 2  | D  | 9  | 1081.6006      | 541.3042        |
| 386.1564       | 3  | V  | 8  | 966.5736       | 483.7907        |
| 487.2040       | 4  | T  | 7  | 867.5052       | 434.2565        |
| 600.2881       | 5  | L  | 6  | 766.4575       | 383.7327        |
| 737.3470       | 6  | H  | 5  | 653.3735       | 327.1907        |
| 850.4311       | 7  | I  | 4  | 516.3146       | 258.6612        |
| 949.4995       | 8  | V  | 3  | 403.2305       | 202.1192        |
| 1078.5421      | 9  | E  | 2  | 304.1621       | 152.5850        |
|                | 10 | R  | 1  | 175.1195       | 88.0637         |

N-term:+43.02

X-range:

0 - 0

MassTol: Y-zoom:

0. 1.

MassType:

☐ AVG ☒ MONO

Axis:

☒ 1 ☐ 2

Label:

☒ I ☐ M ☐ -

Ions:

a ☐ + ☐ 2+ ☐ 3+

b ☒ + ☐ 2+ ☐ 3+

c ☐ + ☐ 2+ ☐ 3+

x ☐ + ☐ 2+ ☐ 3+

y ☒ + ☒ 2+ ☐ 3+

z ☐ + ☐ 2+ ☐ 3+

hide H<sub>2</sub>O/NH<sub>3</sub> ☐

zoom 112-122 ☐

GO

EEAELVKGR, MH+ 1106.6270, m/z 553.8171  
L OS G31 P160811 220811-s1.05257.05257.2.dta

scan 5257; 3.6e+001

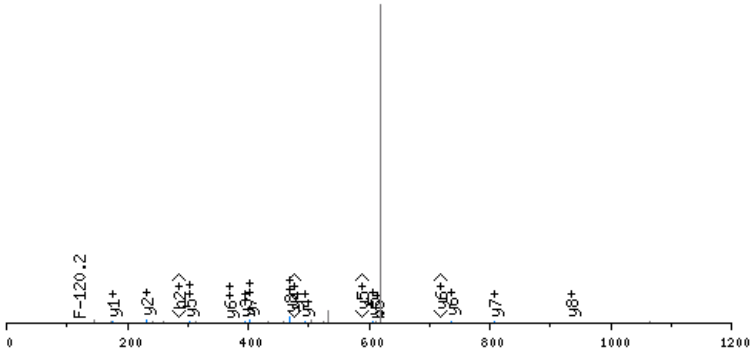

click image to zoom in; click top corners to zoom out [precursor±]

scan 5254; 553.8 m/z; 3.3e+001

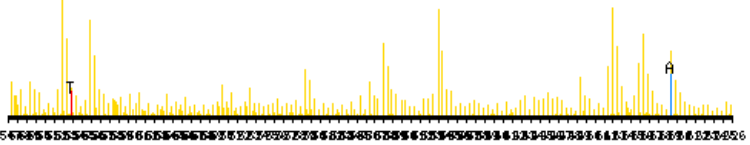

zoomed in precursor plot; T=theoretical m/z, A=acquired m/z

| b <sup>+</sup> | # | AA | # | y <sup>+</sup> | y <sup>2+</sup> |
|----------------|---|----|---|----------------|-----------------|
| 172.0610       | 1 | E  | 9 |                |                 |
| 301.1036       | 2 | E  | 8 | 935.5738       | 468.2908        |
| 372.1407       | 3 | A  | 7 | 806.5312       | 403.7695        |
| 501.1833       | 4 | E  | 6 | 735.4941       | 368.2510        |
| 614.2674       | 5 | L  | 5 | 606.4515       | 303.7297        |
| 713.3358       | 6 | V  | 4 | 493.3675       | 247.1877        |
| 875.4939       | 7 | K  | 3 | 394.2991       | 197.6534        |
| 932.5153       | 8 | G  | 2 | 232.1410       | 116.5744        |
|                | 9 | R  | 1 | 175.1195       | 88.0637         |

N-term: +43.02 K(7): +162.16

X-range:

0 - 0

MassTol: Y-zoom:

0. 1.

MassType:

☐AVG ☒MONO

Axis:

☒1 ☐2

Label:

☒I ☐M ☐-

Ions:

a ☐+ ☐2+ ☐3+

b ☒+ ☐2+ ☐3+

c ☐+ ☐2+ ☐3+

x ☐+ ☐2+ ☐3+

y ☒+ ☒2+ ☐3+

z ☐+ ☐2+ ☐3+

hide H<sub>2</sub>O/NH<sub>3</sub> ☐

zoom 112-122 ☐

GO

EEAPHGCPGADSAQAGR, MH+ 1751.7407, m/z 584.5851  
L OS G30 P160811 220811-s1.02640.02640.3.dta

scan 2640; 1.1e+000

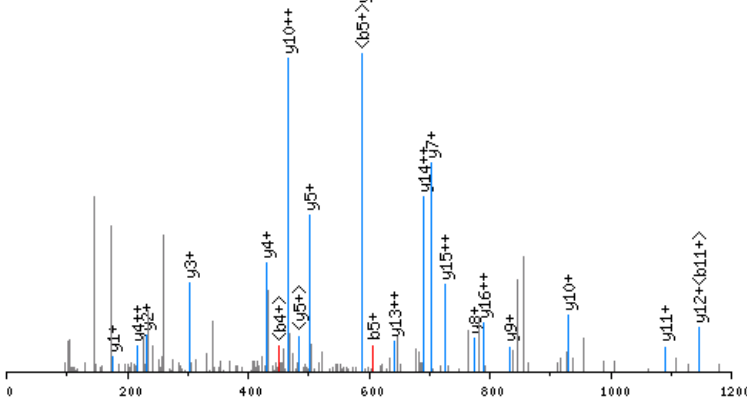

click image to zoom in; click top corners to zoom out

[precursor±]

scan 2639; 584.6 m/z; 3.2e+001

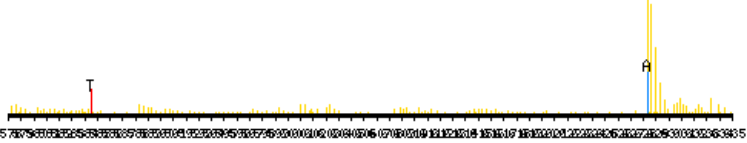

zoomed in precursor plot; T=theoretical m/z, A=acquired m/z

| b <sup>+</sup> | #  | AA | #  | y <sup>+</sup> | y <sup>2+</sup> |
|----------------|----|----|----|----------------|-----------------|
| 172.0610       | 1  | E  | 17 |                |                 |
| 301.1036       | 2  | E  | 16 | 1580.6875      | 790.8477        |
| 372.1407       | 3  | A  | 15 | 1451.6449      | 726.3264        |
| 469.1935       | 4  | P  | 14 | 1380.6078      | 690.8078        |
| 606.2524       | 5  | H  | 13 | 1283.5551      | 642.2814        |
| 663.2738       | 6  | G  | 12 | 1146.4961      | 573.7520        |
| 823.3044       | 7  | C  | 11 | 1089.4747      | 545.2413        |
| 920.3572       | 8  | P  | 10 | 929.4441       | 465.2260        |
| 977.3787       | 9  | G  | 9  | 832.3913       | 416.6996        |
| 1048.4158      | 10 | A  | 8  | 775.3699       | 388.1888        |
| 1163.4427      | 11 | D  | 7  | 704.3327       | 352.6703        |
| 1250.4748      | 12 | S  | 6  | 589.3058       | 295.1568        |
| 1321.5119      | 13 | A  | 5  | 502.2738       | 251.6408        |
| 1449.5704      | 14 | Q  | 4  | 431.2367       | 216.1222        |
| 1520.6076      | 15 | A  | 3  | 303.1781       | 152.0930        |
| 1577.6290      | 16 | G  | 2  | 232.1410       | 116.5744        |
|                | 17 | R  | 1  | 175.1195       | 88.0637         |

N-term:+43.02 C(7):+160.03

X-range:

0 - 0

MassTol: Y-zoom:

0. 1.

MassType:

☐AVG ☒MONO

Axis:

☒1 ☐2

Label:

☒I ☐M ☐-

Ions:

a ☐+ ☐2+ ☐3+

b ☒+ ☐2+ ☐3+

c ☐+ ☐2+ ☐3+

x ☐+ ☐2+ ☐3+

y ☒+ ☒2+ ☐3+

z ☐+ ☐2+ ☐3+

hide H<sub>2</sub>O/NH<sub>3</sub> ☐

zoom 112-122 ☐

GO

EEESIKEGSEKPR, MH+ 1615.8180, m/z 539.2775  
L OS G33 P160811 220811-s1.02739.02739.3.dta

scan 2739; 1.2e+001

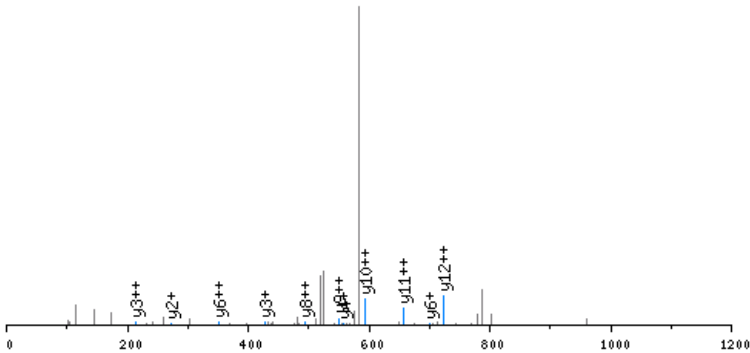

click image to zoom in; click top corners to zoom out [\[precursor±\]](#)

scan 2737; 539.3 m/z; 6.3e+001

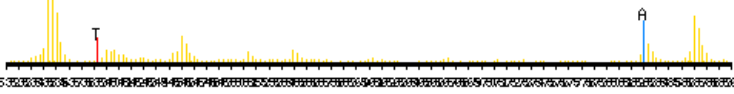

zoomed in precursor plot; T=theoretical m/z, A=acquired m/z

| b <sup>+</sup> | #  | AA | #  | y <sup>+</sup> | y <sup>2+</sup> |
|----------------|----|----|----|----------------|-----------------|
| 172.0610       | 1  | E  | 13 |                |                 |
| 301.1036       | 2  | E  | 12 | 1444.7648      | 722.8863        |
| 430.1462       | 3  | E  | 11 | 1315.7222      | 658.3650        |
| 517.1782       | 4  | S  | 10 | 1186.6796      | 593.8437        |
| 630.2623       | 5  | I  | 9  | 1099.6476      | 550.3277        |
| 786.3886       | 6  | K  | 8  | 986.5635       | 493.7857        |
| 915.4312       | 7  | E  | 7  | 830.4372       | 415.7225        |
| 972.4526       | 8  | G  | 6  | 701.3946       | 351.2012        |
| 1059.4847      | 9  | S  | 5  | 644.3732       | 322.6905        |
| 1188.5273      | 10 | E  | 4  | 557.3412       | 279.1745        |
| 1344.6536      | 11 | K  | 3  | 428.2986       | 214.6532        |
| 1441.7063      | 12 | P  | 2  | 272.1723       | 136.5900        |
|                | 13 | R  | 1  | 175.1195       | 88.0637         |

N-term:+43.02 K(6):+156.13  
K(11):+156.13

N-term:+43.02 K(6):+156.13  
K(11):+156.13 K(14):+156.13

X-range:

0 - 0

MassTol: Y-zoom:

0. 1.

MassType:

☐ AVG ☒ MONO

Axis:

☒ 1 ☐ 2

Label:

☒ I ☐ M ☐ -

Ions:

a ☐ + ☐ 2+ ☐ 3+

b ☒ + ☐ 2+ ☐ 3+

c ☐ + ☐ 2+ ☐ 3+

x ☐ + ☐ 2+ ☐ 3+

y ☒ + ☒ 2+ ☐ 3+

z ☐ + ☐ 2+ ☐ 3+

hide H<sub>2</sub>O/NH<sub>3</sub> ☐

zoom 112-122 ☐

GO

EERPSETNSNVDSSAQPSVAQLAGR, MH+ 2671.2560, m/z 668.5694  
L OS G30 P160811 220811-s1.04622.04622.4.dta

scan 4622; 6.3e-001

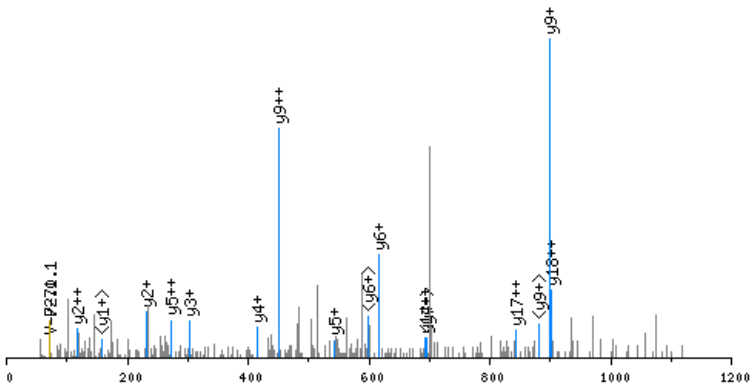

click image to zoom in; click top corners to zoom out [\[precursor±\]](#)

scan 4619; 668.6 m/z; 1.7e+002

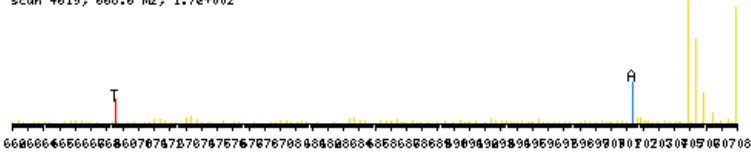

zoomed in precursor plot; T=theoretical m/z, A=acquired m/z

| b <sup>+</sup> | #  | AA | #  | y <sup>+</sup> | y <sup>2+</sup> |
|----------------|----|----|----|----------------|-----------------|
| 172.0610       | 1  | E  | 25 |                |                 |
| 301.1036       | 2  | E  | 24 | 2500.2028      | 1250.6053       |
| 457.2047       | 3  | R  | 23 | 2371.1602      | 1186.0840       |
| 554.2575       | 4  | P  | 22 | 2215.0591      | 1108.0335       |
| 641.2895       | 5  | S  | 21 | 2118.0063      | 1059.5071       |
| 770.3321       | 6  | E  | 20 | 2030.9743      | 1015.9911       |
| 871.3798       | 7  | T  | 19 | 1901.9317      | 951.4698        |
| 985.4227       | 8  | N  | 18 | 1800.8840      | 900.9459        |
| 1072.4547      | 9  | S  | 17 | 1686.8411      | 843.9245        |
| 1186.4976      | 10 | N  | 16 | 1599.8091      | 800.4084        |
| 1285.5661      | 11 | V  | 15 | 1485.7661      | 743.3870        |
| 1400.5930      | 12 | D  | 14 | 1386.6977      | 693.8528        |
| 1487.6250      | 13 | S  | 13 | 1271.6708      | 636.3393        |
| 1574.6571      | 14 | S  | 12 | 1184.6388      | 592.8233        |
| 1645.6942      | 15 | A  | 11 | 1097.6067      | 549.3073        |
| 1773.7527      | 16 | Q  | 10 | 1026.5696      | 513.7887        |
| 1870.8055      | 17 | P  | 9  | 898.5110       | 449.7594        |
| 1957.8375      | 18 | S  | 8  | 801.4583       | 401.2331        |
| 2056.9060      | 19 | V  | 7  | 714.4262       | 357.7170        |
| 2127.9431      | 20 | A  | 6  | 615.3578       | 308.1828        |
| 2256.0016      | 21 | Q  | 5  | 544.3207       | 272.6643        |
| 2369.0857      | 22 | L  | 4  | 416.2621       | 208.6350        |
| 2440.1228      | 23 | A  | 3  | 303.1781       | 152.0930        |
| 2497.1443      | 24 | G  | 2  | 232.1410       | 116.5744        |
|                | 25 | R  | 1  | 175.1195       | 88.0637         |

N-term:+43.02

X-range:

0 - 0

MassTol: Y-zoom:

0. 1.

MassType:

☐ AVG ☒ MONO

Axis:

☒ 1 ☐ 2

Label:

☒ I ☐ M ☐ -

Ions:

a ☐ + ☐ 2+ ☐ 3+

b ☒ + ☐ 2+ ☐ 3+

c ☐ + ☐ 2+ ☐ 3+

x ☐ + ☐ 2+ ☐ 3+

y ☒ + ☒ 2+ ☐ 3+

z ☐ + ☐ 2+ ☐ 3+

hide H<sub>2</sub>O/NH<sub>3</sub> ☐

zoom 112-122 ☐

GO

EESEYESVLCVKPEVHVYR, MH+ 2422.1601, m/z 808.0582  
L OS G32 P160811 220811-s1.05871.05871.3.dta

scan 5871: 1.2e+000

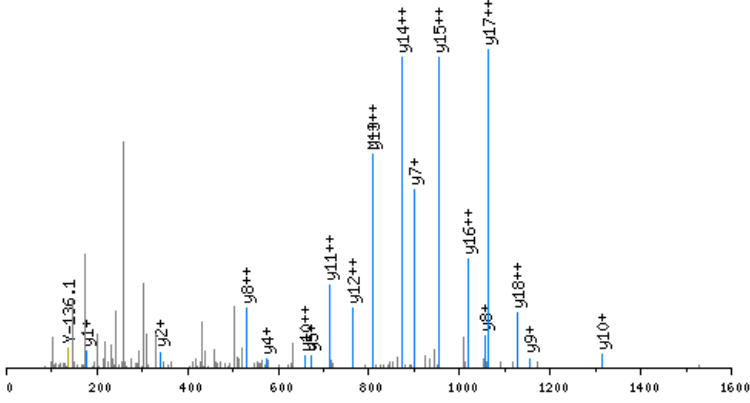

click image to zoom in; click top corners to zoom out [\[precursor±\]](#)

scan 5868: 808.1 m/z; 7.0e+000

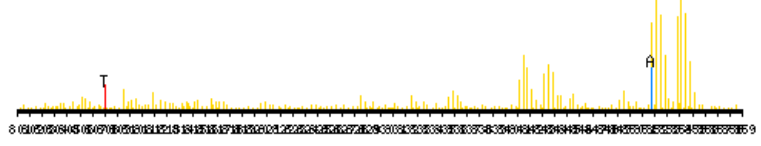

zoomed in precursor plot; T=theoretical m/z, A=acquired m/z

| b <sup>+</sup> | #  | AA | #  | y <sup>+</sup> | y <sup>2+</sup> |
|----------------|----|----|----|----------------|-----------------|
| 172.0610       | 1  | E  | 19 |                |                 |
| 301.1036       | 2  | E  | 18 | 2251.1069      | 1126.0574       |
| 388.1356       | 3  | S  | 17 | 2122.0643      | 1061.5361       |
| 517.1782       | 4  | E  | 16 | 2035.0323      | 1018.0200       |
| 680.2415       | 5  | Y  | 15 | 1905.9897      | 953.4987        |
| 809.2841       | 6  | E  | 14 | 1742.9263      | 871.9671        |
| 896.3162       | 7  | S  | 13 | 1613.8837      | 807.4458        |
| 995.3846       | 8  | V  | 12 | 1526.8517      | 763.9298        |
| 1108.4686      | 9  | L  | 11 | 1427.7833      | 714.3956        |
| 1268.4992      | 10 | C  | 10 | 1314.6992      | 657.8535        |
| 1367.5676      | 11 | V  | 9  | 1154.6686      | 577.8382        |
| 1523.6939      | 12 | K  | 8  | 1055.6002      | 528.3040        |
| 1620.7467      | 13 | P  | 7  | 899.4739       | 450.2409        |
| 1749.7893      | 14 | E  | 6  | 802.4212       | 401.7145        |
| 1848.8577      | 15 | V  | 5  | 673.3786       | 337.1932        |
| 1985.9166      | 16 | H  | 4  | 574.3102       | 287.6590        |
| 2084.9850      | 17 | V  | 3  | 437.2512       | 219.1295        |
| 2248.0484      | 18 | Y  | 2  | 338.1828       | 169.5953        |
|                | 19 | R  | 1  | 175.1195       | 88.0637         |

N-term: +43.02 C(10): +160.03  
K(12): +156.13

zoomed in precursor plot; T=theoretical m/z, A=acquired m/z

X-range:

0 - 0

MassTol: Y-zoom:

0. 1.

MassType:

☐ AVG ☒ MONO

Axis:

☒ 1 ☐ 2

Label:

☒ I ☐ M ☐ -

Ions:

a ☐ + ☐ 2+ ☐ 3+

b ☒ + ☐ 2+ ☐ 3+

c ☐ + ☐ 2+ ☐ 3+

x ☐ + ☐ 2+ ☐ 3+

y ☒ + ☒ 2+ ☐ 3+

z ☐ + ☐ 2+ ☐ 3+

hide H<sub>2</sub>O/NH<sub>3</sub> ☐

zoom 112-122 ☐

GO

EGYHKPDQQLQALKDTANR, MH+ 2466.3106, m/z 617.3331  
L OS G35 P160811 220811-s1.04844.04844.4.dta

scan 4844: 1.8e+001

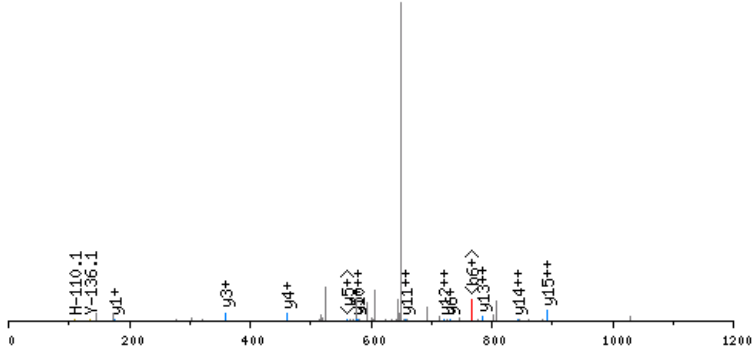

click image to zoom in; click top corners to zoom out [\[precursor±\]](#)

scan 4843: 617.3 m/z; 4.5e+001

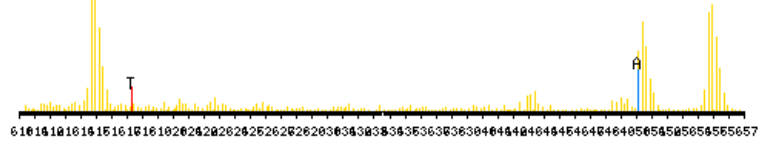

zoomed in precursor plot; T=theoretical m/z, A=acquired m/z

| b <sup>+</sup> | #  | AA | #  | y <sup>+</sup> | y <sup>2+</sup> |
|----------------|----|----|----|----------------|-----------------|
| 172.0610       | 1  | E  | 20 |                |                 |
| 229.0825       | 2  | G  | 19 | 2295.2574      | 1148.1326       |
| 392.1458       | 3  | Y  | 18 | 2238.2360      | 1119.6219       |
| 529.2047       | 4  | H  | 17 | 2075.1727      | 1038.0902       |
| 685.3310       | 5  | K  | 16 | 1938.1137      | 969.5608        |
| 782.3838       | 6  | P  | 15 | 1781.9874      | 891.4976        |
| 897.4107       | 7  | D  | 14 | 1684.9347      | 842.9713        |
| 1025.4693      | 8  | Q  | 13 | 1569.9077      | 785.4578        |
| 1153.5279      | 9  | Q  | 12 | 1441.8492      | 721.4285        |
| 1309.6542      | 10 | K  | 11 | 1313.7906      | 657.3992        |
| 1422.7382      | 11 | L  | 10 | 1157.6643      | 579.3361        |
| 1550.7968      | 12 | Q  | 9  | 1044.5802      | 522.7940        |
| 1621.8339      | 13 | A  | 8  | 916.5216       | 458.7647        |
| 1734.9180      | 14 | L  | 7  | 845.4845       | 423.2462        |
| 1891.0443      | 15 | K  | 6  | 732.4005       | 366.7041        |
| 2006.0712      | 16 | D  | 5  | 576.2742       | 288.6410        |
| 2107.1189      | 17 | T  | 4  | 461.2472       | 231.1275        |
| 2178.1560      | 18 | A  | 3  | 360.1995       | 180.6037        |
| 2292.1989      | 19 | N  | 2  | 289.1624       | 145.0851        |
|                | 20 | R  | 1  | 175.1195       | 88.0637         |

N-term:+43.02 K(5):+156.13  
K(10):+156.13 K(15):+156.13

X-range:

0 - 0

MassTol: Y-zoom:

0. 1.

MassType:

☐ AVG ☒ MONO

Axis:

☒ 1 ☐ 2

Label:

☒ I ☐ M ☐ -

Ions:

a ☐ + ☐ 2+ ☐ 3+

b ☒ + ☐ 2+ ☐ 3+

c ☐ + ☐ 2+ ☐ 3+

x ☐ + ☐ 2+ ☐ 3+

y ☒ + ☒ 2+ ☐ 3+

z ☐ + ☐ 2+ ☐ 3+

hide H<sub>2</sub>O/NH<sub>3</sub> ☐

zoom 112-122 ☐

GO

EIPPTHYAASR, MH+ 1283.6384, m/z 642.3229  
L OS G30 P160811 220811-s1.04081.04081.2.dta

scan 4081; 5.5e+000

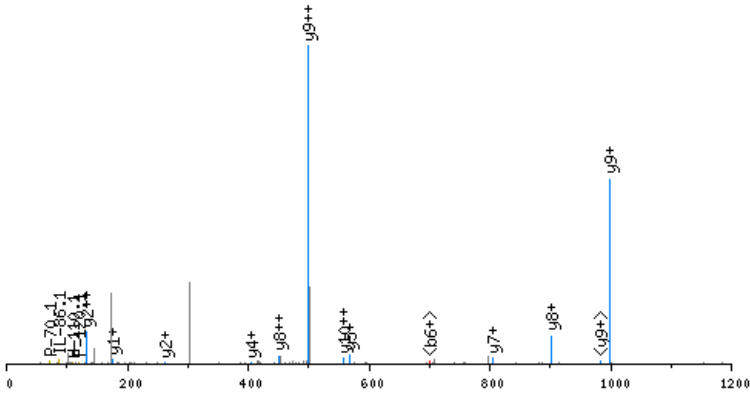

click image to zoom in; click top corners to zoom out

[precursor±]

scan 4079; 642.3 m/z; 1.6e+002

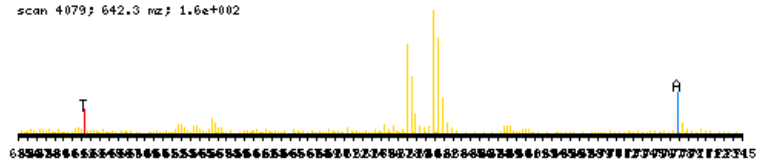

zoomed in precursor plot; T=theoretical m/z, A=acquired m/z

| b <sup>+</sup> | #  | AA | #  | y <sup>+</sup> | y <sup>2+</sup> |
|----------------|----|----|----|----------------|-----------------|
| 172.0610       | 1  | E  | 11 |                |                 |
| 285.1451       | 2  | I  | 10 | 1112.5853      | 556.7965        |
| 382.1978       | 3  | P  | 9  | 999.5012       | 500.2545        |
| 479.2506       | 4  | P  | 8  | 902.4484       | 451.7281        |
| 580.2983       | 5  | T  | 7  | 805.3957       | 403.2018        |
| 717.3572       | 6  | H  | 6  | 704.3480       | 352.6779        |
| 880.4205       | 7  | Y  | 5  | 567.2891       | 284.1485        |
| 951.4576       | 8  | A  | 4  | 404.2258       | 202.6168        |
| 1022.4947      | 9  | A  | 3  | 333.1886       | 167.0982        |
| 1109.5268      | 10 | S  | 2  | 262.1515       | 131.5797        |
|                | 11 | R  | 1  | 175.1195       | 88.0637         |

N-term:+43.02

X-range:

0 - 0

MassTol: Y-zoom:

0. 1.

MassType:

☐ AVG ☒ MONO

Axis:

☒ 1 ☐ 2

Label:

☒ I ☐ M ☐ -

Ions:

a ☐ + ☐ 2+ ☐ 3+

b ☒ + ☐ 2+ ☐ 3+

c ☐ + ☐ 2+ ☐ 3+

x ☐ + ☐ 2+ ☐ 3+

y ☒ + ☒ 2+ ☐ 3+

z ☐ + ☐ 2+ ☐ 3+

hide H<sub>2</sub>O/NH<sub>3</sub> ☐

zoom 112-122 ☐

GO

EKEETTR, MH+ 1091.5221, m/z 546.2647  
L OS G31 P160811 220811-s1.02105.02105.2.dta

scan 2105; 3.2e+001

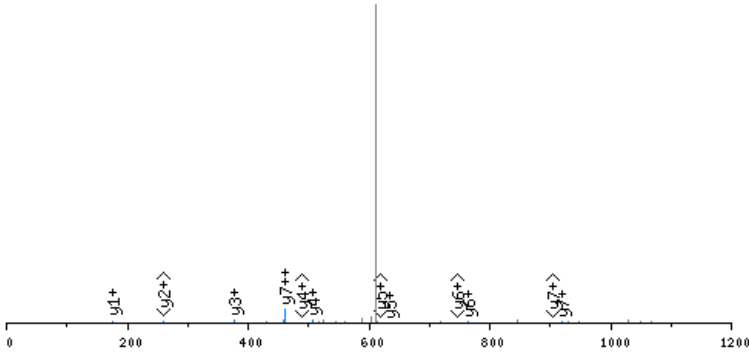

click image to zoom in; click top corners to zoom out [precursor±]

scan 2104; 546.3 m/z; 6.7e+000

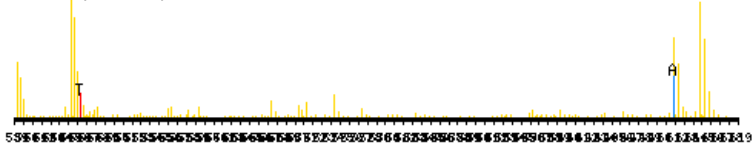

zoomed in precursor plot; T=theoretical m/z, A=acquired m/z

| b <sup>+</sup> | # | AA | # | y <sup>+</sup> | y <sup>2+</sup> |
|----------------|---|----|---|----------------|-----------------|
| 172.0610       | 1 | E  | 8 |                |                 |
| 328.1873       | 2 | K  | 7 | 920.4689       | 460.7384        |
| 457.2299       | 3 | E  | 6 | 764.3426       | 382.6752        |
| 586.2725       | 4 | E  | 5 | 635.3000       | 318.1539        |
| 715.3151       | 5 | E  | 4 | 506.2575       | 253.6326        |
| 816.3628       | 6 | T  | 3 | 377.2149       | 189.1113        |
| 917.4104       | 7 | T  | 2 | 276.1672       | 138.5875        |
|                | 8 | R  | 1 | 175.1195       | 88.0637         |

N-term:+43.02 K(2) :+156.13

X-range:

0 - 0

MassTol: Y-zoom:

0. 1.

MassType:

☐AVG ☒MONO

Axis:

☒1 ☐2

Label:

☒I ☐M ☐-

Ions:

a ☐+ ☐2+ ☐3+

b ☒+ ☐2+ ☐3+

c ☐+ ☐2+ ☐3+

x ☐+ ☐2+ ☐3+

y ☒+ ☒2+ ☐3+

z ☐+ ☐2+ ☐3+

hide H<sub>2</sub>O/NH<sub>3</sub> ☐

zoom 112-122 ☐

GO

EKPAASTEPPQGSR, MH+ 1433.7449, m/z 478.5865  
L OS G30 P160811 220811-s1.02305.02305.3.dta

scan 2305; 6.2e+000

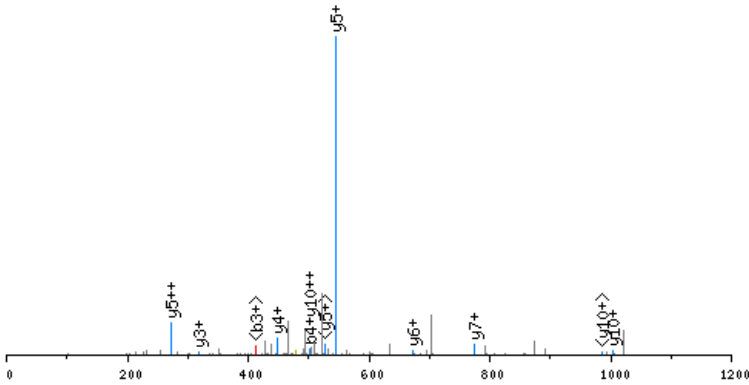

click image to zoom in; click top corners to zoom out

[precursor±]

scan 2304; 478.6 m/z; 3.2e+000

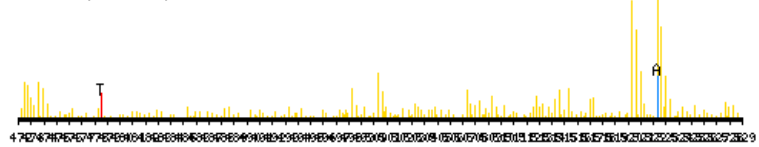

zoomed in precursor plot; T=theoretical m/z, A=acquired m/z

| b <sup>+</sup> | #  | AA | #  | y <sup>+</sup> | y <sup>2+</sup> |
|----------------|----|----|----|----------------|-----------------|
| 172.0610       | 1  | E  | 13 |                |                 |
| 334.2191       | 2  | K  | 12 | 1262.6917      | 631.8498        |
| 431.2719       | 3  | P  | 11 | 1100.5336      | 550.7707        |
| 502.3090       | 4  | A  | 10 | 1003.4809      | 502.2443        |
| 573.3461       | 5  | A  | 9  | 932.4437       | 466.7258        |
| 660.3781       | 6  | S  | 8  | 861.4066       | 431.2072        |
| 761.4258       | 7  | T  | 7  | 774.3746       | 387.6912        |
| 890.4684       | 8  | E  | 6  | 673.3269       | 337.1674        |
| 987.5211       | 9  | P  | 5  | 544.2843       | 272.6461        |
| 1115.5797      | 10 | Q  | 4  | 447.2316       | 224.1197        |
| 1172.6012      | 11 | G  | 3  | 319.1730       | 160.0904        |
| 1259.6332      | 12 | S  | 2  | 262.1515       | 131.5797        |
|                | 13 | R  | 1  | 175.1195       | 88.0637         |

N-term:+43.02 K(2):+162.16

X-range:

0 - 0

MassTol: Y-zoom:

0. 1.

MassType:

☐AVG ☒MONO

Axis:

☒1 ☐2

Label:

☒I ☐M ☐-

Ions:

a ☐+ ☐2+ ☐3+

b ☒+ ☐2+ ☐3+

c ☐+ ☐2+ ☐3+

x ☐+ ☐2+ ☐3+

y ☒+ ☒2+ ☐3+

z ☐+ ☐2+ ☐3+

hide H<sub>2</sub>O/NH<sub>3</sub> ☐

zoom 112-122 ☐

GO

EKPAASTEPQGSRPALGR, MH+ 1928.0414, m/z 643.3520  
L OS G33 P160811 220811-s1.02978.02978.3.dta

scan 2978; 2.1e+001

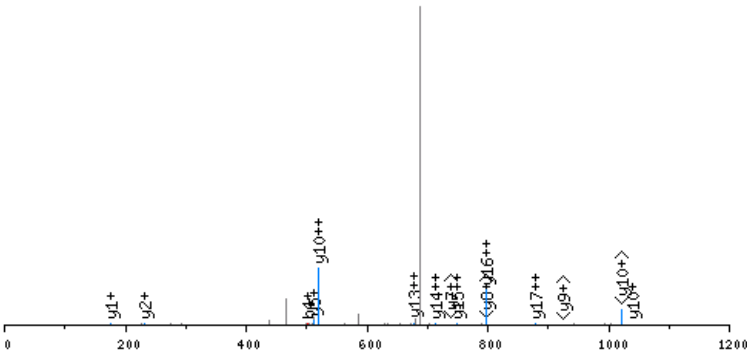

click image to zoom in; click top corners to zoom out

[precursor±]

scan 2977; 643.4 m/z; 1.6e+001

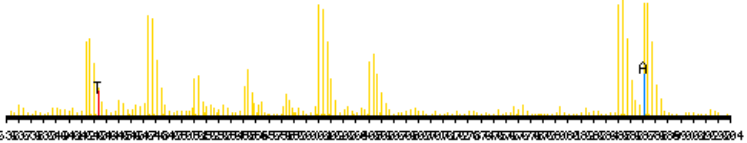

zoomed in precursor plot; T=theoretical m/z, A=acquired m/z

| b <sup>+</sup> | #  | AA | #  | y <sup>+</sup> | y <sup>2+</sup> |
|----------------|----|----|----|----------------|-----------------|
| 172.0610       | 1  | E  | 18 |                |                 |
| 334.2191       | 2  | K  | 17 | 1756.9882      | 878.9980        |
| 431.2719       | 3  | P  | 16 | 1594.8301      | 797.9190        |
| 502.3090       | 4  | A  | 15 | 1497.7774      | 749.3926        |
| 573.3461       | 5  | A  | 14 | 1426.7403      | 713.8740        |
| 660.3781       | 6  | S  | 13 | 1355.7032      | 678.3555        |
| 761.4258       | 7  | T  | 12 | 1268.6711      | 634.8395        |
| 890.4684       | 8  | E  | 11 | 1167.6234      | 584.3156        |
| 987.5211       | 9  | P  | 10 | 1038.5809      | 519.7943        |
| 1115.5797      | 10 | Q  | 9  | 941.5281       | 471.2680        |
| 1172.6012      | 11 | G  | 8  | 813.4695       | 407.2387        |
| 1259.6332      | 12 | S  | 7  | 756.4480       | 378.7279        |
| 1415.7343      | 13 | R  | 6  | 669.4160       | 335.2119        |
| 1512.7871      | 14 | P  | 5  | 513.3149       | 257.1614        |
| 1583.8242      | 15 | A  | 4  | 416.2621       | 208.6350        |
| 1696.9083      | 16 | L  | 3  | 345.2250       | 173.1164        |
| 1753.9297      | 17 | G  | 2  | 232.1410       | 116.5744        |
|                | 18 | R  | 1  | 175.1195       | 88.0637         |

N-term:+43.02 K(2):+162.16

X-range:

0 - 0

MassTol: Y-zoom:

0. 1.

MassType:

☐ AVG ☒ MONO

Axis:

☒ 1 ☐ 2

Label:

☒ I ☐ M ☐ -

Ions:

a ☐ + ☐ 2+ ☐ 3+

b ☒ + ☐ 2+ ☐ 3+

c ☐ + ☐ 2+ ☐ 3+

x ☐ + ☐ 2+ ☐ 3+

y ☒ + ☒ 2+ ☐ 3+

z ☐ + ☐ 2+ ☐ 3+

hide H<sub>2</sub>O/NH<sub>3</sub> ☐

zoom 112-122 ☐

GO

EKTELIQK, MH+ 1098.7047, m/z 549.8560  
L OS G30 P160811 220811-s1.03521.03521.2.dta

scan 3521; 1.4e+001

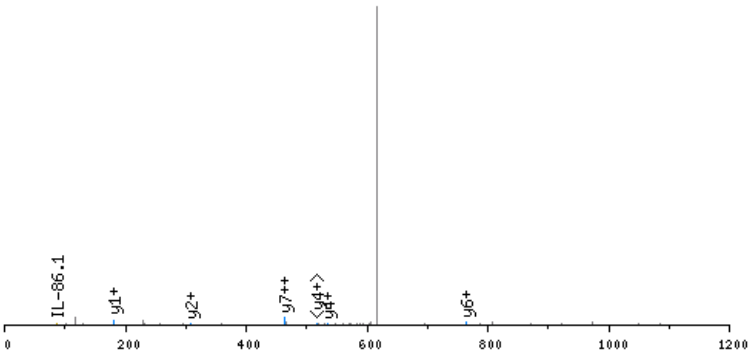

click image to zoom in; click top corners to zoom out [precursor±]

scan 3519; 549.9 m/z; 4.6e+001

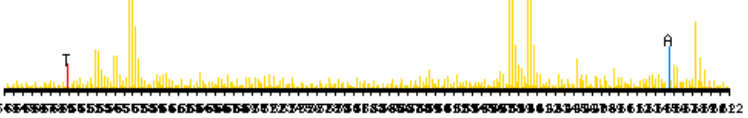

zoomed in precursor plot; T=theoretical m/z, A=acquired m/z

| b <sup>+</sup> | # | AA # | y <sup>+</sup> | y <sup>2+</sup> |
|----------------|---|------|----------------|-----------------|
| 172.0610       | 1 | E 8  |                |                 |
| 334.2191       | 2 | K 7  | 927.6516       | 464.3297        |
| 435.2668       | 3 | T 6  | 765.4935       | 383.2506        |
| 564.3094       | 4 | E 5  | 664.4458       | 332.7268        |
| 677.3934       | 5 | L 4  | 535.4032       | 268.2055        |
| 790.4775       | 6 | I 3  | 422.3191       | 211.6635        |
| 918.5361       | 7 | Q 2  | 309.2351       | 155.1214        |
|                | 8 | K 1  | 181.1765       | 91.0922         |

N-term:+43.02 K(2):+162.16  
K(8):+162.16

X-range:

0 - 0

MassTol: Y-zoom:

0. 1.

MassType:

☐AVG ☒MONO

Axis:

☒1 ☐2

Label:

☒I ☐M ☐-

Ions:

a ☐+ ☐2+ ☐3+

b ☒+ ☐2+ ☐3+

c ☐+ ☐2+ ☐3+

x ☐+ ☐2+ ☐3+

y ☒+ ☒2+ ☐3+

z ☐+ ☐2+ ☐3+

hide H<sub>2</sub>O/NH<sub>3</sub> ☐

zoom 112-122 ☐

GO

EKTELIQKAKLAQAER, MH+ 2129.3031, m/z 533.0812  
L OS G34 P160811 220811-s1.06106.06106.4.dta

scan 6106; 2.2e+001

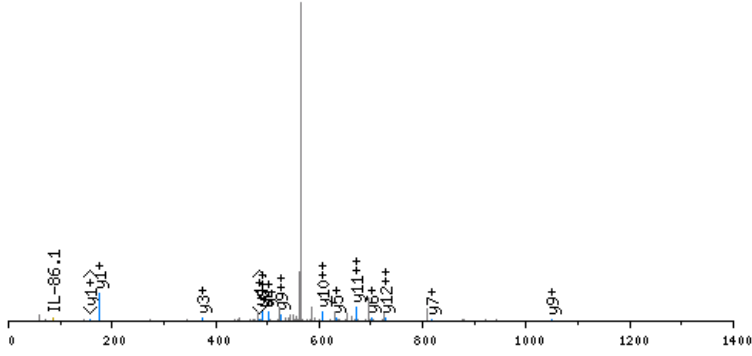

click image to zoom in; click top corners to zoom out [\[precursor±\]](#)

scan 6105; 533.1 m/z; 3.8e+002

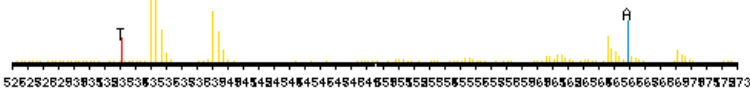

zoomed in precursor plot; T=theoretical m/z, A=acquired m/z

| b <sup>+</sup> | #  | AA | #  | y <sup>+</sup> | y <sup>2+</sup> |
|----------------|----|----|----|----------------|-----------------|
| 172.0610       | 1  | E  | 17 |                |                 |
| 334.2191       | 2  | K  | 16 | 1958.2499      | 979.6289        |
| 435.2668       | 3  | T  | 15 | 1796.0918      | 898.5498        |
| 564.3094       | 4  | E  | 14 | 1695.0442      | 848.0260        |
| 677.3934       | 5  | L  | 13 | 1566.0016      | 783.5047        |
| 790.4775       | 6  | I  | 12 | 1452.9175      | 726.9627        |
| 918.5361       | 7  | Q  | 11 | 1339.8334      | 670.4206        |
| 1080.6942      | 8  | K  | 10 | 1211.7749      | 606.3913        |
| 1151.7313      | 9  | A  | 9  | 1049.6168      | 525.3123        |
| 1313.8894      | 10 | K  | 8  | 978.5797       | 489.7937        |
| 1426.9734      | 11 | L  | 7  | 816.4216       | 408.7147        |
| 1498.0106      | 12 | A  | 6  | 703.3375       | 352.1727        |
| 1627.0532      | 13 | E  | 5  | 632.3004       | 316.6541        |
| 1755.1117      | 14 | Q  | 4  | 503.2578       | 252.1328        |
| 1826.1488      | 15 | A  | 3  | 375.1992       | 188.1035        |
| 1955.1914      | 16 | E  | 2  | 304.1621       | 152.5850        |
|                | 17 | R  | 1  | 175.1195       | 88.0637         |

N-term:+43.02 K(2):+162.16  
K(8):+162.16 K(10):+162.16

X-range:

0 - 0

MassTol: Y-zoom:

0. 1.

MassType:

☐ AVG ☒ MONO

Axis:

☒ 1 ☐ 2

Label:

☒ I ☐ M ☐ -

Ions:

a ☐ + ☐ 2+ ☐ 3+

b ☒ + ☐ 2+ ☐ 3+

c ☐ + ☐ 2+ ☐ 3+

x ☐ + ☐ 2+ ☐ 3+

y ☒ + ☒ 2+ ☐ 3+

z ☐ + ☐ 2+ ☐ 3+

hide H<sub>2</sub>O/NH<sub>3</sub> ☐

zoom 112-122 ☐

GO

EKTLETVPLEK, MH+ 1384.7688, m/z 692.8880  
L OS G30 P160811 220811-s1.05616.05616.2.dta

scan 5616; 2.2e+001

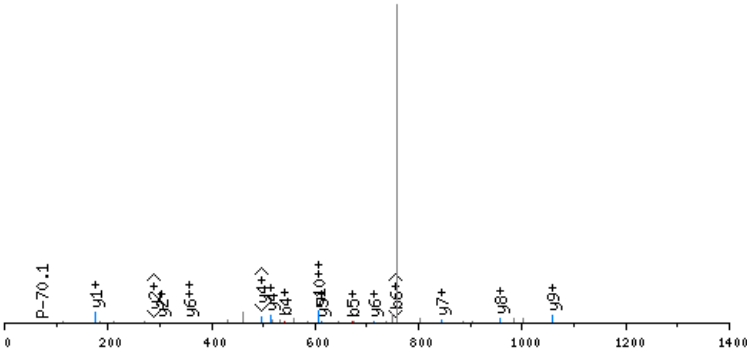

click image to zoom in; click top corners to zoom out

[precursor±]

scan 5614; 692.9 m/z; 1.8e+002

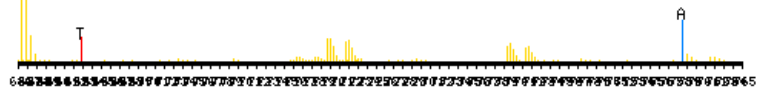

zoomed in precursor plot; T=theoretical m/z, A=acquired m/z

| b <sup>+</sup> | #  | AA | #  | y <sup>+</sup> | y <sup>2+</sup> |
|----------------|----|----|----|----------------|-----------------|
| 172.0610       | 1  | E  | 11 |                |                 |
| 328.1873       | 2  | K  | 10 | 1213.7156      | 607.3617        |
| 429.2350       | 3  | T  | 9  | 1057.5893      | 529.2986        |
| 542.3190       | 4  | L  | 8  | 956.5417       | 478.7747        |
| 671.3616       | 5  | E  | 7  | 843.4576       | 422.2327        |
| 772.4093       | 6  | T  | 6  | 714.4150       | 357.7114        |
| 871.4777       | 7  | V  | 5  | 613.3673       | 307.1876        |
| 968.5305       | 8  | P  | 4  | 514.2989       | 257.6534        |
| 1081.6145      | 9  | L  | 3  | 417.2462       | 209.1270        |
| 1210.6571      | 10 | E  | 2  | 304.1621       | 152.5850        |
|                | 11 | R  | 1  | 175.1195       | 88.0637         |

N-term:+43.02 K(2):+156.13

X-range:

0 - 0

MassTol: Y-zoom:

0. 1.

MassType:

☐AVG ☒MONO

Axis:

☒1 ☐2

Label:

☒I ☐M ☐-

Ions:

a ☐+ ☐2+ ☐3+

b ☒+ ☐2+ ☐3+

c ☐+ ☐2+ ☐3+

x ☐+ ☐2+ ☐3+

y ☒+ ☒2+ ☐3+

z ☐+ ☐2+ ☐3+

hide H<sub>2</sub>O/NH<sub>3</sub> ☐

zoom 112-122 ☐

GO

EKVPGDMEIER, MH+ 1378.7101, m/z 689.8587  
L OS G30 P160811 220811-s1.04703.04703.2.dta

scan 4703; 6.0e+000

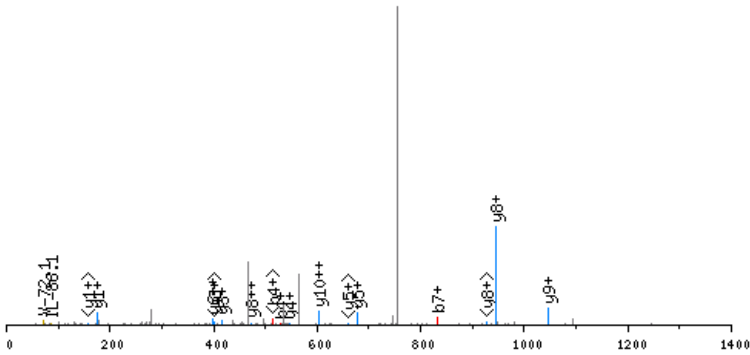

click image to zoom in; click top corners to zoom out [precursor±]

scan 4699; 689.9 m/z; 3.9e+001

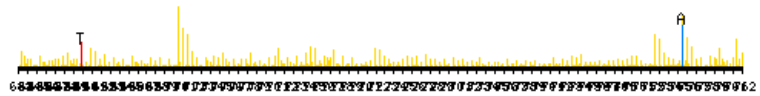

zoomed in precursor plot; T=theoretical m/z, A=acquired m/z

| b <sup>+</sup> | #  | AA | #  | y <sup>+</sup> | y <sup>2+</sup> |
|----------------|----|----|----|----------------|-----------------|
| 172.0610       | 1  | E  | 11 |                |                 |
| 334.2191       | 2  | K  | 10 | 1207.6569      | 604.3324        |
| 433.2875       | 3  | V  | 9  | 1045.4988      | 523.2533        |
| 530.3403       | 4  | P  | 8  | 946.4304       | 473.7191        |
| 587.3617       | 5  | G  | 7  | 849.3776       | 425.1927        |
| 702.3887       | 6  | D  | 6  | 792.3562       | 396.6820        |
| 833.4292       | 7  | M  | 5  | 677.3292       | 339.1685        |
| 962.4718       | 8  | E  | 4  | 546.2888       | 273.6483        |
| 1075.5558      | 9  | I  | 3  | 417.2462       | 209.1270        |
| 1204.5984      | 10 | E  | 2  | 304.1621       | 152.5850        |
|                | 11 | R  | 1  | 175.1195       | 88.0637         |

N-term:+43.02 K(2):+162.16

X-range:

0 - 0

MassTol: Y-zoom:

0. 1.

MassType:

☐ AVG ☒ MONO

Axis:

☒ 1 ☐ 2

Label:

☒ I ☐ M ☐ -

Ions:

a ☐ + ☐ 2+ ☐ 3+

b ☒ + ☐ 2+ ☐ 3+

c ☐ + ☐ 2+ ☐ 3+

x ☐ + ☐ 2+ ☐ 3+

y ☒ + ☒ 2+ ☐ 3+

z ☐ + ☐ 2+ ☐ 3+

hide H<sub>2</sub>O/NH<sub>3</sub> ☐

zoom 112-122 ☐

GO

EKVPGDMEIERR, MH+ 1534.8112, m/z 512.2753  
L OS G33 P160811 220811-s1.04480.04480.3.dta

scan 4480; 2.2e+001

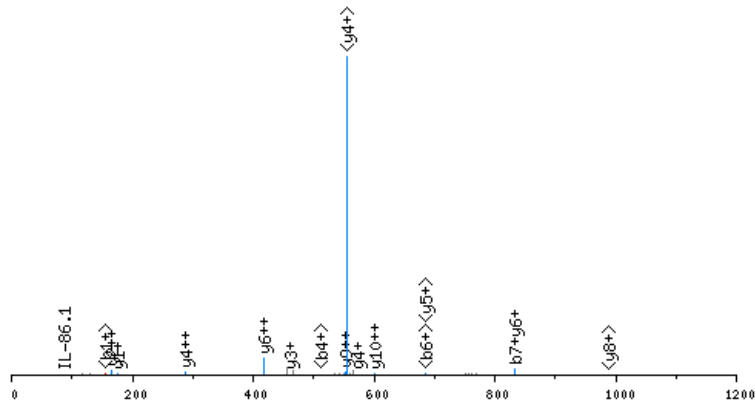

click image to zoom in; click top corners to zoom out

[precursor±]

scan 4477; 512.3 m/z; 1.9e+001

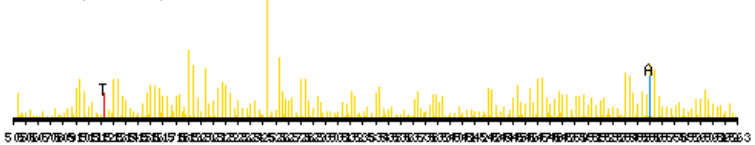

zoomed in precursor plot; T=theoretical m/z, A=acquired m/z

| b <sup>+</sup> | #  | AA | #  | y <sup>+</sup> | y <sup>2+</sup> |
|----------------|----|----|----|----------------|-----------------|
| 172.0610       | 1  | E  | 12 |                |                 |
| 334.2191       | 2  | K  | 11 | 1363.7580      | 682.3829        |
| 433.2875       | 3  | V  | 10 | 1201.5999      | 601.3039        |
| 530.3403       | 4  | P  | 9  | 1102.5315      | 551.7697        |
| 587.3617       | 5  | G  | 8  | 1005.4788      | 503.2433        |
| 702.3887       | 6  | D  | 7  | 948.4573       | 474.7326        |
| 833.4292       | 7  | M  | 6  | 833.4303       | 417.2191        |
| 962.4718       | 8  | E  | 5  | 702.3899       | 351.6988        |
| 1075.5558      | 9  | I  | 4  | 573.3473       | 287.1775        |
| 1204.5984      | 10 | E  | 3  | 460.2632       | 230.6355        |
| 1360.6995      | 11 | R  | 2  | 331.2206       | 166.1142        |
|                | 12 | R  | 1  | 175.1195       | 88.0637         |

N-term:+43.02 K(2):+162.16

X-range:

0 - 0

MassTol: Y-zoom:

0. 1.

MassType:

☐AVG ☒MONO

Axis:

☒1 ☐2

Label:

☒I ☐M ☐-

Ions:

a ☐+ ☐2+ ☐3+

b ☒+ ☐2+ ☐3+

c ☐+ ☐2+ ☐3+

x ☐+ ☐2+ ☐3+

y ☒+ ☒2+ ☐3+

z ☐+ ☐2+ ☐3+

hide H<sub>2</sub>O/NH<sub>3</sub> ☐

zoom 112-122 ☐

GO

ELGELLYNKSEYIETASGNKVSR, MH+ 2698.3940, m/z 675.3540  
L OS G32 P160811 220811-s1.06655.06655.4.dta

scan 6655; 2.0e+000

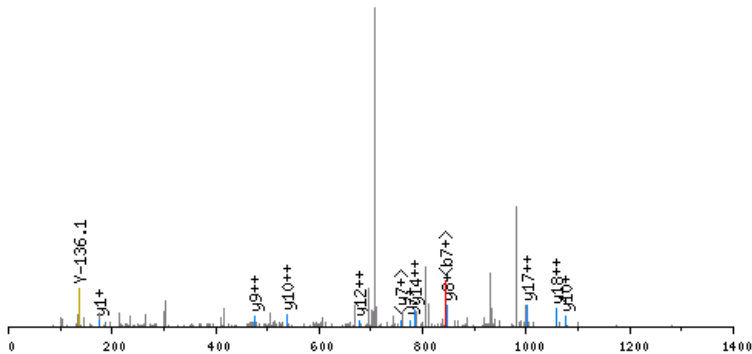

click image to zoom in; click top corners to zoom out

[precursor±]

scan 6653; 675.4 m/z; 8.6e+000

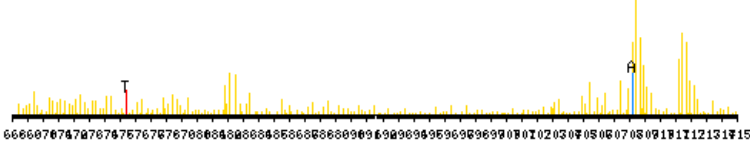

zoomed in precursor plot; T=theoretical m/z, A=acquired m/z

| b <sup>+</sup> | #  | AA | #  | y <sup>+</sup> | y <sup>2+</sup> |
|----------------|----|----|----|----------------|-----------------|
| 172.0610       | 1  | E  | 23 |                |                 |
| 285.1451       | 2  | L  | 22 | 2527.3409      | 1264.1743       |
| 342.1665       | 3  | G  | 21 | 2414.2568      | 1207.6323       |
| 471.2091       | 4  | E  | 20 | 2357.2353      | 1179.1216       |
| 584.2932       | 5  | L  | 19 | 2228.1927      | 1114.6003       |
| 697.3772       | 6  | L  | 18 | 2115.1087      | 1058.0583       |
| 860.4406       | 7  | Y  | 17 | 2002.0246      | 1001.5162       |
| 974.4835       | 8  | N  | 16 | 1838.9613      | 919.9846        |
| 1130.6098      | 9  | K  | 15 | 1724.9184      | 862.9631        |
| 1217.6418      | 10 | S  | 14 | 1568.7921      | 784.8999        |
| 1346.6844      | 11 | E  | 13 | 1481.7600      | 741.3839        |
| 1509.7477      | 12 | Y  | 12 | 1352.7174      | 676.8626        |
| 1622.8318      | 13 | I  | 11 | 1189.6541      | 595.3310        |
| 1751.8744      | 14 | E  | 10 | 1076.5700      | 538.7889        |
| 1852.9221      | 15 | T  | 9  | 947.5275       | 474.2676        |
| 1923.9592      | 16 | A  | 8  | 846.4798       | 423.7438        |
| 2010.9912      | 17 | S  | 7  | 775.4427       | 388.2252        |
| 2068.0127      | 18 | G  | 6  | 688.4106       | 344.7092        |
| 2182.0556      | 19 | N  | 5  | 631.3892       | 316.1985        |
| 2338.1819      | 20 | K  | 4  | 517.3462       | 259.1770        |
| 2437.2503      | 21 | V  | 3  | 361.2199       | 181.1139        |
| 2524.2824      | 22 | S  | 2  | 262.1515       | 131.5797        |
|                | 23 | R  | 1  | 175.1195       | 88.0637         |

N-term:+43.02 K(9):+156.13  
K(20):+156.13

X-range:

0 - 0

MassTol: Y-zoom:

0. 1.

MassType:

☐AVG ☒MONO

Axis:

☒1 ☐2

Label:

☒I ☐M ☐-

Ions:

a ☐+ ☐2+ ☐3+

b ☒+ ☐2+ ☐3+

c ☐+ ☐2+ ☐3+

x ☐+ ☐2+ ☐3+

y ☒+ ☒2+ ☐3+

z ☐+ ☐2+ ☐3+

hide H<sub>2</sub>O/NH<sub>3</sub> ☐

zoom 112-122 ☐

GO

ELVEVLKR, MH+ 1061.6783, m/z 531.3428  
L OS G30 P160811 220811-s1.07657.07657.2.dta

scan 7657; 4.1e+001

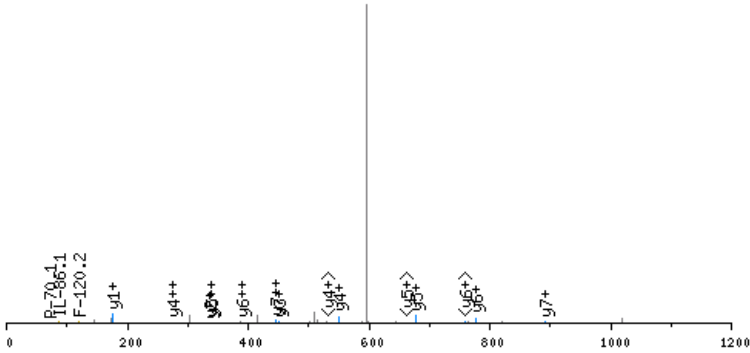

click image to zoom in; click top corners to zoom out

[precursor±]

scan 7654; 531.3 m/z; 9.9e+001

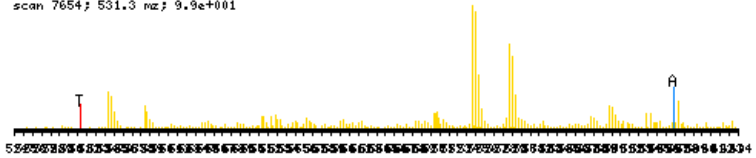

zoomed in precursor plot; T=theoretical m/z, A=acquired m/z

| b <sup>+</sup> | # | AA | # | y <sup>+</sup> | y <sup>2+</sup> |
|----------------|---|----|---|----------------|-----------------|
| 172.0610       | 1 | E  | 8 |                |                 |
| 285.1451       | 2 | L  | 7 | 890.6251       | 445.8165        |
| 384.2135       | 3 | V  | 6 | 777.5411       | 389.2745        |
| 513.2561       | 4 | E  | 5 | 678.4727       | 339.7402        |
| 612.3245       | 5 | V  | 4 | 549.4301       | 275.2190        |
| 725.4085       | 6 | L  | 3 | 450.3617       | 225.6847        |
| 887.5666       | 7 | K  | 2 | 337.2776       | 169.1427        |
|                | 8 | R  | 1 | 175.1195       | 88.0637         |

N-term:+43.02 K(7):+162.16

X-range:

0 - 0

MassTol: Y-zoom:

0. 1.

MassType:

☐ AVG ☒ MONO

Axis:

☒ 1 ☐ 2

Label:

☒ I ☐ M ☐ -

Ions:

a ☐ + ☐ 2+ ☐ 3+

b ☒ + ☐ 2+ ☐ 3+

c ☐ + ☐ 2+ ☐ 3+

x ☐ + ☐ 2+ ☐ 3+

y ☒ + ☒ 2+ ☐ 3+

z ☐ + ☐ 2+ ☐ 3+

hide H<sub>2</sub>O/NH<sub>3</sub> ☐

zoom 112-122 ☐

GO

EMTSTSLKR, MH+ 1128.6147, m/z 564.8110  
L OS G31 P160811 220811-s1.04566.04566.2.dta

scan 4566; 3.1e+001

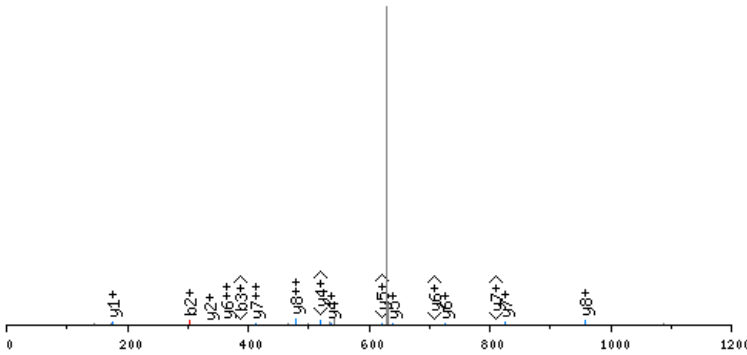

click image to zoom in; click top corners to zoom out [precursor±]

scan 4564; 564.8 m/z; 2.9e+002

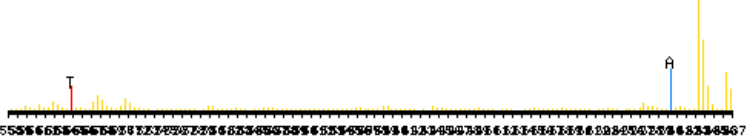

zoomed in precursor plot; T=theoretical m/z, A=acquired m/z

| b <sup>+</sup> | # | AA | # | y <sup>+</sup> | y <sup>2+</sup> |
|----------------|---|----|---|----------------|-----------------|
| 172.0610       | 1 | E  | 9 |                |                 |
| 303.1015       | 2 | M  | 8 | 957.5616       | 479.2847        |
| 404.1492       | 3 | T  | 7 | 826.5211       | 413.7645        |
| 491.1812       | 4 | S  | 6 | 725.4734       | 363.2406        |
| 592.2289       | 5 | T  | 5 | 638.4414       | 319.7246        |
| 679.2609       | 6 | S  | 4 | 537.3937       | 269.2008        |
| 792.3450       | 7 | L  | 3 | 450.3617       | 225.6847        |
| 954.5031       | 8 | K  | 2 | 337.2776       | 169.1427        |
|                | 9 | R  | 1 | 175.1195       | 88.0637         |

N-term:+43.02 K(8):+162.16

X-range:

0 - 0

MassTol: Y-zoom:

0. 1.

MassType:

☐ AVG ☒ MONO

Axis:

☒ 1 ☐ 2

Label:

☒ I ☐ M ☐ -

Ions:

a ☐ + ☐ 2+ ☐ 3+

b ☒ + ☐ 2+ ☐ 3+

c ☐ + ☐ 2+ ☐ 3+

x ☐ + ☐ 2+ ☐ 3+

y ☒ + ☒ 2+ ☐ 3+

z ☐ + ☐ 2+ ☐ 3+

hide H<sub>2</sub>O/NH<sub>3</sub> ☐

zoom 112-122 ☐

GO

ENEYKR, MH+ 908.4478, m/z 454.7275  
L OS G31 P160811 220811-s1.02490.02490.2.dta

scan 2490; 3.1e+001

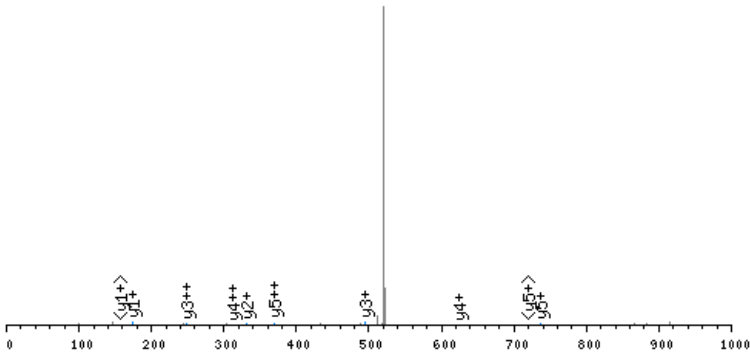

click image to zoom in; click top corners to zoom out

[precursor±]

scan 2489; 454.7 m/z; 5.4e+001

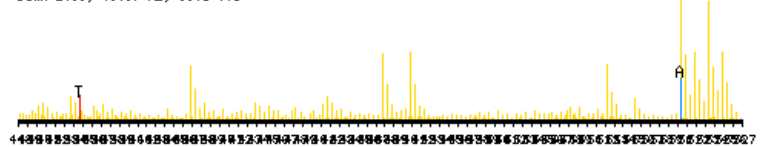

zoomed in precursor plot; T=theoretical m/z, A=acquired m/z

| b <sup>+</sup> | # | AA | # | y <sup>+</sup> | y <sup>2+</sup> |
|----------------|---|----|---|----------------|-----------------|
| 172.0610       | 1 | E  | 6 |                |                 |
| 286.1039       | 2 | N  | 5 | 737.3946       | 369.2012        |
| 415.1465       | 3 | E  | 4 | 623.3517       | 312.1798        |
| 578.2098       | 4 | Y  | 3 | 494.3091       | 247.6585        |
| 734.3361       | 5 | K  | 2 | 331.2458       | 166.1268        |
|                | 6 | R  | 1 | 175.1195       | 88.0637         |

N-term:+43.02 K(5):+156.13

X-range:

0 - 0

MassTol: Y-zoom:

0. 1.

MassType:

☐AVG ☒MONO

Axis:

☒1 ☐2

Label:

☒I ☐M ☐-

Ions:

a ☐+ ☐2+ ☐3+

b ☒+ ☐2+ ☐3+

c ☐+ ☐2+ ☐3+

x ☐+ ☐2+ ☐3+

y ☒+ ☒2+ ☐3+

z ☐+ ☐2+ ☐3+

hide H<sub>2</sub>O/NH<sub>3</sub> ☐

zoom 112-122 ☐

GO

ENQLTKSVEER, MH+ 1402.7178, m/z 701.8626  
L OS G30 P160811 220811-s1.04376.04376.2.dta

scan 4376; 1.2e+001

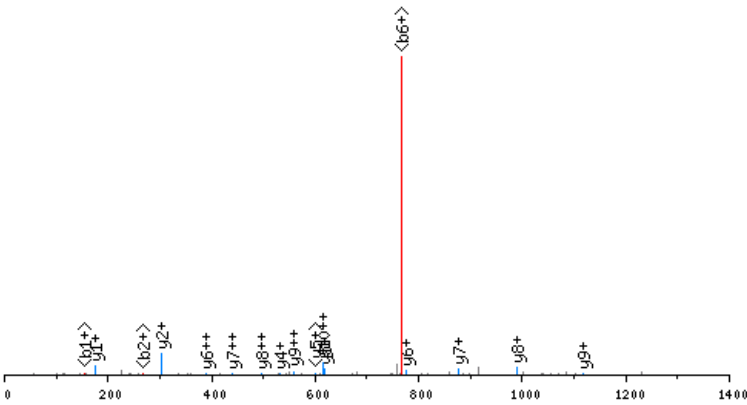

click image to zoom in; click top corners to zoom out

[precursor±]

scan 4374; 701.9 m/z; 1.7e+002

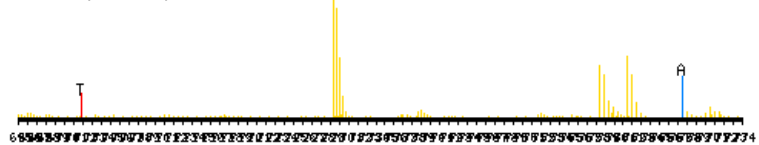

zoomed in precursor plot; T=theoretical m/z, A=acquired m/z

| b <sup>+</sup> | #  | AA | #  | y <sup>+</sup> | y <sup>2+</sup> |
|----------------|----|----|----|----------------|-----------------|
| 172.0610       | 1  | E  | 11 |                |                 |
| 286.1039       | 2  | N  | 10 | 1231.6647      | 616.3363        |
| 414.1625       | 3  | Q  | 9  | 1117.6217      | 559.3148        |
| 527.2466       | 4  | L  | 8  | 989.5632       | 495.2855        |
| 628.2942       | 5  | T  | 7  | 876.4791       | 438.7435        |
| 784.4205       | 6  | K  | 6  | 775.4314       | 388.2196        |
| 871.4526       | 7  | S  | 5  | 619.3051       | 310.1565        |
| 970.5210       | 8  | V  | 4  | 532.2731       | 266.6405        |
| 1099.5636      | 9  | E  | 3  | 433.2047       | 217.1063        |
| 1228.6062      | 10 | E  | 2  | 304.1621       | 152.5850        |
|                | 11 | R  | 1  | 175.1195       | 88.0637         |

N-term:+43.02 K(6):+156.13

X-range:

0 - 0

MassTol: Y-zoom:

0. 1.

MassType:

☐AVG ☒MONO

Axis:

☒1 ☐2

Label:

☒I ☐M ☐-

Ions:

a ☐+ ☐2+ ☐3+

b ☒+ ☐2+ ☐3+

c ☐+ ☐2+ ☐3+

x ☐+ ☐2+ ☐3+

y ☒+ ☒2+ ☐3+

z ☐+ ☐2+ ☐3+

hide H<sub>2</sub>O/NH<sub>3</sub> ☐

zoom 112-122 ☐

GO

EPGPAAPSSGAPRRPAR, MH+ 1559.7930, m/z 520.6025  
L OS G30 P160811 220811-s1.02805.02805.3.dta

scan 2805; 3.1e+000

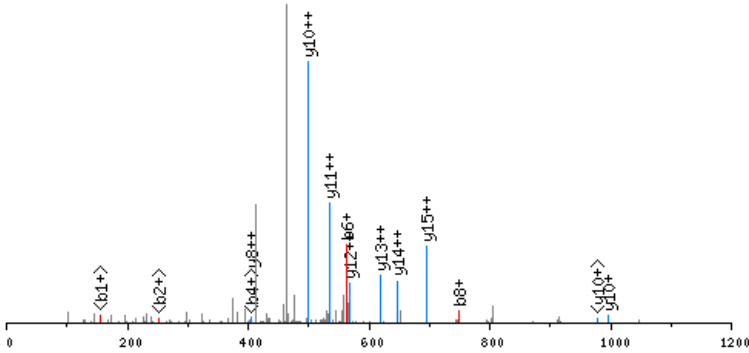

click image to zoom in; click top corners to zoom out

[precursor±]

scan 2804; 520.6 m/z; 9.4e+000

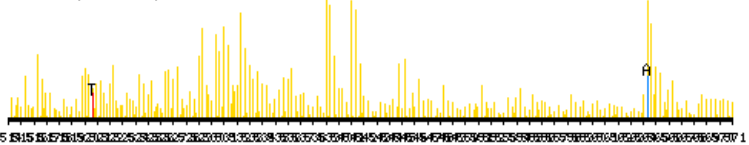

zoomed in precursor plot; T=theoretical m/z, A=acquired m/z

| b <sup>+</sup> | #  | AA | #  | y <sup>+</sup> | y <sup>2+</sup> |
|----------------|----|----|----|----------------|-----------------|
| 172.0610       | 1  | E  | 16 |                |                 |
| 269.1138       | 2  | P  | 15 | 1388.7399      | 694.8738        |
| 326.1352       | 3  | G  | 14 | 1291.6871      | 646.3475        |
| 423.1880       | 4  | P  | 13 | 1234.6656      | 617.8367        |
| 494.2251       | 5  | A  | 12 | 1137.6129      | 569.3104        |
| 565.2622       | 6  | A  | 11 | 1066.5758      | 533.7918        |
| 662.3150       | 7  | P  | 10 | 995.5387       | 498.2732        |
| 749.3470       | 8  | S  | 9  | 898.4859       | 449.7469        |
| 836.3790       | 9  | S  | 8  | 811.4539       | 406.2308        |
| 893.4005       | 10 | G  | 7  | 724.4218       | 362.7148        |
| 964.4376       | 11 | A  | 6  | 667.4004       | 334.2041        |
| 1061.4904      | 12 | P  | 5  | 596.3633       | 298.6855        |
| 1217.5915      | 13 | R  | 4  | 499.3105       | 250.1592        |
| 1314.6442      | 14 | P  | 3  | 343.2094       | 172.1086        |
| 1385.6814      | 15 | A  | 2  | 246.1566       | 123.5822        |
|                | 16 | R  | 1  | 175.1195       | 88.0637         |

N-term:+43.02

X-range:

0 - 0

MassTol: Y-zoom:

0. 1.

MassType:

☐ AVG ☒ MONO

Axis:

☒ 1 ☐ 2

Label:

☒ I ☐ M ☐ -

Ions:

a ☐ + ☐ 2+ ☐ 3+

b ☒ + ☐ 2+ ☐ 3+

c ☐ + ☐ 2+ ☐ 3+

x ☐ + ☐ 2+ ☐ 3+

y ☒ + ☒ 2+ ☐ 3+

z ☐ + ☐ 2+ ☐ 3+

hide H<sub>2</sub>O/NH<sub>3</sub> ☐

zoom 112-122 ☐

GO

EPPKKKKKKKKRK, MH+ 1966.5856, m/z 656.2000  
L OS G35 P160811 220811-s1.08554.08554.3.dta

scan 8554; 6.7e-001

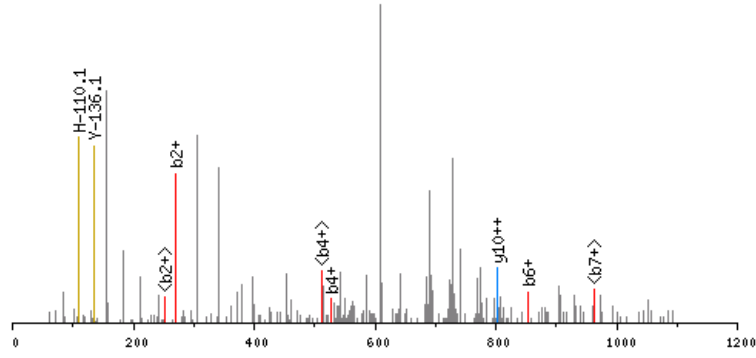

click image to zoom in; click top corners to zoom out [\[precursor±\]](#)

scan 8553; 656.2 m/z; 1.9e+001

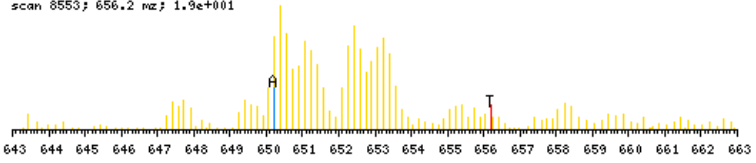

zoomed in precursor plot; T=theoretical m/z, A=acquired m/z

| b <sup>+</sup> | #  | AA | #  | y <sup>+</sup> | y <sup>2+</sup> |
|----------------|----|----|----|----------------|-----------------|
| 172.0610       | 1  | E  | 13 |                |                 |
| 269.1138       | 2  | P  | 12 | 1795.5324      | 898.2701        |
| 366.1665       | 3  | P  | 11 | 1698.4797      | 849.7437        |
| 528.3246       | 4  | K  | 10 | 1601.4269      | 801.2174        |
| 690.4827       | 5  | K  | 9  | 1439.2688      | 720.1383        |
| 852.6408       | 6  | K  | 8  | 1277.1107      | 639.0593        |
| 981.6834       | 7  | E  | 7  | 1114.9526      | 557.9802        |
| 1143.8415      | 8  | K  | 6  | 985.9100       | 493.4589        |
| 1305.9996      | 9  | K  | 5  | 823.7519       | 412.3799        |
| 1468.1577      | 10 | K  | 4  | 661.5938       | 331.3008        |
| 1630.3158      | 11 | K  | 3  | 499.4357       | 250.2218        |
| 1786.4169      | 12 | R  | 2  | 337.2776       | 169.1427        |
|                | 13 | K  | 1  | 181.1765       | 91.0922         |

N-term:+43.02 K(4):+162.16  
K(5):+162.16 K(6):+162.16 K(8):+162.16  
K(9):+162.16 K(10):+162.16  
K(11):+162.16 K(13):+162.16

X-range:

0 - 0

MassTol: Y-zoom:

0. 1.

MassType:

☐AVG ☒MONO

Axis:

☒1 ☐2

Label:

☒I ☐M ☐-

Ions:

a ☐+ ☐2+ ☐3+

b ☒+ ☐2+ ☐3+

c ☐+ ☐2+ ☐3+

x ☐+ ☐2+ ☐3+

y ☒+ ☒2+ ☐3+

z ☐+ ☐2+ ☐3+

hide H<sub>2</sub>O/NH<sub>3</sub> ☐

zoom 112-122 ☐

GO

EPSPDAEEAHTVR, MH+ 1479.6716, m/z 493.8954  
L OS G30 P160811 220811-s1.02952.02952.3.dta

scan 2952; 4.4e+000

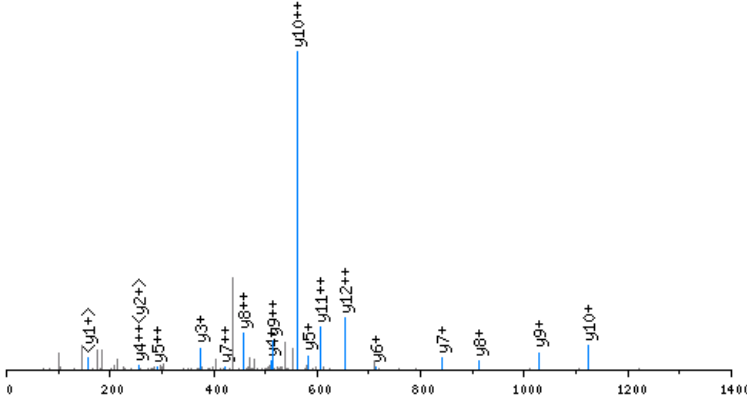

click image to zoom in; click top corners to zoom out

[precursor±]

scan 2949; 493.9 m/z; 3.2e+001

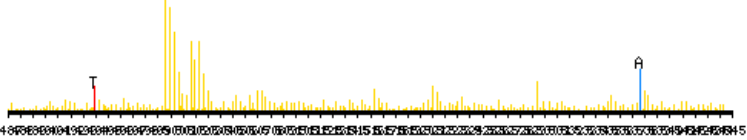

zoomed in precursor plot; T=theoretical m/z, A=acquired m/z

| b <sup>+</sup> | #  | AA | #  | y <sup>+</sup> | y <sup>2+</sup> |
|----------------|----|----|----|----------------|-----------------|
| 172.0610       | 1  | E  | 13 |                |                 |
| 269.1138       | 2  | P  | 12 | 1308.6184      | 654.8131        |
| 356.1458       | 3  | S  | 11 | 1211.5657      | 606.2867        |
| 453.1985       | 4  | P  | 10 | 1124.5336      | 562.7707        |
| 568.2255       | 5  | D  | 9  | 1027.4809      | 514.2443        |
| 639.2626       | 6  | A  | 8  | 912.4539       | 456.7309        |
| 768.3052       | 7  | E  | 7  | 841.4168       | 421.2123        |
| 897.3478       | 8  | E  | 6  | 712.3742       | 356.6910        |
| 968.3849       | 9  | A  | 5  | 583.3316       | 292.1697        |
| 1105.4438      | 10 | H  | 4  | 512.2945       | 256.6512        |
| 1206.4915      | 11 | T  | 3  | 375.2356       | 188.1217        |
| 1305.5599      | 12 | V  | 2  | 274.1879       | 137.5979        |
|                | 13 | R  | 1  | 175.1195       | 88.0637         |

N-term:+43.02

X-range:

0 - 0

MassTol: Y-zoom:

0. 1.

MassType:

☐AVG ☒MONO

Axis:

☒1 ☐2

Label:

☒I ☐M ☐-

Ions:

a ☐+ ☐2+ ☐3+

b ☒+ ☐2+ ☐3+

c ☐+ ☐2+ ☐3+

x ☐+ ☐2+ ☐3+

y ☒+ ☒2+ ☐3+

z ☐+ ☐2+ ☐3+

hide H<sub>2</sub>O/NH<sub>3</sub> ☐

zoom 112-122 ☐

GO

ETASTPEATGTGKYIASTQRPDGTWR, MH+ 2857.4181, m/z 715.1100  
L OS G32 P160811 220811-s1.04449.04449.4.dta

scan 4449; 2.9e+000

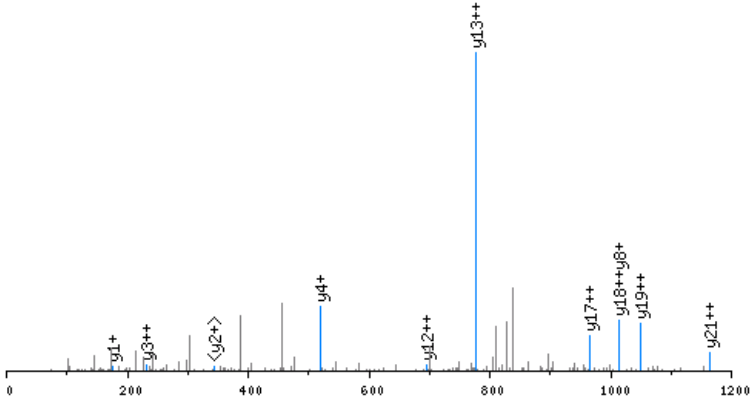

click image to zoom in; click top corners to zoom out [precursor+]

scan 4448; 715.1 m/z; 1.6e+001

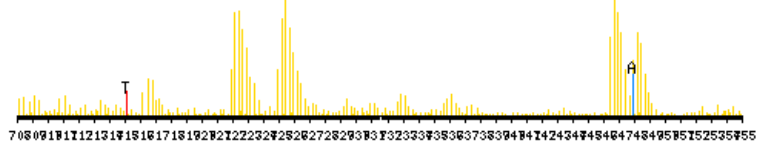

zoomed in precursor plot; T=theoretical m/z, A=acquired m/z

| b <sup>+</sup> | #  | AA | #  | y <sup>+</sup> | y <sup>2+</sup> |
|----------------|----|----|----|----------------|-----------------|
| 172.0610       | 1  | E  | 26 |                |                 |
| 273.1087       | 2  | T  | 25 | 2686.3649      | 1343.6864       |
| 344.1458       | 3  | A  | 24 | 2585.3172      | 1293.1625       |
| 431.1778       | 4  | S  | 23 | 2514.2801      | 1257.6440       |
| 532.2255       | 5  | T  | 22 | 2427.2481      | 1214.1280       |
| 629.2783       | 6  | P  | 21 | 2326.2004      | 1163.6041       |
| 758.3208       | 7  | E  | 20 | 2229.1477      | 1115.0777       |
| 829.3580       | 8  | A  | 19 | 2100.1051      | 1050.5564       |
| 930.4056       | 9  | T  | 18 | 2029.0679      | 1015.0379       |
| 987.4271       | 10 | G  | 17 | 1928.0203      | 964.5140        |
| 1088.4748      | 11 | T  | 16 | 1870.9988      | 936.0033        |
| 1145.4962      | 12 | G  | 15 | 1769.9511      | 885.4795        |
| 1307.6543      | 13 | K  | 14 | 1712.9297      | 856.9687        |
| 1470.7177      | 14 | Y  | 13 | 1550.7716      | 775.8897        |
| 1583.8017      | 15 | I  | 12 | 1387.7082      | 694.3580        |
| 1654.8389      | 16 | A  | 11 | 1274.6242      | 637.8160        |
| 1741.8709      | 17 | S  | 10 | 1203.5871      | 602.2974        |
| 1842.9186      | 18 | T  | 9  | 1116.5550      | 558.7814        |
| 1970.9771      | 19 | Q  | 8  | 1015.5074      | 508.2576        |
| 2127.0782      | 20 | R  | 7  | 887.4488       | 444.2283        |
| 2224.1310      | 21 | P  | 6  | 731.3477       | 366.1777        |
| 2339.1580      | 22 | D  | 5  | 634.2949       | 317.6514        |
| 2396.1794      | 23 | G  | 4  | 519.2680       | 260.1379        |
| 2497.2271      | 24 | T  | 3  | 462.2465       | 231.6272        |
| 2683.3064      | 25 | W  | 2  | 361.1988       | 181.1033        |
|                | 26 | R  | 1  | 175.1195       | 88.0637         |

N-term:+43.02 K(13) :+162.16

X-range:

0 - 0

MassTol: Y-zoom:

0. 1.

MassType:

☐AVG ☒MONO

Axis:

☒1 ☐2

Label:

☒I ☐M ☐-

Ions:

a ☐+ ☐2+ ☐3+

b ☒+ ☐2+ ☐3+

c ☐+ ☐2+ ☐3+

x ☐+ ☐2+ ☐3+

y ☒+ ☒2+ ☐3+

z ☐+ ☐2+ ☐3+

hide H<sub>2</sub>O/NH<sub>3</sub> ☐

zoom 112-122 ☐

GO

ETLLKR, MH+ 835.5466, m/z 418.2769  
L OS G31 P160811 220811-s1.06256.06256.2.dta

scan 6256; 3.7e+001

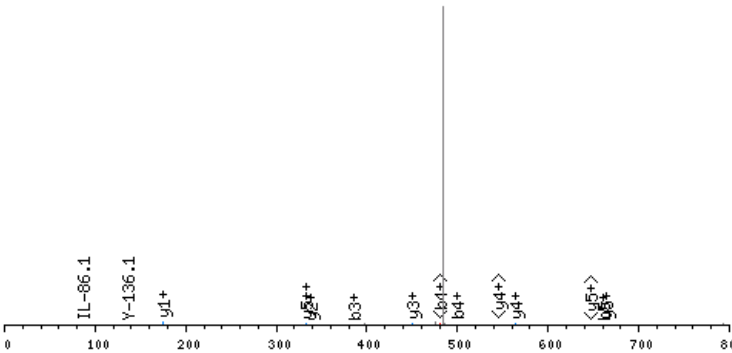

click image to zoom in; click top corners to zoom out [precursor±]

scan 6254; 418.3 m/z; 4.1e+001

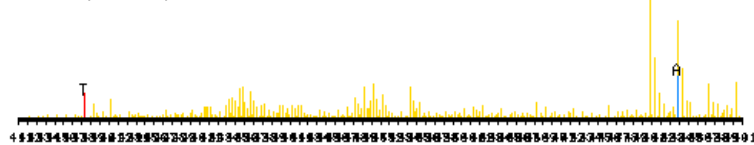

zoomed in precursor plot; T=theoretical m/z, A=acquired m/z

| b <sup>+</sup> | # | AA | # | y <sup>+</sup> | y <sup>2+</sup> |
|----------------|---|----|---|----------------|-----------------|
| 172.0610       | 1 | E  | 6 |                |                 |
| 273.1087       | 2 | T  | 5 | 664.4934       | 332.7506        |
| 386.1927       | 3 | L  | 4 | 563.4457       | 282.2268        |
| 499.2768       | 4 | L  | 3 | 450.3617       | 225.6847        |
| 661.4349       | 5 | K  | 2 | 337.2776       | 169.1427        |
|                | 6 | R  | 1 | 175.1195       | 88.0637         |

N-term:+43.02 K(5):+162.16

X-range:

0 - 0

MassTol: Y-zoom:

0. 1.

MassType:

☐AVG ☒MONO

Axis:

☒1 ☐2

Label:

☒I ☐M ☐-

Ions:

a ☐+ ☐2+ ☐3+

b ☒+ ☐2+ ☐3+

c ☐+ ☐2+ ☐3+

x ☐+ ☐2+ ☐3+

y ☒+ ☒2+ ☐3+

z ☐+ ☐2+ ☐3+

hide H<sub>2</sub>O/NH<sub>3</sub> ☐

zoom 112-122 ☐

GO

ETPKPR, MH+ 797.4522, m/z 399.2297  
L OS G31 P160811 220811-s1.02266.02266.2.dta

scan 2266; 2.8e+001

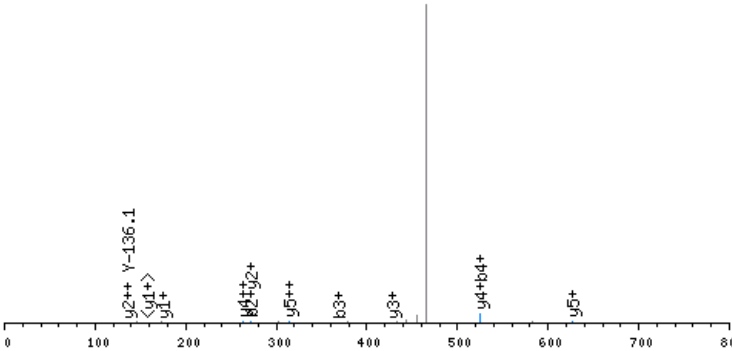

click image to zoom in; click top corners to zoom out [precursor±]

scan 2264; 399.2 m/z; 2.1e+001

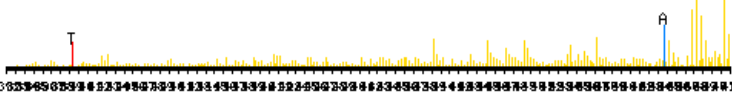

zoomed in precursor plot; T=theoretical m/z, A=acquired m/z

| b <sup>+</sup> | # | AA | # | y <sup>+</sup> | y <sup>2+</sup> |
|----------------|---|----|---|----------------|-----------------|
| 172.0610       | 1 | E  | 6 |                |                 |
| 273.1087       | 2 | T  | 5 | 626.3990       | 313.7034        |
| 370.1614       | 3 | P  | 4 | 525.3513       | 263.1796        |
| 526.2877       | 4 | K  | 3 | 428.2986       | 214.6532        |
| 623.3405       | 5 | P  | 2 | 272.1723       | 136.5900        |
|                | 6 | R  | 1 | 175.1195       | 88.0637         |

N-term:+43.02 K(4):+156.13

X-range:

0 - 0

MassTol: Y-zoom:

0. 1.

MassType:

☐AVG ☒MONO

Axis:

☒1 ☐2

Label:

☒I ☐M ☐-

Ions:

a ☐+ ☐2+ ☐3+

b ☒+ ☐2+ ☐3+

c ☐+ ☐2+ ☐3+

x ☐+ ☐2+ ☐3+

y ☒+ ☒2+ ☐3+

z ☐+ ☐2+ ☐3+

hide H<sub>2</sub>O/NH<sub>3</sub> ☐

zoom 112-122 ☐

GO

EVHELFR, MH+ 971.4951, m/z 486.2512  
L OS G31 P160811 220811-sl.07031.07031.2.dta

scan 7031; 8.9e+000

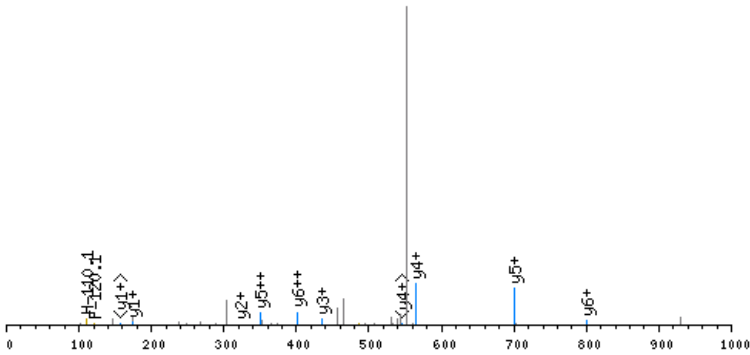

click image to zoom in; click top corners to zoom out

[precursor±]

scan 7029; 486.3 m/z; 1.2e+001

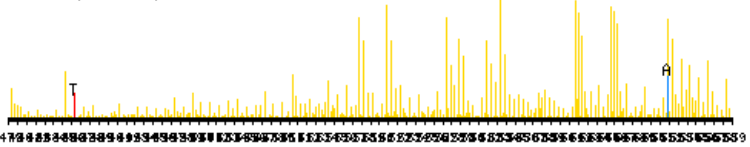

zoomed in precursor plot; T=theoretical m/z, A=acquired m/z

| b <sup>+</sup> | # | AA | # | y <sup>+</sup> | y <sup>2+</sup> |
|----------------|---|----|---|----------------|-----------------|
| 172.0610       | 1 | E  | 7 |                |                 |
| 271.1294       | 2 | V  | 6 | 800.4419       | 400.7249        |
| 408.1883       | 3 | H  | 5 | 701.3735       | 351.1907        |
| 537.2309       | 4 | E  | 4 | 564.3146       | 282.6612        |
| 650.3150       | 5 | L  | 3 | 435.2720       | 218.1399        |
| 797.3834       | 6 | F  | 2 | 322.1879       | 161.5979        |
|                | 7 | R  | 1 | 175.1195       | 88.0637         |

N-term:+43.02

X-range:

0 - 0

MassTol: Y-zoom:

0. 1.

MassType:

☐ AVG ☒ MONO

Axis:

☒ 1 ☐ 2

Label:

☒ I ☐ M ☐ -

Ions:

a ☐ + ☐ 2+ ☐ 3+

b ☒ + ☐ 2+ ☐ 3+

c ☐ + ☐ 2+ ☐ 3+

x ☐ + ☐ 2+ ☐ 3+

y ☒ + ☒ 2+ ☐ 3+

z ☐ + ☐ 2+ ☐ 3+

hide H<sub>2</sub>O/NH<sub>3</sub> ☐

zoom 112-122 ☐

GO

EVKPPPGRRPQPDSSGR, MH+ 1686.8928, m/z 562.9691  
L OS G33 P160811 220811-s1.02835.02835.3.dta

scan 2835; 1.8e+001

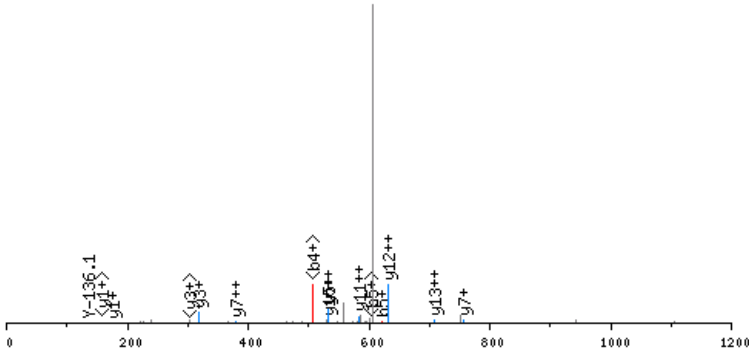

click image to zoom in; click top corners to zoom out [precursor±]

scan 2832; 563.0 m/z; 7.0e+000

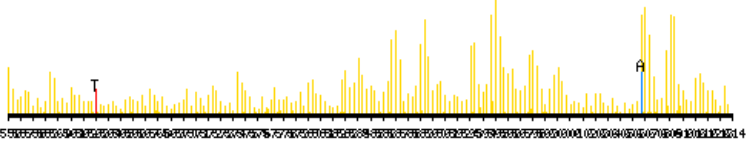

zoomed in precursor plot; T=theoretical m/z, A=acquired m/z

| b <sup>+</sup> | #  | AA | #  | y <sup>+</sup> | y <sup>2+</sup> |
|----------------|----|----|----|----------------|-----------------|
| 172.0610       | 1  | E  | 15 |                |                 |
| 271.1294       | 2  | V  | 14 | 1515.8396      | 758.4237        |
| 427.2557       | 3  | K  | 13 | 1416.7712      | 708.8895        |
| 524.3085       | 4  | P  | 12 | 1260.6449      | 630.8264        |
| 621.3612       | 5  | P  | 11 | 1163.5921      | 582.3000        |
| 718.4140       | 6  | P  | 10 | 1066.5394      | 533.7736        |
| 775.4355       | 7  | G  | 9  | 969.4866       | 485.2472        |
| 931.5366       | 8  | R  | 8  | 912.4652       | 456.7365        |
| 1028.5893      | 9  | P  | 7  | 756.3640       | 378.6859        |
| 1156.6479      | 10 | Q  | 6  | 659.3113       | 330.1596        |
| 1253.7007      | 11 | P  | 5  | 531.2527       | 266.1303        |
| 1368.7276      | 12 | D  | 4  | 434.1999       | 217.6039        |
| 1455.7597      | 13 | S  | 3  | 319.1730       | 160.0904        |
| 1512.7811      | 14 | G  | 2  | 232.1410       | 116.5744        |
|                | 15 | R  | 1  | 175.1195       | 88.0637         |

N-term:+43.02 K(3):+156.13

X-range:

0 - 0

MassTol: Y-zoom:

0. 1.

MassType:

☐ AVG ☒ MONO

Axis:

☒ 1 ☐ 2

Label:

☒ I ☐ M ☐ -

Ions:

a ☐ + ☐ 2+ ☐ 3+

b ☒ + ☐ 2+ ☐ 3+

c ☐ + ☐ 2+ ☐ 3+

x ☐ + ☐ 2+ ☐ 3+

y ☒ + ☒ 2+ ☐ 3+

z ☐ + ☐ 2+ ☐ 3+

hide H<sub>2</sub>O/NH<sub>3</sub> ☐

zoom 112-122 ☐

GO

FADKLPKIQDR, MH+ 1428.8216, m/z 476.9454  
L OS G34 P160811 220811-s1.07061.07061.3.dta

scan 7061; 3.9e+001

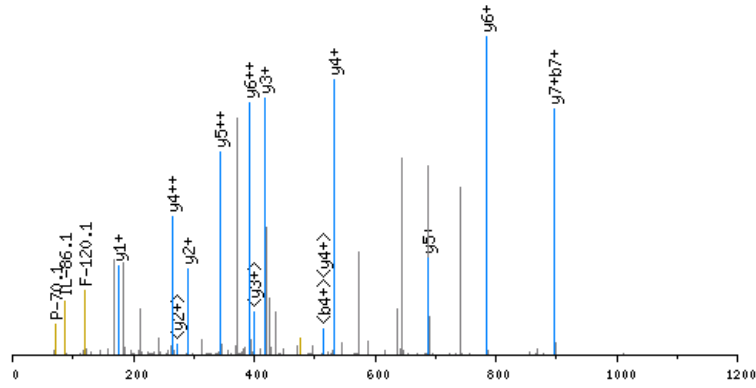

click image to zoom in; click top corners to zoom out [\[precursor±\]](#)

scan 7060; 476.9 m/z; 1.9e+003

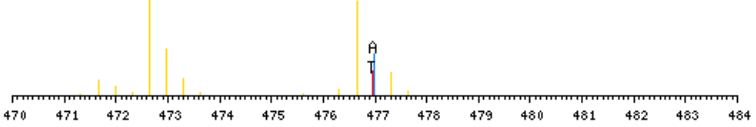

zoomed in precursor plot; T=theoretical m/z, A=acquired m/z

| b <sup>+</sup> | #  | AA | #  | y <sup>+</sup> | y <sup>2+</sup> |
|----------------|----|----|----|----------------|-----------------|
| 190.0868       | 1  | F  | 11 |                |                 |
| 261.1239       | 2  | A  | 10 | 1239.7426      | 620.3752        |
| 376.1509       | 3  | D  | 9  | 1168.7055      | 584.8566        |
| 532.2772       | 4  | K  | 8  | 1053.6785      | 527.3432        |
| 645.3612       | 5  | L  | 7  | 897.5522       | 449.2800        |
| 742.4140       | 6  | P  | 6  | 784.4681       | 392.7380        |
| 898.5403       | 7  | K  | 5  | 687.4154       | 344.2116        |
| 1011.6244      | 8  | I  | 4  | 531.2891       | 266.1485        |
| 1139.6829      | 9  | Q  | 3  | 418.2050       | 209.6064        |
| 1254.7099      | 10 | D  | 2  | 290.1464       | 145.5771        |
|                | 11 | R  | 1  | 175.1195       | 88.0637         |

N-term:+43.02 K(4):+156.13  
K(7):+156.13

X-range:

0 - 0

MassTol: Y-zoom:

0. 1.

MassType:

☐AVG ☒MONO

Axis:

☒1 ☐2

Label:

☒I ☐M ☐-

Ions:

a ☐+ ☐2+ ☐3+

b ☒+ ☐2+ ☐3+

c ☐+ ☐2+ ☐3+

x ☐+ ☐2+ ☐3+

y ☒+ ☒2+ ☐3+

z ☐+ ☐2+ ☐3+

hide H<sub>2</sub>O/NH<sub>3</sub> ☐

zoom 112-122 ☐

GO

FAKAFR, MH+ 809.4674, m/z 405.2374  
L OS G31 P160811 220811-s1.06585.06585.2.dta

scan 6585; 2.8e+001

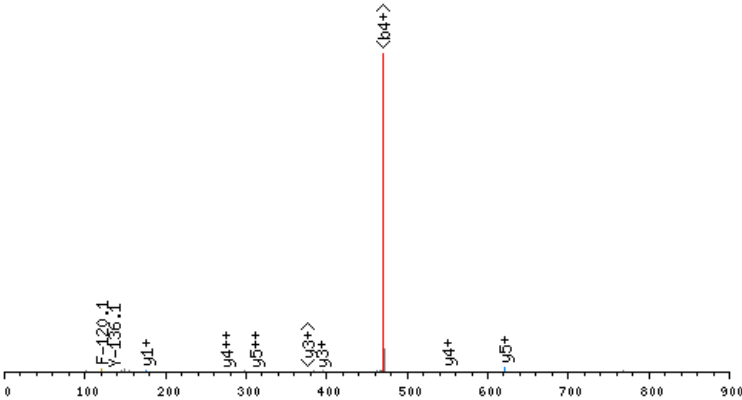

click image to zoom in; click top corners to zoom out

[precursor±]

scan 6584; 405.2 m/z; 1.2e+002

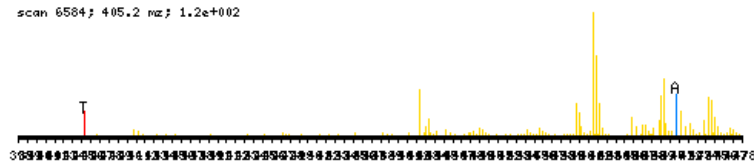

zoomed in precursor plot; T=theoretical m/z, A=acquired m/z

| b <sup>+</sup> | # | AA | # | y <sup>+</sup> | y <sup>2+</sup> |
|----------------|---|----|---|----------------|-----------------|
| 190.0868       | 1 | F  | 6 |                |                 |
| 261.1239       | 2 | A  | 5 | 620.3884       | 310.6981        |
| 417.2502       | 3 | K  | 4 | 549.3513       | 275.1796        |
| 488.2873       | 4 | A  | 3 | 393.2250       | 197.1164        |
| 635.3558       | 5 | F  | 2 | 322.1879       | 161.5979        |
|                | 6 | R  | 1 | 175.1195       | 88.0637         |

N-term:+43.02 K(3):+156.13

X-range:

0 - 0

MassTol: Y-zoom:

0. 1.

MassType:

☐ AVG ☒ MONO

Axis:

☒ 1 ☐ 2

Label:

☒ I ☐ M ☐ -

Ions:

a ☐ + ☐ 2+ ☐ 3+

b ☒ + ☐ 2+ ☐ 3+

c ☐ + ☐ 2+ ☐ 3+

x ☐ + ☐ 2+ ☐ 3+

y ☒ + ☒ 2+ ☐ 3+

z ☐ + ☐ 2+ ☐ 3+

hide H<sub>2</sub>O/NH<sub>3</sub> ☐

zoom 112-122 ☐

GO

FFVNFPSAK, MH+ 1132.6256, m/z 378.2134  
L OS G32 P160811 220811-s1.03474.03474.3.dta

scan 3474; 4.6e+000

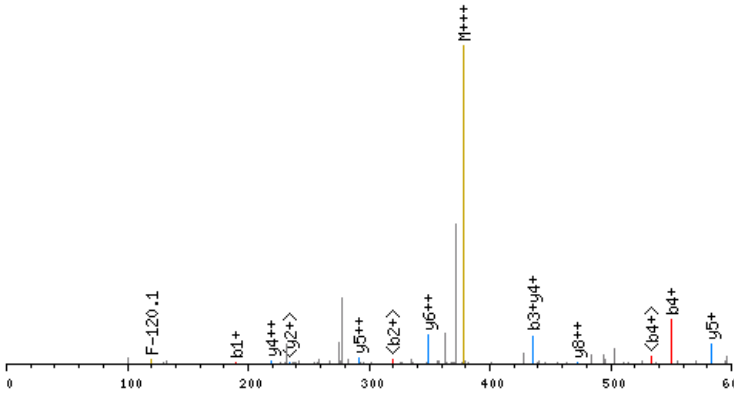

click image to zoom in; click top corners to zoom out

[precursor±]

scan 3473; 378.2 m/z; 4.6e+000

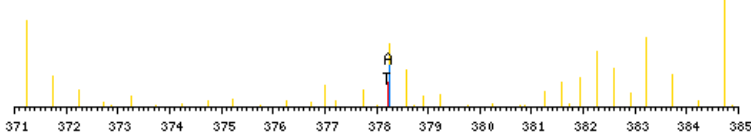

zoomed in precursor plot; T=theoretical m/z, A=acquired m/z

| b <sup>+</sup> | # | AA | # | y <sup>+</sup> | y <sup>2+</sup> |
|----------------|---|----|---|----------------|-----------------|
| 190.0868       | 1 | F  | 9 |                |                 |
| 337.1552       | 2 | F  | 8 | 943.5466       | 472.2772        |
| 436.2236       | 3 | V  | 7 | 796.4782       | 398.7430        |
| 550.2666       | 4 | N  | 6 | 697.4097       | 349.2088        |
| 697.3350       | 5 | F  | 5 | 583.3668       | 292.1873        |
| 794.3877       | 6 | P  | 4 | 436.2984       | 218.6531        |
| 881.4198       | 7 | S  | 3 | 339.2456       | 170.1267        |
| 952.4569       | 8 | A  | 2 | 252.2136       | 126.6107        |
|                | 9 | K  | 1 | 181.1765       | 91.0922         |

N-term:+43.02 K(9):+162.16

N-term: +43.02

N-term: +43.02 K(10): +156.13

N-term: +43.02 K(10): +156.13

X-range:

0 - 0

MassTol: Y-zoom:

0. 1.

MassType:

☐ AVG ☒ MONO

Axis:

☒ 1 ☐ 2

Label:

☒ I ☐ M ☐ -

Ions:

a ☐ + ☐ 2+ ☐ 3+

b ☒ + ☐ 2+ ☐ 3+

c ☐ + ☐ 2+ ☐ 3+

x ☐ + ☐ 2+ ☐ 3+

y ☒ + ☒ 2+ ☐ 3+

z ☐ + ☐ 2+ ☐ 3+

hide H<sub>2</sub>O/NH<sub>3</sub> ☐

zoom 112-122 ☐

GO

FQPAGHGQDWAMEGPR, MH+ 1825.8080, m/z 609.2742  
L OS G30 P160811 220811-s1.06261.06261.3.dta

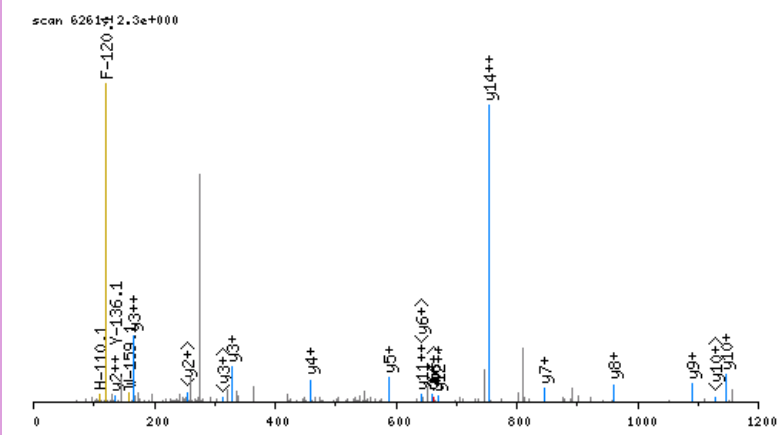

click image to zoom in; click top corners to zoom out [\[precursor±\]](#)

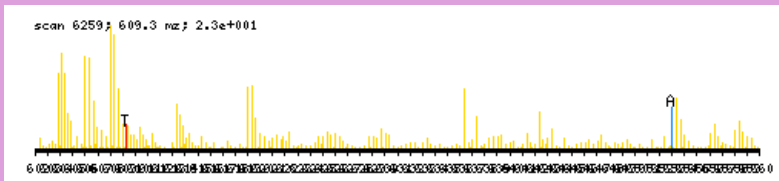

zoomed in precursor plot; T=theoretical m/z, A=acquired m/z

| b <sup>+</sup> | #  | AA | #  | y <sup>+</sup> | y <sup>2+</sup> |
|----------------|----|----|----|----------------|-----------------|
| 190.0868       | 1  | F  | 16 |                |                 |
| 318.1454       | 2  | Q  | 15 | 1636.7290      | 818.8684        |
| 415.1982       | 3  | P  | 14 | 1508.6705      | 754.8391        |
| 486.2353       | 4  | A  | 13 | 1411.6177      | 706.3128        |
| 543.2567       | 5  | G  | 12 | 1340.5806      | 670.7942        |
| 680.3156       | 6  | H  | 11 | 1283.5591      | 642.2835        |
| 737.3371       | 7  | G  | 10 | 1146.5002      | 573.7540        |
| 865.3957       | 8  | Q  | 9  | 1089.4788      | 545.2433        |
| 980.4226       | 9  | D  | 8  | 961.4202       | 481.2140        |
| 1166.5019      | 10 | W  | 7  | 846.3932       | 423.7005        |
| 1237.5391      | 11 | A  | 6  | 660.3139       | 330.6609        |
| 1368.5795      | 12 | M  | 5  | 589.2768       | 295.1423        |
| 1497.6221      | 13 | E  | 4  | 458.2363       | 229.6221        |
| 1554.6436      | 14 | G  | 3  | 329.1937       | 165.1008        |
| 1651.6964      | 15 | P  | 2  | 272.1723       | 136.5900        |
|                | 16 | R  | 1  | 175.1195       | 88.0637         |

N-term:+43.02

X-range:  

0-0

MassTol: Y-zoom:  

0.1.

MassType:  

☐AVG☒MONO

Axis:  

☒1☐2

Label:  

☒I☐M☐-

Ions:  

a

☐+☐2+☐3+

b

☒+☐2+☐3+

c

☐+☐2+☐3+

x

☐+☐2+☐3+

y

☒+☒2+☐3+

z

☐+☐2+☐3+

hide H<sub>2</sub>O/NH<sub>3</sub>☐

zoom 112-122☐

GO

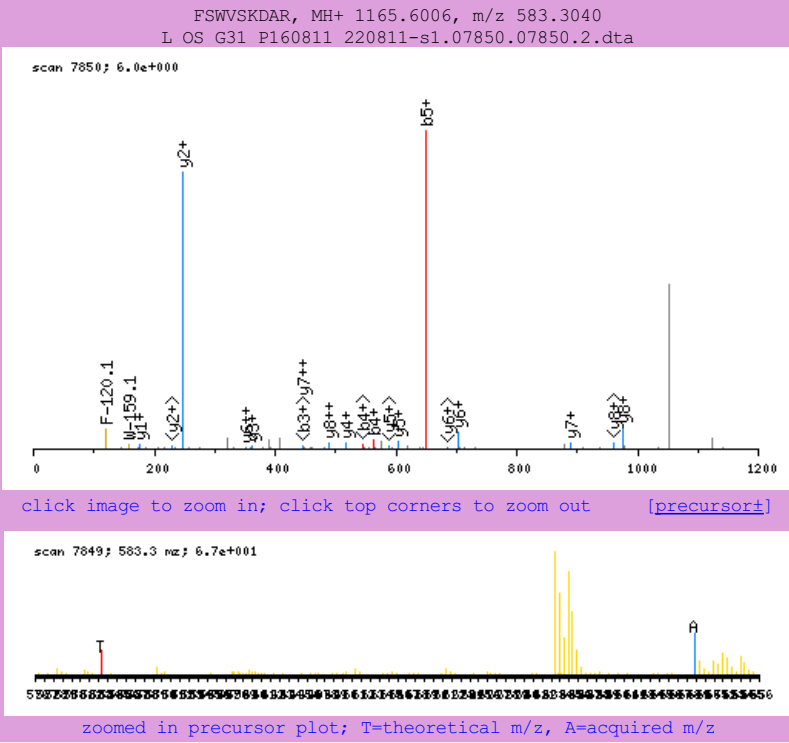

| b <sup>+</sup> | # | AA | # | y <sup>+</sup> | y <sup>2+</sup> |
|----------------|---|----|---|----------------|-----------------|
| 190.0868       | 1 | F  | 9 |                |                 |
| 277.1188       | 2 | S  | 8 | 976.5216       | 488.7647        |
| 463.1982       | 3 | W  | 7 | 889.4896       | 445.2487        |
| 562.2666       | 4 | V  | 6 | 703.4103       | 352.2091        |
| 649.2986       | 5 | S  | 5 | 604.3419       | 302.6749        |
| 805.4249       | 6 | K  | 4 | 517.3099       | 259.1588        |
| 920.4518       | 7 | D  | 3 | 361.1836       | 181.0957        |
| 991.4890       | 8 | A  | 2 | 246.1566       | 123.5822        |
|                | 9 | R  | 1 | 175.1195       | 88.0637         |

N-term:+43.02 K(6):+156.13

X-range:

0 - 0

MassTol: Y-zoom:

0. 1.

MassType:

☐ AVG ☒ MONO

Axis:

☒ 1 ☐ 2

Label:

☒ I ☐ M ☐ -

Ions:

a ☐ + ☐ 2+ ☐ 3+

b ☒ + ☐ 2+ ☐ 3+

c ☐ + ☐ 2+ ☐ 3+

x ☐ + ☐ 2+ ☐ 3+

y ☒ + ☒ 2+ ☐ 3+

z ☐ + ☐ 2+ ☐ 3+

hide H<sub>2</sub>O/NH<sub>3</sub> ☐

zoom 112-122 ☐

GO

FVQEEKIFAGKVLK, MH+ 1774.0904, m/z 592.0350  
L OS G32 P160811 220811-s1.06567.06567.3.dta

scan 6567; 6.0e+000

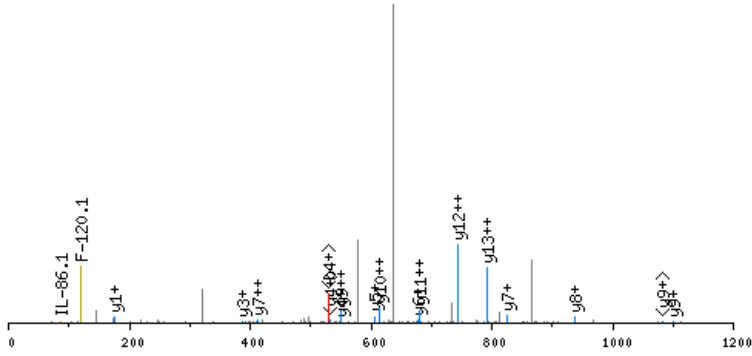

click image to zoom in; click top corners to zoom out [\[precursor±\]](#)

scan 6563; 592.0 m/z; 5.4e+001

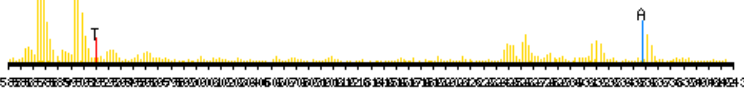

zoomed in precursor plot; T=theoretical m/z, A=acquired m/z

| b <sup>+</sup> | #  | AA | #  | y <sup>+</sup> | y <sup>2+</sup> |
|----------------|----|----|----|----------------|-----------------|
| 190.0868       | 1  | F  | 14 |                |                 |
| 289.1552       | 2  | V  | 13 | 1585.0114      | 793.0096        |
| 417.2138       | 3  | Q  | 12 | 1485.9430      | 743.4754        |
| 546.2564       | 4  | E  | 11 | 1357.8844      | 679.4461        |
| 675.2990       | 5  | E  | 10 | 1228.8418      | 614.9248        |
| 837.4571       | 6  | K  | 9  | 1099.7992      | 550.4035        |
| 950.5412       | 7  | I  | 8  | 937.6411       | 469.3245        |
| 1097.6096      | 8  | F  | 7  | 824.5571       | 412.7824        |
| 1168.6467      | 9  | A  | 6  | 677.4887       | 339.2482        |
| 1225.6681      | 10 | G  | 5  | 606.4515       | 303.7297        |
| 1387.8262      | 11 | K  | 4  | 549.4301       | 275.2190        |
| 1486.8947      | 12 | V  | 3  | 387.2720       | 194.1399        |
| 1599.9787      | 13 | L  | 2  | 288.2036       | 144.6057        |
|                | 14 | R  | 1  | 175.1195       | 88.0637         |

N-term:+43.02 K(6):+162.16  
K(11):+162.16

N-term: +43.02 K(7): +162.16

X-range:

0

-

0

MassTol: Y-zoom:

0.

1.

MassType:

AVG

MONO

Axis:

1

2

Label:

I

M

-

Ions:

a

+

2+

3+

b

+

2+

3+

c

+

2+

3+

x

+

2+

3+

y

+

2+

3+

z

+

2+

3+

hide H<sub>2</sub>O/NH<sub>3</sub>

zoom 112-122

GO

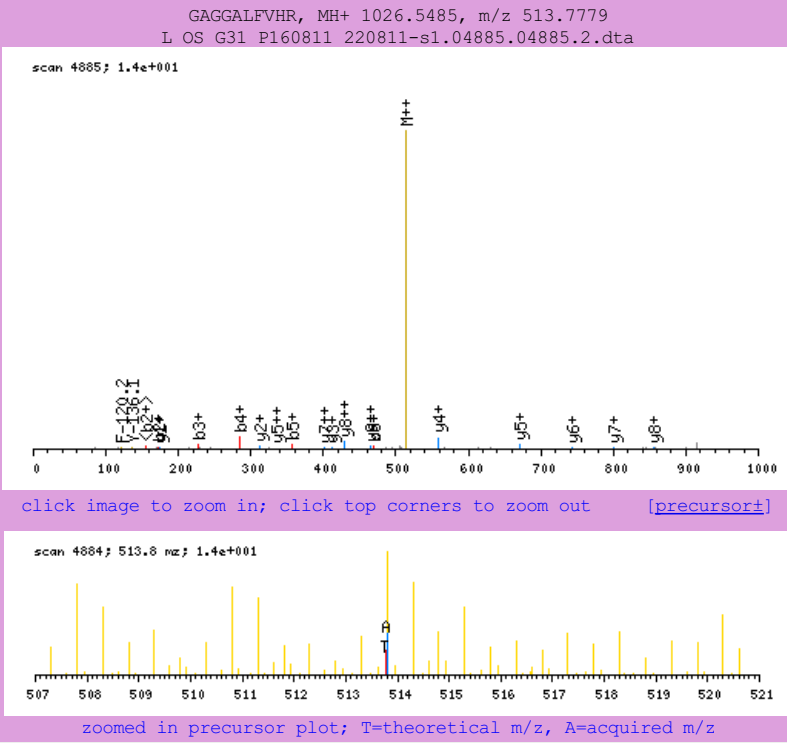

| b <sup>+</sup> | #  | AA | #  | y <sup>+</sup> | y <sup>2+</sup> |
|----------------|----|----|----|----------------|-----------------|
| 100.0399       | 1  | G  | 10 |                |                 |
| 171.0770       | 2  | A  | 9  | 927.5165       | 464.2621        |
| 228.0984       | 3  | G  | 8  | 856.4793       | 428.7436        |
| 285.1199       | 4  | G  | 7  | 799.4579       | 400.2329        |
| 356.1570       | 5  | A  | 6  | 742.4364       | 371.7221        |
| 469.2411       | 6  | L  | 5  | 671.3993       | 336.2036        |
| 616.3095       | 7  | F  | 4  | 558.3152       | 279.6615        |
| 715.3779       | 8  | V  | 3  | 411.2468       | 206.1273        |
| 852.4368       | 9  | H  | 2  | 312.1784       | 156.5931        |
|                | 10 | R  | 1  | 175.1195       | 88.0637         |

N-term:+43.02

N-term: +43.02 K(9): +156.13

X-range:

0 - 0

MassTol: Y-zoom:

0. 1.

MassType:

☐ AVG ☒ MONO

Axis:

☒ 1 ☐ 2

Label:

☒ I ☐ M ☐ -

Ions:

a ☐ + ☐ 2+ ☐ 3+

b ☒ + ☐ 2+ ☐ 3+

c ☐ + ☐ 2+ ☐ 3+

x ☐ + ☐ 2+ ☐ 3+

y ☒ + ☒ 2+ ☐ 3+

z ☐ + ☐ 2+ ☐ 3+

hide H<sub>2</sub>O/NH<sub>3</sub> ☐

zoom 112-122 ☐

GO

GDLSHIER, MH+ 968.4801, m/z 484.7437  
L OS G32 P160811 220811-s1.03252.03252.2.dta

scan 3252; 9.5e+000

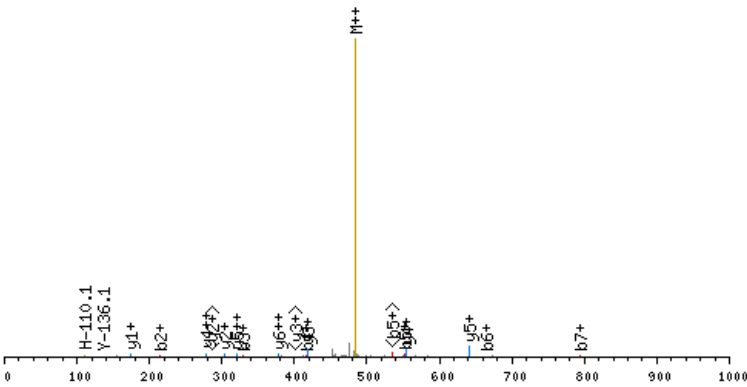

click image to zoom in; click top corners to zoom out [precursor±]

scan 3248; 484.7 m/z; 6.4e+001

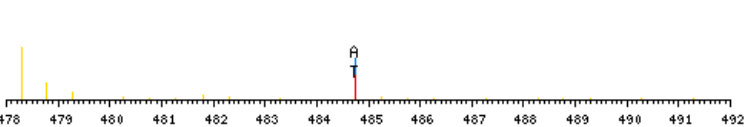

zoomed in precursor plot; T=theoretical m/z, A=acquired m/z

| b <sup>+</sup> | # | AA | # | y <sup>+</sup> | y <sup>2+</sup> |
|----------------|---|----|---|----------------|-----------------|
| 100.0399       | 1 | G  | 8 |                |                 |
| 215.0668       | 2 | D  | 7 | 869.4481       | 435.2280        |
| 328.1509       | 3 | L  | 6 | 754.4212       | 377.7145        |
| 415.1829       | 4 | S  | 5 | 641.3371       | 321.1725        |
| 552.2418       | 5 | H  | 4 | 554.3051       | 277.6564        |
| 665.3259       | 6 | I  | 3 | 417.2462       | 209.1270        |
| 794.3685       | 7 | E  | 2 | 304.1621       | 152.5850        |
|                | 8 | R  | 1 | 175.1195       | 88.0637         |

N-term:+43.02

X-range:

0 - 0

MassTol: Y-zoom:

0. 1.

MassType:

☐AVG ☒MONO

Axis:

☒1 ☐2

Label:

☒I ☐M ☐-

Ions:

a ☐+ ☐2+ ☐3+

b ☒+ ☐2+ ☐3+

c ☐+ ☐2+ ☐3+

x ☐+ ☐2+ ☐3+

y ☒+ ☒2+ ☐3+

z ☐+ ☐2+ ☐3+

hide H<sub>2</sub>O/NH<sub>3</sub> ☐

zoom 112-122 ☐

GO

GDSASKVISAEELPGR, MH+ 1756.9082, m/z 586.3076  
L OS G30 P160811 220811-s1.05056.05056.3.dta

scan 5056; 8.9e-001

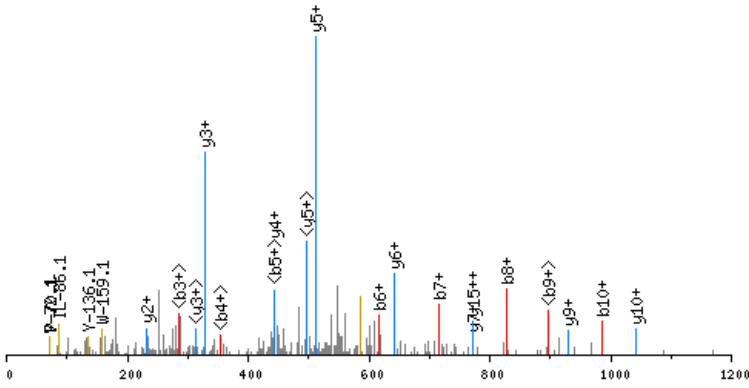

click image to zoom in; click top corners to zoom out

[precursor±]

scan 5054; 586.3 m/z; 2.1e+001

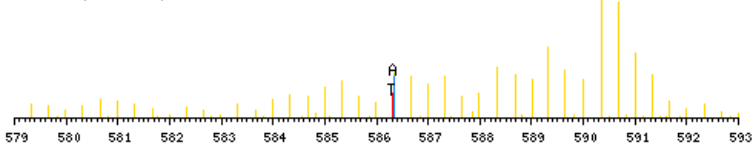

zoomed in precursor plot; T=theoretical m/z, A=acquired m/z

| b <sup>+</sup> | #  | AA | #  | y <sup>+</sup> | y <sup>2+</sup> |
|----------------|----|----|----|----------------|-----------------|
| 100.0399       | 1  | G  | 17 |                |                 |
| 215.0668       | 2  | D  | 16 | 1657.8761      | 829.4420        |
| 302.0988       | 3  | S  | 15 | 1542.8492      | 771.9285        |
| 373.1359       | 4  | A  | 14 | 1455.8172      | 728.4125        |
| 460.1680       | 5  | S  | 13 | 1384.7800      | 692.8939        |
| 616.2943       | 6  | K  | 12 | 1297.7480      | 649.3779        |
| 715.3627       | 7  | V  | 11 | 1141.6217      | 571.3148        |
| 828.4468       | 8  | I  | 10 | 1042.5533      | 521.7806        |
| 915.4788       | 9  | S  | 9  | 929.4692       | 465.2385        |
| 986.5159       | 10 | A  | 8  | 842.4372       | 421.7225        |
| 1115.5585      | 11 | E  | 7  | 771.4001       | 386.2040        |
| 1244.6011      | 12 | E  | 6  | 642.3575       | 321.6827        |
| 1315.6382      | 13 | A  | 5  | 513.3149       | 257.1614        |
| 1428.7223      | 14 | L  | 4  | 442.2778       | 221.6428        |
| 1525.7750      | 15 | P  | 3  | 329.1937       | 165.1008        |
| 1582.7965      | 16 | G  | 2  | 232.1410       | 116.5744        |
|                | 17 | R  | 1  | 175.1195       | 88.0637         |

N-term:+43.02 K(6):+156.13

X-range:

0 - 0

MassTol: Y-zoom:

0. 1.

MassType:

☐AVG ☒MONO

Axis:

☒1 ☐2

Label:

☒I ☐M ☐-

Ions:

a ☐+ ☐2+ ☐3+

b ☒+ ☐2+ ☐3+

c ☐+ ☐2+ ☐3+

x ☐+ ☐2+ ☐3+

y ☒+ ☒2+ ☐3+

z ☐+ ☐2+ ☐3+

hide H<sub>2</sub>O/NH<sub>3</sub> ☐

zoom 112-122 ☐

GO

GETGPAGPAGPIGPAGAR, MH+ 1574.7927, m/z 525.6024  
L OS G30 P160811 220811-s1.03077.03077.3.dta

scan 3077; 1.8e+000

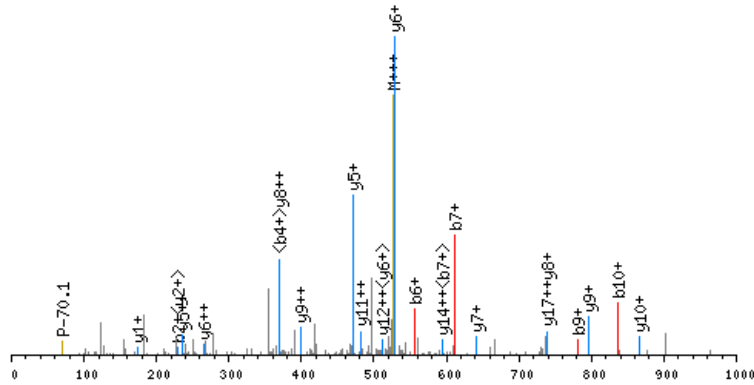

click image to zoom in; click top corners to zoom out [precursor±]

scan 3074; 525.6 m/z; 7.4e+000

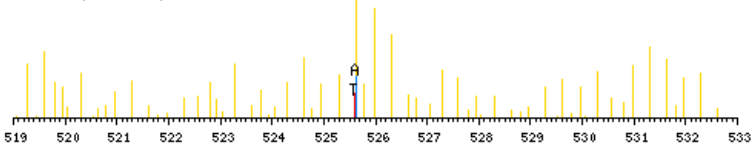

zoomed in precursor plot; T=theoretical m/z, A=acquired m/z

| b <sup>+</sup> | #  | AA | #  | y <sup>+</sup> | y <sup>2+</sup> |
|----------------|----|----|----|----------------|-----------------|
| 100.0399       | 1  | G  | 18 |                |                 |
| 229.0825       | 2  | E  | 17 | 1475.7607      | 738.3842        |
| 330.1301       | 3  | T  | 16 | 1346.7181      | 673.8629        |
| 387.1516       | 4  | G  | 15 | 1245.6704      | 623.3391        |
| 484.2044       | 5  | P  | 14 | 1188.6489      | 594.8284        |
| 555.2415       | 6  | A  | 13 | 1091.5962      | 546.3020        |
| 612.2629       | 7  | G  | 12 | 1020.5591      | 510.7834        |
| 709.3157       | 8  | P  | 11 | 963.5376       | 482.2727        |
| 780.3528       | 9  | A  | 10 | 866.4848       | 433.7463        |
| 837.3743       | 10 | G  | 9  | 795.4477       | 398.2278        |
| 934.4270       | 11 | P  | 8  | 738.4262       | 369.7170        |
| 1047.5111      | 12 | I  | 7  | 641.3735       | 321.1907        |
| 1104.5326      | 13 | G  | 6  | 528.2894       | 264.6486        |
| 1201.5853      | 14 | P  | 5  | 471.2680       | 236.1379        |
| 1272.6225      | 15 | A  | 4  | 374.2152       | 187.6115        |
| 1329.6439      | 16 | G  | 3  | 303.1781       | 152.0930        |
| 1400.6810      | 17 | A  | 2  | 246.1566       | 123.5822        |
|                | 18 | R  | 1  | 175.1195       | 88.0637         |

N-term:+43.02

X-range:

0 - 0

MassTol: Y-zoom:

0. 1.

MassType:

☐AVG ☒MONO

Axis:

☒1 ☐2

Label:

☒I ☐M ☐-

Ions:

a ☐+ ☐2+ ☐3+

b ☒+ ☐2+ ☐3+

c ☐+ ☐2+ ☐3+

x ☐+ ☐2+ ☐3+

y ☒+ ☒2+ ☐3+

z ☐+ ☐2+ ☐3+

hide H<sub>2</sub>O/NH<sub>3</sub> ☐

zoom 112-122 ☐

GO

GKVNSDEVGGEALGR, MH+ 1563.8191, m/z 521.9446  
L OS G34 P160811 220811-s1.03683.03683.3.dta

scan 3683; 2.1e+000

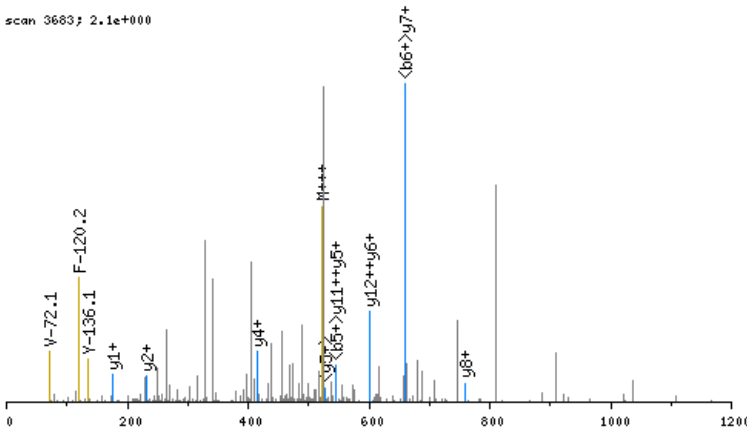

click image to zoom in; click top corners to zoom out

[precursor±]

scan 3680; 521.9 m/z; 6.0e+001

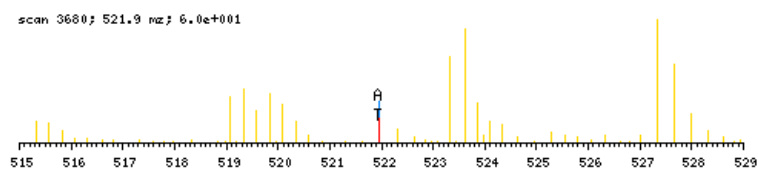

zoomed in precursor plot; T=theoretical m/z, A=acquired m/z

| b <sup>+</sup> | #  | AA | #  | y <sup>+</sup> | y <sup>2+</sup> |
|----------------|----|----|----|----------------|-----------------|
| 100.0399       | 1  | G  | 15 |                |                 |
| 262.1980       | 2  | K  | 14 | 1464.7871      | 732.8975        |
| 361.2664       | 3  | V  | 13 | 1302.6290      | 651.8184        |
| 475.3093       | 4  | N  | 12 | 1203.5606      | 602.2842        |
| 562.3413       | 5  | S  | 11 | 1089.5176      | 545.2627        |
| 677.3683       | 6  | D  | 10 | 1002.4856      | 501.7467        |
| 806.4109       | 7  | E  | 9  | 887.4587       | 444.2332        |
| 905.4793       | 8  | V  | 8  | 758.4161       | 379.7120        |
| 962.5007       | 9  | G  | 7  | 659.3477       | 330.1777        |
| 1019.5222      | 10 | G  | 6  | 602.3262       | 301.6670        |
| 1148.5648      | 11 | E  | 5  | 545.3047       | 273.1563        |
| 1219.6019      | 12 | A  | 4  | 416.2621       | 208.6350        |
| 1332.6860      | 13 | L  | 3  | 345.2250       | 173.1164        |
| 1389.7074      | 14 | G  | 2  | 232.1410       | 116.5744        |
|                | 15 | R  | 1  | 175.1195       | 88.0637         |

N-term:+43.02 K(2):+162.16

X-range:

0 - 0

MassTol: Y-zoom:

0. 1.

MassType:

☐AVG ☒MONO

Axis:

☒1 ☐2

Label:

☒I ☐M ☐-

Ions:

a ☐+ ☐2+ ☐3+

b ☒+ ☐2+ ☐3+

c ☐+ ☐2+ ☐3+

x ☐+ ☐2+ ☐3+

y ☒+ ☒2+ ☐3+

z ☐+ ☐2+ ☐3+

hide H<sub>2</sub>O/NH<sub>3</sub> ☐

zoom 112-122 ☐

GO

GLWSKVNVEEVGGEALGR, MH+ 1976.0666, m/z 659.3604  
L OS G35 P160811 220811-s1.09284.09284.3.dta

scan 9284; 1.7e+000

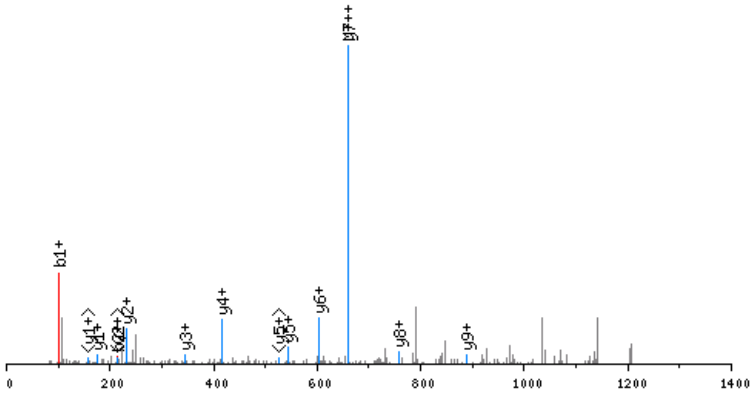

click image to zoom in; click top corners to zoom out

[precursor±]

scan 9283; 659.4 m/z; 6.4e+001

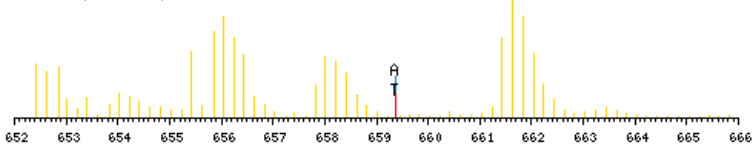

zoomed in precursor plot; T=theoretical m/z, A=acquired m/z

| b <sup>+</sup> | #  | AA | #  | y <sup>+</sup> | y <sup>2+</sup> |
|----------------|----|----|----|----------------|-----------------|
| 100.0399       | 1  | G  | 18 |                |                 |
| 213.1239       | 2  | L  | 17 | 1877.0345      | 939.0212        |
| 399.2032       | 3  | W  | 16 | 1763.9505      | 882.4791        |
| 486.2353       | 4  | S  | 15 | 1577.8711      | 789.4395        |
| 648.3934       | 5  | K  | 14 | 1490.8391      | 745.9235        |
| 747.4618       | 6  | V  | 13 | 1328.6810      | 664.8444        |
| 861.5047       | 7  | N  | 12 | 1229.6126      | 615.3102        |
| 960.5731       | 8  | V  | 11 | 1115.5697      | 558.2888        |
| 1089.6157      | 9  | E  | 10 | 1016.5013      | 508.7545        |
| 1218.6583      | 10 | E  | 9  | 887.4587       | 444.2332        |
| 1317.7267      | 11 | V  | 8  | 758.4161       | 379.7120        |
| 1374.7482      | 12 | G  | 7  | 659.3477       | 330.1777        |
| 1431.7697      | 13 | G  | 6  | 602.3262       | 301.6670        |
| 1560.8122      | 14 | E  | 5  | 545.3047       | 273.1563        |
| 1631.8494      | 15 | A  | 4  | 416.2621       | 208.6350        |
| 1744.9334      | 16 | L  | 3  | 345.2250       | 173.1164        |
| 1801.9549      | 17 | G  | 2  | 232.1410       | 116.5744        |
|                | 18 | R  | 1  | 175.1195       | 88.0637         |

N-term:+43.02 K(5):+162.16

N-term: +43.02

X-range:

0 - 0

MassTol: Y-zoom:

0. 1.

MassType:

☐AVG ☒MONO

Axis:

☒1 ☐2

Label:

☒I ☐M ☐-

Ions:

a ☐+ ☐2+ ☐3+

b ☒+ ☐2+ ☐3+

c ☐+ ☐2+ ☐3+

x ☐+ ☐2+ ☐3+

y ☒+ ☒2+ ☐3+

z ☐+ ☐2+ ☐3+

hide H<sub>2</sub>O/NH<sub>3</sub> ☐

zoom 112-122 ☐

GO

GRVKAAAREGSR, MH+ 1327.7559, m/z 443.2568  
L OS G30 P160811 220811-s1.02431.02431.3.dta

scan 2431; 6.1e+000

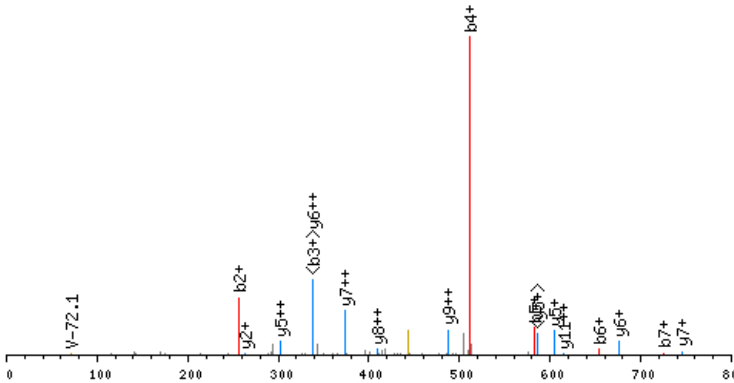

click image to zoom in; click top corners to zoom out

[precursor±]

scan 2429; 443.3 m/z; 7.2e+000

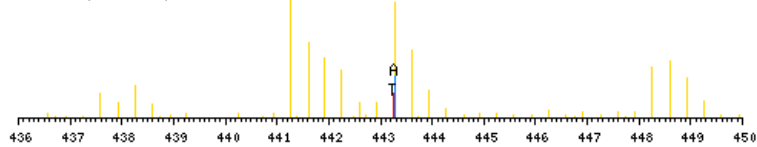

zoomed in precursor plot; T=theoretical m/z, A=acquired m/z

| b <sup>+</sup> | #  | AA | #  | y <sup>+</sup> | y <sup>2+</sup> |
|----------------|----|----|----|----------------|-----------------|
| 100.0399       | 1  | G  | 12 |                |                 |
| 256.1410       | 2  | R  | 11 | 1228.7239      | 614.8658        |
| 355.2094       | 3  | V  | 10 | 1072.6228      | 536.8153        |
| 511.3357       | 4  | K  | 9  | 973.5543       | 487.2811        |
| 582.3728       | 5  | A  | 8  | 817.4280       | 409.2179        |
| 653.4099       | 6  | A  | 7  | 746.3909       | 373.6994        |
| 724.4470       | 7  | A  | 6  | 675.3538       | 338.1808        |
| 880.5481       | 8  | R  | 5  | 604.3167       | 302.6623        |
| 1009.5907      | 9  | E  | 4  | 448.2156       | 224.6117        |
| 1066.6122      | 10 | G  | 3  | 319.1730       | 160.0904        |
| 1153.6442      | 11 | S  | 2  | 262.1515       | 131.5797        |
|                | 12 | R  | 1  | 175.1195       | 88.0637         |

N-term:+43.02 K(4):+156.13

X-range:

0 - 0

MassTol: Y-zoom:

0. 1.

MassType:

☐ AVG ☒ MONO

Axis:

☒ 1 ☐ 2

Label:

☒ I ☐ M ☐ -

Ions:

a ☐ + ☐ 2+ ☐ 3+

b ☒ + ☐ 2+ ☐ 3+

c ☐ + ☐ 2+ ☐ 3+

x ☐ + ☐ 2+ ☐ 3+

y ☒ + ☒ 2+ ☐ 3+

z ☐ + ☐ 2+ ☐ 3+

hide H<sub>2</sub>O/NH<sub>3</sub> ☐

zoom 112-122 ☐

GO

GSEAAQLLEAADFAAHKHR, MH+ 2098.0894, m/z 525.2778  
L OS G34 P160811 220811-s1.08617.08617.4.dta

scan 8617; 1.5e+000

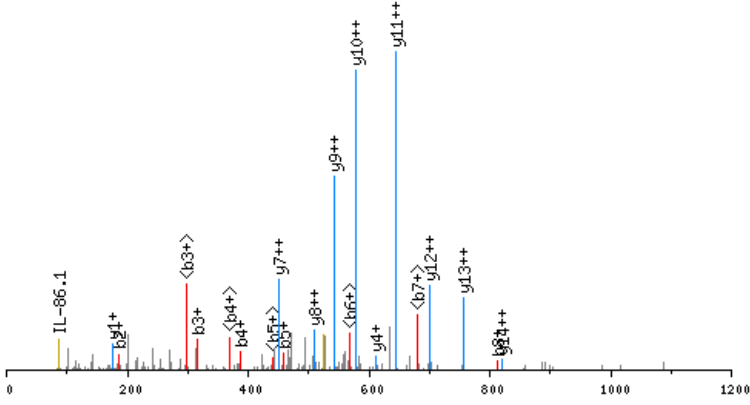

click image to zoom in; click top corners to zoom out [\[precursor±\]](#)

scan 8615; 525.3 m/z; 9.8e+000

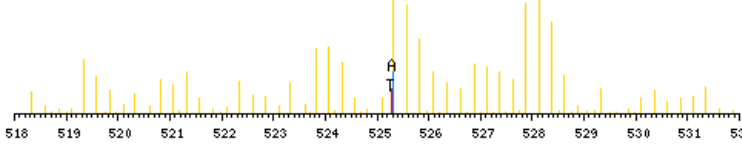

zoomed in precursor plot; T=theoretical m/z, A=acquired m/z

| b <sup>+</sup> | #  | AA | #  | y <sup>+</sup> | y <sup>2+</sup> |
|----------------|----|----|----|----------------|-----------------|
| 100.0399       | 1  | G  | 19 |                |                 |
| 187.0719       | 2  | S  | 18 | 1999.0574      | 1000.0326       |
| 316.1145       | 3  | E  | 17 | 1912.0254      | 956.5166        |
| 387.1516       | 4  | A  | 16 | 1782.9828      | 891.9953        |
| 458.1887       | 5  | A  | 15 | 1711.9456      | 856.4767        |
| 586.2473       | 6  | Q  | 14 | 1640.9085      | 820.9582        |
| 699.3314       | 7  | L  | 13 | 1512.8500      | 756.9289        |
| 812.4154       | 8  | L  | 12 | 1399.7659      | 700.3869        |
| 941.4580       | 9  | E  | 11 | 1286.6818      | 643.8448        |
| 1012.4951      | 10 | A  | 10 | 1157.6392      | 579.3235        |
| 1083.5322      | 11 | A  | 9  | 1086.6021      | 543.8050        |
| 1198.5592      | 12 | D  | 8  | 1015.5650      | 508.2864        |
| 1345.6276      | 13 | F  | 7  | 900.5381       | 450.7729        |
| 1416.6647      | 14 | A  | 6  | 753.4697       | 377.2387        |
| 1487.7018      | 15 | A  | 5  | 682.4325       | 341.7202        |
| 1624.7607      | 16 | H  | 4  | 611.3954       | 306.2016        |
| 1786.9188      | 17 | K  | 3  | 474.3365       | 237.6722        |
| 1923.9777      | 18 | H  | 2  | 312.1784       | 156.5931        |
|                | 19 | R  | 1  | 175.1195       | 88.0637         |

N-term:+43.02 K(17):+162.16

N-term: +43.02

X-range:

0 - 0

MassTol: Y-zoom:

0. 1.

MassType:

☐ AVG ☒ MONO

Axis:

☒ 1 ☐ 2

Label:

☒ I ☐ M ☐ -

Ions:

a ☐ + ☐ 2+ ☐ 3+

b ☒ + ☐ 2+ ☐ 3+

c ☐ + ☐ 2+ ☐ 3+

x ☐ + ☐ 2+ ☐ 3+

y ☒ + ☒ 2+ ☐ 3+

z ☐ + ☐ 2+ ☐ 3+

hide H<sub>2</sub>O/NH<sub>3</sub> ☐

zoom 112-122 ☐

GO

GTLPKQVKIVEVGPR, MH+ 1731.1170, m/z 577.7105  
L OS G32 P160811 220811-s1.04230.04230.3.dta

scan 4230: 1.6e+001

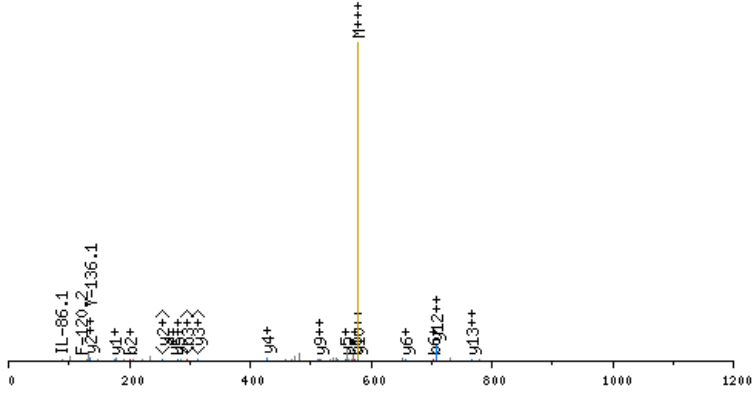

click image to zoom in; click top corners to zoom out [\[precursor±\]](#)

scan 4228: 577.7 m/z; 6.0e+000

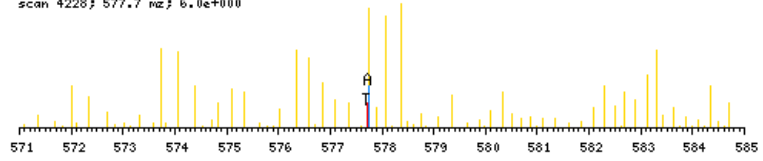

zoomed in precursor plot; T=theoretical m/z, A=acquired m/z

| b <sup>+</sup> | #  | AA | #  | y <sup>+</sup> | y <sup>2+</sup> |
|----------------|----|----|----|----------------|-----------------|
| 100.0399       | 1  | G  | 15 |                |                 |
| 201.0875       | 2  | T  | 14 | 1632.0849      | 816.5464        |
| 314.1716       | 3  | L  | 13 | 1531.0372      | 766.0225        |
| 411.2244       | 4  | P  | 12 | 1417.9532      | 709.4805        |
| 573.3825       | 5  | K  | 11 | 1320.9004      | 660.9541        |
| 701.4410       | 6  | Q  | 10 | 1158.7423      | 579.8751        |
| 800.5095       | 7  | V  | 9  | 1030.6837      | 515.8458        |
| 962.6676       | 8  | K  | 8  | 931.6153       | 466.3116        |
| 1075.7516      | 9  | I  | 7  | 769.4572       | 385.2325        |
| 1174.8200      | 10 | V  | 6  | 656.3731       | 328.6905        |
| 1303.8626      | 11 | E  | 5  | 557.3047       | 279.1563        |
| 1402.9310      | 12 | V  | 4  | 428.2621       | 214.6350        |
| 1459.9525      | 13 | G  | 3  | 329.1937       | 165.1008        |
| 1557.0053      | 14 | P  | 2  | 272.1723       | 136.5900        |
|                | 15 | R  | 1  | 175.1195       | 88.0637         |

N-term:+43.02 K(5):+162.16  
K(8):+162.16

X-range:

0 - 0

MassTol: Y-zoom:

0. 1.

MassType:

☐AVG ☒MONO

Axis:

☒1 ☐2

Label:

☒I ☐M ☐-

Ions:

a ☐+ ☐2+ ☐3+

b ☒+ ☐2+ ☐3+

c ☐+ ☐2+ ☐3+

x ☐+ ☐2+ ☐3+

y ☒+ ☒2+ ☐3+

z ☐+ ☐2+ ☐3+

hide H<sub>2</sub>O/NH<sub>3</sub> ☐

zoom 112-122 ☐

GO

GVQVETISPGDGR, MH+ 1356.6759, m/z 678.8416  
L OS G30 P160811 220811-s1.03146.03146.2.dta

scan 3146; 1.2e+000

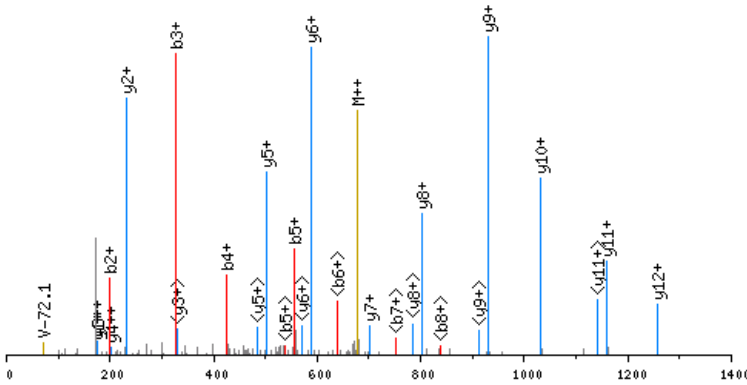

click image to zoom in; click top corners to zoom out

[precursor±]

scan 3144; 678.8 m/z; 1.1e+001

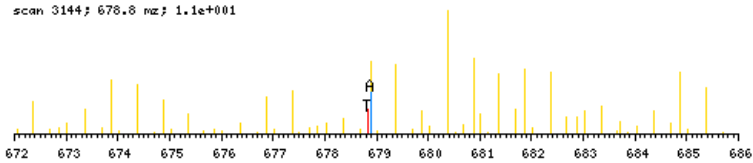

zoomed in precursor plot; T=theoretical m/z, A=acquired m/z

| b <sup>+</sup> | #  | AA | #  | y <sup>+</sup> | y <sup>2+</sup> |
|----------------|----|----|----|----------------|-----------------|
| 100.0399       | 1  | G  | 13 |                |                 |
| 199.1083       | 2  | V  | 12 | 1257.6439      | 629.3259        |
| 327.1669       | 3  | Q  | 11 | 1158.5755      | 579.7917        |
| 426.2353       | 4  | V  | 10 | 1030.5169      | 515.7624        |
| 555.2779       | 5  | E  | 9  | 931.4485       | 466.2282        |
| 656.3255       | 6  | T  | 8  | 802.4059       | 401.7069        |
| 769.4096       | 7  | I  | 7  | 701.3582       | 351.1830        |
| 856.4416       | 8  | S  | 6  | 588.2742       | 294.6410        |
| 953.4944       | 9  | P  | 5  | 501.2421       | 251.1250        |
| 1010.5159      | 10 | G  | 4  | 404.1894       | 202.5986        |
| 1125.5428      | 11 | D  | 3  | 347.1679       | 174.0879        |
| 1182.5643      | 12 | G  | 2  | 232.1410       | 116.5744        |
|                | 13 | R  | 1  | 175.1195       | 88.0637         |

N-term:+43.02

X-range:

0 - 0

MassTol: Y-zoom:

0. 1.

MassType:

☐ AVG ☒ MONO

Axis:

☒ 1 ☐ 2

Label:

☒ I ☐ M ☐ -

Ions:

a ☐ + ☐ 2+ ☐ 3+

b ☒ + ☐ 2+ ☐ 3+

c ☐ + ☐ 2+ ☐ 3+

x ☐ + ☐ 2+ ☐ 3+

y ☒ + ☒ 2+ ☐ 3+

z ☐ + ☐ 2+ ☐ 3+

hide H<sub>2</sub>O/NH<sub>3</sub> ☐

zoom 112-122 ☐

GO

HATGLAAPAGTPR, MH+ 1261.6653, m/z 421.2266  
L OS G30 P160811 220811-s1.03496.03496.3.dta

scan 3496; 2.6e+000

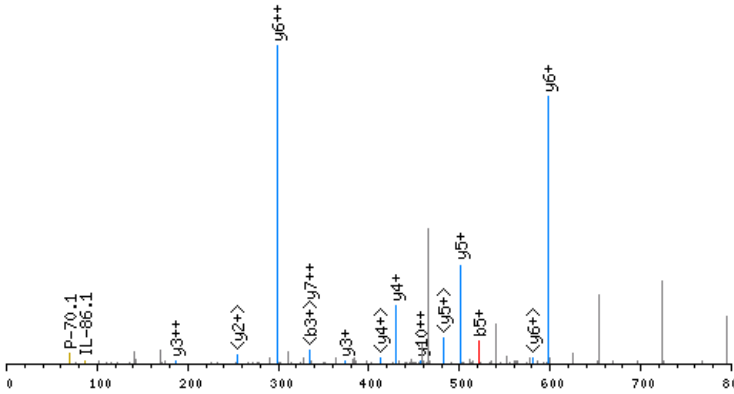

click image to zoom in; click top corners to zoom out [\[precursor±\]](#)

scan 3494; 421.2 m/z; 1.4e+001

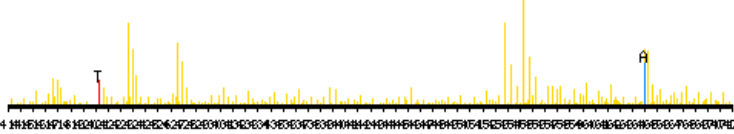

zoomed in precursor plot; T=theoretical m/z, A=acquired m/z

| b <sup>+</sup> | #  | AA | #  | y <sup>+</sup> | y <sup>2+</sup> |
|----------------|----|----|----|----------------|-----------------|
| 180.0773       | 1  | H  | 13 |                |                 |
| 251.1144       | 2  | A  | 12 | 1082.5958      | 541.8018        |
| 352.1621       | 3  | T  | 11 | 1011.5587      | 506.2833        |
| 409.1836       | 4  | G  | 10 | 910.5110       | 455.7594        |
| 522.2676       | 5  | L  | 9  | 853.4896       | 427.2487        |
| 593.3047       | 6  | A  | 8  | 740.4055       | 370.7067        |
| 664.3419       | 7  | A  | 7  | 669.3684       | 335.1881        |
| 761.3946       | 8  | P  | 6  | 598.3313       | 299.6696        |
| 832.4317       | 9  | A  | 5  | 501.2785       | 251.1432        |
| 889.4532       | 10 | G  | 4  | 430.2414       | 215.6246        |
| 990.5009       | 11 | T  | 3  | 373.2199       | 187.1139        |
| 1087.5536      | 12 | P  | 2  | 272.1723       | 136.5900        |
|                | 13 | R  | 1  | 175.1195       | 88.0637         |

N-term:+43.02

X-range:

0 - 0

MassTol: Y-zoom:

0. 1.

MassType:

☐AVG ☒MONO

Axis:

☒1 ☐2

Label:

☒I ☐M ☐-

Ions:

a ☐+ ☐2+ ☐3+

b ☒+ ☐2+ ☐3+

c ☐+ ☐2+ ☐3+

x ☐+ ☐2+ ☐3+

y ☒+ ☒2+ ☐3+

z ☐+ ☐2+ ☐3+

hide H<sub>2</sub>O/NH<sub>3</sub> ☐

zoom 112-122 ☐

GO

HEIATNLGDFAIISLYR, MH+ 1861.9448, m/z 931.4761  
L OS G33 P160811 220811-s1.07384.07384.2.dta

scan 7384; 9.7e+000

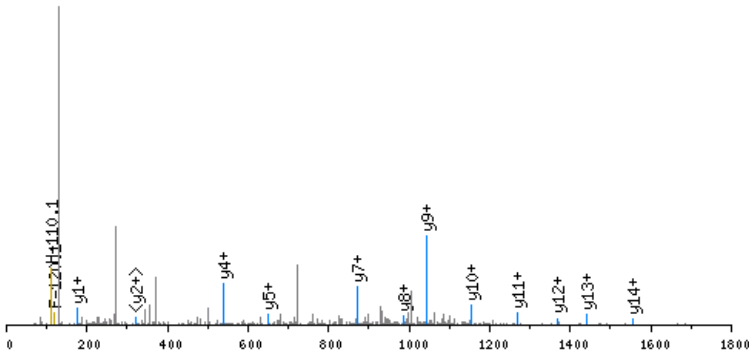

click image to zoom in; click top corners to zoom out

[precursor±]

scan 7382; 931.5 m/z; 2.6e+002

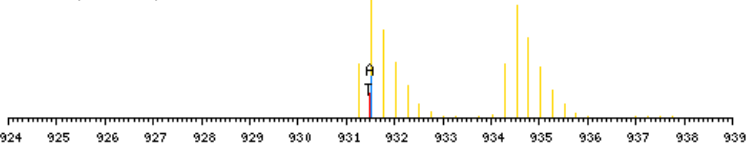

zoomed in precursor plot; T=theoretical m/z, A=acquired m/z

| b <sup>+</sup> | #  | AA | #  | y <sup>+</sup> | y <sup>2+</sup> |
|----------------|----|----|----|----------------|-----------------|
| 180.0773       | 1  | H  | 16 |                |                 |
| 309.1199       | 2  | E  | 15 | 1682.8754      | 841.9416        |
| 422.2040       | 3  | I  | 14 | 1553.8328      | 777.4203        |
| 493.2411       | 4  | A  | 13 | 1440.7487      | 720.8783        |
| 594.2888       | 5  | T  | 12 | 1369.7116      | 685.3597        |
| 708.3317       | 6  | N  | 11 | 1268.6639      | 634.8359        |
| 821.4158       | 7  | L  | 10 | 1154.6210      | 577.8144        |
| 878.4372       | 8  | G  | 9  | 1041.5369      | 521.2724        |
| 993.4642       | 9  | D  | 8  | 984.5155       | 492.7616        |
| 1140.5326      | 10 | F  | 7  | 869.4885       | 435.2482        |
| 1211.5697      | 11 | A  | 6  | 722.4201       | 361.7140        |
| 1324.6538      | 12 | I  | 5  | 651.3830       | 326.1954        |
| 1411.6858      | 13 | S  | 4  | 538.2989       | 269.6534        |
| 1524.7698      | 14 | L  | 3  | 451.2669       | 226.1374        |
| 1687.8332      | 15 | Y  | 2  | 338.1828       | 169.5953        |
|                | 16 | R  | 1  | 175.1195       | 88.0637         |

N-term:+43.02

X-range:

0 - 0

MassTol: Y-zoom:

0. 1.

MassType:

☐AVG ☒MONO

Axis:

☒1 ☐2

Label:

☒I ☐M ☐-

Ions:

a ☐+ ☐2+ ☐3+

b ☒+ ☐2+ ☐3+

c ☐+ ☐2+ ☐3+

x ☐+ ☐2+ ☐3+

y ☒+ ☒2+ ☐3+

z ☐+ ☐2+ ☐3+

hide H<sub>2</sub>O/NH<sub>3</sub> ☐

zoom 112-122 ☐

GO

HGNEALGR, MH+ 895.4386, m/z 448.2229  
L OS G31 P160811 220811-s1.04536.04536.2.dta

scan 4536; 3.1e+000

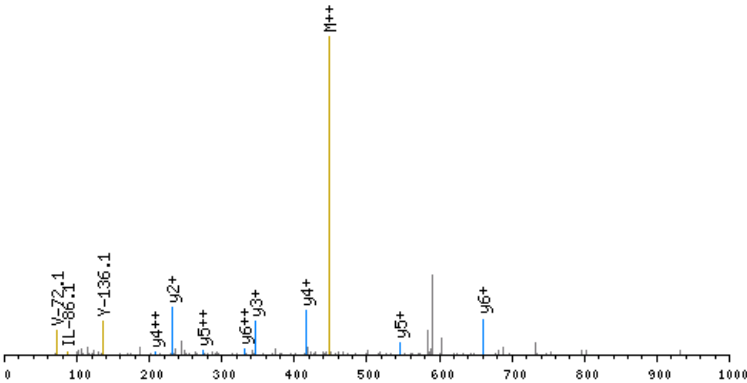

click image to zoom in; click top corners to zoom out [precursor±]

scan 4534; 448.2 m/z; 1.8e+001

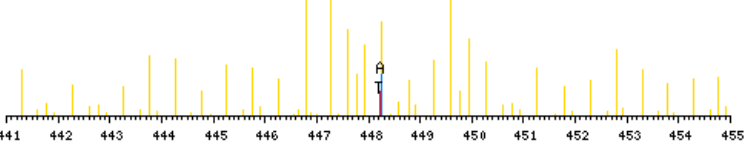

zoomed in precursor plot; T=theoretical m/z, A=acquired m/z

| b <sup>+</sup> | # | AA | # | y <sup>+</sup> | y <sup>2+</sup> |
|----------------|---|----|---|----------------|-----------------|
| 180.0773       | 1 | H  | 8 |                |                 |
| 237.0988       | 2 | G  | 7 | 716.3691       | 358.6885        |
| 351.1417       | 3 | N  | 6 | 659.3477       | 330.1777        |
| 480.1843       | 4 | E  | 5 | 545.3047       | 273.1563        |
| 551.2214       | 5 | A  | 4 | 416.2621       | 208.6350        |
| 664.3055       | 6 | L  | 3 | 345.2250       | 173.1164        |
| 721.3269       | 7 | G  | 2 | 232.1410       | 116.5744        |
|                | 8 | R  | 1 | 175.1195       | 88.0637         |

N-term:+43.02

X-range:

0 - 0

MassTol: Y-zoom:

0. 1.

MassType:

☐AVG ☒MONO

Axis:

☒1 ☐2

Label:

☒I ☐M ☐-

Ions:

a ☐+ ☐2+ ☐3+

b ☒+ ☐2+ ☐3+

c ☐+ ☐2+ ☐3+

x ☐+ ☐2+ ☐3+

y ☒+ ☒2+ ☐3+

z ☐+ ☐2+ ☐3+

hide H<sub>2</sub>O/NH<sub>3</sub> ☐

zoom 112-122 ☐

GO

HQPPESTAAAAAADISAR, MH+ 1876.9153, m/z 626.3100  
L OS G30 P160811 220811-s1.04927.04927.3.dta

scan 4927; 2.1e+000

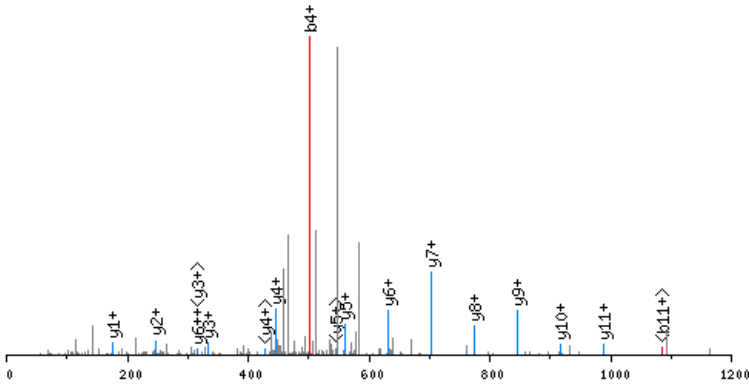

click image to zoom in; click top corners to zoom out

[precursor±]

scan 4924; 626.3 m/z; 3.1e+001

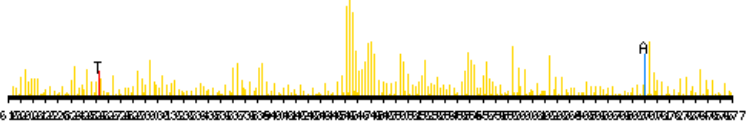

zoomed in precursor plot; T=theoretical m/z, A=acquired m/z

| b <sup>+</sup> | #  | AA | #  | y <sup>+</sup> | y <sup>2+</sup> |
|----------------|----|----|----|----------------|-----------------|
| 180.0773       | 1  | H  | 19 |                |                 |
| 308.1359       | 2  | Q  | 18 | 1697.8459      | 849.4268        |
| 405.1887       | 3  | P  | 17 | 1569.7873      | 785.3975        |
| 502.2414       | 4  | P  | 16 | 1472.7345      | 736.8712        |
| 631.2840       | 5  | E  | 15 | 1375.6817      | 688.3448        |
| 718.3160       | 6  | S  | 14 | 1246.6392      | 623.8235        |
| 819.3637       | 7  | T  | 13 | 1159.6071      | 580.3075        |
| 890.4008       | 8  | A  | 12 | 1058.5594      | 529.7836        |
| 961.4379       | 9  | A  | 11 | 987.5223       | 494.2651        |
| 1032.4751      | 10 | A  | 10 | 916.4852       | 458.7465        |
| 1103.5122      | 11 | A  | 9  | 845.4481       | 423.2280        |
| 1174.5493      | 12 | A  | 8  | 774.4110       | 387.7094        |
| 1245.5864      | 13 | A  | 7  | 703.3739       | 352.1909        |
| 1316.6235      | 14 | A  | 6  | 632.3368       | 316.6723        |
| 1431.6505      | 15 | D  | 5  | 561.2997       | 281.1537        |
| 1544.7345      | 16 | I  | 4  | 446.2727       | 223.6403        |
| 1631.7665      | 17 | S  | 3  | 333.1886       | 167.0982        |
| 1702.8037      | 18 | A  | 2  | 246.1566       | 123.5822        |
|                | 19 | R  | 1  | 175.1195       | 88.0637         |

N-term:+43.02

X-range:

0 - 0

MassTol: Y-zoom:

0. 1.

MassType:

☐AVG ☒MONO

Axis:

☒1 ☐2

Label:

☒I ☐M ☐-

Ions:

a ☐+ ☐2+ ☐3+

b ☒+ ☐2+ ☐3+

c ☐+ ☐2+ ☐3+

x ☐+ ☐2+ ☐3+

y ☒+ ☒2+ ☐3+

z ☐+ ☐2+ ☐3+

hide H<sub>2</sub>O/NH<sub>3</sub> ☐

zoom 112-122 ☐

GO

HSLATAAPVPTALAQVDR, MH+ 1859.9979, m/z 620.6708  
L OS G30 P160811 220811-s1.06681.06681.3.dta

scan 6681; 1.1e+000

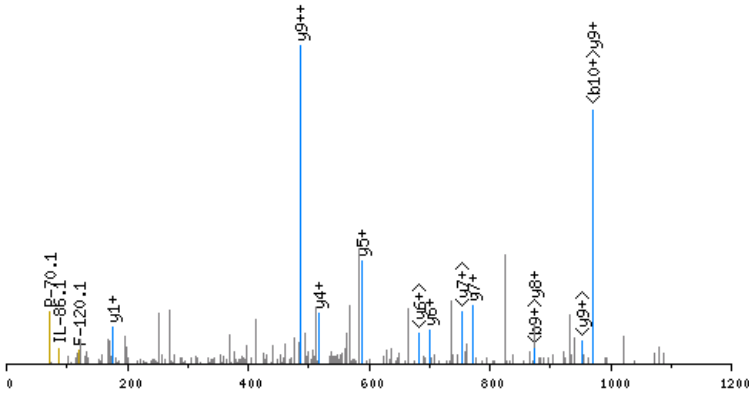

click image to zoom in; click top corners to zoom out [\[precursor±\]](#)

scan 6679; 620.7 m/z; 2.1e+001

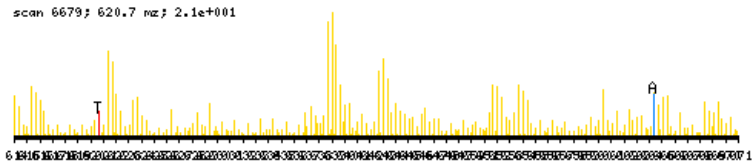

zoomed in precursor plot; T=theoretical m/z, A=acquired m/z

| b <sup>+</sup> | #  | AA | #  | y <sup>+</sup> | y <sup>2+</sup> |
|----------------|----|----|----|----------------|-----------------|
| 180.0773       | 1  | H  | 18 |                |                 |
| 267.1093       | 2  | S  | 17 | 1680.9285      | 840.9681        |
| 380.1934       | 3  | L  | 16 | 1593.8964      | 797.4521        |
| 451.2305       | 4  | A  | 15 | 1480.8124      | 740.9101        |
| 552.2782       | 5  | T  | 14 | 1409.7753      | 705.3915        |
| 623.3153       | 6  | A  | 13 | 1308.7276      | 654.8677        |
| 694.3524       | 7  | A  | 12 | 1237.6905      | 619.3491        |
| 791.4052       | 8  | P  | 11 | 1166.6533      | 583.8306        |
| 890.4736       | 9  | V  | 10 | 1069.6006      | 535.3042        |
| 987.5264       | 10 | P  | 9  | 970.5322       | 485.7700        |
| 1088.5740      | 11 | T  | 8  | 873.4794       | 437.2436        |
| 1159.6112      | 12 | A  | 7  | 772.4317       | 386.7198        |
| 1272.6952      | 13 | L  | 6  | 701.3946       | 351.2012        |
| 1343.7323      | 14 | A  | 5  | 588.3105       | 294.6592        |
| 1471.7909      | 15 | Q  | 4  | 517.2734       | 259.1406        |
| 1570.8593      | 16 | V  | 3  | 389.2149       | 195.1113        |
| 1685.8863      | 17 | D  | 2  | 290.1464       | 145.5771        |
|                | 18 | R  | 1  | 175.1195       | 88.0637         |

N-term:+43.02

X-range:

0 - 0

MassTol: Y-zoom:

0. 1.

MassType:

☐ AVG ☒ MONO

Axis:

☒ 1 ☐ 2

Label:

☒ I ☐ M ☐ -

Ions:

a ☐ + ☐ 2+ ☐ 3+

b ☒ + ☐ 2+ ☐ 3+

c ☐ + ☐ 2+ ☐ 3+

x ☐ + ☐ 2+ ☐ 3+

y ☒ + ☒ 2+ ☐ 3+

z ☐ + ☐ 2+ ☐ 3+

hide H<sub>2</sub>O/NH<sub>3</sub> ☐

zoom 112-122 ☐

GO

IQMTQSTSSLSASLGDR, MH+ 1823.8809, m/z 608.6318  
L OS G30 P160811 220811-s1.05700.05700.3.dta

scan 5700; 9.7e+000

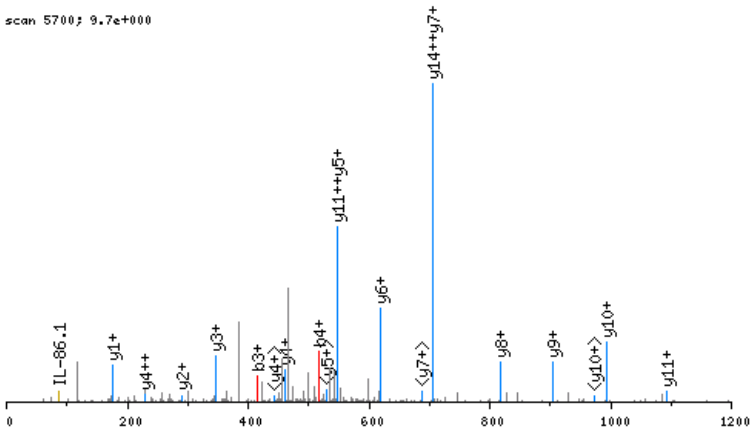

click image to zoom in; click top corners to zoom out

[precursor±]

scan 5699; 608.6 m/z; 1.1e+002

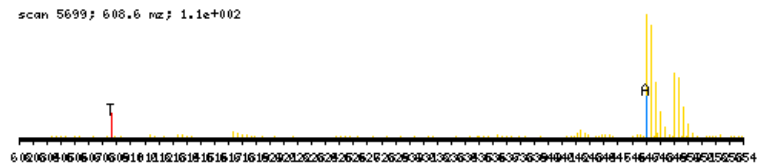

zoomed in precursor plot; T=theoretical m/z, A=acquired m/z

| b <sup>+</sup> | #  | AA | #  | y <sup>+</sup> | y <sup>2+</sup> |
|----------------|----|----|----|----------------|-----------------|
| 156.1025       | 1  | I  | 17 |                |                 |
| 284.1610       | 2  | Q  | 16 | 1668.7863      | 834.8971        |
| 415.2015       | 3  | M  | 15 | 1540.7277      | 770.8678        |
| 516.2492       | 4  | T  | 14 | 1409.6872      | 705.3475        |
| 644.3078       | 5  | Q  | 13 | 1308.6395      | 654.8237        |
| 731.3398       | 6  | S  | 12 | 1180.5810      | 590.7944        |
| 832.3875       | 7  | T  | 11 | 1093.5489      | 547.2784        |
| 919.4195       | 8  | S  | 10 | 992.5013       | 496.7545        |
| 1006.4515      | 9  | S  | 9  | 905.4692       | 453.2385        |
| 1119.5356      | 10 | L  | 8  | 818.4372       | 409.7225        |
| 1206.5676      | 11 | S  | 7  | 705.3531       | 353.1805        |
| 1277.6048      | 12 | A  | 6  | 618.3211       | 309.6645        |
| 1364.6368      | 13 | S  | 5  | 547.2840       | 274.1459        |
| 1477.7208      | 14 | L  | 4  | 460.2520       | 230.6299        |
| 1534.7423      | 15 | G  | 3  | 347.1679       | 174.0879        |
| 1649.7693      | 16 | D  | 2  | 290.1464       | 145.5771        |
|                | 17 | R  | 1  | 175.1195       | 88.0637         |

N-term:+43.02

X-range:

0 - 0

MassTol: Y-zoom:

0. 1.

MassType:

☐AVG ☒MONO

Axis:

☒1 ☐2

Label:

☒I ☐M ☐-

Ions:

a ☐+ ☐2+ ☐3+

b ☒+ ☐2+ ☐3+

c ☐+ ☐2+ ☐3+

x ☐+ ☐2+ ☐3+

y ☒+ ☒2+ ☐3+

z ☐+ ☐2+ ☐3+

hide H<sub>2</sub>O/NH<sub>3</sub> ☐

zoom 112-122 ☐

GO

IQMTQTTSSLSASLGDR, MH+ 1837.8966, m/z 613.3037  
L OS G30 P160811 220811-s1.04575.04575.3.dta

scan 4575; 1.8e+000

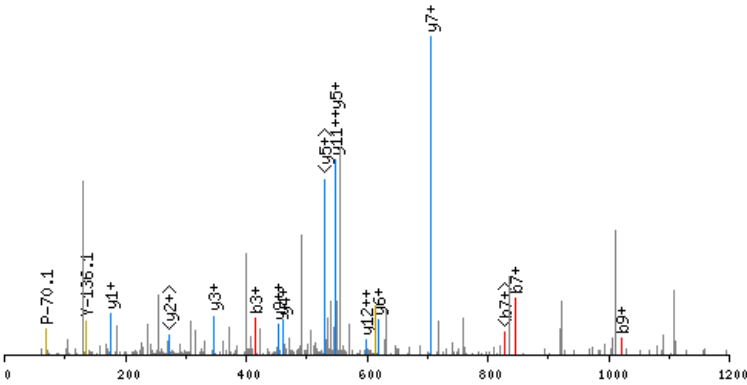

click image to zoom in; click top corners to zoom out [precursor±]

scan 4574; 613.3 m/z; 8.5e+001

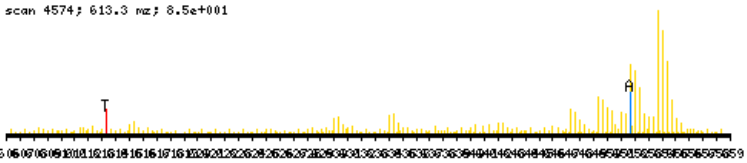

zoomed in precursor plot; T=theoretical m/z, A=acquired m/z

| b <sup>+</sup> | #  | AA | #  | y <sup>+</sup> | y <sup>2+</sup> |
|----------------|----|----|----|----------------|-----------------|
| 156.1025       | 1  | I  | 17 |                |                 |
| 284.1610       | 2  | Q  | 16 | 1682.8019      | 841.9049        |
| 415.2015       | 3  | M  | 15 | 1554.7434      | 777.8756        |
| 516.2492       | 4  | T  | 14 | 1423.7029      | 712.3554        |
| 644.3078       | 5  | Q  | 13 | 1322.6552      | 661.8315        |
| 745.3555       | 6  | T  | 12 | 1194.5966      | 597.8022        |
| 846.4031       | 7  | T  | 11 | 1093.5489      | 547.2784        |
| 933.4352       | 8  | S  | 10 | 992.5013       | 496.7545        |
| 1020.4672      | 9  | S  | 9  | 905.4692       | 453.2385        |
| 1133.5513      | 10 | L  | 8  | 818.4372       | 409.7225        |
| 1220.5833      | 11 | S  | 7  | 705.3531       | 353.1805        |
| 1291.6204      | 12 | A  | 6  | 618.3211       | 309.6645        |
| 1378.6524      | 13 | S  | 5  | 547.2840       | 274.1459        |
| 1491.7365      | 14 | L  | 4  | 460.2520       | 230.6299        |
| 1548.7580      | 15 | G  | 3  | 347.1679       | 174.0879        |
| 1663.7849      | 16 | D  | 2  | 290.1464       | 145.5771        |
|                | 17 | R  | 1  | 175.1195       | 88.0637         |

N-term:+43.02

X-range:

0 - 0

MassTol: Y-zoom:

0. 1.

MassType:

☐AVG ☒MONO

Axis:

☒1 ☐2

Label:

☒I ☐M ☐-

Ions:

a ☐+ ☐2+ ☐3+

b ☒+ ☐2+ ☐3+

c ☐+ ☐2+ ☐3+

x ☐+ ☐2+ ☐3+

y ☒+ ☒2+ ☐3+

z ☐+ ☐2+ ☐3+

hide H<sub>2</sub>O/NH<sub>3</sub> ☐

zoom 112-122 ☐

GO

KDLFDPIIQDR, MH+ 1435.8010, m/z 479.2718  
L OS G31 P160811 220811-s1.07838.07838.3.dta

scan 7838; 4.0e+000

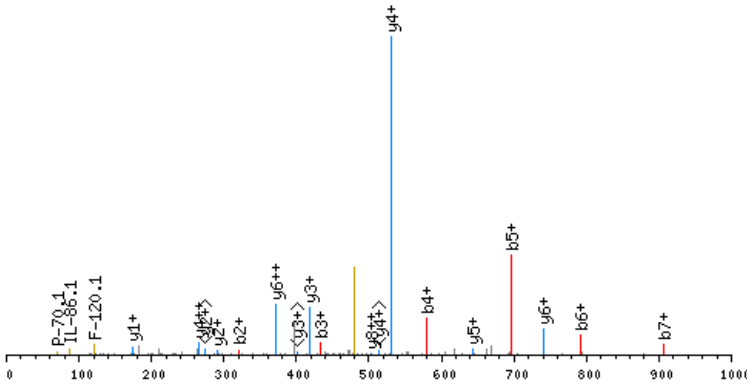

click image to zoom in; click top corners to zoom out [\[precursor±\]](#)

scan 7834; 479.3 m/z; 2.5e+000

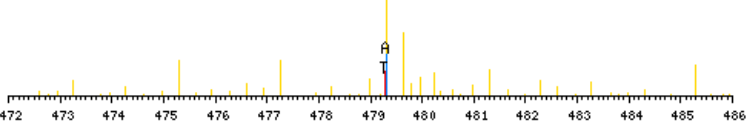

zoomed in precursor plot; T=theoretical m/z, A=acquired m/z

| b <sup>+</sup> | #  | AA | #  | y <sup>+</sup> | y <sup>2+</sup> |
|----------------|----|----|----|----------------|-----------------|
| 205.1765       | 1  | K  | 11 |                |                 |
| 320.2034       | 2  | D  | 10 | 1231.6323      | 616.3201        |
| 433.2875       | 3  | L  | 9  | 1116.6053      | 558.8066        |
| 580.3559       | 4  | F  | 8  | 1003.5213      | 502.2645        |
| 695.3829       | 5  | D  | 7  | 856.4529       | 428.7303        |
| 792.4356       | 6  | P  | 6  | 741.4259       | 371.2169        |
| 905.5197       | 7  | I  | 5  | 644.3731       | 322.6905        |
| 1018.6038      | 8  | I  | 4  | 531.2891       | 266.1485        |
| 1146.6623      | 9  | Q  | 3  | 418.2050       | 209.6064        |
| 1261.6893      | 10 | D  | 2  | 290.1464       | 145.5771        |
|                | 11 | R  | 1  | 175.1195       | 88.0637         |

N-term:+43.02 K(1):+162.16

X-range:

0 - 0

MassTol: Y-zoom:

0. 1.

MassType:

☐ AVG ☒ MONO

Axis:

☒ 1 ☐ 2

Label:

☒ I ☐ M ☐ -

Ions:

a ☐ + ☐ 2+ ☐ 3+

b ☒ + ☐ 2+ ☐ 3+

c ☐ + ☐ 2+ ☐ 3+

x ☐ + ☐ 2+ ☐ 3+

y ☒ + ☒ 2+ ☐ 3+

z ☐ + ☐ 2+ ☐ 3+

hide H<sub>2</sub>O/NH<sub>3</sub> ☐

zoom 112-122 ☐

GO

KEAFTVIDQNR, MH+ 1396.7649, m/z 466.2598  
L OS G32 P160811 220811-s1.04055.04055.3.dta

scan 4055; 3.6e+000

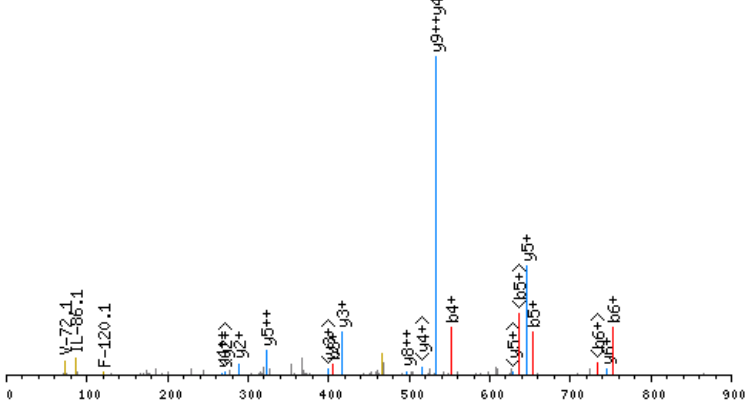

click image to zoom in; click top corners to zoom out

[precursor±]

scan 4053; 466.3 m/z; 5.5e+000

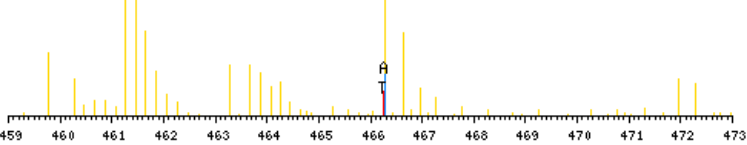

zoomed in precursor plot; T=theoretical m/z, A=acquired m/z

| b <sup>+</sup> | #  | AA | #  | y <sup>+</sup> | y <sup>2+</sup> |
|----------------|----|----|----|----------------|-----------------|
| 205.1765       | 1  | K  | 11 |                |                 |
| 334.2191       | 2  | E  | 10 | 1192.5962      | 596.8020        |
| 405.2562       | 3  | A  | 9  | 1063.5536      | 532.2807        |
| 552.3246       | 4  | F  | 8  | 992.5165       | 496.7622        |
| 653.3723       | 5  | T  | 7  | 845.4481       | 423.2280        |
| 752.4407       | 6  | V  | 6  | 744.4004       | 372.7041        |
| 865.5248       | 7  | I  | 5  | 645.3320       | 323.1699        |
| 980.5517       | 8  | D  | 4  | 532.2479       | 266.6279        |
| 1108.6103      | 9  | Q  | 3  | 417.2210       | 209.1144        |
| 1222.6532      | 10 | N  | 2  | 289.1624       | 145.0851        |
|                | 11 | R  | 1  | 175.1195       | 88.0637         |

N-term:+43.02 K(1):+162.16

X-range:

0 - 0

MassTol: Y-zoom:

0. 1.

MassType:

☐AVG ☒MONO

Axis:

☒1 ☐2

Label:

☒I ☐M ☐-

Ions:

a ☐+ ☐2+ ☐3+

b ☒+ ☐2+ ☐3+

c ☐+ ☐2+ ☐3+

x ☐+ ☐2+ ☐3+

y ☒+ ☒2+ ☐3+

z ☐+ ☐2+ ☐3+

hide H<sub>2</sub>O/NH<sub>3</sub> ☐

zoom 112-122 ☐

GO

KEDLIQKSLGACQDCKVR, MH+ 2292.2904, m/z 573.8281  
L OS G33 P160811 220811-s1.02406.02406.4.dta

scan 2406; 2.0e+000

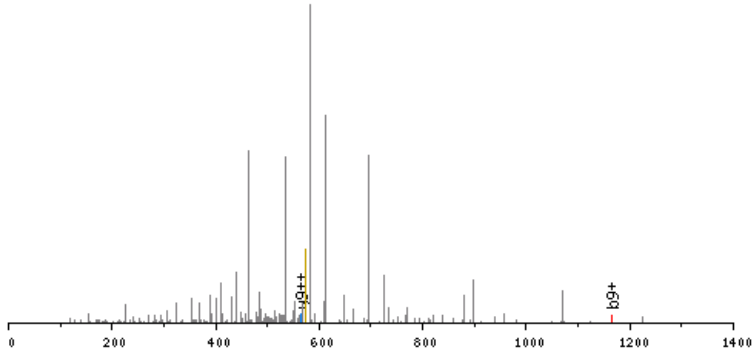

click image to zoom in; click top corners to zoom out [\[precursor±\]](#)

scan 2402; 573.8 m/z; 2.7e+000

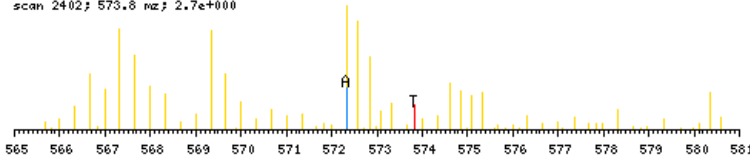

zoomed in precursor plot; T=theoretical m/z, A=acquired m/z

| b <sup>+</sup> | #  | AA | #  | y <sup>+</sup> | y <sup>2+</sup> |
|----------------|----|----|----|----------------|-----------------|
| 205.1765       | 1  | K  | 18 |                |                 |
| 334.2191       | 2  | E  | 17 | 2088.1217      | 1044.5648       |
| 449.2460       | 3  | D  | 16 | 1959.0792      | 980.0435        |
| 562.3301       | 4  | L  | 15 | 1844.0522      | 922.5300        |
| 675.4142       | 5  | I  | 14 | 1730.9681      | 865.9880        |
| 803.4727       | 6  | Q  | 13 | 1617.8841      | 809.4460        |
| 965.6308       | 7  | K  | 12 | 1489.8255      | 745.4167        |
| 1052.6629      | 8  | S  | 11 | 1327.6674      | 664.3376        |
| 1165.7469      | 9  | L  | 10 | 1240.6354      | 620.8216        |
| 1222.7684      | 10 | G  | 9  | 1127.5513      | 564.2796        |
| 1293.8055      | 11 | A  | 8  | 1070.5298      | 535.7688        |
| 1453.8361      | 12 | C  | 7  | 999.4927       | 500.2503        |
| 1581.8947      | 13 | Q  | 6  | 839.4621       | 420.2350        |
| 1696.9216      | 14 | D  | 5  | 711.4036       | 356.2057        |
| 1856.9522      | 15 | C  | 4  | 596.3766       | 298.6922        |
| 2019.1103      | 16 | K  | 3  | 436.3460       | 218.6769        |
| 2118.1787      | 17 | V  | 2  | 274.1879       | 137.5979        |
|                | 18 | R  | 1  | 175.1195       | 88.0637         |

N-term:+43.02 K(1):+162.16  
K(7):+162.16 C(12):+160.03  
C(15):+160.03 K(16):+162.16

X-range:

0 - 0

MassTol: Y-zoom:

0. 1.

MassType:

☐ AVG ☒ MONO

Axis:

☒ 1 ☐ 2

Label:

☒ I ☐ M ☐ -

Ions:

a ☐ + ☐ 2+ ☐ 3+

b ☒ + ☐ 2+ ☐ 3+

c ☐ + ☐ 2+ ☐ 3+

x ☐ + ☐ 2+ ☐ 3+

y ☒ + ☒ 2+ ☐ 3+

z ☐ + ☐ 2+ ☐ 3+

hide H<sub>2</sub>O/NH<sub>3</sub> ☐

zoom 112-122 ☐

GO

KESVSADCNHSFCR, MH+ 1772.7908, m/z 591.6018  
L OS G30 P160811 220811-s1.03058.03058.3.dta

scan 3058; 2.4e+000

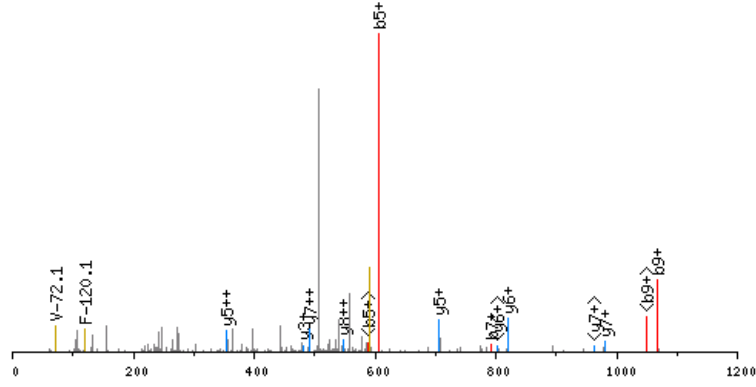

click image to zoom in; click top corners to zoom out [\[precursor±\]](#)

scan 3054; 591.6 m/z; 1.1e+001

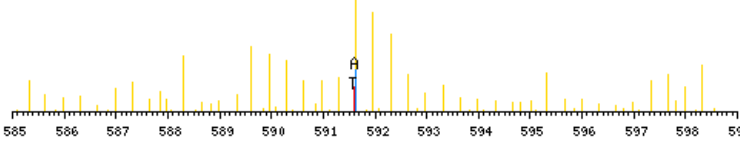

zoomed in precursor plot; T=theoretical m/z, A=acquired m/z

| b <sup>+</sup> | #  | AA | #  | y <sup>+</sup> | y <sup>2+</sup> |
|----------------|----|----|----|----------------|-----------------|
| 205.1765       | 1  | K  | 14 |                |                 |
| 334.2191       | 2  | E  | 13 | 1568.6221      | 784.8150        |
| 421.2511       | 3  | S  | 12 | 1439.5795      | 720.2937        |
| 520.3195       | 4  | V  | 11 | 1352.5475      | 676.7777        |
| 607.3516       | 5  | S  | 10 | 1253.4791      | 627.2434        |
| 678.3887       | 6  | A  | 9  | 1166.4470      | 583.7274        |
| 793.4156       | 7  | D  | 8  | 1095.4099      | 548.2089        |
| 953.4462       | 8  | C  | 7  | 980.3830       | 490.6954        |
| 1067.4891      | 9  | N  | 6  | 820.3524       | 410.6801        |
| 1204.5481      | 10 | H  | 5  | 706.3095       | 353.6586        |
| 1291.5801      | 11 | S  | 4  | 569.2505       | 285.1292        |
| 1438.6485      | 12 | F  | 3  | 482.2185       | 241.6132        |
| 1598.6791      | 13 | C  | 2  | 335.1501       | 168.0790        |
|                | 14 | R  | 1  | 175.1195       | 88.0637         |

N-term:+43.02 K(1):+162.16  
C(8):+160.03 C(13):+160.03

KLNFSGLR, MH+ 1004.5893, m/z 502.7983  
L OS G31 P160811 220811-s1.07241.07241.2.dta

```
scan 7241: 4.3e+001
```

X-range:

MassTol: Y-zoom:

|   |  |   |
|---|--|---|
| 0 |  | 1 |
|---|--|---|

**MassType:**



Axis:

1 2

Label:

☒ T ☐ M ☐ —

Ions:

a  + <sup>2</sup> + <sup>3</sup> +

 $\frac{1}{2} + \frac{1}{2} + \frac{1}{2}$ 






CHITRA

x | | | |

|   |                                     |                                     |                          |
|---|-------------------------------------|-------------------------------------|--------------------------|
| y | <input checked="" type="checkbox"/> | <input checked="" type="checkbox"/> | <input type="checkbox"/> |
|---|-------------------------------------|-------------------------------------|--------------------------|

$$2 \cdot \boxed{\phantom{00}} + \boxed{\phantom{00}}^2 + \boxed{\phantom{00}}^3 +$$
hide: 100% / 100% 

110 100

60

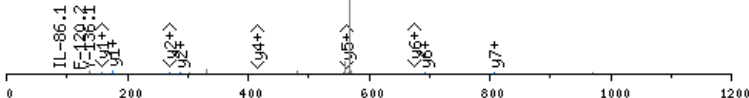

click image to zoom in: click top corners to zoom out      [precursortitle]

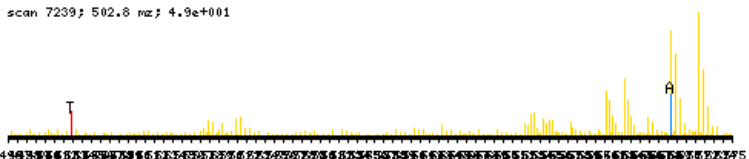

zoomed in precursor plot: T=theoretical m/z     $\Delta$ =acquired m/z

| $b^+$    | # | AA | # | $y^+$    | $y^{2+}$ |
|----------|---|----|---|----------|----------|
| 199.1447 | 1 | K  | 8 |          |          |
| 312.2288 | 2 | L  | 7 | 806.4525 | 403.7301 |
| 426.2717 | 3 | N  | 6 | 693.3684 | 347.1881 |
| 573.3401 | 4 | F  | 5 | 579.3255 | 290.1666 |
| 660.3721 | 5 | S  | 4 | 432.2571 | 216.6324 |
| 717.3936 | 6 | G  | 3 | 345.2250 | 173.1164 |
| 830.4777 | 7 | L  | 2 | 288.2036 | 144.6057 |
|          | 8 | R  | 1 | 175.1195 | 88.0637  |

$$N\text{-term} = +43.02 \quad K(1) = +156.13$$

X-range:

0 - 0

MassTol: Y-zoom:

0. 1.

MassType:

☐ AVG ☒ MONO

Axis:

☒ 1 ☐ 2

Label:

☒ I ☐ M ☐ -

Ions:

a ☐ + ☐ 2+ ☐ 3+

b ☒ + ☐ 2+ ☐ 3+

c ☐ + ☐ 2+ ☐ 3+

x ☐ + ☐ 2+ ☐ 3+

y ☒ + ☒ 2+ ☐ 3+

z ☐ + ☐ 2+ ☐ 3+

hide H<sub>2</sub>O/NH<sub>3</sub> ☐

zoom 112-122 ☐

GO

KNKEMDIDESLYSR, MH+ 1825.9007, m/z 609.3051  
L OS G30 P160811 220811-s1.04051.04051.3.dta

scan 4051; 2.0e+000

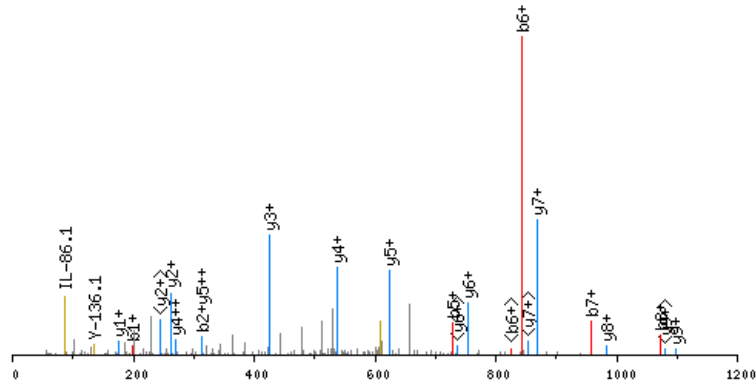

click image to zoom in; click top corners to zoom out [\[precursor±\]](#)

scan 4049; 609.3 m/z; 1.3e+001

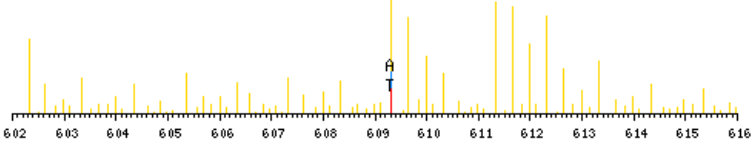

zoomed in precursor plot; T=theoretical m/z, A=acquired m/z

| b <sup>+</sup> | #  | AA | #  | y <sup>+</sup> | y <sup>2+</sup> |
|----------------|----|----|----|----------------|-----------------|
| 199.1447       | 1  | K  | 14 |                |                 |
| 313.1876       | 2  | N  | 13 | 1627.7638      | 814.3858        |
| 469.3139       | 3  | K  | 12 | 1513.7209      | 757.3643        |
| 598.3565       | 4  | E  | 11 | 1357.5946      | 679.3012        |
| 729.3970       | 5  | M  | 10 | 1228.5520      | 614.7799        |
| 844.4239       | 6  | D  | 9  | 1097.5115      | 549.2597        |
| 957.5080       | 7  | I  | 8  | 982.4846       | 491.7462        |
| 1072.5350      | 8  | D  | 7  | 869.4005       | 435.2042        |
| 1201.5775      | 9  | E  | 6  | 754.3735       | 377.6907        |
| 1288.6096      | 10 | S  | 5  | 625.3310       | 313.1694        |
| 1401.6936      | 11 | L  | 4  | 538.2989       | 269.6534        |
| 1564.7570      | 12 | Y  | 3  | 425.2149       | 213.1113        |
| 1651.7890      | 13 | S  | 2  | 262.1515       | 131.5797        |
|                | 14 | R  | 1  | 175.1195       | 88.0637         |

N-term:+43.02 K(1):+156.13  
K(3):+156.13

X-range:

0 - 0

MassTol: Y-zoom:

0. 1.

MassType:

☐ AVG ☒ MONO

Axis:

☒ 1 ☐ 2

Label:

☒ I ☐ M ☐ -

Ions:

a ☐ + ☐ 2+ ☐ 3+

b ☒ + ☐ 2+ ☐ 3+

c ☐ + ☐ 2+ ☐ 3+

x ☐ + ☐ 2+ ☐ 3+

y ☒ + ☒ 2+ ☐ 3+

z ☐ + ☐ 2+ ☐ 3+

hide H<sub>2</sub>O/NH<sub>3</sub> ☐

zoom 112-122 ☐

GO

KPVDQYEDCYLAR, MH+ 1732.8428, m/z 578.2858  
L OS G32 P160811 220811-s1.04027.04027.3.dta

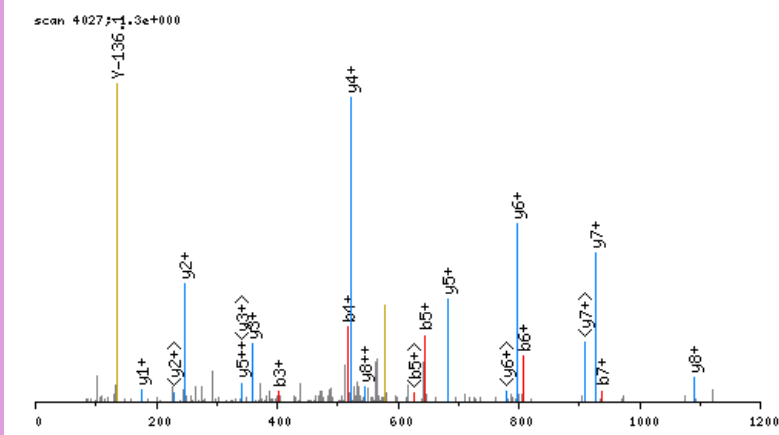

click image to zoom in; click top corners to zoom out [\[precursor±\]](#)

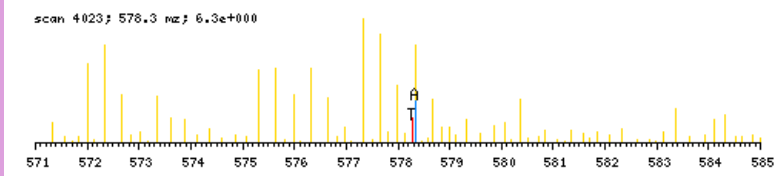

zoomed in precursor plot; T=theoretical m/z, A=acquired m/z

| b <sup>+</sup> | #  | AA | #  | y <sup>+</sup> | y <sup>2+</sup> |
|----------------|----|----|----|----------------|-----------------|
| 205.1765       | 1  | K  | 13 |                |                 |
| 302.2293       | 2  | P  | 12 | 1528.6742      | 764.8410        |
| 401.2977       | 3  | V  | 11 | 1431.6214      | 716.3146        |
| 516.3246       | 4  | D  | 10 | 1332.5530      | 666.7804        |
| 644.3832       | 5  | Q  | 9  | 1217.5260      | 609.2669        |
| 807.4465       | 6  | Y  | 8  | 1089.4675      | 545.2376        |
| 936.4891       | 7  | E  | 7  | 926.4041       | 463.7060        |
| 1051.5161      | 8  | D  | 6  | 797.3616       | 399.1847        |
| 1211.5467      | 9  | C  | 5  | 682.3346       | 341.6712        |
| 1374.6100      | 10 | Y  | 4  | 522.3040       | 261.6559        |
| 1487.6941      | 11 | L  | 3  | 359.2407       | 180.1243        |
| 1558.7312      | 12 | A  | 2  | 246.1566       | 123.5822        |
|                | 13 | R  | 1  | 175.1195       | 88.0637         |

N-term:+43.02 K(1):+162.16  
C(9):+160.03

X-range:

0 - 0

MassTol: Y-zoom:

0. 1.

MassType:

☐AVG ☒MONO

Axis:

☒1 ☐2

Label:

☒I ☐M ☐-

Ions:

a ☐+ ☐2+ ☐3+

b ☒+ ☐2+ ☐3+

c ☐+ ☐2+ ☐3+

x ☐+ ☐2+ ☐3+

y ☒+ ☒2+ ☐3+

z ☐+ ☐2+ ☐3+

hide H<sub>2</sub>O/NH<sub>3</sub> ☐

zoom 112-122 ☐

GO

KQPKNLEGYVGFANLPNQVYR, MH+ 2533.3568, m/z 634.0947  
L OS G32 P160811 220811-s1.05831.05831.4.dta

scan 5831; 2.9e+000

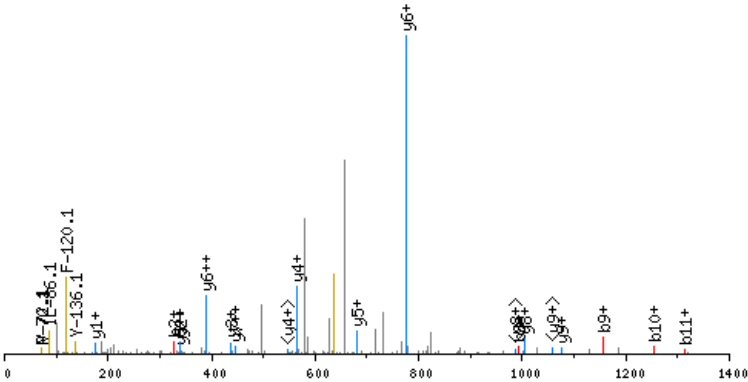

click image to zoom in; click top corners to zoom out

[precursor±]

scan 5828; 634.1 m/z; 9.6e+000

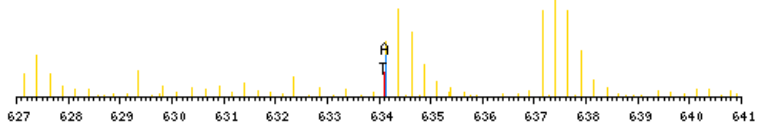

zoomed in precursor plot; T=theoretical m/z, A=acquired m/z

| b <sup>+</sup> | #  | AA | #  | y <sup>+</sup> | y <sup>2+</sup> |
|----------------|----|----|----|----------------|-----------------|
| 199.1447       | 1  | K  | 21 |                |                 |
| 327.2033       | 2  | Q  | 20 | 2335.2199      | 1168.1139       |
| 424.2560       | 3  | P  | 19 | 2207.1613      | 1104.0846       |
| 580.3823       | 4  | K  | 18 | 2110.1086      | 1055.5582       |
| 694.4253       | 5  | N  | 17 | 1953.9823      | 977.4951        |
| 807.5093       | 6  | L  | 16 | 1839.9394      | 920.4736        |
| 936.5519       | 7  | E  | 15 | 1726.8553      | 863.9316        |
| 993.5734       | 8  | G  | 14 | 1597.8127      | 799.4103        |
| 1156.6367      | 9  | Y  | 13 | 1540.7912      | 770.8995        |
| 1255.7051      | 10 | V  | 12 | 1377.7279      | 689.3679        |
| 1312.7266      | 11 | G  | 11 | 1278.6595      | 639.8337        |
| 1459.7950      | 12 | F  | 10 | 1221.6380      | 611.3229        |
| 1530.8321      | 13 | A  | 9  | 1074.5696      | 537.7887        |
| 1644.8751      | 14 | N  | 8  | 1003.5325      | 502.2702        |
| 1757.9591      | 15 | L  | 7  | 889.4896       | 445.2487        |
| 1855.0119      | 16 | P  | 6  | 776.4055       | 388.7067        |
| 1969.0548      | 17 | N  | 5  | 679.3527       | 340.1803        |
| 2097.1134      | 18 | Q  | 4  | 565.3098       | 283.1588        |
| 2196.1818      | 19 | V  | 3  | 437.2512       | 219.1295        |
| 2359.2451      | 20 | Y  | 2  | 338.1828       | 169.5953        |
|                | 21 | R  | 1  | 175.1195       | 88.0637         |

N-term:+43.02 K(1):+156.13  
K(4):+156.13

X-range:

0 - 0

MassTol: Y-zoom:

0. 1.

MassType:

☐AVG ☒MONO

Axis:

☒1 ☐2

Label:

☒I ☐M ☐-

Ions:

a ☐+ ☐2+ ☐3+

b ☒+ ☐2+ ☐3+

c ☐+ ☐2+ ☐3+

x ☐+ ☐2+ ☐3+

y ☒+ ☒2+ ☐3+

z ☐+ ☐2+ ☐3+

hide H<sub>2</sub>O/NH<sub>3</sub> ☐

zoom 112-122 ☐

GO

LDNNKISNIPDEYFKR, MH+ 2076.1403, m/z 519.7905  
L OS G34 P160811 220811-s1.06276.06276.4.dta

scan 6276; 2.6e+001

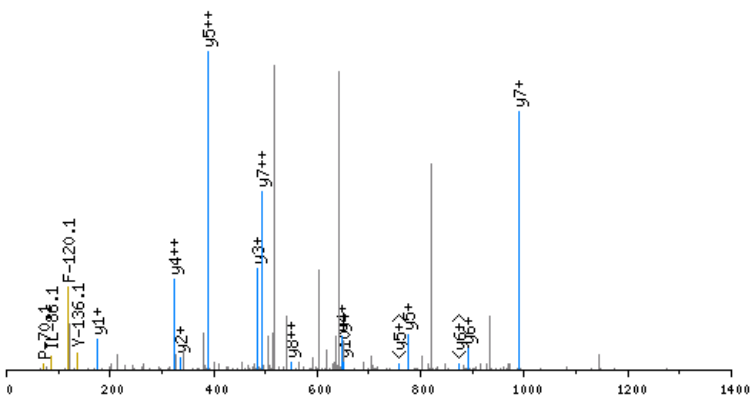

click image to zoom in; click top corners to zoom out

[precursor±]

scan 6275; 519.8 m/z; 3.0e+002

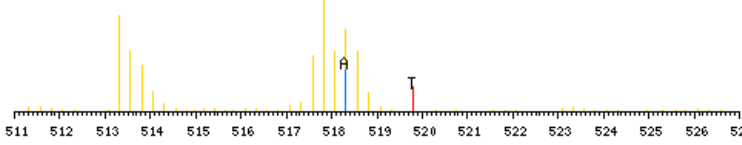

zoomed in precursor plot; T=theoretical m/z, A=acquired m/z

| b <sup>+</sup> | #  | AA | #  | y <sup>+</sup> | y <sup>2+</sup> |
|----------------|----|----|----|----------------|-----------------|
| 156.1025       | 1  | L  | 16 |                |                 |
| 271.1294       | 2  | D  | 15 | 1921.0456      | 961.0267        |
| 385.1723       | 3  | N  | 14 | 1806.0187      | 903.5133        |
| 499.2153       | 4  | N  | 13 | 1691.9758      | 846.4918        |
| 661.3734       | 5  | K  | 12 | 1577.9328      | 789.4703        |
| 774.4574       | 6  | I  | 11 | 1415.7747      | 708.3913        |
| 861.4895       | 7  | S  | 10 | 1302.6907      | 651.8492        |
| 975.5324       | 8  | N  | 9  | 1215.6586      | 608.3332        |
| 1088.6164      | 9  | I  | 8  | 1101.6157      | 551.3118        |
| 1185.6692      | 10 | P  | 7  | 988.5316       | 494.7697        |
| 1300.6962      | 11 | D  | 6  | 891.4789       | 446.2434        |
| 1429.7387      | 12 | E  | 5  | 776.4519       | 388.7299        |
| 1592.8021      | 13 | Y  | 4  | 647.4093       | 324.2086        |
| 1739.8705      | 14 | F  | 3  | 484.3460       | 242.6769        |
| 1902.0286      | 15 | K  | 2  | 337.2776       | 169.1427        |
|                | 16 | R  | 1  | 175.1195       | 88.0637         |

N-term:+43.02 K(5):+162.16  
K(15):+162.16

X-range:

0 - 0

MassTol: Y-zoom:

0. 1.

MassType:

☐AVG ☒MONO

Axis:

☒1 ☐2

Label:

☒I ☐M ☐-

Ions:

a ☐+ ☐2+ ☐3+

b ☒+ ☐2+ ☐3+

c ☐+ ☐2+ ☐3+

x ☐+ ☐2+ ☐3+

y ☒+ ☒2+ ☐3+

z ☐+ ☐2+ ☐3+

hide H<sub>2</sub>O/NH<sub>3</sub> ☐

zoom 112-122 ☐

GO

LGGLGKLAAGLAHR, MH+ 1532.8913, m/z 511.6353  
L OS G33 P160811 220811-s1.07413.07413.3.dta

scan 7413; 5.6e+001

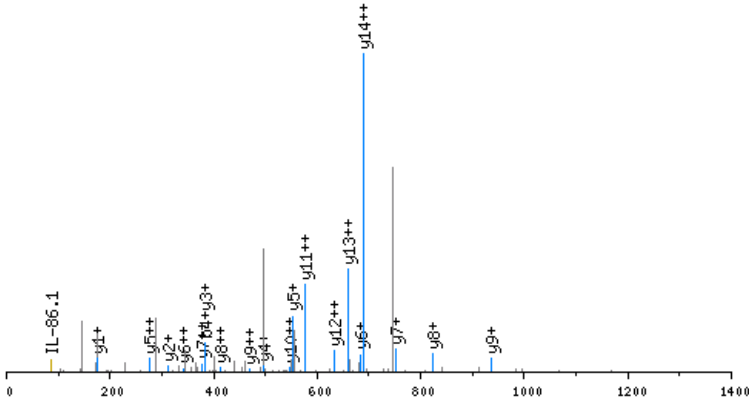

click image to zoom in; click top corners to zoom out [\[precursor±\]](#)

scan 7412; 511.6 m/z; 5.0e+002

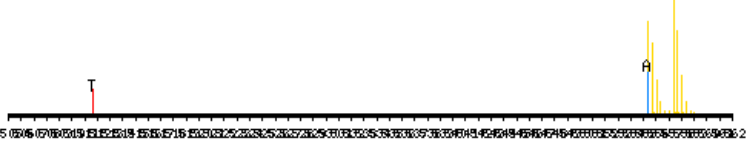

zoomed in precursor plot; T=theoretical m/z, A=acquired m/z

| b <sup>+</sup> | #  | AA | #  | y <sup>+</sup> | y <sup>2+</sup> |
|----------------|----|----|----|----------------|-----------------|
| 156.1025       | 1  | L  | 15 |                |                 |
| 213.1239       | 2  | G  | 14 | 1377.7967      | 689.4023        |
| 270.1454       | 3  | G  | 13 | 1320.7752      | 660.8915        |
| 383.2295       | 4  | L  | 12 | 1263.7538      | 632.3808        |
| 440.2509       | 5  | G  | 11 | 1150.6697      | 575.8388        |
| 596.3772       | 6  | K  | 10 | 1093.6482      | 547.3280        |
| 709.4613       | 7  | L  | 9  | 937.5219       | 469.2649        |
| 780.4984       | 8  | A  | 8  | 824.4379       | 412.7228        |
| 851.5355       | 9  | A  | 7  | 753.4008       | 377.2043        |
| 980.5781       | 10 | E  | 6  | 682.3636       | 341.6857        |
| 1037.5996      | 11 | G  | 5  | 553.3211       | 277.1644        |
| 1150.6836      | 12 | L  | 4  | 496.2996       | 248.6537        |
| 1221.7207      | 13 | A  | 3  | 383.2155       | 192.1117        |
| 1358.7797      | 14 | H  | 2  | 312.1784       | 156.5931        |
|                | 15 | R  | 1  | 175.1195       | 88.0637         |

N-term:+43.02 K(6):+156.13

X-range:

0

-

0

MassTol:

Y-zoom:

0.

1.

MassType:

☐AVG

☒MONO

Axis:

☒1

☐2

Label:

☒I

☐M

☐-

Ions:

a

☐

+

2+

3+

b

☒

+

2+

3+

c

☐

+

2+

3+

x

☐

+

2+

3+

y

☒

+

2+

3+

z

☐

+

2+

3+

hide H<sub>2</sub>O/NH<sub>3</sub>

☐

zoom 112-122

☐

GO

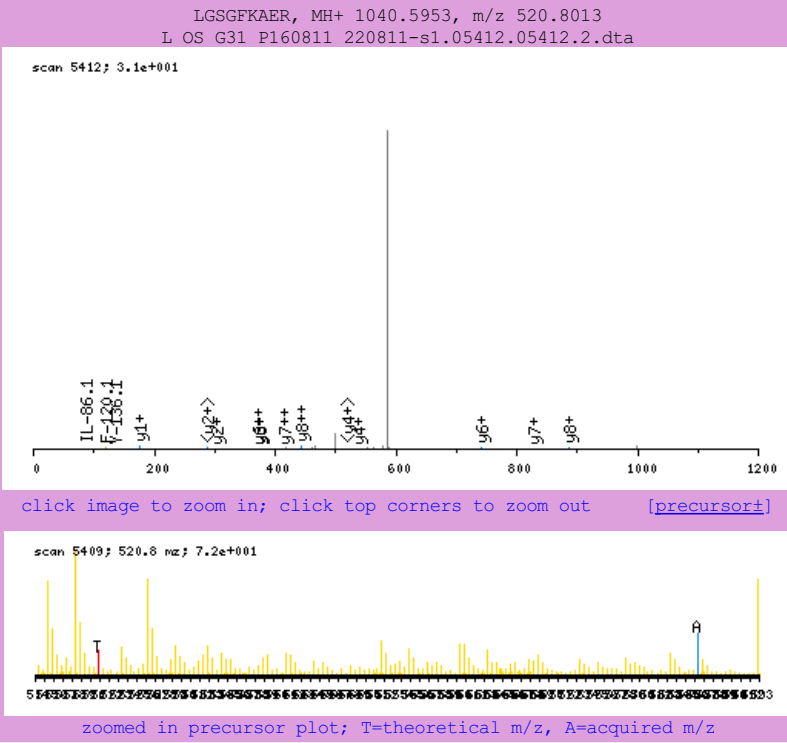

| b <sup>+</sup> | # | AA | # | y <sup>+</sup> | y <sup>2+</sup> |
|----------------|---|----|---|----------------|-----------------|
| 156.1025       | 1 | L  | 9 |                |                 |
| 213.1239       | 2 | G  | 8 | 885.5007       | 443.2543        |
| 300.1560       | 3 | S  | 7 | 828.4792       | 414.7435        |
| 357.1774       | 4 | G  | 6 | 741.4472       | 371.2275        |
| 504.2458       | 5 | F  | 5 | 684.4257       | 342.7168        |
| 666.4039       | 6 | K  | 4 | 537.3573       | 269.1826        |
| 737.4410       | 7 | A  | 3 | 375.1992       | 188.1035        |
| 866.4836       | 8 | E  | 2 | 304.1621       | 152.5850        |
|                | 9 | R  | 1 | 175.1195       | 88.0637         |

N-term: +43.02 K(6): +162.16

X-range:  
 -   
MassTol: Y-zoom:  
   
MassType:  
☐ AVG ☒ MONO  
Axis:  
☒ 1 ☐ 2  
Label:  
☒ I ☐ M ☐ -  
Ions:  
a ☐ + ☐ 2+ ☐ 3+  
b ☒ + ☐ 2+ ☐ 3+  
c ☐ + ☐ 2+ ☐ 3+  
x ☐ + ☐ 2+ ☐ 3+  
y ☒ + ☒ 2+ ☐ 3+  
z ☐ + ☐ 2+ ☐ 3+  
hide H<sub>2</sub>O/NH<sub>3</sub> ☐  
zoom 112-122 ☐

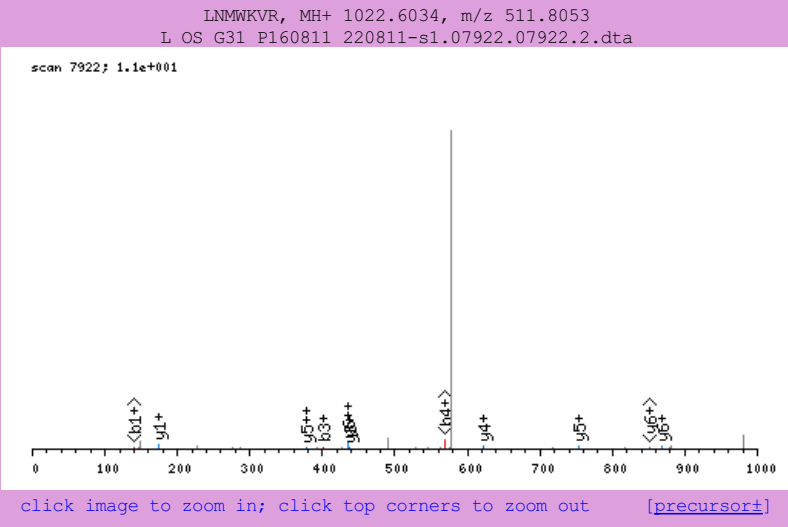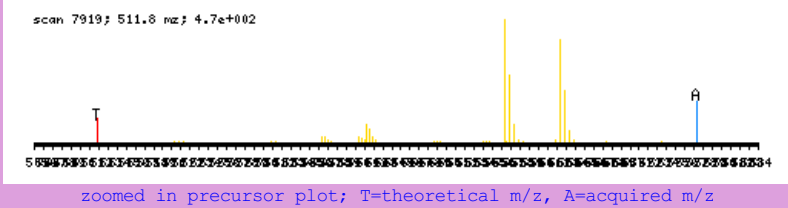

| b <sup>+</sup> | # | AA | # | y <sup>+</sup> | y <sup>2+</sup> |
|----------------|---|----|---|----------------|-----------------|
| 156.1025       | 1 | L  | 7 |                |                 |
| 270.1454       | 2 | N  | 6 | 867.5087       | 434.2583        |
| 401.1859       | 3 | M  | 5 | 753.4658       | 377.2368        |
| 587.2652       | 4 | W  | 4 | 622.4253       | 311.7166        |
| 749.4233       | 5 | K  | 3 | 436.3460       | 218.6769        |
| 848.4917       | 6 | V  | 2 | 274.1879       | 137.5979        |
|                | 7 | R  | 1 | 175.1195       | 88.0637         |

N-term:+43.02 K(5):+162.16

X-range:

0 - 0

MassTol: Y-zoom:

0. 1.

MassType:

☐ AVG ☒ MONO

Axis:

☒ 1 ☐ 2

Label:

☒ I ☐ M ☐ -

Ions:

a ☐ + ☐ 2+ ☐ 3+

b ☒ + ☐ 2+ ☐ 3+

c ☐ + ☐ 2+ ☐ 3+

x ☐ + ☐ 2+ ☐ 3+

y ☒ + ☒ 2+ ☐ 3+

z ☐ + ☐ 2+ ☐ 3+

hide H<sub>2</sub>O/NH<sub>3</sub> ☐

zoom 112-122 ☐

GO

LPAEFDKAAEEVKR, MH+ 1700.9224, m/z 567.6456  
L OS G33 P160811 220811-s1.04216.04216.3.dta

scan 4216; 1.8e+001

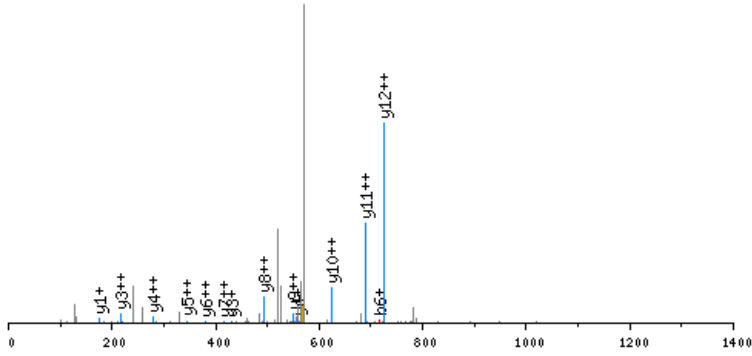

click image to zoom in; click top corners to zoom out [\[precursor±\]](#)

scan 4212; 567.6 m/z; 2.1e+003

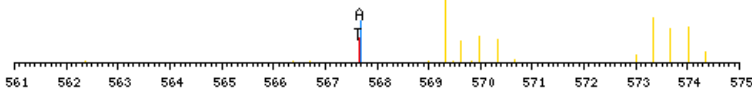

zoomed in precursor plot; T=theoretical m/z, A=acquired m/z

| b <sup>+</sup> | #  | AA | #  | y <sup>+</sup> | y <sup>2+</sup> |
|----------------|----|----|----|----------------|-----------------|
| 156.1025       | 1  | L  | 14 |                |                 |
| 253.1552       | 2  | P  | 13 | 1545.8278      | 773.4178        |
| 324.1923       | 3  | A  | 12 | 1448.7750      | 724.8914        |
| 453.2349       | 4  | E  | 11 | 1377.7379      | 689.3729        |
| 600.3033       | 5  | F  | 10 | 1248.6953      | 624.8516        |
| 715.3303       | 6  | D  | 9  | 1101.6269      | 551.3173        |
| 871.4566       | 7  | K  | 8  | 986.5999       | 493.8039        |
| 942.4937       | 8  | A  | 7  | 830.4736       | 415.7407        |
| 1013.5308      | 9  | A  | 6  | 759.4365       | 380.2222        |
| 1142.5734      | 10 | E  | 5  | 688.3994       | 344.7036        |
| 1271.6160      | 11 | E  | 4  | 559.3568       | 280.1823        |
| 1370.6844      | 12 | V  | 3  | 430.3142       | 215.6610        |
| 1526.8107      | 13 | K  | 2  | 331.2458       | 166.1268        |
|                | 14 | R  | 1  | 175.1195       | 88.0637         |

N-term:+43.02 K(7):+156.13  
K(13):+156.13

X-range:

0 - 0

MassTol: Y-zoom:

0. 1.

MassType:

☐AVG ☒MONO

Axis:

☒1 ☐2

Label:

☒I ☐M ☐-

Ions:

a ☐+ ☐2+ ☐3+

b ☒+ ☐2+ ☐3+

c ☐+ ☐2+ ☐3+

x ☐+ ☐2+ ☐3+

y ☒+ ☒2+ ☐3+

z ☐+ ☐2+ ☐3+

hide H<sub>2</sub>O/NH<sub>3</sub> ☐

zoom 112-122 ☐

GO

LPCVEDYLSAILNR, MH+ 1704.8630, m/z 568.9592  
L OS G30 P160811 220811-s1.07931.07931.3.dta

scan 7931; 2.1e+000

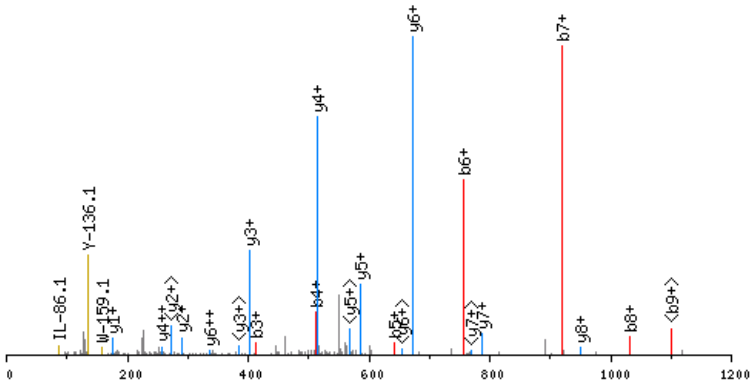

click image to zoom in; click top corners to zoom out

[precursor±]

scan 7929; 569.0 m/z; 6.2e+000

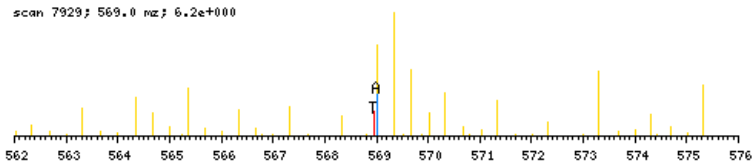

zoomed in precursor plot; T=theoretical m/z, A=acquired m/z

| b <sup>+</sup> | #  | AA | #  | y <sup>+</sup> | y <sup>2+</sup> |
|----------------|----|----|----|----------------|-----------------|
| 156.1025       | 1  | L  | 14 |                |                 |
| 253.1552       | 2  | P  | 13 | 1549.7684      | 775.3881        |
| 413.1858       | 3  | C  | 12 | 1452.7156      | 726.8617        |
| 512.2542       | 4  | V  | 11 | 1292.6850      | 646.8464        |
| 641.2968       | 5  | E  | 10 | 1193.6166      | 597.3122        |
| 756.3238       | 6  | D  | 9  | 1064.5740      | 532.7909        |
| 919.3871       | 7  | Y  | 8  | 949.5471       | 475.2775        |
| 1032.4712      | 8  | L  | 7  | 786.4838       | 393.7458        |
| 1119.5032      | 9  | S  | 6  | 673.3997       | 337.2038        |
| 1190.5403      | 10 | A  | 5  | 586.3677       | 293.6877        |
| 1303.6244      | 11 | I  | 4  | 515.3306       | 258.1692        |
| 1416.7084      | 12 | L  | 3  | 402.2465       | 201.6272        |
| 1530.7514      | 13 | N  | 2  | 289.1624       | 145.0851        |
|                | 14 | R  | 1  | 175.1195       | 88.0637         |

N-term:+43.02 C(3):+160.03

X-range:

0 - 0

MassTol: Y-zoom:

0. 1.

MassType:

☐ AVG ☒ MONO

Axis:

☒ 1 ☐ 2

Label:

☒ I ☐ M ☐ -

Ions:

a ☐ + ☐ 2+ ☐ 3+

b ☒ + ☐ 2+ ☐ 3+

c ☐ + ☐ 2+ ☐ 3+

x ☐ + ☐ 2+ ☐ 3+

y ☒ + ☒ 2+ ☐ 3+

z ☐ + ☐ 2+ ☐ 3+

hide H<sub>2</sub>O/NH<sub>3</sub> ☐

zoom 112-122 ☐

GO

LYLGHNYVTAIR, MH+ 1461.7854, m/z 487.9333  
L OS G32 P160811 220811-s1.05995.05995.3.dta

scan 5995; 2.5e+000

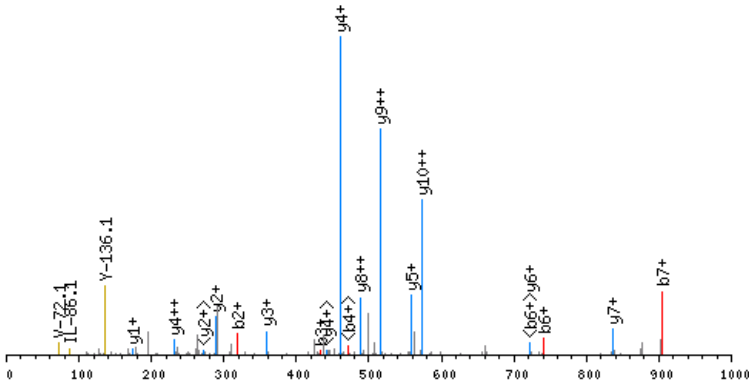

click image to zoom in; click top corners to zoom out

[precursor±]

scan 5993; 487.9 m/z; 6.9e+000

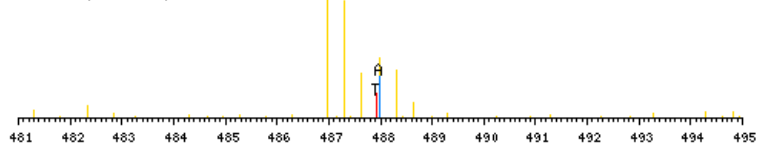

zoomed in precursor plot; T=theoretical m/z, A=acquired m/z

| b <sup>+</sup> | #  | AA | #  | y <sup>+</sup> | y <sup>2+</sup> |
|----------------|----|----|----|----------------|-----------------|
| 156.1025       | 1  | L  | 12 |                |                 |
| 319.1658       | 2  | Y  | 11 | 1306.6908      | 653.8493        |
| 432.2499       | 3  | L  | 10 | 1143.6275      | 572.3176        |
| 489.2713       | 4  | G  | 9  | 1030.5434      | 515.7756        |
| 626.3302       | 5  | H  | 8  | 973.5219       | 487.2649        |
| 740.3732       | 6  | N  | 7  | 836.4630       | 418.7354        |
| 903.4365       | 7  | Y  | 6  | 722.4201       | 361.7140        |
| 1002.5049      | 8  | V  | 5  | 559.3568       | 280.1823        |
| 1103.5526      | 9  | T  | 4  | 460.2884       | 230.6481        |
| 1174.5897      | 10 | A  | 3  | 359.2407       | 180.1243        |
| 1287.6738      | 11 | I  | 2  | 288.2036       | 144.6057        |
|                | 12 | R  | 1  | 175.1195       | 88.0637         |

N-term:+43.02

X-range:

0 - 0

MassTol: Y-zoom:

0. 1.

MassType:

☐AVG ☒MONO

Axis:

☒1 ☐2

Label:

☒I ☐M ☐-

Ions:

a ☐+ ☐2+ ☐3+

b ☒+ ☐2+ ☐3+

c ☐+ ☐2+ ☐3+

x ☐+ ☐2+ ☐3+

y ☒+ ☒2+ ☐3+

z ☐+ ☐2+ ☐3+

hide H<sub>2</sub>O/NH<sub>3</sub> ☐

zoom 112-122 ☐

GO

MDKSELVQKAKLAQEAER, MH+ 2218.2966, m/z 555.3296  
L OS G34 P160811 220811-s1.06114.06114.4.dta

scan 6114; 1.5e+001

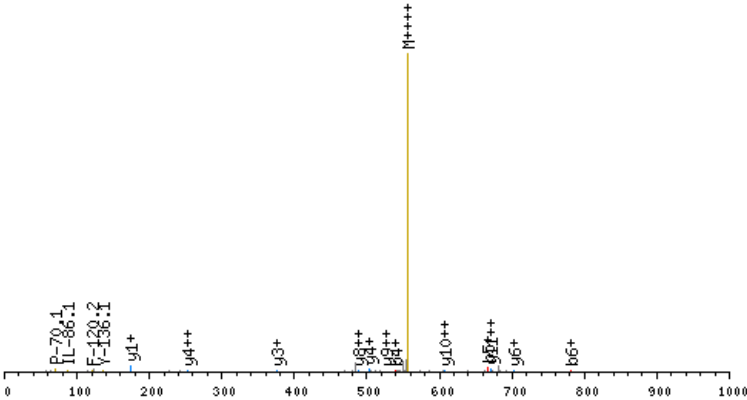

click image to zoom in; click top corners to zoom out [\[precursor±\]](#)

scan 6110; 555.3 m/z; 4.8e+001

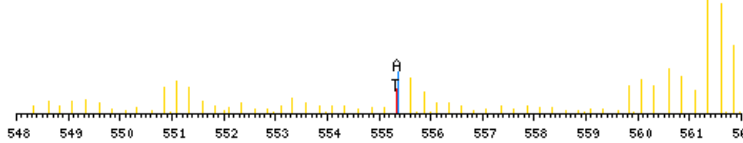

zoomed in precursor plot; T=theoretical m/z, A=acquired m/z

| b <sup>+</sup> | #  | AA | #  | y <sup>+</sup> | y <sup>2+</sup> |
|----------------|----|----|----|----------------|-----------------|
| 174.0589       | 1  | M  | 18 |                |                 |
| 289.0858       | 2  | D  | 17 | 2045.2456      | 1023.1267       |
| 451.2439       | 3  | K  | 16 | 1930.2186      | 965.6132        |
| 538.2760       | 4  | S  | 15 | 1768.0605      | 884.5342        |
| 667.3185       | 5  | E  | 14 | 1681.0285      | 841.0182        |
| 780.4026       | 6  | L  | 13 | 1551.9859      | 776.4969        |
| 879.4710       | 7  | V  | 12 | 1438.9019      | 719.9548        |
| 1007.5296      | 8  | Q  | 11 | 1339.8334      | 670.4206        |
| 1169.6877      | 9  | K  | 10 | 1211.7749      | 606.3913        |
| 1240.7248      | 10 | A  | 9  | 1049.6168      | 525.3123        |
| 1402.8829      | 11 | K  | 8  | 978.5797       | 489.7937        |
| 1515.9670      | 12 | L  | 7  | 816.4216       | 408.7147        |
| 1587.0041      | 13 | A  | 6  | 703.3375       | 352.1727        |
| 1716.0467      | 14 | E  | 5  | 632.3004       | 316.6541        |
| 1844.1053      | 15 | Q  | 4  | 503.2578       | 252.1328        |
| 1915.1424      | 16 | A  | 3  | 375.1992       | 188.1035        |
| 2044.1850      | 17 | E  | 2  | 304.1621       | 152.5850        |
|                | 18 | R  | 1  | 175.1195       | 88.0637         |

N-term:+43.02 K(3):+162.16  
K(9):+162.16 K(11):+162.16

N-term: +43.02

X-range:

0 - 0

MassTol: Y-zoom:

0. 1.

MassType:

☐AVG ☒MONO

Axis:

☒1 ☐2

Label:

☒I ☐M ☐-

Ions:

a ☐+ ☐2+ ☐3+

b ☒+ ☐2+ ☐3+

c ☐+ ☐2+ ☐3+

x ☐+ ☐2+ ☐3+

y ☒+ ☒2+ ☐3+

z ☐+ ☐2+ ☐3+

hide H<sub>2</sub>O/NH<sub>3</sub> ☐

zoom 112-122 ☐

GO

MDLVKSHLMYAVR, MH+ 1632.8606, m/z 544.9584  
L OS G33 P160811 220811-s1.07230.07230.3.dta

scan 7230; 5.9e+000

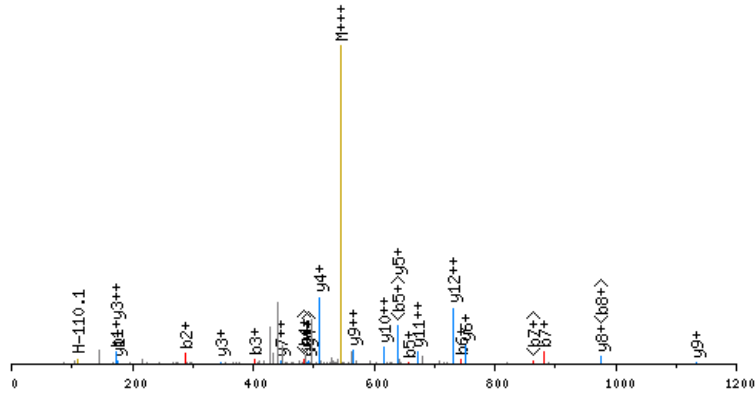

click image to zoom in; click top corners to zoom out

[precursor±]

scan 7227; 545.0 m/z; 5.4e+000

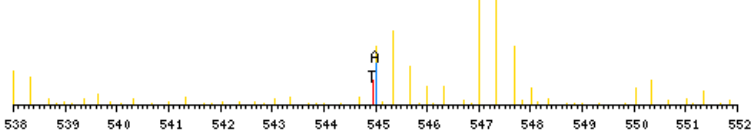

zoomed in precursor plot; T=theoretical m/z, A=acquired m/z

| b <sup>+</sup> | #  | AA | #  | y <sup>+</sup> | y <sup>2+</sup> |
|----------------|----|----|----|----------------|-----------------|
| 174.0589       | 1  | M  | 13 |                |                 |
| 289.0858       | 2  | D  | 12 | 1459.8096      | 730.4087        |
| 402.1699       | 3  | L  | 11 | 1344.7826      | 672.8952        |
| 501.2383       | 4  | V  | 10 | 1231.6986      | 616.3532        |
| 657.3646       | 5  | K  | 9  | 1132.6301      | 566.8190        |
| 744.3966       | 6  | S  | 8  | 976.5038       | 488.7558        |
| 881.4555       | 7  | H  | 7  | 889.4718       | 445.2398        |
| 994.5396       | 8  | L  | 6  | 752.4129       | 376.7104        |
| 1125.5801      | 9  | M  | 5  | 639.3288       | 320.1683        |
| 1288.6434      | 10 | Y  | 4  | 508.2884       | 254.6481        |
| 1359.6805      | 11 | A  | 3  | 345.2250       | 173.1164        |
| 1458.7490      | 12 | V  | 2  | 274.1879       | 137.5979        |
|                | 13 | R  | 1  | 175.1195       | 88.0637         |

N-term:+43.02 K(5):+156.13



X-range:

0 - 0

MassTol: Y-zoom:

0. 1.

MassType:

☐AVG ☒MONO

Axis:

☒1 ☐2

Label:

☒I ☐M ☐-

Ions:

a ☐+ ☐2+ ☐3+

b ☒+ ☐2+ ☐3+

c ☐+ ☐2+ ☐3+

x ☐+ ☐2+ ☐3+

y ☒+ ☒2+ ☐3+

z ☐+ ☐2+ ☐3+

hide H<sub>2</sub>O/NH<sub>3</sub> ☐

zoom 112-122 ☐

GO

MEKPSPLLVGR, MH+ 1302.7668, m/z 651.8870  
L OS G30 P160811 220811-s1.04670.04670.2.dta

scan 4670; 2.4e+001

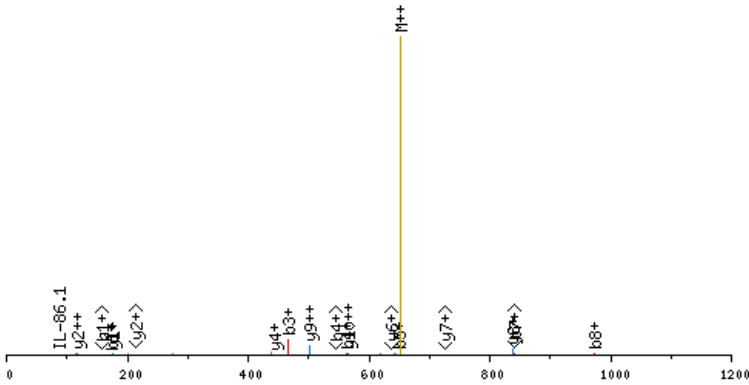

click image to zoom in; click top corners to zoom out

[precursor±]

scan 4669; 651.9 m/z; 1.7e+001

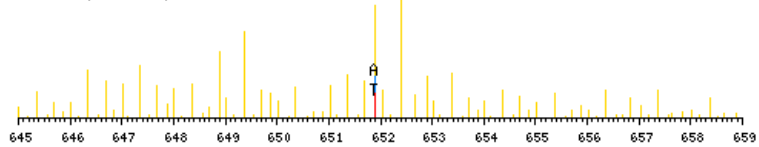

zoomed in precursor plot; T=theoretical m/z, A=acquired m/z

| b <sup>+</sup> | #  | AA | #  | y <sup>+</sup> | y <sup>2+</sup> |
|----------------|----|----|----|----------------|-----------------|
| 174.0589       | 1  | M  | 11 |                |                 |
| 303.1015       | 2  | E  | 10 | 1129.7158      | 565.3618        |
| 465.2596       | 3  | K  | 9  | 1000.6732      | 500.8405        |
| 562.3123       | 4  | P  | 8  | 838.5151       | 419.7614        |
| 649.3444       | 5  | S  | 7  | 741.4623       | 371.2351        |
| 746.3971       | 6  | P  | 6  | 654.4303       | 327.7190        |
| 859.4812       | 7  | L  | 5  | 557.3775       | 279.1927        |
| 972.5653       | 8  | L  | 4  | 444.2934       | 222.6506        |
| 1071.6337      | 9  | V  | 3  | 331.2094       | 166.1086        |
| 1128.6551      | 10 | G  | 2  | 232.1410       | 116.5744        |
|                | 11 | R  | 1  | 175.1195       | 88.0637         |

N-term:+43.02 K(3):+162.16

X-range:

0 - 0

MassTol: Y-zoom:

0. 1.

MassType:

☐ AVG ☒ MONO

Axis:

☒ 1 ☐ 2

Label:

☒ I ☐ M ☐ -

Ions:

a ☐ + ☐ 2+ ☐ 3+

b ☒ + ☐ 2+ ☐ 3+

c ☐ + ☐ 2+ ☐ 3+

x ☐ + ☐ 2+ ☐ 3+

y ☒ + ☒ 2+ ☐ 3+

z ☐ + ☐ 2+ ☐ 3+

hide H<sub>2</sub>O/NH<sub>3</sub> ☐

zoom 112-122 ☐

GO

MEMLPDTTGKGLMFAKR, MH+ 2095.0755, m/z 699.0300  
L OS G32 P160811 220811-s1.06216.06216.3.dta

scan 6216; 4.9e+000

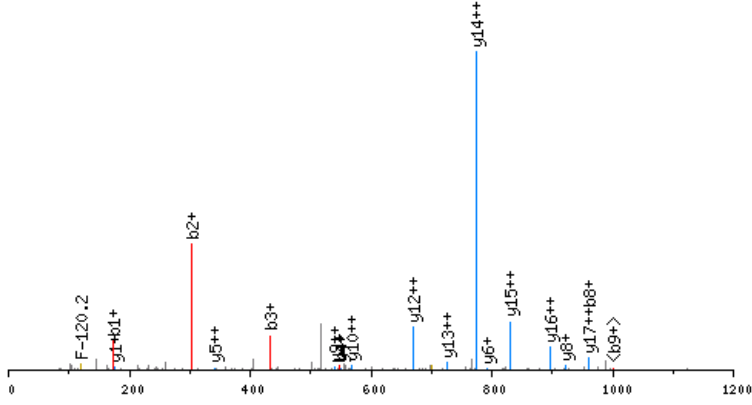

click image to zoom in; click top corners to zoom out [\[precursor±\]](#)

scan 6213; 699.0 mz; 8.4e+000

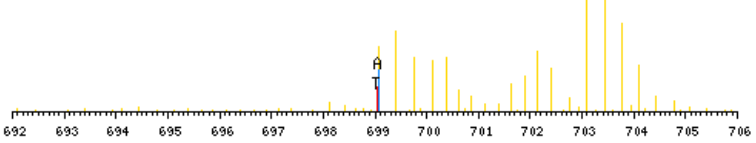

zoomed in precursor plot; T=theoretical m/z, A=acquired m/z

| b <sup>+</sup> | #  | AA | #  | y <sup>+</sup> | y <sup>2+</sup> |
|----------------|----|----|----|----------------|-----------------|
| 174.0589       | 1  | M  | 18 |                |                 |
| 303.1015       | 2  | E  | 17 | 1922.0244      | 961.5161        |
| 434.1420       | 3  | M  | 16 | 1792.9818      | 896.9948        |
| 547.2260       | 4  | L  | 15 | 1661.9413      | 831.4746        |
| 644.2788       | 5  | P  | 14 | 1548.8573      | 774.9326        |
| 759.3057       | 6  | D  | 13 | 1451.8045      | 726.4062        |
| 860.3534       | 7  | T  | 12 | 1336.7776      | 668.8927        |
| 961.4011       | 8  | T  | 11 | 1235.7299      | 618.3689        |
| 1018.4226      | 9  | G  | 10 | 1134.6822      | 567.8450        |
| 1174.5489      | 10 | K  | 9  | 1077.6608      | 539.3343        |
| 1231.5703      | 11 | G  | 8  | 921.5345       | 461.2711        |
| 1302.6074      | 12 | A  | 7  | 864.5130       | 432.7604        |
| 1415.6915      | 13 | L  | 6  | 793.4759       | 397.2419        |
| 1546.7320      | 14 | M  | 5  | 680.3918       | 340.6998        |
| 1693.8004      | 15 | F  | 4  | 549.3513       | 275.1796        |
| 1764.8375      | 16 | A  | 3  | 402.2829       | 201.6454        |
| 1920.9638      | 17 | K  | 2  | 331.2458       | 166.1268        |
|                | 18 | R  | 1  | 175.1195       | 88.0637         |

N-term:+43.02 K(10):+156.13  
K(17):+156.13

X-range:

0 - 0

MassTol: Y-zoom:

0. 1.

MassType:

☐AVG ☒MONO

Axis:

☒1 ☐2

Label:

☒I ☐M ☐-

Ions:

a ☐+ ☐2+ ☐3+

b ☒+ ☐2+ ☐3+

c ☐+ ☐2+ ☐3+

x ☐+ ☐2+ ☐3+

y ☒+ ☒2+ ☐3+

z ☐+ ☐2+ ☐3+

hide H<sub>2</sub>O/NH<sub>3</sub> ☐

zoom 112-122 ☐

GO

MENVEVFTSEGKGR, MH+ 1658.8272, m/z 829.9173  
L OS G30 P160811 220811-s1.05631.05631.2.dta

scan 5631; 3.1e+000

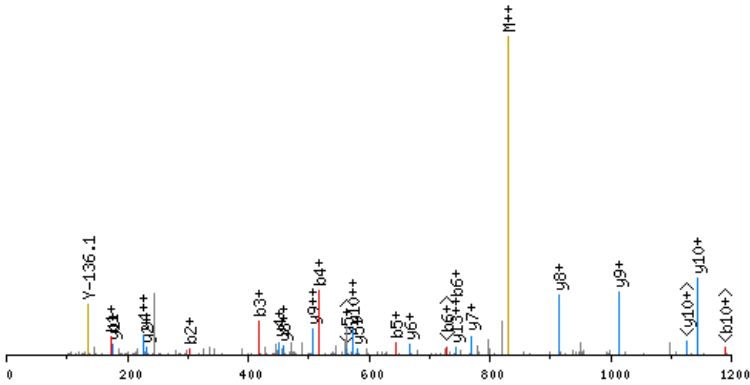

click image to zoom in; click top corners to zoom out

[precursor±]

scan 5629; 829.9 m/z; 9.4e+000

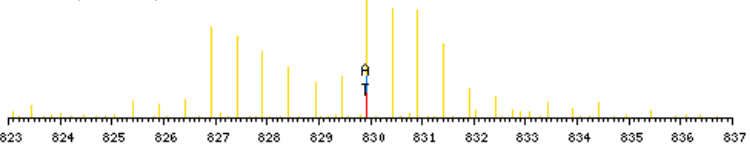

zoomed in precursor plot; T=theoretical m/z, A=acquired m/z

| b <sup>+</sup> | #  | AA | #  | y <sup>+</sup> | y <sup>2+</sup> |
|----------------|----|----|----|----------------|-----------------|
| 174.0589       | 1  | M  | 14 |                |                 |
| 303.1015       | 2  | E  | 13 | 1485.7762      | 743.3920        |
| 417.1444       | 3  | N  | 12 | 1356.7336      | 678.8707        |
| 516.2128       | 4  | V  | 11 | 1242.6907      | 621.8492        |
| 645.2554       | 5  | E  | 10 | 1143.6222      | 572.3150        |
| 744.3238       | 6  | V  | 9  | 1014.5797      | 507.7937        |
| 891.3922       | 7  | F  | 8  | 915.5112       | 458.2595        |
| 992.4399       | 8  | T  | 7  | 768.4428       | 384.7253        |
| 1079.4719      | 9  | S  | 6  | 667.3951       | 334.2015        |
| 1208.5145      | 10 | E  | 5  | 580.3631       | 290.6855        |
| 1265.5360      | 11 | G  | 4  | 451.3205       | 226.1642        |
| 1427.6941      | 12 | K  | 3  | 394.2991       | 197.6534        |
| 1484.7156      | 13 | G  | 2  | 232.1410       | 116.5744        |
|                | 14 | R  | 1  | 175.1195       | 88.0637         |

N-term:+43.02 K(12):+162.16

X-range:

0 - 0

MassTol: Y-zoom:

0. 1.

MassType:

☐ AVG ☒ MONO

Axis:

☒ 1 ☐ 2

Label:

☒ I ☐ M ☐ -

Ions:

a ☐ + ☐ 2+ ☐ 3+

b ☒ + ☐ 2+ ☐ 3+

c ☐ + ☐ 2+ ☐ 3+

x ☐ + ☐ 2+ ☐ 3+

y ☒ + ☒ 2+ ☐ 3+

z ☐ + ☐ 2+ ☐ 3+

hide H<sub>2</sub>O/NH<sub>3</sub> ☐

zoom 112-122 ☐

GO

MFWKMGTTAKR, MH+ 1523.8504, m/z 508.6216  
L OS G34 P160811 220811-s1.04322.04322.3.dta

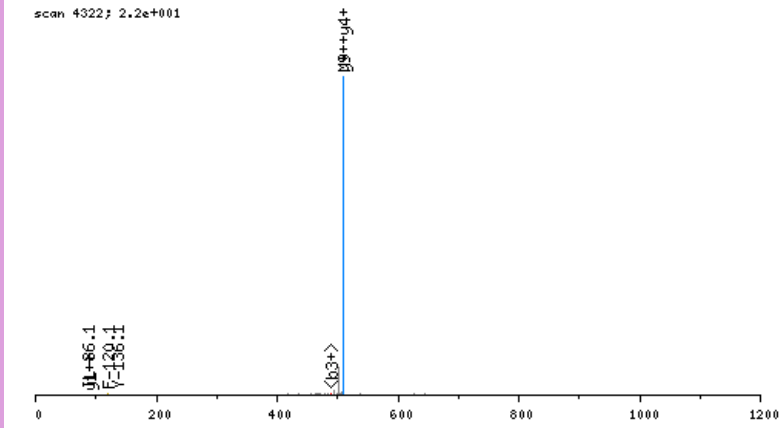

click image to zoom in; click top corners to zoom out [\[precursor±\]](#)

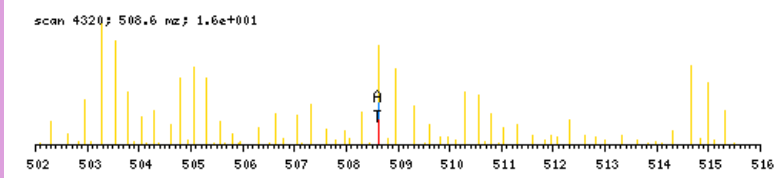

zoomed in precursor plot; T=theoretical m/z, A=acquired m/z

| b <sup>+</sup> | #  | AA | #  | y <sup>+</sup> | y <sup>2+</sup> |
|----------------|----|----|----|----------------|-----------------|
| 174.0589       | 1  | M  | 12 |                |                 |
| 321.1273       | 2  | F  | 11 | 1350.7993      | 675.9036        |
| 507.2066       | 3  | W  | 10 | 1203.7309      | 602.3694        |
| 669.3647       | 4  | K  | 9  | 1017.6516      | 509.3297        |
| 800.4052       | 5  | M  | 8  | 855.4935       | 428.2507        |
| 857.4267       | 6  | G  | 7  | 724.4530       | 362.7304        |
| 914.4481       | 7  | G  | 6  | 667.4315       | 334.2197        |
| 1015.4958      | 8  | T  | 5  | 610.4101       | 305.7089        |
| 1116.5435      | 9  | T  | 4  | 509.3624       | 255.1851        |
| 1187.5806      | 10 | A  | 3  | 408.3147       | 204.6613        |
| 1349.7387      | 11 | K  | 2  | 337.2776       | 169.1427        |
|                | 12 | R  | 1  | 175.1195       | 88.0637         |

N-term:+43.02 K(4):+162.16  
K(11):+162.16

X-range:

0 - 0

MassTol: Y-zoom:

0. 1.

MassType:

☐AVG ☒MONO

Axis:

☒1 ☐2

Label:

☒I ☐M ☐-

Ions:

a ☐+ ☐2+ ☐3+

b ☒+ ☐2+ ☐3+

c ☐+ ☐2+ ☐3+

x ☐+ ☐2+ ☐3+

y ☒+ ☒2+ ☐3+

z ☐+ ☐2+ ☐3+

hide H<sub>2</sub>O/NH<sub>3</sub> ☐

zoom 112-122 ☐

GO

MKVFTVGTPLPAEGR, MH+ 1571.8620, m/z 524.6255  
L OS G30 P160811 220811-s1.06531.06531.3.dta

scan 6531; 1.5e+001

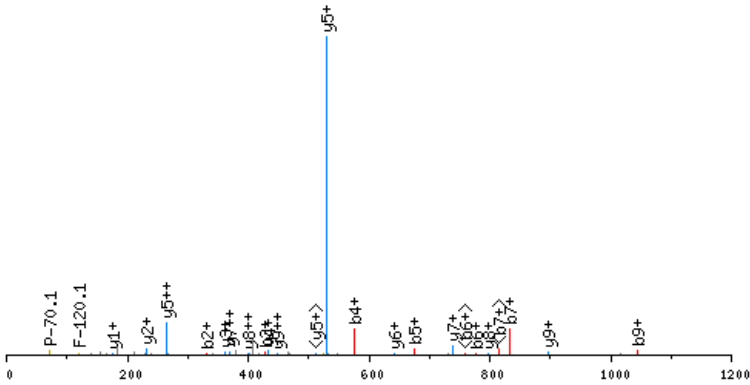

click image to zoom in; click top corners to zoom out

[precursor±]

scan 6529; 524.6 m/z; 9.6e+000

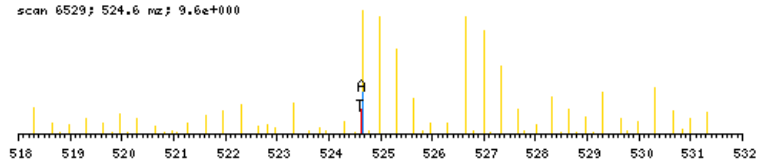

zoomed in precursor plot; T=theoretical m/z, A=acquired m/z

| b <sup>+</sup> | #  | AA | #  | y <sup>+</sup> | y <sup>2+</sup> |
|----------------|----|----|----|----------------|-----------------|
| 174.0589       | 1  | M  | 14 |                |                 |
| 330.1852       | 2  | K  | 13 | 1398.8109      | 699.9094        |
| 429.2536       | 3  | V  | 12 | 1242.6846      | 621.8462        |
| 576.3220       | 4  | F  | 11 | 1143.6162      | 572.3120        |
| 675.3904       | 5  | V  | 10 | 996.5478       | 498.7778        |
| 776.4381       | 6  | T  | 9  | 897.4794       | 449.2436        |
| 833.4596       | 7  | G  | 8  | 796.4317       | 398.7198        |
| 930.5123       | 8  | P  | 7  | 739.4103       | 370.2090        |
| 1043.5964      | 9  | L  | 6  | 642.3575       | 321.6827        |
| 1140.6492      | 10 | P  | 5  | 529.2734       | 265.1406        |
| 1211.6863      | 11 | A  | 4  | 432.2207       | 216.6142        |
| 1340.7289      | 12 | E  | 3  | 361.1836       | 181.0957        |
| 1397.7503      | 13 | G  | 2  | 232.1410       | 116.5744        |
|                | 14 | R  | 1  | 175.1195       | 88.0637         |

N-term:+43.02 K(2):+156.13

X-range:

0 - 0

MassTol: Y-zoom:

0. 1.

MassType:

☐ AVG ☒ MONO

Axis:

☒ 1 ☐ 2

Label:

☒ I ☐ M ☐ -

Ions:

a ☐ + ☐ 2+ ☐ 3+

b ☒ + ☐ 2+ ☐ 3+

c ☐ + ☐ 2+ ☐ 3+

x ☐ + ☐ 2+ ☐ 3+

y ☒ + ☒ 2+ ☐ 3+

z ☐ + ☐ 2+ ☐ 3+

hide H<sub>2</sub>O/NH<sub>3</sub> ☐

zoom 112-122 ☐

GO

MLGAEKGEGFVVKVR, MH+ 1624.8945, m/z 812.9509  
L OS G30 P160811 220811-s1.06602.06602.2.dta

scan 6602; 7.5e+000

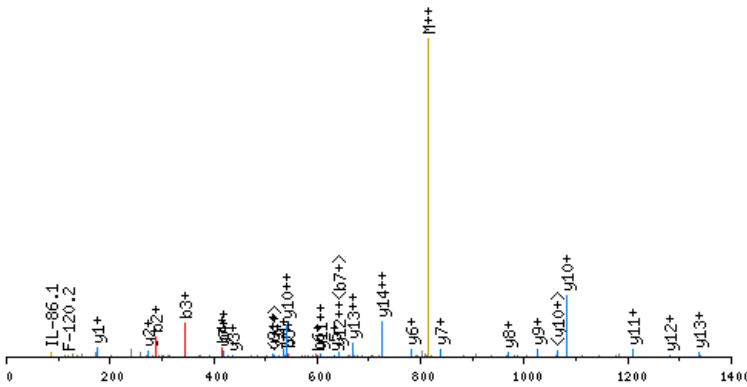

click image to zoom in; click top corners to zoom out [precursor±]

scan 6599; 813.0 m/z; 1.1e+002

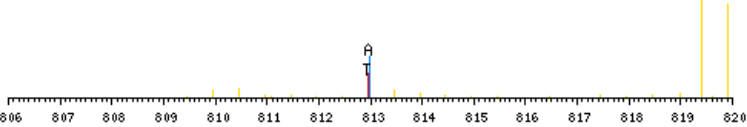

zoomed in precursor plot; T=theoretical m/z, A=acquired m/z

| b <sup>+</sup> | #  | AA | #  | y <sup>+</sup> | y <sup>2+</sup> |
|----------------|----|----|----|----------------|-----------------|
| 174.0589       | 1  | M  | 15 |                |                 |
| 287.1429       | 2  | L  | 14 | 1451.8435      | 726.4257        |
| 344.1644       | 3  | G  | 13 | 1338.7594      | 669.8836        |
| 415.2015       | 4  | A  | 12 | 1281.7379      | 641.3729        |
| 544.2441       | 5  | E  | 11 | 1210.7008      | 605.8543        |
| 601.2656       | 6  | G  | 10 | 1081.6582      | 541.3330        |
| 658.2870       | 7  | G  | 9  | 1024.6368      | 512.8223        |
| 787.3296       | 8  | E  | 8  | 967.6153       | 484.3116        |
| 844.3511       | 9  | G  | 7  | 838.5727       | 419.7903        |
| 991.4195       | 10 | F  | 6  | 781.5513       | 391.2795        |
| 1090.4879      | 11 | V  | 5  | 634.4828       | 317.7453        |
| 1189.5563      | 12 | V  | 4  | 535.4144       | 268.2111        |
| 1351.7144      | 13 | K  | 3  | 436.3460       | 218.6769        |
| 1450.7829      | 14 | V  | 2  | 274.1879       | 137.5979        |
|                | 15 | R  | 1  | 175.1195       | 88.0637         |

N-term:+43.02 K(13):+162.16

X-range:

0 - 0

MassTol: Y-zoom:

0. 1.

MassType:

☐AVG ☒MONO

Axis:

☒1 ☐2

Label:

☒I ☐M ☐-

Ions:

a ☐+ ☐2+ ☐3+

b ☒+ ☐2+ ☐3+

c ☐+ ☐2+ ☐3+

x ☐+ ☐2+ ☐3+

y ☒+ ☒2+ ☐3+

z ☐+ ☐2+ ☐3+

hide H<sub>2</sub>O/NH<sub>3</sub> ☐

zoom 112-122 ☐

GO

MLGPEGGEGYVVKLR, MH+ 1680.9207, m/z 560.9784  
L OS G31 P160811 220811-s1.07568.07568.3.dta

scan 7568; 3.1e+000

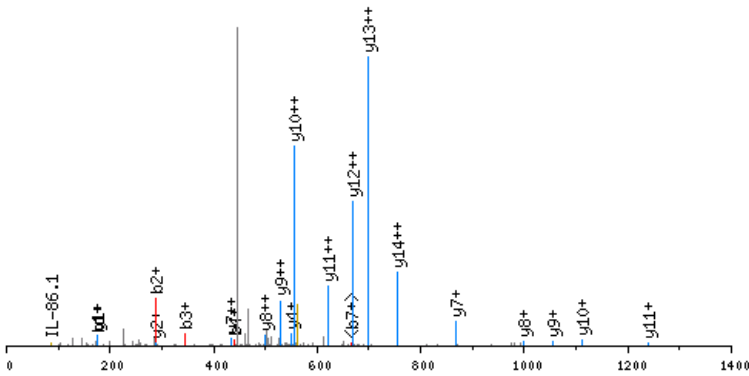

click image to zoom in; click top corners to zoom out

[precursor±]

scan 7564; 561.0 m/z; 6.4e+000

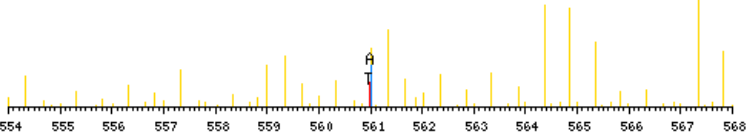

zoomed in precursor plot; T=theoretical m/z, A=acquired m/z

| b <sup>+</sup> | #  | AA | #  | y <sup>+</sup> | y <sup>2+</sup> |
|----------------|----|----|----|----------------|-----------------|
| 174.0589       | 1  | M  | 15 |                |                 |
| 287.1429       | 2  | L  | 14 | 1507.8697      | 754.4388        |
| 344.1644       | 3  | G  | 13 | 1394.7856      | 697.8967        |
| 441.2172       | 4  | P  | 12 | 1337.7642      | 669.3860        |
| 570.2598       | 5  | E  | 11 | 1240.7114      | 620.8596        |
| 627.2812       | 6  | G  | 10 | 1111.6688      | 556.3383        |
| 684.3027       | 7  | G  | 9  | 1054.6473      | 527.8276        |
| 813.3453       | 8  | E  | 8  | 997.6259       | 499.3169        |
| 870.3668       | 9  | G  | 7  | 868.5833       | 434.7956        |
| 1033.4301      | 10 | Y  | 6  | 811.5618       | 406.2848        |
| 1132.4985      | 11 | V  | 5  | 648.4985       | 324.7532        |
| 1231.5669      | 12 | V  | 4  | 549.4301       | 275.2190        |
| 1393.7250      | 13 | K  | 3  | 450.3617       | 225.6847        |
| 1506.8091      | 14 | L  | 2  | 288.2036       | 144.6057        |
|                | 15 | R  | 1  | 175.1195       | 88.0637         |

N-term:+43.02 K(13):+162.16

N-term: +43.02

X-range:

0 - 0

MassTol: Y-zoom:

0. 1.

MassType:

☐AVG ☒MONO

Axis:

☒1 ☐2

Label:

☒I ☐M ☐-

Ions:

a ☐+ ☐2+ ☐3+

b ☒+ ☐2+ ☐3+

c ☐+ ☐2+ ☐3+

x ☐+ ☐2+ ☐3+

y ☒+ ☒2+ ☐3+

z ☐+ ☐2+ ☐3+

hide H<sub>2</sub>O/NH<sub>3</sub> ☐

zoom 112-122 ☐

GO

MQDPDEEALR, MH+ 1245.5422, m/z 623.2747  
L OS G31 P160811 220811-s1.02351.02351.2.dta

scan 2351; 1.6e+000

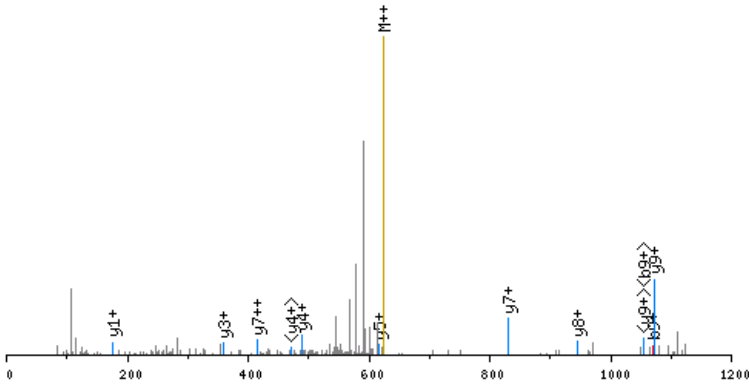

click image to zoom in; click top corners to zoom out

[precursor±]

scan 2349; 623.3 m/z; 1.4e+001

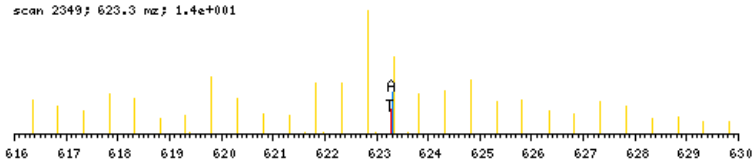

zoomed in precursor plot; T=theoretical m/z, A=acquired m/z

| b <sup>+</sup> | #  | AA | #  | y <sup>+</sup> | y <sup>2+</sup> |
|----------------|----|----|----|----------------|-----------------|
| 174.0589       | 1  | M  | 10 |                |                 |
| 302.1175       | 2  | Q  | 9  | 1072.4911      | 536.7495        |
| 417.1444       | 3  | D  | 8  | 944.4325       | 472.7202        |
| 514.1972       | 4  | P  | 7  | 829.4056       | 415.2067        |
| 629.2241       | 5  | D  | 6  | 732.3528       | 366.6803        |
| 758.2667       | 6  | E  | 5  | 617.3259       | 309.1668        |
| 887.3093       | 7  | E  | 4  | 488.2833       | 244.6455        |
| 958.3464       | 8  | A  | 3  | 359.2407       | 180.1243        |
| 1071.4305      | 9  | L  | 2  | 288.2036       | 144.6057        |
|                | 10 | R  | 1  | 175.1195       | 88.0637         |

N-term:+43.02

X-range:

0 - 0

MassTol: Y-zoom:

0. 1.

MassType:

☐AVG ☒MONO

Axis:

☒1 ☐2

Label:

☒I ☐M ☐-

Ions:

a ☐+ ☐2+ ☐3+

b ☒+ ☐2+ ☐3+

c ☐+ ☐2+ ☐3+

x ☐+ ☐2+ ☐3+

y ☒+ ☒2+ ☐3+

z ☐+ ☐2+ ☐3+

hide H<sub>2</sub>O/NH<sub>3</sub> ☐

zoom 112-122 ☐

GO

MQKIFAR, MH+ 969.5768, m/z 485.2921  
L OS G31 P160811 220811-s1.05865.05865.2.dta

scan 5865; 5.9e+001

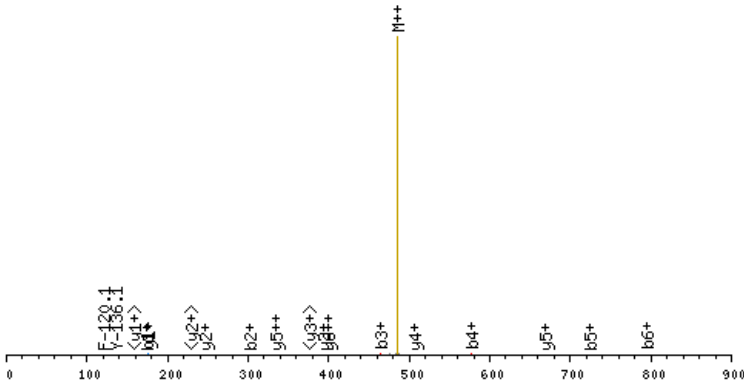

click image to zoom in; click top corners to zoom out

[precursor±]

scan 5864; 485.3 m/z; 1.4e+001

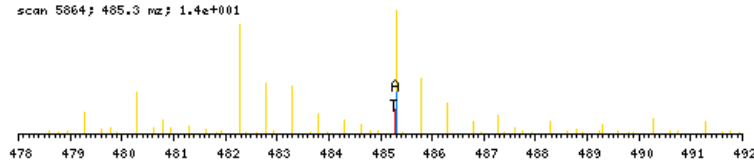

zoomed in precursor plot; T=theoretical m/z, A=acquired m/z

| b <sup>+</sup> | # | AA | # | y <sup>+</sup> | y <sup>2+</sup> |
|----------------|---|----|---|----------------|-----------------|
| 174.0589       | 1 | M  | 7 |                |                 |
| 302.1175       | 2 | Q  | 6 | 796.5258       | 398.7668        |
| 464.2756       | 3 | K  | 5 | 668.4672       | 334.7375        |
| 577.3596       | 4 | I  | 4 | 506.3091       | 253.6585        |
| 724.4280       | 5 | F  | 3 | 393.2250       | 197.1164        |
| 795.4652       | 6 | A  | 2 | 246.1566       | 123.5822        |
|                | 7 | R  | 1 | 175.1195       | 88.0637         |

N-term:+43.02 K(3):+162.16

X-range:

0 - 0

MassTol: Y-zoom:

0. 1.

MassType:

☐ AVG ☒ MONO

Axis:

☒ 1 ☐ 2

Label:

☒ I ☐ M ☐ -

Ions:

a ☐ + ☐ 2+ ☐ 3+

b ☒ + ☐ 2+ ☐ 3+

c ☐ + ☐ 2+ ☐ 3+

x ☐ + ☐ 2+ ☐ 3+

y ☒ + ☒ 2+ ☐ 3+

z ☐ + ☐ 2+ ☐ 3+

hide H<sub>2</sub>O/NH<sub>3</sub> ☐

zoom 112-122 ☐

GO

MTEEHTDLEAR, MH+ 1373.6007, m/z 687.3040  
L OS G31 P160811 220811-s1.04955.04955.2.dta

scan 4955; 1.2e+000

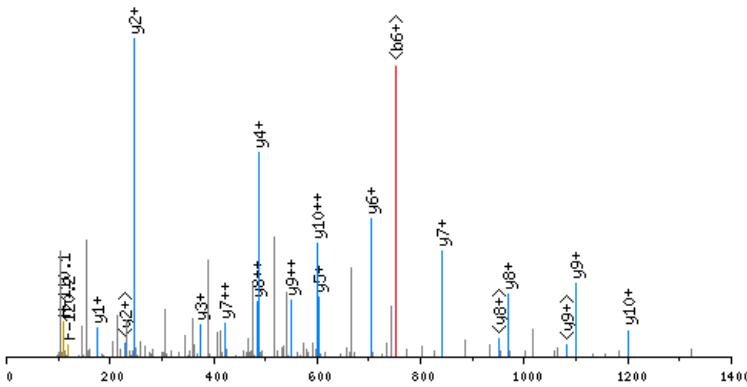

click image to zoom in; click top corners to zoom out

[precursor±]

scan 4954; 687.3 m/z; 2.3e+001

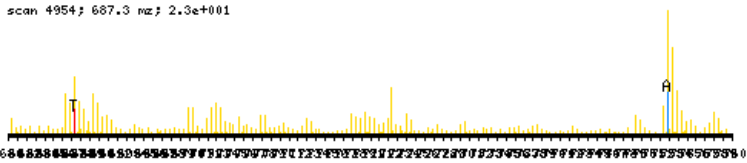

zoomed in precursor plot; T=theoretical m/z, A=acquired m/z

| b <sup>+</sup> | #  | AA | #  | y <sup>+</sup> | y <sup>2+</sup> |
|----------------|----|----|----|----------------|-----------------|
| 174.0589       | 1  | M  | 11 |                |                 |
| 275.1066       | 2  | T  | 10 | 1200.5497      | 600.7787        |
| 404.1492       | 3  | E  | 9  | 1099.5020      | 550.2549        |
| 533.1917       | 4  | E  | 8  | 970.4594       | 485.7336        |
| 670.2507       | 5  | H  | 7  | 841.4168       | 421.2123        |
| 771.2983       | 6  | T  | 6  | 704.3579       | 352.6829        |
| 886.3253       | 7  | D  | 5  | 603.3102       | 302.1590        |
| 999.4093       | 8  | L  | 4  | 488.2833       | 244.6455        |
| 1128.4519      | 9  | E  | 3  | 375.1992       | 188.1035        |
| 1199.4891      | 10 | A  | 2  | 246.1566       | 123.5822        |
|                | 11 | R  | 1  | 175.1195       | 88.0637         |

N-term:+43.02

X-range:

0 - 0

MassTol: Y-zoom:

0. 1.

MassType:

☐ AVG ☒ MONO

Axis:

☒ 1 ☐ 2

Label:

☒ I ☐ M ☐ -

Ions:

a ☐ + ☐ 2+ ☐ 3+

b ☒ + ☐ 2+ ☐ 3+

c ☐ + ☐ 2+ ☐ 3+

x ☐ + ☐ 2+ ☐ 3+

y ☒ + ☒ 2+ ☐ 3+

z ☐ + ☐ 2+ ☐ 3+

hide H<sub>2</sub>O/NH<sub>3</sub> ☐

zoom 112-122 ☐

GO

NGPLHPR, MH+ 832.4430, m/z 416.7251  
L OS G31 P160811 220811-s1.04106.04106.2.dta

scan 4106; 5.2e+000

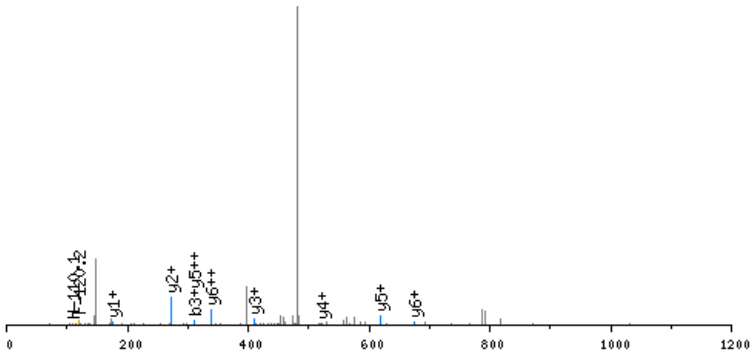

click image to zoom in; click top corners to zoom out [precursor±]

scan 4104; 416.7 m/z; 6.4e+001

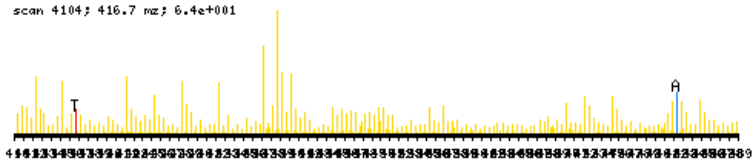

zoomed in precursor plot; T=theoretical m/z, A=acquired m/z

| b <sup>+</sup> | # | AA | # | y <sup>+</sup> | y <sup>2+</sup> |
|----------------|---|----|---|----------------|-----------------|
| 157.0613       | 1 | N  | 7 |                |                 |
| 214.0828       | 2 | G  | 6 | 676.3895       | 338.6986        |
| 311.1356       | 3 | P  | 5 | 619.3680       | 310.1879        |
| 424.2196       | 4 | L  | 4 | 522.3152       | 261.6615        |
| 561.2785       | 5 | H  | 3 | 409.2312       | 205.1195        |
| 658.3313       | 6 | P  | 2 | 272.1723       | 136.5900        |
|                | 7 | R  | 1 | 175.1195       | 88.0637         |

N-term:+43.02

X-range:

0 - 0

MassTol: Y-zoom:

0. 1.

MassType:

☐AVG ☒MONO

Axis:

☒1 ☐2

Label:

☒I ☐M ☐-

Ions:

a ☐+ ☐2+ ☐3+

b ☒+ ☐2+ ☐3+

c ☐+ ☐2+ ☐3+

x ☐+ ☐2+ ☐3+

y ☒+ ☒2+ ☐3+

z ☐+ ☐2+ ☐3+

hide H<sub>2</sub>O/NH<sub>3</sub> ☐

zoom 112-122 ☐

GO

NHTSQAFITAASGGQPPNYER, MH+ 2288.0696, m/z 763.3614  
L OS G30 P160811 220811-s1.05431.05431.3.dta

scan 5431; 3.9e+000

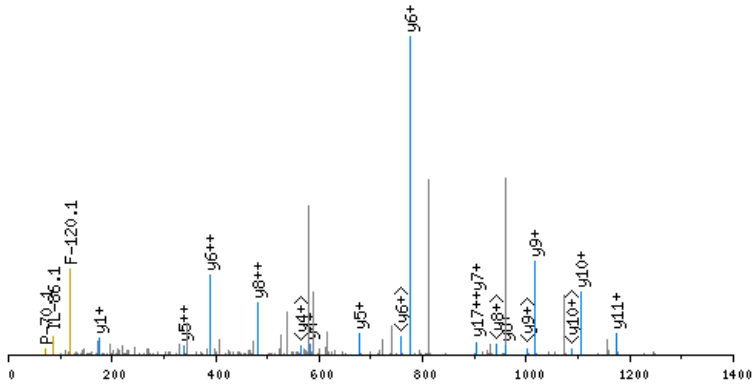

click image to zoom in; click top corners to zoom out [\[precursor±\]](#)

scan 5429; 763.4 m/z; 4.1e+001

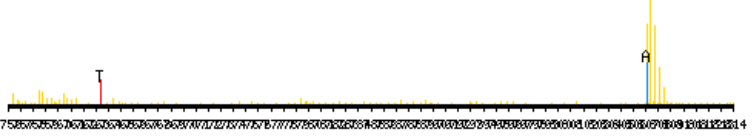

zoomed in precursor plot; T=theoretical m/z, A=acquired m/z

| b <sup>+</sup> | #  | AA | #  | y <sup>+</sup> | y <sup>2+</sup> |
|----------------|----|----|----|----------------|-----------------|
| 157.0613       | 1  | N  | 21 |                |                 |
| 294.1202       | 2  | H  | 20 | 2132.0161      | 1066.5120       |
| 395.1679       | 3  | T  | 19 | 1994.9572      | 997.9825        |
| 482.1999       | 4  | S  | 18 | 1893.9095      | 947.4587        |
| 610.2585       | 5  | Q  | 17 | 1806.8775      | 903.9427        |
| 681.2956       | 6  | A  | 16 | 1678.8189      | 839.9134        |
| 828.3641       | 7  | F  | 15 | 1607.7818      | 804.3948        |
| 941.4481       | 8  | I  | 14 | 1460.7134      | 730.8606        |
| 1042.4958      | 9  | T  | 13 | 1347.6293      | 674.3186        |
| 1113.5329      | 10 | A  | 12 | 1246.5816      | 623.7947        |
| 1184.5700      | 11 | A  | 11 | 1175.5445      | 588.2762        |
| 1271.6021      | 12 | S  | 10 | 1104.5074      | 552.7576        |
| 1328.6235      | 13 | G  | 9  | 1017.4754      | 509.2416        |
| 1385.6450      | 14 | G  | 8  | 960.4539       | 480.7309        |
| 1513.7036      | 15 | Q  | 7  | 903.4325       | 452.2201        |
| 1610.7563      | 16 | P  | 6  | 775.3739       | 388.1909        |
| 1707.8091      | 17 | P  | 5  | 678.3211       | 339.6645        |
| 1821.8520      | 18 | N  | 4  | 581.2683       | 291.1381        |
| 1984.9153      | 19 | Y  | 3  | 467.2254       | 234.1166        |
| 2113.9579      | 20 | E  | 2  | 304.1621       | 152.5850        |
|                | 21 | R  | 1  | 175.1195       | 88.0637         |

N-term:+43.02

X-range:

0 - 0

MassTol: Y-zoom:

0. 1.

MassType:

☐AVG ☒MONO

Axis:

☒1 ☐2

Label:

☒I ☐M ☐-

Ions:

a ☐+ ☐2+ ☐3+

b ☒+ ☐2+ ☐3+

c ☐+ ☐2+ ☐3+

x ☐+ ☐2+ ☐3+

y ☒+ ☒2+ ☐3+

z ☐+ ☐2+ ☐3+

hide H<sub>2</sub>O/NH<sub>3</sub> ☐

zoom 112-122 ☐

GO

NKAPQPTGPPPAR, MH+ 1406.7969, m/z 469.6038  
L OS G30 P160811 220811-s1.02610.02610.3.dta

scan 2610; 2.6e+000

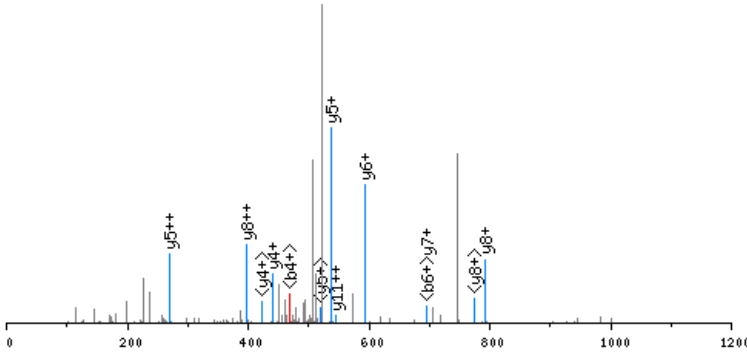

click image to zoom in; click top corners to zoom out [\[precursor±\]](#)

scan 2609; 469.6 m/z; 1.0e+001

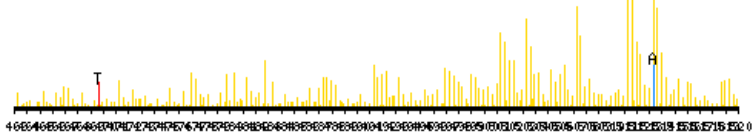

zoomed in precursor plot; T=theoretical m/z, A=acquired m/z

| b <sup>+</sup> | #  | AA | #  | y <sup>+</sup> | y <sup>2+</sup> |
|----------------|----|----|----|----------------|-----------------|
| 157.0613       | 1  | N  | 13 |                |                 |
| 319.2194       | 2  | K  | 12 | 1250.7434      | 625.8756        |
| 390.2565       | 3  | A  | 11 | 1088.5853      | 544.7965        |
| 487.3093       | 4  | P  | 10 | 1017.5482      | 509.2780        |
| 615.3679       | 5  | Q  | 9  | 920.4954       | 460.7516        |
| 712.4206       | 6  | P  | 8  | 792.4368       | 396.7223        |
| 813.4683       | 7  | T  | 7  | 695.3840       | 348.1959        |
| 870.4898       | 8  | G  | 6  | 594.3364       | 297.6721        |
| 967.5426       | 9  | P  | 5  | 537.3149       | 269.1614        |
| 1064.5953      | 10 | P  | 4  | 440.2621       | 220.6350        |
| 1161.6481      | 11 | P  | 3  | 343.2094       | 172.1086        |
| 1232.6852      | 12 | A  | 2  | 246.1566       | 123.5822        |
|                | 13 | R  | 1  | 175.1195       | 88.0637         |

N-term:+43.02 K(2):+162.16

X-range:

0 - 0

MassTol: Y-zoom:

0. 1.

MassType:

☐ AVG ☒ MONO

Axis:

☒ 1 ☐ 2

Label:

☒ I ☐ M ☐ -

Ions:

a ☐ + ☐ 2+ ☐ 3+

b ☒ + ☐ 2+ ☐ 3+

c ☐ + ☐ 2+ ☐ 3+

x ☐ + ☐ 2+ ☐ 3+

y ☒ + ☒ 2+ ☐ 3+

z ☐ + ☐ 2+ ☐ 3+

hide H<sub>2</sub>O/NH<sub>3</sub> ☐

zoom 112-122 ☐

GO

NQEKLAKLQAQVR, MH+ 1623.9547, m/z 541.9898  
L OS G33 P160811 220811-s1.04483.04483.3.dta

scan 4483; 6.9e+001

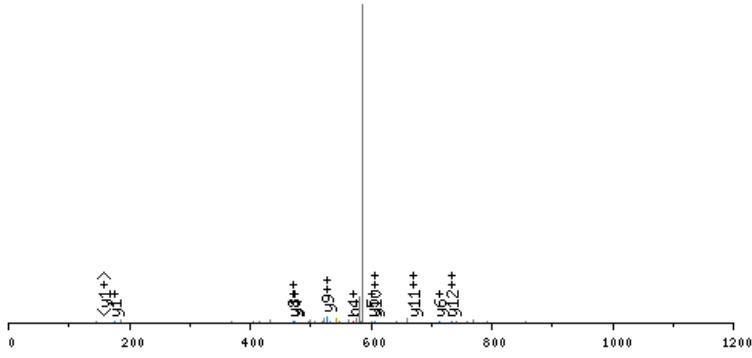

click image to zoom in; click top corners to zoom out [\[precursor±\]](#)

scan 4482; 542.0 m/z; 4.9e+002

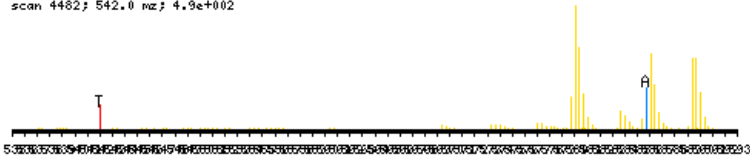

zoomed in precursor plot; T=theoretical m/z, A=acquired m/z

| b <sup>+</sup> | #  | AA | #  | y <sup>+</sup> | y <sup>2+</sup> |
|----------------|----|----|----|----------------|-----------------|
| 157.0613       | 1  | N  | 13 |                |                 |
| 285.1199       | 2  | Q  | 12 | 1467.9012      | 734.4545        |
| 414.1625       | 3  | E  | 11 | 1339.8426      | 670.4252        |
| 570.2888       | 4  | K  | 10 | 1210.8000      | 605.9039        |
| 683.3729       | 5  | L  | 9  | 1054.6737      | 527.8408        |
| 754.4100       | 6  | A  | 8  | 941.5897       | 471.2987        |
| 910.5363       | 7  | K  | 7  | 870.5525       | 435.7802        |
| 1023.6203      | 8  | L  | 6  | 714.4262       | 357.7170        |
| 1151.6789      | 9  | Q  | 5  | 601.3422       | 301.1750        |
| 1222.7160      | 10 | A  | 4  | 473.2836       | 237.1457        |
| 1350.7746      | 11 | Q  | 3  | 402.2465       | 201.6272        |
| 1449.8430      | 12 | V  | 2  | 274.1879       | 137.5979        |
|                | 13 | R  | 1  | 175.1195       | 88.0637         |

N-term:+43.02 K(4):+156.13  
K(7):+156.13

X-range:

0 - 0

MassTol: Y-zoom:

0. 1.

MassType:

☐AVG ☒MONO

Axis:

☒1 ☐2

Label:

☒I ☐M ☐-

Ions:

a ☐+ ☐2+ ☐3+

b ☒+ ☐2+ ☐3+

c ☐+ ☐2+ ☐3+

x ☐+ ☐2+ ☐3+

y ☒+ ☒2+ ☐3+

z ☐+ ☐2+ ☐3+

hide H<sub>2</sub>O/NH<sub>3</sub> ☐

zoom 112-122 ☐

GO

NRPAPVEISYENMR, MH+ 1717.8332, m/z 573.2826  
L OS G30 P160811 220811-s1.05086.05086.3.dta

scan 5086; 2.0e+000

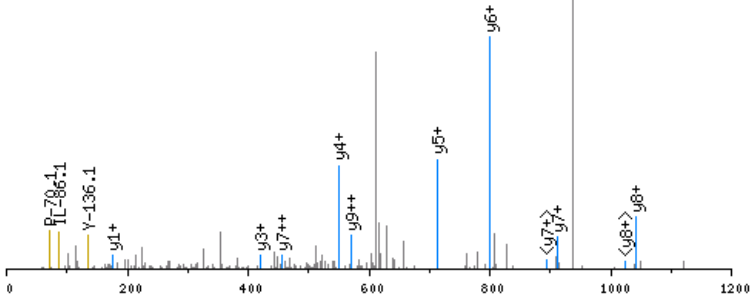

click image to zoom in; click top corners to zoom out [precursor±]

scan 5084; 573.3 m/z; 2.2e+001

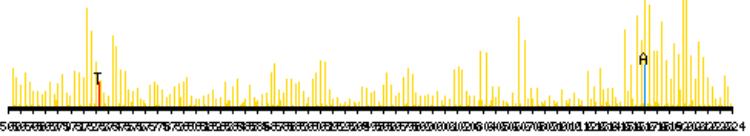

zoomed in precursor plot; T=theoretical m/z, A=acquired m/z

| b <sup>+</sup> | #  | AA | #  | y <sup>+</sup> | y <sup>2+</sup> |
|----------------|----|----|----|----------------|-----------------|
| 157.0613       | 1  | N  | 14 |                |                 |
| 313.1624       | 2  | R  | 13 | 1561.7797      | 781.3938        |
| 410.2152       | 3  | P  | 12 | 1405.6786      | 703.3432        |
| 481.2523       | 4  | A  | 11 | 1308.6258      | 654.8168        |
| 578.3051       | 5  | P  | 10 | 1237.5887      | 619.2983        |
| 677.3735       | 6  | V  | 9  | 1140.5359      | 570.7719        |
| 806.4161       | 7  | E  | 8  | 1041.4675      | 521.2377        |
| 919.5002       | 8  | I  | 7  | 912.4249       | 456.7164        |
| 1006.5322      | 9  | S  | 6  | 799.3409       | 400.1743        |
| 1169.5955      | 10 | Y  | 5  | 712.3088       | 356.6583        |
| 1298.6381      | 11 | E  | 4  | 549.2455       | 275.1267        |
| 1412.6810      | 12 | N  | 3  | 420.2029       | 210.6054        |
| 1543.7215      | 13 | M  | 2  | 306.1600       | 153.5839        |
|                | 14 | R  | 1  | 175.1195       | 88.0637         |

N-term:+43.02

X-range:

0 - 0

MassTol: Y-zoom:

0. 1.

MassType:

☐ AVG ☒ MONO

Axis:

☒ 1 ☐ 2

Label:

☒ I ☐ M ☐ -

Ions:

a ☐ + ☐ 2+ ☐ 3+

b ☒ + ☐ 2+ ☐ 3+

c ☐ + ☐ 2+ ☐ 3+

x ☐ + ☐ 2+ ☐ 3+

y ☒ + ☒ 2+ ☐ 3+

z ☐ + ☐ 2+ ☐ 3+

hide H<sub>2</sub>O/NH<sub>3</sub> ☐

zoom 112-122 ☐

GO

NSVGEACTDMKR, MH+ 1443.6784, m/z 722.3428  
L OS G31 P160811 220811-s1.04438.04438.2.dta

scan 4438; 3.6e+000

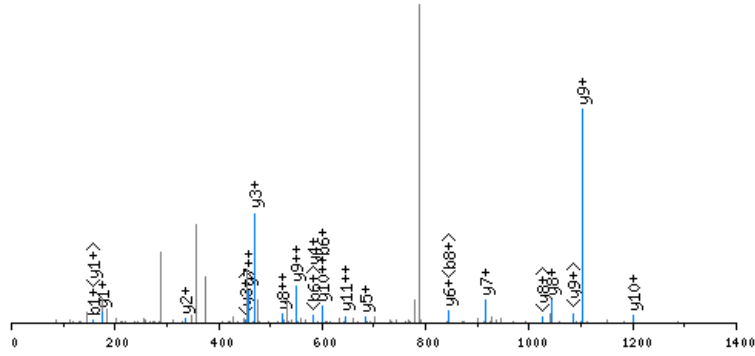

click image to zoom in; click top corners to zoom out [precursor±]

scan 4434; 722.3 m/z; 1.1e+001

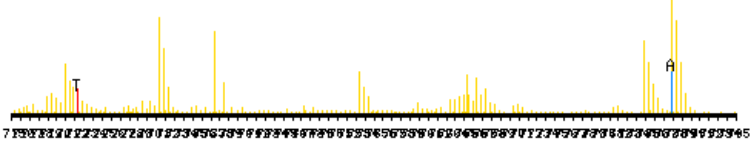

zoomed in precursor plot; T=theoretical m/z, A=acquired m/z

| b <sup>+</sup> | #  | AA | #  | y <sup>+</sup> | y <sup>2+</sup> |
|----------------|----|----|----|----------------|-----------------|
| 157.0613       | 1  | N  | 12 |                |                 |
| 244.0934       | 2  | S  | 11 | 1287.6249      | 644.3164        |
| 343.1618       | 3  | V  | 10 | 1200.5929      | 600.8004        |
| 400.1832       | 4  | G  | 9  | 1101.5245      | 551.2662        |
| 529.2258       | 5  | E  | 8  | 1044.5030      | 522.7554        |
| 600.2629       | 6  | A  | 7  | 915.4604       | 458.2341        |
| 760.2935       | 7  | C  | 6  | 844.4233       | 422.7156        |
| 861.3412       | 8  | T  | 5  | 684.3927       | 342.7003        |
| 976.3682       | 9  | D  | 4  | 583.3450       | 292.1764        |
| 1107.4086      | 10 | M  | 3  | 468.3181       | 234.6630        |
| 1269.5667      | 11 | K  | 2  | 337.2776       | 169.1427        |
|                | 12 | R  | 1  | 175.1195       | 88.0637         |

N-term:+43.02 C(7):+160.03  
K(11):+162.16

X-range:

0 - 0

MassTol: Y-zoom:

0. 1.

MassType:

☐ AVG ☒ MONO

Axis:

☒ 1 ☐ 2

Label:

☒ I ☐ M ☐ -

Ions:

a ☐ + ☐ 2+ ☐ 3+

b ☒ + ☐ 2+ ☐ 3+

c ☐ + ☐ 2+ ☐ 3+

x ☐ + ☐ 2+ ☐ 3+

y ☒ + ☒ 2+ ☐ 3+

z ☐ + ☐ 2+ ☐ 3+

hide H<sub>2</sub>O/NH<sub>3</sub> ☐

zoom 112-122 ☐

GO

NTLGKTITCR, MH+ 1233.6625, m/z 617.3349  
L OS G31 P160811 220811-s1.05695.05695.2.dta

scan 5695; 1.9e+001

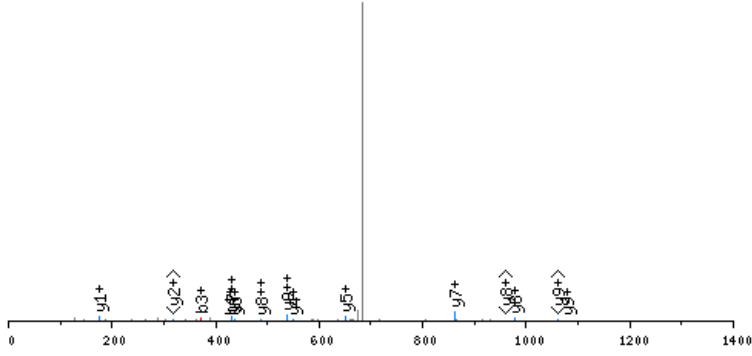

click image to zoom in; click top corners to zoom out [\[precursor±\]](#)

scan 5694; 617.3 m/z; 1.7e+002

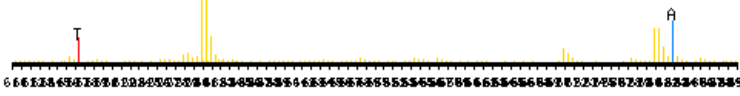

zoomed in precursor plot; T=theoretical m/z, A=acquired m/z

| b <sup>+</sup> | #  | AA | #  | y <sup>+</sup> | y <sup>2+</sup> |
|----------------|----|----|----|----------------|-----------------|
| 157.0613       | 1  | N  | 10 |                |                 |
| 258.1090       | 2  | T  | 9  | 1077.6090      | 539.3084        |
| 371.1931       | 3  | L  | 8  | 976.5613       | 488.7846        |
| 428.2145       | 4  | G  | 7  | 863.4773       | 432.2426        |
| 584.3408       | 5  | K  | 6  | 806.4558       | 403.7318        |
| 685.3885       | 6  | T  | 5  | 650.3295       | 325.6687        |
| 798.4726       | 7  | I  | 4  | 549.2818       | 275.1448        |
| 899.5203       | 8  | T  | 3  | 436.1978       | 218.6028        |
| 1059.5509      | 9  | C  | 2  | 335.1501       | 168.0790        |
|                | 10 | R  | 1  | 175.1195       | 88.0637         |

N-term:+43.02 K(5):+156.13  
C(9):+160.03

X-range:

0 - 0

MassTol: Y-zoom:

0. 1.

MassType:

☐AVG ☒MONO

Axis:

☒1 ☐2

Label:

☒I ☐M ☐-

Ions:

a ☐+ ☐2+ ☐3+

b ☒+ ☐2+ ☐3+

c ☐+ ☐2+ ☐3+

x ☐+ ☐2+ ☐3+

y ☒+ ☒2+ ☐3+

z ☐+ ☐2+ ☐3+

hide H<sub>2</sub>O/NH<sub>3</sub> ☐

zoom 112-122 ☐

GO

NVEHEVNLLVEEIHR, MH+ 1871.9616, m/z 624.6587  
L OS G33 P160811 220811-s1.07518.07518.3.dta

scan 7518; 1.0e+001

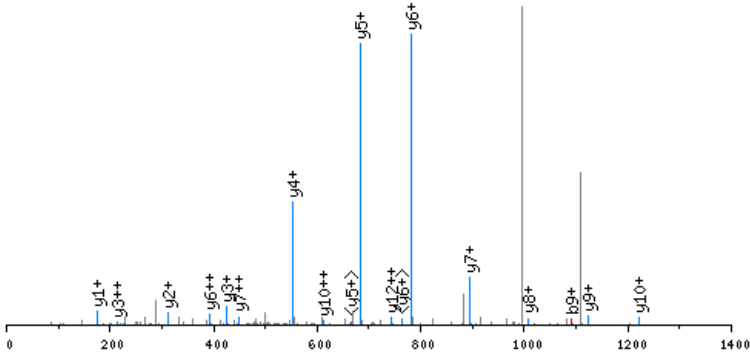

click image to zoom in; click top corners to zoom out [precursor±]

scan 7517; 624.7 m/z; 1.2e+002

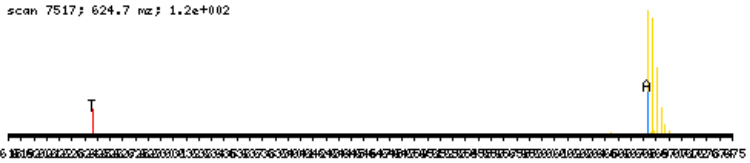

zoomed in precursor plot; T=theoretical m/z, A=acquired m/z

| b <sup>+</sup> | #  | AA | #  | y <sup>+</sup> | y <sup>2+</sup> |
|----------------|----|----|----|----------------|-----------------|
| 157.0613       | 1  | N  | 15 |                |                 |
| 256.1297       | 2  | V  | 14 | 1715.9081      | 858.4579        |
| 385.1723       | 3  | E  | 13 | 1616.8396      | 808.9237        |
| 522.2312       | 4  | H  | 12 | 1487.7971      | 744.4024        |
| 651.2738       | 5  | E  | 11 | 1350.7381      | 675.8730        |
| 750.3423       | 6  | V  | 10 | 1221.6955      | 611.3517        |
| 864.3852       | 7  | N  | 9  | 1122.6271      | 561.8175        |
| 977.4692       | 8  | L  | 8  | 1008.5842      | 504.7960        |
| 1090.5533      | 9  | L  | 7  | 895.5001       | 448.2540        |
| 1189.6217      | 10 | V  | 6  | 782.4161       | 391.7120        |
| 1318.6643      | 11 | E  | 5  | 683.3477       | 342.1777        |
| 1447.7069      | 12 | E  | 4  | 554.3051       | 277.6564        |
| 1560.7910      | 13 | I  | 3  | 425.2625       | 213.1352        |
| 1697.8499      | 14 | H  | 2  | 312.1784       | 156.5931        |
|                | 15 | R  | 1  | 175.1195       | 88.0637         |

N-term:+43.02

X-range:

0 - 0

MassTol: Y-zoom:

0. 1.

MassType:

☐ AVG ☒ MONO

Axis:

☒ 1 ☐ 2

Label:

☒ I ☐ M ☐ -

Ions:

a ☐ + ☐ 2+ ☐ 3+

b ☒ + ☐ 2+ ☐ 3+

c ☐ + ☐ 2+ ☐ 3+

x ☐ + ☐ 2+ ☐ 3+

y ☒ + ☒ 2+ ☐ 3+

z ☐ + ☐ 2+ ☐ 3+

hide H<sub>2</sub>O/NH<sub>3</sub> ☐

zoom 112-122 ☐

GO

NVNDLKQR, MH+ 1062.6120, m/z 531.8097  
L OS G31 P160811 220811-s1.04347.04347.2.dta

scan 4347; 2.9e+001

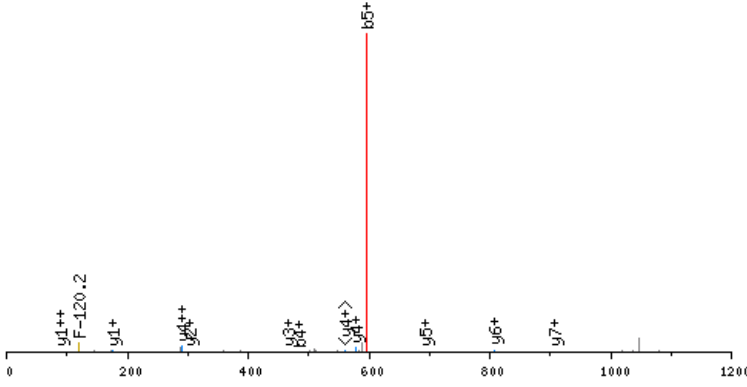

click image to zoom in; click top corners to zoom out [precursor±]

scan 4344; 531.8 m/z; 4.4e+002

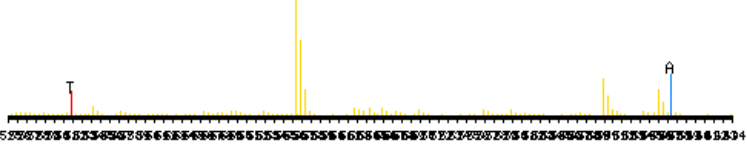

zoomed in precursor plot; T=theoretical m/z, A=acquired m/z

| b <sup>+</sup> | # | AA | # | y <sup>+</sup> | y <sup>2+</sup> |
|----------------|---|----|---|----------------|-----------------|
| 157.0613       | 1 | N  | 8 |                |                 |
| 256.1297       | 2 | V  | 7 | 906.5585       | 453.7832        |
| 370.1727       | 3 | N  | 6 | 807.4901       | 404.2490        |
| 485.1996       | 4 | D  | 5 | 693.4472       | 347.2275        |
| 598.2837       | 5 | L  | 4 | 578.4202       | 289.7140        |
| 760.4418       | 6 | K  | 3 | 465.3362       | 233.1720        |
| 888.5004       | 7 | Q  | 2 | 303.1781       | 152.0930        |
|                | 8 | R  | 1 | 175.1195       | 88.0637         |

N-term:+43.02 K(6):+162.16

X-range:

0 - 0

MassTol: Y-zoom:

0. 1.

MassType:

☐ AVG ☒ MONO

Axis:

☒ 1 ☐ 2

Label:

☒ I ☐ M ☐ -

Ions:

a ☐ + ☐ 2+ ☐ 3+

b ☒ + ☐ 2+ ☐ 3+

c ☐ + ☐ 2+ ☐ 3+

x ☐ + ☐ 2+ ☐ 3+

y ☒ + ☒ 2+ ☐ 3+

z ☐ + ☐ 2+ ☐ 3+

hide H<sub>2</sub>O/NH<sub>3</sub> ☐

zoom 112-122 ☐

GO

QEFKEAFTVIDQNR, MH+ 1794.9027, m/z 598.9724  
L OS G33 P160811 220811-s1.05723.05723.3.dta

scan 5723; 1.4e+001

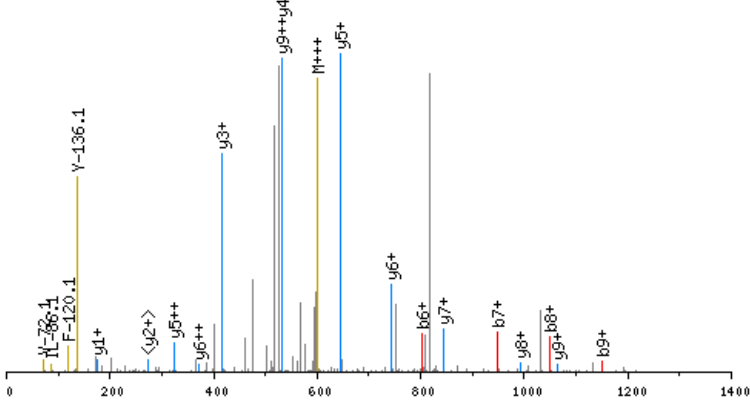

click image to zoom in; click top corners to zoom out

[precursor±]

scan 5722; 599.0 m/z; 1.4e+003

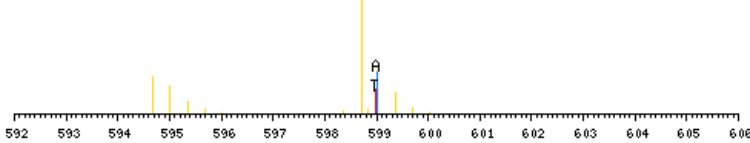

zoomed in precursor plot; T=theoretical m/z, A=acquired m/z

| b <sup>+</sup> | #  | AA | #  | y <sup>+</sup> | y <sup>2+</sup> |
|----------------|----|----|----|----------------|-----------------|
| 171.0770       | 1  | Q  | 14 |                |                 |
| 300.1196       | 2  | E  | 13 | 1624.8335      | 812.9207        |
| 447.1880       | 3  | F  | 12 | 1495.7909      | 748.3994        |
| 603.3143       | 4  | K  | 11 | 1348.7225      | 674.8652        |
| 732.3569       | 5  | E  | 10 | 1192.5962      | 596.8020        |
| 803.3940       | 6  | A  | 9  | 1063.5536      | 532.2807        |
| 950.4624       | 7  | F  | 8  | 992.5165       | 496.7622        |
| 1051.5101      | 8  | T  | 7  | 845.4481       | 423.2280        |
| 1150.5785      | 9  | V  | 6  | 744.4004       | 372.7041        |
| 1263.6626      | 10 | I  | 5  | 645.3320       | 323.1699        |
| 1378.6895      | 11 | D  | 4  | 532.2479       | 266.6279        |
| 1506.7481      | 12 | Q  | 3  | 417.2210       | 209.1144        |
| 1620.7910      | 13 | N  | 2  | 289.1624       | 145.0851        |
|                | 14 | R  | 1  | 175.1195       | 88.0637         |

N-term:+43.02 K(4):+156.13

X-range:

0 - 0

MassTol: Y-zoom:

0. 1.

MassType:

☐ AVG ☒ MONO

Axis:

☒ 1 ☐ 2

Label:

☒ I ☐ M ☐ -

Ions:

a ☐ + ☐ 2+ ☐ 3+

b ☒ + ☐ 2+ ☐ 3+

c ☐ + ☐ 2+ ☐ 3+

x ☐ + ☐ 2+ ☐ 3+

y ☒ + ☒ 2+ ☐ 3+

z ☐ + ☐ 2+ ☐ 3+

hide H<sub>2</sub>O/NH<sub>3</sub> ☐

zoom 112-122 ☐

GO

QNGKTLIMNIDMEPGAVDPQLR, MH+ 2623.3588, m/z 656.5952  
L OS G32 P160811 220811-s1.04495.04495.4.dta

scan 4495; 3.0e+000

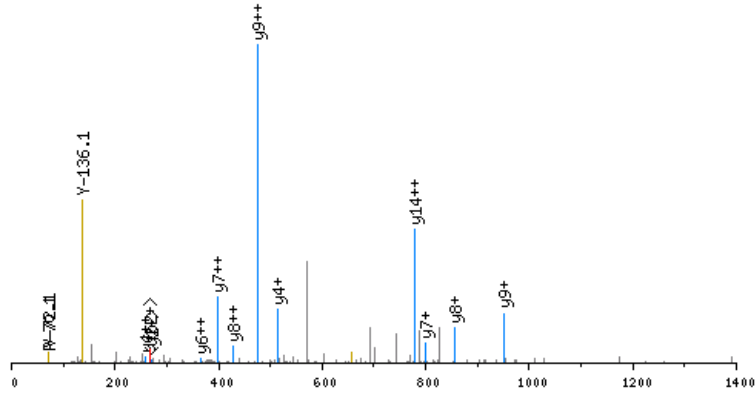

click image to zoom in; click top corners to zoom out

[precursor±]

scan 4493; 656.6 m/z; 3.4e+001

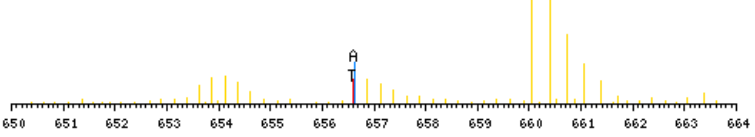

zoomed in precursor plot; T=theoretical m/z, A=acquired m/z

| b <sup>+</sup> | #  | AA | #  | y <sup>+</sup> | y <sup>2+</sup> |
|----------------|----|----|----|----------------|-----------------|
| 171.0770       | 1  | Q  | 23 |                |                 |
| 285.1199       | 2  | N  | 22 | 2453.2897      | 1227.1487       |
| 342.1414       | 3  | G  | 21 | 2339.2467      | 1170.1273       |
| 498.2677       | 4  | K  | 20 | 2282.2253      | 1141.6165       |
| 599.3153       | 5  | T  | 19 | 2126.0990      | 1063.5534       |
| 712.3994       | 6  | L  | 18 | 2025.0513      | 1013.0296       |
| 825.4835       | 7  | L  | 17 | 1911.9672      | 956.4875        |
| 938.5675       | 8  | I  | 16 | 1798.8832      | 899.9455        |
| 1069.6080      | 9  | M  | 15 | 1685.7991      | 843.4035        |
| 1183.6510      | 10 | N  | 14 | 1554.7586      | 777.8832        |
| 1296.7350      | 11 | I  | 13 | 1440.7157      | 720.8618        |
| 1411.7620      | 12 | D  | 12 | 1327.6316      | 664.3197        |
| 1542.8024      | 13 | M  | 11 | 1212.6047      | 606.8063        |
| 1671.8450      | 14 | E  | 10 | 1081.5642      | 541.2860        |
| 1768.8978      | 15 | P  | 9  | 952.5216       | 476.7647        |
| 1825.9193      | 16 | G  | 8  | 855.4688       | 428.2383        |
| 1896.9564      | 17 | A  | 7  | 798.4474       | 399.7276        |
| 1996.0248      | 18 | V  | 6  | 727.4103       | 364.2090        |
| 2111.0517      | 19 | D  | 5  | 628.3418       | 314.6748        |
| 2208.1045      | 20 | P  | 4  | 513.3149       | 257.1614        |
| 2336.1631      | 21 | Q  | 3  | 416.2621       | 208.6350        |
| 2449.2471      | 22 | L  | 2  | 288.2036       | 144.6057        |
|                | 23 | R  | 1  | 175.1195       | 88.0637         |

N-term:+43.02 K(4):+156.13

X-range:

0 - 0

MassTol: Y-zoom:

0. 1.

MassType:

☐ AVG ☒ MONO

Axis:

☒ 1 ☐ 2

Label:

☒ I ☐ M ☐ -

Ions:

a ☐ + ☐ 2+ ☐ 3+

b ☒ + ☐ 2+ ☐ 3+

c ☐ + ☐ 2+ ☐ 3+

x ☐ + ☐ 2+ ☐ 3+

y ☒ + ☒ 2+ ☐ 3+

z ☐ + ☐ 2+ ☐ 3+

hide H<sub>2</sub>O/NH<sub>3</sub> ☐

zoom 112-122 ☐

GO

QNVINTVKGK, MH+ 1198.7160, m/z 599.8617  
L OS G30 P160811 220811-s1.05543.05543.2.dta

scan 5543: 3.6e+000

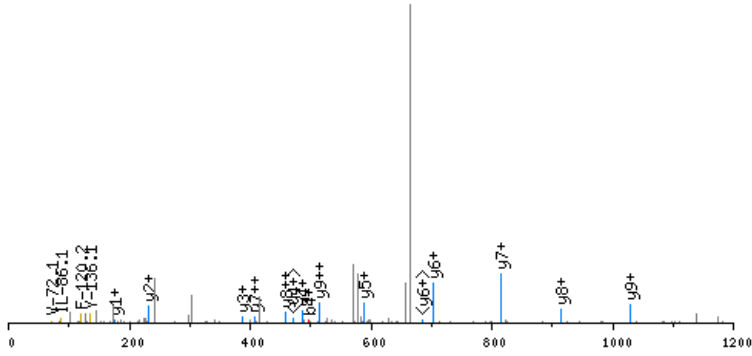

click image to zoom in; click top corners to zoom out [precursor±]

scan 5539: 599.9 m/z; 4.8e+002

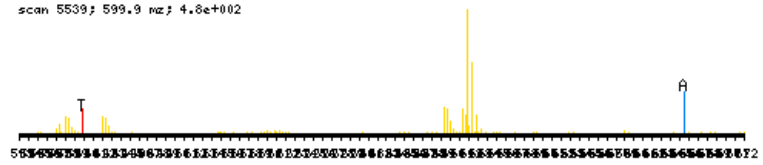

zoomed in precursor plot; T=theoretical m/z, A=acquired m/z

| b <sup>+</sup> | #  | AA | #  | y <sup>+</sup> | y <sup>2+</sup> |
|----------------|----|----|----|----------------|-----------------|
| 171.0770       | 1  | Q  | 10 |                |                 |
| 285.1199       | 2  | N  | 9  | 1028.6469      | 514.8274        |
| 384.1883       | 3  | V  | 8  | 914.6040       | 457.8059        |
| 497.2724       | 4  | I  | 7  | 815.5355       | 408.2717        |
| 611.3153       | 5  | N  | 6  | 702.4515       | 351.7296        |
| 712.3630       | 6  | T  | 5  | 588.4085       | 294.7082        |
| 811.4314       | 7  | V  | 4  | 487.3609       | 244.1843        |
| 967.5577       | 8  | K  | 3  | 388.2925       | 194.6501        |
| 1024.5792      | 9  | G  | 2  | 232.1662       | 116.5870        |
|                | 10 | K  | 1  | 175.1447       | 88.0763         |

N-term:+43.02 K(8):+156.13  
K(10):+156.13

X-range:

0 - 0

MassTol: Y-zoom:

0. 1.

MassType:

☐AVG ☒MONO

Axis:

☒1 ☐2

Label:

☒I ☐M ☐-

Ions:

a ☐+ ☐2+ ☐3+

b ☒+ ☐2+ ☐3+

c ☐+ ☐2+ ☐3+

x ☐+ ☐2+ ☐3+

y ☒+ ☒2+ ☐3+

z ☐+ ☐2+ ☐3+

hide H<sub>2</sub>O/NH<sub>3</sub> ☐

zoom 112-122 ☐

GO

QPASAKWYDR, MH+ 1297.6754, m/z 649.3413  
L OS G31 P160811 220811-s1.05337.05337.2.dta

scan 5337; 7.8e+000

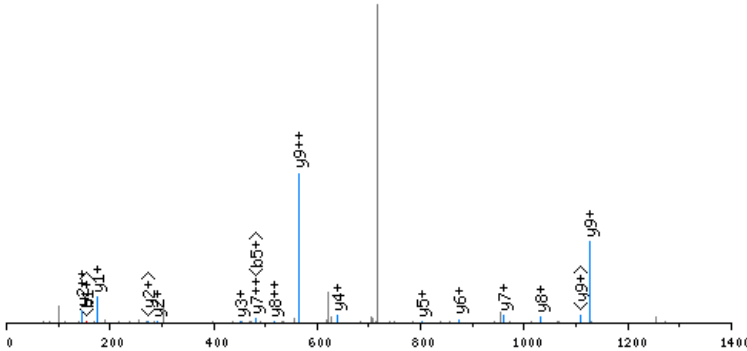

click image to zoom in; click top corners to zoom out

[precursor±]

scan 5334; 649.3 m/z; 2.8e+001

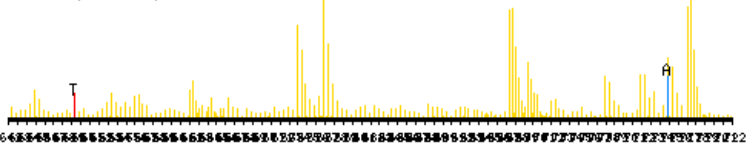

zoomed in precursor plot; T=theoretical m/z, A=acquired m/z

| b <sup>+</sup> | #  | AA | #  | y <sup>+</sup> | y <sup>2+</sup> |
|----------------|----|----|----|----------------|-----------------|
| 171.0770       | 1  | Q  | 10 |                |                 |
| 268.1297       | 2  | P  | 9  | 1127.6062      | 564.3070        |
| 339.1669       | 3  | A  | 8  | 1030.5534      | 515.7806        |
| 426.1989       | 4  | S  | 7  | 959.5163       | 480.2621        |
| 497.2360       | 5  | A  | 6  | 872.4843       | 436.7461        |
| 659.3941       | 6  | K  | 5  | 801.4472       | 401.2275        |
| 845.4734       | 7  | W  | 4  | 639.2891       | 320.1485        |
| 1008.5367      | 8  | Y  | 3  | 453.2098       | 227.1088        |
| 1123.5637      | 9  | D  | 2  | 290.1464       | 145.5771        |
|                | 10 | R  | 1  | 175.1195       | 88.0637         |

N-term:+43.02 K(6):+162.16

X-range:

0 - 0

MassTol: Y-zoom:

0. 1.

MassType:

☐ AVG ☒ MONO

Axis:

☒ 1 ☐ 2

Label:

☒ I ☐ M ☐ -

Ions:

a ☐ + ☐ 2+ ☐ 3+

b ☒ + ☐ 2+ ☐ 3+

c ☐ + ☐ 2+ ☐ 3+

x ☐ + ☐ 2+ ☐ 3+

y ☒ + ☒ 2+ ☐ 3+

z ☐ + ☐ 2+ ☐ 3+

hide H<sub>2</sub>O/NH<sub>3</sub> ☐

zoom 112-122 ☐

GO

QSAPLEQPAKRPR, MH+ 1553.8976, m/z 518.6374  
L OS G34 P160811 220811-s1.03407.03407.3.dta

scan 3407; 1.1e+001

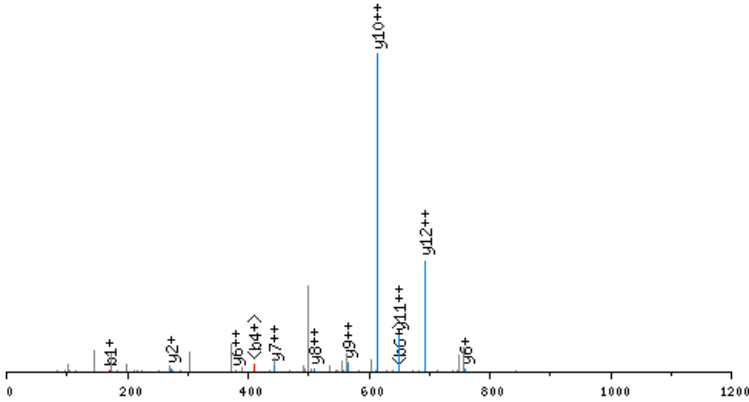

click image to zoom in; click top corners to zoom out

[precursor±]

scan 3405; 518.6 m/z; 4.9e+001

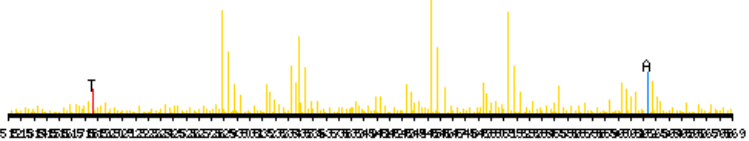

zoomed in precursor plot; T=theoretical m/z, A=acquired m/z

| b <sup>+</sup> | #  | AA | #  | y <sup>+</sup> | y <sup>2+</sup> |
|----------------|----|----|----|----------------|-----------------|
| 171.0770       | 1  | Q  | 13 |                |                 |
| 258.1090       | 2  | S  | 12 | 1383.8285      | 692.4182        |
| 329.1461       | 3  | A  | 11 | 1296.7965      | 648.9021        |
| 426.1989       | 4  | P  | 10 | 1225.7594      | 613.3836        |
| 539.2829       | 5  | L  | 9  | 1128.7066      | 564.8572        |
| 668.3255       | 6  | E  | 8  | 1015.6225      | 508.3152        |
| 796.3841       | 7  | Q  | 7  | 886.5799       | 443.7939        |
| 893.4369       | 8  | P  | 6  | 758.5214       | 379.7646        |
| 964.4740       | 9  | A  | 5  | 661.4686       | 331.2382        |
| 1126.6321      | 10 | K  | 4  | 590.4315       | 295.7197        |
| 1282.7332      | 11 | R  | 3  | 428.2734       | 214.6406        |
| 1379.7860      | 12 | P  | 2  | 272.1723       | 136.5900        |
|                | 13 | R  | 1  | 175.1195       | 88.0637         |

N-term:+43.02 K(10):+162.16

X-range:

0 - 0

MassTol: Y-zoom:

0. 1.

MassType:

☐AVG ☒MONO

Axis:

☒1 ☐2

Label:

☒I ☐M ☐-

Ions:

a ☐+ ☐2+ ☐3+

b ☒+ ☐2+ ☐3+

c ☐+ ☐2+ ☐3+

x ☐+ ☐2+ ☐3+

y ☒+ ☒2+ ☐3+

z ☐+ ☐2+ ☐3+

hide H<sub>2</sub>O/NH<sub>3</sub> ☐

zoom 112-122 ☐

GO

QTAHTGLSHTADGADGQTSR, MH+ 2052.9335, m/z 684.9827  
L OS G33 P160811 220811-s1.02724.02724.3.dta

scan 2724; 7.3e-001

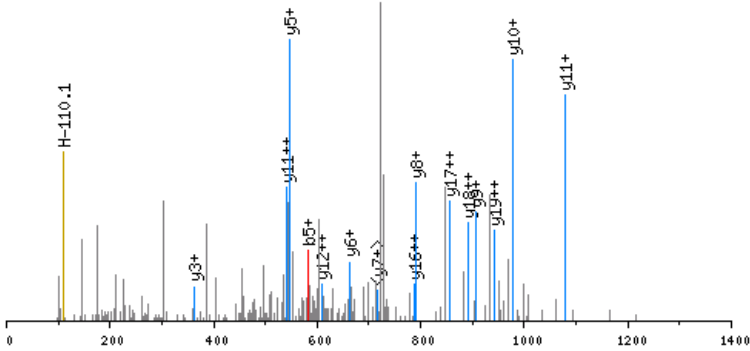

click image to zoom in; click top corners to zoom out

[precursor±]

scan 2722; 685.0 m/z; 1.7e+001

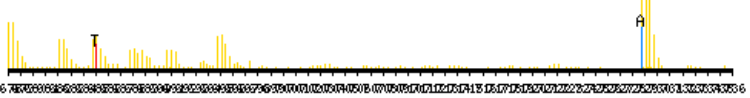

zoomed in precursor plot; T=theoretical m/z, A=acquired m/z

| b <sup>+</sup> | #  | AA | #  | y <sup>+</sup> | y <sup>2+</sup> |
|----------------|----|----|----|----------------|-----------------|
| 171.0770       | 1  | Q  | 20 |                |                 |
| 272.1247       | 2  | T  | 19 | 1882.8644      | 941.9361        |
| 343.1618       | 3  | A  | 18 | 1781.8167      | 891.4123        |
| 480.2207       | 4  | H  | 17 | 1710.7796      | 855.8937        |
| 581.2684       | 5  | T  | 16 | 1573.7207      | 787.3642        |
| 638.2898       | 6  | G  | 15 | 1472.6730      | 736.8404        |
| 751.3739       | 7  | L  | 14 | 1415.6515      | 708.3297        |
| 838.4059       | 8  | S  | 13 | 1302.5674      | 651.7876        |
| 975.4648       | 9  | H  | 12 | 1215.5354      | 608.2716        |
| 1076.5125      | 10 | T  | 11 | 1078.4765      | 539.7422        |
| 1147.5496      | 11 | A  | 10 | 977.4288       | 489.2183        |
| 1262.5766      | 12 | D  | 9  | 906.3917       | 453.6998        |
| 1319.5980      | 13 | G  | 8  | 791.3648       | 396.1863        |
| 1390.6351      | 14 | A  | 7  | 734.3433       | 367.6756        |
| 1505.6621      | 15 | D  | 6  | 663.3062       | 332.1570        |
| 1562.6835      | 16 | G  | 5  | 548.2792       | 274.6435        |
| 1690.7421      | 17 | Q  | 4  | 491.2578       | 246.1328        |
| 1791.7898      | 18 | T  | 3  | 363.1992       | 182.1035        |
| 1878.8218      | 19 | S  | 2  | 262.1515       | 131.5797        |
|                | 20 | R  | 1  | 175.1195       | 88.0637         |

N-term:+43.02

X-range:

0 - 0

MassTol: Y-zoom:

0. 1.

MassType:

☐ AVG ☒ MONO

Axis:

☒ 1 ☐ 2

Label:

☒ I ☐ M ☐ -

Ions:

a ☐ + ☐ 2+ ☐ 3+

b ☒ + ☐ 2+ ☐ 3+

c ☐ + ☐ 2+ ☐ 3+

x ☐ + ☐ 2+ ☐ 3+

y ☒ + ☒ 2+ ☐ 3+

z ☐ + ☐ 2+ ☐ 3+

hide H<sub>2</sub>O/NH<sub>3</sub> ☐

zoom 112-122 ☐

GO

RPAPPPRER, MH+ 1117.6231, m/z 559.3152  
L OS G30 P160811 220811-s1.02453.02453.2.dta

scan 2453; 3.7e+000

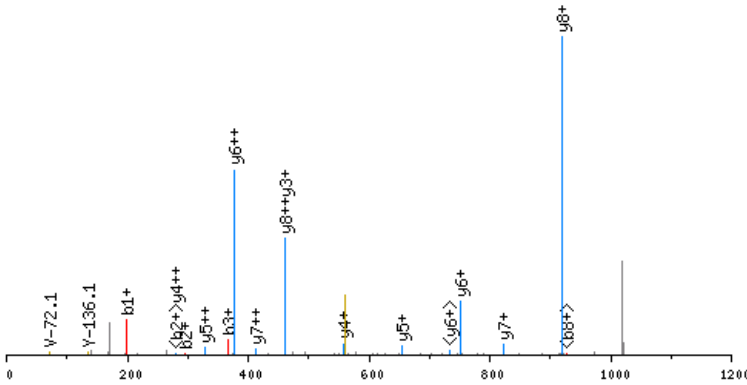

click image to zoom in; click top corners to zoom out

[precursor±]

scan 2449; 559.3 m/z; 8.0e+000

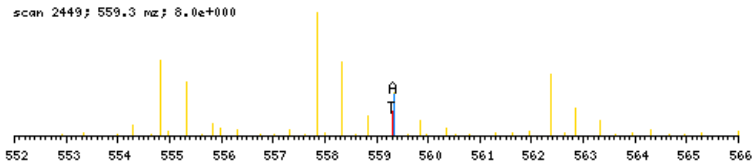

zoomed in precursor plot; T=theoretical m/z, A=acquired m/z

| b <sup>+</sup> | # | AA | # | y <sup>+</sup> | y <sup>2+</sup> |
|----------------|---|----|---|----------------|-----------------|
| 199.1195       | 1 | R  | 9 |                |                 |
| 296.1723       | 2 | P  | 8 | 919.5114       | 460.2596        |
| 367.2094       | 3 | A  | 7 | 822.4586       | 411.7332        |
| 464.2622       | 4 | P  | 6 | 751.4215       | 376.2147        |
| 561.3149       | 5 | P  | 5 | 654.3687       | 327.6883        |
| 658.3677       | 6 | P  | 4 | 557.3160       | 279.1619        |
| 814.4688       | 7 | R  | 3 | 460.2632       | 230.6355        |
| 943.5114       | 8 | E  | 2 | 304.1621       | 152.5850        |
|                | 9 | R  | 1 | 175.1195       | 88.0637         |

N-term:+43.02

X-range:

0 - 0

MassTol: Y-zoom:

0. 1.

MassType:

☐ AVG ☒ MONO

Axis:

☒ 1 ☐ 2

Label:

☒ I ☐ M ☐ -

Ions:

a ☐ + ☐ 2+ ☐ 3+

b ☒ + ☐ 2+ ☐ 3+

c ☐ + ☐ 2+ ☐ 3+

x ☐ + ☐ 2+ ☐ 3+

y ☒ + ☒ 2+ ☐ 3+

z ☐ + ☐ 2+ ☐ 3+

hide H<sub>2</sub>O/NH<sub>3</sub> ☐

zoom 112-122 ☐

GO

SAAEEVDGLGVVRPHYGSVLDNER, MH+ 2611.2752, m/z 871.0966  
L OS G32 P160811 220811-s1.05350.05350.3.dta

scan 5350; 2.3e+000

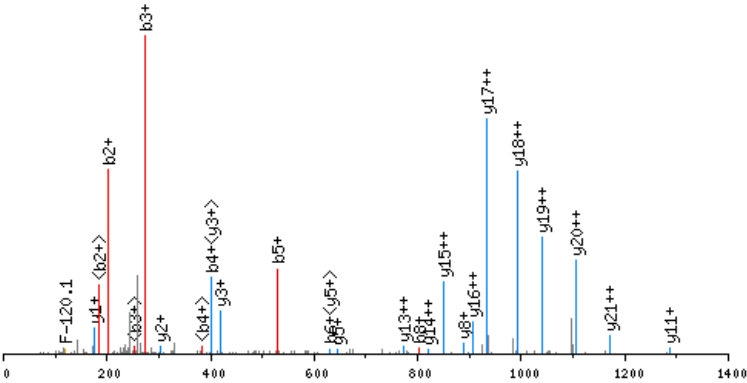

click image to zoom in; click top corners to zoom out [precursor±]

scan 5348; 871.1 m/z; 2.9e+001

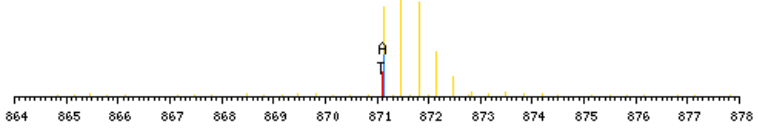

zoomed in precursor plot; T=theoretical m/z, A=acquired m/z

| b <sup>+</sup> | #  | AA | #  | y <sup>+</sup> | y <sup>2+</sup> |
|----------------|----|----|----|----------------|-----------------|
| 130.0504       | 1  | S  | 24 |                |                 |
| 201.0875       | 2  | A  | 23 | 2482.2326      | 1241.6202       |
| 272.1247       | 3  | A  | 22 | 2411.1955      | 1206.1017       |
| 401.1672       | 4  | E  | 21 | 2340.1584      | 1170.5831       |
| 530.2098       | 5  | E  | 20 | 2211.1158      | 1106.0618       |
| 629.2783       | 6  | V  | 19 | 2082.0732      | 1041.5405       |
| 744.3052       | 7  | D  | 18 | 1983.0048      | 992.0063        |
| 801.3267       | 8  | G  | 17 | 1867.9779      | 934.4928        |
| 914.4107       | 9  | L  | 16 | 1810.9564      | 905.9821        |
| 971.4322       | 10 | G  | 15 | 1697.8723      | 849.4401        |
| 1070.5006      | 11 | V  | 14 | 1640.8509      | 820.9294        |
| 1169.5690      | 12 | V  | 13 | 1541.7825      | 771.3951        |
| 1325.6701      | 13 | R  | 12 | 1442.7140      | 721.8609        |
| 1422.7229      | 14 | P  | 11 | 1286.6129      | 643.8104        |
| 1559.7818      | 15 | H  | 10 | 1189.5602      | 595.2840        |
| 1722.8451      | 16 | Y  | 9  | 1052.5013      | 526.7545        |
| 1779.8666      | 17 | G  | 8  | 889.4379       | 445.2229        |
| 1866.8986      | 18 | S  | 7  | 832.4165       | 416.7121        |
| 1965.9670      | 19 | V  | 6  | 745.3844       | 373.1961        |
| 2079.0511      | 20 | L  | 5  | 646.3160       | 323.6619        |
| 2194.0780      | 21 | D  | 4  | 533.2320       | 267.1199        |
| 2308.1210      | 22 | N  | 3  | 418.2050       | 209.6064        |
| 2437.1636      | 23 | E  | 2  | 304.1621       | 152.5850        |
|                | 24 | R  | 1  | 175.1195       | 88.0637         |

N-term:+43.02

X-range:

0 - 0

0. 1.

☐ AVG ☒ MONO

1 2

☒ I ☐ M ☐ -

 $\square + \square^2 + \square^3 + \dots$  $\square + \square^2 + \square^3 + \dots$ 

**Figure 1**

 $\square + \square^2 + \square^3 +$ 

GO

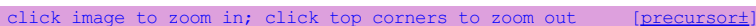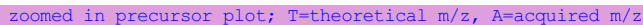

N-term: +43.02

X-range:

0 - 0

MassTol: Y-zoom:

0. 1.

MassType:

☐ AVG ☒ MONO

Axis:

☒ 1 ☐ 2

Label:

☒ I ☐ M ☐ -

Ions:

a ☐ + ☐ 2+ ☐ 3+

b ☒ + ☐ 2+ ☐ 3+

c ☐ + ☐ 2+ ☐ 3+

x ☐ + ☐ 2+ ☐ 3+

y ☒ + ☒ 2+ ☐ 3+

z ☐ + ☐ 2+ ☐ 3+

hide H<sub>2</sub>O/NH<sub>3</sub> ☐

zoom 112-122 ☐

GO

SAFNLLHLVTKSQPVAPR, MH+ 2054.1975, m/z 685.4040  
L OS G32 P160811 220811-s1.06544.06544.3.dta

scan 6544; 7.4e+000

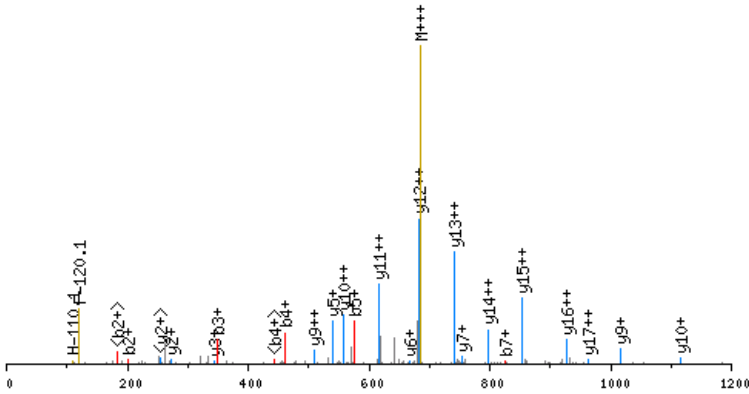

click image to zoom in; click top corners to zoom out

[precursor±]

scan 6543; 685.4 m/z; 3.5e+001

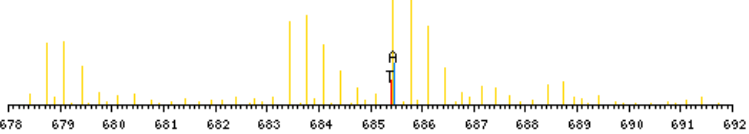

zoomed in precursor plot; T=theoretical m/z, A=acquired m/z

| b <sup>+</sup> | #  | AA | #  | y <sup>+</sup> | y <sup>2+</sup> |
|----------------|----|----|----|----------------|-----------------|
| 130.0504       | 1  | S  | 18 |                |                 |
| 201.0875       | 2  | A  | 17 | 1925.1549      | 963.0814        |
| 348.1560       | 3  | F  | 16 | 1854.1178      | 927.5628        |
| 462.1989       | 4  | N  | 15 | 1707.0494      | 854.0286        |
| 575.2829       | 5  | L  | 14 | 1593.0065      | 797.0071        |
| 688.3670       | 6  | L  | 13 | 1479.9224      | 740.4651        |
| 825.4259       | 7  | H  | 12 | 1366.8383      | 683.9231        |
| 938.5100       | 8  | L  | 11 | 1229.7794      | 615.3936        |
| 1037.5784      | 9  | V  | 10 | 1116.6954      | 558.8516        |
| 1138.6261      | 10 | T  | 9  | 1017.6269      | 509.3174        |
| 1300.7842      | 11 | K  | 8  | 916.5793       | 458.7935        |
| 1387.8162      | 12 | S  | 7  | 754.4212       | 377.7145        |
| 1515.8748      | 13 | Q  | 6  | 667.3891       | 334.1985        |
| 1612.9275      | 14 | P  | 5  | 539.3306       | 270.1692        |
| 1711.9960      | 15 | V  | 4  | 442.2778       | 221.6428        |
| 1783.0331      | 16 | A  | 3  | 343.2094       | 172.1086        |
| 1880.0858      | 17 | P  | 2  | 272.1723       | 136.5900        |
|                | 18 | R  | 1  | 175.1195       | 88.0637         |

N-term:+43.02 K(11):+162.16

X-range:

0 - 0

MassTol: Y-zoom:

0. 1.

MassType:

☐AVG ☒MONO

Axis:

☒1 ☐2

Label:

☒I ☐M ☐-

Ions:

a ☐+ ☐2+ ☐3+

b ☒+ ☐2+ ☐3+

c ☐+ ☐2+ ☐3+

x ☐+ ☐2+ ☐3+

y ☒+ ☒2+ ☐3+

z ☐+ ☐2+ ☐3+

hide H<sub>2</sub>O/NH<sub>3</sub> ☐

zoom 112-122 ☐

GO

SAHLQWMVVR, MH+ 1268.6574, m/z 634.8323  
L OS G31 P160811 220811-s1.07105.07105.2.dta

scan 7105; 3.3e+000

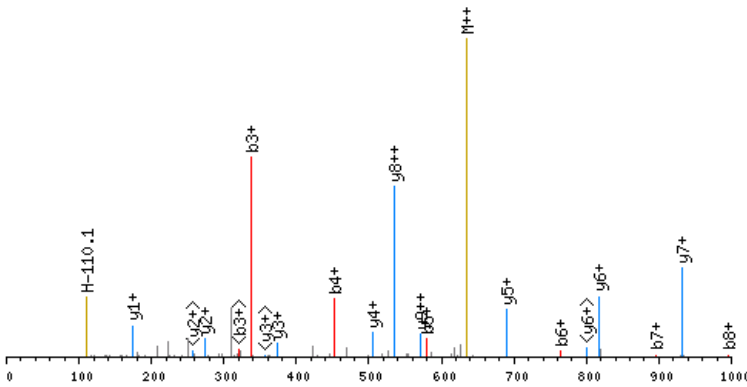

click image to zoom in; click top corners to zoom out [\[precursor±\]](#)

scan 7104; 634.8 m/z; 2.5e+001

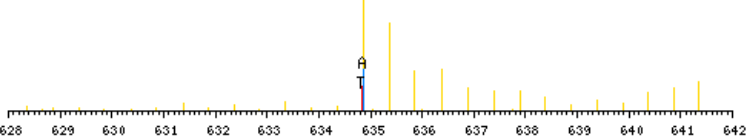

zoomed in precursor plot; T=theoretical m/z, A=acquired m/z

| b <sup>+</sup> | #  | AA | #  | y <sup>+</sup> | y <sup>2+</sup> |
|----------------|----|----|----|----------------|-----------------|
| 130.0504       | 1  | S  | 10 |                |                 |
| 201.0875       | 2  | A  | 9  | 1139.6148      | 570.3113        |
| 338.1465       | 3  | H  | 8  | 1068.5777      | 534.7928        |
| 451.2305       | 4  | L  | 7  | 931.5188       | 466.2633        |
| 579.2891       | 5  | Q  | 6  | 818.4347       | 409.7213        |
| 765.3684       | 6  | W  | 5  | 690.3761       | 345.6920        |
| 896.4089       | 7  | M  | 4  | 504.2968       | 252.6523        |
| 995.4773       | 8  | V  | 3  | 373.2563       | 187.1321        |
| 1094.5457      | 9  | V  | 2  | 274.1879       | 137.5979        |
|                | 10 | R  | 1  | 175.1195       | 88.0637         |

N-term:+43.02

X-range:  

0-0

MassTol: Y-zoom:  

0.1.

MassType:  

☐AVG☒MONO

Axis:  

☒1☐2

Label:  

☒I☐M☐-

Ions:  
a

☐+☐2+☐3+

  
b

☒+☐2+☐3+

  
c

☐+☐2+☐3+

  
x

☐+☐2+☐3+

  
y

☒+☒2+☐3+

  
z

☐+☐2+☐3+

hide H<sub>2</sub>O/NH<sub>3</sub>☐

zoom 112-122☐

GO

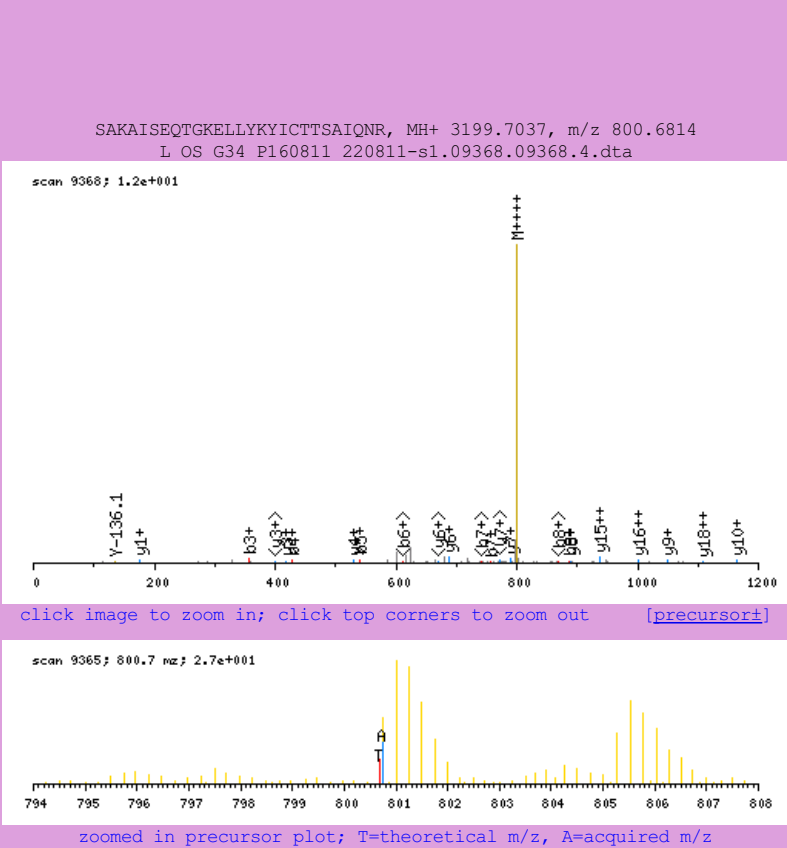

| b <sup>+</sup> | #  | AA | #  | y <sup>+</sup> | y <sup>2+</sup> |
|----------------|----|----|----|----------------|-----------------|
| 130.0504       | 1  | S  | 27 |                |                 |
| 201.0875       | 2  | A  | 26 | 3070.6611      | 1535.8345       |
| 357.2138       | 3  | K  | 25 | 2999.6240      | 1500.3159       |
| 428.2510       | 4  | A  | 24 | 2843.4977      | 1422.2528       |
| 541.3350       | 5  | I  | 23 | 2772.4606      | 1386.7342       |
| 628.3670       | 6  | S  | 22 | 2659.3766      | 1330.1922       |
| 757.4096       | 7  | E  | 21 | 2572.3445      | 1286.6762       |
| 885.4682       | 8  | Q  | 20 | 2443.3019      | 1222.1549       |
| 986.5159       | 9  | T  | 19 | 2315.2434      | 1158.1256       |
| 1043.5374      | 10 | G  | 18 | 2214.1957      | 1107.6018       |
| 1199.6637      | 11 | K  | 17 | 2157.1742      | 1079.0910       |
| 1328.7063      | 12 | E  | 16 | 2001.0479      | 1001.0279       |
| 1441.7903      | 13 | L  | 15 | 1872.0053      | 936.5066        |
| 1554.8744      | 14 | L  | 14 | 1758.9213      | 879.9645        |
| 1717.9377      | 15 | Y  | 13 | 1645.8372      | 823.4225        |
| 1874.0640      | 16 | K  | 12 | 1482.7739      | 741.8908        |
| 2037.1273      | 17 | Y  | 11 | 1326.6476      | 663.8277        |
| 2150.2114      | 18 | I  | 10 | 1163.5842      | 582.2960        |
| 2310.2420      | 19 | C  | 9  | 1050.5002      | 525.7540        |
| 2411.2897      | 20 | T  | 8  | 890.4696       | 445.7387        |
| 2512.3374      | 21 | T  | 7  | 789.4219       | 395.2149        |
| 2599.3694      | 22 | S  | 6  | 688.3742       | 344.6910        |
| 2670.4065      | 23 | A  | 5  | 601.3422       | 301.1750        |
| 2783.4906      | 24 | I  | 4  | 530.3051       | 265.6564        |
| 2911.5491      | 25 | Q  | 3  | 417.2210       | 209.1144        |
| 3025.5921      | 26 | N  | 2  | 289.1624       | 145.0851        |
|                | 27 | R  | 1  | 175.1195       | 88.0637         |

N-term:+43.02 K(3):+156.13  
K(11):+156.13 K(16):+156.13  
C(19):+160.03

X-range:

0 - 0

MassTol: Y-zoom:

0. 1.

MassType:

☐ AVG ☒ MONO

Axis:

☒ 1 ☐ 2

Label:

☒ I ☐ M ☐ -

Ions:

a ☐ + ☐ 2+ ☐ 3+

b ☒ + ☐ 2+ ☐ 3+

c ☐ + ☐ 2+ ☐ 3+

x ☐ + ☐ 2+ ☐ 3+

y ☒ + ☒ 2+ ☐ 3+

z ☐ + ☐ 2+ ☐ 3+

hide H<sub>2</sub>O/NH<sub>3</sub> ☐

zoom 112-122 ☐

GO

SAKSAISKEIFAPLDER, MH+ 1960.0756, m/z 654.0301  
L OS G33 P160811 220811-s1.06499.06499.3.dta

scan 6499; 4.6e+000

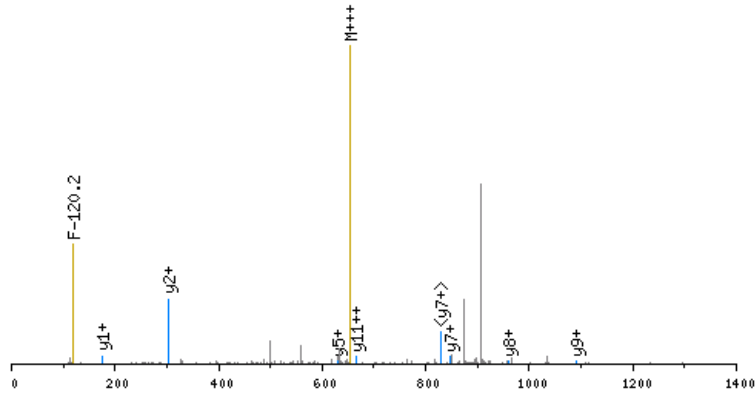

click image to zoom in; click top corners to zoom out

[precursor±]

scan 6497; 654.0 m/z; 7.3e+000

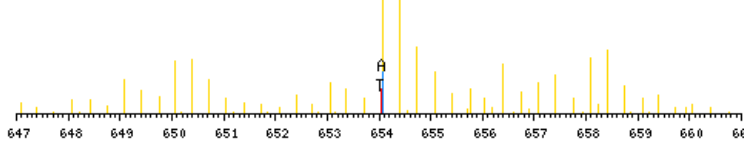

zoomed in precursor plot; T=theoretical m/z, A=acquired m/z

| b <sup>+</sup> | #  | AA | #  | y <sup>+</sup> | y <sup>2+</sup> |
|----------------|----|----|----|----------------|-----------------|
| 130.0504       | 1  | S  | 17 |                |                 |
| 201.0875       | 2  | A  | 16 | 1831.0330      | 916.0204        |
| 357.2138       | 3  | K  | 15 | 1759.9959      | 880.5019        |
| 444.2459       | 4  | S  | 14 | 1603.8696      | 802.4387        |
| 515.2830       | 5  | A  | 13 | 1516.8376      | 758.9227        |
| 628.3670       | 6  | I  | 12 | 1445.8004      | 723.4041        |
| 715.3991       | 7  | S  | 11 | 1332.7164      | 666.8621        |
| 871.5254       | 8  | K  | 10 | 1245.6843      | 623.3461        |
| 1000.5680      | 9  | E  | 9  | 1089.5580      | 545.2829        |
| 1113.6520      | 10 | I  | 8  | 960.5155       | 480.7616        |
| 1260.7204      | 11 | F  | 7  | 847.4314       | 424.2196        |
| 1331.7576      | 12 | A  | 6  | 700.3630       | 350.6854        |
| 1428.8103      | 13 | P  | 5  | 629.3259       | 315.1668        |
| 1541.8944      | 14 | L  | 4  | 532.2731       | 266.6405        |
| 1656.9213      | 15 | D  | 3  | 419.1890       | 210.0984        |
| 1785.9639      | 16 | E  | 2  | 304.1621       | 152.5850        |
|                | 17 | R  | 1  | 175.1195       | 88.0637         |

N-term:+43.02 K(3):+156.13  
K(8):+156.13

X-range:

0 - 0

MassTol: Y-zoom:

0. 1.

MassType:

☐ AVG ☒ MONO

Axis:

☒ 1 ☐ 2

Label:

☒ I ☐ M ☐ -

Ions:

a ☐ + ☐ 2+ ☐ 3+

b ☒ + ☐ 2+ ☐ 3+

c ☐ + ☐ 2+ ☐ 3+

x ☐ + ☐ 2+ ☐ 3+

y ☒ + ☒ 2+ ☐ 3+

z ☐ + ☐ 2+ ☐ 3+

hide H<sub>2</sub>O/NH<sub>3</sub> ☐

zoom 112-122 ☐

GO

SALKAVFQYIDENQDR, MH+ 1966.9875, m/z 656.3340  
L OS G30 P160811 220811-s1.07880.07880.3.dta

scan 7880; 1.3e+000

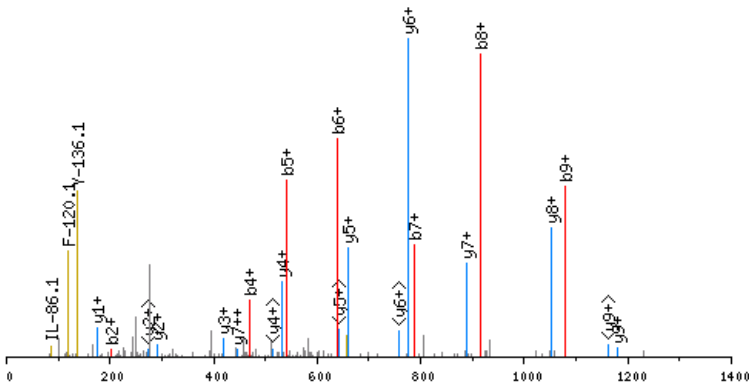

click image to zoom in; click top corners to zoom out

[precursor±]

scan 7879; 656.3 m/z; 7.0e+000

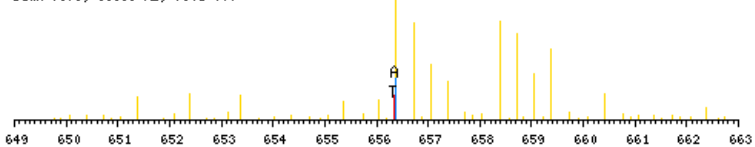

zoomed in precursor plot; T=theoretical m/z, A=acquired m/z

| b <sup>+</sup> | #  | AA | #  | y <sup>+</sup> | y <sup>2+</sup> |
|----------------|----|----|----|----------------|-----------------|
| 130.0504       | 1  | S  | 16 |                |                 |
| 201.0875       | 2  | A  | 15 | 1837.9449      | 919.4763        |
| 314.1716       | 3  | L  | 14 | 1766.9078      | 883.9578        |
| 470.2979       | 4  | K  | 13 | 1653.8237      | 827.4158        |
| 541.3350       | 5  | A  | 12 | 1497.6974      | 749.3526        |
| 640.4034       | 6  | V  | 11 | 1426.6603      | 713.8341        |
| 787.4718       | 7  | F  | 10 | 1327.5919      | 664.2998        |
| 915.5304       | 8  | Q  | 9  | 1180.5235      | 590.7656        |
| 1078.5938      | 9  | Y  | 8  | 1052.4649      | 526.7364        |
| 1191.6778      | 10 | I  | 7  | 889.4015       | 445.2047        |
| 1306.7048      | 11 | D  | 6  | 776.3175       | 388.6627        |
| 1435.7474      | 12 | E  | 5  | 661.2905       | 331.1492        |
| 1549.7903      | 13 | N  | 4  | 532.2479       | 266.6279        |
| 1677.8489      | 14 | Q  | 3  | 418.2050       | 209.6064        |
| 1792.8758      | 15 | D  | 2  | 290.1464       | 145.5771        |
|                | 16 | R  | 1  | 175.1195       | 88.0637         |

N-term:+43.02 K(4):+156.13

X-range:

0 - 0

MassTol: Y-zoom:

0. 1.

MassType:

☐AVG ☒MONO

Axis:

☒1 ☐2

Label:

☒I ☐M ☐-

Ions:

a ☐+ ☐2+ ☐3+

b ☒+ ☐2+ ☐3+

c ☐+ ☐2+ ☐3+

x ☐+ ☐2+ ☐3+

y ☒+ ☒2+ ☐3+

z ☐+ ☐2+ ☐3+

hide H<sub>2</sub>O/NH<sub>3</sub> ☐

zoom 112-122 ☐

GO

SALLEQKEQQER, MH+ 1528.7972, m/z 510.2706  
L OS G31 P160811 220811-s1.04505.04505.3.dta

scan 4505; 1.6e+001

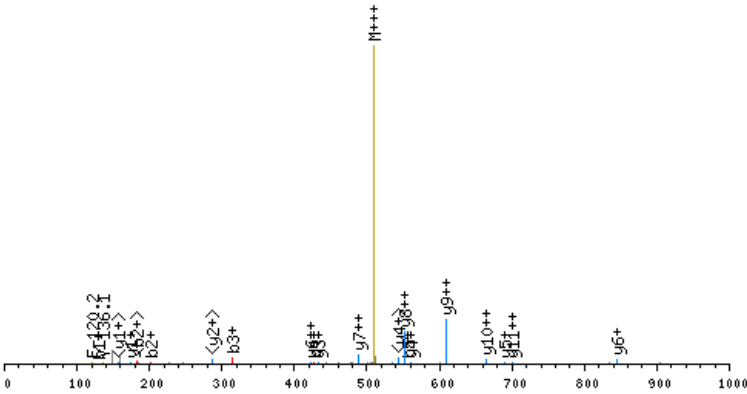

click image to zoom in; click top corners to zoom out

[precursor±]

scan 4504; 510.3 m/z; 4.7e+001

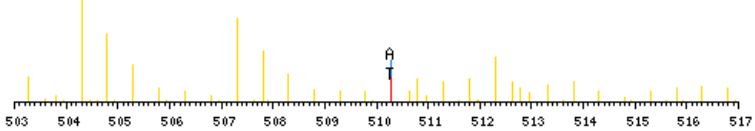

zoomed in precursor plot; T=theoretical m/z, A=acquired m/z

| b <sup>+</sup> | #  | AA | #  | y <sup>+</sup> | y <sup>2+</sup> |
|----------------|----|----|----|----------------|-----------------|
| 130.0504       | 1  | S  | 12 |                |                 |
| 201.0875       | 2  | A  | 11 | 1399.7546      | 700.3812        |
| 314.1716       | 3  | L  | 10 | 1328.7174      | 664.8626        |
| 427.2557       | 4  | L  | 9  | 1215.6334      | 608.3206        |
| 556.2983       | 5  | E  | 8  | 1102.5493      | 551.7786        |
| 684.3568       | 6  | Q  | 7  | 973.5067       | 487.2573        |
| 840.4831       | 7  | K  | 6  | 845.4481       | 423.2280        |
| 969.5257       | 8  | E  | 5  | 689.3218       | 345.1648        |
| 1097.5843      | 9  | Q  | 4  | 560.2792       | 280.6435        |
| 1225.6429      | 10 | Q  | 3  | 432.2207       | 216.6142        |
| 1354.6855      | 11 | E  | 2  | 304.1621       | 152.5850        |
|                | 12 | R  | 1  | 175.1195       | 88.0637         |

N-term:+43.02 K(7):+156.13

X-range:

0 - 0

MassTol: Y-zoom:

0. 1.

MassType:

☐ AVG ☒ MONO

Axis:

☒ 1 ☐ 2

Label:

☒ I ☐ M ☐ -

Ions:

a ☐ + ☐ 2+ ☐ 3+

b ☒ + ☐ 2+ ☐ 3+

c ☐ + ☐ 2+ ☐ 3+

x ☐ + ☐ 2+ ☐ 3+

y ☒ + ☒ 2+ ☐ 3+

z ☐ + ☐ 2+ ☐ 3+

hide H<sub>2</sub>O/NH<sub>3</sub> ☐

zoom 112-122 ☐

GO

SAMEAADVFHR, MH+ 1275.5792, m/z 638.2932  
L OS G31 P160811 220811-s1.06405.06405.2.dta

scan 6405; 1.2e+000

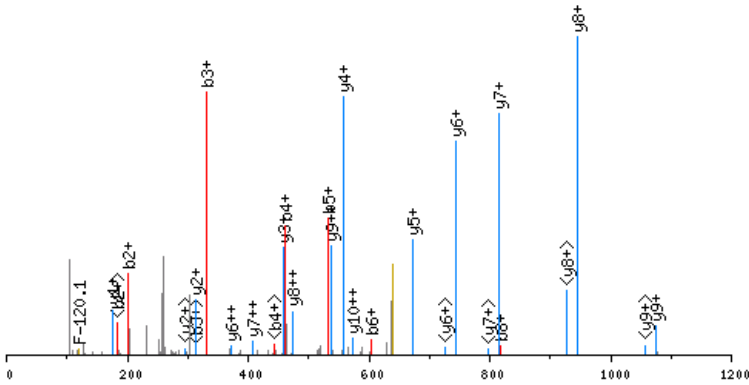

click image to zoom in; click top corners to zoom out

[precursor±]

scan 6404; 638.3 m/z; 3.0e+001

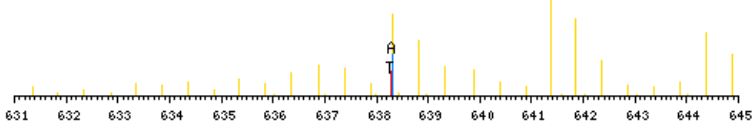

zoomed in precursor plot; T=theoretical m/z, A=acquired m/z

| b <sup>+</sup> | #  | AA | #  | y <sup>+</sup> | y <sup>2+</sup> |
|----------------|----|----|----|----------------|-----------------|
| 130.0504       | 1  | S  | 11 |                |                 |
| 201.0875       | 2  | A  | 10 | 1146.5366      | 573.7722        |
| 332.1280       | 3  | M  | 9  | 1075.4995      | 538.2537        |
| 461.1706       | 4  | E  | 8  | 944.4590       | 472.7334        |
| 532.2077       | 5  | A  | 7  | 815.4164       | 408.2121        |
| 603.2448       | 6  | A  | 6  | 744.3793       | 372.6936        |
| 718.2718       | 7  | D  | 5  | 673.3422       | 337.1750        |
| 817.3402       | 8  | V  | 4  | 558.3152       | 279.6615        |
| 964.4086       | 9  | F  | 3  | 459.2468       | 230.1273        |
| 1101.4675      | 10 | H  | 2  | 312.1784       | 156.5931        |
|                | 11 | R  | 1  | 175.1195       | 88.0637         |

N-term:+43.02

X-range:

0 - 0

MassTol: Y-zoom:

0. 1.

MassType:

☐AVG ☒MONO

Axis:

☒1 ☐2

Label:

☒I ☐M ☐-

Ions:

a ☐+ ☐2+ ☐3+

b ☒+ ☐2+ ☐3+

c ☐+ ☐2+ ☐3+

x ☐+ ☐2+ ☐3+

y ☒+ ☒2+ ☐3+

z ☐+ ☐2+ ☐3+

hide H<sub>2</sub>O/NH<sub>3</sub> ☐

zoom 112-122 ☐

GO

SAPAGSPHPAAGAR, MH+ 1288.6398, m/z 644.8236  
L OS G31 P160811 220811-s1.02003.02003.2.dta

scan 2003; 4.0e+000

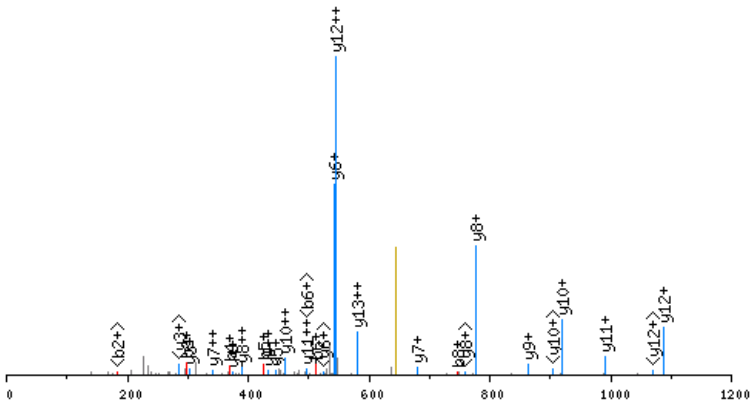

click image to zoom in; click top corners to zoom out [precursor±]

scan 2002; 644.8 m/z; 5.5e+000

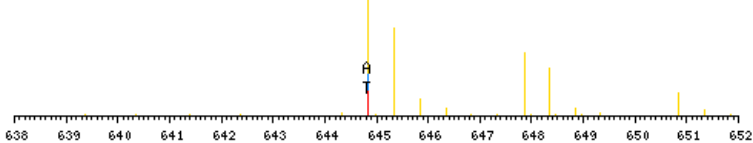

zoomed in precursor plot; T=theoretical m/z, A=acquired m/z

| b <sup>+</sup> | #  | AA | #  | y <sup>+</sup> | y <sup>2+</sup> |
|----------------|----|----|----|----------------|-----------------|
| 130.0504       | 1  | S  | 14 |                |                 |
| 201.0875       | 2  | A  | 13 | 1159.5972      | 580.3025        |
| 298.1403       | 3  | P  | 12 | 1088.5601      | 544.7840        |
| 369.1774       | 4  | A  | 11 | 991.5074       | 496.2576        |
| 426.1989       | 5  | G  | 10 | 920.4702       | 460.7390        |
| 513.2309       | 6  | S  | 9  | 863.4488       | 432.2283        |
| 610.2837       | 7  | P  | 8  | 776.4167       | 388.7123        |
| 747.3426       | 8  | H  | 7  | 679.3640       | 340.1859        |
| 844.3954       | 9  | P  | 6  | 542.3051       | 271.6564        |
| 915.4325       | 10 | A  | 5  | 445.2523       | 223.1301        |
| 986.4696       | 11 | A  | 4  | 374.2152       | 187.6115        |
| 1043.4910      | 12 | G  | 3  | 303.1781       | 152.0930        |
| 1114.5282      | 13 | A  | 2  | 246.1566       | 123.5822        |
|                | 14 | R  | 1  | 175.1195       | 88.0637         |

N-term:+43.02

X-range:

0 - 0

MassTol: Y-zoom:

0. 1.

MassType:

☐AVG ☒MONO

Axis:

☒1 ☐2

Label:

☒I ☐M ☐-

Ions:

a ☐+ ☐2+ ☐3+

b ☒+ ☐2+ ☐3+

c ☐+ ☐2+ ☐3+

x ☐+ ☐2+ ☐3+

y ☒+ ☒2+ ☐3+

z ☐+ ☐2+ ☐3+

hide H<sub>2</sub>O/NH<sub>3</sub> ☐

zoom 112-122 ☐

GO

SATQHKTSLPQGV, MH+ 1585.8875, m/z 529.3007  
L OS G34 P160811 220811-s1.02597.02597.3.dta

scan 2597; 3.5e+001

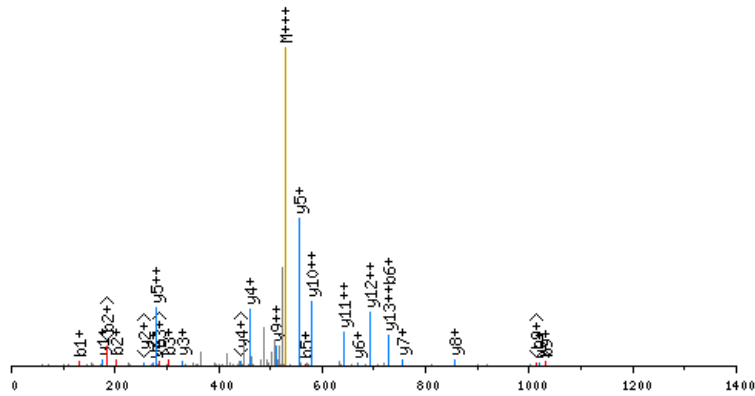

click image to zoom in; click top corners to zoom out

[precursor±]

scan 2595; 529.3 m/z; 4.4e+002

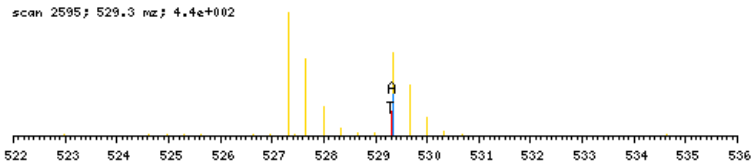

zoomed in precursor plot; T=theoretical m/z, A=acquired m/z

| b <sup>+</sup> | #  | AA | #  | y <sup>+</sup> | y <sup>2+</sup> |
|----------------|----|----|----|----------------|-----------------|
| 130.0504       | 1  | S  | 14 |                |                 |
| 201.0875       | 2  | A  | 13 | 1456.8449      | 728.9263        |
| 302.1352       | 3  | T  | 12 | 1385.8078      | 693.4078        |
| 430.1938       | 4  | Q  | 11 | 1284.7601      | 642.8840        |
| 567.2527       | 5  | H  | 10 | 1156.7015      | 578.8547        |
| 729.4108       | 6  | K  | 9  | 1019.6426      | 510.3252        |
| 830.4585       | 7  | T  | 8  | 857.4845       | 429.2462        |
| 917.4905       | 8  | S  | 7  | 756.4368       | 378.7223        |
| 1030.5746      | 9  | L  | 6  | 669.4048       | 335.2063        |
| 1127.6273      | 10 | P  | 5  | 556.3207       | 278.6643        |
| 1255.6859      | 11 | Q  | 4  | 459.2680       | 230.1379        |
| 1312.7074      | 12 | G  | 3  | 331.2094       | 166.1086        |
| 1411.7758      | 13 | V  | 2  | 274.1879       | 137.5979        |
|                | 14 | R  | 1  | 175.1195       | 88.0637         |

N-term:+43.02 K(6):+162.16

X-range:

0 - 0

MassTol: Y-zoom:

0. 1.

MassType:

☐ AVG ☒ MONO

Axis:

☒ 1 ☐ 2

Label:

☒ I ☐ M ☐ -

Ions:

a ☐ + ☐ 2+ ☐ 3+

b ☒ + ☐ 2+ ☐ 3+

c ☐ + ☐ 2+ ☐ 3+

x ☐ + ☐ 2+ ☐ 3+

y ☒ + ☒ 2+ ☐ 3+

z ☐ + ☐ 2+ ☐ 3+

hide H<sub>2</sub>O/NH<sub>3</sub> ☐

zoom 112-122 ☐

GO

SCYFDIEWCDR, MH+ 1592.6149, m/z 531.5432  
L OS G34 P160811 220811-s1.05858.05858.3.dta

scan 5858; 2.2e+000

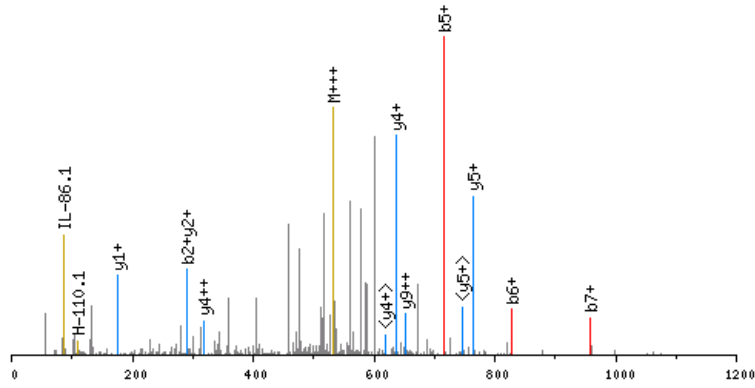

click image to zoom in; click top corners to zoom out [precursor±]

scan 5855; 531.5 m/z; 3.4e+001

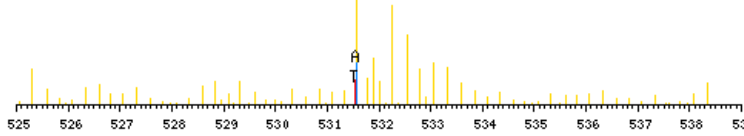

zoomed in precursor plot; T=theoretical m/z, A=acquired m/z

| b <sup>+</sup> | #  | AA | #  | y <sup>+</sup> | y <sup>2+</sup> |
|----------------|----|----|----|----------------|-----------------|
| 130.0504       | 1  | S  | 11 |                |                 |
| 290.0810       | 2  | C  | 10 | 1463.5723      | 732.2901        |
| 453.1444       | 3  | Y  | 9  | 1303.5417      | 652.2748        |
| 600.2128       | 4  | F  | 8  | 1140.4784      | 570.7431        |
| 715.2397       | 5  | D  | 7  | 993.4100       | 497.2089        |
| 828.3238       | 6  | I  | 6  | 878.3830       | 439.6954        |
| 957.3664       | 7  | E  | 5  | 765.2989       | 383.1534        |
| 1143.4457      | 8  | W  | 4  | 636.2564       | 318.6321        |
| 1303.4763      | 9  | C  | 3  | 450.1770       | 225.5924        |
| 1418.5032      | 10 | D  | 2  | 290.1464       | 145.5771        |
|                | 11 | R  | 1  | 175.1195       | 88.0637         |

N-term:+43.02 C(2):+160.03  
C(9):+160.03

X-range:

0 - 0

MassTol: Y-zoom:

0. 1.

MassType:

☐AVG ☒MONO

Axis:

☒1 ☐2

Label:

☒I ☐M ☐-

Ions:

a ☐+ ☐2+ ☐3+

b ☒+ ☐2+ ☐3+

c ☐+ ☐2+ ☐3+

x ☐+ ☐2+ ☐3+

y ☒+ ☒2+ ☐3+

z ☐+ ☐2+ ☐3+

hide H<sub>2</sub>O/NH<sub>3</sub> ☐

zoom 112-122 ☐

GO

SDAAVDTSSEIITTKDLKEKKEVVVEEAENGR, MH+ 3456.8871, m/z 864.9772  
L OS G35 P160811 220811-s1.07044.07044.4.dta

scan 7044; 2.5e+000

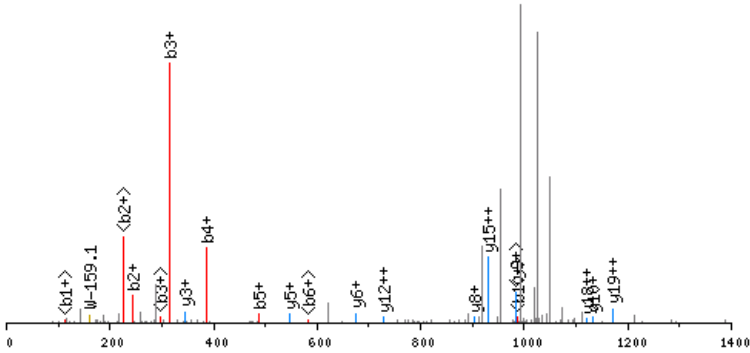

click image to zoom in; click top corners to zoom out

[precursor±]

scan 7043; 865.0 m/z; 3.4e+001

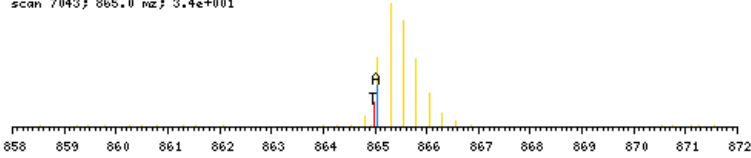

zoomed in precursor plot; T=theoretical m/z, A=acquired m/z

| b <sup>+</sup> | #  | AA | #  | y <sup>+</sup> | y <sup>2+</sup> |
|----------------|----|----|----|----------------|-----------------|
| 130.0504       | 1  | S  | 30 |                |                 |
| 245.0774       | 2  | D  | 29 | 3327.8445      | 1664.4262       |
| 316.1145       | 3  | A  | 28 | 3212.8175      | 1606.9127       |
| 387.1516       | 4  | A  | 27 | 3141.7804      | 1571.3941       |
| 486.2200       | 5  | V  | 26 | 3070.7433      | 1535.8756       |
| 601.2470       | 6  | D  | 25 | 2971.6749      | 1486.3414       |
| 702.2946       | 7  | T  | 24 | 2856.6480      | 1428.8279       |
| 789.3267       | 8  | S  | 23 | 2755.6003      | 1378.3041       |
| 876.3587       | 9  | S  | 22 | 2668.5682      | 1334.7880       |
| 1005.4013      | 10 | E  | 21 | 2581.5362      | 1291.2720       |
| 1118.4853      | 11 | I  | 20 | 2452.4936      | 1226.7507       |
| 1219.5330      | 12 | T  | 19 | 2339.4096      | 1170.2087       |
| 1320.5807      | 13 | T  | 18 | 2238.3619      | 1119.6849       |
| 1482.7388      | 14 | K  | 17 | 2137.3142      | 1069.1610       |
| 1597.7657      | 15 | D  | 16 | 1975.1561      | 988.0820        |
| 1710.8498      | 16 | L  | 15 | 1860.1292      | 930.5685        |
| 1873.0079      | 17 | K  | 14 | 1747.0451      | 874.0265        |
| 2002.0505      | 18 | E  | 13 | 1584.8870      | 792.9474        |
| 2164.2086      | 19 | K  | 12 | 1455.8444      | 728.4261        |
| 2326.3667      | 20 | K  | 11 | 1293.6863      | 647.3471        |
| 2455.4093      | 21 | E  | 10 | 1131.5282      | 566.2680        |
| 2554.4777      | 22 | V  | 9  | 1002.4856      | 501.7467        |
| 2653.5461      | 23 | V  | 8  | 903.4172       | 452.2125        |
| 2782.5887      | 24 | E  | 7  | 804.3488       | 402.6783        |
| 2911.6313      | 25 | E  | 6  | 675.3062       | 338.1570        |
| 2982.6684      | 26 | A  | 5  | 546.2636       | 273.6357        |
| 3111.7110      | 27 | E  | 4  | 475.2265       | 238.1172        |
| 3225.7539      | 28 | N  | 3  | 346.1839       | 173.5959        |
| 3282.7754      | 29 | G  | 2  | 232.1410       | 116.5744        |
|                | 30 | R  | 1  | 175.1195       | 88.0637         |

N-term:+43.02 K(14):+162.16  
K(17):+162.16 K(19):+162.16  
K(20):+162.16

N-term:+43.02 K(4):+156.13  
C(8):+160.03 C(13):+160.03

X-range:

0 - 0

MassTol: Y-zoom:

0. 1.

MassType:

☐ AVG ☒ MONO

Axis:

☒ 1 ☐ 2

Label:

☒ I ☐ M ☐ -

Ions:

a ☐ + ☐ 2+ ☐ 3+

b ☒ + ☐ 2+ ☐ 3+

c ☐ + ☐ 2+ ☐ 3+

x ☐ + ☐ 2+ ☐ 3+

y ☒ + ☒ 2+ ☐ 3+

z ☐ + ☐ 2+ ☐ 3+

hide H<sub>2</sub>O/NH<sub>3</sub> ☐

zoom 112-122 ☐

GO

SDKLPYKQADIGLAAGWGR, MH+ 2070.2025, m/z 690.7390  
L OS G32 P160811 220811-s1.06485.06485.3.dta

scan 6485; 2.7e+001

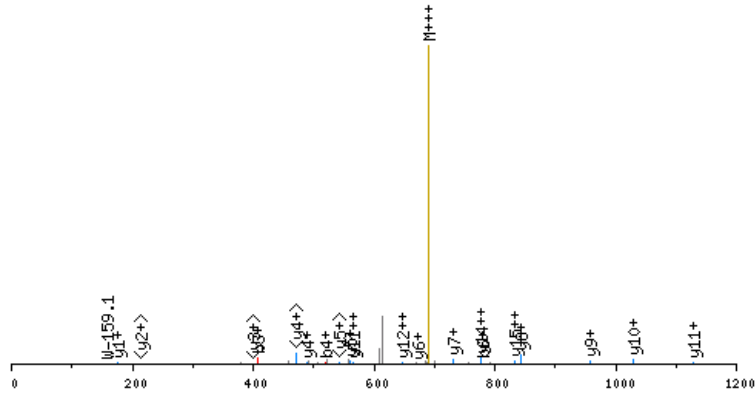

click image to zoom in; click top corners to zoom out [\[precursor±\]](#)

scan 6483; 690.7 m/z; 6.3e+001

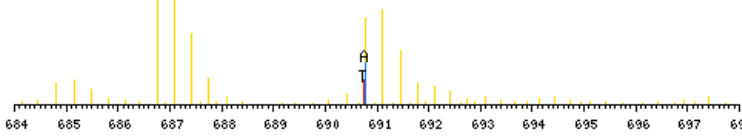

zoomed in precursor plot; T=theoretical m/z, A=acquired m/z

| b <sup>+</sup> | #  | AA | #  | y <sup>+</sup> | y <sup>2+</sup> |
|----------------|----|----|----|----------------|-----------------|
| 130.0504       | 1  | S  | 18 |                |                 |
| 245.0774       | 2  | D  | 17 | 1941.1599      | 971.0838        |
| 407.2355       | 3  | K  | 16 | 1826.1329      | 913.5704        |
| 520.3195       | 4  | L  | 15 | 1663.9748      | 832.4913        |
| 617.3723       | 5  | P  | 14 | 1550.8908      | 775.9493        |
| 780.4356       | 6  | Y  | 13 | 1453.8380      | 727.4229        |
| 942.5937       | 7  | K  | 12 | 1290.7747      | 645.8912        |
| 1041.6621      | 8  | V  | 11 | 1128.6166      | 564.8122        |
| 1112.6993      | 9  | A  | 10 | 1029.5482      | 515.2780        |
| 1227.7262      | 10 | D  | 9  | 958.5110       | 479.7594        |
| 1340.8103      | 11 | I  | 8  | 843.4841       | 422.2460        |
| 1397.8317      | 12 | G  | 7  | 730.4000       | 365.7039        |
| 1510.9158      | 13 | L  | 6  | 673.3786       | 337.1932        |
| 1581.9529      | 14 | A  | 5  | 560.2945       | 280.6512        |
| 1652.9900      | 15 | A  | 4  | 489.2574       | 245.1326        |
| 1839.0693      | 16 | W  | 3  | 418.2203       | 209.6141        |
| 1896.0908      | 17 | G  | 2  | 232.1410       | 116.5744        |
|                | 18 | R  | 1  | 175.1195       | 88.0637         |

N-term:+43.02 K(3):+162.16  
K(7):+162.16

N-term: +43.02 K(9): +162.16

X-range:

0 - 0

MassTol: Y-zoom:

0. 1.

MassType:

☐ AVG ☒ MONO

Axis:

☒ 1 ☐ 2

Label:

☒ I ☐ M ☐ -

Ions:

a ☐ + ☐ 2+ ☐ 3+

b ☒ + ☐ 2+ ☐ 3+

c ☐ + ☐ 2+ ☐ 3+

x ☐ + ☐ 2+ ☐ 3+

y ☒ + ☒ 2+ ☐ 3+

z ☐ + ☐ 2+ ☐ 3+

hide H<sub>2</sub>O/NH<sub>3</sub> ☐

zoom 112-122 ☐

GO

SDNQLQEGKNVIGLQMGNTNR, MH+ 2272.1356, m/z 758.0501  
L OS G30 P160811 220811-s1.05453.05453.3.dta

scan 5453; 5.9e-001

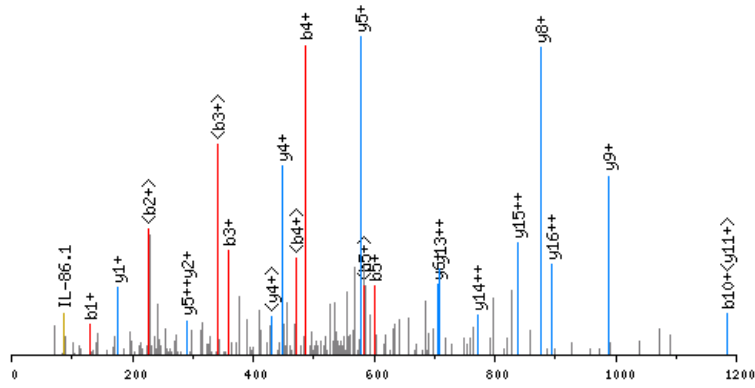

click image to zoom in; click top corners to zoom out [\[precursor±\]](#)

scan 5449; 758.1 m/z; 1.5e+001

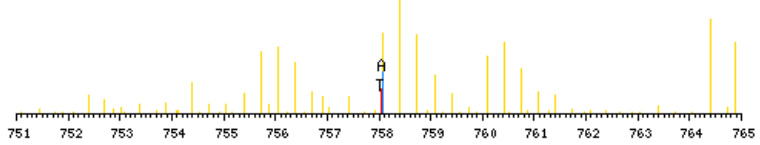

zoomed in precursor plot; T=theoretical m/z, A=acquired m/z

| b <sup>+</sup> | #  | AA | #  | y <sup>+</sup> | y <sup>2+</sup> |
|----------------|----|----|----|----------------|-----------------|
| 130.0504       | 1  | S  | 20 |                |                 |
| 245.0774       | 2  | D  | 19 | 2143.0930      | 1072.0504       |
| 359.1203       | 3  | N  | 18 | 2028.0661      | 1014.5369       |
| 487.1789       | 4  | Q  | 17 | 1914.0231      | 957.5155        |
| 600.2629       | 5  | L  | 16 | 1785.9646      | 893.4862        |
| 728.3215       | 6  | Q  | 15 | 1672.8805      | 836.9442        |
| 857.3641       | 7  | E  | 14 | 1544.8219      | 772.9149        |
| 914.3856       | 8  | G  | 13 | 1415.7793      | 708.3936        |
| 1070.5119      | 9  | K  | 12 | 1358.7579      | 679.8828        |
| 1184.5548      | 10 | N  | 11 | 1202.6316      | 601.8197        |
| 1283.6232      | 11 | V  | 10 | 1088.5886      | 544.7982        |
| 1396.7073      | 12 | I  | 9  | 989.5202       | 495.2640        |
| 1453.7287      | 13 | G  | 8  | 876.4362       | 438.7220        |
| 1566.8128      | 14 | L  | 7  | 819.4147       | 410.2113        |
| 1694.8714      | 15 | Q  | 6  | 706.3306       | 353.6692        |
| 1825.9119      | 16 | M  | 5  | 578.2721       | 289.6399        |
| 1882.9333      | 17 | G  | 4  | 447.2316       | 224.1197        |
| 1983.9810      | 18 | T  | 3  | 390.2101       | 195.6090        |
| 2098.0239      | 19 | N  | 2  | 289.1624       | 145.0851        |
|                | 20 | R  | 1  | 175.1195       | 88.0637         |

N-term:+43.02 K(9):+156.13



X-range:

0 - 0

MassTol: Y-zoom:

0. 1.

MassType:

☐AVG ☒MONO

Axis:

☒1 ☐2

Label:

☒I ☐M ☐-

Ions:

a ☐+ ☐2+ ☐3+

b ☒+ ☐2+ ☐3+

c ☐+ ☐2+ ☐3+

x ☐+ ☐2+ ☐3+

y ☒+ ☒2+ ☐3+

z ☐+ ☐2+ ☐3+

hide H<sub>2</sub>O/NH<sub>3</sub> ☐

zoom 112-122 ☐

GO

SDSFDRAPQTKPQR, MH+ 1831.8939, m/z 611.3028  
L OS G33 P160811 220811-s1.02526.02526.3.dta

scan 2526; 1.5e+001

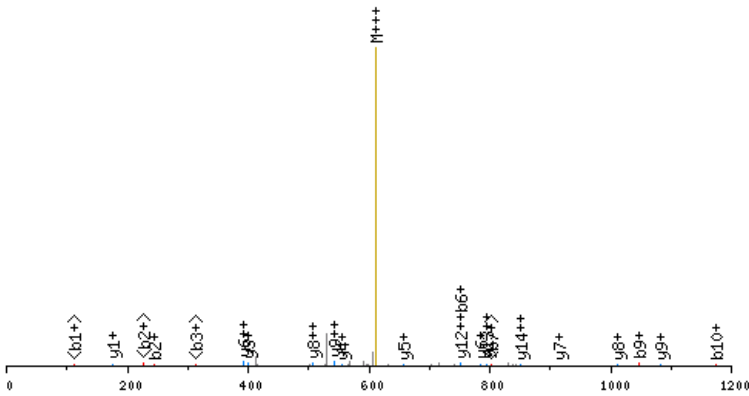

click image to zoom in; click top corners to zoom out [precursor±]

scan 2522; 611.3 m/z; 4.2e+000

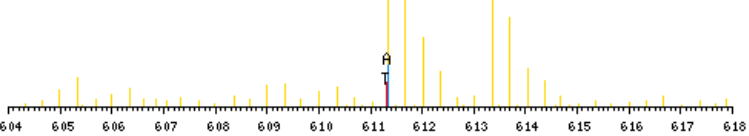

zoomed in precursor plot; T=theoretical m/z, A=acquired m/z

| b <sup>+</sup> | #  | AA | #  | y <sup>+</sup> | y <sup>2+</sup> |
|----------------|----|----|----|----------------|-----------------|
| 130.0504       | 1  | S  | 15 |                |                 |
| 245.0774       | 2  | D  | 14 | 1702.8513      | 851.9296        |
| 332.1094       | 3  | S  | 13 | 1587.8244      | 794.4161        |
| 479.1778       | 4  | F  | 12 | 1500.7923      | 750.9001        |
| 594.2048       | 5  | D  | 11 | 1353.7239      | 677.3659        |
| 750.3059       | 6  | R  | 10 | 1238.6970      | 619.8524        |
| 821.3430       | 7  | A  | 9  | 1082.5959      | 541.8018        |
| 918.3957       | 8  | P  | 8  | 1011.5588      | 506.2833        |
| 1047.4383      | 9  | E  | 7  | 914.5060       | 457.7569        |
| 1175.4969      | 10 | Q  | 6  | 785.4634       | 393.2356        |
| 1276.5446      | 11 | T  | 5  | 657.4048       | 329.2063        |
| 1432.6709      | 12 | K  | 4  | 556.3571       | 278.6825        |
| 1529.7237      | 13 | P  | 3  | 400.2308       | 200.6193        |
| 1657.7822      | 14 | Q  | 2  | 303.1781       | 152.0930        |
|                | 15 | R  | 1  | 175.1195       | 88.0637         |

N-term:+43.02 K(12):+156.13

N-term: +43.02 K(9): +162.16



X-range:

0 - 0

MassTol: Y-zoom:

0. 1.

MassType:

☐AVG ☒MONO

Axis:

☒1 ☐2

Label:

☒I ☐M ☐-

Ions:

a ☐+ ☐2+ ☐3+

b ☒+ ☐2+ ☐3+

c ☐+ ☐2+ ☐3+

x ☐+ ☐2+ ☐3+

y ☒+ ☒2+ ☐3+

z ☐+ ☐2+ ☐3+

hide H<sub>2</sub>O/NH<sub>3</sub> ☐

zoom 112-122 ☐

GO

SEAFDCAKCNESLYGR, MH+ 1976.8482, m/z 659.6209  
L OS G30 P160811 220811-s1.04522.04522.3.dta

scan 4522; 1.2e+000

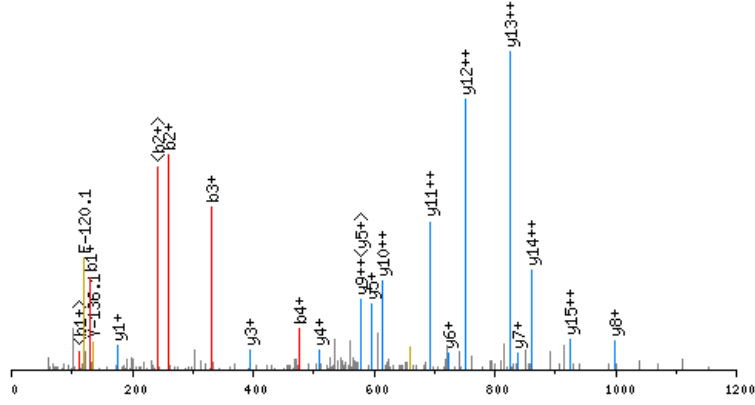

click image to zoom in; click top corners to zoom out [\[precursor±\]](#)

scan 4519; 659.6 m/z; 3.8e+001

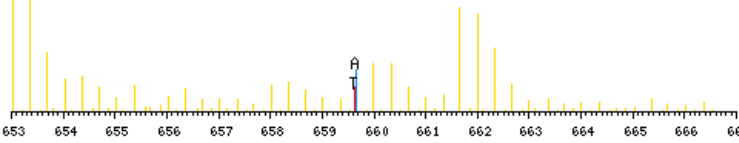

zoomed in precursor plot; T=theoretical m/z, A=acquired m/z

| b <sup>+</sup> | #  | AA | #  | y <sup>+</sup> | y <sup>2+</sup> |
|----------------|----|----|----|----------------|-----------------|
| 130.0504       | 1  | S  | 16 |                |                 |
| 259.0930       | 2  | E  | 15 | 1847.8056      | 924.4067        |
| 330.1301       | 3  | A  | 14 | 1718.7630      | 859.8854        |
| 477.1985       | 4  | F  | 13 | 1647.7259      | 824.3669        |
| 592.2255       | 5  | D  | 12 | 1500.6575      | 750.8326        |
| 752.2561       | 6  | C  | 11 | 1385.6305      | 693.3192        |
| 823.2932       | 7  | A  | 10 | 1225.5999      | 613.3039        |
| 979.4195       | 8  | K  | 9  | 1154.5628      | 577.7853        |
| 1139.4501      | 9  | C  | 8  | 998.4365       | 499.7222        |
| 1253.4930      | 10 | N  | 7  | 838.4059       | 419.7069        |
| 1382.5356      | 11 | E  | 6  | 724.3630       | 362.6854        |
| 1469.5677      | 12 | S  | 5  | 595.3204       | 298.1641        |
| 1582.6517      | 13 | L  | 4  | 508.2884       | 254.6481        |
| 1745.7150      | 14 | Y  | 3  | 395.2043       | 198.1061        |
| 1802.7365      | 15 | G  | 2  | 232.1410       | 116.5744        |
|                | 16 | R  | 1  | 175.1195       | 88.0637         |

N-term:+43.02 C(6):+160.03  
K(8):+156.13 C(9):+160.03

X-range:

0 - 0

MassTol: Y-zoom:

0. 1.

MassType:

☐ AVG ☒ MONO

Axis:

☒ 1 ☐ 2

Label:

☒ I ☐ M ☐ -

Ions:

a ☐ + ☐ 2+ ☐ 3+

b ☒ + ☐ 2+ ☐ 3+

c ☐ + ☐ 2+ ☐ 3+

x ☐ + ☐ 2+ ☐ 3+

y ☒ + ☒ 2+ ☐ 3+

z ☐ + ☐ 2+ ☐ 3+

hide H<sub>2</sub>O/NH<sub>3</sub> ☐

zoom 112-122 ☐

GO

SEDEEKVKLR, MH+ 1330.7219, m/z 444.2455  
L OS G34 P160811 220811-s1.02796.02796.3.dta

scan 2796; 2.7e+001

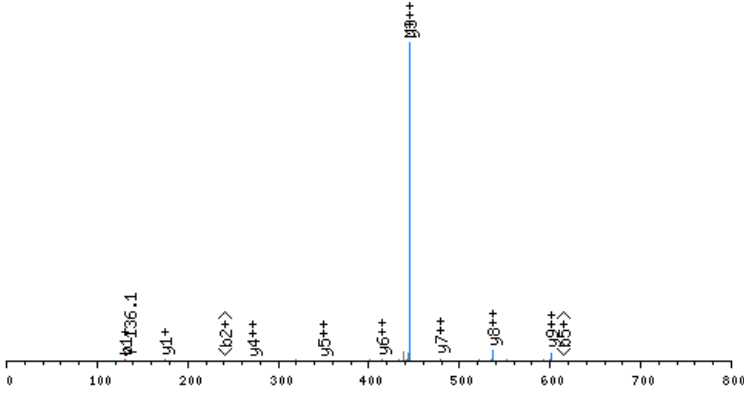

click image to zoom in; click top corners to zoom out [precursor±]

scan 2795; 444.2 m/z; 5.2e+001

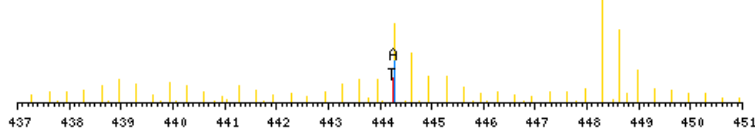

zoomed in precursor plot; T=theoretical m/z, A=acquired m/z

| b <sup>+</sup> | #  | AA | #  | y <sup>+</sup> | y <sup>2+</sup> |
|----------------|----|----|----|----------------|-----------------|
| 130.0504       | 1  | S  | 10 |                |                 |
| 259.0930       | 2  | E  | 9  | 1201.6793      | 601.3436        |
| 374.1200       | 3  | D  | 8  | 1072.6367      | 536.8223        |
| 503.1626       | 4  | E  | 7  | 957.6098       | 479.3088        |
| 632.2052       | 5  | E  | 6  | 828.5672       | 414.7875        |
| 788.3315       | 6  | K  | 5  | 699.5246       | 350.2662        |
| 887.3999       | 7  | V  | 4  | 543.3983       | 272.2031        |
| 1043.5262      | 8  | K  | 3  | 444.3299       | 222.6688        |
| 1156.6102      | 9  | L  | 2  | 288.2036       | 144.6057        |
|                | 10 | R  | 1  | 175.1195       | 88.0637         |

N-term:+43.02 K(6):+156.13  
K(8):+156.13

X-range:

0 - 0

MassTol: Y-zoom:

0. 1.

MassType:

☐AVG ☒MONO

Axis:

☒1 ☐2

Label:

☒I ☐M ☐-

Ions:

a ☐+ ☐2+ ☐3+

b ☒+ ☐2+ ☐3+

c ☐+ ☐2+ ☐3+

x ☐+ ☐2+ ☐3+

y ☒+ ☒2+ ☐3+

z ☐+ ☐2+ ☐3+

hide H<sub>2</sub>O/NH<sub>3</sub> ☐

zoom 112-122 ☐

GO

SEGDSVGDSVHGKPSVVYR, MH+ 2051.0258, m/z 684.3468  
L OS G33 P160811 220811-s1.03245.03245.3.dta

scan 3245; 3.3e+000

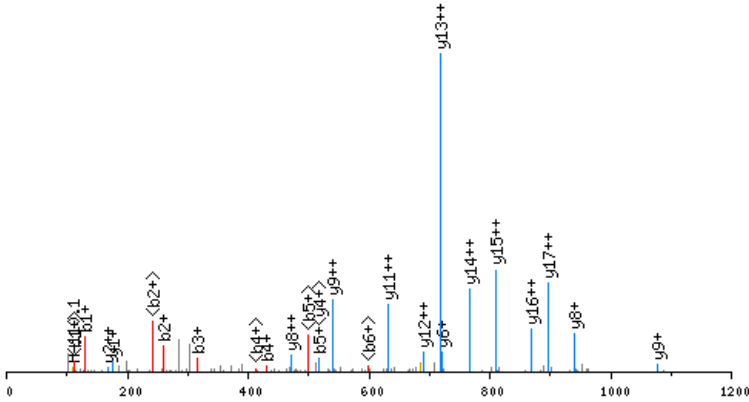

click image to zoom in; click top corners to zoom out [\[precursor±\]](#)

scan 3242; 684.3 m/z; 1.5e+001

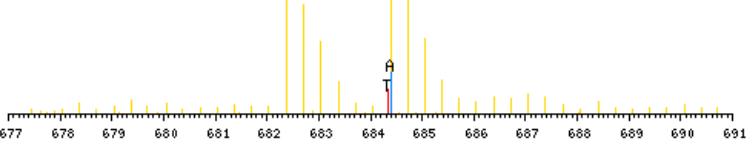

zoomed in precursor plot; T=theoretical m/z, A=acquired m/z

| b <sup>+</sup> | #  | AA | #  | y <sup>+</sup> | y <sup>2+</sup> |
|----------------|----|----|----|----------------|-----------------|
| 130.0504       | 1  | S  | 19 |                |                 |
| 259.0930       | 2  | E  | 18 | 1921.9832      | 961.4955        |
| 316.1145       | 3  | G  | 17 | 1792.9406      | 896.9742        |
| 431.1414       | 4  | D  | 16 | 1735.9192      | 868.4635        |
| 518.1735       | 5  | S  | 15 | 1620.8922      | 810.9500        |
| 617.2419       | 6  | V  | 14 | 1533.8602      | 767.4340        |
| 674.2633       | 7  | G  | 13 | 1434.7918      | 717.8998        |
| 789.2903       | 8  | D  | 12 | 1377.7703      | 689.3891        |
| 876.3223       | 9  | S  | 11 | 1262.7434      | 631.8756        |
| 975.3907       | 10 | V  | 10 | 1175.7113      | 588.3596        |
| 1112.4496      | 11 | H  | 9  | 1076.6429      | 538.8254        |
| 1169.4711      | 12 | G  | 8  | 939.5840       | 470.2959        |
| 1331.6292      | 13 | K  | 7  | 882.5625       | 441.7852        |
| 1428.6820      | 14 | P  | 6  | 720.4044       | 360.7061        |
| 1515.7140      | 15 | S  | 5  | 623.3517       | 312.1798        |
| 1614.7824      | 16 | V  | 4  | 536.3197       | 268.6637        |
| 1713.8508      | 17 | V  | 3  | 437.2512       | 219.1295        |
| 1876.9141      | 18 | Y  | 2  | 338.1828       | 169.5953        |
|                | 19 | R  | 1  | 175.1195       | 88.0637         |

N-term:+43.02 K(13):+162.16

X-range:

0 - 0

MassTol: Y-zoom:

0. 1.

MassType:

☐AVG ☒MONO

Axis:

☒1 ☐2

Label:

☒I ☐M ☐-

Ions:

a ☐+ ☐2+ ☐3+

b ☒+ ☐2+ ☐3+

c ☐+ ☐2+ ☐3+

x ☐+ ☐2+ ☐3+

y ☒+ ☒2+ ☐3+

z ☐+ ☐2+ ☐3+

hide H<sub>2</sub>O/NH<sub>3</sub> ☐

zoom 112-122 ☐

GO

SEKFDCHYCR, MH+ 1477.6416, m/z 493.2187  
L OS G34 P160811 220811-s1.02873.02873.3.dta

scan 2873; 2.1e+001

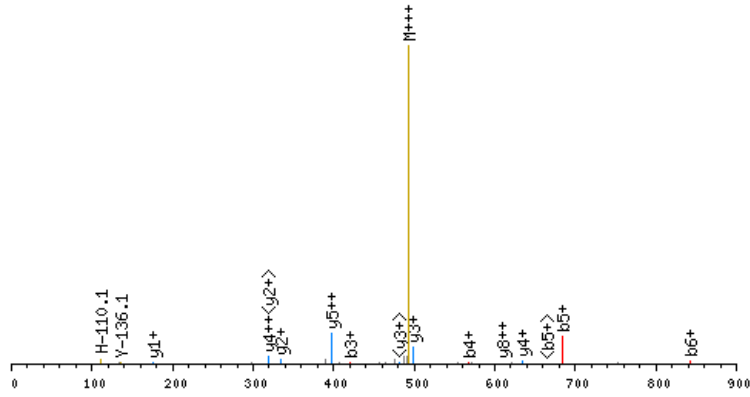

click image to zoom in; click top corners to zoom out [precursor±]

scan 2870; 493.2 m/z; 1.9e+001

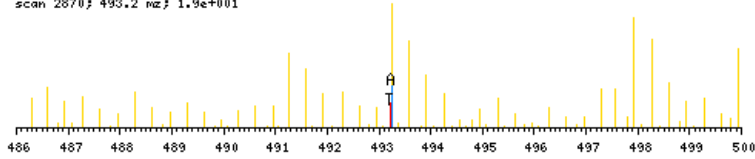

zoomed in precursor plot; T=theoretical m/z, A=acquired m/z

| b <sup>+</sup> | #  | AA | #  | y <sup>+</sup> | y <sup>2+</sup> |
|----------------|----|----|----|----------------|-----------------|
| 130.0504       | 1  | S  | 10 |                |                 |
| 259.0930       | 2  | E  | 9  | 1348.5990      | 674.8034        |
| 421.2511       | 3  | K  | 8  | 1219.5564      | 610.2821        |
| 568.3195       | 4  | F  | 7  | 1057.3983      | 529.2031        |
| 683.3465       | 5  | D  | 6  | 910.3299       | 455.6689        |
| 843.3771       | 6  | C  | 5  | 795.3029       | 398.1554        |
| 980.4360       | 7  | H  | 4  | 635.2723       | 318.1401        |
| 1143.4993      | 8  | Y  | 3  | 498.2134       | 249.6106        |
| 1303.5299      | 9  | C  | 2  | 335.1501       | 168.0790        |
|                | 10 | R  | 1  | 175.1195       | 88.0637         |

N-term:+43.02 K(3):+162.16  
C(6):+160.03 C(9):+160.03

X-range:

0 - 0

MassTol: Y-zoom:

0. 1.

MassType:

☐ AVG ☒ MONO

Axis:

☒ 1 ☐ 2

Label:

☒ I ☐ M ☐ -

Ions:

a ☐ + ☐ 2+ ☐ 3+

b ☒ + ☐ 2+ ☐ 3+

c ☐ + ☐ 2+ ☐ 3+

x ☐ + ☐ 2+ ☐ 3+

y ☒ + ☒ 2+ ☐ 3+

z ☐ + ☐ 2+ ☐ 3+

hide H<sub>2</sub>O/NH<sub>3</sub> ☐

zoom 112-122 ☐

GO

SEKSVEAAAEELSAKDLKEKKDKVEEKAGR, MH+ 3411.9317, m/z 853.7384  
L OS G35 P160811 220811-s1.06729.06729.4.dta

scan 6729; 1.8e+001

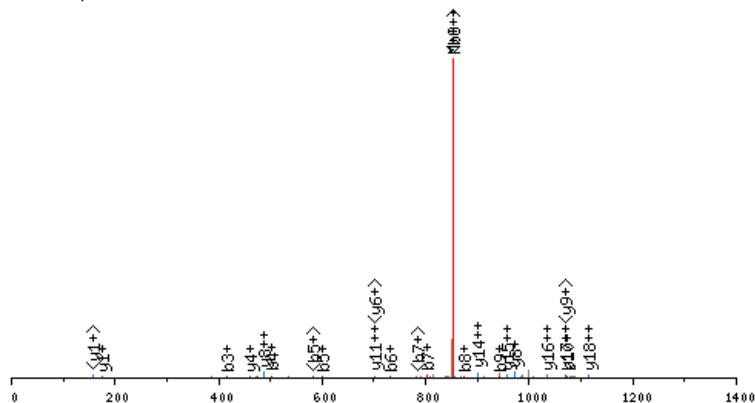

click image to zoom in; click top corners to zoom out

[precursor±]

scan 6728; 853.7 m/z; 2.0e+001

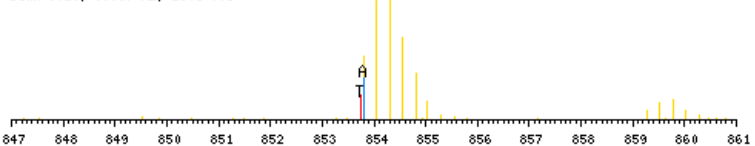

zoomed in precursor plot; T=theoretical m/z, A=acquired m/z

| b <sup>+</sup> | #  | AA | #  | y <sup>+</sup> | y <sup>2+</sup> |
|----------------|----|----|----|----------------|-----------------|
| 130.0504       | 1  | S  | 29 |                |                 |
| 259.0930       | 2  | E  | 28 | 3282.8891      | 1641.9485       |
| 415.2193       | 3  | K  | 27 | 3153.8465      | 1577.4272       |
| 502.2514       | 4  | S  | 26 | 2997.7202      | 1499.3640       |
| 601.3198       | 5  | V  | 25 | 2910.6882      | 1455.8480       |
| 730.3624       | 6  | E  | 24 | 2811.6198      | 1406.3138       |
| 801.3995       | 7  | A  | 23 | 2682.5772      | 1341.7925       |
| 872.4366       | 8  | A  | 22 | 2611.5400      | 1306.2739       |
| 943.4737       | 9  | A  | 21 | 2540.5029      | 1270.7554       |
| 1072.5163      | 10 | E  | 20 | 2469.4658      | 1235.2368       |
| 1185.6004      | 11 | L  | 19 | 2340.4232      | 1170.7155       |
| 1272.6324      | 12 | S  | 18 | 2227.3392      | 1114.1735       |
| 1343.6695      | 13 | A  | 17 | 2140.3071      | 1070.6575       |
| 1499.7958      | 14 | K  | 16 | 2069.2700      | 1035.1389       |
| 1614.8227      | 15 | D  | 15 | 1913.1437      | 957.0758        |
| 1727.9068      | 16 | L  | 14 | 1798.1168      | 899.5623        |
| 1884.0331      | 17 | K  | 13 | 1685.0327      | 843.0203        |
| 2013.0757      | 18 | E  | 12 | 1528.9064      | 764.9571        |
| 2169.2020      | 19 | K  | 11 | 1399.8638      | 700.4358        |
| 2325.3283      | 20 | K  | 10 | 1243.7375      | 622.3727        |
| 2440.3552      | 21 | D  | 9  | 1087.6112      | 544.3095        |
| 2596.4815      | 22 | K  | 8  | 972.5843       | 486.7961        |
| 2695.5500      | 23 | V  | 7  | 816.4580       | 408.7329        |
| 2824.5925      | 24 | E  | 6  | 717.3896       | 359.1987        |
| 2953.6351      | 25 | E  | 5  | 588.3470       | 294.6774        |
| 3109.7614      | 26 | K  | 4  | 459.3044       | 230.1561        |
| 3180.7986      | 27 | A  | 3  | 303.1781       | 152.0930        |
| 3237.8200      | 28 | G  | 2  | 232.1410       | 116.5744        |
|                | 29 | R  | 1  | 175.1195       | 88.0637         |

N-term:+43.02 K(3):+156.13  
K(14):+156.13 K(17):+156.13  
K(19):+156.13 K(20):+156.13  
K(22):+156.13 K(26):+156.13

X-range:

0 - 0

MassTol: Y-zoom:

0. 1.

MassType:

☐AVG ☒MONO

Axis:

☒1 ☐2

Label:

☒I ☐M ☐-

Ions:

a ☐+ ☐2+ ☐3+

b ☒+ ☐2+ ☐3+

c ☐+ ☐2+ ☐3+

x ☐+ ☐2+ ☐3+

y ☒+ ☒2+ ☐3+

z ☐+ ☐2+ ☐3+

hide H<sub>2</sub>O/NH<sub>3</sub> ☐

zoom 112-122 ☐

GO

SELEQLRQEAQLR, MH+ 1770.8986, m/z 590.9711  
L OS G31 P160811 220811-s1.07997.07997.3.dta

scan 7997; 2.6e+000

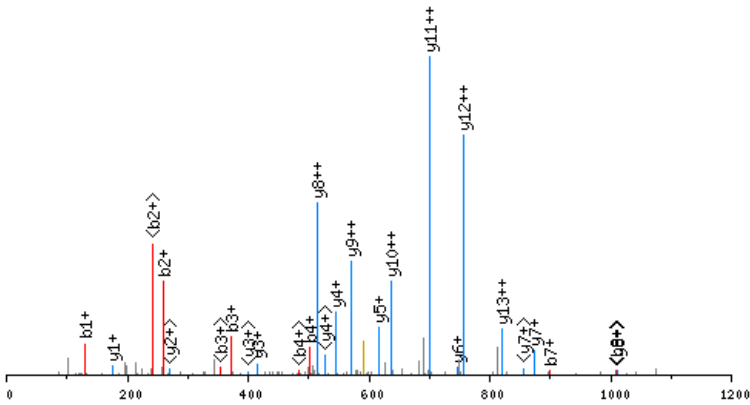

click image to zoom in; click top corners to zoom out

[precursor±]

scan 7994; 591.0 m/z; 8.3e+000

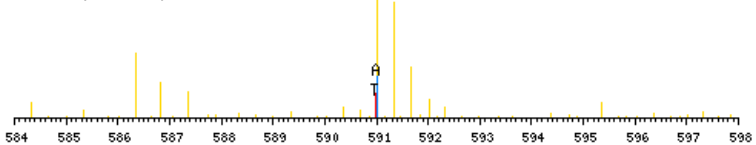

zoomed in precursor plot; T=theoretical m/z, A=acquired m/z

| b <sup>+</sup> | #  | AA | #  | y <sup>+</sup> | y <sup>2+</sup> |
|----------------|----|----|----|----------------|-----------------|
| 130.0504       | 1  | S  | 14 |                |                 |
| 259.0930       | 2  | E  | 13 | 1641.8560      | 821.4319        |
| 372.1771       | 3  | L  | 12 | 1512.8134      | 756.9106        |
| 501.2197       | 4  | E  | 11 | 1399.7294      | 700.3686        |
| 629.2783       | 5  | Q  | 10 | 1270.6868      | 635.8473        |
| 742.3623       | 6  | L  | 9  | 1142.6282      | 571.8180        |
| 898.4634       | 7  | R  | 8  | 1029.5441      | 515.2760        |
| 1026.5220      | 8  | Q  | 7  | 873.4430       | 437.2254        |
| 1155.5646      | 9  | E  | 6  | 745.3844       | 373.1961        |
| 1226.6017      | 10 | A  | 5  | 616.3418       | 308.6748        |
| 1355.6443      | 11 | E  | 4  | 545.3047       | 273.1563        |
| 1483.7029      | 12 | Q  | 3  | 416.2621       | 208.6350        |
| 1596.7870      | 13 | L  | 2  | 288.2036       | 144.6057        |
|                | 14 | R  | 1  | 175.1195       | 88.0637         |

N-term:+43.02

X-range:

0 - 0

MassTol: Y-zoom:

0. 1.

MassType:

☐AVG ☒MONO

Axis:

☒1 ☐2

Label:

☒I ☐M ☐-

Ions:

a ☐+ ☐2+ ☐3+

b ☒+ ☐2+ ☐3+

c ☐+ ☐2+ ☐3+

x ☐+ ☐2+ ☐3+

y ☒+ ☒2+ ☐3+

z ☐+ ☐2+ ☐3+

hide H<sub>2</sub>O/NH<sub>3</sub> ☐

zoom 112-122 ☐

GO

SEPELKLVAR, MH+ 1211.7000, m/z 606.3536  
L OS G31 P160811 220811-s1.05486.05486.2.dta

scan 5486; 3.8e+001

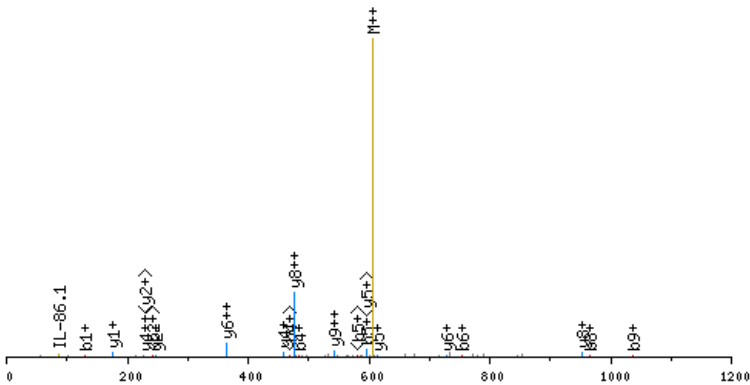

click image to zoom in; click top corners to zoom out [precursor±]

scan 5484; 606.4 m/z; 4.9e+001

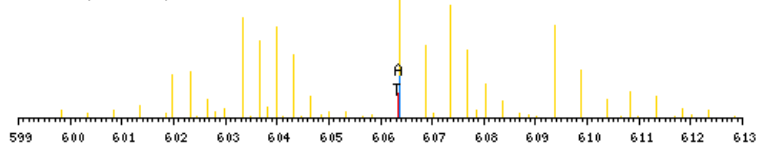

zoomed in precursor plot; T=theoretical m/z, A=acquired m/z

| b <sup>+</sup> | #  | AA | #  | y <sup>+</sup> | y <sup>2+</sup> |
|----------------|----|----|----|----------------|-----------------|
| 130.0504       | 1  | S  | 10 |                |                 |
| 259.0930       | 2  | E  | 9  | 1082.6574      | 541.8326        |
| 356.1458       | 3  | P  | 8  | 953.6148       | 477.3113        |
| 485.1884       | 4  | E  | 7  | 856.5620       | 428.7849        |
| 598.2724       | 5  | L  | 6  | 727.5195       | 364.2636        |
| 754.3987       | 6  | K  | 5  | 614.4354       | 307.7216        |
| 867.4828       | 7  | L  | 4  | 458.3091       | 229.6585        |
| 966.5512       | 8  | V  | 3  | 345.2250       | 173.1164        |
| 1037.5883      | 9  | A  | 2  | 246.1566       | 123.5822        |
|                | 10 | R  | 1  | 175.1195       | 88.0637         |

N-term:+43.02 K(6):+156.13



X-range:

0 - 0

MassTol: Y-zoom:

0. 1.

MassType:

☐AVG ☒MONO

Axis:

☒1 ☐2

Label:

☒I ☐M ☐-

Ions:

a ☐+ ☐2+ ☐3+

b ☒+ ☐2+ ☐3+

c ☐+ ☐2+ ☐3+

x ☐+ ☐2+ ☐3+

y ☒+ ☒2+ ☐3+

z ☐+ ☐2+ ☐3+

hide H<sub>2</sub>O/NH<sub>3</sub> ☐

zoom 112-122 ☐

GO

SETAPAAPAPAPAEKTPVKKAR, MH+ 2565.6042, m/z 642.1565  
L\_OS\_G35\_P160811\_220811-s1.02669.02669.4.dta

scan 2669; 8.7e+000

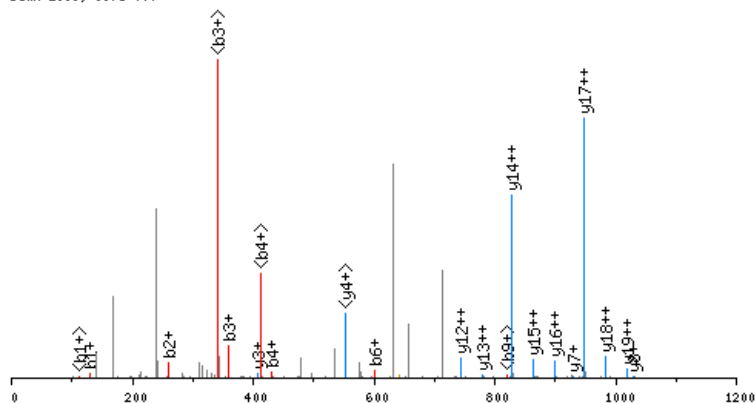

click image to zoom in; click top corners to zoom out

[precursor±]

scan 2668; 642.2 m/z; 5.6e+001

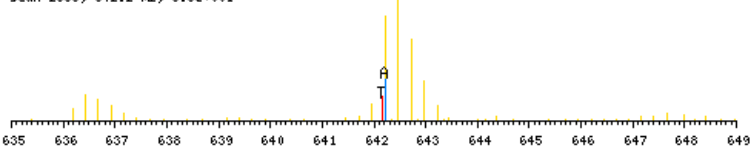

zoomed in precursor plot; T=theoretical m/z, A=acquired m/z

| b <sup>+</sup> | #  | AA | #  | y <sup>+</sup> | y <sup>2+</sup> |
|----------------|----|----|----|----------------|-----------------|
| 130.0504       | 1  | S  | 24 |                |                 |
| 259.0930       | 2  | E  | 23 | 2436.5616      | 1218.7847       |
| 360.1407       | 3  | T  | 22 | 2307.5190      | 1154.2634       |
| 431.1778       | 4  | A  | 21 | 2206.4713      | 1103.7396       |
| 528.2306       | 5  | P  | 20 | 2135.4342      | 1068.2210       |
| 599.2677       | 6  | A  | 19 | 2038.3814      | 1019.6946       |
| 670.3048       | 7  | A  | 18 | 1967.3443      | 984.1761        |
| 767.3576       | 8  | P  | 17 | 1896.3072      | 948.6575        |
| 838.3947       | 9  | A  | 16 | 1799.2544      | 900.1311        |
| 909.4318       | 10 | A  | 15 | 1728.2173      | 864.6126        |
| 1006.4846      | 11 | P  | 14 | 1657.1802      | 829.0940        |
| 1077.5217      | 12 | A  | 13 | 1560.1275      | 780.5676        |
| 1174.5744      | 13 | P  | 12 | 1489.0903      | 745.0491        |
| 1245.6116      | 14 | A  | 11 | 1392.0376      | 696.5227        |
| 1374.6541      | 15 | E  | 10 | 1321.0005      | 661.0041        |
| 1536.8122      | 16 | K  | 9  | 1191.9579      | 596.4828        |
| 1637.8599      | 17 | T  | 8  | 1029.7998      | 515.4038        |
| 1734.9127      | 18 | P  | 7  | 928.7521       | 464.8800        |
| 1833.9811      | 19 | V  | 6  | 831.6993       | 416.3536        |
| 1996.1392      | 20 | K  | 5  | 732.6309       | 366.8194        |
| 2158.2973      | 21 | K  | 4  | 570.4728       | 285.7403        |
| 2320.4554      | 22 | K  | 3  | 408.3147       | 204.6613        |
| 2391.4925      | 23 | A  | 2  | 246.1566       | 123.5822        |
|                | 24 | R  | 1  | 175.1195       | 88.0637         |

N-term:+43.02 K(16):+162.16

K(20):+162.16 K(21):+162.16

K(22):+162.16

X-range:

0 - 0

MassTol: Y-zoom:

0. 1.

MassType:

☐ AVG ☒ MONO

Axis:

☒ 1 ☐ 2

Label:

☒ I ☐ M ☐ -

Ions:

a ☐ + ☐ 2+ ☐ 3+

b ☒ + ☐ 2+ ☐ 3+

c ☐ + ☐ 2+ ☐ 3+

x ☐ + ☐ 2+ ☐ 3+

y ☒ + ☒ 2+ ☐ 3+

z ☐ + ☐ 2+ ☐ 3+

hide H<sub>2</sub>O/NH<sub>3</sub> ☐

zoom 112-122 ☐

GO

SETEHIASISSDATEKTESELR, MH+ 2468.2217, m/z 823.4121  
L OS G32 P160811 220811-s1.03969.03969.3.dta

scan 3969; 4.0e+000

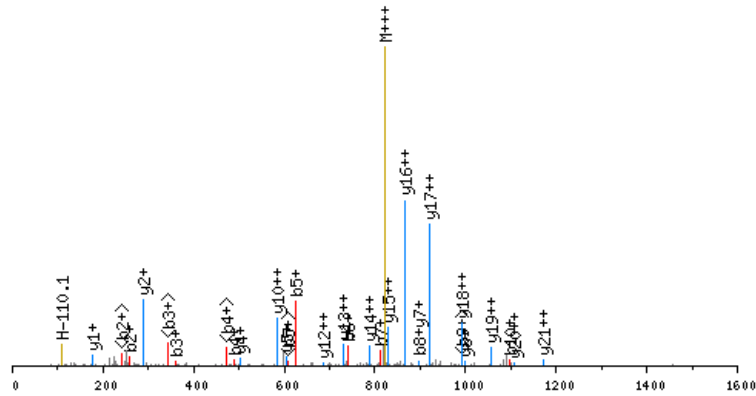

click image to zoom in; click top corners to zoom out [precursor±]

scan 3968; 823.4 m/z; 1.1e+001

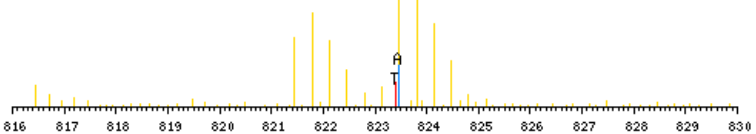

zoomed in precursor plot; T=theoretical m/z, A=acquired m/z

| b <sup>+</sup> | #  | AA | #  | y <sup>+</sup> | y <sup>2+</sup> |
|----------------|----|----|----|----------------|-----------------|
| 130.0504       | 1  | S  | 22 |                |                 |
| 259.0930       | 2  | E  | 21 | 2339.1791      | 1170.0935       |
| 360.1407       | 3  | T  | 20 | 2210.1365      | 1105.5722       |
| 489.1833       | 4  | E  | 19 | 2109.0888      | 1055.0483       |
| 626.2422       | 5  | H  | 18 | 1980.0462      | 990.5270        |
| 739.3263       | 6  | I  | 17 | 1842.9873      | 921.9976        |
| 810.3634       | 7  | A  | 16 | 1729.9032      | 865.4555        |
| 897.3954       | 8  | S  | 15 | 1658.8661      | 829.9370        |
| 1010.4795      | 9  | I  | 14 | 1571.8341      | 786.4210        |
| 1097.5115      | 10 | S  | 13 | 1458.7500      | 729.8789        |
| 1184.5435      | 11 | S  | 12 | 1371.7180      | 686.3629        |
| 1299.5705      | 12 | D  | 11 | 1284.6860      | 642.8469        |
| 1370.6076      | 13 | A  | 10 | 1169.6590      | 585.3334        |
| 1471.6553      | 14 | T  | 9  | 1098.6219      | 549.8149        |
| 1572.7029      | 15 | T  | 8  | 997.5742       | 499.2910        |
| 1701.7455      | 16 | E  | 7  | 896.5266       | 448.7672        |
| 1863.9036      | 17 | K  | 6  | 767.4840       | 384.2459        |
| 1964.9513      | 18 | T  | 5  | 605.3259       | 303.1668        |
| 2051.9833      | 19 | S  | 4  | 504.2782       | 252.6430        |
| 2181.0259      | 20 | E  | 3  | 417.2462       | 209.1270        |
| 2294.1100      | 21 | L  | 2  | 288.2036       | 144.6057        |
|                | 22 | R  | 1  | 175.1195       | 88.0637         |

N-term:+43.02 K(17):+162.16

X-range:

0 - 0

MassTol: Y-zoom:

0. 1.

MassType:

☐ AVG ☒ MONO

Axis:

☒ 1 ☐ 2

Label:

☒ I ☐ M ☐ -

Ions:

a ☐ + ☐ 2+ ☐ 3+

b ☒ + ☐ 2+ ☐ 3+

c ☐ + ☐ 2+ ☐ 3+

x ☐ + ☐ 2+ ☐ 3+

y ☒ + ☒ 2+ ☐ 3+

z ☐ + ☐ 2+ ☐ 3+

hide H<sub>2</sub>O/NH<sub>3</sub> ☐

zoom 112-122 ☐

GO

SFLKSFPPPGSADGLR, MH+ 1751.9545, m/z 584.6563  
L OS G30 P160811 220811-s1.07171.07171.3.dta

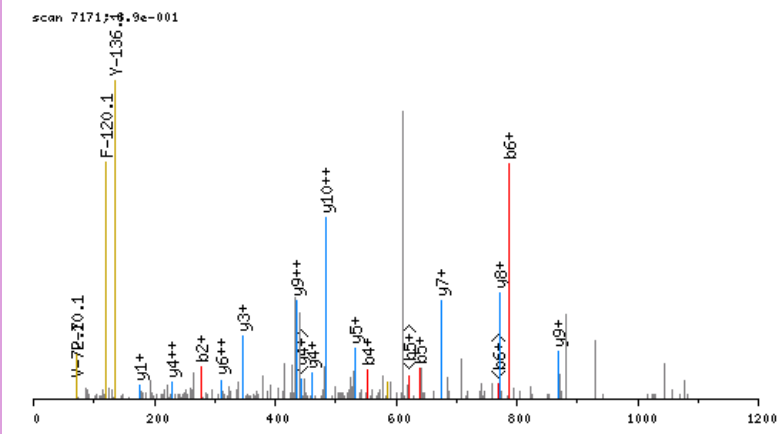

click image to zoom in; click top corners to zoom out [\[precursor±\]](#)

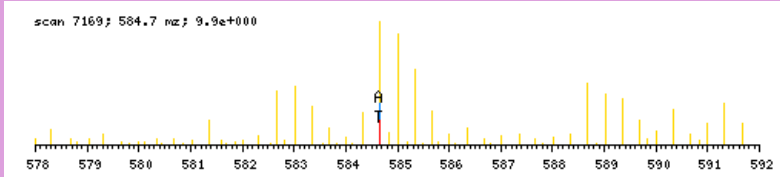

zoomed in precursor plot; T=theoretical m/z, A=acquired m/z

| b <sup>+</sup> | #  | AA | #  | y <sup>+</sup> | y <sup>2+</sup> |
|----------------|----|----|----|----------------|-----------------|
| 130.0504       | 1  | S  | 16 |                |                 |
| 277.1188       | 2  | F  | 15 | 1622.9119      | 811.9599        |
| 390.2029       | 3  | L  | 14 | 1475.8435      | 738.4257        |
| 552.3610       | 4  | K  | 13 | 1362.7594      | 681.8836        |
| 639.3930       | 5  | S  | 12 | 1200.6013      | 600.8046        |
| 786.4614       | 6  | F  | 11 | 1113.5693      | 557.2886        |
| 883.5142       | 7  | P  | 10 | 966.5009       | 483.7543        |
| 980.5670       | 8  | P  | 9  | 869.4481       | 435.2280        |
| 1077.6197      | 9  | P  | 8  | 772.3953       | 386.7016        |
| 1134.6412      | 10 | G  | 7  | 675.3426       | 338.1752        |
| 1221.6732      | 11 | S  | 6  | 618.3211       | 309.6645        |
| 1292.7103      | 12 | A  | 5  | 531.2891       | 266.1485        |
| 1407.7373      | 13 | D  | 4  | 460.2520       | 230.6299        |
| 1464.7588      | 14 | G  | 3  | 345.2250       | 173.1164        |
| 1577.8428      | 15 | L  | 2  | 288.2036       | 144.6057        |
|                | 16 | R  | 1  | 175.1195       | 88.0637         |

N-term:+43.02 K(4):+162.16

X-range:

0 - 0

MassTol: Y-zoom:

0. 1.

MassType:

☐AVG ☒MONO

Axis:

☒1 ☐2

Label:

☒I ☐M ☐-

Ions:

a ☐+ ☐2+ ☐3+

b ☒+ ☐2+ ☐3+

c ☐+ ☐2+ ☐3+

x ☐+ ☐2+ ☐3+

y ☒+ ☒2+ ☐3+

z ☐+ ☐2+ ☐3+

hide H<sub>2</sub>O/NH<sub>3</sub> ☐

zoom 112-122 ☐

GO

SGEDEQQEQTIAEDLVVTKYKMGDIANR, MH+ 3334.6750, m/z 834.4242  
L OS G32 P160811 220811-s1.06411.06411.4.dta

scan 6411; 1.2e+000

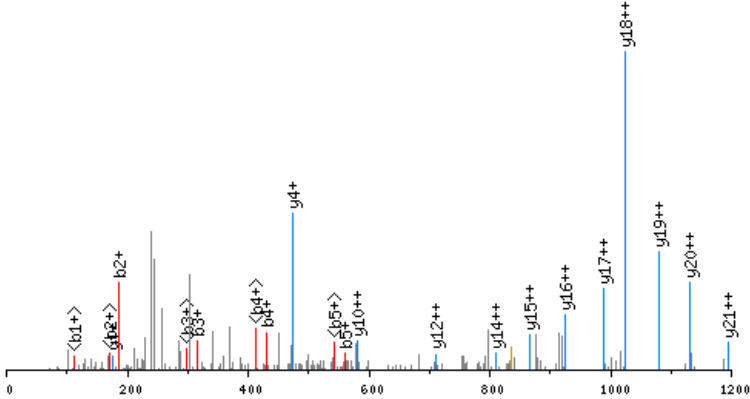

click image to zoom in; click top corners to zoom out

[precursor±]

scan 6408; 834.4 m/z; 2.8e+001

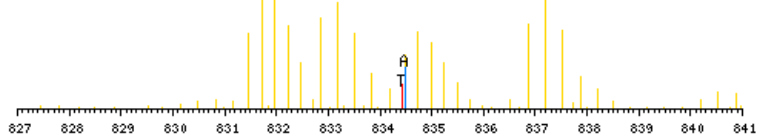

X-range:

0 - 0

MassTol: Y-zoom:

0. 1.

MassType:

☐ AVG ☒ MONO

Axis:

☒ 1 ☐ 2

Label:

☒ I ☐ M ☐ -

Ions:

a ☐ + ☐ 2+ ☐ 3+

b ☒ + ☐ 2+ ☐ 3+

c ☐ + ☐ 2+ ☐ 3+

x ☐ + ☐ 2+ ☐ 3+

y ☒ + ☒ 2+ ☐ 3+

z ☐ + ☐ 2+ ☐ 3+

hide H<sub>2</sub>O/NH<sub>3</sub> ☐

zoom 112-122 ☐

GO

SGEGENPASKPTPVQDVQGDGR, MH+ 2301.1172, m/z 767.7106  
L OS G30 P160811 220811-s1.02850.02850.3.dta

scan 2850; 4.4e+000

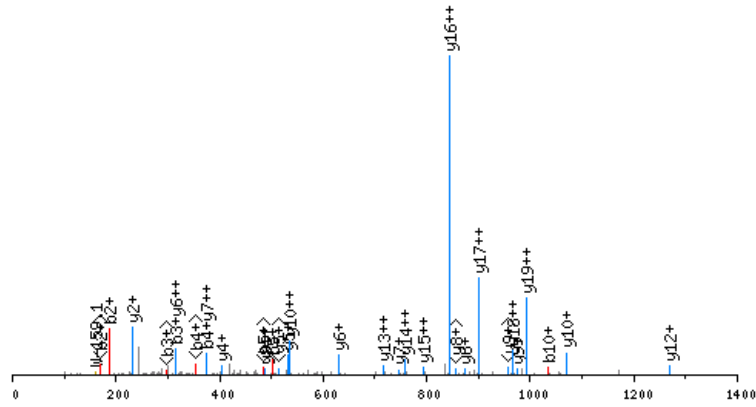

click image to zoom in; click top corners to zoom out [precursor±]

scan 2849; 767.7 m/z; 1.6e+001

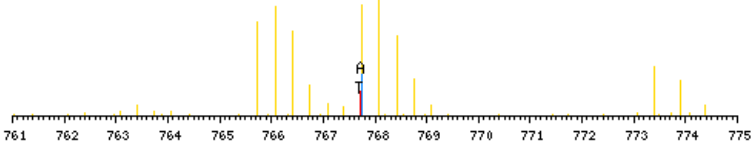

zoomed in precursor plot; T=theoretical m/z, A=acquired m/z

| b <sup>+</sup> | #  | AA | #  | y <sup>+</sup> | y <sup>2+</sup> |
|----------------|----|----|----|----------------|-----------------|
| 130.0504       | 1  | S  | 22 |                |                 |
| 187.0719       | 2  | G  | 21 | 2172.0746      | 1086.5412       |
| 316.1145       | 3  | E  | 20 | 2115.0531      | 1058.0305       |
| 373.1359       | 4  | G  | 19 | 1986.0105      | 993.5092        |
| 502.1785       | 5  | E  | 18 | 1928.9890      | 964.9984        |
| 616.2215       | 6  | N  | 17 | 1799.9464      | 900.4771        |
| 713.2742       | 7  | P  | 16 | 1685.9035      | 843.4557        |
| 784.3113       | 8  | A  | 15 | 1588.8507      | 794.9293        |
| 871.3434       | 9  | S  | 14 | 1517.8136      | 759.4107        |
| 1033.5015      | 10 | K  | 13 | 1430.7816      | 715.8947        |
| 1130.5542      | 11 | P  | 12 | 1268.6235      | 634.8157        |
| 1231.6019      | 12 | T  | 11 | 1171.5707      | 586.2893        |
| 1328.6547      | 13 | P  | 10 | 1070.5231      | 535.7654        |
| 1427.7231      | 14 | V  | 9  | 973.4703       | 487.2391        |
| 1555.7817      | 15 | Q  | 8  | 874.4019       | 437.7049        |
| 1670.8086      | 16 | D  | 7  | 746.3433       | 373.6756        |
| 1769.8770      | 17 | V  | 6  | 631.3164       | 316.1621        |
| 1897.9356      | 18 | Q  | 5  | 532.2479       | 266.6279        |
| 1954.9571      | 19 | G  | 4  | 404.1894       | 202.5986        |
| 2069.9840      | 20 | D  | 3  | 347.1679       | 174.0879        |
| 2127.0055      | 21 | G  | 2  | 232.1410       | 116.5744        |
|                | 22 | R  | 1  | 175.1195       | 88.0637         |

N-term:+43.02 K(10):+162.16

X-range:

0 - 0

MassTol: Y-zoom:

0. 1.

MassType:

☐ AVG ☒ MONO

Axis:

☒ 1 ☐ 2

Label:

☒ I ☐ M ☐ -

Ions:

a ☐ + ☐ 2+ ☐ 3+

b ☒ + ☐ 2+ ☐ 3+

c ☐ + ☐ 2+ ☐ 3+

x ☐ + ☐ 2+ ☐ 3+

y ☒ + ☒ 2+ ☐ 3+

z ☐ + ☐ 2+ ☐ 3+

hide H<sub>2</sub>O/NH<sub>3</sub> ☐

zoom 112-122 ☐

GO

SGEMDKPLISR, MH+ 1302.6728, m/z 651.8400  
L OS G30 P160811 220811-s1.03563.03563.2.dta

scan 3563; 8.0e+000

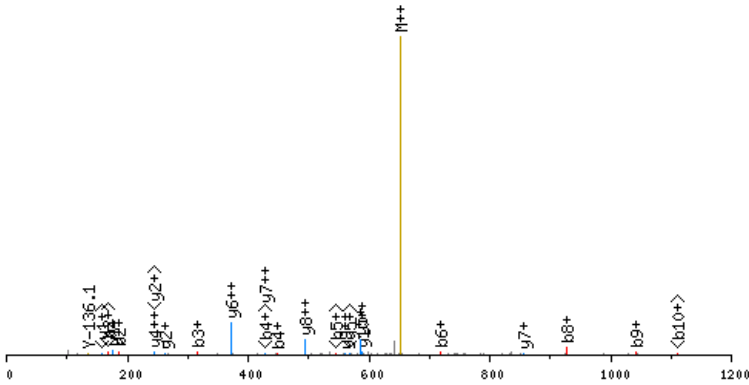

click image to zoom in; click top corners to zoom out

[precursor±]

scan 3559; 651.8 m/z; 7.1e+000

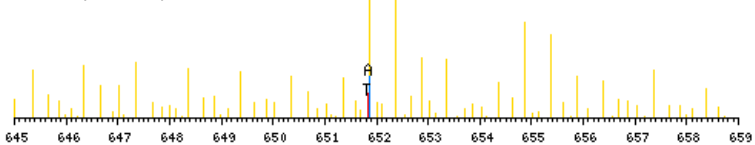

zoomed in precursor plot; T=theoretical m/z, A=acquired m/z

| b <sup>+</sup> | #  | AA | #  | y <sup>+</sup> | y <sup>2+</sup> |
|----------------|----|----|----|----------------|-----------------|
| 130.0504       | 1  | S  | 11 |                |                 |
| 187.0719       | 2  | G  | 10 | 1173.6302      | 587.3190        |
| 316.1145       | 3  | E  | 9  | 1116.6087      | 558.8083        |
| 447.1550       | 4  | M  | 8  | 987.5661       | 494.2870        |
| 562.1819       | 5  | D  | 7  | 856.5257       | 428.7667        |
| 718.3082       | 6  | K  | 6  | 741.4987       | 371.2533        |
| 815.3610       | 7  | P  | 5  | 585.3724       | 293.1901        |
| 928.4450       | 8  | L  | 4  | 488.3197       | 244.6637        |
| 1041.5291      | 9  | I  | 3  | 375.2356       | 188.1217        |
| 1128.5611      | 10 | S  | 2  | 262.1515       | 131.5797        |
|                | 11 | R  | 1  | 175.1195       | 88.0637         |

N-term:+43.02 K(6):+156.13

X-range:

0 - 0

MassTol: Y-zoom:

0. 1.

MassType:

☐AVG ☒MONO

Axis:

☒1 ☐2

Label:

☒I ☐M ☐-

Ions:

a ☐+ ☐2+ ☐3+

b ☒+ ☐2+ ☐3+

c ☐+ ☐2+ ☐3+

x ☐+ ☐2+ ☐3+

y ☒+ ☒2+ ☐3+

z ☐+ ☐2+ ☐3+

hide H<sub>2</sub>O/NH<sub>3</sub> ☐

zoom 112-122 ☐

GO

SGGKYVDSEGHLYTVPIR, MH+ 2048.0453, m/z 683.3533  
L OS G33 P160811 220811-s1.04944.04944.3.dta

scan 4944; 1.1e+001

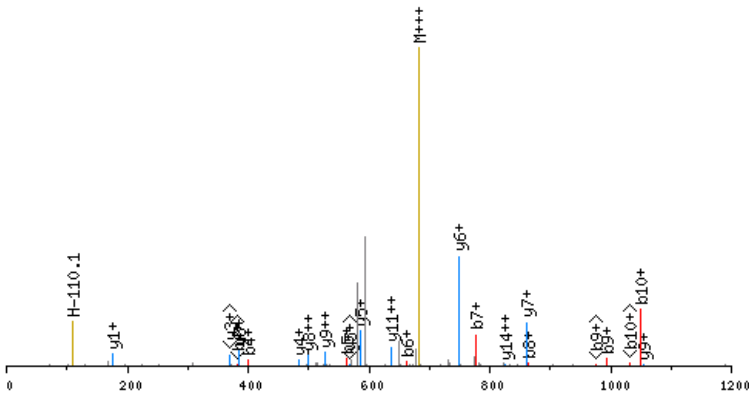

click image to zoom in; click top corners to zoom out

[precursor±]

scan 4942; 683.4 m/z; 3.3e+001

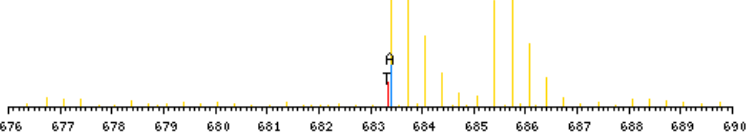

zoomed in precursor plot; T=theoretical m/z, A=acquired m/z

| b <sup>+</sup> | #  | AA | #  | y <sup>+</sup> | y <sup>2+</sup> |
|----------------|----|----|----|----------------|-----------------|
| 130.0504       | 1  | S  | 18 |                |                 |
| 187.0719       | 2  | G  | 17 | 1919.0027      | 960.0053        |
| 244.0934       | 3  | G  | 16 | 1861.9813      | 931.4945        |
| 400.2197       | 4  | K  | 15 | 1804.9598      | 902.9838        |
| 563.2830       | 5  | Y  | 14 | 1648.8335      | 824.9207        |
| 662.3514       | 6  | V  | 13 | 1485.7702      | 743.3890        |
| 777.3783       | 7  | D  | 12 | 1386.7018      | 693.8548        |
| 864.4104       | 8  | S  | 11 | 1271.6748      | 636.3413        |
| 993.4530       | 9  | E  | 10 | 1184.6428      | 592.8253        |
| 1050.4744      | 10 | G  | 9  | 1055.6002      | 528.3040        |
| 1187.5333      | 11 | H  | 8  | 998.5787       | 499.7933        |
| 1300.6174      | 12 | L  | 7  | 861.5198       | 431.2638        |
| 1463.6807      | 13 | Y  | 6  | 748.4357       | 374.7218        |
| 1564.7284      | 14 | T  | 5  | 585.3724       | 293.1901        |
| 1663.7968      | 15 | V  | 4  | 484.3247       | 242.6663        |
| 1760.8496      | 16 | P  | 3  | 385.2563       | 193.1321        |
| 1873.9337      | 17 | I  | 2  | 288.2036       | 144.6057        |
|                | 18 | R  | 1  | 175.1195       | 88.0637         |

N-term:+43.02 K(4):+156.13

X-range:

0 - 0

MassTol: Y-zoom:

0. 1.

MassType:

☐ AVG ☒ MONO

Axis:

☒ 1 ☐ 2

Label:

☒ I ☐ M ☐ -

Ions:

a ☐ + ☐ 2+ ☐ 3+

b ☒ + ☐ 2+ ☐ 3+

c ☐ + ☐ 2+ ☐ 3+

x ☐ + ☐ 2+ ☐ 3+

y ☒ + ☒ 2+ ☐ 3+

z ☐ + ☐ 2+ ☐ 3+

hide H<sub>2</sub>O/NH<sub>3</sub> ☐

zoom 112-122 ☐

GO

SGGLLKALR, MH+ 990.6524, m/z 495.8299  
L OS G31 P160811 220811-s1.06072.06072.2.dta

scan 6072; 2.8e+001

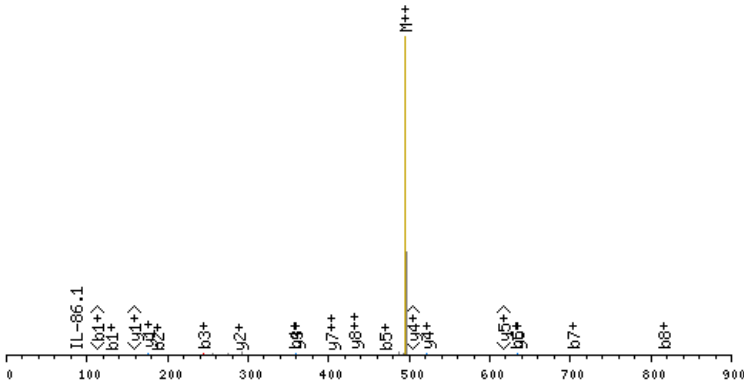

click image to zoom in; click top corners to zoom out [precursor±]

scan 6069; 495.8 m/z; 8.7e+000

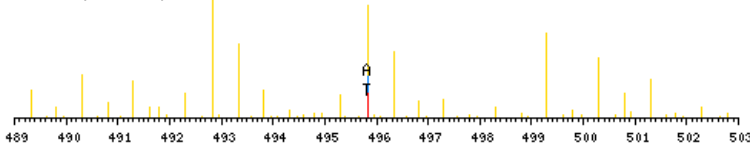

zoomed in precursor plot; T=theoretical m/z, A=acquired m/z

| b <sup>+</sup> | # | AA | # | y <sup>+</sup> | y <sup>2+</sup> |
|----------------|---|----|---|----------------|-----------------|
| 130.0504       | 1 | S  | 9 |                |                 |
| 187.0719       | 2 | G  | 8 | 861.6098       | 431.3088        |
| 244.0934       | 3 | G  | 7 | 804.5884       | 402.7981        |
| 357.1774       | 4 | L  | 6 | 747.5669       | 374.2874        |
| 470.2615       | 5 | L  | 5 | 634.4828       | 317.7453        |
| 632.4196       | 6 | K  | 4 | 521.3988       | 261.2033        |
| 703.4567       | 7 | A  | 3 | 359.2407       | 180.1243        |
| 816.5408       | 8 | L  | 2 | 288.2036       | 144.6057        |
|                | 9 | R  | 1 | 175.1195       | 88.0637         |

N-term: +43.02 K(6): +162.16

X-range:

0 - 0

MassTol: Y-zoom:

0. 1.

MassType:

☐AVG ☒MONO

Axis:

☒1 ☐2

Label:

☒I ☐M ☐-

Ions:

a ☐+ ☐2+ ☐3+

b ☒+ ☐2+ ☐3+

c ☐+ ☐2+ ☐3+

x ☐+ ☐2+ ☐3+

y ☒+ ☒2+ ☐3+

z ☐+ ☐2+ ☐3+

hide H<sub>2</sub>O/NH<sub>3</sub> ☐

zoom 112-122 ☐

GO

SGGSTMYPGIADR, MH+ 1353.6109, m/z 677.3091  
L OS G31 P160811 220811-s1.04187.04187.2.dta

scan 4187; 1.9e+000

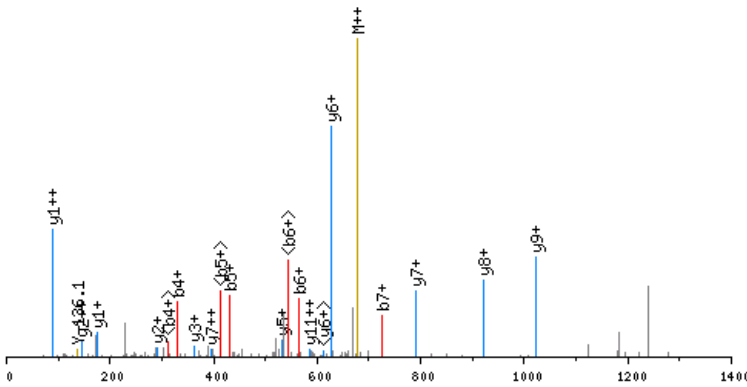

click image to zoom in; click top corners to zoom out

[precursor±]

scan 4184; 677.3 m/z; 1.4e+001

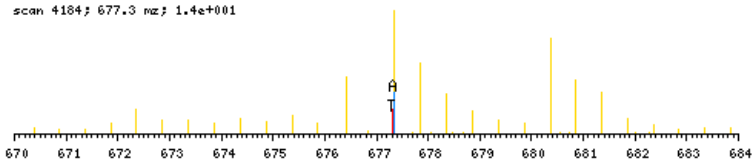

zoomed in precursor plot; T=theoretical m/z, A=acquired m/z

| b <sup>+</sup> | #  | AA | #  | y <sup>+</sup> | y <sup>2+</sup> |
|----------------|----|----|----|----------------|-----------------|
| 130.0504       | 1  | S  | 13 |                |                 |
| 187.0719       | 2  | G  | 12 | 1224.5683      | 612.7881        |
| 244.0934       | 3  | G  | 11 | 1167.5468      | 584.2773        |
| 331.1254       | 4  | S  | 10 | 1110.5254      | 555.7666        |
| 432.1731       | 5  | T  | 9  | 1023.4933      | 512.2506        |
| 563.2135       | 6  | M  | 8  | 922.4457       | 461.7267        |
| 726.2769       | 7  | Y  | 7  | 791.4052       | 396.2065        |
| 823.3296       | 8  | P  | 6  | 628.3418       | 314.6748        |
| 880.3511       | 9  | G  | 5  | 531.2891       | 266.1485        |
| 993.4352       | 10 | I  | 4  | 474.2676       | 237.6377        |
| 1064.4723      | 11 | A  | 3  | 361.1836       | 181.0957        |
| 1179.4992      | 12 | D  | 2  | 290.1464       | 145.5771        |
|                | 13 | R  | 1  | 175.1195       | 88.0637         |

N-term:+43.02

X-range:

0 - 0

MassTol: Y-zoom:

0. 1.

MassType:

☐AVG ☒MONO

Axis:

☒1 ☐2

Label:

☒I ☐M ☐-

Ions:

a ☐+ ☐2+ ☐3+

b ☒+ ☐2+ ☐3+

c ☐+ ☐2+ ☐3+

x ☐+ ☐2+ ☐3+

y ☒+ ☒2+ ☐3+

z ☐+ ☐2+ ☐3+

hide H<sub>2</sub>O/NH<sub>3</sub> ☐

zoom 112-122 ☐

GO

SGGTPYIGSKISLISKAEIR, MH+ 2175.2390, m/z 725.7512  
L OS G32 P160811 220811-s1.05516.05516.3.dta

scan 5516; 5.4e+000

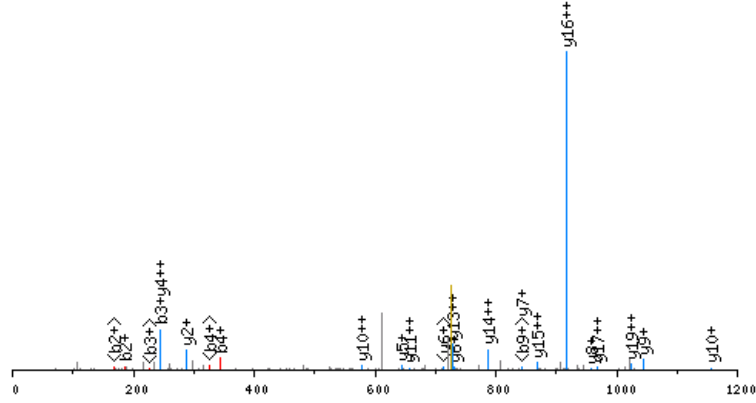

click image to zoom in; click top corners to zoom out [\[precursor±\]](#)

scan 5513; 725.8 m/z; 1.0e+001

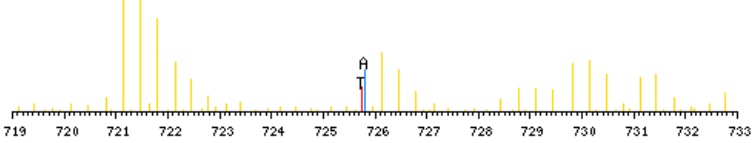

zoomed in precursor plot; T=theoretical m/z, A=acquired m/z

| b <sup>+</sup> | #  | AA | #  | y <sup>+</sup> | y <sup>2+</sup> |
|----------------|----|----|----|----------------|-----------------|
| 130.0504       | 1  | S  | 20 |                |                 |
| 187.0719       | 2  | G  | 19 | 2046.1964      | 1023.6021       |
| 244.0934       | 3  | G  | 18 | 1989.1749      | 995.0914        |
| 345.1410       | 4  | T  | 17 | 1932.1534      | 966.5806        |
| 442.1938       | 5  | P  | 16 | 1831.1058      | 916.0568        |
| 605.2571       | 6  | Y  | 15 | 1734.0530      | 867.5304        |
| 718.3412       | 7  | I  | 14 | 1570.9897      | 785.9988        |
| 775.3627       | 8  | G  | 13 | 1457.9056      | 729.4567        |
| 862.3947       | 9  | S  | 12 | 1400.8841      | 700.9460        |
| 1018.5210      | 10 | K  | 11 | 1313.8521      | 657.4300        |
| 1131.6050      | 11 | I  | 10 | 1157.7258      | 579.3668        |
| 1218.6371      | 12 | S  | 9  | 1044.6418      | 522.8248        |
| 1331.7211      | 13 | L  | 8  | 957.6097       | 479.3088        |
| 1444.8052      | 14 | I  | 7  | 844.5257       | 422.7667        |
| 1531.8372      | 15 | S  | 6  | 731.4416       | 366.2247        |
| 1687.9635      | 16 | K  | 5  | 644.4096       | 322.7087        |
| 1759.0006      | 17 | A  | 4  | 488.2833       | 244.6455        |
| 1888.0432      | 18 | E  | 3  | 417.2462       | 209.1270        |
| 2001.1273      | 19 | I  | 2  | 288.2036       | 144.6057        |
|                | 20 | R  | 1  | 175.1195       | 88.0637         |

N-term:+43.02 K(10):+156.13  
K(16):+156.13

X-range:

0 - 0

MassTol: Y-zoom:

0. 1.

MassType:

☐AVG ☒MONO

Axis:

☒1 ☐2

Label:

☒I ☐M ☐-

Ions:

a ☐+ ☐2+ ☐3+

b ☒+ ☐2+ ☐3+

c ☐+ ☐2+ ☐3+

x ☐+ ☐2+ ☐3+

y ☒+ ☒2+ ☐3+

z ☐+ ☐2+ ☐3+

hide H<sub>2</sub>O/NH<sub>3</sub> ☐

zoom 112-122 ☐

GO

SGKRKLPSTSEERSPAKR, MH+ 2200.3263, m/z 550.8370  
L OS G35 P160811 220811-s1.08785.08785.4.dta

scan 8785; 8.2e+000

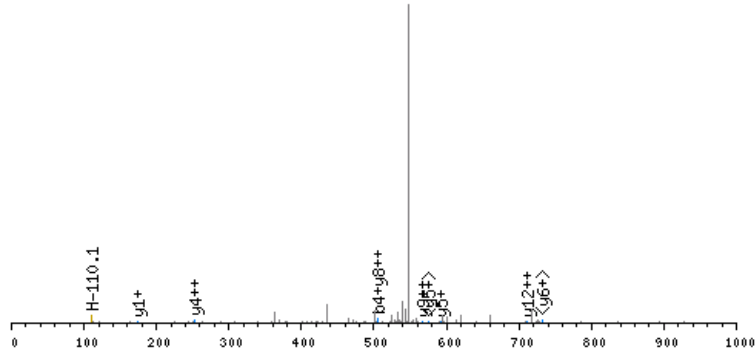

click image to zoom in; click top corners to zoom out [\[precursor±\]](#)

scan 8783; 550.8 m/z; 4.1e+001

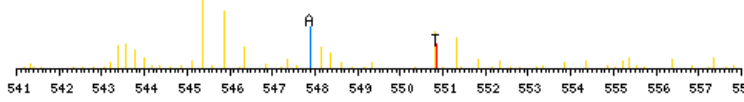

zoomed in precursor plot; T=theoretical m/z, A=acquired m/z

| b <sup>+</sup> | #  | AA | #  | y <sup>+</sup> | y <sup>2+</sup> |
|----------------|----|----|----|----------------|-----------------|
| 130.0504       | 1  | S  | 18 |                |                 |
| 187.0719       | 2  | G  | 17 | 2071.2837      | 1036.1458       |
| 349.2300       | 3  | K  | 16 | 2014.2622      | 1007.6350       |
| 505.3311       | 4  | R  | 15 | 1852.1041      | 926.5560        |
| 667.4892       | 5  | K  | 14 | 1696.0030      | 848.5054        |
| 780.5733       | 6  | L  | 13 | 1533.8449      | 767.4264        |
| 877.6260       | 7  | P  | 12 | 1420.7609      | 710.8843        |
| 978.6737       | 8  | T  | 11 | 1323.7081      | 662.3580        |
| 1065.7057      | 9  | S  | 10 | 1222.6604      | 611.8341        |
| 1194.7483      | 10 | E  | 9  | 1135.6284      | 568.3181        |
| 1323.7909      | 11 | E  | 8  | 1006.5858      | 503.7968        |
| 1452.8335      | 12 | E  | 7  | 877.5432       | 439.2755        |
| 1608.9346      | 13 | R  | 6  | 748.5006       | 374.7542        |
| 1695.9667      | 14 | S  | 5  | 592.3995       | 296.7037        |
| 1793.0194      | 15 | P  | 4  | 505.3675       | 253.1877        |
| 1864.0565      | 16 | A  | 3  | 408.3147       | 204.6613        |
| 2026.2146      | 17 | K  | 2  | 337.2776       | 169.1427        |
|                | 18 | R  | 1  | 175.1195       | 88.0637         |

N-term:+43.02 K(3):+162.16  
K(5):+162.16 K(17):+162.16

X-range:

0 - 0

MassTol: Y-zoom:

0. 1.

MassType:

☐ AVG ☒ MONO

Axis:

☒ 1 ☐ 2

Label:

☒ I ☐ M ☐ -

Ions:

a ☐ + ☐ 2+ ☐ 3+

b ☒ + ☐ 2+ ☐ 3+

c ☐ + ☐ 2+ ☐ 3+

x ☐ + ☐ 2+ ☐ 3+

y ☒ + ☒ 2+ ☐ 3+

z ☐ + ☐ 2+ ☐ 3+

hide H<sub>2</sub>O/NH<sub>3</sub> ☐

zoom 112-122 ☐

GO

SGSSSVAAMKKVVQQLR, MH+ 1886.1170, m/z 629.3772  
L OS G33 P160811 220811-s1.06101.06101.3.dta

scan 6101; 6.3e+000

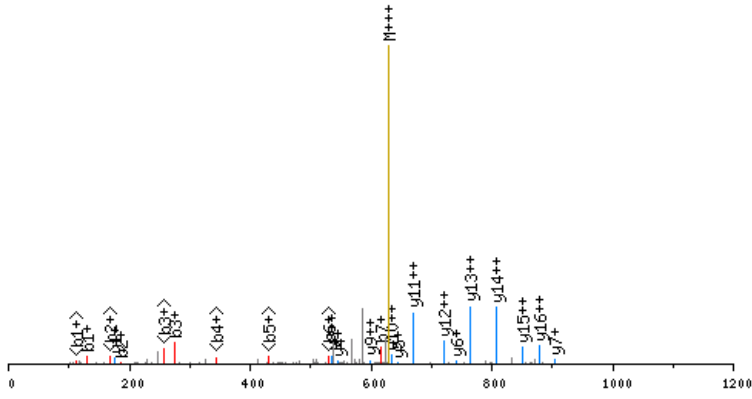

click image to zoom in; click top corners to zoom out [\[precursor±\]](#)

scan 6097; 629.4 mz; 8.2e+000

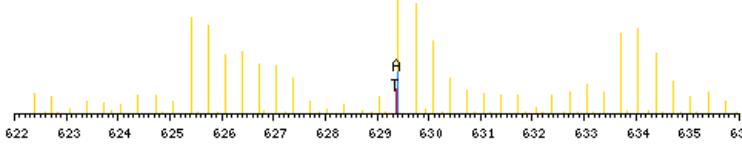

zoomed in precursor plot; T=theoretical m/z, A=acquired m/z

| b <sup>+</sup> | #  | AA | #  | y <sup>+</sup> | y <sup>2+</sup> |
|----------------|----|----|----|----------------|-----------------|
| 130.0504       | 1  | S  | 17 |                |                 |
| 187.0719       | 2  | G  | 16 | 1757.0744      | 879.0411        |
| 274.1039       | 3  | S  | 15 | 1700.0530      | 850.5304        |
| 361.1359       | 4  | S  | 14 | 1613.0209      | 807.0144        |
| 448.1680       | 5  | S  | 13 | 1525.9889      | 763.4984        |
| 547.2364       | 6  | V  | 12 | 1438.9569      | 719.9823        |
| 618.2735       | 7  | A  | 11 | 1339.8885      | 670.4481        |
| 689.3106       | 8  | A  | 10 | 1268.8513      | 634.9296        |
| 820.3511       | 9  | M  | 9  | 1197.8142      | 599.4110        |
| 982.5092       | 10 | K  | 8  | 1066.7737      | 533.8908        |
| 1144.6673      | 11 | K  | 7  | 904.6156       | 452.8117        |
| 1243.7357      | 12 | V  | 6  | 742.4575       | 371.7327        |
| 1342.8041      | 13 | V  | 5  | 643.3891       | 322.1985        |
| 1470.8627      | 14 | Q  | 4  | 544.3207       | 272.6643        |
| 1598.9213      | 15 | Q  | 3  | 416.2621       | 208.6350        |
| 1712.0054      | 16 | L  | 2  | 288.2036       | 144.6057        |
|                | 17 | R  | 1  | 175.1195       | 88.0637         |

N-term:+43.02 K(10):+162.16  
K(11):+162.16

N-term: +43.02 K(11): +162.16  
K(17): +162.16

X-range:

0 - 0

MassTol: Y-zoom:

0. 1.

MassType:

☐AVG ☒MONO

Axis:

☒1 ☐2

Label:

☒I ☐M ☐-

Ions:

a ☐+ ☐2+ ☐3+

b ☒+ ☐2+ ☐3+

c ☐+ ☐2+ ☐3+

x ☐+ ☐2+ ☐3+

y ☒+ ☒2+ ☐3+

z ☐+ ☐2+ ☐3+

hide H<sub>2</sub>O/NH<sub>3</sub> ☐

zoom 112-122 ☐

GO

SGYTPDEKLR, MH+ 1241.6590, m/z 621.3332  
L OS G31 P160811 220811-s1.03450.03450.2.dta

scan 3450; 1.4e+001

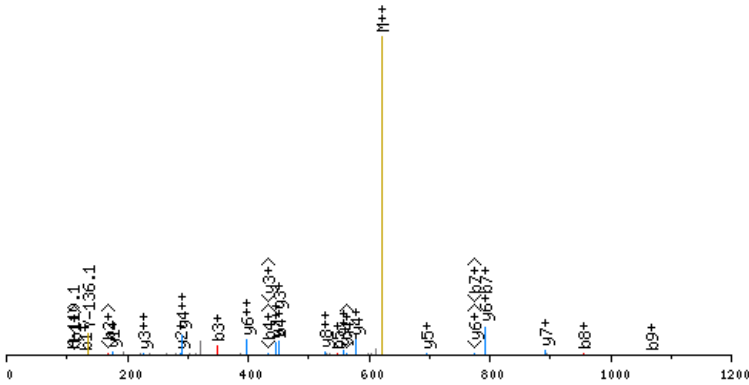

click image to zoom in; click top corners to zoom out

[precursor±]

scan 3449; 621.3 m/z; 2.2e+001

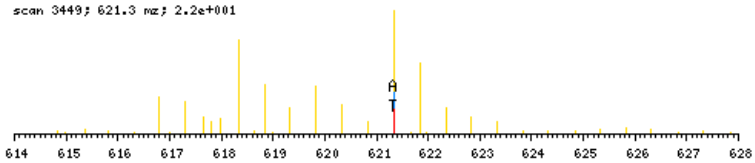

zoomed in precursor plot; T=theoretical m/z, A=acquired m/z

| b <sup>+</sup> | #  | AA | #  | y <sup>+</sup> | y <sup>2+</sup> |
|----------------|----|----|----|----------------|-----------------|
| 130.0504       | 1  | S  | 10 |                |                 |
| 187.0719       | 2  | G  | 9  | 1112.6164      | 556.8121        |
| 350.1352       | 3  | Y  | 8  | 1055.5950      | 528.3014        |
| 451.1829       | 4  | T  | 7  | 892.5316       | 446.7697        |
| 548.2357       | 5  | P  | 6  | 791.4840       | 396.2459        |
| 663.2626       | 6  | D  | 5  | 694.4312       | 347.7195        |
| 792.3052       | 7  | E  | 4  | 579.4043       | 290.2060        |
| 954.4633       | 8  | K  | 3  | 450.3617       | 225.6847        |
| 1067.5474      | 9  | L  | 2  | 288.2036       | 144.6057        |
|                | 10 | R  | 1  | 175.1195       | 88.0637         |

N-term:+43.02 K(8):+162.16

X-range:

MassTol: Y-zoom:

MassType:  
☐ AVG ☒ MONO

Axis:

1 2

Label:

☒ I ☐ M ☐ -

Ions:

**a**  +  <sup>2</sup> +  <sup>3</sup> +

b ☒ 1+ ☐ 2+ ☐ 3+

☐ + ☐ <sup>2</sup>+ ☐ <sup>3</sup>+

c ☐ 1 ☐ 2 ☐ 3

|          |                      |                      |                      |
|----------|----------------------|----------------------|----------------------|
| <b>x</b> | <input type="text"/> | <input type="text"/> | <input type="text"/> |
|          | <input type="text"/> | <input type="text"/> | <input type="text"/> |

**y** ☒<sup>+</sup> ☒<sup>2+</sup> ☐<sup>3+</sup>

$$z^{\frac{1}{2}} + \frac{1}{2}z^{\frac{3}{2}} + \frac{1}{8}z^{\frac{5}{2}} + \dots$$
hide  $\text{H}_2\text{O}/\text{NH}_3$  ☐

zoom 112-122

GO

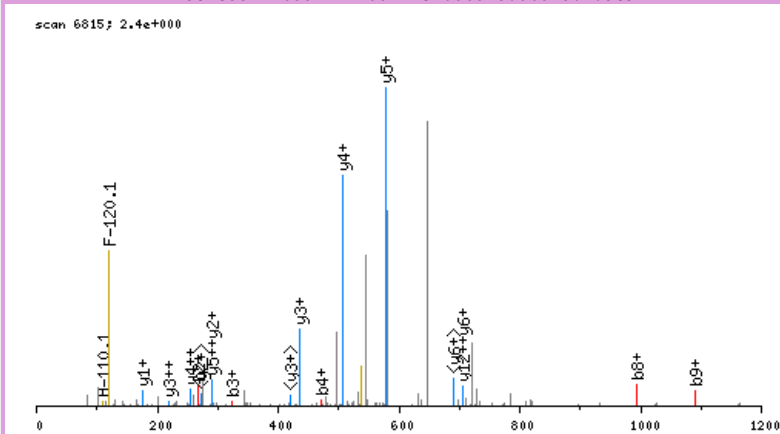

click image to zoom in; click top corners to zoom out      [\[precursor+\]](#)

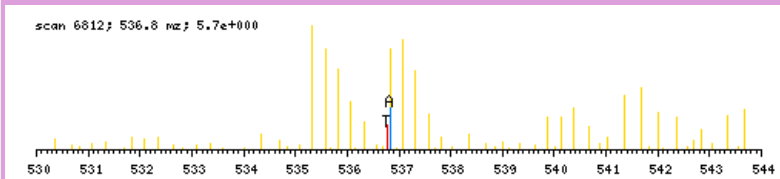

zoomed in precursor plot; T=theoretical m/z, A=acquired m/z

| $b^+$     | #  | AA | #  | $y^+$     | $y^{2+}$  |
|-----------|----|----|----|-----------|-----------|
| 130.0504  | 1  | S  | 18 |           |           |
| 267.1093  | 2  | H  | 17 | 2015.0199 | 1008.0139 |
| 324.1308  | 3  | G  | 16 | 1877.9610 | 939.4844  |
| 471.1992  | 4  | F  | 15 | 1820.9396 | 910.9737  |
| 572.2469  | 5  | T  | 14 | 1673.8711 | 837.4395  |
| 734.4050  | 6  | K  | 13 | 1572.8235 | 786.9156  |
| 863.4476  | 7  | E  | 12 | 1410.6654 | 705.8366  |
| 992.4902  | 8  | E  | 11 | 1281.6228 | 641.3153  |
| 1091.5586 | 9  | V  | 10 | 1152.5802 | 576.7940  |
| 1162.5957 | 10 | A  | 9  | 1053.5118 | 527.2598  |
| 1291.6383 | 11 | E  | 8  | 982.4747  | 491.7412  |
| 1438.7067 | 12 | F  | 7  | 853.4321  | 427.2199  |
| 1566.7653 | 13 | Q  | 6  | 706.3636  | 353.6857  |
| 1637.8024 | 14 | A  | 5  | 578.3051  | 289.6564  |
| 1708.8395 | 15 | A  | 4  | 507.2680  | 254.1379  |
| 1855.9079 | 16 | F  | 3  | 436.2308  | 218.6193  |
| 1969.9509 | 17 | N  | 2  | 289.1624  | 145.0851  |
|           | 18 | R  | 1  | 175.1195  | 88.0637   |

N-term: +43.02    K(6): +162.16

N-term: +43.02 K(9): +156.13

| $b^+$     | #  | AA | #  | $y^+$     | $y^{2+}$ |
|-----------|----|----|----|-----------|----------|
| 130.0504  | 1  | S  | 18 |           |          |
| 267.1093  | 2  | H  | 17 | 1957.0144 | 979.0111 |
| 395.1679  | 3  | Q  | 16 | 1819.9554 | 910.4816 |
| 496.2156  | 4  | T  | 15 | 1691.8969 | 846.4523 |
| 553.2371  | 5  | G  | 14 | 1590.8492 | 795.9285 |
| 666.3211  | 6  | I  | 13 | 1533.8277 | 767.4178 |
| 794.3797  | 7  | Q  | 12 | 1420.7437 | 710.8757 |
| 865.4168  | 8  | A  | 11 | 1292.6851 | 646.8465 |
| 952.4488  | 9  | S  | 10 | 1221.6480 | 611.3279 |
| 1081.4914 | 10 | E  | 9  | 1134.6159 | 567.8119 |
| 1196.5184 | 11 | D  | 8  | 1005.5733 | 503.2906 |
| 1295.5868 | 12 | V  | 7  | 890.5464  | 445.7771 |
| 1451.7131 | 13 | K  | 6  | 791.4780  | 396.2429 |
| 1580.7557 | 14 | E  | 5  | 635.3517  | 318.1798 |
| 1693.8398 | 15 | I  | 4  | 506.3091  | 253.6585 |
| 1840.9082 | 16 | F  | 3  | 393.2250  | 197.1164 |
| 1911.9453 | 17 | A  | 2  | 246.1566  | 123.5822 |
|           | 18 | R  | 1  | 175.1195  | 88.0637  |

X-range:

0 - 0

MassTol: Y-zoom:

0. 1.

MassType:

☐ AVG ☒ MONO

Axis:

☒ 1 ☐ 2

Label:

☒ I ☐ M ☐ -

Ions:

a ☐ + ☐ 2+ ☐ 3+

b ☒ + ☐ 2+ ☐ 3+

c ☐ + ☐ 2+ ☐ 3+

x ☐ + ☐ 2+ ☐ 3+

y ☒ + ☒ 2+ ☐ 3+

z ☐ + ☐ 2+ ☐ 3+

hide H<sub>2</sub>O/NH<sub>3</sub> ☐

zoom 112-122 ☐

GO

SHTILLVQPTKRPEGR, MH+ 1902.0926, m/z 476.2786  
L OS G34 P160811 220811-s1.04116.04116.4.dta

scan 4116; 7.9e+000

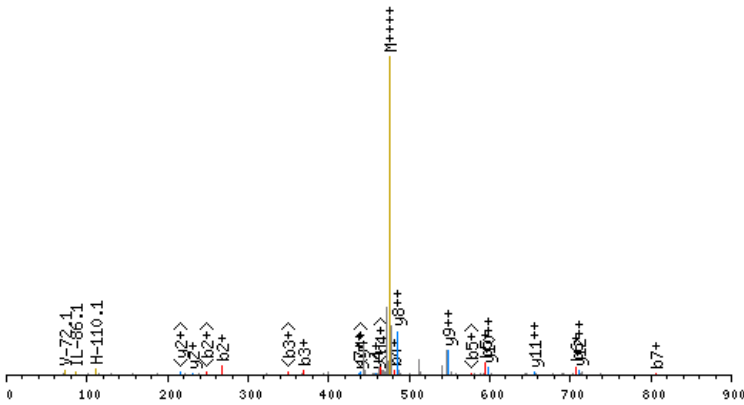

click image to zoom in; click top corners to zoom out

[precursor±]

scan 4115; 476.3 m/z; 5.9e+001

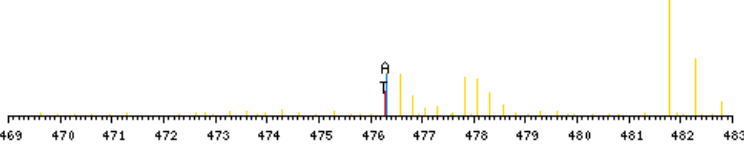

zoomed in precursor plot; T=theoretical m/z, A=acquired m/z

| b <sup>+</sup> | #  | AA | #  | y <sup>+</sup> | y <sup>2+</sup> |
|----------------|----|----|----|----------------|-----------------|
| 130.0504       | 1  | S  | 16 |                |                 |
| 267.1093       | 2  | H  | 15 | 1773.0499      | 887.0289        |
| 368.1570       | 3  | T  | 14 | 1635.9910      | 818.4994        |
| 481.2411       | 4  | I  | 13 | 1534.9434      | 767.9756        |
| 594.3251       | 5  | L  | 12 | 1421.8593      | 711.4336        |
| 707.4092       | 6  | L  | 11 | 1308.7752      | 654.8915        |
| 806.4776       | 7  | V  | 10 | 1195.6912      | 598.3495        |
| 934.5362       | 8  | Q  | 9  | 1096.6228      | 548.8153        |
| 1031.5890      | 9  | P  | 8  | 968.5642       | 484.7860        |
| 1132.6366      | 10 | T  | 7  | 871.5114       | 436.2596        |
| 1288.7629      | 11 | K  | 6  | 770.4637       | 385.7358        |
| 1444.8641      | 12 | R  | 5  | 614.3374       | 307.6726        |
| 1541.9168      | 13 | P  | 4  | 458.2363       | 229.6221        |
| 1670.9594      | 14 | E  | 3  | 361.1836       | 181.0957        |
| 1727.9809      | 15 | G  | 2  | 232.1410       | 116.5744        |
|                | 16 | R  | 1  | 175.1195       | 88.0637         |

N-term:+43.02 K(11):+156.13

X-range:

0-0

MassTol: Y-zoom:

0.1.

MassType:

AVG MONO

Axis:

1 2

Label:

I M -

Ions:

a + 2+ 3+

b + 2+ 3+

c + 2+ 3+

x + 2+ 3+

y + 2+ 3+

z + 2+ 3+

hide H<sub>2</sub>O/NH<sub>3</sub>

zoom 112-122

GO

SIGVPIKVLHEAEGHIVTCETNTGEVYR, MH+ 3178.6207, m/z 795.4106  
L OS G34 P160811 220811-s1.09337.09337.4.dta

scan 9337; 1.8e+000

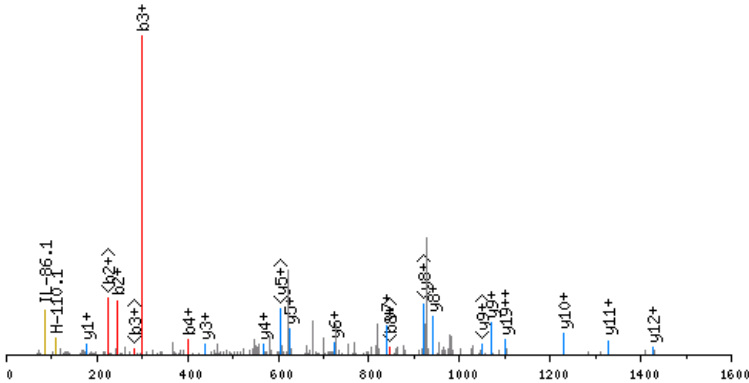

click image to zoom in; click top corners to zoom out [precursor±]

scan 9335; 795.4 m/z; 2.4e+001

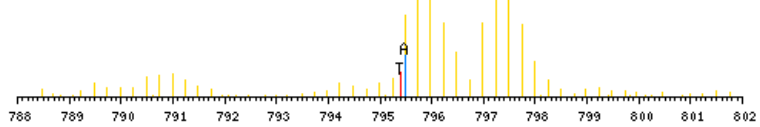

zoomed in precursor plot; T=theoretical m/z, A=acquired m/z

| b <sup>+</sup> | #  | AA | #  | y <sup>+</sup> | y <sup>2+</sup> |
|----------------|----|----|----|----------------|-----------------|
| 130.0504       | 1  | S  | 28 |                |                 |
| 243.1345       | 2  | I  | 27 | 3049.5781      | 1525.2929       |
| 300.1560       | 3  | G  | 26 | 2936.4940      | 1468.7509       |
| 399.2244       | 4  | V  | 25 | 2879.4725      | 1440.2402       |
| 496.2771       | 5  | P  | 24 | 2780.4041      | 1390.7060       |
| 609.3612       | 6  | I  | 23 | 2683.3514      | 1342.1796       |
| 765.4875       | 7  | K  | 22 | 2570.2673      | 1285.6376       |
| 864.5559       | 8  | V  | 21 | 2414.1410      | 1207.5744       |
| 977.6400       | 9  | L  | 20 | 2315.0726      | 1158.0402       |
| 1114.6989      | 10 | H  | 19 | 2201.9885      | 1101.4982       |
| 1243.7415      | 11 | E  | 18 | 2064.9296      | 1032.9687       |
| 1314.7786      | 12 | A  | 17 | 1935.8870      | 968.4474        |
| 1443.8212      | 13 | E  | 16 | 1864.8499      | 932.9289        |
| 1500.8427      | 14 | G  | 15 | 1735.8073      | 868.4076        |
| 1637.9016      | 15 | H  | 14 | 1678.7858      | 839.8968        |
| 1750.9856      | 16 | I  | 13 | 1541.7269      | 771.3674        |
| 1850.0540      | 17 | V  | 12 | 1428.6429      | 714.8253        |
| 1951.1017      | 18 | T  | 11 | 1329.5745      | 665.2911        |
| 2111.1323      | 19 | C  | 10 | 1228.5268      | 614.7673        |
| 2240.1749      | 20 | E  | 9  | 1068.4962      | 534.7520        |
| 2341.2226      | 21 | T  | 8  | 939.4536       | 470.2307        |
| 2455.2655      | 22 | N  | 7  | 838.4059       | 419.7069        |
| 2556.3132      | 23 | T  | 6  | 724.3630       | 362.6854        |
| 2613.3347      | 24 | G  | 5  | 623.3153       | 312.1616        |
| 2742.3773      | 25 | E  | 4  | 566.2938       | 283.6508        |
| 2841.4457      | 26 | V  | 3  | 437.2512       | 219.1295        |
| 3004.5090      | 27 | Y  | 2  | 338.1828       | 169.5953        |
|                | 28 | R  | 1  | 175.1195       | 88.0637         |

N-term:+43.02 K(7):+156.13  
C(19):+160.03

N-term: +43.02

N-term:+43.02 C (17) :+160.03

X-range:

0 - 0

MassTol: Y-zoom:

0. 1.

MassType:

☐ AVG ☒ MONO

Axis:

☒ 1 ☐ 2

Label:

☒ I ☐ M ☐ -

Ions:

a ☐ + ☐ 2+ ☐ 3+

b ☒ + ☐ 2+ ☐ 3+

c ☐ + ☐ 2+ ☐ 3+

x ☐ + ☐ 2+ ☐ 3+

y ☒ + ☒ 2+ ☐ 3+

z ☐ + ☐ 2+ ☐ 3+

hide H<sub>2</sub>O/NH<sub>3</sub> ☐

zoom 112-122 ☐

GO

SISSLGSIGKGR, MH+ 1237.7329, m/z 619.3701  
L OS G31 P160811 220811-s1.05618.05618.2.dta

scan 5618; 1.8e+001

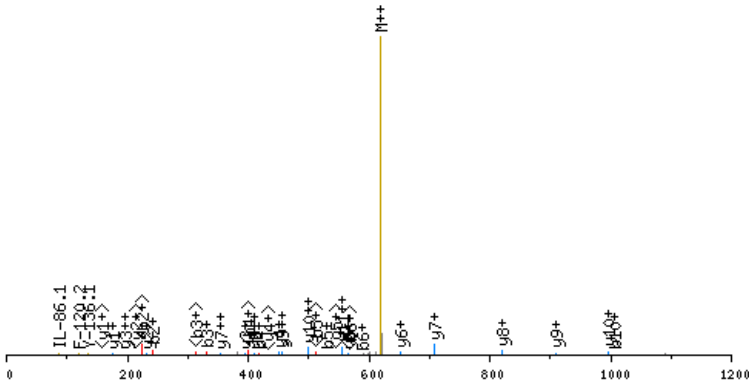

click image to zoom in; click top corners to zoom out

[precursor±]

scan 5614; 619.4 m/z; 2.7e+001

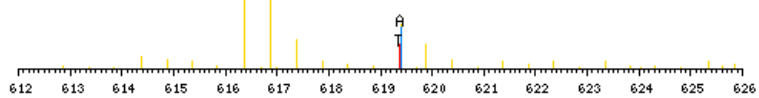

zoomed in precursor plot; T=theoretical m/z, A=acquired m/z

| b <sup>+</sup> | #  | AA | #  | y <sup>+</sup> | y <sup>2+</sup> |
|----------------|----|----|----|----------------|-----------------|
| 130.0504       | 1  | S  | 12 |                |                 |
| 243.1345       | 2  | I  | 11 | 1108.6903      | 554.8490        |
| 330.1665       | 3  | S  | 10 | 995.6062       | 498.3070        |
| 417.1985       | 4  | S  | 9  | 908.5742       | 454.7910        |
| 530.2826       | 5  | L  | 8  | 821.5421       | 411.2750        |
| 587.3041       | 6  | G  | 7  | 708.4581       | 354.7330        |
| 674.3361       | 7  | S  | 6  | 651.4366       | 326.2222        |
| 787.4202       | 8  | I  | 5  | 564.4046       | 282.7062        |
| 844.4416       | 9  | G  | 4  | 451.3205       | 226.1642        |
| 1006.5997      | 10 | K  | 3  | 394.2991       | 197.6534        |
| 1063.6212      | 11 | G  | 2  | 232.1410       | 116.5744        |
|                | 12 | R  | 1  | 175.1195       | 88.0637         |

N-term:+43.02 K(10):+162.16

X-range:

0 - 0

MassTol: Y-zoom:

0. 1.

MassType:

☐AVG ☒MONO

Axis:

☒1 ☐2

Label:

☒I ☐M ☐-

Ions:

a ☐+ ☐2+ ☐3+

b ☒+ ☐2+ ☐3+

c ☐+ ☐2+ ☐3+

x ☐+ ☐2+ ☐3+

y ☒+ ☒2+ ☐3+

z ☐+ ☐2+ ☐3+

hide H<sub>2</sub>O/NH<sub>3</sub> ☐

zoom 112-122 ☐

GO

SKQQPTQFINPETPGYVGFANLPNQVHR, MH+ 3243.6764, m/z 811.6745  
L\_OS\_G32\_P160811\_220811-s1.05966.05966.4.dta

scan 5966; 1.8e+000

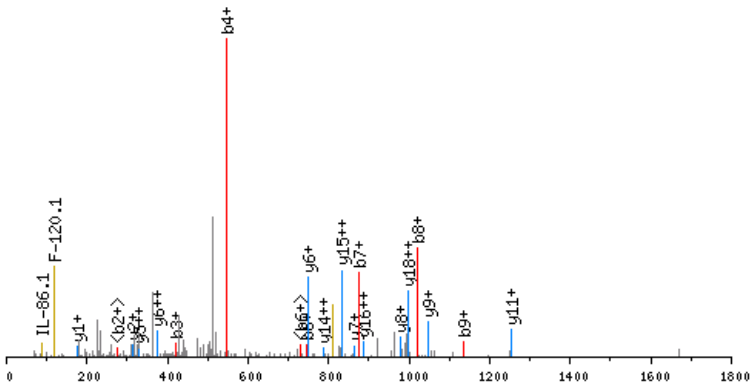

click image to zoom in; click top corners to zoom out

[precursor±]

scan 5963; 811.7 m/z; 9.0e+000

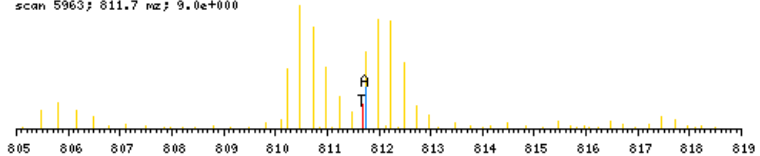

zoomed in precursor plot; T=theoretical m/z, A=acquired m/z

| b <sup>+</sup> | #  | AA | #  | y <sup>+</sup> | y <sup>2+</sup> |
|----------------|----|----|----|----------------|-----------------|
| 130.0504       | 1  | S  | 28 |                |                 |
| 292.2085       | 2  | K  | 27 | 3114.6338      | 1557.8208       |
| 420.2671       | 3  | Q  | 26 | 2952.4757      | 1476.7417       |
| 548.3257       | 4  | Q  | 25 | 2824.4171      | 1412.7125       |
| 645.3784       | 5  | P  | 24 | 2696.3585      | 1348.6832       |
| 746.4261       | 6  | T  | 23 | 2599.3057      | 1300.1568       |
| 874.4847       | 7  | Q  | 22 | 2498.2581      | 1249.6329       |
| 1021.5531      | 8  | F  | 21 | 2370.1995      | 1185.6037       |
| 1134.6372      | 9  | I  | 20 | 2223.1311      | 1112.0695       |
| 1248.6801      | 10 | N  | 19 | 2110.0470      | 1055.5274       |
| 1345.7329      | 11 | P  | 18 | 1996.0041      | 998.5060        |
| 1474.7755      | 12 | E  | 17 | 1898.9513      | 949.9796        |
| 1575.8231      | 13 | T  | 16 | 1769.9087      | 885.4583        |
| 1672.8759      | 14 | P  | 15 | 1668.8610      | 834.9344        |
| 1729.8974      | 15 | G  | 14 | 1571.8083      | 786.4081        |
| 1892.9607      | 16 | Y  | 13 | 1514.7868      | 757.8973        |
| 1992.0291      | 17 | V  | 12 | 1351.7235      | 676.3657        |
| 2049.0506      | 18 | G  | 11 | 1252.6551      | 626.8315        |
| 2196.1190      | 19 | F  | 10 | 1195.6336      | 598.3207        |
| 2267.1561      | 20 | A  | 9  | 1048.5652      | 524.7865        |
| 2381.1990      | 21 | N  | 8  | 977.5281       | 489.2680        |
| 2494.2831      | 22 | L  | 7  | 863.4852       | 432.2465        |
| 2591.3359      | 23 | P  | 6  | 750.4011       | 375.7045        |
| 2705.3788      | 24 | N  | 5  | 653.3483       | 327.1781        |
| 2833.4374      | 25 | Q  | 4  | 539.3054       | 270.1566        |
| 2932.5058      | 26 | V  | 3  | 411.2468       | 206.1273        |
| 3069.5647      | 27 | H  | 2  | 312.1784       | 156.5931        |
|                | 28 | R  | 1  | 175.1195       | 88.0637         |

N-term:+43.02 K(2):+162.16

X-range:

0 - 0

MassTol: Y-zoom:

0. 1.

MassType:

☐ AVG ☒ MONO

Axis:

☒ 1 ☐ 2

Label:

☒ I ☐ M ☐ -

Ions:

a ☐ + ☐ 2+ ☐ 3+

b ☒ + ☐ 2+ ☐ 3+

c ☐ + ☐ 2+ ☐ 3+

x ☐ + ☐ 2+ ☐ 3+

y ☒ + ☒ 2+ ☐ 3+

z ☐ + ☐ 2+ ☐ 3+

hide H<sub>2</sub>O/NH<sub>3</sub> ☐

zoom 112-122 ☐

GO

SKSESPKEPEQLR, MH+ 1624.9183, m/z 542.3110  
L OS G33 P160811 220811-s1.02193.02193.3.dta

scan 2193; 5.4e+001

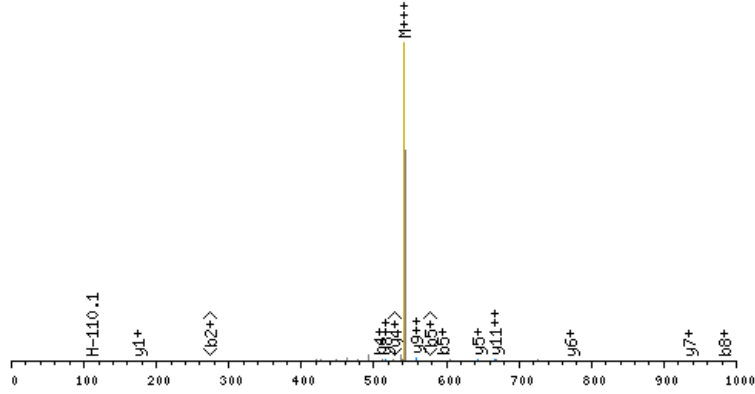

click image to zoom in; click top corners to zoom out [\[precursor±\]](#)

scan 2192; 542.3 m/z; 8.8e+000

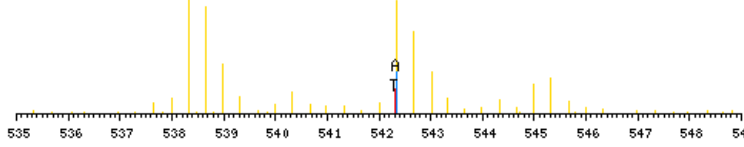

zoomed in precursor plot; T=theoretical m/z, A=acquired m/z

| b <sup>+</sup> | #  | AA | #  | y <sup>+</sup> | y <sup>2+</sup> |
|----------------|----|----|----|----------------|-----------------|
| 130.0504       | 1  | S  | 13 |                |                 |
| 292.2085       | 2  | K  | 12 | 1495.8757      | 748.4418        |
| 379.2406       | 3  | S  | 11 | 1333.7176      | 667.3627        |
| 508.2832       | 4  | E  | 10 | 1246.6856      | 623.8467        |
| 595.3152       | 5  | S  | 9  | 1117.6430      | 559.3254        |
| 692.3679       | 6  | P  | 8  | 1030.6110      | 515.8094        |
| 854.5260       | 7  | K  | 7  | 933.5582       | 467.2830        |
| 983.5686       | 8  | E  | 6  | 771.4001       | 386.2040        |
| 1080.6214      | 9  | P  | 5  | 642.3575       | 321.6827        |
| 1209.6640      | 10 | E  | 4  | 545.3047       | 273.1563        |
| 1337.7226      | 11 | Q  | 3  | 416.2621       | 208.6350        |
| 1450.8066      | 12 | L  | 2  | 288.2036       | 144.6057        |
|                | 13 | R  | 1  | 175.1195       | 88.0637         |

N-term:+43.02 K(2):+162.16  
K(7):+162.16

X-range:

0 - 0

MassTol: Y-zoom:

0. 1.

MassType:

☐ AVG ☒ MONO

Axis:

☒ 1 ☐ 2

Label:

☒ I ☐ M ☐ -

Ions:

a ☐ + ☐ 2+ ☐ 3+

b ☒ + ☐ 2+ ☐ 3+

c ☐ + ☐ 2+ ☐ 3+

x ☐ + ☐ 2+ ☐ 3+

y ☒ + ☒ 2+ ☐ 3+

z ☐ + ☐ 2+ ☐ 3+

hide H<sub>2</sub>O/NH<sub>3</sub> ☐

zoom 112-122 ☐

GO

SKSFQQSSLGR, MH+ 1300.7074, m/z 650.8573  
L OS G31 P160811 220811-s1.03051.03051.2.dta

scan 3051; 5.4e+001

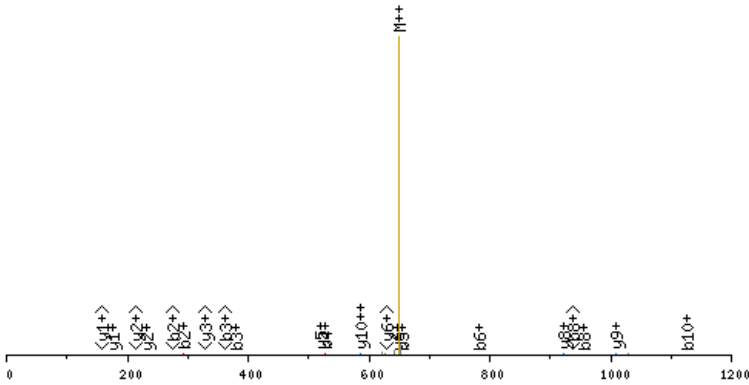

click image to zoom in; click top corners to zoom out

[precursor±]

scan 3049; 650.9 m/z; 5.2e+001

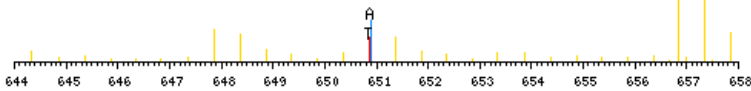

zoomed in precursor plot; T=theoretical m/z, A=acquired m/z

| b <sup>+</sup> | #  | AA | #  | y <sup>+</sup> | y <sup>2+</sup> |
|----------------|----|----|----|----------------|-----------------|
| 130.0504       | 1  | S  | 11 |                |                 |
| 292.2085       | 2  | K  | 10 | 1171.6648      | 586.3363        |
| 379.2406       | 3  | S  | 9  | 1009.5067      | 505.2573        |
| 526.3090       | 4  | F  | 8  | 922.4747       | 461.7412        |
| 654.3675       | 5  | Q  | 7  | 775.4062       | 388.2070        |
| 782.4261       | 6  | Q  | 6  | 647.3477       | 324.1777        |
| 869.4582       | 7  | S  | 5  | 519.2891       | 260.1485        |
| 956.4902       | 8  | S  | 4  | 432.2571       | 216.6324        |
| 1069.5742      | 9  | L  | 3  | 345.2250       | 173.1164        |
| 1126.5957      | 10 | G  | 2  | 232.1410       | 116.5744        |
|                | 11 | R  | 1  | 175.1195       | 88.0637         |

N-term:+43.02 K(2):+162.16

X-range:

0 - 0

MassTol: Y-zoom:

0. 1.

MassType:

☐AVG ☒MONO

Axis:

☒1 ☐2

Label:

☒I ☐M ☐-

Ions:

a ☐+ ☐2+ ☐3+

b ☒+ ☐2+ ☐3+

c ☐+ ☐2+ ☐3+

x ☐+ ☐2+ ☐3+

y ☒+ ☒2+ ☐3+

z ☐+ ☐2+ ☐3+

hide H<sub>2</sub>O/NH<sub>3</sub> ☐

zoom 112-122 ☐

GO

SLHQFLLLEPITCHAWNRR, MH+ 2164.0762, m/z 722.0302  
L OS G33 P160811 220811-s1.07375.07375.3.dta

scan 7375; 2.2e+000

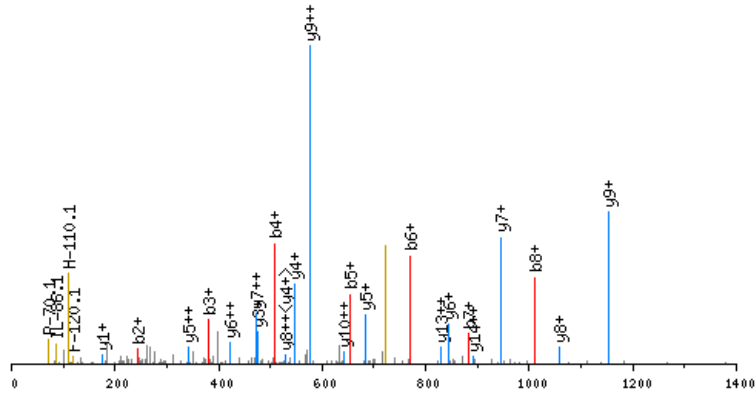

click image to zoom in; click top corners to zoom out [\[precursor±\]](#)

scan 7372; 722.0 m/z; 4.0e+001

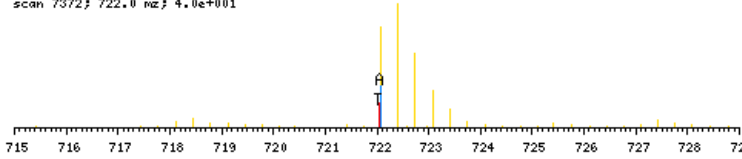

zoomed in precursor plot; T=theoretical m/z, A=acquired m/z

| b <sup>+</sup> | #  | AA | #  | y <sup>+</sup> | y <sup>2+</sup> |
|----------------|----|----|----|----------------|-----------------|
| 130.0504       | 1  | S  | 17 |                |                 |
| 243.1345       | 2  | L  | 16 | 2035.0336      | 1018.0207       |
| 380.1934       | 3  | H  | 15 | 1921.9495      | 961.4787        |
| 508.2520       | 4  | Q  | 14 | 1784.8906      | 892.9492        |
| 655.3204       | 5  | F  | 13 | 1656.8320      | 828.9199        |
| 768.4045       | 6  | L  | 12 | 1509.7636      | 755.3857        |
| 881.4885       | 7  | L  | 11 | 1396.6795      | 698.8437        |
| 1010.5311      | 8  | E  | 10 | 1283.5955      | 642.3016        |
| 1107.5839      | 9  | P  | 9  | 1154.5529      | 577.7803        |
| 1220.6679      | 10 | I  | 8  | 1057.5001      | 529.2540        |
| 1321.7156      | 11 | T  | 7  | 944.4160       | 472.7119        |
| 1481.7462      | 12 | C  | 6  | 843.3684       | 422.1881        |
| 1618.8051      | 13 | H  | 5  | 683.3378       | 342.1728        |
| 1689.8422      | 14 | A  | 4  | 546.2789       | 273.6433        |
| 1875.9216      | 15 | W  | 3  | 475.2417       | 238.1248        |
| 1989.9645      | 16 | N  | 2  | 289.1624       | 145.0851        |
|                | 17 | R  | 1  | 175.1195       | 88.0637         |

N-term:+43.02 C(12):+160.03

X-range:

0 - 0

MassTol: Y-zoom:

0. 1.

MassType:

☐AVG ☒MONO

Axis:

☒1 ☐2

Label:

☒I ☐M ☐-

Ions:

a ☐+ ☐2+ ☐3+

b ☒+ ☐2+ ☐3+

c ☐+ ☐2+ ☐3+

x ☐+ ☐2+ ☐3+

y ☒+ ☒2+ ☐3+

z ☐+ ☐2+ ☐3+

hide H<sub>2</sub>O/NH<sub>3</sub> ☐

zoom 112-122 ☐

GO

SLICSISNEVPEHPCVSPVSNHVVYER, MH+ 3051.4303, m/z 763.6130  
L\_OS\_G32\_P160811\_220811-s1.06075.06075.4.dta

scan 6075; 1.6e+000

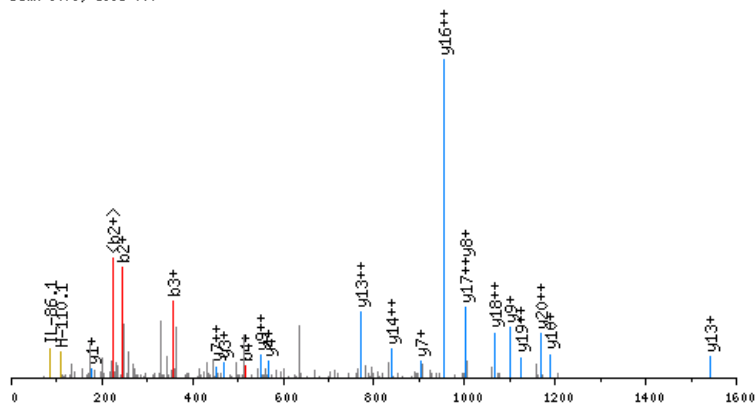

click image to zoom in; click top corners to zoom out [\[precursor±\]](#)

scan 6073; 763.6 mz; 7.1e+000

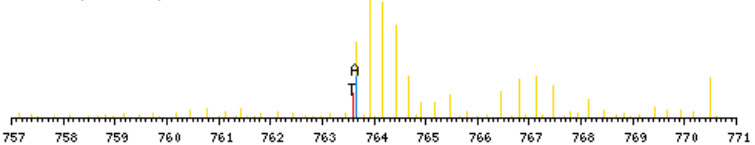

zoomed in precursor plot; T=theoretical m/z, A=acquired m/z

| b <sup>+</sup> | #  | AA | #  | y <sup>+</sup> | y <sup>2+</sup> |
|----------------|----|----|----|----------------|-----------------|
| 130.0504       | 1  | S  | 26 |                |                 |
| 243.1345       | 2  | L  | 25 | 2922.3877      | 1461.6978       |
| 356.2186       | 3  | I  | 24 | 2809.3037      | 1405.1558       |
| 516.2492       | 4  | C  | 23 | 2696.2196      | 1348.6137       |
| 603.2812       | 5  | S  | 22 | 2536.1890      | 1268.5984       |
| 716.3652       | 6  | I  | 21 | 2449.1570      | 1225.0824       |
| 803.3973       | 7  | S  | 20 | 2336.0729      | 1168.5404       |
| 917.4402       | 8  | N  | 19 | 2249.0409      | 1125.0244       |
| 1046.4828      | 9  | E  | 18 | 2134.9980      | 1068.0029       |
| 1145.5512      | 10 | V  | 17 | 2005.9554      | 1003.4816       |
| 1242.6040      | 11 | P  | 16 | 1906.8870      | 953.9474        |
| 1371.6466      | 12 | E  | 15 | 1809.8342      | 905.4210        |
| 1508.7055      | 13 | H  | 14 | 1680.7916      | 840.8997        |
| 1605.7582      | 14 | P  | 13 | 1543.7327      | 772.3703        |
| 1765.7888      | 15 | C  | 12 | 1446.6799      | 723.8439        |
| 1864.8573      | 16 | V  | 11 | 1286.6493      | 643.8286        |
| 1951.8893      | 17 | S  | 10 | 1187.5809      | 594.2944        |
| 2048.9421      | 18 | P  | 9  | 1100.5489      | 550.7784        |
| 2148.0105      | 19 | V  | 8  | 1003.4961      | 502.2520        |
| 2235.0425      | 20 | S  | 7  | 904.4277       | 452.7178        |
| 2349.0854      | 21 | N  | 6  | 817.3957       | 409.2018        |
| 2486.1443      | 22 | H  | 5  | 703.3527       | 352.1803        |
| 2585.2127      | 23 | V  | 4  | 566.2938       | 283.6508        |
| 2748.2761      | 24 | Y  | 3  | 467.2254       | 234.1166        |
| 2877.3187      | 25 | E  | 2  | 304.1621       | 152.5850        |
|                | 26 | R  | 1  | 175.1195       | 88.0637         |

N-term:+43.02 C(4):+160.03  
C(15):+160.03

X-range:

0 - 0

MassTol: Y-zoom:

0. 1.

MassType:

☐AVG ☒MONO

Axis:

☒1 ☐2

Label:

☒I ☐M ☐-

Ions:

a ☐+ ☐2+ ☐3+

b ☒+ ☐2+ ☐3+

c ☐+ ☐2+ ☐3+

x ☐+ ☐2+ ☐3+

y ☒+ ☒2+ ☐3+

z ☐+ ☐2+ ☐3+

hide H<sub>2</sub>O/NH<sub>3</sub> ☐

zoom 112-122 ☐

GO

SLKPQPQPAPATGR, MH+ 1614.8968, m/z 538.9705  
L OS G30 P160811 220811-s1.02795.02795.3.dta

scan 2795; 2.4e+000

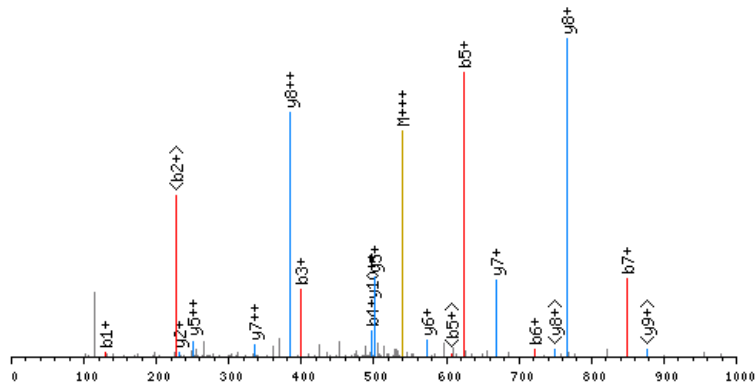

click image to zoom in; click top corners to zoom out

[precursor±]

scan 2794; 539.0 m/z; 6.1e+000

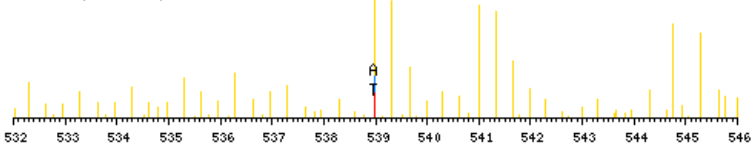

zoomed in precursor plot; T=theoretical m/z, A=acquired m/z

| b <sup>+</sup> | #  | AA | #  | y <sup>+</sup> | y <sup>2+</sup> |
|----------------|----|----|----|----------------|-----------------|
| 130.0504       | 1  | S  | 15 |                |                 |
| 243.1345       | 2  | L  | 14 | 1485.8542      | 743.4310        |
| 399.2608       | 3  | K  | 13 | 1372.7701      | 686.8890        |
| 496.3136       | 4  | P  | 12 | 1216.6438      | 608.8258        |
| 624.3721       | 5  | Q  | 11 | 1119.5911      | 560.2995        |
| 721.4249       | 6  | P  | 10 | 991.5325       | 496.2702        |
| 849.4835       | 7  | Q  | 9  | 894.4797       | 447.7438        |
| 946.5362       | 8  | P  | 8  | 766.4212       | 383.7145        |
| 1043.5890      | 9  | P  | 7  | 669.3684       | 335.1881        |
| 1114.6261      | 10 | A  | 6  | 572.3156       | 286.6617        |
| 1211.6789      | 11 | P  | 5  | 501.2785       | 251.1432        |
| 1282.7160      | 12 | A  | 4  | 404.2258       | 202.6168        |
| 1383.7637      | 13 | T  | 3  | 333.1886       | 167.0982        |
| 1440.7851      | 14 | G  | 2  | 232.1410       | 116.5744        |
|                | 15 | R  | 1  | 175.1195       | 88.0637         |

N-term:+43.02 K(3):+156.13

```

N-term:+43.02 K(5):+156.13
K(10):+156.13 K(14):+156.13
      K(16):+156.13

```

X-range:

0 - 0

MassTol: Y-zoom:

0. 1.

MassType:

☐ AVG ☒ MONO

Axis:

☒ 1 ☐ 2

Label:

☒ I ☐ M ☐ -

Ions:

a ☐ + ☐ 2+ ☐ 3+

b ☒ + ☐ 2+ ☐ 3+

c ☐ + ☐ 2+ ☐ 3+

x ☐ + ☐ 2+ ☐ 3+

y ☒ + ☒ 2+ ☐ 3+

z ☐ + ☐ 2+ ☐ 3+

hide H<sub>2</sub>O/NH<sub>3</sub> ☐

zoom 112-122 ☐

GO

SLVAVPFYQKR, MH+ 1377.7895, m/z 689.3984  
L OS G31 P160811 220811-s1.07482.07482.2.dta

scan 7482; 3.1e+000

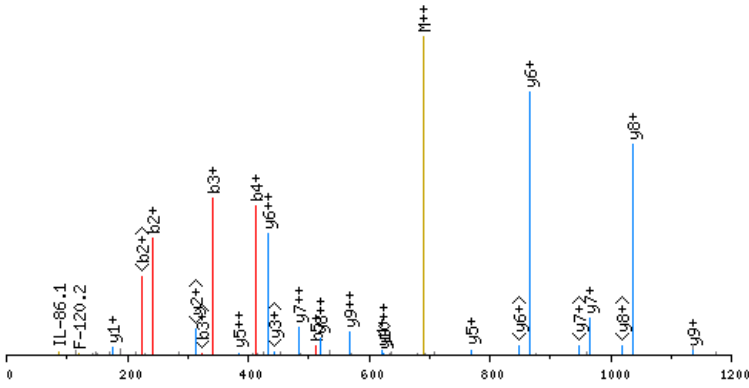

click image to zoom in; click top corners to zoom out [precursor±]

scan 7479; 689.4 m/z; 1.0e+001

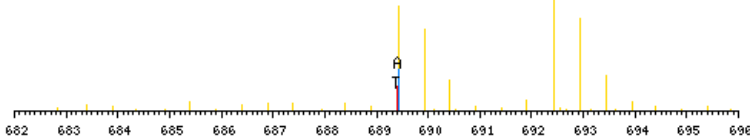

zoomed in precursor plot; T=theoretical m/z, A=acquired m/z

| b <sup>+</sup> | #  | AA | #  | y <sup>+</sup> | y <sup>2+</sup> |
|----------------|----|----|----|----------------|-----------------|
| 130.0504       | 1  | S  | 11 |                |                 |
| 243.1345       | 2  | L  | 10 | 1248.7469      | 624.8774        |
| 342.2029       | 3  | V  | 9  | 1135.6628      | 568.3353        |
| 413.2400       | 4  | A  | 8  | 1036.5944      | 518.8011        |
| 512.3084       | 5  | V  | 7  | 965.5573       | 483.2826        |
| 609.3612       | 6  | P  | 6  | 866.4889       | 433.7484        |
| 756.4296       | 7  | F  | 5  | 769.4361       | 385.2220        |
| 919.4929       | 8  | Y  | 4  | 622.3677       | 311.6878        |
| 1047.5515      | 9  | Q  | 3  | 459.3044       | 230.1561        |
| 1203.6778      | 10 | K  | 2  | 331.2458       | 166.1268        |
|                | 11 | R  | 1  | 175.1195       | 88.0637         |

N-term:+43.02 K(10):+156.13

X-range:

0 - 0

MassTol: Y-zoom:

0. 1.

MassType:

☐ AVG ☒ MONO

Axis:

☒ 1 ☐ 2

Label:

☒ I ☐ M ☐ -

Ions:

a ☐ + ☐ 2+ ☐ 3+

b ☒ + ☐ 2+ ☐ 3+

c ☐ + ☐ 2+ ☐ 3+

x ☐ + ☐ 2+ ☐ 3+

y ☒ + ☒ 2+ ☐ 3+

z ☐ + ☐ 2+ ☐ 3+

hide H<sub>2</sub>O/NH<sub>3</sub> ☐

zoom 112-122 ☐

GO

SLVDLGKKLLEAAR, MH+ 1623.0482, m/z 541.6876  
L OS G33 P160811 220811-s1.07557.07557.3.dta

scan 7557; 6.3e+001

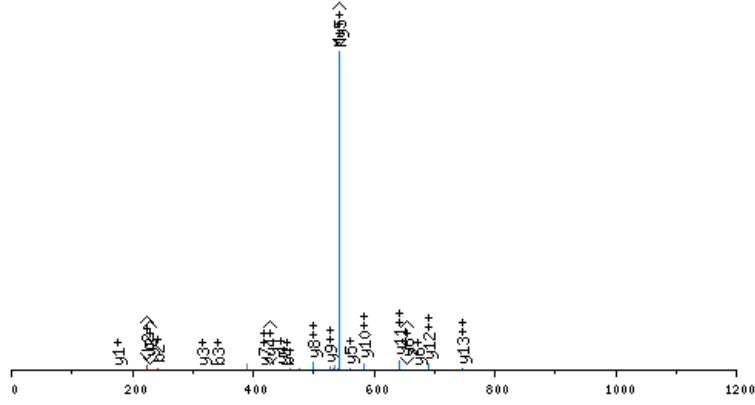

click image to zoom in; click top corners to zoom out

[precursor±]

scan 7556; 541.7 m/z; 3.7e+001

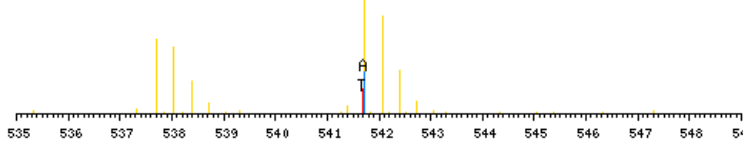

zoomed in precursor plot; T=theoretical m/z, A=acquired m/z

| b <sup>+</sup> | #  | AA | #  | y <sup>+</sup> | y <sup>2+</sup> |
|----------------|----|----|----|----------------|-----------------|
| 130.0504       | 1  | S  | 14 |                |                 |
| 243.1345       | 2  | L  | 13 | 1494.0056      | 747.5067        |
| 342.2029       | 3  | V  | 12 | 1380.9215      | 690.9647        |
| 457.2298       | 4  | D  | 11 | 1281.8531      | 641.4305        |
| 570.3139       | 5  | L  | 10 | 1166.8262      | 583.9170        |
| 627.3354       | 6  | G  | 9  | 1053.7421      | 527.3750        |
| 789.4935       | 7  | K  | 8  | 996.7206       | 498.8642        |
| 951.6516       | 8  | K  | 7  | 834.5625       | 417.7852        |
| 1064.7356      | 9  | L  | 6  | 672.4044       | 336.7061        |
| 1177.8197      | 10 | L  | 5  | 559.3204       | 280.1641        |
| 1306.8623      | 11 | E  | 4  | 446.2363       | 223.6221        |
| 1377.8994      | 12 | A  | 3  | 317.1937       | 159.1008        |
| 1448.9365      | 13 | A  | 2  | 246.1566       | 123.5822        |
|                | 14 | R  | 1  | 175.1195       | 88.0637         |

N-term:+43.02 K(7):+162.16  
K(8):+162.16

X-range:  

0-0

MassTol: Y-zoom:  

0.1.

MassType:  

☐AVG☒MONO

Axis:  

☒1☐2

Label:  

☒I☐M☐-

Ions:  

a☐+☐2+☐3+

b☒+☐2+☐3+

c☐+☐2+☐3+

x☐+☐2+☐3+

y☒+☒2+☐3+

z☐+☐2+☐3+

hide H<sub>2</sub>O/NH<sub>3</sub>☐

zoom 112-122☐

GO

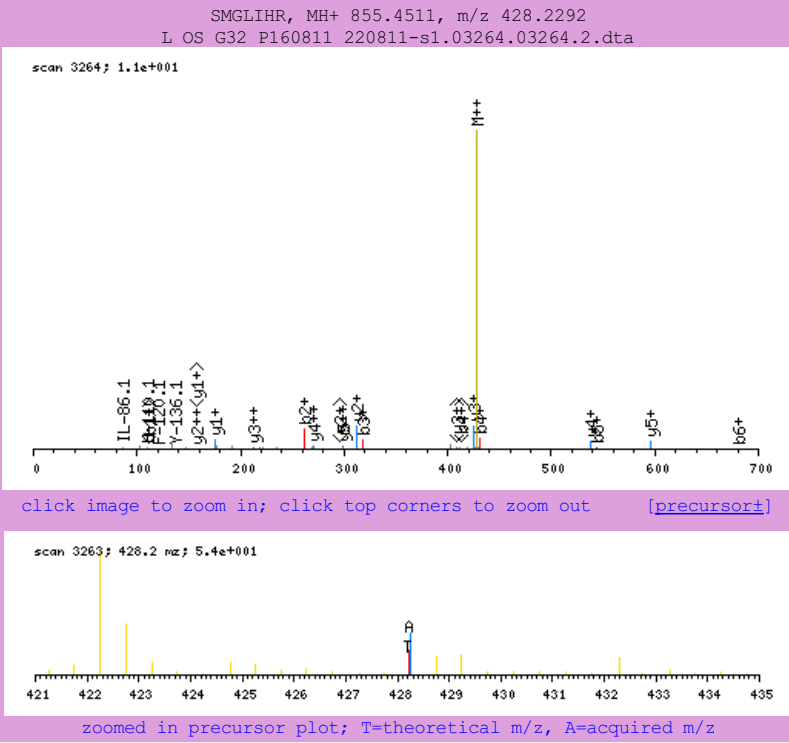

| b <sup>+</sup> | # | AA | # | y <sup>+</sup> | y <sup>2+</sup> |
|----------------|---|----|---|----------------|-----------------|
| 130.0504       | 1 | S  | 7 |                |                 |
| 261.0909       | 2 | M  | 6 | 726.4085       | 363.7082        |
| 318.1124       | 3 | G  | 5 | 595.3680       | 298.1879        |
| 431.1964       | 4 | L  | 4 | 538.3465       | 269.6772        |
| 544.2805       | 5 | I  | 3 | 425.2625       | 213.1352        |
| 681.3394       | 6 | H  | 2 | 312.1784       | 156.5931        |
|                | 7 | R  | 1 | 175.1195       | 88.0637         |

N-term:+43.02

N-term:+43.02

X-range:

0 - 0

MassTol: Y-zoom:

0. 1.

MassType:

☐ AVG ☒ MONO

Axis:

☒ 1 ☐ 2

Label:

☒ I ☐ M ☐ -

Ions:

a ☐ + ☐ 2+ ☐ 3+

b ☒ + ☐ 2+ ☐ 3+

c ☐ + ☐ 2+ ☐ 3+

x ☐ + ☐ 2+ ☐ 3+

y ☒ + ☒ 2+ ☐ 3+

z ☐ + ☐ 2+ ☐ 3+

hide H<sub>2</sub>O/NH<sub>3</sub> ☐

zoom 112-122 ☐

GO

SMNKGPTLLDGDLPQENVLQR, MH+ 2530.3036, m/z 844.1060  
L OS G30 P160811 220811-s1.06778.06778.3.dta

scan 6778; 3.4e+000

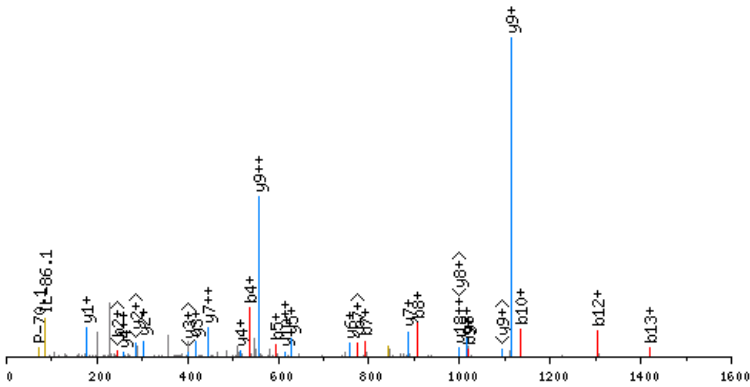

click image to zoom in; click top corners to zoom out [precursor±]

scan 6774; 844.1 m/z; 1.7e+001

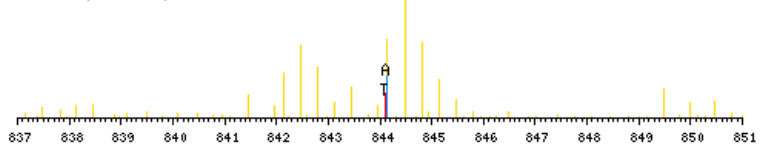

zoomed in precursor plot; T=theoretical m/z, A=acquired m/z

| b <sup>+</sup> | #  | AA | #  | y <sup>+</sup> | y <sup>2+</sup> |
|----------------|----|----|----|----------------|-----------------|
| 130.0504       | 1  | S  | 22 |                |                 |
| 261.0909       | 2  | M  | 21 | 2401.2610      | 1201.1344       |
| 375.1338       | 3  | N  | 20 | 2270.2205      | 1135.6142       |
| 537.2919       | 4  | K  | 19 | 2156.1776      | 1078.5927       |
| 594.3134       | 5  | G  | 18 | 1994.0195      | 997.5136        |
| 691.3662       | 6  | P  | 17 | 1936.9980      | 969.0029        |
| 792.4138       | 7  | T  | 16 | 1839.9452      | 920.4765        |
| 905.4979       | 8  | L  | 15 | 1738.8976      | 869.9527        |
| 1018.5820      | 9  | L  | 14 | 1625.8135      | 813.4107        |
| 1133.6089      | 10 | D  | 13 | 1512.7294      | 756.8686        |
| 1190.6304      | 11 | G  | 12 | 1397.7025      | 699.3552        |
| 1305.6573      | 12 | D  | 11 | 1340.6810      | 670.8444        |
| 1418.7414      | 13 | L  | 10 | 1225.6541      | 613.3310        |
| 1515.7942      | 14 | P  | 9  | 1112.5700      | 556.7889        |
| 1644.8367      | 15 | E  | 8  | 1015.5172      | 508.2625        |
| 1772.8953      | 16 | Q  | 7  | 886.4747       | 443.7412        |
| 1901.9379      | 17 | E  | 6  | 758.4161       | 379.7120        |
| 2015.9808      | 18 | N  | 5  | 629.3735       | 315.1907        |
| 2115.0493      | 19 | V  | 4  | 515.3306       | 258.1692        |
| 2228.1333      | 20 | L  | 3  | 416.2621       | 208.6350        |
| 2356.1919      | 21 | Q  | 2  | 303.1781       | 152.0930        |
|                | 22 | R  | 1  | 175.1195       | 88.0637         |

N-term:+43.02 K(4):+162.16

X-range:

0 - 0

MassTol: Y-zoom:

0. 1.

MassType:

☐ AVG ☒ MONO

Axis:

☒ 1 ☐ 2

Label:

☒ I ☐ M ☐ -

Ions:

a ☐ + ☐ 2+ ☐ 3+

b ☒ + ☐ 2+ ☐ 3+

c ☐ + ☐ 2+ ☐ 3+

x ☐ + ☐ 2+ ☐ 3+

y ☒ + ☒ 2+ ☐ 3+

z ☐ + ☐ 2+ ☐ 3+

hide H<sub>2</sub>O/NH<sub>3</sub> ☐

zoom 112-122 ☐

GO

SNGYEDHMAEDCRDDIGR, MH+ 2181.8565, m/z 727.9570  
L OS G33 P160811 220811-s1.03339.03339.3.dta

scan 3339; 3.0e+000

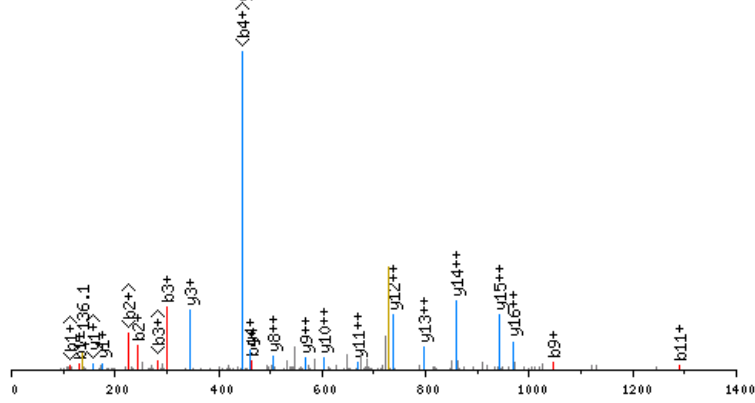

click image to zoom in; click top corners to zoom out

[precursor±]

scan 3337; 728.0 m/z; 1.4e+001

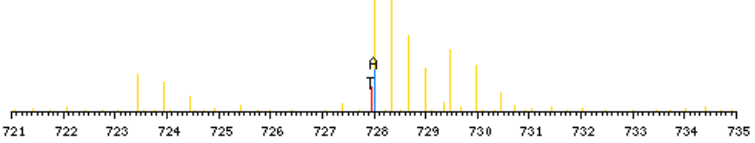

zoomed in precursor plot; T=theoretical m/z, A=acquired m/z

| b <sup>+</sup> | #  | AA | #  | y <sup>+</sup> | y <sup>2+</sup> |
|----------------|----|----|----|----------------|-----------------|
| 130.0504       | 1  | S  | 18 |                |                 |
| 244.0934       | 2  | N  | 17 | 2052.8139      | 1026.9109       |
| 301.1148       | 3  | G  | 16 | 1938.7710      | 969.8894        |
| 464.1781       | 4  | Y  | 15 | 1881.7495      | 941.3787        |
| 593.2207       | 5  | E  | 14 | 1718.6862      | 859.8470        |
| 708.2477       | 6  | D  | 13 | 1589.6436      | 795.3257        |
| 845.3066       | 7  | H  | 12 | 1474.6167      | 737.8122        |
| 976.3471       | 8  | M  | 11 | 1337.5578      | 669.2828        |
| 1047.3842      | 9  | A  | 10 | 1206.5173      | 603.7626        |
| 1176.4268      | 10 | E  | 9  | 1135.4802      | 568.2440        |
| 1291.4537      | 11 | D  | 8  | 1006.4376      | 503.7227        |
| 1451.4843      | 12 | C  | 7  | 891.4106       | 446.2092        |
| 1607.5854      | 13 | R  | 6  | 731.3800       | 366.1939        |
| 1722.6124      | 14 | D  | 5  | 575.2789       | 288.1434        |
| 1837.6393      | 15 | D  | 4  | 460.2520       | 230.6299        |
| 1950.7234      | 16 | I  | 3  | 345.2250       | 173.1164        |
| 2007.7449      | 17 | G  | 2  | 232.1410       | 116.5744        |
|                | 18 | R  | 1  | 175.1195       | 88.0637         |

N-term:+43.02 C(12) :+160.03

X-range:

0 - 0

MassTol: Y-zoom:

0. 1.

MassType:

☐AVG ☒MONO

Axis:

☒1 ☐2

Label:

☒I ☐M ☐-

Ions:

a ☐+ ☐2+ ☐3+

b ☒+ ☐2+ ☐3+

c ☐+ ☐2+ ☐3+

x ☐+ ☐2+ ☐3+

y ☒+ ☒2+ ☐3+

z ☐+ ☐2+ ☐3+

hide H<sub>2</sub>O/NH<sub>3</sub> ☐

zoom 112-122 ☐

GO

SPGEQGPSGASGPAGPR, MH+ 1550.7199, m/z 517.5782  
L OS G30 P160811 220811-s1.02142.02142.3.dta

scan 2142; 1.6e+000

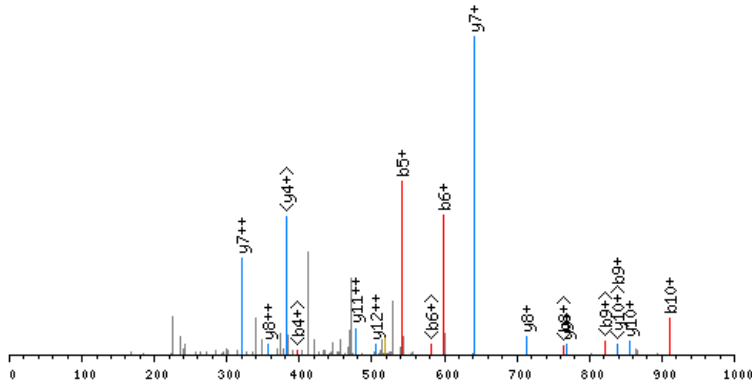

click image to zoom in; click top corners to zoom out

[precursor±]

scan 2141; 517.6 m/z; 1.3e+000

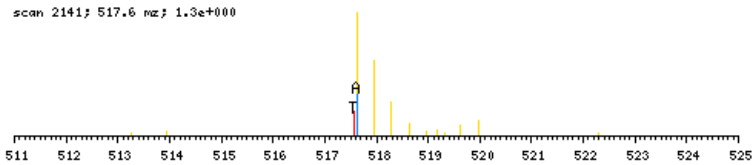

zoomed in precursor plot; T=theoretical m/z, A=acquired m/z

| b <sup>+</sup> | #  | AA | #  | y <sup>+</sup> | y <sup>2+</sup> |
|----------------|----|----|----|----------------|-----------------|
| 130.0504       | 1  | S  | 17 |                |                 |
| 227.1032       | 2  | P  | 16 | 1421.6773      | 711.3426        |
| 284.1247       | 3  | G  | 15 | 1324.6246      | 662.8162        |
| 413.1672       | 4  | E  | 14 | 1267.6031      | 634.3055        |
| 541.2258       | 5  | Q  | 13 | 1138.5605      | 569.7842        |
| 598.2473       | 6  | G  | 12 | 1010.5019      | 505.7549        |
| 695.3001       | 7  | P  | 11 | 953.4805       | 477.2441        |
| 782.3321       | 8  | S  | 10 | 856.4277       | 428.7178        |
| 839.3535       | 9  | G  | 9  | 769.3957       | 385.2018        |
| 910.3907       | 10 | A  | 8  | 712.3742       | 356.6910        |
| 997.4227       | 11 | S  | 7  | 641.3371       | 321.1725        |
| 1054.4442      | 12 | G  | 6  | 554.3051       | 277.6564        |
| 1151.4969      | 13 | P  | 5  | 497.2836       | 249.1457        |
| 1222.5340      | 14 | A  | 4  | 400.2308       | 200.6193        |
| 1279.5555      | 15 | G  | 3  | 329.1937       | 165.1008        |
| 1376.6083      | 16 | P  | 2  | 272.1723       | 136.5900        |
|                | 17 | R  | 1  | 175.1195       | 88.0637         |

N-term:+43.02

N-term: +43.02 K(7): +156.13  
K(13): +156.13

X-range:

 - 

MassTol: Y-zoom:

 

MassType:

☐ AVG ☒ MONO

Axis:

☒ 1 ☐ 2

Label:

☒ I ☐ M ☐ -

Ions:

a ☐ + ☐ 2+ ☐ 3+b ☒ + ☐ 2+ ☐ 3+c ☐ + ☐ 2+ ☐ 3+x ☐ + ☐ 2+ ☐ 3+y ☒ + ☒ 2+ ☐ 3+z ☐ + ☐ 2+ ☐ 3+hide H<sub>2</sub>O/NH<sub>3</sub> ☐zoom 112-122 ☐

GO

SQGDSNPAAIPHAIEDIQGDDR, MH+ 2306.0285, m/z 769.3477  
L OS G30 P160811 220811-s1.04130.04130.3.dta

scan 4130; 5.0e+000

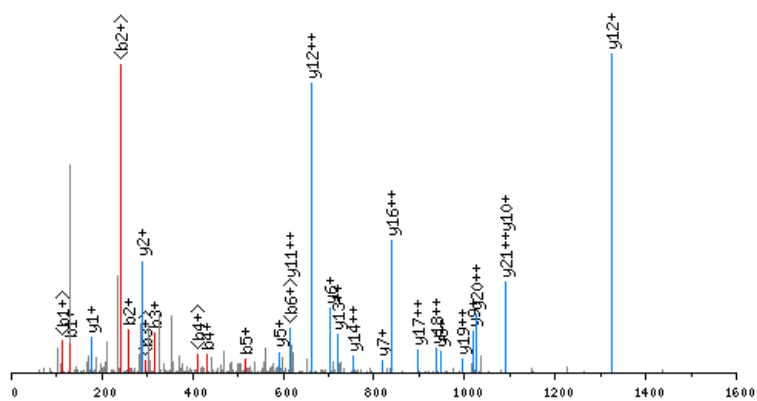click image to zoom in; click top corners to zoom out [\[precursor±\]](#)

scan 4129; 769.3 m/z; 9.8e+001

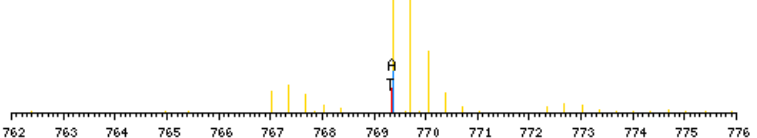

zoomed in precursor plot; T=theoretical m/z, A=acquired m/z

| b <sup>+</sup> | #  | AA | #  | y <sup>+</sup> | y <sup>2+</sup> |
|----------------|----|----|----|----------------|-----------------|
| 130.0504       | 1  | S  | 22 |                |                 |
| 258.1090       | 2  | Q  | 21 | 2176.9859      | 1088.9969       |
| 315.1305       | 3  | G  | 20 | 2048.9273      | 1024.9676       |
| 430.1574       | 4  | D  | 19 | 1991.9059      | 996.4569        |
| 517.1894       | 5  | S  | 18 | 1876.8789      | 938.9434        |
| 631.2324       | 6  | N  | 17 | 1789.8469      | 895.4274        |
| 728.2851       | 7  | P  | 16 | 1675.8040      | 838.4059        |
| 799.3222       | 8  | A  | 15 | 1578.7512      | 789.8795        |
| 870.3594       | 9  | A  | 14 | 1507.7141      | 754.3610        |
| 983.4434       | 10 | I  | 13 | 1436.6770      | 718.8424        |
| 1080.4962      | 11 | P  | 12 | 1323.5929      | 662.3004        |
| 1217.5551      | 12 | H  | 11 | 1226.5402      | 613.7740        |
| 1288.5922      | 13 | A  | 10 | 1089.4813      | 545.2445        |
| 1359.6293      | 14 | A  | 9  | 1018.4441      | 509.7260        |
| 1488.6719      | 15 | E  | 8  | 947.4070       | 474.2074        |
| 1603.6989      | 16 | D  | 7  | 818.3644       | 409.6861        |
| 1716.7829      | 17 | I  | 6  | 703.3375       | 352.1727        |
| 1844.8415      | 18 | Q  | 5  | 590.2534       | 295.6306        |
| 1901.8630      | 19 | G  | 4  | 462.1949       | 231.6013        |
| 2016.8899      | 20 | D  | 3  | 405.1734       | 203.0906        |
| 2131.9169      | 21 | D  | 2  | 290.1464       | 145.5771        |
|                | 22 | R  | 1  | 175.1195       | 88.0637         |

N-term:+43.02

X-range:

0 - 0

MassTol: Y-zoom:

0. 1.

MassType:

☐AVG ☒MONO

Axis:

☒1 ☐2

Label:

☒I ☐M ☐-

Ions:

a ☐+ ☐2+ ☐3+

b ☒+ ☐2+ ☐3+

c ☐+ ☐2+ ☐3+

x ☐+ ☐2+ ☐3+

y ☒+ ☒2+ ☐3+

z ☐+ ☐2+ ☐3+

hide H<sub>2</sub>O/NH<sub>3</sub> ☐

zoom 112-122 ☐

GO

SQVEVILQQAADIAR, MH+ 1769.9398, m/z 590.6514  
L OS G30 P160811 220811-s1.03425.03425.3.dta

scan 3425; 8.5e-001

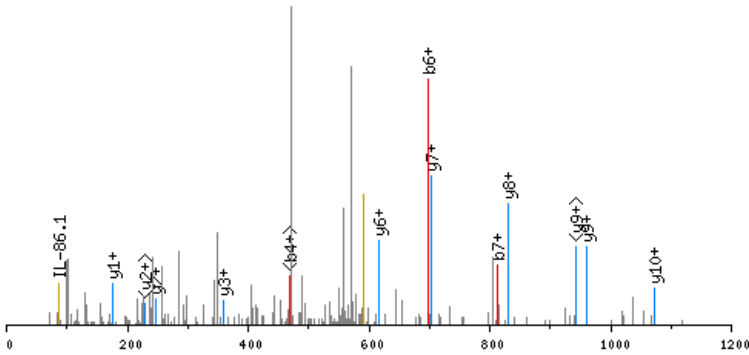

click image to zoom in; click top corners to zoom out [\[precursor±\]](#)

scan 3424; 590.7 m/z; 1.6e+002

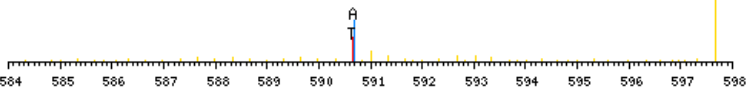

zoomed in precursor plot; T=theoretical m/z, A=acquired m/z

| b <sup>+</sup> | #  | AA | #  | y <sup>+</sup> | y <sup>2+</sup> |
|----------------|----|----|----|----------------|-----------------|
| 130.0504       | 1  | S  | 16 |                |                 |
| 258.1090       | 2  | Q  | 15 | 1640.8972      | 820.9525        |
| 357.1774       | 3  | V  | 14 | 1512.8386      | 756.9232        |
| 486.2200       | 4  | E  | 13 | 1413.7702      | 707.3890        |
| 585.2884       | 5  | V  | 12 | 1284.7276      | 642.8677        |
| 698.3725       | 6  | I  | 11 | 1185.6592      | 593.3335        |
| 811.4566       | 7  | L  | 10 | 1072.5751      | 536.7915        |
| 939.5151       | 8  | Q  | 9  | 959.4910       | 480.2494        |
| 1067.5737      | 9  | Q  | 8  | 831.4325       | 416.2201        |
| 1154.6057      | 10 | S  | 7  | 703.3739       | 352.1909        |
| 1225.6429      | 11 | A  | 6  | 616.3418       | 308.6748        |
| 1296.6800      | 12 | A  | 5  | 545.3047       | 273.1563        |
| 1411.7069      | 13 | D  | 4  | 474.2676       | 237.6377        |
| 1524.7910      | 14 | I  | 3  | 359.2407       | 180.1243        |
| 1595.8281      | 15 | A  | 2  | 246.1566       | 123.5822        |
|                | 16 | R  | 1  | 175.1195       | 88.0637         |

N-term:+43.02

X-range:

0 - 0

MassTol: Y-zoom:

0. 1.

MassType:

☐ AVG ☒ MONO

Axis:

☒ 1 ☐ 2

Label:

☒ I ☐ M ☐ -

Ions:

a ☐ + ☐ 2+ ☐ 3+

b ☒ + ☐ 2+ ☐ 3+

c ☐ + ☐ 2+ ☐ 3+

x ☐ + ☐ 2+ ☐ 3+

y ☒ + ☒ 2+ ☐ 3+

z ☐ + ☐ 2+ ☐ 3+

hide H<sub>2</sub>O/NH<sub>3</sub> ☐

zoom 112-122 ☐

GO

SRGKDAIAPKR, MH+ 1308.8389, m/z 436.9511  
L OS G33 P160811 220811-s1.04070.04070.3.dta

scan 4070; 2.2e+001

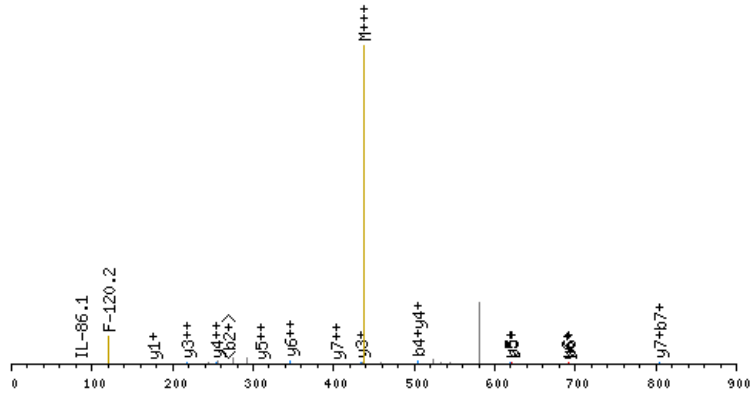

click image to zoom in; click top corners to zoom out [\[precursor±\]](#)

scan 4067; 437.0 m/z; 1.1e+001

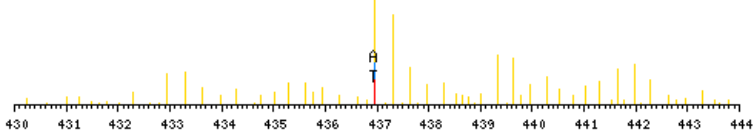

zoomed in precursor plot; T=theoretical m/z, A=acquired m/z

| b <sup>+</sup> | #  | AA | #  | y <sup>+</sup> | y <sup>2+</sup> |
|----------------|----|----|----|----------------|-----------------|
| 130.0504       | 1  | S  | 11 |                |                 |
| 286.1515       | 2  | R  | 10 | 1179.7963      | 590.4020        |
| 343.1730       | 3  | G  | 9  | 1023.6952      | 512.3515        |
| 505.3311       | 4  | K  | 8  | 966.6737       | 483.8408        |
| 620.3580       | 5  | D  | 7  | 804.5156       | 402.7617        |
| 691.3952       | 6  | A  | 6  | 689.4887       | 345.2482        |
| 804.4792       | 7  | I  | 5  | 618.4515       | 309.7297        |
| 875.5163       | 8  | A  | 4  | 505.3675       | 253.1877        |
| 972.5691       | 9  | P  | 3  | 434.3304       | 217.6691        |
| 1134.7272      | 10 | K  | 2  | 337.2776       | 169.1427        |
|                | 11 | R  | 1  | 175.1195       | 88.0637         |

N-term:+43.02 K(4):+162.16  
K(10):+162.16

X-range:

0 - 0

MassTol: Y-zoom:

0. 1.

MassType:

☐ AVG ☒ MONO

Axis:

☒ 1 ☐ 2

Label:

☒ I ☐ M ☐ -

Ions:

a ☐ + ☐ 2+ ☐ 3+

b ☒ + ☐ 2+ ☐ 3+

c ☐ + ☐ 2+ ☐ 3+

x ☐ + ☐ 2+ ☐ 3+

y ☒ + ☒ 2+ ☐ 3+

z ☐ + ☐ 2+ ☐ 3+

hide H<sub>2</sub>O/NH<sub>3</sub> ☐

zoom 112-122 ☐

GO

SSEPPPPPLQPPPTHQTSVGLLDTPR, MH+ 2690.3790, m/z 673.3502  
L OS G30 P160811 220811-s1.06000.06000.4.dta

scan 6000; 7.0e-001

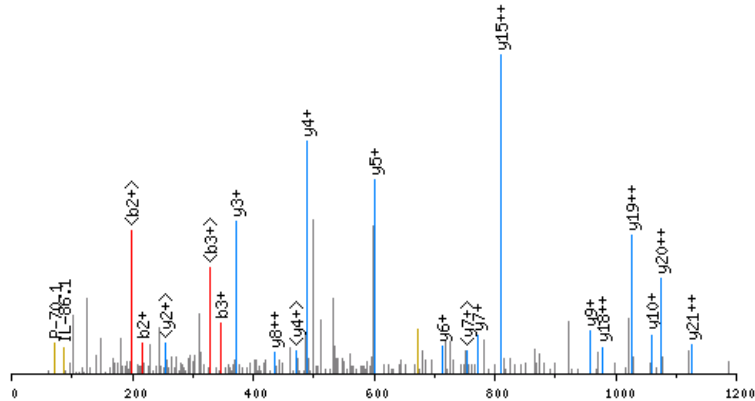

click image to zoom in; click top corners to zoom out [\[precursor±\]](#)

scan 5999; 673.4 m/z; 1.3e+001

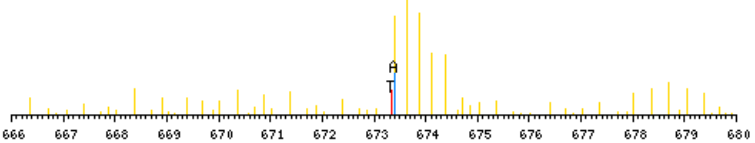

zoomed in precursor plot; T=theoretical m/z, A=acquired m/z

| b <sup>+</sup> | #  | AA | #  | y <sup>+</sup> | y <sup>2+</sup> |
|----------------|----|----|----|----------------|-----------------|
| 130.0504       | 1  | S  | 25 |                |                 |
| 217.0825       | 2  | S  | 24 | 2561.3364      | 1281.1721       |
| 346.1251       | 3  | E  | 23 | 2474.3043      | 1237.6561       |
| 443.1778       | 4  | P  | 22 | 2345.2618      | 1173.1348       |
| 540.2306       | 5  | P  | 21 | 2248.2090      | 1124.6084       |
| 637.2833       | 6  | P  | 20 | 2151.1562      | 1076.0820       |
| 734.3361       | 7  | P  | 19 | 2054.1035      | 1027.5556       |
| 831.3889       | 8  | P  | 18 | 1957.0507      | 979.0293        |
| 944.4729       | 9  | L  | 17 | 1859.9979      | 930.5029        |
| 1072.5315      | 10 | Q  | 16 | 1746.9139      | 873.9608        |
| 1169.5843      | 11 | P  | 15 | 1618.8553      | 809.9316        |
| 1266.6370      | 12 | P  | 14 | 1521.8025      | 761.4052        |
| 1367.6847      | 13 | T  | 13 | 1424.7498      | 712.8788        |
| 1504.7436      | 14 | H  | 12 | 1323.7021      | 662.3550        |
| 1632.8022      | 15 | Q  | 11 | 1186.6432      | 593.8255        |
| 1733.8499      | 16 | T  | 10 | 1058.5846      | 529.7962        |
| 1820.8819      | 17 | S  | 9  | 957.5369       | 479.2724        |
| 1919.9503      | 18 | V  | 8  | 870.5049       | 435.7564        |
| 1976.9718      | 19 | G  | 7  | 771.4365       | 386.2222        |
| 2090.0559      | 20 | L  | 6  | 714.4150       | 357.7114        |
| 2203.1399      | 21 | L  | 5  | 601.3310       | 301.1694        |
| 2318.1669      | 22 | D  | 4  | 488.2469       | 244.6274        |
| 2419.2145      | 23 | T  | 3  | 373.2199       | 187.1139        |
| 2516.2673      | 24 | P  | 2  | 272.1723       | 136.5900        |
|                | 25 | R  | 1  | 175.1195       | 88.0637         |

N-term:+43.02

X-range:

0 - 0

MassTol: Y-zoom:

0. 1.

MassType:

☐AVG ☒MONO

Axis:

☒1 ☐2

Label:

☒I ☐M ☐-

Ions:

a ☐+ ☐2+ ☐3+

b ☒+ ☐2+ ☐3+

c ☐+ ☐2+ ☐3+

x ☐+ ☐2+ ☐3+

y ☒+ ☒2+ ☐3+

z ☐+ ☐2+ ☐3+

hide H<sub>2</sub>O/NH<sub>3</sub> ☐

zoom 112-122 ☐

GO

SSILPFTPPVVKR, MH+ 1516.9316, m/z 758.9694  
L OS G30 P160811 220811-s1.07081.07081.2.dta

scan 7081; 4.2e+000

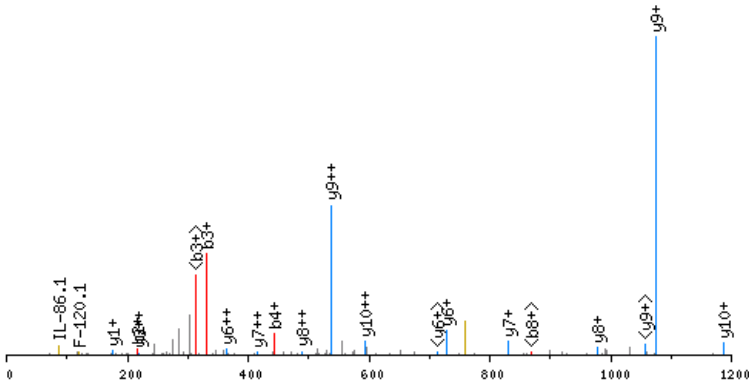

click image to zoom in; click top corners to zoom out

[precursor±]

scan 7079; 759.0 m/z; 2.2e+001

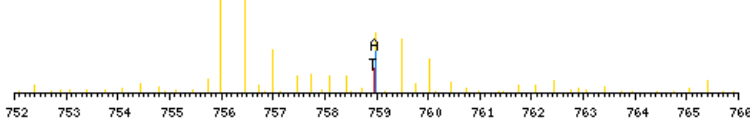

zoomed in precursor plot; T=theoretical m/z, A=acquired m/z

| b <sup>+</sup> | #  | AA | #  | y <sup>+</sup> | y <sup>2+</sup> |
|----------------|----|----|----|----------------|-----------------|
| 130.0504       | 1  | S  | 13 |                |                 |
| 217.0825       | 2  | S  | 12 | 1387.8890      | 694.4484        |
| 330.1665       | 3  | I  | 11 | 1300.8569      | 650.9324        |
| 443.2506       | 4  | L  | 10 | 1187.7729      | 594.3904        |
| 540.3033       | 5  | P  | 9  | 1074.6888      | 537.8483        |
| 687.3718       | 6  | F  | 8  | 977.6360       | 489.3219        |
| 788.4194       | 7  | T  | 7  | 830.5676       | 415.7877        |
| 885.4722       | 8  | P  | 6  | 729.5200       | 365.2639        |
| 982.5250       | 9  | P  | 5  | 632.4672       | 316.7375        |
| 1081.5934      | 10 | V  | 4  | 535.4144       | 268.2111        |
| 1180.6618      | 11 | V  | 3  | 436.3460       | 218.6769        |
| 1342.8199      | 12 | K  | 2  | 337.2776       | 169.1427        |
|                | 13 | R  | 1  | 175.1195       | 88.0637         |

N-term:+43.02 K(12):+162.16

X-range:

0 - 0

MassTol: Y-zoom:

0. 1.

MassType:

☐ AVG ☒ MONO

Axis:

☒ 1 ☐ 2

Label:

☒ I ☐ M ☐ -

Ions:

a ☐ + ☐ 2+ ☐ 3+

b ☒ + ☐ 2+ ☐ 3+

c ☐ + ☐ 2+ ☐ 3+

x ☐ + ☐ 2+ ☐ 3+

y ☒ + ☒ 2+ ☐ 3+

z ☐ + ☐ 2+ ☐ 3+

hide H<sub>2</sub>O/NH<sub>3</sub> ☐

zoom 112-122 ☐

GO

SSKSMVLGYWDIR, MH+ 1611.8205, m/z 537.9450  
L OS G30 P160811 220811-s1.07047.07047.3.dta

scan 7047; 2.4e+000

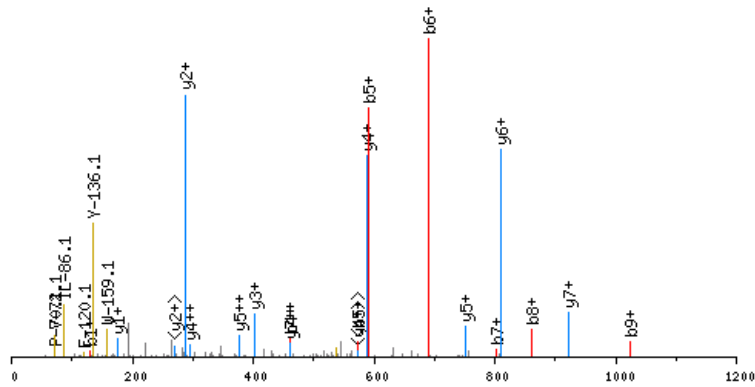

click image to zoom in; click top corners to zoom out

[precursor±]

scan 7044; 537.9 m/z; 1.2e+002

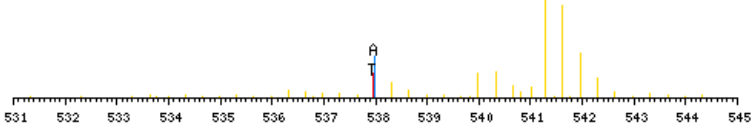

zoomed in precursor plot; T=theoretical m/z, A=acquired m/z

| b <sup>+</sup> | #  | AA | #  | y <sup>+</sup> | y <sup>2+</sup> |
|----------------|----|----|----|----------------|-----------------|
| 130.0504       | 1  | S  | 13 |                |                 |
| 217.0825       | 2  | S  | 12 | 1482.7779      | 741.8929        |
| 373.2088       | 3  | K  | 11 | 1395.7459      | 698.3769        |
| 460.2408       | 4  | S  | 10 | 1239.6196      | 620.3137        |
| 591.2813       | 5  | M  | 9  | 1152.5876      | 576.7977        |
| 690.3497       | 6  | V  | 8  | 1021.5471      | 511.2775        |
| 803.4337       | 7  | L  | 7  | 922.4787       | 461.7433        |
| 860.4552       | 8  | G  | 6  | 809.3946       | 405.2012        |
| 1023.5185      | 9  | Y  | 5  | 752.3731       | 376.6905        |
| 1209.5979      | 10 | W  | 4  | 589.3098       | 295.1588        |
| 1324.6248      | 11 | D  | 3  | 403.2305       | 202.1192        |
| 1437.7089      | 12 | I  | 2  | 288.2036       | 144.6057        |
|                | 13 | R  | 1  | 175.1195       | 88.0637         |

N-term:+43.02 K(3):+156.13

X-range:

0 - 0

MassTol: Y-zoom:

0. 1.

MassType:

☐ AVG ☒ MONO

Axis:

☒ 1 ☐ 2

Label:

☒ I ☐ M ☐ -

Ions:

a ☐ + ☐ 2+ ☐ 3+

b ☒ + ☐ 2+ ☐ 3+

c ☐ + ☐ 2+ ☐ 3+

x ☐ + ☐ 2+ ☐ 3+

y ☒ + ☒ 2+ ☐ 3+

z ☐ + ☐ 2+ ☐ 3+

hide H<sub>2</sub>O/NH<sub>3</sub> ☐

zoom 112-122 ☐

GO

SSKTA<sup>ST</sup>NSIAQAR, MH<sup>+</sup> 1497.8086, m/z 499.9410  
L OS G31 P160811 220811-s1.02190.02190.3.dta

scan 2190; 3.3e+000

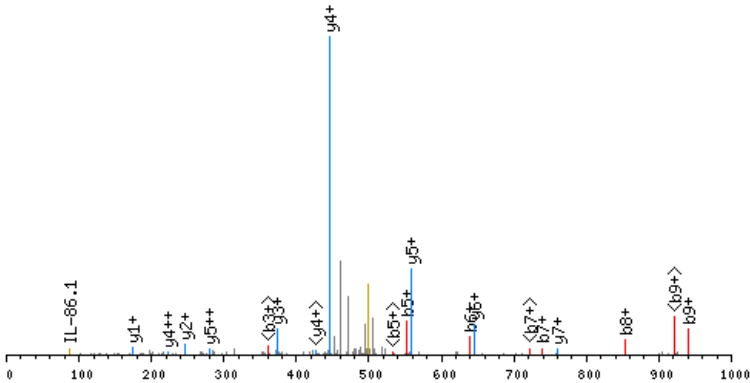

click image to zoom in; click top corners to zoom out

[precursor±]

scan 2189; 499.9 m/z; 5.8e+000

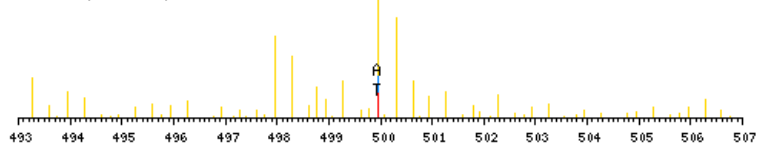

zoomed in precursor plot; T=theoretical m/z, A=acquired m/z

| b <sup>+</sup> | #  | AA | #  | y <sup>+</sup> | y <sup>2+</sup> |
|----------------|----|----|----|----------------|-----------------|
| 130.0504       | 1  | S  | 14 |                |                 |
| 217.0825       | 2  | S  | 13 | 1368.7660      | 684.8869        |
| 379.2406       | 3  | K  | 12 | 1281.7339      | 641.3709        |
| 480.2882       | 4  | T  | 11 | 1119.5758      | 560.2918        |
| 551.3253       | 5  | A  | 10 | 1018.5281      | 509.7680        |
| 638.3574       | 6  | S  | 9  | 947.4910       | 474.2494        |
| 739.4051       | 7  | T  | 8  | 860.4590       | 430.7334        |
| 853.4480       | 8  | N  | 7  | 759.4113       | 380.2096        |
| 940.4800       | 9  | S  | 6  | 645.3684       | 323.1881        |
| 1053.5641      | 10 | I  | 5  | 558.3364       | 279.6721        |
| 1124.6012      | 11 | A  | 4  | 445.2523       | 223.1301        |
| 1252.6598      | 12 | Q  | 3  | 374.2152       | 187.6115        |
| 1323.6969      | 13 | A  | 2  | 246.1566       | 123.5822        |
|                | 14 | R  | 1  | 175.1195       | 88.0637         |

N-term:+43.02 K(3):+162.16

X-range:

0 - 0

MassTol: Y-zoom:

0. 1.

MassType:

☐AVG ☒MONO

Axis:

☒1 ☐2

Label:

☒I ☐M ☐-

Ions:

a ☐+ ☐2+ ☐3+

b ☒+ ☐2+ ☐3+

c ☐+ ☐2+ ☐3+

x ☐+ ☐2+ ☐3+

y ☒+ ☒2+ ☐3+

z ☐+ ☐2+ ☐3+

hide H<sub>2</sub>O/NH<sub>3</sub> ☐

zoom 112-122 ☐

GO

SSPKPNNSYMFKR, MH+ 1665.9060, m/z 555.9735  
L OS G30 P160811 220811-s1.05318.05318.3.dta

scan 5318; 3.0e+000

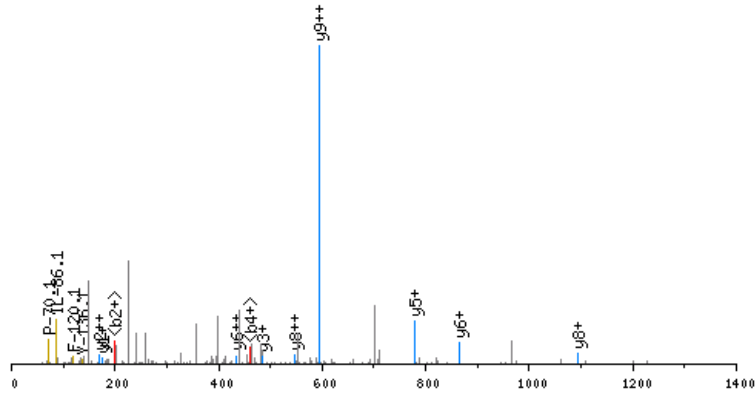

click image to zoom in; click top corners to zoom out [\[precursor±\]](#)

scan 5314; 556.0 m/z; 7.4e+001

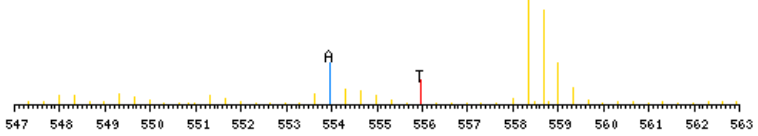

zoomed in precursor plot; T=theoretical m/z, A=acquired m/z

| b <sup>+</sup> | #  | AA | #  | y <sup>+</sup> | y <sup>2+</sup> |
|----------------|----|----|----|----------------|-----------------|
| 130.0504       | 1  | S  | 13 |                |                 |
| 217.0825       | 2  | S  | 12 | 1536.8634      | 768.9356        |
| 314.1352       | 3  | P  | 11 | 1449.8313      | 725.4196        |
| 476.2933       | 4  | K  | 10 | 1352.7786      | 676.8932        |
| 573.3461       | 5  | P  | 9  | 1190.6205      | 595.8142        |
| 687.3890       | 6  | N  | 8  | 1093.5677      | 547.2878        |
| 801.4319       | 7  | N  | 7  | 979.5248       | 490.2663        |
| 888.4640       | 8  | S  | 6  | 865.4819       | 433.2448        |
| 1051.5273      | 9  | Y  | 5  | 778.4498       | 389.7288        |
| 1182.5678      | 10 | M  | 4  | 615.3865       | 308.1972        |
| 1329.6362      | 11 | F  | 3  | 484.3460       | 242.6769        |
| 1491.7943      | 12 | K  | 2  | 337.2776       | 169.1427        |
|                | 13 | R  | 1  | 175.1195       | 88.0637         |

N-term:+43.02 K(4):+162.16  
K(12):+162.16



X-range:

0 - 0

MassTol: Y-zoom:

0. 1.

MassType:

☐AVG ☒MONO

Axis:

☒1 ☐2

Label:

☒I ☐M ☐-

Ions:

a ☐+ ☐2+ ☐3+

b ☒+ ☐2+ ☐3+

c ☐+ ☐2+ ☐3+

x ☐+ ☐2+ ☐3+

y ☒+ ☒2+ ☐3+

z ☐+ ☐2+ ☐3+

hide H<sub>2</sub>O/NH<sub>3</sub> ☐

zoom 112-122 ☐

GO

SSQPGIFCIGVDLNR, MH+ 1704.8379, m/z 568.9508  
L OS G30 P160811 220811-s1.03716.03716.3.dta

scan 3716; 2.3e+000

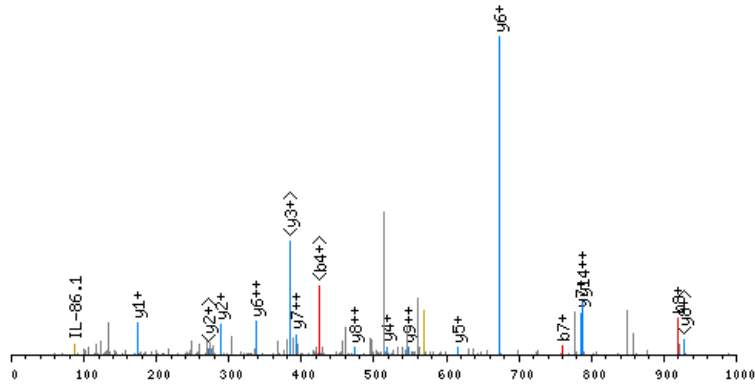

click image to zoom in; click top corners to zoom out [precursor±]

scan 3714; 569.0 m/z; 4.3e+001

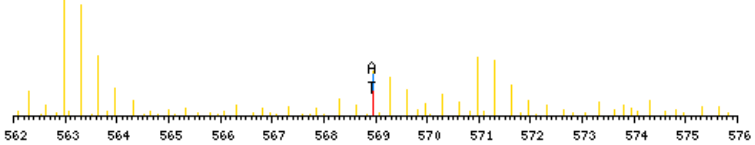

zoomed in precursor plot; T=theoretical m/z, A=acquired m/z

| b <sup>+</sup> | #  | AA | #  | y <sup>+</sup> | y <sup>2+</sup> |
|----------------|----|----|----|----------------|-----------------|
| 130.0504       | 1  | S  | 15 |                |                 |
| 217.0825       | 2  | S  | 14 | 1575.7953      | 788.4016        |
| 345.1410       | 3  | Q  | 13 | 1488.7633      | 744.8855        |
| 442.1938       | 4  | P  | 12 | 1360.7047      | 680.8563        |
| 499.2153       | 5  | G  | 11 | 1263.6519      | 632.3299        |
| 612.2993       | 6  | I  | 10 | 1206.6305      | 603.8191        |
| 759.3677       | 7  | F  | 9  | 1093.5464      | 547.2771        |
| 919.3983       | 8  | C  | 8  | 946.4780       | 473.7429        |
| 1032.4824      | 9  | I  | 7  | 786.4474       | 393.7276        |
| 1089.5039      | 10 | G  | 6  | 673.3633       | 337.1856        |
| 1188.5723      | 11 | V  | 5  | 616.3418       | 308.6748        |
| 1303.5992      | 12 | D  | 4  | 517.2734       | 259.1406        |
| 1416.6833      | 13 | L  | 3  | 402.2465       | 201.6272        |
| 1530.7262      | 14 | N  | 2  | 289.1624       | 145.0851        |
|                | 15 | R  | 1  | 175.1195       | 88.0637         |

N-term:+43.02 C(8):+160.03

X-range:

0 - 0

MassTol: Y-zoom:

0. 1.

MassType:

☐AVG ☒MONO

Axis:

☒1 ☐2

Label:

☒I ☐M ☐-

Ions:

a ☐+ ☐2+ ☐3+

b ☒+ ☐2+ ☐3+

c ☐+ ☐2+ ☐3+

x ☐+ ☐2+ ☐3+

y ☒+ ☒2+ ☐3+

z ☐+ ☐2+ ☐3+

hide H<sub>2</sub>O/NH<sub>3</sub> ☐

zoom 112-122 ☐

GO

SSSASAANGNDSKKFKGDNR, MH+ 2185.1699, m/z 547.0479  
L OS G35 P160811 220811-s1.01841.01841.4.dta

scan 1841; 2.0e+000

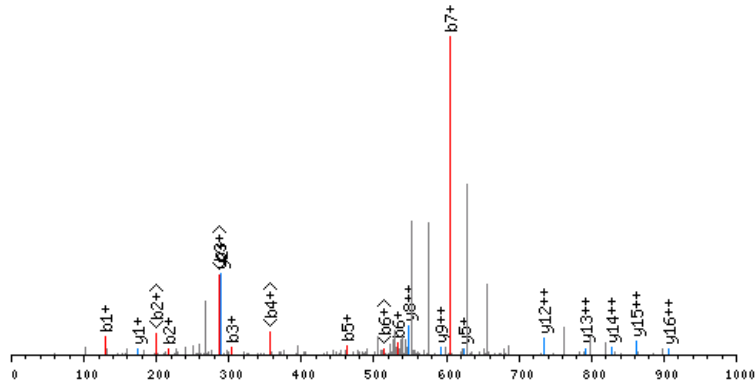

click image to zoom in; click top corners to zoom out [\[precursor±\]](#)

scan 1838; 547.0 m/z; 8.9e+000

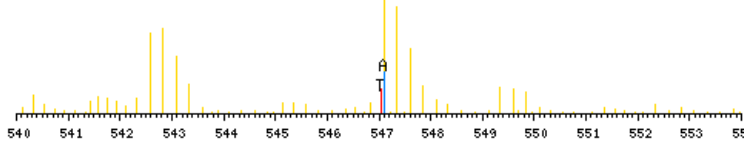

zoomed in precursor plot; T=theoretical m/z, A=acquired m/z

| b <sup>+</sup> | #  | AA | #  | y <sup>+</sup> | y <sup>2+</sup> |
|----------------|----|----|----|----------------|-----------------|
| 130.0504       | 1  | S  | 20 |                |                 |
| 217.0825       | 2  | S  | 19 | 2056.1273      | 1028.5675       |
| 304.1145       | 3  | S  | 18 | 1969.0952      | 985.0515        |
| 375.1516       | 4  | A  | 17 | 1882.0632      | 941.5355        |
| 462.1836       | 5  | S  | 16 | 1811.0261      | 906.0170        |
| 533.2207       | 6  | A  | 15 | 1723.9941      | 862.5009        |
| 604.2579       | 7  | A  | 14 | 1652.9570      | 826.9824        |
| 718.3008       | 8  | N  | 13 | 1581.9198      | 791.4638        |
| 775.3222       | 9  | G  | 12 | 1467.8769      | 734.4424        |
| 889.3652       | 10 | N  | 11 | 1410.8554      | 705.9316        |
| 1004.3921      | 11 | D  | 10 | 1296.8125      | 648.9102        |
| 1091.4241      | 12 | S  | 9  | 1181.7856      | 591.3967        |
| 1253.5822      | 13 | K  | 8  | 1094.7535      | 547.8807        |
| 1415.7403      | 14 | K  | 7  | 932.5954       | 466.8016        |
| 1562.8088      | 15 | F  | 6  | 770.4373       | 385.7226        |
| 1724.9669      | 16 | K  | 5  | 623.3689       | 312.1884        |
| 1781.9883      | 17 | G  | 4  | 461.2108       | 231.1093        |
| 1897.0153      | 18 | D  | 3  | 404.1894       | 202.5986        |
| 2011.0582      | 19 | N  | 2  | 289.1624       | 145.0851        |
|                | 20 | R  | 1  | 175.1195       | 88.0637         |

N-term:+43.02 K(13):+162.16  
K(14):+162.16 K(16):+162.16





X-range:

0 - 0

MassTol: Y-zoom:

0. 1.

MassType:

☐AVG ☒MONO

Axis:

☒1 ☐2

Label:

☒I ☐M ☐-

Ions:

a ☐+ ☐2+ ☐3+

b ☒+ ☐2+ ☐3+

c ☐+ ☐2+ ☐3+

x ☐+ ☐2+ ☐3+

y ☒+ ☒2+ ☐3+

z ☐+ ☐2+ ☐3+

hide H<sub>2</sub>O/NH<sub>3</sub> ☐

zoom 112-122 ☐

GO

SSTQFNKGPSYGLSAEVKNR, MH+ 2280.2261, m/z 760.7469  
L OS G33 P160811 220811-s1.04038.04038.3.dta

scan 4038; 2.6e+001

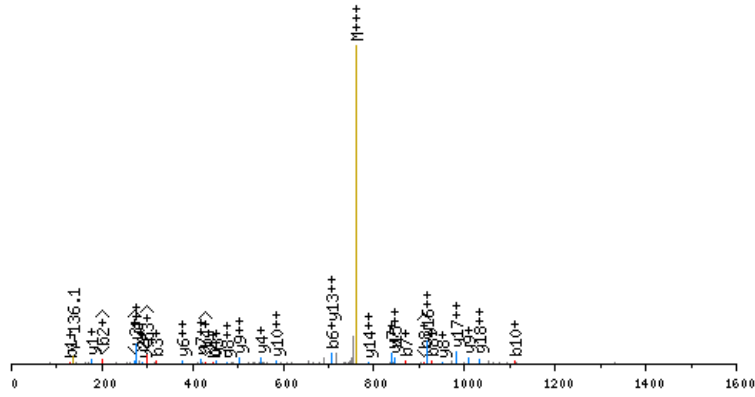

click image to zoom in; click top corners to zoom out [\[precursor±\]](#)

scan 4037; 760.7 m/z; 1.0e+002

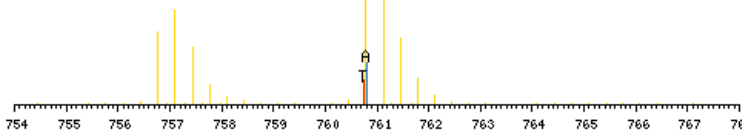

zoomed in precursor plot; T=theoretical m/z, A=acquired m/z

| b <sup>+</sup> | #  | AA | #  | y <sup>+</sup> | y <sup>2+</sup> |
|----------------|----|----|----|----------------|-----------------|
| 130.0504       | 1  | S  | 20 |                |                 |
| 217.0825       | 2  | S  | 19 | 2151.1835      | 1076.0957       |
| 318.1301       | 3  | T  | 18 | 2064.1515      | 1032.5797       |
| 446.1887       | 4  | Q  | 17 | 1963.1038      | 982.0558        |
| 593.2571       | 5  | F  | 16 | 1835.0452      | 918.0265        |
| 707.3001       | 6  | N  | 15 | 1687.9768      | 844.4923        |
| 869.4582       | 7  | K  | 14 | 1573.9339      | 787.4709        |
| 926.4796       | 8  | G  | 13 | 1411.7758      | 706.3918        |
| 1023.5324      | 9  | P  | 12 | 1354.7543      | 677.8811        |
| 1110.5644      | 10 | S  | 11 | 1257.7016      | 629.3547        |
| 1273.6277      | 11 | Y  | 10 | 1170.6695      | 585.8387        |
| 1330.6492      | 12 | G  | 9  | 1007.6062      | 504.3070        |
| 1443.7333      | 13 | L  | 8  | 950.5847       | 475.7963        |
| 1530.7653      | 14 | S  | 7  | 837.5007       | 419.2543        |
| 1601.8024      | 15 | A  | 6  | 750.4686       | 375.7382        |
| 1730.8450      | 16 | E  | 5  | 679.4315       | 340.2197        |
| 1829.9134      | 17 | V  | 4  | 550.3889       | 275.6984        |
| 1992.0715      | 18 | K  | 3  | 451.3205       | 226.1642        |
| 2106.1144      | 19 | N  | 2  | 289.1624       | 145.0851        |
|                | 20 | R  | 1  | 175.1195       | 88.0637         |

N-term:+43.02 K(7):+162.16  
K(18):+162.16

X-range:

0 - 0

MassTol: Y-zoom:

0. 1.

MassType:

☐ AVG ☒ MONO

Axis:

☒ 1 ☐ 2

Label:

☒ I ☐ M ☐ -

Ions:

a ☐ + ☐ 2+ ☐ 3+

b ☒ + ☐ 2+ ☐ 3+

c ☐ + ☐ 2+ ☐ 3+

x ☐ + ☐ 2+ ☐ 3+

y ☒ + ☒ 2+ ☐ 3+

z ☐ + ☐ 2+ ☐ 3+

hide H<sub>2</sub>O/NH<sub>3</sub> ☐

zoom 112-122 ☐

GO

SSVAVLTPQESFAEHR, MH+ 1702.8400, m/z 568.2849  
L OS G31 P160811 220811-s1.07117.07117.3.dta

scan 7117; 1.3e+000

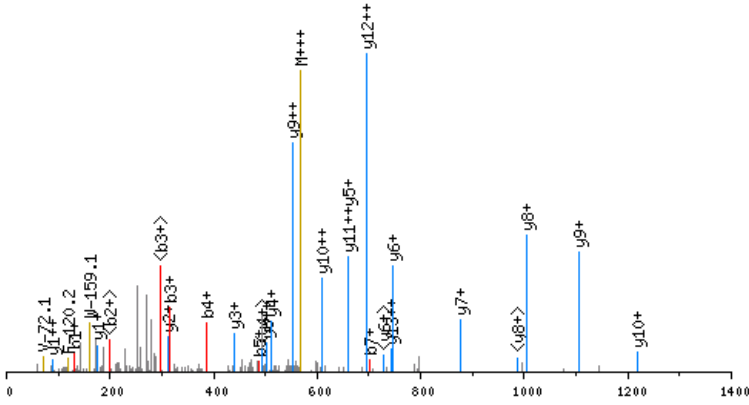

click image to zoom in; click top corners to zoom out

[precursor±]

scan 7114; 568.3 m/z; 1.1e+001

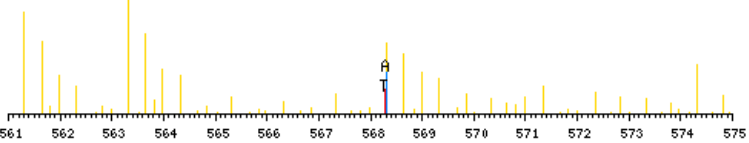

zoomed in precursor plot; T=theoretical m/z, A=acquired m/z

| b <sup>+</sup> | #  | AA | #  | y <sup>+</sup> | y <sup>2+</sup> |
|----------------|----|----|----|----------------|-----------------|
| 130.0504       | 1  | S  | 15 |                |                 |
| 217.0825       | 2  | S  | 14 | 1573.7974      | 787.4026        |
| 316.1509       | 3  | V  | 13 | 1486.7654      | 743.8866        |
| 387.1880       | 4  | A  | 12 | 1387.6970      | 694.3524        |
| 486.2564       | 5  | V  | 11 | 1316.6599      | 658.8339        |
| 599.3405       | 6  | L  | 10 | 1217.5915      | 609.2997        |
| 700.3881       | 7  | T  | 9  | 1104.5074      | 552.7576        |
| 828.4467       | 8  | Q  | 8  | 1003.4597      | 502.2338        |
| 957.4893       | 9  | E  | 7  | 875.4012       | 438.2045        |
| 1044.5213      | 10 | S  | 6  | 746.3586       | 373.6832        |
| 1191.5898      | 11 | F  | 5  | 659.3265       | 330.1672        |
| 1262.6269      | 12 | A  | 4  | 512.2581       | 256.6330        |
| 1391.6695      | 13 | E  | 3  | 441.2210       | 221.1144        |
| 1528.7284      | 14 | H  | 2  | 312.1784       | 156.5931        |
|                | 15 | R  | 1  | 175.1195       | 88.0637         |

N-term:+43.02

X-range:

0 - 0

MassTol: Y-zoom:

0. 1.

MassType:

☐ AVG ☒ MONO

Axis:

☒ 1 ☐ 2

Label:

☒ I ☐ M ☐ -

Ions:

a ☐ + ☐ 2+ ☐ 3+

b ☒ + ☐ 2+ ☐ 3+

c ☐ + ☐ 2+ ☐ 3+

x ☐ + ☐ 2+ ☐ 3+

y ☒ + ☒ 2+ ☐ 3+

z ☐ + ☐ 2+ ☐ 3+

hide H<sub>2</sub>O/NH<sub>3</sub> ☐

zoom 112-122 ☐

GO

STEGPNLVTR, MH+ 1115.5697, m/z 558.2885  
L OS G33 P160811 220811-s1.04831.04831.2.dta

scan 4831; 2.7e-001

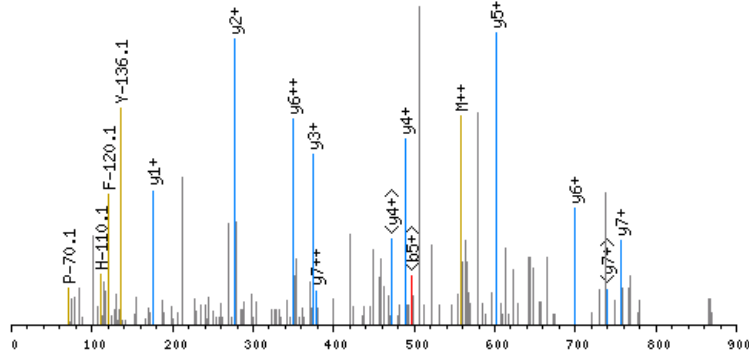

click image to zoom in; click top corners to zoom out [precursor±]

scan 4827; 558.3 m/z; 2.2e+001

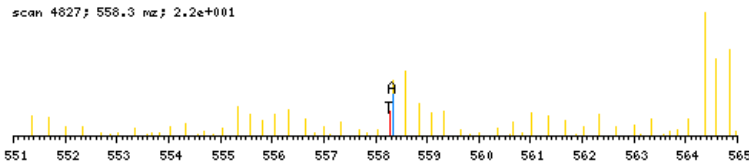

zoomed in precursor plot; T=theoretical m/z, A=acquired m/z

| b <sup>+</sup> | #  | AA | #  | y <sup>+</sup> | y <sup>2+</sup> |
|----------------|----|----|----|----------------|-----------------|
| 130.0504       | 1  | S  | 10 |                |                 |
| 231.0981       | 2  | T  | 9  | 986.5271       | 493.7675        |
| 360.1407       | 3  | E  | 8  | 885.4794       | 443.2436        |
| 417.1622       | 4  | G  | 7  | 756.4368       | 378.7223        |
| 514.2149       | 5  | P  | 6  | 699.4153       | 350.2116        |
| 628.2579       | 6  | N  | 5  | 602.3626       | 301.6852        |
| 741.3419       | 7  | L  | 4  | 488.3197       | 244.6637        |
| 840.4103       | 8  | V  | 3  | 375.2356       | 188.1217        |
| 941.4580       | 9  | T  | 2  | 276.1672       | 138.5875        |
|                | 10 | R  | 1  | 175.1195       | 88.0637         |

N-term:+43.02

X-range:

0 - 0

MassTol: Y-zoom:

0. 1.

MassType:

☐AVG ☒MONO

Axis:

☒1 ☐2

Label:

☒I ☐M ☐-

Ions:

a ☐+ ☐2+ ☐3+

b ☒+ ☐2+ ☐3+

c ☐+ ☐2+ ☐3+

x ☐+ ☐2+ ☐3+

y ☒+ ☒2+ ☐3+

z ☐+ ☐2+ ☐3+

hide H<sub>2</sub>O/NH<sub>3</sub> ☐

zoom 112-122 ☐

GO

STMYPGIADR, MH+ 1152.5359, m/z 576.7716  
L OS G31 P160811 220811-s1.04338.04338.2.dta

scan 4338; 9.9e+000

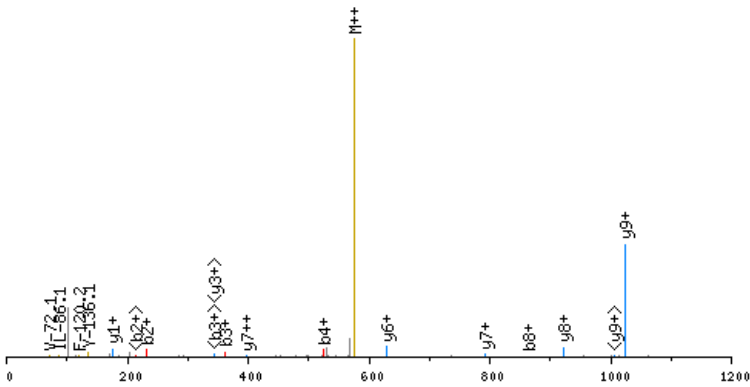

click image to zoom in; click top corners to zoom out

[precursor±]

scan 4334; 576.8 m/z; 1.7e+001

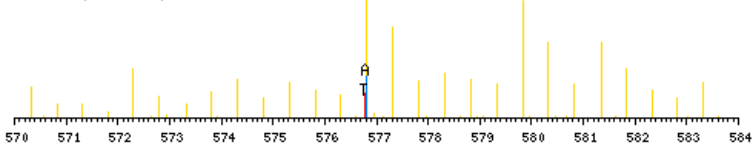

zoomed in precursor plot; T=theoretical m/z, A=acquired m/z

| b <sup>+</sup> | #  | AA | #  | y <sup>+</sup> | y <sup>2+</sup> |
|----------------|----|----|----|----------------|-----------------|
| 130.0504       | 1  | S  | 10 |                |                 |
| 231.0981       | 2  | T  | 9  | 1023.4933      | 512.2506        |
| 362.1386       | 3  | M  | 8  | 922.4457       | 461.7267        |
| 525.2019       | 4  | Y  | 7  | 791.4052       | 396.2065        |
| 622.2547       | 5  | P  | 6  | 628.3418       | 314.6748        |
| 679.2761       | 6  | G  | 5  | 531.2891       | 266.1485        |
| 792.3602       | 7  | I  | 4  | 474.2676       | 237.6377        |
| 863.3973       | 8  | A  | 3  | 361.1836       | 181.0957        |
| 978.4243       | 9  | D  | 2  | 290.1464       | 145.5771        |
|                | 10 | R  | 1  | 175.1195       | 88.0637         |

N-term:+43.02

N-term: +43.02 K(18) : +156.13

X-range:

0 - 0

MassTol: Y-zoom:

0. 1.

MassType:

☐AVG ☒MONO

Axis:

☒1 ☐2

Label:

☒I ☐M ☐-

Ions:

a ☐+ ☐2+ ☐3+

b ☒+ ☐2+ ☐3+

c ☐+ ☐2+ ☐3+

x ☐+ ☐2+ ☐3+

y ☒+ ☒2+ ☐3+

z ☐+ ☐2+ ☐3+

hide H<sub>2</sub>O/NH<sub>3</sub> ☐

zoom 112-122 ☐

GO

STTTGPEAAPKPSAKSIYEQR, MH+ 2317.2040, m/z 773.0729  
L OS G32 P160811 220811-s1.03094.03094.3.dta

scan 3094; 5.3e+000

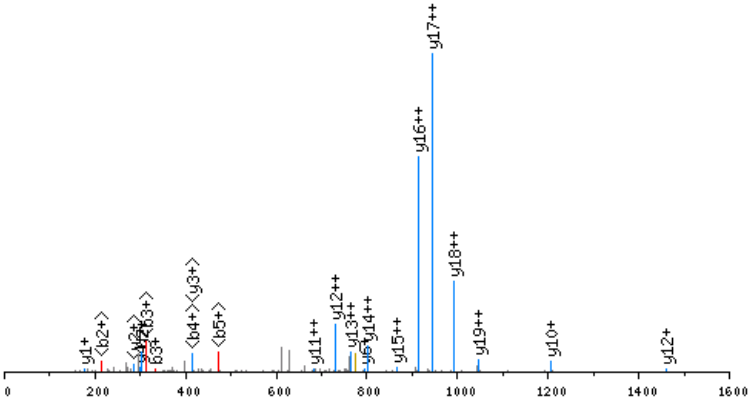

click image to zoom in; click top corners to zoom out

[precursor±]

scan 3093; 773.1 m/z; 2.0e+001

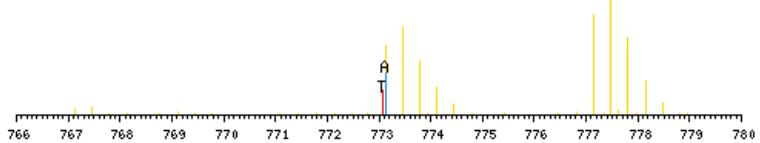

zoomed in precursor plot; T=theoretical m/z, A=acquired m/z

| b <sup>+</sup> | #  | AA | #  | y <sup>+</sup> | y <sup>2+</sup> |
|----------------|----|----|----|----------------|-----------------|
| 130.0504       | 1  | S  | 21 |                |                 |
| 231.0981       | 2  | T  | 20 | 2188.1614      | 1094.5846       |
| 332.1458       | 3  | T  | 19 | 2087.1138      | 1044.0608       |
| 433.1935       | 4  | T  | 18 | 1986.0661      | 993.5370        |
| 490.2149       | 5  | G  | 17 | 1885.0184      | 943.0131        |
| 587.2677       | 6  | P  | 16 | 1827.9969      | 914.5024        |
| 716.3103       | 7  | E  | 15 | 1730.9442      | 865.9760        |
| 787.3474       | 8  | A  | 14 | 1601.9016      | 801.4547        |
| 858.3845       | 9  | A  | 13 | 1530.8645      | 765.9362        |
| 955.4373       | 10 | P  | 12 | 1459.8274      | 730.4176        |
| 1111.5636      | 11 | K  | 11 | 1362.7746      | 681.8912        |
| 1208.6163      | 12 | P  | 10 | 1206.6483      | 603.8281        |
| 1295.6484      | 13 | S  | 9  | 1109.5955      | 555.3017        |
| 1366.6855      | 14 | A  | 8  | 1022.5635      | 511.7857        |
| 1522.8118      | 15 | K  | 7  | 951.5264       | 476.2671        |
| 1609.8438      | 16 | S  | 6  | 795.4001       | 398.2040        |
| 1722.9279      | 17 | I  | 5  | 708.3681       | 354.6879        |
| 1885.9912      | 18 | Y  | 4  | 595.2840       | 298.1459        |
| 2015.0338      | 19 | E  | 3  | 432.2207       | 216.6142        |
| 2143.0924      | 20 | Q  | 2  | 303.1781       | 152.0930        |
|                | 21 | R  | 1  | 175.1195       | 88.0637         |

N-term:+43.02 K(11):+156.13  
K(15):+156.13

X-range:

0 - 0

MassTol: Y-zoom:

0. 1.

MassType:

☐AVG ☒MONO

Axis:

☒1 ☐2

Label:

☒I ☐M ☐-

Ions:

a ☐+ ☐2+ ☐3+

b ☒+ ☐2+ ☐3+

c ☐+ ☐2+ ☐3+

x ☐+ ☐2+ ☐3+

y ☒+ ☒2+ ☐3+

z ☐+ ☐2+ ☐3+

hide H<sub>2</sub>O/NH<sub>3</sub> ☐

zoom 112-122 ☐

GO

SVFGKLFAGGGKAGKGGPTPQEAIQR, MH+ 2741.5104, m/z 686.1331  
I OS G34 P160811 220811-s1.07757.07757.4.dta

scan 7757; 1.8e+001

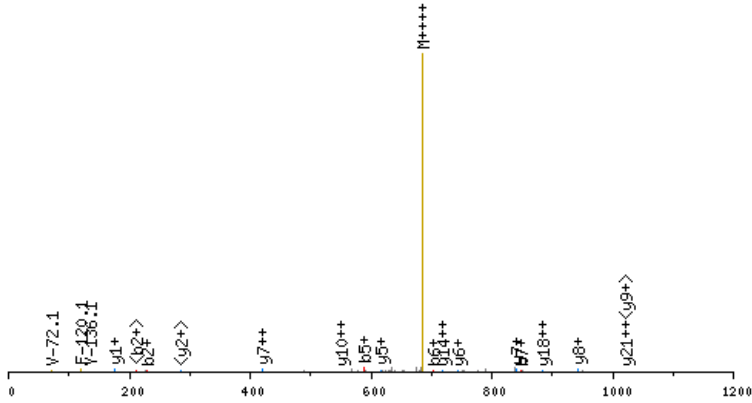

click image to zoom in; click top corners to zoom out

[precursor±]

scan 7755; 686.1 m/z; 3.1e+001

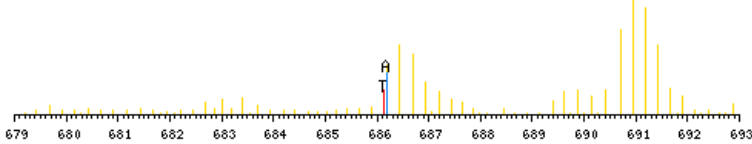

zoomed in precursor plot; T=theoretical m/z, A=acquired m/z

| b <sup>+</sup> | #  | AA | #  | y <sup>+</sup> | y <sup>2+</sup> |
|----------------|----|----|----|----------------|-----------------|
| 130.0504       | 1  | S  | 27 |                |                 |
| 229.1188       | 2  | V  | 26 | 2612.4678      | 1306.7378       |
| 376.1873       | 3  | F  | 25 | 2513.3994      | 1257.2036       |
| 433.2087       | 4  | G  | 24 | 2366.3309      | 1183.6694       |
| 589.3350       | 5  | K  | 23 | 2309.3095      | 1155.1587       |
| 702.4191       | 6  | L  | 22 | 2153.1832      | 1077.0955       |
| 849.4875       | 7  | F  | 21 | 2040.0991      | 1020.5535       |
| 906.5090       | 8  | G  | 20 | 1893.0307      | 947.0193        |
| 977.5461       | 9  | A  | 19 | 1836.0092      | 918.5085        |
| 1034.5675      | 10 | G  | 18 | 1764.9721      | 882.9900        |
| 1091.5890      | 11 | G  | 17 | 1707.9507      | 854.4792        |
| 1148.6105      | 12 | G  | 16 | 1650.9292      | 825.9685        |
| 1304.7368      | 13 | K  | 15 | 1593.9077      | 797.4578        |
| 1375.7739      | 14 | A  | 14 | 1437.7814      | 719.3946        |
| 1432.7953      | 15 | G  | 13 | 1366.7443      | 683.8761        |
| 1588.9216      | 16 | K  | 12 | 1309.7229      | 655.3653        |
| 1645.9431      | 17 | G  | 11 | 1153.5966      | 577.3022        |
| 1702.9646      | 18 | G  | 10 | 1096.5751      | 548.7915        |
| 1800.0173      | 19 | P  | 9  | 1039.5536      | 520.2807        |
| 1901.0650      | 20 | T  | 8  | 942.5009       | 471.7543        |
| 1998.1178      | 21 | P  | 7  | 841.4532       | 421.2305        |
| 2126.1764      | 22 | Q  | 6  | 744.4004       | 372.7041        |
| 2255.2189      | 23 | E  | 5  | 616.3418       | 308.6748        |
| 2326.2561      | 24 | A  | 4  | 487.2993       | 244.1535        |
| 2439.3401      | 25 | I  | 3  | 416.2621       | 208.6350        |
| 2567.3987      | 26 | Q  | 2  | 303.1781       | 152.0930        |
|                | 27 | R  | 1  | 175.1195       | 88.0637         |

N-term:+43.02 K(5):+156.13  
K(13):+156.13 K(16):+156.13

X-range:

0 - 0

MassTol: Y-zoom:

0. 1.

MassType:

☐AVG ☒MONO

Axis:

☒1 ☐2

Label:

☒I ☐M ☐-

Ions:

a ☐+ ☐2+ ☐3+

b ☒+ ☐2+ ☐3+

c ☐+ ☐2+ ☐3+

x ☐+ ☐2+ ☐3+

y ☒+ ☒2+ ☐3+

z ☐+ ☐2+ ☐3+

hide H<sub>2</sub>O/NH<sub>3</sub> ☐

zoom 112-122 ☐

GO

TAFFKTLR, MH+ 1059.6415, m/z 530.3244  
L OS G31 P160811 220811-s1.07436.07436.2.dta

scan 7436; 1.6e+001

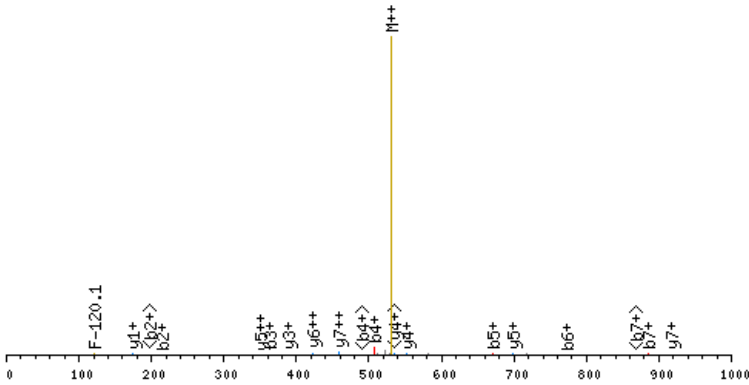

click image to zoom in; click top corners to zoom out

[precursor±]

scan 7434; 530.3 m/z; 5.3e+000

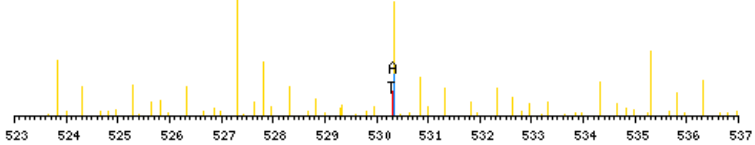

zoomed in precursor plot; T=theoretical m/z, A=acquired m/z

| b <sup>+</sup> | # | AA | # | y <sup>+</sup> | y <sup>2+</sup> |
|----------------|---|----|---|----------------|-----------------|
| 144.0661       | 1 | T  | 8 |                |                 |
| 215.1032       | 2 | A  | 7 | 916.5833       | 458.7956        |
| 362.1716       | 3 | F  | 6 | 845.5462       | 423.2770        |
| 509.2400       | 4 | F  | 5 | 698.4778       | 349.7428        |
| 671.3981       | 5 | K  | 4 | 551.4093       | 276.2086        |
| 772.4458       | 6 | T  | 3 | 389.2512       | 195.1295        |
| 885.5299       | 7 | L  | 2 | 288.2036       | 144.6057        |
|                | 8 | R  | 1 | 175.1195       | 88.0637         |

N-term:+43.02 K(5):+162.16

X-range:

0 - 0

MassTol: Y-zoom:

0. 1.

MassType:

☐ AVG ☒ MONO

Axis:

☒ 1 ☐ 2

Label:

☒ I ☐ M ☐ -

Ions:

a ☐ + ☐ 2+ ☐ 3+

b ☒ + ☐ 2+ ☐ 3+

c ☐ + ☐ 2+ ☐ 3+

x ☐ + ☐ 2+ ☐ 3+

y ☒ + ☒ 2+ ☐ 3+

z ☐ + ☐ 2+ ☐ 3+

hide H<sub>2</sub>O/NH<sub>3</sub> ☐

zoom 112-122 ☐

GO

TAIKEIVSR, MH+ 1199.7364, m/z 600.3718  
L OS G31 P160811 220811-s1.08148.08148.2.dta

scan 8148; 2.8e+001

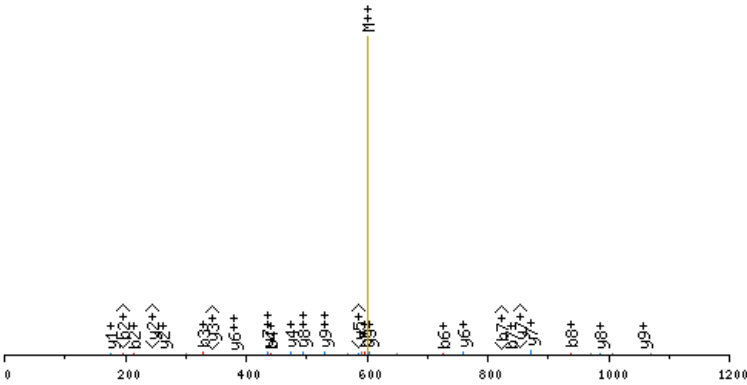

click image to zoom in; click top corners to zoom out

[precursor±]

scan 8144; 600.4 m/z; 6.8e+000

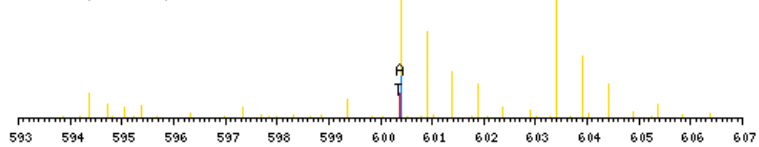

zoomed in precursor plot; T=theoretical m/z, A=acquired m/z

| b <sup>+</sup> | #  | AA | #  | y <sup>+</sup> | y <sup>2+</sup> |
|----------------|----|----|----|----------------|-----------------|
| 144.0661       | 1  | T  | 10 |                |                 |
| 215.1032       | 2  | A  | 9  | 1056.6781      | 528.8430        |
| 328.1873       | 3  | I  | 8  | 985.6410       | 493.3244        |
| 441.2713       | 4  | I  | 7  | 872.5570       | 436.7824        |
| 597.3976       | 5  | K  | 6  | 759.4729       | 380.2404        |
| 726.4402       | 6  | E  | 5  | 603.3466       | 302.1772        |
| 839.5243       | 7  | I  | 4  | 474.3040       | 237.6559        |
| 938.5927       | 8  | V  | 3  | 361.2199       | 181.1139        |
| 1025.6247      | 9  | S  | 2  | 262.1515       | 131.5797        |
|                | 10 | R  | 1  | 175.1195       | 88.0637         |

N-term:+43.02 K(5):+156.13

X-range:

0 - 0

MassTol: Y-zoom:

0. 1.

MassType:

☐ AVG ☒ MONO

Axis:

☒ 1 ☐ 2

Label:

☒ I ☐ M ☐ -

Ions:

a ☐ + ☐ 2+ ☐ 3+

b ☒ + ☐ 2+ ☐ 3+

c ☐ + ☐ 2+ ☐ 3+

x ☐ + ☐ 2+ ☐ 3+

y ☒ + ☒ 2+ ☐ 3+

z ☐ + ☐ 2+ ☐ 3+

hide H<sub>2</sub>O/NH<sub>3</sub> ☐

zoom 112-122 ☐

GO

TATLRPYLSAVR, MH+ 1389.7854, m/z 695.3964  
L OS G30 P160811 220811-s1.05686.05686.2.dta

scan 5686; 6.3e+001

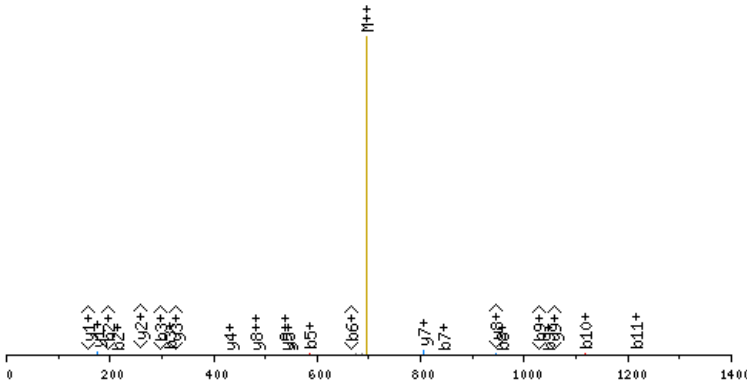

click image to zoom in; click top corners to zoom out

[precursor±]

scan 5684; 695.4 m/z; 1.4e+001

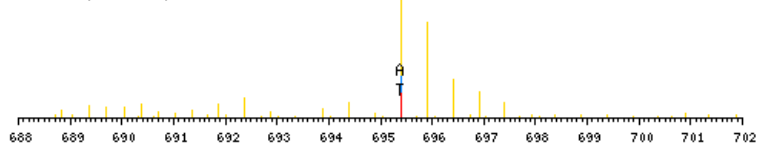

zoomed in precursor plot; T=theoretical m/z, A=acquired m/z

| b <sup>+</sup> | #  | AA | #  | y <sup>+</sup> | y <sup>2+</sup> |
|----------------|----|----|----|----------------|-----------------|
| 144.0661       | 1  | T  | 12 |                |                 |
| 215.1032       | 2  | A  | 11 | 1246.7272      | 623.8675        |
| 316.1509       | 3  | T  | 10 | 1175.6901      | 588.3489        |
| 429.2349       | 4  | L  | 9  | 1074.6424      | 537.8251        |
| 585.3360       | 5  | R  | 8  | 961.5583       | 481.2831        |
| 682.3888       | 6  | P  | 7  | 805.4572       | 403.2325        |
| 845.4521       | 7  | Y  | 6  | 708.4044       | 354.7061        |
| 958.5362       | 8  | L  | 5  | 545.3411       | 273.1745        |
| 1045.5682      | 9  | S  | 4  | 432.2571       | 216.6324        |
| 1116.6053      | 10 | A  | 3  | 345.2250       | 173.1164        |
| 1215.6738      | 11 | V  | 2  | 274.1879       | 137.5979        |
|                | 12 | R  | 1  | 175.1195       | 88.0637         |

N-term:+43.02

N-term: +43.02 K(8): +156.13

X-range:

0 - 0

MassTol: Y-zoom:

0. 1.

MassType:

☐AVG ☒MONO

Axis:

☒1 ☐2

Label:

☒I ☐M ☐-

Ions:

a ☐+ ☐2+ ☐3+

b ☒+ ☐2+ ☐3+

c ☐+ ☐2+ ☐3+

x ☐+ ☐2+ ☐3+

y ☒+ ☒2+ ☐3+

z ☐+ ☐2+ ☐3+

hide H<sub>2</sub>O/NH<sub>3</sub> ☐

zoom 112-122 ☐

GO

TFAEDKTYKYIR, MH+ 1632.8638, m/z 544.9595  
L OS G33 P160811 220811-s1.04449.04449.3.dta

scan 4449; 1.3e+001

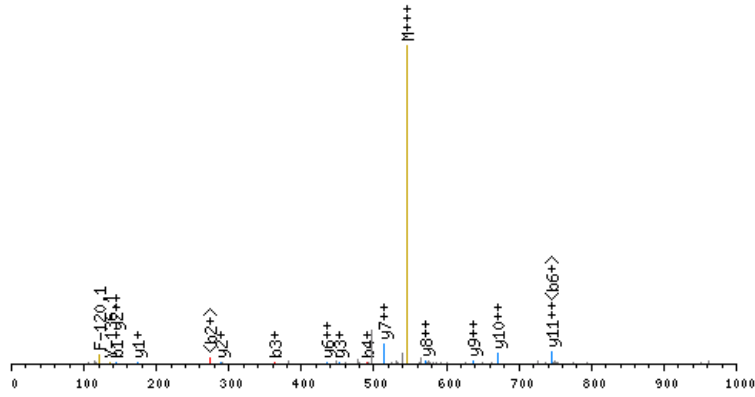

click image to zoom in; click top corners to zoom out [\[precursor±\]](#)

scan 4447; 545.0 m/z; 9.8e+000

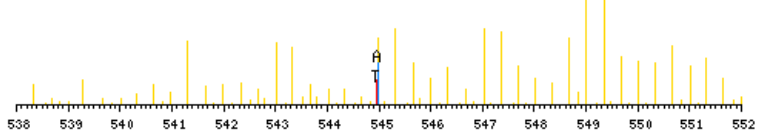

zoomed in precursor plot; T=theoretical m/z, A=acquired m/z

| b <sup>+</sup> | #  | AA | #  | y <sup>+</sup> | y <sup>2+</sup> |
|----------------|----|----|----|----------------|-----------------|
| 144.0661       | 1  | T  | 12 |                |                 |
| 291.1345       | 2  | F  | 11 | 1489.8056      | 745.4067        |
| 362.1716       | 3  | A  | 10 | 1342.7372      | 671.8725        |
| 491.2142       | 4  | E  | 9  | 1271.7000      | 636.3539        |
| 606.2411       | 5  | D  | 8  | 1142.6574      | 571.8326        |
| 762.3674       | 6  | K  | 7  | 1027.6305      | 514.3192        |
| 863.4151       | 7  | T  | 6  | 871.5042       | 436.2560        |
| 1026.4784      | 8  | Y  | 5  | 770.4565       | 385.7322        |
| 1182.6047      | 9  | K  | 4  | 607.3932       | 304.2005        |
| 1345.6681      | 10 | Y  | 3  | 451.2669       | 226.1374        |
| 1458.7521      | 11 | I  | 2  | 288.2036       | 144.6057        |
|                | 12 | R  | 1  | 175.1195       | 88.0637         |

N-term:+43.02 K(6):+156.13  
K(9):+156.13

X-range:

0 - 0

MassTol: Y-zoom:

0. 1.

MassType:

☐ AVG ☒ MONO

Axis:

☒ 1 ☐ 2

Label:

☒ I ☐ M ☐ -

Ions:

a ☐ + ☐ 2+ ☐ 3+

b ☒ + ☐ 2+ ☐ 3+

c ☐ + ☐ 2+ ☐ 3+

x ☐ + ☐ 2+ ☐ 3+

y ☒ + ☒ 2+ ☐ 3+

z ☐ + ☐ 2+ ☐ 3+

hide H<sub>2</sub>O/NH<sub>3</sub> ☐

zoom 112-122 ☐

GO

THSSQDAGSHGIQEEGR, MH+ 1837.8065, m/z 613.2737  
L OS G34 P160811 220811-s1.01908.01908.3.dta

scan 1908; 3.3e+000

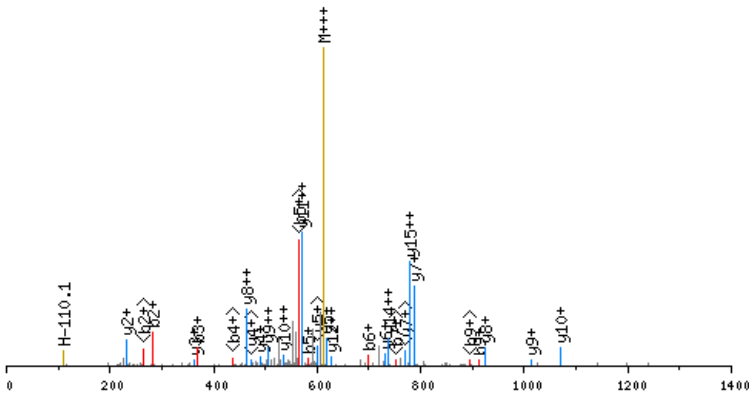

click image to zoom in; click top corners to zoom out

[precursor±]

scan 1905; 613.3 m/z; 9.0e+000

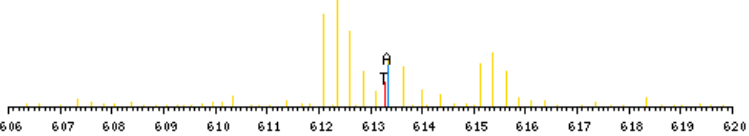

zoomed in precursor plot; T=theoretical m/z, A=acquired m/z

| b <sup>+</sup> | #  | AA | #  | y <sup>+</sup> | y <sup>2+</sup> |
|----------------|----|----|----|----------------|-----------------|
| 144.0661       | 1  | T  | 17 |                |                 |
| 281.1250       | 2  | H  | 16 | 1694.7483      | 847.8780        |
| 368.1570       | 3  | S  | 15 | 1557.6894      | 779.3486        |
| 455.1890       | 4  | S  | 14 | 1470.6573      | 735.8326        |
| 583.2476       | 5  | Q  | 13 | 1383.6253      | 692.3166        |
| 698.2746       | 6  | D  | 12 | 1255.5667      | 628.2873        |
| 769.3117       | 7  | A  | 11 | 1140.5398      | 570.7738        |
| 826.3331       | 8  | G  | 10 | 1069.5027      | 535.2552        |
| 913.3652       | 9  | S  | 9  | 1012.4812      | 506.7445        |
| 1050.4241      | 10 | H  | 8  | 925.4492       | 463.2285        |
| 1107.4455      | 11 | G  | 7  | 788.3903       | 394.6990        |
| 1220.5296      | 12 | I  | 6  | 731.3688       | 366.1883        |
| 1348.5882      | 13 | Q  | 5  | 618.2847       | 309.6463        |
| 1477.6308      | 14 | E  | 4  | 490.2262       | 245.6170        |
| 1606.6734      | 15 | E  | 3  | 361.1836       | 181.0957        |
| 1663.6948      | 16 | G  | 2  | 232.1410       | 116.5744        |
|                | 17 | R  | 1  | 175.1195       | 88.0637         |

N-term:+43.02

X-range:

0 - 0

MassTol: Y-zoom:

0. 1.

MassType:

☐ AVG ☒ MONO

Axis:

☒ 1 ☐ 2

Label:

☒ I ☐ M ☐ -

Ions:

a ☐ + ☐ 2+ ☐ 3+

b ☒ + ☐ 2+ ☐ 3+

c ☐ + ☐ 2+ ☐ 3+

x ☐ + ☐ 2+ ☐ 3+

y ☒ + ☒ 2+ ☐ 3+

z ☐ + ☐ 2+ ☐ 3+

hide H<sub>2</sub>O/NH<sub>3</sub> ☐

zoom 112-122 ☐

GO

TMDKSELVQKAKLAEQAEER, MH+ 2301.2489, m/z 576.0677  
L OS G34 P160811 220811-s1.05981.05981.4.dta

scan 5981; 2.8e+001

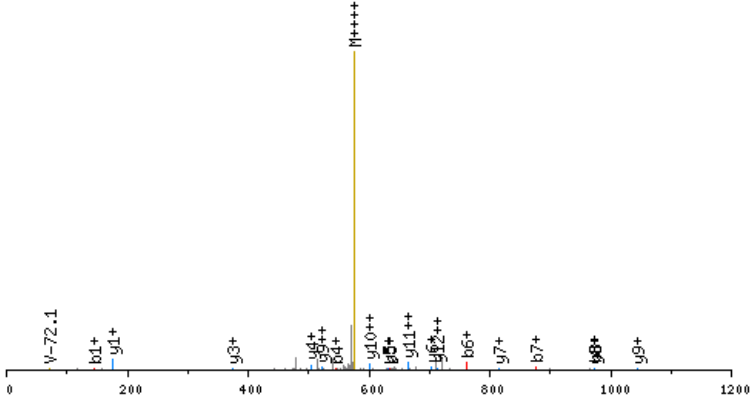

click image to zoom in; click top corners to zoom out [\[precursor±\]](#)

scan 5980; 576.1 m/z; 8.1e+001

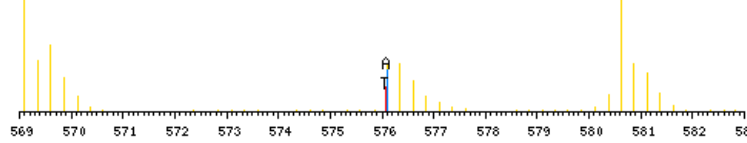

zoomed in precursor plot; T=theoretical m/z, A=acquired m/z

| b <sup>+</sup> | #  | AA | #  | y <sup>+</sup> | y <sup>2+</sup> |
|----------------|----|----|----|----------------|-----------------|
| 144.0661       | 1  | T  | 19 |                |                 |
| 275.1066       | 2  | M  | 18 | 2158.1907      | 1079.5992       |
| 390.1335       | 3  | D  | 17 | 2027.1502      | 1014.0790       |
| 546.2598       | 4  | K  | 16 | 1912.1232      | 956.5655        |
| 633.2918       | 5  | S  | 15 | 1755.9969      | 878.5024        |
| 762.3344       | 6  | E  | 14 | 1668.9649      | 834.9864        |
| 875.4185       | 7  | L  | 13 | 1539.9223      | 770.4651        |
| 974.4869       | 8  | V  | 12 | 1426.8383      | 713.9230        |
| 1102.5455      | 9  | Q  | 11 | 1327.7698      | 664.3888        |
| 1258.6718      | 10 | K  | 10 | 1199.7113      | 600.3595        |
| 1329.7089      | 11 | A  | 9  | 1043.5850      | 522.2964        |
| 1485.8352      | 12 | K  | 8  | 972.5479       | 486.7778        |
| 1598.9193      | 13 | L  | 7  | 816.4216       | 408.7147        |
| 1669.9564      | 14 | A  | 6  | 703.3375       | 352.1727        |
| 1798.9990      | 15 | E  | 5  | 632.3004       | 316.6541        |
| 1927.0575      | 16 | Q  | 4  | 503.2578       | 252.1328        |
| 1998.0947      | 17 | A  | 3  | 375.1992       | 188.1035        |
| 2127.1373      | 18 | E  | 2  | 304.1621       | 152.5850        |
|                | 19 | R  | 1  | 175.1195       | 88.0637         |

N-term:+43.02 K(4):+156.13  
K(10):+156.13 K(12):+156.13

TMLADHAAR, MH+ 1027.4995, m/z 514.2534  
L OS G31 P160811 220811-s1.03366.03366.2.dta

scan 3366; 1.8e+001

X-range :

MassTol: Y-zoom:

0.   1.

Masstype:

AVG MONC

Axis:

01 02

Label:

○ I    ○ M    ○ —

Ions :

$$a \square + \square^2 + \square^3 +$$
$$1 \cdot \frac{1}{2} + \frac{1}{2} \cdot 2 + \frac{1}{2} \cdot 3 + \dots$$

$\square$ ,  $\square^2$ ,  $\square^3$

☐ ☐ ☐

**x**

|   |                                     |                                     |                          |                          |
|---|-------------------------------------|-------------------------------------|--------------------------|--------------------------|
| y | <input checked="" type="checkbox"/> | <input checked="" type="checkbox"/> | <input type="checkbox"/> | <input type="checkbox"/> |
|---|-------------------------------------|-------------------------------------|--------------------------|--------------------------|

$$z^{\boxed{\phantom{0}}} + \boxed{\phantom{0}}^2 + \boxed{\phantom{0}}^3 + \dots$$
hide H<sub>2</sub>O/NH<sub>3</sub> ☐

110 100

GO

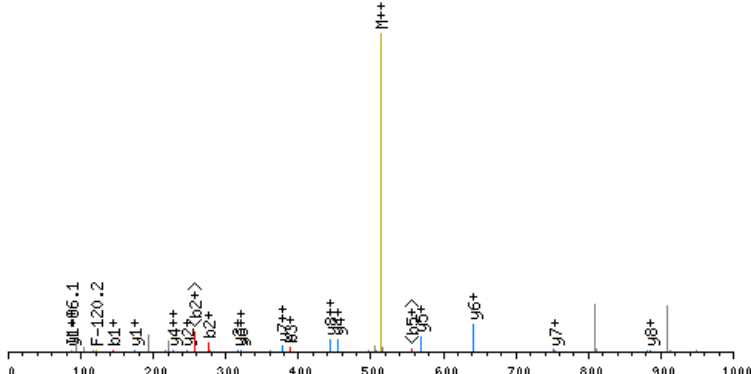

click image to zoom in; click top corners to zoom out      [precursor+]

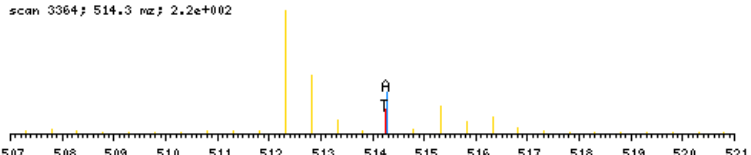

zoomed in precursor plot: T=theoretical m/z, A=acquired m/z

| $b^+$    | # | AA | # | $y^+$    | $y^{2+}$ |
|----------|---|----|---|----------|----------|
| 144.0661 | 1 | T  | 9 |          |          |
| 275.1066 | 2 | M  | 8 | 884.4412 | 442.7245 |
| 388.1906 | 3 | L  | 7 | 753.4008 | 377.2043 |
| 459.2277 | 4 | A  | 6 | 640.3167 | 320.6623 |
| 574.2547 | 5 | D  | 5 | 569.2796 | 285.1437 |
| 711.3136 | 6 | H  | 4 | 454.2526 | 227.6302 |
| 782.3507 | 7 | A  | 3 | 317.1937 | 159.1008 |
| 853.3878 | 8 | A  | 2 | 246.1566 | 123.5822 |
|          | 9 | R  | 1 | 175.1195 | 88.0637  |

N-term: +43.02

X-range:

0 - 0

MassTol: Y-zoom:

0. 1.

MassType:

☐ AVG ☒ MONO

Axis:

☒ 1 ☐ 2

Label:

☒ I ☐ M ☐ -

Ions:

a ☐ + ☐ 2+ ☐ 3+

b ☒ + ☐ 2+ ☐ 3+

c ☐ + ☐ 2+ ☐ 3+

x ☐ + ☐ 2+ ☐ 3+

y ☒ + ☒ 2+ ☐ 3+

z ☐ + ☐ 2+ ☐ 3+

hide H<sub>2</sub>O/NH<sub>3</sub> ☐

zoom 112-122 ☐

GO

TNEEPLPKKVR, MH+ 1420.8801, m/z 474.2982  
L OS G34 P160811 220811-s1.02787.02787.3.dta

scan 2787; 1.5e+000

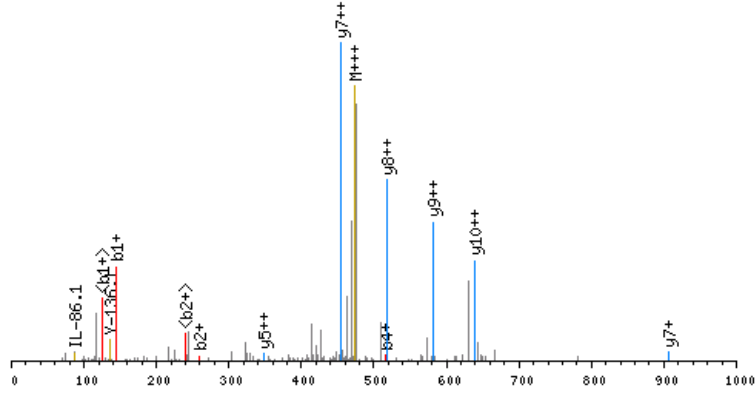

click image to zoom in; click top corners to zoom out

[precursor±]

scan 2785; 474.3 m/z; 1.2e+001

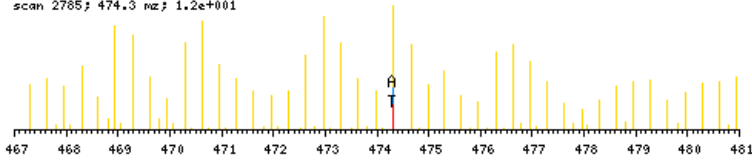

zoomed in precursor plot; T=theoretical m/z, A=acquired m/z

| b <sup>+</sup> | #  | AA | #  | y <sup>+</sup> | y <sup>2+</sup> |
|----------------|----|----|----|----------------|-----------------|
| 144.0661       | 1  | T  | 11 |                |                 |
| 258.1090       | 2  | N  | 10 | 1277.8218      | 639.4148        |
| 387.1516       | 3  | E  | 9  | 1163.7789      | 582.3934        |
| 516.1942       | 4  | E  | 8  | 1034.7363      | 517.8721        |
| 613.2470       | 5  | P  | 7  | 905.6937       | 453.3508        |
| 726.3310       | 6  | L  | 6  | 808.6409       | 404.8244        |
| 823.3838       | 7  | P  | 5  | 695.5569       | 348.2824        |
| 985.5419       | 8  | K  | 4  | 598.5041       | 299.7560        |
| 1147.7000      | 9  | K  | 3  | 436.3460       | 218.6769        |
| 1246.7684      | 10 | V  | 2  | 274.1879       | 137.5979        |
|                | 11 | R  | 1  | 175.1195       | 88.0637         |

N-term:+43.02 K(8):+162.16  
K(9):+162.16

X-range:

0 - 0

MassTol: Y-zoom:

0. 1.

MassType:

☐AVG ☒MONO

Axis:

☒1 ☐2

Label:

☒I ☐M ☐-

Ions:

a ☐+ ☐2+ ☐3+

b ☒+ ☐2+ ☐3+

c ☐+ ☐2+ ☐3+

x ☐+ ☐2+ ☐3+

y ☒+ ☒2+ ☐3+

z ☐+ ☐2+ ☐3+

hide H<sub>2</sub>O/NH<sub>3</sub> ☐

zoom 112-122 ☐

GO

TQEEAGRLPQVLAR, MH+ 1609.8662, m/z 537.2936  
L OS G30 P160811 220811-s1.04718.04718.3.dta

scan 4718; 3.6e+000

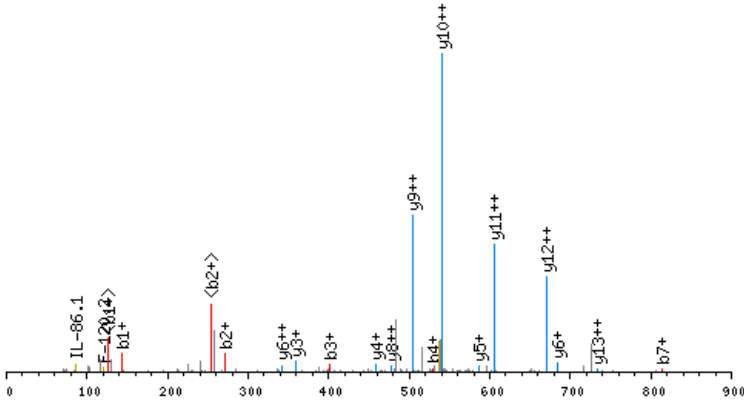

click image to zoom in; click top corners to zoom out [\[precursor±\]](#)

scan 4714; 537.3 m/z; 1.5e+002

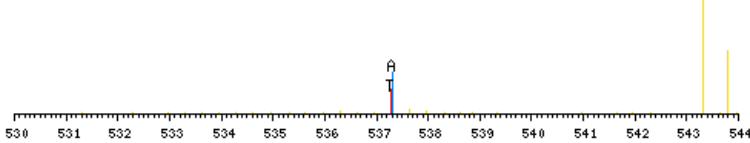

zoomed in precursor plot; T=theoretical m/z, A=acquired m/z

| b <sup>+</sup> | #  | AA | #  | y <sup>+</sup> | y <sup>2+</sup> |
|----------------|----|----|----|----------------|-----------------|
| 144.0661       | 1  | T  | 14 |                |                 |
| 272.1247       | 2  | Q  | 13 | 1466.8080      | 733.9079        |
| 401.1672       | 3  | E  | 12 | 1338.7494      | 669.8786        |
| 530.2098       | 4  | E  | 11 | 1209.7068      | 605.3573        |
| 601.2470       | 5  | A  | 10 | 1080.6642      | 540.8360        |
| 658.2684       | 6  | G  | 9  | 1009.6271      | 505.3174        |
| 814.3695       | 7  | R  | 8  | 952.6056       | 476.8067        |
| 927.4536       | 8  | L  | 7  | 796.5045       | 398.7562        |
| 1024.5064      | 9  | P  | 6  | 683.4204       | 342.2141        |
| 1152.5649      | 10 | Q  | 5  | 586.3677       | 293.6877        |
| 1251.6334      | 11 | V  | 4  | 458.3091       | 229.6585        |
| 1364.7174      | 12 | L  | 3  | 359.2407       | 180.1243        |
| 1435.7545      | 13 | A  | 2  | 246.1566       | 123.5822        |
|                | 14 | R  | 1  | 175.1195       | 88.0637         |

N-term:+43.02

X-range:

0 - 0

MassTol: Y-zoom:

0. 1.

MassType:

☐ AVG ☒ MONO

Axis:

☒ 1 ☐ 2

Label:

☒ I ☐ M ☐ -

Ions:

a ☐ + ☐ 2+ ☐ 3+

b ☒ + ☐ 2+ ☐ 3+

c ☐ + ☐ 2+ ☐ 3+

x ☐ + ☐ 2+ ☐ 3+

y ☒ + ☒ 2+ ☐ 3+

z ☐ + ☐ 2+ ☐ 3+

hide H<sub>2</sub>O/NH<sub>3</sub> ☐

zoom 112-122 ☐

GO

TQEYDNKRPVLVLQNEALYPQR, MH+ 2744.4372, m/z 686.8648  
L OS G32 P160811 220811-s1.05219.05219.4.dta

scan 5219; 1.7e+000

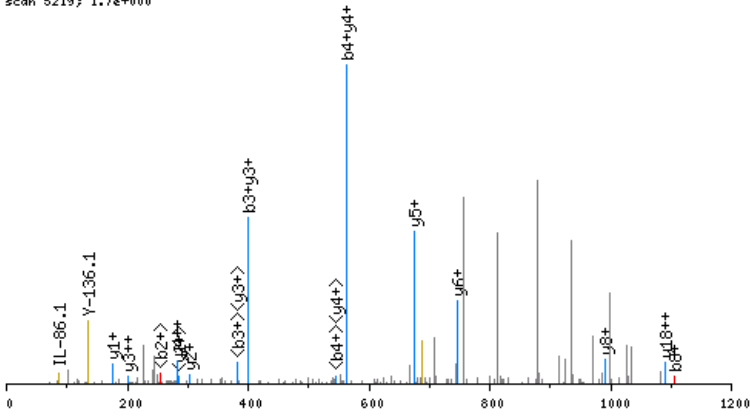

click image to zoom in; click top corners to zoom out [precursor±]

scan 5218; 686.9 m/z; 1.4e+001

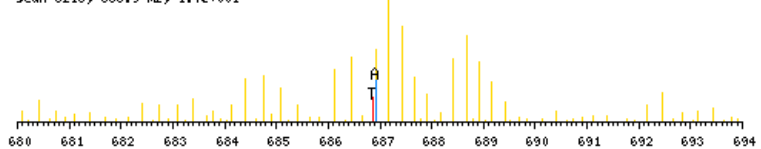

zoomed in precursor plot; T=theoretical m/z, A=acquired m/z

| b <sup>+</sup> | #  | AA | #  | y <sup>+</sup> | y <sup>2+</sup> |
|----------------|----|----|----|----------------|-----------------|
| 144.0661       | 1  | T  | 22 |                |                 |
| 272.1247       | 2  | Q  | 21 | 2601.3789      | 1301.1934       |
| 401.1672       | 3  | E  | 20 | 2473.3204      | 1237.1641       |
| 564.2306       | 4  | Y  | 19 | 2344.2778      | 1172.6428       |
| 679.2575       | 5  | D  | 18 | 2181.2144      | 1091.1111       |
| 793.3004       | 6  | N  | 17 | 2066.1875      | 1033.5977       |
| 949.4267       | 7  | K  | 16 | 1952.1446      | 976.5762        |
| 1105.5279      | 8  | R  | 15 | 1796.0183      | 898.5131        |
| 1202.5806      | 9  | P  | 14 | 1639.9172      | 820.4625        |
| 1301.6490      | 10 | V  | 13 | 1542.8644      | 771.9361        |
| 1414.7331      | 11 | L  | 12 | 1443.7960      | 722.4019        |
| 1513.8015      | 12 | V  | 11 | 1330.7119      | 665.8599        |
| 1626.8856      | 13 | L  | 10 | 1231.6435      | 616.3257        |
| 1754.9442      | 14 | Q  | 9  | 1118.5594      | 559.7836        |
| 1868.9871      | 15 | N  | 8  | 990.5009       | 495.7543        |
| 1998.0297      | 16 | E  | 7  | 876.4579       | 438.7329        |
| 2069.0668      | 17 | A  | 6  | 747.4153       | 374.2116        |
| 2182.1509      | 18 | L  | 5  | 676.3782       | 338.6930        |
| 2345.2142      | 19 | Y  | 4  | 563.2942       | 282.1510        |
| 2442.2669      | 20 | P  | 3  | 400.2308       | 200.6193        |
| 2570.3255      | 21 | Q  | 2  | 303.1781       | 152.0930        |
|                | 22 | R  | 1  | 175.1195       | 88.0637         |

N-term:+43.02 K(7):+156.13

X-range:

0 - 0

MassTol: Y-zoom:

0. 1.

MassType:

☐ AVG ☒ MONO

Axis:

☒ 1 ☐ 2

Label:

☒ I ☐ M ☐ -

Ions:

a ☐ + ☐ 2+ ☐ 3+

b ☒ + ☐ 2+ ☐ 3+

c ☐ + ☐ 2+ ☐ 3+

x ☐ + ☐ 2+ ☐ 3+

y ☒ + ☒ 2+ ☐ 3+

z ☐ + ☐ 2+ ☐ 3+

hide H<sub>2</sub>O/NH<sub>3</sub> ☐

zoom 112-122 ☐

GO

TOPPESTPALPR, MH+ 1206.6483, m/z 402.8876  
L OS G30 P160811 220811-s1.02415.02415.3.dta

scan 2415; 8.0e+000

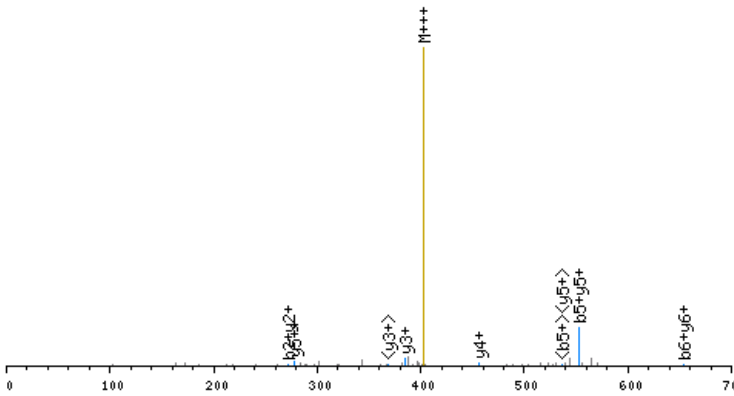

click image to zoom in; click top corners to zoom out [precursor±]

scan 2414; 402.9 m/z; 1.5e+000

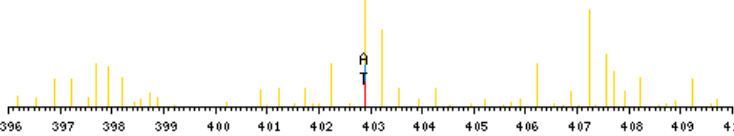

zoomed in precursor plot; T=theoretical m/z, A=acquired m/z

| b <sup>+</sup> | #  | AA | #  | y <sup>+</sup> | y <sup>2+</sup> |
|----------------|----|----|----|----------------|-----------------|
| 144.0661       | 1  | T  | 11 |                |                 |
| 272.1247       | 2  | Q  | 10 | 1063.5900      | 532.2989        |
| 369.1774       | 3  | P  | 9  | 935.5314       | 468.2696        |
| 466.2302       | 4  | P  | 8  | 838.4787       | 419.7433        |
| 553.2622       | 5  | S  | 7  | 741.4259       | 371.2169        |
| 654.3099       | 6  | T  | 6  | 654.3939       | 327.7009        |
| 751.3627       | 7  | P  | 5  | 553.3462       | 277.1770        |
| 822.3998       | 8  | A  | 4  | 456.2934       | 228.6506        |
| 935.4838       | 9  | L  | 3  | 385.2563       | 193.1321        |
| 1032.5366      | 10 | P  | 2  | 272.1723       | 136.5900        |
|                | 11 | R  | 1  | 175.1195       | 88.0637         |

N-term:+43.02

X-range:

0 - 0

MassTol: Y-zoom:

0. 1.

MassType:

☐ AVG ☒ MONO

Axis:

☒ 1 ☐ 2

Label:

☒ I ☐ M ☐ -

Ions:

a ☐ + ☐ 2+ ☐ 3+

b ☒ + ☐ 2+ ☐ 3+

c ☐ + ☐ 2+ ☐ 3+

x ☐ + ☐ 2+ ☐ 3+

y ☒ + ☒ 2+ ☐ 3+

z ☐ + ☐ 2+ ☐ 3+

hide H<sub>2</sub>O/NH<sub>3</sub> ☐

zoom 112-122 ☐

GO

TSPEGAQNKEIDCLSPEAQR, MH+ 2306.1147, m/z 769.3764  
L OS G30 P160811 220811-s1.03880.03880.3.dta

scan 3880; 1.4e+000

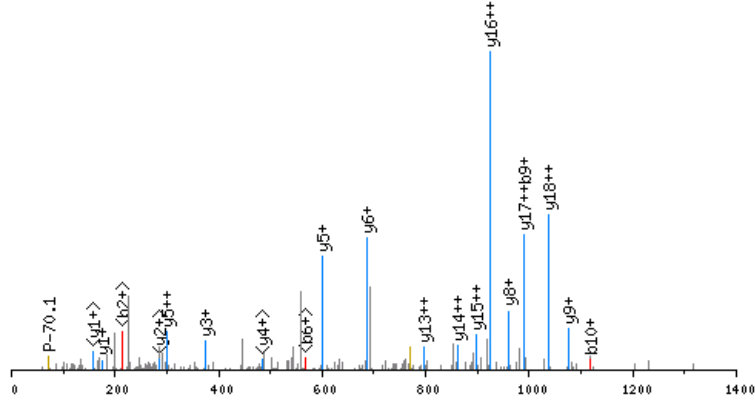

click image to zoom in; click top corners to zoom out [precursor±]

scan 3879; 769.4 m/z; 8.9e+000

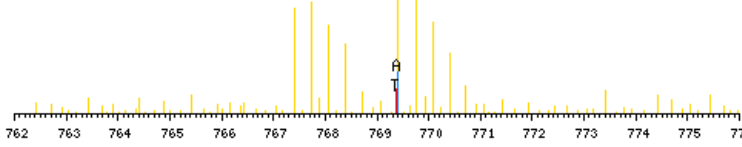

zoomed in precursor plot; T=theoretical m/z, A=acquired m/z

| b <sup>+</sup> | #  | AA | #  | y <sup>+</sup> | y <sup>2+</sup> |
|----------------|----|----|----|----------------|-----------------|
| 144.0661       | 1  | T  | 20 |                |                 |
| 231.0981       | 2  | S  | 19 | 2163.0564      | 1082.0321       |
| 328.1509       | 3  | P  | 18 | 2076.0244      | 1038.5161       |
| 457.1935       | 4  | E  | 17 | 1978.9716      | 989.9897        |
| 514.2149       | 5  | G  | 16 | 1849.9290      | 925.4684        |
| 585.2520       | 6  | A  | 15 | 1792.9076      | 896.9577        |
| 713.3106       | 7  | Q  | 14 | 1721.8704      | 861.4391        |
| 827.3535       | 8  | N  | 13 | 1593.8119      | 797.4098        |
| 989.5116       | 9  | K  | 12 | 1479.7689      | 740.3884        |
| 1118.5542      | 10 | E  | 11 | 1317.6108      | 659.3093        |
| 1231.6383      | 11 | I  | 10 | 1188.5682      | 594.7880        |
| 1346.6652      | 12 | D  | 9  | 1075.4842      | 538.2460        |
| 1506.6958      | 13 | C  | 8  | 960.4572       | 480.7325        |
| 1619.7799      | 14 | L  | 7  | 800.4266       | 400.7172        |
| 1706.8119      | 15 | S  | 6  | 687.3426       | 344.1752        |
| 1803.8647      | 16 | P  | 5  | 600.3105       | 300.6592        |
| 1932.9073      | 17 | E  | 4  | 503.2578       | 252.1328        |
| 2003.9444      | 18 | A  | 3  | 374.2152       | 187.6115        |
| 2132.0030      | 19 | Q  | 2  | 303.1781       | 152.0930        |
|                | 20 | R  | 1  | 175.1195       | 88.0637         |

N-term:+43.02 K(9):+162.16  
C(13):+160.03

X-range:

0 - 0

MassTol: Y-zoom:

0. 1.

MassType:

☐ AVG ☒ MONO

Axis:

☒ 1 ☐ 2

Label:

☒ I ☐ M ☐ -

Ions:

a ☐ + ☐ 2+ ☐ 3+

b ☒ + ☐ 2+ ☐ 3+

c ☐ + ☐ 2+ ☐ 3+

x ☐ + ☐ 2+ ☐ 3+

y ☒ + ☒ 2+ ☐ 3+

z ☐ + ☐ 2+ ☐ 3+

hide H<sub>2</sub>O/NH<sub>3</sub> ☐

zoom 112-122 ☐

GO

TSSYGHVLER, MH+ 1190.5806, m/z 595.7939  
L OS G31 P160811 220811-s1.03998.03998.2.dta

scan 3998; 1.1e+001

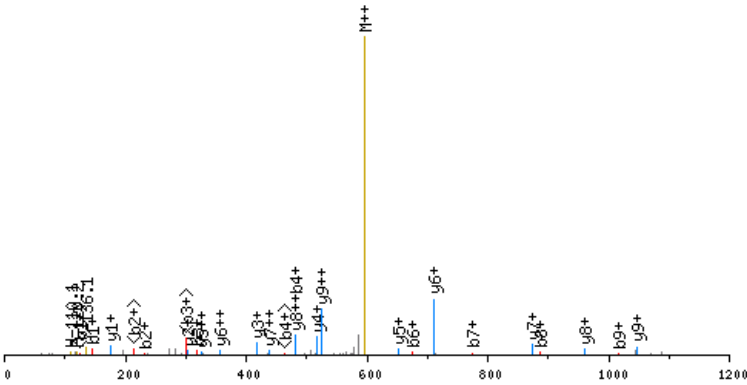

click image to zoom in; click top corners to zoom out

[precursor±]

scan 3994; 595.8 m/z; 2.4e+001

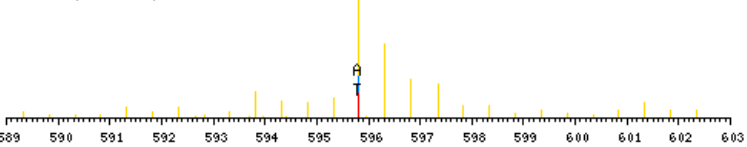

zoomed in precursor plot; T=theoretical m/z, A=acquired m/z

| b <sup>+</sup> | #  | AA | #  | y <sup>+</sup> | y <sup>2+</sup> |
|----------------|----|----|----|----------------|-----------------|
| 144.0661       | 1  | T  | 10 |                |                 |
| 231.0981       | 2  | S  | 9  | 1047.5223      | 524.2651        |
| 318.1301       | 3  | S  | 8  | 960.4903       | 480.7491        |
| 481.1935       | 4  | Y  | 7  | 873.4583       | 437.2331        |
| 538.2149       | 5  | G  | 6  | 710.3949       | 355.7014        |
| 675.2738       | 6  | H  | 5  | 653.3735       | 327.1907        |
| 774.3423       | 7  | V  | 4  | 516.3146       | 258.6612        |
| 887.4263       | 8  | L  | 3  | 417.2462       | 209.1270        |
| 1016.4689      | 9  | E  | 2  | 304.1621       | 152.5850        |
|                | 10 | R  | 1  | 175.1195       | 88.0637         |

N-term:+43.02

X-range:

0 - 0

MassTol: Y-zoom:

0. 1.

MassType:

☐AVG ☒MONO

Axis:

☒1 ☐2

Label:

☒I ☐M ☐-

Ions:

a ☐+ ☐2+ ☐3+

b ☒+ ☐2+ ☐3+

c ☐+ ☐2+ ☐3+

x ☐+ ☐2+ ☐3+

y ☒+ ☒2+ ☐3+

z ☐+ ☐2+ ☐3+

hide H<sub>2</sub>O/NH<sub>3</sub> ☐

zoom 112-122 ☐

GO

TTKDPESEHPSVTLFR, MH+ 1919.9927, m/z 640.6691  
L OS G33 P160811 220811-s1.04619.04619.3.dta

scan 4619; 6.8e+000

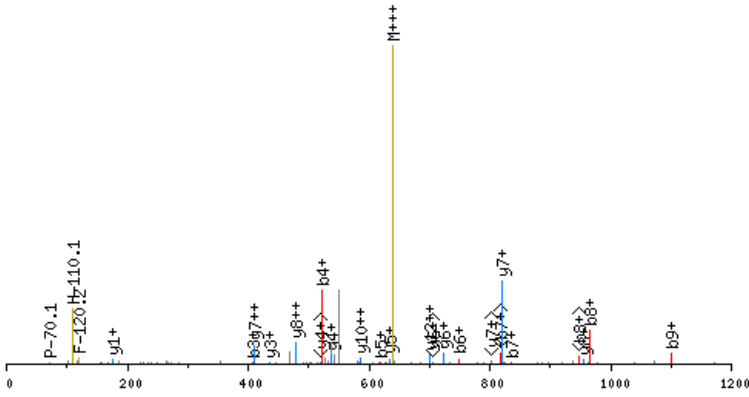

click image to zoom in; click top corners to zoom out

[precursor±]

scan 4617; 640.7 m/z; 1.4e+001

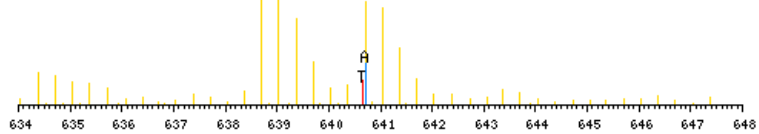

zoomed in precursor plot; T=theoretical m/z, A=acquired m/z

| b <sup>+</sup> | #  | AA | #  | y <sup>+</sup> | y <sup>2+</sup> |
|----------------|----|----|----|----------------|-----------------|
| 144.0661       | 1  | T  | 16 |                |                 |
| 245.1138       | 2  | T  | 15 | 1776.9345      | 888.9712        |
| 407.2719       | 3  | K  | 14 | 1675.8868      | 838.4473        |
| 522.2988       | 4  | D  | 13 | 1513.7287      | 757.3683        |
| 619.3516       | 5  | P  | 12 | 1398.7018      | 699.8548        |
| 748.3942       | 6  | E  | 11 | 1301.6490      | 651.3284        |
| 835.4262       | 7  | S  | 10 | 1172.6064      | 586.8071        |
| 964.4688       | 8  | E  | 9  | 1085.5744      | 543.2911        |
| 1101.5277      | 9  | H  | 8  | 956.5318       | 478.7698        |
| 1198.5805      | 10 | P  | 7  | 819.4729       | 410.2403        |
| 1285.6125      | 11 | S  | 6  | 722.4201       | 361.7140        |
| 1384.6809      | 12 | V  | 5  | 635.3881       | 318.1979        |
| 1485.7286      | 13 | T  | 4  | 536.3197       | 268.6637        |
| 1598.8126      | 14 | L  | 3  | 435.2720       | 218.1399        |
| 1745.8811      | 15 | F  | 2  | 322.1879       | 161.5979        |
|                | 16 | R  | 1  | 175.1195       | 88.0637         |

N-term:+43.02 K(3):+162.16

N-term:+43.02

X-range:

0 - 0

MassTol: Y-zoom:

0. 1.

MassType:

☐AVG ☒MONO

Axis:

☒1 ☐2

Label:

☒I ☐M ☐-

Ions:

a ☐+ ☐2+ ☐3+

b ☒+ ☐2+ ☐3+

c ☐+ ☐2+ ☐3+

x ☐+ ☐2+ ☐3+

y ☒+ ☒2+ ☐3+

z ☐+ ☐2+ ☐3+

hide H<sub>2</sub>O/NH<sub>3</sub> ☐

zoom 112-122 ☐

GO

TTTTTFKGVDPSNR, MH+ 1600.8395, m/z 534.2847  
L OS G30 P160811 220811-s1.03300.03300.3.dta

scan 3300; 1.8e+000

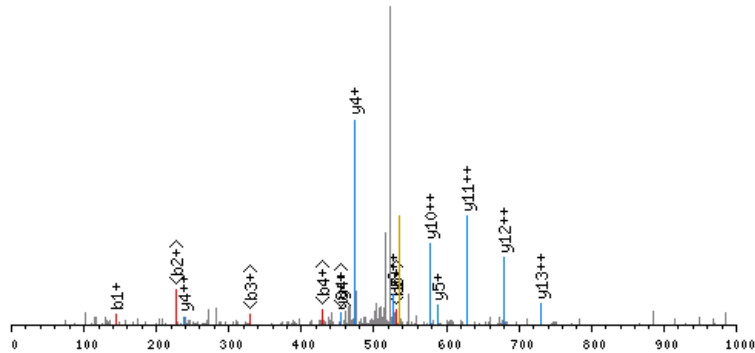

click image to zoom in; click top corners to zoom out

[precursor±]

scan 3299; 534.3 m/z; 1.1e+001

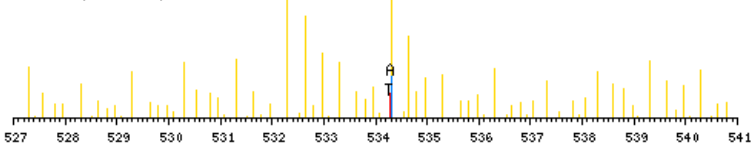

zoomed in precursor plot; T=theoretical m/z, A=acquired m/z

| b <sup>+</sup> | #  | AA | #  | y <sup>+</sup> | y <sup>2+</sup> |
|----------------|----|----|----|----------------|-----------------|
| 144.0661       | 1  | T  | 14 |                |                 |
| 245.1138       | 2  | T  | 13 | 1457.7813      | 729.3945        |
| 346.1614       | 3  | T  | 12 | 1356.7336      | 678.8707        |
| 447.2091       | 4  | T  | 11 | 1255.6859      | 628.3469        |
| 548.2568       | 5  | T  | 10 | 1154.6382      | 577.8230        |
| 695.3252       | 6  | F  | 9  | 1053.5906      | 527.2992        |
| 857.4833       | 7  | K  | 8  | 906.5221       | 453.7650        |
| 914.5048       | 8  | G  | 7  | 744.3640       | 372.6859        |
| 1013.5732      | 9  | V  | 6  | 687.3426       | 344.1752        |
| 1128.6001      | 10 | D  | 5  | 588.2742       | 294.6410        |
| 1225.6529      | 11 | P  | 4  | 473.2472       | 237.1275        |
| 1339.6958      | 12 | N  | 3  | 376.1945       | 188.6011        |
| 1426.7278      | 13 | S  | 2  | 262.1515       | 131.5797        |
|                | 14 | R  | 1  | 175.1195       | 88.0637         |

N-term:+43.02 K(7):+162.16

X-range:

0 - 0

MassTol: Y-zoom:

0. 1.

MassType:

☐ AVG ☒ MONO

Axis:

☒ 1 ☐ 2

Label:

☒ I ☐ M ☐ -

Ions:

a ☐ + ☐ 2+ ☐ 3+

b ☒ + ☐ 2+ ☐ 3+

c ☐ + ☐ 2+ ☐ 3+

x ☐ + ☐ 2+ ☐ 3+

y ☒ + ☒ 2+ ☐ 3+

z ☐ + ☐ 2+ ☐ 3+

hide H<sub>2</sub>O/NH<sub>3</sub> ☐

zoom 112-122 ☐

GO

TVLSGGSTMYPGIADR, MH+ 1666.8111, m/z 556.2752  
L OS G30 P160811 220811-s1.04821.04821.3.dta

scan 4821; 4.5e+000

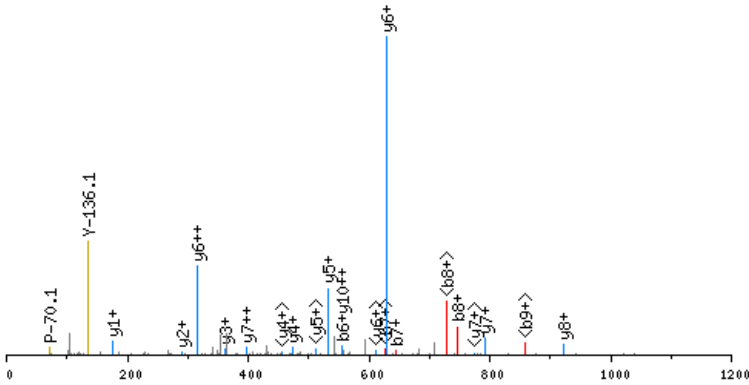

click image to zoom in; click top corners to zoom out

[precursor±]

scan 4819; 556.3 m/z; 1.1e+001

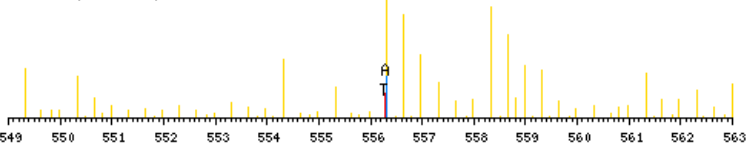

zoomed in precursor plot; T=theoretical m/z, A=acquired m/z

| b <sup>+</sup> | #  | AA | #  | y <sup>+</sup> | y <sup>2+</sup> |
|----------------|----|----|----|----------------|-----------------|
| 144.0661       | 1  | T  | 16 |                |                 |
| 243.1345       | 2  | V  | 15 | 1523.7528      | 762.3803        |
| 356.2186       | 3  | L  | 14 | 1424.6844      | 712.8461        |
| 443.2506       | 4  | S  | 13 | 1311.6003      | 656.3041        |
| 500.2720       | 5  | G  | 12 | 1224.5683      | 612.7881        |
| 557.2935       | 6  | G  | 11 | 1167.5468      | 584.2773        |
| 644.3255       | 7  | S  | 10 | 1110.5254      | 555.7666        |
| 745.3732       | 8  | T  | 9  | 1023.4933      | 512.2506        |
| 876.4137       | 9  | M  | 8  | 922.4457       | 461.7267        |
| 1039.4770      | 10 | Y  | 7  | 791.4052       | 396.2065        |
| 1136.5298      | 11 | P  | 6  | 628.3418       | 314.6748        |
| 1193.5513      | 12 | G  | 5  | 531.2891       | 266.1485        |
| 1306.6353      | 13 | I  | 4  | 474.2676       | 237.6377        |
| 1377.6724      | 14 | A  | 3  | 361.1836       | 181.0957        |
| 1492.6994      | 15 | D  | 2  | 290.1464       | 145.5771        |
|                | 16 | R  | 1  | 175.1195       | 88.0637         |

N-term:+43.02

X-range:

0 - 0

MassTol: Y-zoom:

0. 1.

MassType:

☐AVG ☒MONO

Axis:

☒1 ☐2

Label:

☒I ☐M ☐-

Ions:

a ☐+ ☐2+ ☐3+

b ☒+ ☐2+ ☐3+

c ☐+ ☐2+ ☐3+

x ☐+ ☐2+ ☐3+

y ☒+ ☒2+ ☐3+

z ☐+ ☐2+ ☐3+

hide H<sub>2</sub>O/NH<sub>3</sub> ☐

zoom 112-122 ☐

GO

VEKEEAGGGGGGISEEEAAQYDR, MH+ 2471.1387, m/z 824.3844  
L OS G30 P160811 220811-s1.03731.03731.3.dta

scan 3731; 1.3e+000

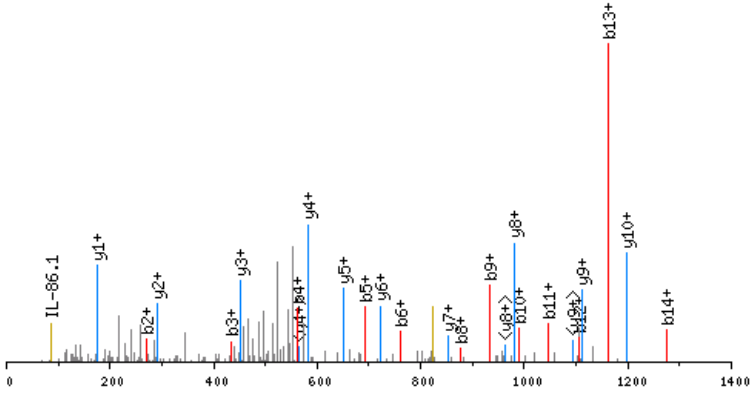

click image to zoom in; click top corners to zoom out [\[precursor±\]](#)

scan 3729; 824.4 m/z; 1.4e+001

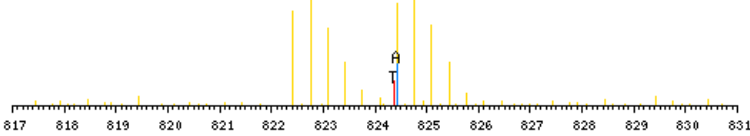

zoomed in precursor plot; T=theoretical m/z, A=acquired m/z

| b <sup>+</sup> | #  | AA | #  | y <sup>+</sup> | y <sup>2+</sup> |
|----------------|----|----|----|----------------|-----------------|
| 142.0868       | 1  | V  | 24 |                |                 |
| 271.1294       | 2  | E  | 23 | 2330.0597      | 1165.5338       |
| 433.2875       | 3  | K  | 22 | 2201.0171      | 1101.0125       |
| 562.3301       | 4  | E  | 21 | 2038.8590      | 1019.9334       |
| 691.3727       | 5  | E  | 20 | 1909.8164      | 955.4121        |
| 762.4098       | 6  | A  | 19 | 1780.7738      | 890.8908        |
| 819.4313       | 7  | G  | 18 | 1709.7367      | 855.3723        |
| 876.4527       | 8  | G  | 17 | 1652.7152      | 826.8615        |
| 933.4742       | 9  | G  | 16 | 1595.6938      | 798.3508        |
| 990.4957       | 10 | G  | 15 | 1538.6723      | 769.8401        |
| 1047.5171      | 11 | G  | 14 | 1481.6508      | 741.3293        |
| 1104.5386      | 12 | G  | 13 | 1424.6294      | 712.8186        |
| 1161.5601      | 13 | G  | 12 | 1367.6079      | 684.3079        |
| 1274.6441      | 14 | I  | 11 | 1310.5864      | 655.7971        |
| 1361.6761      | 15 | S  | 10 | 1197.5024      | 599.2551        |
| 1490.7187      | 16 | E  | 9  | 1110.4704      | 555.7391        |
| 1619.7613      | 17 | E  | 8  | 981.4278       | 491.2178        |
| 1748.8039      | 18 | E  | 7  | 852.3852       | 426.6965        |
| 1819.8410      | 19 | A  | 6  | 723.3426       | 362.1752        |
| 1890.8782      | 20 | A  | 5  | 652.3055       | 326.6566        |
| 2018.9367      | 21 | Q  | 4  | 581.2683       | 291.1381        |
| 2182.0001      | 22 | Y  | 3  | 453.2098       | 227.1088        |
| 2297.0270      | 23 | D  | 2  | 290.1464       | 145.5771        |
|                | 24 | R  | 1  | 175.1195       | 88.0637         |

N-term:+43.02 K(3):+162.16

X-range:

0 - 0

MassTol: Y-zoom:

0. 1.

MassType:

☐AVG ☒MONO

Axis:

☒1 ☐2

Label:

☒I ☐M ☐-

Ions:

a ☐+ ☐2+ ☐3+

b ☒+ ☐2+ ☐3+

c ☐+ ☐2+ ☐3+

x ☐+ ☐2+ ☐3+

y ☒+ ☒2+ ☐3+

z ☐+ ☐2+ ☐3+

hide H<sub>2</sub>O/NH<sub>3</sub> ☐

zoom 112-122 ☐

GO

VISLSGEHSIIGR, MH+ 1409.7753, m/z 470.5966  
L OS G32 P160811 220811-s1.06359.06359.3.dta

scan 6359; 3.5e+000

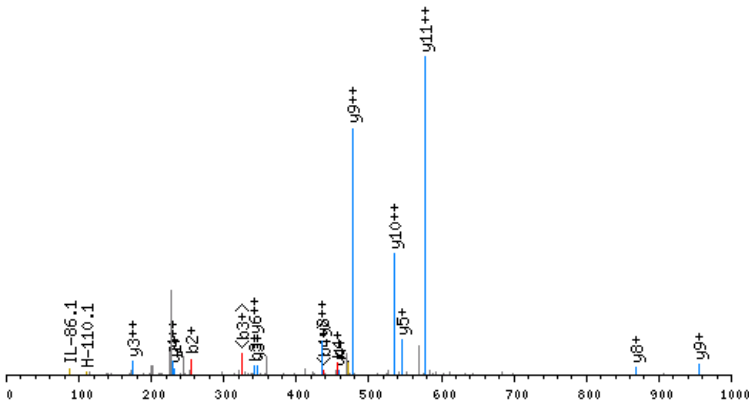

click image to zoom in; click top corners to zoom out

[precursor±]

scan 6358; 470.6 m/z; 7.3e+000

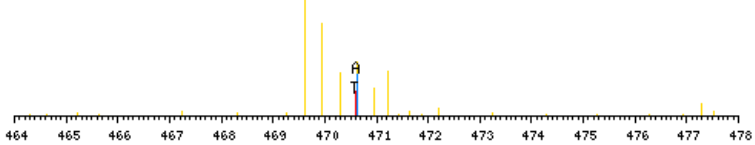

zoomed in precursor plot; T=theoretical m/z, A=acquired m/z

| b <sup>+</sup> | #  | AA | #  | y <sup>+</sup> | y <sup>2+</sup> |
|----------------|----|----|----|----------------|-----------------|
| 142.0868       | 1  | V  | 13 |                |                 |
| 255.1709       | 2  | I  | 12 | 1268.6963      | 634.8520        |
| 342.2029       | 3  | S  | 11 | 1155.6122      | 578.3100        |
| 455.2870       | 4  | L  | 10 | 1068.5802      | 534.7940        |
| 542.3190       | 5  | S  | 9  | 955.4961       | 478.2520        |
| 599.3405       | 6  | G  | 8  | 868.4641       | 434.7360        |
| 728.3831       | 7  | E  | 7  | 811.4426       | 406.2252        |
| 865.4420       | 8  | H  | 6  | 682.4000       | 341.7039        |
| 952.4740       | 9  | S  | 5  | 545.3411       | 273.1745        |
| 1065.5581      | 10 | I  | 4  | 458.3091       | 229.6585        |
| 1178.6421      | 11 | I  | 3  | 345.2250       | 173.1164        |
| 1235.6636      | 12 | G  | 2  | 232.1410       | 116.5744        |
|                | 13 | R  | 1  | 175.1195       | 88.0637         |

N-term:+43.02

X-range:

0 - 0

MassTol: Y-zoom:

0. 1.

MassType:

☐AVG ☒MONO

Axis:

☒1 ☐2

Label:

☒I ☐M ☐-

Ions:

a ☐+ ☐2+ ☐3+

b ☒+ ☐2+ ☐3+

c ☐+ ☐2+ ☐3+

x ☐+ ☐2+ ☐3+

y ☒+ ☒2+ ☐3+

z ☐+ ☐2+ ☐3+

hide H<sub>2</sub>O/NH<sub>3</sub> ☐

zoom 112-122 ☐

GO

VKVGVNQFGR, MH+ 1102.6374, m/z 551.8223  
L OS G31 P160811 220811-s1.05358.05358.2.dta

scan 5358; 4.2e+001

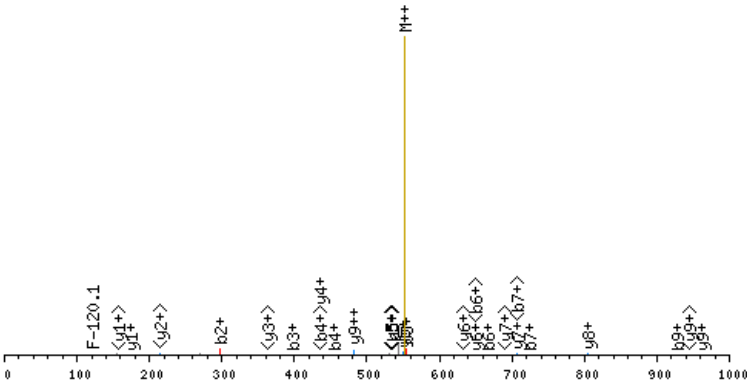

click image to zoom in; click top corners to zoom out

[precursor±]

scan 5354; 551.8 m/z; 4.2e+001

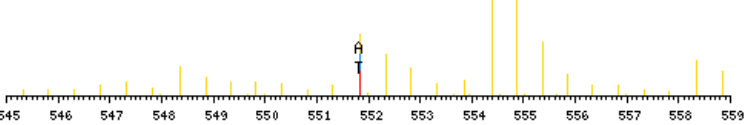

zoomed in precursor plot; T=theoretical m/z, A=acquired m/z

| b <sup>+</sup> | #  | AA | #  | y <sup>+</sup> | y <sup>2+</sup> |
|----------------|----|----|----|----------------|-----------------|
| 142.0868       | 1  | V  | 10 |                |                 |
| 298.2131       | 2  | K  | 9  | 961.5584       | 481.2831        |
| 397.2815       | 3  | V  | 8  | 805.4321       | 403.2199        |
| 454.3030       | 4  | G  | 7  | 706.3636       | 353.6857        |
| 553.3714       | 5  | V  | 6  | 649.3422       | 325.1750        |
| 667.4143       | 6  | N  | 5  | 550.2738       | 275.6408        |
| 724.4358       | 7  | G  | 4  | 436.2308       | 218.6193        |
| 871.5042       | 8  | F  | 3  | 379.2094       | 190.1086        |
| 928.5257       | 9  | G  | 2  | 232.1410       | 116.5744        |
|                | 10 | R  | 1  | 175.1195       | 88.0637         |

N-term:+43.02 K(2):+156.13

X-range:

0 - 0

MassTol: Y-zoom:

0. 1.

MassType:

☐AVG ☒MONO

Axis:

☒1 ☐2

Label:

☒I ☐M ☐-

Ions:

a ☐+ ☐2+ ☐3+

b ☒+ ☐2+ ☐3+

c ☐+ ☐2+ ☐3+

x ☐+ ☐2+ ☐3+

y ☒+ ☒2+ ☐3+

z ☐+ ☐2+ ☐3+

hide H<sub>2</sub>O/NH<sub>3</sub> ☐

zoom 112-122 ☐

GO

VLKSHQAHAR, MH+ 1222.7233, m/z 408.2460  
L OS G34 P160811 220811-s1.02287.02287.3.dta

scan 2287; 1.4e+001

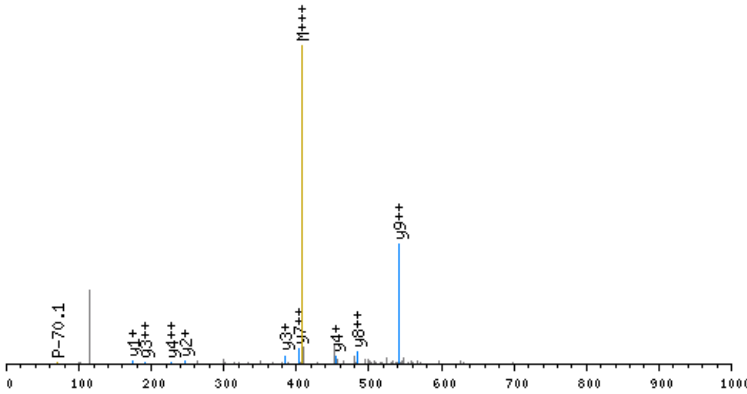

click image to zoom in; click top corners to zoom out

[precursor±]

scan 2285; 408.2 m/z; 3.6e+001

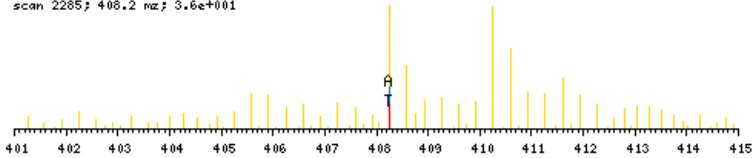

zoomed in precursor plot; T=theoretical m/z, A=acquired m/z

| b <sup>+</sup> | #  | AA | #  | y <sup>+</sup> | y <sup>2+</sup> |
|----------------|----|----|----|----------------|-----------------|
| 142.0868       | 1  | V  | 10 |                |                 |
| 255.1709       | 2  | L  | 9  | 1081.6443      | 541.3261        |
| 417.3290       | 3  | K  | 8  | 968.5603       | 484.7840        |
| 504.3610       | 4  | S  | 7  | 806.4022       | 403.7050        |
| 641.4199       | 5  | H  | 6  | 719.3701       | 360.1890        |
| 769.4785       | 6  | Q  | 5  | 582.3112       | 291.6595        |
| 840.5156       | 7  | A  | 4  | 454.2526       | 227.6302        |
| 977.5745       | 8  | H  | 3  | 383.2155       | 192.1117        |
| 1048.6116      | 9  | A  | 2  | 246.1566       | 123.5822        |
|                | 10 | R  | 1  | 175.1195       | 88.0637         |

N-term:+43.02 K(3):+162.16

X-range:

0 - 0

MassTol: Y-zoom:

0. 1.

MassType:

☐AVG ☒MONO

Axis:

☒1 ☐2

Label:

☒I ☐M ☐-

Ions:

a ☐+ ☐2+ ☐3+

b ☒+ ☐2+ ☐3+

c ☐+ ☐2+ ☐3+

x ☐+ ☐2+ ☐3+

y ☒+ ☒2+ ☐3+

z ☐+ ☐2+ ☐3+

hide H<sub>2</sub>O/NH<sub>3</sub> ☐

zoom 112-122 ☐

GO

VNADEVGGEALGR, MH+ 1328.6446, m/z 664.8260  
L OS G35 P160811 220811-s1.09150.09150.2.dta

scan 9150; 9.2e-001

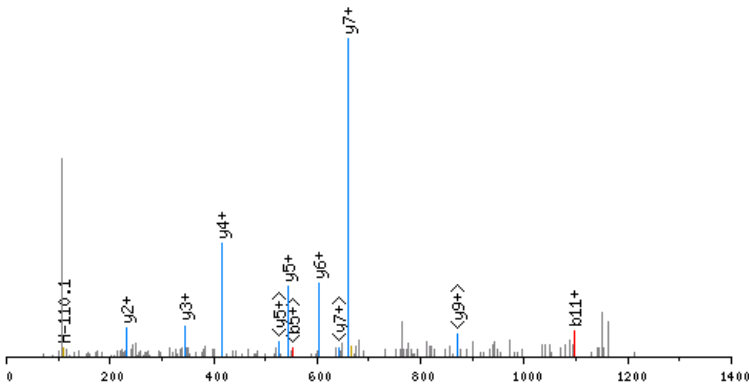

click image to zoom in; click top corners to zoom out

[precursor±]

scan 9148; 664.8 m/z; 2.7e+000

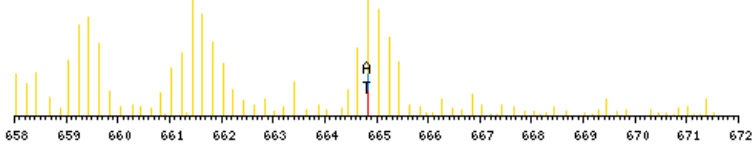

zoomed in precursor plot; T=theoretical m/z, A=acquired m/z

| b <sup>+</sup> | #  | AA | #  | y <sup>+</sup> | y <sup>2+</sup> |
|----------------|----|----|----|----------------|-----------------|
| 142.0868       | 1  | V  | 13 |                |                 |
| 256.1297       | 2  | N  | 12 | 1187.5657      | 594.2867        |
| 327.1669       | 3  | A  | 11 | 1073.5227      | 537.2653        |
| 442.1938       | 4  | D  | 10 | 1002.4856      | 501.7467        |
| 571.2364       | 5  | E  | 9  | 887.4587       | 444.2332        |
| 670.3048       | 6  | V  | 8  | 758.4161       | 379.7120        |
| 727.3263       | 7  | G  | 7  | 659.3477       | 330.1777        |
| 784.3477       | 8  | G  | 6  | 602.3262       | 301.6670        |
| 913.3903       | 9  | E  | 5  | 545.3047       | 273.1563        |
| 984.4274       | 10 | A  | 4  | 416.2621       | 208.6350        |
| 1097.5115      | 11 | L  | 3  | 345.2250       | 173.1164        |
| 1154.5330      | 12 | G  | 2  | 232.1410       | 116.5744        |
|                | 13 | R  | 1  | 175.1195       | 88.0637         |

N-term:+43.02

X-range:

0 - 0

MassTol: Y-zoom:

0. 1.

MassType:

☐ AVG ☒ MONO

Axis:

☒ 1 ☐ 2

Label:

☒ I ☐ M ☐ -

Ions:

a ☐ + ☐ 2+ ☐ 3+

b ☒ + ☐ 2+ ☐ 3+

c ☐ + ☐ 2+ ☐ 3+

x ☐ + ☐ 2+ ☐ 3+

y ☒ + ☒ 2+ ☐ 3+

z ☐ + ☐ 2+ ☐ 3+

hide H<sub>2</sub>O/NH<sub>3</sub> ☐

zoom 112-122 ☐

GO

VSVMTVDTSHEDMIHDAQMDYYGTR, MH+ 3057.3029, m/z 765.0812  
L OS G32 P160811 220811-s1.06255.06255.4.dta

scan 6255; 5.0e-001

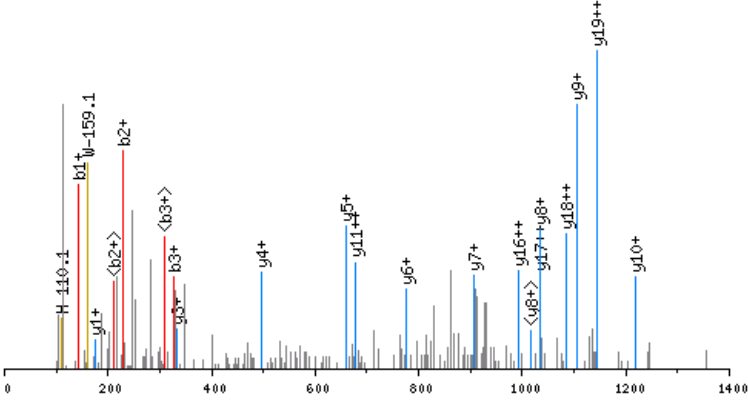

click image to zoom in; click top corners to zoom out [precursor±]

scan 6253; 765.1 m/z; 6.2e+000

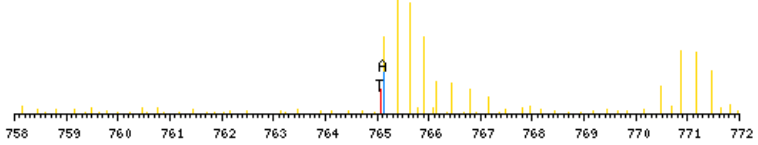

zoomed in precursor plot; T=theoretical m/z, A=acquired m/z

| b <sup>+</sup> | #  | AA | #  | y <sup>+</sup> | y <sup>2+</sup> |
|----------------|----|----|----|----------------|-----------------|
| 142.0868       | 1  | V  | 26 |                |                 |
| 229.1188       | 2  | S  | 25 | 2916.2239      | 1458.6158       |
| 328.1873       | 3  | V  | 24 | 2829.1918      | 1415.0998       |
| 459.2277       | 4  | M  | 23 | 2730.1234      | 1365.5656       |
| 573.2707       | 5  | N  | 22 | 2599.0829      | 1300.0454       |
| 674.3183       | 6  | T  | 21 | 2485.0400      | 1243.0239       |
| 773.3868       | 7  | V  | 20 | 2383.9923      | 1192.5001       |
| 888.4137       | 8  | D  | 19 | 2284.9239      | 1142.9659       |
| 989.4614       | 9  | T  | 18 | 2169.8970      | 1085.4524       |
| 1076.4934      | 10 | S  | 17 | 2068.8493      | 1034.9286       |
| 1213.5523      | 11 | H  | 16 | 1981.8173      | 991.4125        |
| 1342.5949      | 12 | E  | 15 | 1844.7584      | 922.8831        |
| 1457.6219      | 13 | D  | 14 | 1715.7158      | 858.3618        |
| 1588.6623      | 14 | M  | 13 | 1600.6888      | 800.8483        |
| 1701.7464      | 15 | I  | 12 | 1469.6483      | 735.3281        |
| 1838.8053      | 16 | H  | 11 | 1356.5643      | 678.7860        |
| 1953.8323      | 17 | D  | 10 | 1219.5054      | 610.2566        |
| 2024.8694      | 18 | A  | 9  | 1104.4784      | 552.7431        |
| 2152.9280      | 19 | Q  | 8  | 1033.4413      | 517.2246        |
| 2283.9684      | 20 | M  | 7  | 905.3827       | 453.1953        |
| 2398.9954      | 21 | D  | 6  | 774.3422       | 387.6750        |
| 2562.0587      | 22 | Y  | 5  | 659.3153       | 330.1616        |
| 2725.1220      | 23 | Y  | 4  | 496.2520       | 248.6299        |
| 2782.1435      | 24 | G  | 3  | 333.1886       | 167.0982        |
| 2883.1912      | 25 | T  | 2  | 276.1672       | 138.5875        |
|                | 26 | R  | 1  | 175.1195       | 88.0637         |

N-term:+43.02

X-range:

0 - 0

MassTol: Y-zoom:

0. 1.

MassType:

☐ AVG ☒ MONO

Axis:

☒ 1 ☐ 2

Label:

☒ I ☐ M ☐ -

Ions:

a ☐ + ☐ 2+ ☐ 3+

b ☒ + ☐ 2+ ☐ 3+

c ☐ + ☐ 2+ ☐ 3+

x ☐ + ☐ 2+ ☐ 3+

y ☒ + ☒ 2+ ☐ 3+

z ☐ + ☐ 2+ ☐ 3+

hide H<sub>2</sub>O/NH<sub>3</sub> ☐

zoom 112-122 ☐

GO

WDPEEERR, MH+ 1158.5180, m/z 386.8442  
L OS G35 P160811 220811-s1.04069.04069.3.dta

scan 4069; 7.4e+000

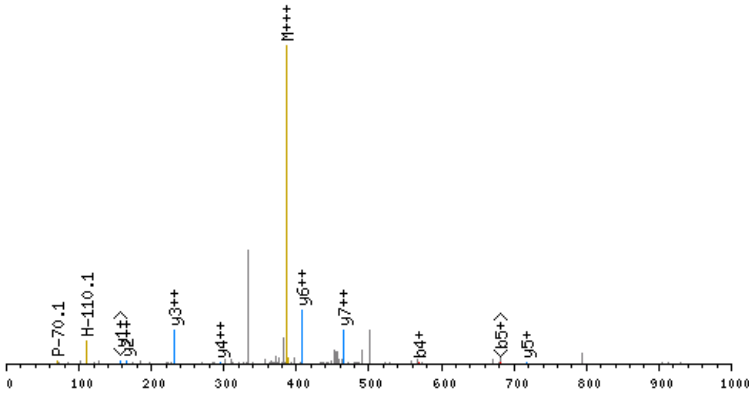

click image to zoom in; click top corners to zoom out

[precursor±]

scan 4068; 386.8 m/z; 2.1e+001

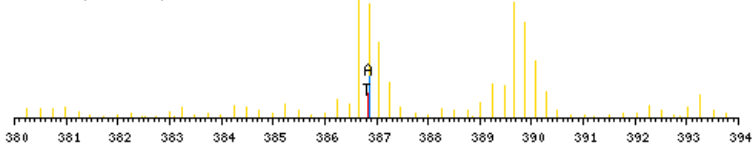

zoomed in precursor plot; T=theoretical m/z, A=acquired m/z

| b <sup>+</sup> | # | AA | # | y <sup>+</sup> | y <sup>2+</sup> |
|----------------|---|----|---|----------------|-----------------|
| 229.0977       | 1 | W  | 8 |                |                 |
| 344.1247       | 2 | D  | 7 | 930.4281       | 465.7180        |
| 441.1774       | 3 | P  | 6 | 815.4012       | 408.2045        |
| 570.2200       | 4 | E  | 5 | 718.3484       | 359.6781        |
| 699.2626       | 5 | E  | 4 | 589.3058       | 295.1568        |
| 828.3052       | 6 | E  | 3 | 460.2632       | 230.6355        |
| 984.4063       | 7 | R  | 2 | 331.2206       | 166.1142        |
|                | 8 | R  | 1 | 175.1195       | 88.0637         |

N-term:+43.02

X-range:

0 - 0

MassTol: Y-zoom:

0. 1.

MassType:

☐AVG ☒MONO

Axis:

☒1 ☐2

Label:

☒I ☐M ☐-

Ions:

a ☐+ ☐2+ ☐3+

b ☒+ ☐2+ ☐3+

c ☐+ ☐2+ ☐3+

x ☐+ ☐2+ ☐3+

y ☒+ ☒2+ ☐3+

z ☐+ ☐2+ ☐3+

hide H<sub>2</sub>O/NH<sub>3</sub> ☐

zoom 112-122 ☐

GO

WISKQYDEAGPSIVHR, MH+ 2085.0406, m/z 522.0156  
L OS G35 P160811 220811-s1.05304.05304.4.dta

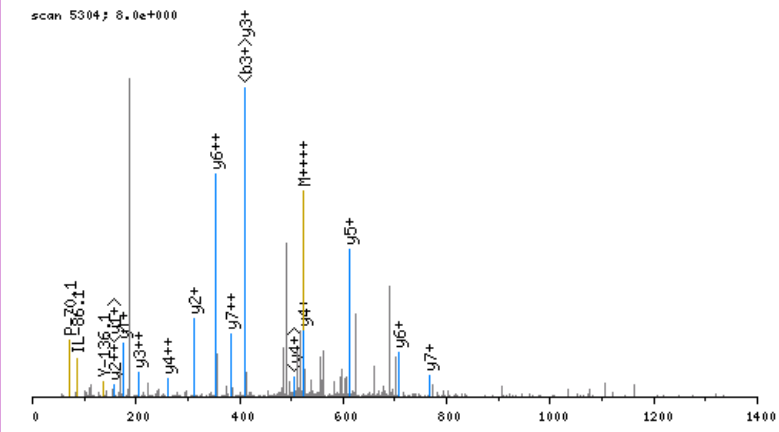

click image to zoom in; click top corners to zoom out [\[precursor±\]](#)

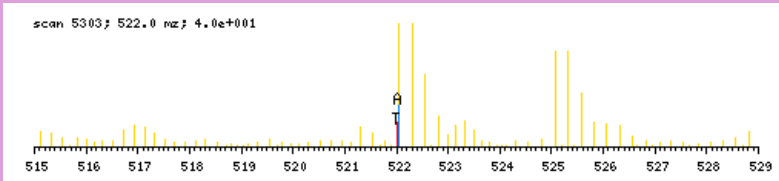

zoomed in precursor plot; T=theoretical m/z, A=acquired m/z

| b <sup>+</sup> | #  | AA | #  | y <sup>+</sup> | y <sup>2+</sup> |
|----------------|----|----|----|----------------|-----------------|
| 229.0977       | 1  | W  | 17 |                |                 |
| 342.1818       | 2  | I  | 16 | 1856.9507      | 928.9793        |
| 429.2138       | 3  | S  | 15 | 1743.8666      | 872.4372        |
| 585.3401       | 4  | K  | 14 | 1656.8346      | 828.9212        |
| 713.3987       | 5  | Q  | 13 | 1500.7083      | 750.8581        |
| 842.4413       | 6  | E  | 12 | 1372.6497      | 686.8288        |
| 1005.5046      | 7  | Y  | 11 | 1243.6071      | 622.3075        |
| 1120.5315      | 8  | D  | 10 | 1080.5438      | 540.7758        |
| 1249.5741      | 9  | E  | 9  | 965.5169       | 483.2623        |
| 1320.6113      | 10 | A  | 8  | 836.4743       | 418.7410        |
| 1377.6327      | 11 | G  | 7  | 765.4371       | 383.2225        |
| 1474.6855      | 12 | P  | 6  | 708.4157       | 354.7118        |
| 1561.7175      | 13 | S  | 5  | 611.3629       | 306.1854        |
| 1674.8016      | 14 | I  | 4  | 524.3309       | 262.6694        |
| 1773.8700      | 15 | V  | 3  | 411.2468       | 206.1273        |
| 1910.9289      | 16 | H  | 2  | 312.1784       | 156.5931        |
|                | 17 | R  | 1  | 175.1195       | 88.0637         |

N-term:+43.02 K(4):+156.13

X-range:

0 - 0

MassTol: Y-zoom:

0. 1.

MassType:

☐AVG ☒MONO

Axis:

☒1 ☐2

Label:

☒I ☐M ☐-

Ions:

a ☐+ ☐2+ ☐3+

b ☒+ ☐2+ ☐3+

c ☐+ ☐2+ ☐3+

x ☐+ ☐2+ ☐3+

y ☒+ ☒2+ ☐3+

z ☐+ ☐2+ ☐3+

hide H<sub>2</sub>O/NH<sub>3</sub> ☐

zoom 112-122 ☐

GO

WITKQEYDEAGPSIVHR, MH+ 2099.0562, m/z 525.5195  
L OS G35 P160811 220811-s1.04870.04870.4.dta

scan 4870; 8.8e+000

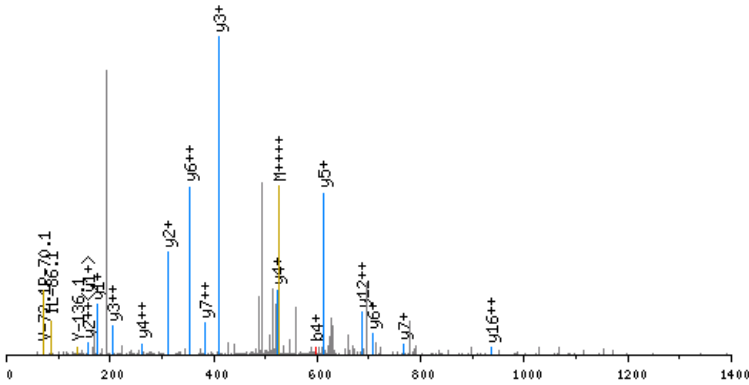

click image to zoom in; click top corners to zoom out

[precursor±]

scan 4868; 525.5 m/z; 9.8e+001

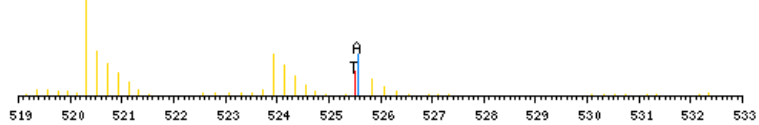

zoomed in precursor plot; T=theoretical m/z, A=acquired m/z

| b <sup>+</sup> | #  | AA | #  | y <sup>+</sup> | y <sup>2+</sup> |
|----------------|----|----|----|----------------|-----------------|
| 229.0977       | 1  | W  | 17 |                |                 |
| 342.1818       | 2  | I  | 16 | 1870.9663      | 935.9871        |
| 443.2295       | 3  | T  | 15 | 1757.8823      | 879.4450        |
| 599.3558       | 4  | K  | 14 | 1656.8346      | 828.9212        |
| 727.4143       | 5  | Q  | 13 | 1500.7083      | 750.8581        |
| 856.4569       | 6  | E  | 12 | 1372.6497      | 686.8288        |
| 1019.5203      | 7  | Y  | 11 | 1243.6071      | 622.3075        |
| 1134.5472      | 8  | D  | 10 | 1080.5438      | 540.7758        |
| 1263.5898      | 9  | E  | 9  | 965.5169       | 483.2623        |
| 1334.6269      | 10 | A  | 8  | 836.4743       | 418.7410        |
| 1391.6484      | 11 | G  | 7  | 765.4371       | 383.2225        |
| 1488.7011      | 12 | P  | 6  | 708.4157       | 354.7118        |
| 1575.7332      | 13 | S  | 5  | 611.3629       | 306.1854        |
| 1688.8172      | 14 | I  | 4  | 524.3309       | 262.6694        |
| 1787.8856      | 15 | V  | 3  | 411.2468       | 206.1273        |
| 1924.9446      | 16 | H  | 2  | 312.1784       | 156.5931        |
|                | 17 | R  | 1  | 175.1195       | 88.0637         |

N-term:+43.02 K(4):+156.13

X-range:

0 - 0

MassTol: Y-zoom:

0. 1.

MassType:

☐AVG ☒MONO

Axis:

☒1 ☐2

Label:

☒I ☐M ☐-

Ions:

a ☐+ ☐2+ ☐3+

b ☒+ ☐2+ ☐3+

c ☐+ ☐2+ ☐3+

x ☐+ ☐2+ ☐3+

y ☒+ ☒2+ ☐3+

z ☐+ ☐2+ ☐3+

hide H<sub>2</sub>O/NH<sub>3</sub> ☐

zoom 112-122 ☐

GO

YFLAGLGPESGR, MH+ 1308.6588, m/z 654.8331  
L OS G31 P160811 220811-s1.02332.02332.2.dta

scan 2332; 1.0e+001

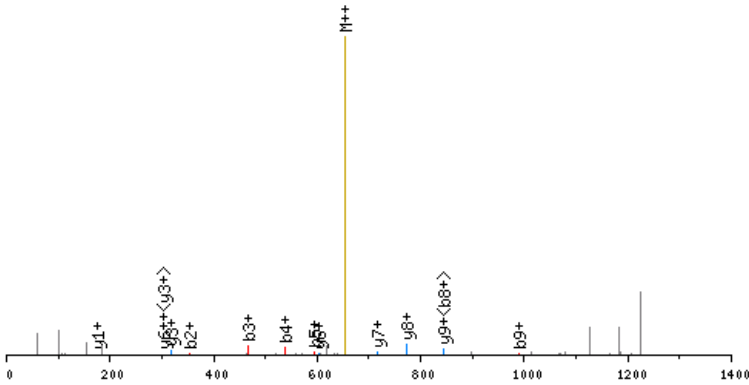

click image to zoom in; click top corners to zoom out

[precursor±]

scan 2329; 654.8 m/z; 1.1e+001

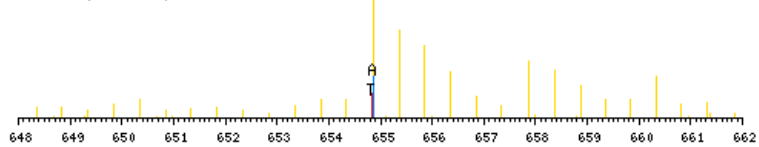

zoomed in precursor plot; T=theoretical m/z, A=acquired m/z

| b <sup>+</sup> | #  | AA | #  | y <sup>+</sup> | y <sup>2+</sup> |
|----------------|----|----|----|----------------|-----------------|
| 206.0817       | 1  | Y  | 12 |                |                 |
| 353.1501       | 2  | F  | 11 | 1103.5849      | 552.2964        |
| 466.2342       | 3  | L  | 10 | 956.5165       | 478.7622        |
| 537.2713       | 4  | A  | 9  | 843.4325       | 422.2201        |
| 594.2928       | 5  | G  | 8  | 772.3953       | 386.7016        |
| 707.3768       | 6  | L  | 7  | 715.3739       | 358.1909        |
| 764.3983       | 7  | G  | 6  | 602.2898       | 301.6488        |
| 861.4511       | 8  | P  | 5  | 545.2683       | 273.1381        |
| 990.4937       | 9  | E  | 4  | 448.2156       | 224.6117        |
| 1077.5257      | 10 | S  | 3  | 319.1730       | 160.0904        |
| 1134.5472      | 11 | G  | 2  | 232.1410       | 116.5744        |
|                | 12 | R  | 1  | 175.1195       | 88.0637         |

N-term:+43.02

N-term: +43.02 K(4): +156.13

X-range:

0 - 0

MassTol: Y-zoom:

0. 1.

MassType:

☐ AVG ☒ MONO

Axis:

☒ 1 ☐ 2

Label:

☒ I ☐ M ☐ -

Ions:

a ☐ + ☐ 2+ ☐ 3+

b ☒ + ☐ 2+ ☐ 3+

c ☐ + ☐ 2+ ☐ 3+

x ☐ + ☐ 2+ ☐ 3+

y ☒ + ☒ 2+ ☐ 3+

z ☐ + ☐ 2+ ☐ 3+

hide H<sub>2</sub>O/NH<sub>3</sub> ☐

zoom 112-122 ☐

GO

YTQKAPQVSTPTLVEAAR, MH+ 2036.1241, m/z 679.3795  
L OS G32 P160811 220811-s1.03735.03735.3.dta

scan 3735; 1.4e+000

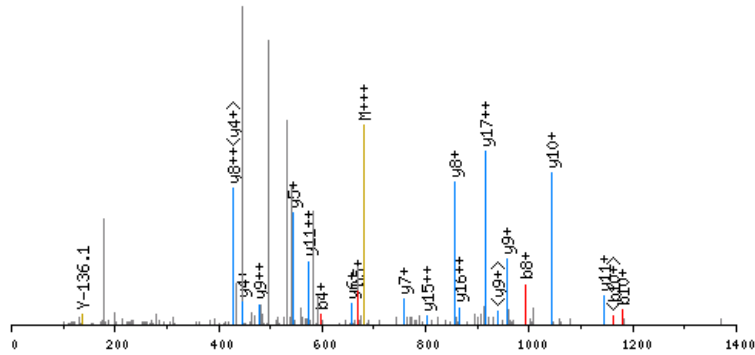

click image to zoom in; click top corners to zoom out

[precursor±]

scan 3733; 679.4 m/z; 6.1e+000

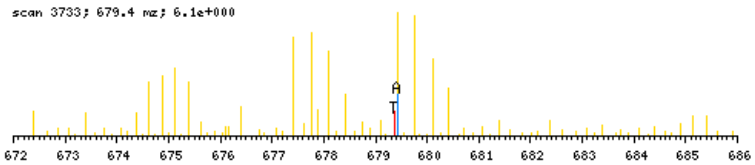

zoomed in precursor plot; T=theoretical m/z, A=acquired m/z

| b <sup>+</sup> | #  | AA | #  | y <sup>+</sup> | y <sup>2+</sup> |
|----------------|----|----|----|----------------|-----------------|
| 206.0817       | 1  | Y  | 18 |                |                 |
| 307.1294       | 2  | T  | 17 | 1831.0502      | 916.0290        |
| 435.1880       | 3  | Q  | 16 | 1730.0025      | 865.5052        |
| 597.3461       | 4  | K  | 15 | 1601.9439      | 801.4759        |
| 668.3832       | 5  | A  | 14 | 1439.7858      | 720.3968        |
| 765.4360       | 6  | P  | 13 | 1368.7487      | 684.8783        |
| 893.4945       | 7  | Q  | 12 | 1271.6959      | 636.3519        |
| 992.5630       | 8  | V  | 11 | 1143.6374      | 572.3226        |
| 1079.5950      | 9  | S  | 10 | 1044.5689      | 522.7884        |
| 1180.6427      | 10 | T  | 9  | 957.5369       | 479.2724        |
| 1277.6954      | 11 | P  | 8  | 856.4892       | 428.7485        |
| 1378.7431      | 12 | T  | 7  | 759.4365       | 380.2222        |
| 1491.8272      | 13 | L  | 6  | 658.3888       | 329.6983        |
| 1590.8956      | 14 | V  | 5  | 545.3047       | 273.1563        |
| 1719.9382      | 15 | E  | 4  | 446.2363       | 223.6221        |
| 1790.9753      | 16 | A  | 3  | 317.1937       | 159.1008        |
| 1862.0124      | 17 | A  | 2  | 246.1566       | 123.5822        |
|                | 18 | R  | 1  | 175.1195       | 88.0637         |

N-term:+43.02 K(4):+162.16
