# Supplementary material
Source: PubMed Central journal article supplement (PMC3591655)
Supplement: supp_M112.017962_mcp.M112.017962-28.pdf [file supp_M112.017962_mcp.M112.017962-28.pdf]

X-range:

0 - 0

MassTol: Y-zoom:

0. 1.

MassType:

☐ AVG ☒ MONO

Axis:

☒ 1 ☐ 2

Label:

☒ I ☐ M ☐ -

Ions:

a ☐ + ☐ 2+ ☐ 3+

b ☒ + ☐ 2+ ☐ 3+

c ☐ + ☐ 2+ ☐ 3+

x ☐ + ☐ 2+ ☐ 3+

y ☒ + ☒ 2+ ☐ 3+

z ☐ + ☐ 2+ ☐ 3+

hide H<sub>2</sub>O/NH<sub>3</sub> ☐

zoom 112-122 ☐

GO

AAAAAAAAGAAGRGSGPGR, MH+ 1765.9170, m/z 589.3105  
H OS G13 P120811 220811-s1.04836.04836.3.dta

scan 4836; 1.5e+000

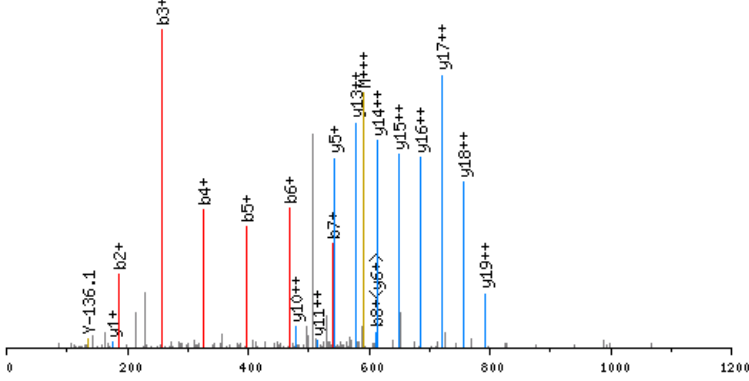

click image to zoom in; click top corners to zoom out

[precursor±]

scan 4834; 589.3 m/z; 3.6e+001

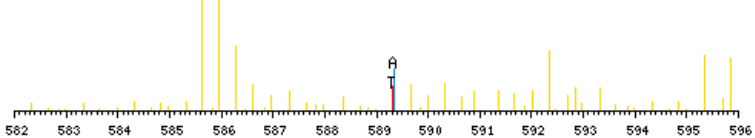

zoomed in precursor plot; T=theoretical m/z, A=acquired m/z

| b <sup>+</sup> | #  | AA | #  | y <sup>+</sup> | y <sup>2+</sup> |
|----------------|----|----|----|----------------|-----------------|
| 114.0555       | 1  | A  | 21 |                |                 |
| 185.0926       | 2  | A  | 20 | 1652.8693      | 826.9386        |
| 256.1297       | 3  | A  | 19 | 1581.8322      | 791.4200        |
| 327.1669       | 4  | A  | 18 | 1510.7951      | 755.9015        |
| 398.2040       | 5  | A  | 17 | 1439.7580      | 720.3829        |
| 469.2411       | 6  | A  | 16 | 1368.7209      | 684.8643        |
| 540.2782       | 7  | A  | 15 | 1297.6838      | 649.3458        |
| 611.3153       | 8  | A  | 14 | 1226.6466      | 613.8272        |
| 668.3368       | 9  | G  | 13 | 1155.6095      | 578.3087        |
| 739.3739       | 10 | A  | 12 | 1098.5881      | 549.7979        |
| 810.4110       | 11 | A  | 11 | 1027.5509      | 514.2794        |
| 867.4325       | 12 | G  | 10 | 956.5138       | 478.7608        |
| 924.4539       | 13 | G  | 9  | 899.4924       | 450.2501        |
| 1080.5550      | 14 | R  | 8  | 842.4709       | 421.7394        |
| 1137.5765      | 15 | G  | 7  | 686.3698       | 343.6888        |
| 1224.6085      | 16 | S  | 6  | 629.3483       | 315.1781        |
| 1281.6300      | 17 | G  | 5  | 542.3163       | 271.6621        |
| 1378.6828      | 18 | P  | 4  | 485.2948       | 243.1513        |
| 1435.7042      | 19 | G  | 3  | 388.2421       | 194.6250        |
| 1591.8053      | 20 | R  | 2  | 331.2206       | 166.1142        |
|                | 21 | R  | 1  | 175.1195       | 88.0637         |

N-term:+43.02

X-range:

0 - 0

MassTol: Y-zoom:

0. 1.

MassType:

☐AVG ☒MONO

Axis:

☒1 ☐2

Label:

☒I ☐M ☐-

Ions:

a ☐+ ☐2+ ☐3+

b ☒+ ☐2+ ☐3+

c ☐+ ☐2+ ☐3+

x ☐+ ☐2+ ☐3+

y ☒+ ☒2+ ☐3+

z ☐+ ☐2+ ☐3+

hide H<sub>2</sub>O/NH<sub>3</sub> ☐

zoom 112-122 ☐

GO

AAAAAAAAEPYPASGTTKR, MH+ 1779.9454, m/z 593.9866  
H OS G13 P120811 220811-s1.04936.04936.3.dta

scan 4936; 4.8e+000

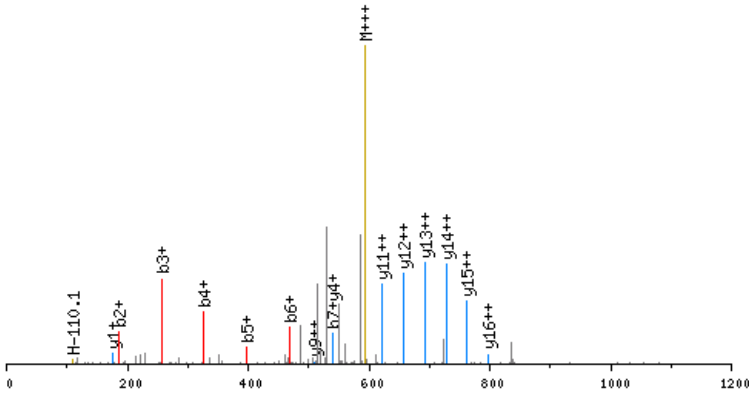

click image to zoom in; click top corners to zoom out [\[precursor±\]](#)

scan 4934; 594.0 m/z; 1.5e+002

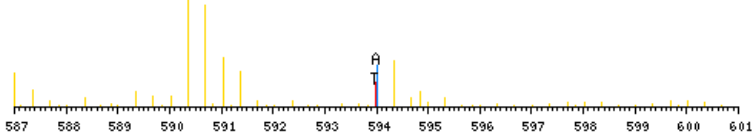

zoomed in precursor plot; T=theoretical m/z, A=acquired m/z

| b <sup>+</sup> | #  | AA | #  | y <sup>+</sup> | y <sup>2+</sup> |
|----------------|----|----|----|----------------|-----------------|
| 114.0555       | 1  | A  | 18 |                |                 |
| 185.0926       | 2  | A  | 17 | 1666.8977      | 833.9528        |
| 256.1297       | 3  | A  | 16 | 1595.8606      | 798.4342        |
| 327.1669       | 4  | A  | 15 | 1524.8235      | 762.9156        |
| 398.2040       | 5  | A  | 14 | 1453.7864      | 727.3971        |
| 469.2411       | 6  | A  | 13 | 1382.7492      | 691.8785        |
| 540.2782       | 7  | A  | 12 | 1311.7121      | 656.3600        |
| 669.3208       | 8  | E  | 11 | 1240.6750      | 620.8414        |
| 766.3736       | 9  | P  | 10 | 1111.6324      | 556.3201        |
| 929.4369       | 10 | Y  | 9  | 1014.5797      | 507.7937        |
| 1026.4896      | 11 | P  | 8  | 851.5163       | 426.2621        |
| 1097.5268      | 12 | A  | 7  | 754.4636       | 377.7357        |
| 1184.5588      | 13 | S  | 6  | 683.4264       | 342.2171        |
| 1241.5803      | 14 | G  | 5  | 596.3944       | 298.7011        |
| 1342.6279      | 15 | T  | 4  | 539.3730       | 270.1904        |
| 1443.6756      | 16 | T  | 3  | 438.3253       | 219.6666        |
| 1605.8337      | 17 | K  | 2  | 337.2776       | 169.1427        |
|                | 18 | R  | 1  | 175.1195       | 88.0637         |

N-term:+43.02 K(17):+162.16

X-range:

0 - 0

MassTol: Y-zoom:

0. 1.

MassType:

☐AVG ☒MONO

Axis:

☒1 ☐2

Label:

☒I ☐M ☐-

Ions:

a ☐+ ☐2+ ☐3+

b ☒+ ☐2+ ☐3+

c ☐+ ☐2+ ☐3+

x ☐+ ☐2+ ☐3+

y ☒+ ☒2+ ☐3+

z ☐+ ☐2+ ☐3+

hide H<sub>2</sub>O/NH<sub>3</sub> ☐

zoom 112-122 ☐

GO

AAAAGAVVASAASGPAEGKKITELR, MH+ 2394.3357, m/z 798.7834  
H OS G14 P120811 220811-s1.05577.05577.3.dta

scan 5577; 3.8e+000

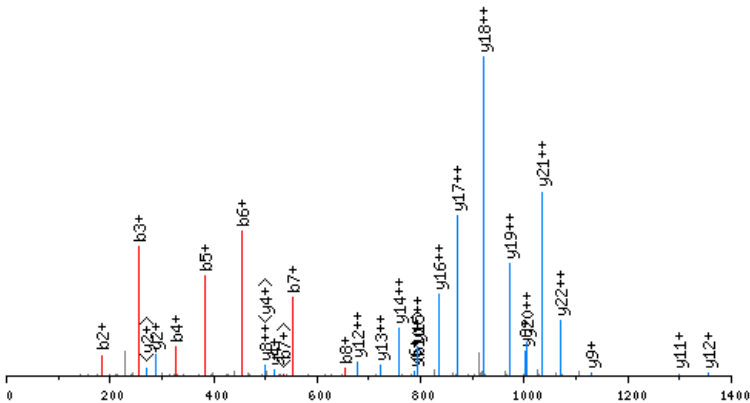

click image to zoom in; click top corners to zoom out

[precursor±]

scan 5576; 798.8 mz; 7.2e+000

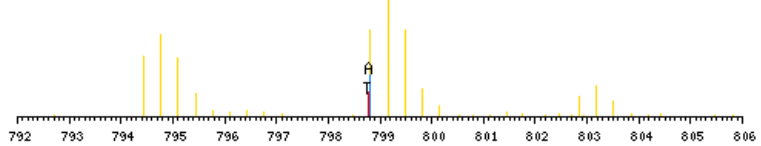

zoomed in precursor plot; T=theoretical m/z, A=acquired m/z

| b <sup>+</sup> | #  | AA | #  | y <sup>+</sup> | y <sup>2+</sup> |
|----------------|----|----|----|----------------|-----------------|
| 114.0555       | 1  | A  | 25 |                |                 |
| 185.0926       | 2  | A  | 24 | 2281.2880      | 1141.1479       |
| 256.1297       | 3  | A  | 23 | 2210.2509      | 1105.6294       |
| 327.1669       | 4  | A  | 22 | 2139.2138      | 1070.1108       |
| 384.1883       | 5  | G  | 21 | 2068.1767      | 1034.5923       |
| 455.2254       | 6  | A  | 20 | 2011.1552      | 1006.0815       |
| 554.2938       | 7  | V  | 19 | 1940.1181      | 970.5630        |
| 653.3623       | 8  | V  | 18 | 1841.0497      | 921.0288        |
| 724.3994       | 9  | A  | 17 | 1741.9813      | 871.4946        |
| 811.4314       | 10 | S  | 16 | 1670.9442      | 835.9760        |
| 882.4685       | 11 | A  | 15 | 1583.9122      | 792.4600        |
| 953.5056       | 12 | A  | 14 | 1512.8750      | 756.9414        |
| 1040.5377      | 13 | S  | 13 | 1441.8379      | 721.4229        |
| 1097.5591      | 14 | G  | 12 | 1354.8059      | 677.9069        |
| 1194.6119      | 15 | P  | 11 | 1297.7844      | 649.3961        |
| 1265.6490      | 16 | A  | 10 | 1200.7317      | 600.8697        |
| 1394.6916      | 17 | E  | 9  | 1129.6946      | 565.3512        |
| 1451.7131      | 18 | G  | 8  | 1000.6520      | 500.8299        |
| 1607.8394      | 19 | K  | 7  | 943.6305       | 472.3192        |
| 1763.9657      | 20 | K  | 6  | 787.5042       | 394.2560        |
| 1877.0497      | 21 | I  | 5  | 631.3779       | 316.1929        |
| 1978.0974      | 22 | T  | 4  | 518.2938       | 259.6508        |
| 2107.1400      | 23 | E  | 3  | 417.2462       | 209.1270        |
| 2220.2241      | 24 | L  | 2  | 288.2036       | 144.6057        |
|                | 25 | R  | 1  | 175.1195       | 88.0637         |

N-term:+43.02 K(19) :+156.13  
K(20) :+156.13

X-range:

0 - 0

MassTol: Y-zoom:

0. 1.

MassType:

☐AVG ☒MONO

Axis:

☒1 ☐2

Label:

☒I ☐M ☐-

Ions:

a ☐+ ☐2+ ☐3+

b ☒+ ☐2+ ☐3+

c ☐+ ☐2+ ☐3+

x ☐+ ☐2+ ☐3+

y ☒+ ☒2+ ☐3+

z ☐+ ☐2+ ☐3+

hide H<sub>2</sub>O/NH<sub>3</sub> ☐

zoom 112-122 ☐

GO

AAAKDGCGLTAAGNGR, MH+ 1688.8026, m/z 563.6057  
H OS G13 P120811 220811-s1.02808.02808.3.dta

scan 2808; 2.2e+000

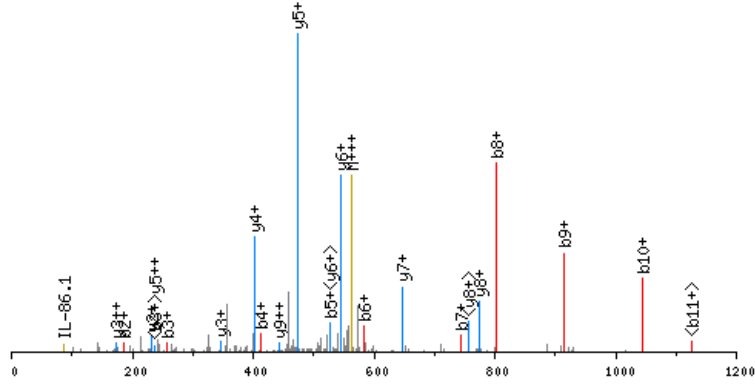

click image to zoom in; click top corners to zoom out [\[precursor±\]](#)

scan 2804; 563.6 m/z; 4.5e+000

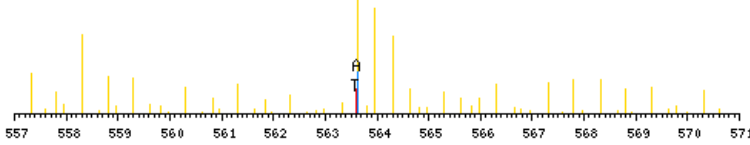

zoomed in precursor plot; T=theoretical m/z, A=acquired m/z

| b <sup>+</sup> | #  | AA | #  | y <sup>+</sup> | y <sup>2+</sup> |
|----------------|----|----|----|----------------|-----------------|
| 114.0555       | 1  | A  | 17 |                |                 |
| 185.0926       | 2  | A  | 16 | 1575.7549      | 788.3814        |
| 256.1297       | 3  | A  | 15 | 1504.7178      | 752.8628        |
| 412.2560       | 4  | K  | 14 | 1433.6807      | 717.3443        |
| 527.2830       | 5  | D  | 13 | 1277.5544      | 639.2811        |
| 584.3044       | 6  | G  | 12 | 1162.5274      | 581.7676        |
| 744.3350       | 7  | C  | 11 | 1105.5060      | 553.2569        |
| 801.3565       | 8  | G  | 10 | 945.4754       | 473.2416        |
| 914.4406       | 9  | L  | 9  | 888.4539       | 444.7309        |
| 1043.4832      | 10 | E  | 8  | 775.3699       | 388.1888        |
| 1144.5308      | 11 | T  | 7  | 646.3273       | 323.6675        |
| 1215.5680      | 12 | A  | 6  | 545.2796       | 273.1437        |
| 1286.6051      | 13 | A  | 5  | 474.2425       | 237.6251        |
| 1343.6265      | 14 | G  | 4  | 403.2054       | 202.1066        |
| 1457.6695      | 15 | N  | 3  | 346.1839       | 173.5959        |
| 1514.6909      | 16 | G  | 2  | 232.1410       | 116.5744        |
|                | 17 | R  | 1  | 175.1195       | 88.0637         |

N-term:+43.02 K(4):+156.13  
C(7):+160.03

X-range:

0 - 0

MassTol: Y-zoom:

0. 1.

MassType:

☐ AVG ☒ MONO

Axis:

☒ 1 ☐ 2

Label:

☒ I ☐ M ☐ -

Ions:

a ☐ + ☐ 2+ ☐ 3+

b ☒ + ☐ 2+ ☐ 3+

c ☐ + ☐ 2+ ☐ 3+

x ☐ + ☐ 2+ ☐ 3+

y ☒ + ☒ 2+ ☐ 3+

z ☐ + ☐ 2+ ☐ 3+

hide H<sub>2</sub>O/NH<sub>3</sub> ☐

zoom 112-122 ☐

GO

AAAKKAVLGPLVGAVDQGTSSSTR, MH+ 2295.3037, m/z 574.5814  
H OS G14 P120811 220811-s1.05479.05479.4.dta

scan 5479; 2.2e+000

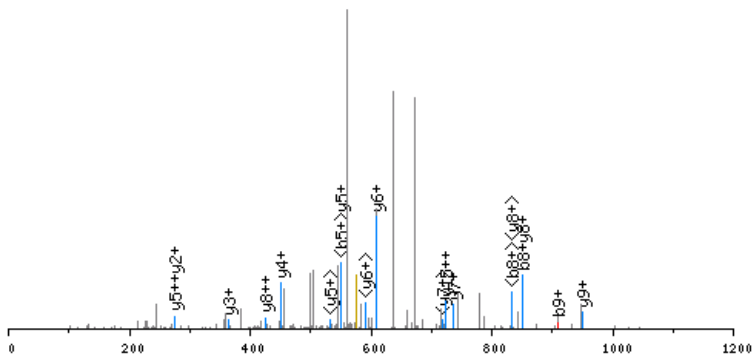

click image to zoom in; click top corners to zoom out

[precursor±]

scan 5476; 574.6 m/z; 1.3e+001

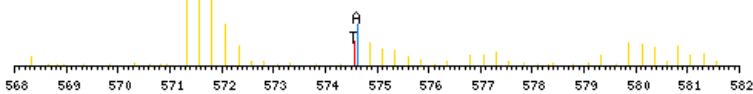

zoomed in precursor plot; T=theoretical m/z, A=acquired m/z

| b <sup>+</sup> | #  | AA | #  | y <sup>+</sup> | y <sup>2+</sup> |
|----------------|----|----|----|----------------|-----------------|
| 114.0555       | 1  | A  | 23 |                |                 |
| 185.0926       | 2  | A  | 22 | 2182.2560      | 1091.6319       |
| 256.1297       | 3  | A  | 21 | 2111.2189      | 1056.1134       |
| 412.2560       | 4  | K  | 20 | 2040.1818      | 1020.5948       |
| 568.3823       | 5  | K  | 19 | 1884.0555      | 942.5317        |
| 639.4195       | 6  | A  | 18 | 1727.9292      | 864.4685        |
| 738.4879       | 7  | V  | 17 | 1656.8921      | 828.9499        |
| 851.5719       | 8  | L  | 16 | 1557.8237      | 779.4157        |
| 908.5934       | 9  | G  | 15 | 1444.7396      | 722.8737        |
| 1005.6462      | 10 | P  | 14 | 1387.7181      | 694.3630        |
| 1118.7302      | 11 | L  | 13 | 1290.6654      | 645.8366        |
| 1217.7986      | 12 | V  | 12 | 1177.5813      | 589.2946        |
| 1274.8201      | 13 | G  | 11 | 1078.5129      | 539.7604        |
| 1345.8572      | 14 | A  | 10 | 1021.4914      | 511.2496        |
| 1444.9256      | 15 | V  | 9  | 950.4543       | 475.7311        |
| 1559.9526      | 16 | D  | 8  | 851.3859       | 426.1969        |
| 1688.0112      | 17 | Q  | 7  | 736.3590       | 368.6834        |
| 1745.0326      | 18 | G  | 6  | 608.3004       | 304.6541        |
| 1846.0803      | 19 | T  | 5  | 551.2789       | 276.1434        |
| 1933.1123      | 20 | S  | 4  | 450.2312       | 225.6195        |
| 2020.1443      | 21 | S  | 3  | 363.1992       | 182.1035        |
| 2121.1920      | 22 | T  | 2  | 276.1672       | 138.5875        |
|                | 23 | R  | 1  | 175.1195       | 88.0637         |

N-term:+43.02 K(4):+156.13

K(5):+156.13

X-range:

0 - 0

MassTol: Y-zoom:

0. 1.

MassType:

☐ AVG ☒ MONO

Axis:

☒ 1 ☐ 2

Label:

☒ I ☐ M ☐ -

Ions:

a ☐ + ☐ 2+ ☐ 3+

b ☒ + ☐ 2+ ☐ 3+

c ☐ + ☐ 2+ ☐ 3+

x ☐ + ☐ 2+ ☐ 3+

y ☒ + ☒ 2+ ☐ 3+

z ☐ + ☐ 2+ ☐ 3+

hide H<sub>2</sub>O/NH<sub>3</sub> ☐

zoom 112-122 ☐

GO

AAAMDVDTPSGTNSGAGKKR, MH+ 2032.0134, m/z 678.0093  
H OS G15 P120811 220811-s1.02557.02557.3.dta

scan 2557; 3.6e+000

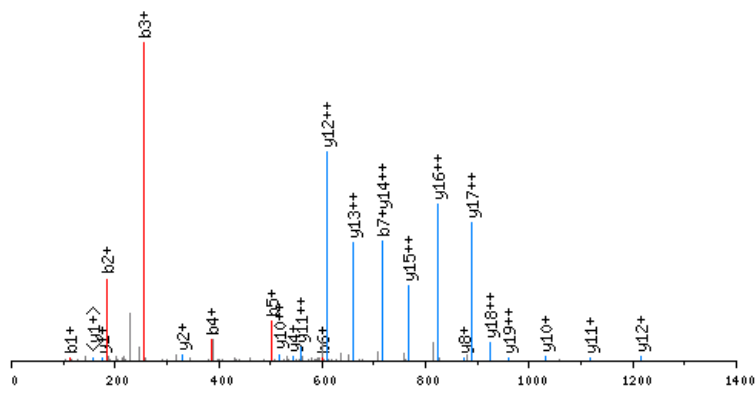

click image to zoom in; click top corners to zoom out [\[precursor±\]](#)

scan 2556; 678.0 m/z; 1.0e+001

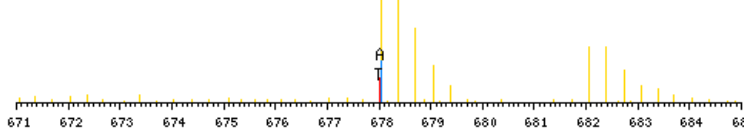

zoomed in precursor plot; T=theoretical m/z, A=acquired m/z

| b <sup>+</sup> | #  | AA | #  | y <sup>+</sup> | y <sup>2+</sup> |
|----------------|----|----|----|----------------|-----------------|
| 114.0555       | 1  | A  | 20 |                |                 |
| 185.0926       | 2  | A  | 19 | 1918.9657      | 959.9868        |
| 256.1297       | 3  | A  | 18 | 1847.9286      | 924.4682        |
| 387.1702       | 4  | M  | 17 | 1776.8915      | 888.9497        |
| 502.1972       | 5  | D  | 16 | 1645.8510      | 823.4294        |
| 601.2656       | 6  | V  | 15 | 1530.8241      | 765.9159        |
| 716.2925       | 7  | D  | 14 | 1431.7557      | 716.3817        |
| 817.3402       | 8  | T  | 13 | 1316.7287      | 658.8683        |
| 914.3930       | 9  | P  | 12 | 1215.6810      | 608.3444        |
| 1001.4250      | 10 | S  | 11 | 1118.6283      | 559.8180        |
| 1058.4465      | 11 | G  | 10 | 1031.5962      | 516.3020        |
| 1159.4941      | 12 | T  | 9  | 974.5748       | 487.7913        |
| 1273.5371      | 13 | N  | 8  | 873.5271       | 437.2675        |
| 1360.5691      | 14 | S  | 7  | 759.4842       | 380.2460        |
| 1417.5906      | 15 | G  | 6  | 672.4521       | 336.7300        |
| 1488.6277      | 16 | A  | 5  | 615.4307       | 308.2193        |
| 1545.6491      | 17 | G  | 4  | 544.3936       | 272.7007        |
| 1701.7754      | 18 | K  | 3  | 487.3721       | 244.1900        |
| 1857.9017      | 19 | K  | 2  | 331.2458       | 166.1268        |
|                | 20 | R  | 1  | 175.1195       | 88.0637         |

N-term:+43.02 K(18):+156.13  
K(19):+156.13

X-range:

0 - 0

MassTol: Y-zoom:

0. 1.

MassType:

☐AVG ☒MONO

Axis:

☒1 ☐2

Label:

☒I ☐M ☐-

Ions:

a ☐+ ☐2+ ☐3+

b ☒+ ☐2+ ☐3+

c ☐+ ☐2+ ☐3+

x ☐+ ☐2+ ☐3+

y ☒+ ☒2+ ☐3+

z ☐+ ☐2+ ☐3+

hide H<sub>2</sub>O/NH<sub>3</sub> ☐

zoom 112-122 ☐

GO

AAAPATLALDPQPQEKQKDAESESELSR, MH+ 3036.5490, m/z 759.8927  
H OS G14 P120811 220811-s1.04830.04830.4.dta

scan 4830; 4.8e+000

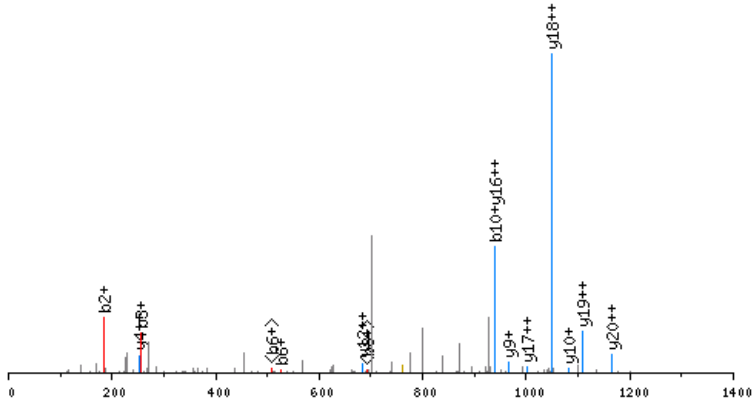

click image to zoom in; click top corners to zoom out

[precursor±]

scan 4826; 759.9 mz; 6.2e+000

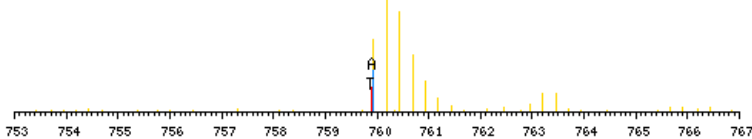

zoomed in precursor plot; T=theoretical m/z, A=acquired m/z

| b <sup>+</sup> | #  | AA | #  | y <sup>+</sup> | y <sup>2+</sup> |
|----------------|----|----|----|----------------|-----------------|
| 114.0555       | 1  | A  | 28 |                |                 |
| 185.0926       | 2  | A  | 27 | 2923.5013      | 1462.2546       |
| 256.1297       | 3  | A  | 26 | 2852.4642      | 1426.7360       |
| 353.1825       | 4  | P  | 25 | 2781.4271      | 1391.2175       |
| 424.2196       | 5  | A  | 24 | 2684.3744      | 1342.6911       |
| 525.2673       | 6  | T  | 23 | 2613.3372      | 1307.1725       |
| 638.3514       | 7  | L  | 22 | 2512.2896      | 1256.6487       |
| 709.3885       | 8  | A  | 21 | 2399.2055      | 1200.1067       |
| 822.4725       | 9  | L  | 20 | 2328.1684      | 1164.5881       |
| 937.4995       | 10 | D  | 19 | 2215.0843      | 1108.0461       |
| 1034.5522      | 11 | P  | 18 | 2100.0574      | 1050.5326       |
| 1162.6108      | 12 | Q  | 17 | 2003.0046      | 1002.0062       |
| 1259.6636      | 13 | P  | 16 | 1874.9460      | 937.9769        |
| 1387.7222      | 14 | Q  | 15 | 1777.8933      | 889.4505        |
| 1516.7648      | 15 | E  | 14 | 1649.8347      | 825.4213        |
| 1672.8911      | 16 | K  | 13 | 1520.7921      | 760.9000        |
| 1800.9496      | 17 | Q  | 12 | 1364.6658      | 682.8368        |
| 1957.0759      | 18 | K  | 11 | 1236.6072      | 618.8075        |
| 2072.1029      | 19 | D  | 10 | 1080.4809      | 540.7444        |
| 2143.1400      | 20 | A  | 9  | 965.4540       | 483.2309        |
| 2230.1720      | 21 | S  | 8  | 894.4169       | 447.7123        |
| 2359.2146      | 22 | E  | 7  | 807.3848       | 404.1963        |
| 2446.2466      | 23 | S  | 6  | 678.3422       | 339.6750        |
| 2533.2787      | 24 | S  | 5  | 591.3102       | 296.1590        |
| 2662.3213      | 25 | E  | 4  | 504.2782       | 252.6430        |
| 2775.4053      | 26 | L  | 3  | 375.2356       | 188.1217        |
| 2862.4374      | 27 | S  | 2  | 262.1515       | 131.5797        |
|                | 28 | R  | 1  | 175.1195       | 88.0637         |

N-term:+43.02 K(16):+156.13  
K(18):+156.13

X-range:  

0-0

MassTol: Y-zoom:  

0.1.

MassType:  

☐AVG☒MONO

Axis:  

☒1☐2

Label:  

☒I☐M☐-

Ions:  

a☐+☐2+☐3+

b☒+☐2+☐3+

c☐+☐2+☐3+

x☐+☐2+☐3+

y☒+☒2+☐3+

z☐+☐2+☐3+

hide H<sub>2</sub>O/NH<sub>3</sub>☐

zoom 112-122☐

GO

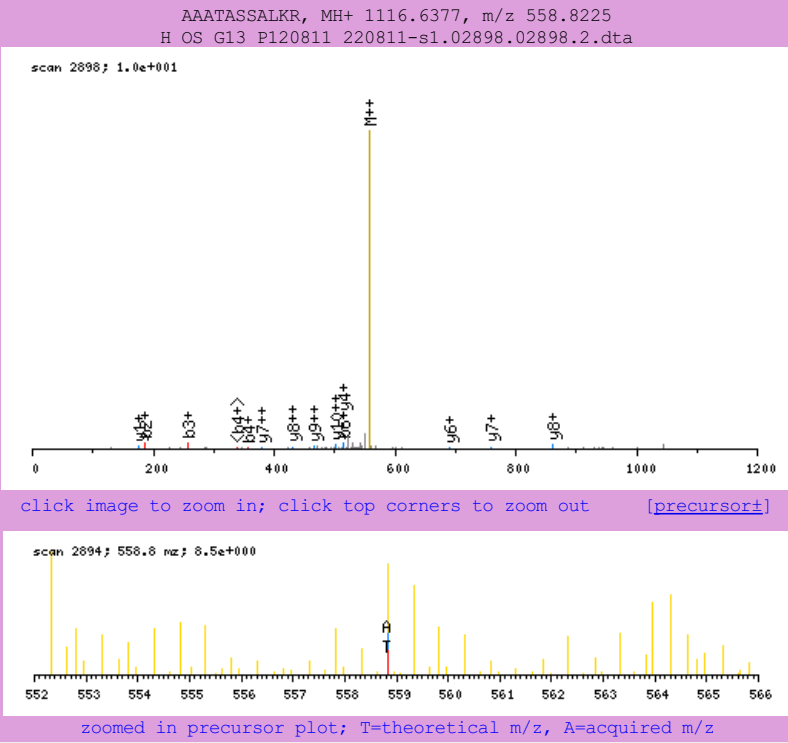

| b <sup>+</sup> | #  | AA | #  | y <sup>+</sup> | y <sup>2+</sup> |
|----------------|----|----|----|----------------|-----------------|
| 114.0555       | 1  | A  | 11 |                |                 |
| 185.0926       | 2  | A  | 10 | 1003.5901      | 502.2989        |
| 256.1297       | 3  | A  | 9  | 932.5529       | 466.7804        |
| 357.1774       | 4  | T  | 8  | 861.5158       | 431.2618        |
| 428.2145       | 5  | A  | 7  | 760.4681       | 380.7380        |
| 515.2466       | 6  | S  | 6  | 689.4310       | 345.2194        |
| 602.2786       | 7  | S  | 5  | 602.3990       | 301.7034        |
| 673.3157       | 8  | A  | 4  | 515.3670       | 258.1874        |
| 786.3998       | 9  | L  | 3  | 444.3299       | 222.6688        |
| 942.5261       | 10 | K  | 2  | 331.2458       | 166.1268        |
|                | 11 | R  | 1  | 175.1195       | 88.0637         |

N-term:+43.02 K(10):+156.13

N-term:+43.02 C(12):+160.03

X-range:

0 - 0

MassTol: Y-zoom:

0. 1.

MassType:

☐AVG ☒MONO

Axis:

☒1 ☐2

Label:

☒I ☐M ☐-

Ions:

a ☐+ ☐2+ ☐3+

b ☒+ ☐2+ ☐3+

c ☐+ ☐2+ ☐3+

x ☐+ ☐2+ ☐3+

y ☒+ ☒2+ ☐3+

z ☐+ ☐2+ ☐3+

hide H<sub>2</sub>O/NH<sub>3</sub> ☐

zoom 112-122 ☐

GO

AAETVELHKLKLAELKQECLAR, MH+ 2676.5123, m/z 669.8835  
H OS G17 P120811 220811-s1.05689.05689.4.dta

scan 5689; 4.9e+000

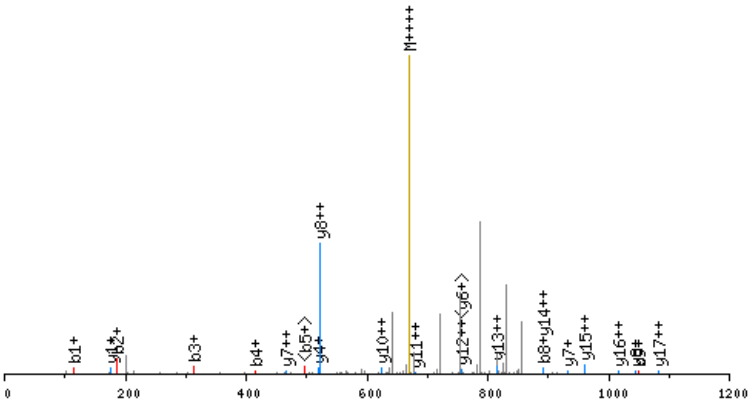

click image to zoom in; click top corners to zoom out [precursor±]

scan 5688; 669.9 m/z; 1.0e+001

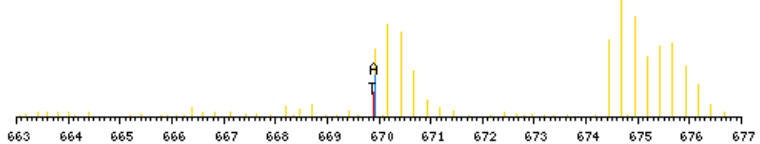

zoomed in precursor plot; T=theoretical m/z, A=acquired m/z

| b <sup>+</sup> | #  | AA | #  | y <sup>+</sup> | y <sup>2+</sup> |
|----------------|----|----|----|----------------|-----------------|
| 114.0555       | 1  | A  | 22 |                |                 |
| 185.0926       | 2  | A  | 21 | 2563.4646      | 1282.2362       |
| 314.1352       | 3  | E  | 20 | 2492.4275      | 1246.7177       |
| 415.1829       | 4  | T  | 19 | 2363.3849      | 1182.1964       |
| 514.2513       | 5  | V  | 18 | 2262.3372      | 1131.6725       |
| 643.2939       | 6  | E  | 17 | 2163.2688      | 1082.1383       |
| 756.3780       | 7  | L  | 16 | 2034.2262      | 1017.6170       |
| 893.4369       | 8  | H  | 15 | 1921.1422      | 961.0750        |
| 1049.5632      | 9  | K  | 14 | 1784.0832      | 892.5455        |
| 1162.6472      | 10 | L  | 13 | 1627.9569      | 814.4824        |
| 1318.7735      | 11 | K  | 12 | 1514.8729      | 757.9404        |
| 1431.8576      | 12 | L  | 11 | 1358.7466      | 679.8772        |
| 1502.8947      | 13 | A  | 10 | 1245.6625      | 623.3352        |
| 1631.9373      | 14 | E  | 9  | 1174.6254      | 587.8166        |
| 1745.0214      | 15 | L  | 8  | 1045.5828      | 523.2953        |
| 1901.1477      | 16 | K  | 7  | 932.4987       | 466.7533        |
| 2029.2063      | 17 | Q  | 6  | 776.3724       | 388.6901        |
| 2158.2489      | 18 | E  | 5  | 648.3139       | 324.6608        |
| 2318.2795      | 19 | C  | 4  | 519.2713       | 260.1396        |
| 2431.3635      | 20 | L  | 3  | 359.2407       | 180.1243        |
| 2502.4006      | 21 | A  | 2  | 246.1566       | 123.5822        |
|                | 22 | R  | 1  | 175.1195       | 88.0637         |

N-term:+43.02 K(9):+156.13  
K(11):+156.13 K(16):+156.13  
C(19):+160.03

N-term: +43.02 K(5): +156.13

X-range:

0 - 0

MassTol: Y-zoom:

0. 1.

MassType:

☐ AVG ☒ MONO

Axis:

☒ 1 ☐ 2

Label:

☒ I ☐ M ☐ -

Ions:

a ☐ + ☐ 2+ ☐ 3+

b ☒ + ☐ 2+ ☐ 3+

c ☐ + ☐ 2+ ☐ 3+

x ☐ + ☐ 2+ ☐ 3+

y ☒ + ☒ 2+ ☐ 3+

z ☐ + ☐ 2+ ☐ 3+

hide H<sub>2</sub>O/NH<sub>3</sub> ☐

zoom 112-122 ☐

GO

AAKPKLYYFNGR, MH+ 1525.8532, m/z 509.2892  
H OS G16 P120811 220811-s1.04231.04231.3.dta

scan 4231; 3.8e+001

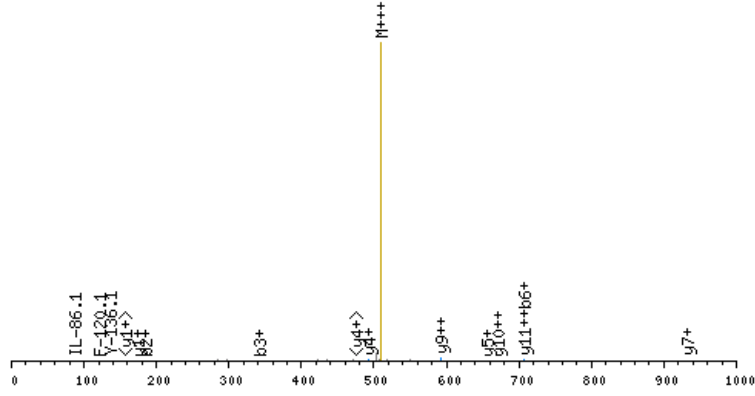

click image to zoom in; click top corners to zoom out [\[precursor±\]](#)

scan 4228; 509.3 m/z; 5.4e+000

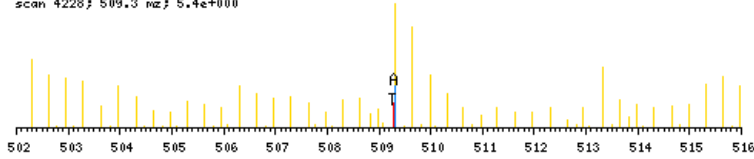

zoomed in precursor plot; T=theoretical m/z, A=acquired m/z

| b <sup>+</sup> | #  | AA | #  | y <sup>+</sup> | y <sup>2+</sup> |
|----------------|----|----|----|----------------|-----------------|
| 114.0555       | 1  | A  | 12 |                |                 |
| 185.0926       | 2  | A  | 11 | 1412.8055      | 706.9067        |
| 341.2189       | 3  | K  | 10 | 1341.7684      | 671.3881        |
| 438.2717       | 4  | P  | 9  | 1185.6421      | 593.3250        |
| 594.3980       | 5  | K  | 8  | 1088.5893      | 544.7986        |
| 707.4821       | 6  | L  | 7  | 932.4630       | 466.7354        |
| 870.5454       | 7  | Y  | 6  | 819.3790       | 410.1934        |
| 1033.6087      | 8  | Y  | 5  | 656.3156       | 328.6617        |
| 1180.6771      | 9  | F  | 4  | 493.2523       | 247.1301        |
| 1294.7201      | 10 | N  | 3  | 346.1839       | 173.5959        |
| 1351.7415      | 11 | G  | 2  | 232.1410       | 116.5744        |
|                | 12 | R  | 1  | 175.1195       | 88.0637         |

N-term:+43.02 K(3):+156.13  
K(5):+156.13

X-range:

0 - 0

MassTol: Y-zoom:

0. 1.

MassType:

☐ AVG ☒ MONO

Axis:

☒ 1 ☐ 2

Label:

☒ I ☐ M ☐ -

Ions:

a ☐ + ☐ 2+ ☐ 3+

b ☒ + ☐ 2+ ☐ 3+

c ☐ + ☐ 2+ ☐ 3+

x ☐ + ☐ 2+ ☐ 3+

y ☒ + ☒ 2+ ☐ 3+

z ☐ + ☐ 2+ ☐ 3+

hide H<sub>2</sub>O/NH<sub>3</sub> ☐

zoom 112-122 ☐

GO

AANATTNPSQLLPLELVDKCIGSR, MH+ 2638.3874, m/z 880.1340  
H OS G12 P120811 220811-s1.05573.05573.3.dta

scan 5573; 4.5e+000

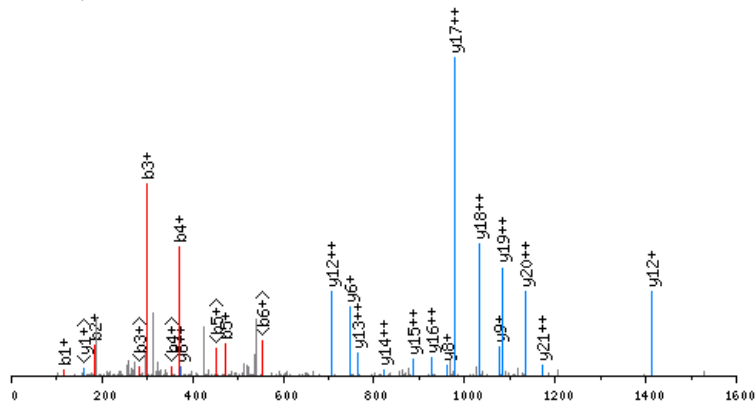

click image to zoom in; click top corners to zoom out

[precursor±]

scan 5572; 880.1 m/z; 9.0e+001

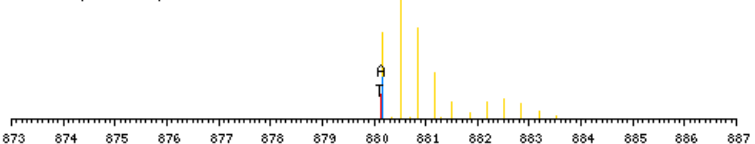

zoomed in precursor plot; T=theoretical m/z, A=acquired m/z

| b <sup>+</sup> | #  | AA | #  | y <sup>+</sup> | y <sup>2+</sup> |
|----------------|----|----|----|----------------|-----------------|
| 114.0555       | 1  | A  | 24 |                |                 |
| 185.0926       | 2  | A  | 23 | 2525.3397      | 1263.1738       |
| 299.1356       | 3  | N  | 22 | 2454.3026      | 1227.6552       |
| 370.1727       | 4  | A  | 21 | 2340.2597      | 1170.6338       |
| 471.2203       | 5  | T  | 20 | 2269.2226      | 1135.1152       |
| 572.2680       | 6  | T  | 19 | 2168.1749      | 1084.5914       |
| 686.3110       | 7  | N  | 18 | 2067.1272      | 1034.0675       |
| 783.3637       | 8  | P  | 17 | 1953.0843      | 977.0461        |
| 870.3957       | 9  | S  | 16 | 1856.0315      | 928.5197        |
| 998.4543       | 10 | Q  | 15 | 1768.9995      | 885.0037        |
| 1111.5384      | 11 | L  | 14 | 1640.9409      | 820.9744        |
| 1224.6225      | 12 | L  | 13 | 1527.8569      | 764.4323        |
| 1321.6752      | 13 | P  | 12 | 1414.7728      | 707.8903        |
| 1434.7593      | 14 | L  | 11 | 1317.7200      | 659.3639        |
| 1563.8019      | 15 | E  | 10 | 1204.6360      | 602.8219        |
| 1676.8859      | 16 | L  | 9  | 1075.5934      | 538.3006        |
| 1775.9544      | 17 | V  | 8  | 962.5093       | 481.7586        |
| 1890.9813      | 18 | D  | 7  | 863.4409       | 432.2244        |
| 2047.1076      | 19 | K  | 6  | 748.4140       | 374.7109        |
| 2207.1382      | 20 | C  | 5  | 592.2877       | 296.6477        |
| 2320.2223      | 21 | I  | 4  | 432.2571       | 216.6324        |
| 2377.2437      | 22 | G  | 3  | 319.1730       | 160.0904        |
| 2464.2757      | 23 | S  | 2  | 262.1515       | 131.5797        |
|                | 24 | R  | 1  | 175.1195       | 88.0637         |

N-term:+43.02 K(19) :+156.13

C(20) :+160.03

X-range:

0 - 0

MassTol: Y-zoom:

0. 1.

MassType:

☐ AVG ☒ MONO

Axis:

☒ 1 ☐ 2

Label:

☒ I ☐ M ☐ -

Ions:

a ☐ + ☐ 2+ ☐ 3+

b ☒ + ☐ 2+ ☐ 3+

c ☐ + ☐ 2+ ☐ 3+

x ☐ + ☐ 2+ ☐ 3+

y ☒ + ☒ 2+ ☐ 3+

z ☐ + ☐ 2+ ☐ 3+

hide H<sub>2</sub>O/NH<sub>3</sub> ☐

zoom 112-122 ☐

GO

AAPAKGENLSLVVHGPGDIR, MH+ 2077.1619, m/z 693.0588  
H OS G15 P120811 220811-s1.04724.04724.3.dta

scan 4724; 3.7e+000

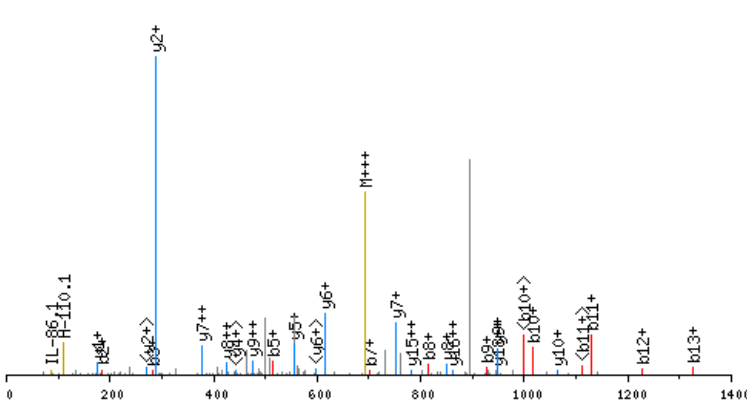

click image to zoom in; click top corners to zoom out

[precursor±]

scan 4721; 693.1 m/z; 1.6e+001

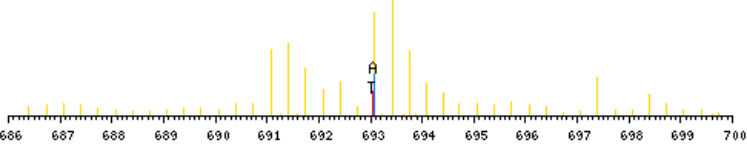

zoomed in precursor plot; T=theoretical m/z, A=acquired m/z

| b <sup>+</sup> | #  | AA | #  | y <sup>+</sup> | y <sup>2+</sup> |
|----------------|----|----|----|----------------|-----------------|
| 114.0555       | 1  | A  | 20 |                |                 |
| 185.0926       | 2  | A  | 19 | 1964.1142      | 982.5610        |
| 282.1454       | 3  | P  | 18 | 1893.0771      | 947.0424        |
| 353.1825       | 4  | A  | 17 | 1796.0243      | 898.5161        |
| 515.3406       | 5  | K  | 16 | 1724.9872      | 862.9975        |
| 572.3621       | 6  | G  | 15 | 1562.8291      | 781.9185        |
| 701.4047       | 7  | E  | 14 | 1505.8076      | 753.4077        |
| 815.4476       | 8  | N  | 13 | 1376.7650      | 688.8864        |
| 928.5317       | 9  | L  | 12 | 1262.7221      | 631.8650        |
| 1015.5637      | 10 | S  | 11 | 1149.6380      | 575.3229        |
| 1128.6477      | 11 | L  | 10 | 1062.6060      | 531.8069        |
| 1227.7162      | 12 | V  | 9  | 949.5219       | 475.2649        |
| 1326.7846      | 13 | V  | 8  | 850.4535       | 425.7307        |
| 1463.8435      | 14 | H  | 7  | 751.3851       | 376.1965        |
| 1520.8649      | 15 | G  | 6  | 614.3262       | 307.6670        |
| 1617.9177      | 16 | P  | 5  | 557.3047       | 279.1563        |
| 1674.9392      | 17 | G  | 4  | 460.2520       | 230.6299        |
| 1789.9661      | 18 | D  | 3  | 403.2305       | 202.1192        |
| 1903.0502      | 19 | I  | 2  | 288.2036       | 144.6057        |
|                | 20 | R  | 1  | 175.1195       | 88.0637         |

N-term:+43.02 K(5):+162.16

X-range:

0 - 0

MassTol: Y-zoom:

0. 1.

MassType:

☐AVG ☒MONO

Axis:

☒1 ☐2

Label:

☒I ☐M ☐-

Ions:

a ☐+ ☐2+ ☐3+

b ☒+ ☐2+ ☐3+

c ☐+ ☐2+ ☐3+

x ☐+ ☐2+ ☐3+

y ☒+ ☒2+ ☐3+

z ☐+ ☐2+ ☐3+

hide H<sub>2</sub>O/NH<sub>3</sub> ☐

zoom 112-122 ☐

GO

AAPQDVHVR, MH+ 1034.5383, m/z 517.7728  
H OS G14 P120811 220811-s1.02488.02488.2.dta

scan 2486; 3.1e+000

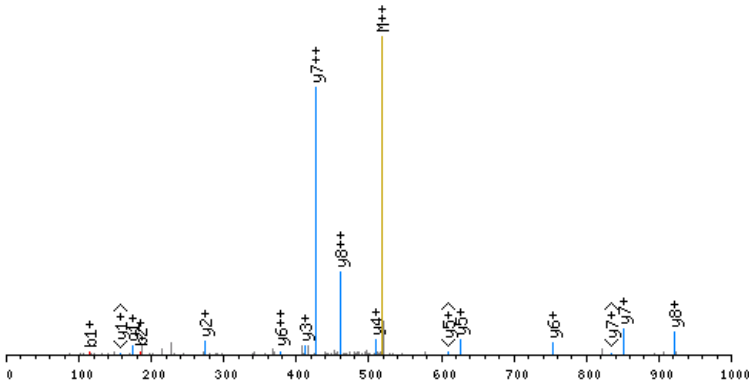

click image to zoom in; click top corners to zoom out

[precursor±]

scan 2486; 517.8 m/z; 4.7e+000

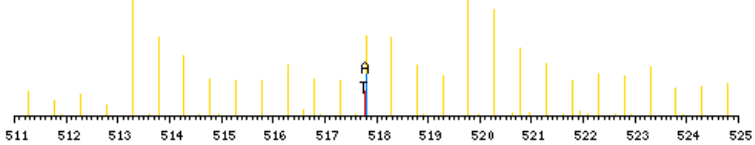

zoomed in precursor plot; T=theoretical m/z, A=acquired m/z

| b <sup>+</sup> | # | AA | # | y <sup>+</sup> | y <sup>2+</sup> |
|----------------|---|----|---|----------------|-----------------|
| 114.0555       | 1 | A  | 9 |                |                 |
| 185.0926       | 2 | A  | 8 | 921.4906       | 461.2492        |
| 282.1454       | 3 | P  | 7 | 850.4535       | 425.7307        |
| 410.2040       | 4 | Q  | 6 | 753.4008       | 377.2043        |
| 525.2309       | 5 | D  | 5 | 625.3422       | 313.1750        |
| 624.2993       | 6 | V  | 4 | 510.3152       | 255.6615        |
| 761.3582       | 7 | H  | 3 | 411.2468       | 206.1273        |
| 860.4267       | 8 | V  | 2 | 274.1879       | 137.5979        |
|                | 9 | R  | 1 | 175.1195       | 88.0637         |

N-term:+43.02

X-range:

0 - 0

MassTol: Y-zoom:

0. 1.

MassType:

☐ AVG ☒ MONO

Axis:

☒ 1 ☐ 2

Label:

☒ I ☐ M ☐ -

Ions:

a ☐ + ☐ 2+ ☐ 3+

b ☒ + ☐ 2+ ☐ 3+

c ☐ + ☐ 2+ ☐ 3+

x ☐ + ☐ 2+ ☐ 3+

y ☒ + ☒ 2+ ☐ 3+

z ☐ + ☐ 2+ ☐ 3+

hide H<sub>2</sub>O/NH<sub>3</sub> ☐

zoom 112-122 ☐

GO

AASAASSEHFEKLHEIFR, MH+ 2100.0515, m/z 525.7683  
H OS G17 P120811 220811-s1.05656.05656.4.dta

scan 5656; 1.5e+000

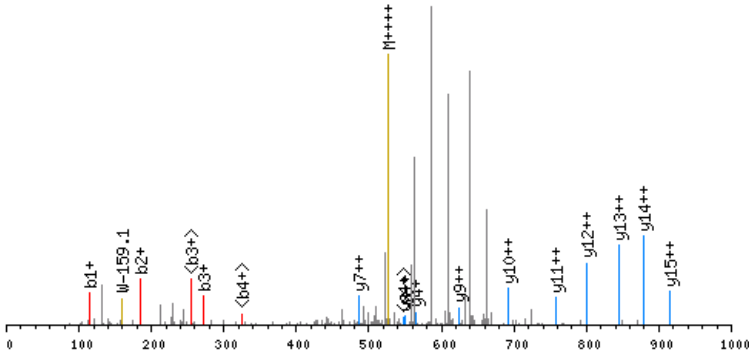

click image to zoom in; click top corners to zoom out [\[precursor±\]](#)

scan 5653; 525.8 m/z; 4.9e+000

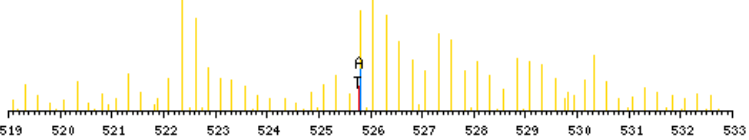

zoomed in precursor plot; T=theoretical m/z, A=acquired m/z

| b <sup>+</sup> | #  | AA | #  | y <sup>+</sup> | y <sup>2+</sup> |
|----------------|----|----|----|----------------|-----------------|
| 114.0555       | 1  | A  | 18 |                |                 |
| 185.0926       | 2  | A  | 17 | 1987.0038      | 994.0058        |
| 272.1247       | 3  | S  | 16 | 1915.9667      | 958.4872        |
| 343.1618       | 4  | A  | 15 | 1828.9346      | 914.9712        |
| 414.1989       | 5  | A  | 14 | 1757.8975      | 879.4527        |
| 501.2309       | 6  | S  | 13 | 1686.8604      | 843.9341        |
| 588.2629       | 7  | S  | 12 | 1599.8284      | 800.4181        |
| 717.3055       | 8  | E  | 11 | 1512.7964      | 756.9021        |
| 854.3644       | 9  | H  | 10 | 1383.7538      | 692.3808        |
| 1001.4329      | 10 | F  | 9  | 1246.6949      | 623.8513        |
| 1130.4755      | 11 | E  | 8  | 1099.6264      | 550.3171        |
| 1286.6018      | 12 | K  | 7  | 970.5838       | 485.7958        |
| 1399.6858      | 13 | L  | 6  | 814.4575       | 407.7327        |
| 1536.7447      | 14 | H  | 5  | 701.3735       | 351.1907        |
| 1665.7873      | 15 | E  | 4  | 564.3146       | 282.6612        |
| 1778.8714      | 16 | I  | 3  | 435.2720       | 218.1399        |
| 1925.9398      | 17 | F  | 2  | 322.1879       | 161.5979        |
|                | 18 | R  | 1  | 175.1195       | 88.0637         |

N-term:+43.02 K(12):+156.13



X-range:

0 - 0

MassTol: Y-zoom:

0. 1.

MassType:

☐ AVG ☒ MONO

Axis:

☒ 1 ☐ 2

Label:

☒ I ☐ M ☐ -

Ions:

a ☐ + ☐ 2+ ☐ 3+

b ☒ + ☐ 2+ ☐ 3+

c ☐ + ☐ 2+ ☐ 3+

x ☐ + ☐ 2+ ☐ 3+

y ☒ + ☒ 2+ ☐ 3+

z ☐ + ☐ 2+ ☐ 3+

hide H<sub>2</sub>O/NH<sub>3</sub> ☐

zoom 112-122 ☐

GO

AATFFGEVVKAPCR, MH+ 1622.8365, m/z 541.6170  
H OS G13 P120811 220811-s1.06705.06705.3.dta

scan 6705; 4.4e+000

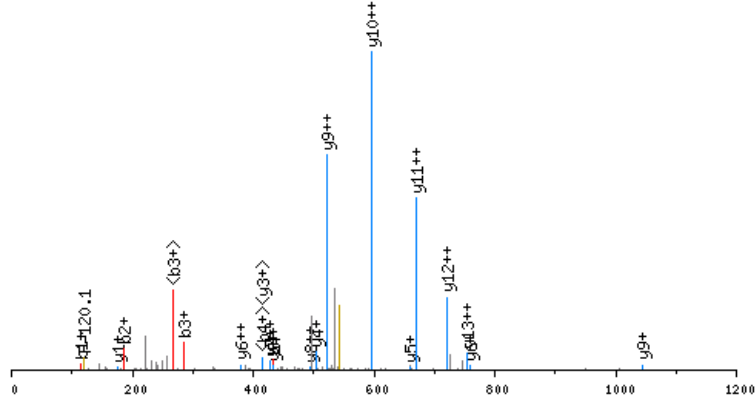

click image to zoom in; click top corners to zoom out [\[precursor±\]](#)

scan 6704; 541.6 m/z; 1.0e+001

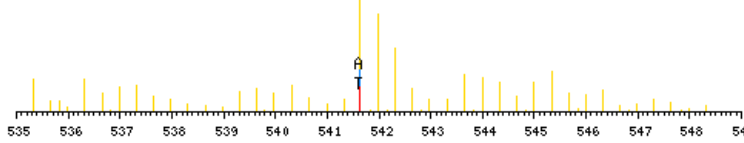

zoomed in precursor plot; T=theoretical m/z, A=acquired m/z

| b <sup>+</sup> | #  | AA | #  | y <sup>+</sup> | y <sup>2+</sup> |
|----------------|----|----|----|----------------|-----------------|
| 114.0555       | 1  | A  | 14 |                |                 |
| 185.0926       | 2  | A  | 13 | 1509.7888      | 755.3983        |
| 286.1403       | 3  | T  | 12 | 1438.7517      | 719.8797        |
| 433.2087       | 4  | F  | 11 | 1337.7040      | 669.3559        |
| 580.2771       | 5  | F  | 10 | 1190.6356      | 595.8217        |
| 637.2986       | 6  | G  | 9  | 1043.5672      | 522.2875        |
| 766.3412       | 7  | E  | 8  | 986.5457       | 493.7768        |
| 865.4096       | 8  | V  | 7  | 857.5031       | 429.2555        |
| 964.4780       | 9  | V  | 6  | 758.4347       | 379.7213        |
| 1120.6043      | 10 | K  | 5  | 659.3663       | 330.1871        |
| 1191.6414      | 11 | A  | 4  | 503.2400       | 252.1239        |
| 1288.6942      | 12 | P  | 3  | 432.2029       | 216.6053        |
| 1448.7248      | 13 | C  | 2  | 335.1501       | 168.0790        |
|                | 14 | R  | 1  | 175.1195       | 88.0637         |

N-term:+43.02 K(10):+156.13  
C(13):+160.03

X-range:

0 - 0

MassTol: Y-zoom:

0. 1.

MassType:

☐ AVG ☒ MONO

Axis:

☒ 1 ☐ 2

Label:

☒ I ☐ M ☐ -

Ions:

a ☐ + ☐ 2+ ☐ 3+

b ☒ + ☐ 2+ ☐ 3+

c ☐ + ☐ 2+ ☐ 3+

x ☐ + ☐ 2+ ☐ 3+

y ☒ + ☒ 2+ ☐ 3+

z ☐ + ☐ 2+ ☐ 3+

hide H<sub>2</sub>O/NH<sub>3</sub> ☐

zoom 112-122 ☐

GO

AATTGSGVKVPR, MH+ 1219.7223, m/z 610.3648  
H OS G13 P120811 220811-s1.02693.02693.2.dta

scan 2693; 1.8e+001

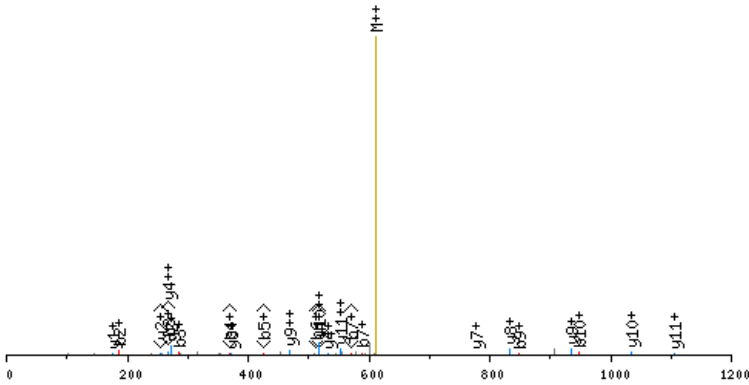

click image to zoom in; click top corners to zoom out

[precursor±]

scan 2689; 610.4 m/z; 5.5e+001

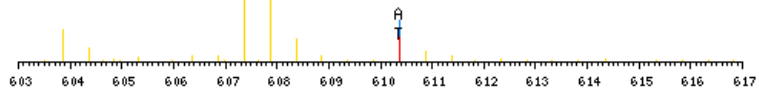

zoomed in precursor plot; T=theoretical m/z, A=acquired m/z

| b <sup>+</sup> | #  | AA | #  | y <sup>+</sup> | y <sup>2+</sup> |
|----------------|----|----|----|----------------|-----------------|
| 114.0555       | 1  | A  | 12 |                |                 |
| 185.0926       | 2  | A  | 11 | 1106.6746      | 553.8412        |
| 286.1403       | 3  | T  | 10 | 1035.6375      | 518.3227        |
| 387.1880       | 4  | T  | 9  | 934.5898       | 467.7988        |
| 444.2094       | 5  | G  | 8  | 833.5421       | 417.2750        |
| 531.2415       | 6  | S  | 7  | 776.5207       | 388.7643        |
| 588.2629       | 7  | G  | 6  | 689.4887       | 345.2482        |
| 687.3314       | 8  | V  | 5  | 632.4672       | 316.7375        |
| 849.4895       | 9  | K  | 4  | 533.3988       | 267.2033        |
| 948.5579       | 10 | V  | 3  | 371.2407       | 186.1243        |
| 1045.6106      | 11 | P  | 2  | 272.1723       | 136.5900        |
|                | 12 | R  | 1  | 175.1195       | 88.0637         |

N-term:+43.02 K(9):+162.16



X-range:

0 - 0

MassTol: Y-zoom:

0. 1.

MassType:

☐AVG ☒MONO

Axis:

☒1 ☐2

Label:

☒I ☐M ☐-

Ions:

a ☐+ ☐2+ ☐3+

b ☒+ ☐2+ ☐3+

c ☐+ ☐2+ ☐3+

x ☐+ ☐2+ ☐3+

y ☒+ ☒2+ ☐3+

z ☐+ ☐2+ ☐3+

hide H<sub>2</sub>O/NH<sub>3</sub> ☐

zoom 112-122 ☐

GO

AAVPSAVHLPR, MH+ 1159.6588, m/z 580.3330  
H OS G13 P120811 220811-s1.04708.04708.2.dta

scan 4708; 2.7e+000

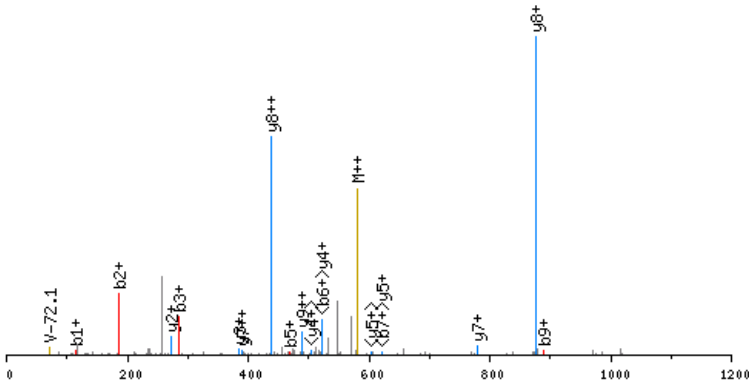

click image to zoom in; click top corners to zoom out

[precursor±]

scan 4704; 580.3 m/z; 1.5e+001

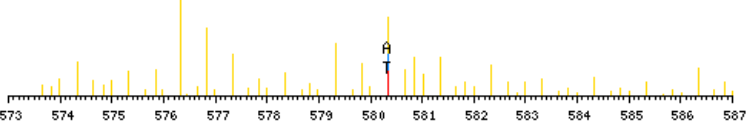

zoomed in precursor plot; T=theoretical m/z, A=acquired m/z

| b <sup>+</sup> | #  | AA | #  | y <sup>+</sup> | y <sup>2+</sup> |
|----------------|----|----|----|----------------|-----------------|
| 114.0555       | 1  | A  | 11 |                |                 |
| 185.0926       | 2  | A  | 10 | 1046.6111      | 523.8095        |
| 284.1610       | 3  | V  | 9  | 975.5740       | 488.2909        |
| 381.2138       | 4  | P  | 8  | 876.5056       | 438.7567        |
| 468.2458       | 5  | S  | 7  | 779.4528       | 390.2303        |
| 539.2829       | 6  | A  | 6  | 692.4208       | 346.7143        |
| 638.3514       | 7  | V  | 5  | 621.3837       | 311.1957        |
| 775.4103       | 8  | H  | 4  | 522.3152       | 261.6615        |
| 888.4943       | 9  | L  | 3  | 385.2563       | 193.1321        |
| 985.5471       | 10 | P  | 2  | 272.1723       | 136.5900        |
|                | 11 | R  | 1  | 175.1195       | 88.0637         |

N-term:+43.02

X-range:

0 - 0

MassTol: Y-zoom:

0. 1.

MassType:

☐AVG ☒MONO

Axis:

☒1 ☐2

Label:

☒I ☐M ☐-

Ions:

a ☐+ ☐2+ ☐3+

b ☒+ ☐2+ ☐3+

c ☐+ ☐2+ ☐3+

x ☐+ ☐2+ ☐3+

y ☒+ ☒2+ ☐3+

z ☐+ ☐2+ ☐3+

hide H<sub>2</sub>O/NH<sub>3</sub> ☐

zoom 112-122 ☐

GO

AAVPSGASTGIYEALRL, MH+ 1846.9551, m/z 616.3232  
H OS G12 P120811 220811-s1.05236.05236.3.dta

scan 5236; 5.7e-001

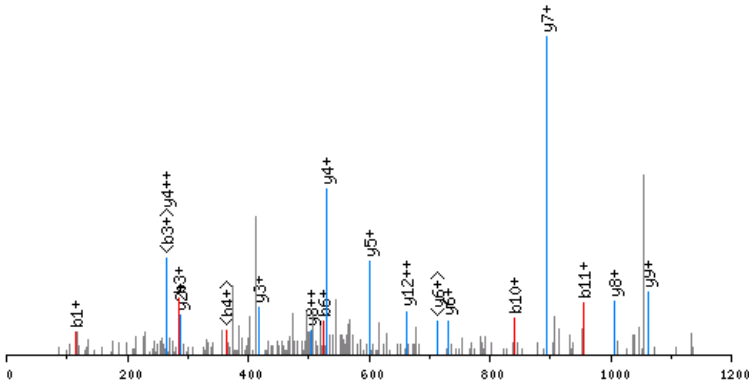

click image to zoom in; click top corners to zoom out

[precursor±]

scan 5232; 616.3 m/z; 4.5e+000

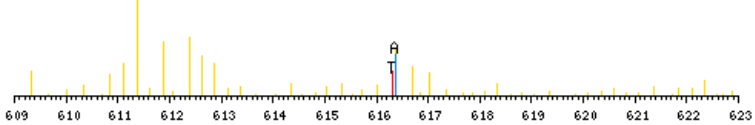

zoomed in precursor plot; T=theoretical m/z, A=acquired m/z

| b <sup>+</sup> | #  | AA | #  | y <sup>+</sup> | y <sup>2+</sup> |
|----------------|----|----|----|----------------|-----------------|
| 114.0555       | 1  | A  | 18 |                |                 |
| 185.0926       | 2  | A  | 17 | 1733.9074      | 867.4576        |
| 284.1610       | 3  | V  | 16 | 1662.8703      | 831.9391        |
| 381.2138       | 4  | P  | 15 | 1563.8019      | 782.4048        |
| 468.2458       | 5  | S  | 14 | 1466.7491      | 733.8785        |
| 525.2673       | 6  | G  | 13 | 1379.7171      | 690.3624        |
| 596.3044       | 7  | A  | 12 | 1322.6956      | 661.8517        |
| 683.3364       | 8  | S  | 11 | 1251.6585      | 626.3332        |
| 784.3841       | 9  | T  | 10 | 1164.6265      | 582.8171        |
| 841.4056       | 10 | G  | 9  | 1063.5788      | 532.2933        |
| 954.4896       | 11 | I  | 8  | 1006.5573      | 503.7826        |
| 1117.5530      | 12 | Y  | 7  | 893.4733       | 447.2405        |
| 1246.5956      | 13 | E  | 6  | 730.4099       | 365.7089        |
| 1317.6327      | 14 | A  | 5  | 601.3673       | 301.1876        |
| 1430.7167      | 15 | L  | 4  | 530.3302       | 265.6690        |
| 1559.7593      | 16 | E  | 3  | 417.2462       | 209.1270        |
| 1672.8434      | 17 | L  | 2  | 288.2036       | 144.6057        |
|                | 18 | R  | 1  | 175.1195       | 88.0637         |

N-term:+43.02

X-range:

0 - 0

MassTol: Y-zoom:

0. 1.

MassType:

☐AVG ☒MONO

Axis:

☒1 ☐2

Label:

☒I ☐M ☐-

Ions:

a ☐+ ☐2+ ☐3+

b ☒+ ☐2+ ☐3+

c ☐+ ☐2+ ☐3+

x ☐+ ☐2+ ☐3+

y ☒+ ☒2+ ☐3+

z ☐+ ☐2+ ☐3+

hide H<sub>2</sub>O/NH<sub>3</sub> ☐

zoom 112-122 ☐

GO

AAYKLVLIR, MH+ 1122.7463, m/z 561.8768  
H OS G13 P120811 220811-s1.06106.06106.2.dta

scan 6106; 6.5e+001

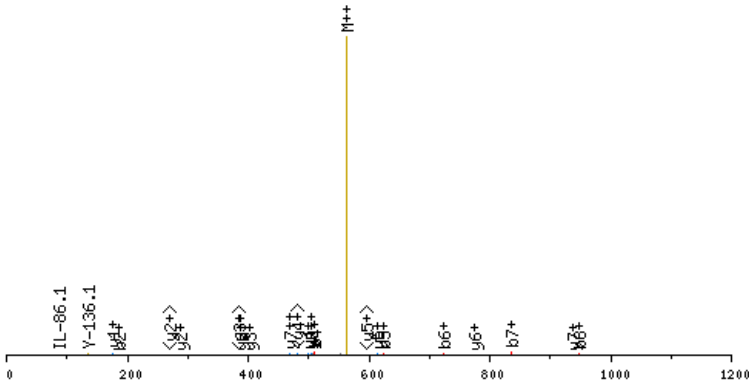

click image to zoom in; click top corners to zoom out

[precursor±]

scan 6104; 561.9 m/z; 2.5e+001

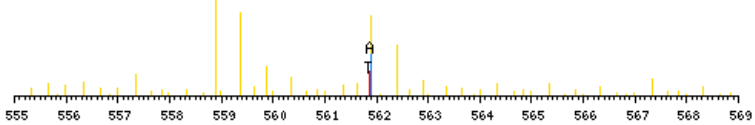

zoomed in precursor plot; T=theoretical m/z, A=acquired m/z

| b <sup>+</sup> | # | AA | # | y <sup>+</sup> | y <sup>2+</sup> |
|----------------|---|----|---|----------------|-----------------|
| 114.0555       | 1 | A  | 9 |                |                 |
| 185.0926       | 2 | A  | 8 | 1009.6986      | 505.3532        |
| 348.1560       | 3 | Y  | 7 | 938.6615       | 469.8347        |
| 510.3141       | 4 | K  | 6 | 775.5982       | 388.3030        |
| 623.3981       | 5 | L  | 5 | 613.4401       | 307.2240        |
| 722.4665       | 6 | V  | 4 | 500.3560       | 250.6819        |
| 835.5506       | 7 | L  | 3 | 401.2876       | 201.1477        |
| 948.6347       | 8 | I  | 2 | 288.2036       | 144.6057        |
|                | 9 | R  | 1 | 175.1195       | 88.0637         |

N-term:+43.02 K(4):+162.16

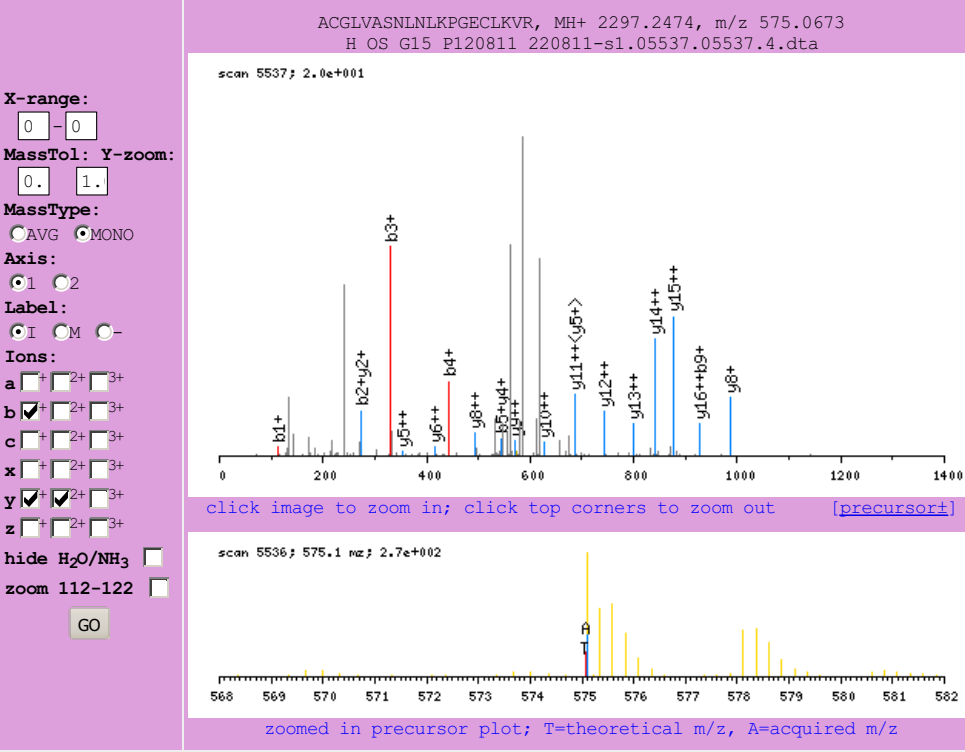

| b <sup>+</sup> | #  | AA | #  | y <sup>+</sup> | y <sup>2+</sup> |
|----------------|----|----|----|----------------|-----------------|
| 114.0555       | 1  | A  | 20 |                |                 |
| 274.0861       | 2  | C  | 19 | 2184.1997      | 1092.6037       |
| 331.1076       | 3  | G  | 18 | 2024.1691      | 1012.5884       |
| 444.1916       | 4  | L  | 17 | 1967.1476      | 984.0777        |
| 543.2601       | 5  | V  | 16 | 1854.0635      | 927.5357        |
| 614.2972       | 6  | A  | 15 | 1754.9951      | 878.0015        |
| 701.3292       | 7  | S  | 14 | 1683.9580      | 842.4829        |
| 815.3721       | 8  | N  | 13 | 1596.9260      | 798.9669        |
| 928.4562       | 9  | L  | 12 | 1482.8831      | 741.9454        |
| 1042.4991      | 10 | N  | 11 | 1369.7990      | 685.4034        |
| 1155.5832      | 11 | L  | 10 | 1255.7561      | 628.3819        |
| 1311.7095      | 12 | K  | 9  | 1142.6720      | 571.8399        |
| 1408.7622      | 13 | P  | 8  | 986.5457       | 493.7768        |
| 1465.7837      | 14 | G  | 7  | 889.4929       | 445.2504        |
| 1594.8263      | 15 | E  | 6  | 832.4715       | 416.7396        |
| 1754.8569      | 16 | C  | 5  | 703.4289       | 352.2184        |
| 1867.9410      | 17 | L  | 4  | 543.3983       | 272.2031        |
| 2024.0673      | 18 | K  | 3  | 430.3142       | 215.6610        |
| 2123.1357      | 19 | V  | 2  | 274.1879       | 137.5979        |
|                | 20 | R  | 1  | 175.1195       | 88.0637         |

N-term:+43.02 C(2):+160.03  
K(12):+156.13 C(16):+160.03  
K(18):+156.13

X-range:

0 - 0

MassTol: Y-zoom:

0. 1.

MassType:

☐AVG ☒MONO

Axis:

☒1 ☐2

Label:

☒I ☐M ☐-

Ions:

a ☐+ ☐2+ ☐3+

b ☒+ ☐2+ ☐3+

c ☐+ ☐2+ ☐3+

x ☐+ ☐2+ ☐3+

y ☒+ ☒2+ ☐3+

z ☐+ ☐2+ ☐3+

hide H<sub>2</sub>O/NH<sub>3</sub> ☐

zoom 112-122 ☐

GO

ADEGEGIHPSAPHR, MH+ 1629.7257, m/z 543.9134  
H OS G16 P120811 220811-s1.02551.02551.3.dta

scan 2551; 1.7e+000

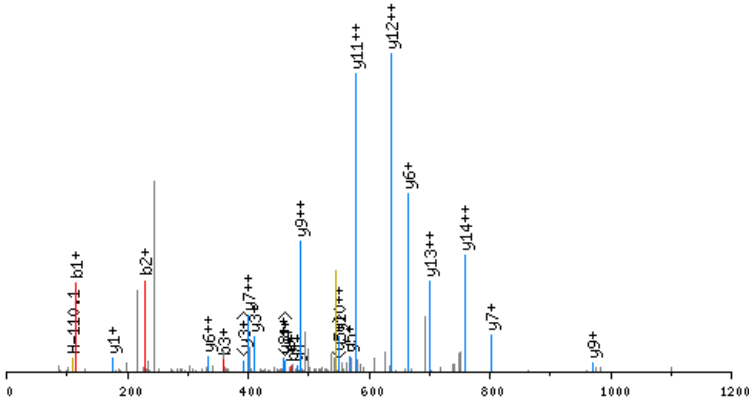

click image to zoom in; click top corners to zoom out

[precursor±]

scan 2548; 543.9 m/z; 4.0e+000

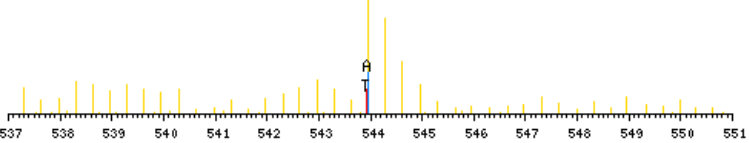

zoomed in precursor plot; T=theoretical m/z, A=acquired m/z

| b <sup>+</sup> | #  | AA | #  | y <sup>+</sup> | y <sup>2+</sup> |
|----------------|----|----|----|----------------|-----------------|
| 114.0555       | 1  | A  | 15 |                |                 |
| 229.0825       | 2  | D  | 14 | 1516.6781      | 758.8429        |
| 358.1251       | 3  | E  | 13 | 1401.6511      | 701.3295        |
| 473.1520       | 4  | D  | 12 | 1272.6085      | 636.8082        |
| 530.1735       | 5  | G  | 11 | 1157.5816      | 579.2947        |
| 659.2160       | 6  | E  | 10 | 1100.5601      | 550.7840        |
| 716.2375       | 7  | G  | 9  | 971.5175       | 486.2627        |
| 829.3216       | 8  | I  | 8  | 914.4961       | 457.7519        |
| 966.3805       | 9  | H  | 7  | 801.4120       | 401.2099        |
| 1063.4333      | 10 | P  | 6  | 664.3531       | 332.6805        |
| 1150.4653      | 11 | S  | 5  | 567.3003       | 284.1541        |
| 1221.5024      | 12 | A  | 4  | 480.2683       | 240.6381        |
| 1318.5552      | 13 | P  | 3  | 409.2312       | 205.1195        |
| 1455.6141      | 14 | H  | 2  | 312.1784       | 156.5931        |
|                | 15 | R  | 1  | 175.1195       | 88.0637         |

N-term:+43.02



X-range:

0 - 0

MassTol: Y-zoom:

0. 1.

MassType:

☐ AVG ☒ MONO

Axis:

☒ 1 ☐ 2

Label:

☒ I ☐ M ☐ -

Ions:

a ☐ + ☐ 2+ ☐ 3+

b ☒ + ☐ 2+ ☐ 3+

c ☐ + ☐ 2+ ☐ 3+

x ☐ + ☐ 2+ ☐ 3+

y ☒ + ☒ 2+ ☐ 3+

z ☐ + ☐ 2+ ☐ 3+

hide H<sub>2</sub>O/NH<sub>3</sub> ☐

zoom 112-122 ☐

GO

ADEIAKAQVAQPGGDTIFGKIIR, MH+ 2496.3827, m/z 624.8511  
H OS G14 P120811 220811-s1.05955.05955.4.dta

scan 5955; 2.9e+000

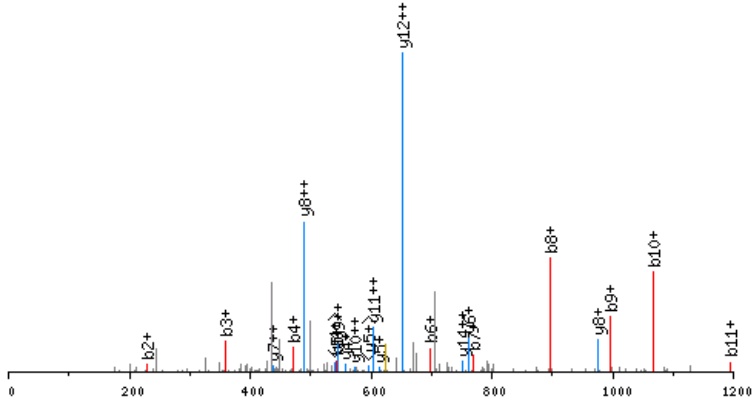

click image to zoom in; click top corners to zoom out

[precursor±]

scan 5952; 624.9 m/z; 1.3e+000

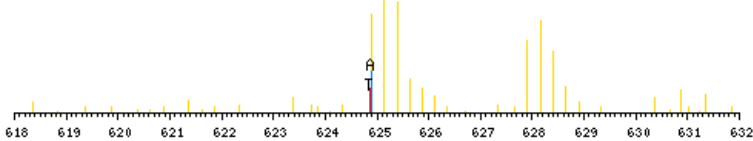

zoomed in precursor plot; T=theoretical m/z, A=acquired m/z

| b <sup>+</sup> | #  | AA | #  | y <sup>+</sup> | y <sup>2+</sup> |
|----------------|----|----|----|----------------|-----------------|
| 114.0555       | 1  | A  | 23 |                |                 |
| 229.0825       | 2  | D  | 22 | 2383.3350      | 1192.1714       |
| 358.1251       | 3  | E  | 21 | 2268.3081      | 1134.6579       |
| 471.2091       | 4  | I  | 20 | 2139.2655      | 1070.1366       |
| 542.2462       | 5  | A  | 19 | 2026.1814      | 1013.5946       |
| 698.3725       | 6  | K  | 18 | 1955.1443      | 978.0761        |
| 769.4096       | 7  | A  | 17 | 1799.0180      | 900.0129        |
| 897.4682       | 8  | Q  | 16 | 1727.9809      | 864.4943        |
| 996.5366       | 9  | V  | 15 | 1599.9223      | 800.4651        |
| 1067.5737      | 10 | A  | 14 | 1500.8539      | 750.9308        |
| 1195.6323      | 11 | Q  | 13 | 1429.8168      | 715.4123        |
| 1292.6851      | 12 | P  | 12 | 1301.7582      | 651.3830        |
| 1349.7066      | 13 | G  | 11 | 1204.7054      | 602.8566        |
| 1406.7280      | 14 | G  | 10 | 1147.6840      | 574.3459        |
| 1521.7550      | 15 | D  | 9  | 1090.6625      | 545.8352        |
| 1622.8026      | 16 | T  | 8  | 975.6355       | 488.3217        |
| 1735.8867      | 17 | I  | 7  | 874.5879       | 437.7978        |
| 1882.9551      | 18 | F  | 6  | 761.5038       | 381.2558        |
| 1939.9766      | 19 | G  | 5  | 614.4354       | 307.7216        |
| 2096.1029      | 20 | K  | 4  | 557.4139       | 279.2109        |
| 2209.1869      | 21 | I  | 3  | 401.2876       | 201.1477        |
| 2322.2710      | 22 | I  | 2  | 288.2036       | 144.6057        |
|                | 23 | R  | 1  | 175.1195       | 88.0637         |

N-term:+43.02 K(6):+156.13  
K(20):+156.13

X-range:

0 - 0

MassTol: Y-zoom:

0. 1.

MassType:

☐ AVG ☒ MONO

Axis:

☒ 1 ☐ 2

Label:

☒ I ☐ M ☐ -

Ions:

a ☐ + ☐ 2+ ☐ 3+

b ☒ + ☐ 2+ ☐ 3+

c ☐ + ☐ 2+ ☐ 3+

x ☐ + ☐ 2+ ☐ 3+

y ☒ + ☒ 2+ ☐ 3+

z ☐ + ☐ 2+ ☐ 3+

hide H<sub>2</sub>O/NH<sub>3</sub> ☐

zoom 112-122 ☐

GO

ADEVTEKQVYDAHTKEIDLVR, MH+ 2683.4216, m/z 671.6109  
H OS G16 P120811 220811-s1.05080.05080.4.dta

scan 5080; 2.4e+000

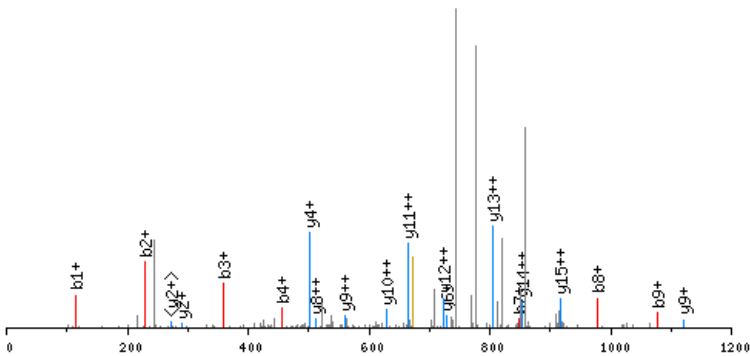

click image to zoom in; click top corners to zoom out

[precursor±]

scan 5078; 671.6 m/z; 1.0e+001

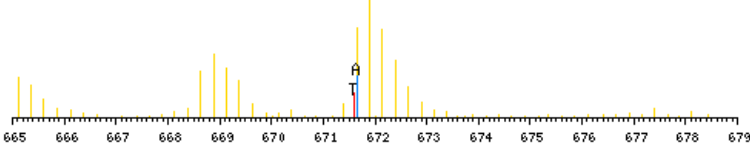

zoomed in precursor plot; T=theoretical m/z, A=acquired m/z

| b <sup>+</sup> | #  | AA | #  | y <sup>+</sup> | y <sup>2+</sup> |
|----------------|----|----|----|----------------|-----------------|
| 114.0555       | 1  | A  | 22 |                |                 |
| 229.0825       | 2  | D  | 21 | 2570.3739      | 1285.6909       |
| 358.1251       | 3  | E  | 20 | 2455.3470      | 1228.1774       |
| 457.1935       | 4  | V  | 19 | 2326.3044      | 1163.6561       |
| 558.2411       | 5  | T  | 18 | 2227.2359      | 1114.1219       |
| 687.2837       | 6  | E  | 17 | 2126.1883      | 1063.5980       |
| 849.4418       | 7  | K  | 16 | 1997.1457      | 999.0767        |
| 977.5004       | 8  | Q  | 15 | 1834.9876      | 917.9977        |
| 1076.5688      | 9  | V  | 14 | 1706.9290      | 853.9684        |
| 1239.6322      | 10 | Y  | 13 | 1607.8606      | 804.4342        |
| 1354.6591      | 11 | D  | 12 | 1444.7973      | 722.9025        |
| 1425.6962      | 12 | A  | 11 | 1329.7703      | 665.3891        |
| 1562.7551      | 13 | H  | 10 | 1258.7332      | 629.8705        |
| 1663.8028      | 14 | T  | 9  | 1121.6743      | 561.3411        |
| 1825.9609      | 15 | K  | 8  | 1020.6266      | 510.8172        |
| 1955.0035      | 16 | E  | 7  | 858.4685       | 429.7382        |
| 2068.0876      | 17 | I  | 6  | 729.4259       | 365.2169        |
| 2183.1145      | 18 | D  | 5  | 616.3418       | 308.6748        |
| 2296.1986      | 19 | L  | 4  | 501.3149       | 251.1614        |
| 2395.2670      | 20 | V  | 3  | 388.2308       | 194.6193        |
| 2509.3099      | 21 | N  | 2  | 289.1624       | 145.0851        |
|                | 22 | R  | 1  | 175.1195       | 88.0637         |

N-term:+43.02 K(7):+162.16  
K(15):+162.16



X-range:

0 - 0

MassTol: Y-zoom:

0. 1.

MassType:

☐AVG ☒MONO

Axis:

☒1 ☐2

Label:

☒I ☐M ☐-

Ions:

a ☐+ ☐2+ ☐3+

b ☒+ ☐2+ ☐3+

c ☐+ ☐2+ ☐3+

x ☐+ ☐2+ ☐3+

y ☒+ ☒2+ ☐3+

z ☐+ ☐2+ ☐3+

hide H<sub>2</sub>O/NH<sub>3</sub> ☐

zoom 112-122 ☐

GO

ADKEAAFDDAVEER, MH+ 1641.7821, m/z 547.9322  
H OS G13 P120811 220811-s1.04348.04348.3.dta

scan 4348; 3.8e+000

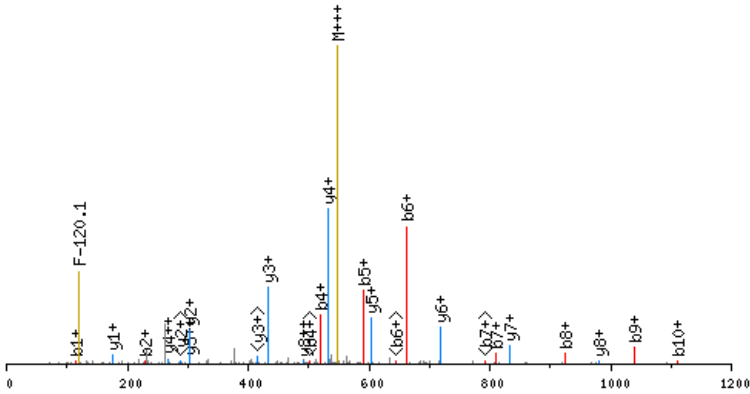

click image to zoom in; click top corners to zoom out

[precursor±]

scan 4344; 547.9 m/z; 5.5e+001

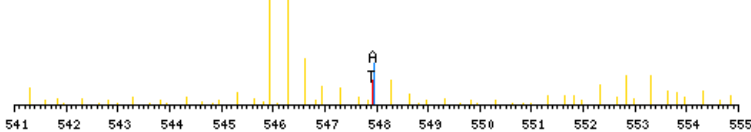

zoomed in precursor plot; T=theoretical m/z, A=acquired m/z

| b <sup>+</sup> | #  | AA | #  | y <sup>+</sup> | y <sup>2+</sup> |
|----------------|----|----|----|----------------|-----------------|
| 114.0555       | 1  | A  | 14 |                |                 |
| 229.0825       | 2  | D  | 13 | 1528.7344      | 764.8711        |
| 391.2406       | 3  | K  | 12 | 1413.7074      | 707.3576        |
| 520.2832       | 4  | E  | 11 | 1251.5493      | 626.2786        |
| 591.3203       | 5  | A  | 10 | 1122.5067      | 561.7573        |
| 662.3574       | 6  | A  | 9  | 1051.4696      | 526.2387        |
| 809.4258       | 7  | F  | 8  | 980.4325       | 490.7202        |
| 924.4527       | 8  | D  | 7  | 833.3641       | 417.1860        |
| 1039.4797      | 9  | D  | 6  | 718.3372       | 359.6725        |
| 1110.5168      | 10 | A  | 5  | 603.3102       | 302.1590        |
| 1209.5852      | 11 | V  | 4  | 532.2731       | 266.6405        |
| 1338.6278      | 12 | E  | 3  | 433.2047       | 217.1063        |
| 1467.6704      | 13 | E  | 2  | 304.1621       | 152.5850        |
|                | 14 | R  | 1  | 175.1195       | 88.0637         |

N-term:+43.02 K(3):+162.16

X-range:

0 - 0

MassTol: Y-zoom:

0. 1.

MassType:

☐AVG ☒MONO

Axis:

☒1 ☐2

Label:

☒I ☐M ☐-

Ions:

a ☐+ ☐2+ ☐3+

b ☒+ ☐2+ ☐3+

c ☐+ ☐2+ ☐3+

x ☐+ ☐2+ ☐3+

y ☒+ ☒2+ ☐3+

z ☐+ ☐2+ ☐3+

hide H<sub>2</sub>O/NH<sub>3</sub> ☐

zoom 112-122 ☐

GO

ADLEEQLSDEEKVR, MH+ 1730.8449, m/z 577.6198  
H OS G13 P120811 220811-s1.05540.05540.3.dta

scan 5540; 2.1e+000

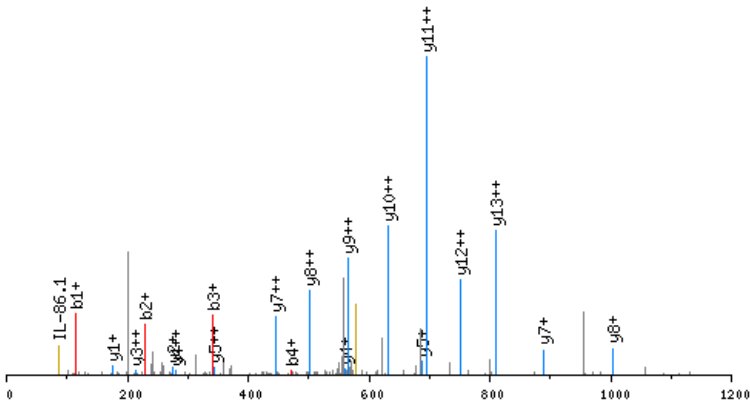

click image to zoom in; click top corners to zoom out

[precursor±]

scan 5539; 577.6 m/z; 9.5e+000

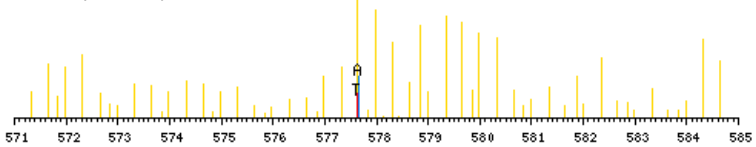

zoomed in precursor plot; T=theoretical m/z, A=acquired m/z

| b <sup>+</sup> | #  | AA | #  | y <sup>+</sup> | y <sup>2+</sup> |
|----------------|----|----|----|----------------|-----------------|
| 114.0555       | 1  | A  | 14 |                |                 |
| 229.0825       | 2  | D  | 13 | 1617.7972      | 809.4025        |
| 342.1665       | 3  | L  | 12 | 1502.7703      | 751.8890        |
| 471.2091       | 4  | E  | 11 | 1389.6862      | 695.3470        |
| 600.2517       | 5  | E  | 10 | 1260.6436      | 630.8257        |
| 728.3103       | 6  | Q  | 9  | 1131.6010      | 566.3044        |
| 841.3943       | 7  | L  | 8  | 1003.5424      | 502.2751        |
| 928.4264       | 8  | S  | 7  | 890.4584       | 445.7331        |
| 1043.4533      | 9  | D  | 6  | 803.4263       | 402.2171        |
| 1172.4959      | 10 | E  | 5  | 688.3994       | 344.7036        |
| 1301.5385      | 11 | E  | 4  | 559.3568       | 280.1823        |
| 1457.6648      | 12 | K  | 3  | 430.3142       | 215.6610        |
| 1556.7332      | 13 | V  | 2  | 274.1879       | 137.5979        |
|                | 14 | R  | 1  | 175.1195       | 88.0637         |

N-term:+43.02 K(12):+156.13

X-range:

0 - 0

MassTol: Y-zoom:

0. 1.

MassType:

☐ AVG ☒ MONO

Axis:

☒ 1 ☐ 2

Label:

☒ I ☐ M ☐ -

Ions:

a ☐ + ☐ 2+ ☐ 3+

b ☒ + ☐ 2+ ☐ 3+

c ☐ + ☐ 2+ ☐ 3+

x ☐ + ☐ 2+ ☐ 3+

y ☒ + ☒ 2+ ☐ 3+

z ☐ + ☐ 2+ ☐ 3+

hide H<sub>2</sub>O/NH<sub>3</sub> ☐

zoom 112-122 ☐

GO

ADTFLEHMCR, MH+ 1321.5669, m/z 661.2871  
H OS G14 P120811 220811-s1.05602.05602.2.dta

scan 5602; 1.6e+000

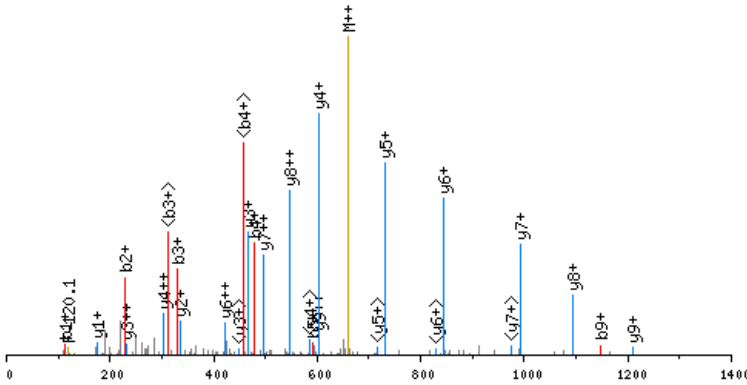

click image to zoom in; click top corners to zoom out

[precursor±]

scan 5601; 661.3 m/z; 4.8e+000

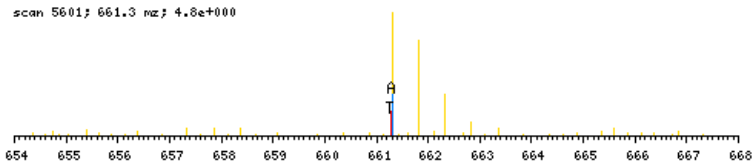

zoomed in precursor plot; T=theoretical m/z, A=acquired m/z

| b <sup>+</sup> | #  | AA | #  | y <sup>+</sup> | y <sup>2+</sup> |
|----------------|----|----|----|----------------|-----------------|
| 114.0555       | 1  | A  | 10 |                |                 |
| 229.0825       | 2  | D  | 9  | 1208.5192      | 604.7635        |
| 330.1301       | 3  | T  | 8  | 1093.4922      | 547.2500        |
| 477.1985       | 4  | F  | 7  | 992.4446       | 496.7262        |
| 590.2826       | 5  | L  | 6  | 845.3762       | 423.1920        |
| 719.3252       | 6  | E  | 5  | 732.2921       | 366.6500        |
| 856.3841       | 7  | H  | 4  | 603.2495       | 302.1287        |
| 987.4246       | 8  | M  | 3  | 466.1906       | 233.5992        |
| 1147.4552      | 9  | C  | 2  | 335.1501       | 168.0790        |
|                | 10 | R  | 1  | 175.1195       | 88.0637         |

N-term:+43.02 C(9):+160.03

N-term: +43.02 K(9): +156.13

X-range:

0 - 0

MassTol: Y-zoom:

0. 1.

MassType:

☐AVG ☒MONO

Axis:

☒1 ☐2

Label:

☒I ☐M ☐-

Ions:

a ☐+ ☐2+ ☐3+

b ☒+ ☐2+ ☐3+

c ☐+ ☐2+ ☐3+

x ☐+ ☐2+ ☐3+

y ☒+ ☒2+ ☐3+

z ☐+ ☐2+ ☐3+

hide H<sub>2</sub>O/NH<sub>3</sub> ☐

zoom 112-122 ☐

GO

AEAEAAQLKEEGNR, MH+ 1585.7822, m/z 529.2656  
H OS G13 P120811 220811-s1.03528.03528.3.dta

scan 3528; 3.7e+000

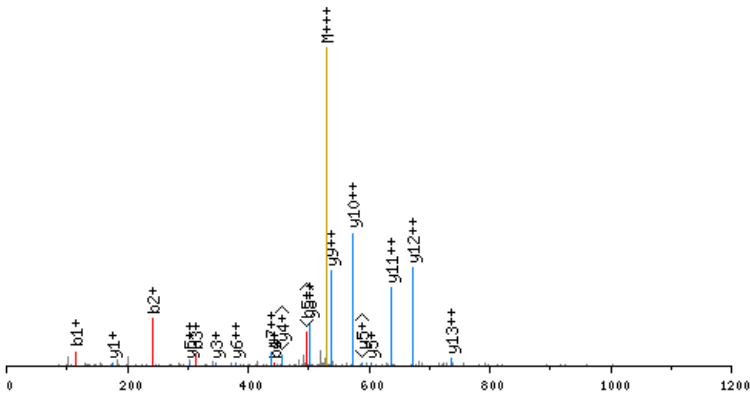

click image to zoom in; click top corners to zoom out

[precursor±]

scan 3524; 529.3 m/z; 3.0e+001

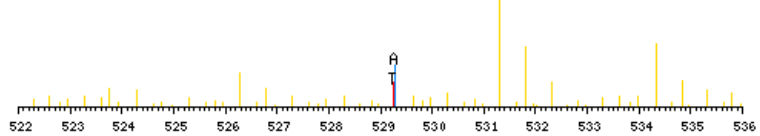

zoomed in precursor plot; T=theoretical m/z, A=acquired m/z

| b <sup>+</sup> | #  | AA | #  | y <sup>+</sup> | y <sup>2+</sup> |
|----------------|----|----|----|----------------|-----------------|
| 114.0555       | 1  | A  | 14 |                |                 |
| 243.0981       | 2  | E  | 13 | 1472.7345      | 736.8712        |
| 314.1352       | 3  | A  | 12 | 1343.6920      | 672.3499        |
| 443.1778       | 4  | E  | 11 | 1272.6548      | 636.8313        |
| 514.2149       | 5  | A  | 10 | 1143.6122      | 572.3100        |
| 585.2520       | 6  | A  | 9  | 1072.5751      | 536.7915        |
| 713.3106       | 7  | Q  | 8  | 1001.5380      | 501.2729        |
| 826.3947       | 8  | L  | 7  | 873.4794       | 437.2436        |
| 982.5210       | 9  | K  | 6  | 760.3954       | 380.7016        |
| 1111.5636      | 10 | E  | 5  | 604.2691       | 302.6385        |
| 1240.6062      | 11 | E  | 4  | 475.2265       | 238.1172        |
| 1297.6276      | 12 | G  | 3  | 346.1839       | 173.5959        |
| 1411.6706      | 13 | N  | 2  | 289.1624       | 145.0851        |
|                | 14 | R  | 1  | 175.1195       | 88.0637         |

N-term:+43.02 K(9):+156.13

X-range:

0 - 0

MassTol: Y-zoom:

0. 1.

MassType:

☐AVG ☒MONO

Axis:

☒1 ☐2

Label:

☒I ☐M ☐-

Ions:

a ☐+ ☐2+ ☐3+

b ☒+ ☐2+ ☐3+

c ☐+ ☐2+ ☐3+

x ☐+ ☐2+ ☐3+

y ☒+ ☒2+ ☐3+

z ☐+ ☐2+ ☐3+

hide H<sub>2</sub>O/NH<sub>3</sub> ☐

zoom 112-122 ☐

GO

AELEEVTLDGKPLQALR, MH+ 1958.1023, m/z 653.3723  
H OS G12 P120811 220811-s1.05408.05408.3.dta

scan 5408; 2.1e+000

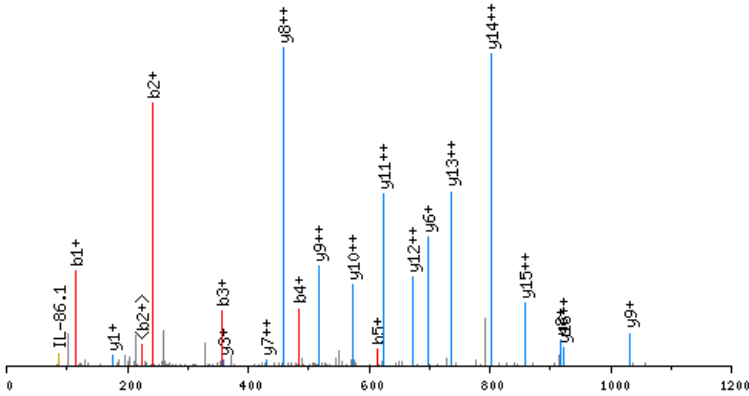

click image to zoom in; click top corners to zoom out [\[precursor±\]](#)

scan 5407; 653.4 m/z; 8.0e+001

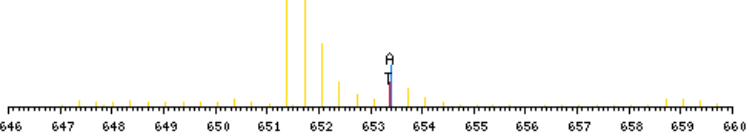

zoomed in precursor plot; T=theoretical m/z, A=acquired m/z

| b <sup>+</sup> | #  | AA | #  | y <sup>+</sup> | y <sup>2+</sup> |
|----------------|----|----|----|----------------|-----------------|
| 114.0555       | 1  | A  | 17 |                |                 |
| 243.0981       | 2  | E  | 16 | 1845.0546      | 923.0312        |
| 356.1822       | 3  | L  | 15 | 1716.0120      | 858.5099        |
| 485.2248       | 4  | E  | 14 | 1602.9279      | 801.9679        |
| 614.2674       | 5  | E  | 13 | 1473.8853      | 737.4466        |
| 713.3358       | 6  | V  | 12 | 1344.8427      | 672.9253        |
| 814.3834       | 7  | T  | 11 | 1245.7743      | 623.3911        |
| 927.4675       | 8  | L  | 10 | 1144.7267      | 572.8672        |
| 1042.4945      | 9  | D  | 9  | 1031.6426      | 516.3252        |
| 1099.5159      | 10 | G  | 8  | 916.6156       | 458.8117        |
| 1261.6740      | 11 | K  | 7  | 859.5942       | 430.3010        |
| 1358.7268      | 12 | P  | 6  | 697.4361       | 349.2220        |
| 1471.8108      | 13 | L  | 5  | 600.3833       | 300.6956        |
| 1599.8694      | 14 | Q  | 4  | 487.2993       | 244.1535        |
| 1670.9065      | 15 | A  | 3  | 359.2407       | 180.1243        |
| 1783.9906      | 16 | L  | 2  | 288.2036       | 144.6057        |
|                | 17 | R  | 1  | 175.1195       | 88.0637         |

N-term:+43.02 K(11):+162.16

X-range:

0 - 0

MassTol: Y-zoom:

0. 1.

MassType:

☐AVG ☒MONO

Axis:

☒1 ☐2

Label:

☒I ☐M ☐-

Ions:

a ☐+ ☐2+ ☐3+

b ☒+ ☐2+ ☐3+

c ☐+ ☐2+ ☐3+

x ☐+ ☐2+ ☐3+

y ☒+ ☒2+ ☐3+

z ☐+ ☐2+ ☐3+

hide H<sub>2</sub>O/NH<sub>3</sub> ☐

zoom 112-122 ☐

GO

AENLLDGPENPKR, MH+ 1490.7968, m/z 497.6038  
H OS G13 P120811 220811-s1.04692.04692.3.dta

scan 4692; 2.4e+000

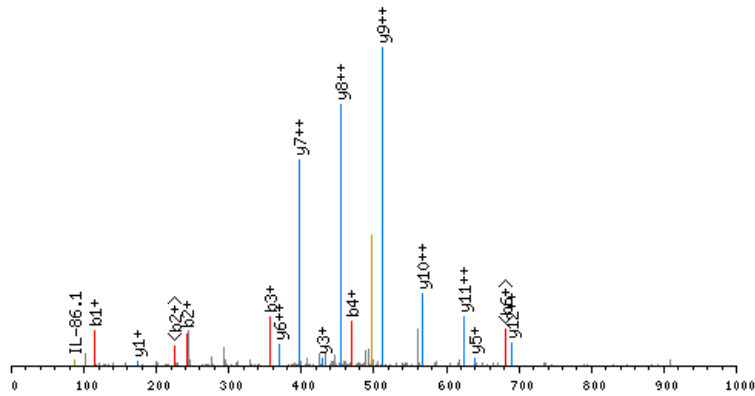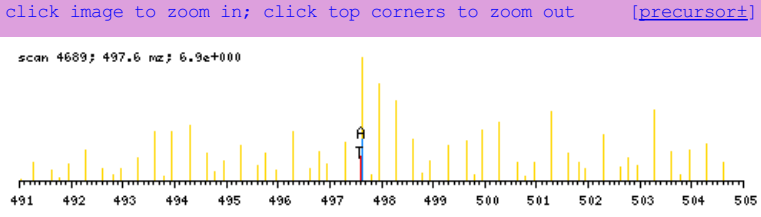

zoomed in precursor plot; T=theoretical m/z, A=acquired m/z

| b <sup>+</sup> | #  | AA | #  | y <sup>+</sup> | y <sup>2+</sup> |
|----------------|----|----|----|----------------|-----------------|
| 114.0555       | 1  | A  | 13 |                |                 |
| 243.0981       | 2  | E  | 12 | 1377.7491      | 689.3785        |
| 357.1410       | 3  | N  | 11 | 1248.7065      | 624.8572        |
| 470.2251       | 4  | L  | 10 | 1134.6636      | 567.8357        |
| 583.3092       | 5  | L  | 9  | 1021.5795      | 511.2937        |
| 698.3361       | 6  | D  | 8  | 908.4954       | 454.7516        |
| 755.3576       | 7  | G  | 7  | 793.4685       | 397.2382        |
| 852.4103       | 8  | P  | 6  | 736.4470       | 368.7274        |
| 949.4631       | 9  | P  | 5  | 639.3943       | 320.2010        |
| 1063.5060      | 10 | N  | 4  | 542.3415       | 271.6747        |
| 1160.5588      | 11 | P  | 3  | 428.2986       | 214.6532        |
| 1316.6851      | 12 | K  | 2  | 331.2458       | 166.1268        |
|                | 13 | R  | 1  | 175.1195       | 88.0637         |

N-term:+43.02 K(12):+156.13

X-range:

0 - 0

MassTol: Y-zoom:

0. 1.

MassType:

☐AVG ☒MONO

Axis:

☒1 ☐2

Label:

☒I ☐M ☐-

Ions:

a ☐+ ☐2+ ☐3+

b ☒+ ☐2+ ☐3+

c ☐+ ☐2+ ☐3+

x ☐+ ☐2+ ☐3+

y ☒+ ☒2+ ☐3+

z ☐+ ☐2+ ☐3+

hide H<sub>2</sub>O/NH<sub>3</sub> ☐

zoom 112-122 ☐

GO

AENNAQNKAKLISETR, MH+ 1885.0144, m/z 629.0097  
H OS G15 P120811 220811-s1.02783.02783.3.dta

scan 2783; 1.1e+001

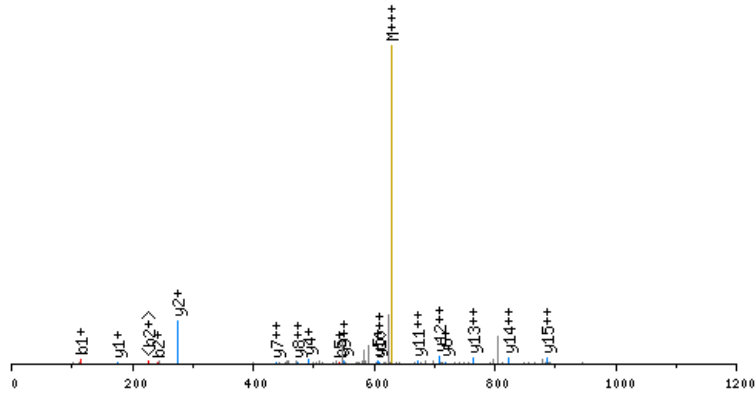

click image to zoom in; click top corners to zoom out [\[precursor±\]](#)

scan 2781; 629.0 m/z; 7.5e+000

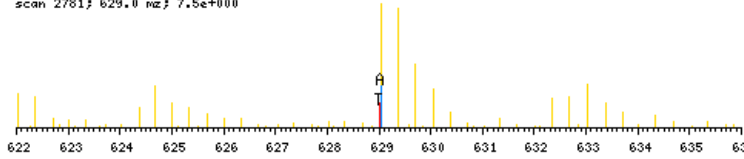

zoomed in precursor plot; T=theoretical m/z, A=acquired m/z

| b <sup>+</sup> | #  | AA | #  | y <sup>+</sup> | y <sup>2+</sup> |
|----------------|----|----|----|----------------|-----------------|
| 114.0555       | 1  | A  | 16 |                |                 |
| 243.0981       | 2  | E  | 15 | 1771.9667      | 886.4873        |
| 357.1410       | 3  | N  | 14 | 1642.9241      | 821.9660        |
| 471.1840       | 4  | N  | 13 | 1528.8812      | 764.9445        |
| 542.2211       | 5  | A  | 12 | 1414.8383      | 707.9230        |
| 670.2797       | 6  | Q  | 11 | 1343.8011      | 672.4045        |
| 784.3226       | 7  | N  | 10 | 1215.7426      | 608.3752        |
| 940.4489       | 8  | K  | 9  | 1101.6996      | 551.3537        |
| 1011.4860      | 9  | A  | 8  | 945.5733       | 473.2906        |
| 1167.6123      | 10 | K  | 7  | 874.5362       | 437.7720        |
| 1280.6964      | 11 | L  | 6  | 718.4099       | 359.7089        |
| 1393.7804      | 12 | I  | 5  | 605.3259       | 303.1668        |
| 1480.8125      | 13 | S  | 4  | 492.2418       | 246.6248        |
| 1609.8550      | 14 | E  | 3  | 405.2098       | 203.1088        |
| 1710.9027      | 15 | T  | 2  | 276.1672       | 138.5875        |
|                | 16 | R  | 1  | 175.1195       | 88.0637         |

N-term:+43.02 K(8):+156.13  
K(10):+156.13

X-range:

0 - 0

MassTol: Y-zoom:

0. 1.

MassType:

☐AVG ☒MONO

Axis:

☒1 ☐2

Label:

☒I ☐M ☐-

Ions:

a ☐+ ☐2+ ☐3+

b ☒+ ☐2+ ☐3+

c ☐+ ☐2+ ☐3+

x ☐+ ☐2+ ☐3+

y ☒+ ☒2+ ☐3+

z ☐+ ☐2+ ☐3+

hide H<sub>2</sub>O/NH<sub>3</sub> ☐

zoom 112-122 ☐

GO

AENPGLNHR, MH+ 1178.5554, m/z 589.7814  
H OS G14 P120811 220811-s1.02214.02214.2.dta

scan 2214; 1.7e+000

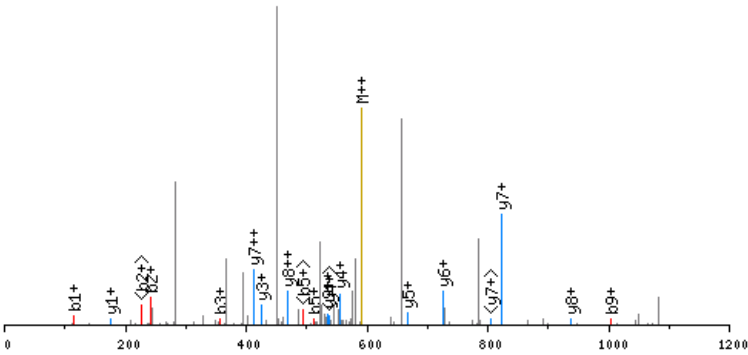

click image to zoom in; click top corners to zoom out [\[precursor±\]](#)

scan 2211; 589.8 m/z; 2.2e+000

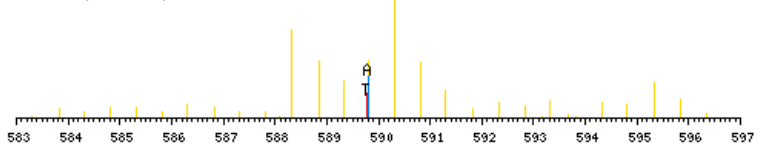

zoomed in precursor plot; T=theoretical m/z, A=acquired m/z

| b <sup>+</sup> | #  | AA | #  | y <sup>+</sup> | y <sup>2+</sup> |
|----------------|----|----|----|----------------|-----------------|
| 114.0555       | 1  | A  | 10 |                |                 |
| 243.0981       | 2  | E  | 9  | 1065.5077      | 533.2578        |
| 357.1410       | 3  | N  | 8  | 936.4652       | 468.7365        |
| 454.1938       | 4  | P  | 7  | 822.4222       | 411.7150        |
| 511.2153       | 5  | G  | 6  | 725.3695       | 363.1886        |
| 624.2993       | 6  | L  | 5  | 668.3480       | 334.6779        |
| 753.3419       | 7  | E  | 4  | 555.2639       | 278.1359        |
| 867.3848       | 8  | N  | 3  | 426.2213       | 213.6146        |
| 1004.4438      | 9  | H  | 2  | 312.1784       | 156.5931        |
|                | 10 | R  | 1  | 175.1195       | 88.0637         |

N-term:+43.02

X-range:

0 - 0

MassTol: Y-zoom:

0. 1.

MassType:

☐AVG ☒MONO

Axis:

☒1 ☐2

Label:

☒I ☐M ☐-

Ions:

a ☐+ ☐2+ ☐3+

b ☒+ ☐2+ ☐3+

c ☐+ ☐2+ ☐3+

x ☐+ ☐2+ ☐3+

y ☒+ ☒2+ ☐3+

z ☐+ ☐2+ ☐3+

hide H<sub>2</sub>O/NH<sub>3</sub> ☐

zoom 112-122 ☐

GO

AERPEDLNLPNAVITR, MH+ 1849.9772, m/z 617.3306  
H OS G13 P120811 220811-s1.05782.05782.3.dta

scan 5782; 2.8e+000

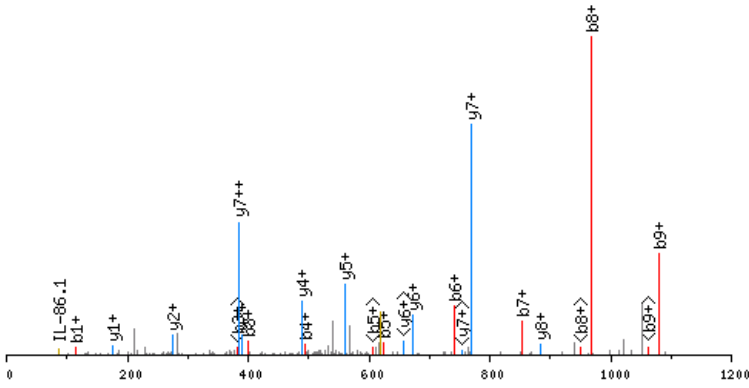

click image to zoom in; click top corners to zoom out [\[precursor±\]](#)

scan 5779; 617.3 m/z; 2.2e+001

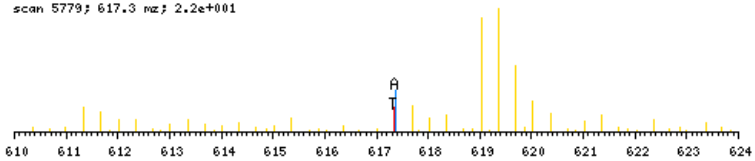

zoomed in precursor plot; T=theoretical m/z, A=acquired m/z

| b <sup>+</sup> | #  | AA | #  | y <sup>+</sup> | y <sup>2+</sup> |
|----------------|----|----|----|----------------|-----------------|
| 114.0555       | 1  | A  | 16 |                |                 |
| 243.0981       | 2  | E  | 15 | 1736.9295      | 868.9687        |
| 399.1992       | 3  | R  | 14 | 1607.8869      | 804.4474        |
| 496.2520       | 4  | P  | 13 | 1451.7858      | 726.3968        |
| 625.2946       | 5  | E  | 12 | 1354.7331      | 677.8704        |
| 740.3215       | 6  | D  | 11 | 1225.6905      | 613.3491        |
| 853.4056       | 7  | L  | 10 | 1110.6635      | 555.8357        |
| 967.4485       | 8  | N  | 9  | 997.5795       | 499.2936        |
| 1080.5326      | 9  | L  | 8  | 883.5365       | 442.2722        |
| 1177.5853      | 10 | P  | 7  | 770.4525       | 385.7301        |
| 1291.6283      | 11 | N  | 6  | 673.3997       | 337.2038        |
| 1362.6654      | 12 | A  | 5  | 559.3568       | 280.1823        |
| 1461.7338      | 13 | V  | 4  | 488.3197       | 244.6637        |
| 1574.8179      | 14 | I  | 3  | 389.2512       | 195.1295        |
| 1675.8655      | 15 | T  | 2  | 276.1672       | 138.5875        |
|                | 16 | R  | 1  | 175.1195       | 88.0637         |

N-term:+43.02

X-range:

0 - 0

MassTol: Y-zoom:

0. 1.

MassType:

☐ AVG ☒ MONO

Axis:

☒ 1 ☐ 2

Label:

☒ I ☐ M ☐ -

Ions:

a ☐ + ☐ 2+ ☐ 3+

b ☒ + ☐ 2+ ☐ 3+

c ☐ + ☐ 2+ ☐ 3+

x ☐ + ☐ 2+ ☐ 3+

y ☒ + ☒ 2+ ☐ 3+

z ☐ + ☐ 2+ ☐ 3+

hide H<sub>2</sub>O/NH<sub>3</sub> ☐

zoom 112-122 ☐

GO

AEVEETLKR, MH+ 1144.6214, m/z 572.8144  
H OS G14 P120811 220811-s1.04002.04002.2.dta

scan 4002; 5.3e+001

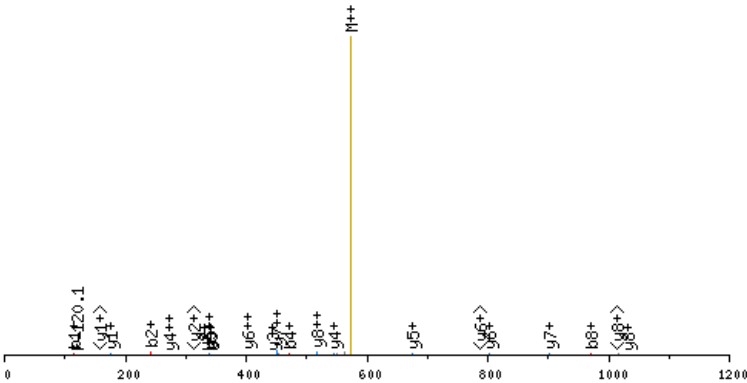

click image to zoom in; click top corners to zoom out

[precursor±]

scan 4001; 572.8 m/z; 8.3e+000

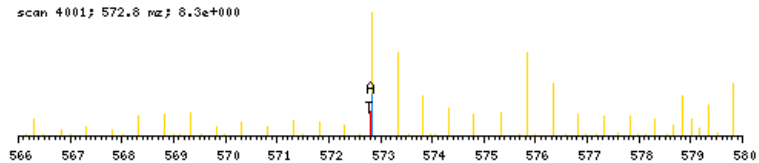

zoomed in precursor plot; T=theoretical m/z, A=acquired m/z

| b <sup>+</sup> | # | AA | # | y <sup>+</sup> | y <sup>2+</sup> |
|----------------|---|----|---|----------------|-----------------|
| 114.0555       | 1 | A  | 9 |                |                 |
| 243.0981       | 2 | E  | 8 | 1031.5737      | 516.2908        |
| 342.1665       | 3 | V  | 7 | 902.5311       | 451.7695        |
| 471.2091       | 4 | E  | 6 | 803.4627       | 402.2353        |
| 600.2517       | 5 | E  | 5 | 674.4201       | 337.7140        |
| 701.2994       | 6 | T  | 4 | 545.3775       | 273.1927        |
| 814.3834       | 7 | L  | 3 | 444.3299       | 222.6688        |
| 970.5097       | 8 | K  | 2 | 331.2458       | 166.1268        |
|                | 9 | R  | 1 | 175.1195       | 88.0637         |

N-term:+43.02 K(8):+156.13

X-range:

0 - 0

MassTol: Y-zoom:

0. 1.

MassType:

☐AVG ☒MONO

Axis:

☒1 ☐2

Label:

☒I ☐M ☐-

Ions:

a ☐+ ☐2+ ☐3+

b ☒+ ☐2+ ☐3+

c ☐+ ☐2+ ☐3+

x ☐+ ☐2+ ☐3+

y ☒+ ☒2+ ☐3+

z ☐+ ☐2+ ☐3+

hide H<sub>2</sub>O/NH<sub>3</sub> ☐

zoom 112-122 ☐

GO

AFKDTGKTPVEPEVAIHR, MH+ 2105.2032, m/z 527.0563  
H OS G16 P120811 220811-s1.04294.04294.4.dta

scan 4294; 6.1e+000

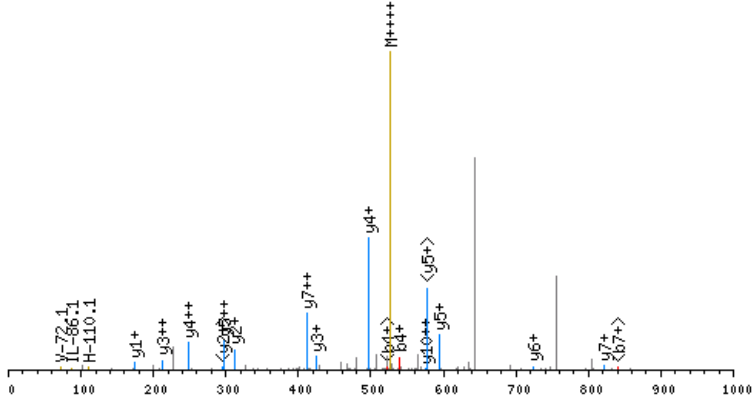

click image to zoom in; click top corners to zoom out [\[precursor±\]](#)

scan 4293; 527.1 m/z; 1.4e+002

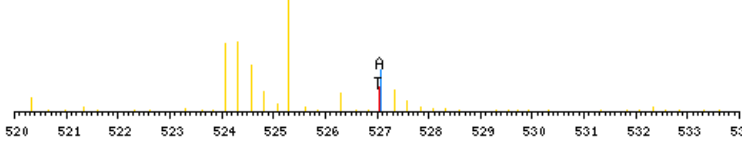

zoomed in precursor plot; T=theoretical m/z, A=acquired m/z

| b <sup>+</sup> | #  | AA | #  | y <sup>+</sup> | y <sup>2+</sup> |
|----------------|----|----|----|----------------|-----------------|
| 114.0555       | 1  | A  | 18 |                |                 |
| 261.1239       | 2  | F  | 17 | 1992.1555      | 996.5817        |
| 423.2820       | 3  | K  | 16 | 1845.0871      | 923.0475        |
| 538.3090       | 4  | D  | 15 | 1682.9290      | 841.9684        |
| 639.3566       | 5  | T  | 14 | 1567.9021      | 784.4549        |
| 696.3781       | 6  | G  | 13 | 1466.8544      | 733.9311        |
| 858.5362       | 7  | K  | 12 | 1409.8329      | 705.4204        |
| 959.5839       | 8  | T  | 11 | 1247.6748      | 624.3413        |
| 1056.6367      | 9  | P  | 10 | 1146.6271      | 573.8175        |
| 1155.7051      | 10 | V  | 9  | 1049.5744      | 525.2911        |
| 1284.7477      | 11 | E  | 8  | 950.5060       | 475.7569        |
| 1381.8004      | 12 | P  | 7  | 821.4634       | 411.2356        |
| 1510.8430      | 13 | E  | 6  | 724.4106       | 362.7092        |
| 1609.9114      | 14 | V  | 5  | 595.3680       | 298.1879        |
| 1680.9485      | 15 | A  | 4  | 496.2996       | 248.6537        |
| 1794.0326      | 16 | I  | 3  | 425.2625       | 213.1352        |
| 1931.0915      | 17 | H  | 2  | 312.1784       | 156.5931        |
|                | 18 | R  | 1  | 175.1195       | 88.0637         |

N-term:+43.02 K(3):+162.16  
K(7):+162.16

X-range:

0 - 0

MassTol: Y-zoom:

0. 1.

MassType:

☐ AVG ☒ MONO

Axis:

☒ 1 ☐ 2

Label:

☒ I ☐ M ☐ -

Ions:

a ☐ + ☐ 2+ ☐ 3+

b ☒ + ☐ 2+ ☐ 3+

c ☐ + ☐ 2+ ☐ 3+

x ☐ + ☐ 2+ ☐ 3+

y ☒ + ☒ 2+ ☐ 3+

z ☐ + ☐ 2+ ☐ 3+

hide H<sub>2</sub>O/NH<sub>3</sub> ☐

zoom 112-122 ☐

GO

AGKPVLYHYFDGR, MH+ 1429.7593, m/z 477.2579  
H OS G16 P120811 220811-s1.04760.04760.3.dta

scan 4760; 2.8e+001

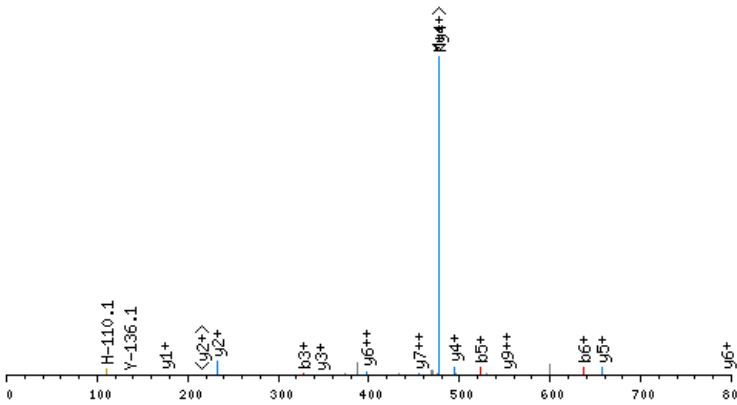

click image to zoom in; click top corners to zoom out

[precursor±]

scan 4758; 477.3 m/z; 2.2e+001

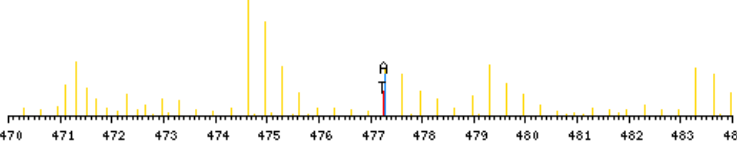

zoomed in precursor plot; T=theoretical m/z, A=acquired m/z

| b <sup>+</sup> | #  | AA | #  | y <sup>+</sup> | y <sup>2+</sup> |
|----------------|----|----|----|----------------|-----------------|
| 114.0555       | 1  | A  | 12 |                |                 |
| 171.0770       | 2  | G  | 11 | 1316.7116      | 658.8597        |
| 327.2033       | 3  | K  | 10 | 1259.6901      | 630.3490        |
| 424.2560       | 4  | P  | 9  | 1103.5638      | 552.2858        |
| 523.3245       | 5  | V  | 8  | 1006.5110      | 503.7594        |
| 636.4085       | 6  | L  | 7  | 907.4426       | 454.2252        |
| 773.4674       | 7  | H  | 6  | 794.3586       | 397.6832        |
| 936.5308       | 8  | Y  | 5  | 657.2997       | 329.1537        |
| 1083.5992      | 9  | F  | 4  | 494.2363       | 247.6221        |
| 1198.6261      | 10 | D  | 3  | 347.1679       | 174.0879        |
| 1255.6476      | 11 | G  | 2  | 232.1410       | 116.5744        |
|                | 12 | R  | 1  | 175.1195       | 88.0637         |

N-term:+43.02 K(3):+156.13

X-range:

0 - 0

MassTol: Y-zoom:

0. 1.

MassType:

☐ AVG ☒ MONO

Axis:

☒ 1 ☐ 2

Label:

☒ I ☐ M ☐ -

Ions:

a ☐ + ☐ 2+ ☐ 3+

b ☒ + ☐ 2+ ☐ 3+

c ☐ + ☐ 2+ ☐ 3+

x ☐ + ☐ 2+ ☐ 3+

y ☒ + ☒ 2+ ☐ 3+

z ☐ + ☐ 2+ ☐ 3+

hide H<sub>2</sub>O/NH<sub>3</sub> ☐

zoom 112-122 ☐

GO

AGLGHPSAFGR, MH+ 1111.5649, m/z 556.2861  
H OS G14 P120811 220811-s1.03744.03744.2.dta

scan 3744; 1.1e+001

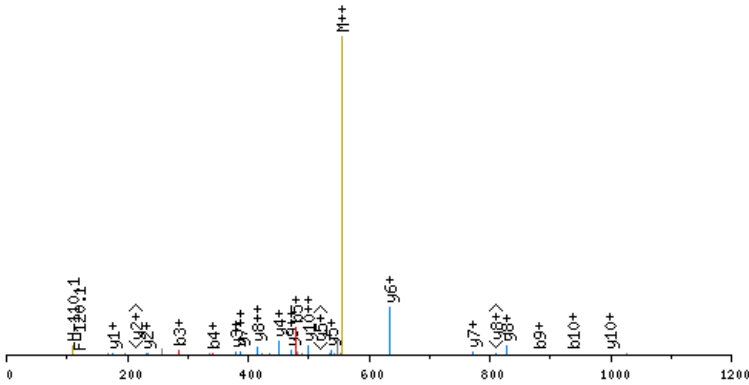

click image to zoom in; click top corners to zoom out

[precursor±]

scan 3741; 556.3 m/z; 1.0e+001

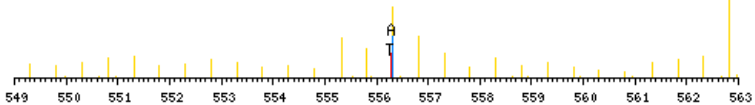

zoomed in precursor plot; T=theoretical m/z, A=acquired m/z

| b <sup>+</sup> | #  | AA | #  | y <sup>+</sup> | y <sup>2+</sup> |
|----------------|----|----|----|----------------|-----------------|
| 114.0555       | 1  | A  | 11 |                |                 |
| 171.0770       | 2  | G  | 10 | 998.5172       | 499.7625        |
| 284.1610       | 3  | L  | 9  | 941.4957       | 471.2518        |
| 341.1825       | 4  | G  | 8  | 828.4117       | 414.7097        |
| 478.2414       | 5  | H  | 7  | 771.3902       | 386.1990        |
| 575.2942       | 6  | P  | 6  | 634.3313       | 317.6696        |
| 662.3262       | 7  | S  | 5  | 537.2785       | 269.1432        |
| 733.3633       | 8  | A  | 4  | 450.2465       | 225.6272        |
| 880.4317       | 9  | F  | 3  | 379.2094       | 190.1086        |
| 937.4532       | 10 | G  | 2  | 232.1410       | 116.5744        |
|                | 11 | R  | 1  | 175.1195       | 88.0637         |

N-term:+43.02

X-range:

0 - 0

MassTol: Y-zoom:

0. 1.

MassType:

☐ AVG ☒ MONO

Axis:

☒ 1 ☐ 2

Label:

☒ I ☐ M ☐ -

Ions:

a ☐ + ☐ 2+ ☐ 3+

b ☒ + ☐ 2+ ☐ 3+

c ☐ + ☐ 2+ ☐ 3+

x ☐ + ☐ 2+ ☐ 3+

y ☒ + ☒ 2+ ☐ 3+

z ☐ + ☐ 2+ ☐ 3+

hide H<sub>2</sub>O/NH<sub>3</sub> ☐

zoom 112-122 ☐

GO

AGLLKTTGLVGLAVCDTPHER, MH+ 2434.3492, m/z 609.3428  
H OS G16 P120811 220811-s1.06244.06244.4.dta

scan 6244; 3.0e+000

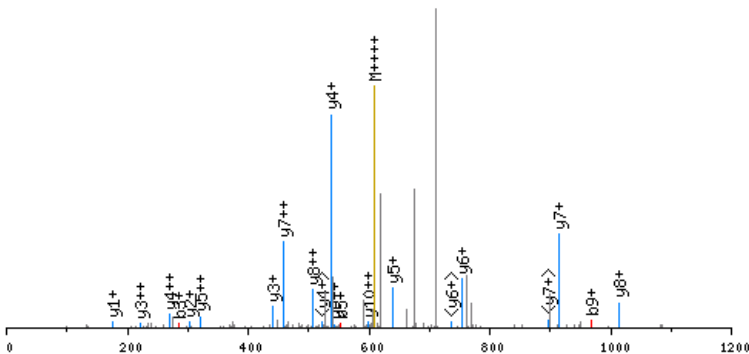

click image to zoom in; click top corners to zoom out

[precursor±]

scan 6242; 609.3 m/z; 3.8e+001

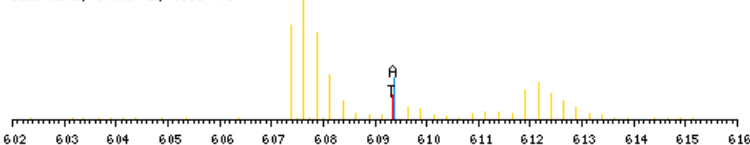

zoomed in precursor plot; T=theoretical m/z, A=acquired m/z

| b <sup>+</sup> | #  | AA | #  | y <sup>+</sup> | y <sup>2+</sup> |
|----------------|----|----|----|----------------|-----------------|
| 114.0555       | 1  | A  | 22 |                |                 |
| 171.0770       | 2  | G  | 21 | 2321.3015      | 1161.1547       |
| 284.1610       | 3  | L  | 20 | 2264.2801      | 1132.6439       |
| 397.2451       | 4  | L  | 19 | 2151.1960      | 1076.1019       |
| 553.3714       | 5  | K  | 18 | 2038.1119      | 1019.5599       |
| 709.4977       | 6  | K  | 17 | 1881.9856      | 941.4967        |
| 810.5454       | 7  | T  | 16 | 1725.8593      | 863.4336        |
| 911.5931       | 8  | T  | 15 | 1624.8117      | 812.9097        |
| 968.6145       | 9  | G  | 14 | 1523.7640      | 762.3859        |
| 1081.6986      | 10 | L  | 13 | 1466.7425      | 733.8752        |
| 1180.7670      | 11 | V  | 12 | 1353.6585      | 677.3331        |
| 1237.7885      | 12 | G  | 11 | 1254.5900      | 627.7989        |
| 1350.8725      | 13 | L  | 10 | 1197.5686      | 599.2882        |
| 1421.9096      | 14 | A  | 9  | 1084.4845      | 542.7462        |
| 1520.9781      | 15 | V  | 8  | 1013.4474      | 507.2276        |
| 1681.0087      | 16 | C  | 7  | 914.3790       | 457.6934        |
| 1796.0356      | 17 | D  | 6  | 754.3484       | 377.6781        |
| 1897.0833      | 18 | T  | 5  | 639.3214       | 320.1646        |
| 1994.1360      | 19 | P  | 4  | 538.2738       | 269.6408        |
| 2131.1950      | 20 | H  | 3  | 441.2210       | 221.1144        |
| 2260.2376      | 21 | E  | 2  | 304.1621       | 152.5850        |
|                | 22 | R  | 1  | 175.1195       | 88.0637         |

N-term:+43.02 K(5):+156.13  
K(6):+156.13 C(16):+160.03

AGLSLEAVKR, MH+ 1227.7062, m/z 614.3567  
H OS G13 P120811 220811-s1.04488.04488.2.dta

scan 4488; 1.5e+001

X-range:

MassTol: Y-zoom:

|    |  |    |
|----|--|----|
| 0. |  | 1. |
|----|--|----|

**MassType:**

AVG MONO

Axis:

1 2

Label:

☒ I ☐ M ☐ -

Ions:

**a**  + <sup>2</sup> + <sup>3</sup> +

**b** ☒ <sup>1</sup>+ ☐ <sup>2</sup>+ ☐ <sup>3</sup>+

c.  $\square + \square^2 + \square^3 +$

$$= \square + \square^2 + \square^3 + \dots$$

**x**

**y** ☒ <sup>+</sup> ☒ <sup>2+</sup> ☐ <sup>3+</sup>

$$z = \begin{bmatrix} 1 \\ 2 \\ 3 \end{bmatrix} + \begin{bmatrix} 1 \\ 2 \\ 3 \end{bmatrix}^2 + \begin{bmatrix} 1 \\ 2 \\ 3 \end{bmatrix}^3 + \dots$$

hide  $\text{H}_2\text{O}/\text{NH}_3$

zoom 112-123

GO

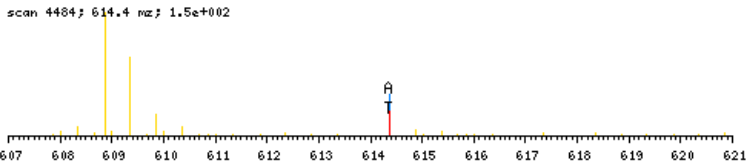

zoomed in precursor plot; T=theoretical m/z, A=acquired m/z

| $b^+$     | #  | AA | #  | $y^+$     | $y^{2+}$ |
|-----------|----|----|----|-----------|----------|
| 114.0555  | 1  | A  | 11 |           |          |
| 171.0770  | 2  | G  | 10 | 1114.6585 | 557.8331 |
| 284.1610  | 3  | L  | 9  | 1057.6370 | 529.3224 |
| 398.2040  | 4  | N  | 8  | 944.5529  | 472.7804 |
| 485.2360  | 5  | S  | 7  | 830.5100  | 415.7589 |
| 598.3201  | 6  | L  | 6  | 743.4780  | 372.2429 |
| 727.3627  | 7  | E  | 5  | 630.3939  | 315.7009 |
| 798.3998  | 8  | A  | 4  | 501.3513  | 251.1796 |
| 897.4682  | 9  | V  | 3  | 430.3142  | 215.6610 |
| 1053.5945 | 10 | K  | 2  | 331.2458  | 166.1268 |
|           | 11 | R  | 1  | 175.1195  | 88.0637  |

N-term: +43.02 K(10): +156.13

[precursor±]

X-range:

0 - 0

MassTol: Y-zoom:

0. 1.

MassType:

☐ AVG ☒ MONO

Axis:

☒ 1 ☐ 2

Label:

☒ I ☐ M ☐ -

Ions:

a ☐ + ☐ 2+ ☐ 3+

b ☒ + ☐ 2+ ☐ 3+

c ☐ + ☐ 2+ ☐ 3+

x ☐ + ☐ 2+ ☐ 3+

y ☒ + ☒ 2+ ☐ 3+

z ☐ + ☐ 2+ ☐ 3+

hide H<sub>2</sub>O/NH<sub>3</sub> ☐

zoom 112-122 ☐

GO

AGTTTIEAVKR, MH+ 1216.6902, m/z 608.8487  
H OS G13 P120811 220811-s1.03065.03065.2.dta

scan 3065; 1.9e+001

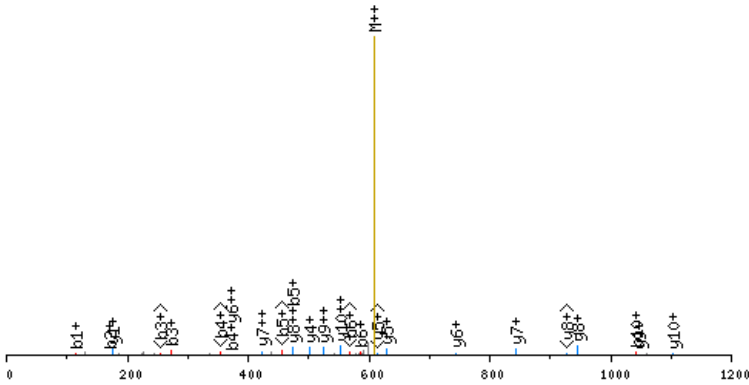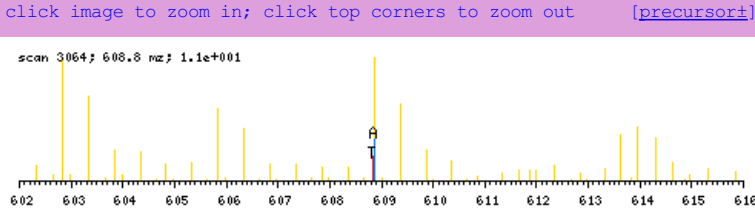

zoomed in precursor plot; T=theoretical m/z, A=acquired m/z

| b <sup>+</sup> | #  | AA | #  | y <sup>+</sup> | y <sup>2+</sup> |
|----------------|----|----|----|----------------|-----------------|
| 114.0555       | 1  | A  | 11 |                |                 |
| 171.0770       | 2  | G  | 10 | 1103.6425      | 552.3252        |
| 272.1247       | 3  | T  | 9  | 1046.6210      | 523.8144        |
| 373.1723       | 4  | T  | 8  | 945.5733       | 473.2906        |
| 474.2200       | 5  | T  | 7  | 844.5257       | 422.7667        |
| 587.3041       | 6  | I  | 6  | 743.4780       | 372.2429        |
| 716.3467       | 7  | E  | 5  | 630.3939       | 315.7009        |
| 787.3838       | 8  | A  | 4  | 501.3513       | 251.1796        |
| 886.4522       | 9  | V  | 3  | 430.3142       | 215.6610        |
| 1042.5785      | 10 | K  | 2  | 331.2458       | 166.1268        |
|                | 11 | R  | 1  | 175.1195       | 88.0637         |

N-term:+43.02 K(10):+156.13

X-range:

0 - 0

MassTol: Y-zoom:

0. 1.

MassType:

☐ AVG ☒ MONO

Axis:

☒ 1 ☐ 2

Label:

☒ I ☐ M ☐ -

Ions:

a ☐ + ☐ 2+ ☐ 3+

b ☒ + ☐ 2+ ☐ 3+

c ☐ + ☐ 2+ ☐ 3+

x ☐ + ☐ 2+ ☐ 3+

y ☒ + ☒ 2+ ☐ 3+

z ☐ + ☐ 2+ ☐ 3+

hide H<sub>2</sub>O/NH<sub>3</sub> ☐

zoom 112-122 ☐

GO

AGVDQHEGTIQVQGQNLFFR, MH+ 2286.1267, m/z 762.7138  
H OS G12 P120811 220811-s1.05043.05043.3.dta

scan 5043; 2.2e+000

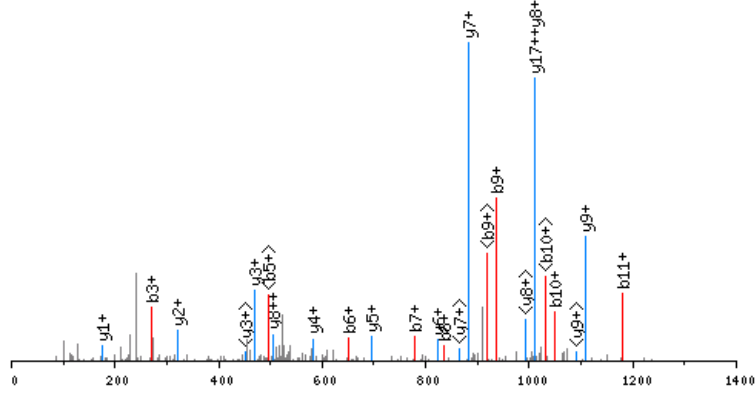

click image to zoom in; click top corners to zoom out [\[precursor±\]](#)

scan 5042; 762.7 m/z; 2.8e+001

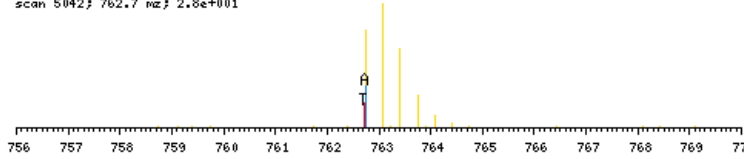

zoomed in precursor plot; T=theoretical m/z, A=acquired m/z

| b <sup>+</sup> | #  | AA | #  | y <sup>+</sup> | y <sup>2+</sup> |
|----------------|----|----|----|----------------|-----------------|
| 114.0555       | 1  | A  | 20 |                |                 |
| 171.0770       | 2  | G  | 19 | 2173.0790      | 1087.0434       |
| 270.1454       | 3  | V  | 18 | 2116.0576      | 1058.5327       |
| 385.1723       | 4  | D  | 17 | 2016.9892      | 1008.9985       |
| 513.2309       | 5  | Q  | 16 | 1901.9622      | 951.4850        |
| 650.2898       | 6  | H  | 15 | 1773.9036      | 887.4557        |
| 779.3324       | 7  | E  | 14 | 1636.8447      | 818.9263        |
| 836.3539       | 8  | G  | 13 | 1507.8021      | 754.4050        |
| 937.4016       | 9  | T  | 12 | 1450.7807      | 725.8942        |
| 1050.4856      | 10 | I  | 11 | 1349.7330      | 675.3704        |
| 1178.5442      | 11 | Q  | 10 | 1236.6489      | 618.8284        |
| 1277.6126      | 12 | V  | 9  | 1108.5904      | 554.7991        |
| 1405.6712      | 13 | Q  | 8  | 1009.5219      | 505.2649        |
| 1462.6927      | 14 | G  | 7  | 881.4634       | 441.2356        |
| 1590.7512      | 15 | Q  | 6  | 824.4419       | 412.7249        |
| 1704.7942      | 16 | N  | 5  | 696.3833       | 348.6956        |
| 1817.8782      | 17 | L  | 4  | 582.3404       | 291.6741        |
| 1964.9466      | 18 | F  | 3  | 469.2563       | 235.1321        |
| 2112.0151      | 19 | F  | 2  | 322.1879       | 161.5979        |
|                | 20 | R  | 1  | 175.1195       | 88.0637         |

N-term:+43.02

X-range:

0 - 0

MassTol: Y-zoom:

0. 1.

MassType:

☐AVG ☒MONO

Axis:

☒1 ☐2

Label:

☒I ☐M ☐-

Ions:

a ☐+ ☐2+ ☐3+

b ☒+ ☐2+ ☐3+

c ☐+ ☐2+ ☐3+

x ☐+ ☐2+ ☐3+

y ☒+ ☒2+ ☐3+

z ☐+ ☐2+ ☐3+

hide H<sub>2</sub>O/NH<sub>3</sub> ☐

zoom 112-122 ☐

GO

AGVRPDNVAEUVAGAR, MH+ 1622.8615, m/z 541.6253  
H OS G13 P120811 220811-s1.05501.05501.3.dta

scan 5501; 4.2e+000

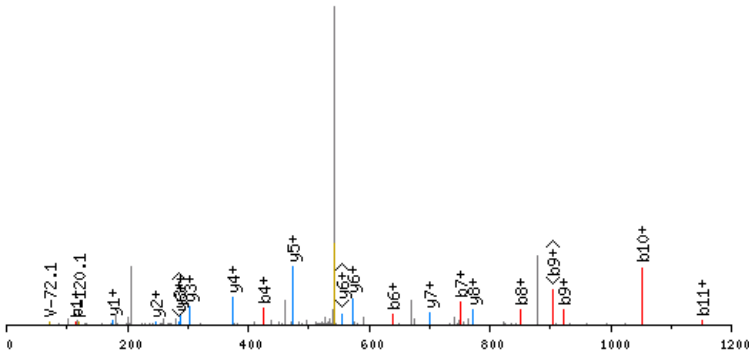

click image to zoom in; click top corners to zoom out

[precursor±]

scan 5499; 541.6 m/z; 1.9e+001

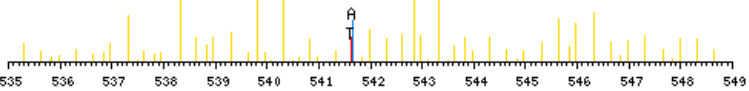

zoomed in precursor plot; T=theoretical m/z, A=acquired m/z

| b <sup>+</sup> | #  | AA | #  | y <sup>+</sup> | y <sup>2+</sup> |
|----------------|----|----|----|----------------|-----------------|
| 114.0555       | 1  | A  | 16 |                |                 |
| 171.0770       | 2  | G  | 15 | 1509.8138      | 755.4108        |
| 270.1454       | 3  | V  | 14 | 1452.7923      | 726.9001        |
| 426.2465       | 4  | R  | 13 | 1353.7239      | 677.3659        |
| 523.2993       | 5  | P  | 12 | 1197.6228      | 599.3153        |
| 638.3262       | 6  | D  | 11 | 1100.5700      | 550.7889        |
| 752.3691       | 7  | N  | 10 | 985.5431       | 493.2754        |
| 851.4376       | 8  | V  | 9  | 871.5001       | 436.2540        |
| 922.4747       | 9  | A  | 8  | 772.4317       | 386.7198        |
| 1051.5173      | 10 | E  | 7  | 701.3946       | 351.2012        |
| 1150.5857      | 11 | V  | 6  | 572.3520       | 286.6799        |
| 1249.6541      | 12 | V  | 5  | 473.2836       | 237.1457        |
| 1320.6912      | 13 | A  | 4  | 374.2152       | 187.6115        |
| 1377.7127      | 14 | G  | 3  | 303.1781       | 152.0930        |
| 1448.7498      | 15 | A  | 2  | 246.1566       | 123.5822        |
|                | 16 | R  | 1  | 175.1195       | 88.0637         |

N-term:+43.02

X-range:

0 - 0

MassTol: Y-zoom:

0. 1.

MassType:

☐AVG ☒MONO

Axis:

☒1 ☐2

Label:

☒I ☐M ☐-

Ions:

a ☐+ ☐2+ ☐3+

b ☒+ ☐2+ ☐3+

c ☐+ ☐2+ ☐3+

x ☐+ ☐2+ ☐3+

y ☒+ ☒2+ ☐3+

z ☐+ ☐2+ ☐3+

hide H<sub>2</sub>O/NH<sub>3</sub> ☐

zoom 112-122 ☐

GO

AIVHTLPVPLEPAR, MH+ 1554.9008, m/z 518.9718  
H OS G12 P120811 220811-s1.05145.05145.3.dta

scan 5145; 1.4e+000

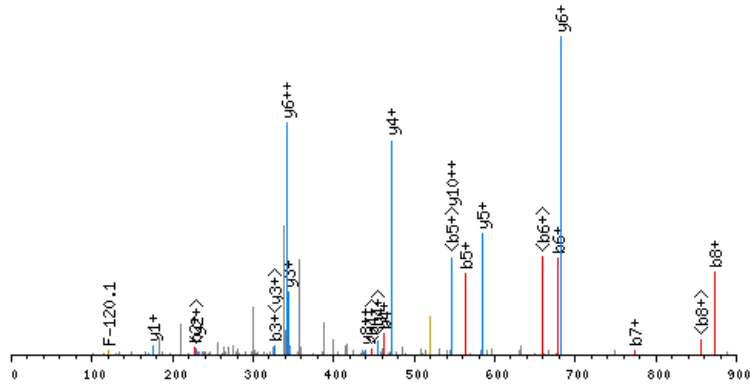

click image to zoom in; click top corners to zoom out

[precursor±]

scan 5142; 519.0 m/z; 1.9e+000

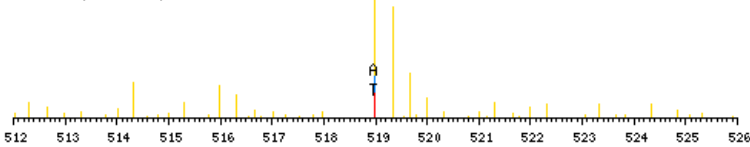

zoomed in precursor plot; T=theoretical m/z, A=acquired m/z

| b <sup>+</sup> | #  | AA | #  | y <sup>+</sup> | y <sup>2+</sup> |
|----------------|----|----|----|----------------|-----------------|
| 114.0555       | 1  | A  | 14 |                |                 |
| 227.1396       | 2  | I  | 13 | 1441.8531      | 721.4305        |
| 326.2080       | 3  | V  | 12 | 1328.7690      | 664.8884        |
| 463.2669       | 4  | H  | 11 | 1229.7006      | 615.3542        |
| 564.3146       | 5  | T  | 10 | 1092.6417      | 546.8248        |
| 677.3986       | 6  | L  | 9  | 991.5940       | 496.3009        |
| 774.4514       | 7  | P  | 8  | 878.5100       | 439.7589        |
| 873.5198       | 8  | V  | 7  | 781.4572       | 391.2325        |
| 970.5726       | 9  | P  | 6  | 682.3888       | 341.6983        |
| 1083.6567      | 10 | L  | 5  | 585.3360       | 293.1719        |
| 1212.6992      | 11 | E  | 4  | 472.2520       | 236.6299        |
| 1309.7520      | 12 | P  | 3  | 343.2094       | 172.1086        |
| 1380.7891      | 13 | A  | 2  | 246.1566       | 123.5822        |
|                | 14 | R  | 1  | 175.1195       | 88.0637         |

N-term:+43.02

X-range:

0 - 0

MassTol: Y-zoom:

0. 1.

MassType:

☐AVG ☒MONO

Axis:

☒1 ☐2

Label:

☒I ☐M ☐-

Ions:

a ☐+ ☐2+ ☐3+

b ☒+ ☐2+ ☐3+

c ☐+ ☐2+ ☐3+

x ☐+ ☐2+ ☐3+

y ☒+ ☒2+ ☐3+

z ☐+ ☐2+ ☐3+

hide H<sub>2</sub>O/NH<sub>3</sub> ☐

zoom 112-122 ☐

GO

AKIAKTHEDIAQIR, MH+ 1833.0871, m/z 459.0272  
H OS G17 P120811 220811-s1.03616.03616.4.dta

scan 3616; 5.1e+000

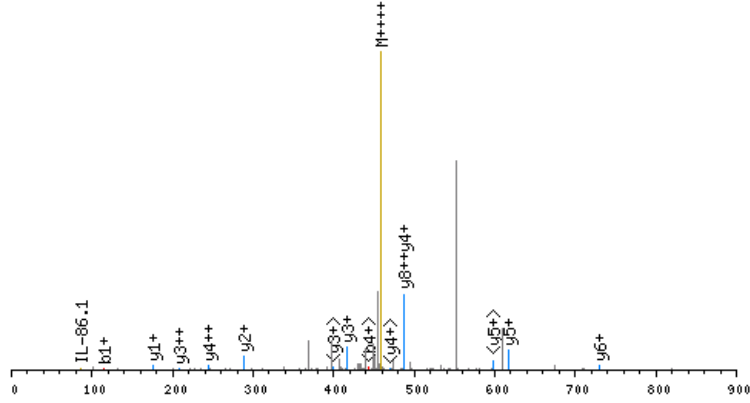

click image to zoom in; click top corners to zoom out [\[precursor±\]](#)

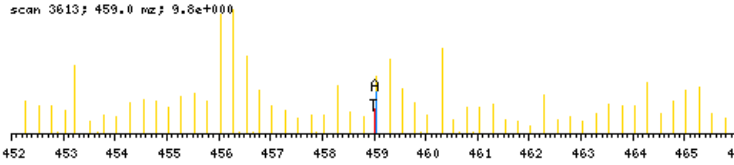

zoomed in precursor plot; T=theoretical m/z, A=acquired m/z

| b <sup>+</sup> | #  | AA | #  | y <sup>+</sup> | y <sup>2+</sup> |
|----------------|----|----|----|----------------|-----------------|
| 114.0555       | 1  | A  | 15 |                |                 |
| 276.2136       | 2  | K  | 14 | 1720.0394      | 860.5236        |
| 389.2977       | 3  | I  | 13 | 1557.8813      | 779.4446        |
| 460.3348       | 4  | A  | 12 | 1444.7973      | 722.9025        |
| 622.4929       | 5  | K  | 11 | 1373.7601      | 687.3840        |
| 723.5406       | 6  | T  | 10 | 1211.6020      | 606.3049        |
| 860.5995       | 7  | H  | 9  | 1110.5544      | 555.7811        |
| 989.6421       | 8  | E  | 8  | 973.4954       | 487.2516        |
| 1104.6690      | 9  | D  | 7  | 844.4529       | 422.7303        |
| 1217.7531      | 10 | I  | 6  | 729.4259       | 365.2169        |
| 1346.7957      | 11 | E  | 5  | 616.3418       | 308.6748        |
| 1417.8328      | 12 | A  | 4  | 487.2993       | 244.1535        |
| 1545.8914      | 13 | Q  | 3  | 416.2621       | 208.6350        |
| 1658.9754      | 14 | I  | 2  | 288.2036       | 144.6057        |
|                | 15 | R  | 1  | 175.1195       | 88.0637         |

N-term:+43.02 K(2):+162.16  
K(5):+162.16

X-range:

0 - 0

MassTol: Y-zoom:

0. 1.

MassType:

☐AVG ☒MONO

Axis:

☒1 ☐2

Label:

☒I ☐M ☐-

Ions:

a ☐+ ☐2+ ☐3+

b ☒+ ☐2+ ☐3+

c ☐+ ☐2+ ☐3+

x ☐+ ☐2+ ☐3+

y ☒+ ☒2+ ☐3+

z ☐+ ☐2+ ☐3+

hide H<sub>2</sub>O/NH<sub>3</sub> ☐

zoom 112-122 ☐

GO

AKIAQGAMYR, MH+ 1184.6674, m/z 592.8374  
H OS G13 P120811 220811-s1.03541.03541.2.dta

scan 3541; 6.9e+001

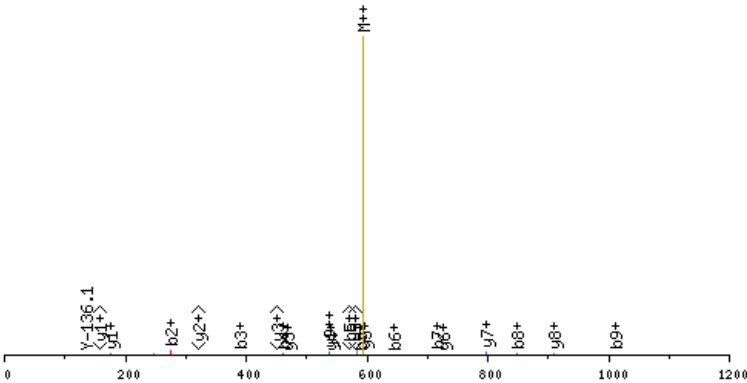

click image to zoom in; click top corners to zoom out

[precursor±]

scan 3539; 592.8 m/z; 4.9e+001

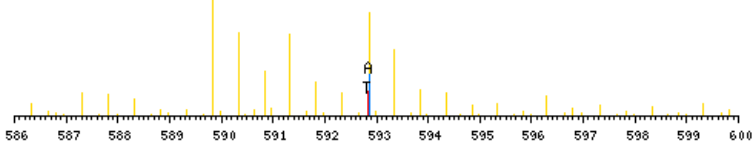

zoomed in precursor plot; T=theoretical m/z, A=acquired m/z

| b <sup>+</sup> | #  | AA | #  | y <sup>+</sup> | y <sup>2+</sup> |
|----------------|----|----|----|----------------|-----------------|
| 114.0555       | 1  | A  | 10 |                |                 |
| 276.2136       | 2  | K  | 9  | 1071.6197      | 536.3138        |
| 389.2977       | 3  | I  | 8  | 909.4616       | 455.2347        |
| 460.3348       | 4  | A  | 7  | 796.3776       | 398.6927        |
| 588.3934       | 5  | Q  | 6  | 725.3405       | 363.1741        |
| 645.4148       | 6  | G  | 5  | 597.2819       | 299.1449        |
| 716.4519       | 7  | A  | 4  | 540.2604       | 270.6341        |
| 847.4924       | 8  | M  | 3  | 469.2233       | 235.1156        |
| 1010.5558      | 9  | Y  | 2  | 338.1828       | 169.5953        |
|                | 10 | R  | 1  | 175.1195       | 88.0637         |

N-term:+43.02 K(2):+162.16

X-range:

0 - 0

MassTol: Y-zoom:

0. 1.

MassType:

☐ AVG ☒ MONO

Axis:

☒ 1 ☐ 2

Label:

☒ I ☐ M ☐ -

Ions:

a ☐ + ☐ 2+ ☐ 3+

b ☒ + ☐ 2+ ☐ 3+

c ☐ + ☐ 2+ ☐ 3+

x ☐ + ☐ 2+ ☐ 3+

y ☒ + ☒ 2+ ☐ 3+

z ☐ + ☐ 2+ ☐ 3+

hide H<sub>2</sub>O/NH<sub>3</sub> ☐

zoom 112-122 ☐

GO

AKNGSEADIDESLYSR, MH+ 1824.8616, m/z 608.9587  
H OS G13 P120811 220811-s1.04082.04082.3.dta

scan 4082; 1.3e+000

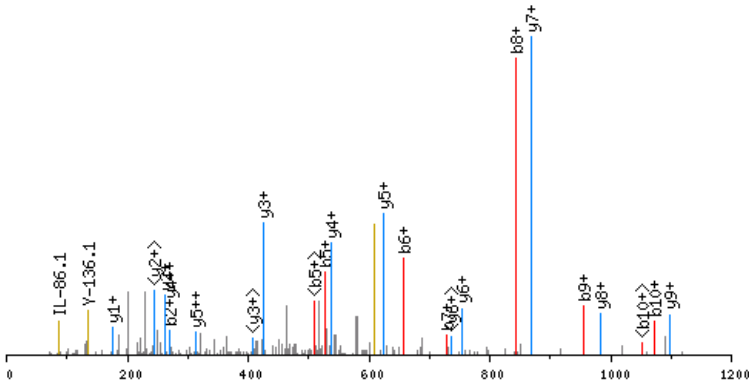

click image to zoom in; click top corners to zoom out

[precursor±]

scan 4079; 609.0 m/z; 9.9e+000

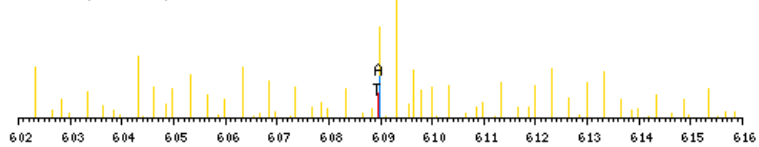

zoomed in precursor plot; T=theoretical m/z, A=acquired m/z

| b <sup>+</sup> | #  | AA | #  | y <sup>+</sup> | y <sup>2+</sup> |
|----------------|----|----|----|----------------|-----------------|
| 114.0555       | 1  | A  | 16 |                |                 |
| 270.1818       | 2  | K  | 15 | 1711.8139      | 856.4109        |
| 384.2247       | 3  | N  | 14 | 1555.6876      | 778.3477        |
| 441.2462       | 4  | G  | 13 | 1441.6447      | 721.3263        |
| 528.2782       | 5  | S  | 12 | 1384.6232      | 692.8155        |
| 657.3208       | 6  | E  | 11 | 1297.5912      | 649.2995        |
| 728.3579       | 7  | A  | 10 | 1168.5486      | 584.7782        |
| 843.3849       | 8  | D  | 9  | 1097.5115      | 549.2597        |
| 956.4689       | 9  | I  | 8  | 982.4846       | 491.7462        |
| 1071.4959      | 10 | D  | 7  | 869.4005       | 435.2042        |
| 1200.5385      | 11 | E  | 6  | 754.3735       | 377.6907        |
| 1287.5705      | 12 | S  | 5  | 625.3310       | 313.1694        |
| 1400.6546      | 13 | L  | 4  | 538.2989       | 269.6534        |
| 1563.7179      | 14 | Y  | 3  | 425.2149       | 213.1113        |
| 1650.7499      | 15 | S  | 2  | 262.1515       | 131.5797        |
|                | 16 | R  | 1  | 175.1195       | 88.0637         |

N-term:+43.02 K(2):+156.13

X-range:

0 - 0

MassTol: Y-zoom:

0. 1.

MassType:

☐AVG ☒MONO

Axis:

☒1 ☐2

Label:

☒I ☐M ☐-

Ions:

a ☐+ ☐2+ ☐3+

b ☒+ ☐2+ ☐3+

c ☐+ ☐2+ ☐3+

x ☐+ ☐2+ ☐3+

y ☒+ ☒2+ ☐3+

z ☐+ ☐2+ ☐3+

hide H<sub>2</sub>O/NH<sub>3</sub> ☐

zoom 112-122 ☐

GO

AKTEEMVQTEEMETPR, MH+ 1978.9102, m/z 660.3083  
H OS G12 P120811 220811-s1.03529.03529.3.dta

scan 3529; 1.8e+000

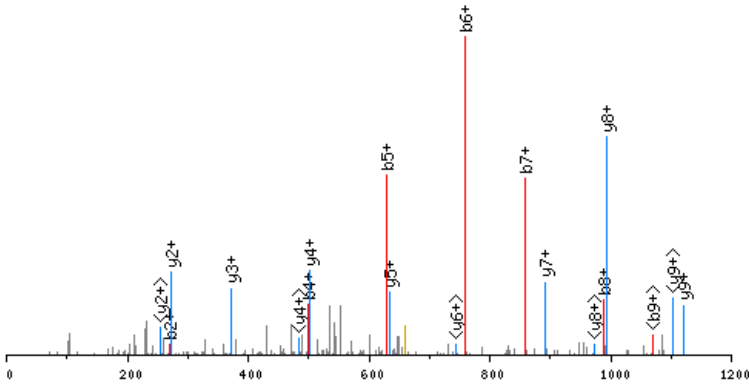

click image to zoom in; click top corners to zoom out

[precursor±]

scan 3527; 660.3 m/z; 4.0e+000

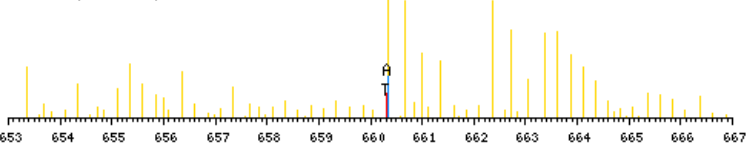

zoomed in precursor plot; T=theoretical m/z, A=acquired m/z

| b <sup>+</sup> | #  | AA | #  | y <sup>+</sup> | y <sup>2+</sup> |
|----------------|----|----|----|----------------|-----------------|
| 114.0555       | 1  | A  | 16 |                |                 |
| 270.1818       | 2  | K  | 15 | 1865.8625      | 933.4352        |
| 371.2295       | 3  | T  | 14 | 1709.7362      | 855.3720        |
| 500.2721       | 4  | E  | 13 | 1608.6885      | 804.8482        |
| 629.3147       | 5  | E  | 12 | 1479.6460      | 740.3269        |
| 760.3552       | 6  | M  | 11 | 1350.6034      | 675.8056        |
| 859.4236       | 7  | V  | 10 | 1219.5629      | 610.2854        |
| 987.4822       | 8  | Q  | 9  | 1120.4945      | 560.7511        |
| 1088.5298      | 9  | T  | 8  | 992.4359       | 496.7219        |
| 1217.5724      | 10 | E  | 7  | 891.3882       | 446.1980        |
| 1346.6150      | 11 | E  | 6  | 762.3456       | 381.6767        |
| 1477.6555      | 12 | M  | 5  | 633.3030       | 317.1554        |
| 1606.6981      | 13 | E  | 4  | 502.2625       | 251.6352        |
| 1707.7458      | 14 | T  | 3  | 373.2199       | 187.1139        |
| 1804.7985      | 15 | P  | 2  | 272.1723       | 136.5900        |
|                | 16 | R  | 1  | 175.1195       | 88.0637         |

N-term:+43.02 K(2):+156.13

X-range:

0 - 0

MassTol: Y-zoom:

0. 1.

MassType:

☐AVG ☒MONO

Axis:

☒1 ☐2

Label:

☒I ☐M ☐-

Ions:

a ☐+ ☐2+ ☐3+

b ☒+ ☐2+ ☐3+

c ☐+ ☐2+ ☐3+

x ☐+ ☐2+ ☐3+

y ☒+ ☒2+ ☐3+

z ☐+ ☐2+ ☐3+

hide H<sub>2</sub>O/NH<sub>3</sub> ☐

zoom 112-122 ☐

GO

AKVEQVLSLEPQHELKFR, MH+ 2249.2659, m/z 563.0719  
H OS G17 P120811 220811-s1.06210.06210.4.dta

scan 6210; 3.2e+000

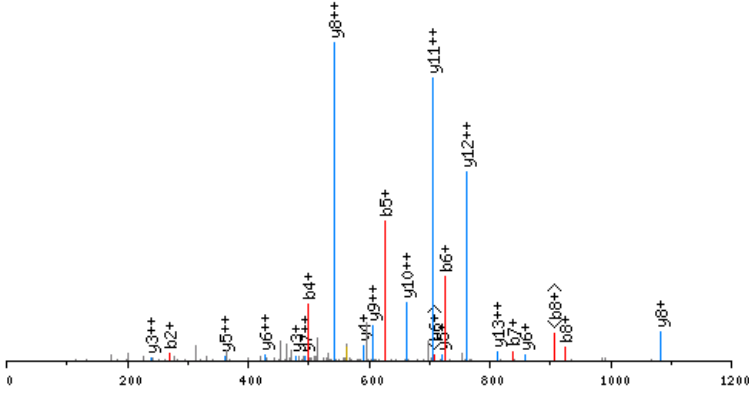

click image to zoom in; click top corners to zoom out [\[precursor±\]](#)

scan 6208; 563.1 m/z; 3.6e+000

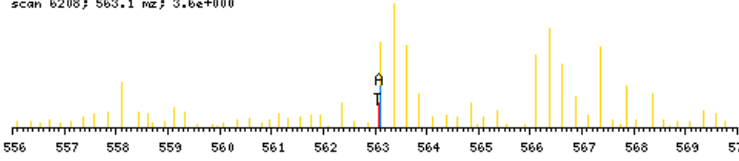

zoomed in precursor plot; T=theoretical m/z, A=acquired m/z

| b <sup>+</sup> | #  | AA | #  | y <sup>+</sup> | y <sup>2+</sup> |
|----------------|----|----|----|----------------|-----------------|
| 114.0555       | 1  | A  | 18 |                |                 |
| 270.1818       | 2  | K  | 17 | 2136.2182      | 1068.6130       |
| 369.2502       | 3  | V  | 16 | 1980.0919      | 990.5498        |
| 498.2928       | 4  | E  | 15 | 1881.0235      | 941.0156        |
| 626.3514       | 5  | Q  | 14 | 1751.9809      | 876.4943        |
| 725.4198       | 6  | V  | 13 | 1623.9223      | 812.4651        |
| 838.5039       | 7  | L  | 12 | 1524.8539      | 762.9308        |
| 925.5359       | 8  | S  | 11 | 1411.7698      | 706.3888        |
| 1038.6200      | 9  | L  | 10 | 1324.7378      | 662.8728        |
| 1167.6626      | 10 | E  | 9  | 1211.6537      | 606.3308        |
| 1264.7153      | 11 | P  | 8  | 1082.6111      | 541.8095        |
| 1392.7739      | 12 | Q  | 7  | 985.5584       | 493.2831        |
| 1529.8328      | 13 | H  | 6  | 857.4998       | 429.2538        |
| 1658.8754      | 14 | E  | 5  | 720.4409       | 360.7243        |
| 1771.9595      | 15 | L  | 4  | 591.3983       | 296.2031        |
| 1928.0858      | 16 | K  | 3  | 478.3142       | 239.6610        |
| 2075.1542      | 17 | F  | 2  | 322.1879       | 161.5979        |
|                | 18 | R  | 1  | 175.1195       | 88.0637         |

N-term:+43.02 K(2):+156.13  
K(16):+156.13

X-range:

0 - 0

MassTol: Y-zoom:

0. 1.

MassType:

☐AVG ☒MONO

Axis:

☒1 ☐2

Label:

☒I ☐M ☐-

Ions:

a ☐+ ☐2+ ☐3+

b ☒+ ☐2+ ☐3+

c ☐+ ☐2+ ☐3+

x ☐+ ☐2+ ☐3+

y ☒+ ☒2+ ☐3+

z ☐+ ☐2+ ☐3+

hide H<sub>2</sub>O/NH<sub>3</sub> ☐

zoom 112-122 ☐

GO

ALDGPEQMELEEGKAGSGLR, MH+ 2157.0498, m/z 719.6881  
H OS G12 P120811 220811-s1.04468.04468.3.dta

scan 4468; 3.6e+000

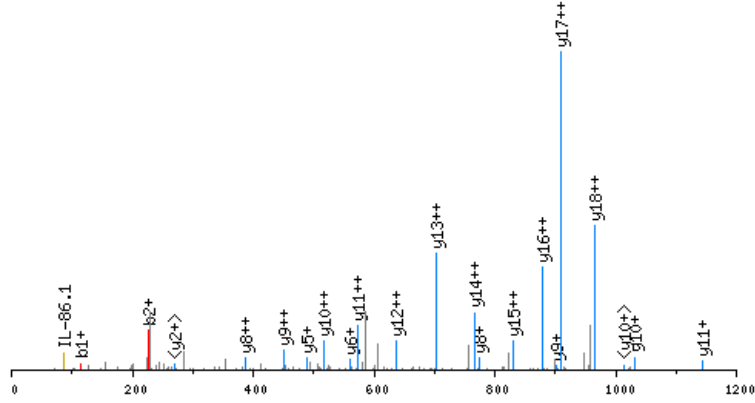

click image to zoom in; click top corners to zoom out [\[precursor±\]](#)

scan 4467; 719.7 m/z; 1.0e+001

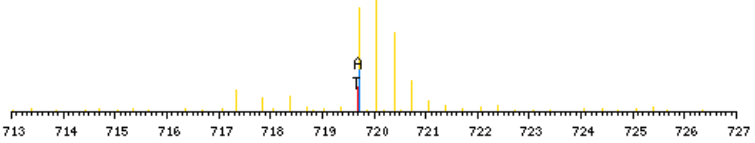

zoomed in precursor plot; T=theoretical m/z, A=acquired m/z

| b <sup>+</sup> | #  | AA | #  | y <sup>+</sup> | y <sup>2+</sup> |
|----------------|----|----|----|----------------|-----------------|
| 114.0555       | 1  | A  | 20 |                |                 |
| 227.1396       | 2  | L  | 19 | 2044.0021      | 1022.5050       |
| 342.1665       | 3  | D  | 18 | 1930.9181      | 965.9629        |
| 399.1880       | 4  | G  | 17 | 1815.8911      | 908.4495        |
| 496.2407       | 5  | P  | 16 | 1758.8697      | 879.9387        |
| 625.2833       | 6  | E  | 15 | 1661.8169      | 831.4124        |
| 753.3419       | 7  | Q  | 14 | 1532.7743      | 766.8911        |
| 884.3824       | 8  | M  | 13 | 1404.7157      | 702.8618        |
| 1013.4250      | 9  | E  | 12 | 1273.6752      | 637.3415        |
| 1126.5091      | 10 | L  | 11 | 1144.6326      | 572.8202        |
| 1255.5517      | 11 | E  | 10 | 1031.5486      | 516.2782        |
| 1384.5942      | 12 | E  | 9  | 902.5060       | 451.7569        |
| 1441.6157      | 13 | G  | 8  | 773.4634       | 387.2356        |
| 1597.7420      | 14 | K  | 7  | 716.4419       | 358.7249        |
| 1668.7791      | 15 | A  | 6  | 560.3156       | 280.6617        |
| 1725.8006      | 16 | G  | 5  | 489.2785       | 245.1432        |
| 1812.8326      | 17 | S  | 4  | 432.2571       | 216.6324        |
| 1869.8541      | 18 | G  | 3  | 345.2250       | 173.1164        |
| 1982.9381      | 19 | L  | 2  | 288.2036       | 144.6057        |
|                | 20 | R  | 1  | 175.1195       | 88.0637         |

N-term:+43.02 K(14):+156.13

X-range:

0 - 0

MassTol: Y-zoom:

0. 1.

MassType:

☐AVG ☒MONO

Axis:

☒1 ☐2

Label:

☒I ☐M ☐-

Ions:

a ☐+ ☐2+ ☐3+

b ☒+ ☐2+ ☐3+

c ☐+ ☐2+ ☐3+

x ☐+ ☐2+ ☐3+

y ☒+ ☒2+ ☐3+

z ☐+ ☐2+ ☐3+

hide H<sub>2</sub>O/NH<sub>3</sub> ☐

zoom 112-122 ☐

GO

ALDPAEQHLLR, MH+ 1191.6122, m/z 596.3097  
H OS G13 P120811 220811-s1.03740.03740.2.dta

scan 3740; 2.7e+000

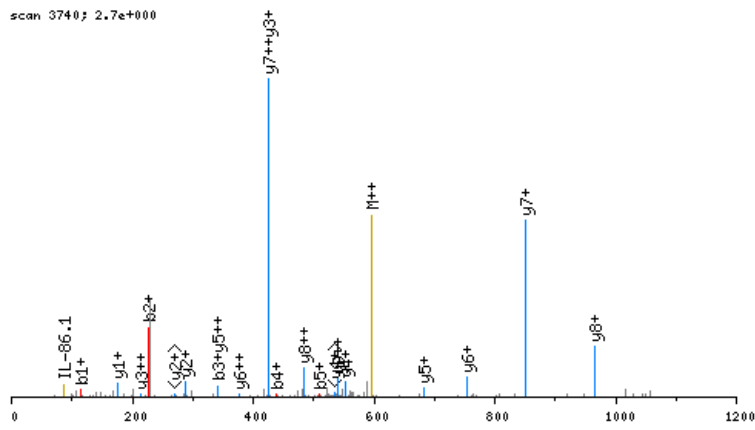

click image to zoom in; click top corners to zoom out

[precursor±]

scan 3739; 596.3 m/z; 1.8e+001

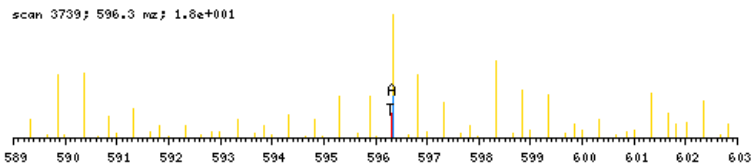

zoomed in precursor plot; T=theoretical m/z, A=acquired m/z

| b <sup>+</sup> | #  | AA | #  | y <sup>+</sup> | y <sup>2+</sup> |
|----------------|----|----|----|----------------|-----------------|
| 114.0555       | 1  | A  | 10 |                |                 |
| 227.1396       | 2  | L  | 9  | 1078.5645      | 539.7862        |
| 342.1665       | 3  | D  | 8  | 965.4805       | 483.2441        |
| 439.2193       | 4  | P  | 7  | 850.4535       | 425.7307        |
| 510.2564       | 5  | A  | 6  | 753.4008       | 377.2043        |
| 639.2990       | 6  | E  | 5  | 682.3636       | 341.6857        |
| 767.3576       | 7  | Q  | 4  | 553.3211       | 277.1644        |
| 904.4165       | 8  | H  | 3  | 425.2625       | 213.1352        |
| 1017.5005      | 9  | L  | 2  | 288.2036       | 144.6057        |
|                | 10 | R  | 1  | 175.1195       | 88.0637         |

N-term:+43.02

X-range:

0 - 0

MassTol: Y-zoom:

0. 1.

MassType:

☐AVG ☒MONO

Axis:

☒1 ☐2

Label:

☒I ☐M ☐-

Ions:

a ☐+ ☐2+ ☐3+

b ☒+ ☐2+ ☐3+

c ☐+ ☐2+ ☐3+

x ☐+ ☐2+ ☐3+

y ☒+ ☒2+ ☐3+

z ☐+ ☐2+ ☐3+

hide H<sub>2</sub>O/NH<sub>3</sub> ☐

zoom 112-122 ☐

GO

ALKQISSNR, MH+ 1092.6590, m/z 546.8331  
H OS G14 P120811 220811-s1.02892.02892.2.dta

scan 2892; 4.2e+001

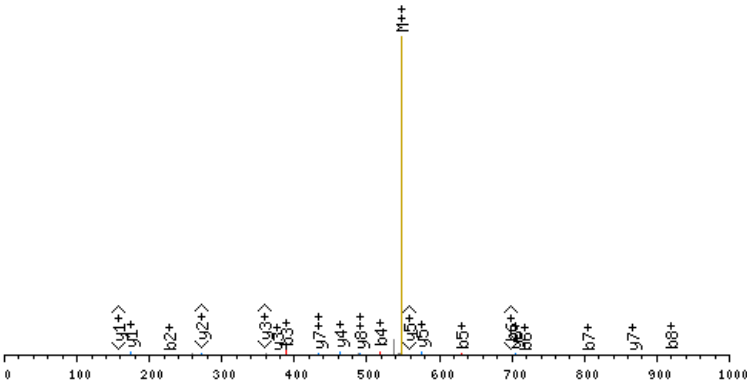

click image to zoom in; click top corners to zoom out

[precursor±]

scan 2891; 546.8 m/z; 1.7e+002

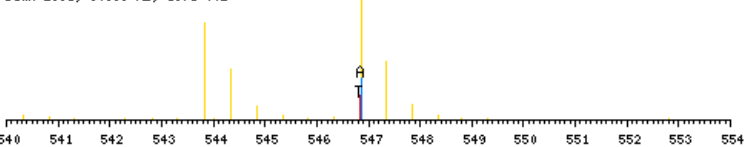

zoomed in precursor plot; T=theoretical m/z, A=acquired m/z

| b <sup>+</sup> | # | AA | # | y <sup>+</sup> | y <sup>2+</sup> |
|----------------|---|----|---|----------------|-----------------|
| 114.0555       | 1 | A  | 9 |                |                 |
| 227.1396       | 2 | L  | 8 | 979.6113       | 490.3096        |
| 389.2977       | 3 | K  | 7 | 866.5272       | 433.7675        |
| 517.3563       | 4 | Q  | 6 | 704.3691       | 352.6885        |
| 630.4403       | 5 | I  | 5 | 576.3105       | 288.6592        |
| 717.4723       | 6 | S  | 4 | 463.2265       | 232.1172        |
| 804.5044       | 7 | S  | 3 | 376.1945       | 188.6011        |
| 918.5473       | 8 | N  | 2 | 289.1624       | 145.0851        |
|                | 9 | R  | 1 | 175.1195       | 88.0637         |

N-term:+43.02 K(3):+162.16

N-term: +43.02 K(9): +156.13

X-range:

0 - 0

MassTol: Y-zoom:

0. 1.

MassType:

☐ AVG ☒ MONO

Axis:

☒ 1 ☐ 2

Label:

☒ I ☐ M ☐ -

Ions:

a ☐ + ☐ 2+ ☐ 3+

b ☒ + ☐ 2+ ☐ 3+

c ☐ + ☐ 2+ ☐ 3+

x ☐ + ☐ 2+ ☐ 3+

y ☒ + ☒ 2+ ☐ 3+

z ☐ + ☐ 2+ ☐ 3+

hide H<sub>2</sub>O/NH<sub>3</sub> ☐

zoom 112-122 ☐

GO

AMQKIFAR, MH+ 1040.6139, m/z 520.8106  
H OS G13 P120811 220811-s1.05126.05126.2.dta

scan 5126; 5.8e+001

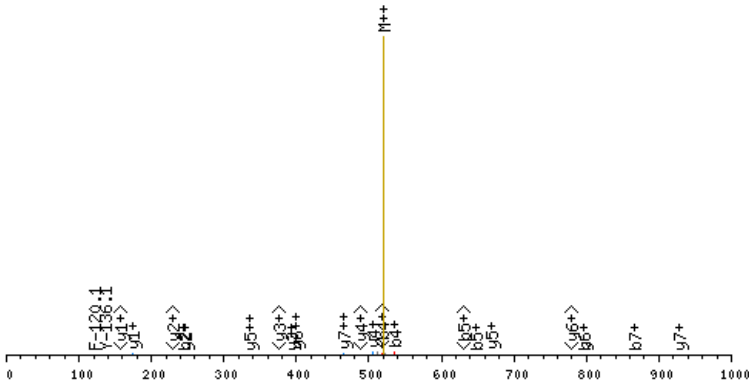

click image to zoom in; click top corners to zoom out

[precursor±]

scan 5124; 520.8 m/z; 3.9e+001

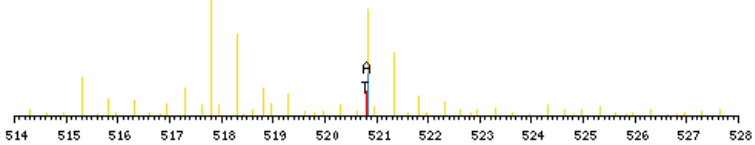

zoomed in precursor plot; T=theoretical m/z, A=acquired m/z

| b <sup>+</sup> | # | AA | # | y <sup>+</sup> | y <sup>2+</sup> |
|----------------|---|----|---|----------------|-----------------|
| 114.0555       | 1 | A  | 8 |                |                 |
| 245.0960       | 2 | M  | 7 | 927.5663       | 464.2870        |
| 373.1546       | 3 | Q  | 6 | 796.5258       | 398.7668        |
| 535.3127       | 4 | K  | 5 | 668.4672       | 334.7375        |
| 648.3967       | 5 | I  | 4 | 506.3091       | 253.6585        |
| 795.4652       | 6 | F  | 3 | 393.2250       | 197.1164        |
| 866.5023       | 7 | A  | 2 | 246.1566       | 123.5822        |
|                | 8 | R  | 1 | 175.1195       | 88.0637         |

N-term:+43.02 K(4):+162.16

X-range:

0

-

0

MassTol:

Y-zoom:

0.

1.

MassType:

☐AVG

☒MONO

Axis:

☒1

☐2

Label:

☒I

☐M

☐-

Ions:

a

☐

2+

☐

3+

b

☒

2+

☐

3+

c

☐

2+

☐

3+

x

☐

2+

☐

3+

y

☒

2+

☒

3+

z

☐

2+

☐

3+

hide H<sub>2</sub>O/NH<sub>3</sub>

☐

zoom 112-122

☐

GO

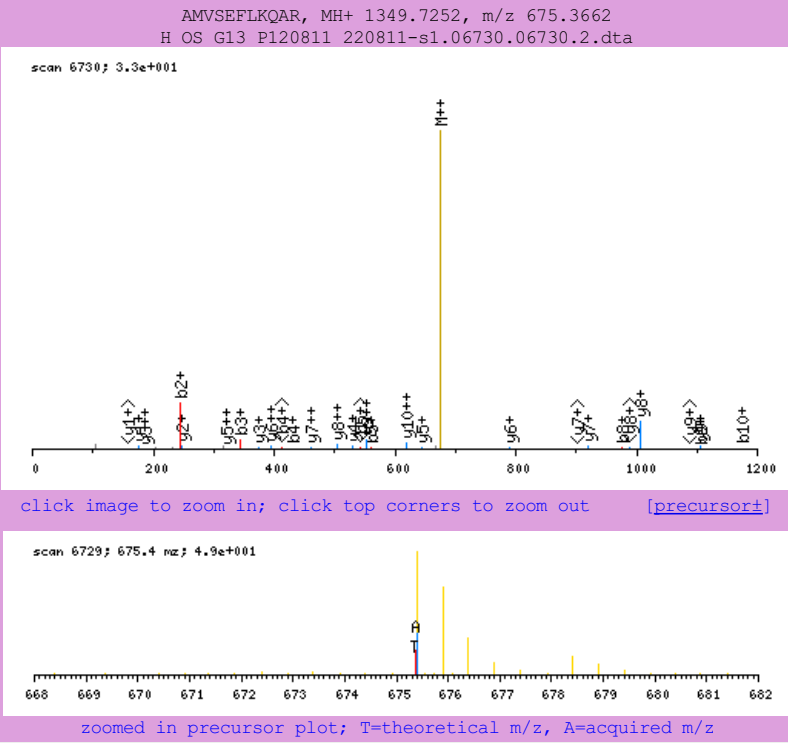

| b <sup>+</sup> | #  | AA | #  | y <sup>+</sup> | y <sup>2+</sup> |
|----------------|----|----|----|----------------|-----------------|
| 114.0555       | 1  | A  | 11 |                |                 |
| 245.0960       | 2  | M  | 10 | 1236.6775      | 618.8427        |
| 344.1644       | 3  | V  | 9  | 1105.6370      | 553.3224        |
| 431.1964       | 4  | S  | 8  | 1006.5686      | 503.7882        |
| 560.2390       | 5  | E  | 7  | 919.5366       | 460.2722        |
| 707.3074       | 6  | F  | 6  | 790.4940       | 395.7509        |
| 820.3915       | 7  | L  | 5  | 643.4256       | 322.2167        |
| 976.5178       | 8  | K  | 4  | 530.3415       | 265.6747        |
| 1104.5764      | 9  | Q  | 3  | 374.2152       | 187.6115        |
| 1175.6135      | 10 | A  | 2  | 246.1566       | 123.5822        |
|                | 11 | R  | 1  | 175.1195       | 88.0637         |

N-term:+43.02 K(8):+156.13

X-range:

0 - 0

MassTol: Y-zoom:

0. 1.

MassType:

☐AVG ☒MONO

Axis:

☒1 ☐2

Label:

☒I ☐M ☐-

Ions:

a ☐+ ☐2+ ☐3+

b ☒+ ☐2+ ☐3+

c ☐+ ☐2+ ☐3+

x ☐+ ☐2+ ☐3+

y ☒+ ☒2+ ☐3+

z ☐+ ☐2+ ☐3+

hide H<sub>2</sub>O/NH<sub>3</sub> ☐

zoom 112-122 ☐

GO

ANHAPFETDISTLTR, MH+ 1714.8400, m/z 572.2849  
H OS G13 P120811 220811-s1.05923.05923.3.dta

scan 5923; 3.4e+000

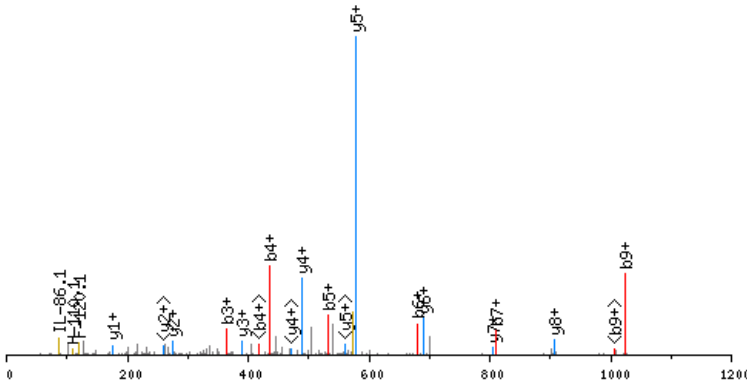

click image to zoom in; click top corners to zoom out [\[precursor±\]](#)

scan 5919; 572.3 m/z; 4.5e+001

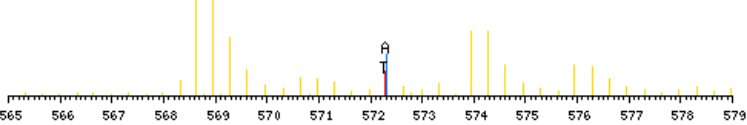

zoomed in precursor plot; T=theoretical m/z, A=acquired m/z

| b <sup>+</sup> | #  | AA | #  | y <sup>+</sup> | y <sup>2+</sup> |
|----------------|----|----|----|----------------|-----------------|
| 114.0555       | 1  | A  | 15 |                |                 |
| 228.0984       | 2  | N  | 14 | 1601.7924      | 801.4001        |
| 365.1574       | 3  | H  | 13 | 1487.7494      | 744.3786        |
| 436.1945       | 4  | A  | 12 | 1350.6905      | 675.8492        |
| 533.2472       | 5  | P  | 11 | 1279.6534      | 640.3306        |
| 680.3156       | 6  | F  | 10 | 1182.6006      | 591.8042        |
| 809.3582       | 7  | E  | 9  | 1035.5322      | 518.2700        |
| 910.4059       | 8  | T  | 8  | 906.4896       | 453.7487        |
| 1025.4329      | 9  | D  | 7  | 805.4420       | 403.2249        |
| 1138.5169      | 10 | I  | 6  | 690.4150       | 345.7114        |
| 1225.5490      | 11 | S  | 5  | 577.3310       | 289.1694        |
| 1326.5966      | 12 | T  | 4  | 490.2989       | 245.6534        |
| 1439.6807      | 13 | L  | 3  | 389.2512       | 195.1295        |
| 1540.7284      | 14 | T  | 2  | 276.1672       | 138.5875        |
|                | 15 | R  | 1  | 175.1195       | 88.0637         |

N-term:+43.02

X-range:

0 - 0

MassTol: Y-zoom:

0. 1.

MassType:

☐ AVG ☒ MONO

Axis:

☒ 1 ☐ 2

Label:

☒ I ☐ M ☐ -

Ions:

a ☐ + ☐ 2+ ☐ 3+

b ☒ + ☐ 2+ ☐ 3+

c ☐ + ☐ 2+ ☐ 3+

x ☐ + ☐ 2+ ☐ 3+

y ☒ + ☒ 2+ ☐ 3+

z ☐ + ☐ 2+ ☐ 3+

hide H<sub>2</sub>O/NH<sub>3</sub> ☐

zoom 112-122 ☐

GO

ANKGPSYGMSR, MH+ 1237.6000, m/z 619.3036  
H OS G14 P120811 220811-s1.02337.02337.2.dta

scan 2337; 3.5e+001

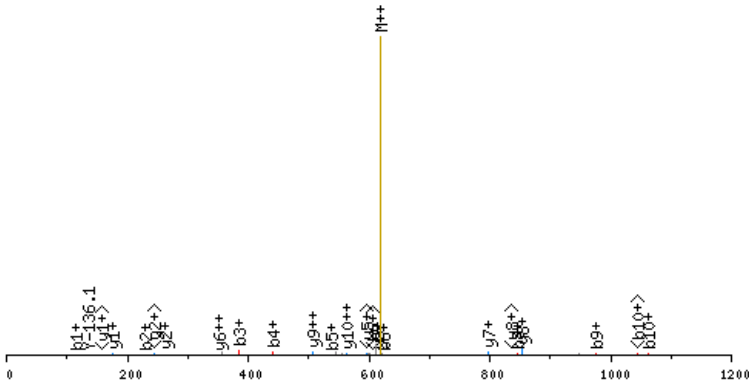

click image to zoom in; click top corners to zoom out [\[precursor±\]](#)

scan 2336; 619.3 m/z; 1.2e+001

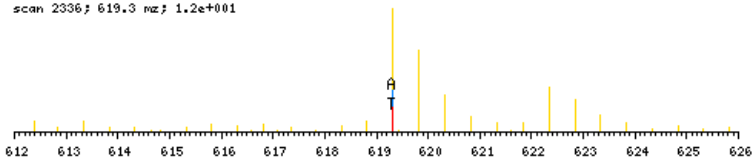

zoomed in precursor plot; T=theoretical m/z, A=acquired m/z

| b <sup>+</sup> | #  | AA | #  | y <sup>+</sup> | y <sup>2+</sup> |
|----------------|----|----|----|----------------|-----------------|
| 114.0555       | 1  | A  | 11 |                |                 |
| 228.0984       | 2  | N  | 10 | 1124.5523      | 562.7801        |
| 384.2247       | 3  | K  | 9  | 1010.5094      | 505.7586        |
| 441.2462       | 4  | G  | 8  | 854.3831       | 427.6954        |
| 538.2990       | 5  | P  | 7  | 797.3616       | 399.1847        |
| 625.3310       | 6  | S  | 6  | 700.3088       | 350.6583        |
| 788.3943       | 7  | Y  | 5  | 613.2768       | 307.1423        |
| 845.4158       | 8  | G  | 4  | 450.2135       | 225.6107        |
| 976.4563       | 9  | M  | 3  | 393.1920       | 197.0999        |
| 1063.4883      | 10 | S  | 2  | 262.1515       | 131.5797        |
|                | 11 | R  | 1  | 175.1195       | 88.0637         |

N-term:+43.02 K(3):+156.13

X-range:

0 - 0

MassTol: Y-zoom:

0. 1.

MassType:

☐ AVG ☒ MONO

Axis:

☒ 1 ☐ 2

Label:

☒ I ☐ M ☐ -

Ions:

a ☐ + ☐ 2+ ☐ 3+

b ☒ + ☐ 2+ ☐ 3+

c ☐ + ☐ 2+ ☐ 3+

x ☐ + ☐ 2+ ☐ 3+

y ☒ + ☒ 2+ ☐ 3+

z ☐ + ☐ 2+ ☐ 3+

hide H<sub>2</sub>O/NH<sub>3</sub> ☐

zoom 112-122 ☐

GO

AQDQGEKENPMR, MH+ 1472.6804, m/z 491.5650  
H OS G13 P120811 220811-s1.02227.02227.3.dta

scan 2227; 2.0e+000

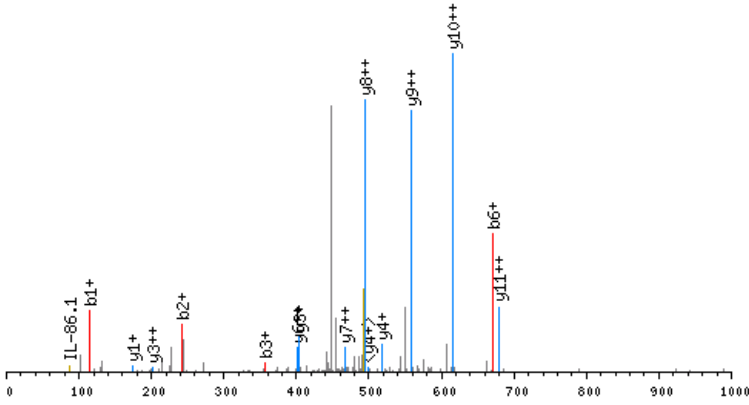

click image to zoom in; click top corners to zoom out

[precursor±]

scan 2224; 491.6 m/z; 3.4e+000

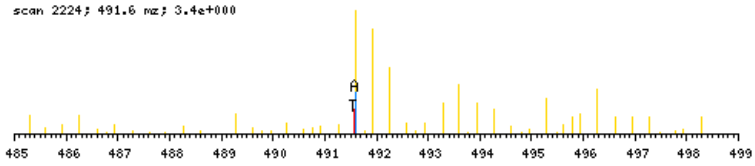

zoomed in precursor plot; T=theoretical m/z, A=acquired m/z

| b <sup>+</sup> | #  | AA | #  | y <sup>+</sup> | y <sup>2+</sup> |
|----------------|----|----|----|----------------|-----------------|
| 114.0555       | 1  | A  | 12 |                |                 |
| 242.1141       | 2  | Q  | 11 | 1359.6327      | 680.3203        |
| 357.1410       | 3  | D  | 10 | 1231.5741      | 616.2910        |
| 485.1996       | 4  | Q  | 9  | 1116.5472      | 558.7775        |
| 542.2211       | 5  | G  | 8  | 988.4886       | 494.7482        |
| 671.2637       | 6  | E  | 7  | 931.4672       | 466.2375        |
| 827.3900       | 7  | K  | 6  | 802.4246       | 401.7162        |
| 956.4326       | 8  | E  | 5  | 646.2983       | 323.6530        |
| 1070.4755      | 9  | N  | 4  | 517.2557       | 259.1318        |
| 1167.5283      | 10 | P  | 3  | 403.2127       | 202.1103        |
| 1298.5687      | 11 | M  | 2  | 306.1600       | 153.5839        |
|                | 12 | R  | 1  | 175.1195       | 88.0637         |

N-term:+43.02 K(7):+156.13

X-range:

0 - 0

MassTol: Y-zoom:

0. 1.

MassType:

☐ AVG ☒ MONO

Axis:

☒ 1 ☐ 2

Label:

☒ I ☐ M ☐ -

Ions:

a ☐ + ☐ 2+ ☐ 3+

b ☒ + ☐ 2+ ☐ 3+

c ☐ + ☐ 2+ ☐ 3+

x ☐ + ☐ 2+ ☐ 3+

y ☒ + ☒ 2+ ☐ 3+

z ☐ + ☐ 2+ ☐ 3+

hide H<sub>2</sub>O/NH<sub>3</sub> ☐

zoom 112-122 ☐

GO

AQELQHPEFAR, MH+ 1367.6708, m/z 456.5618  
H OS G13 P120811 220811-s1.04191.04191.3.dta

scan 4191; 2.0e+000

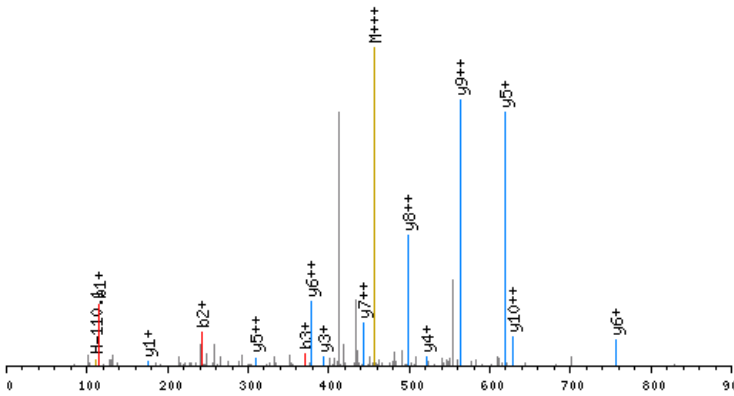

click image to zoom in; click top corners to zoom out [\[precursor±\]](#)

scan 4189; 456.6 m/z; 7.2e+000

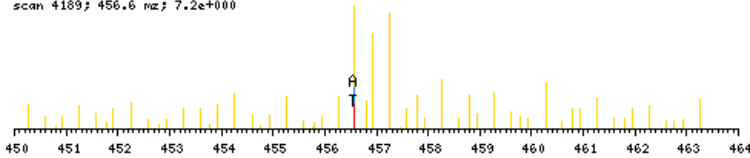

zoomed in precursor plot; T=theoretical m/z, A=acquired m/z

| b <sup>+</sup> | #  | AA | #  | y <sup>+</sup> | y <sup>2+</sup> |
|----------------|----|----|----|----------------|-----------------|
| 114.0555       | 1  | A  | 11 |                |                 |
| 242.1141       | 2  | Q  | 10 | 1254.6231      | 627.8155        |
| 371.1567       | 3  | E  | 9  | 1126.5645      | 563.7862        |
| 484.2407       | 4  | L  | 8  | 997.5219       | 499.2649        |
| 612.2993       | 5  | Q  | 7  | 884.4379       | 442.7228        |
| 749.3582       | 6  | H  | 6  | 756.3793       | 378.6936        |
| 846.4110       | 7  | P  | 5  | 619.3204       | 310.1641        |
| 975.4536       | 8  | E  | 4  | 522.2676       | 261.6377        |
| 1122.5220      | 9  | F  | 3  | 393.2250       | 197.1164        |
| 1193.5591      | 10 | A  | 2  | 246.1566       | 123.5822        |
|                | 11 | R  | 1  | 175.1195       | 88.0637         |

N-term:+43.02

X-range:

$$\boxed{0} - \boxed{0}$$

0. 1.

☐ AVG ☒ MONO

1 2

I M -

$$a \square + \square^2 + \square^3 +$$
b ☒ 1+ ☐ 2+ ☐ 3+
$$= \square + \square^2 + \square^3 + \dots$$

**c**

| x  | 1+     | 2+     | 3+     |
|----|--------|--------|--------|
| 1  | 0.0000 | 0.0000 | 0.0000 |
| 2  | 0.0000 | 0.0000 | 0.0000 |
| 3  | 0.0000 | 0.0000 | 0.0000 |
| 4  | 0.0000 | 0.0000 | 0.0000 |
| 5  | 0.0000 | 0.0000 | 0.0000 |
| 6  | 0.0000 | 0.0000 | 0.0000 |
| 7  | 0.0000 | 0.0000 | 0.0000 |
| 8  | 0.0000 | 0.0000 | 0.0000 |
| 9  | 0.0000 | 0.0000 | 0.0000 |
| 10 | 0.0000 | 0.0000 | 0.0000 |
| 11 | 0.0000 | 0.0000 | 0.0000 |
| 12 | 0.0000 | 0.0000 | 0.0000 |
| 13 | 0.0000 | 0.0000 | 0.0000 |
| 14 | 0.0000 | 0.0000 | 0.0000 |
| 15 | 0.0000 | 0.0000 | 0.0000 |
| 16 | 0.0000 | 0.0000 | 0.0000 |
| 17 | 0.0000 | 0.0000 | 0.0000 |
| 18 | 0.0000 | 0.0000 | 0.0000 |
| 19 | 0.0000 | 0.0000 | 0.0000 |
| 20 | 0.0000 | 0.0000 | 0.0000 |
| 21 | 0.0000 | 0.0000 | 0.0000 |
| 22 | 0.0000 | 0.0000 | 0.0000 |
| 23 | 0.0000 | 0.0000 | 0.0000 |
| 24 | 0.0000 | 0.0000 | 0.0000 |
| 25 | 0.0000 | 0.0000 | 0.0000 |
| 26 | 0.0000 | 0.0000 | 0.0000 |
| 27 | 0.0000 | 0.0000 | 0.0000 |
| 28 | 0.0000 | 0.0000 | 0.0000 |
| 29 | 0.0000 | 0.0000 | 0.0000 |
| 30 | 0.0000 | 0.0000 | 0.0000 |
| 31 | 0.0000 | 0.0000 | 0.0000 |
| 32 | 0.0000 | 0.0000 | 0.0000 |
| 33 | 0.0000 | 0.0000 | 0.0000 |
| 34 | 0.0000 | 0.0000 | 0.0000 |
| 35 | 0.0000 | 0.0000 | 0.0000 |
| 36 | 0.0000 | 0.0000 | 0.0000 |
| 37 | 0.0000 | 0.0000 | 0.0000 |
| 38 | 0.0000 | 0.0000 | 0.0000 |
| 39 | 0.0000 | 0.0000 | 0.0000 |
| 40 | 0.0000 | 0.0000 | 0.0000 |
| 41 | 0.0000 | 0.0000 | 0.0000 |
| 42 | 0.0000 | 0.0000 | 0.0000 |
| 43 | 0.0000 | 0.0000 | 0.0000 |
| 44 | 0.0000 | 0.0000 | 0.0000 |
| 45 | 0.0000 | 0.0000 | 0.0000 |
| 46 | 0.0000 | 0.0000 | 0.0000 |
| 47 | 0.0000 | 0.0000 | 0.0000 |
| 48 | 0.0000 | 0.0000 | 0.0000 |
| 49 | 0.0000 | 0.0000 | 0.0000 |
| 50 | 0.0000 | 0.0000 | 0.0000 |
| 51 | 0.0000 | 0.0000 | 0.0000 |
| 52 | 0.0000 | 0.0000 | 0.0000 |
| 53 | 0.0000 | 0.0000 | 0.0000 |
| 54 | 0.0000 | 0.0000 | 0.0000 |
| 55 | 0.0000 | 0.0000 | 0.0000 |
| 56 | 0.0000 | 0.0000 | 0.0000 |
| 57 | 0.0000 | 0.0000 | 0.0000 |
| 58 | 0.0000 | 0.0000 | 0.0000 |
| 59 | 0.0000 | 0.0000 | 0.0000 |
| 60 | 0.0000 | 0.0000 | 0.0000 |
| 61 | 0.0000 | 0.0000 | 0.0000 |
| 62 | 0.0000 | 0.0000 | 0.0000 |
| 63 | 0.0000 | 0.0000 | 0.0000 |
| 64 | 0.0000 | 0.0000 | 0.0000 |
| 65 | 0.0000 | 0.0000 | 0.0000 |
| 66 | 0.0000 | 0.0000 | 0.0000 |
| 67 | 0.0000 | 0.0000 | 0.0000 |
| 68 | 0.0000 | 0.0000 | 0.0000 |
| 69 | 0.0000 | 0.0000 | 0.0000 |
| 70 | 0.0000 | 0.0000 | 0.0000 |
| 71 | 0.0000 | 0.0000 | 0.0000 |
| 72 | 0.0000 | 0.0000 | 0.0000 |
| 73 | 0.0000 | 0.0000 | 0.0000 |
| 74 | 0.0000 | 0.0000 | 0.0000 |
| 75 | 0.0000 | 0.0000 | 0.0000 |
| 76 | 0.0000 | 0.0000 | 0.0000 |
| 77 | 0.0000 | 0.0000 | 0.0000 |
| 78 | 0.0000 | 0.0000 | 0.0000 |
| 79 | 0.0000 | 0.0000 | 0.0000 |
| 80 | 0.0000 | 0      |        |

y ☒ <sup>+</sup> ☒ <sup>2+</sup> ☐ <sup>3+</sup>

$$z \square + \square^2 + \square^3 +$$

```
hide H2O/NH.
```

FORM 113-13

GO

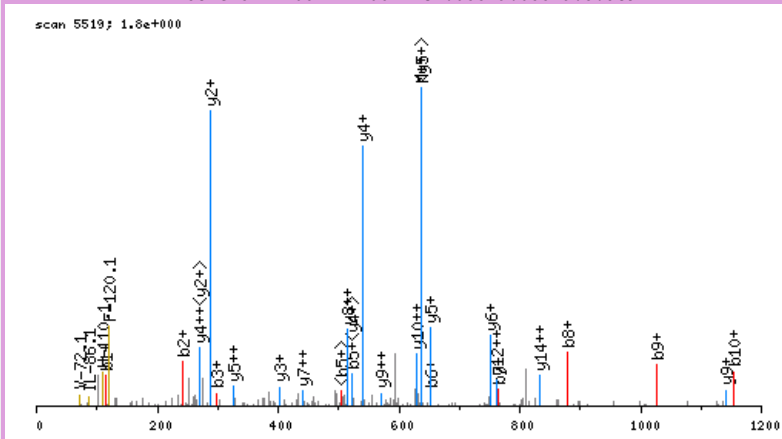

click image to zoom in; click top corners to zoom out

```
[precursor±]
```

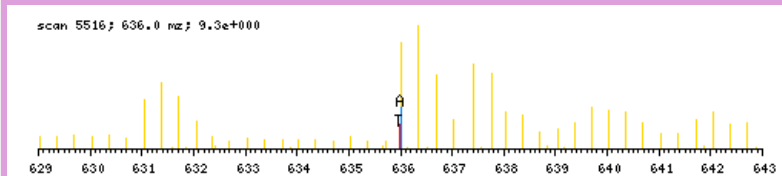

zoomed in precursor plot; T=theoretical m/z, A=acquired m/z

| $b^+$     | #  | AA | #  | $y^+$     | $y^{2+}$ |
|-----------|----|----|----|-----------|----------|
| 114.0555  | 1  | A  | 16 |           |          |
| 242.1141  | 2  | Q  | 15 | 1792.9095 | 896.9586 |
| 299.1356  | 3  | G  | 14 | 1664.8509 | 832.9294 |
| 386.1676  | 4  | S  | 13 | 1607.8294 | 804.4186 |
| 523.2265  | 5  | H  | 12 | 1520.7974 | 760.9026 |
| 651.2851  | 6  | Q  | 11 | 1383.7385 | 692.3731 |
| 764.3691  | 7  | I  | 10 | 1255.6799 | 628.3439 |
| 879.3961  | 8  | D  | 9  | 1142.5958 | 571.8018 |
| 1026.4645 | 9  | F  | 8  | 1027.5689 | 514.2884 |
| 1154.5231 | 10 | Q  | 7  | 880.5005  | 440.7542 |
| 1253.5915 | 11 | V  | 6  | 752.4419  | 376.7249 |
| 1366.6755 | 12 | L  | 5  | 653.3735  | 327.1907 |
| 1503.7345 | 13 | H  | 4  | 540.2894  | 270.6486 |
| 1618.7614 | 14 | D  | 3  | 403.2305  | 202.1192 |
| 1731.8455 | 15 | L  | 2  | 288.2036  | 144.6057 |
|           | 16 | R  | 1  | 175.1195  | 88.0637  |

N-term: +43.02

X-range:

0 - 0

MassTol: Y-zoom:

0. 1.

MassType:

☐ AVG ☒ MONO

Axis:

☒ 1 ☐ 2

Label:

☒ I ☐ M ☐ -

Ions:

a ☐ + ☐ 2+ ☐ 3+

b ☒ + ☐ 2+ ☐ 3+

c ☐ + ☐ 2+ ☐ 3+

x ☐ + ☐ 2+ ☐ 3+

y ☒ + ☒ 2+ ☐ 3+

z ☐ + ☐ 2+ ☐ 3+

hide H<sub>2</sub>O/NH<sub>3</sub> ☐

zoom 112-122 ☐

GO

AQNLIKDLGR, MH+ 1161.6804, m/z 581.3439  
H OS G13 P120811 220811-s1.04111.04111.2.dta

scan 4111; 3.4e+001

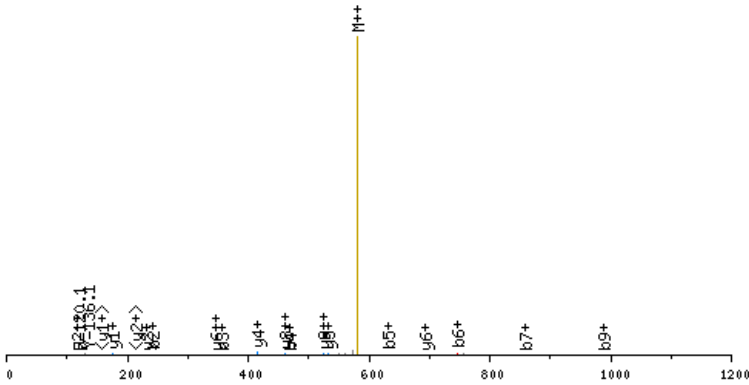

click image to zoom in; click top corners to zoom out [\[precursor±\]](#)

scan 4109; 581.3 m/z; 1.1e+001

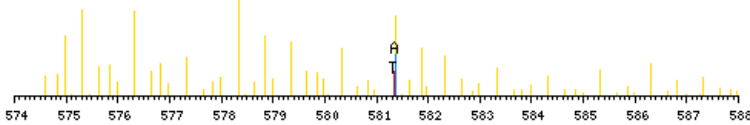

zoomed in precursor plot; T=theoretical m/z, A=acquired m/z

| b <sup>+</sup> | #  | AA | #  | y <sup>+</sup> | y <sup>2+</sup> |
|----------------|----|----|----|----------------|-----------------|
| 114.0555       | 1  | A  | 10 |                |                 |
| 242.1141       | 2  | Q  | 9  | 1048.6328      | 524.8203        |
| 356.1570       | 3  | N  | 8  | 920.5742       | 460.7910        |
| 469.2411       | 4  | L  | 7  | 806.5312       | 403.7695        |
| 631.3992       | 5  | K  | 6  | 693.4472       | 347.2275        |
| 746.4261       | 6  | D  | 5  | 531.2891       | 266.1485        |
| 859.5102       | 7  | L  | 4  | 416.2621       | 208.6350        |
| 930.5473       | 8  | A  | 3  | 303.1781       | 152.0930        |
| 987.5688       | 9  | G  | 2  | 232.1410       | 116.5744        |
|                | 10 | R  | 1  | 175.1195       | 88.0637         |

N-term:+43.02 K(5):+162.16

X-range:

0 - 0

MassTol: Y-zoom:

0. 1.

MassType:

☐AVG ☒MONO

Axis:

☒1 ☐2

Label:

☒I ☐M ☐-

Ions:

a ☐+ ☐2+ ☐3+

b ☒+ ☐2+ ☐3+

c ☐+ ☐2+ ☐3+

x ☐+ ☐2+ ☐3+

y ☒+ ☒2+ ☐3+

z ☐+ ☐2+ ☐3+

hide H<sub>2</sub>O/NH<sub>3</sub> ☐

zoom 112-122 ☐

GO

AQPKNLEGYVGFANLPNQVYR, MH+ 2448.2676, m/z 816.7607  
H OS G12 P120811 220811-s1.05343.05343.3.dta

scan 5343; 2.6e+000

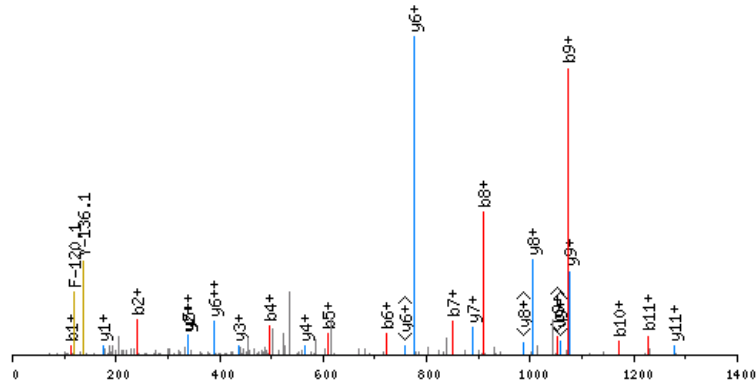

click image to zoom in; click top corners to zoom out [\[precursor±\]](#)

scan 5342; 816.8 m/z; 2.0e+001

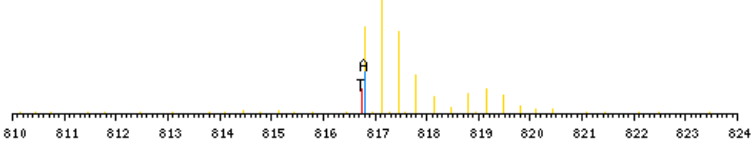

zoomed in precursor plot; T=theoretical m/z, A=acquired m/z

| b <sup>+</sup> | #  | AA | #  | y <sup>+</sup> | y <sup>2+</sup> |
|----------------|----|----|----|----------------|-----------------|
| 114.0555       | 1  | A  | 21 |                |                 |
| 242.1141       | 2  | Q  | 20 | 2335.2199      | 1168.1139       |
| 339.1669       | 3  | P  | 19 | 2207.1613      | 1104.0846       |
| 495.2932       | 4  | K  | 18 | 2110.1086      | 1055.5582       |
| 609.3361       | 5  | N  | 17 | 1953.9823      | 977.4951        |
| 722.4201       | 6  | L  | 16 | 1839.9394      | 920.4736        |
| 851.4627       | 7  | E  | 15 | 1726.8553      | 863.9316        |
| 908.4842       | 8  | G  | 14 | 1597.8127      | 799.4103        |
| 1071.5475      | 9  | Y  | 13 | 1540.7912      | 770.8995        |
| 1170.6159      | 10 | V  | 12 | 1377.7279      | 689.3679        |
| 1227.6374      | 11 | G  | 11 | 1278.6595      | 639.8337        |
| 1374.7058      | 12 | F  | 10 | 1221.6380      | 611.3229        |
| 1445.7429      | 13 | A  | 9  | 1074.5696      | 537.7887        |
| 1559.7859      | 14 | N  | 8  | 1003.5325      | 502.2702        |
| 1672.8699      | 15 | L  | 7  | 889.4896       | 445.2487        |
| 1769.9227      | 16 | P  | 6  | 776.4055       | 388.7067        |
| 1883.9656      | 17 | N  | 5  | 679.3527       | 340.1803        |
| 2012.0242      | 18 | Q  | 4  | 565.3098       | 283.1588        |
| 2111.0926      | 19 | V  | 3  | 437.2512       | 219.1295        |
| 2274.1559      | 20 | Y  | 2  | 338.1828       | 169.5953        |
|                | 21 | R  | 1  | 175.1195       | 88.0637         |

N-term:+43.02 K(4):+156.13

X-range:

0 - 0

MassTol: Y-zoom:

0. 1.

MassType:

AVG MONO

Axis:

1 2

Label:

I M -

Ions:

a 2+ 3+

b 2+ 3+

c 2+ 3+

x 2+ 3+

y 2+ 3+

z 2+ 3+

hide H<sub>2</sub>O/NH<sub>3</sub>

zoom 112-122

GO

ASASYHISNLLKMTSSDKDFR, MH+ 2598.2875, m/z 650.3273  
H OS G16 P120811 220811-s1.06264.06264.4.dta

scan 6264; 2.9e+000

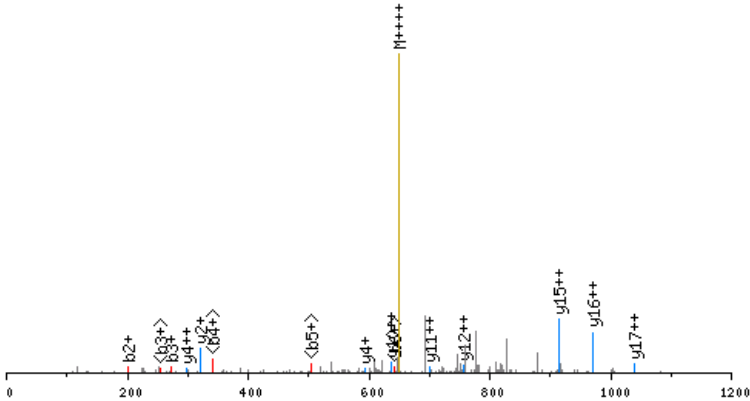

click image to zoom in; click top corners to zoom out [precursor±]

scan 6262; 650.3 m/z; 5.9e+000

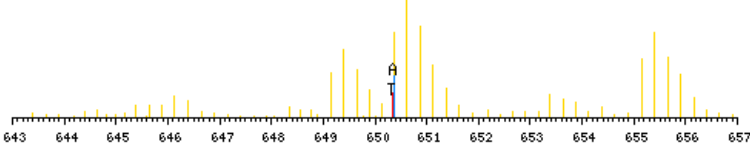

zoomed in precursor plot; T=theoretical m/z, A=acquired m/z

| b <sup>+</sup> | #  | AA | #  | y <sup>+</sup> | y <sup>2+</sup> |
|----------------|----|----|----|----------------|-----------------|
| 114.0555       | 1  | A  | 22 |                |                 |
| 201.0875       | 2  | S  | 21 | 2485.2398      | 1243.1238       |
| 272.1247       | 3  | A  | 20 | 2398.2077      | 1199.6078       |
| 359.1567       | 4  | S  | 19 | 2327.1706      | 1164.0892       |
| 522.2200       | 5  | Y  | 18 | 2240.1386      | 1120.5732       |
| 659.2789       | 6  | H  | 17 | 2077.0753      | 1039.0415       |
| 772.3630       | 7  | I  | 16 | 1940.0164      | 970.5121        |
| 859.3950       | 8  | S  | 15 | 1826.9323      | 913.9701        |
| 973.4379       | 9  | N  | 14 | 1739.9003      | 870.4540        |
| 1086.5220      | 10 | L  | 13 | 1625.8573      | 813.4326        |
| 1199.6061      | 11 | L  | 12 | 1512.7733      | 756.8906        |
| 1328.6487      | 12 | E  | 11 | 1399.6892      | 700.3485        |
| 1484.7750      | 13 | K  | 10 | 1270.6466      | 635.8272        |
| 1615.8155      | 14 | M  | 9  | 1114.5203      | 557.7641        |
| 1716.8631      | 15 | T  | 8  | 983.4798       | 492.2438        |
| 1803.8952      | 16 | S  | 7  | 882.4322       | 441.7200        |
| 1890.9272      | 17 | S  | 6  | 795.4001       | 398.2040        |
| 2005.9541      | 18 | D  | 5  | 708.3681       | 354.6880        |
| 2162.0804      | 19 | K  | 4  | 593.3412       | 297.1745        |
| 2277.1074      | 20 | D  | 3  | 437.2149       | 219.1113        |
| 2424.1758      | 21 | F  | 2  | 322.1879       | 161.5979        |
|                | 22 | R  | 1  | 175.1195       | 88.0637         |

N-term:+43.02 K(13):+156.13  
K(19):+156.13

X-range:

$$0 - 0$$

0. 1.

AVG MONO

1 2

☒ I ☐ M ☐ -

$$a \square + \square^2 + \square^3 +$$
b ☒ 1+ ☐ 2+ ☐ 3+
$$= \square + \square^2 + \square^3 + \dots$$

C [ ] [ ] [ ]  
[ ] [ ] [ ]

**x**

**y** ☒ <sup>+</sup> ☒ <sup>2+</sup> ☐ <sup>3+</sup>

$$z \begin{bmatrix} 1 \\ 0 \\ 0 \end{bmatrix} + \begin{bmatrix} 0 \\ 1 \\ 0 \end{bmatrix}^2 + \begin{bmatrix} 0 \\ 0 \\ 1 \end{bmatrix}^3 +$$
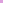

GO

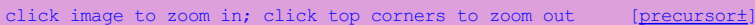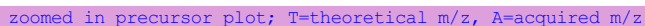

N-term:+43.02 C(3):+160.03

zoomed in precursor plot; T=theoretical m/z, A=acquired m/z

X-range:

0 - 0

MassTol: Y-zoom:

0. 1.

MassType:

☐ AVG ☒ MONO

Axis:

☒ 1 ☐ 2

Label:

☒ I ☐ M ☐ -

Ions:

a ☐ + ☐ 2+ ☐ 3+

b ☒ + ☐ 2+ ☐ 3+

c ☐ + ☐ 2+ ☐ 3+

x ☐ + ☐ 2+ ☐ 3+

y ☒ + ☒ 2+ ☐ 3+

z ☐ + ☐ 2+ ☐ 3+

hide H<sub>2</sub>O/NH<sub>3</sub> ☐

zoom 112-122 ☐

GO

ASESGKLWGGR, MH+ 1217.6279, m/z 609.3176  
H OS G14 P120811 220811-s1.03879.03879.2.dta

scan 3879; 2.1e+001

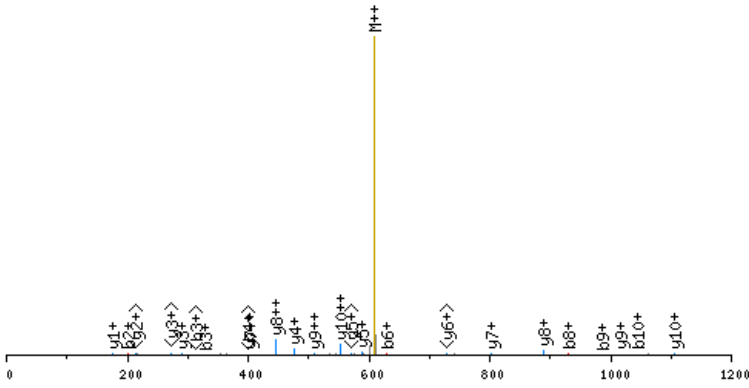

click image to zoom in; click top corners to zoom out [\[precursor±\]](#)

scan 3876; 609.3 m/z; 1.5e+001

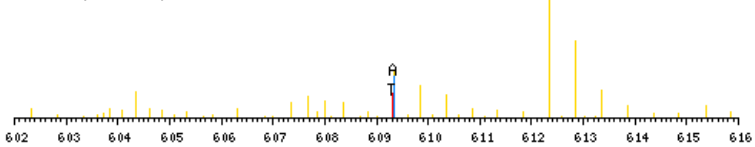

zoomed in precursor plot; T=theoretical m/z, A=acquired m/z

| b <sup>+</sup> | #  | AA | #  | y <sup>+</sup> | y <sup>2+</sup> |
|----------------|----|----|----|----------------|-----------------|
| 114.0555       | 1  | A  | 11 |                |                 |
| 201.0875       | 2  | S  | 10 | 1104.5802      | 552.7940        |
| 330.1301       | 3  | E  | 9  | 1017.5482      | 509.2780        |
| 417.1622       | 4  | S  | 8  | 888.5056       | 444.7567        |
| 474.1836       | 5  | G  | 7  | 801.4736       | 401.2407        |
| 630.3099       | 6  | K  | 6  | 744.4521       | 372.7300        |
| 743.3940       | 7  | L  | 5  | 588.3258       | 294.6668        |
| 929.4733       | 8  | W  | 4  | 475.2417       | 238.1248        |
| 986.4948       | 9  | G  | 3  | 289.1624       | 145.0851        |
| 1043.5162      | 10 | G  | 2  | 232.1410       | 116.5744        |
|                | 11 | R  | 1  | 175.1195       | 88.0637         |

N-term:+43.02 K(6):+156.13

X-range:

0 - 0

MassTol: Y-zoom:

0. 1.

MassType:

☐ AVG ☒ MONO

Axis:

☒ 1 ☐ 2

Label:

☒ I ☐ M ☐ -

Ions:

a ☐ + ☐ 2+ ☐ 3+

b ☒ + ☐ 2+ ☐ 3+

c ☐ + ☐ 2+ ☐ 3+

x ☐ + ☐ 2+ ☐ 3+

y ☒ + ☒ 2+ ☐ 3+

z ☐ + ☐ 2+ ☐ 3+

hide H<sub>2</sub>O/NH<sub>3</sub> ☐

zoom 112-122 ☐

GO

ASGADSKGDDLSTAILKQKNRPNR, MH+ 2668.4383, m/z 667.8650  
H OS G18 P120811 220811-s1.04025.04025.4.dta

scan 4025; 8.5e+000

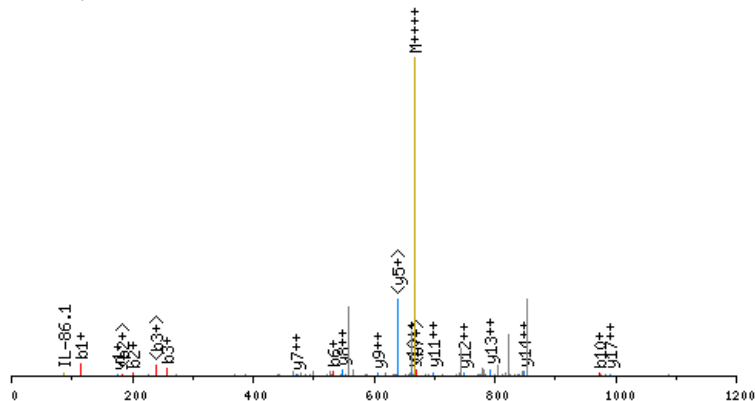

click image to zoom in; click top corners to zoom out

[precursor±]

scan 4021; 667.9 m/z; 1.3e+001

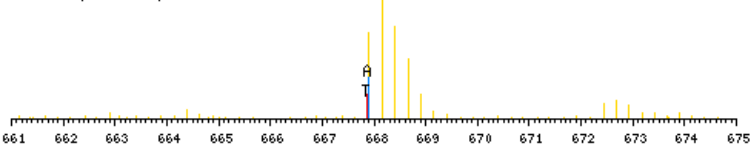

zoomed in precursor plot; T=theoretical m/z, A=acquired m/z

| b <sup>+</sup> | #  | AA | #  | y <sup>+</sup> | y <sup>2+</sup> |
|----------------|----|----|----|----------------|-----------------|
| 114.0555       | 1  | A  | 24 |                |                 |
| 201.0875       | 2  | S  | 23 | 2555.3906      | 1278.1992       |
| 258.1090       | 3  | G  | 22 | 2468.3586      | 1234.6832       |
| 329.1461       | 4  | A  | 21 | 2411.3372      | 1206.1725       |
| 444.1731       | 5  | D  | 20 | 2340.3000      | 1170.6539       |
| 531.2051       | 6  | S  | 19 | 2225.2731      | 1113.1405       |
| 687.3314       | 7  | K  | 18 | 2138.2411      | 1069.6244       |
| 744.3529       | 8  | G  | 17 | 1982.1148      | 991.5613        |
| 859.3798       | 9  | D  | 16 | 1925.0933      | 963.0506        |
| 974.4067       | 10 | D  | 15 | 1810.0664      | 905.5371        |
| 1087.4908      | 11 | L  | 14 | 1695.0394      | 848.0236        |
| 1174.5228      | 12 | S  | 13 | 1581.9554      | 791.4816        |
| 1275.5705      | 13 | T  | 12 | 1494.9233      | 747.9656        |
| 1346.6076      | 14 | A  | 11 | 1393.8757      | 697.4417        |
| 1459.6917      | 15 | I  | 10 | 1322.8385      | 661.9232        |
| 1572.7758      | 16 | L  | 9  | 1209.7545      | 605.3811        |
| 1728.9021      | 17 | K  | 8  | 1096.6704      | 548.8391        |
| 1856.9606      | 18 | Q  | 7  | 940.5441       | 470.7760        |
| 2013.0869      | 19 | K  | 6  | 812.4855       | 406.7467        |
| 2127.1299      | 20 | N  | 5  | 656.3592       | 328.6835        |
| 2283.2310      | 21 | R  | 4  | 542.3163       | 271.6621        |
| 2380.2837      | 22 | P  | 3  | 386.2152       | 193.6115        |
| 2494.3267      | 23 | N  | 2  | 289.1624       | 145.0851        |
|                | 24 | R  | 1  | 175.1195       | 88.0637         |

N-term:+43.02 K(7):+156.13  
K(17):+156.13 K(19):+156.13

X-range:

0 - 0

MassTol: Y-zoom:

0. 1.

MassType:

☐ AVG ☒ MONO

Axis:

☒ 1 ☐ 2

Label:

☒ I ☐ M ☐ -

Ions:

a ☐ + ☐ 2+ ☐ 3+

b ☒ + ☐ 2+ ☐ 3+

c ☐ + ☐ 2+ ☐ 3+

x ☐ + ☐ 2+ ☐ 3+

y ☒ + ☒ 2+ ☐ 3+

z ☐ + ☐ 2+ ☐ 3+

hide H<sub>2</sub>O/NH<sub>3</sub> ☐

zoom 112-122 ☐

GO

ASGCKIGPSILNSDLANLGAECLR, MH+ 2592.3337, m/z 864.7828  
H OS G12 P120811 220811-s1.05484.05484.3.dta

scan 5484; 1.5e+000

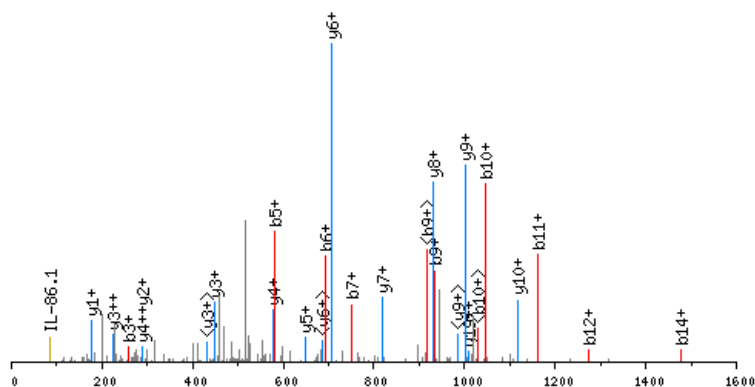

click image to zoom in; click top corners to zoom out

[precursor±]

scan 5482; 864.8 m/z; 6.6e+001

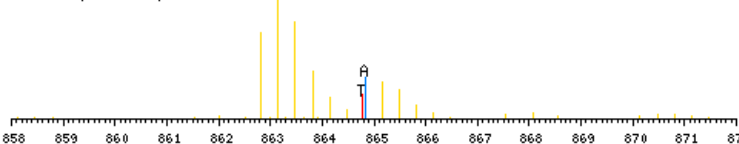

zoomed in precursor plot; T=theoretical m/z, A=acquired m/z

| b <sup>+</sup> | #  | AA | #  | y <sup>+</sup> | y <sup>2+</sup> |
|----------------|----|----|----|----------------|-----------------|
| 114.0555       | 1  | A  | 24 |                |                 |
| 201.0875       | 2  | S  | 23 | 2479.2860      | 1240.1469       |
| 258.1090       | 3  | G  | 22 | 2392.2540      | 1196.6309       |
| 418.1396       | 4  | C  | 21 | 2335.2326      | 1168.1202       |
| 580.2977       | 5  | K  | 20 | 2175.2020      | 1088.1049       |
| 693.3818       | 6  | I  | 19 | 2013.0439      | 1007.0258       |
| 750.4032       | 7  | G  | 18 | 1899.9598      | 950.4838        |
| 847.4560       | 8  | P  | 17 | 1842.9383      | 921.9731        |
| 934.4880       | 9  | S  | 16 | 1745.8856      | 873.4467        |
| 1047.5721      | 10 | I  | 15 | 1658.8535      | 829.9307        |
| 1160.6562      | 11 | L  | 14 | 1545.7695      | 773.3886        |
| 1274.6991      | 12 | N  | 13 | 1432.6854      | 716.8466        |
| 1361.7311      | 13 | S  | 12 | 1318.6425      | 659.8252        |
| 1476.7581      | 14 | D  | 11 | 1231.6104      | 616.3091        |
| 1589.8421      | 15 | L  | 10 | 1116.5835      | 558.7957        |
| 1660.8792      | 16 | A  | 9  | 1003.4994      | 502.2536        |
| 1774.9222      | 17 | N  | 8  | 932.4623       | 466.7351        |
| 1888.0062      | 18 | L  | 7  | 818.4194       | 409.7136        |
| 1945.0277      | 19 | G  | 6  | 705.3353       | 353.1716        |
| 2016.0648      | 20 | A  | 5  | 648.3139       | 324.6608        |
| 2145.1074      | 21 | E  | 4  | 577.2768       | 289.1423        |
| 2305.1380      | 22 | C  | 3  | 448.2342       | 224.6210        |
| 2418.2221      | 23 | L  | 2  | 288.2036       | 144.6057        |
|                | 24 | R  | 1  | 175.1195       | 88.0637         |

N-term:+43.02 C(4):+160.03  
K(5):+162.16 C(22):+160.03

X-range:

0 - 0

MassTol: Y-zoom:

0. 1.

MassType:

☐ AVG ☒ MONO

Axis:

☒ 1 ☐ 2

Label:

☒ I ☐ M ☐ -

Ions:

a ☐ + ☐ 2+ ☐ 3+

b ☒ + ☐ 2+ ☐ 3+

c ☐ + ☐ 2+ ☐ 3+

x ☐ + ☐ 2+ ☐ 3+

y ☒ + ☒ 2+ ☐ 3+

z ☐ + ☐ 2+ ☐ 3+

hide H<sub>2</sub>O/NH<sub>3</sub> ☐

zoom 112-122 ☐

GO

ASGVAVSDGVIKVFNDMKVR, MH+ 2202.2593, m/z 734.7580  
H OS G15 P120811 220811-s1.06270.06270.3.dta

scan 6270; 2.8e+001

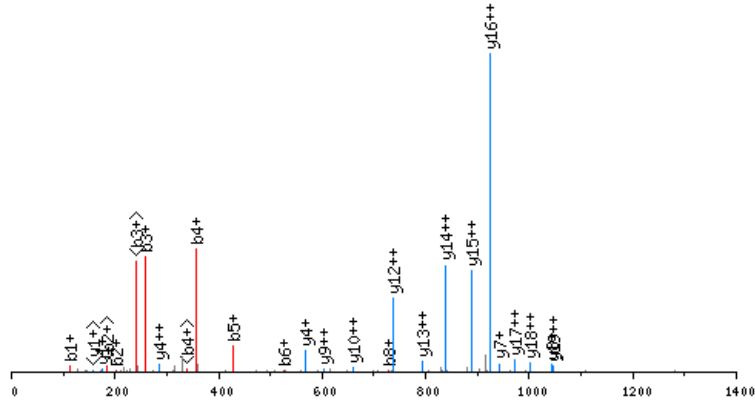

click image to zoom in; click top corners to zoom out [\[precursor±\]](#)

scan 6266; 734.8 m/z; 2.9e+001

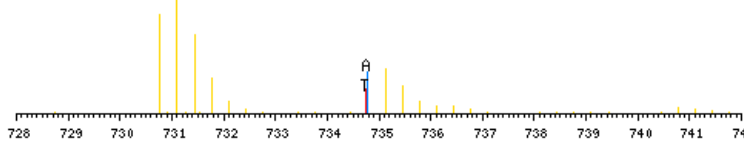

zoomed in precursor plot; T=theoretical m/z, A=acquired m/z

| b <sup>+</sup> | #  | AA | #  | y <sup>+</sup> | y <sup>2+</sup> |
|----------------|----|----|----|----------------|-----------------|
| 114.0555       | 1  | A  | 20 |                |                 |
| 201.0875       | 2  | S  | 19 | 2089.2116      | 1045.1097       |
| 258.1090       | 3  | G  | 18 | 2002.1796      | 1001.5937       |
| 357.1774       | 4  | V  | 17 | 1945.1582      | 973.0830        |
| 428.2145       | 5  | A  | 16 | 1846.0897      | 923.5488        |
| 527.2829       | 6  | V  | 15 | 1775.0526      | 888.0302        |
| 614.3150       | 7  | S  | 14 | 1675.9842      | 838.4960        |
| 729.3419       | 8  | D  | 13 | 1588.9522      | 794.9800        |
| 786.3634       | 9  | G  | 12 | 1473.9252      | 737.4665        |
| 885.4318       | 10 | V  | 11 | 1416.9038      | 708.9558        |
| 998.5159       | 11 | I  | 10 | 1317.8354      | 659.4216        |
| 1160.6740      | 12 | K  | 9  | 1204.7513      | 602.8796        |
| 1259.7424      | 13 | V  | 8  | 1042.5932      | 521.8005        |
| 1406.8108      | 14 | F  | 7  | 943.5248       | 472.2663        |
| 1520.8537      | 15 | N  | 6  | 796.4564       | 398.7321        |
| 1635.8807      | 16 | D  | 5  | 682.4134       | 341.7106        |
| 1766.9211      | 17 | M  | 4  | 567.3865       | 284.1972        |
| 1929.0792      | 18 | K  | 3  | 436.3460       | 218.6769        |
| 2028.1477      | 19 | V  | 2  | 274.1879       | 137.5979        |
|                | 20 | R  | 1  | 175.1195       | 88.0637         |

N-term: +43.02 K(12): +162.16  
K(18): +162.16

X-range:

0 - 0

MassTol: Y-zoom:

0. 1.

MassType:

☐ AVG ☒ MONO

Axis:

☒ 1 ☐ 2

Label:

☒ I ☐ M ☐ -

Ions:

a ☐ + ☐ 2+ ☐ 3+

b ☒ + ☐ 2+ ☐ 3+

c ☐ + ☐ 2+ ☐ 3+

x ☐ + ☐ 2+ ☐ 3+

y ☒ + ☒ 2+ ☐ 3+

z ☐ + ☐ 2+ ☐ 3+

hide H<sub>2</sub>O/NH<sub>3</sub> ☐

zoom 112-122 ☐

GO

ASGVQVADEVCR, MH+ 1332.6218, m/z 666.8145  
H OS G11 P120811 220811-s1.03525.03525.2.dta

scan 3525; 1.1e+000

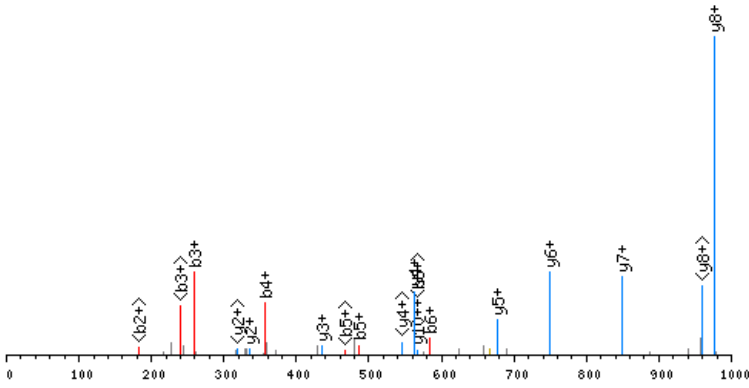

click image to zoom in; click top corners to zoom out

[precursor±]

scan 3524; 666.8 m/z; 1.0e+000

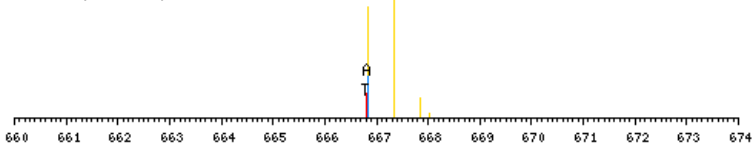

zoomed in precursor plot; T=theoretical m/z, A=acquired m/z

| b <sup>+</sup> | #  | AA | #  | y <sup>+</sup> | y <sup>2+</sup> |
|----------------|----|----|----|----------------|-----------------|
| 114.0555       | 1  | A  | 12 |                |                 |
| 201.0875       | 2  | S  | 11 | 1219.5741      | 610.2909        |
| 258.1090       | 3  | G  | 10 | 1132.5420      | 566.7749        |
| 357.1774       | 4  | V  | 9  | 1075.5206      | 538.2642        |
| 485.2360       | 5  | Q  | 8  | 976.4522       | 488.7300        |
| 584.3044       | 6  | V  | 7  | 848.3936       | 424.7007        |
| 655.3415       | 7  | A  | 6  | 749.3252       | 375.1665        |
| 770.3685       | 8  | D  | 5  | 678.2881       | 339.6479        |
| 899.4111       | 9  | E  | 4  | 563.2611       | 282.1345        |
| 998.4795       | 10 | V  | 3  | 434.2185       | 217.6132        |
| 1158.5101      | 11 | C  | 2  | 335.1501       | 168.0790        |
|                | 12 | R  | 1  | 175.1195       | 88.0637         |

N-term:+43.02 C(11):+160.03

X-range:

0 - 0

MassTol: Y-zoom:

0. 1.

MassType:

☐AVG ☒MONO

Axis:

☒1 ☐2

Label:

☒I ☐M ☐-

Ions:

a ☐+ ☐2+ ☐3+

b ☒+ ☐2+ ☐3+

c ☐+ ☐2+ ☐3+

x ☐+ ☐2+ ☐3+

y ☒+ ☒2+ ☐3+

z ☐+ ☐2+ ☐3+

hide H<sub>2</sub>O/NH<sub>3</sub> ☐

zoom 112-122 ☐

GO

ASGVTVNDEVIKVFNDMKVR, MH+ 2331.3019, m/z 777.7722  
H OS G15 P120811 220811-s1.06293.06293.3.dta

scan 6293; 6.0e+000

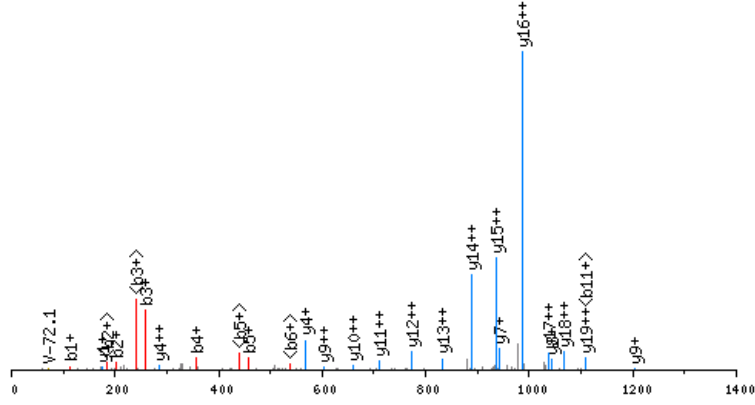

click image to zoom in; click top corners to zoom out [\[precursor±\]](#)

scan 6291; 777.8 m/z; 1.7e+001

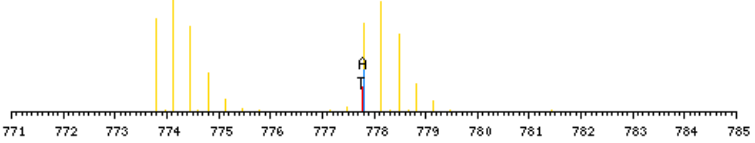

zoomed in precursor plot; T=theoretical m/z, A=acquired m/z

| b <sup>+</sup> | #  | AA | #  | y <sup>+</sup> | y <sup>2+</sup> |
|----------------|----|----|----|----------------|-----------------|
| 114.0555       | 1  | A  | 20 |                |                 |
| 201.0875       | 2  | S  | 19 | 2218.2542      | 1109.6310       |
| 258.1090       | 3  | G  | 18 | 2131.2222      | 1066.1150       |
| 357.1774       | 4  | V  | 17 | 2074.2007      | 1037.6043       |
| 458.2251       | 5  | T  | 16 | 1975.1323      | 988.0701        |
| 557.2935       | 6  | V  | 15 | 1874.0847      | 937.5462        |
| 671.3364       | 7  | N  | 14 | 1775.0162      | 888.0120        |
| 786.3634       | 8  | D  | 13 | 1660.9733      | 830.9906        |
| 915.4060       | 9  | E  | 12 | 1545.9464      | 773.4771        |
| 1014.4744      | 10 | V  | 11 | 1416.9038      | 708.9558        |
| 1127.5585      | 11 | I  | 10 | 1317.8354      | 659.4216        |
| 1289.7166      | 12 | K  | 9  | 1204.7513      | 602.8796        |
| 1388.7850      | 13 | V  | 8  | 1042.5932      | 521.8005        |
| 1535.8534      | 14 | F  | 7  | 943.5248       | 472.2663        |
| 1649.8963      | 15 | N  | 6  | 796.4564       | 398.7321        |
| 1764.9233      | 16 | D  | 5  | 682.4134       | 341.7106        |
| 1895.9637      | 17 | M  | 4  | 567.3865       | 284.1972        |
| 2058.1218      | 18 | K  | 3  | 436.3460       | 218.6769        |
| 2157.1903      | 19 | V  | 2  | 274.1879       | 137.5979        |
|                | 20 | R  | 1  | 175.1195       | 88.0637         |

N-term:+43.02 K(12):+162.16  
K(18):+162.16

X-range:

0 - 0

MassTol: Y-zoom:

0. 1.

MassType:

☐ AVG ☒ MONO

Axis:

☒ 1 ☐ 2

Label:

☒ I ☐ M ☐ -

Ions:

a ☐ + ☐ 2+ ☐ 3+

b ☒ + ☐ 2+ ☐ 3+

c ☐ + ☐ 2+ ☐ 3+

x ☐ + ☐ 2+ ☐ 3+

y ☒ + ☒ 2+ ☐ 3+

z ☐ + ☐ 2+ ☐ 3+

hide H<sub>2</sub>O/NH<sub>3</sub> ☐

zoom 112-122 ☐

GO

ASKEMFEDTVEER, MH+ 1640.7478, m/z 547.5875  
H OS G13 P120811 220811-s1.04780.04780.3.dta

scan 4780; 1.1e+000

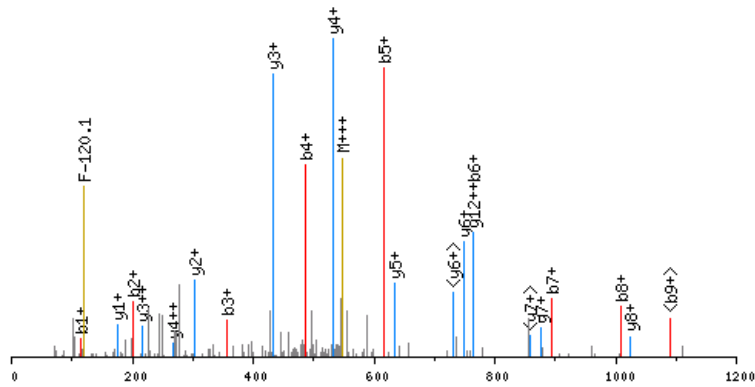

click image to zoom in; click top corners to zoom out

[precursor±]

scan 4779; 547.6 m/z; 2.7e+001

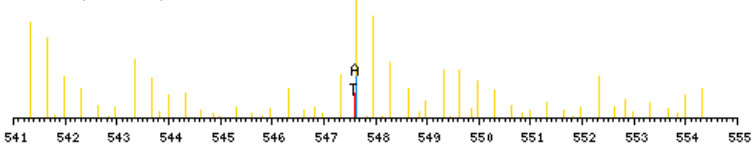

zoomed in precursor plot; T=theoretical m/z, A=acquired m/z

| b <sup>+</sup> | #  | AA | #  | y <sup>+</sup> | y <sup>2+</sup> |
|----------------|----|----|----|----------------|-----------------|
| 114.0555       | 1  | A  | 13 |                |                 |
| 201.0875       | 2  | S  | 12 | 1527.7001      | 764.3540        |
| 357.2138       | 3  | K  | 11 | 1440.6681      | 720.8380        |
| 486.2564       | 4  | E  | 10 | 1284.5418      | 642.7748        |
| 617.2969       | 5  | M  | 9  | 1155.4992      | 578.2535        |
| 764.3653       | 6  | F  | 8  | 1024.4587      | 512.7333        |
| 893.4079       | 7  | E  | 7  | 877.3903       | 439.1991        |
| 1008.4349      | 8  | D  | 6  | 748.3477       | 374.6778        |
| 1109.4825      | 9  | T  | 5  | 633.3208       | 317.1643        |
| 1208.5510      | 10 | V  | 4  | 532.2731       | 266.6405        |
| 1337.5936      | 11 | E  | 3  | 433.2047       | 217.1063        |
| 1466.6361      | 12 | E  | 2  | 304.1621       | 152.5850        |
|                | 13 | R  | 1  | 175.1195       | 88.0637         |

N-term:+43.02 K(3):+156.13

X-range:

$$\boxed{0} - \boxed{0}$$

0. 1.

☐ AVG ☒ MONO

1 2

☒ I ☐ M ☐ -

**a**  + 2 + 3 +

b. ☒ 1 + ☐ 2 + ☐ 3 + $\square + \square^2 + \square^3 +$ 

C

□ □ □  
□ □ □

**x**

y ☒ <sup>+</sup> ☒ <sup>2+</sup> ☐ <sup>3+</sup>

$$\mathbf{z} \begin{bmatrix} 1 \\ 2 \\ 3 \end{bmatrix} + \begin{bmatrix} 1 \\ 2 \\ 3 \end{bmatrix}^2 + \begin{bmatrix} 1 \\ 2 \\ 3 \end{bmatrix}^3 + \dots$$

zoom 112-122

GO

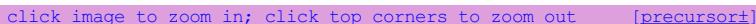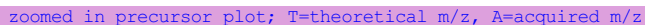

N-term: +43.02 K(4): +156.13  
K(9): +156.13

K(9):+156.13

X-range:

0 - 0

MassTol: Y-zoom:

0. 1.

MassType:

☐ AVG ☒ MONO

Axis:

☒ 1 ☐ 2

Label:

☒ I ☐ M ☐ -

Ions:

a ☐ + ☐ 2+ ☐ 3+

b ☒ + ☐ 2+ ☐ 3+

c ☐ + ☐ 2+ ☐ 3+

x ☐ + ☐ 2+ ☐ 3+

y ☒ + ☒ 2+ ☐ 3+

z ☐ + ☐ 2+ ☐ 3+

hide H<sub>2</sub>O/NH<sub>3</sub> ☐

zoom 112-122 ☐

GO

ASLQQPGGIR, MH+ 1068.5802, m/z 534.7937  
H OS G14 P120811 220811-s1.02232.02232.2.dta

scan 2232; 1.2e+001

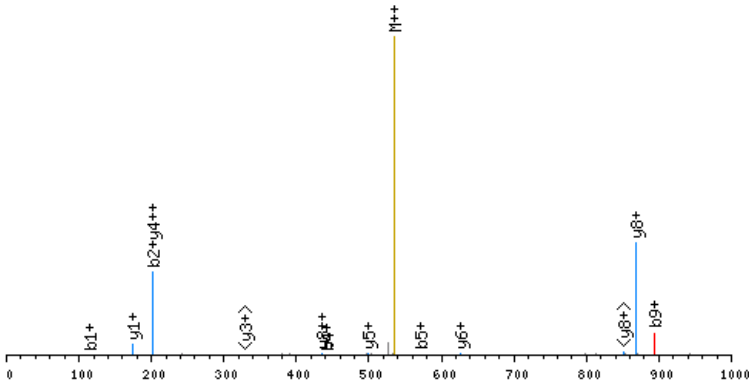

click image to zoom in; click top corners to zoom out

[precursor±]

scan 2231; 534.8 m/z; 4.2e+000

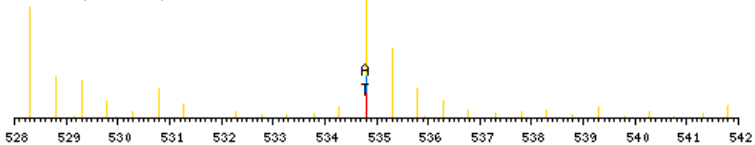

zoomed in precursor plot; T=theoretical m/z, A=acquired m/z

| b <sup>+</sup> | #  | AA | #  | y <sup>+</sup> | y <sup>2+</sup> |
|----------------|----|----|----|----------------|-----------------|
| 114.0555       | 1  | A  | 10 |                |                 |
| 201.0875       | 2  | S  | 9  | 955.5325       | 478.2702        |
| 314.1716       | 3  | L  | 8  | 868.5005       | 434.7542        |
| 442.2302       | 4  | Q  | 7  | 755.4164       | 378.2121        |
| 570.2888       | 5  | Q  | 6  | 627.3578       | 314.1828        |
| 667.3415       | 6  | P  | 5  | 499.2993       | 250.1535        |
| 724.3630       | 7  | G  | 4  | 402.2465       | 201.6272        |
| 781.3845       | 8  | G  | 3  | 345.2250       | 173.1164        |
| 894.4685       | 9  | I  | 2  | 288.2036       | 144.6057        |
|                | 10 | R  | 1  | 175.1195       | 88.0637         |

N-term:+43.02

N-term: +43.02 K(12): +162.16

X-range:

0 - 0

MassTol: Y-zoom:

0. 1.

MassType:

☐ AVG ☒ MONO

Axis:

☒ 1 ☐ 2

Label:

☒ I ☐ M ☐ -

Ions:

a ☐ + ☐ 2+ ☐ 3+

b ☒ + ☐ 2+ ☐ 3+

c ☐ + ☐ 2+ ☐ 3+

x ☐ + ☐ 2+ ☐ 3+

y ☒ + ☒ 2+ ☐ 3+

z ☐ + ☐ 2+ ☐ 3+

hide H<sub>2</sub>O/NH<sub>3</sub> ☐

zoom 112-122 ☐

GO

ASNEFKTTMASSAQR, MH+ 1725.8959, m/z 575.9701  
H OS G15 P120811 220811-s1.02454.02454.3.dta

scan 2454; 3.1e+001

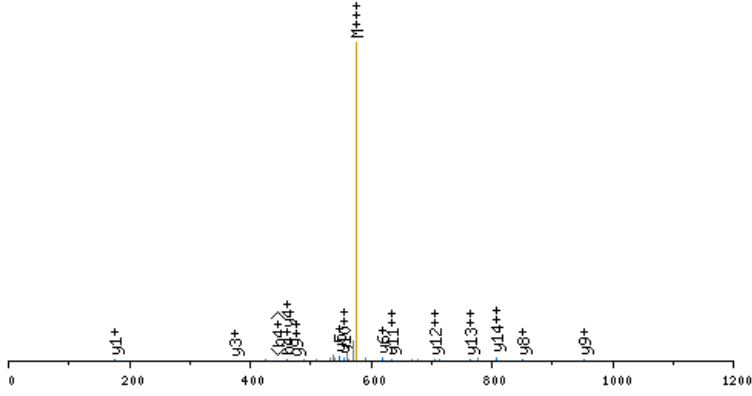

click image to zoom in; click top corners to zoom out [\[precursor±\]](#)

scan 2451; 576.0 m/z; 4.6e+000

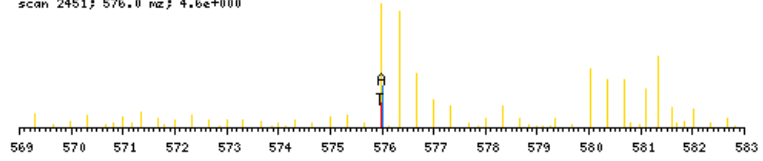

zoomed in precursor plot; T=theoretical m/z, A=acquired m/z

| b <sup>+</sup> | #  | AA | #  | y <sup>+</sup> | y <sup>2+</sup> |
|----------------|----|----|----|----------------|-----------------|
| 114.0555       | 1  | A  | 15 |                |                 |
| 201.0875       | 2  | S  | 14 | 1612.8482      | 806.9280        |
| 315.1305       | 3  | N  | 13 | 1525.8161      | 763.4120        |
| 462.1989       | 4  | F  | 12 | 1411.7732      | 706.3905        |
| 618.3252       | 5  | K  | 11 | 1264.7048      | 632.8563        |
| 774.4515       | 6  | K  | 10 | 1108.5785      | 554.7932        |
| 875.4992       | 7  | T  | 9  | 952.4522       | 476.7300        |
| 976.5468       | 8  | T  | 8  | 851.4045       | 426.2062        |
| 1107.5873      | 9  | M  | 7  | 750.3568       | 375.6823        |
| 1178.6244      | 10 | A  | 6  | 619.3164       | 310.1621        |
| 1265.6565      | 11 | S  | 5  | 548.2792       | 274.6435        |
| 1352.6885      | 12 | S  | 4  | 461.2472       | 231.1275        |
| 1423.7256      | 13 | A  | 3  | 374.2152       | 187.6115        |
| 1551.7842      | 14 | Q  | 2  | 303.1781       | 152.0930        |
|                | 15 | R  | 1  | 175.1195       | 88.0637         |

N-term:+43.02 K(5):+156.13  
K(6):+156.13

X-range:

0 - 0

MassTol: Y-zoom:

0. 1.

MassType:

☐AVG ☒MONO

Axis:

☒1 ☐2

Label:

☒I ☐M ☐-

Ions:

a ☐+ ☐2+ ☐3+

b ☒+ ☐2+ ☐3+

c ☐+ ☐2+ ☐3+

x ☐+ ☐2+ ☐3+

y ☒+ ☒2+ ☐3+

z ☐+ ☐2+ ☐3+

hide H<sub>2</sub>O/NH<sub>3</sub> ☐

zoom 112-122 ☐

GO

ASQSQGIQQLLQAEKR, MH+ 1855.0038, m/z 619.0061  
H OS G13 P120811 220811-s1.05751.05751.3.dta

scan 5751; 2.7e+000

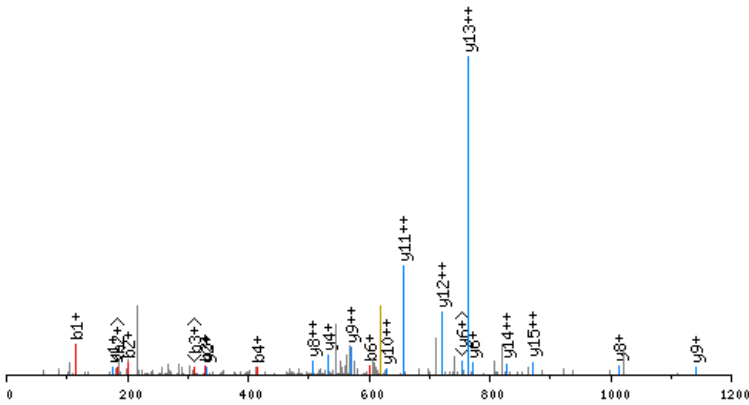

click image to zoom in; click top corners to zoom out

[precursor±]

scan 5749; 619.0 m/z; 9.1e+000

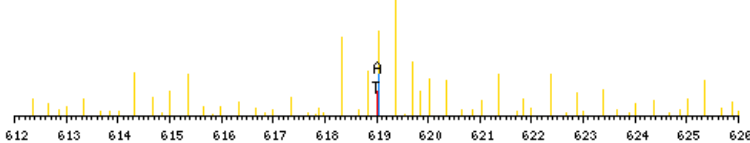

zoomed in precursor plot; T=theoretical m/z, A=acquired m/z

| b <sup>+</sup> | #  | AA | #  | y <sup>+</sup> | y <sup>2+</sup> |
|----------------|----|----|----|----------------|-----------------|
| 114.0555       | 1  | A  | 16 |                |                 |
| 201.0875       | 2  | S  | 15 | 1741.9561      | 871.4820        |
| 329.1461       | 3  | Q  | 14 | 1654.9241      | 827.9660        |
| 416.1781       | 4  | S  | 13 | 1526.8655      | 763.9367        |
| 544.2367       | 5  | Q  | 12 | 1439.8335      | 720.4206        |
| 601.2582       | 6  | G  | 11 | 1311.7749      | 656.3914        |
| 714.3423       | 7  | I  | 10 | 1254.7534      | 627.8806        |
| 842.4008       | 8  | Q  | 9  | 1141.6694      | 571.3386        |
| 970.4594       | 9  | Q  | 8  | 1013.6108      | 507.3093        |
| 1083.5435      | 10 | L  | 7  | 885.5522       | 443.2800        |
| 1196.6275      | 11 | L  | 6  | 772.4681       | 386.7380        |
| 1324.6861      | 12 | Q  | 5  | 659.3841       | 330.1960        |
| 1395.7232      | 13 | A  | 4  | 531.3255       | 266.1667        |
| 1524.7658      | 14 | E  | 3  | 460.2884       | 230.6481        |
| 1680.8921      | 15 | K  | 2  | 331.2458       | 166.1268        |
|                | 16 | R  | 1  | 175.1195       | 88.0637         |

N-term:+43.02 K(15):+156.13

X-range:

0 - 0

MassTol: Y-zoom:

0. 1.

MassType:

☐ AVG ☒ MONO

Axis:

☒ 1 ☐ 2

Label:

☒ I ☐ M ☐ -

Ions:

a ☐ + ☐ 2+ ☐ 3+

b ☒ + ☐ 2+ ☐ 3+

c ☐ + ☐ 2+ ☐ 3+

x ☐ + ☐ 2+ ☐ 3+

y ☒ + ☒ 2+ ☐ 3+

z ☐ + ☐ 2+ ☐ 3+

hide H<sub>2</sub>O/NH<sub>3</sub> ☐

zoom 112-122 ☐

GO

ASSDIQVKELEKR, MH+ 1600.8911, m/z 534.3019  
H OS G15 P120811 220811-s1.03267.03267.3.dta

scan 3267; 1.3e+001

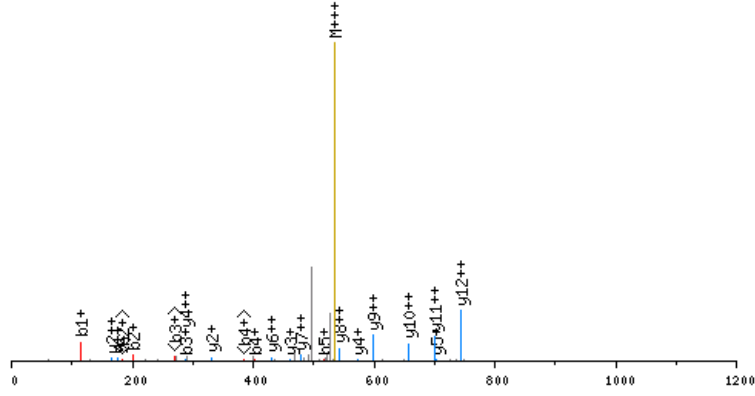

click image to zoom in; click top corners to zoom out

[precursor±]

scan 3266; 534.3 m/z; 3.2e+001

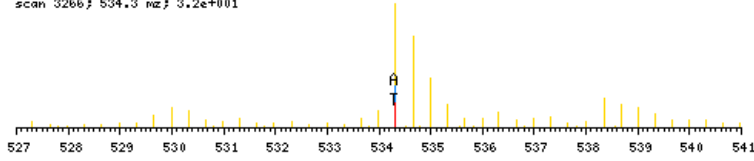

zoomed in precursor plot; T=theoretical m/z, A=acquired m/z

| b <sup>+</sup> | #  | AA | #  | y <sup>+</sup> | y <sup>2+</sup> |
|----------------|----|----|----|----------------|-----------------|
| 114.0555       | 1  | A  | 13 |                |                 |
| 201.0875       | 2  | S  | 12 | 1487.8434      | 744.4256        |
| 288.1196       | 3  | S  | 11 | 1400.8114      | 700.9096        |
| 403.1465       | 4  | D  | 10 | 1313.7793      | 657.3936        |
| 516.2306       | 5  | I  | 9  | 1198.7524      | 599.8801        |
| 644.2892       | 6  | Q  | 8  | 1085.6683      | 543.3381        |
| 743.3576       | 7  | V  | 7  | 957.6098       | 479.3088        |
| 899.4839       | 8  | K  | 6  | 858.5414       | 429.7746        |
| 1028.5265      | 9  | E  | 5  | 702.4151       | 351.7114        |
| 1141.6105      | 10 | L  | 4  | 573.3725       | 287.1901        |
| 1270.6531      | 11 | E  | 3  | 460.2884       | 230.6481        |
| 1426.7794      | 12 | K  | 2  | 331.2458       | 166.1268        |
|                | 13 | R  | 1  | 175.1195       | 88.0637         |

N-term:+43.02 K(8):+156.13  
K(12):+156.13

X-range:

0 - 0

MassTol: Y-zoom:

0. 1.

MassType:

☐AVG ☒MONO

Axis:

☒1 ☐2

Label:

☒I ☐M ☐-

Ions:

a ☐+ ☐2+ ☐3+

b ☒+ ☐2+ ☐3+

c ☐+ ☐2+ ☐3+

x ☐+ ☐2+ ☐3+

y ☒+ ☒2+ ☐3+

z ☐+ ☐2+ ☐3+

hide H<sub>2</sub>O/NH<sub>3</sub> ☐

zoom 112-122 ☐

GO

ASSHTVLMR, MH+ 1043.5308, m/z 522.2690  
H OS G13 P120811 220811-s1.02840.02840.2.dta

scan 2840; 1.6e+001

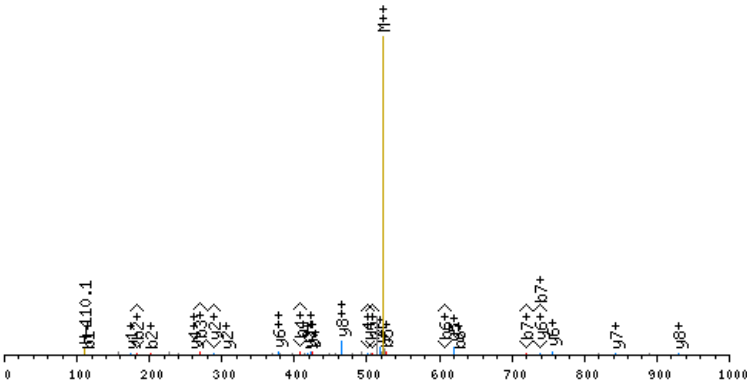

click image to zoom in; click top corners to zoom out

[precursor±]

scan 2839; 522.3 m/z; 1.0e+001

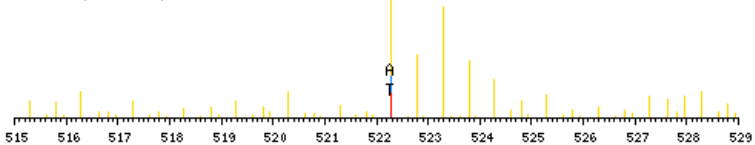

zoomed in precursor plot; T=theoretical m/z, A=acquired m/z

| b <sup>+</sup> | # | AA | # | y <sup>+</sup> | y <sup>2+</sup> |
|----------------|---|----|---|----------------|-----------------|
| 114.0555       | 1 | A  | 9 |                |                 |
| 201.0875       | 2 | S  | 8 | 930.4831       | 465.7455        |
| 288.1196       | 3 | S  | 7 | 843.4511       | 422.2295        |
| 425.1785       | 4 | H  | 6 | 756.4191       | 378.7134        |
| 526.2262       | 5 | T  | 5 | 619.3601       | 310.1840        |
| 625.2946       | 6 | V  | 4 | 518.3125       | 259.6601        |
| 738.3786       | 7 | L  | 3 | 419.2440       | 210.1259        |
| 869.4191       | 8 | M  | 2 | 306.1600       | 153.5839        |
|                | 9 | R  | 1 | 175.1195       | 88.0637         |

N-term:+43.02

X-range:

0 - 0

MassTol: Y-zoom:

0. 1.

MassType:

☐AVG ☒MONO

Axis:

☒1 ☐2

Label:

☒I ☐M ☐-

Ions:

a ☐+ ☐2+ ☐3+

b ☒+ ☐2+ ☐3+

c ☐+ ☐2+ ☐3+

x ☐+ ☐2+ ☐3+

y ☒+ ☒2+ ☐3+

z ☐+ ☐2+ ☐3+

hide H<sub>2</sub>O/NH<sub>3</sub> ☐

zoom 112-122 ☐

GO

ASSKKVTLVLSLR, MH+ 1485.9641, m/z 495.9929  
H OS G15 P120811 220811-s1.03627.03627.3.dta

scan 3627; 7.0e+001

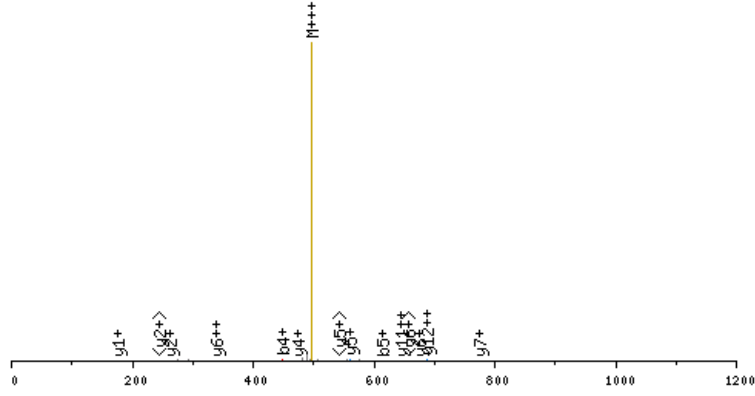

click image to zoom in; click top corners to zoom out [\[precursor±\]](#)

scan 3626; 496.0 m/z; 3.4e+001

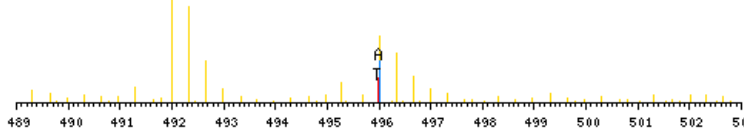

zoomed in precursor plot; T=theoretical m/z, A=acquired m/z

| b <sup>+</sup> | #  | AA | #  | y <sup>+</sup> | y <sup>2+</sup> |
|----------------|----|----|----|----------------|-----------------|
| 114.0555       | 1  | A  | 13 |                |                 |
| 201.0875       | 2  | S  | 12 | 1372.9164      | 686.9621        |
| 288.1196       | 3  | S  | 11 | 1285.8844      | 643.4461        |
| 450.2777       | 4  | K  | 10 | 1198.8524      | 599.9301        |
| 612.4358       | 5  | K  | 9  | 1036.6943      | 518.8511        |
| 711.5042       | 6  | V  | 8  | 874.5362       | 437.7720        |
| 812.5519       | 7  | T  | 7  | 775.4678       | 388.2378        |
| 925.6359       | 8  | L  | 6  | 674.4201       | 337.7140        |
| 1012.6680      | 9  | S  | 5  | 561.3360       | 281.1719        |
| 1111.7364      | 10 | V  | 4  | 474.3040       | 237.6559        |
| 1224.8204      | 11 | L  | 3  | 375.2356       | 188.1217        |
| 1311.8525      | 12 | S  | 2  | 262.1515       | 131.5797        |
|                | 13 | R  | 1  | 175.1195       | 88.0637         |

N-term:+43.02 K(4):+162.16  
K(5):+162.16

X-range:

0 - 0

MassTol: Y-zoom:

0. 1.

MassType:

☐ AVG ☒ MONO

Axis:

☒ 1 ☐ 2

Label:

☒ I ☐ M ☐ -

Ions:

a ☐ + ☐ 2+ ☐ 3+

b ☒ + ☐ 2+ ☐ 3+

c ☐ + ☐ 2+ ☐ 3+

x ☐ + ☐ 2+ ☐ 3+

y ☒ + ☒ 2+ ☐ 3+

z ☐ + ☐ 2+ ☐ 3+

hide H<sub>2</sub>O/NH<sub>3</sub> ☐

zoom 112-122 ☐

GO

ASTVSGIRPAR, MH+ 1156.6439, m/z 578.8256  
H OS G13 P120811 220811-s1.05522.05522.2.dta

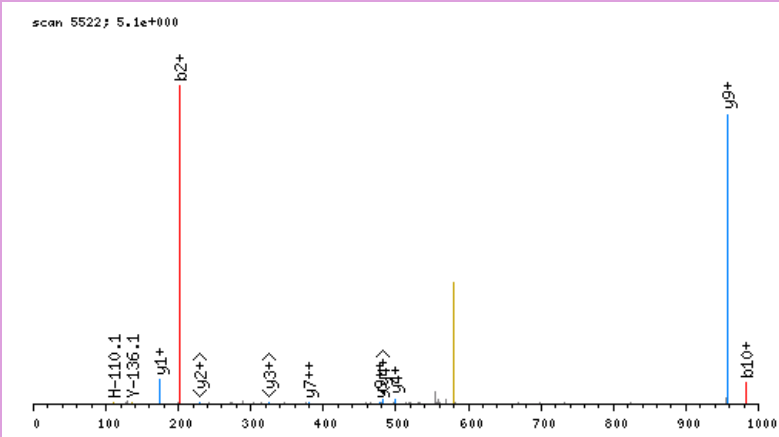

click image to zoom in; click top corners to zoom out [precursor±]

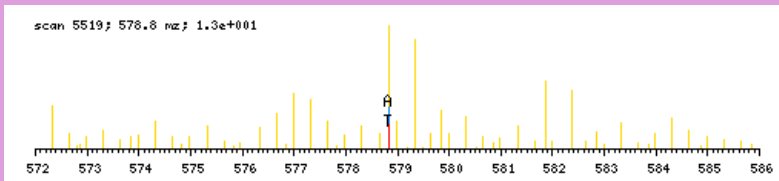

zoomed in precursor plot; T=theoretical m/z, A=acquired m/z

| b <sup>+</sup> | #  | AA | #  | y <sup>+</sup> | y <sup>2+</sup> |
|----------------|----|----|----|----------------|-----------------|
| 114.0555       | 1  | A  | 11 |                |                 |
| 201.0875       | 2  | S  | 10 | 1043.5962      | 522.3020        |
| 302.1352       | 3  | T  | 9  | 956.5641       | 478.7860        |
| 401.2036       | 4  | V  | 8  | 855.5165       | 428.2621        |
| 488.2357       | 5  | S  | 7  | 756.4480       | 378.7279        |
| 545.2571       | 6  | G  | 6  | 669.4160       | 335.2119        |
| 658.3412       | 7  | I  | 5  | 612.3946       | 306.7012        |
| 814.4423       | 8  | R  | 4  | 499.3105       | 250.1592        |
| 911.4951       | 9  | P  | 3  | 343.2094       | 172.1086        |
| 982.5322       | 10 | A  | 2  | 246.1566       | 123.5822        |
|                | 11 | R  | 1  | 175.1195       | 88.0637         |

N-term:+43.02

X-range:

0 - 0

MassTol: Y-zoom:

0. 1.

MassType:

☐AVG ☒MONO

Axis:

☒1 ☐2

Label:

☒I ☐M ☐-

Ions:

a ☐+ ☐2+ ☐3+

b ☒+ ☐2+ ☐3+

c ☐+ ☐2+ ☐3+

x ☐+ ☐2+ ☐3+

y ☒+ ☒2+ ☐3+

z ☐+ ☐2+ ☐3+

hide H<sub>2</sub>O/NH<sub>3</sub> ☐

zoom 112-122 ☐

GO

ATDDKSSPTLDSANDLPR, MH+ 1972.9464, m/z 658.3203  
H OS G12 P120811 220811-s1.03374.03374.3.dta

scan 3374; 8.5e-001

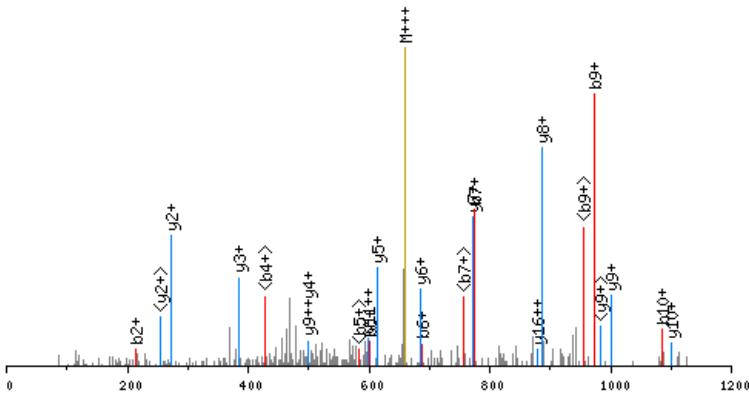

click image to zoom in; click top corners to zoom out

[precursor±]

scan 3372; 658.3 m/z; 3.0e+000

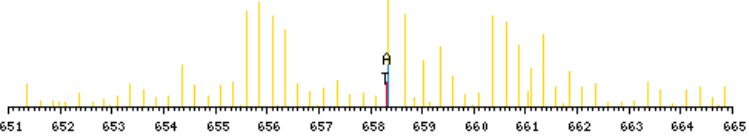

zoomed in precursor plot; T=theoretical m/z, A=acquired m/z

| b <sup>+</sup> | #  | AA | #  | y <sup>+</sup> | y <sup>2+</sup> |
|----------------|----|----|----|----------------|-----------------|
| 114.0555       | 1  | A  | 18 |                |                 |
| 215.1032       | 2  | T  | 17 | 1859.8987      | 930.4533        |
| 330.1301       | 3  | D  | 16 | 1758.8510      | 879.9294        |
| 445.1571       | 4  | D  | 15 | 1643.8241      | 822.4160        |
| 601.2834       | 5  | K  | 14 | 1528.7971      | 764.9025        |
| 688.3154       | 6  | S  | 13 | 1372.6708      | 686.8393        |
| 775.3474       | 7  | S  | 12 | 1285.6388      | 643.3233        |
| 872.4002       | 8  | P  | 11 | 1198.6068      | 599.8073        |
| 973.4479       | 9  | T  | 10 | 1101.5540      | 551.2809        |
| 1086.5319      | 10 | L  | 9  | 1000.5063      | 500.7571        |
| 1201.5589      | 11 | D  | 8  | 887.4223       | 444.2151        |
| 1288.5909      | 12 | S  | 7  | 772.3953       | 386.7016        |
| 1359.6280      | 13 | A  | 6  | 685.3633       | 343.1856        |
| 1473.6710      | 14 | N  | 5  | 614.3262       | 307.6670        |
| 1588.6979      | 15 | D  | 4  | 500.2833       | 250.6455        |
| 1701.7820      | 16 | L  | 3  | 385.2563       | 193.1321        |
| 1798.8347      | 17 | P  | 2  | 272.1723       | 136.5900        |
|                | 18 | R  | 1  | 175.1195       | 88.0637         |

N-term:+43.02 K(5):+156.13

X-range:

0 - 0

MassTol: Y-zoom:

0. 1.

MassType:

☐ AVG ☒ MONO

Axis:

☒ 1 ☐ 2

Label:

☒ I ☐ M ☐ -

Ions:

a ☐ + ☐ 2+ ☐ 3+

b ☒ + ☐ 2+ ☐ 3+

c ☐ + ☐ 2+ ☐ 3+

x ☐ + ☐ 2+ ☐ 3+

y ☒ + ☒ 2+ ☐ 3+

z ☐ + ☐ 2+ ☐ 3+

hide H<sub>2</sub>O/NH<sub>3</sub> ☐

zoom 112-122 ☐

GO

ATDELASKLSR, MH+ 1260.6800, m/z 630.8436  
H OS G13 P120811 220811-s1.04390.04390.2.dta

scan 4390; 3.6e+001

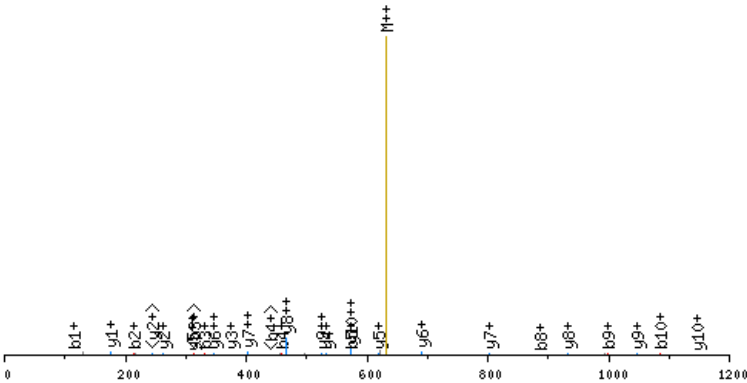

click image to zoom in; click top corners to zoom out

[precursor±]

scan 4389; 630.8 m/z; 3.5e+001

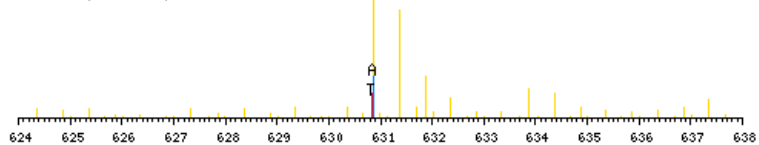

zoomed in precursor plot; T=theoretical m/z, A=acquired m/z

| b <sup>+</sup> | #  | AA | #  | y <sup>+</sup> | y <sup>2+</sup> |
|----------------|----|----|----|----------------|-----------------|
| 114.0555       | 1  | A  | 11 |                |                 |
| 215.1032       | 2  | T  | 10 | 1147.6323      | 574.3201        |
| 330.1301       | 3  | D  | 9  | 1046.5846      | 523.7962        |
| 459.1727       | 4  | E  | 8  | 931.5577       | 466.2828        |
| 572.2568       | 5  | L  | 7  | 802.5151       | 401.7615        |
| 643.2939       | 6  | A  | 6  | 689.4310       | 345.2194        |
| 730.3259       | 7  | S  | 5  | 618.3939       | 309.7009        |
| 886.4522       | 8  | K  | 4  | 531.3619       | 266.1849        |
| 999.5363       | 9  | L  | 3  | 375.2356       | 188.1217        |
| 1086.5683      | 10 | S  | 2  | 262.1515       | 131.5797        |
|                | 11 | R  | 1  | 175.1195       | 88.0637         |

N-term:+43.02 K(8):+156.13

scan 4417; 4.0e+000

Mass spectrum plot showing relative intensity versus mass-to-charge ratio (m/z). The x-axis ranges from 0 to 1200. The y-axis represents relative intensity. The base peak is at m/z 916+ with 100% intensity. Other significant peaks are labeled with their m/z values and relative intensities in parentheses: b1+ (100%), y1+ (100%), y2+ (100%), b3+ (100%), y3+ (100%), b4+ (100%), y4+ (100%), y6+ (100%), y7+ (100%), y14++ (100%), y15++ (100%), b10+y8+ (100%), y18++ (100%), and y19++ (100%).

scan 4413; 803.6 m/z; 6.7e+000

Mass spectrum plot showing relative intensity versus m/z. The x-axis ranges from 797 to 811. The y-axis represents relative intensity. A major peak is labeled 'A' at m/z 803.6. Other significant peaks are visible at m/z 804, 805, 808, 809, and 810.

N-term:+43.02 C(12):+160.03  
K(13):+156.13 K(17):+156.13  
K(21):+156.13

X-range:

0 - 0

MassTol: Y-zoom:

0. 1.

MassType:

☐AVG ☒MONO

Axis:

☒1 ☐2

Label:

☒I ☐M ☐-

Ions:

a ☐+ ☐2+ ☐3+

b ☒+ ☐2+ ☐3+

c ☐+ ☐2+ ☐3+

x ☐+ ☐2+ ☐3+

y ☒+ ☒2+ ☐3+

z ☐+ ☐2+ ☐3+

hide H<sub>2</sub>O/NH<sub>3</sub> ☐

zoom 112-122 ☐

GO

ATEGMILTNDHQIR, MH+ 1777.8656, m/z 593.2934  
H OS G16 P120811 220811-s1.04270.04270.3.dta

scan 4270; 2.5e+000

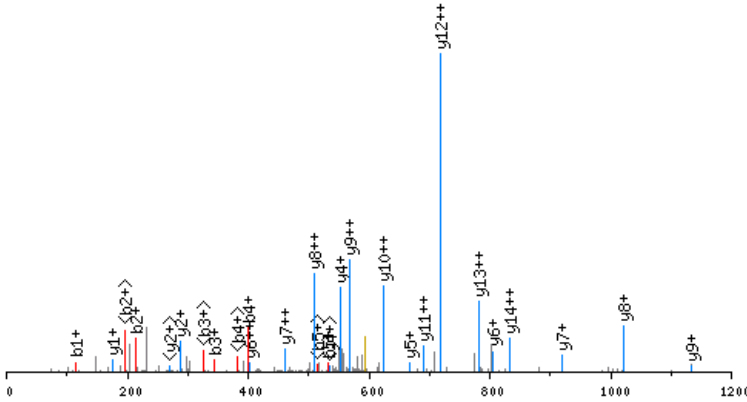

click image to zoom in; click top corners to zoom out

[precursor±]

scan 4268; 593.3 m/z; 3.3e+002

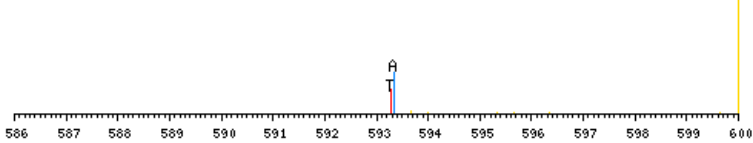

zoomed in precursor plot; T=theoretical m/z, A=acquired m/z

| b <sup>+</sup> | #  | AA | #  | y <sup>+</sup> | y <sup>2+</sup> |
|----------------|----|----|----|----------------|-----------------|
| 114.0555       | 1  | A  | 15 |                |                 |
| 215.1032       | 2  | T  | 14 | 1664.8179      | 832.9128        |
| 344.1458       | 3  | E  | 13 | 1563.7702      | 782.3890        |
| 401.1672       | 4  | G  | 12 | 1434.7276      | 717.8677        |
| 532.2077       | 5  | M  | 11 | 1377.7061      | 689.3570        |
| 645.2918       | 6  | I  | 10 | 1246.6656      | 623.8367        |
| 758.3759       | 7  | L  | 9  | 1133.5816      | 567.2947        |
| 859.4235       | 8  | T  | 8  | 1020.4975      | 510.7527        |
| 973.4665       | 9  | N  | 7  | 919.4498       | 460.2288        |
| 1110.5254      | 10 | H  | 6  | 805.4069       | 403.2074        |
| 1225.5523      | 11 | D  | 5  | 668.3480       | 334.6779        |
| 1362.6112      | 12 | H  | 4  | 553.3211       | 277.1644        |
| 1490.6698      | 13 | Q  | 3  | 416.2621       | 208.6350        |
| 1603.7539      | 14 | I  | 2  | 288.2036       | 144.6057        |
|                | 15 | R  | 1  | 175.1195       | 88.0637         |

N-term:+43.02

X-range:

0 - 0

MassTol: Y-zoom:

0. 1.

MassType:

☐AVG ☒MONO

Axis:

☒1 ☐2

Label:

☒I ☐M ☐-

Ions:

a ☐+ ☐2+ ☐3+

b ☒+ ☐2+ ☐3+

c ☐+ ☐2+ ☐3+

x ☐+ ☐2+ ☐3+

y ☒+ ☒2+ ☐3+

z ☐+ ☐2+ ☐3+

hide H<sub>2</sub>O/NH<sub>3</sub> ☐

zoom 112-122 ☐

GO

ATESSPLTHVLDTASGLPAQGLCLR, MH+ 2737.3830, m/z 913.1325  
H OS G12 P120811 220811-s1.05424.05424.3.dta

scan 5424; 8.8e+000

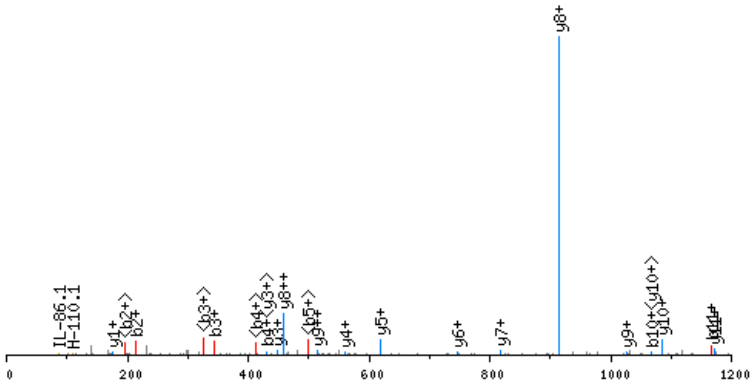



X-range:

0 - 0

MassTol: Y-zoom:

0. 1.

MassType:

☐ AVG ☒ MONO

Axis:

☒ 1 ☐ 2

Label:

☒ I ☐ M ☐ -

Ions:

a ☐ + ☐ 2+ ☐ 3+

b ☒ + ☐ 2+ ☐ 3+

c ☐ + ☐ 2+ ☐ 3+

x ☐ + ☐ 2+ ☐ 3+

y ☒ + ☒ 2+ ☐ 3+

z ☐ + ☐ 2+ ☐ 3+

hide H<sub>2</sub>O/NH<sub>3</sub> ☐

zoom 112-122 ☐

GO

ATIGPSGLHPGER, MH+ 1333.6864, m/z 667.3469  
H OS G13 P120811 220811-s1.03738.03738.2.dta

scan 3738; 2.0e+000

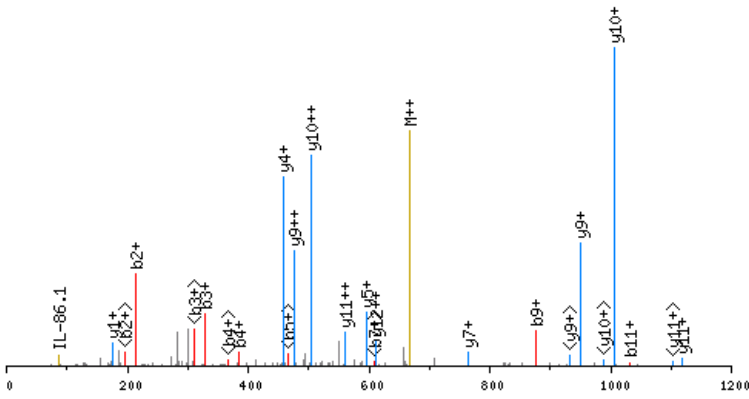

click image to zoom in; click top corners to zoom out

[precursor±]

scan 3734; 667.3 m/z; 2.4e+001

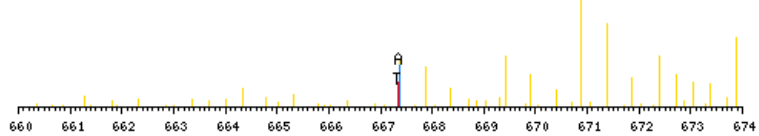

zoomed in precursor plot; T=theoretical m/z, A=acquired m/z

| b <sup>+</sup> | #  | AA | #  | y <sup>+</sup> | y <sup>2+</sup> |
|----------------|----|----|----|----------------|-----------------|
| 114.0555       | 1  | A  | 13 |                |                 |
| 215.1032       | 2  | T  | 12 | 1220.6388      | 610.8233        |
| 328.1873       | 3  | I  | 11 | 1119.5911      | 560.2995        |
| 385.2087       | 4  | G  | 10 | 1006.5070      | 503.7574        |
| 482.2615       | 5  | P  | 9  | 949.4856       | 475.2467        |
| 569.2935       | 6  | S  | 8  | 852.4328       | 426.7203        |
| 626.3150       | 7  | G  | 7  | 765.4008       | 383.2043        |
| 739.3990       | 8  | L  | 6  | 708.3793       | 354.6936        |
| 876.4580       | 9  | H  | 5  | 595.2952       | 298.1515        |
| 973.5107       | 10 | P  | 4  | 458.2363       | 229.6221        |
| 1030.5322      | 11 | G  | 3  | 361.1836       | 181.0957        |
| 1159.5748      | 12 | E  | 2  | 304.1621       | 152.5850        |
|                | 13 | R  | 1  | 175.1195       | 88.0637         |

N-term:+43.02

X-range:

0 - 0

MassTol: Y-zoom:

0. 1.

MassType:

☐AVG ☒MONO

Axis:

☒1 ☐2

Label:

☒I ☐M ☐-

Ions:

a ☐+ ☐2+ ☐3+

b ☒+ ☐2+ ☐3+

c ☐+ ☐2+ ☐3+

x ☐+ ☐2+ ☐3+

y ☒+ ☒2+ ☐3+

z ☐+ ☐2+ ☐3+

hide H<sub>2</sub>O/NH<sub>3</sub> ☐

zoom 112-122 ☐

GO

ATKCTKCGPGYSTPLEAMKGPR, MH+ 2554.3680, m/z 639.3475  
H OS G16 P120811 220811-s1.04024.04024.4.dta

scan 4024; 3.0e+001

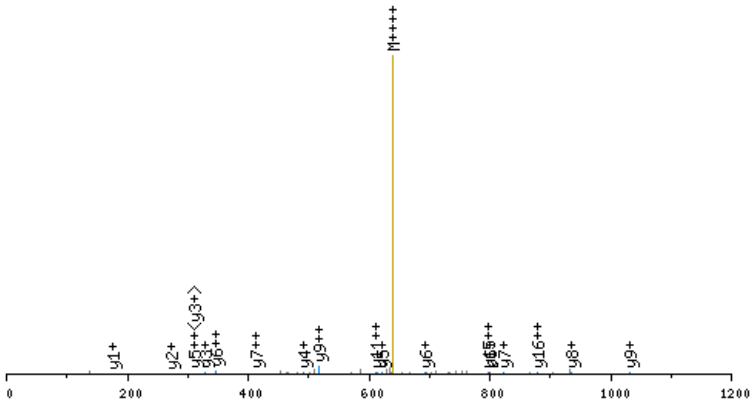

click image to zoom in; click top corners to zoom out

[precursor±]

scan 4023; 639.3 m/z; 1.5e+001

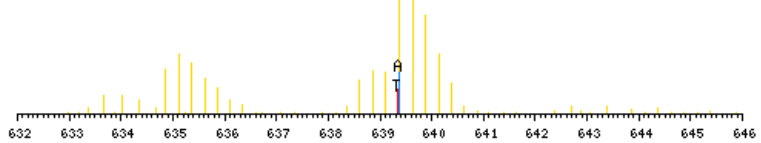

zoomed in precursor plot; T=theoretical m/z, A=acquired m/z

| b <sup>+</sup> | #  | AA | #  | y <sup>+</sup> | y <sup>2+</sup> |
|----------------|----|----|----|----------------|-----------------|
| 114.0555       | 1  | A  | 22 |                |                 |
| 215.1032       | 2  | T  | 21 | 2441.3203      | 1221.1641       |
| 377.2613       | 3  | K  | 20 | 2340.2727      | 1170.6402       |
| 537.2919       | 4  | C  | 19 | 2178.1146      | 1089.5612       |
| 638.3396       | 5  | T  | 18 | 2018.0840      | 1009.5459       |
| 800.4977       | 6  | K  | 17 | 1917.0363      | 959.0220        |
| 960.5283       | 7  | C  | 16 | 1754.8782      | 877.9430        |
| 1017.5497      | 8  | G  | 15 | 1594.8476      | 797.9277        |
| 1114.6025      | 9  | P  | 14 | 1537.8261      | 769.4170        |
| 1171.6240      | 10 | G  | 13 | 1440.7733      | 720.8906        |
| 1334.6873      | 11 | Y  | 12 | 1383.7519      | 692.3799        |
| 1421.7193      | 12 | S  | 11 | 1220.6886      | 610.8482        |
| 1522.7670      | 13 | T  | 10 | 1133.6565      | 567.3322        |
| 1619.8198      | 14 | P  | 9  | 1032.6088      | 516.8083        |
| 1732.9038      | 15 | L  | 8  | 935.5561       | 468.2820        |
| 1861.9464      | 16 | E  | 7  | 822.4720       | 411.7399        |
| 1932.9835      | 17 | A  | 6  | 693.4294       | 347.2186        |
| 2064.0240      | 18 | M  | 5  | 622.3923       | 311.7001        |
| 2226.1821      | 19 | K  | 4  | 491.3518       | 246.1798        |
| 2283.2036      | 20 | G  | 3  | 329.1937       | 165.1008        |
| 2380.2563      | 21 | P  | 2  | 272.1723       | 136.5900        |
|                | 22 | R  | 1  | 175.1195       | 88.0637         |

N-term:+43.02 K(3):+162.16  
C(4):+160.03 K(6):+162.16 C(7):+160.03  
K(19):+162.16

X-range:

0 - 0

MassTol: Y-zoom:

0. 1.

MassType:

☐ AVG ☒ MONO

Axis:

☒ 1 ☐ 2

Label:

☒ I ☐ M ☐ -

Ions:

a ☐ + ☐ 2+ ☐ 3+

b ☒ + ☐ 2+ ☐ 3+

c ☐ + ☐ 2+ ☐ 3+

x ☐ + ☐ 2+ ☐ 3+

y ☒ + ☒ 2+ ☐ 3+

z ☐ + ☐ 2+ ☐ 3+

hide H<sub>2</sub>O/NH<sub>3</sub> ☐

zoom 112-122 ☐

GO

ATKIDKEACR, MH+ 1289.6888, m/z 430.5678  
H OS G16 P120811 220811-s1.02051.02051.3.dta

scan 2051; 7.2e+001

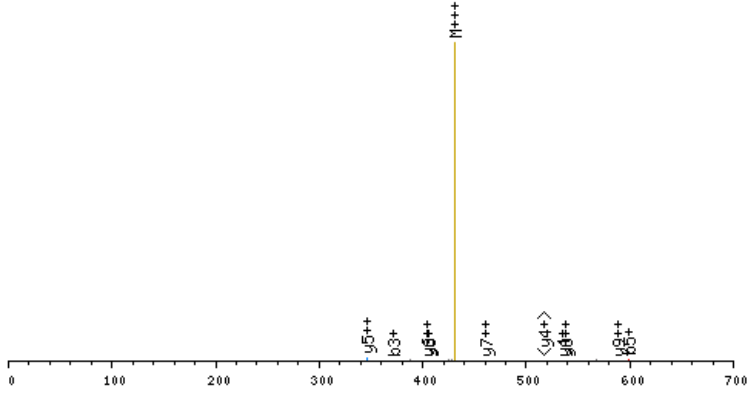

click image to zoom in; click top corners to zoom out [\[precursor±\]](#)

scan 2048; 430.6 m/z; 2.4e+000

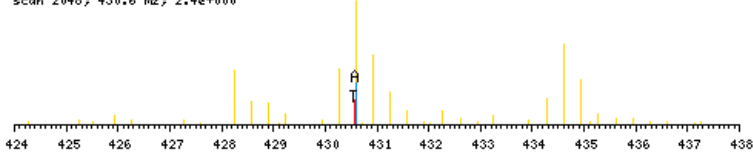

zoomed in precursor plot; T=theoretical m/z, A=acquired m/z

| b <sup>+</sup> | #  | AA | #  | y <sup>+</sup> | y <sup>2+</sup> |
|----------------|----|----|----|----------------|-----------------|
| 114.0555       | 1  | A  | 10 |                |                 |
| 215.1032       | 2  | T  | 9  | 1176.6411      | 588.8245        |
| 371.2295       | 3  | K  | 8  | 1075.5934      | 538.3006        |
| 484.3136       | 4  | I  | 7  | 919.4671       | 460.2375        |
| 599.3405       | 5  | D  | 6  | 806.3831       | 403.6954        |
| 755.4668       | 6  | K  | 5  | 691.3561       | 346.1820        |
| 884.5094       | 7  | E  | 4  | 535.2298       | 268.1188        |
| 955.5465       | 8  | A  | 3  | 406.1872       | 203.5975        |
| 1115.5771      | 9  | C  | 2  | 335.1501       | 168.0790        |
|                | 10 | R  | 1  | 175.1195       | 88.0637         |

N-term:+43.02 K(3):+156.13  
K(6):+156.13 C(9):+160.03

X-range:

0 - 0

MassTol: Y-zoom:

0. 1.

MassType:

☐ AVG ☒ MONO

Axis:

☒ 1 ☐ 2

Label:

☒ I ☐ M ☐ -

Ions:

a ☐ + ☐ 2+ ☐ 3+

b ☒ + ☐ 2+ ☐ 3+

c ☐ + ☐ 2+ ☐ 3+

x ☐ + ☐ 2+ ☐ 3+

y ☒ + ☒ 2+ ☐ 3+

z ☐ + ☐ 2+ ☐ 3+

hide H<sub>2</sub>O/NH<sub>3</sub> ☐

zoom 112-122 ☐

GO

ATPEASGSGEKVEGSEPSVTYYR, MH+ 2477.1897, m/z 826.4014  
H OS G12 P120811 220811-s1.03331.03331.3.dta

scan 3331; 2.3e+000

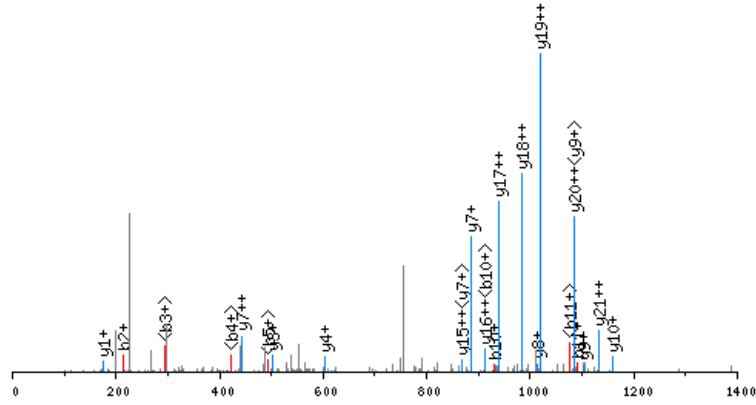

click image to zoom in; click top corners to zoom out [\[precursor±\]](#)

scan 3327; 826.4 m/z; 6.5e+000

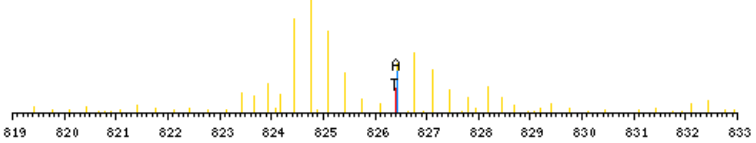

zoomed in precursor plot; T=theoretical m/z, A=acquired m/z

| b <sup>+</sup> | #  | AA | #  | y <sup>+</sup> | y <sup>2+</sup> |
|----------------|----|----|----|----------------|-----------------|
| 114.0555       | 1  | A  | 23 |                |                 |
| 215.1032       | 2  | T  | 22 | 2364.1420      | 1182.5749       |
| 312.1560       | 3  | P  | 21 | 2263.0943      | 1132.0511       |
| 441.1985       | 4  | E  | 20 | 2166.0415      | 1083.5247       |
| 512.2357       | 5  | A  | 19 | 2036.9989      | 1019.0034       |
| 599.2677       | 6  | S  | 18 | 1965.9618      | 983.4848        |
| 656.2892       | 7  | G  | 17 | 1878.9298      | 939.9688        |
| 743.3212       | 8  | S  | 16 | 1821.9083      | 911.4581        |
| 800.3426       | 9  | G  | 15 | 1734.8763      | 867.9421        |
| 929.3852       | 10 | E  | 14 | 1677.8548      | 839.4313        |
| 1091.5433      | 11 | K  | 13 | 1548.8122      | 774.9100        |
| 1190.6118      | 12 | V  | 12 | 1386.6541      | 693.8310        |
| 1319.6543      | 13 | E  | 11 | 1287.5857      | 644.2968        |
| 1376.6758      | 14 | G  | 10 | 1158.5431      | 579.7755        |
| 1463.7078      | 15 | S  | 9  | 1101.5217      | 551.2647        |
| 1592.7504      | 16 | E  | 8  | 1014.4896      | 507.7487        |
| 1689.8032      | 17 | P  | 7  | 885.4470       | 443.2274        |
| 1776.8352      | 18 | S  | 6  | 788.3943       | 394.7011        |
| 1875.9036      | 19 | V  | 5  | 701.3623       | 351.1850        |
| 1976.9513      | 20 | T  | 4  | 602.2938       | 301.6508        |
| 2140.0146      | 21 | Y  | 3  | 501.2462       | 251.1270        |
| 2303.0780      | 22 | Y  | 2  | 338.1828       | 169.5953        |
|                | 23 | R  | 1  | 175.1195       | 88.0637         |

N-term:+43.02 K(11):+162.16

X-range:

0 - 0

MassTol: Y-zoom:

0. 1.

MassType:

☐ AVG ☒ MONO

Axis:

☒ 1 ☐ 2

Label:

☒ I ☐ M ☐ -

Ions:

a ☐ + ☐ 2+ ☐ 3+

b ☒ + ☐ 2+ ☐ 3+

c ☐ + ☐ 2+ ☐ 3+

x ☐ + ☐ 2+ ☐ 3+

y ☒ + ☒ 2+ ☐ 3+

z ☐ + ☐ 2+ ☐ 3+

hide H<sub>2</sub>O/NH<sub>3</sub> ☐

zoom 112-122 ☐

GO

ATQVEPLLPGAPLLQAEHGLAR, MH+ 2523.3571, m/z 841.7906  
H OS G12 P120811 220811-s1.05529.05529.3.dta

scan 5529; 1.3e+000

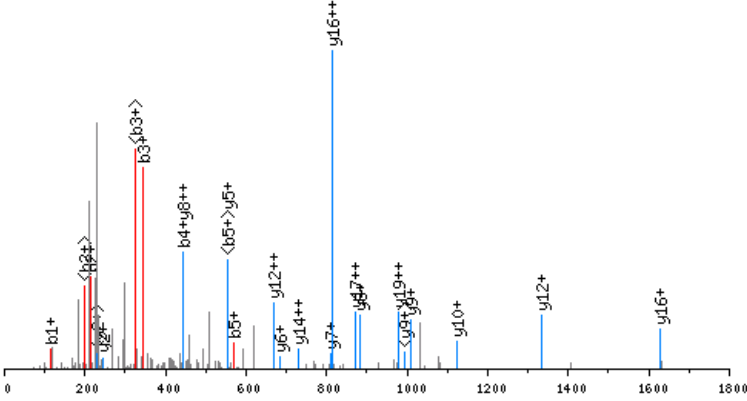

click image to zoom in; click top corners to zoom out [\[precursor±\]](#)

scan 5527; 841.8 m/z; 1.7e+001

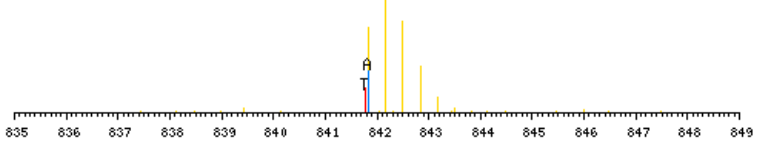

zoomed in precursor plot; T=theoretical m/z, A=acquired m/z

| b <sup>+</sup> | #  | AA | #  | y <sup>+</sup> | y <sup>2+</sup> |
|----------------|----|----|----|----------------|-----------------|
| 114.0555       | 1  | A  | 24 |                |                 |
| 215.1032       | 2  | T  | 23 | 2410.3094      | 1205.6586       |
| 343.1618       | 3  | Q  | 22 | 2309.2618      | 1155.1348       |
| 442.2302       | 4  | V  | 21 | 2181.2032      | 1091.1055       |
| 571.2728       | 5  | E  | 20 | 2082.1348      | 1041.5713       |
| 668.3255       | 6  | P  | 19 | 1953.0922      | 977.0500        |
| 781.4096       | 7  | L  | 18 | 1856.0394      | 928.5236        |
| 894.4937       | 8  | L  | 17 | 1742.9553      | 871.9816        |
| 991.5464       | 9  | P  | 16 | 1629.8713      | 815.4396        |
| 1062.5835      | 10 | A  | 15 | 1532.8185      | 766.9132        |
| 1119.6050      | 11 | G  | 14 | 1461.7814      | 731.3946        |
| 1190.6421      | 12 | A  | 13 | 1404.7599      | 702.8839        |
| 1287.6949      | 13 | P  | 12 | 1333.7228      | 667.3653        |
| 1400.7790      | 14 | L  | 11 | 1236.6701      | 618.8389        |
| 1513.8630      | 15 | L  | 10 | 1123.5860      | 562.2969        |
| 1641.9216      | 16 | Q  | 9  | 1010.5019      | 505.7549        |
| 1712.9587      | 17 | A  | 8  | 882.4434       | 441.7256        |
| 1842.0013      | 18 | E  | 7  | 811.4062       | 406.2070        |
| 1971.0439      | 19 | E  | 6  | 682.3636       | 341.6857        |
| 2108.1028      | 20 | H  | 5  | 553.3211       | 277.1644        |
| 2165.1243      | 21 | G  | 4  | 416.2621       | 208.6350        |
| 2278.2083      | 22 | L  | 3  | 359.2407       | 180.1243        |
| 2349.2454      | 23 | A  | 2  | 246.1566       | 123.5822        |
|                | 24 | R  | 1  | 175.1195       | 88.0637         |

N-term:+43.02

X-range:

0 - 0

MassTol: Y-zoom:

0. 1.

MassType:

☐ AVG ☒ MONO

Axis:

☒ 1 ☐ 2

Label:

☒ I ☐ M ☐ -

Ions:

a ☐ + ☐ 2+ ☐ 3+

b ☒ + ☐ 2+ ☐ 3+

c ☐ + ☐ 2+ ☐ 3+

x ☐ + ☐ 2+ ☐ 3+

y ☒ + ☒ 2+ ☐ 3+

z ☐ + ☐ 2+ ☐ 3+

hide H<sub>2</sub>O/NH<sub>3</sub> ☐

zoom 112-122 ☐

GO

ATRGTVTDFPGFDGR, MH+ 1638.7876, m/z 546.9341  
H OS G13 P120811 220811-s1.05462.05462.3.dta

scan 5462; 2.7e+000

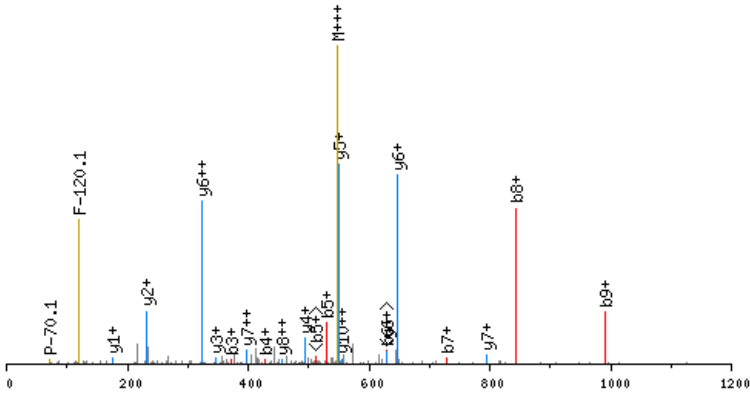

click image to zoom in; click top corners to zoom out [\[precursor±\]](#)

scan 5459; 546.9 m/z; 1.0e+001

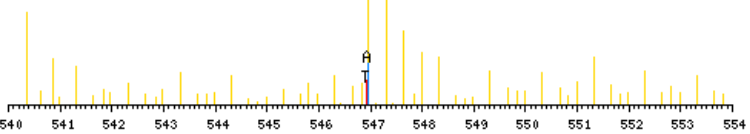

zoomed in precursor plot; T=theoretical m/z, A=acquired m/z

| b <sup>+</sup> | #  | AA | #  | y <sup>+</sup> | y <sup>2+</sup> |
|----------------|----|----|----|----------------|-----------------|
| 114.0555       | 1  | A  | 15 |                |                 |
| 215.1032       | 2  | T  | 14 | 1525.7399      | 763.3739        |
| 371.2043       | 3  | R  | 13 | 1424.6923      | 712.8500        |
| 428.2258       | 4  | G  | 12 | 1268.5911      | 634.7995        |
| 529.2734       | 5  | T  | 11 | 1211.5697      | 606.2888        |
| 628.3419       | 6  | V  | 10 | 1110.5220      | 555.7649        |
| 729.3895       | 7  | T  | 9  | 1011.4536      | 506.2307        |
| 844.4165       | 8  | D  | 8  | 910.4059       | 455.7069        |
| 991.4849       | 9  | F  | 7  | 795.3790       | 398.1934        |
| 1088.5377      | 10 | P  | 6  | 648.3105       | 324.6592        |
| 1145.5591      | 11 | G  | 5  | 551.2578       | 276.1328        |
| 1292.6275      | 12 | F  | 4  | 494.2363       | 247.6221        |
| 1407.6545      | 13 | D  | 3  | 347.1679       | 174.0879        |
| 1464.6759      | 14 | G  | 2  | 232.1410       | 116.5744        |
|                | 15 | R  | 1  | 175.1195       | 88.0637         |

N-term:+43.02

X-range:

0 - 0

MassTol: Y-zoom:

0. 1.

MassType:

☐ AVG ☒ MONO

Axis:

☒ 1 ☐ 2

Label:

☒ I ☐ M ☐ -

Ions:

a ☐ + ☐ 2+ ☐ 3+

b ☒ + ☐ 2+ ☐ 3+

c ☐ + ☐ 2+ ☐ 3+

x ☐ + ☐ 2+ ☐ 3+

y ☒ + ☒ 2+ ☐ 3+

z ☐ + ☐ 2+ ☐ 3+

hide H<sub>2</sub>O/NH<sub>3</sub> ☐

zoom 112-122 ☐

GO

ATTAQQSPQPVAGKR, MH+ 1609.8662, m/z 537.2936  
H OS G13 P120811 220811-s1.02165.02165.3.dta

scan 2165; 1.5e+000

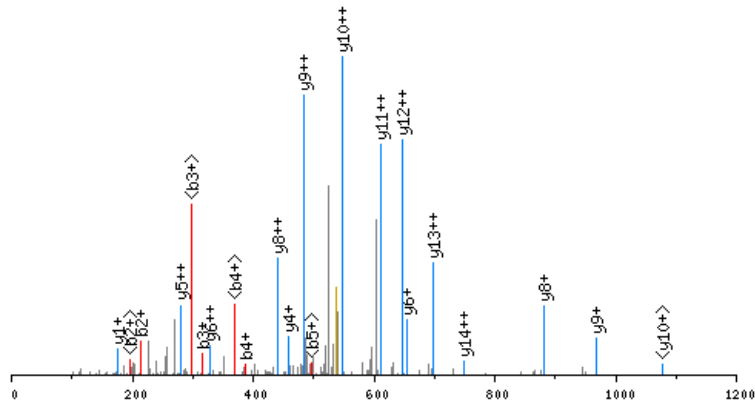

click image to zoom in; click top corners to zoom out

[precursor±]

scan 2164; 537.3 m/z; 8.3e+000

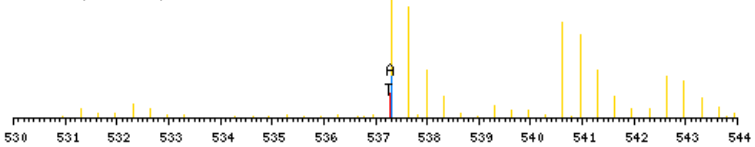

zoomed in precursor plot; T=theoretical m/z, A=acquired m/z

| b <sup>+</sup> | #  | AA | #  | y <sup>+</sup> | y <sup>2+</sup> |
|----------------|----|----|----|----------------|-----------------|
| 114.0555       | 1  | A  | 15 |                |                 |
| 215.1032       | 2  | T  | 14 | 1496.8186      | 748.9132        |
| 316.1509       | 3  | T  | 13 | 1395.7709      | 698.3893        |
| 387.1880       | 4  | A  | 12 | 1294.7232      | 647.8655        |
| 515.2466       | 5  | Q  | 11 | 1223.6861      | 612.3470        |
| 643.3051       | 6  | Q  | 10 | 1095.6275      | 548.3177        |
| 730.3372       | 7  | S  | 9  | 967.5689       | 484.2884        |
| 827.3899       | 8  | P  | 8  | 880.5369       | 440.7724        |
| 955.4485       | 9  | Q  | 7  | 783.4841       | 392.2460        |
| 1052.5013      | 10 | P  | 6  | 655.4256       | 328.2167        |
| 1151.5697      | 11 | V  | 5  | 558.3728       | 279.6903        |
| 1222.6068      | 12 | A  | 4  | 459.3044       | 230.1561        |
| 1279.6283      | 13 | G  | 3  | 388.2673       | 194.6375        |
| 1435.7546      | 14 | K  | 2  | 331.2458       | 166.1268        |
|                | 15 | R  | 1  | 175.1195       | 88.0637         |

N-term:+43.02 K(14):+156.13

X-range:

0 - 0

MassTol: Y-zoom:

0. 1.

MassType:

☐AVG ☒MONO

Axis:

☒1 ☐2

Label:

☒I ☐M ☐-

Ions:

a ☐+ ☐2+ ☐3+

b ☒+ ☐2+ ☐3+

c ☐+ ☐2+ ☐3+

x ☐+ ☐2+ ☐3+

y ☒+ ☒2+ ☐3+

z ☐+ ☐2+ ☐3+

hide H<sub>2</sub>O/NH<sub>3</sub> ☐

zoom 112-122 ☐

GO

AVLVDPLEPGTMSVR, MH+ 1643.8315, m/z 548.6153  
H OS G13 P120811 220811-s1.06371.06371.3.dta

scan 6371; 3.6e+000

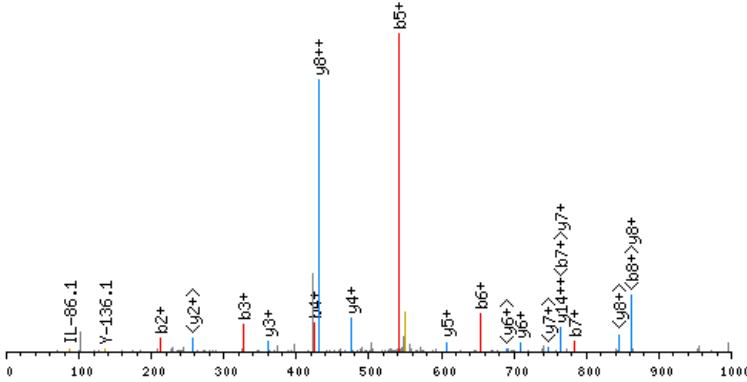

click image to zoom in; click top corners to zoom out [precursor±]

scan 6369; 548.6 m/z; 2.3e+001

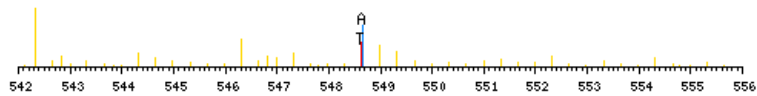

zoomed in precursor plot; T=theoretical m/z, A=acquired m/z

| b <sup>+</sup> | #  | AA | #  | y <sup>+</sup> | y <sup>2+</sup> |
|----------------|----|----|----|----------------|-----------------|
| 114.0555       | 1  | A  | 15 |                |                 |
| 213.1239       | 2  | V  | 14 | 1530.7838      | 765.8958        |
| 326.2080       | 3  | L  | 13 | 1431.7154      | 716.3616        |
| 425.2764       | 4  | V  | 12 | 1318.6313      | 659.8196        |
| 540.3033       | 5  | D  | 11 | 1219.5629      | 610.2854        |
| 653.3874       | 6  | L  | 10 | 1104.5359      | 552.7719        |
| 782.4300       | 7  | E  | 9  | 991.4519       | 496.2298        |
| 879.4828       | 8  | P  | 8  | 862.4093       | 431.7086        |
| 936.5042       | 9  | G  | 7  | 765.3565       | 383.1822        |
| 1037.5519      | 10 | T  | 6  | 708.3350       | 354.6714        |
| 1168.5924      | 11 | M  | 5  | 607.2874       | 304.1476        |
| 1283.6193      | 12 | D  | 4  | 476.2469       | 238.6274        |
| 1370.6514      | 13 | S  | 3  | 361.2199       | 181.1139        |
| 1469.7198      | 14 | V  | 2  | 274.1879       | 137.5979        |
|                | 15 | R  | 1  | 175.1195       | 88.0637         |

N-term:+43.02

X-range:

0 - 0

MassTol: Y-zoom:

0. 1.

MassType:

☐AVG ☒MONO

Axis:

☒1 ☐2

Label:

☒I ☐M ☐-

Ions:

a ☐+ ☐2+ ☐3+

b ☒+ ☐2+ ☐3+

c ☐+ ☐2+ ☐3+

x ☐+ ☐2+ ☐3+

y ☒+ ☒2+ ☐3+

z ☐+ ☐2+ ☐3+

hide H<sub>2</sub>O/NH<sub>3</sub> ☐

zoom 112-122 ☐

GO

AVSTGVKVPK, MH+ 1089.6845, m/z 545.3459  
H OS G13 P120811 220811-s1.03200.03200.2.dta

scan 3200; 3.1e+001

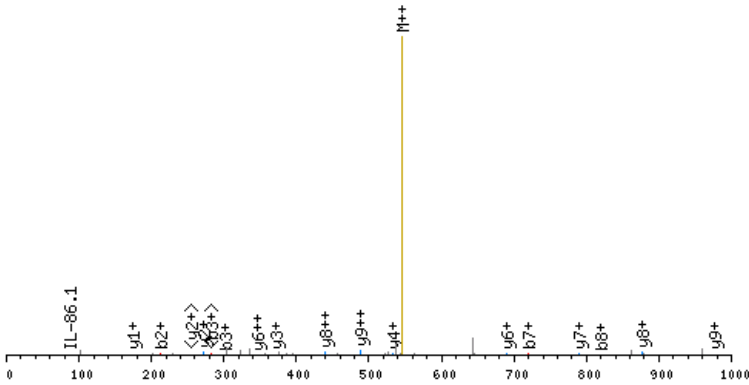

click image to zoom in; click top corners to zoom out

[precursor±]

scan 3199; 545.3 m/z; 3.7e+002

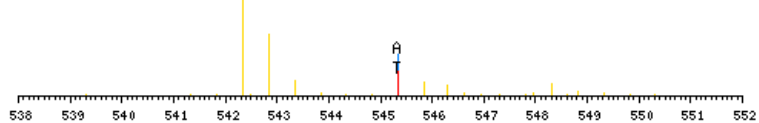

zoomed in precursor plot; T=theoretical m/z, A=acquired m/z

| b <sup>+</sup> | #  | AA | #  | y <sup>+</sup> | y <sup>2+</sup> |
|----------------|----|----|----|----------------|-----------------|
| 114.0555       | 1  | A  | 10 |                |                 |
| 213.1239       | 2  | V  | 9  | 976.6368       | 488.8223        |
| 300.1560       | 3  | S  | 8  | 877.5684       | 439.2881        |
| 401.2036       | 4  | T  | 7  | 790.5363       | 395.7721        |
| 458.2251       | 5  | G  | 6  | 689.4887       | 345.2482        |
| 557.2935       | 6  | V  | 5  | 632.4672       | 316.7375        |
| 719.4516       | 7  | K  | 4  | 533.3988       | 267.2033        |
| 818.5200       | 8  | V  | 3  | 371.2407       | 186.1243        |
| 915.5728       | 9  | P  | 2  | 272.1723       | 136.5900        |
|                | 10 | R  | 1  | 175.1195       | 88.0637         |

N-term:+43.02 K(7):+162.16

X-range:

0 - 0

MassTol: Y-zoom:

0. 1.

MassType:

☐ AVG ☒ MONO

Axis:

☒ 1 ☐ 2

Label:

☒ I ☐ M ☐ -

Ions:

a ☐ + ☐ 2+ ☐ 3+

b ☒ + ☐ 2+ ☐ 3+

c ☐ + ☐ 2+ ☐ 3+

x ☐ + ☐ 2+ ☐ 3+

y ☒ + ☒ 2+ ☐ 3+

z ☐ + ☐ 2+ ☐ 3+

hide H<sub>2</sub>O/NH<sub>3</sub> ☐

zoom 112-122 ☐

GO

AWKSGGASHSELIHNLR, MH+ 1933.0045, m/z 484.0066  
H OS G17 P120811 220811-s1.04219.04219.4.dta

scan 4219; 1.1e+001

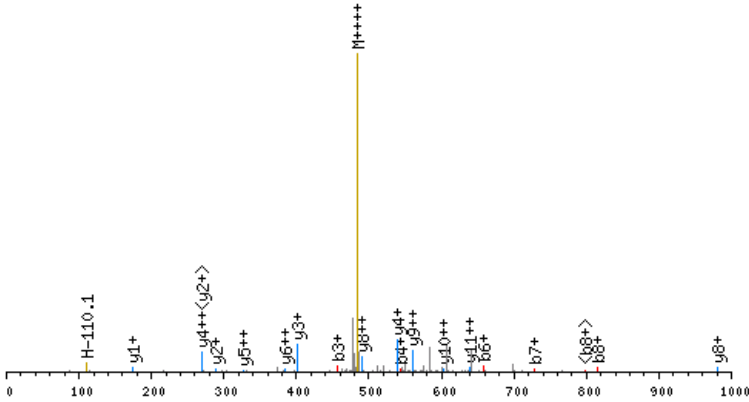

click image to zoom in; click top corners to zoom out

[precursor±]

scan 4218; 484.0 m/z; 6.6e+001

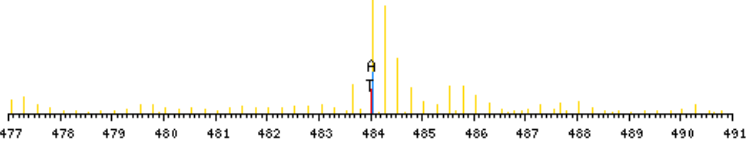

zoomed in precursor plot; T=theoretical m/z, A=acquired m/z

| b <sup>+</sup> | #  | AA | #  | y <sup>+</sup> | y <sup>2+</sup> |
|----------------|----|----|----|----------------|-----------------|
| 114.0555       | 1  | A  | 17 |                |                 |
| 300.1348       | 2  | W  | 16 | 1819.9568      | 910.4823        |
| 456.2611       | 3  | K  | 15 | 1633.8775      | 817.4426        |
| 543.2932       | 4  | S  | 14 | 1477.7512      | 739.3795        |
| 600.3146       | 5  | G  | 13 | 1390.7191      | 695.8635        |
| 657.3361       | 6  | G  | 12 | 1333.6977      | 667.3527        |
| 728.3732       | 7  | A  | 11 | 1276.6762      | 638.8420        |
| 815.4052       | 8  | S  | 10 | 1205.6391      | 603.3235        |
| 952.4641       | 9  | H  | 9  | 1118.6071      | 559.8074        |
| 1039.4962      | 10 | S  | 8  | 981.5482       | 491.2780        |
| 1168.5388      | 11 | E  | 7  | 894.5161       | 447.7620        |
| 1281.6228      | 12 | L  | 6  | 765.4735       | 383.2407        |
| 1394.7069      | 13 | I  | 5  | 652.3895       | 326.6986        |
| 1531.7658      | 14 | H  | 4  | 539.3054       | 270.1566        |
| 1645.8087      | 15 | N  | 3  | 402.2465       | 201.6272        |
| 1758.8928      | 16 | L  | 2  | 288.2036       | 144.6057        |
|                | 17 | R  | 1  | 175.1195       | 88.0637         |

N-term:+43.02 K(3):+156.13

X-range:

0 - 0

MassTol: Y-zoom:

0. 1.

MassType:

☐AVG ☒MONO

Axis:

☒1 ☐2

Label:

☒I ☐M ☐-

Ions:

a ☐+ ☐2+ ☐3+

b ☒+ ☐2+ ☐3+

c ☐+ ☐2+ ☐3+

x ☐+ ☐2+ ☐3+

y ☒+ ☒2+ ☐3+

z ☐+ ☐2+ ☐3+

hide H<sub>2</sub>O/NH<sub>3</sub> ☐

zoom 112-122 ☐

GO

AYHSFLVEPISCHAWNKDR, MH+ 2400.1559, m/z 600.7944  
H OS G17 P120811 220811-s1.06060.06060.4.dta

scan 6060; 3.3e+000

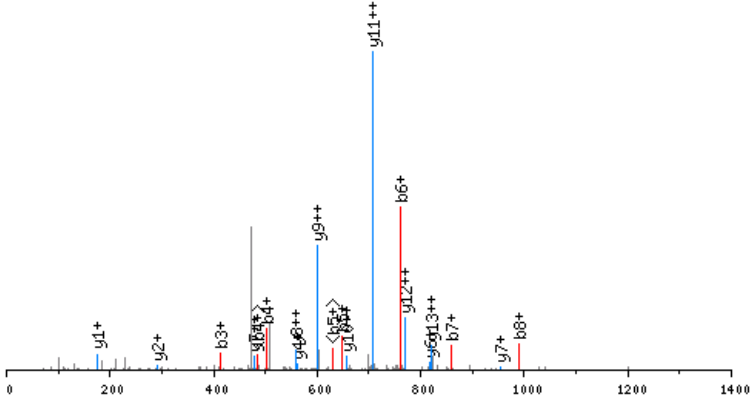

click image to zoom in; click top corners to zoom out [\[precursor±\]](#)

scan 6058; 600.8 m/z; 4.1e+000

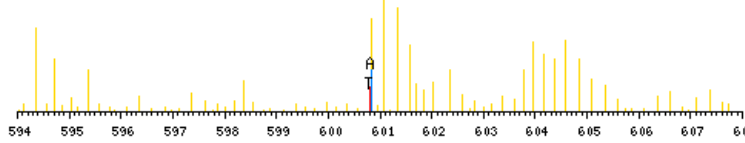

zoomed in precursor plot; T=theoretical m/z, A=acquired m/z

| b <sup>+</sup> | #  | AA | #  | y <sup>+</sup> | y <sup>2+</sup> |
|----------------|----|----|----|----------------|-----------------|
| 114.0555       | 1  | A  | 19 |                |                 |
| 277.1188       | 2  | Y  | 18 | 2287.1082      | 1144.0580       |
| 414.1778       | 3  | H  | 17 | 2124.0449      | 1062.5264       |
| 501.2098       | 4  | S  | 16 | 1986.9860      | 993.9969        |
| 648.2782       | 5  | F  | 15 | 1899.9540      | 950.4809        |
| 761.3623       | 6  | L  | 14 | 1752.8855      | 876.9467        |
| 860.4307       | 7  | V  | 13 | 1639.8015      | 820.4046        |
| 989.4733       | 8  | E  | 12 | 1540.7331      | 770.8704        |
| 1086.5260      | 9  | P  | 11 | 1411.6905      | 706.3491        |
| 1199.6101      | 10 | I  | 10 | 1314.6377      | 657.8228        |
| 1286.6421      | 11 | S  | 9  | 1201.5536      | 601.2807        |
| 1446.6727      | 12 | C  | 8  | 1114.5216      | 557.7647        |
| 1583.7316      | 13 | H  | 7  | 954.4910       | 477.7494        |
| 1654.7687      | 14 | A  | 6  | 817.4321       | 409.2200        |
| 1840.8481      | 15 | W  | 5  | 746.3950       | 373.7014        |
| 1954.8910      | 16 | N  | 4  | 560.3157       | 280.6617        |
| 2111.0173      | 17 | K  | 3  | 446.2727       | 223.6403        |
| 2226.0442      | 18 | D  | 2  | 290.1464       | 145.5771        |
|                | 19 | R  | 1  | 175.1195       | 88.0637         |

N-term:+43.02 C(12):+160.03  
K(17):+156.13

X-range:

0 - 0

MassTol: Y-zoom:

0. 1.

MassType:

☐ AVG ☒ MONO

Axis:

☒ 1 ☐ 2

Label:

☒ I ☐ M ☐ -

Ions:

a ☐ + ☐ 2+ ☐ 3+

b ☒ + ☐ 2+ ☐ 3+

c ☐ + ☐ 2+ ☐ 3+

x ☐ + ☐ 2+ ☐ 3+

y ☒ + ☒ 2+ ☐ 3+

z ☐ + ☐ 2+ ☐ 3+

hide H<sub>2</sub>O/NH<sub>3</sub> ☐

zoom 112-122 ☐

GO

AYKLVLIR, MH+ 1051.7092, m/z 526.3583  
H OS G13 P120811 220811-s1.06063.06063.2.dta

scan 6063; 7.4e+001

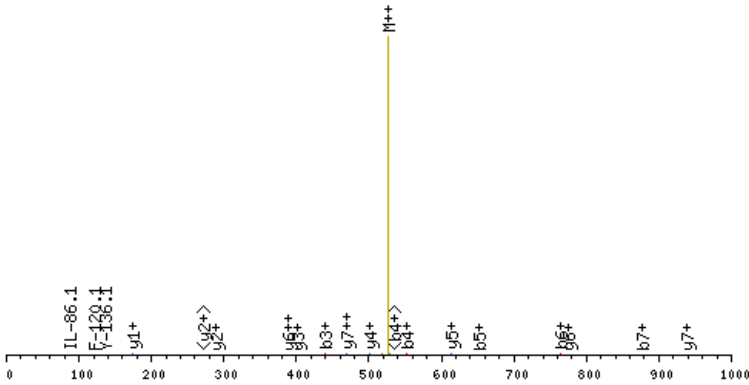

click image to zoom in; click top corners to zoom out

[precursor±]

scan 6059; 526.4 m/z; 1.2e+001

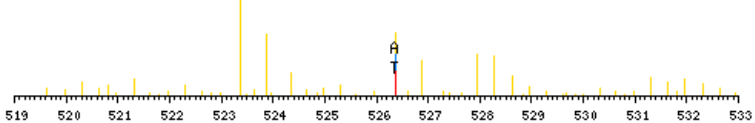

zoomed in precursor plot; T=theoretical m/z, A=acquired m/z

| b <sup>+</sup> | # | AA | # | y <sup>+</sup> | y <sup>2+</sup> |
|----------------|---|----|---|----------------|-----------------|
| 114.0555       | 1 | A  | 8 |                |                 |
| 277.1188       | 2 | Y  | 7 | 938.6615       | 469.8347        |
| 439.2769       | 3 | K  | 6 | 775.5982       | 388.3030        |
| 552.3610       | 4 | L  | 5 | 613.4401       | 307.2240        |
| 651.4294       | 5 | V  | 4 | 500.3560       | 250.6819        |
| 764.5135       | 6 | L  | 3 | 401.2876       | 201.1477        |
| 877.5975       | 7 | I  | 2 | 288.2036       | 144.6057        |
|                | 8 | R  | 1 | 175.1195       | 88.0637         |

N-term:+43.02 K(3):+162.16

X-range:

0 - 0

MassTol: Y-zoom:

0. 1.

MassType:

☐ AVG ☒ MONO

Axis:

☒ 1 ☐ 2

Label:

☒ I ☐ M ☐ -

Ions:

a ☐ + ☐ 2+ ☐ 3+

b ☒ + ☐ 2+ ☐ 3+

c ☐ + ☐ 2+ ☐ 3+

x ☐ + ☐ 2+ ☐ 3+

y ☒ + ☒ 2+ ☐ 3+

z ☐ + ☐ 2+ ☐ 3+

hide H<sub>2</sub>O/NH<sub>3</sub> ☐

zoom 112-122 ☐

GO

CLVQKGLVKTK, MH+ 1417.9665, m/z 709.4869  
H OS G15 P120811 220811-s1.07046.07046.2.dta

scan 7046; 6.5e+000

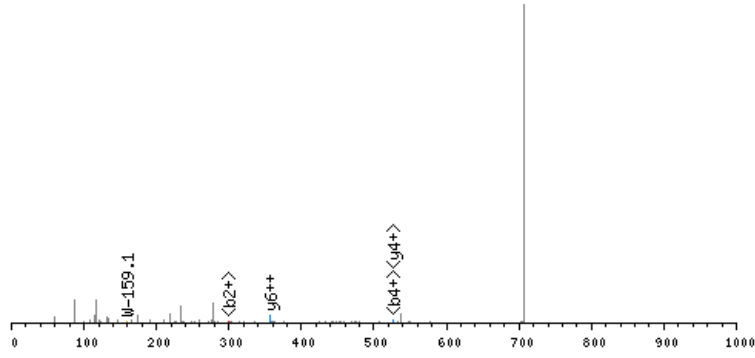

click image to zoom in; click top corners to zoom out [\[precursor±\]](#)

scan 7045; 709.5 m/z; 3.1e+000

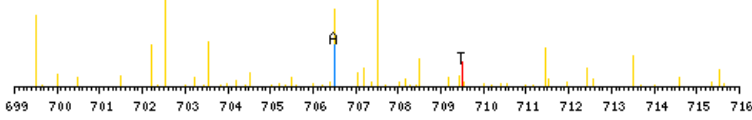

zoomed in precursor plot; T=theoretical m/z, A=acquired m/z

| b <sup>+</sup> | #  | AA | #  | y <sup>+</sup> | y <sup>2+</sup> |
|----------------|----|----|----|----------------|-----------------|
| 203.0490       | 1  | C  | 11 |                |                 |
| 316.1331       | 2  | L  | 10 | 1215.9254      | 608.4666        |
| 415.2015       | 3  | V  | 9  | 1102.8413      | 551.9246        |
| 543.2601       | 4  | Q  | 8  | 1003.7729      | 502.3904        |
| 705.4182       | 5  | K  | 7  | 875.7143       | 438.3611        |
| 762.4396       | 6  | G  | 6  | 713.5562       | 357.2820        |
| 875.5237       | 7  | L  | 5  | 656.5347       | 328.7713        |
| 974.5921       | 8  | V  | 4  | 543.4507       | 272.2293        |
| 1136.7502      | 9  | K  | 3  | 444.3823       | 222.6950        |
| 1237.7979      | 10 | T  | 2  | 282.2242       | 141.6160        |
|                | 11 | K  | 1  | 181.1765       | 91.0922         |

N-term:+43.02 C(1):+160.03  
K(5):+162.16 K(9):+162.16  
K(11):+162.16

X-range:

0 - 0

MassTol: Y-zoom:

0. 1.

MassType:

☐AVG ☒MONO

Axis:

☒1 ☐2

Label:

☒I ☐M ☐-

Ions:

a ☐+ ☐2+ ☐3+

b ☒+ ☐2+ ☐3+

c ☐+ ☐2+ ☐3+

x ☐+ ☐2+ ☐3+

y ☒+ ☒2+ ☐3+

z ☐+ ☐2+ ☐3+

hide H<sub>2</sub>O/NH<sub>3</sub> ☐

zoom 112-122 ☐

GO

CSPDPGLTALLSDHR, MH+ 1680.8015, m/z 560.9387  
H OS G15 P120811 220811-s1.05270.05270.3.dta

scan 5270; 1.4e+000

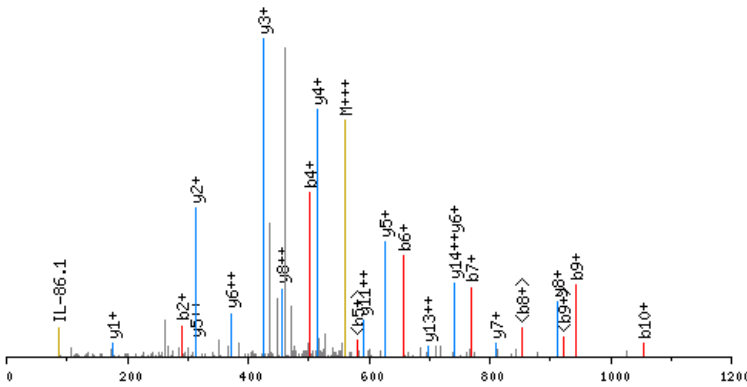

click image to zoom in; click top corners to zoom out

[precursor±]

scan 5266; 560.9 m/z; 5.3e+000

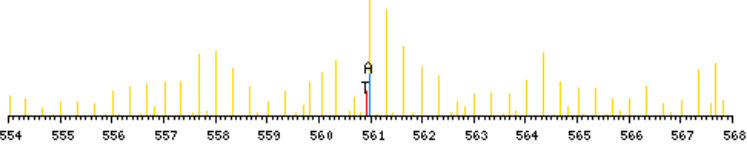

zoomed in precursor plot; T=theoretical m/z, A=acquired m/z

| b <sup>+</sup> | #  | AA | #  | y <sup>+</sup> | y <sup>2+</sup> |
|----------------|----|----|----|----------------|-----------------|
| 203.0490       | 1  | C  | 15 |                |                 |
| 290.0810       | 2  | S  | 14 | 1478.7603      | 739.8841        |
| 387.1338       | 3  | P  | 13 | 1391.7283      | 696.3681        |
| 502.1607       | 4  | D  | 12 | 1294.6755      | 647.8417        |
| 599.2135       | 5  | P  | 11 | 1179.6486      | 590.3282        |
| 656.2350       | 6  | G  | 10 | 1082.5958      | 541.8018        |
| 769.3190       | 7  | L  | 9  | 1025.5744      | 513.2911        |
| 870.3667       | 8  | T  | 8  | 912.4903       | 456.7491        |
| 941.4038       | 9  | A  | 7  | 811.4426       | 406.2252        |
| 1054.4879      | 10 | L  | 6  | 740.4055       | 370.7067        |
| 1167.5719      | 11 | L  | 5  | 627.3214       | 314.1646        |
| 1254.6040      | 12 | S  | 4  | 514.2374       | 257.6226        |
| 1369.6309      | 13 | D  | 3  | 427.2054       | 214.1066        |
| 1506.6898      | 14 | H  | 2  | 312.1784       | 156.5931        |
|                | 15 | R  | 1  | 175.1195       | 88.0637         |

N-term:+43.02 C(1):+160.03

X-range:

0 - 0

MassTol: Y-zoom:

0. 1.

MassType:

☐AVG ☒MONO

Axis:

☒1 ☐2

Label:

☒I ☐M ☐-

Ions:

a ☐+ ☐2+ ☐3+

b ☒+ ☐2+ ☐3+

c ☐+ ☐2+ ☐3+

x ☐+ ☐2+ ☐3+

y ☒+ ☒2+ ☐3+

z ☐+ ☐2+ ☐3+

hide H<sub>2</sub>O/NH<sub>3</sub> ☐

zoom 112-122 ☐

GO

DADKDNIKQACDER, MH+ 1775.8234, m/z 592.6127  
H OS G15 P120811 220811-s1.02562.02562.3.dta

scan 2562; 8.4e+000

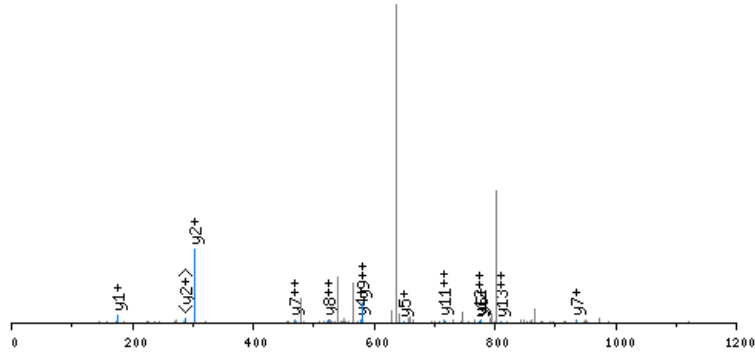

click image to zoom in; click top corners to zoom out [\[precursor±\]](#)

scan 2561; 592.6 m/z; 6.3e+000

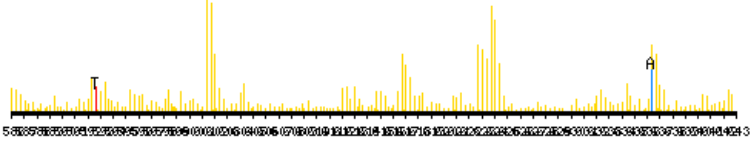

zoomed in precursor plot; T=theoretical m/z, A=acquired m/z

| b <sup>+</sup> | #  | AA | #  | y <sup>+</sup> | y <sup>2+</sup> |
|----------------|----|----|----|----------------|-----------------|
| 158.0453       | 1  | D  | 14 |                |                 |
| 229.0825       | 2  | A  | 13 | 1618.7859      | 809.8969        |
| 344.1094       | 3  | D  | 12 | 1547.7488      | 774.3783        |
| 500.2357       | 4  | K  | 11 | 1432.7219      | 716.8648        |
| 615.2626       | 5  | D  | 10 | 1276.5956      | 638.8017        |
| 729.3056       | 6  | N  | 9  | 1161.5686      | 581.2882        |
| 842.3896       | 7  | I  | 8  | 1047.5257      | 524.2668        |
| 998.5159       | 8  | K  | 7  | 934.4416       | 467.7247        |
| 1126.5745      | 9  | Q  | 6  | 778.3153       | 389.6616        |
| 1197.6116      | 10 | A  | 5  | 650.2568       | 325.6323        |
| 1357.6422      | 11 | C  | 4  | 579.2196       | 290.1137        |
| 1472.6692      | 12 | D  | 3  | 419.1890       | 210.0984        |
| 1601.7118      | 13 | E  | 2  | 304.1621       | 152.5850        |
|                | 14 | R  | 1  | 175.1195       | 88.0637         |

N-term:+43.02 K(4):+156.13  
K(8):+156.13 C(11):+160.03

X-range:  -

MassTol: Y-zoom:

MassType: ☒ AVG ☐ MONO

Axis: ☒ 1 ☐ 2

Label: ☒ I ☐ M ☐ -

Ions:   
a ☐ + ☐ 2+ ☐ 3+   
b ☒ + ☐ 2+ ☐ 3+   
c ☐ + ☐ 2+ ☐ 3+   
x ☐ + ☐ 2+ ☐ 3+   
y ☒ + ☒ 2+ ☐ 3+   
z ☐ + ☐ 2+ ☐ 3+   
hide H<sub>2</sub>O/NH<sub>3</sub> ☐   
zoom 112-122 ☐

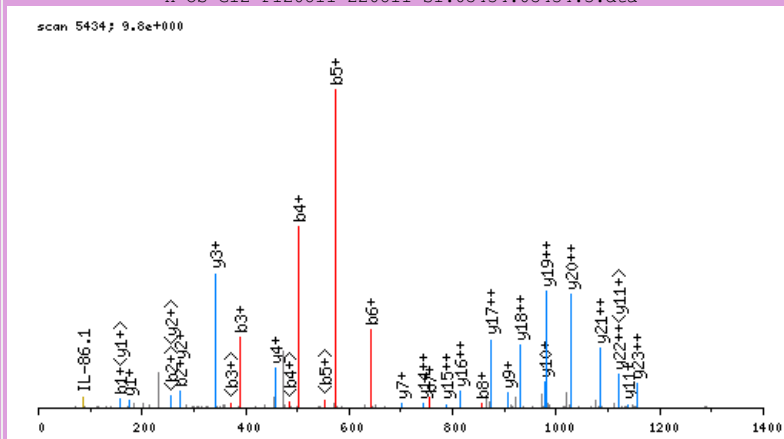

click image to zoom in; click top corners to zoom out      [[precursor1](#)]

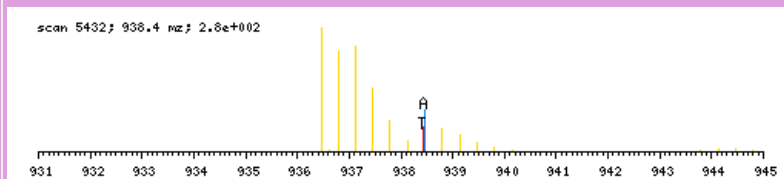

zoomed in precursor plot; T=theoretical m/z, A=acquired m/z

| $b^+$     | #  | AA | #  | $y^+$     | $y^{2+}$  |
|-----------|----|----|----|-----------|-----------|
| 158.0453  | 1  | D  | 27 |           |           |
| 273.0723  | 2  | D  | 26 | 2656.2559 | 1328.6319 |
| 388.0992  | 3  | D  | 25 | 2541.2290 | 1271.1184 |
| 501.1833  | 4  | I  | 24 | 2426.2020 | 1213.6044 |
| 572.2204  | 5  | A  | 23 | 2313.1180 | 1157.0629 |
| 643.2575  | 6  | A  | 22 | 2242.0809 | 1121.5443 |
| 756.3416  | 7  | L  | 21 | 2171.0437 | 1086.0258 |
| 855.4100  | 8  | V  | 20 | 2057.9597 | 1029.4837 |
| 954.4784  | 9  | V  | 19 | 1958.8913 | 979.9495  |
| 1069.5054 | 10 | D  | 18 | 1859.8228 | 930.4153  |
| 1183.5483 | 11 | N  | 17 | 1744.7959 | 872.9019  |
| 1240.5697 | 12 | G  | 16 | 1630.7530 | 815.8804  |
| 1327.6018 | 13 | S  | 15 | 1573.7315 | 787.3697  |
| 1384.6232 | 14 | G  | 14 | 1486.6995 | 743.8537  |
| 1515.6637 | 15 | M  | 13 | 1429.6780 | 715.3429  |
| 1675.6943 | 16 | C  | 12 | 1298.6375 | 649.8227  |
| 1837.8524 | 17 | K  | 11 | 1138.6069 | 569.8074  |
| 1908.8895 | 18 | A  | 10 | 976.4488  | 488.7283  |
| 1965.9110 | 19 | G  | 9  | 905.4117  | 453.2098  |
| 2112.9794 | 20 | F  | 8  | 848.3903  | 424.6990  |
| 2184.0165 | 21 | A  | 7  | 701.3218  | 351.1648  |
| 2241.0380 | 22 | G  | 6  | 630.2847  | 315.6463  |
| 2356.0649 | 23 | D  | 5  | 573.2633  | 287.1355  |
| 2471.0919 | 24 | D  | 4  | 458.2363  | 229.6221  |
| 2542.1290 | 25 | A  | 3  | 343.2094  | 172.1086  |
| 2639.1818 | 26 | P  | 2  | 272.1723  | 136.5900  |
|           | 27 | R  | 1  | 175.1195  | 88.0637   |

N-term:+43.02 C(16):+160.03  
K(17):+162.16

X-range:

0 - 0

MassTol: Y-zoom:

0. 1.

MassType:

☐ AVG ☒ MONO

Axis:

☒ 1 ☐ 2

Label:

☒ I ☐ M ☐ -

Ions:

a ☐ + ☐ 2+ ☐ 3+

b ☒ + ☐ 2+ ☐ 3+

c ☐ + ☐ 2+ ☐ 3+

x ☐ + ☐ 2+ ☐ 3+

y ☒ + ☒ 2+ ☐ 3+

z ☐ + ☐ 2+ ☐ 3+

hide H<sub>2</sub>O/NH<sub>3</sub> ☐

zoom 112-122 ☐

GO

DDREDLVYQAKLAQAER, MH+ 2219.0945, m/z 740.3697  
H OS G15 P120811 220811-s1.05168.05168.3.dta

scan 5166: 1.8e+001

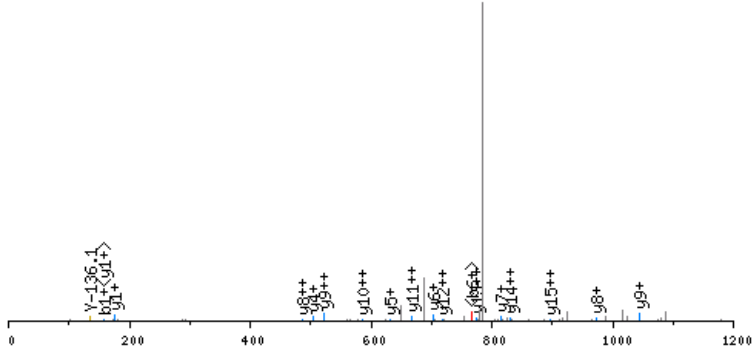

click image to zoom in; click top corners to zoom out [\[precursor±\]](#)

scan 5166: 740.4 m/z; 1.8e+001

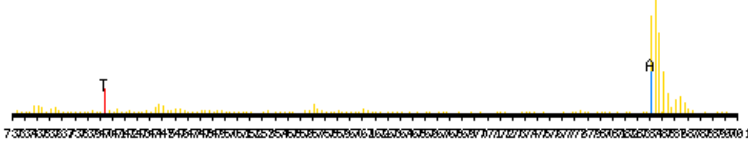

zoomed in precursor plot; T=theoretical m/z, A=acquired m/z

| b <sup>+</sup> | #  | AA | #  | y <sup>+</sup> | y <sup>2+</sup> |
|----------------|----|----|----|----------------|-----------------|
| 158.0453       | 1  | D  | 18 |                |                 |
| 273.0723       | 2  | D  | 17 | 2062.0569      | 1031.5324       |
| 429.1734       | 3  | R  | 16 | 1947.0300      | 974.0189        |
| 558.2160       | 4  | E  | 15 | 1790.9289      | 895.9684        |
| 673.2429       | 5  | D  | 14 | 1661.8863      | 831.4471        |
| 786.3270       | 6  | L  | 13 | 1546.8594      | 773.9336        |
| 885.3954       | 7  | V  | 12 | 1433.7753      | 717.3916        |
| 1048.4587      | 8  | Y  | 11 | 1334.7069      | 667.8574        |
| 1176.5173      | 9  | Q  | 10 | 1171.6435      | 586.3257        |
| 1247.5544      | 10 | A  | 9  | 1043.5850      | 522.2964        |
| 1403.6807      | 11 | K  | 8  | 972.5479       | 486.7778        |
| 1516.7648      | 12 | L  | 7  | 816.4216       | 408.7147        |
| 1587.8019      | 13 | A  | 6  | 703.3375       | 352.1727        |
| 1716.8445      | 14 | E  | 5  | 632.3004       | 316.6541        |
| 1844.9031      | 15 | Q  | 4  | 503.2578       | 252.1328        |
| 1915.9402      | 16 | A  | 3  | 375.1992       | 188.1035        |
| 2044.9828      | 17 | E  | 2  | 304.1621       | 152.5850        |
|                | 18 | R  | 1  | 175.1195       | 88.0637         |

N-term:+43.02 K(11) :+156.13

X-range:

0 - 0

MassTol: Y-zoom:

0. 1.

MassType:

☐ AVG ☒ MONO

Axis:

☒ 1 ☐ 2

Label:

☒ I ☐ M ☐ -

Ions:

a ☐ + ☐ 2+ ☐ 3+

b ☒ + ☐ 2+ ☐ 3+

c ☐ + ☐ 2+ ☐ 3+

x ☐ + ☐ 2+ ☐ 3+

y ☒ + ☒ 2+ ☐ 3+

z ☐ + ☐ 2+ ☐ 3+

hide H<sub>2</sub>O/NH<sub>3</sub> ☐

zoom 112-122 ☐

GO

DEDETTALVCDNGSGLVKAGFAGDDAPR, MH+ 2950.3376, m/z 984.1174  
H OS G12 P120811 220811-s1.05016.05016.3.dta

scan 5016; 1.9e+000

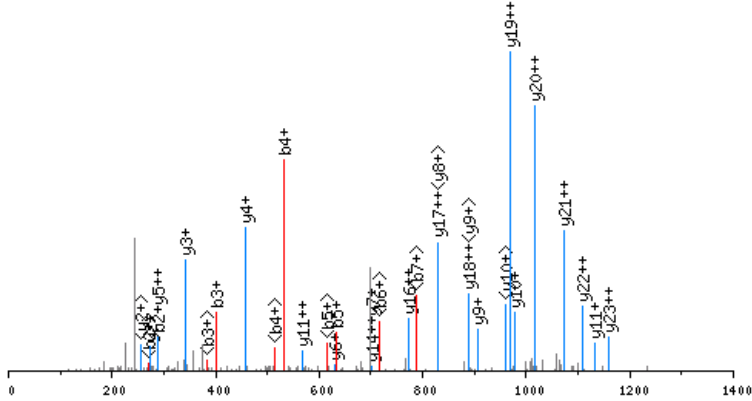

click image to zoom in; click top corners to zoom out

[precursor±]

scan 5012; 984.1 m/z; 1.5e+001

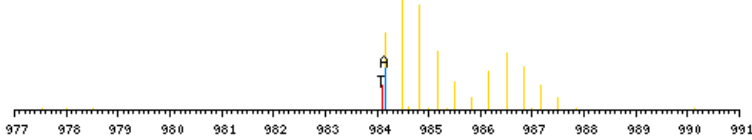

zoomed in precursor plot; T=theoretical m/z, A=acquired m/z

| b <sup>+</sup> | #  | AA | #  | y <sup>+</sup> | y <sup>2+</sup> |
|----------------|----|----|----|----------------|-----------------|
| 158.0453       | 1  | D  | 28 |                |                 |
| 287.0879       | 2  | E  | 27 | 2793.3001      | 1397.1540       |
| 402.1149       | 3  | D  | 26 | 2664.2575      | 1332.6327       |
| 531.1575       | 4  | E  | 25 | 2549.2306      | 1275.1192       |
| 632.2052       | 5  | T  | 24 | 2420.1880      | 1210.5979       |
| 733.2528       | 6  | T  | 23 | 2319.1403      | 1160.0741       |
| 804.2899       | 7  | A  | 22 | 2218.0926      | 1109.5502       |
| 917.3740       | 8  | L  | 21 | 2147.0555      | 1074.0317       |
| 1016.4424      | 9  | V  | 20 | 2033.9715      | 1017.4896       |
| 1176.4730      | 10 | C  | 19 | 1934.9030      | 967.9554        |
| 1291.5000      | 11 | D  | 18 | 1774.8724      | 887.9401        |
| 1405.5429      | 12 | N  | 17 | 1659.8455      | 830.4267        |
| 1462.5644      | 13 | G  | 16 | 1545.8026      | 773.4052        |
| 1549.5964      | 14 | S  | 15 | 1488.7811      | 744.8945        |
| 1606.6178      | 15 | G  | 14 | 1401.7491      | 701.3785        |
| 1719.7019      | 16 | L  | 13 | 1344.7276      | 672.8677        |
| 1818.7703      | 17 | V  | 12 | 1231.6435      | 616.3257        |
| 1974.8966      | 18 | K  | 11 | 1132.5751      | 566.7915        |
| 2045.9337      | 19 | A  | 10 | 976.4488       | 488.7283        |
| 2102.9552      | 20 | G  | 9  | 905.4117       | 453.2098        |
| 2250.0236      | 21 | F  | 8  | 848.3903       | 424.6990        |
| 2321.0607      | 22 | A  | 7  | 701.3218       | 351.1648        |
| 2378.0822      | 23 | G  | 6  | 630.2847       | 315.6463        |
| 2493.1091      | 24 | D  | 5  | 573.2633       | 287.1355        |
| 2608.1361      | 25 | D  | 4  | 458.2363       | 229.6221        |
| 2679.1732      | 26 | A  | 3  | 343.2094       | 172.1086        |
| 2776.2260      | 27 | P  | 2  | 272.1723       | 136.5900        |
|                | 28 | R  | 1  | 175.1195       | 88.0637         |

N-term: +43.02 C(10) : +160.03  
K(18) : +156.13

X-range:

0 - 0

MassTol: Y-zoom:

0. 1.

MassType:

☐AVG ☒MONO

Axis:

☒1 ☐2

Label:

☒I ☐M ☐-

Ions:

a ☐+ ☐2+ ☐3+

b ☒+ ☐2+ ☐3+

c ☐+ ☐2+ ☐3+

x ☐+ ☐2+ ☐3+

y ☒+ ☒2+ ☐3+

z ☐+ ☐2+ ☐3+

hide H<sub>2</sub>O/NH<sub>3</sub> ☐

zoom 112-122 ☐

GO

DGAAGPGEGPAHETLQTLSQL, MH+ 2134.0165, m/z 712.0104  
H OS G12 P120811 220811-s1.04405.04405.3.dta

scan 4405; 1.8e+000

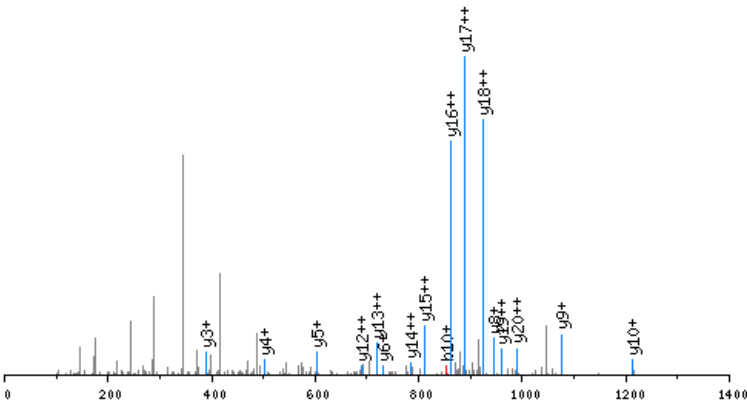

click image to zoom in; click top corners to zoom out

[precursor±]

scan 4402; 712.0 m/z; 7.2e+000

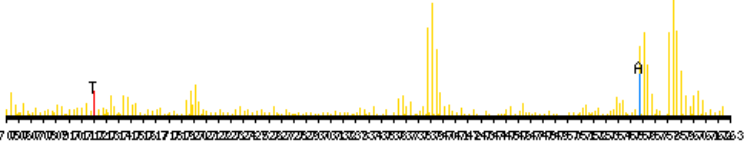

zoomed in precursor plot; T=theoretical m/z, A=acquired m/z

| b <sup>+</sup> | #  | AA | #  | y <sup>+</sup> | y <sup>2+</sup> |
|----------------|----|----|----|----------------|-----------------|
| 158.0453       | 1  | D  | 21 |                |                 |
| 215.0668       | 2  | G  | 20 | 1976.9790      | 988.9934        |
| 286.1039       | 3  | A  | 19 | 1919.9575      | 960.4827        |
| 357.1410       | 4  | A  | 18 | 1848.9204      | 924.9641        |
| 414.1625       | 5  | G  | 17 | 1777.8833      | 889.4456        |
| 511.2153       | 6  | P  | 16 | 1720.8618      | 860.9348        |
| 568.2367       | 7  | G  | 15 | 1623.8091      | 812.4084        |
| 697.2793       | 8  | E  | 14 | 1566.7876      | 783.8977        |
| 754.3008       | 9  | G  | 13 | 1437.7450      | 719.3764        |
| 851.3535       | 10 | P  | 12 | 1380.7236      | 690.8657        |
| 922.3907       | 11 | A  | 11 | 1283.6708      | 642.3393        |
| 1059.4496      | 12 | H  | 10 | 1212.6337      | 606.8207        |
| 1188.4922      | 13 | E  | 9  | 1075.5748      | 538.2913        |
| 1289.5398      | 14 | T  | 8  | 946.5322       | 473.7700        |
| 1402.6239      | 15 | L  | 7  | 845.4845       | 423.2462        |
| 1530.6825      | 16 | Q  | 6  | 732.4004       | 366.7041        |
| 1631.7302      | 17 | T  | 5  | 604.3418       | 302.6748        |
| 1744.8142      | 18 | L  | 4  | 503.2942       | 252.1510        |
| 1831.8463      | 19 | S  | 3  | 390.2101       | 195.6090        |
| 1959.9048      | 20 | Q  | 2  | 303.1781       | 152.0930        |
|                | 21 | R  | 1  | 175.1195       | 88.0637         |

N-term:+43.02

X-range:

0 - 0

MassTol: Y-zoom:

0. 1.

MassType:

☐ AVG ☒ MONO

Axis:

☒ 1 ☐ 2

Label:

☒ I ☐ M ☐ -

Ions:

a ☐ + ☐ 2+ ☐ 3+

b ☒ + ☐ 2+ ☐ 3+

c ☐ + ☐ 2+ ☐ 3+

x ☐ + ☐ 2+ ☐ 3+

y ☒ + ☒ 2+ ☐ 3+

z ☐ + ☐ 2+ ☐ 3+

hide H<sub>2</sub>O/NH<sub>3</sub> ☐

zoom 112-122 ☐

GO

DGDKLVVECVMKGVTSSTR, MH+ 2092.0783, m/z 523.7750  
H OS G16 P120811 220811-s1.05771.05771.4.dta

scan 5771: 8.3e+000

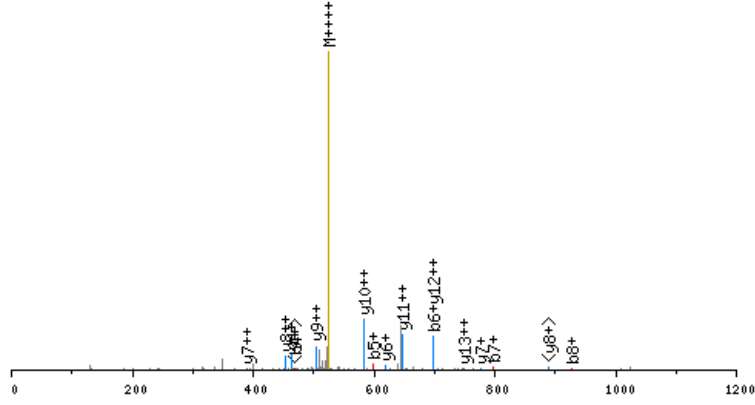

click image to zoom in; click top corners to zoom out [\[precursor±\]](#)

scan 5768: 523.8 m/z; 6.2e+001

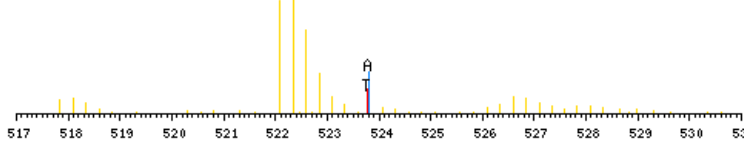

zoomed in precursor plot; T=theoretical m/z, A=acquired m/z

| b <sup>+</sup> | #  | AA | #  | y <sup>+</sup> | y <sup>2+</sup> |
|----------------|----|----|----|----------------|-----------------|
| 158.0453       | 1  | D  | 18 |                |                 |
| 215.0668       | 2  | G  | 17 | 1935.0408      | 968.0243        |
| 330.0937       | 3  | D  | 16 | 1878.0193      | 939.5136        |
| 486.2200       | 4  | K  | 15 | 1762.9923      | 882.0001        |
| 599.3041       | 5  | L  | 14 | 1606.8660      | 803.9369        |
| 698.3725       | 6  | V  | 13 | 1493.7820      | 747.3949        |
| 797.4409       | 7  | V  | 12 | 1394.7136      | 697.8607        |
| 926.4835       | 8  | E  | 11 | 1295.6452      | 648.3265        |
| 1086.5141      | 9  | C  | 10 | 1166.6026      | 583.8052        |
| 1185.5825      | 10 | V  | 9  | 1006.5720      | 503.7899        |
| 1316.6230      | 11 | M  | 8  | 907.5035       | 454.2557        |
| 1472.7493      | 12 | K  | 7  | 776.4631       | 388.7354        |
| 1529.7708      | 13 | G  | 6  | 620.3368       | 310.6723        |
| 1628.8392      | 14 | V  | 5  | 563.3153       | 282.1616        |
| 1729.8869      | 15 | T  | 4  | 464.2469       | 232.6274        |
| 1816.9189      | 16 | S  | 3  | 363.1992       | 182.1035        |
| 1917.9666      | 17 | T  | 2  | 276.1672       | 138.5875        |
|                | 18 | R  | 1  | 175.1195       | 88.0637         |

N-term:+43.02 K(4):+156.13  
C(9):+160.03 K(12):+156.13

X-range:

0 - 0

MassTol: Y-zoom:

0. 1.

MassType:

☐ AVG ☒ MONO

Axis:

☒ 1 ☐ 2

Label:

☒ I ☐ M ☐ -

Ions:

a ☐ + ☐ 2+ ☐ 3+

b ☒ + ☐ 2+ ☐ 3+

c ☐ + ☐ 2+ ☐ 3+

x ☐ + ☐ 2+ ☐ 3+

y ☒ + ☒ 2+ ☐ 3+

z ☐ + ☐ 2+ ☐ 3+

hide H<sub>2</sub>O/NH<sub>3</sub> ☐

zoom 112-122 ☐

GO

DGEDDSNLVIKKR, MH+ 1586.8391, m/z 529.6179  
H OS G15 P120811 220811-s1.03507.03507.3.dta

scan 3507; 2.7e+000

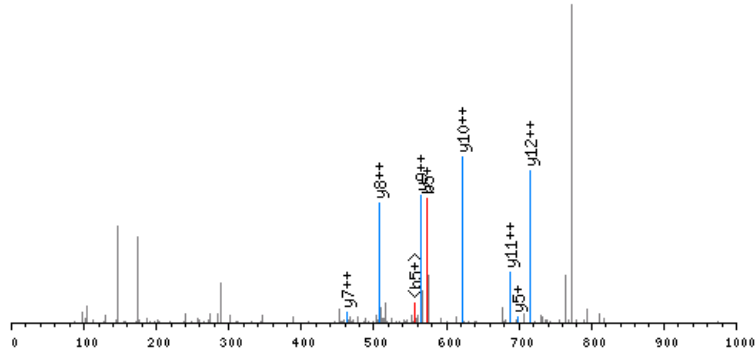

click image to zoom in; click top corners to zoom out [\[precursor±\]](#)

scan 3506; 529.6 m/z; 1.5e+001

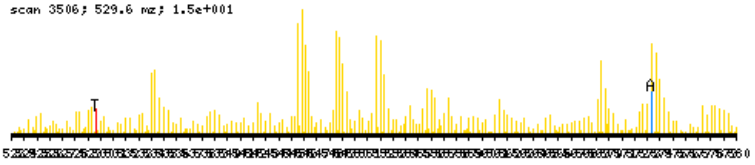

zoomed in precursor plot; T=theoretical m/z, A=acquired m/z

| b <sup>+</sup> | #  | AA | #  | y <sup>+</sup> | y <sup>2+</sup> |
|----------------|----|----|----|----------------|-----------------|
| 158.0453       | 1  | D  | 13 |                |                 |
| 215.0668       | 2  | G  | 12 | 1429.8015      | 715.4047        |
| 344.1094       | 3  | E  | 11 | 1372.7801      | 686.8940        |
| 459.1363       | 4  | D  | 10 | 1243.7375      | 622.3727        |
| 574.1633       | 5  | D  | 9  | 1128.7105      | 564.8592        |
| 661.1953       | 6  | S  | 8  | 1013.6836      | 507.3457        |
| 775.2382       | 7  | N  | 7  | 926.6516       | 463.8297        |
| 888.3223       | 8  | L  | 6  | 812.6086       | 406.8082        |
| 987.3907       | 9  | V  | 5  | 699.5246       | 350.2662        |
| 1100.4748      | 10 | I  | 4  | 600.4562       | 300.7320        |
| 1256.6011      | 11 | K  | 3  | 487.3721       | 244.1900        |
| 1412.7274      | 12 | K  | 2  | 331.2458       | 166.1268        |
|                | 13 | R  | 1  | 175.1195       | 88.0637         |

N-term:+43.02 K(11):+156.13  
K(12):+156.13

X-range:

0 - 0

MassTol: Y-zoom:

0. 1.

MassType:

☐AVG ☒MONO

Axis:

☒1 ☐2

Label:

☒I ☐M ☐-

Ions:

a ☐+ ☐2+ ☐3+

b ☒+ ☐2+ ☐3+

c ☐+ ☐2+ ☐3+

x ☐+ ☐2+ ☐3+

y ☒+ ☒2+ ☐3+

z ☐+ ☐2+ ☐3+

hide H<sub>2</sub>O/NH<sub>3</sub> ☐

zoom 112-122 ☐

GO

DGIIDKEDLR, MH+ 1249.6853, m/z 417.2333  
H OS G15 P120811 220811-s1.03338.03338.3.dta

scan 3338; 1.6e+001

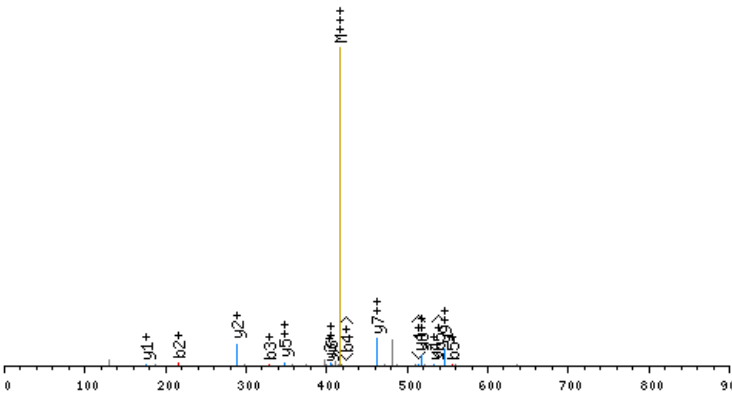

click image to zoom in; click top corners to zoom out

[precursor±]

scan 3336; 417.2 m/z; 6.2e+000

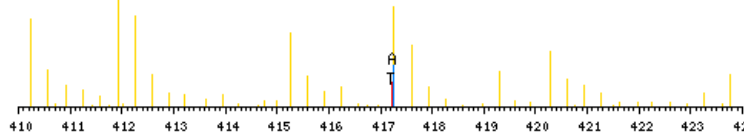

zoomed in precursor plot; T=theoretical m/z, A=acquired m/z

| b <sup>+</sup> | #  | AA | #  | y <sup>+</sup> | y <sup>2+</sup> |
|----------------|----|----|----|----------------|-----------------|
| 158.0453       | 1  | D  | 10 |                |                 |
| 215.0668       | 2  | G  | 9  | 1092.6477      | 546.8278        |
| 328.1509       | 3  | I  | 8  | 1035.6263      | 518.3170        |
| 441.2349       | 4  | I  | 7  | 922.5422       | 461.7750        |
| 556.2619       | 5  | D  | 6  | 809.4581       | 405.2330        |
| 718.4200       | 6  | K  | 5  | 694.4312       | 347.7195        |
| 847.4626       | 7  | E  | 4  | 532.2731       | 266.6405        |
| 962.4895       | 8  | D  | 3  | 403.2305       | 202.1192        |
| 1075.5736      | 9  | L  | 2  | 288.2036       | 144.6057        |
|                | 10 | R  | 1  | 175.1195       | 88.0637         |

N-term:+43.02 K(6):+162.16

X-range:

0 - 0

MassTol: Y-zoom:

0. 1.

MassType:

☐ AVG ☒ MONO

Axis:

☒ 1 ☐ 2

Label:

☒ I ☐ M ☐ -

Ions:

a ☐ + ☐ 2+ ☐ 3+

b ☒ + ☐ 2+ ☐ 3+

c ☐ + ☐ 2+ ☐ 3+

x ☐ + ☐ 2+ ☐ 3+

y ☒ + ☒ 2+ ☐ 3+

z ☐ + ☐ 2+ ☐ 3+

hide H<sub>2</sub>O/NH<sub>3</sub> ☐

zoom 112-122 ☐

GO

DGIVPDIAVGTKR, MH+ 1416.8275, m/z 708.9174  
H OS G13 P120811 220811-s1.06433.06433.2.dta

scan 6433; 4.7e+000

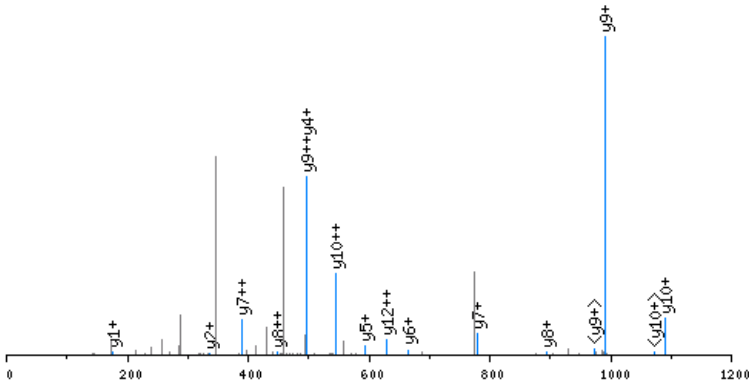

click image to zoom in; click top corners to zoom out

[precursor±]

scan 6429; 708.9 m/z; 5.8e+001

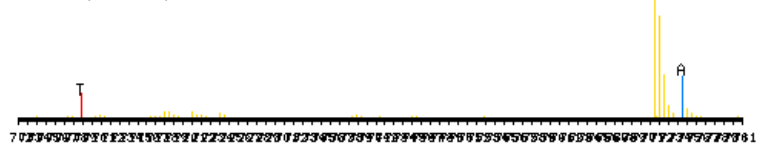

zoomed in precursor plot; T=theoretical m/z, A=acquired m/z

| b <sup>+</sup> | #  | AA | #  | y <sup>+</sup> | y <sup>2+</sup> |
|----------------|----|----|----|----------------|-----------------|
| 158.0453       | 1  | D  | 13 |                |                 |
| 215.0668       | 2  | G  | 12 | 1259.7900      | 630.3989        |
| 328.1509       | 3  | I  | 11 | 1202.7685      | 601.8882        |
| 427.2193       | 4  | V  | 10 | 1089.6845      | 545.3461        |
| 524.2720       | 5  | P  | 9  | 990.6160       | 495.8119        |
| 639.2990       | 6  | D  | 8  | 893.5633       | 447.2856        |
| 752.3831       | 7  | I  | 7  | 778.5363       | 389.7721        |
| 823.4202       | 8  | A  | 6  | 665.4523       | 333.2300        |
| 922.4886       | 9  | V  | 5  | 594.4152       | 297.7115        |
| 979.5100       | 10 | G  | 4  | 495.3467       | 248.1773        |
| 1080.5577      | 11 | T  | 3  | 438.3253       | 219.6666        |
| 1242.7158      | 12 | K  | 2  | 337.2776       | 169.1427        |
|                | 13 | R  | 1  | 175.1195       | 88.0637         |

N-term:+43.02 K(12):+162.16

X-range:

0 - 0

MassTol: Y-zoom:

0. 1.

MassType:

☐AVG ☒MONO

Axis:

☒1 ☐2

Label:

☒I ☐M ☐-

Ions:

a ☐+ ☐2+ ☐3+

b ☒+ ☐2+ ☐3+

c ☐+ ☐2+ ☐3+

x ☐+ ☐2+ ☐3+

y ☒+ ☒2+ ☐3+

z ☐+ ☐2+ ☐3+

hide H<sub>2</sub>O/NH<sub>3</sub> ☐

zoom 112-122 ☐

GO

DGKATLTSSNTPLGR, MH+ 1587.8343, m/z 529.9496  
H OS G15 P120811 220811-s1.03077.03077.3.dta

scan 3077; 1.7e+000

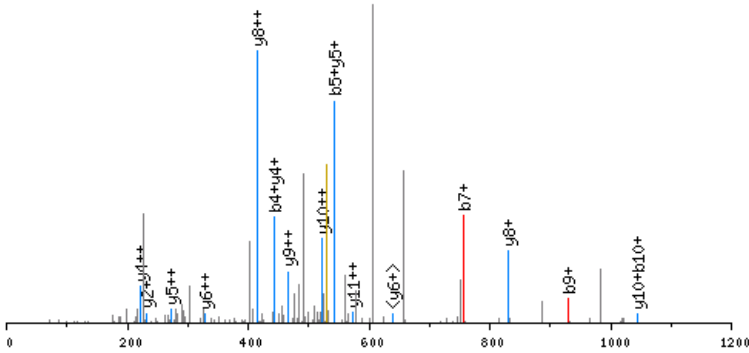

click image to zoom in; click top corners to zoom out

[precursor±]

scan 3076; 529.9 m/z; 1.3e+001

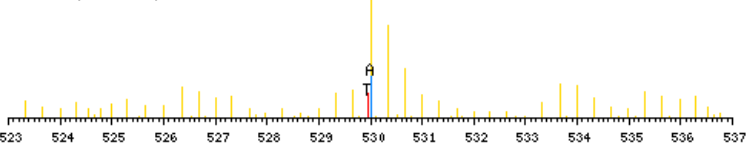

zoomed in precursor plot; T=theoretical m/z, A=acquired m/z

| b <sup>+</sup> | #  | AA | #  | y <sup>+</sup> | y <sup>2+</sup> |
|----------------|----|----|----|----------------|-----------------|
| 158.0453       | 1  | D  | 15 |                |                 |
| 215.0668       | 2  | G  | 14 | 1430.7968      | 715.9023        |
| 371.1931       | 3  | K  | 13 | 1373.7753      | 687.3916        |
| 442.2302       | 4  | A  | 12 | 1217.6490      | 609.3284        |
| 543.2779       | 5  | T  | 11 | 1146.6119      | 573.8099        |
| 656.3620       | 6  | L  | 10 | 1045.5642      | 523.2860        |
| 757.4096       | 7  | T  | 9  | 932.4801       | 466.7440        |
| 844.4417       | 8  | S  | 8  | 831.4325       | 416.2201        |
| 931.4737       | 9  | S  | 7  | 744.4004       | 372.7041        |
| 1045.5166      | 10 | N  | 6  | 657.3684       | 329.1881        |
| 1146.5643      | 11 | T  | 5  | 543.3255       | 272.1666        |
| 1243.6171      | 12 | P  | 4  | 442.2778       | 221.6428        |
| 1356.7011      | 13 | L  | 3  | 345.2250       | 173.1164        |
| 1413.7226      | 14 | G  | 2  | 232.1410       | 116.5744        |
|                | 15 | R  | 1  | 175.1195       | 88.0637         |

N-term:+43.02 K(3):+156.13

X-range:

0 - 0

MassTol: Y-zoom:

0. 1.

MassType:

☐ AVG ☒ MONO

Axis:

☒ 1 ☐ 2

Label:

☒ I ☐ M ☐ -

Ions:

a ☐ + ☐ 2+ ☐ 3+

b ☒ + ☐ 2+ ☐ 3+

c ☐ + ☐ 2+ ☐ 3+

x ☐ + ☐ 2+ ☐ 3+

y ☒ + ☒ 2+ ☐ 3+

z ☐ + ☐ 2+ ☐ 3+

hide H<sub>2</sub>O/NH<sub>3</sub> ☐

zoom 112-122 ☐

GO

DHGKFLDCVVR, MH+ 1421.7423, m/z 474.5856  
H OS G16 P120811 220811-s1.04747.04747.3.dta

scan 4747; 1.4e+001

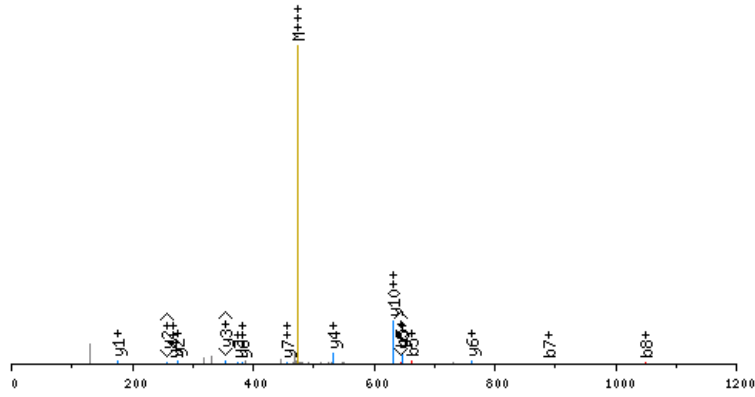

click image to zoom in; click top corners to zoom out [\[precursor±\]](#)

scan 4743; 474.6 m/z; 1.0e+001

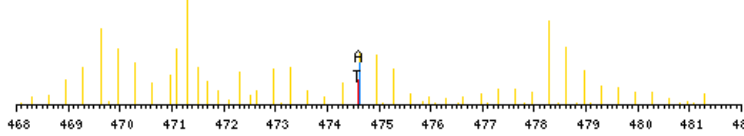

zoomed in precursor plot; T=theoretical m/z, A=acquired m/z

| b <sup>+</sup> | #  | AA | #  | y <sup>+</sup> | y <sup>2+</sup> |
|----------------|----|----|----|----------------|-----------------|
| 158.0453       | 1  | D  | 11 |                |                 |
| 295.1043       | 2  | H  | 10 | 1264.7048      | 632.8563        |
| 352.1257       | 3  | G  | 9  | 1127.6459      | 564.3269        |
| 514.2838       | 4  | K  | 8  | 1070.6244      | 535.8161        |
| 661.3522       | 5  | F  | 7  | 908.4663       | 454.7371        |
| 774.4363       | 6  | L  | 6  | 761.3979       | 381.2029        |
| 889.4632       | 7  | D  | 5  | 648.3139       | 324.6608        |
| 1049.4938      | 8  | C  | 4  | 533.2869       | 267.1474        |
| 1148.5623      | 9  | V  | 3  | 373.2563       | 187.1321        |
| 1247.6307      | 10 | V  | 2  | 274.1879       | 137.5979        |
|                | 11 | R  | 1  | 175.1195       | 88.0637         |

N-term:+43.02 K(4):+162.16  
C(8):+160.03

X-range:

0 - 0

MassTol: Y-zoom:

0. 1.

MassType:

☐AVG ☒MONO

Axis:

☒1 ☐2

Label:

☒I ☐M ☐-

Ions:

a ☐+ ☐2+ ☐3+

b ☒+ ☐2+ ☐3+

c ☐+ ☐2+ ☐3+

x ☐+ ☐2+ ☐3+

y ☒+ ☒2+ ☐3+

z ☐+ ☐2+ ☐3+

hide H<sub>2</sub>O/NH<sub>3</sub> ☐

zoom 112-122 ☐

GO

DIAIHHPWIR, MH+ 1299.6962, m/z 433.9036  
H OS G16 P120811 220811-s1.05809.05809.3.dta

scan 5809; 3.8e+000

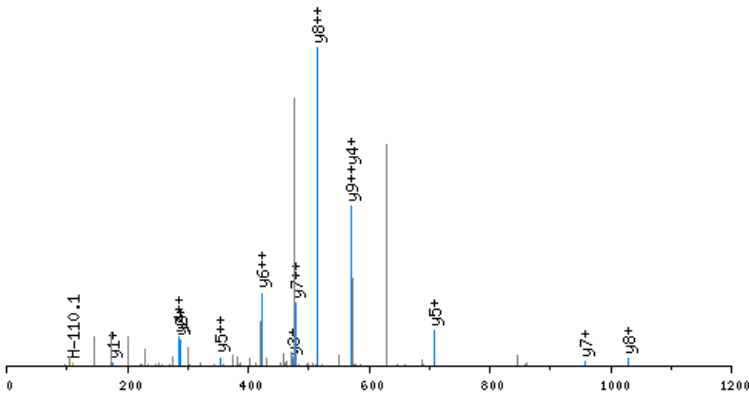

click image to zoom in; click top corners to zoom out

[precursor±]

scan 5808; 433.9 m/z; 1.9e+001

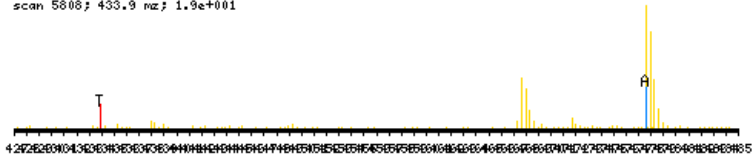

zoomed in precursor plot; T=theoretical m/z, A=acquired m/z

| b <sup>+</sup> | #  | AA | #  | y <sup>+</sup> | y <sup>2+</sup> |
|----------------|----|----|----|----------------|-----------------|
| 158.0453       | 1  | D  | 10 |                |                 |
| 271.1294       | 2  | I  | 9  | 1142.6587      | 571.8333        |
| 342.1665       | 3  | A  | 8  | 1029.5746      | 515.2912        |
| 455.2506       | 4  | I  | 7  | 958.5375       | 479.7727        |
| 592.3095       | 5  | H  | 6  | 845.4535       | 423.2306        |
| 729.3684       | 6  | H  | 5  | 708.3946       | 354.7012        |
| 826.4212       | 7  | P  | 4  | 571.3356       | 286.1717        |
| 1012.5005      | 8  | W  | 3  | 474.2829       | 237.6454        |
| 1125.5845      | 9  | I  | 2  | 288.2036       | 144.6057        |
|                | 10 | R  | 1  | 175.1195       | 88.0637         |

N-term:+43.02

X-range:

0 - 0

MassTol: Y-zoom:

0. 1.

MassType:

☐ AVG ☒ MONO

Axis:

☒ 1 ☐ 2

Label:

☒ I ☐ M ☐ -

Ions:

a ☐ + ☐ 2+ ☐ 3+

b ☒ + ☐ 2+ ☐ 3+

c ☐ + ☐ 2+ ☐ 3+

x ☐ + ☐ 2+ ☐ 3+

y ☒ + ☒ 2+ ☐ 3+

z ☐ + ☐ 2+ ☐ 3+

hide H<sub>2</sub>O/NH<sub>3</sub> ☐

zoom 112-122 ☐

GO

DIDPQNDLTFLR, MH+ 1488.7335, m/z 496.9160  
H OS G13 P120811 220811-s1.06301.06301.3.dta

scan 6301; 1.6e+000

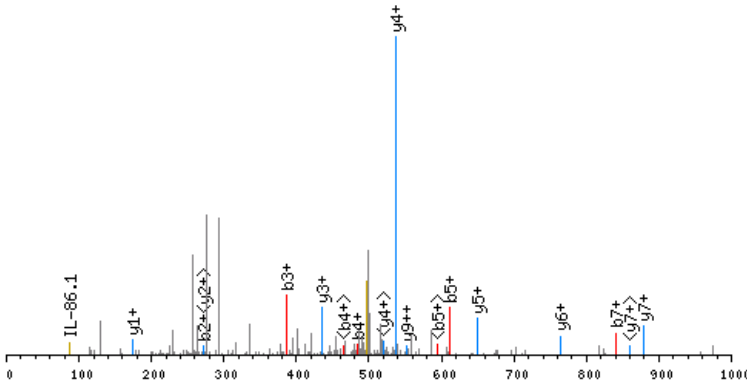

click image to zoom in; click top corners to zoom out

[precursor±]

scan 6299; 496.9 m/z; 4.0e+000

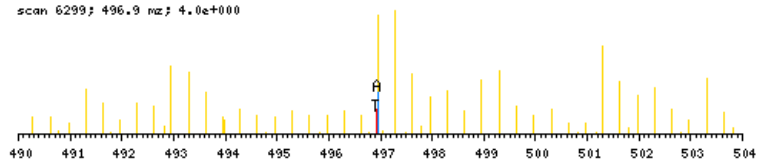

zoomed in precursor plot; T=theoretical m/z, A=acquired m/z

| b <sup>+</sup> | #  | AA | #  | y <sup>+</sup> | y <sup>2+</sup> |
|----------------|----|----|----|----------------|-----------------|
| 158.0453       | 1  | D  | 12 |                |                 |
| 271.1294       | 2  | I  | 11 | 1331.6959      | 666.3519        |
| 386.1564       | 3  | D  | 10 | 1218.6119      | 609.8099        |
| 483.2091       | 4  | P  | 9  | 1103.5849      | 552.2964        |
| 611.2677       | 5  | Q  | 8  | 1006.5322      | 503.7700        |
| 725.3106       | 6  | N  | 7  | 878.4736       | 439.7407        |
| 840.3376       | 7  | D  | 6  | 764.4307       | 382.7192        |
| 953.4216       | 8  | L  | 5  | 649.4037       | 325.2058        |
| 1054.4693      | 9  | T  | 4  | 536.3197       | 268.6637        |
| 1201.5377      | 10 | F  | 3  | 435.2720       | 218.1399        |
| 1314.6218      | 11 | L  | 2  | 288.2036       | 144.6057        |
|                | 12 | R  | 1  | 175.1195       | 88.0637         |

N-term:+43.02

X-range:

0 - 0

MassTol: Y-zoom:

0. 1.

MassType:

☐ AVG ☒ MONO

Axis:

☒ 1 ☐ 2

Label:

☒ I ☐ M ☐ -

Ions:

a ☐ + ☐ 2+ ☐ 3+

b ☒ + ☐ 2+ ☐ 3+

c ☐ + ☐ 2+ ☐ 3+

x ☐ + ☐ 2+ ☐ 3+

y ☒ + ☒ 2+ ☐ 3+

z ☐ + ☐ 2+ ☐ 3+

hide H<sub>2</sub>O/NH<sub>3</sub> ☐

zoom 112-122 ☐

GO

DKNELVQKAK, MH+ 1316.8639, m/z 439.6261  
H OS G15 P120811 220811-s1.02775.02775.3.dta

scan 2775; 8.3e+001

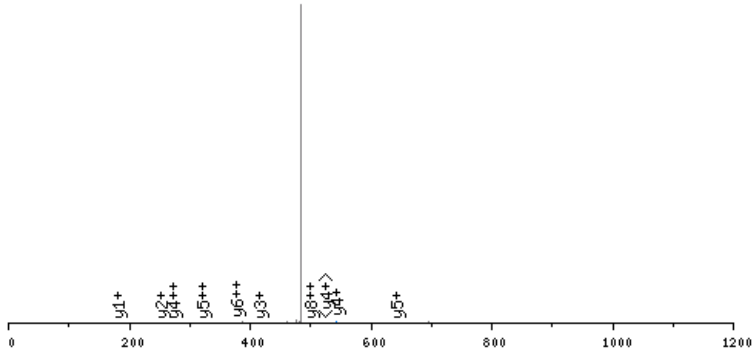

click image to zoom in; click top corners to zoom out [\[precursor±\]](#)

scan 2771; 439.6 m/z; 2.2e+001

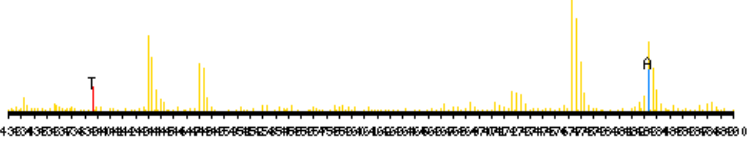

zoomed in precursor plot; T=theoretical m/z, A=acquired m/z

| b <sup>+</sup> | #  | AA | #  | y <sup>+</sup> | y <sup>2+</sup> |
|----------------|----|----|----|----------------|-----------------|
| 158.0453       | 1  | D  | 10 |                |                 |
| 320.2034       | 2  | K  | 9  | 1159.8264      | 580.4171        |
| 434.2464       | 3  | N  | 8  | 997.6683       | 499.3381        |
| 563.2890       | 4  | E  | 7  | 883.6254       | 442.3166        |
| 676.3730       | 5  | L  | 6  | 754.5828       | 377.7953        |
| 775.4414       | 6  | V  | 5  | 641.4987       | 321.2533        |
| 903.5000       | 7  | Q  | 4  | 542.4303       | 271.7191        |
| 1065.6581      | 8  | K  | 3  | 414.3717       | 207.6898        |
| 1136.6952      | 9  | A  | 2  | 252.2136       | 126.6107        |
|                | 10 | K  | 1  | 181.1765       | 91.0922         |

N-term:+43.02 K(2):+162.16  
K(8):+162.16 K(10):+162.16

X-range:

0 - 0

MassTol: Y-zoom:

0. 1.

MassType:

☐AVG ☒MONO

Axis:

☒1 ☐2

Label:

☒I ☐M ☐-

Ions:

a ☐+ ☐2+ ☐3+

b ☒+ ☐2+ ☐3+

c ☐+ ☐2+ ☐3+

x ☐+ ☐2+ ☐3+

y ☒+ ☒2+ ☐3+

z ☐+ ☐2+ ☐3+

hide H<sub>2</sub>O/NH<sub>3</sub> ☐

zoom 112-122 ☐

GO

DKNELVQKAKLAQAER, MH+ 2114.2671, m/z 529.3222  
H OS G17 P120811 220811-s1.05150.05150.4.dta

scan 5150; 2.2e+001

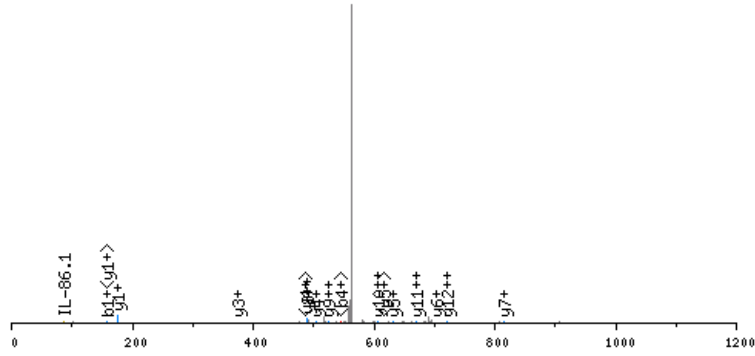

click image to zoom in; click top corners to zoom out [\[precursor±\]](#)

scan 5148; 529.3 m/z; 2.3e+002

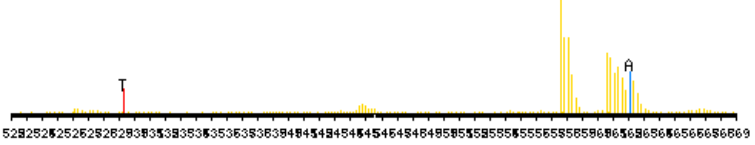

zoomed in precursor plot; T=theoretical m/z, A=acquired m/z

| b <sup>+</sup> | #  | AA | #  | y <sup>+</sup> | y <sup>2+</sup> |
|----------------|----|----|----|----------------|-----------------|
| 158.0453       | 1  | D  | 17 |                |                 |
| 320.2034       | 2  | K  | 16 | 1957.2295      | 979.1187        |
| 434.2464       | 3  | N  | 15 | 1795.0714      | 898.0396        |
| 563.2890       | 4  | E  | 14 | 1681.0285      | 841.0182        |
| 676.3730       | 5  | L  | 13 | 1551.9859      | 776.4969        |
| 775.4414       | 6  | V  | 12 | 1438.9019      | 719.9548        |
| 903.5000       | 7  | Q  | 11 | 1339.8334      | 670.4206        |
| 1065.6581      | 8  | K  | 10 | 1211.7749      | 606.3913        |
| 1136.6952      | 9  | A  | 9  | 1049.6168      | 525.3123        |
| 1298.8533      | 10 | K  | 8  | 978.5797       | 489.7937        |
| 1411.9374      | 11 | L  | 7  | 816.4216       | 408.7147        |
| 1482.9745      | 12 | A  | 6  | 703.3375       | 352.1727        |
| 1612.0171      | 13 | E  | 5  | 632.3004       | 316.6541        |
| 1740.0757      | 14 | Q  | 4  | 503.2578       | 252.1328        |
| 1811.1128      | 15 | A  | 3  | 375.1992       | 188.1035        |
| 1940.1554      | 16 | E  | 2  | 304.1621       | 152.5850        |
|                | 17 | R  | 1  | 175.1195       | 88.0637         |

N-term:+43.02 K(2):+162.16  
K(8):+162.16 K(10):+162.16

X-range:

0 - 0

MassTol: Y-zoom:

0. 1.

MassType:

☐AVG ☒MONO

Axis:

☒1 ☐2

Label:

☒I ☐M ☐-

Ions:

a ☐+ ☐2+ ☐3+

b ☒+ ☐2+ ☐3+

c ☐+ ☐2+ ☐3+

x ☐+ ☐2+ ☐3+

y ☒+ ☒2+ ☐3+

z ☐+ ☐2+ ☐3+

hide H<sub>2</sub>O/NH<sub>3</sub> ☐

zoom 112-122 ☐

GO

DLAAAAEPGAGSQHPEVR, MH+ 1817.8782, m/z 606.6309  
H OS G13 P120811 220811-s1.05121.05121.3.dta

scan 5121; 2.7e+000

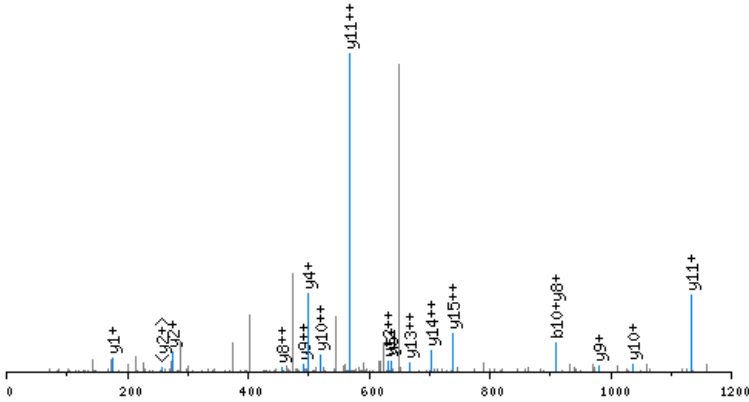

click image to zoom in; click top corners to zoom out

[precursor±]

scan 5119; 606.6 m/z; 4.8e+001

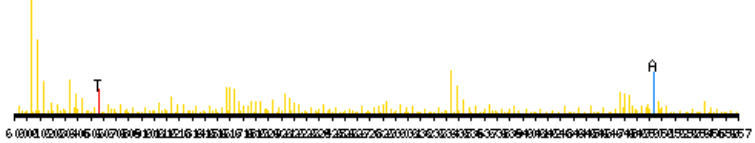

zoomed in precursor plot; T=theoretical m/z, A=acquired m/z

| b <sup>+</sup> | #  | AA | #  | y <sup>+</sup> | y <sup>2+</sup> |
|----------------|----|----|----|----------------|-----------------|
| 158.0453       | 1  | D  | 18 |                |                 |
| 271.1294       | 2  | L  | 17 | 1660.8407      | 830.9243        |
| 342.1665       | 3  | A  | 16 | 1547.7566      | 774.3822        |
| 413.2036       | 4  | A  | 15 | 1476.7195      | 738.8637        |
| 484.2407       | 5  | A  | 14 | 1405.6824      | 703.3451        |
| 555.2779       | 6  | A  | 13 | 1334.6453      | 667.8266        |
| 684.3205       | 7  | E  | 12 | 1263.6082      | 632.3080        |
| 781.3732       | 8  | P  | 11 | 1134.5656      | 567.7867        |
| 838.3947       | 9  | G  | 10 | 1037.5128      | 519.2603        |
| 909.4318       | 10 | A  | 9  | 980.4914       | 490.7496        |
| 966.4533       | 11 | G  | 8  | 909.4543       | 455.2310        |
| 1053.4853      | 12 | S  | 7  | 852.4328       | 426.7203        |
| 1181.5439      | 13 | Q  | 6  | 765.4008       | 383.2043        |
| 1318.6028      | 14 | H  | 5  | 637.3422       | 319.1750        |
| 1415.6555      | 15 | P  | 4  | 500.2833       | 250.6455        |
| 1544.6981      | 16 | E  | 3  | 403.2305       | 202.1192        |
| 1643.7665      | 17 | V  | 2  | 274.1879       | 137.5979        |
|                | 18 | R  | 1  | 175.1195       | 88.0637         |

N-term:+43.02

N-term: +43.02 C(6): +160.03  
K(7): +162.16

X-range:

0 - 0

MassTol: Y-zoom:

0. 1.

MassType:

☐AVG ☒MONO

Axis:

☒1 ☐2

Label:

☒I ☐M ☐-

Ions:

a ☐+ ☐2+ ☐3+

b ☒+ ☐2+ ☐3+

c ☐+ ☐2+ ☐3+

x ☐+ ☐2+ ☐3+

y ☒+ ☒2+ ☐3+

z ☐+ ☐2+ ☐3+

hide H<sub>2</sub>O/NH<sub>3</sub> ☐

zoom 112-122 ☐

GO

DLSSSDLSTASKIVK, MH+ 1648.9010, m/z 550.3052  
H OS G14 P120811 220811-s1.04920.04920.3.dta

scan 4920; 6.5e+000

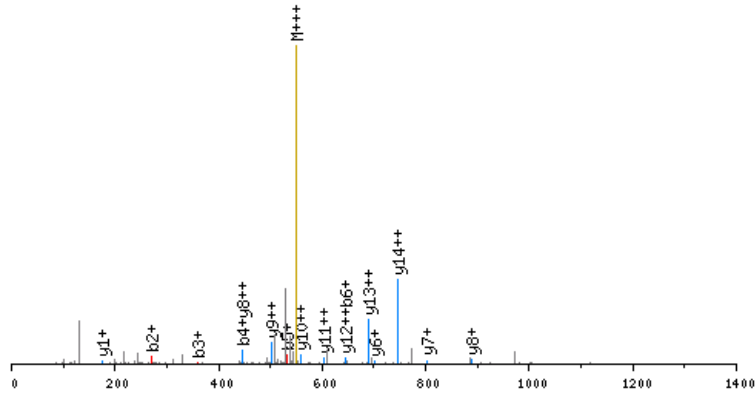

click image to zoom in; click top corners to zoom out [\[precursor±\]](#)

scan 4916; 550.3 m/z; 3.9e+000

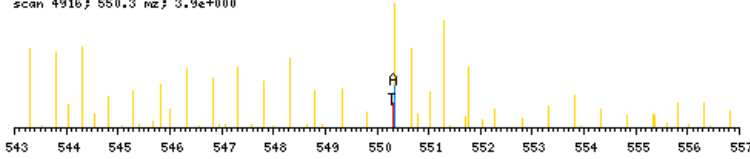

zoomed in precursor plot; T=theoretical m/z, A=acquired m/z

| b <sup>+</sup> | #  | AA | #  | y <sup>+</sup> | y <sup>2+</sup> |
|----------------|----|----|----|----------------|-----------------|
| 158.0453       | 1  | D  | 15 |                |                 |
| 271.1294       | 2  | L  | 14 | 1491.8635      | 746.4356        |
| 358.1614       | 3  | S  | 13 | 1378.7794      | 689.8936        |
| 445.1935       | 4  | S  | 12 | 1291.7474      | 646.3776        |
| 532.2255       | 5  | S  | 11 | 1204.7154      | 602.8616        |
| 647.2524       | 6  | D  | 10 | 1117.6833      | 559.3456        |
| 760.3365       | 7  | L  | 9  | 1002.6564      | 501.8321        |
| 847.3685       | 8  | S  | 8  | 889.5723       | 445.2901        |
| 948.4162       | 9  | T  | 7  | 802.5403       | 401.7741        |
| 1019.4533      | 10 | A  | 6  | 701.4926       | 351.2502        |
| 1106.4853      | 11 | S  | 5  | 630.4555       | 315.7317        |
| 1262.6116      | 12 | K  | 4  | 543.4235       | 272.2156        |
| 1375.6957      | 13 | I  | 3  | 387.2972       | 194.1525        |
| 1474.7641      | 14 | V  | 2  | 274.2131       | 137.6105        |
|                | 15 | K  | 1  | 175.1447       | 88.0763         |

N-term:+43.02 K(12):+156.13  
K(15):+156.13

X-range:

0 - 0

MassTol: Y-zoom:

0. 1.

MassType:

☐AVG ☒MONO

Axis:

☒1 ☐2

Label:

☒I ☐M ☐-

Ions:

a ☐+ ☐2+ ☐3+

b ☒+ ☐2+ ☐3+

c ☐+ ☐2+ ☐3+

x ☐+ ☐2+ ☐3+

y ☒+ ☒2+ ☐3+

z ☐+ ☐2+ ☐3+

hide H<sub>2</sub>O/NH<sub>3</sub> ☐

zoom 112-122 ☐

GO

DNLSDTLKKLKITAADR, MH+ 2028.1706, m/z 507.7981  
H OS G16 P120811 220811-s1.06268.06268.4.dta

scan 6268; 5.0e+000

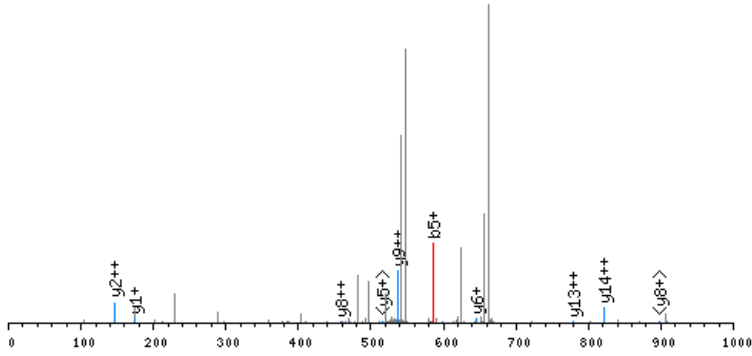

click image to zoom in; click top corners to zoom out [\[precursor±\]](#)

scan 6267; 507.8 m/z; 2.8e+001

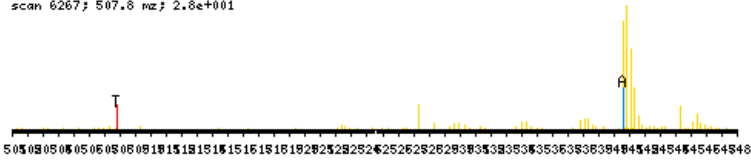

zoomed in precursor plot; T=theoretical m/z, A=acquired m/z

| b <sup>+</sup> | #  | AA | #  | y <sup>+</sup> | y <sup>2+</sup> |
|----------------|----|----|----|----------------|-----------------|
| 158.0453       | 1  | D  | 17 |                |                 |
| 272.0883       | 2  | N  | 16 | 1871.1331      | 936.0705        |
| 385.1723       | 3  | L  | 15 | 1757.0902      | 879.0490        |
| 472.2044       | 4  | S  | 14 | 1644.0061      | 822.5070        |
| 587.2313       | 5  | D  | 13 | 1556.9741      | 778.9909        |
| 688.2790       | 6  | T  | 12 | 1441.9471      | 721.4775        |
| 801.3630       | 7  | L  | 11 | 1340.8994      | 670.9536        |
| 957.4893       | 8  | K  | 10 | 1227.8154      | 614.4116        |
| 1113.6156      | 9  | K  | 9  | 1071.6891      | 536.3485        |
| 1226.6997      | 10 | L  | 8  | 915.5628       | 458.2853        |
| 1382.8260      | 11 | K  | 7  | 802.4787       | 401.7433        |
| 1495.9101      | 12 | I  | 6  | 646.3524       | 323.6801        |
| 1596.9578      | 13 | T  | 5  | 533.2683       | 267.1381        |
| 1667.9949      | 14 | A  | 4  | 432.2207       | 216.6142        |
| 1739.0320      | 15 | A  | 3  | 361.1836       | 181.0957        |
| 1854.0589      | 16 | D  | 2  | 290.1464       | 145.5771        |
|                | 17 | R  | 1  | 175.1195       | 88.0637         |

N-term:+43.02 K(8):+156.13  
K(9):+156.13 K(11):+156.13

X-range:

0 - 0

MassTol: Y-zoom:

0. 1.

MassType:

☐ AVG ☒ MONO

Axis:

☒ 1 ☐ 2

Label:

☒ I ☐ M ☐ -

Ions:

a ☐ + ☐ 2+ ☐ 3+

b ☒ + ☐ 2+ ☐ 3+

c ☐ + ☐ 2+ ☐ 3+

x ☐ + ☐ 2+ ☐ 3+

y ☒ + ☒ 2+ ☐ 3+

z ☐ + ☐ 2+ ☐ 3+

hide H<sub>2</sub>O/NH<sub>3</sub> ☐

zoom 112-122 ☐

GO

DPSGVKVLTAEDIQER, MH+ 1955.9926, m/z 652.6691  
H OS G12 P120811 220811-s1.05248.05248.3.dta

scan 5248; 2.9e+000

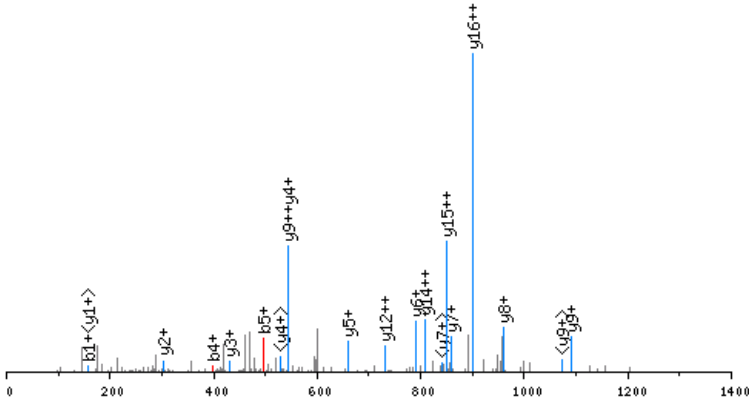

click image to zoom in; click top corners to zoom out

[precursor±]

scan 5247; 652.7 m/z; 9.9e+000

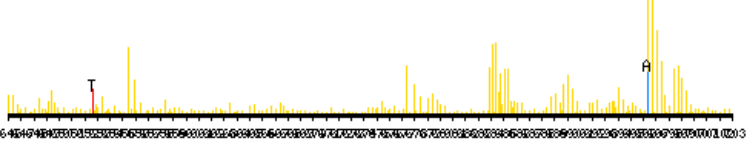

zoomed in precursor plot; T=theoretical m/z, A=acquired m/z

| b <sup>+</sup> | #  | AA | #  | y <sup>+</sup> | y <sup>2+</sup> |
|----------------|----|----|----|----------------|-----------------|
| 158.0453       | 1  | D  | 17 |                |                 |
| 255.0981       | 2  | P  | 16 | 1798.9551      | 899.9815        |
| 342.1301       | 3  | S  | 15 | 1701.9023      | 851.4551        |
| 399.1516       | 4  | G  | 14 | 1614.8703      | 807.9391        |
| 498.2200       | 5  | V  | 13 | 1557.8488      | 779.4283        |
| 654.3463       | 6  | K  | 12 | 1458.7804      | 729.8941        |
| 753.4147       | 7  | V  | 11 | 1302.6541      | 651.8310        |
| 866.4988       | 8  | L  | 10 | 1203.5857      | 602.2968        |
| 995.5414       | 9  | E  | 9  | 1090.5017      | 545.7547        |
| 1096.5891      | 10 | T  | 8  | 961.4591       | 481.2334        |
| 1167.6262      | 11 | A  | 7  | 860.4114       | 430.7096        |
| 1296.6688      | 12 | E  | 6  | 789.3743       | 395.1910        |
| 1411.6957      | 13 | D  | 5  | 660.3317       | 330.6698        |
| 1524.7798      | 14 | I  | 4  | 545.3047       | 273.1563        |
| 1652.8384      | 15 | Q  | 3  | 432.2207       | 216.6142        |
| 1781.8809      | 16 | E  | 2  | 304.1621       | 152.5850        |
|                | 17 | R  | 1  | 175.1195       | 88.0637         |

N-term:+43.02 K(6):+156.13

X-range:

0 - 0

MassTol: Y-zoom:

0. 1.

MassType:

☐AVG ☒MONO

Axis:

☒1 ☐2

Label:

☒I ☐M ☐-

Ions:

a ☐+ ☐2+ ☐3+

b ☒+ ☐2+ ☐3+

c ☐+ ☐2+ ☐3+

x ☐+ ☐2+ ☐3+

y ☒+ ☒2+ ☐3+

z ☐+ ☐2+ ☐3+

hide H<sub>2</sub>O/NH<sub>3</sub> ☐

zoom 112-122 ☐

GO

DSEAFQHAR, MH+ 1102.4918, m/z 551.7495  
H OS G14 P120811 220811-s1.03714.03714.2.dta

scan 3714; 1.4e+000

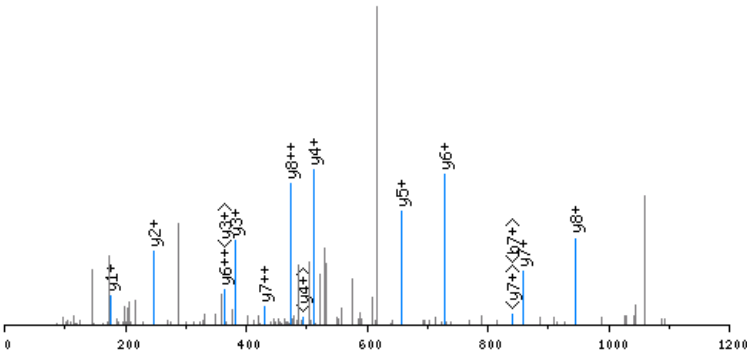

click image to zoom in; click top corners to zoom out

[precursor±]

scan 3711; 551.7 m/z; 1.3e+002

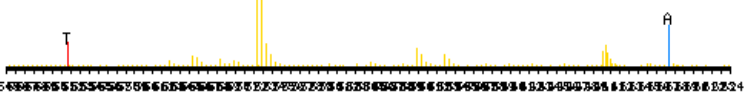

zoomed in precursor plot; T=theoretical m/z, A=acquired m/z

| b <sup>+</sup> | # | AA | # | y <sup>+</sup> | y <sup>2+</sup> |
|----------------|---|----|---|----------------|-----------------|
| 158.0453       | 1 | D  | 9 |                |                 |
| 245.0774       | 2 | S  | 8 | 945.4543       | 473.2310        |
| 374.1200       | 3 | E  | 7 | 858.4222       | 429.7150        |
| 445.1571       | 4 | A  | 6 | 729.3796       | 365.1937        |
| 592.2255       | 5 | F  | 5 | 658.3425       | 329.6752        |
| 720.2841       | 6 | Q  | 4 | 511.2741       | 256.1410        |
| 857.3430       | 7 | H  | 3 | 383.2155       | 192.1117        |
| 928.3801       | 8 | A  | 2 | 246.1566       | 123.5822        |
|                | 9 | R  | 1 | 175.1195       | 88.0637         |

N-term:+43.02

X-range:

0 - 0

MassTol: Y-zoom:

0. 1.

MassType:

☐AVG ☒MONO

Axis:

☒1 ☐2

Label:

☒I ☐M ☐-

Ions:

a ☐+ ☐2+ ☐3+

b ☒+ ☐2+ ☐3+

c ☐+ ☐2+ ☐3+

x ☐+ ☐2+ ☐3+

y ☒+ ☒2+ ☐3+

z ☐+ ☐2+ ☐3+

hide H<sub>2</sub>O/NH<sub>3</sub> ☐

zoom 112-122 ☐

GO

EAATHQVGMAGPR, MH+ 1366.6538, m/z 456.2228  
H OS G13 P120811 220811-s1.04123.04123.3.dta

scan 4123; 2.7e+000

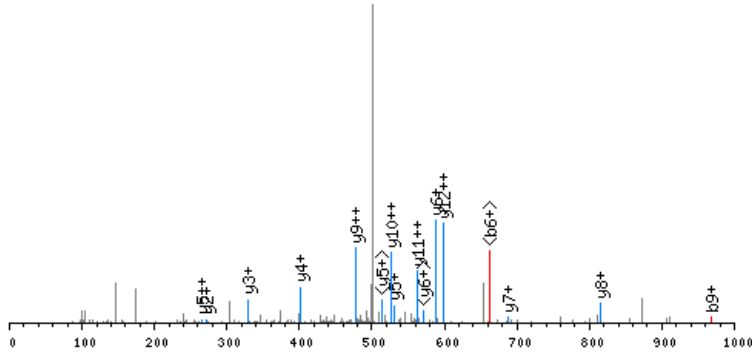

click image to zoom in; click top corners to zoom out [\[precursor±\]](#)

scan 4119; 456.2 m/z; 1.1e+001

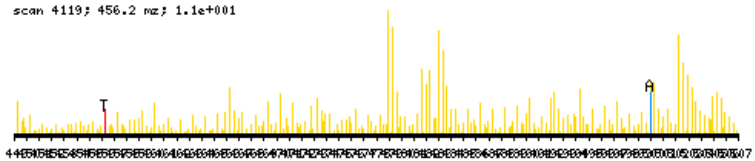

zoomed in precursor plot; T=theoretical m/z, A=acquired m/z

| b <sup>+</sup> | #  | AA | #  | y <sup>+</sup> | y <sup>2+</sup> |
|----------------|----|----|----|----------------|-----------------|
| 172.0610       | 1  | E  | 13 |                |                 |
| 243.0981       | 2  | A  | 12 | 1195.6006      | 598.3042        |
| 314.1352       | 3  | A  | 11 | 1124.5635      | 562.7857        |
| 415.1829       | 4  | T  | 10 | 1053.5264      | 527.2671        |
| 552.2418       | 5  | H  | 9  | 952.4787       | 476.7433        |
| 680.3004       | 6  | Q  | 8  | 815.4198       | 408.2138        |
| 779.3688       | 7  | V  | 7  | 687.3612       | 344.1845        |
| 836.3903       | 8  | G  | 6  | 588.2928       | 294.6503        |
| 967.4308       | 9  | M  | 5  | 531.2713       | 266.1396        |
| 1038.4679      | 10 | A  | 4  | 400.2308       | 200.6193        |
| 1095.4893      | 11 | G  | 3  | 329.1937       | 165.1008        |
| 1192.5421      | 12 | P  | 2  | 272.1723       | 136.5900        |
|                | 13 | R  | 1  | 175.1195       | 88.0637         |

N-term:+43.02

X-range:

0 - 0

MassTol: Y-zoom:

0. 1.

MassType:

☐AVG ☒MONO

Axis:

☒1 ☐2

Label:

☒I ☐M ☐-

Ions:

a ☐+ ☐2+ ☐3+

b ☒+ ☐2+ ☐3+

c ☐+ ☐2+ ☐3+

x ☐+ ☐2+ ☐3+

y ☒+ ☒2+ ☐3+

z ☐+ ☐2+ ☐3+

hide H<sub>2</sub>O/NH<sub>3</sub> ☐

zoom 112-122 ☐

GO

EAKGGTVKAASGFNATEDAQTLR, MH+ 2420.2422, m/z 605.8160  
H OS G14 P120811 220811-s1.04552.04552.4.dta

scan 4552; 2.2e+000

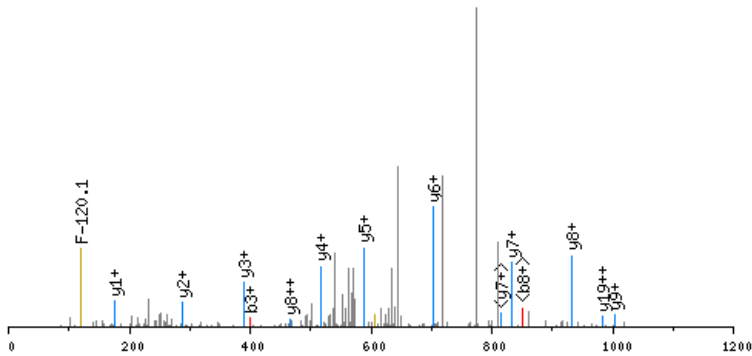

click image to zoom in; click top corners to zoom out

[precursor±]

scan 4551; 605.8 m/z; 2.4e+001

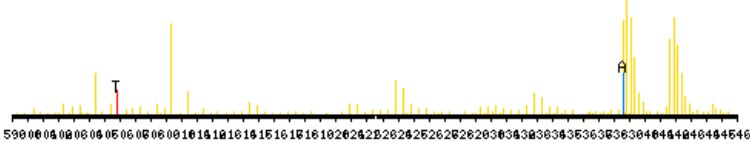

zoomed in precursor plot; T=theoretical m/z, A=acquired m/z

| b <sup>+</sup> | #  | AA | #  | y <sup>+</sup> | y <sup>2+</sup> |
|----------------|----|----|----|----------------|-----------------|
| 172.0610       | 1  | E  | 23 |                |                 |
| 243.0981       | 2  | A  | 22 | 2249.1891      | 1125.0984       |
| 399.2244       | 3  | K  | 21 | 2178.1519      | 1089.5799       |
| 456.2459       | 4  | G  | 20 | 2022.0256      | 1011.5167       |
| 513.2673       | 5  | G  | 19 | 1965.0042      | 983.0060        |
| 614.3150       | 6  | T  | 18 | 1907.9827      | 954.4953        |
| 713.3834       | 7  | V  | 17 | 1806.9350      | 903.9714        |
| 869.5097       | 8  | K  | 16 | 1707.8666      | 854.4372        |
| 940.5468       | 9  | A  | 15 | 1551.7403      | 776.3741        |
| 1011.5840      | 10 | A  | 14 | 1480.7032      | 740.8555        |
| 1098.6160      | 11 | S  | 13 | 1409.6661      | 705.3370        |
| 1155.6374      | 12 | G  | 12 | 1322.6341      | 661.8209        |
| 1302.7059      | 13 | F  | 11 | 1265.6126      | 633.3102        |
| 1416.7488      | 14 | N  | 10 | 1118.5442      | 559.7760        |
| 1487.7859      | 15 | A  | 9  | 1004.5013      | 502.7545        |
| 1588.8336      | 16 | T  | 8  | 933.4641       | 467.2360        |
| 1717.8762      | 17 | E  | 7  | 832.4165       | 416.7121        |
| 1832.9031      | 18 | D  | 6  | 703.3739       | 352.1909        |
| 1903.9402      | 19 | A  | 5  | 588.3469       | 294.6774        |
| 2031.9988      | 20 | Q  | 4  | 517.3098       | 259.1588        |
| 2133.0465      | 21 | T  | 3  | 389.2512       | 195.1295        |
| 2246.1306      | 22 | L  | 2  | 288.2036       | 144.6057        |
|                | 23 | R  | 1  | 175.1195       | 88.0637         |

N-term:+43.02 K(3):+156.13  
K(8):+156.13

X-range:

0 - 0

MassTol: Y-zoom:

0. 1.

MassType:

☐AVG ☒MONO

Axis:

☒1 ☐2

Label:

☒I ☐M ☐-

Ions:

a ☐+ ☐2+ ☐3+

b ☒+ ☐2+ ☐3+

c ☐+ ☐2+ ☐3+

x ☐+ ☐2+ ☐3+

y ☒+ ☒2+ ☐3+

z ☐+ ☐2+ ☐3+

hide H<sub>2</sub>O/NH<sub>3</sub> ☐

zoom 112-122 ☐

GO

EDPGEDTSIHR, MH+ 1297.5661, m/z 649.2867  
H OS G13 P120811 220811-s1.03168.03168.2.dta

scan 3168; 4.1e+000

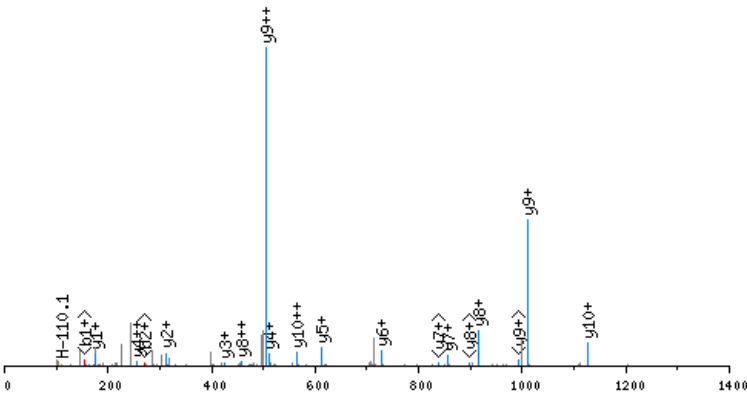

click image to zoom in; click top corners to zoom out

[precursor±]

scan 3164; 649.3 m/z; 3.2e+001

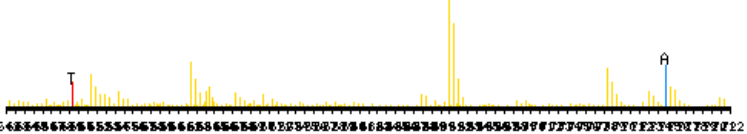

zoomed in precursor plot; T=theoretical m/z, A=acquired m/z

| b <sup>+</sup> | #  | AA | #  | y <sup>+</sup> | y <sup>2+</sup> |
|----------------|----|----|----|----------------|-----------------|
| 172.0610       | 1  | E  | 11 |                |                 |
| 287.0879       | 2  | D  | 10 | 1126.5129      | 563.7604        |
| 384.1407       | 3  | P  | 9  | 1011.4859      | 506.2469        |
| 441.1622       | 4  | G  | 8  | 914.4332       | 457.7205        |
| 570.2048       | 5  | E  | 7  | 857.4117       | 429.2098        |
| 685.2317       | 6  | D  | 6  | 728.3691       | 364.6885        |
| 786.2794       | 7  | T  | 5  | 613.3422       | 307.1750        |
| 873.3114       | 8  | S  | 4  | 512.2945       | 256.6512        |
| 986.3955       | 9  | I  | 3  | 425.2625       | 213.1352        |
| 1123.4544      | 10 | H  | 2  | 312.1784       | 156.5931        |
|                | 11 | R  | 1  | 175.1195       | 88.0637         |

N-term:+43.02

X-range:

0 - 0

MassTol: Y-zoom:

0. 1.

MassType:

☐ AVG ☒ MONO

Axis:

☒ 1 ☐ 2

Label:

☒ I ☐ M ☐ -

Ions:

a ☐ + ☐ 2+ ☐ 3+

b ☒ + ☐ 2+ ☐ 3+

c ☐ + ☐ 2+ ☐ 3+

x ☐ + ☐ 2+ ☐ 3+

y ☒ + ☒ 2+ ☐ 3+

z ☐ + ☐ 2+ ☐ 3+

hide H<sub>2</sub>O/NH<sub>3</sub> ☐

zoom 112-122 ☐

GO

EEAELVKGR, MH+ 1100.5952, m/z 550.8012  
H OS G13 P120811 220811-s1.04350.04350.2.dta

scan 4350; 2.1e+001

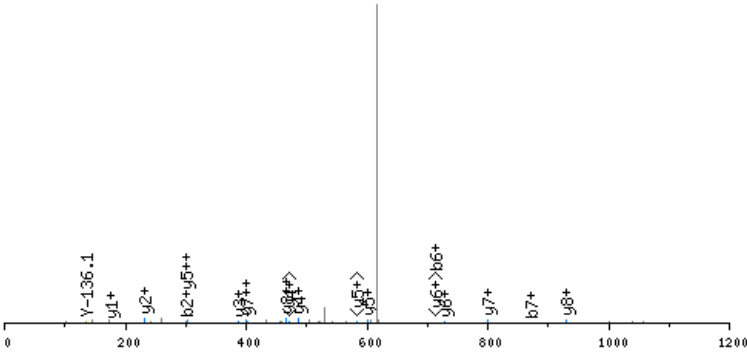

click image to zoom in; click top corners to zoom out

[precursor±]

scan 4349; 550.8 m/z; 9.7e+001

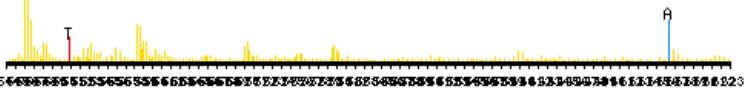

zoomed in precursor plot; T=theoretical m/z, A=acquired m/z

| b <sup>+</sup> | # | AA | # | y <sup>+</sup> | y <sup>2+</sup> |
|----------------|---|----|---|----------------|-----------------|
| 172.0610       | 1 | E  | 9 |                |                 |
| 301.1036       | 2 | E  | 8 | 929.5420       | 465.2749        |
| 372.1407       | 3 | A  | 7 | 800.4994       | 400.7536        |
| 501.1833       | 4 | E  | 6 | 729.4623       | 365.2351        |
| 614.2674       | 5 | L  | 5 | 600.4197       | 300.7138        |
| 713.3358       | 6 | V  | 4 | 487.3357       | 244.1718        |
| 869.4621       | 7 | K  | 3 | 388.2673       | 194.6375        |
| 926.4835       | 8 | G  | 2 | 232.1410       | 116.5744        |
|                | 9 | R  | 1 | 175.1195       | 88.0637         |

N-term:+43.02 K(7):+156.13

X-range:

0 - 0

MassTol: Y-zoom:

0. 1.

MassType:

☐AVG ☒MONO

Axis:

☒1 ☐2

Label:

☒I ☐M ☐-

Ions:

a ☐+ ☐2+ ☐3+

b ☒+ ☐2+ ☐3+

c ☐+ ☐2+ ☐3+

x ☐+ ☐2+ ☐3+

y ☒+ ☒2+ ☐3+

z ☐+ ☐2+ ☐3+

hide H<sub>2</sub>O/NH<sub>3</sub> ☐

zoom 112-122 ☐

GO

EEAPHGCPGADSAQAGR, MH+ 1751.7407, m/z 584.5851  
H OS G13 P120811 220811-s1.02821.02821.3.dta

scan 2821; 6.6e-001

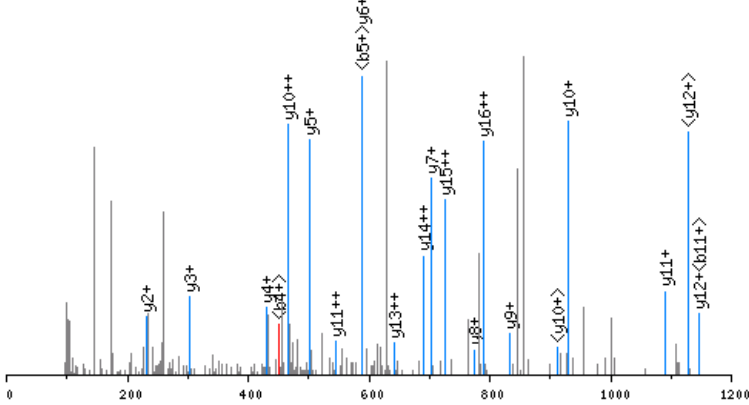

click image to zoom in; click top corners to zoom out

[precursor±]

scan 2819; 584.6 m/z; 2.3e+001

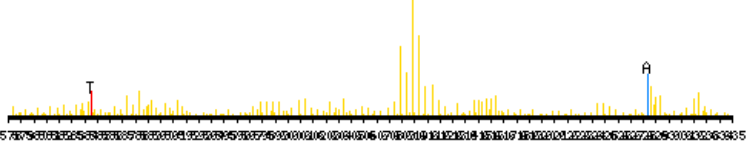

zoomed in precursor plot; T=theoretical m/z, A=acquired m/z

| b <sup>+</sup> | #  | AA | #  | y <sup>+</sup> | y <sup>2+</sup> |
|----------------|----|----|----|----------------|-----------------|
| 172.0610       | 1  | E  | 17 |                |                 |
| 301.1036       | 2  | E  | 16 | 1580.6875      | 790.8477        |
| 372.1407       | 3  | A  | 15 | 1451.6449      | 726.3264        |
| 469.1935       | 4  | P  | 14 | 1380.6078      | 690.8078        |
| 606.2524       | 5  | H  | 13 | 1283.5551      | 642.2814        |
| 663.2738       | 6  | G  | 12 | 1146.4961      | 573.7520        |
| 823.3044       | 7  | C  | 11 | 1089.4747      | 545.2413        |
| 920.3572       | 8  | P  | 10 | 929.4441       | 465.2260        |
| 977.3787       | 9  | G  | 9  | 832.3913       | 416.6996        |
| 1048.4158      | 10 | A  | 8  | 775.3699       | 388.1888        |
| 1163.4427      | 11 | D  | 7  | 704.3327       | 352.6703        |
| 1250.4748      | 12 | S  | 6  | 589.3058       | 295.1568        |
| 1321.5119      | 13 | A  | 5  | 502.2738       | 251.6408        |
| 1449.5704      | 14 | Q  | 4  | 431.2367       | 216.1222        |
| 1520.6076      | 15 | A  | 3  | 303.1781       | 152.0930        |
| 1577.6290      | 16 | G  | 2  | 232.1410       | 116.5744        |
|                | 17 | R  | 1  | 175.1195       | 88.0637         |

N-term:+43.02 C(7):+160.03

X-range:

0 - 0

MassTol: Y-zoom:

0. 1.

MassType:

☐AVG ☒MONO

Axis:

☒1 ☐2

Label:

☒I ☐M ☐-

Ions:

a ☐+ ☐2+ ☐3+

b ☒+ ☐2+ ☐3+

c ☐+ ☐2+ ☐3+

x ☐+ ☐2+ ☐3+

y ☒+ ☒2+ ☐3+

z ☐+ ☐2+ ☐3+

hide H<sub>2</sub>O/NH<sub>3</sub> ☐

zoom 112-122 ☐

GO

EEEDSTALVCDNGSGLCKAGFAGDDAPR, MH+ 3011.2998, m/z 753.5804  
H OS G12 P120811 220811-s1.04358.04358.4.dta

scan 4358; 1.8e+000

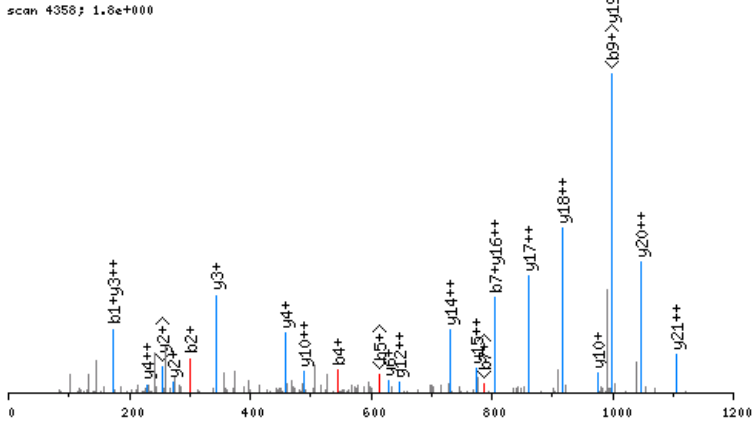

click image to zoom in; click top corners to zoom out

[precursor±]

scan 4357; 753.6 m/z; 7.5e+000

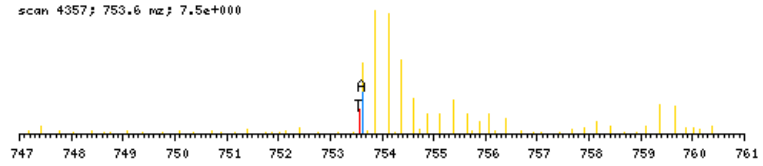

zoomed in precursor plot; T=theoretical m/z, A=acquired m/z

| b <sup>+</sup> | #  | AA | #  | y <sup>+</sup> | y <sup>2+</sup> |
|----------------|----|----|----|----------------|-----------------|
| 172.0610       | 1  | E  | 28 |                |                 |
| 301.1036       | 2  | E  | 27 | 2840.2467      | 1420.6272       |
| 430.1462       | 3  | E  | 26 | 2711.2041      | 1356.1059       |
| 545.1731       | 4  | D  | 25 | 2582.1615      | 1291.5846       |
| 632.2052       | 5  | S  | 24 | 2467.1345      | 1234.0712       |
| 733.2528       | 6  | T  | 23 | 2380.1025      | 1190.5552       |
| 804.2899       | 7  | A  | 22 | 2279.0548      | 1140.0313       |
| 917.3740       | 8  | L  | 21 | 2208.0177      | 1104.5128       |
| 1016.4424      | 9  | V  | 20 | 2094.9336      | 1047.9707       |
| 1176.4730      | 10 | C  | 19 | 1995.8652      | 998.4365        |
| 1291.5000      | 11 | D  | 18 | 1835.8346      | 918.4212        |
| 1405.5429      | 12 | N  | 17 | 1720.8077      | 860.9078        |
| 1462.5644      | 13 | G  | 16 | 1606.7648      | 803.8863        |
| 1549.5964      | 14 | S  | 15 | 1549.7433      | 775.3756        |
| 1606.6178      | 15 | G  | 14 | 1462.7113      | 731.8595        |
| 1719.7019      | 16 | L  | 13 | 1405.6898      | 703.3488        |
| 1879.7325      | 17 | C  | 12 | 1292.6057      | 646.8068        |
| 2035.8588      | 18 | K  | 11 | 1132.5751      | 566.7915        |
| 2106.8959      | 19 | A  | 10 | 976.4488       | 488.7283        |
| 2163.9174      | 20 | G  | 9  | 905.4117       | 453.2098        |
| 2310.9858      | 21 | F  | 8  | 848.3903       | 424.6990        |
| 2382.0229      | 22 | A  | 7  | 701.3218       | 351.1648        |
| 2439.0444      | 23 | G  | 6  | 630.2847       | 315.6463        |
| 2554.0713      | 24 | D  | 5  | 573.2633       | 287.1355        |
| 2669.0983      | 25 | D  | 4  | 458.2363       | 229.6221        |
| 2740.1354      | 26 | A  | 3  | 343.2094       | 172.1086        |
| 2837.1881      | 27 | P  | 2  | 272.1723       | 136.5900        |
|                | 28 | R  | 1  | 175.1195       | 88.0637         |

N-term:+43.02 C(10):+160.03  
C(17):+160.03 K(18):+156.13

X-range:

$$\boxed{0} - \boxed{0}$$

0. 1.

☐ AVG ☒ MONO

1 2

☒ I ☐ M ☐ -

**a**  +  2 +  3 +

b ☒ 1+ ☐ 2+ ☐ 3+

**c**  $\begin{bmatrix} 1 & 2 & 3 \\ 2 & 4 & 6 \\ 3 & 6 & 9 \end{bmatrix}$

$$y \begin{bmatrix} \checkmark \\ \checkmark \end{bmatrix} + \begin{bmatrix} \checkmark \\ \checkmark \end{bmatrix}^2 + \begin{bmatrix} \quad \\ \quad \end{bmatrix}^3 + \dots$$
$$z_1 + z_2 + z_3 + \dots$$
hide  $\text{H}_2\text{O}/\text{NH}_3$ 

zoom 112-123

GO

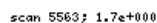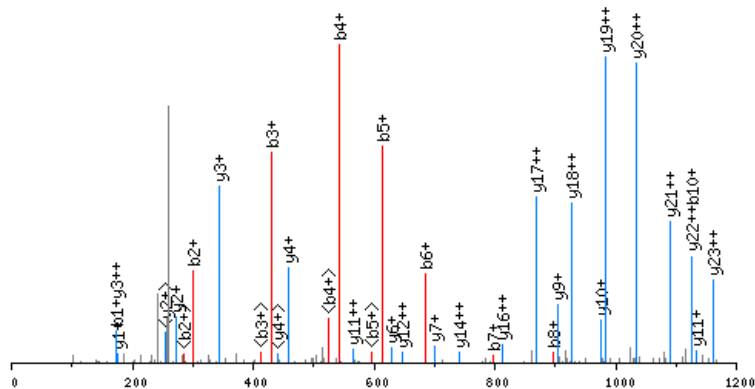

click image to zoom in; click top corners to zoom out

[precursor<sub>±</sub>]

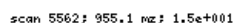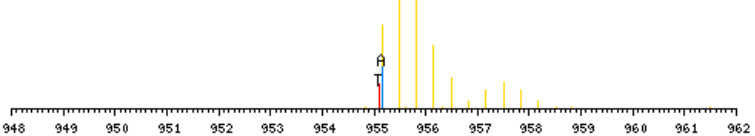

zoomed in precursor plot; T=theoretical m/z, A=acquired m/z

| $b^+$     | #  | AA | #  | $y^+$     | $y^{2+}$  |
|-----------|----|----|----|-----------|-----------|
| 172.0610  | 1  | E  | 27 |           |           |
| 301.1036  | 2  | E  | 26 | 2692.2711 | 1346.6394 |
| 430.1462  | 3  | E  | 25 | 2563.2285 | 1282.1181 |
| 543.2302  | 4  | I  | 24 | 2434.1859 | 1217.5969 |
| 614.2674  | 5  | A  | 23 | 2321.1018 | 1161.0548 |
| 685.3045  | 6  | A  | 22 | 2250.0647 | 1125.5363 |
| 798.3885  | 7  | L  | 21 | 2179.0276 | 1090.0177 |
| 897.4569  | 8  | V  | 20 | 2065.9435 | 1033.4757 |
| 1010.5410 | 9  | I  | 19 | 1966.8751 | 983.9415  |
| 1125.5680 | 10 | D  | 18 | 1853.7910 | 927.3994  |
| 1239.6109 | 11 | N  | 17 | 1738.7641 | 869.8860  |
| 1296.6323 | 12 | G  | 16 | 1624.7212 | 812.8645  |
| 1383.6644 | 13 | S  | 15 | 1567.6997 | 784.3538  |
| 1440.6858 | 14 | G  | 14 | 1480.6677 | 740.8378  |
| 1571.7263 | 15 | M  | 13 | 1423.6462 | 712.3270  |
| 1731.7569 | 16 | C  | 12 | 1292.6057 | 646.8068  |
| 1887.8832 | 17 | K  | 11 | 1132.5751 | 566.7915  |
| 1958.9203 | 18 | A  | 10 | 976.4488  | 488.7283  |
| 2015.9418 | 19 | G  | 9  | 905.4117  | 453.2098  |
| 2163.0102 | 20 | F  | 8  | 848.3903  | 424.6990  |
| 2234.0473 | 21 | A  | 7  | 701.3218  | 351.1648  |
| 2291.0688 | 22 | G  | 6  | 630.2847  | 315.6463  |
| 2406.0957 | 23 | D  | 5  | 573.2633  | 287.1355  |
| 2521.1227 | 24 | D  | 4  | 458.2363  | 229.6221  |
| 2592.1598 | 25 | A  | 3  | 343.2094  | 172.1086  |
| 2689.2126 | 26 | P  | 2  | 272.1723  | 136.5900  |
|           | 27 | R  | 1  | 175.1195  | 88.0637   |

N-term:+43.02 C(16):+160.03  
K(17):+156.13

X-range:

0 - 0

MassTol: Y-zoom:

0. 1.

MassType:

☐AVG ☒MONO

Axis:

☒1 ☐2

Label:

☒I ☐M ☐-

Ions:

a ☐+ ☐2+ ☐3+

b ☒+ ☐2+ ☐3+

c ☐+ ☐2+ ☐3+

x ☐+ ☐2+ ☐3+

y ☒+ ☒2+ ☐3+

z ☐+ ☐2+ ☐3+

hide H<sub>2</sub>O/NH<sub>3</sub> ☐

zoom 112-122 ☐

GO

EEESIKEGSEKPR, MH+ 1615.8180, m/z 539.2775  
H OS G15 P120811 220811-s1.02577.02577.3.dta

scan 2577; 7.6e+000

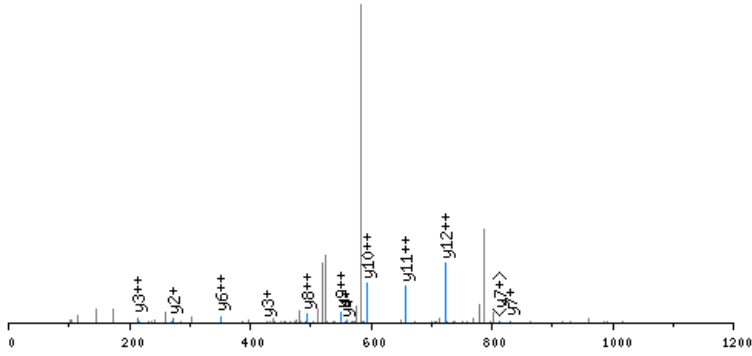

click image to zoom in; click top corners to zoom out [\[precursor±\]](#)

scan 2576; 539.3 m/z; 3.6e+000

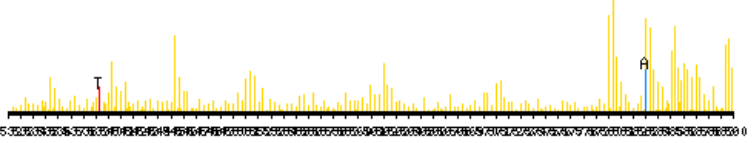

zoomed in precursor plot; T=theoretical m/z, A=acquired m/z

| b <sup>+</sup> | #  | AA | #  | y <sup>+</sup> | y <sup>2+</sup> |
|----------------|----|----|----|----------------|-----------------|
| 172.0610       | 1  | E  | 13 |                |                 |
| 301.1036       | 2  | E  | 12 | 1444.7648      | 722.8863        |
| 430.1462       | 3  | E  | 11 | 1315.7222      | 658.3650        |
| 517.1782       | 4  | S  | 10 | 1186.6796      | 593.8437        |
| 630.2623       | 5  | I  | 9  | 1099.6476      | 550.3277        |
| 786.3886       | 6  | K  | 8  | 986.5635       | 493.7857        |
| 915.4312       | 7  | E  | 7  | 830.4372       | 415.7225        |
| 972.4526       | 8  | G  | 6  | 701.3946       | 351.2012        |
| 1059.4847      | 9  | S  | 5  | 644.3732       | 322.6905        |
| 1188.5273      | 10 | E  | 4  | 557.3412       | 279.1745        |
| 1344.6536      | 11 | K  | 3  | 428.2986       | 214.6532        |
| 1441.7063      | 12 | P  | 2  | 272.1723       | 136.5900        |
|                | 13 | R  | 1  | 175.1195       | 88.0637         |

N-term:+43.02 K(6):+156.13  
K(11):+156.13

X-range:

$$\boxed{0} - \boxed{0}$$

0. 1.

☐ AVG ☒ MONO

1 2

☒ I ☐ M ☐ -

**a**  + 2 + 3 +

b ☒ 1+ ☐ 2+ ☐ 3+

$\square \pm \square^2 \pm \square^3$

$$x \begin{vmatrix} & + & \\ & & 2+ \\ & & & 3+ \end{vmatrix}$$

**y** ☒<sup>+</sup> ☒<sup>2+</sup> ☐<sup>3+</sup>

$$z \begin{bmatrix} \phantom{0} \\ \phantom{0} \\ \phantom{0} \end{bmatrix} + \begin{bmatrix} \phantom{0} \\ \phantom{0} \\ \phantom{0} \end{bmatrix}^2 + \begin{bmatrix} \phantom{0} \\ \phantom{0} \\ \phantom{0} \end{bmatrix}^3 + \dots$$

110 120

zoom 112-12.

GO

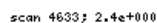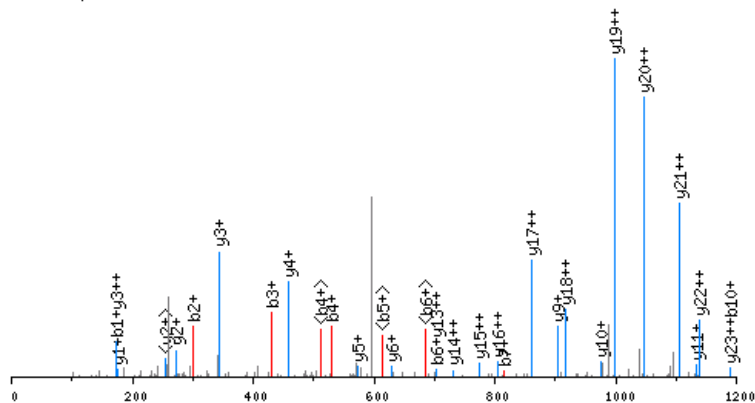

click image to zoom in; click top corners to zoom out

[precursor±]

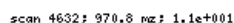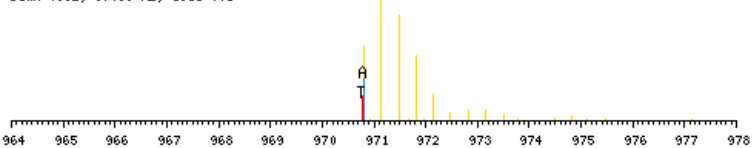

zoomed in precursor plot; T=theoretical m/z, A=acquired m/z

| b <sup>+</sup> | #  | AA | #  | y <sup>+</sup> | y <sup>2+</sup> |
|----------------|----|----|----|----------------|-----------------|
| 172.0610       | 1  | E  | 27 |                |                 |
| 301.1036       | 2  | E  | 26 | 2739.2354      | 1370.1216       |
| 430.1462       | 3  | E  | 25 | 2610.1928      | 1305.6003       |
| 531.1939       | 4  | T  | 24 | 2481.1502      | 1241.0799       |
| 632.2415       | 5  | T  | 23 | 2380.1025      | 1190.5552       |
| 703.2787       | 6  | A  | 22 | 2279.0548      | 1140.0313       |
| 816.3627       | 7  | L  | 21 | 2208.0177      | 1104.5128       |
| 915.4311       | 8  | V  | 20 | 2094.9336      | 1047.9707       |
| 1075.4617      | 9  | C  | 19 | 1995.8652      | 998.4365        |
| 1190.4887      | 10 | D  | 18 | 1835.8346      | 918.4212        |
| 1304.5316      | 11 | N  | 17 | 1720.8077      | 860.9078        |
| 1361.5531      | 12 | G  | 16 | 1606.7648      | 803.8863        |
| 1448.5851      | 13 | S  | 15 | 1549.7433      | 775.3756        |
| 1505.6066      | 14 | G  | 14 | 1462.7113      | 731.8595        |
| 1618.6906      | 15 | L  | 13 | 1405.6898      | 703.3488        |
| 1778.7212      | 16 | C  | 12 | 1292.6057      | 646.8068        |
| 1934.8475      | 17 | K  | 11 | 1132.5751      | 566.7915        |
| 2005.8846      | 18 | A  | 10 | 976.4488       | 488.7283        |
| 2062.9061      | 19 | G  | 9  | 905.4117       | 453.2098        |
| 2209.9745      | 20 | F  | 8  | 848.3903       | 424.6990        |
| 2281.0116      | 21 | A  | 7  | 701.3218       | 351.1648        |
| 2338.0331      | 22 | G  | 6  | 630.2847       | 315.6463        |
| 2453.0600      | 23 | D  | 5  | 573.2633       | 287.1355        |
| 2568.0870      | 24 | D  | 4  | 458.2363       | 229.6221        |
| 2639.1241      | 25 | A  | 3  | 343.2094       | 172.1086        |
| 2736.1769      | 26 | P  | 2  | 272.1723       | 136.5900        |
|                | 27 | R  | 1  | 175.1195       | 88.0637         |

```

N-term:+43.02 C(9):+160.03
C(16):+160.03 K(17):+156.13

```

X-range:

0 - 0

MassTol: Y-zoom:

0. 1.

MassType:

☐ AVG ☒ MONO

Axis:

☒ 1 ☐ 2

Label:

☒ I ☐ M ☐ -

Ions:

a ☐ + ☐ 2+ ☐ 3+

b ☒ + ☐ 2+ ☐ 3+

c ☐ + ☐ 2+ ☐ 3+

x ☐ + ☐ 2+ ☐ 3+

y ☒ + ☒ 2+ ☐ 3+

z ☐ + ☐ 2+ ☐ 3+

hide H<sub>2</sub>O/NH<sub>3</sub> ☐

zoom 112-122 ☐

GO

EERPSETNSNVDSSAQPSVAQLAGR, MH+ 2671.2560, m/z 668.5694  
H OS G12 P120811 220811-s1.03846.03846.4.dta

scan 3846; 1.3e+000

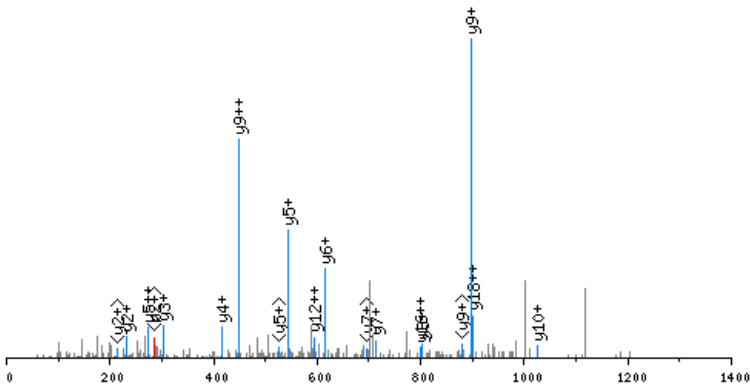

click image to zoom in; click top corners to zoom out

[precursor±]

scan 3842; 668.6 m/z; 2.4e+001

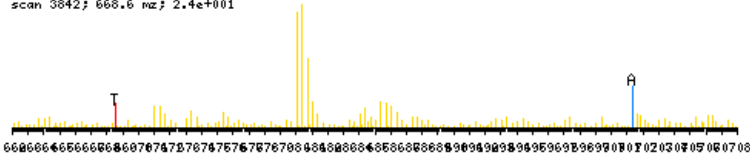

zoomed in precursor plot; T=theoretical m/z, A=acquired m/z

| b <sup>+</sup> | #  | AA | #  | y <sup>+</sup> | y <sup>2+</sup> |
|----------------|----|----|----|----------------|-----------------|
| 172.0610       | 1  | E  | 25 |                |                 |
| 301.1036       | 2  | E  | 24 | 2500.2028      | 1250.6053       |
| 457.2047       | 3  | R  | 23 | 2371.1602      | 1186.0840       |
| 554.2575       | 4  | P  | 22 | 2215.0591      | 1108.0335       |
| 641.2895       | 5  | S  | 21 | 2118.0063      | 1059.5071       |
| 770.3321       | 6  | E  | 20 | 2030.9743      | 1015.9911       |
| 871.3798       | 7  | T  | 19 | 1901.9317      | 951.4698        |
| 985.4227       | 8  | N  | 18 | 1800.8840      | 900.9459        |
| 1072.4547      | 9  | S  | 17 | 1686.8411      | 843.9245        |
| 1186.4976      | 10 | N  | 16 | 1599.8091      | 800.4084        |
| 1285.5661      | 11 | V  | 15 | 1485.7661      | 743.3870        |
| 1400.5930      | 12 | D  | 14 | 1386.6977      | 693.8528        |
| 1487.6250      | 13 | S  | 13 | 1271.6708      | 636.3393        |
| 1574.6571      | 14 | S  | 12 | 1184.6388      | 592.8233        |
| 1645.6942      | 15 | A  | 11 | 1097.6067      | 549.3073        |
| 1773.7527      | 16 | Q  | 10 | 1026.5696      | 513.7887        |
| 1870.8055      | 17 | P  | 9  | 898.5110       | 449.7594        |
| 1957.8375      | 18 | S  | 8  | 801.4583       | 401.2331        |
| 2056.9060      | 19 | V  | 7  | 714.4262       | 357.7170        |
| 2127.9431      | 20 | A  | 6  | 615.3578       | 308.1828        |
| 2256.0016      | 21 | Q  | 5  | 544.3207       | 272.6643        |
| 2369.0857      | 22 | L  | 4  | 416.2621       | 208.6350        |
| 2440.1228      | 23 | A  | 3  | 303.1781       | 152.0930        |
| 2497.1443      | 24 | G  | 2  | 232.1410       | 116.5744        |
|                | 25 | R  | 1  | 175.1195       | 88.0637         |

N-term:+43.02

N-term: +43.02

X-range:

0 - 0

MassTol: Y-zoom:

0. 1.

MassType:

☐AVG ☒MONO

Axis:

☒1 ☐2

Label:

☒I ☐M ☐-

Ions:

a ☐+ ☐2+ ☐3+

b ☒+ ☐2+ ☐3+

c ☐+ ☐2+ ☐3+

x ☐+ ☐2+ ☐3+

y ☒+ ☒2+ ☐3+

z ☐+ ☐2+ ☐3+

hide H<sub>2</sub>O/NH<sub>3</sub> ☐

zoom 112-122 ☐

GO

EGYHKPDQQLQALKDTANR, MH+ 2484.4060, m/z 621.8570  
H OS G18 P120811 220811-s1.04032.04032.4.dta

scan 4032; 1.5e+001

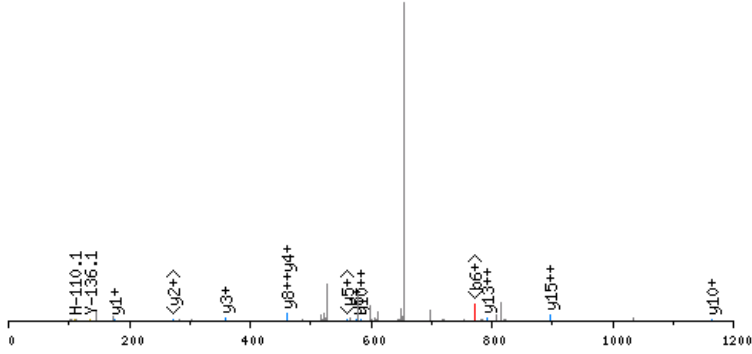

click image to zoom in; click top corners to zoom out [\[precursor±\]](#)

scan 4031; 621.9 m/z; 2.6e+001

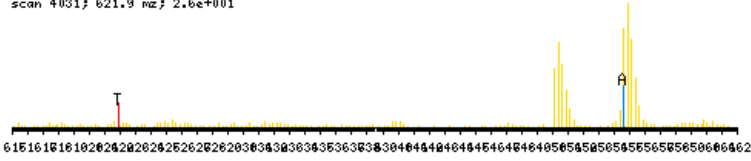

zoomed in precursor plot; T=theoretical m/z, A=acquired m/z

| b <sup>+</sup> | #  | AA | #  | y <sup>+</sup> | y <sup>2+</sup> |
|----------------|----|----|----|----------------|-----------------|
| 172.0610       | 1  | E  | 20 |                |                 |
| 229.0825       | 2  | G  | 19 | 2313.3528      | 1157.1803       |
| 392.1458       | 3  | Y  | 18 | 2256.3314      | 1128.6696       |
| 529.2047       | 4  | H  | 17 | 2093.2681      | 1047.1379       |
| 691.3628       | 5  | K  | 16 | 1956.2091      | 978.6085        |
| 788.4156       | 6  | P  | 15 | 1794.0510      | 897.5294        |
| 903.4425       | 7  | D  | 14 | 1696.9983      | 849.0031        |
| 1031.5011      | 8  | Q  | 13 | 1581.9713      | 791.4896        |
| 1159.5597      | 9  | Q  | 12 | 1453.9128      | 727.4603        |
| 1321.7178      | 10 | K  | 11 | 1325.8542      | 663.4310        |
| 1434.8018      | 11 | L  | 10 | 1163.6961      | 582.3520        |
| 1562.8604      | 12 | Q  | 9  | 1050.6120      | 525.8099        |
| 1633.8975      | 13 | A  | 8  | 922.5534       | 461.7806        |
| 1746.9816      | 14 | L  | 7  | 851.5163       | 426.2621        |
| 1909.1397      | 15 | K  | 6  | 738.4323       | 369.7200        |
| 2024.1666      | 16 | D  | 5  | 576.2742       | 288.6410        |
| 2125.2143      | 17 | T  | 4  | 461.2472       | 231.1275        |
| 2196.2514      | 18 | A  | 3  | 360.1995       | 180.6037        |
| 2310.2943      | 19 | N  | 2  | 289.1624       | 145.0851        |
|                | 20 | R  | 1  | 175.1195       | 88.0637         |

N-term:+43.02 K(5):+162.16  
K(10):+162.16 K(15):+162.16

X-range:

0 - 0

MassTol: Y-zoom:

0. 1.

MassType:

☐ AVG ☒ MONO

Axis:

☒ 1 ☐ 2

Label:

☒ I ☐ M ☐ -

Ions:

a ☐ + ☐ 2+ ☐ 3+

b ☒ + ☐ 2+ ☐ 3+

c ☐ + ☐ 2+ ☐ 3+

x ☐ + ☐ 2+ ☐ 3+

y ☒ + ☒ 2+ ☐ 3+

z ☐ + ☐ 2+ ☐ 3+

hide H<sub>2</sub>O/NH<sub>3</sub> ☐

zoom 112-122 ☐

GO

EIPPTHYAASR, MH+ 1283.6384, m/z 642.3229  
H OS G13 P120811 220811-s1.04312.04312.2.dta

scan 4312; 4.3e+000

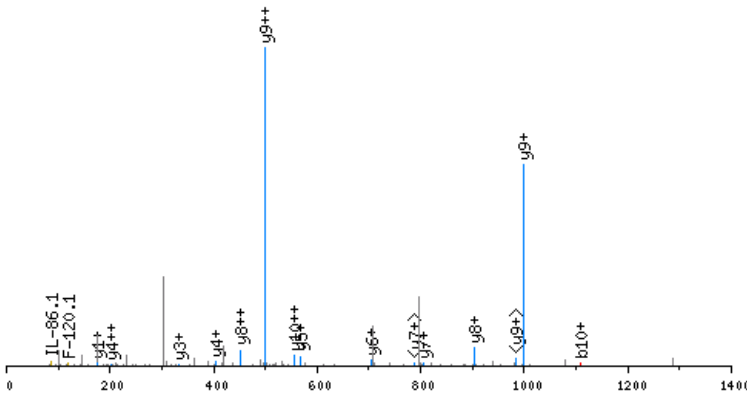

click image to zoom in; click top corners to zoom out

[precursor±]

scan 4309; 642.3 m/z; 1.5e+001

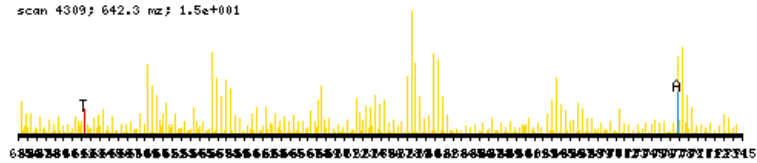

zoomed in precursor plot; T=theoretical m/z, A=acquired m/z

| b <sup>+</sup> | #  | AA | #  | y <sup>+</sup> | y <sup>2+</sup> |
|----------------|----|----|----|----------------|-----------------|
| 172.0610       | 1  | E  | 11 |                |                 |
| 285.1451       | 2  | I  | 10 | 1112.5853      | 556.7965        |
| 382.1978       | 3  | P  | 9  | 999.5012       | 500.2545        |
| 479.2506       | 4  | P  | 8  | 902.4484       | 451.7281        |
| 580.2983       | 5  | T  | 7  | 805.3957       | 403.2018        |
| 717.3572       | 6  | H  | 6  | 704.3480       | 352.6779        |
| 880.4205       | 7  | Y  | 5  | 567.2891       | 284.1485        |
| 951.4576       | 8  | A  | 4  | 404.2258       | 202.6168        |
| 1022.4947      | 9  | A  | 3  | 333.1886       | 167.0982        |
| 1109.5268      | 10 | S  | 2  | 262.1515       | 131.5797        |
|                | 11 | R  | 1  | 175.1195       | 88.0637         |

N-term:+43.02

X-range:

0 - 0

MassTol: Y-zoom:

0. 1.

MassType:

☐ AVG ☒ MONO

Axis:

☒ 1 ☐ 2

Label:

☒ I ☐ M ☐ -

Ions:

a ☐ + ☐ 2+ ☐ 3+

b ☒ + ☐ 2+ ☐ 3+

c ☐ + ☐ 2+ ☐ 3+

x ☐ + ☐ 2+ ☐ 3+

y ☒ + ☒ 2+ ☐ 3+

z ☐ + ☐ 2+ ☐ 3+

hide H<sub>2</sub>O/NH<sub>3</sub> ☐

zoom 112-122 ☐

GO

EKEEETTR, MH+ 1097.5539, m/z 549.2806  
H OS G13 P120811 220811-s1.02106.02106.2.dta

scan 2106; 1.5e+001

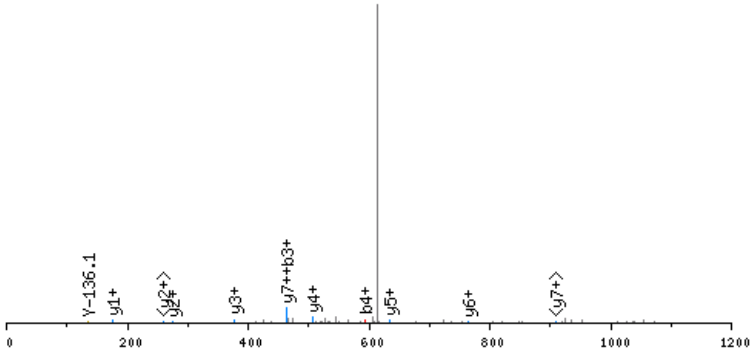

click image to zoom in; click top corners to zoom out

[precursor±]

scan 2104; 549.3 m/z; 8.9e+000

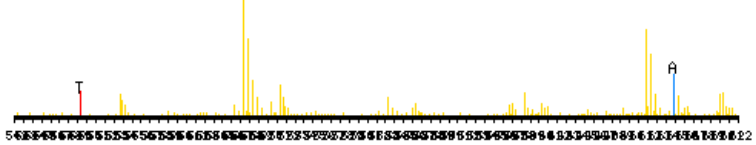

zoomed in precursor plot; T=theoretical m/z, A=acquired m/z

| b <sup>+</sup> | # | AA | # | y <sup>+</sup> | y <sup>2+</sup> |
|----------------|---|----|---|----------------|-----------------|
| 172.0610       | 1 | E  | 8 |                |                 |
| 334.2191       | 2 | K  | 7 | 926.5007       | 463.7543        |
| 463.2617       | 3 | E  | 6 | 764.3426       | 382.6752        |
| 592.3043       | 4 | E  | 5 | 635.3000       | 318.1539        |
| 721.3469       | 5 | E  | 4 | 506.2575       | 253.6326        |
| 822.3946       | 6 | T  | 3 | 377.2149       | 189.1113        |
| 923.4422       | 7 | T  | 2 | 276.1672       | 138.5875        |
|                | 8 | R  | 1 | 175.1195       | 88.0637         |

N-term:+43.02 K(2):+162.16

X-range:

0 - 0

MassTol: Y-zoom:

0. 1.

MassType:

☐AVG ☒MONO

Axis:

☒1 ☐2

Label:

☒I ☐M ☐-

Ions:

a ☐+ ☐2+ ☐3+

b ☒+ ☐2+ ☐3+

c ☐+ ☐2+ ☐3+

x ☐+ ☐2+ ☐3+

y ☒+ ☒2+ ☐3+

z ☐+ ☐2+ ☐3+

hide H<sub>2</sub>O/NH<sub>3</sub> ☐

zoom 112-122 ☐

GO

EKTELIQKAK, MH+ 1331.8999, m/z 444.6382  
H OS G15 P120811 220811-s1.03110.03110.3.dta

scan 3110; 4.5e+001

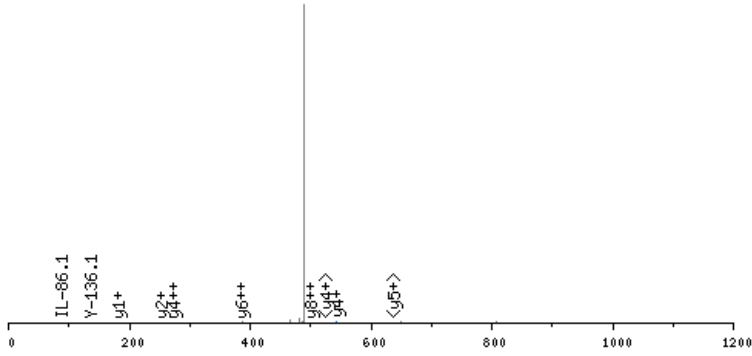

click image to zoom in; click top corners to zoom out [\[precursor±\]](#)

scan 3106; 444.6 m/z; 1.3e+002

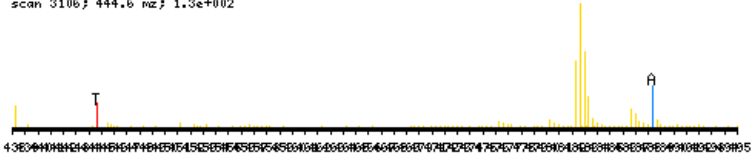

zoomed in precursor plot; T=theoretical m/z, A=acquired m/z

| b <sup>+</sup> | #  | AA | #  | y <sup>+</sup> | y <sup>2+</sup> |
|----------------|----|----|----|----------------|-----------------|
| 172.0610       | 1  | E  | 10 |                |                 |
| 334.2191       | 2  | K  | 9  | 1160.8468      | 580.9273        |
| 435.2668       | 3  | T  | 8  | 998.6887       | 499.8483        |
| 564.3094       | 4  | E  | 7  | 897.6410       | 449.3244        |
| 677.3934       | 5  | L  | 6  | 768.5984       | 384.8031        |
| 790.4775       | 6  | I  | 5  | 655.5143       | 328.2611        |
| 918.5361       | 7  | Q  | 4  | 542.4303       | 271.7191        |
| 1080.6942      | 8  | K  | 3  | 414.3717       | 207.6898        |
| 1151.7313      | 9  | A  | 2  | 252.2136       | 126.6107        |
|                | 10 | K  | 1  | 181.1765       | 91.0922         |

N-term:+43.02 K(2):+162.16  
K(8):+162.16 K(10):+162.16

X-range:

0 - 0

MassTol: Y-zoom:

0. 1.

MassType:

☐AVG ☒MONO

Axis:

☒1 ☐2

Label:

☒I ☐M ☐-

Ions:

a ☐+ ☐2+ ☐3+

b ☒+ ☐2+ ☐3+

c ☐+ ☐2+ ☐3+

x ☐+ ☐2+ ☐3+

y ☒+ ☒2+ ☐3+

z ☐+ ☐2+ ☐3+

hide H<sub>2</sub>O/NH<sub>3</sub> ☐

zoom 112-122 ☐

GO

EKTLETVPLEK, MH+ 1390.8006, m/z 464.2717  
H OS G13 P120811 220811-s1.05783.05783.3.dta

scan 5783; 5.4e+000

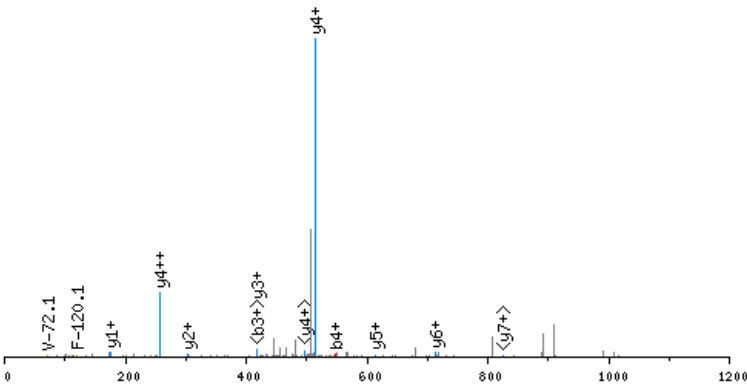

click image to zoom in; click top corners to zoom out

[precursor±]

scan 5779; 464.3 m/z; 4.0e+001

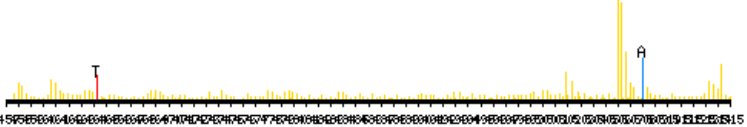

zoomed in precursor plot; T=theoretical m/z, A=acquired m/z

| b <sup>+</sup> | #  | AA | #  | y <sup>+</sup> | y <sup>2+</sup> |
|----------------|----|----|----|----------------|-----------------|
| 172.0610       | 1  | E  | 11 |                |                 |
| 334.2191       | 2  | K  | 10 | 1219.7474      | 610.3776        |
| 435.2668       | 3  | T  | 9  | 1057.5893      | 529.2986        |
| 548.3508       | 4  | L  | 8  | 956.5417       | 478.7747        |
| 677.3934       | 5  | E  | 7  | 843.4576       | 422.2327        |
| 778.4411       | 6  | T  | 6  | 714.4150       | 357.7114        |
| 877.5095       | 7  | V  | 5  | 613.3673       | 307.1876        |
| 974.5623       | 8  | P  | 4  | 514.2989       | 257.6534        |
| 1087.6463      | 9  | L  | 3  | 417.2462       | 209.1270        |
| 1216.6889      | 10 | E  | 2  | 304.1621       | 152.5850        |
|                | 11 | R  | 1  | 175.1195       | 88.0637         |

N-term:+43.02 K(2):+162.16

X-range:

0 - 0

MassTol: Y-zoom:

0. 1.

MassType:

☐ AVG ☒ MONO

Axis:

☒ 1 ☐ 2

Label:

☒ I ☐ M ☐ -

Ions:

a ☐ + ☐ 2+ ☐ 3+

b ☒ + ☐ 2+ ☐ 3+

c ☐ + ☐ 2+ ☐ 3+

x ☐ + ☐ 2+ ☐ 3+

y ☒ + ☒ 2+ ☐ 3+

z ☐ + ☐ 2+ ☐ 3+

hide H<sub>2</sub>O/NH<sub>3</sub> ☐

zoom 112-122 ☐

GO

EKVPGDMEIER, MH+ 1372.6783, m/z 458.2309  
H OS G13 P120811 220811-s1.04922.04922.3.dta

scan 4922; 1.9e+000

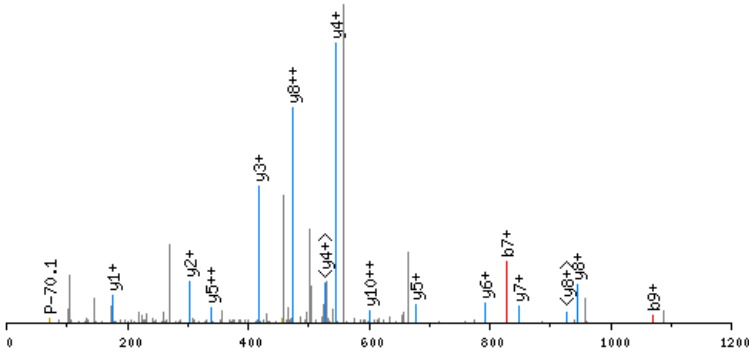

click image to zoom in; click top corners to zoom out [\[precursor±\]](#)

scan 4919; 458.2 m/z; 3.7e+001

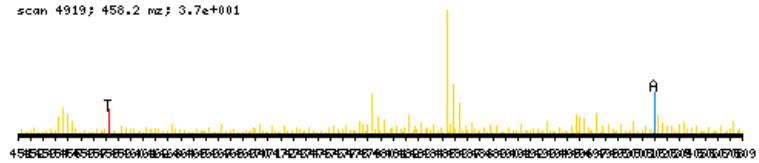

zoomed in precursor plot; T=theoretical m/z, A=acquired m/z

| b <sup>+</sup> | #  | AA | #  | y <sup>+</sup> | y <sup>2+</sup> |
|----------------|----|----|----|----------------|-----------------|
| 172.0610       | 1  | E  | 11 |                |                 |
| 328.1873       | 2  | K  | 10 | 1201.6251      | 601.3165        |
| 427.2557       | 3  | V  | 9  | 1045.4988      | 523.2533        |
| 524.3085       | 4  | P  | 8  | 946.4304       | 473.7191        |
| 581.3299       | 5  | G  | 7  | 849.3776       | 425.1927        |
| 696.3569       | 6  | D  | 6  | 792.3562       | 396.6820        |
| 827.3974       | 7  | M  | 5  | 677.3292       | 339.1685        |
| 956.4400       | 8  | E  | 4  | 546.2888       | 273.6483        |
| 1069.5240      | 9  | I  | 3  | 417.2462       | 209.1270        |
| 1198.5666      | 10 | E  | 2  | 304.1621       | 152.5850        |
|                | 11 | R  | 1  | 175.1195       | 88.0637         |

N-term:+43.02 K(2):+156.13

X-range:

0 - 0

MassTol: Y-zoom:

0. 1.

MassType:

☐AVG ☒MONO

Axis:

☒1 ☐2

Label:

☒I ☐M ☐-

Ions:

a ☐+ ☐2+ ☐3+

b ☒+ ☐2+ ☐3+

c ☐+ ☐2+ ☐3+

x ☐+ ☐2+ ☐3+

y ☒+ ☒2+ ☐3+

z ☐+ ☐2+ ☐3+

hide H<sub>2</sub>O/NH<sub>3</sub> ☐

zoom 112-122 ☐

GO

EKVPGDMEIERR, MH+ 1528.7794, m/z 510.2647  
H OS G15 P120811 220811-s1.03999.03999.3.dta

scan 3999; 1.7e+001

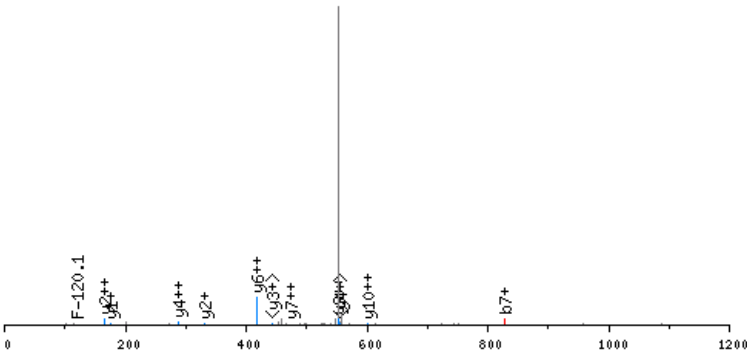

click image to zoom in; click top corners to zoom out

[precursor±]

scan 3996; 510.3 m/z; 1.5e+001

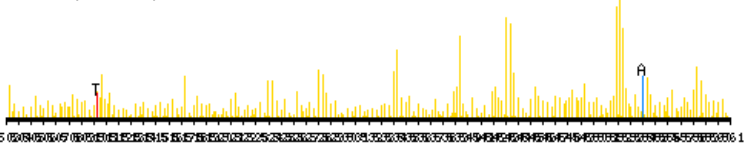

zoomed in precursor plot; T=theoretical m/z, A=acquired m/z

| b <sup>+</sup> | #  | AA | #  | y <sup>+</sup> | y <sup>2+</sup> |
|----------------|----|----|----|----------------|-----------------|
| 172.0610       | 1  | E  | 12 |                |                 |
| 328.1873       | 2  | K  | 11 | 1357.7262      | 679.3670        |
| 427.2557       | 3  | V  | 10 | 1201.5999      | 601.3039        |
| 524.3085       | 4  | P  | 9  | 1102.5315      | 551.7697        |
| 581.3299       | 5  | G  | 8  | 1005.4788      | 503.2433        |
| 696.3569       | 6  | D  | 7  | 948.4573       | 474.7326        |
| 827.3974       | 7  | M  | 6  | 833.4303       | 417.2191        |
| 956.4400       | 8  | E  | 5  | 702.3899       | 351.6988        |
| 1069.5240      | 9  | I  | 4  | 573.3473       | 287.1775        |
| 1198.5666      | 10 | E  | 3  | 460.2632       | 230.6355        |
| 1354.6677      | 11 | R  | 2  | 331.2206       | 166.1142        |
|                | 12 | R  | 1  | 175.1195       | 88.0637         |

N-term:+43.02 K(2):+156.13

X-range:

0 - 0

MassTol: Y-zoom:

0. 1.

MassType:

☐ AVG ☒ MONO

Axis:

☒ 1 ☐ 2

Label:

☒ I ☐ M ☐ -

Ions:

a ☐ + ☐ 2+ ☐ 3+

b ☒ + ☐ 2+ ☐ 3+

c ☐ + ☐ 2+ ☐ 3+

x ☐ + ☐ 2+ ☐ 3+

y ☒ + ☒ 2+ ☐ 3+

z ☐ + ☐ 2+ ☐ 3+

hide H<sub>2</sub>O/NH<sub>3</sub> ☐

zoom 112-122 ☐

GO

ELHILEHR, MH+ 1088.5853, m/z 363.5333  
H OS G16 P120811 220811-s1.05251.05251.3.dta

scan 5251; 5.9e+000

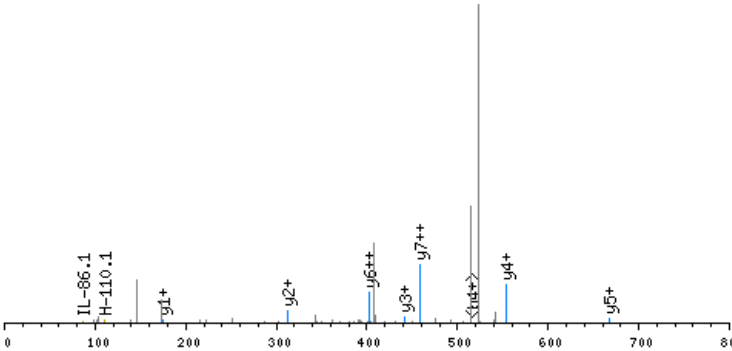

click image to zoom in; click top corners to zoom out [\[precursor±\]](#)

scan 5248; 363.5 m/z; 9.4e+000

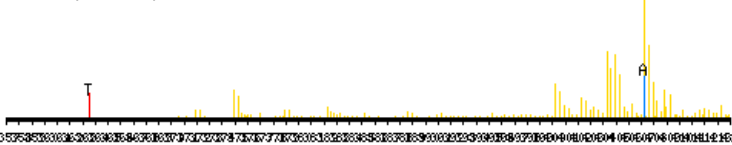

zoomed in precursor plot; T=theoretical m/z, A=acquired m/z

| b <sup>+</sup> | # | AA | # | y <sup>+</sup> | y <sup>2+</sup> |
|----------------|---|----|---|----------------|-----------------|
| 172.0610       | 1 | E  | 8 |                |                 |
| 285.1451       | 2 | L  | 7 | 917.5321       | 459.2700        |
| 422.2040       | 3 | H  | 6 | 804.4480       | 402.7279        |
| 535.2880       | 4 | I  | 5 | 667.3891       | 334.1985        |
| 648.3721       | 5 | L  | 4 | 554.3051       | 277.6564        |
| 777.4147       | 6 | E  | 3 | 441.2210       | 221.1144        |
| 914.4736       | 7 | H  | 2 | 312.1784       | 156.5931        |
|                | 8 | R  | 1 | 175.1195       | 88.0637         |

N-term:+43.02

N-term: +43.02 K(7): +162.16

X-range:

0 - 0

MassTol: Y-zoom:

0. 1.

MassType:

☐AVG ☒MONO

Axis:

☒1 ☐2

Label:

☒I ☐M ☐-

Ions:

a ☐+ ☐2+ ☐3+

b ☒+ ☐2+ ☐3+

c ☐+ ☐2+ ☐3+

x ☐+ ☐2+ ☐3+

y ☒+ ☒2+ ☐3+

z ☐+ ☐2+ ☐3+

hide H<sub>2</sub>O/NH<sub>3</sub> ☐

zoom 112-122 ☐

GO

ELVRPGAMATATVR, MH+ 1513.8161, m/z 505.2769  
H OS G13 P120811 220811-s1.02132.02132.3.dta

scan 2132; 2.2e+000

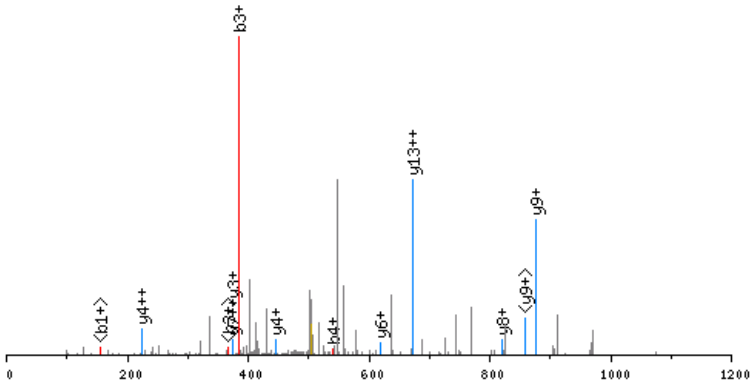

click image to zoom in; click top corners to zoom out [\[precursor±\]](#)

scan 2129; 505.3 m/z; 4.4e+000

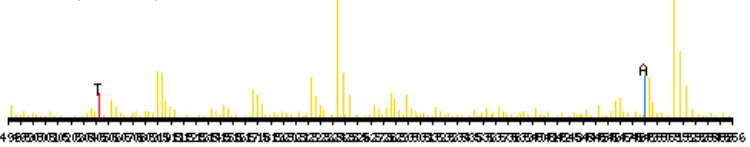

zoomed in precursor plot; T=theoretical m/z, A=acquired m/z

| b <sup>+</sup> | #  | AA | #  | y <sup>+</sup> | y <sup>2+</sup> |
|----------------|----|----|----|----------------|-----------------|
| 172.0610       | 1  | E  | 14 |                |                 |
| 285.1451       | 2  | L  | 13 | 1342.7629      | 671.8854        |
| 384.2135       | 3  | V  | 12 | 1229.6789      | 615.3433        |
| 540.3146       | 4  | R  | 11 | 1130.6104      | 565.8091        |
| 637.3673       | 5  | P  | 10 | 974.5093       | 487.7586        |
| 694.3888       | 6  | G  | 9  | 877.4566       | 439.2322        |
| 765.4259       | 7  | A  | 8  | 820.4351       | 410.7215        |
| 896.4664       | 8  | M  | 7  | 749.3980       | 375.2029        |
| 967.5035       | 9  | A  | 6  | 618.3575       | 309.6827        |
| 1068.5512      | 10 | T  | 5  | 547.3204       | 274.1641        |
| 1139.5883      | 11 | A  | 4  | 446.2727       | 223.6403        |
| 1240.6360      | 12 | T  | 3  | 375.2356       | 188.1217        |
| 1339.7044      | 13 | V  | 2  | 274.1879       | 137.5979        |
|                | 14 | R  | 1  | 175.1195       | 88.0637         |

N-term:+43.02

X-range:

0 - 0

MassTol: Y-zoom:

0. 1.

MassType:

☐AVG ☒MONO

Axis:

☒1 ☐2

Label:

☒I ☐M ☐-

Ions:

a ☐+ ☐2+ ☐3+

b ☒+ ☐2+ ☐3+

c ☐+ ☐2+ ☐3+

x ☐+ ☐2+ ☐3+

y ☒+ ☒2+ ☐3+

z ☐+ ☐2+ ☐3+

hide H<sub>2</sub>O/NH<sub>3</sub> ☐

zoom 112-122 ☐

GO

ENEYKR, MH+ 908.4478, m/z 454.7275  
H OS G14 P120811 220811-s1.02330.02330.2.dta

scan 2330; 5.4e+001

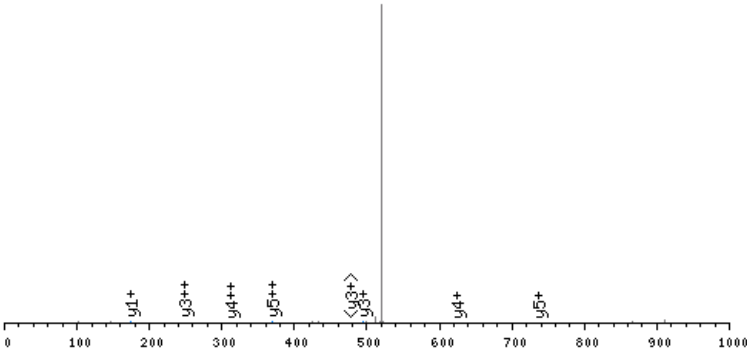

click image to zoom in; click top corners to zoom out [\[precursor±\]](#)

scan 2326; 454.7 m/z; 1.2e+001

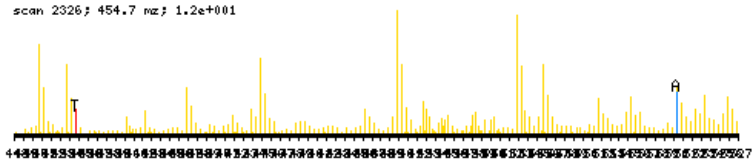

zoomed in precursor plot; T=theoretical m/z, A=acquired m/z

| b <sup>+</sup> | # | AA | # | y <sup>+</sup> | y <sup>2+</sup> |
|----------------|---|----|---|----------------|-----------------|
| 172.0610       | 1 | E  | 6 |                |                 |
| 286.1039       | 2 | N  | 5 | 737.3946       | 369.2012        |
| 415.1465       | 3 | E  | 4 | 623.3517       | 312.1798        |
| 578.2098       | 4 | Y  | 3 | 494.3091       | 247.6585        |
| 734.3361       | 5 | K  | 2 | 331.2458       | 166.1268        |
|                | 6 | R  | 1 | 175.1195       | 88.0637         |

N-term:+43.02 K(5):+156.13

X-range:

0 - 0

MassTol: Y-zoom:

0. 1.

MassType:

☐ AVG ☒ MONO

Axis:

☒ 1 ☐ 2

Label:

☒ I ☐ M ☐ -

Ions:

a ☐ + ☐ 2+ ☐ 3+

b ☒ + ☐ 2+ ☐ 3+

c ☐ + ☐ 2+ ☐ 3+

x ☐ + ☐ 2+ ☐ 3+

y ☒ + ☒ 2+ ☐ 3+

z ☐ + ☐ 2+ ☐ 3+

hide H<sub>2</sub>O/NH<sub>3</sub> ☐

zoom 112-122 ☐

GO

ENQLTKSVEER, MH+ 1402.7178, m/z 701.8626  
H OS G13 P120811 220811-s1.04606.04606.2.dta

scan 4606; 1.5e+001

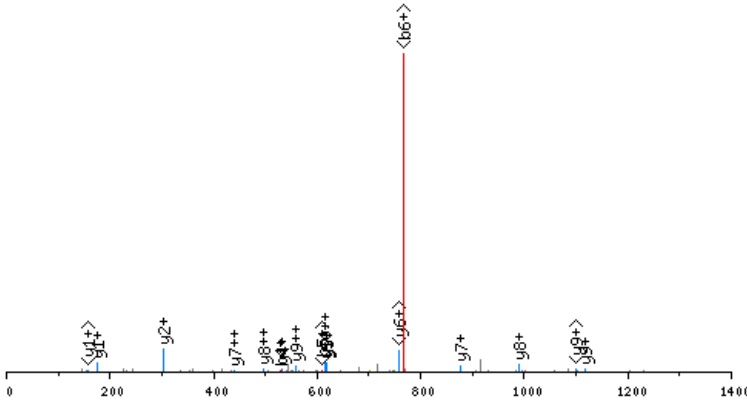

click image to zoom in; click top corners to zoom out

[precursor±]

scan 4604; 701.9 m/z; 2.0e+001

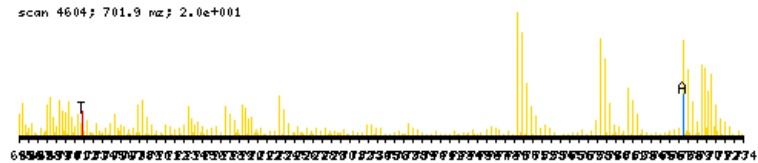

zoomed in precursor plot; T=theoretical m/z, A=acquired m/z

| b <sup>+</sup> | #  | AA | #  | y <sup>+</sup> | y <sup>2+</sup> |
|----------------|----|----|----|----------------|-----------------|
| 172.0610       | 1  | E  | 11 |                |                 |
| 286.1039       | 2  | N  | 10 | 1231.6647      | 616.3363        |
| 414.1625       | 3  | Q  | 9  | 1117.6217      | 559.3148        |
| 527.2466       | 4  | L  | 8  | 989.5632       | 495.2855        |
| 628.2942       | 5  | T  | 7  | 876.4791       | 438.7435        |
| 784.4205       | 6  | K  | 6  | 775.4314       | 388.2196        |
| 871.4526       | 7  | S  | 5  | 619.3051       | 310.1565        |
| 970.5210       | 8  | V  | 4  | 532.2731       | 266.6405        |
| 1099.5636      | 9  | E  | 3  | 433.2047       | 217.1063        |
| 1228.6062      | 10 | E  | 2  | 304.1621       | 152.5850        |
|                | 11 | R  | 1  | 175.1195       | 88.0637         |

N-term:+43.02 K(6):+156.13

N-term:+43.02 C(9):+160.03  
C(10):+160.03 K(12):+156.13

X-range:

0 - 0

MassTol: Y-zoom:

0. 1.

MassType:

☐ AVG ☒ MONO

Axis:

☒ 1 ☐ 2

Label:

☒ I ☐ M ☐ -

Ions:

a ☐ + ☐ 2+ ☐ 3+

b ☒ + ☐ 2+ ☐ 3+

c ☐ + ☐ 2+ ☐ 3+

x ☐ + ☐ 2+ ☐ 3+

y ☒ + ☒ 2+ ☐ 3+

z ☐ + ☐ 2+ ☐ 3+

hide H<sub>2</sub>O/NH<sub>3</sub> ☐

zoom 112-122 ☐

GO

EPKAPCPAAVPSEER, MH+ 1713.8694, m/z 571.9613  
H OS G12 P120811 220811-s1.03265.03265.3.dta

scan 3265; 2.1e+000

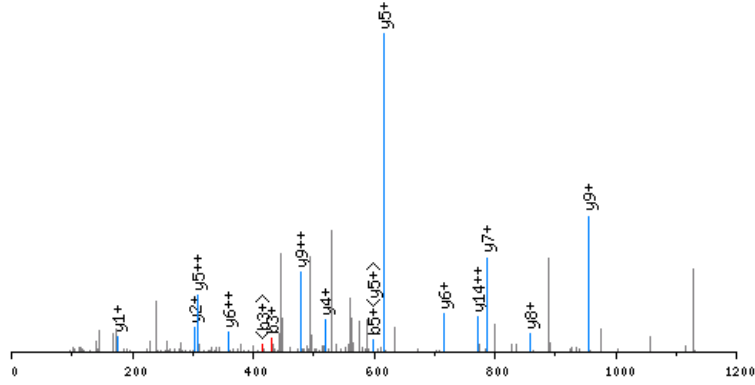

click image to zoom in; click top corners to zoom out [\[precursor±\]](#)

scan 3262; 572.0 m/z; 1.3e+001

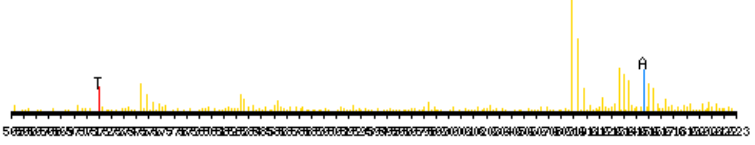

zoomed in precursor plot; T=theoretical m/z, A=acquired m/z

| b <sup>+</sup> | #  | AA | #  | y <sup>+</sup> | y <sup>2+</sup> |
|----------------|----|----|----|----------------|-----------------|
| 172.0610       | 1  | E  | 15 |                |                 |
| 269.1138       | 2  | P  | 14 | 1542.8162      | 771.9120        |
| 431.2719       | 3  | K  | 13 | 1445.7635      | 723.3856        |
| 502.3090       | 4  | A  | 12 | 1283.6054      | 642.3066        |
| 599.3617       | 5  | P  | 11 | 1212.5682      | 606.7880        |
| 759.3923       | 6  | C  | 10 | 1115.5155      | 558.2617        |
| 856.4451       | 7  | P  | 9  | 955.4849       | 478.2464        |
| 927.4822       | 8  | A  | 8  | 858.4321       | 429.7200        |
| 998.5193       | 9  | A  | 7  | 787.3950       | 394.2014        |
| 1097.5877      | 10 | V  | 6  | 716.3579       | 358.6829        |
| 1194.6405      | 11 | P  | 5  | 617.2895       | 309.1487        |
| 1281.6725      | 12 | S  | 4  | 520.2367       | 260.6223        |
| 1410.7151      | 13 | E  | 3  | 433.2047       | 217.1063        |
| 1539.7577      | 14 | E  | 2  | 304.1621       | 152.5850        |
|                | 15 | R  | 1  | 175.1195       | 88.0637         |

N-term:+43.02 K(3):+162.16  
C(6):+160.03

X-range:

0 - 0

MassTol: Y-zoom:

0. 1.

MassType:

☐AVG ☒MONO

Axis:

☒1 ☐2

Label:

☒I ☐M ☐-

Ions:

a ☐+ ☐2+ ☐3+

b ☒+ ☐2+ ☐3+

c ☐+ ☐2+ ☐3+

x ☐+ ☐2+ ☐3+

y ☒+ ☒2+ ☐3+

z ☐+ ☐2+ ☐3+

hide H<sub>2</sub>O/NH<sub>3</sub> ☐

zoom 112-122 ☐

GO

EQAVHGESKR, MH+ 1210.6181, m/z 404.2109  
H OS G16 P120811 220811-s1.02266.02266.3.dta

scan 2266; 6.6e+000

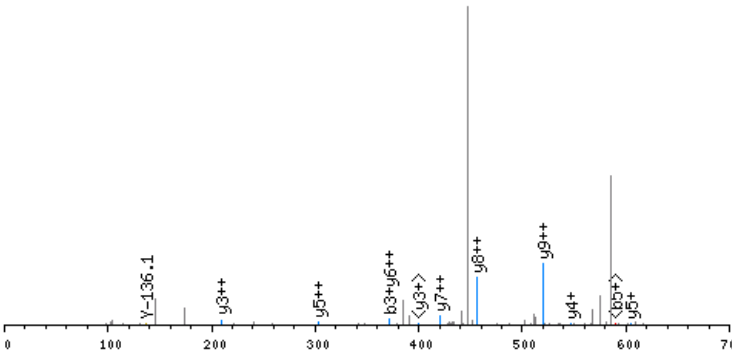

click image to zoom in; click top corners to zoom out [precursor±]

scan 2263; 404.2 m/z; 3.7e+001

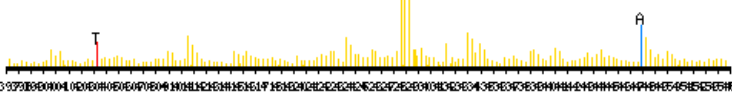

zoomed in precursor plot; T=theoretical m/z, A=acquired m/z

| b <sup>+</sup> | #  | AA | #  | y <sup>+</sup> | y <sup>2+</sup> |
|----------------|----|----|----|----------------|-----------------|
| 172.0610       | 1  | E  | 10 |                |                 |
| 300.1196       | 2  | Q  | 9  | 1039.5649      | 520.2864        |
| 371.1567       | 3  | A  | 8  | 911.5063       | 456.2571        |
| 470.2251       | 4  | V  | 7  | 840.4692       | 420.7385        |
| 607.2840       | 5  | H  | 6  | 741.4008       | 371.2043        |
| 664.3055       | 6  | G  | 5  | 604.3419       | 302.6749        |
| 793.3481       | 7  | E  | 4  | 547.3204       | 274.1641        |
| 880.3801       | 8  | S  | 3  | 418.2778       | 209.6428        |
| 1036.5064      | 9  | K  | 2  | 331.2458       | 166.1268        |
|                | 10 | R  | 1  | 175.1195       | 88.0637         |

N-term:+43.02 K(9):+156.13

X-range:

0 - 0

MassTol: Y-zoom:

0. 1.

MassType:

☐AVG ☒MONO

Axis:

☒1 ☐2

Label:

☒I ☐M ☐-

Ions:

a ☐+ ☐2+ ☐3+

b ☒+ ☐2+ ☐3+

c ☐+ ☐2+ ☐3+

x ☐+ ☐2+ ☐3+

y ☒+ ☒2+ ☐3+

z ☐+ ☐2+ ☐3+

hide H<sub>2</sub>O/NH<sub>3</sub> ☐

zoom 112-122 ☐

GO

ETLLKR, MH+ 835.5466, m/z 418.2769  
H OS G14 P120811 220811-s1.05038.05038.2.dta

scan 5038; 1.9e+001

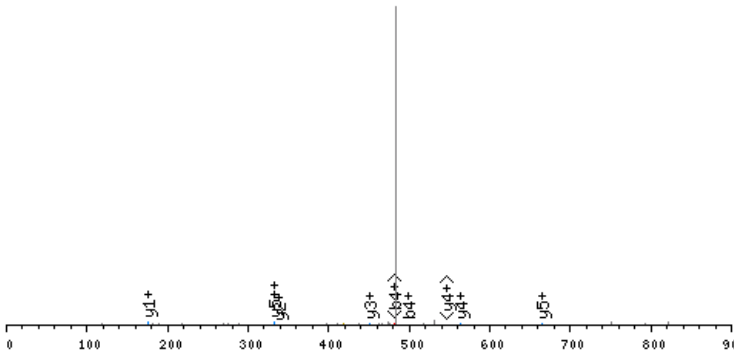

click image to zoom in; click top corners to zoom out [precursor±]

scan 5036; 418.3 m/z; 3.4e+001

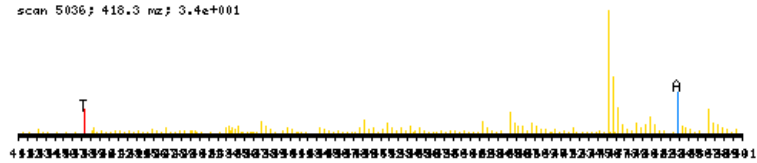

zoomed in precursor plot; T=theoretical m/z, A=acquired m/z

| b <sup>+</sup> | # | AA | # | y <sup>+</sup> | y <sup>2+</sup> |
|----------------|---|----|---|----------------|-----------------|
| 172.0610       | 1 | E  | 6 |                |                 |
| 273.1087       | 2 | T  | 5 | 664.4934       | 332.7506        |
| 386.1927       | 3 | L  | 4 | 563.4457       | 282.2268        |
| 499.2768       | 4 | L  | 3 | 450.3617       | 225.6847        |
| 661.4349       | 5 | K  | 2 | 337.2776       | 169.1427        |
|                | 6 | R  | 1 | 175.1195       | 88.0637         |

N-term:+43.02 K(5):+162.16

X-range:

0 - 0

MassTol: Y-zoom:

0. 1.

MassType:

☐AVG ☒MONO

Axis:

☒1 ☐2

Label:

☒I ☐M ☐-

Ions:

a ☐+ ☐2+ ☐3+

b ☒+ ☐2+ ☐3+

c ☐+ ☐2+ ☐3+

x ☐+ ☐2+ ☐3+

y ☒+ ☒2+ ☐3+

z ☐+ ☐2+ ☐3+

hide H<sub>2</sub>O/NH<sub>3</sub> ☐

zoom 112-122 ☐

GO

ETPKPR, MH+ 797.4522, m/z 399.2297  
H OS G14 P120811 220811-s1.02264.02264.2.dta

scan 2264; 1.4e+001

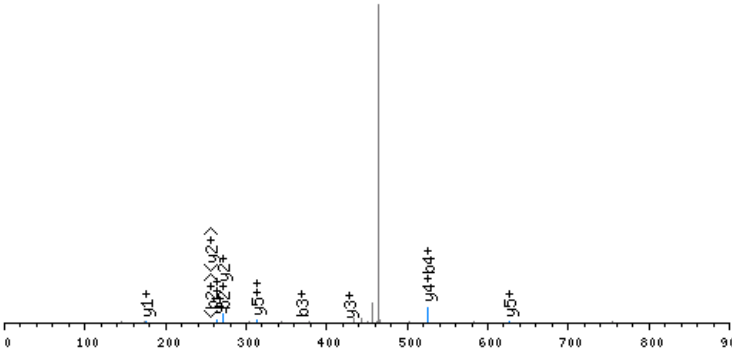

click image to zoom in; click top corners to zoom out

[precursor±]

scan 2261; 399.2 m/z; 1.0e+001

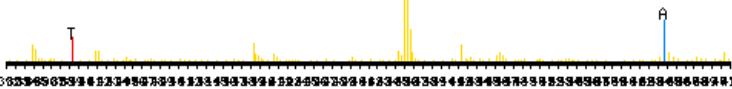

zoomed in precursor plot; T=theoretical m/z, A=acquired m/z

| b <sup>+</sup> | # | AA | # | y <sup>+</sup> | y <sup>2+</sup> |
|----------------|---|----|---|----------------|-----------------|
| 172.0610       | 1 | E  | 6 |                |                 |
| 273.1087       | 2 | T  | 5 | 626.3990       | 313.7034        |
| 370.1614       | 3 | P  | 4 | 525.3513       | 263.1796        |
| 526.2877       | 4 | K  | 3 | 428.2986       | 214.6532        |
| 623.3405       | 5 | P  | 2 | 272.1723       | 136.5900        |
|                | 6 | R  | 1 | 175.1195       | 88.0637         |

N-term:+43.02 K(4):+156.13

X-range:

0 - 0

MassTol: Y-zoom:

0. 1.

MassType:

☐AVG ☒MONO

Axis:

☒1 ☐2

Label:

☒I ☐M ☐-

Ions:

a ☐+ ☐2+ ☐3+

b ☒+ ☐2+ ☐3+

c ☐+ ☐2+ ☐3+

x ☐+ ☐2+ ☐3+

y ☒+ ☒2+ ☐3+

z ☐+ ☐2+ ☐3+

hide H<sub>2</sub>O/NH<sub>3</sub> ☐

zoom 112-122 ☐

GO

EVKVVESGGGLVQPGGSLR, MH+ 1938.0661, m/z 646.6935  
H OS G15 P120811 220811-s1.04550.04550.3.dta

scan 4550; 2.4e+000

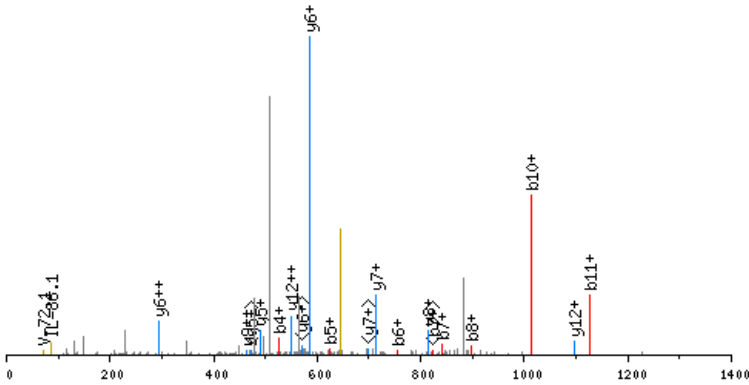

click image to zoom in; click top corners to zoom out [precursor±]

scan 4546; 646.7 m/z; 5.7e+000

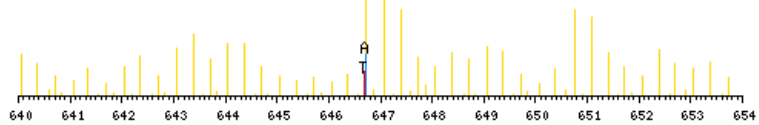

zoomed in precursor plot; T=theoretical m/z, A=acquired m/z

| b <sup>+</sup> | #  | AA | #  | y <sup>+</sup> | y <sup>2+</sup> |
|----------------|----|----|----|----------------|-----------------|
| 172.0610       | 1  | E  | 19 |                |                 |
| 271.1294       | 2  | V  | 18 | 1767.0129      | 884.0104        |
| 427.2557       | 3  | K  | 17 | 1667.9445      | 834.4762        |
| 526.3241       | 4  | V  | 16 | 1511.8182      | 756.4130        |
| 625.3925       | 5  | V  | 15 | 1412.7498      | 706.8788        |
| 754.4351       | 6  | E  | 14 | 1313.6814      | 657.3446        |
| 841.4672       | 7  | S  | 13 | 1184.6388      | 592.8233        |
| 898.4886       | 8  | G  | 12 | 1097.6067      | 549.3073        |
| 955.5101       | 9  | G  | 11 | 1040.5853      | 520.7965        |
| 1012.5315      | 10 | G  | 10 | 983.5638       | 492.2858        |
| 1125.6156      | 11 | L  | 9  | 926.5423       | 463.7751        |
| 1224.6840      | 12 | V  | 8  | 813.4583       | 407.2331        |
| 1352.7426      | 13 | Q  | 7  | 714.3899       | 357.6988        |
| 1449.7954      | 14 | P  | 6  | 586.3313       | 293.6696        |
| 1506.8168      | 15 | G  | 5  | 489.2785       | 245.1432        |
| 1563.8383      | 16 | G  | 4  | 432.2571       | 216.6324        |
| 1650.8703      | 17 | S  | 3  | 375.2356       | 188.1217        |
| 1763.9544      | 18 | L  | 2  | 288.2036       | 144.6057        |
|                | 19 | R  | 1  | 175.1195       | 88.0637         |

N-term:+43.02 K(3):+156.13

X-range:

0 - 0

MassTol: Y-zoom:

0. 1.

MassType:

☐ AVG ☒ MONO

Axis:

☒ 1 ☐ 2

Label:

☒ I ☐ M ☐ -

Ions:

a ☐ + ☐ 2+ ☐ 3+

b ☒ + ☐ 2+ ☐ 3+

c ☐ + ☐ 2+ ☐ 3+

x ☐ + ☐ 2+ ☐ 3+

y ☒ + ☒ 2+ ☐ 3+

z ☐ + ☐ 2+ ☐ 3+

hide H<sub>2</sub>O/NH<sub>3</sub> ☐

zoom 112-122 ☐

GO

FQGADSQAGKSGSR, MH+ 1465.7036, m/z 489.2394  
H OS G13 P120811 220811-s1.03158.03158.3.dta

scan 3158; 5.5e+000

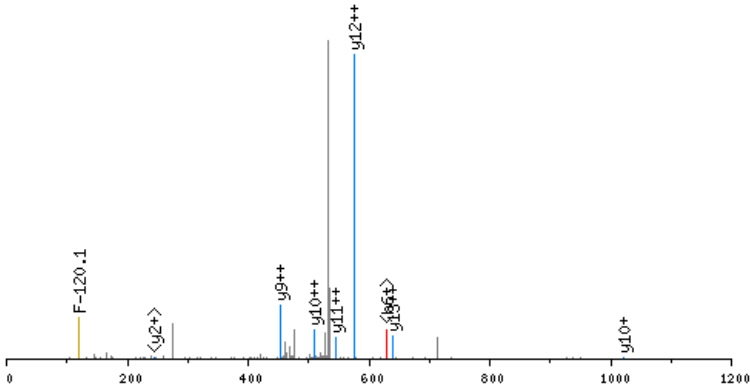

click image to zoom in; click top corners to zoom out

[precursor±]

scan 3154; 489.2 m/z; 2.1e+002

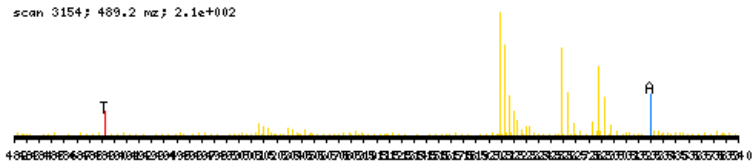

zoomed in precursor plot; T=theoretical m/z, A=acquired m/z

| b <sup>+</sup> | #  | AA | #  | y <sup>+</sup> | y <sup>2+</sup> |
|----------------|----|----|----|----------------|-----------------|
| 190.0868       | 1  | F  | 14 |                |                 |
| 318.1454       | 2  | Q  | 13 | 1276.6246      | 638.8162        |
| 375.1669       | 3  | G  | 12 | 1148.5660      | 574.7869        |
| 446.2040       | 4  | A  | 11 | 1091.5446      | 546.2762        |
| 561.2309       | 5  | D  | 10 | 1020.5074      | 510.7576        |
| 648.2629       | 6  | S  | 9  | 905.4805       | 453.2442        |
| 776.3215       | 7  | Q  | 8  | 818.4485       | 409.7282        |
| 847.3586       | 8  | A  | 7  | 690.3899       | 345.6989        |
| 904.3801       | 9  | G  | 6  | 619.3528       | 310.1803        |
| 1060.5064      | 10 | K  | 5  | 562.3313       | 281.6696        |
| 1147.5384      | 11 | S  | 4  | 406.2050       | 203.6064        |
| 1204.5599      | 12 | G  | 3  | 319.1730       | 160.0904        |
| 1291.5919      | 13 | S  | 2  | 262.1515       | 131.5797        |
|                | 14 | R  | 1  | 175.1195       | 88.0637         |

N-term:+43.02 K(10):+156.13

X-range:

0 - 0

MassTol: Y-zoom:

0. 1.

MassType:

☐ AVG ☒ MONO

Axis:

☒ 1 ☐ 2

Label:

☒ I ☐ M ☐ -

Ions:

a ☐ + ☐ 2+ ☐ 3+

b ☒ + ☐ 2+ ☐ 3+

c ☐ + ☐ 2+ ☐ 3+

x ☐ + ☐ 2+ ☐ 3+

y ☒ + ☒ 2+ ☐ 3+

z ☐ + ☐ 2+ ☐ 3+

hide H<sub>2</sub>O/NH<sub>3</sub> ☐

zoom 112-122 ☐

GO

GAGGALFVHR, MH+ 1026.5485, m/z 513.7779  
H OS G14 P120811 220811-s1.04210.04210.2.dta

scan 4210; 6.5e+000

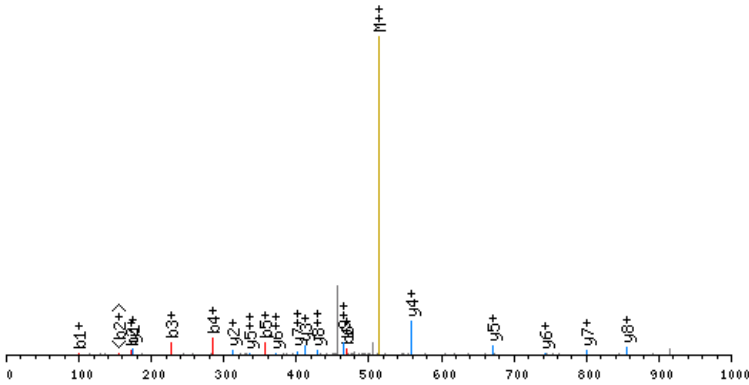

click image to zoom in; click top corners to zoom out [precursor±]

scan 4206; 513.8 m/z; 6.0e+000

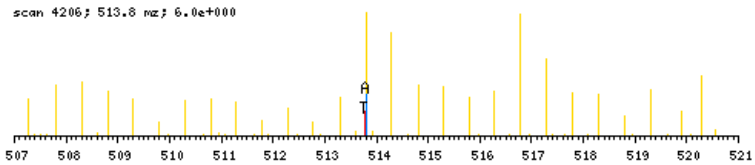

zoomed in precursor plot; T=theoretical m/z, A=acquired m/z

| b <sup>+</sup> | #  | AA | #  | y <sup>+</sup> | y <sup>2+</sup> |
|----------------|----|----|----|----------------|-----------------|
| 100.0399       | 1  | G  | 10 |                |                 |
| 171.0770       | 2  | A  | 9  | 927.5165       | 464.2621        |
| 228.0984       | 3  | G  | 8  | 856.4793       | 428.7436        |
| 285.1199       | 4  | G  | 7  | 799.4579       | 400.2329        |
| 356.1570       | 5  | A  | 6  | 742.4364       | 371.7221        |
| 469.2411       | 6  | L  | 5  | 671.3993       | 336.2036        |
| 616.3095       | 7  | F  | 4  | 558.3152       | 279.6615        |
| 715.3779       | 8  | V  | 3  | 411.2468       | 206.1273        |
| 852.4368       | 9  | H  | 2  | 312.1784       | 156.5931        |
|                | 10 | R  | 1  | 175.1195       | 88.0637         |

N-term:+43.02

X-range:

0 - 0

MassTol: Y-zoom:

0. 1.

MassType:

☐ AVG ☒ MONO

Axis:

☒ 1 ☐ 2

Label:

☒ I ☐ M ☐ -

Ions:

a ☐ + ☐ 2+ ☐ 3+

b ☒ + ☐ 2+ ☐ 3+

c ☐ + ☐ 2+ ☐ 3+

x ☐ + ☐ 2+ ☐ 3+

y ☒ + ☒ 2+ ☐ 3+

z ☐ + ☐ 2+ ☐ 3+

hide H<sub>2</sub>O/NH<sub>3</sub> ☐

zoom 112-122 ☐

GO

GDGGSSFQSTTGHCVHMR, MH+ 1962.8186, m/z 491.4601  
H OS G18 P120811 220811-s1.02662.02662.4.dta

scan 2662; 1.5e+000

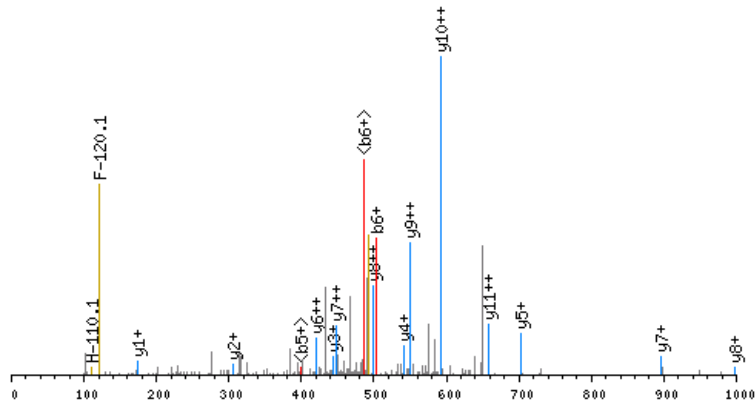

click image to zoom in; click top corners to zoom out [\[precursor±\]](#)

scan 2661; 491.5 m/z; 4.0e+000

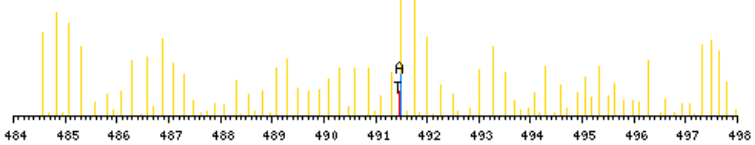

zoomed in precursor plot; T=theoretical m/z, A=acquired m/z

| b <sup>+</sup> | #  | AA | #  | y <sup>+</sup> | y <sup>2+</sup> |
|----------------|----|----|----|----------------|-----------------|
| 100.0399       | 1  | G  | 18 |                |                 |
| 215.0668       | 2  | D  | 17 | 1863.7866      | 932.3972        |
| 272.0883       | 3  | G  | 16 | 1748.7596      | 874.8837        |
| 329.1097       | 4  | G  | 15 | 1691.7382      | 846.3730        |
| 416.1418       | 5  | S  | 14 | 1634.7167      | 817.8623        |
| 503.1738       | 6  | S  | 13 | 1547.6847      | 774.3463        |
| 650.2422       | 7  | F  | 12 | 1460.6527      | 730.8302        |
| 778.3008       | 8  | Q  | 11 | 1313.5842      | 657.2960        |
| 865.3328       | 9  | S  | 10 | 1185.5257      | 593.2667        |
| 966.3805       | 10 | T  | 9  | 1098.4936      | 549.7507        |
| 1067.4282      | 11 | T  | 8  | 997.4460       | 499.2269        |
| 1124.4496      | 12 | G  | 7  | 896.3983       | 448.7031        |
| 1261.5085      | 13 | H  | 6  | 839.3768       | 420.1923        |
| 1421.5391      | 14 | C  | 5  | 702.3179       | 351.6629        |
| 1520.6076      | 15 | V  | 4  | 542.2873       | 271.6476        |
| 1657.6665      | 16 | H  | 3  | 443.2189       | 222.1134        |
| 1788.7070      | 17 | M  | 2  | 306.1600       | 153.5839        |
|                | 18 | R  | 1  | 175.1195       | 88.0637         |

N-term:+43.02 C(14):+160.03

X-range:

0 - 0

MassTol: Y-zoom:

0. 1.

MassType:

☐AVG ☒MONO

Axis:

☒1 ☐2

Label:

☒I ☐M ☐-

Ions:

a ☐+ ☐2+ ☐3+

b ☒+ ☐2+ ☐3+

c ☐+ ☐2+ ☐3+

x ☐+ ☐2+ ☐3+

y ☒+ ☒2+ ☐3+

z ☐+ ☐2+ ☐3+

hide H<sub>2</sub>O/NH<sub>3</sub> ☐

zoom 112-122 ☐

GO

GDLSHIER, MH+ 968.4801, m/z 484.7437  
H OS G14 P120811 220811-s1.03838.03838.2.dta

scan 3838; 2.2e+001

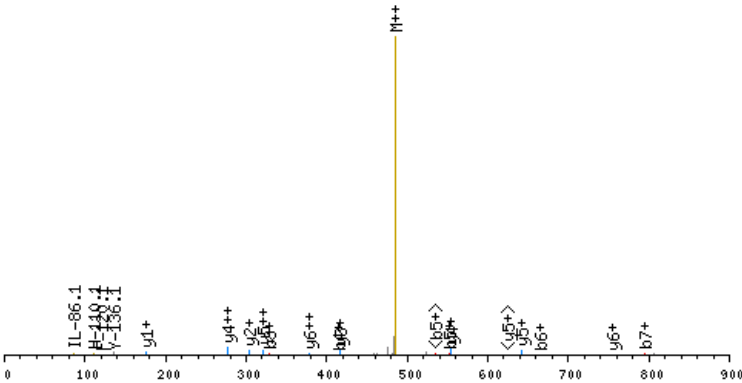

click image to zoom in; click top corners to zoom out [precursor±]

scan 3836; 484.7 m/z; 1.9e+001

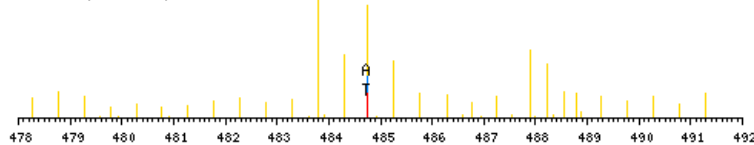

zoomed in precursor plot; T=theoretical m/z, A=acquired m/z

| b <sup>+</sup> | # | AA | # | y <sup>+</sup> | y <sup>2+</sup> |
|----------------|---|----|---|----------------|-----------------|
| 100.0399       | 1 | G  | 8 |                |                 |
| 215.0668       | 2 | D  | 7 | 869.4481       | 435.2280        |
| 328.1509       | 3 | L  | 6 | 754.4212       | 377.7145        |
| 415.1829       | 4 | S  | 5 | 641.3371       | 321.1725        |
| 552.2418       | 5 | H  | 4 | 554.3051       | 277.6564        |
| 665.3259       | 6 | I  | 3 | 417.2462       | 209.1270        |
| 794.3685       | 7 | E  | 2 | 304.1621       | 152.5850        |
|                | 8 | R  | 1 | 175.1195       | 88.0637         |

N-term:+43.02

X-range:

0 - 0

MassTol: Y-zoom:

0. 1.

MassType:

☐ AVG ☒ MONO

Axis:

☒ 1 ☐ 2

Label:

☒ I ☐ M ☐ -

Ions:

a ☐ + ☐ 2+ ☐ 3+

b ☒ + ☐ 2+ ☐ 3+

c ☐ + ☐ 2+ ☐ 3+

x ☐ + ☐ 2+ ☐ 3+

y ☒ + ☒ 2+ ☐ 3+

z ☐ + ☐ 2+ ☐ 3+

hide H<sub>2</sub>O/NH<sub>3</sub> ☐

zoom 112-122 ☐

GO

GDPSKQDILAIFKR, MH+ 1685.9591, m/z 562.6579  
H OS G15 P120811 220811-s1.06014.06014.3.dta

scan 6014; 1.2e+001

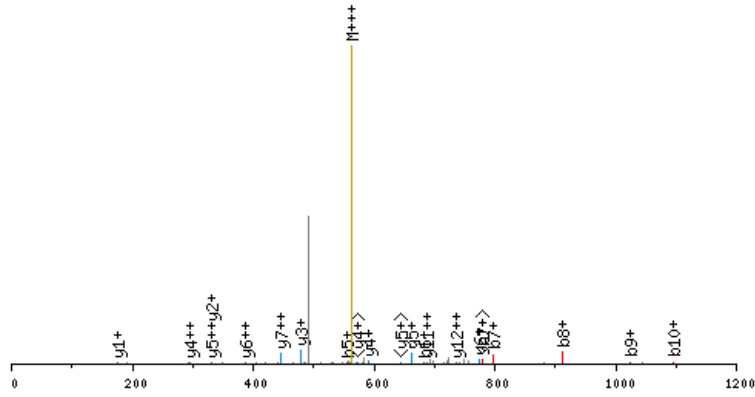

click image to zoom in; click top corners to zoom out [\[precursor±\]](#)

scan 6011; 562.7 m/z; 1.2e+001

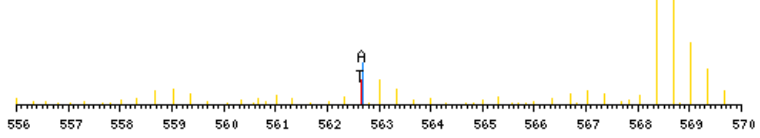

zoomed in precursor plot; T=theoretical m/z, A=acquired m/z

| b <sup>+</sup> | #  | AA | #  | y <sup>+</sup> | y <sup>2+</sup> |
|----------------|----|----|----|----------------|-----------------|
| 100.0399       | 1  | G  | 14 |                |                 |
| 215.0668       | 2  | D  | 13 | 1586.9271      | 793.9675        |
| 312.1196       | 3  | P  | 12 | 1471.9001      | 736.4540        |
| 399.1516       | 4  | S  | 11 | 1374.8474      | 687.9276        |
| 555.2779       | 5  | K  | 10 | 1287.8153      | 644.4116        |
| 683.3365       | 6  | Q  | 9  | 1131.6890      | 566.3484        |
| 798.3634       | 7  | D  | 8  | 1003.6305      | 502.3191        |
| 911.4475       | 8  | I  | 7  | 888.6035       | 444.8057        |
| 1024.5315      | 9  | L  | 6  | 775.5195       | 388.2636        |
| 1095.5687      | 10 | A  | 5  | 662.4354       | 331.7216        |
| 1208.6527      | 11 | I  | 4  | 591.3983       | 296.2031        |
| 1355.7211      | 12 | F  | 3  | 478.3142       | 239.6610        |
| 1511.8474      | 13 | K  | 2  | 331.2458       | 166.1268        |
|                | 14 | R  | 1  | 175.1195       | 88.0637         |

N-term:+43.02 K(5):+156.13  
K(13):+156.13

X-range:

0 - 0

MassTol: Y-zoom:

0. 1.

MassType:

☐AVG ☒MONO

Axis:

☒1 ☐2

Label:

☒I ☐M ☐-

Ions:

a ☐+ ☐2+ ☐3+

b ☒+ ☐2+ ☐3+

c ☐+ ☐2+ ☐3+

x ☐+ ☐2+ ☐3+

y ☒+ ☒2+ ☐3+

z ☐+ ☐2+ ☐3+

hide H<sub>2</sub>O/NH<sub>3</sub> ☐

zoom 112-122 ☐

GO

GEAGAAGPSGPAGPR, MH+ 1293.6188, m/z 647.3130  
H OS G13 P120811 220811-s1.02071.02071.2.dta

scan 2071; 2.1e+000

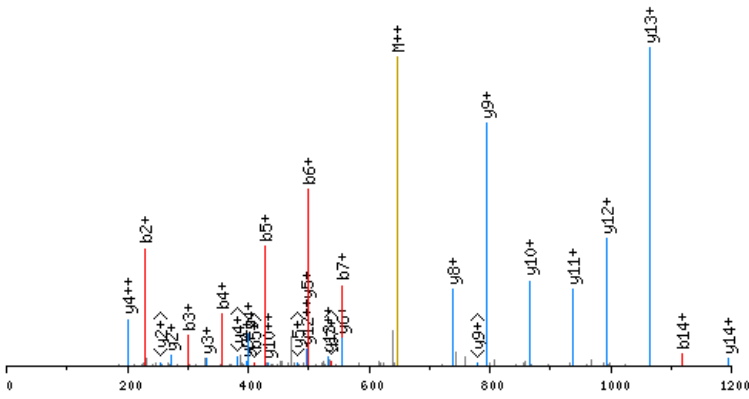

click image to zoom in; click top corners to zoom out [\[precursor±\]](#)

scan 2069; 647.3 m/z; 2.8e+000

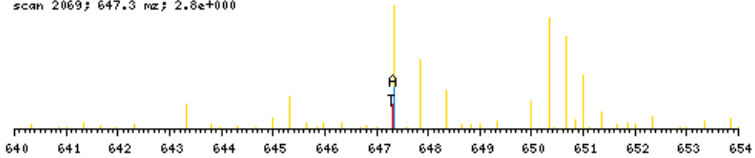

zoomed in precursor plot; T=theoretical m/z, A=acquired m/z

| b <sup>+</sup> | #  | AA | #  | y <sup>+</sup> | y <sup>2+</sup> |
|----------------|----|----|----|----------------|-----------------|
| 100.0399       | 1  | G  | 15 |                |                 |
| 229.0825       | 2  | E  | 14 | 1194.5867      | 597.7973        |
| 300.1196       | 3  | A  | 13 | 1065.5441      | 533.2760        |
| 357.1410       | 4  | G  | 12 | 994.5070       | 497.7574        |
| 428.1781       | 5  | A  | 11 | 937.4856       | 469.2467        |
| 499.2153       | 6  | A  | 10 | 866.4484       | 433.7281        |
| 556.2367       | 7  | G  | 9  | 795.4113       | 398.2096        |
| 653.2895       | 8  | P  | 8  | 738.3899       | 369.6988        |
| 740.3215       | 9  | S  | 7  | 641.3371       | 321.1725        |
| 797.3430       | 10 | G  | 6  | 554.3051       | 277.6564        |
| 894.3957       | 11 | P  | 5  | 497.2836       | 249.1457        |
| 965.4329       | 12 | A  | 4  | 400.2308       | 200.6193        |
| 1022.4543      | 13 | G  | 3  | 329.1937       | 165.1008        |
| 1119.5071      | 14 | P  | 2  | 272.1723       | 136.5900        |
|                | 15 | R  | 1  | 175.1195       | 88.0637         |

N-term:+43.02

X-range:

0 - 0

MassTol: Y-zoom:

0. 1.

MassType:

☐AVG ☒MONO

Axis:

☒1 ☐2

Label:

☒I ☐M ☐-

Ions:

a ☐+ ☐2+ ☐3+

b ☒+ ☐2+ ☐3+

c ☐+ ☐2+ ☐3+

x ☐+ ☐2+ ☐3+

y ☒+ ☒2+ ☐3+

z ☐+ ☐2+ ☐3+

hide H<sub>2</sub>O/NH<sub>3</sub> ☐

zoom 112-122 ☐

GO

GEELLHHHR, MH+ 1169.5816, m/z 585.2944  
H OS G19 P120811 220811-s1.02759.02759.2.dta

scan 2759; 1.0e+000

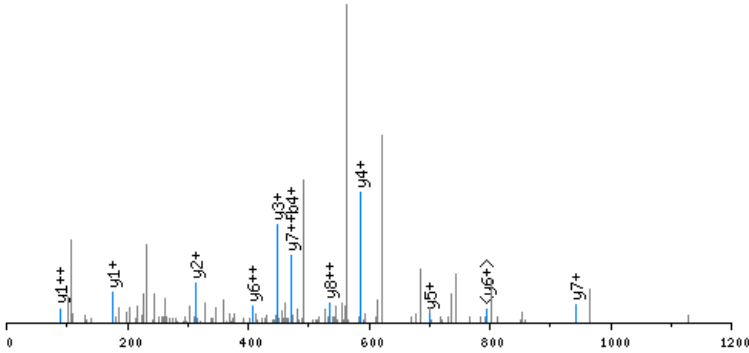

click image to zoom in; click top corners to zoom out [precursor±]

scan 2756; 585.3 m/z; 3.6e+000

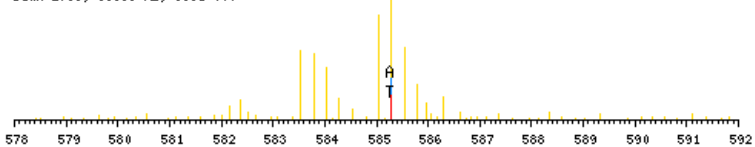

zoomed in precursor plot; T=theoretical m/z, A=acquired m/z

| b <sup>+</sup> | # | AA | # | y <sup>+</sup> | y <sup>2+</sup> |
|----------------|---|----|---|----------------|-----------------|
| 100.0399       | 1 | G  | 9 |                |                 |
| 229.0825       | 2 | E  | 8 | 1070.5496      | 535.7787        |
| 358.1251       | 3 | E  | 7 | 941.5070       | 471.2574        |
| 471.2091       | 4 | L  | 6 | 812.4644       | 406.7361        |
| 584.2932       | 5 | L  | 5 | 699.3803       | 350.1941        |
| 721.3521       | 6 | H  | 4 | 586.2962       | 293.6520        |
| 858.4110       | 7 | H  | 3 | 449.2373       | 225.1226        |
| 995.4699       | 8 | H  | 2 | 312.1784       | 156.5931        |
|                | 9 | R  | 1 | 175.1195       | 88.0637         |

N-term:+43.02

X-range:

0 - 0

MassTol: Y-zoom:

0. 1.

MassType:

☐AVG ☒MONO

Axis:

☒1 ☐2

Label:

☒I ☐M ☐-

Ions:

a ☐+ ☐2+ ☐3+

b ☒+ ☐2+ ☐3+

c ☐+ ☐2+ ☐3+

x ☐+ ☐2+ ☐3+

y ☒+ ☒2+ ☐3+

z ☐+ ☐2+ ☐3+

hide H<sub>2</sub>O/NH<sub>3</sub> ☐

zoom 112-122 ☐

GO

GEKLTDEEVDEMIR, MH+ 1733.8268, m/z 578.6138  
H OS G15 P120811 220811-s1.04248.04248.3.dta

scan 4248; 3.0e+000

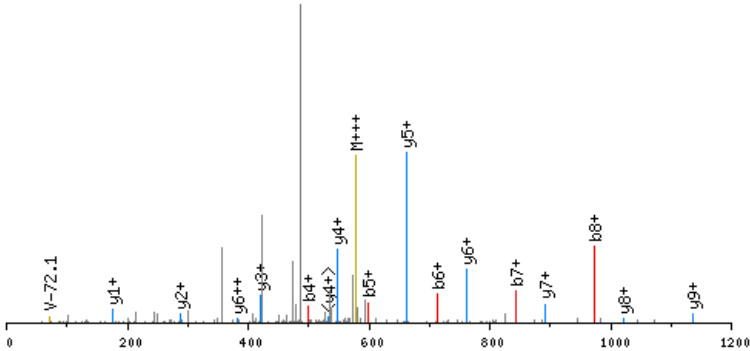

click image to zoom in; click top corners to zoom out

[precursor±]

scan 4246; 578.6 m/z; 1.1e+001

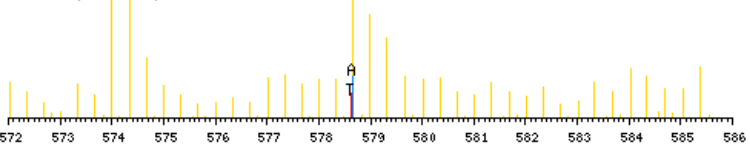

zoomed in precursor plot; T=theoretical m/z, A=acquired m/z

| b <sup>+</sup> | #  | AA | #  | y <sup>+</sup> | y <sup>2+</sup> |
|----------------|----|----|----|----------------|-----------------|
| 100.0399       | 1  | G  | 14 |                |                 |
| 229.0825       | 2  | E  | 13 | 1634.7948      | 817.9013        |
| 385.2088       | 3  | K  | 12 | 1505.7522      | 753.3800        |
| 498.2928       | 4  | L  | 11 | 1349.6259      | 675.3168        |
| 599.3405       | 5  | T  | 10 | 1236.5418      | 618.7748        |
| 714.3674       | 6  | D  | 9  | 1135.4941      | 568.2510        |
| 843.4100       | 7  | E  | 8  | 1020.4672      | 510.7375        |
| 972.4526       | 8  | E  | 7  | 891.4246       | 446.2162        |
| 1071.5210      | 9  | V  | 6  | 762.3820       | 381.6949        |
| 1186.5480      | 10 | D  | 5  | 663.3136       | 332.1607        |
| 1315.5906      | 11 | E  | 4  | 548.2866       | 274.6472        |
| 1446.6311      | 12 | M  | 3  | 419.2440       | 210.1259        |
| 1559.7151      | 13 | I  | 2  | 288.2036       | 144.6057        |
|                | 14 | R  | 1  | 175.1195       | 88.0637         |

N-term:+43.02 K(3):+156.13

X-range:

0 - 0

MassTol: Y-zoom:

0. 1.

MassType:

☐AVG ☒MONO

Axis:

☒1 ☐2

Label:

☒I ☐M ☐-

Ions:

a ☐+ ☐2+ ☐3+

b ☒+ ☐2+ ☐3+

c ☐+ ☐2+ ☐3+

x ☐+ ☐2+ ☐3+

y ☒+ ☒2+ ☐3+

z ☐+ ☐2+ ☐3+

hide H<sub>2</sub>O/NH<sub>3</sub> ☐

zoom 112-122 ☐

GO

GETGPAGPAGPIGPAGAR, MH+ 1574.7927, m/z 525.6024  
H OS G13 P120811 220811-s1.03210.03210.3.dta

scan 3210; 1.4e+001

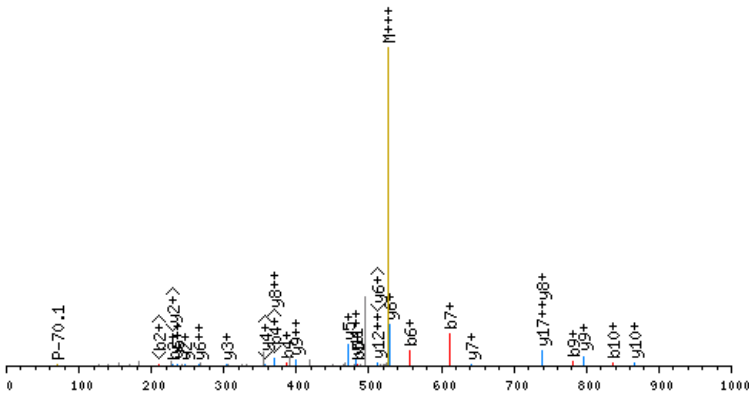

click image to zoom in; click top corners to zoom out [precursor±]

scan 3209; 525.6 m/z; 1.6e+001

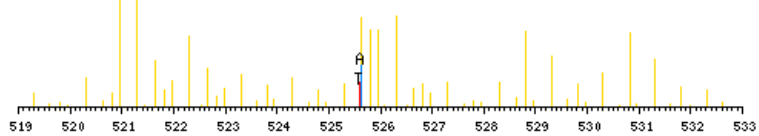

zoomed in precursor plot; T=theoretical m/z, A=acquired m/z

| b <sup>+</sup> | #  | AA | #  | y <sup>+</sup> | y <sup>2+</sup> |
|----------------|----|----|----|----------------|-----------------|
| 100.0399       | 1  | G  | 18 |                |                 |
| 229.0825       | 2  | E  | 17 | 1475.7607      | 738.3842        |
| 330.1301       | 3  | T  | 16 | 1346.7181      | 673.8629        |
| 387.1516       | 4  | G  | 15 | 1245.6704      | 623.3391        |
| 484.2044       | 5  | P  | 14 | 1188.6489      | 594.8284        |
| 555.2415       | 6  | A  | 13 | 1091.5962      | 546.3020        |
| 612.2629       | 7  | G  | 12 | 1020.5591      | 510.7834        |
| 709.3157       | 8  | P  | 11 | 963.5376       | 482.2727        |
| 780.3528       | 9  | A  | 10 | 866.4848       | 433.7463        |
| 837.3743       | 10 | G  | 9  | 795.4477       | 398.2278        |
| 934.4270       | 11 | P  | 8  | 738.4262       | 369.7170        |
| 1047.5111      | 12 | I  | 7  | 641.3735       | 321.1907        |
| 1104.5326      | 13 | G  | 6  | 528.2894       | 264.6486        |
| 1201.5853      | 14 | P  | 5  | 471.2680       | 236.1379        |
| 1272.6225      | 15 | A  | 4  | 374.2152       | 187.6115        |
| 1329.6439      | 16 | G  | 3  | 303.1781       | 152.0930        |
| 1400.6810      | 17 | A  | 2  | 246.1566       | 123.5822        |
|                | 18 | R  | 1  | 175.1195       | 88.0637         |

N-term:+43.02

X-range:

0 - 0

MassTol: Y-zoom:

0. 1.

MassType:

☐AVG ☒MONO

Axis:

☒1 ☐2

Label:

☒I ☐M ☐-

Ions:

a ☐+ ☐2+ ☐3+

b ☒+ ☐2+ ☐3+

c ☐+ ☐2+ ☐3+

x ☐+ ☐2+ ☐3+

y ☒+ ☒2+ ☐3+

z ☐+ ☐2+ ☐3+

hide H<sub>2</sub>O/NH<sub>3</sub> ☐

zoom 112-122 ☐

GO

GFPGADGVAGPKGPSGER, MH+ 1731.8879, m/z 577.9675  
H OS G13 P120811 220811-s1.04061.04061.3.dta

scan 4061; 2.1e+000

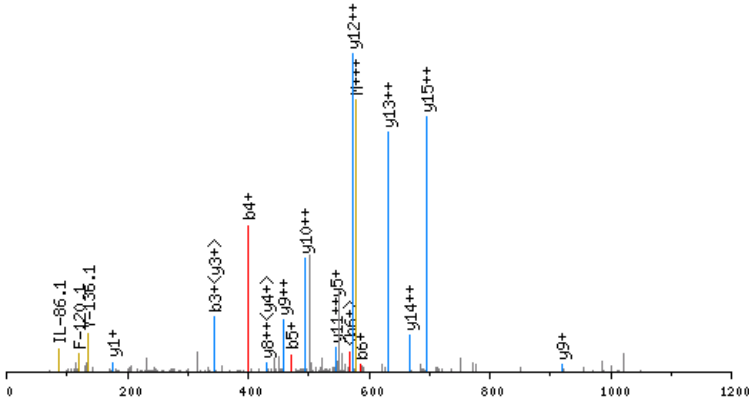

click image to zoom in; click top corners to zoom out

[precursor±]

scan 4059; 578.0 m/z; 1.1e+001

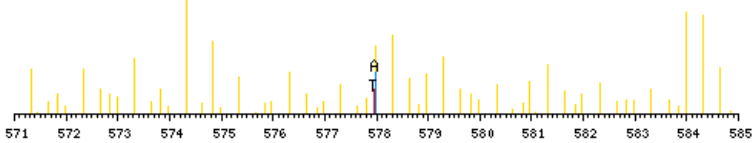

zoomed in precursor plot; T=theoretical m/z, A=acquired m/z

| b <sup>+</sup> | #  | AA | #  | y <sup>+</sup> | y <sup>2+</sup> |
|----------------|----|----|----|----------------|-----------------|
| 100.0399       | 1  | G  | 18 |                |                 |
| 247.1083       | 2  | F  | 17 | 1632.8558      | 816.9318        |
| 344.1610       | 3  | P  | 16 | 1485.7874      | 743.3976        |
| 401.1825       | 4  | G  | 15 | 1388.7347      | 694.8712        |
| 472.2196       | 5  | A  | 14 | 1331.7132      | 666.3605        |
| 587.2466       | 6  | D  | 13 | 1260.6761      | 630.8420        |
| 644.2680       | 7  | G  | 12 | 1145.6491      | 573.3285        |
| 743.3364       | 8  | V  | 11 | 1088.6277      | 544.8177        |
| 814.3736       | 9  | A  | 10 | 989.5593       | 495.2835        |
| 871.3950       | 10 | G  | 9  | 918.5221       | 459.7650        |
| 968.4478       | 11 | P  | 8  | 861.5007       | 431.2543        |
| 1130.6059      | 12 | K  | 7  | 764.4479       | 382.7279        |
| 1187.6273      | 13 | G  | 6  | 602.2898       | 301.6488        |
| 1284.6801      | 14 | P  | 5  | 545.2683       | 273.1381        |
| 1371.7121      | 15 | S  | 4  | 448.2156       | 224.6117        |
| 1428.7336      | 16 | G  | 3  | 361.1836       | 181.0957        |
| 1557.7762      | 17 | E  | 2  | 304.1621       | 152.5850        |
|                | 18 | R  | 1  | 175.1195       | 88.0637         |

N-term:+43.02 K(12):+162.16

X-range:

0 - 0

MassTol: Y-zoom:

0. 1.

MassType:

☐AVG ☒MONO

Axis:

☒1 ☐2

Label:

☒I ☐M ☐-

Ions:

a ☐+ ☐2+ ☐3+

b ☒+ ☐2+ ☐3+

c ☐+ ☐2+ ☐3+

x ☐+ ☐2+ ☐3+

y ☒+ ☒2+ ☐3+

z ☐+ ☐2+ ☐3+

hide H<sub>2</sub>O/NH<sub>3</sub> ☐

zoom 112-122 ☐

GO

GFPGAVGAKGEAGPQGAR, MH+ 1702.9089, m/z 568.3078  
H OS G13 P120811 220811-s1.03658.03658.3.dta

scan 3658; 2.9e+000

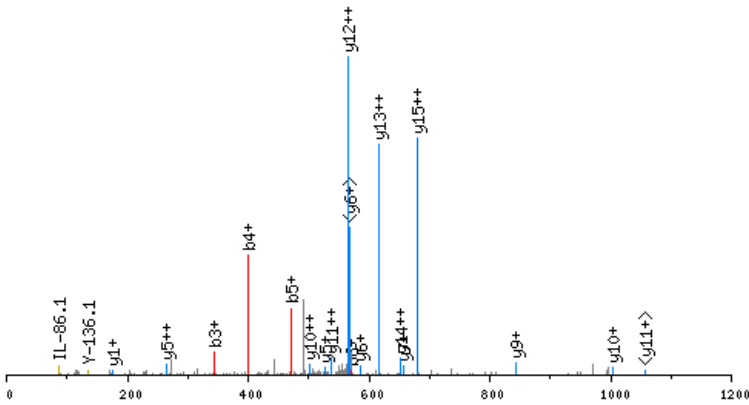

click image to zoom in; click top corners to zoom out

[precursor±]

scan 3654; 568.3 m/z; 1.2e+001

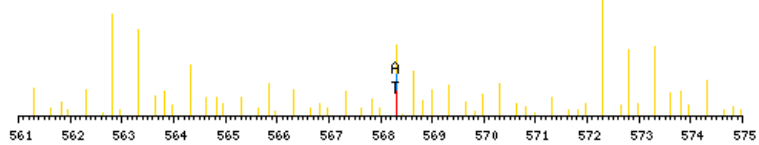

zoomed in precursor plot; T=theoretical m/z, A=acquired m/z

| b <sup>+</sup> | #  | AA | #  | y <sup>+</sup> | y <sup>2+</sup> |
|----------------|----|----|----|----------------|-----------------|
| 100.0399       | 1  | G  | 18 |                |                 |
| 247.1083       | 2  | F  | 17 | 1603.8769      | 802.4424        |
| 344.1610       | 3  | P  | 16 | 1456.8085      | 728.9082        |
| 401.1825       | 4  | G  | 15 | 1359.7557      | 680.3818        |
| 472.2196       | 5  | A  | 14 | 1302.7343      | 651.8710        |
| 571.2880       | 6  | V  | 13 | 1231.6971      | 616.3525        |
| 628.3095       | 7  | G  | 12 | 1132.6287      | 566.8183        |
| 699.3466       | 8  | A  | 11 | 1075.6073      | 538.3075        |
| 861.5047       | 9  | K  | 10 | 1004.5702      | 502.7890        |
| 918.5262       | 10 | G  | 9  | 842.4121       | 421.7099        |
| 1047.5688      | 11 | E  | 8  | 785.3906       | 393.1992        |
| 1118.6059      | 12 | A  | 7  | 656.3480       | 328.6779        |
| 1175.6273      | 13 | G  | 6  | 585.3109       | 293.1594        |
| 1272.6801      | 14 | P  | 5  | 528.2894       | 264.6486        |
| 1400.7387      | 15 | Q  | 4  | 431.2367       | 216.1222        |
| 1457.7602      | 16 | G  | 3  | 303.1781       | 152.0930        |
| 1528.7973      | 17 | A  | 2  | 246.1566       | 123.5822        |
|                | 18 | R  | 1  | 175.1195       | 88.0637         |

N-term:+43.02 K(9):+162.16

X-range:

0 - 0

MassTol: Y-zoom:

0. 1.

MassType:

☐AVG ☒MONO

Axis:

☒1 ☐2

Label:

☒I ☐M ☐-

Ions:

a ☐+ ☐2+ ☐3+

b ☒+ ☐2+ ☐3+

c ☐+ ☐2+ ☐3+

x ☐+ ☐2+ ☐3+

y ☒+ ☒2+ ☐3+

z ☐+ ☐2+ ☐3+

hide H<sub>2</sub>O/NH<sub>3</sub> ☐

zoom 112-122 ☐

GO

GLPGPSGEPGKQGPSGSSGER, MH+ 2014.0054, m/z 672.0067  
H OS G13 P120811 220811-s1.02938.02938.3.dta

scan 2938; 1.9e+000

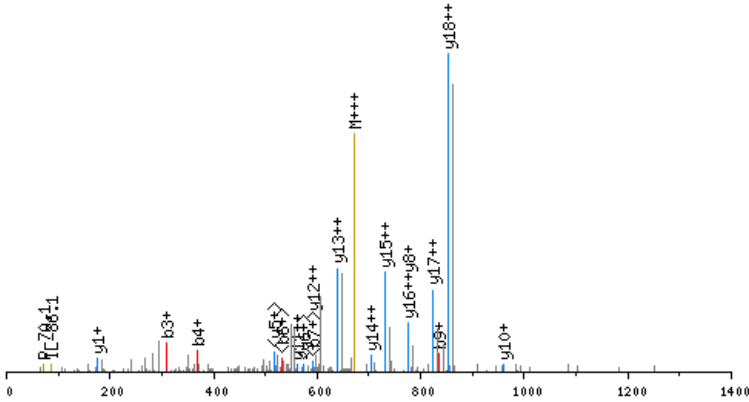

click image to zoom in; click top corners to zoom out

[precursor±]

scan 2934; 672.0 m/z; 7.5e+000

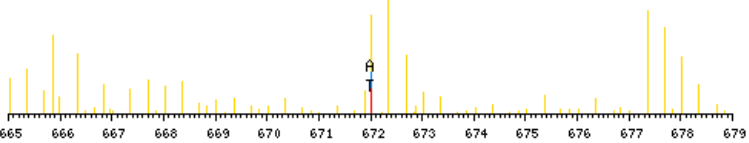

zoomed in precursor plot; T=theoretical m/z, A=acquired m/z

| b <sup>+</sup> | #  | AA | #  | y <sup>+</sup> | y <sup>2+</sup> |
|----------------|----|----|----|----------------|-----------------|
| 100.0399       | 1  | G  | 21 |                |                 |
| 213.1239       | 2  | L  | 20 | 1914.9734      | 957.9906        |
| 310.1767       | 3  | P  | 19 | 1801.8893      | 901.4486        |
| 367.1982       | 4  | G  | 18 | 1704.8366      | 852.9222        |
| 464.2509       | 5  | P  | 17 | 1647.8151      | 824.4115        |
| 551.2829       | 6  | S  | 16 | 1550.7623      | 775.8851        |
| 608.3044       | 7  | G  | 15 | 1463.7303      | 732.3691        |
| 737.3470       | 8  | E  | 14 | 1406.7088      | 703.8583        |
| 834.3998       | 9  | P  | 13 | 1277.6662      | 639.3370        |
| 891.4212       | 10 | G  | 12 | 1180.6135      | 590.8107        |
| 1053.5793      | 11 | K  | 11 | 1123.5920      | 562.2999        |
| 1181.6379      | 12 | Q  | 10 | 961.4339       | 481.2209        |
| 1238.6594      | 13 | G  | 9  | 833.3753       | 417.1916        |
| 1335.7121      | 14 | P  | 8  | 776.3539       | 388.6808        |
| 1422.7442      | 15 | S  | 7  | 679.3011       | 340.1545        |
| 1479.7656      | 16 | G  | 6  | 592.2691       | 296.6385        |
| 1566.7977      | 17 | S  | 5  | 535.2476       | 268.1277        |
| 1653.8297      | 18 | S  | 4  | 448.2156       | 224.6117        |
| 1710.8512      | 19 | G  | 3  | 361.1836       | 181.0957        |
| 1839.8937      | 20 | E  | 2  | 304.1621       | 152.5850        |
|                | 21 | R  | 1  | 175.1195       | 88.0637         |

N-term:+43.02 K(11):+162.16

X-range:

0 - 0

MassTol: Y-zoom:

0. 1.

MassType:

☐AVG ☒MONO

Axis:

☒1 ☐2

Label:

☒I ☐M ☐-

Ions:

a ☐+ ☐2+ ☐3+

b ☒+ ☐2+ ☐3+

c ☐+ ☐2+ ☐3+

x ☐+ ☐2+ ☐3+

y ☒+ ☒2+ ☐3+

z ☐+ ☐2+ ☐3+

hide H<sub>2</sub>O/NH<sub>3</sub> ☐

zoom 112-122 ☐

GO

GPQGSPGPAGPR, MH+ 1119.5547, m/z 560.2810  
H OS G15 P120811 220811-s1.02134.02134.2.dta

scan 2134; 1.0e+000

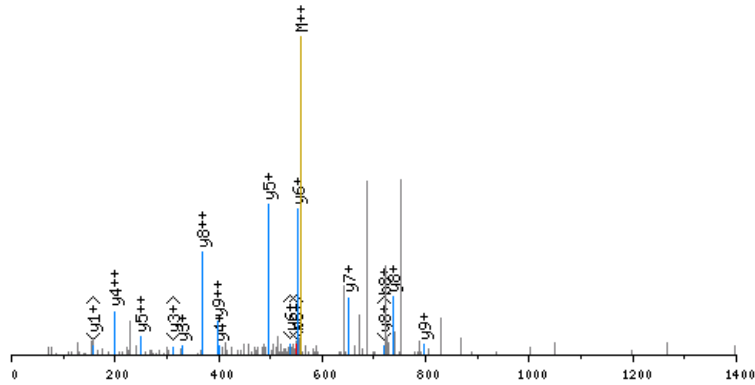

click image to zoom in; click top corners to zoom out [\[precursor±\]](#)

scan 2131; 560.3 m/z; 5.9e+000

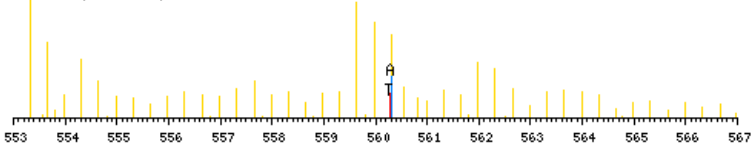

zoomed in precursor plot; T=theoretical m/z, A=acquired m/z

| b <sup>+</sup> | #  | AA | #  | y <sup>+</sup> | y <sup>2+</sup> |
|----------------|----|----|----|----------------|-----------------|
| 100.0399       | 1  | G  | 12 |                |                 |
| 197.0926       | 2  | P  | 11 | 1020.5227      | 510.7652        |
| 325.1512       | 3  | Q  | 10 | 923.4699       | 462.2389        |
| 382.1727       | 4  | G  | 9  | 795.4113       | 398.2096        |
| 469.2047       | 5  | S  | 8  | 738.3899       | 369.6988        |
| 566.2575       | 6  | P  | 7  | 651.3578       | 326.1828        |
| 623.2789       | 7  | G  | 6  | 554.3051       | 277.6564        |
| 720.3317       | 8  | P  | 5  | 497.2836       | 249.1457        |
| 791.3688       | 9  | A  | 4  | 400.2308       | 200.6193        |
| 848.3903       | 10 | G  | 3  | 329.1937       | 165.1008        |
| 945.4430       | 11 | P  | 2  | 272.1723       | 136.5900        |
|                | 12 | R  | 1  | 175.1195       | 88.0637         |

N-term:+43.02

X-range:

0 - 0

MassTol: Y-zoom:

0. 1.

MassType:

☐AVG ☒MONO

Axis:

☒1 ☐2

Label:

☒I ☐M ☐-

Ions:

a ☐+ ☐2+ ☐3+

b ☒+ ☐2+ ☐3+

c ☐+ ☐2+ ☐3+

x ☐+ ☐2+ ☐3+

y ☒+ ☒2+ ☐3+

z ☐+ ☐2+ ☐3+

hide H<sub>2</sub>O/NH<sub>3</sub> ☐

zoom 112-122 ☐

GO

GSEAAQLLEADFAAHKHR, MH+ 2092.0576, m/z 523.7699  
H OS G17 P120811 220811-s1.06344.06344.4.dta

scan 6344; 2.6e+000

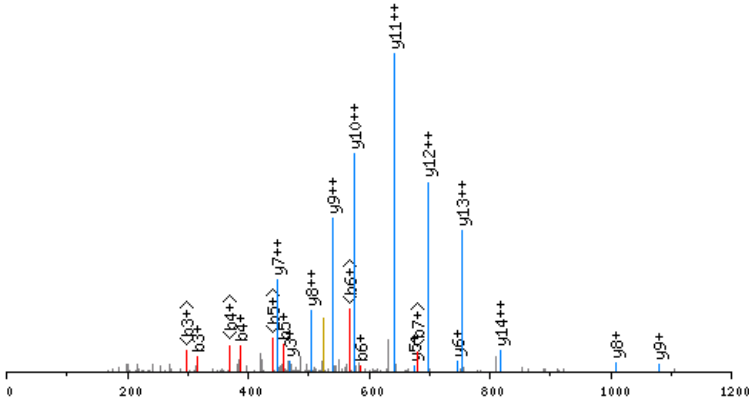

click image to zoom in; click top corners to zoom out

[precursor±]

scan 6343; 523.8 m/z; 1.9e+000

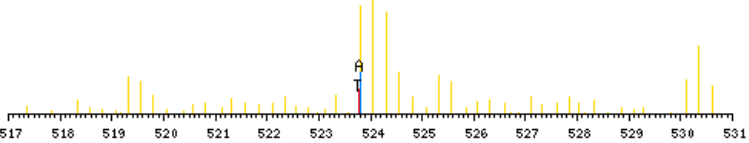

zoomed in precursor plot; T=theoretical m/z, A=acquired m/z

| b <sup>+</sup> | #  | AA | #  | y <sup>+</sup> | y <sup>2+</sup> |
|----------------|----|----|----|----------------|-----------------|
| 100.0399       | 1  | G  | 19 |                |                 |
| 187.0719       | 2  | S  | 18 | 1993.0256      | 997.0167        |
| 316.1145       | 3  | E  | 17 | 1905.9936      | 953.5007        |
| 387.1516       | 4  | A  | 16 | 1776.9510      | 888.9794        |
| 458.1887       | 5  | A  | 15 | 1705.9138      | 853.4608        |
| 586.2473       | 6  | Q  | 14 | 1634.8767      | 817.9423        |
| 699.3314       | 7  | L  | 13 | 1506.8182      | 753.9130        |
| 812.4154       | 8  | L  | 12 | 1393.7341      | 697.3710        |
| 941.4580       | 9  | E  | 11 | 1280.6500      | 640.8289        |
| 1012.4951      | 10 | A  | 10 | 1151.6074      | 576.3076        |
| 1083.5322      | 11 | A  | 9  | 1080.5703      | 540.7891        |
| 1198.5592      | 12 | D  | 8  | 1009.5332      | 505.2705        |
| 1345.6276      | 13 | F  | 7  | 894.5063       | 447.7570        |
| 1416.6647      | 14 | A  | 6  | 747.4379       | 374.2228        |
| 1487.7018      | 15 | A  | 5  | 676.4007       | 338.7043        |
| 1624.7607      | 16 | H  | 4  | 605.3636       | 303.1857        |
| 1780.8870      | 17 | K  | 3  | 468.3047       | 234.6563        |
| 1917.9459      | 18 | H  | 2  | 312.1784       | 156.5931        |
|                | 19 | R  | 1  | 175.1195       | 88.0637         |

N-term:+43.02 K(17):+156.13

X-range:

0 - 0

MassTol: Y-zoom:

0. 1.

MassType:

☐AVG ☒MONO

Axis:

☒1 ☐2

Label:

☒I ☐M ☐-

Ions:

a ☐+ ☐2+ ☐3+

b ☒+ ☐2+ ☐3+

c ☐+ ☐2+ ☐3+

x ☐+ ☐2+ ☐3+

y ☒+ ☒2+ ☐3+

z ☐+ ☐2+ ☐3+

hide H<sub>2</sub>O/NH<sub>3</sub> ☐

zoom 112-122 ☐

GO

GTGGVDTAAVGAVFDISNADR, MH+ 2034.9732, m/z 678.9959  
H OS G12 P120811 220811-s1.05279.05279.3.dta

scan 5279; 2.4e+000

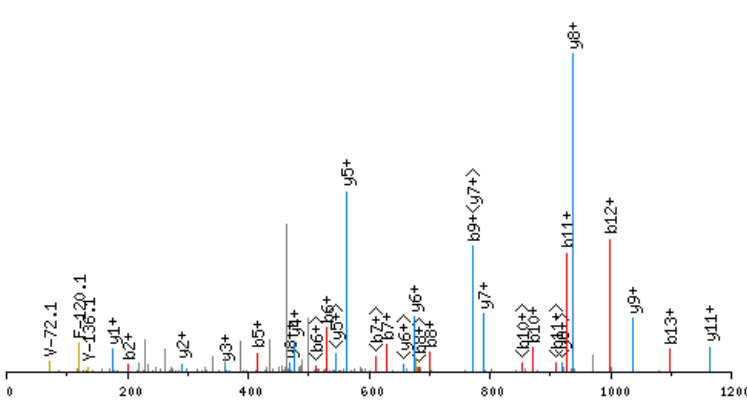

click image to zoom in; click top corners to zoom out

[precursor±]

scan 5277; 679.0 m/z; 6.4e+000

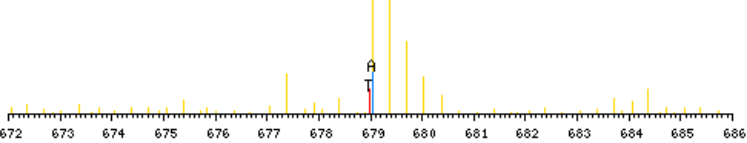

zoomed in precursor plot; T=theoretical m/z, A=acquired m/z

| b <sup>+</sup> | #  | AA | #  | y <sup>+</sup> | y <sup>2+</sup> |
|----------------|----|----|----|----------------|-----------------|
| 100.0399       | 1  | G  | 21 |                |                 |
| 201.0875       | 2  | T  | 20 | 1935.9412      | 968.4745        |
| 258.1090       | 3  | G  | 19 | 1834.8935      | 917.9507        |
| 315.1305       | 4  | G  | 18 | 1777.8721      | 889.4399        |
| 414.1989       | 5  | V  | 17 | 1720.8506      | 860.9292        |
| 529.2258       | 6  | D  | 16 | 1621.7822      | 811.3950        |
| 630.2735       | 7  | T  | 15 | 1506.7552      | 753.8815        |
| 701.3106       | 8  | A  | 14 | 1405.7076      | 703.3577        |
| 772.3477       | 9  | A  | 13 | 1334.6705      | 667.8391        |
| 871.4161       | 10 | V  | 12 | 1263.6333      | 632.3206        |
| 928.4376       | 11 | G  | 11 | 1164.5649      | 582.7864        |
| 999.4747       | 12 | A  | 10 | 1107.5435      | 554.2756        |
| 1098.5431      | 13 | V  | 9  | 1036.5063      | 518.7571        |
| 1245.6116      | 14 | F  | 8  | 937.4379       | 469.2229        |
| 1360.6385      | 15 | D  | 7  | 790.3695       | 395.6887        |
| 1473.7226      | 16 | I  | 6  | 675.3426       | 338.1752        |
| 1560.7546      | 17 | S  | 5  | 562.2585       | 281.6332        |
| 1674.7975      | 18 | N  | 4  | 475.2265       | 238.1172        |
| 1745.8346      | 19 | A  | 3  | 361.1836       | 181.0957        |
| 1860.8616      | 20 | D  | 2  | 290.1464       | 145.5771        |
|                | 21 | R  | 1  | 175.1195       | 88.0637         |

N-term:+43.02

X-range:

0 - 0

MassTol: Y-zoom:

0. 1.

MassType:

☐AVG ☒MONO

Axis:

☒1 ☐2

Label:

☒I ☐M ☐-

Ions:

a ☐+ ☐2+ ☐3+

b ☒+ ☐2+ ☐3+

c ☐+ ☐2+ ☐3+

x ☐+ ☐2+ ☐3+

y ☒+ ☒2+ ☐3+

z ☐+ ☐2+ ☐3+

hide H<sub>2</sub>O/NH<sub>3</sub> ☐

zoom 112-122 ☐

GO

GVQVETISPGDGR, MH+ 1356.6759, m/z 452.8968  
H OS G13 P120811 220811-s1.03388.03388.3.dta

scan 3388; 2.3e+000

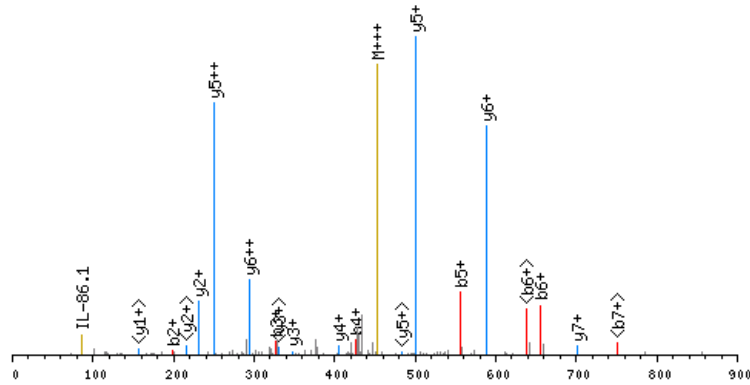

click image to zoom in; click top corners to zoom out

[precursor±]

scan 3384; 452.9 m/z; 7.8e+000

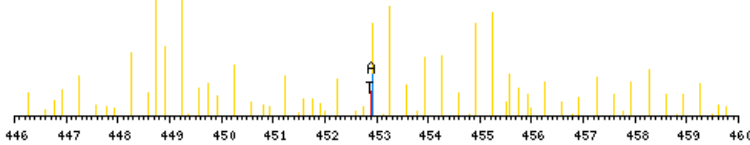

zoomed in precursor plot; T=theoretical m/z, A=acquired m/z

| b <sup>+</sup> | #  | AA | #  | y <sup>+</sup> | y <sup>2+</sup> |
|----------------|----|----|----|----------------|-----------------|
| 100.0399       | 1  | G  | 13 |                |                 |
| 199.1083       | 2  | V  | 12 | 1257.6439      | 629.3259        |
| 327.1669       | 3  | Q  | 11 | 1158.5755      | 579.7917        |
| 426.2353       | 4  | V  | 10 | 1030.5169      | 515.7624        |
| 555.2779       | 5  | E  | 9  | 931.4485       | 466.2282        |
| 656.3255       | 6  | T  | 8  | 802.4059       | 401.7069        |
| 769.4096       | 7  | I  | 7  | 701.3582       | 351.1830        |
| 856.4416       | 8  | S  | 6  | 588.2742       | 294.6410        |
| 953.4944       | 9  | P  | 5  | 501.2421       | 251.1250        |
| 1010.5159      | 10 | G  | 4  | 404.1894       | 202.5986        |
| 1125.5428      | 11 | D  | 3  | 347.1679       | 174.0879        |
| 1182.5643      | 12 | G  | 2  | 232.1410       | 116.5744        |
|                | 13 | R  | 1  | 175.1195       | 88.0637         |

N-term:+43.02

X-range:

0 - 0

MassTol: Y-zoom:

0. 1.

MassType:

☐ AVG ☒ MONO

Axis:

☒ 1 ☐ 2

Label:

☒ I ☐ M ☐ -

Ions:

a ☐ + ☐ 2+ ☐ 3+

b ☒ + ☐ 2+ ☐ 3+

c ☐ + ☐ 2+ ☐ 3+

x ☐ + ☐ 2+ ☐ 3+

y ☒ + ☒ 2+ ☐ 3+

z ☐ + ☐ 2+ ☐ 3+

hide H<sub>2</sub>O/NH<sub>3</sub> ☐

zoom 112-122 ☐

GO

HQGVVMGMGQKDSYVGDEAQSQR, MH+ 2605.2504, m/z 652.0680  
H OS G18 P120811 220811-s1.03243.03243.4.dta

scan 3243; 2.2e+000

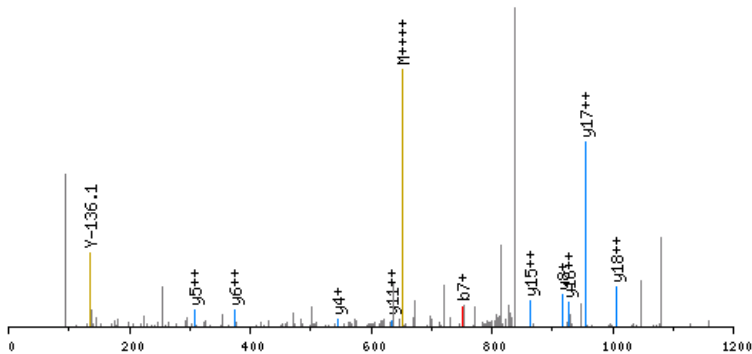

click image to zoom in; click top corners to zoom out

[precursor±]

scan 3241; 652.1 m/z; 6.0e+000

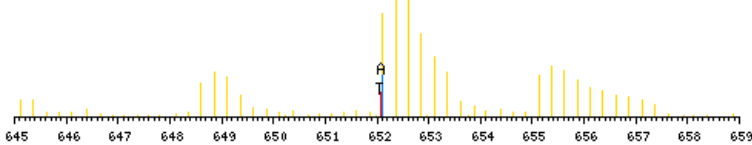

zoomed in precursor plot; T=theoretical m/z, A=acquired m/z

| b <sup>+</sup> | #  | AA | #  | y <sup>+</sup> | y <sup>2+</sup> |
|----------------|----|----|----|----------------|-----------------|
| 180.0773       | 1  | H  | 23 |                |                 |
| 308.1359       | 2  | Q  | 22 | 2426.1809      | 1213.5944       |
| 365.1574       | 3  | G  | 21 | 2298.1223      | 1149.5651       |
| 464.2258       | 4  | V  | 20 | 2241.1008      | 1121.0543       |
| 595.2663       | 5  | M  | 19 | 2142.0324      | 1071.5201       |
| 694.3347       | 6  | V  | 18 | 2010.9919      | 1005.9999       |
| 751.3561       | 7  | G  | 17 | 1911.9235      | 956.4657        |
| 882.3966       | 8  | M  | 16 | 1854.9021      | 927.9549        |
| 939.4181       | 9  | G  | 15 | 1723.8616      | 862.4347        |
| 1067.4767      | 10 | Q  | 14 | 1666.8401      | 833.9240        |
| 1223.6030      | 11 | K  | 13 | 1538.7815      | 769.8947        |
| 1338.6299      | 12 | D  | 12 | 1382.6552      | 691.8315        |
| 1425.6619      | 13 | S  | 11 | 1267.6283      | 634.3181        |
| 1588.7253      | 14 | Y  | 10 | 1180.5963      | 590.8020        |
| 1687.7937      | 15 | V  | 9  | 1017.5329      | 509.2704        |
| 1744.8151      | 16 | G  | 8  | 918.4645       | 459.7362        |
| 1859.8421      | 17 | D  | 7  | 861.4431       | 431.2254        |
| 1988.8847      | 18 | E  | 6  | 746.4161       | 373.7120        |
| 2059.9218      | 19 | A  | 5  | 617.3735       | 309.1907        |
| 2187.9804      | 20 | Q  | 4  | 546.3364       | 273.6721        |
| 2275.0124      | 21 | S  | 3  | 418.2778       | 209.6428        |
| 2431.1387      | 22 | K  | 2  | 331.2458       | 166.1268        |
|                | 23 | R  | 1  | 175.1195       | 88.0637         |

N-term:+43.02 K(11):+156.13  
K(22):+156.13

X-range:

0 - 0

MassTol: Y-zoom:

0. 1.

MassType:

☐AVG ☒MONO

Axis:

☒1 ☐2

Label:

☒I ☐M ☐-

Ions:

a ☐+ ☐2+ ☐3+

b ☒+ ☐2+ ☐3+

c ☐+ ☐2+ ☐3+

x ☐+ ☐2+ ☐3+

y ☒+ ☒2+ ☐3+

z ☐+ ☐2+ ☐3+

hide H<sub>2</sub>O/NH<sub>3</sub> ☐

zoom 112-122 ☐

GO

HQPPESTAAAAAADISAR, MH+ 1876.9153, m/z 626.3100  
H OS G12 P120811 220811-s1.04086.04086.3.dta

scan 4086; 1.2e+000

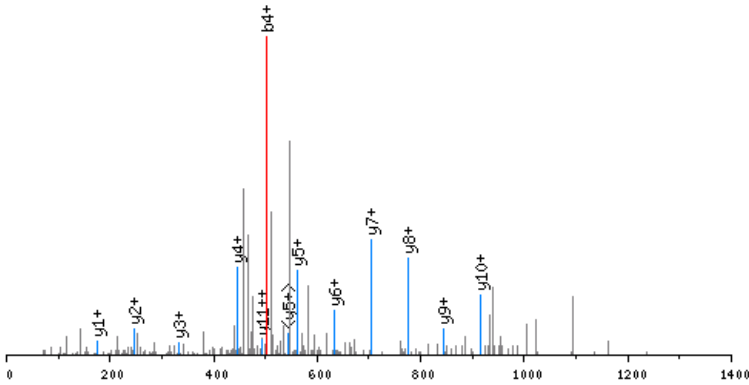

click image to zoom in; click top corners to zoom out

[precursor±]

scan 4082; 626.3 m/z; 1.3e+002

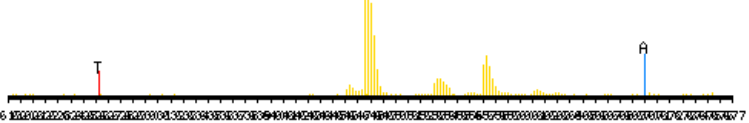

zoomed in precursor plot; T=theoretical m/z, A=acquired m/z

| b <sup>+</sup> | #  | AA | #  | y <sup>+</sup> | y <sup>2+</sup> |
|----------------|----|----|----|----------------|-----------------|
| 180.0773       | 1  | H  | 19 |                |                 |
| 308.1359       | 2  | Q  | 18 | 1697.8459      | 849.4268        |
| 405.1887       | 3  | P  | 17 | 1569.7873      | 785.3975        |
| 502.2414       | 4  | P  | 16 | 1472.7345      | 736.8712        |
| 631.2840       | 5  | E  | 15 | 1375.6817      | 688.3448        |
| 718.3160       | 6  | S  | 14 | 1246.6392      | 623.8235        |
| 819.3637       | 7  | T  | 13 | 1159.6071      | 580.3075        |
| 890.4008       | 8  | A  | 12 | 1058.5594      | 529.7836        |
| 961.4379       | 9  | A  | 11 | 987.5223       | 494.2651        |
| 1032.4751      | 10 | A  | 10 | 916.4852       | 458.7465        |
| 1103.5122      | 11 | A  | 9  | 845.4481       | 423.2280        |
| 1174.5493      | 12 | A  | 8  | 774.4110       | 387.7094        |
| 1245.5864      | 13 | A  | 7  | 703.3739       | 352.1909        |
| 1316.6235      | 14 | A  | 6  | 632.3368       | 316.6723        |
| 1431.6505      | 15 | D  | 5  | 561.2997       | 281.1537        |
| 1544.7345      | 16 | I  | 4  | 446.2727       | 223.6403        |
| 1631.7665      | 17 | S  | 3  | 333.1886       | 167.0982        |
| 1702.8037      | 18 | A  | 2  | 246.1566       | 123.5822        |
|                | 19 | R  | 1  | 175.1195       | 88.0637         |

N-term:+43.02

X-range:

0 - 0

MassTol: Y-zoom:

0. 1.

MassType:

☐AVG ☒MONO

Axis:

☒1 ☐2

Label:

☒I ☐M ☐-

Ions:

a ☐+ ☐2+ ☐3+

b ☒+ ☐2+ ☐3+

c ☐+ ☐2+ ☐3+

x ☐+ ☐2+ ☐3+

y ☒+ ☒2+ ☐3+

z ☐+ ☐2+ ☐3+

hide H<sub>2</sub>O/NH<sub>3</sub> ☐

zoom 112-122 ☐

GO

HSLATAAPVPTALAQVDR, MH+ 1859.9979, m/z 620.6708  
H OS G12 P120811 220811-s1.05030.05030.3.dta

scan 5030; 2.6e+000

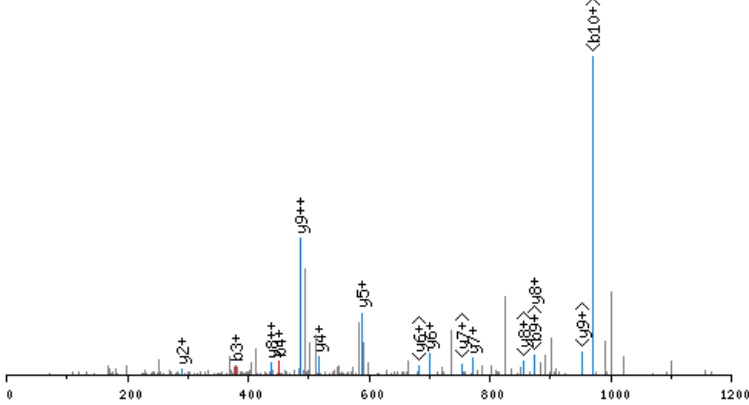

click image to zoom in; click top corners to zoom out

[precursor±]

scan 5027; 620.7 m/z; 8.2e+000

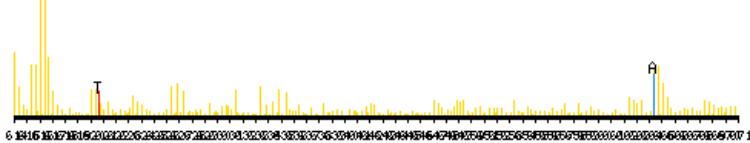

zoomed in precursor plot; T=theoretical m/z, A=acquired m/z

| b <sup>+</sup> | #  | AA | #  | y <sup>+</sup> | y <sup>2+</sup> |
|----------------|----|----|----|----------------|-----------------|
| 180.0773       | 1  | H  | 18 |                |                 |
| 267.1093       | 2  | S  | 17 | 1680.9285      | 840.9681        |
| 380.1934       | 3  | L  | 16 | 1593.8964      | 797.4521        |
| 451.2305       | 4  | A  | 15 | 1480.8124      | 740.9101        |
| 552.2782       | 5  | T  | 14 | 1409.7753      | 705.3915        |
| 623.3153       | 6  | A  | 13 | 1308.7276      | 654.8677        |
| 694.3524       | 7  | A  | 12 | 1237.6905      | 619.3491        |
| 791.4052       | 8  | P  | 11 | 1166.6533      | 583.8306        |
| 890.4736       | 9  | V  | 10 | 1069.6006      | 535.3042        |
| 987.5264       | 10 | P  | 9  | 970.5322       | 485.7700        |
| 1088.5740      | 11 | T  | 8  | 873.4794       | 437.2436        |
| 1159.6112      | 12 | A  | 7  | 772.4317       | 386.7198        |
| 1272.6952      | 13 | L  | 6  | 701.3946       | 351.2012        |
| 1343.7323      | 14 | A  | 5  | 588.3105       | 294.6592        |
| 1471.7909      | 15 | Q  | 4  | 517.2734       | 259.1406        |
| 1570.8593      | 16 | V  | 3  | 389.2149       | 195.1113        |
| 1685.8863      | 17 | D  | 2  | 290.1464       | 145.5771        |
|                | 18 | R  | 1  | 175.1195       | 88.0637         |

N-term:+43.02

X-range:

0 - 0

MassTol: Y-zoom:

0. 1.

MassType:

☐ AVG ☒ MONO

Axis:

☒ 1 ☐ 2

Label:

☒ I ☐ M ☐ -

Ions:

a ☐ + ☐ 2+ ☐ 3+

b ☒ + ☐ 2+ ☐ 3+

c ☐ + ☐ 2+ ☐ 3+

x ☐ + ☐ 2+ ☐ 3+

y ☒ + ☒ 2+ ☐ 3+

z ☐ + ☐ 2+ ☐ 3+

hide H<sub>2</sub>O/NH<sub>3</sub> ☐

zoom 112-122 ☐

GO

HVMTNLGEKLTDEEVDEMIR, MH+ 2429.1693, m/z 608.0478  
H OS G17 P120811 220811-s1.06084.06084.4.dta

scan 6084; 3.7e+000

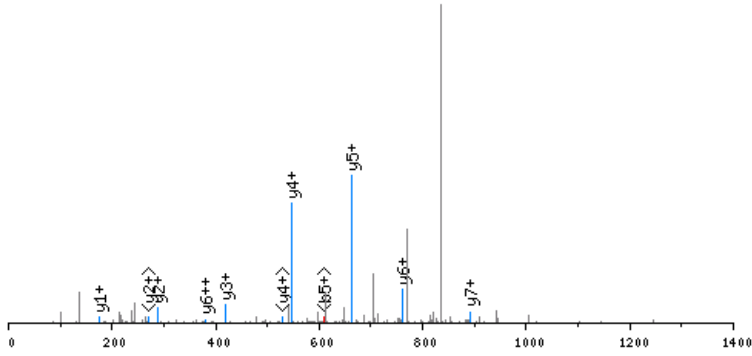

click image to zoom in; click top corners to zoom out [\[precursor±\]](#)

scan 6083; 608.0 m/z; 5.0e+000

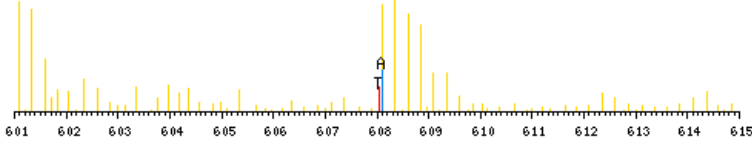

zoomed in precursor plot; T=theoretical m/z, A=acquired m/z

| b <sup>+</sup> | #  | AA | #  | y <sup>+</sup> | y <sup>2+</sup> |
|----------------|----|----|----|----------------|-----------------|
| 180.0773       | 1  | H  | 20 |                |                 |
| 279.1457       | 2  | V  | 19 | 2250.0998      | 1125.5538       |
| 410.1862       | 3  | M  | 18 | 2151.0314      | 1076.0196       |
| 511.2339       | 4  | T  | 17 | 2019.9909      | 1010.4994       |
| 625.2768       | 5  | N  | 16 | 1918.9432      | 959.9755        |
| 738.3609       | 6  | L  | 15 | 1804.9003      | 902.9541        |
| 795.3823       | 7  | G  | 14 | 1691.8162      | 846.4120        |
| 924.4249       | 8  | E  | 13 | 1634.7948      | 817.9013        |
| 1080.5512      | 9  | K  | 12 | 1505.7522      | 753.3800        |
| 1193.6353      | 10 | L  | 11 | 1349.6259      | 675.3168        |
| 1294.6830      | 11 | T  | 10 | 1236.5418      | 618.7748        |
| 1409.7099      | 12 | D  | 9  | 1135.4941      | 568.2510        |
| 1538.7525      | 13 | E  | 8  | 1020.4672      | 510.7375        |
| 1667.7951      | 14 | E  | 7  | 891.4246       | 446.2162        |
| 1766.8635      | 15 | V  | 6  | 762.3820       | 381.6949        |
| 1881.8905      | 16 | D  | 5  | 663.3136       | 332.1607        |
| 2010.9331      | 17 | E  | 4  | 548.2866       | 274.6472        |
| 2141.9735      | 18 | M  | 3  | 419.2440       | 210.1259        |
| 2255.0576      | 19 | I  | 2  | 288.2036       | 144.6057        |
|                | 20 | R  | 1  | 175.1195       | 88.0637         |

N-term:+43.02 K(9):+156.13

X-range:

0 - 0

MassTol: Y-zoom:

0. 1.

MassType:

☐AVG ☒MONO

Axis:

☒1 ☐2

Label:

☒I ☐M ☐-

Ions:

a ☐+ ☐2+ ☐3+

b ☒+ ☐2+ ☐3+

c ☐+ ☐2+ ☐3+

x ☐+ ☐2+ ☐3+

y ☒+ ☒2+ ☐3+

z ☐+ ☐2+ ☐3+

hide H<sub>2</sub>O/NH<sub>3</sub> ☐

zoom 112-122 ☐

GO

IEEALGDKAVFAGR, MH+ 1545.8277, m/z 515.9474  
H OS G15 P120811 220811-s1.03918.03918.3.dta

scan 3918; 1.1e+001

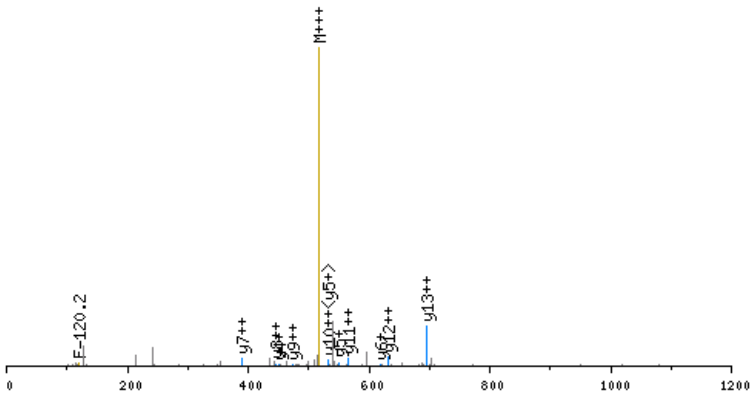

click image to zoom in; click top corners to zoom out [precursor±]

scan 3916; 515.9 m/z; 4.5e+001

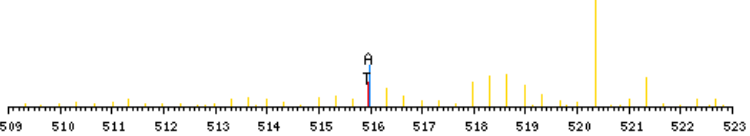

zoomed in precursor plot; T=theoretical m/z, A=acquired m/z

| b <sup>+</sup> | #  | AA | #  | y <sup>+</sup> | y <sup>2+</sup> |
|----------------|----|----|----|----------------|-----------------|
| 156.1025       | 1  | I  | 14 |                |                 |
| 285.1451       | 2  | E  | 13 | 1390.7331      | 695.8705        |
| 414.1877       | 3  | E  | 12 | 1261.6905      | 631.3492        |
| 485.2248       | 4  | A  | 11 | 1132.6479      | 566.8279        |
| 598.3088       | 5  | L  | 10 | 1061.6108      | 531.3093        |
| 655.3303       | 6  | G  | 9  | 948.5267       | 474.7673        |
| 770.3572       | 7  | D  | 8  | 891.5053       | 446.2565        |
| 926.4835       | 8  | K  | 7  | 776.4783       | 388.7431        |
| 997.5206       | 9  | A  | 6  | 620.3520       | 310.6799        |
| 1096.5891      | 10 | V  | 5  | 549.3149       | 275.1614        |
| 1243.6575      | 11 | F  | 4  | 450.2465       | 225.6272        |
| 1314.6946      | 12 | A  | 3  | 303.1781       | 152.0930        |
| 1371.7161      | 13 | G  | 2  | 232.1410       | 116.5744        |
|                | 14 | R  | 1  | 175.1195       | 88.0637         |

N-term:+43.02 K(8):+156.13

X-range:

0 - 0

MassTol: Y-zoom:

0. 1.

MassType:

☐AVG ☒MONO

Axis:

☒1 ☐2

Label:

☒I ☐M ☐-

Ions:

a ☐+ ☐2+ ☐3+

b ☒+ ☐2+ ☐3+

c ☐+ ☐2+ ☐3+

x ☐+ ☐2+ ☐3+

y ☒+ ☒2+ ☐3+

z ☐+ ☐2+ ☐3+

hide H<sub>2</sub>O/NH<sub>3</sub> ☐

zoom 112-122 ☐

GO

ILGGQEAAAHAR, MH+ 1235.6497, m/z 412.5547  
H OS G16 P120811 220811-s1.02151.02151.3.dta

scan 2151; 5.6e+000

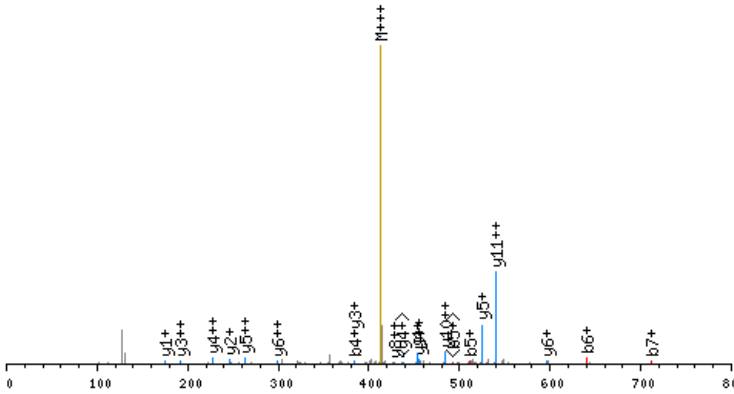

click image to zoom in; click top corners to zoom out [precursor±]

scan 2148; 412.6 m/z; 2.8e+000

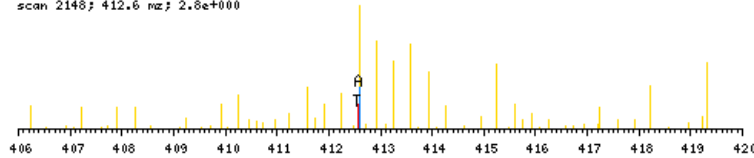

zoomed in precursor plot; T=theoretical m/z, A=acquired m/z

| b <sup>+</sup> | #  | AA | #  | y <sup>+</sup> | y <sup>2+</sup> |
|----------------|----|----|----|----------------|-----------------|
| 156.1025       | 1  | I  | 12 |                |                 |
| 269.1865       | 2  | L  | 11 | 1080.5550      | 540.7814        |
| 326.2080       | 3  | G  | 10 | 967.4710       | 484.2394        |
| 383.2295       | 4  | G  | 9  | 910.4495       | 455.7287        |
| 511.2880       | 5  | Q  | 8  | 853.4280       | 427.2179        |
| 640.3306       | 6  | E  | 7  | 725.3695       | 363.1886        |
| 711.3677       | 7  | A  | 6  | 596.3269       | 298.6673        |
| 782.4049       | 8  | A  | 5  | 525.2898       | 263.1488        |
| 853.4420       | 9  | A  | 4  | 454.2526       | 227.6302        |
| 990.5009       | 10 | H  | 3  | 383.2155       | 192.1117        |
| 1061.5380      | 11 | A  | 2  | 246.1566       | 123.5822        |
|                | 12 | R  | 1  | 175.1195       | 88.0637         |

N-term:+43.02

X-range:

0 - 0

MassTol: Y-zoom:

0. 1.

MassType:

☐AVG ☒MONO

Axis:

☒1 ☐2

Label:

☒I ☐M ☐-

Ions:

a ☐+ ☐2+ ☐3+

b ☒+ ☐2+ ☐3+

c ☐+ ☐2+ ☐3+

x ☐+ ☐2+ ☐3+

y ☒+ ☒2+ ☐3+

z ☐+ ☐2+ ☐3+

hide H<sub>2</sub>O/NH<sub>3</sub> ☐

zoom 112-122 ☐

GO

IPGGLTEARPATAEVQEIADR, MH+ 2236.1574, m/z 746.0573  
H OS G12 P120811 220811-s1.05315.05315.3.dta

scan 5315; 5.1e+000

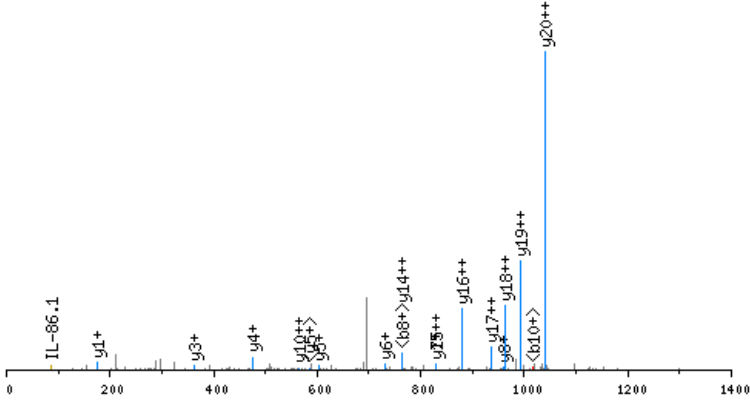

click image to zoom in; click top corners to zoom out [\[precursor±\]](#)

scan 5312; 746.1 m/z; 3.6e+000

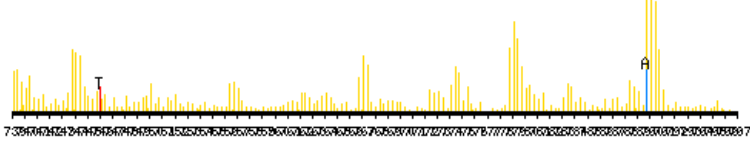

zoomed in precursor plot; T=theoretical m/z, A=acquired m/z

| b <sup>+</sup> | #  | AA | #  | y <sup>+</sup> | y <sup>2+</sup> |
|----------------|----|----|----|----------------|-----------------|
| 156.1025       | 1  | I  | 21 |                |                 |
| 253.1552       | 2  | P  | 20 | 2081.0627      | 1041.0353       |
| 310.1767       | 3  | G  | 19 | 1984.0100      | 992.5089        |
| 367.1982       | 4  | G  | 18 | 1926.9885      | 963.9982        |
| 480.2822       | 5  | L  | 17 | 1869.9670      | 935.4874        |
| 581.3299       | 6  | T  | 16 | 1756.8830      | 878.9454        |
| 710.3725       | 7  | E  | 15 | 1655.8353      | 828.4216        |
| 781.4096       | 8  | A  | 14 | 1526.7927      | 763.9003        |
| 937.5107       | 9  | R  | 13 | 1455.7556      | 728.3817        |
| 1034.5635      | 10 | P  | 12 | 1299.6545      | 650.3311        |
| 1105.6006      | 11 | A  | 11 | 1202.6017      | 601.8048        |
| 1206.6483      | 12 | T  | 10 | 1131.5646      | 566.2862        |
| 1277.6854      | 13 | A  | 9  | 1030.5169      | 515.7624        |
| 1406.7280      | 14 | E  | 8  | 959.4798       | 480.2438        |
| 1505.7964      | 15 | V  | 7  | 830.4372       | 415.7225        |
| 1633.8550      | 16 | Q  | 6  | 731.3688       | 366.1883        |
| 1762.8976      | 17 | E  | 5  | 603.3102       | 302.1590        |
| 1875.9816      | 18 | I  | 4  | 474.2676       | 237.6377        |
| 1947.0187      | 19 | A  | 3  | 361.1836       | 181.0957        |
| 2062.0457      | 20 | D  | 2  | 290.1464       | 145.5771        |
|                | 21 | R  | 1  | 175.1195       | 88.0637         |

N-term:+43.02

X-range:

0 - 0

MassTol: Y-zoom:

0. 1.

MassType:

☐AVG ☒MONO

Axis:

☒1 ☐2

Label:

☒I ☐M ☐-

Ions:

a ☐+ ☐2+ ☐3+

b ☒+ ☐2+ ☐3+

c ☐+ ☐2+ ☐3+

x ☐+ ☐2+ ☐3+

y ☒+ ☒2+ ☐3+

z ☐+ ☐2+ ☐3+

hide H<sub>2</sub>O/NH<sub>3</sub> ☐

zoom 112-122 ☐

GO

IQMTQSTSSLSASLGDR, MH+ 1823.8809, m/z 608.6318  
H OS G12 P120811 220811-s1.04454.04454.3.dta

scan 4454; 1.7e+000

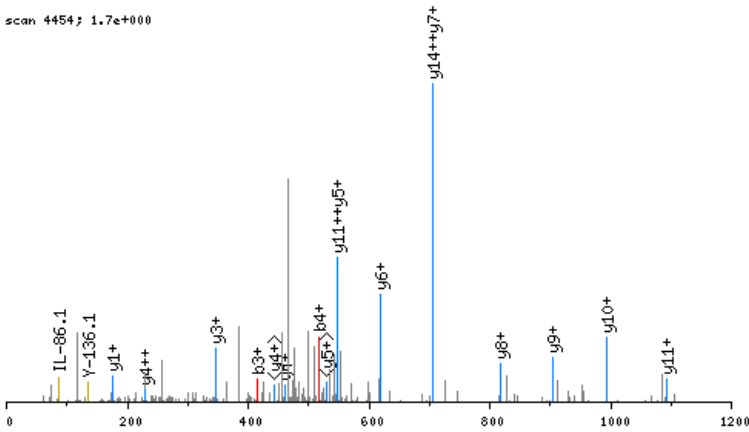

click image to zoom in; click top corners to zoom out

[precursor±]

scan 4452; 608.6 m/z; 1.5e+002

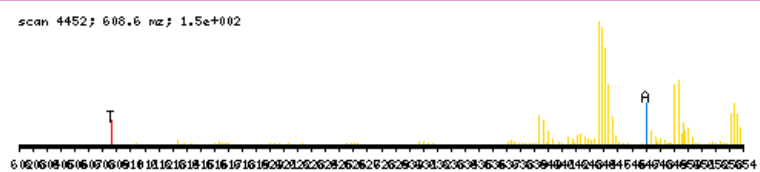

zoomed in precursor plot; T=theoretical m/z, A=acquired m/z

| b <sup>+</sup> | #  | AA | #  | y <sup>+</sup> | y <sup>2+</sup> |
|----------------|----|----|----|----------------|-----------------|
| 156.1025       | 1  | I  | 17 |                |                 |
| 284.1610       | 2  | Q  | 16 | 1668.7863      | 834.8971        |
| 415.2015       | 3  | M  | 15 | 1540.7277      | 770.8678        |
| 516.2492       | 4  | T  | 14 | 1409.6872      | 705.3475        |
| 644.3078       | 5  | Q  | 13 | 1308.6395      | 654.8237        |
| 731.3398       | 6  | S  | 12 | 1180.5810      | 590.7944        |
| 832.3875       | 7  | T  | 11 | 1093.5489      | 547.2784        |
| 919.4195       | 8  | S  | 10 | 992.5013       | 496.7545        |
| 1006.4515      | 9  | S  | 9  | 905.4692       | 453.2385        |
| 1119.5356      | 10 | L  | 8  | 818.4372       | 409.7225        |
| 1206.5676      | 11 | S  | 7  | 705.3531       | 353.1805        |
| 1277.6048      | 12 | A  | 6  | 618.3211       | 309.6645        |
| 1364.6368      | 13 | S  | 5  | 547.2840       | 274.1459        |
| 1477.7208      | 14 | L  | 4  | 460.2520       | 230.6299        |
| 1534.7423      | 15 | G  | 3  | 347.1679       | 174.0879        |
| 1649.7693      | 16 | D  | 2  | 290.1464       | 145.5771        |
|                | 17 | R  | 1  | 175.1195       | 88.0637         |

N-term:+43.02

X-range:

0 - 0

MassTol: Y-zoom:

0. 1.

MassType:

☐AVG ☒MONO

Axis:

☒1 ☐2

Label:

☒I ☐M ☐-

Ions:

a ☐+ ☐2+ ☐3+

b ☒+ ☐2+ ☐3+

c ☐+ ☐2+ ☐3+

x ☐+ ☐2+ ☐3+

y ☒+ ☒2+ ☐3+

z ☐+ ☐2+ ☐3+

hide H<sub>2</sub>O/NH<sub>3</sub> ☐

zoom 112-122 ☐

GO

IVAPGKGILAADESTGSIAKR, MH+ 2164.2978, m/z 541.8299  
H OS G16 P120811 220811-s1.04486.04486.4.dta

scan 4486; 1.4e+001

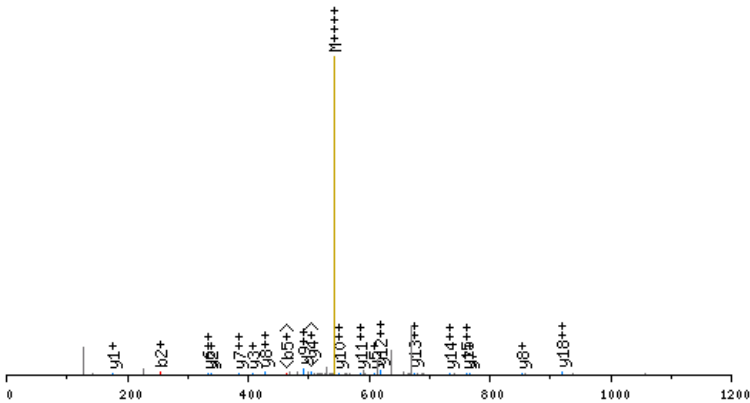

click image to zoom in; click top corners to zoom out

[precursor±]

scan 4483; 541.8 m/z; 7.9e+000

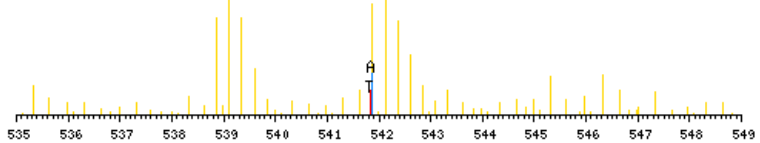

zoomed in precursor plot; T=theoretical m/z, A=acquired m/z

| b <sup>+</sup> | #  | AA | #  | y <sup>+</sup> | y <sup>2+</sup> |
|----------------|----|----|----|----------------|-----------------|
| 156.1025       | 1  | I  | 21 |                |                 |
| 255.1709       | 2  | V  | 20 | 2009.2032      | 1005.1055       |
| 326.2080       | 3  | A  | 19 | 1910.1348      | 955.5713        |
| 423.2608       | 4  | P  | 18 | 1839.0977      | 920.0527        |
| 480.2822       | 5  | G  | 17 | 1742.0449      | 871.5264        |
| 642.4403       | 6  | K  | 16 | 1685.0234      | 843.0156        |
| 699.4618       | 7  | G  | 15 | 1522.8653      | 761.9366        |
| 812.5458       | 8  | I  | 14 | 1465.8439      | 733.4258        |
| 925.6299       | 9  | L  | 13 | 1352.7598      | 676.8838        |
| 996.6670       | 10 | A  | 12 | 1239.6757      | 620.3418        |
| 1067.7041      | 11 | A  | 11 | 1168.6386      | 584.8232        |
| 1182.7311      | 12 | D  | 10 | 1097.6015      | 549.3047        |
| 1311.7737      | 13 | E  | 9  | 982.5746       | 491.7912        |
| 1398.8057      | 14 | S  | 8  | 853.5320       | 427.2699        |
| 1499.8534      | 15 | T  | 7  | 766.4999       | 383.7539        |
| 1556.8748      | 16 | G  | 6  | 665.4523       | 333.2300        |
| 1643.9069      | 17 | S  | 5  | 608.4308       | 304.7193        |
| 1756.9909      | 18 | I  | 4  | 521.3988       | 261.2033        |
| 1828.0281      | 19 | A  | 3  | 408.3147       | 204.6613        |
| 1990.1862      | 20 | K  | 2  | 337.2776       | 169.1427        |
|                | 21 | R  | 1  | 175.1195       | 88.0637         |

N-term:+43.02 K(6):+162.16  
K(20):+162.16

X-range:

0 - 0

MassTol: Y-zoom:

0. 1.

MassType:

☐ AVG ☒ MONO

Axis:

☒ 1 ☐ 2

Label:

☒ I ☐ M ☐ -

Ions:

a ☐ + ☐ 2+ ☐ 3+

b ☒ + ☐ 2+ ☐ 3+

c ☐ + ☐ 2+ ☐ 3+

x ☐ + ☐ 2+ ☐ 3+

y ☒ + ☒ 2+ ☐ 3+

z ☐ + ☐ 2+ ☐ 3+

hide H<sub>2</sub>O/NH<sub>3</sub> ☐

zoom 112-122 ☐

GO

KELLSPGAPLTKQSR, MH+ 1723.0119, m/z 575.0088  
H OS G16 P120811 220811-s1.02756.02756.3.dta

scan 2756; 1.9e+000

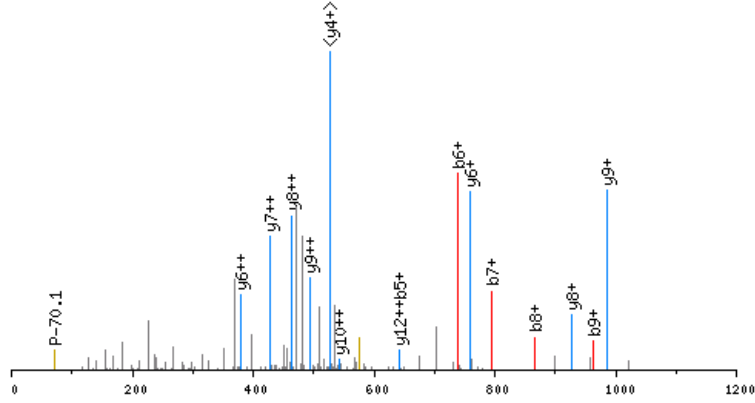

click image to zoom in; click top corners to zoom out [\[precursor±\]](#)

scan 2753; 575.0 m/z; 7.0e+000

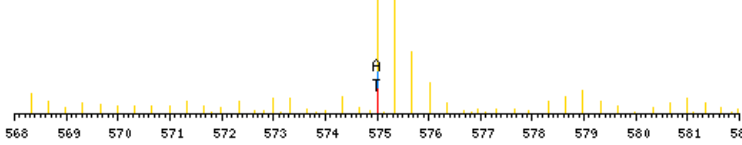

zoomed in precursor plot; T=theoretical m/z, A=acquired m/z

| b <sup>+</sup> | #  | AA | #  | y <sup>+</sup> | y <sup>2+</sup> |
|----------------|----|----|----|----------------|-----------------|
| 199.1447       | 1  | K  | 15 |                |                 |
| 328.1873       | 2  | E  | 14 | 1524.8750      | 762.9414        |
| 441.2714       | 3  | L  | 13 | 1395.8324      | 698.4201        |
| 554.3554       | 4  | L  | 12 | 1282.7483      | 641.8781        |
| 641.3874       | 5  | S  | 11 | 1169.6643      | 585.3361        |
| 738.4402       | 6  | P  | 10 | 1082.6323      | 541.8200        |
| 795.4617       | 7  | G  | 9  | 985.5795       | 493.2937        |
| 866.4988       | 8  | A  | 8  | 928.5580       | 464.7829        |
| 963.5516       | 9  | P  | 7  | 857.5209       | 429.2644        |
| 1076.6356      | 10 | L  | 6  | 760.4681       | 380.7380        |
| 1177.6833      | 11 | T  | 5  | 647.3841       | 324.1960        |
| 1333.8096      | 12 | K  | 4  | 546.3364       | 273.6721        |
| 1461.8682      | 13 | Q  | 3  | 390.2101       | 195.6090        |
| 1548.9002      | 14 | S  | 2  | 262.1515       | 131.5797        |
|                | 15 | R  | 1  | 175.1195       | 88.0637         |

N-term:+43.02 K(1):+156.13  
K(12):+156.13

X-range:

0 - 0

MassTol: Y-zoom:

0. 1.

MassType:

☐ AVG ☒ MONO

Axis:

☒ 1 ☐ 2

Label:

☒ I ☐ M ☐ -

Ions:

a ☐ + ☐ 2+ ☐ 3+

b ☒ + ☐ 2+ ☐ 3+

c ☐ + ☐ 2+ ☐ 3+

x ☐ + ☐ 2+ ☐ 3+

y ☒ + ☒ 2+ ☐ 3+

z ☐ + ☐ 2+ ☐ 3+

hide H<sub>2</sub>O/NH<sub>3</sub> ☐

zoom 112-122 ☐

GO

KITEQEEDSPKR, MH+ 1569.8761, m/z 523.9636  
H OS G15 P120811 220811-s1.04405.04405.3.dta

scan 4405; 5.5e+001

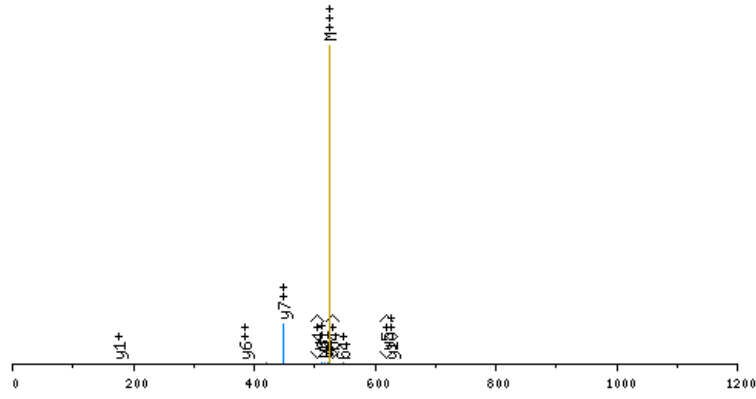

click image to zoom in; click top corners to zoom out [\[precursor±\]](#)

scan 4401; 524.0 m/z; 2.2e+001

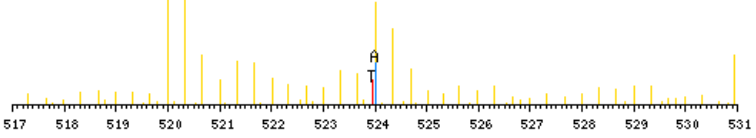

zoomed in precursor plot; T=theoretical m/z, A=acquired m/z

| b <sup>+</sup> | #  | AA | #  | y <sup>+</sup> | y <sup>2+</sup> |
|----------------|----|----|----|----------------|-----------------|
| 205.1765       | 1  | K  | 12 |                |                 |
| 318.2606       | 2  | I  | 11 | 1365.7074      | 683.3576        |
| 419.3082       | 3  | T  | 10 | 1252.6234      | 626.8156        |
| 548.3508       | 4  | E  | 9  | 1151.5757      | 576.2918        |
| 676.4094       | 5  | Q  | 8  | 1022.5331      | 511.7705        |
| 805.4520       | 6  | E  | 7  | 894.4745       | 447.7412        |
| 934.4946       | 7  | E  | 6  | 765.4319       | 383.2199        |
| 1049.5215      | 8  | D  | 5  | 636.3893       | 318.6986        |
| 1136.5536      | 9  | S  | 4  | 521.3624       | 261.1851        |
| 1233.6063      | 10 | P  | 3  | 434.3304       | 217.6691        |
| 1395.7644      | 11 | K  | 2  | 337.2776       | 169.1427        |
|                | 12 | R  | 1  | 175.1195       | 88.0637         |

N-term:+43.02 K(1):+162.16  
K(11):+162.16

zoomed in precursor plot; T=theoretical m/z, A=acquired m/z

X-range:

0 - 0

MassTol: Y-zoom:

0. 1.

MassType:

☐AVG ☒MONO

Axis:

☒1 ☐2

Label:

☒I ☐M ☐-

Ions:

a ☐+ ☐2+ ☐3+

b ☒+ ☐2+ ☐3+

c ☐+ ☐2+ ☐3+

x ☐+ ☐2+ ☐3+

y ☒+ ☒2+ ☐3+

z ☐+ ☐2+ ☐3+

hide H<sub>2</sub>O/NH<sub>3</sub> ☐

zoom 112-122 ☐

GO

KQPKNLEGYVGFANLPNQVYR, MH+ 2533.3568, m/z 634.0947  
H OS G15 P120811 220811-s1.05858.05858.4.dta

scan 5858; 2.5e+000

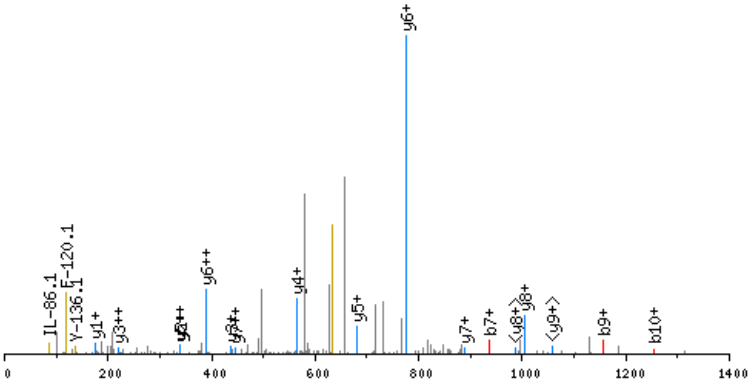

click image to zoom in; click top corners to zoom out

[precursor±]

scan 5856; 634.1 m/z; 5.9e+000

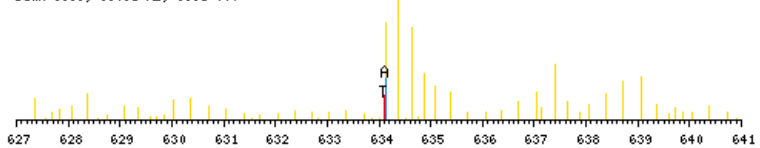

zoomed in precursor plot; T=theoretical m/z, A=acquired m/z

| b <sup>+</sup> | #  | AA | #  | y <sup>+</sup> | y <sup>2+</sup> |
|----------------|----|----|----|----------------|-----------------|
| 199.1447       | 1  | K  | 21 |                |                 |
| 327.2033       | 2  | Q  | 20 | 2335.2199      | 1168.1139       |
| 424.2560       | 3  | P  | 19 | 2207.1613      | 1104.0846       |
| 580.3823       | 4  | K  | 18 | 2110.1086      | 1055.5582       |
| 694.4253       | 5  | N  | 17 | 1953.9823      | 977.4951        |
| 807.5093       | 6  | L  | 16 | 1839.9394      | 920.4736        |
| 936.5519       | 7  | E  | 15 | 1726.8553      | 863.9316        |
| 993.5734       | 8  | G  | 14 | 1597.8127      | 799.4103        |
| 1156.6367      | 9  | Y  | 13 | 1540.7912      | 770.8995        |
| 1255.7051      | 10 | V  | 12 | 1377.7279      | 689.3679        |
| 1312.7266      | 11 | G  | 11 | 1278.6595      | 639.8337        |
| 1459.7950      | 12 | F  | 10 | 1221.6380      | 611.3229        |
| 1530.8321      | 13 | A  | 9  | 1074.5696      | 537.7887        |
| 1644.8751      | 14 | N  | 8  | 1003.5325      | 502.2702        |
| 1757.9591      | 15 | L  | 7  | 889.4896       | 445.2487        |
| 1855.0119      | 16 | P  | 6  | 776.4055       | 388.7067        |
| 1969.0548      | 17 | N  | 5  | 679.3527       | 340.1803        |
| 2097.1134      | 18 | Q  | 4  | 565.3098       | 283.1588        |
| 2196.1818      | 19 | V  | 3  | 437.2512       | 219.1295        |
| 2359.2451      | 20 | Y  | 2  | 338.1828       | 169.5953        |
|                | 21 | R  | 1  | 175.1195       | 88.0637         |

N-term:+43.02 K(1):+156.13  
K(4):+156.13

X-range:

0 - 0

MassTol: Y-zoom:

0. 1.

MassType:

☐ AVG ☒ MONO

Axis:

☒ 1 ☐ 2

Label:

☒ I ☐ M ☐ -

Ions:

a ☐ + ☐ 2+ ☐ 3+

b ☒ + ☐ 2+ ☐ 3+

c ☐ + ☐ 2+ ☐ 3+

x ☐ + ☐ 2+ ☐ 3+

y ☒ + ☒ 2+ ☐ 3+

z ☐ + ☐ 2+ ☐ 3+

hide H<sub>2</sub>O/NH<sub>3</sub> ☐

zoom 112-122 ☐

GO

KTAQNKATMGILR, MH+ 1541.9474, m/z 514.6540  
H OS G16 P120811 220811-s1.04200.04200.3.dta

scan 4200; 1.7e+000

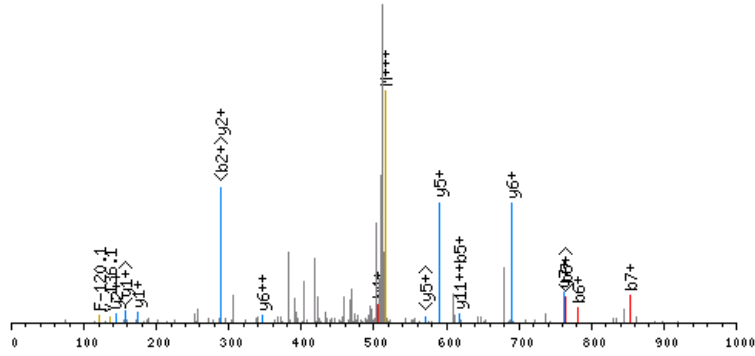

click image to zoom in; click top corners to zoom out [\[precursor±\]](#)

scan 4198; 514.7 m/z; 3.8e+000

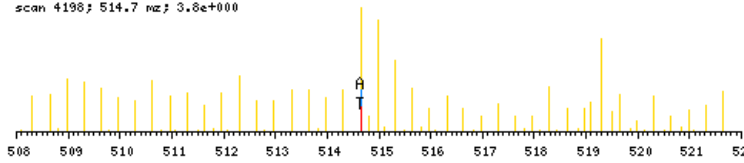

zoomed in precursor plot; T=theoretical m/z, A=acquired m/z

| b <sup>+</sup> | #  | AA | #  | y <sup>+</sup> | y <sup>2+</sup> |
|----------------|----|----|----|----------------|-----------------|
| 205.1765       | 1  | K  | 13 |                |                 |
| 306.2242       | 2  | T  | 12 | 1337.7788      | 669.3933        |
| 377.2613       | 3  | A  | 11 | 1236.7311      | 618.8695        |
| 505.3199       | 4  | Q  | 10 | 1165.6940      | 583.3509        |
| 619.3628       | 5  | N  | 9  | 1037.6354      | 519.3216        |
| 781.5209       | 6  | K  | 8  | 923.5925       | 462.3001        |
| 852.5580       | 7  | A  | 7  | 761.4344       | 381.2211        |
| 953.6057       | 8  | T  | 6  | 690.3973       | 345.7025        |
| 1084.6462      | 9  | M  | 5  | 589.3496       | 295.1787        |
| 1141.6676      | 10 | G  | 4  | 458.3091       | 229.6585        |
| 1254.7517      | 11 | I  | 3  | 401.2876       | 201.1477        |
| 1367.8358      | 12 | L  | 2  | 288.2036       | 144.6057        |
|                | 13 | R  | 1  | 175.1195       | 88.0637         |

N-term:+43.02 K(1):+162.16  
K(6):+162.16

X-range:

0 - 0

MassTol: Y-zoom:

0. 1.

MassType:

☐AVG ☒MONO

Axis:

☒1 ☐2

Label:

☒I ☐M ☐-

Ions:

a ☐+ ☐2+ ☐3+

b ☒+ ☐2+ ☐3+

c ☐+ ☐2+ ☐3+

x ☐+ ☐2+ ☐3+

y ☒+ ☒2+ ☐3+

z ☐+ ☐2+ ☐3+

hide H<sub>2</sub>O/NH<sub>3</sub> ☐

zoom 112-122 ☐

GO

LAALPLLATSSSR, MH+ 1341.7742, m/z 447.9296  
H OS G13 P120811 220811-s1.05325.05325.3.dta

scan 5325; 1.9e+000

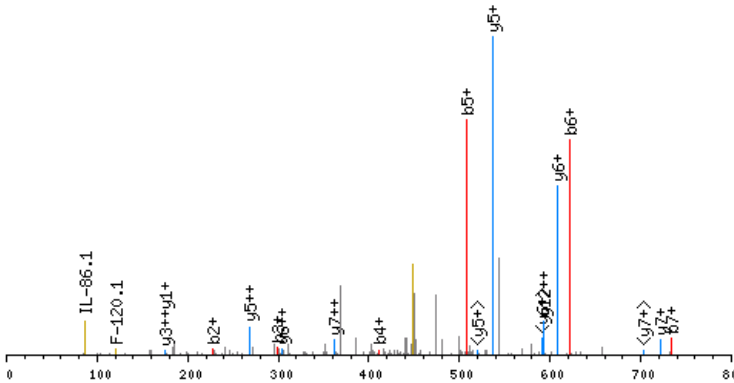

click image to zoom in; click top corners to zoom out

[precursor±]

scan 5324; 447.9 m/z; 5.4e+000

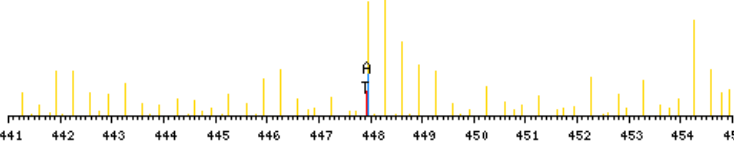

zoomed in precursor plot; T=theoretical m/z, A=acquired m/z

| b <sup>+</sup> | #  | AA | #  | y <sup>+</sup> | y <sup>2+</sup> |
|----------------|----|----|----|----------------|-----------------|
| 156.1025       | 1  | L  | 13 |                |                 |
| 227.1396       | 2  | A  | 12 | 1186.6796      | 593.8437        |
| 298.1767       | 3  | A  | 11 | 1115.6424      | 558.3251        |
| 411.2608       | 4  | L  | 10 | 1044.6053      | 522.8066        |
| 508.3135       | 5  | P  | 9  | 931.5213       | 466.2645        |
| 621.3976       | 6  | L  | 8  | 834.4685       | 417.7382        |
| 734.4816       | 7  | L  | 7  | 721.3844       | 361.1961        |
| 805.5188       | 8  | A  | 6  | 608.3004       | 304.6541        |
| 906.5664       | 9  | T  | 5  | 537.2633       | 269.1355        |
| 993.5985       | 10 | S  | 4  | 436.2156       | 218.6117        |
| 1080.6305      | 11 | S  | 3  | 349.1836       | 175.0957        |
| 1167.6625      | 12 | S  | 2  | 262.1515       | 131.5797        |
|                | 13 | R  | 1  | 175.1195       | 88.0637         |

N-term:+43.02

X-range:

0 - 0

MassTol: Y-zoom:

0. 1.

MassType:

☐AVG ☒MONO

Axis:

☒1 ☐2

Label:

☒I ☐M ☐-

Ions:

a ☐+ ☐2+ ☐3+

b ☒+ ☐2+ ☐3+

c ☐+ ☐2+ ☐3+

x ☐+ ☐2+ ☐3+

y ☒+ ☒2+ ☐3+

z ☐+ ☐2+ ☐3+

hide H<sub>2</sub>O/NH<sub>3</sub> ☐

zoom 112-122 ☐

GO

LGGLGKLAAGLAHR, MH+ 1532.8913, m/z 511.6353  
H OS G16 P120811 220811-s1.06295.06295.3.dta

scan 6295; 3.0e+000

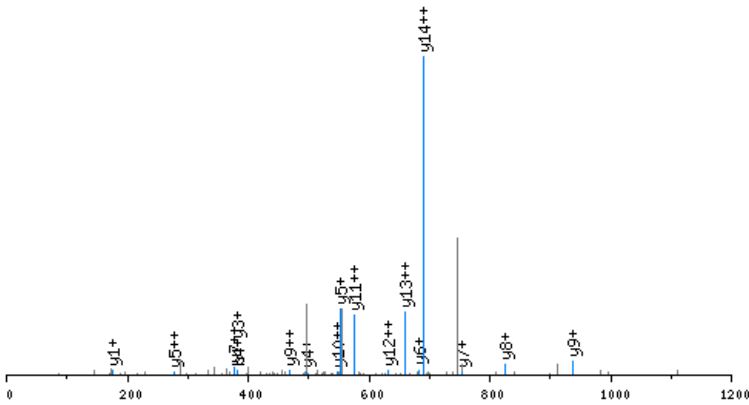

click image to zoom in; click top corners to zoom out

[precursor±]

scan 6291; 511.6 m/z; 7.6e+000

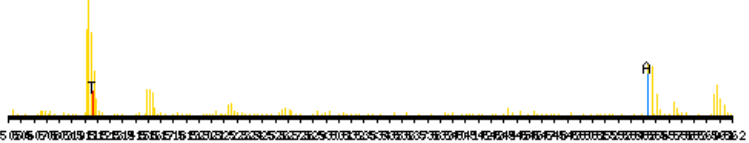

zoomed in precursor plot; T=theoretical m/z, A=acquired m/z

| b <sup>+</sup> | #  | AA | #  | y <sup>+</sup> | y <sup>2+</sup> |
|----------------|----|----|----|----------------|-----------------|
| 156.1025       | 1  | L  | 15 |                |                 |
| 213.1239       | 2  | G  | 14 | 1377.7967      | 689.4023        |
| 270.1454       | 3  | G  | 13 | 1320.7752      | 660.8915        |
| 383.2295       | 4  | L  | 12 | 1263.7538      | 632.3808        |
| 440.2509       | 5  | G  | 11 | 1150.6697      | 575.8388        |
| 596.3772       | 6  | K  | 10 | 1093.6482      | 547.3280        |
| 709.4613       | 7  | L  | 9  | 937.5219       | 469.2649        |
| 780.4984       | 8  | A  | 8  | 824.4379       | 412.7228        |
| 851.5355       | 9  | A  | 7  | 753.4008       | 377.2043        |
| 980.5781       | 10 | E  | 6  | 682.3636       | 341.6857        |
| 1037.5996      | 11 | G  | 5  | 553.3211       | 277.1644        |
| 1150.6836      | 12 | L  | 4  | 496.2996       | 248.6537        |
| 1221.7207      | 13 | A  | 3  | 383.2155       | 192.1117        |
| 1358.7797      | 14 | H  | 2  | 312.1784       | 156.5931        |
|                | 15 | R  | 1  | 175.1195       | 88.0637         |

N-term:+43.02 K(6):+156.13

X-range:

0 - 0

MassTol: Y-zoom:

0. 1.

MassType:

☐AVG ☒MONO

Axis:

☒1 ☐2

Label:

☒I ☐M ☐-

Ions:

a ☐+ ☐2+ ☐3+

b ☒+ ☐2+ ☐3+

c ☐+ ☐2+ ☐3+

x ☐+ ☐2+ ☐3+

y ☒+ ☒2+ ☐3+

z ☐+ ☐2+ ☐3+

hide H<sub>2</sub>O/NH<sub>3</sub> ☐

zoom 112-122 ☐

GO

LGSFGKAER, MH+ 1034.5635, m/z 517.7854  
H OS G14 P120811 220811-s1.04544.04544.2.dta

scan 4544; 6.9e+000

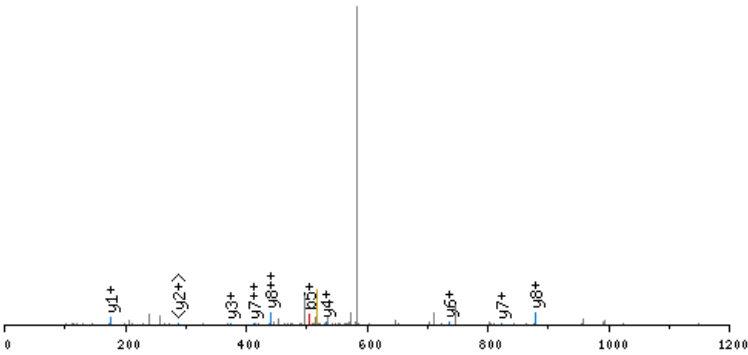

click image to zoom in; click top corners to zoom out [precursor±]

scan 4541; 517.8 m/z; 1.5e+001

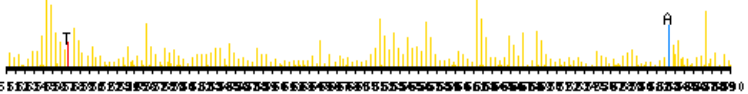

zoomed in precursor plot; T=theoretical m/z, A=acquired m/z

| b <sup>+</sup> | # | AA | # | y <sup>+</sup> | y <sup>2+</sup> |
|----------------|---|----|---|----------------|-----------------|
| 156.1025       | 1 | L  | 9 |                |                 |
| 213.1239       | 2 | G  | 8 | 879.4689       | 440.2384        |
| 300.1560       | 3 | S  | 7 | 822.4474       | 411.7276        |
| 357.1774       | 4 | G  | 6 | 735.4154       | 368.2116        |
| 504.2458       | 5 | F  | 5 | 678.3939       | 339.7009        |
| 660.3721       | 6 | K  | 4 | 531.3255       | 266.1667        |
| 731.4092       | 7 | A  | 3 | 375.1992       | 188.1035        |
| 860.4518       | 8 | E  | 2 | 304.1621       | 152.5850        |
|                | 9 | R  | 1 | 175.1195       | 88.0637         |

N-term:+43.02 K(6):+156.13

X-range:

0

-

0

MassTol: Y-zoom:

0.

1.

MassType:

AVG

MONO

Axis:

1

2

Label:

I

M

-

Ions:

a

b

c

x

y

z

+

2+

3+

+

2+

3+

+

2+

3+

+

2+

3+

+

2+

3+

+

2+

3+

hide H<sub>2</sub>O/NH<sub>3</sub>

zoom 112-122

GO

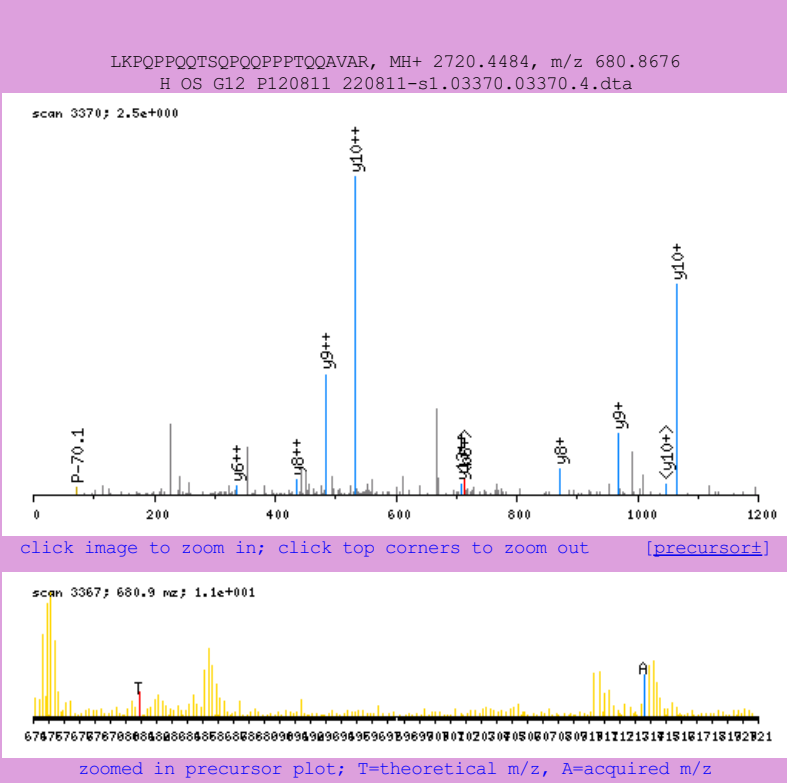

| b <sup>+</sup> | #  | AA | #  | y <sup>+</sup> | y <sup>2+</sup> |
|----------------|----|----|----|----------------|-----------------|
| 156.1025       | 1  | L  | 24 |                |                 |
| 312.2288       | 2  | K  | 23 | 2565.3538      | 1283.1808       |
| 409.2815       | 3  | P  | 22 | 2409.2275      | 1205.1177       |
| 537.3401       | 4  | Q  | 21 | 2312.1747      | 1156.5913       |
| 634.3929       | 5  | P  | 20 | 2184.1162      | 1092.5620       |
| 731.4456       | 6  | P  | 19 | 2087.0634      | 1044.0356       |
| 859.5042       | 7  | Q  | 18 | 1990.0106      | 995.5092        |
| 987.5628       | 8  | Q  | 17 | 1861.9520      | 931.4799        |
| 1088.6105      | 9  | T  | 16 | 1733.8935      | 867.4506        |
| 1175.6425      | 10 | S  | 15 | 1632.8458      | 816.9268        |
| 1303.7011      | 11 | Q  | 14 | 1545.8138      | 773.4108        |
| 1400.7538      | 12 | P  | 13 | 1417.7552      | 709.3815        |
| 1528.8124      | 13 | Q  | 12 | 1320.7024      | 660.8551        |
| 1656.8710      | 14 | Q  | 11 | 1192.6438      | 596.8258        |
| 1753.9238      | 15 | P  | 10 | 1064.5853      | 532.7965        |
| 1850.9765      | 16 | P  | 9  | 967.5325       | 484.2702        |
| 1948.0293      | 17 | P  | 8  | 870.4797       | 435.7438        |
| 2049.0770      | 18 | T  | 7  | 773.4270       | 387.2174        |
| 2177.1355      | 19 | Q  | 6  | 672.3793       | 336.6936        |
| 2305.1941      | 20 | Q  | 5  | 544.3207       | 272.6643        |
| 2376.2312      | 21 | A  | 4  | 416.2621       | 208.6350        |
| 2475.2996      | 22 | V  | 3  | 345.2250       | 173.1164        |
| 2546.3368      | 23 | A  | 2  | 246.1566       | 123.5822        |
|                | 24 | R  | 1  | 175.1195       | 88.0637         |

N-term:+43.02 K(2):+156.13

X-range:

0 - 0

MassTol: Y-zoom:

0. 1.

MassType:

☐AVG ☒MONO

Axis:

☒1 ☐2

Label:

☒I ☐M ☐-

Ions:

a ☐+ ☐2+ ☐3+

b ☒+ ☐2+ ☐3+

c ☐+ ☐2+ ☐3+

x ☐+ ☐2+ ☐3+

y ☒+ ☒2+ ☐3+

z ☐+ ☐2+ ☐3+

hide H<sub>2</sub>O/NH<sub>3</sub> ☐

zoom 112-122 ☐

GO

LPNTGKLAGCTVFITGASR, MH+ 2033.0854, m/z 678.3666  
H OS G12 P120811 220811-s1.05338.05338.3.dta

scan 5338; 2.9e+000

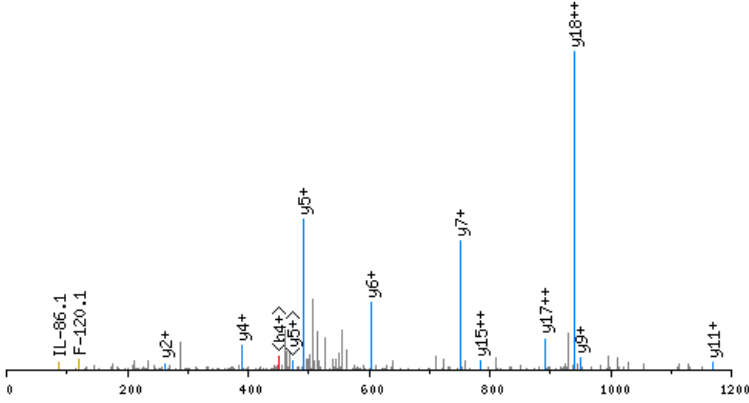

click image to zoom in; click top corners to zoom out (precursor±)

scan 5337; 678.4 m/z; 1.5e+001

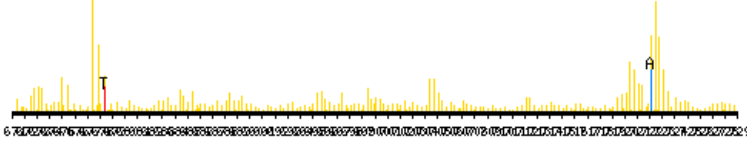

zoomed in precursor plot; T=theoretical m/z, A=acquired m/z

| b <sup>+</sup> | #  | AA | #  | y <sup>+</sup> | y <sup>2+</sup> |
|----------------|----|----|----|----------------|-----------------|
| 156.1025       | 1  | L  | 19 |                |                 |
| 253.1552       | 2  | P  | 18 | 1877.9907      | 939.4993        |
| 367.1982       | 3  | N  | 17 | 1780.9380      | 890.9729        |
| 468.2458       | 4  | T  | 16 | 1666.8950      | 833.9514        |
| 525.2673       | 5  | G  | 15 | 1565.8474      | 783.4276        |
| 681.3936       | 6  | K  | 14 | 1508.8259      | 754.9169        |
| 794.4777       | 7  | L  | 13 | 1352.6996      | 676.8537        |
| 865.5148       | 8  | A  | 12 | 1239.6155      | 620.3117        |
| 922.5362       | 9  | G  | 11 | 1168.5784      | 584.7931        |
| 1082.5668      | 10 | C  | 10 | 1111.5570      | 556.2824        |
| 1183.6145      | 11 | T  | 9  | 951.5264       | 476.2671        |
| 1282.6829      | 12 | V  | 8  | 850.4787       | 425.7433        |
| 1429.7513      | 13 | F  | 7  | 751.4103       | 376.2090        |
| 1542.8354      | 14 | I  | 6  | 604.3418       | 302.6748        |
| 1643.8831      | 15 | T  | 5  | 491.2578       | 246.1328        |
| 1700.9046      | 16 | G  | 4  | 390.2101       | 195.6090        |
| 1771.9417      | 17 | A  | 3  | 333.1886       | 167.0982        |
| 1858.9737      | 18 | S  | 2  | 262.1515       | 131.5797        |
|                | 19 | R  | 1  | 175.1195       | 88.0637         |

N-term:+43.02 K(6):+156.13  
C(10):+160.03

X-range:

0 - 0

MassTol: Y-zoom:

0. 1.

MassType:

☐AVG ☒MONO

Axis:

☒1 ☐2

Label:

☒I ☐M ☐-

Ions:

a ☐+ ☐2+ ☐3+

b ☒+ ☐2+ ☐3+

c ☐+ ☐2+ ☐3+

x ☐+ ☐2+ ☐3+

y ☒+ ☒2+ ☐3+

z ☐+ ☐2+ ☐3+

hide H<sub>2</sub>O/NH<sub>3</sub> ☐

zoom 112-122 ☐

GO

LYLGHNYVTAIR, MH+ 1461.7854, m/z 487.9333  
H OS G16 P120811 220811-s1.04741.04741.3.dta

scan 4741; 4.5e+000

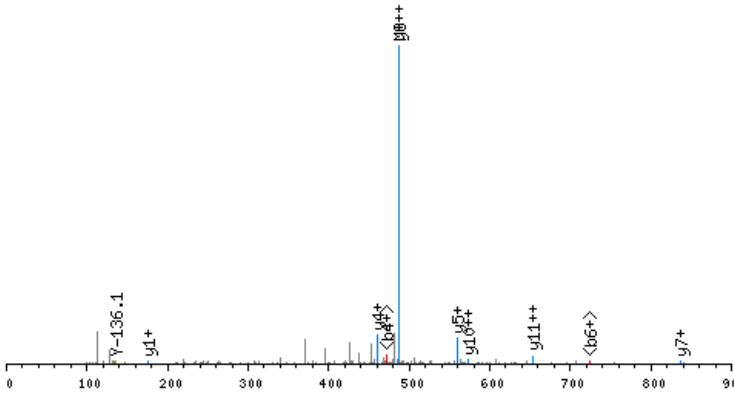

click image to zoom in; click top corners to zoom out [\[precursor±\]](#)

scan 4738; 487.9 m/z; 4.0e+000

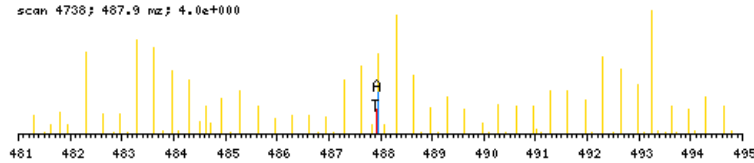

zoomed in precursor plot; T=theoretical m/z, A=acquired m/z

| b <sup>+</sup> | #  | AA | #  | y <sup>+</sup> | y <sup>2+</sup> |
|----------------|----|----|----|----------------|-----------------|
| 156.1025       | 1  | L  | 12 |                |                 |
| 319.1658       | 2  | Y  | 11 | 1306.6908      | 653.8493        |
| 432.2499       | 3  | L  | 10 | 1143.6275      | 572.3176        |
| 489.2713       | 4  | G  | 9  | 1030.5434      | 515.7756        |
| 626.3302       | 5  | H  | 8  | 973.5219       | 487.2649        |
| 740.3732       | 6  | N  | 7  | 836.4630       | 418.7354        |
| 903.4365       | 7  | Y  | 6  | 722.4201       | 361.7140        |
| 1002.5049      | 8  | V  | 5  | 559.3568       | 280.1823        |
| 1103.5526      | 9  | T  | 4  | 460.2884       | 230.6481        |
| 1174.5897      | 10 | A  | 3  | 359.2407       | 180.1243        |
| 1287.6738      | 11 | I  | 2  | 288.2036       | 144.6057        |
|                | 12 | R  | 1  | 175.1195       | 88.0637         |

N-term:+43.02

X-range:

0 - 0

MassTol: Y-zoom:

0. 1.

MassType:

☐AVG ☒MONO

Axis:

☒1 ☐2

Label:

☒I ☐M ☐-

Ions:

a ☐+ ☐2+ ☐3+

b ☒+ ☐2+ ☐3+

c ☐+ ☐2+ ☐3+

x ☐+ ☐2+ ☐3+

y ☒+ ☒2+ ☐3+

z ☐+ ☐2+ ☐3+

hide H<sub>2</sub>O/NH<sub>3</sub> ☐

zoom 112-122 ☐

GO

MDLVKSHLMYAVR, MH+ 1632.8606, m/z 544.9584  
H OS G15 P120811 220811-s1.06123.06123.3.dta

scan 6123; 6.1e+000

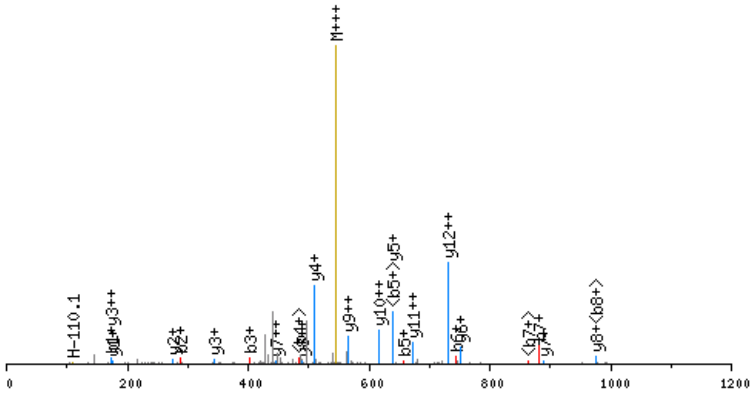

click image to zoom in; click top corners to zoom out

[precursor±]

scan 6121; 545.0 m/z; 3.2e+000

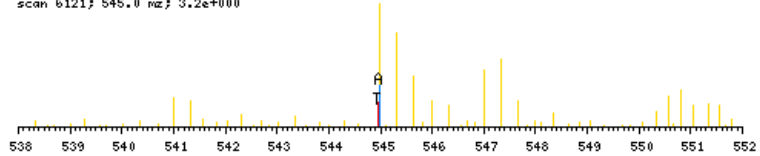

zoomed in precursor plot; T=theoretical m/z, A=acquired m/z

| b <sup>+</sup> | #  | AA | #  | y <sup>+</sup> | y <sup>2+</sup> |
|----------------|----|----|----|----------------|-----------------|
| 174.0589       | 1  | M  | 13 |                |                 |
| 289.0858       | 2  | D  | 12 | 1459.8096      | 730.4087        |
| 402.1699       | 3  | L  | 11 | 1344.7826      | 672.8952        |
| 501.2383       | 4  | V  | 10 | 1231.6986      | 616.3532        |
| 657.3646       | 5  | K  | 9  | 1132.6301      | 566.8190        |
| 744.3966       | 6  | S  | 8  | 976.5038       | 488.7558        |
| 881.4555       | 7  | H  | 7  | 889.4718       | 445.2398        |
| 994.5396       | 8  | L  | 6  | 752.4129       | 376.7104        |
| 1125.5801      | 9  | M  | 5  | 639.3288       | 320.1683        |
| 1288.6434      | 10 | Y  | 4  | 508.2884       | 254.6481        |
| 1359.6805      | 11 | A  | 3  | 345.2250       | 173.1164        |
| 1458.7490      | 12 | V  | 2  | 274.1879       | 137.5979        |
|                | 13 | R  | 1  | 175.1195       | 88.0637         |

N-term:+43.02 K(5):+156.13

X-range:

0 - 0

MassTol: Y-zoom:

0. 1.

MassType:

☐ AVG ☒ MONO

Axis:

☒ 1 ☐ 2

Label:

☒ I ☐ M ☐ -

Ions:

a ☐ + ☐ 2+ ☐ 3+

b ☒ + ☐ 2+ ☐ 3+

c ☐ + ☐ 2+ ☐ 3+

x ☐ + ☐ 2+ ☐ 3+

y ☒ + ☒ 2+ ☐ 3+

z ☐ + ☐ 2+ ☐ 3+

hide H<sub>2</sub>O/NH<sub>3</sub> ☐

zoom 112-122 ☐

GO

MEAADVFHR, MH+ 1117.5101, m/z 559.2587  
H OS G14 P120811 220811-s1.05033.05033.2.dta

scan 5033; 3.0e+000

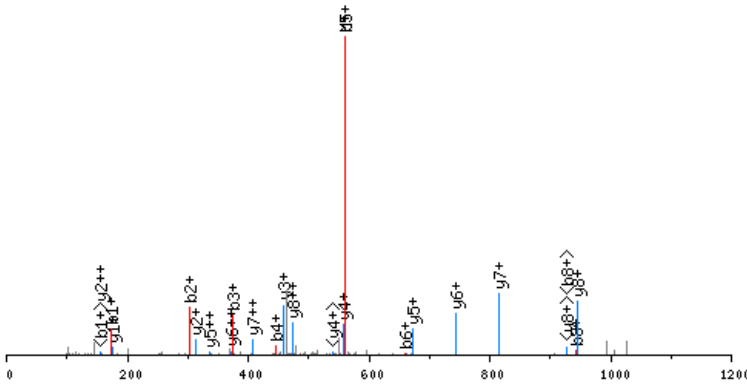

click image to zoom in; click top corners to zoom out [precursor±]

scan 5031; 559.3 m/z; 8.2e+001

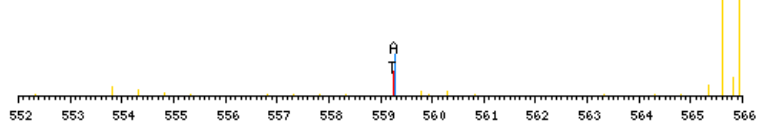

zoomed in precursor plot; T=theoretical m/z, A=acquired m/z

| b <sup>+</sup> | # | AA | # | y <sup>+</sup> | y <sup>2+</sup> |
|----------------|---|----|---|----------------|-----------------|
| 174.0589       | 1 | M  | 9 |                |                 |
| 303.1015       | 2 | E  | 8 | 944.4590       | 472.7334        |
| 374.1386       | 3 | A  | 7 | 815.4164       | 408.2121        |
| 445.1757       | 4 | A  | 6 | 744.3793       | 372.6936        |
| 560.2026       | 5 | D  | 5 | 673.3422       | 337.1750        |
| 659.2711       | 6 | V  | 4 | 558.3152       | 279.6615        |
| 806.3395       | 7 | F  | 3 | 459.2468       | 230.1273        |
| 943.3984       | 8 | H  | 2 | 312.1784       | 156.5931        |
|                | 9 | R  | 1 | 175.1195       | 88.0637         |

N-term:+43.02

X-range:

0 - 0

MassTol: Y-zoom:

0. 1.

MassType:

☐ AVG ☒ MONO

Axis:

☒ 1 ☐ 2

Label:

☒ I ☐ M ☐ -

Ions:

a ☐ + ☐ 2+ ☐ 3+

b ☒ + ☐ 2+ ☐ 3+

c ☐ + ☐ 2+ ☐ 3+

x ☐ + ☐ 2+ ☐ 3+

y ☒ + ☒ 2+ ☐ 3+

z ☐ + ☐ 2+ ☐ 3+

hide H<sub>2</sub>O/NH<sub>3</sub> ☐

zoom 112-122 ☐

GO

MEMLPDTTGKGLMFAKR, MH+ 2095.0755, m/z 699.0300  
H OS G15 P120811 220811-s1.06097.06097.3.dta

scan 6097; 8.3e+000

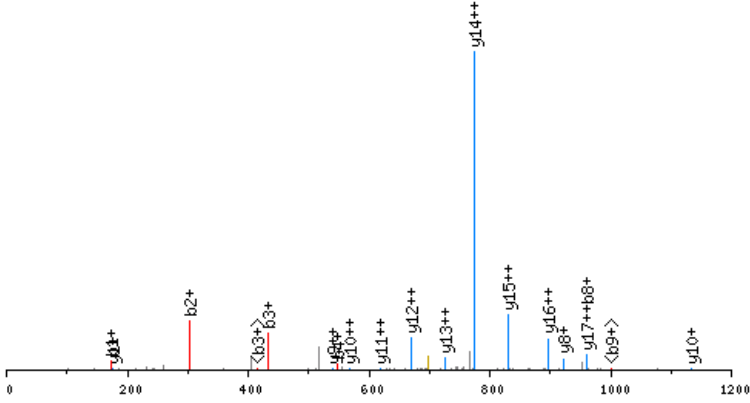

click image to zoom in; click top corners to zoom out [\[precursor±\]](#)

scan 6096; 699.0 m/z; 3.2e+000

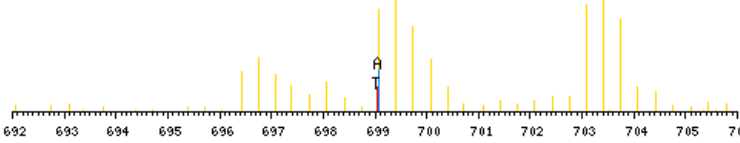

zoomed in precursor plot; T=theoretical m/z, A=acquired m/z

| b <sup>+</sup> | #  | AA | #  | y <sup>+</sup> | y <sup>2+</sup> |
|----------------|----|----|----|----------------|-----------------|
| 174.0589       | 1  | M  | 18 |                |                 |
| 303.1015       | 2  | E  | 17 | 1922.0244      | 961.5161        |
| 434.1420       | 3  | M  | 16 | 1792.9818      | 896.9948        |
| 547.2260       | 4  | L  | 15 | 1661.9413      | 831.4746        |
| 644.2788       | 5  | P  | 14 | 1548.8573      | 774.9326        |
| 759.3057       | 6  | D  | 13 | 1451.8045      | 726.4062        |
| 860.3534       | 7  | T  | 12 | 1336.7776      | 668.8927        |
| 961.4011       | 8  | T  | 11 | 1235.7299      | 618.3689        |
| 1018.4226      | 9  | G  | 10 | 1134.6822      | 567.8450        |
| 1174.5489      | 10 | K  | 9  | 1077.6608      | 539.3343        |
| 1231.5703      | 11 | G  | 8  | 921.5345       | 461.2711        |
| 1302.6074      | 12 | A  | 7  | 864.5130       | 432.7604        |
| 1415.6915      | 13 | L  | 6  | 793.4759       | 397.2419        |
| 1546.7320      | 14 | M  | 5  | 680.3918       | 340.6998        |
| 1693.8004      | 15 | F  | 4  | 549.3513       | 275.1796        |
| 1764.8375      | 16 | A  | 3  | 402.2829       | 201.6454        |
| 1920.9638      | 17 | K  | 2  | 331.2458       | 166.1268        |
|                | 18 | R  | 1  | 175.1195       | 88.0637         |

N-term: +43.02 K(10): +156.13  
K(17): +156.13

X-range:

0 - 0

MassTol: Y-zoom:

0. 1.

MassType:

☐AVG ☒MONO

Axis:

☒1 ☐2

Label:

☒I ☐M ☐-

Ions:

a ☐+ ☐2+ ☐3+

b ☒+ ☐2+ ☐3+

c ☐+ ☐2+ ☐3+

x ☐+ ☐2+ ☐3+

y ☒+ ☒2+ ☐3+

z ☐+ ☐2+ ☐3+

hide H<sub>2</sub>O/NH<sub>3</sub> ☐

zoom 112-122 ☐

GO

MGHYLHEVAR, MH+ 1254.6054, m/z 418.8733  
H OS G18 P120811 220811-s1.02495.02495.3.dta

scan 2495; 6.7e+000

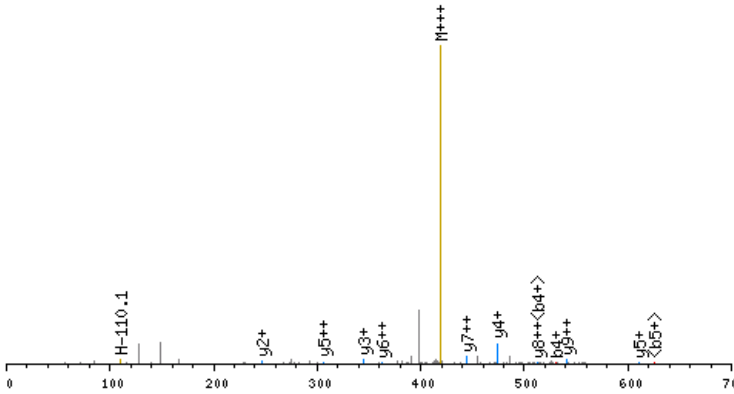

click image to zoom in; click top corners to zoom out

[precursor±]

scan 2491; 418.9 m/z; 3.3e+000

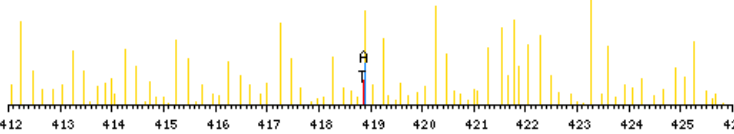

zoomed in precursor plot; T=theoretical m/z, A=acquired m/z

| b <sup>+</sup> | #  | AA | #  | y <sup>+</sup> | y <sup>2+</sup> |
|----------------|----|----|----|----------------|-----------------|
| 174.0589       | 1  | M  | 10 |                |                 |
| 231.0803       | 2  | G  | 9  | 1081.5543      | 541.2811        |
| 368.1393       | 3  | H  | 8  | 1024.5328      | 512.7703        |
| 531.2026       | 4  | Y  | 7  | 887.4739       | 444.2409        |
| 644.2867       | 5  | L  | 6  | 724.4106       | 362.7092        |
| 781.3456       | 6  | H  | 5  | 611.3265       | 306.1672        |
| 910.3882       | 7  | E  | 4  | 474.2676       | 237.6377        |
| 1009.4566      | 8  | V  | 3  | 345.2250       | 173.1164        |
| 1080.4937      | 9  | A  | 2  | 246.1566       | 123.5822        |
|                | 10 | R  | 1  | 175.1195       | 88.0637         |

N-term:+43.02

X-range:

0 - 0

MassTol: Y-zoom:

0. 1.

MassType:

☐AVG ☒MONO

Axis:

☒1 ☐2

Label:

☒I ☐M ☐-

Ions:

a ☐+ ☐2+ ☐3+

b ☒+ ☐2+ ☐3+

c ☐+ ☐2+ ☐3+

x ☐+ ☐2+ ☐3+

y ☒+ ☒2+ ☐3+

z ☐+ ☐2+ ☐3+

hide H<sub>2</sub>O/NH<sub>3</sub> ☐

zoom 112-122 ☐

GO

MKVFVTGPLPAEGR, MH+ 1577.8938, m/z 526.6361  
H OS G12 P120811 220811-s1.04975.04975.3.dta

scan 4975; 7.1e+000

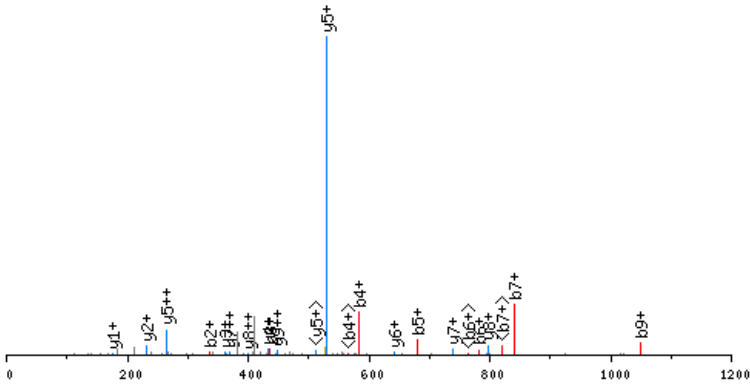

click image to zoom in; click top corners to zoom out

[precursor±]

scan 4972; 526.6 m/z; 2.2e+000

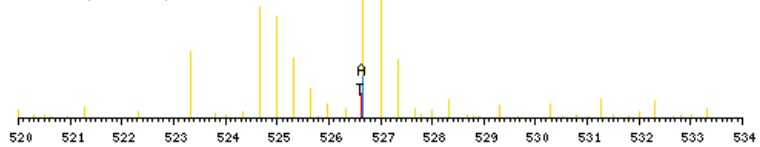

zoomed in precursor plot; T=theoretical m/z, A=acquired m/z

| b <sup>+</sup> | #  | AA | #  | y <sup>+</sup> | y <sup>2+</sup> |
|----------------|----|----|----|----------------|-----------------|
| 174.0589       | 1  | M  | 14 |                |                 |
| 336.2170       | 2  | K  | 13 | 1404.8427      | 702.9253        |
| 435.2854       | 3  | V  | 12 | 1242.6846      | 621.8462        |
| 582.3538       | 4  | F  | 11 | 1143.6162      | 572.3120        |
| 681.4222       | 5  | V  | 10 | 996.5478       | 498.7778        |
| 782.4699       | 6  | T  | 9  | 897.4794       | 449.2436        |
| 839.4914       | 7  | G  | 8  | 796.4317       | 398.7198        |
| 936.5441       | 8  | P  | 7  | 739.4103       | 370.2090        |
| 1049.6282      | 9  | L  | 6  | 642.3575       | 321.6827        |
| 1146.6810      | 10 | P  | 5  | 529.2734       | 265.1406        |
| 1217.7181      | 11 | A  | 4  | 432.2207       | 216.6142        |
| 1346.7607      | 12 | E  | 3  | 361.1836       | 181.0957        |
| 1403.7821      | 13 | G  | 2  | 232.1410       | 116.5744        |
|                | 14 | R  | 1  | 175.1195       | 88.0637         |

N-term:+43.02 K(2):+162.16

X-range:

0 - 0

MassTol: Y-zoom:

0. 1.

MassType:

☐ AVG ☒ MONO

Axis:

☒ 1 ☐ 2

Label:

☒ I ☐ M ☐ -

Ions:

a ☐ + ☐ 2+ ☐ 3+

b ☒ + ☐ 2+ ☐ 3+

c ☐ + ☐ 2+ ☐ 3+

x ☐ + ☐ 2+ ☐ 3+

y ☒ + ☒ 2+ ☐ 3+

z ☐ + ☐ 2+ ☐ 3+

hide H<sub>2</sub>O/NH<sub>3</sub> ☐

zoom 112-122 ☐

GO

MLGPEGGEGYVVKLR, MH+ 1674.8889, m/z 558.9678  
H OS G13 P120811 220811-s1.06265.06265.3.dta

scan 6265; 4.2e+000

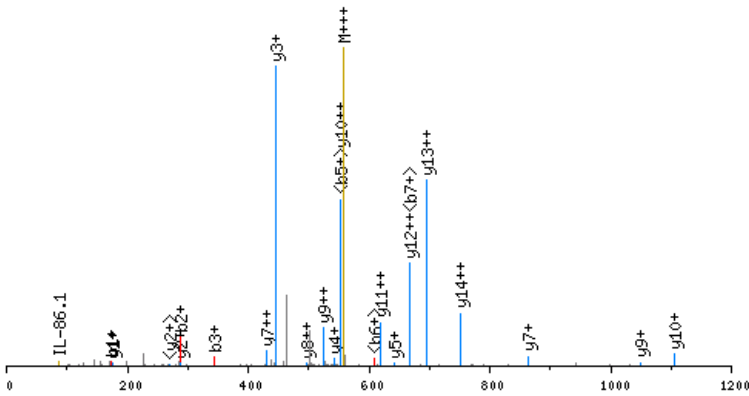

click image to zoom in; click top corners to zoom out

[precursor±]

scan 6264; 559.0 m/z; 9.5e+000

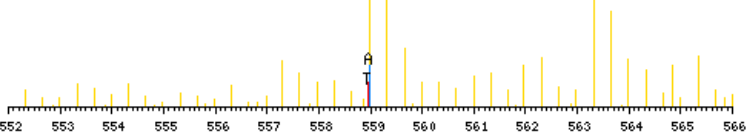

zoomed in precursor plot; T=theoretical m/z, A=acquired m/z

| b <sup>+</sup> | #  | AA | #  | y <sup>+</sup> | y <sup>2+</sup> |
|----------------|----|----|----|----------------|-----------------|
| 174.0589       | 1  | M  | 15 |                |                 |
| 287.1429       | 2  | L  | 14 | 1501.8379      | 751.4229        |
| 344.1644       | 3  | G  | 13 | 1388.7538      | 694.8808        |
| 441.2172       | 4  | P  | 12 | 1331.7324      | 666.3701        |
| 570.2598       | 5  | E  | 11 | 1234.6796      | 617.8437        |
| 627.2812       | 6  | G  | 10 | 1105.6370      | 553.3224        |
| 684.3027       | 7  | G  | 9  | 1048.6155      | 524.8117        |
| 813.3453       | 8  | E  | 8  | 991.5941       | 496.3010        |
| 870.3668       | 9  | G  | 7  | 862.5515       | 431.7797        |
| 1033.4301      | 10 | Y  | 6  | 805.5300       | 403.2689        |
| 1132.4985      | 11 | V  | 5  | 642.4667       | 321.7373        |
| 1231.5669      | 12 | V  | 4  | 543.3983       | 272.2031        |
| 1387.6932      | 13 | K  | 3  | 444.3299       | 222.6688        |
| 1500.7773      | 14 | L  | 2  | 288.2036       | 144.6057        |
|                | 15 | R  | 1  | 175.1195       | 88.0637         |

N-term:+43.02 K(13):+156.13

X-range:

0 - 0

MassTol: Y-zoom:

0. 1.

MassType:

☐AVG ☒MONO

Axis:

☒1 ☐2

Label:

☒I ☐M ☐-

Ions:

a ☐+ ☐2+ ☐3+

b ☒+ ☐2+ ☐3+

c ☐+ ☐2+ ☐3+

x ☐+ ☐2+ ☐3+

y ☒+ ☒2+ ☐3+

z ☐+ ☐2+ ☐3+

hide H<sub>2</sub>O/NH<sub>3</sub> ☐

zoom 112-122 ☐

GO

MQQVEASLQPETLR, MH+ 1671.8376, m/z 557.9507  
H OS G13 P120811 220811-s1.04617.04617.3.dta

scan 4617; 3.6e+000

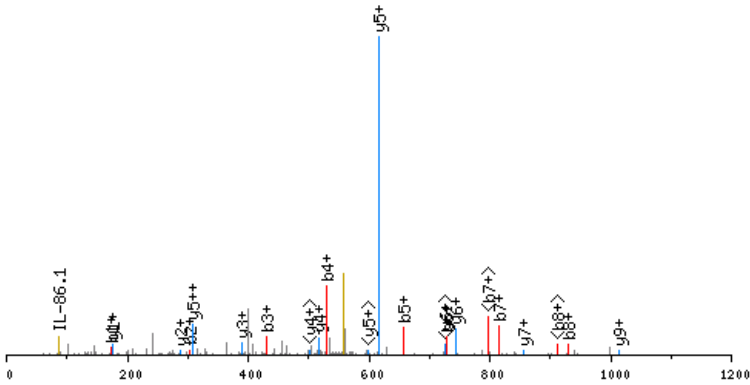

click image to zoom in; click top corners to zoom out [\[precursor±\]](#)

scan 4614; 558.0 m/z; 1.0e+001

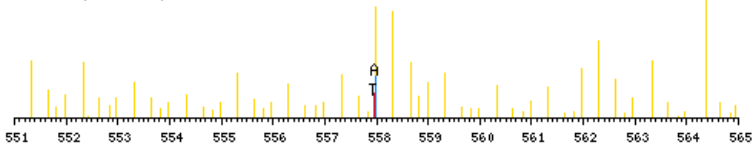

zoomed in precursor plot; T=theoretical m/z, A=acquired m/z

| b <sup>+</sup> | #  | AA | #  | y <sup>+</sup> | y <sup>2+</sup> |
|----------------|----|----|----|----------------|-----------------|
| 174.0589       | 1  | M  | 14 |                |                 |
| 302.1175       | 2  | Q  | 13 | 1498.7865      | 749.8972        |
| 430.1760       | 3  | Q  | 12 | 1370.7280      | 685.8679        |
| 529.2445       | 4  | V  | 11 | 1242.6694      | 621.8386        |
| 658.2870       | 5  | E  | 10 | 1143.6010      | 572.3044        |
| 729.3242       | 6  | A  | 9  | 1014.5584      | 507.7831        |
| 816.3562       | 7  | S  | 8  | 943.5213       | 472.2645        |
| 929.4403       | 8  | L  | 7  | 856.4892       | 428.7485        |
| 1057.4988      | 9  | Q  | 6  | 743.4052       | 372.2065        |
| 1154.5516      | 10 | P  | 5  | 615.3466       | 308.1772        |
| 1283.5942      | 11 | E  | 4  | 518.2938       | 259.6508        |
| 1384.6419      | 12 | T  | 3  | 389.2512       | 195.1295        |
| 1497.7259      | 13 | L  | 2  | 288.2036       | 144.6057        |
|                | 14 | R  | 1  | 175.1195       | 88.0637         |

N-term:+43.02

X-range:

0 - 0

MassTol: Y-zoom:

0. 1.

MassType:

☐ AVG ☒ MONO

Axis:

☒ 1 ☐ 2

Label:

☒ I ☐ M ☐ -

Ions:

a ☐ + ☐ 2+ ☐ 3+

b ☒ + ☐ 2+ ☐ 3+

c ☐ + ☐ 2+ ☐ 3+

x ☐ + ☐ 2+ ☐ 3+

y ☒ + ☒ 2+ ☐ 3+

z ☐ + ☐ 2+ ☐ 3+

hide H<sub>2</sub>O/NH<sub>3</sub> ☐

zoom 112-122 ☐

GO

MTEEHTDLEAR, MH+ 1373.6007, m/z 687.3040  
H OS G13 P120811 220811-s1.04100.04100.2.dta

scan 4100; 2.5e+000

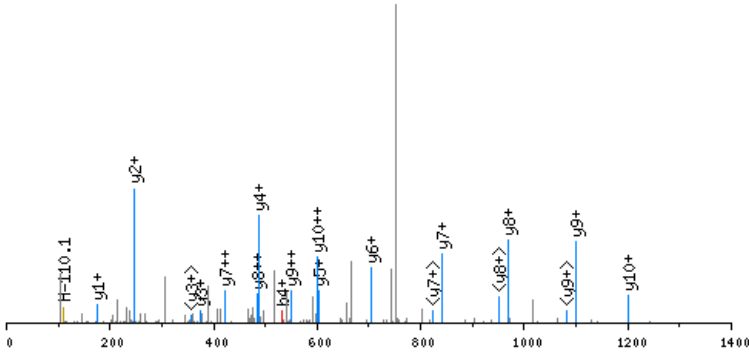

click image to zoom in; click top corners to zoom out

[precursor±]

scan 4099; 687.3 m/z; 1.7e+001

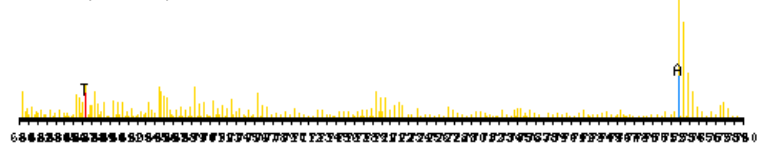

zoomed in precursor plot; T=theoretical m/z, A=acquired m/z

| b <sup>+</sup> | #  | AA | #  | y <sup>+</sup> | y <sup>2+</sup> |
|----------------|----|----|----|----------------|-----------------|
| 174.0589       | 1  | M  | 11 |                |                 |
| 275.1066       | 2  | T  | 10 | 1200.5497      | 600.7787        |
| 404.1492       | 3  | E  | 9  | 1099.5020      | 550.2549        |
| 533.1917       | 4  | E  | 8  | 970.4594       | 485.7336        |
| 670.2507       | 5  | H  | 7  | 841.4168       | 421.2123        |
| 771.2983       | 6  | T  | 6  | 704.3579       | 352.6829        |
| 886.3253       | 7  | D  | 5  | 603.3102       | 302.1590        |
| 999.4093       | 8  | L  | 4  | 488.2833       | 244.6455        |
| 1128.4519      | 9  | E  | 3  | 375.1992       | 188.1035        |
| 1199.4891      | 10 | A  | 2  | 246.1566       | 123.5822        |
|                | 11 | R  | 1  | 175.1195       | 88.0637         |

N-term:+43.02

X-range:

0 - 0

MassTol: Y-zoom:

0. 1.

MassType:

☐AVG ☒MONO

Axis:

☒1 ☐2

Label:

☒I ☐M ☐-

Ions:

a ☐+ ☐2+ ☐3+

b ☒+ ☐2+ ☐3+

c ☐+ ☐2+ ☐3+

x ☐+ ☐2+ ☐3+

y ☒+ ☒2+ ☐3+

z ☐+ ☐2+ ☐3+

hide H<sub>2</sub>O/NH<sub>3</sub> ☐

zoom 112-122 ☐

GO

NILAPVRR, MH+ 980.6005, m/z 490.8039  
H OS G14 P120811 220811-s1.05355.05355.2.dta

scan 5355; 1.8e+001

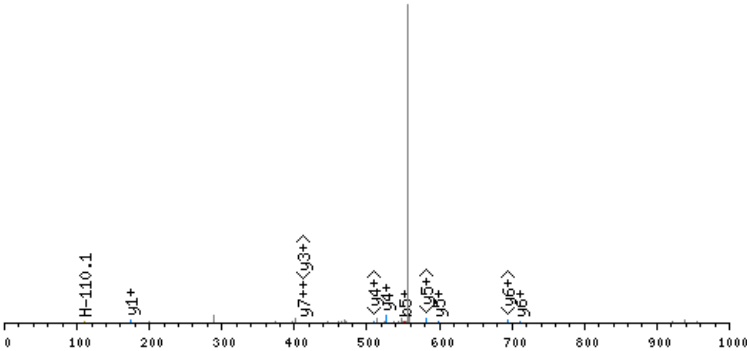

click image to zoom in; click top corners to zoom out [precursor±]

scan 5351; 490.8 m/z; 2.5e+001

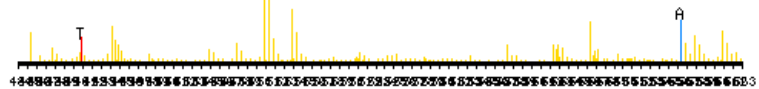

zoomed in precursor plot; T=theoretical m/z, A=acquired m/z

| b <sup>+</sup> | # | AA | # | y <sup>+</sup> | y <sup>2+</sup> |
|----------------|---|----|---|----------------|-----------------|
| 157.0613       | 1 | N  | 8 |                |                 |
| 270.1454       | 2 | I  | 7 | 824.5470       | 412.7774        |
| 383.2295       | 3 | L  | 6 | 711.4630       | 356.2354        |
| 454.2666       | 4 | A  | 5 | 598.3789       | 299.6934        |
| 551.3193       | 5 | P  | 4 | 527.3418       | 264.1748        |
| 650.3877       | 6 | V  | 3 | 430.2890       | 215.6484        |
| 806.4889       | 7 | R  | 2 | 331.2206       | 166.1142        |
|                | 8 | R  | 1 | 175.1195       | 88.0637         |

N-term:+43.02

X-range:

0 - 0

MassTol: Y-zoom:

0. 1.

MassType:

☐AVG ☒MONO

Axis:

☒1 ☐2

Label:

☒I ☐M ☐-

Ions:

a ☐+ ☐2+ ☐3+

b ☒+ ☐2+ ☐3+

c ☐+ ☐2+ ☐3+

x ☐+ ☐2+ ☐3+

y ☒+ ☒2+ ☐3+

z ☐+ ☐2+ ☐3+

hide H<sub>2</sub>O/NH<sub>3</sub> ☐

zoom 112-122 ☐

GO

NKAPQPTGPPPAR, MH+ 1400.7651, m/z 467.5932  
H OS G13 P120811 220811-s1.02812.02812.3.dta

scan 2812; 2.6e+000

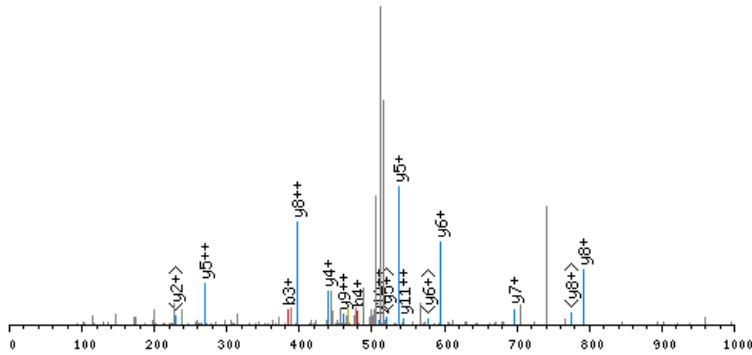

click image to zoom in; click top corners to zoom out

[precursor±]

scan 2809; 467.6 m/z; 1.2e+001

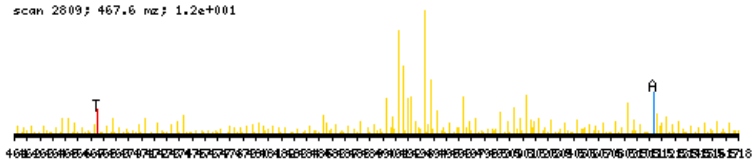

zoomed in precursor plot; T=theoretical m/z, A=acquired m/z

| b <sup>+</sup> | #  | AA | #  | y <sup>+</sup> | y <sup>2+</sup> |
|----------------|----|----|----|----------------|-----------------|
| 157.0613       | 1  | N  | 13 |                |                 |
| 313.1876       | 2  | K  | 12 | 1244.7116      | 622.8597        |
| 384.2247       | 3  | A  | 11 | 1088.5853      | 544.7965        |
| 481.2775       | 4  | P  | 10 | 1017.5482      | 509.2780        |
| 609.3361       | 5  | Q  | 9  | 920.4954       | 460.7516        |
| 706.3888       | 6  | P  | 8  | 792.4368       | 396.7223        |
| 807.4365       | 7  | T  | 7  | 695.3840       | 348.1959        |
| 864.4580       | 8  | G  | 6  | 594.3364       | 297.6721        |
| 961.5108       | 9  | P  | 5  | 537.3149       | 269.1614        |
| 1058.5635      | 10 | P  | 4  | 440.2621       | 220.6350        |
| 1155.6163      | 11 | P  | 3  | 343.2094       | 172.1086        |
| 1226.6534      | 12 | A  | 2  | 246.1566       | 123.5822        |
|                | 13 | R  | 1  | 175.1195       | 88.0637         |

N-term:+43.02 K(2):+156.13

X-range:

0 - 0

MassTol: Y-zoom:

0. 1.

MassType:

☐ AVG ☒ MONO

Axis:

☒ 1 ☐ 2

Label:

☒ I ☐ M ☐ -

Ions:

a ☐ + ☐ 2+ ☐ 3+

b ☒ + ☐ 2+ ☐ 3+

c ☐ + ☐ 2+ ☐ 3+

x ☐ + ☐ 2+ ☐ 3+

y ☒ + ☒ 2+ ☐ 3+

z ☐ + ☐ 2+ ☐ 3+

hide H<sub>2</sub>O/NH<sub>3</sub> ☐

zoom 112-122 ☐

GO

NQEKLAKLQAQVR, MH+ 1623.9547, m/z 541.9898  
H OS G15 P120811 220811-s1.04042.04042.3.dta

scan 4042; 7.5e+001

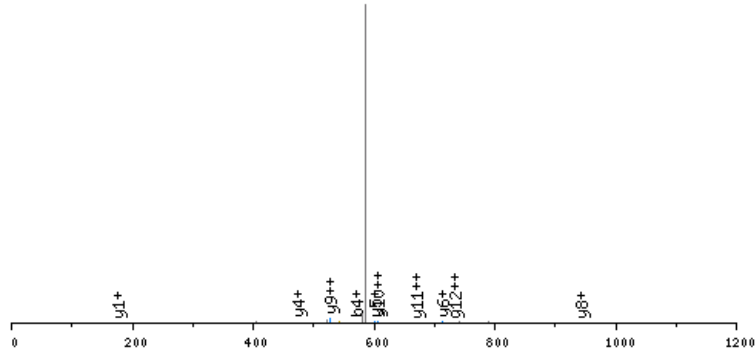

click image to zoom in; click top corners to zoom out [\[precursor±\]](#)

scan 4041; 542.0 m/z; 2.1e+001

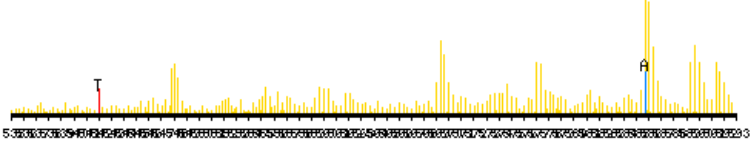

zoomed in precursor plot; T=theoretical m/z, A=acquired m/z

| b <sup>+</sup> | #  | AA | #  | y <sup>+</sup> | y <sup>2+</sup> |
|----------------|----|----|----|----------------|-----------------|
| 157.0613       | 1  | N  | 13 |                |                 |
| 285.1199       | 2  | Q  | 12 | 1467.9012      | 734.4545        |
| 414.1625       | 3  | E  | 11 | 1339.8426      | 670.4252        |
| 570.2888       | 4  | K  | 10 | 1210.8000      | 605.9039        |
| 683.3729       | 5  | L  | 9  | 1054.6737      | 527.8408        |
| 754.4100       | 6  | A  | 8  | 941.5897       | 471.2987        |
| 910.5363       | 7  | K  | 7  | 870.5525       | 435.7802        |
| 1023.6203      | 8  | L  | 6  | 714.4262       | 357.7170        |
| 1151.6789      | 9  | Q  | 5  | 601.3422       | 301.1750        |
| 1222.7160      | 10 | A  | 4  | 473.2836       | 237.1457        |
| 1350.7746      | 11 | Q  | 3  | 402.2465       | 201.6272        |
| 1449.8430      | 12 | V  | 2  | 274.1879       | 137.5979        |
|                | 13 | R  | 1  | 175.1195       | 88.0637         |

N-term:+43.02 K(4):+156.13  
K(7):+156.13

X-range:

0 - 0

MassTol: Y-zoom:

0. 1.

MassType:

☐AVG ☒MONO

Axis:

☒1 ☐2

Label:

☒I ☐M ☐-

Ions:

a ☐+ ☐2+ ☐3+

b ☒+ ☐2+ ☐3+

c ☐+ ☐2+ ☐3+

x ☐+ ☐2+ ☐3+

y ☒+ ☒2+ ☐3+

z ☐+ ☐2+ ☐3+

hide H<sub>2</sub>O/NH<sub>3</sub> ☐

zoom 112-122 ☐

GO

NRPAPVEISYENMR, MH+ 1717.8332, m/z 573.2826  
H OS G13 P120811 220811-s1.05318.05318.3.dta

scan 5318; 4.2e+000

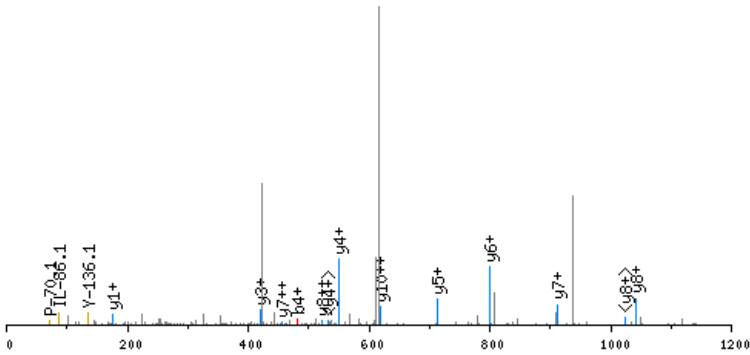

click image to zoom in; click top corners to zoom out [precursor±]

scan 5314; 573.3 m/z; 2.2e+001

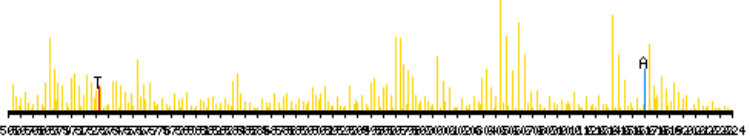

zoomed in precursor plot; T=theoretical m/z, A=acquired m/z

| b <sup>+</sup> | #  | AA | #  | y <sup>+</sup> | y <sup>2+</sup> |
|----------------|----|----|----|----------------|-----------------|
| 157.0613       | 1  | N  | 14 |                |                 |
| 313.1624       | 2  | R  | 13 | 1561.7797      | 781.3938        |
| 410.2152       | 3  | P  | 12 | 1405.6786      | 703.3432        |
| 481.2523       | 4  | A  | 11 | 1308.6258      | 654.8168        |
| 578.3051       | 5  | P  | 10 | 1237.5887      | 619.2983        |
| 677.3735       | 6  | V  | 9  | 1140.5359      | 570.7719        |
| 806.4161       | 7  | E  | 8  | 1041.4675      | 521.2377        |
| 919.5002       | 8  | I  | 7  | 912.4249       | 456.7164        |
| 1006.5322      | 9  | S  | 6  | 799.3409       | 400.1743        |
| 1169.5955      | 10 | Y  | 5  | 712.3088       | 356.6583        |
| 1298.6381      | 11 | E  | 4  | 549.2455       | 275.1267        |
| 1412.6810      | 12 | N  | 3  | 420.2029       | 210.6054        |
| 1543.7215      | 13 | M  | 2  | 306.1600       | 153.5839        |
|                | 14 | R  | 1  | 175.1195       | 88.0637         |

N-term:+43.02

X-range:

0 - 0

MassTol: Y-zoom:

0. 1.

MassType:

☐ AVG ☒ MONO

Axis:

☒ 1 ☐ 2

Label:

☒ I ☐ M ☐ -

Ions:

a ☐ + ☐ 2+ ☐ 3+

b ☒ + ☐ 2+ ☐ 3+

c ☐ + ☐ 2+ ☐ 3+

x ☐ + ☐ 2+ ☐ 3+

y ☒ + ☒ 2+ ☐ 3+

z ☐ + ☐ 2+ ☐ 3+

hide H<sub>2</sub>O/NH<sub>3</sub> ☐

zoom 112-122 ☐

GO

NSVGEACTDMKR, MH+ 1437.6466, m/z 719.3269  
H OS G13 P120811 220811-s1.03723.03723.2.dta

scan 3723; 5.2e+000

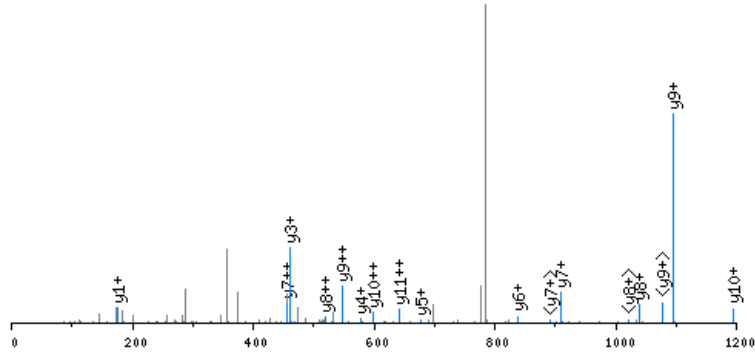

click image to zoom in; click top corners to zoom out [\[precursor±\]](#)

scan 3719; 719.3 m/z; 1.6e+001

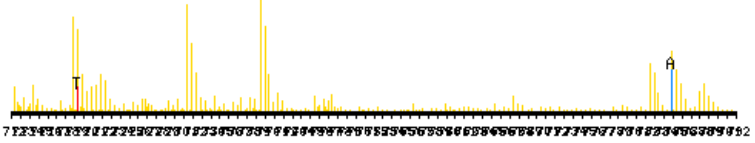

zoomed in precursor plot; T=theoretical m/z, A=acquired m/z

| b <sup>+</sup> | #  | AA | #  | y <sup>+</sup> | y <sup>2+</sup> |
|----------------|----|----|----|----------------|-----------------|
| 157.0613       | 1  | N  | 12 |                |                 |
| 244.0934       | 2  | S  | 11 | 1281.5931      | 641.3005        |
| 343.1618       | 3  | V  | 10 | 1194.5611      | 597.7845        |
| 400.1832       | 4  | G  | 9  | 1095.4927      | 548.2503        |
| 529.2258       | 5  | E  | 8  | 1038.4712      | 519.7395        |
| 600.2629       | 6  | A  | 7  | 909.4286       | 455.2182        |
| 760.2935       | 7  | C  | 6  | 838.3915       | 419.6997        |
| 861.3412       | 8  | T  | 5  | 678.3609       | 339.6844        |
| 976.3682       | 9  | D  | 4  | 577.3132       | 289.1605        |
| 1107.4086      | 10 | M  | 3  | 462.2863       | 231.6471        |
| 1263.5349      | 11 | K  | 2  | 331.2458       | 166.1268        |
|                | 12 | R  | 1  | 175.1195       | 88.0637         |

N-term: +43.02 C(7): +160.03  
K(11): +156.13

X-range:

0 - 0

MassTol: Y-zoom:

0. 1.

MassType:

☐ AVG ☒ MONO

Axis:

☒ 1 ☐ 2

Label:

☒ I ☐ M ☐ -

Ions:

a ☐ + ☐ 2+ ☐ 3+

b ☒ + ☐ 2+ ☐ 3+

c ☐ + ☐ 2+ ☐ 3+

x ☐ + ☐ 2+ ☐ 3+

y ☒ + ☒ 2+ ☐ 3+

z ☐ + ☐ 2+ ☐ 3+

hide H<sub>2</sub>O/NH<sub>3</sub> ☐

zoom 112-122 ☐

GO

NTLGKTITCR, MH+ 1239.6943, m/z 620.3508  
H OS G13 P120811 220811-s1.04760.04760.2.dta

scan 4760; 1.2e+001

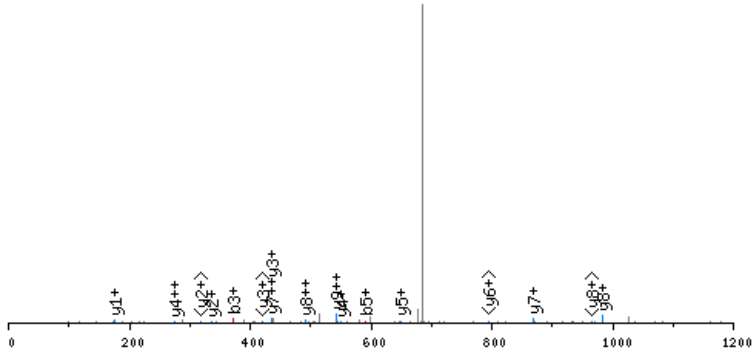

click image to zoom in; click top corners to zoom out [precursor±]

scan 4759; 620.4 m/z; 1.4e+002

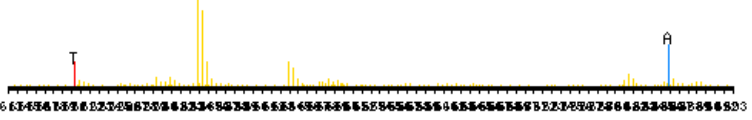

zoomed in precursor plot; T=theoretical m/z, A=acquired m/z

| b <sup>+</sup> | #  | AA | #  | y <sup>+</sup> | y <sup>2+</sup> |
|----------------|----|----|----|----------------|-----------------|
| 157.0613       | 1  | N  | 10 |                |                 |
| 258.1090       | 2  | T  | 9  | 1083.6408      | 542.3243        |
| 371.1931       | 3  | L  | 8  | 982.5931       | 491.8005        |
| 428.2145       | 4  | G  | 7  | 869.5091       | 435.2585        |
| 590.3726       | 5  | K  | 6  | 812.4876       | 406.7477        |
| 691.4203       | 6  | T  | 5  | 650.3295       | 325.6687        |
| 804.5044       | 7  | I  | 4  | 549.2818       | 275.1448        |
| 905.5521       | 8  | T  | 3  | 436.1978       | 218.6028        |
| 1065.5827      | 9  | C  | 2  | 335.1501       | 168.0790        |
|                | 10 | R  | 1  | 175.1195       | 88.0637         |

N-term:+43.02 K(5):+162.16  
C(9):+160.03

X-range:

0 - 0

MassTol: Y-zoom:

0. 1.

MassType:

☐AVG ☒MONO

Axis:

☒1 ☐2

Label:

☒I ☐M ☐-

Ions:

a ☐+ ☐2+ ☐3+

b ☒+ ☐2+ ☐3+

c ☐+ ☐2+ ☐3+

x ☐+ ☐2+ ☐3+

y ☒+ ☒2+ ☐3+

z ☐+ ☐2+ ☐3+

hide H<sub>2</sub>O/NH<sub>3</sub> ☐

zoom 112-122 ☐

GO

NVNDLKQR, MH+ 1056.5802, m/z 528.7938  
H OS G13 P120811 220811-s1.03671.03671.2.dta

scan 3671; 1.2e+001

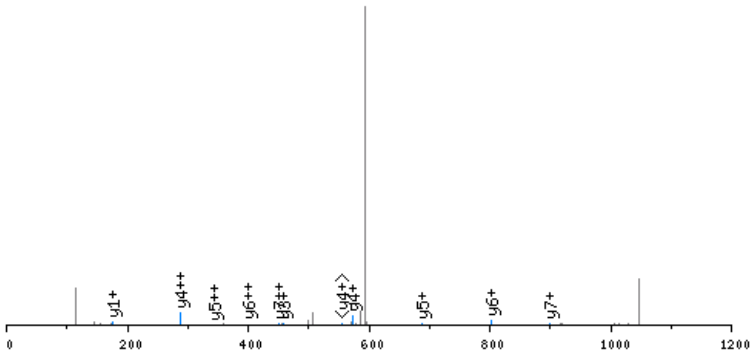

click image to zoom in; click top corners to zoom out [precursor±]

scan 3669; 528.8 m/z; 8.1e+001

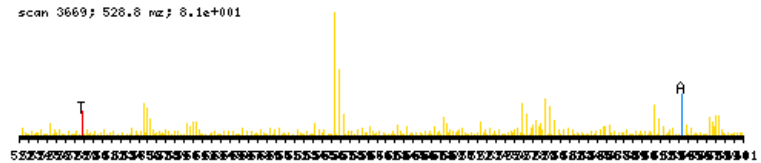

zoomed in precursor plot; T=theoretical m/z, A=acquired m/z

| b <sup>+</sup> | # | AA | # | y <sup>+</sup> | y <sup>2+</sup> |
|----------------|---|----|---|----------------|-----------------|
| 157.0613       | 1 | N  | 8 |                |                 |
| 256.1297       | 2 | V  | 7 | 900.5267       | 450.7673        |
| 370.1727       | 3 | N  | 6 | 801.4583       | 401.2331        |
| 485.1996       | 4 | D  | 5 | 687.4154       | 344.2116        |
| 598.2837       | 5 | L  | 4 | 572.3884       | 286.6981        |
| 754.4100       | 6 | K  | 3 | 459.3044       | 230.1561        |
| 882.4686       | 7 | Q  | 2 | 303.1781       | 152.0930        |
|                | 8 | R  | 1 | 175.1195       | 88.0637         |

N-term:+43.02 K(6):+156.13

X-range:

$$0 - 0$$

MassTol: Y-zoom:

0. 1.

**MassType:**

☐ AVG ☒ MONO

Axis:

1 2

Label:



Ions :

a  +  2 +  3 +

b. ☒ 1+ ☐ 2+ ☐ 3+

$$\square + \square^2 + \square^3 + \dots$$

**c**

$$x^1 + x^2 + x^3 + \dots$$

**y** ☒1+ ☒2+ ☐3+

$$z^{\boxed{\phantom{00}}} + \boxed{\phantom{00}}^2 + \boxed{\phantom{00}}^3 +$$
hide H<sub>2</sub>O/NH<sub>3</sub> ☐

zoom 112-122

GO

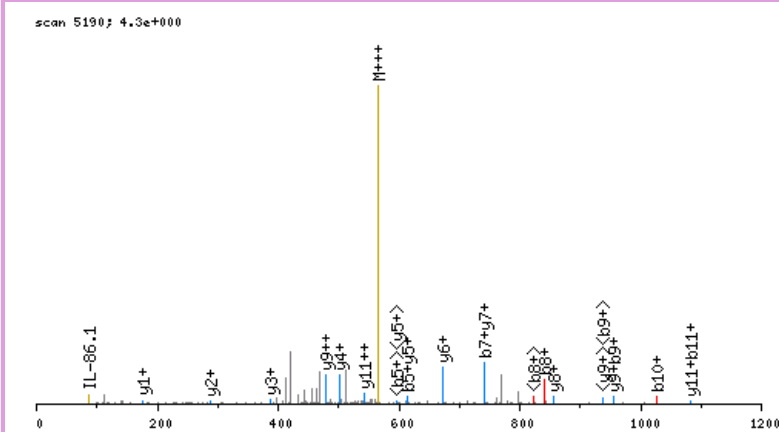

click image to zoom in; click top corners to zoom out [precursor±]

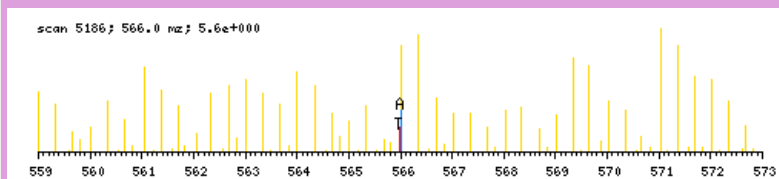

zoomed in precursor plot; T=theoretical m/z, A=acquired m/z

| $b^+$     | #  | AA | #  | $y^+$     | $y^{2+}$ |
|-----------|----|----|----|-----------|----------|
| 171.0770  | 1  | Q  | 16 |           |          |
| 242.1141  | 2  | A  | 15 | 1525.9066 | 763.4572 |
| 343.1618  | 3  | T  | 14 | 1454.8695 | 727.9387 |
| 499.2881  | 4  | K  | 13 | 1353.8218 | 677.4148 |
| 614.3150  | 5  | D  | 12 | 1197.6955 | 599.3517 |
| 685.3521  | 6  | A  | 11 | 1082.6686 | 541.8382 |
| 742.3736  | 7  | G  | 10 | 1011.6315 | 506.3197 |
| 841.4420  | 8  | V  | 9  | 954.6100  | 477.8089 |
| 954.5261  | 9  | I  | 8  | 855.5416  | 428.2747 |
| 1025.5632 | 10 | A  | 7  | 742.4575  | 371.7327 |
| 1082.5846 | 11 | G  | 6  | 671.4204  | 336.2141 |
| 1195.6687 | 12 | L  | 5  | 614.3990  | 307.7034 |
| 1309.7116 | 13 | N  | 4  | 501.3149  | 251.1614 |
| 1408.7801 | 14 | V  | 3  | 387.2720  | 194.1399 |
| 1521.8641 | 15 | L  | 2  | 288.2036  | 144.6057 |
|           | 16 | R  | 1  | 175.1195  | 88.0637  |

N-term: +43.02 K(4): +156.13

X-range:

0 - 0

MassTol: Y-zoom:

0. 1.

MassType:

☐AVG ☒MONO

Axis:

☒1 ☐2

Label:

☒I ☐M ☐-

Ions:

a ☐+ ☐2+ ☐3+

b ☒+ ☐2+ ☐3+

c ☐+ ☐2+ ☐3+

x ☐+ ☐2+ ☐3+

y ☒+ ☒2+ ☐3+

z ☐+ ☐2+ ☐3+

hide H<sub>2</sub>O/NH<sub>3</sub> ☐

zoom 112-122 ☐

GO

QEGDKVIHPGVSQAGEEMEQFGQGV, MH+ 2888.4061, m/z 722.8570  
H OS G16 P120811 220811-s1.05296.05296.4.dta

scan 5296; 3.2e+000

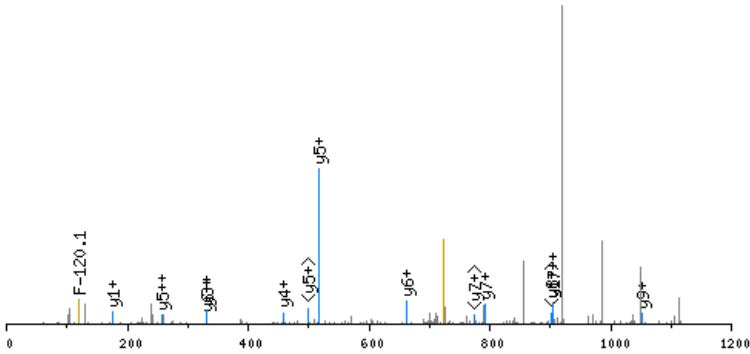

click image to zoom in; click top corners to zoom out [precursor±]

scan 5293; 722.9 m/z; 4.3e+000

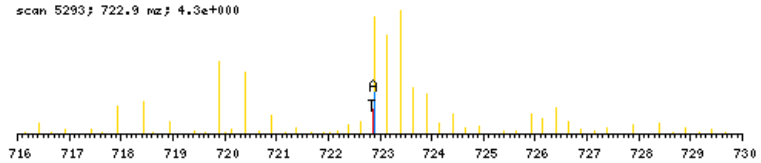

zoomed in precursor plot; T=theoretical m/z, A=acquired m/z

| b <sup>+</sup> | #  | AA | #  | y <sup>+</sup> | y <sup>2+</sup> |
|----------------|----|----|----|----------------|-----------------|
| 171.0770       | 1  | Q  | 26 |                |                 |
| 300.1196       | 2  | E  | 25 | 2718.3370      | 1359.6724       |
| 357.1410       | 3  | G  | 24 | 2589.2944      | 1295.1511       |
| 472.1680       | 4  | D  | 23 | 2532.2729      | 1266.6404       |
| 634.3261       | 5  | K  | 22 | 2417.2460      | 1209.1269       |
| 733.3945       | 6  | V  | 21 | 2255.0879      | 1128.0479       |
| 846.4786       | 7  | I  | 20 | 2156.0195      | 1078.5137       |
| 983.5375       | 8  | H  | 19 | 2042.9354      | 1021.9716       |
| 1080.5902      | 9  | P  | 18 | 1905.8765      | 953.4422        |
| 1137.6117      | 10 | G  | 17 | 1808.8237      | 904.9158        |
| 1236.6801      | 11 | V  | 16 | 1751.8023      | 876.4050        |
| 1323.7121      | 12 | S  | 15 | 1652.7339      | 826.8708        |
| 1451.7707      | 13 | Q  | 14 | 1565.7018      | 783.3548        |
| 1522.8078      | 14 | A  | 13 | 1437.6433      | 719.3255        |
| 1579.8293      | 15 | G  | 12 | 1366.6061      | 683.8070        |
| 1708.8719      | 16 | E  | 11 | 1309.5847      | 655.2963        |
| 1837.9145      | 17 | E  | 10 | 1180.5421      | 590.7750        |
| 1968.9550      | 18 | M  | 9  | 1051.4995      | 526.2537        |
| 2097.9976      | 19 | E  | 8  | 920.4590       | 460.7334        |
| 2226.0561      | 20 | Q  | 7  | 791.4164       | 396.2121        |
| 2373.1245      | 21 | F  | 6  | 663.3578       | 332.1828        |
| 2430.1460      | 22 | G  | 5  | 516.2894       | 258.6486        |
| 2558.2046      | 23 | Q  | 4  | 459.2680       | 230.1379        |
| 2615.2261      | 24 | G  | 3  | 331.2094       | 166.1086        |
| 2714.2945      | 25 | V  | 2  | 274.1879       | 137.5979        |
|                | 26 | R  | 1  | 175.1195       | 88.0637         |

N-term:+43.02 K(5):+162.16

X-range:

0 - 0

MassTol: Y-zoom:

0. 1.

MassType:

☐ AVG ☒ MONO

Axis:

☒ 1 ☐ 2

Label:

☒ I ☐ M ☐ -

Ions:

a ☐ + ☐ 2+ ☐ 3+

b ☒ + ☐ 2+ ☐ 3+

c ☐ + ☐ 2+ ☐ 3+

x ☐ + ☐ 2+ ☐ 3+

y ☒ + ☒ 2+ ☐ 3+

z ☐ + ☐ 2+ ☐ 3+

hide H<sub>2</sub>O/NH<sub>3</sub> ☐

zoom 112-122 ☐

GO

QPASAKWYDR, MH+ 1291.6436, m/z 646.3254  
H OS G13 P120811 220811-s1.04447.04447.2.dta

scan 4447; 7.8e+000

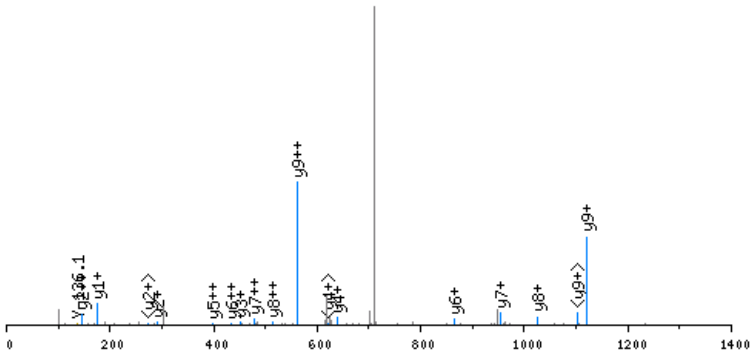

click image to zoom in; click top corners to zoom out [precursor±]

scan 4444; 646.3 m/z; 1.0e+001

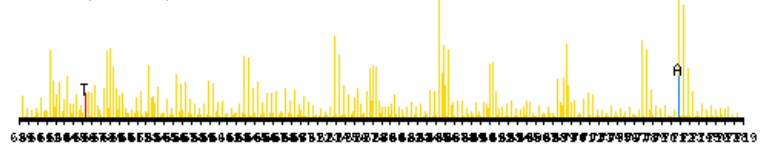

zoomed in precursor plot; T=theoretical m/z, A=acquired m/z

| b <sup>+</sup> | #  | AA | #  | y <sup>+</sup> | y <sup>2+</sup> |
|----------------|----|----|----|----------------|-----------------|
| 171.0770       | 1  | Q  | 10 |                |                 |
| 268.1297       | 2  | P  | 9  | 1121.5744      | 561.2911        |
| 339.1669       | 3  | A  | 8  | 1024.5216      | 512.7647        |
| 426.1989       | 4  | S  | 7  | 953.4845       | 477.2462        |
| 497.2360       | 5  | A  | 6  | 866.4525       | 433.7302        |
| 653.3623       | 6  | K  | 5  | 795.4154       | 398.2116        |
| 839.4416       | 7  | W  | 4  | 639.2891       | 320.1485        |
| 1002.5049      | 8  | Y  | 3  | 453.2098       | 227.1088        |
| 1117.5319      | 9  | D  | 2  | 290.1464       | 145.5771        |
|                | 10 | R  | 1  | 175.1195       | 88.0637         |

N-term:+43.02 K(6):+156.13

X-range:

0 - 0

MassTol: Y-zoom:

0. 1.

MassType:

☐AVG ☒MONO

Axis:

☒1 ☐2

Label:

☒I ☐M ☐-

Ions:

a ☐+ ☐2+ ☐3+

b ☒+ ☐2+ ☐3+

c ☐+ ☐2+ ☐3+

x ☐+ ☐2+ ☐3+

y ☒+ ☒2+ ☐3+

z ☐+ ☐2+ ☐3+

hide H<sub>2</sub>O/NH<sub>3</sub> ☐

zoom 112-122 ☐

GO

QSAPLEQPAKRPR, MH+ 1553.8976, m/z 518.6374  
H OS G16 P120811 220811-s1.03039.03039.3.dta

scan 3039; 6.0e+000

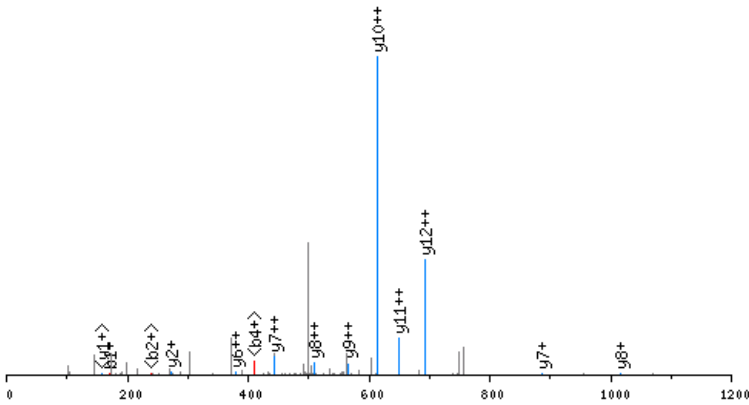

click image to zoom in; click top corners to zoom out

[precursor±]

scan 3038; 518.6 m/z; 6.5e+001

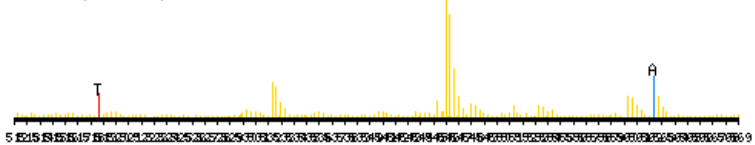

zoomed in precursor plot; T=theoretical m/z, A=acquired m/z

| b <sup>+</sup> | #  | AA | #  | y <sup>+</sup> | y <sup>2+</sup> |
|----------------|----|----|----|----------------|-----------------|
| 171.0770       | 1  | Q  | 13 |                |                 |
| 258.1090       | 2  | S  | 12 | 1383.8285      | 692.4182        |
| 329.1461       | 3  | A  | 11 | 1296.7965      | 648.9021        |
| 426.1989       | 4  | P  | 10 | 1225.7594      | 613.3836        |
| 539.2829       | 5  | L  | 9  | 1128.7066      | 564.8572        |
| 668.3255       | 6  | E  | 8  | 1015.6225      | 508.3152        |
| 796.3841       | 7  | Q  | 7  | 886.5799       | 443.7939        |
| 893.4369       | 8  | P  | 6  | 758.5214       | 379.7646        |
| 964.4740       | 9  | A  | 5  | 661.4686       | 331.2382        |
| 1126.6321      | 10 | K  | 4  | 590.4315       | 295.7197        |
| 1282.7332      | 11 | R  | 3  | 428.2734       | 214.6406        |
| 1379.7860      | 12 | P  | 2  | 272.1723       | 136.5900        |
|                | 13 | R  | 1  | 175.1195       | 88.0637         |

N-term:+43.02 K(10):+162.16

X-range:

0 - 0

MassTol: Y-zoom:

0. 1.

MassType:

☐ AVG ☒ MONO

Axis:

☒ 1 ☐ 2

Label:

☒ I ☐ M ☐ -

Ions:

a ☐ + ☐ 2+ ☐ 3+

b ☒ + ☐ 2+ ☐ 3+

c ☐ + ☐ 2+ ☐ 3+

x ☐ + ☐ 2+ ☐ 3+

y ☒ + ☒ 2+ ☐ 3+

z ☐ + ☐ 2+ ☐ 3+

hide H<sub>2</sub>O/NH<sub>3</sub> ☐

zoom 112-122 ☐

GO

RDEEVHTGLGELLR, MH+ 1665.8560, m/z 417.2195  
H OS G18 P120811 220811-s1.05002.05002.4.dta

scan 5002; 2.3e+000

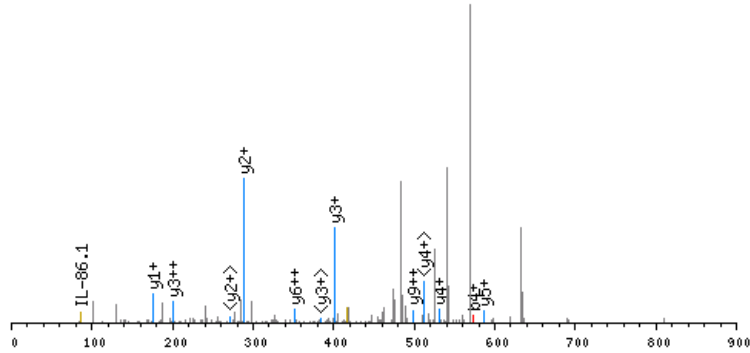

click image to zoom in; click top corners to zoom out

[precursor±]

scan 5001; 417.2 m/z; 1.3e+002

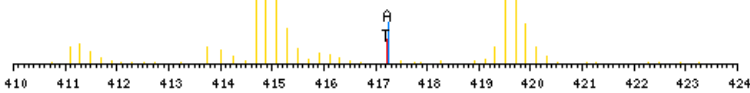

zoomed in precursor plot; T=theoretical m/z, A=acquired m/z

| b <sup>+</sup> | #  | AA | #  | y <sup>+</sup> | y <sup>2+</sup> |
|----------------|----|----|----|----------------|-----------------|
| 199.1195       | 1  | R  | 14 |                |                 |
| 314.1465       | 2  | D  | 13 | 1467.7443      | 734.3761        |
| 443.1890       | 3  | E  | 12 | 1352.7174      | 676.8626        |
| 572.2316       | 4  | E  | 11 | 1223.6748      | 612.3413        |
| 671.3001       | 5  | V  | 10 | 1094.6322      | 547.8200        |
| 808.3590       | 6  | H  | 9  | 995.5638       | 498.2858        |
| 909.4066       | 7  | T  | 8  | 858.5049       | 429.7564        |
| 966.4281       | 8  | G  | 7  | 757.4572       | 379.2325        |
| 1079.5122      | 9  | L  | 6  | 700.4357       | 350.7218        |
| 1136.5336      | 10 | G  | 5  | 587.3517       | 294.1798        |
| 1265.5762      | 11 | E  | 4  | 530.3302       | 265.6690        |
| 1378.6603      | 12 | L  | 3  | 401.2876       | 201.1477        |
| 1491.7444      | 13 | L  | 2  | 288.2036       | 144.6057        |
|                | 14 | R  | 1  | 175.1195       | 88.0637         |

N-term:+43.02

X-range:

0 - 0

MassTol: Y-zoom:

0. 1.

MassType:

☐AVG ☒MONO

Axis:

☒1 ☐2

Label:

☒I ☐M ☐-

Ions:

a ☐+ ☐2+ ☐3+

b ☒+ ☐2+ ☐3+

c ☐+ ☐2+ ☐3+

x ☐+ ☐2+ ☐3+

y ☒+ ☒2+ ☐3+

z ☐+ ☐2+ ☐3+

hide H<sub>2</sub>O/NH<sub>3</sub> ☐

zoom 112-122 ☐

GO

RMANTNTSTATPQGQVR, MH+ 1874.9143, m/z 625.6429  
H OS G12 P120811 220811-s1.03688.03688.3.dta

scan 3688; 1.6e+000

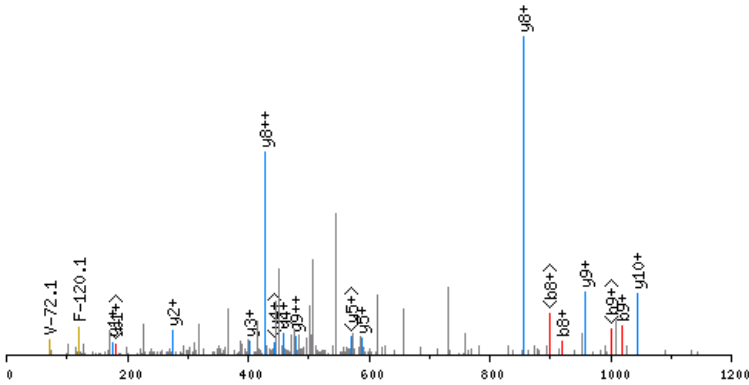

click image to zoom in; click top corners to zoom out [precursor±]

scan 3687; 625.6 m/z; 2.4e+001

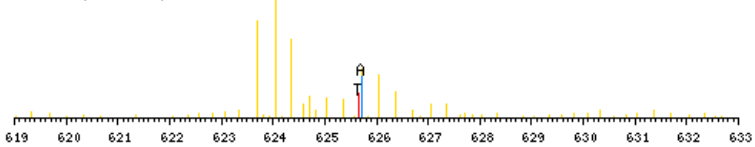

X-range:

0 - 0

MassTol: Y-zoom:

0. 1.

MassType:

☐ AVG ☒ MONO

Axis:

☒ 1 ☐ 2

Label:

☒ I ☐ M ☐ -

Ions:

a ☐ + ☐ 2+ ☐ 3+

b ☒ + ☐ 2+ ☐ 3+

c ☐ + ☐ 2+ ☐ 3+

x ☐ + ☐ 2+ ☐ 3+

y ☒ + ☒ 2+ ☐ 3+

z ☐ + ☐ 2+ ☐ 3+

hide H<sub>2</sub>O/NH<sub>3</sub> ☐

zoom 112-122 ☐

GO

SAAEEVDGLGVVRPHYGSVLDNER, MH+ 2611.2752, m/z 871.0966  
H OS G15 P120811 220811-s1.05425.05425.3.dta

scan 5425; 2.7e+000

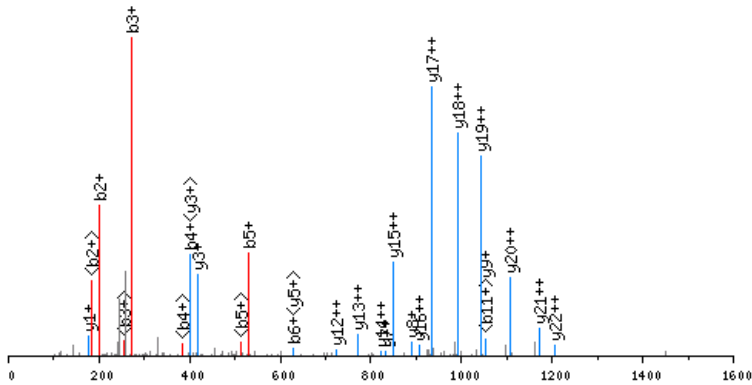

click image to zoom in; click top corners to zoom out [\[precursor±\]](#)

scan 5421; 871.1 m/z; 1.3e+001

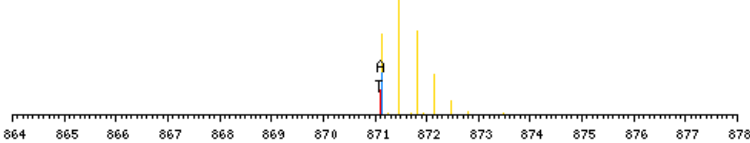

zoomed in precursor plot; T=theoretical m/z, A=acquired m/z

| b <sup>+</sup> | #  | AA | #  | y <sup>+</sup> | y <sup>2+</sup> |
|----------------|----|----|----|----------------|-----------------|
| 130.0504       | 1  | S  | 24 |                |                 |
| 201.0875       | 2  | A  | 23 | 2482.2326      | 1241.6202       |
| 272.1247       | 3  | A  | 22 | 2411.1955      | 1206.1017       |
| 401.1672       | 4  | E  | 21 | 2340.1584      | 1170.5831       |
| 530.2098       | 5  | E  | 20 | 2211.1158      | 1106.0618       |
| 629.2783       | 6  | V  | 19 | 2082.0732      | 1041.5405       |
| 744.3052       | 7  | D  | 18 | 1983.0048      | 992.0063        |
| 801.3267       | 8  | G  | 17 | 1867.9779      | 934.4928        |
| 914.4107       | 9  | L  | 16 | 1810.9564      | 905.9821        |
| 971.4322       | 10 | G  | 15 | 1697.8723      | 849.4401        |
| 1070.5006      | 11 | V  | 14 | 1640.8509      | 820.9294        |
| 1169.5690      | 12 | V  | 13 | 1541.7825      | 771.3951        |
| 1325.6701      | 13 | R  | 12 | 1442.7140      | 721.8609        |
| 1422.7229      | 14 | P  | 11 | 1286.6129      | 643.8104        |
| 1559.7818      | 15 | H  | 10 | 1189.5602      | 595.2840        |
| 1722.8451      | 16 | Y  | 9  | 1052.5013      | 526.7545        |
| 1779.8666      | 17 | G  | 8  | 889.4379       | 445.2229        |
| 1866.8986      | 18 | S  | 7  | 832.4165       | 416.7121        |
| 1965.9670      | 19 | V  | 6  | 745.3844       | 373.1961        |
| 2079.0511      | 20 | L  | 5  | 646.3160       | 323.6619        |
| 2194.0780      | 21 | D  | 4  | 533.2320       | 267.1199        |
| 2308.1210      | 22 | N  | 3  | 418.2050       | 209.6064        |
| 2437.1636      | 23 | E  | 2  | 304.1621       | 152.5850        |
|                | 24 | R  | 1  | 175.1195       | 88.0637         |

N-term:+43.02

N-term: +43.02

X-range:

0 - 0

MassTol: Y-zoom:

0. 1.

MassType:

☐ AVG ☒ MONO

Axis:

☒ 1 ☐ 2

Label:

☒ I ☐ M ☐ -

Ions:

a ☐ + ☐ 2+ ☐ 3+

b ☒ + ☐ 2+ ☐ 3+

c ☐ + ☐ 2+ ☐ 3+

x ☐ + ☐ 2+ ☐ 3+

y ☒ + ☒ 2+ ☐ 3+

z ☐ + ☐ 2+ ☐ 3+

hide H<sub>2</sub>O/NH<sub>3</sub> ☐

zoom 112-122 ☐

GO

SAKAISEQTGKELLYKYICTTSAIQNR, MH+ 3199.7037, m/z 800.6814  
H OS G16 P120811 220811-s1.06265.06265.4.dta

scan 6265; 8.4e+000

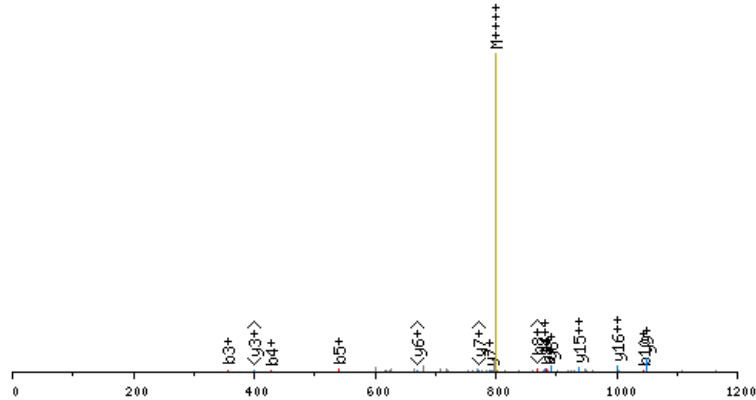

click image to zoom in; click top corners to zoom out [precursor±]

scan 6262; 800.7 m/z; 6.9e+000

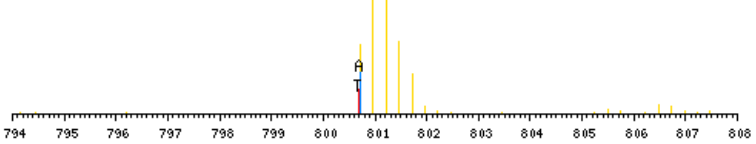

zoomed in precursor plot; T=theoretical m/z, A=acquired m/z

| b <sup>+</sup> | #  | AA | #  | y <sup>+</sup> | y <sup>2+</sup> |
|----------------|----|----|----|----------------|-----------------|
| 130.0504       | 1  | S  | 27 |                |                 |
| 201.0875       | 2  | A  | 26 | 3070.6611      | 1535.8345       |
| 357.2138       | 3  | K  | 25 | 2999.6240      | 1500.3159       |
| 428.2510       | 4  | A  | 24 | 2843.4977      | 1422.2528       |
| 541.3350       | 5  | I  | 23 | 2772.4606      | 1386.7342       |
| 628.3670       | 6  | S  | 22 | 2659.3766      | 1330.1922       |
| 757.4096       | 7  | E  | 21 | 2572.3445      | 1286.6762       |
| 885.4682       | 8  | Q  | 20 | 2443.3019      | 1222.1549       |
| 986.5159       | 9  | T  | 19 | 2315.2434      | 1158.1256       |
| 1043.5374      | 10 | G  | 18 | 2214.1957      | 1107.6018       |
| 1199.6637      | 11 | K  | 17 | 2157.1742      | 1079.0910       |
| 1328.7063      | 12 | E  | 16 | 2001.0479      | 1001.0279       |
| 1441.7903      | 13 | L  | 15 | 1872.0053      | 936.5066        |
| 1554.8744      | 14 | L  | 14 | 1758.9213      | 879.9645        |
| 1717.9377      | 15 | Y  | 13 | 1645.8372      | 823.4225        |
| 1874.0640      | 16 | K  | 12 | 1482.7739      | 741.8908        |
| 2037.1273      | 17 | Y  | 11 | 1326.6476      | 663.8277        |
| 2150.2114      | 18 | I  | 10 | 1163.5842      | 582.2960        |
| 2310.2420      | 19 | C  | 9  | 1050.5002      | 525.7540        |
| 2411.2897      | 20 | T  | 8  | 890.4696       | 445.7387        |
| 2512.3374      | 21 | T  | 7  | 789.4219       | 395.2149        |
| 2599.3694      | 22 | S  | 6  | 688.3742       | 344.6910        |
| 2670.4065      | 23 | A  | 5  | 601.3422       | 301.1750        |
| 2783.4906      | 24 | I  | 4  | 530.3051       | 265.6564        |
| 2911.5491      | 25 | Q  | 3  | 417.2210       | 209.1144        |
| 3025.5921      | 26 | N  | 2  | 289.1624       | 145.0851        |
|                | 27 | R  | 1  | 175.1195       | 88.0637         |

N-term:+43.02 K(3):+156.13  
K(11):+156.13 K(16):+156.13  
C(19):+160.03

X-range:

0 - 0

MassTol: Y-zoom:

0. 1.

MassType:

☐AVG ☒MONO

Axis:

☒1 ☐2

Label:

☒I ☐M ☐-

Ions:

a ☐+ ☐2+ ☐3+

b ☒+ ☐2+ ☐3+

c ☐+ ☐2+ ☐3+

x ☐+ ☐2+ ☐3+

y ☒+ ☒2+ ☐3+

z ☐+ ☐2+ ☐3+

hide H<sub>2</sub>O/NH<sub>3</sub> ☐

zoom 112-122 ☐

GO

SAKSAISKEIFAPLDER, MH+ 1960.0756, m/z 654.0301  
H OS G15 P120811 220811-s1.05550.05550.3.dta

scan 5550; 7.2e+000

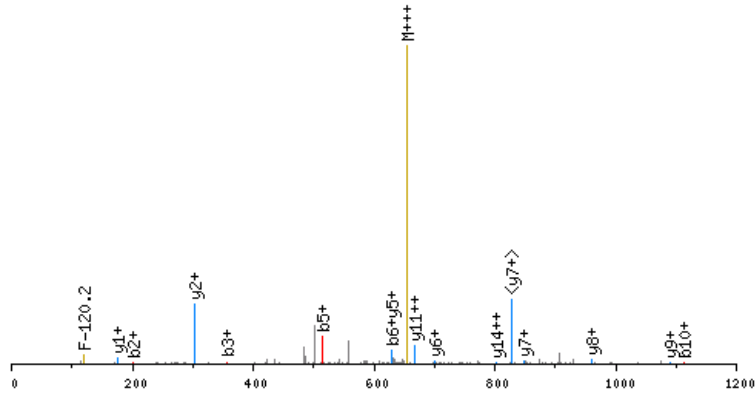

click image to zoom in; click top corners to zoom out

[precursor±]

scan 5546; 654.0 m/z; 3.5e+000

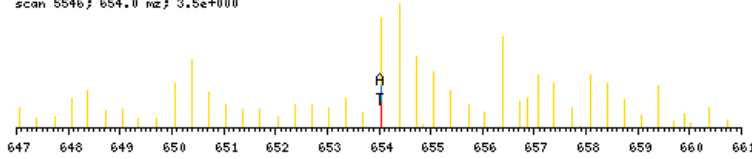

zoomed in precursor plot; T=theoretical m/z, A=acquired m/z

| b <sup>+</sup> | #  | AA | #  | y <sup>+</sup> | y <sup>2+</sup> |
|----------------|----|----|----|----------------|-----------------|
| 130.0504       | 1  | S  | 17 |                |                 |
| 201.0875       | 2  | A  | 16 | 1831.0330      | 916.0204        |
| 357.2138       | 3  | K  | 15 | 1759.9959      | 880.5019        |
| 444.2459       | 4  | S  | 14 | 1603.8696      | 802.4387        |
| 515.2830       | 5  | A  | 13 | 1516.8376      | 758.9227        |
| 628.3670       | 6  | I  | 12 | 1445.8004      | 723.4041        |
| 715.3991       | 7  | S  | 11 | 1332.7164      | 666.8621        |
| 871.5254       | 8  | K  | 10 | 1245.6843      | 623.3461        |
| 1000.5680      | 9  | E  | 9  | 1089.5580      | 545.2829        |
| 1113.6520      | 10 | I  | 8  | 960.5155       | 480.7616        |
| 1260.7204      | 11 | F  | 7  | 847.4314       | 424.2196        |
| 1331.7576      | 12 | A  | 6  | 700.3630       | 350.6854        |
| 1428.8103      | 13 | P  | 5  | 629.3259       | 315.1668        |
| 1541.8944      | 14 | L  | 4  | 532.2731       | 266.6405        |
| 1656.9213      | 15 | D  | 3  | 419.1890       | 210.0984        |
| 1785.9639      | 16 | E  | 2  | 304.1621       | 152.5850        |
|                | 17 | R  | 1  | 175.1195       | 88.0637         |

N-term:+43.02 K(3):+156.13  
K(8):+156.13

X-range:

0 - 0

MassTol: Y-zoom:

0. 1.

MassType:

☐AVG ☒MONO

Axis:

☒1 ☐2

Label:

☒I ☐M ☐-

Ions:

a ☐+ ☐2+ ☐3+

b ☒+ ☐2+ ☐3+

c ☐+ ☐2+ ☐3+

x ☐+ ☐2+ ☐3+

y ☒+ ☒2+ ☐3+

z ☐+ ☐2+ ☐3+

hide H<sub>2</sub>O/NH<sub>3</sub> ☐

zoom 112-122 ☐

GO

SAMEAADVFHR, MH+ 1275.5792, m/z 638.2932  
H OS G14 P120811 220811-s1.05115.05115.2.dta

scan 5115; 9.4e-001

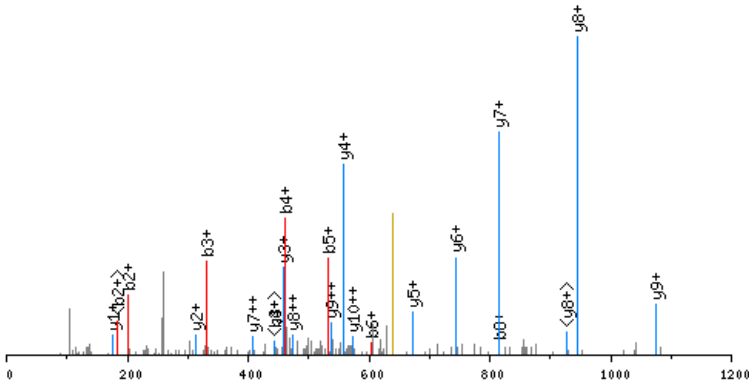

click image to zoom in; click top corners to zoom out

[precursor±]

scan 5111; 638.3 m/z; 2.4e+000

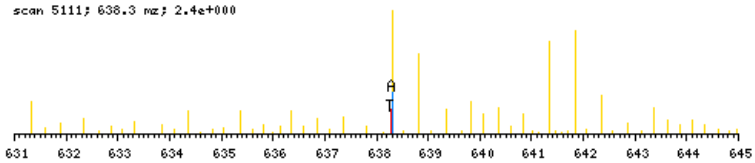

zoomed in precursor plot; T=theoretical m/z, A=acquired m/z

| b <sup>+</sup> | #  | AA | #  | y <sup>+</sup> | y <sup>2+</sup> |
|----------------|----|----|----|----------------|-----------------|
| 130.0504       | 1  | S  | 11 |                |                 |
| 201.0875       | 2  | A  | 10 | 1146.5366      | 573.7722        |
| 332.1280       | 3  | M  | 9  | 1075.4995      | 538.2537        |
| 461.1706       | 4  | E  | 8  | 944.4590       | 472.7334        |
| 532.2077       | 5  | A  | 7  | 815.4164       | 408.2121        |
| 603.2448       | 6  | A  | 6  | 744.3793       | 372.6936        |
| 718.2718       | 7  | D  | 5  | 673.3422       | 337.1750        |
| 817.3402       | 8  | V  | 4  | 558.3152       | 279.6615        |
| 964.4086       | 9  | F  | 3  | 459.2468       | 230.1273        |
| 1101.4675      | 10 | H  | 2  | 312.1784       | 156.5931        |
|                | 11 | R  | 1  | 175.1195       | 88.0637         |

N-term:+43.02

X-range:

0 - 0

MassTol: Y-zoom:

0. 1.

MassType:

☐ AVG ☒ MONO

Axis:

☒ 1 ☐ 2

Label:

☒ I ☐ M ☐ -

Ions:

a ☐ + ☐ 2+ ☐ 3+

b ☒ + ☐ 2+ ☐ 3+

c ☐ + ☐ 2+ ☐ 3+

x ☐ + ☐ 2+ ☐ 3+

y ☒ + ☒ 2+ ☐ 3+

z ☐ + ☐ 2+ ☐ 3+

hide H<sub>2</sub>O/NH<sub>3</sub> ☐

zoom 112-122 ☐

GO

SAPAGSPHPAAGAR, MH+ 1288.6398, m/z 644.8236  
H OS G13 P120811 220811-s1.02014.02014.2.dta

scan 2014; 3.3e+000

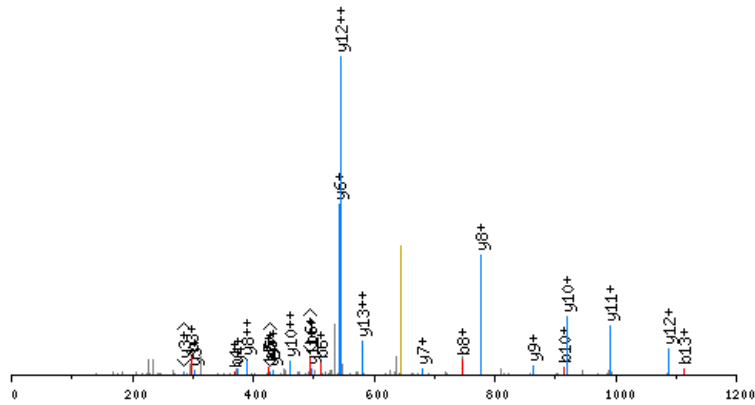

click image to zoom in; click top corners to zoom out

[precursor±]

scan 2011; 644.8 m/z; 3.1e+000

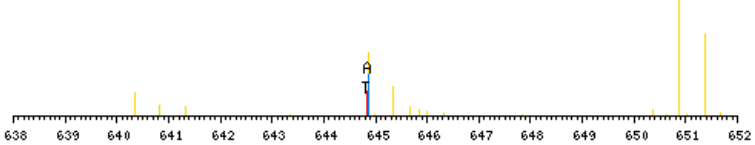

zoomed in precursor plot; T=theoretical m/z, A=acquired m/z

| b <sup>+</sup> | #  | AA | #  | y <sup>+</sup> | y <sup>2+</sup> |
|----------------|----|----|----|----------------|-----------------|
| 130.0504       | 1  | S  | 14 |                |                 |
| 201.0875       | 2  | A  | 13 | 1159.5972      | 580.3025        |
| 298.1403       | 3  | P  | 12 | 1088.5601      | 544.7840        |
| 369.1774       | 4  | A  | 11 | 991.5074       | 496.2576        |
| 426.1989       | 5  | G  | 10 | 920.4702       | 460.7390        |
| 513.2309       | 6  | S  | 9  | 863.4488       | 432.2283        |
| 610.2837       | 7  | P  | 8  | 776.4167       | 388.7123        |
| 747.3426       | 8  | H  | 7  | 679.3640       | 340.1859        |
| 844.3954       | 9  | P  | 6  | 542.3051       | 271.6564        |
| 915.4325       | 10 | A  | 5  | 445.2523       | 223.1301        |
| 986.4696       | 11 | A  | 4  | 374.2152       | 187.6115        |
| 1043.4910      | 12 | G  | 3  | 303.1781       | 152.0930        |
| 1114.5282      | 13 | A  | 2  | 246.1566       | 123.5822        |
|                | 14 | R  | 1  | 175.1195       | 88.0637         |

N-term:+43.02

X-range:

0 - 0

MassTol: Y-zoom:

0. 1.

MassType:

☐AVG ☒MONO

Axis:

☒1 ☐2

Label:

☒I ☐M ☐-

Ions:

a ☐+ ☐2+ ☐3+

b ☒+ ☐2+ ☐3+

c ☐+ ☐2+ ☐3+

x ☐+ ☐2+ ☐3+

y ☒+ ☒2+ ☐3+

z ☐+ ☐2+ ☐3+

hide H<sub>2</sub>O/NH<sub>3</sub> ☐

zoom 112-122 ☐

GO

SATQHKTSLPQGV, MH+ 1579.8557, m/z 527.2901  
H OS G16 P120811 220811-s1.02419.02419.3.dta

scan 2419; 3.4e+001

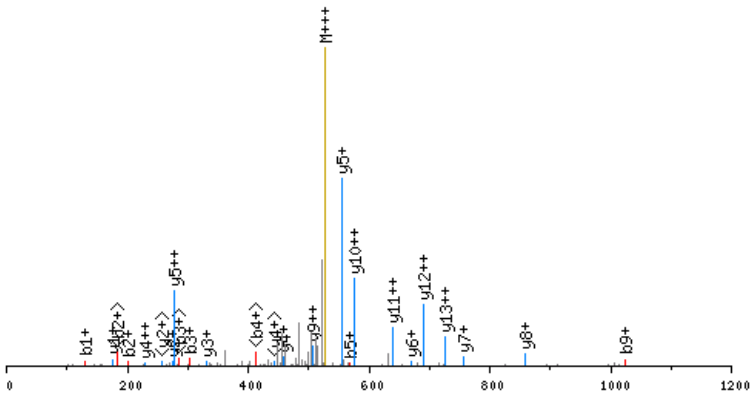

click image to zoom in; click top corners to zoom out

[precursor±]

scan 2418; 527.3 m/z; 4.8e+002

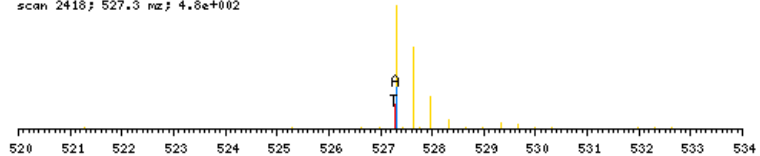

zoomed in precursor plot; T=theoretical m/z, A=acquired m/z

| b <sup>+</sup> | #  | AA | #  | y <sup>+</sup> | y <sup>2+</sup> |
|----------------|----|----|----|----------------|-----------------|
| 130.0504       | 1  | S  | 14 |                |                 |
| 201.0875       | 2  | A  | 13 | 1450.8131      | 725.9104        |
| 302.1352       | 3  | T  | 12 | 1379.7760      | 690.3919        |
| 430.1938       | 4  | Q  | 11 | 1278.7283      | 639.8681        |
| 567.2527       | 5  | H  | 10 | 1150.6697      | 575.8388        |
| 723.3790       | 6  | K  | 9  | 1013.6108      | 507.3093        |
| 824.4267       | 7  | T  | 8  | 857.4845       | 429.2462        |
| 911.4587       | 8  | S  | 7  | 756.4368       | 378.7223        |
| 1024.5428      | 9  | L  | 6  | 669.4048       | 335.2063        |
| 1121.5955      | 10 | P  | 5  | 556.3207       | 278.6643        |
| 1249.6541      | 11 | Q  | 4  | 459.2680       | 230.1379        |
| 1306.6756      | 12 | G  | 3  | 331.2094       | 166.1086        |
| 1405.7440      | 13 | V  | 2  | 274.1879       | 137.5979        |
|                | 14 | R  | 1  | 175.1195       | 88.0637         |

N-term:+43.02 K(6):+156.13

X-range:

0 - 0

MassTol: Y-zoom:

0. 1.

MassType:

☐AVG ☒MONO

Axis:

☒1 ☐2

Label:

☒I ☐M ☐-

Ions:

a ☐+ ☐2+ ☐3+

b ☒+ ☐2+ ☐3+

c ☐+ ☐2+ ☐3+

x ☐+ ☐2+ ☐3+

y ☒+ ☒2+ ☐3+

z ☐+ ☐2+ ☐3+

hide H<sub>2</sub>O/NH<sub>3</sub> ☐

zoom 112-122 ☐

GO

SDAAVDTSSSEITTKDLKEKKEVVVEEAENGR, MH+ 3432.7599, m/z 858.9454  
H OS G17 P120811 220811-s1.05412.05412.4.dta

scan 5412; 3.4e+000

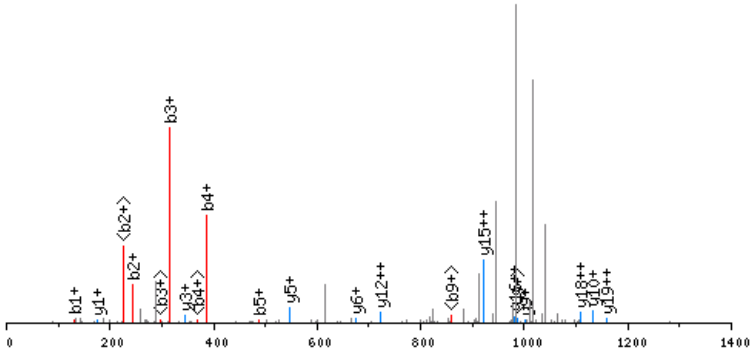

click image to zoom in; click top corners to zoom out [precursor±]

scan 5408; 858.9 m/z; 1.0e+001

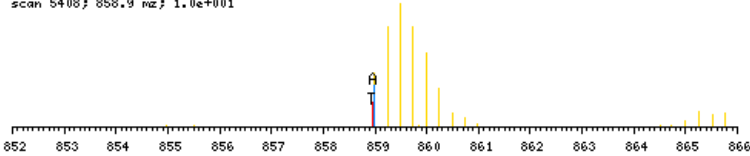

zoomed in precursor plot; T=theoretical m/z, A=acquired m/z

| b <sup>+</sup> | #  | AA | #  | y <sup>+</sup> | y <sup>2+</sup> |
|----------------|----|----|----|----------------|-----------------|
| 130.0504       | 1  | S  | 30 |                |                 |
| 245.0774       | 2  | D  | 29 | 3303.7173      | 1652.3626       |
| 316.1145       | 3  | A  | 28 | 3188.6903      | 1594.8491       |
| 387.1516       | 4  | A  | 27 | 3117.6532      | 1559.3305       |
| 486.2200       | 5  | V  | 26 | 3046.6161      | 1523.8120       |
| 601.2470       | 6  | D  | 25 | 2947.5477      | 1474.2778       |
| 702.2946       | 7  | T  | 24 | 2832.5208      | 1416.7643       |
| 789.3267       | 8  | S  | 23 | 2731.4731      | 1366.2405       |
| 876.3587       | 9  | S  | 22 | 2644.4410      | 1322.7244       |
| 1005.4013      | 10 | E  | 21 | 2557.4090      | 1279.2084       |
| 1118.4853      | 11 | I  | 20 | 2428.3664      | 1214.6871       |
| 1219.5330      | 12 | T  | 19 | 2315.2824      | 1158.1451       |
| 1320.5807      | 13 | T  | 18 | 2214.2347      | 1107.6213       |
| 1476.7070      | 14 | K  | 17 | 2113.1870      | 1057.0974       |
| 1591.7339      | 15 | D  | 16 | 1957.0607      | 979.0343        |
| 1704.8180      | 16 | L  | 15 | 1842.0338      | 921.5208        |
| 1860.9443      | 17 | K  | 14 | 1728.9497      | 864.9788        |
| 1989.9869      | 18 | E  | 13 | 1572.8234      | 786.9156        |
| 2146.1132      | 19 | K  | 12 | 1443.7808      | 722.3943        |
| 2302.2395      | 20 | K  | 11 | 1287.6545      | 644.3312        |
| 2431.2821      | 21 | E  | 10 | 1131.5282      | 566.2680        |
| 2530.3505      | 22 | V  | 9  | 1002.4856      | 501.7467        |
| 2629.4189      | 23 | V  | 8  | 903.4172       | 452.2125        |
| 2758.4615      | 24 | E  | 7  | 804.3488       | 402.6783        |
| 2887.5041      | 25 | E  | 6  | 675.3062       | 338.1570        |
| 2958.5412      | 26 | A  | 5  | 546.2636       | 273.6357        |
| 3087.5838      | 27 | E  | 4  | 475.2265       | 238.1172        |
| 3201.6267      | 28 | N  | 3  | 346.1839       | 173.5959        |
| 3258.6482      | 29 | G  | 2  | 232.1410       | 116.5744        |
|                | 30 | R  | 1  | 175.1195       | 88.0637         |

N-term:+43.02 K(14):+156.13  
K(17):+156.13 K(19):+156.13  
K(20):+156.13

X-range:

0 - 0

MassTol: Y-zoom:

0. 1.

MassType:

☐ AVG ☒ MONO

Axis:

☒ 1 ☐ 2

Label:

☒ I ☐ M ☐ -

Ions:

a ☐ + ☐ 2+ ☐ 3+

b ☒ + ☐ 2+ ☐ 3+

c ☐ + ☐ 2+ ☐ 3+

x ☐ + ☐ 2+ ☐ 3+

y ☒ + ☒ 2+ ☐ 3+

z ☐ + ☐ 2+ ☐ 3+

hide H<sub>2</sub>O/NH<sub>3</sub> ☐

zoom 112-122 ☐

GO

SDDKPFLCTAPGCGQR, MH+ 1878.8478, m/z 626.9541  
H OS G13 P120811 220811-s1.04167.04167.3.dta

scan 4167; 1.7e+000

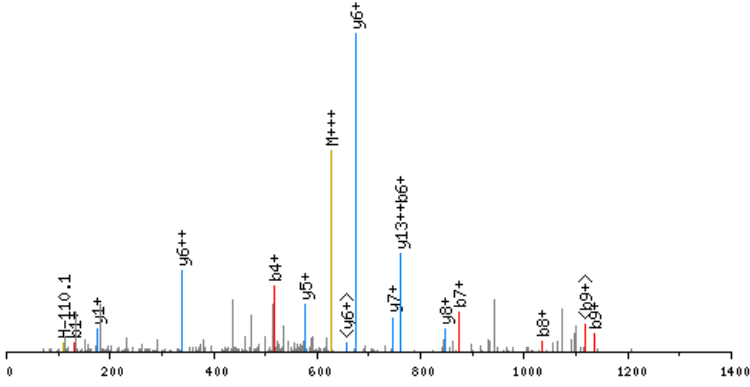

click image to zoom in; click top corners to zoom out [\[precursor±\]](#)

scan 4164; 627.0 m/z; 6.3e+000

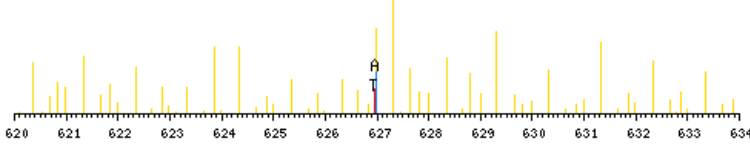

zoomed in precursor plot; T=theoretical m/z, A=acquired m/z

| b <sup>+</sup> | #  | AA | #  | y <sup>+</sup> | y <sup>2+</sup> |
|----------------|----|----|----|----------------|-----------------|
| 130.0504       | 1  | S  | 16 |                |                 |
| 245.0774       | 2  | D  | 15 | 1749.8052      | 875.4065        |
| 360.1043       | 3  | D  | 14 | 1634.7782      | 817.8930        |
| 516.2306       | 4  | K  | 13 | 1519.7513      | 760.3796        |
| 613.2834       | 5  | P  | 12 | 1363.6250      | 682.3164        |
| 760.3518       | 6  | F  | 11 | 1266.5722      | 633.7900        |
| 873.4359       | 7  | L  | 10 | 1119.5038      | 560.2558        |
| 1033.4665      | 8  | C  | 9  | 1006.4198      | 503.7138        |
| 1134.5141      | 9  | T  | 8  | 846.3892       | 423.6985        |
| 1205.5512      | 10 | A  | 7  | 745.3415       | 373.1747        |
| 1302.6040      | 11 | P  | 6  | 674.3044       | 337.6561        |
| 1359.6255      | 12 | G  | 5  | 577.2516       | 289.1297        |
| 1519.6561      | 13 | C  | 4  | 520.2301       | 260.6190        |
| 1576.6775      | 14 | G  | 3  | 360.1995       | 180.6037        |
| 1704.7361      | 15 | Q  | 2  | 303.1781       | 152.0930        |
|                | 16 | R  | 1  | 175.1195       | 88.0637         |

N-term:+43.02 K(4):+156.13  
C(8):+160.03 C(13):+160.03

X-range:

0 - 0

MassTol: Y-zoom:

0. 1.

MassType:

☐ AVG ☒ MONO

Axis:

☒ 1 ☐ 2

Label:

☒ I ☐ M ☐ -

Ions:

a ☐ + ☐ 2+ ☐ 3+

b ☒ + ☐ 2+ ☐ 3+

c ☐ + ☐ 2+ ☐ 3+

x ☐ + ☐ 2+ ☐ 3+

y ☒ + ☒ 2+ ☐ 3+

z ☐ + ☐ 2+ ☐ 3+

hide H<sub>2</sub>O/NH<sub>3</sub> ☐

zoom 112-122 ☐

GO

SDKLPYKQADIGLAAGWR, MH+ 2058.1389, m/z 686.7178  
H OS G15 P120811 220811-s1.06208.06208.3.dta

scan 6208; 1.7e+001

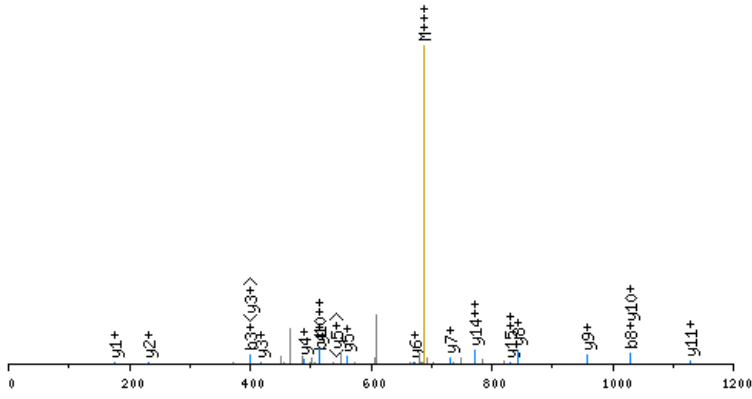

click image to zoom in; click top corners to zoom out [\[precursor±\]](#)

scan 6206; 686.7 m/z; 1.5e+001

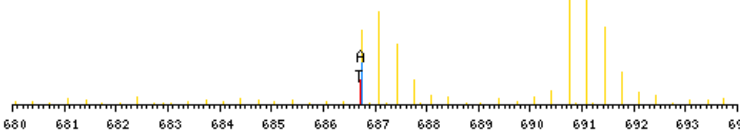

zoomed in precursor plot; T=theoretical m/z, A=acquired m/z

| b <sup>+</sup> | #  | AA | #  | y <sup>+</sup> | y <sup>2+</sup> |
|----------------|----|----|----|----------------|-----------------|
| 130.0504       | 1  | S  | 18 |                |                 |
| 245.0774       | 2  | D  | 17 | 1929.0963      | 965.0520        |
| 401.2037       | 3  | K  | 16 | 1814.0693      | 907.5386        |
| 514.2877       | 4  | L  | 15 | 1657.9430      | 829.4754        |
| 611.3405       | 5  | P  | 14 | 1544.8590      | 772.9334        |
| 774.4038       | 6  | Y  | 13 | 1447.8062      | 724.4070        |
| 930.5301       | 7  | K  | 12 | 1284.7429      | 642.8753        |
| 1029.5985      | 8  | V  | 11 | 1128.6166      | 564.8122        |
| 1100.6357      | 9  | A  | 10 | 1029.5482      | 515.2780        |
| 1215.6626      | 10 | D  | 9  | 958.5110       | 479.7594        |
| 1328.7467      | 11 | I  | 8  | 843.4841       | 422.2460        |
| 1385.7681      | 12 | G  | 7  | 730.4000       | 365.7039        |
| 1498.8522      | 13 | L  | 6  | 673.3786       | 337.1932        |
| 1569.8893      | 14 | A  | 5  | 560.2945       | 280.6512        |
| 1640.9264      | 15 | A  | 4  | 489.2574       | 245.1326        |
| 1827.0057      | 16 | W  | 3  | 418.2203       | 209.6141        |
| 1884.0272      | 17 | G  | 2  | 232.1410       | 116.5744        |
|                | 18 | R  | 1  | 175.1195       | 88.0637         |

N-term:+43.02 K(3):+156.13  
K(7):+156.13

X-range:

0 - 0

MassTol: Y-zoom:

0. 1.

MassType:

☐ AVG ☒ MONO

Axis:

☒ 1 ☐ 2

Label:

☒ I ☐ M ☐ -

Ions:

a ☐ + ☐ 2+ ☐ 3+

b ☒ + ☐ 2+ ☐ 3+

c ☐ + ☐ 2+ ☐ 3+

x ☐ + ☐ 2+ ☐ 3+

y ☒ + ☒ 2+ ☐ 3+

z ☐ + ☐ 2+ ☐ 3+

hide H<sub>2</sub>O/NH<sub>3</sub> ☐

zoom 112-122 ☐

GO

SDNGELEDKPPAPPVR, MH+ 1790.8925, m/z 597.6357  
H OS G12 P120811 220811-s1.03083.03083.3.dta

scan 3083; 2.3e+000

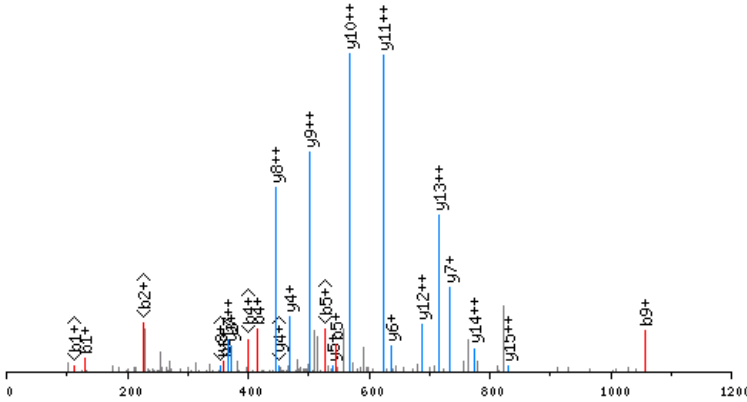

click image to zoom in; click top corners to zoom out

[precursor±]

scan 3082; 597.6 m/z; 5.7e+000

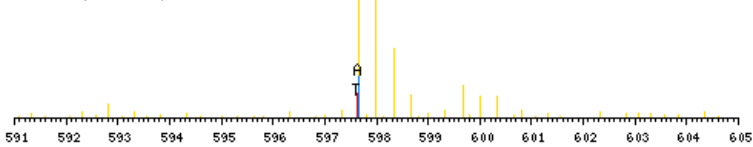

zoomed in precursor plot; T=theoretical m/z, A=acquired m/z

| b <sup>+</sup> | #  | AA | #  | y <sup>+</sup> | y <sup>2+</sup> |
|----------------|----|----|----|----------------|-----------------|
| 130.0504       | 1  | S  | 16 |                |                 |
| 245.0774       | 2  | D  | 15 | 1661.8499      | 831.4289        |
| 359.1203       | 3  | N  | 14 | 1546.8230      | 773.9154        |
| 416.1418       | 4  | G  | 13 | 1432.7800      | 716.8939        |
| 545.1844       | 5  | E  | 12 | 1375.7586      | 688.3832        |
| 658.2684       | 6  | L  | 11 | 1246.7160      | 623.8619        |
| 787.3110       | 7  | E  | 10 | 1133.6319      | 567.3199        |
| 902.3380       | 8  | D  | 9  | 1004.5893      | 502.7986        |
| 1058.4643      | 9  | K  | 8  | 889.5624       | 445.2851        |
| 1155.5170      | 10 | P  | 7  | 733.4361       | 367.2220        |
| 1252.5698      | 11 | P  | 6  | 636.3833       | 318.6956        |
| 1323.6069      | 12 | A  | 5  | 539.3306       | 270.1692        |
| 1420.6597      | 13 | P  | 4  | 468.2934       | 234.6506        |
| 1517.7124      | 14 | P  | 3  | 371.2407       | 186.1243        |
| 1616.7808      | 15 | V  | 2  | 274.1879       | 137.5979        |
|                | 16 | R  | 1  | 175.1195       | 88.0637         |

N-term:+43.02 K(9):+156.13

N-term: +43.02 K(5): +162.16

X-range:

0 - 0

MassTol: Y-zoom:

0. 1.

MassType:

☐AVG ☒MONO

Axis:

☒1 ☐2

Label:

☒I ☐M ☐-

Ions:

a ☐+ ☐2+ ☐3+

b ☒+ ☐2+ ☐3+

c ☐+ ☐2+ ☐3+

x ☐+ ☐2+ ☐3+

y ☒+ ☒2+ ☐3+

z ☐+ ☐2+ ☐3+

hide H<sub>2</sub>O/NH<sub>3</sub> ☐

zoom 112-122 ☐

GO

SDSLDNEEKPPAPPLR, MH+ 1834.9187, m/z 612.3111  
H OS G12 P120811 220811-s1.03429.03429.3.dta

scan 3429; 2.8e+000

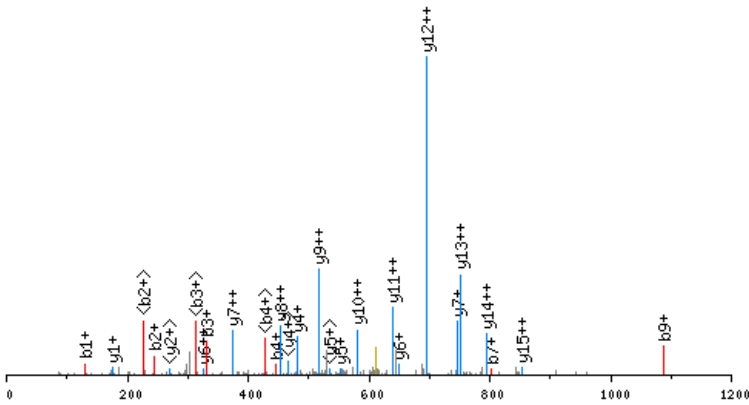

click image to zoom in; click top corners to zoom out [\[precursor±\]](#)

scan 3427; 612.3 m/z; 2.6e+000

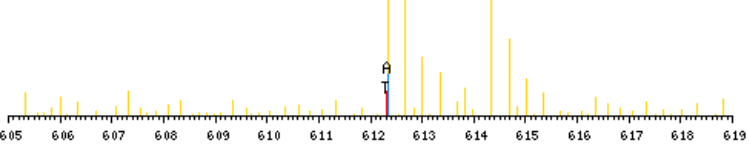

zoomed in precursor plot; T=theoretical m/z, A=acquired m/z

| b <sup>+</sup> | #  | AA | #  | y <sup>+</sup> | y <sup>2+</sup> |
|----------------|----|----|----|----------------|-----------------|
| 130.0504       | 1  | S  | 16 |                |                 |
| 245.0774       | 2  | D  | 15 | 1705.8761      | 853.4420        |
| 332.1094       | 3  | S  | 14 | 1590.8492      | 795.9285        |
| 445.1935       | 4  | L  | 13 | 1503.8172      | 752.4125        |
| 560.2204       | 5  | D  | 12 | 1390.7331      | 695.8705        |
| 674.2633       | 6  | N  | 11 | 1275.7061      | 638.3570        |
| 803.3059       | 7  | E  | 10 | 1161.6632      | 581.3355        |
| 932.3485       | 8  | E  | 9  | 1032.6206      | 516.8142        |
| 1088.4748      | 9  | K  | 8  | 903.5780       | 452.2929        |
| 1185.5276      | 10 | P  | 7  | 747.4517       | 374.2298        |
| 1282.5803      | 11 | P  | 6  | 650.3990       | 325.7034        |
| 1353.6175      | 12 | A  | 5  | 553.3462       | 277.1770        |
| 1450.6702      | 13 | P  | 4  | 482.3091       | 241.6585        |
| 1547.7230      | 14 | P  | 3  | 385.2563       | 193.1321        |
| 1660.8071      | 15 | L  | 2  | 288.2036       | 144.6057        |
|                | 16 | R  | 1  | 175.1195       | 88.0637         |

N-term:+43.02 K(9):+156.13

X-range:

0 - 0

MassTol: Y-zoom:

0. 1.

MassType:

☐AVG ☒MONO

Axis:

☒1 ☐2

Label:

☒I ☐M ☐-

Ions:

a ☐+ ☐2+ ☐3+

b ☒+ ☐2+ ☐3+

c ☐+ ☐2+ ☐3+

x ☐+ ☐2+ ☐3+

y ☒+ ☒2+ ☐3+

z ☐+ ☐2+ ☐3+

hide H<sub>2</sub>O/NH<sub>3</sub> ☐

zoom 112-122 ☐

GO

SDSLVVCEVDPELKETLR, MH+ 2159.0906, m/z 720.3684  
H OS G12 P120811 220811-s1.05328.05328.3.dta

scan 5328; 8.8e+000

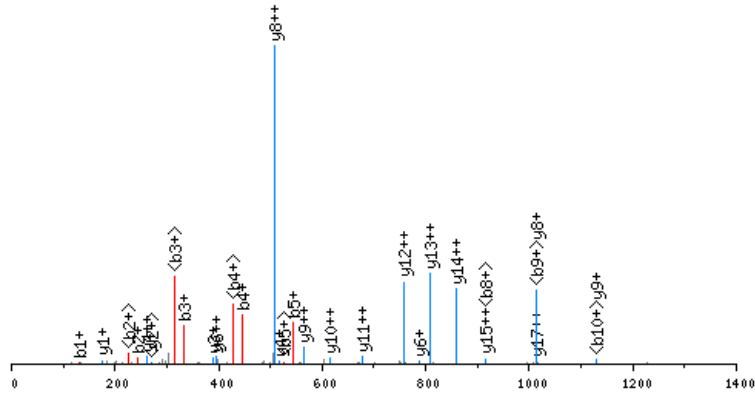

click image to zoom in; click top corners to zoom out [\[precursor±\]](#)

scan 5327; 720.4 m/z; 7.7e+001

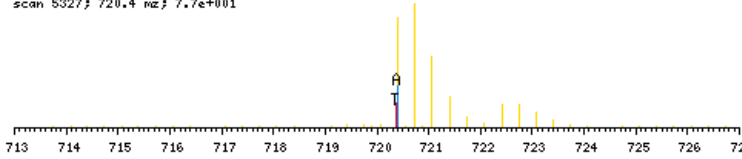

zoomed in precursor plot; T=theoretical m/z, A=acquired m/z

| b <sup>+</sup> | #  | AA | #  | y <sup>+</sup> | y <sup>2+</sup> |
|----------------|----|----|----|----------------|-----------------|
| 130.0504       | 1  | S  | 18 |                |                 |
| 245.0774       | 2  | D  | 17 | 2030.0480      | 1015.5279       |
| 332.1094       | 3  | S  | 16 | 1915.0210      | 958.0144        |
| 445.1935       | 4  | L  | 15 | 1827.9890      | 914.4984        |
| 544.2619       | 5  | V  | 14 | 1714.9049      | 857.9564        |
| 643.3303       | 6  | V  | 13 | 1615.8365      | 808.4222        |
| 803.3609       | 7  | C  | 12 | 1516.7681      | 758.8880        |
| 932.4035       | 8  | E  | 11 | 1356.7375      | 678.8727        |
| 1031.4719      | 9  | V  | 10 | 1227.6949      | 614.3514        |
| 1146.4988      | 10 | D  | 9  | 1128.6265      | 564.8172        |
| 1243.5516      | 11 | P  | 8  | 1013.5996      | 507.3037        |
| 1372.5942      | 12 | E  | 7  | 916.5468       | 458.7773        |
| 1485.6783      | 13 | L  | 6  | 787.5042       | 394.2560        |
| 1641.8046      | 14 | K  | 5  | 674.4201       | 337.7140        |
| 1770.8472      | 15 | E  | 4  | 518.2938       | 259.6508        |
| 1871.8948      | 16 | T  | 3  | 389.2512       | 195.1295        |
| 1984.9789      | 17 | L  | 2  | 288.2036       | 144.6057        |
|                | 18 | R  | 1  | 175.1195       | 88.0637         |

N-term:+43.02 C(7):+160.03  
K(14):+156.13

X-range:

0 - 0

MassTol: Y-zoom:

0. 1.

MassType:

☐ AVG ☒ MONO

Axis:

☒ 1 ☐ 2

Label:

☒ I ☐ M ☐ -

Ions:

a ☐ + ☐ 2+ ☐ 3+

b ☒ + ☐ 2+ ☐ 3+

c ☐ + ☐ 2+ ☐ 3+

x ☐ + ☐ 2+ ☐ 3+

y ☒ + ☒ 2+ ☐ 3+

z ☐ + ☐ 2+ ☐ 3+

hide H<sub>2</sub>O/NH<sub>3</sub> ☐

zoom 112-122 ☐

GO

SEAFDCAKCNESLYGR, MH+ 1976.8482, m/z 659.6209  
H OS G13 P120811 220811-s1.04703.04703.3.dta

scan 4703; 2.4e+000

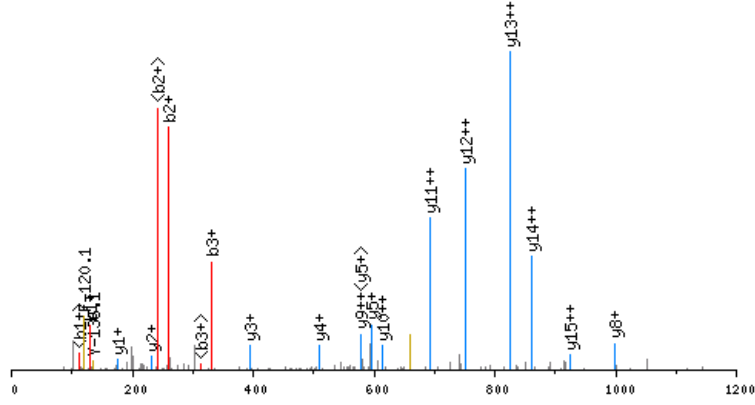

click image to zoom in; click top corners to zoom out

[precursor±]

scan 4699; 659.6 m/z; 1.1e+001

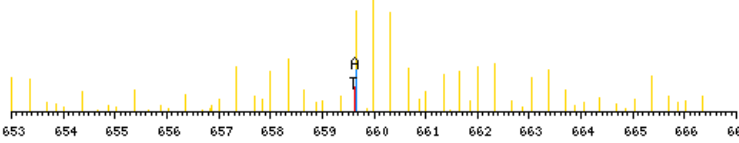

zoomed in precursor plot; T=theoretical m/z, A=acquired m/z

| b <sup>+</sup> | #  | AA | #  | y <sup>+</sup> | y <sup>2+</sup> |
|----------------|----|----|----|----------------|-----------------|
| 130.0504       | 1  | S  | 16 |                |                 |
| 259.0930       | 2  | E  | 15 | 1847.8056      | 924.4067        |
| 330.1301       | 3  | A  | 14 | 1718.7630      | 859.8854        |
| 477.1985       | 4  | F  | 13 | 1647.7259      | 824.3669        |
| 592.2255       | 5  | D  | 12 | 1500.6575      | 750.8326        |
| 752.2561       | 6  | C  | 11 | 1385.6305      | 693.3192        |
| 823.2932       | 7  | A  | 10 | 1225.5999      | 613.3039        |
| 979.4195       | 8  | K  | 9  | 1154.5628      | 577.7853        |
| 1139.4501      | 9  | C  | 8  | 998.4365       | 499.7222        |
| 1253.4930      | 10 | N  | 7  | 838.4059       | 419.7069        |
| 1382.5356      | 11 | E  | 6  | 724.3630       | 362.6854        |
| 1469.5677      | 12 | S  | 5  | 595.3204       | 298.1641        |
| 1582.6517      | 13 | L  | 4  | 508.2884       | 254.6481        |
| 1745.7150      | 14 | Y  | 3  | 395.2043       | 198.1061        |
| 1802.7365      | 15 | G  | 2  | 232.1410       | 116.5744        |
|                | 16 | R  | 1  | 175.1195       | 88.0637         |

N-term:+43.02 C(6):+160.03  
K(8):+156.13 C(9):+160.03

| b <sup>+</sup> | #  | AA | #  | y <sup>+</sup> | y <sup>2+</sup> |
|----------------|----|----|----|----------------|-----------------|
| 130.0504       | 1  | S  | 19 |                |                 |
| 259.0930       | 2  | E  | 18 | 1915.9514      | 958.4796        |
| 316.1145       | 3  | G  | 17 | 1786.9088      | 893.9583        |
| 431.1414       | 4  | D  | 16 | 1729.8874      | 865.4476        |
| 518.1735       | 5  | S  | 15 | 1614.8604      | 807.9341        |
| 617.2419       | 6  | V  | 14 | 1527.8284      | 764.4181        |
| 674.2633       | 7  | G  | 13 | 1428.7600      | 714.8839        |
| 789.2903       | 8  | D  | 12 | 1371.7385      | 686.3732        |
| 876.3223       | 9  | S  | 11 | 1256.7116      | 628.8597        |
| 975.3907       | 10 | V  | 10 | 1169.6795      | 585.3437        |
| 1112.4496      | 11 | H  | 9  | 1070.6111      | 535.8095        |
| 1169.4711      | 12 | G  | 8  | 933.5522       | 467.2800        |
| 1325.5974      | 13 | K  | 7  | 876.5307       | 438.7693        |
| 1422.6502      | 14 | P  | 6  | 720.4044       | 360.7061        |
| 1509.6822      | 15 | S  | 5  | 623.3517       | 312.1798        |
| 1608.7506      | 16 | V  | 4  | 536.3197       | 268.6637        |
| 1707.8190      | 17 | V  | 3  | 437.2512       | 219.1295        |
| 1870.8823      | 18 | Y  | 2  | 338.1828       | 169.5953        |
|                | 19 | R  | 1  | 175.1195       | 88.0637         |

X-range:

0 - 0

MassTol: Y-zoom:

0. 1.

MassType:

☐AVG ☒MONO

Axis:

☒1 ☐2

Label:

☒I ☐M ☐-

Ions:

a ☐+ ☐2+ ☐3+

b ☒+ ☐2+ ☐3+

c ☐+ ☐2+ ☐3+

x ☐+ ☐2+ ☐3+

y ☒+ ☒2+ ☐3+

z ☐+ ☐2+ ☐3+

hide H<sub>2</sub>O/NH<sub>3</sub> ☐

zoom 112-122 ☐

GO

SELEQLRQEAQLR, MH+ 1770.8986, m/z 590.9711  
H OS G13 P120811 220811-s1.06645.06645.3.dta

scan 6645; 2.3e+000

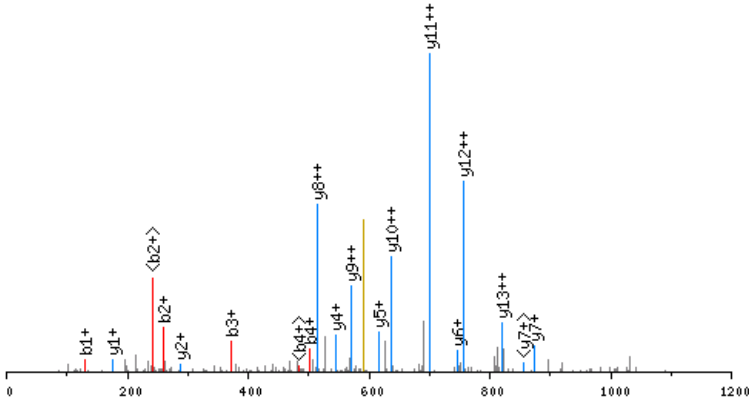

click image to zoom in; click top corners to zoom out [\[precursor±\]](#)

scan 6644; 591.0 m/z; 4.1e+000

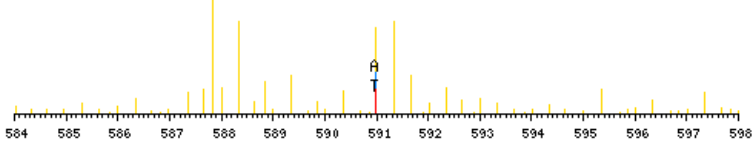

zoomed in precursor plot; T=theoretical m/z, A=acquired m/z

| b <sup>+</sup> | #  | AA | #  | y <sup>+</sup> | y <sup>2+</sup> |
|----------------|----|----|----|----------------|-----------------|
| 130.0504       | 1  | S  | 14 |                |                 |
| 259.0930       | 2  | E  | 13 | 1641.8560      | 821.4319        |
| 372.1771       | 3  | L  | 12 | 1512.8134      | 756.9106        |
| 501.2197       | 4  | E  | 11 | 1399.7294      | 700.3686        |
| 629.2783       | 5  | Q  | 10 | 1270.6868      | 635.8473        |
| 742.3623       | 6  | L  | 9  | 1142.6282      | 571.8180        |
| 898.4634       | 7  | R  | 8  | 1029.5441      | 515.2760        |
| 1026.5220      | 8  | Q  | 7  | 873.4430       | 437.2254        |
| 1155.5646      | 9  | E  | 6  | 745.3844       | 373.1961        |
| 1226.6017      | 10 | A  | 5  | 616.3418       | 308.6748        |
| 1355.6443      | 11 | E  | 4  | 545.3047       | 273.1563        |
| 1483.7029      | 12 | Q  | 3  | 416.2621       | 208.6350        |
| 1596.7870      | 13 | L  | 2  | 288.2036       | 144.6057        |
|                | 14 | R  | 1  | 175.1195       | 88.0637         |

N-term:+43.02

X-range:

0 - 0

MassTol: Y-zoom:

0. 1.

MassType:

☐ AVG ☒ MONO

Axis:

☒ 1 ☐ 2

Label:

☒ I ☐ M ☐ -

Ions:

a ☐ + ☐ 2+ ☐ 3+

b ☒ + ☐ 2+ ☐ 3+

c ☐ + ☐ 2+ ☐ 3+

x ☐ + ☐ 2+ ☐ 3+

y ☒ + ☒ 2+ ☐ 3+

z ☐ + ☐ 2+ ☐ 3+

hide H<sub>2</sub>O/NH<sub>3</sub> ☐

zoom 112-122 ☐

GO

SEPELKLVAR, MH+ 1217.7318, m/z 609.3695  
H OS G13 P120811 220811-s1.04612.04612.2.dta

scan 4612; 1.3e+001

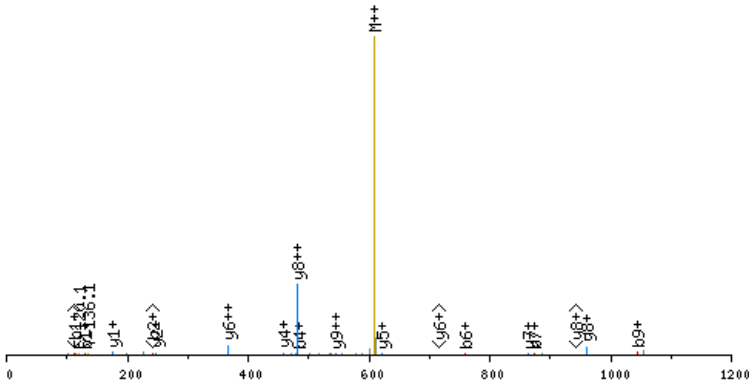

click image to zoom in; click top corners to zoom out [precursor±]

scan 4609; 609.4 m/z; 3.8e+001

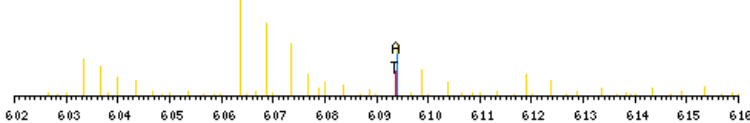

X-range:

0 - 0

MassTol: Y-zoom:

0. 1.

MassType:

☐AVG ☒MONO

Axis:

☒1 ☐2

Label:

☒I ☐M ☐-

Ions:

a ☐+ ☐2+ ☐3+

b ☒+ ☐2+ ☐3+

c ☐+ ☐2+ ☐3+

x ☐+ ☐2+ ☐3+

y ☒+ ☒2+ ☐3+

z ☐+ ☐2+ ☐3+

hide H<sub>2</sub>O/NH<sub>3</sub> ☐

zoom 112-122 ☐

GO

SETAPAAPAPAPAEKTPVKKAR, MH+ 2541.4770, m/z 636.1247  
H\_OS\_G17\_P120811\_220811-s1.02325.02325.4.dta

scan 2325; 4.3e+000

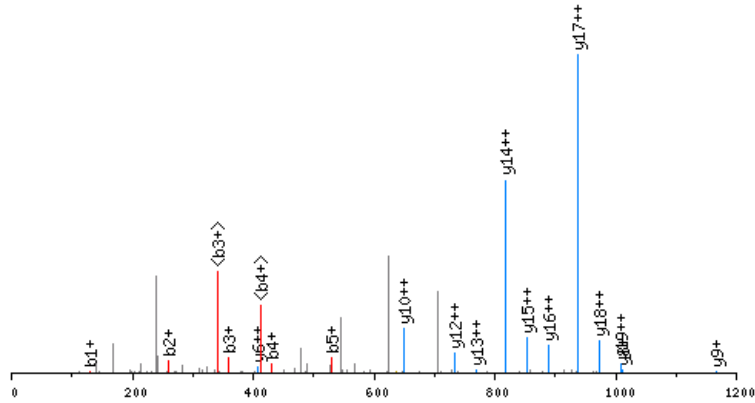

click image to zoom in; click top corners to zoom out

[precursor±]

scan 2323; 636.1 m/z; 7.0e+000

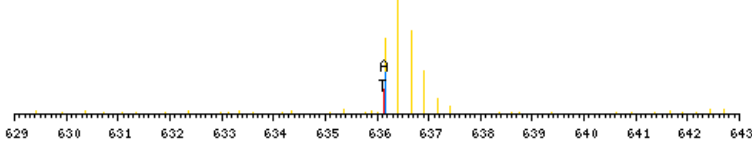

zoomed in precursor plot; T=theoretical m/z, A=acquired m/z

| b <sup>+</sup> | #  | AA | #  | y <sup>+</sup> | y <sup>2+</sup> |
|----------------|----|----|----|----------------|-----------------|
| 130.0504       | 1  | S  | 24 |                |                 |
| 259.0930       | 2  | E  | 23 | 2412.4344      | 1206.7211       |
| 360.1407       | 3  | T  | 22 | 2283.3918      | 1142.1998       |
| 431.1778       | 4  | A  | 21 | 2182.3441      | 1091.6760       |
| 528.2306       | 5  | P  | 20 | 2111.3070      | 1056.1574       |
| 599.2677       | 6  | A  | 19 | 2014.2542      | 1007.6310       |
| 670.3048       | 7  | A  | 18 | 1943.2171      | 972.1125        |
| 767.3576       | 8  | P  | 17 | 1872.1800      | 936.5939        |
| 838.3947       | 9  | A  | 16 | 1775.1272      | 888.0675        |
| 909.4318       | 10 | A  | 15 | 1704.0901      | 852.5490        |
| 1006.4846      | 11 | P  | 14 | 1633.0530      | 817.0304        |
| 1077.5217      | 12 | A  | 13 | 1536.0003      | 768.5040        |
| 1174.5744      | 13 | P  | 12 | 1464.9631      | 732.9855        |
| 1245.6116      | 14 | A  | 11 | 1367.9104      | 684.4591        |
| 1374.6541      | 15 | E  | 10 | 1296.8733      | 648.9405        |
| 1530.7804      | 16 | K  | 9  | 1167.8307      | 584.4192        |
| 1631.8281      | 17 | T  | 8  | 1011.7044      | 506.3561        |
| 1728.8809      | 18 | P  | 7  | 910.6567       | 455.8323        |
| 1827.9493      | 19 | V  | 6  | 813.6039       | 407.3059        |
| 1984.0756      | 20 | K  | 5  | 714.5355       | 357.7717        |
| 2140.2019      | 21 | K  | 4  | 558.4092       | 279.7085        |
| 2296.3282      | 22 | K  | 3  | 402.2829       | 201.6454        |
| 2367.3653      | 23 | A  | 2  | 246.1566       | 123.5822        |
|                | 24 | R  | 1  | 175.1195       | 88.0637         |

N-term:+43.02 K(16):+156.13  
K(20):+156.13 K(21):+156.13  
K(22):+156.13

X-range:

0 - 0

MassTol: Y-zoom:

0. 1.

MassType:

☐ AVG ☒ MONO

Axis:

☒ 1 ☐ 2

Label:

☒ I ☐ M ☐ -

Ions:

a ☐ + ☐ 2+ ☐ 3+

b ☒ + ☐ 2+ ☐ 3+

c ☐ + ☐ 2+ ☐ 3+

x ☐ + ☐ 2+ ☐ 3+

y ☒ + ☒ 2+ ☐ 3+

z ☐ + ☐ 2+ ☐ 3+

hide H<sub>2</sub>O/NH<sub>3</sub> ☐

zoom 112-122 ☐

GO

SGCQAQGDCSRPCGAQDKEHPR, MH+ 2737.1510, m/z 685.0432  
H OS G17 P120811 220811-s1.01771.01771.4.dta

scan 1771; 2.6e+000

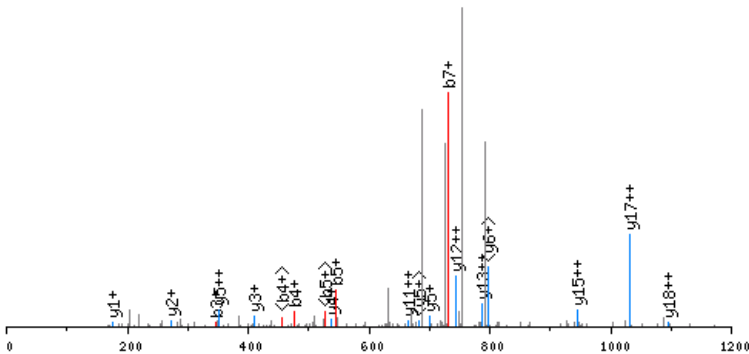

click image to zoom in; click top corners to zoom out

[precursor±]

scan 1769; 685.0 m/z; 2.2e+000

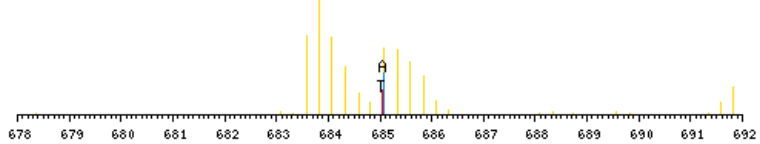

zoomed in precursor plot; T=theoretical m/z, A=acquired m/z

| b <sup>+</sup> | #  | AA | #  | y <sup>+</sup> | y <sup>2+</sup> |
|----------------|----|----|----|----------------|-----------------|
| 130.0504       | 1  | S  | 23 |                |                 |
| 187.0719       | 2  | G  | 22 | 2608.1084      | 1304.5581       |
| 347.1025       | 3  | C  | 21 | 2551.0869      | 1276.0474       |
| 475.1611       | 4  | Q  | 20 | 2391.0563      | 1196.0321       |
| 546.1982       | 5  | A  | 19 | 2262.9978      | 1132.0028       |
| 674.2568       | 6  | Q  | 18 | 2191.9607      | 1096.4842       |
| 731.2782       | 7  | G  | 17 | 2063.9021      | 1032.4550       |
| 846.3052       | 8  | D  | 16 | 2006.8806      | 1003.9442       |
| 1006.3358      | 9  | C  | 15 | 1891.8537      | 946.4307        |
| 1166.3664      | 10 | C  | 14 | 1731.8231      | 866.4154        |
| 1253.3984      | 11 | S  | 13 | 1571.7925      | 786.4001        |
| 1409.4995      | 12 | R  | 12 | 1484.7604      | 742.8841        |
| 1506.5523      | 13 | P  | 11 | 1328.6593      | 664.8336        |
| 1666.5829      | 14 | C  | 10 | 1231.6066      | 616.3072        |
| 1723.6043      | 15 | G  | 9  | 1071.5760      | 536.2919        |
| 1794.6414      | 16 | A  | 8  | 1014.5545      | 507.7812        |
| 1922.7000      | 17 | Q  | 7  | 943.5174       | 472.2626        |
| 2037.7270      | 18 | D  | 6  | 815.4588       | 408.2333        |
| 2199.8851      | 19 | K  | 5  | 700.4319       | 350.7198        |
| 2328.9277      | 20 | E  | 4  | 538.2738       | 269.6408        |
| 2465.9866      | 21 | H  | 3  | 409.2312       | 205.1195        |
| 2563.0393      | 22 | P  | 2  | 272.1723       | 136.5900        |
|                | 23 | R  | 1  | 175.1195       | 88.0637         |

N-term:+43.02 C(3):+160.03  
C(9):+160.03 C(10):+160.03  
C(14):+160.03 K(19):+162.16

X-range:

0 - 0

MassTol: Y-zoom:

0. 1.

MassType:

☐ AVG ☒ MONO

Axis:

☒ 1 ☐ 2

Label:

☒ I ☐ M ☐ -

Ions:

a ☐ + ☐ 2+ ☐ 3+

b ☒ + ☐ 2+ ☐ 3+

c ☐ + ☐ 2+ ☐ 3+

x ☐ + ☐ 2+ ☐ 3+

y ☒ + ☒ 2+ ☐ 3+

z ☐ + ☐ 2+ ☐ 3+

hide H<sub>2</sub>O/NH<sub>3</sub> ☐

zoom 112-122 ☐

GO

SGEGENPASKPTPVQDVQGDGR, MH+ 2295.0854, m/z 765.7000  
H OS G12 P120811 220811-s1.02734.02734.3.dta

scan 2734; 2.8e+000

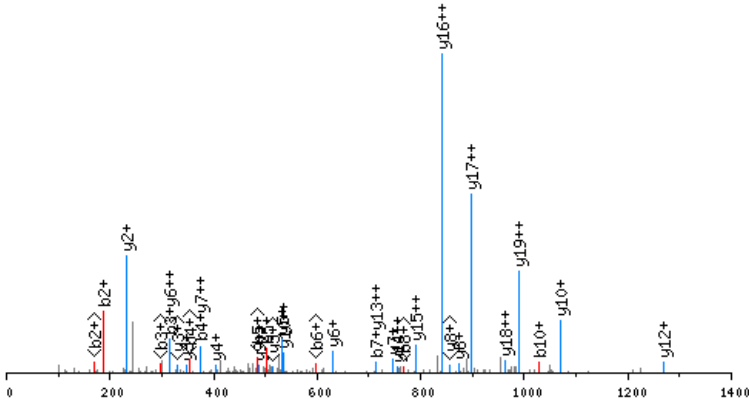

click image to zoom in; click top corners to zoom out [precursor±]

scan 2732; 765.7 m/z; 1.6e+000

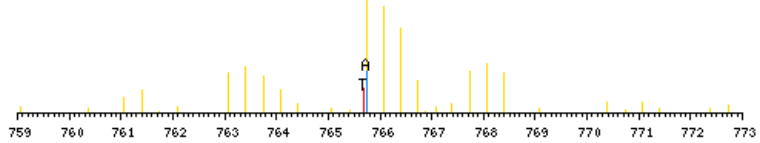

zoomed in precursor plot; T=theoretical m/z, A=acquired m/z

| b <sup>+</sup> | #  | AA | #  | y <sup>+</sup> | y <sup>2+</sup> |
|----------------|----|----|----|----------------|-----------------|
| 130.0504       | 1  | S  | 22 |                |                 |
| 187.0719       | 2  | G  | 21 | 2166.0428      | 1083.5253       |
| 316.1145       | 3  | E  | 20 | 2109.0213      | 1055.0146       |
| 373.1359       | 4  | G  | 19 | 1979.9787      | 990.4933        |
| 502.1785       | 5  | E  | 18 | 1922.9572      | 961.9825        |
| 616.2215       | 6  | N  | 17 | 1793.9146      | 897.4612        |
| 713.2742       | 7  | P  | 16 | 1679.8717      | 840.4398        |
| 784.3113       | 8  | A  | 15 | 1582.8189      | 791.9134        |
| 871.3434       | 9  | S  | 14 | 1511.7818      | 756.3948        |
| 1027.4697      | 10 | K  | 13 | 1424.7498      | 712.8788        |
| 1124.5224      | 11 | P  | 12 | 1268.6235      | 634.8157        |
| 1225.5701      | 12 | T  | 11 | 1171.5707      | 586.2893        |
| 1322.6229      | 13 | P  | 10 | 1070.5231      | 535.7654        |
| 1421.6913      | 14 | V  | 9  | 973.4703       | 487.2391        |
| 1549.7499      | 15 | Q  | 8  | 874.4019       | 437.7049        |
| 1664.7768      | 16 | D  | 7  | 746.3433       | 373.6756        |
| 1763.8452      | 17 | V  | 6  | 631.3164       | 316.1621        |
| 1891.9038      | 18 | Q  | 5  | 532.2479       | 266.6279        |
| 1948.9253      | 19 | G  | 4  | 404.1894       | 202.5986        |
| 2063.9522      | 20 | D  | 3  | 347.1679       | 174.0879        |
| 2120.9737      | 21 | G  | 2  | 232.1410       | 116.5744        |
|                | 22 | R  | 1  | 175.1195       | 88.0637         |

N-term:+43.02 K(10):+156.13

N-term: +43.02 K(4): +156.13

X-range:

0 - 0

MassTol: Y-zoom:

0. 1.

MassType:

☐AVG ☒MONO

Axis:

☒1 ☐2

Label:

☒I ☐M ☐-

Ions:

a ☐+ ☐2+ ☐3+

b ☒+ ☐2+ ☐3+

c ☐+ ☐2+ ☐3+

x ☐+ ☐2+ ☐3+

y ☒+ ☒2+ ☐3+

z ☐+ ☐2+ ☐3+

hide H<sub>2</sub>O/NH<sub>3</sub> ☐

zoom 112-122 ☐

GO

SGQPGVPVGPAGVR, MH+ 1220.6388, m/z 610.8230  
H OS G13 P120811 220811-s1.02600.02600.2.dta

scan 2600; 4.7e+000

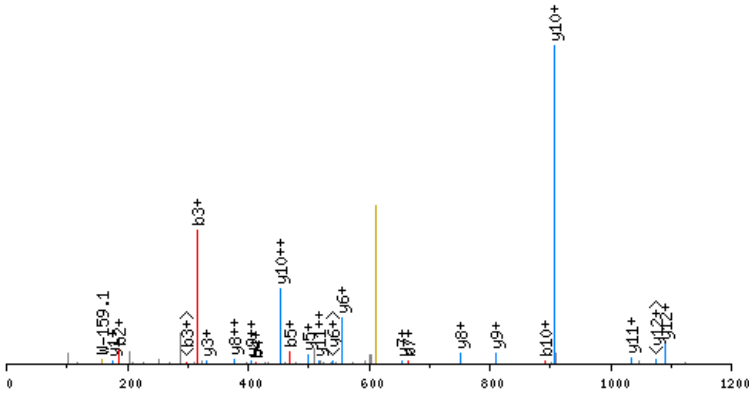

click image to zoom in; click top corners to zoom out

[precursor±]

scan 2599; 610.8 m/z; 8.5e+000

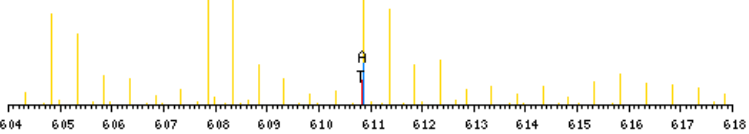

zoomed in precursor plot; T=theoretical m/z, A=acquired m/z

| b <sup>+</sup> | #  | AA | #  | y <sup>+</sup> | y <sup>2+</sup> |
|----------------|----|----|----|----------------|-----------------|
| 130.0504       | 1  | S  | 13 |                |                 |
| 187.0719       | 2  | G  | 12 | 1091.5962      | 546.3020        |
| 315.1305       | 3  | Q  | 11 | 1034.5747      | 517.7913        |
| 412.1832       | 4  | P  | 10 | 906.5161       | 453.7620        |
| 469.2047       | 5  | G  | 9  | 809.4634       | 405.2356        |
| 566.2575       | 6  | P  | 8  | 752.4419       | 376.7249        |
| 665.3259       | 7  | V  | 7  | 655.3891       | 328.1985        |
| 722.3473       | 8  | G  | 6  | 556.3207       | 278.6643        |
| 819.4001       | 9  | P  | 5  | 499.2993       | 250.1535        |
| 890.4372       | 10 | A  | 4  | 402.2465       | 201.6272        |
| 947.4587       | 11 | G  | 3  | 331.2094       | 166.1086        |
| 1046.5271      | 12 | V  | 2  | 274.1879       | 137.5979        |
|                | 13 | R  | 1  | 175.1195       | 88.0637         |

N-term:+43.02

X-range:

0 - 0

MassTol: Y-zoom:

0. 1.

MassType:

☐ AVG ☒ MONO

Axis:

☒ 1 ☐ 2

Label:

☒ I ☐ M ☐ -

Ions:

a ☐ + ☐ 2+ ☐ 3+

b ☒ + ☐ 2+ ☐ 3+

c ☐ + ☐ 2+ ☐ 3+

x ☐ + ☐ 2+ ☐ 3+

y ☒ + ☒ 2+ ☐ 3+

z ☐ + ☐ 2+ ☐ 3+

hide H<sub>2</sub>O/NH<sub>3</sub> ☐

zoom 112-122 ☐

GO

SGSSSVAAMKKVVQQLR, MH+ 1874.0534, m/z 625.3560  
H OS G15 P120811 220811-s1.05239.05239.3.dta

scan 5239; 8.9e+000

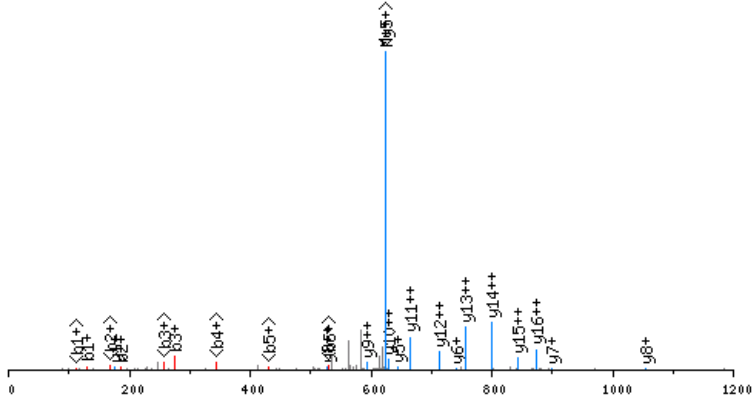

click image to zoom in; click top corners to zoom out [\[precursor±\]](#)

scan 5236; 625.4 m/z; 1.1e+001

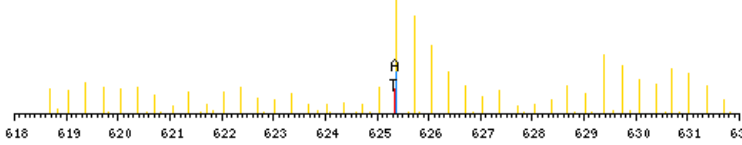

zoomed in precursor plot; T=theoretical m/z, A=acquired m/z

| b <sup>+</sup> | #  | AA | #  | y <sup>+</sup> | y <sup>2+</sup> |
|----------------|----|----|----|----------------|-----------------|
| 130.0504       | 1  | S  | 17 |                |                 |
| 187.0719       | 2  | G  | 16 | 1745.0108      | 873.0093        |
| 274.1039       | 3  | S  | 15 | 1687.9894      | 844.4986        |
| 361.1359       | 4  | S  | 14 | 1600.9573      | 800.9826        |
| 448.1680       | 5  | S  | 13 | 1513.9253      | 757.4666        |
| 547.2364       | 6  | V  | 12 | 1426.8933      | 713.9505        |
| 618.2735       | 7  | A  | 11 | 1327.8249      | 664.4163        |
| 689.3106       | 8  | A  | 10 | 1256.7877      | 628.8978        |
| 820.3511       | 9  | M  | 9  | 1185.7506      | 593.3792        |
| 976.4774       | 10 | K  | 8  | 1054.7101      | 527.8590        |
| 1132.6037      | 11 | K  | 7  | 898.5838       | 449.7958        |
| 1231.6721      | 12 | V  | 6  | 742.4575       | 371.7327        |
| 1330.7405      | 13 | V  | 5  | 643.3891       | 322.1985        |
| 1458.7991      | 14 | Q  | 4  | 544.3207       | 272.6643        |
| 1586.8577      | 15 | Q  | 3  | 416.2621       | 208.6350        |
| 1699.9418      | 16 | L  | 2  | 288.2036       | 144.6057        |
|                | 17 | R  | 1  | 175.1195       | 88.0637         |

N-term:+43.02 K(10):+156.13  
K(11):+156.13

X-range:

0 - 0

MassTol: Y-zoom:

0. 1.

MassType:

☐ AVG ☒ MONO

Axis:

☒ 1 ☐ 2

Label:

☒ I ☐ M ☐ -

Ions:

a ☐ + ☐ 2+ ☐ 3+

b ☒ + ☐ 2+ ☐ 3+

c ☐ + ☐ 2+ ☐ 3+

x ☐ + ☐ 2+ ☐ 3+

y ☒ + ☒ 2+ ☐ 3+

z ☐ + ☐ 2+ ☐ 3+

hide H<sub>2</sub>O/NH<sub>3</sub> ☐

zoom 112-122 ☐

GO

SGYTPDEKLR, MH+ 1241.6590, m/z 621.3332  
H OS G13 P120811 220811-s1.03042.03042.2.dta

scan 3042; 5.7e+000

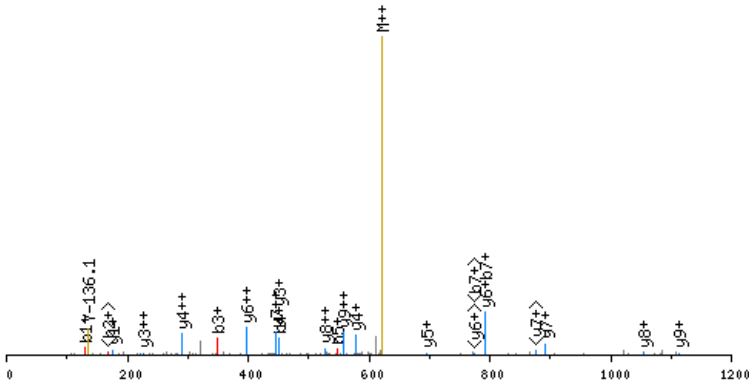

click image to zoom in; click top corners to zoom out

[precursor±]

scan 3039; 621.3 m/z; 5.5e+000

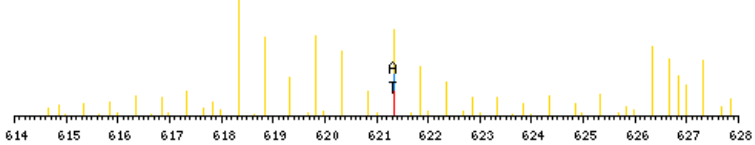

zoomed in precursor plot; T=theoretical m/z, A=acquired m/z

| b <sup>+</sup> | #  | AA | #  | y <sup>+</sup> | y <sup>2+</sup> |
|----------------|----|----|----|----------------|-----------------|
| 130.0504       | 1  | S  | 10 |                |                 |
| 187.0719       | 2  | G  | 9  | 1112.6164      | 556.8121        |
| 350.1352       | 3  | Y  | 8  | 1055.5950      | 528.3014        |
| 451.1829       | 4  | T  | 7  | 892.5316       | 446.7697        |
| 548.2357       | 5  | P  | 6  | 791.4840       | 396.2459        |
| 663.2626       | 6  | D  | 5  | 694.4312       | 347.7195        |
| 792.3052       | 7  | E  | 4  | 579.4043       | 290.2060        |
| 954.4633       | 8  | K  | 3  | 450.3617       | 225.6847        |
| 1067.5474      | 9  | L  | 2  | 288.2036       | 144.6057        |
|                | 10 | R  | 1  | 175.1195       | 88.0637         |

N-term:+43.02 K(8):+162.16

X-range:

0 - 0

MassTol: Y-zoom:

0. 1.

MassType:

☐AVG ☒MONO

Axis:

☒1 ☐2

Label:

☒I ☐M ☐-

Ions:

a ☐+ ☐2+ ☐3+

b ☒+ ☐2+ ☐3+

c ☐+ ☐2+ ☐3+

x ☐+ ☐2+ ☐3+

y ☒+ ☒2+ ☐3+

z ☐+ ☐2+ ☐3+

hide H<sub>2</sub>O/NH<sub>3</sub> ☐

zoom 112-122 ☐

GO

SHGFTKEEVAEFQAAFNR, MH+ 2138.0307, m/z 535.2631  
H OS G15 P120811 220811-s1.05797.05797.4.dta

scan 5797; 3.5e+000

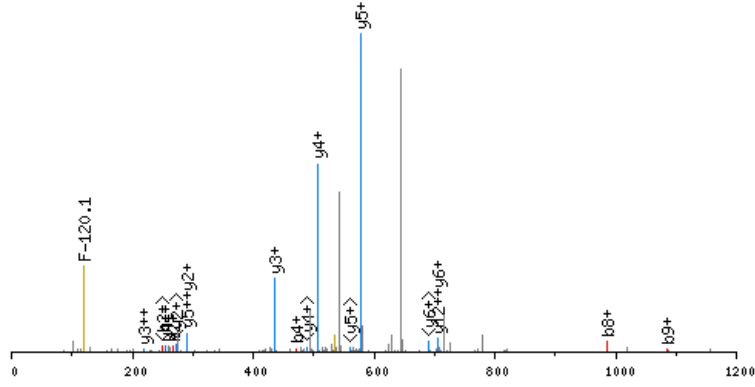

click image to zoom in; click top corners to zoom out [\[precursor±\]](#)

scan 5796; 535.3 m/z; 2.1e+001

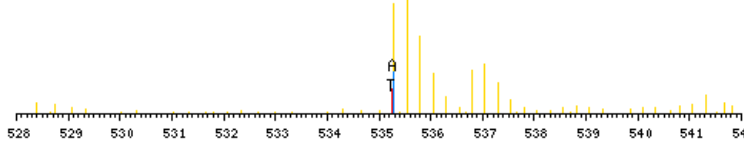

zoomed in precursor plot; T=theoretical m/z, A=acquired m/z

| b <sup>+</sup> | #  | AA | #  | y <sup>+</sup> | y <sup>2+</sup> |
|----------------|----|----|----|----------------|-----------------|
| 130.0504       | 1  | S  | 18 |                |                 |
| 267.1093       | 2  | H  | 17 | 2008.9881      | 1004.9980       |
| 324.1308       | 3  | G  | 16 | 1871.9292      | 936.4685        |
| 471.1992       | 4  | F  | 15 | 1814.9078      | 907.9578        |
| 572.2469       | 5  | T  | 14 | 1667.8393      | 834.4236        |
| 728.3732       | 6  | K  | 13 | 1566.7917      | 783.8997        |
| 857.4158       | 7  | E  | 12 | 1410.6654      | 705.8366        |
| 986.4584       | 8  | E  | 11 | 1281.6228      | 641.3153        |
| 1085.5268      | 9  | V  | 10 | 1152.5802      | 576.7940        |
| 1156.5639      | 10 | A  | 9  | 1053.5118      | 527.2598        |
| 1285.6065      | 11 | E  | 8  | 982.4747       | 491.7412        |
| 1432.6749      | 12 | F  | 7  | 853.4321       | 427.2199        |
| 1560.7335      | 13 | Q  | 6  | 706.3636       | 353.6857        |
| 1631.7706      | 14 | A  | 5  | 578.3051       | 289.6564        |
| 1702.8077      | 15 | A  | 4  | 507.2680       | 254.1379        |
| 1849.8761      | 16 | F  | 3  | 436.2308       | 218.6193        |
| 1963.9191      | 17 | N  | 2  | 289.1624       | 145.0851        |
|                | 18 | R  | 1  | 175.1195       | 88.0637         |

N-term:+43.02 K(6):+156.13

N-term: +43.02 K(9): +162.16

X-range:

0 - 0

MassTol: Y-zoom:

0. 1.

MassType:

☐ AVG ☒ MONO

Axis:

☒ 1 ☐ 2

Label:

☒ I ☐ M ☐ -

Ions:

a ☐ + ☐ 2+ ☐ 3+

b ☒ + ☐ 2+ ☐ 3+

c ☐ + ☐ 2+ ☐ 3+

x ☐ + ☐ 2+ ☐ 3+

y ☒ + ☒ 2+ ☐ 3+

z ☐ + ☐ 2+ ☐ 3+

hide H<sub>2</sub>O/NH<sub>3</sub> ☐

zoom 112-122 ☐

GO

SHQTGIQASEDVKEIFAR, MH+ 2086.0570, m/z 696.0238  
H OS G15 P120811 220811-s1.05197.05197.3.dta

scan 5197; 4.2e+000

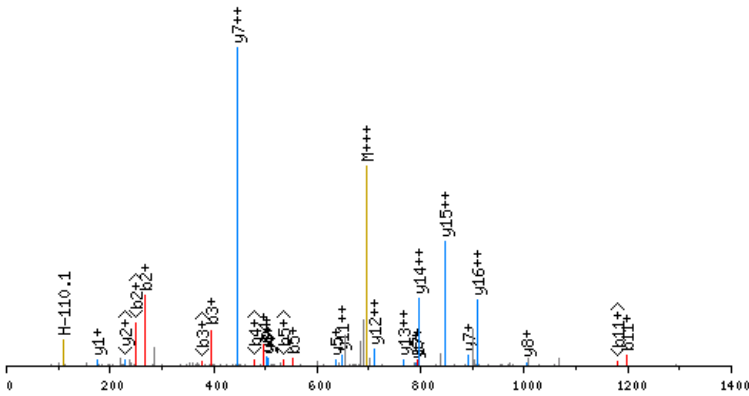

click image to zoom in; click top corners to zoom out

[precursor±]

scan 5196; 696.0 m/z; 2.0e+001

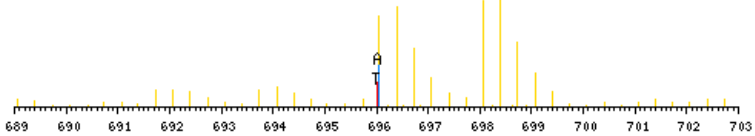

zoomed in precursor plot; T=theoretical m/z, A=acquired m/z

| b <sup>+</sup> | #  | AA | #  | y <sup>+</sup> | y <sup>2+</sup> |
|----------------|----|----|----|----------------|-----------------|
| 130.0504       | 1  | S  | 18 |                |                 |
| 267.1093       | 2  | H  | 17 | 1957.0144      | 979.0111        |
| 395.1679       | 3  | Q  | 16 | 1819.9554      | 910.4816        |
| 496.2156       | 4  | T  | 15 | 1691.8969      | 846.4523        |
| 553.2371       | 5  | G  | 14 | 1590.8492      | 795.9285        |
| 666.3211       | 6  | I  | 13 | 1533.8277      | 767.4178        |
| 794.3797       | 7  | Q  | 12 | 1420.7437      | 710.8757        |
| 865.4168       | 8  | A  | 11 | 1292.6851      | 646.8465        |
| 952.4488       | 9  | S  | 10 | 1221.6480      | 611.3279        |
| 1081.4914      | 10 | E  | 9  | 1134.6159      | 567.8119        |
| 1196.5184      | 11 | D  | 8  | 1005.5733      | 503.2906        |
| 1295.5868      | 12 | V  | 7  | 890.5464       | 445.7771        |
| 1451.7131      | 13 | K  | 6  | 791.4780       | 396.2429        |
| 1580.7557      | 14 | E  | 5  | 635.3517       | 318.1798        |
| 1693.8398      | 15 | I  | 4  | 506.3091       | 253.6585        |
| 1840.9082      | 16 | F  | 3  | 393.2250       | 197.1164        |
| 1911.9453      | 17 | A  | 2  | 246.1566       | 123.5822        |
|                | 18 | R  | 1  | 175.1195       | 88.0637         |

N-term:+43.02 K(13):+156.13

N-term: +43.02 K(11): +162.16

X-range:

0 - 0

MassTol: Y-zoom:

0. 1.

MassType:

☐ AVG ☒ MONO

Axis:

☒ 1 ☐ 2

Label:

☒ I ☐ M ☐ -

Ions:

a ☐ + ☐ 2+ ☐ 3+

b ☒ + ☐ 2+ ☐ 3+

c ☐ + ☐ 2+ ☐ 3+

x ☐ + ☐ 2+ ☐ 3+

y ☒ + ☒ 2+ ☐ 3+

z ☐ + ☐ 2+ ☐ 3+

hide H<sub>2</sub>O/NH<sub>3</sub> ☐

zoom 112-122 ☐

GO

SIEKIWAR, MH+ 1078.6474, m/z 539.8273  
H OS G13 P120811 220811-s1.05460.05460.2.dta

scan 5460; 5.4e+001

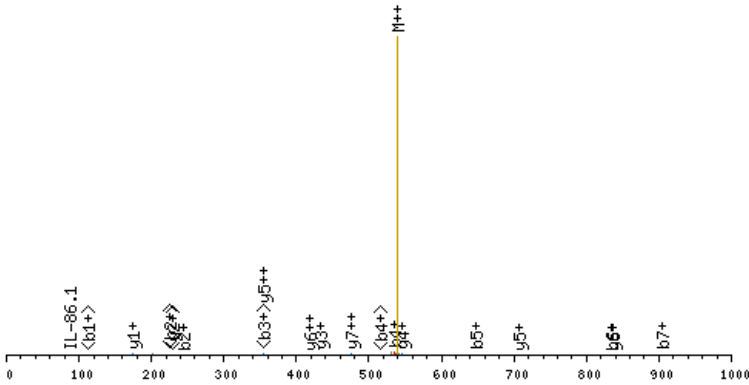

click image to zoom in; click top corners to zoom out

[precursor±]

scan 5459; 539.8 m/z; 1.4e+001

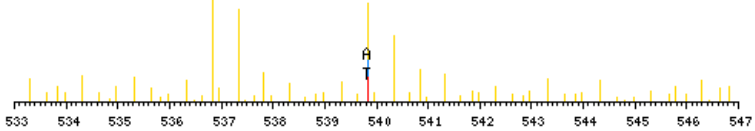

zoomed in precursor plot; T=theoretical m/z, A=acquired m/z

| b <sup>+</sup> | # | AA | # | y <sup>+</sup> | y <sup>2+</sup> |
|----------------|---|----|---|----------------|-----------------|
| 130.0504       | 1 | S  | 8 |                |                 |
| 243.1345       | 2 | I  | 7 | 949.6047       | 475.3063        |
| 372.1771       | 3 | E  | 6 | 836.5207       | 418.7643        |
| 534.3352       | 4 | K  | 5 | 707.4781       | 354.2430        |
| 647.4192       | 5 | I  | 4 | 545.3200       | 273.1639        |
| 833.4986       | 6 | W  | 3 | 432.2359       | 216.6219        |
| 904.5357       | 7 | A  | 2 | 246.1566       | 123.5822        |
|                | 8 | R  | 1 | 175.1195       | 88.0637         |

N-term:+43.02 K(4):+162.16

X-range:

0 - 0

MassTol: Y-zoom:

0. 1.

MassType:

☐AVG ☒MONO

Axis:

☒1 ☐2

Label:

☒I ☐M ☐-

Ions:

a ☐+ ☐2+ ☐3+

b ☒+ ☐2+ ☐3+

c ☐+ ☐2+ ☐3+

x ☐+ ☐2+ ☐3+

y ☒+ ☒2+ ☐3+

z ☐+ ☐2+ ☐3+

hide H<sub>2</sub>O/NH<sub>3</sub> ☐

zoom 112-122 ☐

GO

SILYVSPHPDAFPSLR, MH+ 1840.9598, m/z 614.3248  
H OS G12 P120811 220811-s1.05453.05453.3.dta

scan 5453; 2.7e+000

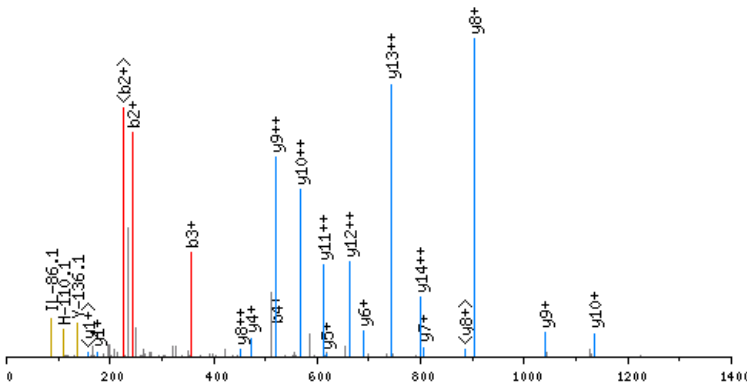

click image to zoom in; click top corners to zoom out

[precursor±]

scan 5452; 614.3 m/z; 3.0e+001

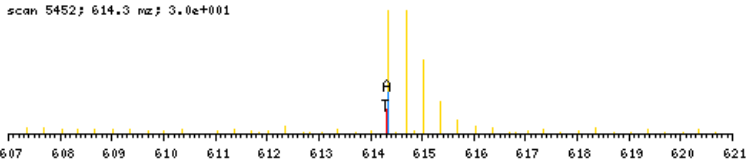

zoomed in precursor plot; T=theoretical m/z, A=acquired m/z

| b <sup>+</sup> | #  | AA | #  | y <sup>+</sup> | y <sup>2+</sup> |
|----------------|----|----|----|----------------|-----------------|
| 130.0504       | 1  | S  | 16 |                |                 |
| 243.1345       | 2  | I  | 15 | 1711.9172      | 856.4625        |
| 356.2186       | 3  | L  | 14 | 1598.8331      | 799.9205        |
| 519.2819       | 4  | Y  | 13 | 1485.7490      | 743.3784        |
| 618.3503       | 5  | V  | 12 | 1322.6857      | 661.8468        |
| 705.3823       | 6  | S  | 11 | 1223.6173      | 612.3126        |
| 802.4351       | 7  | P  | 10 | 1136.5853      | 568.7965        |
| 939.4940       | 8  | H  | 9  | 1039.5325      | 520.2702        |
| 1036.5468      | 9  | P  | 8  | 902.4736       | 451.7407        |
| 1151.5737      | 10 | D  | 7  | 805.4208       | 403.2143        |
| 1222.6108      | 11 | A  | 6  | 690.3939       | 345.7009        |
| 1369.6792      | 12 | F  | 5  | 619.3568       | 310.1823        |
| 1466.7320      | 13 | P  | 4  | 472.2884       | 236.6481        |
| 1553.7640      | 14 | S  | 3  | 375.2356       | 188.1217        |
| 1666.8481      | 15 | L  | 2  | 288.2036       | 144.6057        |
|                | 16 | R  | 1  | 175.1195       | 88.0637         |

N-term:+43.02

X-range:

0 - 0

MassTol: Y-zoom:

0. 1.

MassType:

☐AVG ☒MONO

Axis:

☒1 ☐2

Label:

☒I ☐M ☐-

Ions:

a ☐+ ☐2+ ☐3+

b ☒+ ☐2+ ☐3+

c ☐+ ☐2+ ☐3+

x ☐+ ☐2+ ☐3+

y ☒+ ☒2+ ☐3+

z ☐+ ☐2+ ☐3+

hide H<sub>2</sub>O/NH<sub>3</sub> ☐

zoom 112-122 ☐

GO

SKQEYDEAGPSIVHR, MH+ 1785.8772, m/z 447.2248  
H OS G17 P120811 220811-s1.02667.02667.4.dta

scan 2667; 6.7e+000

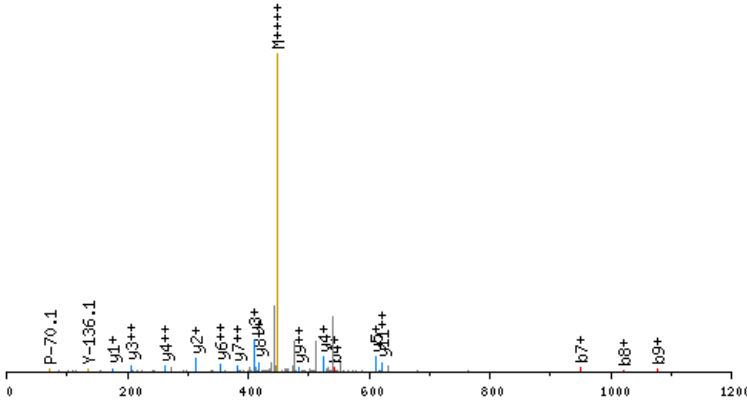

click image to zoom in; click top corners to zoom out

[precursor±]

scan 2663; 447.2 m/z; 5.6e+000

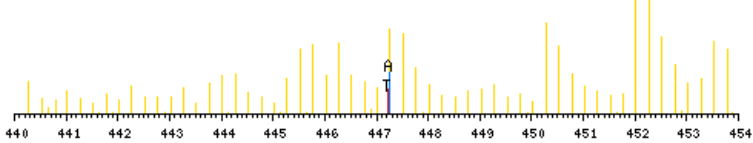

zoomed in precursor plot; T=theoretical m/z, A=acquired m/z

| b <sup>+</sup> | #  | AA | #  | y <sup>+</sup> | y <sup>2+</sup> |
|----------------|----|----|----|----------------|-----------------|
| 130.0504       | 1  | S  | 15 |                |                 |
| 286.1767       | 2  | K  | 14 | 1656.8346      | 828.9212        |
| 414.2353       | 3  | Q  | 13 | 1500.7083      | 750.8581        |
| 543.2779       | 4  | E  | 12 | 1372.6497      | 686.8288        |
| 706.3412       | 5  | Y  | 11 | 1243.6071      | 622.3075        |
| 821.3682       | 6  | D  | 10 | 1080.5438      | 540.7758        |
| 950.4108       | 7  | E  | 9  | 965.5169       | 483.2623        |
| 1021.4479      | 8  | A  | 8  | 836.4743       | 418.7410        |
| 1078.4693      | 9  | G  | 7  | 765.4371       | 383.2225        |
| 1175.5221      | 10 | P  | 6  | 708.4157       | 354.7118        |
| 1262.5541      | 11 | S  | 5  | 611.3629       | 306.1854        |
| 1375.6382      | 12 | I  | 4  | 524.3309       | 262.6694        |
| 1474.7066      | 13 | V  | 3  | 411.2468       | 206.1273        |
| 1611.7655      | 14 | H  | 2  | 312.1784       | 156.5931        |
|                | 15 | R  | 1  | 175.1195       | 88.0637         |

N-term:+43.02 K(2):+156.13

X-range:

0 - 0

MassTol: Y-zoom:

0. 1.

MassType:

☐AVG ☒MONO

Axis:

☒1 ☐2

Label:

☒I ☐M ☐-

Ions:

a ☐+ ☐2+ ☐3+

b ☒+ ☐2+ ☐3+

c ☐+ ☐2+ ☐3+

x ☐+ ☐2+ ☐3+

y ☒+ ☒2+ ☐3+

z ☐+ ☐2+ ☐3+

hide H<sub>2</sub>O/NH<sub>3</sub> ☐

zoom 112-122 ☐

GO

SKQQPTQFINPETPGYVGFANLPNQVHR, MH+ 3237.6446, m/z 810.1666  
H\_OS\_G14\_P120811\_220811-s1.05814.05814.4.dta

scan 5814; 2.0e+000

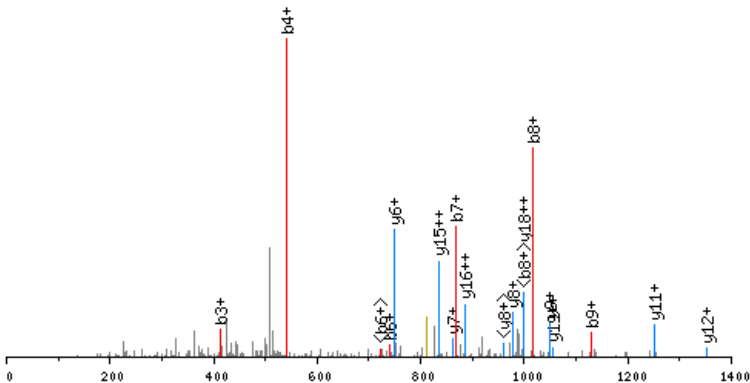

click image to zoom in; click top corners to zoom out

[precursor±]

scan 5811; 810.2 m/z; 2.6e+000

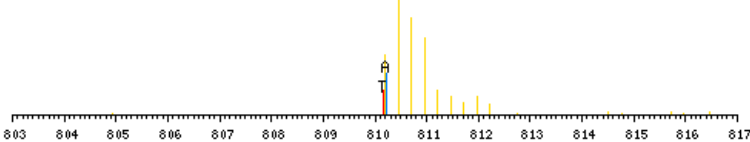

zoomed in precursor plot; T=theoretical m/z, A=acquired m/z

| b <sup>+</sup> | #  | AA | #  | y <sup>+</sup> | y <sup>2+</sup> |
|----------------|----|----|----|----------------|-----------------|
| 130.0504       | 1  | S  | 28 |                |                 |
| 286.1767       | 2  | K  | 27 | 3108.6020      | 1554.8049       |
| 414.2353       | 3  | Q  | 26 | 2952.4757      | 1476.7417       |
| 542.2939       | 4  | Q  | 25 | 2824.4171      | 1412.7125       |
| 639.3466       | 5  | P  | 24 | 2696.3585      | 1348.6832       |
| 740.3943       | 6  | T  | 23 | 2599.3057      | 1300.1568       |
| 868.4529       | 7  | Q  | 22 | 2498.2581      | 1249.6329       |
| 1015.5213      | 8  | F  | 21 | 2370.1995      | 1185.6037       |
| 1128.6054      | 9  | I  | 20 | 2223.1311      | 1112.0695       |
| 1242.6483      | 10 | N  | 19 | 2110.0470      | 1055.5274       |
| 1339.7011      | 11 | P  | 18 | 1996.0041      | 998.5060        |
| 1468.7437      | 12 | E  | 17 | 1898.9513      | 949.9796        |
| 1569.7913      | 13 | T  | 16 | 1769.9087      | 885.4583        |
| 1666.8441      | 14 | P  | 15 | 1668.8610      | 834.9344        |
| 1723.8656      | 15 | G  | 14 | 1571.8083      | 786.4081        |
| 1886.9289      | 16 | Y  | 13 | 1514.7868      | 757.8973        |
| 1985.9973      | 17 | V  | 12 | 1351.7235      | 676.3657        |
| 2043.0188      | 18 | G  | 11 | 1252.6551      | 626.8315        |
| 2190.0872      | 19 | F  | 10 | 1195.6336      | 598.3207        |
| 2261.1243      | 20 | A  | 9  | 1048.5652      | 524.7865        |
| 2375.1672      | 21 | N  | 8  | 977.5281       | 489.2680        |
| 2488.2513      | 22 | L  | 7  | 863.4852       | 432.2465        |
| 2585.3041      | 23 | P  | 6  | 750.4011       | 375.7045        |
| 2699.3470      | 24 | N  | 5  | 653.3483       | 327.1781        |
| 2827.4056      | 25 | Q  | 4  | 539.3054       | 270.1566        |
| 2926.4740      | 26 | V  | 3  | 411.2468       | 206.1273        |
| 3063.5329      | 27 | H  | 2  | 312.1784       | 156.5931        |
|                | 28 | R  | 1  | 175.1195       | 88.0637         |

N-term:+43.02 K(2):+156.13

X-range:

0 - 0

MassTol: Y-zoom:

0. 1.

MassType:

☐ AVG ☒ MONO

Axis:

☒ 1 ☐ 2

Label:

☒ I ☐ M ☐ -

Ions:

a ☐ + ☐ 2+ ☐ 3+

b ☒ + ☐ 2+ ☐ 3+

c ☐ + ☐ 2+ ☐ 3+

x ☐ + ☐ 2+ ☐ 3+

y ☒ + ☒ 2+ ☐ 3+

z ☐ + ☐ 2+ ☐ 3+

hide H<sub>2</sub>O/NH<sub>3</sub> ☐

zoom 112-122 ☐

GO

SKSESPKEPEQLR, MH+ 1612.8547, m/z 538.2898  
H OS G15 P120811 220811-s1.02117.02117.3.dta

scan 2117: 7.8e+001

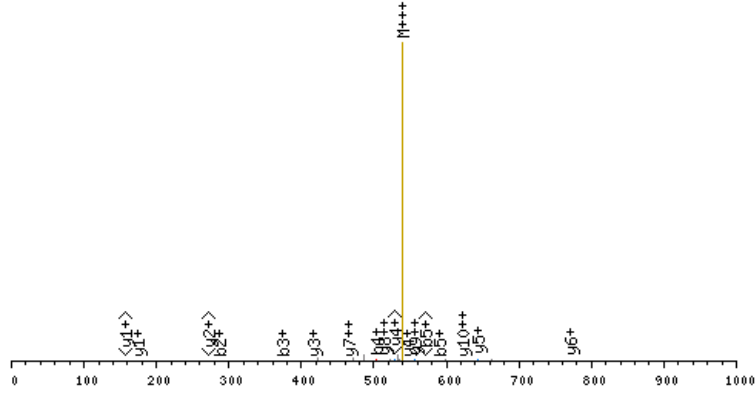

click image to zoom in; click top corners to zoom out [\[precursor±\]](#)

scan 2116: 538.3 m/z; 6.0e+000

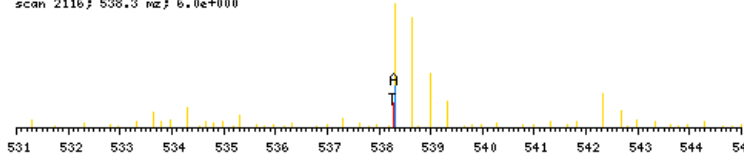

X-range:

0 - 0

MassTol: Y-zoom:

0. 1.

MassType:

☐AVG ☒MONO

Axis:

☒1 ☐2

Label:

☒I ☐M ☐-

Ions:

a ☐+ ☐2+ ☐3+

b ☒+ ☐2+ ☐3+

c ☐+ ☐2+ ☐3+

x ☐+ ☐2+ ☐3+

y ☒+ ☒2+ ☐3+

z ☐+ ☐2+ ☐3+

hide H<sub>2</sub>O/NH<sub>3</sub> ☐

zoom 112-122 ☐

GO

SLKPQPQPPAPATGR, MH+ 1614.8968, m/z 538.9705  
H OS G12 P120811 220811-s1.02746.02746.3.dta

scan 2746; 2.7e+000

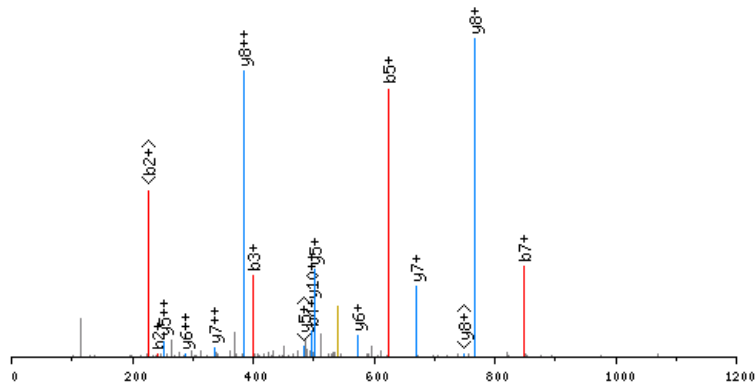

click image to zoom in; click top corners to zoom out

[precursor±]

scan 2742; 539.0 m/z; 2.5e+000

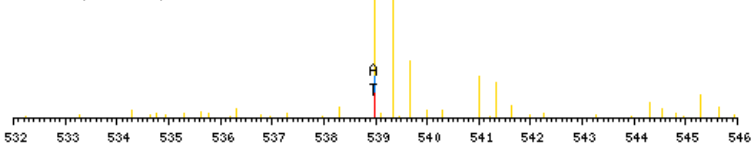

zoomed in precursor plot; T=theoretical m/z, A=acquired m/z

| b <sup>+</sup> | #  | AA | #  | y <sup>+</sup> | y <sup>2+</sup> |
|----------------|----|----|----|----------------|-----------------|
| 130.0504       | 1  | S  | 15 |                |                 |
| 243.1345       | 2  | L  | 14 | 1485.8542      | 743.4310        |
| 399.2608       | 3  | K  | 13 | 1372.7701      | 686.8890        |
| 496.3136       | 4  | P  | 12 | 1216.6438      | 608.8258        |
| 624.3721       | 5  | Q  | 11 | 1119.5911      | 560.2995        |
| 721.4249       | 6  | P  | 10 | 991.5325       | 496.2702        |
| 849.4835       | 7  | Q  | 9  | 894.4797       | 447.7438        |
| 946.5362       | 8  | P  | 8  | 766.4212       | 383.7145        |
| 1043.5890      | 9  | P  | 7  | 669.3684       | 335.1881        |
| 1114.6261      | 10 | A  | 6  | 572.3156       | 286.6617        |
| 1211.6789      | 11 | P  | 5  | 501.2785       | 251.1432        |
| 1282.7160      | 12 | A  | 4  | 404.2258       | 202.6168        |
| 1383.7637      | 13 | T  | 3  | 333.1886       | 167.0982        |
| 1440.7851      | 14 | G  | 2  | 232.1410       | 116.5744        |
|                | 15 | R  | 1  | 175.1195       | 88.0637         |

N-term:+43.02 K(3):+156.13

N-term:+43.02 K(5):+162.16  
K(10):+162.16 K(14):+162.16  
K(16):+162.16

X-range:

0 - 0

MassTol: Y-zoom:

0. 1.

MassType:

☐AVG ☒MONO

Axis:

☒1 ☐2

Label:

☒I ☐M ☐-

Ions:

a ☐+ ☐2+ ☐3+

b ☒+ ☐2+ ☐3+

c ☐+ ☐2+ ☐3+

x ☐+ ☐2+ ☐3+

y ☒+ ☒2+ ☐3+

z ☐+ ☐2+ ☐3+

hide H<sub>2</sub>O/NH<sub>3</sub> ☐

zoom 112-122 ☐

GO

SMHTEAAEVLLER, MH+ 1527.7477, m/z 509.9208  
H OS G13 P120811 220811-s1.05641.05641.3.dta

scan 5641; 3.7e+000

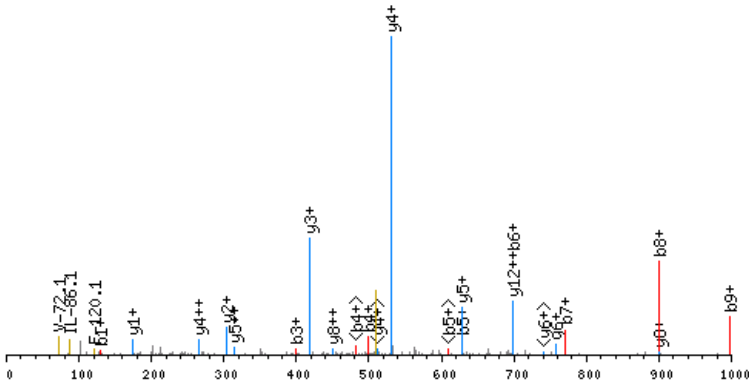

click image to zoom in; click top corners to zoom out

[precursor±]

scan 5639; 509.9 m/z; 1.1e+001

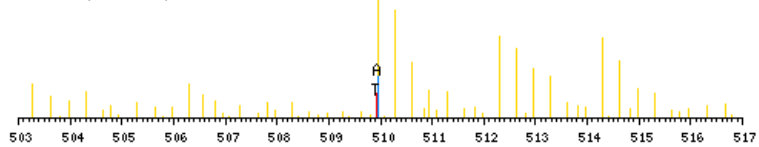

zoomed in precursor plot; T=theoretical m/z, A=acquired m/z

| b <sup>+</sup> | #  | AA | #  | y <sup>+</sup> | y <sup>2+</sup> |
|----------------|----|----|----|----------------|-----------------|
| 130.0504       | 1  | S  | 13 |                |                 |
| 261.0909       | 2  | M  | 12 | 1398.7051      | 699.8565        |
| 398.1498       | 3  | H  | 11 | 1267.6646      | 634.3362        |
| 499.1975       | 4  | T  | 10 | 1130.6057      | 565.8068        |
| 628.2401       | 5  | E  | 9  | 1029.5580      | 515.2829        |
| 699.2772       | 6  | A  | 8  | 900.5155       | 450.7616        |
| 770.3143       | 7  | A  | 7  | 829.4783       | 415.2431        |
| 899.3569       | 8  | E  | 6  | 758.4412       | 379.7245        |
| 998.4253       | 9  | V  | 5  | 629.3986       | 315.2032        |
| 1111.5094      | 10 | L  | 4  | 530.3302       | 265.6690        |
| 1224.5935      | 11 | L  | 3  | 417.2462       | 209.1270        |
| 1353.6361      | 12 | E  | 2  | 304.1621       | 152.5850        |
|                | 13 | R  | 1  | 175.1195       | 88.0637         |

N-term:+43.02

X-range:

0 - 0

MassTol: Y-zoom:

0. 1.

MassType:

☐ AVG ☒ MONO

Axis:

☒ 1 ☐ 2

Label:

☒ I ☐ M ☐ -

Ions:

a ☐ + ☐ 2+ ☐ 3+

b ☒ + ☐ 2+ ☐ 3+

c ☐ + ☐ 2+ ☐ 3+

x ☐ + ☐ 2+ ☐ 3+

y ☒ + ☒ 2+ ☐ 3+

z ☐ + ☐ 2+ ☐ 3+

hide H<sub>2</sub>O/NH<sub>3</sub> ☐

zoom 112-122 ☐

GO

SMNKGPTLLDGDLPQENVLQR, MH+ 2524.2718, m/z 842.0954  
H OS G12 P120811 220811-s1.05060.05060.3.dta

scan 5060; 4.4e+000

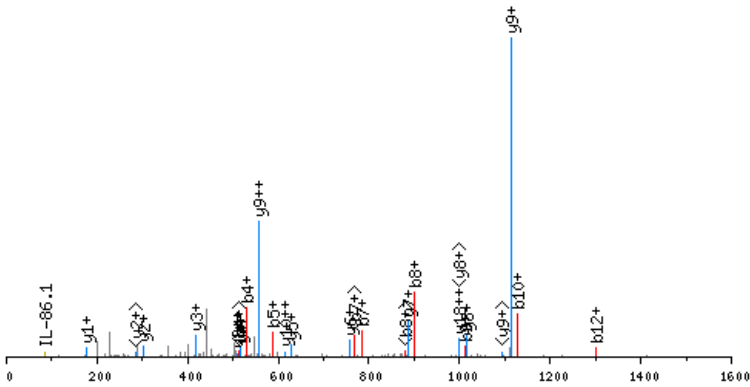

click image to zoom in; click top corners to zoom out [precursor±]

scan 5057; 842.1 m/z; 5.7e+000

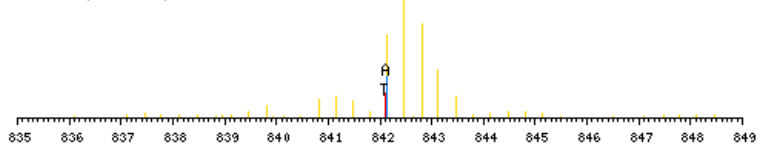

zoomed in precursor plot; T=theoretical m/z, A=acquired m/z

| b <sup>+</sup> | #  | AA | #  | y <sup>+</sup> | y <sup>2+</sup> |
|----------------|----|----|----|----------------|-----------------|
| 130.0504       | 1  | S  | 22 |                |                 |
| 261.0909       | 2  | M  | 21 | 2395.2292      | 1198.1185       |
| 375.1338       | 3  | N  | 20 | 2264.1887      | 1132.5983       |
| 531.2601       | 4  | K  | 19 | 2150.1458      | 1075.5768       |
| 588.2816       | 5  | G  | 18 | 1994.0195      | 997.5136        |
| 685.3344       | 6  | P  | 17 | 1936.9980      | 969.0029        |
| 786.3820       | 7  | T  | 16 | 1839.9452      | 920.4765        |
| 899.4661       | 8  | L  | 15 | 1738.8976      | 869.9527        |
| 1012.5502      | 9  | L  | 14 | 1625.8135      | 813.4107        |
| 1127.5771      | 10 | D  | 13 | 1512.7294      | 756.8686        |
| 1184.5986      | 11 | G  | 12 | 1397.7025      | 699.3552        |
| 1299.6255      | 12 | D  | 11 | 1340.6810      | 670.8444        |
| 1412.7096      | 13 | L  | 10 | 1225.6541      | 613.3310        |
| 1509.7624      | 14 | P  | 9  | 1112.5700      | 556.7889        |
| 1638.8049      | 15 | E  | 8  | 1015.5172      | 508.2625        |
| 1766.8635      | 16 | Q  | 7  | 886.4747       | 443.7412        |
| 1895.9061      | 17 | E  | 6  | 758.4161       | 379.7120        |
| 2009.9490      | 18 | N  | 5  | 629.3735       | 315.1907        |
| 2109.0175      | 19 | V  | 4  | 515.3306       | 258.1692        |
| 2222.1015      | 20 | L  | 3  | 416.2621       | 208.6350        |
| 2350.1601      | 21 | Q  | 2  | 303.1781       | 152.0930        |
|                | 22 | R  | 1  | 175.1195       | 88.0637         |

N-term:+43.02 K(4):+156.13

N-term: +43.02 K(7): +156.13  
K(13): +156.13

X-range:

0 - 0

MassTol: Y-zoom:

0. 1.

MassType:

☐ AVG ☒ MONO

Axis:

☒ 1 ☐ 2

Label:

☒ I ☐ M ☐ -

Ions:

a ☐ + ☐ 2+ ☐ 3+

b ☒ + ☐ 2+ ☐ 3+

c ☐ + ☐ 2+ ☐ 3+

x ☐ + ☐ 2+ ☐ 3+

y ☒ + ☒ 2+ ☐ 3+

z ☐ + ☐ 2+ ☐ 3+

hide H<sub>2</sub>O/NH<sub>3</sub> ☐

zoom 112-122 ☐

GO

SQGDSNPAAIPHAAEDIQGDDR, MH+ 2306.0285, m/z 769.3477  
H OS G12 P120811 220811-s1.03423.03423.3.dta

scan 3423; 1.4e+000

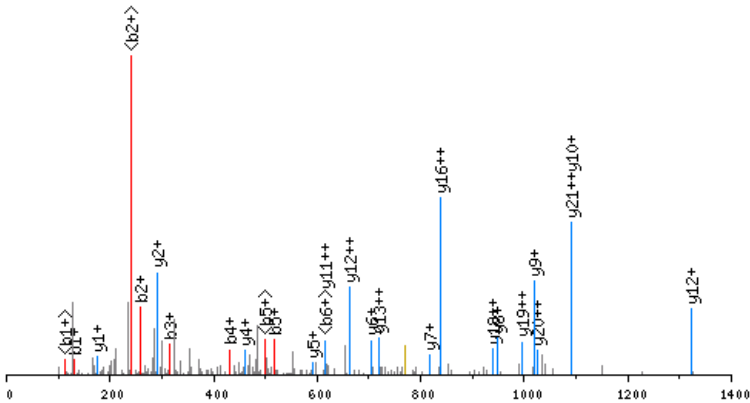

click image to zoom in; click top corners to zoom out [precursor±]

scan 3422; 769.3 m/z; 1.3e+001

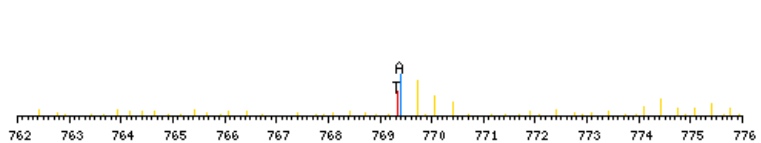

zoomed in precursor plot; T=theoretical m/z, A=acquired m/z

| b <sup>+</sup> | #  | AA | #  | y <sup>+</sup> | y <sup>2+</sup> |
|----------------|----|----|----|----------------|-----------------|
| 130.0504       | 1  | S  | 22 |                |                 |
| 258.1090       | 2  | Q  | 21 | 2176.9859      | 1088.9969       |
| 315.1305       | 3  | G  | 20 | 2048.9273      | 1024.9676       |
| 430.1574       | 4  | D  | 19 | 1991.9059      | 996.4569        |
| 517.1894       | 5  | S  | 18 | 1876.8789      | 938.9434        |
| 631.2324       | 6  | N  | 17 | 1789.8469      | 895.4274        |
| 728.2851       | 7  | P  | 16 | 1675.8040      | 838.4059        |
| 799.3222       | 8  | A  | 15 | 1578.7512      | 789.8795        |
| 870.3594       | 9  | A  | 14 | 1507.7141      | 754.3610        |
| 983.4434       | 10 | I  | 13 | 1436.6770      | 718.8424        |
| 1080.4962      | 11 | P  | 12 | 1323.5929      | 662.3004        |
| 1217.5551      | 12 | H  | 11 | 1226.5402      | 613.7740        |
| 1288.5922      | 13 | A  | 10 | 1089.4813      | 545.2445        |
| 1359.6293      | 14 | A  | 9  | 1018.4441      | 509.7260        |
| 1488.6719      | 15 | E  | 8  | 947.4070       | 474.2074        |
| 1603.6989      | 16 | D  | 7  | 818.3644       | 409.6861        |
| 1716.7829      | 17 | I  | 6  | 703.3375       | 352.1727        |
| 1844.8415      | 18 | Q  | 5  | 590.2534       | 295.6306        |
| 1901.8630      | 19 | G  | 4  | 462.1949       | 231.6013        |
| 2016.8899      | 20 | D  | 3  | 405.1734       | 203.0906        |
| 2131.9169      | 21 | D  | 2  | 290.1464       | 145.5771        |
|                | 22 | R  | 1  | 175.1195       | 88.0637         |

N-term:+43.02

N-term: +43.02

X-range:

0 - 0

MassTol: Y-zoom:

0. 1.

MassType:

☐AVG ☒MONO

Axis:

☒1 ☐2

Label:

☒I ☐M ☐-

Ions:

a ☐+ ☐2+ ☐3+

b ☒+ ☐2+ ☐3+

c ☐+ ☐2+ ☐3+

x ☐+ ☐2+ ☐3+

y ☒+ ☒2+ ☐3+

z ☐+ ☐2+ ☐3+

hide H<sub>2</sub>O/NH<sub>3</sub> ☐

zoom 112-122 ☐

GO

SSGALLPKPQMR, MH+ 1354.7517, m/z 677.8795  
H OS G13 P120811 220811-s1.04316.04316.2.dta

scan 4316; 6.2e+000

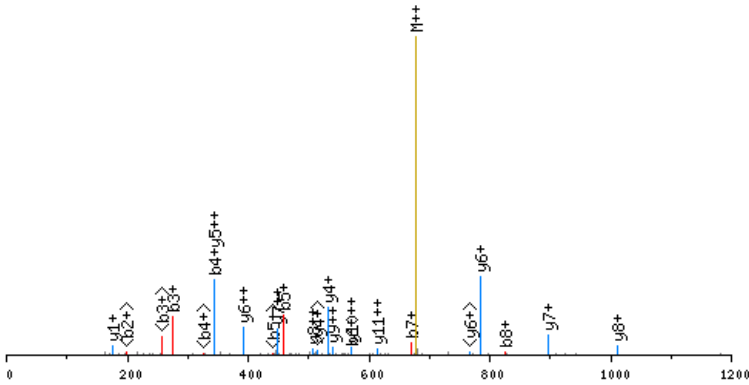

click image to zoom in; click top corners to zoom out

[precursor±]

scan 4314; 677.9 m/z; 1.4e+001

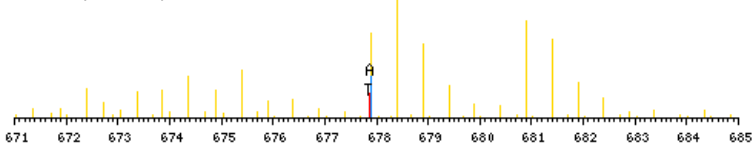

zoomed in precursor plot; T=theoretical m/z, A=acquired m/z

| b <sup>+</sup> | #  | AA | #  | y <sup>+</sup> | y <sup>2+</sup> |
|----------------|----|----|----|----------------|-----------------|
| 130.0504       | 1  | S  | 12 |                |                 |
| 217.0825       | 2  | S  | 11 | 1225.7091      | 613.3585        |
| 274.1039       | 3  | G  | 10 | 1138.6771      | 569.8425        |
| 345.1410       | 4  | A  | 9  | 1081.6556      | 541.3317        |
| 458.2251       | 5  | L  | 8  | 1010.6185      | 505.8132        |
| 571.3092       | 6  | L  | 7  | 897.5345       | 449.2711        |
| 668.3619       | 7  | P  | 6  | 784.4504       | 392.7291        |
| 824.4882       | 8  | K  | 5  | 687.3976       | 344.2027        |
| 921.5410       | 9  | P  | 4  | 531.2713       | 266.1396        |
| 1049.5996      | 10 | Q  | 3  | 434.2186       | 217.6132        |
| 1180.6401      | 11 | M  | 2  | 306.1600       | 153.5839        |
|                | 12 | R  | 1  | 175.1195       | 88.0637         |

N-term:+43.02 K(8):+156.13

X-range:

0 - 0

MassTol: Y-zoom:

0. 1.

MassType:

☐ AVG ☒ MONO

Axis:

☒ 1 ☐ 2

Label:

☒ I ☐ M ☐ -

Ions:

a ☐ + ☐ 2+ ☐ 3+

b ☒ + ☐ 2+ ☐ 3+

c ☐ + ☐ 2+ ☐ 3+

x ☐ + ☐ 2+ ☐ 3+

y ☒ + ☒ 2+ ☐ 3+

z ☐ + ☐ 2+ ☐ 3+

hide H<sub>2</sub>O/NH<sub>3</sub> ☐

zoom 112-122 ☐

GO

SSIKVECVLR, MH+ 1266.7304, m/z 633.8688  
H OS G13 P120811 220811-s1.04735.04735.2.dta

scan 4735; 2.5e+001

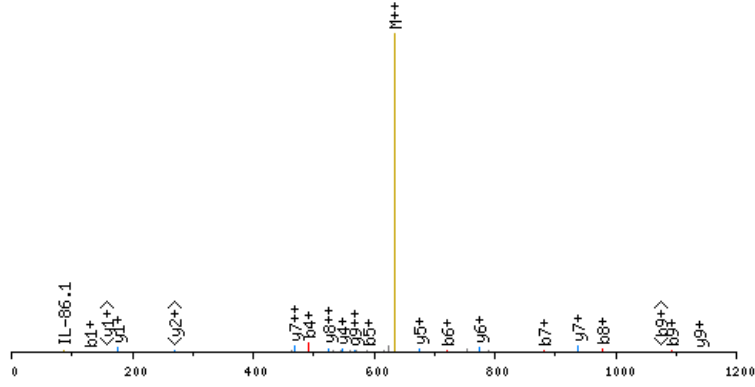

click image to zoom in; click top corners to zoom out [\[precursor±\]](#)

scan 4734; 633.9 m/z; 2.4e+001

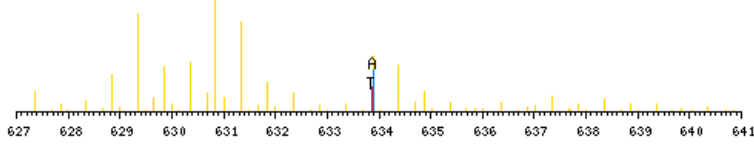

zoomed in precursor plot; T=theoretical m/z, A=acquired m/z

| b <sup>+</sup> | #  | AA | #  | y <sup>+</sup> | y <sup>2+</sup> |
|----------------|----|----|----|----------------|-----------------|
| 130.0504       | 1  | S  | 10 |                |                 |
| 217.0825       | 2  | S  | 9  | 1137.6878      | 569.3478        |
| 330.1665       | 3  | I  | 8  | 1050.6557      | 525.8318        |
| 492.3246       | 4  | K  | 7  | 937.5717       | 469.2898        |
| 591.3930       | 5  | V  | 6  | 775.4136       | 388.2107        |
| 720.4356       | 6  | E  | 5  | 676.3452       | 338.6765        |
| 880.4662       | 7  | C  | 4  | 547.3026       | 274.1552        |
| 979.5346       | 8  | V  | 3  | 387.2720       | 194.1399        |
| 1092.6187      | 9  | L  | 2  | 288.2036       | 144.6057        |
|                | 10 | R  | 1  | 175.1195       | 88.0637         |

N-term:+43.02 K(4):+162.16  
C(7):+160.03

X-range:

0 - 0

MassTol: Y-zoom:

0. 1.

MassType:

☐AVG ☒MONO

Axis:

☒1 ☐2

Label:

☒I ☐M ☐-

Ions:

a ☐+ ☐2+ ☐3+

b ☒+ ☐2+ ☐3+

c ☐+ ☐2+ ☐3+

x ☐+ ☐2+ ☐3+

y ☒+ ☒2+ ☐3+

z ☐+ ☐2+ ☐3+

hide H<sub>2</sub>O/NH<sub>3</sub> ☐

zoom 112-122 ☐

GO

SSKTA<sup>ST</sup>NSIAQAR, MH<sup>+</sup> 1491.7768, m/z 497.9304  
H OS G13 P120811 220811-s1.02185.02185.3.dta

scan 2185; 3.4e+000

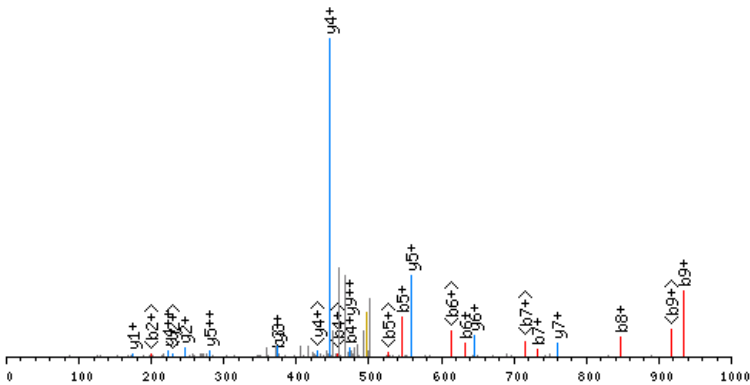

click image to zoom in; click top corners to zoom out

[precursor±]

scan 2184; 497.9 m/z; 6.1e+000

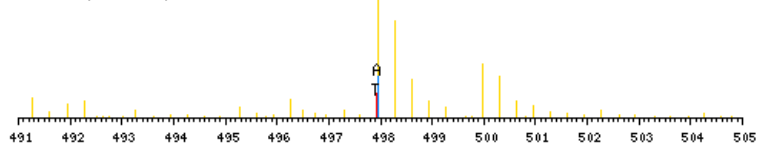

zoomed in precursor plot; T=theoretical m/z, A=acquired m/z

| b <sup>+</sup> | #  | AA | #  | y <sup>+</sup> | y <sup>2+</sup> |
|----------------|----|----|----|----------------|-----------------|
| 130.0504       | 1  | S  | 14 |                |                 |
| 217.0825       | 2  | S  | 13 | 1362.7342      | 681.8710        |
| 373.2088       | 3  | K  | 12 | 1275.7021      | 638.3550        |
| 474.2564       | 4  | T  | 11 | 1119.5758      | 560.2918        |
| 545.2935       | 5  | A  | 10 | 1018.5281      | 509.7680        |
| 632.3256       | 6  | S  | 9  | 947.4910       | 474.2494        |
| 733.3733       | 7  | T  | 8  | 860.4590       | 430.7334        |
| 847.4162       | 8  | N  | 7  | 759.4113       | 380.2096        |
| 934.4482       | 9  | S  | 6  | 645.3684       | 323.1881        |
| 1047.5323      | 10 | I  | 5  | 558.3364       | 279.6721        |
| 1118.5694      | 11 | A  | 4  | 445.2523       | 223.1301        |
| 1246.6280      | 12 | Q  | 3  | 374.2152       | 187.6115        |
| 1317.6651      | 13 | A  | 2  | 246.1566       | 123.5822        |
|                | 14 | R  | 1  | 175.1195       | 88.0637         |

N-term:+43.02 K(3):+156.13

X-range:

0 - 0

MassTol: Y-zoom:

0. 1.

MassType:

☐ AVG ☒ MONO

Axis:

☒ 1 ☐ 2

Label:

☒ I ☐ M ☐ -

Ions:

a ☐ + ☐ 2+ ☐ 3+

b ☒ + ☐ 2+ ☐ 3+

c ☐ + ☐ 2+ ☐ 3+

x ☐ + ☐ 2+ ☐ 3+

y ☒ + ☒ 2+ ☐ 3+

z ☐ + ☐ 2+ ☐ 3+

hide H<sub>2</sub>O/NH<sub>3</sub> ☐

zoom 112-122 ☐

GO

SSLQELCSGLPLRPLPENR, MH+ 2208.1446, m/z 736.7197  
H OS G12 P120811 220811-s1.05383.05383.3.dta

scan 5383; 2.3e+000

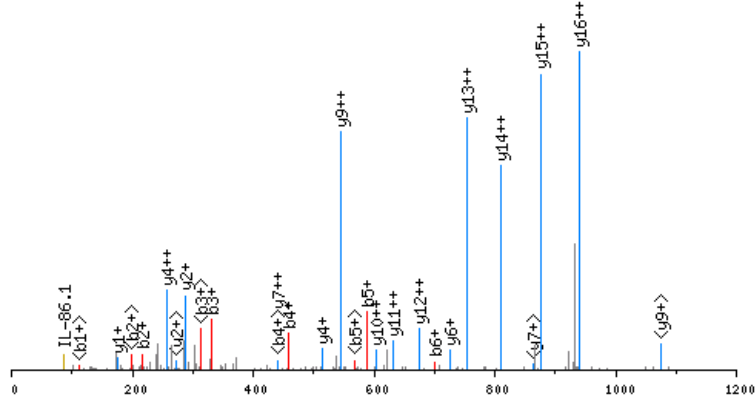

click image to zoom in; click top corners to zoom out

[precursor±]

scan 5382; 736.7 m/z; 1.8e+001

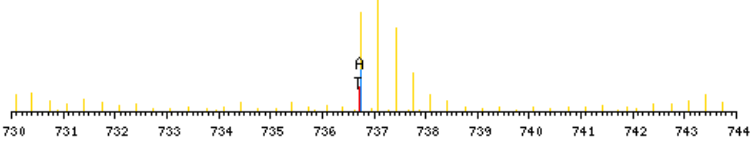

zoomed in precursor plot; T=theoretical m/z, A=acquired m/z

| b <sup>+</sup> | #  | AA | #  | y <sup>+</sup> | y <sup>2+</sup> |
|----------------|----|----|----|----------------|-----------------|
| 130.0504       | 1  | S  | 19 |                |                 |
| 217.0825       | 2  | S  | 18 | 2079.1020      | 1040.0549       |
| 330.1665       | 3  | L  | 17 | 1992.0700      | 996.5389        |
| 458.2251       | 4  | Q  | 16 | 1878.9859      | 939.9969        |
| 587.2677       | 5  | E  | 15 | 1750.9274      | 875.9676        |
| 700.3518       | 6  | L  | 14 | 1621.8848      | 811.4463        |
| 860.3824       | 7  | C  | 13 | 1508.8007      | 754.9043        |
| 947.4144       | 8  | S  | 12 | 1348.7701      | 674.8890        |
| 1004.4358      | 9  | G  | 11 | 1261.7381      | 631.3730        |
| 1117.5199      | 10 | L  | 10 | 1204.7166      | 602.8622        |
| 1214.5727      | 11 | P  | 9  | 1091.6326      | 546.3202        |
| 1327.6567      | 12 | L  | 8  | 994.5798       | 497.7938        |
| 1483.7579      | 13 | R  | 7  | 881.4957       | 441.2518        |
| 1580.8106      | 14 | P  | 6  | 725.3946       | 363.2012        |
| 1693.8947      | 15 | L  | 5  | 628.3418       | 314.6748        |
| 1790.9474      | 16 | P  | 4  | 515.2578       | 258.1328        |
| 1919.9900      | 17 | E  | 3  | 418.2050       | 209.6064        |
| 2034.0330      | 18 | N  | 2  | 289.1624       | 145.0851        |
|                | 19 | R  | 1  | 175.1195       | 88.0637         |

N-term:+43.02 C(7):+160.03

X-range:

$$\boxed{0} - \boxed{0}$$

0. 1.

☐ AVG ☒ MONO

1 2

☒ I ☐ M ☐ -

a  + 2 + 3 +

☐ 1 ☐ 2 ☐ 3 ☐ 4 ☐ 5 ☐ 6 ☐ 7 ☐ 8 ☐ 9 ☐ 10 ☐ 11 ☐ 12 ☐ 13 ☐ 14 ☐ 15 ☐ 16 ☐ 17 ☐ 18 ☐ 19 ☐ 20 ☐ 21 ☐ 22 ☐ 23 ☐ 24 ☐ 25 ☐ 26 ☐ 27 ☐ 28 ☐ 29 ☐ 30 ☐ 31 ☐ 32 ☐ 33 ☐ 34 ☐ 35 ☐ 36 ☐ 37 ☐ 38 ☐ 39 ☐ 40 ☐ 41 ☐ 42 ☐ 43 ☐ 44 ☐ 45 ☐ 46 ☐ 47 ☐ 48 ☐ 49 ☐ 50 ☐ 51 ☐ 52 ☐ 53 ☐ 54 ☐ 55 ☐ 56 ☐ 57 ☐ 58 ☐ 59 ☐ 60 ☐ 61 ☐ 62 ☐ 63 ☐ 64 ☐ 65 ☐ 66 ☐ 67 ☐ 68 ☐ 69 ☐ 70 ☐ 71 ☐ 72 ☐ 73 ☐ 74 ☐ 75 ☐ 76 ☐ 77 ☐ 78 ☐ 79 ☐ 80 ☐ 81 ☐ 82 ☐ 83 ☐ 84 ☐ 85 ☐ 86 ☐ 87 ☐ 88 ☐ 89 ☐ 90 ☐ 91 ☐ 92 ☐ 93 ☐ 94 ☐ 95 ☐ 96 ☐ 97 ☐ 98 ☐ 99 ☐ 100

$$x \square + \square^2 + \square^3 +$$
$$7 \quad \boxed{\phantom{00}} + \boxed{\phantom{00}}^2 + \boxed{\phantom{00}}^3 +$$

zoom 112-122

GO

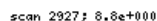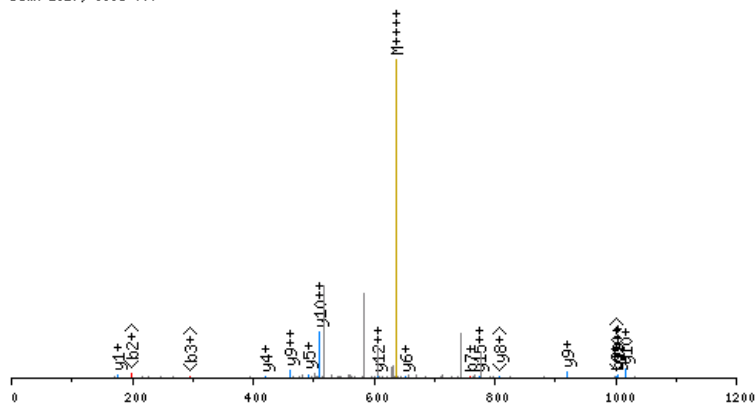

click image to zoom in; click top corners to zoom out

```
[precursor±]
```

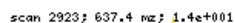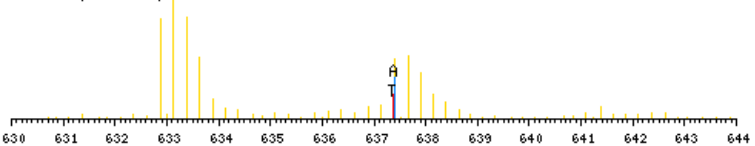

zoomed in precursor plot; T=theoretical m/z, A=acquired m/z

| $b^+$     | #  | AA | #  | $y^+$     | $y^2$     |
|-----------|----|----|----|-----------|-----------|
| 130.0504  | 1  | S  | 24 |           |           |
| 217.0825  | 2  | S  | 23 | 2417.4188 | 1209.2133 |
| 314.1352  | 3  | P  | 22 | 2330.3868 | 1165.6973 |
| 411.1880  | 4  | P  | 21 | 2233.3340 | 1117.1709 |
| 540.2306  | 5  | E  | 20 | 2136.2813 | 1068.6445 |
| 597.2520  | 6  | G  | 19 | 2007.2387 | 1004.1232 |
| 759.4101  | 7  | K  | 18 | 1950.2172 | 975.6125  |
| 872.4942  | 8  | L  | 17 | 1788.0591 | 894.5335  |
| 1001.5368 | 9  | E  | 16 | 1674.9750 | 837.9914  |
| 1102.5845 | 10 | T  | 15 | 1545.9325 | 773.4701  |
| 1264.7426 | 11 | K  | 14 | 1444.8848 | 722.9463  |
| 1335.7797 | 12 | A  | 13 | 1282.7267 | 641.8672  |
| 1392.8012 | 13 | G  | 12 | 1211.6896 | 606.3487  |
| 1529.8601 | 14 | H  | 11 | 1154.6681 | 577.8380  |
| 1626.9128 | 15 | P  | 10 | 1017.6092 | 509.3085  |
| 1723.9656 | 16 | P  | 9  | 920.5564  | 460.7821  |
| 1795.0027 | 17 | A  | 8  | 823.5037  | 412.2557  |
| 1894.0711 | 18 | V  | 7  | 752.4665  | 376.7372  |
| 2056.2292 | 19 | K  | 6  | 653.3981  | 327.2030  |
| 2127.2663 | 20 | A  | 5  | 491.2400  | 246.1239  |
| 2184.2878 | 21 | G  | 4  | 420.2029  | 210.6054  |
| 2241.3093 | 22 | G  | 3  | 363.1814  | 182.0946  |
| 2372.3497 | 23 | M  | 2  | 306.1600  | 153.5839  |
|           | 24 | R  | 1  | 175.1195  | 88.0637   |

N-term:+43.02 K(7):+162.16  
K(11):+162.16 K(19):+162.16

N-term:+43.02 K(14):+162.16

X-range:

0 - 0

MassTol: Y-zoom:

0. 1.

MassType:

☐AVG ☒MONO

Axis:

☒1 ☐2

Label:

☒I ☐M ☐-

Ions:

a ☐+ ☐2+ ☐3+

b ☒+ ☐2+ ☐3+

c ☐+ ☐2+ ☐3+

x ☐+ ☐2+ ☐3+

y ☒+ ☒2+ ☐3+

z ☐+ ☐2+ ☐3+

hide H<sub>2</sub>O/NH<sub>3</sub> ☐

zoom 112-122 ☐

GO

SSTQFNKGPSYGLSAEVKNR, MH+ 2268.1625, m/z 756.7257  
H OS G15 P120811 220811-s1.03674.03674.3.dta

scan 3674; 8.0e+000

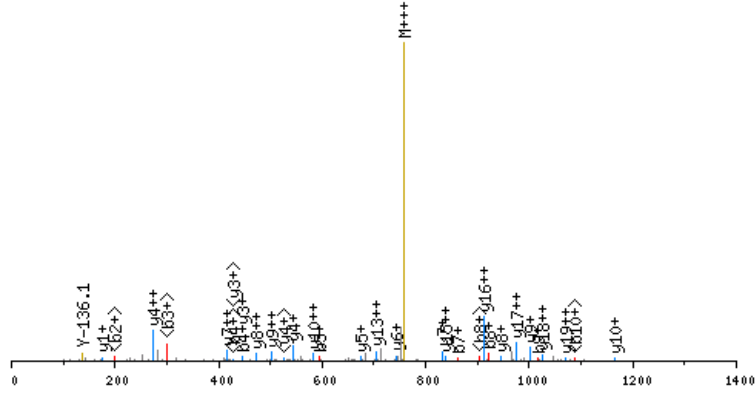

click image to zoom in; click top corners to zoom out [\[precursor±\]](#)

scan 3671; 756.7 m/z; 1.7e+001

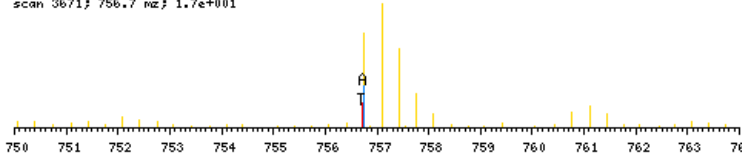

zoomed in precursor plot; T=theoretical m/z, A=acquired m/z

| b <sup>+</sup> | #  | AA | #  | y <sup>+</sup> | y <sup>2+</sup> |
|----------------|----|----|----|----------------|-----------------|
| 130.0504       | 1  | S  | 20 |                |                 |
| 217.0825       | 2  | S  | 19 | 2139.1199      | 1070.0639       |
| 318.1301       | 3  | T  | 18 | 2052.0879      | 1026.5479       |
| 446.1887       | 4  | Q  | 17 | 1951.0402      | 976.0240        |
| 593.2571       | 5  | F  | 16 | 1822.9816      | 911.9947        |
| 707.3001       | 6  | N  | 15 | 1675.9132      | 838.4605        |
| 863.4264       | 7  | K  | 14 | 1561.8703      | 781.4391        |
| 920.4478       | 8  | G  | 13 | 1405.7440      | 703.3759        |
| 1017.5006      | 9  | P  | 12 | 1348.7225      | 674.8652        |
| 1104.5326      | 10 | S  | 11 | 1251.6698      | 626.3388        |
| 1267.5959      | 11 | Y  | 10 | 1164.6377      | 582.8228        |
| 1324.6174      | 12 | G  | 9  | 1001.5744      | 501.2911        |
| 1437.7015      | 13 | L  | 8  | 944.5529       | 472.7804        |
| 1524.7335      | 14 | S  | 7  | 831.4689       | 416.2384        |
| 1595.7706      | 15 | A  | 6  | 744.4368       | 372.7223        |
| 1724.8132      | 16 | E  | 5  | 673.3997       | 337.2038        |
| 1823.8816      | 17 | V  | 4  | 544.3571       | 272.6825        |
| 1980.0079      | 18 | K  | 3  | 445.2887       | 223.1483        |
| 2094.0508      | 19 | N  | 2  | 289.1624       | 145.0851        |
|                | 20 | R  | 1  | 175.1195       | 88.0637         |

N-term:+43.02 K(7):+156.13  
K(18):+156.13



X-range:

-

MassTol: Y-zoom:

MassType:

☐AVG ☒MONO

Axis:

☒1 ☐2

Label:

☒I ☐M ☐-

Ions:

a ☐+ ☐2+ ☐3+

b ☒+ ☐2+ ☐3+

c ☐+ ☐2+ ☐3+

x ☐+ ☐2+ ☐3+

y ☒+ ☒2+ ☐3+

z ☐+ ☐2+ ☐3+

hide H<sub>2</sub>O/NH<sub>3</sub> ☐

zoom 112-122 ☐

GO

SVFGKLFAGAGGKAGKGGPTPQEAIQR, MH+ 2741.5104, m/z 686.1331  
H OS G16 P120811 220811-s1.05802.05802.4.dta

scan 5802; 2.2e+001

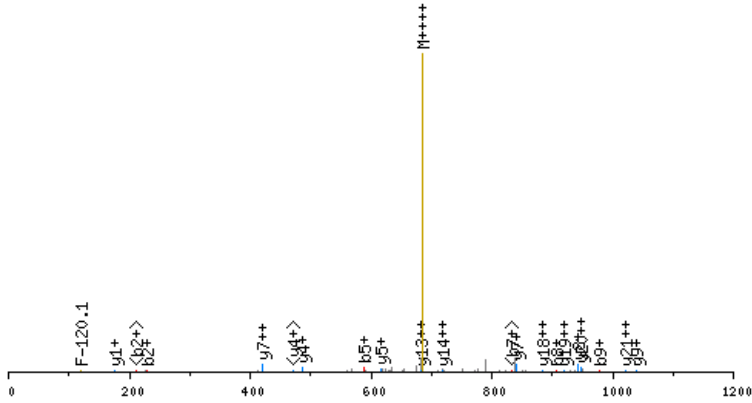

click image to zoom in; click top corners to zoom out

[precursor±]

scan 5798; 686.1 m/z; 4.0e+000

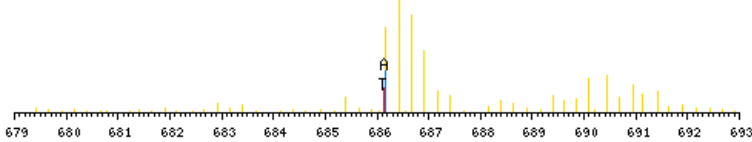

zoomed in precursor plot; T=theoretical m/z, A=acquired m/z

| b <sup>+</sup> | #  | AA | #  | y <sup>+</sup> | y <sup>2+</sup> |
|----------------|----|----|----|----------------|-----------------|
| 130.0504       | 1  | S  | 27 |                |                 |
| 229.1188       | 2  | V  | 26 | 2612.4678      | 1306.7378       |
| 376.1873       | 3  | F  | 25 | 2513.3994      | 1257.2036       |
| 433.2087       | 4  | G  | 24 | 2366.3309      | 1183.6694       |
| 589.3350       | 5  | K  | 23 | 2309.3095      | 1155.1587       |
| 702.4191       | 6  | L  | 22 | 2153.1832      | 1077.0955       |
| 849.4875       | 7  | F  | 21 | 2040.0991      | 1020.5535       |
| 906.5090       | 8  | G  | 20 | 1893.0307      | 947.0193        |
| 977.5461       | 9  | A  | 19 | 1836.0092      | 918.5085        |
| 1034.5675      | 10 | G  | 18 | 1764.9721      | 882.9900        |
| 1091.5890      | 11 | G  | 17 | 1707.9507      | 854.4792        |
| 1148.6105      | 12 | G  | 16 | 1650.9292      | 825.9685        |
| 1304.7368      | 13 | K  | 15 | 1593.9077      | 797.4578        |
| 1375.7739      | 14 | A  | 14 | 1437.7814      | 719.3946        |
| 1432.7953      | 15 | G  | 13 | 1366.7443      | 683.8761        |
| 1588.9216      | 16 | K  | 12 | 1309.7229      | 655.3653        |
| 1645.9431      | 17 | G  | 11 | 1153.5966      | 577.3022        |
| 1702.9646      | 18 | G  | 10 | 1096.5751      | 548.7915        |
| 1800.0173      | 19 | P  | 9  | 1039.5536      | 520.2807        |
| 1901.0650      | 20 | T  | 8  | 942.5009       | 471.7543        |
| 1998.1178      | 21 | P  | 7  | 841.4532       | 421.2305        |
| 2126.1764      | 22 | Q  | 6  | 744.4004       | 372.7041        |
| 2255.2189      | 23 | E  | 5  | 616.3418       | 308.6748        |
| 2326.2561      | 24 | A  | 4  | 487.2993       | 244.1535        |
| 2439.3401      | 25 | I  | 3  | 416.2621       | 208.6350        |
| 2567.3987      | 26 | Q  | 2  | 303.1781       | 152.0930        |
|                | 27 | R  | 1  | 175.1195       | 88.0637         |

N-term:+43.02 K(5):+156.13  
K(13):+156.13 K(16):+156.13

X-range:

0 - 0

MassTol: Y-zoom:

0. 1.

MassType:

☐AVG ☒MONO

Axis:

☒1 ☐2

Label:

☒I ☐M ☐-

Ions:

a ☐+ ☐2+ ☐3+

b ☒+ ☐2+ ☐3+

c ☐+ ☐2+ ☐3+

x ☐+ ☐2+ ☐3+

y ☒+ ☒2+ ☐3+

z ☐+ ☐2+ ☐3+

hide H<sub>2</sub>O/NH<sub>3</sub> ☐

zoom 112-122 ☐

GO

SYQGKKNIPR, MH+ 1288.7378, m/z 430.2508  
H OS G16 P120811 220811-s1.02010.02010.3.dta

scan 2010; 5.3e+001

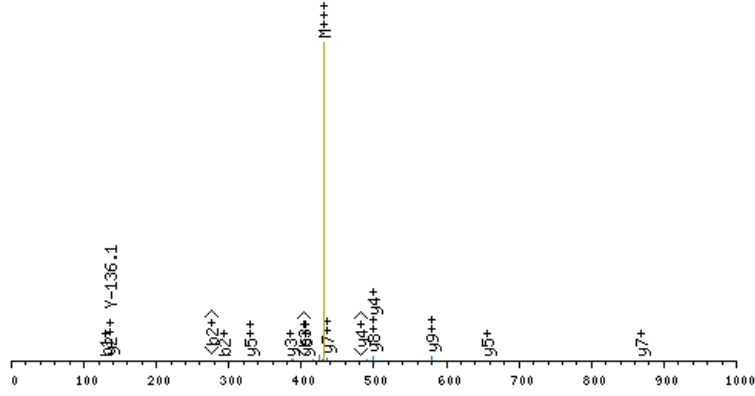

click image to zoom in; click top corners to zoom out [precursor±]

scan 2008; 430.3 m/z; 5.4e+000

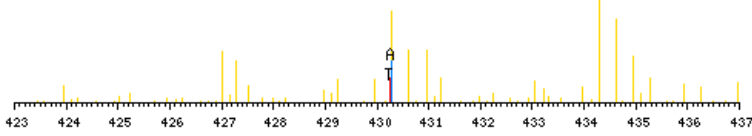

zoomed in precursor plot; T=theoretical m/z, A=acquired m/z

| b <sup>+</sup> | #  | AA | #  | y <sup>+</sup> | y <sup>2+</sup> |
|----------------|----|----|----|----------------|-----------------|
| 130.0504       | 1  | S  | 10 |                |                 |
| 293.1138       | 2  | Y  | 9  | 1159.6952      | 580.3515        |
| 421.1723       | 3  | Q  | 8  | 996.6319       | 498.8199        |
| 478.1938       | 4  | G  | 7  | 868.5733       | 434.7906        |
| 634.3201       | 5  | K  | 6  | 811.5519       | 406.2798        |
| 790.4464       | 6  | K  | 5  | 655.4256       | 328.2167        |
| 904.4893       | 7  | N  | 4  | 499.2993       | 250.1535        |
| 1017.5734      | 8  | I  | 3  | 385.2563       | 193.1321        |
| 1114.6262      | 9  | P  | 2  | 272.1723       | 136.5900        |
|                | 10 | R  | 1  | 175.1195       | 88.0637         |

N-term:+43.02 K(5):+156.13  
K(6):+156.13

X-range:

0 - 0

MassTol: Y-zoom:

0. 1.

MassType:

☐AVG ☒MONO

Axis:

☒1 ☐2

Label:

☒I ☐M ☐-

Ions:

a ☐+ ☐2+ ☐3+

b ☒+ ☐2+ ☐3+

c ☐+ ☐2+ ☐3+

x ☐+ ☐2+ ☐3+

y ☒+ ☒2+ ☐3+

z ☐+ ☐2+ ☐3+

hide H<sub>2</sub>O/NH<sub>3</sub> ☐

zoom 112-122 ☐

GO

TATLRPYLSAVR, MH+ 1389.7854, m/z 695.3964  
H OS G13 P120811 220811-s1.05850.05850.2.dta

scan 5850; 5.5e+001

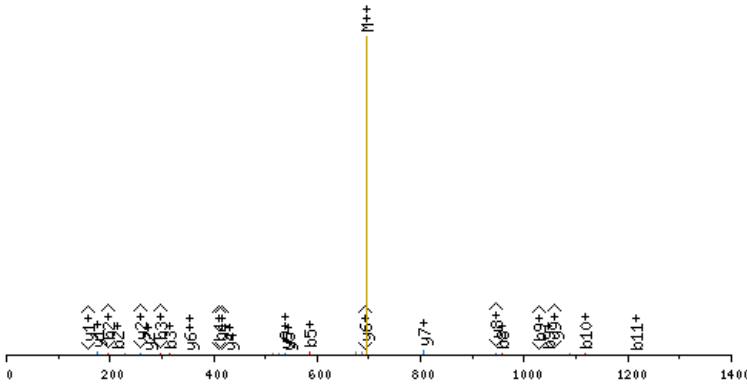

click image to zoom in; click top corners to zoom out

[precursor±]

scan 5849; 695.4 m/z; 3.4e+001

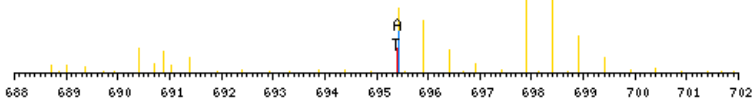

zoomed in precursor plot; T=theoretical m/z, A=acquired m/z

| b <sup>+</sup> | #  | AA | #  | y <sup>+</sup> | y <sup>2+</sup> |
|----------------|----|----|----|----------------|-----------------|
| 144.0661       | 1  | T  | 12 |                |                 |
| 215.1032       | 2  | A  | 11 | 1246.7272      | 623.8675        |
| 316.1509       | 3  | T  | 10 | 1175.6901      | 588.3489        |
| 429.2349       | 4  | L  | 9  | 1074.6424      | 537.8251        |
| 585.3360       | 5  | R  | 8  | 961.5583       | 481.2831        |
| 682.3888       | 6  | P  | 7  | 805.4572       | 403.2325        |
| 845.4521       | 7  | Y  | 6  | 708.4044       | 354.7061        |
| 958.5362       | 8  | L  | 5  | 545.3411       | 273.1745        |
| 1045.5682      | 9  | S  | 4  | 432.2571       | 216.6324        |
| 1116.6053      | 10 | A  | 3  | 345.2250       | 173.1164        |
| 1215.6738      | 11 | V  | 2  | 274.1879       | 137.5979        |
|                | 12 | R  | 1  | 175.1195       | 88.0637         |

N-term:+43.02

N-term: +43.02 K(8): +156.13

TFMGHYLHEVAR, MH+ 1502.7215, m/z 501.5787

H OS G16 P120811 220811-s1.04425.04425.3.dta

scan 4425; 8.4e+000

scan 4423; 501.6 m/z; 7.0e+000

zoomed in precursor plot; T=theoretical m/z, A=acquired m/z

X-range:  

00

MassTol: Y-zoom:  

0.1

MassType:  

AVG

MONO

Axis:  

1

2

Label:  

I

M

-

Ions:  
a

+

2+

3+

  
b

+

2+

3+

  
c

+

2+

3+

  
x

+

2+

3+

  
y

+

2+

3+

  
z

+

2+

3+

hide H<sub>2</sub>O/NH<sub>3</sub>

zoom 112-122

GO

| b <sup>+</sup> | #  | AA | #  | y <sup>+</sup> | y <sup>2+</sup> |
|----------------|----|----|----|----------------|-----------------|
| 144.0661       | 1  | T  | 12 |                |                 |
| 291.1345       | 2  | F  | 11 | 1359.6632      | 680.3355        |
| 422.1750       | 3  | M  | 10 | 1212.5948      | 606.8013        |
| 479.1964       | 4  | G  | 9  | 1081.5543      | 541.2811        |
| 616.2554       | 5  | H  | 8  | 1024.5328      | 512.7703        |
| 779.3187       | 6  | Y  | 7  | 887.4739       | 444.2409        |
| 892.4027       | 7  | L  | 6  | 724.4106       | 362.7092        |
| 1029.4617      | 8  | H  | 5  | 611.3265       | 306.1672        |
| 1158.5043      | 9  | E  | 4  | 474.2676       | 237.6377        |
| 1257.5727      | 10 | V  | 3  | 345.2250       | 173.1164        |
| 1328.6098      | 11 | A  | 2  | 246.1566       | 123.5822        |
|                | 12 | R  | 1  | 175.1195       | 88.0637         |

N-term:+43.02

N-term: +43.02

N-term: +43.02 C(4): +160.03  
K(5): +156.13

X-range:

0 - 0

MassTol: Y-zoom:

0. 1.

MassType:

☐ AVG ☒ MONO

Axis:

☒ 1 ☐ 2

Label:

☒ I ☐ M ☐ -

Ions:

a ☐ + ☐ 2+ ☐ 3+

b ☒ + ☐ 2+ ☐ 3+

c ☐ + ☐ 2+ ☐ 3+

x ☐ + ☐ 2+ ☐ 3+

y ☒ + ☒ 2+ ☐ 3+

z ☐ + ☐ 2+ ☐ 3+

hide H<sub>2</sub>O/NH<sub>3</sub> ☐

zoom 112-122 ☐

GO

TMDKSELVQKAKLAFAQER, MH+ 2301.2489, m/z 576.0677  
H OS G16 P120811 220811-s1.04704.04704.4.dta

scan 4704; 5.9e+001

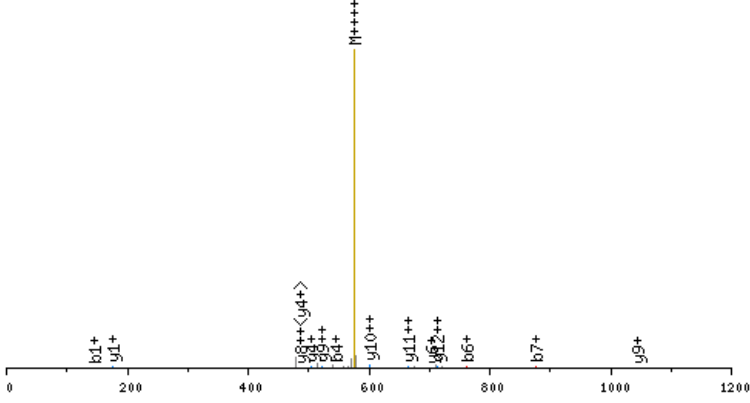

click image to zoom in; click top corners to zoom out [\[precursor±\]](#)

scan 4703; 576.1 m/z; 2.6e+001

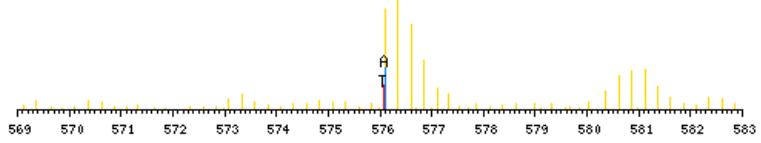

zoomed in precursor plot; T=theoretical m/z, A=acquired m/z

| b <sup>+</sup> | #  | AA | #  | y <sup>+</sup> | y <sup>2+</sup> |
|----------------|----|----|----|----------------|-----------------|
| 144.0661       | 1  | T  | 19 |                |                 |
| 275.1066       | 2  | M  | 18 | 2158.1907      | 1079.5992       |
| 390.1335       | 3  | D  | 17 | 2027.1502      | 1014.0790       |
| 546.2598       | 4  | K  | 16 | 1912.1232      | 956.5655        |
| 633.2918       | 5  | S  | 15 | 1755.9969      | 878.5024        |
| 762.3344       | 6  | E  | 14 | 1668.9649      | 834.9864        |
| 875.4185       | 7  | L  | 13 | 1539.9223      | 770.4651        |
| 974.4869       | 8  | V  | 12 | 1426.8383      | 713.9230        |
| 1102.5455      | 9  | Q  | 11 | 1327.7698      | 664.3888        |
| 1258.6718      | 10 | K  | 10 | 1199.7113      | 600.3595        |
| 1329.7089      | 11 | A  | 9  | 1043.5850      | 522.2964        |
| 1485.8352      | 12 | K  | 8  | 972.5479       | 486.7778        |
| 1598.9193      | 13 | L  | 7  | 816.4216       | 408.7147        |
| 1669.9564      | 14 | A  | 6  | 703.3375       | 352.1727        |
| 1798.9990      | 15 | E  | 5  | 632.3004       | 316.6541        |
| 1927.0575      | 16 | Q  | 4  | 503.2578       | 252.1328        |
| 1998.0947      | 17 | A  | 3  | 375.1992       | 188.1035        |
| 2127.1373      | 18 | E  | 2  | 304.1621       | 152.5850        |
|                | 19 | R  | 1  | 175.1195       | 88.0637         |

N-term:+43.02 K(4):+156.13  
K(10):+156.13 K(12):+156.13

zoomed in precursor plot; T=theoretical m/z, A=acquired m/z

X-range:

0 - 0

MassTol: Y-zoom:

0. 1.

MassType:

☐AVG ☒MONO

Axis:

☒1 ☐2

Label:

☒I ☐M ☐-

Ions:

a ☐+ ☐2+ ☐3+

b ☒+ ☐2+ ☐3+

c ☐+ ☐2+ ☐3+

x ☐+ ☐2+ ☐3+

y ☒+ ☒2+ ☐3+

z ☐+ ☐2+ ☐3+

hide H<sub>2</sub>O/NH<sub>3</sub> ☐

zoom 112-122 ☐

GO

TQKAPQVSTPTLVEAAR, MH+ 1873.0607, m/z 625.0251  
H OS G12 P120811 220811-s1.03719.03719.3.dta

scan 3719; 1.3e+001

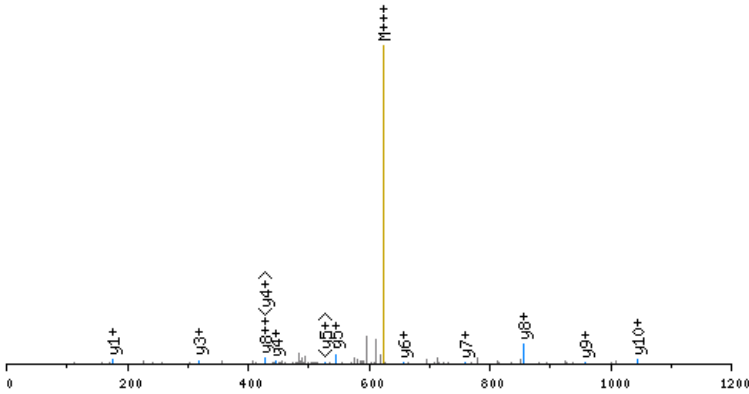

click image to zoom in; click top corners to zoom out

[precursor±]

scan 3717; 625.0 m/z; 2.0e+002

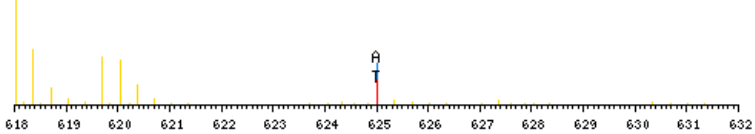

zoomed in precursor plot; T=theoretical m/z, A=acquired m/z

| b <sup>+</sup> | #  | AA | #  | y <sup>+</sup> | y <sup>2+</sup> |
|----------------|----|----|----|----------------|-----------------|
| 144.0661       | 1  | T  | 17 |                |                 |
| 272.1247       | 2  | Q  | 16 | 1730.0025      | 865.5052        |
| 434.2828       | 3  | K  | 15 | 1601.9439      | 801.4759        |
| 505.3199       | 4  | A  | 14 | 1439.7858      | 720.3968        |
| 602.3726       | 5  | P  | 13 | 1368.7487      | 684.8783        |
| 730.4312       | 6  | Q  | 12 | 1271.6959      | 636.3519        |
| 829.4996       | 7  | V  | 11 | 1143.6374      | 572.3226        |
| 916.5317       | 8  | S  | 10 | 1044.5689      | 522.7884        |
| 1017.5793      | 9  | T  | 9  | 957.5369       | 479.2724        |
| 1114.6321      | 10 | P  | 8  | 856.4892       | 428.7485        |
| 1215.6798      | 11 | T  | 7  | 759.4365       | 380.2222        |
| 1328.7638      | 12 | L  | 6  | 658.3888       | 329.6983        |
| 1427.8323      | 13 | V  | 5  | 545.3047       | 273.1563        |
| 1556.8748      | 14 | E  | 4  | 446.2363       | 223.6221        |
| 1627.9120      | 15 | A  | 3  | 317.1937       | 159.1008        |
| 1698.9491      | 16 | A  | 2  | 246.1566       | 123.5822        |
|                | 17 | R  | 1  | 175.1195       | 88.0637         |

N-term:+43.02 K(3):+162.16

X-range:

0 - 0

MassTol: Y-zoom:

0. 1.

MassType:

☐AVG ☒MONO

Axis:

☒1 ☐2

Label:

☒I ☐M ☐-

Ions:

a ☐+ ☐2+ ☐3+

b ☒+ ☐2+ ☐3+

c ☐+ ☐2+ ☐3+

x ☐+ ☐2+ ☐3+

y ☒+ ☒2+ ☐3+

z ☐+ ☐2+ ☐3+

hide H<sub>2</sub>O/NH<sub>3</sub> ☐

zoom 112-122 ☐

GO

TSDQDAKVVAEPPQAQR, MH+ 1812.9092, m/z 604.9746  
H OS G12 P120811 220811-s1.02586.02586.3.dta

scan 2586; 1.3e+000

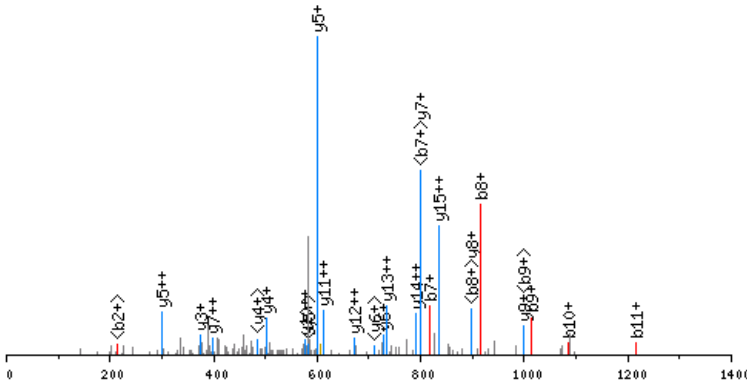

click image to zoom in; click top corners to zoom out

[precursor±]

scan 2585; 605.0 m/z; 2.4e+000

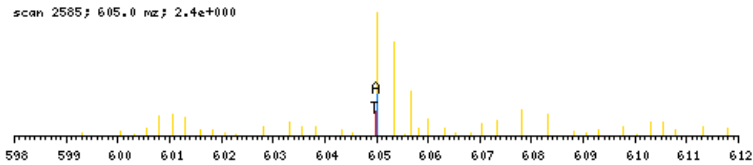

zoomed in precursor plot; T=theoretical m/z, A=acquired m/z

| b <sup>+</sup> | #  | AA | #  | y <sup>+</sup> | y <sup>2+</sup> |
|----------------|----|----|----|----------------|-----------------|
| 144.0661       | 1  | T  | 16 |                |                 |
| 231.0981       | 2  | S  | 15 | 1669.8510      | 835.4294        |
| 346.1251       | 3  | D  | 14 | 1582.8189      | 791.9134        |
| 474.1836       | 4  | Q  | 13 | 1467.7920      | 734.3999        |
| 589.2106       | 5  | D  | 12 | 1339.7334      | 670.3706        |
| 660.2477       | 6  | A  | 11 | 1224.7065      | 612.8572        |
| 816.3740       | 7  | K  | 10 | 1153.6694      | 577.3386        |
| 915.4424       | 8  | V  | 9  | 997.5431       | 499.2754        |
| 1014.5108      | 9  | V  | 8  | 898.4747       | 449.7412        |
| 1085.5479      | 10 | A  | 7  | 799.4062       | 400.2070        |
| 1214.5905      | 11 | E  | 6  | 728.3691       | 364.6885        |
| 1311.6433      | 12 | P  | 5  | 599.3265       | 300.1672        |
| 1439.7019      | 13 | Q  | 4  | 502.2738       | 251.6408        |
| 1510.7390      | 14 | A  | 3  | 374.2152       | 187.6115        |
| 1638.7976      | 15 | Q  | 2  | 303.1781       | 152.0930        |
|                | 16 | R  | 1  | 175.1195       | 88.0637         |

N-term:+43.02 K(7):+156.13

X-range:

0 - 0

MassTol: Y-zoom:

0. 1.

MassType:

☐ AVG ☒ MONO

Axis:

☒ 1 ☐ 2

Label:

☒ I ☐ M ☐ -

Ions:

a ☐ + ☐ 2+ ☐ 3+

b ☒ + ☐ 2+ ☐ 3+

c ☐ + ☐ 2+ ☐ 3+

x ☐ + ☐ 2+ ☐ 3+

y ☒ + ☒ 2+ ☐ 3+

z ☐ + ☐ 2+ ☐ 3+

hide H<sub>2</sub>O/NH<sub>3</sub> ☐

zoom 112-122 ☐

GO

TSEKENTTFMGHYLHEVAR, MH+ 2441.2136, m/z 611.0589  
H OS G17 P120811 220811-s1.05236.05236.4.dta

scan 5236; 7.9e-001

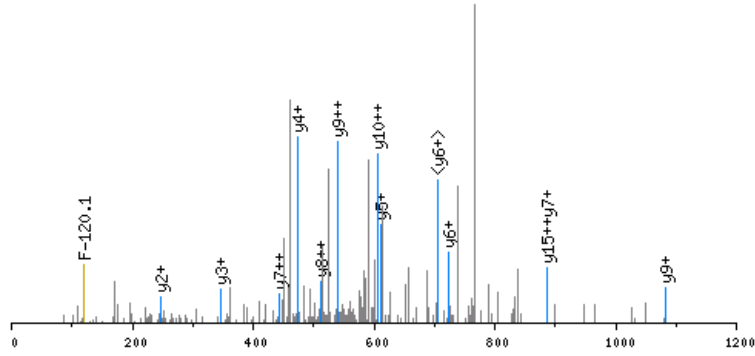

click image to zoom in; click top corners to zoom out [\[precursor±\]](#)

scan 5233; 611.1 m/z; 1.3e+001

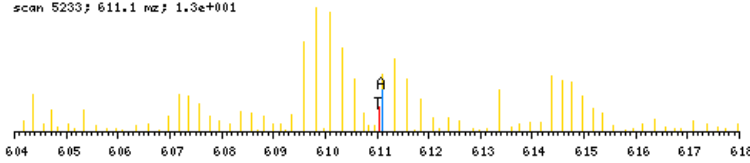

zoomed in precursor plot; T=theoretical m/z, A=acquired m/z

| b <sup>+</sup> | #  | AA | #  | y <sup>+</sup> | y <sup>2+</sup> |
|----------------|----|----|----|----------------|-----------------|
| 144.0661       | 1  | T  | 20 |                |                 |
| 231.0981       | 2  | S  | 19 | 2298.1554      | 1149.5816       |
| 378.1665       | 3  | F  | 18 | 2211.1234      | 1106.0656       |
| 540.3246       | 4  | K  | 17 | 2064.0549      | 1032.5314       |
| 669.3672       | 5  | E  | 16 | 1901.8968      | 951.4523        |
| 783.4101       | 6  | N  | 15 | 1772.8542      | 886.9310        |
| 880.4629       | 7  | P  | 14 | 1658.8113      | 829.9096        |
| 981.5106       | 8  | T  | 13 | 1561.7586      | 781.3832        |
| 1082.5583      | 9  | T  | 12 | 1460.7109      | 730.8594        |
| 1229.6267      | 10 | F  | 11 | 1359.6632      | 680.3355        |
| 1360.6672      | 11 | M  | 10 | 1212.5948      | 606.8013        |
| 1417.6886      | 12 | G  | 9  | 1081.5543      | 541.2811        |
| 1554.7475      | 13 | H  | 8  | 1024.5328      | 512.7703        |
| 1717.8109      | 14 | Y  | 7  | 887.4739       | 444.2409        |
| 1830.8949      | 15 | L  | 6  | 724.4106       | 362.7092        |
| 1967.9538      | 16 | H  | 5  | 611.3265       | 306.1672        |
| 2096.9964      | 17 | E  | 4  | 474.2676       | 237.6377        |
| 2196.0648      | 18 | V  | 3  | 345.2250       | 173.1164        |
| 2267.1020      | 19 | A  | 2  | 246.1566       | 123.5822        |
|                | 20 | R  | 1  | 175.1195       | 88.0637         |

N-term:+43.02 K(4):+162.16

X-range:

0 - 0

MassTol: Y-zoom:

0. 1.

MassType:

☐ AVG ☒ MONO

Axis:

☒ 1 ☐ 2

Label:

☒ I ☐ M ☐ -

Ions:

a ☐ + ☐ 2+ ☐ 3+

b ☒ + ☐ 2+ ☐ 3+

c ☐ + ☐ 2+ ☐ 3+

x ☐ + ☐ 2+ ☐ 3+

y ☒ + ☒ 2+ ☐ 3+

z ☐ + ☐ 2+ ☐ 3+

hide H<sub>2</sub>O/NH<sub>3</sub> ☐

zoom 112-122 ☐

GO

TSPEGAQNKEIDCLSPQAQR, MH+ 2306.1147, m/z 769.3764  
H OS G12 P120811 220811-s1.03354.03354.3.dta

scan 3354; 2.1e+000

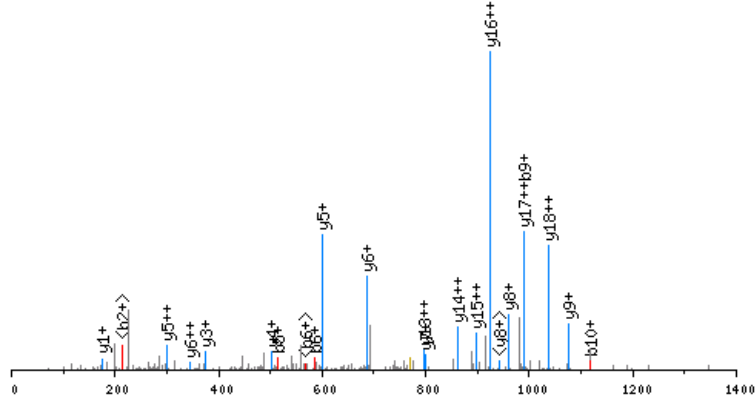

click image to zoom in; click top corners to zoom out [precursor±]

scan 3352; 769.4 m/z; 1.0e+001

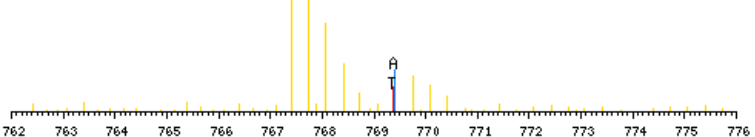

zoomed in precursor plot; T=theoretical m/z, A=acquired m/z

| b <sup>+</sup> | #  | AA | #  | y <sup>+</sup> | y <sup>2+</sup> |
|----------------|----|----|----|----------------|-----------------|
| 144.0661       | 1  | T  | 20 |                |                 |
| 231.0981       | 2  | S  | 19 | 2163.0564      | 1082.0321       |
| 328.1509       | 3  | P  | 18 | 2076.0244      | 1038.5161       |
| 457.1935       | 4  | E  | 17 | 1978.9716      | 989.9897        |
| 514.2149       | 5  | G  | 16 | 1849.9290      | 925.4684        |
| 585.2520       | 6  | A  | 15 | 1792.9076      | 896.9577        |
| 713.3106       | 7  | Q  | 14 | 1721.8704      | 861.4391        |
| 827.3535       | 8  | N  | 13 | 1593.8119      | 797.4098        |
| 989.5116       | 9  | K  | 12 | 1479.7689      | 740.3884        |
| 1118.5542      | 10 | E  | 11 | 1317.6108      | 659.3093        |
| 1231.6383      | 11 | I  | 10 | 1188.5682      | 594.7880        |
| 1346.6652      | 12 | D  | 9  | 1075.4842      | 538.2460        |
| 1506.6958      | 13 | C  | 8  | 960.4572       | 480.7325        |
| 1619.7799      | 14 | L  | 7  | 800.4266       | 400.7172        |
| 1706.8119      | 15 | S  | 6  | 687.3426       | 344.1752        |
| 1803.8647      | 16 | P  | 5  | 600.3105       | 300.6592        |
| 1932.9073      | 17 | E  | 4  | 503.2578       | 252.1328        |
| 2003.9444      | 18 | A  | 3  | 374.2152       | 187.6115        |
| 2132.0030      | 19 | Q  | 2  | 303.1781       | 152.0930        |
|                | 20 | R  | 1  | 175.1195       | 88.0637         |

N-term:+43.02 K(9):+162.16  
C(13):+160.03

X-range:  

0-0

MassTol: Y-zoom:  

0.1.

MassType:  

☐AVG☒MONO

Axis:  

☒1☐2

Label:  

☒I☐M☐-

Ions:  

a

☐+☐2+☐3+

b

☒+☐2+☐3+

c

☐+☐2+☐3+

x

☐+☐2+☐3+

y

☒+☒2+☐3+

z

☐+☐2+☐3+

hide H<sub>2</sub>O/NH<sub>3</sub>

☐

zoom 112-122

☐

GO

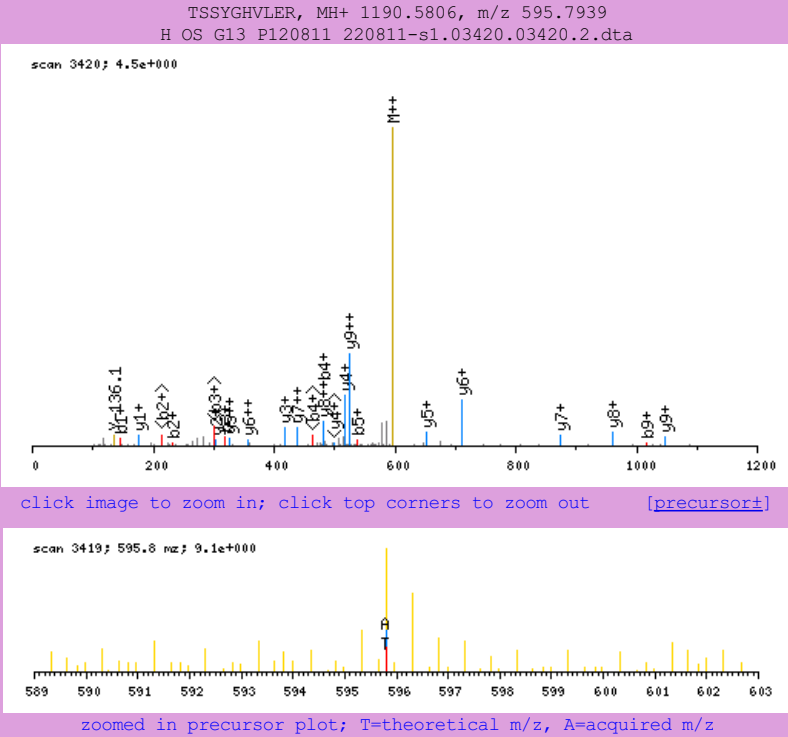

| b <sup>+</sup> | #  | AA | #  | y <sup>+</sup> | y <sup>2+</sup> |
|----------------|----|----|----|----------------|-----------------|
| 144.0661       | 1  | T  | 10 |                |                 |
| 231.0981       | 2  | S  | 9  | 1047.5223      | 524.2651        |
| 318.1301       | 3  | S  | 8  | 960.4903       | 480.7491        |
| 481.1935       | 4  | Y  | 7  | 873.4583       | 437.2331        |
| 538.2149       | 5  | G  | 6  | 710.3949       | 355.7014        |
| 675.2738       | 6  | H  | 5  | 653.3735       | 327.1907        |
| 774.3423       | 7  | V  | 4  | 516.3146       | 258.6612        |
| 887.4263       | 8  | L  | 3  | 417.2462       | 209.1270        |
| 1016.4689      | 9  | E  | 2  | 304.1621       | 152.5850        |
|                | 10 | R  | 1  | 175.1195       | 88.0637         |

N-term:+43.02

N-term:+43.02

X-range:

0 - 0

MassTol: Y-zoom:

0. 1.

MassType:

☐ AVG ☒ MONO

Axis:

☒ 1 ☐ 2

Label:

☒ I ☐ M ☐ -

Ions:

a ☐ + ☐ 2+ ☐ 3+

b ☒ + ☐ 2+ ☐ 3+

c ☐ + ☐ 2+ ☐ 3+

x ☐ + ☐ 2+ ☐ 3+

y ☒ + ☒ 2+ ☐ 3+

z ☐ + ☐ 2+ ☐ 3+

hide H<sub>2</sub>O/NH<sub>3</sub> ☐

zoom 112-122 ☐

GO

TTKDPESEHPSVTLFR, MH+ 1913.9609, m/z 638.6585  
H OS G15 P120811 220811-s1.04137.04137.3.dta

scan 4137; 7.9e+000

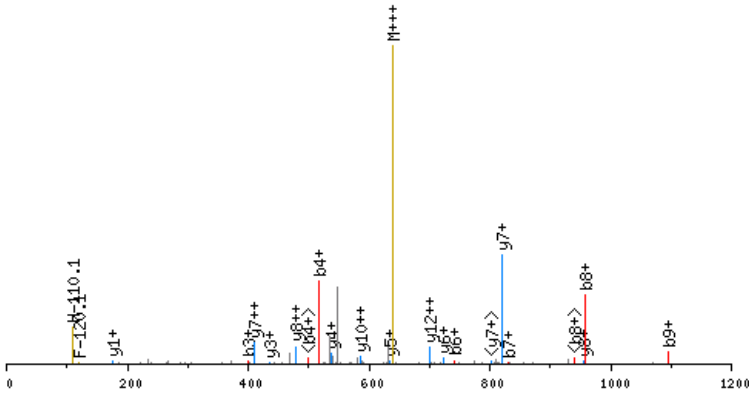

click image to zoom in; click top corners to zoom out

[precursor±]

scan 4136; 638.7 m/z; 3.2e+001

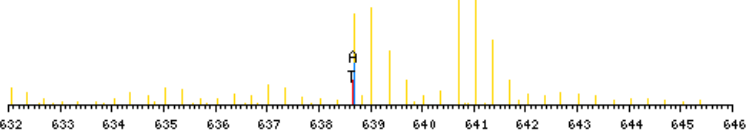

zoomed in precursor plot; T=theoretical m/z, A=acquired m/z

| b <sup>+</sup> | #  | AA | #  | y <sup>+</sup> | y <sup>2+</sup> |
|----------------|----|----|----|----------------|-----------------|
| 144.0661       | 1  | T  | 16 |                |                 |
| 245.1138       | 2  | T  | 15 | 1770.9027      | 885.9553        |
| 401.2401       | 3  | K  | 14 | 1669.8550      | 835.4314        |
| 516.2670       | 4  | D  | 13 | 1513.7287      | 757.3683        |
| 613.3198       | 5  | P  | 12 | 1398.7018      | 699.8548        |
| 742.3624       | 6  | E  | 11 | 1301.6490      | 651.3284        |
| 829.3944       | 7  | S  | 10 | 1172.6064      | 586.8071        |
| 958.4370       | 8  | E  | 9  | 1085.5744      | 543.2911        |
| 1095.4959      | 9  | H  | 8  | 956.5318       | 478.7698        |
| 1192.5487      | 10 | P  | 7  | 819.4729       | 410.2403        |
| 1279.5807      | 11 | S  | 6  | 722.4201       | 361.7140        |
| 1378.6491      | 12 | V  | 5  | 635.3881       | 318.1979        |
| 1479.6968      | 13 | T  | 4  | 536.3197       | 268.6637        |
| 1592.7808      | 14 | L  | 3  | 435.2720       | 218.1399        |
| 1739.8493      | 15 | F  | 2  | 322.1879       | 161.5979        |
|                | 16 | R  | 1  | 175.1195       | 88.0637         |

N-term:+43.02 K(3):+156.13

X-range:

0 - 0

0. 1.

AVG MONO

1 2

☒ I ☐ M ☐ -

**a**  +  2 +  3 +

b. ☒ 1+ ☐ 2+ ☐ 3+
$$= \square + \square^2 + \square^3 + \dots$$

☐ 1 ☐ 2 ☐ 3  
☐ 4 ☐ 5 ☐ 6

 $x \quad y \quad z$ 

y ☒ <sup>+</sup> ☒ <sup>2+</sup> ☐ <sup>3+</sup>

$$z = \boxed{\phantom{00}} + \boxed{\phantom{00}}^2 + \boxed{\phantom{00}}^3 + \dots$$

GO

GO

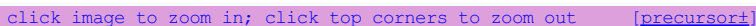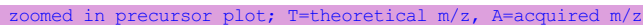

N-term: +43.02 K(3): +156.13

X-range:

0 - 0

MassTol: Y-zoom:

0. 1.

MassType:

☐AVG ☒MONO

Axis:

☒1 ☐2

Label:

☒I ☐M ☐-

Ions:

a ☐+ ☐2+ ☐3+

b ☒+ ☐2+ ☐3+

c ☐+ ☐2+ ☐3+

x ☐+ ☐2+ ☐3+

y ☒+ ☒2+ ☐3+

z ☐+ ☐2+ ☐3+

hide H<sub>2</sub>O/NH<sub>3</sub> ☐

zoom 112-122 ☐

GO

VKILKKKKLR, MH+ 1466.2412, m/z 489.4186  
H OS G18 P120811 220811-s1.04112.04112.3.dta

scan 4112; 1.0e+000

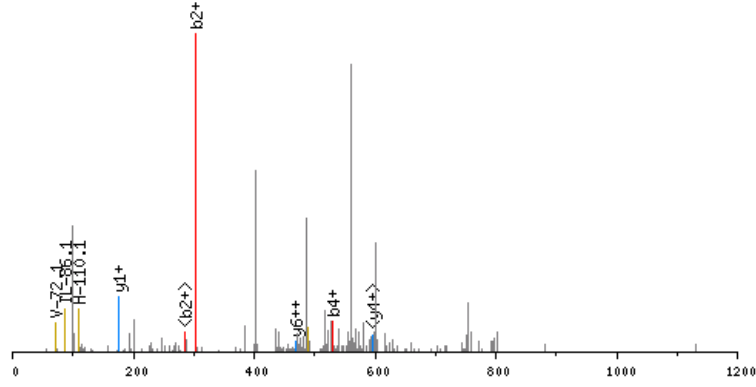

click image to zoom in; click top corners to zoom out [precursor±]

scan 4111; 489.4 m/z; 7.1e+001

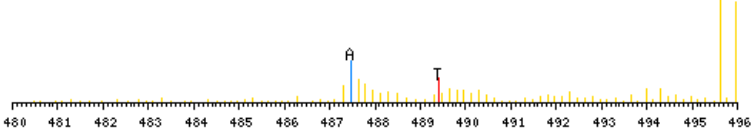

zoomed in precursor plot; T=theoretical m/z, A=acquired m/z

| b <sup>+</sup> | #  | AA | #  | y <sup>+</sup> | y <sup>2+</sup> |
|----------------|----|----|----|----------------|-----------------|
| 142.0868       | 1  | V  | 10 |                |                 |
| 304.2449       | 2  | K  | 9  | 1325.1622      | 663.0850        |
| 417.3290       | 3  | I  | 8  | 1163.0041      | 582.0060        |
| 530.4130       | 4  | L  | 7  | 1049.9200      | 525.4639        |
| 692.5711       | 5  | K  | 6  | 936.8360       | 468.9219        |
| 854.7292       | 6  | K  | 5  | 774.6779       | 387.8428        |
| 1016.8873      | 7  | K  | 4  | 612.5198       | 306.7638        |
| 1179.0454      | 8  | K  | 3  | 450.3617       | 225.6847        |
| 1292.1295      | 9  | L  | 2  | 288.2036       | 144.6057        |
|                | 10 | R  | 1  | 175.1195       | 88.0637         |

N-term:+43.02 K(2):+162.16  
K(5):+162.16 K(6):+162.16 K(7):+162.16  
K(8):+162.16

X-range:

0 - 0

MassTol: Y-zoom:

0. 1.

MassType:

☐AVG ☒MONO

Axis:

☒1 ☐2

Label:

☒I ☐M ☐-

Ions:

a ☐+ ☐2+ ☐3+

b ☒+ ☐2+ ☐3+

c ☐+ ☐2+ ☐3+

x ☐+ ☐2+ ☐3+

y ☒+ ☒2+ ☐3+

z ☐+ ☐2+ ☐3+

hide H<sub>2</sub>O/NH<sub>3</sub> ☐

zoom 112-122 ☐

GO

VKVGVNGFGR, MH+ 1108.6692, m/z 554.8382  
H OS G13 P120811 220811-s1.04470.04470.2.dta

scan 4470; 4.6e+001

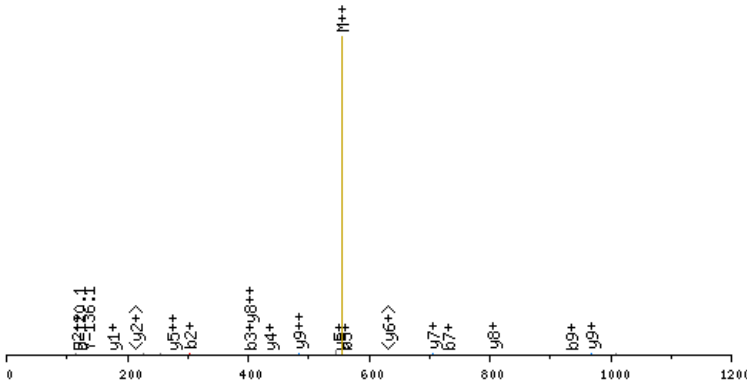

click image to zoom in; click top corners to zoom out [precursor±]

scan 4469; 554.8 m/z; 4.9e+001

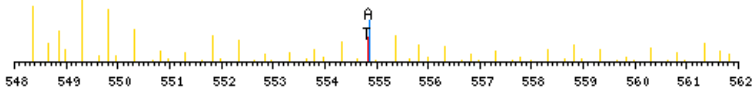

zoomed in precursor plot; T=theoretical m/z, A=acquired m/z

| b <sup>+</sup> | #  | AA | #  | y <sup>+</sup> | y <sup>2+</sup> |
|----------------|----|----|----|----------------|-----------------|
| 142.0868       | 1  | V  | 10 |                |                 |
| 304.2449       | 2  | K  | 9  | 967.5902       | 484.2990        |
| 403.3133       | 3  | V  | 8  | 805.4321       | 403.2199        |
| 460.3348       | 4  | G  | 7  | 706.3636       | 353.6857        |
| 559.4032       | 5  | V  | 6  | 649.3422       | 325.1750        |
| 673.4461       | 6  | N  | 5  | 550.2738       | 275.6408        |
| 730.4676       | 7  | G  | 4  | 436.2308       | 218.6193        |
| 877.5360       | 8  | F  | 3  | 379.2094       | 190.1086        |
| 934.5575       | 9  | G  | 2  | 232.1410       | 116.5744        |
|                | 10 | R  | 1  | 175.1195       | 88.0637         |

N-term:+43.02 K(2):+162.16

X-range:

0 - 0

MassTol: Y-zoom:

0. 1.

MassType:

☐AVG ☒MONO

Axis:

☒1 ☐2

Label:

☒I ☐M ☐-

Ions:

a ☐+ ☐2+ ☐3+

b ☒+ ☐2+ ☐3+

c ☐+ ☐2+ ☐3+

x ☐+ ☐2+ ☐3+

y ☒+ ☒2+ ☐3+

z ☐+ ☐2+ ☐3+

hide H<sub>2</sub>O/NH<sub>3</sub> ☐

zoom 112-122 ☐

GO

VPNVKSEWER, MH+ 1337.7430, m/z 669.3752  
H OS G13 P120811 220811-s1.03722.03722.2.dta

scan 3722; 3.0e+000

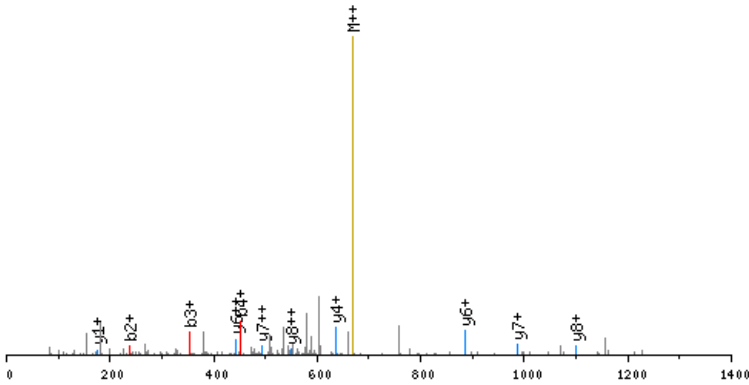

click image to zoom in; click top corners to zoom out

[precursor±]

scan 3719; 669.4 m/z; 8.7e+000

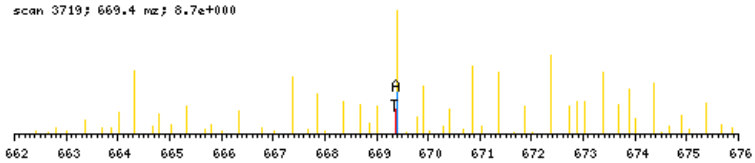

zoomed in precursor plot; T=theoretical m/z, A=acquired m/z

| b <sup>+</sup> | #  | AA | #  | y <sup>+</sup> | y <sup>2+</sup> |
|----------------|----|----|----|----------------|-----------------|
| 142.0868       | 1  | V  | 10 |                |                 |
| 239.1396       | 2  | P  | 9  | 1196.6641      | 598.8359        |
| 353.1825       | 3  | N  | 8  | 1099.6113      | 550.3096        |
| 452.2509       | 4  | V  | 7  | 985.5684       | 493.2881        |
| 614.4090       | 5  | K  | 6  | 886.4999       | 443.7539        |
| 701.4410       | 6  | S  | 5  | 724.3418       | 362.6748        |
| 830.4836       | 7  | E  | 4  | 637.3098       | 319.1588        |
| 1016.5630      | 8  | W  | 3  | 508.2672       | 254.6375        |
| 1163.6314      | 9  | F  | 2  | 322.1879       | 161.5979        |
|                | 10 | R  | 1  | 175.1195       | 88.0637         |

N-term:+43.02 K(5):+162.16

X-range:

0 - 0

MassTol: Y-zoom:

0. 1.

MassType:

☐ AVG ☒ MONO

Axis:

☒ 1 ☐ 2

Label:

☒ I ☐ M ☐ -

Ions:

a ☐ + ☐ 2+ ☐ 3+

b ☒ + ☐ 2+ ☐ 3+

c ☐ + ☐ 2+ ☐ 3+

x ☐ + ☐ 2+ ☐ 3+

y ☒ + ☒ 2+ ☐ 3+

z ☐ + ☐ 2+ ☐ 3+

hide H<sub>2</sub>O/NH<sub>3</sub> ☐

zoom 112-122 ☐

GO

VVFDDTYDR, MH+ 1171.5272, m/z 586.2672  
H OS G13 P120811 220811-s1.03900.03900.2.dta

scan 3900; 4.5e+000

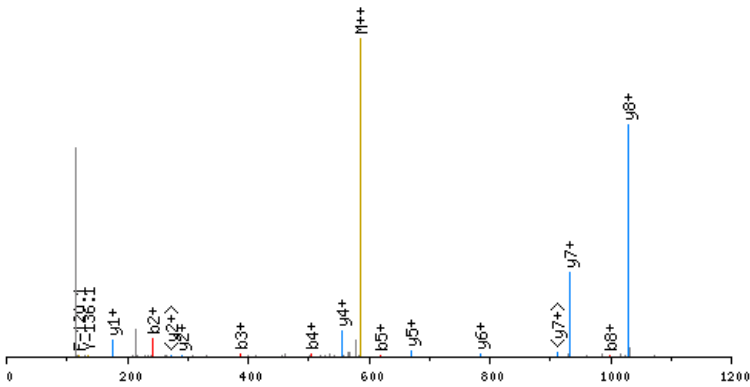

click image to zoom in; click top corners to zoom out

[precursor±]

scan 3899; 586.3 m/z; 1.2e+001

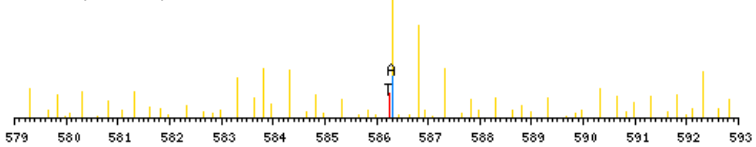

zoomed in precursor plot; T=theoretical m/z, A=acquired m/z

| b <sup>+</sup> | # | AA | # | y <sup>+</sup> | y <sup>2+</sup> |
|----------------|---|----|---|----------------|-----------------|
| 142.0868       | 1 | V  | 9 |                |                 |
| 241.1552       | 2 | V  | 8 | 1030.4482      | 515.7280        |
| 388.2236       | 3 | F  | 7 | 931.3798       | 466.1938        |
| 503.2506       | 4 | D  | 6 | 784.3113       | 392.6596        |
| 618.2775       | 5 | D  | 5 | 669.2844       | 335.1461        |
| 719.3252       | 6 | T  | 4 | 554.2575       | 277.6326        |
| 882.3885       | 7 | Y  | 3 | 453.2098       | 227.1088        |
| 997.4155       | 8 | D  | 2 | 290.1464       | 145.5771        |
|                | 9 | R  | 1 | 175.1195       | 88.0637         |

N-term:+43.02

X-range:

0 - 0

MassTol: Y-zoom:

0. 1.

MassType:

☐AVG ☒MONO

Axis:

☒1 ☐2

Label:

☒I ☐M ☐-

Ions:

a ☐+ ☐2+ ☐3+

b ☒+ ☐2+ ☐3+

c ☐+ ☐2+ ☐3+

x ☐+ ☐2+ ☐3+

y ☒+ ☒2+ ☐3+

z ☐+ ☐2+ ☐3+

hide H<sub>2</sub>O/NH<sub>3</sub> ☐

zoom 112-122 ☐

GO

WISKQYDEAGPSIVHR, MH+ 2085.0406, m/z 522.0156  
H OS G17 P120811 220811-s1.04405.04405.4.dta

scan 4405; 5.9e+000

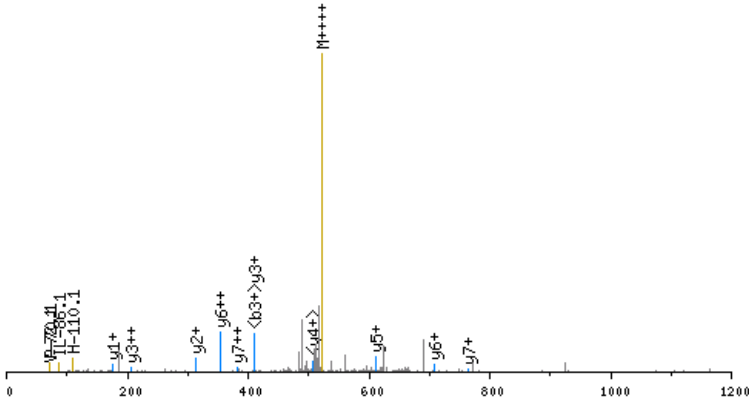

click image to zoom in; click top corners to zoom out

[precursor±]

scan 4403; 522.0 m/z; 4.2e+001

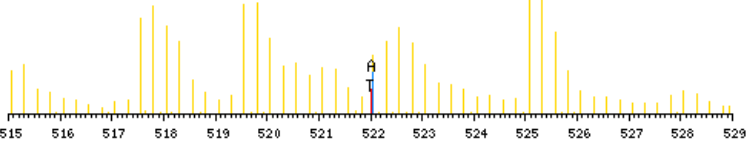

zoomed in precursor plot; T=theoretical m/z, A=acquired m/z

| b <sup>+</sup> | #  | AA | #  | y <sup>+</sup> | y <sup>2+</sup> |
|----------------|----|----|----|----------------|-----------------|
| 229.0977       | 1  | W  | 17 |                |                 |
| 342.1818       | 2  | I  | 16 | 1856.9507      | 928.9793        |
| 429.2138       | 3  | S  | 15 | 1743.8666      | 872.4372        |
| 585.3401       | 4  | K  | 14 | 1656.8346      | 828.9212        |
| 713.3987       | 5  | Q  | 13 | 1500.7083      | 750.8581        |
| 842.4413       | 6  | E  | 12 | 1372.6497      | 686.8288        |
| 1005.5046      | 7  | Y  | 11 | 1243.6071      | 622.3075        |
| 1120.5315      | 8  | D  | 10 | 1080.5438      | 540.7758        |
| 1249.5741      | 9  | E  | 9  | 965.5169       | 483.2623        |
| 1320.6113      | 10 | A  | 8  | 836.4743       | 418.7410        |
| 1377.6327      | 11 | G  | 7  | 765.4371       | 383.2225        |
| 1474.6855      | 12 | P  | 6  | 708.4157       | 354.7118        |
| 1561.7175      | 13 | S  | 5  | 611.3629       | 306.1854        |
| 1674.8016      | 14 | I  | 4  | 524.3309       | 262.6694        |
| 1773.8700      | 15 | V  | 3  | 411.2468       | 206.1273        |
| 1910.9289      | 16 | H  | 2  | 312.1784       | 156.5931        |
|                | 17 | R  | 1  | 175.1195       | 88.0637         |

N-term:+43.02 K(4):+156.13

X-range:

0 - 0

MassTol: Y-zoom:

0. 1.

MassType:

☐AVG ☒MONO

Axis:

☒1 ☐2

Label:

☒I ☐M ☐-

Ions:

a ☐+ ☐2+ ☐3+

b ☒+ ☐2+ ☐3+

c ☐+ ☐2+ ☐3+

x ☐+ ☐2+ ☐3+

y ☒+ ☒2+ ☐3+

z ☐+ ☐2+ ☐3+

hide H<sub>2</sub>O/NH<sub>3</sub> ☐

zoom 112-122 ☐

GO

YTQKAPQVSTPTLVEAAR, MH+ 2030.0923, m/z 677.3689  
H OS G15 P120811 220811-s1.03784.03784.3.dta

scan 3784; 2.0e+000

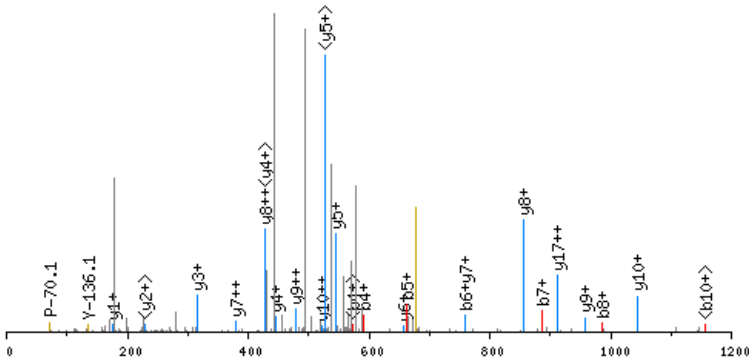

click image to zoom in; click top corners to zoom out

[precursor±]

scan 3781; 677.4 m/z; 2.7e+001

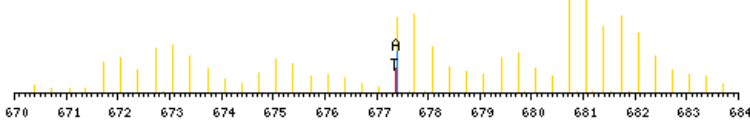

zoomed in precursor plot; T=theoretical m/z, A=acquired m/z

| b <sup>+</sup> | #  | AA | #  | y <sup>+</sup> | y <sup>2+</sup> |
|----------------|----|----|----|----------------|-----------------|
| 206.0817       | 1  | Y  | 18 |                |                 |
| 307.1294       | 2  | T  | 17 | 1825.0184      | 913.0131        |
| 435.1880       | 3  | Q  | 16 | 1723.9707      | 862.4893        |
| 591.3143       | 4  | K  | 15 | 1595.9121      | 798.4600        |
| 662.3514       | 5  | A  | 14 | 1439.7858      | 720.3968        |
| 759.4042       | 6  | P  | 13 | 1368.7487      | 684.8783        |
| 887.4627       | 7  | Q  | 12 | 1271.6959      | 636.3519        |
| 986.5312       | 8  | V  | 11 | 1143.6374      | 572.3226        |
| 1073.5632      | 9  | S  | 10 | 1044.5689      | 522.7884        |
| 1174.6109      | 10 | T  | 9  | 957.5369       | 479.2724        |
| 1271.6636      | 11 | P  | 8  | 856.4892       | 428.7485        |
| 1372.7113      | 12 | T  | 7  | 759.4365       | 380.2222        |
| 1485.7954      | 13 | L  | 6  | 658.3888       | 329.6983        |
| 1584.8638      | 14 | V  | 5  | 545.3047       | 273.1563        |
| 1713.9064      | 15 | E  | 4  | 446.2363       | 223.6221        |
| 1784.9435      | 16 | A  | 3  | 317.1937       | 159.1008        |
| 1855.9806      | 17 | A  | 2  | 246.1566       | 123.5822        |
|                | 18 | R  | 1  | 175.1195       | 88.0637         |

N-term:+43.02 K(4):+156.13
